# Supplementary material
Source: HighWire-hosted journal article supplement (https://gut.bmj.com/content/73/1/131)
Supplement: inline-supplementary-material-8 [file inline-supplementary-material-8.pdf]

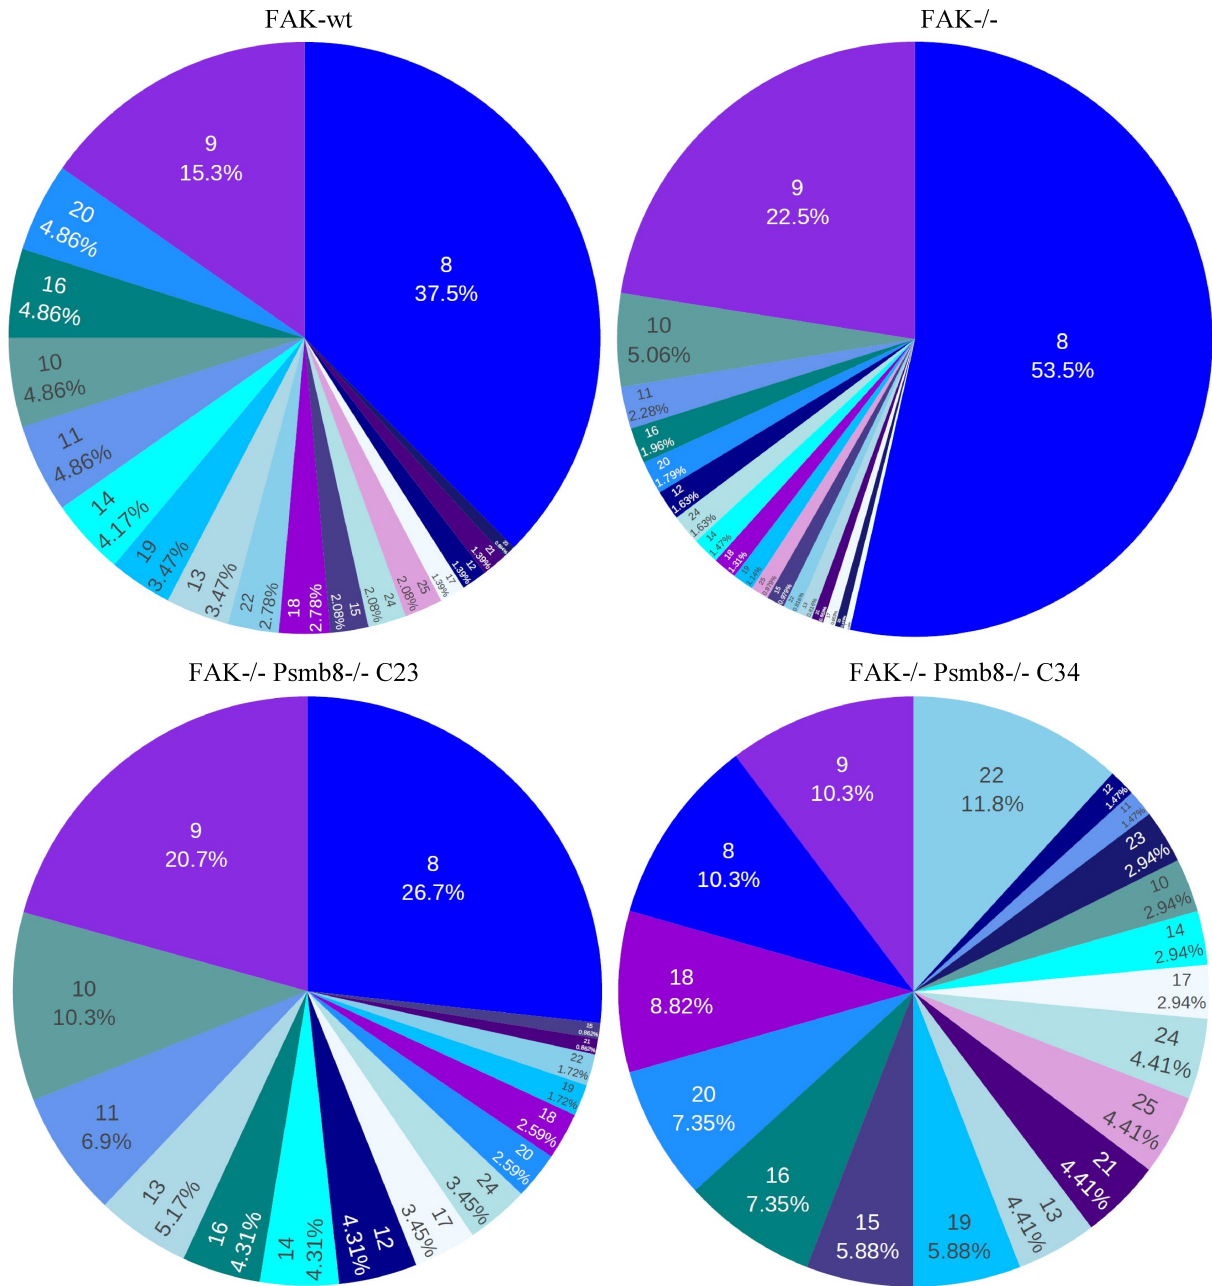

Supplementary Figure 4. FAK depletion alters peptide antigen length distribution in a Psmb8-dependent manner.
