# Supplementary material
Source: HighWire-hosted journal article supplement (https://gut.bmj.com/content/73/1/131)
Supplement: inline-supplementary-material-10 [file inline-supplementary-material-10.pdf]

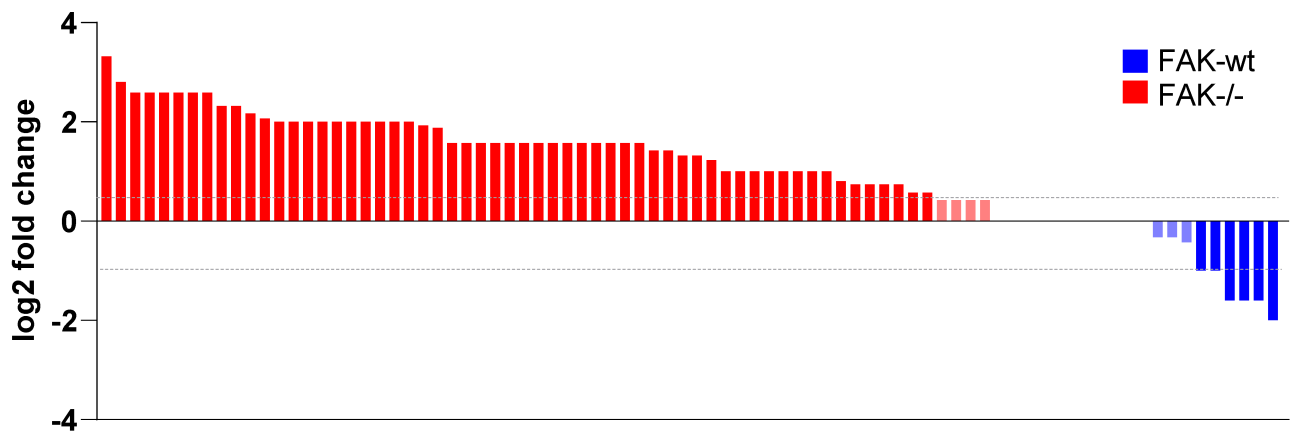

Supplementary Figure 5. Expression of peptide antigens common to FAK-wt and FAK-/- cells.
