# Supplementary material
Source: HighWire-hosted journal article supplement (https://gut.bmj.com/content/73/1/131)
Supplement: inline-supplementary-material-13 [file inline-supplementary-material-13.pdf]

>ENSMUSP00000043594\_c.3228:A>G\_p.I1077V ENSMUST00000041447.5|Trpa1-201|ENSMUSG00000032769|-|chr1:g.14943879:T>C  
 MKRGLRRILLPEERKEVQGVYRGGVGEDMDCSKESFKVDIEGDMCRLEDFIKNRRKLSKYEDENLCPHAAAA  
 EGQVELMELIINGSSCEVLNIMDGYGNTPLHCAAENQVESVKFLLSQGANPNLRNRNMMSPLHIAVHGMYNE  
 VIKVLTEHKATNINLEGENGNTALMSTCAKDNSEALQILLEKGAKLCKSNKWGDYPVHQAAFSGAKKCMELIL  
 AYGEKNGYSRETHINFVNHHKASPLHLAVQSGDLDMIKMCLDNGAHDMMENAKCMALHFAATQGATDIVKLM  
 ISSYTGSSDIVNAVDGNQETLLHRASLFDHHDLAEYLSVGDINSTDSEGRSPLILATASASWNIVNLLLCK  
 GAKVDIKDHLGRNFLHLTVQQPYGLRNLRFPEFMQMQHIKELVMDEDNDGCTPLHYACRQGVVPSVNNLLGFNV  
 SIHSSKDKKSPHFAASYGRINTCQRLLQDISDTRLLNEGDLHGMPHLHLAAKNGHDKVVQLLLKKGALFLS  
 DHNGWTALHHAASMGYQTMTKVIIDTNLKTDRLEEGNTALHFAAREGHAKAVAMLLSYNADILLNKKQASFL  
 LHIALHNKRKEVVLTTIRNKRWDECLQVFTHNSPSNRCPIMEMVEYLPECMKVLDFCMIPTSTEDKSCQDYHI  
 EYNFKYLQCPPLSMTKKVAPTQDVVYEPLTILNVMVQHNRIELLNHPVCREYLLMKWCAYGFRAHMMNLGSYCL  
 GLIPMTLLVVKIQQGMAFNSTGIINGTSSTHEERIDTLNSFPKIKMILVFLSSIFGYCKEVIQIFQQRNYF  
 LDYNNALEWVIYTTSIIFVLPFLNIPAYMQWQCGAIAIFFYWMNLLYLQRFENCGIFIVMLEVIFKTLRLS  
 TGVFIFLLAFGLSFYVLLNFQDAFSTPLLSLIQTFSMMLGDINRDAFLEPLFRNELAYPVLTFGQLIAFTM  
 FVPVIVLMNLLIGLAVGDIAEVQKHASLKRIAMQVELHTNLEKPLWYLRKVDQRSTIVYPNRPGRHMLRFF  
 HYFLNMQETRQEVNIDTCEMEILKQKYLKDLTSLLEKQHELIKLI IQKMEIVSETEDEDNHCSFQDRFKK  
 ERLEQMHSKWNFVLNAVKTTHCSISHPDF\*

>ENSMUSP00000157371\_c.3138:A>G\_p.I1047V ENSMUST00000235071.2|Trpa1-202|ENSMUSG00000032769|-|chr1:g.14943879:T>C  
 MKRGLRRILLPEERKEVQGVYRGGVGEDMDCSKESFKVDIEGDMCRLEDFIKNRRKLSKYEDENLCPHAAAA  
 EGQVELMELIINGSSCEVLNIMDGYGNTPLHCAAENQVESVKFLLSQGANPNLRNRNMMSPLHIAVHGMYNE  
 VIKVLTEHKATNINLEGENGNTALMSTCAKDNSEALQILLEKGAKLCKSNKWGDYPVHQAAFSGAKKCMELIL  
 AYGEKNGYSRETHINFVNHHKASPLHLAVQSGDLDMIKMCLDNGAHDMMENAKCMALHFAATQGATDIVKLM  
 ISSYTGSSDIVNAVDGNQETLLHRASLFDHHDLAEYLSVGDINSTDSEGRSPLILATASASWNIVNLLLCK  
 GAKVDIKDHLGRNFLHLTVQQPYGLRNLRFPEFMQMQHIKELVMDEDNDGCTPLHYACRQGVVPSVNNLLGFNV  
 SIHSSKDKKSPHFAASYGRINTCQRLLQDISDTRLLNEGDLHGMPHLHLAAKNGHDKVVQLLLKKGALFLS  
 DHNGWTALHHAASMGYQTMTKVIIDTNLKTDRLEEGNTALHFAAREGHAKAVAMLLSYNADILLNKKQASFL  
 LHIALHNKRKEVVLTTIRNKRWDECLQVFTHNSPSNRCPIMEMVEYLPECMKVLDFCMIPTSTEDKSCQDYHI  
 EYNFKYLQCPPLSMTKKVAPTQDVVYEPLTILNVMVQHNRIELLNHPVCREYLLMKWCAYGFRAHMMNLGSYCL  
 GLIPMTLLVVKIQQGMAFNSTGIINGTSSTHEERIDTLKRNFLDYNNALEWVIYTTSIIFVLPFLNIPAYM  
 QWQCGAIAIFFYWMNLLYLQRFENCGIFIVMLEVIFKTLRLSTGVFIFLLAFGLSFYVLLNFQDAFSTPL  
 SLIQTFSMMLGDINRDAFLEPLFRNELAYPVLTFGQLIAFTMFPVIVLMNLLIGLAVGDIAEVQKHASLKRI  
 AMQVELHTNLEKPLWYLRKVDQRSTIVYPNRPGRHMLRFFHYFLNMQETRQEVNIDTCEMEILKQKYL  
 LKDLTSLLEKQHELIKLI IQKMEIVSETEDEDNHCSFQDRFKKERLEQMHSKWNFVLNAVKTTHCSISHPDF  
 \*

>ENSMUSP00000043594\_c.505:C>A\_p.A169D ENSMUST00000041447.5|Trpa1-201|ENSMUSG00000032769|-|chr1:g.14976196:G>T  
 MKRGLRRILLPEERKEVQGVYRGGVGEDMDCSKESFKVDIEGDMCRLEDFIKNRRKLSKYEDENLCPHAAAA  
 EGQVELMELIINGSSCEVLNIMDGYGNTPLHCAAENQVESVKFLLSQGANPNLRNRNMMSPLHIAVHGMYNE  
 VIKVLTEHKATNINLEGENGNTDLMSTCAKDNSEALQILLEKGAKLCKSNKWGDYPVHQAAFSGAKKCMELIL  
 AYGEKNGYSRETHINFVNHHKASPLHLAVQSGDLDMIKMCLDNGAHDMMENAKCMALHFAATQGATDIVKLM  
 ISSYTGSSDIVNAVDGNQETLLHRASLFDHHDLAEYLSVGDINSTDSEGRSPLILATASASWNIVNLLLCK  
 GAKVDIKDHLGRNFLHLTVQQPYGLRNLRFPEFMQMQHIKELVMDEDNDGCTPLHYACRQGVVPSVNNLLGFNV  
 SIHSSKDKKSPHFAASYGRINTCQRLLQDISDTRLLNEGDLHGMPHLHLAAKNGHDKVVQLLLKKGALFLS  
 DHNGWTALHHAASMGYQTMTKVIIDTNLKTDRLEEGNTALHFAAREGHAKAVAMLLSYNADILLNKKQASFL  
 LHIALHNKRKEVVLTTIRNKRWDECLQVFTHNSPSNRCPIMEMVEYLPECMKVLDFCMIPTSTEDKSCQDYHI  
 EYNFKYLQCPPLSMTKKVAPTQDVVYEPLTILNVMVQHNRIELLNHPVCREYLLMKWCAYGFRAHMMNLGSYCL  
 GLIPMTLLVVKIQQGMAFNSTGIINGTSSTHEERIDTLNSFPKIKMILVFLSSIFGYCKEVIQIFQQRNYF  
 LDYNNALEWVIYTTSIIFVLPFLNIPAYMQWQCGAIAIFFYWMNLLYLQRFENCGIFIVMLEVIFKTLRLS  
 TGVFIFLLAFGLSFYVLLNFQDAFSTPLLSLIQTFSMMLGDINRDAFLEPLFRNELAYPVLTFGQLIAFTM  
 FVPVIVLMNLLIGLAVGDIAEVQKHASLKRIAMQVELHTNLEKPLWYLRKVDQRSTIVYPNRPGRHMLRFF  
 HYFLNMQETRQEVNIDTCEMEILKQKYLKDLTSLLEKQHELIKLI IQKMEIIVSETEDEDNHCSFQDRFKK  
 ERLEQMHSKWNFVLNAVKTTHCSISHPDF\*

>ENSMUSP00000157371\_c.505:C>A\_p.A169D ENSMUST00000235071.2|Trpa1-202|ENSMUSG00000032769|-|chr1:g.14976196:G>T  
 MKRGLRRILLPEERKEVQGVYRGGVGEDMDCSKESFKVDIEGDMCRLEDFIKNRRKLSKYEDENLCPHAAAA  
 EGQVELMELIINGSSCEVLNIMDGYGNTPLHCAAENQVESVKFLLSQGANPNLRNRNMMSPLHIAVHGMYNE

VIKVLTEHKATNINLEGENGNTDLMSTCAKDNSEALQILLEKGAKLCKSNKWGDYPVHQAAFSGAKKCMELIL  
 AYGEKNGYSRETHINFVNHHKASPLHLAVQSGDLDMIKMCLDNGAHDMMENAKCMALHFAATQGATDIVKLM  
 ISSYTGSSDIVNAVDGNQETLLHRASLFDHHDLAEYLISVGADINSTDSEGRSPLILATASASWNIVNLLLCK  
 GAKVDIKDHLGRNFLHLTVQQPYGLRNLRPEFQMOMHIKELVMDEDNDGCTPLHYACRQGVPSVNNLLGFNV  
 SIHSSKSKDKKSPLHFAASYGRINTCQRLLQDISDTRLLNEGDLHGMPHLHLAAKNGHDKVVQLLLKKGALFLS  
 DHNGWTALHSHASMGYQTMTKVIILDTNLKCTDRLDEEGNTALHFAAREGHAKAVAMLLSYNADILLNKKQAS  
 LHIALHNKRKEVVLTTIRNKRWDECLQVFTHNSPSNRCPIMEMVEYLPECMKVLDFDCMIPSTEDKSCQDYHI  
 EYNFKYLQCPPLSMTKKVAPTQDVVYEPLTILNVMVQHNRIELLNHPVCREYLLMKWCAYGFRAHMMNLGSYCL  
 GLIPMTLLVVKIQPGMAFNSTGIINGTSSTHEERIDTLKRNFLDYNNALEWVIYTTSIIFVLPFLFNI  
 PAYM  
 QWQCAGAI  
 IFFYWMN  
 FLLYLQ  
 RFENCG  
 IFIVMLE  
 VIFKTL  
 LLRSTG  
 VVIFL  
 LLAFGL  
 SFYVLL  
 NFQDA  
 FSTPLL  
 SLIQTF  
 SMMLG  
 DINYR  
 DAFLE  
 PLFRN  
 ELAYP  
 VLTFF  
 GQLIA  
 FTMFV  
 PIVLM  
 NLLIG  
 LAVGD  
 IAIEV  
 QKHAS  
 LKRI  
 AMQVEL  
 HNTLE  
 KKLPL  
 WYLR  
 KVDQ  
 RSTIV  
 YPNR  
 PRHR  
 GMLR  
 FFFHY  
 FLNM  
 QETR  
 QEV  
 PNID  
 TCLE  
 MEIL  
 KQKY  
 R  
 LKDLT  
 SLLEK  
 QHELI  
 KLI  
 IQKME  
 I  
 I  
 SETE  
 DEDN  
 HCSF  
 QDRF  
 KKER  
 LEQ  
 MHSK  
 WNFV  
 LNAV  
 KTKT  
 HCSI  
 SHPDF  
 \*

>ENSMUSP00000140422\_c.162:GA>CT\_p.N55L ENSMUST00000188641.7|Eloc-  
 208|ENSMUSG00000079658|-|chr1:g.16713688:TC>AG  
 MDGEEKTYGGCEGPDAMYVKLISSDGHEFIVKREHALTSGTIKAMLSGPGQFAEL\*NQRGQF\*RDPLTCAIKS  
 VHVLYLQGPLY\*QLH\*NS\*IPNCT\*NCTGTADGCKLPRLL

>ENSMUSP00000111009\_c.162:GA>CT\_p.N55L ENSMUST00000115352.10|Eloc-  
 201|ENSMUSG00000079658|-|chr1:g.16713688:TC>AG  
 MDGEEKTYGGCEGPDAMYVKLISSDGHEFIVKREHALTSGTIKAMLSGPGQFAEL\*NQRGQF\*RDPLTCAIKS  
 VHVLYLQGPLY\*QLH\*NS\*IPNCT\*NCTGTADGCKLPRLL

>ENSMUSP00000140962\_c.162:GA>CT\_p.N55L ENSMUST00000186948.7|Eloc-  
 206|ENSMUSG00000079658|-|chr1:g.16713688:TC>AG  
 MDGEEKTYGGCEGPDAMYVKLISSDGHEFIVKREHALTSGTIKAMLSGPGQFAEL\*NQRGQF\*RDPLTCAIKS  
 VHVLYLQGPLY\*QLH\*NS\*IPNCT\*NCTGTADGCKLPRLL

>ENSMUSP00000139480\_c.228:GA>CT\_p.N77L ENSMUST00000187910.7|Eloc-  
 207|ENSMUSG00000079658|-|chr1:g.16713688:TC>AG  
 MDSLELEEEEEEGGSGRRRGRHDGEEKTYGGCEGPDAMYVKLISSDGHEFIVKREHALTSGTIKAMLSGPGQ  
 FAEL\*NQRGQF\*RDPLTCAIKSVHVLYLQGPLY\*QLH\*NS\*IPNCT\*NCTGTADGCKLPRLL

>ENSMUSP00000139675\_c.162:GA>CT\_p.N55L ENSMUST00000185771.7|Eloc-  
 203|ENSMUSG00000079658|-|chr1:g.16713688:TC>AG  
 MDGEEKTYGGCEGPDAMYVKLISSDGHEFIVKREHALTSGTIKAMLSGPGQFAEL\*NQRGQF\*RDPLTCAIKS  
 VHVLYLQGPLY\*QLH\*NS\*IPNCT\*NCTGTADGCKLPRLL

>ENSMUSP00000140161\_c.162:GA>CT\_p.N55L ENSMUST00000185393.7|Eloc-  
 202|ENSMUSG00000079658|-|chr1:g.16713688:TC>AG  
 MDGEEKTYGGCEGPDAMYVKLISSDGHEFIVKREHALTSGTIKAMLSGPGQFAEL\*NQRGQF\*RDPLTCAIKS  
 VHVLYLQGPLY\*QLH\*NS\*IPN

>ENSMUSP00000158584\_c.3647:C>G\_p.H1216Q ENSMUST00000238425.2|Vwa3b-  
 211|ENSMUSG00000050122|+|chr1:g.37226023:C>G  
 MAEQSLLSSERWLQLHGLKSKKLTQILSQIGFPQSEYVTSRRLVASRYADGLFPQIYTAEDGRLYNLTA  
 KTELICQFVDYLTQAVESYKQRMDWLTSGSRQIFGVILEQVRVTVLDFGDVLMEEELNLCRDALKMVLQEQVAL  
 ITRFNMIWVSAEPVKWQYAYAILVTEHSIAAAISWIEKMTFEPKPVREVSGLDALLEAGKDKTIEAIYYFVVDG  
 VPQEFQKLLLTGVLEIPIPVCTVSVFNARGEETIAFLKDLSTKTHSRFHAFARTECEEFSAFSTEGVDGSMTW  
 NSRKLKGRLLPPGAGVREDVFLIWRMEMEACRILAQVRSVLDKAPQSDVSPADCKSRPAESKENAEDTWSQKW  
 LQKYGLKAQKLTIFYDVLHCSFRHADGVVDIKAKPENESVQTSADTNKKTIAHAKYCSRFIHIPWKDGLVHVN  
 ITKEKYKWYRERIHTALAMIQRRIKWLQNGSHILFGKARGECIYVLIDTSCSMKSRLNLVKDKIIQFIQEQLR  
 YKSKFNFTVFDGQAIWREKLAEVNEDNLKQAQSWIRGIVKGSSTNTLNALKIAFADEETQVIYLLTDGRPDQ  
 PPEMVMHDHVKLFQNIPICAISFSYNDEVANEFKELAAALTGGEFRAYNFGCKDPIQDTQDEDLNLQEMEQQ  
 HSDLEKMQELYMESLVVDWWYNADKDTDSKHQKEILSMVSTPEERANSQPADADSLASSPPNVSTGSWKFL  
 TQKKKILHAESTKTSLLRSHISNFKSSSNKSSNSSRSHTSALSREMSVLLTNKCLDDKLSSESASNGS  
 SGHTSSDTSSKTWLTQTHGLVAKKLTADALAGAMVPHSSSTYVPIILNKNVSVKVFDEVFPLAHVCNNSNKMVLI  
 NPHGINLNIYKQNEQAIKSYEKCLNKIVWQALSEEKELDAIKPIQYLENKDVNLKALERLNWPISLKELS  
 VLENIIVGKMYIQVALELQETSARKNYQSKTLQEQKCLQGYPTKKIKSRKLDPLKQKQVIAARCEENG  
 FYPGV  
 VKKCVSSSHALVDFRYGDTKVVPI  
 SFIMPV  
 GAMP  
 CQLQ  
 VGDY  
 VFAK  
 IMT  
 SKG  
 FDFY  
 VPAI  
 VIAL  
 PNH  
 VAS  
 EKFY  
 TVLK  
 CNNR  
 REFC  
 PRS  
 ALIK  
 ISQ  
 NKY  
 ALS  
 CSM  
 IHS  
 SLV  
 EKNG  
 AGE  
 EVD  
 GSN  
 SSI  
 NIW  
 TVT  
 EEA  
 TGN  
 LKQ  
 PR  
 QENL  
 RRK  
 RKR  
 KTR  
 KRL  
 PLQ  
 ELM  
 CSD  
 F  
 DGSS  
 RSTR  
 FSTR  
 GLRR  
 QLR  
 PRQ  
 TATR  
 SSPAL  
 TESS  
 HPQR  
 KGLR  
 THR\*

>ENSMUSP00000158612\_c.6691:A>C\_p.H2231P ENSMUST00000238212.2|Dnah7b-207|ENSMUSG00000041144|+|chr1:g.46272697:A>C

MSSKKDKLSTKGTSKPPARFLPQLPMDKLSREKDKLPTTVLPQLTSTGVKPKQWQQIAPSFHLMNKQENPILE  
 PYPVKNEQSFADYMEYFQKQKQLYQIDDKRSGPSTSRSKVKSPQKERENFRSTLVKLIQQDGDLESDVIDE  
 SGIPKATTTAREKDISRYYYYIRHGLDTHVAPMEDSWLEHVLQVLPQHLKILNNSIMVLSDEIREDYLLSVK  
 KSIVDFVLKDPKDDDDGKI TELPPHRAEMEVLKPKWRRSFLSACS YIRDHLNAMNPMMLAVLDLWHSTFKKL  
 RLVDIEEFHNRQDSLELSEFQNI VIKHMESAKEMLLKTFWPEVQNIYYKGNKKKQLPTGKSSAKLDSFFNCAA  
 TLMTLQLQDLILVSMQDFTDLIAQPPESTRAFEPHGFIMRLI LDKKT IKFAPDFNDYIDILINVEYIMIKMVS  
 FVPRVETKLYSQWESKSKPTTLKPIILNEIIDTHKEKIREVVLRRESVAPTEHLKMYDKYQFLITGKAERDIDE  
 FLFQSQNYERLIEEIRKYQKLEEEIQYTSRKAVRLGMFEMHCEELIKSLVKRADVICGKLI AKMFRDHQEVNT  
 MLCDEFEKIAEKALSMPLNTAELMEMKAHVQKLETTDMLELRQLVDSKNCLAFLEICVNFSPADIRLNNVSVF  
 QWYGRMGEIFDEHRKI IKDKTEQYQEAALKFR CERFVEELESYAKQVEEFHTFGDLLDVQRYLKAQVNLGKLD  
 AAADKIEQFNAAAAEAYGWVPSVY PQRKKIQDGLNPLYRLRYETAVEFSTKHRGWTEGYPYHKVNPQVEADVGN  
 WRGLYKLEKVFHDSPNALAMTKKVQSMVEEFKQYIPLIQVICNPLRPRHWEAMSTIVGFPLLPDSTVFSF  
 IDMNLEPFLDRFEGISEAASKEYSLEKAMDKMMTEWDSMEFVILPYRESGTYILSSVDDIQMLLDDHIKTQT  
 MRGSPFIKPYEKQMRWEWEGKLLLLQEILDEWLKVQATWLYLEPIFSSPDIMSQMPEEGRRFKAVDKTWRDVMK  
 TVVQDKRVLAVVTIERMLERLKKSNELLELILKGLNEYLEKKRLLFFPRFFFLSNDELLEILSETKDPTRVQPH  
 LKKCFEGIAKVEFTETLDITHMKSEGEVVELVDITSTAKARGQVEKWLVELELERTMIKSIHKVIGDAIAAYTK  
 NSRISWVRDWPQQTIVLCVSTFWTVEVQTAIPKGHRALEGYLAKCNHQIDDIIVTLVRGKLSKQNRVTLGALVV  
 LDVHARDVLAASLVDKKISDDSDFWLSQLRYWQENNLETKMINAGLRYGYEYLGNSPRLVITPLTDRCYRTL  
 FGALHLHLGGAPEGPAGTGKTEETKDLAKAVAKQCVVFNCS DGLDY LALGKFFKGLLSCGAWACDFENRIDL  
 EVLSVVAQQILTIQGINAGTELLVFEGTELKLDPTCAVFITMNPYAGRSEL PDNLKALFRVAMMVPDYAM  
 IAEIVLYSCGFVTARPLSIKIVATYRLCSEQLSSQHNYNYGMRAVKSVLTAAGNLKLYPNENEEILLRSII  
 DVNLPKFLSHDLPLFEGITSDLFPGVKLPKPDYNELLA AIRENCHTMNLQMTDFFSEKILQIYEMMIVRHGFM  
 IVGEPFGGKTSAYRVLGALNDICEKGLMEENKVLITVLPKSVTMGQLYGQFDLVSHWSDGILAVSFRAFA  
 ASSTPDRKWLIFDGPVDAVWIENMNTVLDNKKLCLMSGEIIQMS PQMNLIFEPMDLEVASPATVSRCGMIYM  
 EPHMLGWRPLMVSWINTLPQS VSI IQKEFIEGLFDRMIVPLSVVEFIRRHTELKLSPTDNLVLSMNLIDCFMD  
 DFADENKQKERNDRESFSLLEGI FMFSLAWSVGATCTDDDRLKFDKILRELMEGPI SDLTRNKFKLLSGTEQT  
 SSKVFI VPFPEKGTIYEYQFIEPEGLGRWDKWKIKKLADTPPIPKDVQFIEIIVPTLDTIRYSALMHLLTTHQKP  
 SIFVGTGTGKSVYIINFLNQLNKDIYKPLIVNFSAQTTAAQTQNIIMSKLDRKRGVFGPPLGKRMI VFDV  
 DVNMPAREVYGAQPPIELLRQWLDHWNWYDLKDCSVIKLVDIQIMCAMGPPGGGRNPITPRYMRHFNI VINE  
 FSDKSMFTIFSRILAWHLRTCYKFPDDFLDLTTQIVNGTMALYKDAMKNLLPTPAKSHYLFNLRDFSRVIQGV  
 CLSRPETAENKEAIKRLWVHEVLRVYDRLVDNADRSWLIPIYIQEILKNYMQEDFHDLFKNLDFNQDGTVEED  
 DLRLSMFCDFHDPKREDFGYREIANVDALRMIVEGHLDEYNNMSKKPMNLVLFRAIEHISRIIRILKQPRSH  
 ALLVGVGSGRQSVTRLAHMADYSLFQVEISKGYGSHWEDLKVILRKAENMDMGVFLFTDTQIKRESFL  
 EDVNNLLNAGEVPNLFDLDEKQEICEKMRQLDRQRDKTRQTDGSPIALFNMFIDRCRNQLHVVLAMSPIGDAF  
 RIRLRKFPALVNCCTIDWFQSWPEDALEAVASRFLEDIEMSEEIQEGCIDMKRFHTSTINLSTSFHNELQRY  
 NYVTPTSYLELISTFKLLLEKRNEMKMRRYEVGLDKLDSASSQVATMQSELEALHPQLKVASREVDMMI  
 IIERESMEVAKTEKIVKADETVANDQAMA AKAIKDECDADLAEALPILESALAALDTLTAQDITVVKSMKSP  
 AGVKLVMEAI CILKGIKADKIPDPTGSGKKIEDFWGPAKRL LGDIRFLQSLHEYDKDNIPPAYMNIIRKSYIP  
 NPDFVPEKIRNASTAAEGLCKWVIAMDSYDKVAKIVAPKKIKLAAAEGLRIAMEGLRKKQAALYEVQDKLAK  
 LQDTLELNKQKKADLENQVDLCSKKLERAELIGGLGGEKTRWSNSALELGHLYINLTGDI LISSGVVAYLGA  
 FTSNYRQNTQEQWSQCKERDIPCSDDYSLMGTLGEAVTIRAWN IAGLPSDSFSIDNGI IIMNARRWPLMIDP  
 QGQANKWIKNMEKTNLQLIKLSDPDYVRTLENCIQFGTPVLEENVGEELDPILEPLLLKQTFKQGGSTCIRL  
 GDSTIEYAPDFRFYITTKLRNPHYLPETSVKVTLNLFMITPEGMQDQLLGIVVARERPDLEEEKQSLIVQGD  
 NKRQLKEIEDKILEVLSLSEGNILEDETAIKILSSSKSLANEISQKQEVAAETEKKIDNTRMGYRIIAIHSSI  
 LFFSIADLANIEPMYQYSLTWFINLFI LS IENSEKSDILSKRLQILRDHFTYSLYVNICRSLFEKDKLLFSFC  
 LTVNLLIHENAINKTEWRFLLTGGIGLDNPNYTNCTWLPQKSWDEICRLDDLPAFKTIRREFMRLKDGWKKVY  
 DSMEPHHEMFPEWENKANDFQRMLIIRCLRDPKVI PMLQEFIIKKLGRPFIEPPPFLAKAFGDSNCCAPLI  
 FVLSPGADPMNALLKFADDQYGGSKLSSLSLGGQGGPIAMKMLEKAVKDGTVWVVLQNCHLATSWMPTELEKVC  
 EELSAESTHPDFRIWLTSYSPNFPVSVLQNGVKMTNEAPKGLRANIIRSYLMDPISDPEFFGSCCKPEEFKK  
 LLYGLCFFHALVQERRKFGPLGWNIPYEFNETDLRISVQQLHMF LDQYEE LPYDALRYMTGECNYGGRVTDW  
 DRRTLRSILNKFFCTSELLENPQYKFDSSGIYFVPPSGDHKSYIN YTKTLPLI PAPEVFGMNNADITKQDSET  
 QLLFDNILLTQSQSSSGTSSSDEVVNEVAGDILSKLPNNFDVEAAMRRYPTTYTQSMNTVVLVQEMGRFNKLL  
 ITIRESCINIQAIAKGLVVMSTELEEVVSSILNVKIPVMWVGKSYPSLKPLGYSYVNDFLERLKFLLQWYEVGP  
 PPVFWLSGFFFTQAFLTGAQQNFARKFTIPIIDLGF DYEVMDDEKEYKNAPEDGVYIHGLFLDGASWNRKTKKL  
 AESHPKVLVYDTPVMMWLKPCCKSDIPKRPSYVAPLYKTSERRGTLSTTGHSTNFVIAMILP SDQPKEHWIGRG  
 VALLCQLNS\*

>ENSMUSP00000068738\_c.6823:A>C\_p.H2275P ENSMUST00000069293.10|Dnah7b-201|ENSMUSG00000041144|+|chr1:g.46272697:A>C

MPQRATLLDLSESSAPNLADADDRKWIPPQRSRPIILPGPQVLAAMSSKKDKLSTKGTSKPPARFLPQLPMDKLSREKDKLPTTVLPQLTSTGVKPPQWQIAPSFHLNMKQENPILEPYVVKNEQSFADYMEYFQQKQKQLYQIDDKRSRGPSTSRSKVKSPOKERENFRSTLVKLIQQDGDLESVDI DESGIPKATTTAREKDISRYYYYIRHGLDTHVAPMEDSWLEHVLQVLPQHLKILNNSIMVLSDEIREDYLLSVKKSIVDFVLKDPKDDDDGKITELPPHRAEMEVLKPKWRRSFLSACSIRDHNLNAMNPMMLAVLDLWHSTFKKLRVLDIEEFHNRQDSLELSEFQNIIVIKHME SAKEMLLKTFWPFVQNIYYKGNKKKQLPTGKSSAKLDSFFNCAATLMTLQQLDLILVSMQDFDLDIAQPPESTRAFEHHPGFIMRLILDKKTIKFAPDFNDYIDILINVEYIMIKMVSFVPRVETKLYSQWESKSKPTTLKPIILNEI IDTHKEKIREVVLRESVAPTEHLKMYDKYQFLITGKAERDIDEFLFQSQNYERLIEEIRKYQKLEEEIQYTSRKAVRLGMFEMHCEELIKSLVKRADVICGKLIAMFRDHQEVNTMLCDEFEKIAEKALSMPLNLAELMEMKAHVQKLETTDMLERLQRLVDSKNCLAFLEICVNFSPADIRLNNVVFQWYGRMGEIFDEHRKIIKDKTEQYQEALEKFR CERFVEELESYAKQVEEFHTFGDLDLVQRYLKAQVLNGLKDAADKIEQFNAEEEEAYGWVPSVYPQRKKIQDGLNPLYRLYETAVEFSTKHRGWTEGYPYHKVNPQVEADVGNVWRGLYKLEKVFHDSPNALAMTKKVQSMVEEFKQYIPLIQVICNPLRPRHWEAMSTIVGFPLPSDDSTVFSFIDMNLPEFLDRFEGISEAASKEYSLEKAMDMMTEWDSMEFVILPYRESGTYLSSVDDIQMLLDDHIKTKQTMGRGSPFIKPYEKQMWREWEGKLLLLQEILD EWLKVQATWLYLEPIFSSPDIMSQMPEEGRRFKAVDKTRDVMKTVVQDKRVLAVVTIERMLERLKKSNELLE LILKGLNEYLEKRLFFPRFFFLSNDELLEILSETKDPTRVQPHLKKCFEGIAKVEFTETLDITHMKSSEGEVVELVDTISTAKARGQVEKWLVELEERTMIKSIHKVIGDAIAAYTKNSRISWVRDWPQGQTVLVCVSTFWTVEVQTAIPKGHRALEGYLAKCNHQIDDIVTLVRGKLSKQNRVTLGALVVLVDVHARDVLAASLVDKKISDDSDFQWLSQL RYYWQENNLETKMINAGLRYGYEYLGNSPRLVITPLTDRCYRTLFGALHLHLGGAPGEPAGTGKTEETTKDLAK AVAKQCVVFNCSDDLALGKFFKGLLSCGAWACFDEFNRIDLEVLVVAQQIILTIQGINAGTELLVFEFT ELKLDPTCAVFIITMNPYAGRSELPDNLKALFRTVAMMVPDYAMIAEIVLYSCGFVTARPLSIKIVATYRLCS EQLSSQHHYNYGMRAVKSVLTAAGNLKLYPNENEEILLRSIIDVNLPKFLSHDLPLFEGITSDLFPGVKLP KPDYNELLAATIRENCHTMNLQMTDFSEKILQIYEMMIVRHGFMIIVGEPFGGKTSAYRVLGALNDICEKGLM EENKVQITVLPKSVTMGQLYGQFDLVSHEDSAGILAVSFRAFAASSTPDRKWLIFDGPVDAVWIENMNTVLD DNKKLCLMSGEIIQMSQPMNLIFEPMDLEVASPATVSRGMIYMEPHMLGWRPLMVSWINTLPQSVSIIQKEF IEGFLDRMVPVLSVEFIRRHTEKELSPTSDTNLVQSLMNLIDCFMDDFADENKQKERNDRESFSLLEGI FMFSLA WSVGATCTDDDRLKFDKILRELMEGPISDLTRNKFKLLSGTEQTSSKVFIVPFPEKGTIYEYQFPEGLGRWD KWIKKLADTPPIPKDVQFIEIIVPTLDTIRYSALMHLTTHQKPSIFVGPTGTGKSUYIINFLNQLNKDIYK PLIVNFSAQTTAAQTQNIIMSKLDRRRKGVFGPPLGKRMIVFVDDVNMPAREVYGAQPPIELLRQWLDHWNWY DLKDCSVIKLVDIQIMCAMGPPGGGRNPITPRYMRHFNIIVTINEFSDKSMFTIFSRI LAWHLRTCYKFPDDFL DLTQIVNGTMALYKDAMKNLLPTPAKSHYLFNLRDFSRVIQGVCLSRPETAEENKEAIKRLWVHEVLRVYDR LVDNADRSLWLIPIYIQEILKNYMQEDFHDLFKNLDFNQDGTVEEDDLRSLMFCDFHDPKREDFGYREIANVDAL RMIVEGHLDEYNNMSKPMNLVLFRAIEHISRISRIKQPRSHALLVGVGGSGRQSVTRLAHAMADYSLFQV EISKGYGSHEWEDLKVILRKCAENDMQGVFLFTDTQIKRESFLEDVNNLLNAGEVPNLFALEKQEI CEKMR QLDRQRDKTRQTDGSPIALFNMFIIDRCRNQLHVVLAMSPIGDAFRIRLRKFPALVNCCTIDWFQSWPEDALEA VASRFLEDIEMSEEQEGCIDMCKRFHTSTINLSTSFHNELQRYNYVTPTSYLELISTFKLLEKRNEMKMKRRYEVGLDKLDSASSQVATMQSELEALHPQLKVASREVDEMMIIIERESMEVAKTEKIVKADETVANDQAMA AKAIKDECDADLAEALPILESALALDTLTAQDITVVKSMKSPAGVKLVMEAIICILKGIKADKIPDPTGSGK KIEDFWGPAKRLLGDIRFLQSLHEYDKDNIPPAYMNIIRKSYIPNPDFVPEKIRNASTAAEGLCKWVIAMDSY DKVAKIVAPKKIKLAAEGLKRIAMEGLRKKQAALYEVQDKLAKLQDTLELNKQKKADLENQVDLCSKKLERA EQLIGGLGGEKTRWSNSALELGHLYINLTGDIILISSGVVAYLGAFTSNYRQNTQEQSWQSKERDIPCSDDYS LMGTLGEAVTIRAWNIAGLPSDFSIDNGIIMNARRWPLMIDPQQQANKWIKNMEKTNLQILKLSDPDYVR TLENCIQFGTPTVLENVGEEELDPILEPLLLKQTFKQGGSTCIRLGDSTIEYAPDFRYIITTKLRNPHYLPETS VKVTLNFMITPEGMQDQLLGIIVARERPDLEEEKQSLIVQGADNKRQLKEIEDKILEVLSLSEGNILEDETA IKILSSSKSLANEISQKQEVAAETEKKIDNTRMGYRIIAIHSSILFFSIADLANIEPMYQYSLTWFINLFILS IENSEKSDILSKRLQILRDHFTYSLYVNICRSLFEKDKLLFSFCLTVNLLIHENAINKTEWRFLLTGGIGLDN PYTNPCTWLPQKSWDEICRLDDLPAFKTIRREFMRLKDGWKKVYDSMEPHHEMFPEWENKANDFQRLIIRC LRDPKVI PMLQEFIIKKLGRPFIEPPFDLAKAFGDSNCCAPLIFVLSPGADPMNALLKFADDQYGGSKLSS LSLGQGGQPIAMKMLEKAVKDGTVVVLQNLHATSWMPTLEKVCHEELSAESTHPDFRIWLTSYSPNFPVSVL QNGVKMTNEAPKGLRANIIRSYLMDPISDPEFFGSCCKPEEFKLLYGLCFFHALVQERRKFGPLGWNIPYEF NETDLRISVQQLHMFLDQYEEELPYDALRYMTGECNYGGRVTDWDRRTLRSLINLKFCTELVENPQYKFDSSG IYFVPPSGDHSYINYTKTLPPIPAPEVFGMNNANADITKDQSETQLLFDNILLTQSQSSSGTKSSDEVVNEV AGDILSKLPNNFDVEAAMRRYPTTYTQSMNTVLVQEMGRFNKLLITIRESCINIQAIAKGLVMSTELEEVVS SILNVKIPVMWMMGKSYPSLPLGSYVNDFLERLKLFLQWYEVGPPPVFWLSGFFFTQAFLTGAQQNFARKFTI PIDLLGFDYEVMDKEYKNAPEDGVYIHGLFLDGASWNRKTKKLAESHKPVLYDTPVMWLKPKCKSDIPKRP SYVAPLYKTSERRGTLSTTGHSTNFVIAMILPSDQPKHEHWIGRVALLCQLNS\*

>ENSMUSP00000092571\_c.11792:T>G\_p.D3931E ENSMUST00000094964.7|Dnah7a-201|ENSMUSG00000096141|-|chr1:g.53444910:A>C

MSSKKDKLSTKGKSKTPVRFPLPQLPMDKLSKKEKVKLPPTTVLPQLSLTGVKPQWQQTAPSFHLNIKQENPVLE  
PYTVKNEQSFAEYMEHCQKKGKLLDQIDDDRSAPSTSRSKIKSPQKERENLRSTLAKVIMQKDGGLSDVIDE  
SGIPKETTSATEKDISRYYYYIRQGLDTHVAPMEDSWLEHVLQVPEHLKVLTNISIKVLSDEIREDYLLSVK  
KSIVDFVLKDPREKDDDGKITELEPPHRAEMEVLKPKWRRSFLSACSYIRDHLNAMNPMMLAVLDLWHSTFKKL  
RLVDIEEFHSCQDALELSEFQNIIVIKHMESAKETLLKTFWPEVQNI FNQGNKKKQLPTGKSTAKLDSFFNCAA  
TLMTLQQLDLILVSMQDFTDLIAQPLESIRVFEHPGFIMRLVLDKEAIKFEPEFNEYIDSLINIYEIMIKAVS  
FVPRVETKLYSQWESKSKPTTLKPIILNEIIDTHKEKIREVILRESVAPTEHLKMYDKYQFLITGKAERDIDE  
LLFQONQNYERLIEEIRKYQKLGEEIQYTSQKTVCLGMFEMHCEELIRSLVKRADVICGKLIAMFRDHQEVNT  
MLCDEFEKIAEKALSTPLNTAELMEMKAHVQKLETTDMLELQRLVDSKICLAFLIECVNFSPADIRLNKSVF  
QWYGRMGEIFDEHRKIIKEKTELYQEFKFRFCERFVEELESYAKQVEEFHAFGLLDLVQRYLQKAQVNLGKLD  
AAADKIDQFNAAAAFGWVPSAYPQRKKIQDALNPYLHLYETAVEFSTKHRGWTEGPYHKVNPQVEADVGNV  
WRGLYKLEKVFHDSNALAMTKKVHSMVEEFKQYIPLIQVFCNPLRPRHWEAMSTIVGYPLQPSDDSTVFSF  
IDMNLFPFLDRFGSISEAASKEYSLEKAMDKMMTEWDSMEFVILPYRESGTYILSSVDDIQMLDDHIIKTQT  
MRGSPFIKPYEKQMRWEWEGKLLLLQEILDEWLKVQATWLYLEPIFSSRDIMSQMPEEGRFRTAVDKTWRDVMK  
TVVQDKQVLAVVTIERMLERLKKSNELLELILKGLNEYLEKKRLLFFRFFFLSNDELLEILSETKDPTRVQPH  
LKKCFEGIAKVFETETLDITHMKSEGEVVELVDTIISTAKARGQVEKWLVELEERTMIKSIHKVIRDAIVAYTK  
TSRISWVRDWPQQTIVLCSVQTFWTVVEVQIAIPEGHRALEGYLAKCNHQIDDIIVTLVRGKLSKQNRVTLGALVV  
LDVHARDVLAASLVDKKISDDSDQWLSQLRYWQENNLETKMINAGLRYGYEYLGNSPRLVITPLTDRCYRTL  
FGALHLHLGGAPEGPAGTGKTEETKDLAKAVAKQCVVFNCSGLDYLALGKFFKGLLSCGAWACDFEFNRIDL  
EVLSSVVAQQILTIQGINAGTDLVFEGETELKLDPTCAVFIITMNPYAGRSELDPNLKALFRVAMMVPDYAM  
IAEIVLYSCGFVTARPLSIKIVATYRLCSEQLSSQHHDYDGMRAVKSVLTAAGNLKLYPNENEEILLRSII  
DVNLPKFLSHDLPLFEGITSDLFPVGLKPKPDYNDLLAAIRDNCHSMNLQMTDFEFSEKILQIYEMMIVRHGFM  
IVGEPFGGKTSAYRVLGALNDICEKGLMEENKVLITVNLPKSVTMGQLYGQFDLVSHWSDGVLAVSFRAFA  
ASSTPDRKWLIFDGPVDAVWIENMNTVLDNKKLCLMSGEIQMSPQMNLIFEPMDLEVASPATVSRGMIY  
EPHMLGWRPLMVSWINTLPQSVSI IQKEFIEGLFDRMVKLSEVFEIRRHTELKELSDTNLVRSLMNLIDCFMD  
DFADENKQKERNDRESFSLLEGIFFLSLIWSVGATCTDDDRLKFDKILRELLLEGPI SNLTRNKFKLLSGTEQT  
SSKVFIVPFPEKGTIYDYQFIPEGLGRWDKWKIDLADTPPIPKDVQFNEIIVPTLDTIRYSALMNLTTHQKP  
SIFVGTGTGKSVYIINFLNQLNKDIYKPLIVNFSAQTTAAQTQNIIMSKLDRKRGVFGPPLGKRMI VFVD  
DVNMPAREVYGAQPPIELLRQWLDHWNWYDLKDCSVIKLVDIQIMCAMGPPGGGRNPITPRYMRHFNI VTIME  
FSNKSMTIFSRILAWHLRTCYKFPDDFLDLTTQIVNGTMALYKDAMKNLLPTPAKSHYLFNLDFSRV IQGV  
CLSRPETAENKEAIKRLWVHEVLRVYDRLVDNADRSWLINYYIQEILKNYMQEDFHDLFKNLDFNHDGTVEED  
DLRSLMFCDFHDPKREDFGYREIANVDALRMIVEGHLDEYNNMSKPKMNLVLFRAIEHISRIIRILKQPRSH  
ALLVGVGSGRQSVTRLAHMADYSLFQVEISKGYGSHWEDLKVILRKCAESDMQGVFLFTDTQIKRESFL  
EDVNNLLNAGEVPNLFDLDEKQEI CEKMRQIDRQRDKSKQTDGSPIALFNMFIDCCRNQLHVVLAMSPIGDAF  
RIRLRKFPALVNCCTIDWFQSWPEDALEAVASRFLEDIEMSEEIREGCIDMCKRFHTSTINLSTSFHNELQRY  
NYVTPTSYLELISTFKLLLEKRNEMKMRRYEVGLDKLDSASSQVATMQSELEALHPQLKVASREVDMMI  
I IERESMEVAKTEKIVKADETVANDQAMAAKAIKDECDADLAGALPILESALAALDTLTAQDITVVKSMKSP  
AGVKLVMEAVCILKGIKADKIPDPTGSGKKTEDFWGPAKRLLDGIRFLQSLHEYDKDNIPPAYMNIIRKSYIP  
NPDFVPEKIRNASTAAEGLCKWVIAMDSYDKVAKIVAPKKIKLAAAEGLKVAMEGLRKKQAALHEVQDKLAK  
LQDTLELNKQKADLEHQVDLCSKKLERAELIGGLGGEKTRWSNSALELGHLYINLTGDI LISSGVVAYLGA  
FTSNYRQNTKQWSQCKERDIPCSDDYSLMGTLGEAVTIRAWN IAGLPSDSFSIDNGI IIMNARRWPLMIDP  
QGQANKWIKNMEKTNLQLIKLSDPSYVRTLENCIQFGTPVLEENVGEELDPILEPLLLKQTFKQGGSTCIRL  
GDSTIEYSPDFRFYITTKLRNPHYLPETSVKVTLNLFMITPEGMQDQLLGIVVARERPDLEEEKQALILQCAD  
NKRQLKEIEDKILEVLSLSEGNILEDETAIKILSSSKSLANEISQKQVEAEETEKKIDITRMGYRPIAIIHSSI  
LFFSIADLANIEPMYQYSLTWFINLFI LS IENSEKSDILSKRLQILRDHFTYSLYVNICRSLFEKDKLLFSFC  
LTVNLLIHDNAINKTEWRFLLTGGIIGLDNPNYTNCTWLPQKSWDEICRLDDLPAFKTIREEFMRLKDGWKKVY  
DSMEPHHEMFPEDWGNKANDEFQRLIIRCLRDPKVI PMLQEFIIKKLGRSFIEPPPFLAKAFGDSNCCAPLI  
FVLSPGADPMNALLKFADDQYGGSKLSSLSLGGQGGPIAMKMLEKAVKDGTVWVVLQNCHLATSWMPTELEKVC  
EELSAESTHPDFRIWLTSYSPNFPVSVLQNGVKMTNEAPKGLRANIRSYLMDPISDPEFFGSCCKPEEFKK  
LLYGLCFFHALVQERRKFGPLGWNIPYEFNETDLRISVQQLHMFLDQYEELPYDALRYMTGECNYGGRVTDW  
DRRTLRSILNKFFCTSELLENPQYKFDSSGIYFVPPSGDHSYIDYTKTLPLI PAPEVFGMNNADITKQDSET  
QLLFDNILLTQSHSSSGTSSSDEVVNEVAGDILGKLPNNFVDEAAMRRYPTTYTQSMNTVVLVQEMGRFNKLL  
ITIRESCINIQAOKVGLVVMSTELEEVVSSILNVKIPAMWVGKSYPSLKPLGYSYVNDFLERLKFLLQWYEVGP  
PPVFWLSGFFFTQAFLTGAQQNYARKFTIPIIDLGFVYEMDDKEYKAPEDGVYIHGLFLEGASWDRKTKKL  
AESHKVLVYDTPVMMWLKPKCKSDIPRRPSYVAPLYKTSERRGTLSTTGHSTNFVIAMILPSVHPKEHWIGRG  
VALLCQLNS\*



>ENSMUSP00000109881\_c.801:A>G\_p.T268A ENSMUST00000114243.8|Gm973-201|ENSMUSG00000047361|+|chr1:g.59590296:A>G  
MKAVAREPDATSRLPQQRRNTSTEARASAGDYLNWKSPEDYILVSKAQNGDSASQHSWNLFPLKTFSTRK GALI  
LYSEGLAVSAWTPRDRKRGRPRKKQDLGLHTLRDLKEAILAYGRKRKQDSAWRPYLYFRSKPESQTRQIQPG  
YSAKRYLRGFLRTWPPDIMHRLQCAGHIKDSVLLQDSQLGIPKNLRPQQDLSGVPPKYHLLPVI PSFRIQQRSS  
SYAQGLDEWEIDTYMDQGSVAQNHSNPDTHLMSVRRQLWQEDELQAEDALRESHLRVHASEQSHNGKSQQASR  
EVLGRASFYSYFQLPTDKSLFSFYCGAFPDKQRNMKPKHARGGCLSQEPPVERCLFPPLASAVGSEQNTLGETK  
KKKALRTLKLPVSEPPGVVLRPRRSRFRKDESEPPKELFIIPMEIHFHAAQPPKEKASRRGARHPSEPEEATP  
LWWPPMKHLYLERPRGITVHLPVDSQDTPSPQEDGDILAQSVNQPLGGLPPMKGKKSSEIQRDMDRTRTSGF  
SSPTGCPNERAPPAGPEDSRDLTLKHFLSPDGENVCLTLPRLMGTEVLPPLGQANAGAGASLHGNLYETSSRL  
AQAAESQERGSSELD SHEEPGGPLRGNAKDSQDPELNRKTLACLSTSLAEYNQPSEADTLKSMGDYNVHHLHR  
GPLKREPAFPKLASETPRKKKRRSKLLNQKTGVGINHGKDLVDKAKRKRKTKTHQAKALKKEREERGLGQA  
EAAGGKPKHSHKIKKSELTPKKEKLRKMKRTHKERNMEMAAGLSKSDITNSKEAGGTS HQGLLRSHSAAGQL  
SLELDALESQVAIDGR LSSIQATDVASMECEEERSHEDPSKALQDKKQEKASRDRIIEKAEMRWLKVQR  
RREQEELTWLHKEQLEKAEKMEELELEQQRRTEENLRKQRLEEEERQQQEEAEKKRRLQLQAARERARQQQE  
ELRRKLEIQRKKQQAEEAERAEAEKQRQKELEMQLAEQKRLMEMAEERLEYYQQQKLAEEKARQEAEEERRK  
QEEEAAKLALAEATKLAQE QIRYLDRGTTAVRACSEA\*

>ENSMUSP00000141102\_c.798:A>G\_p.T267A ENSMUST00000186434.3|Gm973-205|ENSMUSG00000047361|+|chr1:g.59590296:A>G  
MFTLSLLSRGHGKLAQNKQKLEVYFEPEDYLNWKSPEYILVSKAQNGDSASQHSWNLFPLKTFSTRK GALIL  
YSEGLAVSAWTPRDRKRGRPRKKQDLGLHTLRDLKEAILAYGRKRKQDSAWRPYLYFRSKPESQTRQIQPGY  
SAKRYLRGFLRTWPPDIMHRLQCAGHIKDSVLLQDSQLGIPKNLRPQQDLSGVPPKYHLLPVI PSFRIQQRSS  
YAQGLDEWEIDTYMDQGSVAQNHSNPDTHLMSVRRQLWQEDELQAEDALRESHLRVHASEQSHNGKSQQASRE  
VLGRASFYSYFQLPTDKSLFSFYCGAFPDKQRNMKPKHARGGCLSQEPPVERCLFPPLASAVGS

>ENSMUSP00000006462\_c.1213:T>C\_p.L405P ENSMUST00000006462.14|Aamp-201|ENSMUSG00000006299|-|chr1:g.74319960:A>G  
MESESESGAAADTPPLETSLFSGHDEEIEVVELDPGPPDPDDLQEMEDVDVFEEEEEEEEEGNDEGWVLEPQEG  
VVGSMEGPDDSEVTFALHSASVFCVSLDPKTNLAVTGGEDDKAFVWRLGDGELLFECAGHKDSVTCAGF SHD  
STLVATGDMSGLLKVWQVDTKEEVWSFEAGDLEWMEWHPRAPVLLAGTADGNTWMMKVPNGDCKTFQGPNCPA  
TCGRVLPDGKRAVVG YEDGTIRIWDLKQGNPIHVLKGTGEGHQGPLTCVATNQDGSILITGSVDCQAKLV SATT  
GKVVGVFRPETVASQPSLGE GEESESNSVESLGFCSVMPLAAVGYLDGTLAIYDLSTQTLRHQCQHQS GIVQL  
LWEAGTAVVYTCSLDG VVRLWDARTGRLLTDYRGHTAEI PDFALSKDASLVVTTSGD HKAKVFCVQR PDR\*

>ENSMUSP00000136644\_c.1216:T>C\_p.L406P ENSMUST00000178235.8|Aamp-202|ENSMUSG00000006299|-|chr1:g.74319960:A>G  
MESESESGAAADTPPLETSLFSGHDEEIEVVELDPGPPDPADDLQEMEDVDVFEEEEEEEEEGNDEGWVLEPQE  
GVVGSMEGPDDSEVTFALHSASVFCVSLDPKTNLAVTGGEDDKAFVWRLGDGELLFECAGHKDSVTCAGF SH  
DSTLVATGDMSGLLKVWQVDTKEEVWSFEAGDLEWMEWHPRAPVLLAGTADGNTWMMKVPNGDCKTFQGPNC P  
ATCGRVLPDGKRAVVG YEDGTIRIWDLKQGNPIHVLKGTGEGHQGPLTCVATNQDGSILITGSVDCQAKLV SAT  
TGKVVGVFRPETVASQPSLGE GEESESNSVESLGFCSVMPLAAVGYLDGTLAIYDLSTQTLRHQCQHQS GIVQ  
LLWEAGTAVVYTCSLDG VVRLWDARTGRLLTDYRGHTAEI PDFALSKDASLVVTTSGD HKAKVFCVQR PDR\*

>ENSMUSP00000159251\_c.811:T>G\_p.L271W ENSMUST00000239185.2|Gm7582-201|ENSMUSG00000118640|-|chr1:g.85005754:A>C  
MNSSSEHCNVSDWLRLEATVKASVYVVAFSITTSITLTIIVIIAIVSQSLQRKEVRLVLLCHHLLC ISSYCGLGV  
VFQGMWALLANSPLLLCWL VFGAQLSVGEGILLTLTFMALNTYLAICYPLNSPSFVDSAKYRILAGTWTTVIL  
KNVGLFLIEGTSPTPASV FQSAPLCPVILNGMPARVIGMFLAFLLSVILVSYCLIIYREGKRAGHFNKSNIKA  
RRTVLVHLLQISLHV IPTLIIIGLGKRCGVFFFALNLALFGIFAFVQCFNPWFYGLHNRDVQSKLYPFLCCRK  
KLLP\*

>ENSMUSP00000159251\_c.793:C>T\_p.A265V ENSMUST00000239185.2|Gm7582-201|ENSMUSG00000118640|-|chr1:g.85005772:G>A  
MNSSSEHCNVSDWLRLEATVKASVYVVAFSITTSITLTIIVIIAIVSQSLQRKEVRLVLLCHHLLC ISSYCGLGV  
VFQGMWALLANSPLLLCWL VFGAQLSVGEGILLTLTFMALNTYLAICYPLNSPSFVDSAKYRILAGTWTTVIL  
KNVGLFLIEGTSPTPASV FQSAPLCPVILNGMPARVIGMFLAFLLSVILVSYCLIIYREGKRAGHFNKSNIKA  
RRTVLVHLLQISLHV IPTLIIIGLGKRCGVFFFALNLALFGIFAFVQCFNPWFYGLHNRDVQSKLYPFLCCRK  
KLLP\*

>ENSMUSP00000159251\_c.399:T>A\_p.Y134N ENSMUST00000239185.2|Gm7582-201|ENSMUSG00000118640|-|chr1:g.85006166:A>T  
MNSSSEHCNVSDWLRLEATVKASVYVVAFSITTSITLTIIVIIAIVSQSLQRKEVRLVLLCHHLLC ISSYCGLGV  
VFQGMWALLANSPLLLCWL VFGAQLSVGEGILLTLTFMALNTYLAICYPLNSPSFVDSAKNRIILAGTWTTVIL

KNVGLFLIEGTSPTPASVQFQAPLCPVILNGMPARVIGMFLSLAFLLSVILVSYCLIYREGKRAGHFNKSNIKA  
RRTVLVHLLQISLHV IPTLII IGLGKRCGVFFFALNLALFGIFAFACFNPLFYGLHNRDVSQSKLYPFLCCRK  
KLLP\*

>ENSMUSP00000123750\_c.450:A>G\_p.N151D ENSMUST00000161724.8|A530032D15Rik-  
203|ENSMUSG00000089844|-|chr1:g.85068890:T>C  
MAGGDNELSSRTIPEDQNEEESDDYQLMFKHFKENKVEIASAITKPFPPFLMSLRDRDFISEQKFQEQETCKN  
LAPVERVVYDILSNVQKKFSRDLLKVI FSKTHLKVYPDLKETLKHFFLNASKTNDEQAEEMLSLPQCNGGVLA  
QEHSNPHVKRSVPVSCVPQHMCQKTWKQGWAAKEKVWAPGGTFLQENPRSREEKRKATTGQNQNGESQ\*

>ENSMUSP00000125122\_c.450:A>G\_p.N151D ENSMUST00000160792.8|A530032D15Rik-  
201|ENSMUSG00000089844|-|chr1:g.85068890:T>C  
MAGGDNELSSRTIPEDQNEEESDDYQLMFKHFKENKVEIASAITKPFPPFLMSLRDRDFISEQKFQEQETCKN  
LAPVERVVYDILSNVQKKFSRDLLKVI FSKTHLKVYPDLKETLKHFFLNASKTNDEQAEEMLSLPQCNGGVLA  
QEHSNPHVKRSVPVSCVPQHMCQKTWKQGWAAKEKVWAPGGTFLQENPRSRESWQVWSLHCRPW\*

>ENSMUSP00000123750\_c.75:C>T\_p.Q26\* ENSMUST00000161724.8|A530032D15Rik-  
203|ENSMUSG00000089844|-|chr1:g.85078372:G>A  
MAGGDNELSSRTIPEDQNEEESDDY\*LMFKHFKENKVEIASAITKPFPPFLMSLRDRDFISEQKFQEQETCKN  
LAPVERVVYDILSNVQKKFSRDLLKVI FSKTHLKVYPDLKETLKHFFLNASKTNDEQAEEMLSLPQCNGGVLA  
QEHSNPHVKRSVPVSCVPQHMCQKTWKQGWAAKEKVWAPGGTFLQENPRSRESWQVWSLHCRPW\*

>ENSMUSP00000125122\_c.75:C>T\_p.Q26\* ENSMUST00000160792.8|A530032D15Rik-  
201|ENSMUSG00000089844|-|chr1:g.85078372:G>A  
MAGGDNELSSRTIPEDQNEEESDDY\*LMFKHFKENKVEIASAITKPFPPFLMSLRDRDFISEQKFQEQETCKN  
LAPVERVVYDILSNVQKKFSRDLLKVI FSKTHLKVYPDLKETLKHFFLNASKTNDEQAEEMLSLPQCNGGVLA  
QEHSNPHVKRSVPVSCVPQHMCQKTWKQGWAAKEKVWAPGGTFLQENPRSRESWQVWSLHCRPW\*

>ENSMUSP00000123812\_c.75:C>T\_p.Q26\* ENSMUST00000161675.3|A530032D15Rik-  
202|ENSMUSG00000089844|-|chr1:g.85078372:G>A  
MAGGDNELSSRTIPEDQNEEESDDY\*LMFKHFKENKVEIASAITKPFPPFLMSLRDRDFISEQKFQEQETCKN  
LAPVERVVYDILSNVQKKFSRDLLKVI FSKTHLKVYPDLKETLKHFFLNASKTNDEQAEEMLSLPQCNGGVLA  
QEHSNPHVKRSVPVSCVPQHMCQKTWKQGWAAKEKVWAPGGTFLQENPRSRESWQVWSLHCRPW\*

>ENSMUSP00000123750\_c.60:G>A\_p.E21K ENSMUST00000161724.8|A530032D15Rik-  
203|ENSMUSG00000089844|-|chr1:g.85078387:C>T  
MAGGDNELSSRTIPEDQNEEKSDDYQLMFKHFKENKVEIASAITKPFPPFLMSLRDRDFISEQKFQEQETCKN  
LAPVERVVYDILSNVQKKFSRDLLKVI FSKTHLKVYPDLKETLKHFFLNASKTNDEQAEEMLSLPQCNGGVLA  
QEHSNPHVKRSVPVSCVPQHMCQKTWKQGWAAKEKVWAPGGTFLQENPRSREEKRKATTGQNQNGESQ\*

>ENSMUSP00000125122\_c.60:G>A\_p.E21K ENSMUST00000160792.8|A530032D15Rik-  
201|ENSMUSG00000089844|-|chr1:g.85078387:C>T  
MAGGDNELSSRTIPEDQNEEKSDDYQLMFKHFKENKVEIASAITKPFPPFLMSLRDRDFISEQKFQEQETCKN  
LAPVERVVYDILSNVQKKFSRDLLKVI FSKTHLKVYPDLKETLKHFFLNASKTNDEQAEEMLSLPQCNGGVLA  
QEHSNPHVKRSVPVSCVPQHMCQKTWKQGWAAKEKVWAPGGTFLQENPRSRESWQVWSLHCRPW\*

>ENSMUSP00000123812\_c.60:G>A\_p.E21K ENSMUST00000161675.3|A530032D15Rik-  
202|ENSMUSG00000089844|-|chr1:g.85078387:C>T  
MAGGDNELSSRTIPEDQNEEKSDDYQLMFKHFKENKVEIASAITKPFPPFLMSLRDRDFISEQKFQEQETCKN  
LAPVERVVYDILSNVQKKFSRDLLKVI FSKTHLKVYPDLKETLKHFFLNASKTNDEQAEEMLSLPQCNGGVLA  
QEHSNPHVKRSVPVSCVPQHMCQKTWKQGWAAKEKVWAPGGTFLQENPRSRESWQVWSLHCRPW\*

>ENSMUSP00000124435\_c.222:G>C\_p.V75L ENSMUST00000161267.8|C130026I21Rik-  
205|ENSMUSG00000052477|-|chr1:g.85090303:C>G  
MAGGNNELSSRTIPEDQNEEESDDYQLMFKHFKENKVEIASAITKPFPPFLMSLRDRDFISEQKFQEQETCKN  
LLPLERVVYDILSNVQKKFSRDLLKVI FSKTHLKAYPEIRNQVHQL\*

>ENSMUSP00000125215\_c.270:G>C\_p.V91L ENSMUST00000162421.2|C130026I21Rik-  
207|ENSMUSG00000052477|-|chr1:g.85090303:C>G  
MDEPHMSHTCLSPGSTALLPQMSWKKRTIPEDQNEEESDDYQLMFKHFKENKVEIASAITKPFPPFLMSLRDRD  
FISEQKFQEQETCKNLLPLERVVYDILSNVQKKFSRDLLKVI FSKTHLKAYPEIRNQVHQL\*

>ENSMUSP00000159243\_c.88:C>A\_p.S30\* ENSMUST00000161424.5|Gm7609-  
202|ENSMUSG00000079457|+|chr1:g.85190459:C>A  
MNSSEHALLNSDWRLEATVKASVYVAF\*ITTSLTVVIIAIVSQSLQRKEVPLVLLCHHLLCISYCGLV  
VFQGMRLLIANSPLLLCWL VFGAQLSVGEGILLTLTLMALNTYLAICYPLNSPSFVDSAKYRI LAGTWTTVIL  
KNVGLFLIEGTSPTPASVQFQAPLCPVILNGMPARVIGMFLSLAFLLSVILVSYCLIYREGKWAGHFNKSNIKA  
RRTVLVHLLQISLHV IPTLII IGLGKRCGVFFFALNLALFGIFAFACFNHLVYGLHNRDLQSKLYPWLCRRK  
KLLP\*

>ENSMUSP00000159200\_c.88:C>A\_p.S30\* ENSMUST00000113402.4|Gm7609-  
201|ENSMUSG00000079457|+|chr1:g.85190459:C>A

MNSSSEHCNVSDWLRLEATVKASVYVAF\*ITTSLTVVIAIVSQSLQRKEVPLVLLCHHLLCISSYCGLGV  
VFQGM RALLANSPLLLCWL VFGAQLSVGEGILLTLTLMALNTYLAICYPLNSPSFVDSAKYRILAGTWTTVIL  
KNVGLFLIEGTSPTPASVFQSAPLCPVILNGMPARVIGMFSLAFLLSVILVSYCLIYREGKWAGHFNKSNIKA  
RRTVLVHLLQISLHV IPTLIIIGLGKRCGVFFFALNLALFGIFAFQAQCFNHLVYGLHNRDLQSKLYPWLCCRK  
KLLP\*

>rs107861961\_ENSMUSP00000159243\_c.558:T>C\_p.S187P  
ENSMUST00000161424.5|Gm7609-202|ENSMUSG00000079457|+|chr1:g.85190929:T>C  
MNSSSEHCNVSDWLRLEATVKASVYVAFSITTSLTVVIAIVSQSLQRKEVPLVLLCHHLLCISSYCGLGV  
VFQGM RALLANSPLLLCWL VFGAQLSVGEGILLTLTLMALNTYLAICYPLNSPSFVDSAKYRILAGTWTTVIL  
KNVGLFLIEGTSPTPASVFQSAPLCPVILNGMPARVIGMFPLAFLLSVILVSYCLIYREGKWAGHFNKSNIKA  
RRTVLVHLLQISLHV IPTLIIIGLGKRCGVFFFALNLALFGIFAFQAQCFNHLVYGLHNRDLQSKLYPWLCCRK  
KLLP\*

>rs107861961\_ENSMUSP00000159200\_c.558:T>C\_p.S187P  
ENSMUST00000113402.4|Gm7609-201|ENSMUSG00000079457|+|chr1:g.85190929:T>C  
MNSSSEHCNVSDWLRLEATVKASVYVAFSITTSLTVVIAIVSQSLQRKEVPLVLLCHHLLCISSYCGLGV  
VFQGM RALLANSPLLLCWL VFGAQLSVGEGILLTLTLMALNTYLAICYPLNSPSFVDSAKYRILAGTWTTVIL  
KNVGLFLIEGTSPTPASVFQSAPLCPVILNGMPARVIGMFPLAFLLSVILVSYCLIYREGKWAGHFNKSNIKA  
RRTVLVHLLQISLHV IPTLIIIGLGKRCGVFFFALNLALFGIFAFQAQCFNHLVYGLHNRDLQSKLYPWLCCRK  
KLLP\*

>ENSMUSP00000125160\_c.359:C>A\_p.F120L ENSMUST00000159582.8|C130026I21Rik-  
204|ENSMUSG00000052477|-|chr1:g.85237423:G>T  
MAGGNLSSRTIPEDQNEEESDDYQLMFKHFENKVEIASAITKPF PFLMSLRDRDFISEQKFQEYQETCKN  
LVPVERVVYDVL SNVQKKFSRDLKVI FSKTHLKAYPDLKETLKHFLNASKTNDEQAEEMLSLPQCNGGEGS  
SSCEQTCDEQEPQDDLPS SLRQEAAARRKKRPNWSNSKRRLQKKKPRQDEMMEISKEASKTSGIKR PSTARRT  
Q

>ENSMUSP00000091224\_c.359:C>A\_p.F120L  
ENSMUST00000093506.12|C130026I21Rik-202|ENSMUSG00000052477|-  
|chr1:g.85237423:G>T  
MAGGNLSSRTIPEDQNEEESDDYQLMFKHFENKVEIASAITKPF PFLMSLRDRDFISEQKFQEYQETCKN  
LVPVERVVYDVL SNVQKKFSRDLKVI FSKTHLKAYPDLKETLKHFLNVDSDSHRTHQRINGRNV EERPLPS  
VVREASKTNDEQAEEMLSLPQCNGGEGSSSCEQTCDEQEPQDDLPS SLRQEAAARRKKRPNWSNSKRRLQKKK  
RQDEM MGVPSPGHGVQEKLKAVSRRTLWKDSSSTNVKEVTKTLRARMRCGTCHWKGS AWANLSELVQGSRD T\*  
>ENSMUSP00000066587\_c.359:C>A\_p.F120L ENSMUST00000064341.9|C130026I21Rik-  
201|ENSMUSG00000052477|-|chr1:g.85237423:G>T  
MAGGNLSSRTIPEDQNEEESDDYQLMFKHFENKVEIASAITKPF PFLMSLRDRDFISEQKFQEYQETCKN  
LVPVERVVYDVL SNVQKKFSRDLKVI FSKTHLKAYPDLKETLKHFLNASKTNDEQAEEMLSLPQCNGGEGS  
SSCEQTCDEQEPQDDLPS SLRQEAAARRKKRPNWSNSKRRLQKKKPRQDEM MGVPSPGHGVQEKLKAVSRRTLW  
KDDSSSTNVKEVTKTLRARMRCGTCHWKGS AWANLSELVQGSRD T\*  
>ENSMUSP00000159221\_c.477:A>C\_p.T160P ENSMUST00000113407.11|Gm7592-  
201|ENSMUSG00000118607|+|chr1:g.85477885:A>C  
MNSSSEHCNVSDWLRLEATVKASVYVAFSITTSLTVVIAIVSQSLQRKEVRLVLLCHHLLCISSYCGLGV  
VFQGM RALLANSPLLLCWL VFGAQLSVGEGILLTLTLMALNTYLAICYPLNSPSFVDSAKYRILAGTWTM VIL  
KNVGLFLIEGTSPPPASVFQSAPLCPVILNGMPARVIGMFSLAFLLSVILVSYLIYQEGKRAGHFNKSNIKA  
QRTVLVHLLQISLHV IPTLIIIGLGKRCGVFFFALNLALFGIFAFQAQCFNPLVYGLHNRDLQSKLYPWLCCRK  
KLLP\*

>ENSMUSP00000159207\_c.585:A>C\_p.T196P ENSMUST00000239236.2|Gm7592-  
202|ENSMUSG00000118607|+|chr1:g.85477885:A>C  
MTVLC ELFNEVNMEKYPDLNLIRRSFECGAKPALKTMNSSSEHCNVSDWLRLEATVKASVYVAFSITTSLTV  
VIAIVSQSLQRKEVRLVLLCHHLLCISSYCGLGVVFQGM RALLANSPLLLCWL VFGAQLSVGEGILLTLT  
MALNTYLAICYPLNSPSFVDSAKYRILAGTWTM VILKNVGLFLIEGTSPPPASVFQSAPLCPVILNGMPARV  
GMFSLAFLLSVILVSYLIYQEGKRAGHFNKSNIKAQRTVLVHLLQISLHV IPTLIIIGLGKRCGVFFFALNL  
ALFGIFAFQAQCFNPLVYGLHNRDLQSKLYPWLCCRKLLP\*

>ENSMUSP00000091226\_c.1322:A>T\_p.Q441H ENSMUST00000093508.7|Sp110-  
201|ENSMUSG00000070034|-|chr1:g.85505028:T>A  
MFTLTKALEKALLQHFIYMKVNIAYAINKPF PFEALRDN SFITERMYKESLEACQNLVPLSKV VHNILTSLE  
QTFHPSVLLTLFSKVNLR EYPSLV AIFRSFRNVGYTYEENRPP LTTLEDLANPAEGCSLQTLPPPRPQISL  
PSHLSSAPRVCDPRATAQPIIEILDEQPS PRAVPLLCIQEGKTTVPVSSRDHQ RKDKEDSREMPHSPSGPE  
SVVKDDSPAANDLEMAREVPCTPANKKARRKKRPNWSNSKRRLQKKKPRQDEM MGVPSPGHGVQEKLKAVSR



TLWKDDSSSTNVKEVTKTQTRMRRAQTSNSQEI SKEASKTSGRKR PSTARRTTQVPEKTKNDVDFSP TLPVT  
 CGKAKGTLFQEK LKQGASKKCIQNEAGDWLTVKEFLNEGGRATSKDWKGVIRCNGETLRHLEQKGLLFFTSKS  
 KPHKKA\*

>rs108615523\_ENSMUSP00000091226\_c.1047:A>G\_p.K350E  
 ENSMUST00000093508.7|Sp110-201|ENSMUSG00000070034|-|chr1:g.85507458:T>C  
 MFTLTKALEKALLQHFIYMKVNIAYAINKPF PFFFEALRDN SFITERMYKESLEACQNLVPLSKVVHNILTSLE  
 QTFHPSVLLTLFSKVNLR EYPSLVAIFRSFRNVGYTYEENRPP LTLLEDLANPAEGCSLQTLPPPRPQISL  
 PSHLSSAPRVCDPRATAQPIIEILDEQPS PPRAVPLLGCIQEGKTFVSSRDHQKDKEDSREMPHSPSGPE  
 SVVKDDSPAANDLEMAREVPC TPANKKARRKKRPNWSNSKRRRQKKKPRQDEMMGVASPGHGVQEK LKAVSRR  
 TLWKDDSSSTNVKEVTKTQTRMRRAQTSNSQEI SKEASKTSGRKR PSTARRTTQVPEETKNDVDFSP TLPVT  
 CGKAKGTLFQEK LKQGASKKCIQNEAGDWLTVKEFLNEGGRATSKDWKGVIRCNGETLRHLEQKGLLFFTSKS  
 KPQKKA\*

>ENSMUSP00000091226\_c.138:A>G\_p.M47V ENSMUST00000093508.7|Sp110-  
 201|ENSMUSG00000070034|-|chr1:g.85523691:T>C  
 MFTLTKALEKALLQHFIYMKVNIAYAINKPF PFFFEALRDN SFITERVYKESLEACQNLVPLSKVVHNILTSLE  
 QTFHPSVLLTLFSKVNLR EYPSLVAIFRSFRNVGYTYEENRPP LTLLEDLANPAEGCSLQTLPPPRPQISL  
 PSHLSSAPRVCDPRATAQPIIEILDEQPS PPRAVPLLGCIQEGKTFVSSRDHQKDKEDSREMPHSPSGPE  
 SVVKDDSPAANDLEMAREVPC TPANKKARRKKRPNWSNSKRRRQKKKPRQDEMMGVASPGHGVQEK LKAVSRR  
 TLWKDDSSSTNVKEVTKTQTRMRRAQTSNSQEI SKEASKTSGRKR PSTARRTTQVPEKTKNDVDFSP TLPVT  
 CGKAKGTLFQEK LKQGASKKCIQNEAGDWLTVKEFLNEGGRATSKDWKGVIRCNGETLRHLEQKGLLFFTSKS  
 KPQKKA\*

>rs48330068\_ENSMUSP00000079095\_c.25:G>A\_p.S9N  
 ENSMUST00000080204.11|Sp140-201|ENSMUSG00000070031|+|chr1:g.85528906:G>A  
 MAGGYNELNSRTIPEDQNEEESDDYQLMFKHFKENKVEIASAITKPF PFLMSLRDRDFISEQKFQ EYQETCKN  
 LVPVERVVYDILSNVQK KFSRDLLKVI FSKTHLKAYPDLKETLKHFFLNASKTNDEQAEEMQCNGGEGS NSCE  
 QTRQTRQEPQDDLPSSLRQEAGAQQPTREKKKSCVICSP TYVPEDLEARMGSSQGE CVGTRRNI PARKPKKQR  
 RKKKGHNWSKPRWRK PMSVQRKRLRRRRKENANFSAELLPVTCGNLKGVLHKEKFKQGISVKS IQCQNGNWFT  
 PSEFEMMGY GSKSNWKL SLRCHNWPLKLLIQRNFLPNP PRIHRKRKEQRTQNLHRSPADPSIQNSDKCEVCR  
 DGGLLFCCDTCFRAF HEDCHIPTVEAEITPWSCIFCRMQSLGSPSLPESEILQREMAPQEQLKCEYVLLRVY  
 CCESSFFSKMPYYYY FREMTVSVQEP MWLDI IKKKLSDQAYCQVEDFVQDMRLIFRNHKITFKDPKFGEMGF  
 RLESKFESKFKEVFAIQETNEKS\*

>ENSMUSP00000079095\_c.26:C>A\_p.S9R ENSMUST00000080204.11|Sp140-  
 201|ENSMUSG00000070031|+|chr1:g.85528907:C>A  
 MAGGYNELNSRTIPEDQNEEESDDYQLMFKHFKENKVEIASAITKPF PFLMSLRDRDFISEQKFQ EYQETCKN  
 LVPVERVVYDILSNVQK KFSRDLLKVI FSKTHLKAYPDLKETLKHFFLNASKTNDEQAEEMQCNGGEGS NSCE  
 QTRQTRQEPQDDLPSSLRQEAGAQQPTREKKKSCVICSP TYVPEDLEARMGSSQGE CVGTRRNI PARKPKKQR  
 RKKKGHNWSKPRWRK PMSVQRKRLRRRRKENANFSAELLPVTCGNLKGVLHKEKFKQGISVKS IQCQNGNWFT  
 PSEFEMMGY GSKSNWKL SLRCHNWPLKLLIQRNFLPNP PRIHRKRKEQRTQNLHRSPADPSIQNSDKCEVCR  
 DGGLLFCCDTCFRAF HEDCHIPTVEAEITPWSCIFCRMQSLGSPSLPESEILQREMAPQEQLKCEYVLLRVY  
 CCESSFFSKMPYYYY FREMTVSVQEP MWLDI IKKKLSDQAYCQVEDFVQDMRLIFRNHKITFKDPKFGEMGF  
 RLESKFESKFKEVFAIQETNEKS\*

>rs108167277\_ENSMUSP00000079095\_c.1598:G>C\_p.K533N  
 ENSMUST00000080204.11|Sp140-201|ENSMUSG00000070031|+|chr1:g.85572397:G>C  
 MAGGYNELSSRTIPEDQNEEESDDYQLMFKHFKENKVEIASAITKPF PFLMSLRDRDFISEQKFQ EYQETCKN  
 LVPVERVVYDILSNVQK KFSRDLLKVI FSKTHLKAYPDLKETLKHFFLNASKTNDEQAEEMQCNGGEGS NSCE  
 QTRQTRQEPQDDLPSSLRQEAGAQQPTREKKKSCVICSP TYVPEDLEARMGSSQGE CVGTRRNI PARKPKKQR  
 RKKKGHNWSKPRWRK PMSVQRKRLRRRRKENANFSAELLPVTCGNLKGVLHKEKFKQGISVKS IQCQNGNWFT  
 PSEFEMMGY GSKSNWKL SLRCHNWPLKLLIQRNFLPNP PRIHRKRKEQRTQNLHRSPADPSIQNSDKCEVCR  
 DGGLLFCCDTCFRAF HEDCHIPTVEAEITPWSCIFCRMQSLGSPSLPESEILQREMAPQEQLKCEYVLLRVY  
 CCESSFFSKMPYYYY FREMTVSVQEP MWLDI IKKKLSDQAYCQVEDFVQDMRLIFRNHKITFKDPKFGEMGF  
 RLESKFESKFKEVFAIQETNENS\*

>rs108167277\_ENSMUSP00000125026\_c.548:G>C\_p.K183N  
 ENSMUST00000161497.2|Sp140-205|ENSMUSG00000070031|+|chr1:g.85572397:G>C  
 XISVKS IQCQNGNWFT PSEFEMMGY GSKSNWKL SLRCHNWPLKLLIQRNFLPNP PRIHRKRKEQRTQNLHRS  
 PADPSIQNSDKCEVCR DGGLLFCCDTCFRAF HEDCHIPTVEAEITPWSCIFCRMQSLGSPSLPESEILQREM  
 APQEQLDPKFGEMGFRLESKFESKFKEVFAIQETNENS\*

>ENSMUSP00000118481\_c.1272:G>A\_p.D425N ENSMUST00000155094.8|Sp100-  
 213|ENSMUSG00000026222|+|chr1:g.85627381:G>A

MEGSDGSPRMSTEQENTEMHLLIECMLKHFKTQKVAISNAIRSTFPFLESIRDHEFITGKMYEDLLDSCRSLVP  
VDKVIYRALEELEKKFDMTVLCELFNEVNMEKYPDLNLIIRRSFGCVFPNELCFQGIDGGNPNSQLSLEQGP  
SYSQGSPNGSSLDLSASEGWRNSNDRRNSNLMQANQTENHQLAESPGHLDSCSELQVQLNNRDATPESCSLLPQ  
EERAVQLNYELQINPCFVQLVDVKKENSSFSLAGNQQTARNTQNEDESEIELSSGSDNGENFSEATTTVPS  
QPAPAYSRKPPPTLRRDRGGDTSDTESSIIIRRRKRTGRKKRERLGSYLIRNIKIPMKPSWKTAFLARSANPSS  
QRRRKRGPRIPREENADFGGAELPVVCGNAQGFLLDKEKFKQGIYVRSIRGKTGRLFTPMNFEIEGNCEKAKNW  
RQSIRCKGWTLRELIQKGVLDPPRKKKETPRNPRQTRRQVNAL\*

>ENSMUSP00000116942\_c.1218:G>A\_p.D407N ENSMUST00000147552.8|Sp100-  
210|ENSMUSG00000026222|+|chr1:g.85627381:G>A

MEGSDGSPRMSTEQENTEMHLLIECMLKHFKTQKVAISNAIRSTFPFLESIRDHEFITGKMYEDLLDSCRSLVP  
VDKVIYRALEELEKKFDMTVLCELFNEVNMEKYPDLNLIIRRSFGCVFPNELCFQGIDGGNPNSQLSLEQGP  
SYSQGSPNGSSLDLSASEGWRNSNDRRNSNLMQANQTENHQLAESPGHLDSCSELQVQLNNRDATPESCSLLPQ  
EERAVQLNYELQINPCFVQLVDVKKENSSFSLAGNQQTARNTQNEDESEIELSSGSDNGENFSEATTTVPS  
QPAPAYSRKPPPTLRRDRGGGKRELRGSLYLRNIKIPMKPSWKTAFLARSANPSSQRRRKRGPRIPREENADF  
GGAEPLVVCGNAQGFLLDKEKFKQGIYVRSIRGKTGRLFTPMNFEIEGNCEKAKNWRQSIRCKGWTLRELIQK  
VLQDPPRKKKETPRNPRQTRRQVNAL\*

>ENSMUSP00000122670\_c.1197:G>A\_p.D400N ENSMUST00000153574.8|Sp100-  
212|ENSMUSG00000026222|+|chr1:g.85627381:G>A

MEGSDGSPRMSTEQENTEMHLLIECMLKHFKTQKVAISNAIRSTFPFLESIRDHEFITGKMYEDLLDSCRSLVP  
VDKVIYRALEELEKKFDMTVLCELFNEVNMEKYPDLNLIIRRSFGCVFPNELCFQGIDGGNPNSQLSLEQGP  
SYSQGSPNGSSLDLSASEGWRNSNDRRNSNLMQANQTENHQLAESPGHLDSCSELQVQLNNRDATPESCSLLPQ  
EERAVQLNYELQINPCFVQLVDVKKENSSFSLAGNQQTARNTQNEDESEIELSSGSDNGENFSEATTTVPS  
QPAPAYSRKPPPTLRRDRGGDTSDTESSIIIRRRKRTGPFLLARSANPSSQRRRKRGPRIPREENADFGGAELP  
VCGNAQGFLLDKEKFKQGIYVRSIRGKTGRLFTPMNFEIEGNCEKAKNWRQSIRCKGWTLRELIQKGVLDPP  
KKKETPRNPRQTRRQKRFKNLGIIVGKKFEKNFKRIFSIEDTSEQHEPCNHTVLLT\*

>ENSMUSP00000122899\_c.1143:G>A\_p.D382N ENSMUST00000150967.8|Sp100-  
211|ENSMUSG00000026222|+|chr1:g.85627381:G>A

MEGSDGSPRMSTEQENTEMHLLIECMLKHFKTQKVAISNAIRSTFPFLESIRDHEFITGKMYEDLLDSCRSLVP  
VDKVIYRALEELEKKFDMTVLCELFNEVNMEKYPDLNLIIRRSFGCVFPNELCFQGIDGGNPNSQLSLEQGP  
SYSQGSPNGSSLDLSASEGWRNSNDRRNSNLMQANQTENHQLAESPGHLDSCSELQVQLNNRDATPESCSLLPQ  
EERAVQLNYELQINPCFVQLVDVKKENSSFSLAGNQQTARNTQNEDESEIELSSGSDNGENFSEATTTVPS  
QPAPAYSRKPPPTLRRDRGGAFLLARSANPSSQRRRKRGPRIPREENADFGGAELPVVCGNAQGFLLDKEKFKQGI  
YVRSIRGKTGRLFTPMNFEIEGNCEKAKNWRQSIRCKGWTLRELIQKGVLDPP

>ENSMUSP00000066399\_c.1272:G>A\_p.D425N ENSMUST00000066427.11|Sp100-  
202|ENSMUSG00000026222|+|chr1:g.85627381:G>A

MEGSDGSPRMSTEQENTEMHLLIECMLKHFKTQKVAISNAIRSTFPFLESIRDHEFITGKMYEDLLDSCRSLVP  
VDKVIYRALEELEKKFDMTVLCELFNEVNMEKYPDLNLIIRRSFGCVFPNELCFQGIDGGNPNSQLSLEQGP  
SYSQGSPNGSSLDLSASEGWRNSNDRRNSNLMQANQTENHQLAESPGHLDSCSELQVQLNNRDATPESCSLLPQ  
EERAVQLNYELQINPCFVQLVDVKKENSSFSLAGNQQTARNTQNEDESEIELSSGSDNGENFSEATTTVPS  
QPAPAYSRKPPPTLRRDRGGDTSDTESSIIIRRRKRTGRKKRERLGSYLIRNIKIPMKPSWKTAFLARSANPSS  
QRRRKRGPRIPREENADFGGAELPVVCGNAQGFLLDKEKFKQGIYVRSIRGKTGRLFTPMNFEIEGNCEKAKNW  
RQSIRCKGWTLRELIQKGVLDPPRKKKETPRNPRQTRRQKCELLLLTIYCYPKSGFFIPKPKQRKEKFPDLR  
EHMWLNKIKNRLNKKAYHSVRRFVEDMRLIFHNHSIFYKKRFKNLGIIVGKKFEKNFKRIFSIEDTSEQHEPC  
NHTVLLT\*

>ENSMUSP00000120267\_c.171:G>A\_p.D58N ENSMUST00000132641.8|Sp100-  
204|ENSMUSG00000026222|+|chr1:g.85627381:G>A

RRKRGPRIPREENADFGGAELPVVCGNAQGFLLDKEKFKQGIYVRSIRGKTGRLFTPMNFEIEGNCEKAKNWRQ  
SIRCKGWTLRELIQKGVLDPPRKKKETPRNPRQTRRQGNPKACKVCGQPRKVHPCTACKEFYHKNCHIPPV  
EDKRSRWHCAFCKRKNQLRGQKTQACHKEAEVLKRKMSPEEQKCELLLLTIYCYPKSGFFIPKPKQRKEKFP  
DLREHMWLNKIKNRLNKKAYHSVRRFVEDMRLIFHNHSIFYKKRFKNLGIIVGKKFEKNFKRIFSIEDTSEQH  
EPCNHTVLLT\*

>ENSMUSP00000120267\_c.558:G>A\_p.E187K ENSMUST00000132641.8|Sp100-  
204|ENSMUSG00000026222|+|chr1:g.85634667:G>A

RRKRGPRIPREENADFGGAELPVVCGNAQGFLLDKEKFKQGIYVRSIRGKTGRLFTPMDFEIEGNCEKAKNWRQ  
SIRCKGWTLRELIQKGVLDPPRKKKETPRNPRQTRRQGNPKACKVCGQPRKVHPCTACKEFYHKNCHIPPV  
EDKRSRWHCAFCKRKNQLRGQKTQACHKEAEVLKRKMSPEKQKCELLLLTIYCYPKSGFFIPKPKQRKEKFP  
DLREHMWLNKIKNRLNKKAYHSVRRFVEDMRLIFHNHSIFYKKRFKNLGIIVGKKFEKNFKRIFSIEDTSEQH  
EPCNHTVLLT\*

>ENSMUSP00000119301\_c.315:G>A\_p.E106K ENSMUST00000141709.2|Sp100-207|ENSMUSG00000026222|+|chr1:g.85634667:G>A  
 XHPGRRRLRQLPRMQNWTLGAFPLFGGFLVRRGNPKACKVCGQPRKVHPCTACKEFYHKNCHIPPVEDKRSRSHW  
 CAFCKRKNQLRGQKTQACHKEAEVLKRRKMSPEKQLKCELLLLTIYCYPKSGFFIPKPKQRKEK  
 >rs107748797\_ENSMUSP00000122670\_c.1380:A>G\_p.I461V  
 ENSMUST00000153574.8|Sp100-212|ENSMUSG00000026222|+|chr1:g.85636735:A>G  
 MEGSDGSPRMSTEQENTEMHLIECMLKHFKTKQVAISNAIRSTFPFLESIRDHEFITGKMYEDLLDSCRSLVP  
 VDKVIYRALEEELEKKFDMFTVLCLEFNEVNMEKYPDLNLIIRRSFGCVFPNELCFQGDGIDGNNPNSQLSLEQGP  
 SYSQGSPNGSSLDLSASEGWRSDRRNSNLMQANQTENHQLAESPGHLDSCQLQVQLNRRDATPESCSLLPQN  
 EERAVQLNYELQINPCFVQLVDVKKENSSFSLAGNQOQTRARTNQNEDESEIELSSGSDNGENFSEATTTVPS  
 QPAPAYSRKPPPTLRDRGGDTSDESSIIIRRRKRTGPFLLARSANPSSQRRRKRGPRIPREENADFGGAELPV  
 VCGNAQGFLLDKEKFKQGIYVRSIRGKTGRLFTPMDFEIEGNCEKAKNWRQSIRCKGWTTLRELIQKGVLDPPR  
 KKKETPRNPRQTRRQKRFKNLGVIVGKKFEKNFKRIFSIEDTSEQHEPCNHTVLLT\*  
 >rs107748797\_ENSMUSP00000066399\_c.1671:A>G\_p.I558V  
 ENSMUST00000066427.11|Sp100-202|ENSMUSG00000026222|+|chr1:g.85636735:A>G  
 MEGSDGSPRMSTEQENTEMHLIECMLKHFKTKQVAISNAIRSTFPFLESIRDHEFITGKMYEDLLDSCRSLVP  
 VDKVIYRALEEELEKKFDMFTVLCLEFNEVNMEKYPDLNLIIRRSFGCVFPNELCFQGDGIDGNNPNSQLSLEQGP  
 SYSQGSPNGSSLDLSASEGWRSDRRNSNLMQANQTENHQLAESPGHLDSCQLQVQLNRRDATPESCSLLPQN  
 EERAVQLNYELQINPCFVQLVDVKKENSSFSLAGNQOQTRARTNQNEDESEIELSSGSDNGENFSEATTTVPS  
 QPAPAYSRKPPPTLRDRGGDTSDESSIIIRRRKRTGRKKRERLGSYLIRNIKIPMKPSWKTAFLARSANPSS  
 QRRRKRGPRIPREENADFGGAELPVVCGNAQGFLLDKEKFKQGIYVRSIRGKTGRLFTPMDFEIEGNCEKAKN  
 RQSIRCKGWTTLRELIQKGVLDPPRKKKETPRNPRQTRRQKCELLLLTIYCYPKSGFFIPKPKQRKEKFPDLR  
 EHMWLNKIKNRLNKKAYHSVRRFVEDMRLIFHNHSIFYKKRFKNLGVIVGKKFEKNFKRIFSIEDTSEQHEPC  
 NHTVLLT\*  
 >rs107748797\_ENSMUSP00000120267\_c.804:A>G\_p.I269V  
 ENSMUST00000132641.8|Sp100-204|ENSMUSG00000026222|+|chr1:g.85636735:A>G  
 RRRKRGPRIPREENADFGGAELPVVCGNAQGFLLDKEKFKQGIYVRSIRGKTGRLFTPMDFEIEGNCEKAKNWRQ  
 SIRCKGWTTLRELIQKGVLDPPRKKKETPRNPRQTRRQGNPKACKVCGQPRKVHPCTACKEFYHKNCHIPPV  
 EDKRSRSHWCAFCKRKNQLRGQKTQACHKEAEVLKRRKMSPEEQKCELLLLTIYCYPKSGFFIPKPKQRKEKFP  
 DLREHMWLNKIKNRLNKKAYHSVRRFVEDMRLIFHNHSIFYKKRFKNLGVIVGKKFEKNFKRIFSIEDTSEQH  
 EPCNHTVLLT\*  
 >ENSMUSP00000124137\_c.523:G>T\_p.S175I ENSMUST00000159122.8|A630001G21Rik-202|ENSMUSG00000052760|-|chr1:g.85646080:C>A  
 MFGVIQKEERFNEVFLNYFKENKIEIAHAITKLFPPLESIRDHSFITDKIYADSYEACRNSVPIVEVVYVNVLS  
 HLERLSDSSFLWALFNVRNLKEYPALREIHKSLGTELDQGYSPQKCKQEEQKKLATVHPSYEQGTNLCTHEKW  
 AQPCFVKQDNLQPEPIQQNQVDEIILISIESSECSDEDEEDQALGTGLRRQMNKEAEDSSPPGFQNIELPAGS  
 HTSCVWTNHS\*  
 >ENSMUSP00000070374\_c.523:G>T\_p.S175I  
 ENSMUST00000064788.14|A630001G21Rik-201|ENSMUSG00000052760|-  
 |chr1:g.85646080:C>A  
 MFGVIQKEERFNEVFLNYFKENKIEIAHAITKLFPPLESIRDHSFITDKIYADSYEACRNSVPIVEVVYVNVLS  
 HLERLSDSSFLWALFNVRNLKEYPALREIHKSLGTELDQGYSPQKCKQEEQKKLATVHPSYEQGTNLCTHEKW  
 AQPCFVKQDNLQPEPIQQNQVDEIILISIESSECSDEDEEDQALGTGLRRQMNKEAEDSSPPGFQNIELPAGS  
 HTSCVWTNHS\*  
 >ENSMUSP00000124137\_c.445:C>A\_p.P149H ENSMUST00000159122.8|A630001G21Rik-202|ENSMUSG00000052760|-|chr1:g.85646814:G>T  
 MFGVIQKEERFNEVFLNYFKENKIEIAHAITKLFPPLESIRDHSFITDKIYADSYEACRNSVPIVEVVYVNVLS  
 HLERLSDSSFLWALFNVRNLKEYPALREIHKSLGTELDQGYSPQKCKQEEQKKLATVHPSYEQGTNLCTHEKW  
 AQHCFVKQDNLQPEPIQQNQVDEIILISSESSECSDEDEEDQALGTGLRRQMNKEAEDSSPPGFQNIELPAGS  
 HTSCVWTNHS\*  
 >ENSMUSP00000070374\_c.445:C>A\_p.P149H  
 ENSMUST00000064788.14|A630001G21Rik-201|ENSMUSG00000052760|-  
 |chr1:g.85646814:G>T  
 MFGVIQKEERFNEVFLNYFKENKIEIAHAITKLFPPLESIRDHSFITDKIYADSYEACRNSVPIVEVVYVNVLS  
 HLERLSDSSFLWALFNVRNLKEYPALREIHKSLGTELDQGYSPQKCKQEEQKKLATVHPSYEQGTNLCTHEKW  
 AQHCFVKQDNLQPEPIQQNQVDEIILISSESSECSDEDEEDQALGTGLRRQMNKEAEDSSPPGFQNIELPAGS  
 HTSCVWTNHS\*

>ENSMUSP00000072983\_c.481:T>A\_p.F161Y ENSMUST00000073252.9|Chrnd-201|ENSMUSG00000026251|+|chr1:g.87120327:T>A  
MAGPVLTLGLLAALVVCALPGSWG LNEEQRLIQHLFNEKGYDKDLRPVARKEDKVDVALSLTSLNLSLKEVE  
ETLTTNVWIDHAWVDSRLQWDANDFGNITVLR LPPDMVWLPEIVLENNNDGSFQISYACNVLVYDSGYVTWLP  
PAIFRSSCPI SVTYYPFDWQNC SLKFSSSLKYTAKEITLSLKQEEENNRSYPIEWIIIDPEGFTENGWEIVHR  
AAKLNVDPSVPM DSTNHQDVTFYLI IRRKPLFYI INILVPCV LISFMINLVFYLPGDCGEKTSVAISVLLAQS  
VFLLLISKRLPAT SMAIPLVGKFL LFGMVLVTM VVICVIVLNIHFRT PSTHVLSEGVKFFLETLPKLLHMS  
RPAEEDPGPRALIRRSSSLGYICKAE EYFSLKSRSDLMFEKQSERHGLARRLT TARRPPASSEQVQQELFNEM  
KPAVDGANFIVNHMRDQNSYNEEKDNWNQVARTVDR LCLFVVTPVMVVGTAWIFLQGVYNQ PPLQPFPGD PFS  
YSEQDKRFI\*

>ENSMUSP00000139537\_c.154:T>A\_p.F52Y ENSMUST00000186373.2|Chrnd-202|ENSMUSG00000026251|+|chr1:g.87120327:T>A  
MVWLPEIVLENNNDGSFQISYACNVLVYDSGYVTWLP PAIFRSSCPI SVTYYPFDWQNC SLKFSSSLKYTAKEI  
TSLKQEEENNRSYPIEWIIIDPEGFTENGWEIVHRAAKLNVDPSVPM DSTNHQDVTFYLI IRRKPLFYI IN  
ILVPCV LISFMINLVFYLPGDCGEKTSVAISVLLAQS VFLLLISKRLPAT SMAIPLVGKFL LFGMVLVTM VV  
ICVIVLNIHFRT PSTHVLSEGVKFFLETLPKLLHMSRPAEEDPGPRALIRRSSSLGYICKAE EYFSLKSRSD  
LMFEKQSERHGLARRLT TARRPPASSEQVQQELFNEMKPAVDGANFIVNHMRDQNSYNEEKDNWNQVARTVDR  
LCLFVVTPVMVVGTAWIFLQGVYNQ PPLQPFPGD PFSYSEQDKRFI\*

>ENSMUSP00000108739\_c.106:A>C\_p.Y36S ENSMUST00000113114.10|Trpm8-202|ENSMUSG00000036251|+|chr1:g.88246798:A>C  
MSFEGARLSMRSRRNGTMGSTR TLYSSVSRSTDVSSSDSDLVNF IQANFKKRECVFFTRDSKAMENICKCGYA  
QSQHIEGTQINQNEKWN YKKHTKEFPTDAFGDIQFETLGKKGKYLRLSCD TDSETLYELLTQHWHLKT PNLVI  
SVTGGAKNFALKPRMRKIFSR LIYIAQSKGAWIL TGGTHYGLMKYIGEVVRDNTISR NSEENIVAIGIAAWGM  
VSNRDTLIRSCDDEGHFSAQYIMDDFTRDPLYILDNNHTHLLVDNGCHGHPTVEAKLRN QLEKYISERTSQD  
SNYGGKIPIVCFAQGGGRET LKAINTSVKSKI PCVVVEGSGQIADVIASLVEVEDVLTSSMVKEKLV RFLPRT  
VSRLP EEEIESWIKWLKEI LESSHLLTVIKMEEAGDEIVSNAISYALYKAFSTNEQDKDNWNGQLK LLEWNQ  
LDLASDEIFTNDRRWEADLQEV MFTALIKDRPKFVRLFLENGLNLQKFLTNEVLT ELFSTHFSTL VYRNLQI  
AKNSYNDALLTFVWKL VANFRRSFWKEDRSSREDLDVELHDASLTTRHPLQALFIWAILQNKKELSKVIWEQT  
KGCTLAALGASKLLKTLAKVKNDINAAGESEELANEYETRAVELFTECYSNEDDLAEQLLVYSCEAWGGSNCL  
ELAVEATDQHFI AQPGVQNF LSKQWYGEISRDTKNWKIILCLFI IPLVGCGLV SFRKKPIDKHKLLWYVAF  
FTSPFVVFSWNVV FYIAFLLLFAYVLLMDFH SVPHTEPILILYALVFV LFCDEV RQWYMGVNYFTDLWNVMDT  
LGLFYFIAGIVFRLHSSNKSSLYSGRVI FCLDYIIFTLRLIHI FTVSRNLGPKI IMLQRMLIDVFFF LFLFAV  
WMVAFGVARQGILRQNEQRWRWIFRSVIYEPY LAMFGQVPSD VDDSTTYDFSHCTFSGNESKPLCVELDEHNLP  
RFPEWITIPLVCIYMLSTN ILLVNLVAMFGYTVGIVQENNDQVWKFOR YFLVQ EYCNRLNIPFPVVFAYFY  
MVKKCFKCCCKEKNMESNACCFRNEDNETLAWEGVMKENYLVKINTKANDNSEEMRHRFRQLDSKLN DLKSL  
LKEIANNIK\*

>ENSMUSP00000036991\_c.106:A>C\_p.Y36S ENSMUST00000040210.14|Trpm8-201|ENSMUSG00000036251|+|chr1:g.88246798:A>C  
MSFEGARLSMRSRRNGTMGSTR TLYSSVSRSTDVSSSDSDLVNF IQANFKKRECVFFTRDSKAMENICKCGYA  
QSQHIEGTQINQNEKWN YKKHTKEFPTDAFGDIQFETLGKKGKYLRLSCD TDSETLYELLTQHWHLKT PNLVI  
SVTGGAKNFALKPRMRKIFSR LIYIAQSKGAWIL TGGTHYGLMKYIGEVVRDNTISR NSEENIVAIGIAAWGM  
VSNRDTLIRSCDDEGHFSAQYIMDDFTRDPLYILDNNHTHLLVDNGCHGHPTVEAKLRN QLEKYISERTSQD  
SNYGGKIPIVCFAQGGGRET LKAINTSVKSKI PCVVVEGSGQIADVIASLVEVEDVLTSSMVKEKLV RFLPRT  
VSRLP EEEIESWIKWLKEI LESSHLLTVIKMEEAGDEIVSNAISYALYKAFSTNEQDKDNWNGQLK LLEWNQ  
LDLASDEIFTNDRRWEADLQEV MFTALIKDRPKFVRLFLENGLNLQKFLTNEVLT ELFSTHFSTL VYRNLQI  
AKNSYNDALLTFVWKL VANFRRSFWKEDRSSREDLDVELHDASLTTRHPLQALFIWAILQNKKELSKVIWEQT  
KGCTLAALGASKLLKTLAKVKNDINAAGESEELANEYETRAVELFTECYSNEDDLAEQLLVYSCEAWGGSNCL  
ELAVEATDQHFI AQPGVQNF LSKQWYGEISRDTKNWKIILCLFI IPLVGCGLV SFRKKPIDKHKLLWYVAF  
FTSPFVVFSWNVV FYIAFLLLFAYVLLMDFH SVPHTEPILILYALVFV LFCDEV RQWYMGVNYFTDLWNVMDT  
LGLFYFIAGIVFRLHSSNKSSLYSGRVI FCLDYIIFTLRLIHI FTVSRNLGPKI IMLQRMLIDVFFF LFLFAV  
WMVAFGVARQGILRQNEQRWRWIFRSVIYEPY LAMFGQVPSD VDDSTTYDFSHCTFSGNESKPLCVELDEHNLP  
RFPEWITIPLVCIYMLSTN ILLVNLVAMFGYTVGIVQENNDQVWKFOR YFLVQ EYCNRLNIPFPVVFAYFY  
MVKKCFKCCCKEKNMESNACCFRNEDNETLAWEGVMKENYLVKINTKANDNSEEMRHRFRQLDSKLN DLKSL  
LKEIANNIK\*

>ENSMUSP00000131209\_c.106:A>C\_p.Y36S ENSMUST00000171176.3|Trpm8-204|ENSMUSG00000036251|+|chr1:g.88246798:A>C  
MSFEGARLSMRSRRNGTMGSTR TLYSSVSRSTDVSSSDSDLVNF IQANFKKRECVFFTRDSKAMENICKCGYA  
QSQHIEGTQINQNEKWN YKKHTKEFPTDAFGDIQFETLGKKGKYLRLSCD TDSETLYELLTQHWHLKT PNLVI

SVTGGAKNFALKPRMRKIFSRLIYIAQSKGAWILTGGTHYGLMKYIGEVVRDNTISRNSEENIVAIGIAAWGM  
VSNRDTLIRSCDDEGHFSAQYIMDDFTRDPLYILDNNHTHLLLVDNGCHGHPTVEAKLRNQLEKYISERTSQD  
SNYGGKIPIVCFAQGGGRETAKAINTSVKSKI PCVVVEGSGQIADV IASLVEVEDVLTSSMVKEKLVRF LPR T  
VSRLPEEEIESWIKWLKEI LESSHLLTVIKMEEAGDEIVSN AISYALYKAFSTNEQDKDNWNGQLKLLLEWNQ  
LDLASDEIFTNDRRWEADLQEVMTALIKDRPKFVRLFLENGLNLQKFLTNEVLTTELSTHFSSTLVYRNLQI  
AKNSYNDALLTFVWKL VANFRRSFWKEDRSSRELDDELHDA SLTTRHPLQALFIWAILQNKKELSKVIWEQT  
KGCTLAALGASKLLKTLAKVKNDINAAGESEELANEYETRAVELFTECYSNDEDLAEQLLVYSCEAWGGSNCL  
ELAVEATDQHFIAQPGVQNF LSKQWYGEISRDTKNWKI ILC LFI I PLVGCGLVSRKPKPIDKHKLLWYVAV  
FTSPFVVF SWNVVFI AFLLLFAYVLLMDFHSPHTPELILYALVFLFCDEV RQWYMN GVN YFTDLWNVMDT  
LGLFYFIAGIVFRLHSSNKSSLYSGRVIFCLDYII FTLR LIHIFTVSRNLGPKI IMLQRMLIDVFFF LFLFAV  
WMVAFGVARQGILRQNEQRWRWIFRSVIYEPY LAMFGQVPSD VDS TTYDFSHCTFSGNESKPLCVELDEHNLP  
RFPEWIT I PLVCIYMLSTNILLVNLVAMFGYTVGIVQENNDQVWKQRYFLVQ EYCNRLNIPFPVVFAYFY  
MVVKKCFKCCCKEKNMESNACCFRNEDNETLAWEGVMKENYL VKINTKANDNSEEMRHRFRQLDSKLN DLKSL  
LKEIANNIK\*

>rs50202562\_ENSMUSP00000108739\_c.145:T>C\_p.F49S

ENSMUST00000113114.10|Trpm8-202|ENSMUSG00000036251|+|chr1:g.88248614:T>C  
MSFEGARLSMRSRRNGTGMSTR TLYSSVSRSTDVSYSDSLVNF IQANSKKRECVFFTRDSKAMENICKCGYA  
QSQHIEGTQINQNEKWN YKKHTKEFPTDAFGDIQFETLGKKGKYLRLSCDT DSETLYELLTQHWHLKTPNLVI  
SVTGGAKNFALKPRMRKIFSRLIYIAQSKGAWILTGGTHYGLMKYIGEVVRDNTISRNSEENIVAIGIAAWGM  
VSNRDTLIRSCDDEGHFSAQYIMDDFTRDPLYILDNNHTHLLLVDNGCHGHPTVEAKLRNQLEKYISERTSQD  
SNYGGKIPIVCFAQGGGRETAKAINTSVKSKI PCVVVEGSGQIADV IASLVEVEDVLTSSMVKEKLVRF LPR T  
VSRLPEEEIESWIKWLKEI LESSHLLTVIKMEEAGDEIVSN AISYALYKAFSTNEQDKDNWNGQLKLLLEWNQ  
LDLASDEIFTNDRRWEADLQEVMTALIKDRPKFVRLFLENGLNLQKFLTNEVLTTELSTHFSSTLVYRNLQI  
AKNSYNDALLTFVWKL VANFRRSFWKEDRSSRELDDELHDA SLTTRHPLQALFIWAILQNKKELSKVIWEQT  
KGCTLAALGASKLLKTLAKVKNDINAAGESEELANEYETRAVELFTECYSNDEDLAEQLLVYSCEAWGGSNCL  
ELAVEATDQHFIAQPGVQNF LSKQWYGEISRDTKNWKI ILC LFI I PLVGCGLVSRKPKPIDKHKLLWYVAV  
FTSPFVVF SWNVVFI AFLLLFAYVLLMDFHSPHTPELILYALVFLFCDEV RQWYMN GVN YFTDLWNVMDT  
LGLFYFIAGIVFRLHSSNKSSLYSGRVIFCLDYII FTLR LIHIFTVSRNLGPKI IMLQRMLIDVFFF LFLFAV  
WMVAFGVARQGILRQNEQRWRWIFRSVIYEPY LAMFGQVPSD VDS TTYDFSHCTFSGNESKPLCVELDEHNLP  
RFPEWIT I PLVCIYMLSTNILLVNLVAMFGYTVGIVQENNDQVWKQRYFLVQ EYCNRLNIPFPVVFAYFY  
MVVKKCFKCCCKEKNMESNACCFRNEDNETLAWEGVMKENYL VKINTKANDNSEEMRHRFRQLDSKLN DLKSL  
LKEIANNIK\*

>rs50202562\_ENSMUSP00000036991\_c.145:T>C\_p.F49S

ENSMUST00000040210.14|Trpm8-201|ENSMUSG00000036251|+|chr1:g.88248614:T>C  
MSFEGARLSMRSRRNGTGMSTR TLYSSVSRSTDVSYSDSLVNF IQANSKKRECVFFTRDSKAMENICKCGYA  
QSQHIEGTQINQNEKWN YKKHTKEFPTDAFGDIQFETLGKKGKYLRLSCDT DSETLYELLTQHWHLKTPNLVI  
SVTGGAKNFALKPRMRKIFSRLIYIAQSKGAWILTGGTHYGLMKYIGEVVRDNTISRNSEENIVAIGIAAWGM  
VSNRDTLIRSCDDEGHFSAQYIMDDFTRDPLYILDNNHTHLLLVDNGCHGHPTVEAKLRNQLEKYISERTSQD  
SNYGGKIPIVCFAQGGGRETAKAINTSVKSKI PCVVVEGSGQIADV IASLVEVEDVLTSSMVKEKLVRF LPR T  
VSRLPEEEIESWIKWLKEI LESSHLLTVIKMEEAGDEIVSN AISYALYKAFSTNEQDKDNWNGQLKLLLEWNQ  
LDLASDEIFTNDRRWEADLQEVMTALIKDRPKFVRLFLENGLNLQKFLTNEVLTTELSTHFSSTLVYRNLQI  
AKNSYNDALLTFVWKL VANFRRSFWKEDRSSRELDDELHDA SLTTRHPLQALFIWAILQNKKELSKVIWEQT  
KGCTLAALGASKLLKTLAKVKNDINAAGESEELANEYETRAVELFTECYSNDEDLAEQLLVYSCEAWGGSNCL  
ELAVEATDQHFIAQPGVQNF LSKQWYGEISRDTKNWKI ILC LFI I PLVGCGLVSRKPKPIDKHKLLWYVAV  
FTSPFVVF SWNVVFI AFLLLFAYVLLMDFHSPHTPELILYALVFLFCDEV RQWYMN GVN YFTDLWNVMDT  
LGLFYFIAGIVFRLHSSNKSSLYSGRVIFCLDYII FTLR LIHIFTVSRNLGPKI IMLQRMLIDVFFF LFLFAV  
WMVAFGVARQGILRQNEQRWRWIFRSVIYEPY LAMFGQVPSD VDS TTYDFSHCTFSGNESKPLCVELDEHNLP  
RFPEWIT I PLVCIYMLSTNILLVNLVAMFGYTVGIVQENNDQVWKQRYFLVQ EYCNRLNIPFPVVFAYFY  
MVVKKCFKCCCKEKNMESNACCFRNEDNETLAWEGVMKENYL VKINTKANDNSEEMRHRFRQLDSKLN DLKSL  
LKEIANNIK\*

>rs50202562\_ENSMUSP00000131209\_c.145:T>C\_p.F49S

ENSMUST00000171176.3|Trpm8-204|ENSMUSG00000036251|+|chr1:g.88248614:T>C  
MSFEGARLSMRSRRNGTGMSTR TLYSSVSRSTDVSYSDSLVNF IQANSKKRECVFFTRDSKAMENICKCGYA  
QSQHIEGTQINQNEKWN YKKHTKEFPTDAFGDIQFETLGKKGKYLRLSCDT DSETLYELLTQHWHLKTPNLVI  
SVTGGAKNFALKPRMRKIFSRLIYIAQSKGAWILTGGTHYGLMKYIGEVVRDNTISRNSEENIVAIGIAAWGM  
VSNRDTLIRSCDDEGHFSAQYIMDDFTRDPLYILDNNHTHLLLVDNGCHGHPTVEAKLRNQLEKYISERTSQD  
SNYGGKIPIVCFAQGGGRETAKAINTSVKSKI PCVVVEGSGQIADV IASLVEVEDVLTSSMVKEKLVRF LPR T  
VSRLPEEEIESWIKWLKEI LESSHLLTVIKMEEAGDEIVSN AISYALYKAFSTNEQDKDNWNGQLKLLLEWNQ



LDLASDEIFTNDRRWEADLQEVMTALIKDRPKFVRLFLENGLNLQKFLTNEVLTELFSTHFSTLVYRNLQI  
AKNSYNDALLTFVWKLWANFRRSFWKEDRSSREDLDVELHDASLTTRHPLQALFIWAILQNKKELSKVIWEQT  
KGCTLAALGASKLLKTLAKVKNDINAAGESEELANEYETRAVELFTECYSNDEDLAEQLLVYSCEAWGGSNCL  
ELAVEATDQHFIQAQPGVQNFSLKQWYGEISRDTKNWKIILCLFIIPLVGCGLVSRKPKPIDKHKLLWYVAF  
FTSPFVVFVSWNVVFIYIAFLLLFAYVLLMDFHSPHTPELIIYALVFLFCDEVRQWYMNQVNYFTDLWNVMDT  
LGLFYFIAGIVFRLHSSNKSSLYSGRVIIFCLDYIIIFTLRLIHIFTVSRNLGPKIIMLQRMIDVFFFLLFAV  
WMVAFGVARQGILRQNEQRWRWIFRSVIYEPYLAAMFGQVPSVDSTTYDFSHCTFSGNESKPLCVELDEHNLP  
RFPEWITIPLVCIYMLSTNILLVNLVAMFGYTVGIVQENNDQVWKFORQYFLVQEYCNRLNIPFPFVVFAYFY  
MVVKKCFKCCCKEKNMESNACCFRNEEDNETLAWEGVMKENYLVKINTKANDNSEEMRHRFRQLDSKLNLDLKS  
LKEIANNIK\*

>rs51885729\_ENSMUSP00000108739\_c.186:G>A\_p.A63T

ENSMUST00000113114.10|Trpm8-202|ENSMUSG00000036251||+|chr1:g.88248655:G>A  
MSFEGARLSMRSRRNGTMGSTRITLYSSVSRSTDVSYSDSDLVNFIQANFKKRECVFFTRDSKTMENICKCGYA  
QSQHIEGTQINQNEKWNKKHTKEFPTDAFGDIQFETLGKKGKYLRLSCDTDSETLYELLTQHWHLKTPNLVI  
SVTGGAKNFALKPRMRKIFSRLIYIAQSKGAWILTGGTHYGLMKYIGEVVRDNTISRNSEENIVAIGIAAWGM  
VSNRDTLIRSCDDEGHFSAQYIMDDFTRDPLYILDNNHTHLLVDNGCHGHPTVEAKLRNQLKEYISERTSQD  
SNYGGKIPIVCFQAQGGGRETAKAINTSVKSKIICVVEGSGQIADVIAASLVEVEDVLTSSMVKEKLVRFPLPRT  
VSRLEPEEIESWIKWLKEILESSHLLTVIKMEEAGDEIVSNAIYALYKAFSTNEQDKDNWNGQLKLLLEWNQ  
LDLASDEIFTNDRRWEADLQEVMTALIKDRPKFVRLFLENGLNLQKFLTNEVLTELFSTHFSTLVYRNLQI  
AKNSYNDALLTFVWKLWANFRRSFWKEDRSSREDLDVELHDASLTTRHPLQALFIWAILQNKKELSKVIWEQT  
KGCTLAALGASKLLKTLAKVKNDINAAGESEELANEYETRAVELFTECYSNDEDLAEQLLVYSCEAWGGSNCL  
ELAVEATDQHFIQAQPGVQNFSLKQWYGEISRDTKNWKIILCLFIIPLVGCGLVSRKPKPIDKHKLLWYVAF  
FTSPFVVFVSWNVVFIYIAFLLLFAYVLLMDFHSPHTPELIIYALVFLFCDEVRQWYMNQVNYFTDLWNVMDT  
LGLFYFIAGIVFRLHSSNKSSLYSGRVIIFCLDYIIIFTLRLIHIFTVSRNLGPKIIMLQRMIDVFFFLLFAV  
WMVAFGVARQGILRQNEQRWRWIFRSVIYEPYLAAMFGQVPSVDSTTYDFSHCTFSGNESKPLCVELDEHNLP  
RFPEWITIPLVCIYMLSTNILLVNLVAMFGYTVGIVQENNDQVWKFORQYFLVQEYCNRLNIPFPFVVFAYFY  
MVVKKCFKCCCKEKNMESNACCFRNEEDNETLAWEGVMKENYLVKINTKANDNSEEMRHRFRQLDSKLNLDLKS  
LKEIANNIK\*

>rs51885729\_ENSMUSP00000036991\_c.186:G>A\_p.A63T

ENSMUST00000040210.14|Trpm8-201|ENSMUSG00000036251||+|chr1:g.88248655:G>A  
MSFEGARLSMRSRRNGTMGSTRITLYSSVSRSTDVSYSDSDLVNFIQANFKKRECVFFTRDSKTMENICKCGYA  
QSQHIEGTQINQNEKWNKKHTKEFPTDAFGDIQFETLGKKGKYLRLSCDTDSETLYELLTQHWHLKTPNLVI  
SVTGGAKNFALKPRMRKIFSRLIYIAQSKGAWILTGGTHYGLMKYIGEVVRDNTISRNSEENIVAIGIAAWGM  
VSNRDTLIRSCDDEGHFSAQYIMDDFTRDPLYILDNNHTHLLVDNGCHGHPTVEAKLRNQLKEYISERTSQD  
SNYGGKIPIVCFQAQGGGRETAKAINTSVKSKIICVVEGSGQIADVIAASLVEVEDVLTSSMVKEKLVRFPLPRT  
VSRLEPEEIESWIKWLKEILESSHLLTVIKMEEAGDEIVSNAIYALYKAFSTNEQDKDNWNGQLKLLLEWNQ  
LDLASDEIFTNDRRWEADLQEVMTALIKDRPKFVRLFLENGLNLQKFLTNEVLTELFSTHFSTLVYRNLQI  
AKNSYNDALLTFVWKLWANFRRSFWKEDRSSREDLDVELHDASLTTRHPLQALFIWAILQNKKELSKVIWEQT  
KGCTLAALGASKLLKTLAKVKNDINAAGESEELANEYETRAVELFTECYSNDEDLAEQLLVYSCEAWGGSNCL  
ELAVEATDQHFIQAQPGVQNFSLKQWYGEISRDTKNWKIILCLFIIPLVGCGLVSRKPKPIDKHKLLWYVAF  
FTSPFVVFVSWNVVFIYIAFLLLFAYVLLMDFHSPHTPELIIYALVFLFCDEVRQWYMNQVNYFTDLWNVMDT  
LGLFYFIAGIVFRLHSSNKSSLYSGRVIIFCLDYIIIFTLRLIHIFTVSRNLGPKIIMLQRMIDVFFFLLFAV  
WMVAFGVARQGILRQNEQRWRWIFRSVIYEPYLAAMFGQVPSVDSTTYDFSHCTFSGNESKPLCVELDEHNLP  
RFPEWITIPLVCIYMLSTNILLVNLVAMFGYTVGIVQENNDQVWKFORQYFLVQEYCNRLNIPFPFVVFAYFY  
MVVKKCFKCCCKEKNMESNACCFRNEEDNETLAWEGVMKENYLVKINTKANDNSEEMRHRFRQLDSKLNLDLKS  
LKEIANNIK\*

>rs51885729\_ENSMUSP00000131209\_c.186:G>A\_p.A63T

ENSMUST00000171176.3|Trpm8-204|ENSMUSG00000036251||+|chr1:g.88248655:G>A  
MSFEGARLSMRSRRNGTMGSTRITLYSSVSRSTDVSYSDSDLVNFIQANFKKRECVFFTRDSKTMENICKCGYA  
QSQHIEGTQINQNEKWNKKHTKEFPTDAFGDIQFETLGKKGKYLRLSCDTDSETLYELLTQHWHLKTPNLVI  
SVTGGAKNFALKPRMRKIFSRLIYIAQSKGAWILTGGTHYGLMKYIGEVVRDNTISRNSEENIVAIGIAAWGM  
VSNRDTLIRSCDDEGHFSAQYIMDDFTRDPLYILDNNHTHLLVDNGCHGHPTVEAKLRNQLKEYISERTSQD  
SNYGGKIPIVCFQAQGGGRETAKAINTSVKSKIICVVEGSGQIADVIAASLVEVEDVLTSSMVKEKLVRFPLPRT  
VSRLEPEEIESWIKWLKEILESSHLLTVIKMEEAGDEIVSNAIYALYKAFSTNEQDKDNWNGQLKLLLEWNQ  
LDLASDEIFTNDRRWEADLQEVMTALIKDRPKFVRLFLENGLNLQKFLTNEVLTELFSTHFSTLVYRNLQI  
AKNSYNDALLTFVWKLWANFRRSFWKEDRSSREDLDVELHDASLTTRHPLQALFIWAILQNKKELSKVIWEQT  
KGCTLAALGASKLLKTLAKVKNDINAAGESEELANEYETRAVELFTECYSNDEDLAEQLLVYSCEAWGGSNCL  
ELAVEATDQHFIQAQPGVQNFSLKQWYGEISRDTKNWKIILCLFIIPLVGCGLVSRKPKPIDKHKLLWYVAF

FTSPFVVFVSWNVVFIYIAFLLLFAYVLLMDFHSPHTPELILYALVFVFLFCDEVRQWYMNGVNYFTDLWNVMDT  
LGLFYFIAGIVFRLHSSNKSSLYSGRVI FCLDYII FTLRLLIHIFTVSRNLGPKI IMLQRMLIDVFFFLLFLFAV  
WMVAFGVARQGILRQNEQRWRWIFRSVIYEPYLAMFGQVPSDSDSTTYDFSHCTFSGNESKPLCVELDEHNLP  
RFPEWITIPLVCIYMLSTNILLVNLVAMFGYTVGIVQENNDQVWKFORYFLVQEYCNRLNIPFPFVVFAYFY  
MVVKKCFKCCCKEKNMESNACCFRNEDNETLAWEGVMKENYLVKINTKANDNSEEMRHRFRQLDSKLNLDLKS  
LKEIANNIK\*

>rs51130807\_ENSMUSP00000108739\_c.210:G>C\_p.G71R

ENSMUST00000113114.10|Trpm8-202|ENSMUSG00000036251|+|chr1:g.88253123:G>C  
MSFEGARLSMRSRRNGTMGSTRTYSSVSRSTDVSYSDSDLVNF IQANFKKRECVFFTRDSKAMENICKCRYA  
QSQHIEGTQINQNEKWNKKHTKEFPTDAFGDIQFETLGKKGKYLRLSCD TDSETLYELLTQHWHLKT PNLVI  
SVTGGAKNFALKPRMRKIFSRLIYIAQSKGAWILTGGTHYGLMKYIGEVRDNTISRNSEENIVAIGIAAWGM  
VSNRDTLIRSCDDEGHFSAQYIMDDFTRDPLYILDNNHTHLLVDNGCHGHTVEAKLRNQLEKYISERTSQD  
SNYGGKIPIVCFAQGGGRET LKAINTSVKSKIPCVVVEGSGQIADV IASLVEVEDVLTSSMVKEKLVRF LPR  
VSRLPEEEIESWIKWLKEI LESSHLLTVIKMEEAGDEIVSNAISYALYKAFSTNEQDKDNWNGQLKLLLEWNQ  
LDLASDEIFTNDRRWEADLQEVMTALIKDRPKFVRLFLENGLNQKFLTNVTELFSTHSTLVYRNLQI  
AKNSYNDALLTFVWKL VANFRRSFWKEDRSSREDLDVELHDASLTTRHPLQALFIWAILQNKKELSKVIWEQT  
KGCTLAALGASKLLKTLAKVKNDINAAGESEELANEYETRAVELFTECYSNEDLAEQLLVYSCEAWGGSNCL  
ELAVEATDQHFI AQPGVQNF LSKQWYGEISRDTKNWKIILCLFIIPLVGCGLVSRKPKPIDKHKLLWYVAF  
FTSPFVVFVSWNVVFIYIAFLLLFAYVLLMDFHSPHTPELILYALVFVFLFCDEVRQWYMNGVNYFTDLWNVMDT  
LGLFYFIAGIVFRLHSSNKSSLYSGRVI FCLDYII FTLRLLIHIFTVSRNLGPKI IMLQRMLIDVFFFLLFLFAV  
WMVAFGVARQGILRQNEQRWRWIFRSVIYEPYLAMFGQVPSDSDSTTYDFSHCTFSGNESKPLCVELDEHNLP  
RFPEWITIPLVCIYMLSTNILLVNLVAMFGYTVGIVQENNDQVWKFORYFLVQEYCNRLNIPFPFVVFAYFY  
MVVKKCFKCCCKEKNMESNACCFRNEDNETLAWEGVMKENYLVKINTKANDNSEEMRHRFRQLDSKLNLDLKS  
LKEIANNIK\*

>rs51130807\_ENSMUSP00000036991\_c.210:G>C\_p.G71R

ENSMUST00000040210.14|Trpm8-201|ENSMUSG00000036251|+|chr1:g.88253123:G>C  
MSFEGARLSMRSRRNGTMGSTRTYSSVSRSTDVSYSDSDLVNF IQANFKKRECVFFTRDSKAMENICKCRYA  
QSQHIEGTQINQNEKWNKKHTKEFPTDAFGDIQFETLGKKGKYLRLSCD TDSETLYELLTQHWHLKT PNLVI  
SVTGGAKNFALKPRMRKIFSRLIYIAQSKGAWILTGGTHYGLMKYIGEVRDNTISRNSEENIVAIGIAAWGM  
VSNRDTLIRSCDDEGHFSAQYIMDDFTRDPLYILDNNHTHLLVDNGCHGHTVEAKLRNQLEKYISERTSQD  
SNYGGKIPIVCFAQGGGRET LKAINTSVKSKIPCVVVEGSGQIADV IASLVEVEDVLTSSMVKEKLVRF LPR  
VSRLPEEEIESWIKWLKEI LESSHLLTVIKMEEAGDEIVSNAISYALYKAFSTNEQDKDNWNGQLKLLLEWNQ  
LDLASDEIFTNDRRWEADLQEVMTALIKDRPKFVRLFLENGLNQKFLTNVTELFSTHSTLVYRNLQI  
AKNSYNDALLTFVWKL VANFRRSFWKEDRSSREDLDVELHDASLTTRHPLQALFIWAILQNKKELSKVIWEQT  
KGCTLAALGASKLLKTLAKVKNDINAAGESEELANEYETRAVELFTECYSNEDLAEQLLVYSCEAWGGSNCL  
ELAVEATDQHFI AQPGVQNF LSKQWYGEISRDTKNWKIILCLFIIPLVGCGLVSRKPKPIDKHKLLWYVAF  
FTSPFVVFVSWNVVFIYIAFLLLFAYVLLMDFHSPHTPELILYALVFVFLFCDEVRQWYMNGVNYFTDLWNVMDT  
LGLFYFIAGIVFRLHSSNKSSLYSGRVI FCLDYII FTLRLLIHIFTVSRNLGPKI IMLQRMLIDVFFFLLFLFAV  
WMVAFGVARQGILRQNEQRWRWIFRSVIYEPYLAMFGQVPSDSDSTTYDFSHCTFSGNESKPLCVELDEHNLP  
RFPEWITIPLVCIYMLSTNILLVNLVAMFGYTVGIVQENNDQVWKFORYFLVQEYCNRLNIPFPFVVFAYFY  
MVVKKCFKCCCKEKNMESNACCFRNEDNETLAWEGVMKENYLVKINTKANDNSEEMRHRFRQLDSKLNLDLKS  
LKEIANNIK\*

>rs51130807\_ENSMUSP00000131209\_c.210:G>C\_p.G71R

ENSMUST00000171176.3|Trpm8-204|ENSMUSG00000036251|+|chr1:g.88253123:G>C  
MSFEGARLSMRSRRNGTMGSTRTYSSVSRSTDVSYSDSDLVNF IQANFKKRECVFFTRDSKAMENICKCRYA  
QSQHIEGTQINQNEKWNKKHTKEFPTDAFGDIQFETLGKKGKYLRLSCD TDSETLYELLTQHWHLKT PNLVI  
SVTGGAKNFALKPRMRKIFSRLIYIAQSKGAWILTGGTHYGLMKYIGEVRDNTISRNSEENIVAIGIAAWGM  
VSNRDTLIRSCDDEGHFSAQYIMDDFTRDPLYILDNNHTHLLVDNGCHGHTVEAKLRNQLEKYISERTSQD  
SNYGGKIPIVCFAQGGGRET LKAINTSVKSKIPCVVVEGSGQIADV IASLVEVEDVLTSSMVKEKLVRF LPR  
VSRLPEEEIESWIKWLKEI LESSHLLTVIKMEEAGDEIVSNAISYALYKAFSTNEQDKDNWNGQLKLLLEWNQ  
LDLASDEIFTNDRRWEADLQEVMTALIKDRPKFVRLFLENGLNQKFLTNVTELFSTHSTLVYRNLQI  
AKNSYNDALLTFVWKL VANFRRSFWKEDRSSREDLDVELHDASLTTRHPLQALFIWAILQNKKELSKVIWEQT  
KGCTLAALGASKLLKTLAKVKNDINAAGESEELANEYETRAVELFTECYSNEDLAEQLLVYSCEAWGGSNCL  
ELAVEATDQHFI AQPGVQNF LSKQWYGEISRDTKNWKIILCLFIIPLVGCGLVSRKPKPIDKHKLLWYVAF  
FTSPFVVFVSWNVVFIYIAFLLLFAYVLLMDFHSPHTPELILYALVFVFLFCDEVRQWYMNGVNYFTDLWNVMDT  
LGLFYFIAGIVFRLHSSNKSSLYSGRVI FCLDYII FTLRLLIHIFTVSRNLGPKI IMLQRMLIDVFFFLLFLFAV  
WMVAFGVARQGILRQNEQRWRWIFRSVIYEPYLAMFGQVPSDSDSTTYDFSHCTFSGNESKPLCVELDEHNLP  
RFPEWITIPLVCIYMLSTNILLVNLVAMFGYTVGIVQENNDQVWKFORYFLVQEYCNRLNIPFPFVVFAYFY

MVVKKCFKCCCCKEKNMESNACCFRNEDNETLAWEGVMKENYLVKINTKANDNSEEMRHRFRQLDSKLNLDKSL  
LKEIANNIK\*  
>ENSMUSP00000108739\_c.302:C>CAGTGA\_p.D101ins-fs  
ENSMUST00000113114.10|Trpm8-  
202|ENSMUSG00000036251|+|chr1:g.88253215:C>CAGTGA  
MSFEGARLSMRSRRNGTMGSTRTRYSSVSRSTDVSYSDSDLVNF IQANFKKRECVFFTRDSKAMENICKCGYA  
QSQHIEGTQINQNEKWNYYKKHTKEFPTDSEPSGTFSRLRWGRKASTYACPVTPTLKLLSTNC  
>ENSMUSP00000036991\_c.302:C>CAGTGA\_p.D101ins-fs  
ENSMUST00000040210.14|Trpm8-  
201|ENSMUSG00000036251|+|chr1:g.88253215:C>CAGTGA  
MSFEGARLSMRSRRNGTMGSTRTRYSSVSRSTDVSYSDSDLVNF IQANFKKRECVFFTRDSKAMENICKCGYA  
QSQHIEGTQINQNEKWNYYKKHTKEFPTDSEPSGTFSRLRWGRKASTYACPVTPTLKLLSTNC  
>ENSMUSP00000131209\_c.302:C>CAGTGA\_p.D101ins-fs  
ENSMUST00000171176.3|Trpm8-  
204|ENSMUSG00000036251|+|chr1:g.88253215:C>CAGTGA  
MSFEGARLSMRSRRNGTMGSTRTRYSSVSRSTDVSYSDSDLVNF IQANFKKRECVFFTRDSKAMENICKCGYA  
QSQHIEGTQINQNEKWNYYKKHTKEFPTDSEPSGTFSRLRWGRKASTYACPVTPTLKLLSTNC  
>rs45725458\_ENSMUSP00000108739\_c.480:A>T\_p.M161L  
ENSMUST00000113114.10|Trpm8-202|ENSMUSG00000036251|+|chr1:g.88254259:A>T  
MSFEGARLSMRSRRNGTMGSTRTRYSSVSRSTDVSYSDSDLVNF IQANFKKRECVFFTRDSKAMENICKCGYA  
QSQHIEGTQINQNEKWNYYKKHTKEFPTDAFGDIQFETLGKKGKYLRLSCD TDSETLYELLTQHWHLKT PNLVI  
SVTGAKNFALKPRLRKFISRLIYIAQSKGAWILTGTHYGLMKYIGEVVRDNTISRNSEENIVAIGIAAWGM  
VSNRDTLIRSCDDEGHFSAQYIMDDFTRDPLYILDNNHTHLLLVDNGCHGHPTVEAKLRNQLEKYISERTSQD  
SNYGGKIPIVCFAQGGGRET LKAINTSVKSKI PCVVVEGSGQIADV IASLVEVEDVLTSSMVKEKLVRF LPR  
VSRLPEEEIESWIKWLKEILESSHLLTVIKMEEAGDEIVSNAISYALYKAFSTNEQDKDNWNGQLKLLLEWNQ  
LDLASDEIFTNDRRWEADLQEVMTALIKDRPKFVRLFLENGLNQKFLTNEVLTSTHSTHSTLVYRNLOI  
AKNSYNDALLTFVWKL VANFRRSFWKEDRSSRELDLVELHDASL TTRHPLQALFIWAILQNKKELSKVIWEQT  
KGCTLAALGASKLLKTLAKVKNDINAAGESEELANEYETRAVELFTECYSNDEDLAEQLLVYSCEAWGGSNCL  
ELAVEATDQHFIAPGVQNF LSKQWYGEISRDTKNWKIILCLFI IPLVGCGLVSRKPKPIDKHKLLWYVAF  
FTSPFVVFVSWNVVFIYIAFLLLFAYVLLMDFHVPHTPELILYALVFLFCDEVQRQWYMNQVNYFTDLWNVMDT  
LGLFYFIAGIVFRLHSSNKSSLYSGRVIFCLDYII FTLR LIHI FTVSRNLGPKIIMLQRM LIDVFFF LFLFAV  
WMVAFGVARQGILRQNEQRWRWIFRSVIYEPYLA MFGQVPSD VDSSTYDFSHCTFSGNESKPLCVELDEHNLP  
RFPEWITIPLVCIYMLSTNILLVNLVAMFGYTVGIVQENNDQVWKQRYFLVQEYCNRLNIPFPVVFAYFY  
MVVKKCFKCCCCKEKNMESNACCFRNEDNETLAWEGVMKENYLVKINTKANDNSEEMRHRFRQLDSKLNLDKSL  
LKEIANNIK\*  
>rs45725458\_ENSMUSP00000036991\_c.480:A>T\_p.M161L  
ENSMUST00000040210.14|Trpm8-201|ENSMUSG00000036251|+|chr1:g.88254259:A>T  
MSFEGARLSMRSRRNGTMGSTRTRYSSVSRSTDVSYSDSDLVNF IQANFKKRECVFFTRDSKAMENICKCGYA  
QSQHIEGTQINQNEKWNYYKKHTKEFPTDAFGDIQFETLGKKGKYLRLSCD TDSETLYELLTQHWHLKT PNLVI  
SVTGAKNFALKPRLRKFISRLIYIAQSKGAWILTGTHYGLMKYIGEVVRDNTISRNSEENIVAIGIAAWGM  
VSNRDTLIRSCDDEGHFSAQYIMDDFTRDPLYILDNNHTHLLLVDNGCHGHPTVEAKLRNQLEKYISERTSQD  
SNYGGKIPIVCFAQGGGRET LKAINTSVKSKI PCVVVEGSGQIADV IASLVEVEDVLTSSMVKEKLVRF LPR  
VSRLPEEEIESWIKWLKEILESSHLLTVIKMEEAGDEIVSNAISYALYKAFSTNEQDKDNWNGQLKLLLEWNQ  
LDLASDEIFTNDRRWEADLQEVMTALIKDRPKFVRLFLENGLNQKFLTNEVLTSTHSTHSTLVYRNLOI  
AKNSYNDALLTFVWKL VANFRRSFWKEDRSSRELDLVELHDASL TTRHPLQALFIWAILQNKKELSKVIWEQT  
KGCTLAALGASKLLKTLAKVKNDINAAGESEELANEYETRAVELFTECYSNDEDLAEQLLVYSCEAWGGSNCL  
ELAVEATDQHFIAPGVQNF LSKQWYGEISRDTKNWKIILCLFI IPLVGCGLVSRKPKPIDKHKLLWYVAF  
FTSPFVVFVSWNVVFIYIAFLLLFAYVLLMDFHVPHTPELILYALVFLFCDEVQRQWYMNQVNYFTDLWNVMDT  
LGLFYFIAGIVFRLHSSNKSSLYSGRVIFCLDYII FTLR LIHI FTVSRNLGPKIIMLQRM LIDVFFF LFLFAV  
WMVAFGVARQGILRQNEQRWRWIFRSVIYEPYLA MFGQVPSD VDSSTYDFSHCTFSGNESKPLCVELDEHNLP  
RFPEWITIPLVCIYMLSTNILLVNLVAMFGYTVGIVQENNDQVWKQRYFLVQEYCNRLNIPFPVVFAYFY  
MVVKKCFKCCCCKEKNMESNACCFRNEDNETLAWEGVMKENYLVKINTKANDNSEEMRHRFRQLDSKLNLDKSL  
LKEIANNIK\*  
>rs45725458\_ENSMUSP00000131209\_c.480:A>T\_p.M161L  
ENSMUST00000171176.3|Trpm8-204|ENSMUSG00000036251|+|chr1:g.88254259:A>T  
MSFEGARLSMRSRRNGTMGSTRTRYSSVSRSTDVSYSDSDLVNF IQANFKKRECVFFTRDSKAMENICKCGYA  
QSQHIEGTQINQNEKWNYYKKHTKEFPTDAFGDIQFETLGKKGKYLRLSCD TDSETLYELLTQHWHLKT PNLVI  
SVTGAKNFALKPRLRKFISRLIYIAQSKGAWILTGTHYGLMKYIGEVVRDNTISRNSEENIVAIGIAAWGM

VSNRDTLIRSCDDEGHFSAQYIMDDFTRDPLYILDNNHTHLLLVDNGCHGHPTVEAKLRNQLEKYISERTSQD  
SNYGGKIPIVCFAQGGGRETLLKAINTSVKSKIIPCVVVEGSGQIADVIASLVEVEDVLTSSMVKEKLVRFPLPRT  
VSRLPEEEIESWIKWLKEILESSHLLTVIKMEEAGDEIVSNAISYALYKAFSTNEQDKDNWNGQLKLLLEWNQ  
LDLASDEIFTNDRRWESADLQEVMTALIKDRPKFVRLFLENGLNQKFLTNEVLTTELSTHSTLVYRNLQI  
AKNSYNDALLTFVWKLVANFRRSFWKEDRSSREDLDVELHDASLTTRHPLQALFIWAILQNKKELSKVIWEQT  
KGCTLAALGASKLLKTLAKVKNDINAAGESEELANEYETRAVELFTECYSNEDDLAEQLLVYSCEAWGGSNCL  
ELAVEATDQHFIAPGVQNFSLKQWYGEISRDTKNWKIILCLFIIPLVGCGLVSRKPKPIDKHKLLWYVAF  
FTSPFVVFVSWNVVFIYIAFLLLFAYVLLMDFHSPVHTPELILYALVFLFCDEVRQWYMNQVNYFTDLWNVMDT  
LGLFYFIAGIVFRLHSSNKSSLYSGRVIIFCLDYIIFTLRLIHFIVSRNLGPKIIMLQRMLIDVFFFLFLFAV  
WMVAFGVARQGILRQNEQRWRWIFRSVIYEPYLAAMFGQVPSDSDSTTYDFSHCTFSGNESKPLCVELDEHNLP  
RFPEWITIPLVCIYMLSTNILLVNLVAMFGYTVGIVQENNDQVWKFQRYFLVQEYCNRLNIPFPVVFAYFY  
MVVKKCFKCCCKEKNMESNACCFRNEDNETLAWEGVMKENYLVKINTKANDNSEEMRHRFRQLDSKLNLDKSL  
LKEIANNIK\*

>rs47939991\_ENSMUSP00000108739\_c.702:C>A\_p.H235N

ENSMUST00000113114.10|Trpm8-202|ENSMUSG00000036251|+|chr1:g.88258421:C>A  
MSFEGARLSMRSRRNGTMGSTRTLYSSVSRSTDVSYSDSDLVNFIQANFKKRECIVFFTRDSKAMENICKCGYA  
QSQHIEGTQINQNEKWNKHTKEFPTDAFGDIQFETLGGKGYLRLSCDSDSETLYELLTQHWHLKTPLNVI  
SVTGGAKNFALKPRMRKIFSRLIYIAQSKGAWILTGTHYGLMKYIGEVVRDNTISRNSEENIVAIGIAAWGM  
VSNRDTLIRSCDDEGNFSAQYIMDDFTRDPLYILDNNHTHLLLVDNGCHGHPTVEAKLRNQLEKYISERTSQD  
SNYGGKIPIVCFAQGGGRETLLKAINTSVKSKIIPCVVVEGSGQIADVIASLVEVEDVLTSSMVKEKLVRFPLPRT  
VSRLPEEEIESWIKWLKEILESSHLLTVIKMEEAGDEIVSNAISYALYKAFSTNEQDKDNWNGQLKLLLEWNQ  
LDLASDEIFTNDRRWESADLQEVMTALIKDRPKFVRLFLENGLNQKFLTNEVLTTELSTHSTLVYRNLQI  
AKNSYNDALLTFVWKLVANFRRSFWKEDRSSREDLDVELHDASLTTRHPLQALFIWAILQNKKELSKVIWEQT  
KGCTLAALGASKLLKTLAKVKNDINAAGESEELANEYETRAVELFTECYSNEDDLAEQLLVYSCEAWGGSNCL  
ELAVEATDQHFIAPGVQNFSLKQWYGEISRDTKNWKIILCLFIIPLVGCGLVSRKPKPIDKHKLLWYVAF  
FTSPFVVFVSWNVVFIYIAFLLLFAYVLLMDFHSPVHTPELILYALVFLFCDEVRQWYMNQVNYFTDLWNVMDT  
LGLFYFIAGIVFRLHSSNKSSLYSGRVIIFCLDYIIFTLRLIHFIVSRNLGPKIIMLQRMLIDVFFFLFLFAV  
WMVAFGVARQGILRQNEQRWRWIFRSVIYEPYLAAMFGQVPSDSDSTTYDFSHCTFSGNESKPLCVELDEHNLP  
RFPEWITIPLVCIYMLSTNILLVNLVAMFGYTVGIVQENNDQVWKFQRYFLVQEYCNRLNIPFPVVFAYFY  
MVVKKCFKCCCKEKNMESNACCFRNEDNETLAWEGVMKENYLVKINTKANDNSEEMRHRFRQLDSKLNLDKSL  
LKEIANNIK\*

>rs47939991\_ENSMUSP00000036991\_c.702:C>A\_p.H235N

ENSMUST00000040210.14|Trpm8-201|ENSMUSG00000036251|+|chr1:g.88258421:C>A  
MSFEGARLSMRSRRNGTMGSTRTLYSSVSRSTDVSYSDSDLVNFIQANFKKRECIVFFTRDSKAMENICKCGYA  
QSQHIEGTQINQNEKWNKHTKEFPTDAFGDIQFETLGGKGYLRLSCDSDSETLYELLTQHWHLKTPLNVI  
SVTGGAKNFALKPRMRKIFSRLIYIAQSKGAWILTGTHYGLMKYIGEVVRDNTISRNSEENIVAIGIAAWGM  
VSNRDTLIRSCDDEGNFSAQYIMDDFTRDPLYILDNNHTHLLLVDNGCHGHPTVEAKLRNQLEKYISERTSQD  
SNYGGKIPIVCFAQGGGRETLLKAINTSVKSKIIPCVVVEGSGQIADVIASLVEVEDVLTSSMVKEKLVRFPLPRT  
VSRLPEEEIESWIKWLKEILESSHLLTVIKMEEAGDEIVSNAISYALYKAFSTNEQDKDNWNGQLKLLLEWNQ  
LDLASDEIFTNDRRWESADLQEVMTALIKDRPKFVRLFLENGLNQKFLTNEVLTTELSTHSTLVYRNLQI  
AKNSYNDALLTFVWKLVANFRRSFWKEDRSSREDLDVELHDASLTTRHPLQALFIWAILQNKKELSKVIWEQT  
KGCTLAALGASKLLKTLAKVKNDINAAGESEELANEYETRAVELFTECYSNEDDLAEQLLVYSCEAWGGSNCL  
ELAVEATDQHFIAPGVQNFSLKQWYGEISRDTKNWKIILCLFIIPLVGCGLVSRKPKPIDKHKLLWYVAF  
FTSPFVVFVSWNVVFIYIAFLLLFAYVLLMDFHSPVHTPELILYALVFLFCDEVRQWYMNQVNYFTDLWNVMDT  
LGLFYFIAGIVFRLHSSNKSSLYSGRVIIFCLDYIIFTLRLIHFIVSRNLGPKIIMLQRMLIDVFFFLFLFAV  
WMVAFGVARQGILRQNEQRWRWIFRSVIYEPYLAAMFGQVPSDSDSTTYDFSHCTFSGNESKPLCVELDEHNLP  
RFPEWITIPLVCIYMLSTNILLVNLVAMFGYTVGIVQENNDQVWKFQRYFLVQEYCNRLNIPFPVVFAYFY  
MVVKKCFKCCCKEKNMESNACCFRNEDNETLAWEGVMKENYLVKINTKANDNSEEMRHRFRQLDSKLNLDKSL  
LKEIANNIK\*

>rs47939991\_ENSMUSP00000131209\_c.702:C>A\_p.H235N

ENSMUST00000171176.3|Trpm8-204|ENSMUSG00000036251|+|chr1:g.88258421:C>A  
MSFEGARLSMRSRRNGTMGSTRTLYSSVSRSTDVSYSDSDLVNFIQANFKKRECIVFFTRDSKAMENICKCGYA  
QSQHIEGTQINQNEKWNKHTKEFPTDAFGDIQFETLGGKGYLRLSCDSDSETLYELLTQHWHLKTPLNVI  
SVTGGAKNFALKPRMRKIFSRLIYIAQSKGAWILTGTHYGLMKYIGEVVRDNTISRNSEENIVAIGIAAWGM  
VSNRDTLIRSCDDEGNFSAQYIMDDFTRDPLYILDNNHTHLLLVDNGCHGHPTVEAKLRNQLEKYISERTSQD  
SNYGGKIPIVCFAQGGGRETLLKAINTSVKSKIIPCVVVEGSGQIADVIASLVEVEDVLTSSMVKEKLVRFPLPRT  
VSRLPEEEIESWIKWLKEILESSHLLTVIKMEEAGDEIVSNAISYALYKAFSTNEQDKDNWNGQLKLLLEWNQ  
LDLASDEIFTNDRRWESADLQEVMTALIKDRPKFVRLFLENGLNQKFLTNEVLTTELSTHSTLVYRNLQI

AKNSYNDALLTFVWKLVANFRRSFWKEDRSSREDLDVELHDASLTTRHPLQALFIWAILQNKKELSKVIWEQT  
KGCTLAALGASKLLKTLAKVKNDINAAGESEELANEYETRAVELFTECYSNDEDLAEQLLVYSCEAWGGSNCL  
ELAVEATDQHFIQAQPGVQNFSLKQWYGEISRDTKNWKIILCLFIIPLVGCGLVSRKPKPIDKHKLLWYVAF  
FTSPFVVFVSWNVVFIYIAFLLLFAYVLLMDFHSPHTPELILYALVFLFCDEVQRQWYMGVNYFTDLWNVMDT  
LGLFYFIAIVFRLHSSNKSSLYSGRVIIFCLDYIIFTLRLIHIIFTVSRNLGPKIIMLQRMIDVFFFLLFAV  
WMVAFGVARQGILRQNEQRWRWIFRSVIYEPYLAAMFGQVPSVDSTTYDFSHCTFSGNESKPLCVELDEHNLP  
RFPEWITIPLVCIYMLSTNILLVNLVAMFGYTVGIVQENNDQVWKQRYFLVQVEYCNRLNIPFPVVFAYFY  
MVKKCFKCCCKEKNMESNACCFRNEDNETLAWEGVMKENYLVKINTKANDNSEEMRHRFRQLDSKLNLDKSL  
LKEIANNIK\*

>ENSMUSP00000108739\_c.702:C>G\_p.H235D ENSMUST00000113114.10|Trpm8-  
202|ENSMUSG00000036251|+|chr1:g.88258421:C>G

MSFEGARLSMRSRRNGTMGSTRTYSSVSRSTDVSYSDSDLVNF IQANFKKRECVFFTRDSKAMENICKCGYA  
QSQHIEGTQINQNEKWNKKHTKEFPTDAFGDIQFETLGKKGKYLRLSCD TDSETLYELLTQHWHLKT PNLVI  
SVTGGAKNFALKPRMRKIFSR LIYIAQSKGAWILTGGTHYGLMKYIGEVVRDNTISRNSEENIVAIGIAAWGM  
VSNRDTLIRSCDDEGDFSAQYIMDDFTRDPLYILDNNHTHLLLVNDGCHGHPTVEAKLRNQLEKYISERTSQD  
SNYGGKIPIVCFAQGGGRET LKAINTSVKSKI PCVVVEGSGQIADVIASLVEVEDVLTSSMVKEKLVRF LPR T  
VSRLPEEEIESWIKWLKEI LESSHLLTVIKMEEAGDEIVSNAISYALYKAFSTNEQDKDNWNGQLKLLLEWNQ  
LDLASDEIFTNDRRWEADLQEVMTALIKDRPKFVRLFLENGLNLQKFLTNEVLT E L F S T H F S T L V Y R N L Q I  
AKNSYNDALLTFVWKLVANFRRSFWKEDRSSREDLDVELHDASLTTRHPLQALFIWAILQNKKELSKVIWEQT  
KGCTLAALGASKLLKTLAKVKNDINAAGESEELANEYETRAVELFTECYSNDEDLAEQLLVYSCEAWGGSNCL  
ELAVEATDQHFIQAQPGVQNFSLKQWYGEISRDTKNWKIILCLFIIPLVGCGLVSRKPKPIDKHKLLWYVAF  
FTSPFVVFVSWNVVFIYIAFLLLFAYVLLMDFHSPHTPELILYALVFLFCDEVQRQWYMGVNYFTDLWNVMDT  
LGLFYFIAIVFRLHSSNKSSLYSGRVIIFCLDYIIFTLRLIHIIFTVSRNLGPKIIMLQRMIDVFFFLLFAV  
WMVAFGVARQGILRQNEQRWRWIFRSVIYEPYLAAMFGQVPSVDSTTYDFSHCTFSGNESKPLCVELDEHNLP  
RFPEWITIPLVCIYMLSTNILLVNLVAMFGYTVGIVQENNDQVWKQRYFLVQVEYCNRLNIPFPVVFAYFY  
MVKKCFKCCCKEKNMESNACCFRNEDNETLAWEGVMKENYLVKINTKANDNSEEMRHRFRQLDSKLNLDKSL  
LKEIANNIK\*

>ENSMUSP00000036991\_c.702:C>G\_p.H235D ENSMUST00000040210.14|Trpm8-  
201|ENSMUSG00000036251|+|chr1:g.88258421:C>G

MSFEGARLSMRSRRNGTMGSTRTYSSVSRSTDVSYSDSDLVNF IQANFKKRECVFFTRDSKAMENICKCGYA  
QSQHIEGTQINQNEKWNKKHTKEFPTDAFGDIQFETLGKKGKYLRLSCD TDSETLYELLTQHWHLKT PNLVI  
SVTGGAKNFALKPRMRKIFSR LIYIAQSKGAWILTGGTHYGLMKYIGEVVRDNTISRNSEENIVAIGIAAWGM  
VSNRDTLIRSCDDEGDFSAQYIMDDFTRDPLYILDNNHTHLLLVNDGCHGHPTVEAKLRNQLEKYISERTSQD  
SNYGGKIPIVCFAQGGGRET LKAINTSVKSKI PCVVVEGSGQIADVIASLVEVEDVLTSSMVKEKLVRF LPR T  
VSRLPEEEIESWIKWLKEI LESSHLLTVIKMEEAGDEIVSNAISYALYKAFSTNEQDKDNWNGQLKLLLEWNQ  
LDLASDEIFTNDRRWEADLQEVMTALIKDRPKFVRLFLENGLNLQKFLTNEVLT E L F S T H F S T L V Y R N L Q I  
AKNSYNDALLTFVWKLVANFRRSFWKEDRSSREDLDVELHDASLTTRHPLQALFIWAILQNKKELSKVIWEQT  
KGCTLAALGASKLLKTLAKVKNDINAAGESEELANEYETRAVELFTECYSNDEDLAEQLLVYSCEAWGGSNCL  
ELAVEATDQHFIQAQPGVQNFSLKQWYGEISRDTKNWKIILCLFIIPLVGCGLVSRKPKPIDKHKLLWYVAF  
FTSPFVVFVSWNVVFIYIAFLLLFAYVLLMDFHSPHTPELILYALVFLFCDEVQRQWYMGVNYFTDLWNVMDT  
LGLFYFIAIVFRLHSSNKSSLYSGRVIIFCLDYIIFTLRLIHIIFTVSRNLGPKIIMLQRMIDVFFFLLFAV  
WMVAFGVARQGILRQNEQRWRWIFRSVIYEPYLAAMFGQVPSVDSTTYDFSHCTFSGNESKPLCVELDEHNLP  
RFPEWITIPLVCIYMLSTNILLVNLVAMFGYTVGIVQENNDQVWKQRYFLVQVEYCNRLNIPFPVVFAYFY  
MVKKCFKCCCKEKNMESNACCFRNEDNETLAWEGVMKENYLVKINTKANDNSEEMRHRFRQLDSKLNLDKSL  
LKEIANNIK\*

>ENSMUSP00000131209\_c.702:C>G\_p.H235D ENSMUST00000171176.3|Trpm8-  
204|ENSMUSG00000036251|+|chr1:g.88258421:C>G

MSFEGARLSMRSRRNGTMGSTRTYSSVSRSTDVSYSDSDLVNF IQANFKKRECVFFTRDSKAMENICKCGYA  
QSQHIEGTQINQNEKWNKKHTKEFPTDAFGDIQFETLGKKGKYLRLSCD TDSETLYELLTQHWHLKT PNLVI  
SVTGGAKNFALKPRMRKIFSR LIYIAQSKGAWILTGGTHYGLMKYIGEVVRDNTISRNSEENIVAIGIAAWGM  
VSNRDTLIRSCDDEGDFSAQYIMDDFTRDPLYILDNNHTHLLLVNDGCHGHPTVEAKLRNQLEKYISERTSQD  
SNYGGKIPIVCFAQGGGRET LKAINTSVKSKI PCVVVEGSGQIADVIASLVEVEDVLTSSMVKEKLVRF LPR T  
VSRLPEEEIESWIKWLKEI LESSHLLTVIKMEEAGDEIVSNAISYALYKAFSTNEQDKDNWNGQLKLLLEWNQ  
LDLASDEIFTNDRRWEADLQEVMTALIKDRPKFVRLFLENGLNLQKFLTNEVLT E L F S T H F S T L V Y R N L Q I  
AKNSYNDALLTFVWKLVANFRRSFWKEDRSSREDLDVELHDASLTTRHPLQALFIWAILQNKKELSKVIWEQT  
KGCTLAALGASKLLKTLAKVKNDINAAGESEELANEYETRAVELFTECYSNDEDLAEQLLVYSCEAWGGSNCL  
ELAVEATDQHFIQAQPGVQNFSLKQWYGEISRDTKNWKIILCLFIIPLVGCGLVSRKPKPIDKHKLLWYVAF  
FTSPFVVFVSWNVVFIYIAFLLLFAYVLLMDFHSPHTPELILYALVFLFCDEVQRQWYMGVNYFTDLWNVMDT



LGLFYFIAGIVFRLHSSNKSSLYSGRVIFCLDYIIFTLRLIHFIVTSRNLGPKIIMLQRMIDVFFFLLFAV  
 WMVAFGVARQGILRQNEQRWRWIFRSVIYEPYLAMFGQVPSDSDVSTTYDFSHCTFSGNESKPLCVELDEHNLP  
 RFPEWITIPLVCIYMLSTNILLVNLVAMFGYTVGIVQENNDQVWKQRYFLVQEYCNRLNIPFPVVFAYFY  
 MVVKKCFKCCCKEKNMESNACCFRNEDNETLAWEGVMKENYLKINTKANDNSEEMRHRFRQLDSKLNLDKSL  
 LKEIANNIK\*

>rs236575408\_ENSMUSP00000108739\_c.702:C>CA\_p.H235ins-fs  
 ENSMUST00000113114.10|Trpm8-202|ENSMUSG00000036251|+|chr1:g.88258421:C>CA  
 MSFEGARLSMRSRRNGTMGSTRITLYSSVSRSTDVSYSDSDLVNFIQANFKKRECVFFTRDSKAMENICKCGYA  
 QSQHIEGTQINQNEKWNKKHTKEFPTDAFGDIQFETLGKKGKYLRLSCDSDSETLYELLTQHWHLKTPNLVI  
 SVTGGAKNFALKPRMRKIFSRLIYIAQSKGAWILTTGGTHYGLMKYIGEVVRDNTISRNSEENIVAIGIAAWGM  
 VSNRDTLIRSCDDEGQFFSSIHHG

>rs236575408\_ENSMUSP00000036991\_c.702:C>CA\_p.H235ins-fs  
 ENSMUST00000040210.14|Trpm8-201|ENSMUSG00000036251|+|chr1:g.88258421:C>CA  
 MSFEGARLSMRSRRNGTMGSTRITLYSSVSRSTDVSYSDSDLVNFIQANFKKRECVFFTRDSKAMENICKCGYA  
 QSQHIEGTQINQNEKWNKKHTKEFPTDAFGDIQFETLGKKGKYLRLSCDSDSETLYELLTQHWHLKTPNLVI  
 SVTGGAKNFALKPRMRKIFSRLIYIAQSKGAWILTTGGTHYGLMKYIGEVVRDNTISRNSEENIVAIGIAAWGM  
 VSNRDTLIRSCDDEGQFFSSIHHG

>rs236575408\_ENSMUSP00000131209\_c.702:C>CA\_p.H235ins-fs  
 ENSMUST00000171176.3|Trpm8-204|ENSMUSG00000036251|+|chr1:g.88258421:C>CA  
 MSFEGARLSMRSRRNGTMGSTRITLYSSVSRSTDVSYSDSDLVNFIQANFKKRECVFFTRDSKAMENICKCGYA  
 QSQHIEGTQINQNEKWNKKHTKEFPTDAFGDIQFETLGKKGKYLRLSCDSDSETLYELLTQHWHLKTPNLVI  
 SVTGGAKNFALKPRMRKIFSRLIYIAQSKGAWILTTGGTHYGLMKYIGEVVRDNTISRNSEENIVAIGIAAWGM  
 VSNRDTLIRSCDDEGQFFSSIHHG

>rs243361112\_ENSMUSP00000108739\_c.766:A>G\_p.N256S  
 ENSMUST00000113114.10|Trpm8-202|ENSMUSG00000036251|+|chr1:g.88258485:A>G  
 MSFEGARLSMRSRRNGTMGSTRITLYSSVSRSTDVSYSDSDLVNFIQANFKKRECVFFTRDSKAMENICKCGYA  
 QSQHIEGTQINQNEKWNKKHTKEFPTDAFGDIQFETLGKKGKYLRLSCDSDSETLYELLTQHWHLKTPNLVI  
 SVTGGAKNFALKPRMRKIFSRLIYIAQSKGAWILTTGGTHYGLMKYIGEVVRDNTISRNSEENIVAIGIAAWGM  
 VSNRDTLIRSCDDEGHFSAQYIMDDFTRDPLYILDNSHTHLLLVDNGCHGHPTVEAKLRNQLKEYISERTSQD  
 SNYGGKIPIVCFAQGGGRETAKINTSVKSKIPCWVVEGSGQIADVIASLVEVEDVLTSSMVKEKLVRFPLPRT  
 VSRLPEEEIESWIKWLKEILESSHLLTVIKMEEAGDEIVSNAISYALYKAFSTNEQDKDNWNGQLKLLLEWNQ  
 LDLASDEIFTNDRRWEADLQEVMTALIKDRPKFVRLFLENGLNLQKFLTNEVLTTELSTHFTSLVYRNLQI  
 AKNSYNDALLTFVWKLVANFRSEFWKEDRSSREDLDVELHDASLTTRHPLQALFIWAILQNKKELSKVIWEQT  
 KGCTLAALGASKLLKTLAKVKNDINAAGESEELANEYETRAVELFTECYSNEDLAEQLLVYSCEAWGGSNCL  
 ELAVEATDQHFIAPGVQNFLSKQWYGEISRDTKNWKIILCLFIIPLVGCGLVSRKPKPIDKHKLLWYVAF  
 FTSFPVVFVSWNVVFIYIAFLLLFAYVLLMDFHSVPHTPELILYALVFLFCDEVRQWYMNQVNYFTDLWNVMDT  
 LGLFYFIAGIVFRLHSSNKSSLYSGRVIFCLDYIIFTLRLIHFIVTSRNLGPKIIMLQRMIDVFFFLLFAV  
 WMVAFGVARQGILRQNEQRWRWIFRSVIYEPYLAMFGQVPSDSDVSTTYDFSHCTFSGNESKPLCVELDEHNLP  
 RFPEWITIPLVCIYMLSTNILLVNLVAMFGYTVGIVQENNDQVWKQRYFLVQEYCNRLNIPFPVVFAYFY  
 MVVKKCFKCCCKEKNMESNACCFRNEDNETLAWEGVMKENYLKINTKANDNSEEMRHRFRQLDSKLNLDKSL  
 LKEIANNIK\*

>rs243361112\_ENSMUSP00000036991\_c.766:A>G\_p.N256S  
 ENSMUST00000040210.14|Trpm8-201|ENSMUSG00000036251|+|chr1:g.88258485:A>G  
 MSFEGARLSMRSRRNGTMGSTRITLYSSVSRSTDVSYSDSDLVNFIQANFKKRECVFFTRDSKAMENICKCGYA  
 QSQHIEGTQINQNEKWNKKHTKEFPTDAFGDIQFETLGKKGKYLRLSCDSDSETLYELLTQHWHLKTPNLVI  
 SVTGGAKNFALKPRMRKIFSRLIYIAQSKGAWILTTGGTHYGLMKYIGEVVRDNTISRNSEENIVAIGIAAWGM  
 VSNRDTLIRSCDDEGHFSAQYIMDDFTRDPLYILDNSHTHLLLVDNGCHGHPTVEAKLRNQLKEYISERTSQD  
 SNYGGKIPIVCFAQGGGRETAKINTSVKSKIPCWVVEGSGQIADVIASLVEVEDVLTSSMVKEKLVRFPLPRT  
 VSRLPEEEIESWIKWLKEILESSHLLTVIKMEEAGDEIVSNAISYALYKAFSTNEQDKDNWNGQLKLLLEWNQ  
 LDLASDEIFTNDRRWEADLQEVMTALIKDRPKFVRLFLENGLNLQKFLTNEVLTTELSTHFTSLVYRNLQI  
 AKNSYNDALLTFVWKLVANFRSEFWKEDRSSREDLDVELHDASLTTRHPLQALFIWAILQNKKELSKVIWEQT  
 KGCTLAALGASKLLKTLAKVKNDINAAGESEELANEYETRAVELFTECYSNEDLAEQLLVYSCEAWGGSNCL  
 ELAVEATDQHFIAPGVQNFLSKQWYGEISRDTKNWKIILCLFIIPLVGCGLVSRKPKPIDKHKLLWYVAF  
 FTSFPVVFVSWNVVFIYIAFLLLFAYVLLMDFHSVPHTPELILYALVFLFCDEVRQWYMNQVNYFTDLWNVMDT  
 LGLFYFIAGIVFRLHSSNKSSLYSGRVIFCLDYIIFTLRLIHFIVTSRNLGPKIIMLQRMIDVFFFLLFAV  
 WMVAFGVARQGILRQNEQRWRWIFRSVIYEPYLAMFGQVPSDSDVSTTYDFSHCTFSGNESKPLCVELDEHNLP  
 RFPEWITIPLVCIYMLSTNILLVNLVAMFGYTVGIVQENNDQVWKQRYFLVQEYCNRLNIPFPVVFAYFY

MVVKKCFKCCCKEKNMESNACCFRNEDNETLAWEGVMKENYLVKINTKANDNSEEMRHRFRQLDSKLNLDKSL  
LKEIANNIK\*  
>rs243361112\_ENSMUSP00000131209\_c.766:A>G\_p.N256S  
ENSMUST00000171176.3|Trpm8-204|ENSMUSG00000036251|+|chr1:g.88258485:A>G  
MSFEGARLSMRSRRNGTMGSTRTYSSVSRSTDVSYSDSDLVNF IQANFKKRECVFFTRDSKAMENICKCGYA  
QSQHIEGTQINQNEKWNKKHTKEFPTDAFGDIQFETLGKKGKYLRLSCD TDSETLYELLTQHWHLKTPLNVI  
SVTGGAKNFALKPRMRKIFSRLIYIAQSKGAWILTGTHYGLMKYIGEVVRDNTISRNSEENIVAIGIAAWGM  
VSNRDTLIRSCDDEGHFSAQYIMDDFTRDPLYILDNSHTHLLVDNGCHGHPTVEAKLRNLEKYISERTSQD  
SNYGGKIPIVCFAQGGGRET LKAINTSVKSKIPCVVVEGSGQIADV IASLVEVEDVLTSSMVKEKLVRF LPR T  
VSR LPEEEIESWIKWLKEI LESSHLLTVIKMEEAGDEIVSNAISYALYKAFSTNEQDKDNWNGQLKLLLEWNQ  
LDLASDEIFTNDRRWEADLQEVMTALIKDRPKFVRLFLENGLN LQKFLTNEVLT E L FSTH FSTLVYRNLQI  
AKNSYNDALLTFVWKL VANFRRSFWKEDRSSREDLDVELHDASLTTRHPLQALFIWAILQNKKELSKVIWEQT  
KGCTLAALGASKLLKT LAKVKN DINAAGESEELANEYETRAVELFTECYSNDEDLAEQLLVYSCEAWGGSNCL  
ELAVEATDQHFI AQPGVQNF LSKQWYGEISRDTKNWKIILCLFI I PLVGCGLV SFRKKPIDKHKKLLWYVAF  
FTSPFVVF SWNVVFI AFLLLFAYVLLMDFH SVPH TPELILYALV FV LFCDEVRQWYMN GVN YFTDLWNVMDT  
LGLFYFIAGIVFRLHSSNKSSLYSGRVIFCLDYII FTLR LLIHIFTVSRNLGPKIIMLQRM LIDVFFF LFLFAV  
WMVAFGVARQGILRQNEQRWRWI FRSVIYEPYLA MFGQVPSD VSTTYDFSHCTFSGNESKPLCVELDEHNLP  
RFPEWIT I PLVCIYMLSTN ILLVNL L VAMFGYTVGIVQENNDQVWKFQRYFLVQ EYCNRLNI PFPFVVFAYFY  
MVVKKCFKCCCKEKNMESNACCFRNEDNETLAWEGVMKENYLVKINTKANDNSEEMRHRFRQLDSKLNLDKSL  
LKEIANNIK\*  
>rs212640068\_ENSMUSP00000108739\_c.819:G>C\_p.E274Q  
ENSMUST00000113114.10|Trpm8-202|ENSMUSG00000036251|+|chr1:g.88258538:G>C  
MSFEGARLSMRSRRNGTMGSTRTYSSVSRSTDVSYSDSDLVNF IQANFKKRECVFFTRDSKAMENICKCGYA  
QSQHIEGTQINQNEKWNKKHTKEFPTDAFGDIQFETLGKKGKYLRLSCD TDSETLYELLTQHWHLKTPLNVI  
SVTGGAKNFALKPRMRKIFSRLIYIAQSKGAWILTGTHYGLMKYIGEVVRDNTISRNSEENIVAIGIAAWGM  
VSNRDTLIRSCDDEGHFSAQYIMDDFTRDPLYILDNNHTHLLVDNGCHGHPTVQAKLRNLEKYISERTSQD  
SNYGGKIPIVCFAQGGGRET LKAINTSVKSKIPCVVVEGSGQIADV IASLVEVEDVLTSSMVKEKLVRF LPR T  
VSR LPEEEIESWIKWLKEI LESSHLLTVIKMEEAGDEIVSNAISYALYKAFSTNEQDKDNWNGQLKLLLEWNQ  
LDLASDEIFTNDRRWEADLQEVMTALIKDRPKFVRLFLENGLN LQKFLTNEVLT E L FSTH FSTLVYRNLQI  
AKNSYNDALLTFVWKL VANFRRSFWKEDRSSREDLDVELHDASLTTRHPLQALFIWAILQNKKELSKVIWEQT  
KGCTLAALGASKLLKT LAKVKN DINAAGESEELANEYETRAVELFTECYSNDEDLAEQLLVYSCEAWGGSNCL  
ELAVEATDQHFI AQPGVQNF LSKQWYGEISRDTKNWKIILCLFI I PLVGCGLV SFRKKPIDKHKKLLWYVAF  
FTSPFVVF SWNVVFI AFLLLFAYVLLMDFH SVPH TPELILYALV FV LFCDEVRQWYMN GVN YFTDLWNVMDT  
LGLFYFIAGIVFRLHSSNKSSLYSGRVIFCLDYII FTLR LLIHIFTVSRNLGPKIIMLQRM LIDVFFF LFLFAV  
WMVAFGVARQGILRQNEQRWRWI FRSVIYEPYLA MFGQVPSD VSTTYDFSHCTFSGNESKPLCVELDEHNLP  
RFPEWIT I PLVCIYMLSTN ILLVNL L VAMFGYTVGIVQENNDQVWKFQRYFLVQ EYCNRLNI PFPFVVFAYFY  
MVVKKCFKCCCKEKNMESNACCFRNEDNETLAWEGVMKENYLVKINTKANDNSEEMRHRFRQLDSKLNLDKSL  
LKEIANNIK\*  
>rs212640068\_ENSMUSP00000036991\_c.819:G>C\_p.E274Q  
ENSMUST00000040210.14|Trpm8-201|ENSMUSG00000036251|+|chr1:g.88258538:G>C  
MSFEGARLSMRSRRNGTMGSTRTYSSVSRSTDVSYSDSDLVNF IQANFKKRECVFFTRDSKAMENICKCGYA  
QSQHIEGTQINQNEKWNKKHTKEFPTDAFGDIQFETLGKKGKYLRLSCD TDSETLYELLTQHWHLKTPLNVI  
SVTGGAKNFALKPRMRKIFSRLIYIAQSKGAWILTGTHYGLMKYIGEVVRDNTISRNSEENIVAIGIAAWGM  
VSNRDTLIRSCDDEGHFSAQYIMDDFTRDPLYILDNNHTHLLVDNGCHGHPTVQAKLRNLEKYISERTSQD  
SNYGGKIPIVCFAQGGGRET LKAINTSVKSKIPCVVVEGSGQIADV IASLVEVEDVLTSSMVKEKLVRF LPR T  
VSR LPEEEIESWIKWLKEI LESSHLLTVIKMEEAGDEIVSNAISYALYKAFSTNEQDKDNWNGQLKLLLEWNQ  
LDLASDEIFTNDRRWEADLQEVMTALIKDRPKFVRLFLENGLN LQKFLTNEVLT E L FSTH FSTLVYRNLQI  
AKNSYNDALLTFVWKL VANFRRSFWKEDRSSREDLDVELHDASLTTRHPLQALFIWAILQNKKELSKVIWEQT  
KGCTLAALGASKLLKT LAKVKN DINAAGESEELANEYETRAVELFTECYSNDEDLAEQLLVYSCEAWGGSNCL  
ELAVEATDQHFI AQPGVQNF LSKQWYGEISRDTKNWKIILCLFI I PLVGCGLV SFRKKPIDKHKKLLWYVAF  
FTSPFVVF SWNVVFI AFLLLFAYVLLMDFH SVPH TPELILYALV FV LFCDEVRQWYMN GVN YFTDLWNVMDT  
LGLFYFIAGIVFRLHSSNKSSLYSGRVIFCLDYII FTLR LLIHIFTVSRNLGPKIIMLQRM LIDVFFF LFLFAV  
WMVAFGVARQGILRQNEQRWRWI FRSVIYEPYLA MFGQVPSD VSTTYDFSHCTFSGNESKPLCVELDEHNLP  
RFPEWIT I PLVCIYMLSTN ILLVNL L VAMFGYTVGIVQENNDQVWKFQRYFLVQ EYCNRLNI PFPFVVFAYFY  
MVVKKCFKCCCKEKNMESNACCFRNEDNETLAWEGVMKENYLVKINTKANDNSEEMRHRFRQLDSKLNLDKSL  
LKEIANNIK\*  
>rs212640068\_ENSMUSP00000131209\_c.819:G>C\_p.E274Q  
ENSMUST00000171176.3|Trpm8-204|ENSMUSG00000036251|+|chr1:g.88258538:G>C

MSFEGARLSMRSRRNGTMGSTRTRYSSVSRSTDVSYSDSDLVNFQANFKKREC VFFTRDSKAMENICKCGYA  
QSQHIEGTQINQNEKWNKKHTKEFPTDAFGDIQFETLGKKGKYLRLSCD TDSETLYELLTQHWHLKT PNLVI  
SVTGGAKNFALKPRMRKIFSR LIYIAQSKGAWIL TGGTHYGLMKY IGEVVRDNTISR NSEENIVAIGIAAWGM  
VSNRDTLIRSCDDEGHFSAQYIMDDFTRDPLYILDNNHTHLLVDNGCHGHPTVQAKLRNQLEKYISERTSQD  
SNYGGKIPIVCFAQGGGRETLKAINTSVKSKI PCVVVEGSGQIADV IASLVEVEDVLTSSMVKEKLVRF L PRT  
VSRLPEEEIESWIKWLKEI LESSHLLTVIKMEEAGDEIVSNAISYALYKAFSTNEQDKDNWNGQLKLLLEWNQ  
LDLASDEIFTNDRRWESADLQEVMTALIKDRPKFVRLFLENGLN LQKFLTNEVLT E L FSTH FSTLVYRNLQI  
AKNSYNDALLTFVWKL VANFRRSFWKEDRSSRELDV ELHDASLTTRHPLQALFIWAILQNKKELSKVIWEQT  
KGCTLAALGASKLLKTLAKVKNDINAAGESEELANEYETRAVELFTECYSNDEDLAEQLLVYSCEAWGGSNCL  
ELAVEATDQHFIAPGVQNF LSKQWYGEISRDTKNWKIILCLFI I PLVGCGLV SFRKKPIDKHKLLWYVAF  
FTSPFV VFSWNVVFI AFLLLFAYVLLMDFH SVPHTPELILYALV FV LFCDEVRQWYMN GVN YFTDLWNVMDT  
LGLFYFIAGIVFRLHSSNKSSLYSGRVIFCLDYII FTLR LIHIFTVSRNLGPKI IMLQRMLIDVFFF LFLFAV  
WMVAFGVARQGILRQNEQRWRWIFRSVIYEPY LAMFGQVPSD VDS TTYDFSHCTFSGNESKPLCVELDEHNLP  
RPEWIT I PLVCIYMLSTNILLVNL LVAMFGYTVGIVQENNDQVWKFQRYFLVQEYCNRLNI PPFVVFAYFY  
MVVKKCFKCCCCKEKNMESNACCFRNEDNETLAWEGVMKENYL VKINTKANDNSEEMRHRFRQLDSKLN DLKSL  
LKEIANNIK\*

>rs49882804\_ENSMUSP00000108739\_c.1126:G>A\_p.S376N

ENSMUST00000113114.10|Trpm8-202|ENSMUSG00000036251|+|chr1:g.88265019:G>A  
MSFEGARLSMRSRRNGTMGSTRTRYSSVSRSTDVSYSDSDLVNFQANFKKREC VFFTRDSKAMENICKCGYA  
QSQHIEGTQINQNEKWNKKHTKEFPTDAFGDIQFETLGKKGKYLRLSCD TDSETLYELLTQHWHLKT PNLVI  
SVTGGAKNFALKPRMRKIFSR LIYIAQSKGAWIL TGGTHYGLMKY IGEVVRDNTISR NSEENIVAIGIAAWGM  
VSNRDTLIRSCDDEGHFSAQYIMDDFTRDPLYILDNNHTHLLVDNGCHGHPTV EAKLRNQLEKYISERTSQD  
SNYGGKIPIVCFAQGGGRETLKAINTSVKSKI PCVVVEGSGQIADV IASLVEVEDVLTSSMVKEKLVRF L PRT  
VSRLPEEEIENWIKWLKEI LESSHLLTVIKMEEAGDEIVSNAISYALYKAFSTNEQDKDNWNGQLKLLLEWNQ  
LDLASDEIFTNDRRWESADLQEVMTALIKDRPKFVRLFLENGLN LQKFLTNEVLT E L FSTH FSTLVYRNLQI  
AKNSYNDALLTFVWKL VANFRRSFWKEDRSSRELDV ELHDASLTTRHPLQALFIWAILQNKKELSKVIWEQT  
KGCTLAALGASKLLKTLAKVKNDINAAGESEELANEYETRAVELFTECYSNDEDLAEQLLVYSCEAWGGSNCL  
ELAVEATDQHFIAPGVQNF LSKQWYGEISRDTKNWKIILCLFI I PLVGCGLV SFRKKPIDKHKLLWYVAF  
FTSPFV VFSWNVVFI AFLLLFAYVLLMDFH SVPHTPELILYALV FV LFCDEVRQWYMN GVN YFTDLWNVMDT  
LGLFYFIAGIVFRLHSSNKSSLYSGRVIFCLDYII FTLR LIHIFTVSRNLGPKI IMLQRMLIDVFFF LFLFAV  
WMVAFGVARQGILRQNEQRWRWIFRSVIYEPY LAMFGQVPSD VDS TTYDFSHCTFSGNESKPLCVELDEHNLP  
RPEWIT I PLVCIYMLSTNILLVNL LVAMFGYTVGIVQENNDQVWKFQRYFLVQEYCNRLNI PPFVVFAYFY  
MVVKKCFKCCCCKEKNMESNACCFRNEDNETLAWEGVMKENYL VKINTKANDNSEEMRHRFRQLDSKLN DLKSL  
LKEIANNIK\*

>rs49882804\_ENSMUSP00000036991\_c.1126:G>A\_p.S376N

ENSMUST00000040210.14|Trpm8-201|ENSMUSG00000036251|+|chr1:g.88265019:G>A  
MSFEGARLSMRSRRNGTMGSTRTRYSSVSRSTDVSYSDSDLVNFQANFKKREC VFFTRDSKAMENICKCGYA  
QSQHIEGTQINQNEKWNKKHTKEFPTDAFGDIQFETLGKKGKYLRLSCD TDSETLYELLTQHWHLKT PNLVI  
SVTGGAKNFALKPRMRKIFSR LIYIAQSKGAWIL TGGTHYGLMKY IGEVVRDNTISR NSEENIVAIGIAAWGM  
VSNRDTLIRSCDDEGHFSAQYIMDDFTRDPLYILDNNHTHLLVDNGCHGHPTV EAKLRNQLEKYISERTSQD  
SNYGGKIPIVCFAQGGGRETLKAINTSVKSKI PCVVVEGSGQIADV IASLVEVEDVLTSSMVKEKLVRF L PRT  
VSRLPEEEIENWIKWLKEI LESSHLLTVIKMEEAGDEIVSNAISYALYKAFSTNEQDKDNWNGQLKLLLEWNQ  
LDLASDEIFTNDRRWESADLQEVMTALIKDRPKFVRLFLENGLN LQKFLTNEVLT E L FSTH FSTLVYRNLQI  
AKNSYNDALLTFVWKL VANFRRSFWKEDRSSRELDV ELHDASLTTRHPLQALFIWAILQNKKELSKVIWEQT  
KGCTLAALGASKLLKTLAKVKNDINAAGESEELANEYETRAVELFTECYSNDEDLAEQLLVYSCEAWGGSNCL  
ELAVEATDQHFIAPGVQNF LSKQWYGEISRDTKNWKIILCLFI I PLVGCGLV SFRKKPIDKHKLLWYVAF  
FTSPFV VFSWNVVFI AFLLLFAYVLLMDFH SVPHTPELILYALV FV LFCDEVRQWYMN GVN YFTDLWNVMDT  
LGLFYFIAGIVFRLHSSNKSSLYSGRVIFCLDYII FTLR LIHIFTVSRNLGPKI IMLQRMLIDVFFF LFLFAV  
WMVAFGVARQGILRQNEQRWRWIFRSVIYEPY LAMFGQVPSD VDS TTYDFSHCTFSGNESKPLCVELDEHNLP  
RPEWIT I PLVCIYMLSTNILLVNL LVAMFGYTVGIVQENNDQVWKFQRYFLVQEYCNRLNI PPFVVFAYFY  
MVVKKCFKCCCCKEKNMESNACCFRNEDNETLAWEGVMKENYL VKINTKANDNSEEMRHRFRQLDSKLN DLKSL  
LKEIANNIK\*

>rs49882804\_ENSMUSP00000131209\_c.1126:G>A\_p.S376N

ENSMUST00000171176.3|Trpm8-204|ENSMUSG00000036251|+|chr1:g.88265019:G>A  
MSFEGARLSMRSRRNGTMGSTRTRYSSVSRSTDVSYSDSDLVNFQANFKKREC VFFTRDSKAMENICKCGYA  
QSQHIEGTQINQNEKWNKKHTKEFPTDAFGDIQFETLGKKGKYLRLSCD TDSETLYELLTQHWHLKT PNLVI  
SVTGGAKNFALKPRMRKIFSR LIYIAQSKGAWIL TGGTHYGLMKY IGEVVRDNTISR NSEENIVAIGIAAWGM  
VSNRDTLIRSCDDEGHFSAQYIMDDFTRDPLYILDNNHTHLLVDNGCHGHPTV EAKLRNQLEKYISERTSQD

SNYGGKIPIVCFAQGGGRETLLKAINTSVSKIPCVVVEGSGQIADV IASLVEVEDVLTSSMVKEKLVRFPLPRT  
VSRLPEEEIENWIKWLKEI LESSHLLTVIKMEEAGDEIVSNAISYALYKAFSTNEQDKDNWNGQLKLLLEWNQ  
LDLASDEIFTNDRRWESADLQEVMTALIKDRPKFVRLFLENGLNQKFLTNEVLTELFSTHSTLVYRNLQI  
AKNSYNDALLTFVWKL VANFRRSFWKEDRSSREDLDVELHDASLTTRHPLQALFIWAILQNKKELSKVIWEQT  
KGCTLAALGASKLLKTLAKVKN DINAAGESEELANEYETRAVELFTECYSNDEDLAEQLLVYSCEAWGGSNCL  
ELAVEATDQHFI AQPGVQNF LSKQWYGEISRDTKNWKIILCLFI IPLVGCGLVSFRKKPIDKHKLLWYVAF  
FTSPFVVFVSWNVVYFIAFLLLFAYVLLMDFHVSVPHTPELILYALVFLFCDEVRQWYMNQVNYFTDLWNVMDT  
LGLFYFIAGIVFRLHSSNKSSLYSGRVIFCLDYII FTLRLLIHI FTVSRNLGPKI IMLQRMLIDVFFF LFLFAV  
WMVAFGVARQGILRQNEQRWRWIFRSVIYEPYLA MFGQVPSD VDSSTYDFSHCTFSGNESKPLCVELDEHNLP  
RFPEWITIPLVCIYMLSTNILLVNLVAMFGYTVGIVQENNDQVWKQRYFLVQVEYCNRLNIPFPFVVFAYFY  
MVVKKCFKCCCKEKNMESNACCFRNEDNETLAWEGVMKENYLVKINTKANDNSEEMRHRFRQLDSKLNLDKSL  
LKEIANNIK\*

>rs49585932\_ENSMUSP00000108739\_c.1135:A>G\_p.K379R

ENSMUST00000113114.10|Trpm8-202|ENSMUSG00000036251|+|chr1:g.88265028:A>G  
MSFEGARLSMRSRRNGTMGSTRTYSSVSRSTDVSYSDSDLVNF IQANFKKREC VFFTRDSKAMENICKCGYA  
QSQHIEGTQINQNEKWNKKHTKEFPTDAFGDIQFETLGKKGKYLRLSCD TDSETLYELLTQHWHLKT PNLVI  
SVTGGAKNFALKPRMKIFSR LIYIAQSKGAWILTGTHYGLMKYI GEVVRDNTISRNSEENIVAIGIAAWGM  
VSNRDTLIRSCDDEGHFSAQYIMDDFTRDPLYILDNNHTHLLLV DNGCHGHTVEAKLRNQLKYISERTSQD  
SNYGGKIPIVCFAQGGGRETLLKAINTSVSKIPCVVVEGSGQIADV IASLVEVEDVLTSSMVKEKLVRFPLPRT  
VSRLPEEEIESWIRWLKEI LESSHLLTVIKMEEAGDEIVSNAISYALYKAFSTNEQDKDNWNGQLKLLLEWNQ  
LDLASDEIFTNDRRWESADLQEVMTALIKDRPKFVRLFLENGLNQKFLTNEVLTELFSTHSTLVYRNLQI  
AKNSYNDALLTFVWKL VANFRRSFWKEDRSSREDLDVELHDASLTTRHPLQALFIWAILQNKKELSKVIWEQT  
KGCTLAALGASKLLKTLAKVKN DINAAGESEELANEYETRAVELFTECYSNDEDLAEQLLVYSCEAWGGSNCL  
ELAVEATDQHFI AQPGVQNF LSKQWYGEISRDTKNWKIILCLFI IPLVGCGLVSFRKKPIDKHKLLWYVAF  
FTSPFVVFVSWNVVYFIAFLLLFAYVLLMDFHVSVPHTPELILYALVFLFCDEVRQWYMNQVNYFTDLWNVMDT  
LGLFYFIAGIVFRLHSSNKSSLYSGRVIFCLDYII FTLRLLIHI FTVSRNLGPKI IMLQRMLIDVFFF LFLFAV  
WMVAFGVARQGILRQNEQRWRWIFRSVIYEPYLA MFGQVPSD VDSSTYDFSHCTFSGNESKPLCVELDEHNLP  
RFPEWITIPLVCIYMLSTNILLVNLVAMFGYTVGIVQENNDQVWKQRYFLVQVEYCNRLNIPFPFVVFAYFY  
MVVKKCFKCCCKEKNMESNACCFRNEDNETLAWEGVMKENYLVKINTKANDNSEEMRHRFRQLDSKLNLDKSL  
LKEIANNIK\*

>rs49585932\_ENSMUSP00000036991\_c.1135:A>G\_p.K379R

ENSMUST00000040210.14|Trpm8-201|ENSMUSG00000036251|+|chr1:g.88265028:A>G  
MSFEGARLSMRSRRNGTMGSTRTYSSVSRSTDVSYSDSDLVNF IQANFKKREC VFFTRDSKAMENICKCGYA  
QSQHIEGTQINQNEKWNKKHTKEFPTDAFGDIQFETLGKKGKYLRLSCD TDSETLYELLTQHWHLKT PNLVI  
SVTGGAKNFALKPRMKIFSR LIYIAQSKGAWILTGTHYGLMKYI GEVVRDNTISRNSEENIVAIGIAAWGM  
VSNRDTLIRSCDDEGHFSAQYIMDDFTRDPLYILDNNHTHLLLV DNGCHGHTVEAKLRNQLKYISERTSQD  
SNYGGKIPIVCFAQGGGRETLLKAINTSVSKIPCVVVEGSGQIADV IASLVEVEDVLTSSMVKEKLVRFPLPRT  
VSRLPEEEIESWIRWLKEI LESSHLLTVIKMEEAGDEIVSNAISYALYKAFSTNEQDKDNWNGQLKLLLEWNQ  
LDLASDEIFTNDRRWESADLQEVMTALIKDRPKFVRLFLENGLNQKFLTNEVLTELFSTHSTLVYRNLQI  
AKNSYNDALLTFVWKL VANFRRSFWKEDRSSREDLDVELHDASLTTRHPLQALFIWAILQNKKELSKVIWEQT  
KGCTLAALGASKLLKTLAKVKN DINAAGESEELANEYETRAVELFTECYSNDEDLAEQLLVYSCEAWGGSNCL  
ELAVEATDQHFI AQPGVQNF LSKQWYGEISRDTKNWKIILCLFI IPLVGCGLVSFRKKPIDKHKLLWYVAF  
FTSPFVVFVSWNVVYFIAFLLLFAYVLLMDFHVSVPHTPELILYALVFLFCDEVRQWYMNQVNYFTDLWNVMDT  
LGLFYFIAGIVFRLHSSNKSSLYSGRVIFCLDYII FTLRLLIHI FTVSRNLGPKI IMLQRMLIDVFFF LFLFAV  
WMVAFGVARQGILRQNEQRWRWIFRSVIYEPYLA MFGQVPSD VDSSTYDFSHCTFSGNESKPLCVELDEHNLP  
RFPEWITIPLVCIYMLSTNILLVNLVAMFGYTVGIVQENNDQVWKQRYFLVQVEYCNRLNIPFPFVVFAYFY  
MVVKKCFKCCCKEKNMESNACCFRNEDNETLAWEGVMKENYLVKINTKANDNSEEMRHRFRQLDSKLNLDKSL  
LKEIANNIK\*

>rs49585932\_ENSMUSP00000131209\_c.1135:A>G\_p.K379R

ENSMUST00000171176.3|Trpm8-204|ENSMUSG00000036251|+|chr1:g.88265028:A>G  
MSFEGARLSMRSRRNGTMGSTRTYSSVSRSTDVSYSDSDLVNF IQANFKKREC VFFTRDSKAMENICKCGYA  
QSQHIEGTQINQNEKWNKKHTKEFPTDAFGDIQFETLGKKGKYLRLSCD TDSETLYELLTQHWHLKT PNLVI  
SVTGGAKNFALKPRMKIFSR LIYIAQSKGAWILTGTHYGLMKYI GEVVRDNTISRNSEENIVAIGIAAWGM  
VSNRDTLIRSCDDEGHFSAQYIMDDFTRDPLYILDNNHTHLLLV DNGCHGHTVEAKLRNQLKYISERTSQD  
SNYGGKIPIVCFAQGGGRETLLKAINTSVSKIPCVVVEGSGQIADV IASLVEVEDVLTSSMVKEKLVRFPLPRT  
VSRLPEEEIESWIRWLKEI LESSHLLTVIKMEEAGDEIVSNAISYALYKAFSTNEQDKDNWNGQLKLLLEWNQ  
LDLASDEIFTNDRRWESADLQEVMTALIKDRPKFVRLFLENGLNQKFLTNEVLTELFSTHSTLVYRNLQI  
AKNSYNDALLTFVWKL VANFRRSFWKEDRSSREDLDVELHDASLTTRHPLQALFIWAILQNKKELSKVIWEQT

KGCTLAALGASKLLKTLAKVKNDINAAGESEELANEYETRAVELFTECYSNDEDLAEQLLVYSCEAWGGSNCL  
ELAVEATDQHFIAPGVQNFSLKQWYGEISRDTKNWKIILCLFIIPLVGCGLVSRKPKPIDKHKLLWYVAF  
FTSPFVVFVSWNVVFIYIAFLLLFAYVLLMDFHVPHTPELILYALVFLFCDEVRQWYMGVNYFTDLWNVMDT  
LGLFYFIAGIVFRLHSSNKSSLYSGRVIFCLDYIIFTLRLIHIFTVSRNLGPKIIMLQRMIDVFFFLLFAV  
WMVAFGVARQGILRQNEQRWRWIFRSVIYEPYLAAMFGQVPSVDVSTTYDFSHCTFSGNESKPLCVLDEHNLP  
RFPEWITIPLVCIYMLSTNILLVNLVAMFGYTVGIVQENNDQVVKFQRYFLVQEYCNRLNIPFPVVFAYFY  
MVVKCFKCCCCKEKNMESNACCFRNEEDNETLAWEGVMKENYLKINTKANDNSEEMRHRFRQLDSKLNLDLKS  
LKEIANNIK\*

>ENSMUSP00000108739\_c.1702:C>G\_p.A568G ENSMUST00000113114.10|Trpm8-  
202|ENSMUSG00000036251|+|chr1:g.88277618:C>G

MSFEGARLSMRSRRNGTMGSTRTYSSVSRSTDVSYSDSDLVNF IQANFKKRECVFFTRDSKAMENICKCGYA  
QSQHIEGTQINQNEKWNKKHTKEFPTDAFGDIQFETLGKKGKYLRLSCD TDSETLYELLTQHWHLKT PNLVI  
SVTGAKNFALKPRMRKIFSRLIYIAQSKGAWILTGTHYGLMKYIGEVVRDNTISRNSEENIVAIGIAAWGM  
VSNRDTLIRSCDDEGHFSAQYIMDDFTRDPLYILDNNHTHLLVDNGCHGHTVEAKLRNQLEKYISERTSQD  
SNYGGKIPIVCFAQGGGRETLKAINTSVSKSIPCVVVEGSGQIADV IASLVEVEDVLTSSMVKEKLVRF LPR  
VSRLPEEEIESWIKWLKEILESSHLLTVIKMEEAGDEIVSNAISYALYKAFSTNEQDKDNWNGQLKLLLEWNQ  
LDLASDEIFTNDRRWESADLQEVMTALIKDRPKFVRLFLENGLNQKFLTNEVLTSTHSTLTVYRNLQI  
AKNSYNDALLTFVWKLVANFRRSFWKEDRSSREDLDVELHDASLTTRHPLQALFIWGI LQNKKELSKVIWEQT  
KGCTLAALGASKLLKTLAKVKNDINAAGESEELANEYETRAVELFTECYSNDEDLAEQLLVYSCEAWGGSNCL  
ELAVEATDQHFIAPGVQNFSLKQWYGEISRDTKNWKIILCLFIIPLVGCGLVSRKPKPIDKHKLLWYVAF  
FTSPFVVFVSWNVVFIYIAFLLLFAYVLLMDFHVPHTPELILYALVFLFCDEVRQWYMGVNYFTDLWNVMDT  
LGLFYFIAGIVFRLHSSNKSSLYSGRVIFCLDYIIFTLRLIHIFTVSRNLGPKIIMLQRMIDVFFFLLFAV  
WMVAFGVARQGILRQNEQRWRWIFRSVIYEPYLAAMFGQVPSVDVSTTYDFSHCTFSGNESKPLCVLDEHNLP  
RFPEWITIPLVCIYMLSTNILLVNLVAMFGYTVGIVQENNDQVVKFQRYFLVQEYCNRLNIPFPVVFAYFY  
MVVKCFKCCCCKEKNMESNACCFRNEEDNETLAWEGVMKENYLKINTKANDNSEEMRHRFRQLDSKLNLDLKS  
LKEIANNIK\*

>ENSMUSP00000036991\_c.1702:C>G\_p.A568G ENSMUST00000040210.14|Trpm8-  
201|ENSMUSG00000036251|+|chr1:g.88277618:C>G

MSFEGARLSMRSRRNGTMGSTRTYSSVSRSTDVSYSDSDLVNF IQANFKKRECVFFTRDSKAMENICKCGYA  
QSQHIEGTQINQNEKWNKKHTKEFPTDAFGDIQFETLGKKGKYLRLSCD TDSETLYELLTQHWHLKT PNLVI  
SVTGAKNFALKPRMRKIFSRLIYIAQSKGAWILTGTHYGLMKYIGEVVRDNTISRNSEENIVAIGIAAWGM  
VSNRDTLIRSCDDEGHFSAQYIMDDFTRDPLYILDNNHTHLLVDNGCHGHTVEAKLRNQLEKYISERTSQD  
SNYGGKIPIVCFAQGGGRETLKAINTSVSKSIPCVVVEGSGQIADV IASLVEVEDVLTSSMVKEKLVRF LPR  
VSRLPEEEIESWIKWLKEILESSHLLTVIKMEEAGDEIVSNAISYALYKAFSTNEQDKDNWNGQLKLLLEWNQ  
LDLASDEIFTNDRRWESADLQEVMTALIKDRPKFVRLFLENGLNQKFLTNEVLTSTHSTLTVYRNLQI  
AKNSYNDALLTFVWKLVANFRRSFWKEDRSSREDLDVELHDASLTTRHPLQALFIWGI LQNKKELSKVIWEQT  
KGCTLAALGASKLLKTLAKVKNDINAAGESEELANEYETRAVELFTECYSNDEDLAEQLLVYSCEAWGGSNCL  
ELAVEATDQHFIAPGVQNFSLKQWYGEISRDTKNWKIILCLFIIPLVGCGLVSRKPKPIDKHKLLWYVAF  
FTSPFVVFVSWNVVFIYIAFLLLFAYVLLMDFHVPHTPELILYALVFLFCDEVRQWYMGVNYFTDLWNVMDT  
LGLFYFIAGIVFRLHSSNKSSLYSGRVIFCLDYIIFTLRLIHIFTVSRNLGPKIIMLQRMIDVFFFLLFAV  
WMVAFGVARQGILRQNEQRWRWIFRSVIYEPYLAAMFGQVPSVDVSTTYDFSHCTFSGNESKPLCVLDEHNLP  
RFPEWITIPLVCIYMLSTNILLVNLVAMFGYTVGIVQENNDQVVKFQRYFLVQEYCNRLNIPFPVVFAYFY  
MVVKCFKCCCCKEKNMESNACCFRNEEDNETLAWEGVMKENYLKINTKANDNSEEMRHRFRQLDSKLNLDLKS  
LKEIANNIK\*

>ENSMUSP00000131209\_c.1702:C>G\_p.A568G ENSMUST00000171176.3|Trpm8-  
204|ENSMUSG00000036251|+|chr1:g.88277618:C>G

MSFEGARLSMRSRRNGTMGSTRTYSSVSRSTDVSYSDSDLVNF IQANFKKRECVFFTRDSKAMENICKCGYA  
QSQHIEGTQINQNEKWNKKHTKEFPTDAFGDIQFETLGKKGKYLRLSCD TDSETLYELLTQHWHLKT PNLVI  
SVTGAKNFALKPRMRKIFSRLIYIAQSKGAWILTGTHYGLMKYIGEVVRDNTISRNSEENIVAIGIAAWGM  
VSNRDTLIRSCDDEGHFSAQYIMDDFTRDPLYILDNNHTHLLVDNGCHGHTVEAKLRNQLEKYISERTSQD  
SNYGGKIPIVCFAQGGGRETLKAINTSVSKSIPCVVVEGSGQIADV IASLVEVEDVLTSSMVKEKLVRF LPR  
VSRLPEEEIESWIKWLKEILESSHLLTVIKMEEAGDEIVSNAISYALYKAFSTNEQDKDNWNGQLKLLLEWNQ  
LDLASDEIFTNDRRWESADLQEVMTALIKDRPKFVRLFLENGLNQKFLTNEVLTSTHSTLTVYRNLQI  
AKNSYNDALLTFVWKLVANFRRSFWKEDRSSREDLDVELHDASLTTRHPLQALFIWGI LQNKKELSKVIWEQT  
KGCTLAALGASKLLKTLAKVKNDINAAGESEELANEYETRAVELFTECYSNDEDLAEQLLVYSCEAWGGSNCL  
ELAVEATDQHFIAPGVQNFSLKQWYGEISRDTKNWKIILCLFIIPLVGCGLVSRKPKPIDKHKLLWYVAF  
FTSPFVVFVSWNVVFIYIAFLLLFAYVLLMDFHVPHTPELILYALVFLFCDEVRQWYMGVNYFTDLWNVMDT  
LGLFYFIAGIVFRLHSSNKSSLYSGRVIFCLDYIIFTLRLIHIFTVSRNLGPKIIMLQRMIDVFFFLLFAV



WMVAFGVARQGILRQNEQRWRWIFRSVIYEPYLAMFGQVPSDSDVSTTYDFSHCTFSGNESKPLCVELDEHNLP  
 RFPEWITITPLVCIYMLSTNILLVNLVAMFGYTVGIVQENNDQVWKQRYFLVQEYCNRLNIPFPFVVFAYFY  
 MVVKKCFKCCCCKEKNMESNACCFRNEDNETLAWEGVMKENYLKINTKANDNSEEMRHRFRQLDSKLNLDKSL  
 LKEIANNIK\*

>ENSMUSP00000108739\_c.1745:G>T\_p.E582D ENSMUST00000113114.10|Trpm8-  
 202|ENSMUSG00000036251|+|chr1:g.88277661:G>T  
 MSFEGARLSMRSRRNGTMGSTRTLYSSVSRSTDVSYSDSDLVNF IQANFKKRECVFFTRDSKAMENICKCGYA  
 QSQHIEGTQINQNEKWNYYKHTKEFPTDAFGDIQFETLGKKGKYLRLSCD TDSETLYELLTQHWHLKTPNLVI  
 SVTGGAKNFALKPRMRKIFSRLLIYAQSKGAWILTGTHYGLMKYIGEVVRDNTISRNSEENIVAIGIAAWGM  
 VSNRDTLIRSCDDEGHFSAQYIMDDFTRDPLYILDNNHTHLLLVDNGCHGHPTVEAKLRNQLEKYISERTSQD  
 SNYGGKIPIVCFAQGGGRET LKAINTSVKSKI PCVVVEGSGQIADVIASLVEVEDVLTSSMVKEKLVRF LPR T  
 VSRLPEEEIESWIKWLKEI LESSHLLTVIKMEEAGDEIVSNAISYALYKAFSTNEQDKDNWNGQLKLLLEWNQ  
 LDLASDEIFTNDRRWESADLQEVMTALIKDRPKFVRLFLENGLN LQKFLTNEVLT E L FSTH FSTLVYRNLQI  
 AKNSYNDALLTFVWKL VANFRRSFWKEDRSSREDLDVELHDASLTTRHPLQALFIWAILQNKKELSKVIWDQT  
 KGCTLAALGASKLLKTLAKVKNDINAAGESEELANEYETRAVELFTECYSNEDDLAEQLLVYSCEAWGGSNCL  
 ELAVEATDQHFI AQPGVQNF LSKQWYGEISRDTKNWKIILCLFI I PLVGCGLVSFRKKPIDKHKLLWYVAF  
 FTSPFVVFVSWNVVFIYIAFLLLFAYVLLMDFHVPHTPELILYALVFLFCDEVRQWYMGVNYFTDLWNVMDT  
 LGLFYFIAGIVFRLHSSNKSSLYSGRVI FCLDYIIFTLRLIHFIVSRNLGPKIIMLQRMLIDVFFFLFLFAV  
 WMVAFGVARQGILRQNEQRWRWIFRSVIYEPYLAMFGQVPSDSDVSTTYDFSHCTFSGNESKPLCVELDEHNLP  
 RFPEWITITPLVCIYMLSTNILLVNLVAMFGYTVGIVQENNDQVWKQRYFLVQEYCNRLNIPFPFVVFAYFY  
 MVVKKCFKCCCCKEKNMESNACCFRNEDNETLAWEGVMKENYLKINTKANDNSEEMRHRFRQLDSKLNLDKSL  
 LKEIANNIK\*

>ENSMUSP00000036991\_c.1745:G>T\_p.E582D ENSMUST00000040210.14|Trpm8-  
 201|ENSMUSG00000036251|+|chr1:g.88277661:G>T  
 MSFEGARLSMRSRRNGTMGSTRTLYSSVSRSTDVSYSDSDLVNF IQANFKKRECVFFTRDSKAMENICKCGYA  
 QSQHIEGTQINQNEKWNYYKHTKEFPTDAFGDIQFETLGKKGKYLRLSCD TDSETLYELLTQHWHLKTPNLVI  
 SVTGGAKNFALKPRMRKIFSRLLIYAQSKGAWILTGTHYGLMKYIGEVVRDNTISRNSEENIVAIGIAAWGM  
 VSNRDTLIRSCDDEGHFSAQYIMDDFTRDPLYILDNNHTHLLLVDNGCHGHPTVEAKLRNQLEKYISERTSQD  
 SNYGGKIPIVCFAQGGGRET LKAINTSVKSKI PCVVVEGSGQIADVIASLVEVEDVLTSSMVKEKLVRF LPR T  
 VSRLPEEEIESWIKWLKEI LESSHLLTVIKMEEAGDEIVSNAISYALYKAFSTNEQDKDNWNGQLKLLLEWNQ  
 LDLASDEIFTNDRRWESADLQEVMTALIKDRPKFVRLFLENGLN LQKFLTNEVLT E L FSTH FSTLVYRNLQI  
 AKNSYNDALLTFVWKL VANFRRSFWKEDRSSREDLDVELHDASLTTRHPLQALFIWAILQNKKELSKVIWDQT  
 KGCTLAALGASKLLKTLAKVKNDINAAGESEELANEYETRAVELFTECYSNEDDLAEQLLVYSCEAWGGSNCL  
 ELAVEATDQHFI AQPGVQNF LSKQWYGEISRDTKNWKIILCLFI I PLVGCGLVSFRKKPIDKHKLLWYVAF  
 FTSPFVVFVSWNVVFIYIAFLLLFAYVLLMDFHVPHTPELILYALVFLFCDEVRQWYMGVNYFTDLWNVMDT  
 LGLFYFIAGIVFRLHSSNKSSLYSGRVI FCLDYIIFTLRLIHFIVSRNLGPKIIMLQRMLIDVFFFLFLFAV  
 WMVAFGVARQGILRQNEQRWRWIFRSVIYEPYLAMFGQVPSDSDVSTTYDFSHCTFSGNESKPLCVELDEHNLP  
 RFPEWITITPLVCIYMLSTNILLVNLVAMFGYTVGIVQENNDQVWKQRYFLVQEYCNRLNIPFPFVVFAYFY  
 MVVKKCFKCCCCKEKNMESNACCFRNEDNETLAWEGVMKENYLKINTKANDNSEEMRHRFRQLDSKLNLDKSL  
 LKEIANNIK\*

>ENSMUSP00000131209\_c.1745:G>T\_p.E582D ENSMUST00000171176.3|Trpm8-  
 204|ENSMUSG00000036251|+|chr1:g.88277661:G>T  
 MSFEGARLSMRSRRNGTMGSTRTLYSSVSRSTDVSYSDSDLVNF IQANFKKRECVFFTRDSKAMENICKCGYA  
 QSQHIEGTQINQNEKWNYYKHTKEFPTDAFGDIQFETLGKKGKYLRLSCD TDSETLYELLTQHWHLKTPNLVI  
 SVTGGAKNFALKPRMRKIFSRLLIYAQSKGAWILTGTHYGLMKYIGEVVRDNTISRNSEENIVAIGIAAWGM  
 VSNRDTLIRSCDDEGHFSAQYIMDDFTRDPLYILDNNHTHLLLVDNGCHGHPTVEAKLRNQLEKYISERTSQD  
 SNYGGKIPIVCFAQGGGRET LKAINTSVKSKI PCVVVEGSGQIADVIASLVEVEDVLTSSMVKEKLVRF LPR T  
 VSRLPEEEIESWIKWLKEI LESSHLLTVIKMEEAGDEIVSNAISYALYKAFSTNEQDKDNWNGQLKLLLEWNQ  
 LDLASDEIFTNDRRWESADLQEVMTALIKDRPKFVRLFLENGLN LQKFLTNEVLT E L FSTH FSTLVYRNLQI  
 AKNSYNDALLTFVWKL VANFRRSFWKEDRSSREDLDVELHDASLTTRHPLQALFIWAILQNKKELSKVIWDQT  
 KGCTLAALGASKLLKTLAKVKNDINAAGESEELANEYETRAVELFTECYSNEDDLAEQLLVYSCEAWGGSNCL  
 ELAVEATDQHFI AQPGVQNF LSKQWYGEISRDTKNWKIILCLFI I PLVGCGLVSFRKKPIDKHKLLWYVAF  
 FTSPFVVFVSWNVVFIYIAFLLLFAYVLLMDFHVPHTPELILYALVFLFCDEVRQWYMGVNYFTDLWNVMDT  
 LGLFYFIAGIVFRLHSSNKSSLYSGRVI FCLDYIIFTLRLIHFIVSRNLGPKIIMLQRMLIDVFFFLFLFAV  
 WMVAFGVARQGILRQNEQRWRWIFRSVIYEPYLAMFGQVPSDSDVSTTYDFSHCTFSGNESKPLCVELDEHNLP  
 RFPEWITITPLVCIYMLSTNILLVNLVAMFGYTVGIVQENNDQVWKQRYFLVQEYCNRLNIPFPFVVFAYFY  
 MVVKKCFKCCCCKEKNMESNACCFRNEDNETLAWEGVMKENYLKINTKANDNSEEMRHRFRQLDSKLNLDKSL  
 LKEIANNIK\*

>rs51912375\_ENSMUSP00000108739\_c.1788:C>T\_p.L597F  
 ENSMUST00000113114.10|Trpm8-202|ENSMUSG00000036251|+|chr1:g.88278617:C>T  
 MSFEGARLSMRSRRNGTMGSTRTRYSSVSRSTDVSYSDSDLVNF IQANFKKRECVFFTRDSKAMENICKCGYA  
 QSQHIEGTQINQNEKWNKKHTKEFPTDAFGDIQFETLGKKGKYLRLSCD TDSETLYELLTQHWHLKT PNLVI  
 SVTGGAKNFALKPRMRKIFSR LIYIAQSKGAWIL TGGTHYGLMKY IGEVVRDNTISRNSEENIVAIGIAAWGM  
 VSNRDTLIRSCDDEGHFSAQYIMDDFTRDPLYILDNNHTHLLLVDNGCHGHPTVEAKLRNQLEKYISERTSQD  
 SNYGGKIPIVCFAQGGGRET LKAINTSVKSKI PCVVVEGSGQIADVIASLVEVEDVLTSSMVKEKLVRF LPR T  
 VSRLPEEEIESWIKWLKEI LESSHLLTVIKMEEAGDEIVSNAISYALYKAFSTNEQDKDNWNGQLK LLEWNQ  
 LDLASDEIFTNDRRWESADLQEVMTALIKDRPKFVRLFLENGLN LQKFLTNEVLT E L FSTH FSTLVYRNLQI  
 AKNSYNDALLTFVWKL VANFRRSFWKEDRSSREDLDVELHDASLTTRHPLQALFIWAILQNKKELSKVIWEQT  
 KGCTLAALGASKFLKTLAKVKNDINAAGESEELANEYETRAVELFTECYSNEDDLAEQLLVYSCEAWGGSNCL  
 ELAVEATDQHFI AQPGVQNF LSKQWYGEISRDTKNWKI I LCLFI I PLVGCGLV SFRKKPIDKHKLLWYVAF  
 FTSPFVVFVSWNVVFIYIAFLLLFAYVLLMDFH SVPHTPELILYALVFLFCDEVRQWYMGVNYFTDLWNVMDT  
 LGLFYFIAGIVFRLHSSNKSSLYSGRVI FCLDYII FTLR LIHI FTVSRNLGPKI IMLQRMLIDVFFF LFLFAV  
 WMVAFGVARQGILRQNEQRWRWIFRSVIYEPYLA MFGQVPSVDSTTYDFSHCTFSGNESKPLCVELDEHNLP  
 RFPEWIT I PLVCIYMLSTNILLVNLVAMFGYTVGIVQENNDQVWKFOR YFLVQ EYCNRLNIPFPVVFAYFY  
 MVVKKCFKCCCKEKNMESNACCFRNE DNETLAWEGVMKENYLVKINTKANDNSEEMRHRFRQLDSKLN DLKSL  
 LKEIANNIK\*

>rs51912375\_ENSMUSP00000036991\_c.1788:C>T\_p.L597F  
 ENSMUST00000040210.14|Trpm8-201|ENSMUSG00000036251|+|chr1:g.88278617:C>T  
 MSFEGARLSMRSRRNGTMGSTRTRYSSVSRSTDVSYSDSDLVNF IQANFKKRECVFFTRDSKAMENICKCGYA  
 QSQHIEGTQINQNEKWNKKHTKEFPTDAFGDIQFETLGKKGKYLRLSCD TDSETLYELLTQHWHLKT PNLVI  
 SVTGGAKNFALKPRMRKIFSR LIYIAQSKGAWIL TGGTHYGLMKY IGEVVRDNTISRNSEENIVAIGIAAWGM  
 VSNRDTLIRSCDDEGHFSAQYIMDDFTRDPLYILDNNHTHLLLVDNGCHGHPTVEAKLRNQLEKYISERTSQD  
 SNYGGKIPIVCFAQGGGRET LKAINTSVKSKI PCVVVEGSGQIADVIASLVEVEDVLTSSMVKEKLVRF LPR T  
 VSRLPEEEIESWIKWLKEI LESSHLLTVIKMEEAGDEIVSNAISYALYKAFSTNEQDKDNWNGQLK LLEWNQ  
 LDLASDEIFTNDRRWESADLQEVMTALIKDRPKFVRLFLENGLN LQKFLTNEVLT E L FSTH FSTLVYRNLQI  
 AKNSYNDALLTFVWKL VANFRRSFWKEDRSSREDLDVELHDASLTTRHPLQALFIWAILQNKKELSKVIWEQT  
 KGCTLAALGASKFLKTLAKVKNDINAAGESEELANEYETRAVELFTECYSNEDDLAEQLLVYSCEAWGGSNCL  
 ELAVEATDQHFI AQPGVQNF LSKQWYGEISRDTKNWKI I LCLFI I PLVGCGLV SFRKKPIDKHKLLWYVAF  
 FTSPFVVFVSWNVVFIYIAFLLLFAYVLLMDFH SVPHTPELILYALVFLFCDEVRQWYMGVNYFTDLWNVMDT  
 LGLFYFIAGIVFRLHSSNKSSLYSGRVI FCLDYII FTLR LIHI FTVSRNLGPKI IMLQRMLIDVFFF LFLFAV  
 WMVAFGVARQGILRQNEQRWRWIFRSVIYEPYLA MFGQVPSVDSTTYDFSHCTFSGNESKPLCVELDEHNLP  
 RFPEWIT I PLVCIYMLSTNILLVNLVAMFGYTVGIVQENNDQVWKFOR YFLVQ EYCNRLNIPFPVVFAYFY  
 MVVKKCFKCCCKEKNMESNACCFRNE DNETLAWEGVMKENYLVKINTKANDNSEEMRHRFRQLDSKLN DLKSL  
 LKEIANNIK\*

>rs51912375\_ENSMUSP00000131209\_c.1788:C>T\_p.L597F  
 ENSMUST00000171176.3|Trpm8-204|ENSMUSG00000036251|+|chr1:g.88278617:C>T  
 MSFEGARLSMRSRRNGTMGSTRTRYSSVSRSTDVSYSDSDLVNF IQANFKKRECVFFTRDSKAMENICKCGYA  
 QSQHIEGTQINQNEKWNKKHTKEFPTDAFGDIQFETLGKKGKYLRLSCD TDSETLYELLTQHWHLKT PNLVI  
 SVTGGAKNFALKPRMRKIFSR LIYIAQSKGAWIL TGGTHYGLMKY IGEVVRDNTISRNSEENIVAIGIAAWGM  
 VSNRDTLIRSCDDEGHFSAQYIMDDFTRDPLYILDNNHTHLLLVDNGCHGHPTVEAKLRNQLEKYISERTSQD  
 SNYGGKIPIVCFAQGGGRET LKAINTSVKSKI PCVVVEGSGQIADVIASLVEVEDVLTSSMVKEKLVRF LPR T  
 VSRLPEEEIESWIKWLKEI LESSHLLTVIKMEEAGDEIVSNAISYALYKAFSTNEQDKDNWNGQLK LLEWNQ  
 LDLASDEIFTNDRRWESADLQEVMTALIKDRPKFVRLFLENGLN LQKFLTNEVLT E L FSTH FSTLVYRNLQI  
 AKNSYNDALLTFVWKL VANFRRSFWKEDRSSREDLDVELHDASLTTRHPLQALFIWAILQNKKELSKVIWEQT  
 KGCTLAALGASKFLKTLAKVKNDINAAGESEELANEYETRAVELFTECYSNEDDLAEQLLVYSCEAWGGSNCL  
 ELAVEATDQHFI AQPGVQNF LSKQWYGEISRDTKNWKI I LCLFI I PLVGCGLV SFRKKPIDKHKLLWYVAF  
 FTSPFVVFVSWNVVFIYIAFLLLFAYVLLMDFH SVPHTPELILYALVFLFCDEVRQWYMGVNYFTDLWNVMDT  
 LGLFYFIAGIVFRLHSSNKSSLYSGRVI FCLDYII FTLR LIHI FTVSRNLGPKI IMLQRMLIDVFFF LFLFAV  
 WMVAFGVARQGILRQNEQRWRWIFRSVIYEPYLA MFGQVPSVDSTTYDFSHCTFSGNESKPLCVELDEHNLP  
 RFPEWIT I PLVCIYMLSTNILLVNLVAMFGYTVGIVQENNDQVWKFOR YFLVQ EYCNRLNIPFPVVFAYFY  
 MVVKKCFKCCCKEKNMESNACCFRNE DNETLAWEGVMKENYLVKINTKANDNSEEMRHRFRQLDSKLN DLKSL  
 LKEIANNIK\*

>rs48579533\_ENSMUSP00000108739\_c.2109:T>A\_p.L704I  
 ENSMUST00000113114.10|Trpm8-202|ENSMUSG00000036251|+|chr1:g.88282215:T>A  
 MSFEGARLSMRSRRNGTMGSTRTRYSSVSRSTDVSYSDSDLVNF IQANFKKRECVFFTRDSKAMENICKCGYA  
 QSQHIEGTQINQNEKWNKKHTKEFPTDAFGDIQFETLGKKGKYLRLSCD TDSETLYELLTQHWHLKT PNLVI

SVTGGAKNFALKPRMRKIFSRLIYIAQSKGAWILTGGTHYGLMKYIGEVVRDNTISRNSEENIVAIGIAAWGM  
VSNRDTLIRSCDDEGHFSAQYIMDDFTRDPLYILDNNHTHLLLVDNGCHGHPTVEAKLRNQLEKYISERTSQD  
SNYGGKIPIVCFAQGGGRETAKAINTSVKSKI PCVVVEGSGQIADVIASLVEVEDVLTSSMVKEKLVRFPLRT  
VSRLPEEEIESWIKWLKEILESSHLLTVIKMEEAGDEIVSNAISYALYKAFSTNEQDKDNWNGQLKLLLEWNQ  
LDLASDEIFTNDRRWEADLQEVMTALIKDRPKFVRLFLENGLNLQKFLTNEVLTTELSTHFSTLVYRNLQI  
AKNSYNDALLTFVWKLVANFRRSFWKEDRSSRELDDELHDSALTRHPLQALFIWAILQNKKELSKVIWEQT  
KGCTLAALGASKLLKTLAKVKNDINAAGESEELANEYETRAVELFTECYSNDEDLAEQLLVYSCEAWGGSNCL  
ELAVEATDQHFIAQPGVQNFLSKQWYGEISRDTKNWKIILCLFIPIVGCGLVSRKPKPIDKHKLLWYVAV  
FTSPFVVFVSWNVVFIYIAFLLLFAYVLLMDFHSPHTPELILYALVFLFCDEVQRQWYMNQVNYFTDLWNVMDT  
LGLFYFIAGIVFRLHSSNKSSLYSGRVIFCLDYIIFTLRLIHIFTVSRNLGPKIIMLQRMIDVFFFLLFAV  
WMVAFGVARQGILRQNEQRWRWIFRSVIYEPYLAMFGQVPSDSDVSTTYDFSHCTFSGNESKPLCVELDEHNLP  
RFPEWITITPLVCIYMLSTNILLVNLVAMFGYTVGIVQENNDQVWKQRYFLVQEYCNRLNIPFPVVFAYFY  
MVVKKCFKCCCKEKNMESNACCFRNEDNETLAWEGVMKENYLKINTKANDNSEEMRHRFRQLDSKLNLDKSL  
LKEIANNIK\*

>rs48579533\_ENSMUSP00000036991\_c.2109:T>A\_p.L704I

ENSMUST00000040210.14|Trpm8-201|ENSMUSG00000036251|+|chr1:g.88282215:T>A  
MSFEGARLSMRSRNRNGTMGSTRITLYSSVSRSTDVSYSDSLVNF IQANFKKRECVFFTRDSKAMENICKCGYA  
SQHIEGTQINQNEKWNKKHTKEFPTDAFGDIQFETLGKKGKYLRLSCD TDSETLYELLTQHWHLKTPNLVI  
SVTGGAKNFALKPRMRKIFSRLIYIAQSKGAWILTGGTHYGLMKYIGEVVRDNTISRNSEENIVAIGIAAWGM  
VSNRDTLIRSCDDEGHFSAQYIMDDFTRDPLYILDNNHTHLLLVDNGCHGHPTVEAKLRNQLEKYISERTSQD  
SNYGGKIPIVCFAQGGGRETAKAINTSVKSKI PCVVVEGSGQIADVIASLVEVEDVLTSSMVKEKLVRFPLRT  
VSRLPEEEIESWIKWLKEILESSHLLTVIKMEEAGDEIVSNAISYALYKAFSTNEQDKDNWNGQLKLLLEWNQ  
LDLASDEIFTNDRRWEADLQEVMTALIKDRPKFVRLFLENGLNLQKFLTNEVLTTELSTHFSTLVYRNLQI  
AKNSYNDALLTFVWKLVANFRRSFWKEDRSSRELDDELHDSALTRHPLQALFIWAILQNKKELSKVIWEQT  
KGCTLAALGASKLLKTLAKVKNDINAAGESEELANEYETRAVELFTECYSNDEDLAEQLLVYSCEAWGGSNCL  
ELAVEATDQHFIAQPGVQNFLSKQWYGEISRDTKNWKIILCLFIPIVGCGLVSRKPKPIDKHKLLWYVAV  
FTSPFVVFVSWNVVFIYIAFLLLFAYVLLMDFHSPHTPELILYALVFLFCDEVQRQWYMNQVNYFTDLWNVMDT  
LGLFYFIAGIVFRLHSSNKSSLYSGRVIFCLDYIIFTLRLIHIFTVSRNLGPKIIMLQRMIDVFFFLLFAV  
WMVAFGVARQGILRQNEQRWRWIFRSVIYEPYLAMFGQVPSDSDVSTTYDFSHCTFSGNESKPLCVELDEHNLP  
RFPEWITITPLVCIYMLSTNILLVNLVAMFGYTVGIVQENNDQVWKQRYFLVQEYCNRLNIPFPVVFAYFY  
MVVKKCFKCCCKEKNMESNACCFRNEDNETLAWEGVMKENYLKINTKANDNSEEMRHRFRQLDSKLNLDKSL  
LKEIANNIK\*

>rs48579533\_ENSMUSP000000131209\_c.2109:T>A\_p.L704I

ENSMUST000000171176.3|Trpm8-204|ENSMUSG00000036251|+|chr1:g.88282215:T>A  
MSFEGARLSMRSRNRNGTMGSTRITLYSSVSRSTDVSYSDSLVNF IQANFKKRECVFFTRDSKAMENICKCGYA  
SQHIEGTQINQNEKWNKKHTKEFPTDAFGDIQFETLGKKGKYLRLSCD TDSETLYELLTQHWHLKTPNLVI  
SVTGGAKNFALKPRMRKIFSRLIYIAQSKGAWILTGGTHYGLMKYIGEVVRDNTISRNSEENIVAIGIAAWGM  
VSNRDTLIRSCDDEGHFSAQYIMDDFTRDPLYILDNNHTHLLLVDNGCHGHPTVEAKLRNQLEKYISERTSQD  
SNYGGKIPIVCFAQGGGRETAKAINTSVKSKI PCVVVEGSGQIADVIASLVEVEDVLTSSMVKEKLVRFPLRT  
VSRLPEEEIESWIKWLKEILESSHLLTVIKMEEAGDEIVSNAISYALYKAFSTNEQDKDNWNGQLKLLLEWNQ  
LDLASDEIFTNDRRWEADLQEVMTALIKDRPKFVRLFLENGLNLQKFLTNEVLTTELSTHFSTLVYRNLQI  
AKNSYNDALLTFVWKLVANFRRSFWKEDRSSRELDDELHDSALTRHPLQALFIWAILQNKKELSKVIWEQT  
KGCTLAALGASKLLKTLAKVKNDINAAGESEELANEYETRAVELFTECYSNDEDLAEQLLVYSCEAWGGSNCL  
ELAVEATDQHFIAQPGVQNFLSKQWYGEISRDTKNWKIILCLFIPIVGCGLVSRKPKPIDKHKLLWYVAV  
FTSPFVVFVSWNVVFIYIAFLLLFAYVLLMDFHSPHTPELILYALVFLFCDEVQRQWYMNQVNYFTDLWNVMDT  
LGLFYFIAGIVFRLHSSNKSSLYSGRVIFCLDYIIFTLRLIHIFTVSRNLGPKIIMLQRMIDVFFFLLFAV  
WMVAFGVARQGILRQNEQRWRWIFRSVIYEPYLAMFGQVPSDSDVSTTYDFSHCTFSGNESKPLCVELDEHNLP  
RFPEWITITPLVCIYMLSTNILLVNLVAMFGYTVGIVQENNDQVWKQRYFLVQEYCNRLNIPFPVVFAYFY  
MVVKKCFKCCCKEKNMESNACCFRNEDNETLAWEGVMKENYLKINTKANDNSEEMRHRFRQLDSKLNLDKSL  
LKEIANNIK\*

>ENSMUSP000000108739\_c.2505:T>A\_p.Y836N ENSMUST000000113114.10|Trpm8-

202|ENSMUSG00000036251|+|chr1:g.88288365:T>A  
MSFEGARLSMRSRNRNGTMGSTRITLYSSVSRSTDVSYSDSLVNF IQANFKKRECVFFTRDSKAMENICKCGYA  
SQHIEGTQINQNEKWNKKHTKEFPTDAFGDIQFETLGKKGKYLRLSCD TDSETLYELLTQHWHLKTPNLVI  
SVTGGAKNFALKPRMRKIFSRLIYIAQSKGAWILTGGTHYGLMKYIGEVVRDNTISRNSEENIVAIGIAAWGM  
VSNRDTLIRSCDDEGHFSAQYIMDDFTRDPLYILDNNHTHLLLVDNGCHGHPTVEAKLRNQLEKYISERTSQD  
SNYGGKIPIVCFAQGGGRETAKAINTSVKSKI PCVVVEGSGQIADVIASLVEVEDVLTSSMVKEKLVRFPLRT  
VSRLPEEEIESWIKWLKEILESSHLLTVIKMEEAGDEIVSNAISYALYKAFSTNEQDKDNWNGQLKLLLEWNQ

LDLASDEIFTNDRRWEADLQEVMTALIKDRPKFVRLFLENGLNLQKFLTNEVLTELFSTHFSTLVYRNLQI  
AKNSYNDALLTFVWKLVANFRRSFWKEDRSSREDLDVELHDASLTTRHPLQALFIWAILQNKKELSKVIWEQT  
KGCTLAALGASKLLKTLAKVKNDINAAGESEELANEYETRAVELFTECYSNDEDLAEQLLVYSCEAWGGSNCL  
ELAVEATDQHFIQAQPGVQNFSLKQWYGEISRDTKNWKIILCLFIIPLVGCGLVSRKPKPIDKHKLLWYYVAF  
FTSPFVVFVSWNVVFIYIAFLLLFAYVLLMDFHSPHTPELIIYALVFLFCDEVRQWYMNQVNYFTDLWNVMDT  
LGLFYFIAGIVFRLHSSNKSSLYSGRVI FCLDNIIFTLRLIHIFTVSRNLGPKIIMLQRMIDVFFFLLFAV  
WMVAFGVARQGILRQNEQRWRWIFRSVIYEPYLAAMFGQVPSVDSTTYDFSHCTFSGNESKPLCVELDEHNLP  
RFPEWITIPLVCIYMLSTNILLVNLVAMFGYTVGIVQENNDQVWKFORQYFLVQEYCNRLNIPFPFVVFAYFY  
MVVKKCFKCCCKEKNMESNACCFRNEEDNETLAWEGVMKENYLVKINTKANDNSEEMRHRFRQLDSKLNLDLKS  
LKEIANNIK\*

>ENSMUSP00000036991\_c.2505:T>A\_p.Y836N ENSMUST00000040210.14|Trpm8-  
201|ENSMUSG00000036251|+|chr1:g.88288365:T>A

MSFEGARLSMRSRRNGTMGSTRITLYSSVSRSTDVSYSDSDLVNFIQANFKKRECVFFTRDSKAMENICKCGYA  
QSQHIEGTQINQNEKWNKKHTKEFPTDAFGDIQFETLGKKGKYLRLSCDTDSETLYELLTQHWHLKTPNLVI  
SVTGGAKNFALKPRMRKIFSRLIYIAQSKGAWILTGGTHYGLMKYIGEVRDNTISRNSEENIVAIGIAAWGM  
VSNRDTLIRSCDDEGHFSAQYIMDDFTRDPLYILDNNHTHLLVDNGCHGHPTVEAKLRNQLKEYISERTSQD  
SNYGGKIPIVCFQAQGGGRETAKAINTSVKSKI PCVVVEGSGQIADVIASLVEVEDVLTSSMVKEKLVRFPLRT  
VSRLEPEEIESWIKWLKEILESSHLLTVIKMEEAGDEIVSNAI SYALYKAFSTNEQDKDNWNGQLKLLLEWNQ  
LDLASDEIFTNDRRWEADLQEVMTALIKDRPKFVRLFLENGLNLQKFLTNEVLTELFSTHFSTLVYRNLQI  
AKNSYNDALLTFVWKLVANFRRSFWKEDRSSREDLDVELHDASLTTRHPLQALFIWAILQNKKELSKVIWEQT  
KGCTLAALGASKLLKTLAKVKNDINAAGESEELANEYETRAVELFTECYSNDEDLAEQLLVYSCEAWGGSNCL  
ELAVEATDQHFIQAQPGVQNFSLKQWYGEISRDTKNWKIILCLFIIPLVGCGLVSRKPKPIDKHKLLWYYVAF  
FTSPFVVFVSWNVVFIYIAFLLLFAYVLLMDFHSPHTPELIIYALVFLFCDEVRQWYMNQVNYFTDLWNVMDT  
LGLFYFIAGIVFRLHSSNKSSLYSGRVI FCLDNIIFTLRLIHIFTVSRNLGPKIIMLQRMIDVFFFLLFAV  
WMVAFGVARQGILRQNEQRWRWIFRSVIYEPYLAAMFGQVPSVDSTTYDFSHCTFSGNESKPLCVELDEHNLP  
RFPEWITIPLVCIYMLSTNILLVNLVAMFGYTVGIVQENNDQVWKFORQYFLVQEYCNRLNIPFPFVVFAYFY  
MVVKKCFKCCCKEKNMESNACCFRNEEDNETLAWEGVMKENYLVKINTKANDNSEEMRHRFRQLDSKLNLDLKS  
LKEIANNIK\*

>ENSMUSP00000131209\_c.2505:T>A\_p.Y836N ENSMUST00000171176.3|Trpm8-  
204|ENSMUSG00000036251|+|chr1:g.88288365:T>A

MSFEGARLSMRSRRNGTMGSTRITLYSSVSRSTDVSYSDSDLVNFIQANFKKRECVFFTRDSKAMENICKCGYA  
QSQHIEGTQINQNEKWNKKHTKEFPTDAFGDIQFETLGKKGKYLRLSCDTDSETLYELLTQHWHLKTPNLVI  
SVTGGAKNFALKPRMRKIFSRLIYIAQSKGAWILTGGTHYGLMKYIGEVRDNTISRNSEENIVAIGIAAWGM  
VSNRDTLIRSCDDEGHFSAQYIMDDFTRDPLYILDNNHTHLLVDNGCHGHPTVEAKLRNQLKEYISERTSQD  
SNYGGKIPIVCFQAQGGGRETAKAINTSVKSKI PCVVVEGSGQIADVIASLVEVEDVLTSSMVKEKLVRFPLRT  
VSRLEPEEIESWIKWLKEILESSHLLTVIKMEEAGDEIVSNAI SYALYKAFSTNEQDKDNWNGQLKLLLEWNQ  
LDLASDEIFTNDRRWEADLQEVMTALIKDRPKFVRLFLENGLNLQKFLTNEVLTELFSTHFSTLVYRNLQI  
AKNSYNDALLTFVWKLVANFRRSFWKEDRSSREDLDVELHDASLTTRHPLQALFIWAILQNKKELSKVIWEQT  
KGCTLAALGASKLLKTLAKVKNDINAAGESEELANEYETRAVELFTECYSNDEDLAEQLLVYSCEAWGGSNCL  
ELAVEATDQHFIQAQPGVQNFSLKQWYGEISRDTKNWKIILCLFIIPLVGCGLVSRKPKPIDKHKLLWYYVAF  
FTSPFVVFVSWNVVFIYIAFLLLFAYVLLMDFHSPHTPELIIYALVFLFCDEVRQWYMNQVNYFTDLWNVMDT  
LGLFYFIAGIVFRLHSSNKSSLYSGRVI FCLDNIIFTLRLIHIFTVSRNLGPKIIMLQRMIDVFFFLLFAV  
WMVAFGVARQGILRQNEQRWRWIFRSVIYEPYLAAMFGQVPSVDSTTYDFSHCTFSGNESKPLCVELDEHNLP  
RFPEWITIPLVCIYMLSTNILLVNLVAMFGYTVGIVQENNDQVWKFORQYFLVQEYCNRLNIPFPFVVFAYFY  
MVVKKCFKCCCKEKNMESNACCFRNEEDNETLAWEGVMKENYLVKINTKANDNSEEMRHRFRQLDSKLNLDLKS  
LKEIANNIK\*

>rs30294597\_ENSMUSP00000108739\_c.2541:A>G\_p.T848A

ENSMUST00000113114.10|Trpm8-202|ENSMUSG00000036251|+|chr1:g.88288401:A>G  
MSFEGARLSMRSRRNGTMGSTRITLYSSVSRSTDVSYSDSDLVNFIQANFKKRECVFFTRDSKAMENICKCGYA  
QSQHIEGTQINQNEKWNKKHTKEFPTDAFGDIQFETLGKKGKYLRLSCDTDSETLYELLTQHWHLKTPNLVI  
SVTGGAKNFALKPRMRKIFSRLIYIAQSKGAWILTGGTHYGLMKYIGEVRDNTISRNSEENIVAIGIAAWGM  
VSNRDTLIRSCDDEGHFSAQYIMDDFTRDPLYILDNNHTHLLVDNGCHGHPTVEAKLRNQLKEYISERTSQD  
SNYGGKIPIVCFQAQGGGRETAKAINTSVKSKI PCVVVEGSGQIADVIASLVEVEDVLTSSMVKEKLVRFPLRT  
VSRLEPEEIESWIKWLKEILESSHLLTVIKMEEAGDEIVSNAI SYALYKAFSTNEQDKDNWNGQLKLLLEWNQ  
LDLASDEIFTNDRRWEADLQEVMTALIKDRPKFVRLFLENGLNLQKFLTNEVLTELFSTHFSTLVYRNLQI  
AKNSYNDALLTFVWKLVANFRRSFWKEDRSSREDLDVELHDASLTTRHPLQALFIWAILQNKKELSKVIWEQT  
KGCTLAALGASKLLKTLAKVKNDINAAGESEELANEYETRAVELFTECYSNDEDLAEQLLVYSCEAWGGSNCL  
ELAVEATDQHFIQAQPGVQNFSLKQWYGEISRDTKNWKIILCLFIIPLVGCGLVSRKPKPIDKHKLLWYYVAF

FTSPFVVFVSWNVVFIYIAFLLLFAYVLLMDFHSPHTPELILYALVFLVFCDEVQRQWYMNQVNYFTDLWNVMDT  
LGLFYFIAGIVFRLHSSNKSSLYSGRVI FCLDYII FTLRLLIHIFAVSRNLGPKI IMLQRMLIDVFFFLLFAV  
WMVAFGVARQGILRQNEQRWRWIFRSVIYEPYLAMFGQVPSVDSTTYDFSHCTFSGNESKPLCVELDEHNLP  
RFPEWITIPLVCIYMLSTNILLVNLVAMFGYTVGIVQENNDQVWKFORQYFLVQEYCNRLNIPFPFVVFAYFY  
MVVKKCFKCCCKEKNMESNACCFRNEDNETLAWEGVMKENYLKINTKANDNSEEMRHRFRQLDSKLNLDLKS  
LKEIANNIK\*

>rs30294597\_ENSMUSP00000036991\_c.2541:A>G\_p.T848A

ENSMUST00000040210.14|Trpm8-201|ENSMUSG00000036251|+|chr1:g.88288401:A>G  
MSFEGARLSMRSRRNGTMGSTRTLYSSVSRSTDVSYSDSLVNF IQANFKKRECVFFTRDSKAMENICKCGYA  
QSQHIEGTQINQNEKWNKKHTKEFPTDAFGDIQFETLGKKGKYLRLSCD TDSETLYELLTQHWHLKT PNLVI  
SVTGGAKNFALKPRMRKIFSRLIYIAQSKGAWILTTGGTHYGLMKYIGEVRDNTISRNSEENIIVAIGIAAWGM  
VSNRDTLIRSCDDEGHFSAQYIMDDFTRDPLYILDNNHTHLLVDNGCHGHTVEAKLRNQLEKYISERTSQD  
SNYGGKIPIVCF AQGGGRETLKAINTSVSKSIPCVVVEGSGQIADVIASLVEVEDVLTSSMVKEKLVRF LPR  
VSRLPEEEIESWIKWLKEI LESSHLLTVIKMEEAGDEIVSNAISYALYKAFSTNEQDKDNWNGQLKLLLEWNQ  
LDLASDEIFTNDRRWEADLQEVMTALIKDRPKFVRLFLENGLNQKFLTNEVLT E L FSTH FSTLVYRNLQI  
AKNSYNDALLTFVWKL VANFRRSFWKEDRSSREDLDVELHDASLTTRHPLQALFIWAILQNKKELSKVIWEQT  
KGCTLAALGASKLLKTLAKVKN DINAAGESEELANEYETRAVELFTECYSNDEDLAEQLLVYSCEAWGGSNCL  
ELAVEATDQHFI AQPGVQNF LSKQWYGEISRDTKNWKIILCLFIIPLVGCGLV SFRKKPIDKHKKLLWYVAF  
FTSPFVVFVSWNVVFIYIAFLLLFAYVLLMDFHSPHTPELILYALVFLVFCDEVQRQWYMNQVNYFTDLWNVMDT  
LGLFYFIAGIVFRLHSSNKSSLYSGRVI FCLDYII FTLRLLIHIFAVSRNLGPKI IMLQRMLIDVFFFLLFAV  
WMVAFGVARQGILRQNEQRWRWIFRSVIYEPYLAMFGQVPSVDSTTYDFSHCTFSGNESKPLCVELDEHNLP  
RFPEWITIPLVCIYMLSTNILLVNLVAMFGYTVGIVQENNDQVWKFORQYFLVQEYCNRLNIPFPFVVFAYFY  
MVVKKCFKCCCKEKNMESNACCFRNEDNETLAWEGVMKENYLKINTKANDNSEEMRHRFRQLDSKLNLDLKS  
LKEIANNIK\*

>rs30294597\_ENSMUSP00000131209\_c.2541:A>G\_p.T848A

ENSMUST00000171176.3|Trpm8-204|ENSMUSG00000036251|+|chr1:g.88288401:A>G  
MSFEGARLSMRSRRNGTMGSTRTLYSSVSRSTDVSYSDSLVNF IQANFKKRECVFFTRDSKAMENICKCGYA  
QSQHIEGTQINQNEKWNKKHTKEFPTDAFGDIQFETLGKKGKYLRLSCD TDSETLYELLTQHWHLKT PNLVI  
SVTGGAKNFALKPRMRKIFSRLIYIAQSKGAWILTTGGTHYGLMKYIGEVRDNTISRNSEENIIVAIGIAAWGM  
VSNRDTLIRSCDDEGHFSAQYIMDDFTRDPLYILDNNHTHLLVDNGCHGHTVEAKLRNQLEKYISERTSQD  
SNYGGKIPIVCF AQGGGRETLKAINTSVSKSIPCVVVEGSGQIADVIASLVEVEDVLTSSMVKEKLVRF LPR  
VSRLPEEEIESWIKWLKEI LESSHLLTVIKMEEAGDEIVSNAISYALYKAFSTNEQDKDNWNGQLKLLLEWNQ  
LDLASDEIFTNDRRWEADLQEVMTALIKDRPKFVRLFLENGLNQKFLTNEVLT E L FSTH FSTLVYRNLQI  
AKNSYNDALLTFVWKL VANFRRSFWKEDRSSREDLDVELHDASLTTRHPLQALFIWAILQNKKELSKVIWEQT  
KGCTLAALGASKLLKTLAKVKN DINAAGESEELANEYETRAVELFTECYSNDEDLAEQLLVYSCEAWGGSNCL  
ELAVEATDQHFI AQPGVQNF LSKQWYGEISRDTKNWKIILCLFIIPLVGCGLV SFRKKPIDKHKKLLWYVAF  
FTSPFVVFVSWNVVFIYIAFLLLFAYVLLMDFHSPHTPELILYALVFLVFCDEVQRQWYMNQVNYFTDLWNVMDT  
LGLFYFIAGIVFRLHSSNKSSLYSGRVI FCLDYII FTLRLLIHIFAVSRNLGPKI IMLQRMLIDVFFFLLFAV  
WMVAFGVARQGILRQNEQRWRWIFRSVIYEPYLAMFGQVPSVDSTTYDFSHCTFSGNESKPLCVELDEHNLP  
RFPEWITIPLVCIYMLSTNILLVNLVAMFGYTVGIVQENNDQVWKFORQYFLVQEYCNRLNIPFPFVVFAYFY  
MVVKKCFKCCCKEKNMESNACCFRNEDNETLAWEGVMKENYLKINTKANDNSEEMRHRFRQLDSKLNLDLKS  
LKEIANNIK\*

>ENSMUSP00000150858\_c.910:T>A\_p.V304E ENSMUST00000213247.2|Olf12-  
202|ENSMUSG00000061616|+|chr1:g.92548540:T>A

MATAVHRNGSLTPVSLRVFVLVGFVGGGALTQALLFAVFLVLYVTVLGNLTMIVVITLDARLHSPMYFFLKNL  
SFVDLCYSSAIAPNALANFLSTSKVISFEACATQFFFFSLLATTETFLAVMAYDRFMAICSPLYPVTMCPT  
TCTRLVLGTFVCGCLNSIVQTSLTFQLPFCSSNRIDHFYCDVPPLLQLACASTALNELFLFGLCGFIIVSTTL  
AVLVSYGYITVTILRMHSGSGRHKVFSTCGSHLTAVSLFYGTFLVMYAQP GALTSMEQ GKVVSI FYTLVIPML  
NPLIYSLRNKDEKDALQRLGQRHSLVKAVRGCPAAGGNASV\*

>ENSMUSP00000080027\_c.910:T>A\_p.V304E ENSMUST00000081274.6|Olf12-  
201|ENSMUSG00000061616|+|chr1:g.92548540:T>A

MATAVHRNGSLTPVSLRVFVLVGFVGGGALTQALLFAVFLVLYVTVLGNLTMIVVITLDARLHSPMYFFLKNL  
SFVDLCYSSAIAPNALANFLSTSKVISFEACATQFFFFSLLATTETFLAVMAYDRFMAICSPLYPVTMCPT  
TCTRLVLGTFVCGCLNSIVQTSLTFQLPFCSSNRIDHFYCDVPPLLQLACASTALNELFLFGLCGFIIVSTTL  
AVLVSYGYITVTILRMHSGSGRHKVFSTCGSHLTAVSLFYGTFLVMYAQP GALTSMEQ GKVVSI FYTLVIPML  
NPLIYSLRNKDEKDALQRLGQRHSLVKAVRGCPAAGGNASV\*

>ENSMUSP00000036916\_c.331:T>G\_p.L111R ENSMUST00000049027.10|Slc26a9-  
201|ENSMUSG00000042268|+|chr1:g.131680924:T>G



MNQPRPRYVVDRAAYSLSLFDDEFEKDRAYPVGEKLRNTFRCS SAKFKAFVFGLLPVLSWLPKYKIKDYIIP  
 DLLGGLSGGCIQVPQGMFAFALLANLPAVNGLYSSFFPRLTYFFLGGIHQMVPGTFAVISILVGNICLQLAPES  
 KFQIFNNVTNETYVDTAAMEAERLHVSATLACLTAVIQMALGFMQGFVAIYLSSEFIRGFMTAAGLQILISV  
 LKYIFGLTIPSYTGPISIVFTFIDICKNLPHTNIASLIFALVSGVFLVLVKELNARYMHKIHFPITEMIVVV  
 VATAISGSCMKPKYHMQIVGEIRQGFPTPVAPMVSQWKDMVGTAFSLAIVGYVINLAMGRTLASKHGYDVDS  
 NQEMIALGCSNFFGSFFKIHVICCALSVTLAVDGGGKSQVASLVCVSLVVMITMLVLGYSYLYPLPKAVLGALI  
 AVNLKNSLKLQTDPPYLLWRKSKLDCCVWVVSFLSSFFLSLPYGVAVGVAFSILVVI FQTQFRNGSTLAQVMDT  
 DIYVNPKTYNRAQEIAGVKIVTYCSPLYFANSEIFRQKVIKTGMDFQKVLAKQKYLKQEKRTAIP TQQRK  
 SLFMKTKTVSLQELQQDFESAPSTDPNNQAPAAEAHISYITFSPDASTAAACELPASTRSPQEASDTLASVP  
 PFVTFHTLILDMSGVSFV DLMGIKALAKLSSTYEKIGVQIFLVNIHAQVYNDISHGGVFEDGCVQRSHVFP  
 HDVAFLFAQANAREAPDRNFHGAPGDTEFSLYDSEEEGPSYWDLEQEMFGTMTFHTETLTAL\*  
 >ENSMUSP00000122075\_c.331:T>G\_p.L111r ENSMUST00000147800.2|Slc26a9-  
 203|ENSMUSG00000042268|+|chr1:g.131680924:T>G  
 MNQPRPRYVVDRAAYSLSLFDDEFEKDRAYPVGEKLRNTFRCS SAKFKAFVFGLLPVLSWLPKYKIKDYIIP  
 DLLGGLSGGCIQVPQGMFAFALLANLPAVNGLYSSFFPRLTYFFLGGIHQMVPGTFAVISILVGNICLQLAPES  
 KFQIFNNVTNETYVDTAAMEAERLHVSATLACL  
 >rs239134730\_ENSMUSP00000140443\_c.423:G>A\_p.V142I  
 ENSMUST00000188145.7|Edem3-203|ENSMUSG00000043019|+|chr1:g.151651683:G>A  
 MSKAGGCRGCGCRVPQRASWSLVAATAALCLVLATSVC TAGAAPMSREEKQKLGQVLEMFDHAYGNMEHAY  
 PADELMPLTCRGRVGRGQEPSRGD VDDALGKFSLTLDLSDTLVVLNKTKEFEDAVRKVLRD VNLNDNDVIVSVF  
 ETNIRVLGGLLGGHSLAIMLKEKGEHMQWYNDELLHMAKQLGYKLLPAFN TTSGLPYPRINLKFGRKPEART  
 GTETDCTACAGTLILEFAALS RFTGATIFEEYARKALDFLWEKRQRSSNLVGV TINIHTGDWVRKDSG V GAG  
 IDSYYEYLLKAYVLLGDDSF LERFNTHYDAIMRYISQPPLLLDVHIHKPMLNARTWMDALLAFFPGLQVLKGD  
 IRPAIETHEMLYQVIKKNFLPEAF TDFRVHWAQHPLRPEFAESTYFLYKATGDPY YLEVGTKLIENLNKYA  
 RVPCGFAAMKDVRTGSHEDR MDSFFLAEMFKYL YLLFADKEDIIFDIEDYIFTTEAHL LPLWLSTNRSISKK  
 NTTSEYTELDDSNFDWTC PNTQILFPNDPLYAQSI REPLKNVVDKSCPRGIIRVEESFRSGAKPPLRARDFMA  
 TNPEHLEILKKGMSL IHLKDG RVQLVQHAIQAASSIDAEDGLRFMQEMIELSSQQQKEQQLP PRAVQIISHP  
 FFGRVVLTAGPAQFGLDLSKHKETRGFVASSKPYNGCSEL TNPEAVMGKIALIQRGQCMFAEKARNIQNAGAI  
 GGIVIDDNEGSSSDTAPLFQ MAGDGKDTDDIKIPMLFLFSKEGSIILDAIREHEQVEVLLSDKARDRAAILKG  
 KMIPSYIINSNPEMENEDQPSSENDSONQSAEQMLSLSQTVDLADKESPEHPADSHSEASPSDSEEAAGFAPS  
 EQISGSTENHETTSLDGECTDLDNQVQE QSETEEDSSPNVSWGTKAQPID SILADWNEDIEAFEMMEKDEL\*  
 >rs239134730\_ENSMUSP00000058941\_c.423:G>A\_p.V142I  
 ENSMUST00000059498.12|Edem3-201|ENSMUSG00000043019|+|chr1:g.151651683:G>A  
 MSKAGGCRGCGCRVPQRASWSLVAATAALCLVLATSVC TAGAAPMSREEKQKLGQVLEMFDHAYGNMEHAY  
 PADELMPLTCRGRVGRGQEPSRGD VDDALGKFSLTLDLSDTLVVLNKTKEFEDAVRKVLRD VNLNDNDVIVSVF  
 ETNIRVLGGLLGGHSLAIMLKEKGEHMQWYNDELLHMAKQLGYKLLPAFN TTSGLPYPRINLKFGRKPEART  
 GTETDCTACAGTLILEFAALS RFTGATIFEEYARKALDFLWEKRQRSSNLVGV TINIHTGDWVRKDSG V GAG  
 IDSYYEYLLKAYVLLGDDSF LERFNTHYDAIMRYISQPPLLLDVHIHKPMLNARTWMDALLAFFPGLQVLKGD  
 IRPAIETHEMLYQVIKKNFLPEAF TDFRVHWAQHPLRPEFAESTYFLYKATGDPY YLEVGTKLIENLNKYA  
 RVPCGFAAMKDVRTGSHEDR MDSFFLAEMFKYL YLLFADKEDIIFDIEDYIFTTEAHL LPLWLSTNRSISKK  
 NTTSEYTELDDSNFDWTC PNTQILFPNDPLYAQSI REPLKNVVDKSCPRGIIRVEESFRSGAKPPLRARDFMA  
 TNPEHLEILKKGMSL IHLKDG RVQLVQHAIQAASSIDAEDGLRFMQEMIELSSQQQKEQQLP PRAVQIISHP  
 FFGRVVLTAGPAQFGLDLSKHKETRGFVASSKPYNGCSEL TNPEAVMGKIALIQRGQCMFAEKARNIQNAGAI  
 GGIVIDDNEGSSSDTAPLFQ MAGDGKDTDDIKIPMLFLFSKEGSIILDAIREHEQVEVLLSDKARDRPEMEN  
 EDQPSSENDSONQSAEQMLSLSQTVDLADKESPEHPADSHSEASPSDSEEAAGFAPSEQISGSTENHETTSLD  
 GECTDLDNQVQE QSETEEDSSPNVSWGTKAQPID SILADWNEDIEAFEMMEKDEL\*  
 >rs239134730\_ENSMUSP00000140775\_c.423:G>A\_p.V142I  
 ENSMUST00000187951.7|Edem3-202|ENSMUSG00000043019|+|chr1:g.151651683:G>A  
 MSKAGGCRGCGCRVPQRASWSLVAATAALCLVLATSVC TAGAAPMSREEKQKLGQVLEMFDHAYGNMEHAY  
 PADELMPLTCRGRVGRGQEPSRGD VDDALGKFSLTLDLSDTLVVLNKTKEFEDAVRKVLRD VNLNDNDVIVSVF  
 ETNIRVLGGLLGGHSLAIMLKEKGEHMQWYNDELLHMAKQLGYKLLPAFN TTSGLPYPRINLKFGRKPEART  
 GTETDCTACAGTLILEFAALS RFTGATIFEEYARKALDFLWEKRQRSSNLVGV TINIHTGDWVRKDSG V GAG  
 IDSYYEYLLKAYVLLGDDSF LERFNTHYDAIMRYISQPPLLLDVHIHKPMLNARTWMDALLAFFPGLQVLKGD  
 IRPAIETHEMLYQVIKKNFLPEAF TDFRVHWAQHPLRPEFAESTYFLYKATGDPY YLEVGTKLIENLNKYA  
 RVPCGFAAMKDVRTGSHEDR MDSFFLAEMFKYL YLLFADKEDIIFDIEDYIFTTEAHL LPLWLSTNRSISKK  
 NTTSEYTELDDSNFDWTC PNTQILFPNDPLYAQSI REPLKNVVDKSCPRGIIRVREESFRSGAKPPLRARDFM  
 ATNPEHLEILKKGMAASSIDAEDGLRFMQEMIELSSQQQKEQQLP PRAVQIISHPFFGRVVLTAGPAQFGLDL  
 SKHKETRGFVASSKPYNGCSEL TNPEAVMGKIALIQRGQCMFAEKARNIQNAGAI GGIVIDDNEGSSSDTAPL

FQMAGDGKDTDDIKIPMLFLFSKEGSIILDAIREHEQVEVLLSDKARDRDPENEDQPSSENDSQNQSAEQM  
LSLSQTVDLADKESPEHPADSHSEASPSDSEEAAGFAPSEQISGSTENHETTSLDGECTDLDNQVQEQSETEE  
DSSPNVSWGKTAQPIDSILADWNEDIAEFEMMEKDEL\*

>rs239134730\_ENSMUSP00000140234\_c.423:G>A\_p.V142I  
ENSMUST00000191070.2|Edem3-204|ENSMUSG00000043019|+|chr1:g.151651683:G>A  
MSKAGGCRGCGCRVPQRASWSLVAATAALCLVLATSVCTAGAAPMSREEKQKLGQVLEMFHDHAYGNMEHAY  
PADELMPLTCRGRVVRGQEPSRGDVEDALGKFSLTLDLSDTLVVLNKTKEFEDAVRKLVRDNLNDNIVSVF  
ETNIRVLGGLLGGHSLAIMLKEKGEHMOWYNDELHMAKQLGYKLLPAFNNTSGLPYPRINLKFGRKPEART  
GTETDCTACAGTLILEFAALSRTGATIFEEYARKALDFLWEKRQRSSNLVGVVTINIHTGDWVRKDSGVGAG  
IDSYYEYLLKAYVLLGDDSFLEFRNTHYDAIMRYISQPPLLLDVHIIHKPMLNARTWMDALLAFFPGLQVLKGD  
IRPAIETHEMLYQVIKKNHFLPEAFTTDFRVHWAQHPLRPEFAESTYFLYKATGDPYYLEVVGKTLIENLNKYA  
RVPCGFAAMKDVRTGSHEDRMSFFLAEMFKYLYLLFADKEDIIFDIEDYIFTTEAHLPLWLSTNRSISKK  
NTTSEYTELDDSNFDWTCNPNTQILFPNDPLYAQSIREPLKNVVDKSCPRGIIIRVEESFRSGAKPPLRARDFMA  
TNPEHLEILKMGGAASSIDAEDGLRFMQEMIELSSQQQEQQLPRAVQIISHPFFGRVVLTAGPAQFGLDLS  
KHKETRGRFVASSKPYNGCSELTNPEAVMGKIALIQRGQCMFAEKARNIQNAGAIGGIVIDDNEGSSSDTAPLF  
QMAGDGKDTDDIKIPMLFLFSKEGSIILDAIREHEQVEVLLSDKARDRAAILKDPENEDQPSSENDSQNQS  
AEQMLSLSQTVDLADKESPEHPADSHSEASPSDSEEAAGFAPSEQISGSTENHETTSLDGECTDLDNQVQEQS  
ETEEDSSPNVSWGKTAQPIDSILADWNEDIAEFEMMEKDEL\*

>ENSMUSP00000073144\_c.549:T>G\_p.S184A ENSMUST00000073441.13|Smg7-  
202|ENSMUSG00000042772|-|chr1:g.152736207:A>C  
MSLQSAQYLRQAEVLKAEMTDSKLGPAEVWTSRQALQDLYQKMLVTDLEYALDKKVEQDLWNHAFKNQITTLQ  
GQAKNRANPNRSEVQANLSLFLEAASGFYTTQLLQELCTVFNVDLPCRVKSSQLGIIISNKQTHSSTIVKPOSSS  
CSYICQHCLVHLGDIARYRNQTSQAESYRHAALVLPANGQPYNQLAILASSKGDHLTTIFYYCRSIAVKFPF  
PAASTNLQKALSKALESRDELKTKWGVSDFIKAFIKFHGHVYLSKSLKLSPLREKLEEQFKRLLFQKAFNSQ  
QLVHVTVINLFLHHLRDFSNETEQHSYSQDEQLCWTQLLALFMSFLGILCKCPLQNDQSQESNNAYPPLPAVKV  
SMDWLRPRVVFQAEAVVDERQYIWPWLISLLNSFHPREDDLSNTNATPLPEEFELQGFALRPSFRNLDFSKG  
HQGITGDKGQGITGDKGQRRIRQRLISIGKWIADNPRLIQCENEVKGKLLFITEIPELILEDPSEAKENLILQETSVV  
ESLATDGSPLKSVLSTGRNPNNSCDSGEKPVVTFKENIKPREVNQGRSFPPKEVRRDCSKGVTVTQEDGQKD  
SSKRAETKRCTLGKLEQETGKQSVAVQVKSQTELKRPVSEARKTPVTQTPSQTSSNSQFPIIHHPGAFPPPLPS  
RPGFPPPTYVIPPPVAFSMGSGYTFPAGVSVPGTFLQSTAHSPAGNQVQAGKQSHIPIYSQQRPSGPGPMNQG  
QQSQPPSQPPLTSLPAQPTAQSTSOLQVQALAAQQQSPTKVIIPALGKSPPHSGFQQYQQADASKQLWNPQV  
QSPGKIMPVKQSYLQTDPIKLFEPQLPPVIQQQPLEKMKPFMEPYNHNPNSEVKVPEFYWDSYSMAD  
NRAVMAQQPNMDRRSKRSPGVFRPEQDPVPRMPFEKSLLEKPSSELMSSSSFLSLTGFSVQERYPNSSMFNE  
VYGKNTTSSKAELNPSVASQETSLSYLFEGTPWSPSLPASSDHSTPASQSPHSSNPSSLPSPPTHNHNSAP  
FSNFGPIGTPDNRDRRPPADRWKTDKAMGGFGVDYLSATSSSESSWHQASTPSGTWTGHGSPMEDSSAVLMES  
LKSIIWSSMMHPPGSALEQLLMQKQKQQRGQAMNPPH\*

>ENSMUSP00000041241\_c.573:T>G\_p.S192A ENSMUST00000043560.15|Smg7-  
201|ENSMUSG00000042772|-|chr1:g.152736207:A>C  
MRTENLKSEEHLKSSNIRQAEVLKAEMTDSKLGPAEVWTSRQALQDLYQKMLVTDLEYALDKKVEQDLWNHAF  
KNQITTLQGQAKNRANPNRSEVQANLSLFLEAASGFYTTQLLQELCTVFNVDLPCRVKSSQLGIIISNKQTHSST  
IVKPOSSSCSYICQHCLVHLGDIARYRNQTSQAESYRHAALVLPANGQPYNQLAILASSKGDHLTTIFYYCR  
SIAVKFPFPAASTNLQKALSKALESRDELKTKWGVSDFIKAFIKFHGHVYLSKSLKLSPLREKLEEQFKRLL  
FQKAFNSQQLVHVTVINLFLHHLRDFSNETEQHSYSQDEQLCWTQLLALFMSFLGILCKCPLQNDQSQESNNA  
YPLPAVKVSMDWLRPRVVFQAEAVVDERQYIWPWLISLLNSFHPREDDLSNTNATPLPEEFELQGFALRPSF  
RNLDFSKGHQGITGDKGQRRIRQRLISIGKWIADNPRLIQCENEVKGKLLFITEIPELILEDPSEAKENL  
ILQETSVVESLATDGSPLKSVLSTGRNPNNSCDSGEKPVVTFKENIKPREVNQGRSFPPKEVKSQTELKRP  
VSEARKTPVTQTPSQTSSNSQFPIIHHPGAFPPPLPSRPGFPPPTYVIPPPVAFSMGSGYTFPAGVSVPGTFLQ  
TAHSPAGNQVQAGKQSHIPIYSQQRPSGPGPMNQGPPSQPPSQPPLTSLPAQPTAQSTSOLQVQALAAQQQSP  
TKVIIPALGKSPPHSGFQQYQQADASKQLWNPQVQSPGKIMPVKQSYLQTDPIKLFEPQLPPVIQQQ  
LEKMKPFMEPYNHNPNSEVKVPEFYWDSYSMADNRAVMAQQPNMDRRSKRSPGVFRPEQDPVPRMPFEDPK  
SSPLLPDLLKSLAALEEEEEELIFSNPPDLYPALLGPLASLPGRSLFKSLLEKPSSELMSSSSFLSLTGFSVN  
QERYPNSSMFNEVYGKNTTSSKAELNPSVASQETSLSYLFEGTPWSPSLPASSDHSTPASQSPHSSNPSSLP  
SSPPTHNHNSAPFSNFGPIGTPDNRDRRPPADRWKTDKAMGGFGVDYLSATSSSESSWHQASTPSGTWTGHG  
SPMEDSSAVLMESLKSIIWSSMMHPPGSALEQLLMQKQKQQRGQAMNPPH\*

>ENSMUSP00000107467\_c.549:T>G\_p.S184A ENSMUST00000111836.4|Smg7-  
203|ENSMUSG00000042772|-|chr1:g.152736207:A>C  
MSLQSAQYLRQAEVLKAEMTDSKLGPAEVWTSRQALQDLYQKMLVTDLEYALDKKVEQDLWNHAFKNQITTLQ  
GQAKNRANPNRSEVQANLSLFLEAASGFYTTQLLQELCTVFNVDLPCRVKSSQLGIIISNKQTHSSTIVKPOSSS

CSYICQHCLVHLGDIARYRNQTSQAESYRHAHQLVLPANGQPYNQLAAILASSKGDHLTTIFYYCRSIAVKFPF  
 PAASTNLQKALSKALESRDELKTKWGVSDFIKAFIKFHGHVYLSKSLKLSPLREKLEEQFKRLLFQKAFNSQ  
 QLVHVTVINLFLQLHHLRDFSNETEQHSYSQDEQLCWTQLLALFMSFLGILCKCPLQNDQSQESNNAYPLPAVKV  
 SMDWLRRLRPRVFQEAUVDERQYIWPWLISLLNSFHPREDDLSNTNATPLPEEFELQGFALRPSFRNLDFSKG  
 HQGITGDKEGQRRIRQRLISIGKWIADNQPRLIQCENEVGKLLFITEIPELILEDPSEAKENLILQETSVV  
 ESLATDGSPLKSVLSTGRNPSNSCDSGEKPVVTFKENIKPREVNQGRSFPKPEVKSQTELKRKTPVSEARKTP  
 VTQTSPQTSNSQFIPIHHPGAFPPPLSRPGFPPPTYVIPPPVAFSMGSGYTFPAGVSVPGTFLQSTAHSPAGN  
 QVQAGKQSHIPIYSQQRPSGPGPMNQGPQQSQPPSPPLTSLPAQPTAQSTSQLQVQALAQQQQSPTKVI PALG  
 KSPPHHSGFQQYQADASKQLWNPPQVQSPGLGIMPVKQSYLQTDPIKLFEPQLPPVIQQQPLEKKMKPF  
 PMEPYNHNPSEVKVPEFYWDSSYSMADNRAVMAQQPNMDRRSKRSPGVFRPEQDPVPRMPFEDPKSSPLPPD  
 LLKSLAALEEEELIFSNPPDLYPALLGPLASLPGRSFLKSLLEKPSSELMSSSSFLSLTGFSVNVQERYPNSS  
 MFNEVYGKNTTSSKAELNPSVASQETSLSYLFEGTPWSPSLPASSDHSTPASQSPHSSNPSSLPSSPPTHNH  
 NSAPFSNFGPIGTPDNRDRPADRWKTDKPMGGGVDYLSATSSSESSWHQASTPSGTWTGHGSPMEDSSAV  
 LMEISLKIWSSSMMHPGSALEQLLMQKQKQQRGQGANPPH\*

>ENSMUSP00000106947\_c.2008:A>T\_p.K670M ENSMUST00000111315.9|Adams4-  
 202|ENSMUSG00000006403|+|chr1:g.171085397:A>T  
 MSQMLHPRRGLTGHWLQRFQPCPLPHTVQWRLLLLLAFLLSLAWPASPLPREEEIVFPEKLNSSILPGSGV  
 PARLLYRLPAFGEMLLLELEQDPGVQVEGLTVQYLGQAPPEMLGGAEPGTYLTGTINGDPESVASLHWDGGALL  
 GVLQYRGAELHLQPLEGGALNSAGGPGAHLRKRKSPASSQGPMTVKAPSGSPSPISRRTKRFAASLRFVETL  
 VVADDKMAAFHGTGLKRYLLTVMAAAAKAFKHPSIRNPVNLVVTRLVILGSGQEGPQVGPSSAAQTLRSFCTWQ  
 RGLNTPNDSDPDHFDTAILFTRQDLCGVSTCDTLGMADVGTVCDFPARSCAIVEDDGLQSAFTAHAHELGHVFNM  
 LHDNSKPCNTLNGQGGSSRHVMAVPMMAHVDPEEPWSPCSARFITDFLDNGYGHCLLDKPEAPLHLPATFPKGD  
 YDADRQCQLTFGPDSSHCPQLPPCAALWCSGHLNGHAMCQTKHSPWADGTPCGSSQACMGRCLHVDQLKDF  
 NVPQAGGWGPWGPWGDCSRTCGGGVQFSSRDCTRVPVPRNGGKYCEGRRTFRSCNTENCPHGSALTFREEQCA  
 AYNHRTDLFKSFPMPMDWVPRYTGVAAPRDQCKLTCQARALGYVLEPRVADGTPCSPDTSVVCVQGRCIHAG  
 CDRIIGSKKKFDMCMVCGGDSRCSKQSGSFKKFRYGYSDVVTIPAGATHILVRQQGGGSLKSIYALALKLSDG  
 SYALNGEYTLMPSPDQVPLGAVSLRYSGATAAASETLSGHGPLAQPLTLQVLVAGNPQNARLRYSFVPRPVP  
 STPRPPPQDWLQRRAEILKILRKRPAWGRK\*

>ENSMUSP00000106946\_c.1453:A>T\_p.K485M ENSMUST00000111314.2|Adams4-  
 201|ENSMUSG00000006403|+|chr1:g.171085397:A>T  
 MKGGERDLRLLSLIFFLLLLKRFAASLRFVETLVVADDKMAAFHGTGLKRYLLTVMAAAAKAFKHPSIRNPV  
 NLVVTRLVILGSGQEGPQVGPSSAAQTLRSFCTWQRGLNTPNDSDPDHFDTAILFTRQDLCGVSTCDTLGMADV  
 GTVCDFPARSCAIVEDDGLQSAFTAHAHELGHVFNMLHDNSKPCNTLNGQGGSSRHVMAVPMMAHVDPEEPWSPCS  
 ARFITDFLDNGYGHCLLDKPEAPLHLPATFPKGDYDADRQCQLTFGPDSSHCPQLPPCAALWCSGHLNGHAM  
 CQTKHSPWADGTPCGSSQACMGRCLHVDQLKDFNVPQAGGWGPWGPWGDCSRTCGGGVQFSSRDCTRVPVPRN  
 GKRYCEGRRTFRSCNTENCPHGSALTFREEQCAAYNHRTDLFKSFPMPMDWVPRYTGVAAPRDQCKLTCQARA  
 LGYVLEPRVADGTPCSPDTSVVCVQGRCIHAGCDRIIGSKKKFDMCMVCGGDSRCSKQSGSFKKFRYGYSD  
 DVVTIPAGATHILVRQQGGGSLKSIYALALKLSDGSYALNGEYTLMPSPDQVPLGAVSLRYSGATAAASETLSG  
 HGPLAQPLTLQVLVAGNPQNARLRYSFVPRPVPSTPRPPPQDWLQRRAEILKILRKRPAWGRK\*

>ENSMUSP00000151387\_c.2044:A>T\_p.K682M ENSMUST00000219033.2|Adams4-  
 203|ENSMUSG00000006403|+|chr1:g.171085397:A>T  
 MASIHPSPCSPGTMSQMLHPRRGLTGHWLQRFQPCPLPHTVQWRLLLLLAFLLSLAWPASPLPREEEIVFPEK  
 LNGSSILPGSGVPARLLYRLPAFGEMLLLELEQDPGVQVEGLTVQYLGQAPPEMLGGAEPGTYLTGTINGDPES  
 VASLHWDGGALLGVLQYRGAELHLQPLEGGALNSAGGPGAHLRKRKSPASSQGPMTVKAPSGSPSPISRRTK  
 RFASLSRFVETLVVADDKMAAFHGTGLKRYLLTVMAAAAKAFKHPSIRNPVNLVVTRLVILGSGQEGPQVGPSS  
 AAQTLRSFCTWQRGLNTPNDSDPDHFDTAILFTRQDLCGVSTCDTLGMADVGTVCDFPARSCAIVEDDGLQSAF  
 TAAHELGHVFNMLHDNSKPCNTLNGQGGSSRHVMAVPMMAHVDPEEPWSPCSARFITDFLDNGYGHCLLDKPEA  
 PLHLPATFPKGDYDADRQCQLTFGPDSSHCPQLPPCAALWCSGHLNGHAMCQTKHSPWADGTPCGSSQACMG  
 GRCLHVDQLKDFNVPQAGGWGPWGPWGDCSRTCGGGVQFSSRDCTRVPVPRNGGKYCEGRRTFRSCNTENC  
 PHGSALTFREEQCAAYNHRTDLFKSFPMPMDWVPRYTGVAAPRDQCKLTCQARALGYVLEPRVADGTPCSPDTS  
 SVCVQGRCIHAGCDRIIGSKKKFDMCMVCGGDSRCSKQSGSFKKFRYGYSDVVTIPAGATHILVRQQGGGSL  
 KSIYALALKLSDGSYALNGEYTLMPSPDQVPLGAVSLRYSGATAAASETLSGHGPLAQPLTLQVLVAGNPQNAR  
 LRYSFVPRPVPSTPRPPPQDWLQRRAEILKILRKRPAWGRK\*

>ENSMUSP00000134646\_c.892:A>T\_p.Q298L ENSMUST00000160565.4|Ifi206-  
 201|ENSMUSG00000037849|-|chr1:g.173309102:T>A  
 MVNYKQIVLLSGLLEYMNDYNFRALKSLLNHDLKLTKNMQDDYDRIKIADLMEEKFPEDAGLSKLIIEVCEDIP  
 ELADHVDILRKKKKEKVNKTKIKSESSPPPLTSSLMEAVEVEPAMVTASSEESKDTIPESPDMTTQFLEEK  
 KFPLLSTTSTSQAEGEPLTPQRFPTASSSLQTPLEPPEISSTILATSQSSVPYSTCDKSSRVPVPTASSST

QTIQTCLATSTLPCSHQATLKS PKTEPSSVQATQMTQAIKASGHNCQVPAAPVSSSF IKPQVTPAMLLSGVQ  
 APLMPLATVPSCAQT FEMNPATMTNGCNSPQMSAATVHSSYSNPRVTPVTVASSGQSFRLTPSRWSSGFNSPH  
 VSAATISSYSKPHVTLAIVPHNAQTLQOTPAAMTSGCNSPQMSAATISSYNNPQVTPATVPRSAQSLLIPO  
 VAVPSSAFQMI FQMTPAAMAHGCNSPQISAATVHSSYSNPRVTPATVASSGQSFQLTPSRWSSGFNSPHVSAA  
 TISHSYKPHVTLAIVPHNAQTLRQTPAAMTSGCNSPQMSAATISSYNNPQVTPATVPRSAQSLLIPOVAVP  
 SSAFQMI FQMTPAAMANGCNSPQISAATVHSNYSNPRVTPATVASSDQSYRLTPSRWSSGFNSPHVSAA TIPS  
 SYQNSPQVSSATMRRSFPAMSLSPATPPKKPRLKVKVQKQSEENGHQGFKQVMVLKVTEPFTYDIRKDKRMF  
 HATVATETEFFRVKVFIDIALEEKFI PRKVIIVISDYIGYNGFLEIYTASCVSEVNDNSVMNIPTSLRQKANATP  
 KISTLCTQRAGTFVNGTFTVYEKTVRSEFIYGGIEDRTGRMEVVVYGQFTKLYCEPGDKLSLFCFELSSSLDM  
 WQLRSVRHSYMQVIQARKRDYELPNVHAI IETAQSSLSWIPEQQW\*  
 >ENSMUSP00000030039\_c.1048:A>T\_p.E350V ENSMUST00000030039.13|Fmn2-  
 201|ENSMUSG00000028354|+|chr1:g.174330660:A>T  
 MGNQDGKLRKRSAGDASHEGGGAEDAAGPRDAEITKKASGSKKALGKHGKGGGGSGGETSKKKKSKSDSRASVFSN  
 LRIRKNLTGKKGACDSREDVLDLQALPIGELDSAHSIVTKTPDLLSAEETGLSDTECADPFEVIHFGASRPA  
 EAGVGIQATAEDLETAAGA QDQRTSSGSDTDIYSFHSATEQEDLLSDIQQAIRLQOQQQQKLLQLDSEEPAA  
 PPTAISPQPGAFGLDQFLLGPRSEAEKDTVQALPVRPDLPETTKSLVPEHPPSSGSHLTSETPGYATAPSAV  
 TDSLSSPAFTFPEAGPGEAGAAGVPVAGTGDTEECEEDAFEDAPRGSFGEWVPEVEVASQRLEKEPEEGMRE  
 SITSAVVSPLGSPAPSPRCFKPYPLITPCYIKTTTRQLSSPNHSPSQSNQSPRIKKRPDPSVSRSSRTALAS  
 AAAPAKKRRLEGGTLGGLSRSADWTEELGVRTPGAGGSVHLLGRGATADDSGGGSPVLAAPGAPATADGFQ  
 NVFTGRITLLEKLFSSQENGPEEAEKFCRSRI IAMGLLLPFSDCFREPCNQAGSSSAPFDQDQLYTAAVVSQP  
 THSM DYSEGQFPRREPSMWPSSKLP EEEPSPKD VDTPEKSSILESPKCSNGVQQEVFVVKSEGQATVIQQL  
 QTIEDLRTKIAELEKQYPALDLEGRGLSGL ENGLTASADVSLDALVHLHGKVAQPPRTLEAKSIQTSPTTEGR  
 ILLTLPKAPPEGLLGSAAAESALLTSPSGPQTKFCSEISLIVSPRISVQLDAQQIQSASQLPPPPPLL  
 GSDSQGQPSQPSLHTESETSHEHSVSSSFGNNCNVPPAPPLPCTESSSFMPLGMAIPPPPCLSDITVPALPS  
 PTAPALQFNSLQGP EMLPAPPQPPPLPGLGVPPPPAPPLPGMGI PPPPLPGMGI PPPPLPGMGI SPLPPL  
 PGMGI PPPPLPGVGI PPPPLPGVGI PPPPLPGVGI PPPPLPGVGI PPPPLPGVGI PPPPLPGVGI PPPPLPGVGI  
 PPPPLPGVGI PPPPLPGVGI PPPPLPGVGI PPPPLPGVGI PPPPLPGVGI PPPPLPGVGI PPPPLPGVGI  
 SGPPHSSQVGSSTLPAAPQGCGLFPLPPTGLFGLGMNQDRVARKQLIEPCRPMKPLYWTRIQHLHSHKRDSSPS  
 LIWEKIEEPSIDCHEFEELFSKTAVKERKKPISDTISKTKAKQVVKLLSNKRSQAVGILMSSLHLDMDKIQA  
 VVNLDNSVVDLETLQALYENRAQSDELEKIEKHSRSSKDKENAKSLDKPEQFLYELSLIPNFSERVF CILFQS  
 TFSESI CSIRRKLELLQKLCETLKNPGVMQVLGLVLAFGNYMAGNKTRGQADGFGLDILPKLKDVKSSDNS  
 RSLLSYIVSYLRFNFD EDAGKEQC VFLAEPQELFQASQMKFEDFQKDLRKLKDLKACEAEAGKYVQVSSAE  
 HMQPFKENMEQFISQAKIDQESQEAALTE THKCFLETTAYYFMKPKLGEKEVSPNVFFSVWHFEFSSDFKDAWK  
 KENKLLIQERVKEAEEVCRQKKGKSLYKVKPRHDSGIKAKISMKT\*  
 >rs265450187\_ENSMUSP00000046686\_c.1444:T>GT\_p.L482ins-fs  
 ENSMUST00000044190.12|Hhat-201|ENSMUSG00000037375|-|chr1:g.192196247:A>AC  
 MLPGWELTLCLLVSLGFHFRSFYEVYKVSREHEEELDQEFELMDTLFGGLKKDPTDFEWNFWMEWGRRLVW  
 LFIGHMAVSQLATLLTKHRPWIVMVYGMWACWCVLGAPGVVMVLLHSTIAFCVAQFRSVLLSWLCSLLLLST  
 LRLQSVVEVKRRWYKTENEYLLQFTLTVRCLYYSFSL ELCRQPPSAQPTPSAQGASHSYPLLTYVFYYPV  
 FHNGPILNFP EFRQMQPELNSLQHS LCIVAKGLGRLLCWWWLAE LHMVHLMYMHALYSSAPLLESVSCWTLG  
 GLALAQVLFYVYKYLVLFGVPALLMRLDGLTPPPLPRCVSTMFSFTGMWRYFDVGLHNFLIRYVYIPLGGSQH  
 GLLGTLLSTATTF AFVSYWHGSYEDLWCWAALNWLGVTVESGVRRLLETPCVRET LARHLSQAHHRLHALLA  
 ACSTSM LILFNLVFLGGIQVGKTYWNRIFLQGWVWTLVSLVGFVLLFSRGHCLGSDIHSLL  
 >ENSMUSP00000014290\_c.880:A>T\_p.N294I ENSMUST00000014290.15|Apbblip-  
 201|ENSMUSG00000026786|+|chr2:g.22739607:A>T  
 MGESNEDIDQMFSTLLGEMDLLTQSLGVDTLPPDPNPPREEFNYTVGFKDLNESLNALEDQDL DALMADLVA  
 DISEAEQRTIQAQKESSQNQDRFALLRASDGQTASGGYGASAAAIDVSHHEEALPPPPVEPMLDLLPPPPPP  
 PPELLSKEEEEEAKAKADKIKLAL EKLKEAKVKKLVVKVHMDDSSTKSLMVD ERQLARDVLDNLF EKTHCDN  
 VDWC LYEIYPELQIERVFE DHENVV EVLSDWTRDTENKVL FLEKEERYAVFKNPQNFYLDNKGKKENKETNEK  
 MIAKNKEYLLEESFCGTSIIVPELEGALY LKEDGKKS WKRRYFLLRASGIYVVPKGKTKTSRDLACFIQFENV  
 NIYYGIQCKMKYKAPT DHC FVLKHPQIQKESQYIKYLCCDDARTLSQWVMGIRIAKYGKTLYDNYQRAVARAG  
 LASRWTNLGTVGTPMPAQ PSTVSSGLKTGTSQPNGQMPQAI PSAGPPLQEAQTQIETTKDEKQGLGNHSPGAT  
 RENHRPKSSLPPPPPPVRRSSDTCGSPALPSKVKGPCTCFPHPPENFLPPPPPPPEEDNSGLLPPPPPPY  
 LEEPDPFVPPPPPAAVEDSALPPPPPPPPCLSQEITKSSPLPKKPLVPPPKRQENQGLPGAPGNSEQDFMSD  
 LMKALQKRRGNIP\*  
 >rs228911540\_ENSMUSP00000109957\_c.1728:C>T\_p.Q577\*  
 ENSMUST00000114318.10|Grin1-208|ENSMUSG00000026959|-|chr2:g.25187693:G>A

MSTMHLLTFALLFSCSFARAACDPKIVNIGAVLSTRKHEQMFREAVNQANKRHGSKWIKLQNLATSVTHKPNAIQ
MALSVCEDLISSQVYAILVSHPPPTNDHFTPTPVSYTAGFYRIPVLGLTTRMSIYSDKSIHLSFLRTVPPYSH
QSSVWFEMMRVYNWNHII LLVSDDEHGRAAQKRLETLLEERESKSKKRNYENLDQLSDYDNKRGPKAQKVLQFD
PGTKNVTALLMEARDLEARVILSASEDDAATVYRAAAMLNMTGSGYVWLVGEREISGNALRYAPDGIIGLQL
INGKNESAHI SDAVGVVAQAVHELLEKENITDPPRGCVGNTNIWKTGPLFKRVLMSKSYADGVTGRVEFNEDG
DRKFANYSIMNLQNRKLVQVGIYNGTHVIPNDRKI IWPGGETEKPRGYQMSTRLKIVTIHQEPFVYVKTMSD
GTCKEEFTVNGDVPKVKVICTGPNDSFGSPRHTVPQCCYGFCDLLIKLARTMNFTYEVHVLVADGKFGTQERV
NNSNKKEWNGMMGELLSGQADMIVAPLTINNERAQYIEFSKPFKYQGLTILVKKEIPRSTLDSFM\*PFQSTLW
LLVGLSVHVAVMPLYLLDRFSPFGRFKVNSEEEEEEDALTSSAMWFSWGVLLNSGIGEGAPRSFARILGMVW
AGFAMIIVASYTANLAAFLVLDLDRPEERITGINDPRLRNPSDKFIYATVKQSSVDIYFRRQVELSTMYRHMEKH
NYESAAEAIQAVRDNKLHAFIWD SAVLEFEASQKCDLVTGELFFRSGFGIGMRKDSPWKQNVLSILKSHEN
GFMEDLDKTTWVRYQECDSRSNAPATLTFENMAGVFMLVAGGIVAGIFLIFIEIAYKRHKDARRKQMLAFAAV
NVWRKNLQDRKSGRAEPDPKKKATFRAITSTLASSFKRRRSSKDTQYHPTDITGPLNLSDPVSVTVV\*

>rs228911540\_ENSMUSP00000109949\_c.1728:C>T\_p.Q577\*

ENSMUST00000114310.10|Grin1-204|ENSMUSG00000026959|-|chr2:g.25187693:G>A
MSTMHLLTFALLFSCSFARAACDPKIVNIGAVLSTRKHEQMFREAVNQANKRHGSKWIKLQNLATSVTHKPNAIQ
MALSVCEDLISSQVYAILVSHPPPTNDHFTPTPVSYTAGFYRIPVLGLTTRMSIYSDKSIHLSFLRTVPPYSH
QSSVWFEMMRVYNWNHII LLVSDDEHGRAAQKRLETLLEERESKSKKRNYENLDQLSDYDNKRGPKAQKVLQFD
PGTKNVTALLMEARDLEARVILSASEDDAATVYRAAAMLNMTGSGYVWLVGEREISGNALRYAPDGIIGLQL
INGKNESAHI SDAVGVVAQAVHELLEKENITDPPRGCVGNTNIWKTGPLFKRVLMSKSYADGVTGRVEFNEDG
DRKFANYSIMNLQNRKLVQVGIYNGTHVIPNDRKI IWPGGETEKPRGYQMSTRLKIVTIHQEPFVYVKTMSD
GTCKEEFTVNGDVPKVKVICTGPNDSFGSPRHTVPQCCYGFCDLLIKLARTMNFTYEVHVLVADGKFGTQERV
NNSNKKEWNGMMGELLSGQADMIVAPLTINNERAQYIEFSKPFKYQGLTILVKKEIPRSTLDSFM\*PFQSTLW
LLVGLSVHVAVMPLYLLDRFSPFGRFKVNSEEEEEEDALTSSAMWFSWGVLLNSGIGEGAPRSFARILGMVW
AGFAMIIVASYTANLAAFLVLDLDRPEERITGINDPRLRNPSDKFIYATVKQSSVDIYFRRQVELSTMYRHMEKH
NYESAAEAIQAVRDNKLHAFIWD SAVLEFEASQKCDLVTGELFFRSGFGIGMRKDSPWKQNVLSILKSHEN
GFMEDLDKTTWVRYQECDSRSNAPATLTFENMAGVFMLVAGGIVAGIFLIFIEIAYKRHKDARRKQMLAFAAV
NVWRKNLQDRKSGRAEPDPKKKATFRAITSTLASSFKRRRSSKDTSTGGGRGALQNQKDTVLPRAIEREEGQ
LQLCSRHRRES\*

>rs228911540\_ENSMUSP00000109947\_c.1728:C>T\_p.Q577\*

ENSMUST00000114308.10|Grin1-203|ENSMUSG00000026959|-|chr2:g.25187693:G>A
MSTMHLLTFALLFSCSFARAACDPKIVNIGAVLSTRKHEQMFREAVNQANKRHGSKWIKLQNLATSVTHKPNAIQ
MALSVCEDLISSQVYAILVSHPPPTNDHFTPTPVSYTAGFYRIPVLGLTTRMSIYSDKSIHLSFLRTVPPYSH
QSSVWFEMMRVYNWNHII LLVSDDEHGRAAQKRLETLLEERESKSKKRNYENLDQLSDYDNKRGPKAQKVLQFD
PGTKNVTALLMEARDLEARVILSASEDDAATVYRAAAMLNMTGSGYVWLVGEREISGNALRYAPDGIIGLQL
INGKNESAHI SDAVGVVAQAVHELLEKENITDPPRGCVGNTNIWKTGPLFKRVLMSKSYADGVTGRVEFNEDG
DRKFANYSIMNLQNRKLVQVGIYNGTHVIPNDRKI IWPGGETEKPRGYQMSTRLKIVTIHQEPFVYVKTMSD
GTCKEEFTVNGDVPKVKVICTGPNDSFGSPRHTVPQCCYGFCDLLIKLARTMNFTYEVHVLVADGKFGTQERV
NNSNKKEWNGMMGELLSGQADMIVAPLTINNERAQYIEFSKPFKYQGLTILVKKEIPRSTLDSFM\*PFQSTLW
LLVGLSVHVAVMPLYLLDRFSPFGRFKVNSEEEEEEDALTSSAMWFSWGVLLNSGIGEGAPRSFARILGMVW
AGFAMIIVASYTANLAAFLVLDLDRPEERITGINDPRLRNPSDKFIYATVKQSSVDIYFRRQVELSTMYRHMEKH
NYESAAEAIQAVRDNKLHAFIWD SAVLEFEASQKCDLVTGELFFRSGFGIGMRKDSPWKQNVLSILKSHEN
GFMEDLDKTTWVRYQECDSRSNAPATLTFENMAGVFMLVAGGIVAGIFLIFIEIAYKRHKDARRKQMLAFAAV
NVWRKNLQSTGGGRGALQNQKDTVLPRAIEREEGQLQLCSRHRRES\*

>rs228911540\_ENSMUSP00000109956\_c.1728:C>T\_p.Q577\*

ENSMUST00000114317.10|Grin1-207|ENSMUSG00000026959|-|chr2:g.25187693:G>A
MSTMHLLTFALLFSCSFARAACDPKIVNIGAVLSTRKHEQMFREAVNQANKRHGSKWIKLQNLATSVTHKPNAIQ
MALSVCEDLISSQVYAILVSHPPPTNDHFTPTPVSYTAGFYRIPVLGLTTRMSIYSDKSIHLSFLRTVPPYSH
QSSVWFEMMRVYNWNHII LLVSDDEHGRAAQKRLETLLEERESKSKKRNYENLDQLSDYDNKRGPKAQKVLQFD
PGTKNVTALLMEARDLEARVILSASEDDAATVYRAAAMLNMTGSGYVWLVGEREISGNALRYAPDGIIGLQL
INGKNESAHI SDAVGVVAQAVHELLEKENITDPPRGCVGNTNIWKTGPLFKRVLMSKSYADGVTGRVEFNEDG
DRKFANYSIMNLQNRKLVQVGIYNGTHVIPNDRKI IWPGGETEKPRGYQMSTRLKIVTIHQEPFVYVKTMSD
GTCKEEFTVNGDVPKVKVICTGPNDSFGSPRHTVPQCCYGFCDLLIKLARTMNFTYEVHVLVADGKFGTQERV
NNSNKKEWNGMMGELLSGQADMIVAPLTINNERAQYIEFSKPFKYQGLTILVKKEIPRSTLDSFM\*PFQSTLW
LLVGLSVHVAVMPLYLLDRFSPFGRFKVNSEEEEEEDALTSSAMWFSWGVLLNSGIGEGAPRSFARILGMVW
AGFAMIIVASYTANLAAFLVLDLDRPEERITGINDPRLRNPSDKFIYATVKQSSVDIYFRRQVELSTMYRHMEKH
NYESAAEAIQAVRDNKLHAFIWD SAVLEFEASQKCDLVTGELFFRSGFGIGMRKDSPWKQNVLSILKSHEN



GFMEDLDKTTWVRYQECDSRSNAPATLTFENMAGVFMLVAGGIVAGIFLIFIEIAYKRHKDARRKQMLAFAAV  
 NVWRKNLQQYHPTDITGPLNLS DPSVSTVV\*  
 >rs228911540\_ENSMUSP00000028335\_c.1665:C>T\_p.Q556\*  
 ENSMUST00000028335.13|Grin1-201|ENSMUSG00000026959|-|chr2:g.25187693:G>A  
 MSTMHLLTFALLFSCSFARAACDPKIVNIGAVLSTRKHEQMFREAVNQANKRHGSKWIKLQNLATS VTHKPNAIQ  
 MALSVCEDLISSQVYAILVSHPTPNDFHTPTPVSYTAGFYRIPVLGLTTRMSIYSDKSIHLSFLRTVPPYSH  
 QSSVWFEMMRVYNWNHII LLVSDDEHGRAAQKRLETLLEERESKAQKVLQFDPGKTNVTALLMEARDLEARVI  
 ILSASEDDAATVYRAAAMLNMTGSGYVWLVGEREISGNALRYAPDGI IGLQLINGKNESAHI SDAVGVVAQAV  
 HELLEKENITDPPRGCVGNTNIWKTGPLFKRVLMSKYADGVTGRVEFNEDGDRKFANYSIMNLQNRKLVQVG  
 IYNGTHVIPNDRKI IWPGGETEKPRGYQMSTRLKI VTIHQEPFVYVKPTMSDGTCKEEFTVNGDPVKKVICTG  
 PNDTSPGSPRHTVPQCCYGFCDLLIKLARTMNFTYEVHLVADGKFGTQERVNNSNKKEWNGMMGELLSGQAD  
 MIVAPLTIINNERAQYIEFSKPFKYQGLTILVKKEI PRSTLDSFM\*PFQSTLWLLVGLSVHVAVMMLYLLDRFS  
 PFGRFKVNSEEEEEEDALTSSAMWFSWGVLLNSGIGEGAPRSFSARILGMVWAGFAMI IVASYTANLAAFLVL  
 DRPEERITGINDPRLRNPSDKFIYATVKQSSVDIYFRRQVELSTMYRHMEKHNYESAEEAIQAVRDNKLHAFI  
 WDSAVLEFEASQKCDLVTGTGELFFRSGFGIGMRKDSPWKQNVLSILKSHENGFMEDLDKTTWVRYQECDSRSN  
 APATLTFENMAGVFMLVAGGIVAGIFLIFIEIAYKRHKDARRKQMLAFAAVNVWRKNLQDRKSGRAEPDPKK  
 KATFRAITSTLASSFKRRRSSKDTSTGGGRGALQNQKDTVLPRAIEREEGQLQLCSRHRRES\*  
 >rs228911540\_ENSMUSP00000109953\_c.1665:C>T\_p.Q556\*  
 ENSMUST00000114314.10|Grin1-206|ENSMUSG00000026959|-|chr2:g.25187693:G>A  
 MSTMHLLTFALLFSCSFARAACDPKIVNIGAVLSTRKHEQMFREAVNQANKRHGSKWIKLQNLATS VTHKPNAIQ  
 MALSVCEDLISSQVYAILVSHPTPNDFHTPTPVSYTAGFYRIPVLGLTTRMSIYSDKSIHLSFLRTVPPYSH  
 QSSVWFEMMRVYNWNHII LLVSDDEHGRAAQKRLETLLEERESKAQKVLQFDPGKTNVTALLMEARDLEARVI  
 ILSASEDDAATVYRAAAMLNMTGSGYVWLVGEREISGNALRYAPDGI IGLQLINGKNESAHI SDAVGVVAQAV  
 HELLEKENITDPPRGCVGNTNIWKTGPLFKRVLMSKYADGVTGRVEFNEDGDRKFANYSIMNLQNRKLVQVG  
 IYNGTHVIPNDRKI IWPGGETEKPRGYQMSTRLKI VTIHQEPFVYVKPTMSDGTCKEEFTVNGDPVKKVICTG  
 PNDTSPGSPRHTVPQCCYGFCDLLIKLARTMNFTYEVHLVADGKFGTQERVNNSNKKEWNGMMGELLSGQAD  
 MIVAPLTIINNERAQYIEFSKPFKYQGLTILVKKEI PRSTLDSFM\*PFQSTLWLLVGLSVHVAVMMLYLLDRFS  
 PFGRFKVNSEEEEEEDALTSSAMWFSWGVLLNSGIGEGAPRSFSARILGMVWAGFAMI IVASYTANLAAFLVL  
 DRPEERITGINDPRLRNPSDKFIYATVKQSSVDIYFRRQVELSTMYRHMEKHNYESAEEAIQAVRDNKLHAFI  
 WDSAVLEFEASQKCDLVTGTGELFFRSGFGIGMRKDSPWKQNVLSILKSHENGFMEDLDKTTWVRYQECDSRSN  
 APATLTFENMAGVFMLVAGGIVAGIFLIFIEIAYKRHKDARRKQMLAFAAVNVWRKNLQDRKSGRAEPDPKK  
 KATFRAITSTLASSFKRRRSSKDTQYHPTDITGPLNLS DPSVSTVV\*  
 >rs228911540\_ENSMUSP00000109946\_c.1665:C>T\_p.Q556\*  
 ENSMUST00000114307.8|Grin1-202|ENSMUSG00000026959|-|chr2:g.25187693:G>A  
 MSTMHLLTFALLFSCSFARAACDPKIVNIGAVLSTRKHEQMFREAVNQANKRHGSKWIKLQNLATS VTHKPNAIQ  
 MALSVCEDLISSQVYAILVSHPTPNDFHTPTPVSYTAGFYRIPVLGLTTRMSIYSDKSIHLSFLRTVPPYSH  
 QSSVWFEMMRVYNWNHII LLVSDDEHGRAAQKRLETLLEERESKAQKVLQFDPGKTNVTALLMEARDLEARVI  
 ILSASEDDAATVYRAAAMLNMTGSGYVWLVGEREISGNALRYAPDGI IGLQLINGKNESAHI SDAVGVVAQAV  
 HELLEKENITDPPRGCVGNTNIWKTGPLFKRVLMSKYADGVTGRVEFNEDGDRKFANYSIMNLQNRKLVQVG  
 IYNGTHVIPNDRKI IWPGGETEKPRGYQMSTRLKI VTIHQEPFVYVKPTMSDGTCKEEFTVNGDPVKKVICTG  
 PNDTSPGSPRHTVPQCCYGFCDLLIKLARTMNFTYEVHLVADGKFGTQERVNNSNKKEWNGMMGELLSGQAD  
 MIVAPLTIINNERAQYIEFSKPFKYQGLTILVKKEI PRSTLDSFM\*PFQSTLWLLVGLSVHVAVMMLYLLDRFS  
 PFGRFKVNSEEEEEEDALTSSAMWFSWGVLLNSGIGEGAPRSFSARILGMVWAGFAMI IVASYTANLAAFLVL  
 DRPEERITGINDPRLRNPSDKFIYATVKQSSVDIYFRRQVELSTMYRHMEKHNYESAEEAIQAVRDNKLHAFI  
 WDSAVLEFEASQKCDLVTGTGELFFRSGFGIGMRKDSPWKQNVLSILKSHENGFMEDLDKTTWVRYQECDSRSN  
 APATLTFENMAGVFMLVAGGIVAGIFLIFIEIAYKRHKDARRKQMLAFAAVNVWRKNLQSTGGGRGALQNQK  
 DTVLPRAIEREEGQLQLCSRHRRES\*  
 >rs228911540\_ENSMUSP00000109951\_c.1665:C>T\_p.Q556\*  
 ENSMUST00000114312.2|Grin1-205|ENSMUSG00000026959|-|chr2:g.25187693:G>A  
 MSTMHLLTFALLFSCSFARAACDPKIVNIGAVLSTRKHEQMFREAVNQANKRHGSKWIKLQNLATS VTHKPNAIQ  
 MALSVCEDLISSQVYAILVSHPTPNDFHTPTPVSYTAGFYRIPVLGLTTRMSIYSDKSIHLSFLRTVPPYSH  
 QSSVWFEMMRVYNWNHII LLVSDDEHGRAAQKRLETLLEERESKAQKVLQFDPGKTNVTALLMEARDLEARVI  
 ILSASEDDAATVYRAAAMLNMTGSGYVWLVGEREISGNALRYAPDGI IGLQLINGKNESAHI SDAVGVVAQAV  
 HELLEKENITDPPRGCVGNTNIWKTGPLFKRVLMSKYADGVTGRVEFNEDGDRKFANYSIMNLQNRKLVQVG  
 IYNGTHVIPNDRKI IWPGGETEKPRGYQMSTRLKI VTIHQEPFVYVKPTMSDGTCKEEFTVNGDPVKKVICTG  
 PNDTSPGSPRHTVPQCCYGFCDLLIKLARTMNFTYEVHLVADGKFGTQERVNNSNKKEWNGMMGELLSGQAD  
 MIVAPLTIINNERAQYIEFSKPFKYQGLTILVKKEI PRSTLDSFM\*PFQSTLWLLVGLSVHVAVMMLYLLDRFS  
 PFGRFKVNSEEEEEEDALTSSAMWFSWGVLLNSGIGEGAPRSFSARILGMVWAGFAMI IVASYTANLAAFLVL

DRPEERITGINDPRLRNPSDKFIYATVKQSSVDIYFRQVELSTMYRHMKEKHNYESAAEAIQAVRDNKLHAFI  
WDSAVLEFEASQKCDLVTGTGELFFRSGFGIGMRKSDPWKQNVLSILKSHENGFMEDLDKTTWVRYQECDSRSN  
APATLTFENMAGVFMVLVAGGIVAGIFLIFIEIAYKRHKDARRKQMLAFAAVNVWRKNLQQYHPTDITGPLNL  
SDPSVSTVV\*

>ENSMUSP00000028170\_c.549:C>T\_p.R184C ENSMUST00000028170.15|Ralgds-  
201|ENSMUSG00000026821|+|chr2:g.28433696:C>T  
MMVDCQSSTQEIGEELINGVIYSISLRKVQLHQGATKGQRWLGCEENESALNLYETCKVVRTVKAGTLEKLVEHL  
VPAFQGSDDLVSVTVFLCTYRAFTTTQQVLDLLFKRYGRCDALTASSRYGCILPYSSSEDGGPQDQLKNAISSIL  
GTWLDQYSEDFCQPPDFPCLKQLVAVYVQLNMPGSDLECRALLLAQLEDLEPSEAASEALSAPVLSLKPASQ  
LEPALLLTPSQVVTSTPVREPAAPVPLASSPVVAPAPELEPVPEPPQEPEPSLALAPELEPAVSQSLELES  
APVPTPALEPSWSLPEATENGLTEKPHLLLFPDDLVAEQFTLMDAELFKKVVYPYHCLGSIWSQRDKKGEHLA  
PTIRATVAQFNNVANCVITTCCLGDQSMKAPDRARVVEHWIEVARECRALKNFSSLYAILSALQSNAIHRLKKT  
WEEVSRDSFRVFQKLSEIFSDENNYLSRELLIKEGTSKFATLEMNPRRAQRRQKETGVIQGTVPYLGTFLLTD  
LVMLDTAMKDYLYGRLINFEKRRKEFEVIAQIKLLQSACNNYSIAPEEHFGTWFRAMERLSEAESYTLSCLE  
PPSESASNTLRSKKSTAIVKRWSRQAPSTELSTSSSAHKSQCDQLRCSPLYLGSQDITDALS VHSAGSSSSDV  
EEINMSFVPESPDGQEKKFWESASQSSPETSGISSASSSTSSSSASTTPVSTTRTHKRSVSGVCSYSSSLPLY  
NQVGDCCIIRVSLDQSMKAPDRARVVEHWIEVARECRALKNFSSLYAILSALQSNAIHRLKKTWEEVSRDSFRVFQKLSE  
VYAMNSTANYDFILKKRTFTKGAKVKHGASSTLPRMKQKGLRIAKGIF\*

>ENSMUSP00000158697\_c.717:C>T\_p.R240C ENSMUST00000238699.2|Ralgds-  
211|ENSMUSG00000026821|+|chr2:g.28433696:C>T  
MAREADRVHARPAVPRGRKGSVFFACVSVVTARRWAIARRTTAHSPTPPTPCPAPLLAPTAESSTQEIGEELI  
NGVIYSISLRKVQLHQGATKGQRWLGCEENESALNLYETCKVVRTVKAGTLEKLVEHLVPAFQGSDDLVSVTVFLC  
TYRAFTTTQQVLDLLFKRYGRCDALTASSRYGCILPYSSSEDGGPQDQLKNAISSILGTWLDQYSEDFCQPPDF  
PCLKQLVAVYVQLNMPGSDLECRALLLAQLEDLEPSEAASEALSAPVLSLKPASQLEPALLLTPSQVVTSTP  
VREPAAPVPLASSPVVAPAPELEPVPEPPQEPEPSLALAPELEPAVSQSLELESAPVPTPALEPSWSLPEA  
TENGLTEKPHLLLFPDDLVAEQFTLMDAELFKKVVYPYHCLGSIWSQRDKKGEHLAPTIRATVAQFNNVANCV  
ITTCCLGDQSMKAPDRARVVEHWIEVARECRALKNFSSLYAILSALQSNAIHRLKKTWEEVSRDSFRVFQKLSE  
IFSDENNYLSRELLIKEGTSKFATLEMNPRRAQRRQKETGVIQGTVPYLGTFLLTDLVMLDTAMKDYLYGRLI  
NFEKRRKEFEVIAQIKLLQSACNNYSIAPEEHFGTWFRAMERLSEAESYTLSCLEPPSESASNTLRSKKSTA  
IVKRWSRQAPSTELSTSSSAHKSQCDQLRCSPLYLGSQDITDALS VHSAGSSSSDVEEINMSFVPESPDGQEK  
KFWESASQSSPETSGISSASSSTSSSSASTTPVSTTRTHKRSVSGVCSYSSSLPLYNQVGDCCIIRVSLDQSMKAP  
DRARVVEHWIEVARECRALKNFSSLYAILSALQSNAIHRLKKTWEEVSRDSFRVFQKLSEIFSDENNYLSRE  
LLIKEGTSKFATLEMNPRRAQRRQKETGVIQGTVPYLGTFLLTDLVMLDTAMKDYLYGRLINFEKRRKEFEVIA  
QIKLLQSACNNYSIAPEEHFGTWFRAMERLSEAESYTLSCLEPPSESASNTLRSKKSTAIVKRWSRQAPST  
ELSTSSSAHKSQCDQLRCSPLYLGSQDITDALS VHSAGSSSSDVEEINMSFVPESPDGQEKKFWESASQSSPET  
SGISSASSSTSSSSASTTPVSTTRTHKRSVSGVCSYSSSLPLYNQVGDCCIIRVSLDQSMKAPDRARVVEHWIE  
VARECRALKNFSSLYAILSALQSNAIHRLKKTWEEVSRDSFRVFQKLSEIFSDENNYLSRELLIKEGTSKFAT  
LEMNPRRAQRRQKETGVIQGTVPYLGTFLLTDLVMLDTAMKDYLYGRLINFEKRRKEFEVIAQIKLLQSACNNYS  
IAPEEHFGTWFRAMERLSEAESYTLSCLEPPSESASNTLRSKKSTAI

>ENSMUSP00000109526\_c.678:C>T\_p.R227C ENSMUST00000113893.8|Ralgds-  
203|ENSMUSG00000026821|+|chr2:g.28433696:C>T  
MVQRMWAEAAAGPIGGTEPLFPGSRRSRSVWDAVRLEVGVPDSCPVLHLSFTQLDLPDLRLESSTQEIGEELIN  
GVIYSISLRKVQLHQGATKGQRWLGCEENESALNLYETCKVVRTVKAGTLEKLVEHLVPAFQGSDDLVSVTVFLC  
TYRAFTTTQQVLDLLFKRYGRCDALTASSRYGCILPYSSSEDGGPQDQLKNAISSILGTWLDQYSEDFCQPPDF  
PCLKQLVAVYVQLNMPGSDLECRALLLAQLEDLEPSEAASEALSAPVLSLKPASQLEPALLLTPSQVVTSTP  
VREPAAPVPLASSPVVAPAPELEPVPEPPQEPEPSLALAPELEPAVSQSLELESAPVPTPALEPSWSLPEA  
TENGLTEKPHLLLFPDDLVAEQFTLMDAELFKKVVYPYHCLGSIWSQRDKKGEHLAPTIRATVAQFNNVANCV  
ITTCCLGDQSMKAPDRARVVEHWIEVARECRALKNFSSLYAILSALQSNAIHRLKKTWEEVSRDSFRVFQKLSE  
IFSDENNYLSRELLIKEGTSKFATLEMNPRRAQRRQKETGVIQGTVPYLGTFLLTDLVMLDTAMKDYLYGRLI  
NFEKRRKEFEVIAQIKLLQSACNNYSIAPEEHFGTWFRAMERLSEAESYTLSCLEPPSESASNTLRSKKSTA  
IVKRWSRQAPSTELSTSSSAHKSQCDQLRCSPLYLGSQDITDALS VHSAGSSSSDVEEINMSFVPESPDGQEK  
KFWESASQSSPETSGISSASSSTSSSSASTTPVSTTRTHKRSVSGVCSYSSSLPLYNQVGDCCIIRVSLDQSMKAP  
DRARVVEHWIEVARECRALKNFSSLYAILSALQSNAIHRLKKTWEEVSRDSFRVFQKLSEIFSDENNYLSRE  
LLIKEGTSKFATLEMNPRRAQRRQKETGVIQGTVPYLGTFLLTDLVMLDTAMKDYLYGRLINFEKRRKEFEVIA  
QIKLLQSACNNYSIAPEEHFGTWFRAMERLSEAESYTLSCLEPPSESASNTLRSKKSTAIVKRWSRQAPST  
ELSTSSSAHKSQCDQLRCSPLYLGSQDITDALS VHSAGSSSSDVEEINMSFVPESPDGQEKKFWESASQSSPET  
SGISSASSSTSSSSASTTPVSTTRTHKRSVSGVCSYSSSLPLYNQVGDCCIIRVSLDQSMKAPDRARVVEHWIE  
VARECRALKNFSSLYAILSALQSNAIHRLKKTWEEVSRDSFRVFQKLSEIFSDENNYLSRELLIKEGTSKFAT  
LEMNPRRAQRRQKETGVIQGTVPYLGTFLLTDLVMLDTAMKDYLYGRLINFEKRRKEFEVIAQIKLLQSACNNYS  
IAPEEHFGTWFRAMERLSEAESYTLSCLEPPSESASNTLRSKKSTAI

>ENSMUSP00000097812\_c.714:C>T\_p.R239C ENSMUST00000100241.10|Ralgds-  
202|ENSMUSG00000026821|+|chr2:g.28433696:C>T  
MVQRMWAEAAAGPIGGTEPLFPGSRRSRSVWDAVRLEVGVPDSCPVLHLSFTQLDLPDLRLESSTQEIGEELIN  
GVIYSISLRKVQLHQGATKGQRWLGCEENESALNLYETCKVVRTVKAGTLEKLVEHLVPAFQGSDDLVSVTVFLC  
TYRAFTTTQQVLDLLFKRYGRCDALTASSRYGCILPYSSSEDGGPQDQLKNAISSILGTWLDQYSEDFCQPPDF  
PCLKQLVAVYVQLNMPGSDLECRALLLAQLEDLEPSEAASEALSAPVLSLKPASQLEPALLLTPSQVVTSTP  
VREPAAPVPLASSPVVAPAPELEPVPEPPQEPEPSLALAPELEPAVSQSLELESAPVPTPALEPSWSLPEA  
TENGLTEKPHLLLFPDDLVAEQFTLMDAELFKKVVYPYHCLGSIWSQRDKKGEHLAPTIRATVAQFNNVANCV  
ITTCCLGDQSMKAPDRARVVEHWIEVARECRALKNFSSLYAILSALQSNAIHRLKKTWEEVSRDSFRVFQKLSE  
IFSDENNYLSRELLIKEGTSKFATLEMNPRRAQRRQKETGVIQGTVPYLGTFLLTDLVMLDTAMKDYLYGRLI  
NFEKRRKEFEVIAQIKLLQSACNNYSIAPEEHFGTWFRAMERLSEAESYTLSCLEPPSESASNTLRSKKSTA  
IVKRWSRQAPSTELSTSSSAHKSQCDQLRCSPLYLGSQDITDALS VHSAGSSSSDVEEINMSFVPESPDGQEK  
KFWESASQSSPETSGISSASSSTSSSSASTTPVSTTRTHKRSVSGVCSYSSSLPLYNQVGDCCIIRVSLDQSMKAP  
DRARVVEHWIEVARECRALKNFSSLYAILSALQSNAIHRLKKTWEEVSRDSFRVFQKLSEIFSDENNYLSRE  
LLIKEGTSKFATLEMNPRRAQRRQKETGVIQGTVPYLGTFLLTDLVMLDTAMKDYLYGRLINFEKRRKEFEVIA  
QIKLLQSACNNYSIAPEEHFGTWFRAMERLSEAESYTLSCLEPPSESASNTLRSKKSTAI

VKRWSDRQAPSTELSTSSSAHSKSCDQLRCSPLYLGSDDITDALSVHSAGSSSSDVEEINMSFVPEPDPGQEKK  
FWESASQSSPETSGLISSASSSTSSSASTTPVSTTRTHKRSVSGVCSYSSSLPLYNQVGDCCIIRVSLDVDN  
GNMYKSILVTSQDKAPTIVIRKAMDKNLDEDEPEDYELVQIIISEDHKLKIPENANVFYAMNSTANYDFILKKR  
TFTKGAKVKHGASSTLPRMKQKGLRIAKGIF\*

>ENSMUSP00000066492\_c.6232:A>T\_p.Q2078L ENSMUST00000065398.13|Nup214-  
201|ENSMUSG00000001855|+|chr2:g.31942139:A>T  
MGDEMDAMIPEREMKDFQFRALKKVRIFDSPEELPKERSVLTISNKYGMLFAGGTNGLNVFPKSLLIQNKP  
GDDPNKIVDTIQGLNVPKFPVHHLALSCDSLTLACMMSSEYGSIIAFFDVRTFSNQAKPLKRPFTYHKVSN  
DASGMVNDMKWNPTVPSMVAVCLADGSI SVLQVTDVVKVCATLPPSTGVTCVCWSPKQKQLAVGKQNGTVVQY  
LPTLQEKKVI PCPPFYESDHPVRVLDVLDVWIGTYVFTIVYAGADGTLETCPDVVMALLPKKEEKHPEIFVNFME  
PCYSSCTERQHYYLSYIEEWDLVLAASAASTEVSILARQNDQTNWESWLLLEDSSRAELPVTDKSDDSLPMGV  
AIDYTNEVEVTINEEKTLPAPVLLLLSTDGVLCPFYMINQNPVRSI LKTLLELISTEGERQPKSSGSPFGTP  
SSPQAPQNLDPATASSPLPPVSAAPTSTFPMPAAGSPSVFSGPSSFKSSASVTGEPPLYPTGSDSSRAAP  
GSGTSTFSFAPPSKGLASTPAVAVPATSAAFTFGFKPTLESTPMSSTPNTGMKPSFPPSASSVKVNLNEKF  
TAVASSAPVHSSSTSTPSVLPFSSSPKPTASGPLSHPTPLPASSSSMPLKSSVSPSPAAGRSTQTAPSSAPSTG  
QKSPRVNPPVVKSGSSQAKALQPPVTEKQRPQWKSDPVLGIGEEIAHFQKELEELKARTAKACLQVGTSEE  
MKMLRTESDDLHTFLFEIRETTESLHGDISTLKTTLLEGFAGVEEAREQHGRNHDSEYLLHLLYKRP LDPKSEA  
QLQEIRRLHQYVKFAVQDVNDVLDLEWDRHLEQKKRQRLIVPERETLEFNTLANNREIINQQRKLNQLVDSL  
QQLRLYNHTAPWSLPSALSTQNSHSFSDLECLLKTITESHKPSRVPVKLSPAKQAQLRNFLAKRKTTPPV  
RSTAPASLSRS AFLSQRYYEDLDEGSSASSVAQPLEGEDARPTCTSV AQPLEGEDAQPICKEEEAVVPVPRHA  
PVRVTPSIQPSLLPQSMFPAKPHLIHSSSPAVMSSAVSTSATKVI PQGADSTMLATKTVKHGAPGPSHTVAAP  
QAAAAAALRRQMASQAPAMSTLTESTLKTVPQVNVQELRSNPPSAAMGSAVQHSAAKTPHAVLTPVANSQ  
AKQGLINSFKPSGPTAASCQLSSGDKAVGQGTAKTESAATSTPSAAGQLNKPFASFASPGTFTFGTITPTPSS  
SFTATPGAGPPTKEPTQLEAFSFGGGGKPFSEAI PGNSPATGATSAPSTSVTAASLEDSAPSSSKPAAPPETT  
VSSASSKLETPPSKLGE LFPSSLAGETLGSFSGLRVQGAEDSTKPVSKASSTNLAGAQPAPKPSGVSFPNTSV  
LGKPVPAVPTSSVPAPAPASALNVSTSSSASTVFGSVPLTSAGPGLISFGGAALASSKASFSGNQQTSS  
STASSATPTSTSVAPSLPASFPPTLSFGGLLSSPASLSPVSSSGKSTEEAAPPVAVPDKSDSSEVATTPSLPVQ  
PQSTQASLQTS DVPKKEPVLVQTTDSSPSRPASSASFVASTESMPVTLGAPDSKIEAVSPASTFAGPGQAAVA  
TAVLPGAGSAATEASGTPTTSTVSSSSPTSATETAVFGTATSGSSVFTQPPAASSSSAFS QLSNTATAPSAT  
PVFGQVAASITSTAAATPQASSSGFGSPAFGASAPGVFGQTAFGQTPAFGQATSSPASGFSFSQPGFSSVPAF  
GQSVSSTPASTSANVFGATSSSTSPGFSFSGQASTNTGGTLFGQNNPFAFGQSPGFGQSSVFGGTSATTSTA  
APSGFSFCQASGFGSSNTGSVFGQAANTGGSVFGQSSTSSGGVFGSGNATRGGGFFSGLGGKPSQDAANKNPF  
SSAGGGFGSTAAPNTSNLFGNSGAKTFGGFGSSSFGEQKPAFTFSSGGGSVASQGFSTPNKTGGFGAAPVF  
GSPPTFGGSPGFGVPAFGSAPAFSTPLGSGTGGKVFEGETAASAGGFGFGSSGNTASFGTLASQNAPTFGSL  
SQQTSGFGTPSSGFAGFGSGTGAFTFGSSNSSVLGFGGWRS\*

>ENSMUSP00000115665\_c.1720:A>T\_p.Q574L ENSMUST00000138012.2|Nup214-  
208|ENSMUSG00000001855|+|chr2:g.31942139:A>T  
TEEAAPPVAVPDKSDSSEVSATTPSLPVQPQSTQASLQTS DVPKKEPVLVQTTDSSPSRPASSASFVASTESMP  
VTLGAPDSKIEAVSPASTFAGPGQAAVATAVLPGAGSAATEASGTPTTSTVSSSSPTSATETAVFGTATSGSS  
VFTQPPAASSSSAFS QLSNTATAPSATPVFGQVAASITSTAAATPQASSSGFGSPAFGASAPGVFGQTAFGQ  
TPAFGQATSSPASGFSFSQPGFSSVPAFGQSVSSTPASTSANVFGATSSSTSPGFSFSGQASTNTGGTLFGQN  
NPPAFGQSPGFGQSSVFGGTSATTSTAAPSGFSFCQASGFGSSNTGSVFGQAANTGGSVFGQSSSTSSGGVF  
GSGNATRGGGFFSGLGGKPSQDAANKNPFSSAGGGFGSTAAPNTSNLFGNSGAKTFGGFGSSSFGEQKPAFTF  
SSGGGSVASQGFSTPNKTGGFGAAPVFGSPPTFGGSPGFGVPAFGSAPAFSTPLGSGTGGKVFEGETAAS  
AGGFGFGSSGNTASFGTLASQNAPTFGSLSQQTSGFGTPSSGFAGFGSGTGAFTFGSSNSSVLGFGGWRS\*

>ENSMUSP00000142255\_c.225:A>T\_p.R76W ENSMUST00000152791.4|Nup214-  
210|ENSMUSG00000001855|+|chr2:g.31942139:A>T  
GGSVASQGFSTPNKTGSGAAA ILHPSVPSVVRTHPPSGPCPSRPQALGPRAVDSLGLDRAQEPSPLDHLTR  
LSWASVAGEAELMSAFPQVPVSSCAHPSTATDCQKNFLMKTLSQEETLETKAQQLTNCFLPAFKFYIKFFVC  
Y\*

>ENSMUSP00000050219\_c.1608:T>C\_p.W537R ENSMUST00000053087.4|K1h123-  
201|ENSMUSG000000042155|+|chr2:g.69664261:T>C  
MALKGQEDYIFHFKDSSHPVDFLDAFRTFYMDGLFTDITLQCPSGIIFHCHRAVLAACSNYFKAMFTADMKEK  
FKSKIKLSGIHHDILEGLVNYAYTSQIEITKRNVQSLLEAADLLQFLSVKKACEQFLVRHL DIDNCIGMHSFA  
EFHVCSELEKESRRILCSRFEVWQEEFLEISLEKFLF ILSRKNLSVWKEEAILEPVIKWT AH DVENRIECI  
YNLLSYINIDIDPVYLKTA LGLQRSCLLTENKIRSLIYNALNPMHKEISQRSTATMYIIGGYYWHPLSEVHIW  
DPLTNVWIQGA EI PDYTRESYGVTC LGPN IYVTGGYRTDNIDALDVTWVIYNSEGDEWTEGLPMLNARYYHCAV  
TLGGCVYALGGYRKGAPAEAEFYDPLKEKWLP IANMIKGVGNATACVLHEVIYVIGGHCGYRGSC TYDKVQS

YNSDINEWSLITASPHPEYGLCSVPFENKLYLVGGQTTITECYDPEQNEWRETAPMMERRMECGAVIMNGCIY  
VTGGYSYKGTYLQSIKDYDPLNKREIVGNLPSAMRSHGCVVYNV\*  
>ENSMUSP00000011934\_c.57582:A>C\_p.K19195Q ENSMUST00000011934.13|Ttn-  
201|ENSMUSG00000051747|-|chr2:g.76568328:T>G  
MTTQAPMFTQPLQSVVLEGGSTATFEAHVSGSPVPEVSWFRDGGVISTSTLPGVQISFSDGRARLMI PAVTKA  
NSGRYSLRATNGSGQATSTAELLVTAETAPPNFSQRLQSMTRVQGSQVRLQVRVTGIPTPVVKFYRDGAEIQS  
SLDFQISQEGDLYSLLIAEAYPEDSGTYSVNATNSVGRATSTAELVVQGEVVPAAKTKTIVSTAQISETROT  
RIEKKIEAHFDARSIATVEMVIDGATGQLPHKTPPRI PPKPKRSRPTPPSIAAKAQLARQQSPSIRHSPSPV  
RHVRAPTPSPVRSVPAGRISTSPIRSVKSPLLIRKTQTTMATGPEVPPPWKQEGYVASSTEAMRETMTS  
STQIRREERWEGRYGVQEQVTISGAAAAAASASVSSSFTAGAITTGTKEVKQETDKSAAVATVVAAVDMARVR  
EPAISAVEQTAQRTTTTAVHIQPAQEQRKEAEKTAVTKVVAADKAKEQELKSRTREVMVTTQEQTTHISHEQ  
IRKETEKAQFVQVVISATKAKEQETRITGEITTKQEQKRI TQETMMKETRKTVPKIVIVATPKIKEQDLVSRS  
REAITTKRDQVQITQEKKRKEVETALSTIAVATAKAKEQETVLRSRREAMATRQEHIQVTHGQVGVGKKAQAV  
ATVVAAVDQARVREPPTHVEESHQQTTLLEYGYKEHISTTKVPEQPRRPASEPHVVPQAVKPAVIQAPSET  
HIKTTDQMGMHISSQVKKTTDISTERLVHVDKRPRTASPHFTVSKISVPKTEHGYEASIAAGSAIATLQKELSA  
TSSTQKITKSVKAPTVPKGETRVRAEPTPSPQFPFADMPPDPDYKQAGIEVKKEVGVVISGTVVREEHFEVL  
RGREAKVTETARVPAPAEPVPTPPTLVSGLNVTVIEGESVTLLECHISGYSPKVTWYREDYQIESSIDFQIT  
FQGGIARLMI REAFAEDSGRFTCSAVNEAGTVSTSCYLAVQVSEEFDKETTLTEKFATEEKRFVESRDVMTD  
TSITEEQAGPGEPAAPFFISKPVVQKLVGEGSVVFECQIGGNPKPHVYWKSGVPLTTGYRYKVSYNKQGTGEC  
RLVISMTFADDAGEYTI VIRNKHGETSASASLLEEADYEALVKTQEQEMLYQTMSTFIQEPKVG EIAPGFAYS  
EYEKEYEKEQALIRKKMAKDTVMVRFVVDQEFHISSFEERLIKEIEYRI IKTTLEELLEEDGEEKMAVDISE  
SEAIESGFDIRIKNYRILEGMGVTFHCKMSGYPLPKIAWYKDGKRI RHGERYQMDFLQDGRASLRI PVVLPED  
EGLYTAFAFASNIKGNACSGKLYVEPAAPFSAPTYMPTPEAVSRIRSVSPRSLRSRSPIRMS PAMSPARMS PARM  
SPARMS PARMSPGRRL EETDESQLERLYKPVFVLKPAFVKCLEGQTARFDLKVVGPRMPETFWFHNGQQIVND  
YTHKVIKEDGTQSLI VPPASPSDSGEWTVVAQN RAGKSTISVTLTVEAVEHQIKPAFVEKLNKVN IKEGSR  
EMKVRATGNPNPDI VVWLNKSDI IVPHKYPRRIEGRGAEALKIDSII SQDSAWYTATAINKAGRDTTRCKVN  
VEVEFAEPENPRKLI I PRGTYRAKEIAAPELEPLHLRYGAEQWEEGDLYDKEKQKPFKKKLTSLRLKRFGP  
AHFECRLTPIGDPTMVVEWLHDGKPLEAANRLRMINEFGYCSLDYGAAYSRDSGVI TCRATNKYGTDHTSATL  
IVKDEKSLVEESQLPDGKGLQRIEELERMAHEGALTGVTTDQKEKQKPDIVLFPPEVVRVLEGETARFCRVT  
GYPQPKVNWYLNGLIRKSKRFRVRYDGIHYLDIVDCKSYDTGEVKVTAENPEGVTEHKVKLEIQQREDFRSV  
LRRAPPEPKPEFHVHEPGKLQFEVQKVD RVPDTSSETKEVVKLRAERITHEKVSESEELRSKFKRRTEEGY  
AITAVELKSRKDES YEELLKKTDELLHWTKELT EEEKKALAEKGK IITPTFKPERIELSPSMEAPKIFERI  
QSQT VGGSDAHFRVRVVGKPDPECEWYKNGVKIERSDRIYWYWPEDNVCELVIRDVTAEDSASIMVKA INIA  
GETSSHAFLLVQAKQLITFTQELQDVVAKEDTMAFECETSEPFIKVKWYKDGIEVHAGDKYRMHSDRKHVF  
LSVLTIDTSDAEDYSCVLVEDENIKTTAKLIVEGAVVEFVKELQDIEVPESYSGELECIISPENIEGKWHND  
VELKSNKYSITSRGRQNLTVKDVTKEDQGEYSFVVDGKKTCKLKMKPRPIAILQGLSDQKVCEDGDIVQLE  
VKVSLNVEGVMMKDGQEVQHSRDRVHIVIDKQSHMLLIEDMTKEDAGNYSFTIPALGLSTSGNVSVYSVDVIT  
PLKDVNVEIGTKAVLECKVSPDVT SVKWYLNDEQIKPDDRVSIVKGTQQLRVINRTHASDEGPYKLMVGRV  
ETSCNLSVEKIKIIRGLRDLTCTETQNVVFEVELSHSGIDVWVNFKGKEIKPSSKYKIEAHGKIYKLTVLNMM  
KDDEGEYAFYAGENTTSGKLTVAGGAI STPLTDQTVAESQEA VFECEVANPESEGEWLKDGKHLALSNNFRGE  
SDGHKRLVIAAAKLD DAGEYTYKVATSKTSAKLVKVEAVKIKKTLRNLTVTETQDAVFSVELTHPDVKGQWI  
KNGVVLDSNDKYEISVKGTLYSLKIKNCAMADESVYGFKLGR LGASARLHVETVKI IKKPKDVTALENATVTF  
EVSVSHDTPVVKWFHKNVEIKPSDKHRLVSEKRVHKLMLQSI SPSDAGEYTAMVGQLECKAKLFVETLHITKT  
MKSIEVPETKAASFCEVSHFNVPMSWLKNGVEIEMSEKFKIIVVQGLHQLIIMNTSTEDSAEYTFVCGNDQV  
SATLTVTPIMITSMLKDINAEEKDTITFEVTVNYEGISYKWLKNGVEIKSTDRCQMRKTLHSLNIRNVHFG  
DAADYTFVAGKATSTATLYVEARHIEFRKH IKDKVLEKKRAMFECEVSEPDITVQWMDGQELQIADRIKIQ  
KEYVHRLLI PSTRMSDAGKYTVVAGNMSTANLFVEGRDVRIRS IKKEVQVIEKQRAVVEFEVNEDDVDAH  
YKDGIEINFQVQERHQYVVERRIHRMFISETRHS DAGEYTFVAGRNRSSVTLVNAPEPPQVLQELQPVTVQS  
GKPARFCAVISGRPQPKISWYKEEQLLSTGFKCKFLHDGQEYTLLEAFPEDAAVYTCEAKNDYGVATTSAS  
LSVEVPEVVS PDQEMPVYPPAIVTPLQDVTV TSEGRPARFQCQVSGTDLKVS WYCKDKKIKPSRFRMTQFEDT  
YQLEIAEAYPEDEGTYAFVANNAVGVSSSTATLRLEAPESILHERIGQQIEMEMKEIASLLSAEEDFQTYSSD  
LRLPNANETLELLSEPPARSTQFDSRQEGAAPV FIREISDVEISVEDVAKLSVTVTGCPKPKIQWFFNGMLLT  
PSADYKVFVGDGTHSLIILFTRFQDEGEYTCLASNEYKAVCSAHLRISPRGERSTEMSEGEKKALEKPKGCP  
PPYFFKELKFPVHCGPGIPAVFEYSVHGEPAPTVLWFKEDMPLYSVCYTI IHSPDGSGETFIVNDPQRGDSGLY  
LCKAQN LWGESTCAEELLVLPEDTDVDPDASCKEESTLGVPGDFLET SARGPLVQGVDSRQEITAFAGETISKA  
ALIAEETLQLSYERSVDDSEVGTGVTIGAQKLPPVVLSTPQGTGELPSIDGAVHTQPRGPPPTLNLQAVQAQ  
TTLPEATLQFEEPEGVFPGASSAAQVSPVTIKPLITLTAEPKGNYPQSSTAAPDHALLSSVAEATLQLGEEK  
IPEVDKAQRALLLSQSLAEGCVESLEVPDVAVSNMRSEPQVPFQHTCTEGKILMASADTLKSTGQDVALRTEE

GKSLSFPLALEEKQVLLKEEQSEVVAVPTSQTSKSEKEPEAIKGVKEVREQELLSKETLFPSPMPEEQRLHLKT
QVRRALQAAVAREQANLFSEWLRNIDKVEVTAVNFTQEPKRILCTYLITSVSSLTEELTVTIEDIDPQMANLE
TGLKDALCSIVCEERNILMAEDPRIHEEDKIDVQGGRDHLSDAQKQVETVIEAEADSKYLVSKKEEVSWSKVESQ
LKDGDVTNEVPQAETLKLAEESGTQKTSTEMSQEEAEGTLADLCPAVLKHLDVTI SEEEDTVHLLTSSISNAKEV
HWYFKGNLVP SDGKFKCLKEQNAYTLVIEAVKTEDEGEYVCEASND SGKAKTSAKLTGGERAAPVIKRRIEPL
EVALGHLAKFTCEIQGAPNVRWFQWFKAGREIYESDKCSIRSSNYVSSLEILRTQVVDCGEYTCASNEYGSVS
CTATLTVTVPTAEKKVRKLLPEPKPQPKKEEVVLKSVLRKKPEEEEEPKVEPKKVEKAKKPEEPQPPKAVEVEA
PPEPTPKERKVPPEPAKVPEIKPAIPLPGPEPKPKPEPEVKTMKAPPIEPAPTPIAAPVTAPVVGKKAEEKPKD
EAAKPKGPIKGVAKKTPSPIEAERKLRPGSGGEEKPPDEAPFTYQLKAVPLKFVKEIKDVLTEAESVGSASAI
FECLVSPSTAITTMMKDGNSIRESPKHRFIADGKDRKLIHIDVQLSDAGEYTCVLRRLGNKEKTSTAKLIVEEL
PVRVFKTLEEEVTVVKGQPLYLSCNELNKERDVVWRKDGKIVVEKPGRIVPGVIGLMRALTINDADDTDAGTYT
VTVENANNLECCSSCVKVEIIREWLVKPIRDQHVKPKGTAVFTCDIAKDTPNIKWFKGYDEIPELNDKTEIL
KEGNHLFLKVKNAMPEIDIEYAVEIEGKRYPAKLLTGEREVELLKP IEDVTIYEKESASFDAEISEEDI PGEW
KLGELLRPSPTCEIKAEGGKRFLLHKVKLDQAGEVLYQACNAITTAITLTVKEIELDFAVPLKDVTVPEKRO
ARFECVLTREANVIWSKGPDIKASDKFDIADGKKHILVINDSQFDDEGVYTAEEVEGKTSQAFLVFTGIRLK
FISPLEDQTVKEGQTATFVCELSHEKMHVVWFKNDVKLHTRTVLMSSEGKTYKLEIRETTLDDISQIKAQVK
NLSSTANLKVLEADPYFTVKLHDKTGVEKDEIILKCEVSKDVPVKWFKDGEEIVPSPKHSVKTDGLRRLIKIK
KAECLKDKEGYVDCDGTDTTKANVTVEARLIKVEKPLYGVEVFGETARFEIELSEPDVHGQWKLKGEPLTASP
DCEI IEDGKKHVLVLYNCQLDMTGEISFQAANAKSAANLKVKEPLIFITPLSDVKVFEKDEAKFECEVSREP
KTFRWLKGTEITGDDRFELIKDGRHSLVIKSAAFEDEAKYMFEAEDKRTSGKLIIEGIRLKFLLPLKDVTA
KERENAVFTVELSHDNIPVSWFKNDQRLHTSKRVSMHDEGKTHSITFKDLSIDDTSQIRVEAMGISEAKLTV
LEGDPYFTGKLGQDYTGVEKDEVILQCEISKADAPVKWFKDGKEIKPSKNVVIKADGKKRMLILKALKSDIGQ
YTCDCGTDQTSKGLDIEDREIKLVRPLYSVVEMETETARFETEISEDDIHANWKLKGEALLQTPCECIKEEGK
IHVLIHLNCRLDQTTGGVDFQAANVKSSAHLRVKPRVIGLLRPLKDVTVTAGEATATFDCELSYEDI PVEWYKLG
KKLEPNDKVVTRSEGRVHTLTLRDVKLEDAAGEVQLTAKDFKTQANLKVKEPPVEFTKPLEDQTVVEEATAVLE
CEVSRNAKVKWFKNGTEILKSKKYEIVADGRVRKLIHIGCTPEDIKTYTCDAKDFKTSNCLNVVPPHVEFLR
PLTDLQVKEKTEVDTAEQTSFRISEAKKDDKGRYKIVLQNKHKGKAEGFINLQVIDVPGPVRNLEVTETFDGEVSL
AWEEP L TDGGSKIIGYVVERRDIKRTWVLTDRADSCEFTVTGLQKGGVEYLFVRSARNRVGTGEPVETDSP
VEARSKYDVP GPPLNVTITD VNRFGVSLTWEPP EYDGGAEITNYVIELRDKTSIRWDTAMTVRAEDLSATVTD
VVEGQEYSFRVRAQNRIGVGKPSAATPFVKVADPIERPSPVNLNASEQTQSSVQLTWEPP LKDGGSPIILGYI
IERREEGKDNWIRCNMKNPVELTYKVTGLQKGNKYLYRVS AENAAGVSDPSEILGLPTADDAFVEPTMDLSAF
KDGLEVIVPNPIKILVPSTGYPRPKATWTFGDQVLEEGDRVKMKTISAYAELVISP SERTDKGIYTLTENPV
KSI SGEIN NVVIAPPSAPKELKFSDI TKDSVHLTWEPPDDDDGGSPLTG YVVEKRDMSRKTWTKVMDVFTDLEF
TVPDLVQGKEYL FKV CARNKCGPEPAYTDEPVNMSAPATVPDP PENVKWRDRTANSIFLTDWPPKNDGGSRI
KGYIVEKCPRGSDKWVACGEPV PDKMEV TGLEEGKWAYRVKALNRQ GASKPSKPTTEEIQAVDTQEAPEIFL
DVKLLAGITVKAGTKIELPATVTGKPEPKITWTAKATLLKPDQRIT IENVPKSTVTITDSKRS DTGTIIEA
VNVCGRATAVVEVNL D KPGPPA AFDITDVTNESCLL TWNPPRDDGGSKI TNYVVERKATDS DVHKLSSTVK
DTNFKATKLT PNKEYIFRVAENMYGVGEPVQAAPIIAKYQFDP PGPPTRELP SDITKDAVTLTWCEPDDDDGG
SPITGYWVERLDPD TDKWVRCNKMPVKDTTYRVKGLTNKKKYRFRVLAENLAGPGKPSRSTEPILIKDPIDPP
WPPGKPTVKDIGKTSLVLNWTKPEHDGGAKIESYVIEMLKTGTDEWVRVAEGVPTTEHLLTGLMEGQEYSFRV
RAVNKAGESEPSEPSDPVLCREKLYPPSPRWLEVINITKN TADLKWTVPEKDGGSPITNYIVEKRDVRRKGW
QTVDTTVKDKTCTVTPLEGS LYVFRVAENAIGQSDYTEIGDSVLAKDTFTTPGPPYALT VVDVTKRHVDLK
WEPKNDGGRPIQRYIEKKEKLGTRWVKAGKTS GPD CNFRVTDVIEGTEVQFQVRAENEAGVGHSEPTEIL
SIEDPTSPSPPLDLHVT DAGRKHIAIAWK PPEKNKGSPIIGYHVEMCPVGTEKWMRVNSRPIKDLKFKVKEEG
IVPDKYASDLRVRANVAVGSEPS EISENVVAKDPDCKGPTIDLETHDIVVIEGEKLNIPVFRVAVPVTVSWHK
DGKEVKASDRLTMKNDHISAHLEVPKSVHADAGVYITITLENKLG SATASINVKVIGLPGPKDIKASDITKSS
CKLTWEPP EFDGGSPIILHYVLERREAGRRTYIPVM SGENKLSWTVKDLIPNGEYFFRVKAVNKIGGGEYIELK
NPVIAQDPKQPPDPVDVEVHNPTAKAMTITWK PPLYDGGSKIMGYIEKIKTGEDRWKRCNEHLVPLTYTA
KGLEEGKEYQFRVRAENAAGIGEPSRATPPTKAVDPI DAPKVI LRTSLEV KRGDEIALDATISGSPYPTITWI



KDENVIVPEEIKKRAAPPVRRKKGEAESEEPFSLPLTERLSINNSKQGESQLRIRDSLRPDHGQYMIKVENDH
GVAKAPCSVSVLDTPGPPINFVVEDIRKDSVLCKWEPPLDDGGSEIINYTLEKKDKTKPDSDWIVITSTLRNC
KYSVTKLIEGKEYLFRVRAENRFGPGPPCVSKPLLAKDPFEPDAPDKPIVEDVTSNSMLVKWNEPKDNGSPI
LGYWLEKREVNSTHWSRVNKTLLSSLKTKVDGLLEGLTYVFRVCAENAAGPGKFSPPSPDKTARDPI SPPGPP
VPRVADTSSTTIELEWEPFAFNNGGGEIMGYFVVKQLVGTNEWRSRCEKMIKVRQFTVKEIREGADYKLRVSAV
NAAGEGPPGETEPTVAEPQEPPTVELDVSVKGGI QIMAGKTLRIPAEVTGRPVPTKVWTTIEEGELDKERVI I
ENVGTKSELI IKNALRKDHGRYVITATNSCGSFAAVRVEVFDVPGPVLDLKPVVTRNKMCLLNWSDPADDGG
SDITGFI IERKDAKMHTWRQPIETERSKCDITGLIEGQEYKFRVIAKNKFGCGPPVEIGPILAVDPLGPPTSP
ERLTYTERTKSTITLDWKEPRSDGGSPIQGYIIEKRRHDKPDFERVNKRLCPTTSFLVENLDEHQMYEFRVKA
VNDVGESEPSLPLNVVIQDDEVPTIKLRLAVRGDTIKVKAGEPVNIPADVTGLPMPKIEWSKNEKVIDKPTD
TLNITKEEVRSEAKTELSIPKAAREDKGTYTITASNRLGSVFRNVHVEVYDRPSPPRNLAVTDIKAESCYLT
WDAPLDNGGSEITHYIIDKRDASRKKSEWEEVTNTAVERRYGIWKLIPNGQYEFVRVAVNKYGISDECKSDKV
VIQDPYRLPGPPGPKVLERKSGMLVSWTPPLDNGGSPITGYWLEKREEGGTYWSRVSRAPITKVGLKGVEF
NVPRLIEGVKYQFRAMAINAAGIGPPSEPSDPAVAGDPIYPPGPPSCPEVKDKTKSSI SLAWKPPAKDGGSPI
KGYIVEMQEEGTTDWPVNEPDKLLTACECVVNLKELRKYRFRVKAVNEAGESEPSDTTGEIPATDIQEVPE
VFIDIGAQDCLVCKAGSQVKIPAVIKGRPTPKSSWEFDFGKAKKAMKDGVDHIDEDAQLETAENSSVII IPECT
RAHSGKYSITAKNKAGQKTANCRVKVMDAPGPPKDLKVS DITRGSCLRSWKMPDDDGGDRIKGYVIEKKTIDG
KAWTKVNPNCGSTTFVVPDLI SEQQYFFRVRAENRFGIGPPAETIQRTTARDPIYPPDPPIKLIKGLITKNTV
HLSWKPPKNDGGSPVTHYIVECLAWDPTGKKKEAWRQCNRRDVEELEFTVEDLIEGGEYEFVRKAVNEAGVSK
PSATVGPVIVKDQTCPPAIELKEFMEVEEGTDVNIVAKIKGVFPPTLTWFKAPPKPKDSKEPVVYDTHVNVKQV
VDDTCTLVI PQSRRSDTGLYSITAVNNLGTASKEMRLNVLGRPGPPVGP I K F E S I S A D Q M T L S W L P P K D D G G S
KITNYVIEKREANRKTWVRVSSEPKECMYTIPKLLGHEHYVFRIMAQNKYGIGEPLDSEPETARNLFSVPGAP
DKPTVSSVTRNSMTVNWEEPEYDGGSPVTGYWLEMKDTTSKRWRVNRDPIKAMTLGVS YKVTGLIEGSDYQF
RVYAINAAGVGPASLSPDPTARDPVAPPGPPFPKVTDWTKSSVDLEWSPPLKDDGGSKITGYIVEYKEEGKEE
WEKGDKEVRGKLLVVTGLKEGAFYKFRVRAVNVAGVGEVGEVTDVIEMKDRIVSPDLQLDASVRDRIVVHAG
GVIRI IAYVSGKPPPTVTWSMNERALPQEAAIETTAISSMV IKNCQRSHQGVYSLAKNEGGERKKT IVDV
LDVPGPVGIPFLSDNLTWFSPEDDGGSPITNYVIQKREADRRAWTPTVYTVTRQNTATVQGLIQGKS
YFFRIAAENSIGMPPFVETPNALVIRDPI TVPERPEDLEVKEVTKNTVSLTWNPPKYDGGSEIINYVLESRLI
GTEKFHKVTNDNLLSRKYTVKGLKEGDTYEVRSVAVNIVGQKPSFCTKPI TCKDELAPPTLDDLFRDKLTVR
VGESFALTGRYSKPKPKIDWFKDEADVLEDDRTHIKTPTTLLALEKTKAKRSDSGKYCVVENSTGSRKGF
QNVVDRPGPPVGPVIFDEVTKYMVISWKPPPLDDGGSEITNYIIEKKELGKDIWMPVTSASAKTCKVPKLL
EGKDYIFRIHAENLYGISDPLVSDSMKAKDRFRVPDAPEQPVVTEVTKDSALVTWNKPNDDGGKPI TNYIIEKR
ETMSKRWRVVTKEPIHPYTKYRVPDLLEGQCQYEFRVSAENEIGIGDPSPPSKPVFARDPIAKPSPPINPEAID
TTCNSVELTWQPPRHDDGGSKILGYIVEYQKVGDEEWRRANHTPESCPETKYKVTGLRDGQSYKFRVLAVNEAG
ESDPAHVPEVVLVDRLEPPELIL DANMAREQHIRVGDTRLLSAIIKGVFPKVTWKKEDEAPTKAQIDVTP
VGSKLEIRNAAHEDGGIYSLTVENPAGTKTVSVKVLVLDKPGPPRDLEVSEIRKDSCYLTWKEPLDDGGSVVT
NYVVERKDVATAQWSPSTTSKKKSHMAKHLTEGNQYLFRVAAENQYGRGPFVETPKPIKALDPLHPPGPPKD
LHHVDVDKTEVSLVWNKPPDRDGGSPITGYLVEYQEEGDKDWIKFVKVNLDCVVTGLQQGKTYRFRVKAENII
GLGLPDTTIPIECQEKLVPPSVELDVKLIIEGLVVKAGTTVRFPAIIRGVVPVPTAKWTTDGTEIKTDDHYTVET
DSFSSVLTIKNCLRKDTGEYQLTVSNAAGTKTVAVHLTVLDVPGPPTGPINILDVTPEYMTISWQPKDDGG
PVINYIVEKQDTRKGTWGVVSAGSSKLLKLVPHLQKGCEYVFRVKAENKMGVGPPLDSIPTVAKHKFSPPSP
GKPVVTDITENAATVSWTLPKSDGGSPITGYVVERREITGKVVVRVNTPIADLKFRVTGLYEGNTYEFRVFAE
NLAGLSNPSPPSDPIKACRPKPPGPPINPKLKDKSKESADLVWTKPLSDGGSPILGYVVEYQKPGTAQWDRI
NKDELIRQCAFVRVPLIEGNEYRFRIRAANIVGEGEPRELAESVIAKDILHPPPEVELDVTCDRVI TVRVGQTI
RILARVGRPEPDI TWSKEGKVLVKDKRVDL I HDLPRVELQIKEAVRADHGKYIISAKNSSGHAQGSAINVNL
DRPGPCQNLKVSNTKENCTISWENPLDNGGSEITNFIVEYRKNQKGSIVASDVTKRLVKANLLANNEYF
RVCAENKVGVPPTIETKTPILAINPIDRGPENLHIADKGTFFVYLKWRPDPYDGGSPNLSYHVERRLKGS
DWERVHKS IKETHYVMDKVENQIYEFRVQTKNEGGESDWVRTEEVVVKEDLQKPVLDLKL SGLTVKAGDT
IRLEAGVRGKPFPEVAWTKDKDATDLTRS PRVKIDTSAESSKFSLTAKRSDGGKYVITATNPAGSFVAYATV
NVLDPKPGVNRNLKIDTVSSDRCTIRWDPPEDDGGCEIQNYILEKCESKRMVWSTYSANVLTPSATVTRLIEGN
EYIFRVRAENKIGTGPPTESKPVIAKTKYDRPGRDPPEVTKVSKEEMTVVWNAPEYDGGKSI TGYYLEKKEK
HAVRWVPVNSAIPERRLVQNLLPGHEYQFRVKAENEVIGEPSLPSRPVAKDPIEPPGPPNFKVVDTTK
SSITLAWGKPVYDGGAPIIGYVEMRPKIADASVDEGWKRCNAAAQLIRMEFTVTSLDENQYEFRVCAQNQV
GIGRPAELKEAIKPKIELEPPEIDL DASMRRKLVVVRAGCPIRLFAIVRGRPAKVTWRKVGDVNVVRKGGVDL
VDTMAFLVIPNSTRDDSGKYSLTLVNPAGEKAVFVNVKVLDTPGPVADLKVSDVTKTSCHVSWAPPENDGGSQ
VTHYIVEKREAERKTWSTVTEPVKKT SFNVTNLVPGNEYFFRVTA VNEYGPGVPTDIPKPVLASDPLSEDP
RKLEVTEMTKNSATLAWLPLRDGGAKIDGYIISYREEDQPADRWTEYSVVKDLSLIVTGLKEGKKYKFRVAA
RNAVGVSMPREAEVYEAKEQLLPKILMPEQITIKAGKCLRVEAHVYKPNPICWKKKGDDDEVVTS SHLAIH

KADGSSVLI IKDVTRKDSGYYSILTAENSSGSDTQKIKVTVMDAPGPPQPPFDISEIDADACSLSWHIPLEDGG  
SNITNYIVEKCDVSRGDWVTALASVTKTSCRVGKLI PGQEYIFRVRAENRFGISEPLTSPKMLAKFPFDVDPSE  
PKNARVTKVKNKDCIFVAWDRPDSGGSPITGYLIERKERNSSLWVKANDTIVRSTEYPCAGLVEGLEYSFRIY  
ALNKAGSSPPSKPTEYVTARMPVDPGKPEVVDVTKNSASLIWARPKHDGGSRIIGYFVEACKLPGDKWVRCN  
TTPHQIPQEEYTATGLEENAQYQFRAIAKTAVNISQPSEPSDPVTILAENVPPRIELSVEMKSLTLVKAGTNV  
CLDATVFGKPMPTVSWKKDTPIKQAEGIKMAMKRNLCLELFSVNRKDSGDYTTITAENSSGSKSATIKLKVL  
DKPGPPASVKINKMYADRAMLSEWEPLEDGGSEITNYIIDKRETSRPNWAQVSATVPITSTCTVEKLIIEGHEYQ  
FRICAENKYGVGDPILTEPAIAKNPYDPPGRCDPPVINSITKDHMTVSWKAPADDGGSPITGYLVEKRETQAV  
NWTKNVRKPIERTLKATGLQEGTEYEFVTAINKAGPGKPSDASKAVYAQDPLYPPGPPAFPKVYDTRSSV  
SLSWGKPAYDGGSPIIGYLVEVKRADS DHWVRNLPKELQKTRFEVTLGMENTEYQFRVYAVNKIGYSDPSDV  
PDKHCPKDI LIPPEGELDAELRKTILRAGVTMRLYVPVKGRPPPKITWSKPNVNLRRERIGLDIKSTDFDTFL  
RCENVNKYDAGKYILTLNENSCGKKEYTIVVKVLDTPGPPVNVTVKEVSKDSAYVTWDPPIIDGGSPIINYVVE  
KRDAERKSWSTVTTECSKTSFRVSNLEEGKSYFFRVFAENEYIGDGPGETRDAVKASET PGPVVDL KALAITK  
SSCTIGWKKPRSDGGSRITGYVVDLFTENKQVRMKSLSLQYSTKDLKEGKEYTFRVSAENENEGETPSEIV  
VVAKDDVVAPDLDLKDLPLCYLAKENSFRLKIPKIKGPPASVSWKKGEDPLATDTRVSVESTAVNTTLVVY  
DCQKSDAGKYITLKNVAGTKEGTLSIKVVGKPGIPTGPIKFDEVTAEAMTLKWGPPKDDGGSEITNYVLEKR  
DSVNNKWVTCASAVQKTTFRVTRLHEGIEYTFRVSAENKYGVGEGKSEPIVAKHPFDVDPAPPPIVDVRRH  
DSVSLTWTDPKKTGGSPITGYHIEFKERNSSLWKRANKTPIRMKDFKVTGLTEGLEEYFRVMAINLAGVKGPS  
LPSEPVVALDPIDPPGKPEVISVTRNSVTLIWEPEKYDGGHKLTYIVEKRDLPKSKWMKANHVNPDCAFV  
TDLVEGGKYEFRIRAKNTAGAI SAPSESTGTIICKDEYEAPTIVLDPTIKDGLTVKAGDSIVLSAISILGKPL  
PKSSWSRAGKDIRPSDIAQITSTPTSSMLTVKYATRKDAGEYTI TATNPFGTKEEHVKVSVLDVPGPPGPIEI  
SNVSAEKATLTWTPPLEDGGSPIKAYVLEKRETSRLLWTVVSEDIQACRHVVTKLIQGNEYLFRVSAVNHYGK  
GEFVQSEPVKMDRFGPPGPPGKPEISNVTKNTATVSWKRPTDDGGSEITGYHVERREKKGLRWVRATKTPVS  
DLRCKVTGLQEGNTYEFVSAENRAGIGPPSDASNVLMDVAYPPGPPSNAHVTDTTKKSASLAWGKPHYDG  
GLEITGYVVEHQVGDDAWIKDGTGTALRITQFVVDLQTKKEYNFRI SAINDAGVGEPAVIPNVEIVEKEVA  
PDFELDAELRRTLVVRAGLSIRIFVPIKGRPAPEVWTWTKDNINLKHRIANIENTESFTLLIIEPCNRYDTGKFV  
MTIENPAGKKS GFVNRVLDTPGVLNLRPTDITKDSVTLHWDLPLIDGGSRITNYIVEKREATRKS YSTATVTT  
KCHKCTYKVTGLTEGCEYFFRVMAENEYGVGEPTETTEPVRASEAPLPDSL NIMDITKNTVSLAWPKPRHDG  
GSKITGYVIEAQRKGSQWTHISTVKGLECVVRNLTEGEEYTFQVMAVNSAGRSAPRESRPVIVEKQTM LPEL  
DLRGIYQKLV IARAGDNIKVEIPVLGRPKPTVTWKKGDQILKQTRQVNVENTATSTILNINECVRS DSGPYPL  
TAKNTVGEVGDVITIQVHDI PGPPPTGPIKFDEVSSDFVTF SWEPPENDGGVPI SNYVEMRQTDSTTWELAT  
TVIRTTYKATRLTTGVEYQFRVRAQNRYGVGPGITSASVVANYPFKVP GPPGTPQVTA VTKDSMTISWHEPLS  
DGGSPILGYHIERKERNGLWQTVSKALVPGNIFKSTGLTDGIA YEFRVIAENMAGKSKPSKSPSEPMFALDPI  
DPPGKPVPLNITRHTVALKWAKPEYTG GFKITSYVVEKRDLPNGRWLKANF SNILENEFTVSGLTEDAA YEFR  
VIAKNAAGAI SPPSEPSDAITCRDLEAPRIMVDVRFKDTITL KAGEAFKLEADVSRPPPTMEWTKDGKELE  
GTGKLEIKIADFTHLINKDSSR TDSGAYILTATNPGGF AKHIFNVKVLDRPGPPEGFLAVSDVTEKCVLSW  
LPPLDGGAKIDHYIVQKRETSRLAWTNVATEVQVTKLKVTKLLK GNEYIFRVMAVNKYGVGEPELESEPV LAV  
DPYGPDPDPKNPEVTTITKDSMVVCWGH PDSGGSEIINYIVERRDKAGQRWVKCNK KALD LRFKVSGLTEG  
HEYEFRIMAENAAGISAPSATSPFYKACD TVFKPGPPGNRVLDTSRSSISIAWNKPIYDGGSEITGYMVEIA  
LPEEDEVQVVTTPAGLKATS YTTITSLIENQ EYKIRIYAMNSEGLGEPALVPGTPKAEERMLPPEI ELADLRK  
VVTIRACCTLR LRFVPIKGRPAPEVKWAREHGESLDKASIESTSSY TLLVVG NVNRFD SGKYILTVENSSGSKS  
AFVNVRLDTPGPPQNLKIKEVTKTSVTLTWE PPLLDGGSKIKNYIVEKRESTRKAYSTVATNCHKTSWKVDQ  
LQEGCSYFRVLAENEYIGLPAETAESVKASERPLPPGKITLTDVTRNSVLSWEKPEHDGGSRI LGYIVEM  
QSKGSDRWATCATVKVTEATITGLIQGEEYSFRVSAQNEKGISDPRQLSVPVIAKDLVIPP AFKLLFNTFTVL  
AGEDLKIDVFPFGRPPPAVTWHKDDIPLKQTTTRVNAESTENNSLLTIKEACREDVGHYTVKLTNSAGEATVTL  
NVIVLDKPGPPTGPVKMDEVTADSVTLSEWPPKYDGGSSINNYIVEKRD TSTTAWQIVSATVARTTIKACRLK  
TGCEYQFRIAAENRYGKSTYLNSEPVVAQYPFKVP GPPGTPFVTLASKDSMEVQWHEPVSDGGSKVIGYHLER  
KERN SILWVKLNKTPIPQTKFKTTGLEEGIEYEFVSAENIVGIGKPSKPSSECYAAHDPDPPGRPEAIIVTR  
NSVTLQWKKPTYDGGSKIITGYIVEKKELPDGRWMKASFTNIIDTQFEV TGLLEDHRYEFRVIARNAAGVFSEP  
SESTGAITARDEVEPPRISMDPKYRDTVVVQAGESFKIDADIYKGP IPTTQWVKGDQELSSSTARLEIKSTDF A  
TSLSVKDAVRVDSGNYILKAKNVAGEKSVTINVKVLDRPGPPEGPVAISGVTAEKCTLAWK PPLQDGGSDITN  
YIVERRETSRLVWTLVDANVQTL SCKVVLKLEGNEYIFRIMAVNKYGVGEPELESESLIAKNPFVVPDAPKAPE  
VTAVTKDSMILVWERPASDGGSEILGYVLEKRDKEGIRWTRCHKRLIGELRLRV TGLLENHNYEFVSAENAA  
GLSEPSPPSAYQKACDPIYKPGPPNNPKVMDVTRSSVFLSWTKPIYDGGCEIQGYIVEKCDVSVGEWMTCTPP  
TGINKNTNLEVEKLEKHEYNFRI CAINKAGVGEHADVP GPMVEEKLEAPDIDLDEL RKVINIRAGGSLR L F  
VPIKGRPTPEVKWGVGDGDIRDAAIIDVTSSTSLVLDNVNRYDSGKYTLTLENSSGTKSAFVTVRVLDT PSP  
PVNLKVTEITKDSV SITWEPPLLDGGSKIKNYIVEKREATRKS YAAVVTNCHKNSWKIDQLQEGCSYFRVTA  
ENEYIGL PARTADPIKVAEVPQPGKITVDDVTRNSVLSWTKPEHDGGSKI IQYIVEMQAKNTDKWSECAR

VKSLDAVITNLTQGEYYLFRVIAVNEKGRSDPRSLAVPI IAKDLVIEPDVRPAFSSYSVQVGGQDLKIEVPI SG  
RPKPSISWTKDGMPLKQTRINVTDSLDTLTLISIKETHKDDGGQYGITVSNVVGQKTAIEIITLTKDPDPKG  
PVKFDEISAESITLSWNPPLYTGGCQITNYIVQKRDTTTTVDVVSATVARTTLKVTKLKTGTEYQFRI FAEN  
RYGQSFALESEPVVAQYPYKEPGPPGTPFVTAISKESMVVQWHEPINNGGSPVIGYHLERKERN SILWTKVNK  
TIIHDTQFKALNLEEGIEYEFRVYAENIVGVGKASKNSECYVARPCDPPGTPEAIIVKRNETLQWTKPVYD  
GGSMITGYIVEKRDLPEGRWMKASFTNVIETQFTVSGLTEDQRYEFVIAKNAAGAISKPSDSTGPI TAKDEV  
ELPRISMDPKFRDITIVNAGETFRLEADVHGKPLPTIEWLRGDKEIEESARCEIKNTDFKALLIVKDAIRIDG  
QQYILRASNVAGSKSFPVNVKVLDRPGPPEGVPQVTGVTAEKCTLAWSPPLQDGGSDISHYVVEKRETSRLAW  
TVVASEVVTNSLKVTKLLEGNKYIFRIMAVNKYGVGEPLASAPVLMKNPFVLPGLPKSLEVKENIAKDSMTVCW  
NRPDSDDGGSEIIGYIVEKRDRSGIRWIKCNKRITDLRLRVTGLTEDHEYEFRVSAENAAGVGEPSPATVYYK  
ACDPVFKPGPPTNAHVVDTTKNSITLAWSKPIYDGGSEILGYVVEICKADEEEWQIVTPQTGLRVTRFEIAKL  
IEHQEYKIRVCALNKVGLGEAASVPGTVKPEDKLEAPELDDLSELRKGI VVRAGGSARIHIPFKGRPTPEITW  
SKEEGEFTDKVQIEKGINFTQLSIDNCDRNDAGKYILKLENSGSKSAFVTVKVLDTPGPPQNLAVKEVRKDS  
VLLVWEPPIDGGAKVKNYVIDKRESTRKAYANVSSKCNKTSFRVENLTEGAIYYFRVMAENEFVGVPTETS  
DAVKASEPPSPGKVTLDVVSQTSASLMWEKPEHDGGSRI LGYVEMQPKGTEKWSVVAESKVCNAVVSGLSS  
GQEQYQFRVKAYNEKGS DPRVLGIPVIAKDLTIQPSFKLPFNTYSVQAGEDLKIEIPVIGRPRPKISWVKDGE  
PLKQTRVNVEETATSTILHIKESKDDFGKYSVTATNSAGTATENLSVIVLEKPGPPVGPVKDEVSADFVV  
ISWEPAYTGGCQISNYIVEKRDTTTTNWQMVSAVARTTIKISKLKTGTEYQFRI FAENRYGKSTPLDVKPV  
VVQYPFKEPGPPGTPFVTSISKDQMLVQWHEPVDGGSKVTGYHLEQKEKNSILWVKLNKIPIQDTKFKTTGL  
DEGLEEYFRVSAENIVGIGKPSKVSECYVARPCDPPGRPEAIVITRNSVTLKWKPKVYDGGSKI TGYIVEKK  
DLPDGRWMKASFTNVVETEFTVTGLVEDQRYEFVIA RNAADNFSEPSSESSGAI TARDEIDAPNASLDPKYRD  
VIVHAGETFVLEADIRGKPI PDI IWSKDGNLEETAARMEIKSTLQKTTLIVKDCIRTDGGQYTLKLSNVGG  
TKTIPITVKVLD RGPPEGLKVTGVTAEKCYLAWNPPLQDGGASISHYIEKRETSRLSWTQVSNVEVQALNY  
KVTKLLPGNEYIFRMAVNKYGIGEALSEPVIAACNPKRPGPPSTPEASAITKDSMVLWTWRPVDGGAIE  
GYILEKRDKEGIRWTKCNKKTLDLRFVVTGLTEGHSYEFVRAAENAAGVGEPEPSVFFYRACDALYPPGPPS  
NPKVTDTSRSTSVSLAWNKPIYDGGAPVVRGYIELKKAADAEWTTCTPPSGLQKQFTVTKLKENTENFRICA  
FNTEGVGEPATIPGSVVAQERMEAPEIELDADLKRVTTHVLRASATLRLRFVTIKGRPEPEVKWEKAEGILTERAQ  
IEVTSSYTMLVIDNVTRFDSGRYNLTLENNSGSKTAFVNVRLDSDSPAPVNLTIREVKKDSVTLTSLWEPLIDG  
GAKITNYIVEKRETRKAYATITNCTKNFKIENLQEGCSYFRVLA SNEYGIGLPAETAEPVKVSEPLPP  
GRVTLVDVTRNTATIKWEKPESDGGSKITGYVEMQTKGSEKWSACTQVKTLETTI SGLTAGEEYFRVAAVN  
EKGRSDPRQLGVPVIAKDIEIKPSVELPFNTFNVKANDQLKIDI PFKGRPQATVAWKKDGOVLR ETRVNVAS  
SKTVTTLTSLIKEASREDVGTIELCVSNTAGSITVPITVIVLDRPGPPGPIRIDEVSCDNVSI SWNPPEYDGGCQ  
ISNYIVEKRETTSTTWQVVSQAVARTSIKIVRLTTGSEYQFRVCAENRYGKSSYSESSAVVAEYFPSPGPPG  
TPKVHATKSTMVVSWQVPVNDGGSQVIGYHLEYKERSSILWSKANKVLIADTQMKVSGLDEGLMYEYRVYAE  
NIAGIGKCSKACEPVPARDPCDPPGQPEVTNITRKS VSLKWSKPRYDGGAKITGYIVERREL PDGRWLQCNFT  
NVQETTYFEVTELTEDQRYEFVRFARNAADSVSEPESTGPIITVKDDVEAPRIMMDVKFRDVIIVKAGEVLKIN  
ADIAGRPLPVISWAKDVEIEERAKTEIVSTDYTTTTLTVKDCVRRDTGQYVLT LKNVAGTRTMAVNCKVLDKP  
GPPAGPLEINGLTAEKCSLSWGRPQEDGGADIDYIVEKRETSRLAWTICEAELRTTCKVTLLKLGNEYIFR  
VTGVNKYGVGEPLESMVAVKALDPFTTSPPTSLEITSVTKDSMTLCWSRPETDGGSDISGYIERREKNSLRW  
MRVNKKPVYDLRVKSTGLREGCEYERVFAENAAGLSLPSETSPLVRAEDPVFLPSPSKPKIIVDSGKTTITI  
GWVKPLFDGGAPITGYTVEYKKEETDWKVAIQSFRGTEY TMSGLTTGDEYVFRVRS LNKMGASDPSDSSDPQ  
VAKEREEEPVFDVDSEMRKTLIVKAGSSFTMTVPFRGRPIPNVSWSKPDTDLRTRAYIDSTDSRLLTIENAN  
RNDSGKYTLTIQNVLSAASMTFVVKVLDSPGPPANITVREVTKETAMLSWDVPENDGGAPVKNYHIEKREASK  
KAWSVTNNCNRLSYKVTNLQEGAIYYFRVSGENEFGVGVPAETKEGVKITEKPSPEKLGVT SVSKDSVLS  
WLKPEHDGGSRIIHYVVEALEKGQKTWVKCAVVKTTTHVVSGLRESHEYFFRVFAENQAGLSDPRELLLPVLI  
KDQLEPPEIDMKNFPSHTVYVRAGSNLKVDIPI SGKPLPKVTL SRDGVPLKATMRFNTEITAENLTINLKE SV  
TTDAGRYEITAANSSGTTKTFINIIVLDRPGPPTGPVAISDI TEESVTLKWEPPKYDGGSHVTNYIVLKRETS  
TAVWSEVSATVARTMIKVMKLTGEEYQFRIKAENRFGISDHIDSVCVVVKLPYTTGPPSTPWVSNVTRESI  
TVGWHEPVSNGGSAVTGYHLEMKDRNSILWQKANKMI IRTTHFKVTTISAGLIYEFVRYAENAAGIKP SHPS  
EPVLAI DACEPPRNVRITDISKNSVNL SWQQPAFDGGSKITGYIVERDLPDGRWTKASFTNVIETQFTVSGL  
TQNSQYEFVRFARNAVGSVSNPSEVVGPITCIDSYGGPVIDLPLEYTEVVKYRAGTSVKLRAGISGKPEPTIE  
WYKDDKELQTNALVCVENSTDLASILIKDANRLNSGSYELKLRNAMGSASATIRVQILDKPGPPGGPIEFKTV  
TAEKITLLWRPPADDGGAKITHYIVEKRETSRVVWDRVAENLEECIVTTTKI IKGNEYFRVRAVNKYGIGEP  
LESEPVVAKNAFVTPGPPSIPVTKITKNSMTVVWDRPTVDGGSEINGYFLERRDKKSLAWLVLKETIRDTR  
QKVVTGLTENS DYQYRVCVAVNAAGVGPFPSEPSDFYKAADPIDPPGPPAKIRIADSTKSSITLGWSKPVYDGGSD  
VTGYVEMKQGDDEEWTIVSTRGEVRTTEYVVSNLKPGVNYFYQVSAVNCAGQGEPI TMTPEAQAKDVLEEPE  
IDLDVALRTSVIAKAGEDVQLLIPFKGRPPPTVTWRKDEKNLGS DTRYSIQNTDSSLLVLPQVTRNDTGKYI  
LTIENGVGQPKSSTVSVKVLDTPAACQKLQVKHVS LGTVTLLWDPPLIDGGSPI INYVIEKR DATKRTWSVVS

HKCSGTSFKVTDLSEKTPFFFRVLAENEIGIGEPCEETTEPVKAAEVPAPIRDLMSMKDSTKTSVVLWSWTKPDFD  
GGSII TDYLVVERKKGKEQAWSHAGISKTCEIEIGQLKEQSVLEFRVSARNEKQSDPVTIGPLTVKELVITPE  
VDLSEIPGAQISVRIGHNVHLELPYKKGPKPSISWLKDGPLKESEYVRFKSTENKITLSIKNSKKEHGKKT  
VILDNAVCRNSFPITIIITLGPSPKPKGPIRFDEIKADSAIMSWDIPEDDGGGEITCYSIEKREASQTNWKMVC  
SSVARTTFKVSNLVKDSEYQFRVRAENRYGVSEPLASNIIVAKHQFRIPGPPGPKVIYNVTS DGM SLTWDAPV  
YDGGSEVTGFHVEKKERNSILWQRVNTSPISGREYRATGLIEGLDYQFRVYAENSAGLSSPSPDPSKFTLAVSP  
VDPGPTPDYIDVTRETITLKWNPPLRDGGSKIVAYSIEKRQGS DRWVR CNFTDVSECQYTVTGLSPGDRYEF  
I IARNAVGTISPPSQSSGLIMTRDENVPPTVEFGPEYFDGLVIKSGDSLRIKALVQGRPVPRVTFKDGVEIE  
RRMNMEITDVLGSTSLFVRDATRDHRGVYTVFAKNVSGSTKAEVTVKVQDTPGKVVGPIRFNTITGKMTLWW  
EAPLNDGCAPVTHYII EKRETSRLAWALIEDNCEALS YTAIKLITGNEYQFRISAVNKFVGRPLESDPVVAQ  
IQYTI PDAPGVPEPSNVTGNSITLWTRPESDGGSEIQHYILERREKKSTRWVKVISKRPIS ETRFKVTGLVE  
GNEYEFHVMAENAAGIGPASGISRLIKCREPVNPPSAPS VVKVTDTSKTTVSLWARPVFDGGMEIIGYI IEM  
CKADLGDWHKVNTEPCVKTRYTVTDLQAGEEYKFRVSAVNGAGKGDSC EVTGTIKAVDRLSAPELDIDANFKQ  
THIVRAGVSI RLFIA YQGRPTPTAVWSKPD SNLSIRADIHTTDSFSTLTVENCNRNDAGKYTLTVENNSGKKS  
ITFTVKVLDSPGPPGPIITFKDVTRGSATLMWDAPLLDGGARIHHYVIEKREASRRSQV VSEKTRQILKVSE  
LTEGVPPYFRVSAENEYGVGPEPEPIVATEQPAPRRLDVVDTSKSSAVLAWLKP DHDGGSRTSYLLEM  
RQKGSDFWVEAGHTKQLTFTVERLVENTEYEFVRVKAKNDAGYSEPREAFSSV I IKEPQIEPTADLTGITNQLI  
TCKAGSTFTIDVPI SGRPAKVTWKLEEMRLKETDRMSIATTKDR TLT TVKDSMRGDSGRYFLTLENTAGVKT  
FTITVVVIGRPGPVTGPIEVSSVSAESCVLSWTEPKDDGGTEITNY IVEKRESGTTAWQLINSVVKRTQIKVT  
HLTKYKEYCFRVSSENRFVSKPLESVPIVAEHPFVPPSAPTRPEVYVVSANAMSIRWEEPYHDGGSKIVGYW  
VEKKERNTILWVKENKVPCLCNYKV TGLVEGLE YQFRYALNAAGVSKASEASRP IMAQNPVDPGRPEVTD  
VTRSTVSLIWSAPVYDGGSKVGY I IERKPVSEVGDGRWLKCN YTI VSDNFFT V TALS EGDYEFVRLAKNAA  
GVISKGSESTGPVTCRDEYAPKAELDARLQGD LVTIRAGSDLVLDAAVGGKPEPKI IWTKGDKELDLCEKIS  
LQYTGKRATAVIKYCDRSDSGKYTLTVKNASGTKSVSVMVKVLDSPGPGKLT VSRVTEEKCTLAWSLPQEDG  
GAEITHYIVERRETSRLNWVIVEGECLTASYVVTRLIKNNEYTFRVRAVNKYGLGVPVESEPIVARNSTI PS  
QPGIPEEVGAGKEHII IQWTKPESDGGNEI SNYLDVKREKKS LRWTRV NKDYVVDYDTRLVKTSLMEGCDYQFR  
VTAVNAAGNSEPSEASNFI SCREPSYTPGPPSAPRVVDTTKRSI SLAWTKPMYDGGTDI IGYVLEMQEKD TDQ  
WCRVHTNATIRNNEFTV PDLKMGQKYSFRVAAVNAKGMSDYSETTAEIEPVERLEI PDLELADDLKKTIVIRA  
GASLRMLMSVSGRPSPVITWSKKGIDLANRAIIDNTE SYSLI VDKVNR YDAGKYTIEAENQSGKKSATVLVK  
VYDTPGPCPSVSVKEVSRDSVTITWEIPTIDGGAPVNNY I I EKREAA MRAFKT VTTKCSKTL YRISGLVEGTM  
YYFRVL PENIYGIGEPCE TSDAVLVSEVPLVPTKLEVV DVTKSTVTLAWEKPLYDGGSR L TG YVLEACKAGTE  
RWMKVVT LKPTVLEHTV I SLNEGEQYLFVRVAQNEKGVSEPREIVTPVTVQDLRVLPTIDLSTMPQKTIHVPA  
GRPIELVPIPTGRPPPTASWFFAGSKLRESERVTVETHTKVTKLTI RETTIRDTGEY TLELKNVTGTTSETIK  
VIILDKPGPPTGPIKIDEIDATSVTISWEPPELDGGAPLSGYVVEQRDAHRPGWLPVSESVTRPTFKFTRLTE  
GNEYVFRVAATNRFGIGSYLQSEVIECRSSISIPGPPE TLQIFDVS RDGMTLTWYPPEDDGGSQVTGY IVERK  
EVRADRWRVNVKVPVMTTRYRSTGLIEGLE YEHRVTA INARGTKP SRPSKPTVAMDP IAPGKPNRVTDT  
TRTSVSLAWSVPEDEGGSKVTGYLIEMQKVDQREWTKCNTTPTKIREYTLTHLPQGA EYFRVRLACNAGGPGE  
PAEVPGTVKVTEMLEYPDYELDERYQEGV FVRQGGVIRLTIPIKGPFPVCKWTKEGQDISKRAMIATSEHT  
ELVIKEADRNDSGTYDLVLENKCGKKT VYIKVKVIGSPNTPEGPLEYDDIQARSVRVSWRPPADDGGADILGY  
ILERREVPKAAWYTI DSRVGTSLVVKGLKENVEYHFRVSAENQFGISKPLKSEEPVI PKTPLNPPPEPPSNPP  
EVL DVTKSSVLSWSRPKDDGGSRV TGY IERKETSTDKWVRHNKTQITTTMYTVTGLVPDAEYQFRI IAQND  
VGLSETSPASEPVVCKDPFDKPSQPGELEILSISKDSVTLQWEKPECDGGKEILGYWVEYRQSGDSAWKKS NK  
ERIKDRQFTIGLLEATEYEFVFAENETGLSRPRRTAMSVKTKLTSGEAPGVRKEMADVTTKLGEAAQLSCQ  
IVGRPLPDIKWYRFGKELIQSRKYKMSDGRTHLTVMTDEQEDEGVYTCVATNEVGEVESSSKLLQLAAPQF  
HPGYPLKEKYGAVGSTLRHLV MYIGRPV PAMTWFHGQKLLQNSEKITIENTEHYTHLV MKNVQRKTHAGKYK  
VQLSNAFGTV DATLDVEIQDKPKPTGPIVIEALLKNSVVISWKPPADDGGSWITNYVVEKCEAKEGAEWQLV  
SSAISVTTCRIVNLTENAGYFRVSAQNTFGISEPLEVASIVI I KSPFEKPGVPGKPTITAVTKDSCVVAWKP  
PASDGGAKIRNYLERREKKQNKWIAVTTEEIRETVFSVQNLIEGLE YEFVVKCENLGGESEWSEISEPVTPK  
SDVPIQAPHFKEELRNLNVRYSNATLVCKVTGHPKPIVKWYRQK E IADGLKYRIQEFKGGYHQLI IASVT  
DDDATVYQVRATNQQGSSVSGTASLEVEVPAKIHLPKTLEGMGAVHALRGEVVS IKIPFSGKPDVITWQKGQD  
LIDNNGHYQVIVTRSF TSLVFSNGVERKDAGFYV VCAKNRFGIDQKTVELD VADVPDPPRGVKVSDVSRDSVN  
LTWTEPASDGGSKVTNYIVEKCATTAERWLRVQKARETRYTVINLFGKTSYQFRVIAENKFGLSKPSSEPT  
VTKEDKTRAMNYDDEVDREVT TTKASHSKTKELYKYMIAEDLGRGEFGIVHRCVETSSKRTFMAKFVVKV  
GTDQVLVKKEISILNIARHNILYLHESFESMEELVYEFISGLDIFERINTSAFELNEREIVSVRVQVCEA  
LEFLHSQNI GHFDIRPENI IYQTRKNSTIKI IEFQARQLKPGDNFRLLFTAPEY YAPEVHQHDVVSTATDMW  
SLGTLVYVLLSGINPFLAETNQQMIENIMNAEYTFDEEAFKEISLEAMDFVDRLLVKERKSRMTASEALQHPW  
LKQRIDRVSTKVIRT LKHRRYHTLIKKDLNMVVSAA RISC GGAI RSQRGVSVAKVVASIEIGPVSGQIMHA  
IGEEGGYVYVCKIENYDQSTQVTWYFGVRQLENSEKYEITYEDGVATMYVKDITKFDGTYRCKVNDYGED

SSYAEFLVKGVREVDYDCRRTKVKRRTDAMRLLERPPEFTLPLYNKTAIVGENVRFVGTITVHPEPRVTWY  
KSGQKIKPGDDEKKYTFESDKGLYQLTINSVTTDDDAEYTVVARNKHGEDSCKAKLTVTLHPPPTETTLRPMF  
KRLLANAECHEGQSVCFEIRVSGIPAPTLKWEKDGQPLSLGPHIEIVHEGLDYYALHIRDTLPEDTGYRVTA  
TNTAGSTSCQAHLQVERLRYVKQEFQSKKEERERHVQKQIDKTLRMAEILSGTETVPLTPVAQEAALREAAIYK  
PAVSTKTVKGEYRLQTEEKKEERKLMPYEVPEPRRFKQATVEEDQRIKQFVPMSPDMKWYKKIRDQYEMPGKL  
DRVVQKRPKRIRLSRWEQFYVMPPLPRITDQYRPKWRIPKLTQDDLEMRPARRRTPSPDYDLYYRRRRSLG  
DMSDEELLPIDDYLAMKRTEERLRLEEELELGFASPPSRSPRFELSSSLRYSSPPAHVKVEDRRRDFRYS  
TYHVPTKEETSTSYAELRERHAQASYRQPKLRQRIMAEKEEEELRPVTTTQRLSEYKSELDYMSKEEKSKK  
SKRQRQVTEITEIEEYIEISRRAQRESSSSVSRLLRRRRSLSPYIELMRPVSELIRSHRPAEYEDDAERR  
SPTPERTRPRSPSPVSSERSLSRFERSARFDIFSRYESMKAALKTQKTSEKYEVLSSQPPFTLDHAPRITLRM  
RSHRVPCGQNTFRILNVQSKPTAEVKWYHNGVELQESSKIHYTNTSGVLTLEILDCQTEDGGTYRAVCTNYKG  
EASDYATLDVTGGAYTTYASQRRDEEVPKSVFPELTKTEAYAVSSFKRTSELEAASSVREVKSQMTETRESLS  
TYEHYASAEMKSATSEEKSLEEKATVRKIKTTLAARILTKPRSI TVHEGESARFSCDTDGEVPVPTVTLWREGQ  
VVSTSARHQVTTTTKYKSTFEISSVQASDEGNYSVVVENS DGKQEAQFTLTVQKARVIEKAVTSPPRVKSPEPR  
VKSPETVKSPKRVKSPEPVTSHPKAVSPTETKPKTEKGQHLVPSAPPKITQSLKAEASKDIAKLCAVESSALC  
AKEVAWYKDGKCLKENGHFQFHYADGTYELKIHNLSSEDCGEYVCEVSGEGGTSKTSFQFTGQSFKSIHEQV  
SSISETTKSVQKTAESAESAQKTAESVEDKKAQKTVESAEAKKPAQKTAESPEAKKPAQKTAESPEAKK  
QEPILAPESISSKPVIVTGLRDTTVSSDSVAKFTIKVTGEPQPTITWTKDGKAIQAQGSYKLSNKEEFILILEIL  
KTETSDGGLYACTVTNSAGSVSSSCKLTIKAVKDTEAQKVVSTQKTSEVTSQKKASAQEEISQKALTSEEIKMS  
EVKSHETLAIKEEASKVLI AEVVKRSAAAASLEKSI VHEEVTKTSQASEEVKTHAEIKTLSTQMNITKGQRATL  
KANIAGATDVKWLNGTELPNSEERYGVSGSDQTLTIKQASHREEGILSCIGKTSQGVKQCQFDLTLSEELS  
DAPSFITQPRSQNINEGQNVLFCEVSGEPSPEIEWFKNLPISSNISVSRSRNVYTLIRNAAVSDSGKY  
TIKAKNFHGQCSATASLTVLPLVEEPPREVVLKTSDDVSLHGSVSSQSVQMSASKQEAFFSSSSASSMTE  
MKFASMSAQMSMSMQESFVEMSSSSFMGKSSMTQLESSTSRMLKAGGRGIPPKIEALPSDISIDEGKVLTVAC  
AFTGEPTPEITWSCGGRKIQNQEQGRFHIENTDDLTTLIIMDVQKQDGGLYTSLGNEFGSDSATVNINIRS  
M\*

>ENSMUSP00000097561\_c.82938:A>C\_p.K27647Q\_ENSMUST00000099981.10|Ttn-  
203|ENSMUSG00000051747|-|chr2:g.76568328:T>G  
MTTQAPMFTQPLQSVVVLGSTATFEAHVSGSPVPEVSWFRDQGVISTSTLPGVQISFSDGRARLMI PAVTKA  
NSGRYSLRATNGSGQATSTAELLVTAETAPPNFSQRLQSMVTRQGSQVRLQVRVTGIPTPVVKFYRDGAETIQS  
SLDFQISQEGDLYSLLIAEAYPEDSGTYSVNATNSVGRATSTAELVVQGEVVPAAKTKTIVSTAQISETRQT  
RIEKKIEAHFDARS IATVEMVIDGATGQLPHKTPPRI PPKPKRSPTPPSIAAKAQLARQQSPSPIRHSPSPV  
RHVRAPTPSPVRSVSPAGRISTSP IRSVKSPLLIRKTQTTMATGPEVPPPWKQEGYVASSTEAMRETTMTS  
STQIRREERWEGRYGVQEQVTISGAAAAAASASVSSSFTAGAITTGTKEVKQETDKSAAVATVVAADMARVR  
EPAISAVEQTAQRTTTTAVHIQPAQEQRKEAEKTAVTKVVAADKAKEQELKSRTREVMVTTQEQTHISHEQ  
IRKETEKAFVPKVVISATKAKEQETRIITGEITTKQEQKRIQTETIRQETEEIAASMVVATAKSTKLEAVGV  
QEETAIQDDQMHLETHEQMMKETRKTVPKIVIVATPKIKEQDLVSRSEAITTKRDQVQITQEKRRKEVETTAL  
STIAVATAKAKEQETVLRREAMATRQEHIQVTHGQVGVGKKAEEAVATVVAAVDQARVREPREPHTHEESHQ  
QTTLEYGYKEHISTTKVPEQPRRPAEPHVVPQAVKPAVIQAPSETHIKTTDQMGMHISSQVKKTTDISTERL  
VHVDKRPRTASPHFTVSKI SVPKTEHGYEAS IAGSAIATLQKELSATSSSTQKITKSVKAPTVPKGETRVRAEP  
TPSPQFPFADMPDPDYKQAGIEVKKEVGVISGSTVREEHFVLRGREAQVTETARVPAPAEVPTPPTLV  
SGLKNVTVIEGESVTLLECHISGYPSPKVTWYREDYQIESSIDFQITFQGGIARLMIREAFAEDSGRFTCSAVN  
EAGTVSTSCYLAVQVSEEFDKETTLTEKFATEEKRFVESRDVMTDTSITEEQAGPGEPAAPFFISKPVVQKL  
VEGGSVVFECQIGGNPKPHVYWKKSGVPLTTGYRYKVSYNKQTGECLVISMFTFADDAGEYTIIVIRNKHGETS  
ASALLEEADYEALVKTQQEMLYQTMSTFIQEPKVGIEIAPGFAYSEYEKEYEKEQALIRKKMAKDTVMVRTF  
VEDQEFHISSEFEERLIKEIEYRIKTTLEELLEEDGEEKMAVDISESEAIESGFDIRIKNYRILEGMGVTFHC  
KMSGYPLPKIAWYKDGKIRIRHGERYQMDFLQDGRASLRIPVVLPEDEGIYTAFAFASNIKGNIAICSGKLYVEPAA  
PFSAPTYMPTPEAVSRIRSVSPRSLSRSP IRMS PAMSPARMS PAMSPARMS PAMSPARMS PGRLEETDESQLERL  
YKPVFVLKPAFCKLEGQTARFDLKVVGRRPMPETFWFHNGQQIIVNDYTHKVVIKEDGTQSLIIVPASPSDSGE  
WTVVAQNRAGKSTISVTLTVEAVEHQIKPAFVEKLNKVNIEKGRLEMKVRATGNPNPDI VWLKNSDIIVPHK  
YPRIRIEGTRGEAALKIDSII SQDSAWYTATAINKAGRDTTRCKVNVEVEFAEPEPERKLIIPRGTYRAKEIA  
APELEPLHLRYGQEQWEEGLDYDKEKQKQPFKFKKLTSLRLKRFPAHFECRLTPIGDPTMVVWVLDHGKPLE  
AANRLRMALTEFGYCSLDYGAAYS RDSGVI TCRATNKYGTDRHTSATLIVKDEKSLVEESQLPDGKGLQRIEEL  
ERMAHEGALGTVTTDQKQKPDIVLFPPEVRLEGTARFRCRVTGYQPKVNWYLNGLIRKSKRFRVRYD  
GIHYLDIVDCKSDTGEVKVTAENPEGVTEHKVKLEIQQREDFRSVLRRAPEPKPEFHVHEPGKLQFEVQKVD  
RPVDTSETKEVVKLRAERI THEKVSESEELRSKFKRRTEEGYEAITAVELKSRKKDES YEELKKTKDEL  
LHWTKELTEEEKKALAEKGKTIPTFKPERIELSPSMEAPKIFERIQSQTVGQGS DAHFRVRVVGKPDPECEW  
YKNGVKIERSDRIYWYWPEDNVCELVIRDVTAEDSASIMVKAINIAGETSSHAFLLVQAKQLITFTQELQDVV



AKEKDTMATFECETSEPFIKVKWYKDGIEVHAGDKYRMSDRKVFHLSVLTIDTSDAEDYSCVLVEDENIKTT
AKLIVEGAVVEFVKELQDIEVPESYSGELECIISPENIEGKWHNDVELKSNKYSITSRGRQNLTVKDVTK
EDQGEYSFVVDGKKTCKLKMKPRPIAILQGLSDQKVCEGDIVQLEVKVSLLENVEGVMMKDGQEVQHSRVDHI
VIDKQSHMLLIEDMTKEDAGNYSFTIPALGLSTSGNVSVYSVDVITPLKDVNVEGTVKAVLECKVSPDVTSV
KWYLNDEQIKPDDRVQSIKGTQRLVINRTHASDEGPYKLMVGRVETSCNLSVEKIKIRGLRDLTCTETQN
VVEVELSHSGIDVWVNFKGKEIKPSSKYKIEAHGKIYKLTVLNMMKDDEGEYAFYAGENTTSGLKTVAGGAI
STPLTDQTVAESQEAVFCEVANPESEGEWLKDGKHLALSNNFRGESDGHKRRLVIAAAKLDAGEYTYKVAT
SKTSAKLVKVEAVKIKKTLRNLTVTETQDAVFSVELTHPDVKGVQWIKNGVVLDSNDKYEISVKGTLYSLKIKN
CAMADESVYGFKLGRLGASARLHVETVKIKKPKDVTALENATVTFEVSVSHDTPVKWFKHKNVEIKPSDKHR
LVSERKVHKLMLQSI SPSDAGEYTAMVQGLECKAKLFVETLHITKTMKSEVPETKAASFCEVSHFNVPMSW
LKNVVEIEMSEKFKIVVQGLHQLIMNTSTEDSAEYTFVCGNDQVSATLTVTPIMITSMLKDINAEEKDITIT
FEVTVNYEGISYKWLKNGVEIKSTDRQMRKTKLTHSLNIRNVHFGDAADYTFVAGKATSTATLYVEARHIEF
RKHIKDIKVKLEKKRAMFECEVSEPDITVQWMDGQELQIADRIKIQKEKYVHRLLIIPSTRMSDAGKYTVVAGG
NMSTANLVEGRDVRIRS IKKEVQVIEKQRAVVEFEVNEDDVDAHVKYKDGIEINFQVQERHQYVVERRIHRMF
ISETRHS DAGEYTFVAGRNRSSVTLYVNAPEPPQVLQELQPVTVQSGKPARFCAVISGRPQPKISWYKEEQLL
STGFKCKFLHDGQEYTLLEAFPEDAAVYTCEAKNDYGVATTASLSVEVPEVSPDQEMPVYPPAIVTFLQ
DVTSEGRPARFQCQVSGTDLKVSWYCKDKKIKPSRFRMTQFEDTYQLEIAEAYPEDEGTAFVANNVAGQV
SSTATLRLEGFSKSEEVTSKSWHTSPSVSLKKEALGQKPIFIQPLSSLRVHSGETVRFHARVSGVPKPAIQW
FHNHQPIPLPSKDVVVFHFEESTGMALMLIVDAYPEHAGKYS CRAANSAGEATCAATLTVTAKAPESILHERIGQ
QIEMEMKEIASLLSAEEDFQTYSSDLRLPNANETLELLSEPPARSTQFDSRQEGAAPVFIRESIDVEISVEDV
AKLSVTVTGCPKPKIQWFFNGMLLTPSADYKFFVDGDTHSLIILFTRFQDEGEYTCLASNEYKAVCSAHLRI
SPRGERSTEMESGEKKALEKPKGPCPPYFFKELKPVHCGPGIPAVFEYSVHGEPAPTVLWFKEDMPLYTSVCY
TIHSPDGSFTIVNDPQRGDSGLYLCKAQNLWGESTCAEELLVLPEDTDPDASCKEESTLGPVDFLETSA
RGPLVQGVDSRQEITAFAGETISKAALIAEETLQLSYERSVDDSEVGTGVTIGAQLKPPVVLSTPQGTGELPS
IDGAVHTQHRGPPPTLNLQAVQAQTTLPKKATLQFEEPEGVFPGASSAAQVSPVTIKPLITLTAEPKGNYPQ
SSTAAPDHALLSSVAEETLQLEKKEIPEVDKAQRAALLSLSLAEGCVESLEVPDVAVSNMRSEPVFQHTCT
EGKILMASADTLKSTQDVALRTEEGKLSLSPKALAEKQVLLKKEEQSEVVAVPTSQTSKSEKEPEAIKGVKEV
REQELLSKETLFPSPMEEQRLHLKTQVRRALQAAVAREQANLSEWLRNIDKVEVAVNFTQEPKRIICTYLI
TSVSSLTEELTVTIEDIDPQMANLETGLKDALCSIVCEERNILMAEDPRIHEEDKIDVQGGRDHLSDAQKQVET
VIEAEADSKYLVSKEEVSWKVESQLKDGDTNEVPQAETLKLAEESGTQKTSTEMSQEEAEGTLADLCPAVLK
HLVDTIISEEGDVTHTSSISNAKEVHWYFKGNLVPDGGFKCLKEQNAYTLVIEAVKTEDEGEYVCEASNDSG
KAKTSAKLVGERAAPVIKRRIEPLEVALGHLAKFTCEIQGAPNVRFQWFKAGREIYESDKCSIRSSNYVSSL
EILRTQVVDGCEYTCASNEYGSVCTATLTVTEAYPPTFLSRPKALTTFVKGAAKFLCTVSGTPVIEI IWQK
DGAALSPPDCRVTADANKHSLLESLNLTVQDRGIYSCKASNKFGADICQAEITIDKPHFIKELEAVQSAINK
KIHLCEQVDEDRKVTITWSKDGQKLPAGKDYKIYFEDKIASLEIPLAKLKDSGTYTCTASNEAGSSSSAAVA
VREPPSFVKKVDPDPSYMLPGESARLHCKLKGSPVIQVTFWKNNKELSESNTVRSFVNSEALDITDVKVDDS
GTYSCEATNDVGS DSCSTEVVIKEPPSFIKLEPADIVRGANALLQCEIAGTGPFVFNWFKDKKQIRSSKKYR
LFTQKTFVYLEISSFNADVDGYECVVANEVGKCGCVATHLLKEPPTFVKVDDFTALAGQVTVLQAAVARGSE
PISVMWMMKGQEVIKEDGKIKMSFSNGVAVLTI PDVQISLGGKYTCLAENEAGSQT SVGELIVKEPAKIERAE
LIQVTAGDPATLEYTVSGTPELKPWKYKDGRLPLVASKKYRISFKNNIAQLKFYSAELHDSGQYTFEISNEVGS
SSCETFTFLVDRDIAPLFTKPLRNVDVGGACRLDCKIAGSLPMRVSWFKDGKELTASDRYQIAFVEGTASL
EISRVDMDNAGNFTCRATNSVSGSKDSSGALIVQEPFVTKPGSRDVLPGSAVCLKSAFQGSAPLTIKWFKGD
KELVSGGSCYITKETSESSLELYAVKTS DSGTYTCKVSNVAGSVECSADL FVKEPATFIEKLEPSQLLKKGDG
TQLACKVTGTPPIKITW FANDRELRESSKHKMSFAESTAVLRLTDVAIEDSGEYMCEAQNEAGSDHCTGIVIV
KESPYFTEKFKSIEVLKEYDVMLLAEVAGTPPPFEITWFKDNTLRSGRKYKTFLQDQLVSLQVLKFAAADAGE
YQCRVTNEVGSSTCSARVTLREPPSFIKKEIATSSLRGGTAAAFQATLKGSLPITVTVLKDNDIETEDDNIRMT
FENNVASLYLSGIEVKHDGKYVCQAKNDAGIQRC SALLSVKEPATIMEEAVSIDVTQGD PATLQVKFSGTKEI
SAKWFKDGQELTLGPKYKISVTDTVSILKII STEKKDSGEYTFEVQNDVGRSSCKASINVLDLIIPPSFTKKL
RKMSDIKGSFIDLECI VAGSHPI SIQWFKDDQEISASDKHKFSFHDNTAFLEISQLEGTDSGTYTCSATNKAG
HSQCSGHLTVKEPPYFVEKPPSQDVNPGTRVQLKALVGGTAPMTIKWFKDNKELHPGAARSVWKDDTSTILEL
FSAKAADS GTYICQLSNDVGTSSKATIFVKEPPQFIKPPSPVLVLRNGQSTTFECQVTGTPEIRVSWYLDGN
EITDLRKYGISFVDGLATFQISNARVENSGTYVCEARN DAGTASCSELKVKKEPPIFIRELEPVEVVKDS DVE
LECEVMTGTPFEVTVLKNKNEIRSGKTYTMSEKMSVFLYHITKCDPSDVGEYQCIANEGGSCACSARVALKE
PPSFIKKIENVTTVLKNSSATFQSTVAGSPPI SITWTKDDQILEENDNVHISFEDSVATLQVRSDVNGHSGRYT
CQAKNESGIERTYAFLLVQEPAQIIEKAKSVDVTEKDPVTLCEVAVAGTPELKVVKWKDGKQIVPSRYFMSMFE
NNVASFRIQSVMKQDSGQYTFKVENDFGSSSCDAYLRVLDQDIPPSFTKKLTKMDKVLGSSIHMECKVSGSLP
ISAQWFKDGKEISTSAKYRLVCHENTVSLEVSNLELEDTANYTCKVSNVAGDNACSGILTVKEPPSFLVKPER
QQAI PDSTVEFKAVLKGTPPFKIKWLKDDVELVSGPKCFIGLEGSTSFLNLYSVDS SSKTGQYTCQVTNDVGS D

SCTTMLLVTEPPKFKLEASKI IKAGDSARLECKITGSPEIQVVYRNEHELTASDKYQMTFFIDSVAVIQMN
SLGTEDSGDFICEAQNPA GSTSCSTKVIVKEPPVSSFPPIVETLKNTEVSLECELSGTPPFVWVYKDKRQL
RSSKKYKVASKNFHASIHLNVESTDI GEYHCKAQNEVGS DACVCAVKLKEPPKFI SKLNSLTVVAGEPAELQ
ASIEGAQPI SVQWLKEKEEVIRESENIRISFVNNVATLQFAKVEPANAGKYICQVKNDDGGVRENMATLTVLEP
AVIIEKAGSMTVTVGETCALECKVAGTPELSVEWYKDGKLLTSSQKHKFSFYNKISSKILSVEKEDAGTYTF
QVQNNVGKSSCTAVVDVSDRMVPPSFTRRLKDTGGVLGTSCILECKVAGSSPISIAWFHEKTKIVSGAKYQTT
FSDNVCTLQLNSLDSSDMGSYTCVAANVAGSDECRALLTVQEPSPFVKEPEPELVLPGNITFTSVIRGTPPF
KVGWFRGARELVKGNRCNIYFEDTVAELELFNIDISQSGEYTCVVSNNAGQASCTTRLFVKEPATFVKKLSDH
SVEPGKSIILEGTYTGTLPISVTWKKDGVSI TP SERCNIVTTEKTCILEILSSTKGDAGHYSEIENEAGRDA
CDALVSTLEPPYFVTELEPLEASVGDSVSLQCQVAGTPEITVSWFKGDTKLRSTPEYRXYFTNNVATLVFNKV
SINDSGEYTCMAENSIGTAASKTIFRIQERQLPPSFARQLKDIEQTVGLPVTLTCLNGSAPIQVCWYRDGVL
LRDDENLQMSFVDNVATLKIILQTDLSHSGQYSCSASNPLGTASSTARLTAREPKKSPFFDIKPVSIDVIAGES
ADFECHVTGAQPMRVTWSKDNKEIRPGNYTITCVGNTPHLRILKVGKGDGSGYTCQATNDVGMDCSAQLSV
KEPPKFIKKLDASKVAKQGESIQLECKISGSPKVVWFRNDSSELHESWKYNMSFVNSVALLTINEASAEDTG
DYICEAHNGVDASCSTALKVKAPPVFTQKPPVPGALKGSDVILQCEISGTPPFVWVYKDKRQVRSKFKFI
TSKNFDTSLHIFNLEAPDIGEYHCKATNEVGS DTC ACTVFKEPFRFVKKLSDA STLIGDPVELQAVVEGFQP
ISVVWLKDKGEVIRESENVRI SFVDNIATLQLGSPASQSGKYVCQIKNDAGMRECSAVLTVLEPATIVEKPE
PMTVTTGNPFTLECVVAGTPELSAKWFKDGRELSGSRHHITFVRNLASLKI PSAEMNDKGLYTFEVENRVGK
SSCTVSVHVS DRVPPSFVRRLKDTSATLGASVLECRVSGSAPISVWFLDGNIEISSPKCQSSFADNVCTL
TLSSLEPSDTGAYTCVAANVAGQDESSAVLTVQEPSPFEQTPDSVEVLPGMSLTFTSVIRGTPPFVKVWFKGS
RELVSGEACTISLEDFVTELELLEVEPGQSGDY SCLVTNDAGSASCTHLFVKEPATFVKRLADTSVETGSP
VLEATYSGTPPISVSWMKNEYPLSQSPNCGITTTTEKSSILEILESTIEDYAQYACLIENEAGQDICEALVSVL
EPYFIEPLEHVEAAIGEPITLQCKVDGTPEIRISWYKEHTKLRSA PAYKMQFKNNVASLVINKVDHSDVGEY
TCKAENSVGAVASSAVLVIKERKLP SFARKLKD V HETLGFVAFECRINGSEPLQVSWYKDGELLKDDANLQ
MSFVHHVATLQILQTDQSHVQYNCASANPLGTASSAKLILSEHEVPPFFDLKPVSVDLALGESG SFKCHVT
GTAPIKITWAKDNREIRPGNYKMTLVENTATLTVLKVAKGDAGQYTCYASNVAGKDS CSAQLGVQEPFRFIK
KLDQSRIVKQDEYTRIECKIGGPEIKVLWYKGDTEVEI QESSKFRMSFEDSVAILEMHSLSVSDSGDYTC EARN
AAGSASSSTSLKVKEPPVFRKKPFVETLKGADVHLECELQGT PPFQVSWHKDKRELRSKGYKIMSENLLTS
IHLNVDTADIGEYQCKATNDVGS DTCVGSVTMKA PPQFVKKLTDISTIGKEVQLQTTIEGAEPISVAWFKD
KGEIVRES DNIWISY SENIATLQFSRAEPANAGKYTCQIKNDAGMQECYATLSVLEPAAIVEKPE SIKVTTGD
TCTLECTVSGTPELSTKWFKDGKELTS DNKYKISFFNKVSGLKI INVVPGDSGVYSFEVQNPVGKDSCKVSIQ
VSDRIIPPSFTRK LKETNGLSGSSVMECKVYGS PPI SVLWFHDGNEISSGRKYQTTLTDNTCALTVNMLEEA
DAGDYTCIATNVAGSDECSAPLTVREPPSFVQKPDMDVLTGSNVTFTSIVKGSPPFTVSWFKGSTELVPGAR
CNVSLQDSVGELELFDVDT SQSGEYTCIVSNEAGRASCTTRLFVKAPAI FVKRLNDYSIEKGKPLILEGTFSG
TPPISVTWKKNGINVIASQR CNITTEKSAILEILSSTVEDSGQYNCYIENASGKDS CSAQILILEPPYFVKQ
LEPVKVTVGDSASLQCQLAGTPEIGVSWYKGDTKLRPTATCKMHFKNNVATLVFTQVDS SSGEYICRAENSV
GEVSSSTFLTQEQKLPPSFSRQLRDVQETVGLPVVFECAVSGSEPISVSWYKDGKPLKDSNPIQTSFLDNIA
TLNIFKTRDSLGSQY SCTATNP IGSASSGAKLILTEGKNPPFFDIPLAPMDAVVGESADLECHVTGTQPIKVT
WAKDNREIRSGGNYQISYLENSAHLTIVKVDKGDGSGQYTCYAVNEVGKDSCTAQLNIKERLIPPSFTKLSSET
VEETEGNSFKLEGRVAGSQPI TVAWYKNNVEIHPTSNCEIMFKNNALLQVKRASMADAGLYTCKATNDAGSA
LCTSSIVIKEPKKPPVFDQHLAPVTASEGDSVQLSCHVQGSEPIRIQWLKAGREVKPSDRCSF SFASGTAMLE
LKETA KADSGDYVCKASNVAGSDTSKCKVTIKEKPAAPAAKAAVDGK LFFVSE PQSIRVVEKTATTFIAKV
GGDPIPNVKWTKGKWRQLNQGRILIHQKGDEAKLEIRDTTKTD SGLYRCVAFNKHGEIESNVNLQVDERKKQ
EKIEGDLRAMLKKT PALKKGSGEEEEIDIMELLKNVDPKEYEKYARMYGITDFRGLLQAFEL LKQSQEEETHR
LEIEBELEKSERDEKEFEELVAFIQRLTQTEPVTLIKDIENQTVLKDND AIFEIDIKINYPEIKLSWYKTEK
LEPSNKYEISIDGDRHTLRVKNCPKDQGNRYRLVCGPHIASAKLTVIEPAWERHLQDVTLKEGQCTMTQCFS
VPNVKSEWFRNGRVLKPPQGRVKTEVEHKVHKLT IADVRAEDQGYTC KHEDLETS AELRIEAEPIQFTKRIQN
IVVSEHQ SATFECEVS FDDAIVTWYKGPTELTESQYKYNFRNDGRCHYMTIHNVT PDDEGVYSVIARLEPRGEA
RSTAELYLT TKEIKLEMKPPDIPDSRVPIPTMPIRAVPPEEIPPAVAPSIPLLLPLPEEKKPPAKRIEVT KKG
VKKDTKKVVTKPKEEAPPPVAKKPPPTPMIPAKASEIDVSSKAEV KITTITR KKEVHKKEAVYEREEA
VYEKKVHI EPWEEPYEELETEPEYTEPEYEEPYEEPEDEYEEIKVEAKKQVHEEWEEDFEEGQ EY YEREEGYDE
GEEEWEEIYHEREIQVQKEVHEELHEKKIPAKVPEKKVPPPKVVKPVVEKVEKTRRMEEKVVQVIKVPV
SKKIVPQKPSRTPVQEEIEVKVPAVHTKKMVI SEEMKFASHTEEEVSVSPEVQKKTVTEEKI HVAVSKKI
EPPKVPPEPPKPPVEEVVPIPKKVEPPAAKVPPEAKKVPPEEKKVPPIPKKKEPAAPPQVPEAPKPAPE
EKIPVPVTKKKEAPPKVPVEVQKVVTEEKIAIITQREESPPPAVPEIPKKKVPEEKRPVPRKEEVPPKVPV
PPKKAVPEAVVPAPIPKKAPPRAEVSKKTVVEEKRFAAEEKLSVAVPQRVELMRHEEEEWYSEEEERVSVS
YREEERDEEEAEITEYEVLEEP EYVVEEKMHFISKKVEVEPAKVPEKKIIPKPKVPKIEPPPTKVPEPPK
KIVPEKKVPAPAPKKVPPAKAPEESKRFPVPEKRAPAEVGVIEEPPPTKVAERHMKITQEEKVLVAVTKEAPP

RARVPEEPKPKVAPEERFPKPKLPRREEEPPAKVTEVRKRAVKEEKVSIEVPKREPRPTKEVTVTEKKWSYTRE  
EETVSEHREEEYEDYEDYEEYKEFEYEPTEEYDQYDEYAEREVEHYEEHVEEYVTEPKKVPVPAQEPVPAK  
PKAPPPKVLKKAAPPEEKAPLPKQKLLKPLPKKAPPEPKKVVEEKIQISITKREKQOVTEPVAKVPMPKRVVP  
EAKIPAPTKEVAVPVRVPGVPKPKRELEEVVVFKEEVEAHEEYIVEEEEEYVHEEEYVHKEEYVHEEEYVHKEE  
YIHEEEHLHEEEETIAEEVVVPAVVKVPVVPKPKVPPEEKKVPVVPKKEAPPKAVPEIPKKPEEKVPVPI  
KKEKAPPKAVPEVPKPKVPPEEKPPVVPKKEVPPAKVPEVPKPKVPPEKKVPAPTPKKVEAPPKAVPEVPKPK  
IPEEKPTALLKMEAPPKAPKREVVVPVALPREEEEEVPFEEVPEEEILPEEEVPSEEEAPPEEVPPE  
EEVLPPEEEVLPPEEEVLPPEEEVQPEEEALPEIKPKVPKPAVPPKKTVPPEKKVPVVPKKEVPPPPKVPPE  
IKKVPPEKKVVVPKKEEAPPKVPPEVSKKVEERRIIPKKEEVPPEAEVYEEAAEPTPEEIPPEPPSIEEEEIV  
EEEEEEVLPPEEAPPKAVPEAPTPVPKKAAPPKAVPKKIPEEKVPVVPQKKEAPPKAVPEKKKIPEKK  
VPVPKKEAVPPAKGKAVFEEKISVAYQOEELVQERIELELVEAKVEEAFFFFEHVEQYEFEEEFHEVEEFTI  
RVEERRFQEEHKVEEVHRVIEFLEAEVEVYKPKIPPKKGPEVSEKVIIPKPKPTKVIIPRKEPPKAVPEVTK  
KTVVEEKIRAPEEPKVPAPKAPPEVPKKITPEEKVREAVPKKPEVPPKVPPEVVKKIIOEEKLPVVLPEDEIY  
MYEASEETVIEEEHVTLTPQKARLKVAKVPAPPQTVVTEEKTYVTIRKTRTLALKESETTREAFPELKSYKAV  
PEIPEPPSPEDLEIIEDVLPKEKRPASKRRKTQLPTAPEAPREMPPEMNTFEEISVEPEMLPTQVLDTYQEAT  
VEKTLRISRKKPELPSDEEVPEAPREVVAKKVLPPQVPEVVPVKVPGAPKEVVSERKSLEPPKPAVRPV  
TVPEEPKEVIPEKKVSLVPPKPAAPPVTVPEAPEEVEFSEDEETLAPPQPEAPPAKVEAPKEVPEKKVSV  
VPKKEAPPKAVPEAPKEAAPEKKVPVAPKPKPEAPPVVKVPEAPKPKVPEKKLPVAAPKKEAPAAEVEVP  
KTAVPQKKIPEAIPPKPESPPLEVEVPVPEVTPPEKKVPAAPPTKPEIPPPKVPPEAPQAAVVEEKTPEALPKK  
AEAAPVVPVQVQETVPEKTRPVGPPKPEATTVPVVKVQKTIPEKTRPEAPPKRPEARTVPETVPEKTRPMA  
PKKPEATTLPVPEVQETVPEKTRPVGPPKPEATTVPVPEVQETIPEKTRPPKPEATVPVPEVQETVPEKT  
RVPVPPKPEATTVPVPEVQETIPEKTRPAAPPKPEATAVPETIPEKTRPEAPPKRPEATTVPVPEADQAVV  
PEKKVPRVPPKVEAPPIVPEEPKEVIPEKKVSLVPPKPAAPPVTVPEAPEEVEFSEDEETLAPPQPEAPPA  
AKVPEAPKEVVPPEKKVSVVPPKPEAPPKAVPEAPKEAAPEKKVPVAPKPKPEAPPVVKVPEAPKPKVPEKKLP  
VAAPKKEAPAAEVEVPKAAVPPQKKIPEAIPPKPESPPPEVYEEPEEEIVPEEPPEEAVEEPVAPPPKVPTE  
PPKVPPEKKAPPVVKKEPEPPKAVPEVPKPEAPPEKVPKKEAPPKPEAPPKAVPEVPKEVPEKKVAVPKKVP  
PAKVPEVPKPIVIEEKPAIPVVEKVASPPAEVYEEPEEVTVAEEEEEPAPAVEEEEEYEAAPPPAPVPEEPPKVV  
EKKFPVIKKPEAPPKVPPEVPPKAVPVKVPVVKKPEPPEAEVPEVPKKLVPVKKPEVPVTKTEVLPKEVPE  
APKKITPEKKEVSVPEEPEAPPASVEETPEETIYEKATITIGRKETPPVEEREIEKFIQPEEPELEPEPEE  
IPVQEPPEKKEVIEKPKLPRPPARPPSPKEDVKEKMFQKAVSKKKVPEKPEVVEKVEPAPLKVPTAEKKV  
RKLLEPKPKQPKKEEVVLKSVLRKKPEEPEKVEPKKVEKAKKPEEPQPPKAVEVEAPPEPTPKERKVPPEAK  
VPEIKPAIPLPGPEPKPKPEPEVKTMKAPPIEPAPTPIAAPVTAAPVVGKKAEEKPKDEAAKPKGPIKGVAKKT  
PSPIEAERKLRPGSGGKPPDEAPFTYQLKAVPLKFKVKEIKDIVLTEAESVGSAAIFECVSPSTAITTWK  
DGSNIRESPKHRFIADGKDRKLHIIDVQLSDAGEYTCVLRNLNKEKSTAKLIVEELPVRVFKTLEEEVTVVK  
GQPLYLSCELNKRDDVWRKDGKIVVEKPGRIVPGVIGLMLRALTINDADDDTAGTYTVTVENANNLECSVCV  
VVEIIREWLVPKPIRDQHVKPKGTAVFTCDIAKDTPNIKWFKGYDEIPLPNDKTEILKEGNHLFLKVKNAMPE  
DIDEYAVEIEGKRYPAKLTGGEREVLLKPIEDVTIYEKESASFDAEISEEDIPGEWKLKGEELLRPSPTCEIK  
AEGGKRFLTLHKVKLDQAGEVLYQACNAITTAITLTKVIELEDFAVPLKDVTVPEKRQARFECVLTREANVIWS  
KGPDIKASDKFDIADGKHHILVINDSQFDDEGVYTAEEVGGKTSQQLFVTGIRLKFISPLEDQTVKEGQTA  
TFVCELSHEKMHVWFKNVVKLHTRTVLMSSEGKTYKLEIRETTLDDISQIKAQVKNLSSTANLKVLEADPY  
FTVKLHDKTGVEKDEIILKCEVSKDVPVWFKDGEIIVSPKHSVKTDGLRRILKIKKAEKDKGEYVDCDGT  
DTTKANVTVEARLIKVEKPLYGVEVFGVETARFEIEELSEPDVHGQWKLKGEPLTASPDCEIIEDGKKHVVLVLY  
NCQLDMTGEISFQAANAKSAANLKVKELPLIFITPLSDVKVFEKDEAKFECEVSREPKTFRWLKGTQETIGDD  
RFELIKDGRHSLVIKSAAFEDEAKYMFEEADKRTSGKLIIEGIRLKFPLTKDVTAKERENAVFTVELSHDN  
IPVSWFKNDQRLHTSKRVSMHDEGKTHSITFKDLSIDDSQIRVEAMGISSEAKLTVLEGDPTFTGKLQDYTG  
VEKDEVILQCEISKADAPVWFKDGEIKPKSNVVIKADGKRLMLILKALKSDIGQYTCDCGTDQTSGLLDI  
EDREIKLVRPLYSVEVMETETARFETEISEDDIHANWKLKGEALLQTPECEIKEEGKIHVLIHNCRLDQTTGG  
VDFQAANVKSSAHLRVKPRVIGLLRPLKDVTVTAGEATATFDCELSYEDIPEVWYLGKKKLEPNDKVVTRSEGR  
VHTLTLRDVKLEDAQVQLTAKDFKTQANLKVKEPPVEFTKPLEDQTVVEEATAVLECEVSRENKVKWFKNG  
TEILKSKKYEIVADGRVRKLIHGCTPEDIKTYTCDKDFKTSNCLNVVPPHVEFLRPLTDLQVKEKETARFE  
CEISKENEKVQWFKDGAIEKKGKDYDIISKGAVRILVINKCLLNDEAEYSCEVTRTARTSGMLTVLEEEAVFTK  
NLANLEVSEGDTIKLVCEVSKPGAIEVIWYKGDDEIIEETGRFEILTDRKRILIIQNAQLEDAGSYNCRPLSSR  
TDSKVHVELAAEAFISKPQNLLEILEGEKAEFVCTISKESFEVQWKRDDQTLSESGDKYDIADGKRVLVVKDA  
TLQDMGTYYVMVGAARAAHLTVIEKLRIIVPLKDTKVKKEQEVVFNCEVNTGAKAKWFRNEEAIFDSKYI  
ILQKDLVYTLRIRDARLDDQANFNVSLTNHRGENVSAANLIVEEEDLRIVEPLKDIETMEKKSVTFWCKVNR  
LNVTLKWTNGEEVAFDNRISYRIDKYKHSIIKDCGFPDEGEYVVTAGQDKSVAELLIIEAPTEFVEHLEDQ  
TVTEFDDAVFSCQLSREKANVKWYRNGREIKEGKYYKFEKDGSIHRLIKDCRLEDECEYACGVEDRKSARL  
FVEEIPVEIIRPPQDILEAPGADVIFLAELNKDKVEVQWLRNNMIVVQGDKHQMMSEGKIHRQLICDIKPRDQ

GEYRFIAKDKEARAKLELAAAPKIKTADQDLVVDAGQPLTMVVPYDAYPKAEAEWFKENEPLSTKTVDTTAEQ  
TSFRISEAKKDDKGRYKIVLQNKHGKAEGFINLQVIDVPGPVRNLEVTETFDGEVSLAWEEPLTDGGSKIIGY  
VVERRDIKRKTWVLTDRADSCFEFTVGLQKGGVEYLFVRSARNRVGTGEPVETDSPVEARSKYDVPGPPLNV  
TITDVRNRFVSLTWEPPPEYDGGAEITNYVIELRDKTSIRWDTAMTVRAEDLSATVTDVVEGQEYSFRVRAQNR  
IGVGKPSAATPFVKVADPIERPSPVNLNASEQTQSSVQLTWEPPPLKDDGGSPILGYI IERREEGKNWIRCNM  
KPVPELTYKVTGLQKGNKYLYRVS AENAAGVSDPSEILGPLTADDAFVEPTMDLSAFKDGLEIVPNPIKILV  
PSTGYPRPKATWTFGDQVLEEGDRVKMKTISAYAELVISPERTDKGIYTLTLENPVKSSISGEINNVVIAPPS  
APKELKFSDI TKDSVHLTWEPPDDDDGGSPLTGYVVEKRDMSRKTWTKVMDVFTDLEFTVPDLVQKEYLKFVC  
ARNKCGPGEPAYTDEPVNMSAPATVPDPPENVKWRDRANSIFLTWDPKNDGGSRKGYIVEKCRPGSDKWV  
ACGEPVPDTKMEVTGLEEGKWYAYRVKALNRQGASKPSKPTTEIQAVDTQEAPEIFLDVKLLAGITVKAGTKI  
ELPATVTGKPEPKITWTKADTLKPDQRITIENTVPKSTVITITDSKRSDTGTIIEAVNVCGRATAVVEVNVL  
DKPGPPAAFDITDVTNESCLLTWNPRDDGGSKIITNYVVERKATDSDVWHKLSSTVKDTNFKATKLTNKEYI  
FRVAENMYGVGEPVQAAPIIAKYQFDPGPPTRLEPSDITKDAVTLTWCEPDDDDGGSPITGYWVERLDPDTD  
KWVRCNKMPVKDTTYRVKGLTNKKYRFRVLAENLAGPGKPSRSTEPILIKDPI DPPWPPGKPTVKDIGKTSL  
VLNWTKPEHDGGAKIESYVIEMLKTGTDEWVRVAEGVPTTEHLLTGLMEGQEYSFRVRAVNKAGESESPSPD  
PVLCREKLYPPSPRRWLEVINITKNTADLKWTVPEKDDGGSPITNYIVEKRDVRRKGWQTVDTVKDKCTVTP  
LTEGSLYVFRVAENAIGQSDYTEIGDSVLAKDTFTTGPYYALTVVDVTKRHVDLKWEPKNDGGRPIQRYI  
IEKKEKLGTRVWKAGKTSGLPDCNFRVTDVIEGTEVQFVRAENAEAGVGHSEPTEILSIEDPTSPSPPLDLH  
VTDAGRKHIAIAWKPPEKNGGSPIIIGYHVEMCPVGTKEWMRVNSRP IKDLKFVVEEGIVPDKYVLRVAVNA  
VGVSEPISENVAKDPCKPTIDLETHDIVVIEGEKLNIPVPPFRAVPVPTVSWHKDGKEVKASDRMTMKN  
HISAHLEVPKSVHADAGVYITITLENKLSATASINVKVI GLPGCKDIKASDITKSSCKLTWEPPFDGGSP  
LHYVLERREAGRRTYIPVMSGENKLSWTVKDLIPNGEYFFRVKAVNKIGGGEYIELKNPVIAQDPKQPPDPV  
DVEVHNPTAKAMTITWKPPLYDGGSKIMGYIEKIKGEDRWKRCNEHLVPVLTYTAKGLEEGKEYQFRVRAE  
NAAGIGEPSRATPPTKAVDPI DAPKVI LRSTSLEVKRGDEIALDATISGSPYPTITWIKDENVI VPEEIKKRAA  
PPVRRKKGAE EEEFSLPLTERLSINNSKQGESQLRIRDSLRPDHGQYMIKVENDHGVAKAPCSVSVLDTPG  
PPINFVFEDIRKDSVLCKWEPPPLDDGGSEIINYTELEKDKTKPDSDWIVITSTLRNCKYSVTKLIEGKEYLFR  
VRAENRFGPGPCVSKPPLAKDPFEPDAPDKPIVEDVTSNSMLVKNWNEPKDNGSPI LGYVLEKREVNSTHWS  
RVNKTLLSSLKTKVDGLLEGLTYVFRVCAENAAGPGKFSPPSDPKTARDPISPPGPPVPRVADTSSTTIELEW  
EPPAFNGGGEIMGYFVDKQLVGTNEWSRCKTEKMIKVRQFTVKEIREGADYKLRVSAVNAAGEGPPGETEPTV  
AEPQEPPTVELDVSVKGGI QIMAGKTLRI PAEVTGRPVPTKVWTIEEGELDKERVI IENVGKSELI IKNALR  
KDHGRYVITATNSCGSKFAAVRVEVFDVPGPVLDLKPVTNRKMCLLNWSDPADDGGSDITGFI IERKDAKMH  
TWRQPIETERSKCDITGLIEGQYKFRVIAKNKFGCGPPVEIGPILAVDPLGPPTS PERLTYTERTKSTITLD  
WKEPRSDGGSPIQGYIEKRRHDKPDFERVNKRLCPTTSFLVENLDEHQMYEFRVAVNDVGESEPSLPLNVV  
IQDDEVPTIKLRLAVRGDTIKVKAGEPVNIPADVTGLMPKIEWSKNEKVIDKPTDTLNI TKEEVS RSEAKT  
ELSI PKAAREDKGTYTITASNRLGSVFRNVHVEVYDRPSPRNLAVTDIKAESCYLTWDAPLDNGGSEITHYI  
IDKRDASRKKSEWEGVTNTAVERYGIWKLI PNGQYEFVRVAVNKYGISDECKSDKVV IQDPYRLGPPGPKP  
VLERTKGSMLVSWTPPLDNGGSPITGYWLEKREEGGTYWSRVSRAPITKVGLKGVFNVPRLIEGVKYQFRAM  
AINAAGIGPPSEPSDPAVAGDPIYPPGPPSCPEVKDKTKSSISLAWKPPAKDGGSPIKGYIVEMQEEGTTDWK  
PVNEPDKLLTACECVPNLKELRKYRFRVAVNEAGESEPSDTTGEIPATDIQEVPEVFDIGAQDCLVCKAG  
SQVKIPAVIKGRPTPKSSWEDFGKAKKAMKDGVDHIDPEDAQLETAENSSV I IPECTRAHSGKYSITAKNKAG  
QKTANCRVKVMDAPGPPKDLKVDITRGSCLSWKMPDDDDGGDRIKGYVIEKKTIDGKAWTKVNPNCGSTTFV  
VPDLISEQQYFFRVRAENRFGIGPPAETIQRRTARDPIYPPDPPIKLKI GLITKNTVHLSWKPPKNDGGSPVT  
HYIVECLAWDPTGKKKEAWRQCNRDVEELEFTVEDLIEGGEYEFVRVAVNEAGVSKPSATVGPVIVKDQTC  
PAIELKEFMEVEEGTDVNI VAKIKGVFPFPLTWFKAPPKPKDSKEPVVYDTHVNKQVDDTCTLVI PQSRRSD  
TGLYSITAVNNLGTASKEMRLNVLGRPGPPVGP I K FESISADQMTLSWLPKDDGGSKIITNYVIEKREANRKT  
WVRVSSEPKECMYTI PKLLEGHEYVFRIMAQNKYGIGEPDSEPETARNLFSVPGAPDKPTVSSVTRNSMTVN  
WEEPEYDGGSPVTGYWLEMKD TTSKRWKVRNRDPIKAMTLGVS YKVTGLIEGSDYQFRVYAINAAGVPASLP  
SDPVTARDPVAPPGPPFPKVDWTKSSVDLEWSPPLKDDGGSKITGYIVEYKEEGKEEWEKGDKEVRGTKLVV  
TGLKEGAFYKFRVAVNVAGVGEPEVTDVIEMKDRIVSPDLQLDASVRDRI VVHAGGVIRI IAYVSGKPPPT  
VTWSMNERALPQEA IETTAISSSMVIKNCQRSHQGVYSLAKNEGGERKKT I IVDVLDVPGPVGIPFLSDNL  
TNDSCKLTWFSPEDDGGSPITNYVIQKREADRRAWTPVYTVTRQNATVQGLIQGKSYFFRIA AENSIGMGPF  
VETPNALVIRDPITVPERPEDLEVKEVTKNVSLTWNPPKYDGGSEIINYLESRIGTEKFHKVTNDNLLSR  
KYTVKGLKEGDTYIEYRVS AVNIVGQKPSFCTKPICTCKDELAPPTLDLDFRDKLTVRVGSFALTRYS GKPK  
PKIDWFKDEADVLEDDRTHIKTPTTLALEKTKAKRSDSGKYCVVVENSTGSRKGFQCVNVVDTRGPPVGPVI  
FDEVTKYEMV I SWKPLDDGGSEITNYIIEKKELGKDIWMPVTSASAKTTCVKPKLLEGKDYIFRIHAENLYG  
ISDPLVSDSMKAKDRFRVPDAPEQPVVTEVTKDSALVTWNKPNDDGGKPIITNYILEKRETMKRWRVVTKEPIH  
PYTKYRVPDLLEGQYEFVRS AENEIGIGDPSPPSKPVFARDPIAKPSPPINPEAIDTTCNSVELTWQPPRHD  
GGSKILGYIVEYQKVGDEEWRRANHTPESCPETKYKVTGLRDGQSYKFRVLAVNEAGESDPAHVPEPVLVKDR

LEPPELILDANMAREQHIRVGDTRLRLSAI IKGVFPKVTWKEDREAPTKAQIDVTPVGSKLEIRNAAHEDGG IYSLTVENPAGTKTVSVKVLVLDKPGPPRDLEVSEIRKDCSYLTWKEPLDDGGSVVTNYVVERKDVATAQWSP LSTTSKKKSHMAKHLTEGNQYLFVAAENQYGRGPFVETPKPIKALDPLHPPGPPKDLHHVDVKTEVSLVWN KPDRDGGSPITGYLVEYQEEGDKDWIKFKTVKNLDCVVTGLQQGKTYRFRVKAENI IGLGLPDTTPIECQEK LVPPSVELDVKLIIEGLVVKAGTTRVRFPAI IRGVPVPTAKWTTDGTETIKTDDHYTVETDSFSSVLTIKNCLRKD TGEYQLTVSNAAGTKTVAVHLTVLDVPGPPTGPINILDVTPPEYMTISWQPPKDDGGGSPVINYIVEKQDTRKGT WGVVSAGSSKLLKLVPHLQKGEYVFRVKAENKMGVGPPLDSIPTVAKHKFSPSPGKPVVTDITENAATVS WTLPKSDGGSPITGYVVERREITGKWVRVNKPTIADLKFRVTGLYEGNTYEFVFAENLAGLSNPSPSSDPIK ACRPIKPPGPPINPKLKDKSKESADLWTKPLSDGGSPILGYVVEYQKPGTAQWDRINKDELIRQCAFVRPGL IEGNEYRFRIRAANIVGEGEPRELAESVIAKDILHPPEVELDVTCDVITVRVGQTIIRILARVKGRPEPDI TW SKEGKVLVKDKRVDLIHDLPRVELQIKEAVRADHGKYIIISAKNSSGHAQGSAINVLDPRGPCQNLKVSNTK ENCTISWENPLDNGGSEITNFIVEYRKPQKGSIVASDVTKRLVKANLLANNEYFRVCAENKVGVPPTIET KTPILAINPIDRPGEPENLHIADKGTFFVYLKWRPPDYDGGSPNLSYHVERRLKGSAWDERVHKSIKETHYM VDKCVENQIYEFVQTKNEGGSWVTRTEEVVVKEDLQKPVLDLKLKSGVLTVKAGDTRLEAGVGRKPFPEVA WTKDKDATDLTRSPRVKIDTSAESSKFSLTAKAKRSDGGKYVITATNPAGSFVAYATVNVLDKPGPVRNLKITD VSSDRCTIRWDPPEDDGGCEIQNYILEKCESKRMVWSTYSANVLTSPSATVTRLIEGNEYIFRVRAENKIGTGP PTESKPVIAKTKYDRPGRPDPEVTKVSKEMTVVWNAPEYDGGKSI TGYYLEKKEKHAVRWVFNKSAIPER RLKVQNLPLPGHEYQFRVKAENEVGI GEPSPSRPVVAKDPIEPPGPTNFKVVDTTKSSITLWAGKPVYDGGGA PIIGYVEMRPKIADASPDEGWKRCNAAAQLIRMEFTVTSLDENQYEFVCAQNQVIGRPAELKEAIKPKKE ILEPPEIDL DASMRLVVRAGCPIRLFAIVRGRPAKVTWRKVGIDNVVRKQVLDVDTMAFLVIPNSTRDD SGKYSLTLVNPAGEKAVFVNKVLDTPGPVADLVSDVTKTSCHVSWAPPENDGGSQVTHYIVEKREAERKTW STVTPEVKKTSFNVTNLVPGNEYFRVTA VNEYGPGVPTDI PKPVLASDPLSEPDPPRKLVEVTEMTKNSATLA WLPPLRDGGAKIDGYIISYREEDQPADRWTEYSVVKDLSLIVTGLKEGKYYKFRVAARNAVGVSMPREAEGVY EAKEQLLPKILMPEQITIKAGKLRVEAHVYKPNPICKWKKGDDDEVVTS SHLAIHKADGSSVLI IKDVTRK DSGYSLTAENSSGSDTQKIKVTVMDAPGPPQPPFDISEIDADACLSLWHI PLEDGGSNITNYIVEKCDVSRG DWVTALASVTKTSCRVGKLI PGQEIIFRVRAENRFGISEPLTSPKMLAKFPFDVDPSEPKNARVTVNKCDCIFV AWRPDSGGSPITGYLIERKERNLLWVKANDTI VRSTEYPCAGLVEGLEYSFRIYALNKAGSSVTKPSTEY VTARMPVDPGKPEVVDVTKNSASLIWARPKHDGGSRIIGYFVEACKLPGDKWVRCNTTTPHQIQEYATATGL EENAQYQFRAIAKTAVNISQPSESPDPVTILAENVPPRIELSVEMKSLTLVKAGTNVCLDATVFGKPMPTVSW KKDTPPIKQAEGIKAMKRNLCLELFSVNRKDSGDYTTITAENSSGSKSATIKLKVLDKPGPPASVKINKMYA DRAMLSWEPPELDDGGSEITNYIIDKRETSRPNWAQVSATVPI TSCVTEKLIIEGHEYQFRICAENKYGVGDPIL TEPAI AKNPYDPPGRCDPPVINSITKDHMTVSWKAPADDGGSPITGYLVEKRETQAVNWTKVNRKPIERTLK ATGLQEGTEYEFVTAINKAGPGKPSDASKAVYAQDPLYPPGPPAFPKVYDTRSSVLSLWKGKPAYDGGSP I I GYLVEVKRADSDHWVRNCLPEKLQKTRFEVTGLMENTEYQFRVYAVNKIGYSDPSDVPDKHCPKDI LIPPEGE LDAELRKTILIRAGVTMRLYVPVKGRPPPKITWSKPNVLRERIGLDIKSTDFDTFLRCENVNKYDAGKYILT LENS CGKEYTIVVKVLDTPGPPVNVTVKEVSKDSAYVTWDPPIIDGGSPINIVVEKRD AERKSWSTVTEC SKTSFRVSNLEEGKSYFFRVFAENEYIGIDPGETRDAVKASETPGPPVLDKALAITKSSCTIGWKKPRSDGGS RITGYVVDLFTENKQVRMKSLSLQYSTKDLKEGKEYTFRVSAENENGEPTSEIVVVAKDDVAPDLDLKD LPDLCYLAKENSFNRLKPIKIGKPPASVSWKKGEDPLATDRVSVESTAVNTTLVYDCQKSDAGKYTITLKN VAGTKEGTLKIKVVGKPGIPTGPIKFDEVTAEAMTLKWGPPKDDGGSEITNYVLEKRDVSVNKNWVT CASAVQK TFRVTRLHEGIEYTFRVSAENKYGVGEGKSEPIVAKHPFDVDPAPPPNIVDVRHDSVSLTWTDPKKTGGS PITGYHIEFKERNLLWKRANKTPIRMKDFKVTGLTEGLEYEFRVMAINLAGVKGKPSLPSEPVVALDPIDPPG KPEVISVTRNSVTLIWTEPKYDGGHKLTYGIVEKRDLPSKSWMKANHVNPDCAFVTDLVEGGKYEFRIRAK NTAGALISAPSESTGTICKDEYEAPTIVLDPTIKDGLTVKAGDSIVLSAISILGKPLPKSSWSRAGKDIRPSD IAQITSTPTSSMLTVKYATRKDAGEYTTATNPFGTKEEHVKVSVLDVPGPPGPIEISNVS AEAKTLTWT PPL EDGGSPIKAYVLEKRETSRLLWTVVSEDIQACRHVVTKLIQGN EYLFRVSAVNHYGKGEVQSEPVMVDRFG PPGPPGKPEISNVTKNATVSWKRPTDDGGSEITGYHVERREKGLRWVRATKTPVSDLRCKVTGLQEGNTYE FRVSAENRAGIGPPSDASNPVLMKDVAYPPGPPSNAHVTDTTKKSASLAWGKPHYDGGLEITGYVVEHQKVG DDAWIKDTTGTALRITQFVVPDLQTKKYNFRISAINDAGVGEPAVIPNVEIVEKEVAPDFELDAELRRLTVVR AGLSIRIFVPIKGRPAPEVWTWKDNINLKHRIENFTLLIIEPCNRYDTGKFMVTIENPAGKKS GFVNV RVLDTPGPVNLNRPTDITKDSVTLHWDPLIDGGSRITNYIVEKREATRKSYSTVTTKCHKCTYKVTGLTEGC EYFFRVMAENEYGVGEPTEETEPVRASEAPLPPDSLNIIMDITKNTVSLAWPKPRHDGGSKI TGYVIEAQRKGS DQWTHI STVLRGKLECVNRNLTGEEYTFQVMANVENSAGRSAPRESRPVIVKEQTMPEL DLRG IYQKLV IARAGD NIKVEIPVLTGRPKPTVTKKGDQILKQTRQVRNVENTATSTILNINECVRSDSGYPPLTAKNTVGEVGDVITIQ VHDIPGPPTGPIKFDEVSDFVTFSWEPPENDGGVPI SNYVEMRQTDSTTWVELATTVIRTTYKATRLTTGV EYQFRVRAQNRYGVGPGITSASVVANYPFKVPGPPGTQVTA VTKDSMTISWHEPLSDGGSPILGYHIERKER NGILWQTVSKALVPGNIFKSTGLTDGIAYEFVRIAENMAGKSKPSKPSSEPMFALDPIDPPGKPVPLNITRHTV ALKWAKPEYTGGFKITSYVVEKRDLPNGRWLVKANFNSILENEFTVSGLTEDAAYEFVRIAKNAAGAI SPPSEP



SDAITCRDDLEAPRIMVDVRFKDTITLKAGEAFKLEADVSGRPPPTMEWTKDGKELEGTGKLEIKIADFSTHL  
INKDSSRTDYGAYILATATNPGGFAKHFVNVKVLDRPGPEGLAVSDVTSEKCVLSWLPPLDDGGAKIDHYIV  
QKRETSRLAWTNVATEVQVTKLKVTKLLKGNIEYIFRVMVANKYGVGEPLSESEPVLAVDYPGPPDPKPNPEVTT  
ITKDSMVVCGHPDSDGGSEIINYIVERRRDKAGQRVWKCNKKALDRLFKVSGLTEGHEYEFRIMAENAAGIS  
APSATSFPFYKACDVTFKPGPPGNPRVLDTSRSSISIAWNKPIYDGGSEITGYMVEIALPEEDEWQVVTTPAGL  
KATSYTITSLIENQYKIRIYAMNSEGLGEPALVPGTPKAEERMLPPEIELDADLRKVVTIRACCTLRFLVPI  
KGRPAPEVVKWAREHGESLKDASIESTSSYTLVGVNVRFDGSKYILTVENSSGSKSAFVNVRVLDTPGPPQN  
LKIKEVTKTSVTLTWEPPLDGGGSKIKNYIVEKRESTRKAYSTVATNCHKTSWKVDQLQEGCSYFRVLAENE  
YGIGLPAETAESVKASERPLPPGKITLTDVTRNSVLSWEKPEHDGGSRIILGYIVEMQSKGSDRWATCATVKV  
TEATITGLIQGEEYSFRVSAQNEKGISDPRQLSVPVIAKDLVIPPFAFKLLFNTFTVLAGEDLKDVPPIGRPP  
PAVTWHKDDIPLKQTTTRVNAESTENNSLLTIKEACREVDGHYTVKLTNSAGEATETLNVIIVLDKPGPPTGPVK  
MDEVTAADSVTLSEWPPKYDGGSSINNYIVEKRDSTTAWQIVSATVARTTIKACRLKTGCEYQFRIAAENRYG  
KSTYLNSEPVVAQYPFKVPGPPGTPFVTLASKDSMEVQWHEPVSDDGGSKVIGYHLERKERNISILWVKLNKTP  
PQTKFKTTGLEEGIEYEFVSAENIVGIGKPSKSECYAAHDPDPPGRPEAIVTRNSVTLQWKPTYDGGSS  
KITGYIVEKKELPDGRWMMKASFTNIIDTQFEVTGLEDHRYEFVRIARNAAGVFSEPESTGAI TARDEVEPP  
RISMDPKYRDTVVVQAGESFKIDADIYGKPIPTTQVWKGQDLELSSTARLEIKSTDFATSLSVKDAVRVDSGNY  
ILKAKNVAGEKSVTINVKVLDRPGPEGPVAISGVTAEKCTLAWKPLQDGGSDITNYIVERRET SRLVWTKLV  
DANVQTLSCVKLLLEGNEYIFRIMAVNKYGVGEPLSESESLIAKNPFVVPDAPKAPEVTAVTKDSMIVVWERP  
ASDGGSEILGYVLEKRDKEGIRWTRCHKRLIGELRLRVGTGLENHNYEFVSAENAAGLSEPPSPAYQKACD  
PIYKPGPPNNPKVMDVTRSSVFLSWTKPIYDGGCEIQGYIVEKCDVSVGEWTMCTPPTGINKTNLEVEKLEK  
HEYNFRICAINKAGVGEHADVPGPVMVEEKLEAPDIDLDELKRVINIRAGGSLRFLVPIKGRPTPEVKWGV  
DGDIRDAAIIDVTSSTSLVLDNVNRYDSGKYTLTLENSSGTKSAFVTVRVLDTPSPVNLKVTEITKDSVSI  
TWEPLLDGGGSKIKNYIVEKRETRKSYAAVVTNCHKNSWKIDQLQEGCSYFRVTAENEYIGLPARTADPI  
KVAEVPQPPGKITVDDVTRNSVLSWTKPEHDGGSKI IQYIVEMQAKNTDKWSECARVKS LDAVI TNLTQGEE  
YLFVRIAVNEKGRSDPRSLAVPI IAKDLVIEPDVRPAFSSYSVQVQDLKIEVPI SGRPKPSISWTKDGMPLK  
QTRINVTDSLDTLTLTKETHKDDGGQYGITVSNVVGQKTAIEIITLTKDPDPKGPVKFDEISAESITLSW  
NPPLYTGGCQITNYIVQKRDTTTTVWVVSATVARTTLKVTCLKTGTEYQFRIFAENRYGSDFALESEPVVAQ  
YPYKEPGPPGTPFVTAISKESMVVQWHEPINNGSPVIGYHLERKERNISLWTKVNKTI IHDQTQKALNLEEG  
IEYEFVRYAENIVGVGKASKNSECYVARDPCDPPGTPEAIVKRNEITLQWTKPVYDGGSMITGYIVEKRDLP  
EGRWMKASFTNVIETQFTVSGLTEDQRYEFVRIAKNAAGAI SKPSDSTGPI TAKDEVELPRI SMDPKFRDITV  
VNAGETFRLEADVHGKPLPTIEWLRGDKEIEESARCEIKNTDFKALLIVKDAIRIDGGQYILRASNVAGSKSF  
PVNVKVLDRPGPEGPVQVTGVTAEKCTLAWS PPLQDGGSDI SHYVVEKRETSRLAWTVVASEVVTNSLKVTK  
LLEGNKYIFRIMAVNKYGVGEPLSEAPVLMKNPFVLPGPPKSLVVTNIAKDSMTVCWNRDSDGGSEIIGYIV  
EKRDRSGIRWIKCNKRITDLRLRVGTGLTEDHEYEFVSAENAAGVGEPS PATVYKACDPVFKPGPPTNAHV  
VDTTKNSITLAWSKPIYDGGSEILGYVVEICKADEEWQIVTPQTGLRVTRFEIAKLIHEQYKIRV CALNKV  
GLGEAASVPGTVKPEKLEAPELDDLSELKRGIVVRAGGSARIHIPFKGRPTPEITWSKEEGEFTDKVQIEKG  
INFTQLSIDNCDNRNDAGKYILKLENSSGSKSAFVTVKVLDTGPPQNLA VKEVRKDSVLLVWEPPIIDGGAKV  
KNYVIDKRESTRKAYANVSSKCNKTSFRVENLTEGAIYFRVMAENEFVGVPTETS DAVKASEPPSPGKVT  
LTDVSQTSASLMWEKPEHDGGSRIILGYVEMQPKGTEKWSVVAESKVCNAVVSGLSSGQEQFRVKAYNEK GK  
SDPRVLGIPVIAKDLTIQPSFKLPFNTYSVQAGEDLKEIIPVIGRPRPKISWVKDGEPLKQTTTRVNVEETATS  
TILHIKESKDDFGKYSVTATNSAGTATENLSVIVLEKPGPPVGVKFDVVSADFFVI SWEPPAYTGGCQISN  
YIVEKRDTTTTNQMVSATVARTTIKISKLKTGTEYQFRIFAENRYGKSTPLDSKPVVVQYPFKEPGPPGTPF  
VTSISKDQMLVQWHEPVNDGGSKVTGYHLEQKEKNSILWVKLNKIPIDQTKFKTTGLDEGLEYEFRVSAENIV  
GIGKPSKVSECYVARDPCDPPGRPEAIVITRNSVTLKWKPKVYDGGSKITGYIVEKLDLPDGRWMKASFTNVV  
ETEFTVTGLVEDQRYEFVRIARNAADNFSEPSSESGAITARDEIDAPNASLDPKYRDVIIVHAGETFVLEADI  
RGKPIPDI IWSKDGNELEETAARMEIKSTLQKTTLIVKDCIRTDGGQYTLKLSNVGGTKTIPITVKVLDRPGP  
PEGPLKVTGVTAEKCYLAWNPPQLDGGASISHYIIEKRETSRLSWTQVSNVQALNYKVTKLLPGNEYIFRVM  
AVNKYGIGEALSESEPIACNPYKRPGPPSTPEASAITKDSMVLTWTRPVDDGGAEIEGYILEKRDKEGIRWTK  
CNKKTLDLDRFRVTGLTEGHSYEFVRAENAAGVGEPESEPSVFYRACDALYPPGPPSPNKVTDTSRSSVSLAW  
NKPIYDGGAPVRGYVIELKAAADEWTTCTPPSGLQKQFTVTKLKENTEYNFRICAFNTEGVGEPATIPGSV  
VAQERMEAPEIELDADLRKVVTLRASATLRLFVTIKGRPEPEVKWEKAEGILTERAQIEVTSYTMLVIDNVT  
RFDSGRYNLTLENSGSKTAFVNVRVLDSPSAPVNLTIREVKKDSVTLSEWPLIDGGAKITNYIVEKRETR  
KAYATITNNCTKNTFKIENLQEGCSYFRVLAENYIGLPAETAEPVKVSEPPPLPGRVTLVDVTRNTAIK  
WEKPESDGSKITGYVEMQTKGSEKWSACTQVNETLTTISGLTAGEEYFRVAAVNEKGRSDPRQLGVPVIA  
KDIEIKPSVELPFNTFNKANDQLKIDIPFKGRPQATVAWKKGQVLRRETRVNVAVSSKTVTTLIKEASRED  
VGTIELCVSNTAGSITVPIITVIVLDRPGPPGPIRIDEVSCDNVSI SWNPPEYDGGCQISNYIVEKRETTSTTW  
QVVSQAVARTSIKIVRLTTGSEYQFRVCAENRYGKSSYSESSAVVAEYFPSPGPPGTPKVVHATKSTMVSW  
QVPVNDGGSQVIGYHLEYKERS SILWSKANKVLIADTQMKVSGLDEGLMYEYRVYAENIAGIGKCSKACEPVP

ARDCDPPGQPEVTNITRKSVSCLKWSKPRYDGGAKITGYIVERRELDPGRWLQCNTNVQETYFEVTELTEDQ
RYEYFRVFARNAADSVSESTGPI TVKDDVEAPRIMMDVKFRDVI IVKAGEVLKINADIAGRPLPVISWAKD
GVEIEERAKTEIVSTDYTTTLTVKDCVRRDGTQYVLTLLKNVAGTRTMAVNCKVLDKPGPPAGPLE INGLTAEK
CSLSWGRPQEDGGADIDYIIVEKRETSRLAWTICEAELRTTSCKVTKLLKGNIEYIFRVTGVNKYGVGEPLESM
AVKALDPFTTTPSPPTSLEITSVTKDSMTLCWSRPETDGGSDISGYI IERREKNSLRWMRVNKKPVYDLRVKST
GLREGCEYEYRVFAENAAGLSLPSETSPLVRAEDPVFLPSPSPKPKIVDSGKTTITIGWVKPLFDGGAPITGY
TVEYKKSEETDWKVAIQSFRGTEYTMGLTTGDEYVFRVRSLNKMGASDPSSSDPQVAKEREEEPVFDVDSE
MRKTLIVKAGSSFTMTVPPFRGRPIPNVSWSKPDTDLRTRAYIDSTDSRTLLTIENANRNDSGKYTLTIQNVLS
AASMTFVVKVLDSPGPPANITVREVTKETAMLSDVDPENDGGAPVKNYHIEKREASKKAWSVTNNCNRLSYK
VTNLQEGAIYYFRVSGENEFGVGVPAETKEGVKITEKPSPEKLGVTSSKDSVLSWLKPEHDGGSRI IHYV
VEALEKGQKTWVKCAVVKTHHVVSGLRESHEYFFRVFAENQAGLSDPRELLLPVLIKDQLEPPEIDMKNFPS
HTVYVRAGSNLKVDPISGKPLPKVTLSRDGVPLKATMRFNTEITAENLTINLKVSTTDAGRYEITAANSSG
TTKTFINIIVLDRPGPPTGPVAISDITEESVTLKWEPPKYDGGSHVTNYIVLKRETSTAVWSEVSATVARTMI
KVMKLTTEGEEYQFRIKAENRFGISDHIDSVCVVVKLPYTPPGPPSTPWVSNVTRESITVGWHEPVSNGGSAVT
GYHLEMKDRNSILWQKANKMIRTHFKVTTISAGLIYEFVRYAENAAGIGKPSHPSEPVLAIDACEPPRNV
ITDISKNSVNLWQPAFDGGSKITGYIVERRDLDPGRWTKASFNTVIETQFTVSGLTQNSQYEFVRFARNAV
GSVSNPSEVVGPI TICIDSYGGPVIDLPLEYTEVVKYRAGTSVKLRAGISGKPEPTIEWYKDDKELQTNALVCV
ENSTDLASILIKDANRLNSGSYELKLRNAMGSASATIRVQILDGPGPPGGPIEFKTVTAEKITLLWRPADDG
GAKITHYIVEKRETSRVVWSMVAENLEECIVTTTKI IKGNEYVFRVRAVNKYGIGEPLESEPVVAKNAFVTPG
PPSIPEVTKITKNSMTVVWDRPTVDGGSEINGYFLERRDKKSLAWLKVLEKIRDTROKVTGLTENSQYQYRV
CAVNAAGVGFSEPSDFYKAADPIDPPGPPAKIRIADSTKSSITLGWSKPVYDGGSDVTGYVEMKQGDDEEW
TIVSTRGEVRTTEYVVSNLKPGVNYFQVSAVNCAGQGEPI TMTEPAQAKDVLEPEIDL DVALRTSVIAKAG
EDVQLLIPFKGRPPPTVTRKDEKNLGS DTRYSIQNTDSSSLVPIQVTRNDTGKYILT IENGVGQPKSSTVS
VKVLDTPAACQKLVKHVSLGTVTLWDPPLIDGGSPI INYVIEKRDATKRTWSVVSHKCSGTSFKVTDLSEK
TPFFFRVLAENEIGIGEPCEPTEPVKAAEVPAPIRDLSMKDSTKTSVLSWTKPFDGGSII TDYLVERKKGK
EQAWSHAGISKTCEIEIGQLKEQSVLEFRV SARNEKQSDPVTIGPLTVKELVITPEVDLSEIPGAQISVRIG
HNVHLELPYKPKPSISWLKDLPLKESEYVRFSEKSTENKITLS IKNKKEHGGKYTVILDNAVCRNSFPITI
ITLGPPSKPKGPIRFDEIKADSAIMSWDIPEDDGGGEITCYSIEKREASQTNWKMVCSVARTTFKVSNLVKD
SEYQFRVRAENRYGVSEPLASNIIVAKHQFRIPGPPGKPIYINVTSDGMSLTWDAPVYDGGSEVTGFHVEKKE
RNSILWQRVNTSPI SGREYRATGLIEGLDYQFRVYAENSAGLSSPSPSKFTLAVSPVDPPGTPDYIDVTRET
ITLKNWPPLRDGGSKIVAYSIEKRQGS DRWVRCNFTDVSQCQYTVTGLSPGDRYEFRIIARNVGTISPPSQS
SGLLIMTRDENVPPTVEFGPEYFDGLVIKSGDSLRIKALVQGRVPRVTFWKDVEIERRMMEITDVLGSTSL
FVRDATRDHRGVYTVAKNVSGSTKAEVTVKVQDTPGKVVGP IREFTNITGEKMTLWWEAPLNDGCAPVTHYII
EKRETSRLAWALIEDNCEALS YTAIKLITGNEYQFRI SAVNKFVGRPLESDPVVAIQIYTI PDAPGVPEPSN
VTGNSITLWTRPESDGGSEIQHYI LERREKKS TRWVKVISKRP ISETRFKVTGLVEGNEYEFHMAENAAGI
GPASGISRLIKREPVNPPSAPS VVKVTDTSKTTVSLWARPVFDGGM EIIGYI IEMCKADLGDWHKVNTEPC
VKTRYTVTDLQAGEEYKFRVSAVNGAGKGDSC EVTGTIKAVDRLSAPELDIDANFKQTHIVRAGVSI RLFIAIY
QGRPTPTAVWSKPDNSLIRADIHTTDSFSTLTVENCNRNDAGKYTLTVENNSGKKSITFTVKVLDSPGPPGP
ITFKDVTRGSATLMWDAPLLDGGAR IHHYVIEKREASRRSWQVSEKTRQILKVSELTEGVPYFRVSAENE
YGVGEPYEMPEPIVATEQPAPRRLDVVDTSKSSAVLAWLKP DHDGGSRITSYLLEMRQKGSDFWVEAGHTKQ
LFTTVERLVENTEYEFVVKAKNDAGYSEPREAFSSVI IKEPQIEPTADLTGITNQLITCKAGSTFTIDVPI SG
RPAPKVTWKLEEMRLKETDRMSIATTKDRTTLVKDSMRGDSGRYFLTLENTAGVKTFTITVVVIGRPGPVTG
PIEVSSVSAESCVL SWTEPKDDGGTEITNYIVEKRESGTTAWQLINSSVKRTQIKVTHLTKYKEYCFRVSEN
RFGVSKPLESVPIVAEHPFVPPSAPTRPEVYVVSANAMSIRWEEPHYDGGSKI VGYVWEKKERNITLWVKENK
VPCLECNKYKVTGLVEGLE YQFRTYALNAAGVSKASEASRP IMAQNVPDPPGRPEVTDVTRSTVSLIWSAPVYD
GGSKVVGYI IERKPVSEVGDGRWLKCN YTIVSDNFFTVTALSEGDTYEFVRLAKNAAGVISKGSESTGPVTCR
DEYAPPKAELDARLQGD LVTIRAGSDLVLDAAVGGKPEPKI IWTKGDKELDLCEKISLQYTGKRATAVIKYCD
RSDSGKYTLTVKNASGTSVSV MVKVLDSPGPCGKLTVSRVTEEKCTLAWSLPQEDGGAEITHYIVERRETSR
LNWVIVEGECLTASYVVTRLIKNNEYTFRVRVNKYGLGVPVESEPIVARNSTFTIPSQGP IPEEVGAGKEHII
IQWTKPESDGGNEISNYLVDKREKSLRWTRVNKDYVVDTRLKVTSLMEGCDYQFRVTAVNAAGNSEPSEAS
NFISCREPSYTPGPPSAPRVVDTTKRSISLAWTKPMYDGGTDIIGYVLEMQEKD TDQWCRVHTNATIRNNEFT
VPDLKMGQKYSFRVA AVNAKMSDYSETTAEIEPVERLEIPDLELADDLKKTVIVRAGASLRMLMSVSGRPS
VITWSKKGIDLANRAI DNTESYSLIVDKVNRYDAGKYTIEAENQSGKKSATVLVKVYDTPGPCPSVSKVE
SRDSVTITWEIPTIDGGAPVNNYIIEKREAA MRAFKVTITKCSKTYLRIISGLVEGTMYYFRVLPENIYVIGEP
CETSDAVLVSEVPLVPTKLEVVDVTKSTVTLAW EKPLYDGGSRLTGYVLEACKAGTERWMMKVTLKPTVLEHT
VISLNEGEQYLFRVRAQNEKGVSEPREIVTPVTQDLRVLPTIDLSTMPQKTIHVPAGRPIELVPIPTGRPPP
TASWFFAGSKLRESERVTVETHTKVTKLTI RETTIRDTGEYTLLELKNVTGTTSETIKVILDKPGPPTGPIKI
DEIDATSVTISWEPPELDGGAPLSGYVVEQRDAHRPGWLPVSESVTRPTFKFTRLTEGNEYVFRVAATNRFGI

GSYLQSEVIECRSSISIPGPPETLQIFDVSRDGMTLTWYPPEDDGGSQVTGYIVERKEVRADRWRVVRNKPVT  
MTRYRSTGLIEGLEYEHRVTAINARGTGKPSRPSKPTVAMDP IAPPKPNPRVTDTRTSVSLAWSVPEDEG  
GSKVTGYLIEMQKVDQREWTKCNTTPTKIREYTLTHLPQGAERYFRVLACNAGGPGPEAEVPGTVKVTMLEY  
PDYELDERYQEGVFRQGGVIRLTIPIKKGKPPVCKWTKEGQDISKRAMIATSEHTELVIKEADRNDSTGYD  
LVLENKCGKKTVYIKVKVIGSPNTPEGPLEYDDIQARSVRVSWRPPADDGGADILGYILERRREVPKAAWYTD  
SRVRGTSLVVVKGLKENVEYHFRVSAENQFGISKPLKSEEPVI PKTPLNPPPEPPSNPPEVLDVTKSSVLSWSR  
PKDDGGSRVTYGYYIERKETSTDKWVRHNKTQITTTMYTVTGLVPAEYQFRI IAQNDVGLSETSPASEPVC  
DPFDKPSQPGELEILSISKDSVTLQWEKPECDDGGEKILGYWVEYRQSGDSAWKKSNNKERIKDRQFTIGLLEA  
TEYEFVFAENETGLSRPRRTAMS VKTKLTSGEAPGRKEMADVTTKLGEAAQLSCQIVGRPLD IKWYRFGK  
ELIQSRKYMSSDGRHTTLTVMTDEQEDEGVYTCVATNEVGEVESSSKLLLQAAPQFHPGYPLKEKYGAVGS  
TLRLHVMYIGRPVPAWTFHGGKLLQNSEKITIENTEYHVLVMKNVQRKTHAGKYKVQLSNAFGTVDATLDV  
EIQDKPDKPTGPIVIEALLKNSVVISWKPPADDGGSWITNYVVEKCEAKEGAEWQLVSSAISVTTCRIVNLTE  
NAGYYFRVSAQNTFGISEPLEVASIVI IKS PFKEKPGVPGKPTITAVTKDSCVVAWKPPASDGGAKIRNYLER  
REKKQNKWIAVTTEEIRETVFSVQNLIEGLEYEFRVKCENLGGSEWSEI SEPVTPKSDVP IQAPHFKEELRN  
LNVRYQSNATLVCKVTGHPKPIVKWYRQGEI IADGLKYRIQEFKGGYHQLI IASVTDDDQVYQVRATNQQG  
SVSGTASLEVEVPAKIHLPKTLEGMGAVHALRGEVVS IKIPFSGKPDVITWQKQDLIDNNGHYQVIVTRSF  
TSLVFSNGVERKDAFGYVCAKNRFGIDQKTVELDVADVDPDPRGVKVDVSRDSDVNLTWTEPASDGGSKVTN  
YIVEKCATTAERWLRVGOARETRYTVINLFGKTSYQFRVIAENKFGLSKPSSEPSEPTVTKEDKTRAMNYDDEV  
DETREVTTTKASHSKTKELYEKYMAEDLGRGEFGIVHRCVETSSKRTFMAKFKVVKGTQDQVLVKEISILNI  
ARHRNIIYLHESFESMEELVMIFEFISGLDIFERINTSAFELNEREIVSYVRQVCEALEFLHSQNIHFDIRP  
ENI IYQTRKNSTIKIIEFGQARQLKPGDNFRLLFTAPEYYAPEVHQHDVVSTATDMWSLGTLVYVLLSGINPF  
LAETNQMIENIMNAEYTFDEEAFKEISLEAMDFVDRLLVKERKSRMTASEALQHPWLKQRIDRVSTKVRTL  
KRRYHTLIKKDLNMVSAARISCGGAI RSGRVSAKVVASIEIGPVSGQIMHAI GEEGGYVYVCKIEN  
YDQSTQVTWYFGVRQLENSEKYEITYEDGVATMYVKDITKFDGTYRCKVVNDYGEDSSYAEFLVKGVREVYD  
YYCRRTKKVRRDAMRLLERPEFTLPLYNKTAAYGENVRFVGTITVHPEPRVTWYKSGQKIKPGDDEKKT  
FESDKGLYQLTINSVTTDDAEYTVVARNKHGDESCKAKLITLHPPTETTLRPMFKRLLANAECHGQSV  
FEIRVSGI PAPTLLKWEKDGQPLSLGPHIEIVHEGLDYALHIRDITLPEDTGYRVTATNTAGTSCQAHQVE  
RLRYVKQEFQSKERERHVQKQIDKTLRMAEILSGTETVPLTPVAQEALREAAI LYKPAVSTKTVKGEYRLQT  
EEKKEERKLRMPYEVPEPRRFKQATVEEDQRIKQFVPMDSMKWYK IRDQYEMPGKLDVQKRPKRIRLSRW  
EQFYVMPLPRITDQYRPKWRIPKLTQDDLEMVRPARRPTSPDYDLYYRRRRRSLGDMSDEELLPI DDYLA  
MKRTEEERLRLEEELELGFSA SPPSRSPRFELSSLRYSPPAHVKVEDRRRDFRYSTYHVPKTEETSTSYAE  
LREHAQASYPKLRQRIMAEKEEEELLRPVTTTQRLSEYKSELDYMSKEEKSKKSKRQRQVTEI TEIEEE  
YEISRAQRESSSSVSRLRRRRSLSPYIELMRPVSELIRSHRPAEEYEDDAERRSPTPERTRPRSPSPVS  
SERSLSRFERSARFDIFSRYESMKAALKTKTQKTSERKYEVLSSQPFLLDHA PRITLMRSHRVP CGQNTFRILN  
VQSKPTAEVKWYHNGVELQESSKIHYTNTSGVLTLEILDCQTEDGGTYRAVCTNYKGEASDYATLDVTTGGAYT  
TYASQRDEEVPKSVFPELTKTEAYAVSSFKRTSELEAASSVREVKSQMTETRESLSTYEHYASAEKMSATSE  
EKSLEEKATVRKIKTTLAARILTKPRSITVHEGESARFSCD TDGEPVPTVTLWREGQVVST SARHQVTTTKYK  
STFEISSVQASDEGNYSVVVENS DGKQEAQFTLTVQKARVIEKAVTSPPRVKSPEPRVKSPEVKS PKRVKSP  
EPVTSHPKAVSPTETKPTKEGQHLVPSAPPKITQSLKAEASKDI AKLTCAVESSALCAKEVAVYKDGKLLKEN  
GHFQFHYADGTYELKIHNLSESDCGEYVCEVSGEGGTSKTSFQFTGQSFKSIHEQVSS ISETTKSVQKTAES  
AEAKKSAQKTAESVEDKKAQKTVE SAEAKKPAQKTAESPEAKKPAQKTAESPEAKKQEP IAPESISSKPVIV  
TGLRDTTVSSDSVAKFTIKVTGEPQPTITWTKDGKAI AQGSKYKLSNKEEF ILEILKTETS DGGLYACTVTN  
SAGSVSSSCKLTIKAVKDTEAQKVSTQKTSEVTSQKASAEQEEISQKALTSEEIKMSEVKSHE TLAIKEEASK  
VLIAEEVKRSAAASLEKSI VHEEVTKTSQASEEVKTHAEIKTLSTQMNITKGQRATLKANIAGATDVKWVNLN  
TELPNSEEYRYGVSGSDQTLTIKQASHREEGILSCIGKTSQGVVKCQFDLTLSEELSDAPSFITQPRSQNLN  
GQNVLFSEVSGEPSPEIEWFKNNLPISISSNISVSRSRNVYTLERNAAVSDSGKYTIKAKNFHQCSATAS  
LTVLPLVEEPPREVVLTSSDVS LHGSVSSQSVQMSASKQEA SFSFSSSASSMTEMKFASMSAQSMSMQE  
SFVEMSSSFMGKSSMTQLESSTSRMLKAGGRGIPPKIEALPSDISIDEGKVLTVACAFTGEPTEPITWSCGG  
RKIQNQEQGRFHIENTDDLTTLIIMDVQKQDGGLYTTL SLGNEFGSDSATVNINIRSM\*

>ENSMUSP00000107477\_c.77325:A>C\_p.K25776Q ENSMUST00000111846.9|Ttn-  
204|ENSMUSG00000051747|-|chr2:g.76568328:T>G  
MTTQAPMFTQPLQSVVVLEGSTATFEAHVSGSPVPEVSWFRDQVISTSTLPGVQISFSDGRARLMI PAVTKA  
NSGRYSLRATNGSGQATSTAE LLVTAETAPPNFSQRLQSM TVRQGSQVRLQVRVTGIPTPVVKFYRDGAEIQS  
SLDFQISQEGDLISLLIAEAYPEDSGTYSVNATNSVGRATSTAE LLVVQGEVVP AKKTKTIVSTAQISETRQT  
RIEKKIEAHFDARS IATVEMVIDGATGQLPHKTPPRI PPKPKSRSP T PPSIAAKAQLARQQSPSP IRHSPSPV  
RHVRAPTSPVRSVSPAGRISTSP IRSVKSPLLIRKTQTTT MATGPEVPPPWKQEGYVASSTEAE MRETTMTS  
STQIRREERWEGRYGVQEQVTISGAAAAAASASVSSSFTAGAITTGTKEVKQETDKSAAVATVVAAVDMARVR  
EPAISAVEQTAQRTTTTAVHIQPAQE QARKEAEKTAVTKVVVAADKAKEQELKSRTREVMVTTQEQT HISHQ

IRKETEKA FV PKVVISATKAKEQETRITGEITTKQE QKRITQETIRQETEEIAASMVVVATAKSTKLEAAVGV
QEETA IQDDQMH LTHEQMMKETRKT VV PKVIVATPKIKEQDLVSR SREAITTKRDQVQITQEKKRKEVETTAL
STIAVATAKAKEQETVLR SREAMATRQEH IQVTHGQVGVGKKA EAVATVVA AVDQARVREP REPTHVEESH SQ
QT TLEYGYKEHISTTKVPEQPRR PASEPHVVPQAVKPAVIQAPSETHIKTTDQMGMHISSQVKKTTDISTERL
VHVDKRPRTASPHFTVSKI SVPKTEHGYEAS IAGSAIATLQKELSATSSTQKITKSVKAPT VPKGETRVRAEP
TPSPQFPFADMP PPDYKYSQAGIEVKKEVGV S ISGSTVREEHFVLRGREAKVTETARVPAPAEVPTPPTLV
SGLKNVTVIEGESVTL ECHISGYPSPKVTWYRE DYQIESSIDFQITFQGGIARLMIREAFAEDSGRFTCSAVN
EAGTVSTSCYLAVQVSEEFDKETTLTEKFATEEKRFVESRDVVM TDT SITEEQAGPGEPAAPFFISKPVVQKL
VEGGSVVFECQIGGNPKPHVYWKSGVPLTTGYRYKVSYNKQTGECRLVISM T FADDAGEYTI V I RNKHGETS
ASASLLEEADYEALVK TQQEMLYQTQMSTFIQEPKVG E IAPGFAYSEYEKEYEKEQALIRKKMAKDTVMVRTF
VEDQEFHIS SFEERLIKEIEYRIKTTLEELLEEDGEEKMAVDISESEAIESGFDIRIKNYRILEGMGVTFHC
KMSGYPLPKIAWYKDGKRIRHGERYQMDFLQDGRASLRIPVVLPEDEGIYTA FASN IKGNAICSGKLYVEPAA
PFSAPTYMPTPEAVSRIRSVSPRSLSRSP IRMSPAMSPARMSPARMSPARMSPARMSPARMS PGRRL EETDESQLERL
YKPVFVLKPA SFKCLEGQTARFDLKV VGRPMPETFWFHNGQQIVNDYTHKVVIKEDGTQSLIIVPASPSDSGE
WTVVAQNRAGKSTISVTLTVEAVEHQIKPAFVEKLNKVNNIKEGSRLEMKVRATGNPNPDI VWLKNSDIIVPHK
YPRIRIEGTRGEAALKIDSII SQDSAWYTATAINKAGRDTTRCKVNVEVEFAEPEPERKLIIPRGTYRAKEIA
APELEPLHLRYGQEWEEDLYDKEKQKQPF FKKKLTSLR LKRF GPAHFECRLTPIGDPTMVVEWLHDGKPLE
AANRLRMIN EFGYCSLDYGAAYS RDSGVI TCRATNKYQTDHTSATLIVKDEKSLVEESQLPDGKGLGRIEEL
ERMAHEGALTGVTTDQKEKQKPDIVLFP E PVRVLEGETARFR CRTGYPQPKVNWYLNGLIRKSKRFRVRYD
GIHYLDIVDCKSYDTGEVKVTAENPEGVTEHKVKLEIQQREDFRSVLRRAPEPKPEFHVHEPGKLQFEVQKVD
RPVDTSETKEVVKL KRAERITHEKVSESEELRSKFKRRTEEGYEAITAVELKSRKKDES YEELLKKTDEL
LHWTKELTEEEKKALAE EGKITITPTFKPERIELSPSMEAPKIFERIQSQT VGGSDAHFRVRVVGKPDPECEW
YKNGVKIERSDRIYWYWPEDNVC ELVIRDVTAEDSASIMVKA INIAGETS SHAFLLVQAKQLITFTQELQDVV
AKEKDTMATFECETSEPFIKVKWYKDGIEVHAGDKYRMHSDRKHVHFLSVLTI DTSDAEDYSCVLVEDENIKTT
AKLIVEGAVVEFVKELQDIEVPESYSGELECIISPENIEGKWHNDVELKSN GKYSITSRGRQNLTVKDVTK
EDQGEYSFVVDGKKTCKLKMKPRP IAILQGLSDQKVEGDIQLEVKVSL ENVEGVMMKDGQEVQHSDRVHI
VIDKQSHMLLIEDMTKEDAGNYSFTIPALGLSTSGNVSVYSDVITPLKDVNVI EGTKAVLECVSVPDVT SV
KWYLNDEQIKPDDRVSIVKGTQRQLVINRTHASDEGPYKLMVGRVETSCNLSVEKIKIIRGLRDLTCTETQN
VVFEVELSHSGIDV VWNFKGKEIKPSSKYKIEAHGKIYKLTVLNMMKDDEGEYAFYAGENTTSGLTVAGGAI
STPLTDQTVAESQEA VFECEVANPESEGEWLKDGKHLALSNNFRGESDGHKRRLVIAAAKLD DAGEYTYKVAT
SKTSAKLV EAVKIKKTLRNLTVTETQDAVFSVELTHPDKVQWIKNGVVLDSNDKYEISVKGTL YSLKIKN
CAMADESVYGFKLGR LGASARLHVETVKI IKKPKDVTALENATVTFEVS VSHDTPVKWFHKNVEIKPSDKHR
LVSERKVHKLMLQSI SPSDAGEYTAMVGQLECKAKLFVETLHITKTMKSIEVPETKAASFCEVSHFNVP SMW
LKNVGEIEMSEKFKI VVQGLHQLIIMNTSTEDSAEYTFVCGNDQVSATLTVTPIMITSMLKDINAEKDTIT
FEVTVNYEGISYKWLKNGVEIKSTDR CQMRTKKLTHSLNIRNVHFGDAADYTFVAGKATSTATLYVEARHIEF
RKHIKDIKVLEK KRAMFECEVSEPDITVQWMDGQELQIADR I KIQKEKYVHRLLI PSTRMSDAGKYTVVAGG
NMSTANL FVEGRDVRIRS IKKEVQVIEKQRAVVEFEVNEDDVAHWYKDGIEINFQVQERHQYVVERRIHRMF
ISETRHS DAGEYTFVAGRNRSSVTLYVNAPEPPQVLQELQPVTVQSGKPARFCAVISGRPQPKISWYKEEQLL
STGFCKFLHDGQEY TLLLIEAFPEDA AVYTCEAKNDYGVATTSASLSVEVPEV VSPDQEMPVYPPAIVTPLQ
DTVTSEGRPARFQCQVSGTDLK VSWYCKDKKIKPSRFFRMTQFEDTYQLEIAEAYPEDEGTYAFVANNAVGVQV
SSTATLRLEAPESILHERIGQQIEMEMKAAPVIKRRIEPLEVALGHLAKFTCEIQGAPNVR FQWFKAGREIYE
SDKCSIRSSNYVSSLEILRTQV VDCGEYTCKASNEYGSV SCTATLTVTEAYPPTFLSRPKALTTFV GKA AKFL
CTVSGTPVIEI IWQKDGAA LSPSPDCRVTDADNKHSLELSNLTVQDRGIYSCKASNKFGADICQAE LTIIDKP
HFIKELEAVQSAINKKIHLECQVDEDRKVTITWSKDGQKLPAGKDYKIYFEDKIASLEIPLAKLKDSGTYTCT
ASNEAGSSSSSA AVAVREPPS FVKVDP SYLMLPGESARLHCKLKGSPVIQVTFWFKNNKELSESN TVRMSFVN
SEAILDITDVKVDDSGTYSCEATNDVGS DSCSTEVVIKEPPSFKTLEPADIVRGANALLQCEIAGTGF FEVN
WFKDKKQIRSSKKYRLFTQKTFVYLEISSFN SADVGDYECVVANEV GKCGCVATHLLKEPPTFVKVVD DFTAL
AGQTVTLQAAVRGSEPI SVMW MKGQEV IKEDGKIKMSFSNGVA VLTIPDVQISLGGKYTCLAENEAGS QTSVG
ELIVKEPAKII ERAELIQV TAGDPATLEYTVSGTPELKP KWKYK DGRPLVASKKYRISFKNNIAQLK FYS AELH
DSGQYTFEISNEVGSSSCE TTFVLDRDIAPLFTKPLRNVDSVVGACRLDCKIAGSLP MRVSWFKDGKELTA
SDRYQIAFVEGTASLEISRVD MNDAGNF TCRATNSVSGSKDSSGALIVQEP SFVTKPGSRDVLPGSAVCLKSA
FQGSAPLTIKWFKGDKELVSGGSCYITKETSESSLELYAVKTS DSGTYTCKVSNVAGSVECSADLFVKEPATF
IEKLEPSDHLKGDGTQLACKVTGTPPIKITWFANDRELLRESSKHKMSFAESTAVLRLTDVAIEDSGEYMCEA
QNEAGSDHCTGIVIVKESPYFTKEFKSIEVLKEDV MLLAEVAGT PPF EITWFKDNTLRSGRKYKTFLODQL
VSLQVLKFAADAGEYQCRVTNEVGSSTCSARVTLREPPSFIKIEATSSLRGGTAA FQATLKGS LPI TVTWL
KDNDEITEDDNIRMTFENNVASLYLSGIEVKHDKGYVCQAKNDAGIQRCSALLSVKEPATIMEEAVS IDVTQG
DPATLQVKFSGTKEISAKWFKDGQELTLGPKYKISVTDTVSILKIIISTEKKDSGEYTFEVQNDVGRSSCKASI
NVLDLIIPPSFTKKLRKMDSIKGSFIDLECI VAGSHPI SIQWFKDDQEI SASDKHKFSFHDNTAFLEISQLEG

TDSGTYTCSATNKAGHSQCSGHLTVKEPPYFVEKPPSQSDVNPGRVQLKALVGGTAPMTIKWFKDNKELHPGA  
ARSVWKKDDTSTILELFSAKAADSGTYICQLSNDVGTSSKATIFVKEPPQFIKKPSPVLVLRNGQSTTFECQV  
TGTPEIRVSWYLDGNEITDLRKYGISFVDGLATFQISNARVENSCTYVCEARNDAAGTASCSIELKVKPEPPIFI  
RELEPVEVVKDSDVELECEVMTTPEFVTLWLNKNEIRSGKKTMSKMSVLYLHITKCDPSPDVGEYQCIAN  
EGGSCACARSVALKEPPSFIKKIENVTTVLKSSATFQSTVAGSPPISTITWLKDDQILEENDNVHISFEDSVAT  
LQVRSVDNGHSGRYTCQAKNESGIERCYAFLLVQEPAQIIEKAKSVDVTEKDPVTELEVAGTPELVKVKWLD  
GKQIVPSRYFMSFENNVASFRIQSVMKQDSGQYTFKVENDFGSSSCDAYLRVLDQDIPPSFTKLLTKMDKVL  
GSSIHMCKVSGSLPI SAQWFKDGKEISTSAKYRLVCHENTVSLVSNLEEDTANYTCKVSNVAGDNACSGI  
LTVKEPPSFLVKPERQQAIPDSTVEFKAVLKGTPPFKIKWLKDDVELVSGPKCFIGLEGSTSFNLNLSVDSSK  
TGQYTCQVNTDVEPPKFKVKKLEASKIKAGDSARLECKITGSPETQVWVWRNEHELTASDKYQMTFIDSVAVI  
QMNSLGTEDSGDFICEAQNPAAGSTSCSTKVIKPEPPVSSFPPIVETLKNTEVSLCELSGTPPFVWVYKDK  
RQLRSSKKYKVASKNFHASIHILNVESTDIGEYHCKAQNEVGS DACVAVKLEPPKFI SKLNSLTVVAGEPA  
ELQASIEGAQPI SVQWLKEKEEVIRESENIRISFVNNVATLQFAKVEPANAGKYICQVKNDDGGVRENMATLTV  
LEPAVIEKAGSMTVTVGETCALECKVAGTPELSVEWYKDGKLLTSQKHKFSFYNKISSLKILSVEKEDAGT  
YTFQVQNNVKGSSCTAVVDVSDRMVPPSFTRRLLKDTGGVLGTSCILECKVAGSSPISIAWFHEKTKIVSGAKY  
QTFSDNVCTLQLNSLSDSDMGSYTCVAANVAGSDECRALLTVQEPSPFVKEPEPLEVLPKGNITFTSVIRGT  
PPFKVGFWRGARELVKGNRCNIYFEDTVAELELFNIDISQSGEYTCVSNAGQASCTTRLFVKEPATFVKKL  
SDHSVEPGKSIILEGTYTGTLPISVTWKKDGVSTPSERCNIVTEKTCILEILSSTKGDAGHYSCIEINEAG  
RDACDALVSTLEPPYFVTELEPLEASVGSVSLQCQVAGTPEITVSWFKGDTKLRSTPEYRITYFTNNVATLVF  
NKVINDSGEYTCMAENSIGTAASKTIFRIQERQLPPSFARQLKDIEQTVGLPVTLTCLNLSGAPIQVCWYRD  
GVLLRDDENLQMSFVDNVATLKI LQTDLSHSGQYSCSASNPLGTASSTARLTAREPKKSPFFDIKPVSIDVIA  
GESADFECHVTGAQPMRVTWKDNKEIRPGGNYTITCVGNTPHLRILKVGKGDGSGQYTCQATNDVKGDMCSAQ  
LSVKEPPKFIKKLDASKVAKQGESIQLECKISGSPKIVVWFRNDELHESWKYNMSFVNSVALLTINEASAE  
DTGDYICEAHNGVGDASCSTALKVKAPPVFTQKPPVGVGALGSDVILQCEISGTPPFVWVWVDRKQVRSSK  
FKITSKNFDTSLHIFNLEAPDIGEYHCKATNEVGS DCTACTVKEPPEPRFVKKLSDASTLIGDPVELQAVVEG  
FQPI SVVWLTKDKEGVIRESNVRISFVDNIATLQLGSPASQSGKYVCQIKNDAGMRECSAVLTVLEPATIVE  
KPEPMTVTGNPFTLECVVAGTPELSAKWFKDGLRELSGSRHHITFVRNLASLKI PSAEMNDKGLYTFEVENR  
VGKSSCTVSVHVS DRVPPSFRRLKDTSATLGASVLECRVSGSAPISVGVWFLDGNEIISPKCQSSFADNV  
CTLTLSSLEPSDTGAYTCVAANVAGQDESSAVLTVQEPSPFEQTPDSVEVLPGMSLTFTSVIRGTPPFKVKWF  
KGSRELVSGEACTISLEDFVTELELLEVEPGQSGDYSCLVNDAGSASCTHLLFVKEPATFVKRLADTSVETG  
SPIVLEATYSGTPPISVSWMKNEYPLSQSPNCGITTEKSSILEILESTIEDYAQYACLIENEAGQDICEALV  
SVLEPPYFIEPLEHVEAAIGEPITLQCKVDGTPEIRISWYKEHTKLRSA PAYKMQFKNNVASLVINKVDHSDV  
GEYTCKAENSVGAVASSAVLVIKERKLPPSFARKLKD VHE TLGFPVAFECRINGSEPLQVSWYKDGELKDDA  
NLQMSFVHHVATLQILQTDQSHVQYNCASASNPLGTASSAKLILSEHEVPPFFDLKPVSVLDLALGESGSFKC  
HVTGTAPIKITWAKDNREIRPGGNYKMTLVENTATLTVLKVAKGDAGQYTCYASNVAGKDCSCSAQLGVQEP  
FIKKLDQSRIVKQDEYTRYECKIGGSPKIKVLWYKDEVEIQESSKFRMSFEDSVAILEMHSLSVEDSGDYTC  
ARNAAGSASSSTSLKVKPEPPVFRKPPFVETLKGADVHLECELQGTQVSWHKDKRELRSKGYKIMS ENL  
LTSIHILNVDTADIGEYQCKATNDVGS DTCVGSVTMKAPPQFVKKLTDISTIGKEVQLQTTIEGAEPISVAW  
FKDKGEIVRESDNIIWISYSENIA TLQFSRAEPANAGKYTCQIKNDAGMQECYATLSVLEPA AIVEKPESIKVT  
TGDTCTLECTVSGTPELSTKWFKDGKELTSDNKYKISFFNKVSLK I INVVPGDSGVYSFEVQNPVKGDSCKV  
SIQVSDRIIPPSFTRKLEKTNGLSGSSVMECKVYGSPI SVLWFHDGNEISSGRKYQTTLTDNTCALTVNML  
EEADAGDYTCIATNVAGSDECSAPLTVREPPS FVQKPDMDVLTGSNVTFTSIVKGSPPFTVSWFKGSTELVP  
GARCNSVSLQDSVGELELFDVDTSSQGEYTCIVSNEAGRASCTTRLFVKAPAI FVKRLNDYSIEKGKPLILEGT  
FSGTPPISVTWKKNGINVIASQRCNITTEKSAILEILSSTVEDSGQYNCYIENASGKDCSCSAQILILEPPYF  
VKQLEPVKVTVGDSASLQCQLAGTPEIGVSWYKGDTKLRPTATCKMHFKNNVATLVFTQVDS SSGEYICRAE  
NSVGEVSSSTFLTVQEQLPPSFRQLRDVQETVGLPVVFECAVSGSEPI SVSWYKDGKPLKDS PNIQTSFLD  
NIATLNI FKTDRSLSGQYSC TATNP IGSASSGAKLILTEGKNPPFFDIPLAPMDAVVGESADLECHVTGTQPI  
KVTWAKDNREIRSGGNYQISYLENSAHLTIVKVDKGDGSGQYTCYAVNEVGKDSCTAQLNIKERLIPPSFTKLL  
SETVEETE GNSFKLEGRVAGSQPITVAWYKNNVEIHPTSNCEIMFKNNALLLQVKRASMADAGLYTCKATNDA  
GSALCTSSIVIKEPKKPPVFDQHLAPVTASEGDSVQLSCHVQSGSEPIRIQWLKAGREVKPSDRCSF SFASGTA  
MLELKETAKADSGDYVCKASNAGSDTSKCKVTIKEKPAAPAAKKA AVDGLKFFVSE PQSIRVVEKTTATFI  
AKVGGDPIPNVKWTKGKWRQLNQGGRILIHQKGDEAKLEIRD TTKTDSGLYRCVAFNKHGEIESNVNLQVDER  
KKQEKIEGDLRAMLKKT PALKKSGSEEEEDIMELLKNVDKPEYK YARMYGITDFRGLLQAFELKQSQE  
THRLEIEELEKSERDEKEFEELVAFIQQLRTQTEPVTLIKDIENQTVLKDNDIAFEIDIKINYPEIKLSWYK  
TEKLEPSNKYEISIDGDRHTLRVKNCPKQKDGNYRLVCGPHIASAKLTVIEPAWERHLQDVTLKEGQCTMTC  
QFSVENVKSEWFRNGRVLPQGRVTEVEHKVHKLTIADVRAEDQGYTC KHEDLETS AELRIEAEPIQFTKR  
IQNIVVSEHQSATFECEVSFDDAIVTWYKGPTELTESQKYNFRNDGRCHYMTIHNVTPDDEGVYSVIARLEPR  
GEARSTAELYLTTEIKLEMKPPDIPDSRVPIPTMPIRAVPPEEIPPAVAPSIPLLLPLPEEKPPAKRIEVT



KKGVKDKTKKVVTKPKEEAPPPVPEVAKKPPPPTPMIPAKASEIIDVSSKAEEVKITITTRKKEVHKEKEAV
YEREEAVYEKKVHIEPWEPEYEELETEPYTEPYEPPYEEPPDEYEEIKVEAKKQVHEEWEEDFEEGQYER
EEGYDEGEEWEIEIYHEREIIQVQKEVHEELHEKKIPAKVPEKKVPPKVVKKPVVEKVEKTRRMEEEKVQV
IKVPEVSKKIVPQKPSRTPVQEEIEVVKVPAVHTKKMVISEEKMFASHTEEEVSVSVEVQKKTVTEEKIHV
AVSKKIEPPPKVPEPPKKPVPEEVVVPVPIPKKVEPPAAKVPEAPKKPVPEEKKVPVPIPKKKEPAAAPQVPEAP
KKPAPEEKIPVPVTKKKEAPPKAVPEVQKQVTEEKIAIITQREESPPPAVPEIPKKKVPEEKRPVPRKEEVP
PPKVPVPPKAVPEAVVPAPIPKKAPPRAEVSKKTVEEKRFAAEEKLSVAVPQVRELMRHEEEEWYSEEEE
RVSVSVYREEERDEEEAEITEYEVLEEPPEEYVVEEKMHFISKKVEVEPAKVPEKKIIPKPKVPAKIEEPPPTK
VPEPPKKIVPEKKVPAPAPKKVPPAKAPEESKRPVPEKRAPAEVGEIEPPPTKVAERHMKITQEEKVLVAVT
KKEAPPRARVPEEPKVAPEERFPKPKPRREEEPKAVTEVRKRAVKEEKVSEVVKREPRPTKEVTVTEKK
WSYTRREETVSEHREEEYEDYEDYEEYKEFEEYEPTTEYDQYDEYAEREVEHYEEHEEYVTEPKKVPVQPAQ
EPVPAKPKAPPKVLKAVPEEKAPLPKQKLLKPLPKAPEEPKVVVEEKIQISITKREKQVTEPVAKVPMK
PKRVVPEAKIPAPTKEVAVPVRESLSFVICGSVLLKCLNFIEELENSQLKDDIFKVPVGVKPKRELEEVVVFKE
EVEAHEEYIVEEEEYVHEEEYVHKEEYVHEEEYVHKEEYIHEEEHLHEEEETIAEEEVVPVAVKVPVVPK
KPVPEEKKVPVVPKKEAPPKAVPEIPKKPEEKVPVPIPKKEKAPPKAVPEVPKPKVPPEEKPPVVPKKEVEPP
PAKVEVPKPKVPPEKKVPAPTPKKVEAPPKAVPEVPKPKPIPEEKKTALLKMEAPPKAPKKREVVPVVAL
PREEEEEEVFPFEVPEEEILPEEEVPSSEEEAPPEEVPPPEEEVLPPEEEVLPPEEEVQPEEEALPE
IKPKVPKPAVPEIKKKVPEKKVVVPKKEEAPPTKVPEVSKKVEERRIIPKKEEVPPAEVYEEAEPTPEEI
PEEPPSIEEEIEVEEEEEEEVLPPEEVEVVKAVPEAPTVPKKAAPPKAVPKPIPEEKVPVQVQKKEAPP
AKVPEVPKPKVPEKKKIPKPKVPKKEAVPPAKGKAVFEEKISVAYQOQELVQERIELELVEAKVEEAFEEEE
FHEVQYEFEEEEFHEVEEFIRVEERRFQEEHKEVEVHRVIEFLEAEVEVEYKPKPIPKKGPVSEKVIIPKK
PPTKVIIPRKEPPKAVPEVTKKTVEEKIRAPEEPKVPAPKEVVEKKSVPVPPKKEAPPKAVPEAPKAAPE
KKVPVAPKKKPEAPPKVPVPEVPTAVPQKKIPEAIPPKPESPLLEVPEAPKEVVEKKSVPVPPKKEAPPK
VPEAPKAAPEKKVPVAPKKKPEAPPKVPVPEVPAVPPQKKIPEAIPPKPESPPPEVYEEPEEEIVPEEPPPE
AVEEVPVAPPKVPTEPPKPKVPEKKAPPVVKKPEPPKAVPEVPKEAPPEKKVPKPKPEAPPKAVPEVPKEV
VTEKKVAVPKKVPVPAKVPEVPKPKVIEEKPAIPVVEKVASPPAEVYEEPEEVTAEPEEPPAEVEEYEAPE
PPEAPVPEKPKVPEKKFPVIKKPEAPPKPEPEKPKVIEKPKLKRPPARPPSPKPEEVEEVEEVEEVEEVEE
KKVPEKPEVVEKVEPAPLKVPTAEKKVRKLLPEPKPQKPEEVVLSVLRKKPEEEEPKVEPKKVEKAKKPEEP
QPPPKAVEVEAPPEPTPKERKVPPEPAKVEIKPAIPLPGPEPKPEPEVKTMTKAPPIEPAPTPIAAPVTAPEV
VGKKAEEKPKDEAAKPKGPIKGVAKKTPSPIEAERKKLRPGSGGKPPDEAPFTYQLKAVPLKVFKEIKDIVL
TEAESVGSSEAI FECLVSPSTAITTWMKDGSNIRESPKHRFIADGKDRKLIIDVQLSDAGEYTCVLRNLNKEK
TSTAKLIVEELPVRFVKTLEEEVTVVKGQPLYLSCELNKERDVVWRKDGKIVVEKPGRIVPGVIGLMRALTIN
DADDDTAGTYTVTVENANNLECSSCVKVEIIREWLVKPIRDQHVKPKGTAVFTCDIAKDTPNIKWFKGYDEI
PLEPNDKTEILKEGNHFLKVKNAMPEDI DEYAVEIEGKRYPAKLT LGEREVELLKP IEDVTIYEKESASFDA
EISEEDIPEGWKLKGLLELRSPPTCEIKAEGGKRFLLTKVVKLDQAGEVLYQACNAITTAITLTKVEIELDFAVP
LKDVTVPEKRVARFECVLTREANVWISKGPDI IKASDKFDI IADGKKHILVINDSQFDDEGVTAEVEGKKS
AQLFVTGIRLKFISPLEDQTVKEGQTATFVCELSHEKMHVWVFNKNDVKLHTTRTVLMSSEGKTYKLEIRETTL
DDISQIKAQVKNLSSTANLKVLEADPYFTVKLHDKTGVEKDEIILKCEVSKDVPVKWFKDGEIIVSPKHSVK
TDGLRRLIKIKKAELKDKGEYVDCDGTDTTKANVTVEARLIKVEKPLYGVEVFGVGETARFEIELSEPDVHGQW
KLKGEPLTASPDCEIIEEDGKKHVLVLYNCQLDMTGEISFQAANAKSAANLKVKEPLIFITPLSDVKVFEKDE
AKFECEVSREPKTFRWLKGTQEIITGDDRFELIKDGTSHSLVIKSAAFEDEAKYMFEEADKRTSGKLIIEGIRL
KFLTPLKDVTAKERENAVFTVELSHDNIPVSWFKNDQRLHTSKRVSMHDEGKTHSITFKDLSIDDTSQIRVEA
MGISSEAKLTVLEGDPYFTGKLQDYTGVEKDEVILQCEISKADAPVKWFKDGKEIKPSKNVVIKADGKRRMLI
LKKALKSDIGQYTCDCGTDQTSGLDIEDREIKLVRPLYSVEVMEETETARFETEISEDDIHANWKLKGEALLQ
TPECEIKEEGKIHVLIILHNCRLDQTTGGVDFQAANVKS SAHLRVKPRVIGLLRPLKDVTVTAGEATATFDCELSY
EDIPVEWYLKGGKLEPNDKVTRSEGRVHTLTLRDVKLEDAAGEVQLTAKDFKTQANLNFVEKPPVEFTKPLEDQ
TVEEEEATAVLECEVSRENKVKWFKNGTEILKSKKYEIVADGRVRKLI IHGCTPEDIKTYTCDKDFKTSNCL
NVVPPHVEFLRPLTDLQVKEKETARFECEISKENEKVQWFKDGAIEKKGKDYDIISKGAVRILVINKCLLNDE
AEYSCEVRTARTSGMLTVLEEEAVFTKNLANLEVSEGDTIKLVCEVSKPGAIEVIWYKGDDEEIIETGRFEILTD
GRKRILIIQNAQLEDAGSYNCR LPSRRTDSKVKVHELAAEFISKPQNLEIIEGEKAEFVCTISKESFEVQWKR
DDQTLESGDKYDI IADGKKRVLVVKDATLQDMGTYVVMVGAARAAAHLTVIEKLRIIVPLKDTKVKEQQEVVF
NCEVNTGAKAKWFRNEEAI FDSKYYIILQKDLVYTLRIRDARLDDQANFVSLTNRHGENVKSANLIVEEE
DLRIVEPLKDIETMEKKS VTFWCKVNRNLNVTLKWTKNGEVAFDNRISYRIDKYKHS LIKDCGFPDEGEYVV
TAGQDKSVAELIIIEAPTEFVEHLEDQTVTEFDVDFSCQLSREKANVKWYRNGREIKEGKVKFEKDGSIHR
LIIKDCRLEDECEYACGVEDRKSARLRFVEEIPVEIIRPPQDILEAPGADVIFLAELNKDKVEVQWLRNNMIV
VQGDKHQMMSEGKIHRLQICDIKPRDQGEYRFIAKDKEARAKLELAAAPKIKTADQDLVDAGQPLTMVVPYD
AYPKAEAEWFKENEPLSTKTVDTTAEQTSFRISEAKKDDKGRYKIVLQNKHGKAEGFINLQVIDVPGFVRNLE
VTETFDGEVSLAWEEPLTDGGSKIIGYVVERRDIKRKTWVLVTDRAADSCEFTVTGLQKGGVEYLFVRSARNRV

GTGEPVETDPSPEARSKYDVPGPPLNVTITDVRNRFVSLTWEPPPEYDGGAEITNYVIELRDKTISRWDTAMTV
RAEDLSATVTDVVEGQEYSFRVRAQNRIGVGKPSAATPFVKVADPIERPSPPVNLNASEQTQSSVQLTWEPPPL
KDGGSPIILGYIIEERREEGKDNWIRCNMKNPVELTYKVTGLQKGNKYLYRVSAENAAGVSDPSEILGLTADDA
FVEPTMDLSAFKDGLEIVPNPIKILVLPSTGYPRPKATWTFGDQVLEEGDRVKMKTISAYAEIIVISPSERTDK
GIYTLTLENPVKISISGEINNVNVIAPPSAPKELKFSIDITKDSVHLTWEPPDDDDGGSPLTGYVVEKRDMSRKTWT
KVMDFVTDLEFTVPLVQGEYLFKVCARNKCGPGEPAYTDEPVNMSAPATVPDPPENVKWRDRTRANSIFLWT
DPPKNDGGSRIKGYIVEKCPGRSDKWVACGEPVPTKMEVTGLEEGKWAYRVKALNRQGASKPSKPTTEIIQA
VDTQEAPFIIFLDVKLLAGITVKAGTKIELPATVVTGKPEPKITWTKADTLLKPDQRITIEINVPKKSTVTTITDSK
RSDTGTYIEAVNVCGRATAVVEVNVLDKPGPPAAFDITDVTNESCLLTWNPDRDDGGSKITNYVVERKATDS
DVWHKLSSTVKDTNFKATKLTNPKEYIFRVAENMYGVGEPVQAAPIIAKYQFDPPGPPTRLEPSDITKDAVT
LTWCEPDDDDGGSPIITGYWVERLDPDTDKWVRNKNMPVKDTTYRVKGLTNKKKYRFRVLAENLAGPGKPSRSTE
PILIKDPIDPPWPPGKPTVKDIGKTSVLNWTKEPHDGGAKIESYVIEMLKTGTDEWVRVAEVPTEHLLTG
LMEGQEYSFRVRAVNKAGESESESPDPVLCREKLYPPSPRWLEVINITKNATDLKWTVPEKDGGSPIITNYI
VEKRDVRRKGWQTVDTTVKDTKCTVPLTEGSLYVFRVAENAIQGSDYTEIGDSVLAKDFTTTPGPPYALTV
VDVTKRHVDLKWEPKNDGGRPIQRYIEKKEKLGTRVWKAGKTSGPDCNFRVTDVIEGTEVQFQVRAENEAG
VGHPEPTEILSIEDPTSPSPPLDLHVTDAGRKHIAIAWKPPPEKNGGSPIIIGYHVEMCPVGTAKWVRVNSRP
IKDLKFKVEEIVDPKKEYVLRVRAVNAVGVSEPISENVVAKDPDCKPTIDLETHDIVVIEGEKLNIPVPPFR
AVPVPTVSWHKDGEVKASDRLTMKNDHI SAHLEVPKSVHADAGVYITITLENKLGSAENINVKVIGLPGPCK
DIKASDITKSSCKLTWEPPPEFDGGSPILHYVLERREAGRRTYIPVMSGENKLSWTVKDLIPNGEYFFRVKAVN
KIGGGEYIELKNPVIAQDPKQPPDPVDVEVHNPTAKAMTITWKPLYDGGSKIMGYIEKITKGEDRWKRCN
EHLVPVLTYTAKGLEEGKEYQFRVRAENAAGIGEPSRATPPTKAVDPI DAPKVI LRSTSLEVKRGDEIALDATI
SGSPYPTITWIKDENVIIVPEEIKKRAAPPVRRKKGEAESEEPFSLPLTERLSINNSKQGESQLRIRDSLRPDH
GQYMIKVENDHGVAKAPCSVSLDTPGPPINFVFEDIRKDSVLCCKWEPPLDDGGSEIINYTLEKKDKTKPDS
WIVITSTLRNCKYSVTKIEGKEYLFRVRAENRFGPGPPCVSKPLLAKDPFEPDAPDKPIVEDVTSNSMLVK
WNEPKDNGSPILGYWLEKREVNSTHWSRVNKTLLSSLTKTKVDGLLEGLTYVFRVCAENAAGPGKFSPPSDPKT
ARDPISPPGPPVNRAGDTSSTIELEWEPFAFNNGGSEIMGYFVDKQLVGTNEWSRCKTEKMIKVRQFTVKEIRE
GADYKLRVSANVAGEGPPGETEPTVAEPQEPTEVELDVSVKGGIQIMAGKTLRI PAEVTGRPVPTKVVMTIE
EGELDKERVI IENVGKSELI IKNALRKDHGRYVITATNSCGSKFAAVRVEVFDVPGPVLDLKPVVNTRKMCL
LNWSDPADDGGSIDITGFI IERKDAKMHTWRQPIETERSKCDITGLIEGQYKFRVIAKNKFGCGPPVEIGPIL
AVDPLGPPSPERLTYTERTKSTITLDWKEPRSDGGSPIQGYIEKRRHDKPDERVNRKLCPTTSFLVENLD
EHQMYEFRVKAVNDVGESEPSLPLNVVQDDEVPPTIKLRLAVRGDTIKVKAGEPVNIPADVTGLPMPKIEWS
KNEKVIDKPTDTLNIITKEEVSRSSEAKTELSIPKAAREDKGTYTITASNRLGSVFRNVHVEVYDRPSPRNLAV
TDIKAESCYLTDAPLDNGGSEITHYIDKRDASRKKSEWEEVTNTAVERRYGIWKLI PNGQYEFVRVAVNKY
GISDECKSDKVVQDPYRPLPGPPGPKVLERLTKGSMVSWTPPLDNGGSPITGYWLEKREEGGTYWSRVSRAP
ITKVLKGVFEFNVPRLEIGVKYQFRAMAINAAGIGPPSESPDPAVAGDPIYPPGPPSCPEVKDKTKSSI SLAW
KPPAKDGGSPIKGYIVEMQEEGTTDWKPVNEPKLLLTACECVVNLKELRKYRFRVKAVNEAGESEPSDTTGE
IPATDIQEVPEVFIIDIGAQCCLVCKAGSQVKIPAVIKGRPTPKSSWEFDGKAKKAMKDGVDHIDPEDAQLETA
NSSVVI IPECTRAHSGKYSITAKNKAGQKTANCRVKVMDAPGPPKDLKVS DITRGSCLSWKMPDDDDGGDRIK
GYVIEKKTIDGKAWTKVNPNCGSTTFVVPDLISEQQYFFRVRAENRFGIGPPAETIQRTTARDPIYPPDPPIK
LKIGLITKNVHLSWKPPKNDGGSPVTHYIVECLAWDPTGKKKEAWRQCNRRDVEELEFTVEDLIEGGEYEF
VKAVNEAGVSKPSATVGPVIVKDQTCPPAIELKEFMEVEEGTDVNIIVAKIKGVFPFTLTWFKAPPKPKPSKEP
VVYDTHVKNQVVDCTTLVIPQSRSDTGLYSITAVNNLGTASKEMRLNVLGRPGPPVGPPIKFESISADQMTL
SWLPPKDDGGSKITNYVIEKREANRKTWVRVSSSEPKCEMYTI PKLLEGHEYVFRIMAQNKYIGIGEPDSEPET
ARNLFSVPGAPDKPTVSSVTRNSMTVNWEEPEYDGGSPVTGYWLEMKDITTSKRWRKVRNRP IKAMTLGVSYKV
TGLIEGSDYQFRVYAINAAGVGPASLPSDPVTARDPVAPPGPPFPKVTDWTKSSVDLEWSPPLKDDGGSKITGY
IVEYKEEGKEEWEKGDKEVVRGTLVVVTGLKEGAFYKFRVRAVNAVGVGEPGEVTDVIEKMDRIVSPDLQLDA
SVRDRI VVHAGGVIRIIAYVSGKPPPTVTWSMNERALPQEA IETTAISSSMVIKNCQRSHQGVYSLAKNEG
GERKKTIIVDVLDVPGVGI PFLSDNLTNDSCKLTWFSPEDDGGSPITNYVIQKREADRRAWTPVTVTRQN
ATVQGLIQGKSYFFRIAAENSIGMGPFVETPNALVIRDPIITVPERPEDLEVKEVTKNVSLTWNPKYDGGSE
IINYVLESRLIGTEKFHKVTNDNLLSRKYTVKGLKEGDTYEYRVSAVNI VQGKPSFCTKPIITCKDELAPPTL
DLDFRDKLTVRVGESFALTGRYSKPKPKIDWFKDEADVLEDDRTHIKTPTTLALEKTKAKRSDSGKYCVVV
ENSTGSRKGCQVNVVDRPGPPVGPVIFDEVTKKEYMVISWKPPLDDGGSEITNYIIEKKEKLDIWMVPTSAS
AKTTCVKVPLLEGKDYIFRIHAENLYGISDPLVSDSMKAKDRFRVDAPEQPVVTEVTKDSALVTWNKPNDDG
KPIITNYILEKRETTMSKRWRVTKEP IHPYTKYRVPDLLEGQYEFVRVSAENEIGIDPSPSPKPVFARDPIAK
PSPPIINPEAIDTTTNSVELTWQPPRHDDGGSKILGYIVEYQKVGDEEWRRANHTPESCPETKYKVTGLRDQSY
KFRVLAVNEAGESDPAHVPEPVLVKDRLEPPELILDANMAREQHIRVGDTLRLSAI IKGVPFPKVTWKEDRE
APTQAQIDVTPVGSKLEIRNAAHEDGGIYSLTVENPAGTKTVSVKVLVLDKPGPPRDLEVSEIRKDCYLTWK
EPLDDGGSVVNTNYVVERKDVATAQWSPLSTTSKKKSHMAKHLTEGNQYLFVRAAENQYGRGPFVETPKPIKAL

DPLHPPGPPKDLHHVDVDKTEVSLVWNKPRDRGGSPITGYLVEYQEEGDKDWIKFKTKVKNLDCVVTGLQQGKT  
YRFRVKAENI IGLGLPDTTPIECQEKLVPPSVELDVKLI EGLVVKAGTTVRFPAIIRGVPVPTAKWTTDGTE  
IKTDDHYTVETDSFSSVLTIKNCLRKDTGEYQLTVSNAAGTKTVAVHLLTVLDVPGPPTGPINILDVTPEYMTI  
SWQPPKDDGGSPVINYIVEKQDTRKGTWGVVSAGSSKLLKLVPHLQKGCYVFRVKAENKMGVGPPLDSIPTV  
AKHKFSPPSPGKPVVTDITENAATVSWTLPKSDGGSPITGYVERREITGKWVRVNKTP IADLKFRVTGLYE  
GNTYEFVFAENLAGLSNPSPPSSDP I KACRP I KPPGPPINPKLKD KSKESADLVWTKPLSDGGSP I LGYVVEY  
QKPGTAQWDRINKDELIRQCAFVRVPLIEGNEYFRFRI RAANI VGEGEPRELAESVIAKDILHPPEVELDVTCT  
DVI TVRVGQTI RILARVKGRPEPDI TWSKEGKVLVKKRVDLI HDLPRVELQIKEAVRADHGKYI ISAKNSSG  
HAQGSAINVLD RGPQC NLKVS NVTKENCTI SWENPLDNGGSEITNFIVEYRKNQKGSIVASDVTKRLVK  
ANLLANNEYFRVCAENKVGVP T IETKTP I LAINPI DRGEPENLHIADKGKTFVYLLKWRRPDYDGGSPNLS  
YHVERRLKGSADWERVHKGS I KETHYMDKVENQIYEFVQTKNEGGS DWVRTEEVVVKEDLQKPVLDLKL  
SGVLTVKAGDTIRLEAGVRGKPFPEVAWTKDKDATDLTRSPRVKIDTSAESSKFSLTKAKRS DGGKYVITATN  
PAGSFVAYATVNVLDKPGPVRNLK I TDVSSDRCTIRWDPPEDDGGCEIQNYILEKCESKRMVWSTYSANVLT  
SATVTRLIEGNEYIFRVAENKIGTGPPTESKPVIAKTKYDRPGRPDPEVTKVSKEEMTVVWNAPEYDGGKS  
ITGYYLEKKEKHAVRWVFNKSAIPERRLKVQNLPGHEYQFRVKAENEVGI GEPSPSRPVVAKDPIEPPGP  
PTNFKVVDTTKSSITLAWGKPVYDGGAPIIGYVEMRPKIADASPDEGWKRCNAAAQLIRMEFTVTSLDENQE  
YEFVCAQNVGIGRPAELKEAIKPKELIPEPIDLDASMRKLVVRAGCPIRLFAIVRGRPAKVTWRKVG  
DNVVRKQVLDLVTMAFLV I PNSTRDDSGKYSLTLVNPAGEKAVFVNVKVLDTPGPVADLVKVDLTKRSCHVS  
WAPPENDGGSQVTHYIIVEKREARKTWSTVTPPEVKKTSFNVTNLVPGNEYFFRVTA VNEYGPGVPTDIPKPV  
ASDPLSEPDPPRKLVEVTEMTKNSATLAWLPPLRDGGAKIDGYIISYREEDQPADRWTEYSVVKDLSLIVTGLK  
EGKYYKFRVAARNAVGVSM PREAEGVYEAKEQLLPKILMPEQITIKAGKLRVEAHVYKPNPICKWKKGDD  
EVTSSHLAIHKADGSSVLI IKDVT RKDSGYSLTAENSSGSDTQKIKVTMDAPGPPQPPFDISEIDADACS  
LSWHI PLEDGGSNITNYIIVEKCDVSRGDWVTALASVTKTSCRVGKLI PGQEYIFRVAENRFGISEPLTSPKM  
LAKFPFDVPSEPKNARVTKVNKDCIFVAWDRPDS DGGSPITGYLIERKERNLLVWKANDTIVRSTEYPCAGL  
VEGLEYSFRIYALNKAGSSPPSKPTEYVTARMPVDPGKPEVVDVTKNSASLIWARPKHDGGSRIIGYFVEAC  
KLPDGKWRNCNTTPHQIQEEYTATGLEENAQYQFRAIAKTA VNI SQPSEPSDPVTLAENVPRIELSVEMK  
SLLTVKAGTVLDLDTVFGKMPPTVSWKDDTPIKQAEGIKMMAMKRNLCLELFSVNRKGS DGYTITVAENSSG  
SKSATIKLVLDKPGPPASVKINKMYADRAMLSWEPPELDDGGSEITNYI IDKRETSRPNWAQVSATVPIT  
SCTVEKLEIEGHEYQFRICAENKYGVGDPILTEPAIAKNPYDPPGRCDPPVINSITKDHMTVSWKAPADDGGSPITG  
YLVEKRETQAVNWTKVNRKPVIERTLKATGLOEGTEYEFVTAINKAGPGKPSDASKAVYAQDPLYPGPPAF  
PKVYDTRSSVLSLWGPAYDGGSP I IGYLVEVKRADS DHWVR CNLPEKLQKTRFEVTGLMENTEYQFRVYAV  
NKIGYSDPSDVPDKHCPKDI L I PPEGELDAELRKT L I L RAGVTMRLYVPVKGRPPKI TWSKPNVNL RERIGL  
DIKSTDFDTFLRCENVNKYDAGKYI L TLENSCGKKEYTIVVKVLDTPGPPVNVTVKEVSKDSAYVTWDPPIID  
GGSP I INYVVEKRDAERKSWSVTTECSKTSFRVSNLEEGKSYFFRVFAENEYIGIDPGETRDAVKASETPGP  
VVDLKA LAITKSSCTIGWKKPRSDGGSRI TGYVDFL TEENKWRVMKSLSLQYSTKDLKEGKEYTFRVSAEN  
ENEGT PSEI VVVAKDDVAPDLDLKDLPLCYLAKENSFNRLK I P I K GK PAPS VSWKKGEDPLATDTRVSVE  
STAVNTTLVYDQC KSDAGKYITITLKNVAGTKEGTL S I KVVGKPGI PTGP I K FDEVTA EAMTLKWGPPKDDGG  
SEITNYVLEKRDSVNNKWVTCASAVQKTTFRVTRLHEGIEYTFRVAENKYGVGEGKSEPIVAKHPFDVPA  
PPPPNIVDVRHDSVSLTWTDPKKTGGSPITGYHIEFKERNLLWKRANKTPIRMKDFKVTGLTEGLE YEFV  
AINLAGVKGKPSLSEPVVALDPI D PPGKPEV I SVTRNSVTLIWTEPKYDGGHKL TGYI VEKRDLPKSKWMKAN  
HVNVPDCAFTVTDLVEGGKYEFRIRAKNTAGAI SAPSESTGT I ICKDEYEAPTIVLDPTIKDGLTVKAGDSIV  
LSAISILGKPLPKSSWSRAGKDIRPSDIAQITSTPTSSMLTVKYATRKDAGEYTTATNPFGTKEEHVKVSVL  
DVPGPPGPIEISNVSAEKATLTWTPPELDDGGSP I KAYVLEKRETSRLLWTVVSEDIQACRHVVTKLIQGNEYL  
FRVSAVNHYGKGEVQSEPVKMVDRFGPPGPPGKPEISNVTKNTATVSWKRPTDDGGSEITGYHVERREKKGL  
RWVRATKTPVSDLRKVTGLQE GNTYEFVSAENRAGIGPPSDASN PVL MKDVAYPPGPPSNAHVDTTKKSA  
SLAWGKPHYDGGLEITGYVVEHQVGDDAWIKD TTGTALRITQFVVPDLQTK EKYNFRISAINDAGVGEPAVI  
PNVEIVEKEVAPDFELDAELRRLTVVRAGLSIRIFVPIKGRPAPEVTWTKDNINLKH RANIENTESFTLLIIP  
ECNRYDTGKFVMTIENPAGKKS GFVNVRLDTPGPVNLNRPTDITKDSVTLHWDLPLIDGGSRITNYIVEKRE  
ATRSYSTVTTKCHKCTYKVTGLTEGCEYFFRVMAENEYGVGEPTETTEPVRASEAPLPPDSL NIMDITKNTV  
SLAWPKPRHDGSKITGYVIEAQRKGS DQWTHI STVKGLECVVRNLTEGEEYTFQVMVNSAGRSAPRESRPV  
IVKEQTMPELDRGIYQKLV IARAGDN I KVEI PVLGRPKPTVTWKKGDQILKQTQRVNVENTATSTILNINE  
CVRSDSGPYPLTAKNTVGEVGDVITIQVHDI PGPPGPIK FDEVSSDFVTF SWEPPENDGGVPI SNYVEMRQ  
TDSTWVELATTVIRTYKATRLTTGVEYQFRVQAQNRALVGVGPI TSASVVANYPFKVPVGPPTGPQVAVTKD  
SMTISWHEPLSDGGSPI LGYHIERKERNILWQTVSKALVPGNIFKSTGLTDGIAEYFRVIAENMAGKSKPSK  
PSEPMFALDPI D PPGKPVPLNITRHTVALKWA KPEYTG GFKITSYVVEKRDLPNGRWLKANSI LENEFTVS  
GLTEDAAEYFRVIAKNAAGAI SPPSEPSDAITCRDDLEAPRIMVDVRFKDTITL KAGEAFKLEADVSGRPPPT  
MEWTKDGKELEGTGKLEIKIADFSTHLINKDSSRTDSGAYILTATNPGGFAKHFNVKVLDRPGPPEGLAVS  
DVTSEKCVLSWLPPLDDGGAKIDHYIVQKRETSRLAWTNVATEVQVTKLKVTKLLKGNEYIFRMAVNKYGVG

EPLSESEVLAVDPYGPPDPPKNPEVTTITKDSMVVCWGHPPDSGGSEIINYIVERRDKAGQRVWVKCNKALTD
LRFKVSGLTEGHEYEFRIMAENAAGISAPSATSPPFYKACDVTFKPGPPGNPRVLDTSRSSISIAWNKPIYDGG
SEITGYMVEIALPEEDEWQVVTTPAGLKATSYTITSLIENQYKIRIYAMNSEGLGEPALVPGTPKAERMLP
PEIELDADLRKVVTIRACCTLRFLVPIKGRPAPEVKWAREHGESLDKASIESTSSYTLLVGVNVRNRFDSGKYI
LTVENSSGSKSAFVNVRVLDTPGPPQNLKIKEVTKTSVTLTWEPLLDGGSKIKNYIVEKRESTRKAYSTVAT
NCHKTSWKVDQLQEGCSYFRVLAENEYIGLPAETAESVKASERPLPPGKITLTDVTRNSVLSWEKPEHDG
GSRILGYIVEMQSKGSDRWATCATVKVTEATITGLIQGEEYSFRVSAQNEKGISDPRQLSVPVIAKDLVIPP
FKLLFNTFTVLAGEDLKDVPFPIGRPPPAVTWHKDDIPLKQTTTRVNAESTENNSLLTIKEACREDDVGHYTVKL
TNSAGEATETLNVIIVLDKPGPPTGPKMDEVMTADSVTLSWEPKPYDGGSSINNYIVEKRDTSTTAWQIVSATV
ARTTIKACRLKTGCEYQFRIAAENRYGKSTYLNSEPVVAQYPFKVPGGPPTPFVTLASKDSMEVQWHEPVSDG
GSKVIGYHLERKERNISILWVKLNKTPIPQTKFKTTGLEEGIEYEFVSAENIVGIGKPSKSPSECYAAHDFCDP
PGRPEAIVTRNSVTLQWKKPTYDGGSKITGYIVEKKELPDGRWMKASFTNIIDTQFEVTLGLEDHRYEFRVI
ARNAAGVFSEPESTGAITARDEVEPPRISMDPKYRDTVVVQAGESFKIDADIYGKPIPTTQVWKGQDQELSST
ARLEIKSTDFATSLSVKDAVRVDSGNYILKAKNVAGEKSVTINVKVLDRPGPPEGPVAISGVTAEKCTLAWKP
PLQDGGSDITNYIVERRETSRLVWTLVDANVQTLSCVKLKLLEGNEYIFRIMAVNKYGVGEPLESESLIAKNP
FVVPDAPKAPEVTAVTKDSMIVWERPASDGGSEILGYVLEKRDKEGIRWTRCHKRLIGELRLRVTGLLENHN
YEFVSAENAAGLSEPPSPSAYQKACDPIYKPGPPNPKVMDVTRSSVFLSWTKPIYDGGCIEIQYIVEKCDV
SVGEWMTCTPPTGINKTNLEVEKLEKHEYNFRICAINKAGVGEHADVPGPVMVEEKLEAPDIDLELRKVI
NIRAGGSLRFLVPIKGRPTPEVKWGVGDGDIRDAAIIDVTSSTSLVLDNVNRYDSGKYTLTLENSSGTSKSAF
VTVRVLDTPSPVNLKVTETITKDSVSIWEPLLDGGSKIKNYIVEKREATRKSAAVVTNCHKNSWKIDQLQ
EGCSYFRVTAENEYIGLTPARTADPIKVAEVPQPPGKITVDDVTRNSVLSWTKPEHDGGSKI IQYIVEMQA
KNTDKWSECARVKS L DAVITNLQGEYLF RVI AVNEKGRSDPRSLAVPI IAKDLVIEPDRPAFSSYSVQVG
QDLKIEVPI SGRPKPSISWTKDGMPLKQTTTRINVTDSLDTLTLSEKETHKDDGGQYGITVSNVVGQKTA AIEI
ITLQDPPPKGPVKFDEISAESITLSWNPPLYTGGCQITNYIVQKRDTTTTVWVVSATVARTTLKVTKLKTG
TEYQFRIFAENRYGQSFALASEPVVAQYPYKEPGPPGTPFVTAISKESMVVQWHEPINNGGSPVIGYHLERKE
RNSILWTKVNYKTI IHDTFKALNLEEGIEYEFVSAENIVGVGASKNSECYVARDPCDPPGTPPEAIVKRNE
ITLQWTKPVNDGGSMITGYIVEKRDLEPEGRWMAKFTNVIETQFTVSGLTEDQRYEFRVIAKNAAGAI SKPSD
STGPI TAKDEVELPRI SMDPKFRDTIVVNAGETFRLEADVHGKPLPTIEWLRGDKEIEESARCEIKNTDFKAL
LIVKDAIRIDGGQYILRASNVAGSKSFPVNVKVLDRPGPPEGPVQVTGVTAEKCTLAWSPPLQDGGSDISHYV
VEKRETSRLAWTVVASEVVTNSLKVTKLLEGNKYIFRIMAVNKYGVGEPLESA PVL MKNPFVLP GPPKSLEVT
NIAKDSMTVCWNRPDS DGGSEI IGYIVEKRDRSGIRWIKCNKRITDLRLRVTGLTEDHEYEFRVSAENAAGV
GEPSPATVYKACDPVFKPGPPTNAHVVDTTKNSITLAWSKPIYDGGSEILGYVVEICKADEEWEQIVTPQTG
LRVTRFEIAKLIHQEYKIRVCA LNKVGLGEAASVPGTVKPEDKLEAPELDDLSELKGI VVRAGGSARIHIP
FKGRPTPEITWSKEEGEFTDKVQIEKGINFTQLSIDNCDRNDAGKYLKLENSGSKSAFVTVKVLDTGPPQ
NLAVKEVRKDSVLLWVEPPIIDGGAKVKNYVIDKRESTRKAYANVSSKCNKTSFRVENLTEGAIYFRVMAEN
EFGVGVPTETSDAVKASEPPSPGKVTLTDVVSQTSASLMWEKPEHDGSRILGYVVEMQPKGTEKWSVVAESK
VCNAVVSGLSSGQYQFRVKAYNEKGKSDPRVLGIPVIAKDLTIQPSFKLPFNTYSVQAGEDLKIEIPVIGRP
RPKISWVKDGEPLKQTTTRVNVEETATSTILHIKESKDDFGKYSVTATNSAGTATENLSVIVLEKPGPPVGPV
KFDEVSADFVVISWEPAYTGGCQISNYIVEKRDTTTTNWQMV SATVARTTIKISKLKTGTEYQFRIFAENRY
GKSTPLDSKPVVVQYPFKEPGPPGTPFVTSISKDQMLVQWHEPVNDGGSKVTGYHLEQKEKNSILWVKLNKIP
IQDTKFKTTGLDEGLEYEFRVSAENIVGIGKPSKVSECYVARDPCDPPGRPEAIVITRNSVTLKWKKPVYDGG
SKITGYIVEKKDLPDGRWMKASF TNVVEFTVTGLVEDQRYEFRVIARNAADNFSEPSSESSGAI TARDEIDA
PNASLDPKYRDVIVHAGETFVLEADIRGKPI PDI IWSKDGNLEETAARMEIKSTLQKTTLIVKDCIRTDGG
QYTLKLSNVGGTKTIPITVKVLDRPGPPEGLKVTGVTAEKCYLAWNPPLQDGGASISHYIEKRETSRLSWT
QVSNEVQALNYKVTLLPGNEYIFRVMANVNYGIGEALASEPVIACNPYKRP GPPSTPEASAITKDSMVLWTWT
RPVDDGGAEIEGYILEKRDKEGIRWTKCNKKTLDLFRVVTGLTEGHSYEFVAAENAAGVGEPESEPSVFYRA
CDALYPPGPPSNPKVTDTSRSSVSLAWNKPIYDGGAPVRGYVIELKAAADEWTTCTPPSGLQKQFTVTKLK
ENTEYNFRICAFNTEGVGEPATIPGSVVAQERMEAPEIELDADLRKVVTLRASATLRLFVTIKGRPEPEVKWE
KAEGILTERAQIEVTSSTMLVIDNVTRFDSGRYNLTLENNSGSKTAFVNVRVLDSPSAPVNLTIREVKKDSV
TLSWEPPLIDGGAKITNYIVEKRETRKAYATITNCTKNFKIENLQEGCSYFRVLASNEYIGLPAETAE
PVKVSEPLPPGRVTLVDVTRNTATIKWEKPESDGGSKITGYVEMQTKGSEKWSACTQVKTLETTISGLTAG
EEYVFRVAANEKGRSDPRQLGVPVIAKDIEIKPSVELPFNTFNVKANDQLKIDIPFKGRPQATVAWKKDGQV
LRETTRVNVASSKTVTTLSEKASREDVGTIELCVSNTAGSITVPI TVIVLDRPGPPGPIRIDEVSCDNVSI
WNPPEYDGGCQISNYIVEKRETTSTWQVVSQAVANTSIKIVRLTGTSEYQFRVCAENRYGKSSYSESSAVVA
EYFPSPGPPGTPKVVHATKSTMVVSQVVDGGSQVIGYHLEYKERSILWSKANKVLIADTQMKVSGLDE
GLMYEYRVYAENIAGIGKCSKACEPVPARDPCDPPGQPEVTNITRKS VSLKWSKPRYDGGAKITGYIVERREL
PDGRWLQCNFTNVQETYFEVTELTEDQRYEFRVFARNAADSVSEPESTGPI TVKDDVEAPRIMMDVKFRDVI
IVKAGEVLKINADIAGRPLPVISWAKDGEIEERAKTEIVSTDYTTTLTVKDCVRRDGTQYVLT LKNVAGTRT

MAVNCVKLDPKPGPPAGPLEINGLTAEKCSLSWGRPQEDGGADIDYIIVEKRETSRLAWTICEAELRTTSCVKVT  
KLLKNGEYIFRVTGVNKYGVGEPLSMVAVKALDPFTTSPPTSLIETSVTKDSMTLCWSRPETDGGSDISGYI  
IERREKNSLRWMRVKNKPVYDLRVKSTGLREGCEYEYRVFAENAAGLSLPSETSPLVRAEDPVFLPSPSPKPK  
IVDSGKTTITIGVWKPLFDGGAPITGYTVEYKSEETDWKVAIQSFRGTEYTMSSGLTTGDEYVFRVRSLNKMG  
ASDPDSDSDPQVAKEREEEPVFDVDSEMRKTLIVKAGSSFTMTVPFRGRPIPNVSWSKPDTDLRTRAYIDSTD  
SRTLLTIENANRNDGKYTLTIQNVLSAASMTFVVKVLDSPGPPANITVREVTKETAMLSWDVPENDGGAPVK  
NYHIEKREASKAWVSVTNNRNSYKVTNLQEGAIYFRVSGENEFVGVPAETKEGVKITEKPSPEKLG  
TSVSKDSVSLWKLPEHDGGSRIIHYVVEALEKQKTVWKCVAVKTTHHVVSGLRESHEYFFRVAENQAGLS  
DPRELLLPVLIKDQLEPPEIDMKNFPSHTVYVVRAGSNLKVDPISGKPLPKVTLSDRGVPLKATMRFNTEITA  
ENLTINLKESVTTDAGRYEITAANSSTGTTKTFINIIVLDRPGPPTGPVAISDITEESVTLKWEPPKYDGGSHV  
TNYIVLKRETSTAVWSEVSATVARTMIKVMKLTGEEYQFRIKAENRFGISDHIDSVCVVVLPYTPPGPST  
PWVSNVTRESITVWHEPVSNGGSAVTGYHLEMKDRNSILWQKANKMIIRTTFKVTTISAGLIYFRVYAEN  
AAGIGKPSHPSEPVLAIDACEPPRNVRIITDISKNSVNLWQQPAFDGGSKITGYIVERRDLDPGRWTKASFTN  
VIETQFTVSGLTQNSQYEFRVFARNAVGSVSNPSEVVGPIITCIDSYGGPVIDLPLEYTEVVKYRAGTSVKLRA  
GISGKPEPTIEWYKDDKELQTNALVCVENSTDLASILIKDANRLNSGSYELKLRNAMGSASATIRVQILDKPG  
PPGGPIEFKTVTAEKITLLWRPPADDGGAKITHYIVEKRETSRVVWSMVAENLEECIVTTTKIKGNEYVFRV  
RAVNYKIGEPLESEPVVAKNAFVTPGPPSIEVTKITKNSMTVVWDRPTVDGGSEINGYFLERRDKKSLAWL  
KVLKETIRDTRQKVTGLTENSQYQYRVCANVAGVGFSEPSDFYKAADPIDPPGPAKIRIADSKSSITLG  
WSKPVYDGGSDVTGYVEMKQGDDEEWTIVSTRGEVRTTEYVSNLKPQVNYFQVSAVNCAGQGEPIITMTEP  
AQAKDVLEPEIDLVALRTSVIAKAGEDVQLLIPFKGRPPPTVTRKDEKNLGSSTRYSIQNTDSSLLVIP  
QVTRNDTGKYILTIENGVGQPKSSTVSVKVLDTPAACQKLVKHVSLGTVTLWDPPLIDGGSPIINVIK  
DATKRTWSVSSHKCSGTSFKVTDLSEKTPFFFRVLAENEIGIGEPCEETPEVKAEEVPAPIRDLMSKDKSTKTS  
VVLWTKPDFDGGSIITDYLVERKKGGEQAWSHAGISKTCEIEIGQLKEQSVLEFRVSARNEKQSDPVTIGP  
LTVKELVITPEVDLSEIPGAQISVRIGHNVHLELPYKPKPKPSISWLKDGPLKESYVFRFSKTEKNTLSIK  
NSKKEHGGKYTVILDNAVCRNSFPITITITLGPSSKPKGPIRFDEIKADSAIMSWDIPEDDGGGEITCYSIEKR  
EASQTNWKMVPCSSVARTTFKVSNLVKDSEYQFRVRAENRYGVSEPLASNIIVAKHQFRIIPGPPKPVINYVTS  
DGMSLTWDAVYDGGSEVTFGHVEKKERNLSILWQRVNTSPISGREYRATGLIEGLDYQVRYAENSAGLSSPS  
DPSKFTLAVSPVDPPTDYIDVTRETITLKNPPLRDGGSKIVAYSIEKRQGS DRWVRCNFTDVSCEQYTVT  
GLSPGDRYEFRIIARNAVGTISPPSQSSGLIMTRDENVPPTVEFGPEYFDGLVIKSGDSLRIKALVQGRVPR  
VTWFKDGEIERRMMEITDVLGSTSLFVRDATRDHRGVYVTEAKNVSGSTKA EVTVKVQDTPGKVVGP  
IRFTNITGEKMTLWWEAPLNDGCAPVTHYIEKRETSRLAWALIEDNCEALSHTAIKLTITGNEYQFRISAVNKFVGV  
RPLESDPVVAQIQYTIIPDAPGVPEPSNVTGNSITLWTRPESDGGSEIQHYILERREKKSTRWVKVISKRPIS  
ETRFKVTGLVEGNEYEFHVMENAAGIGPASGISRLIKREPVNPPSAPS VVKVTDTSKTTVSLWARPVFDG  
GMEIGYIIECKADLDGWHKVNTEPCVKTRYTVTDLQAGEEYKFRVSAVNGAGKGDSCVETGTIKAVDRLSA  
PELDIDANFKQTHIVRAGVSRILFIAYQGRPTTAVWSKPDNSLIRADIHTTDSFSTLTVENCNRNDAGKYT  
LTVENNSGKKSITFTVKVLDSPGPPGPIITFKDVTRGSATLMWDAPLLDGGARIHHYVIEKREASRSWQVSE  
KCTRQILKSELTEGVPYFRVSAENEYGVGEPYEMPEPIVATEQPAPRRRLDVVDTSKSSAVLAWLKP  
DHDGGSRTSYLLEMRQKGSDFWVEAGHTKQLTFTVERLVENTEYEFVKAANDAGYSEPREAFSSV  
IIEKPEQIEPTADLTGITNQLITCKAGSTFTIDVPIISGRPAPKVTWKLEEMRLKETDRMSIATTKDR  
TTLTKVSDMRGDSGRYFLTLENTAGVKTFTITVVVIGRPGVPTGPIEVSSVSAESC  
VLSWTEPKDDGGTEITNYIVEKRESGTTAWQLINSSVKRTQIKVTHLTKYKEYCFRV  
SENRFVSKPLESVPVIAEHPFVPPSAPTRPEVYVVSANAMIRWEEPYHDGGSKIVGYWVEK  
KERNILWVKENKVPCLCNYKVTGLVEGLEYPFRTYALNAAGVSKASEASRP  
IMAQNVPDPPGRPEVTDVTRSTVSLIWSAPVYDGGSKVGYIIEKRPVSEVGDGRWLKCN  
YTIIVSDNFFVTALSEGDTYEFVRLAKNAAGVISKGESETPVTCRDEYAPPKAELDARLQGD  
LVTIRAGSDLVLDAAVGGKPEPKI IWTKGDKELDLCEKISLQYTGKRATAVIKYCDRSDSGKYTLTVKNASG  
TKSVSMVKVLDSPGCGKLTVSRVTEEKCTLAWSLPQEDGGAETHYIVERRETSRLNWV  
IVEGECLTASYVVTRLIKNNEYTFRVRVAVNKYGLVPESEPIVARNSTIPSQPIE  
EVGAGKEHIIIQWTKPESDGGNEISNYLVDKREKSLRWTRVKNKYVYVYDTR  
LKVTSMEGCDYQFRVTAVNAAGNSEPSEASNFIISCREPSYTPGPPSAPRVVDTTKRS  
ISLAWTKPMYDGGTDIGYVLEMQEKD TDQWCRVHTNATIRNNEFTVPDLKMGQKY  
SFRVAAVNAKGMSDYSETTAEIEPVERLEIPDLELADDLKKTIVIRAGASRLMVS  
VSGRPSPIITWSKKGIDLANRAIDNTESYLLIVDKVNRDAGKYTIEAENQSGKKSAT  
VLVKVYDTPGPCPSVSVKEVSRDSVTITWEIPTIDGGAPVNNYIEKREAMRAFKT  
VTTKCSKTLYRISGLVEGTMYYFRVLPENIYGIGEPCE TSDAVLVSEVPLVPTKLE  
VVDTKSTVTLAWEKPLYDGGSRITGYVLEACKAGTERMVKVTLKPTVLEHTV  
ISLNEFGEQYLFVRQAONEKGVSEPREIVTPVTVQDLRVLPTIDLS  
TMPQKTIHVPAGRPIELVPIITGRPPPTASWFFAGSKLRESERVTEHTKVT  
KLTIRETTIRDTGEBYTELKNTVGTSETIKVILDKPGPPTGPIKIDEIDATSVTI  
SWEPELDGGAPLSGYVVEQRDAHRPGWLPVSESVTRPTFKFTRLTEGNEYVFR  
VAATNRFGIGSYLQSEVIECRSSISIPGPPETLQIFDVSRDGMTLWYPPEDDGG  
SQVTGYIVERKEVRADRWRVKNKVPVTMTRYRSTGLIEGLEYEHRVTA  
INARGTGKPSRPSKPTVAMDFIAPP GKPNPRVTDTRTSVSLAWSVPEDEGGSKVT  
GYLIEMQKVDQREWTKCNTTPTKIREYTLTHLPQGAEYFR



VLACNAGGPGEPAEVPVGTVKVTEMLEYDPYELDERYQEGVFVRQGGVIRLTIPIKKGKPPVCKWTKEGQDISK  
RAMIATSEHTELVIKEADRNDSTYDLVLENKCGKKTIVYIKVKVIGSPNTPEGPLEYDDIQARSVRVSWRPP  
ADDGGADILGYILERREVPKAAWYITDSRVRGTSLVVKGLENVEYHFRVSAENQFGISKPLKSEEPVPIPKTP  
LNPPEPPSNPPEVLDTVKSSVLSWSRPKDDGGSRVGTGYIERKETSTDKWVRHNKTQITTTMYTVTGLVPDA  
EYQFRIIAQNVDVGLSETSPASEPVVCKDPFDKPSQPGELEILSISKDSVTLQWEKPECDGGKEILGYWVEYRQ  
SGDSAWKKSNERIKDRQFTIGGLLEATEYEFVRVFAENETGLSRPRRTAMSVKTKLTSGEAPGVRKEMADVTT  
KLGEAAQLSCQIVGRPLPDIKWYRFGKELIQSRKYKMSDGRTHTLTVMTDEQEDEGVYTCVATNEVGEVSS  
SKLLLQAAPQFHPGYPLKEKYGAVGSTLRHLVMIYGRPVAMPWFHGOQKLLQNSEKITIENTEHTYTHLVMKN  
VQRKTHAGKYKVLQLSNAFGTVDATLDVEIQDKPKPTGPIVIEALLKNSVVI SWKPPADDGGSWI TNYVVEKC  
EAKEGAEWQLVSSAISVTTTCRIVNLTENAGYYFRVSAQNTFGISEPLEVASIVI IKSPEFKPGVPGKPTITAV  
TKDSCVVAWKPPASDGGAKIRNYLERREKKQNKWIAVTTEEIRETVFSVQNLIEGLEEYFRVKCENLGGESE  
WSEISEPVTPKSDVPIQAPHFKEELRNLNVRVYQSNATLVCKVTGHPKPIVKWYRQKKEIIADGLKYRIQEFKG  
GYHQLIIASVTDDDQVYQVRATNQGGSVSGTASLEVEVPAKIHLPKTLGEMGAVHALRGEVVSIKIPFSGKP  
DPIVTWQKQDLIDNNGHYQVIVTRSFSTLVFSNGVERKDAGFYVCAKNRFGIDQKTVELDVADVPDPGRGV  
KVSVDVSRDSVNLTWTEPASDGGSKVTNYIVEKCATTAERWLRVGGQARETRYTVINLFGKTSYQFRVIAENKFG  
LSKPSEPEPTTKEDKTRAMNYDDEVDETREVTTKASHSKTKELYEKYMI AEDLGRGEFGIVHRCVETSSK  
RTFMAKRVKGTDRQVLVKEISILNIARHRNLIYLHESFESMEELVMI FEFISGLDIFERINTSAFELNERE  
IVSYVRQVCEALEFLHSQNIHFDIRPENI IYQTRKNSTIKI IEFQARQLKPGDNFRLLFTAPEYYAEVHQ  
HDVVSTATDMWSLGTLYVLLSGINPFLAETNQMIENIMNAEYTFDEEAFKEISLEAMDFVDRLLVKERKSR  
MTASEALQHPWLKQRIDRVSTKVIRTLKHRRYYHTLIKKDLNMVVAARI SCGGAIRSQRGVSVAKVVASIE  
IGPVSGQIMHAI GEEGGYVYVCKIENYDQSTQVTVYFGVRQLENSEKYEITYEDGVATMYVKDITKFDGTY  
RCKVVNDYGEDSSYAEFLVKGVREVYDYYCRRTKVKRRTDAMRLLERPPFTLPLYNKTA YVGENVRFVGTI  
TVHPEPRVTWYKSGQKIKPGDDEKKTFFESDKGLYQLTINSVTDDDAEYTVVARNKHGEDSCKAKLTVTLHP  
PPTETTLRPMFKRLLANAECHEGQSVCFEIRVSGIPAPTLKWEKDGQPLSLGPHIEIVHEGLDYALHIRDTL  
PEDTGYRVTATNTAGSTSCQAHLQVERLRYVKQEFQSKEEERHVQKQIDKTLRMAEILSGTETVPLTPVAQ  
EALREAAI LYKPAVSTVKGEYRLQTEEKKEERKLMPYVEPEPRRFKQATVEEDQRIKQFVPMSPMDKWKYK  
IRDQYEMPGKLDREVQKRPKRI RLSRWEQFYVAMPLPRITDQYRPKWRI PKLTQDDLEMRPARRRTPSPDYDL  
YYRRLRRSLGDMSDEELLPIDY LAMKRTEEERLRLEEELELGF SASPPSRSPRPFELSSLRYSSPPAHVK  
VEDRRRDFRYSTYHVPTKEETSTSYAELRERHAQASYRQPKLRQRI MAEKEEEELLRPVTTTQRLSEYKSELD  
YMSKEEKSKKKSKRQRQVTEITEIEEYEISRRAQRESSSSVSRLRRRRSLSPTYIELMRPVSELIRSHPRP  
AEEYEDDAERRSPTPERTRPRSPSPVSSERSLSRFERSARFDIFSRYESMKAALKTKTQKTSERKYEVLSQQPFT  
LDHAPRITLRMRSHRVP CGQNTREILNVQSKPTAEVKWYHNGVELQESSKIHYTNTSGVLTLEILDQTEDGG  
TYRAVCTNYKGEASDYATLDVTGGAYTTYASQRRDEEVKPSVFPPELTKTEAYAVSSFKRTSELEAASSVREVK  
SQMTETRESLSTYEHYASAEMKSATSEEKSLEEKATVRKIKTTLAARILTKPRSITVHEGESARFSCDTDGEF  
VPTVTVLWREGQVST SARHQVTTTKYKSTFEISSVQASDEGNYSVVVENS DGKQEAQFTLTVQKARVIEKAVT  
SPRVRKSPERVKSPETVKS PKRVKSPPEVTSHPKAVSPTEKPKTEKGQHLVPSAPPKITQSLKAEASKDIAK  
LTCAVESSALCAKEVAVYKDGKCLKENGHFQFHYSADGTYELKIHNLSESDCGEYVCEVSGEGGTSKTSFQFT  
GQSFKSIHQVSSISETTKSVQKTAESA EAKKSEPIAPESISSKPIVTVGLRDTTVSSDSVAKFTIKVTGEPQ  
PTITWTKDGKAI AQGSKYKLSNKEEFLEILKTETS DGGLYACTVNSAGSVSSSCKLTIKAVKDTEAQKVS  
TQKTSEVTSQKKASAEIISQKALTSEEIKMSEVKS HETLAIKEEASKVLI AEEVKRSAAASLEKSI VHEEVT  
KTSQASEEVKTHAEIKTLSTQMNITKGQRATLKANIAGATDVKVVNLNGTELPNSEEYRYGVSGSDQTLTIKQA  
SHREEGILSCIGKTSQGVVKQFDLTLSEELSDAPSFITQPRSQININEGNVLFSCVSGEPSPEIEWFKNL  
PISISSNISVSRSRNVYTLERNAAVSDSGKYTIKAKNFHGOCSATASLTVLPLVEEPPREVVLTSSDVS LH  
GSVSSQSVQMSASKQEA SFSSFSASSMTEMKFASMSAQMSMSMQESFVEMSSSSFMGKSSMTQLESSTSR  
MLKAGGRGIPPKIEALPSDISIDEGKVLTVACFTGEPTPEITWSCGGRKIQNQEQGRFHIENTDDLTTLII  
MDVQKQDGGLYTTLGNEFGSDSATVNINIRSM\*

>ENSMUSP00000107513\_c.77325:A>C\_p.K25776Q ENSMUST00000111882.9|Ttn-  
205|ENSMUSG00000051747|-|chr2:g.76568328:T>G  
MTTQAPMFTQPLQSVVLEGGSTATFEAHVSGSPVPEVSWFRDQVISTSTLPGVQISFSDGRARLMI PAVTKA  
NSGRYSLRATNGSGQATSTAELLVTAETAPPNFSQRLQSM TVRQGSQVRLQVRVTGIPTPVVKFYRDGAEIQS  
SLDFQISQEGDLYSLLIAEAYPEDSGTYSVNATNSVGRATSTAELVVQGEVVP AKKTKTIVSTAQISETRQT  
RIEKKIEAHFDARS IATVEMVIDGATGQLPHKTPPRI PPKPKRSRPTPPSIAAKAQLARQQSPSPIRHSPSPV  
RHVRAPTPSPVRSVPAGRISTSP IRSVKSPLLIRKTQTTMATGPEVPPPWKQEGYVASSTEAMRETTMTS  
STQIRREERWEGRYGVQEQTISGAAAAAASAVSSSFTAGAITTGTKEVKQETDKSAAVATVVAAVDMARVR  
EPAISAVEQTAQRTTTTAVHIQPAQE QARKEAETAVTKVVVAADKAKEQELKSR TREVMVTTQEQT HISEQ  
IRKETEKA FVPKVVISATKAKEQETRITGEITTKQEQRITQETIRQETEEIAASMVV VATAKSTKLEAAVGV  
QEETAIQDDQMH LTHEQMMKETRKT VVPKVI VATPKI KEQDLVSR SREAITTKRDQVQITQEKKRKEVET TAL  
STIAVATAKAKEQETVLR SREAMATRQEHIQVTHGQVGVGKKA EAVATVVAAVDQARVREP REPTHVEESH SQ



RELEPVEVVKDSVLECEVMTTPFEVTVLKNKEIRSGKMYTMSEKMSVFFYLHITKCDPSDVGEYQCI IAN  
EGGSCAC SARVALKEPPSFIKKIENVTTVLKSSATFQSTVAGSPPI SITWLKDDQILEENDNVHISFEDSVAT  
LQVRSDVNGHSGRYTCQAKNESGIERCYAFLLVQEPAQI IEKAKSV DVTEKDPVTLECVVAGTPELVKVKWLKD  
GKQIVPSRYFSMSFENNVASFRIQSVMKQDSGQYTFKVENDFGSSSCDAYLRVLDQDI PPSFTKKLTKMDKVL  
GSSIHMECKVSGSLPI SAQWFKDGKEISTSAKYRLVCHENTVSLVSNLELEDTANYTCKVSNVAGDNACSGI  
LTVKEPPSFLVKPERQQAIPDSTVEFKAVLKGTPPFKIKWLKDDVELVSGPKCFIGLEGSTSFNLNLYSVDSK  
TGQYTCQVTVNDVEPPKFVKKLEASKI IKAGDSARLECKITGSP EIQVWYRNEHELTASDKYQMTFIDSVAVI  
QMNSLGTEDSGDFICEAQNAPAGSTSCSTKVI VKEPPVFSFPPI VETLKNTEVSLCELESGT PPFVWVYKDK  
RQLRS SKKYK VASKNFHASIHILNVESTDIGEYHCKAQNEVGS DACVCAVKLKEPPKFI SKLNSLTVVAGEPA  
ELQASIEGAQPI SVQWLKEKEEVIRESENIRISFVNNVATLQFAKVEPANAGKYICQVKNDDGGVRENMATLTV  
LEPAVIEKAGSMTVTVGETCALECKVAGTPELSVEWYKDGKLLTSSQKHKFSFYNKISSLKILSVEKEDAGT  
YTFQVQNNVKGSSCTAVVDVSDRMVPPSFTRRLLKDTGGVLGTSCILECKVAGSSPISIAWFHEKTKIVSGAKY  
QTTFSDNVCTLQLNSLSDSDMGSYTCVAANVAGSDECRALLTVQEPSPFVKEPEPLEVLPGKNITFTSVIRGT  
PPFKVGVWFRGARELVKGNRCNIYFEDTVAELELFNIDISQSGEYTCVVSNNAGQASCTTRLFVKEPATFVKKL  
SDHSVEPGKSIILEGTYTGTLPI SVTWKKDGVSI TSPERCNI VTEKTCILEILSSTKGDAGHYSCIEINEAG  
RDACDALVSTLEPPYFVTELEPLEASVGDVSLQCQVAGTPEITVSWFKGDTKLRSTPEYRITYFTNNVATLVF  
NKVSI NDSGEYTCMAENSIGTAASKTIFRIQERQLPPSFARQLKDIEQTVGLPVTLTCLRLNGSAPIQVCWYRD  
GVLRRDDENLQMSFVDNVATLKLQTDLSHSGQYSCSASNPLGTASSTARLTAREPKKSPFFDIKPVSIDVIA  
GESADFECHVTGAQPMRVTWSKDNKEIRPGGNYTITCVGNTPHLRILKVGKGD SGQYTCQATNDV GKMCSAQ  
LSVKEPPKFIKKLDASKVAKQGESIQLECKISGSPEIKVWVFRNDELHESWKYNMSFVNSVALLTINEASAE  
DTGDYICEAHNGVGDASCSTALKVKAPPVFTQKPPVPGALGSDVILQCEISGTPPFVWVVKDRKQVRSSKK  
FKITSKNFDTSLHIFNLEAPDIGEYHCKATNEVGS DTCAC TVKFKEPFRFVKKLSDASTLIGDPVELQAVVEG  
FQPI SVVWLKDKGEVIRESENVRI SFVDNIATLQLGSP EASQSGKYVCQIKNDAGMRECSAVLTVLEPATIVE  
KPEPMTVTTGNPFTLECVVAGTPELSAKWFKDGRELSSGSRHHITFVRNLASLKI PSAEMNDKGLYTFEVENR  
VGKSSCTVSVHVS DRVPPSFVRRLKDTSATLAVS VVLECRVSGSAPI SVGWFLDGNIEISSPKCQSSFADNV  
CTLTLSSLEPSTGAYTCVAANVAGQDESSAGLTVQEPSPFEQTPDSVEVLPGMSLTFTSVIRGT PPFVKVWF  
KGSRELVSGEACTISLEDFVTELELLEVEPGQSGDYSCLVNTNDAGSASCTHFLVKEPATFVKRLADTVSVETG  
SPIVLEATYSGTPPISVSWMKNEYPLSQSPNCGITTTTEKSSILEILESTIEDYAQYACLIENEAGQDICEALV  
SVLEPPYFIEPLEHVEAAIGEPITLQCKVDGTPEIRISWYKEHTKLRSA PAYKMQFKNNVASLVINKVDHSDV  
GEYTCKAENSVGAVASSAVLVIKERKLPPSFARKLKD VHE TLGFPVAFECRINGSEPLQVSWYKDGELLLKDDA  
NLQMSFVHHVATLQILQTDQSHVQYNCASASNPLGTASSAKLILSEHEVPPFFDLKPVSVLDLALGESG SFKC  
HVTGTAPIKITWAKDNREIRPGGNYKMTLVENTATLTVLKVAKGDAGQYTCYASNVAGK DSCSAQLGVQEPFR  
FIKKLDQSRIVKQDEYTRYECKIGGSPEIKVLWYKDEVEIQESSKFRMSFEDSVAILEMHSLSVEDSGDYTCE  
ARNAAGSASSSTSLVKKEPPVFRKKPFPVETLKGADVHLECELOGT PPFQVSWHKDKRELRS GKKYKIMS ENL  
LTSIHILNVDTADIGEYCKATNDVGS DTCVGSVTMKAPPQFVKKLTDISTIIGKEVQLQTTIEGAEPI SVAV  
FKDKGEIVRES DNIWISYSENIATLQFSRAEPANAGKYTCQIKNDAGMQECYATLSVLEPA AIVEKPE SIKVT  
TGDCTLECTVSGTPELSTKWFKDGKELTSDNKYKISFFNKVSGLKI INVVPGD SGVYSFEVQNPV GKDCKV  
SIQVSDRIIPPSFTRK LKETNGLSGSSVMECKVYGSPPISVLWFHDGNEISSGRKYQTTLTDNTCALTVNML  
EEADAGDYTCIATNVAGSDECSAPLTVREPPSFVQKPDMDVLTGSNVTFTSIVKGSPPFTVSWFKGSTELVP  
GARC NVSLQDSVGELELFDVDTQS GEYTCIVSNEAGRASCTTRLFVKAPAI FVKRLNDYSIEKGKPLILEGT  
FSGT PPI SVTWKKNGINVIASQR CNITTTTEKSAILEILSSTVEDSGQYNCYIENASGKDSCSAQILILEPPYF  
VKQLEPVKVTVGDSASLQCQLAGTPEIGVSWYKGDTKLRPTATCKMHFKNNVATLVFTQVDSSDSGEYICRAE  
NSVGEVSSSTFLTVQEQKLPPSFRQLRDVQETVGLPVVFECAVSGSEPI SVSWYKDGKPLKDS PNIQTSFLD  
NIATLNI FKTDRSLSGQY SCTATNP IGSASSGAKLILTEGKNPPFFDI PLAPMDAVVGESADLECHVTGTQPI  
KVTWAKDNREIRSGGNYQISYLENSAHLTIVKVDKGD SGQYTCYAVNEVGKDSCTAQLNIKERLIPPSFTKKL  
SETVEETE GNSFKLEGRVAGSQPITVAWYKNNVEIHPTSNCEIMFKNNALLLQVKRASMADAGLYTCKATNDA  
GSALCTSSIVIKEPKKPPVFDQHLAPVTASEGDSVQLSCHVQGSEPIRIQWLKAGREVKPSDRCSFSFASGTA  
MLELKETAKADSGDYVCKASNVAGSDTSKCKVTI KEKPAAPAAKKA AVDGKLFVSE PQSIRVVEKTATFI  
AKVGGDPIPNVKWTKGKWRQLNQGGRI LIHQKGDEAKLEIRD TTKTDSGLYRCVAFNKHGEIESNVNLQVDER  
KKQEKIEGDLRAMLKKT PALKKGSGEEEEIDIMELLKNVDPKYEYK YARMYGITDFRGLLQAFEL LKQSQEEE  
THRLEIEELEKSERDEKEFEELVAFIQORLTQTEPVTLIKDIENQTVLKDND AIFEIDIKINYPEIKLSWYKG  
TEKLEPSNKYEISIDGDRHTLRVKNCPKDQGNRYLVC GPHIASAKLTVIEPAWERHLQDVTLKEGQCTMTC  
QFSVPNVKSEWFRNCEVLSFKPQGRVKTEVEHKVHKLTIADVRAEDQGYTCCKHEDLETSAELRIEAEPIQFTKR  
IQNI VVSEHQ SATFEECEVLSFDDAIVTWYKGPTELTESSQYKNFRNDGRCHYMTIHNVT PDDEGVYSVIARLEPR  
GEARSTAEALYLTTEKIEKLEMKPPDIPDSRVPIPTMPIR AVPPEEIPPAVAPS IPLLPLPEEKKPPAKRIEVT  
KKGVKKDTKKVVTKPKEEAPPPVPEVAKKPPPPTPMIPAKASEIIDVSSKAEVKITITTRKKEVHKEKEAV  
YEREEAVYEKKVHIEPWEPEYEELETEPYTEPYEPEYEEPEDEYEEIKVEAKKQVHEEWEEDEFEEGQYER  
EEGYDEGEEWEEIYHEREIIQVQKEVHEELHEKKIPAKVPEKKVPPKVVKKPVVEKVEKTRRMEEEKVQV

IKVPEVSKKIVPQKPSRTPVQEEIIEVKVPAVHTKKMVIISSEKMFASHTEEEVSVSVPEVQKKTVTTEEKIHV  
AVSKKIEPPPKVPEPPKKVPVEEVVVPVPIPKKVEPPAAKVPEAPKKVPPEKKVPVPIPKKKEPAAPPQVPEAP  
KKPAPEEKIPVPVTKKKEAPPKAVPEVQKKVVTEEKIAIITQREESPPPAVPEIPKKKVPEEKRPVPRKEEVP  
PPKVVPVPPKAVPEAVVPAPIPKKAPPRAEVSKKTVEEKRFAAEEKLSVAVPQRVELMRHEEEEWYSEEEE  
RVSVSVYREEEERDEEEAEITEYEVLEEPEEYVVEEKMHFISKKVEVEPAKVPEKKIIPKKVPAKIEEPPPTK  
VPEPPKKIVPEKKVPAPAPKKVPPAKAPEESKRPVPEKRAPAEVGIIEEPPPTKVAERHMKITQEEKVLVAVT  
KKEAPPRARVPEEPKKVAPPEERFPKPKPREEEPPAKVTEVRKRAVKEEKVSIIEVPKREPRPTKEVTVTEEEK  
WSYTRREEETVSEHREEEYEDYEDYEEYKEFEYEPTEEYDQYDEYAEREVEHYEEHEEYVTEPKKVPVVKPAQ  
EPVPAKPKAPPKVLKKAPEEKAPLPIQKKLPLPKAPEEPKPKVVEEKIQISITKKEQQVTEPVAKVPMK  
PKRVVPEAKIPAPTKEVAVPVRESLSFVICGSVLLKCLNFIEELENSQLKDDIFKVPVGPVKKRELEEVVVFKE  
EVEAHEEYIVEEEEEEYVHEEEYVHKEEYVHEEEYVHKEEYIHEEEHLHEEEETIAEEEVVPAVVKVPVVPK  
KPVPEEKKVPVPPKKEAPPKAVPEIPKKPEEKVPVPIPKKEKAPPKAVPEVPKKVPPEEKPPVVPVPPKVEPP  
PAKVPEVPKKVPPEKKVPAPTPKKVEAPPKAVPEVPKKPIPEEKKPTALLKKMEAPPPKAPKKREVVVPVVAL  
PREEEEEVVPFEVPEEELPEEEVPSSEEAPEEVPPEEEVLPPEEEVLPPEEEVLPPEEEVQPEEEALPE  
IKPKVPAVPEIKKKVPEKKVVVPKKEEAPPTKVPEVSKKVEERRIIPKKEEVPPAEVYEEAEETPEEI  
PEEPPSIEEEIIVEEEEEEEVLPRAPEVVKAVPEAPTVPKKAAPPKAVPKKIPPEKVPVVPQKKEAPP  
AKVPEVPKKVPEKKKIPKPKVPVPPKKEAVPPAKGKAVFEKISVAYQEEELVQERIELELVEAKVEEAFEEEE  
FHEVQYEFEEEEFHEVEEFIRVEERRFQEEHKVEEVHRVIEFLAEEVEVVEYKPKIPKKGPEVSEKVIPPKK  
PPTKVIIPRKEPPKAVPEVTTKTVVEEKIRAPEEPKVPAPKEVPEKKVSVVPPKKPEAPPKAVPEAPKEAAPE  
KKVPVAPKKKPEAPPVVPVPEVPTAVPQKKIPEAIPPKPESPPLEVPPEAPKEVVPPEKKVSVVPPKKPEAPPK  
VPEAPKEAAPEKKVPVAPKKKPEAPVVKVPEVPAVPPQKKIPEAIPPKPESPPPEVYEEPEEEIVPEEPPPE  
AVEEVPVAPPKVPTEPPKKVPPEKKAPPVVKKPEPPPAKVPEVPKEAPPEKKVPPKKPEAPPKAVPEVPKEV  
VTEKKVAVPPKPEVPPKAVPEVPKPKVIEEKPAIPVVEKVASPPAEVYEEPEEVTAESEEPAPAVEEEYEA  
PPPAVPEEPKVVPEKKFPVIKKPEAPPKEPEPEKKVIEKPKLPRPPARPPSPKEDVKEKMFQLKAVSK  
KKVPEKPEVVEKPEAPLKVPTAEKKVRKLLPEPKQPKEEVLKSVLRKKPEEEEPKVEPKKVEKAKKPEEP  
QPPKAVEVEAPEPTPKERKVPPEKAVPEIKPAIPLGPEPKPEPEVTKMKAPPIEAPPTPIAAPVAVTAV  
VGKKAEBKPEAAKPKGPIKGVAKKTPSIEAERKKLRPGSGGKPPDEAPTYQLKAVPLKFVKEIKDIVL  
TEAESVGSSEAI FECLVSPSTAITTWMKDGSNIRESPKHRFIADGKDRKLIIDVQLSDAGEYTCVLRRLGNKEK  
TSTAKLIVEELPVRVFKTLEEEVTVVKGQPLYLSCELNKERDVVWRKDGKIVVEKPGRIVPGVIGLMRALTIN  
DADDDAGTYTVTVENANNLECCSCVKVVEIIREWLKPIRDQHVKPKGTAVFTCDIAKDTPNIKWFKGYDEI  
PLEPNDKTEILKEGNHFLKVKNAMPEIDIYAVEIEGKRYPAKLT LGEREVELLKPIEDVTIYEKESASFDA  
EISEEDIPEGWKLKGEELLRPSPTCEIKAEGGKRFLTLHKVKLDQAGEVLYQACNAITTAITLTVKEIELDFAVP  
LKDVTVPKEKRQARFECVLTREANVIEWSKGPDIKASDKFDIADGKHHILVINDSQFDDEGVYTAEEVGGKTS  
AQLFVTGIRLKFISPLEDQTVKEGQTATFVCELSHEKMHVWVFNKNDVKLHTTRTVLMSSEGKTYKLEIRETTL  
DDISQIKAQVKNLSSTANLKVLEADPYFTVKLHDKTGVEKDEIILKCEVSKDVPVKWFKDGEIIVSPKHSVK  
TDGLRRLIKIKKAELKDKGEYVCDGTDTTKANVTVEARLIKVEKPLYGVEVVFVGETARFIEELSEPDVHGQW  
KLKGEPLTASPDCEIIEEDGKKHVLVLYNCQLDMTGEISFQAANAKSAANLKVKELPLIFITPLSDVKVFEKDE  
AKFECEVSREPKTFRWLKGTQEIITGDDRFELIKDGTRHSLVIKSAAFEDEAKYMFEAEDKRTSGKLIIEGIRL  
KFLTPLKDVTAKEARENNAVFTVELSHDNI PVSWFKNDQRLHTSKRVSMHDEGKTHSITFKDLSIDDSQIRVEA  
MGISSEAKLTVLEGDYFTGKLQDYTGVEKDEVILQCEISKADAPVKWFKDGKEIKPSKNVVIKADGKKRMLI  
LKKALKSDIGQYTCDCGTDQTSGLDIEDREIKLVRPLYSVEMETETARFETEISEDDIHANWKLKGEALLQ  
TPECEIKEEGKIHVLI LHNCRLDQTTGGVDFQAANVKS SAHLRVKPRVIGLLRPLKDVTVTAGEATFDCELSY  
EDIPVEWYLKGGKLEPNDKVVTRSEGRVHTLTLRDVKLEDAVEVQLTAKDFKTQANLRFVKEPPVEFTKPLEDQ  
TVVEEATAVLECEVSRNAKVKWFKNGTEILKSKKYEIVADGRVRKLI IHGCTPEDIKTYTCDAKDFKTSNCL  
NVVPPHVEFLRPLTDLQVKEKETARFECEISKENEKVQWFKDGAELKKGKYDIISKGAVRILVINKCLLNDE  
AEYSCEVRTARTSGMLTVLEEEAVFTKNLANLEVSEGDTIKLVCEVSKPGAIEVIWYKGDDEEIIETGRFEILTD  
GRKRILIIQNAQLEDAGSYNCRLPSSRTDSKVKVHELAAEFISKPQNLEILEGEKAEFVCTISKESFEVQWKR  
DDQTTLESGDKYDIADGKKRVLVVKDATLQDMGTYVVMVGAARAAHLTVIEKLRIIVPLKDTKVKEQQEVVF  
NCEVNTGAKAKWFRNEEAI FDSKYIILQKDLVYTLRIRDARLDDQANFVSLTNHRGENVKSANLIVEEE  
DLRIVEPLKDIETMEKKSVTFWCKVNRLNVTLKWTKNGEEVAFDNRISYRIDKYKHSILIKDCGFPEDEGEYVV  
TAGQDKSVAELLIIEAPTEFVEHLEDQTVTEFDDAVFSCQLSREKANVKWYRNGREIKEGKYYKFEKDGSIHR  
LI IKDCRLEDECEYACGVEDRKSARL FVEEIPVEIIRPPQDILEAPGADVIFLAELNKDKVEVQWLRNMIIV  
VQGDKHQMSSEGIHRLQICDIKPRDQGEYRFIAKDKKARAKLELAAAPKIKTADQDLVVDAGQPLTMVVPYD  
AYPKAEBAEWFKENEPLSTKTVDTAEQTSFRISSEAKKADKGRYKIVLQNKHGKAEGFINLQVIVDPVGPVNRLE  
VTETFDGEVSLAWEELTDGGSKIIGYVVERRDIKRKTWVLTDRADSCEFTVTGLQKGGYLFVFRVSARNRV  
GTGEPVETDSPVEARSKYDVPGPPLNVTITDVRNRFVSLTWEPPPEYDGGAEITNYVIELRDKTISRWDTAMTV  
RAEDLSATVTDVVEGQEYSFRVRAQNRIGVGKPSAATPFVKVADPIERPSPPVNLNASEQTQSSVQLTWEPPPL  
KDGGSPILGYIIEERREEGKDNWIRCNMMPVPELTYKVTGLQKGNKYLYRVSAENAAGVSDPSEILGPLTADDA

FVEPTMDLSAFKDGLEVI VPNPIKILVLPSTGYPRPKATWTFGDQVLEEGDRVKMKTISAYAE LVI SPSE RTDK  
GIYTLTLENPVKSI SGEINVNVIAPPSAPKELKFS DITKDSVHLTWEPPDDDDGGSPLTGYVVEKRDMSRKTWT  
KVMDFVTDLEFTVPDLVQGEYLFKVCARNKCGPGEPAYTDEPVNMSAPATVPDPPENVKWRDR TANSIFL TW  
DPPKNDGGSRIKGYIVEKCPRGSDKWVACGEPVPD TKMEVTGLEEGKWYAYRVKALNRQGASKPSKPT EEIQA  
VDTQEAP E IFLDVKLLAGITVKAGTKIELPATVTGKPEPKITWTKADTLLKPDQRIT IENVPKKS TVTITDSK  
RSDTGTYIEAVNVCGRATAVVEVNVLDKPGPPAAF DITDVTNESCLLTWNPPRDDGGSKITNYVVERKATDS  
DVWHKLSSTVKDTNFKATKLT PNKEYIFRVA AENMYGVGEPVQAAP IIAKYQFDPPGPPTRLEPSDI TKDAVT  
LTWCEPDDDDGGSPI TGYWVERLDPD TDKWVR CNKMPVKDTTYRVKGLTNKKKYRFRVLAENLAGPGKPSRSTE  
PILIKDPIDPPWPPGKPTVKDIGK TSLVLNWTKPEHDGGAKIESYVIEMLKTGTDEWVRVAEGVPTTEHLLTG  
LMEGQEYSFRVRAVNKAGESESESPDPVLCREKLYPPSPRRWLEVINITKNTADLKWTVPEKDDGGSPI TNYI  
VEKRDVRRKGWQTVDTTVKDTKCTV TPLEGSLYVFRVAENAIGQSDYTEIGDSVLAKDTFTTPGPPYALT V  
VDVTKRHVDLKWEPKNDGGRPIQRYIEKKEKLGTRVWKAGKTS GPCNFRVTDVIEGTEVQFQVRAENEAG  
VGHPS EPT EILSIEDPTSPSPPLDLHVT DAGRKHIAIAWKPP EKNGGSP IIGYHVEMCPVGTEKWMRVNSRP  
IKDLKFKVEEGIVPDK EYVLRVRAVNAVGVSEPS EISENVVAKDPDCKPTIDLETHDIVVIEGEKLNIPVPFR  
AVPVPTVSWHKDGKEVKASDRLTMKNDHISAHLEVPKSVHADAGVY TITLENKLG SATASINVKVI GLPGPCK  
DIKASDITKSSCKLTWEPPEFDGGSPI LHVYLERREAGRRTYIPVMSENGKLSWTVKDLIPNGEYFRVKAVN  
KIGGGEYIELKNPIAQDPKQPPDPVDVEVHNPTAKAMTITWK PPLYDGGSKIMGYIEKIKTEGDRWKRCN  
EHLVPLTYTAKGLEEGKEYQFRVRAENAAGIGEPSRATPPTKA VDPIDAPKVI LR TSLVEVRKDEI ALDATI  
SGSPYPTITWIKDENVI VPEEIKKRAAPPVRRKKGEAE EEEEPFSLPLTERLSINNSKQGESQLRIRDSLRPDH  
GQYMIKVENDHGVAKAPCSVSVLDTPGPPINFV FEDIKDSVLCKWEPPLDDGGSEIINYTLEKKDKTKPDS  
WIVITSTLRNCKYSVTKLI EGKEYLFRVRAENRFGPGPCVSKP LLAKDPFEPPDAPDKPIVEDVTSNSMLVK  
WNEPKDNGSPILGYWLEKREVNSTHWSRVNKTLLSSLKTKVDGLLEGLTYVFRVCAENAAGPGKFSPPSDPKT  
ARDPISPPGPPVPRVADTSSTTIELEWEP PAFNGGGEIMGYFVDKQLVGTNEWSRCKTEKMIKVRQFTVKEIRE  
GADYKLRVSAVNAAGEGPPGETEPEVTVAE PQEPPTVELDVS VKGGIQIMAGKTLRI PAEVTGRPVPTKVW TIE  
EGELDKERVI IENVGTKSELI IKNALRKDHGRYVITATNSCGSKFAAVRVEVFDVPGPVLDLKP VVTNRKMCL  
LNWSDPADDDGGS DITGFI IERKDAKMHTWRQPI ETERSKCDITGLIEGQEYKFRVIAKNKFGCGPVEI GPIL  
AVDPLGPPTYSPERLTYTERTKSTITLDWKEPRSDGGSPIQGYIEKRRRHDKP DFERVNRKLCPTTSEFLVNL D  
EHQMYEFRVKA VNDVGESEPSLPLNVVIQDDEVPPTIKLRLAVRGDTIKVKAGEPVNIPADVTGLPMPKIEWS  
KNEKVIDKPTDTL NITKEEVS RSEAKTELSIPKAAREDKGTYTITASNRLG SVFRNVHVEVYDRSPPRNLAV  
TDIKAESCYL TWDA PLDNGGSEITHYI IDKR DASRKKSEWEEVTNTA VERRYGIWKLI PNGQYEFVRVAVNKY  
GISDECKSDKVVIIQDPYR LPPGPKPKVLERTKGSMLVSWT PPLDNGGSPITGYWLEKREEGGYWSRVSRAP  
ITKVGLKGVEFNVPRLIEGVKYQFRAMA INAAGIGPPSEPSDPAVAGDPIYPPGPPSCPEVKDKTKSSISLAW  
KPPAKDDGGSPIKGYIVEMQEEGTTDWKPVNEPDKLLTACECVV PNLKELRKYRFRVKAVNEAGESEPSDTTGE  
IPATDIQEVPEV FIDIGAQDCLVCKAGS QVKIPAVIKGRPTPKSSWEFDGKAKKAMKDG VHDIPEDAQLETA E  
NSSV I I IPECTRAHSGKYSITAKNKAGQKTANCRVKVMDAPGPPKDLKVS DITRGSCLRSWKMPDDDDGGDR I K  
GYVIEKKTIDGKAWTKVNPNCGS TTFVVPDLISEQYFFRVRAENRFGIGPPAETIQR TTARDPIYPPDPP I K  
LKIGLITKNTVHLSWKPPKNDGGS PVTHYIVECLAWDPTGKKKEAWRQCNRRDVEELEFTVEDLIEGGEYEF R  
VKAVNEAGVSKPSATVGPVIVKDQTCPPAIELKEFMEVEEGTDVNI VAKIKGVFPPTLTWFKAPPKPKDSKEP  
VVYDTHVNKQVDDTCTLVI PQSRRSDTGLYSITAVNNLGTASKEMRLNVLGRPGPPVGP I K FESISADQMTL  
SWLPPKDDGGSKITNYVIEKREANRKTWVRVSSEPKECMYTI PKLLEGHEYVFRIMAQNKYGIGEP L DSEPET  
ARNLFSVPGAPDKPTVSSVTRNSMTVNWEEPEYDGGSPVTGYWLEMKDTT SKRWKRVNRDPIKAMTLGVSYKV  
TGLIEGSDYQFRVYAINAAGVGPASLSPDPVTARDPVAPPGPPFPKVTDWTKSSVDLEWSPPLKDDGGSKITGY  
IVEYKEEGKEEWEKGDKEVRGTKLVVTGLKEGAFYKFRVRAVNAVGVGEPGEVTDVIEMKDRIVSPDLQLDA  
SVRDRIVVHAGGVIRI IAYVSGKPPPTVTWSMNERALPQEA A IETTAISSSMVIKNCQRSHQGVYSLAKNEG  
GERKKT I IVDVLDVPGPVGI PFLSDNL TNDSCKLTWFS PEDDGGSPITNYVI QKREADRRAWTPVYTVTRQN  
ATVQGLIQKSYFFRIAAENSIGMGPFVETPNALVIRDPI TVPERPEDLEVKEVTKNTVSLTWNPPKYDGGSE  
I INYVLESRLIGTEKFHKVTNDNLLSRKYTVKGLKEGDTY EYRVS AVNIVGQGKPSFCTK PITCKDELAPPTL  
DLDFRDKLTVRVGESFALTGRYS GKPKPIDWFKDEADVLEDDRTHIKTPTTLALEKTKAKRSDSGKYCVVV  
ENSTGSRKGFCQVNVVDRPGPPVGPVIFDEVTK EYMVISWKPPLDDGGSEITNYIEKKELGKDIWMPVTSAS  
AKTTCCKVPKLLLEGKDYIFRIHAENLYGIDPLVSDSMKAKDRFRV DAPEQPVVTEVTKDSALVTWNKPNDDG  
KPITNYILEKRETM SKRWVRVTK EPIHPYTKYRVPDLLEGQYEF RVS AENEIGIGDPSPPSKPVFARDPIAK  
PSPPINPEAIDTTCNSVELTWQPPRHDDGGSKILGYIVEYQKVGDEEWRANHTPESC PETKYKVTGLR DGQSY  
KFRVLAVNEAGESDPAHVPEPVLVKDRLEPSELLENMAREQHIRVGD TLRLSAI I KGVFPKVTWKKEDRE  
APTKAQIDVTPEVSGKLEIRNAAHEDGGIYSLTVENPAGTKTVSVKVLVLDKPGPPRDLEVFSEIRKDS CYLTKW  
EPLDDGGSVVTNYVVERKDVATAQWSPLSTTSK KSHMAKHLTEGNQYLF RVAENQYGRGPFVETPKPIKAL  
DPLHPPGPPKDLHHDVVDKTEVSLVWNK PDRDGGSPITGYLVEYQEEGDKDWIKFKTVKNLDCVVTGLQQGKT  
YRFRVKAENI IGLGLPDTTPIECQEKLVPSSVELDVK LIEGLVVKAGTTRVFP AIIRGVVP T AKWTTDGTE  
IKTDDHYTVETDSFSSVLT IKNCLRKDTGEYQLTVSNAAGTKTVAVHLTVLDVPGPPTGPINIL DVTPEYMTI



SWQPPKDDGGSPVINYIVEKQDTRKGTWGVVSAAGSSKLLKLVPHLQKGEYVFRVKAENKMGVGPPLDLSIPTV  
AKHKFSPSPSPGKPVVTDITENAAVSWTLPKSDGGSPITGYVERREITGKWVRVNTPIADLKFRVTGLYE  
GNTYEFVFAENLAGLSNPSPPSDPIKACRPKPPGPPINPKLKDKSKESADLVWTKPLSDGGSPILGYVVEY  
QKPGTAQWDRINKDELIRQCAFVRVPLIEGNEYRFRIRAAANIVGEGEPRELAESVIAKDILHPPEVELDVTCT  
DVITVRVGTIRILARVKRPEPDI TWSKEGKVLVKDKRVDLIHDLPRVELQIKEAVRADHGKYIISAKNSSG  
HAQGSAINVNLDRPGPCQNLKVSNTKENCTISWENPLDNGGSEITNFIVEYRKPQKGSIVASDVTKRLVK  
ANLLANNEYFRVCAENKVGVPETIETKTPILAINPIDRGPENLHIADKGTFFVYLKWRPDPYDGGSPNLS  
YHVERRLKGSADWERVHKGSIKETHYMVDKCVENQIYEFVQTKNEGGESDWRTEEVVVKEDLQKPVLDLKL  
SGVLTVKAGDTRLEAGVRGKPFPEVAWTKDKDATDLTRS PRVKIDTSAESSKFSLTAKRSDGGKYVITATN  
PAGSFVAYATVNVLDKPGPVRNLKIDTVSSDRCTIRWDPPEDDGGCEIQNYILEKCESKRMVWSTYSANVLT  
SATVTRLIEGNEYIFRVRAENKIGTGPPTESKPVIAKTKYDRPGRDPPEVTKVSKEEMTVVWNAPEYDGGKS  
ITGYYLEKKEKHAVRWVFNKSAIPERRLKVQNLPLGHEYQFRVKAENEVGI GEPSPSRPVVAKDPIEPPGP  
PTNFVVDTTKSSITLAWGKPVYDGGAPIIGYVEMRPKIADASPDEGWKRCNAAAQLIRMEFTVTSLDENQE  
YEFVCAQNVGIGRPAELKEAIKPKELIPEPIDLDASMRKLVVVRAGCPIRLFAIVRGRPAKVTWRKVG  
DNVVRKQVLDVDTMAFLVINSTRDDSGKYSLTLVNPAGEKAVFVNVKVLDTPGPVADLVKSDVTKTSCHVS  
WAPPENDGGSQVTHYIVEKREAEKRTWSTVTPPEVKTSTFNVTNLVPGNEYFFRVTA VNEYGPGVPTDIPKPV  
ASDPLSEPPRKLVEVTEMTKNSATLAWLPLLRDGGAKIDGYIISYREEDQPADRWTEYSVVKDLSLIVTGLK  
EGKYYKFRVAARNAVGVSMPREAEVYEAKEQLLPPKILMPEQITIKAGKLRVEAHVYKPNPICWKKGDD  
EVVTSSSHAIHKADGSSVLIKDVTRKDSGYSLTAENSSGSDTQKIKVTVM DAPGPPQPPFDISEIDADACS  
LSWHIPLDGGSNITNYIVEKCDVSRGDWVTALASVTKTSCRVGKLI PGQYIFRVRAENRFGISEPLTSPKM  
LAKFPFDVPSEPKNARVTKVNKDCIFVAWDRPDSGGSPITGYLIERKERNLLVWKANDTIVRSTEYPCAGL  
VEGLEYSFRIYALNKAGSSPPSKPTEYVTARMPVDPGKPEVVDVTKNSASLIWARPKHGGSRIGYFVEAC  
KLPDGVKVRNCTTPHQIQEYATATGLEENAQYQFRAIAKTAVNISQPSSESDPVTILAENVPPRIELSVEMK  
SLLTVKAGTNVCLDATVFGKPMPTVSWKKTTPIKQAEGIKMAMKRNLCLELFSVNRKDSGDYTTAENSSG  
SKSATIKLVLDKPGPPASVKINKMYADRAMLSWEPPLDGGSEITNYIIDKRETSRPNWAQVSATVPI TSCT  
VEKLEIGHYQFRICAENKYGVGDPILTEPAIAKNQYDPPGRCDPVI SNITKDHMTVSWKAPADGGSPITG  
YLVEKRETQAVNWTKVNRPVIERLTKATGLQEGTEYEFVTAINKAGPGKPSDASKAVYAQDPLYPPGPAF  
PKVYDTRSSVLSWGKPAYDGGSPIGYLVKVRADSDHWVRNLPKELQKTRFEV TGLMENTEYQFRVYAV  
NKIGYSDPSDVPDKHCPKIDILIPPEGELDAELRKTILRAGVTMRLYVPVKGRPPPKITWSPKNVNLRRIGL  
DIKSTDFDTFLRCENVNKYDAGKYLTLNENSCGKKEYTIVVKVLDTPGPPVNVTVKEVSKDSAYVTWDPPIID  
GGSPIINYVVEKRDARERKSWSTVTECSKTSFRVSNLEEGKSYFFRVFAENEYIGIDPGETRDAVKASETPGP  
VVDLKAALITKSSCTIGWKKPRSDGGSRITGYVVDLFTENKQVRVMKSLSLQYSTKDLKEGKEYTFRVSAEN  
ENGEPTSEIVVVAKDDVVPDLDLKLDLPDLCYLAKENSFNRLKIPKPKPAPSVSWKKGEDPLATDTRVSV  
STAVNTLVVYDCQKSDAGKYITLKNVAGTKEGTLKIKVVGKPGIPTGPIKFDEVTAEAMTLKWGPPKDDGG  
SEITNYVLEKRDVSNLWVTCASAVQKTFRVTRELHEGIEYTFRVSAENKYGVGEGKSEPIVAKHPFDVDP  
PPPNIVDVRHDSVSLTWTDPKKTGGSPITGYHIEFKERNLLWKRANKTPIRMKDFKVTGLTEGLEYEFRVM  
AINLAGVKGKPSLSEPVVALDPI DPPGKPEVISVTRNSVTLIWTEPKYDGGHKLTYIVEKRDLPKSWMKAN  
HVNVPDCAFTVTDLVEGGKYEFRIRAKNTAGAISAPSESTGTIICKDEYEAPTIVLDPTIKDGLTVKAGDSIV  
LSAISILGKPLPKSSWSRAGKDIRPSDIAQITSTPTSSMLTVKYATRKDAGEYTTATNPFGTKEEHVKVSVL  
DVPGPPGPIEISNVSAEKATLTWTPPLEDGGSPIKAYVLEKRETSRLLWTVVSEDIQACRHVVTKLIQGNEYL  
FRVSAVNHYGKGEVQSEPVKMDRFGPPGPPGKPEISNVTKNTATVSWKRPTDDGGSEITGYHVERREKGL  
RWVRATKTPVSDLRCKVTGLQEGNTYEFVSAENRAGIGPPSDASNVLMDVAYPPGPPSNAHVTDTTKSA  
SLAWGKPHYDGGLEITGYVVEHQVGDDAWIKDTTGTALRITQFVVPDLQTKKEYNFRISAINDAGVGEPAVI  
PNVEIVEKEVAPDFELDAELRRTLVRAGLSIRIFVPIKGRPAPEVTWTKDNINLKHRIANIENTESFTLLIIP  
ECNRYDTGKFVMTIENPAGKSGFVNRVLDTPGPVNLNRPTDITKDSVTLHWDLPLIDGGSRITNYIVEKRE  
ATRKSYSTVTTKCHKCTYKVTGLTEGCEYFFRVMAENEYGVGEPTEPETEPVRASEAPLPPDSLIMDITKNTV  
SLAWPKPRHDGGSKITGYVIEAQRKGSQWTHISTVKGLECVVRNLTEGEEYTFQVMVNSAGRSAPRESRPV  
IVKEQTMPELDRGIYQKLVVIARAGDNKVEIPVLGRPKPTVTWKKGDQILKQTRVNVNTATSTILNINE  
CVRSDSGPYPLTAKNTVGEVGDVITIQVHDI PGPPTGPIKFDEVSDFVTFVSWEPPEPNDGGVPI SNYVEMRQ  
TDSTTWVELATTVIRTTYKATRLTGVVEYQFRVRAQNRVGVGPGIT SASVVANYPFKVP GPGTQVAVTKD  
SMTISWHEPLSDGGSPILGYHIERKERNILWQTVSKALVPGNIFKSTGLTDGIAYEFVRIAENMAGKSKPSK  
PSEPMFALDPI DPPGKPVPLNITRHTVALKWAKPEYTGFKITSYVVEKRDLPNGRWLKANFNSI LENEFTVS  
GLTEDAAVEFRVIAKNAAGAI SPPSEPSDAITCRDLDLSEAPRIMVDVRFKDTITLKAGEAVFKLEADVSGRPPPT  
MEWTKDGKELEGTGKLEIKIADFSTHLINKDSSRTDSGAYILTATNPGGFAKHIFNVKVLDRPPEGLAVS  
DVTSEKCVLSWLPPLDDGGAKIDHYIVQKRETSRLAWTNVATEVQVTKLVTKLLKNEYIFRVMVNVKYGVG  
EPLSEPVLAVDPYGPPDPPKNPEVTTITKDSMVVCWGHPPSDGGSEIINYIVERDRKAGQRVVKCNKALTD  
LRFKVSGLTEGHEYEFRIMAENAAGISAPSATS PFYKACDVTVKP GPPGNPRVLDTSRSSISIAWNKPIYDGG  
SEITGYMVEIALPEEDEVQVTPPAGLKATS YTTISLIENQEYKIRIYAMNSEGLGEPALVPGTPKAEERMLP

PEIELDADLRKVVVTRACCTLRFLVPIKGRPAPEVVKWAREHGESLDKASIESTSSYTLVVGNVNRFDSGKYI  
LTVENSSGSKSAFVNVRLDTPGPPQNLKIKEVTKTSVTLTWEPLLDGGSKIKNYIVEKRESTRKAYSTVAT  
NCHKTSWKVDQLQEGCSYYFRVLAENEYIGLPAETAESVKASERPLPPGKITLTDVTRNSVLSWEKPEHDG  
GSRILGYIVEMQSKGSDRWATCATVKVTEATITGLIQGEEYSFRVSAQNEKGISDPRQLSVPVIAKDLVIPP  
FKLLENTFTVLAGEDLKDVPFGRPPPAVTWHKDDIPLKQTRVNAESTENNSLLTIKEACREVDGHYTVKL  
TNSAGEATETLNVIVLDPGPPPTGPVKMDEVTAADSVTLSEWEPKYDGGSSINNYIVEKRDSTTAWQIVSATV  
ARTTIKACRLKTGCEYQFRIAENRYGKSTYLNSEPVVAQYPPFKVPGPPGTFVTLASKDSMEVQWHEPVS  
GSKVIGYHLERKERNISILWVKLNKTFIPQTKFKTTGLEEGIEYEFVSAENIVGIGKPSKPECYAAHDFCDP  
PGRPEAIVTRNSVTLQWKKPTYDGGSKITGYIVEKKEPLDGRWMKASFTNIIDTQFEVTGLEDHRYEFRVI  
ARNAAGVFSEPESTGAITARDEVEPPRISMDPKYRDTVVVQAGESFKIDADIYGKPIPTTQWVKGDQELS  
ARLEIKSTDFATSLSVKDAVRVDSGNYILKAKNVAGEKSVTINVKVLDRPGPPEGPVAISGVTAEKCTLAWK  
PLQDGGSDITNYIVERRETSRLVWTLVDANVQTLSCVKLKLLEGNEYIFRIMAVNKYGVGEPLESESLIAKNP  
FVVPDAPKAPEVTAVTKDSMIVVWERPASDGGSEILGYVLEKRDKEGIRWTRCHKRLIGELRLRVTLLENHN  
YEFVSAENAAGLSESPSPSAYQKACDPIYKPGPPNNPKVMDVTRSSVFLSWTKPIYDGGCEIQGYIVEKCDV  
SVGEWTMCTPPTGINKTNLEVEKLEKHEYNFRICAINKAGVGEHADVPGPVMVEEKLEAPDIDLDELRLKVI  
NIRAGGSLRFLVPIKGRPTPEVKWGVKVDGDIRDAAIIDVTSSFTSLVLDNVNRYDSGKYTLTLENSSGTKSAF  
VTVRVLDTSPPPVNLKVTEITKDSVSIWEPLLDGGSKIKNYIVEKREATRKSAYAAVVTNCHKNSWKIDQLQ  
EGCSYYFRVTAENEYIGLPAETAESVKASERPLPPGKITVDDVTRNSVLSWTKPEHDGGSKIQYIVEMQA  
KNTDKWSECARVKS L DAVITNL TQGE EYLFRVIAVNEKGRSDPRSLAVPIIAKDLVIEPDVRPAFSSYSVQVG  
QDLKIEVPI SGRPKPSISWTKDGMPLKQTRINVTDSLDTLTSIKETHKDDGGQYGITVSNVVGQKTA AIEI  
ITLTKDPDPKGPVKFDEISAESITLSWNPPLYTGGCQITNYIVQKRDTTTTVWVVSATVARTTLKVTKLKTG  
TEYQFRIFAENRYGQSFALESEPVVAQYPYKEPGPPGTFVTAISKESMVVQWHEPINNGGSPVIGYHLERKE  
RNSILWTKVNKTI IHD TQFKALNLEEGIEYEFVYAENIVGVGKASKNSECYVARDPCDPPGTPPEAIVKRNE  
ITLQWTKPVYDGGSMITGYIVEKRDLEPGRWMKASFTNVIETQFTVSGLTEDQRYEFRVIAKNAAGAI SKPSD  
STGPI TAKDEVELPRI SMDPKFRDTIVVNAGETFRLEADVHGKPLPTIEWLRGDKEIEESARCEIKNTDFKAL  
LIVKDAIRIDGGQYILRASNVAGSKSFPVNVKVLDRPGPPEGPVQVTGVTAEKCTLAWSPQLDGGSDISHYV  
VEKRETSRLAWTVVASEVVTNSLKVTKLLEGNKYIFRIMAVNKYGVGEPLESAVLMKNPFVLPGPPEKSLLEV  
NIAKDSMTVCWNRPDSDGGSEIIGYIVEKRD RSGIRWIKCNKRRITDLRLRV TGLTEDHEYEFRVSAENAAGV  
GEPSPATVYYKACDPVFKPGPPTNAHVVDTTKNSITLAWSKPIYDGGSEILGYVVEICKADEE EWQIVTPQTG  
LRVTRFEIAK LIEHQEYKIRV CALNKVGLGEAASVPGTVKPEDKLEAPELDDLSELRKGIVVRAGGSARIHIP  
FKGRPTPEITWSKEEGEFTDKVQIEKGINFTQLSIDNCDNRNDAGKYILKLENSSGSKSAFVTVKVLDTPGPPQ  
NLAVKEVRKDSVLLVWEPPIIDGGAKVKNYVIDKRESTRKAYANVSSKCNKTSFRVENL TEGAIYFRVMAEN  
EFGVGVPTETS DAVKASEPPSPGKVTLT DVSQTSASLMWEKPEHDGGSRI LGYV VEMQPKGTEKWSVVAESK  
VCNAVVSGLSSGQYQFRVKAYNEKGKSDPRVLGIPVIAKDLTIQPSFKLPFNTYSVQAGEDLKIEIPVIGRP  
RPKISWVKDGEPLKQTRVNVEETATSTILHIKESKDDDFGKYSVTATNSAGTATENLSVIVLEKPGPPVGPV  
KFDEVSADFVVISWEPPAYTGGCQISNYIVEKRDTTTTNWMVSA TVARTTIKISKLKTGTEYQFRIFAENRY  
GKSTPLDSKPVVQYPFKEPGPPGTPFVTSISKDQMLVQWHEPVNDGGSKVTGYHLEQKEKNSILWVKLNKIP  
IQDTKFKTTGLDEGLEYEFRVSAENIVGIGKPSKVSECYVARDPCDPPGRPEAIVITRNSVTLKWKPVYDGG  
SKITGYIVEKKDLDPGRWMKASFTNVVETEFTVTGLVEDQRYEFRVIARNAADNFSEPESSGAI TARDEIDA  
PNASLDPKYRDVIVHAGETFVLEADIRGKPIPDI IWSKDGNELEETAARMEIKSTLQKTTLIVKDCIRTDGG  
QYTLKLSNVGGTKTIPITVKVLD RGPPEG PLKVTGVTAEKCYLAWNPPLQDGGASISHYIEKRETSRLSWT  
QVSNEVQALNYKVTKLLPGNEYIFRIMAVNKYGIGEALESEPV IACNPYKRPGPSTPEASAITKDSMVL TWT  
RPVDDGGAIEGYILEKRDKEGIRWTKCNKKTLDLFRVVTGLTEGHSYEFVAAENAAGVGEPESEPSV FYRA  
CDALYPPGPPSNPKVTDTSRSSVSLAWNKPIYDGGAPVRGYVIELKAAADEWTTCTPPSGLQKQFTVTKLK  
ENTEYNFRICAFNTEGVGEPATIPGSVVAQERMEAPEI EL DADLRKVVTLRASATLRLFVTIKGRPEPEVKWE  
KAEGILTERAQIEVTSYTMLVIDNVTRFDSGRYNLTLENSGSKTAFVNVRLDSPSAPVNL TIREVKKDSV  
TLSWEPPLIDGGAKITNYIVEKRETRKAYATITNCTKNFKIENLQEGCSYYFRVLASNEYIGLPAETA  
PVKVSEPLPPGRVTLVDVTRNTATIKWEKPESDGGSKITGYVEMQTKGSEKWSACTQVKTLETTISGLTAG  
EEYVFRVA AVNEKGRSDPRQLGVPVIAKDIEIKPSVELPFNTFNVKANDQLKIDIPFKGRPQATVAWKDQV  
LRETTRVNVASSKVTVTL SIK EASREVDGTYELCVSNTAGSITVPI TVIVLDRPGPPGPIRIDEVSCDNV S  
WNPPEYDGGCQISNYIVEKRETTSTWQVVSQAVARTSIKIVRLTTGSEYQFRVCAENRYGKSSYSESSAVVA  
EYFSPGPPGTPKVVHATKSTMVSWQVPVNDGGSQVIGYHLEYKERSSILWSKANKVLIADTQMKSGLDE  
GLMYEYRVYAENIAGIGKCSKACEPVPARDPCDPPGQPEVNTITRKS VSLKWSKPRYDGGAKITGYIVERREL  
PDGRWLQCNFNTVQETIYFEVTELTEDQRYEFRVFAARNAADVSEPESTGPI TVKDDVEAPRIMMDVKFRDVI  
IVKAGEV LKINADIAGRPLPVI SWAKD GVEIEERAKTEIVSTDYTTTLTVKDCVRRDTGQYVLT LKNVAGTRT  
MAVNCKVLDKPGPPAGPLEINGLTAEKCSLSWGRPQEDGGADIDYIVEKRETSRLAWTICEAELRTTSCKVT  
KLLKGNEYIFRVTGVNKYGVGEPLESMVAVKALDPFTTSPPTSL EITSVTKDSMTLCWSRPETDGGSDISGYI  
IERREKNSLRWMRV NKKPVYDLRVKSTGLREGCEYEYRVFAENAAGLSLPSETSP LVRAEDPVFLPSPSKPK

IVDSGKTTITIGVWKPLFDGGAPITGYTVEYKKSEETDWKVAIQSFRGTEYTMSSGLTTGDEYVFRVRSLNKMG  
ASDPSDSSDPQVAKEREEEPVFDVDSEMRKTLIVKAGSSFTMTVPFRGRP IPNVSWSKPDTDLRTRAYIDSTD  
SRTLLTIENANRNDGKYTLTIQNVLSAASMTFVVKVLDSPGPPANITVREVTKETAMLSWDVPENDGGAPVK  
NYHIEKREASKKAWVSVTNNCNRLSYKVTNLQEGAIYYFRVSGENEFVGVPAETKEGVKITEKPSPEKLG  
TSVSKDSVSLSWLKPEHDGGSRI IHVVEALEKQKTWVKCAVVKTTTHVVSGLRESHEYFFRVFAENQAGLS  
DPRELLLPVLIKDQLEPPEIDMKNFPSHTVYVRAGSNLKVDPISGKPLPKVTLRSRDLGVPKATMRFNTEITA  
ENLTI NLKESVTTDAGRYEITAANSSTGTTKTFINIIVLDRPGPPTGPVAISDITEESVTLKWEPPKYDGGSHV  
TNYIVLKRETSTAVWSEVTSATVARTMIKVMKLTGEEYQFRIKAENRFGISDHIDSVCVVVKLPYTTFGPPST  
PWSNVNTRESITVGVWHEPVSNGGSAVTGYHLEMKDRNSILWQKANKMIRTTTHFKVTTISAGLIYEFVRYAEN  
AAGIGKPSHPSEPVLAIDACEPPRNVRIITDISKNSVNLWQQPAFDGGSKITGYIVERRDLPDRWTKASFTN  
VIETQFTVSGLTQNSQYEFRVFARNAVGSVSNPSEVVGPIITCIDSYGGPVIDLPLEYTEVVKYRAGTSVKLRA  
GISGKPEPTIEWYKDDKELQTNALVCVENSTDLASILIKDANRLNSGSYELKLRNAMGSASATIRVQILDKPG  
PPGGPIEFKTVTAEKITLLWRPPADDGGAKITHYIVEKRETSRVVWMSVAENLEECIVTTTKIKGNEYVFRV  
RAVNKYGIGEPESEPVAKNAFVTPGPPSIPVTKITKNSMTVVWDRPTVDGGSEINGYFLERRDKKSLAWL  
KVLKETIRDTRQKVTGLTENS DYQYRVCVNAAGVGFSEPSDFYKAADPIDPPGPPAKIRIADSTKSSITLG  
WSKPVYDGGSDVTGYVEMKQGDDEEWTIVSTRGEVTRTEYVSNLKPQVNYFQVSAVNCAGQGEPIITMTEP  
AQAKDVEEPEIDLVALRTSVIAKAGEDVQLLIPFKGRPPPTVTRKDEKNLGS DTRYSIQNTDSSSLVPI  
QVTRNDTGKYILTIENGVGQPKSSTVSVKVLDTPAACQKLVKHVSLGTVTLLWDPPLIDGGSPIINYVIEKR  
DATKRTWSVSVSHKCSGTSFKVTDLSEKTPFFFRVLAENEIGIGEPCEETPEVKA AEVPAPIRDLSMKDSTKTS  
VVLSWTKPFDGGSIIITDYLVERKKGGEQAWSHAGISKTCEIEIGQLKEQSVLEFRVSARNEKQSDPVTIGP  
LTVKELVITPEVDLSEIPGAQISVRIGHNVHLELPYKGPKPSISWLKDG LPLKESEYVRF SKTENKITLSIK  
NSKKEHGGKYTVILDNAVCRNSFPITITILGPPSKPKGPIRFD EIKADSAIMSWDIPEDDGGGEITCYSIEKR  
EASQTNWKMVCSVARTTFKVSNLVKDSEYQFRVRAENRYGVSEPLASNIIVAKHQFRI PGPPGKPIYINVT  
DGMSLTWDAPVYDGGSEVTGFHVEKKERN SILWQVRVNTSPISGREYRATGLIEGLDYQFRVYAENSAGLSSPS  
DPSKFTLAVSPVDPPGTPDYIDVTRETITLKNPPLRDGGSKIVAYSIEKRQGS DRWVRCNFTDVSECQYTVT  
GLSPGDRYEFRIIARNAVGTISPSPSSGLIMTRDENVPTVEFGPEYFDGLVIKSGSDTRIKALVQGRVPR  
VTWFKDVEIERRNMEITDVLGSTSLFVRDATRDHRGVYTVAEAKNVSGSTKAEVTVKVDQDTPGKVVGPVIRFT  
NITGEKMTLWWEAPLNDGCAPVTHYIEKRETSRLAWALIEDNCEALS YTAIKLITGNEYQFRISAVNKFVGV  
RPLESDPVVAQIQYTIIPDAPGVPEPSNVTGNSITLWTRPESDGGSEIQHYILERREKKSTRWVKVISKRPIS  
ETRFKVTGLVEGNEYEFHVM AENAAGIGPASGISRLIKREP VNPSPAPS VVKVTDTSKTTVSLWARPVFDG  
GMEIIGYIEMCKADLGDWHKVNTEPCVKTRYTVTDLQAGEEYKFRVSAVNGAGKGDSC EVTGTIKAVDRLSA  
PELDIDANFKQTHIVRAGVIRLFIAYQGRPTPTAVWSKPDNSLIRADIHTTDSFSTLTVENCNRNNDAGKYT  
LTVENNSGKKSITFTVKVLDSPGPPGPIITFKDVTRGSATLMWDA PLLDGGARIHHYVIEKREASRRSQV VSE  
KCTRQILKSELTEGVPPYFRVSAENEYGVGPEYEMPEPIVATEQPAPPRRLDVVDTSKSSAVLAWLKP DHG  
GSRITSYLLEMRQKGSDFWEAGHTKQLTFTVERLVENTEYEFVKAKNADAGYSEPREAFSSVIKPEQIEPT  
ADLTGITNQLITCKAGSTFTIDVPI SGRPAPKVTWKLEEMRLKETDRMSIATTKDRTTLTVKDSMRGDSGRYF  
LTLTAGVKTFTITVVVIGRPGPVTGP IEVSSVSAESC VLWTEPKDDGGTEITNYIVEKRESGTTAWQLIN  
SSVKRTQIKVTHLTKYKEYCFRVSSENRFGVSKPLESVPIVAEHPFVPPSAPTRPEVYVVSANAMSIRWEEPY  
HDGSKIVGYVVEKKERNTILWVKENKVPCLCNYKVTGLVEGLE YQFRTYALNAAGVSKASEASRP IMAQNP  
VDPPGRPEVTDVTRSTVSLIWSAPVYDGGSKVVGYYIERKPVSEVGDGRWLKCN YTIIVSDNFFTVALSEGDT  
YEFVRLAKNAAGVISKGSESTGPVTCRDEYAPKAELDARLQGD LVTIRAGSDLVLDAVGGKPEPKI IWTKG  
DKELDLCEKISLQYTGKRATAVIKCDRSDSGKYTLTVKNASGTKSVSVMVKVLDSPGPGKLT VSRVTEEK  
TLAWSLPQEDGGAEITHYIVERRETSRLNWVIVEGECLTASYVVTRLIKNNEYTFRVRAVNKYGLGVPVESEP  
IVARNSFTIPSQPGIPEEVGAGKEHII IQWTKPESDGGNEISNYLVDKREKSLRWTRVNKDYVVDTRLKVT  
SLMEGCDYQFRVTAVNAAGNSEPSEASNFISCREPSYTPGPPSAPRVVDTTKRSISLAWTKPMYDGGTDIIGY  
VLEMQEKD TDQWCRVHTNATIRNNEFTVPDLKMGQKYSFRVA AVNAKGMSDYSETTAEIEPVERLEIPDLELA  
DDLKKTIVIRAGASRLMVS VSGRPSVITWSKKGIDLANRAIIDNTESYSLLI VDKVNRYDAGKYTIEAENQ  
SGKKSATVLVKVYDTPGPCPSVSVKEVSRDSVTITWEIPTIDGGAPVNNYIEKREAA MRAFKVTVTTKCSKTL  
YRISGLVEGTMYYFRVLPENIYGIGEPCE TSDAVLVSEVPLVPTKLEVVVDVTKSTVTLAWEKPLYDGG SRLTG  
YVLEACKAGTERWMKVVT LKPTVLEHTV I SLNEGEQYLFRVRAQNEKGVSEPREIVTPVTQDLRVLPTIDLS  
TMPQKTIHVPAGRPIELVPIITGRPPPTASWFFAGSKLRESERVTVETHTKVTKLTIRETTIRD TGEYTLK  
NVTGTTSETIKV IILDKPGPPTGPIKIDEIDATSVTISWEPPELDGGAPLSGYVVEQRDAHRPGWLPVSESVT  
RPTFKFTRLTEGNEYVFRVAATNRFGIGSYLQSEVIECRSSISIPGPPETLQIFDVSRDGMTLWYPPEDDGG  
SQVTGYIVERKEVADRWRVNKVPVMTMYRSTGLIEGLEVEYHRVTA INARGTGKPSRPSKPTVAMDP IAPP  
GKPNRVTDTTRTSVSLAWSVPEDEGGSKVTGYLIEMQKVDQREWTKCNTTPTKIREYTLTHLPQGA EYRFR  
VLACNAGGPGEPAEVPGTVKVTEMLEYDPYELDERYQEGVFRQGGVIRLTIPIKGPFPVCKWTKEGQDISK  
RAMIATSETHTELVIKEADRNDSGTYDLVLENKCGKKT VYIKVKVIGSPNTPEGPLEYDDIQARSVRVSWRPP  
ADDGADILGYILERREVPKAAWYITDSRVRGTSLVVKGLKENVEYHFRVSAENQFGISKPLKSEEPV I PKTP

LNPPEPPSNPPEVLDTVKSSVLSWSRPKDDGGSRVTYGYYIERKETSTDKWVRHNKTQITTTMYTVTGLVPDA  
 EYQFRIIAQNDVGLSETSPASEPVVCKDPFDKPSQPGELEILSISKDSVTLQWEKPECDGGKEILGYWVEYRQ  
 SGDSAWKKSNERIKDRQFTIGGLLEATEYEFVFAENETGLSRPRRTAMSVKTKLTSGEAPGVRKEMADVTT  
 KLGEAAQLSCQIVGRPLPDIKWYRFGKELIQSRKYKMSSDGRTHTLTVMTDEQEDEGVYTCVATNEVGEVSS  
 SKLLLQAAPQFHPGYPLKEKYYGAVGSTLRLHVMIIGRPVPMATWFGQKLLQNSEKITIENTEYHVLVMKN  
 VQRKTHAGKYKVLNSAFGTVDATLDVEIQDKPDKPTGPIVIEALLKNSVVIISWKPPADDGGSWITNYVVEKC  
 EAKEGAEWQLVSSAISVTTTCRIVNLTENAGYYFRVSAQNTFGISEPLEVASIVIISKPFKPGVPGKPTITAV  
 TKDSCVVAWKPPASDGGAKIRNYLERREKKQNKWIAVTTTEIRETVFSVQNLIIEGLEVEYFRVKCENLGGESE  
 WSEISEPVTPKSDVPIQAPHFKEELRNLNVRYSQSNATLVCKVTGHPKPIVKWYRQGKEIADGLKYRIQEFKG  
 GYHQLIIASVTDDDQVYQVRATNQGGSVSGTASLEVEVPAKIHLPKTLGEMGAVHALRGEVVSIIKIPFSGKP  
 DPVITWQKQDLIDNNGHYQVIVTRSFSLVFSNGVERKDAGFYVCAKNRFGIDQKTVELDVADVPDPPRGV  
 KVSVDVSRDSVNLWTPEASDGGSKVTNYIVEKCATTAEWRVWGQARETRYTVINLFGKTSYQFRVIAENKFG  
 LSKPSEPTVTTKEDKTRAMNYDDEVDETREVTTTKASHSKTKELYEKYMIADLGRGEFGIVHRCVETSSK  
 RTFMAKFKVKGTDQVLVKEISILNIARHRNIIYLHESFESMEELVMIFFEFISGLDIFERINTSAFELNERE  
 IVSYVRQVCEALEFLHSQNIHFDIRPENIIYQTRKNSTIKIIEFGQARQLKPGDNFRLLFTAPEYYAPEVHQ  
 HDVVSTATDMWSLGLTVLVLLSGINPFLAETNQMIENIMNAEYTFDEEAFKEISLEAMDFVDRLLVKERKSR  
 MTASEALQHPWLKQRIDRVSTKVIKIRLKHRRYYHTLIKKDLNMVSAARIISCGGAIRSQRGVSVAKVVASIE  
 IGPVSGQIMHAIGEEGGYVYVCKIENYDQSTQVTWYFGVRQLENSEKYEITYEDGVATMYVKDITKFDGTY  
 RCKVVNDYGEDSSYAEFLVKGVREVYDYCRRTKVKRRRTDAMLLERPEFTLPLYNKTAAYGENVRFVGTI  
 TVHPEPRVTWYKSGQIKIPGDDKTYTFESDKGLYQLTINSVTTDDDAEYTVVARNKHGEDSCKAKLTVTLHP  
 PPTETTLRPMFKRLLANAECHEGQSVCFEIRVSGIPAPTLKWEKDGQPLSLGPHIEIVHEGLDYALHIRDTL  
 PEDTGYRVTATNTAGSTSCQAHLQVERLRYVKQEFQSKKEERERHVQKQIDKTLRMAEILSGTETVPLTPVAQ  
 EALREAAIILYKPAVSTKTKVGEYRLQTEEKKEERKLRMPYEVPEPRRFKQATVEEDQRIKQFVPMMDMKWYK  
 IRDQYEMPGKLDREVQKRPKRIRLSRWEQFYVMPLPRITDQYRKPWRIPKLTQDDLEMVRPARRRTPSPDYDL  
 YYYRRRRRSLGDMDEELLPIIDDYLAMKRTEEERLRLEEELELGFSAFPSRSPRPFELSLRYSSPPAHVK  
 VEDRRDRFRYSTYHVPTKEETSTSYAELRERHAQASYRQPKLRQIRMAEKEEEELLRPVTTTQRLSEYKSELD  
 YMSKEEKSKKSKRQVTEITEIEEYIEISRAAQRESSSVSRLLRRRRRSLSPTYIELMRPVSELIRSHPRP  
 AEEYEDDAERRSPTPERTRPRSPSPVSSERSLSRFERSARFDIFSRYESMKAALKTKQTSERKYEVLSSQQPFT  
 LDHAPRITLRRMRSHRVPCCQNTRFILNVQSKPTAEVKWYHNGVELQESSKIHNTNTSGVLTLEILDQCQTEDGG  
 TYRAVCTNYKGEASDYATLDVTGGAYTTYASQRRDEEVKSVFPELTKTEAYAVSSFKRTSELEAASSVREVK  
 SQMTEETRESLSTYEHYASAEMKSATSEEKSLEEKATVRKIKTTLAARILTKPRSITVHEGESARFSCDTDGE  
 VPTVTLWREGQVSTARSHQVTTTKYKSTFEISSVQASDEGNYSVVENSDDGKQEAQFTTLTVQKARVIEKAVT  
 SPPRVKSPPEPRVKSPEVTKSPKRVKSPPEVTSHPKAVSPTETKPTKEGQHLVPSAPPKITQSLKAEASKDIAK  
 LTCAVESSALCAKEVAWYKDGKLLKENGHFQFHYSADGTYELKIHNLSESDCGEYVCEVSGEGGTSKTSFQFT  
 GQSFKSIHEQVSSISETTKSVQKTAESAIAEKQEPPIAPESISSKPVIVTGLRDTTVSSDSVAKFTIKVTGEPQ  
 PTLTWTGDKAIAQEGSKYKLSNKEEFLEILKTEITSDGGLYACTVTVNSAGSVSSSCKLTIKAVKDEAQKVS  
 TQKTSEVTSQKASAEQEEISQKALTSEEIKMSEVKSSETLAIKEEASKVLIAAEVKRSAAASLEKSVHHEEVT  
 KTSQASEEVKTHAEIKTLSTQMNITKQQRATLKANIAGATDVKWLNGTELPNSEEYRYGVSGSDQTLTIKQA  
 SHREEGILSCIGKTSQGVKQFDLTLSEELSDAPSFITQPRSQNINEGQNVLFSCVSGEPSPEIEWFKNL  
 PISISSNISVSRSRNVYTLIRNAAVSDSGKYTIKAKNFHGQCSATASLTVLPLVEPPREVVLKTSDDVSLH  
 GSVSSQSVQMSASKQEAFFSSSSASSMTEMKFASMSAQSMSMQESFVEMSSSSFMGKSSMTQLESSTSR  
 MLKAGGRGIPPKIEALPSDISIDEGKVLTVACAFTEPTPEITWSSCGGRKIQNQEQGRFHIENTDDLTTLII  
 MDVQKQDGGLYTLTLGNEFGSDSATVNINIRSM\*  
 >rs218903976\_ENSMUSP00000150405\_c.751:T>C\_p.L251P  
 ENSMUST00000215548.3|01fr1002-202|ENSMUSG00000075214|-  
 |chr2:g.85477912:A>G  
 MMHRNQTVVTEFFFTGLTSSFHLQIVLFLTFLCVYLATLLGNLGMIIILIHQDTRLHIPMYFFLSHLSFVDACS  
 SSVISPKMLSDIFVDKVISFLGCAIQFCLFSQFVVTECFLLASMAVDYVAICKPLLYTLIMSQRVCVQLVI  
 GPYSIGLISTVVHTTSAFILPYCGPNLINHFFCDLLPVLSLACADTQMNKHLIFIMAGILGVFSGIILVSYV  
 YIAITILKINSADGRRKAFSTCSHLTAVSIPYGTLLFFIYVRPSSSFLDINKVVSFLYTAVIMPLNPFIIYSL  
 RNKEVKDALIRTFEKKFCYSLQDKIL\*  
 >rs218903976\_ENSMUSP00000097504\_c.751:T>C\_p.L251P  
 ENSMUST00000099920.2|01fr1002-201|ENSMUSG00000075214|-  
 |chr2:g.85477912:A>G  
 MMHRNQTVVTEFFFTGLTSSFHLQIVLFLTFLCVYLATLLGNLGMIIILIHQDTRLHIPMYFFLSHLSFVDACS  
 SSVISPKMLSDIFVDKVISFLGCAIQFCLFSQFVVTECFLLASMAVDYVAICKPLLYTLIMSQRVCVQLVI  
 GPYSIGLISTVVHTTSAFILPYCGPNLINHFFCDLLPVLSLACADTQMNKHLIFIMAGILGVFSGIILVSYV

YIAITILKINSADGRRKAFSTCSSHLTAVSIPYGTLLFFIYVRPSSSFSLDINKVVSLFYTAVIPMLNPFIIYSL  
RNKEVKDALIRTFEKKFCYSLQDKIL\*  
>ENSMUSP00000150405\_c.282:CT>AA\_p.L95N ENSMUST00000215548.3|Olfr1002-  
202|ENSMUSG00000075214|-|chr2:g.85478381:AG>TT  
MMHRNQTVVTEFFFTGLTSSFHLQIVLFLFTFLCVYLATLLGNLGMILIIHQDTRLHIPMYFFLSHLSFVDACS  
SSVISPKMLSDIFVDKKVISFNRLCYPVLFIQPVCSDRMFPPGLHGL\*\*ICCHL\*AFAVYSHHVPASLCTVSD  
WPLQHRPYKHCOPYFYFCIYSSILWSKSHQSLFL\*PSSCPLTGMCRYSD\*TFAFHHGWDPRCIQWYNHIGVLC  
LHCHHHPKDQFC\*WEAQSLHLLFTPDSSLSLDRSLLYLCTSKLQLLSGYQ\*SCVTILHCCNPYVEPIHL\*L  
EK\*GSQRCINQDI\*KEVLLQLAR\*NII  
>ENSMUSP00000097504\_c.282:CT>AA\_p.L95N ENSMUST00000099920.2|Olfr1002-  
201|ENSMUSG00000075214|-|chr2:g.85478381:AG>TT  
MMHRNQTVVTEFFFTGLTSSFHLQIVLFLFTFLCVYLATLLGNLGMILIIHQDTRLHIPMYFFLSHLSFVDACS  
SSVISPKMLSDIFVDKKVISFNRLCYPVLFIQPVCSDRMFPPGLHGL\*\*ICCHL\*AFAVYSHHVPASLCTVSD  
WPLQHRPYKHCOPYFYFCIYSSILWSKSHQSLFL\*PSSCPLTGMCRYSD\*TFAFHHGWDPRCIQWYNHIGVLC  
LHCHHHPKDQFC\*WEAQSLHLLFTPDSSLSLDRSLLYLCTSKLQLLSGYQ\*SCVTILHCCNPYVEPIHL\*L  
EK\*GSQRCINQDI\*KEVLLQLAR\*NII  
>ENSMUSP00000150405\_c.52:C>T\_p.T18I ENSMUST00000215548.3|Olfr1002-  
202|ENSMUSG00000075214|-|chr2:g.85478611:G>A  
MMHRNQTVVTEFFFTGLISSFHLQIVLFLFTFLCVYLATLLGNLGMILIIHQDTRLHIPMYFFLSHLSFVDACS  
SSVISPKMLSDIFVDKKVISFLGCAIQFCLFSQFVVTECFLLASMAYDRYVAICKPLLYTLIMSQRVCVQLVI  
GPYSIGLISTVVHTTSAFILPYCGPNLINHFFCDLLPVLSLACADTQMKNHLLFIMAGILGVFSGIILVSYV  
YIAITILKINSADGRRKAFSTCSSHLTAVSILYGTLLFFIYVRPSSSFSLDINKVVSLFYTAVIPMLNPFIIYSL  
RNKEVKDALIRTFEKKFCYSLQDKIL\*  
>ENSMUSP00000097504\_c.52:C>T\_p.T18I ENSMUST00000099920.2|Olfr1002-  
201|ENSMUSG00000075214|-|chr2:g.85478611:G>A  
MMHRNQTVVTEFFFTGLISSFHLQIVLFLFTFLCVYLATLLGNLGMILIIHQDTRLHIPMYFFLSHLSFVDACS  
SSVISPKMLSDIFVDKKVISFLGCAIQFCLFSQFVVTECFLLASMAYDRYVAICKPLLYTLIMSQRVCVQLVI  
GPYSIGLISTVVHTTSAFILPYCGPNLINHFFCDLLPVLSLACADTQMKNHLLFIMAGILGVFSGIILVSYV  
YIAITILKINSADGRRKAFSTCSSHLTAVSILYGTLLFFIYVRPSSSFSLDINKVVSLFYTAVIPMLNPFIIYSL  
RNKEVKDALIRTFEKKFCYSLQDKIL\*  
>ENSMUSP00000149830\_c.474:C>A\_p.Q159K ENSMUST00000216566.3|Olfr1039-  
203|ENSMUSG00000075204|-|chr2:g.85961531:G>T  
MAEGNSSTVFQFILEGLTDDPELEVTLFAVFLVIYLTTLVGNLGLIMLIQVSPQLHTPMYFFLCHLAFVDFCY  
TSSVTPNTIINFLREIKSITFYACATQVCCFITFAVCEMYLLSVMAYDRYVAIWNPLLYVVLMPKKLCLQVIT  
STYIYGFTVGLAKAVATFRLSFCGSNVINHFYCDVPLVALACSDTHVKELMLLIIAGFNLTCLSLVIVVISYI  
CILFAILRIHSAEGRRKAFSTCASHLTSITIFYGTIIFMYLQPKSSHSLNTDKFVSVFYVYVVI PMLNPLIYSL  
RNKEVKNALKRFTEKLSLTIHDSRKSE\*  
>ENSMUSP00000150584\_c.474:C>A\_p.Q159K ENSMUST00000214364.2|Olfr1039-  
202|ENSMUSG00000075204|-|chr2:g.85961531:G>T  
MAEGNSSTVFQFILEGLTDDPELEVTLFAVFLVIYLTTLVGNLGLIMLIQVSPQLHTPMYFFLCHLAFVDFCY  
TSSVTPNTIINFLREIKSITFYACATQVCCFITFAVCEMYLLSVMAYDRYVAIWNPLLYVVLMPKKLCLQVIT  
STYIYGFTVGLAKAVATFRLSFCGSNVINHFYCDVPLVALACSDTHVKELMLLIIAGFNLTCLSLVIVVISYI  
CILFAILRIHSAEGRRKAFSTCASHLTSITIFYGTIIFMYLQPKSSHSLNTDKFVSVFYVYVVI PMLNPLIYSL  
RNKEVKNALKRFTEKLSLTIHDSRKSE\*  
>ENSMUSP00000097494\_c.474:C>A\_p.Q159K ENSMUST00000099910.2|Olfr1039-  
201|ENSMUSG00000075204|-|chr2:g.85961531:G>T  
MAEGNSSTVFQFILEGLTDDPELEVTLFAVFLVIYLTTLVGNLGLIMLIQVSPQLHTPMYFFLCHLAFVDFCY  
TSSVTPNTIINFLREIKSITFYACATQVCCFITFAVCEMYLLSVMAYDRYVAIWNPLLYVVLMPKKLCLQVIT  
STYIYGFTVGLAKAVATFRLSFCGSNVINHFYCDVPLVALACSDTHVKELMLLIIAGFNLTCLSLVIVVISYI  
CILFAILRIHSAEGRRKAFSTCASHLTSITIFYGTIIFMYLQPKSSHSLNTDKFVSVFYVYVVI PMLNPLIYSL  
RNKEVKNALKRFTEKLSLTIHDSRKSE\*  
>ENSMUSP00000149099\_c.118:C>G\_p.T40R ENSMUST00000217575.3|Olfr1166-  
202|ENSMUSG00000101078|-|chr2:g.87955209:G>C  
MAYEVMNQTSATTFILVGFSEYPQLQKPLFLFLAIYSVRLVGNLGLIVVIVKVNPKLHTPMYFFLSHLSFLDI  
CYSSVFTPKLLQILIMEDRTVSPKACMVQFFICTFVITEMFMLAVMAYDRFVAVCNPLLYTVVMPFQFCALL  
VAGTYMIGGLCTVILLYTLLQLSYCEYGIINHFGCEYSAVISVSCSDSSFSQLTSLVIAIVSESSSVLITLAS  
YVFIIVVTI IKMPSKGLRKAFSTCTSHLTAISIFHGIILLLYCVPNSNSRFLVVKVATALYTITIMIPMLNPLIY  
SLRNKDVKDTVRRLLISSKLHSHLT\*



>ENSMUSP00000097421\_c.118:C>G\_p.T40R ENSMUST00000099833.6|Olfr1166-201|ENSMUSG000000101078|-|chr2:g.87955209:G>C  
MAYEVMNQTSATTFILVGFSEYPQLQKPLFLLFLAIYSVRLVGNLILVVIKVNPKLHTPMYFFLSHLSFLDI  
CYSSVFTPKLLQILIMEDRTVSFKACMVQFFFICTFVITEMFMLAVMAYDRFVAVCNPLLYTVVMPFQFCALL  
VAGTYMIGGLCTVILLYTLLQLSYCEYGIINHFGEYSAVISVSCSDSSFSQLTSLVIAIVSESSVLITLAS  
YVFIVVTIIKMPKSGGLRKAFTSTCTSHLTAISIFHGIILLLYCVPNSNSRFLVFKVATALYTITIMPLNPLIY  
SLRNKDVKDTVRRLISSKLHSHLT\*

>ENSMUSP00000149507\_c.520:A>C\_p.H174P ENSMUST00000216587.2|Olfr1254-203|ENSMUSG00000075074|-|chr2:g.89619174:T>G  
MGKNNNVTEFILLGLTQDPVGQKALFVLFLLMYIVTMAGNLIIVVTIIASPSLSSPMYFFLAYLSLMDAIYST  
AISPKLIMDLLCNKKTISFRACMGQLFVEHLFGATEIFLLVAMAYDRYVAICKPLHYLTIMNHRVCILLVMAT  
WVGGAHSMQVLFVYDLPFCGPNVIDPFACDMYPLLVLVCSPTYFLGLTVIANDGAICMVVFIILLASYGII  
LNSLKTSHSQEGRKALSTCSSHIMVVILFFVPCIFMYVRPVSNEFPVDSVTIFYTVVTPMLNPLIYTLRNSEI  
KHSMLKLWSKILHSDRLRKSCC\*

>ENSMUSP00000107148\_c.520:A>C\_p.H174P ENSMUST00000111523.3|Olfr1254-202|ENSMUSG00000075074|-|chr2:g.89619174:T>G  
MGKNNNVTEFILLGLTQDPVGQKALFVLFLLMYIVTMAGNLIIVVTIIASPSLSSPMYFFLAYLSLMDAIYST  
AISPKLIMDLLCNKKTISFRACMGQLFVEHLFGATEIFLLVAMAYDRYVAICKPLHYLTIMNHRVCILLVMAT  
WVGGAHSMQVLFVYDLPFCGPNVIDPFACDMYPLLVLVCSPTYFLGLTVIANDGAICMVVFIILLASYGII  
LNSLKTSHSQEGRKALSTCSSHIMVVILFFVPCIFMYVRPVSNEFPVDSVTIFYTVVTPMLNPLIYTLRNSEI  
KHSMLKLWSKILHSDRLRKSCC\*

>ENSMUSP00000097352\_c.520:A>C\_p.H174P ENSMUST00000099764.2|Olfr1254-201|ENSMUSG00000075074|-|chr2:g.89619174:T>G  
MGKNNNVTEFILLGLTQDPVGQKALFVLFLLMYIVTMAGNLIIVVTIIASPSLSSPMYFFLAYLSLMDAIYST  
AISPKLIMDLLCNKKTISFRACMGQLFVEHLFGATEIFLLVAMAYDRYVAICKPLHYLTIMNHRVCILLVMAT  
WVGGAHSMQVLFVYDLPFCGPNVIDPFACDMYPLLVLVCSPTYFLGLTVIANDGAICMVVFIILLASYGII  
LNSLKTSHSQEGRKALSTCSSHIMVVILFFVPCIFMYVRPVSNEFPVDSVTIFYTVVTPMLNPLIYTLRNSEI  
KHSMLKLWSKILHSDRLRKSCC\*

>ENSMUSP00000149507\_c.234:T>G\_p.L79V ENSMUST00000216587.2|Olfr1254-203|ENSMUSG00000075074|-|chr2:g.89619460:A>C  
MGKNNNVTEFILLGLTQDPVGQKALFVLFLLMYIVTMAGNLIIVVTIIASPSLSSPMYFFLAYLSLMDAIYST  
AISPKVIMDLLCNKKTISFRACMGQLFVEHLFGATEIFLLVAMAYDRYVAICKPLHYLTIMNHRVCILLVMAT  
WVGGAHSMQVLFVYDLPFCGPNVIDHDFACDMYPLLVLVCSPTYFLGLTVIANDGAICMVVFIILLASYGII  
LNSLKTSHSQEGRKALSTCSSHIMVVILFFVPCIFMYVRPVSNEFPVDSVTIFYTVVTPMLNPLIYTLRNSEI  
KHSMLKLWSKILHSDRLRKSCC\*

>ENSMUSP00000107148\_c.234:T>G\_p.L79V ENSMUST00000111523.3|Olfr1254-202|ENSMUSG00000075074|-|chr2:g.89619460:A>C  
MGKNNNVTEFILLGLTQDPVGQKALFVLFLLMYIVTMAGNLIIVVTIIASPSLSSPMYFFLAYLSLMDAIYST  
AISPKVIMDLLCNKKTISFRACMGQLFVEHLFGATEIFLLVAMAYDRYVAICKPLHYLTIMNHRVCILLVMAT  
WVGGAHSMQVLFVYDLPFCGPNVIDHDFACDMYPLLVLVCSPTYFLGLTVIANDGAICMVVFIILLASYGII  
LNSLKTSHSQEGRKALSTCSSHIMVVILFFVPCIFMYVRPVSNEFPVDSVTIFYTVVTPMLNPLIYTLRNSEI  
KHSMLKLWSKILHSDRLRKSCC\*

>ENSMUSP00000097352\_c.234:T>G\_p.L79V ENSMUST00000099764.2|Olfr1254-201|ENSMUSG00000075074|-|chr2:g.89619460:A>C  
MGKNNNVTEFILLGLTQDPVGQKALFVLFLLMYIVTMAGNLIIVVTIIASPSLSSPMYFFLAYLSLMDAIYST  
AISPKVIMDLLCNKKTISFRACMGQLFVEHLFGATEIFLLVAMAYDRYVAICKPLHYLTIMNHRVCILLVMAT  
WVGGAHSMQVLFVYDLPFCGPNVIDHDFACDMYPLLVLVCSPTYFLGLTVIANDGAICMVVFIILLASYGII  
LNSLKTSHSQEGRKALSTCSSHIMVVILFFVPCIFMYVRPVSNEFPVDSVTIFYTVVTPMLNPLIYTLRNSEI  
KHSMLKLWSKILHSDRLRKSCC\*

>ENSMUSP00000028672\_c.345:A>G\_p.T116A ENSMUST00000028672.13|Mdk-201|ENSMUSG00000027239|-|chr2:g.91761214:T>C  
MQHRGFLLALLALLVVTSAVAKKKEKVKKGSECSEWTWGPCTPSSKDCGMGFREGTCGAQTQRVHCKVPCNW  
KKEFGADCKYKFESWGACDGSSTGKARQGTLLKARYNAQCQEAIRVTKPCTSKTKSKTKAKKGGKGD\*

>ENSMUSP00000068413\_c.345:A>G\_p.T116A ENSMUST00000069423.13|Mdk-202|ENSMUSG00000027239|-|chr2:g.91761214:T>C  
MQHRGFLLALLALLVVTSAVAKKKEKVKKGSECSEWTWGPCTPSSKDCGMGFREGTCGAQTQRVHCKVPCNW  
KKEFGADCKYKFESWGACDGSSTGKARQGTLLKARYNAQCQEAIRVTKPCTSKTKSKTKAKKGGKGD\*

>ENSMUSP00000088090\_c.345:A>G\_p.T116A ENSMUST00000090602.6|Mdk-203|ENSMUSG00000027239|-|chr2:g.91761214:T>C  
MQHRGFFLLALLLVVTSAVAKKKEKVKKGSECESEWTWGPCTPSSKDCGMGFREGTTCGAQTQRVHCKVPCNW  
KKEFGADCKYKFESWGACDGTGTRKARQGTLLKARYNAQCQEAI RVTKPCTSKTKSKTKAKKKGKGD\*  
>ENSMUSP00000106941\_c.345:A>G\_p.T116A ENSMUST00000111309.8|Mdk-204|ENSMUSG00000027239|-|chr2:g.91761214:T>C  
MQHRGFFLLALLLVVTSAVAKKKEKVKKGSECESEWTWGPCTPSSKDCGMGFREGTTCGAQTQRVHCKVPCNW  
KKEFGADCKYKFESWGACDGTGTRKARQGTLLKARYNAQCQEAI RVTKPCTSKTKSKTKAKKKGKGD\*  
>ENSMUSP00000028612\_c.326:G>T\_p.K109N ENSMUST00000028612.8|Pamr1-201|ENSMUSG00000027188|+|chr2:g.102417016:G>T  
MELDRWAQLGLVFLQLLLISLSPREYTVINEACPGAENWIMCRECCEYDQIECLCPGKKEVGYTIPCCRNED  
NECDSCLIHPGCTIFENCKSCRNGSWGGLDDFYVNGFYCAECRAGWYGGDCMRCGQVLRASKGQILLESYPL  
NAHCEWTIHARPGFIIQLRFGLSLEFDYMCQYDYVEVRDGDNSDSPIIKRFCGNERPAPIRSTGSSLHVLFH  
SDGSKNFDGFHAVFEEITACSSSPCFHDGTCLLDTTGSFKACLAGYTGQRCEENLLEERNCSDLGGPVNGYKK  
ITEGPGLLNERHVKIGTVVVSFFCNGSYVLSGNEKRTCQQNGEWSGKQPVCMKACREPKISDLVRRRVLSMQVQ  
SRETPLHLQLYSTAFSKQKLDASTKKPALPFGDLPPGYQHLHTQVQYECISPFYRRLGSSRRCTCLRTGKWSGR  
APSCIPICGKIESTPSPKTQGRTRWPQAAIYRRTSGVHDGGLHKGAWFLVCSGALVNERTVVAACHCVTELGK  
ATIIKTADLKVVVLGKFYRDDDRDEKSIQNLRVSAIILHPNYDPIILLDTDIAVLKLLDKARIVSTVQVPICLATT  
RDLSTSFQESHITVAGWNILADVRSFGFKNDTLHYGMVRVVDPLMCEEQHEDHGIPVSVTDNMFCAKDPSTP  
SDICTAETGGIAALSFPGRASPEPRWHLVGLVSWSYDKTCSNGLSTAFTKVLFPKDWIERNMK\*  
>ENSMUSP00000155023\_c.262:C>T\_p.T88I ENSMUST00000136156.9|D430041D05Rik-202|ENSMUSG00000068373|-|chr2:g.104088826:G>A  
MALQEAKPQGPSEAEPAAREPRDRLREQGLCGAGGIAARCGVRSSEARRSEDVLLRRPLLLGLLLLAALS  
CWADSGTDNLQIHVPTSESPFLGKLLPISPTWPFLEVKSSSAADRFRKNVVGQPPDNTLLKLSQTPLPKAHR  
RTRAHVDFSSSPYQGSGHASLDLAKDPTETLVQTRPEGGREAADMSVETSVSSKGEALSATAAATATTLFLR  
RSSPAPLSAALTAKGTGSSSSNLAKSSLTTALAKNVTNKAASGPKVTAAGTIHTAFPFPTPTMYLARTAHLSLSTH  
TAMQGATGSSVGLLSTHLPKPKQAMHTGLPNPTRPDTPRASTPRPLTITAALTSMTASVKATRLPSLQTGNT  
DAAFPVAVSTAMATTGRMASNLDCQMSHKFLVKTVFVFLTQRRIQSSESLKLGVTGKLTQALRKAHFQNDVSAHV  
DILEYSHNVTVGYYATKGRVLYLPAVVMVLDVGVYGVSNVTADLKQHTPNLQSVAVLASPWKPPAGAFQKLT  
LQFVVSQSDNIQSCRFAQTMEQRLQKAFQDAERKVLSTRSNLTVQIVSTSNASQAVTLVYAVGNQSSFLNGTVA  
SSLLSLSAELVGFYLYPPLTIAEPLIYPNLDTSETTRDYWVITVLQGVNLSLVGLHNQSFARVMEQRLAQL  
FMMSQQQGRFRKRAATLGSYTVQVMKQRPVGPDPKPAELTYTYLYNGKPLLGTAAAKILSTIDSQRMALTLHH  
VVLLQADPVVKNPPNNLWIIAAVLAPIAVVTIIIIITAVLRCRKNKDFKPDPTMINLPQRAKPVQGFYAKQH  
LGQQGADEEVIPTVQETVVLPIPVVDRTPQERDQAQDGSIAIKTAKSTETRRSRSPSENGSVISNESGKPSGR  
SPQNGMTQQKVTKEESRKRNVASDEEEGAGLFDSAGKAAADPFDTSAGSVQLIAIKPSALPVVHPASDRGQES  
SSAALNGEVNKALKQKSDIEHYRNKLRKAKRKYDFPPVEAGKGLAERKMYEKAPKEVEHVLADPELFCAP  
FAESKNRQOMKNSVYRSRQSLNSPSPGETEMDLLVTRERPRRGRIRNSGYDTEPEIEETNVDRVHEPRGYGRA  
RQAKGHSETSTLSSQPSIDEVRQMMHMLLEAFSLASAGHAGQSRHQETYGSTQHLPHYSEVVTAPGTMTRPR  
AGVQVWPVTPYRPEMYQYSLPRPAYRFSQLPEMVMGSPPPPVPRTGPVAVASLRRSTSDIGSKTRMAESTGPEP  
TQLHDSASFAQVSRGPVSVTQLDQASALNYSNTVPAVFAIPAANRPGFTGYFIPTPPSSYSRQAWMSYAGENE  
LPSQWADSVPLPGYIEAYPRSRYQQSSPSRLPRQYSQPANLHPSLEQAPVPSAAASQQSLTENEPDPTPLTNI  
STAALVKAIREEVAKLAKKQTDMEFQV\*  
>ENSMUSP00000106756\_c.262:C>T\_p.T88I ENSMUST00000089726.10|D430041D05Rik-201|ENSMUSG00000068373|-|chr2:g.104088826:G>A  
MALQEAKPQGPSEAEPAAREPRDRLREQGLCGAGGIAARCGVRSSEARRSEDVLLRRPLLLGLLLLAALS  
CWADSGTDNLQIHVPTSESPFLGKLLPISPTWPFLEVKSSSAADRFRKNVVGQPPDNTLLKLSQTPLPKAHR  
RTRAHVDFSSSPYQGSGHASLDLAKDPTETLVQTRPEGGREAADMSVETSVSSKGEALSATAAATATTLFLR  
RSSPAPLSAALTAKGTGSSSSNLAKSSLTTALAKNVTNKAASGPKVTAAGTIHTAFPFPTPTMYLARTAHLSLSTH  
TAMQGATGSSVGLLSTHLPKPKQAMHTGLPNPTRPDTPRASTPRPLTITAALTSMTASVKATRLPSLQTGNT  
DAAFPVAVSTAMATTGRMASNLDCQMSHKFLVKTVFVFLTQRRIQSSESLKLGVTGKLTQALRKAHFQNDVSAHV  
DILEYSHNVTVGYYATKGRVLYLPAVVMVLDVGVYGVSNVTADLKQHTPNLQSVAVLASPWKPPAGAFQKLT  
LQFVVSQSDNIQSCRFAQTMEQRLQKAFQDAERKVLSTRSNLTVQIVSTSNASQAVTLVYAVGNQSSFLNGTVA  
SSLLSLSAELVGFYLYPPLTIAEPLIYPNLDTSETTRDYWVITVLQGVNLSLVGLHNQSFARVMEQRLAQL  
FMMSQQQGRFRKRAATLGSYTVQVMKQRPVGPDPKPAELTYTYLYNGKPLLGTAAAKILSTIDSQRMALTLHH  
VVLLQADPVVKNPPNNLWIIAAVLAPIAVVTIIIIITAVLRCRKNKDFKPDPTMINLPQRAKPVQGFYAKQH  
LGQQGADEEVIPTVQETVVLPIPVVDRTPQERDQAQDGSIAIKTAKSTETRRSRSPSENGSVISNESGKPSGR  
PQNGMTQQKVTKEESRKRNVASDEEEGAGLFDSAGKAAADPFDTSAGSVQLIAIKPSALPVVHPASDRGQES  
SAALNGEVNKALKQKSDIEHYRNKLRKAKRKYDFPPVEAGKGLAERKMYEKAPKEVEHVLADPELFCAPF

AESKNRQQMKNSVYRSRQSLNSPSPGETEMDLLVTRERPRRGIRNSGYDTEPEIIEETNVDRVHEPRGYGRAR QAKGHSETSTLSSQPSIDEVRQQMHMLLEEAFSLASAGHAGQSRHQETYGSTQHLPHYSEVVTSAAGTMRPRA GVQWVPTYPREMYQYSLPRPAYRFSQLPEMVMGSPPPPVPPTGPGVAVASLRRSTSDIGSKTRMAESTGPEPT QLHDSASFAQVSRGVPVSVTQLDQASALNYSNGTVPVAVFAIPAAANRPGFTGYFIPTPPSSYRSQAWMSYAGENEL PSQWADSVPLPGYIEAYPRSRYYQQSSPSRLPRQYSQPANLHPSLEQAPVPSAAASQQSLTENEPDPTPLTNIS TAALVKAIREEVAKLAKKQTDMEFFQV\*

>ENSMUSP00000155485\_c.148:C>T\_p.T50I ENSMUST00000230671.2|D430041D05Rik-207|ENSMUSG00000068373|-|chr2:g.104088826:G>A

MCCCGRCCWDSCCWLPSPGTAGTPCILIPLHMLMWSFTGTDLNLQIHVIPTSESFPLGKLLPISPTWPFLEV KSSSAADRFRKENVLGGPPDNTLLKLSQTPLPKAHRRTTRAHVDFSSSPYQSGHSASLDLAKDPTETLVQTRPE GGREAADMSGLPRTSMLPPLTAPSATSSAVSPSQPLVGMFPLSKHPLRSDSLLPPSSSSSLAPDSPHSIP TPKPVQHPHTKVLFPQMTPADFSSGQSPVNVNLPFFHKTNLFPSTRDAQTLIGTPRLDFSTSSTKQYSEPSLSE SPRPAASPTPGVLSIAEQDHLSPSLAPGGLPGVTSSRSMWEEALSPVSTQPFRTSGPVRGRGAESLPIYLR TLAASYGAWAPRFQTAESVMTSRELAPVPPTNSFANWPHLSEVPESSRKPTLSPENKPSLVPFPQPLTTLTSLQ GQMVHPEAAPGSPKGTGTPLSLLTVRQPNKDHASAPVPEAPLSREGAHDEYLPDAATQLLSSKLPNPPPTI WTFPQQKEDRAAAI FWTNEKANGTTS LWALPTKEAPSRRAVGTSTDFNTGRLSPLIMTALRDTLSPGSPPS SALTTOAASPRSSGKLES LAAVTSQSEL PASASKQVTELPSTDVHGLPTMGGTRKPAATDFWFSFLSAETA SLATQSGISGSQQQTNHDVNTHTINSTHRELRPASVALPGGTTSAANALQSRNFKEIAGQLVAADSFNFQDPV LSPRTSQPLQPSEEAUVESHDTDFPPTGKHARDFDTEMVHYSSSTSQNPMSQLPIRPAHPFWPTWPSLASAASL HQMLSDGTDAGSHISSDIYLSPGENGSPQFQSVLEYHSSTASPSVPTGAFSRTPSKVLRTSRRPKKWTGAATH TVETSVSSKGELSATAAATATTTFLRRSSPAPLSAALTAKGTGSSSNLAKSSLTALAKNVTNKAASGPKV TAGTIHTAFPFPTPTMYLARTAHLSHTAMQGATGVSGLLSTTHLPKKPQAMHTGLPNPTRPDTPRASTPRP LTIITAALTSMASVKATRLPSLQGTGNTDAAFPAVSTAMATTGRMASNLDCQMSHKFLVKTVFFLTQRRIQSSE SLKLGVTGKLTQALRKAHFQNDVSAHVDI LEYSHNVTVGYATKGRLLVLPVAVMDVLGVYGVSNVTADLKQH TPNLQSVAVLASPWKQPAGAFQKTVLQFVVSQSDNIQSCRFAQTMEQRLQKAFQDAERKVLSTRSNLTVQIV STSNASQAVTLVYAVGNQSSFLNGTVASSLLSQLSAELVGFYLYTYPPLTIAEPLYENLDTSETTRDYWVITV LQGVDNSLVGLHNQSFARVMEQRLAQLFMMSQQGRRFRKRATTLGSYTVQMVKMQRVPGPKDPAELTYTYTLN GKPLLGTAALKILSTIDSQRMALTLHHVVLLQADPVVKNPPNNLWI IAAVLAPIAVVTIIIIITAVLCRKNK NDFKPDPTMINLPQRAKPVQGFYAKQHLGQQGADEEVIPTVQETVVLPIVPRDTPQERDTAQDGSIAIKTAKST ETRRSRSPSENGSVISNESGKPSGRRSPQNGMTQKQVTKESRKRNVTVASDEEEGAGLFDSDAGKAAADPFDT SSGSVQLIAIKPSALPVVHPASDRGQESSAALNGEVNKALKQKSDIEHYRNKLRLLKAKRKGYYDFPPVEAGKG LAERKMYEKAPKEVEHVLADPELCAFPFAESKNRQQMKNSVYRSRQSLNSPSPGETEMDLLVTRERPRRGIRN SGYDTEPEIIEETNVDRVHEPRGYGRARQAKGHSETSTLSSQPSIDEVRQQMHMLLEEAFSLASAGHAGQSRH QETYGSTQHLPHYSEVVTSAAGTMRPRAVQWVPTYPREMYQYSLPRPAYRFSQLPEMVMGSPPPPVPPTGPG VAVASLRRSTSDIGSKTRMAESTGPEPTQLHDSASFAQVSRGVPVSVTQLDQASALNYSNGTVPVAVFAIPAAANR PFTGYFIPTPPSSYRSQAWMSYAGENELPSQWADSVPLPGYIEAYPRSRYYQQSSPSRLPRQYSQPANLHPSLE QAPVPSAAASQQSLTENEPDPTPLTNISTAALVKAIREEVAKLAKKQTDMEFFQV\*

>ENSMUSP00000150073\_c.843:A>G\_p.M282V ENSMUST00000214801.3|Olfr1317-203|ENSMUSG00000050776|+|chr2:g.111973135:A>G

MDGGNHSVVSEFLLLGLTNSWRIQILLFLFFTVFYVASMLGNLLIVLTIISDHHLHSPMYFLLANLSFIDTGV SSIATPKMIYDLFRKHKVISLNGCITQMFFIHTVGGTEMVLLIVMAYDRYIAICKPLHYLTIMSLRMCIVLLA LAWIIGLIHVAQLAFVNLFPFCGANKMDSFYCDFPRFIKLACTDTYRLEFLVTANSGFISMATFFILIVSYI FILVTVRKHSSGASSKALSTLSAHTVVVFFFGPCIIIVYVWPFPTLPIDKFLAIFDAIITPSVNPVIYTLRKN EMKVAMRRLFARALSFIDSLRDSN\*

>ENSMUSP00000149091\_c.843:A>G\_p.M282V ENSMUST00000216988.2|Olfr1317-204|ENSMUSG00000050776|+|chr2:g.111973135:A>G

MDGGNHSVVSEFLLLGLTNSWRIQILLFLFFTVFYVASMLGNLLIVLTIISDHHLHSPMYFLLANLSFIDTGV SSIATPKMIYDLFRKHKVISLNGCITQMFFIHTVGGTEMVLLIVMAYDRYIAICKPLHYLTIMSLRMCIVLLA LAWIIGLIHVAQLAFVNLFPFCGANKMDSFYCDFPRFIKLACTDTYRLEFLVTANSGFISMATFFILIVSYI FILVTVRKHSSGASSKALSTLSAHTVVVFFFGPCIIIVYVWPFPTLPIDKFLAIFDAIITPSVNPVIYTLRKN EMKVAMRRLFARALSFIDSLRDSN\*

>ENSMUSP00000058587\_c.843:A>G\_p.M282V ENSMUST00000060098.2|Olfr1317-201|ENSMUSG00000050776|+|chr2:g.111973135:A>G

MDGGNHSVVSEFLLLGLTNSWRIQILLFLFFTVFYVASMLGNLLIVLTIISDHHLHSPMYFLLANLSFIDTGV SSIATPKMIYDLFRKHKVISLNGCITQMFFIHTVGGTEMVLLIVMAYDRYIAICKPLHYLTIMSLRMCIVLLA LAWIIGLIHVAQLAFVNLFPFCGANKMDSFYCDFPRFIKLACTDTYRLEFLVTANSGFISMATFFILIVSYI FILVTVRKHSSGASSKALSTLSAHTVVVFFFGPCIIIVYVWPFPTLPIDKFLAIFDAIITPSVNPVIYTLRKN EMKVAMRRLFARALSFIDSLRDSN\*

>ENSMUSP00000106076\_c.114:A>C\_p.I39L ENSMUST00000110446.9|Fam227b-201|ENSMUSG00000027209|-|chr2:g.125968958:T>G  
MELPVPQKLPDPPRSFDEFKLSQNWDYWPRDVFHFRDSDLWEDTLKKLEEAI SYTSIYSYLWTVNPRLYDIVDS  
LESKLESSHLLQHHASRLFESDKMISKKRSYTNLERYKAFVKEHYRPPKIALSDRMETEKNI EGCTFLFNQN  
EVTQLPRHLDAKQIYLYVLKTHNFEEKVFKVWKT HVLSDCSIALHDSFWWWFLHKFKPKDRDEDFLFDRIAE  
SYVTLFIKIPLRKDAFFKMPDCLTQAVYTTTFQESFPESCSLFNDKFKEDLGNTIFLWLSGLKPE TGFWTHW  
KLQDLCTTTIHGSRVVPVKLRRSVIP SQEHIPGIRD LKIEDILKNPRAYAMPKLMKESVASKAATKPSHYRSL  
GPEFHKVLDFDFGGQSPLILYLYLKMHELGGISVTHNPKGTKFTKILREPS PAPT YCDIIRD AKRKFADNKKDFK  
RVKQRIKDDIKFLREQQELIDKELDRIQAKASKNLQEVKNEFENFLHKQRVEAKLKEEYGGSTSASESPQSMQ  
SPQSSSFPTISED FNNVEEG\*

>ENSMUSP00000136349\_c.114:A>C\_p.I39L ENSMUST00000178118.8|Fam227b-204|ENSMUSG00000027209|-|chr2:g.125968958:T>G  
MELPVPQKLPDPPRSFDEFKLSQNWDYWPRDVFHFRDSDLWEDTLKKLEEAI SYTSIYSYLWTVNPRLYDIVDS  
LESKLESSHLLQHHASRLFESDKMISKKRSYTNLERYKAFVKEHYRPPKIALSDRMETEKNI EGCTFLFNQN  
EVTQLPRHLDAKQIYLYVLKTHNFEEKVFKVWKT HVLSDCSIALHDSFWWWFLHKFKPKDRDEDFLFDRIAE  
SYVTLFIKIPLRKDAFFKMPDCLTQAVYTTTFQESFPESCSLFNDKFKEDLGNTIFLWLSGLKPE TGFWTHW  
KLQDLCTTTIHGSRVVPVKLRRSVIP SQEHIPGIRD LKIEDILKNPRAYAMPKLMKESVASKAATKPSHYRSL  
GPEFHKVLDFDFGGQSPLILYLYLKMHELGGISVTHNPKGTKFTKILREPS PAPT YCDIIRD AKRKFADNKKDFK  
RVKQRIKDDIKFLREQQELIDKELDRIQAKASKNLQEVKNEFENFLHKQRVEAKLKEEYGGSTSASESPQSMQ  
SPQSSSFPTISED FNNVEEG\*

>ENSMUSP00000106078\_c.114:A>C\_p.I39L ENSMUST00000110448.3|Fam227b-202|ENSMUSG00000027209|-|chr2:g.125968958:T>G  
MELPVPQKLPDPPRSFDEFKLSQNWDYWPRDVFHFRDSDLWEDTLKKLEEAI SYTSIYSYLWTVNPRLYDIVDS  
LESKLESSHLLQHHASRLFESDKMISKKRSYTNLERYKAFVKEHYRPPKIALSDRMETEKNI EGCTFLFNQN  
EVTQLPRHLDAKQIYLYVLKTHNFEEKVFKVWKT HVLSDCSIALHDSFWWWFLHKFKPKDRDEDFLFDRIAE  
SYVTLFIKIPLRKDAFFKMPDCLTQAVYTTTFQESFPESCSLFNDKFKEDLGNTIFLWLSGLKPE TGFWTHW  
KLQDLCTTTIHGSRVVPVKLRRSVIP SQEHIPGIRD LKIEDILKNPRAYAMPKLMKESVASKAATKPSHYRSL  
GPEFHKVLDFDFGGQSPLILYLYLKMHELGGISVTHNPKGTKFTKILREPS PAPT YCDIIRD AKRKFADNKKDFK  
RVKQRIKDDIKFLREQQELIDKELDRIQAKASKNLQEVKNEFENFLHKQRVEAKLKEEYGGSTSASESPQSMQ  
SPQSSSFPTISED FNNVEEG\*

>rs262016965\_ENSMUSP00000028897\_c.448:A>G\_p.D150G  
ENSMUST00000028897.8|Cp xm1-201|ENSMUSG00000027408|-|chr2:g.130237860:T>C  
MWGLLLAVTAFAPSVGLGLGAPSASVPG LAPGSTLAPHSSVAQPSTKANETSERHVRLRVIKKKKIVVKKRKK  
LRHPGPLGTARPVVPVTHPAKTLTLPEKQEPGCPPLGLES LRVS DSQLEASSSQS FGLGAHRGRNLNIQSGLEDG  
DLYGGAWCAEQDTEPWLQVDAKNPVRFAGIVTQGRNSVWR YD WVT SFKVQFSNDSQTWWKSRNSTGMDIVFP  
ANSDAETPVLNLLPEPQVARFIRLLLPQTWFGGAPCLRAEILACPVSDPNDFPEAHTLGSSNSLDFRHHNYK  
AMRKLKMQVNEQCPNITRIYSIGKSHQGLKLYVME MS DHPGEHELGEPEVRYVAGMHGNEALGRELLLLLLMQF  
LCHEFLRGDPRVTRLLTETRIHLLPSMNP DGYETAYHRGSELV GWA EGRWTHQGIDLNHN FADLNTQLWYAED  
DGLVPDTPVNHHLPLPTYTLPNATVAPETWAVIKWMKRI PFVLSANLHG GELVVSYPFDMTRTPWAARELTP  
TPDDAVFRWLSTVYAGTNRAMQDTRRPCHS QDFSLHG NVINGADWHTVPGSMNDFS YLHTNCFEVTVELSCD  
KFPHEKELPQEWENNKDALLTYLEQVRMGITGVVRDKDELGIADAVI AVEGINHDVTTAWGGDYWRLLTPGD  
YVVTASAEGYHTVRQHCQVTFEEGVPVPCNFLLTKTPKERLRELLATRGLPDLRRKLERLRGQK\*

>ENSMUSP00000119606\_c.166:G>C\_p.S56T ENSMUST00000150843.9|Pank2-204|ENSMUSG00000037514|+|chr2:g.131104616:G>C  
LGGWLGRQRRLLRMGAGRFGAPMERQGRAAATSAAVGESADSEARRRDPLRRR ASTAAPS GSGEAE SVRRERP  
GSLGGSTSAGRPRAEGLRKRRLPF PWFGLDIGGTLVKLVYFEPKDI TAE EEEKEEVE SLKSIRKYLTSNVAYGS  
TGIRDVHLELKD LTL CGR KGNLHFIRFP THDMPAFIQMGRDNK FSSLHTVFCATGGGSYKFEQDFLTIGDLQL  
RKLDEL DCLIKGILYIDS VGFNGRSQCYYFENPADSEK CQKLPFDLKNPYPLLLVNI GSGVSI LAVYSKDN YK  
RVTG TSLGGGTF FGLCCLLTGCSTFEEALEMASRGDSTKV DKLVRDIYGGDYERFGLPGWAVASSFGNMMSKE  
KREAASKEDLARATLITITN NIGSIARMCALNENINQVVFVGNFLRVNTIAMRLLAYALDYWSKGQLKALFSE  
HEGYFGAVGALLELLKIP\*

>ENSMUSP00000138992\_c.166:G>C\_p.S56T ENSMUST00000184105.9|Pank2-207|ENSMUSG00000037514|+|chr2:g.131104616:G>C  
LGGWLGRQRRLLRMGAGRFGAPMERQGRAAATSAAVGESADSEARRRDPLRRR ASTAAPS GSGEAE SVRRERP  
GSLGGSTSAGRPRAEGLRKRRLPF PWFGLDIGGTLVKLVYFEPKDI TAE EEEKEEVE SLKSIRKYLTSNVAYGS  
TGIRDVHLELKD LTL CGR KDR\*

>ENSMUSP00000139259\_c.130:G>C\_p.S44T ENSMUST00000184932.9|Pank2-208|ENSMUSG00000037514|+|chr2:g.131104616:G>C

XMGAGRFGAPMERQGRAAATSAAVGESADSEARRRDPLRRRASTAAPSGSGEAEVRRERPGSLGGSTSAGRP  
RAEGLRKRRLPFPWFLDIGGTLVKLVYFEPKIDITAEKEEVEESLKSIRKYLTSNVAYGSTGIRDVHLELKD  
LTLGCRKVLET\*

>ENSMUSP00000000369\_c.182:T>TC\_p.P61ins-fs ENSMUST00000000369.4|Rem1-  
201|ENSMUSG00000000359|+|chr2:g.152470198:T>TC  
MTLNTQQEAKTTLRRRASTPLPLSSRGHPGRLCTAPSAPSQHPRLGQSVSLNPPVRKPSRPGWVVL  
>ENSMUSP00000119532\_c.182:T>TC\_p.P61ins-fs ENSMUST00000150913.2|Rem1-  
203|ENSMUSG00000000359|+|chr2:g.152470198:T>TC  
MTLNTQQEAKTTLRRRASTPLPLSSRGHPGRLCTAPSAPSQHPRLGQSVSLNPPVRKPSRPGWVVL  
>ENSMUSP00000105198\_c.484:T>TG\_p.L162ins-fs ENSMUST00000109570.8|Aar2-  
202|ENSMUSG00000027628|+|chr2:g.156393097:T>TG  
MSSMQMDPELAKQLFFEGATVVILNMPKGTEFGIDYNSWEVGPVKFRGVKMI PPGIHFYLYSSVDKANPREVGP  
RMGFFLSLKQRGLTVLRWNAVQEEVDLSPAPEAEVEAMRANLPDLQFLGYPYATLKKWISLTNFI SEATME  
KLQPESRQICAFSDVLACAFHEAHQGGGAEPAPLRHRVQKLPKRGPSPAARDEAQQGWRDPLLRVAHSDVPSR  
SHTSRDHQAQHGLELCPRNCAQQAVPWQPPGCAW  
>ENSMUSP00000029158\_c.484:T>TG\_p.L162ins-fs ENSMUST00000029158.4|Aar2-  
201|ENSMUSG00000027628|+|chr2:g.156393097:T>TG  
MSSMQMDPELAKQLFFEGATVVILNMPKGTEFGIDYNSWEVGPVKFRGVKMI PPGIHFYLYSSVDKANPREVGP  
RMGFFLSLKQRGLTVLRWNAVQEEVDLSPAPEAEVEAMRANLPDLQFLGYPYATLKKWISLTNFI SEATME  
KLQPESRQICAFSDVLACAFHEAHQGGGAEPAPLRHRVQKLPKRGPSPAARDEAQQGWRDPLLRVAHSDVPSR  
SHTSRDHQAQHGLELCPRNCAQQAVPWQPPGCAW  
>ENSMUSP00000070052\_c.132:A>C\_p.T45P ENSMUST00000069600.13|Ndr3-  
201|ENSMUSG00000027634|-|chr2:g.156792020:T>G  
MDELQDVQLTEIKPLLNDKNGTRNFQDFDCQEHDIETPHGMVHVP I RGLPKGNRPVILTYHDI GLNHKSCFNT  
FFNFEDMQEITQHFAVCHVDAPGQQEAAPSFTGYQYPTMDELAEMLPVLT HLSMKSIIGIGVGAGAYILSR  
FALNHPELVEGLV LINIDPCA KGWIDWAASKLSGFTTNI VDI I LAH HFGQEELQANLDLIQTYRLHIAQDINQ  
ENLQLFLG SYNGRRDLEIERPILGQNDNRKLTLCSTLLVVGDN SPAVEAVVECN S RLDPI NT TLLK MADCGG  
LPQVVQPGKLT EAFKYFLQGMGYIPYVQLSHLSSESVP SASMTR LARS RTHSTSSSIGSGESPFSRSVTSNQ S  
DGTQESCESPDVLD RHQTMEVSC\*

>ENSMUSP00000072144\_c.132:A>C\_p.T45P ENSMUST00000072298.13|Ndr3-  
202|ENSMUSG00000027634|-|chr2:g.156792020:T>G  
MDELQDVQLTEIKPLLNDKNGTRNFQDFDCQEHDIETPHGMVHVP I RGLPKGNRPVILTYHDI GLNHKSCFNT  
FFNFEDMQEITQHFAVCHVDAPGQQEAAPSFTGYQYPTMDELAEMLPVLT HLSMKSIIGIGVGAGAYILSR  
FALNHPELVEGLV LINIDPCA KGWIDWAASKLSGFTTNI VDI I LAH HFGQEELQANLDLIQTYRLHIAQDINQ  
ENLQLFLG SYNGRRDLEIERPILGQNDNRKLTLCSTLLVVGDN SPAVEAVVECN S RLDPI NT TLLK MADCGG  
LPQVVQPGKLT EAFKYFLQGMGYIPYVQLSHLSSESVP SASMTR LARS RTHSTSSSIGSGESPFSRSVTSNQ S  
DRHQTMEVSC\*

>ENSMUSP00000105185\_c.132:A>C\_p.T45P ENSMUST00000109558.2|Ndr3-  
203|ENSMUSG00000027634|-|chr2:g.156792020:T>G  
MDELQDVQLTEIKPLLNDKNGTRNFQDFDCQEHDIETPHGMVHVP I RGLPKGNRPVILTYHDI GLNHKSCFNT  
FFNFEDMQEITQHFAVCHVDAPGQQEAAPSFTGYQYPTMDELAEMLPVLT HLSMKSIIGIGVGAGAYILSR  
FALNHPELVEGLV LINIDPCA KGWIDWAASKLSGFTTNI VDI I LAH HFGQEELQANLDLIQTYRLHIAQDINQ  
ENLQLFLG SYNGRRDLEIERPILGQNDNRKLTLC\*

>ENSMUSP00000105038\_c.6:A>C\_p.M3L ENSMUST00000109411.8|Hnf4a-  
202|ENSMUSG00000017950|+|chr2:g.163389258:A>C  
MDLADYSAALDPAYTTLEFENVQVLTMGNDTSPSEGANLNSSNSLGV SALCAICGDRATGKHYGASSCDGCKG  
FFRRSVRKNHMYSCRFSRQCVDKDKRNQCRYCRLKCKFRAGMKKEAVQNERDRISTRSSYEDSSLPSINAL  
LQAEVLSQQITSPISGINGDIRAKKIANITDVCESMKEQLLVLVEWAKYIPAFCELLLDDQVALLRAHAGEHL  
LLGATKRSMVFKDVLVLLGNDYIVPRHCP ELAEMSRV SIRILDELVLPFQELQIDDNEYACLKAIIFFDPAK  
LSDPGKIKRLRSQVQSLEDYINDRQYDSRGRFGELLLLLPTLQSI TWQMIEQIQFIKLFGMAKIDNLLQEML  
LGGASDAPHTHHPHPLMQEHMGTNVI VANTMPSHLSNGQMCEWPRPRGQAATPETPQSPSPSGSGSES YK  
LLPGAITTVKPPSAIPQPTITKQEI\*

>ENSMUSP00000018094\_c.33:A>C\_p.M12L ENSMUST00000018094.13|Hnf4a-  
201|ENSMUSG00000017950|+|chr2:g.163389258:A>C  
MRLSKTLAGMDLADYSAALDPAYTTLEFENVQVLTMGNDTSPSEGANLNSSNSLGV SALCAICGDRATGKHYG  
ASSCDGCKGFFRRSVRKNHMYSCRFSRQCVDKDKRNQCRYCRLKCKFRAGMKKEAVQNERDRISTRSSYED  
SSLPSINALLQAEVLSQQITSPISGINGDIRAKKIANITDVCESMKEQLLVLVEWAKYIPAFCELLLDDQVAL  
LRAHAGEHLLLGATKRSMVFKDVLVLLGNDYIVPRHCP ELAEMSRV SIRILDELVLPFQELQIDDNEYACLKAI



IFFDPDAKGLSDPGKIKRLRSQVQVSLLEDYINDRQYDSRGRFGELELLLLLPTLQSIWQIEQIQFIKLFGMAK  
IDNLLQEMLLGGSASDAPHTHHPLHPLHMQEHMGTNVIVANTMPSHLSNGQMCEWPRPRGQAATPETPQPSPF  
SGSGSESYKLLPGAITTIKPPSAIPQPTITKQEI\*

>ENSMUSP00000041806\_c.430:A>T\_p.E144V ENSMUST00000042775.5|Neur12-  
201|ENSMUSG00000039873|-|chr2:g.164674930:T>A  
MAAPSEHVGLGGPRSPARPEPPTRFHQVHGANIRMDPSGTRATRIVESFAHGVCFSREPLAPGQVFLVEIEEK  
ELGWCGLRLGLTALDPAASLAAPVPEFSLPDLVSLGHSWVFAITRHHNRVPREGQPEAEAAVPSGPQALLVVPY  
LRIEQFRI PRDRLVGRSRPGLYSHLLDQLYEQNVLPPTARRSRLGVLFCPREDGTADMHIIINGEDMGPSARG  
LPAAQPLYAVVDVFASTKSVRLVQLEYGLPSLQTLCLRLVIQKRVRHRLAIDVLHLPKGLKDFCKYE\*

>ENSMUSP00000074198\_c.2630:A>T\_p.R877S ENSMUST00000074618.10|Nfatc2-  
202|ENSMUSG00000027544|-|chr2:g.168346462:T>A  
MDVPEPQDPDPDGGDGPHEGPGSPQDELDFSI LFDYDYLNP IEEEEPIAHKAISSPSGLAYPDDVDLDYGLKPCN  
PLASLSGEPGPRFGEPDSIGFQNF LSPVKPAGASGSPRIEITPSHELMQAGGALRGRDAGLSPEQPALALAG  
VAASPRFTLPVPGYEGYREPLCLSPASSGSSASFISDTFSPYTPCVSPNNAGPDDLCQFQNI PAHYSPRTS  
PIMSPRTSLAEDSCLGRHSPVPRPASRSSSPGAKRRHS CAEALVAPLPAASPQRSRSPSPQPSPHVALQDDSI  
PAGYPPTAGSAVLM DALNTLATDSPCGIPSKIWKTS PDPTPVSTAPSKAGLARHIYPTVEFLGPCEQEERRNS  
APESILLVPPTWPKQLVPAIPICSI PVTASLPLEWPLSNQSGSYELRIEVQPKPHHRAHYETEGSRGAVKAP  
TGGHPVVQLHGYMENKPLGLQIFIGTADERILKPHAFYQVHRITGKTVTTTTSYEKIVGNTKVLEI PLEPKNNM  
RATIDCAGILKLRNADIELRKGETD IGRKNTRVRLVFRVHVPEPSGRIVSLQAASNPIECSQRSASHELPMVER  
QDMSCLVYGGQMMILTGNFTAESKVVFMKTTDGGQI WEMEATVDKDKSQPNMLFVEI PEYRNKHIRVPVK  
VNFYVINGKRKRSQPQHFTYHPVPAIKTEPSDEYEPSLICSPAHHGLGSGPYYPQHPMLAESPSCLVATMAPC  
QQFRSGLSSPDARYQQQSPAAALYQRSKSLSPGLLGYQQPSLLAAPLGLADAHRSVLVHAGSQGQGGSTLPH  
TSSASQQASPVIIHYSPTNQQLRGGGHQEFQHIMYCENFGPSSARPGPPP INQGQRLSPGAYPTVIQQQTAPSQ  
SAAKNGPSDQKEALPTGVTVKQEQLNDQTYLDDVNEI IRKEFSGPPSRNQT\*

>ENSMUSP00000104812\_c.2630:A>T\_p.R877S ENSMUST00000109184.8|Nfatc2-  
204|ENSMUSG00000027544|-|chr2:g.168346462:T>A  
MDVPEPQDPDPDGGDGPHEGPGSPQDELDFSI LFDYDYLNP IEEEEPIAHKAISSPSGLAYPDDVDLDYGLKPCN  
PLASLSGEPGPRFGEPDSIGFQNF LSPVKPAGASGSPRIEITPSHELMQAGGALRGRDAGLSPEQPALALAG  
VAASPRFTLPVPGYEGYREPLCLSPASSGSSASFISDTFSPYTPCVSPNNAGPDDLCQFQNI PAHYSPRTS  
PIMSPRTSLAEDSCLGRHSPVPRPASRSSSPGAKRRHS CAEALVAPLPAASPQRSRSPSPQPSPHVALQDDSI  
PAGYPPTAGSAVLM DALNTLATDSPCGIPSKIWKTS PDPTPVSTAPSKAGLARHIYPTVEFLGPCEQEERRNS  
APESILLVPPTWPKQLVPAIPICSI PVTASLPLEWPLSNQSGSYELRIEVQPKPHHRAHYETEGSRGAVKAP  
TGGHPVVQLHGYMENKPLGLQIFIGTADERILKPHAFYQVHRITGKTVTTTTSYEKIVGNTKVLEI PLEPKNNM  
RATIDCAGILKLRNADIELRKGETD IGRKNTRVRLVFRVHVPEPSGRIVSLQAASNPIECSQRSASHELPMVER  
QDMSCLVYGGQMMILTGNFTAESKVVFMKTTDGGQI WEMEATVDKDKSQPNMLFVEI PEYRNKHIRVPVK  
VNFYVINGKRKRSQPQHFTYHPVPAIKTEPSDEYEPSLICSPAHHGLGSGPYYPQHPMLAESPSCLVATMAPC  
QQFRSGLSSPDARYQQQSPAAALYQRSKSLSPGLLGYQQPSLLAAPLGLADAHRSVLVHAGSQGQGGSTLPH  
TSSASQQASPVIIHYSPTNQQLRGGGHQEFQHIMYCENFGPSSARPGPPP INQGQRLSPGAYPTVIQQQTAPSQ  
SAAKNGPSDQKEALPTGVTVKQEQLNDQTYLDDDELIDTHLSWIQNIL\*

>ENSMUSP00000116617\_c.558:T>A\_p.Y187N ENSMUST00000128657.8|Gm14418-  
202|ENSMUSG00000078867|-|chr2:g.177079435:A>T  
MDLVTYDDVHVNF TQE EWALLHPSQKSLYKGVMLETYRNLT AIGYI WEEHTIEDHFQTSRSHGRHERSCSAEQ  
PPEFIQCGKAFAYESGRQRHQIKHTGGKHHCNQCCKDFRTRNAPQIHKRTH TGEKPYDCNQYKAFARISHL  
RVHKRTH TGEKPYECNQCGKAFASSDLQKHKRTH TGEKPYECNQCGKAFASSHLRIHKRTHAGDKRYECNQ  
CGKAFTQSNLQIHKGTHAGEKRYECNQCGKAFASSDLQKHKRTH TGEKPYECNQCGKAFASCDLQKHKRT  
HTGEKPYECKQCGKAFASITLQIHNRTHTGEKPYECKQCGKAFASNLRIHKQTHTGERLYECN\*

>ENSMUSP00000116617\_c.388:C>T\_p.P130L ENSMUST00000128657.8|Gm14418-  
202|ENSMUSG00000078867|-|chr2:g.177079605:G>A  
MDLVTYDDVHVNF TQE EWALLHPSQKSLYKGVMLETYRNLT AIGYI WEEHTIEDHFQTSRSHGRHERSCSAEQ  
PPEFIQCGKAFAYESGRQRHQIKHTGGKHHCNQCCKDFRTRNAPQIHKRTH TGEKLYDCNQYKAFARISHL  
RVHKRTH TGEKPYECNQCGKAFASSDLQKHKRTH TGEKPYECNQCGKAFASSHLRIHKRTHAGDKRYECNQ  
CGKAFTQSNLQIHKGTHAGEKRYECNQCGKAFASSDLQKHKRTH TGEKPYECNQCGKAFASCDLQKHKRT  
HTGEKPYECKQCGKAFASITLQIHNRTHTGEKPYECKQCGKAFASNLRIHKQTHTGERLYECN\*

>rs107973180\_ENSMUSP00000079909\_c.504:C>A\_p.Q169K  
ENSMUST00000081134.10|Sycp2-201|ENSMUSG00000060445|-|chr2:g.178037639:G>T  
MPVRPDLQOLEKCIDDALRKNDFKPLLALLQIDICEDVKIKCSKQFLRKLDDLICRELNKKDIQTVSSILISI  
GRCSKNIFILGQAGLQTMIKQGLVQKMWVWFENSKEIILNQQSKDEAVMMIEDLFDLLMVIYDISDEGKNQ  
VLESFIPQICALVIDSRVNFCKQEAALKKMNMLDRI PQDANKILSNQEMLTLMNSMGERILDVGDYELQVGI

VEALCRMTTEKRRQELAYEWFSDMFIANAFKEIKDCEFETDCRIFLNLVNGILGDKRRVYTFPCLSAFLGKYE  
LQIPSEDEKLEEFWIDFNLSHTLSFYIAGDEEDHQWEAVTVPEEKVQMYNIEVRESKLLTTLTKNIVKISKK  
EGKELLFYFDESLEITNVTKKVFVGGNKYKEFTRKQGISVAKTSHVLFSDASGSQILVPESQSPVKENLIHLK  
EKSDIQKKLVNPLELGNSSSQDEITTPSRKKMSEASMIVPDTRDYTVRSPILLINTSTPRRSREPLQAINSV  
KAVSKTSESGMDYAASPKSRQSDGRKRWNRRANHNKTTAVIQNKQYEDNESPDQNFNEIEDTLNSVSSAVGKV  
DKPVLPGVLDISKNTTHSRWACWTPVTTIKLCNNQRSRALPGDCTQDTGVNKKCTKQKSVSDDDSEETQKGG  
YSKDVIKCNKSDEAEFCERNIQEQNHPKYSQKKNANAKKSDWHIESETTYKSVLLNKTTEESLIYKKTCVLS  
KDVNTTICDKSPSRKSRNHTKSRKELMSELTSCLEEEIPVRENSKGRFTGASESLINQISRRYNPSDSMMS  
TRKLKEPQDGSFGSKPDLQFNKVQRKSYRKLKATVVNVTVSECLDDVYNFSLNGADEPVIKLGIEFQATTR  
EASMDNSLKLKVNKHNDEHDPFLKTKDKRMLSYEKKTLSDTETECGDDSKTDISWLKEPKTKRLMDYSRNKNT  
TKYKSRKSRSSMEKQPRPTMVLNKNMSKNDYEVVVDGRTRLPRRATKTKKNYKDLSTSESESESEKECSYLF  
KDKLPTKEETIHSRAQTKKLEKQKVFNSEALKGQPSSEQKNSRRLREGREDSLCLSSASVSRSSSVEMR  
CTEKITERDFTQDYDYITKSLSPYKAPSPFLNGNNSVVGGRQSPRISSETSAMCVKRSYSPASGPPSPRHT  
PTKNNSVVMKANSVINNRQTHCNSYSVSSNSSEKLYMEPESEPCDNHMQNKREGNHAASPLSLSSSEKI  
EKMWFDMPSENTHVSQPSQRGSKRRMYLEDELNSNSNAEVEEAEEREHLLSKKRCQWENSQHTFKTSLSTP  
DFSVPKDWQOELQAGMFYDNISSDYKRKTDSDQHKIMDDFTTKTLKLTQOHLMAMTSQAQGRDENVEKQVLT  
LLELEKVEKDSQTLRDLKELVDIEEKLQKMRAYHRCERERFRVLKTSLDKSFVLYNSVYEEVSFTSEMCL  
MKANMKMLQDKLLKEMHEEEVLRIRGLQSLFKAHEGND\*

>rs107973180\_ENSMUSP00000116917\_c.504:C>A\_p.Q169K  
ENSMUST00000138175.2|Sycp2-204|ENSMUSG0000060445|-|chr2:g.178037639:G>T  
MPVRPDLQOLEKCIDDALRKNDFKPLLALLQIDICEDVKIKCSKQFLRKLDDLICRELNKKDIQTVSSILISI  
GRCSKNIFILGQAGLQTMIKQGLVQKMSVWFENSKEIILNQOQSKDEAVMMIEDLFDLLMVIYDISDEGKNQ  
VLESFIPQICALVIDSRVNFICKQEALKKMNMLDRI PQ

>ENSMUSP0000015791\_c.1006:G>A\_p.G336D ENSMUST0000015791.6|Lama5-  
201|ENSMUSG0000015647|-|chr2:g.179844265:C>T  
MAKRGQQLCAGSAPGALGPRSPAPRPLLLLLLAGLALVGEARTPGDGFSLHPPYFNLAEGARITASATCGEEA  
PTRSVSRPTEDLYLGGPVAGGDPNQTIQGGYCDICTAANSNKAHPVSNALDGTERRWQSPPLSRGLEYNE  
VNVTLDLGQVHVAVYVLIKFNANSPRDLWVLERSTDFGHTYQPPWQFFASSKRDCLEFRGPRTLERITQDDVVI  
CTTEYSRIVPLENGEIVVSLVNGRPGALNFSYSPLLRDFTKATNIRLRFLRTNTLLGHLMGKALRDPVTRRY  
YYSIKDISIGRCVCHGHADVCDADPLDPFRLQCACQHNTCGDSCDRCCPGFNQPPWKPATDTSANECQSCN  
CHGHAYDCYYDPEVDRNASQNDNVYQGGVCLDCQHHTTGINCERCLPGFFRAPDQPLDSPHVCRPCDCES  
DFTDGTCEDLTGRCYCRPNFTGELCAACAEGYTDFFPHCYPLPSFPHNDTREQVLPAQQIVNCDNAAGTQGNA  
CRKDPRLGRCVCKPNFRGAHCELCAPGFHGPSCHPCQCSSPGVANSLCDPESGQCMCRTGFEGDRCDHCALGY  
FHFFPLCQLCGCSPAGTLPEGCDEAGRCQCRPGFDGPHCDRCLPGYHGYPDCHACACDPRGALDQQCGVGGGLCH  
CRPGYTGATQCECSPGFYGFPCIPCHCSADGSLHTTCDPTTGQCRPRVTLGLHCDMCPVGAYNFPYCEAGS  
CHPAGLAPANPALPETQAPCMCRAHVEGSPCDRCKPGYWGLSASNPEGCTRCSDPRGTLGGVTECQNGVQCF  
CKAHVCGKTCACACKDGFGLDYADYFGCRSCRCVGGALGQGCPEKGTGACRCRPNTPQGPTCSEPAKDHYLPDL  
HHMRLELEEAATPEGHAVRFGFNPLEFENFSWRGYAHMMAIQPRIVARLNVTSPLDRLVFRYVNRGSTSVNG  
QISVREEGKLSSCTNCTEQSQPVAFPPSTEPAFVTVPQRFGEFPVLPNGIALLVEAEGVLLDYVLLPSTY  
YEALLQHRVTEACTYRPSALHSTENCLVYAHPLDGFPSAAGTEALCRHDNSLPRPCPTEQLSPSPHPLATC  
FGSDVDIQLEMAVPQPGQYVLVVEYVGEDSHQEMGVAVHTPQRAQQGVNLNHPCPYSSLCRSPARDTQHHLA  
IFYLDSEASIRLTAEQAHFHLSVTLVPVEEFSTEFVEPRVFCVSSHGTFNPSSAACLASRFKPPQPIILKD  
CQVLPPLPDLPLTQSQELSPGAPPEGPQPRPPTAVDPNAEPTLLRHPQGTVVFTTQVPTLGRYAFLLHGYPV  
HPSFPVEVLINGGRIWQGHANASFCPHGYGCRTLVLCGQTMLDVTDNELTVTVRVPEGRWLWLDYVLIQVPE  
AYSSSYLQEEPLDKSYDFISHCATQGYHISPPSSSPFCRANAATLSLFFYNNGALPCGCEHVGAVSPTCEPFGG  
QCPGRGHVIGRDCSRCATGYWGFNCRPCDCGARLCELTGQCICPRTVPPDCLVCPQPSFGCHPLVGCCEC  
NCSGPGVQELTDPTCDMDSGQCRCRPNVAGRCDTCAFGFYGYPSRCPCDCHEAGTMASVCDPLTGQCHCKEN  
VQGSRCQCRVGTFSLDAANPKGCTRCFCFGATERCGNSNLARHEFVDMEGWVLLSSDRQVVPHEHRPEIELL  
HADLRVADTFSELYWQAPPSYLGDRVSSYGGTLHYELHSETQRGDIPIYESRPDVVLQGNQMSIAFLELAY  
PPPGQVHRGQLQLVEGNFRHLETHNPVSREELMMVLAGLEQLQIRALFSQTSVSSVLRVVELEVASEAGRGP  
ASNVELCMCPANYRGDSCQECAPGYRDTKGLFLGRCVPCQCHGHSRCLPGSGICVGCQHNTGDDQCRCR  
GFVSSDPSNPASPCVSCPCPLAVPSNNFADGCVLRNGRTQCLCRPGYAGASCERCAPGFFGNPLVLGSSCQPC  
DCSGNGDPNMFSDCPLTGACRGLRHTTGPHLRCERCAPGYGNALLPGNCTRCDSPCGTETCDPQSGRCLC  
KAGVTGQRCDRCLEDFGFEQCGCRPCACGPAKGCSECHPQSGQCHCQPGTTGPPQCLECAPGYWGLPEKGC  
RCQCPRGCDPHTGHCTCPPGLSGERCDCSQQHQVVPVPGKPGHGIHCEVCDHCVVLLDDLERAGALLPAI  
REQLQGINASSAAWARLHRLNASIADLQSKLRSPPGPRYQAAQQLQTLQEQSISLQDTERLGSQATGVQQA  
GQLLDTTESTLGRAQKLLSVRAVGRALNELASRMGQSPGDALVPSGEQLRWALAEVERLLWDMRTRDLGAQ  
GAVAEAEALAEQRLMARVQEQLTSFWEENQSLATHIRDQLAQYESGLMDLREALNQAVNTTREAELNSRNE

RLKEALQWKQELSQDNATLKATLQAASLILGHVSELLQGIQAKEDLEHLAASLDGAWTPLLKRMQAFSPASS  
 KVDLVEAAEAHAQKLNQLAINLSGIILGINQDRFIQRAVEASNAISSILQAVQAAEDAAGQALRQASRTWEMV  
 VQRGLAAGARQLLANSSALEETILGHQGRGLGQAQRLQAAGIQLHNVWARKNQLAAQIQEAQAMLAMDTSETS  
 EKIAHAKAVAAEALSTATHVQSQQLQGMQKNVERWQSQLGGGLQGDLSQVERDASSSVSTLEKTLPLQLLAKLSR  
 LENRGVHNASLALSANIGRVRKLIQAARSAASKVKVSMKFNGRSGVRLRTPRDLADLAAYTALKFHIQSPVPA  
 PEPGKNTGDHFVLYMGSQRATGDYMGVSLRNQKVHVWYRLGKAGPTTSLIDENIGEQAFAVSIIDRTLQFGHMS  
 VTVEKQMVHEIKGDTVAPGSEGLLNHPDDFVYVGGYPSNFTPEPLRFPYGLGCIEMETLNEEVVSLYNFE  
 QTFMLDTAVDKPCARSKATGDPWLTGDSYLDGSGFARISFEKQFSNTRKRFQDELRLVSYNGIIFFLKQESQFL  
 CLAVQEGTLVLFYDFGSLKKADPLQPPQALTAASKAIQVFLLAGNRKRVLVRVERATVFSVDQDNMLEMADA  
 YYLGGVPPEQLPLSLRQLFPSSGGSVRCIKGKALGKYVDLKRNLNTTGISFGCTADLLVGRMTTFHGHGFLPL  
 ALPDVAPITEVVYSGFGFRGTQDNNLLYRTSPDGPYQVSLREGHVTLRFMNQEVETQRFVADGAPHYVAFYS  
 NVTGVWLYVDDQLQLVKSHERTT PMLQLQPEEPSRLLLGGPLVSGTFHNFSGCISNVFVQRLRGPQRFVLDLHQ  
 NMGSVNVSVGCTPAQLIETSRAQKVSRRSRQPSQDLACTTPWLPGTIQDAYQFGGPLPSYLQFVGISPSHR  
 NRLHLMLVLRPHAASQGLLLSTAPMSGRSPSLVFLNHGHFVAQTEGPGPRLQVQSRQHSRAGQWHRVSVRWG  
 MQQIQLVVDGSDTWSQKALHHRVPRAERPQPYTSLVGGPLPASSYSSKLPVSVGFGSGLKQLDKRPLRTPQ  
 MVGVTPCVSGPLEDGLFFPGSEGVVTELEPKAKMPYVSLLEMRPLAAAGLI FHLGQALATPYMQLKVLTEQV  
 LLQANDGAGEFSTWVTYPKLCDRWHRVAVIMGRDTRLEVDTQSNHTTGRLPESLAGSPALLHLGSLPKSST  
 AREPELPAYRGCLRKLLINGAPVNVTVASVQIQGAVGMRGCPSTGLALSQKQKALTQRQAKPSVSPLLWH\*  
 >ENSMUSP00000139512\_c.157:C>GC\_p.A53ins-fs ENSMUST00000185384.7|Rbis-  
 202|ENSMUSG00000078784|-|chr3:g.14672310:G>GC  
 MAKNKLGKQKSRNVFHIASHKTFKAKNKAKPVTTNLKKNINIMNHEKVNRMNRGFCYKERTERTCKLLKPPFS  
 >ENSMUSP00000104002\_c.283:C>GC\_p.A95ins-fs ENSMUST00000108365.4|Rbis-  
 201|ENSMUSG00000078784|-|chr3:g.14672310:G>GC  
 MAAAAAPRALFCQLLVLYRFLVGDRTPGVPRPETLRPPLSRMAKNKLGKQKSRNVFHIASHKTFKAKNKAKP  
 VTNLKKNINIMNHEKVNRMNRGFCYKERTERTCKLLKPPFS  
 >ENSMUSP00000139464\_c.157:C>GC\_p.A53ins-fs ENSMUST00000186870.7|Rbis-  
 204|ENSMUSG00000078784|-|chr3:g.14672310:G>GC  
 MAKNKLGKQKSRNVFHIASHKTFKAKNKAKPVTTNLKKNINIMNHEKVNRMNRGFCYKERTERTCKLLKPPFS  
 >ENSMUSP00000096807\_c.87:G>A\_p.E30K ENSMUST00000099201.9|Sirpbla-  
 201|ENSMUSG00000095788|-|chr3:g.15482239:C>T  
 MLLLDAAWTHI PHSVLLLLLILLLGFKGA AVRKLKVIQPVKSFFVAGGSATLNCTVTSLLPVGPIRWYRGVQSR  
 LLIYPFTGEHSPRITNVSDVTKRNNMDFSIRISNVTPADSGTYCVKQFQSGSSEPDIEIQSGGGTELLVLAKP  
 SSPMVSGPAARAVPQQT VTFTRSHGFFPRNLTLKWFKNGDEISHLETSVEPEETS SVSYRVSSSTVQVLEPRD  
 VRSQIICEVDHVTLDRAPLRGI AHISEFIQVPPTLEIRQQPTMVWNVINVTTCQIQKFYPPSFQLTWLENGNIS  
 RREVPFTLIVNKDGTYNWISCLLVNISALEENMVVTCQVEHDEQAEVIETHHTVLVTEHQVRVKGTATKSELKTA  
 GIAKIPVAVLLGSKILLLLIAATVIYMHKKQNA\*  
 >ENSMUSP00000141504\_c.87:G>A\_p.E30K ENSMUST00000192700.3|Sirpbla-  
 203|ENSMUSG00000095788|-|chr3:g.15482239:C>T  
 MLLLDAAWTHI PHSVLLLLLILLLGFKGA AVRKLKVIQPVKSFFVAGGSATLNCTVTSLLPVGPIRWYRGVQSR  
 LLIYPFTGEHSPRITNVSDVTKRNNMDFSIRISNVTPADSGTYCVKQFQSGSSEPDIEIQSGGGTELLVLAKP  
 SSPMVSGPAARAVPQQT VTFTRSHGFFPRNLTLKWFKNGDEISHLETSVEPEETS SVSYRVSSSTVQVLEPRD  
 VRSQIICEVDHVTLDRAPLRGI AHISEFIQVPPTLEIRQQPTMVWNVINVTTCQIQKFYPPSFQLTWLENGNIS  
 RREVPFTLIVNKDGTYNWISCLLVNISALEENMVVTCQVEHDEQAEVIETHHTVLVTEHQVRVKELKTAGIAKIP  
 VAVLLGSKILLLLIAATVIYMHKKQNA\*  
 >rs49659380\_ENSMUSP00000103989\_c.1177:A>G\_p.K393R  
 ENSMUST00000108352.9|Sirpblc-204|ENSMUSG00000074677|-|chr3:g.15856671:T>C  
 MLLLDAAWTHI PHCVLLLLLILLLGGLKGAAMRELKVIQPVKSFFVAGGSATLNCTVTSLLPVGPIRWFKGVQSR  
 LLIYSFTGERFPRITNVSDVTKRNSLDFSIRISNVTPADSGTYCVKQFQSGPSEPDMEIQSGGGTELSVFAKP  
 SSPMVSGPAARAVPQQTVAFTCRSHGFFPRNLTLKWFKNGNEISHLETSVEPEETS SVSYRVSSSTVQVLEPRD  
 VRSQIICEVDHVTLDRAPLRGI AHISEFIQVPPTLEISQQPTMVWNVII VTCQIQKFYPPRFQVWLENGNIS  
 RREVPFTLIVNKDGTYNWISCLLVNISALEENMVVTCQVEHDEQAEVIETHHTVVVTEHQVRVKGTATKSELKTA  
 GIAKIPVAVLLGSKILLLLIAATVIYMRKQNA\*  
 >rs49659380\_ENSMUSP00000061216\_c.1159:A>G\_p.K387R  
 ENSMUST00000050623.11|Sirpblc-201|ENSMUSG00000074677|-  
 |chr3:g.15856671:T>C  
 MLLLDAAWTHI PHCVLLLLLILLLGGLKGAAMRELKVIQPVKSFFVAGGSATLNCTVTSLLPVGPIRWFKGVQSR  
 LLIYSFTGERFPRITNVSDVTKRNSLDFSIRISNVTPADSGTYCVKQFQSGPSEPDMEIQSGGGTELSVFAKP  
 SSPMVSGPAARAVPQQTVAFTCRSHGFFPRNLTLKWFKNGNEISHLETSVEPEETS SVSYRVSSSTVQVLEPRD

VRSQIICEVDHVTLDRAPLRGIAHISEFIQVPPTLEISQQPTMVWVNIIVTCQIQKFYPPRFQVTWLENGNIS  
RREVPFTLIVNKDGTYNWISCLLVNISALEENMVVTCQVEHDGQAEVIETHHTVVVTEHQRVKELKTAGIAKIP  
VAVLLGSKILLLIAATVIYMRKKQNA\*  
>ENSMUSP00000103989\_c.1164:A>T\_p.I389F ENSMUST00000108352.9|Sirpblc-  
204|ENSMUSG00000074677|-|chr3:g.15856684:T>A  
MLLLDAWTHIPHCVLLLLLLLGLKGAAMRELKVIQPVKSFFVGAGGSATLNCTVTSLLPVGPIRWFKGVGQSR  
LLIYSFTGERFPRITNVSDVTKRSNLDFSIRISNVTPADSGTYCVKFQRGPEPDMEIQSGGGTELSVFAKP  
SSPMVSGPAARAVPQQTVAFTCRSHGFFPRNLTLKWFKNGNEISHLETSVEPEETS SVSYRVSSTVQVVLEPRD  
VRSQIICEVDHVTLDRAPLRGIAHISEFIQVPPTLEISQQPTMVWVNIIVTCQIQKFYPPRFQVTWLENGNIS  
RREVPFTLIVNKDGTYNWISCLLVNISALEENMVVTCQVEHDGQAEVIETHHTVVVTEHQRVKGTATKSELKTA  
GIAKIPVAVLLGSKILLLIAATVFYMRKKQNA\*  
>ENSMUSP00000061216\_c.1146:A>T\_p.I383F ENSMUST00000050623.11|Sirpblc-  
201|ENSMUSG00000074677|-|chr3:g.15856684:T>A  
MLLLDAWTHIPHCVLLLLLLLGLKGAAMRELKVIQPVKSFFVGAGGSATLNCTVTSLLPVGPIRWFKGVGQSR  
LLIYSFTGERFPRITNVSDVTKRSNLDFSIRISNVTPADSGTYCVKFQRGPEPDMEIQSGGGTELSVFAKP  
SSPMVSGPAARAVPQQTVAFTCRSHGFFPRNLTLKWFKNGNEISHLETSVEPEETS SVSYRVSSTVQVVLEPRD  
VRSQIICEVDHVTLDRAPLRGIAHISEFIQVPPTLEISQQPTMVWVNIIVTCQIQKFYPPRFQVTWLENGNIS  
RREVPFTLIVNKDGTYNWISCLLVNISALEENMVVTCQVEHDGQAEVIETHHTVVVTEHQRVKELKTAGIAKIP  
VAVLLGSKILLLIAATVFYMRKKQNA\*  
>rs219323197\_ENSMUSP00000120527\_c.232:G>A\_p.S78N  
ENSMUST00000148194.8|Sirpblc-207|ENSMUSG00000074677|-|chr3:g.15887212:C>T  
XQSGGGTELSVFAKPSSPMVSGPAARAVPQQTVAFTCRSHGFFPRNLTLKWFKNGNEISHLETSVEPEETS SVS  
YRVSNTVQVVLEPRDVRSQIICEVDHVTLDRAPLRGIAHISEFIQVPPTLEISQQPTMVWVNIIVTCQIQKFY  
PPRFQVTWLENGNISRREVPFTLIVNKDGTYNWISCLLVNISALEENMVVTCQVEHDGQAEVIETHHTVVVTEH  
QRVKGTATKSEAPNGNKC\*  
>rs219323197\_ENSMUSP00000103991\_c.625:G>A\_p.S209N  
ENSMUST00000108354.8|Sirpblc-205|ENSMUSG00000074677|-|chr3:g.15887212:C>T  
MLLLDAWTHIPHCVLLLLLLLGLKGAAMRELKVIQPVKSFFVGAGGSATLNCTVTSLLPVGPIRWFKGVGQSR  
LLIYSFTGERFPRITNVSDVTKRSNLDFSIRISNVTPADSGTYCVKFQRGPEPDMEIQSGGGTELSVFAKP  
SSPMVSGPAARAVPQQTVAFTCRSHGFFPRNLTLKWFKNGNEISHLETSVEPEETS SVSYRVSNTVQVVLEPRD  
VRSQIICEVDHVTLDRAPLRGIAHISEFIQVPPTLEISQQPTMVWVNIIVTCQIQKFYPPRFQVTWLENGNIS  
RREVPFTLIVNKDGTYNWISCLLVNISALEENMVVTCQVEHDGQAEVIETHHTVVVTEHQRVKEAPNGNKC\*  
>rs219323197\_ENSMUSP00000103989\_c.625:G>A\_p.S209N  
ENSMUST00000108352.9|Sirpblc-204|ENSMUSG00000074677|-|chr3:g.15887212:C>T  
MLLLDAWTHIPHCVLLLLLLLGLKGAAMRELKVIQPVKSFFVGAGGSATLNCTVTSLLPVGPIRWFKGVGQSR  
LLIYSFTGERFPRITNVSDVTKRSNLDFSIRISNVTPADSGTYCVKFQRGPEPDMEIQSGGGTELSVFAKP  
SSPMVSGPAARAVPQQTVAFTCRSHGFFPRNLTLKWFKNGNEISHLETSVEPEETS SVSYRVSNTVQVVLEPRD  
VRSQIICEVDHVTLDRAPLRGIAHISEFIQVPPTLEISQQPTMVWVNIIVTCQIQKFYPPRFQVTWLENGNIS  
RREVPFTLIVNKDGTYNWISCLLVNISALEENMVVTCQVEHDGQAEVIETHHTVVVTEHQRVKGTATKSELKTA  
GIAKIPVAVLLGSKILLLIAATVIYMRKKQNA\*  
>rs219323197\_ENSMUSP00000061216\_c.625:G>A\_p.S209N  
ENSMUST00000050623.11|Sirpblc-201|ENSMUSG00000074677|-  
|chr3:g.15887212:C>T  
MLLLDAWTHIPHCVLLLLLLLGLKGAAMRELKVIQPVKSFFVGAGGSATLNCTVTSLLPVGPIRWFKGVGQSR  
LLIYSFTGERFPRITNVSDVTKRSNLDFSIRISNVTPADSGTYCVKFQRGPEPDMEIQSGGGTELSVFAKP  
SSPMVSGPAARAVPQQTVAFTCRSHGFFPRNLTLKWFKNGNEISHLETSVEPEETS SVSYRVSNTVQVVLEPRD  
VRSQIICEVDHVTLDRAPLRGIAHISEFIQVPPTLEISQQPTMVWVNIIVTCQIQKFYPPRFQVTWLENGNIS  
RREVPFTLIVNKDGTYNWISCLLVNISALEENMVVTCQVEHDGQAEVIETHHTVVVTEHQRVKELKTAGIAKIP  
VAVLLGSKILLLIAATVIYMRKKQNA\*  
>rs219323197\_ENSMUSP00000103987\_c.625:G>A\_p.S209N  
ENSMUST00000108350.8|Sirpblc-203|ENSMUSG00000074677|-|chr3:g.15887212:C>T  
MLLLDAWTHIPHCVLLLLLLLGLKGAAMRELKVIQPVKSFFVGAGGSATLNCTVTSLLPVGPIRWFKGVGQSR  
LLIYSFTGERFPRITNVSDVTKRSNLDFSIRISNVTPADSGTYCVKFQRGPEPDMEIQSGGGTELSVFAKP  
SSPMVSGPAARAVPQQTVAFTCRSHGFFPRNLTLKWFKNGNEISHLETSVEPEETS SVSYRVSNTVQVVLEPRD  
VRSQIICEVDHVTLDRAPLRGIAHISEFIQVPPTLEISQQPTMVWVNIIVTCQIQKFYPPRFQVTWLENGNIS  
RREVPFTLIVNKDGTYNWISCLLVNISALEENMVVTCQVEHDGQAEVIETHHTVVVTEHQRVKGTATKSGEVFT  
PPLCLNVNWAFFMYKVTFLIIVALIS\*

>rs219323197\_ENSMUSP00000103986\_c.619:G>A\_p.S207N  
ENSMUST00000108349.2|Sirpblc-202|ENSMUSG00000074677|-|chr3:g.15887212:C>T  
MLLLDAWTHI PHCVLLLI LLLGLKAMRELKVIQPVKSFFV GAGGSATLNCTVTSLLPVGPIRWFKGVGQSRLL  
IYSFTGERFPRITNVSDVTKRSNLDFSIRISNVTPADSGTY YCVKFQ RGPSEPDMEIQSGGGTELSVFAKPSS  
PMVSGPAARAVPQQIVAF TCRSHGFFPRNLTLKWFKNGNEISHLETSVEPEETS SVSYRVSNTVQVVLEPRDVR  
SQIICEVDHVTLDRAPLRGIAHISEFIQVPPTLEISQQPTMVWNVIIVTCQIQKFYPPRFQVTWLENGNISRR  
EVPFTLIVNKDGTYNWISCLLVNISALEENMVVTCQVEHDGQAEVIETHTVVVTEHQVRVKG TATKSGEVFTPP  
LCLNVN WASFFMYKVTFLLIIVAL S\*

>ENSMUSP00000120527\_c.94:C>T\_p.T32I ENSMUST00000148194.8|Sirpblc-  
207|ENSMUSG00000074677|-|chr3:g.15887350:G>A  
XQSGGGTELSVFAKPSSPMVSGPAARAVPQQIVAF TCRSHGFFPRNLTLKWFKNGNEISHLETSVEPEETS SVS  
YRVSSTVQVVLEPRDVR SQIICEVDHVTLDRAPLRGIAHISEFIQVPPTLEISQQPTMVWNVIIVTCQIQKFY  
PPRFQVTWLENGNISRREVPFTLIVNKDGTYNWISCLLVNISALEENMVVTCQVEHDGQAEVIETHTVVVTEH  
QVRVKG TATKSEAPNGNKC\*

>ENSMUSP00000103991\_c.487:C>T\_p.T163I ENSMUST00000108354.8|Sirpblc-  
205|ENSMUSG00000074677|-|chr3:g.15887350:G>A  
MLLLDAWTHI PHCVLLLI LLLGLKGAAMRELKVIQPVKSFFV GAGGSATLNCTVTSLLPVGPIRWFKGVGQSR  
LLIYSFTGERFPRITNVSDVTKRSNLDFSIRISNVTPADSGTY YCVKFQ RGPSEPDMEIQSGGGTELSVFAKP  
SSPMVSGPAARAVPQQIVAF TCRSHGFFPRNLTLKWFKNGNEISHLETSVEPEETS SVSYRVSSTVQVVLEPRD  
VRSQIICEVDHVTLDRAPLRGIAHISEFIQVPPTLEISQQPTMVWNVIIVTCQIQKFYPPRFQVTWLENGNIS  
RREVPFTLIVNKDGTYNWISCLLVNISALEENMVVTCQVEHDGQAEVIETHTVVVTEHQVRVKEAPNGNKC\*

>ENSMUSP00000103989\_c.487:C>T\_p.T163I ENSMUST00000108352.9|Sirpblc-  
204|ENSMUSG00000074677|-|chr3:g.15887350:G>A  
MLLLDAWTHI PHCVLLLI LLLGLKGAAMRELKVIQPVKSFFV GAGGSATLNCTVTSLLPVGPIRWFKGVGQSR  
LLIYSFTGERFPRITNVSDVTKRSNLDFSIRISNVTPADSGTY YCVKFQ RGPSEPDMEIQSGGGTELSVFAKP  
SSPMVSGPAARAVPQQIVAF TCRSHGFFPRNLTLKWFKNGNEISHLETSVEPEETS SVSYRVSSTVQVVLEPRD  
VRSQIICEVDHVTLDRAPLRGIAHISEFIQVPPTLEISQQPTMVWNVIIVTCQIQKFYPPRFQVTWLENGNIS  
RREVPFTLIVNKDGTYNWISCLLVNISALEENMVVTCQVEHDGQAEVIETHTVVVTEHQVRVKG TATKSELKTA  
GIAKIPVAVLLGSKILLLLIAATVIYMRKKQNA\*

>ENSMUSP00000061216\_c.487:C>T\_p.T163I ENSMUST00000050623.11|Sirpblc-  
201|ENSMUSG00000074677|-|chr3:g.15887350:G>A  
MLLLDAWTHI PHCVLLLI LLLGLKGAAMRELKVIQPVKSFFV GAGGSATLNCTVTSLLPVGPIRWFKGVGQSR  
LLIYSFTGERFPRITNVSDVTKRSNLDFSIRISNVTPADSGTY YCVKFQ RGPSEPDMEIQSGGGTELSVFAKP  
SSPMVSGPAARAVPQQIVAF TCRSHGFFPRNLTLKWFKNGNEISHLETSVEPEETS SVSYRVSSTVQVVLEPRD  
VRSQIICEVDHVTLDRAPLRGIAHISEFIQVPPTLEISQQPTMVWNVIIVTCQIQKFYPPRFQVTWLENGNIS  
RREVPFTLIVNKDGTYNWISCLLVNISALEENMVVTCQVEHDGQAEVIETHTVVVTEHQVRVKE LKTAGIAKIP  
VAVLLGSKILLLLIAATVIYMRKKQNA\*

>ENSMUSP00000103987\_c.487:C>T\_p.T163I ENSMUST00000108350.8|Sirpblc-  
203|ENSMUSG00000074677|-|chr3:g.15887350:G>A  
MLLLDAWTHI PHCVLLLI LLLGLKGAAMRELKVIQPVKSFFV GAGGSATLNCTVTSLLPVGPIRWFKGVGQSR  
LLIYSFTGERFPRITNVSDVTKRSNLDFSIRISNVTPADSGTY YCVKFQ RGPSEPDMEIQSGGGTELSVFAKP  
SSPMVSGPAARAVPQQIVAF TCRSHGFFPRNLTLKWFKNGNEISHLETSVEPEETS SVSYRVSSTVQVVLEPRD  
VRSQIICEVDHVTLDRAPLRGIAHISEFIQVPPTLEISQQPTMVWNVIIVTCQIQKFYPPRFQVTWLENGNIS  
RREVPFTLIVNKDGTYNWISCLLVNISALEENMVVTCQVEHDGQAEVIETHTVVVTEHQVRVKG TATKSGEVFT  
PPLCLNVN WASFFMYKVTFLLIIVAL S\*

>ENSMUSP00000103986\_c.481:C>T\_p.T161I ENSMUST00000108349.2|Sirpblc-  
202|ENSMUSG00000074677|-|chr3:g.15887350:G>A  
MLLLDAWTHI PHCVLLLI LLLGLKAMRELKVIQPVKSFFV GAGGSATLNCTVTSLLPVGPIRWFKGVGQSRLL  
IYSFTGERFPRITNVSDVTKRSNLDFSIRISNVTPADSGTY YCVKFQ RGPSEPDMEIQSGGGTELSVFAKPSS  
PMVSGPAARAVPQQIVAF TCRSHGFFPRNLTLKWFKNGNEISHLETSVEPEETS SVSYRVSSTVQVVLEPRDVR  
SQIICEVDHVTLDRAPLRGIAHISEFIQVPPTLEISQQPTMVWNVIIVTCQIQKFYPPRFQVTWLENGNISRR  
EVPFTLIVNKDGTYNWISCLLVNISALEENMVVTCQVEHDGQAEVIETHTVVVTEHQVRVKG TATKSGEVFTPP  
LCLNVN WASFFMYKVTFLLIIVAL S\*

>ENSMUSP00000043492\_c.1044:G>T\_p.A349S ENSMUST00000037141.9|Setd7-  
201|ENSMUSG00000037111|-|chr3:g.51428784:C>A  
MDSDDVEVVEEAVEGHLDDDG LPHGFCTVYSSDRFEGNFVHGEKNGRKGFFFDGSTLEGYYVDDALQGGV  
YTYEDGGVLQGTYYVDGELNGPAQEYDSDGRLIFKGYKDNRRHGVCIWHPDGGSLVGEVNEDEGEMTGEKIA Y  
VYPDQRTALYKGFIDGEMLEGLATLMATEEGRPHFEVTS GSSVYHFDKSTSSCISSDALLPDPYESERVYVA



DSLISSAGEGLFSKVAVGPNVTVMSEFYNGVRITHQEVDSDRDWALNGNTLSLDEETVIDVPEPYNHVSKYCASLG  
 HKANHSFTPNVCVYDLFVHPRFGPIKCIRTLRAVEAEELTVAYGYDHSPPGKSGPESPEWYQVELKAFQATQQ  
 K\*  
 >ENSMUSP00000029419\_c.814:T>G\_p.F272C ENSMUST00000029419.8|Veph1-  
 201|ENSMUSG00000027831|-|chr3:g.66112988:A>C  
 MHQLFRLVLGQKDLKAGDLFSLDDAEIEDSLTEALEQIKVISSSLDYQTNNNDQAVVEICITRITTAIRETE  
 SIEKHARALVGLWDSCLEHNLRPAGKDEDTPHAKIASDIMSCILQYNRTFVMVLAVPIAVKFLHRGSKELCR  
 NMSNYLSLAAITKADLLADHTEGIIKSILQGNAMLLRVLPAVYEKQFPINRHLAELLALMSQLEQTEQYHLL  
 RLLHVAAKRKDVEVVQKCVFLIRNLKDYNDIILNILEIAGHEPLALNSCLPMLKEIAEQFPYLTGQMAR  
 IFGAVGHVDEERARSCLRYLVSQLANMEHPFHILLLEIKSITDAFSSILGPHSRDIFRMSNSFTNIAKLLSR  
 QLENSKADSSRRKTSTEVSIPEKLELNSMEPESEDHEKLVKIQAFEDKINAESNTPGSGRRYSLDHISKEE  
 RKSIRFSRSLALNTVLTNGVSVEDNEVEEKAGMHASISLSQIDPLSHGIGKLPFKTDTHGSPLRNSSASHP  
 SIIHTEPETMPETFKENIQEEILEAATSPIEYQDKLYLHLRENLSKVKAYALEIAKKVPIPDQCTIEDTMRSC  
 VAKLFFTCSLKGYCLYSKSSFILVSOAPQPWIQVMFLSQSLFPEPLSIQSGSVQFLKALWEKTQDTGAHSF  
 EVAMTESTFPQKDLQQLHLEEVRFDFVGFSETAGAWQCFCMNNPEKATVVNQDGOPLIEGKLEKQVWRW  
 KFIKRWKTHYFTLAGNQLLFQKGSKDDPDDSPIELSKVQSVKAVAKRRDRSLPRAFEIFDTSKTYVFKAKD  
 EKNAEELWQCINVALAQAKERESREVTTYL\*  
 >ENSMUSP00000056728\_c.123:C>G\_p.P42A ENSMUST00000054825.5|Rarres1-  
 201|ENSMUSG00000049404|-|chr3:g.67422625:G>C  
 MQPRQPPMALLLSLWLLPSLALAAAVTEPADLEYTEVPRQAAAVGLPRGILQLAARAALHFFNFRAGSPSAL  
 RVLATVQEGRAWVNPQEGCEVDLVFSTEQYNPEQEGERLGKCSARVFFKNEKPRPAVNVTCARLFDKVKRQEK  
 DYRLYKQMKQLKTPHLSISIPDSHGHDNSLRPLWDLAFLGSSVVMWEKTTQVLHYYLVQLSSVERLKTDDDS  
 IDFDFTVLLHEFSTQEIIPCRHLVWYPGKPLKVNHYHCQEQQSPEEASGTMEASAMAPPEFGNF\*  
 >ENSMUSP00000135168\_c.1170:A>C\_p.I391L ENSMUST00000175903.9|Arhgef2-  
 207|ENSMUSG00000028059|+|chr3:g.88540665:A>C  
 MNRSVGPEFUGEDPVPHGLPQCCPAAVESREQLLEVEGREENQEDNKDGFHTSLLRSGAFRARSYTTDSFK  
 RHSWGPGEKQDPIISRRRLQSSECPGSGEAPFLQSLLEELGTPLGAQQQEQQQEQEQRQPFHRGQSFQCYPSA  
 ASSVPSVTGMLSKAVSMSDINLLSDCSDPNGNSPQSYVTDLSKCGKQLEEDSGTWAGSSLRRTFSFLLGMTGR  
 DKTREKEKMEAKDARYTNGHLFTTISVSGMTMCYACNKSITAKEALICPTCNVTIHNRCRDLTANCTKVQKQ  
 QKKAALLRNNTALQSVSLRSKTTTRERPTSAIYPSDSFRQSLGSRRLSSLSLAKSVSTTNIAGHFNDESPL  
 GLRQILSQSTDSLNRNRTLSVESLLDEEVFYNELMSDFEMDEKDFEADSWSLAVDSSFLQHQKKEVMKKQDV  
 IYELIQTELHHVRTLKIMTRLFRFGMLEELQMEPEVVQGLFPCVDELSDIHTRFLNQLLERRRQALCPGSTRN  
 FVIHRLGDLISQFSGSNAEQMRKTYSEFCSRHTKALKLYKELYARDKRFQFIRKMTSAVLKRHVQECIL  
 LVTQRITKYPVLINRILQNSHGVEEYQDLASALGLVKELLSNVDQDVHELEKEARLQEIYNRMDPRAQTPVP  
 GKGFGRDELLRRKLIHEGCLLWKTATGRFKDVLVLLMTDVLVFLQEKDQKIYFTSLDKPSVSVLQNLIVRDI  
 ANQAKGMFLISSGPPEMYEVHAASRDRTTIRVIQSQSVRLCPSREDFPLIETEDKAYLRRIKTKLQKQKQAL  
 VELLQKNVELFAEMVHFQALKAGFVGMPPALPRGLFRLESFESLRGERLLKDALREVEGLKDLLGPCVDLP  
 MTSREPALPLDSDSGSCPGVTANGEARTFNNGSIELCRADSDSSQKDRNGNQLRSPQEEVLQPLINLYGLLHGL  
 QAVVVQERLMEALFPEGPERWEKLSRANSRDGEAGRAAVASVTPEKQATELALLQRQHTLLQEELRRCQRLG  
 EERATEAGSLEARLRESEQARALLEREAEIIRQLAALGQNEPLPAEAPWARRPLDPRRRSLPAGDALYLSFN  
 PPQPSRGHDRLDLPVTVRSLSLHRPFDREAQELGSPEDRLQDSSDPDTGSEEEVSSRLSPPHSPRDFTRMQDIP  
 EETESRDGEPTASES\*  
 >ENSMUSP00000134859\_c.519:A>C\_p.I174L ENSMUST00000177023.8|Arhgef2-  
 225|ENSMUSG00000028059|+|chr3:g.88540665:A>C  
 MTGRDKTREKEKMEAKDARYTNGHLFTTISVSGMTMCYACNKSITAKEALICPTCNVTIHNRCRDLTANCTK  
 VKQKQKKAALLRNNTALQSVSLRSTTTTRERPTSAIYPSDSFRQSLGSRRLSSLSLAKSVSTTNIAGHFNDES  
 PLGLRQILSQSTDSLNRNRTLSVESLLDEGVEVFYNELMSDFEMDEKDFEADSWSLAVDSS  
 >ENSMUSP00000135612\_c.525:A>C\_p.I176L ENSMUST00000176539.8|Arhgef2-  
 222|ENSMUSG00000028059|+|chr3:g.88540665:A>C  
 MTGRDKTREKEKMEAKDARYTNGHLFTTISVSGMTMCYACNKSITAKEALICPTCNVTIHNRCRDLTANCTK  
 VKQKQKKAALLRNNTALQSVSLRSTTTTRERPTSAIYPSDSFRQSLGSRRLSSLSLAKSVSTTNIAGHFND  
 ESPLGLRQILSQSTDSLNRNRTLSVESLLDEGVEVFYNELMSDFEMDEKDFEADSWSLAVDSSFLQHQKKEV  
 MKKQDVYELIQTELHHVRTLKIMTRLFRFGMLEELQ  
 >ENSMUSP00000134840\_c.519:A>C\_p.I174L ENSMUST00000177498.8|Arhgef2-  
 231|ENSMUSG00000028059|+|chr3:g.88540665:A>C  
 MTGRDKTREKEKMEAKDARYTNGHLFTTISVSGMTMCYACNKSITAKEALICPTCNVTIHNRCRDLTANCTK  
 VKQKQKKAALLRNNTALQSVSLRSTTTTRERPTSAIYPSDSFRQSLGSRRLSSLSLAKSVSTTNIAGHFNDES  
 PLGLRQILSQSTDSLNRNRTLSVESLLDEGVEVFYNELMSDFEMDEKDFEADSWSLAVDSSFLQHQKKEVMK

KQDVIYELIQTELHHVRTLKIMTRLFRTGMLEELQMEPEVVQGLFPCVDELSDIHTRFLNQLLERRRQALCPG  
STRNFVIHRLGDLISQFSGSNAEQMRKTYSEFCSRHTKALKLYKELYARDKRFQQFIRKMTRS AVLKRHGVQ  
ECILLVTRITKYPVLINRILQNSHGVEEYQDLASALGLVKELLSNVDQDVHELEKEARLQEIYNRMDPRAQ  
TPVPGKGFGRDELRLRRLIHEGCLLWKTATGRFKDVLLMLTDVLFVFLQEKDQKYIFTSLDKPSVSVLQNL  
VRDIANQAKGMFLISSGPPMEYEVHAASRDDRTTWIRVIQQSVRLCPSREDFPLIETEDKAYLRRIKTKLQK  
NQALVELLQKNVELFAEMVHFQALKAGFVGMPPALPRGLFRLESFESLRGERLLKDALREVEGLKDLLGPC  
VDLPMTSREPALPLDSGSCPGVTANGEARTFNCSI ELCRADSDSSQKDRNGNQLRSPQEEVLQPLINLYGL  
LHGLQAVVVQERLMEALFPEGPERWEKLSRANSRDGEAGRAAVASVTPEKQATELALLQRQHTLLQEELRRC  
QRLGEERATEAGSLEARLRESEQARALLEREAEIIRQLAALGQNEPLPAEAPWARRPLDPRRSLPAGDALY  
LSFNPPQPSRGHRLDLPVTVRSLHRPFDDREAQELGSPEDRLQDSSDPDTGSEEEVSSRSLSPPHSPRDFTRM  
QDIPEETESRDGEPTASES\*

>ENSMUSP00000134834\_c.525:A>C\_p.I176L ENSMUST00000176500.8|Arhgef2-  
219|ENSMUSG00000028059|+|chr3:g.88540665:A>C

MTGRDKTREKEKMEAKDARYTNGHLFTTISVSGMTMCYACNKSI TAKEALICPTCNVTIHNRC KDTLANCTK  
VKQKQQAALLRNNTALQSVSLRSKTTTRERPTS AIYPSDSFRQSLGSRRLSLSLAKSVSTTNIAGHFND  
ESPLGLRQILSQSTDLSLNRNRTLSVESLLDEGVEVFYNELMSDFEMDEKDFEADSWSLAVDSSFLQQHKKEV  
MKKQDVIYELIQTELHHVRTLKIMTRLFRTGMLEELQMEPEVVQGLFPCVDELSDIHTRFLNQLLERRRQALC  
PGSTRNFVIHRLGDLISQFSGSNAEQMRKTYSEFCSRHTKALKLYKELYARDKRFQQFIRKMTRS AVLKRHG  
VQECILLVTRITKYPVLINRILQNSHGVEEYQDLASALGLVKELLSNVDQDVHELEKEARLQEIYNRMDP  
AQTTPVPGKGFGRDELRLRRLIHEGCLLWKTATGRFKDVLLMLTDVLFVFLQEKDQKYIFTSLDKPSVSVLQ  
LIVRDIANQAKGMFLISSGPPMEYEVHAASRDDRTTWIRVIQQSVRLCPSREDFPLIETEDKAYLRRIKTKLQ  
QKNQALVELLQKNVELFAEMVHFQALKAGFVGMPPALPRGLFRLESFESLRGERLLKDALREVEGLKDLLG  
PCVDLPMTSREPALPLDSGSCPGVTANGEARTFNCSI ELCRADSDSSQKDRNGNQLRSPQEEVLQPLINLY  
GLLHGLQAVVVQERLMEALFPEGPERWEKLSRANSRDGEAGRAAVASVTPEKQATELALLQRQHTLLQEELR  
RCQRLGEERATEAGSLEARLRESEQARALLEREAEIIRQLAALGQNEPLPAEAPWARRPLDPRRSLPAGDA  
LYLSFNPPQPSRGHRLDLPVTVRSLHRPFDDREAQELGSPEDRLQDSSDPDTGSEEEVSSRSLSPPHSPRDFTR  
M QDIPEETESRDGEPTASES\*

>ENSMUSP00000135177\_c.525:A>C\_p.I176L ENSMUST00000175779.8|Arhgef2-  
206|ENSMUSG00000028059|+|chr3:g.88540665:A>C

MTGRDKTREKEKMEAKDARYTNGHLFTTISVSGMTMCYACNKSI TAKEALICPTCNVTIHNRC KDTLANCTK  
VKQKQQAALLRNNTALQSVSLRSKTTTRERPTS AIYPSDSFRQSLGSRRLSLSLAKSVSTTNIAGHFND  
ESPLGLRQILSQSTDLSLNRNRTLSVESLLDEGVEVFYNELMSDFEMDEKDFEADSWSLAVDSSFLQQHKKEV  
MKKQDVIYELIQTELHHVRTLKIMTRLFRTGMLEELQMEPEVVQGLFPCVDELSDIHTRFLNQLLERRRQALC  
PGSTRNFVIHRLGDLISQFSGSNAEQMRKTYSEFCSRHTKALKLYKELYARDKRFQQFIRKMTRS AVLKRHG  
VQECILLVTRITKYPVLINRILQNSHGVEEYQDLASALGLVKELLSNVDQDVHELEKEARLQEIYNRMDP  
AQTTPVPGKGFGRDELRLRRLIHEGCLLWKTATGRFKDVLLMLTDVLFVFLQEKDQKYIFTSLDKPSVSVLQ  
LIVRDIANQAKGMFLISSGPPMEYEVHAASRDDRTTWIRVIQQSVRLCPSREDFPLIETEDKAYLRRIKTKLQ  
QKNQALVELLQKNVELFAEMVHFQALKAGFVGMPPALPRGLFRLESFESLRGERLLKDALREVEGLKDLLG  
PCVDLPMTSREPALPLDSGSCPGVTANGEARTFNCSI ELCRADSDSSQKDRNGNQLRSPQEEVLQPLINLY  
GLLHGLQAVVVQERLMEALFPEGPERWEKLSRANSRDGEAGRAAVASVTPEKQATELALLQRQHTLLQEELR  
RCQRLGEERATEAGSLEARLRESEQARALLEREAEIIRQLAALGQNEPLPAEAPWARRPLDPRRSLPAGDA  
LYLSFNPPQPSRGHRLDLPVTVRSLHRPFDDREAQELGSPEDRLQDSSDPDTGSEEEVSSRSLSPPHSPRDFTR  
M QDIPEETESRDGEPTASES\*

>ENSMUSP00000029694\_c.570:A>C\_p.I191L ENSMUST00000029694.14|Arhgef2-  
201|ENSMUSG00000028059|+|chr3:g.88540665:A>C

MSRIESLTRARIDRSKEQATKTREKEKMEAKDARYTNGHLFTTISVSGMTMCYACNKSI TAKEALICPTCNV  
TIHNRC KDTLANCTKVKQKQQAALLRNNTALQSVSLRSKTTTRERPTS AIYPSDSFRQSLGSRRLSLSL  
AKSVSTTNIAGHFND ESPLGLRQILSQSTDLSLNRNRTLSVESLLDEGVEVFYNELMSDFEMDEKDFEADSW  
LAVDSSFLQQHKKEVMKKQDVIYELIQTELHHVRTLKIMTRLFRTGMLEELQMEPEVVQGLFPCVDELSDIHT  
RFLNQLLERRRQALCPGSTRNFVIHRLGDLISQFSGSNAEQMRKTYSEFCSRHTKALKLYKELYARDKRFQQ  
FIRKMTRS AVLKRHGVQECILLVTRITKYPVLINRILQNSHGVEEYQDLASALGLVKELLSNVDQDVHELE  
KEARLQEIYNRMDPRAQTTPVPGKGFGRDELRLRRLIHEGCLLWKTATGRFKDVLLMLTDVLFVFLQEKDQKY  
IFTSLDKPSVSVLQNLIVRDIANQAKGMFLISSGPPMEYEVHAASRDDRTTWIRVIQQSVRLCPSREDFPLIE  
TEDKAYLRRIKTKLQKNQALVELLQKNVELFAEMVHFQALKAGFVGMPPALPRGLFRLESFESLRGERLLK  
DALREVEGLKDLLGPCVDLPMTSREPALPLDSGSCPGVTANGEARTFNCSI ELCRADSDSSQKDRNGNQL  
RSPQEEVLQPLINLYGLLHGLQAVVVQERLMEALFPEGPERWEKLSRANSRDGEAGRAAVASVTPEKQATEL  
ALLQRQHTLLQEELRRCQRLGEERATEAGSLEARLRESEQARALLEREAEIIRQLAALGQNEPLPAEAPWAR

RPLDPRRSLPAGDALYLSFNPPQPSRGHDRLDLPVTVRSLHRPFDDREAQELGSPEDRLQDSSDPDTGSEEE  
VSSRLSPPHSPRDFTRMQDIPEETESRDGEPTASES\*  
>ENSMUSP00000135397\_c.570:A>C\_p.I191L ENSMUST00000176804.8|Arhgef2-  
223|ENSMUSG00000028059|+|chr3:g.88540665:A>C  
MSRIESLTRARIDRSKEQATKTREKEKMKAKDARYTNGHLFTTISVSGMTMICYACNKSI TAKEALICPTCNV  
TIHNRCKDTLANCTKVKQKQKKAALLRNNTALQSVSLRSKTTTTRERPTSAIYPSDSFRQSLGSRRLGSSLSL  
AKSVSTTNIAGHFNDESPLGLRQILSQSTDSLNMNRNRTLSVESLLDEEVFYNELMSDFEMDEKDFEADSWSLA  
VDSSFLQQHKKEVMKKQDVIYELIQTE LHVVRLTKIMTRLFRTGMLEELQMEPEVVQGLFPCVDELSDIHTRF  
LNQLLERRRQALCPGSTRNFVIHRLGDLLISQFSGSNAEQMRKTYSEFCSRHTKALKLYKELYARDKRFQQFI  
RKMTRS AVLKRHGVQECILLVTQRITKYPVLINRILQNSHGVEEYQDLASALGLVKELLSNVDQDVHELEKE  
ARLQEIYNRMDPRAQTPVPGKGFGRDELRLRRLIHEGCLLWKTATGRFKDVLVLLM TDVLFVFLQEKDQKYIF  
TSLDKPSVVSQNLIVRDIANQAKGMFLISSGPPMEYEVHAASRDDRTTWIRVIQQSVRLCPSREDFPLIETE  
DKAYLRRIKTKLQKNQALVELLQKNVELFAEMVHFQALKAGFVGMPPALPRGLFRLESFESLGRERLLKDA  
LREVEGLKDLLGPCVDLPMTSREPALPLDSGSCPGVTANGEARTFNNGSIELCRADSDSSQKDRNGNQLRS  
PQEEVLQPLINLYGLLHGLQAVVVQQERLMEALFPEGPERWEKLSRANSRDGEAGRAAVASVTPEKQATELAL  
LQRQHTLLQEELRRCQRLGEERATEAGSLEARLRESEQARALLEREAEERRQLAALGQNEPLPAEAPWARRP  
LDPRRRSLPAGDALYLSFNPPQPSRGHDRLDLPVTVRSLHRPFDDREAQELGSPEDRLQDSSDPDTGSEEEVS  
SRLSPPHSPRDFTRMQDIPEETESRDGEPTASES\*  
>ENSMUSP00000103134\_c.489:A>C\_p.I164L ENSMUST00000107510.10|Arhgef2-  
202|ENSMUSG00000028059|+|chr3:g.88540665:A>C  
MKEAKDARYTNGHLFTTISVSGMTMICYACNKSI TAKEALICPTCNVTIHNRCKDTLANCTKVKQKQKKAALLR  
NNTALQSVSLRSKTTTTRERPTSAIYPSDSFRQSLGSRRLGSSLSLAKSVSTTNIAGHFNDESPLGLRQILSQ  
STDSLNMNRNRTLSVESLLDEGVEVFYNELMSDFEMDEKDFEADSWSLAVDSSFLQQHKKEVMKKQDVIYELIQ  
TELHHVRLTKIMTRLFRTGMLEELQMEPEVVQGLFPCVDELSDIHTRFLNQLLERRRQALCPGSTRNFVIHRL  
GDLLISQFSGSNAEQMRKTYSEFCSRHTKALKLYKELYARDKRFQQFIRKMTRS AVLKRHGVQECILLVTQRIT  
TKYPVLINRILQNSHGVEEYQDLASALGLVKELLSNVDQDVHELEKEARLQEIYNRMDPRAQTPVPGKGFPG  
RDELRLRRLIHEGCLLWKTATGRFKDVLVLLM TDVLFVFLQEKDQKYIFTSLDKPSVVSQNLIVRDIANQAKG  
MFLISSGPPMEYEVHAASRDDRTTWIRVIQQSVRLCPSREDFPLIETEDKAYLRRIKTKLQKNQALVELLQK  
NVELFAEMVHFQALKAGFVGMPPALPRGLFRLESFESLGRERLLKDALREVEGLKDLLGPCVDLPMTSREP  
ALPLDSGSCPGVTANGEARTFNNGSIELCRADSDSSQKDRNGNQLRS PQEEVLQPLINLYGLLHGLQAVVVQ  
QERLMEALFPEGPERWEKLSRANSRDGEAGRAAVASVTPEKQATELALLQRQHTLLQEELRRCQRLGEERATE  
AGSLEARLRESEQARALLEREAEERRQLAALGQNEPLPAEAPWARRPLDPRRSLPAGDALYLSFNPPQPSR  
GHDRDLDPVTVRSLHRPFDDREAQELGSPEDRLQDSSDPDTGSEEEVSSRLSPPHSPRDFTRMQDIPEETESR  
DGEPTASES\*  
>ENSMUSP00000127843\_c.483:A>C\_p.I162L ENSMUST00000170653.9|Arhgef2-  
203|ENSMUSG00000028059|+|chr3:g.88540665:A>C  
MKEAKDARYTNGHLFTTISVSGMTMICYACNKSI TAKEALICPTCNVTIHNRCKDTLANCTKVKQKQKKAALLR  
NNTALQSVSLRRTTTRERPTSAIYPSDSFRQSLGSRRLGSSLSLAKSVSTTNIAGHFNDESPLGLRQILSQST  
DSLNMNRNRTLSVESLLDEGVEVFYNELMSDFEMDEKDFEADSWSLAVDSSFLQQHKKEVMKKQDVIYELIQTE  
LHHVRLTKIMTRLFRTGMLEELQMEPEVVQGLFPCVDELSDIHTRFLNQLLERRRQALCPGSTRNFVIHRLGD  
LLISQFSGSNAEQMRKTYSEFCSRHTKALKLYKELYARDKRFQQFIRKMTRS AVLKRHGVQECILLVTQRITK  
YPVLINRILQNSHGVEEYQDLASALGLVKELLSNVDQDVHELEKEARLQEIYNRMDPRAQTPVPGKGFGRD  
ELLRRLIHEGCLLWKTATGRFKDVLVLLM TDVLFVFLQEKDQKYIFTSLDKPSVVSQNLIVRDIANQAKGMF  
LISSGPPMEYEVHAASRDDRTTWIRVIQQSVRLCPSREDFPLIETEDKAYLRRIKTKLQKNQALVELLQKNV  
ELFAEMVHFQALKAGFVGMPPALPRGLFRLESFESLGRERLLKDALREVEGLKDLLGPCVDLPMTSREPAL  
PLDSGSCPGVTANGEARTFNNGSIELCRADSDSSQKDRNGNQLRS PQEEVLQPLINLYGLLHGLQAVVVQ  
RLMEALFPEGPERWEKLSRANSRDGEAGRAAVASVTPEKQATELALLQRQHTLLQEELRRCQRLGEERATEAG  
SLEARLRESEQARALLEREAEERRQLAALGQNEPLPAEAPWARRPLDPRRSLPAGDALYLSFNPPQPSRGH  
DRDLDPVTVRSLHRPFDDREAQELGSPEDRLQDSSDPDTGSEEEVSSRLSPPHSPRDFTRMQDIPEETESRDG  
EPTASES\*  
>ENSMUSP00000135131\_c.489:A>C\_p.I164L ENSMUST00000177303.8|Arhgef2-  
229|ENSMUSG00000028059|+|chr3:g.88540665:A>C  
MKEAKDARYTNGHLFTTISVSGMTMICYACNKSI TAKEALICPTCNVTIHNRCKDTLANCTKVKQKQKKAALLR  
NNTALQSVSLRSKTTTTRERPTSAIYPSDSFRQSLGSRRLGSSLSLAKSVSTTNIAGHFNDESPLGLRQILSQ  
STDSLNMNRNRTLSVESLLDEEVFYNELMSDFEMDEKDFEADSWSLAVDSSFLQQHKKEVMKKQDVIYELIQTE  
LHHVRLTKIMTRLFRTGMLEELQMEPEVVQGLFPCVDELSDIHTRFLNQLLERRRQALCPGSTRNFVIHRLGD  
LLISQFSGSNAEQMRKTYSEFCSRHTKALKLYKELYARDKRFQQFIRKMTRS AVLKRHGVQECILLVTQRITK  
YPVLINRILQNSHGVEEYQDLASALGLVKELLSNVDQDVHELEKEARLQEIYNRMDPRAQTPVPGKGFGRD

ELLRRKLIHEGCLLWKTATGRFKDVLVLLMLTDLVFLVFLQEKDQKYIFTSLDKPSVSVSLQNLIVRDIANQAKGMFLISSGPPPEMYEVHAASRDDRTTWIRVIQQSVRLCPSREDFPLIETEDKAYLRRIKTKLQKNQALVELLQKNV  
ELFAEMVHFQALKAGFVGMPPPALPRGLFRLESFESLGRERLLKDALREVEGLKDLLLGPVLDLPMTSREPAL  
PLDSDSGSCPGVTANGEARTFNCSIELCRADSDSSQKDRNGNQLRSPOEEVLQPLINLYGLLHGLQAVVQQE  
RLMEALFPEGPERWEKLSRANSRDGEAGRAAVASVTPEKQATELALLQRQHTLLQEELRRCQRLGEEERATEAG  
SLEARLRESEQARALLEREAEERRQLAALGQNEPLPAEAPWARRPLDPRRSLPAGDALYLSFNPPQPSRGH  
DRLDLPVTRSLRHRPFDDREAQELGSPEDRLQDSSDPDTGSEEEVSSRSLSPPHSPRDFTRMQDIPPEETESRDG  
EPTASES\*

>ENSMUSP00000135428\_c.546:A>C\_p.I183L ENSMUST00000175911.8|Arhgef2-  
208|ENSMUSG00000028059|+|chr3:g.88540665:A>C  
MSGNRRQPSRRGQTREKEKMKAKDARYTNGHLFTTISVSGMTMCYACNKSITAKEALICPTCNVTIHNRCKD  
TLANCTKVKQKQQAALLRNNTALQSVSLRSKTTTTRERPTSAYPSDSFRQSLLSGRRGLSSLSLAKSVSTTN  
IAGHFNDESPLGLRQILSQSTDSLNMNRNTLSVESLLEDEGVEVFYNELMSDFEMDEKDFEADSWSLAVDSSFL  
QQHKKEVMKKQDVIYELIQTELHHVRTLTKIMTRLFRTGMLEELQMEPEVVQGLFPCVDELSDIHTRFINQLLE  
RRRQALCPGSTRNFVIHRLGDLISQFSGSNAEQMRKTYSEFCSRHTKALKLYKELYARDKRFQFIRKMTRS  
AVLKRHGVQECILLVTQRITKYVPLINRILQNSHGVEEYQDLASALGLVKELLSNVDQDVHELEKEARLQEI  
YNRMDPRAQTVPVPGKGFGRDELRLRRKLIHEGCLLWKTATGRFKDVLVLLMLTDLVFLVFLQEKDQKYIFTSLDKP  
SVVSLQNLIVRDIANQAKGMFLISSGPPPEMYEVHAASRDDRTTWIRVIQQSVRLCPSREDFPLIETEDKAYLR  
RIKS\*

>ENSMUSP00000135771\_c.483:A>C\_p.I162L ENSMUST00000176243.8|Arhgef2-  
212|ENSMUSG00000028059|+|chr3:g.88540665:A>C  
MKEAKDARYTNGHLFTTISVSGMTMCYACNKSITAKEALICPTCNVTIHNRCKDTLANCTKVKQKQQAALLR  
NNTALQSVSLRTTTTTRERPTSAYPSDSFRQSLLSGRRGLSSLSLAKSVSTTNIAAGHFNDESPLGLRQILSQST  
DSLNMNRNTLSVESLLEDEGVEVFYNELMSDFEMDEKDFEADSWSLAVDSSFLQQHKK

>ENSMUSP00000140251\_c.876:G>A\_p.A293T ENSMUST00000186583.7|Ash11-  
202|ENSMUSG00000028053|+|chr3:g.88888999:G>A  
MDPRNTAMGLGSDSEGFSRKSPTINPGTLASKREAEIEGATEEEDPRKRNRRERGTEAGKEDGSTDAQQQFS  
VKETNFSEGNLKLKIGLQAKRTKKPPKNLENYVCRPAIKTTIKHSRKALKSGKMTDEKNEHCPSKWDSSKLFK  
KAGDATAIDCQAEESIHLHSQGESNPLSKKLSPVHSQMAFYISAAPSLVGSRDPIKDRALLNGGTSVTEKLA  
QLIATCPPSKSSKAKPKKLTGTTVGLVSKDLIRKPGVGS IAGI IHKDLIKKPALSTAVGLVTKDPGKKPMFN  
TAVGLINKDSVKKLGTGTAVFINKDLGKKPGAITTVGLLSKESGKKGIGIVPGLVNKESGKKGGLGTVVGL  
VNKELGKKLSSTVGLVAKDVTKKIVASSAMGLVNKDI GKLLNCPMAGQLGSKDALNLKSEALLPTQEQLKAS  
CSANISNHDSQELPESLKDSATGKAFAEKSVMRHSKESMLEKFSVRKEITNLEKEMFNEGTCIQQDNFSSSERG  
AFETSKHEKQPPVYCTSPDFQIGGASDASTAKSPFSAVGENLPSSSPTVSVNPVTRSPPEASSQLVPNPLLL  
NSTAEQMEEISESIGSKQFTAESTHLNVGHRSLGHLSLIECKGIDKELNESKNTHLDIPRISSSLGKKPCLTS  
DSGITHAITPSVNVFTSLFSNKPFLLKLGAVTAPDKHCQVAESLSSSFQSKPLKRRKGRKPRWTKVVARSTCRSP  
KGLDLERSELFKNVSCSSLSNSSEPAKFMKTIGASSFVDHDFLKRRLPKLSKSSAPSLALLTDSEKPSHKSFI  
THKLSSSMCVTSDLLSDIYKPKRGRPKSKEMPQLEGPPKRTLKI PASKVFSLSQSKEEQEPPIIQPEIEIPSFK  
QSLSVSPFPKRRGRPKRQMRSPVKMKPPVLSVAPFVATESPSKLESESENHRSSSDFFESEDQLQDTDLDDDS  
HRQSVCSMSDLEMEPDKKISKRNNGQLMKTIRKINKMKTLLKRLNQLILSSSVESNKGKQVSKLHNTVSS  
LAATFGSKLQGINVSKKGTIYIGKRRGRKPKTVLNGLLSGSPASLAVLEQTAQQAAGSALGQILPPLLPSPA  
SSSEILPSPICSSQSSGTSGGQSPVSSDAGFVEPSSVPLYLHVHSRQGSMIQTLAMKKASKGRRRLSPPTLLPNS  
PSHLSLSELTSLEATPSVSESHSDETI PSDSGIGTDNNSTSDRAEKFCGQKRRRHSFEHISLIPPETSTVLNS  
LKEKHKHKCKRRSHDYSYDKMKRQKRKRRKKYPQLRNRQDPDFIAELEELISRLSEIRITHRSHHFIPRDL  
PTIFRINFNSFYTHPSFPLDPLHYIRKPDLLKRRGRPPKMRAMAEMPFMHSLSFPLSSTGFYPSYGMPPYSPS  
PLTAAPIGLGYGRYPPTLYPPPPSPSFTTLPPLPSYMHAGHLLLNPTKYHKKKHKLLRQEAFLTTSRTPLLS  
MSTYPSVPEMAYGWMVEHKHRHRKHREHRSEQPQVSMDSGSSRSVLESKRYRFGKDTVGDRIYKHEKHC  
HMSCPHLSPSKNLINREEQVVSREPSESSSLALGLQTPLOIDCESSPSLSLGGFTPNSEPASSDEHMNLFTS  
AIGSCRVSNPSSCRKKTDSPLGFVQDTALNRPHRKEPLPSSERAIQSLAGSQSASDKPSQRSSESTNCSP  
TRKRSSSESTSVNGVPSRS PRLVASMDDSDVSLQRI VHHDEQESMEKNGDASITTVSAPPSSPGHSYSK  
ERALGKSDSLLVPAVPNDSCSNIPLLSEKSASRCSPHHIKRSVVEAMQRQARKMCNYDKILATKKNLDHVNKI  
LKAKKLQRQARTGNFVRRRGRPRKCPQAVVSMQAFQAAQFVSPPELNEGEDMSLHLSPTDVTVDVIEAVVQS  
VNLTSEHKKGVKRKNWALLEEQTRKKQKTVPPEEEQENNKKEYIETPVEIPSPLETAPAESEPENTLQPVLALIP  
REKAPRPPKPKKYQAGLYSDVYKTIIDPKSRLIQLKKEKLEYTPGEHEYGLFPAPIHVGYLQRKRI DFQLPY  
DILWQWKNQLYKKPDVPLYKKIRSNVYVDVKPLSGYEATTCNCKKPDDDTRKGCDDCLNRMIFAECSPNTC  
PCGEQCCNQRIRHEWVQCLERFRAEEKGWGIRTKEPLKAGQFIIEYLGEVVSEQEFNRNMIQYHNHSDHYC  
LNLDSGMVIDSYRMGNARFINHSCDPNCEMOKWSVNGVYRIGLYALKDMPAGTELTYDYNFHSFNVEKQQLC  
KCGFEKCRGIIGGKSQRMNGLPSHKGSSSSTHRKSARAKEKRSKHKLKKRKGHPSEEPSENINTPTRLTPQ

LQMKPMSNRERNFVLKHHVFLVRNWEKIHQKQEEVKHTRDIHSASLYTRWNGLCRDDGNIKSDVFMTOFSALQ  
TARSVRTRRLAAAEENLEVARAARLAQIFKEICDGIISYRDSSQOTLAAPLLNLPKKNADYYEKISDPLDL  
STIEKQILIGYYKTVEAFDADMLKVFRNAEKYYGRKSPIGRDVCRLRKAYYSARHEASAQIDEIVGETASEAD  
SSETSVSEKESGHEKDDDDVIRICGLYKDEGLMIQCDKCMVWQHCDKCMGVNTDVEHYLCEQC DPRPVDREVPM  
IPRPHYAQPGCVYFICLLRDDLLLRQGDVYLMRDSRRTPDGHPVRQSYRLLSHINRDKLDIFRIEKLWKNEK  
EERFAFGHHYFRPHETHHSPSRFRYHNELFRVPLYEIIIPLEAVVGTCCVLDLYTYCKGRPKGIKEQDVYICDY  
RLDKSAHLFYKIHRNRYPVCTKPYAFDHFPPKLTTPKRDFSPHYVPDNYKRNGGRSSWKSERSKPPKLDLGOED  
DALPLIEEVLASQEAAREVPSPEEPDQERATGDIGDAEKKPEESSQEAQLASTPEERRHSQRERLNQILLNL  
LEKIPGKNAIDVTYLLEEGSGRKLRRRTLFI PENSFRK\*  
>ENSMUSP00000088451\_c.876:G>A\_p.A293T ENSMUST00000090933.5|Ash11-  
201|ENSMUSG00000028053|+|chr3:g.88888999:G>A  
MDPRNTAMGLGSDSEGF SRKSPSTINPGTLASKREAEIEGATEEEDPRKRNRRERGTEAGKEDGSTDAQQOFS  
VKETNFSEGNLKLKIGLQAKRTKKPKNLENYVCRPAIKTTIKHSRKALKSGKMTDEKNEHCPSKWDSSKLFK  
KAGDATAIDCQAEESIHLHSQGESNPLSKKLSPVHSQMADYISAAPSLVGSRDPIKDRALLNGGT SVTEKLA  
QLIATCPPSKSSKAKPKLGTGTTVGLVSKDLIRKPGVGS IAGI IHKDLIKK PALSTAVGLVTKDPGKKPMFN  
TAVGLINKDSVKKLGTGTAVFINKDLGKKPGAITTVGLLSKESGKKGIGIIVPGLVNKESGKKGIGLTVVGL  
VNKELGKLLSSTVGLVAKDVTTKIVASSAMGLVNKDIGKLLNCPMAGQLGSKDALNLKSEALLPTQEQLKAS  
CSANISNHDSQELPESLKDSATGKAFEKSVMRHSKESMLEKFSVRKEITNLEKEMFNEGTCIQDDNFS SERG  
AFETSKHEKQPPVYCTSPDFQIGGASDASTAKSPFSAVGESNLPSSTVSVNPVTRSPPEASSQLVNPPLLL  
NSTAEQMEIISESIGKSQFTAESTHLNVGHRSLGHLSLIECKGIDKELNESKNTHLDIPRISSSLGKKPSLTS  
DSGIHAITPSVVNFTSLFSNKPFLKLGAVTAPDKHCQVAESLSSSFQSKPLKKRKRGRKPRWTKVVARSTCRSP  
KGLDLERSELFKNVSCSSLSNSSEPAKFMKTIGASSFVDHDFLKRRLPKLSKSSAPSLALLTDSEKPSHKSF  
THKLSSSM CVTSDLLSDIYKPKRGRPKSKEMPQLEGPPKRTLKI PASKVFSLQSKEEQEPPI LQPEIEI PSFK  
QSLSVSPFPKGRGRPKRQMRSPVKMKPPVLSVAPFVATESPSKLESESENHRSSSDFFESEDQLQD TDDLDDS  
HRQSVCSMSDLEMEDKIKSRNNGQLMKTIRKINKMKT LKRKLLNQLISSSVESNKGKGVQSKLHNTVSS  
LAATFGSKLPGQINVSCKGTIYIGKRRGRKPKTVNLGLLSGSPASLAVLEQTAQQAAGSALGQILPPLLPSPA  
SSSEILPSPICQSSSGTSGGQSPVSSDAGFVEPSSPYLHVHSRQGSMIQTLAMKKASKGRRRLSPPTLLPNS  
PSHLSLSELTSLKEATSPVSESHSDETI PSDSGIGTDNNSTSDRAEKFCGQKKRRHSFEHISLIPPETSTVLNS  
LKEKHKHKCKRRSHDYSYDKMKRQKRKRKKYPQLRNRQDPDFIAELEELISRLSEIRITHRSHHFIPRDL  
PTIFRINFNSFYTHPSFPLDPLHYIRKPD LKKRGRPPKMRAMAEMPFMHLSLSPLSSTGFYPSYGMPPSPS  
PLTAAPIGLGYYGRYPPTLYPPPPSPSFTTLPPLPPSYMHAGHLLNPTKYHKKKHKLLRQEAFLTTSRTPLLS  
MSTYPSVPPMAYGWMVEHKHRHRHKHREHRSEQPQVSMDSGSSRSVLES LKRYRFGKDTVGDYKHKKEKHC  
HMSCPHLSPSKNLINREEQWVSREPSESSSLALGLQTPLOIDCESSPSLSLGGFTPNSEPASSDEHMNLFTS  
AIGSCRVSNNPSSCRKLTDS PGLFPVQDTALNRPHRKEPLPSSERAIQSLAGSQSASDKPSQRSSESTNCSP  
TRKRSSSESTSTVNGVPSRS PRLVASMDDSDVSLQLRIVHDEQESMEKNGDASITTVSAPSSSPGHYSK  
ERALGKSDSLLVPAVPNDSCSNIPLLSEKASARCSPHHIKRSVVEAMQRQARKMCNYDKILATKKNLDHVNKI  
LKAKKLQRQARTGNFVKKRRPGRPRKCPLQAVVSMQAFQAAQVSPPELNEGEDMSLHLSPDTVTVDIEAVVQS  
VNLTSEHKKGVKRKNWLLLEEQTRKKQKTVPEEEQENNKSFIE TPVEIPSPLET PAEPSE PENTLQPV LALIP  
REKKAPRPPKKKYQRAGLYSDVYKTIDPKSRLIQLKKEKLEYTPGEHEYGLFPAPIHVGYL RQKRIDFQLPY  
DILWQWKHNQLYKKPDVPLYKIRSNVYVDVKPLSGYEATTCNCKPDDDRKGCDDCLNRMIFAECSPNTC  
PCGEQCCNQRIRHEWVQCLERFRAEEKGWGIRTKEPLKAGQFIEYLG EVVSEQEFNRNMIQYHNHSDHYC  
LNLDSGMVIDSYRMGNearFINHSCDPNCEMOKWSVNGVYRIGLYALKDMPAGTELTYDYNFHSFNVEKQQLC  
KCGFEKCRGIIGGKSQRMNGLPSHKGSSSTHRKSARAKEKRKSKHKLKRRKGGHPSEEPS ENINTPRTLTPQ  
LQMKPMSNRERNFVLKHHVFLVRNWEKIHQKQEEVKHTRDIHSASLYTRWNGLCRDDGNIKSDVFMTOFSALQ  
TARSVRTRRLAAAEENLEVARAARLAQIFKEICDGIISYRDSSQOTLAAPLLNLPKKNADYYEKISDPLDL  
STIEKQILIGYYKTVEAFDADMLKVFRNAEKYYGRKSPIGRDVCRLRKAYYSARHEASAQIDEIVGETASEAD  
SSETSVSEKESGHEKDDDDVIRICGLYKDEGLMIQCDKCMVWQHCDKCMGVNTDVEHYLCEQC DPRPVDREVPM  
IPRPHYAQPGCVYFICLLRDDLLLRQGDVYLMRDSRRTPDGHPVRQSYRLLSHINRDKLDIFRIEKLWKNEK  
EERFAFGHHYFRPHETHHSPSRFRYHNELFRVPLYEIIIPLEAVVGTCCVLDLYTYCKGRPKGIKEQDVYICDY  
RLDKSAHLFYKIHRNRYPVCTKPYAFDHFPPKLTTPKRDFSPHYVPDNYKRNGGRSSWKSERSKPPKLDLGOED  
DALPLIEEVLASQEAAREVPSPEEPDQERATGDIGDAEKKPEESSQEAQLASTPEERRHSQRERLNQILLNL  
LEKIPGKNAIDVTYLLEEGSGRKLRRRTLFI PENSFRK\*  
>ENSMUSP00000142428\_c.186:G>A\_p.G63R ENSMUST00000199538.5|S100a14-  
203|ENSMUSG000000042306|+|chr3:g.90435394:G>A  
MGQCRSANAEDAQEFSDVERA IETLIKNFHKYSVAGKKTLPALERDLVTQQLPHLMPSNCRLEEKIANLGN  
CND SKLEFGSFWELIGEAAKSVKMERPVTRS\*  
>ENSMUSP00000129862\_c.39:G>A\_p.G14R ENSMUST00000164481.7|S100a14-  
201|ENSMUSG000000042306|+|chr3:g.90435394:G>A



MGQCRSANAESNCRLEEKIANLGNCSKLEFGSFWELIGEAAKSVKMERPVTRS\*  
 >ENSMUSP00000126821\_c.186:G>A\_p.G63R ENSMUST00000167598.6|S100a14-  
 202|ENSMUSG00000042306|+|chr3:g.90435394:G>A  
 MGQCRSANAEDAQEFSDVERAIEETLIKFNHFKYSVAGKKETLTPAELRDLVTTQQLPHLMPSNCRLEEKIANLGN  
 CNDKLEFGSFWELIGEAAKSVKMERPVTRS\*  
 >ENSMUSP00000088366\_c.650:T>A\_p.F217L ENSMUST00000090853.5|Gm5773-  
 201|ENSMUSG00000068879|+|chr3:g.93680980:T>A  
 MSGDMEAKIWGSTQISVKEFCYEWITISNFSFCMGGIRRKIKSPVFSVLVANEVAVWCLRHPNGFDEESKDYLS  
 VYLVLVNCPKRQVRKFEFWIKNSQGEKYQYTQSLNVPSFQRKQNWGFSKFILRDSLLSHRNWLLPKDKLTLC  
 CKVSI VGAILNMPGQNMIPAIDPRHMLTDDDLGKLWENPLFTDCSLLVAGHEIRAHKAILAARSVFRAMLEH  
 QMEERLANCFEIQELDFQVFKEMMDFIYTGKAPTLHSHSMACDVLAEEKYGLEGLKVICEDSLCRNLSVENA  
 AHTLIVADLHSTEQLKTRALHFIAVHASEVSKSSGWSMESHVPHLVDERFHSLSASAQSVFLESSFKCLKGF\*  
 >ENSMUSP00000089793\_c.4394:A>T\_p.Q1465H ENSMUST00000092155.12|Col11a1-  
 201|ENSMUSG00000027966|+|chr3:g.113999472:A>T  
 MEPWSRWKTKRWIWDLTISTLALTFQAREVGAAPVDILKALDFHNSPVGISKTTGFCNTNRKNSKDPDVA  
 RVTEEAQISAPTKQLFPGGIFPQDFSFILFTIKPKKGTQAFLLSLYNEHGIQQLGVEVGRSPVFLFEDHTGKPT  
 PENYPLFSTVNADGKWHRVAISVEKKTVMIVDCKKIKTKPLDRSERSIVDTNNGIMVFGTRILETDVFGQDI  
 QQFLITGDPKAAADYDCHYSPDCDLTSKAAQAQEPHIDEYAPEDIIEYDYEYGETDYKEAESVTEMPFTTEET  
 VAQTEANIVDDFQDYNYGTMEPEYQTEPRRVSGSNENPVEEGFTEEYLTGEDYDVQRNTSEIDILYGNKGV  
 RDSDLLVDGDLGEYDFEYKEYEERTTTSNNEEFGPGVPAETDFTETSINGHAYGEKQKGEPAVVEPGMLV  
 EGPPGAGPAGLMPGGLQGPSGLPGDPGDRGPPGRPLPGADGLPGPPGTMLMLPFYRGGDGSKGTISAQE  
 AQAQAILQQARIALRPPGPMGLTGRPGVGGPGSAGAKGESGDPGQGPGRGVQGGPPGPTGKPKGRGRPGADG  
 GRGMPGESGSKGDRGFDGLPGLPGDKGHRGERGPPGGLPGDDGMRGEDGEIGRPLPGEAGPRGLLGRGT  
 PGPPGQPGIGGIDGPPGKGNMGPQGEPPGQGNPQPGLPGPQGPPIGPPGEGKPPGKPLAGLPGADGPP  
 GHPGKEGSEKGAALGPPGPPGPIGYPGRGVKADGVRGLKGSKEKGEDGFPFGKDMGLKDRGEVGVQV  
 PRGEDGPEGPKRAGPTGDPGSPQAGEKGLGVPLPGYGRQGPKGSTGFPFGFANGEKARGIAGKPGP  
 RGQRGPTGPRKSRGARTGPKGPKGTSGDGPVPPGPPGERGPPGQGPVGFPGPKGPPGAGKDLPLGHPGQR  
 GETGFQKGTGPPGPGVVPQGPGETGPIGERGHPGPPGPPGEGQLPGAAGKEGAKGDPGQGISGKDGPA  
 IRGFPGERGLPGAQAGPLKGGEGPQGPVGVSPGERGSAGTAGPIGLPGRPGPQGGPPGAGEKGAPEKGP  
 QGPAGRQVQGPVGLPGPAGPAGSPGEDGDKGEIGEPGQKSGKDKGENGPPGPPGLQGPVGAAGIAGDGE  
 GPRGQGMFGQKGDGARGFPGLPGPIGLQGLPGPPGKGENGDVGMPPGPPGPRGPPGADGPPGPPG  
 SIGSVGVVDKGEPEAGNPPGPEAGSGGLKGERGEKGEAGPPGAAGPAGIKGPPGDDGPKGNPVPVGFPGD  
 PGPPGEPGAGQDGVGGDKGEDGDPGPPGPPGSGEAGPPGPPGKRGPPGASGSEGRQGEKGAKEGAEAGPP  
 GKTGVPVGPQGPSKPGPEGLRGI PGVVEQGLPGAAGQDGPPLGPPGLPGLKGDPSKGEKHPGLI GLIG  
 PPGEHGEKDRGLPGLTQSGPAKGDGGIPGAPGPIGPPGPPGLPGPAGPKGNKSSGPTGQKGDGMPGPPG  
 PGPPGEVIGPLPILSPKKTRRHTESIQQDAGDNILDYSDGMEEIFGSLNSLKQDIEHMKFPMGTQTNPART  
 DLQLSHPDFPDGEYWIDPNQGCSDSFKVYCNFTAGGETCIYDPKKSEGVRISSWPKEKPGSWYSEFKRGLL  
 SYLDVEGNSINMVQMTFLKLLTASARQNFTYNCHQSAAWYDVLSSGSYDKALRFLGSNDEEMS YENPHIKALY  
 DGCASRKGYEKTVIEINTPKIDQVPIIDVMINDFGDNQKFGFEVGPACFLG\*  
 >ENSMUSP00000138879\_c.974:A>T\_p.Q325H ENSMUST00000184978.2|Col11a1-  
 204|ENSMUSG00000027966|+|chr3:g.113999472:A>T  
 KGENGPPGPPGLQGPVGAAGIAGGDGEPGPRGQGMFGQKGDGARGFPGLPGPIGLQGLPGPPGKGENGDV  
 GMPGPPGPPGPRGPPGPNADGPPGPPGSGSVGVVDKGEPEAGNPPGPEAGSGGLKGERGEKGEAGPPG  
 AAGPAGIKGPPGDDGPKGNPVPVGFPGDPGPPGEPGAGQDGVGGDKGEDGDPGPPGPPGSGEAGPPGPPG  
 RGPPGASGSEGRQGEKGAKEGAEAGPPGKGTGPPVGPQGPSKPGPEGLRGI PGVVEQGLPGAAGQDGP  
 GPPGLPGLKGDPSKGEKHPGLI GLIGPPGEHGEKDRGLPGLTQSGPAKGDGGIPGAPGPIGPPGPPGL  
 PAGPKGNKSSGPTGQKGDGMPGPPGPPGPPGPEVIQPLPILSPKKTRRHTESIQQDAGDNILDYSDGMEEIF  
 GSLNSLKQDIEHMKFPMGTQTNPARTCKDLQLSHPDFPDGEYWIDPNQGCSDSFKVYCNFTAGGETCIY  
 PDKKSEGMYSLGTCLLSKILWLSMTQHS\*  
 >ENSMUSP00000029569\_c.867:T>G\_p.L290V ENSMUST00000029569.9|Slc35a3-  
 201|ENSMUSG00000027957|-|chr3:g.116468842:A>C  
 MSANLKYLSLGLILVQTTSLVLTMRYSRTLKEEGPRYLSSTAVVVAEFLKIMACIFLVYKDSKCSVRALNRVL  
 HDEILNKPMETLKLAI PSGIYTLQNNLLYVALSNLDAATYQVTYQLKILTTALFSVSMGLKGLVYQWLSLVI  
 LMAGVAVVQWPSDSQELNSKDLSTGSQFVGLMAVLTA CFSSGFAGVYFEKILKETKQSVWIRNIQLGFFGSIF  
 GLMGVYVYDQELVSKNGFFQGYNQLTWIVVALQALGLLVIAAVIKYADNIIKGFATSLSIILSTIISYFVWQD  
 FVPTSVFFLGAILVIAATFLYGYDPKPAGNPTKA\*  
 >ENSMUSP00000112674\_c.867:T>G\_p.L290V ENSMUST00000120120.8|Slc35a3-  
 202|ENSMUSG00000027957|-|chr3:g.116468842:A>C

MSANLKYLSLGLVLFQTTSLVLTMRYSRTLKEEGPRYLSSTAVVVAEFLKIMACIFLVYKDSKCSVRALNRVL  
HDEILNKPMETLKLAIPSGIYTLQNNLLYVALSNLDAATYQVTYQLKILTALFSVSMGLKGLVYQWLSLVI  
LMAGVAFVQWPSDSQELNSKDLSTGSQFVGLMAVLTACFSSGFAGVYFEKILKETKQSVWIRNIQLGFFGSI  
GLMGVYVYDGLVSKNGFFQGYNQLTWIVVALQALGGLVIAAVIKYADNLIKGFATSLSIILSTIISYFWVQD  
FVPTSVFFLGAILVIAATFLYGYDPKPAKNPTKA\*

>ENSMUSP00000096149\_c.617:C>A\_p.S206R ENSMUST00000098549.4|Clca4b-  
201|ENSMUSG00000074195|-|chr3:g.144631886:G>T

MMAFSRGPVFLFLLYLLWGSDSLKLNNGYEDIIAIDPAVPEDTTIEHIKGMVTKASTYLFEATEKRF  
FFKNVSIILIPESWKNSSQYRRPKQESYKHADIKVAPPFAFEGRDEPYTRQFTQCEEKAEYIHFPTDFVLGRKQV  
EYGDGKLLVHEWAHLRWGVFDEYNEDQPFYSASSKKIEATRCSTGITGMNRVHTCQGGRCITRRCRTNSTTK  
LYEKDCQFFPDQVQSEKASIMFMQSIDSVTEFCKKENHNREAPTLHNEKCQWRSTWEVISSSEDFNSSTPMET  
PPAPFFSLLRISERIVCLVLDVSGSMSSDRLNRMNQAAYFLSQIENRSWVGMVHFSSQATIVHELIQMN  
SDIERNKLLQTLPTSAIGGTSICSGIKTAFQVFKNGEYQTDGTEILLSDGEDSTAKDCIDEVKDGSIVHFI  
ALGPSADLAVTNMSILTGGNHKLATDEAQNGLIDAFGALASENTDITQKSLQLESKGAILLNNSLWLNDDTVVI  
DSTVGRDFTFLVTSKQAPAIYLRDPKGTQTTNFTMDFVSKMAYLSIPGTAEVGVWVTYNLEAKENSEILTITV  
TSRAANSSVPPISVNAKVNTDTNTFSPMIVYAEVLQGYTPIIGARVTATIESNSGKTEELVLLDNGAGADAF  
KDDGVYSRFFTAYSVNGRYSLKVRADGGTNSARRSLRHPSSRAAYIPGWVVDGEIQGNPPREPMTEATQPVLE  
NFSRTASGGAFVMSNPVIGPLPDQYPPNRITDLQATLDGEEISLWTAPGDDYDVGVRVQYIIRTSENIIDLR  
DNFNNSLRVDTTKLTPEANSKETFAFKPENISEENATYIFIAIESVDKNNLSGSPNIAQVAMFTPAEPV  
DESPRSSGVSISTIVLSVVGSVVLVCIIVSTTICILKNKRSSSGAATTF\*

>ENSMUSP00000029671\_c.165:A>T\_p.S56C ENSMUST00000029671.9|Ifi44-  
201|ENSMUSG00000028037|-|chr3:g.151455058:T>A

MAMRTRLTWQOEKCLQNYFGGKRCFLLYKASVQKFSHQNLCTCENQGPTMIVVYCEKCVIGMYLKEGFQGGK  
VSIITIFALQETGFSLCAKGPDSPYLLFHKRKTNDFSILLDEKAVIVSSAICKMLQLTARNNVIPIQECEAFRC  
EELLDERKTRGIAVLHNSLLQALRDYKPYGDLVQQTTRVLLGLPIGAGKSSFVNSVKSIVFKGSIHQILVGCDE  
DGISDKYRTYSIKAKDDSDPLPFI LDCSLGLGENAGLHTDDVWHILKGHTPDYQFDSMKPITSNHPNYTHDP  
LLKDRIHCVVVFVDINSFEMHSELVAKIKKIRRDLIKHGILHLALLTHVDSLDTIKEDMDTIYNSPVKSK  
LEAFHGVGFALSILVSNVSEWQLDVPKMLILSALKEILYTANEFLEDLPLNK\*

>ENSMUSP00000036227\_c.840:A>T\_p.M281L ENSMUST00000044278.6|St6galnac5-  
201|ENSMUSG00000039037|-|chr3:g.152527315:T>A

MKTLMRHGLAVCLVLTMMCTSLLLVYSSLGSKERPPQQQQQQQQAATATGSTQLVLESSPQPRRTAPAGP  
RQLEGYLGAVDHKPLKMHCKDCALVTSSGHLRSQQGPHIDQTECVIRMNDAPTRGYGLDVGNRTSLRVIAHS  
SIQRILRNHRDHLNVSQGTVFIFWGPSSYMRRDGKQAYNNLQLLSQVLPRLKAFMITRHRMLQFDELFKQET  
GKDRKISNTWLTGWFTMTIALELCDRIDVYGMVPPDFCRDPKHPSPVPHYHYPSPGPDCECTLYLSHERGRKGS  
HHRFITEKRVFKNWARTFNIHFFQPDWKPESPAVNHAEGKPVF\*

>ENSMUSP00000143365\_c.4563:G>T\_p.D1522Y ENSMUST00000200196.5|Irrc7-  
206|ENSMUSG00000028176|-|chr3:g.157790108:C>A

XIGRLVPCRCFRGEEEEISVLDYSHCSLQVQPKVFNFFERTLEELYLDANQIEELPKQLFNCQALRKLSSIPDN  
DLSSLPTSIAASLVNLKELDISKNGVQEFPENIKCKCLTIEASVNPI SKLPDGFTQLLNLTLQYLNDAFLEF  
LPANFGRVLKLRILELRENHLKTLPKSMHKLALQLERLDLGNNEFSELPEVLDQIQNLRELWMDNNALQVLPGS  
IGKLMVLYLDMSKNRIETVDMDISGCEALEDLLSSNMLQQLPDSIGLLKLTTLKVDDNQLTMLPNTIGNL  
SLLEEFDCSCNELESPLPTIGYLHSLRTLAVDENFLPELPREIGSCKNVTVMSLRSNKLEFLPEEIGQMORLR  
VLNLSDNRLKLNLPFSFTKLKELALWLSDNQSKALIPLOTEAHPETKQRVLTNYMFPQQPRGDEDFQSDSDSF  
NPTLWEEQRQQRMTVAFEFEDKKEDESAGKVKALSCQAPWDRGQRGITLQPARLSGDCCTPWARCDQQIQDM  
PVPQSDPQLAWGCSISGLQQERSMCAPLVAAQSTTLPSLSGRQVEINLKRYPTPYPEDLKNMVKSVQNLVGGP  
SHGVRVENSNTANTEQTVKEKFEHKWPVAPKEITVEDSFVHPANEMRIGELHPSLAETPLYPPKLVLLGKDK  
KESTDESEVDKTHCLNNSVSSGTYSYDSSQASSASNTRMKVGSLQATAKDAVHNSLWGNRIAPPPQPLDA  
KPLLSQREAVPPGNIPQRPDRLPMSDAFPDNDWTDGSHYDNTGVFVSEEAAGENANNNPLSSKARSVPAHGRP  
LIRQERIVGVPLELEQSTHRHTPETEVPPSNPWQNWTRTPSPFEDRTAFPSKLETTPTTSPLPERKDHMKEPT  
ETPGPFPSPGVPEYHDPTPNRSLGNVFSQIHCPRDSSKGVIAISKSTERLSPLMKDIKSNKFKKSQSIDEIDV  
GTYKVYNIPLENYASGSDHLGSHERPDKFLGPEHGMSMSRSQSVPMDDDEMLMYGSSKGGPPQKASMTKKVY  
QFDQSFNPQGAVEVKAEKRIPPPFAHNSEYVQPPSKNIAKDLVSPRAYRGYPPEQMFSFSQPSVNEADAMVNA  
QFASQGPFRAGLRRADSLASSTEMAMFRVSEPHLPGRDRYGRATYRGGLEGQSSISMTDPQLFRNGRYED  
EHPSYQEVKAQAGSFPAKNLTQRRPLSARSYSTESYASGATRPVARSPTMAALLEKIPSDYNLGNYGDKTSDN  
SDIKTRPTPVKGEESCCKMPADWRQQLLRHIEARRLDRNAAYKHNTVNLGMLPYGGISAMHAGRSMTLNLQTK  
SKFDLQDLPLQKTPSQSNILDNGQEDVSPSGQWNPYPLGRRDVPDITTKAGSHIQTLMGSSQLQHSREQ  
QPYEGNINKVTIQFQSPPIQIPSSQATRGPQPGRCIQTKGQRSMDGYPEQFCVRIEKNPGLGFSISGGIS  
GQGNPFKPSDKGIFVTRVQPDGPASNLLQPGDKILQANGHSFVHMEHEKAVLLLSKFQNTVYLVIQRELTV\*

>ENSMUSP00000142498\_c.4455:G>T\_p.D1486Y ENSMUST00000200137.5|Lrrc7-205|ENSMUSG00000028176|-|chr3:g.157790108:C>A  
 MQCLEMTTKRKLIGRLVPCRCFRGEEEEIISVLDYSHCSLQQVPKEVFNFFERTLEELYLDANQIEELPKQLFNC  
 QALRKLSPDNDLSSLPTSIAASLVNLKELDISKNGVQEFPENIKCCKCLTIEASVNPISKLPDGFQTQLLNLTL  
 QLYLNDAFLEFLPANFGRVLKLRILELRENHLKTLPKSMHKLQALERLDLGNNEFSELPEVLDQIQNLRELWMD  
 DNNALQVLPQSIGKLMVLYLDMKNRIETVDMDISGCEALEDLLSSNMLQQLPDSIGLLKLTTLKVDDNQ  
 LTMLPNTIGNLSLLEEFDCSCNELESPLPTIGYLHSLRTLAVDENFLPELPREIGSCKNVTVMSLRSNKLEFL  
 PEEIGQMQRRLVNLSDNRLKLNLPFSFTKLKELAAALWLSDNQSKALIPLQTEAHPETKQRVLTNYMFPQQPRG  
 DEDFQSDSDSFNPTLWEEQRQQRMTVAFAFEFEDKEDDESAGKVKALSCQAPWDRGQRGITLQPARLSGDCTP  
 WARCDDQIQDMPVPPQSDPQLAWGCISGLQQERSMCAPLPVAAQSTTLPSLSGRQVEINLKRYPTYPEDLKNM  
 VKSVQNLVKGKPSHGVRVENSNTANTEQTVKEKFEHKWPVAPKEITVEDSFVHPANEMRIGELHPSLAETPLY  
 PPKLVLLGKDKKKESTDESEVDKTHCLNNSVSSGTYSYSDYSPQASASSNTRMKVGSQATAKDAVHNSLWGNR  
 IAPFPQPLDAKPLLSQREAVPPGNIQRPDRPLPMSDAFPDNDWTDGSHYDNTGFVSEEAAGENANNNPLSSK  
 ARSVPAGHRRPLIRQERIVGVPLELEQSTHRHTPETEVPPSNPWQNWTRTPSPFEDRTAFPSKLETTPTTSPL  
 PERKDHMKEPTETPGPFSPGVPEYHDPTPNRSLGNVFSQIHCPRDSSKGVIAISKSTERLSPLMKDIKSNKF  
 KKSQSIDEIDVGTYKVYNIPLENYASGSDHLGSHERPDKFLGPEHGMSMSRSQSVPMDDDEMLYSSKGGPP  
 QQKASMTKKVYQDFQSFNPQGAWEVKAEKRIPPPFAHNSEYVQQPSKNIADLVSPRAYRGPPEMQMFSFSQ  
 PSVNEADAMVNAQFASQGPFRAGFLRRADSLASSTEMAMFRRVSEPHLEPPGDRYGRATYRGGLEGQSSISMTDP  
 QFLKRNRYEDEHPSYQEVKAQAGSFPAKNLQRRPLSARSYSTESYGASQTRPVSARPTMAALLEKIPSDYN  
 LGNYGDKTSDNSDIKTRPTPVKGEESCGKMPADWRQQLLRHIEARRLDRTPSQQSNILDNGQEDVSPSGQWNP  
 YPLGRRDVPDITTKAGSHIQLMGSQSLQHSREQQPYEGNINKVTIQQFQSPLPIQIPSSQATRGPQPRG  
 CLIQTKGQRSMDGYPEQFCVRIEKNPGLGFSISGGISGQGNPFKPSDKGIFVTRVQPDGPASNLQPGDKILQ  
 ANGHSEFVHMEHEKAVLLKSFQNTVYLVIQRELTV\*

>ENSMUSP00000158628\_c.4434:G>T\_p.D1479Y ENSMUST00000238317.3|Lrrc7-207|ENSMUSG00000028176|-|chr3:g.157790108:C>A  
 MMESLIRGRNPPQYQSPCKEARAALRKRPEEELQCLEMTTKRKLIGRLVPCRCFRGEEEEIISVLDYSHCSLQ  
 QVPKEVFNFFERTLEELYLDANQIEELPKQLFNCQALRKLSPDNDLSSLPTSIAASLVNLKELDISKNGVQEF  
 ENIKCCKCLTIEASVNPISKLPDGFQTQLLNLTLQLYLNDAFLEFLPANFGRVLKLRILELRENHLKTLPKSMH  
 KLAQALERLDLGNNEFSELPEVLDQIQNLRELWMDNNALQVLPQSIGKLMVLYLDMKNRIETVDMDISGCEA  
 LEDLLSSNMLQQLPDSIGLLKLTTLKVDDNQLTMLPNTIGNLSLLEEFDCSCNELESPLPTIGYLHSLRTL  
 AVDENFLPELPREIGSCKNVTVMSLRSNKLEFLPEEIGQMQRRLVNLSDNRLKLNLPFSFTKLKELAAALWLS  
 NQSKALIPLQTEAHPETKQRVLTNYMFPQQPRGDEDFQSDSDSFNPTLWEEQRQQRMTVAFAFEFEDKEDDESA  
 GKVKALSCQAPWDRGQRGITLQPARLSGDCTPWARCDDQIQDMPVPPQSDPQLAWGCISGLQQERSMCAPLPV  
 AAQSTTLPSLSGRQVEINLKRYPTYPEDLKNMVKSVQNLVKGKPSHGVRVENSNTANTEQTVKEKFEHKWPV  
 APKEITVEDSFVHPANEMRIGELHPSLAETPLYPPKLVLLGKDKKKESTDESEVDKTHCLNNSVSSGTYSYSDY  
 SQASSASSNTRMKVGSQATAKDAVHNSLWGNRIAPFPQPLDAKPLLSQREAVPPGNIQRPDRPLPMSDAFP  
 DNWTDGSHYDNTGFVSEEAAGENANNNPLSSKARSVPAGHRRPLIRQERIVGVPLELEQSTHRHTPETEVPP  
 SNPWQNWTRTPSPFEDRTAFPSKLETTPTTSPLPERKDHMKEPTETPGPFSPGVPEYHDPTPNRSLGNVFSQ  
 IHCPRDSSKGVIAISKSTERLSPLMKDIKSNKFKKSQSIDEIDVGTYKVYNIPLENYASGSDHLGSHERPDKF  
 LGPEHGMSMSRSQSVPMDDDEMLYSSKGGPPQQKASMTKKVYQDFQSFNPQGAWEVKAEKRIPPPFAHNSE  
 YVQQPSKNIADLVSPRAYRGPPEMQMFSFSQPSVNEADAMVNAQFASQGPFRAGFLRRADSLASSTEMAMFRR  
 VSEPHLEPPGDRYGRATYRGGLEGQSSISMTDPQFLKRNRYEDEHPSYQEVKAQAGSFPAKNLQRRPLSAR  
 SYSTESYGASQTRPVSARPTMAALLEKIPSDYNLGNYGDKTSDNSDIKTRPTPVKGEESCGKMPADWRQQLLR  
 HIEARRLDLAGSHIQLMGSQSLQHSREQQPYEGNINKVTIQQFQSPLPIQIPSSQATRGPQPRGCLIQTKG  
 QRSMDGYPEQFCVRIEKNPGLGFSISGGISGQGNPFKPSDKGIFVTRVQPDGPASNLQPGDKILQANGHSFV  
 HMEHEKAVLLKSFQNTVYLVIQRELTV\*

>ENSMUSP00000101659\_c.4596:G>T\_p.D1533Y ENSMUST00000106044.6|Lrrc7-201|ENSMUSG00000028176|-|chr3:g.157790108:C>A  
 MQCLEMTTKRKLIGRLVPCRCFRGEEEEIISVLDYSHCSLQQVPKEVFNFFERTLEELYLDANQIEELPKQLFNC  
 QALRKLSPDNDLSSLPTSIAASLVNLKELDISKNGVQEFPENIKCCKCLTIEASVNPISKLPDGFQTQLLNLTL  
 QLYLNDAFLEFLPANFGRVLKLRILELRENHLKTLPKSMHKLQALERLDLGNNEFSELPEVLDQIQNLRELWMD  
 DNNALQVLPQSIGKLMVLYLDMKNRIETVDMDISGCEALEDLLSSNMLQQLPDSIGLLKLTTLKVDDNQ  
 LTMLPNTIGNLSLLEEFDCSCNELESPLPTIGYLHSLRTLAVDENFLPELPREIGSCKNVTVMSLRSNKLEFL  
 PEEIGQMQRRLVNLSDNRLKLNLPFSFTKLKELAAALWLSDNQSKALIPLQTEAHPETKQRVLTNYMFPQQPRG  
 DEDFQSDSDSFNPTLWEEQRQQRMTVAFAFEFEDKEDDESAGKVKALSCQAPWDRGQRGITLQPARLSGDCTP  
 WARCDDQIQDMPVPPQSDPQLAWGCISGLQQERSMCAPLPVAAQSTTLPSLSGRQVEINLKRYPTYPEDLKNM  
 VKSVQNLVKGKPSHGVRVENSNTANTEQTVKEKFEHKWPVAPKEITVEDSFVHPANEMRIGELHPSLAETPLY  
 PPKLVLLGKDKKKESTDESEVDKTHCLNNSVSSGTYSYSDYSPQASASSNTRMKVGSQATAKDAVHNSLWGNR

IAPFPQPLDAKPLLSQREAVPPGNIPQRPDRLPMSDAFPDNDWDGSHYDNTGFVSEEAAGENANNNPLLSK  
ARSVPAHGRRPLIRQERIVGVPLELEQSTHRHTPETEVPPSNPWQNWTRTPSPFEDRTAFPSKLETTPTTSPL  
PERKDHMKEPTETPGPFSPGVPEYHDPTPNRSLGNVFSQIHCPRDSSKGVIAISKSTERLSPLMKDIKSNKF  
KKSQSIDEIDVGTYKVYNIPLENYASGSDHLGSHERPDKFLGPEHGMSMSRSQSVPMLDDEMLMYGSSKGGP  
QQKASMTKKVYQFDQSFNPQGAVEVKAEKRIPPPFAHNSEYVQQPSKNIKDLVSPRAYRGYPMEQMF'SFSQ  
PSVNEDAMVNAQFASQGPFRAGFLRRADSLASSTEMAMFRVSEPHLPPGDRYGRATYRGGLGQSSISMTDP  
QFLKRNRYEDEHPSYQEVKAQAGSFPKLNLTQRRPLSARSYTESYASQTRPV SARPTMAALLEKIPSDYN  
LGNYGDKTSDNSDIKTRPTPVKGEESCGKMPADWRQQLLRHIEARRLDRNAAYKHNTVNLGMLPYGGISAMHA  
GRSMTLNLQTKSKFDLQDLPLQKTPSQSNILDNGQEDVSPSGQWNPYPLGRRDVPDITIKKAGSHIQTLMG  
SQSLQHRSSREQQPYEGNINKVTIQQFQSPLEPIQIPSSQATRGQPGRCLIQTKGQRSMGDYPEQFCVRIEKNP  
GLGFSISGGISGQGNPFKPSDKGIFVTRVQPDGPASNLLQPGDKILQANGHSFVHMEHEKAVLLLKSFQNTVY  
LVIQRELTV\*

>ENSMUSP00000154142\_c.823:C>T\_p.S275F ENSMUST00000226198.2|Vmn1r2-  
202|ENSMUSG00000115072|+|chr4:g.3172906:C>T  
MKMDPGNFAIETFLFCQITVGMFGNSSILFYIILIFTEKHLTSKDLIEHLTFANYLTVILRGFPQTMSYFG  
FKNFLDDMGCKLIVYISRITRGVSLYALCLLSCFQAITTSNNRWIKLKYRATKYIGPSCSVSCLVHLLLNI  
LTPRESGTNYKKNATNRLSYGYCSLFASDSVATTLYISLVCFSDFVCLGLMACSSISMVSILYRHERQVKHI  
HSAQYFLKVYPEDRATQTILILLCTFVISYSFSSIVAIIRTYLNYPVIWGVNIFTFLEIFFPMFCPFVLITNM  
RSSNLFLPCLGKR\*

>ENSMUSP00000100791\_c.823:C>T\_p.S275F ENSMUST00000105160.5|Vmn1r2-  
201|ENSMUSG00000115072|+|chr4:g.3172906:C>T  
MKMDPGNFAIETFLFCQITVGMFGNSSILFYIILIFTEKHLTSKDLIEHLTFANYLTVILRGFPQTMSYFG  
FKNFLDDMGCKLIVYISRITRGVSLYALCLLSCFQAITTSNNRWIKLKYRATKYIGPSCSVSCLVHLLLNI  
LTPRESGTNYKKNATNRLSYGYCSLFASDSVATTLYISLVCFSDFVCLGLMACSSISMVSILYRHERQVKHI  
HSAQYFLKVYPEDRATQTILILLCTFVISYSFSSIVAIIRTYLNYPVIWGVNIFTFLEIFFPMFCPFVLITNM  
RSSNLFLPCLGKR\*

>ENSMUSP00000154142\_c.840:C>T\_p.P281S ENSMUST00000226198.2|Vmn1r2-  
202|ENSMUSG00000115072|+|chr4:g.3172923:C>T  
MKMDPGNFAIETFLFCQITVGMFGNSSILFYIILIFTEKHLTSKDLIEHLTFANYLTVILRGFPQTMSYFG  
FKNFLDDMGCKLIVYISRITRGVSLYALCLLSCFQAITTSNNRWIKLKYRATKYIGPSCSVSCLVHLLLNI  
LTPRESGTNYKKNATNRLSYGYCSLFASDSVATTLYISLVCFSDFVCLGLMACSSISMVSILYRHERQVKHI  
HSAQYFLKVYPEDRATQTILILLCTFVISYSFSSIVAIIRTYLNYPVIWGVNIFTSLEIFFSMFCPFVLITNM  
RSSNLFLPCLGKR\*

>ENSMUSP00000100791\_c.840:C>T\_p.P281S ENSMUST00000105160.5|Vmn1r2-  
201|ENSMUSG00000115072|+|chr4:g.3172923:C>T  
MKMDPGNFAIETFLFCQITVGMFGNSSILFYIILIFTEKHLTSKDLIEHLTFANYLTVILRGFPQTMSYFG  
FKNFLDDMGCKLIVYISRITRGVSLYALCLLSCFQAITTSNNRWIKLKYRATKYIGPSCSVSCLVHLLLNI  
LTPRESGTNYKKNATNRLSYGYCSLFASDSVATTLYISLVCFSDFVCLGLMACSSISMVSILYRHERQVKHI  
HSAQYFLKVYPEDRATQTILILLCTFVISYSFSSIVAIIRTYLNYPVIWGVNIFTSLEIFFSMFCPFVLITNM  
RSSNLFLPCLGKR\*

>ENSMUSP00000154142\_c.882:A>T\_p.S295C ENSMUST00000226198.2|Vmn1r2-  
202|ENSMUSG00000115072|+|chr4:g.3172965:A>T  
MKMDPGNFAIETFLFCQITVGMFGNSSILFYIILIFTEKHLTSKDLIEHLTFANYLTVILRGFPQTMSYFG  
FKNFLDDMGCKLIVYISRITRGVSLYALCLLSCFQAITTSNNRWIKLKYRATKYIGPSCSVSCLVHLLLNI  
LTPRESGTNYKKNATNRLSYGYCSLFASDSVATTLYISLVCFSDFVCLGLMACSSISMVSILYRHERQVKHI  
HSAQYFLKVYPEDRATQTILILLCTFVISYSFSSIVAIIRTYLNYPVIWGVNIFTSLEIFFPMFCPFVLITNM  
RSCSNLFLPCLGKR\*

>ENSMUSP00000100791\_c.882:A>T\_p.S295C ENSMUST00000105160.5|Vmn1r2-  
201|ENSMUSG00000115072|+|chr4:g.3172965:A>T  
MKMDPGNFAIETFLFCQITVGMFGNSSILFYIILIFTEKHLTSKDLIEHLTFANYLTVILRGFPQTMSYFG  
FKNFLDDMGCKLIVYISRITRGVSLYALCLLSCFQAITTSNNRWIKLKYRATKYIGPSCSVSCLVHLLLNI  
LTPRESGTNYKKNATNRLSYGYCSLFASDSVATTLYISLVCFSDFVCLGLMACSSISMVSILYRHERQVKHI  
HSAQYFLKVYPEDRATQTILILLCTFVISYSFSSIVAIIRTYLNYPVIWGVNIFTSLEIFFPMFCPFVLITNM  
RSCSNLFLPCLGKR\*

>ENSMUSP00000100790\_c.882:A>T\_p.S295C ENSMUST00000105159.5|Vmn1r3-  
201|ENSMUSG00000115466|-|chr4:g.3184423:T>A  
MKMGPGNFAIETFLFCQITVGMFGNSSIPFYIILIFTEKHLTPKDLIEHLTFANYLTVILRGFPQTMSYFG  
FKNFLDDMGCKLLVYISRITRGVSLYAMCLLSCFQAITTSNNRWIKLKYRATKYIGPSCSVSCLVHLLLNI

LTPLRESGTNYKKNATNRLSYGYCSLFASDSVATTLYISLVCFSDFVCLGLMACSSISMVSIYRHKRQVKHI  
HSAQHFLKVPEDRATQTILILLCTFVISYSFSSIVAIIRTYLNYPVIWGVNIFTSLEIFFPMFCPFVLITNM  
RSCSNLFLPCLGKR\*

>ENSMUSP00000100790\_c.840:C>T\_p.P281S ENSMUST00000105159.5|Vmn1r3-  
201|ENSMUSG00000115466|-|chr4:g.3184465:G>A  
MKMGPGNFAIETFLFCQITVGMFGNSSIPFYIILIFTEKHLTPKDLIEHLTFANYLTVILRGFPQTMSYFG  
FKNFLDDMGCKLLVYISRITRGVSLYAMCLLSCFQAITTSNNNSRWIKLYRATKYIGPSCSVSCLVHLLLNI  
LTPLRESGTNYKKNATNRLSYGYCSLFASDSVATTLYISLVCFSDFVCLGLMACSSISMVSIYRHKRQVKHI  
HSAQHFLKVPEDRATQTILILLCTFVISYSFSSIVAIIRTYLNYPVIWGVNIFTSLEIFFSMFCPFVLITNM  
RSSSNLFLPCLGKR\*

>ENSMUSP00000100790\_c.823:C>T\_p.S275F ENSMUST00000105159.5|Vmn1r3-  
201|ENSMUSG00000115466|-|chr4:g.3184482:G>A  
MKMGPGNFAIETFLFCQITVGMFGNSSIPFYIILIFTEKHLTPKDLIEHLTFANYLTVILRGFPQTMSYFG  
FKNFLDDMGCKLLVYISRITRGVSLYAMCLLSCFQAITTSNNNSRWIKLYRATKYIGPSCSVSCLVHLLLNI  
LTPLRESGTNYKKNATNRLSYGYCSLFASDSVATTLYISLVCFSDFVCLGLMACSSISMVSIYRHKRQVKHI  
HSAQHFLKVPEDRATQTILILLCTFVISYSFSSIVAIIRTYLNYPVIWGVNIFTFLEIFFPMFCPFVLITNM  
RSSSNLFLPCLGKR\*

>ENSMUSP00000100790\_c.614:G>A\_p.M205I ENSMUST00000105159.5|Vmn1r3-  
201|ENSMUSG00000115466|-|chr4:g.3184691:C>T  
MKMGPGNFAIETFLFCQITVGMFGNSSIPFYIILIFTEKHLTPKDLIEHLTFANYLTVILRGFPQTMSYFG  
FKNFLDDMGCKLLVYISRITRGVSLYAMCLLSCFQAITTSNNNSRWIKLYRATKYIGPSCSVSCLVHLLLNI  
LTPLRESGTNYKKNATNRLSYGYCSLFASDSVATTLYISLVCFSDFVCLGLMACSSISIVSIYRHKRQVKHI  
HSAQHFLKVPEDRATQTILILLCTFVISYSFSSIVAIIRTYLNYPVIWGVNIFTSLEIFFPMFCPFVLITNM  
RSSSNLFLPCLGKR\*

>ENSMUSP00000100790\_c.531:G>A\_p.V178I ENSMUST00000105159.5|Vmn1r3-  
201|ENSMUSG00000115466|-|chr4:g.3184774:C>T  
MKMGPGNFAIETFLFCQITVGMFGNSSIPFYIILIFTEKHLTPKDLIEHLTFANYLTVILRGFPQTMSYFG  
FKNFLDDMGCKLLVYISRITRGVSLYAMCLLSCFQAITTSNNNSRWIKLYRATKYIGPSCSVSCLVHLLLNI  
LTPLRESGTNYKKNATNRLSYGYCSLFASDSIATTLYISLVCFSDFVCLGLMACSSISMVSIYRHKRQVKHI  
HSAQHFLKVPEDRATQTILILLCTFVISYSFSSIVAIIRTYLNYPVIWGVNIFTSLEIFFPMFCPFVLITNM  
RSSSNLFLPCLGKR\*

>ENSMUSP00000100790\_c.334:C>T\_p.T112I ENSMUST00000105159.5|Vmn1r3-  
201|ENSMUSG00000115466|-|chr4:g.3184971:G>A  
MKMGPGNFAIETFLFCQITVGMFGNSSIPFYIILIFTEKHLTPKDLIEHLTFANYLTVILRGFPQTMSYFG  
FKNFLDDMGCKLLVYISRITRGVSLYAMCLLSCFQAITTSNNNSRWIKLYRATKYIGPSCSVSCLVHLLLNI  
LTPLRESGTNYKKNATNRLSYGYCSLFASDSVATTLYISLVCFSDFVCLGLMACSSISMVSIYRHKRQVKHI  
HSAQHFLKVPEDRATQTILILLCTFVISYSFSSIVAIIRTYLNYPVIWGVNIFTSLEIFFPMFCPFVLITNM  
RSSSNLFLPCLGKR\*

>ENSMUSP00000100790\_c.283:G>A\_p.G95E ENSMUST00000105159.5|Vmn1r3-  
201|ENSMUSG00000115466|-|chr4:g.3185022:C>T  
MKMGPGNFAIETFLFCQITVGMFGNSSIPFYIILIFTEKHLTPKDLIEHLTFANYLTVILRGFPQTMSYFG  
FKNFLDDMGCKLLVYISRITREVSLYAMCLLSCFQAITTSNNNSRWIKLYRATKYIGPSCSVSCLVHLLLNI  
LTPLRESGTNYKKNATNRLSYGYCSLFASDSVATTLYISLVCFSDFVCLGLMACSSISMVSIYRHKRQVKHI  
HSAQHFLKVPEDRATQTILILLCTFVISYSFSSIVAIIRTYLNYPVIWGVNIFTSLEIFFPMFCPFVLITNM  
RSSSNLFLPCLGKR\*

>ENSMUSP00000100790\_c.255:C>A\_p.L86I ENSMUST00000105159.5|Vmn1r3-  
201|ENSMUSG00000115466|-|chr4:g.3185050:G>T  
MKMGPGNFAIETFLFCQITVGMFGNSSIPFYIILIFTEKHLTPKDLIEHLTFANYLTVILRGFPQTMSYFG  
FKNFLDDMGCKLLVYISRITRGVSLYAMCLLSCFQAITTSNNNSRWIKLYRATKYIGPSCSVSCLVHLLLNI  
LTPLRESGTNYKKNATNRLSYGYCSLFASDSVATTLYISLVCFSDFVCLGLMACSSISMVSIYRHKRQVKHI  
HSAQHFLKVPEDRATQTILILLCTFVISYSFSSIVAIIRTYLNYPVIWGVNIFTSLEIFFPMFCPFVLITNM  
RSSSNLFLPCLGKR\*

>ENSMUSP00000100790\_c.85:C>T\_p.P29L ENSMUST00000105159.5|Vmn1r3-  
201|ENSMUSG00000115466|-|chr4:g.3185220:G>A  
MKMGPGNFAIETFLFCQITVGMFGNSSIPFYIILIFTEKHLTPKDLIEHLTFANYLTVILRGFPQTMSYFG  
FKNFLDDMGCKLLVYISRITRGVSLYAMCLLSCFQAITTSNNNSRWIKLYRATKYIGPSCSVSCLVHLLLNI  
LTPLRESGTNYKKNATNRLSYGYCSLFASDSVATTLYISLVCFSDFVCLGLMACSSISMVSIYRHKRQVKHI



HSAQHFLKVSPEDRATQTILILLCTFVISYSFSSIVAIIRTYLNYPVVIWGVNIFTSLEIFFPMFCPFVLIITNM  
 RSSSNLFLPCLGKR\*  
 >ENSMUSP00000062039\_c.547:G>A\_p.G183D ENSMUST00000058183.9|Ndufaf6-  
 201|ENSMUSG00000050323|-|chr4:g.11062082:C>T  
 MATSMLGSVRGPFPFGLANLFHRQPFRDAWERVRRRLPGPSAVRRSVAAASGPGIPGSHLYCLELLRKRDIYESY  
 LCSLLFPAECQRSASALRAFVVELAQVKDSVSEKTIGLMRMQFWKKAVEDMYCDNPPHPQVVAIELWKAVKKHN  
 LTKRWLMRIIDEREKNLDDKAYRSMQELENYAENTQDSSLYLTLLEV LGVKDLHADHAASHIGKAQGIVTCLRA  
 TPYHSSRRQVFLPMDVVCVQHGVSQEDFLRRNQDKNVRDVVYDIASQAHLHLKHARSFHRSPVAEAFPAFLQTV  
 SLEDYLKKIQRVDFDI FHPSLQQKNMLLPLSLYIQSWRKRY\*  
 >ENSMUSP00000115154\_c.267:A>G\_p.N90D ENSMUST00000131145.9|Tmem67-  
 203|ENSMUSG00000049488|-|chr4:g.12085959:T>C  
 XMVTRTRPVAAMAVRSRSSRTGTAYLLLVLCEVSWAQIFSFPPRRPETCDFNQYFDISALSCAPCGANQRRD  
 ALGTSCVCLPGYHMISDNNGGPSICKKCPENMKGVTKDGWDCISCPGLTAEGKCHCPTGHILVERNVSGLL  
 AQATCELCDESENSFTKANALGTRCVRCEPTFVNTSRSCSCSEPHTLVDYVSATQGI FINV\*  
 >ENSMUSP00000103928\_c.471:A>G\_p.N158D ENSMUST00000108293.3|Tmem67-  
 202|ENSMUSG00000049488|-|chr4:g.12085959:T>C  
 METTLPSPGDPKPMHRLSAHAQSRPNQPLGALNARAQTYCFGYSWDRVVSADSPRLLGSRWRLRTQDMGTMVTR  
 TRPVAAMAVRSRSSRTGTAYLLLVLCEVSWAQIFSFPPRRPETCDFNQYFDISALSCAPCGANQRRDALGTS  
 CVCLPGYHMISDNNGGPSICKKCPENMKGVTKDGWDCISCPGLTAEGKCHCPTGHILVERNVSGLLQAQATC  
 ELCESENSFTKANALGTRCVRCEPTFVNTSRSCSCSEPHTLTGGLCFSENTGNFHQRVISTARYGELGMSLNS  
 EWFAYLQATAAACWTHANLTSQALGNMCMVMNNSYDSTTLDACRLFHYIFESTAGLISVHVSVPFWRQNLPLW  
 LFGDQPGGLAPQVLSTTPLPTNFSFKGQNLKQFVAASYDIRGNFIKWQPLEGGVLLQCPDTERRLDAAYAFGT  
 TYQQNCEISLSKLLVDFSSPVFYDVYLEYTDDEEQHRYLWPI PVLNINLQHNKLFVNQDSSSSKWLTRRI FLV  
 DAVSGRENDLGNQPRVIRVATQISLSIRLVPNTKNGNIYTPLLTIAYSIDIDIKNAHSQSAKISFSVKYEMNQ  
 DASVHTDIALGVLGGLAVLSSLLKTAGWKRRIGSPMIDLQTVMKFLLYYAGDLANVFFIITVGTGLYWLIFFK  
 AQKSVSVLLPMPVQEERFVTYVGCFAFAMKALQFLHKFISQISIDIFFIDWERPKGKVLKAVEGEGGVSATVP  
 VSIWRTYFVANENEIQTVRKINPLFQVLTTLFFLEVVGFKNLALMDSSSSLSRNPSDYTAPYSRI LRYAVAT  
 AIWLVIIGIIQVVFVFAAFYERFIEDKIRQFVDLCSMSNVSVFLLSHRCFGYYIHGRSVHGHADTNMEEMNMLK  
 REAENLCSQRGLVPNTDQTFQIAVSSQMRQHYDRIHETLRRNGPARLLSSSGSTFEQSIKAYHAMNKFLGS  
 FIDHVKEMDYFIKDKLLLERILGMEFMEPMEKSI FYNDEGHSFSSVLYYGNEATLLIFDLLFFCVVDLACQD  
 FVLASFLTYLQOEIFRFIRNTVGQKNLATKTLVDERFLI\*  
 >ENSMUSP00000052644\_c.273:A>G\_p.N92D ENSMUST00000050686.10|Tmem67-  
 201|ENSMUSG00000049488|-|chr4:g.12085959:T>C  
 MGTMVTRTRPVAAMAVRSRSSRTGTAYLLLVLCEVSWAQIFSFPPRRPETCDFNQYFDISALSCAPCGANQR  
 RDALGTSCVCLPGYHMISDNNGGPSICKKCPENMKGVTKDGWDCISCPGLTAEGKCHCPTGHILVERNVSGLS  
 LLAQATCELCDESENSFTKANALGTRCVRCEPTFVNTSRSCSCSEPHTLTGGLCFSENTGNFHQRVISTARYGE  
 LGMSLNSEWFAYLQATAAACWTHANLTSQALGNMCMVMNNSYDSTTLDACRLFHYIFESTAGLISVHVSVPF  
 WRQNLPLWLFYGDQPGGLAPQVLSTTPLPTNFSFKGQNLKQFVAASYDIRGNFIKWQPLEGGVLLQCPDTERRLD  
 AAYAFGTTYQQNCEISLSKLLVDFSSPVFYDVYLEYTDDEEQHRYLWPI PVLNINLQHNKLFVNQDSSSSKWL  
 TRRI FLVDVAVSGRENDLGNQPRVIRVATQISLSIRLVPNTKNGNIYTPLLTIAYSIDIDIKNAHSQSAKISFSV  
 KYEMNQGDASVHTDIALGVLGGLAVLSSLLKTAGWKRRIGSPMIDLQTVMKFLLYYAGDLANVFFIITVGTGL  
 YWLIFFKAQKSVSVLLPMPVQEERFVTYVGCFAFAMKALQFLHKFISQISIDIFFIDWERPKGKVLKAVEGEGG  
 VRSATVPVSIWRTYFVANENEIQTVRKINPLFQVLTTLFFLEVVGFKNLALMDSSSSLSRNPSDYTAPYSRI  
 LRYAVATAIWLVIIGIIQVVFVFAAFYERFIEDKIRQFVDLCSMSNVSVFLLSHRCFGYYIHGRSVHGHADTNME  
 EMNMLKREANLCSQRGLVPNTDQTFQIAVSSQMRQHYDRIHETLRRNGPARLLSSSGSTFEQSIKAYHA  
 MNKFLGSFIDHVKEMDYFIKDKLLLERILGMEFMEPMEKSI FYNDEGHSFSSVLYYGNEATLLIFDLLFFCV  
 VDLACQDFVLASFLTYLQOEIFRFIRNTVGQKNLATKTLVDERFLI\*  
 >ENSMUSP00000041789\_c.217:C>G\_p.S73C ENSMUST00000042221.14|Slc26a7-  
 201|ENSMUSG00000040569|-|chr4:g.14593896:G>C  
 MTGAKRKRKRSVLWGKMHTPHREDIKQWCKRRLPILEWAPQYNLKENLLPDTVSGIMLAVQQVAQGLSFAMLS  
 VHPVFGLYGSLFPAIIYAFGMGRHVATGTFALTSLSANAVERLVPQSSRNLTQSNSSVLGLSEFELQRIG  
 VAAAVSFLGGVIQLVMFVLQLSATFLLTEPVISAMTTGAATHVVTSSQVKYLLGKMPYISGPLGFFYIYAYV  
 FENIKSVQLEALLFSLLSIIIVLVLVKELENEQFKRAIKQVLPVDLVLIIAASFACYCTNMNTYGLEVVGHIPN  
 GIPPPRAPPNNILSAVLEAFGVALVGYVASLALAKGSAKFKYSVDDNQEFLAHGLSNVIPSFLFCIPSA  
 MGRTAGLYSTGAKTQVAFLISCFVLIYIYAGPLLYWLPVCVLSIIIVVGLKGMIIQFRDLKKYWNVDKIDW  
 GIWISTYIFTICFAANVGLLFGVICTIAIVLGRFPRAKTLSTITDMKEMELKVKTEMHDETSQQIKIISINNPL  
 VFLNAKKFSADLMKIILKESDSNQPLDDVSKCEQNTLLSSLSNGNCNEEASQPCSSSEKCSLVNCSGLTFFDY  
 TGVSTLVELYLDCKRSRVDVFLANCTASLIKAMTYYGDLDEKPIFFDSVPAAISIIQSNKNLSKASDHSEV\*

>ENSMUSP00000116157\_c.217:C>G\_p.S73C ENSMUST00000149633.2|Slc26a7-204|ENSMUSG00000040569|-|chr4:g.14593896:G>C  
 MTGAKRKKRSVLWGKMHTPHREDIKQWCKRRLPILEWAPQYNLKENLLPDTVSGIMLAVQQVAQGLSFAMLSV  
 VHPVFGLYGSLFPAAIIYAIIFGMGRHVATGTFALTSLISANAVERLVPQSSRNLTTSNSSLVGLSEFELQRIG  
 VAAAVSFLGGVIQLVMFVLQLGSATFLLTEPVISAMTTGAATHVVTSSQVKYLLG  
 >ENSMUSP00000122870\_c.217:C>G\_p.S73C ENSMUST00000143105.2|Slc26a7-203|ENSMUSG00000040569|-|chr4:g.14593896:G>C  
 MTGAKRKKRSVLWGKMHTPHREDIKQWCKRRLPILEWAPQYNLKENLLPDTVSGIMLAVQQVAQGLSFAMLSV  
 VHPVFGLYGSLFPAAIIYAIIFGMGRHV  
 >ENSMUSP00000055293\_c.105:C>T\_p.R36C ENSMUST00000054538.13|Arhgef39-201|ENSMUSG00000051517|-|chr4:g.43499502:G>A  
 MESSGSAACCPVLQQRARWERKRVCTARELLETERCYQEQLGLVATYFLRILKAKGTLRPPPELQTLFGTWELI  
 YAASLELLPYLEEGQWGLGLQGFCPHLELYAQFAANAERSQTTLQAQLKKNKRRFRFVKLQEGRPEFRGLQLQ  
 DLLPLPLQRLQQYENLVVALAENTVPSNDYQQLTRAARLVSETAQKVHAIQSQKNDQHLLRVQALLSGRKA  
 KGLTSGRWFLRQGWLLVPPPTGEPFRPRMFFLFSQVLLMAKPRPPLHLLKSGTFVFCRALYPMSQCHLSRVFGHS  
 GGPCGGLLSLSPHEKLLMSTDQEELSQWHHSLTLAIRSQKSTHRSVTAT\*  
 >ENSMUSP00000103497\_c.324:C>A\_p.H109N ENSMUST00000107865.9|Tmem8b-202|ENSMUSG00000078716|+|chr4:g.43685342:C>A  
 MNMPQSLGTQPLPPEPPSLGTPIEGSGAIAPTEHCWPVRPTLRNELDTFVSHFYIFFGSPVALPPERPAVFAL  
 RLLPVLDSDGGVLSLELQLNASSLRQENVTVFGLTNEVPLSLGDAAVTCSKESLAGFLLSVSATSRRVARLRIP  
 FPQTGTWFLTLRSLCGVGRFVRCRNATAEVRRLRTFLSPCVDDCGPYGQCKLLRTHNYLYAAACEKAGWRGWG  
 CTDSADALTYGFQLLSTLLLCLSNLMFLPPVVLAIIRSRYVLEAAVYFTMFFSTFYHACDQPGIVVFCIMDYD  
 VLQFCDFLGLSLSVWVTVIAMARLQPVIKQVLYLLGAMLLSMALQLDRHGLWNLLGPSLFALGILATAWTVRS  
 VRRRHCPPTWRRWFLYLCPGSLIAGSAVLLYAFVETRDNYFYIHSIWHMLIAGSVGFLPPRAKTDRRVPSG  
 ARARGCGYQLCINEQEELGLVGPGGTTVSSICVS\*  
 >ENSMUSP00000129760\_c.324:C>A\_p.H109N ENSMUST00000167153.8|Tmem8b-209|ENSMUSG00000078716|+|chr4:g.43685342:C>A  
 MNMPQSLGTQPLPPEPPSLGTPIEGSGAIAPTEHCWPVRPTLRNELDTFVSHFYIFFGSPVALPPERPAVFAL  
 RLLPVLDSDGGVLSLELQLNASSLRQENVTVFGLTNEVPLSLGDAAVTCSKESLAGFLLSVSATSRRVARLRIP  
 FPQTGTWFLTLRSLCGVGRFVRCRNATAEVRRLRTFLSPCVDDCGPYGQCKLLRTHNYLYAAACEKAGWRGWG  
 CTDSADALTYGFQLLSTLLLCLSNLMFLPPVVLAIIRSRYVLEAAVYFTMFFSTFYHACDQPGIVVFCIMDYD  
 VLQFCDFLGLSLSVWVTVIAMARLQPVIKQVLYLLGAMLLSMALQLDRHGLWNLLGPSLFALGILATAWTVRS  
 VRRRHCPPTWRRWFLYLCPGSLIAGSAVLLYAFVETRDNYFYIHSIWHMLIAGSVGFLPPRAKTDRRVPSG  
 ARARGCGYQLCINEQEELGLVGPGGTTVSSICVS\*  
 >ENSMUSP00000103496\_c.324:C>A\_p.H109N ENSMUST00000107864.8|Tmem8b-201|ENSMUSG00000078716|+|chr4:g.43685342:C>A  
 MNMPQSLGTQPLPPEPPSLGTPIEGSGAIAPTEHCWPVRPTLRNELDTFVSHFYIFFGSPVALPPERPAVFAL  
 RLLPVLDSDGGVLSLELQLNASSLRQENVTVFGLTNEVPLSLGDAAVTCSKESLAGFLLSVSATSRRVARLRIP  
 FPQTGTWFLTLRSLCGVGRFVRCRNATAEVRRLRTFLSPCVDDCGPYGQCKLLRTHNYLYAAACEKAGWRGWG  
 CTDSADALTYGFQLLSTLLLCLSNLMFLPPVVLAIIRSRYVLEAAVYFTMFFSTFYHACDQPGIVVFCIMDYD  
 VLQFCDFLGLSLSVWVTVIAMARLQPVIKQVLYLLGAMLLSMALQLDRHGLWNLLGPSLFALGILATAWTVRS  
 VRRRHCPPTWRRWFLYLCPGSLIAGSAVLLYAFVETRDNYFYIHSIWHMLIAGSVGFLPPRAKTDRRVPSG  
 ARARGCGYQLCINEQEELGLVGPGGTTVSSICVS\*  
 >ENSMUSP00000103498\_c.1701:C>A\_p.H568N ENSMUST00000107866.9|Tmem8b-203|ENSMUSG00000078716|+|chr4:g.43685342:C>A  
 MAQPLSRPLILSQFQPWPATPSRFRPNLSRPRVPSQRMSRSRSPQLQPRSLPPAWPLSPRPLRFLHPLSQFPAQ  
 HLTLSHSPRLKPLAQPPQLLQSPSHPLLPSSHLLPLFEPKRSVQRHPKKAQSLPPSLCLPKSLPLGPRLSHTL  
 PLSQPRLRSLQLPALLLLLLFSVLGPGAGGLFLTDYSTCSPRKLSPFRSFASTELFHVHVPEDTFILAVWNL  
 IIFKEQGGTFGDHCPDQSVTVYFRSGAPPVINPLHTHFPADTAVPGVFSLTLSWTLPNRTSGIFNVSSPLPGD  
 WFLAAHLPAQAHGHSVKGLQDECCYLLQPLIVRRLLDVAVLVPGRPSEQTLSSHNRSAKYKVFVPSFTYRVS  
 AQLVCVGGRGASVCPLTLRLRPKAPPLHNSSSVACGGASVCQLELALPPWGHVYVVRVETPSRGPGRITISFQL  
 CVRLQECQPPLSRALVPGAAMNPQSLGTQPLPPEPPSLGTPIEGSGAIAPTEHCWPVRPTLRNELDTFVSH  
 FYIFFGSPVALPPERPAVFALRLLPVLDSDGGVLSLELQLNASSLRQENVTVFGLTNEVPLSLGDAAVTCSKE  
 SLAGFLLSVSATSRRVARLRIPFPQTGTWFLTLRSLCGVGRFVRCRNATAEVRRLRTFLSPCVDDCGPYGQCKL  
 LRTHNYLYAAACEKAGWRGWGCTDSADALTYGFQLLSTLLLCLSNLMFLPPVVLAIIRSRYVLEAAVYFTMFF  
 STFYHACDQPGIVVFCIMDYDVLQFCDFLGLSLSVWVTVIAMARLQPVIKQVLYLLGAMLLSMALQLDRHGLW  
 NLLGPSLFALGILATAWTVRSVRRRHCPPTWRRWFLYLCPGSLIAGSAVLLYAFVETRDNYFYIHSIWHMLI  
 AGSVGFLPPRAKTDRRVPSGARARGCGYQLCINEQEELGLVGPGGTTVSSICVS\*

>ENSMUSP00000130133\_c.324:C>A\_p.H109N ENSMUST00000143339.8|Tmem8b-206|ENSMUSG00000078716|+|chr4:g.43685342:C>A  
 MNMPQSLGTQPLPPEPPSLGTPIEGSGAIAPTEHCWPVRPTLRNELDTFSVHFYIFFGSPVALPPERPAVFAL  
 RLLPVLDSGGVLSLELQLNASSLRQENVTVFGCLTNEVPLSLGDAAVTCSKVPGRPLPSLGQCHLQSGQASNPI  
 PTDGDLVP

>ENSMUSP00000080908\_c.440:C>G\_p.D147E ENSMUST00000082287.3|Mup5-201|ENSMUSG00000058523|-|chr4:g.61750865:G>C  
 MKLLLLLLELTLYVYHAESESEGQNLNVEKINGKWFSSILLASDKREKIEEHGTMRVFVEHIDVLENSLAFK  
 FHTVIDEECTEIIYLVADKTEKAGEYSVTDYDFNTFTILKTDYDNYIMFHLINKKDEENFQLMELFGREPDLSS  
 EIKEKFAKLCEEHGIVRENIIDLSNANRCLQARE\*

>ENSMUSP00000056520\_c.3685:A>T\_p.H1229L ENSMUST00000053414.13|Ccdc171-201|ENSMUSG00000052407|+|chr4:g.83736316:A>T  
 MSLNTSSNATPGDTQRLKNASLDVKQMLKNETESDIIADLRKKLHRAKKEKLEMTTKHNAELSSYESQIARLR  
 SEVEKGEALRQRLEYDLAVARKEAGLGRRAAEERLAEAQRIQERLCAQNSSELQGKANEIEKTFQISQEKWREE  
 CRRFEHDLEERDNI IQNCNQEYESLMQEKTRLOKTLQEI LEKHEQEKELESRVRETALGEFRLQTEEWEAER  
 RELQLIVQEQDSAVQSMQKQVEQLEAEHMDCSDLLRRQTSELEFSTQREERLRKEFEATTLRVKLEENIEAE  
 RAAHLESKFNSEIIQLRIRDLEGALQVEKASQAEAVADLEMIKNEFKEVESAYEREKQNTQESCAKLNLLERE  
 YFSQNKKLNEEIEDQKKVIIDLSKRLQYNEKSCGELQEELVMAKHHQAFLVETCENNVRELESILGSFSVSAQ  
 WTSVGHKDKDKPPSFSVLETLRRTLTDYQNKLEDASNEEKTSNELDSTKQKIETHIKNTKELQDKLTEVHKE  
 LSHLRKACADREALITSLKVELQNVLHCWEKEKACAAQCESELQKLSQAFQKDSEEKLTFLHTLYQHLVAGCV  
 LIKQPEGMLDKFSWSELCAVLQENVDALIADLNANRANEKISHLEYICKNKSDTMRELQQTQEDTFNKVAEQIKA  
 QESCWQKQKKELEFQYSELLEVVQRRRAQKQFQIEAEKNSEKLNRIETSHEQLVRENHFKTTLSRTQREQTCLL  
 AACALMAGALCPLYSRSCALSTQRDFLQEQVNSLELFKLEIRTLAQALS AVDEKKQEEAKTKKTKFKGLVRFV  
 RKGVI AILAANRLKLLGQSCAFLFTWMESCKEGIGMLVCTGEPKDKRQFPKHQREQLRCLQALAWLTSSDLLG  
 TVISSMTELQEVISKTDPNRIRCGHLLIGAANKSFAKLMDKLSSAMASIPHSSRSITYVEKDSLVRQLARGL  
 HKVNTLALKYGLCSHIPIMKSTAALQKQIFGFTQRLHAAEVERRSLRLEVTEYKRTVHEMKKELDKSLSLQTLQ  
 LNEFKHKLITHEKFESACEELNALLREQQAQMLLNEQAQQLQELNRYRLELHSSSEADKNQTLGEAVKSLSE  
 AKMELRRKDQSLRQLNRHLTQLEQDKRRLEENIRDAESALRMAAKDKECVANHMRTIENMLHKVRDQISLSRT  
 AATRNDFTLQPLKHLLET FAMEGLQGGPEVVACQAMIKSFMVDVYQLASARISTLEKEMTSLRSHIATLKSELH  
 TACLRENESLQSMGSRDHSNLSVPSRAAAPMDTVGDLPLQAEALDITYTFLKETFVNTAPHSLSSQSSPGVPT  
 NAKRPSQIGL\*

>ENSMUSP00000155912\_c.3709:A>T\_p.H1237L ENSMUST00000231339.2|Ccdc171-206|ENSMUSG00000052407|+|chr4:g.83736316:A>T  
 MSLNTSSNATPGDTQRLKNASLDVKQMLKNETESDIIADLRKKLHRAKKEKLEMTTKHNAELSSYESQIARLR  
 SEVEKGEALRQRLEYDLAVARKEAGLGRRAAEERLAEAQRIQERLCAQNSSELQGKANEIEKTFQISQEKWREE  
 CRRFEHDLEERDNI IQNCNQEYESLMQEKTRLOKTLQEI LEKHEQEKELESRVRETALGEFRLQTEEWEAER  
 RELQLIVQEQDSAVQSMQKQVEQLEAEHMDCSDLLRRQTSELEFSTQREERLRKEFEATTLRVKLEENIEAE  
 RAAHLESKFNSEIIQLRIRDLEGALQVEKASQAEAVADLEMIKNEFKEVESAYEREKQNTQESCAKLNLLERE  
 YFSQNKKLNEEIEDQKKVIIDLSKRLQYNEKSCGELQEELVMAKHHQAFLVETCENNVRELESILGSFSVSAQ  
 WTSVGHKDKDKPPSFSVLETLRRTLTDYQNKLEDASNELNINDAKEKTSNELDSTKQKIETHIKNTKELQD  
 KLTEVHKELSHLRKACADREALITSLKVELQNVLHCWEKEKACAAQCESELQKLSQAFQKDSEEKLTFLHTLY  
 QHLVAGCVLIKQPEGMLDKFSWSELCAVLQENVDALIADLNANRANEKISHLEYICKNKSDTMRELQQTQEDTFN  
 KVAEQIKAQESCWQKQKKELEFQYSELLEVVQRRRAQKQFQIEAEKNSEKLNRIETSHEQLVRENHFKTTLSRT  
 QREQTCLLAACALMAGALCPLYSRSCALSTQRDFLQEQVNSLELFKLEIRTLAQALS AVDEKKQEEAKTKKTK  
 FKGLVRFVFRKGVIAILAANRLKLLGQSCAFLFTWMESCKEGIGMLVCTGEPKDKRQFPKHQREQLRCLQALAW  
 LTSSDLGTVISSMTELQEVISKTDPNRIRCGHLLIGAANKSFAKLMDKLSSAMASIPHSSRSITYVEKDSL  
 VQRLARGLHKVNTLALKYGLCSHIPIMKSTAALQKQIFGFTQRLHAAEVERRSLRLEVTEYKRTVHEMKKELDK  
 KSLSLQTLQNEFKHKLITHEKFESACEELNALLREQQAQMLLNEQAQQLQELNRYRLELHSSSEADKNQTLG  
 EAVKSLSEAKMELRRKDQSLRQLNRHLTQLEQDKRRLEENIRDAESALRMAAKDKECVANHMRTIENMLHKVR  
 DQISLSRTAATRNDFTLQPLKHLLET FAMEGLQGGPEVVACQAMIKSFMVDVYQLASARISTLEKEMTSLRSHI  
 ATLKSELHTACLRENESLQSMGSRDHSNLSVPSRAAAPMDTVGDLPLQAEALDITYTFLKETFVNTAPHSLSS  
 QSSPGVPTNAKRPSQIGL\*

>ENSMUSP00000092521\_c.402:A>C\_p.S135R ENSMUST00000094916.5|Ldlrad1-201|ENSMUSG00000070877|+|chr4:g.107073369:A>C  
 MSVGCERAEFCPACFWFLGQADAESNITTRKARPGDEGCGPLCCSRRGACLSVGLLLLLLAMLALAVATIL  
 GHPPRTPETHSCVTLANRTGFLCHDRRHCI PAHAVCDGIRTCPHGEDEAESLCRDVPQSLPRFLTTTCGDPDS  
 WIYSDQKCDGVNNGDCSDELSPTTCCPPCGPGWWRCSPTVFKYCSCVPRDLCRDSVQHCSWDSDEYSCPGP\*

>ENSMUSP00000118617\_c.282:C>T\_p.H95Y ENSMUST00000152717.8|Hspb11-204|ENSMUSG00000063172|+|chr4:g.107135132:C>T  
MRKVDLCSVTEGTEVILATSSDEKHPPENIIDGNPETFWTTTGMFPQEFIIICFHKKHVKIEKLVIQSYLVRTLRIEKTTSKEPLDFEQWVEKDLVYTEGQLQNEEIVARDGYATFLRFIIVSAFDHFASVHSISAEGLTVSSLP  
>ENSMUSP00000102360\_c.282:C>T\_p.H95Y ENSMUST00000106749.8|Hspb11-202|ENSMUSG00000063172|+|chr4:g.107135132:C>T  
MRKVDLCSVTEGTEVILATSSDEKHPPENIIDGNPETFWTTTGMFPQEFIIICFHKKHVKIEKLVIQSYLVRTLRIEKTTSKEPLDFEQWVEKDLVYTEGQLQNEEIVARDGYATFLRFIIVSAFDHFASVHSISAEGLTVSSLP\*  
>ENSMUSP00000048810\_c.282:C>T\_p.H95Y ENSMUST00000046558.8|Hspb11-201|ENSMUSG00000063172|+|chr4:g.107135132:C>T  
MRKVDLCSVTEGTEVILATSSDEKHPPENIIDGNPETFWTTTGMFPQEFIIICFHKKHVKIEKLVIQSYLVRTLRIEKTTSKEPLDFEQWVEKDLVYTEGQLQNEEIVARDGYATFLRFIIVSAFDHFASVHSISAEGLTVSSLP\*  
>ENSMUSP00000049474\_c.2941:T>A\_p.I981N ENSMUST00000044823.4|Zswim5-201|ENSMUSG00000033948|+|chr4:g.116843905:T>A  
MAEGGEREELLSPPPISPAKRLCSWSPQAHHRPGTGAAGGGAGGGGGGCLAPGARPHLQPESELLDCAAKTV  
AEKWAYERVEERFERIPEPVQRRIVYWSFPRNEREICMYSSFFQYRGGPGAGAAAGAAGASPVEEGPPPPPGAA  
APAGSAPGAAGAGSSPGLGAGTGTASGGCGGEGLPFRRGIRLLDSGSVENVLQVGFHLSGTVTEPAMASEPA  
VTYKVAISFDRCKITSVSCGCGNKDIFYCAHVVALSLYRIRKPDQVKLRLPISETLQMNDRDQLQKFIQYLIT  
AHHTEVLPTAQKLADEILSSNSEINQVNGAPDPTAGASIDDENCWHLDEEQVKEQVKLFLSQGGYGGSGKQLN  
SMFAKVRMLRMRDSNGARMLTLITEQFMADPRLLTWRQQGTSMTDKCRQLWDELGALWVCIIILNPHCKLEEK  
SCWLQQLQKWSDDLICPLEDGNYGHELPNITNALSQSASHSPDLSLRPRRTVFTRAIEGRELHWQDSDLQRII  
SSGIYTAPACQRENERLLFNHSHGQPLWLEHVPTACARVDALRSHGYPKEALRLTVAIINTLRLQQQRQLEIYK  
HQKKEQLLQRGTTTTITNLEGGWVGHPLDPIGCLFLLTTEACRLNDDSYMMSDMNESRLPVYQHVVPVAGCPNSN  
ESYLSLALVALMGMGQQRVMPEGLYAQDKVCRNEEQLLSQLELQDDELVQTLRQKQICILLEGGPFSGLGE  
VIHRESVPMHTFAKYLFSALLPHDPDLSYKALRAMRLPVLNENSSAGDTSHPHMHVSVVPSRYPRWFTLGH  
ESQQCELASTMTAAKGDTLRLRTLLEAIQKHIHSPSLIFKLAQDAFKIATPTDSSTDTLLNVALELGLQVM  
RMTLSTLNWRREMRWRLVTCATEVGVVALVSIQSWYTLFTPTTEATSIVAATAVSHTTILRLSLDYVQREEL  
ASCARTLALQCAMKDPQSCALSALTCEKDHNAFEAAYQIAIDAAAGGMTHSQLFTIARYMELRGYPLRAFKL  
ASLAMSHLNLAYNQDTHPAINDVLWACALSHSLGKNEALAALIPLVVKSVHCATVLSDLIRRCTVTAPGLAGIP  
GRRSSGKLMSTDKAPLRQLLDATINAYINTTHSRLTHISPRHYGEFIEFLSKARETFLLPQDGHLOFAQFIDN  
LKQIYKGGKKLMLLVRRERFG\*  
>rs46360603\_ENSMUSP00000149966\_c.412:T>C\_p.L138P  
ENSMUST00000216226.2|olfr1342-202|ENSMUSG00000043383|-  
|chr4:g.118547235:A>G  
MQTLRKDNCSSVSEFLLGFSSSESQVRVALFIFLLLYMITLLGNGLIITLIYLDLSDRLHTPMYFFLSILSLVD  
MSYVTTTVPQMLVNMVCPRRITISWGACVAQMFIIFLLGLIAECVLYAIMAYDRYVAICFPLHYSVPM SRLVCIK  
MVTVCWSISITGALIYTVFTMRLPYCGPYKINHFFCEVPAVLKACADTSFNDRLDLDFILGFIIFLLVPLSLILA  
SYACIFASILRIRSSQGRKLSFSTCASHITVVTMFGPAMIMYMRPGSWYDPERDKKALFYNNVSAFLNPII  
YSLRNKDVKGAFKVLGDRGAAK\*  
>rs46360603\_ENSMUSP00000053925\_c.412:T>C\_p.L138P  
ENSMUST00000060562.6|olfr1342-201|ENSMUSG00000043383|-  
|chr4:g.118547235:A>G  
MQTLRKDNCSSVSEFLLGFSSSESQVRVALFIFLLLYMITLLGNGLIITLIYLDLSDRLHTPMYFFLSILSLVD  
MSYVTTTVPQMLVNMVCPRRITISWGACVAQMFIIFLLGLIAECVLYAIMAYDRYVAICFPLHYSVPM SRLVCIK  
MVTVCWSISITGALIYTVFTMRLPYCGPYKINHFFCEVPAVLKACADTSFNDRLDLDFILGFIIFLLVPLSLILA  
SYACIFASILRIRSSQGRKLSFSTCASHITVVTMFGPAMIMYMRPGSWYDPERDKKALFYNNVSAFLNPII  
YSLRNKDVKGAFKVLGDRGAAK\*  
>rs213024301\_ENSMUSP00000138958\_c.2263:G>A\_p.G755D  
ENSMUST00000184063.3|Csm2-205|ENSMUSG00000028804|+|chr4:g.128266349:G>A  
MPRSGRGEQCCGCPAVRARGEIGI WALVPGTGSRWGRPPPPPPPPPPPLLLLLLGGWLLSASAAAGQNCTF  
HLQGPNGTVESPGFPYGYPNYANCTWTITAEDQHRIQLVQSFAL EEDFDVLSVFDGPPQAENLRTRLTGFQL  
PATIVSAASTLSLSLISDYAVSAQGFRASEYVLPSTHTCGNPGRLPNGIQQGSTFNLGDKVRYSCNPGFFLEGH  
AVLTCCHASSEANTWDFPLPSCRADDACGGTLRGQSGIISPHFPAEYHNNADCTWTILAE LGDTIALVFI DF  
QLEDGDFLEVTGTGESSLWFTGASLPAPVISKKNWLRHLFTSDGNHRQRFSAQYQVKKQIELKSRGVKMLP  
SKDNNQKTSVLTQVGVSSQGHMCPDPGIPKPKGKRLGDFRLGSSVQFTCNEGYDLQGSKRITCMKVSDMFAAW  
SDHRPVCRRMCD AHLRGP SGIITSPNFPIQYDNNAHCVWIIITALNPAKVIKLAFFEEFDLERYD TLTVDGG  
QDGDQKTVLYILTGTSPDLIVSTHHQMWLLFQSDSSGSSLGFKASYEEIEQGSCGDPGIPAYGQREGSRFRH  
GDTLEFECQPAFELVQKSIITCQKNNQWSAKKPGCVFSCFFNF TSPSGIVLSPNYPEDYGNHLHCVVWILARP

ESRIHLAFNDIDVEPQDFDLVIKDGATAEAPVLGTFSGNQLPSSITSSGHVARLEFQTDHSTGKRGNITFTT  
FRHNECPDPGVPVNGKRFGDSLQLDSSISFLCDEGFLGTQGSSETITCVLKEGSSVVWNSAVLRCEAPCGHLTS  
PSGTILSPGWPGFYKDALSACAWVIEAQPGYPIKITFDRFKTEVNYDTLEVRDGRYTSAPLIGVYHGTQVPOFL  
ISTSNYLYLLFSTDKSHSDIGFQLRYETITLQSDHCLDPIVNGQRHGNDYFVGALVTFSCDSGYTLDGEP  
LECEPNFQWSHALPSCEALCGGFIQSSGTILSPGFDFYNNLNCTWVIETSHGKGVFFTFHTFHLES GHDY  
LLITENGSFSQPLRQLTGSRLPAPISAGLYGNFTAQVRFISDFSMSYEGFNITFSEYDLEPCEEPEVPAYSIR  
KGLQFGVGDTLTFSCFPYRLEGTARITCLGGRRRLWSSPLPRCVAECGNSVTGTQGTLLSPNFVYNNNHE  
CIYSIQTPGKGIQLKAKAFELAEGLLKVYDGTNNSARLLGVFSRSEMLGVTLNSTSSSLWDFITDAENTS  
KGFELQFSSFELIRCEDPGTPQFGYKVDHGGHFAGSSVTFSCDPGYSLRGSEELMCLSGERRTWDRPLPTCVA  
ECGGTVRGEVSGQVLSPGYPAPYEHNLNCIWTIEADAGCTIGLHFLVFDTEEVHDVLRIDWGPVSEGVLLKEL  
SGPMLPKDLHSTFNSSVVLQFSTDFFTSKQGFQFVSVSTATSCNDPQVQNGSRSGDSWEAGDSTVFQCDPGY  
ALQGSAEISCVKIQRNRFWQSPPTCIAPCGDLTGPSGVILSPNYPEPYPPGKECDWKVTVSPDYVIALVFN  
TFNLEPGYDFLHIYDGRDLSLPLIGSFYGSQPLSRIESSNSLFLAFRSDASVSNAGFVIDYTENPRESCFDP  
GSIKNGTRVGSDLKLGSSVYCHGGYEVEGASTLSCILGPDGKPMWNNRPRVCTAPCGGQYVGS DGVVLSN  
YPQNYTSGQTCLYFVTVPKDYVVFQFAFFHTALNDIVEVHDGYSQHSRLLSSLSGSHTGESLPLATSNQVLI  
KFSAKGQVSARGFFHVYQAVPRTSATQCSSVPEPRYGRKLGSDFSVGAIIRFECNSGYALQGSPEIECLPVP  
ALAQWNVSAPTCVVPCGGNLTERGTILSPGFPEYLNLSLNCVWKIMVPEGAGIQIQVISFVTEQNWDSLEVF  
DGADNTVTMLGSGFTVPALLNSTSNQLYLHFYSIVSAAAGFHLEYKTVGLSSCPEPAVPSNGVKTGERYL  
VNDVVSFQCEPGYALQGHAIHSCMPGTVRRWNYPPPLCIAQCGGAVEEMEGVILSPGFPNGYPSNMDCSWKIS  
LPVGFGAHIQFLNFSTEPNHDFLEIRSGPSETSRMMGRFSGSELPGLSLLSTSHDSIVYFHS DHSQNRPGFKLE  
YQAYELQECDPPEPFANGIVRGAGYVNGQSVTFECLPGYQLTGQPVLTQCQHGTRNRNDHPLRCEVPCGGNIT  
SFNGTVYSPGYSPYSSQDCVWQITVPIGHGVHLNLSLLQIEPFDYITVWDGPPQTSLQLVGVTSLSKKI  
AHSSSNQVLLKFRDRTATGGIFAIASFAYPLTKCPPPTILPNAEVVTENEENIGDIVRYRCLPGFTLVGSEI  
LTCKLGTYLQFEGPPPICEVHCPTNELLTDSTGVILSQSYPGSPQFQTC SWLVRVEPEYNISITVEYFLSEK  
QYDEFEIFDGPSPGSPLLKALSGNYSAPLIVTSSSNYSVLRWSSDHAYNRKGFKIRYSAPYCSLPKAPLHGFI  
LGQTTTQPGGSIHFQACNTGYRLVGHSMACITRHPQGYHLWSEAIPLCQALSCGLPADAPKNGIVFGKEYTVGTG  
AVYSCNEGYHLQAGAEATAECLDTGLWSNSNVPPQCVVPTCPDISSISVEHGRWRLLIFETQYQFQALMLICD  
PGYYTQGRVIRCQANGRWSLGE SMPTCQIISCGELPTPPSGHRIGTMSVYGATAIFSCNSGYTLVGSRVREC  
MANGLWSGSEVRCLAGHCCTPEPIVNGHNGENFNRYGVSVVYQCRAGFRLIGMSVRICQDDHHWSGKTPFCVP  
ITCGHPGNPVNGLTQGSQFNLDVVKFICNPGYIAEGAARSQCLASGQWSDTLPTCRIINCTDPGHQENSVRQ  
VHTSGPHRFSFGTTVSYQCNGHFYLLGTPALSCQDGTWDRPRPQCLLVSCGHGPGSPPHAQMSGDSYIVGAVV  
RYSCTGKRTLGVNSTRMCGLDGHWGSLPHCSGTSTGVC DPGI PAHGIRLGDSFAPGSMRFS CDAGHVLRG  
SSERMCOANGSWSGSQPECGVISCGNPGTPSNARVVFSDGLVFSVVYECREGYATGLLSRHCSVNGTWTG  
SDPECTVINCGDPGIPANGIRLGNDFRYNKTVTYQCVPGYVMESHRSVLSCTKDRTWNGTKPVCKAIMCKPP  
QLIPNGKVSDFTWGSSVSYACLEGYQLSLPAVLTCENGSWTGELPQCFPVFCGDPGVPVPRGRDRGRFSY  
RSVSVFCHAPLVLVGSPPRRFCQSDGTWSGTQPSCIDPTLTTCADPGMPQFGIQNSSQGYQVGSVTLFRQKQ  
YLLQGSTTRTCLPNLTWSGTPDCVPHHKQPETPTHANVGALDLP SMGYTLIYSCQEGFSLRGSEHRTCKA  
DGSWTGKPPVCLEVRPSGRPI NTAREPMLTQASVPGDVFAKNSLWKGAYEYQGKKQPAMLRVTGFQVANSKVN  
ATMIDHSGVELHLGAGNYKKEDFRLLQVYQVTGPVESFVNKFKDDHWALDGHVSSSESSGGTFVYQGSVKQGF  
GQFGFQRLDLRLLES DPESIGRHFASNSSVAAA ILVPIALIIAGFVLYLYKHRRRPKVPFNGYAGHENTNV  
RATFENPMYDRNIQPTDIMSNEAEFTVSTVCTAV\*  
>ENSMUSP00000101487\_c.2030:G>T\_p.E677D ENSMUST00000105861.8|Srrm1-  
203|ENSMUSG00000028809|-|chr4:g.135052315:C>A  
MDAGFFRGTSAEQDNRFNSNKQKLLKQLKFAECLKVKVDMKVNLEVIKPVITKRVTIELGFEDDVVIEFIFN  
QLEVKNPDSKMMQINLTGFLNGKNAREFMGELWPLLLSAQENIAGIPSAFLELKKKEIKQRQIEQEKLASLKK  
QDEDKDKRDKKEEKESREKRERSRSPRRRKSRSRSPRRRSPVRRERKRSHRSRSPRHRTKRSRSPAPEKKEK  
SPELPEPSVRMKDSSVQEATSTSDILKAPKEPVPEPKEPSPEKNSKKEKEKTRPRRSRSRSKRSRTRRSRSP  
HTRPRRRHRSRSRSYSPRRRSPRRRSPRRRTPPRRMPPPPHRRRSRSPGRRRRRSSASLSGSSSSSSSSRS  
RSPPKKPPKRTSSPPKTRRLSPSASPPRRRRHRPSSPATPPPKRHSPTPQQSNRTRKSRVSVSPGRTSGKVT  
KHKGTEKRESPPAPKPRKVELSEEDKGSKMAAADSVQQRQYRRQNQQSSSDSGSSSTSEDERPKRSHVK  
NGEVGRRRRHSPRSASPSPRKRQKETS PRSRRRRSPSPPPARRRRSPSPAPPPPPPPPPRRRRSPTPPRR  
RTPSPPPRRRSPSPRRYSPPIQRYSRSPSPPKRRTASPPPPKRRASPSPPPKRRVSHSPPPKQRSPTVTKRR  
SPSLSSKHKKSSPGRSTRDARSQPKNRHSPPAPRAPQTSPPPVRRGASASPQGRQSPSPSTRPIRRVSR  
TPEPKIKKKAASPSQSVRRVSSRSVSGSPEPAKAKPPAPSPVQSQSPSTNWSPAVPAKAKSPTPSLSPA  
RNSDQEGGGKKKKKKDKKHKKDKKHKKHKKHKKAVTIATPATAAAPAAVSAATTTSAQEPEAAAEPRKET  
ESEAEDDNLDDLERHLREKALRSMRKAQVSPQS\*  
>ENSMUSP00000081906\_c.2057:G>T\_p.E686D ENSMUST00000084846.12|Srrm1-  
202|ENSMUSG00000028809|-|chr4:g.135052315:C>A



MDAGFFRGTSAEQDNRFNSNKQKLLKQLKFAECLKVVMSKVNLEVIKPWITKRVTEILGFEDDVVIEFIFN  
QLEVKNPDSKMMQINLTGFLNGKNAREFMGELWPLLLSAQENIAGIPSAFLELKKEEIKQRQIEQEKLASLKK  
QDEDKDKRDKEEKESSREKRERSRSPRRRKSRSRSPRRRSSPVRREKRKSHSRSPRHRTKRSRSPAPEKKEK  
SPELPEPSVRMKDSSVQEATSTSDILKAPKEPVPEPKEPSPEKNSKKEKEKTRPRRSRRSKRSRSTRRSRSPS  
HTRPRRRHRSRSTRSPRRRPSPRRRTPPRRMPPPPRHRRRSRSPGRRRRRSSASLSGSSSSSSSSSRSPK  
KPPKRTSSPPKTRRLSPSASP RRHRPSSPATPPPKTRHSPTPQQSNRTRKSRVSVSPGRTSGKVTKHKGT  
EKRESPPAPKPRKVELSESEEDKGSKMAAADSVQRRQYRRQNQQSSSDSGSSSTSEDERPKRSHVKNGEVG  
RRRRHSPRSASPSPRKRQKETS PRMQMGRWQSPVTKSSRRRRSPSPPPARRRRSPSPAPPPPPPPPPRRR  
RSPTPPRRRTSPSPRRRSPSPRRYSPIQRRYSRSPPPKRRRTASPPPPKRRASPSPPKRRVSHSPPPKQ  
RSPTVTKRRSPSLSSKHRKGSSPGRSTRDARSPQPNKRHSRSPRPRAPQTSSPPVRRGASAS PQGRQSPSPS  
TRPIRRVSRTPPEPKKIKKAASPSQSVRRVSSSRVSGSPEPAKKPPAPSPVQSQSPSTNWS PAVPAKKAK  
SPTPSLSPARNSDQEGGGKKKKKKDKKHKKDKKHKKHKKHKKEKAVTIATPATAAPA AVSAATTTSAQEPA  
AAPEPRKETESEAEEDNLDLDERHLREKALRSMRKAQVSPQS\*

>ENSMUSP00000125003\_c.2072:G>T\_p.E691D ENSMUST00000136342.9|Srrml-  
208|ENSMUSG00000028809|-|chr4:g.135052315:C>A

MDAGFFRGTSAEQDNRFNSNKQKLLKQLKFAECLKVVMSKVNLEVIKPWITKRVTEILGFEDDVVIEFIFN  
QLEVKNPDSKMMQINLTGFLNGKNAREFMGELWPLLLSAQENIAGIPSAFLELKKEEIKQRQIEQEKLASLKK  
QDEDKDKRDKEEKESSREKRERSRSPRRRKSRSRSPRRRSSPVRREKRKSHSRSPRHRTKRSRSPAPEKKEK  
SPELPEPSVRMKDSSVQEATSTSDILKAPKEPVPEPKEPSPEKNSKKEKEKTRPRRSRRSKRSRSTRRSRSPS  
HTRPRRRHRSRSTRSPRRRPSPRRRTPPRRMPPPPRHRRRSRSPGRRRRRSSASLSGSSSSSSSSSRSPK  
RSPKPPKRTSSPPKTRRLSPSASP RRHRPSSPATPPPKTRHSPTPQQSNRTRKSRVSVSPGRTSGKVT  
KHKGT EKRESPPAPKPRKVELSESEEDKGSKMAAADSVQRRQYRRQNQQSSSDSGSSSTSEDERPKRSHVKN  
NGEVGRRRRHSPRSASPSPRKRQKETS PRMQMGRWQSPVTKSSRRRRSPSPPPARRRRSPSPAPPPPPPP  
PPRRRSPTPPRRRTSPSPRRRSPSPRRYSPIQRRYSRSPPPKRRRTASPPPPKRRASPSPPKRRVSHS  
PPPKQRSPTVTKRRSPSLSSKHRKGSSPGRSTRDARSPQPNKRHSRSPRPRAPQTSSPPVRRGASAS PQGRQ  
SPSPSTRPIRRVSRTPPEPKKIKKAASPSQSVRRVSSSRVSGSPEPAKKPPAPSPVQSQSPSTNWS PAVP  
AKKAKSPTPSLSPARNSDQEGGGKKKKKKDKKHKKDKKHKKHKKHKKEKAVTIATPATAAPA AVSAATTTSA  
QEPAAPAEPRKETESEAEEDNLDLDERHLREKALRSMRKAQVSPQS\*

>ENSMUSP00000030613\_c.2072:G>T\_p.E691D ENSMUST00000030613.11|Srrml-  
201|ENSMUSG00000028809|-|chr4:g.135052315:C>A

MDAGFFRGTSAEQDNRFNSNKQKLLKQLKFAECLKVVMSKVNLEVIKPWITKRVTEILGFEDDVVIEFIFN  
QLEVKNPDSKMMQINLTGFLNGKNAREFMGELWPLLLSAQENIAGIPSAFLELKKEEIKQRQIEQEKLASLKK  
QDEDKDKRDKEEKESSREKRERSRSPRRRKSRSRSPRRRSSPVRREKRKSHSRSPRHRTKRSRSPAPEKKEK  
SPELPEPSVRMKDSSVQEATSTSDILKAPKEPVPEPKEPSPEKNSKKEKEKTRPRRSRRSKRSRSTRRSRSPS  
HTRPRRRHRSRSTRSPRRRPSPRRRTPPRRMPPPPRHRRRSRSPGRRRRRSSASLSGSSSSSSSSSRSPK  
RSPKPPKRTSSPPKTRRLSPSASP RRHRPSSPATPPPKTRHSPTPQQSNRTRKSRVSVSPGRTSGKVT  
KHKGT EKRESPPAPKPRKVELSESEEDKGSKMAAADSVQRRQYRRQNQQSSSDSGSSSTSEDERPKRSHVKN  
NGEVGRRRRHSPRSASPSPRKRQKETS PRMQMGRWQSPVTKSSRRRRSPSPPPARRRRSPSPAPPPPPPP  
PPRRRSPTPPRRRTSPSPRRRSPSPRRYSPIQRRYSRSPPPKRRRTASPPPPKRRASPSPPKRRVSHS  
PPPKQRSPTVTKRRSPSLSSKHRKGSSPGRSTRDARSPQPNKRHSRSPRPRAPQTSSPPVRRGASAS PQGRQ  
SPSPSTRPIRRVSRTPPEPKKIKKAASPSQSVRRVSSSRVSGSPEPAKKPPAPSPVQSQSPSTNWS PAVP  
AKKAKSPTPSLSPARNSDQEGGGKKKKKKDKKHKKDKKHKKHKKHKKEKAVTIATPATAAPA AVSAATTTSA  
QEPAAPAEPRKVFPTPLPAV\*

>ENSMUSP00000120952\_c.410:G>T\_p.E137D ENSMUST00000140050.3|Srrml-  
211|ENSMUSG00000028809|-|chr4:g.135052315:C>A

XSRRRRSPSPPPARRRRSPSPAPPPPPPPPPRRRRSPTPPRRRTSPSPRRRSPSPRRYSPIQRRYSRSP  
PPKRRRTASPPPPKRRASPSPPKRRVSHSPPPKQRSPTVTKRRSPSLSSKHRKGSSPGRSTRDARSPQPNKR  
HSPSPRPRAPQTSSPPVRRGASAS PQGRQSPSPSTRPIRRVSRTPPEPKKIKKSVSGSPEPAKKPPAPSPV  
QSQSPSTNWS PAVPAKKAKSPTPSLSPARNSDQEGGGKKKKKKDKKHKKDKKHKKHKKHKKEKAVTIATPAT  
AAPAAVSAATTTSAQEPAAPAEPRK

>ENSMUSP00000101442\_c.42:G>TAAAG\_p.V15ins-fs ENSMUST00000105816.8|Pink1-  
202|ENSMUSG00000028756|-|chr4:g.138043014:C>CTTTA  
MAPEVSTAHSGPSA

>ENSMUSP00000030536\_c.1278:G>TAAAG\_p.V427ins-fs  
ENSMUST00000030536.13|Pink1-201|ENSMUSG00000028756|-  
|chr4:g.138043014:C>CTTTA  
MAVRQALGRGLQLGRALLLRFPKPGPLFGWGKPGPAAAWGRGERPGQVVSPPGAQPRPVGLPLPDRYRFFRQS  
VAGLAARIQRQFMVRARGGAGPCGRAVFLAFGLGLGLIEEKQAEGRRAASACQEIQAIFTQKTRKRVSDPLDTR

CWQGFRELDYLIGQAIGKGCNAAVYEATMPTLPQHLEKAKHLGLIGKGPDVVLKGADGEQAPGTPFPFAIKM  
MWNISAGSSSEAILS SKMSQELVPASRVALAGEYGAVTYRRSRDGPQLAPHPNI IRVFRAFTSSVPLLPGALA  
DYPDMLPPHYYPEGLGHGRTLFLVMKNYPCTLRQYLEEQTPSSRLATMMTLQLEGVVDHLVQQGIAHRDLKSD  
NILVEWDS DGC PWLVISDFGCCLADQHVGLRLFPNSSSVERGGNGSLMAPEVSTAHSGPSA  
>ENSMUSP00000101443\_c.1188:G>TAAAG\_p.V397ins-fs  
ENSMUST00000105817.4|Pink1-203|ENSMUSG00000028756|-  
|chr4:g.138043014:C>CTTTA  
MAVRQALGRGLQLERPGQVSPGAQPRPVGLPLPDRYRFFRQSVAGLAARIQRQFMVRARGGAGPCGRAVFLA  
FGLGLGLIEEKQAEGRRAASACQEIQAIFFTQKTKRVSDPLDTRCQWQGFRELDYLIGQAIGKGCNAAVYEATMP  
TLPQHLEKAKHLGLIGKGPDVVLKGADGEQAPGTPFPFAIKMMWNISAGSSSEAILS SKMSQELVPASRVALA  
GEYGAVTYRRSRDGPQLAPHPNI IRVFRAFTSSVPLLPALADYPDMLPPHYYPEGLGHGRTLFLVMKNYP  
TLRQYLEEQTPSSRLATMMTLQLEGVVDHLVQQGIAHRDLKSDNILVEWDS DGC PWLVISDFGCCLADQHVGL  
RLFPNSSSVERGGNGSLMAPEVSTAHSGPSA  
>rs50525384\_ENSMUSP00000030536\_c.1155:T>C\_p.C386R  
ENSMUST00000030536.13|Pink1-201|ENSMUSG00000028756|-|chr4:g.138043407:A>G  
MAVRQALGRGLQLGRALLRFPKPGPLFGWGKPGPAAAWGRGERPGQVSPGAQPRPVGLPLPDRYRFFRQSV  
VAGLAARIQRQFMVRARGGAGPCGRAVFLAFGLGLGLIEEKQAEGRRAASACQEIQAIFFTQKTKRVSDPLDTR  
CQWQGFRELDYLIGQAIGKGCNAAVYEATMPTLPQHLEKAKHLGLIGKGPDVVLKGADGEQAPGTPFPFAIKM  
MWNISAGSSSEAILS SKMSQELVPASRVALAGEYGAVTYRRSRDGPQLAPHPNI IRVFRAFTSSVPLLPGALA  
DYPDMLPPHYYPEGLGHGRTLFLVMKNYPCTLRQYLEEQTPSSRLATMMTLQLEGVVDHLVQQGIAHRDLKSD  
NILVEWDS DGC PWLVISDFGRCLADQHVGLRLFPNSSSVERGGNGSLMAPEVSTAHSGPSAVIDYSKADTWAV  
GAIAYEIFGLANPFYGGQSAHLESRSYQEAQLPEMPESVPPPEARLVRSLQREASKRPSARLAANVLHLSLW  
GEHLLALKNLKLDKMIAWLLQQAATLLADRLREKSCVETKLMFLANLECEALCQAALLSSWRAAP\*  
>rs50525384\_ENSMUSP00000101443\_c.1065:T>C\_p.C356R  
ENSMUST00000105817.4|Pink1-203|ENSMUSG00000028756|-|chr4:g.138043407:A>G  
MAVRQALGRGLQLERPGQVSPGAQPRPVGLPLPDRYRFFRQSVAGLAARIQRQFMVRARGGAGPCGRAVFLA  
FGLGLGLIEEKQAEGRRAASACQEIQAIFFTQKTKRVSDPLDTRCQWQGFRELDYLIGQAIGKGCNAAVYEATMP  
TLPQHLEKAKHLGLIGKGPDVVLKGADGEQAPGTPFPFAIKMMWNISAGSSSEAILS SKMSQELVPASRVALA  
GEYGAVTYRRSRDGPQLAPHPNI IRVFRAFTSSVPLLPALADYPDMLPPHYYPEGLGHGRTLFLVMKNYP  
TLRQYLEEQTPSSRLATMMTLQLEGVVDHLVQQGIAHRDLKSDNILVEWDS DGC PWLVISDFGRCLADQHVGL  
RLFPNSSSVERGGNGSLMAPEVSTAHSGPSAVIDYSKADTWAVGAIAYEIFGLANPFYGGQSAHLESRSYQEA  
QLPEMPESVPPPEARLVRSLQREASKRPSARLAANVLHLSLWGEHLLALKNLKLDKMIAWLLQQAATLLAD  
RLREKSCVETKLMFLANLECEALCQAALLSSWRAAP\*  
>ENSMUSP00000115949\_c.53:G>T\_p.L18F ENSMUST00000148204.8|Szrd1-  
205|ENSMUSG00000040842|-|chr4:g.140847667:C>A  
VAESWEEAADSGEIDRRFEKCLKITQKERKSKSPKVPVIVIQDDSLPTGPPPQIRILKRPTSNVSSPNSTS  
RPALPVKSLAQREAEYAEARRRILGSASPEEEQEKPIIDRPTRISQPEDSRQPSNVIRQPLGPDGSGQFKQRR  
\*  
>ENSMUSP00000099545\_c.68:G>T\_p.L23F ENSMUST00000102487.4|Szrd1-  
203|ENSMUSG00000040842|-|chr4:g.140847667:C>A  
MEDEEVAESWEEAADSGEIDRRFEKCLKITQKESRKS SPKVPVIVIQDDSLPTGPPPQIRILKRPTSNVSS  
SPNSTSRPALPVKSLAQREAEYAEARRRILGSASPEEEQEKPIIDRPTRISQPEDSRQPSNVIRQPLGPDGSGQ  
GFKQRR\*  
>ENSMUSP00000077761\_c.646:G>C\_p.W216S ENSMUST00000078695.5|Pramel24-  
201|ENSMUSG00000046435|+|chr4:g.143453540:G>C  
MSFKDPPTLQQLARRSLLKDEALTISALPNLPMQLFPPLFKDAFTNKHPNLRQMVVAVPFPPTLPVGSMLKIP  
HLET LKAVLDGLDLMSQKDRPSRWNLQVLDLRDAHKDFWDGWAGLLHEVCSQDVFQGNQVGNHPILGGKQT  
MTIKMNLMSRRPSKYLYRWAKERKNGIQVCEKLEFGAIPAYDPLDVLKLCDAASIQELAINTCSDIY  
TLASLALGVGQMKNLQKLLFKEICISWDRPWDLEKEARIVTEIFSEFSKLHKLQHLYLNDVYFLTERLDQMLR  
CFESPLETLAITHCTLSSESDMSYLSQCPSIHQLKHLDLGVTLLLSHPFLQSLLERLTATLQTLKLGCKLMD  
WQISDLLPALSQCSQLTEVDFVENFFSMDSLKLLQNTANLTLTLEKYPAPDEVYDDSDGVIIDRFLQLCSE  
LIDTLKVVVRQPKQVYFVSKRCLYCRNFCIYSFVGN\*  
>rs108334209\_ENSMUSP00000092103\_c.849:C>T\_p.L284F  
ENSMUST00000094526.5|Pramel31-  
201|ENSMUSG00000070619|+|chr4:g.144089533:C>T  
MSFQAPPTLLSLAVQSLAKNEALAINALQELPRELFPPLFKAAFTGRHTKILKEMVGAWPLPCLPVGALMNIP  
DMTVLQAVLDGVDMLTGNFHPKSKRKLQVLDLRNVHHHFWDVVSAGPEDEDSSAETVCQKQKATHPHRYALRRR  
LKVVTDLHLQFDLEEHQTYFLQWAQERRASLNLCCVKLQIRGLAMHTVRKILQIFQPYCIEELELNTGWTLS



FTDKGSLRVHHRH HAGEKPYKCSECDKCF TDKG YLRVHHRH HAGEKPYKCSECDKCF THK GSLRVHHRH HAGE  
KPYKCSECDKCF TEKNGLRRHQRIHTGEKPYKCSECDKCF TRKSHLSIHQNSYRRETVQMQ\*  
>rs30953777\_ENSMUSP00000137589\_c.902:T>A\_p.H301Q  
ENSMUST00000180014.2|zfp980-202|ENSMUSG00000058186|+|chr4:g.145428175:T>A  
MFAPHQESGRRTTKRMSASLENTAQCLLTFKDVFLDFSSEEWECNFAQRTLYMDVMLENYNNLLFVENHCIC  
GNYEKEKVLEQDTQHIVNEHGHNRRKSSKCNELRNVIHESSESTPYNTNHRDATLQSSNLKRHKGTGTTKEVCT  
YKDCVNCLKGSSIIISLNQGTHIEKKEHNRNKNLDEVLVSQRNNSEMSTYTCGEFDKCF TDSDNLQSQQR IYPG  
KKSYYIYSESDKCF TQLSHLSIHHTIHSGEKPYKCSECDKCF TDKFTLRKHQRIHTGEKPYKCNECDKCF TDKG  
SLRVHQRIHTGEKPYKCSECDKCF TQPSHLSIHRRHISGEKPYKCSECDKCF TDKSSLRVHQRIHTGEKPYQC  
SECDKCF TDKGSLRVHHRH HAGEKPYQCSECDKCF TDKGSLRVHHRH HAGEKPYKCSECDKCF THKDSL RVH  
RIHAGEKPYKCSECDKCF TEKNGLRRHQRIHTGEKPYKCSECDKCF TDKSSLRVHQRIHTGEKPYQCSECDK  
FTDKGSLRVHHRH HAGEKPYKCSECDKCF TDKG YLRVHHRH HAGEKPYKCSECDKCF THK GSLRVHHRH HAGE  
KPYKCSECDKCF TEKNGLRRHQRIHTGEKPYKCSECDKCF TRKSHLSIHQNSYRRETVQMQ\*  
>rs108218830\_ENSMUSP00000101364\_c.1317:A>G\_p.I440V  
ENSMUST00000105738.9|zfp980-201|ENSMUSG00000058186|+|chr4:g.145428590:A>G  
MFAPHQESGRRTTKRMSASLENTAQCLLTFKDVFLDFSSEEWECNFAQRTLYMDVMLENYNNLLFVENHCIC  
GNYEKEKVLEQDTQHIVNEHGHNRRKSSKCNELRNVIHESSESTPYNTNHRDATLQSSNLKRHKGTGTTKEVCT  
YKDCVNCLKGSSIIISLNQGTHIEKKEHNRNKNLDEVLVSQRNNSEMSTYTCGEFDKCF TDSDNLQSQQR IYPG  
KKSYYIYSESDKCF TQLSHLSIHHTIHSGEKPYKCSECDKCF TDKFTLRKHQRIHTGEKPYKCNECDKCF TDKG  
SLRVHQRIHTGEKPYKCSECDKCF TQPSHLSIHRRHISGEKPYKCSECDKCF TDKSSLRVHQRIHTGEKPYQC  
SECDKCF TDKGSLRVHHRH HAGEKPYQCSECDKCF TDKGSLRVHHRH HAGEKPYKCSECDKCF THKDSL RVH  
RVHAGEKPYKCSECDKCF TEKNGLRRHQRIHTGEKPYKCSECDKCF TDKSSLRVHQRIHTGEKPYQCSECDK  
FTDKGSLRVHHRH HAGEKPYKCSECDKCF TDKG YLRVHHRH HAGEKPYKCSECDKCF THK GSLRVHHRH HAGE  
KPYKCSECDKCF TEKNGLRRHQRIHTGEKPYKCSECDKCF TRKSHLSIHQNSYRRETVQMQ\*  
>rs108218830\_ENSMUSP00000137589\_c.1317:A>G\_p.I440V  
ENSMUST00000180014.2|zfp980-202|ENSMUSG00000058186|+|chr4:g.145428590:A>G  
MFAPHQESGRRTTKRMSASLENTAQCLLTFKDVFLDFSSEEWECNFAQRTLYMDVMLENYNNLLFVENHCIC  
GNYEKEKVLEQDTQHIVNEHGHNRRKSSKCNELRNVIHESSESTPYNTNHRDATLQSSNLKRHKGTGTTKEVCT  
YKDCVNCLKGSSIIISLNQGTHIEKKEHNRNKNLDEVLVSQRNNSEMSTYTCGEFDKCF TDSDNLQSQQR IYPG  
KKSYYIYSESDKCF TQLSHLSIHHTIHSGEKPYKCSECDKCF TDKFTLRKHQRIHTGEKPYKCNECDKCF TDKG  
SLRVHQRIHTGEKPYKCSECDKCF TQPSHLSIHRRHISGEKPYKCSECDKCF TDKSSLRVHQRIHTGEKPYQC  
SECDKCF TDKGSLRVHHRH HAGEKPYQCSECDKCF TDKGSLRVHHRH HAGEKPYKCSECDKCF THKDSL RVH  
RVHAGEKPYKCSECDKCF TEKNGLRRHQRIHTGEKPYKCSECDKCF TDKSSLRVHQRIHTGEKPYQCSECDK  
FTDKGSLRVHHRH HAGEKPYKCSECDKCF TDKG YLRVHHRH HAGEKPYKCSECDKCF THK GSLRVHHRH HAGE  
KPYKCSECDKCF TEKNGLRRHQRIHTGEKPYKCSECDKCF TRKSHLSIHQNSYRRETVQMQ\*  
>ENSMUSP00000101364\_c.1398:A>G\_p.R467G ENSMUST00000105738.9|zfp980-  
201|ENSMUSG00000058186|+|chr4:g.145428671:A>G  
MFAPHQESGRRTTKRMSASLENTAQCLLTFKDVFLDFSSEEWECNFAQRTLYMDVMLENYNNLLFVENHCIC  
GNYEKEKVLEQDTQHIVNEHGHNRRKSSKCNELRNVIHESSESTPYNTNHRDATLQSSNLKRHKGTGTTKEVCT  
YKDCVNCLKGSSIIISLNQGTHIEKKEHNRNKNLDEVLVSQRNNSEMSTYTCGEFDKCF TDSDNLQSQQR IYPG  
KKSYYIYSESDKCF TQLSHLSIHHTIHSGEKPYKCSECDKCF TDKFTLRKHQRIHTGEKPYKCNECDKCF TDKG  
SLRVHQRIHTGEKPYKCSECDKCF TQPSHLSIHRRHISGEKPYKCSECDKCF TDKSSLRVHQRIHTGEKPYQC  
SECDKCF TDKGSLRVHHRH HAGEKPYQCSECDKCF TDKGSLRVHHRH HAGEKPYKCSECDKCF THKDSL RVH  
RIHAGEKPYKCSECDKCF TEKNGLRRHQRIHTGEKPYKCSECDKCF TDKSSLRVHQRIHTGEKPYQCSECDK  
FTDKGSLRVHHRH HAGEKPYKCSECDKCF TDKG YLRVHHRH HAGEKPYKCSECDKCF THK GSLRVHHRH HAGE  
KPYKCSECDKCF TEKNGLRRHQRIHTGEKPYKCSECDKCF TRKSHLSIHQNSYRRETVQMQ\*  
>ENSMUSP00000137589\_c.1398:A>G\_p.R467G ENSMUST00000180014.2|zfp980-  
202|ENSMUSG00000058186|+|chr4:g.145428671:A>G  
MFAPHQESGRRTTKRMSASLENTAQCLLTFKDVFLDFSSEEWECNFAQRTLYMDVMLENYNNLLFVENHCIC  
GNYEKEKVLEQDTQHIVNEHGHNRRKSSKCNELRNVIHESSESTPYNTNHRDATLQSSNLKRHKGTGTTKEVCT  
YKDCVNCLKGSSIIISLNQGTHIEKKEHNRNKNLDEVLVSQRNNSEMSTYTCGEFDKCF TDSDNLQSQQR IYPG  
KKSYYIYSESDKCF TQLSHLSIHHTIHSGEKPYKCSECDKCF TDKFTLRKHQRIHTGEKPYKCNECDKCF TDKG  
SLRVHQRIHTGEKPYKCSECDKCF TQPSHLSIHRRHISGEKPYKCSECDKCF TDKSSLRVHQRIHTGEKPYQC  
SECDKCF TDKGSLRVHHRH HAGEKPYQCSECDKCF TDKGSLRVHHRH HAGEKPYKCSECDKCF THKDSL RVH  
RIHAGEKPYKCSECDKCF TEKNGLRRHQRIHTGEKPYKCSECDKCF TDKSSLRVHQRIHTGEKPYQCSECDK  
FTDKGSLRVHHRH HAGEKPYKCSECDKCF TDKG YLRVHHRH HAGEKPYKCSECDKCF THK GSLRVHHRH HAGE  
KPYKCSECDKCF TEKNGLRRHQRIHTGEKPYKCSECDKCF TRKSHLSIHQNSYRRETVQMQ\*

>ENSMUSP00000101364\_c.1702:T>A\_p.F568Y ENSMUST00000105738.9|Zfp980-201|ENSMUSG00000058186|+|chr4:g.145428975:T>A  
MFAPHQESGRRTTKRMSASLENTAQCLLTfkdVfLDFsSSEWECLNFAQRTLYMDVMLENYNNLLFVENHCIC  
GNYEKEKVLQDQTQHIVNEHGHNRRKSSKCNELRNVIHESSESTPYNTNHRDATLQSSNLKRHKGTGTTKEVCT  
YKDCVNCLKGSSIIISLNQGTHIEKKEHNRNKNLDEVLVSQRNNSEMSTYTCGEFDKCFQSDNLQSQQRIYPG  
KKSYYISESDKCFQLSHLSIHHTIHSGEKPYKCECDKCFDkFtLRKHQRIHTGEKPYKCECDKCFDkG  
SLRVHQRIHTGEKPYKCECDKCFQPSHLSIHRRHSGEKPYKCECDKCFDkSSLRVHQRIHTGEKPYQC  
SECDKCFDkGSLRVHHRHAGEKPYQCSECDKCFDkGSLRVHHRHAGEKPYKCECDKCFTHKDSL RVH  
RIHAGEKPYKCECDKCFTEKNGLRRHQRIHTGEKPYKCECDKCFDkSSLRVHQRIHTGEKPYQCSECDK  
FTDkGSLRVHHRHAGEKPYKCECDKCFDkGYLRVHHRHAGEKPYKCECDKCYTHKGSRLVHHRHAGE  
KPYKCECDKCFTEKNGLRRHQRIHTGEKPYKCECDKCFTRKSHLSIHQNSYRRETVMQ\*  
>ENSMUSP00000137589\_c.1702:T>A\_p.F568Y ENSMUST00000180014.2|Zfp980-202|ENSMUSG00000058186|+|chr4:g.145428975:T>A  
MFAPHQESGRRTTKRMSASLENTAQCLLTfkdVfLDFsSSEWECLNFAQRTLYMDVMLENYNNLLFVENHCIC  
GNYEKEKVLQDQTQHIVNEHGHNRRKSSKCNELRNVIHESSESTPYNTNHRDATLQSSNLKRHKGTGTTKEVCT  
YKDCVNCLKGSSIIISLNQGTHIEKKEHNRNKNLDEVLVSQRNNSEMSTYTCGEFDKCFQSDNLQSQQRIYPG  
KKSYYISESDKCFQLSHLSIHHTIHSGEKPYKCECDKCFDkFtLRKHQRIHTGEKPYKCECDKCFDkG  
SLRVHQRIHTGEKPYKCECDKCFQPSHLSIHRRHSGEKPYKCECDKCFDkSSLRVHQRIHTGEKPYQC  
SECDKCFDkGSLRVHHRHAGEKPYQCSECDKCFDkGSLRVHHRHAGEKPYKCECDKCFTHKDSL RVH  
RIHAGEKPYKCECDKCFTEKNGLRRHQRIHTGEKPYKCECDKCFDkSSLRVHQRIHTGEKPYQCSECDK  
FTDkGSLRVHHRHAGEKPYKCECDKCFDkGYLRVHHRHAGEKPYKCECDKCYTHKGSRLVHHRHAGE  
KPYKCECDKCFTEKNGLRRHQRIHTGEKPYKCECDKCFTRKSHLSIHQNSYRRETVMQ\*  
>ENSMUSP00000101364\_c.1771:A>G\_p.E591G ENSMUST00000105738.9|Zfp980-201|ENSMUSG00000058186|+|chr4:g.145429044:A>G  
MFAPHQESGRRTTKRMSASLENTAQCLLTfkdVfLDFsSSEWECLNFAQRTLYMDVMLENYNNLLFVENHCIC  
GNYEKEKVLQDQTQHIVNEHGHNRRKSSKCNELRNVIHESSESTPYNTNHRDATLQSSNLKRHKGTGTTKEVCT  
YKDCVNCLKGSSIIISLNQGTHIEKKEHNRNKNLDEVLVSQRNNSEMSTYTCGEFDKCFQSDNLQSQQRIYPG  
KKSYYISESDKCFQLSHLSIHHTIHSGEKPYKCECDKCFDkFtLRKHQRIHTGEKPYKCECDKCFDkG  
SLRVHQRIHTGEKPYKCECDKCFQPSHLSIHRRHSGEKPYKCECDKCFDkSSLRVHQRIHTGEKPYQC  
SECDKCFDkGSLRVHHRHAGEKPYQCSECDKCFDkGSLRVHHRHAGEKPYKCECDKCFTHKDSL RVH  
RIHAGEKPYKCECDKCFTEKNGLRRHQRIHTGEKPYKCECDKCFDkSSLRVHQRIHTGEKPYQCSECDK  
FTDkGSLRVHHRHAGEKPYKCECDKCFDkGYLRVHHRHAGEKPYKCECDKCFTHKGSRLVHHRHAGE  
KPYKCSGCDKCFTEKNGLRRHQRIHTGEKPYKCECDKCFTRKSHLSIHQNSYRRETVMQ\*  
>ENSMUSP00000137589\_c.1771:A>G\_p.E591G ENSMUST00000180014.2|Zfp980-202|ENSMUSG00000058186|+|chr4:g.145429044:A>G  
MFAPHQESGRRTTKRMSASLENTAQCLLTfkdVfLDFsSSEWECLNFAQRTLYMDVMLENYNNLLFVENHCIC  
GNYEKEKVLQDQTQHIVNEHGHNRRKSSKCNELRNVIHESSESTPYNTNHRDATLQSSNLKRHKGTGTTKEVCT  
YKDCVNCLKGSSIIISLNQGTHIEKKEHNRNKNLDEVLVSQRNNSEMSTYTCGEFDKCFQSDNLQSQQRIYPG  
KKSYYISESDKCFQLSHLSIHHTIHSGEKPYKCECDKCFDkFtLRKHQRIHTGEKPYKCECDKCFDkG  
SLRVHQRIHTGEKPYKCECDKCFQPSHLSIHRRHSGEKPYKCECDKCFDkSSLRVHQRIHTGEKPYQC  
SECDKCFDkGSLRVHHRHAGEKPYQCSECDKCFDkGSLRVHHRHAGEKPYKCECDKCFTHKDSL RVH  
RIHAGEKPYKCECDKCFTEKNGLRRHQRIHTGEKPYKCECDKCFDkSSLRVHQRIHTGEKPYQCSECDK  
FTDkGSLRVHHRHAGEKPYKCECDKCFDkGYLRVHHRHAGEKPYKCECDKCFTHKGSRLVHHRHAGE  
KPYKCSGCDKCFTEKNGLRRHQRIHTGEKPYKCECDKCFTRKSHLSIHQNSYRRETVMQ\*  
>ENSMUSP00000101364\_c.1786:T>C\_p.F596S ENSMUST00000105738.9|Zfp980-201|ENSMUSG00000058186|+|chr4:g.145429059:T>C  
MFAPHQESGRRTTKRMSASLENTAQCLLTfkdVfLDFsSSEWECLNFAQRTLYMDVMLENYNNLLFVENHCIC  
GNYEKEKVLQDQTQHIVNEHGHNRRKSSKCNELRNVIHESSESTPYNTNHRDATLQSSNLKRHKGTGTTKEVCT  
YKDCVNCLKGSSIIISLNQGTHIEKKEHNRNKNLDEVLVSQRNNSEMSTYTCGEFDKCFQSDNLQSQQRIYPG  
KKSYYISESDKCFQLSHLSIHHTIHSGEKPYKCECDKCFDkFtLRKHQRIHTGEKPYKCECDKCFDkG  
SLRVHQRIHTGEKPYKCECDKCFQPSHLSIHRRHSGEKPYKCECDKCFDkSSLRVHQRIHTGEKPYQC  
SECDKCFDkGSLRVHHRHAGEKPYQCSECDKCFDkGSLRVHHRHAGEKPYKCECDKCFTHKDSL RVH  
RIHAGEKPYKCECDKCFTEKNGLRRHQRIHTGEKPYKCECDKCFDkSSLRVHQRIHTGEKPYQCSECDK  
FTDkGSLRVHHRHAGEKPYKCECDKCFDkGYLRVHHRHAGEKPYKCECDKCFTHKGSRLVHHRHAGE  
KPYKCECDKCFTEKNGLRRHQRIHTGEKPYKCECDKCFTRKSHLSIHQNSYRRETVMQ\*  
>ENSMUSP00000137589\_c.1786:T>C\_p.F596S ENSMUST00000180014.2|Zfp980-202|ENSMUSG00000058186|+|chr4:g.145429059:T>C



MFAPHQESGRRTTKRMSASLENTAQCLLTFKDVFLDFSSEEWECNFAQRTLYMDVMLENYNNLLFVENHCIC  
 GNYEKEKVLEQDTQHIVNEHGHNRRKSSKCNELRNVIHESSESTPYNTNHRDATLQSSNLKRHKGTGTTKEVCT  
 YKDCVNCLKGSSIIISLNQGTHIEKKEHNRNKNLDEVLVSRQNNSEMSTYTCGEFDKCFDQSDNLQSQORIYPG  
 KKSYYIYSESDKCFDQLSHLSIHHTIHSGEKPYKCSECDKCFDFTLRKHQRIHTGEKPYKCNECDKCFDCKG  
 SLRVHQRIHTGEKPYKCSECDKCFDQPSHLSIHRRIHSGEKPYKCSECDKCFDCKSSLRVHQRIHTGEKPYQC  
 SECDKCFDCKGSLRVVHRIHAGEKPYQCSECDKCFDCKGSLRVVHRIHAGEKPYKCSECDKCFTHKDSL RVH  
 RIHAGEKPYKCSECDKCFTEKNGLRRHQRIHTGEKPYKCSECDKCFDCKSSLRVHQRIHTGEKPYQCSECDK  
 FTDKGLSRVHHRHAGEKPYKCSECDKCFDCKGSLRVVHRIHAGEKPYKCSECDKCFTHKGLSRVHHRHAGE  
 KPYKCSECDKCFTEKNGLRRHQRIHTGEKPYKCSECDKCFTRKSHLSIHQNSYRRETVQMQ\*  
 >ENSMUSP00000101364\_c.1798:A>G\_p.N600S ENSMUST00000105738.9|Zfp980-  
 201|ENSMUSG00000058186|+|chr4:g.145429071:A>G  
 MFAPHQESGRRTTKRMSASLENTAQCLLTFKDVFLDFSSEEWECNFAQRTLYMDVMLENYNNLLFVENHCIC  
 GNYEKEKVLEQDTQHIVNEHGHNRRKSSKCNELRNVIHESSESTPYNTNHRDATLQSSNLKRHKGTGTTKEVCT  
 YKDCVNCLKGSSIIISLNQGTHIEKKEHNRNKNLDEVLVSRQNNSEMSTYTCGEFDKCFDQSDNLQSQORIYPG  
 KKSYYIYSESDKCFDQLSHLSIHHTIHSGEKPYKCSECDKCFDFTLRKHQRIHTGEKPYKCNECDKCFDCKG  
 SLRVHQRIHTGEKPYKCSECDKCFDQPSHLSIHRRIHSGEKPYKCSECDKCFDCKSSLRVHQRIHTGEKPYQC  
 SECDKCFDCKGSLRVVHRIHAGEKPYQCSECDKCFDCKGSLRVVHRIHAGEKPYKCSECDKCFTHKDSL RVH  
 RIHAGEKPYKCSECDKCFTEKNGLRRHQRIHTGEKPYKCSECDKCFDCKSSLRVHQRIHTGEKPYQCSECDK  
 FTDKGLSRVHHRHAGEKPYKCSECDKCFDCKGSLRVVHRIHAGEKPYKCSECDKCFTHKGLSRVHHRHAGE  
 KPYKCSECDKCFTEKNGLRRHQRIHTGEKPYKCSECDKCFTRKSHLSIHQNSYRRETVQMQ\*  
 >ENSMUSP00000137589\_c.1798:A>G\_p.N600S ENSMUST00000180014.2|Zfp980-  
 202|ENSMUSG00000058186|+|chr4:g.145429071:A>G  
 MFAPHQESGRRTTKRMSASLENTAQCLLTFKDVFLDFSSEEWECNFAQRTLYMDVMLENYNNLLFVENHCIC  
 GNYEKEKVLEQDTQHIVNEHGHNRRKSSKCNELRNVIHESSESTPYNTNHRDATLQSSNLKRHKGTGTTKEVCT  
 YKDCVNCLKGSSIIISLNQGTHIEKKEHNRNKNLDEVLVSRQNNSEMSTYTCGEFDKCFDQSDNLQSQORIYPG  
 KKSYYIYSESDKCFDQLSHLSIHHTIHSGEKPYKCSECDKCFDFTLRKHQRIHTGEKPYKCNECDKCFDCKG  
 SLRVHQRIHTGEKPYKCSECDKCFDQPSHLSIHRRIHSGEKPYKCSECDKCFDCKSSLRVHQRIHTGEKPYQC  
 SECDKCFDCKGSLRVVHRIHAGEKPYQCSECDKCFDCKGSLRVVHRIHAGEKPYKCSECDKCFTHKDSL RVH  
 RIHAGEKPYKCSECDKCFTEKNGLRRHQRIHTGEKPYKCSECDKCFDCKSSLRVHQRIHTGEKPYQCSECDK  
 FTDKGLSRVHHRHAGEKPYKCSECDKCFDCKGSLRVVHRIHAGEKPYKCSECDKCFTHKGLSRVHHRHAGE  
 KPYKCSECDKCFTEKNGLRRHQRIHTGEKPYKCSECDKCFTRKSHLSIHQNSYRRETVQMQ\*  
 >ENSMUSP00000101364\_c.1836:A>G\_p.K613E ENSMUST00000105738.9|Zfp980-  
 201|ENSMUSG00000058186|+|chr4:g.145429109:A>G  
 MFAPHQESGRRTTKRMSASLENTAQCLLTFKDVFLDFSSEEWECNFAQRTLYMDVMLENYNNLLFVENHCIC  
 GNYEKEKVLEQDTQHIVNEHGHNRRKSSKCNELRNVIHESSESTPYNTNHRDATLQSSNLKRHKGTGTTKEVCT  
 YKDCVNCLKGSSIIISLNQGTHIEKKEHNRNKNLDEVLVSRQNNSEMSTYTCGEFDKCFDQSDNLQSQORIYPG  
 KKSYYIYSESDKCFDQLSHLSIHHTIHSGEKPYKCSECDKCFDFTLRKHQRIHTGEKPYKCNECDKCFDCKG  
 SLRVHQRIHTGEKPYKCSECDKCFDQPSHLSIHRRIHSGEKPYKCSECDKCFDCKSSLRVHQRIHTGEKPYQC  
 SECDKCFDCKGSLRVVHRIHAGEKPYQCSECDKCFDCKGSLRVVHRIHAGEKPYKCSECDKCFTHKDSL RVH  
 RIHAGEKPYKCSECDKCFTEKNGLRRHQRIHTGEKPYKCSECDKCFDCKSSLRVHQRIHTGEKPYQCSECDK  
 FTDKGLSRVHHRHAGEKPYKCSECDKCFDCKGSLRVVHRIHAGEKPYKCSECDKCFTHKGLSRVHHRHAGE  
 KPYKCSECDKCFTEKNGLRRHQRIHTGEEPYKCSECDKCFTRKSHLSIHQNSYRRETVQMQ\*  
 >ENSMUSP00000137589\_c.1836:A>G\_p.K613E ENSMUST00000180014.2|Zfp980-  
 202|ENSMUSG00000058186|+|chr4:g.145429109:A>G  
 MFAPHQESGRRTTKRMSASLENTAQCLLTFKDVFLDFSSEEWECNFAQRTLYMDVMLENYNNLLFVENHCIC  
 GNYEKEKVLEQDTQHIVNEHGHNRRKSSKCNELRNVIHESSESTPYNTNHRDATLQSSNLKRHKGTGTTKEVCT  
 YKDCVNCLKGSSIIISLNQGTHIEKKEHNRNKNLDEVLVSRQNNSEMSTYTCGEFDKCFDQSDNLQSQORIYPG  
 KKSYYIYSESDKCFDQLSHLSIHHTIHSGEKPYKCSECDKCFDFTLRKHQRIHTGEKPYKCNECDKCFDCKG  
 SLRVHQRIHTGEKPYKCSECDKCFDQPSHLSIHRRIHSGEKPYKCSECDKCFDCKSSLRVHQRIHTGEKPYQC  
 SECDKCFDCKGSLRVVHRIHAGEKPYQCSECDKCFDCKGSLRVVHRIHAGEKPYKCSECDKCFTHKDSL RVH  
 RIHAGEKPYKCSECDKCFTEKNGLRRHQRIHTGEKPYKCSECDKCFDCKSSLRVHQRIHTGEKPYQCSECDK  
 FTDKGLSRVHHRHAGEKPYKCSECDKCFDCKGSLRVVHRIHAGEKPYKCSECDKCFTHKGLSRVHHRHAGE  
 KPYKCSECDKCFTEKNGLRRHQRIHTGEEPYKCSECDKCFTRKSHLSIHQNSYRRETVQMQ\*  
 >ENSMUSP00000116281\_c.628:A>G\_p.K210R ENSMUST00000123460.2|Zfp986-  
 201|ENSMUSG00000078500|+|chr4:g.145625970:A>G  
 MSVCLVNTPOGLLTFKDVFLDFSLEEWECLSFAQRSLYMDVMLENYNNLLFVENHCIRGKNGKVLDDQDSQYIV  
 HEHMNIQEKSSKWDKLSNVILESILQCTPYKTNHSSDALQFSNQRLKPRNTKEVCKYNDVSNLSLFSSTISLN  
 QGINMQKKKHNRNAELEKVFVSKHKVMVKKDNIAGNPYKSEFHKYLTQREKLQSQORIYHGKRPYESSKSDK

CFTHQIHLHSIHQEIHTEEKIYKCECDKCFKNKFNLTMHQRIHTGEKPYKCECDKCFKQSNLSIHQRIHTG  
EKPYKCECDKCFKQSNLSIHQRIHTGEKPYKCECGKCFTEKGLRIHQRIHTGEKPYKCECDKCFKQSNLS  
NLTIHQRIHTGEKPYKCECGKCFTEKSSLRHQRI  
>ENSMUSP00000089493\_c.1225:A>G\_p.K409R ENSMUST00000091878.6|zfp987-  
201|ENSMUSG00000066009|+|chr4:g.146061795:A>G  
MSVCLVNTPOGLLTFKDVLDVDFSLLEEWELSFQARSLYMDVMLENYNNLLFVENHCIRGKNGKVLDDQDSQYIV  
HEHMNIQEKSSKWDKLSNVILESLQCTPYKTNHSSDALQFSNQRLKPRNTKEVCKYNDVNSLSLSTISLN  
QGINMQKKKHNRNAELDKIFVSKHKVMVKKDNIAGNPYKCESEFHKYLTQRENLSQQRRIYHGKKPYKSSKSDK  
CFTHQIHLHSIHQEIHTEEKIYKCECDKCFKNKFNLTMHQRIHTGEKPYKCECDKCFKQSNLSIHQRIHTG  
EKPYKCECDKCFKQSNLSIHQRIHTGEKPYKCECGKCFTEKSSLRHQRIHTGEKPYKCECDKCFKQSNLS  
HLSIHQRIHTGEKPYKCECDKCFKQSNLSIHQRIHTGEKPYKCECGKCFTEKSSLRHQRIHTGEKPYK  
SECGKCFTEKSSLRHQRIHTGEKPYKCECGKCFTEKSSLRHQRIHTGEKPYKCECGKCFKQSNLSRHQ  
KIHTGEKPYKCECDKCFKQSNLSIHQRIHTGEKPYKCECEKCFNEKNILKIHQRIHTGERPYKCECDK  
FSRKFHLGIHQRIHTGKPYKCECDKCFKQSNLSIHQKIHTGEKPYK\*  
>ENSMUSP00000090425\_c.1121:C>A\_p.D374E ENSMUST00000092750.12|zfp600-  
201|ENSMUSG00000066007|+|chr4:g.146132455:C>A  
MFAPHQESGRRTTKRMSASLENTAQCLLTFKDVLDVDFSLLEEWELNFAQRTLYMDVMLENYNNLLFVENHCIC  
GNYEKEKVLQETQHIIVNEHGHNRKSSKCNVNRNVIHESSESTPYNTNHRDATLQSSNLKRHKGTGTVKGVCT  
YKDCVNCLKGSSIIISLNQGTHIEKKEHNRNKNLDEVLVSRQNNSEMNTYTTCGEFDFKCFKQSNLSQQRRIYPG  
KKSYYIYSESDKCFKQSNLSIHHTIHSGEKPYKCECDKCFKQSNLSRHQRIHTGEKPYKCECDKCFKQSNLS  
TLRKHQRIHTGEKPYKCECDKCFKQSNLSRHQRIHTGEKPYKCECDKCFKQSNLSRHQRIHTGEKPYK  
SECDKCFTEKCTLRKHQRIHTGEKPYKCECDKCFTEKFTLRKHQRIHTGEKPYKCECDKCFKQSNLSRHQ  
RIHTGEKPYKCECDKCFKQSNLSRHQRIHTGEKPYKCECDKCFKQSNLSRHQRIHTGEKPYKCECDK  
FTDKGSLRVHQRIHIGEKPYKCECDKCFKQSNLSRHQRIHTGEKPYKCECDKCFKQSNLSRHQRIHTGE  
KPYQCSECDKCFKQSNLSRHQRIHAGEKPYKCECGKCFKQSNLSRHQRIHAGEKPYKCECDKCFKQSNLS  
LRVHHRHTGEKPYKCECDKCFTRKSHLSIHQRIHTGEKLYKCECDKCFKQSNLSRHQRIHTGETPYKCN  
ECDKCF\*

>ENSMUSP00000126879\_c.1121:C>A\_p.D374E ENSMUST00000168483.9|zfp600-  
204|ENSMUSG00000066007|+|chr4:g.146132455:C>A  
MFAPHQESGRRTTKRMSASLENTAQCLLTFKDVLDVDFSLLEEWELNFAQRTLYMDVMLENYNNLLFVENHCIC  
GNYEKEKVLQETQHIIVNEHGHNRKSSKCNVNRNVIHESSESTPYNTNHRDATLQSSNLKRHKGTGTVKGVCT  
YKDCVNCLKGSSIIISLNQGTHIEKKEHNRNKNLDEVLVSRQNNSEMNTYTTCGEFDFKCFKQSNLSQQRRIYPG  
KKSYYIYSESDKCFKQSNLSIHHTIHSGEKPYKCECDKCFKQSNLSRHQRIHTGEKPYKCECDKCFKQSNLS  
TLRKHQRIHTGEKPYKCECDKCFKQSNLSRHQRIHTGEKPYKCECDKCFKQSNLSRHQRIHTGEKPYK  
SECDKCFTEKCTLRKHQRIHTGEKPYKCECDKCFTEKFTLRKHQRIHTGEKPYKCECDKCFKQSNLSRHQ  
RIHTGEKPYKCECDKCFKQSNLSRHQRIHTGEKPYKCECDKCFKQSNLSRHQRIHTGEKPYKCECDK  
FTDKGSLRVHQRIHIGEKPYKCECDKCFKQSNLSRHQRIHTGEKPYKCECDKCFKQSNLSRHQRIHTGE  
KPYQCSECDKCFKQSNLSRHQRIHAGEKPYKCECGKCFKQSNLSRHQRIHAGEKPYKCECDKCFKQSNLS  
LRVHHRHTGEKPYKCECDKCFTRKSHLSIHQRIHTGEKLYKCECDKCFKQSNLSRHQRIHTGETPYKCN  
ECDKCF\*

>ENSMUSP00000101359\_c.391:A>ATT\_p.N131ins-fs ENSMUST00000105733.3|zfp992-  
201|ENSMUSG00000070605|+|chr4:g.146550672:A>ATT  
MSVCLVNTPOGLLTFKDVLDVDFSLLEEWESLSFAQRTLYMDVMLENYNNLLFVENHCICGKYEKVLDDQDSQYIV  
HEHMNIQEKSSKWDKLSNVILEAPQCTPYKTNHTSDALQFSNQRLKPRNTKEVCKYNLTL  
>rs240941694 ENSMUSP00000101359\_c.565:T>G\_p.F189C  
ENSMUST00000105733.3|zfp992-201|ENSMUSG00000070605|+|chr4:g.146550846:T>G  
MSVCLVNTPOGLLTFKDVLDVDFSLLEEWESLSFAQRTLYMDVMLENYNNLLFVENHCICGKYEKVLDDQDSQYIV  
HEHMNIQEKSSKWDKLSNVILEAPQCTPYKTNHTSDALQFSNQRLKPRNTKEVCKYNDVNSLSLSTISLN  
QGIHMQKKKHNGNAESEKAFISKHKVMVKKRNTGVNPNYKCSKDKYLTQDKLQSQQRRIYHEKHKFRSSKSDK  
CFTHQIDLSIHQGIHAEKIYKCECDKCFTHKFNLIHQRIHTGEKPYKCECDKCFKQSNLSRHQRIHTG  
EKPYKCECDKCFKQSNLSRHQRIHTGDKPYKCECDKCFKQSNLSRHQRIHTGEKPYKCSKDKSFTENG  
HLRIHQRNHTGEKPYKCSQDKSFTENGLRIHQRIHTGEKPYKCECDKCFKQSNLSRHQRIHTGEKPYK  
SECDKCFKQSNLSRHQRIHTGEKPYKCECDKCFKQSNLSRHQRIHTGEKPYKCECDKCFKQSNLSRHQ  
RIHTGEKPYKCECDKCFKQSNLSRHQRIHTGEKPYKCECDKCFTEKGHQRIHTGEIPYK\*  
>ENSMUSP00000101359\_c.649:G>C\_p.S217T ENSMUST00000105733.3|zfp992-  
201|ENSMUSG00000070605|+|chr4:g.146550930:G>C  
MSVCLVNTPOGLLTFKDVLDVDFSLLEEWESLSFAQRTLYMDVMLENYNNLLFVENHCICGKYEKVLDDQDSQYIV  
HEHMNIQEKSSKWDKLSNVILEAPQCTPYKTNHTSDALQFSNQRLKPRNTKEVCKYNDVNSLSLSTISLN

QGIHMQKKKHNGNAESEKAFISKHKVMVKNRNTGVNPKYKSKFDKYLTDQDKLQSQQRIYHEKKHFRSSKTDK  
CFTHQIDLSIHQGIHAAEKIYKCECDKCFTHKFLNIHQRIHTGEKPYKCECDKCFQKSHLNIHQRIHTG  
EKPYKCIKCEKCFTEKGNLRIHQRIHTGDKPYKCECDKCFQKSHLNIHQRIHTGEKPYKCSKCDKSFTENG  
HLRIHQRNHTGEKPYKCSQCDKSFTENGHLRIHQRIHTGEKPYKCECDKCFQKSHLNIHQRIHTG  
SECDKCFQKSHLNIHQRIHTGEKPYKCECDKCFTEKGFSLRIHQRIHGEKPYK  
SECDKCFQKSHLNIHQRIHTGEKPYKCECDKSFTEKGLRIHQRIHTGEKPYKCECDKCFTEKGFSLRIHQ  
RIHTGEKPYKCECDKSFTEKGLRIHQRIHTGEKPYKCECDKCFTEKGFSLRIHQRIHTGEIPIYK\*  
>ENSMUSP00000101359\_c.700:A>G\_p.H234R ENSMUST00000105733.3|Zfp992-  
201|ENSMUSG00000070605|+|chr4:g.146550981:A>G  
MSVCLVNTPOGLLTFKDVDFSLSEEWESLSFAQRTLYMDVMLENYNNLLFVENHCICGKYEKVLDQDSQYIV  
HEHMNIQEKSSKWDKLSNVILEAPQCTPYKTNHTSDALQFSNQRLKPRNTKEVCKYNDVSNLTLFSTISLN  
QGIHMQKKKHNGNAESEKAFISKHKVMVKNRNTGVNPKYKSKFDKYLTDQDKLQSQQRIYHEKKHFRSSKSDK  
CFTHQIDLSIHQGIHAAEKIYKCECDKCFTHKFLNIHQRIHTGEKPYKCECDKCFQKSHLNIHQRIHTG  
EKPYKCIKCEKCFTEKGNLRIHQRIHTGDKPYKCECDKCFQKSHLNIHQRIHTGEKPYKCSKCDKSFTENG  
HLRIHQRNHTGEKPYKCSQCDKSFTENGHLRIHQRIHTGEKPYKCECDKCFQKSHLNIHQRIHTG  
SECDKCFQKSHLNIHQRIHTGEKPYKCECDKSFTEKGLRIHQRIHTGEKPYKCECDKCFTEKGFSLRIHQ  
RIHTGEKPYKCECDKSFTEKGLRIHQRIHTGEKPYKCECDKCFTEKGFSLRIHQRIHTGEIPIYK\*  
>ENSMUSP00000121301\_c.285:G>A\_p.A96T ENSMUST00000130825.8|Zfp993-  
202|ENSMUSG00000063245|+|chr4:g.146741963:G>A  
MSVCLVNTPOGLLTFKDVDFSLSEEWESLSFAQRTLYMDVMLENYNNLLFVENHCICGKYEKVLDQDSQYIV  
HEHMNIQEKSSKWDKLSNVILETPQCTPYKTNHTSDALQFSNQRLKPRNTKEVCKYNDVSNLTLFSTVSLN  
QGIHMQKKKHNGNAESEKAFISKHKVMVKNRNTGVNPKYKSKFDKYLTDQDKLQSQQRIYHEKKHYRSSKSDK  
CFTHQIDLSIHQGIHAAEKIYKCECDKCFTHKFLNIHQRIHTGEKPYKCECDKCFQKSHLNIHQRIHTG  
EKPYKCIKCEKCFTEKGNLRI  
>ENSMUSP00000065923\_c.285:G>A\_p.A96T ENSMUST00000070932.4|Zfp993-  
201|ENSMUSG00000063245|+|chr4:g.146741963:G>A  
MSVCLVNTPOGLLTFKDVDFSLSEEWESLSFAQRTLYMDVMLENYNNLLFVENHCICGKYEKVLDQDSQYIV  
HEHMNIQEKSSKWDKLSNVILETPQCTPYKTNHTSDALQFSNQRLKPRNTKEVCK  
>ENSMUSP00000158852\_c.997:T>C\_p.F333S ENSMUST00000238583.2|Gm21411-  
202|ENSMUSG00000045699|-|chr4:g.146976275:A>G  
MSVCLVNTPOGLLTFKDVDFSLSEEWESLSFAQRTLYMDVMLENYNNLLFVENHCICGKYEKVLDQDSQYIV  
HEHMNIQEKSSKWDKLSNVILESLQCTPYKTNHSSDALQFSNQRLKPRNTKEVCKYNHVNSLSLTFSTISLN  
QGINMQKKKHNRNAELEKVFVSKHKVVVKNNIAGNPYKSEFHKYLTQREKLSQSQRIYHGKPYESSKSDK  
CFTHQIHLSIHQGIHTEEKIYKCECDKCFKHKFNLTMHQRIHTGETPNKCECDKCFQKSHLNIHQRIHTG  
EKPYKCECDKCFQKSHLNIHQRIHTGEKPYKCECDKCFQKSHLNIHQRIHTGEKPYKCECDKCFTEKGS  
SLRIHQRI  
>ENSMUSP00000075179\_c.592:G>A\_p.G198D ENSMUST00000075775.6|Rex2-  
201|ENSMUSG00000067919|+|chr4:g.147142106:G>A  
MFAPHQESGRRTTKRMSASLENTAQCLLTFKDVFLDFSSSEWECLNFAQRTLYMDVMLENYNNLLFVENHCIC  
GNYEKEKVEQDQTHIVNEHGHNRRKSSKCNELRNVIHESSESTPYNTNHRDATLQSSNLKRHKGTGTTKVCT  
YKDCVNCLKSSIIISLNQGTHIEKKEHNRNKNLDEVLSRQNNSEMNTYTCDKCFQSDNLQSQQRIYPG  
KKSYPKSESDKCFQKSHLNIHQRIHTGSEKPYKCECDKCFQKSHLNIHQRIHTGSEKPYKCECDKCFQKSHLNIHQRIHTG  
TLRKHQRIHTGEKPYKCECDKCFQKSHLNIHQRIHTGSEKPYKCECDKCFQKSHLNIHQRIHTGSEKPYK  
SECDKCFQKSHLNIHQRIHTGSEKPYKCECDKCFTEKFTLRKHQRIHTGSEKPYKCECDKCFQKSHLNIHQRIHTG  
RIHTGSEKPYKCECDKCFQKSHLNIHQRIHTGSEKPYKCECDKCFQKSHLNIHQRIHTGSEKPYKCECDKCF  
FTDKGSLRVHQRIHIGSEKPYKCECDKCFQKSHLNIHQRIHTGSEKPYKCECDKCFQKSHLNIHQRIHTGSEK  
KPYKCECDKCFTEKGNLRRHQRIHTGSEKPYKCECDKCFQKSHLNIHQRIHTGSEKPYKCECDKCFQKSHLNIHQRIHTG  
LSIHQKIHSGENLTAMNATNALVTNTV\*  
>ENSMUSP00000075179\_c.695:T>A\_p.F232L ENSMUST00000075775.6|Rex2-  
201|ENSMUSG00000067919|+|chr4:g.147142209:T>A  
MFAPHQESGRRTTKRMSASLENTAQCLLTFKDVFLDFSSSEWECLNFAQRTLYMDVMLENYNNLLFVENHCIC  
GNYEKEKVEQDQTHIVNEHGHNRRKSSKCNELRNVIHESSESTPYNTNHRDATLQSSNLKRHKGTGTTKVCT  
YKDCVNCLKSSIIISLNQGTHIEKKEHNRNKNLDEVLSRQNNSEMNTYTCDKCFQSDNLQSQQRIYPG  
KKSYPKSESDKCFQKSHLNIHQRIHTGSEKPYKCECDKCFQKSHLNIHQRIHTGSEKPYKCECDKCFQKSHLNIHQRIHTG  
TLRKHQRIHTGEKPYKCECDKCFQKSHLNIHQRIHTGSEKPYKCECDKCFQKSHLNIHQRIHTGSEKPYK  
SECDKCFQKSHLNIHQRIHTGSEKPYKCECDKCFTEKFTLRKHQRIHTGSEKPYKCECDKCFQKSHLNIHQRIHTG  
RIHTGSEKPYKCECDKCFQKSHLNIHQRIHTGSEKPYKCECDKCFQKSHLNIHQRIHTGSEKPYKCECDKCF  
FTDKGSLRVHQRIHIGSEKPYKCECDKCFQKSHLNIHQRIHTGSEKPYKCECDKCFQKSHLNIHQRIHTGSEK  
KPYKCECDKCFTEKGNLRRHQRIHTGSEKPYKCECDKCFQKSHLNIHQRIHTGSEKPYKCECDKCFQKSHLNIHQRIHTG

KPYKCECDKCFTEKNGLRHRIHTGEKPYKCECDKCFTRKSHLSIHQRIHTGEKLYKCECDKCFDQCH  
LSIHQKIHSGENLTNAMNATNALVTNTV\*  
>ENSMUSP00000081167\_c.133:A>T\_p.N45I ENSMUST00000084149.10|Zfp991-  
201|ENSMUSG00000067916|+|chr4:g.147261307:A>T  
MSVCLVNTPQGLLTFKDVALDFSLEEWESLSFAQRTLYMDVMLEIYNNLLFVENHCICGKYEKVLDQDSQYIV  
HEHMNIQEKSSKWDKLSNVILEAPQCTPYKTNHTSDALQFSNQRLKPRNTKEVCKYNDVSNLSLTFSTISLN  
QGIHMQKKKHNGNAESEKAFISKHKVMVKNRNTGVNPKYKCSKFDKYLTDQDKLQSQQRIYHEKKHYRSSKSDK  
CFTHQIDLSIHQGIHAEKIYKCECDKCFTHKFLNIHQRIHTGEKPYKCECDKCFDQKSHLNIHQRIHTG  
EKPYKCIKCEKCFTEKGNLRIHQRIHTGDKPYKCECDKCFDQKSHLNIHQRIHTGEKPYKCSQCDKSFTEG  
HLRIHQRNHTGEKPYKCSRCDKSFTEGHLRIHQRIHTGEKPYKCECDKCFDQKSHLNIHQRIHTGEKPYK  
CECDKCFDQKSHLNIHQRIHTGEKPYKCECDKSFTEGHLRIHQRIHTGEKPYKCECDKCFDQKSHLNIHQ  
RIHTGEKPYKCECDKSFTEKGLRIHQRIHKGKPYKCECDKCFTEKGHQRIHTGEIAYK\*  
>rs49128380\_ENSMUSP00000081167\_c.1183:T>C\_p.L395P  
ENSMUST00000084149.10|Zfp991-  
201|ENSMUSG00000067916|+|chr4:g.147263808:T>C  
MSVCLVNTPQGLLTFKDVALDFSLEEWESLSFAQRTLYMDVMLEYNNLLFVENHCICGKYEKVLDQDSQYIV  
HEHMNIQEKSSKWDKLSNVILEAPQCTPYKTNHTSDALQFSNQRLKPRNTKEVCKYNDVSNLSLTFSTISLN  
QGIHMQKKKHNGNAESEKAFISKHKVMVKNRNTGVNPKYKCSKFDKYLTDQDKLQSQQRIYHEKKHYRSSKSDK  
CFTHQIDLSIHQGIHAEKIYKCECDKCFTHKFLNIHQRIHTGEKPYKCECDKCFDQKSHLNIHQRIHTG  
EKPYKCIKCEKCFTEKGNLRIHQRIHTGDKPYKCECDKCFDQKSHLNIHQRIHTGEKPYKCSQCDKSFTEG  
HLRIHQRNHTGEKPYKCSRCDKSFTEGHLRIHQRIHTGEKPYKCECDKCFDQKSHLNIHQRIHTGEKPYK  
CECDKCFDQKSHLNIHQRIHTGEKPYKCECDKSFTEGHLRIHQRIHTGEKPYKCECDKCFDQKSHLNIHQ  
RIHTGEKPYKCECDKSFTEKGLRIHQRIHKGKPYKCECDKCFTEKGHQRIHTGEIAYK\*  
>ENSMUSP00000081167\_c.1315:G>A\_p.S439N ENSMUST00000084149.10|Zfp991-  
201|ENSMUSG00000067916|+|chr4:g.147263940:G>A  
MSVCLVNTPQGLLTFKDVALDFSLEEWESLSFAQRTLYMDVMLEYNNLLFVENHCICGKYEKVLDQDSQYIV  
HEHMNIQEKSSKWDKLSNVILEAPQCTPYKTNHTSDALQFSNQRLKPRNTKEVCKYNDVSNLSLTFSTISLN  
QGIHMQKKKHNGNAESEKAFISKHKVMVKNRNTGVNPKYKCSKFDKYLTDQDKLQSQQRIYHEKKHYRSSKSDK  
CFTHQIDLSIHQGIHAEKIYKCECDKCFTHKFLNIHQRIHTGEKPYKCECDKCFDQKSHLNIHQRIHTG  
EKPYKCIKCEKCFTEKGNLRIHQRIHTGDKPYKCECDKCFDQKSHLNIHQRIHTGEKPYKCSQCDKSFTEG  
HLRIHQRNHTGEKPYKCSRCDKSFTEGHLRIHQRIHTGEKPYKCECDKCFDQKSHLNIHQRIHTGEKPYK  
CECDKCFDQKSHLNIHQRIHTGEKPYKCECDKSFTEGHLRIHQRIHTGEKPYKCECDKCFDQKSHLNIHQ  
RIHTGEKPYKCECDKSFTEKGLRIHQRIHKGKPYKCECDKCFTEKGHQRIHTGEIAYK\*  
>ENSMUSP00000081167\_c.1362:C>T\_p.Q455\* ENSMUST00000084149.10|Zfp991-  
201|ENSMUSG00000067916|+|chr4:g.147263987:C>T  
MSVCLVNTPQGLLTFKDVALDFSLEEWESLSFAQRTLYMDVMLEYNNLLFVENHCICGKYEKVLDQDSQYIV  
HEHMNIQEKSSKWDKLSNVILEAPQCTPYKTNHTSDALQFSNQRLKPRNTKEVCKYNDVSNLSLTFSTISLN  
QGIHMQKKKHNGNAESEKAFISKHKVMVKNRNTGVNPKYKCSKFDKYLTDQDKLQSQQRIYHEKKHYRSSKSDK  
CFTHQIDLSIHQGIHAEKIYKCECDKCFTHKFLNIHQRIHTGEKPYKCECDKCFDQKSHLNIHQRIHTG  
EKPYKCIKCEKCFTEKGNLRIHQRIHTGDKPYKCECDKCFDQKSHLNIHQRIHTGEKPYKCSQCDKSFTEG  
HLRIHQRNHTGEKPYKCSRCDKSFTEGHLRIHQRIHTGEKPYKCECDKCFDQKSHLNIHQRIHTGEKPYK  
CECDKCFDQKSHLNIHQRIHTGEKPYKCECDKSFTEGHLRIHQRIHTGEKPYKCECDKCFDQKSHLNIHQ  
RIHTGEKPYKCECDKSFTEKGLRIHQRIHKGKPYKCECDKCFTEKGHQRIHTGEIAYK\*  
>rs252974414\_ENSMUSP00000120413\_c.109:T>G\_p.L37W  
ENSMUST00000148762.4|Zfp988-201|ENSMUSG00000078498|+|chr4:g.147413518:T>G  
MSVCLVNTPQGLLTFKDVALDFSLEEWESLSFAQRSWYMDVMLEYNNLLFVENHCIRGKNGKVLDDQDSQYIV  
HEHMNIQEKSSKWDKLSNVILESLQCTPYKTNHSSDALQFSNQRLKPRNTKEVCKYNDVSNLSLTFSTISLN  
QGINMQKKKHNRNAELDNIFVSKHKVMVKKDNIAGNPKYKSEFHKYLTQRENLSQSQRIYHGKPKYKSSKSDK  
CFTHQIHLSIHQGIHTEEIIYKCECDKCFKKNFNLTMHQRIHTGEKPYKCECGKCFTEKSSLRIHQRIHTG  
EKPYKCECDKCFDQKSHLNIHQRIHTGEKPYKCECDKCFDQKSHLNIHQRIHTGEKPYKCECGKCFTEKSS  
SLRIHQRIHTGEKPYKCECDKCFTRKFLGIHQRIHTGEKPYKCECDKCFDQKSHLNIHQRIHTGEKPYK  
PECGKCFTEKSSSLRIHQRIHTGEKPYKCECGKCFTEKSSSLRIHQRIHTGEKPYKCECGKCFTEKSSSLRIHQ  
RIHTGEKPYKCECGKCFTEKSSSLRIHQRIHTGEKPYKCECDKCFDQKSHLNIHQRIHTGEKPYKCECGK  
FSRKLHLGIHQRIHTGERPYKCECEKCFSRKFLGIHQRIHTGKPKYK\*  
>ENSMUSP00000120413\_c.751:A>G\_p.N251S ENSMUST00000148762.4|Zfp988-  
201|ENSMUSG00000078498|+|chr4:g.147416319:A>G  
MSVCLVNTPQGLLTFKDVALDFSLEEWESLSFAQRSYMDVMLEYNNLLFVENHCIRGKNGKVLDDQDSQYIV  
HEHMNIQEKSSKWDKLSNVILESLQCTPYKTNHSSDALQFSNQRLKPRNTKEVCKYNDVSNLSLTFSTISLN

QGINMQKKKHNRNAELDNIFVSKHKVMVKKDNIAGNPYKCFSEFHKYLTQRENLQSQQRIYHGKPKYKSSKSDK  
CFTHQIHLSIHQGIHTEEIIYKCECDKCFKSKFNLTMHQRIHTGEKPYKCECGKCFTEKSSLRHQRHTG  
EKPYKCECDKCFKQSNLSIHQRHTGEKPYKCECDKCFKQSNLSIHQRHTGEKPYKCECGKCFTEKSSLRHQRHTG  
EKPYKCECDKCFTRKFHLGIHQRIHTGEKPYKCECDKCFKQSNLSIHQRHTGEKPYKCECDKCFKQSNLSIHQRHTGEKPYK  
CECGKCFTEKSSLRHQRHTGEKPYKCECGKCFTEKSSLRHQRHTGEKPYKCECGKCFTEKSSLRHQRHTG  
RIHTGEKPYKCECGKCFKQSNLSIHQRHTGEKPYKCECDKCFKQSNLSIHQRHTGEKPYKCECEKCF  
FSRKLHLGIHQRIHTGERPYKCECEKCFSRKFHLGIHQRIHTGKPKYK\*

>rs48329995\_ENSMUSP00000120413\_c.838:A>T\_p.K280I  
ENSMUST00000148762.4|zfp988-201|ENSMUSG00000078498|+|chr4:g.147416406:A>T  
MSVCLVNTPOGLLTFKDVALDFSLLEWECLSFQAQRSLYMDVMLENYNNLLFVENHCIRGKNGKVLDDQDSQYIV  
HEHMNIQEKSSKWDKLSNVILESLQCTPYKTNHSSDALQFSNQRLKPRNTKEVCKYNDVNSLSLSTISLN  
QGINMQKKKHNRNAELDNIFVSKHKVMVKKDNIAGNPYKCFSEFHKYLTQRENLQSQQRIYHGKPKYKSSKSDK  
CFTHQIHLSIHQGIHTEEIIYKCECDKCFKSKFNLTMHQRIHTGEKPYKCECGKCFTEISSLRHQRHTG  
EKPYKCECDKCFKQSNLSIHQRHTGEKPYKCECDKCFKQSNLSIHQRHTGEKPYKCECGKCFTEKSSLRHQRHTG  
EKPYKCECDKCFTRKFHLGIHQRIHTGEKPYKCECDKCFKQSNLSIHQRHTGEKPYKCECGKCFTEKSSLRHQRHTG  
RIHTGEKPYKCECGKCFKQSNLSIHQRHTGEKPYKCECDKCFKQSNLSIHQRHTGEKPYKCECGKCFTEKSSLRHQRHTG  
RIHTGEKPYKCECGKCFKQSNLSIHQRHTGEKPYKCECDKCFKQSNLSIHQRHTGEKPYKCECEKCF  
FSRKLHLGIHQRIHTGERPYKCECEKCFSRKFHLGIHQRIHTGKPKYK\*

>ENSMUSP00000120413\_c.1106:TCAT>C\_p.H370del ENSMUST00000148762.4|zfp988-  
201|ENSMUSG00000078498|+|chr4:g.147416674:TCAT>C  
MSVCLVNTPOGLLTFKDVALDFSLLEWECLSFQAQRSLYMDVMLENYNNLLFVENHCIRGKNGKVLDDQDSQYIV  
HEHMNIQEKSSKWDKLSNVILESLQCTPYKTNHSSDALQFSNQRLKPRNTKEVCKYNDVNSLSLSTISLN  
QGINMQKKKHNRNAELDNIFVSKHKVMVKKDNIAGNPYKCFSEFHKYLTQRENLQSQQRIYHGKPKYKSSKSDK  
CFTHQIHLSIHQGIHTEEIIYKCECDKCFKSKFNLTMHQRIHTGEKPYKCECGKCFTEKSSLRHQRHTG  
EKPYKCECDKCFKQSNLSIHQRHTGEKPYKCECDKCFKQSNLSIHQRHTGEKPYKCECGKCFTEKSSLRHQRHTG  
EKPYKCECDKCFTRKFHLGIHQRIHTGEKPYKCECDKCFKQSNLSIHQRHTGEKPYKCECGKCFTEKSSLRHQRHTG  
ECGKCFTEKSSLRHQRHTGEKPYKCECGKCFTEKSSLRHQRHTGEKPYKCECGKCFTEKSSLRHQRHTG  
IHTGEKPYKCECGKCFKQSNLSIHQRHTGEKPYKCECDKCFKQSNLSIHQRHTGEKPYKCECEKCF  
SRKLHLGIHQRIHTGERPYKCECEKCFSRKFHLGIHQRIHTGKPKYK\*

>rs47993660\_ENSMUSP00000120413\_c.1218:C>G\_p.P407A  
ENSMUST00000148762.4|zfp988-201|ENSMUSG00000078498|+|chr4:g.147416786:C>G  
MSVCLVNTPOGLLTFKDVALDFSLLEWECLSFQAQRSLYMDVMLENYNNLLFVENHCIRGKNGKVLDDQDSQYIV  
HEHMNIQEKSSKWDKLSNVILESLQCTPYKTNHSSDALQFSNQRLKPRNTKEVCKYNDVNSLSLSTISLN  
QGINMQKKKHNRNAELDNIFVSKHKVMVKKDNIAGNPYKCFSEFHKYLTQRENLQSQQRIYHGKPKYKSSKSDK  
CFTHQIHLSIHQGIHTEEIIYKCECDKCFKSKFNLTMHQRIHTGEKPYKCECGKCFTEKSSLRHQRHTG  
EKPYKCECDKCFKQSNLSIHQRHTGEKPYKCECDKCFKQSNLSIHQRHTGEKPYKCECGKCFTEKSSLRHQRHTG  
EKPYKCECDKCFTRKFHLGIHQRIHTGEKPYKCECDKCFKQSNLSIHQRHTGEKPYKCECGKCFTEKSSLRHQRHTG  
SLRIHQRIHTGEKPYKCECDKCFTRKFHLGIHQRIHTGEKPYKCECDKCFKQSNLSIHQRHTGEKPYKCECGKCFTEKSSLRHQRHTG  
RIHTGEKPYKCECGKCFKQSNLSIHQRHTGEKPYKCECDKCFKQSNLSIHQRHTGEKPYKCECGKCFTEKSSLRHQRHTG  
RIHTGEKPYKCECGKCFKQSNLSIHQRHTGEKPYKCECDKCFKQSNLSIHQRHTGEKPYKCECEKCF  
FSRKLHLGIHQRIHTGERPYKCECEKCFSRKFHLGIHQRIHTGKPKYK\*

>rs108848453\_ENSMUSP00000120413\_c.1618:G>A\_p.R540K  
ENSMUST00000148762.4|zfp988-201|ENSMUSG00000078498|+|chr4:g.147417186:G>A  
MSVCLVNTPOGLLTFKDVALDFSLLEWECLSFQAQRSLYMDVMLENYNNLLFVENHCIRGKNGKVLDDQDSQYIV  
HEHMNIQEKSSKWDKLSNVILESLQCTPYKTNHSSDALQFSNQRLKPRNTKEVCKYNDVNSLSLSTISLN  
QGINMQKKKHNRNAELDNIFVSKHKVMVKKDNIAGNPYKCFSEFHKYLTQRENLQSQQRIYHGKPKYKSSKSDK  
CFTHQIHLSIHQGIHTEEIIYKCECDKCFKSKFNLTMHQRIHTGEKPYKCECGKCFTEKSSLRHQRHTG  
EKPYKCECDKCFKQSNLSIHQRHTGEKPYKCECDKCFKQSNLSIHQRHTGEKPYKCECGKCFTEKSSLRHQRHTG  
EKPYKCECDKCFTRKFHLGIHQRIHTGEKPYKCECDKCFKQSNLSIHQRHTGEKPYKCECGKCFTEKSSLRHQRHTG  
SLRIHQRIHTGEKPYKCECDKCFTRKFHLGIHQRIHTGEKPYKCECDKCFKQSNLSIHQRHTGEKPYKCECGKCFTEKSSLRHQRHTG  
RIHTGEKPYKCECGKCFKQSNLSIHQRHTGEKPYKCECDKCFKQSNLSIHQRHTGEKPYKCECGKCFTEKSSLRHQRHTG  
RIHTGEKPYKCECGKCFKQSNLSIHQRHTGEKPYKCECDKCFKQSNLSIHQRHTGEKPYKCECEKCF  
FSRKLHLGIHQRIHTGERPYKCECEKCFSRKFHLGIHQRIHTGKPKYK\*

>rs108848453\_ENSMUSP00000120413\_c.1618:G>A\_p.R540K  
ENSMUST00000148762.4|zfp988-201|ENSMUSG00000078498|+|chr4:g.147417186:G>A  
MSVCLVNTPOGLLTFKDVALDFSLLEWECLSFQAQRSLYMDVMLENYNNLLFVENHCIRGKNGKVLDDQDSQYIV  
HEHMNIQEKSSKWDKLSNVILESLQCTPYKTNHSSDALQFSNQRLKPRNTKEVCKYNDVNSLSLSTISLN  
QGINMQKKKHNRNAELDNIFVSKHKVMVKKDNIAGNPYKCFSEFHKYLTQRENLQSQQRIYHGKPKYKSSKSDK  
CFTHQIHLSIHQGIHTEEIIYKCECDKCFKSKFNLTMHQRIHTGEKPYKCECGKCFTEKSSLRHQRHTG  
EKPYKCECDKCFKQSNLSIHQRHTGEKPYKCECDKCFKQSNLSIHQRHTGEKPYKCECGKCFTEKSSLRHQRHTG  
EKPYKCECDKCFTRKFHLGIHQRIHTGEKPYKCECDKCFKQSNLSIHQRHTGEKPYKCECGKCFTEKSSLRHQRHTG  
SLRIHQRIHTGEKPYKCECDKCFTRKFHLGIHQRIHTGEKPYKCECDKCFKQSNLSIHQRHTGEKPYKCECGKCFTEKSSLRHQRHTG  
RIHTGEKPYKCECGKCFKQSNLSIHQRHTGEKPYKCECDKCFKQSNLSIHQRHTGEKPYKCECGKCFTEKSSLRHQRHTG  
RIHTGEKPYKCECGKCFKQSNLSIHQRHTGEKPYKCECDKCFKQSNLSIHQRHTGEKPYKCECEKCF  
FSRKLHLGIHQRIHTGERPYKCECEKCFSRKFHLGIHQRIHTGKPKYK\*

>ENSMUSP00000120413\_c.1819:G>A\_p.S607N ENSMUST00000148762.4|zfp988-  
201|ENSMUSG00000078498|+|chr4:g.147417387:G>A  
MSVCLVNTPOGLLTFKDVALDFSLLEWECLSFQAQRSLYMDVMLENYNNLLFVENHCIRGKNGKVLDDQDSQYIV  
HEHMNIQEKSSKWDKLSNVILESLQCTPYKTNHSSDALQFSNQRLKPRNTKEVCKYNDVNSLSLSTISLN  
QGINMQKKKHNRNAELDNIFVSKHKVMVKKDNIAGNPYKCFSEFHKYLTQRENLQSQQRIYHGKPKYKSSKSDK  
CFTHQIHLSIHQGIHTEEIIYKCECDKCFKSKFNLTMHQRIHTGEKPYKCECGKCFTEKSSLRHQRHTG  
EKPYKCECDKCFKQSNLSIHQRHTGEKPYKCECDKCFKQSNLSIHQRHTGEKPYKCECGKCFTEKSSLRHQRHTG  
EKPYKCECDKCFTRKFHLGIHQRIHTGEKPYKCECDKCFKQSNLSIHQRHTGEKPYKCECGKCFTEKSSLRHQRHTG  
SLRIHQRIHTGEKPYKCECDKCFTRKFHLGIHQRIHTGEKPYKCECDKCFKQSNLSIHQRHTGEKPYKCECGKCFTEKSSLRHQRHTG  
RIHTGEKPYKCECGKCFKQSNLSIHQRHTGEKPYKCECDKCFKQSNLSIHQRHTGEKPYKCECGKCFTEKSSLRHQRHTG  
RIHTGEKPYKCECGKCFKQSNLSIHQRHTGEKPYKCECDKCFKQSNLSIHQRHTGEKPYKCECEKCF  
FSRKLHLGIHQRIHTGERPYKCECEKCFSRKFHLGIHQRIHTGKPKYK\*





DKCFIQKYSLSHDQRIHTGEKPYKCSECNKCFIQKSSLNHQS IHTGEKPYKCSECDKCFD KRNLRRHQKIHT  
TGEKPYKCSECEKCFD KGS LRRH HKIHTGEKPYKCSECEKCYTD KGS LRRH QKIHTKGEKLTNAVNVNALLK  
KAI\*

>ENSMUSP00000101346\_c.1051:A>G\_p.E351G ENSMUST00000105721.9|Zfp982-  
202|ENSMUSG00000078496|+|chr4:g.147597696:A>G  
MSVFLVNT PQGLLTFKDVAVEFSL EEWERLSFAQRSLYIDVMLENYNNLLFVENH FICAKCGKALDEDSQYIV  
HEHMNIQEKSSKWNKLSNVILESPHCVP HKCSEWDKCF SQRSHLSIHQKIHTGEKPYKCSECDKCFTEKGILR  
IHQKIHSGEKSYKYHECDKCFPKKSHLSIHLRIHKGEKPYKSCDCDKCFTEKRKLRRHQKIHTGEKPYKCSEC  
DKCFIQKYSLSHDQRIHTGEKPYKCSECNKCFIQKSSLNHQS IHTGEKPYKCSECDKCFD KRNLRRHQKIHT  
TGEKPYKCSECEKCFD KGS LRRH QKIHTGEKPYKCSECEKCYTD KGS LRRH QKIHTKGGKLTNAVNVNALLK  
KAI\*

>ENSMUSP00000068021\_c.1051:A>G\_p.E351G ENSMUST00000063704.8|Zfp982-  
201|ENSMUSG00000078496|+|chr4:g.147597696:A>G  
MSVFLVNT PQGLLTFKDVAVEFSL EEWERLSFAQRSLYIDVMLENYNNLLFVENH FICAKCGKALDEDSQYIV  
HEHMNIQEKSSKWNKLSNVILESPHCVP HKCSEWDKCF SQRSHLSIHQKIHTGEKPYKCSECDKCFTEKGILR  
IHQKIHSGEKSYKYHECDKCFPKKSHLSIHLRIHKGEKPYKSCDCDKCFTEKRKLRRHQKIHTGEKPYKCSEC  
DKCFIQKYSLSHDQRIHTGEKPYKCSECNKCFIQKSSLNHQS IHTGEKPYKCSECDKCFD KRNLRRHQKIHT  
TGEKPYKCSECEKCFD KGS LRRH QKIHTGEKPYKCSECEKCYTD KGS LRRH QKIHTKGGKLTNAVNVNALLK  
KAI\*

>ENSMUSP00000101346\_c.1066:C>A\_p.A356E ENSMUST00000105721.9|Zfp982-  
202|ENSMUSG00000078496|+|chr4:g.147597711:C>A  
MSVFLVNT PQGLLTFKDVAVEFSL EEWERLSFAQRSLYIDVMLENYNNLLFVENH FICAKCGKALDEDSQYIV  
HEHMNIQEKSSKWNKLSNVILESPHCVP HKCSEWDKCF SQRSHLSIHQKIHTGEKPYKCSECDKCFTEKGILR  
IHQKIHSGEKSYKYHECDKCFPKKSHLSIHLRIHKGEKPYKSCDCDKCFTEKRKLRRHQKIHTGEKPYKCSEC  
DKCFIQKYSLSHDQRIHTGEKPYKCSECNKCFIQKSSLNHQS IHTGEKPYKCSECDKCFD KRNLRRHQKIHT  
TGEKPYKCSECEKCFD KGS LRRH QKIHTGEKPYKCSECEKCYTD KGS LRRH QKIHTKGGKLTNAVNVNALLK  
KAI\*

>ENSMUSP00000068021\_c.1066:C>A\_p.A356E ENSMUST00000063704.8|Zfp982-  
201|ENSMUSG00000078496|+|chr4:g.147597711:C>A  
MSVFLVNT PQGLLTFKDVAVEFSL EEWERLSFAQRSLYIDVMLENYNNLLFVENH FICAKCGKALDEDSQYIV  
HEHMNIQEKSSKWNKLSNVILESPHCVP HKCSEWDKCF SQRSHLSIHQKIHTGEKPYKCSECDKCFTEKGILR  
IHQKIHSGEKSYKYHECDKCFPKKSHLSIHLRIHKGEKPYKSCDCDKCFTEKRKLRRHQKIHTGEKPYKCSEC  
DKCFIQKYSLSHDQRIHTGEKPYKCSECNKCFIQKSSLNHQS IHTGEKPYKCSECDKCFD KRNLRRHQKIHT  
TGEKPYKCSECEKCFD KGS LRRH QKIHTGEKPYKCSECEKCYTD KGS LRRH QKIHTKGGKLTNAVNVNALLK  
KAI\*

>ENSMUSP00000123296\_c.412:T>C\_p.F138S ENSMUST00000139784.8|Zfp985-  
202|ENSMUSG00000065999|+|chr4:g.147667546:T>C  
MSESLVNT PQGLLTFKDV ALDFSLEEWERLSFAQRTLYIDVMLENYNNLLFVENH CIRGKYRKVLDQDSQYIV  
HEHMNIQEKSSKWDKLSKVL L DSPQYTPYKTYHSSLQYWNQKRLKPRNTKEVCKYND SVNSVLSSTISLNQG  
IHMQ

>ENSMUSP00000080438\_c.412:T>C\_p.F138S ENSMUST00000081742.7|Zfp985-  
201|ENSMUSG00000065999|+|chr4:g.147667546:T>C  
MSESLVNT PQGLLTFKDV ALDFSLEEWERLSFAQRTLYIDVMLENYNNLLFVENH CIRGKYRKVLDQDSQYIV  
HEHMNIQEKSSKWDKLSKVL L DSPQYTPYKTYHSSLQYWNQKRLKPRNTKEVCKYND SVNSVLSSTISLNQG  
IHMQKKKHKR NA EF EKVFVSKHKDMVKQNTGVN PYKCSEFHKYLTQREKLQTRQRIYHGKPKYKSSKSDKCF  
THQIHLRSHQGIHTGEKPHKCSECDKCFTHKFNLRHQRIHTGEKLYKCSECDKCFTHKSRNLNYHQRIHTGEK  
PHKCSECDKCFTHKFNLRHQIHTGEKPHKCSECDKCFTHKFNLRHQRIHTGEKPYKCSECDKCFTRKFHL  
GIHHR IHTGEKPYKCSECDKCF TGKSLRIHQRIHIGEKPYKCSECDKCF TGKSLRIHQRIHTGERPHKCSE  
CDKCF TGKSLRIHQRMHTGEKPYKCSECDKCF TQKSHLNIHQIHTGEKPYKCSECDKCF THKSHLNIHQKI  
HTGEKPYK\*

>ENSMUSP00000080438\_c.598:A>G\_p.Q200R ENSMUST00000081742.7|Zfp985-  
201|ENSMUSG00000065999|+|chr4:g.147667732:A>G  
MSESLVNT PQGLLTFKDV ALDFSLEEWERLSFAQRTLYIDVMLENYNNLLFVENH CIRGKYRKVLDQDSQYIV  
HEHMNIQEKSSKWDKLSKVL L DSPQYTPYKTYHSSLQYWNQKRLKPRNTKEVCKYND SVNSVLSSTISLNQG  
IHMQKKKHKR NA EF EKVFVSKHKDMVKQNTGVN PYKCSEFHKYLTQREKLQTRQRIYHGKPKYKSSKSDKCF  
THQIHLRSHQGIHTGEKPHKCSECDKCFTHKFNLRHQRIHTGEKLYKCSECDKCFTHKSRNLNYHQRIHTGEK  
PHKCSECDKCFTHKFNLRHQIHTGEKPHKCSECDKCFTHKFNLRHQRIHTGEKPYKCSECDKCFTRKFHL  
GIHHR IHTGEKPYKCSECDKCF TGKSLRIHQRIHIGEKPYKCSECDKCF TGKSLRIHQRIHTGERPHKCSE

CDKCF TGKGLRIHQRMHTGEKPYKCECDKCF TQKSHLNHQGIHTGEKPYKCECDKCF THKSHLNHQKI  
HTGEKPYK\*  
>ENSMUSP00000080438\_c.865:C>T\_p.T289I ENSMUST00000081742.7|zfp985-  
201|ENSMUSG00000065999|+|chr4:g.147667999:C>T  
MSESLVNT PQGLLTFKDVALDFSL EEWERLSFAQRTLYIDVMLENYNNLLFVENHCIRGKYRKVLDQDSQYIV  
HEHMNIQEKSSKWDKLSKVLDS PQYTPYKTYHSSLOQYWNQKRLKPRNTKEVCKYNDVNSVSLFSTISLNQG  
IHMOKKKHKNR NAEFEKVFVSKHKDMVKQKNTGVNPKYKSEFHKYLTQREKLOTQQR IYHGKPKYKSSKSDKCF  
THQIHLRSHQGIHTGEKPHKCECDKCF THKFNLRHQRIHTGEKLYKCECDKCF THKSRNLNYHQRIHTGEK  
PHKCECDKCF THKFNLRHQIHTGEKPHKCECDKCF THKFNLRHQRIHTGEKPYKCECDKCF TRKFHL  
GIHHR IHTGEKPYKCECDKCF TGKGLRIHQRIHTGEKPYKCECDKCF TGKGLRIHQRIHTGERPHKCE  
CDKCF TGKGLRIHQRMHTGEKPYKCECDKCF TQKSHLNHQGIHTGEKPYKCECDKCF THKSHLNHQKI  
HTGEKPYK\*  
>ENSMUSP00000080438\_c.1506:T>C\_p.S503P ENSMUST00000081742.7|zfp985-  
201|ENSMUSG00000065999|+|chr4:g.147668640:T>C  
MSESLVNT PQGLLTFKDVALDFSL EEWERLSFAQRTLYIDVMLENYNNLLFVENHCIRGKYRKVLDQDSQYIV  
HEHMNIQEKSSKWDKLSKVLDS PQYTPYKTYHSSLOQYWNQKRLKPRNTKEVCKYNDVNSVSLFSTISLNQG  
IHMOKKKHKNR NAEFEKVFVSKHKDMVKQKNTGVNPKYKSEFHKYLTQREKLOTQQR IYHGKPKYKSSKSDKCF  
THQIHLRSHQGIHTGEKPHKCECDKCF THKFNLRHQRIHTGEKLYKCECDKCF THKSRNLNYHQRIHTGEK  
PHKCECDKCF THKFNLRHQIHTGEKPHKCECDKCF THKFNLRHQRIHTGEKPYKCECDKCF TRKFHL  
GIHHR IHTGEKPYKCECDKCF TGKGLRIHQRIHTGEKPYKCECDKCF TGKGLRIHQRIHTGERPHKCE  
CDKCF TGKGLRIHQRMHTGEKPYKCECDKCF TQKSHLNHQGIHTGEKPYKCECDKCF THKSHLNHQKI  
HTGEKPYK\*  
>rs47730106\_ENSMUSP00000113561\_c.1179:A>G\_p.N394D  
ENSMUST00000117638.2|zfp534-201|ENSMUSG00000062518|-|chr4:g.147759488:T>C  
MSVCLVNT PQGLLTFKDVALDFSL EEWECLSFAQRS LYMDVMLENYNNLLFVENHCIRGKNGKVL DQDSQYIV  
HEHMNIQEKSSKWDKLSNVILESLQCTPYKTNHSSDALQFSTQKRLKPRNTKEVCKYNDVNSVSLFSTISLN  
QG INMQKKHKNR NAEELDKIFVSKHKVMVKKDNIAGNPKYKSEFHKYLTQREKLSQQR IYHGKPKYESSKSDK  
CFTHQIHLRSIHQGIHT EEKIYKCECDKCFKNFNLTMHQRIHKGEKPYKCECGKCF TDKTSLRIHQRIHTG  
EKPYKCECGKCFTEKSSLR IHQRIHTGEKPYKCECGKCFTEKSSLR IHQRIHTGEKPYKCECDKCF TQQS  
YLSIHQRIHTGEKPYKCECDKCF TQSDLSIHQRIHTGEKPYKCECDKCF TQSHLSIHQRIHTGEKPYK  
CECDKCF TQSYLSIHQRIHAGEKPYKCECDKCF TTKGNLIHQRIHTREKPYKCECGKCFTEKSSLR IHQ  
RIHTGEKPYKCECDKCF TQSKLSIHQRIHTGEKPYKCECEKCFNEKNSLKIHQRIHTGERPYKCECDK  
FTQKSYLNIHQRIHAGEKPYKCECDKCF TTKGNLIHQRIHTREKPYKCECDKCF TQKSLSIHQKIHTGE  
KPYK\*  
>rs107953444\_ENSMUSP00000113561\_c.729:G>A\_p.E244K  
ENSMUST00000117638.2|zfp534-201|ENSMUSG00000062518|-|chr4:g.147759938:C>T  
MSVCLVNT PQGLLTFKDVALDFSL EEWECLSFAQRS LYMDVMLENYNNLLFVENHCIRGKNGKVL DQDSQYIV  
HEHMNIQEKSSKWDKLSNVILESLQCTPYKTNHSSDALQFSTQKRLKPRNTKEVCKYNDVNSVSLFSTISLN  
QG INMQKKHKNR NAEELDKIFVSKHKVMVKKDNIAGNPKYKSEFHKYLTQREKLSQQR IYHGKPKYESSKSDK  
CFTHQIHLRSIHQGIHT EEKIYKCECDKCFKNFNLTMHQRIHKGEKPYKCECGKCF TDKTSLRIHQRIHTG  
EKPYKCECGKCFTEKSSLR IHQRIHTGEKPYKCECGKCFTEKSSLR IHQRIHTGEKPYKCECDKCF TQQS  
YLSIHQRIHTGEKPYKCECDKCF TQSNLSIHQRIHTGEKPYKCECDKCF TQSHLSIHQRIHTGEKPYK  
CECDKCF TQSYLSIHQRIHAGEKPYKCECDKCF TTKGNLIHQRIHTREKPYKCECGKCFTEKSSLR IHQ  
RIHTGEKPYKCECDKCF TQSKLSIHQRIHTGEKPYKCECEKCFNEKNSLKIHQRIHTGERPYKCECDK  
FTQKSYLNIHQRIHAGEKPYKCECDKCF TTKGNLIHQRIHTREKPYKCECDKCF TQKSLSIHQKIHTGE  
KPYK\*  
>ENSMUSP00000114023\_c.452:G>C\_p.K151N ENSMUST00000122309.2|zfp984-  
202|ENSMUSG00000078495|-|chr4:g.147840397:C>G  
MSVSLVNT PQGLLTFKDVALYFSL EEWECLSFAQRTLYMDVMLENYNNLLFVENHCIRGKYKVLG EESQYIV  
HEHVNIQEKSSKWDKLIKVILESPQCTPYKTNHSSLOQYSNQKRLKPRNTKEVCKYNDVNSVSLFSTISLNQG  
IHLQNKHKNR NAEFEKVFVSKHKVMVKRNNTGVNPKYKSEFDKYLTQREKLSQQR IYHGKPKYRSSKSDKCF  
THQIHLRSIHQGIHAE EKIYKCECDKCF THKSHLNHQRIHTGENPYKCECDKCF KHKFSFMSHQRIHTGEK  
PYKCECDKCF TQKSHLSVHQRIHTGEKPYKCECDKCF THKSHLSHQRIHTGEKPYKCECDKCF TKNGL  
RIHQRIHTGENPYKCECDKCF THKSNLNHQRIHTGEKPYKCECDKCF THKSHLSHQRIHTGEKPYKCE  
CDKCF TRKFHLSIHQRIHTGENPYKCECDKCF TQKSNLNHQRIHTGEKPYKCECDKCF TEKGLRIHQRI  
HTGENPYKCECDKCF TRKFHLSIHQKIHTGEKPYK\*  
>ENSMUSP00000101360\_c.452:G>C\_p.K151N ENSMUST00000105734.10|zfp984-  
201|ENSMUSG00000078495|-|chr4:g.147840397:C>G



LGLLALALGLSVHHWDSPLVQASGGSQFCFGLICLGLFCLSVLLFPGRPSSASCLAQQPMAHLPLTGCLSTLF  
LQAAETFVESELPLSWANWLCSYLRGLWAWLVLLATFVEAALCAWYLIAFPPEVVDWSVLPTEVLEHCHVR  
SWVSLGLVHITNAMLAFLCFLGTFLVQSOPGRYNRARGLTFAMLAYFITWVSVFVPLLANVQVAYQPAVQMGAI  
LVCALGILVTFHLPKCYVLLWLPKLNTOEFFFLGRNAKKAADENSGGEEAAQGHNE\*  
>ENSMUSP00000101194\_c.1180:G>T\_p.G394V ENSMUST00000105569.5|Klh117-  
201|ENSMUSG000002076083|-|chr4:g.156316259:C>A  
MQPRGERPAGRTQSPHSSPGPGPEAPPPPPQPPAPEAERARPRQARPAAPMEGAMQLLSREGHSAHNSKRHY  
HDAFVAMSRMRQRGLLCDIVLHVAAKEIRAHKVVLASCSFYHAMFTNEMSESRQTHVTLHDI DPQALDQLVQ  
FAYTAEIVVGEQNVQTLTPAASLLQLNGVRDACCKFLLSQLDPSNCLGIRGFADTHSCSDLLKAAHRYVLQHF  
VDVAKTEEFMLLPLKQVLELVSSDSLNVPSSEEDVYRAVLSWVKHDVDTRRQHVPRLMKCVRLPPLSRDFLLGH  
VDAESLVRHHPDCKDLLIEALKFHLLPEQRGVLGTSRTRPRRCEGAGPVLFAVGGGSLFAIHGDCEAYDTRTD  
RWHVVASMSTRRARVGVAAVGNRLYAVGVYDGTSDLATVESYDPVTNTWQPEVSMGTRRSCLGVAALHGLLYA  
AGGYDGASCLNSAERYDPLTGTWTSIAAMSTRRRYVRVATLDGNLYAVGGYDSSSHLATVEKEYEPQVNSWTPV  
ASMLSRSSAGVAVLEGALYVAGNDGTSCLSNVERYSTKAGAWESVAPMNI RRSTHDLVAMDGWLYAVGGND  
GSSSLNSIEKYNPRNTKWWAASCMFTRRSSVGVAVLELLNFPPSSPTLSVSSTSL\*  
>ENSMUSP000001091659\_c.52:G>T\_p.G18V ENSMUST00020183129.1|Klh117-  
204|ENSMUSG000002076083|-|chr4:g.156316259:C>A  
XARVGVAAVGNRLYAVGVYDGTSDLATVESYDPVTNTWQPEVSMGTRRSCLGVAALHGLLYAAGGYDGASCLN  
SAERYDPLTGTWTSIAAMSTRRRYVRVATLDGNLYAVGGYDSSSHLATVEKEYEPQEHT\*  
>ENSMUSP00000101194\_c.1161:C>T\_p.R388\* ENSMUST00000105569.5|Klh117-  
201|ENSMUSG000002076083|-|chr4:g.156316278:G>A  
MQPRGERPAGRTQSPHSSPGPGPEAPPPPPQPPAPEAERARPRQARPAAPMEGAMQLLSREGHSAHNSKRHY  
HDAFVAMSRMRQRGLLCDIVLHVAAKEIRAHKVVLASCSFYHAMFTNEMSESRQTHVTLHDI DPQALDQLVQ  
FAYTAEIVVGEQNVQTLTPAASLLQLNGVRDACCKFLLSQLDPSNCLGIRGFADTHSCSDLLKAAHRYVLQHF  
VDVAKTEEFMLLPLKQVLELVSSDSLNVPSSEEDVYRAVLSWVKHDVDTRRQHVPRLMKCVRLPPLSRDFLLGH  
VDAESLVRHHPDCKDLLIEALKFHLLPEQRGVLGTSRTRPRRCEGAGPVLFAVGGGSLFAIHGDCEAYDTRTD  
RWHVVASMSTRRARVGVAAVGN\*LYAVGGYDGTSDLATVESYDPVTNTWQPEVSMGTRRSCLGVAALHGLLYA  
AGGYDGASCLNSAERYDPLTGTWTSIAAMSTRRRYVRVATLDGNLYAVGGYDSSSHLATVEKEYEPQVNSWTPV  
ASMLSRSSAGVAVLEGALYVAGNDGTSCLSNVERYSTKAGAWESVAPMNI RRSTHDLVAMDGWLYAVGGND  
GSSSLNSIEKYNPRNTKWWAASCMFTRRSSVGVAVLELLNFPPSSPTLSVSSTSL\*  
>ENSMUSP000001091659\_c.33:C>T\_p.R12\* ENSMUST00020183129.1|Klh117-  
204|ENSMUSG000002076083|-|chr4:g.156316278:G>A  
XARVGVAAVGN\*LYAVGGYDGTSDLATVESYDPVTNTWQPEVSMGTRRSCLGVAALHGLLYAAGGYDGASCLN  
SAERYDPLTGTWTSIAAMSTRRRYVRVATLDGNLYAVGGYDSSSHLATVEKEYEPQEHT\*  
>ENSMUSP00000101194\_c.1038:G>C\_p.G347R ENSMUST00000105569.5|Klh117-  
201|ENSMUSG000002076083|-|chr4:g.156316401:C>G  
MQPRGERPAGRTQSPHSSPGPGPEAPPPPPQPPAPEAERARPRQARPAAPMEGAMQLLSREGHSAHNSKRHY  
HDAFVAMSRMRQRGLLCDIVLHVAAKEIRAHKVVLASCSFYHAMFTNEMSESRQTHVTLHDI DPQALDQLVQ  
FAYTAEIVVGEQNVQTLTPAASLLQLNGVRDACCKFLLSQLDPSNCLGIRGFADTHSCSDLLKAAHRYVLQHF  
VDVAKTEEFMLLPLKQVLELVSSDSLNVPSSEEDVYRAVLSWVKHDVDTRRQHVPRLMKCVRLPPLSRDFLLGH  
VDAESLVRHHPDCKDLLIEALKFHLLPEQRGVLGTSRTRPRRCEGAGPVLFAVGRGSLFAIHGDCEAYDTRTD  
RWHVVASMSTRRARVGVAAVGNRLYAVGGYDGTSDLATVESYDPVTNTWQPEVSMGTRRSCLGVAALHGLLYA  
AGGYDGASCLNSAERYDPLTGTWTSIAAMSTRRRYVRVATLDGNLYAVGGYDSSSHLATVEKEYEPQVNSWTPV  
ASMLSRSSAGVAVLEGALYVAGNDGTSCLSNVERYSTKAGAWESVAPMNI RRSTHDLVAMDGWLYAVGGND  
GSSSLNSIEKYNPRNTKWWAASCMFTRRSSVGVAVLELLNFPPSSPTLSVSSTSL\*  
>ENSMUSP00000137253\_c.180:C>A\_p.P61T ENSMUST00000179543.8|Noc21-  
201|ENSMUSG00000095567|+|chr4:g.156320766:C>A  
MAASRAPRRRLEDLSVDEFLASGFESGSESELEGAEEAAEERRARGAAWNRRERRGARTSTGPAGRPRKGRAS  
EHKQDLSRLKDRDPEFYKFLQENDRSLDFSDSDSSAESEEPFHSLPDTLEEASETEEDGGEDSDALPRGLRS  
KKNEPVPVTLAMVERWRQGSRHLS PRLFHEVVQAFRAAVATTQGEQEAETCRFQVADSAVFNALVTF CIRD  
LCGCLQKLLFGKTPKDSNRLPSSSPLWGKLRVDVKTYLSAVVQLVACLAEATVSAAVLQHISSLVPPYLTFFP  
KQCRMLLKRMMVVLWSTGEESLRVLAFLVLRVCRHKKEAFLGPILKQMYIMYVRNCKFTSPSTLPLISFMQRT  
LTEMALDPSVSYQTHAFYIRQLAVHLRNAMTAGKKEHQSYVNWQYVHCLYLWCRVLTLSGSEILQPLLYP  
LSQIIIGCIKLLPHTARFYPLRMHCVRALTLLSQITGTFIPVLPFILEIFQQVDFNRRRPMSSKPI N FSVILK  
LSSTNLQEKAYRDGELLEQLCDLTLEYLHLSQAHSIAFPELVLPVTLQKLSFLRECKVANYCROVQLLEKQVEN  
AQHIQSLRQSATFSVSDQMAVD AWEKQVREEGTPLTRYYGHWKKLRDREIQLEISGKERLEDLNFPEIKRRKV  
EDRKDEDRKELKDLFELDSSEGEDSTDFFERGVPRLP EAHQGLKEDQEEDKEEGDSSEGDGTDGVDLSEL  
WQLAQGPQDELEDLQLSEED\*



>ENSMUSP00000137253\_c.1791:A>G\_p.S598G ENSMUST00000179543.8|Noc21-201|ENSMUSG00000095567|+|chr4:g.156329744:A>G  
MAASRAPRRRLEDLSVDEFLASGFESGSESELEGAEEAAAEERRARGAAWNRRERRGARTSPGPAGRPRKGRAS  
EHKQDLSRLKDRDPEFYKFLQENDRSLDDFSDDSSAESEEPFHSLPDTLEEASETEEDGGEDSDALPRGLRS  
KKNEPVPVTLAMVERWRQGSRRHLSRPLFHEVVQAFRAAVATTQGEQEAETCRFQVADSAVNALVTFCIRD  
LCGCLQKLLFGKTPKDSNRLPSSSPLWGKLRVDVKTYLSAVVQLVACLAETVSAAVLQHISSLVPPYLTFF  
KQCRMLLKRMMVVLWSTGEESLRVLAFLVLIIRVCRHKKEAFLGPIILKQMYIMYVRNCKFTSPSTLPLISFMQRT  
LTEMALDPSVSYQHAFLYIRQLAVHLRNAMTAGKKETHQSVYNWQYVHCLYLWCRVLSTLGSSEILQPLLYP  
LSQIIIGCIKLLPTARFYPLRMHCVRALTLLSQTIGTFIPVLPFILEIFQQVDFNRRPGRMSSKPINFSVILK  
LSSTNLQEKAYRDGLLEQLCDLTLEYLHLSQAHSIAFPELVLPVTLQKLSFLRECKVANYCRQVRQLEKQVEN  
AQHIQSLRQSATFGVSDQMAVDAAWEKQVREEGTPLTRYGHWKLRDREIQLEISGKERLEDLNFPEIKRRKV  
EDRKDEDRKELKDLFELDSSEGEDSTDFFERGVPRPPEAHQGLKEDQEEDKEEGSDSSEDGDTDTGVDLSEL  
WQLAQGPQDELEDLQLSEED\*

>rs30778148\_ENSMUSP00000137253\_c.1843:A>G\_p.E615G  
ENSMUST00000179543.8|Noc21-201|ENSMUSG00000095567|+|chr4:g.156329915:A>G  
MAASRAPRRRLEDLSVDEFLASGFESGSESELEGAEEAAAEERRARGAAWNRRERRGARTSPGPAGRPRKGRAS  
EHKQDLSRLKDRDPEFYKFLQENDRSLDDFSDDSSAESEEPFHSLPDTLEEASETEEDGGEDSDALPRGLRS  
KKNEPVPVTLAMVERWRQGSRRHLSRPLFHEVVQAFRAAVATTQGEQEAETCRFQVADSAVNALVTFCIRD  
LCGCLQKLLFGKTPKDSNRLPSSSPLWGKLRVDVKTYLSAVVQLVACLAETVSAAVLQHISSLVPPYLTFF  
KQCRMLLKRMMVVLWSTGEESLRVLAFLVLIIRVCRHKKEAFLGPIILKQMYIMYVRNCKFTSPSTLPLISFMQRT  
LTEMALDPSVSYQHAFLYIRQLAVHLRNAMTAGKKETHQSVYNWQYVHCLYLWCRVLSTLGSSEILQPLLYP  
LSQIIIGCIKLLPTARFYPLRMHCVRALTLLSQTIGTFIPVLPFILEIFQQVDFNRRPGRMSSKPINFSVILK  
LSSTNLQEKAYRDGLLEQLCDLTLEYLHLSQAHSIAFPELVLPVTLQKLSFLRECKVANYCRQVRQLEKQVEN  
AQHIQSLRQSATFSVSDQMAVDAAWEKQVREGGTPLTRYGHWKLRDREIQLEISGKERLEDLNFPEIKRRKV  
EDRKDEDRKELKDLFELDSSEGEDSTDFFERGVPRPPEAHQGLKEDQEEDKEEGSDSSEDGDTDTGVDLSEL  
WQLAQGPQDELEDLQLSEED\*

>ENSMUSP00000137253\_c.2188:T>C\_p.L730P ENSMUST00000179543.8|Noc21-201|ENSMUSG00000095567|+|chr4:g.156331512:T>C  
MAASRAPRRRLEDLSVDEFLASGFESGSESELEGAEEAAAEERRARGAAWNRRERRGARTSPGPAGRPRKGRAS  
EHKQDLSRLKDRDPEFYKFLQENDRSLDDFSDDSSAESEEPFHSLPDTLEEASETEEDGGEDSDALPRGLRS  
KKNEPVPVTLAMVERWRQGSRRHLSRPLFHEVVQAFRAAVATTQGEQEAETCRFQVADSAVNALVTFCIRD  
LCGCLQKLLFGKTPKDSNRLPSSSPLWGKLRVDVKTYLSAVVQLVACLAETVSAAVLQHISSLVPPYLTFF  
KQCRMLLKRMMVVLWSTGEESLRVLAFLVLIIRVCRHKKEAFLGPIILKQMYIMYVRNCKFTSPSTLPLISFMQRT  
LTEMALDPSVSYQHAFLYIRQLAVHLRNAMTAGKKETHQSVYNWQYVHCLYLWCRVLSTLGSSEILQPLLYP  
LSQIIIGCIKLLPTARFYPLRMHCVRALTLLSQTIGTFIPVLPFILEIFQQVDFNRRPGRMSSKPINFSVILK  
LSSTNLQEKAYRDGLLEQLCDLTLEYLHLSQAHSIAFPELVLPVTLQKLSFLRECKVANYCRQVRQLEKQVEN  
AQHIQSLRQSATFSVSDQMAVDAAWEKQVREGGTPLTRYGHWKLRDREIQLEISGKERLEDLNFPEIKRRKV  
EDRKDEDRKELKDLFELDSSEGEDSTDFFERGVPRPPEAHQGLKEDQEEDKEEGSDSSEDGDTDTGVDLSEP  
WQLAQGPQDELEDLQLSEED\*

>ENSMUSP00000136611\_c.219:G>A\_p.A74T ENSMUST00000179919.3|Samd11-201|ENSMUSG00000096351|-|chr4:g.156336502:C>T  
MPEHPRHCDQFQRGNVEIGLPGGGDLLGKRLSCPCITSHCSSEKKARSKDPQGESPTLEKDAATSLLEPELSTM  
TPEDHYHQLMSALSEASSFEETQRLYHLGIPSHDLLRVRQEVATATLRGPGSGLVHLPSSSTADHRRKQGLVQR  
REGAVPAAATSFSEMERMSQPPPLSPQNAAHITMSSHLRPPFLGMPAVCQTPGFSFLPSAQAEMLARQOELL  
RKQSLARLEMSELLRQKELGSVHRPPLPAPEVALHIPEGPDELQRRGSMVLVKHSSAPLLALPPQPPPGPGPP  
IPPKESARSRSEKGLGVQPSQPKETTGAQLWAQEVSEEPSKSDSDGEDPETAAREGTSTPSQVPAGGTRAEG  
RGLLSGSTLPPPLPLGFPAGVSPYFHTGTMGGLFTDEETTTLEDVNKWTVDVVCNPFVGGLSGCGEYARVFGE  
QGIDGETLPLLTEEHLNMTMGLKLGPAKIRAVAKRLGRVFMASFPVALPLQPPSLQAPELSPGHQPLSPA  
TTTSPYEGTHLPTGQASPKQENGSGTIALLSGAPDPSQLLQ\*

>ENSMUSP00000151756\_c.189:G>A\_p.A64T ENSMUST00000217934.2|Samd11-202|ENSMUSG00000096351|-|chr4:g.156336502:C>T  
MPEHPRHCDQFQRGNVEIGLPGGGDLLGKRLSCPCITSHCSSEKKARSKDPQATSLLPELESTMTPEDHYHQLM  
SALSEASSFEETQRLYHLGIPSHDLLRVRQEVATATLRGPGSGLVHLPSSSTADHRRKQGLVQRREGAVPAAAT  
SFSEMERMSQPPPLSPQNAAHITMSSHLRPPFLGMPAVCQTPGFSFLPSAQAEMLARQOELLRQSLARLEM  
SELLRQKELGSVHRPPLPAPEVALHIPEGPDELQRRGSMVLVKHSSAPLLALPPQPPPGPGPPIPPKESARSR  
SEKGLGVQPSQPKETTGAQLWAQEVSEEPSKSDSDGEDPETAAREGTSTPSQVPAGGTRAEGRGLLSGSTLPL  
PPLPLGFPAGVSPYFHTGTMGGLFTDEETTTLEDVNKWTVDVVCNPFVGGLSGCGEYARVFGEQGIDGETLPL

LTEEHLNLTMLGKLGPAKIRAQVAKRLGRVVFYMASFPVALPLQPPSLQAPELSPGHQPLSPATTTSPYEGTH  
LPTGQASPKQENGSGTIALLSGAPDPSQLLQ\*  
>ENSMUSP00000151442\_c.189:G>A\_p.A64T ENSMUST00000218788.2|Samd11-  
204|ENSMUSG00000096351|-|chr4:g.156336502:C>T  
MPEHPRHCDFQRGNVEIGLPGGGDLLGKRLSCPCITSHCSSEKKARSKDPQATSLLEPELESTMTPEDHYHQML  
SALSEASSFEETQRLYHLGIPSHDLLRVRQEVATATLRGPGSGLEVHLPSSSTADHRRKQGLVQRREGAVPAAAT  
SFSEREMSQPPPLLSPQNAAHITMSSHLRPPFLGMPTAVCQTPGFSLPSAQAEMLARQQEELLRQSLARLEM  
SELLRQKELGVSVHRPLLPAPEVALHIPEGPDELQRRGSMMLVVKHSSAPLLALPPQGGPPGPPPIPPKESARSR  
SEKGS LGVQPSQPKETTGAQLWAQEVSEEPSKSDSDGEDPETAAAREGTSTPSQVPAGGTRAEGRGLLSGSTLP  
PPLPLGFPFCGAVSPYFHTGTMGGLFTDEETTTLEDVNKWTVDVVCNFCVGGLSGCGEYARVFGEQGIDGETLPL  
LTEEHLNLTMLGKLGPAKIRAQVAKRLGRVVFYMASFPVALPLQPPSLQAPELSPGHQPLSPATTTSPYEGTH  
LPTGQASPKQENGSGTIALLSGAPDPSQLLQ\*  
>ENSMUSP00000151261\_c.219:G>A\_p.A74T ENSMUST00000220228.2|Samd11-  
209|ENSMUSG00000096351|-|chr4:g.156336502:C>T  
MPEHPRHCDFQRGNVEIGLPGGGDLLGKRLSCPCITSHCSSEKKARSKDPQGESPTLEKDAATSLLEPELESTM  
TPEDHYHQMLSALSEASSFEETQRLYHLGIPSHADHRRKQGLVQRREGAVPAAATSFSEREMSQPPPLLSPQN  
AAHITMSSHLRPPFLGMPTAVCQTPGFSLPSAQAEMLARQQEELLRQSLARLEMSELLRQKELGVSVHRPLLP  
APEVALHIPEGPDELQRRGSMMLVVKH  
>ENSMUSP00000151817\_c.189:G>A\_p.A64T ENSMUST00000219393.2|Samd11-  
206|ENSMUSG00000096351|-|chr4:g.156336502:C>T  
MPEHPRHCDFQRGNVEIGLPGGGDLLGKRLSCPCITSHCSSEKKARSKDPQATSLLEPELESTMTPEDHYHQML  
SALSEASSFEETQRLYHLGIPSHDLLRVRQEVATATLRGPGSGLEVHLPSSSTADHRRKQGLVQR  
>ENSMUSP00000041597\_c.748:A>T\_p.D250V ENSMUST00000035980.9|Gm9758-  
201|ENSMUSG00000033219|-|chr5:g.14960484:T>A  
MALFARLCRLFQRANVDGRENREGRKDADIPSERNEGRRRGRTWRMWMALRQTSSPVPVVISKKQFEKEEKKLIK  
EIQLTTEETNELRDRLTYVTEGSMNKRPYHRQNPLYEKLKKEKEIMTFLHNLEMENMEAQENKQELKKETHF  
YRNLHSRLLMEENLIKKKSMPLQQESKEVQADWAIHQRLVELNLSGKDEQEENSLETPEYQVSEAAARELGLA  
TAEEDSILQNELPGQEAPAEHHLQHPQSSSVESSSI\*  
>ENSMUSP00000041597\_c.748:A>G\_p.D250G ENSMUST00000035980.9|Gm9758-  
201|ENSMUSG00000033219|-|chr5:g.14960484:T>C  
MALFARLCRLFQRANVDGRENREGRKDADIPSERNEGRRRGRTWRMWMALRQTSSPVPVVISKKQFEKEEKKLIK  
EIQLTTEETNELRDRLTYVTEGSMNKRPYHRQNPLYEKLKKEKEIMTFLHNLEMENMEAQENKQELKKETHF  
YRNLHSRLLMEENLIKKKSMPLQQESKEVQADWAIHQRLVELNLSGKDEQEENSLETPEYQVSEAAARELGLA  
TAEEDSILQNELPGQEAPAEHHLQHPQSSSGESSI\*  
>ENSMUSP00000125587\_c.232:C>G\_p.T78S ENSMUST00000159973.3|Speer4e-  
201|ENSMUSG00000091255|-|chr5:g.14987171:G>C  
MALFARLCRLFQRANVDGSDTREGRKDADLPSENERGRRRGRTWRMWMALRQTSSPVPVVISKKQFEKEEKKLIK  
EIQLSTTEETNELRDRLIYVTEGSMNKRPYHRQNPLYEKLKKEKEIMTFLHNLEMENMEAKETKQELKKETHF  
YRNLHSRLLMEENLIKKKLMPLQQESKEVQADWAIHQCLLELNLNSGKDEQEENSLETPEYQVSEAAARELGLA  
TAEEDSILQNELPGQEAPAEHHLQHPQSSSDESSSI\*  
>ENSMUSP00000094716\_c.703:A>G\_p.Q235R ENSMUST00000096953.5|Gm10354-  
201|ENSMUSG00000072188|-|chr5:g.15024578:T>C  
MALFARLCRLFQRANVDGRETREGRKDADLPSENEGRRRGRTWRMCMALRQTSSPVPVVISKKQFEKEEKKLIK  
EIQLTMEETNELRDRLIYVTEGSMNKRPYHRQNPLYEKLKKEKEIMTFLHNLEMENMEAKETKQELKKETHF  
YHNLHSRLLMEENLIKKKLMPLQQESKEVQADWAIHQRLVELNLSGKDEQEENSLETPEYQVSEAAARELGL  
ATAEEDSILQNELPGQEAPAEHHLQHPQSSSDESSSI\*  
>rs49800592\_ENSMUSP00000094716\_c.516:A>G\_p.K173E  
ENSMUST00000096953.5|Gm10354-201|ENSMUSG00000072188|-|chr5:g.15025509:T>C  
MALFARLCRLFQRANVDGRETREGRKDADLPSENEGRRRGRTWRMCMALRQTSSPVPVVISKKQFEKEEKKLIK  
EIQLTMEETNELRDRLIYVTEGSMNKRPYHRQNPLYEKLKKEKEIMTFLHNLEMENMEAKETKQELKKETHF  
YHNLHSRLLMEENLIKKKLMPLQQESKEVQADWAIHQRLVELNLSGKDEQEENSLETPEYQVSEAAARELGL  
ATAEEDSILQNELPGQEAPAEHHLQHPQSSSDESSSI\*  
>ENSMUSP00000094716\_c.262:G>A\_p.R88H ENSMUST00000096953.5|Gm10354-  
201|ENSMUSG00000072188|-|chr5:g.15027612:C>T  
MALFARLCRLFQRANVDGRETREGRKDADLPSENEGRRRGRTWRMCMALRQTSSPVPVVISKKQFEKEEKKLIK  
EIQLTMEETNELRDHLIYVTEGSMNKRPYHRQNPLYEKLKKEKEIMTFLHNLEMENMEAKETKQELKKETHF  
YHNLHSRLLMEENLIKKKLMPLQQESKEVQADWAIHQRLVELNLSGKDEQEENSLETPEYQVSEAAARELGL  
ATAEEDSILQNELPGQEAPAEHHLQHPQSSSDESSSI\*

>ENSMUSP00000143356\_c.462:CC>TT\_p.L155F ENSMUST00000197995.2|Gm21149-201|ENSMUSG00000099762|-|chr5:g.15678133:GG>AA  
MALFARLCRLFQRANVDRRETREGRKDADLPPDSNEGRRRGTRWRMWMALRQTSSPVPVVISKKQFEKEEKKLIK  
EIQLTTEETNELRDLRIYVTEGSMNKRPYHRQNPLYEKLKLKEKEIMTFLHNLEMENMEAQENKQELKKETHF  
YRNLHSRLFDGGESYKEEVDDIAAGEQGSTG\*LGHHSPTFGGIEPEW\*RRGTGEQQS\*DSRISGLRNCKRAGIG  
HS\*RRQHPAE\*VARPGGPC\*APSPAPTIFLG\*IFFHI  
>ENSMUSP00000143356\_c.168:C>T\_p.P57S ENSMUST00000197995.2|Gm21149-201|ENSMUSG00000099762|-|chr5:g.15680276:G>A  
MALFARLCRLFQRANVDRRETREGRKDADLPPDSNEGRRRGTRWRMWMALRQTSSPVSVISKKQFEKEEKKLIK  
EIQLTTEETNELRDLRIYVTEGSMNKRPYHRQNPLYEKLKLKEKEIMTFLHNLEMENMEAQENKQELKKETHF  
YRNLHSRLMEENLIKKSMTLQQESKEVQADWAIHQRLVELNLSGKDEQENSLETPEYQVSETARELGLA  
TAEEDSILQNELPGQEAPAEHHLQHPOSSSDESSSI\*  
>ENSMUSP00000158761\_c.1020:T>G\_p.C341G ENSMUST00000238335.2|Tmub1-206|ENSMUSG00000028958|-|chr5:g.24650653:A>C  
MALIEGVGDEVTVLFAVLACLLVLALAWVSTHTTESTDPPQPPGTTTPAQPSEAMSASDSIREEAPGAESPS  
LRHRGSPAQPEPDTGVTASTPPDSPQEPDLLRLKFLNDSEQVARAWPQDTIGSLKRSLSPQDPVSRPGTAGSA  
HLPRSTARRRHSDDRQSPAPQLRSPLPRVHESRSPTSSLPTGVRARPLRAGNRQPSVAPAASAAAALVLPD  
PVPALLSPDRYPGSGRLHPAPQSPGLCHVSAVVPRAFGSVASPSGPHSPRRKGSCLPRPTSPAACLFPLPW  
SPALRRRGLRVLAEAAPCDLHSSRPSGAAGPQPSLAVGSSGSGTCCRGLGRQGTMPGPS\*  
>rs387511256\_ENSMUSP00000030795\_c.1139:T>GGT\_p.V380ins-fs  
ENSMUST00000030795.10|Abcf2-201|ENSMUSG00000028953|-|chr5:g.24773748:A>ACC  
MPSDLAKKKAAKKKEAAKARQRPRKGHEENGDAVTEPQVAEEKIEEANGRETTGDGEVDLLTKELEDFEMKKA  
AARAVTGVVLASHPNSTDVHIINLSLTFHGQELLSDTKLELNSGRRYGLIGLNGIGKSMLLSAIGKREVPPIEH  
IDIYHLTREMPPSEKTPQCVMEDTERAMLEREAERLAHEDAECEKLMELYERLEELDADKAEMRASRILHG  
LGFTPAMQRKLLKDFSGGWRMRVALARALFIRPFMLLLDEPTNHLDLDACVWLEELKTFKRIILVLVSHSQDF  
LNGVCTNI IHMHNKLLKYYTYGNYDQYVVKTRLELEENQMKRFHWEQDQIAHMKNYIARFHHGSAKLARQAQSKE  
KTLQKMMASGLTERVV  
>ENSMUSP00000085578\_c.103:T>G\_p.I35S ENSMUST00000088244.6|Actr3b-201|ENSMUSG00000056367|+|chr5:g.26014786:T>G  
MAGSLPPCVVDCGTGYTKLGYAGNTEPQFIIIPSCSAIRESAKVVDQAQRRVLRGVDDLLDFFIGDEAIDKPTYA  
TKWPIRHGIVEDWDLMERFMEQVVFYKYLRAEPEDHYFLMTEPPLNTPENREYLAEIMFESFNVPGLYIAVQAV  
LALAASWTSRQVGERTLTGIVIDSGDGVTHVIPVAEGYVIGSCIKHIPIAGRDITYFIQQLLREREVGIPEEQ  
SLETAKAIKEKYCYICPDIVREFAKYDVPDKWIKQYTGINAINQKFFIIDVGYERFLGPEIFFHPEFANPDF  
MESISDVVDEVIQSCPIDVRRPLYKNVVLSSGGSTMFRDFGRRLQDLKRVVDARLKLSQLSGLSGGRIPKPKPVEV  
QVVTHHMQRVAVWFGGSMLASTPEFFQVCHTKKDYEEYGPSICRHNPFVFGVMS\*  
>ENSMUSP00000085578\_c.226:G>A\_p.W76\* ENSMUST00000088244.6|Actr3b-201|ENSMUSG00000056367|+|chr5:g.26016916:G>A  
MAGSLPPCVVDCGTGYTKLGYAGNTEPQFIIIPSCIAIRESAKVVDQAQRRVLRGVDDLLDFFIGDEAIDKPTYA  
TK\*PIRHGIVEDWDLMERFMEQVVFYKYLRAEPEDHYFLMTEPPLNTPENREYLAEIMFESFNVPGLYIAVQAV  
LALAASWTSRQVGERTLTGIVIDSGDGVTHVIPVAEGYVIGSCIKHIPIAGRDITYFIQQLLREREVGIPEEQ  
SLETAKAIKEKYCYICPDIVREFAKYDVPDKWIKQYTGINAINQKFFIIDVGYERFLGPEIFFHPEFANPDF  
MESISDVVDEVIQSCPIDVRRPLYKNVVLSSGGSTMFRDFGRRLQDLKRVVDARLKLSQLSGLSGGRIPKPKPVEV  
QVVTHHMQRVAVWFGGSMLASTPEFFQVCHTKKDYEEYGPSICRHNPFVFGVMS\*  
>ENSMUSP00000085578\_c.240:G>T\_p.G81C ENSMUST00000088244.6|Actr3b-201|ENSMUSG00000056367|+|chr5:g.26016930:G>T  
MAGSLPPCVVDCGTGYTKLGYAGNTEPQFIIIPSCIAIRESAKVVDQAQRRVLRGVDDLLDFFIGDEAIDKPTYA  
TKWPIRHGIVEDWDLMERFMEQVVFYKYLRAEPEDHYFLMTEPPLNTPENREYLAEIMFESFNVPGLYIAVQAV  
LALAASWTSRQVGERTLTGIVIDSGDGVTHVIPVAEGYVIGSCIKHIPIAGRDITYFIQQLLREREVGIPEEQ  
SLETAKAIKEKYCYICPDIVREFAKYDVPDKWIKQYTGINAINQKFFIIDVGYERFLGPEIFFHPEFANPDF  
MESISDVVDEVIQSCPIDVRRPLYKNVVLSSGGSTMFRDFGRRLQDLKRVVDARLKLSQLSGLSGGRIPKPKPVEV  
QVVTHHMQRVAVWFGGSMLASTPEFFQVCHTKKDYEEYGPSICRHNPFVFGVMS\*  
>ENSMUSP00000121629\_c.119:A>T\_p.E40D ENSMUST00000128727.8|Actr3b-202|ENSMUSG00000056367|+|chr5:g.26027450:A>T  
MERFMEQVVFYKYLRAEPEDHYFLMTEPPLNTPENREYLADIMFESFNVPGLYIAVQAVLALAASWTSRQVGER  
TLTGIVIDSGDGVTHVIPVAEGYVIGSCIKHIPIAGRDITYFIQQLLREREVGIPEEQSLETAKAIKEKYCYI  
CPDIVREFAKYDVPDKWIKQYTGINAINQKFFIIDVGYERFLGPEIFFHPEFANPDFMESISDVVDEVIQSC

PIDVRRPLYKNNVLSGGSTMFRDFGRRLQRDLKRVVDARLKLSQLSGGRIKPKPVEVQVVTHHMQRVAVWFG  
 GSMLASTPEFFQVCHTKKDYEEYGPSICRHNPFVFGVMS\*  
 >ENSMUSP00000085578\_c.383:A>T\_p.E128D ENSMUST00000088244.6|Actr3b-  
 201|ENSMUSG00000056367|+|chr5:g.26027450:A>T  
 MAGSLPPCVVDCGTGYTKLGYAGNTEPQFIIPSCIAIRESAKVVDQAQRVLRGVDDLDFFIGDEAIDKPTYA  
 TKWPIRHGIVEDWDLMERFMEQVVFVKYLRAEPEDHYFLMTEPPLNTPENREYLADIMFESFNVPGLYIAVQAV  
 LALAASWTSRQVGERTLTGIVIDSGDGVTHVIPVAEGYVIGSCIKHIPIAGRDITYFIQQLLREREVGPPEQ  
 SLETAKAIKEKYCYICPDIVREFAKYDVPDKRWIKQYTGINAINQKFFIIDVGYERFLGPEIFFHPEFANPDF  
 MESISDVVDEVIQSCPIDVRRPLYKNNVLSGGSTMFRDFGRRLQRDLKRVVDARLKLSQLSGGRIKPKPVEV  
 QVVTHHMQRVAVWFGGSMLASTPEFFQVCHTKKDYEEYGPSICRHNPFVFGVMS\*  
 >rs50914511\_ENSMUSP00000121629\_c.456:G>T\_p.E153\*  
 ENSMUST00000128727.8|Actr3b-202|ENSMUSG00000056367|+|chr5:g.26036645:G>T  
 MERFMEQVVFVKYLRAEPEDHYFLMTEPPLNTPENREYLAEIMFESFNVPGLYIAVQAVLALAASWTSRQVGER  
 TLTGIVIDSGDGVTHVIPVAEGYVIGSCIKHIPIAGRDITYFIQQLLREREVGPPEQSLETAKAIKEKYCYI  
 CPDIVR\*FAKYDVPDKRWIKQYTGINAINQKFFIIDVGYERFLGPEIFFHPEFANPDFMESISDVVDEVIQSC  
 PIDVRRPLYKNNVLSGGSTMFRDFGRRLQRDLKRVVDARLKLSQLSGGRIKPKPVEVQVVTHHMQRVAVWFG  
 GSMLASTPEFFQVCHTKKDYEEYGPSICRHNPFVFGVMS\*  
 >rs50914511\_ENSMUSP00000085578\_c.720:G>T\_p.E241\*  
 ENSMUST00000088244.6|Actr3b-201|ENSMUSG00000056367|+|chr5:g.26036645:G>T  
 MAGSLPPCVVDCGTGYTKLGYAGNTEPQFIIPSCIAIRESAKVVDQAQRVLRGVDDLDFFIGDEAIDKPTYA  
 TKWPIRHGIVEDWDLMERFMEQVVFVKYLRAEPEDHYFLMTEPPLNTPENREYLAEIMFESFNVPGLYIAVQAV  
 LALAASWTSRQVGERTLTGIVIDSGDGVTHVIPVAEGYVIGSCIKHIPIAGRDITYFIQQLLREREVGPPEQ  
 SLETAKAIKEKYCYICPDIVR\*FAKYDVPDKRWIKQYTGINAINQKFFIIDVGYERFLGPEIFFHPEFANPDF  
 MESISDVVDEVIQSCPIDVRRPLYKNNVLSGGSTMFRDFGRRLQRDLKRVVDARLKLSQLSGGRIKPKPVEV  
 QVVTHHMQRVAVWFGGSMLASTPEFFQVCHTKKDYEEYGPSICRHNPFVFGVMS\*  
 >ENSMUSP00000121629\_c.723:G>C\_p.D242H ENSMUST00000128727.8|Actr3b-  
 202|ENSMUSG00000056367|+|chr5:g.26053396:G>C  
 MERFMEQVVFVKYLRAEPEDHYFLMTEPPLNTPENREYLAEIMFESFNVPGLYIAVQAVLALAASWTSRQVGER  
 TLTGIVIDSGDGVTHVIPVAEGYVIGSCIKHIPIAGRDITYFIQQLLREREVGPPEQSLETAKAIKEKYCYI  
 CPDIVREFAKYDVPDKRWIKQYTGINAINQKFFIIDVGYERFLGPEIFFHPEFANPDFMESISDVVDEVIQSC  
 PIDVRRPLYKNNVLSGGSTMFRDFGRRLQRDLKRVVDARLKLSQLSGGRIKPKPVEVQVVTHHMQRVAVWFG  
 GSMLASTPEFFQVCHTKKDYEEYGPSICRHNPFVFGVMS\*  
 >ENSMUSP00000085578\_c.987:G>C\_p.D330H ENSMUST00000088244.6|Actr3b-  
 201|ENSMUSG00000056367|+|chr5:g.26053396:G>C  
 MAGSLPPCVVDCGTGYTKLGYAGNTEPQFIIPSCIAIRESAKVVDQAQRVLRGVDDLDFFIGDEAIDKPTYA  
 TKWPIRHGIVEDWDLMERFMEQVVFVKYLRAEPEDHYFLMTEPPLNTPENREYLAEIMFESFNVPGLYIAVQAV  
 LALAASWTSRQVGERTLTGIVIDSGDGVTHVIPVAEGYVIGSCIKHIPIAGRDITYFIQQLLREREVGPPEQ  
 SLETAKAIKEKYCYICPDIVREFAKYDVPDKRWIKQYTGINAINQKFFIIDVGYERFLGPEIFFHPEFANPDF  
 MESISDVVDEVIQSCPIDVRRPLYKNNVLSGGSTMFRDFGRRLQRDLKRVVDARLKLSQLSGGRIKPKPVEV  
 QVVTHHMQRVAVWFGGSMLASTPEFFQVCHTKKDYEEYGPSICRHNPFVFGVMS\*  
 >ENSMUSP00000129503\_c.952:G>A\_p.G318E ENSMUST00000165512.4|Mnx1-  
 202|ENSMUSG00000001566|-|chr5:g.29679129:C>T  
 MEKSKNFRIDALLAVDPPRAASTQSAPLALVTSLATTVSGPGRGGSGGGGTSSGASRSCSPASSEATAAPGDR  
 LRAESPPRLLAAHCALLPKPGFLGAGGGGGAAGGPGTPHHHAHPGAAAAAAAAAAAAAAAAAGGLALGLHPGGA  
 QGGAGLPAQAALYGHVPVYSYAAAAAAAAALAGQHPALSYSYPQVQGAHPAHPADPIKLGASTFQLDQWLRATA  
 GMILPKMPDFSSQAQSNLLGKCRPRPTAFTSQQLLELEHQFKLNKYLRSRPKRFEVATSLMLTETQVKIWFQNR  
 RMKWKRSKKAKEQAAQEAQKQGGGEGTGKGGSEEKTEEELMGPPVSGDKASGRRLRDLRSDPDEDEDDEEE  
 DNFPYSNGAGAHAASSDCSSEDDSPPPRLGGPGHQPLPQ\*  
 >ENSMUSP00000001608\_c.952:G>A\_p.G318E ENSMUST00000001608.8|Mnx1-  
 201|ENSMUSG00000001566|-|chr5:g.29679129:C>T  
 MEKSKNFRIDALLAVDPPRAASTQSAPLALVTSLATTVSGPGRGGSGGGGTSSGASRSCSPASSEATAAPGDR  
 LRAESPPRLLAAHCALLPKPGFLGAGGGGGAAGGPGTPHHHAHPGAAAAAAAAAAAAAAAAAGGLALGLHPGGA  
 QGGAGLPAQAALYGHVPVYSYAAAAAAAAALAGQHPALSYSYPQVQGAHPAHPADPIKLGASTFQLDQWLRATA  
 GMILPKMPDFSSQAQSNLLGKCRPRPTAFTSQQLLELEHQFKLNKYLRSRPKRFEVATSLMLTETQVKIWFQNR  
 RMKWKRSKKAKEQAAQEAQKQGGGEGTGKGGSEEKTEEELMGPPVSGDKASGRRLRDLRSDPDEDEDDEEE  
 DNFPYSNGAGAHAASSDCSSEDDSPPPRLGGPGHQPLPQ\*

>rs218645019\_ENSMUSP00000144615\_c.613:TG>T\_p.L205del-fs  
ENSMUST00000201203.4|Tmem214-  
202|ENSMUSG00000038828|+|chr5:g.31029176:TG>T  
MAARSAGSGGWEVVKRGRPGASSGGRGGGGSDRRALGEANGVLKYDLSSPIQTTSTLYERGFEKIMKRQNK  
EQVPPAAESKPKPINKKQPKKVTAVPSQNKQKQGFRRLEDALKALDVAALQKELDKSQSVFTGNPSVWLKDLA  
SYLNYKLTQTPRMEPTLSQYPHDYPYSLVSRELIRGLLTKAAGSVLFFDHLCLFTMLKSWIKHQGSRMG  
ASVFKPFCKTSLRLSPQTWTSS  
>ENSMUSP00000143938\_c.204:C>T\_p.P69S ENSMUST00000202520.4|Slc5a6-  
205|ENSMUSG00000006641|-|chr5:g.31200479:G>A  
MSVASTAAPFHTTSGSSGAISTFSVVDYVVFGLLLVLSLVIGLYHACRGGHHTVGELLMADRKMGCCLSVALS  
LLATFQSAVAAILGAPAEIFRFGTQYWFLGCSYFLGLLIPAHIFIPVFYRLHLTSAYEYLELRFNKAVRICGT  
TFIFQMVIYMGVALYAPSLALNAVTGFDLWLSVLALGIVCNIYTALGGLKAVIWTDFVQTLVMFLGQLVVIIV  
GAARVGGGLGHVWNVTSQHGLISGINLDPDPFVRHTFWTLAFGGVFMMLSLYGVNQAQVQRYLSSHSERAAVLS  
CYAVFPCQQVALCMSCLIGLVMFAYYNYMSMSPKQAAPDQLVLYFVMDLLKDMPLPGLFVACLFSGSLST  
ISSAFNSLATVTMEDLIQWFPQLTETRAIMLSRGLAFAYGLVCLGMAYISSHLGSLVQAALSIFGMVGGPLL  
GLFCLGLFFPCANPLGAIVGLLTGLTMAFWIGIGSIVSRMSSAVAPPPLNGSSSFLPANVTVAAVTTVMPSTL  
SKPTGLQHFFYSLSYLWYSAHNSTTVIVVGLIVSLLTGGMRGRSLNPGTIYPVLPKLLALLPLSCQKRLCWRSH  
SQDIPVIPNLFPEKMRNGVLQDSTDKERMAEDGLVHQPCSPYVYVQETSLS\*  
>ENSMUSP00000110316\_c.204:C>T\_p.P69S ENSMUST00000114668.7|Slc5a6-  
202|ENSMUSG00000006641|-|chr5:g.31200479:G>A  
MSVASTAAPFHTTSGSSGAISTFSVVDYVVFGLLLVLSLVIGLYHACRGGHHTVGELLMADRKMGCCLSVALS  
LLATFQSAVAAILGAPAEIFRFGTQYWFLGCSYFLGLLIPAHIFIPVFYRLHLTSAYEYLELRFNKAVRICGT  
TFIFQMVIYMGVALYAPSLALNAVTGFDLWLSVLALGIVCNIYTALGGLKAVIWTDFVQTLVMFLGQLVVIIV  
GAARVGGGLGHVWNVTSQHGLISGINLDPDPFVRHTFWTLAFGGVFMMLSLYGVNQAQVQRYLSSHSERAAVLS  
CYAVFPCQQVALCMSCLIGLVMFAYYNYMSMSPKQAAPDQLVLYFVMDLLKDMPLPGLFVACLFSGSLST  
ISSAFNSLATVTMEDLIQWFPQLTETRAIMLSRGLAFAYGLVCLGMAYISSHLGSLVQAALSIFGMVGGPLL  
GLFCLGLFFPCANPLGAIVGLLTGLTMAFWIGIGSIVSRMSSAVAPPPLNGSSSFLPANVTVAAVTTVMPSTL  
SKPTGLQHFFYSLSYLWYSAHNSTTVIVVGLIVSLLTGGMRGRSLNPGTIYPVLPKLLALLPLSCQKRLCWRSH  
SQDIPVIPNLFPEKMRNGVLQDSTDKERMAEDGLVHQPCSPYVYVQETSLS\*  
>ENSMUSP00000079291\_c.204:C>T\_p.P69S ENSMUST00000080431.8|Slc5a6-  
201|ENSMUSG00000006641|-|chr5:g.31200479:G>A  
MSVASTAAPFHTTSGSSGAISTFSVVDYVVFGLLLVLSLVIGLYHACRGGHHTVGELLMADRKMGCCLSVALS  
LLATFQSAVAAILGAPAEIFRFGTQYWFLGCSYFLGLLIPAHIFIPVFYRLHLTSAYEYLELRFNKAVRICGT  
TFIFQMVIYMGVALYAPSLALNAVTGFDLWLSVLALGIVCNIYTALGGLKAVIWTDFVQTLVMFLGQLVVIIV  
GAARVGGGLGHVWNVTSQHGLISGINLDPDPFVRHTFWTLAFGGVFMMLSLYGVNQAQVQRYLSSHSERAAVLS  
CYAVFPCQQVALCMSCLIGLVMFAYYNYMSMSPKQAAPDQLVLYFVMDLLKDMPLPGLFVACLFSGSLST  
ISSAFNSLATVTMEDLIQWFPQLTETRAIMLSRGLAFAYGLVCLGMAYISSHLGSLVQAALSIFGMVGGPLL  
GLFCLGLFFPCANPLGAIVGLLTGLTMAFWIGIGSIVSRMSSAVAPPPLNGSSSFLPANVTVAAVTTVMPSTL  
SKPTGLQHFFYSLSYLWYSAHNSTTVIVVGLIVSLLTGGMRGRSLNPGTIYPVLPKLLALLPLSCQKRLCWRSH  
SQDIPVIPNLFPEKMRNGVLQDSTDKERMAEDGLVHQPCSPYVYVQETSLS\*  
>ENSMUSP00000143993\_c.204:C>T\_p.P69S ENSMUST00000202556.4|Slc5a6-  
206|ENSMUSG00000006641|-|chr5:g.31200479:G>A  
MSVASTAAPFHTTSGSSGAISTFSVVDYVVFGLLLVLSLVIGLYHACRGGHHTVGELLMADRKMGCCLSVALS  
LLATFQSAVAAILGAPAEIFRFGTQYWFLGCSYFLGLLIPAHIFIPVFYRLHLTSAYEYLELRFNKAVRICGT  
TFIFQMVIYMGVALYAPSLALNAVTGFDLWLSVLALGIVCNIYTALGGLKAVIWTDFVQTLVMFLGQLVVIIV  
GAARVGGGLGHVWNVTSQHGLISGINLDPDPFVRHTFWTLAFGGVFMMLSLYGVNQAQVQRYLSSHSERAAVLS  
CYAVFPCQQVALCMSCLIGLVMFAYYNYMSMSPKQAAPDQLVLYFVMDLLKDMPLPGLFVACLFSGSLST  
ISSAFNSLATVTMEDLIQWFPQLTETRAIMLSRGLAFAYGLVCLGMAYISSHLGSLVQAALSIFGMVGGPLL  
GLFCLGLFFPCANPLGAIVGLLTGLTMAFWIGIGSIVSRMSSAVAPPPLNGSSSFLPANVTVAAVTTVMPSTL  
SKPTGLQHFFYSLSYLWYSAHNSTTVIVVGLIVSLLTGGMRGRSLNPGTIYPVLPKLLALLPLSCQKRLCWRSH  
SQDIPVIPNLFPEKMRNGVLQDSTDKERMAEDGLVHQPCSPYVYVQETSLS\*  
>ENSMUSP00000144665\_c.204:C>T\_p.P69S ENSMUST00000200816.2|Slc5a6-  
203|ENSMUSG00000006641|-|chr5:g.31200479:G>A  
MSVASTAAPFHTTSGSSGAISTFSVVDYVVFGLLLVLSLVIGLYHACRGGHHTVGELLMADRKMGCCLSVALS  
LLATFQSA  
>ENSMUSP00000142442\_c.238:T>G\_p.I80S ENSMUST00000199534.5|Ldb2-  
207|ENSMUSG00000039706|-|chr5:g.44699198:A>C



MSSTPHDPFYSSPFGPFYRRHTPYMVQPEYRIYEMNKRLQSRTESDNLWWDAFATEFFEDDATLTLSCLED  
GPKRYTSGRTLIPRYFSTVFEGGVTDLYYILKHSKESYHNSSIIVDCDQCAMVTQHKGPMFTKVCTEGRLILE  
FTFDDLMRIKTWHFTIRQYRELVPRSILAMHAQDPQVLDQLSKNITRMGLTNFTLNLYLRLCVILEPMQELMSR  
HKTYNLSRPDCLKTCLFQKWQRMVAPPAEPTRQPTTKRRKRKNSTSSSTSNSSAGNTTNSAGSKKTPAASLSL  
ATQVPGLGAI PNCSLNPGRDGLCHSTAVTPSGQFKEKH\*

>ENSMUSP00000067737\_c.238:T>G\_p.I80S ENSMUST00000070748.10|Ldb2-  
201|ENSMUSG00000039706|-|chr5:g.44699198:A>C

MSSTPHDPFYSSPFGPFYRRHTPYMVQPEYRIYEMNKRLQSRTESDNLWWDAFATEFFEDDATLTLSCLED  
GPKRYTSGRTLIPRYFSTVFEGGVTDLYYILKHSKESYHNSSIIVDCDQCAMVTQHKGPMFTKVCTEGRLILE  
FTFDDLMRIKTWHFTIRQYRELVPRSILAMHAQDPQVLDQLSKNITRMGLTNFTLNLYLRLCVILEPMQELMSR  
HKTYNLSRPDCLKTCLFQKWQRMVAPPAEPTRQPTTKRRKRKNSTSSSTSNSSAGNTTNSAGSKKTPAASLSL  
ATQVPDVMVVGEP TLMGGFEGDEDERLITRLENTQYDAANGMDDEEDFNNSPALGNNSPWNSKPPATQETKSE  
NAPPQASQ\*

>ENSMUSP00000143775\_c.238:T>G\_p.I80S ENSMUST00000199256.5|Ldb2-  
204|ENSMUSG00000039706|-|chr5:g.44699198:A>C

MSSTPHDPFYSSPFGPFYRRHTPYMVQPEYRIYEMNKRLQSRTESDNLWWDAFATEFFEDDATLTLSCLED  
GPKRYTSGRTLIPRYFSTVFEGGVTDLYYILKHSKESYHNSSIIVDCDQCAMVTQHKGPMFTKVCTEGRLILE  
FTFDDLMRIKTWHFTIRQYRELVPRSILAMHAQDPQVLDQLSKNITRMGLTNFTLNLYLRLCVILEPMQELMSR  
HKTYNLSRPDCLKTCLFQKWQRMVAPPAEPTRQPTTKRRKRKNSTSSSTSNSSAGNTTNSAGSKKTPAASLSL  
ATQGLGAI PNCSLNPGRDGLCHSTAVTPSGQFKEKH\*

>ENSMUSP00000143289\_c.238:T>G\_p.I80S ENSMUST00000199261.2|Ldb2-  
205|ENSMUSG00000039706|-|chr5:g.44699198:A>C

MSSTPHDPFYSSPFGPFYRRHTPYMVQPEYRIYEMNKRLQSRTESDNLWWDAFATEFFEDDATLTLSCLED  
GPKRYTSGRTLIPRYFSTVFEGGVTDLYYILKHSKESYHNSSIIVDCDQCAMVTQHKGPMFTKVCTEGRLILE  
FTFDDLMRIKTWHFTIRQYRELVPRSILAMHAQDPQVLDQLSKNITRMGLTNFTLNLYLRLCVILEPMQELMSR  
HKTYNLSRPDCLKTCLFQKWQRMVAPPAEPTRQPTTKRRKRKNSTSSSTSNSSAGNTTNSAGSKKTPAASLSL  
ATQDVMVVGEP TLMGGFEGDEDERLITRLENTQYDAANGMDDEEDFNNSPALGNNSPWNSKPPATQETKSENA  
PPQASQ\*

>rs230178563\_ENSMUSP00000133840\_c.1389:G>GA\_p.A464ins-fs  
ENSMUST00000173107.8|Slit2-208|ENSMUSG00000031558|+|chr5:g.48377374:G>GA  
MSGIGWQTLSSLGLVLSILNKVAPQACPAQCSCSGSTVDCHGLALRSVPRNIPRNTERLDLNGNITRITKI  
DFAGLRHLRVLQLMENRISTIERGAFQDLKELERLRLNRNNLQLFPELLFLGTAKLYRLDLSENQIQAI PRKA  
FRGAVDIKNLQLDYDYNQISCIEDGAFRALRDLEVLTLNNTNITRLSVASFNHMPKLRTRFLHSNNLYCDCHLAW  
LSDWLRQRPRVGLYTQCMGPHLRGHNVAEVQKREFVCSGHQSFMAPSCSVLHCPAACTCSNNIVDCRGKGLT  
EIPNLPETITEIRLEQNSIRVIPPAGAFSPYKLRRLDLSNNQISELAPDAFQGLRSLNSLVLYGNKITELPK  
SLFEGFLSLQLLLLNANKINCLRVDAFQDLHNLNLLSLYDNKLQTVAKGTF SALRAIQTMHLAQNPFCDCHL  
KWLADYLHTNPIETSGARCTSPRRLDKQKNWTDQKQEIPLFRYRRLSIKIKWRLLCRLGLS

>rs230178563\_ENSMUSP00000033967\_c.1389:G>GA\_p.A464ins-fs  
ENSMUST00000033967.15|Slit2-201|ENSMUSG00000031558|+|chr5:g.48377374:G>GA  
MSGIGWQTLSSLGLVLSILNKVAPQACPAQCSCSGSTVDCHGLALRSVPRNIPRNTERLDLNGNITRITKI  
DFAGLRHLRVLQLMENRISTIERGAFQDLKELERLRLNRNNLQLFPELLFLGTAKLYRLDLSENQIQAI PRKA  
FRGAVDIKNLQLDYDYNQISCIEDGAFRALRDLEVLTLNNTNITRLSVASFNHMPKLRTRFLHSNNLYCDCHLAW  
LSDWLRQRPRVGLYTQCMGPHLRGHNVAEVQKREFVCSGHQSFMAPSCSVLHCPAACTCSNNIVDCRGKGLT  
EIPNLPETITEIRLEQNSIRVIPPAGAFSPYKLRRLDLSNNQISELAPDAFQGLRSLNSLVLYGNKITELPK  
SLFEGFLSLQLLLLNANKINCLRVDAFQDLHNLNLLSLYDNKLQTVAKGTF SALRAIQTMHLAQNPFCDCHL  
KWLADYLHTNPIETSGARCTSPRRLDKQKNWTDQKQEIPLFRYRRLSIKIKWRLLCRLGLS

>rs230178563\_ENSMUSP00000133912\_c.1401:G>GA\_p.A468ins-fs  
ENSMUST00000174313.8|Slit2-216|ENSMUSG00000031558|+|chr5:g.48377374:G>GA  
MSGIGWQTLSSLGLVLSILNKVAPQACPAQCSCSGSTVDCHGLALRSVPRNIPRNTERLDLNGNITRITKI  
DFAGLRHLRVLQLMENRISTIERGAFQDLKELERLRLNRNNLQLFPELLFLGTAKLYRLDLSENQIQAI PRKA  
FRGAVDIKNLQLDYDYNQISCIEDGAFRALRDLEVLTLNNTNITRLSVASFNHMPKLRTRFLHSNNLYCDCHLAW  
LSDWLRQRPRVGLYTQCMGPHLRGHNVAEVQKREFVCSDEEGHQSFMAPSCSVLHCPAACTCSNNIVDCRG  
KGLTEIPNLPETITEIRLEQNSIRVIPPAGAFSPYKLRRLDLSNNQISELAPDAFQGLRSLNSLVLYGNKITE  
ELPKSLFEGFLSLQLELLLNANKINCLRVDAFQDLHNLNLLSLYDNKLQTVAKGTF SALRAIQTMHLAQNPFC  
DCHLKWADYLHTNPIETSGARCTSPRRLDKQKNWTDQKQEIPLFRYRRLSIKIKWRLLCRLGLS

>rs230178563\_ENSMUSP00000134263\_c.1401:G>GA\_p.A468ins-fs  
ENSMUST00000174421.8|Slit2-217|ENSMUSG00000031558|+|chr5:g.48377374:G>GA

MSGIGWQTLSSLGLVLSILNKVAPQACPAQCSCSGSTVDCHGLALRSVPRNIPRNTERLDLNGNNITRITKI  
DFAGLRHLRVLQLMENRISTIERGAFQDLKELERLRNRNNLQFLPELLFLGTAKLYRLDLSNQIQAI PRKA  
FRGAVDIKNLQLDYNQISCIEDGAFRALRDLEVLTLNNNNITRISVASFNHMPKLRTRFRLHSNNLYCDCHLAW  
LSDWLRQRPRVGLYTQCMGPSHLRGHNVAEVQKREFVCSDEEEGHQSFMAPSCSVLHCPAACTCSNNIVDCRG  
KGLTEIPTNLPETITEIRLEQNSIRVI PP GAFSPYKLRRLDLSNNQISELAPDAFQGLRSLNSLVLYGNKIT  
ELPKSLFEGFLSLQLLLLLNANKINCLRVDAFQDLHNLNLLSLYDNKLQTVAKGTF SALRAIQTMHLAQNPFFIC  
DCHLKLWADYLHTNPIETSGARCTSPRRLDKQKNWTDQKQEIPLFS  
>rs230178563\_ENSMUSP00000127615\_c.1401:G>GA\_p.A468ins-fs  
ENSMUST00000170109.9|Slit2-202|ENSMUSG00000031558|+|chr5:g.48377374:G>GA  
MSGIGWQTLSSLGLVLSILNKVAPQACPAQCSCSGSTVDCHGLALRSVPRNIPRNTERLDLNGNNITRITKI  
DFAGLRHLRVLQLMENRISTIERGAFQDLKELERLRNRNNLQFLPELLFLGTAKLYRLDLSNQIQAI PRKA  
FRGAVDIKNLQLDYNQISCIEDGAFRALRDLEVLTLNNNNITRISVASFNHMPKLRTRFRLHSNNLYCDCHLAW  
LSDWLRQRPRVGLYTQCMGPSHLRGHNVAEVQKREFVCSDEEEGHQSFMAPSCSVLHCPAACTCSNNIVDCRG  
KGLTEIPTNLPETITEIRLEQNSIRVI PP GAFSPYKLRRLDLSNNQISELAPDAFQGLRSLNSLVLYGNKIT  
ELPKSLFEGFLSLQLLLLLNANKINCLRVDAFQDLHNLNLLSLYDNKLQTVAKGTF SALRAIQTMHLAQNPFFIC  
DCHLKLWADYLHTNPIETSGARCTSPRRLDKQKNWTDQKQEIPLFS  
>ENSMUSP00000031121\_c.1506:C>A\_p.P503T ENSMUST00000031121.10|Gabra4-  
201|ENSMUSG00000029211|-|chr5:g.71729194:G>T  
MVSVQKVPAIALCSGVSLALLHFLCLAACLNESPGQNSKDEKLCPENFTRILDSLLDGYDNRLRPGFGGPVTE  
VKTDIYVTSFGPVSDEVEMEYTMDFFRQTWIDKRLKYDGP I EILRLNMMVTKVWTPDFFRNGKKS VSHNMT  
APNKLFRIMRNGTILYTMRLTISAECPMRLVDFPMDGHACPLKFGSYAYPKSEMIYTWTKGPEKSVEVPKES  
SLVQYDLIGQTVSSETIKSITGEYIVMTVYFHLRRKMGYFMIQTYIPCIMTVILSQVSWINKESVPARTVFG  
ITTVLTMTTSLISARHSLPKVSYATAMDWFI AVCF AFVFSALIEFAAVNYFTNIQMOKAKKKISKPPPEVPAA  
PVLKEKHTETSLQNTHANLNMRKRTNALVHSESDVKSRTVEVGNHSSKTSAVQESSEATPKAHLASSPNPFSRA  
NAAETMSAAARGLSSAASPSPHGTLRPAASLGASTRPAFGSLGRIKTTVNTTGAAGNVSATPPTPAPPPSGS  
GTSKIDKYARILFPVTFGAFNMVYVVVYLSKDTMEKSES LM\*  
>ENSMUSP00000143675\_c.1584:C>A\_p.P529T ENSMUST00000199357.2|Gabra4-  
205|ENSMUSG00000029211|-|chr5:g.71729194:G>T  
MVSVQKVPAIALCSGVSLALLHFLCLAACLNESPGQNSKDEKLCPENFTRILDSLLDGYDNRLRPGFGGTD  
KTCKCALSRLWSACL FVEILGPVTEVKTDIYVTSFGPVSDEVEMEYTMDFFRQTWIDKRLKYDGP I EILRLN  
NMMVTKVWTPDFFRNGKKS VSHNMTAPNKLFRIMRNGTILYTMRLTISAECPMRLVDFPMDGHACPLKFGSY  
AYPKSEMIYTWTKGPEKSVEVPKES SLVQYDLIGQTVSSETIKSITGEYIVMTVYFHLRRKMGYFMIQTYIP  
CIMTVILSQVSWINKESVPARTVFGITTVLTMTTSLISARHSLPKVSYATAMDWFI AVCF AFVFSALIEFAA  
VNYFTNIQMOKAKKKISKPPPEVPAA PVLKEKHTETSLQNTHANLNMRKRTNALVHSESDVKSRTVEVGNHSSK  
TSAVQESSEATPKAHLASSPNPFSRANAETMSAAARGLSSAASPSPHGTLRPAASLGASTRPAFGSLGRIK  
TTVNTTGAAGNVSATPPTPAPPPSGSGTSKIDKYARILFPVTFGAFNMVYVVVYLSKDTMEKSES LM\*  
>ENSMUSP00000079231\_c.804:A>G\_p.K269E ENSMUST00000080359.12|Rest-  
201|ENSMUSG00000029249|+|chr5:g.77416592:A>G  
MATQVMGQSSGGSLFNNSANMGMALTNMDYDLHELKSKAELAAPQLIMLANVALTGEASGCCDYLVGEERQM  
AELMPVGDNHFSESEGEGLSEADLKGLENMELGSLSELSAVEPQPVFEASAAPEIYSANKDPAPETPVAEDKC  
RSSKAKPFRCKPCQYEAEESEEFVHHIRIHS AKKFFVEESA EKQAKAWESGSSPAEEGEFSKGP I RCDRCGYN  
TNRVDHYMAHLKHHLRAGENERIYKCI ICTYTTVSEYHWRKHLRNHFPREVYTC SKCNYFS DRKNYVQHVRT  
HTGERPYKCELC PYSSSQKTHLTRHMRTHSGEKPFKCDQCNYVASNQHEVTRHARQVHNGPKPLNCPHCDYKT  
ADRSNFKKHVELHVNPRQFNCPVCDYAASKKCNLQYHFKSKHPTCPSKTM DVSKVKLKKTKKREADLLNNAVS  
NEKMENEQTKTKGDVSGKNEKPKAVGKDASKEKPGSSVSVVQVTRTRKSAVAEETKAAEVKHTDQGTGN  
NPEKPKAKKNRKKDAEAHPSEEPVNEGVPVTKKKKSECKSIGTNPVKGGRAEERPGVKKQSASLKKGTK  
KTPPKTKTSKKGKGLAPKGMGQTEPSSGALAQVGVSPDPALIQAEVTGSGSSQTELPSPMDIAKSEPAQMEVS  
LTGPPPVEPAQMEPSPAKPPQVEAPTYPPPPQRPAPPTGPAPPTGPAPPTGLAEMEPTPEPSQKE  
PPPSMEPPCPEELPQAEPMPMEDCQKELPSPVEPAQIEVAQTAPTQVQEEPPVSEPPRVKPTKRSSLRKDRA  
EKELSLLESEMARQEQLMGVGLVPRVDSKLLKGNKSAQDPPAPSPSPKGN SREETPKDQEMVSDGEGTIVFP  
LKKGGPEEAGESPAELAALKESARVSSSEQNSAMPEGGASHSKCQTGSSGLCDVDTEQKTDTPVMKDSAAEPV  
SPPTPTVDRDAGSPAVVASPPITLAENESQEI DEDEGIHSHDGS DLSDNMSEGSDDSGLHGARPTPEATSKN  
GKAGLAGKVTEGEFVCI FCDRSFRKEKDYSKHLNRHLVNVYFLEEAABEEQEEQEEREQEE\*  
>ENSMUSP00000109076\_c.804:A>G\_p.K269E ENSMUST00000113449.2|Rest-  
202|ENSMUSG00000029249|+|chr5:g.77416592:A>G  
MATQVMGQSSGGSLFNNSANMGMALTNMDYDLHELKSKAELAAPQLIMLANVALTGEASGCCDYLVGEERQM  
AELMPVGDNHFSESEGEGLSEADLKGLENMELGSLSELSAVEPQPVFEASAAPEIYSANKDPAPETPVAEDKC  
RSSKAKPFRCKPCQYEAEESEEFVHHIRIHS AKKFFVEESA EKQAKAWESGSSPAEEGEFSKGP I RCDRCGYN

TNRYDHYMAHLKHHLRAGENERIYKCI ICTYTTVSEYHWRKHLRNHFPREVYTC SKCNYFSDRKNYVQHVRT  
HTGERPYKCELCPYSSSQKTHLTRHMRTHS GEKPFKCDQCNYVASNQHEVTRHARQVHNGPKPLNCPHCDYKT  
ADRSNFKKHVELHVNPRQFNCPVCDYAASKKCNLQYHFKSKHPTCPSKTM DVSKVKLKKTKKREADLLNNAVS  
NEKMENEQTKTKGDVSGKNEKPKAVGKDASKEKKPGSSVSVVQVTRTRKSAVA AETKAAEVKHTDGQTGN  
NPEKPCAKKNKRKKDAEAHPSEEPVNEGVPVTKKKKSECKSKI GTNVPKGGGRAEERPGVKKQSASLKKGTK  
KTPPKTKTSKKGKGLAPKGMGQTEPSSGALAQVGVSPDPALIQAEVTGSGSSQTELPSPMDIAKSEPAQMEVS  
LTGPPPVEPAQMEPSPAKPPQVEAPTYPPPPQRPAPPTGPAPPTGPAPPTGPAPPTGLAEMEPSPTEPSQKE  
PPPSMEPPCPEELPQAEPMPMEDCQKELPSPVEPAQIEVAQTAPTQVQEEPPPVPSEPPRVKPTKRSSLRKDRA  
EKELSLLESEMARQEQLMGVGLVPVRDSKLLKGNKSAQDPPAPPSPPKGN SREETPKDQEMVSDGEGTIVFP  
LKKGGPEEAGESPAELAALKE SARVSSSEQNSAMPEGGASHSKCQTGSSGLCDVDTEQKTDTPVPMKDSAAEPV  
SPPTPTVDRDAGSPAVVASPPIITLAENESQEI DEDEGIHSHDGS DLSDNMSEGSDDSGLHGARPTPEATSKN  
GKAGLAGKVTGEFVCIFCDRSFRKEKDYSKHLNRHLVNVYFLEEAAEEQEEQEEEREEQE\*  
>ENSMUSP00000079231\_c.834:T>A\_p.F279I ENSMUST00000080359.12|Rest-  
201|ENSMUSG00000029249|+|chr5:g.77416622:T>A  
MATQVMGQSSGGSLFNNSANMGMALTN DMYDLHEL SKAELAAPQLIMLANVALTGEASGCCDYLVGEERQM  
AELMPVGDNH FSESEGEGL EESADLKGLENMELGSLELSAVEPQPVFEASAAPEIYSANKDPAPETPVAEDKC  
RSSKAKPFRCKPCQYEA ESEEQFVHHIRIHS AKKFFVEESA EKQAKAWESGSSPAEEGEF SKGPIRCDRCGYN  
TNRYDHYMAHLKHHLRAGENERIYKCI ICTYTTVSEYHWRKHLRNHFPRKVYTC SKCNYISDRKNYVQHVRT  
HTGERPYKCELCPYSSSQKTHLTRHMRTHS GEKPFKCDQCNYVASNQHEVTRHARQVHNGPKPLNCPHCDYKT  
ADRSNFKKHVELHVNPRQFNCPVCDYAASKKCNLQYHFKSKHPTCPSKTM DVSKVKLKKTKKREADLLNNAVS  
NEKMENEQTKTKGDVSGKNEKPKAVGKDASKEKKPGSSVSVVQVTRTRKSAVA AETKAAEVKHTDGQTGN  
NPEKPCAKKNKRKKDAEAHPSEEPVNEGVPVTKKKKSECKSKI GTNVPKGGGRAEERPGVKKQSASLKKGTK  
KTPPKTKTSKKGKGLAPKGMGQTEPSSGALAQVGVSPDPALIQAEVTGSGSSQTELPSPMDIAKSEPAQMEVS  
LTGPPPVEPAQMEPSPAKPPQVEAPTYPPPPQRPAPPTGPAPPTGPAPPTGPAPPTGLAEMEPSPTEPSQKE  
PPPSMEPPCPEELPQAEPMPMEDCQKELPSPVEPAQIEVAQTAPTQVQEEPPPVPSEPPRVKPTKRSSLRKDRA  
EKELSLLESEMARQEQLMGVGLVPVRDSKLLKGNKSAQDPPAPPSPPKGN SREETPKDQEMVSDGEGTIVFP  
LKKGGPEEAGESPAELAALKE SARVSSSEQNSAMPEGGASHSKCQTGSSGLCDVDTEQKTDTPVPMKDSAAEPV  
SPPTPTVDRDAGSPAVVASPPIITLAENESQEI DEDEGIHSHDGS DLSDNMSEGSDDSGLHGARPTPEATSKN  
GKAGLAGKVTGEFVCIFCDRSFRKEKDYSKHLNRHLVNVYFLEEAAEEQEEQEEEREEQE\*  
>ENSMUSP00000109076\_c.834:T>A\_p.F279I ENSMUST00000113449.2|Rest-  
202|ENSMUSG00000029249|+|chr5:g.77416622:T>A  
MATQVMGQSSGGSLFNNSANMGMALTN DMYDLHEL SKAELAAPQLIMLANVALTGEASGCCDYLVGEERQM  
AELMPVGDNH FSESEGEGL EESADLKGLENMELGSLELSAVEPQPVFEASAAPEIYSANKDPAPETPVAEDKC  
RSSKAKPFRCKPCQYEA ESEEQFVHHIRIHS AKKFFVEESA EKQAKAWESGSSPAEEGEF SKGPIRCDRCGYN  
TNRYDHYMAHLKHHLRAGENERIYKCI ICTYTTVSEYHWRKHLRNHFPRKVYTC SKCNYISDRKNYVQHVRT  
HTGERPYKCELCPYSSSQKTHLTRHMRTHS GEKPFKCDQCNYVASNQHEVTRHARQVHNGPKPLNCPHCDYKT  
ADRSNFKKHVELHVNPRQFNCPVCDYAASKKCNLQYHFKSKHPTCPSKTM DVSKVKLKKTKKREADLLNNAVS  
NEKMENEQTKTKGDVSGKNEKPKAVGKDASKEKKPGSSVSVVQVTRTRKSAVA AETKAAEVKHTDGQTGN  
NPEKPCAKKNKRKKDAEAHPSEEPVNEGVPVTKKKKSECKSKI GTNVPKGGGRAEERPGVKKQSASLKKGTK  
KTPPKTKTSKKGKGLAPKGMGQTEPSSGALAQVGVSPDPALIQAEVTGSGSSQTELPSPMDIAKSEPAQMEVS  
LTGPPPVEPAQMEPSPAKPPQVEAPTYPPPPQRPAPPTGPAPPTGPAPPTGPAPPTGLAEMEPSPTEPSQKE  
PPPSMEPPCPEELPQAEPMPMEDCQKELPSPVEPAQIEVAQTAPTQVQEEPPPVPSEPPRVKPTKRSSLRKDRA  
EKELSLLESEMARQEQLMGVGLVPVRDSKLLKGNKSAQDPPAPPSPPKGN SREETPKDQEMVSDGEGTIVFP  
LKKGGPEEAGESPAELAALKE SARVSSSEQNSAMPEGGASHSKCQTGSSGLCDVDTEQKTDTPVPMKDSAAEPV  
SPPTPTVDRDAGSPAVVASPPIITLAENESQEI DEDEGIHSHDGS DLSDNMSEGSDDSGLHGARPTPEATSKN  
GKAGLAGKVTGEFVCIFCDRSFRKEKDYSKHLNRHLVNVYFLEEAAEEQEEQEEEREEQE\*  
>ENSMUSP00000079231\_c.1713:G>T\_p.V572F ENSMUST00000080359.12|Rest-  
201|ENSMUSG00000029249|+|chr5:g.77429296:G>T  
MATQVMGQSSGGSLFNNSANMGMALTN DMYDLHEL SKAELAAPQLIMLANVALTGEASGCCDYLVGEERQM  
AELMPVGDNH FSESEGEGL EESADLKGLENMELGSLELSAVEPQPVFEASAAPEIYSANKDPAPETPVAEDKC  
RSSKAKPFRCKPCQYEA ESEEQFVHHIRIHS AKKFFVEESA EKQAKAWESGSSPAEEGEF SKGPIRCDRCGYN  
TNRYDHYMAHLKHHLRAGENERIYKCI ICTYTTVSEYHWRKHLRNHFPRKVYTC SKCNYFSDRKNYVQHVRT  
HTGERPYKCELCPYSSSQKTHLTRHMRTHS GEKPFKCDQCNYVASNQHEVTRHARQVHNGPKPLNCPHCDYKT  
ADRSNFKKHVELHVNPRQFNCPVCDYAASKKCNLQYHFKSKHPTCPSKTM DVSKVKLKKTKKREADLLNNAVS  
NEKMENEQTKTKGDVSGKNEKPKAVGKDASKEKKPGSSVSVVQVTRTRKSAVA AETKAAEVKHTDGQTGN  
NPEKPCAKKNKRKKDAEAHPSEEPVNEGVPVTKKKKSECKSKI GTNVPKGGGRAEERPGFVKQSASLKKGTK  
KTPPKTKTSKKGKGLAPKGMGQTEPSSGALAQVGVSPDPALIQAEVTGSGSSQTELPSPMDIAKSEPAQMEVS  
LTGPPPVEPAQMEPSPAKPPQVEAPTYPPPPQRPAPPTGPAPPTGPAPPTGPAPPTGLAEMEPSPTEPSQKE

PPPSMEPPCPEELPQAEPPPMEDCQKELPSPVEPAQIEVAQTAPTQVQEEPPPVSSEPPRVKPTKRSSLRKDRA  
EKELSLLESEMARQEQVLMGVGLVVRDSKLLKGNKSAQDPPAPPSPSPKGNREETPKDQEMVSDGEGTIVFP  
LKKGGPEEAGESPAELAALKE SARVSSSEQNSAMPEGGASHKQCQTGSSGLCDVDTEQKTDTPVPMKDSAAEPV  
SPPTPTVDRDAGSPAVVASPITLAENESQEIDEDEGIHSHDGS DLSDNMSEGSDDSGLHGARPTPEATSKN  
GKAGLAGKVTGEFVCIFCDRSFRKEKDYSKHLNRHLVNVYFLEEAEEQEEQEEREEQE\*

>ENSMUSP00000109076\_c.1713:G>T\_p.V572F ENSMUST00000113449.2|Rest-  
202|ENSMUSG00000029249|+|chr5:g.77429296:G>T

MATQVMGQSSGGSLFNNSANMGMALTNMDYDLHELKSKAELAAPQLIMLANVALTGEASGSCCDYLVEERQM  
AELMPVGDNHSESEGEGLLEESADLKGLNEMELGSLELSAVEPQPVFEASAAPEIYSANKDPAPETPVAEDKC  
RSSKAKPFRCKPCQYEAEESEEQFVHHIRIHSAKKFFVEESA EKQAKAWESGSSPAEEGEFSGKPIRCDCRGYN  
TNRYDHYMAHLKHHLRAGENERIYKCI ICTYTTVSEYHWRKHLRNHFPRKVYTC SKCNYSFDRKNYVQHVRT  
HTGERPYKCELCPYSSSQKTHLTRHMRTHSGEKPFKCDQCNYVASNQHEVTRHARQVHNGPKPLNCPHC DYKT  
ADRSNFKKHVELHVNPRQFNCPVCDYAASKKCNLQYHFKSKHPTCPSKTM DVSKVKLKKTKKREADLLNNAVS  
NEKMENEQTKTKGDVSGKKNEKPKAVGKDASKEKKPGSSSVVQVTRTRKSAVA AETKAAEVKHTDGQTGN  
NPEKPKAKKNKRKKDAEAHPSEEPVNEGVPVTKKKKSECKSIGTNPVKG GGRAEERPGFKQSASLKKGTK  
KTPPKTKTSKKGGK LAKPMGQTEPSSGALAQVGVSPDPALIQAEVTGSGSSQTELPSPMDIAKSEPAQMEVS  
LTGPPVPEPAQMEPSPAKPPQVEAPTYPQQPGRGAPPTGPAPPTEPAPPTGLAEMEPSPTEPSQKE  
PPPSMEPPCPEELPQAEPPPMEDCQKELPSPVEPAQIEVAQTAPTQVQEEPPPVSSEPPRVKPTKRSSLRKDRA  
EKELSLLESEMARQEQVLMGVGLVVRDSKLLKGNKSAQDPPAPPSPSPKGNREETPKDQEMVSDGEGTIVFP  
LKKGGPEEAGESPAELAALKE SARVSSSEQNSAMPEGGASHKQCQTGSSGLCDVDTEQKTDTPVPMKDSAAEPV  
SPPTPTVDRDAGSPAVVASPITLAENESQEIDEDEGIHSHDGS DLSDNMSEGSDDSGLHGARPTPEATSKN  
GKAGLAGKVTGEFVCIFCDRSFRKEKDYSKHLNRHLVNVYFLEEAEEQEEQEEREEQE\*

>ENSMUSP00000031181\_c.1518:G>A\_p.V507M ENSMUST00000031181.16|Ugt2b34-  
201|ENSMUSG00000029260|-|chr5:g.87039141:C>T

MPVKMTAALLLLLLLQLSGFFGSGTGKVLVWPMFESHWNLKTILDEL LKKGHEVMVLRPSASLSYEVDNTSA  
IEFETYPTSYSLSELEEI FWESLKKYIYELPKQSFWGYFLMLQEMVWVDSKYFESLCKDVVFNKELMTKLQKS  
RFDVILADPFIPCGDLLAEVLKIPLVYSLRFFPGSTYEKYSGGLPLPPSYVPVVMSELSDRMTFMERVRNVIY  
MLCFDFWFQTFNEKNWNQLYTEVLGRPTTLSETMAKADIWLIRTYWDLEFPHVPLPNFDFIGGLHCRPAKPLP  
KEIEDFVQSSGEHGVVVFSLGSMVGSITEERANVIAAGLAQIPQKVLWRFEGKPKETLGSNTRLYKWIPQNDL  
LGHSKTRAFITHGGTNGIYEAIYHGIPVVGIPLFGDQYDNIVHLKAKGAAVRLDFTMSSTDLHTALKTVTND  
PSYKENAMRLSRIHHDQPVKPLDRAVFWIEFVMRHKGAKHLRVA AHDLSWVQYHSLDVLGLLACVLTM MFIL  
KKCLFCCQKLTAKGRKKKGE\*

>ENSMUSP00000046636\_c.985:C>A\_p.P329Q ENSMUST00000049209.13|Gc-  
201|ENSMUSG00000035540|-|chr5:g.89586153:G>T

MKRVLVLLLALFGHALERGRDYEKDKVCNELAMLGKEDFRSLSLILYSRKFSSSTFEQVNQLVKEVVS LTEE  
CCAEGADPTCYDTRTSEL SVKSCESDAPFPVHPGTPECCTKEGLERKLCMAALSHQPQEFPTYVEPTNDEICE  
AFRRDPKGFADQFLYEYSSNYGQAPLPLLVAYTKNYLSMVGSCCTS ANPTVCFVKERLQMKHLSLLTTMSNRV  
CSQYAAYGKEKSRLSHLIKLAQKVPTANLNVLPLAEDFTEILSRCEESTSEDCMASELPEHTIKICQNL SKK  
NSKFEECCQENTPMNIFMCTYFMPAAEPLQLPAIKLQTKGDLGQSTTQAMDQYTFELSRRTQVPEVFLSKVL  
EPTLKTRECCDTQDSVACFSTQSPLLKRQLTSFIEKGQEMCADYSENTTFTEYKKKLAERLRKTPTNTSPAEL  
KDMVEKHSDFA SKCCSINSPPLYCSSQIDAEMIDTLQS\*

>ENSMUSP00000043764\_c.1034:T>G\_p.N345K ENSMUST00000049146.12|Ephx4-  
201|ENSMUSG00000033805|+|chr5:g.107577712:T>G

MAPRPRRLLPALRALLYWSLVGYCGLCASVHLLKLLWSIGRAPAQTFRRAARANPPACLNDPSLGHCHYVR  
IKDSGLRFHYVAAGERGKPLMLLLHGFPEFWYSWRHQLREFKSEYRVVALDLRGYGESDAPAHQESYKLDCLI  
ADIKDILDLSLGYSKCVLIGHDWGMIAWLI AVCYPEMIMKLI VINFPHPVSFTEYILRHQAQLFRSSFYFFQ  
IPRFPEFMFSINDFKALKHLFTSQSTGIGRKGRLTTEDLEAYVYVFSQPGALSGPINHYRNIFSCPLKHHM  
VTPTLLLWGEEDAFMEVEMA EVTKIYVKNYFRLTILSEGSHWLQDQDPDIVKGLIWAFLKEETRRD\*

>ENSMUSP00000107978\_c.430:C>T\_p.T144I ENSMUST00000112359.9|Hps4-  
202|ENSMUSG00000042328|+|chr5:g.112511458:C>T

MATTTTPPETKSAAWWNYFFLYDGSKVKGEGDPTRAGICYFYPQ TLLDQOELLCGQLAGVVRCLWDLSGT PPM  
LIRMRNLKFAIRADGDYLWALGCGVEISDASCRIQFLDQLIGFFHFYMGVSLAYKSHPQEELS LQWDTSIIQV  
LRSTSESHRIFINALWNLDRTKVEPLLLLKAALILQTCQRSHPVLGACILYKGLIVNSQYLLPSLTAKVLLHQTV  
PADQRLPHGAGAAPQETGAALPPDVQITSVFLSEEEVARSHEFVPEHETRLQGS SVQYPPWDQSSPTQAEDAWA  
SAAIPEPTPHDGACPSGSGADERLPRLEQECAGPTGLCTTACGQSGSLSSRLQKELCLSREELDSSEM HVSEA  
QEAFPLPALGDLETLHSSHSAPTLPEDTAICSLHPCPLERLPESGRGLQADLPLTNGQTQVPGTDPLPSS  
MPVALPPQHPVGVPEPSVEPYNGAQESHASALPRSSRSPD SPGSPSADRTGFKPSPSGRHAGLVPMNLYTHSV  
NGLVLSLLAEETLLSDTAAIEEVYHSSLASLNGLEVHLKETLPRDEASLTSSTYNFLHYDRIQSVLSANLPLV

TAPQDRRFLQAVNLMHSDFALLPMLYEMTIRNASTAVYACSSPAQETYFQQLAPTARSSGFPNPQDCAFSLAG  
KAKQKLLKHGVNLL\*

>ENSMUSP00000047920\_c.430:C>T\_p.T144I ENSMUST00000035279.4|Hps4-  
201|ENSMUSG00000042328|+|chr5:g.112511458:C>T  
MATTTTPPETKSAAWWNYFFLYDGSKVKGEGDPTRAGICYFYPPQTLLDQQEELLCGQLAGVVRCLWDLSTGTPPM  
LIRMRNLKFAIRADGDYLWALGCGVEISDASCRQFLDQLIGFFHFYMGFVSLAYKSHPQEELSLOQWDTSI IQV  
LRSTSESHRIFNALWNLDRTKVEPLLLLKAALILQTCQRSPhVLGACILYKGLIVNSQLLPSLTAKVLLHQTV  
PADQRLPGAGAAPQETGAALPPDVQITSVFLSEEEVASLHEFPVEHETRLQGSSVQYPPWDQSSPTQAEDAWA  
SAAIPEPTPHDGCPSGSGADERLPRLEQECAGPTGLCTTACGQGSGLSSRLQKELCLSREELDSSEMHVSEA  
QEAFPLPALGDLETLHSSHSAPTLPEDTAICSLHPCPLERLPESGRGLQADLPLTNGQTQVPGTDPLPSS  
MPVALPPQHPVGVPEPSVEPYNGAQESHASLPRSSRSPDPSGPPSPADRTGFKPSPSGRHAGLVPMNLYTHSV  
NGLVLSLLAEETLLSDTAAIEEVYHSSLASLNGLEVHLKETLPRDEASLTSSTYNFLHYDRIQSVLSANLPLV  
TAPQDRRFLQAVNLMHSDFALLPMLYEMTIRNASTAVYACSSPAQETYFQQLAPTARSSGFPNPQDCAFSLAG  
KAKQKLLKHGVNLL\*

>ENSMUSP00000031590\_c.2342:A>C\_p.K781N ENSMUST00000031590.12|Rbm19-  
201|ENSMUSG00000029594|+|chr5:g.120279677:A>C  
MSRLIVKNLPLNGMKEERFRQLFAAFGLTDCSLKFTKDGKFRKFGFIFGFKSEEEEAQALNHFHRSFIDTTRIT  
VEFCKSFGDPSKPAWSKHAQKSSQPKQPSQDSVPSDTKKDKKKKGPSDLEKLKEDAKFQEFLSIHQKRTQVA  
TWANDALEAKLPKAKTKASSDYLNFDSDNSDSGQSESEEPAREDPPEEQGLQPAAVQKELSDMDYLKSKMV  
RAEVSSSEDEDEDESEDAVNCEEGSEEEEEEGSPASPAKQGGVSRGAVPGVLRPQEAAGKVEKPVSQKEPTTP  
YTVKLRGAPFNVTEKNVIEFLAPLKPVAIRIVRNAHGKNTGYVFDLSSEEEVKKALKCNRDYMGGRYIEVFR  
EKQAPTARGPPKSTTPWQGRTLGENEEEEEDLADSGRLFVRNLSYTSSEEDLEKLFSAYGPLSELHYPIDSLTK  
KPKGFVAVTTFMFPEHAVKAYAEVDGQVFGQGRMLHVLVLPSTIKKEASQEANAPGSSYKKKKEAMDKANSSSSHNV  
NTLFMGPNAVADAIQAQYNATKSQVFDHETRGSVAVRVALGETQLVQEVRSFLIDNGVCLDSFSQAAAERSKT  
VILAKNLPAGTLAAEIQETFSRFGSLGRVLLPEGGITAI VEFLEPLEARKAFRHLAYSKFHHVPLYLEWAPIG  
VFGAAPQKKDSQHEQPAEKAEVEQETVLDPEGEKASVEGAEASTGKMEEEEEEEEEEEEEESIPGCTLFIKNLN  
FSTTEETLKGVSFKVGAIKSCTISKKKNKAGVLLSMGFGFVEYKKPEQAQNALKQLQGHTVVDGHKLEVRISER  
ATKPALSTRRKQVPPKQTTSKILVRNIPFQANQREIRELFSSTFGELKTVRLPKKMTGTGAHRGFGFVDFITK  
QDAKAFNALCHSTHLYGRRLVLEWADSEVTVQTLRRKTARHFQEPKPKKRSVLDGILEQLEDEDNDSGEQA  
LQL\*

>ENSMUSP00000144339\_c.2342:A>C\_p.K781N ENSMUST00000202777.2|Rbm19-  
209|ENSMUSG00000029594|+|chr5:g.120279677:A>C  
MSRLIVKNLPLNGMKEERFRQLFAAFGLTDCSLKFTKDGKFRKFGFIFGFKSEEEEAQALNHFHRSFIDTTRIT  
VEFCKSFGDPSKPAWSKHAQKSSQPKQPSQDSVPSDTKKDKKKKGPSDLEKLKEDAKFQEFLSIHQKRTQVA  
TWANDALEAKLPKAKTKASSDYLNFDSDNSDSGQSESEEPAREDPPEEQGLQPAAVQKELSDMDYLKSKMV  
RAEVSSSEDEDEDESEDAVNCEEGSEEEEEEGSPASPAKQGGVSRGAVPGVLRPQEAAGKVEKPVSQKEPTTP  
YTVKLRGAPFNVTEKNVIEFLAPLKPVAIRIVRNAHGKNTGYVFDLSSEEEVKKALKCNRDYMGGRYIEVFR  
EKQAPTARGPPKSTTPWQGRTLGENEEEEEDLADSGRLFVRNLSYTSSEEDLEKLFSAYGPLSELHYPIDSLTK  
KPKGFVAVTTFMFPEHAVKAYAEVDGQVFGQGRMLHVLVLPSTIKKEASQEANAPGSSYKKKKEAMDKANSSSSHNV  
NTLFMGPNAVADAIQAQYNATKSQVFDHETRGSVAVRVALGETQLVQEVRSFLIDNGVCLDSFSQAAAERSKT  
VILAKNLPAGTLAAEIQETFSRFGSLGRVLLPEGGITAI VEFLEPLEARKAFRHLAYSKFHHVPLYLEWAPIG  
VFGAAPQKKDSQHEQPAEKAEVEQETVLDPEGEKASVEGAEASTGKMEEEEEEEEEEEEEESIPGCTLFIKNLN  
FSTTEETLKGVSFKVGAIKSCTISKKKNKAGVLLSMGFGFVEYKKPEQAQNALKQLQGHTVVDGHKLEVRISER  
ATKPALSTRRKQVPPKQTTSKILVRNIPFQANQREIRELFSSTFGELKTVRLPKKMTGTESLQCAVS\*

>ENSMUSP00000042188\_c.2354:T>G\_p.H785Q ENSMUST00000046426.10|Tpcn1-  
201|ENSMUSG00000032741|-|chr5:g.120674272:A>C  
MAVSLDDDDVPLILTLDEAESAPLPPSNSLQGEQLPSKNGGSHSIHNSQVPSLVSGADSPSSPTGHNWEMNYQ  
EAAIYLOEQGNNDKFFTHPKDARALAAFLVHNHFYMMELLTALLLLLLSLCESPAVPVCLKLHTYVHATLEL  
FALMVVVFELCMKLRWLGFTFVRHKRTMVKTSVLVQVIEAIVVLRQTSVHRVTRALRCIFLVDCRYCGGV  
RRNLRFQIFQSLPPFMDILLLLLFFMIIFAILGFYLFSTNPSDPYFSTLENSIVNLFVLLTTANFPDVMMPYS  
RNPWSCVFFIVYLSIELYFIMNLLLAVVFDTFNDIEKHKFKSLLLHKRTAIQHAYGLLASQRRPAGISYRQFE  
GLMRFYKPRMSARERFLTFAKALNQSNTPLLSLKDFYDIYEVAALQWKAKRNRQHWDFELPRTAFLIFKGINIL  
VNSKAFQYFMYLVVAVNGVWILVETFMKGGNFTSKHVPYSLVFLTYIGVELFMKVAGLGPVEYLSGWNLF  
DFSVTAFALGLLALTLNMEPFYFIVVLRPLQLLRLFLKLRKRYRNVLDTMFELLPRMASLGLTLLTFYYSFAI  
VGMEFFNGRLTLLNCNTSTVADAYRFINHTVGNKTKVEEGYYLNNFDNILNSFVTLFELTVVNNWYIIMEGV  
TSQTSHWSRLYFMTFYIVTMVMTIIVAFILEAFVFRMNYSRKSQDSEVDSGIVIEKEMSKEELMAVLELYRE  
ERGTSSDVTRLLDTLQMEKYQQNSMVFLGRRSRTKSDLSLKMYYQEEIQEWYEEQAREQEQQLRGSVPGPAA  
QQPPGSRQRSQTVT\*





DVTTTAEVTTTAEVTTTAEATTTADLNTTPEITTTDDVTTTGDVVTITAEVTTTAYVTTTTDFTTTAEVNTTDD  
VTTIADLTTTAEVTTTNDVTTSTAEITTTADLTTTTEVTTTADFITTGDVTTTADVTTMADVTTTADVTTADLT  
TTVDVTTMDDVTTTAEVITSGDVTTTSEVTTTNSLNTTPEITTTIDFTSTVDVTTTGDVTTTADVTTSDVTT  
TSKVTTTGDVTTTADTTSTADVTTTADVITTAEVTTTADFNTGDVTTTADVTTTADLTTMPDLTTAEVTTT  
ADVTTTSEFTTTADVTTTADVTTSTADVTTTAEVTTTGDVTTTADVNTGDIITIGDVTTTTTEITTTAYLTTTL  
EITTTGEVTTSTADVTTSAEVTTTDEITTTDVVTTTGDVTPTAESTTTDDVTTTSDVTTTGDFTTTADVTTTAY  
VTTTADVTTTVEVTTTADFTTTGVVNTTADVTTTADVTTTSEVTTTADLTTTPEITTTVDFTSTADVTTTADV  
ITTEVTTTSDVTTTAEVITTTADVTTTADVTTTVEVTTTGDVVTITADVTTTPEITTTVDFTSTADVTTTADV  
TTADVTTTSDVTTITPDVTTTAEVTTTVEITTTDDVATTGEVTTTADVTTTSDVTTTSEETTTADITTTSDVST  
TSEVTTTAYVTTTADTTSTAEVTTTADVTTTADVTTTADVTTTADVTTTVEVTTTGDVTTTADVTTTAEVTTT  
AEITTTGDVTTTADVTTTAEVTTTAEITTTGDVTTTADVTTTADVTTTADVTTTIDVTTTADVTTTSAEVTTTA  
DVTTTTEVTTTTEVATTPEPTTTPAPTAVNCMNGGFWTGDKCICPNGFGGDRCCENIVNVVNCENGGTWDGL  
KCQCTSLFYGPRCEELVESVEIEPTVAASVEVSVTVTSQEYSEKLQDRKSEEFNSFNKFTFKQMALIYAGIPE  
YEGVLIKNSKSGSIVVDYDVIKAKYTPGFENTLDTVVKNLETKIKNATEVQVQDVNNNSALLCFNSTATKV  
QNSATVSVNPEETCKKEAGEDFAKVFVTLGQKGDWFCITPCSAGYSTSKNCSYGKQCQLQRSGPQCCLITDTH  
WYSGENCWDWGIQKSLVYGLGGAGVAVLLVILVILLVFSIRFRKDAQRRSRVSEMYKWGEEEGRASPGTFHNF  
GFDHNEERENYMPPLDSVYNTFQPSLNHINPERKIQIQRPQVVMVMTSL\*

>ENSMUSP00000045196\_c.10645:A>T.D3549V ENSMUST00000041226.11|Muc3-  
201|ENSMUSG00000037390|-|chr5:g.137179694:T>A

MSTRRWVRQTAALCLLAFILHSLPRHIAAENGTTESGSVWDGGGNSQDDSQETQFRTVLKTKTTDGENSEAW  
PRQEQQRSSSPSTTKAEVTTTADVTTTADVTTTAEITTTSDVTTTAEITNTDDVTTTGEVTTTADVTTTSDV  
PTTSEVTTSTDDVITTAEVTTTAEVTTTAEVTTTAEVTTTAEVTTTAEVTTTAEVTTTAEVTTTAEVTTTAEV  
TTADGTTADLTTTAKVTTTDDVTTTGEITTTSEITTTSDVTTTAEITTTDITVTTTGEVTTTADVTTTSDVTT  
TSEETPTADITTTADLTTTAEVTTTDDVTTTVEITTTSEITTTSDVTTTAEITTTDITVTTTGEVTTTADVTTT  
SDVTTTSEETTTADITTTADLTTTAEVTTTDDVTTTVEITTTSEITTTSDVTTTAEITTTDITVTTTGEVTTTADVTTT  
DVTTTSEETTTADITTTADLTTTAEVTTTDDVTTTVEITTTSEITTTSDVTTTAEITTTDITVTTTGEVTTTADVTTT  
ITTTDDITSTADVTTTADVTTTSDVPTTSEETTTADVTTTSDVTTTAEITTTDDITSTADVTTTADVTTTSDV  
TTTTENPTADITTTADLTTTAEVTTTDDVTTTVEITTTSEITTTSDVTTTAEITTTDITVTTTDEDTTADVTT  
TTSVTTTSEETPTADITTTADLTTTADVTTTSDVTTTSEETTTADVTTTSDVTTTAEITTTDDITSTADVTT  
TTNVTTTSDVPTTSEVTTSTDDVITTEVTTTAEIIPDDVTTTSEVTTTGDVTTTGDVTTMTGDLTTTADVTTT  
ADLTTTDEVTTTADGTTADLTTTAEVTTTDDVTTTVQITTTSEITTTSDVTTTAEITTTDNVTTTGEVTTTA  
DVTTTSDVTTTSEETPTADITTTADLNTTAEVTTTDEVTTTVEITTTSEITTTSDITTTAEITTTDITVTTTGE  
VTTTADVTTTNDVTTTSEETPTADITTTADLTTTAEITTTDDITSTADVTTTADVTTTSDVPTTSEVTTSTDDV  
ITTEVTTTAEIIPDDVTTTSEVTTTGDVTTTGDVTTMTGDLTTTADVTTTADLTTTDEVTTTADGTTADLTT  
TAEVTTTDDVTTTVQITTTSEITTTSDVTTTAEITTTDNVTTTGEVTTTADVTTTSDVTTTSEETPTADITTT  
TADLTTTAEVTTTDEVTTTVEITTTSEITTTSDITTTAEITTTDITVTTTGEVTTTADVTTTNDVTTTSEETPT  
ADITTTADLTTTAEITTTDDVTTTGEVTTTADVTTTSDVTTTSEETPTADITTTADLTTTAEITTTDDVTTTGE  
EVTTTADVTTTSDITTTSEETPTADITTTADLTTTAEVTTTDDVTTTGEVTTTADVTTTSDITTTSEETPTAD  
ITTTADLTTTAEVTTTDDVTTTVEITTTSEITTTSDVTTTAEITTTDITVTTTGEVTTTADVTTTSDVTTTSEQ  
TPTADITTTADLTTTAEVTTTDDVTTTVEITTTSEITTTSDVTTTAEITTTDITVTTTGEVTTTADITTTSDVTT  
TTSEETTTADVTTTDDVTTTSEETTTGDGKTTTAEITTTDDITTTADVTTTADVTTTAAVTTTGEITPTDDVTT  
TTSEVTTTGDVTTSTGDVTTTGEVTTTAEVTTTADVTTTSDVTTTSEETPTADITTTADLTTTAEVTTTDDVTT  
TGEVTTTADVTTTSDITTTSEETPTADITTTVDLTTTAEVTTTDDVTTTVEITTTSEITTTSDVTTTAEITTS  
DIFTTTGEVTTTADITTTSDVTTTSEETPTADITTTADLTTTAEITTTDDVTTTVEITTTSEITTTSEVTTTTP  
DVTTTSDVTTTSEETPTADITTTADLTTTAEVTTTDDVTTTVEITTTSEITTTSDVTTTAEITTTDITVTTTGE  
VTTTVDVTTTNDVTTTSEETPTADITTTADLTTTAEVTTTDDVTTTGEVTTTADVTTTSDITTTSEETPTADI  
TTTVDLTTTVEITTTSEITTTSDVTTTAEITTTDITVTTTGEVTTTADVTTTSDVTTTSEETPTADITTTADLT  
TTAEVTTTDDVTTTVEITTTSEITTTSDVTTTAEITTTDITVTTTGEVTTTADVTTTSDVTTTSEETTTADVTT  
TTDVTTTSEETTTGDGTTTTAEITTTDDLTTTADVTTTADVTTTAAVTTTAEITPTDDVTTTSEVTTTGDVTT  
TGEVTTTAEVTTTDDVTTTGDVTTTGDVTTMADVTTTADFNTTDDVTTTADASTTADLTTAEVTTTDDVTTT  
VEITTTAEITTTAEVTTTDDVTTTGEVTTTADVTTTADVTTTSEVTTTADVTTTNDVTTTAEITTTDDITTTA  
DVTTTADVTTTSYVPTTSEVTTSTDDVTTTAEVTTTAEIIPDDVTTTSEVTTTGDVTTTGDVTTMCDLTTSDA  
VTTTADFNTTDDVTTTKADGTTADLTTTAEVTTTNDVTTTGEVTTTAEITTTSDVTTTAEITTTDITVTTTGEV  
TTTADVTTTSDVTTTSEETTTADITTTADLTTTAEVTTTDDVTTTVEITTTSEITTTSDVTTTAEITTTDITVTT  
TTGEVTTTADVTTTNDVTTTSEETPTADITTTADLTTTAEVTTTDDVTTTGEVTTTADVTTTSDVTTTSEETP  
TADITTTADLTTTAEVTTTDDVTTTVEITTTSEITTTSDVTTTAEITTTDITVTTTGEVTTTADITTTSDVTTT  
SEETTTADVTTTDDVTTTSEETTTGDGKTTTAEITTTDDITTTADVTTTADVTTTAAVTTTGEITPTDDVTTT  
SEVTTTGDVTTTGDVTTTGEVTTTAEVTTTDDVTTTGDVTTTGDVTTMCDLTTTADVTTTAYFTTTDDVTTTADGTTA

DLTTAEVTTTDDVTTTVEITTTAEITTTDDVTTTGEVTTTADVTTTSDVTTTSEETPTADITTTADLTTTAE  
VTTTDDVTTTVEITTTSEITTTSDVTTTAEITTTDIVTTTGEVTTTADVTTTSDVTTTSEETPTADITTTADL  
TTTAEVTTTDDVTTTVEITTTSEITTTSDVTTTAEITTTDIVTTTGEVTTTADVTTTSDVTTTSEETPTADIT  
TTADLTTTAEVTTTDDVTTTVEITTTAEITTTDDVTTTGEVTTTADVTTTAEVITTTSDVTTTADVTTMPDFTT  
TAEVTTTLDVTTNDEVTTTTSVVTTPETITTAGDVTTTSEVTTTADLTTTPEITTTGDVTTTADVTTADITTT  
SDVTTTADVTTTADITTTSDVTTTADVTTIADLSTTPEITTTGDFSSTTDDVTSTGDVTTTADVTTTADVTTT  
DVTTTAEVTTTAEVTTTAEATTTADLNTTPEITTTDDVTTTGDVTTTAEVTTTAYVTTTDFTTTAEVNTTDD  
VTTIADLTTTAEVTTTNDVTTSTAEITTTADLTTTTEVTTTADFITTGDVTTTADVTTTADVTTTADVTTADLT  
TTVDVTTMDDVTTTAEVITSGDVTTTSEVTTTSTNLNTTPEITTTIDFTSTVDVTTTGDVTTTADVTTTSDVTT  
TSKVTTTGDVTTTADTTSTADVTTTADVITTAEVTTTADFNTTGVVTTTADVTTTADLTTMPDLTTTAEVTTT  
ADVTTTSEFTTTADVTTTADVTTSTADVTTTAEVTTTGDVTTTADVTTTGDITTTIGDVTTTTEITTTAYLTTTL  
EITTTGEVTTSTADVTTTAEVTTTDEITTTDVTTTGDVTPTAESTTTDDVTTTSDVTTTGDFTTTADVTTTAY  
VTTTDPVTTTVEVTTTADFNTTGVVNTTADVTTTADVTTTSEVTTTADLTTTPEITTTVDFTSTADVTTTADV  
ITTEVTTTSDVTTTAEVITTTADVTTTADVTTTVEVTTTGDVTTTADVTTTPEITTTVDFTSTADVTTTADV  
TTADVTTTSDVTTTADVTTTAEVTTTVEITTTDDVTTTGEVTTTADVTTTSDVTTTSEETTTADITTTSDVST  
TSEVTTTAYVTTTADTTSTAEVTTTADVTTTADVTTTADVTTTADVTTTVEVTTTGDVTTTADVTTTAEVTTT  
AEITTTGDVTTTADVTTTAEVTTTAEITTTGDVTTTADVTTTADVTTTADVTTTADVTTTADVTTTADVTTT  
DVTTTTEVTTTTEVATTPEPTTTPAPTAVNCMNGGFWTGDKICPNGFGGDRNCENIVNVNCGNGGTWDGL  
KCQCTSLFYGPRCEELVESVEIEPTVAASVEVSVTVTSQEYSEKLQDRKSEEFNSFNKFTTKQMALIYAGIPE  
YEGVVIKNSKGSIVVDYDVIKAKYTPGFENTLDTVVKNLETKIKNATEVQVQDVNNNCSALLCFNSTATKV  
QNSATVSVNPEETCKKEAGEDFAKFTVLTGQKGDWFCITPCSAGYSTSKNCSYGKCLQSRGQPCLCLITDTH  
WYSGENCWDWGIQKSLVYGLGGAGVAVLLVILLVLSIRFRKDAQRQSRVSEMYKKGEEEGRASPGTFHNF  
GFDHNEERENYMLDSVYNTFQPSLNHINPERKIQIQRPQVVMVMTSL\*  
>ENSMUSP00000045196\_c.10258:C>G\_p.T3420S ENSMUST00000041226.11|Muc3-  
201|ENSMUSG00000037390|-|chr5:g.137180081:G>C  
MSTRRWVRQSTAALCLLAFILHSLPRHIAAENGTTESGSVWDGGGNSQTQDSQETQFRTVLKTKTTDGENSEAW  
PRQEYQQRSSSPSTTTAEVTTTADVTTTADVTTTAEITTTSDVTTTAEITNTDDVTTTGEVTTTADVTTTSDV  
PTTSEVTTSTDDVITTAEVTTTAEVTTTDDVTTTSEVTTTGDVTTTGDVTTTGDVTTTGDVTTTGDVTTTGDV  
TTADGSTTADLTTTAKVTTTDDVTTTGEITTTSEITTTSDVTTTAEITTTDIVTTTGEVTTTADVTTTSDVTT  
TSEETPTADITTTADLTTTAEVTTTDDVTTTVEITTTSEITTTSDVTTTAEITTTDIVTTTGEVTTTADVTTT  
SDVTTTSEETTTADITTTADLTTTAEITTTDDVTTTVEITTTSDVTTTTEITTTDIVTTTGEVTTTADVTTAS  
DVTTTSEETPTADITTTADLTTTAEVTTTDDVTTTGEVTTTADVTTTSDVTTTSEETTTADVTTTSDVTTTAE  
ITTTDDITSTADVTTTADVTTTSDVPTTSEETTTADVTTTSDVTTTAEITTTDDITSTADVTTTADVTTTSDV  
TTTTEENPTADITTTADLTTTAEVTTTDDVTTTVEITTTSEITTTSDVTTTAEITTTDIVTTTDEDTTADVTT  
TTSADVTTTSEETPTADITTTADLTTTADVTTTSDVTTTSEETTTADVTTTSDVTTTAEITTTDDITSTADVTT  
TTNVTTTSDVPTTSEVTTSTDDVITTEVTTTAEIIPDDVTTTSEVTTTGDVTTTGDVTTTGDVTTTGDVTTT  
ADLTTTDEVTTTADGSTTADLTTTAEVTTTDDVTTTVEITTTSEITTTSDVTTTAEITTTDNVTTTGEVTTTA  
DVTTTSDVTTTSEETPTADITTTADLNTTAEVTTTDEVTTTVEITTTSEITTTSDITTTAEITTTDIVTTTGE  
VTTTADVTTTNDVTTTSEETPTADITTTADLTTTAEITTTDDITSTADVTTTDDVTTTSDVPTTSEVTTSTDDV  
ITTEVTTTAEIIPDDVTTTSEVTTTGDVTTTGDVTTTGDVTTTGDVTTTGDVTTTGDVTTTGDVTTTGDVTT  
TTAEVTTTDDVTTTVEITTTSEITTTSDVTTTAEITTTDNVTTTGEVTTTADVTTTSDVTTTSEETPTADIT  
TADLTTTAEVTTTDEVTTTVEITTTSEITTTSDITTTAEITTTDIVTTTGEVTTTADVTTTNDVTTTSEETPT  
ADITTTADLTTTAEITTTDDVTTTGEVTTTADVTTTSDVTTTSEETPTADITTTADLTTTAEITTTDDVTTT  
EVTTTADVTTTSDITTTSEETPTADITTTADLTTTAEVTTTDDVTTTGEVTTTADVTTTSDITTTSEETPTAD  
ITTTADLTTTAEVTTTDDVTTTVEITTTSEITTTSDVTTTAEITTTDIVTTTGEVTTTADVTTTSDVTTTSE  
TPTADITTTADLTTTAEVTTTDDVTTTVEITTTSEITTTSDVTTTAEITTTDIVTTTGEVTTTADITTTSDV  
TTSEETTTADVTTTDDVTTTSEETTTGDGKTTTAEITTTDDITTTADVTTTDPVTTTAAVTTTGEITPTDDV  
TTSEVTTTGDVTTSTGDVTTTGEVTTTAEVTTTADVTTTSDVTTTSEETPTADITTTADLTTTAEVTTTDDV  
TGEVTTTADVTTTSDITTTSEETPTADITTTVDLTTTAEVTTTDDVTTTVEITTTSEITTTSDVTTTAEITTS  
DIFTTTGEVTTTADITTTSDVTTTSEETPTADITTTADLTTTAEITTTDDVTTTVEITTTSEITTTSEVTTTP  
DVTTTSDVTTTSEETPTADITTTADLTTTAEVTTTDDVTTTVEITTTSEITTTSDVTTTAEITTTDIVTTTGE  
VTTTVDVTTTNDVTTTSEETPTADITTTADLTTTAEVTTTDDVTTTGEVTTTADVTTTSDITTTSEETPTADI  
TTTVDLTTTVEITTTSEITTTSDVTTTAEITTTDIVTTTGEVTTTADVTTTSDVTTTSEETPTADITTTADL  
TTAEVTTTDDVTTTVEITTTSEITTTSDVTTTAEITTTDIVTTTGEVTTTADVTTTSDVTTTSEETPTADIT  
TTADVTTTDDVTTTVEITTTSEITTTSDVTTTAEITTTDIVTTTGEVTTTADVTTTSDVTTTSEVTTTGDVTT  
TGEVTTTAEVTTTDDVTTTGDVTTTGDVTTTGDVTTTGDVTTTGDVTTTGDVTTTGDVTTTGDVTTTGDVTT  
VEITTTAEITTTAEVTTTDDVTTTGEVTTTADVTTTDDVTTTSEVTTTADVTTTNDVTTTAEITTTDDITTTA  
DVTTTADVTTTTSYVPTTSEVTTSTDDVTTTAEVTTTAEIIPDDVTTTSEVTTTGDVTTTGDVTTTGDVTT

VTTTADFTTTDDVTTKADGSTTADLTTTAEVTTNDDVTTTGELTTTAEITTTSDVTTTAEITTTDIVTTTGEV  
TTTADVTTTSDVTTTSEETTTADITTTADLTTTAEVTTTDDVTTTVEITTTSEITTTSDVTTTAEITTTDIVT  
TTGEVTTTADVTTTNDVTTTSEETPTADITTTADLTTTAEVTTTDDVTTTGEVTTTADVTTTSDVTTTSEETP  
TADITTTADLTTTAEVTTTDDVTTTVEITTTSEITTTSDVTTTAEITTTDIVTTTGEVTTTADITTTSDVTTT  
SEETTTADVTTTDDVTTTSEETTTGDGKTTTAEITTTDDITTTADVTTTPDVTTTAAVTTTGEITPTDDVTTT  
SEVTTTGDVTTTGDVTTTGEVTTTAEVTTTDDVTTTGDVTTTGDLLTTADVTTTAYFTTTDDVTTTADGSTTA  
DLTTTAEVTTTDDVTTTVEITTTAEITTTDDVTTTGEVTTTADVTTTSDVTTTSEETPTADITTTADLTTTAE  
VTTTDDVTTTVEITTTSEITTTSDVTTTAEITTTDIVTTTGEVTTTADVTTTSDVTTTSEETPTADITTTADL  
TTTAEVTTTDDVTTTVEITTTSEITTTSDVTTTAEITTTDIVTTTGEVTTTADVTTTSDVTTTSEETPTADIT  
TTADLTTTAEVTTTDDVTTTVEITTTAEITTTDDVTTTGEVTTTADVTTTAEVITTTSDVTTTADVTTMPDFTT  
TAEVTTTLDVTTNDEVTTTSSVTTTPEITTAGDVTTTSEVTTTADLTTTPEITTTGDVTTTADVTTTADITTT  
SDVTTTADVTTTADITTTSDVTTTADVTTIADLSTTPEITTTGDFSSTTDVTTSTGDVTTTADVTTTADVTTTGD  
DVTTTAEVTTTAEVTTTAEATTTADLNTTPEITTTDDVTTTGDVTTTAEVTTTAYVTTTDFTTTAEVNTTDD  
VTTIADLTTTAEVTTTNDVTTSTAEITTTADLTTTTEVTTTADFTTTGDVTTTADVTTMADVSTTADVTTADLT  
TTVDVTTMDDVTTTAEVITSGDVTTTSEVTTTNSLNTTPEITTTIDFTSTVDVTTTGDVTTTADVTTTSDVTT  
TSKVTTTGDVTTTADTTSTADVTTTADVITTAEVTTTADFNTGDVTTTADVTTTADLTTMPDLTTTAEVTTT  
ADVTTTSEFTTTADVTTTADVTTSTADVTTTAEVTTTGDVTTTADVTTTADVNTGDIITTIIGDVTTTTEITTTAYLTTTL  
EITTTGEVTTSTADVTTTAEVTTTDEITTTDVTTGGDVTTTAEVTTTADVTTTADVTTTSDVTTTGDFTTTADVTTTAY  
VTTTTPDVTTTVEVTTTADFTTTGVVNTTADVTTTADVTTTSEVTTTADLTTTPEITTTVDFTSTADVTTTADV  
ITTEVTTTSDVTTTAEVITTTADVTTTADVTTTVEVTTTGDVTTTADVTTTPEITTTVDFTSTADVTTTADVTT  
TTADVTTTSDVTTIPDVTTTAEVTTTVEITTTDDVTTTGEVTTTADVTTTSDVTTTSEETTTADITTTSDVST  
TSEVTTTAYVTTTADTTSTAEVTTTADVTTTADVTTTADVTTTADVTTTVEVTTTGDVTTTADVTTTAEVTTT  
AEITTTGDVTTTADVTTTAEVTTTAEITTTGDVTTTADVTTTADVTTTADVTTTIDVTTTADVTTTAEVTTTA  
DVTTTTEVTTTTEVATTPEPTTTPAPTAVNCMNGGFWTGDKCICPNFGGDRCCENIVNVNCENGGTWDGL  
KCQCTSLFYGRCEELVESVEIEPTVAASVEVSVTVTSQEYSEKLQDRKSEEFNSFNKFTTKQMALIYAGIPE  
YEGV I IKNLSKGSIVVDYDVI LKAKYTPGFENTLDTVVKNLKTKIKNATEVQVQDVNNNSALLCFNSTATKV  
QNSATVSVNPEETCKEAGEDFAKEFVTLGQKGDKWFICIPCSAGYSTSKNCSYGKCLQRSGPQCLCLITDTH  
WYSGENCWDWGIQKSLVYGLGGAGVAVLLVILVILLVFSIRFRKDAQRQRSRVSEMYKWGEEEGRASPGTFHNF  
GFDHNEERENYMLDSVYNTFQPSLNHINPERKIQIQRPVVMTSL\*

>ENSMUSP00000045196\_c.10093:T>C\_p.L3365P ENSMUST00000041226.11|Muc3-  
201|ENSMUSG00000037390|-|chr5:g.137180246:A>G

MSTRRWVRQTAALCLLAFILHSLPRHIAAENGTTESGSVWDGGGNSTQDDSQETQFRTVLKTKTTDGENSEAW  
PRQEYQQRSSSPSTTKAEVTTTADVTTTADVTTTAEITTTSDVTTTAEITNTDDVTTTGEVTTTADVTTTSDV  
PTTSEVTTSTDDVITTAEVTTTAEVTTTAEVTTTAEVTTTAEVTTTAEVTTTAEVTTTAEVTTTAEVTTTAEV  
TTADGSTTADLTTAKVTTTDDVTTTGEITTTSEITTTSDVTTTAEITTTDIVTTTGEVTTTADVTTTSDVTT  
TSEETPTADITTTADLTTTAEVTTTDDVTTTVEITTTSEITTTSDVTTTAEITTTDIVTTTGEVTTTADVTTT  
SDVTTTSEETTTADITTTADLTTTAEITTTDDVTTTVEITTTSDVTTTTEITTTDIVTTTGEVTTTADVTTAS  
DVTTTSEETPTADITTTADLTTTAEVTTTDDVTTTGEVTTTADVTTTSDVTTTSEETTTADVTTTSDVTTTAE  
ITTTDDITSTADVTTTADVTTTSDVPTTSEETTTADVTTTSDVTTTAEITTTDDITSTADVTTTADVTTTSDV  
TTTTEENPTADITTTADLTTTAEVTTTDDVTTTVEITTTSEITTTSDVTTTAEITTTDIVTTTDEDTTADVTT  
TSDVTTTSEETPTADITTTADLTTTADVTTTSDVTTTSEETTTADVTTTSDVTTTAEITTTDDITSTADVTT  
TTNVTTTSDVPTTSEVTTSTDDVITTTVEVTTTAEIIPDDVTTTSEVTTTGDVTTTGDVTTMTGDLTTTADVTTT  
ADLTTTDEVTTTADGSTTADLTTTAEVTTTDDVTTTQIITTTSEITTTSDVTTTAEITTTDNVTTTGEVTTTA  
DVTTTSDVTTTSEETPTADITTTADLNTTAEVTTTEDVTTTVEITTTSEITTTSDITTTAEITTTDIVTTTGE  
VTTTADVTTTNDVTTTSEETPTADITTTADLTTTAEITTTDDITSTADVTTTDDVTTTSDVPTTSEVTTSTDDV  
ITTTVEVTTTAEIIPDDVTTTSEVTTTGDVTTTGDVTTMTGDLTTTADVTTTADLTTTDEVTTTADGSTTADLT  
TTAEVTTTDDVTTTQIITTTSEITTTSDVTTTAEITTTDNVTTTGEVTTTADVTTTSDVTTTSEETPTADITT  
TADLTTTAEVTTTDEDVTTTVEITTTSEITTTSDITTTAEITTTDIVTTTGEVTTTADVTTTNDVTTTSEETPT  
ADITTTADLTTTAEITTTDDVTTTGEVTTTADVTTTSDVTTTSEETPTADITTTADLTTTAEITTTDDVTTTGD  
EVTTTADVTTTSDITTTSEETPTADITTTADLTTTAEVTTTDDVTTTGEVTTTADVTTTSDITTTSEETPTAD  
ITTTADLTTTAEVTTTDDVTTTVEITTTSEITTTSDVTTTAEITTTDIVTTTGEVTTTADVTTTSDVTTTSEQ  
TPTADITTTADLTTTAEVTTTDDVTTTVEITTTSEITTTSDVTTTAEITTTDIVTTTGEVTTTADITTTSDVT  
TTSEETTTADVTTTDDVTTTSEETTTGDGKTTTAEITTTDDITTTADVTTTADVTTTAAVTTTGEITPTDDVT  
TTSEVTTTGDVTTTSTGDVTTTGEVTTTAEVTTTADVTTTSDVTTTSEETPTADITTTADLTTTAEVTTTDDVTT  
TGEVTTTADVTTTSDITTTSEETPTADITTTVDLTTTAEVTTTDDVTTTVEITTTSEITTTSDVTTTAEITTT  
DIFTTTGEVTTTADITTTSDVTTTSEETPTADITTTADLTTTAEITTTDDVTTTVEITTTSEITTTSEVTTTP  
DVTTTSDVTTTSEETPTADITTTADLTTTAEVTTTDDVTTTVEITTTSEITTTSDVTTTAEITTTDIVTTTGE  
VTTTVDVTTTNDVTTTSEETPTADITTTADLTTTAEVTTTDDVTTTGEVTTTADVTTTSDITTTSEETPTADI

TTTVDLTTTVEITTTSEITTTSDVTTTAEITTTDIVTTTGEVTTTADVTTTSDVTTTSEETPTADITTTADLT  
TAEVTTTDDVTTTVEITTTSEITTTSDVTTTAEITTTDIVTTTSGEVTTTADVTTTSDVTTTSEETTTADVTT  
TTDVTTTSEETTTGDGTTTAEITTTDDLTTTADVTTTTPDVTTTAAVTTTAEITPTDDVTTTSEVTTTGDVTT  
TGEVTTTAEVTTTDDVTTTGDVTTTGLDITTMADVTTTADFTTTDDVTTTADASTTADLATTAEVTTTDDVTTT  
VEITTTAEITTTAEVTTTDDVTTTGEVTTTADVTTTDDVTTTSEVTTTADVTTTNDVTTTAEITTTDDITTTA  
DVTTTADVTTTTSYVPTTSEVTTSTDDVTTTAEVTTTAEITPTDDVTTTSEVTTTGDVTTTGDVTTMCDLTTSD  
VTTTADFTTTDDVTTTKADGSTTADLTTTAEVTTTNDVTTTGEVTTTAEITTTSDVTTTAEITTTDIVTTTGEV  
TTTADVTTTSDVTTTSEETTTADITTTADLTTTAEVTTTDDVTTTVEITTTSEITTTSDVTTTAEITTTDIVT  
TTGEVTTTADVTTTNDVTTTSEETPTADITTTADLTTTAEVTTTDDVTTTGEVTTTADVTTTSDVTTTSEETP  
TADITTTADLTTTAEVTTTDDVTTTVEITTTSEITTTSDVTTTAEITTTDIVTTTGEVTTTADITTTSDVTTT  
SEETTTADVTTTDDVTTTSEETTTGDGKTTTAEITTTDDITTTADVTTTTPDVTTTAAVTTTGEITPTDDVTTT  
SEVTTTGDVTTTGDVTTTGEVTTTAEVTTTDDVTTTGDVTTTGLDITTADVTTTAYFTTTDDVTTTADGSTTA  
DLTTTAEVTTTDDVTTTVEITTTAEITTTDDVTTTGEVTTTADVTTTSDVTTTSEETPTADITTTADLTTTAE  
VTTTDDVTTTVEITTTSEITTTSDVTTTAEITTTDIVTTTGEVTTTADVTTTSDVTTTSEETPTADITTTADL  
TTTAEVTTTDDVTTTVEITTTSEITTTSDVTTTAEITTTDIVTTTGEVTTTADVTTTSDVTTTSEETPTADIT  
TTADLTTTAEVTTTDDVTTTVEITTTAEITTTDDVTTTGEVTTTADVTTTAEVITTTSDVTTTADVTTMPDFTT  
TAEVTTTLDVTTTNDVTTTSEVTTTPEITTAGDVTTTSEVTTTADLTTTPEITTTGDVTTTADVTTTADVTTT  
SDVTTTADVTTTADITTTSDVTTTADVTTIADLSTTPEITTTGDFSSTTDVTTSTGDVTTTADVTTTADVTTT  
DVTTTAEVTTTAEVTTTAEATTTADLNTTPEITTTDDVTTTGDVTTTAEVTTTAYVTTTDFTTTAEVNTTDD  
VTTIADPTTTAEVTTTNDVTTSTAEITTTADLTTTTEVTTTADFITTTGDVTTTADVTTMADVTTTADVTTADLT  
TTVDVTTMDDVTTTAEVITSGDVTTTSEVTTTSNLNTTPEITTTIDFTSTVDVTTTGDVTTTADVTTTSDVTT  
TSKVTTTGDVTTTADTTSTADVTTTADVITTAEVTTTADFNTGDVTTTADVTTTADLTTMPDLTTTAEVTTT  
ADVTTTSEFTTTADVTTTADVTTTADVTTTAEVTTTGDVTTTADVTTTNGDITTTIGDVTTTTEITTTAYLTTTL  
EITTTGEVTTSTADVTTSAEVTTTDEITTTDVTTTGDVTTPTAESTTTDDVTTTSDVTTTGFDTTADVTTTAY  
VTTTTPDVTTTVEVTTTADFTTTGVVNTTADVTTTADVTTTSEVTTTADLTTTPEITTTVDFTSTADVTTTADV  
ITTTPEVTTTSDVTTTAEVITTTADVTTTADVTTTVEVTTTGDVTTTADVTTTPEITTTVDFTSTADVTTTADV  
TTADVTTTSDVTTITPDVTTTAEVTTTVEITTTDDVTTTGEVTTTADVTTTSDVTTTSEETTTADITTTSDVST  
TSEVTTTAYVTTTADTTSTAEVTTTADVTTTADVTTTADVTTTADVTTTADVTTTVEVTTTGDVTTTADVTTTAEVTTT  
AEITTTGDVTTTADVTTTAEVTTTAEITTTGDVTTTADVTTTADVTTTADVTTTIDVTTTADVTTTSAEVTTTA  
DVTTTTEVTTTTEVATTPEPTTTPAPTAVNCMNGGFWTGDKCICPNGFGGDRNCENIVNVVNCENGGTWDGL  
KCQCTSLFYGPRCEELVESVEIEPTVAASVEVSVTVTSQEYSEKLDQRKSEEFNSFNKFTTKQMALIYAGIPE  
YEGVILKNSKGSIVVDYDVLKAKYTPGFENTLDTVVKNLETKIKNATEVQVQDVNNNSALLCFNSTATKV  
QNSATVSVNPEETCKKEAGEDFAKVFVTLGQKGDKWFCITPCSAGYSTSKNCSYGKQQLQSRGPPQCLCLITDTH  
WYSGENCWDWGIQKSLVYGLGGAGVAVLLVILVILLVFSIRFRKDAQQRSRVSEMYKWGEEGRASPPTFHNF  
GFDHNEERENYMLPLDSVYNTFQPSLNHINPERKIQIQRPQVMTSL\*

>ENSMUSP0000072406\_c.4533:G>C\_p.A1512P ENSMUST00000072607.9|Ints1-  
201|ENSMUSG00000029547|-|chr5:g.139744221:C>G

MTERASDSRRLPLGEGASSRGARAAGRMNRAKPTTVRRPSAAAKPSGHPPPGDFIALGSKGQASESKTTSTLL  
KPAPSGLPSEKRKRDASASLSGTSALTGLTKRPKLSSTPPLSALGRLAEEAAVAEKRAISPSIKEPSVVPPIEVL  
TVLLDEIEAAELEGNDRIEGLVLCGAVKQKLVTRAKPDSTLYLSLMLYLAIKPNIFATEGVIEALCSLLRRDA  
SVNFKAKGNSLVSVLACNLLMAAYEEDENWPEIFVKVYIEDSLGERIWWDSPHCRTFVDNIQTAFNTKMPKPS  
VLLQGEGARSGGELGAGSSPHPSLTHEEDSQTELLIAEEKLSPQEGLMPRYDELTESVEEYVLDMLRDQLN  
RRQPIDNVSRLNLLRLTATCGYKEVRLAVQRLEMWLNPKLTRPAQDLLMSVCMNCNSHGSEDMDVISHLIK  
IRLKPVLLNHYMLCIRELLNAHKDNLGTTIKFVIFNELSNARNPNMQILYTVLQHSSELAPKFLAMVFQDL  
LTNKDDYLRSRALLREIIKQTKHEINFQAFCLGLMQRKEPQYLEMEFKERFVHHITDVLAVSMMLGITAQV  
KEAGVAWDKGEKRNLEVLRTFQNIQAAIQRDVWVWVHTVVPVSVSKLAPKDYVHCLHKVLFTEQPEITYKWDNW  
PPESDRNFFLRRCSEVPILEDTLMRVLVIGLSRELPLGPADAMELADHLVKRAAAVQADDVEVLKVERIQID  
AVLNLCTYHHPENIQLPQYQPPNLAISTLYWKAWPLLLVVAAFNPENIGLAAWEEYPTLKLMLMEMVMTNYS  
YPPCTLTDEETRTEMINRELQISQREKQEIILAFEGHLAAASTKQITTESSSLLLSQLTSLDPQGP RRPPPHI  
LDQVKALNQSLRLGHLRCRSRNPDFLLHI IQRQASSQSMPWLADLVQSSEGLDVLVPVQCLCEFLHDAADST  
ASGEEDDEGESREQKAKKRQRQKQRLGRLQDLLLLGPKADEQTTCEVLDYFLRRLGSSQVASRVLAMKGLS  
LVLSEGGRLDKEEKEPPMEEDIGETDALQGYQWLLRDLRPLPLFDSVRTTTALALQQA IHMETDPQTI SAYLI  
YLSQHTPVVEEQGPHSDLALDVARLVVERSTIMAHFLSKPSCSTASDAVLSALLSVFSRYVRRMRKSKEGEEVY  
SWSESQDQVFLRWSSGETATMHI LVVHAMVILLTLGPPKSGDSEFSELLDIWFPEKKPLPTAFVLDVTTSEEALL  
LPDWLKLRMIRSEVPRLVDAALQDLEPQQLLLFVQSFGIPVSSMSKLLQYLDQAVAQDPQTLQINIMDKNYMA  
HLVEVQHERGASGGQTFHSLLTASLPPRRDSTEAPKPESSPEPPPGQGRTRAGTQVPVLPEDDLAIFLQIF  
PLSPDPRWQSSSPRPLALALQALGQELARVRQGNPEVPGITVRLQAMTLLSSPHGGTLALAMHSHFLSC  
PLMRQLYQYQRAVPQDTGFSSFLKVLQMILQWLDSPAVEDGPLQAQLKLPTRY SARHRI SDVRSGLLHLAD



ALSFHGDLEVANSTARAVIATLRSGEKCPVEPELISKVLRGLIEVRSPHLEELLTALFSATTETSCPSPASGP  
IVVVSSLLLQEKELLGPKQVEGASTEAMRLGPASGLLDVWLETLDPEVVCSCPDLQWKLFSRRKKGKHI  
SAQVLSFRPYLLALLTHQASWSTLHCCIRVLLGKSREQRDLPSASLDLFWACIHPRIWQGRDQRTPOKRREE  
LVLHVQGPPELLSLVELILSEAEQRSQDGD SAARTLIQTRPLLLSCCRSNDESIGKVTEHLTSCIQQWGD  
GQRCRDLQLYLQRPVPEVLLQSEGATSSSICKLDGLVHRFITLLADTSDRSSESERVADANMACRK  
LAVAHVLLLRLHPLMIAALLHGRTHLNFOEFRQNHAFLLHVLGILELLQPRVQSEHQGALWDCLRSFIRL  
LLNYRKSRRHLAPFISKFVQFIHKYVGC SAPA AVAFLOKHAEPHLDLSFDNSDLVMLKSLLAGLSLPSRDGRT  
DQGLDEEGEDERSAGSLPLVSVSLSTPLTVADVAPHMKRLSRGRAVEDVLETLSIDIEMSRRRPEVLGFFSTN  
LQRLMSSAAEESCRNLAFSLALRSIQNNPSIAADFLPTFMYCLGSRDFEVVQTALRNLPEYTLQCQEHAAVLLH  
RAFLVGVYQIDTSAQISEALKILHMEAVM\*

>ENSMUSP00000143789\_c.4539:G>C\_p.A1514P ENSMUST00000200393.5|Ints1-  
210|ENSMUSG00000029547|-|chr5:g.139744221:C>G

MTERASDSRRLPLGEGASSRGARAAGRMNRAKPTTVRRPSSAAKPSGHPPPGDFIALGSKGQASESKTTSTLL  
KPAPSGLPSEKRDASASLSGTALTGLTKRPKLSSTPPLSALGRLAEAAVAEKRAISPSIKEPSVVPVIEVLP  
TVLLDEIEAAELEGNDRIEGLVCGAVKQKLVTRAKPDSTLYLSLMLYAKIKPNIFATEGVIEALCSLLRDA  
SVNFKAKGNSLVSVLACNLLMAAYEEDENWPEIFVKVYIEDSLGERIWDSPHCRTFVDNIQTAFNTKMPKPS  
VLLQGEGARSGGELGAGSSPHSLTEEEDSQTELLIAEEKLSPQEGLMPPRYDELTEVSVEEYVLDMLRDQ  
LNRRQPIDNVSRLRLLTATCGYKEVRLAVQRLEMWLNPKLTRPAQDLLMSVCMNCNSHGSEMDMVI SHL  
IKIRLKPVKVLLNHYMLCIRELLNAHKDNLGTTIKFVIFNELSNARNPNMQILYTVLQHSSELAPKFLAMVFQ  
DLLTNKDDYLRSRALLREIKQTKHEINFQAFCLGLMQRKEPQYLEMEFKERFVVHITDVLAVSMMLGITA  
QVKEAGVAWDKGEKRNLEVLRTFQNIQAAIQORDAVWWLHTVVPVSKLAPKDYVHCLHKVLFTEQPEYTKWD  
NWPPESDRNFFLRCLCEVPILEDTLMRVLVIIGLSRELPLGPADAMELADHLVKRAAAVQADDVEVLKVERIQ  
IDAVLNLCYHHPENIQLPFGYQPPNLAISTLYWKA WPLLVVAAFPENIGLAAWEEYPTLKMMLMEMVMTNN  
YSYPPCTLTDEETRTEMINRELQISQREKQEIILAFEGHLAAASTKQITITESSSLLLSQLTSLDPQGP  
HILDQVKALNQSLRLGLLCSRNPDFLLHI IQRQASSQSMPLADLVQSSEGLDVLVQCLCEFLHDAAD  
STASGEEDGESREKQAKKRQKQKQRLQLLGRLLDGLLGPKADEQTTCEVLDYFLRRLGSSQVASRVLAMK  
LSLVLSEGGLRKEEKEPMEEDIGETDALQGYQWLLRDLRPLPLFDSVRTTALALQQA IHMETDPTI SAY  
LIYLSQHTPVVEEQGPHSDLALDVARLVVERSTIMAHFLSKPSCSTASDAVLSALLSVFSRYVRRMRKSKEGEE  
VYSWSESQDQVFLRWSSGETATMHILVVHAMVILLTLGPPRSGDSEFSELLDIWFPEKKPLPTAFVLDTSEE  
LLLDPDWLKLIRMIRSEVPRVDAALQDLEPQQLLFFVQSF GIPVSSMSKLLQYLDQAVAQDPQTLQNI  
MAHLVEVQHERGASGGQTFHSLLTASLPPRRDSTEAPKPESSEPPPGQGRTRAGTQVPVLPEDLAGIFLQ  
IFPLSPDRWQSSSPRPLALALQALGQELARVRQGNPEVPGITVRLQAMTLLSSPHGGTLALAMHSHFL  
SCPLMRQLYQYQRAVPQDTGFSSSLFKVLMQILQWLDSPAVEDGPLQAQLKLPTRY SARHRI SDVRSGLLHL  
ADALSFHGDLEVANSTARAVIATLRSGEKCPVEPELISKVLRGLIEVRSPHLEELLTALFSATTETSCPSPAS  
GPIVVVSSLLLQEKELLGPKQVEGASTEAMRLGPASGLLDVWLETLDPEVVCSCPDLQWKLFSRRKKGK  
HISAQVLSFRPYLLALLTHQASWSTLHCCIRVLLGKSREQRDLPSASLDLFWACIHPRIWQGRDQRTPOKR  
EELVHVQGPPELLSLVELILSEAEQRSQDGD SAARTLIQTRPLLLSCCRSNDESIGKVTEHLTSCIQQWGD  
VLGQRCRDLQLYLQRPVPEVLLQSEGATSSSICKLDGLVHRFITLLADTSDRSSESERVADANMAC  
RKLAVAHVLLLRLHPLMIAALLHGRTHLNFOEFRQNHAFLLHVLGILELLQPRVQSEHQGALWDCLRSFI  
RLLLNYRKSRRHLAPFISKFVQFIHKYVGC SAPA AVAFLOKHAEPHLDLSFDNSDLVMLKSLLAGLSLPSRDG  
RTDQGLDEEGEDERSAGSLPLVSVSLSTPLTVADVAPHMKRLSRGRAVEDVLETLSIDIEMSRRRPEVLGFFS  
TNLQRLMSSAAEESCRNLAFSLALRSIQNNPSIAADFLPTFMYCLGSRDFEVVQTALRNLPEYTLQCQEHA  
LHRAFLVGVYQIDTSAQISEALKILHMEAVM\*

>ENSMUSP00000041863\_c.1314:C>G\_p.L439V ENSMUST00000038699.13|Ap5z1-  
201|ENSMUSG00000039623|+|chr5:g.142459666:C>G

MFSAGAESLLHQAREIQDEELRRFC SRVTKLQEQAPGPATVDALQRLFLIVSATKYPRRLEKMCVDLLQTTLC  
LPASPEQLQVLC AAILREMSPFNDLALSCDHTPNTRQLSLVASVLLAQGDRKGEIRCVSQRIFKILENRQPEG  
PSVRPLLPILSKVIGLAPGILMEDQTNLLSKRLVDWLYASIQGLPYSGGFFSTPRTRQPGPITEVDGAVAS  
DFFTIVLSTGQHFTEDQWVNMQAFSMLRKWLLHSGPEDPCSPDADKSELEGSTLSVLSAASTASRLPPRERL  
REVAFEYCQRLLQSNRRALRKGSDLQKACLVEAVSVLDVLCRQDPSFLYRTL SCLKALHRRLEGDPGSE  
LVPLAQFFLNHGEEAAMD AEAVYQQLRGLPSERFHSP TLA FEV IHFCTHNLALFDSHFLSLLRSLFPLFKF  
VAVNSPPLTAEFVLLPALVDAGTAVEMHALLDLPCLTAA DLQRLSTQTPSERLLWDISLRVPSCLEAFQD  
PQFQGLFRHLRRTKASGSTERLTPHQLVKPMASCARVLTQCAEAVPVLLQAFFSAVTQTADGALINQLALLL  
ERSDSVLPVPPQYEAARHGVLSSQLLVLCCKLPSLVLELSELEFVGSVSSIHSRVSQVTFVVAIGEYLSVT  
WDRCTAEQINKFEALEALLFEVTQSRPLADLPCPPEVVTALMTTLTKLASRSQDLI PRVSLFLSKMRTLA  
QNPATSSVHSEEGAESIRTRASELLTLLKMP SVAQFVFTPPAGVCQPRYHRDTNVALPLALRTVSR LVEKEAG  
LLPG\*

>ENSMUSP00000143179\_c.1314:C>G\_p.L439V ENSMUST00000196055.2|Ap5z1-202|ENSMUSG00000039623|+|chr5:g.142459666:C>G  
MFSAGAESLLHQAREIQDEELRRFCSRVTKLLQEAPGPATVDALQRLFLIVSATKYPRRLEKMCVDLLQTTLC  
LPASPEQLQVLCAILREMSPFNDLALSCDHTPNTRQLSLVASVLLAQGDRKGEIRCVSQRIFKILENRQPEG  
PSVRPLLPILSKVIGLAPGILMEDQTNLLSKRLVDWLRYSIQQGLPYSGGFFSTPRTRQPGPI TEVDGAVAS  
DFFTVLSTGQHFTEDQWVNMQAFSMLRKWLLHSGPEDPCSPDADDKSELEGSTLSVLSAASTASRLPPRERL  
REVAFEYCQRLLQSNRRALRKGDSDLQKACLVEAVSVLDVLCRQDPSFLYRTLSCCLKALHRRRLGEDPGSERA  
LVPLAQFFLNHGEEAAMDAAEAVYGQLLRGLPSERFHSPTLAFEVIHFCTHNLALFDSHFLSLLRLSFPSLFKF  
VAWNSPPLTAEFVLLPALVDAGTAVEMHLALLDLPLCLTAALDLQLRVPSCLEAFQDPQFQGLFRHLLRKTAS  
GSTERLTPHLQVLPKPMASCARVTQCAEAVPVLLQAFFSAVTQTADGALINQLALLLLERSDSLYPVPQYEARV  
HGVLSQQLLVLCCLKPSLVVLSRELLFVGSVSSIHRSRVSFTCVVWAI GEYLSVTWDRKCTAEQINKFFEA  
LEALLFEVTQSRPLADLPCCPPEVVTALMTTLTKLASRSQDLIPRVSLFLSKMRTLAQNPATSSVHSEEGAES  
IRTRASELLTLLKMPVAQVFVTPPAGVCQPRYHRDTNVALPLALRVTVSRLVEKEAGLLPG\*  
>ENSMUSP00000064539\_c.3039:C>G\_p.R1014G ENSMUST00000063635.15|Radil-201|ENSMUSG00000029576|-|chr5:g.142471235:G>C  
MFYGTQLIMSPPTKNKLRQSQQLLSTMLSRTLSYKYRDL DSTFCSLGASDDPSELSTQLSAPGVLVKVF GDSVC  
TGTHYKSVLATGSSSAQELVKEALERYALDPECAGQYVLC DVVGQAGDSGQRWQAQC FRVFGDNEKPLLIQEL  
WKPREGLSRRFELRKKSDVEELASRDVDTT TAGINAQARRLQIRAKGTPALTSEAAQSSPPTRLRRTVSETS  
LSPAPSLPEAAQRPEEPVPEAMRYSLYQC PHLLLLLQGYSQQHDSLVYVLSKERHTV GQRT PSSKPSISLSAPD  
ILPLHCTIRRHQSPEGGPAGTRLVLEPITGASVSVNFSEVGRNPVVLQHGDL LSLGLY YLLL FDKDPGQAQPLP  
ACALARLGAAPQSCRMCGAVLRARGAPSLPAAVVRRRSLLLEFE PDVEDTLLQRIIMTLIEPGDDHKLT PAFLL  
LCLCIQHSAMHFQPGTFRHLLKISKRV RDTVWEKTKELAEKQAQLQEPI SWASFP MADLVPDLQHILFWMSN  
SIELLYFIQQKSPLYVQSMEEELDVTGSKESLF SCTLTASEEAMAALEEVVLYAFQQC VY YLSKCLYVCLPAL  
LECPPFQTERRESWRSGPALPEELRRVSVVFQATL DLLQQLQMHPEVASQMLAYLFFFSGTLLLNQVLDKGPS  
LSCFHWPRGVQVCARLQQFLEWARSAGLGAPAERFFRKL SCTLHLLATPRAQLIQMSWATLRVTFPALNPAQL  
HRLLTQYQLASAMGPVSAWEPGAPDGPEAFQSEDI LESYENPPP I VLP SQGFQVDLEADCVEDSIYQHLLYIR  
HFPLWGLRGQASPDSPGPAQPESEIEGLYHTIPEGHLEGHGCP LANRDPGRVAVETAPPHSLPVTGAPRAQGPGR  
QPTRGDRRGSQAGSLHTDSSCMLTPPSTPLGLEPAGPSWPEPSGLCGRAVL DQQRNGPGLPGAVLEGD AIQD  
AEPPEAEASSPSSAEDFCYVFMVELERGPSGLGMGLIDGMHTPLGAQGLYIQ TLLPGSPAASDGGLSLGDQIL  
EVNGSSLRGVSYMRVLDLIRHGGKMRFLVAKSDMETAKKIRFRNPPS\*  
>ENSMUSP00000082910\_c.3126:C>G\_p.R1043G ENSMUST00000085758.10|Radil-202|ENSMUSG00000029576|-|chr5:g.142471235:G>C  
MGSSIFLGLQPSPSHWLKSSVVIHEDAPT MFYGTQLIMSPPTKNKLRQSQQLLSTMLSRTLSYKYRDL DSTFC  
SLGASDDPSELSTQLSAPGVLVKVF GDSVCTGTHYKSVLATGSSSAQELVKEALERYALDPECAGQYVLC DVVG  
QAGDSGQRWQAQC FRVFGDNEKPLLIQELWKPREGLSRRFELRKKSDVEELASRDVDTT TAGINAQARRLQIR  
RAKGTALTSEAAQSSPPTRLRRTVSETSLS PAPSLEAAQRPEEPVPEAMRYSLYQC PHLLLLLQGYSQQHDS  
LVYVLSKERHTV GQRT PSSKPSISLSAPDILPLHCTIRRHQSPEGGPAGTRLVLEPITGASVSVNFSEVGRNP  
VVLQHGDL LSLGLY YLLL FDKDPGQAQPLPACALARLGAAPQSCRMCGAVLRARGAPSLPAAVVRRRSLLLEFE  
PDVEDTLLQRIIMTLIEPGDDHKLT PAFLLCLCIQHSAMHFQPGTFRHLLKISKRV RDTVWEKTKELAEKQA  
QLQEPI SWASFP MADLVPDLQHILFWMSNSI ELLYFIQQKSPLYVQSMEEELDVTGSKESLF SCTLTASEEAM  
AALEEVVLYAFQQC VY YLSKCLYVCLPALLECPPFQTERRESWRSGPALPEELRRVSVVFQATL DLLQQLQMH  
PEVASQMLAYLFFFSGTLLLNQVLDKGPSLSCFHWPRGVQVCARLQQFLEWARSAGLGAPAERFFRKL SCTLH  
LLATPRAQLIQMSWATLRVTFPALNPAQLHRLLTQYQLASAMGPVSAWEPGAPDGPEAFQSEDI LESYENPPP  
IVLP SQGFQVDLEADCVEDSIYQHLLYIRHFLWGLRGQASPDSPGPAQPESEIEGLYHTIPEGHLEGHGCP LANR  
DPGRVAVETAPPHSLPVTGAPRAQGPGRQPTRGDRRGSQAGSLHTDSSCMLTPPSTPLGLEPAGPSWPEPSG  
LCGRAVL DQQRNGPGLPGAVLEGD AIQDAEPPEAEASSPSSAEDFCYVFMVELERGPSGLGMGLIDGMHTPL  
GAQGLYIQ TLLPGSPAASDGGLSLGDQILEVNGSSLRGVSYMRVLDLIRHGGKMRFLVAKSDMETAKKIRFR  
NPPS\*  
>ENSMUSP00000106411\_c.2319:C>G\_p.R774G ENSMUST00000110784.8|Radil-203|ENSMUSG00000029576|-|chr5:g.142471235:G>C  
MRYSLYQC PHLLLLLQGYSQQHDSLVYVLSKERHTV GQRT PSSKPSISLSAPDILPLHCTIRRHQSPEGGPAGT  
RLVLEPITGASVSVNFSEVGRNPVVLQHGDL LSLGLY YLLL FDKDPGQAQPLPACALARLGAAPQSCRMCGAVL  
RARGAPSLPAAVVRRRSLLLEFE PDVEDTLLQRIIMTLIEPGDDHKLT PAFLLCLCIQHSAMHFQPGTFRHLL  
LKISKRV RDTVWEKTKELAEKQAQLQEPI SWASFP MADLVPDLQHILFWMSNSI ELLYFIQQKSPLYVQSMEE  
ELDVTGSKESLF SCTLTASEEAMAALEEVVLYAFQQC VY YLSKCLYVCLPALLECPPFQTERRESWRSGPALP  
EELRRVSVVFQATL DLLQQLQMHPEVASQMLAYLFFFSGTLLLNQVLDKGPSLSCFHWPRGVQVCARLQQFLE  
WARSAGLGAPAERFFRKL SCTLHLLATPRAQLIQMSWATLRVTFPALNPAQLHRLLTQYQLASAMGPVSAWEP  
GAPDGPEAFQSEDI LESYENPPP I VLP SQGFQVDLEADCVEDSIYQHLLYIRHFLWGLRGQASPDSPGPAQPESE

IEGLYHTIPEGHLEGHGCLANRDPGRVAVETAPPHSLPVTGAPRAQGPPGRQPTRGDRRGSQAGSLHTDSSC  
MLTTPSTPLGLEPAGPSWPEPSGLCGRAVLGDQQRNGPGLPGAVLEGDAIQDAEPPAEASSPSSSAEDFCYVF  
MVELERGPSSGLMGLIDGMHTPLGAQGLYIQTLLPGSPAASDGGLSLGDQILEVNGSSLRGVSYMRAVDLIRH  
GGKMRFLVAKSDMETAKKIRFRNPPS\*  
>ENSMUSP00000106412\_c.3108:C>G\_p.R1037G ENSMUST00000110785.2|Rad1-  
204|ENSMUSG00000029576|-|chr5:g.142471235:G>C  
MFYGTQLIMSPPTKNKLRQSLLSTMLSRTLASYKYRDLSTFCSLGASDDPSELSTQLSAPGVLVKVFSDSVC  
TGTHYKSVLATGSSSAQELVKEALERYALDPECAGQYVLCVVGQAGDSGQRWQAQCFRVFGDNEKPLLIQEL  
WKPREGLSRRFELRKKSDVEELASRDVDTTATAGINAQARRLQIRIRAKGTPALTSEAAQSSPPTLRRTVSETS  
LSPAPSLPEAAQRPEEPVPEAMRYSLYQCPhLLLLLQGYSSQQHDSLVVYVLSKERHTVQRTPESSKPSISLSAPD  
IILPLHCTIRRHQSPPEGGPAGTRLVLEPITGASVSVNFSEVGRNPVVLQHGDLSSLGLYLLLFKDPGQAQPLP  
ACALARLGAAPQSCRMCGAVLRARGAPSLPAAVVRRRSLLEFEFDPVEDTLLQRIIMTLIEPGDDHKLTPAFL  
LCLCIQHSAMHFQPGTFRHLLKISKVRVDTVWEKTKELAEKQAQLQEPISWASFPMDLVPDLQHILFWMSN  
SIELLYFIQQKSPLYVQSMEEELDVTGSKESLFSCTLTASEEAMAALEEVVLYAFQQCQVYLLSKCLYVCLPAL  
LECPFFQTERRESWRSGPALPEELRRVSVVFQATLDDLQQLQMHPEVASQMLAYLFFFSGTLLLNQVLDKGPS  
LSCFHWPRGVQVCARLQQFLEWARSAGLGAPAEFRKLSCTLHLLATPRAQLIQMSWATLRVTFPALNPAQL  
HRLLTQYQLASAMGPVSAWEPGAPDGEAFQSEDILESYENPPPIVLPSSQGFQVDLEADCVEDSIYQHLLYIR  
HFLWGLRGQASPDSPAQPESEIEGAIMDTWAIIPSSGPQRLSTFSSQGLYHTIPEGHLEGHGCLANRDPGRVA  
VETAPPHSLPVTGAPRAQGPPGRQPTRGDRRGSQAGSLHTDSSCMLTTPSTPLGLEPAGPSWPEPSGLCGRAV  
LDGQRNGPGLPGAVLEGDAIQDAEPPAEASSPSSSAEDFCYVFMVELERGPSSGLMGLIDGMHTPLGAQGLY  
IQTLLPGSPAASDGGLSLGDQILEVNGSSLRGVSYMRAVDLIRHGGKMRFLVAKSDMETAKKIRFRNPPS\*  
>ENSMUSP00000124899\_c.117:GT>G\_p.V40del-fs ENSMUST00000160629.8|Cpsf4-  
205|ENSMUSG00000029625|+|chr5:g.145107339:GT>G  
MQEIIASVDHIKFDLEIAVEQQQLGAQPLPFPFGMDKSGAAAVNSF  
>ENSMUSP00000069243\_c.117:GT>G\_p.V40del-fs ENSMUST00000070487.12|Cpsf4-  
201|ENSMUSG00000029625|+|chr5:g.145107339:GT>G  
MQEIIASVDHIKFDLEIAVEQQQLGAQPLPFPFGMDKSGAAAVNSF  
>ENSMUSP00000125019\_c.117:GT>G\_p.V40del-fs ENSMUST00000160422.8|Cpsf4-  
202|ENSMUSG00000029625|+|chr5:g.145107339:GT>G  
MQEIIASVDHIKFDLEIAVEQQQLGAQPLPFPFGMDKSGAAAVNSF  
>ENSMUSP00000124966\_c.117:GT>G\_p.V40del-fs ENSMUST00000162244.8|Cpsf4-  
207|ENSMUSG00000029625|+|chr5:g.145107339:GT>G  
MQEIIASVDHIKFDLEIAVEQQQLGAQPLPFPFGMDKSGAAAVNSF  
>ENSMUSP00000137910\_c.117:GT>G\_p.V40del-fs ENSMUST00000160574.8|Cpsf4-  
204|ENSMUSG00000029625|+|chr5:g.145107339:GT>G  
MQEIIASVDHIKFDLEIAVEQQQLGAQPLPFPFGMDKSGAAAVNSF  
>ENSMUSP00000125640\_c.21:GT>G\_p.V8del-fs ENSMUST00000160762.2|Cpsf4-  
206|ENSMUSG00000029625|+|chr5:g.145107339:GT>G  
XDKSGAAAVNSF  
>ENSMUSP00000124899\_c.118:T>TGG\_p.V40ins-fs ENSMUST00000160629.8|Cpsf4-  
205|ENSMUSG00000029625|+|chr5:g.145107340:T>TGG  
MQEIIASVDHIKFDLEIAVEQQQLGAQPLPFPFGMDKSGAAAVNSF  
>ENSMUSP00000069243\_c.118:T>TGG\_p.V40ins-fs ENSMUST00000070487.12|Cpsf4-  
201|ENSMUSG00000029625|+|chr5:g.145107340:T>TGG  
MQEIIASVDHIKFDLEIAVEQQQLGAQPLPFPFGMDKSGAAAVNSF  
>ENSMUSP00000125019\_c.118:T>TGG\_p.V40ins-fs ENSMUST00000160422.8|Cpsf4-  
202|ENSMUSG00000029625|+|chr5:g.145107340:T>TGG  
MQEIIASVDHIKFDLEIAVEQQQLGAQPLPFPFGMDKSGAAAVNSF  
>ENSMUSP00000124966\_c.118:T>TGG\_p.V40ins-fs ENSMUST00000162244.8|Cpsf4-  
207|ENSMUSG00000029625|+|chr5:g.145107340:T>TGG  
MQEIIASVDHIKFDLEIAVEQQQLGAQPLPFPFGMDKSGAAAVNSF  
>ENSMUSP00000137910\_c.118:T>TGG\_p.V40ins-fs ENSMUST00000160574.8|Cpsf4-  
204|ENSMUSG00000029625|+|chr5:g.145107340:T>TGG  
MQEIIASVDHIKFDLEIAVEQQQLGAQPLPFPFGMDKSGAAAVNSF  
>ENSMUSP00000125640\_c.22:T>TGG\_p.V8ins-fs ENSMUST00000160762.2|Cpsf4-  
206|ENSMUSG00000029625|+|chr5:g.145107340:T>TGG  
XDKSGAAAVNSF

```

>rs108505794_ENSMUSP00000091659_c.1296:T>C_p.Y433H
ENSMUST00000094111.6|Cyp3a41a-201|ENSMUSG00000075551|-
|chr5:g.145635069:A>G
MNLFSALSALDWTWVLLAIIILVLLYRYGTRTHGLFKKQGI PGPKPLPFLGTVLNYYKGLWKFDMECYEKYKGTWG
LFDGQMPFLFVITDPEMIKNVVKVKECF SVFTNRREFGPGVIMSKAISISKDEEWKRYRALLSPTFTSGKLEKEMF
PVIEQYGDILVKYLMQEAEGKGPVTMKDVLGAYSIDVITSTSTSGVNVDSLNNPEDPFVEKAKGILRVDFDPL
VFSVVLFPFLTPVYEMLNICMFPKDSIEFFKFKFVNRMKESRLDSKQKHRVDFLQMMNAHNNKDKDSDHKALS
DMEITAQSI VFI FAGYETTSSTLSFTLYCLATHPDIQKKLQEEI DETLPNKAPPTYDVTMEMEYLDMLVNETL
RLYPIGNRLERFCKKDVELNGVYIPKGSTVMIPSYALHHD PQHWPEPEEFQPERFSKENKGSIDPYLYMPFGI
GPRNCIGMRFAFMTMKLALTKVMQNFSFQPCQETQIPLKLSRQGLLQPEKPIVLKVVPRDVTITGA*
>ENSMUSP00000091659_c.877:A>C_p.D293A ENSMUST00000094111.6|Cyp3a41a-
201|ENSMUSG00000075551|-|chr5:g.145639089:T>G
MNLFSALSALDWTWVLLAIIILVLLYRYGTRTHGLFKKQGI PGPKPLPFLGTVLNYYKGLWKFDMECYEKYKGTWG
LFDGQMPFLFVITDPEMIKNVVKVKECF SVFTNRREFGPGVIMSKAISISKDEEWKRYRALLSPTFTSGKLEKEMF
PVIEQYGDILVKYLMQEAEGKGPVTMKDVLGAYSIDVITSTSTSGVNVDSLNNPEDPFVEKAKGILRVDFDPL
VFSVVLFPFLTPVYEMLNICMFPKDSIEFFKFKFVNRMKESRLDSKQKHRVDFLQMMNAHNNKDKDSDHKALS
AMEITAQSI VFI FAGYETTSSTLSFTLYCLATHPDIQKKLQEEI DETLPNKAPPTYDVTMEMEYLDMLVNETL
RLYPIGNRLERFCKKDVELNGVYIPKGSTVMIPSYALHHD PQHWPEPEEFQPERFSKENKGSIDPYLYMPFGI
GPRNCIGMRFAFMTMKLALTKVMQNFSFQPCQETQIPLKLSRQGLLQPEKPIVLKVVPRDVTITGA*
>rs108243600_ENSMUSP00000091659_c.493:A>G_p.E165G
ENSMUST00000094111.6|Cyp3a41a-201|ENSMUSG00000075551|-
|chr5:g.145645714:T>C
MNLFSALSALDWTWVLLAIIILVLLYRYGTRTHGLFKKQGI PGPKPLPFLGTVLNYYKGLWKFDMECYEKYKGTWG
LFDGQMPFLFVITDPEMIKNVVKVKECF SVFTNRREFGPGVIMSKAISISKDEEWKRYRALLSPTFTSGKLEKEMF
PVIEQYGDILVKYLMQEAEGKGPVTMKDVLGAYSIDVITSTSTSGVNVDSLNNPEDPFVEKAKGILRVDFDPL
VFSVVLFPFLTPVYEMLNICMFPKDSIEFFKFKFVNRMKESRLDSKQKHRVDFLQMMNAHNNKDKDSDHKALS
DMEITAQSI VFI FAGYETTSSTLSFTLYCLATHPDIQKKLQEEI DETLPNKAPPTYDVTMEMEYLDMLVNETL
RLYPIGNRLERFCKKDVELNGVYIPKGSTVMIPSYALHHD PQHWPEPEEFQPERFSKENKGSIDPYLYMPFGI
GPRNCIGMRFAFMTMKLALTKVMQNFSFQPCQETQIPLKLSRQGLLQPEKPIVLKVVPRDVTITGA*
>ENSMUSP00000091659_c.376:G>T_p.W126L ENSMUST00000094111.6|Cyp3a41a-
201|ENSMUSG00000075551|-|chr5:g.145645910:C>A
MNLFSALSALDWTWVLLAIIILVLLYRYGTRTHGLFKKQGI PGPKPLPFLGTVLNYYKGLWKFDMECYEKYKGTWG
LFDGQMPFLFVITDPEMIKNVVKVKECF SVFTNRREFGPGVIMSKAISISKDEELKRYRALLSPTFTSGKLEKEMF
PVIEQYGDILVKYLMQEAEGKGPVTMKDVLGAYSIDVITSTSTSGVNVDSLNNPEDPFVEKAKGILRVDFDPL
VFSVVLFPFLTPVYEMLNICMFPKDSIEFFKFKFVNRMKESRLDSKQKHRVDFLQMMNAHNNKDKDSDHKALS
DMEITAQSI VFI FAGYETTSSTLSFTLYCLATHPDIQKKLQEEI DETLPNKAPPTYDVTMEMEYLDMLVNETL
RLYPIGNRLERFCKKDVELNGVYIPKGSTVMIPSYALHHD PQHWPEPEEFQPERFSKENKGSIDPYLYMPFGI
GPRNCIGMRFAFMTMKLALTKVMQNFSFQPCQETQIPLKLSRQGLLQPEKPIVLKVVPRDVTITGA*
>ENSMUSP00000091659_c.291:T>C_p.C98R ENSMUST00000094111.6|Cyp3a41a-
201|ENSMUSG00000075551|-|chr5:g.145650350:A>G
MNLFSALSALDWTWVLLAIIILVLLYRYGTRTHGLFKKQGI PGPKPLPFLGTVLNYYKGLWKFDMECYEKYKGTWG
LFDGQMPFLFVITDPEMIKNVVKVKECF SVFTNRREFGPGVIMSKAISISKDEEWKRYRALLSPTFTSGKLEKEMF
PVIEQYGDILVKYLMQEAEGKGPVTMKDVLGAYSIDVITSTSTSGVNVDSLNNPEDPFVEKAKGILRVDFDPL
VFSVVLFPFLTPVYEMLNICMFPKDSIEFFKFKFVNRMKESRLDSKQKHRVDFLQMMNAHNNKDKDSDHKALS
DMEITAQSI VFI FAGYETTSSTLSFTLYCLATHPDIQKKLQEEI DETLPNKAPPTYDVTMEMEYLDMLVNETL
RLYPIGNRLERFCKKDVELNGVYIPKGSTVMIPSYALHHD PQHWPEPEEFQPERFSKENKGSIDPYLYMPFGI
GPRNCIGMRFAFMTMKLALTKVMQNFSFQPCQETQIPLKLSRQGLLQPEKPIVLKVVPRDVTITGA*
>rs107987353_ENSMUSP00000091659_c.111:A>G_p.I38V
ENSMUST00000094111.6|Cyp3a41a-201|ENSMUSG00000075551|-
|chr5:g.145654788:T>C
MNLFSALSALDWTWVLLAIIILVLLYRYGTRTHGLFKKQGVPGPKPLPFLGTVLNYYKGLWKFDMECYEKYKGTWG
LFDGQMPFLFVITDPEMIKNVVKVKECF SVFTNRREFGPGVIMSKAISISKDEEWKRYRALLSPTFTSGKLEKEMF
PVIEQYGDILVKYLMQEAEGKGPVTMKDVLGAYSIDVITSTSTSGVNVDSLNNPEDPFVEKAKGILRVDFDPL
VFSVVLFPFLTPVYEMLNICMFPKDSIEFFKFKFVNRMKESRLDSKQKHRVDFLQMMNAHNNKDKDSDHKALS
DMEITAQSI VFI FAGYETTSSTLSFTLYCLATHPDIQKKLQEEI DETLPNKAPPTYDVTMEMEYLDMLVNETL
RLYPIGNRLERFCKKDVELNGVYIPKGSTVMIPSYALHHD PQHWPEPEEFQPERFSKENKGSIDPYLYMPFGI
GPRNCIGMRFAFMTMKLALTKVMQNFSFQPCQETQIPLKLSRQGLLQPEKPIVLKVVPRDVTITGA*

```







NVYTPVDEHVYPGHRVVDPNIEMIPGAHSLPSGHLYSMSESEMNALRNFVDRNVKDGLMTPTVAPNGAQVLQV  
KRGWKLQVTYNCRAPQSGTIQNYLRMSLPNMGDPAHLASYGEFVQVPGYPYPAYVYYTSPHMMTAWYPVGRD  
VHGRIIVVPVVIITWSQNTNRQPPVPQYPPPPQPPPPPPPPPPPPPPPPPPASSCSAA\*  
>ENSMUSP00000135076\_c.924:CCTC>G\_p.PP309del ENSMUST00000176551.3|Peg10-  
203|ENSMUSG00000092035|+|chr6:g.4756350:CCTC>G  
MLQIHMGRPTLFFVRAMIDSGASGNFIDQDFVIQNAIPLRIKDWVPMVEAIDGHPIASGP I ILETHHLIVDLG  
DHREILSFDVTSQSPFFPIVLGIRWLSTHDPHITWSTRSIVFNSDYCRLRCRMFAQIPSNLLFTVPQPNLHPYL  
LHHVHPHVHPMHQHHLHQHLHQFLHPDPHQYHPDPHYHHHQADMQHQLQQYLYQYLYYHLYPVMHHHLPPD  
QHEHLHEYLHQYLYHQYLYHQFLHHHLHPDLHQYLYQYLYLHNHMNPDPHHPHPDPPQDPHHPHQDPHQDPHQ  
DPPHQDPHQDPHQDPHQDPHQDPHQDPHQDPHQDPHQDPHQDPHQDPHQDPHQDPHQDPHQDPHQDPHQDPHQ  
PQPQHPHQHPNHPQPPFFYHMAGFRIYHPVRYYYIQNVYTPVDEHVYPGHRVVDPNIEMIPGAHSLPSGHL  
YSMSESEMNALRNFVDRNVKDGLMTPTVAPNGAQVLQV KRGWKLQVTYNCRAPQSGTIQNYLRMSLPNMGD  
AHLASYGEFVQVPGYPYPAYVYYTSPHMMTAWYPVGRDVHGRIIVVPVVIITWSQNTNRQPPVPQYPPPPQPPPP  
PPPPPPPPPPPPASSCSAA\*  
>ENSMUSP00000127306\_c.2127:CCTC>G\_p.PP710del ENSMUST00000166678.2|Peg10-  
201|ENSMUSG00000092035|+|chr6:g.4756350:CCTC>G  
MAAAGSSNCPPPPPPPPNNNNNNNTPKSPGVPDAEDDDERRHDELPEIDNNFDEDMNRQFENMNLLDQVEL  
LAQSYSLDLHLDLDDFDDDDDDDFDEPDQDELPEYSDDDDLELQGAAAAPINPFSDDDCLEDLPEKFDGNPD  
MLGPFMYQCQLFMEKSTRDFSVDRIRVCFVTSMLIGRAARWATAKLQRCTYLMHNYTAFMMELKHVFEDPQRR  
EAAKRKIRRLRQGGPVDYSNAFQMIADLDWTEPALMDQFQEGLNPDIRAELSRQEAPKTLAALITACIHI  
ERRLARDAAAKPDPSPRALVMPNSQTDPTPEVGGARMRLSKEEKERRRKMNLCLYCGNGGFADTCPAKASK  
NSPPGLPGPAVGGPSATGPERIRSPPSEASTQHLQVMLQIHMGRPTLFFVRAMIDSGASGNFIDQDFVIQNAI  
PLRIKDWVPMVEAIDGHPIASGP I ILETHHLIVDLGDHREILSFDVTSQSPFFPIVLGIRWLSTHDPHITWSTR  
SIVFNSDYCRLRCRMFAQIPSNLLFTVPQPNLHPYLLHHVHPHVHPMHQHHLHQHLHQFLHPDPHQYHPDPH  
YHHHQADMQHQLQQYLYQYLYYHLYPVMHHHLPPDQHEHLHEYLHQYLYHQYLYHQFLHHHLHPDLHQYLYQYL  
HNHMNPDPHHPHPDPPQDPHHPHQDPHQDPHQDPHQDPHQDPHQDPHQDPHQDPHQDPHQDPHQDPHQDPHQ  
QDAHQHQDPHQDAHQPDPHQDPHMDPHLHQHPQPPQHPNHPQPPFFYHMAGFRIYHPVRYYYIQNVYTPVDEHVYPGHRVVDPNIEMIPGAHSLPSGHL  
VYSMSESEMNALRNFVDRNVKDGLMTPTVAPNGAQVLQV KRGWKLQVTYNCRAPQSGTIQNYLRMSLPNMGDPAHLASYGEFVQVPGYPYPAYVYYTSPHMMTAWYPVGR  
DVHGRIIVVPVVIITWSQNTNRQPPVPQYPPPPQPPPPPPPPPPPPPPPPPPASSCSAA\*  
>ENSMUSP00000135076\_c.967:ATCC>A\_p.DP323del ENSMUST00000176551.3|Peg10-  
203|ENSMUSG00000092035|+|chr6:g.4756393:ATCC>A  
MLQIHMGRPTLFFVRAMIDSGASGNFIDQDFVIQNAIPLRIKDWVPMVEAIDGHPIASGP I ILETHHLIVDLG  
DHREILSFDVTSQSPFFPIVLGIRWLSTHDPHITWSTRSIVFNSDYCRLRCRMFAQIPSNLLFTVPQPNLHPYL  
LHHVHPHVHPMHQHHLHQHLHQFLHPDPHQYHPDPHYHHHQADMQHQLQQYLYQYLYYHLYPVMHHHLPPD  
QHEHLHEYLHQYLYHQYLYHQFLHHHLHPDLHQYLYQYLYLHNHMNPDPHHPHPDPPQDPHHPHQDPHQDPHQ  
DPPHQDPHQDPHQDPHQDPHQDPHQDPHQDPHQDPHQDPHQDPHQDPHQDPHQDPHQDPHQDPHQDPHQDPHQ  
PQPQHPHQHPNHPQPPFFYHMAGFRIYHPVRYYYIQNVYTPVDEHVYPGHRVVDPNIEMIPGAHSLPSGHL  
YSMSESEMNALRNFVDRNVKDGLMTPTVAPNGAQVLQV KRGWKLQVTYNCRAPQSGTIQNYLRMSLPNMGD  
AHLASYGEFVQVPGYPYPAYVYYTSPHMMTAWYPVGRDVHGRIIVVPVVIITWSQNTNRQPPVPQYPPPPQPPPP  
PPPPPPPPPPPPASSCSAA\*  
>ENSMUSP00000127306\_c.2170:ATCC>A\_p.DP724del ENSMUST00000166678.2|Peg10-  
201|ENSMUSG00000092035|+|chr6:g.4756393:ATCC>A  
MAAAGSSNCPPPPPPPPNNNNNNNTPKSPGVPDAEDDDERRHDELPEIDNNFDEDMNRQFENMNLLDQVEL  
LAQSYSLDLHLDLDDFDDDDDDDFDEPDQDELPEYSDDDDLELQGAAAAPINPFSDDDCLEDLPEKFDGNPD  
MLGPFMYQCQLFMEKSTRDFSVDRIRVCFVTSMLIGRAARWATAKLQRCTYLMHNYTAFMMELKHVFEDPQRR  
EAAKRKIRRLRQGGPVDYSNAFQMIADLDWTEPALMDQFQEGLNPDIRAELSRQEAPKTLAALITACIHI  
ERRLARDAAAKPDPSPRALVMPNSQTDPTPEVGGARMRLSKEEKERRRKMNLCLYCGNGGFADTCPAKASK  
NSPPGLPGPAVGGPSATGPERIRSPPSEASTQHLQVMLQIHMGRPTLFFVRAMIDSGASGNFIDQDFVIQNAI  
PLRIKDWVPMVEAIDGHPIASGP I ILETHHLIVDLGDHREILSFDVTSQSPFFPIVLGIRWLSTHDPHITWSTR  
SIVFNSDYCRLRCRMFAQIPSNLLFTVPQPNLHPYLLHHVHPHVHPMHQHHLHQHLHQFLHPDPHQYHPDPH  
YHHHQADMQHQLQQYLYQYLYYHLYPVMHHHLPPDQHEHLHEYLHQYLYHQYLYHQFLHHHLHPDLHQYLYQYL  
HNHMNPDPHHPHPDPPQDPHHPHQDPHQDPHQDPHQDPHQDPHQDPHQDPHQDPHQDPHQDPHQDPHQDPHQ  
QDAHQHQDPHQDAHQPDPHQDPHMDPHLHQHPQPPQHPNHPQPPFFYHMAGFRIYHPVRYYYIQNVYTPVDEHVYPGHRVVDPNIEMIPGAHSLPSGHL  
VYSMSESEMNALRNFVDRNVKDGLMTPTVAPNGAQVLQV KRGWKLQVTYNCRAPQSGTIQNYLRMSLPNMGDPAHLASYGEFVQVPGYPYPAYVYYTSPHMMTAWYPVGR  
DVHGRIIVVPVVIITWSQNTNRQPPVPQYPPPPQPPPPPPPPPPPPPPPPPPASSCSAA\*

>ENSMUSP00000135076\_c.972:CCACATCAGGATCCACATCAGGATGCACATCAGCATCAGGATCCCCA  
TCAGGATG>C\_p.PHQDPHQDAHQHQDPHQDA325del ENSMUST00000176551.3|Peg10-  
203|ENSMUSG00000092035|+|chr6:g.4756398:CCACATCAGGATCCACATCAGGATGCACATCAG  
CATCAGGATCCCCATCAGGATG>C  
MLQIHMPGRPTLFVVRAMIDSGASGNFIDQDFVIQNAIPLRIKDWPMVEAIDGHPIASGPIILETHHLIVDLG  
DHREILSFDVTSQSPFFPIVLGIRWLSTHDPHITWSTRSIVFNSDYCRLRCRMFAQIPSNLLFTVPQPNLHPYL  
LHHVHPHVHPMHQHLHQHLHQFLHPDPHQYHPDPHYHHHQADMQHQLQQYLYQYLYYHLYPVMHHHLPPD  
QHEHLHEYHLHQYLYHQYLYHQFLHHHLHPDLHQYLYQYLYLHNHMNPDPHHPHPDPDPDPHPHPHPQDPHQ  
DPHQDPHQHPDPHQDPHPHQDPHQDPHQDPHQDPHQDPHQDPHQDPHQDPHQDPHQDPHQDPHQDPHQDPHQ  
PPFFYHMAGFRIYHPVRYYYIQNVYTPVDEHVYPGHRVDPNIEMIPGAHSLSGHLYSMSESEMNALRNFVDR  
NVKDGLMTPTVAPNGAQVLQVKGWKLQVTYNCRAPQSGTIQNYLRMSLPNMGDPAHLASYGEFVQVPGYPY  
PAYVYYTSPHMMTAWYPVGRDVHGRIIVVPVVIWTSQNTNRQPPVPQYPPPPQPPPPPPPPPPPPPPASSCS  
AA\*

>ENSMUSP00000127306\_c.2175:CCACATCAGGATCCACATCAGGATGCACATCAGCATCAGGATCCCC  
ATCAGGATG>C\_p.PHQDPHQDAHQHQDPHQDA726del ENSMUST00000166678.2|Peg10-  
201|ENSMUSG00000092035|+|chr6:g.4756398:CCACATCAGGATCCACATCAGGATGCACATCAG  
CATCAGGATCCCCATCAGGATG>C  
MAAAGSSNCPPPPPPPPNNNNNNNTPKSPGVDAEDDDERRHDELPEIDNNFDEDMNRQFENMNLDDQVEL  
LAQSYSLLDHLDLDDDDDEDDDFDPEPDQDELPEYSDDDDLELQGAAAAPIPNFFSDDDCLEDLPEKFDGNPD  
MLGPFMYQCQLFMEKSTRDFSVDRIKRVCFVTSMLIGRAARWATAKLQRCTYLMHNYTAFMMELKHVFEDPQRR  
EAAKRKIRRLRQGGPVPVVDYSNAFQMIQDLWTEPALMDQFQEGLNPDIRAELSRQEAPKTLAALITACIHI  
ERRLARDAAAKPDPSPRALVMPNSQTDPTPEVGGARMRLSKEEKERRRKMNLCLYCGNGGFADTCPAKASK  
NSPPGLPGPAVGGPSATGPERIRSPSEASTQHLQVMLQIHMPGRPTLFVVRAMIDSGASGNFIDQDFVIQNAI  
PLRIKDWPMVEAIDGHPIASGPIILETHHLIVDLGDHREILSFDVTSQSPFFPIVLGIRWLSTHDPHITWSTR  
SIVFNSDYCRLRCRMFAQIPSNLLFTVPQPNLHPYLLHHVHPHVHPMHQHLHQHLHQFLHPDPHQYHPDPH  
YHHHQADMQHQLQQYLYQYLYYHLYPVMHHHLPPDQHEHLHEYHLHQYLYHQYLYHQFLHHHLHPDLHQYLYQY  
LHNHMNPDPHHPHPDPDPHPHQDPHQDPHPHQDPHQDPHQDPHQDPHQDPHQDPHQDPHQDPHQDPHQDPHQ  
HQDAHQDPHMDPHLHQHQHPQPPFFYHMAGFRIYHPVRYYYIQNVYTPVDEHVYPGHRV  
VDPNIEMIPGAHSLSGHLYSMSESEMNALRNFVDRNVKDGLMTPTVAPNGAQVLQVKGWKLQVTYNCRAPQ  
SGTIQNYLRMSLPNMGDPAHLASYGEFVQVPGYPYPAYVYYTSPHMMTAWYPVGRDVHGRIIVVPVVIWTSQ  
NTNRQPPVPQYPPPPQPPPPPPPPPPPPPPPPPPASSCSAA\*

>ENSMUSP00000135076\_c.984:C>G\_p.P329A ENSMUST00000176551.3|Peg10-  
203|ENSMUSG00000092035|+|chr6:g.4756410:C>G  
MLQIHMPGRPTLFVVRAMIDSGASGNFIDQDFVIQNAIPLRIKDWPMVEAIDGHPIASGPIILETHHLIVDLG  
DHREILSFDVTSQSPFFPIVLGIRWLSTHDPHITWSTRSIVFNSDYCRLRCRMFAQIPSNLLFTVPQPNLHPYL  
LHHVHPHVHPMHQHLHQHLHQFLHPDPHQYHPDPHYHHHQADMQHQLQQYLYQYLYYHLYPVMHHHLPPD  
QHEHLHEYHLHQYLYHQYLYHQFLHHHLHPDLHQYLYQYLYLHNHMNPDPHHPHPDPDPDPHQDPHQDPHQ  
DPHQDPHQHPDPHQDPHPHQDPHQDPHQDPHQDPHQDPHQDPHQDPHQDPHQDPHQDPHQDPHQDPHQDPHQ  
HPQPPFFYHMAGFRIYHPVRYYYIQNVYTPVDEHVYPGHRVDPNIEMIPGAHSLSGHL  
LYSMSESEMNALRNFVDRNVKDGLMTPTVAPNGAQVLQVKGWKLQVTYNCRAPQSGTIQNYLRMSLPNMGD  
PAHLASYGEFVQVPGYPYPAYVYYTSPHMMTAWYPVGRDVHGRIIVVPVVIWTSQNTNRQPPVPQYPPPPQPP  
PPPPPPPPPPPPASSCSAA\*

>ENSMUSP00000127306\_c.2187:C>G\_p.P730A ENSMUST00000166678.2|Peg10-  
201|ENSMUSG00000092035|+|chr6:g.4756410:C>G  
MAAAGSSNCPPPPPPPPNNNNNNNTPKSPGVDAEDDDERRHDELPEIDNNFDEDMNRQFENMNLDDQVEL  
LAQSYSLLDHLDLDDDDDEDDDFDPEPDQDELPEYSDDDDLELQGAAAAPIPNFFSDDDCLEDLPEKFDGNPD  
MLGPFMYQCQLFMEKSTRDFSVDRIKRVCFVTSMLIGRAARWATAKLQRCTYLMHNYTAFMMELKHVFEDPQRR  
EAAKRKIRRLRQGGPVPVVDYSNAFQMIQDLWTEPALMDQFQEGLNPDIRAELSRQEAPKTLAALITACIHI  
ERRLARDAAAKPDPSPRALVMPNSQTDPTPEVGGARMRLSKEEKERRRKMNLCLYCGNGGFADTCPAKASK  
NSPPGLPGPAVGGPSATGPERIRSPSEASTQHLQVMLQIHMPGRPTLFVVRAMIDSGASGNFIDQDFVIQNAI  
PLRIKDWPMVEAIDGHPIASGPIILETHHLIVDLGDHREILSFDVTSQSPFFPIVLGIRWLSTHDPHITWSTR  
SIVFNSDYCRLRCRMFAQIPSNLLFTVPQPNLHPYLLHHVHPHVHPMHQHLHQHLHQFLHPDPHQYHPDPH  
YHHHQADMQHQLQQYLYQYLYYHLYPVMHHHLPPDQHEHLHEYHLHQYLYHQYLYHQFLHHHLHPDLHQYLYQY  
LHNHMNPDPHHPHPDPDPHPHQDPHQDPHPHQDPHQDPHQDPHQDPHQDPHQDPHQDPHQDPHQDPHQDPHQ  
HQDAHQDPHMDPHLHQHQHPQPPFFYHMAGFRIYHPVRYYYIQNVYTPVDEHVYPGHRVDPNIEMIPGAHSLSGHL  
YSMSESEMNALRNFVDRNVKDGLMTPTVAPNGAQVLQVKGWKLQVTYNCRAPQSGTIQNYLRMSLPNMGD  
PAHLASYGEFVQVPGYPYPAYVYYTSPHMMTAWYPVGRDVHGRIIVVPVVIWTSQNTNRQPPVPQYPPPPQPP  
PPPPPPPPPPPPASSCSAA\*

```

>rs52535223_ENSMUSP00000135076_c.996:G>C_p.A333P
ENSMUST00000176551.3|Peg10-203|ENSMUSG00000092035|+|chr6:g.4756422:G>C
MLQIHMPGRPTLFFVRAMIDSGASGNFIDQDFVIQNAIPLRIKDWPMVVEAIDGHPIASGP I ILETHHLIVDLG
DHREILSFDVTSQSPFFPIVLGIRWLSTHDPHITWSTRSIVFNSDYCRLRCRMFAQIPSNLLFTVPQPNLHPYL
LHHVHPHVHPMHQHHLHQHLHQFLHPDPHQYHPDPHYHHHQADMQHQLQQYLYQYLYYHLYPVMHHHLPPD
QHEHLHEYLHQYLYHQYLYHQFLHHHLHPDLHQYLYQYLYLHNHMNPDPHHHPDPFPQDPHHPHQDPHQHPDPHQ
DPPHQDPHQHPDPHQDPHPHQDPHQDPHQDPHQDPHQDPHQDPHQDPHQDPHQDPHQDPHQDPHQDPHQDPHQDPHQ
HPQPQHPHPQHPNHPQPPFFYHMAGFRIYHPVRYYYIQNVYTPVDEHVYPGHRVVDPNIEMI PGAHSLPSGH
LYSMSESEMNALRNFVDRNVKDGMLTPTVAPNGAQVLQVKGWKLQVTYNCRAPQSGTIQNQYLRMSLPMGD
PAHLASYGEFVQVPGYPYPAYVYYTSPHMMTAWYPVGRDVHGRIIVVPVITWSQNTNRQPPVPQYPPPQPPP
PPPPPPPPPPPPASSCSAA*
>rs52535223_ENSMUSP00000127306_c.2199:G>C_p.A734P
ENSMUST00000166678.2|Peg10-201|ENSMUSG00000092035|+|chr6:g.4756422:G>C
MAAAGSSNCPPPPPPPPNNNNNNNTPKSPGVDAEDDDERRHDELPEIDINNFDEDMNRQFENMNLDDQVEL
LAQSYSLDHLDDDFDDDEDDDFDPEPDQDELPEYSDDDDLELQGAAAAPIPNFFSDDDCLEDLPEKFDGNPD
MLGPFMYQCQLFMEKSTRDFSVDIRVCFVTSMLIGRAARWATAKLQRCTYLMHNYTAFMMELKHVFEDPQRR
EAAKRKIRRLRQGPGPVVDYSNAFQMI AQDLDWTEPALMDQFQEGLNPDIRAELSRQEAPKTLAALITACIHI
ERRLARDAAAKPDPSPRALVMPNSQTDPTPEVGGARMRLSKEEKERRRKMNLCLYCGNGGFADTCPAKASK
NSPPGLPGPAVGGPSATGPERIRSPSEASTQHLQVMLQIHMPGRPTLFFVRAMIDSGASGNFIDQDFVIQNAI
PLRIKDWPMVVEAIDGHPIASGP I ILETHHLIVDLGDHREILSFDVTSQSPFFPIVLGIRWLSTHDPHITWSTR
SIVFNSDYCRLRCRMFAQIPSNLLFTVPQPNLHPYLLHHVHPHVHPMHQHHLHQHLHQFLHPDPHQYHPDPH
YHHHQADMQHQLQQYLYQYLYYHLYPVMHHHLPPDQHEHLHEYLHQYLYHQYLYHQFLHHHLHPDLHQYLYQYL
HNHMNPDPHHHPDPFPQDPHHPHQDPHQDPHPHQDPHQDPHQDPHQDPHQDPHQDPHQDPHQDPHQDPHQDP
HQDPHQDPHQDAHQDPHQDAHQDPHMDPHLHQHPQPQHPHPQHPNHPQPPFFYHMAGFRIYHPVRYYY
IQNVYTPVDEHVYPGHRVVDPNIEMI PGAHSLPSGHLYSMSESEMNALRNFVDRNVKDGMLTPTVAPNGAQVL
QVKGWKLQVTYNCRAPQSGTIQNQYLRMSLPMGDPAHLASYGEFVQVPGYPYPAYVYYTSPHMMTAWYPVG
RDVHGRIIVVPVITWSQNTNRQPPVPQYPPPQPPPPPPPPPPPPPPPPPPPPPPASSCSAA*
>rs52233015_ENSMUSP00000135076_c.1009:A>C_p.Q337P
ENSMUST00000176551.3|Peg10-203|ENSMUSG00000092035|+|chr6:g.4756435:A>C
MLQIHMPGRPTLFFVRAMIDSGASGNFIDQDFVIQNAIPLRIKDWPMVVEAIDGHPIASGP I ILETHHLIVDLG
DHREILSFDVTSQSPFFPIVLGIRWLSTHDPHITWSTRSIVFNSDYCRLRCRMFAQIPSNLLFTVPQPNLHPYL
LHHVHPHVHPMHQHHLHQHLHQFLHPDPHQYHPDPHYHHHQADMQHQLQQYLYQYLYYHLYPVMHHHLPPD
QHEHLHEYLHQYLYHQYLYHQFLHHHLHPDLHQYLYQYLYLHNHMNPDPHHHPDPFPQDPHHPHQDPHQHPDPHQ
DPPHQDPHQHPDPHQDPHPHQDPHQDPHQDPHQDPHQDPHQDPHQDPHQDPHQDPHQDPHQDPHQDPHQDPHQDP
HQDPHQDPHQDAHQDPHQDAHQDPHMDPHLHQHPQPQHPHPQHPNHPQPPFFYHMAGFRIYHPVRYYY
IQNVYTPVDEHVYPGHRVVDPNIEMI PGAHSLPSGHLYSMSESEMNALRNFVDRNVKDGMLTPTVAPNGAQVL
QVKGWKLQVTYNCRAPQSGTIQNQYLRMSLPMGDPAHLASYGEFVQVPGYPYPAYVYYTSPHMMTAWYPVG
RDVHGRIIVVPVITWSQNTNRQPPVPQYPPPQPPPPPPPPPPPPPPPPPPPPPPASSCSAA*
>rs52233015_ENSMUSP00000127306_c.2212:A>C_p.Q738P
ENSMUST00000166678.2|Peg10-201|ENSMUSG00000092035|+|chr6:g.4756435:A>C
MAAAGSSNCPPPPPPPPNNNNNNNTPKSPGVDAEDDDERRHDELPEIDINNFDEDMNRQFENMNLDDQVEL
LAQSYSLDHLDDDFDDDEDDDFDPEPDQDELPEYSDDDDLELQGAAAAPIPNFFSDDDCLEDLPEKFDGNPD
MLGPFMYQCQLFMEKSTRDFSVDIRVCFVTSMLIGRAARWATAKLQRCTYLMHNYTAFMMELKHVFEDPQRR
EAAKRKIRRLRQGPGPVVDYSNAFQMI AQDLDWTEPALMDQFQEGLNPDIRAELSRQEAPKTLAALITACIHI
ERRLARDAAAKPDPSPRALVMPNSQTDPTPEVGGARMRLSKEEKERRRKMNLCLYCGNGGFADTCPAKASK
NSPPGLPGPAVGGPSATGPERIRSPSEASTQHLQVMLQIHMPGRPTLFFVRAMIDSGASGNFIDQDFVIQNAI
PLRIKDWPMVVEAIDGHPIASGP I ILETHHLIVDLGDHREILSFDVTSQSPFFPIVLGIRWLSTHDPHITWSTR
SIVFNSDYCRLRCRMFAQIPSNLLFTVPQPNLHPYLLHHVHPHVHPMHQHHLHQHLHQFLHPDPHQYHPDPH
YHHHQADMQHQLQQYLYQYLYYHLYPVMHHHLPPDQHEHLHEYLHQYLYHQYLYHQFLHHHLHPDLHQYLYQYL
HNHMNPDPHHHPDPFPQDPHHPHQDPHQDPHPHQDPHQDPHQDPHQDPHQDPHQDPHQDPHQDPHQDPHQDP
HQDAHQHPDPHQDAHQDPHQDAHQDPHMDPHLHQHPQPQHPHPQHPNHPQPPFFYHMAGFRIYHPVRYYY
IQNVYTPVDEHVYPGHRVVDPNIEMI PGAHSLPSGHLYSMSESEMNALRNFVDRNVKDGMLTPTVAPNGAQVL
QVKGWKLQVTYNCRAPQSGTIQNQYLRMSLPMGDPAHLASYGEFVQVPGYPYPAYVYYTSPHMMTAWYPVG
RDVHGRIIVVPVITWSQNTNRQPPVPQYPPPQPPPPPPPPPPPPPPPPPPPPPPASSCSAA*
>ENSMUSP00000135076_c.1026:G>CTC_p.A343PP-ins
ENSMUST00000176551.3|Peg10-203|ENSMUSG00000092035|+|chr6:g.4756452:G>CTC
MLQIHMPGRPTLFFVRAMIDSGASGNFIDQDFVIQNAIPLRIKDWPMVVEAIDGHPIASGP I ILETHHLIVDLG
DHREILSFDVTSQSPFFPIVLGIRWLSTHDPHITWSTRSIVFNSDYCRLRCRMFAQIPSNLLFTVPQPNLHPYL

```





ICTQCCLSLK\*MLCEISWTGMLKMGs\*LPLWRPMEPKSCK\*KEGGNSKSLTIAELHRVAPSKIStyACLFQIWE  
 TLHTWQAMVNLskFLATHIQPMFTIQARI\*\*LRGTQ\*DEMYMDE\*SLCLL\*SPGLKIRTASLRCPSILLRSHL  
 HHHHLLHRHHLLHQHHPAVLR  
 >ENSMUSP00000127306\_c.2253:GCA>CCC\_p.A752P ENSMUST00000166678.2|Peg10-  
 201|ENSMUSG00000092035|+|chr6:g.4756476:GCA>CCC  
 MAAAGGSSNCPppppppppnnnnnnntPKSPGVPDAEDDDERRHDELPEdINNFDEdMNRQFENMNLDDQVEL  
 LAQSYSLDDHLDDDFDDDDDDDFDPEPDQDELPEYSDDDDLELQAAAAPIPNFFSDDDCLEDLPEKFDGNPD  
 MLGPFMYQCQLFMEKSTRDFSVDRIRVCFVTSMLIGRAARWATAKLQRCTYLMHNYTAFMMELKHVFEDPQRR  
 EAAKRKIRRLRQGPGPVVDYSNAFQMIQDLDWTEPALMDQFQEGLNPDIRAELSRQEAPKTLAALITACIHI  
 ERLARDAAAKPDPSRALVMPPNSQTDPTPEVGGARMRLSKEEKERRRKMNLCLYCGNGGHFADTCPAKASK  
 NSPPGLPGPAVGGPSATGPERIRSPSEASTQHLQVMLQIHMPGRPTLFVRAMIDSGASGNFIDQDFVIQNAI  
 PLRIKDWPMVEAIDGHPIASGPIILETHHLIVDLGDHREILSFVDTQSPFFPIVLGIRWLSTHDPHITWSTR  
 SIVFNSDYCRLRCRMFAQIPSNLFTVPQPNLHPYLLHHVHPHVHPMHQHHLHQHLHQFLHPDPHQYHPDPH  
 YHHHQADMQHQLQYLYQYLYHYLYPVMHHHLPPDQHEHLEHLYLHQYLYHQYLYHQYLYHQYLYHQYLY  
 HNHMNPDPHHHPDPDPDPDPHHPHQPDPHQPDPHQPDPHQPDPHQPDPHQPDPHQPDPHQPDPHQPDPH  
 HQDAHQHQPDPHQPDPHQPDPHIRIPIWIHTCISTSIrSRsRIHNSILTILSSHSSSTTWLdSEFTTL\*GIT  
 IFRMCIHLLMSMIRVGTWLTTLTLR\*FLERTACPDICTQCCLSLK\*MLCEISWTGMLKMGs\*LPLWRPMEPKS  
 CK\*KEGGNSKSLTIAELHRVAPSKIStyACLFQIWEtlHTWQAMVNLskFLATHIQPMFTIQARI\*\*LRGTQ\*  
 DEMYMDE\*SLCLL\*SPGLKIRTASLRCPSILLRSHLHHHHLLHRHHLLHQHHPAVLR  
 >ENSMUSP00000158794\_c.4095:C>A\_p.L1366I ENSMUST00000238599.2|Mgam-  
 208|ENSMUSG00000068587|+|chr6:g.40666353:C>A  
 MAGRRFKKfSKLELVLIVLLVLFIAVVLIVLLANSTPENAIgAETTGTPTTvtRtTLNSPNCpVlSELER  
 INCIpDQSSNKGTCDErGCCWDpQGSISVPCYYSRNHGyKMEsDvVNTnAGFTATLKNLPSAPVFGNSIENIL  
 LTAEYQTSNRfHFkLTDQTKKRyEVPHEHVQPFSGNAPSSLNyKVEVSKEPFsIKVTRKSNnrVLFdSSIGPL  
 LfSDQfLQfSTHLPSANvyGLGEHVHQYrHNmnWktWpMfSRDTPnEDGtNlyGVQTFfLcLEDnSGLSfG  
 VFLMNSNAMEVTLQPTPAITYRTGGILDFYVFLGNTPEQVvQeYLELIgRPALPSYWTlGfQLSRyDYKSLD  
 NMKAVERNRRAAQLPYDVQHADIDYMDQKkDFTYDPVNFkGFPEFVKELHnNGQKLVIILDPAISnNSfSNP  
 YGPyDRGSAMKIwvNssDgISpVIGkVwPGTtVFPDYtSPNCAVwWtKEfELfHKEVEFDGIWIDMNEvSNFI  
 DGSfSGCSQNNLnyPPfTPKVLdGyLFSKTLcMDAVQHWGkQYdVHNlyGYSMAIATAKAVKdVfPDKRSfII  
 TRSTfAGSGkFAAHwLGDNTATWkDLQWSIPGMLEfNLfGIPMVGADICGfAQDtyEELCRRwMQlGAFyPFS  
 RNHNGQGYKdQDPASfGNsLLLNSSrHYLNIRyTLLPYLYTLfYRAHSRGDTVARPLLHEfYDDNNTWGIrD  
 QFLWGPGLLITPVLdQGAEKVKAyVPNATWYDYETGEELGWRKQSIEMQLPGDKIGLHLRGGYIFPTQQPATT  
 TEASrKNPLGLIvalDENKEARGELfWDDGESKDTVAQNIYLFSEfSVtQNHLDVTISSPNyKDPNNLEfQEI  
 KIFGTREfRNVRVKQNGNLLQMSpQVTYNPNLkVATItnIHlRLGEAYtVEWDFfTREEERIDcYPDEHGASE  
 ANCSARGCIWEASNTTRGPPCYfAhELySVSNVQYdSHGATADISLKASTYSNAfPSTPVNKLKlQVtYHKNE  
 MLQfKIYDPNHSrYEVpVPLNIPsAPLSTPEGrLYdVLIkENPFGIQIRrKtTGTVIWDSQLLGFtNDMFIR  
 ISTRLPSTYIYGfGETEHTTfKIDMNWHTWGMfSRDEPPGYKkNSyGvHPYMGLEEDGNahGvLLMNSNAMd  
 VTFQMPALTYRTIGGILDFYVFLGPTPEIVTQQYTELIGRPVMVPYWSLGFQLCRYGYENDTEIANLYDEMv  
 AKQIPYDVQYSDIDYMERQLDFKLSPKfSGFPALINRMKANGMRVILILDPAISGNETQPYPAFTQGVENDVf  
 IRYPNNGGIVWgKvWpDYpNITVDSsLDWDIQVERYRAYVAfPDPFRDSTAIWwKKEIKELHSNSQDQAKSLK  
 FDGLWIDMNEPSSfVNGAVPSGCSDATLNHPpYMPHVEGRDRGLSSKTLcMESEHILPDGSRVRHYDVHSlyG  
 WSQTRPTyEAMQEVtGERGIVITRSTfPSSGRWGGHWLGDNTAAWdQLGKSIIGMMDFSLFGISyTGSdICGF  
 FQDAEYEMCVRWwQLGAFyPFSRNHTIGTKRQDPVSWDKTFEDISRSVLETRYTLPLyLYTLMyKAHKEGST  
 VVRPLLHEfLADRETWNIDKQfLLGPAFLVSPVLEPNARNVTAYfPKAQWYDYtTGADINStGWtTLpAPLEH  
 INLHVrGGYILPWQPALNTNLSrKKPLGLLIALDEKKEARGELfWDDGQSKDTVAkNIYLFSEfSVtQNHLD  
 VTISSPNyKDPNNLEfQEIKIIFGTQEFsNVRVKQNGNLLQMSpQVTYNPNLkVATItnIHlRLGEAYtVEWGF  
 FTREEERIDcYPDEHGASEANCSARGCIWEESNTIGVPTCYfAhELySVSNVQYdSHGATADISLKASTYSNA  
 FPSTPVNKLKlQVtYHKNEMLQfKIYDPNNSrYEVpVPLNIPsAPSStNEGrLYdVLIkENPFGIQVRrKSTG  
 TVIWDsQLLGFtFNDMFIRISTRLPSTYIYGfGETEHTTfKIDMNWHTWGMfSRDEPPGYKkNSyGvHPYMG  
 LEEDGNahGvLLMNSNAMdVTFQMPALTYRTIGGILDFYVLLGPTPEIVTQQYTELIGRPVMVPYWSLGFQL  
 CRYGYENDSEIASLYDEMVDKQIPYDVQYSDIDYMERQLDFKLSPKfSGFPALINRMKANGMRVILILDPAIS  
 GNETQPYPAFTTRGVENDVfIRYPNNGSIVWgKvWpDYpNITVDPsLGWDHQVEQYRAYVAfPDPFRNSTATWw  
 KKEIEELyTNTHEEPEKSLKfDGLWIDMNEPSSfVNGAVPSGCSDATLNHPpYMPHVEGRDRGLSSKTLcMESE  
 HILPDGSRVrHYDVHSlyGWSQTRPTyEAVQEVtGERGIVITRSTfPSSGRWGGHWLGDNTAAWdQLGKSIIG  
 MMDfSLFGISyTGSdICGFQDAEYEMCVRWwQLGAFyPFSRNHTIGTKRQDPVSWNKTfEDISRSVLETRY  
 TLLPYLYTLMyKAHMEGSTVVRPLLHEfVSDRKTWNIDKQfLLGPAFLVSPVLEPNARNISAYfPTALWYDY  
 TGANINStGEWkTLpAPLEHINLHVrGGYILPWQRPALNTHLSrKNPLGLLIALDENKEARGELfWDDGQSKD  
 LTTNNILCKfSVtQNRldVSTLQStYMNpDNlAFQEIKIIFGTRPLyNVtVKHNGMVnQMAPQVSyDPsMKVAV

ITGLQLLLNESYTVIEWDDSIIRDEEKIDCYPDQHGASETSCTARGCVWEESNSDVPVFCYFVNELYSVSNVQYG  
SHGATANISLKASPYSAGFPSTPVKELQLQVTYHKNEMLQFKIYDPNHSRYEVPVPLNIPSAPSTPESRLYD  
VLIKENPFGIEIRRKGTGTVVWDSQLLGFTFSDMFIRISTRLPSTYIYGFGETEHTTFKIDMNWNKGMFSRD  
EPPGYRKNSYGVHPYMGLEEDGNAHGVLLMNSNAMDVTFQPMALTYRRTGGILDFYVFLGPTPEFVTOQYT  
ELIGRPVMPVYWSLGFQLCRYGYENDSEIASLYDEMVDKIPYDVQYSDIDYMERQLDFKLSPKFSGFPALIN  
RMKANGMRVILILDPAISGNETEPEYPAFTRGVENDVFIIRYPNNGSIVWGKVPDPYDNITVDPSLGDWHQVEQY  
RAYVAFPDFFRNSTATWWKKEIKELHSNTQDPAKSLKFDGLWIDMNEPSSFVNGAVPSGCSDATLNHPYMPY  
LEARDRGLSSKTLCEMESEQILPDGSRVRHYDVHNLVYGSQTRPTYEAVQEVGTGERGIVITRSTFPSSGRWGGH  
WLGDNATAAWDLGKSIIGMMDFSLFGISYTGSDICGFFQDAEYEMCVRWMLGAFYPPSRNHNTIGTRRQDPV  
SWNKTFEDISRSVLETRYTLPLPYLYTLMYKAHTEGSTVVRPLLHEFVSDRETWNIDKQFLLGPAFLVSPVLEP  
NARKVEAYFPRARWYDYYKGVNDINATGEWKTLEAPLEYINLHIRGGYILPWQEPAMNTHLSRQKFMGLRAALN  
AEGRAEGWLFWDGKRINTDQYYLARFSVNQTLLTHEKFNNYLTGTAPLYLGYIDIWGLSSSSITNVSISWN  
TNNEEVFANYNSTTKILSVNMTDKISLHTFNLSLTWSSS\*

>ENSMUSP00000153815\_c.208:T>A\_p.I70N ENSMUST00000227909.2|Vmn1r20-  
202|ENSMUSG00000115253|+|chr6:g.57408884:T>A  
MFSLKNVLYFQAGLGVLANMSLLCFYIFIIVGHRPKPTDLISCQLTFIHMVFLTGGDLLLTDIFESLNNND  
FKCKATFYISRVMRCLSICTSCLLSVFQAVTISPSTSLAKFKQKLRKYMVYVFLCIWSFSFSYSSSRIFYVR  
GFTNVSETNQMQITKSCLLFRMNSIIRVFIIFTVTTSRDVFVGMMLTTSTYMVIILCRHQKHLHSIKHLR  
ASPEKRATQTILLLVIFVVMYVWDFIISTISVLLWRYDTVILRVQKFLMYAYPTISPLVQISSDNRIIMVK  
NMYSKHHQRFF\*

>ENSMUSP00000153909\_c.208:T>A\_p.I70N ENSMUST00000226808.2|Vmn1r20-  
201|ENSMUSG00000115253|+|chr6:g.57408884:T>A  
MFSLKNVLYFQAGLGVLANMSLLCFYIFIIVGHRPKPTDLISCQLTFIHMVFLTGGDLLLTDIFESLNNND  
FKCKATFYISRVMRCLSICTSCLLSVFQAVTISPSTSLAKFKQKLRKYMVYVFLCIWSFSFSYSSSRIFYVR  
GFTNVSETNQMQITKSCLLFRMNSIIRVFIIFTVTTSRDVFVGMMLTTSTYMVIILCRHQKHLHSIKHLR  
ASPEKRATQTILLLVIFVVMYVWDFIISTISVLLWRYDTVILRVQKFLMYAYPTISPLVQISSDNRIIMVK  
NMYSKHHQRFF\*

>ENSMUSP00000087096\_c.486:T>A\_p.C163S ENSMUST00000089667.8|Reg3d-  
201|ENSMUSG00000068341|-|chr6:g.78353095:A>T  
MVSHKTLHSMWMLLCCMLSLSWVQGEQSQKLLSPRISCPQEAQYGSYCYLLILEPQTWANAIEHCQKHFS  
GHLAFLLLTYGEEIFVSSLVKNSLTFPYIWIWGLHDLGLSLPNENGWGWSSSDPLTFYNWEIPPSMSAHHGYC  
AALSQASGYQKWRDYSDTIFPYVCKFKG\*

>ENSMUSP00000144715\_c.348:T>A\_p.C117S ENSMUST00000205240.2|Reg3d-  
203|ENSMUSG00000068341|-|chr6:g.78353095:A>T  
MVSHKTLHSMWMLLCCMLSLSWVQGEQSQKLLSPRISCPQEAQYGSYCYLLILEPQTWANAIEGSLPNENG  
WKWSSSDPLTFYNWEIPPSMSAHHGYCAALSQASGYQKWRDYSDTIFPYVCKFKG\*

>ENSMUSP00000132220\_c.348:T>A\_p.C117S ENSMUST00000167492.4|Reg3d-  
202|ENSMUSG00000068341|-|chr6:g.78353095:A>T  
MVSHKTLHSMWMLLCCMLSLSWVQGEQSQKLLSPRISCPQEAQYGSYCYLLILEPQTWANAIEGSLPNENG  
WKWSSSDPLTFYNWEIPPSMSAHHGYCAALSQASGYQKWRDYSDTIFPYVCKFKG\*

>ENSMUSP00000131840\_c.4165:C>G\_p.S1389\* ENSMUST00000163139.8|Plxna1-  
202|ENSMUSG00000030084|-|chr6:g.89306663:G>C  
MPLPPLSSRTLLLLLLLLLRGVWIAISSPPAGLGPQAFRTFVASDWGLTHLVVHEQTGEVYVAVNRRIYKLS  
GNLTLRAHVTPVEDNEKCYPPPSVQSCPHGLGSTDNVNKLKLLLDYAANRLLACGSASQGCQFLRLDDLK  
LGEPPHRRKEHYLSSVREAGSMAGVLIAGPPGQQAFLVGTPIIDGKSEYFPTLSSRRLMANEEDADMFGFVYQ  
DEFVSSQLKIPSDTLKFPFADIIYVYSFRSEQFVYLLTLQLDQLTSPDAAGEHFFTSKIVRLCVDNPKFYS  
YVEFPIGCEQAGVEYRLVQDAYLSRPGQALAKQLGLAEDEEVLFVFAQQGNRVKPPKESALCLFTLRAIKE  
KIKERIQSCYRGEKLSLWLLNKELGINSPLQIDDDFCGQDFNQPLGGTVTIEGTPLFVKEDGLTAVAAAY  
DYQGRVTVFAGTRSGRIRKILVDLANPSGRPALAYESVVAQEGNPILRDLVLSPNRQYLYAMTEKQVTVQVVE  
SCVQYTSCELCLGSRDPHCGWCVLHSCSRQDACERAEEPQRFASDLLQCVQLTVQPRNVSVTMSQVPLVLA  
WVNPDLASGVNCSFEDFTETESILEDGRIHCHSPSAREVAPITQQGQDQRVVKLYLKSKETGKKFASVDFVY  
NCSVHQSQLACVNGSFPCHWCKYRHVCTNNAADCAFLEGRVNMSSEDCPQILPSTHIYVPGVVKPITLAARNL  
PQPQSGQRGYECLFLHIGSPARVTAALRFNSSLQCRNCSYSEYEGNDVSDLPVNLSSVWVNGNFVIDNPQNIQAH  
LYKCPALRQCEGLKADPRFECGWCVAERSSCLRHHCSPASWMMHAHHGSSRCTDPKILKLSPETGPRQG  
GTRLTITGENLGLRFEDVRLGVHVGKVLCSPESEYISAEQIVCEIGDASTLRAHDALVEVCVRDCSLHYRAL  
SPKRFTFVTPTFYRVSPSRGPLSGGTWIGIEGSHLNAGSDVAVSIIGRPFCSFSWRNSREIRCLTPPGHTPGSA  
PIVININRAQLSNPEVKYNYTEDPTILRIDPEWSINSGGTLTGTNLATVREPRIRAKYGGIERENSCMVY  
NDTMTMCRAPSIDNPKRSPPELGERPDEIGFIMDNVRTLLVLNSSSFLYYPDPVLEPLSPTGLELPLSSPLI

LKGRNLLPPAPGNSRLNYTVLIGSTPCILTVSETQLLCEAPNLTGQHKVTVRAGGFEEFSPGMLQVYSDSLLTL  
PAIVGIGGGGGLLLLLVIVAVLIA YKRKSRDADRTLKRLQLQMDNLESRVALECKEAFaelQTDIHELTSDLG  
AGIPFLDYRTYAMRVLPFGIEDHPVLKEMEVQANVEKSLTLFGQLLTKKHFLTLFIRTLEAQRFSMRDRGNV  
A\*LIMTALQGEMEYATGVLKQLSDLIEKNLESKNHPKLLLRRTESVAEKMLTNWFTFLLYKFLKECAGEPLF  
MLYCAIKQQMEKGPIDAITGEARYSLSEDKLIQQIDYKTLTLNCVNPENHNAPEVPVKGLNCDTQVQKEKL  
LDAVYKGVYPYSQRPKAGDMLEWRQGRMARIILQDEDEVTTKIDNDWKRLNTLAHYQVTDGSSVALVPKQTSAY  
NISNSSTFTKLSRYESMLRTASSPDSLRSRTPMITPDLESGTKLWHLVKNHDHLDQREGDRGSKMVSEIYLT  
RLLATKGTLOKQFVDDLFEFIFSTAHRGSALPLAIKYMFDLDEQADKHQIHDSVDRHTWKSNCPLRFWVNV  
KNPQFVFDIHKNSITDACLSVAQTFMDCSTSEHKLKGDSPSNKLLYAKDIPNYKSWVERYADIAKMPAIS  
DQDMSAYLAEQSRLHLSQFNMSALHEIYSYIAKYKDEILVALEKDEQARRQRLRSKLEQVVDTMALSS\*  
>ENSMUSP00000063066\_c.4165:C>G\_p.S1389\* ENSMUST00000049845.6|Plxna1-  
201|ENSMUSG00000030084|-|chr6:g.89306663:G>C  
MPLPPLSSRTLLLLLLLLLLLRGVWIAISSPPAGLGPQAFRTFVASDWGLTHLVVHEQTGEVYVAVNRIYKLS  
GNLTLRAHVTPVEDNEKCYPPPSVQSCPHGLGSTDNVNKL LLLDYAANRLLACGSASQGICQFLRLDDLDFK  
LGEPHHRKEHYLSSVREAGSMAGVLIAGPPGQQAklfVGTPIIDGKSEYFPTLSSRRLMANEEDADMFGFVYQ  
DEFVSSQLKIPSDTLKFPFADIIYVYSFRSEQFVYYLTLQLDQTLPDAAGEHFFTSKIVRLCVDNPKFYS  
YVEFPICGEQAGVEYRLVQDAYLSRPGQALAKQLGLAEDEEVLFVFAQGQKNRVKPKESALCLFLTRAIKE  
KIKERIQCSCYRGEKLSLPLWLLNKELGICINSPLQIDDDFCGQDFNQPLGGTVTIEGTPLFVDEKGLTAVAA  
DYQGRTVVFAGTRSGRIRKILVLDLANPSGRPALAYESVVAQEGNPILRDLVLSPNRQYLYAMTEKQVTVPVE  
SCVQYTSCELCLGSRDPHCWCVLHSICSRQDACERAEPPQRFASDLLQCVQLTVQPRNVSVTMSQVPLVLA  
WVNPDL SAGVNC SFEDFTETESI LEDGRIHCHSPSAREVAPITQGGDQRVVKLYLKSKETGKFFASVDFVY  
NCSVHQSLACVNGSFPCWCKYRHVCTNNAADCAFLGVRNMSDCPQILPSTHIYVPGVVKPITLAARNL  
PQPQSGQRGYECLFHI PGSPARVTALRFNSSSLQCQNSSYSYEGNDVSDLPVNL SVVWNGNFVIDNPQNIQAH  
LYKCPALRQSCGLCLKADPRFECGWCAERRCSLRHHC PADS PASWMHAHGGSSRCTDPKILKLSPETGPRQG  
GTRLTITGENLGLRFEDVRLGVHVGKVLCSPESEYISAEQIVCEIGDASTLRAHDALVEVCVRDCSLHYRQ  
SPKRFTFVTPTFYRVEVSPSRGPLSGGTWIGIEGSHLNAGSDVAVSIGGRPCSF SWRNSREIRCLTPPGHTPGSA  
PIVININRAQLSNPEVKYNYTEDPTILRIDPEWSINSGGTLLTVTGTNLATVREPRIRAKYGGIERENSCMVY  
NDTTMVCRAPSIDNPKRSPPELGERPDEIGFIMDNVRTLLVNLSSSFLYYPDPVLEPLSPTGELLEKPSPLI  
LKGRNLLPPAPGNSRLNYTVLIGSTPCILTVSETQLLCEAPNLTGQHKVTVRAGGFEEFSPGMLQVYSDSLLTL  
PAIVGIGGGGGLLLLLVIVAVLIA YKRKSRDADRTLKRLQLQMDNLESRVALECKEAFaelQTDIHELTSDLG  
AGIPFLDYRTYAMRVLPFGIEDHPVLKEMEVQANVEKSLTLFGQLLTKKHFLTLFIRTLEAQRFSMRDRGNV  
A\*LIMTALQGEMEYATGVLKQLSDLIEKNLESKNHPKLLLRRTESVAEKMLTNWFTFLLYKFLKECAGEPLF  
MLYCAIKQQMEKGPIDAITGEARYSLSEDKLIQQIDYKTLTLNCVNPENHNAPEVPVKGLNCDTQVQKEKL  
LDAVYKGVYPYSQRPKAGDMLEWRQGRMARIILQDEDEVTTKIDNDWKRLNTLAHYQVTDGSSVALVPKQTSAY  
NISNSSTFTKLSRYESMLRTASSPDSLRSRTPMITPDLESGTKLWHLVKNHDHLDQREGDRGSKMVSEIYLT  
RLLATKGTLOKQFVDDLFEFIFSTAHRGSALPLAIKYMFDLDEQADKHQIHDSVDRHTWKSNCPLRFWVNV  
KNPQFVFDIHKNSITDACLSVAQTFMDCSTSEHKLKGDSPSNKLLYAKDIPNYKSWVERYADIAKMPAIS  
DQDMSAYLAEQSRLHLSQFNMSALHEIYSYIAKYKDEILVALEKDEQARRQRLRSKLEQVVDTMALSS\*  
>ENSMUSP00000154788\_c.680:TA>GTG\_p.L227ins-fs  
ENSMUST00000226436.2|Vmn1r42-202|ENSMUSG00000068232|-  
|chr6:g.89821887:TA>CAC  
MGDILFSSPQSMFSHTMNKNSILHTHSIIIGKTFEIGIGISGNSFLLLHVHILKFIRGHRPRLTDLPIGLLSL  
IHLLMLLVAAFIATDIFISRRGWDDIICKFLVYLYRVLRGFSLCTTSMLSILQAIILSPRSSCLAKFKHISPH  
HISGAILFLSVLYMLIGSQLLVSI IATPNLTMNDFIYVTQSCSILPLSYLMQSIYSTLLAIREFFLISLMVLS  
NWYMVALL  
>ENSMUSP00000154442\_c.680:TA>GTG\_p.L227ins-fs  
ENSMUST00000227279.2|Vmn1r42-203|ENSMUSG00000068232|-  
|chr6:g.89821887:TA>CAC  
MGDILFSSPQSMFSHTMNKNSILHTHSIIIGKTFEIGIGISGNSFLLLHVHILKFIRGHRPRLTDLPIGLLSL  
IHLLMLLVAAFIATDIFISRRGWDDIICKFLVYLYRVLRGFSLCTTSMLSILQAIILSPRSSCLAKFKHISPH  
HISGAILFLSVLYMLIGSQLLVSI IATPNLTMNDFIYVTQSCSILPLSYLMQSIYSTLLAIREFFLISLMVLS  
NWYMVALL  
>ENSMUSP00000086840\_c.680:TA>GTG\_p.L227ins-fs  
ENSMUST00000089419.3|Vmn1r42-201|ENSMUSG00000068232|-  
|chr6:g.89821887:TA>CAC  
MGDILFSSPQSMFSHTMNKNSILHTHSIIIGKTFEIGIGISGNSFLLLHVHILKFIRGHRPRLTDLPIGLLSL  
IHLLMLLVAAFIATDIFISRRGWDDIICKFLVYLYRVLRGFSLCTTSMLSILQAIILSPRSSCLAKFKHISPH

HISGAILFLSVLYMLIGSQLLVSI IATPNLTMNDFIYVTQSCSILPLSYLMQSIYSTLLAIREFFLISLMVLS  
 NWYMVALL  
 >ENSMUSP00000114304\_c.2360:G>C\_p.Q787H ENSMUST00000130418.8|Aldh11l-  
 203|ENSMUSG00000030088|+|chr6:g.90573863:G>C  
 MKIAVIGQSLFGQEVYQCLRKEGHEVVGVTIPDKDGKADPLGLEAEKDGVPVFKFPRWRARGQALPEVVAKY  
 QALGAELNVLPFCSQFIPMEVINAPRHGSI IYHPSLLPRHRGASAINWTLIHGDKKGGFTIFWADDGLDTGDL  
 LLQKECDVLPDDTVSTLYNRFLFPEGIKGMVQAVRLIAEGTAPRRPQPEEGATYEGIQKKETAMINWDQPAAE  
 IHNWIRGNDKVPGAWTEACGQKLTFFNSTLNTSGLVAQGEALPIPGAHRPGLVTKAGLILFGNDRMLLVKNI  
 QLEDGKMPASQFFFKGSASSALELTHEELATAEAVRSSWMRILPNVPEVEDSTDFFKSGAASVDVRLVEEVK  
 ELCDGLELENEDEVYMATTFGDFIQLLVRKLRGEDGESECVINYVEKAVKKLTLQMPYQLFIGGEFVDAEGAKT  
 YSTINPTDGSVICQVSLAQVSDVDKAVAAAKEAFENGLWGKINARDRGRLLYRLADLMEQHQEELATIEALDA  
 GAVYTLALKTHVGMISIQTFRYFAGWCDKIQGATIPINQARPNRNLTLTKKEPVGVCGIVIPWNYPLMMLSWKT  
 AACLAAGNTVVIKPAQVTPLTALKFAELTLKAGIPKGVNINILPGSGSLVGQRLSDHPDVRKIGFTGSTEVEGKH  
 IMKSCALS NVKVSLELGGKSP LIIFADC DLNKAVQMGMSVFFNKGENCIAAGRLFVEDSIHQFVQKVVEE  
 VGKMKIGNPLDRDTHGPNHEAHLRKLVEYQCQRGVKEGATLVCCGNQVPRPGFFHPTVFTDVEDHMYIAKE  
 ESFGPIMIISRFADGDVDAVLSRANATEFGLASGVFTRDINKALYVSDKLQAGTVFVNTYKTDVAAPFGGFK  
 QSGFGKDLGEAALNEYLRIKTDTFEY\*  
 >ENSMUSP00000032175\_c.2360:G>C\_p.Q787H ENSMUST00000032175.11|Aldh11l-  
 201|ENSMUSG00000030088|+|chr6:g.90573863:G>C  
 MKIAVIGQSLFGQEVYQCLRKEGHEVVGVTIPDKDGKADPLGLEAEKDGVPVFKFPRWRARGQALPEVVAKY  
 QALGAELNVLPFCSQFIPMEVINAPRHGSI IYHPSLLPRHRGASAINWTLIHGDKKGGFTIFWADDGLDTGDL  
 LLQKECDVLPDDTVSTLYNRFLFPEGIKGMVQAVRLIAEGTAPRRPQPEEGATYEGIQKKETAMINWDQPAAE  
 IHNWIRGNDKVPGAWTEACGQKLTFFNSTLNTSGLVAQGEALPIPGAHRPGLVTKAGLILFGNDRMLLVKNI  
 QLEDGKMPASQFFFKGSASSALELTHEELATAEAVRSSWMRILPNVPEVEDSTDFFKSGAASVDVRLVEEVK  
 ELCDGLELENEDEVYMATTFGDFIQLLVRKLRGEDGESECVINYVEKAVKKLTLQMPYQLFIGGEFVDAEGAKT  
 YSTINPTDGSVICQVSLAQVSDVDKAVAAAKEAFENGLWGKINARDRGRLLYRLADLMEQHQEELATIEALDA  
 GAVYTLALKTHVGMISIQTFRYFAGWCDKIQGATIPINQARPNRNLTLTKKEPVGVCGIVIPWNYPLMMLSWKT  
 AACLAAGNTVVIKPAQVTPLTALKFAELTLKAGIPKGVNINILPGSGSLVGQRLSDHPDVRKIGFTGSTEVEGKH  
 IMKSCALS NVKVSLELGGKSP LIIFADC DLNKAVQMGMSVFFNKGENCIAAGRLFVEDSIHQFVQKVVEE  
 VGKMKIGNPLDRDTHGPNHEAHLRKLVEYQCQRGVKEGATLVCCGNQVPRPGFFHPTVFTDVEDHMYIAKE  
 ESFGPIMIISRFADGDVDAVLSRANATEFGLASGVFTRDINKALYVSDKLQAGTVFVNTYKTDVAAPFGGFK  
 QSGFGKDLGEAALNEYLRIKTDTFEY\*  
 >ENSMUSP00000080469\_c.2562:A>G\_p.R855G ENSMUST00000081777.8|Mug2-  
 201|ENSMUSG00000030131|+|chr6:g.122048798:A>G  
 MWKSRRAQLCLFVLLAFLPSASSLNGDSKYMVLVPSQLYTETPEKICLHLYHLNETVTVTASLVSQTGRNRL  
 FDELVVVDKDLFQCVSFI IPTLNSPDEEEFLYVDIKGPTHEFSKRNAVLVKNKESVVFVQTDKPVYKPGQSVKF  
 RVVSMDKTLRPLNELLPPLAYIEDPKKNRIMQWRDIKTENGLKQMSFSLAAEPIQGPYKIVVHKQSGVKEEHSF  
 TVMEFVLPFRFVNDLKVPAISVNDVQLQVTVCGKYTYGKPVPGQVKISICHETEAGCKEVNSKLDNNGCSTQE  
 VNITELQSKKRNYEVQLFHVNATVTEEGTGLEFNGYGTTKIERITNKLI FLKADSHFRHGIPFFVKVRLVDIK  
 GDPI PNERVFIKAQVLGYTSATTTDQHGLAKFSIDTAGFSGSSLHIKVNHKGKDCSYFFYCMEEERYASAETHVA  
 YAVYSLSKSYIYLVKETSSILPCNQIHTVQAHFILKGDGLVLELVFYLVMAQGSIIQTGNHHTQVEPGEAP  
 VKGNFDLEIPVEFSMAPMAKMLIYTI LDPGEVIADSVNFEIEKCLRNKVDLSFSSSQSLPASQTRLQVTASPO  
 SLICGLRAVDQSVLLKPEDELSPSWIYNLPGMQHNKFI PSSSLEDREDCILYSSWVAEKHTDWPVPHGREKDV  
 YRYVEDMDLKAFTNLKIKLPKICFDSAPMSGPRGKFDLAFSSEVSGTLQKGSKRQPPEEPREDPPPKDPLA  
 ETIRKYFPETWVWDIVTVNSTGVAEEMTVPDTITETWKAGALCLSNDTGLGLSSVPLQAFQPFVVEVSLPYS  
 VVRGEAFMLKATVMNYLPTSMRMSVQLEASPDFTAVPVGDDHDSYCLSANGGHTSSWLVTPKSLGNVNFVSVV  
 EAQSSSEPCGSEVATVPETGRKDTVVKVLIVEPEGIKQEHTFNSLFCASDAEISEKMSLVLPPTVVKDSARAH  
 FSVMGDILSSAIKNTQNLHMPYGCGEQNMVLFAPNIYVLKYLDKTQQLTQKIKTKALGFLRAGYQRELNYKH  
 KDGSYSAFGDQNGEREGNTWLTAFVLKSFAQARAFIFIDESHITHAFTWLSQQQKDNCGFRSSGSLFHNDIKH  
 PVVSKALSCLLESSWKTIEQGRNANFVYTKALMAYAFALAGNQDKRNEILKSLDEEAIKEDNSIHWERPQKPRK  
 SEHNLKYPQASSVEVEMNAYVVLARLTAQPAPSPEDLTLRSSTIMWLTQKQNSNGGFSSTQDVTVALDALSKY  
 GAVTFSTRQKTSLVTIQSTGFSQKQVENSNCLLLQVPLPDI PGDYTISVSGEGCVYAQTTLRYNMHLEKQ  
 QSAFALRVQTVPLTCNNPKGHNSFQISLEISYTGSRPASNMVIADV KMLSGFIPLPKTPVKKLERLEHISRTEV  
 SNNVLLYLDQVLTNQTAFSFI IQQDISVRNLQPAIVKVYDYETDEVAAYEYSSPCSSDKQNV\*  
 >ENSMUSP00000048092\_c.460:G>T\_p.C154F ENSMUST00000042081.9|C3ar1-  
 201|ENSMUSG00000040552|-|chr6:g.122827755:C>A  
 MESFDADTNSDHLRPLFQPDIASMVILGLTCLLGLLGNGLVVLWVAGVKMKTTVNTVWFLHLTLADFLCCL  
 SLPFSLAHLILQGHWPYGLFLCKLIPSI IILNMFASVFLLT AISLDRCLIVHKPIWCQNHRNVRTAFAICGCV

WVVAFMVFPVVFYRDLFIMDNRSICRYNFDSSRSYDYWDYVYKLSLPESNSTDNSTAQLTGHMNDRSAPSSV  
QARDYFWVTVTALQSQPFLTSPEDSFSLDSANQQPHYGGKPPNVLTAAVPSGFPVEDRKSNTLNADAFLSAHT  
ELFPTASSGHLYPYDFQGDYVDQFTYDNHVPTPLMAITITRLVVGFLVPPFFIMVICYSLIVFRMRKTNFTKSR  
NKTFRVAVAVVTVFFICWTPYHLVGVLLITDPESSLGEAVMSWDHMSIALASANSFCNPNFLYALGKDFRKK  
ARQSIKGIIEAAFEELTHSTNCTQDKASSKRNNMSTDV\*  
>ENSMUSP00000125303\_c.1135:T>G\_p.I379R ENSMUST00000160496.8|Ano2-  
204|ENSMUSG00000038115|+|chr6:g.125840466:T>G  
MAAPGLRDIPLLPSPRRSSRTVARGSQGPKHGQYLVKVPGHRAFGQRDNSSLHPSQVSRRESSRDRSVINN  
YLDANEPPSSEARLSRMHFHDNRKVDYVLAHYHRKRGHAHLGHGSPGHSLAVISNGETGKERHGGGPGDVELG  
PLDALEEEERREQRDEFEHNLMAAGLELEKDLKESKSGSVFVRIHAPQVLAAREAEFLKIKVPTKKMYEIKAGG  
SIAKKFSAILQTLSSPLQPRVPEHSNNRMKNLSYFSSREKMYLYNIQEKDTFFDNATRSRIVHEILKRTACSR  
ANNTMGINSLIANNIYEAAYPLHDGEYDSPGDDMNDKLLYQEWARYGVFYKFPIDILIRKYFGEKIGLYFAW  
LGLYTSFLIPSSVGVIVFLYGCATIEEDI PSKEMCDHQNAFTMCPLCDKSCDYWNLSACGTARASHLFDNP  
ATVFFSIFMALWATMFLENWKRLQMLGYFWDLTGIEEEEERSQEHSRPEYETKVREKLLKESGKSAVQKLEA  
NSPEDDEDDEDKLTWKDRFPGYLMNFASILFMIALTFSIVFGVIVYRITTAALSLNKATRSNVRVTATAV  
IINLVVILILDEIYGAVAKWLTKEIEVPKTEQTFEERLILKAFLLKFNAYSPIFYVAFFKGRFVGRPGSYVYV  
FDGYRMEECAPGGCLMELCIQLSIIMLGKQLIQNNIFEIGVPKLKKLFRKLLKDETEPGESDPDHSKRPEQWDL  
DHSLEPYTGLTPEYMEMI IQFGFVTLFVASFPLAPVFALLNNVIEVRLDAKKFVTELRPPDAVRTKDIGIWF  
ILSGIGKFSVIINAFVIAVTSDFIPRLVYQYSYSHNGTLHGFMNHTLSFFNVSQKKEGTQPENSQFDQEVQFC  
RFKDYREPPWAPNPYEFKQYWSVLSARLAFVIFQNLVFMFLSVLVDWMI PDIPDTDISDQIKKEKSLLVDFFL  
KEEHEKVKLADEPTQRSQGGGDRSRRSRAASSAPSGRSQPGSIASSGSQHTNV\*  
>ENSMUSP00000125426\_c.1045:T>G\_p.I349R ENSMUST00000161619.8|Ano2-  
206|ENSMUSG00000038115|+|chr6:g.125840466:T>G  
XKHGQYLVKVPGHRAFGQRDNSSLHPSQVSRRESSRDRSVINNYLDANEPPSSEARLSRMHFHDNRKVDYV  
LAHYHRKRGHAHLGHGSPGHSLAVISNGETGKERHGGGPGDVELG PLDALEEEERREQRDEFEHNLMAAGLELEK  
DLKESKSGSVFVRIHAPQVLAAREAEFLKIKVPTKKMYEIKAGGSIAKKFSAILQTLSSPLQPRVPEHSNNRMK  
NLSYFSSREKMYLYNIQEKDTFFDNATRSRIVHEILKRTACSRANNTMGINSLIANNIYEAAYPLHDGEYDSP  
GDDMNDKLLYQEWARYGVFYKFPIDILIRKYFGEKIGLYFAWLGLYTSFLIPSSVGVIVFLYGCATIEEDI  
PSKEMCDHQNAFTMCPLCDKSCDYWNLSACGTARASHLFDNPATVFFSIFMALWATMFLENWKRLQMLGYF  
WDLTGIEEEEERSQEHSRPEYETKVREKLLKESGKSAVQKLEANSPEDEPSTS\*  
>ENSMUSP00000123965\_c.145:T>G\_p.I49R ENSMUST00000159984.2|Ano2-  
202|ENSMUSG00000038115|+|chr6:g.125840466:T>G  
LLYQEWARYGVFYKFPIDILIRKYFGEKIGLYFAWLGLYTSFLIPSSVGVIVFLYGCATIEEDI PSKEMCDH  
QNAFTMCPLCDKSCDYWNLSACGTARASHLFDNPATVFFSIFMALWATMFLENWKRLQMLGYFWDLTGIEE  
EEHSRPEYETKVREKLLKESGKSAVQKLEANSPEDEPSTS\*  
>ENSMUSP00000125303\_c.1150:T>G\_p.F384C ENSMUST00000160496.8|Ano2-  
204|ENSMUSG00000038115|+|chr6:g.125840481:T>G  
MAAPGLRDIPLLPSPRRSSRTVARGSQGPKHGQYLVKVPGHRAFGQRDNSSLHPSQVSRRESSRDRSVINN  
YLDANEPPSSEARLSRMHFHDNRKVDYVLAHYHRKRGHAHLGHGSPGHSLAVISNGETGKERHGGGPGDVELG  
PLDALEEEERREQRDEFEHNLMAAGLELEKDLKESKSGSVFVRIHAPQVLAAREAEFLKIKVPTKKMYEIKAGG  
SIAKKFSAILQTLSSPLQPRVPEHSNNRMKNLSYFSSREKMYLYNIQEKDTFFDNATRSRIVHEILKRTACSR  
ANNTMGINSLIANNIYEAAYPLHDGEYDSPGDDMNDKLLYQEWARYGVFYKFPIDILIRKYFGEKIGLYFAW  
LGLYTSFLIPSSVIGVIVCLYGCATIEEDI PSKEMCDHQNAFTMCPLCDKSCDYWNLSACGTARASHLFDNP  
ATVFFSIFMALWATMFLENWKRLQMLGYFWDLTGIEEEEERSQEHSRPEYETKVREKLLKESGKSAVQKLEA  
NSPEDDEDDEDKLTWKDRFPGYLMNFASILFMIALTFSIVFGVIVYRITTAALSLNKATRSNVRVTATAV  
IINLVVILILDEIYGAVAKWLTKEIEVPKTEQTFEERLILKAFLLKFNAYSPIFYVAFFKGRFVGRPGSYVYV  
FDGYRMEECAPGGCLMELCIQLSIIMLGKQLIQNNIFEIGVPKLKKLFRKLLKDETEPGESDPDHSKRPEQWDL  
DHSLEPYTGLTPEYMEMI IQFGFVTLFVASFPLAPVFALLNNVIEVRLDAKKFVTELRPPDAVRTKDIGIWF  
ILSGIGKFSVIINAFVIAVTSDFIPRLVYQYSYSHNGTLHGFMNHTLSFFNVSQKKEGTQPENSQFDQEVQFC  
RFKDYREPPWAPNPYEFKQYWSVLSARLAFVIFQNLVFMFLSVLVDWMI PDIPDTDISDQIKKEKSLLVDFFL  
KEEHEKVKLADEPTQRSQGGGDRSRRSRAASSAPSGRSQPGSIASSGSQHTNV\*  
>ENSMUSP00000125426\_c.1060:T>G\_p.F354C ENSMUST00000161619.8|Ano2-  
206|ENSMUSG00000038115|+|chr6:g.125840481:T>G  
XKHGQYLVKVPGHRAFGQRDNSSLHPSQVSRRESSRDRSVINNYLDANEPPSSEARLSRMHFHDNRKVDYV  
LAHYHRKRGHAHLGHGSPGHSLAVISNGETGKERHGGGPGDVELG PLDALEEEERREQRDEFEHNLMAAGLELEK  
DLKESKSGSVFVRIHAPQVLAAREAEFLKIKVPTKKMYEIKAGGSIAKKFSAILQTLSSPLQPRVPEHSNNRMK  
NLSYFSSREKMYLYNIQEKDTFFDNATRSRIVHEILKRTACSRANNTMGINSLIANNIYEAAYPLHDGEYDSP  
GDDMNDKLLYQEWARYGVFYKFPIDILIRKYFGEKIGLYFAWLGLYTSFLIPSSVIGVIVCLYGCATIEEDI



PSKEMCDHQNAFTMCPCLCDKSCDYWNLSACGTARASHLFDNPATVFFSIFMALWATMFLENWKRLQMRGIFY  
WDLTGIEEEEEERSQEHSRPEYETKVRKLLKESGKSAVQKLEANSPEDEPSTS\*  
>ENSMUSP00000123965\_c.160:T>G\_p.F54C ENSMUST00000159984.2|Ano2-  
202|ENSMUSG00000038115|+|chr6:g.125840481:T>G  
LLYQEWARYGVFYKFPIDLIRKYFGEKIGLYFAWLGLYTSFLIPSSVIGVIVCLYGATIEEDIPSKEMCDH  
QNAFTMCPCLCDKSCDYWNLSACGTARASHLFDNPATVFFSIFMALWATMFLENWKRLQMRGIFYFWDLTGIEE  
EEHSRPEYETKVRKLLKESGKSAVQKLEANSPEDEPSTS\*  
>ENSMUSP00000032396\_c.337:A>C\_p.E113A ENSMUST00000032396.13|Lrmp-  
201|ENSMUSG00000030263|+|chr6:g.145093777:A>C  
MLCVKGPPEQEPEDGALDVTRGCQCPLPTEGSILGQELLDCTRMNEDQSTDENGADHLYSESPSQLREYLTQP  
SSEQTSSSESTVTSSESGSDILHMASGDLDCCKPLCEKEEAARAASAMQGTSLAPAAAGDYTSVGVAKAASQLE  
AGEELRTTENGKGSAPGETEISMPPKASVKLVNFQQSENTSANEKEVEAEFLRLSLGLKCDWFTLEKRVKLE  
ERSRDLAEENLKKEITNCLKLESLESLTPLCEEDNQAQEIIVKKLEKSIVLLSQCTARVASRAEMLGAINQESRVS  
RAVEVMIQHVENLKRMYAKEHAELEDLKQALLQNDRSFNSLPDEDDCQIKKRSSSLNSKPSSLRRVTIASLPR  
NLGNVGLVSGMENNDRFSSRRSSSWRILGKQGEHRPSLHRFISTYSWADAEDERSDVKARDAPEPQGEAEVEG  
TRKPSLSERRSSTLAWDRGTICSSVASWVTHLQASFRANRALWLTGLIIILIAALMSFLTGLFQTAVEAAP  
TQEGDWSLSLEHILWPFTRLGHGDLPLV\*  
>ENSMUSP00000120166\_c.397:A>C\_p.E133A ENSMUST00000152571.8|Lrmp-  
209|ENSMUSG00000030263|+|chr6:g.145093777:A>C  
MLCVKGPPEQEPEDGALDVTRGCQCPLPTEGSILGQELLDCTRMNEDQSTDVSRITLFLSSEHLNHRVQFEEN  
GADHLYSESPSQLREYLTQPSSEQTSSSESTVTSSESGSDILHMASGDLDCCKPLCEKEEAARAASAMQGTSLA  
PAAAGDYTSVGVAKAASQLEAGEELRTTENGKGSAPGETEISMPPKASVKL  
>ENSMUSP00000115043\_c.235:A>C\_p.E79A ENSMUST00000156849.8|Lrmp-  
210|ENSMUSG00000030263|+|chr6:g.145093777:A>C  
XLFSFWGLLRGVSQSAENGADHLYSESPSQLREYLTQPSSEQTSSSESTVTSSESGSDILHMASGDLDCCKPL  
CEKEEAARAASAMQGTSLAPAAAGDYTSVGVAKAASQLEAGEELRTTENGKGSAPGETEISMPPKASVKLVN  
FQQSENTSANEKEVEAEFLRLSLGLKCDWFTLEKRVKLEERSRDLAEENLKKEITNCLKLESLESLTPLCEEDNQA  
QEIIVKKLEKSIVLLSQCTARVASRAEMLGAINQESRVSRAVEVMIQHVENLKRMYAKEHAELEDLKQALLQND  
RSFNSLPDEDDCQIKKRSSSLNSKPSSLRRVTIASLPRNLGNVGLVSGMENNDRFSSRRSSSWRILGKQGEHR  
PSLHRFISTYSWADAEDERSDVKARDAPEPQGEAEVEGTRKPSLSERRSSTLAWDRGTICSSVASWVTHLQAS  
FRANRALWLTGLIIILIAALMSFLTGLFQTAVEAAP  
>ENSMUSP00000120248\_c.232:A>C\_p.E78A ENSMUST00000132948.2|Lrmp-  
204|ENSMUSG00000030263|+|chr6:g.145093777:A>C  
XFSFWGLLRGVSQSAENGADHLYSESPSQLREYLTQPSSEQTSSSESTVTSSESGSDILHMASGDLDCCKPLC  
EKEEAARAASAMQGTSLAPAAAGDYTSVGVAKAASQLEAGEELRTTENGKGSAPGETEISMPPKASVKLVNF  
QQSENTSANEKEVEAEFLRLSLGLKCDWFTLEKRVKLEERSRDLAEENLKKEITNCLKLESLESLTPLCEEDNQA  
QEIIVKKLEKSIVLLSQCTARVASRAEMLGAINQESRVSRAVEVMIQHVENLKRMYAKEHAELEDLKQALLQND  
RSFNSLPDEDDCQIKKRSSSLNSKPSSLRRVTIASLPRNLGNVGLVSGMENNDRFSSRRSSSWRILGKQGEHR  
PSLHRFISTYSWADAEDERSDVKARDAPEPQGEAEVEGTRKPSLSERRSSTLAWDRGTICSSVASWVTHLQAS  
FRANRALWLTGLIIILIAALMSFLTGLFQTAVEAAP  
>ENSMUSP00000032396\_c.585:G>A\_p.A196T ENSMUST00000032396.13|Lrmp-  
201|ENSMUSG00000030263|+|chr6:g.145106603:G>A  
MLCVKGPPEQEPEDGALDVTRGCQCPLPTEGSILGQELLDCTRMNEDQSTDENGADHLYSESPSQLREYLTQP  
SSEQTSSSESTVTSSESGSDILHMASGDLDCCKPLCEKEEAARAASAMQGTSLAPAAAGDYTSVGVAKAASQLE  
AGEELRTTENGKGSAPGETEISMPPKASVKLVNFQQSENTSANEKEVEAEFLRLSLGLKCDWFTLEKRVKLE  
ERSRDLAEENLKKEITNCLKLESLESLTPLCEEDNQAQEIIVKKLEKSIVLLSQCTARVASRAEMLGAINQESRVS  
RAVEVMIQHVENLKRMYAKEHAELEDLKQALLQNDRSFNSLPDEDDCQIKKRSSSLNSKPSSLRRVTIASLPR  
NLGNVGLVSGMENNDRFSSRRSSSWRILGKQGEHRPSLHRFISTYSWADAEDERSDVKARDAPEPQGEAEVEG  
TRKPSLSERRSSTLAWDRGTICSSVASWVTHLQASFRANRALWLTGLIIILIAALMSFLTGLFQTAVEAAP  
TQEGDWSLSLEHILWPFTRLGHGDLPLV\*  
>ENSMUSP00000115043\_c.483:G>A\_p.A162T ENSMUST00000156849.8|Lrmp-  
210|ENSMUSG00000030263|+|chr6:g.145106603:G>A  
XLFSFWGLLRGVSQSAENGADHLYSESPSQLREYLTQPSSEQTSSSESTVTSSESGSDILHMASGDLDCCKPL  
CEKEEAARAASAMQGTSLAPAAAGDYTSVGVAKAASQLEAGEELRTTENGKGSAPGETEISMPPKASVKLVN  
FQQSENTSANEKEVEAEFLRLSLGLKCDWFTLEKRVKLEERSRDLAEENLKKEITNCLKLESLESLTPLCEEDNQA  
QEIIVKKLEKSIVLLSQCTARVASRAEMLGAINQESRVSRAVEVMIQHVENLKRMYAKEHAELEDLKQALLQND  
RSFNSLPDEDDCQIKKRSSSLNSKPSSLRRVTIASLPRNLGNVGLVSGMENNDRFSSRRSSSWRILGKQGEHR  
PSLHRFISTYSWADAEDERSDVKARDAPEPQGEAEVEGTRKPSLSERRSSTLAWDRGTICSSVASWVTHLQAS  
FRANRALWLTGLIIILIAALMSFLTGLFQTAVEAAP

PSLHRFISTYSWADAEDERSDVKARDAPEPQGEAEVETRKPSSLSERRSSTLAWDRGTICSSVASWVTHLQAS  
 FFRANRALWLTGLIIILIAALMSFLTGLFQTAVEAAPTQEGDWSLSLEHILWPFTRLGHGDLPLV\*  
 >ENSMUSP00000107357\_c.924:C>G\_p.L309V ENSMUST00000111728.8|Cascl-  
 203|ENSMUSG00000043541|-|chr6:g.145137143:G>C  
 MTKAERLRMLQEEEEERLKEEEEARLKFEKEEQERLEIQRIEREKWSLLEKKDLERRSQELEEALLEGCFPE  
 AEKQKREIRALAQWKHYTECDGSPDPWVAQEMNTFISLWEEKNQAFEQVMEKSKLVLSLIEKVKLILLETPT  
 YELDHRTVLQHQGSILRLQELLSLKINVATELLLRQASNLADLDTGNMEKIIKDENVTLVWVANLKKNPRHRS  
 VRFSETQIGFEIPRILATSNVALRLLHTRYDHTPLFPPIAVTEQNQNPVGAEQVNVEESTEKAMTEEKLFTTE  
 KAANEDEQPKAEQEREVNLVQEENKYEAIENTVLQRTSDSEGEDSQTQLELEMKLLSEAVLAAQLCLVENNV  
 ELPEASQAYKVDLCHFSTLGGVYHLDVLELPPQCKPVKGWVLEILQEGLRQRFIYPPDTEEPDPDVTFFPIE  
 VTLEIHKSVIFFERPRVVRWDNEGKFWRS DGISSVYNNREDRLLTF SMDTLGPVTLIQDAHVNPYQSWEMSP  
 CGMNKVLIVKTVFMELQIYIKENLCMLASVKLRGKGLEFHLK GKWMAPIPFILALKEAGLNIFPAVYSHFYV  
 VINNKVREQLSEETEHTWSLLMFGDRAQMLKMQEENDKFSEALREGTEFHSTLYHMMKDFASPVAMERVRH  
 SNCQFIDSVCYMLLSIRVLSYS\*

>ENSMUSP00000062279\_c.963:C>G\_p.L322V ENSMUST00000060797.10|Cascl-  
 201|ENSMUSG00000043541|-|chr6:g.145137143:G>C  
 MAPKSKKAPSKKKMTKAERLRMLQEEEEERLKEEEEARLKFEKEEQERLEIQRIEREKWSLLEKKDLERRSQE  
 LEEALLEGCFPEAEKQKREIRALAQWKHYTECDGSPDPWVAQEMNTFISLWEEKNQAFEQVMEKSKLVLSL  
 IEKVKLILLETPTYELDHRTVLQHQGSILRLQELLSLKINVATELLLRQASNLADLDTGNMEKIIKDENVTLV  
 VWANLKKNPRHRSVRFSETQIGFEIPRILATSNVALRLLHTRYDHTPLFPPIAVTEQNQNPVGAEQVNVEEST  
 EKAMTEEKLFTTEKAANEDEQPKAEQEREVNLVQEENKYEAIENTVLQRTSDSEGEDSQTQLELEMKLLSEA  
 VLAQLCLVENNVVELPEASQAYKVDLCHFSTLGGVYHLDVLELPPQCKPVKGWVLEILQEGLRQRFIYPPDTE  
 EEPDPDVTFFPIEVTLEIHKSVIFFERPRVVRWDNEGKFWRS DGISSVYNNREDRLLTF SMDTLGPVTLIQDA  
 HVNPYQSWEMSPCGMNKVLIVKTVFMELQIYIKENLCMLASVKLRGKGLEFHLK GKWMAPIPFILALKEAG  
 LNIFPAVYSHFYVVINNKVPQVELKAYRQMALSSAFSFGWSKWNMVCNSTRVVRVREQLSEETEHTWSLL  
 MFGDRAQMLKMQEENDKFSEALREGTEFHSTLYHMMKDFASPVAMERVRHSNCQFIDSVCYMLLSIRVLSYS  
 \*

>ENSMUSP00000144783\_c.963:C>G\_p.L322V ENSMUST00000204105.2|Cascl-  
 208|ENSMUSG00000043541|-|chr6:g.145137143:G>C  
 MAPKSKKAPSKKKMTKAERLRMLQEEEEERLKEEEEARLKFEKEEQERLEIQRIEREKWSLLEKKDLERRSQE  
 LEEALLEGCFPEAEKQKREIRALAQWKHYTECDGSPDPWVAQEMNTFISLWEEKNQAFEQVMEKSKLVLSL  
 IEKVKLILLETPTYELDHRTVLQHQGSILRLQELLSLKINVATELLLRQASNLADLDTGNMEKIIKDENVTLV  
 VWANLKKNPRHRSVRFSETQIGFEIPRILATSNVALRLLHTRYDHTPLFPPIAVTEQNQNPVGAEQVNVEEST  
 EKAMTEEKLFTTEKAANEDEQPKAEQEREVNLVQEENKYEAIENTVLQRTSDSEGEDSQTQLELEMKLLSEA  
 VLAQLCLVENNVVELPEASQAYKVDLCHFSTLGGVYHLDVLELPPQCKPVKGWVLEILQEGLRQRFIYPPDTE  
 EEPDPDVTFFPIEVTLEIHKSVIFFERPRVVRWDNEGKFWRS DGISSVYNNREDRLLTF SMDTLGPVTLIQDA  
 HVNPYQSWEMSPCGMNKVLIVKTVFMELQIYIKENLCMLASVKLRGKGLEFHLK GKWMAPIPFILALKEAG  
 LNIFPAVYSHFYVVINNKVPQVELKAYRQMALSSAFSFGWSKWNMVCNSTRVVRVIRHWGG\*

>ENSMUSP00000107357\_c.556:T>C\_p.L186S ENSMUST00000111728.8|Cascl-  
 203|ENSMUSG00000043541|-|chr6:g.145138618:A>G  
 MTKAERLRMLQEEEEERLKEEEEARLKFEKEEQERLEIQRIEREKWSLLEKKDLERRSQELEEALLEGCFPE  
 AEKQKREIRALAQWKHYTECDGSPDPWVAQEMNTFISLWEEKNQAFEQVMEKSKLVLSLIEKVKLILLETPT  
 YELDHRTVLQHQGSILRLQELLSLKINVATELLLRQASNSADLDTGNMEKIIKDENVTLVWVANLKKNPRHRS  
 VRFSETQIGFEIPRILATSNVALRLLHTRYDHTPLFPPIAVTEQNQNPVGAEQVNVEESTEKAMTEEKLFTTE  
 KAANEDEQPKAEQERELNLVQEENKYEAIENTVLQRTSDSEGEDSQTQLELEMKLLSEAVLAAQLCLVENNV  
 ELPEASQAYKVDLCHFSTLGGVYHLDVLELPPQCKPVKGWVLEILQEGLRQRFIYPPDTEEPDPDVTFFPIE  
 VTLEIHKSVIFFERPRVVRWDNEGKFWRS DGISSVYNNREDRLLTF SMDTLGPVTLIQDAHVNPYQSWEMSP  
 CGMNKVLIVKTVFMELQIYIKENLCMLASVKLRGKGLEFHLK GKWMAPIPFILALKEAGLNIFPAVYSHFYV  
 VINNKVREQLSEETEHTWSLLMFGDRAQMLKMQEENDKFSEALREGTEFHSTLYHMMKDFASPVAMERVRH  
 SNCQFIDSVCYMLLSIRVLSYS\*

>ENSMUSP00000062279\_c.595:T>C\_p.L199S ENSMUST00000060797.10|Cascl-  
 201|ENSMUSG00000043541|-|chr6:g.145138618:A>G  
 MAPKSKKAPSKKKMTKAERLRMLQEEEEERLKEEEEARLKFEKEEQERLEIQRIEREKWSLLEKKDLERRSQE  
 LEEALLEGCFPEAEKQKREIRALAQWKHYTECDGSPDPWVAQEMNTFISLWEEKNQAFEQVMEKSKLVLSL  
 IEKVKLILLETPTYELDHRTVLQHQGSILRLQELLSLKINVATELLLRQASNSADLDTGNMEKIIKDENVTLV  
 VWANLKKNPRHRSVRFSETQIGFEIPRILATSNVALRLLHTRYDHTPLFPPIAVTEQNQNPVGAEQVNVEEST  
 EKAMTEEKLFTTEKAANEDEQPKAEQERELNLVQEENKYEAIENTVLQRTSDSEGEDSQTQLELEMKLLSEA  
 VLAQLCLVENNVVELPEASQAYKVDLCHFSTLGGVYHLDVLELPPQCKPVKGWVLEILQEGLRQRFIYPPDTE

EEPDPDVTFPPIEVTL EIHKSVIFFERPRVVRWDNEGKFWRS DGISSVYNNREDRLLTF SMDTLGPVTLIQDA  
HVNMPYQSWEMSPCGMKNVLLIVKTVFMELQIYIKENLCMLASVKLRGKGLEFHLKGKWMAPIPFILALKEAG  
LNIFPAVYSHFYVVINNKVPQVELKAYRQ MALLSSAFSFGWSKWNMVCNSTRV VIRVREQLSEETEHTWSLL  
MFGSDRAQMLKMQEENDKFSEALREGTEFHSTLYHMMKDFASPVAMERVRHSNCQFIDSVCYMLLSIRVLSYS  
\*

>ENSMUSP00000144783\_c.595:T>C\_p.L199S ENSMUST00000204105.2|Cascl-  
208|ENSMUSG00000043541|-|chr6:g.145138618:A>G  
MAPKSKKAPSKKKMTKAERLRMQEEEEERLKEEEEEARLKFEKEEQERLEIQRIEREKWSLLEKKDLERRSQE  
LEELALLEGC FPEAEKQKREIRALA QWKHYTECDGSPVPWVAQEMNTFISLWEEKNQAFEQVMEKSKLVLSL  
IEKVKLILLETPTYELDHRTVLQH QGSILRLQELLSLKINVA TELLLRQASNSADLDTGNMEKIIKDENV TLY  
VWANLKKNPRHRSVRFSETQIGFEIPRILATSNVALRLLHTRYDHITPLFPPIAVTEQNQNPVGAEQV NVEEST  
EKAMTEEKLFTTEEKAANEDEQPKAEQERELNLVQEENKYEAIENTVLQRTSDSEGEDSQT TQLELEMKLLSEA  
VLAAQLCLVENNVVELPEASQAYKVDLCHFSTLGGVYHLDVLELPPQCKPVKGWV LVEILQEGLRFIYPPD TT  
EEPDPDVTFPPIEVTL EIHKSVIFFERPRVVRWDNEGKFWRS DGISSVYNNREDRLLTF SMDTLGPVTLIQDA  
HVNMPYQSWEMSPCGMKNVLLIVKTVFMELQIYIKENLCMLASVKLRGKGLEFHLKGKWMAPIPFILALKEAG  
LNIFPAVYSHFYVVINNKVPQVELKAYRQ MALLSSAFSFGWSKWNMVCNSTRV VIRHWGG\*

>ENSMUSP00000107357\_c.292:A>T\_p.D98V ENSMUST00000111728.8|Cascl-  
203|ENSMUSG00000043541|-|chr6:g.145142644:T>A  
MTKAERLRMQEEEEERLKEEEEEARLKFEKEEQERLEIQRIEREKWSLLEKKDLERRSQELEELALLEGC FPE  
AEKQKREIRALA QWKHYTECDGSPVPWVAQEMNTFISLWEEKNQAFEQVMEKSKLVLSLIEKVKLILLETPT  
YELDHRTVLQH QGSILRLQELLSLKINVA TELLLRQASNLADLDTGNMEKIIKDENV TLYVWANLKKNPRHR  
SVRFSETQIGFEIPRILATSNVALRLLHTRYDHITPLFPPIAVTEQNQNPVGAEQV NVEESTEKAMTEEKLFTTEE  
KAANEDEQPKAEQERELNLVQEENKYEAIENTVLQRTSDSEGEDSQT TQLELEMKLLSEAVLAAQLCLVENNV  
ELPEASQAYKVDLCHFSTLGGVYHLDVLELPPQCKPVKGWV LVEILQEGLRFIYPPD TTTEEPDPDVTFPPIE  
VTLEIHKSVIFFERPRVVRWDNEGKFWRS DGISSVYNNREDRLLTF SMDTLGPVTLIQDAHVNMPYQSWEMSP  
CGMKNVLLIVKTVFMELQIYIKENLCMLASVKLRGKGLEFHLKGKWMAPIPFILALKEAGLNIFPAVYSHFYV  
VINNKVREQLSEETEHTWSLLMFGSDRAQMLKMQEENDKFSEALREGTEFHSTLYHMMKDFASPVAMERVRH  
SNCQFIDSVCYMLLSIRVLSYS\*

>ENSMUSP00000062279\_c.331:A>T\_p.D111V ENSMUST00000060797.10|Cascl-  
201|ENSMUSG00000043541|-|chr6:g.145142644:T>A  
MAPKSKKAPSKKKMTKAERLRMQEEEEERLKEEEEEARLKFEKEEQERLEIQRIEREKWSLLEKKDLERRSQE  
LEELALLEGC FPEAEKQKREIRALA QWKHYTECDGSPVPWVAQEMNTFISLWEEKNQAFEQVMEKSKLVLSL  
IEKVKLILLETPTYELDHRTVLQH QGSILRLQELLSLKINVA TELLLRQASNLADLDTGNMEKIIKDENV TLY  
VWANLKKNPRHRSVRFSETQIGFEIPRILATSNVALRLLHTRYDHITPLFPPIAVTEQNQNPVGAEQV NVEEST  
EKAMTEEKLFTTEEKAANEDEQPKAEQERELNLVQEENKYEAIENTVLQRTSDSEGEDSQT TQLELEMKLLSEA  
VLAAQLCLVENNVVELPEASQAYKVDLCHFSTLGGVYHLDVLELPPQCKPVKGWV LVEILQEGLRFIYPPD TT  
EEPDPDVTFPPIEVTL EIHKSVIFFERPRVVRWDNEGKFWRS DGISSVYNNREDRLLTF SMDTLGPVTLIQDA  
HVNMPYQSWEMSPCGMKNVLLIVKTVFMELQIYIKENLCMLASVKLRGKGLEFHLKGKWMAPIPFILALKEAG  
LNIFPAVYSHFYVVINNKVPQVELKAYRQ MALLSSAFSFGWSKWNMVCNSTRV VIRVREQLSEETEHTWSLL  
MFGSDRAQMLKMQEENDKFSEALREGTEFHSTLYHMMKDFASPVAMERVRHSNCQFIDSVCYMLLSIRVLSYS  
\*

>ENSMUSP00000144783\_c.331:A>T\_p.D111V ENSMUST00000204105.2|Cascl-  
208|ENSMUSG00000043541|-|chr6:g.145142644:T>A  
MAPKSKKAPSKKKMTKAERLRMQEEEEERLKEEEEEARLKFEKEEQERLEIQRIEREKWSLLEKKDLERRSQE  
LEELALLEGC FPEAEKQKREIRALA QWKHYTECDGSPVPWVAQEMNTFISLWEEKNQAFEQVMEKSKLVLSL  
IEKVKLILLETPTYELDHRTVLQH QGSILRLQELLSLKINVA TELLLRQASNLADLDTGNMEKIIKDENV TLY  
VWANLKKNPRHRSVRFSETQIGFEIPRILATSNVALRLLHTRYDHITPLFPPIAVTEQNQNPVGAEQV NVEEST  
EKAMTEEKLFTTEEKAANEDEQPKAEQERELNLVQEENKYEAIENTVLQRTSDSEGEDSQT TQLELEMKLLSEA  
VLAAQLCLVENNVVELPEASQAYKVDLCHFSTLGGVYHLDVLELPPQCKPVKGWV LVEILQEGLRFIYPPD TT  
EEPDPDVTFPPIEVTL EIHKSVIFFERPRVVRWDNEGKFWRS DGISSVYNNREDRLLTF SMDTLGPVTLIQDA  
HVNMPYQSWEMSPCGMKNVLLIVKTVFMELQIYIKENLCMLASVKLRGKGLEFHLKGKWMAPIPFILALKEAG  
LNIFPAVYSHFYVVINNKVPQVELKAYRQ MALLSSAFSFGWSKWNMVCNSTRV VIRHWGG\*

>ENSMUSP00000032399\_c.509:G>T\_p.M170I ENSMUST00000032399.12|Kras-  
201|ENSMUSG00000030265|-|chr6:g.145166391:C>A  
MTEYKLVVVGAGGVGKSALTIQLIQNH FVDEYDPTIEDSYRKQVVIDGETCLLDILD TAGQEEYSAMRDQYMR  
TGEGFLCVFAINNTKSFEDIH HYREQIKRVK DSEDVPMVLVGNKCDLPSRTVDTKQAQELARSYGIPFIETSA  
KTRQGVDDAFYTLVREIRKHKEKISKDGK KKKKSRTRCTVM\*

>ENSMUSP00000145294\_c.170:G>T\_p.M57I ENSMUST00000203147.3|Kras-207|ENSMUSG00000030265|-|chr6:g.145166391:C>A  
MTEYKLVVVGAGGVGKSALTIQLIQNHVFVDEYDPTIEGVDDAFYTLVREIRKHKKEKISKDGKKKKKKSRTRCTVM\*

>ENSMUSP00000032399\_c.325:T>AT\_p.V109ins-fs ENSMUST00000032399.12|Kras-201|ENSMUSG00000030265|-|chr6:g.145177945:A>AT  
MTEYKLVVVGAGGVGKSALTIQLIQNHVFVDEYDPTIEDSYRKQVVIDGETCLLDILDITAGQEEYSAMRDQYMR  
TGEGFLCVFAINNTKSFEDIHHYREQIKRVKDESDDAYGPGRE

>ENSMUSP00000107339\_c.325:T>AT\_p.V109ins-fs ENSMUST00000111710.8|Kras-202|ENSMUSG00000030265|-|chr6:g.145177945:A>AT  
MTEYKLVVVGAGGVGKSALTIQLIQNHVFVDEYDPTIEDSYRKQVVIDGETCLLDILDITAGQEEYSAMRDQYMR  
TGEGFLCVFAINNTKSFEDIHHYREQIKRVKDESDDAYGPGRE

>ENSMUSP00000120740\_c.300:A>T\_p.K101\* ENSMUST00000148739.8|Lmntd1-205|ENSMUSG00000054966|-|chr6:g.145363221:T>A  
MSIQVHSSGRYPRTPAQQAAVSSPKGGILSSLGEIKIAEVNIKGLFVRLVNSSNEKEVEIGNHILQQNVNGHAVSLYQFPDNITLQANSTVTVWAAASEA\*PQPPTDFVWEEQSKFRSSPDCTTILCKPNGEAIAWYTPPIHWKQAW  
EKLETDIEFERC SVVVP SMRNHMF GWITASVSSTNEEKEEPIQKTPSQVYPVLYREKEIPPTVLPNKSPWCRN  
PNTSPHPYSSLIDSHSDISESSLDTQLKPQPTKPKPDPGTGKTKKKAKS\*

>ENSMUSP00000107335\_c.588:A>T\_p.K197\* ENSMUST00000111706.8|Lmntd1-201|ENSMUSG00000054966|-|chr6:g.145363221:T>A  
MDS DSTTLIPLSRFSQEMPIGFYQITSTQNSSTLSSRGQLASKSTILSCSHKDS SSGKQSTSSMVP RRQPQS  
SSD VDTYTFGNGEDYFLSLFGESK KLT AHTPQAEN VSEHLSVILEEVGQFTSSSLGEIKIAEVNIKGLFVRLV  
NSSNEKEVEIGNHILQQNVNGHAVSLYQFPDNITLQANSTVTVWAAASEA\*PQPPTDFVWEEQSKFRSSPDCT  
TILCKPNGEAIAWYTPPIHWKQAW EKLETDIEFERC SVVVP SMRNHMF GWITASVSSTNEEKEEPIQKTPSQVY  
PVL YREKEIPPTVLPNKSPWCRN PNTSPHPYSSLIDSHSDISESSLDTQLKPQPTKPKPDPGTGKTKKKAKS\*

>ENSMUSP00000107337\_c.738:A>T\_p.K247\* ENSMUST00000111708.9|Lmntd1-202|ENSMUSG00000054966|-|chr6:g.145363221:T>A  
MMKEASEPLASVTSINKQDSKVQDGEIRKEKIGTITPSKQHS SVHFFPKIMDSDSTTLIPLSRFSQEMPIGF  
YQITSTQNSSTLSSRGQLASKSTILSCSHKDS SSGKQSTSSMVP RRQPQSSSD VDTYTFGNGEDYFLSLFGES  
K KLT AHTPQAEN VSEHLSVILEEVGQFTSSSLGEIKIAEVNIKGLFVRLVNSSNEKEVEIGNHILQQNVNGHA  
VSLYQFPDNITLQANSTVTVWAAASEA\*PQPPTDFVWEEQSKFRSSPDCTTILCKPNGEAIAWYTPPIHWKQAW  
EKLETDIEFERC SVVVP SMRNHMF GWITASVSSTNEEKEEPIQKTPSQVYPVLYREKEIPPTVLPNKSPWCRN  
PNTSPHPYSSLIDSHSDISESSLDTQLKPQPTKPKPDPGTGKTKKKAKS\*

>ENSMUSP00000120740\_c.291:T>C\_p.S98P ENSMUST00000148739.8|Lmntd1-205|ENSMUSG00000054966|-|chr6:g.145363230:A>G  
MSIQVHSSGRYPRTPAQQAAVSSPKGGILSSLGEIKIAEVNIKGLFVRLVNSSNEKEVEIGNHILQQNVNGHA  
VSLYQFPDNITLQANSTVTVWAAAPEAKPQPPTDFVWEEQSKFRSSPDCTTILCKPNGEAIAWYTPPIHWKQAW  
EKLETDIEFERC SVVVP SMRNHMF GWITASVSSTNEEKEEPIQKTPSQVYPVLYREKEIPPTVLPNKSPWCRN  
PNTSPHPYSSLIDSHSDISESSLDTQLKPQPTKPKPDPGTGKTKKKAKS\*

>ENSMUSP00000107335\_c.579:T>C\_p.S194P ENSMUST00000111706.8|Lmntd1-201|ENSMUSG00000054966|-|chr6:g.145363230:A>G  
MDS DSTTLIPLSRFSQEMPIGFYQITSTQNSSTLSSRGQLASKSTILSCSHKDS SSGKQSTSSMVP RRQPQS  
SSD VDTYTFGNGEDYFLSLFGESK KLT AHTPQAEN VSEHLSVILEEVGQFTSSSLGEIKIAEVNIKGLFVRLV  
NSSNEKEVEIGNHILQQNVNGHAVSLYQFPDNITLQANSTVTVWAAAPEAKPQPPTDFVWEEQSKFRSSPDCT  
TILCKPNGEAIAWYTPPIHWKQAW EKLETDIEFERC SVVVP SMRNHMF GWITASVSSTNEEKEEPIQKTPSQVY  
PVL YREKEIPPTVLPNKSPWCRN PNTSPHPYSSLIDSHSDISESSLDTQLKPQPTKPKPDPGTGKTKKKAKS\*

>ENSMUSP00000107337\_c.729:T>C\_p.S244P ENSMUST00000111708.9|Lmntd1-202|ENSMUSG00000054966|-|chr6:g.145363230:A>G  
MMKEASEPLASVTSINKQDSKVQDGEIRKEKIGTITPSKQHS SVHFFPKIMDSDSTTLIPLSRFSQEMPIGF  
YQITSTQNSSTLSSRGQLASKSTILSCSHKDS SSGKQSTSSMVP RRQPQSSSD VDTYTFGNGEDYFLSLFGES  
K KLT AHTPQAEN VSEHLSVILEEVGQFTSSSLGEIKIAEVNIKGLFVRLVNSSNEKEVEIGNHILQQNVNGHA  
VSLYQFPDNITLQANSTVTVWAAAPEAKPQPPTDFVWEEQSKFRSSPDCTTILCKPNGEAIAWYTPPIHWKQAW  
EKLETDIEFERC SVVVP SMRNHMF GWITASVSSTNEEKEEPIQKTPSQVYPVLYREKEIPPTVLPNKSPWCRN  
PNTSPHPYSSLIDSHSDISESSLDTQLKPQPTKPKPDPGTGKTKKKAKS\*

>ENSMUSP00000120740\_c.160:A>G\_p.N54S ENSMUST00000148739.8|Lmntd1-205|ENSMUSG00000054966|-|chr6:g.145365529:T>C  
MSIQVHSSGRYPRTPAQQAAVSSPKGGILSSLGEIKIAEVNIKGLFVRLVNSSSEKEVEIGNHILQQNVNGHA  
VSLYQFPDNITLQANSTVTVWAAASEAKPQPPTDFVWEEQSKFRSSPDCTTILCKPNGEAIAWYTPPIHWKQAW

EKLETDIEFERC SVVVP SMRNHMF GWITASVSSTNEEKEEPIQKTPSQVYPVLYREKEIPPTVLPNKSPWCRN  
PNTSPHPYSSLIDSHSDISESSLDTQLKPQPTKPKPDPGTTKTKKAKS\*  
>ENSMUSP00000107335\_c.448:A>G\_p.N150S ENSMUST00000111706.8|Lmntd1-  
201|ENSMUSG00000054966|-|chr6:g.145365529:T>C  
MDS DSTLIPLSRFSQEMPIGFYQITSTQNSSTLSSRGLASKSTILSCSHKDSGLKQSTSSMVP RRQPQS  
SSD VDTYTFNGEDYFLSLFGESKKLTAHTPQAENVSEHLSVILEEVGQFTSSSLGEIKIAEVNIKGLFVRLV  
NNSSEKEVEIGNHILQQNVNGHAVSLYQFPDNITLQANSTVTVWAAASEAKQPPTDFVWEEQSKFRSSPDCT  
TILCKPNGEAI AWYTP IHWKQAW EKLETDIEFERC SVVVP SMRNHMF GWITASVSSTNEEKEEPIQKTPSQVY  
PVLYREKEIPPTVLPNKSPWCRN PNTSPHPYSSLIDSHSDISESSLDTQLKPQPTKPKPDPGTTKTKKAKS\*  
>ENSMUSP00000107337\_c.598:A>G\_p.N200S ENSMUST00000111708.9|Lmntd1-  
202|ENSMUSG00000054966|-|chr6:g.145365529:T>C  
MMKEASEPLASVTSINKQDSKVQDGEIRKEKIGTITPSKQHS SVHFFPKIMDS DSTLIPLSRFSQEMPIGF  
YQITSTQNSSTLSSRGLASKSTILSCSHKDSGLKQSTSSMVP RRQPQSSSD VDTYTFNGEDYFLSLFGES  
KKLTAHTPQAENVSEHLSVILEEVGQFTSSSLGEIKIAEVNIKGLFVRLV NNSSEKEVEIGNHILQQNVNGHA  
VSLYQFPDNITLQANSTVTVWAAASEAKQPPTDFVWEEQSKFRSSPDCTTILCKPNGEAI AWYTP IHWKQAW  
EKLETDIEFERC SVVVP SMRNHMF GWITASVSSTNEEKEEPIQKTPSQVYPVLYREKEIPPTVLPNKSPWCRN  
PNTSPHPYSSLIDSHSDISESSLDTQLKPQPTKPKPDPGTTKTKKAKS\*  
>ENSMUSP00000107335\_c.337:T>C\_p.L113P ENSMUST00000111706.8|Lmntd1-  
201|ENSMUSG00000054966|-|chr6:g.145373044:A>G  
MDS DSTLIPLSRFSQEMPIGFYQITSTQNSSTLSSRGLASKSTILSCSHKDSGLKQSTSSMVP RRQPQS  
SSD VDTYTFNGEDYFLSLFGESKKLTAHTPQAENVSEHPSVILEEVGQFTSSSLGEIKIAEVNIKGLFVRLV  
NNSNEKEVEIGNHILQQNVNGHAVSLYQFPDNITLQANSTVTVWAAASEAKQPPTDFVWEEQSKFRSSPDCT  
TILCKPNGEAI AWYTP IHWKQAW EKLETDIEFERC SVVVP SMRNHMF GWITASVSSTNEEKEEPIQKTPSQVY  
PVLYREKEIPPTVLPNKSPWCRN PNTSPHPYSSLIDSHSDISESSLDTQLKPQPTKPKPDPGTTKTKKAKS\*  
>ENSMUSP00000107337\_c.487:T>C\_p.L163P ENSMUST00000111708.9|Lmntd1-  
202|ENSMUSG00000054966|-|chr6:g.145373044:A>G  
MMKEASEPLASVTSINKQDSKVQDGEIRKEKIGTITPSKQHS SVHFFPKIMDS DSTLIPLSRFSQEMPIGF  
YQITSTQNSSTLSSRGLASKSTILSCSHKDSGLKQSTSSMVP RRQPQSSSD VDTYTFNGEDYFLSLFGES  
KKLTAHTPQAENVSEHPSVILEEVGQFTSSSLGEIKIAEVNIKGLFVRLV NNSNEKEVEIGNHILQQNVNGHA  
VSLYQFPDNITLQANSTVTVWAAASEAKQPPTDFVWEEQSKFRSSPDCTTILCKPNGEAI AWYTP IHWKQAW  
EKLETDIEFERC SVVVP SMRNHMF GWITASVSSTNEEKEEPIQKTPSQVYPVLYREKEIPPTVLPNKSPWCRN  
PNTSPHPYSSLIDSHSDISESSLDTQLKPQPTKPKPDPGTTKTKKAKS\*  
>ENSMUSP00000107337\_c.13:C>T\_p.A5V ENSMUST00000111708.9|Lmntd1-  
202|ENSMUSG00000054966|-|chr6:g.145379478:G>A  
MMKEVSEPLASVTSINKQDSKVQDGEIRKEKIGTITPSKQHS SVHFFPKIMDS DSTLIPLSRFSQEMPIGF  
YQITSTQNSSTLSSRGLASKSTILSCSHKDSGLKQSTSSMVP RRQPQSSSD VDTYTFNGEDYFLSLFGES  
KKLTAHTPQAENVSEHLSVILEEVGQFTSSSLGEIKIAEVNIKGLFVRLV NNSNEKEVEIGNHILQQNVNGHA  
VSLYQFPDNITLQANSTVTVWAAASEAKQPPTDFVWEEQSKFRSSPDCTTILCKPNGEAI AWYTP IHWKQAW  
EKLETDIEFERC SVVVP SMRNHMF GWITASVSSTNEEKEEPIQKTPSQVYPVLYREKEIPPTVLPNKSPWCRN  
PNTSPHPYSSLIDSHSDISESSLDTQLKPQPTKPKPDPGTTKTKKAKS\*  
>ENSMUSP00000123226\_c.13:C>T\_p.A5V ENSMUST00000149666.2|Lmntd1-  
206|ENSMUSG00000054966|-|chr6:g.145379478:G>A  
MMKEVSEPLASVTSINKQDSKVQDGEIRKEKIGTITPSKQHS SVHFFPKIMDS DSTLIPLSRFSQEMPI  
>ENSMUSP00000107333\_c.448:A>T\_p.E150V ENSMUST00000111704.8|Rassf8-  
203|ENSMUSG00000030259|+|chr6:g.145761124:A>T  
MELKVVVDGVRIVCGVTEVTTCQEVVIALAQAI GRTGRYTLIEKWRDTERH LAPHENPIVSLNKWGQYASDV  
QLILRR TGPSLSERPTSDSVARIPERTLYRQSLPLAKLRPQADKS IRRREP KRKSLTFTGGAKGLTDIFGKG  
KETVFRQVLSNCRATAEELKRLIRLQTGKLQAI EKQLESSEAEIRFWEQKYSCSLEEEIVRLEQRIKRDVE  
IEEEEFWENELQIEQENEKQLDQLEEIRQKVTDC EGR LKDYLAQIHTMESGLQAEKLHREVQEAQVNEEEVK  
GKIEKVKGEMDLQGQSLRLENGIRAVERSLQATKRLQDKELEQLTKELRQVNLQQFIQQTGTKVTVLPA  
EPTIEIASQADIETEAPFQSGSLKRP GSSRQLPSNLRILQNPVSSGFNPEGIYV\*  
>ENSMUSP00000032388\_c.448:A>T\_p.E150V ENSMUST00000032388.5|Rassf8-  
201|ENSMUSG00000030259|+|chr6:g.145761124:A>T  
MELKVVVDGVRIVCGVTEVTTCQEVVIALAQAI GRTGRYTLIEKWRDTERH LAPHENPIVSLNKWGQYASDV  
QLILRR TGPSLSERPTSDSVARIPERTLYRQSLPLAKLRPQADKS IRRREP KRKSLTFTGGAKGLTDIFGKG  
KETVFRQVLSNCRATAEELKRLIRLQTGKLQAI EKQLESSEAEIRFWEQKYSCSLEEEIVRLEQRIKRDVE  
IEEEEFWENELQIEQENEKQLDQLEEIRQKVTDC EGR LKDYLAQIHTMESGLQAEKLHREVQEAQVNEEEVK



GKIEKVKGEMDLQGQQLRLENGIRAVERSLGQATKRLQDKEQELEQLTKELRQVNLQQFIQQGTGKVTVLPA  
 EPTIEASQADIETEAPFQSGSLKRPGSSRQLPSNLRILQNPVSSGFNPEGIYV\*  
 >ENSMUSP00000107333\_c.471:A>T\_p.N158Y ENSMUST00000111704.8|Rassf8-  
 203|ENSMUSG00000030259|+|chr6:g.145761147:A>T  
 MELKVVVDGVRIVCGVTEVTTCQEVVIALAQAIGRTGRYTLIEKWRDTERHLPHENPIVSLNKWQYASDV  
 QLILRRTGPSLSERPTSDSVARIPERTLYRQSLPPLAKLRPQADKSIRREPKRKSLTFTGGAKGLTDIFGKG  
 KETEFRQKVLVSYCRATAEELKRLIRLQGTGKLOAIEKQLESSEAEIRFWEQKYSKSLSEEEIVRLEQRIKRNVE  
 IEEEEFWENELQIEQENKQLDQLEEIRQKVTDCGRLKDYLAQIHTMESGLQAEKLRHREVQEAQVNEEEVK  
 GKIEKVKGEMDLQGQQLRLENGIRAVERSLGQATKRLQDKEQELEQLTKELRQVNLQQFIQQGTGKVTVLPA  
 EPTIEASQADIETEAPFQSGSLKRPGSSRQLPSNLRILQNPVSSGFNPEGIYV\*  
 >ENSMUSP00000032388\_c.471:A>T\_p.N158Y ENSMUST00000032388.5|Rassf8-  
 201|ENSMUSG00000030259|+|chr6:g.145761147:A>T  
 MELKVVVDGVRIVCGVTEVTTCQEVVIALAQAIGRTGRYTLIEKWRDTERHLPHENPIVSLNKWQYASDV  
 QLILRRTGPSLSERPTSDSVARIPERTLYRQSLPPLAKLRPQADKSIRREPKRKSLTFTGGAKGLTDIFGKG  
 KETEFRQKVLVSYCRATAEELKRLIRLQGTGKLOAIEKQLESSEAEIRFWEQKYSKSLSEEEIVRLEQRIKRNVE  
 IEEEEFWENELQIEQENKQLDQLEEIRQKVTDCGRLKDYLAQIHTMESGLQAEKLRHREVQEAQVNEEEVK  
 GKIEKVKGEMDLQGQQLRLENGIRAVERSLGQATKRLQDKEQELEQLTKELRQVNLQQFIQQGTGKVTVLPA  
 EPTIEASQADIETEAPFQSGSLKRPGSSRQLPSNLRILQNPVSSGFNPEGIYV\*  
 >ENSMUSP00000107333\_c.1114:C>CTT\_p.A372ins-fs  
 ENSMUST00000111704.8|Rassf8-  
 203|ENSMUSG00000030259|+|chr6:g.145762345:C>CTT  
 MELKVVVDGVRIVCGVTEVTTCQEVVIALAQAIGRTGRYTLIEKWRDTERHLPHENPIVSLNKWQYASDV  
 QLILRRTGPSLSERPTSDSVARIPERTLYRQSLPPLAKLRPQADKSIRREPKRKSLTFTGGAKGLTDIFGKG  
 KETEFRQKVLVSNCRATAEELKRLIRLQGTGKLOAIEKQLESSEAEIRFWEQKYSKSLSEEEIVRLEQRIKRNVE  
 IEEEEFWENELQIEQENKQLDQLEEIRQKVTDCGRLKDYLAQIHTMESGLQAEKLRHREVQEAQVNEEEVK  
 GKIEKVKGEMDLQGQQLRLENGIRAVERSLGQATKRLQDKEQELEQLTKELRQVNLQQFIQQGTGKVTVLPA  
 EPTIEASRRQT  
 >ENSMUSP00000032388\_c.1114:C>CTT\_p.A372ins-fs  
 ENSMUST00000032388.5|Rassf8-  
 201|ENSMUSG00000030259|+|chr6:g.145762345:C>CTT  
 MELKVVVDGVRIVCGVTEVTTCQEVVIALAQAIGRTGRYTLIEKWRDTERHLPHENPIVSLNKWQYASDV  
 QLILRRTGPSLSERPTSDSVARIPERTLYRQSLPPLAKLRPQADKSIRREPKRKSLTFTGGAKGLTDIFGKG  
 KETEFRQKVLVSNCRATAEELKRLIRLQGTGKLOAIEKQLESSEAEIRFWEQKYSKSLSEEEIVRLEQRIKRNVE  
 IEEEEFWENELQIEQENKQLDQLEEIRQKVTDCGRLKDYLAQIHTMESGLQAEKLRHREVQEAQVNEEEVK  
 GKIEKVKGEMDLQGQQLRLENGIRAVERSLGQATKRLQDKEQELEQLTKELRQVNLQQFIQQGTGKVTVLPA  
 EPTIEASRRQT  
 >ENSMUSP00000130671\_c.141:GA>G\_p.E48del-fs ENSMUST00000058538.7|Rassf8-  
 202|ENSMUSG00000030259|+|chr6:g.145765813:GA>G  
 FICEASVGIIDRSCPLTVQIDITIRGQLGIAPPSRACTVKMQLMVLAVGVAARTDRSALLHS  
 >ENSMUSP00000130671\_c.283:T>C\_p.L95S ENSMUST00000058538.7|Rassf8-  
 202|ENSMUSG00000030259|+|chr6:g.145765955:T>C  
 FICEASVGIIDRSCPLTVQIDITIRGQLGIAPPSRACTVKMQLMVLAVECGSTDRQISTPPQLRQPSAATQLL  
 VSAKRSATRSLEHLQHLGTSSQVRTLID\*  
 >ENSMUSP00000122279\_c.346:G>C\_p.G116A ENSMUST00000139979.8|Ints13-  
 207|ENSMUSG00000040250|-|chr6:g.146455512:C>G  
 XAGVIVKESLTEEDVLCNKQKTIYNLVDMERKNDPLPVSTVGTRGKPKRDEQYRIMWNELETLVRAHISNSEK  
 HQRVLECLMACRSKPPPEEERKKRGRKREDREDKSEQAGKEHATEKARPDADRLKGILERGKEELAEAEVIKD  
 SPDSPEPPNKKPLVETDETPHMEKSKGPVSLLSLWSNRINTANSRKHQEFAGRLNSVNNRAELYQHLKEENGM  
 ETTENGKASRQ\*  
 >ENSMUSP00000145229\_c.637:G>C\_p.G213A ENSMUST00000203545.3|Ints13-  
 209|ENSMUSG00000040250|-|chr6:g.146455512:C>G  
 TNSIELHYCTGAYRISPDVNSRPSSCLTNFLNRSVLLQPRKSGSKVISHMLSSHGGEIFLHVLSSRSI  
 LEDPPSISEGCGGRVTDRITVPLAGVIVKESLTEEDVLCNKQKTIYNLVDMERKNDPLPVSTVGTRGKPKR  
 DEQYRIMWNELETLVRAHISNSEKHQRVLECLMACRSKPPPEEERKKRGRKREDREDKSEQAGKEHATEKAR  
 PADRLKGILERGKEELAEAEVIKDSPPDSPEPPNKKPLVETDETPHMEKSKGPVSLLSLWSNRINTANSRKHQ  
 FAGRLNSVNNRAELYQHLKEENGMETTENGKASRQ\*  
 >ENSMUSP00000032427\_c.1774:G>C\_p.G592A ENSMUST00000032427.15|Ints13-  
 201|ENSMUSG00000040250|-|chr6:g.146455512:C>G

MKIFSESHKTVFVVDHCPYMAESCRQHVEFDMLVKNRTQGIIPLAPISKSLWTCVSESSMEYCRIMYDIFPFK  
KLVNFIVSDSGAHLVNSWTQEDQNLQELMAALATVGGPPNPRADPECCSILHGLVAAVETLCKITEYQHEARTL  
LMENAERVGNRGRICITNAKSDSHVRMLEDCVQETIHEHNKLAANSDHLMQIQKCELVLIIHTYPVGEDSLVS  
DRPKKELSPVLTSEVHVSVRAGRHLATKLNVLVQQHFDLASTTITNIPMKEEQHANTSANYDVELLHKKDAHVD  
FLRSGDSHSGSSSREGPFKETVTLKWCTPRTNSIELHYCTGAYRISPVDVNSRPSSCLTNFLLNGRSVLLQP  
RKSQSGKVISHMLSSHGGEIFLHVLSSSSRSILEDPPSISEGCGGRVTDYRITDFGEFMRENRLTPFLDPYKID  
ASLEIPLERAKDQLEKHTRYWPMIISQTTIFNMQAVVPLAGVIVKESLTHEEDVLNCKQKTIYNLVDMERKNDPL  
PVSTVGTGRGKPKRDEQYRIMWNELETLVRAHISNSEKHQVLECLMACRSKPEEEEEERKKRGRKREDREDKS  
EQAGKEHATEKARPDADRLKGIILERGKEELAAEVIKDS PDSPEPPNKKPLVETDETDPHMEKSKGPVSLSLW  
SNRINTANSRKHQEFAGRLNSVNNRAELYQHLKEENGEVGLTGGPRTAIPFLKCPSPVVRNMETTENGKAS  
RQ\*

>ENSMUSP00000098352\_c.528:A>G\_p.R177G ENSMUST00000067404.13|Fgfrlop2-  
203|ENSMUSG00000040242|+|chr6:g.146498811:A>G  
MSCTIEKALADAKALVERLRDHDAAESLIEQTTALSKRVEAMKQYQEEIQELNEVARHRPRSTLVMGIQQEN  
RQIRELQQENKELRTSLEEHQSALELIMSKYREQMFRLLMASHKDDPGIIMKLKEQHSKELQAHVDQITEMAA  
VMRKAIEIDEQQGCKEQRIFQLEQENKGLGEILQITRESFLNLRKDDASESTLSLALVTNSDLRKS\*

>ENSMUSP00000107292\_c.642:A>G\_p.R215G ENSMUST00000111663.9|Fgfrlop2-  
204|ENSMUSG00000040242|+|chr6:g.146498811:A>G  
MSCTIEKALADAKALVERLRDHDAAESLIEQTTALSKRVEAMKQYQEEIQELNEVARHRPRSTLVMGIQQEN  
RQIRELQQENKELRTSLEEHQSALELIMSKYREQMFRLLMASHKDDPGIIMKLKEQHSKIDMVHRNSCEGFFL  
DASRHILEAPQHGLERRHLEANQNELQAHVDQITEMAAVMRKAIEIDEQQGCKEQRIFQLEQENKGLGEILQ  
ITRESFLNLRKDDASESTLSLALVTNSDLRKS\*

>ENSMUSP00000045650\_c.1498:G>A\_p.R500K ENSMUST00000037709.16|Tm7sf3-  
201|ENSMUSG00000040234|-|chr6:g.146505456:C>T  
MWRRLRLVLAVALAAGSAEAQANS SDGFLEFSVKGFTYFVLSKSSPQEAVLRHISSNVTFLLFQIHSQYQNTTV  
SFTKTLPLPSTSGTGNDRGLVFLRPEQAVCTWYLETGDTKPVQSVALTLSYSERDPIPGGCNLEFDLDDIDPNL  
YLDYNFFETTIFKAPANIGYARATEPPPCDVSTSRERWRLRYDVYQYFLPEGDLTEASLLHHLQRMAQVAQV  
KASAIKVATLTADDKTAVSFSSLPQGVIYNVIVWDPNSLNTSAAVVPVHTYACSFESVDGNCAFPGRVSTKVF  
STLVALLGLFVCFVGHFRFWKTDLFFIGFIFLGGFFFYILITRLTPLQYDVRALALTAVAGSFGGLLLVASWWRFG  
ILTLCLMLCVGLVGLVSSGTFFTPLGNLNVFHDGDFWVTFSCIALLVVPIFMGCLRILNIIACGVVGSYSV  
VLAVNSYMFTSLSYITLNLVLRALNTDFRGAVIRVPFQNTDYIILAVWGMLAVSGITLQIRKERGQPPFPHP  
YKLWKQERERRVTNILDPSHHIPLRERLYGRVARIKELFQKEQPAGERTPLLL\*

>ENSMUSP00000045650\_c.762:G>A\_p.D255N ENSMUST00000037709.16|Tm7sf3-  
201|ENSMUSG00000040234|-|chr6:g.146520122:C>T  
MWRRLRLVLAVALAAGSAEAQANS SDGFLEFSVKGFTYFVLSKSSPQEAVLRHISSNVTFLLFQIHSQYQNTTV  
SFTKTLPLPSTSGTGNDRGLVFLRPEQAVCTWYLETGDTKPVQSVALTLSYSERDPIPGGCNLEFDLDDIDPNL  
YLDYNFFETTIFKAPANIGYARATEPPPCDVSTSRERWRLRYDVYQYFLPEGDLTEASLLHHLQRMAQVAQV  
KASAIKVATLTADDKTAVSFSSLPQGVIYNVIVWNPNSLNTSAAVVPVHTYACSFESVDGNCAFPGRVSTKVF  
STLVALLGLFVCFVGHFRFWKTDLFFIGFIFLGGFFFYILITRLTPLQYDVRALALTAVAGSFGGLLLVASWWRFG  
ILTLCLMLCVGLVGLVSSGTFFTPLGNLNVFHDGDFWVTFSCIALLVVPIFMGCLRILNIIACGVVGSYSV  
VLAVNSYMFTSLSYITLNLVLRALNTDFRGAVIRVPFQNTDYIILAVWGMLAVSGITLQIRRERGQPPFPHP  
YKLWKQERERRVTNILDPSHHIPLRERLYGRVARIKELFQKEQPAGERTPLLL\*

>ENSMUSP0000001675\_c.427:T>C\_p.V143A ENSMUST0000001675.14|Stk381-  
201|ENSMUSG00000001630|+|chr6:g.146668951:T>C  
MAMTAGATTTFPMSNHTRERVTAKLTLENFYSNLILQHEERETRQKKLEVAMEEEGLADEEKKLRSSQHARK  
ETEFRLRLKRLRLGLDDFESLKVIGRGAFGEVRLVQKKDTGHIYAMKILRKADMLEKEQVAHIRAERDILAEAD  
GAWVVKMFYSFQDKRNLYLIMEFLPGGDMMTLLMKKDTLTHEETQFYISETVLAIDAIHQLGFIHRDVKPDNL  
LLDAKGHVKLSDFGLCTGLKKAHRTEFYRNLTHNPPSDFSFQNMNSKRKAETWKKNRRQLAYSTVGTDPYIAP  
EVFMQTGYNKLCDWWSLGVIMYEMLIGFPPFCSETPQETYRKMVSWKETLAFPPPEVPVSEKAKDLILRFCTDS  
ENRIGNGGVEEIKGHPFFEGVDWGHIRERPAAPIEIRSIDDTSNFDFFPESDILQVPVNTTEPDYKSKDWVF  
LNYTYKRFEGLTQRGSIPTYMKAGKL\*

>ENSMUSP00000107271\_c.427:T>C\_p.V143A ENSMUST00000111644.2|Stk381-  
202|ENSMUSG00000001630|+|chr6:g.146668951:T>C  
MAMTAGATTTFPMSNHTRERVTAKLTLENFYSNLILQHEERETRQKKLEVAMEEEGLADEEKKLRSSQHARK  
ETEFRLRLKRLRLGLDDFESLKVIGRGAFGEVRLVQKKDTGHIYAMKILRKADMLEKEQVAHIRAERDILAEAD  
GAWVVKMFYSFQDKRNLYLIMEFLPGGDMMTLLMKKDTLTHEETQFYISETVLAIDAIHQLGFIHRDVKPDNL  
LLDAKGHVKLSDFGLCTGLKKAHRTEFYRNLTHNPPSDFSFQNMNSKRKAETWKKNRRQLAYSTVGTDPYIAP  
EVFMQTGYNKLCDWWSLGVIMYEMLIGFPPFCSETPQETYRKMVSWKETLAFPPPEVPVSEKAKDLILRFCTDS

ENRIGNGGVEEIKGHPFFEGVDWGHIRERPAAIPIEIRSIDDTSNFDDFPESDILQPVAFFLFLVPNTTEPDY  
KSKDWVFLNYTYKRFEGLTQRGSIPTYMKAGKL\*  
>ENSMUSP00000001675\_c.501:G>A\_p.E168K ENSMUST00000001675.14|Stk381-  
201|ENSMUSG00000001630|+|chr6:g.146669025:G>A  
MAMTAGATTTFPMSNHTRETRVAKLTLENFYNSLILQHEERETRQKKLEVAMEEEGLADEEKKLRRSQHARK  
ETEFRLRLKRLGLDDFESLKVIGRGAFGEVRLVQKKDTGHIYAMKILRKADMLEKEQVAHIRAERDILVEAD  
GAWVVKMFYSFQDKRNLYLIMKFLPGGDMMLLTKKDTLTHEETQFYISETVLAIDAIHQLGFIHRDVKPDNL  
LLDAKGHVKLSDFGLCTGLKKAHRTEFYRNLTHNPPSDFSFQNMNSKRKAETWKKNRRQLAYSTVGTDPDIAP  
EVFMQTGYNKLCDWWSLGVIMYEMLIGFPPFCSETPQETRYKVMWSKETLAFPEVPVSEKAKDLILRFCTDS  
ENRIGNGGVEEIKGHPFFEGVDWGHIRERPAAIPIEIRSIDDTSNFDDFPESDILQPVPNTTEPDYKSKDWVFL  
NYTYKRFEGLTQRGSIPTYMKAGKL\*  
>ENSMUSP00000107271\_c.501:G>A\_p.E168K ENSMUST00000111644.2|Stk381-  
202|ENSMUSG00000001630|+|chr6:g.146669025:G>A  
MAMTAGATTTFPMSNHTRETRVAKLTLENFYNSLILQHEERETRQKKLEVAMEEEGLADEEKKLRRSQHARK  
ETEFRLRLKRLGLDDFESLKVIGRGAFGEVRLVQKKDTGHIYAMKILRKADMLEKEQVAHIRAERDILVEAD  
GAWVVKMFYSFQDKRNLYLIMKFLPGGDMMLLTKKDTLTHEETQFYISETVLAIDAIHQLGFIHRDVKPDNL  
LLDAKGHVKLSDFGLCTGLKKAHRTEFYRNLTHNPPSDFSFQNMNSKRKAETWKKNRRQLAYSTVGTDPDIAP  
EVFMQTGYNKLCDWWSLGVIMYEMLIGFPPFCSETPQETRYKVMWSKETLAFPEVPVSEKAKDLILRFCTDS  
ENRIGNGGVEEIKGHPFFEGVDWGHIRERPAAIPIEIRSIDDTSNFDDFPESDILQPVAFFLFLVPNTTEPDY  
KSKDWVFLNYTYKRFEGLTQRGSIPTYMKAGKL\*  
>ENSMUSP00000001675\_c.832:A>G\_p.Q278R ENSMUST00000001675.14|Stk381-  
201|ENSMUSG00000001630|+|chr6:g.146670650:A>G  
MAMTAGATTTFPMSNHTRETRVAKLTLENFYNSLILQHEERETRQKKLEVAMEEEGLADEEKKLRRSQHARK  
ETEFRLRLKRLGLDDFESLKVIGRGAFGEVRLVQKKDTGHIYAMKILRKADMLEKEQVAHIRAERDILVEAD  
GAWVVKMFYSFQDKRNLYLIMEFLPGGDMMLLTKKDTLTHEETQFYISETVLAIDAIHQLGFIHRDVKPDNL  
LLDAKGHVKLSDFGLCTGLKKAHRTEFYRNLTHNPPSDFSFQNMNSKRKAETWKKNRRQLAYSTVGTDPDIAP  
EVFMQTGYNKLCDWWSLGVIMYEMLIGFPPFCSETPQETRYKVMWSKETLAFPEVPVSEKAKDLILRFCTDS  
ENRIGNGGVEEIKGHPFFEGVDWGHIRERPAAIPIEIRSIDDTSNFDDFPESDILQPVPNTTEPDYKSKDWVFL  
NYTYKRFEGLTQRGSIPTYMKAGKL\*  
>ENSMUSP00000107271\_c.832:A>G\_p.Q278R ENSMUST00000111644.2|Stk381-  
202|ENSMUSG00000001630|+|chr6:g.146670650:A>G  
MAMTAGATTTFPMSNHTRETRVAKLTLENFYNSLILQHEERETRQKKLEVAMEEEGLADEEKKLRRSQHARK  
ETEFRLRLKRLGLDDFESLKVIGRGAFGEVRLVQKKDTGHIYAMKILRKADMLEKEQVAHIRAERDILVEAD  
GAWVVKMFYSFQDKRNLYLIMEFLPGGDMMLLTKKDTLTHEETQFYISETVLAIDAIHQLGFIHRDVKPDNL  
LLDAKGHVKLSDFGLCTGLKKAHRTEFYRNLTHNPPSDFSFQNMNSKRKAETWKKNRRQLAYSTVGTDPDIAP  
EVFMQTGYNKLCDWWSLGVIMYEMLIGFPPFCSETPQETRYKVMWSKETLAFPEVPVSEKAKDLILRFCTDS  
ENRIGNGGVEEIKGHPFFEGVDWGHIRERPAAIPIEIRSIDDTSNFDDFPESDILQPVPNTTEPDYKSKDWVFL  
NYTYKRFEGLTQRGSIPTYMKAGKL\*  
>ENSMUSP00000001675\_c.912:G>A\_p.D305N ENSMUST00000001675.14|Stk381-  
201|ENSMUSG00000001630|+|chr6:g.146673155:G>A  
MAMTAGATTTFPMSNHTRETRVAKLTLENFYNSLILQHEERETRQKKLEVAMEEEGLADEEKKLRRSQHARK  
ETEFRLRLKRLGLDDFESLKVIGRGAFGEVRLVQKKDTGHIYAMKILRKADMLEKEQVAHIRAERDILVEAD  
GAWVVKMFYSFQDKRNLYLIMEFLPGGDMMLLTKKDTLTHEETQFYISETVLAIDAIHQLGFIHRDVKPDNL  
LLDAKGHVKLSDFGLCTGLKKAHRTEFYRNLTHNPPSDFSFQNMNSKRKAETWKKNRRQLAYSTVGTDPDIAP  
EVFMQTGYNKLCDWWSLGVIMYEMLIGFPPFCSETPQETRYKVMWSKETLAFPEVPVSEKAKDLILRFCTDS  
ENRIGNGGVEEIKGHPFFEGVDWGHIRERPAAIPIEIRSIDDTSNFDDFPESDILQPVPNTTEPDYKSKDWVFL  
NYTYKRFEGLTQRGSIPTYMKAGKL\*  
>ENSMUSP00000107271\_c.912:G>A\_p.D305N ENSMUST00000111644.2|Stk381-  
202|ENSMUSG00000001630|+|chr6:g.146673155:G>A  
MAMTAGATTTFPMSNHTRETRVAKLTLENFYNSLILQHEERETRQKKLEVAMEEEGLADEEKKLRRSQHARK  
ETEFRLRLKRLGLDDFESLKVIGRGAFGEVRLVQKKDTGHIYAMKILRKADMLEKEQVAHIRAERDILVEAD  
GAWVVKMFYSFQDKRNLYLIMEFLPGGDMMLLTKKDTLTHEETQFYISETVLAIDAIHQLGFIHRDVKPDNL  
LLDAKGHVKLSDFGLCTGLKKAHRTEFYRNLTHNPPSDFSFQNMNSKRKAETWKKNRRQLAYSTVGTDPDIAP  
EVFMQTGYNKLCDWWSLGVIMYEMLIGFPPFCSETPQETRYKVMWSKETLAFPEVPVSEKAKDLILRFCTDS  
ENRIGNGGVEEIKGHPFFEGVDWGHIRERPAAIPIEIRSIDDTSNFDDFPESDILQPVPNTTEPDYKSKDWVFL  
NYTYKRFEGLTQRGSIPTYMKAGKL\*  
>ENSMUSP00000032433\_c.283:G>A\_p.G95D ENSMUST00000032433.9|Smco2-  
201|ENSMUSG00000030292|+|chr6:g.146760429:G>A

MMSLQLGTAGKERQLAEKSRDLQNVSMTEGSEEVSEMDHISDRPDEKDKPSENLQTDSDLYKMDTEKWDGLEQE  
 SEHSQDPPSKPDEQEVTLCVCEQPVSQVLSQSPSTDESTPIPELTHKLNWHAKMGLQMKELGADHGDWLERINN  
 IIQNINNTTESTVKSLLEVISLENQSKNLESDQEQADIEEKITEIRRQLKEVNIKLTQVDACEEARELKEKLV  
 EQIESFHKEMNVLNSKLEMYYTQGSADSHNSEDDVTEQEEPLVPEASPSLSASPTPPCSAVWKNALKLFVIV  
 YVVTITGLSCYILFVDATFLFERVLPSVLGHRTMWDLREMMAPFLNLEAEDLLPS\*  
 >ENSMUSP00000032433\_c.687:A>G\_p.N230D ENSMUST00000032433.9|Smco2-  
 201|ENSMUSG00000030292|+|chr6:g.146769605:A>G  
 MMSLQLGTAGKERQLAEKSRDLQNVSMTEGSEEVSEMDHISDRPDEKDKPSENLQTDSDLYKMDTEKWDGLEQE  
 SEHSQDPPSKPDEQEVTLCVCEQPVSQVLSQSPSTDESTPIPELTHKLNWHAKMGLQMKELGADHGDWLERINN  
 IIQNINNTTESTVKSLLEVISLENQSKNLESDQEQADIEEKITEIRRQLKEVNIKLTQVDACEEARELKEKLV  
 EQIESFHKEMNVLNSKLEMYYTQGSADSHNSEDDVTEQEEPLVPEASPSLSASPTPPCSAVWKNALKLFVIV  
 YVVTITGLSCYILFVDATFLFERVLPSVLGHRTMWDLREMMAPFLNLEAEDLLPS\*  
 >ENSMUSP00000032433\_c.768:G>A\_p.E257K ENSMUST00000032433.9|Smco2-  
 201|ENSMUSG00000030292|+|chr6:g.146769686:G>A  
 MMSLQLGTAGKERQLAEKSRDLQNVSMTEGSEEVSEMDHISDRPDEKDKPSENLQTDSDLYKMDTEKWDGLEQE  
 SEHSQDPPSKPDEQEVTLCVCEQPVSQVLSQSPSTDESTPIPELTHKLNWHAKMGLQMKELGADHGDWLERINN  
 IIQNINNTTESTVKSLLEVISLENQSKNLESDQEQADIEEKITEIRRQLKEVNIKLTQVDACEEARELKEKLV  
 EQIESFHKEMNVLNSKLEMYYTQGSADSHNSEDDVTEQEEPLVPEASPSLSASPTPPCSAVWKNALKLFVIV  
 YVVTITGLSCYILFVDATFLFERVLPSVLGHRTMWDLREMMAPFLNLEAEDLLPS\*  
 >ENSMUSP00000032433\_c.934:T>C\_p.L312P ENSMUST00000032433.9|Smco2-  
 201|ENSMUSG00000030292|+|chr6:g.146772734:T>C  
 MMSLQLGTAGKERQLAEKSRDLQNVSMTEGSEEVSEMDHISDRPDEKDKPSENLQTDSDLYKMDTEKWDGLEQE  
 SEHSQDPPSKPDEQEVTLCVCEQPVSQVLSQSPSTDESTPIPELTHKLNWHAKMGLQMKELGADHGDWLERINN  
 IIQNINNTTESTVKSLLEVISLENQSKNLESDQEQADIEEKITEIRRQLKEVNIKLTQVDACEEARELKEKLV  
 EQIESFHKEMNVLNSKLEMYYTQGSADSHNSEDDVTEQEEPLVPEASPSLSASPTPPCSAVWKNALKLFVIV  
 YVVTITGLSCYILFVDATFLFERVLPSVLGHRTMWDLREMMAPFLNLEAEDLLPS\*  
 >ENSMUSP00000043802\_c.685:C>T\_p.S229F  
 ENSMUST00000036592.15|1700034J05Rik-201|ENSMUSG00000040163|-  
 |chr6:g.146853970:G>A  
 MTTSPSSSDYSSTEDSIYECKSNQASVGYYPSENTFSYEDLVSREETASVDSLHVHFLPPVQSTWRTESLRRL  
 FRKRDQVEHDPEQFSKLSITLAWDIDVDSNHADSLANLDLNAHSQWMDKWPEDKTKLTPCKLYNLVQKLETFL  
 GKEKGGQHDGCVLPESTQKEDVHLNSTTPPHTAQVSPKERDVCQDLSKQRSLENEEDICQVLEDPRLKDEVV  
 QEIRQASESFLLETSSVSSPQPEGASRSHNIFCMNFRWVFQWLRTQIFSRWRRQRPSQATNTWHQKAVRNHSL  
 RSNRIQPQE\*  
 >ENSMUSP000000107249\_c.682:C>T\_p.S228F ENSMUST00000111622.2|1700034J05Rik-  
 202|ENSMUSG00000040163|-|chr6:g.146853970:G>A  
 MTTSPSSSDYSSTEDSIYECKSNQASVGYYPSENTFSYEDLVSREETASVDSLHVHFLPPVQSTWRTESLRRL  
 FRKRDQVEHDPEQFSKLSITLAWDIDVDSNHADSLANLDLNAHSQWMDKWPEDKTKLTPCKLYNLVQKLETFL  
 GKEKGGQHDGCVLPESTQKEDVHLNSTTPPHTAQVSPKERDVCQDLSKQRSLENEEDICQVLEDPRLKDEVV  
 EIRQASESFLLETSSVSSPQPEGASRSHNIFCMNFRWVFQWLRTQIFSRWRRQRPSQATNTWHQKAVRNHSLR  
 SNRIQPQE\*  
 >ENSMUSP00000043802\_c.666:A>T\_p.R223\*  
 ENSMUST00000036592.15|1700034J05Rik-201|ENSMUSG00000040163|-  
 |chr6:g.146853989:T>A  
 MTTSPSSSDYSSTEDSIYECKSNQASVGYYPSENTFSYEDLVSREETASVDSLHVHFLPPVQSTWRTESLRRL  
 FRKRDQVEHDPEQFSKLSITLAWDIDVDSNHADSLANLDLNAHSQWMDKWPEDKTKLTPCKLYNLVQKLETFL  
 GKEKGGQHDGCVLPESTQKEDVHLNSTTPPHTAQVSPKERDVCQDLSKQRSLENEEDICQVLEDPRLKDEVV  
 QEI\*QASESLETSSVSSPQPEGASRSHNIFCMNFRWVFQWLRTQIFSRWRRQRPSQATNTWHQKAVRNHSLR  
 RSNRIQPQE\*  
 >ENSMUSP000000107249\_c.663:A>T\_p.R222\* ENSMUST00000111622.2|1700034J05Rik-  
 202|ENSMUSG00000040163|-|chr6:g.146853989:T>A  
 MTTSPSSSDYSSTEDSIYECKSNQASVGYYPSENTFSYEDLVSREETASVDSLHVHFLPPVQSTWRTESLRRL  
 FRKRDQVEHDPEQFSKLSITLAWDIDVDSNHADSLANLDLNAHSQWMDKWPEDKTKLTPCKLYNLVQKLETFL  
 GKEKGGQHDGCVLPESTQKEDVHLNSTTPPHTAQVSPKERDVCQDLSKQRSLENEEDICQVLEDPRLKDEVV  
 EI\*QASESLETSSVSSPQPEGASRSHNIFCMNFRWVFQWLRTQIFSRWRRQRPSQATNTWHQKAVRNHSLR  
 RSNRIQPQE\*

>rs249638215\_ENSMUSP00000043802\_c.641:G>AG\_p.L214ins-fs  
ENSMUST00000036592.15|1700034J05Rik-201|ENSMUSG00000040163|-  
|chr6:g.146854399:C>CT  
MTTSPSSSDYSSTEDSIYECKSNQSASVGYYPSENTFSYEDLVSREETASVDSLHVHFLPPVQSTWRTESELRRL  
FRKRDQVEHDPEQFSKLSITLAWDIDVDSNHADSLANLDDLNAHSQWMDKWPEDKTKLTPCKLYNLVQKLETFL  
GKEKGGQHDGCVLPSTQKEDVHLNSTTPPHTAQVSPKERDVCQDLSKQRSLENEEDICQVLEDPRLLEERRSC  
AGDKTGI  
>rs249638215\_ENSMUSP00000107249\_c.641:G>AG\_p.L214ins-fs  
ENSMUST00000111622.2|1700034J05Rik-202|ENSMUSG00000040163|-  
|chr6:g.146854399:C>CT  
MTTSPSSSDYSSTEDSIYECKSNQSASVGYYPSENTFSYEDLVSREETASVDSLHVHFLPPVQSTWRTESELRRL  
FRKRDQVEHDPEQFSKLSITLAWDIDVDSNHADSLANLDDLNAHSQWMDKWPEDKTKLTPCKLYNLVQKLETFL  
GKEKGGQHDGCVLPSTQKEDVHLNSTTPPHTAQVSPKERDVCQDLSKQRSLENEEDICQVLEDPRLLEERRSC  
GDKTGI  
>ENSMUSP00000043802\_c.421:A>G\_p.K141R  
ENSMUST00000036592.15|1700034J05Rik-201|ENSMUSG00000040163|-  
|chr6:g.146854619:T>C  
MTTSPSSSDYSSTEDSIYECKSNQSASVGYYPSENTFSYEDLVSREETASVDSLHVHFLPPVQSTWRTESELRRL  
FRKRDQVEHDPEQFSKLSITLAWDIDVDSNHADSLANLDDLNAHSQWMDKWPEDKTKLTPCKLYNLVQKLETFL  
GKEKGGQHDGCVLPSTQKEDVHLNSTTPPHTAQVSPKERDVCQDLSKQRSLENEEDICQVLEDPRLLEERRSC  
QEIRQASESSLETSSVSSPQPEGASRSHNIFCMNFRWVFQWLRQTQIFSRWRRQRPSQATNTWHQKAVRNIHSL  
RSNRIQPQE\*  
>ENSMUSP00000107249\_c.421:A>G\_p.K141R ENSMUST00000111622.2|1700034J05Rik-  
202|ENSMUSG00000040163|-|chr6:g.146854619:T>C  
MTTSPSSSDYSSTEDSIYECKSNQSASVGYYPSENTFSYEDLVSREETASVDSLHVHFLPPVQSTWRTESELRRL  
FRKRDQVEHDPEQFSKLSITLAWDIDVDSNHADSLANLDDLNAHSQWMDKWPEDKTKLTPCKLYNLVQKLETFL  
GKEKGGQHDGCVLPSTQKEDVHLNSTTPPHTAQVSPKERDVCQDLSKQRSLENEEDICQVLEDPRLLEERRSC  
EIRQASESSLETSSVSSPQPEGASRSHNIFCMNFRWVFQWLRQTQIFSRWRRQRPSQATNTWHQKAVRNIHSLR  
SNRIQPQE\*  
>ENSMUSP00000043802\_c.223:G>T\_p.R75M ENSMUST00000036592.15|1700034J05Rik-  
201|ENSMUSG00000040163|-|chr6:g.146854817:C>A  
MTTSPSSSDYSSTEDSIYECKSNQSASVGYYPSENTFSYEDLVSREETASVDSLHVHFLPPVQSTWRTESELRRL  
FMKRDQVEHDPEQFSKLSITLAWDIDVDSNHADSLANLDDLNAHSQWMDKWPEDKTKLTPCKLYNLVQKLETFL  
GKEKGGQHDGCVLPSTQKEDVHLNSTTPPHTAQVSPKERDVCQDLSKQRSLENEEDICQVLEDPRLLEERRSC  
QEIRQASESSLETSSVSSPQPEGASRSHNIFCMNFRWVFQWLRQTQIFSRWRRQRPSQATNTWHQKAVRNIHSL  
RSNRIQPQE\*  
>ENSMUSP00000107249\_c.223:G>T\_p.R75M ENSMUST00000111622.2|1700034J05Rik-  
202|ENSMUSG00000040163|-|chr6:g.146854817:C>A  
MTTSPSSSDYSSTEDSIYECKSNQSASVGYYPSENTFSYEDLVSREETASVDSLHVHFLPPVQSTWRTESELRRL  
FMKRDQVEHDPEQFSKLSITLAWDIDVDSNHADSLANLDDLNAHSQWMDKWPEDKTKLTPCKLYNLVQKLETFL  
GKEKGGQHDGCVLPSTQKEDVHLNSTTPPHTAQVSPKERDVCQDLSKQRSLENEEDICQVLEDPRLLEERRSC  
EIRQASESSLETSSVSSPQPEGASRSHNIFCMNFRWVFQWLRQTQIFSRWRRQRPSQATNTWHQKAVRNIHSLR  
SNRIQPQE\*  
>ENSMUSP00000122515\_c.329:G>T\_p.M110I ENSMUST00000154221.2|Pp fibp1-  
208|ENSMUSG00000016487|+|chr6:g.146898375:G>T  
EKLNATEEMLQOELLRSRTSLETQKLELMAEISNLKLLTAVEKDRLDYEDRFRDTEGLIQEINDLRLKVNEMD  
GERLQYEEKLSTKSLMAKLSMKIKVGMQYEQRIEQWETLKDELASLKEQLEEKECEVKRLQERLVCKA  
KGGIEVLDRDIEVQMKKAVESLMAANEKERRKIEDLRQCLSRYRKMQDPAVLAQGDSECEGLFHSSSIST  
LLDAQGFSDLERSTSSTPGMGSP  
>ENSMUSP00000121270\_c.428:G>C\_p.E143D ENSMUST00000155415.8|Pp fibp1-  
209|ENSMUSG00000016487|+|chr6:g.146914424:G>C  
XQDPAVLAQGDSECEGLFHSSSISTLLDAQGFSDLERSTSSTPGMGSPSRDLLHTSAPEEFHTSVLQASIPS  
LLPPSVDVDTCEKPKLPTKPEFSFEEDGRAILGAAAEVSLSDGVSTSSLQKSSSLGNLKEASDGTEDKDSIQ  
KLSEDKAPTDSTRTFGTLPKVPKGHEASVDNPFPGTRAKARSSFRGGRFFKIKSGKRTASAPNLAETEKETAEHLN  
LACTSRKSGQGTSPFPMSPPSPDRKKSIRGMLR  
>ENSMUSP0000016631\_c.2904:G>A\_p.V969I ENSMUST0000016631.14|Pp fibp1-  
201|ENSMUSG00000016487|+|chr6:g.146931893:G>A



MMSDASDMLAAALEQMDGIIAGSKALEYSNGIFDCQSPTSPFMGSLRALHLVEDLRGLLEMMETDEKEGLRCQ  
 IPDSTAIEVLIIEWLQNQMTNGHLPNGDQVYQERLARLENDKESLVLQVSVLTDQVEAQGEKIRDLEFCLEEHRE  
 KLNATEEMLQOELLRSRTSLETQKLELMAEISNLKLLKTAVEKDRLDYEDRFRDTEGLIQEINDLRRLKVNEMDG  
 ERLQYEKKLKSTKDELASLKEQLEEKKECEVKRLQERLVCKAKGEGIEVLDRDIEVQKMKKAVESLMAANEEKE  
 RKIEDLRQCLSRYRKMQDPAVLAQQQDSECEGLFHSSSISTLLDAQGFSDLERSTSSSTPGMGSPSRDLLHTSA  
 PEEFHTSVLQASIPSLPPSVVDVDTCEKPKLPKPKPETSFEEDGGRAILGAAAIEVSLSDGVSTSSSLQKSSSLGN  
 LKKEASDGTDKAPTDSRTFGTLPKVPVPGHEASVDDNPFGRTRKARSSFGRGFFKIKSGKRTASAPNLAETEKET  
 AEHLNLAGTSRSKSGQGTSPFPMSPPSPDSRKKSRGIMRFLGKLRSSQSTTFNPDMMSEPEFKRGGTRATAGP  
 RLGWSRDLGQNSDLDMPFAKWTKQVCSWLAEQGLGSLSSGKHWIISGQTLQASQQDLEKELGKIKHSLHR  
 KKLQALQALGSEETNYGKLDNFNWRWLDLDDIGLPQYKQFDEGRVDGRMLHYMTVDDLLSLKVVSVLHHL  
 IKRAIQVLRINNFEPNCLRRRPSDENISITPSEVQQWNTNHRVMEWLRSDLAEYAPNLRGSGVHGGLMVLEPRF  
 NVETMAQLLNIPPNKTLRRHLATHFNLLIGAEAQHQKRDAMELDPYVLLTATAKVKPKKLTFSNFGNLRKKK  
 HEDGEYVCPMELGQASGSSQKGFRLDMRLYEEDDLDRLEQMEDSEGTVRQIGAFSEGNNLTHMLKEDDM  
 FKDFAARSPSASITDEDSNI\*

>ENSMUSP00000107250\_c.2937:G>A\_p.V980I ENSMUST00000111623.9|Pp fibp1-  
 202|ENSMUSG00000016487|+|chr6:g.146931893:G>A

MMSDASDMLAAALEQMDGIIAGSKALEYSNGIFDCQSPTSPFMGSLRALHLVEDLRGLLEMMETDEKEGLRCQ  
 IPDSTAIEVLIIEWLQNQMTNGHLPNGDQVYQERLARLENDKESLVLQVSVLTDQVEAQGEKIRDLEFCLEEHRE  
 KLNATEEMLQOELLRSRTSLETQKLELMAEISNLKLLKTAVEKDRLDYEDRFRDTEGLIQEINDLRRLKVNEMDG  
 ERLQYEKKLKSTKDELASLKEQLEEKKECEVKRLQERLVCKAKGEGIEVLDRDENIKKKLKEKNIEVQKMKKAV  
 ESLMAANEEKERKIEDLRQCLSRYRKMQDPAVLAQQQDSECEGLFHSSSISTLLDAQGFSDLERSTSSSTPGMG  
 SPSRDLHTSAPEEFHTSVLQASIPSLPPSVVDVDTCEKPKLPKPKPETSFEEDGGRAILGAAAIEVSLSDGVST  
 SSLQKSSSLGNLKKKEASDGTDKAPTDSRTFGTLPKVPVPGHEASVDDNPFGRTRKARSSFGRGFFKIKSGKRTAS  
 APNLAETEKETAEHLNLAGTSRSKSGQGTSPFPMSPPSPDSRKKSRGIMRFLGKLRSSQSTTFNPDMMSEPEF  
 KRGGTRATAGPRLGWSRDLGQNSDLDMPFAKWTKQVCSWLAEQGLGSLSSGKHWIISGQTLQASQQDLE  
 KELGKIKHSLHRKKLQALQALGSEETNYGKLDNFNWRWLDLDDIGLPQYKQFDEGRVDGRMLHYMTVDDLLS  
 LKVVSVLHHLSSIKRAIQVLRINNFEPNCLRRRPSDENISITPSEVQQWNTNHRVMEWLRSDLAEYAPNLRGSGV  
 HGGLMVLEPRFNVTMAQLLNIPPNKTLRRHLATHFNLLIGAEAQHQKRDAMELDPYVLLTATAKVKPKKLT  
 FSNFGNLRKKKHEDGEYVCPMELGQASGSSQKGFRLDMRLYEEDDLDRLEQMEDSEGTVRQIGAFSEGIN  
 NLTHMLKEDDMFKDFAARSPSASITDEDSNI\*

>ENSMUSP00000037503\_c.16:C>T\_p.S6L ENSMUST00000036194.6|Rep15-  
 201|ENSMUSG00000040121|+|chr6:g.146934179:C>T

MGQKALQQVAPKDSQEVLAMCEVVSAAISHAAQKLKEYLGFYPLSRLCLAASSLTVFLVHFVTFQCQERGAD  
 EWLTTTKMTHKQAWLFGADWIWTFWGPDKQIRLQVAVQTLRMASLPLTDPKSCESRGEESWKKGRFDKLEFC  
 NLVGEDCLGLFIIIFGVGPEPKAIRGVVLESVRNGMMESQLPGRKAVEQFVLETKDCISIKELLGNCLSKRDGL  
 SDMGRVYIRIL\*

>ENSMUSP00000048348\_c.171:G>T\_p.D58Y ENSMUST00000036111.10|Mrps35-  
 201|ENSMUSG00000040112|+|chr6:g.146949659:G>T

MAAAALQLRQTLCPGARVLRTFSSVASPAAPRAGPRTASRSERPMMRRKALPPRTEKMYTDQDWPVSYPTAAPF  
 KPSAVPLPVRMGYPVKKGVMPMAKEGNLELLKIPNLFHLTPVAIKRHCAALKDFCTEWPALDSDEKCEEHPV  
 EIDTADYVSSGSPSIRNPKARAVTLRVKLSLNLNDNHAKKKLIKLVGERYCKATDVLTTITDRCPKLRQNCDYA  
 VYLLTVLYHESWKTEDWENSKTEEDMDEYVWAKSSSENSVLQTLQMRAAESSVAPSREELLGTKEVEDYQKC  
 IVRLKNEGENEASLAQYKESVKRLLNLA\*

>ENSMUSP00000144920\_c.39:G>T\_p.D14Y ENSMUST00000137556.3|Mrps35-  
 203|ENSMUSG00000040112|+|chr6:g.146949659:G>T

MRRKALPPRTEKMYTDQDWPVSYPTAAPFKPSAVPLPVRMGYPVKKGVMPMAKEGNLELLKIPNLFHLTPVAIK  
 RHCAALKDFCTE

>ENSMUSP00000048348\_c.777:C>CACCTGTTTACTTTGCAAACCTCTCTA\_p.L260ins-fs  
 ENSMUST00000036111.10|Mrps35-  
 201|ENSMUSG00000040112|+|chr6:g.146972136:C>CACCTGTTTACTTTGCAAACCTCTCTA  
 MAAAALQLRQTLCPGARVLRTFSSVASPAAPRAGPRTASRSERPMMRRKALPPRTEKMDTDQDWPVSYPTAAPF  
 KPSAVPLPVRMGYPVKKGVMPMAKEGNLELLKIPNLFHLTPVAIKRHCAALKDFCTEWPALDSDEKCEEHPV  
 EIDTADYVSSGSPSIRNPKARAVTLRVKLSLNLNDNHAKKKLIKLVGERYCKATDVLTTITDRCPKLRQNCDYA  
 VYLLTVLYHESWKTEDWENSKTEEDMDEYVWAKSSSENSVHLFTLQTSLFRPCCR

>ENSMUSP00000042558\_c.147:G>A\_p.V50M ENSMUST00000036003.8|Klh142-  
 201|ENSMUSG00000040102|+|chr6:g.146993177:G>A

MSAEEMVQIRLEDRCYPVSKSKLIEQSDYFRALYRSGMREAVRPEVGPPEMQQLRGLSAPGLRLVLDIFINAGGA  
 REGWGLSEDELAASVLESEMVEAASFLLQVTALLRLLLSHVRLGNCLLEYRLAQVYGLPDLQDACLRFMVLRFH

QVLCQPQFPPLLSPPQAPGDCSLKQRLREARMRGT PVLVALGDFLGGPLAPHPYQGEPPSMLRYEETTERWFP  
LANNLPPDLVNVGRYGSAILDNYLFI VGGYRITSQEISAAHSYNPITNEWLQVASMNQKRSNFKLVAVNSKLY  
AIGGQAVSNVECYNPEQDAWNFVAPLPNPLAEFSACECKGKIYVIGGYTTRDRNMNIIQYCP SADLWTLFETC  
DVHIRKQQMVSVEETIYIVGGCLHELGPNNRRSSQSEDMLTVQSYNTVTRQWLYLKENTSKSGLNLTALHNDG  
IYIMSRDVTLSLSTLEHRVFLKYNIFADSWEAFRRFPFAGHNLLISSLYLPNKAET\*  
>rs246022839\_ENSMUSP00000042558\_c.247:A>AC\_p.E83ins-fs  
ENSMUST00000036003.8|Klh142-  
201|ENSMUSG00000040102|+|chr6:g.146993277:A>AC  
MSAEEMVQIRLEDRCYPVSKSKLIEQSDYFRALYRSGMREAVRPEVGPVQQLRGLSAPGLRRLVLDIFINAGGA  
REGWGLSEDDAGRG  
>ENSMUSP00000042558\_c.446:G>GTCTCTTCCCTCCCCGC\_p.L149ins-fs  
ENSMUST00000036003.8|Klh142-  
201|ENSMUSG00000040102|+|chr6:g.146993476:G>GTCTCTTCCCTCCCCGC  
MSAEEMVQIRLEDRCYPVSKSKLIEQSDYFRALYRSGMREAVRPEVGPVQQLRGLSAPGLRRLVLDIFINAGGA  
REGWGLSEDELAEASVLSMVEAASFLQVTALLRLLLSHVRLGNCLELYRLAQVYGLPDLQDACLRFMVLRFH  
QVLSLSPSLSAAI PATVVAAGPRGLQPEAEAEAGGPHARDP GPGGPGGLPRGTPCPAPVSGGTPVHA  
>ENSMUSP00000042558\_c.478:C>T\_p.P160L ENSMUST00000036003.8|Klh142-  
201|ENSMUSG00000040102|+|chr6:g.146993508:C>T  
MSAEEMVQIRLEDRCYPVSKSKLIEQSDYFRALYRSGMREAVRPEVGPVQQLRGLSAPGLRRLVLDIFINAGGA  
REGWGLSEDELAEASVLSMVEAASFLQVTALLRLLLSHVRLGNCLELYRLAQVYGLPDLQDACLRFMVLRFH  
QVLCQPQFPPLLSLPPQAPGDCSLKQRLREARMRGT PVLVALGDFLGGPLAPHPYQGEPPSMLRYEETTERWFP  
LANNLPPDLVNVGRYGSAILDNYLFI VGGYRITSQEISAAHSYNPITNEWLQVASMNQKRSNFKLVAVNSKLY  
AIGGQAVSNVECYNPEQDAWNFVAPLPNPLAEFSACECKGKIYVIGGYTTRDRNMNIIQYCP SADLWTLFETC  
DVHIRKQQMVSVEETIYIVGGCLHELGPNNRRSSQSEDMLTVQSYNTVTRQWLYLKENTSKSGLNLTALHNDG  
IYIMSRDVTLSLSTLEHRVFLKYNIFADSWEAFRRFPFAGHNLLISSLYLPNKAET\*  
>ENSMUSP00000042558\_c.486:G>A\_p.A163T ENSMUST00000036003.8|Klh142-  
201|ENSMUSG00000040102|+|chr6:g.146993516:G>A  
MSAEEMVQIRLEDRCYPVSKSKLIEQSDYFRALYRSGMREAVRPEVGPVQQLRGLSAPGLRRLVLDIFINAGGA  
REGWGLSEDELAEASVLSMVEAASFLQVTALLRLLLSHVRLGNCLELYRLAQVYGLPDLQDACLRFMVLRFH  
QVLCQPQFPPLLSPPQTPGDCSLKQRLREARMRGT PVLVALGDFLGGPLAPHPYQGEPPSMLRYEETTERWFP  
LANNLPPDLVNVGRYGSAILDNYLFI VGGYRITSQEISAAHSYNPITNEWLQVASMNQKRSNFKLVAVNSKLY  
AIGGQAVSNVECYNPEQDAWNFVAPLPNPLAEFSACECKGKIYVIGGYTTRDRNMNIIQYCP SADLWTLFETC  
DVHIRKQQMVSVEETIYIVGGCLHELGPNNRRSSQSEDMLTVQSYNTVTRQWLYLKENTSKSGLNLTALHNDG  
IYIMSRDVTLSLSTLEHRVFLKYNIFADSWEAFRRFPFAGHNLLISSLYLPNKAET\*  
>ENSMUSP00000042558\_c.703:G>A\_p.G235D ENSMUST00000036003.8|Klh142-  
201|ENSMUSG00000040102|+|chr6:g.146993733:G>A  
MSAEEMVQIRLEDRCYPVSKSKLIEQSDYFRALYRSGMREAVRPEVGPVQQLRGLSAPGLRRLVLDIFINAGGA  
REGWGLSEDELAEASVLSMVEAASFLQVTALLRLLLSHVRLGNCLELYRLAQVYGLPDLQDACLRFMVLRFH  
QVLCQPQFPPLLSPPQAPGDCSLKQRLREARMRGT PVLVALGDFLGGPLAPHPYQGEPPSMLRYEETTERWFP  
LANNLPPDLVNVGRYGSAILDNYLFI VGGYRITSQEISAAHSYNPITNEWLQVASMNQKRSNFKLVAVNSKLY  
AIGGQAVSNVECYNPEQDAWNFVAPLPNPLAEFSACECKGKIYVIGGYTTRDRNMNIIQYCP SADLWTLFETC  
DVHIRKQQMVSVEETIYIVGGCLHELGPNNRRSSQSEDMLTVQSYNTVTRQWLYLKENTSKSGLNLTALHNDG  
IYIMSRDVTLSLSTLEHRVFLKYNIFADSWEAFRRFPFAGHNLLISSLYLPNKAET\*  
>ENSMUSP00000042558\_c.888:C>T\_p.Q297\* ENSMUST00000036003.8|Klh142-  
201|ENSMUSG00000040102|+|chr6:g.147003116:C>T  
MSAEEMVQIRLEDRCYPVSKSKLIEQSDYFRALYRSGMREAVRPEVGPVQQLRGLSAPGLRRLVLDIFINAGGA  
REGWGLSEDELAEASVLSMVEAASFLQVTALLRLLLSHVRLGNCLELYRLAQVYGLPDLQDACLRFMVLRFH  
QVLCQPQFPPLLSPPQAPGDCSLKQRLREARMRGT PVLVALGDFLGGPLAPHPYQGEPPSMLRYEETTERWFP  
LANNLPPDLVNVGRYGSAILDNYLFI VGGYRITSQEISAAHSYNPITNEWLQVASMNQKRSNFKLVAVNSKLY  
AIGG\*AVSNVECYNPEQDAWNFVAPLPNPLAEFSACECKGKIYVIGGYTTRDRNMNIIQYCP SADLWTLFETC  
DVHIRKQQMVSVEETIYIVGGCLHELGPNNRRSSQSEDMLTVQSYNTVTRQWLYLKENTSKSGLNLTALHNDG  
IYIMSRDVTLSLSTLEHRVFLKYNIFADSWEAFRRFPFAGHNLLISSLYLPNKAET\*  
>ENSMUSP00000042558\_c.1224:T>C\_p.Y409H ENSMUST00000036003.8|Klh142-  
201|ENSMUSG00000040102|+|chr6:g.147009387:T>C  
MSAEEMVQIRLEDRCYPVSKSKLIEQSDYFRALYRSGMREAVRPEVGPVQQLRGLSAPGLRRLVLDIFINAGGA  
REGWGLSEDELAEASVLSMVEAASFLQVTALLRLLLSHVRLGNCLELYRLAQVYGLPDLQDACLRFMVLRFH  
QVLCQPQFPPLLSPPQAPGDCSLKQRLREARMRGT PVLVALGDFLGGPLAPHPYQGEPPSMLRYEETTERWFP  
LANNLPPDLVNVGRYGSAILDNYLFI VGGYRITSQEISAAHSYNPITNEWLQVASMNQKRSNFKLVAVNSKLY

AIGGQAVSNVECYNPEQDAWNFVAPLPNPLAEFSACECKGKIYVIGGYTTRDRNMNIIQYCPASDLWTLFETC  
DVHIRKQOMVSVEETIYIVGGCLHELGNRRSSQSEDMTLVQSHNTVTRQWLYLKENTSKSGLNLTCALHNDG  
IYIMSRDVTLSSTLEHRVFLKYNIFADSWAEFRFPFAGHNLLISSLYLPNKAET\*

>ENSMUSP00000032441\_c.531:A>C\_p.K178Q ENSMUST00000032441.14|Ccdc91-  
201|ENSMUSG00000030301|+|chr6:g.147438931:A>C  
MDDDDFGGFEAAETFDGEGGNQAVSPAVPWATFPAVSGVRLSPASPELILDHHDHSSPSTGHLPPDAVISSAD  
DTHADSSLMSQTISKAQIQQSAHNLNIPFLPLGLTDEPSHGALALEDEPEGPGVHVSNSQLRQKISSLETKL  
KASEEEKQRIKKDVESLMEKHSVLEKGFLEKEQEQDAVSEFQARYRELQEKHKQELEDMRKAGHEALSIVDEYK  
ALLQSSVKQQLDAIEKQYVSAIEKQAHRCCELLHAQHQRLLDVLDTKEKELLREKIQEALTQQSQEQKESLEKC  
LQEQEMQRNKETLESVAVKLEKEAMKDVIITKAVGEERENLEKVHAEERELWKTEHARDQERVAEAIQAAVQEQQR  
MSQFAVKAAIVEEQRRSEKAMEEAVKTRTRDELVEYVREQRRLDQVTRQRSLSSLELFLSQAQKQLSALIATEP  
VDIE\*

>rs244165131\_ENSMUSP00000032441\_c.535:A>AT\_p.E179ins-fs  
ENSMUST00000032441.14|Ccdc91-  
201|ENSMUSG00000030301|+|chr6:g.147438935:A>AT  
MDDDDFGGFEAAETFDGEGGNQAVSPAVPWATFPAVSGVRLSPASPELILDHHDHSSPSTGHLPPDAVISSAD  
DTHADSSLMSQTISKAQIQQSAHNLNIPFLPLGLTDEPSHGALALEDEPEGPGVHVSNSQLRQKISSLETKL  
KASEEEKQRIKKDVESLMEKHSVLEKGFLEKEDAGCCILSSQIP

>ENSMUSP00000041180\_c.4515:A>G\_p.M1506V ENSMUST00000046689.13|Resf1-  
201|ENSMUSG00000032712|+|chr6:g.149236197:A>G  
MNWNTKQENVPKPPPYSKTQSSILQHFLMTSTTSQSSFNYSFHNQEQASQTSFNYSLHNQEQACMYSGNSNSVSO  
PLLSGRNYITPQTQISVSNMPTRTIVASQSSMERVVSTNGKGPQQPNHNLQTVSSGIMQNVWLPSTHTEATISH  
NPDGGTNMPYMHPPQNQLVTSDTYSMQLQMAPLHSGKVPMTHQSSQGLNHFI PDQLVDWTQYTSNELSYPEYR  
PPPQKQYSYILPATTSLQVKNQLPTTYTQSLQSKHSVPLSSHQYAAEASKRLSALPYSCRYENQHVVQNAQPVSK  
HLPMEVQPSSEVHSSEKKTDRYRQKQWQNPNEKVSIGQFSEVKINIKQPYSESVRPSGDGVQALVQNNQEK  
RKTYTNPNTNQVIDTNAATKEKLVKDIKSLVEIKKKFSELARKIKINKSLLMAAGCSKTANTSYTEPIQHSEFS  
AKEMSAKNGNDCSMELLATCLSLWKNQPSKTEENVPKPLEEKQCNTSRI STTVVGSANPTNEVHVKSILCSGV  
GNSQKMMSSSQTVLPVLI PSCSSGVAVGKGTTELQIAVVSPLVLSDTNTLPGKDSVPEVLPETLYPVVKEGSV  
CSLQTPQPTETVALPFDVIGAVASNNISAEIPLPVDKEKQHKPIQGDPIADSSLGKHSPLGTEVLPKPMDSI  
VSGPMLQIESICSLAEGDVSYSNQAIEIFNSVQTEPQKPSNPQVIDSQEQVYDITENKDFSLQKDKCVQCTD  
VPHEVPEQPEPLQPEEPASSEYVEANREATEESCREYTGRKESTAKDVCLPAAIQQDPPHRETDMFSKSDHSL  
PAINEINDESEPI SYLHDQLSELLKEFPYGIETFNREHVS LDQQKTHKIVENQTGGKTSNVSGDST DQIKITV  
LNSEQIKELFPEDDQPCDKLAEPENKEI VAEVKS PCD SQI PREESHDLGMLDPEKDKIHCCALGWLSMVYEGV  
PQCHCSSTEKKEKDQCLDINSKQGEQPCNSGITIFEINPVSNNSKTPLTQATEEGHFSAVHGEKTKASKTKD  
NREGQELACHFS AKCYKDKGNFKIRHDTSLKMEQKLNISSKCDIPNPSKCNKIAAPEILHVTTSNAKMN  
PFSKQASQESLQKKHTSQDLGVPKAPIELSSNTDPCRSNTSSVQSVSPEKKKLKFAGGSRLKYFEKRKTDHV  
IIPDVEIKKKKYEKQEQNKNAGDTLKLCSILTESNERASVQEKTVPSPESSDPKGSSSKSTRVITVQEQYLQKQ  
KDKQITGNNASRNICVETVLCDSGHGHTKSKHSAVSWGKLVGQSSISAETAKELEHNSSSHGKDFKIHHSSEAS  
RTHSVSNNNKGFDFGKQPKMFKNKTSMNNE SNQMPLOVKEQRKQYLN RVAFKCTERESICLTKLDSASKKLS  
IEKKS GEYTSKTKD TDKPSM LEFKLCPDVLKNTSTVDKQDCPGPGPEKEQAPVQVSGIKSTKEDWLKCI PTR  
TKMPESSQRDSADSRLSKRSLSADEFEILQNPVKESNIMFRTYKKVYLEKRSRSLGSSPVK\*

>ENSMUSP00000140026\_c.4515:A>G\_p.M1506V ENSMUST00000189932.7|Resf1-  
209|ENSMUSG00000032712|+|chr6:g.149236197:A>G  
MNWNTKQENVPKPPPYSKTQSSILQHFLMTSTTSQSSFNYSFHNQEQASQTSFNYSLHNQEQACMYSGNSNSVSO  
PLLSGRNYITPQTQISVSNMPTRTIVASQSSMERVVSTNGKGPQQPNHNLQTVSSGIMQNVWLPSTHTEATISH  
NPDGGTNMPYMHPPQNQLVTSDTYSMQLQMAPLHSGKVPMTHQSSQGLNHFI PDQLVDWTQYTSNELSYPEYR  
PPPQKQYSYILPATTSLQVKNQLPTTYTQSLQSKHSVPLSSHQYAAEASKRLSALPYSCRYENQHVVQNAQPVSK  
HLPMEVQPSSEVHSSEKKTDRYRQKQWQNPNEKVSIGQFSEVKINIKQPYSESVRPSGDGVQALVQNNQEK  
RKTYTNPNTNQVIDTNAATKEKLVKDIKSLVEIKKKFSELARKIKINKSLLMAAGCSKTANTSYTEPIQHSEFS  
AKEMSAKNGNDCSMELLATCLSLWKNQPSKTEENVPKPLEEKQCNTSRI STTVVGSANPTNEVHVKSILCSGV  
GNSQKMMSSSQTVLPVLI PSCSSGVAVGKGTTELQIAVVSPLVLSDTNTLPGKDSVPEVLPETLYPVVKEGSV  
CSLQTPQPTETVALPFDVIGAVASNNISAEIPLPVDKEKQHKPIQGDPIADSSLGKHSPLGTEVLPKPMDSI  
VSGPMLQIESICSLAEGDVSYSNQAIEIFNSVQTEPQKPSNPQVIDSQEQVYDITENKDFSLQKDKCVQCTD  
VPHEVPEQPEPLQPEEPASSEYVEANREATEESCREYTGRKESTAKDVCLPAAIQQDPPHRETDMFSKSDHSL  
PAINEINDESEPI SYLHDQLSELLKEFPYGIETFNREHVS LDQQKTHKIVENQTGGKTSNVSGDST DQIKITV  
LNSEQIKELFPEDDQPCDKLAEPENKEI VAEVKS PCD SQI PREESHDLGMLDPEKDKIHCCALGWLSMVYEGV  
PQCHCSSTEKKEKDQCLDINSKQGEQPCNSGITIFEINPVSNNSKTPLTQATEEGHFSAVHGEKTKASKTKD  
NREGQELACHFS AKCYKDKGNFKIRHDTSLKMEQKLNISSKCDIPNPSKCNKIAAPEILHVTTSNAKMN

PFSKQASQESLQKKHTSQDLGPVKAPIELSSNTDPCRSNTSSVQSVSPEKKKLKFAGGSRLLKYFEKRKTDHV  
IIPDVEIKKKKYEKQEONKNAGDTLKLCSILTESNERASVQEKTVPSPESSDPKGSSSKSTRVITVQEYLQRQ  
KDKQITGNNASRNICVETVLCDSGHTKTSKHSAAVSWGKLVGQSI SAETAKELEHNSSSHGKDFKIHSEAS  
RTHSVSNNNKGFDFGKQPDKMFKNKTSMNNESNQMPLOVKEQRKQYLNRVAFKCTERESICLTKLDSASKKLS  
IEKKSGETYSKTKDTPKSMLEFKLCPDVLLKNTSTVVKQDCPGGPEKEQAPVQVSGIKSTKEDWLKCIPTR  
TKMPESQRDSADSRLSKRSLSADEFEILQNPVKESNIMFRITYKKVYLEKRSRSLGSSPVK\*  
>ENSMUSP00000098328\_c.4515:A>G\_p.M1506V ENSMUST00000100765.11|Resf1-  
202|ENSMUSG00000032712|+|chr6:g.149236197:A>G  
MNWNTKQENVPKPPPYSKTQSSILQHFLMTSTTSQSSFNYSPhNQEASQTSFNYSLHNQEACMYSGNSNSVSQ  
PLLSGRNYITPQTQISVSNMPTRTIVASQSSMERVVSTNGKGPQQPNHNLQTVSSGIMQNVWLPSHTEATISH  
NPDGGTNMPYMHPPQNQLVTSDTYSMQLQMAPLHSGKVPMTHQGSQGLNHFI PDQLVDWTQYTSNELSYPEYR  
PPPKQYSYILPATTSLQVKNQLPTYTQSLQSKHSVPLSSHQYAAEASKRSLALPYSCRYENQHVQNAQPVSK  
HLPMEVPQSSSEVHSSEKKTDRYRQFQWQNPNEKVSIGQFSEVKINIKQPYSESVRPSGDGVQALVQNNQEK  
RKYTYNPNTNQVIDTNATKEKLRDIKSLVEIKKKFSELARKIKINKSLLMAAGCSKTANTSYTEPIQHSEFS  
AKEMSAKNGNDCSMELLATCLSLWKNQPSKTTEENVPKPLEEKQCNTSRI STTVVGSANPTNEVHVKSLCSGV  
GNSQKMMSSSQTVLPVLI PCESSGVAVGKGTTELQIAVVSPLVLSDTNTLPGKDSVPEVLPETLYPVVKEGSV  
CSLQTPPTETVALPFDVIGAVASNNISAEIPLPVDKEKQHKPIQGDPDIADSSLGKHSPLGTEVLPKPMDS TI  
VSGPMLQIESICSLAEGDVS YNSQIAEIFNSVQTEPQKPSPNQVIDSQEQVYD TTENKDFSLQKDKCVQCTD  
VPHEVPEQPEPLQPEEPASSEYVEANREATEEESCREYTGRKESTAKDVCLPAAIQQDPPHRETDMFSKSDHSL  
PAINEINDESEPI SYLHDQLSELLKEFPYGIETFNREHVS LDQQKTHKIVENQTGGKTSNVSGDSTDQIKITV  
LNSEQIKELFPEDDQPCDKLAEPENKEIVA EVKSPCDSQI PREESHDLGMLDPEKDKIHCCALGWLMSVYEGV  
PQCHCSSTEKKEKDQCLDINSKQGEQPCNSGITIFEINPVSNNSKTPLTQATEEGHFSAVHGEKTKASKTKD  
NREGQELACHFS AKCYKKDKGNFKIRHDTSLKMEQKLNIS SKCDIPNPSKCNKIAAPEILHVTTNSAKNM  
PFSKQASQESLQKKHTSQDLGPVKAPIELSSNTDPCRSNTSSVQSVSPEKKKLKFAGGSRLLKYFEKRKTDHV  
IIPDVEIKKKKYEKQEONKNAGDTLKLCSILTESNERASVQEKTVPSPESSDPKGSSSKSTRVITVQEYLQRQ  
KDKQITGNNASRNICVETVLCDSGHTKTSKHSAAVSWGKLVGQSI SAETAKELEHNSSSHGKDFKIHSEAS  
RTHSVSNNNKGFDFGKQPDKMFKNKTSMNNESNQMPLOVKEQRKQYLNRVAFKCTERESICLTKLDSASKKLS  
IEKKSGETYSKTKDTPKSMLEFKLCPDVLLKNTSTVVKQDCPGGPEKEQAPVQVSGIKSTKEDWLKCIPTR  
TKMPESQRDSADSRLSKRSLSADEFEILQNPVKESNIMFRITYKKVYLEKRSRSLGSSPVK\*  
>ENSMUSP00000139660\_c.4509:A>G\_p.M1504V ENSMUST00000189837.2|Resf1-  
208|ENSMUSG00000032712|+|chr6:g.149236197:A>G  
MNWNTKQENVPKPPPYSKTQSSILQHFLMTSTTSQSSFNYSPhNQEASQTSFNYSLHNQEACMYSGNSNSVSQ  
PLLSGRNYITPQTQISVSNMPTRTIVASQSSMERVVSTNGKGPQQPNHNLQTVSSGIMQNVWLPSHTEATISH  
NPDGGTNMPYMHPPQNQLVTSDTYSMQLQMAPLHSGKVPMTHQGSQGLNHFI PDQLVDWTQYTSNELSYPEYR  
PPPKQYSYILPATTSLQVKNQLPTYTQSLQSKHSVPLSSHQYAAEASKRSLALPYSCRYENQHVQNAQPVSK  
HLPMEVPQSSSEVHSSEKKTDRYRQFQWQNPNEKVSIGQFSEVKINIKQPYSESVRPSGDGVQALVQNNQEK  
RKYTYNPNTNQVIDTNATKEKLRDIKSLVEIKKKFSELARKIKINKSLLMAAGCSKTANTSYTEPIQHSEFS  
AKEMSAKNGNDCSMELLATCLSLWKNQPSKTTEENVPKPLEEKQCNTSRI STTVVGSANPTNEVHVKSLCSGV  
GNSQKMMSSSQTVLPVLI PCESSGVAVGKGTTELQIAVVSPLVLSDTNTLPGKDSVPEVLPETLYPVVKEGSV  
CSLQTPPTETVALPFDVIGAVASNNISAEIPLPVDKEKQHKPIQGDPDIADSSLGKHSPLGTEVLPKPMDS TI  
VSGPMLQIESICSLAEGDVS YNSQIAEIFNSVQTEPQKPSPNQVIDSQEQVYD TTENKDFSLQKDKCVQCTD  
VPHEVPEQPEPLQPEEPASSEYVEANREATEEESCREYTGRKESTAKDVCLPAAIQQDPPHRETDMFSKSDHSL  
PAINEINDESEPI SYLHDQLSELLKEFPYGIETFNREHVS LDQQKTHKIVENQTGGKTSNVSGDSTDQIKITV  
LNSEQIKELFPEDDQPCDKLAEPENKEIVA EVKSPCDSQI PREESHDLGMLDPEKDKIHCCALGWLMSVYEGV  
PQCHCSSTEKKEKDQCLDINSKQGEQPCNSGITIFEINPVSNNSKTPLTQATEEGHFSAVHGEKTKASKTKD  
NREGQELACHFS AKCYKKDKGNFKIRHDTSLKMEQKLNIS SKCDIPNPSKCNKIAAPEILHVTTNSAKNM  
PFSKQASQESLQKKHTSQDLGPVKAPIELSSNTDPCRSNTSSVQSVSPEKKKLKFAGGSRLLKYFEKRKTDHV  
IIPDVEIKKKKYEKQEONKNAGDTLKLCSILTESNERASVQEKTVPSPESSDPKGSSSKSTRVITVQEYLQRQ  
KDKQITGNNASRNICVETVLCDSGHTKTSKHSAAVSWGKLVGQSI SAETAKELEHNSSSHGKDFKIHSEAS  
RTHSVSNNNKGFDFGKQPDKMFKNKTSMNNESNQMPLOVKEQRKQYLNRVAFKCTERESICLTKLDSASKKLS  
IEKKSGETYSKTKDTPKSMLEFKLCPDVLLKNTSTVVKQDCPGGPEKEQAPVQVSGIKSTKEDWLKCIPTR  
TKMPESQRDSADSRLSKRSLSADEFEILQNPVKESNIMFRITYKKVYLEKRSRSLGSSPVK\*  
>ENSMUSP00000145740\_c.478:A>CA\_p.K160ins-fs ENSMUST00000206928.2|Gp6-  
202|ENSMUSG00000078810|-|chr7:g.4387989:T>TG  
MSPASPTFFCIGLCLVLIQTQSGPLPKPSLQAQPSLPLGQSVILRCQGPDPVDLYRLEKLEKPEKYEDQDF  
LFIPTMERSNAGRYRCSYQNGSHWSLPSDQLELIATGVYAKPSLSAHPSSAVPQGRDVTLCQSPYSFDEFVL  
YKEGDTGSYKRPEMTPVPGQFPHHHSDCCSQWDVPLVQLLQLISIPVVSPE

>ENSMUSP00000104231\_c.478:A>CA\_p.K160ins-fs ENSMUST00000108590.4|Gp6-  
201|ENSMUSG00000078810|-|chr7:g.4387989:T>TG  
MSPASPTFFCIGLCLVLIQIQSGPLPKPSLQAQPSSLVPLGQSVILRCQGPDPVDLYRLEKLEKPEKYEDQDF  
LFIPMERSNAGRYRCSYQNGSHWSLPSDQLELIATGVYAKPSLSAHPSSAVPQGRDVTLCQSPYSFDEFVL  
YKEGDTGSYKRPETMVPQGFPHHSDCCSQWDVVPVLLQLLISIPVVSPE  
>ENSMUSP00000130452\_c.196:A>T\_p.D66V ENSMUST00000168578.3|Tmem238-  
201|ENSMUSG00000030431|-|chr7:g.4792345:T>A  
MAAASPVCQSASAVGASSPPAPAPAPAAGLGRCRMALLLAVALDVAGMAALLTGVAQLQVRGRVFGDLLIY  
SGALLVFLSLLGWILWYTGNIETSRQELERDYGRLRPSAIARLARLKLRRWSAPATASPRTTAGLRSARRANRA  
PQPSSSSGRRVRLQLATLEAGSVAAGTGSE\*  
>ENSMUSP00000074613\_c.2287:C>A\_p.T763N ENSMUST00000075108.9|Vmn2r31-  
201|ENSMUSG00000096373|-|chr7:g.7387282:G>T  
MFTLMGVFFFLNIPLFMANFIDPRCFWRINLNEIQDEYLGLTCAFI LAAVQKPIEKDYFNKTLNLFKTKTKNHK  
YALALAFAMDEINRNPDLNPMSLIIRYTLGRCDGKTVIPTPYLFHKKKQSPINNYFCNEETMCSFLLTGPNW  
GVSISFWKYLDSFLSPRILQLTYGPFSSIFSDDEQYPYLYQMAPKDTSLALAMVSFIFYFNWNWIGLVI PDDD  
QGNQFLLLELKKQSENKEICFAFVKMISVDDISFEHKTEMYKQIVMSSSNVIIIEETINFIDLI FRMWEPPV  
LQRIWITTKQWNFPKRDITHTGTFYGLTFLPHGGISGFKDFVQTFWHLRSKDLYLVMPEWKYFKYESSAS  
KCKILKNNSSDASFDLMEQKFDMAFSESSHNIYNVHAIHAHALHEVNLQQVDNQAI DNGKGASSHCLKVNNSF  
LRKIHF'FNPLGDKVIMKQRVIMQEEYDIFHFGNLSQHLGKIKVKGKFSYFVSHGRNFHLYVDMLEVATGSRKM  
PSSVCSAECSPGFRRLWKEGMAACCFVCSPCPENEISNETNMDQCVNCPYQYANTEQNKCIQKGVTFLSYED  
PLGMALALMAFCFSFTAFAVLCVFKHHDTPIVKANNRILSYLLLI SLMSCFLCSFFYIGHPNRATCVLQQIT  
FGIVFTVAVSTVLAKTIVTVLAFKVTDPGRRLRNFLVSGTPNYIIPICSLQLQCVLCAIWIIEVSPPFVDIDEHS  
QHGHIIIVCNKGSVTAFCVGLYLACLALGSFNLAFLAKNLPDFTNEAKFLTFSMLVFFSVVWVTFPLVYHSTK  
GKVMVAVEIFSI LASSAGMLGCI FAPKIYIILMRPERNSTQKIKVRNSTQKIKEKSYF\*  
>ENSMUSP00000156838\_c.1624:G>T\_p.S542I ENSMUST00000233892.2|Vmn2r53-  
203|ENSMUSG00000096002|-|chr7:g.12318665:C>A  
MWLCTLLSVLFGCLSGSALS GPRVWII PRQSPRFDRPGDVI VGGSF SIFHFS DGTLSNFTAPPPVLKTS SASM  
WSYRVAQS FVFAIEEINRSAHLLPNLTLGFSIRNSGDSVHGALYETMGFLT GQEEPIPNYTCQHGSPPAALVG  
DTRSSLSVSMARLLGLYKFPQVSYSSSLPSLSDKI QFP SFIRTLTSDLTCSHAVTQLVIHFQWSWVILAHDD  
DFGQQASSLATQMLTPAGVCIEYHLHVP SHQSFGKIEETVQKMQKCTARVVLVFLSNSNFQLILHGLLAVPVS  
GQVWVSMDTLHMALALTI PGISQVLQGT FGLLYHSSRAIGFPEFLAHLRPSQTPEDMF I KKFWEFTFDCTWPY  
QNSTVTEGVQFCTGNE SLKNKPHFPPEVSRIDAAYTAVYSIAHALHNMLACEHQERKGTNSHNHFSWQLLHNL  
RNVYFKTSDGNKIMFDANGDLVTQFDIFQGKKT PAGVFHLVHVGLIDPQASSGNKMMVQLKQDLQVSSLNAEI  
TVPTSICSESLPGFSQVPRLGAPHCCFDCIPCPEGQFTDQDRMKRCLLCPKEQYSSHTRDHCLPRTEIFLAF  
EELPLGFILALVALLLAGLAVLVLGVFLKHRDTPVVRANRNTLSYFLLI SLSL CALCALLFLGRPTVTTC LLRQ  
TIFAVVFTVAVSSVLAKTTLTVLAFRVTRPRSRIQVCLSSGASTSVVLIASLIQVVLCGIWLITSPFPDRDM  
ISEPRHTVIQCHEGSGANFFCVLGFGLGFLAGGTFSVAFLARGLPDVFNETKFLTFSMLLFCSVWTAFLPLYHS  
ARGKSTVAVEIFSI LASTAGLLGGIFIPKCYI ILLKPEKNTPAWLRQGHQVQHNRQCEMLQRRCVSSGESLGS  
SL\*  
>ENSMUSP00000126979\_c.1408:G>T\_p.S470I ENSMUST00000170412.2|Vmn2r53-  
201|ENSMUSG00000096002|-|chr7:g.12318665:C>A  
MWSYRVAQS FVFAIEEINRSAHLLPNLTLGFSIRNSGDSVHGALYETMGFLT GQEEPIPNYTCQHGSPPAALV  
GDTRSSLSVSMARLLGLYKFPQVSYSSSLPSLSDKI QFP SFIRTLTSDLTCSHAVTQLVIHFQWSWVILAHDD  
DDFGQQASSLATQMLTPAGVCIEYHLHVP SHQSFGKIEETVQKMQKCTARVVLVFLSNSNFQLILHGLLAVPVS  
SGQVWVSMDTLHMALALTI PGISQVLQGT FGLLYHSSRAIGFPEFLAHLRPSQTPEDMF I KKFWEFTFDCTWP  
YQNSTVTEGVQFCTGNE SLKNKPHFPPEVSRIDAAYTAVYSIAHALHNMLACEHQERKGTNSHNHFSWQLLHNL  
LRNVYFKTSDGNKIMFDANGDLVTQFDIFQGKKT PAGVFHLVHVGLIDPQASSGNKMMVQLKQDLQVSSLNAEI  
ITVPTSICSESLPGFSQVPRLGAPHCCFDCIPCPEGQFTDQDRMKRCLLCPKEQYSSHTRDHCLPRTEIFLA  
FEELPLGFILALVALLLAGLAVLVLGVFLKHRDTPVVRANRNTLSYFLLI SLSL CALCALLFLGRPTVTTC LLR  
QTIFAVVFTVAVSSVLAKTTLTVLAFRVTRPRSRIQVCLSSGASTSVVLIASLIQVVLCGIWLITSPFPDRD  
MISEPRHTVIQCHEGSGANFFCVLGFGLGFLAGGTFSVAFLARGLPDVFNETKFLTFSMLLFCSVWTAFLPLYH  
SARGKSTVAVEIFSI LASTAGLLGGIFIPKCYI ILLKPEKNTPAWLRQGHQVQHNRQCEMLQRRCVSSGESLGS  
SSL\*  
>ENSMUSP00000134531\_c.741:T>A\_p.S248T ENSMUST00000174443.8|Obox3-  
206|ENSMUSG00000066772|-|chr7:g.15359926:A>T  
MAEGPSLHPKLQVANSIPIELSSQIPQDPARNLAFQMCQNPLMTPGSTMQSRLSVPERNLLQQESQGPTRQSG  
RMPLSDRYVKNQGTGPMALRKRKERTVYSKEQQCLLQKHDFEQYPNEKKIVELALSVGVTKREIKIWFKNNR  
AKYRRMKLQNIKQALPETNESSKAVSESTHFPGSI PVVSDNGESMCSGTFGEDSIPKLNCSQESSLHCFQAC



DGDMCCPQEYQEYQEYLLHGHPVTAWNTGQSAAFESQTDLAVAEVFPVGLAYAAQAPEDAHNSSGPCEDELWQR  
ILEDLDTSDDWLTLRNLSTPVYTTEVLDQSKPYSHEEV CYTHL\*  
>ENSMUSP00000133427\_c.741:T>A\_p.S248T ENSMUST00000173912.8|Obox3-  
204|ENSMUSG00000066772|-|chr7:g.15359926:A>T  
MAEGPSLHPKLQVASNIPIELSSQIPQDPARNLAFQMCQNPLMTPGSTMQSRLSVPERNLLQQESQGPTRQSG  
RMPLSDRYVVKQTGPMALRKFRKERTVYSKEQQCLLQKHFDEFQYPNEKKIVELALSVGVTKREIKIWFKNR  
AKYRRMKLQNIKQALPETNESSKAVSESTHFPGSIPVVDSDNGESMCSGTFGEDSIPKLNCSQESSLHCFQAC  
DGDMCCPQEYQEYQEYLLHGHPVTAWNTGQSAAFESQTDLAVAEVFPVGLAYAAQAPEDAHNSSGPCEDELWQR  
ILEDLDTSDDWLTLRNLSTPVYTTEVLDQSKPYSHEEV CYTHL\*  
>ENSMUSP00000092842\_c.741:T>A\_p.S248T ENSMUST00000095217.11|Obox3-  
202|ENSMUSG00000066772|-|chr7:g.15359926:A>T  
MAEGPSLHPKLQVASNIPIELSSQIPQDPARNLAFQMCQNPLMTPGSTMQSRLSVPERNLLQQESQGPTRQSG  
RMPLSDRYVVKQTGPMALRKFRKERTVYSKEQQCLLQKHFDEFQYPNEKKIVELALSVGVTKREIKIWFKNR  
AKYRRMKLQNIKQALPETNESSKAVSESTHFPGSIPVVDSDNGESMCSGTFGEDSIPKLNCSQESSLHCFQAC  
DGDMCCPQEYQEYQEYLLHGHPVTAWNTGQSAAFESQTDLAVAEVFPVGLAYAAQAPEDAHNSSGPCEDELWQR  
ILEDLDTSDDWLTLRNLSTPVYTTEVLDQSKPYSHEEV CYTHL\*  
>ENSMUSP00000083291\_c.741:T>A\_p.S248T ENSMUST00000086122.10|Obox3-  
201|ENSMUSG00000066772|-|chr7:g.15359926:A>T  
MAEGPSLHPKLQVASNIPIELSSQIPQDPARNLAFQMCQNPLMTPGSTMQSRLSVPERNLLQQESQGPTRQSG  
RMPLSDRYVVKQTGPMALRKFRKERTVYSKEQQCLLQKHFDEFQYPNEKKIVELALSVGVTKREIKIWFKNR  
AKYRRMKLQNIKQALPETNESSKAVSESTHFPGSIPVVDSDNGESMCSGTFGEDSIPKLNCSQESSLHCFQAC  
DGDMCCPQEYQEYQEYLLHGHPVTAWNTGQSAAFESQTDLAVAEVFPVGLAYAAQAPEDAHNSSGPCEDELWQR  
ILEDLDTSDDWLTLRNLSTPVYTTEVLDQSKPYSHEEV CYTHL\*  
>ENSMUSP00000147475\_c.304:A>G\_p.Q102R ENSMUST00000209369.2|Zfp541-  
202|ENSMUSG00000078796|+|chr7:g.15806171:A>G  
MEPYSLGEEGALPSEGHLPSEFSESQVLNCSDTLNRDLGPSTRDLYAGLSGLDLDPSLSTSDMPSEVLEDNLD  
TSLSYSGKDSDSVKLLEEYADSESQTSRDLGLGALKVPKEADEGGRATGSTRKGKRQHSSPQNPLLDLDCSLCG  
KVFSSASSLSKHYLTHSQERKHVCKVCSKAFKRQDHLTGHLTHQTKPFVFCIEQGCSKSYCDYRSLRRHYEV  
QHGVICILKETPPEEEAYGDPHNDVANQPPPSGLRSLGPEARSPPSVLPNDRDLRCIVSSIVHQKIPSPGP  
AVGSPDTEARSSACACPTSLGSSSCTPASTPVALGTLGSEIPEETHPPRKEAATEVFTPVQSRRAENGVPDPP  
ESELESESPRLQRPSSLEGWPEGSSLPACLPLFRGHVSPSGSQPSSHNFWLRLNLPGPCPKNKGSNVFMVHKPP  
AVASREGSEGSGSPSPTPSVEPSPSLGTTQEELLFPFPALLKAPGEASSEVRQAAGEDETWAPKKCKPDCE  
SFPWQSPTELGLQDAQNPGLPSDATPLFRQLFMKSQESLVSHEQMQLVQMIAKSQRIFSHQVATASAQRPG  
PEGKQSTLKLPLQGPWPQTLPAPTVDVSFQIGPGHSEPEGSPVRRRKTMPAVSRETSPPGGPRRDTKGGPKVAS  
APPSLTGPGLLPSRNPDSSSLAKGTLDLGDIIPNAGSRQSQLGGDEPAGTQLVKGKQGGENGLASGAMRGEKG  
PACPRGGGYRLFSGHPRQRFSGFRKEKVKMDVCCAASPSQVAMASFSSAGPLADPPRDMKSKLTFNRIQGG  
NIYRLPHVPKKEESLAGGCHQPNGGPTDWMESKSTFVCKNCSQMFYTEKGLSSHMCFHSDQWPSPRGKQEQQVK  
GQMVASVKKRAGREEGAVEDMKRHYDCSSSEPQDVTILSMLVSSGCGVTPVVLSSLLQGGQEKDGEERDSKES  
CQYRKRKRKRPQKALFAPPAPSALGEPGPGGCHQSCLHSPVFLVDHLLKGLFQCSPTYTPPMLSPIREGSGLY  
FNTLCSTSRAGPHLISPVLQVDSFQICVVKDDTKISIEPHINVGRFQAEIPELQERLLARVDENVASLWV  
KPWGDVMTNPETQDRVMELCNVACSSVMPGGGTNLELALHCLHDAQGSVQVALETLLLRGPQKPRTHPLADYR  
YTGSDIWTPEKRLFKKAFCAHKKDFYLIHKMIQTKSVAQCVEYYYIWKMKVCFDCGRAPGLEKRRRELDEV  
ERTEDKVTCSPRERPTHRPTPELKIKTYSYRRESILHSSPSAAPKRTPEPPGGSVESQGVFPCECERVFDDKIK  
SRNAHMKRHRQLQEHVEPVRVKWPVKPYPLKEEEEEEEEEELGADMGPLQW\*  
>ENSMUSP00000148143\_c.304:A>G\_p.Q102R ENSMUST00000210805.2|Zfp541-  
203|ENSMUSG00000078796|+|chr7:g.15806171:A>G  
MEPYSLGEEGALPSEGHLPSEFSESQVLNCSDTLNRDLGPSTRDLYAGLSGLDLDPSLSTSDMPSEVLEDNLD  
TSLSYSGKDSDSVKLLEEYADSESQTSRDLGLGALKVPKEADEGGRATGSTRKGKRQHSSPQNPLLDLDCSLCG  
KVFSSASSLSKHYLTHSQERKHVCKVCSKAFKRQDHLTGHLTHQTKPFVFCIEQGCSKSYCDYRSLRRHYEV  
QHGVICILKETPPEEEAYGDPHNDVANQPPPSGLRSLGPEARSPPSVLPNDRDLRCIVSSIVHQKIPSPGP  
AVGSPDTEARSSACACPTSLGSSSCTPASTPVALGTLGSEIPEETHPPRKEAATEVFTPVQSRRAENGVPDPP  
ESELESESPRLQRPSSLEGWPEGSSLPACLPLFRGHVSPSGSQPSSHNFWLRLNLPGPCPKNKGSNVFMVHKPP  
AVASREGSEGSGSPSPTPSVEPSPSLGTTQEELLFPFPALLKAPGEASSEVRQAAGEDETWAPKKCKPDCE  
SFPWQSPTELGLQDAQNPGLPSDATPLFRQLFMKSQESLVSHEQMQLVQMIAKSQRIFSHQVATASAQRPG  
PEGKQSTLKLPLQGPWPQTLPAPTVDVSFQIGPGHSEPEGSPVRRRKTMPAVSRETSPPGGPRRDTKGGPKVAS  
APPSLTGPGLLPSRNPDSSSLAKGTLDLGDIIPNAGSRQSQLGGDEPAGTQLVKGKQGGENGLASGAMRGEKG  
PACPRGGGYRLFSGHPRQRFSGFRKEKVKMDVCCAASPSQVAMASFSSAGPLADPPRDMKSKLTFNRIQGG  
NIYRLPHVPKKEESLAGGCHQPNGGPTDWMESKSTFVCKNCSQMFYTEKGLSSHMCFHSDQWPSPRGKQEQQVQ

EKDGEERDSKESQYRKRKRKRPQPKALFAPPAPSALGEPGGGCHQSCSLHSPVFLVDHLLKGLFQCSPYTPPP  
 MSLSPIREGSGLYFNTLCSTSRAGPHLISPVLQVDSSFGICVVKDDTKISIEPHINVGSRFQAEIPELQERLL  
 ARVDENVASLWKPWGDVMTNPETQDRVMELCNVACSSVMPGGGTNLELALHCLHDAQGSVQVALETLLLRGP  
 QKPRTHPLADYRYTGSIDIWTPMEKRLFKKAFCAHKKDFYLIHKMIQTKSVAQCVEYYYIWKMKVFCDCGRAPG  
 LEKRGRRELDEVERTEDKVTCSPRERPTHPTPELKIKTYSYRRESILHSSPSAAPKRTPEPPGVSQGVFP  
 CRECERVFDDIKSRNAHMKRHLQEHVEPVRVKWPKPYPLKEEEEEEEEEELGADMGPLQW\*  
 >ENSMUSP00000104149\_c.304:A>G\_p.Q102R ENSMUST00000108509.2|Zfp541-  
 201|ENSMUSG00000078796|+|chr7:g.15806171:A>G  
 MEPSYSLGEEGALPSEGLPSFSESQVLNCSDTLNRDLGPSTRDRLLYAGLSGLDLDPSLSTSDMPSEVLEDNLD  
 TLSLYSGKDSDSVKLLEEYADSESTSLRDLGLGALKVPKEADEGGRATGSTRKGRQHSSPQNPLLDLDCSLCG  
 KVFSSASSLSKHYLTHSQERKHVCKVCSKAFKRQDHLTGMLTHQKTKPFVCI EQGCSKSYCDYRSLRRHYEV  
 QHGVCILKETPPEEEAYGDPHTNHVDVANQPPPSGLRSLGPPEARS PGSVLPNRDRLRCIVSSIVHQIPSPGP  
 AVGSPDTEARSSACACPTSLGSSCTPASTPVALGTLGSEIPEETHPPRKEAATEVFTPVQSRRAENGVPDPP  
 ESELESESPRLQRPSSLEGWPEGSSLPACLPLFRGHVSPSGSQSSHNFWQLRNLPGCPKNKGSNVFMVHKPP  
 AVASREGSEGGGSGPSSTPTSVEPSPSLGTTEELLFPFPALLKAPGEASSEVRQAAGEDETWAPKKCKPDCE  
 SFPWQSPTELGLQDAQNPGGLPSDATPLFRQLFMKQESLVSHEQMQLVQMIAKSQRIFSHQVATASAQRP  
 PEGKQSTLKPQLQGPWPPQTLPPAPTVDVDFQIGPGHSEPEGSPVRRRKTMPAVSRETSPPGPRRDTKGGPKVAS  
 APBSLTGPGLLPSRNPDSSSLAKGTLDLGDIPNAGSRQSLGGDEPAGTQLVGVKQGGENGLASGAMRKEGK  
 PACPRGGGYRLFSGHPRAQRFSGFRKEKVKMDVCCAASPSQVAMASFSAGPLADPPRDMKSKLTI FNRIQGG  
 NIYRLPHPVKEESLAGGCHQPNGGPTDWMESKSTFVCKNCSQMFYTEKGLSSHMCFHSDQWPSPRGKQEQQVK  
 GQMVASVKKRAGREEGAVEDMKRHYDCSSSEPDVITLSMLVSSGCGVTPVVLSSLLQGOEKDGEERDSKES  
 CQYRKRKRKRPQPKALFAPPAPSALGEPGGGCHQSCSLHSPVFLVDHLLKGLFQCSPYTPPPMLSPIREGSGLY  
 FNTLCSTSRAGPHLISPVLQVDSSFGICVVKDDTKISIEPHINVGSRFQAEIPELQERLLARVDENVASLW  
 KPWGDVMTNPETQDRVMELCNVACSSVMPGGGTNLELALHCLHDAQGSVQVALETLLLRGPQKPRTHPLADYR  
 YTGSDIWTPEKRLFKKAFCAHKKDFYLIHKMIQTKSVAQCVEYYYIWKMKVFCDCGRAPGLEKRGRRELDE  
 ERTEDKVTCSPRERPTHPTPELKIKTYSYRRESILHSSPSAAPKRTPEPPGVSQGVFPCECERVFDDIK  
 SRNAHMKRHLQEHVEPVRVKWPKPYPLKEEEEEEEEEELGADMGPLQW\*  
 >ENSMUSP00000071348\_c.1137:A>G\_p.T380A ENSMUST00000071399.13|Psg16-  
 201|ENSMUSG00000066760|+|chr7:g.16864544:A>G  
 MGQMYSGREIVSSNGSLWIHNVTTRKDTGLYTLRTVNRGEIVSTSFTFLYVYTSLFICGRPSFPAKLTIESVP  
 PSVAEGGSVLLRVHNLQDKLRGLSWYKGAHVSRNLEIARQIIAKNSSVPGPAHSGRETIVYNSGSLLLQNVTRN  
 DTGFYTLQTLRHRKMELAHVQLQVDTSLSGCCDLDSTQLIIDMPRYAAEGESILLRVLNLPEDFQVFCWY  
 KGALIFQIFKIAEYSRARNSTKGAQSRTERVYTNGLSLLQVDTEKDTGLYTLQTLIDRNFKIEKAHVQIQVN  
 KPVTQPFMRVTDSTVRVQSSVVFCTCFSDNTGVS IHWLFNQNLSQLTERITLSPSKCQLRINPVRKEDGGGEYQY  
 EDHQNRPLIGMQEATDTMGFPSPDLSVP\*  
 >ENSMUSP00000146795\_c.399:A>C\_p.T134P ENSMUST00000208221.2|Psg22-  
 203|ENSMUSG00000044903|+|chr7:g.18453706:A>C  
 MEVSSELLSNGWTSWQRVLLTASLLTCWLLPITAGVTIESVPPKLVGENVLLRVDNLPENLRVFWYRGVTD  
 MSLGIALYSLDYSTSVTGPKHSGRETLYRNGSLWIQNVTRDGTYYTLQTIKNGKVVSNPSIFLQVNSSLFI  
 CGRPSPPALLTIESVPPASVAEGGSVLLLVHSLPDNLQSLWYKGLTVFNKVEIARHRTVKNSSEMGPAYSGRE  
 IVYNSGSLLLQNVTWEDTGFYTLQIVNRYWKMELAHIYLQVDTSLSGCCDDFNSVQLRINPVPHPAAEGERVL  
 LQVHNLPEQVQTFWLWYKGVYSTQSFKITEYSIVTESLINGYAHSGREILFINGSLLLQVDTEKDSGFYTLVTI  
 DSNVKVETAHVQVNVNKLVTQPMRVTDSTVRIQGSVVVFCTCFSDNTGVSIRWLFNQNQLQLTERMTLSPSKCQ  
 LRIHTVRKEDAGEYQCEAFNPVSSKTSPLVRLTMNE\*  
 >ENSMUSP00000104121\_c.516:A>C\_p.T173P ENSMUST00000108481.8|Psg22-  
 202|ENSMUSG00000044903|+|chr7:g.18453706:A>C  
 MCSCLENSAQKEEGQSPGALQEQSSPLRKASTVRRDMEVSSELLSNGWTSWQRVLLTASLLTCWLLPITA  
 GVTIESVPPKLVGENVLLRVDNLPENLRVFWYRGVTDMSLGIALYSLDYSTSVTGPKHSGRETLYRNGSLW  
 IQNVTRDGTYYTLQTIKNGKVVSNPSIFLQVNSSLFICGRPSPPALLTIESVPPASVAEGGSVLLLVHSLPD  
 NLQSLWYKGLTVFNKVEIARHRTVKNSSEMGPAYSGREIVYNSGSLLLQNVTWEDTGFYTLQIVNRYWKME  
 AHIYLQVDTSLSGCCDDFNSVQLRINPVPHPAAEGERVLLQVHNLPEQVQTFWLWYKGVYSTQSFKITEYSIVT  
 ESLINGYAHSGREILFINGSLLLQVDTEKDSGFYTLVTIDSNVKVETAHVQVNVNKLVTQPMRVTDSTVRIQ  
 GSVVFCTCFSDNTGVSIRWLFNQNQLQLTERMTLSPSKCQLRIHTVRKEDAGEYQCEAFNPVSSKTSPLVRLTM  
 MNE\*  
 >ENSMUSP00000050633\_c.399:A>C\_p.T134P ENSMUST00000051973.9|Psg22-  
 201|ENSMUSG00000044903|+|chr7:g.18453706:A>C  
 MEVSSELLSNGWTSWQRVLLTASLLTCWLLPITAGVTIESVPPKLVGENVLLRVDNLPENLRVFWYRGVTD  
 MSLGIALYSLDYSTSVTGPKHSGRETLYRNGSLWIQNVTRDGTYYTLQTIKNGKVVSNPSIFLQVNSSLFI

CGRPSPPALLTIESVPASVAEGGSVLLLVHSLPDNLQSLWYKGLTVFNKVEIARHRTVKNSSEMGPAYSGRE  
IVYNSGSLLLQNVTWEDTGFYTLQIVNRYWKMELAHIYLQVDTSLSSCCDDFNSVQLRINPVPHPAAEGERVL  
LQVHNLPEDVQTFWLWYKGVYSTQSFKITEYSIVTESLINGYAHSGREILFINGSLLLQDVTEKDSGFYTLVTI  
DSNVKVETAHVQVNVNKLVTQPVMRVTDSTVRIQGSVVFTCFSDNTGVSIRWLFNQNQLQLTERMTLSPSKCQ  
LRIHTVRKEDAGEYQCEAFNPVSSKTSLPVRLTMNE\*  
>rs235733715\_ENSMUSP00000104093\_c.760:A>C\_p.K254T  
ENSMUST00000108453.2|zfp296-201|ENSMUSG00000011267|+|chr7:g.19313907:A>C  
MSRRKAGRVPRRVDPTDTEIEMPDLMVDVVKPDLDLRSLAQGPWIARDMPI SDVVKRQLQTASRPLGAPSTCAP  
RMPLSSKSSDRQPWTDKHPDLLTCGRGKIFPLGAI IAFMDHKKQGCQLLQVSDPI SESKELKALSCLQCGRQ  
YTSPWKL LCHAQWDHGLCIYQTQHLDTP EAPLLGLAEVAAAMSAVAVVAPVESKPPPVSSAARRSPTCDVCKK  
TLSSFSNLKVHMRSHTERPYSQDCSYACAQSSTLNRHKKTHRQLAPGSPSTSASSRGVSPAAPPEPAAAYAA  
APASTLPSQTV EKAGAAATAGVQEPGAPGSGAQGGPGFVWGAPAKVERTDPVKIEKTAPRKSHGPGGKCEFC  
GKSFTNSSNLTVHRRSHTGERPYTCDQCPYACAQSSKLNRRRTHGLGTGKTVKCPHCLVPFGLQATLDKHLR  
QKHPEMA\*  
>ENSMUSP00000104093\_c.770:A>C\_p.R257S ENSMUST00000108453.2|zfp296-  
201|ENSMUSG00000011267|+|chr7:g.19313917:A>C  
MSRRKAGRVPRRVDPTDTEIEMPDLMVDVVKPDLDLRSLAQGPWIARDMPI SDVVKRQLQTASRPLGAPSTCAP  
RMPLSSKSSDRQPWTDKHPDLLTCGRGKIFPLGAI IAFMDHKKQGCQLLQVSDPI SESKELKALSCLQCGRQ  
YTSPWKL LCHAQWDHGLCIYQTQHLDTP EAPLLGLAEVAAAMSAVAVVAPVESKPPPVSSAARRSPTCDVCKK  
TLSSFSNLKVHMRSHTERPYSQDCSYACAQSSKLNHKKTHRQLAPGSPSTSASSRGVSPAAPPEPAAAYAA  
APASTLPSQTV EKAGAAATAGVQEPGAPGSGAQGGPGFVWGAPAKVERTDPVKIEKTAPRKSHGPGGKCEFC  
GKSFTNSSNLTVHRRSHTGERPYTCDQCPYACAQSSKLNRRRTHGLGTGKTVKCPHCLVPFGLQATLDKHLR  
QKHPEMA\*  
>ENSMUSP00000066880\_c.109:GT>CG\_p.G37A ENSMUST00000068023.8|Cadm4-  
201|ENSMUSG00000054793|+|chr7:g.24198626:GT>CG  
MGRARRFQWPLLLLWAAAAGPGTGQEVQ TENVTVAEAWG\* DHLPSASVRWVHSRHSEPSADPLFQWHQSSE  
GRAIPAGGVLPAPGAHQALRRPPGGRGGLL PALHGGHPPSDRHAHCLSGSGESCGGGPRASSGRRGQTLP  
GSAVAPRSGPALVSGSQGVERSEQRPGERQGV ERGKHRVPCGSGRRWYCHLRSTPGAALGTQQADAVRAG  
CAVFPHSADPRLSSCEGGRHSGADL CCHREPQAKPDPLEPWE\* VSAREGGGGGRDAHATWP GICR\*RHLHLR  
GGEQARPREGALRACGL\* PRCSGRGSDIGSLRHCRHPGATGVS DHMCASGHGLVLRPTEGILSDP\* QWLG\*  
AGRSQRSLPQWRRWTQTERRILHL  
>ENSMUSP00000003529\_c.1156:C>T\_p.A386V ENSMUST00000003529.9|Paf1-  
201|ENSMUSG00000003437|+|chr7:g.28098148:C>T  
MAPTIQTQAQRE DGHPRNSHRTLPERSGVVCRVKYCNSLPDI PFDPKFITYPFDQNRVQYKATSLEKQHKHD  
LLTEPDLGVTIDLINPDTYRIDPNVLLDPADEKLEEEIQAPTS SKRSQQHAKVVPWMRKTEYISTEFNRYGI  
SNEKPEVKIGVSVKQFT EEEIYKDRDSQITAEIKTFEDAQKSI SQHYSKPRVTPVEVMPVFPDFKMWINPCA  
QVIFDSDPAPKDTSGAAALEMMSQAMIRGMMDEEGNQFVAYFLPVEETLKKRKRQEEEMDYAPDDVYDYKIA  
REYNWNVKNKASKGYEENYFFIFREGDGVYNELETRVRLSKRRAKAGVQSGTNALLVVKHRDMNEKELEAQE  
ARKAQLENHEPEEEEEEMEVEEKEAGGSDEEQEKGSSEKEGESEDEHSGSESDREEGRDEASDKSGSGEDE  
SSEDEARAARDKEE IFGSDADSEDDADSDDEDRGQAHRGSDNDS DSGSDGGGQSRRSRSRSRSASFPFSGS  
EHSAQEDGSEAAAASDSSEADSDSD\*  
>ENSMUSP00000146824\_c.568:A>C\_p.H190P ENSMUST00000207873.2|zfp14-  
203|ENSMUSG00000053985|-|chr7:g.29738415:T>G  
MALAQGLVTFGDVAVDFSQEWEFLDPAQKNLYRDVMWETYSNFI SLDLERSFKTDTSSSDKGICEVYSLQWE  
LIEKIKNLSPPQSGSLSDDQECKHKTGLQKEPQEGYFGQLKITSEKVTYEKHSFLSEYQRVQNGEKFYECKEKR  
KTFIRRSTLSQHLRIHTGEKPYKCKEKGQPFQRRAHLIRHKKLPTGEKPYECKDCGKAFTVLQELTQHQR LH  
GEKPYECKEKGKAFRVHQQLARHQRIHTGEKPYECKEKGKTFRQC THLTRHQR LH TSEKLYECKEKGKAFVCG  
PDLRVHQIHFGEKPYACKDCGKSFRICQQLTVHQSIHTGEKPYECKEKGKTFRLRQQLVRHQRIHTHERPYE  
CLECWKTFSSYSQLISHQSIHVGERPYECECGKAFRLLSQLTQHQS IHTGEKPYECKEKRKPFRLLSQLTQH  
RSIHTGEKPYECKDCGKAFLYFSLSQHQRIHTGEKPYKCKEKGKAFRQSHL TQHQKIHSGT\*  
>ENSMUSP00000146913\_c.568:A>C\_p.H190P ENSMUST00000207072.2|zfp14-  
202|ENSMUSG00000053985|-|chr7:g.29738415:T>G  
MALAQGLVTFGDVAVDFSQEWEFLDPAQKNLYRDVMWETYSNFI SLDLERSFKTDTSSSDKGICEVYSLQWE  
LIEKIKNLSPPQSGSLSDDQECKHKTGLQKEPQEGYFGQLKITSEKVTYEKHSFLSEYQRVQNGEKFYECKEKR  
KTFIRRSTLSQHLRIHTGEKPYKCKEKGQPFQRRAHLIRHKKLPTGEKPYECKDCGKAFTVLQELTQHQR LH  
GEKPYECKEKGKAFRVHQQLARHQRIHTGEKPYECKEKGKTFRQC THLTRHQR LH TSEKLYECKEKGKAFVCG  
PDLRVHQIHFGEKPYACKDCGKSFRICQQLTVHQSIHTGEKPYECKEKGKTFRLRQQLVRHQRIHTHERPYE



>ENSMUSP00000127022\_c.583:A>T\_p.D195V ENSMUST00000098433.5|Mrgprx2-201|ENSMUSG00000074109|-|chr7:g.48132233:T>A  
MEERNISGRDLRVDNSITYWGTNITAVNESNHTGMSFCEVVSCTMVFLSLIVALVGLVGNATVWLFLGFQMRR  
NAFSVYILNLAGADFLFCFQIGYCFHMLDIDISIPIEIDLFLYLVLNFPYFCGLSILSAISIERCLSVMWPI  
WYHCQRPRHTSAVICLLWVLSLVCSSLEGEKCGFLYYSDDPGWCKTFVLITATWLIVLFLVALLGSSIALVIT  
IFWGLHKIPVTRLYVAIVFTVLVFLFGLPYGIYWFLLVWIEKFYYVLPCSIYPVTVFLSCVNSSAKPIIYCL  
VGSIRHHRFORKTLKFLQRAMQDTPEEEECEGEMGSSGRSREIKTIWKGLRAALIRHKEL\*  
>rs236992428\_ENSMUSP00000047775\_c.728:T>CT\_p.A243ins-fs  
ENSMUST00000042318.6|Fs d2-201|ENSMUSG00000038663|-|chr7:g.81202849:A>AG  
MEEEEAEESGLGRSAAPKDFHFYHMDLYDSEDRLQLFPGDSSRIRREVTQAEDDRELGDEFVDEHRLGTLGYP  
SYGMRRRDPGREPRDWGEAAEADLGYGGGQGPLDQCQDLREAYRYTHGRASEEYECYVIEEEDEEPPADVF  
CITCKTPVVRTVEKDFDTHKEHEVTPISKALEHAKDEVHKNMCKLEQQIEMENFASHLEEVFITVEENFGRQE  
QNFECHYNGILETLAQKYEEKIQASGGEKERETGSLIRTTGQLWREPRCLQGADGNRRGDVS  
>ENSMUSP00000076687\_c.7:C>T\_p.S3F ENSMUST00000077478.8|Vmn2r73-201|ENSMUSG00000070458|-|chr7:g.85525139:G>A  
MFFLIFIFWFLKISYIFCHLSNPRCFWRIKDTKDKLGDKETYCFFSISAKHGYIRNDYFSWNLDKHVTPKTNH  
LIFSVMYLALEEINKNSHILPNISLVVNIIECVLLKYGEKTLGLKHEEFIPNYCANERRYLIVLTAPIWAVST  
KLGPFLEMSRIPELYCGHFHPLSDNEQFPPLYQISPKDTSPLAMVSLVVHFRWNWIGVIITNDNHGIQFLS  
ELRGETQKQIVCLSVVIIQTDITAYKEYHMNKNKIVMSSAKVVIVYGDHNSPIKFVFLWKSQGI FRIWVS  
VSQFDMITPLGDFMFLYSASGTLIFSHQQSELSGFEEKFIKTVKPSNYSSEFSFAKLWWTYFRCSLPPSNCKKL  
KNCPTKTVFRWLFMTPLGMAMSDTCYNLYNAIYAVAHSLHEMLLQQVDTWSENAGKELEFDSWKMF SILKTMQ  
FVNPAGDLVNMNQNKLQEREYDIFYIMDFQKDYGLKMKIGKFSGHLPSHQQLYMSKEMIEWATDMDQILPSIC  
SMPCRPGLRKS PQEGKDICCFCVNPCPENEISNMTNMDQCVC PEDQYANEDHTLCLQKIVAILDYRDLGKA  
LAGFALCF CVITSGVLCIFLKHRETPIVKANNQTL SYVLLISLIFCFICSLLYIGHPTIVICVLQQSTFAISF  
TVAASTILAKTITVVLAFKVTVPGRMRWLLVAGAPKYIILICTMIQLILCGVWLGTSPPFVDADLHMVHGHI  
IVCNKGSVIAFYFVLGMYGSI ALASFTVAFLARNLPDTFNEAKLLTFSMLVFC SVVWTFIPVYYSTKGKTMVA  
VEVFCILASSAGLLLCIFAPKCYNILLRPGKNSSHMFKKLHAKTENII\*  
>ENSMUSP00000156568\_c.7:C>T\_p.S3F ENSMUST00000233729.2|Vmn2r73-207|ENSMUSG00000070458|-|chr7:g.85525139:G>A  
MFFLIFIFWFLKISYIFCHLSNPRCFWRIKDTKDKLGDKETYCFFSISAKHGYIRNDYFSWNLDKHVTPKTNH  
LIFSVMYLALEEINKNSHILPNISLVVNIIECVLLKYGEKTLGLKHEEFIPNYCANERRYLIVLTAPIWAVST  
KLGPFLEMSRIPEISPKDTSPLAMVSLVVHFRWNWIGVIITNDNHGIQFLSELRGETQKQIVCLSVVIIQTD  
DDITAYKEYHMNKNKIVMSSAKVVIVYGDHNSPIKFVFLWKSQGI FRIWVSVSQFDMITPLGDFMFLYSASGT  
LIFSHQQSELSGFEEKFIKTVKPSNYSSEFSFAKLWWTYFRCSLPPSNCKKLKNCPTKTVFRWLFMTPLGMAM  
SDTCYNLYNAIYAVAHSLHEMLLQQVDTWSENAGKELEFDSWKMF SILKTMQFVNPAGDLVNMNQNKLQEREY  
DIFYIMDFQKDYGLKMKIGKFSGHLPSHQQLYMSKEMIEWATDMDQILPSICSMPCRPGLRKS PQEGKDICC  
VCNPCPENEISNMTNMDQCVC PEDQYANEDHTLCLQKIVAILDYRDLGKALAGFALCF CVITSGVLCIFL  
KHRETPIVKANNQTL SYVLLISLIFCFICSLLYIGHPTIVICVLQQSTFAISFTVAASTILAKTITVVLAFKVT  
VPGRMRWLLVAGAPKYIILICTMIQLILCGVWLGTSPPFVDADLHMVHGHI IVCNKGSVIAFYFVLGMYGSI  
ALASFTVAFLARNLPDTFNEAKLLTFSMLVFC SVVWTFIPVYYSTKGKTMVAVEVFCILASSAGLLLCIFAPK  
CYNILLRPGKNSSHMFKKLHAKTENII\*  
>ENSMUSP00000156903\_c.7:C>T\_p.S3F ENSMUST00000233079.2|Vmn2r73-204|ENSMUSG00000070458|-|chr7:g.85525139:G>A  
MFFLIFIFWFLKISYIFCHLSNPRCFWRIKDTKDKLGDKETYCFFSISAKHGYIRNDYFSWNLDKHVTPKTNH  
LIFSVMYLALEEINKNSHILPNISLVVNIIECVLLKYGEKTLGLKHEEFIPNYCANERRYLIVLTAPIWAVST  
KLGPFLEMSRIPELYCGHFHPLSDNEQFPPLYQISPKDTSPLAMVSLVVHFRWNWIGVIITNDNHGIQFLS  
ELRGETQKQIVCLSVVIIQTDITAYKEYHMNKNKIVMSSAKVVIVYGDHNSPIKFVFLWKSQGI FRIWVS  
VSQFDMITPLGDFMFLYSASGTLIFSHQQSELSGFEEKFIKTVKPSNYSSEFSFAKLWWTYFRCSLPPSNCKKL  
KNCPTKTVFRWLFMTPLGMAMSDTCYNLYNAIYAVAHSLHEMLLQQVDTWSENAGKELEFDSWKILPSICSM  
PCRPGLRKS PQEGKDICCFCVNPCPENEISNMTNMDQCVC PEDQYANEDHTLCLQKIVAILDYRDLGKALAG  
FALCF CVITSGVLCIFLKHRETPIVKANNQTL SYVLLISLIFCFICSLLYIGHPTIVICVLQQSTFAISFTVA  
ASTILAKTITVVLAFKVTVPGRMRWLLVAGAPKYIILICTMIQLILCGVWLGTSPPFVDADLHMVHGHI IVC  
NKGSVIAFYFVLGMYGSI ALASFTVAFLARNLPDTFNEAKLLTFSMLVFC SVVWTFIPVYYSTKGKTMVAVEV  
FCILASSAGLLLCIFAPKCYNILLRPGKNSSHMFKKLHAKTENII\*  
>ENSMUSP00000156619\_c.7:C>T\_p.S3F ENSMUST00000233315.2|Vmn2r73-206|ENSMUSG00000070458|-|chr7:g.85525139:G>A  
MFFLIFIFWFLKISYIFCHLSNPRCFWRIKDTKDKLGDKETYCFFSISAKHGYIRNDYFSWNLDKHVTPKTNH  
LIFSVMYLALEEINKNSHILPNISLVVNIIECVLLKYGEKTLGLKHEEFIPNYCANERRYLIVLTAPIWAVST



KLGPFLLFMSRIPEISPKDTSPLAMVSLVVHFRWNWIGVIITNDNHGIQFLSELRGETQKQIVCLSVVII IQT  
 DDITAYKEYHMNKNKIVMSSAKVVIVYGDHNSPIKFLVFLWKSQGI FRIWVSVSQFDMITPLGDFMFLYSASGT  
 LIFSHQQSELSGFEKFIKTVKPSNYSSEFSFAKLWWTYFRCSLPPSNCKKLKNCPTKTVFRWLFMTPLGMAM  
 SDTCYNLYNAIYAVAHSLHEMLLQQVDTWSENAGKELEFDSWKILPISICSMPCRPLGRKSPQEGKDICCFCVN  
 PCPENEISNMTNMDQCVPEDQYANEDHTLCLQKIVAILDYRDLGKALAGFALCFVCVITSGVLCIFLKHRE  
 TPIVKANNQTLISVLLISLIFCFICSLLYIGHPTIVICVLLQQTFAISFTVAASTILAKTITVVLAFKVTVP  
 RMRWLLVAGAPKYIILICTMIQLILCGVWLGTSPFFVDADLHMVHGHIIVCNKGSVIAFYFVLGYMGSIALA  
 SFTVAFLARNLPDFTFNEAKLLTFMSLVFCSVWVTFIPVYYSTKGKTMVAVEVFCILASSAGLLLCIFAPKCYN  
 ILLRPGKNSSHMFKKLHAKTENI I\*  
 >ENSMUSP00000156444\_c.7:C>T\_p.S3F ENSMUST00000233115.2|Vmn2r73-  
 205|ENSMUSG00000070458|-|chr7:g.85525139:G>A  
 MFFLIFIFWFLKISYIFCHLSNPRCFWRIKDTKDKLGDKETYCFFSISAKHGYIRNDYFVSNLDDKHVTPKTNH  
 LIFSVMYLALEEINKNSHILPNISLVVNIIECVLLKYGEKTGLGLKHEEFIPNYCANERRYLIVLTAIWAIVST  
 KLGPFLLFMSRIPELYCGHFHLLPLSDNEQFPHLYQISPKDTSPLAMVSLVVHFRWNWIGVIITNDNHGIQFLS  
 ELRGETQKQIVCLSVVII IQTDDITAYKEYHMNKNKIVMSSAKVVIVYGDHNSPIKFLVFLWKSQGI FRIWVSV  
 VSQFDMITPLGDFMFLYSASGT LIFSHQQSELSGFEKFIKTVKPSNYSSEFSFAKLWWTYFRCSLPPSNCKKL  
 KNCPTKTVFRWLFMTPLGMAMSDTCYNLYNAIYAVAHSLHEMLLQQVDTWSENAGKELEFDSWKMFSLKTMQ  
 FVNPAGDLVNMNQLKQEREYDIFYIMDFQKDYGLKMKIGKFSGHLPSHQQLYMSKEMIEWATDMDQILPISIC  
 SMPCRPLGRKSPQEGKDICCFCVNCPCPENEISNMTSFLCLYICLLFRYGSVCEMSRRSICQ\*  
 >ENSMUSP00000156901\_c.7:C>T\_p.S3F ENSMUST00000233748.2|Vmn2r73-  
 208|ENSMUSG00000070458|-|chr7:g.85525139:G>A  
 MFFLIFIFWFLKISYIFCHLSNPRCFWRIKDTKDKLGDKETYCFFSISAKHGYIRNDYFVSNLDDKHVTPKTNH  
 LIFSVMYLALEEINKNSHILPNISLVVNIIECVLLKYGEKTGLGLKHEEFIPNYCANERRYLIVLTAIWAIVST  
 KLGPFLLFMSRIPEISPKDTSPLAMVSLVVHFRWNWIGVIITNDNHGIQFLSELRGETQKQIVCLSVVII IQT  
 DDITAYKEYHMNKNKIVMSSAKVVIVYGDHNSPIKFLVFLWKSQGI FRIWVSVSQFDMITPLGDFMFLYSASGT  
 LIFSHQQSELSGFEKFIKTVKPSNYSSEFSFAKLWWTYFRCSLPPSNCKKLKNCPTKTVFRWLFMTPLGMAM  
 SDTCYNLYNAIYAVAHSLHEMLLQQVDTWSENAGKELEFDSWKMFSLKTMQFVNPAGDLVNMNQLKQEREY  
 DIFYIMDFQKDYGLKMKIGKFSGHLPSHQQLYMSKEMIEWATDMDQILPISICSMPCRPLGRKSPQEGKDICC  
 FCVNCPCPENEISNMTSFLCLYICLLFRYGSVCEMSRRSICQ\*  
 >ENSMUSP00000156768\_c.7:C>T\_p.S3F ENSMUST00000232965.2|Vmn2r73-  
 203|ENSMUSG00000070458|-|chr7:g.85525139:G>A  
 MFFLIFIFWFLKISYIFCHLSNPRCFWRIKDTKDKLGDKETYCFFSISAKHGYIRNDYFVSNLDDKHVTPKTNH  
 LIFSVMYLALEEINKNSHILPNISLVVNIIECVLLKYGEKTGLGLKHEEFIPNYCANERRYLIVLTAIWAIVST  
 KLGPFLLFMSRIPELYCGHFHLLPLSDNEQFPHLYQISPKDTSPLAMVSLVVHFRWNWIGVIITNDNHGIQFLS  
 ELRGETQKQIVCLSVVII IQTDDITAYKEYHMNKNKIVMSSAKVVIVYGDHNSPIKFLVFLWKSQGI FRIWVSV  
 VSQFDMITPLGDFMFLYSASGT LIFSHQQSELSGFEKFIKTVKPSNYSSEFSFAKLWWTYFRCSLPPSNCKKL  
 KNCPTKTVFRWLFMTPLGMAMSDTCYNLYNAIYAVAHSLHEMLLQQVDTWSENAGKELEFDSWKILPISICSM  
 PCRPLGRKSPQEGKDICCFCVNCPCPENEISNMTSFLCLYICLLFRYGSVCEMSRRSICQ\*  
 >ENSMUSP00000156472\_c.7:C>T\_p.S3F ENSMUST00000232897.2|Vmn2r73-  
 202|ENSMUSG00000070458|-|chr7:g.85525139:G>A  
 MFFLIFIFWFLKISYIFCHLSNPRCFWRIKDTKDKLGDKETYCFFSISAKHGYIRNDYFVSNLDDKHVTPKTNH  
 LIFSVMYLALEEINKNSHILPNISLVVNIIECVLLKYGEKTGLGLKHEEFIPNYCANERRYLIVLTAIWAIVST  
 KLGPFLLFMSRIPEISPKDTSPLAMVSLVVHFRWNWIGVIITNDNHGIQFLSELRGETQKQIVCLSVVII IQT  
 DDITAYKEYHMNKNKIVMSSAKVVIVYGDHNSPIKFLVFLWKSQGI FRIWVSVSQFDMITPLGDFMFLYSASGT  
 LIFSHQQSELSGFEKFIKTVKPSNYSSEFSFAKLWWTYFRCSLPPSNCKKLKNCPTKTVFRWLFMTPLGMAM  
 SDTCYNLYNAIYAVAHSLHEMLLQQVDTWSENAGKELEFDSWKILPISICSMPCRPLGRKSPQEGKDICCFCVN  
 PCPENEISNMTSFLCLYICLLFRYGSVCEMSRRSICQ\*  
 >ENSMUSP00000134377\_c.871:G>A\_p.R291K ENSMUST00000174158.3|Olfr309-  
 202|ENSMUSG00000054054|-|chr7:g.85955448:C>T  
 MMNFSIVSEFMILGLTQKSELQGILFIVFLFIYLVALLGNMLIVVAIIYNTTLHTPMYIILLLALAVVDI ICTT  
 SIIPKMLGTMLTSKNSISYGGCMSQLFFFTWSLGAEMVLF TTMAYDRYVAICFPLRYSTIMNHYTCVGLLSIV  
 MAIAVTNSWVHTGLILRLTFCGPNIIDHFFCEIPLLLALSCSPVRVNEVMVYVADITLAVGDFTLTLCISYGF  
 IAAILRIRTTTEGKKKAFSTCSSHLMVVSLSYSPVIYTYIRPASSYTFDKDKVVAALYTLVTPTLNPIVYSFKN  
 KEMQSGIKKVF AFLKG\*  
 >ENSMUSP00000061929\_c.871:G>A\_p.R291K ENSMUST00000055690.3|Olfr309-  
 201|ENSMUSG00000054054|-|chr7:g.85955448:C>T  
 MMNFSIVSEFMILGLTQKSELQGILFIVFLFIYLVALLGNMLIVVAIIYNTTLHTPMYIILLLALAVVDI ICTT  
 SIIPKMLGTMLTSKNSISYGGCMSQLFFFTWSLGAEMVLF TTMAYDRYVAICFPLRYSTIMNHYTCVGLLSIV

MAIAV TNSWVHTGLILRLTFCGPNIIDHFFCEIPPLLALSCSPVRVNEVMVYVADITLAVGDFTLTCISYGFII  
IAAILRIRTTTEGKKKAFSTCSSHLMVVSLYSPVIYTYIRPASSYTFDKDKVVAALYTLVTPTLNPIVYSFKN  
KEMQSGIKKVF AFLG\*

>ENSMUSP00000032967\_c.661:A>G\_p.K221R ENSMUST00000032967.4|Lipt2-  
201|ENSMUSG00000030725|+|chr7:g.99809576:A>G  
MSLFPVRLVWLGRVHYSELLALQEHWLRLQADPRPGLTSGTKAGVLLVCEPAGPVYTGGLRGGLTPEETTRL  
RALGAEVRATGRGGLATFHGPGQLLCHPVLDLRLRLRTHVAALEACAVRLCELRLQGARARPPPYTGVM  
LGERKICAI GVRGRHITSHGLALNCSTDLTWFEHIVPCGLVGTGVTSLSALQRLVTVDEVMP SFLVAFKET  
FRCTLI SEDSPS\*

>ENSMUSP00000149045\_c.647:T>A\_p.D216E ENSMUST00000216516.2|Olfr617-  
203|ENSMUSG00000073946|+|chr7:g.103233878:T>A  
MATSTTLNNTNVRDIWYTMIGIPGLE YAHIIWISIPICSMYIVAIAGNALLLFLIITERSLHEP MYLFLSMLA  
LADIFLSTVTTPKMLAIFWFRAGGISFASCVSQMFFLHFIFVAESA ILLAMAFDRYVAICYPLRYTTILTTSV  
IIKMGIAAVIRSFFICFPLIFLVYRLTYCGKSTIRHSYCEHMG IARLACDSIKVNIYYGVIVALFSTCLEAVL  
IIVSYALILCAVFRIPSRDARLKALGT CGSHVCVILLFYTPAFFSFFAHRFGGHSIPLHVHILLANLYVVVPP  
SVNPIIYGVKTKQIQERVIQVFSLGK\*

>ENSMUSP00000150982\_c.647:T>A\_p.D216E ENSMUST00000215755.2|Olfr617-  
202|ENSMUSG00000073946|+|chr7:g.103233878:T>A  
MATSTTLNNTNVRDIWYTMIGIPGLE YAHIIWISIPICSMYIVAIAGNALLLFLIITERSLHEP MYLFLSMLA  
LADIFLSTVTTPKMLAIFWFRAGGISFASCVSQMFFLHFIFVAESA ILLAMAFDRYVAICYPLRYTTILTTSV  
IIKMGIAAVIRSFFICFPLIFLVYRLTYCGKSTIRHSYCEHMG IARLACDSIKVNIYYGVIVALFSTCLEAVL  
IIVSYALILCAVFRIPSRDARLKALGT CGSHVCVILLFYTPAFFSFFAHRFGGHSIPLHVHILLANLYVVVPP  
SVNPIIYGVKTKQIQERVIQVFSLGK\*

>ENSMUSP00000040319\_c.647:T>A\_p.D216E ENSMUST00000048265.5|Olfr617-  
201|ENSMUSG00000073946|+|chr7:g.103233878:T>A  
MATSTTLNNTNVRDIWYTMIGIPGLE YAHIIWISIPICSMYIVAIAGNALLLFLIITERSLHEP MYLFLSMLA  
LADIFLSTVTTPKMLAIFWFRAGGISFASCVSQMFFLHFIFVAESA ILLAMAFDRYVAICYPLRYTTILTTSV  
IIKMGIAAVIRSFFICFPLIFLVYRLTYCGKSTIRHSYCEHMG IARLACDSIKVNIYYGVIVALFSTCLEAVL  
IIVSYALILCAVFRIPSRDARLKALGT CGSHVCVILLFYTPAFFSFFAHRFGGHSIPLHVHILLANLYVVVPP  
SVNPIIYGVKTKQIQERVIQVFSLGK\*

>ENSMUSP00000023934\_c.207:A>G\_p.T70A ENSMUST00000023934.8|Hbb-bs-  
201|ENSMUSG00000052305|-|chr7:g.103476762:T>C  
MVHLTDAEKA AVSGLWGKVNAD EVGGEALGRLLVVYPW TQRYFDSFGDLSSASAIMGN AKVKAHGK KVI AAFN  
DGLNHLDSLKGTFASLSELHCDKLHVDPENFRL LGNMIVIVLGHHLGKDFTPAAQA AFQKV VAGVAAALAHKY  
H\*

>ENSMUSP00000115607\_c.207:A>G\_p.T70A ENSMUST00000153218.2|Hbb-bs-  
203|ENSMUSG00000052305|-|chr7:g.103476762:T>C  
MVHLTDAEKA AVSGLWGKVNAD EVGGEALGRLLVVYPW TQRYFDSFGDLSSASAIMGN AKVKAHGK KVI AAFN  
DGLNHLDSLKGTFASLSELHCDKLHVDPEN

>ENSMUSP00000023934\_c.192:G>A\_p.G65S ENSMUST00000023934.8|Hbb-bs-  
201|ENSMUSG00000052305|-|chr7:g.103476777:C>T  
MVHLTDAEKA AVSGLWGKVNAD EVGGEALGRLLVVYPW TQRYFDSFGDLSSASAIMGN AKVKAH S K KVI TAFN  
DGLNHLDSLKGTFASLSELHCDKLHVDPENFRL LGNMIVIVLGHHLGKDFTPAAQA AFQKV VAGVAAALAHKY  
H\*

>ENSMUSP00000115607\_c.192:G>A\_p.G65S ENSMUST00000153218.2|Hbb-bs-  
203|ENSMUSG00000052305|-|chr7:g.103476777:C>T  
MVHLTDAEKA AVSGLWGKVNAD EVGGEALGRLLVVYPW TQRYFDSFGDLSSASAIMGN AKVKAH S K KVI TAFN  
DGLNHLDSLKGTFASLSELHCDKLHVDPEN

>ENSMUSP00000150733\_c.24:A>G\_p.N9D ENSMUST00000216247.2|Olfr681-  
205|ENSMUSG00000095248|+|chr7:g.104770690:A>G  
MTAHKNDTDP TGVSDFL LNC FVRSPSWQLWLSLPLSLLFL LAMGANAILLITIRMEASLHEP MYLLSLLSML  
DIILCLTVIPKVL AIFWFDLRAIGFPACFLQMYIMNSFLAMESCTFMIMAFDRYIAICHPLRYP S IITDQFVV  
KAATFILVRNVL IPLPI PILSRLHYCGRNVIENICANMSVSR LSCDDVTVNRLYQFAGGW TLLGSDLVLI F  
LSYTLILRAVRLRKAEGAVAKALSTCGSHFILILFFSTILLV F I LTHVAKRKVSSDVP ILLNVLHHVIPAALN  
PIVYGVRTQEIKQGIKLLKRGW\*

>ENSMUSP00000151022\_c.24:A>G\_p.N9D ENSMUST00000215517.2|Olfr681-  
203|ENSMUSG00000095248|+|chr7:g.104770690:A>G

MTAHKNDTDPGTGVSDFLLNCFVRSQWQLWLSLPLSLLFLLAMGANAILLITIRMEASLHEPMPYLLSLLSML  
DIILCLTVIPKVLAIWFWDLRAIGFPACFLQMYIMNSFLAMESCTFMIMAFDRYIAICHPLRYPSIITDQFVV  
KAATFILVRNVLIPPLIPILSGRLHYCGRNVIENCICANMSVSRSLCDDVTVNRLYQFAGGWTLGSDLVLIF  
LSYTLILRAVLRRLKAEGAVAKALSTCGSHFILILFFSTILLVFLTHVAKRKVSSDVPILLNLVHHVIPAALN  
PIVYGVRTQEIKQGIKLLKRGW\*

>ENSMUSP00000149338\_c.24:A>G\_p.N9D ENSMUST00000215564.2|Olfr681-  
204|ENSMUSG00000095248|+|chr7:g.104770690:A>G

MTAHKNDTDPGTGVSDFLLNCFVRSQWQLWLSLPLSLLFLLAMGANAILLITIRMEASLHEPMPYLLSLLSML  
DIILCLTVIPKVLAIWFWDLRAIGFPACFLQMYIMNSFLAMESCTFMIMAFDRYIAICHPLRYPSIITDQFVV  
KAATFILVRNVLIPPLIPILSGRLHYCGRNVIENCICANMSVSRSLCDDVTVNRLYQFAGGWTLGSDLVLIF  
LSYTLILRAVLRRLKAEGAVAKALSTCGSHFILILFFSTILLVFLTHVAKRKVSSDVPILLNLVHHVIPAALN  
PIVYGVRTQEIKQGIKLLKRGW\*

>ENSMUSP00000095760\_c.24:A>G\_p.N9D ENSMUST00000098157.4|Olfr681-  
201|ENSMUSG00000095248|+|chr7:g.104770690:A>G

MTAHKNDTDPGTGVSDFLLNCFVRSQWQLWLSLPLSLLFLLAMGANAILLITIRMEASLHEPMPYLLSLLSML  
DIILCLTVIPKVLAIWFWDLRAIGFPACFLQMYIMNSFLAMESCTFMIMAFDRYIAICHPLRYPSIITDQFVV  
KAATFILVRNVLIPPLIPILSGRLHYCGRNVIENCICANMSVSRSLCDDVTVNRLYQFAGGWTLGSDLVLIF  
LSYTLILRAVLRRLKAEGAVAKALSTCGSHFILILFFSTILLVFLTHVAKRKVSSDVPILLNLVHHVIPAALN  
PIVYGVRTQEIKQGIKLLKRGW\*

>ENSMUSP00000150733\_c.192:T>C\_p.Y65H ENSMUST00000216247.2|Olfr681-  
205|ENSMUSG00000095248|+|chr7:g.104770858:T>C

MTAHKNDTNPVTGVSDFLLNCFVRSQWQLWLSLPLSLLFLLAMGANAILLITIRMEASLHEPMPYHLLSLLSML  
DIILCLTVIPKVLAIWFWDLRAIGFPACFLQMYIMNSFLAMESCTFMIMAFDRYIAICHPLRYPSIITDQFVV  
KAATFILVRNVLIPPLIPILSGRLHYCGRNVIENCICANMSVSRSLCDDVTVNRLYQFAGGWTLGSDLVLIF  
LSYTLILRAVLRRLKAEGAVAKALSTCGSHFILILFFSTILLVFLTHVAKRKVSSDVPILLNLVHHVIPAALN  
PIVYGVRTQEIKQGIKLLKRGW\*

>ENSMUSP00000151022\_c.192:T>C\_p.Y65H ENSMUST00000215517.2|Olfr681-  
203|ENSMUSG00000095248|+|chr7:g.104770858:T>C

MTAHKNDTNPVTGVSDFLLNCFVRSQWQLWLSLPLSLLFLLAMGANAILLITIRMEASLHEPMPYHLLSLLSML  
DIILCLTVIPKVLAIWFWDLRAIGFPACFLQMYIMNSFLAMESCTFMIMAFDRYIAICHPLRYPSIITDQFVV  
KAATFILVRNVLIPPLIPILSGRLHYCGRNVIENCICANMSVSRSLCDDVTVNRLYQFAGGWTLGSDLVLIF  
LSYTLILRAVLRRLKAEGAVAKALSTCGSHFILILFFSTILLVFLTHVAKRKVSSDVPILLNLVHHVIPAALN  
PIVYGVRTQEIKQGIKLLKRGW\*

>ENSMUSP00000149338\_c.192:T>C\_p.Y65H ENSMUST00000215564.2|Olfr681-  
204|ENSMUSG00000095248|+|chr7:g.104770858:T>C

MTAHKNDTNPVTGVSDFLLNCFVRSQWQLWLSLPLSLLFLLAMGANAILLITIRMEASLHEPMPYHLLSLLSML  
DIILCLTVIPKVLAIWFWDLRAIGFPACFLQMYIMNSFLAMESCTFMIMAFDRYIAICHPLRYPSIITDQFVV  
KAATFILVRNVLIPPLIPILSGRLHYCGRNVIENCICANMSVSRSLCDDVTVNRLYQFAGGWTLGSDLVLIF  
LSYTLILRAVLRRLKAEGAVAKALSTCGSHFILILFFSTILLVFLTHVAKRKVSSDVPILLNLVHHVIPAALN  
PIVYGVRTQEIKQGIKLLKRGW\*

>ENSMUSP00000095760\_c.192:T>C\_p.Y65H ENSMUST00000098157.4|Olfr681-  
201|ENSMUSG00000095248|+|chr7:g.104770858:T>C

MTAHKNDTNPVTGVSDFLLNCFVRSQWQLWLSLPLSLLFLLAMGANAILLITIRMEASLHEPMPYHLLSLLSML  
DIILCLTVIPKVLAIWFWDLRAIGFPACFLQMYIMNSFLAMESCTFMIMAFDRYIAICHPLRYPSIITDQFVV  
KAATFILVRNVLIPPLIPILSGRLHYCGRNVIENCICANMSVSRSLCDDVTVNRLYQFAGGWTLGSDLVLIF  
LSYTLILRAVLRRLKAEGAVAKALSTCGSHFILILFFSTILLVFLTHVAKRKVSSDVPILLNLVHHVIPAALN  
PIVYGVRTQEIKQGIKLLKRGW\*

>ENSMUSP00000154052\_c.510:T>A\_p.C171S ENSMUST00000214399.4|Olfr682-ps1-  
202|ENSMUSG00000059768|-|chr7:g.104775966:A>T

VSEFLMICFPGMQDTQHWLSIILAPLLVLALAAANFVLLFTIHQEASLHEPMPYLLAILSVLDVILCLTVIPKV  
LLIFWFNMKPIISFVGCFLQMFVMTFLPMESSTFLVMAYDRYVAICHPLRYPSIITEQFVINAIFIVARNLL  
ATLPTPVLAARLNVCASNVENICISANISVAKLSCGDIRLNKLYQFVSVWCLLGSDLVLLSFCYFILRVVMC  
QQSGGTVKALSTCGSHLILILFLTLVFIIFTNKAGKPISEVPILLNLVHHVIPAALNPIVYGVRTQEIKQ  
GIKLFK

>ENSMUSP00000154164\_c.540:T>A\_p.C181S ENSMUST00000071242.5|Olfr682-ps1-  
201|ENSMUSG00000059768|-|chr7:g.104775966:A>T

MVSPNNTGVQVSEFLMICFPGMQDTQHWLSIILAPLLVLALAAANFVLLFTIHQEASLHEPMPYLLAILSVLDV  
ILCLTVIPKVLIFWFNMKPIISFVGCFLQMFVMTFLPMESSTFLVMAYDRYVAICHPLRYPSIITEQFVINA

AIFIVARNLLATLPTPVLAARLNYCASNVVENCISANISVAKLSCGDIRLNKLYQFVSVWCLLGSDLVLLILLS  
YCFILRVVMCQQSGGTVTKALSTCGSHLILILFLYFVASLYLHKQGRKEDTVRGTNSS\*CAASSHPTCPQSHC  
VWSTNPGNQAGDYQAIQTL  
>ENSMUSP00000147446\_c.886:A>T\_p.D296V ENSMUST00000210644.3|Olfr707-  
203|ENSMUSG00000069390|-|chr7:g.106490428:T>A  
MGEDNRTSVTEFIFLGLSQDPQTQVLLFFLFLFIYLLTVLGNLLIIVLIHSDPRLHTPMYFFLRNLSFADLCF  
STTTVPQVLVHFLVKRKTISFAGCSTQIVVLLLVGCTECALLAVMSYDRYVAVCKPLHYSTIMTHWVCVQLAA  
GSWASGALVSLVDTTFTLRLPYRGNNVINHFFCEPPALLKLASADTYSTEMAIFAMGVVILLAPVSLILTSYW  
NIVSTVIQMQSGEGRKVFSTCGSHLIVVVLVYGS AIFAYMRPNSKIMNEKDKMISVFYSAVTPMLNPIIYSL  
RNKVVKGALRRITLK\*  
>ENSMUSP00000150100\_c.886:A>T\_p.D296V ENSMUST00000214112.2|Olfr707-  
205|ENSMUSG00000069390|-|chr7:g.106490428:T>A  
MGEDNRTSVTEFIFLGLSQDPQTQVLLFFLFLFIYLLTVLGNLLIIVLIHSDPRLHTPMYFFLRNLSFADLCF  
STTTVPQVLVHFLVKRKTISFAGCSTQIVVLLLVGCTECALLAVMSYDRYVAVCKPLHYSTIMTHWVCVQLAA  
GSWASGALVSLVDTTFTLRLPYRGNNVINHFFCEPPALLKLASADTYSTEMAIFAMGVVILLAPVSLILTSYW  
NIVSTVIQMQSGEGRKVFSTCGSHLIVVVLVYGS AIFAYMRPNSKIMNEKDKMISVFYSAVTPMLNPIIYSL  
RNKVVKGALRRITLK\*  
>ENSMUSP00000150235\_c.886:A>T\_p.D296V ENSMUST00000213251.2|Olfr707-  
204|ENSMUSG00000069390|-|chr7:g.106490428:T>A  
MGEDNRTSVTEFIFLGLSQDPQTQVLLFFLFLFIYLLTVLGNLLIIVLIHSDPRLHTPMYFFLRNLSFADLCF  
STTTVPQVLVHFLVKRKTISFAGCSTQIVVLLLVGCTECALLAVMSYDRYVAVCKPLHYSTIMTHWVCVQLAA  
GSWASGALVSLVDTTFTLRLPYRGNNVINHFFCEPPALLKLASADTYSTEMAIFAMGVVILLAPVSLILTSYW  
NIVSTVIQMQSGEGRKVFSTCGSHLIVVVLVYGS AIFAYMRPNSKIMNEKDKMISVFYSAVTPMLNPIIYSL  
RNKVVKGALRRITLK\*  
>ENSMUSP00000146644\_c.886:A>T\_p.D296V ENSMUST00000208759.2|Olfr707-  
202|ENSMUSG00000069390|-|chr7:g.106490428:T>A  
MGEDNRTSVTEFIFLGLSQDPQTQVLLFFLFLFIYLLTVLGNLLIIVLIHSDPRLHTPMYFFLRNLSFADLCF  
STTTVPQVLVHFLVKRKTISFAGCSTQIVVLLLVGCTECALLAVMSYDRYVAVCKPLHYSTIMTHWVCVQLAA  
GSWASGALVSLVDTTFTLRLPYRGNNVINHFFCEPPALLKLASADTYSTEMAIFAMGVVILLAPVSLILTSYW  
NIVSTVIQMQSGEGRKVFSTCGSHLIVVVLVYGS AIFAYMRPNSKIMNEKDKMISVFYSAVTPMLNPIIYSL  
RNKVVKGALRRITLK\*  
>ENSMUSP00000086062\_c.886:A>T\_p.D296V ENSMUST00000088687.3|Olfr707-  
201|ENSMUSG00000069390|-|chr7:g.106490428:T>A  
MGEDNRTSVTEFIFLGLSQDPQTQVLLFFLFLFIYLLTVLGNLLIIVLIHSDPRLHTPMYFFLRNLSFADLCF  
STTTVPQVLVHFLVKRKTISFAGCSTQIVVLLLVGCTECALLAVMSYDRYVAVCKPLHYSTIMTHWVCVQLAA  
GSWASGALVSLVDTTFTLRLPYRGNNVINHFFCEPPALLKLASADTYSTEMAIFAMGVVILLAPVSLILTSYW  
NIVSTVIQMQSGEGRKVFSTCGSHLIVVVLVYGS AIFAYMRPNSKIMNEKDKMISVFYSAVTPMLNPIIYSL  
RNKVVKGALRRITLK\*  
>ENSMUSP00000033342\_c.81:G>A\_p.A28T ENSMUST00000033342.7|Eif3f-  
201|ENSMUSG00000031029|+|chr7:g.108533720:G>A  
MASPAVPANVPPATAAAAPVVTAAAPTSAPTPSTPAATPAASPAPVSSDPAAVAAPAAGQTPASAPAP  
AQTAPASQPGPALPGPFPGGRVRLHPVILASIVDSYERRNEGAARVIGTLLGTVDKHSVEVTNCFVPHNES  
EDEVAVDMEFAKNMYELHKKVSPNELILGWYATGHDITEHSVLIHEYYSSREAPNPIHLTVDTGLQHGGRMSIKA  
YVSTLMGVPPGRTMGVMFTPLTVKYAYYDTERIGVDLIMKTCFSPNRVIGLSSDLQOVGGASARIQDALSTVLQ  
YAEVDLSGKVSADNTVGRFLMSLVNQVPKIVPDDFETMLNSNINDLLMVTYLANLTQSQIALNEKLVNL\*  
>ENSMUSP00000051263\_c.1269:G>GC\_p.G424ins-fs  
ENSMUST00000059390.13|Vps351-  
202|ENSMUSG00000030982|+|chr7:g.118379484:G>GC  
MASGAGPSFPGEKRGWTRKTGDHVTGKMAVFPWHSRNRNYKAELASCRLETVPLECGDYHPLKPIITVTESKT  
KKVSRKGSTSSTSSSSSSSIDPLSSVLDGTDPLSMFAATS DPAATGTVTDS SRKKRDKDENS FVGPDFEPWA  
NKRVEILARYTTTEKLSINLFGSEKGRGGAASAMSEKVRTRLEELDDFEEGSQKELLNLTQQDYVNRIEEL  
NQSLKDAWASDQKVKALKIIVIQCSKLLSDTSVIQFYPSKFLVITDILDITFGKLVYERISSMCVDSRSALPDHF  
SPENVNDTAKETCLNWFVKIASIRELIPRFYVEASILKCNKFLSKTGI SECLPRLTCMIRGIGDPLVSVYARA  
YLCRVGIEVAPHLKESLNKNFFDFLLTFKQIHGDTVQNQLVAQGVVELLSYLPYSPAMALDLPVCLLPRSRGF  
ADGDDGKM  
>ENSMUSP00000102163\_c.1197:G>GC\_p.G400ins-fs ENSMUST00000106553.8|Vps351-  
204|ENSMUSG00000030982|+|chr7:g.118379484:G>GC

VTGKMAVFPWHSRNRNYKAELASCRLETVPLECGDYHPLKPI TVTESKTKKVSRRKGSTSSTSSSSSSSSVIDPL  
SSVLDGTDPLSMFAATS DPAATGTVDSSRKKRDKDENSVFGPDFEPWANKRVEILARYTTTEKLSINLFMGS  
EKGRGGAASAMSEKVRTRLEELDDFEEGSQKELLNLTQQDYVNRIBELNQLSKDAWASDQKVKALKIVIQCS  
KLLSDTSVIQFYPSKFVLITDILDTFGKLVYERISSMCVDSRSALPDHFS PENVNDTAKETCLNWFVKIASIR  
ELIPRFYVEASILKCNKFLSKTGI SECLPRLTCMIRGIGDPLVSVYARAYLCRVGIEVAPHLKESLNKNFFDF  
LLTFKQIHGDTVQNQLVAQGVVELLSYLPYSPAMALDLPVCLLPRSRGFADGDDGKM  
>ENSMUSP00000033280\_c.480:G>GC\_p.G161ins-fs ENSMUST00000033280.14|Vps351-  
201|ENSMUSG00000030982|+|chr7:g.118379484:G>GC  
MLLAGHGKLVYERISSMCVDSRSALPDHFS PENVNDTAKETCLNWFVKIASIRELIPRFYVEASILKCNKFLS  
KTGISECLPRLTCMIRGIGDPLVSVYARAYLCRVGIEVAPHLKESLNKNFFDFLLTFKQIHGDTVQNQLVAQGV  
VELLSYLPYSPAMALDLPVCLLPRSRGFADGDDGKM  
>ENSMUSP00000044177\_c.1377:C>T\_p.Q460\* ENSMUST00000047025.15|Otoa-  
201|ENSMUSG00000034990|+|chr7:g.120724700:C>T  
MSQGPRTC SLLLVL LSHGGAYQREPSRQDLHPLLQKMAEEIEG SYLNALLDLTLFERSHVTADLSHRVL  
AYLNSKNVAFTIPSLQAVMEAHLEQYLYQPQKLEDLRATDNQQFHTAMKCLEDEKWKHLDLEDVVINLGD  
DEALQSPGVNRSFLITLERC FQVLNALECEVEVLGRVLRGSSGSFLQPDITERLPQDLHEDAFKNLSAVFKDL  
YDQTS AHTQRALYSWMTGILRTPFNVT DGSVSWVAEKLWILGRYMVHLSFEEIMNISPIEIGLFI SYDNATK  
QLDMVYDITPELAQAFLEIRICSSFDVRNISTIHRLGLLVCFYDGLELLDATALAQVLLHQMLKCSRLRGFQAG  
VQKLANLLDIATENQTLNETLGSLSDAVVGLTSSQLESLSSDAVHSAISTLNQVTGWGRSQIVILSAKYLAQ  
EKVLSFYNVCMGVLLAGVGT\*AFYSMDHKDLWQVLRSPSLQDMSDLSPVQQQVGLKLM EAEDATSGIAEVP  
RALFKEVSLYDLWKE SRFNATVLKAKELRRSQALFLYEF LGKTERPEELLSAGQLVKGVPCSHIDAMSDHLF  
LALFQYFDNNSLLSPDQVNCLAWKYWEVSRSSMPPFLATLPSRFLSSI PPSRCVRFLISLGRRLETLVLD  
SDKRSVVVRKVQQCLDGVIADEYTVDIVGHLLCHLPASFIERGISPRAWAAALHGLRSCTALSSEQKAAVRVR  
LLEQWGPENWTAETTKDLAPFLAFFSGDELHTVATKFEILQQTASKMVGVL LKPEFLWAVFESVQNSSNES  
PSFDPTFGCHGVVTPSSDDIFKLAEANACWDPEVLLCMEEDTFIRNVELLGAVKGF SRAQLMALKEKAIQVWD  
LPSRWKEHHIVSLGRIALALSESELEQLDLSSIDTIVASLQQTETWTPGQAKSILQAFLEDSGYGIQDLKSFHL  
VGFGPTLCAMPDIEIQLIKTSEFRAVVARIGTLFCSTPVLGFKKKAEEVVFGRPTEWTS SIIQELGTIAAGIT  
KAELRMLNKELMTYFQPSAIRCLPGEVFKELSTEQIASLGPQNAASVTHSQRLQLSSAQLQSLQRALDGA KTH  
SWQTDPLSSSPTWPASTGSPTEGPASQALWLGC TLLLLTAKS\*  
>ENSMUSP00000114873\_c.195:C>T\_p.H66Y ENSMUST00000130498.2|Bo1a2-  
203|ENSMUSG00000047721|+|chr7:g.126295761:C>T  
MELSADYLREKLRQDLEAEHVEVEDTTLNRCATSFRVLVVS AKFEGKPLLQRHRLVNECLAEELPYIHAFEQK  
TLTPEQWTRQRE\*  
>ENSMUSP00000035535\_c.148:T>C\_p.L50S ENSMUST00000037248.10|Hirip3-  
201|ENSMUSG00000042606|+|chr7:g.126461855:T>C  
MAPGDEM RKFTRSFFRACPDLS SVTHAIVRQKFLIHVGRDHLEPEEKQASKRLVEEELPKMQADAGTREGKPD  
FIKVKRSPAPCSDPKKKRFRFNSESESSSSPSSPDGSGPSTKNRTTKKTC LRRALKKAVESTDEDHQTD LDAK  
MGLEESSEGEAE GSVRSKVTEEEEDMKQE QKQVRKQAGAKDKQVPLKADRQVREESGSSEEEAVLQRAKV  
EGSTGANCQE ESEESGEESPAKKKELSEPRSRSNRAERTAREKRSYKQKSRPGRPTGGLRDSEAEKEGGTVGS  
GDSSEEGEAEKEGGTVGSGDSSEKGEAEKEEGTVGSGDSSEEGEEH SVKRKSKVRTQTESGRRQNTSSRDDS  
STQE QAAAQGTTKSGSLGSSNGDS DTEREVSDSQAGQNTKEERKSRSSNKSSKNGQARS C SSSSDSSPEPTGQ  
KGKARSSSSSSDSGPEPTGRKAASRCGEDHPAVARLKRYIRACGAHRNYK KLLGSCSSHKARLSVLRAELEAL  
GMKGNPSLEKCRALKLQREAAEVAALDVANIISSTGRPRRRNAWNPSGEGTSPGETYRRTLDSEEEQPRQAP  
PDWSHMRDIISSDGDSS\*  
>ENSMUSP00000052641\_c.3025:A>C\_p.E1009A ENSMUST00000050383.8|zfp646-  
201|ENSMUSG00000049739|+|chr7:g.127480850:A>C  
MEDMPLSFSCSDCQRHFPNLPELARHREL RHSSAKQDGEADGIPHPYGSHPENLANHQRNHETLFFPCTTCG  
KDFS NR LALQSHMRTHAPESHRRHGPPHAME TAPHLGSETMATDSWGQRLGSGEGWENQTKLVRETHDWESGA  
DPRAASGTWEDPPTKQRQGLEMQPDSKGGTADWVPAVSSEGASPLPTPASNLLSNLEQYLAESV VNFTEAQEP  
TEPLPTEGERKYRCSECGKYKHAGSLTNHRQSHTLGIYPC SICFKEFSNLMALKNHSRLHAQYRPHYCPCP  
RAFRLPRDLLEHQQSHEGLKQEQPWEDKEMPTTNGHADERSWGQLSKTGMLNGSGELSSSGQLEDGGSEERYP  
FCCGDCGRTYRHAGSLINHRKSHQTGIYPCSICSKQLFNAAALKNHIRAHRPRQGAGEGGQSSVSTAL TSA  
ENTPKVDEVPTASLDHRPYKCNCEGRAYRHRGSLVNHRSHTRTGEYQCSLCPRKYPNLMALRNHVRVHCKATR  
RSTDPGTEGSPSPVKKEQHDPVGM EAAFHGDEEHACKREEEATSNPMSMADRTVPQVCSICGMLFEDLKSLEHH  
SVTHREGEKSRDSTVSPTRTFACQDCGKSYRHSGLINHRQTHQTGDFSCGACAKHFHTMAAMKSHLRRHSR  
QWNRQRKQDSGTGEVATLPPGGAWTLKLEND EDPDSSQDPLGESPCETEDNLERDGDCLQAGSRGNECVLKR  
EEACFLGDKEGTEEGLEEREACFLDDLGT PGDECNETGFCGGLPGMDSDRKRGICHSDSSSHPADADTVW KAA  
ATHTCSDCGDSFSHAAGLLSHRSCHPPGIYQCSLCPKEFDSL PALRSHFQTHRPGEVASAQPFLCCLCGMIFP



GRTGYRRHLRQAHGASAMTEGSEEEEEEGTAETASTHSPPLQLSEAE LLNQLQREVEALDGAGYGHICGCCGQT  
YDDLGLSLERHHQSQSSSNRTENVP SHLEGAGDATEMVADHGFEGTVTSVSEEGGDIKSEAGVGGTVADSLCMQ  
AGESFLESHRPPFCQNCQCGKTYRHGGS LVNHRKIHQTGDFICPVCSRCPNLAAYRNHLRNHPRCKGSEPMQ  
PISEAGGCSEPNAAEAGQEQA VIGQLQEELKVEPLEELAGVKEEVWEGTAVKEEELEQELETGCQTEVTSER  
PFCEVCGRTYKHAGSLINHRQSHQ TGHFGCQACSKGFSNLMSLKNHRRIHADPRQFRCSECGKAFRLRKQLA  
NHQRVHAERRRSRGTQKLTREDRPFR CGQCGRTYRHAGSLMNHQCNPEASRYSCPFCFKTYSNR TALKDHQRV  
HSDSQRRRQSGCPQRAAAVRCTLCGCGFSGGQSLQHLQEHEDTKLEVASGQGGQHATEGSEENLDDWGLEGR  
SDGTEVLQVEHETKRPGGHSQSPSPACSGGTESTQQVGKVDGSGQDRGQMNHNHNGAWVLQDQLTKPEGKLEDT  
VSRNPCHLSESQSNGPTLRYRDSWKGADSGS QLQPESHCCSQCGKAYCQPDG LLNPSINGKDCHICLLCSKEF  
LNPVTEIHNHTTAQRFACSNCSKVCESHSELATHMKTHAVEHSQMSGQMEKTRGPQAGMAEVGPPGPKAQE  
APSELPGDPEENGVPANGGQGIHFPAAEDKERPFCCAQCGRSYRHAGSLLNHQKAHTIGLYPCSLCPKLLPNL  
LSLKNHSRTHTDPKRYSCNICGKAFRTAARLQGHGRVHAPQEGPFTCSHCPRRFRHRISFLRHQQQHQE EWPV  
SSSGASVAPAAASREDSSTASLPNPSQPW PADLSLSL\*

>ENSMUSP00000145675\_c.2368:A>C\_p.E790A ENSMUST00000206340.2|zfp646-  
204|ENSMUSG00000049739|+|chr7:g.127480850:A>C  
XEPLPTEGERKYRCSECGKTYKHAGSLTNHRQSHTLGIYPCSIKFKEFSNLMA LKNHSRLHAQYRPHYCHPCP  
RAFRLPRDLLEHQSHQGLKQEPWEDKEMPTTNGHADERSWGQLSKTGMLNGSGELSSSGQLEDGSGEYRP  
FCGDCGRTYRHAGSLINHRKSHQ TGIYPCSI CSKQLFNAAALKNHIRAHHRPRQGAGEGGQSSVSTALTSA  
ENTPKVDEVPTASLDHRPYKCNCEGRAYRHRGSLVNHRHSHRTGEYQCSLCPRKYPNLMALRNHVRVHCKATR  
RSTDPGTEGSPSPVKKEQHDPVGM EAAAFHGDEEHACKREEEATSNP SMADRTVPQVCSICGMLFEDLKSLEHH  
SVTHREGEKSRDSTVSPTRTFACQDCGKSYRHSGSLINHRQTHQTGDFSCGACAKHFHTMAAMKSHLRRHSR  
QWNRQRQKQDSGTGEVATLPPGGAWTLKLENDEDPDSSQDPLGESPCETEDNLERDGDCLQAGSRGNECVLKR  
EEACFLGDKEGTEEGLEEREACFLDDLGT PGDECNETGFCGGLPGMDSDRKRGICHSDSSHPADADTVWAAA  
ATHTCSDCGDSFSHAAGLLSHRSCHPPGIYQCSLCPKFEDSLPALRSHFQTHRPGEVASAPFLCCLCGMIFP  
GRTGYRRHLRQAHGASAMTEGSEEEEEEGTAETASTHSPPLQLSEAE LLNQLQREVEALDGAGYGHICGCCGQT  
YDDLGLSLERHHQSQSSSNRTENVP SHLEGAGDATEMVADHGFEGTVTSVSEEGGDIKSEAGVGGTVADSLCMQ  
AGESFLESHRPPFCQNCQCGKTYRHGGS LVNHRKIHQTGDFICPVCSRCPNLAAYRNHLRNHPRCKGSEPMQ  
PISEAGGCSEPNAAEAGQEQA VIGQLQEELKVEPLEELAGVKEEVWEGTAVKEEELEQELETGCQTEVTSER  
PFCEVCGRTYKHAGSLINHRQSHQ TGHFGCQACSKGFSNLMSLKNHRRIHADPRQFRCSECGKAFRLRKQLA  
NHQRVHAERRRSRGTQKLTREDRPFR CGQCGRTYRHAGSLMNHQCNPEASRYSCPFCFKTYSNR TALKDHQRV  
HSDSQRRRQSGCPQRAAAVRCTLCGCGFSGGQSLQHLQEHEDTKLEVASGQGGQHATEGSEENLDDWGLEGR  
SDGTEVLQVEHETKRPGGHSQSPSPACSGGTESTQQVGKVDGSGQDRGQMNHNHNGAWVLQDQLTKPEGKLEDT  
VSRNPCHLSESQSNGPTLRYRDSWKGADSGS QLQPESHCCSQCGKAYCQPDG LLNPSINGKDCHICLLCSKEF  
LNPVTEIHNHTTAQRFACSNCSKVCESHSELATHMKTHAVEHSQMSGQMEKTRGPQAGMAEVGPPGPKAQE  
APSELPGDPEENGVPANGGQGIHFPAAEDKERPFCCAQCGRSYRHAGSLLNHQKAHTIGLYPCSLCPKLLPNL  
LSLKNHSRTHTDPKRYSCNICGKAFRTAARLQGHGRVHAPQEGPFTCSHCPRRFRHRISFLRHQQQHQE EWPV  
SSSGMWLGRGLRGRSRRRWAQRRESMARSR\*

>ENSMUSP00000123566\_c.262:A>G\_p.D88G ENSMUST00000126662.2|Gm21974-  
201|ENSMUSG00000030804|-|chr7:g.127492558:T>C  
XDVGTAISCSRVFSSRWGRGFLVEHMLGADSVLNQSN SIFGCLFYTLQ LLLGCLRGRWASILLVLSLVSVA  
GSVYLAWILFFVLYGFCIVCITTYAINVGLMLLSFQKVPEHKTKKH\*

>ENSMUSP00000033074\_c.388:A>G\_p.D130G ENSMUST00000033074.8|Vkorc1-  
201|ENSMUSG00000096145|-|chr7:g.127492558:T>C  
MGTTRWSPGLVRLALCLAGLALS LYLALHVKAARARDENYRALCDVGT AISCSRVFSSRWGRGFLVEHMLGAD  
SVLNQSN SIFGCLFYTLQ LLLGCLRGRWASILLVLSLVS VAGSVYLAWILFFVLYGFCIVCITTYAINVGLM  
LLSFQKVPEHKTKKH\*

>ENSMUSP00000145795\_c.241:A>G\_p.D81G ENSMUST00000206053.2|Vkorc1-  
203|ENSMUSG00000096145|-|chr7:g.127492558:T>C  
MMGRLEEAGWGRGFLVEHMLGADSVLNQSN SIFGCLFYTLQ LLLGCLRGRWASILLVLSLVS VAGSVYLAW  
ILFFVLYGFCIVCITTYAINVGLMLLSFQKVPEHKTKKH\*

>ENSMUSP00000112542\_c.184:A>G\_p.D62G ENSMUST00000119922.2|Vkorc1-  
202|ENSMUSG00000096145|-|chr7:g.127492558:T>C  
MLGADSVLNQSN SIFGCLFYTLQ LLLGCLRGRWASILLVLSLVS VAGSVYLAWILFFVLYGFCIVCITTYAI  
NVGLMLLSFQKVPEHKTKKH\*

>ENSMUSP00000158736\_c.52:A>G\_p.K18R ENSMUST00000238294.2|D7Ert443e-  
211|ENSMUSG00000030994|-|chr7:g.134100653:T>C  
MVSDLVKRGWLPSQRRARVCFIHTCPSLKVTEQPASGYEPEELRSFDS PKDSYPFTYKSRL LAPRLHTCYST  
NDQIALKNLQSDVTERKLD FSKETLASQNTRMISPVVISRLIDEK KSMENGAILPQAIAQPQLCPTK PALARR

DGVSMHRRFALSPDRGLILTPSDDQGLETEPLSTGDNLKGKSHSGFSSITITARRVGPASSLVWDTFRDPLC  
 PKCKAKDALFQEPVLAGDAHLQHNRPFTCTESPSNGSVEGMKVFQAHSRLSARQDYVWVHTNDNEDSFSSD  
 NSPSRKVPLVFSSCVHFRV  
 >ENSMUSP00000128276\_c.6079:C>A\_p.S2027\* ENSMUST00000165147.3|Muc5b-  
 201|ENSMUSG00000066108|+|chr7:g.141413135:C>A  
 MGSRNWSWALVWASVALLMVWPAESQQAELSSEHLELTGDSQRVYSDSISSSSTRHVTFPIPIITVFPMSALH  
 LAHNGRVCSTWGFDFHYKTFDGDVFRFPGLCNVYFSSSHCGATYEDFNIQLRRGLEGSRPTVTVYLLRAQGLVIE  
 LSNQSVLVNGHREKLPYSRAGLLMEKSSGYVKISIRLVLTFLWNEEDSALLELDISKYINQTCGLCGDFNGLPA  
 VSEFYTHNTRLTPVQFQNLQKLDGPTQCQDVLPSAVSNCTDTEIDICRRTLLGPAFDKCTALVDVSMYLDACV  
 QDLRCRCPTPCPATFAEYSRQCAHAGGYPQNWHRPDLNWTCPFNMEYRECSSPCVDTCSNPQRSQLEDHCMD  
 GCFPCPPGTVLDVDRHLGCLPLEQCHCTHGGRIYAPGESFNNTSCRSTCFGGLWKCKDLPCPGTCSVQGGSHIF  
 TFDEKLYNVHGDCSIILTKKCADSSFTVLVLDLRKCGVTDTENCLKAVTLNLSGDTVIRIQVNGAVFLNSIFT  
 QMPLSAGNITIFKPSSFFIIVQTMGLQLQVQLVPLMQVFRVRLDRSYQGMCGLCGNFNQADDFALSGVV  
 EGTGAAFSNTWKTQASCPNSKNTYEDPCSYSVENENFAREWCSMLTESSGVFSACHATVSPVPFYSNCLFDTC  
 NCENSEDCMAALSSYVFACAAKGVLLSGWRDKVCYKYTNNPCQTKGYFYSVSSCQPTCRSLSEADVTCVVPF  
 VTVDGCTCPEGTFLNDKDHCVPEECPCYFHGTVVAPREVVDNGVVCSTNGKLTCLGALMQKSTECQAPMV  
 YLDCNNASVGHGHAELKSCHTLDVECFSTQCVSGCVPCSVGLVADGNGGCI AEEDCPCIHNEVTYRPEIIRV  
 DCNNCTCKNRRWECTNKPCMGACVAYGDGHFVTFDGERYIFEGSCEYTLAQDYCRGNTSTNGTFRIVITENVPC  
 GTTGTTCSTIKIFVESYELILHEGNFKVVEQGPSGDPYKIRFMGIFLVIEIRSGIVVSWDRKTSVFRVRLQQ  
 HYKGRVCGLCGNFDDNAINDFTTRSQSVVGDVLEFGNSWKFSPCPDAPVPKDPCIANPYRKSWAQKKCSIIN  
 SATFAACHSQVDSTKYEACVHDCACDSGGDCECFCTAVAAAYAQACRDVGVCLSWRTPDICPLFCDYNNPHG  
 ECEWHYQPCGAPCLKTCRNPTGHCLVDLPGLEGYPCQPASQPFNEDQMKCVAQCGCYDDNGNYHDIGTQVP  
 TAENCQSCLCPTGGLQCVYNLTACTCTYEGRTYNYNDVVYNTTDGLGACLVAICKDNGTIARTTEVCHEVPST  
 TPFFTTTTAPLATNGSASTVSTVCVHEVCQWSIWYDESHPEAGMSGGDFETFENLRKKGHQVCQTPVGIETR  
 AVKFPMSDLEKLGQKVNCDPSSGLSCFNSEQSPPLCHDYELRVLCCDYVPCGSSLTGISTTSPQPDTSRRPS  
 SPTLTHTASSESSQSWTREKKTSVDKSSSRQTVTPTNSRLTSTSMSSASSLPLSNNGDIETWTTLTKATDENTM  
 LSRRTAVFTSQTSTRPSTVQPISSPETSSSTCQPCQWTKWIDVDYVSSSINGGDIETYENIRANGEKI  
 CEKPDQDIRCMAQNHGPNVDELGQKVKCDVSSGLVCYNKQGGTFQMCYNYLIKVLCCSVSHCQGSTTPEGSV  
 STTETATSTPQTLSSKPLPNTSSFETWSPSGPTTSMEASEMPTFWTLRSTSVSSPPTPLTVTSVSTQHPKSLE  
 SSGSPSVVTARSTSQGYSLPSSPHTTNSLSATTSKASLSSMTTISTSLTTPGPSSPPHGGTTTHPVTTASTT  
 RAVTETLSSRPHTKTTSELPTVSSASSTAGPGTQTFSTTCQPCQWTKWIDVDYVSSSINGGDIETYENIRAN  
 GEKICEKPDQDIRCMAQNYPGVNDKLGQKVKCDVSSGLVCYNKQGGTFQMCYNYLIKVLCCSVSHCQGSTT  
 EGSVSTTETTTATPQTLSSKPLPNTSSIETWSPSGPTTSMEASEMPTFWTLRSTSV\*SPPTPLTVTSVSTQHP  
 KSLESSGSPSVVTARSTSPGHSQPPSSPYATNSLSATTSKASLSSMTTISTSLTTPGPSSPPHGGTTTHPVTT  
 ASTTRAVTETLSSRPHTKTTSELPTVSSVSSTAGPGTQGTGSTRPNTVTQPASSPETSSTTCQPCQWTKWID  
 VDYVSSSINGGDIETYENIRANGEKICEKPDQDIRCMAQNHGPNVDELGQKVKCDVSSGLVCYNKQGGTFQMC  
 CYNLYLIKVLCCSVSHCQGSTTPEGSVSTTETTTATPQTLSSKPLPNTSSIETWSPSGPTTSMEASEMPTFWTL  
 RTSVSSPPTPLTVTSVSTQHPKSLESSGSPSVVTARSTSPGHSQPPSSPYATNSLSATTSKASLSSMTTIST  
 SLTTPGPSSPPHGGTTTHPVTTASTTRAVTETLSSRPHTKTTSELPTVSSVSSTAGPGTQGTGSTRPNTVTQ  
 ASSPETSSTTCQPCQWTKWIDVDYVSSSINGGDIETYENIRANGEKICEKPDQDIRCMAQNHGPNVDELGQK  
 VKCDVSSGLVCYNKQGGTFQMCYNYLIKVLCCSVSHCQRSTTPAGSAPTTGTAPTATSGTATHTSWPASSMP  
 TSTTESPSSSGKTTILTASSLATGTPRETQTSLLTTGLSSALTTTGTSTGCKSQCTWTDWLDSDKPPQPGQ  
 FEGDIETYYHIQNKTKIKICKKPVIECEAVLFPNISFQKLGQEVVENVDFGLICRNSKQSDNQICFNYHIRV  
 LCCEEDTSCISTTGLLSTSTAPGFPSTVSTSTSKLPSEEPSTSTSTSRPSTPRTEKIVSIATARTTG  
 SFPVSSLSTFPASPTSLPTSEEPHSGKPTSSWTASSNVPTAKPTTSTGRQFPRTKTTLWNSLPSSTPTMA  
 TRSIHPISTMTTKNPQTLVTSIDSKSNSMLPSRPHITASSVSTSGSQISKYSSTSLTTAGPSSPPHGGTT  
 THPVTTASTTRAVTETLSSRPHTKTTSELPTVSSVSSTAGPGTQGTGSTRPNTVTQPVSSPETSSTTCQPCQ  
 WTRWINVDYVSSSINGGDIETYENIRANGEKICEKPDQDIRCMAQNYPGVNDKLGQKVKCDVSSGLVCYNKQ  
 GGTFKMCYNYLIKVLCCSVSHCQGSTTPEGSVSTTETASSIPQTLSSKPLPNTSSFETWSPSGPTTSMEASEM  
 PTFWTLRSTSVSSPPTPLTVTSVSTQHPKSLESSGSPSVVTARSTSQGHSLPSSPHTTNSLSATTSKASLSS  
 MTTISTSLTTEPSSPPHGGTTTHPVTTASTTRAVTETLSSRPHTKTTSELPTVPSASSTAGPGTQGTGSTRP  
 STVTQPASSPETSSTTCQPCQWTKWIDVDYVSSSINGGDIETYENIRANGEKICEKPDQDIRCMAQNHGPNV  
 DELGQKVKCDVSSGLVCYNKQGGTFQMCYNYLIKVLCCSVSHCQGSTTTPGSAPMTGSATTATQLSSMPLP  
 NTSLTVTSPHSASITETSSPRSVSSIHITPKIFPETLQSTGLTTQOTSSTGIATWSMLTGTAGTVSS  
 TSLSTLESTTGITEVSTSMPTSTLPTVTNATTPQGTTLCPCKKTEWFDVDSPTSGSVKGDMEITYENIR  
 ASGKTLQAPEKIECRAENYPAVSIDKVGQVVCNLETGLVCKNEDQKDDFKMCFNYNIRVLCDDYSHCPPTT  
 TYTTIKSPLAPFTTSVSSSMESTFQTRNPASPSGPSTQASTWSTLPSGCTPRCKWTEWFDADYPNPGRGGD  
 FEVYAVFREVGYIFCDQPKDIECRSEKEPDRPLETLEQVVQCDVRFGLICKNINQSGPLQYCDNYHVRLCCD

NYSHCTSSPMATMSTALSSSHLPSTHTSLALNTTFFPGLSSSSSEPHSSSLMSTHTSTMLTTETSPIATGPTV  
 APSSTSGTPYTPKVSPPSSQVTFVSTAFSSVSTPRPVFSSSHASSPSPCFQAFGQLFLPGDIIYNKTDGAGC  
 QFYAICNQYCDVDRFQGTCPSSSPMSSTTVPLPPLLPGCDNAIPPRQVNESWTLENCTVARCQGNQIILLE  
 PEPVDNVTCANRHLPIKVVDQEPCHFHYECECFCSGWGHSYLTFDGTSYTFLDNCTSVLMREIHPRHGNSI  
 LAHSYYCGATTNVTSCPRALSVYYSMEIILTISTTESGKDESLIWDQMWIRSGFSKNGVTVSLGATTMSV  
 NISTIGTIITFDGNIFQIWLPHYRYSNTEGQCGTCTNSQIDDCRRPDGTIASDCQDMAKEWLVPGNSSSSCL  
 AQPSPLPSTTPQTPVSSSTLTSTPCPSAPLCELMLSQVFAECHRLIPPDAFFRSCVSDHCNANITDMLCQSLEA  
 YAALCRAQGVCTNWRNATGGGLDLSCPPTKEYRPCGPHLPASCNSRTQDSTTGMLAEGCFCEPENQLFNSRMD  
 ICVSEPCVGPDLGPKFPGHEWISNCQACVCEPGSVSVQCFEPVKCESQDKPPQCTEAGFVTVWPSADNPCCP  
 ETLCVCNSTTCPKSLPTCEPGYELVQTHENS SCCPSYSCRPKLCTYNDTIYGVGTTFFGGPCHTCTCLSDGDQ  
 EPKVECKETNCTTSCPPQGFYTLVPEQCCGECLQNACLTPEGHAVQPNETWVNSPVDNCTAYHCAENGYYVL  
 TPIPTSCPDVSNCTGTLRKTGCCYSCKEKDSSTCQVHVNATVLRKGCETEVNITFCEGSCSGISKYSMEAQA  
 MERQCTCCQESKVHDAVATMCPDGTVIQHTYTHIDECNCAPACSSLPGTSMIAS\*  
 >ENSMUSP00000096508\_c.457:c>T\_p.T153I ENSMUST00000098909.5|4930467E23Rik-  
 201|ENSMUSG00000096265|+|chr8:g.19783749:c>T  
 MEEEINYDSQTMNIPRRRRWYTHLWRSCLGLRCMHPQKKKKYPLYLIGYDPIGQLQRAASVGDLDLDTTEKLIHS  
 SQHHVDESRRKRTSLHYACAHNHPDVVTLLENNSSINIRDDGCTPLIKATQRDNVDCASVLLTHNADPNL  
 IDSSGNIAFHHAISRGNIRIVKMLLEHNVDIEAKTEYGLTPLQLATFEQKPEMVEFLAAKCAKSVTPSWSPS  
 PTVSPCPSSTSPSSLGLPVCNPGTSSLSSEDRKSSSARRIKLSTGSSAQRTEVKHVRFNEEIILYFKEERPLS  
 CEARPPGQLKSILKNTVQYNTVNEKITRRTSLWCSKAEDVRYTSCIKVKCFSVKSSFL\*  
 >ENSMUSP00000081041\_c.1410:T>G\_p.W471G ENSMUST00000084027.13|Fgfr1-  
 201|ENSMUSG00000031565|+|chr8:g.26058330:T>G  
 MWGWKCLLFWAVLVTATLCTARPAPTLPEQAQPWGVPEVESLLVHVPDGLLQLRCRLRDDVQSINWLRDGVQL  
 VESNRTRITGEEVEVRDSSIPADSGLYACVTSSPSGSDTTYFSVNVSDALPSEDDDDDDSSSEEKETDNTKP  
 NRRPVAPYWTSPEKMEKKLHAVPAAKTVKFKCPSSGTPNPTLRWLKNGKEFKPDHRIGGYKVRYATWSIIMDS  
 VVPSDKGNYTCIVENEYGSINHTYQLDVVERSPhRPILQAGLPANKTVALGNSVFMCKVYSDPQPHIQWLKH  
 IEVNGSKI GPDNLPHYVQILKTAGVNTTDKEMEVLHLRNVSFEDAGEYTCLAGNSIGLSHHSAWLTVLEALEER  
 PAVMTSPLYLEIIIIYCTGAFLISCM LGSVIIYKMKSGTKKSDFHSMQMAVHKLAKSIPRRQVTVSADSSASMN  
 SGVLLVRPSRLSSSGTPMLAGVSEYELPEDPRGELPRDRLV LGKPLGEGCFGQVVLAEAI GLDKDKPNRVTKV  
 AVKMLKSDATEKDLSDLISEMEMMKMIGKHKNIINLLGACTQDGPLYVIVEYASKGNLREYLQARRPPGLEYC  
 YNPSHNPEEQQLSSKDLVSCAYQVARGMEYLASKKCIHRDLAARNVLVTEEDNMKIADFLGLARDIHHIDYKKT  
 TNGRLPVKWMPEALFDRIYTHQSDVWSFGVLLWEIFTLGGSYPYGPVPEELFKLLKEGHRMDKPSNCTNELY  
 MMRDCWHAVPSQRPTFKQLVEDLDRIVALTSNQEYLDLSIPLDQYSPSPDTRSSSTCSSGEDSVFSHEPLPE  
 EPCLPRHPTQLANSGLKRR\*  
 >ENSMUSP00000137515\_c.1143:T>G\_p.W382G ENSMUST00000178276.8|Fgfr1-  
 214|ENSMUSG00000031565|+|chr8:g.26058330:T>G  
 MWGWKCLLFWAVLVTATLCTARPAPTLPEQDALPSEDDDDDDSSSEEKETDNTKPNPVAPYWTSPEKMEKK  
 LHAVPAAKTVKFKCPSSGTPNPTLRWLKNGKEFKPDHRIGGYKVRYATWSIIMDSVVPSDKGNYTCIVENEY  
 SINHTYQLDVVERSPhRPILQAGLPANKTVALGNSVFMCKVYSDPQPHIQWLKHIEVNGSKI GPDNLPHYVQI  
 LKHSGINSSDAEVLTLFNVTEAQSGEYVCKVSNYIGEANQSAWLTVTRPVAKALEERP AVMTSPLYLEIIIIY  
 TGAFLISCM LGSVIIYKMKSGTKKSDFHSMQMAVHKLAKSIPRRQVTVSADSSASMNSGVLLVRPSRLSSSGT  
 PMLAGVSEYELPEDPRGELPRDRLV LGKPLGEGCFGQVVLAEAI GLDKDKPNRVTKVAVKMLKSDATEKDLS  
 LISEMEMMKMIGKHKNIINLLGACTQDGPLYVIVEYASKGNLREYLQARRPPGLEYCYNPSHNPEEQQLSSKDL  
 VSCAYQVARGMEYLASKKCIHRDLAARNVLVTEEDNMKIADFLGLARDIHHIDYKKT TNGRLPVKWMPEALF  
 DRIYTHQSDVWSFGVLLWEIFTLGGSYPYGPVPEELFKLLKEGHRMDKPSNCTNELYMMMRDCWHAVPSQRPT  
 FKQLVEDLDRIVALTSNQEYLDLSIPLDQYSPSPDTRSSSTCSSGEDSVFSHEPLPEEPCLPRHPTQLANSGL  
 KRR\*  
 >ENSMUSP00000136640\_c.1443:T>G\_p.W482G ENSMUST00000179592.8|Fgfr1-  
 215|ENSMUSG00000031565|+|chr8:g.26058330:T>G  
 MWGWKCLLFWAVLVTATLCTARPAPTLPEQVGSWPLWAAAAQPWGVPEVESLLVHVPDGLLQLRCRLRDD  
 VQSINWLRDGVQLVESNRTRITGEEVEVRDSSIPADSGLYACVTSSPSGSDTTYFSVNVSDALPSEDDDDDD  
 SSSEEKETDNTKPNPVAPYWTSPEKMEKKLHAVPAAKTVKFKCPSSGTPNPTLRWLKNGKEFKPDHRIGGYK  
 VRYATWSIIMDSVVPSDKGNYTCIVENEYGSINHTYQLDVVERSPhRPILQAGLPANKTVALGNSVFMCKVY  
 SDPQPHIQWLKHIEVNGSKI GPDNLPHYVQILKTAGVNTTDKEMEVLHLRNVSFEDAGEYTCLAGNSIGLSH  
 HSAWLTVLEALEERP AVMTSPLYLEIIIIYCTGAFLISCM LGSVIIYKMKSGTKKSDFHSMQMAVHKLAKSIP  
 RRRQVTVSADSSASMNSGVLLVRPSRLSSSGTPMLAGVSEYELPEDPRGELPRDRLV LGKPLGEGCFGQV  
 VLAEAI GLDKDKPNRVTKVAVKMLKSDATEKDLSDLISEMEMMKMIGKHKNIINLLGACTQDGPLYVIVEY  
 ASKGNLREYLQARRPPGLEYCYNPSHNPEEQQLSSKDLVSCAYQVARGMEYLASKKCIHRDLAARNVLVTE  
 EDNMKIADFLGLAR

DIHHIDYKKTNGRLPVKWMPEALFDRIYTHQSDVWSFGVLLWEIFTLGGSPYPGVPVEELFKLLKEGHRM  
DKPSNCTNELYMMMRDCWHA VPSQRPTFKQLVEDLDRIVALTSNQEYLDLSIPLDQYSPSPFDTRSSTCSSGE  
DSVFSHEPLPEEPCLPRHPTQLANSGLKRR\*

>ENSMUSP00000113855\_c.1143:T>G\_p.W382G ENSMUST00000119398.10|Fgfr1-  
203|ENSMUSG00000031565|+|chr8:g.26058330:T>G  
MWGWKCLLFWAVLVATLCTARPAPTLPEQDALPSSSEDDDDDDSSSEEKETDNTKPNRRPVAPYWTSPEKME  
KKLHAVPAAKTVKFKCPSSGTPNPTLRWLKNGKEFKPDHRIGGYKVRATWSIIMDSVVP SDKGNYTCIVENE  
YGSINHTYQLDVVERS PHRPILQAGLPANKTVALGNSVEFMCKVYSDPQPHIQWLKHIEVNGSKIGPDNLPYV  
QILKTAGVNTTDKEMEVLHLRNVSFEDAGEYTC LAGNSIGLSHHSAWLTVLEALEERP AVMTSPLYLEIIYC  
TGAF LISCM LGSV IYKMKSGTKKSD FHSQMAVHKLAKSIPLRRQVTVSADSSASMNSGVLLVRPRLSSSGT  
PMLAGVSEYELPEDPRGELPRDRLVLGKPLGEGCFGQVVLAEAI GLDKDKPNRVTKVAVKMLKSDATEKDLSD  
LISEMEMMMKIGKHKNIINLLGACTQDGPLYVIVEYASKGNLREYLQARRPPGLEICYNPSHNPEEQ LSSKDL  
VSCAYQVARGMEYLASKKCIHRDLAARNVLVTE DNVMKIA DFGLARDIHHIDYKKTNGRLPVKWMPEALF  
DRIYTHQSDVWSFGVLLWEIFTLGGSPYPGVPVEELFKLLKEGHRMDKPSNCTNELYMMMRDCWHA VPSQRPT  
FKQLVEDLDRIVALTSNQEYLDLSIPLDQYSPSPFDTRSSTCSSGEDSVFSHEPLPEEPCLPRHPTQLANSGL  
KRR\*

>ENSMUSP00000113909\_c.1404:T>G\_p.W469G ENSMUST00000117179.9|Fgfr1-  
202|ENSMUSG00000031565|+|chr8:g.26058330:T>G  
MWGWKCLLFWAVLVATLCTARPAPTLPEQAQPWGPVVEVESLLVHVPDGLLQRCRLRDDVQSINWLRDGVQL  
VESNRTRITGEEVEVRDSSIPADSGLYACVTSSPSGSDTTYFSVNVSDALPSSSEDDDDDDSSSEEKETDNTK  
NPVAPYWTSPEKMEKKLHAVPAAKTVKFKCPSSGTPNPTLRWLKNGKEFKPDHRIGGYKVRATWSIIMDSV  
PSDKGNYTCIVENEYGSINHTYQLDVVERS PHRPILQAGLPANKTVALGNSVEFMCKVYSDPQPHIQWLKHIE  
VNGSKIGPDNLPYVQILKTAGVNTTDKEMEVLHLRNVSFEDAGEYTC LAGNSIGLSHHSAWLTVLEALEERPA  
VMTSPLYLEIIICYTGAF LISCM LGSV IYKMKSGTKKSD FHSQMAVHKLAKSIPLRRQVTVSADSSASMNSG  
VLLVRPRLSSSGTPMLAGVSEYELPEDPRGELPRDRLVLGKPLGEGCFGQVVLAEAI GLDKDKPNRVTKVAV  
KMLKSDATEKDLSDLISEMEMMMKIGKHKNIINLLGACTQDGPLYVIVEYASKGNLREYLQARRPPGLEICYN  
PSHNPEEQ LSSKDLVSCAYQVARGMEYLASKKCIHRDLAARNVLVTE DNVMKIA DFGLARDIHHIDYKKTNG  
RRLPVKWMPEALFDRIYTHQSDVWSFGVLLWEIFTLGGSPYPGVPVEELFKLLKEGHRMDKPSNCTNELYMM  
MRDCWHA VPSQRPTFKQLVEDLDRIVALTSNQEYLDLSIPLDQYSPSPFDTRSSTCSSGEDSVFSHEPLPEEP  
CLPRHPTQLANSGLKRR\*

>ENSMUSP00000131343\_c.1143:T>G\_p.W382G ENSMUST00000167764.2|Fgfr1-  
213|ENSMUSG00000031565|+|chr8:g.26058330:T>G  
MWGWKCLLFWAVLVATLCTARPAPTLPEQDALPSSSEDDDDDDSSSEEKETDNTKPNPVAPYWTSPEKMEKK  
LHAVPAAKTVKFKCPSSGTPNPTLRWLKNGKEFKPDHRIGGYKVRATWSIIMDSVVP SDKGNYTCIVENEY  
GSINHTYQLDVVERS PHRPILQAGLPANKTVALGNSVEFMCKVYSDPQPHIQWLKHIEVNGSKIGPDNLPYV  
QILKTAGVNTTDKEMEVLHLRNVSFEDAGEYTC LAGNSIGLSHHSAWLTVTRPVAKALEERP AVMTSPLYLEIIYC  
TGAF LISCM LGSV IYKMKSGTKKSD FHSQMAVHKLAKSIPLRRQVTVSADSSASMNSGVLLVRPRLSSSGT  
PMLAGVSEYELPEDPRGELPRDRLVLGKPLGEGCFGQVVLAEAI GLDKDKPNRVTKVAVKMLKSDATEKDLSD  
LISEMEMMMKIGKHKNIINLLGACTQDGPLYVIVEYASKGNLREYLQARRPPGLEICYNPSHNPEEQ LSSKDL  
VSCAYQVARGMEYLASKKCIHRDLAARNVLVTE DNVMKIA DFGLARDIHHIDYKKTNGRLPVKWMPEALF  
DRIYTHQSDVWSFGVLLWEIFTLGGSPYPGVPVEELFKLLKEGHRMDKPSNCTNELYMMMRDCWHA VPSQRPT  
FKQLVEDLDRIVALTSNQEYLDLSIPLDQYSPSPFDTRSSTCSSGEDSVFSHEPLPEEPCLPRHPTQLANSGL  
KRR\*

>rs221982749\_ENSMUSP00000033990\_c.382:A>GA\_p.K128ins-fs  
ENSMUST00000033990.7|Wrn-201|ENSMUSG00000031583|-|chr8:g.33833108:T>TC  
METTSLQRKFPEWMSMQSQRCA TE EKACVQKSVLEDNLPFLFEPGSIVYSYEASDCSFLSEDISMRLSDGDVV  
GFDMEWPPIYKPGKRSRVAVIQLCVSESKCYLFHISSMSVFPQGLKMLLENKSIREGRGW  
>rs221982749\_ENSMUSP00000033991\_c.382:A>GA\_p.K128ins-fs  
ENSMUST00000033991.13|Wrn-202|ENSMUSG00000031583|-|chr8:g.33833108:T>TC  
METTSLQRKFPEWMSMQSQRCA TE EKACVQKSVLEDNLPFLFEPGSIVYSYEASDCSFLSEDISMRLSDGDVV  
GFDMEWPPIYKPGKRSRVAVIQLCVSESKCYLFHISSMSVFPQGLKMLLENKSIREGRGW

>ENSMUSP00000148728\_c.711:A>T\_p.K238\* ENSMUST00000212436.2|Iqcn-  
201|ENSMUSG000000110622|+|chr8:g.71161520:A>T  
MQPAAQLQFQNLMSPSGSLPQPTPIHQEKVAKLCPQLQHDFFYPSEELAVLPSQEVPRLARAVVESQAFRNILV  
DEMMDMVSRAATVIQASWKGYRLRQKLSQMTAAKAIQEAWRRFSTRRLMHSNRLTVKKAKREDEEDI PYHQ  
QQVRFHAPEDQPPVMVTKETQFSPFDNLVPSQATAGPCASRVPGGLHPQYVINRLTVPKYQPCMLTKTFRSS  
CLMRHLEGDSLKIRHVAS\*TIKVGAAEAATGRYQGAMHGSLKTQTQAHTESDVPKAPLRIYPVNKTHTKVCP  
MAAAVPESSATMSTAPRSAPQARPTSPATVMKMQATTSPVIRLPAPVGPNSLSSNTTPQMQRVYMMFPGAR

IQPPGSAVASTIKALPHFGAPVMKVPLQGTGPGFTMTKTSLOMRPMTRSQAQTYTVSTSSKTSPPSSPTVKPSPQ  
 TRLAAMLTKTPAQLRSVAAVFRTLCCGTTTEAVASSPRCSPQSPVVAGNTPSQVHLNSTRTKVTVSTKQATTVV  
 KVNSQSYLGRCSQGNLDTIVPKPPATYPLEVEKMKSCPARSPKKEAALKTNTTIAARALSWTKMMEDRSKAL  
 TQIKQRAEIIKVHFRVYMPEEIPVTLTQAQLAVPLTKSSSQIQPPCHARTQPTSPFCKAVSQSCMPGLAHG  
 TPEGQRPPVGLSASLSSSPLAAHMLSLTAQLQPACEQARSVSRDHLTRSCPASASLQARSSGTIVPEVYPNT  
 YSPTSAPQHMMASLLAKSSSQHLHPPAEHAKTMMNTKTKAACQVCPCSTKLSKAPSLAQLITCLAKVPSQAQLAT  
 ETAKCLLAAHPTTDHRSKTSQSTFLSSSKASVQLWQHLGLTSTGSRAPDDRVAQVQLHSHAPNKTMQNPRS  
 VVTDSQGMLIPLMTPSGHPVCNAESWGDGSGRAQTPPSPVFNQAVPCHDDLAASVASLACADLVAMLGSPEDLR  
 TLLVLTLSQGEVHTALSQALSREVLGSPVVKALPQGLMGMALMKALSWGELGISLSRALSRGELRPELNKATQ  
 GKLAEVLCKALTEEERATLSQALCQGELGAVFTQSLAQMAQRTGTFLPKATSKTVGSRMTTAPAPVEVTCSSGS  
 LSVANGPAMGPVGARCSKGPVDAGLASGQSWNSKVPNVSVRATAHAGAPQGVWYPSRGHKPWPDPGAEAEELDR  
 KPSAELLSVQGMKVVVQAVVTIQACARGYLVRRTVKVWHQWATI IQATWRGYRVRNLERLFRATTIQAA  
 WRGYCIRRARARQVLLPIAWPEHSGRTKGTLDNRNSSEHRCFLSCQPDVCSVCQSLGPPVESPPSVVMLVGSQ  
 PRTCHVCGHTLSTRVVGFGQGISGQPVSRWASASQNTLLSQQHRACTIIQAAWKGYRTRRQLSQKQSAAKM  
 VQAVWRGHYTRSCLTDDALLGTGGPWSISRDTSRHSSRAYSLHWPGV\*

>ENSMUSP00000037929\_c.298:A>C\_p.K100T ENSMUST00000038626.10|Mpv1712-  
 201|ENSMUSG00000035559|-|chr8:g.71213073:T>G  
 MALGGWRWARKALAAGRPLFQGRALLLNTLGCGLVMAAGDGARQVWEVRARPGQRFSAARRSASMFVGCSSMG  
 PFLHFYWLWLDRLLPASGLRSLPSVMTKVLVDQTVASPI LGVWYFLGLGSLEGQTLLEESCQELRAKFWDFYKA  
 DWCVWPAQLVNFLLFIPSHFRVTYINGLTLGWDTYLSYLYWVPEPLQTPGCAD\*

>ENSMUSP00000148307\_c.37:A>C\_p.K13T ENSMUST00000212617.2|Mpv1712-  
 203|ENSMUSG00000035559|-|chr8:g.71213073:T>G  
 XASGLRSLPSVMTKVLVDQTVASPI LGVWYFLGFFV\*

>ENSMUSP00000148316\_c.2835:C>G\_p.R946G ENSMUST00000212935.2|Myo9b-  
 206|ENSMUSG00000004677|+|chr8:g.71800279:C>G  
 MSAHEAGSSGRRQATYHLHIYPQLSSAGSQTSRVTATKDDSTSDV IQDVVASLHLDGSKHYVIVEVKESGG  
 EEWVLDASDSPVHRVLLWPRRAQDEHPQEDGYYFLLQERNADGSIQYLPIQLLAQPTAACRLVERGLLPRPQA  
 DFDDLCNLPELTHEANLLQNLKLRFMQKIIYTYAGSILVAINPFKFLPIYNPKYVKMYENQQLGKLEPHVFALA  
 DVAYYAMLRKHVNQCIVISGESGSGKTQSTNFLIHCLTALSQKGYASGVERTILGAGPVLEAFGNAKTAHNNN  
 SSRFGKFIQVNYLENGIVRGAVVEKYLEKSRVLSQEKDERNYHVFYLLLVSEEEERLEFQKQPDYFYLN  
 QHNLNIEDGEDLKHDFERLQQAMEMVGFPLPATKKQIFSVLSAILYLGNTYKRRATGRDEGLEVGPEVLDLTL  
 SLLKVKRETLVEVLTTRKKTVTVNDKILPYSLSAITARDSMAKSLYSALFDWIVLRINHALLNKMDMEEAV  
 SCLSIGVLDIFGFEDFERNSEFCINYANEQLQYYFTQHI FKLEQEEYQGGEGISWHNIDYTDNVGCIHLISK  
 KPTGLFYLLDEESNFPHATSHTLAKFKQOHEDNKYFLGTPVLEPAFIIQHFAGRVKYQIKDFREKNMDYMRP  
 DIVALLRGSDDSSVYRQLIGMDPVAVFRWAVLRAAIRAMAVLREAGRLRAERAKEAAAGISSPATRSHMEELPR  
 GASTPSEKLYRDLHNQIIKSLKGLPWQGEDPRRLQLSLSLFQKPRTSFLKSKGKQKQIIPKNLLDSKSLRLI  
 ISMTLHDRTTKSLHLHLHKKKPPSISAQFQTSNLKLEALGKAEFFIRCIRSNAEKKELCFDDLEVLQQLRY  
 TGMLETVRIRRSYGSAKYTFQDFTEQFQVLLPKDVQPCREAI AALLEKLVDRQNYQIGKTKVFLKETEGQTL  
 QEKLHGEVLRRLQLQSWFRMVLERKHFVQMKHAALT IQACWRSYRVRALERTQAAYVYLAQAWRGYLQORQAY  
 HHQRHSIIRLQSLCRGHLQRRSFSQMVSEKQKAEQAREAAGGKLESEGEPPVAAGEQLSEHPVEDPELGV  
 EAEETWVNKSPDGMSPKKETPSPEMETAQKTVPAESHEKVSSSREKRESRRQRGLEHVERQNKHIQSCREESSTH  
 REPSRRASLEIGESFPEGTKGPREDGLEAWTETTPASSSKQAQVVGDPGSPSPVQRPTTLALDSRVSPVLP  
 SSLESKPKDKKDESSTKAQDKPESPSGSTQIQRYQHPDTERLATAVEIWRGKKLASAVLSQSLDLSEKHRATG  
 AALTPTTEERRISFSTSDVSKLSPVKTSAEIDGDFSSKKPSIHKKKSGDPSAGPDAGLSPGSGQDSKSAFKRFL  
 LHKAKDKKPSLEGVEETESNGGQAQETPARKTLDVSSSQHRHTTEKPLKGGKNNRNVGQITVSEKWRES  
 VFRKITNANELKFLDEFLLNKVNDLRSQKTPIESLFI EATERFRSNIKTMYSVPNGKIHVGYKDLMENYQIVV  
 SNLAAERGEKDTNLVNLVQSLLEDEFTRSYNKTDFERAKQSKAQKKRQKQERAVQEHNGHV FASYQVNI PQSC  
 EQCLSYIWLMDKALLCSVCKMTCHKKCVHKIQSYCSYTGRRKSELGAE PGHFGVCVDSLTSKASVP IVLEKL  
 LEHVEMHGLYTEGLYRKS GAANRTRELRLQALQTDPAAVKLEDFPIHAITGVLKQWLRELPEPLMTFAQYGD  
 FLRAVELPEKQEQLSAIYAVLDHLPEANHTSLERLIFHLVKVALLEDVNRMSPGALAIIFAPCLLRCPDNDPLT  
 SMKDVLIKITTCVEMLIKEQMRKYKMKMEEINHLEAAESIAFRRLSLLRQNAIKSPRTPVVQDLEL GALPEE  
 EAA GGDEDEKEILMERICSIKEEKEDITYRLELDPGRGSDENLDSETSASTESLLEERGVRGAVEE\*

>ENSMUSP00000129220\_c.2832:C>G\_p.R945G ENSMUST00000170242.8|Myo9b-  
 203|ENSMUSG00000004677|+|chr8:g.71800279:C>G  
 MSAHEAGSSGRRQATYHLHIYPQLSSAGSQTSRVTATKDDSTSDV IQDVVASLHLDGSKHYVIVEVKESGG  
 EEWVLDASDSPVHRVLLWPRRAQDEHPQEDGYYFLLQERNADGSIQYLPIQLLAQPTAACRLVERGLLPRPQA  
 DFDDLCNLPELTHEANLLQNLKLRFMQKIIYTYAGSILVAINPFKFLPIYNPKYVKMYENQQLGKLEPHVFALA  
 DVAYYAMLRKHVNQCIVISGESGSGKTQSTNFLIHCLTALSQKGYASGVERTILGAGPVLEAFGNAKTAHNNN



SSRFGKFIQVNYLENGIVRGAVVEKYLLEKSRLVSQEKDERNYHVFYLLLVSEEEERLEFQLKQPQDYFYLN  
 QHNLNIEDGEDLKHDFERLQQAMEMVGFLPATKKQIFSVLSAILYLGNTYKQRATGRDEGLEVGPPVLDLTL  
 SQLLKVKRETLVEVLTKRKTVTVNDKILIPYSLSEAITARDSMAKSLYSALFDWIVLRINHALLNKKDMEEAV  
 SCLSIGVLDIFGFEDFERNSEFEQFCINYANEQLQYYFTQHI FKLEQEYQEGEGISWHNIDYTDNVGCIHLISK  
 KPTGLFYLLDEESNFPHTSHTLLAKFKQQHEDNKYFLGTPVLEPAFI IQHFAGRVKYQIKDFREKNMDYMRP  
 DIVALLRGS DSSYVRQLIGMDPVAVFRWAVLRAAIRAMAVLREAGRLRAERA EKAAGISSPATRSHMEELPRG  
 ASTPSEKLYRDLHNQIIKSLKGLPWQGEDPRRLQSLSLFQKPRTSFLKSKGKIKQKQIIPKNLLDSKSLRLII  
 SMTLHDRTTKSLLHLHKKKKPPSISAQFQTSLNKLLLEALGKAEPFFIRCIRSNAEKKELCFDDELVLQQLRYT  
 GMLTVRIRRRSGYS AKYTFQDFTEQFQVLLPKDVQPCREAI AALLEKLVDRQNYQIGKTKVFLKETEGQTLQ  
 EKLHGEVLRILQLQSWFRMVLERKHFVQMKHAALTIQACWRSYRVRRALERTQAAVYLQAAWRGYLQRQAYH  
 HQRHSIIRLQSLCRGHLQRRSFSQMVSEKQKAEQAREAAGGKLESEGEPPVAAGEQLSEHPVEDPESLGVEAE  
 TWMNKSPDGMSPKKETPSPEMETAAQKTVPAESHEKVSSSREKRESRRQRGLEHVERQNKHIQSCREESSTR  
 EPSRRASLEIGESFPEGTKGPREDEGLEAWTETTAPSSSKQAQVVGDPGSPSPVQRPTTLALDSRVS PMLPSS  
 SLEVSPVLPSSSLES PKDKDKDESSTKAQDKPESPSGSTQIQRYQHPDTERLATAVEIWRGKKLASAVLSQSL  
 DLSEKHRATGAALTPTTEERRISFSTSDVSKLSPVKVQTSAEIDGDFSSKKPSIHKKSGDPSAGPDAGLSPGS  
 QGDSKSAFKRFLFLHAKADKKPSLEGVEETESNGGQAAQETPARKTLDVPSSQQRHTTGEKPLKGGKNNRNV  
 GQITVSEKWRESVFRKITNANELKFLDEFLLNKVNDLRSQKTPIESLFI EATERFRSNIKTMYSVPNGKIHVG  
 YKDLMENYQIVVSNLAAERGEKDTNLVNLVNFQSLLEDEFTRS YNKTDFERAKQSKAQKKRQERAVQEHNGHV  
 FASYQVNI PQSCEQCLSYIWLMDKALLCSVCKMTCHKKCVHKIQSYCSYTGRRKSELGAEPGHFGVCVDSLTS  
 DKASVPIVLEKLEHVMHGLYTEGLYRKSGAANRTRELRLQALQTDPAAVKLEDFPIHAITGVLKQWLRELPE  
 PLMTFAQYGDFLRAVELPEKQEQLSAIYAVLDHLPEANHTSLERLI FHLVKVALLEDVNRMSPGALAIIFAPC  
 LLRCPDNDSDPLTSMKDVLIKTTCVEMLIKEQMRKYKMKMEEINHLEAAESIAFRRLSLLRQNAWPWPLKLGFS  
 PYEGVRIKSPRTPVVQDLEL GALPEEAAGGDEDREKEILMERIQSIKEEKEDITYRLELDPDPRGSDEENLDSE  
 TSASTESLLEERGVRGAVEGPPAPALPCPISPTLSPLPEAAAPRGRPTS FVTVRVKT PRTRTPIMMANIKLP  
 PGLPLHLT SWAPALQEA VVPKRREPPARRQDQVHSVYIAPGADLPSQSTLIALDHDHTILPGTKRRYS DPPTY  
 CLPPSSGQANG\*

>ENSMUSP00000071827\_c.2832:C>G\_p.R945G ENSMUST00000071935.7|Myo9b-  
 201|ENSMUSG00000004677|+|chr8:g.71800279:C>G

MSAHEAGSSGRRQATYHLHIYPQLSSAGSQTSCRVTATKDSSTSDVIQDVVASLHLDGSKHYVLVEVKESGG  
 EEWVLDASDSPVHRVLLWPRRAQDEHPQEDGYYFLLQERNADGSIQYLP IQLLAQPTAACRLVERGLLPRPQA  
 DFDDL CNLPEL TEANLLQNLKLRFMQKQIYTYAGSILVA INPFKFLPIYNPKYVKMYENQQLGKLEPHVFALA  
 DVAYYAML RKHVNQCIVISGESGSGKTQSTNFLIHCLTALSQKGYASGVERTILGAGPVLEAFGNAKTAHNNN  
 SSRFGKFIQVNYLENGIVRGAVVEKYLLEKSRLVSQEKDERNYHVFYLLLVSEEEERLEFQLKQPQDYFYLN  
 QHNLNIEDGEDLKHDFERLQQAMEMVGFLPATKKQIFSVLSAILYLGNTYKQRATGRDEGLEVGPPVLDLTL  
 SQLLKVKRETLVEVLTKRKTVTVNDKILIPYSLSEAITARDSMAKSLYSALFDWIVLRINHALLNKKDMEEAV  
 SCLSIGVLDIFGFEDFERNSEFEQFCINYANEQLQYYFTQHI FKLEQEYQEGEGISWHNIDYTDNVGCIHLISK  
 KPTGLFYLLDEESNFPHTSHTLLAKFKQQHEDNKYFLGTPVLEPAFI IQHFAGRVKYQIKDFREKNMDYMRP  
 DIVALLRGS DSSYVRQLIGMDPVAVFRWAVLRAAIRAMAVLREAGRLRAERA EKAAGISSPATRSHMEELPRG  
 ASTPSEKLYRDLHNQIIKSLKGLPWQGEDPRRLQSLSLFQKPRTSFLKSKGKIKQKQIIPKNLLDSKSLRLII  
 SMTLHDRTTKSLLHLHKKKKPPSISAQFQTSLNKLLLEALGKAEPFFIRCIRSNAEKKELCFDDELVLQQLRYT  
 GMLTVRIRRRSGYS AKYTFQDFTEQFQVLLPKDVQPCREAI AALLEKLVDRQNYQIGKTKVFLKETEGQTLQ  
 EKLHGEVLRILQLQSWFRMVLERKHFVQMKHAALTIQACWRSYRVRRALERTQAAVYLQAAWRGYLQRQAYH  
 HQRHSIIRLQSLCRGHLQRRSFSQMVSEKQKAEQAREAAGGKLESEGEPPVAAGEQLSEHPVEDPESLGVEAE  
 TWMNKSPDGMSPKKETPSPEMETAAQKTVPAESHEKVSSSREKRESRRQRGLEHVERQNKHIQSCREESSTR  
 EPSRRASLEIGESFPEGTKGPREDEGLEAWTETTAPSSSKQAQVVGDPGSPSPVQRPTTLALDSRVS PMLPSS  
 SLES PKDKDKDESSTKAQDKPESPSGSTQIQRYQHPDTERLATAVEIWRGKKLASAVLSQSLDLSEKHRATGA  
 ALTPTEERRISFSTSDVSKLSPVKVQTSAEIDGDFSSKKPSIHKKSGDPSAGPDAGLSPGSQGDSKSAFKRFL  
 HKAKADKKPSLEGVEETESNGGQAAQETPARKTLDVPSSQQRHTTGEKPLKGGKNNRNVGQITVSEKWRESV  
 FRKITNANELKFLDEFLLNKVNDLRSQKTPIESLFI EATERFRSNIKTMYSVPNGKIHVGKDLMENYQIVV  
 NLAAERGEKDTNLVNLVNFQSLLEDEFTRS YNKTDFERAKSKAQKKRQERAVQEHNGHV FASYQVNI PQSCEQ  
 CLSYIWLMDKALLCSVCKMTCHKKCVHKIQSYCSYTGRRKSELGAEPGHFGVCVDSLTS DKASVPIVLEKLE  
 HVEMHGLYTEGLYRKSGAANRTRELRLQALQTDPAAVKLEDFPIHAITGVLKQWLRELPEPLMTFAQYGDFLRA  
 VELPEKQEQLSAIYAVLDHLPEANHTSLERLI FHLVKVALLEDVNRMSPGALAIIFAPCLLRCPDNDSDPLTSM  
 KDVLKITTTCVEMLIKEQMRKYKMKMEEINHLEAAESIAFRRLSLLRQNAIKSPRTPVVQDLEL GALPEEAAGG  
 DEDREKEILMERIQSIKEEKEDITYRLELDPDPRGSDEENLDSETSASTESLLEERGVRGAVEE\*

>ENSMUSP00000131635\_c.2832:C>G\_p.R945G ENSMUST00000168839.9|Myo9b-  
 202|ENSMUSG00000004677|+|chr8:g.71800279:C>G

MSAHEAGSSGRRQQATYHLHIYPQLSSAGSQTSCRVTATKDDSTSDVIQDVVASLHLDGSKHYVLVEVKESGG  
 EEWVLDASDSPVHRVLLWPRRAQDEHPQEDGYYFLLQERNADGSIQYLP IQLLAQPTAACRLVERGLLPRPQA  
 DFDDLCNLPELTEANLLQNLKLRFMQQKIYTYAGSILVA INPFKFLPIYNPKYVKMYENQQLGKLEPHVFALA  
 DVAYYAMLKRVNQCIVISGESGSGKTQSTNFLIHCLTALSQKGYASGVERTILGAGPVLEAFGNAKTAHNNN  
 SSRFGKFIQVNYLENGIVRGAVVEKYLLEKSRLVSQEKDERNYHVFFYLLLVSEEEERLEFQLKQPQDYFYLN  
 QHNLNIEDGEDLKHDFERLQQAMEMVGFLPATKKQIFSVLSAILYLGNAVTYKKRATGRDEGLEVGPEVLDLTL  
 SLLKVKRETLEVEVLTKRKTVTVNDKILPYSLSAITARDSMAKSLSYALFDWIVLRINHALLNKDKMEEAV  
 SCLSIGVLDIFGFEDFERNSEFCINYANEQLQYYFTQHFIFKLEQEEYQEGEISWHNIDYTDNVGCIHLISK  
 KPTGLFYLLDEESNFPHTSHTLLAKFKQQHEDNKYFLGTPVLEPAFIIQHAFGRVKYQIKDFREKNMDYMRP  
 DIVALLRGS DSSVYRQLIGMDPVAVFRWAVLRAAIRAMAVLREAGRLRAERA EKAAGISSPATRSHMEELPRG  
 ASTPSEKLYRDLHNQIIKSLKGLPWQGEDPRRLQLSLSLFQKPRTSFLKSKGKQKQIIIPKNLLDSKSLRLII  
 SMTLHDRTTKSLLLHLHKKKPPSISAQFQTSLNKLEALGKAEFFIRCIRSNAEKKELCFDELVLQQLRYT  
 GMLETVRIRRSYGSAKYTFQDFTEQFQVLLPKDVQPCREAI AALLEKLVQVDRQNYQIGKTKVFLKETEGQTLQ  
 EKLHGEVLRRIQLQSWFRMVLERKHFVQMKHAALTIQACWRSYRVRRALERTQAAYV LQAAWRGYLQRQAYH  
 HQRHSIIRLQSLCRGHLQRRSFSQMVSEKQKAEQAREAAGGKLESEGEPPVAAGEQLSEHPVEDPESLGV EAE  
 TWMNKSPDGMSPKKEPSPPEMETAAQKTVPAESHEKVSSSREKRESRRQRGLEHVERQNKHIQSCREESSTR  
 EPSRRASLEIGESFPEGTKGPREDEGLEAWTETTAPSSSKQAQVVDPPGSPSPVQRPTTLALDSRVPMLPSS  
 SLEVSPVLPSSSLES PKDKDKDESSTKAQDKPESPSGSTQIQRYQHPDTERLATAVEIWRGKLLASAVLSQSL  
 DLSEKHRATGAALTPTERRISFSTSDVSKLSPVKVQTSAEIDGDFSSKKPSIHKKSGDPSAGPDAGLSPGS  
 QGDSKSAFKRLFLHKAKDKKPSLEGVEETESNGGQAAQETPARKTLDVPSSQQHRHTTGEKPLKGGKNRNRKV  
 GQITVSEKWRESVFRKITNANELKFLDEFLLNKVNDLRSQKTPIESLFEATERFRSNIKTMYSVPNGKIHVG  
 YKDLMENYQIVVSNLAAERGEKDTNLVNLVNFQSLLEDEFTRSYNKTDFERAKQSKAQKKRQKQERAVQEHNGHV  
 FASYQVNI PQSCEQCLSYIWLMDKALLCSVCKMTCHKKCVHKIQSYCSYTGRRKSELGAEPGHFGVCVDSLTS  
 DKASVPIVLEKLEHVEMHGLYTEGLYRKS GAANRTRELRQALQTDPAAVKLEDFPIHAITGV LKQWLRELPE  
 PLMTFAQYGDFLRAVELPEKQEQLSAIYAVLDHLPEANHTSLERLI FHLVKVALLEDVNRMSPGALAIIFAPC  
 LLRCPDNDSDPLTSMKDVLIKITTCVEMLIKEQMRKYKMKMEEINHLEAAESIAFRRLSLLRQNAIKSPRTFVVQ  
 DLEL GALPEEAAGGDE DREKEILMERIQS IKEEKEDITYRLPELDPGRGSDEENLDSETSASTESLLEERGVRG  
 AVEE\*

>ENSMUSP00000148316\_c.3322:CT>G\_p.P1108del-fs ENSMUST00000212935.2|Myo9b-206|ENSMUSG00000004677|+|chr8:g.71801166:CT>G

MSAHEAGSSGRRQQATYHLHIYPQLSSAGSQTSCRVTATKDDSTSDVIQDVVASLHLDGSKHYVLVEVKESGG  
 EEWVLDASDSPVHRVLLWPRRAQDEHPQEDGYYFLLQERNADGSIQYLP IQLLAQPTAACRLVERGLLPRPQA  
 DFDDLCNLPELTEANLLQNLKLRFMQQKIYTYAGSILVA INPFKFLPIYNPKYVKMYENQQLGKLEPHVFALA  
 DVAYYAMLKRVNQCIVISGESGSGKTQSTNFLIHCLTALSQKGYASGVERTILGAGPVLEAFGNAKTAHNNN  
 SSRFGKFIQVNYLENGIVRGAVVEKYLLEKSRLVSQEKDERNYHVFFYLLLVSEEEERLEFQLKQPQDYFYLN  
 QHNLNIEDGEDLKHDFERLQQAMEMVGFLPATKKQIFSVLSAILYLGNAVTYKKRATGRDEGLEVGPEVLDLTL  
 SLLKVKRETLEVEVLTKRKTVTVNDKILPYSLSAITARDSMAKSLSYALFDWIVLRINHALLNKDKMEEAV  
 SCLSIGVLDIFGFEDFERNSEFCINYANEQLQYYFTQHFIFKLEQEEYQEGEISWHNIDYTDNVGCIHLISK  
 KPTGLFYLLDEESNFPHTSHTLLAKFKQQHEDNKYFLGTPVLEPAFIIQHAFGRVKYQIKDFREKNMDYMRP  
 DIVALLRGS DSSVYRQLIGMDPVAVFRWAVLRAAIRAMAVLREAGRLRAERA EKAAGISSPATRSHMEELPR  
 GASTPSEKLYRDLHNQIIKSLKGLPWQGEDPRRLQLSLSLFQKPRTSFLKSKGKQKQIIIPKNLLDSKSLRLII  
 SMTLHDRTTKSLLLHLHKKKPPSISAQFQTSLNKLEALGKAEFFIRCIRSNAEKKELCFDELVLQQLRYT  
 TGMLETVRIRRSYGSAKYTFQDFTEQFQVLLPKDVQPCREAI AALLEKLVQVDRQNYQIGKTKVFLKETEQTL  
 QEKLHGEVLRRIQLQSWFRMVLERKHFVQMKHAALTIQACWRSYRVRRALERTQAAYV LQAAWRGYLQRQAYH  
 HHQRHSIIRLQSLCRGHLQRRSFSQMVSEKQKAEQAREAAGGKLESEGEPPVAAGEQLSEHPVEDPESLGV EAE  
 ETWMNKSPDGMSPRRRHPAQRWRPQPKRQCQLKVMRKS PVAERSESHGGNEGWSMLNDRINTSNPAGRRAAPT  
 ENLPEGQAWK

>ENSMUSP00000129220\_c.3319:CT>G\_p.P1107del-fs ENSMUST00000170242.8|Myo9b-203|ENSMUSG00000004677|+|chr8:g.71801166:CT>G

MSAHEAGSSGRRQQATYHLHIYPQLSSAGSQTSCRVTATKDDSTSDVIQDVVASLHLDGSKHYVLVEVKESGG  
 EEWVLDASDSPVHRVLLWPRRAQDEHPQEDGYYFLLQERNADGSIQYLP IQLLAQPTAACRLVERGLLPRPQA  
 DFDDLCNLPELTEANLLQNLKLRFMQQKIYTYAGSILVA INPFKFLPIYNPKYVKMYENQQLGKLEPHVFALA  
 DVAYYAMLKRVNQCIVISGESGSGKTQSTNFLIHCLTALSQKGYASGVERTILGAGPVLEAFGNAKTAHNNN  
 SSRFGKFIQVNYLENGIVRGAVVEKYLLEKSRLVSQEKDERNYHVFFYLLLVSEEEERLEFQLKQPQDYFYLN  
 QHNLNIEDGEDLKHDFERLQQAMEMVGFLPATKKQIFSVLSAILYLGNAVTYKKRATGRDEGLEVGPEVLDLTL  
 SLLKVKRETLEVEVLTKRKTVTVNDKILPYSLSAITARDSMAKSLSYALFDWIVLRINHALLNKDKMEEAV  
 SCLSIGVLDIFGFEDFERNSEFCINYANEQLQYYFTQHFIFKLEQEEYQEGEISWHNIDYTDNVGCIHLISK  
 KPTGLFYLLDEESNFPHTSHTLLAKFKQQHEDNKYFLGTPVLEPAFIIQHAFGRVKYQIKDFREKNMDYMRP

DIVALLRGS DSSYVRQLIGMDPVAVFRWAVLRAAIRAMAVLREAGRLRAERA EKAAGISSPATRSHMEELPRG  
ASTPSEKLYRDLHNQIIKSLKGLPWQGEDPRLLQSLSLFQKPRTSFLKSKGIKQKQIIPKNLLD SKSLRLII  
SMTLHDRTTKSLLHLHKKKKPPSISAQFQTSLNKLLLEALGKAE PFFIRCIRSNAEKKELCFDDELVLQQLRYT  
GMLFTVRIIRRSYGSAKYTFQDFTEQFQVLLPKDVQPCREAI AALLEKLVQDRQNYQIGKTKVFLKETERQTLQ  
EKLHGEVLRRLILQLQSWFRMVLERKHFVQMKHAALTIQACWRSYRVRRALERTQAAVYLQA AWRGYLQRQAYH  
HQRHSIIRLQSLCRGHLQRRSFSQMVSEKQKAEQAREAAGGKLESEGE PGPVAAGEQLSEHPVEDPESLGVEAE  
TWMNKSPDGM SRRRRHPAQRWRPQPKRQCQLKVMRKS PVAERSESHGGNEGWSMLNDRINTSNPAGRRAAPTE  
NLPEGQAWK

>ENSMUSP00000071827\_c.3319:CT>G\_p.P1107del-fs ENSMUST00000071935.7|Myo9b-  
201|ENSMUSG00000004677|+|chr8:g.71801166:CT>G

MSAHEAGSSGRRQQATYHLHIYPQLSSAGSQTSCRVTATKDSSTSDVIQDVVASLHLDGSKHYV LVEVKESGG  
EEWVLDASDSPVHRVLLWPRRAQDEHPQEDGYYFLLQERNADGSIQYLP IQLLAQPTAACRLVERGLLPRPQA  
DFDDL CNLPEL TEANLLQNLKLRFMQKQIYTYAGSILVA INPFKFLPIYNPKYVKMYENQQLGKLEPHVFALA  
DVAYYAMLRKHVNQCIVISGESGSGKTQSTNFLIHCLTALSQKGYASGVERTILGAGPVLEAFGNAKTAHNNN  
SSRFGKFIQVNYLENGIVRGAVVEKYLLEKSRLVSQEKDERNYHVFYLLLG VSEEEERLEFQLKQPQDYFYLN  
QHNLNIEDGEDLKHDFERLQQAMEMVGFLPATKKQIFSVLSA ILYLGNVTYKKRATGRDEGLEVGPP EVDLTL  
SOLLKVKRETLVEVLTKRKTVTVNDKILIPYSLSEAITARDSMAKSLYSALFDWIVLRINHALLNK KDMEEAV  
SCLSIGVLDIFGFEDFERN SFEQFCINYANEQLQYYFTQHI FKLEQEEYQGE GEGISWHNIDYTDNVC IHLISK  
KPTGLFYLLDEESNFP HATSH TLLAKFKQQHEDNKYFLGTPVLEPAFI IQHFAGRVKYQIKDFREKNMDYMRP

DIVALLRGS DSSYVRQLIGMDPVAVFRWAVLRAAIRAMAVLREAGRLRAERA EKAAGISSPATRSHMEELPRG  
ASTPSEKLYRDLHNQIIKSLKGLPWQGEDPRLLQSLSLFQKPRTSFLKSKGIKQKQIIPKNLLD SKSLRLII  
SMTLHDRTTKSLLHLHKKKKPPSISAQFQTSLNKLLLEALGKAE PFFIRCIRSNAEKKELCFDDELVLQQLRYT  
GMLFTVRIIRRSYGSAKYTFQDFTEQFQVLLPKDVQPCREAI AALLEKLVQDRQNYQIGKTKVFLKETERQTLQ  
EKLHGEVLRRLILQLQSWFRMVLERKHFVQMKHAALTIQACWRSYRVRRALERTQAAVYLQA AWRGYLQRQAYH  
HQRHSIIRLQSLCRGHLQRRSFSQMVSEKQKAEQAREAAGGKLESEGE PGPVAAGEQLSEHPVEDPESLGVEAE  
TWMNKSPDGM SRRRRHPAQRWRPQPKRQCQLKVMRKS PVAERSESHGGNEGWSMLNDRINTSNPAGRRAAPTE  
NLPEGQAWK

>ENSMUSP00000131635\_c.3319:CT>G\_p.P1107del-fs ENSMUST00000168839.9|Myo9b-  
202|ENSMUSG00000004677|+|chr8:g.71801166:CT>G

MSAHEAGSSGRRQQATYHLHIYPQLSSAGSQTSCRVTATKDSSTSDVIQDVVASLHLDGSKHYV LVEVKESGG  
EEWVLDASDSPVHRVLLWPRRAQDEHPQEDGYYFLLQERNADGSIQYLP IQLLAQPTAACRLVERGLLPRPQA  
DFDDL CNLPEL TEANLLQNLKLRFMQKQIYTYAGSILVA INPFKFLPIYNPKYVKMYENQQLGKLEPHVFALA  
DVAYYAMLRKHVNQCIVISGESGSGKTQSTNFLIHCLTALSQKGYASGVERTILGAGPVLEAFGNAKTAHNNN  
SSRFGKFIQVNYLENGIVRGAVVEKYLLEKSRLVSQEKDERNYHVFYLLLG VSEEEERLEFQLKQPQDYFYLN  
QHNLNIEDGEDLKHDFERLQQAMEMVGFLPATKKQIFSVLSA ILYLGNVTYKKRATGRDEGLEVGPP EVDLTL  
SOLLKVKRETLVEVLTKRKTVTVNDKILIPYSLSEAITARDSMAKSLYSALFDWIVLRINHALLNK KDMEEAV  
SCLSIGVLDIFGFEDFERN SFEQFCINYANEQLQYYFTQHI FKLEQEEYQGE GEGISWHNIDYTDNVC IHLISK  
KPTGLFYLLDEESNFP HATSH TLLAKFKQQHEDNKYFLGTPVLEPAFI IQHFAGRVKYQIKDFREKNMDYMRP

DIVALLRGS DSSYVRQLIGMDPVAVFRWAVLRAAIRAMAVLREAGRLRAERA EKAAGISSPATRSHMEELPRG  
ASTPSEKLYRDLHNQIIKSLKGLPWQGEDPRLLQSLSLFQKPRTSFLKSKGIKQKQIIPKNLLD SKSLRLII  
SMTLHDRTTKSLLHLHKKKKPPSISAQFQTSLNKLLLEALGKAE PFFIRCIRSNAEKKELCFDDELVLQQLRYT  
GMLFTVRIIRRSYGSAKYTFQDFTEQFQVLLPKDVQPCREAI AALLEKLVQDRQNYQIGKTKVFLKETERQTLQ  
EKLHGEVLRRLILQLQSWFRMVLERKHFVQMKHAALTIQACWRSYRVRRALERTQAAVYLQA AWRGYLQRQAYH  
HQRHSIIRLQSLCRGHLQRRSFSQMVSEKQKAEQAREAAGGKLESEGE PGPVAAGEQLSEHPVEDPESLGVEAE  
TWMNKSPDGM SRRRRHPAQRWRPQPKRQCQLKVMRKS PVAERSESHGGNEGWSMLNDRINTSNPAGRRAAPTE  
NLPEGQAWK

>ENSMUSP00000002469\_c.522:A>G\_p.K175E ENSMUST00000002469.9|Ocell-  
201|ENSMUSG00000002396|+|chr8:g.71825438:A>G

MQIHAGPASRRRGRGLARLSGPEATCNSRPAARGRQRAAAPRMPAPERPRSRRPQS QPGPGELCVRPRKIVF  
ADELRPREPLHPEKHPRDLGPRLNVPDYELKYPVNTNRDRSRYA AVFQDQYGEFSELQREVGA TQAKLQQL  
EALLLSLPPPRSQKEARMAAHVREFEKERGD PGLDKQARCN YLKGKLRHLKAQIRKFD DQQDSNSED SVYF  
\*

>ENSMUSP00000002466\_c.104:A>TAA\_p.S35ins-fs ENSMUST00000002466.9|Nr2f6-  
201|ENSMUSG00000002393|-|chr8:g.71833811:T>TTA

MAMVTGGWGD PGGDTNGVDKAGGSYPRATEDDSASNL PGRPATRSRATRSVRGCRWTAWCAGTSPVESITACS  
PARAARVSSAASAAISATPAGPTVTVRLISTTGTSVSTVGSRSASGWACARRPCSEAASRMRS PVQRPVPR  
ARRASNL SRGRQCPS

>ENSMUSP00000121648\_c.10:A>TAA\_p.H4ins-fs ENSMUST00000137058.2|Nr2f6-205|ENSMUSG00000002393|-|chr8:g.71833811:T>TTA  
IRRLTSRGDQRRGAGRRGASGVAGGLRGVVRGQVQWKALRRVHLRGLQEFLLQAQHPPQSQLHLPVRDPPLVFP  
GLQAHQWEPWPVSPGPTVTVRLISTTGTSTVTVGSRASGWACARRPCSEAA SRMRSPVQRPVPRARRASNL  
SRGRQCPS  
>rs387475422\_ENSMUSP00000045668\_c.1824:C>T\_p.Q609\*  
ENSMUST00000049184.9|Ushbp1-201|ENSMUSG00000034911|-|chr8:g.71838600:G>A  
MSARATRRPRRRGRHPLPGELDPVAESSEEV DANNGRFETKPELHQEYLGPGQLQSPRNWIKEGCDVGS  
HAVLS  
LSPEEQCEPEVEAHQVLQEA PLDSGPAEISVPSVYETLQCRLSSLEAVVAALRHHSLSFPKSV  
EAE DRDQGAP  
GPF GDEKEDAGPGQQAARLIERNAWLRLALCNREDELACTQASLQDAQAEKETLQRQVQ  
ELED SLMQMEASP  
PTPILRAGRRNSNSSTSGAERRPWVQDSSMAHPFLQRLRSDSSTQSFGLSTQHPAPETYLM  
EDQMGLQGS  
IEK LKCFNRLLLAVLQGYKGRCELSIKLAKREAEATALRLALQYSEDCEEVYEVLLALKMAG  
LGTGVTGTTKG  
DLQAAEKEASRLLMKKEATMEVETPQPSSESGV DKTPEELASQLHG YVQHLRERWALVKI  
PEELGPVTAPK  
ATMPHAEATVQAILEIQPGPTLPHLEKSQIQD LAATRDRDLADLVLRQLTQREKRGLELRE  
AALRAQGP AHQ  
LLLQQLRWERAHFAGDGSSGGSS EDPSS EEEAGEDRQQHYQG PLALLDGMGKVWDS  
ENVSQELSASLARAID  
LRAQLQSLRQQLEQVTQKGRTRRV\*SAELSRELCKAHSALALAFRGAHRKQEEQRLKLEQQ  
VARLQAQQAEEL  
AVLTATARALGKPGAPQPAQTFL\*  
>ENSMUSP00000045668\_c.1606:A>G\_p.D536G ENSMUST00000049184.9|Ushbp1-201|ENSMUSG00000034911|-|chr8:g.71840043:T>C  
MSARATRRPRRRGRHPLPGELDPVAESSEEV DANNGRFETKPELHQEYLGPGQLQSPRNWIKEGCDVGS  
HAVLS  
LSPEEQCEPEVEAHQVLQEA PLDSGPAEISVPSVYETLQCRLSSLEAVVAALRHHSLSFPKSV  
EAE DRDQGAP  
GPF GDEKEDAGPGQQAARLIERNAWLRLALCNREDELACTQASLQDAQAEKETLQRQVQ  
ELED SLMQMEASP  
PTPILRAGRRNSNSSTSGAERRPWVQDSSMAHPFLQRLRSDSSTQSFGLSTQHPAPETYLM  
EDQMGLQGS  
IEK LKCFNRLLLAVLQGYKGRCELSIKLAKREAEATALRLALQYSEDCEEVYEVLLALKMAG  
LGTGVTGTTKG  
DLQAAEKEASRLLMKKEATMEVETPQPSSESGV DKTPEELASQLHG YVQHLRERWALVKI  
PEELGPVTAPK  
ATMPHAEATVQAILEIQPGPTLPHLEKSQIQD LAATRDRDLADLVLRQLTQREKRGLELRE  
AALRAQGP AHQ  
LLLQQLRWERAHFAGDGSSGGSS EDPSS EEEAGEDRQQHYQG PLALLDGMGKVWDS  
ENVSQELSASLARAID  
LRAQLQSLRQQLEQVTQKGRTRRVQSAELSRELCKAHSALALAFRGAHRKQEEQRLKLEQQ  
VARLQAQQAEEL  
AVLTATARALGKPGAPQPAQTFL\*  
>rs108499415\_ENSMUSP00000045668\_c.1260:C>T\_p.R421C  
ENSMUST00000049184.9|Ushbp1-201|ENSMUSG00000034911|-|chr8:g.71841567:G>A  
MSARATRRPRRRGRHPLPGELDPVAESSEEV DANNGRFETKPELHQEYLGPGQLQSPRNWIKEGCDVGS  
HAVLS  
LSPEEQCEPEVEAHQVLQEA PLDSGPAEISVPSVYETLQCRLSSLEAVVAALRHHSLSFPKSV  
EAE DRDQGAP  
GPF GDEKEDAGPGQQAARLIERNAWLRLALCNREDELACTQASLQDAQAEKETLQRQVQ  
ELED SLMQMEASP  
PTPILRAGRRNSNSSTSGAERRPWVQDSSMAHPFLQRLRSDSSTQSFGLSTQHPAPETYLM  
EDQMGLQGS  
IEK LKCFNRLLLAVLQGYKGRCELSIKLAKREAEATALRLALQYSEDCEEVYEVLLALKMAG  
LGTGVTGTTKG  
DLQAAEKEASRLLMKKEATMEVETPQPSSESGV DKTPEELASQLHG YVQHLRERWALVKI  
PEELGPVTAPK  
ATMPHAEATVQAILEIQPGPTLPHLEKSQIQD LAATRDRDLADLVLRQLTQREKRGLELRE  
AALRAQGP AHQ  
LLLQQLRWERAHFAGDGSSGGSS EDPSS EEEAGEDRQQHYQG PLALLDGMGKVWDS  
ENVSQELSASLARAID  
LRAQLQSLRQQLEQVTQKGRTRRVQSAELSRELCKAHSALALAFRGAHRKQEEQRLKLEQQ  
VARLQAQQAEEL  
AVLTATARALGKPGAPQPAQTFL\*  
>ENSMUSP00000002473\_c.16:C>T\_p.A6V ENSMUST00000002473.10|Babam1-201|ENSMUSG00000031820|+|chr8:g.71850389:C>T  
MEVAEVNSPTEEEEEEEEEEGEETISEPRPHTRS NPEGAEDRALGAQASVGSRSSEGE GEAATADGGAASVPGAG  
PKPWQVPASASEVQIRTPRVNCP EKVIICLDLSEEMSVPKLESFN GSRTNALNVSQKMVMFVRTKHKIDKSH  
EFALVVVNDSDSAWLSGLTSDPRELCSCLYDLETASCSTFNLEGLFSLIQKTEL PVTENVQTI PPPYVVRTIL  
VYSRPPCQPQFSLTEPMKMFQCPYFFFDIVYIHNGTEEKEEDMSWKDMFAFMGSLDTKGASYKYEVALAGPA  
LELHNCMAKLLAHPLQRPCQTHASYSLLEED EEEAGEEEATV\*  
>ENSMUSP00000002473\_c.180:A>T\_p.T61S ENSMUST00000002473.10|Babam1-201|ENSMUSG00000031820|+|chr8:g.71850553:A>T  
MEVAEANSPTEEEEEEEEEGEETISEPRPHTRS NPEGAEDRALGAQASVGSRSSEGE GEAASADGGAASVPGAG  
PKPWQVPASASEVQIRTPRVNCP EKVIICLDLSEEMSVPKLESFN GSRTNALNVSQKMVMFVRTKHKIDKSH  
EFALVVVNDSDSAWLSGLTSDPRELCSCLYDLETASCSTFNLEGLFSLIQKTEL PVTENVQTI PPPYVVRTIL  
VYSRPPCQPQFSLTEPMKMFQCPYFFFDIVYIHNGTEEKEEDMSWKDMFAFMGSLDTKGASYKYEVALAGPA  
LELHNCMAKLLAHPLQRPCQTHASYSLLEED EEEAGEEEATV\*  
>ENSMUSP00000002473\_c.219:C>T\_p.P74S ENSMUST00000002473.10|Babam1-201|ENSMUSG00000031820|+|chr8:g.71850592:C>T

MEVAEANSPTEEEEEEEEEGEETISEPRPHTRSNEGAEDRALGAQASVGSRSSEGEGEAATADGGAASVPGAG  
SKPWQVPASASEVQIRTPRVNCPKVIICLDLSEEMSVPKLESFNRSRTNALNVSQKVMEMFVRTKHKIDKSH  
EFALVVVNDSSAWLSGLTSDPRELCSCLYDLETASCSTFNLEGLFSLIQQKTELPTVENVQTI PPPYVVRTIL  
VYSRPPCQPQFSLTEPMKMFQCPYFFFDIVYIHNGTEEKEEDMSWKDMFAFMGSLDTKGASYKYEVALAGPA  
LELHNCMAKLLAHPLQRPCQTHASYSLLEEDDEEAGEEEATV\*  
>rs51871462\_ENSMUSP00000113162\_c.615:A>C\_p.S206R  
ENSMUST00000119976.8|Ankle1-201|ENSMUSG00000046295|+|chr8:g.71860039:A>C  
MADTACLALRLLAALREEEARAVEELLRLGADPNLVLDGAAAVHLAARASHPRALHCLRMLLRWGADPNARS  
AEGLTVPVHVAAWGCCGALELLLSRGGDPTLRDQDGLRPLDWALQQRHHNCARVLQELDTPTQPDETREPTET  
FHVAQGSFETETCQGPALAESSGVSQDSELHVHRAELEVEAVEVAVHPQSSEATENS DYRS DAS FVTAVEDSL  
QPGRPGGALELVAGLWVTRGAVSAGK GAPNCQPQVLTLTARDTDKPVLPDGDGLGALHPHSSVPPMSDLQLLQ  
ALRALGYS PGPVTFPTRGHYLRRLQEAQASRADVGHQSQELAEALRTGTIPDCQVDEEALAQCFQRLDPLKKWR  
EGITKSSFTYLLLDPRLTKDLPARASSLTAECLQCFVRAIFYVVGKTRARPDAHLWEAFGYHDQPRKQVCPK  
VRRILDIWASGRGII SLHCFQHVVAMEAYTREACLLDALGLQTLTNQKQGHYYGVVAHWPPSRRRRLGVHLLQ  
RALLVFLAEGERE LRPQDIQARG\*  
>rs51871462\_ENSMUSP00000112797\_c.555:A>C\_p.S186R  
ENSMUST00000120725.2|Ankle1-202|ENSMUSG00000046295|+|chr8:g.71860039:A>C  
MADTACLALRLLAALREEEARAVEELLRLGADPNLVLDGAAAVHLAARASHPRALHCLRMLLRWGADPNARS  
AEGLTVPVHVAAWGCCGALELLLSRGGDPTLRDQDGLRPLDWALQQRHHNCARVLQELDTPTQPDETREPTAE  
SSGVSQDSELHVHRAELEVEAVEVAVHPQSSEATENS DYRS DAS FVTAVEDSLQPGRPGGALELVAGLWVTRG  
AVSAGK GAPNCQPQVLTLTARDTDKPVLPDGDGLGALHPHSSVPPMSDLQLLQALRALGYS PGPVTFPTRGHY  
LRRLQEAQASRADVGHQSQELAEALRTGTIPDCQVDEEALAQCFQRLDPLKKWREGITKSSFTYLLLDPRLT  
L PARASSLTAECLQCFVRAIFYVVGKTRARPDAHLWEAFGYHDQPRKQVCPK VRRILDIWASGRGII SLHCF  
QHVVAMEAYTREACLLDALGLQTLTNQKQGHYYGVVAHWPPSRRRRLGVHLLQ RALLVFLAEGERE LRPQDIQ  
ARG\*  
>ENSMUSP00000140285\_c.200:T>TCATTCTCCCTCCACCCCAAACATGACGATCCACTCTAGCTCCAC  
CCCAAATTAACAATC\_p.V67HSPSTPNMTIHSSSTPKLTI-ins  
ENSMUST00000188685.7|Zfp709-  
203|ENSMUSG00000056019|+|chr8:g.72642773:T>TCATTCTCCCTCCACCCCAAACATGACGAT  
CCACTCTAGCTCCACCCCAAATTAACAATC  
MGSVSFQDVAVTFTVEEWALLDPSQKKLHKDVMEETFRNLAAIGKTQEGQNIDEDHRYSRRNQRNEVHSPSTP  
NMTIHSSSTPKLTIIVERLLEHSGKTESKEIFRQIPNTIVNRKSSHRTMLSENHVYKDNVLI SQSSLT VSVPLQ  
TPHKPHEYELHGENLYKFGECEKAFIYPECF LKHKDSGTRQRSYELNQCEEIFKSNDYIQIRVNDETREEIC I  
DKQHYAFNYPDFLQYVEKVHTGKKPYACKQCGKTF SFLSNIKRHERIHSGEKPYRCNICDKAFT CSTNFQEH  
RTHTGEKPYLCTQCGKSF SFLSNIRRHERTHTGEKPYRCNACGKAFSYLTNFQDHERHTHTGEKPYVCTQCGKA  
FTYYYSFQTHKRCHTGEKPYVCKQCGKAFSYNSIQTHKRCHTGEKPYVCKLCAKAF TLLSSLR YHERIHSGE  
KPHVCLQCGKGFNSSTLRIHERHTHTGEKPYKCKKCGKVFSDSSLRCHERIHSGEKPYVCKQCGKAFTRHTS  
LRCHERIHSGEKPYICKQCGKGFISSNFRKHEWTHS GEKLCVCKL CGKAFTGHSSLRHERIHSGEKPYVCK  
HCGKDFSSLSGCQRHEQIHTGEKPYVCKNCGKAFTNPSALRNHERIHSGEKPYVCGQCGKGFISFSKFR IHER  
IHTGEKPYKCKQCGKAFTGHSSLRHERIHSGEKPFVCKHCGKSFYTLSDCQRHEQIHTGEKPFICKQCGKAF  
TRSSSLKIHDKTHSRSP\*  
>ENSMUSP00000034259\_c.197:T>TCATTCTCCCTCCACCCCAAACATGACGATCCACTCTAGCTCCAC  
CCCAAATTAACAATC\_p.V66HSPSTPNMTIHSSSTPKLTI-ins  
ENSMUST00000034259.8|Zfp709-  
201|ENSMUSG00000056019|+|chr8:g.72642773:T>TCATTCTCCCTCCACCCCAAACATGACGAT  
CCACTCTAGCTCCACCCCAAATTAACAATC  
GSVSFQDVAVTFTVEEWALLDPSQKKLHKDVMEETFRNLAAIGKTQEGQNIDEDHRYSRRNQRNEVHSPSTPN  
MTIHSSSTPKLTIIVERLLEHSGKTESKEIFRQIPNTIVNRKSSHRTMLSENHVYKDNVLI SQSSLT VSVPLQ  
PHKPHEYELHGENLYKFGECEKAFIYPECF LKHKDSGTRQRSYELNQCEEIFKSNDYIQIRVNDETREEIC I  
KQHYAFNYPDFLQYVEKVHTGKKPYACKQCGKTF SFLSNIKRHERIHSGEKPYRCNICDKAFT CSTNFQEH  
RTHTGEKPYLCTQCGKSF SFLSNIRRHERTHTGEKPYRCNACGKAFSYLTNFQDHERHTHTGEKPYVCTQCGKA  
FTYYYSFQTHKRCHTGEKPYVCKQCGKAFSYNSIQTHKRCHTGEKPYVCKLCAKAF TLLSSLR YHERIHSGE  
KPHVCLQCGKGFNSSTLRIHERHTHTGEKPYKCKKCGKVFSDSSLRCHERIHSGEKPYVCKQCGKAFTRHTS  
LRCHERIHSGEKPYICKQCGKGFISSNFRKHEWTHS GEKLCVCKL CGKAFTGHSSLRHERIHSGEKPYVCK  
HCGKDFSSLSGCQRHEQIHTGEKPYVCKNCGKAFTNPSALRNHERIHSGEKPYVCGQCGKGFISFSKFR IHER  
IHTGEKPYKCKQCGKAFTGHSSLRHERIHSGEKPFVCKHCGKSFYTLSDCQRHEQIHTGEKPFICKQCGKAF  
TRSSSLKIHDKTHSRSP\*



>ENSMUSP00000140285\_c.301:T>C\_p.M101T ENSMUST00000188685.7|Zfp709-203|ENSMUSG00000056019|+|chr8:g.72642874:T>C  
MGSVSFQDVAVTFTVEEWALLDPSQKHLKHDVMEETFRNLAAIGKTQEGQNIDEDHRYSRRNQRNEVVERLLE  
HSGTESKEIFRQIPNTIVNRKSSHRTTLESENHVYKDNVLISQSSLTVSVPLQTPHKPHEYELHGENLYKFGE  
CEKAFIYPECFLLKHKDSGTRQRSYELNQCCEEIFKSNDYIQIRVNDETREEICIDKQHYAFNYPDFLQYVEKVH  
TGKKPYACKQCGKTFSSFLSNIKRHERIHSGEKPYRCNICDKAFTCTSTNFQEHERTHTGEKPYLCTQCGKSFSF  
LSNIRRHERHTHTGEKPYRCNACGKAFSYLTNFDHERHTHTGEKPYVCTQCGKAFTYYSFQTHKRCHTGEKPY  
VCKQCGKAFSYNSIQTHKRCHTGEKPYVCKLCAKAFTTLLSSLRHERIHSGEKPHVCLQCGKGFNSSTLRI  
HERHTHTGEKPYKCKKCGKVFSDSSLRCHERIHSGEKPYVCKQCGKAFTTRHTSLRCHERIHCGEKPYICKQCG  
KGFISSSNFRKHEWTHSGEKLCVCKLGGKAFTGHSSLRHERIHSGEKPYVCKHCGKDFSSLSGCQRHEQIHT  
GEKPYVCKNCGKAFTNPSALRNHERIHSGEKPYVCGQCGKGFISFSKFRIPHERIHTGEKPYKCKQCGKAFTGH  
SSLRRHERIHSGEKPFVCKHCGKSFYTLSDCQRHEQIHTGEKPFICKQCGKAFTTRSSSLKIHDKTHSRSP\*  
>ENSMUSP00000034259\_c.298:T>C\_p.M100T ENSMUST00000034259.8|Zfp709-201|ENSMUSG00000056019|+|chr8:g.72642874:T>C  
GSVSFQDVAVTFTVEEWALLDPSQKHLKHDVMEETFRNLAAIGKTQEGQNIDEDHRYSRRNQRNEVVERLLEH  
SKGTESKEIFRQIPNTIVNRKSSHRTTLESENHVYKDNVLISQSSLTVSVPLQTPHKPHEYELHGENLYKFGE  
EKAFIYPECFLLKHKDSGTRQRSYELNQCCEEIFKSNDYIQIRVNDETREEICIDKQHYAFNYPDFLQYVEKVHT  
GKKPYACKQCGKTFSSFLSNIKRHERIHSGEKPYRCNICDKAFTCTSTNFQEHERTHTGEKPYLCTQCGKSFSF  
SNIRRHERHTHTGEKPYRCNACGKAFSYLTNFDHERHTHTGEKPYVCTQCGKAFTYYSFQTHKRCHTGEKPYV  
CKQCGKAFSYNSIQTHKRCHTGEKPYVCKLCAKAFTTLLSSLRHERIHSGEKPHVCLQCGKGFNSSTLRIH  
ERTHTHTGEKPYKCKKCGKVFSDSSLRCHERIHSGEKPYVCKQCGKAFTTRHTSLRCHERIHCGEKPYICKQCGK  
GFISSSNFRKHEWTHSGEKLCVCKLGGKAFTGHSSLRHERIHSGEKPYVCKHCGKDFSSLSGCQRHEQIHTG  
EKPYVCKNCGKAFTNPSALRNHERIHSGEKPYVCGQCGKGFISFSKFRIPHERIHTGEKPYKCKQCGKAFTGH  
SLRRHERIHSGEKPFVCKHCGKSFYTLSDCQRHEQIHTGEKPFICKQCGKAFTTRSSSLKIHDKTHSRSP\*  
>ENSMUSP00000140285\_c.351:T>TTTCTAGCTCCACCTCACCATGATGATCCATTCTAGCTCCATACC  
TCCAAGACAATCCATTCTAGCTCCACGCCACCATGACGACCCATTCTAGCTCCACTTTCTAGCTCCACCCCA  
CCATAACAATCCAATCTAGCTCACCCTCAGAGACGCTCCATTCTAGCTCTACACCACCATAACAATCAAT  
CTACCTCCACCACAACCATGACAATCCA\_p.S118ins-fs ENSMUST00000188685.7|Zfp709-203|ENSMUSG00000056019|+|chr8:g.72642924:T>TTTCTAGCTCCACCTCACCATGATGATCCA  
TTCTAGCTCCATACCCTCAAGACAATCCATTCTAGCTCCACGCCACCATGACGACCCATTCTAGCTCCACTT  
TCTAGCTCCACCCACCATAACAATCCAATCTAGCTCACCCTCAGAGACGCTCCATTCTAGCTCTACACCA  
CCATAACAATCAATCTACCTCCACCACAACCATGACAATCCA  
MGSVSFQDVAVTFTVEEWALLDPSQKHLKHDVMEETFRNLAAIGKTQEGQNIDEDHRYSRRNQRNEVVERLLE  
HSGTESKEIFRQIPNTIVNRKSSHRTMLESENHVYKDNVLISQSFLLAPPHDDPF  
>ENSMUSP00000034259\_c.348:T>TTTCTAGCTCCACCTCACCATGATGATCCATTCTAGCTCCATACC  
TCCAAGACAATCCATTCTAGCTCCACGCCACCATGACGACCCATTCTAGCTCCACTTTCTAGCTCCACCCCA  
CCATAACAATCCAATCTAGCTCACCCTCAGAGACGCTCCATTCTAGCTCTACACCACCATAACAATCAAT  
CTACCTCCACCACAACCATGACAATCCA\_p.S117ins-fs ENSMUST00000034259.8|Zfp709-201|ENSMUSG00000056019|+|chr8:g.72642924:T>TTTCTAGCTCCACCTCACCATGATGATCCA  
TTCTAGCTCCATACCCTCAAGACAATCCATTCTAGCTCCACGCCACCATGACGACCCATTCTAGCTCCACTT  
TCTAGCTCCACCCACCATAACAATCCAATCTAGCTCACCCTCAGAGACGCTCCATTCTAGCTCTACACCA  
CCATAACAATCAATCTACCTCCACCACAACCATGACAATCCA  
MGSVSFQDVAVTFTVEEWALLDPSQKHLKHDVMEETFRNLAAIGKTQEGQNIDEDHRYSRRNQRNEVVERLLEH  
HSGTESKEIFRQIPNTIVNRKSSHRTMLESENHVYKDNVLISQSFLLAPPHDDPF  
>ENSMUSP00000140285\_c.458:T>A\_p.Y153\* ENSMUST00000188685.7|Zfp709-203|ENSMUSG00000056019|+|chr8:g.72643031:T>A  
MGSVSFQDVAVTFTVEEWALLDPSQKHLKHDVMEETFRNLAAIGKTQEGQNIDEDHRYSRRNQRNEVVERLLE  
HSGTESKEIFRQIPNTIVNRKSSHRTMLESENHVYKDNVLISQSSLTVSVPLQTPHKPHEYELHGENLYKFGE  
CEKAFI\*PECFLKHKDSGTRQRSYELNQCCEEIFKSNDYIQIRVNDETREEICIDKQHYAFNYPDFLQYVEKVH  
TGKKPYACKQCGKTFSSFLSNIKRHERIHSGEKPYRCNICDKAFTCTSTNFQEHERTHTGEKPYLCTQCGKSFSF  
LSNIRRHERHTHTGEKPYRCNACGKAFSYLTNFDHERHTHTGEKPYVCTQCGKAFTYYSFQTHKRCHTGEKPY  
VCKQCGKAFSYNSIQTHKRCHTGEKPYVCKLCAKAFTTLLSSLRHERIHSGEKPHVCLQCGKGFNSSTLRI  
HERHTHTGEKPYKCKKCGKVFSDSSLRCHERIHSGEKPYVCKQCGKAFTTRHTSLRCHERIHCGEKPYICKQCG  
KGFISSSNFRKHEWTHSGEKLCVCKLGGKAFTGHSSLRHERIHSGEKPYVCKHCGKDFSSLSGCQRHEQIHT  
GEKPYVCKNCGKAFTNPSALRNHERIHSGEKPYVCGQCGKGFISFSKFRIPHERIHTGEKPYKCKQCGKAFTGH  
SSLRRHERIHSGEKPFVCKHCGKSFYTLSDCQRHEQIHTGEKPFICKQCGKAFTTRSSSLKIHDKTHSRSP\*  
>ENSMUSP00000034259\_c.455:T>A\_p.Y152\* ENSMUST00000034259.8|Zfp709-201|ENSMUSG00000056019|+|chr8:g.72643031:T>A

GSVVSFQDVAVTFTVEEWALLDPSQKKLHKDVM EETFRNLAAIGKTQEGQNI DEDHRYSRRNQRNEVVERLLEH  
 SKGTESKEIFRQIPNTIVNRKSSHRTMLSENHVYKDNVLISQSSLT VSVPLQTPHKPHEYELHGENLYKFGEC  
 EKAFIY\*PECFLKHKD SGTRQRSYELNQCEEI FKSNDYIQIRVNDE TREEICIDKQHYAFNYPDFLQYVEKVHT  
 GKPKYACKQCGKTF SFLSNIKRHERIHSGEKPYRCNICDKAFT CSTNFQEHERTHTGEKPYLCTQCGKSFSFSL  
 SNIRRHERTHTGEKPYRCNACGKAFSYLTNFDHERHTHTGEKPYVCTQCGKAFTYYSFQTHKRCHTGEKPYV  
 CKQCGKAFSYYSIQTHKRCHTGEKPYVCKLCAKAFTT LSSLRHYHERIHSGEKPHVCLQCGKGFNSSTLR IH  
 ERTHTGEKPYKCKKCGKVFVSDSSLRCHERIHSGEKPYVCKQCGKAFTRHTSLRCHERIHCGEKPYICKQCGK  
 GFISSNFRKHEWTHS GEKLCVCKL CGKAFTGHSSLRHERIHSGEKPYVCKHCGKDFSSLSGCQRHEQIHTG  
 EKPYVCKNCGKAFTNPSALRNHERIHSGEKPYVCGQCGKGFISFSKFR IHERIHTGEKPYKCKQCGKAFTGHS  
 SLRRHERIHSGEKPFVCKHCGKSFYTLSDCQRHEQIHTGEKPFICKQCGKAFTRSSSLKIHDKTHSRSP\*  
 >ENSMUSP00000140285\_c.524:T>G\_p.C175W ENSMUST00000188685.7|Zfp709-  
 203|ENSMUSG00000056019|+|chr8:g.72643097:T>G  
 MGSVVSFQDVAVTFTVEEWALLDPSQKKLHKDVM EETFRNLAAIGKTQEGQNI DEDHRYSRRNQRNEVVERLLE  
 HSKGTESKEIFRQIPNTIVNRKSSHRTMLSENHVYKDNVLISQSSLT VSVPLQTPHKPHEYELHGENLYKFGEC  
 CEKAFIYPECFLKHKD SGTRQRSYELNQWEEI FKSNDYIQIRVNDE TREEICIDKQHYAFNYPDFLQYVEKVH  
 TGKPKYACKQCGKTF SFLSNIKRHERIHSGEKPYRCNICDKAFT CSTNFQEHERTHTGEKPYLCTQCGKSFSF  
 LSNI RRHERHTHTGEKPYRCNACGKAFSYLTNFDHERHTHTGEKPYVCTQCGKAFTYYSFQTHKRCHTGEKPY  
 VCKQCGKAFSYYSIQTHKRCHTGEKPYVCKLCAKAFTT LSSLRHYHERIHSGEKPHVCLQCGKGFNSSTLR I  
 HERHTHTGEKPYKCKKCGKVFVSDSSLRCHERIHSGEKPYVCKQCGKAFTRHTSLRCHERIHCGEKPYICKQCG  
 KGFISSNFRKHEWTHS GEKLCVCKL CGKAFTGHSSLRHERIHSGEKPYVCKHCGKDFSSLSGCQRHEQIHT  
 GEKPYVCKNCGKAFTNPSALRNHERIHSGEKPYVCGQCGKGFISFSKFR IHERIHTGEKPYKCKQCGKAFTGH  
 SSLRRHERIHSGEKPFVCKHCGKSFYTLSDCQRHEQIHTGEKPFICKQCGKAFTRSSSLKIHDKTHSRSP\*  
 >ENSMUSP00000034259\_c.521:T>G\_p.C174W ENSMUST00000034259.8|Zfp709-  
 201|ENSMUSG00000056019|+|chr8:g.72643097:T>G  
 GSVVSFQDVAVTFTVEEWALLDPSQKKLHKDVM EETFRNLAAIGKTQEGQNI DEDHRYSRRNQRNEVVERLLEH  
 SKGTESKEIFRQIPNTIVNRKSSHRTMLSENHVYKDNVLISQSSLT VSVPLQTPHKPHEYELHGENLYKFGEC  
 EKAFIYPECFLKHKD SGTRQRSYELNQWEEI FKSNDYIQIRVNDE TREEICIDKQHYAFNYPDFLQYVEKVHT  
 GKPKYACKQCGKTF SFLSNIKRHERIHSGEKPYRCNICDKAFT CSTNFQEHERTHTGEKPYLCTQCGKSFSFSL  
 SNIRRHERTHTGEKPYRCNACGKAFSYLTNFDHERHTHTGEKPYVCTQCGKAFTYYSFQTHKRCHTGEKPYV  
 CKQCGKAFSYYSIQTHKRCHTGEKPYVCKLCAKAFTT LSSLRHYHERIHSGEKPHVCLQCGKGFNSSTLR IH  
 ERTHTGEKPYKCKKCGKVFVSDSSLRCHERIHSGEKPYVCKQCGKAFTRHTSLRCHERIHCGEKPYICKQCGK  
 GFISSNFRKHEWTHS GEKLCVCKL CGKAFTGHSSLRHERIHSGEKPYVCKHCGKDFSSLSGCQRHEQIHTG  
 EKPYVCKNCGKAFTNPSALRNHERIHSGEKPYVCGQCGKGFISFSKFR IHERIHTGEKPYKCKQCGKAFTGH  
 SSLRRHERIHSGEKPFVCKHCGKSFYTLSDCQRHEQIHTGEKPFICKQCGKAFTRSSSLKIHDKTHSRSP\*  
 >ENSMUSP00000140285\_c.529:A>ATTCTAGCTCCACTTCCACCATGACTATCCAATCGAGCTTCACCC  
 CCACCATAAGTCTCCTTCTAGCACCAACCCACCATTAGGATCCATTCTATCACCATCCCCCTCCAAGATGATCC  
 C\_p.E177ins-fs ENSMUST00000188685.7|Zfp709-  
 203|ENSMUSG00000056019|+|chr8:g.72643102:A>ATTCTAGCTCCACTTCCACCATGACTATCC  
 AATCGAGCTTCACCCCCACCATAATGCTCCTTCTAGCACCAACCCACCATTAGGATCCATTCTATCACCATCC  
 CCTCCAAGATGATCCC  
 MGSVVSFQDVAVTFTVEEWALLDPSQKKLHKDVM EETFRNLAAIGKTQEGQNI DEDHRYSRRNQRNEVVERLLE  
 HSKGTESKEIFRQIPNTIVNRKSSHRTMLSENHVYKDNVLISQSSLT VSVPLQTPHKPHEYELHGENLYKFGEC  
 CEKAFIYPECFLKHKD SGTRQRSYELNQCEDSSSTSTMTIQSSFTPTIMLLAPTHH  
 >ENSMUSP00000034259\_c.526:A>ATTCTAGCTCCACTTCCACCATGACTATCCAATCGAGCTTCACCC  
 CCACCATAAGTCTCCTTCTAGCACCAACCCACCATTAGGATCCATTCTATCACCATCCCCCTCCAAGATGATCC  
 C\_p.E176ins-fs ENSMUST00000034259.8|Zfp709-  
 201|ENSMUSG00000056019|+|chr8:g.72643102:A>ATTCTAGCTCCACTTCCACCATGACTATCC  
 AATCGAGCTTCACCCCCACCATAATGCTCCTTCTAGCACCAACCCACCATTAGGATCCATTCTATCACCATCC  
 CCTCCAAGATGATCCC  
 GSVVSFQDVAVTFTVEEWALLDPSQKKLHKDVM EETFRNLAAIGKTQEGQNI DEDHRYSRRNQRNEVVERLLEH  
 SKGTESKEIFRQIPNTIVNRKSSHRTMLSENHVYKDNVLISQSSLT VSVPLQTPHKPHEYELHGENLYKFGEC  
 EKAFIYPECFLKHKD SGTRQRSYELNQCEDSSSTSTMTIQSSFTPTIMLLAPTHH  
 >ENSMUSP00000140285\_c.536:C>G\_p.F179L ENSMUST00000188685.7|Zfp709-  
 203|ENSMUSG000000056019|+|chr8:g.72643109:C>G  
 MGSVVSFQDVAVTFTVEEWALLDPSQKKLHKDVM EETFRNLAAIGKTQEGQNI DEDHRYSRRNQRNEVVERLLE  
 HSKGTESKEIFRQIPNTIVNRKSSHRTMLSENHVYKDNVLISQSSLT VSVPLQTPHKPHEYELHGENLYKFGEC  
 CEKAFIYPECFLKHKD SGTRQRSYELNQCEEI LKSNDYIQIRVNDE TREEICIDKQHYAFNYPDFLQYVEKVH  
 TGKPKYACKQCGKTF SFLSNIKRHERIHSGEKPYRCNICDKAFT CSTNFQEHERTHTGEKPYLCTQCGKSFSF

LSNIRRHERHTHTGEKPYRCNACGKAFSYLTNFDHERHTHTGEKPYVCTQCGKAFTYYSFQTHKRCHTGEKPY  
VCKQCGKAFSYNSIQTHKRCHTGEKPYVCKLCAKAFTTSSSLRYHERIHSGEKPHVCLQCGKGFNSSTLRI  
HERHTHTGEKPYKCKKCGKVFSDSSLRCHERIHSGEKPYVCKQCGKAFTTRHTSLRCHERIHCGEKPYICKQCG  
KGFISSSNFRKHEWTHSGEKLCVCKLQCGKAFTGHSSSLQRHERIHSGEKPYVCKHCGKDFSSLSGCQRHEQIHT  
GEKPYVCKNCGKAFTNPSALRNHERIHSGEKPYVCGQCGKGFISFSKFRIHHERIHTGEKPYKCKQCGKAFTGH  
SSLRRHERIHSGEKPFVCKHCGKSFYTLSDCQRHEQIHTGEKPFICKQCGKAFTTRSSSLKIHDKTHSRSP\*  
>ENSMUSP00000034259\_c.533:C>G\_p.F178L ENSMUST00000034259.8|zfp709-  
201|ENSMUSG00000056019|+|chr8:g.72643109:C>G  
GSVVSFQDVAVTFTVEEWALLDPSQKLLHKDVMEEETFRNLAAIGKTQEGQNIDEDHRYSRRNQRNEVVERLLEH  
SKGTESKEIFRQIPNTIVNRKSSHRTMLSENHVYKDNVLISQSSSLTVSVPLQTPHKPHEYELHGENLYKFGEC  
EKAFIYPECFLKHKDSGTRQRSYELNQCEEILKSNDYIQIRVNDEETREEICIDKQHYAFNYPDFLQYVEKVHT  
GKKPYACKQCGKTFSSLSNIKRHERIHSGEKPYRCNICDKAFTCSTNFQEHERTHTGEKPYLCTQCGKSFSFL  
SNIRRHERHTHTGEKPYRCNACGKAFSYLTNFDHERHTHTGEKPYVCTQCGKAFTYYSFQTHKRCHTGEKPYV  
CKQCGKAFSYNSIQTHKRCHTGEKPYVCKLCAKAFTTSSSLRYHERIHSGEKPHVCLQCGKGFNSSTLRIH  
ERTHTHTGEKPYKCKKCGKVFSDSSLRCHERIHSGEKPYVCKQCGKAFTTRHTSLRCHERIHCGEKPYICKQCGK  
GFISSSNFRKHEWTHSGEKLCVCKLQCGKAFTGHSSSLQRHERIHSGEKPYVCKHCGKDFSSLSGCQRHEQIHTG  
EKPYVCKNCGKAFTNPSALRNHERIHSGEKPYVCGQCGKGFISFSKFRIHHERIHTGEKPYKCKQCGKAFTGH  
SSLRRHERIHSGEKPFVCKHCGKSFYTLSDCQRHEQIHTGEKPFICKQCGKAFTTRSSSLKIHDKTHSRSP\*  
>ENSMUSP00000140285\_c.554:T>G\_p.I185M ENSMUST00000188685.7|zfp709-  
203|ENSMUSG00000056019|+|chr8:g.72643127:T>G  
MGSVVSFQDVAVTFTVEEWALLDPSQKLLHKDVMEEETFRNLAAIGKTQEGQNIDEDHRYSRRNQRNEVVERLLE  
HSGTESKEIFRQIPNTIVNRKSSHRTMLSENHVYKDNVLISQSSSLTVSVPLQTPHKPHEYELHGENLYKFGEC  
CEKAFIYPECFLKHKDSGTRQRSYELNQCEEIFKSNDYMQIRVNDEETREEICIDKQHYAFNYPDFLQYVEKVH  
TGKKPYACKQCGKTFSSLSNIKRHERIHSGEKPYRCNICDKAFTCSTNFQEHERTHTGEKPYLCTQCGKSFSF  
LSNIRRHERHTHTGEKPYRCNACGKAFSYLTNFDHERHTHTGEKPYVCTQCGKAFTYYSFQTHKRCHTGEKPY  
VCKQCGKAFSYNSIQTHKRCHTGEKPYVCKLCAKAFTTSSSLRYHERIHSGEKPHVCLQCGKGFNSSTLRI  
HERHTHTGEKPYKCKKCGKVFSDSSLRCHERIHSGEKPYVCKQCGKAFTTRHTSLRCHERIHCGEKPYICKQCG  
KGFISSSNFRKHEWTHSGEKLCVCKLQCGKAFTGHSSSLQRHERIHSGEKPYVCKHCGKDFSSLSGCQRHEQIHT  
GEKPYVCKNCGKAFTNPSALRNHERIHSGEKPYVCGQCGKGFISFSKFRIHHERIHTGEKPYKCKQCGKAFTGH  
SSLRRHERIHSGEKPFVCKHCGKSFYTLSDCQRHEQIHTGEKPFICKQCGKAFTTRSSSLKIHDKTHSRSP\*  
>ENSMUSP00000034259\_c.551:T>G\_p.I184M ENSMUST00000034259.8|zfp709-  
201|ENSMUSG00000056019|+|chr8:g.72643127:T>G  
GSVVSFQDVAVTFTVEEWALLDPSQKLLHKDVMEEETFRNLAAIGKTQEGQNIDEDHRYSRRNQRNEVVERLLE  
HSGTESKEIFRQIPNTIVNRKSSHRTMLSENHVYKDNVLISQSSSLTVSVPLQTPHKPHEYELHGENLYKFGEC  
CEKAFIYPECFLKHKDSGTRQRSYELNQCEEIFKSNDYMQIRVNDEETREEICIDKQHYAFNYPDFLQYVEKVH  
TGKKPYACKQCGKTFSSLSNIKRHERIHSGEKPYRCNICDKAFTCSTNFQEHERTHTGEKPYLCTQCGKSFSF  
LSNIRRHERHTHTGEKPYRCNACGKAFSYLTNFDHERHTHTGEKPYVCTQCGKAFTYYSFQTHKRCHTGEKPY  
VCKQCGKAFSYNSIQTHKRCHTGEKPYVCKLCAKAFTTSSSLRYHERIHSGEKPHVCLQCGKGFNSSTLRI  
HERHTHTGEKPYKCKKCGKVFSDSSLRCHERIHSGEKPYVCKQCGKAFTTRHTSLRCHERIHCGEKPYICKQCG  
KGFISSSNFRKHEWTHSGEKLCVCKLQCGKAFTGHSSSLQRHERIHSGEKPYVCKHCGKDFSSLSGCQRHEQIHTG  
EKPYVCKNCGKAFTNPSALRNHERIHSGEKPYVCGQCGKGFISFSKFRIHHERIHTGEKPYKCKQCGKAFTGH  
SSLRRHERIHSGEKPFVCKHCGKSFYTLSDCQRHEQIHTGEKPFICKQCGKAFTTRSSSLKIHDKTHSRSP\*  
>ENSMUSP00000140285\_c.587:A>C\_p.E196D ENSMUST00000188685.7|zfp709-  
203|ENSMUSG00000056019|+|chr8:g.72643160:A>C  
MGSVVSFQDVAVTFTVEEWALLDPSQKLLHKDVMEEETFRNLAAIGKTQEGQNIDEDHRYSRRNQRNEVVERLLE  
HSGTESKEIFRQIPNTIVNRKSSHRTMLSENHVYKDNVLISQSSSLTVSVPLQTPHKPHEYELHGENLYKFGEC  
CEKAFIYPECFLKHKDSGTRQRSYELNQCEEIFKSNDYIQIRVNDEETREDICIDKQHYAFNYPDFLQYVEKVH  
TGKKPYACKQCGKTFSSLSNIKRHERIHSGEKPYRCNICDKAFTCSTNFQEHERTHTGEKPYLCTQCGKSFSF  
LSNIRRHERHTHTGEKPYRCNACGKAFSYLTNFDHERHTHTGEKPYVCTQCGKAFTYYSFQTHKRCHTGEKPY  
VCKQCGKAFSYNSIQTHKRCHTGEKPYVCKLCAKAFTTSSSLRYHERIHSGEKPHVCLQCGKGFNSSTLRI  
HERHTHTGEKPYKCKKCGKVFSDSSLRCHERIHSGEKPYVCKQCGKAFTTRHTSLRCHERIHCGEKPYICKQCG  
KGFISSSNFRKHEWTHSGEKLCVCKLQCGKAFTGHSSSLQRHERIHSGEKPYVCKHCGKDFSSLSGCQRHEQIHTG  
EKPYVCKNCGKAFTNPSALRNHERIHSGEKPYVCGQCGKGFISFSKFRIHHERIHTGEKPYKCKQCGKAFTGH  
SSLRRHERIHSGEKPFVCKHCGKSFYTLSDCQRHEQIHTGEKPFICKQCGKAFTTRSSSLKIHDKTHSRSP\*  
>ENSMUSP00000034259\_c.584:A>C\_p.E195D ENSMUST00000034259.8|zfp709-  
201|ENSMUSG00000056019|+|chr8:g.72643160:A>C  
GSVVSFQDVAVTFTVEEWALLDPSQKLLHKDVMEEETFRNLAAIGKTQEGQNIDEDHRYSRRNQRNEVVERLLEH  
SKGTESKEIFRQIPNTIVNRKSSHRTMLSENHVYKDNVLISQSSSLTVSVPLQTPHKPHEYELHGENLYKFGEC

EKAFIYPECFLLKHKDSGTRQRSYELNQCEEIIFKSNDYIQIRVNDETTREIDICIDKQHYAFNYPDFLQYVEKVHT  
GKKPYACKQCGKTFSSFLSNIKRHERIHSGEKPYRCNICDKAFTCSTNFQEHERTHTGEKPYLCTQCGKSFSFL  
SNIRRHERTHTGEKPYRCNACGKAFSYLTNFQDHERHTHTGEKPYVCTQCGKAFTYYSFQTHKRCHTGEKPYV  
CKQCGKAFSYNSIQTHKRCHTGEKPYVCKLCAKAFTTSSSLRYHERIHSGEKPHVCLQCGKGFNSSTLRH  
ERTHTGEKPYKCKKCGKVFSDSSLRCHERIHSGEKPYVCKQCGKAFTRHTSLRCHERIHCGEKPYICKQCGK  
GFISSSNFRKHEWTHSSEKLCVCKLCKGKAFTGHSSLRHERIHSGEKPYVCKHCGKDFSSLSGCQRHEQIHTG  
EKPYVCKNCGKAFTNPSALRNHERIHSGEKPYVCGQCGKGFISFSKFRHERIHTGEKPYKCKQCGKAFTGHS  
SLRRHERIHSGEKPFVCKHCGKSFYTLSDCQRHEQIHTGEKPFICKQCGKAFTRSSSLKIHDKTHSRSP\*  
>rs218700520\_ENSMUSP00000140285\_c.639:T>A\_p.Y214N  
ENSMUST00000188685.7|zfp709-203|ENSMUSG00000056019|+|chr8:g.72643212:T>A  
MGSVSFQDVAVTFTVEEWALLDPSQKLLHKDVMETFRNLAAIGKTQEGQNIDEDHRYSRNRQNEVVERLLE  
HSKGTESKEIFRQIPNTIVNRKSSHRTMLSENHVYKDNVLISQSSSLTVSVPLQTPHKPHEYELHGENLYKFG  
CEKAFIYPECFLLKHKDSGTRQRSYELNQCEEIIFKSNDYIQIRVNDETTREEICIDKQHYAFNYPDFLQNV  
TGKKPYACKQCGKTFSSFLSNIKRHERIHSGEKPYRCNICDKAFTCSTNFQEHERTHTGEKPYLCTQCGKSFS  
LSNIRRHERTHTGEKPYRCNACGKAFSYLTNFQDHERHTHTGEKPYVCTQCGKAFTYYSFQTHKRCHTGEKPY  
VCKQCGKAFSYNSIQTHKRCHTGEKPYVCKLCAKAFTTSSSLRYHERIHSGEKPHVCLQCGKGFNSSTLRH  
ERTHTGEKPYKCKKCGKVFSDSSLRCHERIHSGEKPYVCKQCGKAFTRHTSLRCHERIHCGEKPYICKQCG  
KGFISSSNFRKHEWTHSSEKLCVCKLCKGKAFTGHSSLRHERIHSGEKPYVCKHCGKDFSSLSGCQRHEQIHT  
GEKPYVCKNCGKAFTNPSALRNHERIHSGEKPYVCGQCGKGFISFSKFRHERIHTGEKPYKCKQCGKAFTGH  
SSLRRHERIHSGEKPFVCKHCGKSFYTLSDCQRHEQIHTGEKPFICKQCGKAFTRSSSLKIHDKTHSRSP\*  
>rs218700520\_ENSMUSP00000034259\_c.636:T>A\_p.Y213N  
ENSMUST00000034259.8|zfp709-201|ENSMUSG00000056019|+|chr8:g.72643212:T>A  
GSVSVFQDVAVTFTVEEWALLDPSQKLLHKDVMETFRNLAAIGKTQEGQNIDEDHRYSRNRQNEVVERLLEH  
SKGTESKEIFRQIPNTIVNRKSSHRTMLSENHVYKDNVLISQSSSLTVSVPLQTPHKPHEYELHGENLYKFG  
EKAFIYPECFLLKHKDSGTRQRSYELNQCEEIIFKSNDYIQIRVNDETTREEICIDKQHYAFNYPDFLQNV  
TGKKPYACKQCGKTFSSFLSNIKRHERIHSGEKPYRCNICDKAFTCSTNFQEHERTHTGEKPYLCTQCGKSFS  
LSNIRRHERTHTGEKPYRCNACGKAFSYLTNFQDHERHTHTGEKPYVCTQCGKAFTYYSFQTHKRCHTGEKPY  
VCKQCGKAFSYNSIQTHKRCHTGEKPYVCKLCAKAFTTSSSLRYHERIHSGEKPHVCLQCGKGFNSSTLRH  
ERTHTGEKPYKCKKCGKVFSDSSLRCHERIHSGEKPYVCKQCGKAFTRHTSLRCHERIHCGEKPYICKQCG  
KGFISSSNFRKHEWTHSSEKLCVCKLCKGKAFTGHSSLRHERIHSGEKPYVCKHCGKDFSSLSGCQRHEQIHT  
GEKPYVCKNCGKAFTNPSALRNHERIHSGEKPYVCGQCGKGFISFSKFRHERIHTGEKPYKCKQCGKAFTGH  
SSLRRHERIHSGEKPFVCKHCGKSFYTLSDCQRHEQIHTGEKPFICKQCGKAFTRSSSLKIHDKTHSRSP\*  
>ENSMUSP00000064823\_c.583:T>G\_p.F195C ENSMUST00000067912.8|klf2-  
201|ENSMUSG00000055148|+|chr8:g.73073781:T>G  
MALSEPIILPSGFATFASPCERGLQERWPRNEPEAGGTDEDLNNVLDLDFILSMGLDGLGAENPPEPPPPQPPPPAFY  
YEPFGAPPYSIPAASLGTETLLRDLDPQGPALHGRFLLAPPGRVLVKAEPPEVDGGGYGCAPGLAHGPRGLK  
LEGAPGATGACMRGPAGRPPPPDPPLSPDGPLRIPASGPRNPFPPPCGPGPSFGGPGPALHYGPPAPGAFG  
LFEDAAAAAALGLAPPATRGLLTPSSPLELLEAKPKRGRRSWPRKRAATHTCYTNCGKTYTKSSHLKAHL  
RTHHTGEKPYHCNWEKGFARSDDELTRHYRKHTGHRPFQCHLCDRAFSRSDHLALHMKRHM\*  
>rs47424793\_ENSMUSP00000105539\_c.1158:G>A\_p.G387S  
ENSMUST00000109913.9|Nr3c2-204|ENSMUSG00000031618|+|chr8:g.77636059:G>A  
METKGYHSLPEGLDMERRWSQVSTLERSLGAERTNENSYMEIVNVSCVSGATPNNSTQGSSKEKHELLPC  
LQQDNSRSGILPDSIKTELESKELSATVAESMGLYMDSVRDAEYTYDQONQOGLSPAKIYQNMELVKFYKE  
NGHRSSSTLSAISRPLRSFMPDSGTSMNGGALRAIVKSPIICHEKSPSVCSPLNMPSSVCS PAGINSMSSTAS  
FGSFPVHSPITQGTSLTCSPSVENRGRSRSHSPVHASNVGSPSSPLSSMKSPISPPSHCSVKSPVSSPNNVP  
LRSSVSSPANLNNRCSVSSPNTNRRSTLSSPTASTVGSIGSPI SNAFSYTTSGASAGAGAIQDMVSPDTH  
EKGAHDVPPFKTEEVEKAI NSVVTGQLNIVQYIKPEPDGAFSSSCLGGNNKINPSSPFSVPIKQESSKHSCSG  
ASFKNPTVNPFFMDGSYFSFMDDKDYSLSGILGPPVPGFDSSCEGSAFPGGIKQEPDDGSYFPETSIPSS  
AIGVNSGGQSFHYRIGAQGTISLSRSPRDQSFQHLSSFPVNALVESWKP HGLDSSRRSDGYPVLEYPEN  
SSSTLRSVSTGSSRPSKICLVCGDEASGCHYGVTTCGSKVFFKRAVEGQHNYLCAGRNDICIDKIRKNC  
CRLQKCLQAGMNLGARKSKKLGLKGLHEEQPQPQPQPQPSSPEEGTTYIAPTKEPSVNSALVPQLASITRAL  
TPSPMILENIEPEIVYAGYDNSKPDTAESLLSTLNLRLAGKQMIQVVKWAKVLPGFKNLPLEDQITLIQYSW  
CLSSFALSWSRYKHTNSQFLYFAPDLVFNEEKMHQSAMYELCQGMROI SLQFVRLQLTFEYYSIMKVL  
VVKDGLKSAFAEEMRTNYIKELRKMVTKCPNNSGGQSWQRFYQLTKLLDMSMDLVNDLLEFCFYTFRESQALK  
VEFPAMLVEIISDQLPKVESGNAPLYFHRK\*  
>rs47424793\_ENSMUSP00000118222\_c.1158:G>A\_p.G387S  
ENSMUST00000148106.8|Nr3c2-208|ENSMUSG00000031618|+|chr8:g.77636059:G>A

METKGYHSLPEGLDMERRWSQVSQTLERSLGAERTNENSYMEIVNVSCVSGATPNNSTQGSSKEKHELLPC  
LQQDNSRSGILPSDIKTELESKELSATVAESMGLYMDSVRDAEYTYDQQNQOGLSLSPAKIYQNMEQLVKFYKE  
NGHRSSSTLSAISRPLRSFMPDSTSMNGGALRAIVKSPIICHEKSPSVCSPLNMPSSVCS PAGINSMSSSTAS  
FGSFPVHSPITQGTSLTCSPSVENRGRSRSHSPVHASNVGSPSSPLSSMKSPISSPPSHCSVKSPVSSPNNVP  
LRSSVSSPANLNNSRCSVSSPNTNNRSTLSSPTASTVGSIGSPISNAFSYTTSGASAGAGAIQDMVPSPDTH  
EKGAHDVFPFKTEEVEKAI S NSVTGQLNIVQYIKPEPDGAFSSSCLGGNNKINPSSPFSVPIKQESSKHSCSG  
ASFKNPTVNPFFMDGYSYFSFMDKDYSLSGILGPPVPGFDSCEGSAFPGGIKQEPDDGYSYFPETSIPSS  
AIIGVNSGGQSFHYRIGAQGTISLSRSPRDQSFQHLSSFPVNALVESWKPHGDLSSRRSDGYPVLEYIPENV  
SSSTLRVSTGSSRPSKICLVCGEASGCHYGVTTCGCKVFFKRAVEGQHNYLCAGRNDICIIDKIRRKNCPA  
CRLQKCLQAGMNLGERRCISLPCMSCARGCGRSAFSSCGFS\*  
>rs47424793\_ENSMUSP00000105538\_c.1158:G>A\_p.G387S  
ENSMUST00000109912.8|Nr3c2-203|ENSMUSG00000031618|+|chr8:g.77636059:G>A  
METKGYHSLPEGLDMERRWSQVSQTLERSLGAERTNENSYMEIVNVSCVSGATPNNSTQGSSKEKHELLPC  
LQQDNSRSGILPSDIKTELESKELSATVAESMGLYMDSVRDAEYTYDQQNQOGLSLSPAKIYQNMEQLVKFYKE  
NGHRSSSTLSAISRPLRSFMPDSTSMNGGALRAIVKSPIICHEKSPSVCSPLNMPSSVCS PAGINSMSSSTAS  
FGSFPVHSPITQGTSLTCSPSVENRGRSRSHSPVHASNVGSPSSPLSSMKSPISSPPSHCSVKSPVSSPNNVP  
LRSSVSSPANLNNSRCSVSSPNTNNRSTLSSPTASTVGSIGSPISNAFSYTTSGASAGAGAIQDMVPSPDTH  
EKGAHDVFPFKTEEVEKAI S NSVTGQLNIVQYIKPEPDGAFSSSCLGGNNKINPSSPFSVPIKQESSKHSCSG  
ASFKNPTVNPFFMDGYSYFSFMDKDYSLSGILGPPVPGFDSCEGSAFPGGIKQEPDDGYSYFPETSIPSS  
AIIGVNSGGQSFHYRIGAQGTISLSRSPRDQSFQHLSSFPVNALVESWKPHGDLSSRRSDGYPVLEYIPENV  
SSSTLRVSTGSSRPSKICLVCGEASGCHYGVTTCGCKVFFKRAVEGQHNYLCAGRNDICIIDKIRRKNCPA  
CRLQKCLQAGMNLGARKSKKLGKLGHEEQPPPPPPQSPPEEGTTYIAPTKEPSVNSALVPQLASITRAL  
TPSPSMILENIEPEIVYAGYDNSKPDTAESLLSTLNRLAGKQMIQVVKWAKVLPGFKNLPLEDQITLIQYSWM  
CLSSFALSWSRYKHTNSQFLYFAPDLVFNEEKMHQSAMYELCQGMROI SLQFVRLQLTFFEEYSIMKVLLLLST  
VPKDGKLSQA AFEEMRTNYIKELRKMVTKCPNSSGQSWQRFYQLTKLLDSMHDLVNDLLEFCFYTFRESQALK  
VEFPAMLVEIISDQLPKVESGNAKPLYFHRK\*  
>rs47424793\_ENSMUSP00000105537\_c.1158:G>A\_p.G387S  
ENSMUST00000109911.8|Nr3c2-202|ENSMUSG00000031618|+|chr8:g.77636059:G>A  
METKGYHSLPEGLDMERRWSQVSQTLERSLGAERTNENSYMEIVNVSCVSGATPNNSTQGSSKEKHELLPC  
LQQDNSRSGILPSDIKTELESKELSATVAESMGLYMDSVRDAEYTYDQQNQOGLSLSPAKIYQNMEQLVKFYKE  
NGHRSSSTLSAISRPLRSFMPDSTSMNGGALRAIVKSPIICHEKSPSVCSPLNMPSSVCS PAGINSMSSSTAS  
FGSFPVHSPITQGTSLTCSPSVENRGRSRSHSPVHASNVGSPSSPLSSMKSPISSPPSHCSVKSPVSSPNNVP  
LRSSVSSPANLNNSRCSVSSPNTNNRSTLSSPTASTVGSIGSPISNAFSYTTSGASAGAGAIQDMVPSPDTH  
EKGAHDVFPFKTEEVEKAI S NSVTGQLNIVQYIKPEPDGAFSSSCLGGNNKINPSSPFSVPIKQESSKHSCSG  
ASFKNPTVNPFFMDGYSYFSFMDKDYSLSGILGPPVPGFDSCEGSAFPGGIKQEPDDGYSYFPETSIPSS  
AIIGVNSGGQSFHYRIGAQGTISLSRSPRDQSFQHLSSFPVNALVESWKPHGDLSSRRSDGYPVLEYIPENV  
SSSTLRVSTGSSRPSKICLVCGEASGCHYGVTTCGCKVFFKRAVEGQHNYLCAGRNDICIIDKIRRKNCPA  
CRLQKCLQAGMNLGGFKNLPLEDQITLIQYSWMCLSSFALSWSRYKHTNSQFLYFAPDLVFNEEKMHQSAMYEL  
CQGMROI SLQFVRLQLTFFEEYSIMKVLLLLSTVPKDGKLSQA AFEEMRTNYIKELRKMVTKCPNSSGQSWQ  
RFYQLTKLLDSMHDLVNDLLEFCFYTFRESQALKVEFPAMLVEIISDQLPKVESGNAKPLYFHRK\*  
>rs47424793\_ENSMUSP00000034031\_c.1158:G>A\_p.G387S  
ENSMUST00000034031.6|Nr3c2-201|ENSMUSG00000031618|+|chr8:g.77636059:G>A  
METKGYHSLPEGLDMERRWSQVSQTLERSLGAERTNENSYMEIVNVSCVSGATPNNSTQGSSKEKHELLPC  
LQQDNSRSGILPSDIKTELESKELSATVAESMGLYMDSVRDAEYTYDQQNQOGLSLSPAKIYQNMEQLVKFYKE  
NGHRSSSTLSAISRPLRSFMPDSTSMNGGALRAIVKSPIICHEKSPSVCSPLNMPSSVCS PAGINSMSSSTAS  
FGSFPVHSPITQGTSLTCSPSVENRGRSRSHSPVHASNVGSPSSPLSSMKSPISSPPSHCSVKSPVSSPNNVP  
LRSSVSSPANLNNSRCSVSSPNTNNRSTLSSPTASTVGSIGSPISNAFSYTTSGASAGAGAIQDMVPSPDTH  
EKGAHDVFPFKTEEVEKAI S NSVTGQLNIVQYIKPEPDGAFSSSCLGGNNKINPSSPFSVPIKQESSKHSCSG  
ASFKNPTVNPFFMDGYSYFSFMDKDYSLSGILGPPVPGFDSCEGSAFPGGIKQEPDDGYSYFPETSIPSS  
AIIGVNSGGQSFHYRIGAQGTISLSRSPRDQSFQHLSSFPVNALVESWKPHGDLSSRRSDGYPVLEYIPENV  
SSSTLRVSTGSSRPSKICLVCGEASGCHYGVTTCGCKVFFKRAVEGKCSRQHNYLCAGRNDICIIDKIRRK  
NCPACRLQKCLQAGMNLGARKSKKLGKLGHEEQPPPPPPQSPPEEGTTYIAPTKEPSVNSALVPQLASI  
TRALTPSPSMILENIEPEIVYAGYDNSKPDTAESLLSTLNRLAGKQMIQVVKWAKVLPGFKNLPLEDQITLIQ  
YSWMCLSSFALSWSRYKHTNSQFLYFAPDLVFNEEKMHQSAMYELCQGMROI SLQFVRLQLTFFEEYSIMKVLL  
LLSTVPKDGKLSQA AFEEMRTNYIKELRKMVTKCPNSSGQSWQRFYQLTKLLDSMHDLVNDLLEFCFYTFRES  
QALKVEFPAMLVEIISDQLPKVESGNAKPLYFHRK\*  
>rs387004511\_ENSMUSP00000105539\_c.2820:A>G\_p.T941A  
ENSMUST00000109913.9|Nr3c2-204|ENSMUSG00000031618|+|chr8:g.77969037:A>G



METKGYHSLPEGLDMERRWSQVSTLERSLGAERTNENSYMEIVNVSCVSGATPNNSTQGSSKEKHELLPC
LQQDNSRSGILPSDIKTELESKELSATVAESMGLYMDSVRDAEYTYDQQNQOGLSLPAKIYQNMEQLVKFYKE
NGHRSSSTLSAISRPLRSFMPDSGTSMNGGALRAIVKSPIICHEKSPSVCSPLNMPSSVCS PAGINSMSSSTAS
FGSFPVHSPITQGTSLTCSPSVENRGRSRSHSPVHASNVGSPSSPLSSMKSPISSPPSHCSVKSPVSSPNNVP
LRSSVSSPANLNNRCSVSSPSNTNNRSTLSSPTASTVGSIGSPISNAFSYTTSGASAGAGAIQDMVSPDTH
EKG AHDVFPFKTEEEVEKAI SNGVTGQLNIVQYIKPEPDGAFSSSCLGGNNKINPSSPFSVPIKQESSKHSCSG
ASFKNPTVNPFFMDGSIYFSFMDDKDYSLSGILGPPVPGFDSCEGSAFPGGIKQEPDDGSIYFPETSI PSS
AIGVNSGGQSFHYRIGAQGTISLSRSPRDQSFQHLSSFPVNALVESWKPHGDLSSRRSDGYPVLEYIPENV
SSSTLRVSTGSSRPSKICLVCGDEASGCHYGVTTCGSKVFFKRAVEGQHNYLCAGRNDICIIDKIRRNCPA
CRLQKCLQAGMNLGARKSKKLGKLGHEEQPQQPPPPPPQSPPEEGTTYIAPTKEPSVNSALVPQLASITRAL
TPSPSMILENIEPEIVYAGYDNSKPDTAESLLSTLNRLAGKQMIQVVKWAKVLPGFKNLPLEDQITLIQYSWM
CLSSFALSWSRSYKHTNSQFLYFAPDLVFNEEKMHQSAMYELCQGMROI SLQFVRLQLT FEEYSIMKVLLLLST
VPKDGLKSQA AFEEMRTNYIKELRKMVTKCPNSSGQSWORFYQLTKLLDSMHDLVNDLLEFCFYAFRESQALK
VEFPAMLVEIISDQLPKVESGNAKPLYFHRK\*

>rs387004511\_ENSMUSP00000105538\_c.2820:A>G\_p.T941A

ENSMUST00000109912.8|Nr3c2-203|ENSMUSG00000031618|+|chr8:g.77969037:A>G

METKGYHSLPEGLDMERRWSQVSTLERSLGAERTNENSYMEIVNVSCVSGATPNNSTQGSSKEKHELLPC
LQQDNSRSGILPSDIKTELESKELSATVAESMGLYMDSVRDAEYTYDQQNQOGLSLPAKIYQNMEQLVKFYKE
NGHRSSSTLSAISRPLRSFMPDSGTSMNGGALRAIVKSPIICHEKSPSVCSPLNMPSSVCS PAGINSMSSSTAS
FGSFPVHSPITQGTSLTCSPSVENRGRSRSHSPVHASNVGSPSSPLSSMKSPISSPPSHCSVKSPVSSPNNVP
LRSSVSSPANLNNRCSVSSPSNTNNRSTLSSPTASTVGSIGSPISNAFSYTTSGASAGAGAIQDMVSPDTH
EKG AHDVFPFKTEEEVEKAI SNGVTGQLNIVQYIKPEPDGAFSSSCLGGNNKINPSSPFSVPIKQESSKHSCSG
ASFKNPTVNPFFMDGSIYFSFMDDKDYSLSGILGPPVPGFDSCEGSAFPGGIKQEPDDGSIYFPETSI PSS
AIGVNSGGQSFHYRIGAQGTISLSRSPRDQSFQHLSSFPVNALVESWKPHGDLSSRRSDGYPVLEYIPENV
SSSTLRVSTGSSRPSKICLVCGDEASGCHYGVTTCGSKVFFKRAVEGQHNYLCAGRNDICIIDKIRRNCPA
CRLQKCLQAGMNLGARKSKKLGKLGHEEQPQQPPPPPPQSPPEEGTTYIAPTKEPSVNSALVPQLASITRAL
TPSPSMILENIEPEIVYAGYDNSKPDTAESLLSTLNRLAGKQMIQVVKWAKVLPGFKNLPLEDQITLIQYSWM
CLSSFALSWSRSYKHTNSQFLYFAPDLVFNEEKMHQSAMYELCQGMROI SLQFVRLQLT FEEYSIMKVLLLLST
VPKDGLKSQA AFEEMRTNYIKELRKMVTKCPNSSGQSWORFYQLTKLLDSMHDLVNDLLEFCFYAFRESQALK
VEFPAMLVEIISDQLPKVESGNAKPLYFHRK\*

>rs387004511\_ENSMUSP00000105537\_c.2481:A>G\_p.T828A

ENSMUST00000109911.8|Nr3c2-202|ENSMUSG00000031618|+|chr8:g.77969037:A>G

METKGYHSLPEGLDMERRWSQVSTLERSLGAERTNENSYMEIVNVSCVSGATPNNSTQGSSKEKHELLPC
LQQDNSRSGILPSDIKTELESKELSATVAESMGLYMDSVRDAEYTYDQQNQOGLSLPAKIYQNMEQLVKFYKE
NGHRSSSTLSAISRPLRSFMPDSGTSMNGGALRAIVKSPIICHEKSPSVCSPLNMPSSVCS PAGINSMSSSTAS
FGSFPVHSPITQGTSLTCSPSVENRGRSRSHSPVHASNVGSPSSPLSSMKSPISSPPSHCSVKSPVSSPNNVP
LRSSVSSPANLNNRCSVSSPSNTNNRSTLSSPTASTVGSIGSPISNAFSYTTSGASAGAGAIQDMVSPDTH
EKG AHDVFPFKTEEEVEKAI SNGVTGQLNIVQYIKPEPDGAFSSSCLGGNNKINPSSPFSVPIKQESSKHSCSG
ASFKNPTVNPFFMDGSIYFSFMDDKDYSLSGILGPPVPGFDSCEGSAFPGGIKQEPDDGSIYFPETSI PSS
AIGVNSGGQSFHYRIGAQGTISLSRSPRDQSFQHLSSFPVNALVESWKPHGDLSSRRSDGYPVLEYIPENV
SSSTLRVSTGSSRPSKICLVCGDEASGCHYGVTTCGSKVFFKRAVEGQHNYLCAGRNDICIIDKIRRNCPA
CRLQKCLQAGMNLGGFKNLPLEDQITLIQYSWMCLSSFALSWSRSYKHTNSQFLYFAPDLVFNEEKMHQSAMYE
LCQGMROI SLQFVRLQLT FEEYSIMKVLLLLSTVPKDGLKSQA AFEEMRTNYIKELRKMVTKCPNSSGQSWOR
FYQLTKLLDSMHDLVNDLLEFCFYAFRESQALKVEFPAMLVEIISDQLPKVESGNAKPLYFHRK\*

>rs387004511\_ENSMUSP00000034031\_c.2832:A>G\_p.T945A

ENSMUST00000034031.6|Nr3c2-201|ENSMUSG00000031618|+|chr8:g.77969037:A>G

METKGYHSLPEGLDMERRWSQVSTLERSLGAERTNENSYMEIVNVSCVSGATPNNSTQGSSKEKHELLPC
LQQDNSRSGILPSDIKTELESKELSATVAESMGLYMDSVRDAEYTYDQQNQOGLSLPAKIYQNMEQLVKFYKE
NGHRSSSTLSAISRPLRSFMPDSGTSMNGGALRAIVKSPIICHEKSPSVCSPLNMPSSVCS PAGINSMSSSTAS
FGSFPVHSPITQGTSLTCSPSVENRGRSRSHSPVHASNVGSPSSPLSSMKSPISSPPSHCSVKSPVSSPNNVP
LRSSVSSPANLNNRCSVSSPSNTNNRSTLSSPTASTVGSIGSPISNAFSYTTSGASAGAGAIQDMVSPDTH
EKG AHDVFPFKTEEEVEKAI SNGVTGQLNIVQYIKPEPDGAFSSSCLGGNNKINPSSPFSVPIKQESSKHSCSG
ASFKNPTVNPFFMDGSIYFSFMDDKDYSLSGILGPPVPGFDSCEGSAFPGGIKQEPDDGSIYFPETSI PSS
AIGVNSGGQSFHYRIGAQGTISLSRSPRDQSFQHLSSFPVNALVESWKPHGDLSSRRSDGYPVLEYIPENV
SSSTLRVSTGSSRPSKICLVCGDEASGCHYGVTTCGSKVFFKRAVEGKCSRQHNYLCAGRNDICIIDKIRRN
NCPACRLQKCLQAGMNLGARKSKKLGKLGHEEQPQQPPPPPPQSPPEEGTTYIAPTKEPSVNSALVPQLASI
TRALTPSPSMILENIEPEIVYAGYDNSKPDTAESLLSTLNRLAGKQMIQVVKWAKVLPGFKNLPLEDQITLIQ
YSWMCLSSFALSWSRSYKHTNSQFLYFAPDLVFNEEKMHQSAMYELCQGMROI SLQFVRLQLT FEEYSIMKVLL

LLSTVPKDGLKSQAAFEEMRTNYIKELRKMVTKCPNSSGQSWQRFYQLTKLLDSMHDLVNDLLEFCFYAFRES  
QALKVEFPAMLVEIISDQLPKVESGNAKPLYFHRK\*  
>rs47888503\_ENSMUSP00000075658\_c.1918:C>G\_p.S640C  
ENSMUST00000076316.6|Arhgap10-201|ENSMUSG00000037148|-  
|chr8:g.78003885:G>C  
MGLQPLEFSDCYLDSPWFRERIRAHEAEELERTNKFIKELIKDGKNLISATKSLSAAQRKFAHSLRDFKFEFIG  
DAETDDERCIDASLREFSNFLKNLEEQREIMALSVTETLIKPLEKFRKEQLGAVKKEKKKFKDETEKNYSLID  
KHLTLSARKKDSLQEADLQVEQNRQHFYELSLEYVCKLQEIQERKKFEFVEPMLSFFQGMFTFYHQHELK  
DFNHYKMELQINIQNTRNRFEGTRSEVEELMNKIRQNPKDQKRASQFTAEGYLYVQEKRPAPFGSSWVKHYCM  
YRKTAKKFNMIPFEHRSGGKLDGGEAFFLKECTKRHMDSTDRRFCFDIEAADRPGVPLTVQAFSEEEKQWLE  
ALGGKEALFHTFNRAIVPRPEGGAQLDKMGFTILRKCISAVETRGINDQGLYRVVGVSSKVQRLSMLMDVKM  
CNELDLENSADWEVKTVTSAKQYLRSLPEPLMTYELHRDFIVPAKSGSPESRVNAIHFLVHKLPEKNKEMLD  
ILVKHLTNVSSSHSKQNLMTVANLGVVFGPTLMRPQEETVAAIMDLKFQNIIVVEILIIENHEKIFRTSPDITFAE  
PTCLSASPPNAPPRQSKRQGQRTKRPVAVYNLCLELEEGDSPSPKEDPPSSSQDCLSTPSPITSAAHGPPGL  
DGNHLLAADGGSCGDATATTPSQTRPSMVQWLNMQSPITPSSNPAGTPPSPRMSPFPLSPAASIVDKLPECVIN  
RKARAVYPCEAEHSSELSFEIGAI FEDVQTSREPGWLEGLTNGKRGLIPQNYVKLL\*  
>rs47888503\_ENSMUSP00000147485\_c.1918:C>G\_p.S640C  
ENSMUST000000210922.2|Arhgap10-203|ENSMUSG00000037148|-  
|chr8:g.78003885:G>C  
MGLQPLEFSDCYLDSPWFRERIRAHEAEELERTNKFIKELIKDGKNLISATKSLSAAQRKFAHSLRDFKFEFIG  
DAETDDERCIDASLREFSNFLKNLEEQREIMALSVTETLIKPLEKFRKEQLGAVKKEKKKFKDETEKNYSLID  
KHLTLSARKKDSLQEADLQVEQNRQHFYELSLEYVCKLQEIQERKKFEFVEPMLSFFQGMFTFYHQHELK  
DFNHYKMELQINIQNTRNRFEGTRSEVEELMNKIRQNPKDQKRASQFTAEGYLYVQEKRPAPFGSSWVKHYCM  
YRKTAKKFNMIPFEHRSGGKLDGGEAFFLKECTKRHMDSTDRRFCFDIEAADRPGVPLTVQAFSEEEKQWLE  
ALGGKEALFHTFNRAIVPRPEGGAQLDKMGFTILRKCISAVETRGINDQGLYRVVGVSSKVQRLSMLMDVKM  
CNELDLENSADWEVKTVTSAKQYLRSLPEPLMTYELHRDFIVPAKSGSPESRVNAIHFLVHKLPEKNKEMLD  
ILVKHLTNVSSSHSKQNLMTVANLGVVFGPTLMRPQEETVAAIMDLKFQNIIVVEILIIENHEKIFRTSPDITFAE  
PTCLSASPPNAPPRQSKRQGQRTKRPVAVYNLCLELEEGDSPSPKEDPPSSSQDCLSTPSPITSAAHGPPGL  
DGNHLLAADGGSCGDATATTVINRKARAVYPCEAEHSSELSFEIGAI FEDVQTSREPGWLEGLTNGKRGLIPQNYVKLL\*  
>rs47888503\_ENSMUSP00000147493\_c.1852:C>G\_p.S618C  
ENSMUST000000210519.2|Arhgap10-202|ENSMUSG00000037148|-  
|chr8:g.78003885:G>C  
MGLQPLEFSDCYLDSPWFRERIRAHEAEELERTNKFIKELIKDGKNLISATKSLSAAQRKFAHSLRDFKFEFIG  
DAETDDERCIDASLREFSNFLKNLEEQREIMALSVTETLIKPLEKFRKEQLGAVKKEKKKFKDETEKNYSLID  
KHLTLSARKKDSLQEADLQVEQNRQHFYELSLEYVCKLQEIQERKKFEFVEPMLSFFQGMFTFYHQHELK  
DFNHYKMELQINIQNTRNRFEGTRSEVEELMNKIRQNPKDQKRASQFTAEGYLYVQEKRPAPFGSSWVKHYCM  
YRKTAKKFNMIPFEHRSGGKLDGGEAFFLKECTKRHMDSTDRRFCFDIEAADRPGVPLTVQAFSEEEKQWLE  
ALGGKEALFHTFNRAIVPRPEGGINDQGLYRVVGVSSKVQRLSMLMDVKMCNELDLENSADWEVKTVTSAK  
QYLRSLPEPLMTYELHRDFIVPAKSGSPESRVNAIHFLVHKLPEKNKEMLDILVKHLTNVSSSHSKQNLMTVAN  
LGVVFGPTLMRPQEETVAAIMDLKFQNIIVVEILIIENHEKIFRTSPDITFAEPTCLSASPPNAPPRQSKRQGQRT  
KRPVAVYNLCLELEEGDSPSPKEDPPSSSQDCLSTPSPITSAAHGPPGLDGNHLLAADGGSCGDATATTPSQ  
TRPSMVQWLNMQSPITPSSNPAGTPPSPRMSPFPLSPAASIVDKLPECVINRKARAVYPCEAEHSSELSFEIG  
AIFEDVQTSREPGWLEGLTNGKRGLIPQNYVKLL\*  
>rs50544875\_ENSMUSP00000075658\_c.1783:C>T\_p.A595V  
ENSMUST00000076316.6|Arhgap10-201|ENSMUSG00000037148|-  
|chr8:g.78037443:G>A  
MGLQPLEFSDCYLDSPWFRERIRAHEAEELERTNKFIKELIKDGKNLISATKSLSAAQRKFAHSLRDFKFEFIG  
DAETDDERCIDASLREFSNFLKNLEEQREIMALSVTETLIKPLEKFRKEQLGAVKKEKKKFKDETEKNYSLID  
KHLTLSARKKDSLQEADLQVEQNRQHFYELSLEYVCKLQEIQERKKFEFVEPMLSFFQGMFTFYHQHELK  
DFNHYKMELQINIQNTRNRFEGTRSEVEELMNKIRQNPKDQKRASQFTAEGYLYVQEKRPAPFGSSWVKHYCM  
YRKTAKKFNMIPFEHRSGGKLDGGEAFFLKECTKRHMDSTDRRFCFDIEAADRPGVPLTVQAFSEEEKQWLE  
ALGGKEALFHTFNRAIVPRPEGGAQLDKMGFTILRKCISAVETRGINDQGLYRVVGVSSKVQRLSMLMDVKM  
CNELDLENSADWEVKTVTSAKQYLRSLPEPLMTYELHRDFIVPAKSGSPESRVNAIHFLVHKLPEKNKEMLD  
ILVKHLTNVSSSHSKQNLMTVANLGVVFGPTLMRPQEETVAAIMDLKFQNIIVVEILIIENHEKIFRTSPDITFAE  
PTCLSASPPNVPPRQSKRQGQRTKRPVAVYNLCLELEEGDSPSPKEDPPSSSQDCLSTPSPITSAAHGPPGL  
DGNHLLAADGGSCGDATATTPSQTRPSMVQWLNMQSPITPSSNPAGTPPSPRMSPFPLSPAASIVDKLPECVIN  
RKARAVYPCEAEHSSELSFEIGAI FEDVQTSREPGWLEGLTNGKRGLIPQNYVKLL\*

>rs50544875\_ENSMUSP00000147485\_c.1783:C>T\_p.A595V  
ENSMUST00000210922.2|Arhgap10-203|ENSMUSG00000037148|-  
|chr8:g.78037443:G>A  
MGLQPLEFSDCYLDSPWFRERIRAHEAELERTNKFIKELIKDGKNLISATKSLSAAQRKFAHSLRDFKFEFIG  
DAETDDERCIDASLREFSNFLKNLEEQREIMALSVTETLIKPLEKFRKEQLGAVKKEKKKFDKETEKNYSLID  
KHLTSLARKKDSLQEQADLQVEQNRQHFYELSLEYVCKLQEIQRKKEFVEPMLSFFQGMFTFYHQGHLSK  
DFNHYKMELQINIQNTRNRFEGTRSEVEELMNKIRQNPKDQKRASQFTAEGYLYVQEKRPAPFGSSWVKHYCM  
YRKTAKKFNMIPEHRSGGKLDGGEAFFLKECTKRHMDSTDRRFCFDIEAADRPGVPLTVQAFSEEEKQWLE  
ALGGKEALFHTFNRAIVPRPEGGAQLDKMGFTILRKCISAVETRGINDQGLYRVVGVSSKVQRLLSMLMDVKM  
CNELDLENSADWEVKTVTSALKQYLRSLPEPLMTYELHRDFIVPAKSGSPESRVNAIHFLVHKLPEKNKEMLD  
ILVKHLTNVSSHQKQNLMTVANLGVVFGPTLMRPQEETVAAIMDLKFQNIIVVEILINHEKIFRTSPDITFAE  
PTCLSASPPNPPRQSKRQQRTRKRPVAVYNLCLELEEGDPSPLKEDPPSSSQDSLSTPSPITSAAHGPPGL  
DGNHLAADGGSCGDATATTVINRKARAVYPCEAEHSSELSFEIGAI FEDVQTSREPGWLEGLTNGKRGLIPQN  
YVKLL\*

>rs50544875\_ENSMUSP00000147493\_c.1717:C>T\_p.A573V  
ENSMUST00000210519.2|Arhgap10-202|ENSMUSG00000037148|-  
|chr8:g.78037443:G>A  
MGLQPLEFSDCYLDSPWFRERIRAHEAELERTNKFIKELIKDGKNLISATKSLSAAQRKFAHSLRDFKFEFIG  
DAETDDERCIDASLREFSNFLKNLEEQREIMALSVTETLIKPLEKFRKEQLGAVKKEKKKFDKETEKNYSLID  
KHLTSLARKKDSLQEQADLQVEQNRQHFYELSLEYVCKLQEIQRKKEFVEPMLSFFQGMFTFYHQGHLSK  
DFNHYKMELQINIQNTRNRFEGTRSEVEELMNKIRQNPKDQKRASQFTAEGYLYVQEKRPAPFGSSWVKHYCM  
YRKTAKKFNMIPEHRSGGKLDGGEAFFLKECTKRHMDSTDRRFCFDIEAADRPGVPLTVQAFSEEEKQWLE  
ALGGKEALFHTFNRAIVPRPEGGINDQGLYRVVGVSSKVQRLLSMLMDVKMCNELDLENSADWEVKTVTSALK  
QYLRSLPEPLMTYELHRDFIVPAKSGSPESRVNAIHFLVHKLPEKNKEMLDILVKHLTNVSSHQKQNLMTVAN  
LGVVFGPTLMRPQEETVAAIMDLKFQNIIVVEILINHEKIFRTSPDITFAEPTCLSASPPNPPRQSKRQQR  
TRKRPVAVYNLCLELEEGDPSPLKEDPPSSSQDSLSTPSPITSAAHGPPGLDGNHLAADGGSCGDATATTPSQ  
TRPSMVQWLNMQSPTTTPSSNPAGTTPSPRMSPFPLSPAASIVDKLPECVINRKARAVYPCEAEHSSELSFEIG  
AIFEDVQTSREPGWLEGLTNGKRGLIPQNYVKLL\*

>rs230726632\_ENSMUSP00000075658\_c.1189:C>T\_p.T397I  
ENSMUST00000076316.6|Arhgap10-201|ENSMUSG00000037148|-  
|chr8:g.78109392:G>A  
MGLQPLEFSDCYLDSPWFRERIRAHEAELERTNKFIKELIKDGKNLISATKSLSAAQRKFAHSLRDFKFEFIG  
DAETDDERCIDASLREFSNFLKNLEEQREIMALSVTETLIKPLEKFRKEQLGAVKKEKKKFDKETEKNYSLID  
KHLTSLARKKDSLQEQADLQVEQNRQHFYELSLEYVCKLQEIQRKKEFVEPMLSFFQGMFTFYHQGHLSK  
DFNHYKMELQINIQNTRNRFEGTRSEVEELMNKIRQNPKDQKRASQFTAEGYLYVQEKRPAPFGSSWVKHYCM  
YRKTAKKFNMIPEHRSGGKLDGGEAFFLKECTKRHMDSTDRRFCFDIEAADRPGVPLTVQAFSEEEKQWLE  
ALGGKEALFHTFNRAIVPRPEGGAQLDKMGFTILRKCISAVETRGINDQGLYRVVGVSSKVQRLLSMLMDVKM  
CNELDLENSADWEVKTVTSALKQYLRSLPEPLMTYELHRDFIVPAKSGSPESRVNAIHFLVHKLPEKNKEMLD  
ILVKHLTNVSSHQKQNLMTVANLGVVFGPTLMRPQEETVAAIMDLKFQNIIVVEILINHEKIFRTSPDITFAE  
PTCLSASPPNAPPRQSKRQQRTRKRPVAVYNLCLELEEGDPSPLKEDPPSSSQDSLSTPSPITSAAHGPPGL  
DGNHLAADGGSCGDATATTPSQTRPSMVQWLNMQSPTTTPSSNPAGTTPSPRMSPFPLSPAASIVDKLPECVIN  
RKARAVYPCEAEHSSELSFEIGAI FEDVQTSREPGWLEGLTNGKRGLIPQNYVKLL\*

>rs230726632\_ENSMUSP00000147485\_c.1189:C>T\_p.T397I  
ENSMUST00000210922.2|Arhgap10-203|ENSMUSG00000037148|-  
|chr8:g.78109392:G>A  
MGLQPLEFSDCYLDSPWFRERIRAHEAELERTNKFIKELIKDGKNLISATKSLSAAQRKFAHSLRDFKFEFIG  
DAETDDERCIDASLREFSNFLKNLEEQREIMALSVTETLIKPLEKFRKEQLGAVKKEKKKFDKETEKNYSLID  
KHLTSLARKKDSLQEQADLQVEQNRQHFYELSLEYVCKLQEIQRKKEFVEPMLSFFQGMFTFYHQGHLSK  
DFNHYKMELQINIQNTRNRFEGTRSEVEELMNKIRQNPKDQKRASQFTAEGYLYVQEKRPAPFGSSWVKHYCM  
YRKTAKKFNMIPEHRSGGKLDGGEAFFLKECTKRHMDSTDRRFCFDIEAADRPGVPLTVQAFSEEEKQWLE  
ALGGKEALFHTFNRAIVPRPEGGAQLDKMGFTILRKCISAVETRGINDQGLYRVVGVSSKVQRLLSMLMDVKM  
CNELDLENSADWEVKTVTSALKQYLRSLPEPLMTYELHRDFIVPAKSGSPESRVNAIHFLVHKLPEKNKEMLD  
ILVKHLTNVSSHQKQNLMTVANLGVVFGPTLMRPQEETVAAIMDLKFQNIIVVEILINHEKIFRTSPDITFAE  
PTCLSASPPNAPPRQSKRQQRTRKRPVAVYNLCLELEEGDPSPLKEDPPSSSQDSLSTPSPITSAAHGPPGL  
DGNHLAADGGSCGDATATTPSQTRPSMVQWLNMQSPTTTPSSNPAGTTPSPRMSPFPLSPAASIVDKLPECVIN  
RKARAVYPCEAEHSSELSFEIGAI FEDVQTSREPGWLEGLTNGKRGLIPQNYVKLL\*

>rs51928797\_ENSMUSP00000112692\_c.369:T>C\_p.F124L  
ENSMUST00000118622.2|Prmt9-202|ENSMUSG00000037134|+|chr8:g.78285539:T>C

MPNSRPRRRGAGGGAGAAGRDRDLVARSLQSAEHCLGDQDFGTAYAHYLLVLSLAPELKDDVKETFQYTLFKW  
 AEELHALSRIQDLLGCYEQAELFPDDEVICNSMGEHLFRMGFRDEAAGYLHKAVKLNPFNDAKENFYRVAN  
 WLVERWHFIMLNDTRRNMYNAAIQKAVCLGSRVLDIGTGTGILSMFAKKAGAQSVAACELSKTMYELACDV  
 VAANKMENGIKLLHMKSLDIEIPKHIPERLSLVVTETVDAGVFGGIVESLIHAWEHLLLQPKTKEENGNCCK  
 YGKVI PAGAVIFGMAVECAEIRRHRVGVAKDIAGIHLPTNVKQSPAYTSVDTEETVEPYTTEKMSGIPGGYL  
 PLTECFQIMKVFNNLQELKSLATKKPHSLNVPAIKEGVLDAMVWVFLQLDDEYSLSTSPSEETCWEQAVYP  
 VQALEDYCIQPGDRVTMEASCHDCYLRIQGISILHLEHEMEVMKGFTKSKDLLSLGNEAELCSALANLQTSRP  
 EALEQTCMLEPTEIALLNNIPYHEGFKTAMRKVLSLAPELLWQPMTHCQYMEMNSGSGQSDAAPSTADPFY  
 VLDVSEGFSLLPILAGTLGHVKPYSSVEKDQHCIALDLIAEANHFPKETLEFWRHIEDEAAVLQRPKSDKWL  
 SIIILDVIEPSGLIQQELMEKAAISRCLLQSGGKIFPQYVLMFGMLVESQTLVEESAVQGTHTLGLNIAPFI  
 NQFQVPIRVCLDLSSLPCVPLSQPVELLRLDLMTPLYNTSNKEVKVRVCRSGRVTAVPFWFHLCLDDEVRLDT  
 SGEASHWKQAAVVLDNPIQVQAGEELVLSVEHHKSNVSIIVKPK\*

>rs51928797\_ENSMUSP00000148193\_c.369:T>C\_p.F124L  
 ENSMUST00000210040.2|Prmt9-205|ENSMUSG00000037134|+|chr8:g.78285539:T>C  
 MPNSRPRRRGAGGGAGAAGRDRDLVARSLQSAEHCLGDQDFGTAYAHYLLVLSLAPELKDDVKETFQYTLFKW  
 AEELHALSRIQDLLGCYEQAELFPDDEVICNSMGEHLFRMGFRDEAAGYLHKAVKLNPFNDAKENFYRVAN  
 WLVERWHFIMLNDTRRNMYNAAIQKAVCLGSRVLDIGTGTGILSMFAKKAGAQSVAACELSKTMYELACDV  
 VAANKMENGIKLLHMKSLDIEIPKHIPERCIWRRNCGEFNSCMGTFTSATKDQRRKWKLEWVESDTSRCCYI  
 WDGSRVCRDTKAS\*

>rs51928797\_ENSMUSP00000050181\_c.369:T>C\_p.F124L  
 ENSMUST00000056237.15|Prmt9-201|ENSMUSG00000037134|+|chr8:g.78285539:T>C  
 MPNSRPRRRGAGGGAGAAGRDRDLVARSLQSAEHCLGDQDFGTAYAHYLLVLSLAPELKDDVKETFQYTLFKW  
 AEELHALSRIQDLLGCYEQAELFPDDEVICNSMGEHLFRMGFRDEAAGYLHKAVKLNPFNDAKENFYRVAN  
 WLVERWHFIMLNDTRRNMYNAAIQKAVCLGSRVLDIGTGTGILSMFAKKAGAQSVAACELSKTMYELACDV  
 VAANKMENGIKLLHMKSLDIEIPKHIPERVSLVVTETVDAGVFGGIVESLIHAWEHLLLQPKTKEENGNCCK  
 YGKVI PAGAVIFGMAVECAEIRRHRVGVAKDIAGIHLPTNVKQSPAYTSVDTEETVEPYTTEKMSGIPGGYL  
 PLTECFQIMKVFNNLQELKSLATKKPHSLNVPAIKEGVLDAMVWVFLQLDDEYSLSTSPSEETCWEQAVYP  
 VQALEDYCIQPGDRVTMEASCHDCYLRIQGISILHLEHEMEVMKGFTKSKDLLSLGNEAELCSALANLQTSRP  
 EALEQTCMLEPTEIALLNNIPYHEGFKTAMRKVLSLAPELLWQPMTHCQYMEMNSGSGQSDAAPSTADPFY  
 VLDVSEGFSLLPILAGTLGHVKPYSSVEKDQHCIALDLIAEANHFPKETLEFWRHIEDEAAVLQRPKSDKWL  
 SIIILDVIEPSGLIQQELMEKAAISRCLLQSGGKIFPQYVLMFGMLVESQTLVEESAVQGTHTLGLNIAPFI  
 NQFQVPIRVCLDLSSLPCVPLSQPVELLRLDLMTPLYNTSNKEVKVRVCRSGRVTAVPFWFHLCLDDEVRLDT  
 SGEASHWKQAAVVLDNPIQVQAGEELVLSVEHHKSNVSIIVKPK\*

>rs254367289\_ENSMUSP00000112692\_c.1410:A>C\_p.I471L  
 ENSMUST00000118622.2|Prmt9-202|ENSMUSG00000037134|+|chr8:g.78298718:A>C  
 MPNSRPRRRGAGGGAGAAGRDRDLVARSLQSAEHCLGDQDFGTAYAHYLLVLSLAPELKDDVKETFQYTLFKW  
 AEELHALSRIQDLLGCYEQAELFPDDEVICNSMGEHLFRMGFRDEAAGYFHKAVKLNPFNDAKENFYRVAN  
 WLVERWHFIMLNDTRRNMYNAAIQKAVCLGSRVLDIGTGTGILSMFAKKAGAQSVAACELSKTMYELACDV  
 VAANKMENGIKLLHMKSLDIEIPKHIPERLSLVVTETVDAGVFGGIVESLIHAWEHLLLQPKTKEENGNCCK  
 YGKVI PAGAVIFGMAVECAEIRRHRVGVAKDIAGIHLPTNVKQSPAYTSVDTEETVEPYTTEKMSGIPGGYL  
 PLTECFQIMKVFNNLQELKSLATKKPHSLNVPAIKEGVLDAMVWVFLQLDDEYSLSTSPSEETCWEQAVYP  
 VQALEDYCIQPGDRVTMEASCHDCYLRIQGISLHLEHEMEVMKGFTKSKDLLSLGNEAELCSALANLQTSRP  
 EALEQTCMLEPTEIALLNNIPYHEGFKTAMRKVLSLAPELLWQPMTHCQYMEMNSGSGQSDAAPSTADPFY  
 VLDVSEGFSLLPILAGTLGHVKPYSSVEKDQHCIALDLIAEANHFPKETLEFWRHIEDEAAVLQRPKSDKWL  
 SIIILDVIEPSGLIQQELMEKAAISRCLLQSGGKIFPQYVLMFGMLVESQTLVEESAVQGTHTLGLNIAPFI  
 NQFQVPIRVCLDLSSLPCVPLSQPVELLRLDLMTPLYNTSNKEVKVRVCRSGRVTAVPFWFHLCLDDEVRLDT  
 SGEASHWKQAAVVLDNPIQVQAGEELVLSVEHHKSNVSIIVKPK\*

>rs254367289\_ENSMUSP00000050181\_c.1410:A>C\_p.I471L  
 ENSMUST00000056237.15|Prmt9-201|ENSMUSG00000037134|+|chr8:g.78298718:A>C  
 MPNSRPRRRGAGGGAGAAGRDRDLVARSLQSAEHCLGDQDFGTAYAHYLLVLSLAPELKDDVKETFQYTLFKW  
 AEELHALSRIQDLLGCYEQAELFPDDEVICNSMGEHLFRMGFRDEAAGYFHKAVKLNPFNDAKENFYRVAN  
 WLVERWHFIMLNDTRRNMYNAAIQKAVCLGSRVLDIGTGTGILSMFAKKAGAQSVAACELSKTMYELACDV  
 VAANKMENGIKLLHMKSLDIEIPKHIPERVSLVVTETVDAGVFGGIVESLIHAWEHLLLQPKTKEENGNCCK  
 YGKVI PAGAVIFGMAVECAEIRRHRVGVAKDIAGIHLPTNVKQSPAYTSVDTEETVEPYTTEKMSGIPGGYL  
 PLTECFQIMKVFNNLQELKSLATKKPHSLNVPAIKEGVLDAMVWVFLQLDDEYSLSTSPSEETCWEQAVYP  
 VQALEDYCIQPGDRVTMEASCHDCYLRIQGISLHLEHEMEVMKGFTKSKDLLSLGNEAELCSALANLQTSRP  
 EALEQTCMLEPTEIALLNNIPYHEGFKTAMRKVLSLAPELLWQPMTHCQYMEMNSGSGQSDAAPSTADPFY  
 VLDVSEGFSLLPILAGTLGHVKPYSSVEKDQHCIALDLIAEANHFPKETLEFWRHIEDEAAVLQRPKSDKWL

SIIILDVIEPSGLIQQELMEKAAISRCLLQSGGKIFPQYVLMFGMLVESQTLVEESAVQGTEHTLGLNIAPFI  
 NQFQVPIRVCLDLSLPCVPLSQPVELLRLDLMTPLYLNTSNKEVKVRVCRSGRVTAVPFWFHLCLDDEVRLDT  
 SGEASHWKQAAVVLDNPIQVQAGEELVLSVEHHKSNVSIIVK\*  
 >rs32616028\_ENSMUSP00000112692\_c.2380:G>T\_p.C794F  
 ENSMUST00000118622.2|Prmt9-202|ENSMUSG00000037134|+|chr8:g.78307718:G>T  
 MPNSRPRRRGAGGGAGAAGRDLVARSLQSAEHLGDDFGTAYAHYLLVLSLAPELKDDVKETFQYTLFKW  
 AEELHALSRIQDLLGCYEQAELFPDDEVICNSMGEHLFRMGFRDEAAGYFHKAVKLNPDFNDAKENFYRVAN  
 WLVERWHFIMLNDTRRNVMVYNAIQKAVCLGSRTVLDIGTGTGILSMFAKKAGAQSVYACELSKTMYELACDV  
 VAANKMENGIKLLHMKSLDIEIPKHIPERLSLVVTETVDAGVFGEGIVESLIHAWEHLLLQPKTKEENGNCCK  
 YGKVIPAGAVIFGMAVECAEIRRHRVGVAKDIAGIHLPTNVKQSPAYTSVDTEETVEPYTTEKMSGIPGGYL  
 PLTECFQIMKVDFFNNLQELKSLATKKPHSLNVPKIEGVLDAIMVWFVLQDDEYSLSTSPSEETCWEQAVYP  
 VQALEDYCIQPGDRVTMEASCHDCYLRIQGISILHLEHEMVMKGFTKSKDLLSLGNEAELCSALANLQTSRP  
 EALEQTCMLEPTEIALNNIPYHEGFKTAMRKVLSLAPPELLWQPMTHCQYMEMNSGSGQSDAAPSTADPFY  
 VLDVSEGFSLLPILAGTLGHVKPYSSVEKDQHCIALDLIAEANHFPKETLEFWRHIEDEAAVLQRPKSDKLW  
 SIIILDVIEPSGLIQQELMEKAAISRCLLQSGGKIFPQYVLMFGMLVESQTLVEESAVQGTEHTLGLNIAPFI  
 NQFQVPIRVCLDLSLPCVPLSQPVELLRLDLMTPLYLNTSNKEVKVRVCRSGRVTAVPFWFHLFLDDEVRLDT  
 SGEASHWKQAAVVLDNPIQVQAGEELVLSVEHHKSNVSIIVK\*  
 >rs32616028\_ENSMUSP00000050181\_c.2380:G>T\_p.C794F  
 ENSMUST00000056237.15|Prmt9-201|ENSMUSG00000037134|+|chr8:g.78307718:G>T  
 MPNSRPRRRGAGGGAGAAGRDLVARSLQSAEHLGDDFGTAYAHYLLVLSLAPELKDDVKETFQYTLFKW  
 AEELHALSRIQDLLGCYEQAELFPDDEVICNSMGEHLFRMGFRDEAAGYFHKAVKLNPDFNDAKENFYRVAN  
 WLVERWHFIMLNDTRRNVMVYNAIQKAVCLGSRTVLDIGTGTGILSMFAKKAGAQSVYACELSKTMYELACDV  
 VAANKMENGIKLLHMKSLDIEIPKHIPERVSLVVTETVDAGVFGEGIVESLIHAWEHLLLQPKTKEENGNCCK  
 YGKVIPAGAVIFGMAVECAEIRRHRVGVAKDIAGIHLPTNVKQSPAYTSVDTEETVEPYTTEKMSGIPGGYL  
 PLTECFQIMKVDFFNNLQELKSLATKKPHSLNVPKIEGVLDAIMVWFVLQDDEYSLSTSPSEETCWEQAVYP  
 VQALEDYCIQPGDRVTMEASCHDCYLRIQGISILHLEHEMVMKGFTKSKDLLSLGNEAELCSALANLQTSRP  
 EALEQTCMLEPTEIALNNIPYHEGFKTAMRKVLSLAPPELLWQPMTHCQYMEMNSGSGQSDAAPSTADPFY  
 VLDVSEGFSLLPILAGTLGHVKPYSSVEKDQHCIALDLIAEANHFPKETLEFWRHIEDEAAVLQRPKSDKLW  
 SIIILDVIEPSGLIQQELMEKAAISRCLLQSGGKIFPQYVLMFGMLVESQTLVEESAVQGTEHTLGLNIAPFI  
 NQFQVPIRVCLDLSLPCVPLSQPVELLRLDLMTPLYLNTSNKEVKVRVCRSGRVTAVPFWFHLFLDDEVRLDT  
 SGEASHWKQAAVVLDNPIQVQAGEELVLSVEHHKSNVSIIVK\*  
 >rs47583370\_ENSMUSP00000034030\_c.1239:A>G\_p.S414G  
 ENSMUST00000034030.15|Tmem184c-201|ENSMUSG00000031617|-  
 |chr8:g.78323621:T>C  
 MPCACNRSNWRRWRIPLLVLFYATTILVAVPICIWKFKQMKVGMHTKSWFIAGIFLLLTIPVSLWGILOHLVH  
 YTPQLKQPIIRILWMPYIYVDSWVALVYPKIAIYVDTWRECYEAYVIYNFMIFLTNYLTIRFPNLILHLEA  
 KDQQNHILPLCCPPWAMGEMLLFRCKLGVLYQTVVRPITTTVTALVCEILDVYDEGNFGFSNAWYTLVILNNL  
 SQLFAMYCLLLFYKVLKEELSPIQPVGKFLCVKLVVFSFWQAVLIALLVKLGVISEKRTWEWQSAEAVATGL  
 QDFIICIEMFFAAIAHHTYFSYKPYVHEAEEGSCFDSFLAMWDVSDIRDDISEQVRRVGRMTGRYPKPKCFPG  
 DDPDHNEHSSLLSSSSQDLTSGSSKVPSPGGLYQGGFHTISSQSPISIAGIYEEIMNDIPEEQKLLNPGQDVT  
 INIPEEQKLNLTGKDVMLDRQITTSRPIASIASIYEKIMIDIPEEQKLTDTGQDVMINRQITITPPRPISTIS  
 IYEEVLIDITEKQKLNLTGKNVMINIPEEQKLDIKRDKVMDIPEQNAIPDNSQYQDQEQIVTLQALFPST  
 ETSSENSMIDTSESQQESSDLCTESSDSSTESSDLSTDP\*  
 >rs387604461\_ENSMUSP00000034115\_c.508:C>T\_p.A170V  
 ENSMUST00000034115.5|Pou4f2-201|ENSMUSG00000031688|-|chr8:g.79162093:G>A  
 MMMSLNSKQAFSMPHAGSLHVEPKYSALHSASPGSSAPAAPSASSPSSSSNAGGGGGGGGGGGGRSSSSS  
 SSGSGGGGGGGSEAMRACLPTPPSNIFGGLDESLLARAEALAAVDIVSQSKSHHHPPHSPFKPDPATYHT  
 MNTIPCTSAASSSSVPI SHPSALVGTTHHHHHHHHHHHQPHQALEGELLEHLSPGLALGAMAGPDGTVVSTPA  
 HAPHMATMNPMAHAALSMHAHGLPSHMGCMDSVDADPRDLEAFERFKQRRIKLGVTQADVGSALANLKI PG  
 VGSLSQSTICRFESLTLSHNNMIALKPILQAWLEEAESHREKLTPELFGAEEKRKRRTSIAAPEKRSLEAY  
 FAIQPRPSSKIAAIAEKLDLKKNVVRVWFCNQKQKQKRMKYSAGI\*  
 >rs387536632\_ENSMUSP00000085238\_c.196:C>T\_p.S66F  
 ENSMUST00000087927.11|Zfp827-201|ENSMUSG00000071064|+|chr8:g.79787032:C>T  
 MPRRKQEQPKRLPSHVSRQDEAEGDFSEGEQWYGNSSSETPSEASYGEVQENYKLSLEDRIQEQTFFPDTSLGS  
 ATPSSHTLELVALDGEVLRDLSLQCGHLSPGVSSVCDPPSSNKPLSSNLRLLEAGSLKLDGTANGRVESP  
 VNVGPSLSFSPPSHHAQQLSVLARKLAEKQDQSDQFTPSNRFIWNQGWLPNSTTTTCGLSPDSAILKKAAN  
 AVLQDKSLSRTEESLRFESFSSPFSSQSASSTLAALSCKVRSERLTPGQEHPPPASSFLSLASMTSSAALLKE  
 VAARAAGSLLAEKSSLLPDDPLPLPSSEKKPEKVTPPPPPPPTAQPQSLLELLLPLVSKGRASKPSNSAPEE



ESGKPFQCPICGLVIKRSYWKHRMVIHTGLKSHQCPLCPFRCAKDNLKSHMKVSHLPRRGRGFVLFSTAGG  
FLADREHCGGAGLRKLTLGCE\*  
>rs387536632\_ENSMUSP00000113199\_c.196:C>T\_p.S66F  
ENSMUST00000119254.8|zfp827-203|ENSMUSG00000071064|+|chr8:g.79787032:C>T  
MPRRKQEQPKRLPSHVSQRDEAEGDFSEGEQWYGNSSSETPSEASYGEVQENYKLSLEDRIQEQTFFPDTSLGS  
ATPSSHTLELVALDGEVLRDLSLQCQGHLSPGVSSVCDDDDPPSSNKPLSSNLRLRLEAGSLKLDGTANGRVES  
VNVGPSLSFSPPSHHAQQLSVLARKLAEKQDQSDQFTPSNRFIWNQGWLPNSTTTTCGLSPDSAILKLKAAAN  
AVLQDKLSLRTEESLRFESFSSPFSSQSASSTLAALS KKVSESLTPGQEHPPPASSFSLASMTSSAALLKE  
VAARAAGSLLAEKSSLLPDDPLPLPSSEKKPEKVTPPPPPPPTAQPQSLLELLLLPVSKGRASKPSNSAPEE  
ESGKPFQCPICGLVIKRSYWKHRMVIHTGLKSHQCPLCPFRCAKDNLKSHMKVSHLPRRGRGFVLFSTAGG  
SSRHFSCLKHMRCHQHFLRTEAKVKEEIPDPDVKGSPLSDSGCLGQREGGGTELVTMTSNTPERTGQGG  
AGVAPLLVKEEPKEDNGLPTSFTLNAADR PANHTKLDKDPSEYVSNSAAVLFSDISVKMASDFLMKLSAANQK  
EPMNLNFKVKEEPKEEESLSMPLPRSSYVFSPEPEVSTPSVSEDPLTPQEGKGSVLRDRMSAKAASELLMKLS  
AESYKETQAVTVKEEPMEVDIQDSPASISPSRNIGYSTLMGREKTEPLQKLPEGRVPPERNLFSQDISVKMAS  
ELLFQLSEKVSKEHNHTKENAMRTTSPFFSEDFTFRQSPFTSNSKDLLPGESVLHGRVSAPETEKIVLEAGNG  
LPSWKFNQDLFPDVCVKVFRQQTLSRHLSLHTEERKYKCHLCPYAAKCRANLNQHLTVHVSVKLVSTDTEDI  
VSAVTSEGS DGKKHPYYSCHVCGFETELNVQFVSHMSLHVDKEQWMFSCCTACDFVTMEEAEIKTHIGTKH  
TGDDRKTPESENPSSSSLSTLSDSANGKDDSDSSQKNKGNNLLVIVSVVPGSQPSLNNEEKPEKGFECVFCN  
FVCKTKNMFERHLQIHLITRMFECVCHKFMKTPEQLLEHKKCHTVPTGGLK\*  
>rs387536632\_ENSMUSP00000158613\_c.196:C>T\_p.S66F  
ENSMUST00000238669.2|zfp827-209|ENSMUSG00000071064|+|chr8:g.79787032:C>T  
MPRRKQEQPKRLPSHVSQRDEAEGDFSEGEQWYGNSSSETPSEASYGEVQENYKLSLEDRIQEQTFFPDTSLGS  
ATPSSHTLELVALDGEVLRDLSLQCQGHLSPGVSSVCDDDDPPSSNKPLSSNLRLRLEAGSLKLDGTANGRVES  
VNVGPSLSFSPPSHHAQQLSVLARKLAEKQDQSDQFTPSNRFIWNQGWLPNSTTTTCGLSPDSAILKLKAAAN  
AVLQDKLSLRTEESLRFESFSSPFSSQSASSTLAALS KKVSESLTPGQEHPPPASSFSLASMTSSAALLKE  
VAARAAGSLLAEKSSLLPDDPLPLPSSEKKPEKVTPPPPPPPTAQPQSLLELLLLPVSKGRASKPSNSAPEE  
ESGKPFQCPICGLVIKRSYWKHRMVIHTGLKSHQCPLCPFRCAKDNLKSHMKVSHLPRRGRGFVLFSTAGG  
SSRHFSCLKHMRCHQHFLRTEAKVKEEIPDPDVKGSPLSDSGCLGQREGGGTELVTMTSNTPERTGQGG  
AGVAPLLVKEEPKEDNGLPTSFTLNAADR PANHTKLDKDPSEYVSNSAAVLFSDISVKMASDFLMKLSAANQK  
EPMNLNFKVKEEPKEEESLSMPLPRSSYVFSPEPEVSTPSVSEDPLTPQEGKGSVLRDRMSAKAASELLMKLS  
AESYKETQAVTVKEEPMEVDIQDSPASISPSRNIGYSTLMGREKTEPLQKLPEGRVPPERNLFSQDISVKMAS  
ELLFQLSEKVSKEHNHTKENAMRTTSPFFSEDFTFRQSPFTSNSKDLLPGESVLHGRVSAPETEKIVLEAGNG  
LPSWKFNQDLFPDVCVKVFRQQTLSRHLSLHTEERKYKCHLCPYAAKCRANLNQHLTVHVSVKLVSTDTEDI  
VSAVTSEGS DGKKHPYYSCHVCGFETELNVQFVSHMSLHVDKEQWMFSCCTACDFVTMEEAEIKTHIGTKH  
TGDDRKTPESENPSSSSLSTLSDSANGKDDSDSSQKNKGNNLLVIVSVVPGSQPSLNNEEKPEKGFECVFCN  
FVCKTKNMFERHLQIHLITRMFECVCHKFMKTPEQLLEHKKCHTVPTGGLKCPFCIYSTNRPAAMECHLKTH  
YKMEYKCRICQTVKANQLELETHTREHRLGNHYKCEQCGYLSKTANKLIEHVRVHTGERPFHCDQCSYSCKRK  
DNLNLHKKLKHAPRQTFSCGCELFKTHFPVFSRHVKKHQSGDGPEDDKGLSPASREPAGPGAPLLVGGGR  
SLLSPLSVMSASQALQTVALSAAHGSSEPNLALKALAFSGSPLHLDKYRNSDVAHLIPLTMLYPRNHLDLTF  
HPPRPQTAPPSIPSPKHSFLAYLGLRERAGTV\*  
>rs387536632\_ENSMUSP00000096214\_c.196:C>T\_p.S66F  
ENSMUST00000098614.9|zfp827-202|ENSMUSG00000071064|+|chr8:g.79787032:C>T  
MPRRKQEQPKRLPSHVSQRDEAEGDFSEGEQWYGNSSSETPSEASYGEVQENYKLSLEDRIQEQTFFPDTSLGS  
ATPSSHTLELVALDGEVLRDLSLQCQGHLSPGVSSVCDDDDPPSSNKPLSSNLRLRLEAGSLKLDGTANGRVES  
VNVGPSLSFSPPSHHAQQLSVLARKLAEKQDQSDQFTPSNRFIWNQGWLPNSTTTTCGLSPDSAILKLKAAAN  
AVLQDKLSLRTEESLRFESFSSPFSSQSASSTLAALS KKVSESLTPGQEHPPPASSFSLASMTSSAALLKE  
VAARAAGSLLAEKSSLLPDDPLPLPSSEKKPEKVTPPPPPPPTAQPQSLLELLLLPVSKGRASKPSNSAPEE  
ESGKPFQCPICGLVIKRSYWKHRMVIHTGLKSHQCPLCPFRCAKDNLKSHMKVSHLPRRGRGFVLFSTAGG  
SSRHFSCLKHMRCHQHFLRTEAKVKEEIPDPDVKGSPLSDSGCLGQREGGGTELVTMTSNTPERTGQGG  
AGVAPLLVKEEPKEDNGLPTSFTLNAADR PANHTKLDKDPSEYVSNSAAVLFSDISVKMASDFLMKLSAANQK  
EPMNLNFKVKEEPKEEESLSMPLPRSSYVFSPEPEVSTPSVSEDPLTPQEGKGSVLRDRMSAKAASELLMKLS  
AESYKETQAVTVKEEPMEVDIQDSPASISPSRNIGYSTLMGREKTEPLQKLPEGRVPPERNLFSQDISVKMAS  
ELLFQLSEKVSKEHNHTKENAMRTTSPFFSEDFTFRQSPFTSNSKDLLPGESVLHGRVSAPETEKIVLEAGNG  
LPSWKFNQDLFPDVCVKVFRQQTLSRHLSLHTEERKYKCHLCPYAAKCRANLNQHLTVHVSVKLVSTDTEDI  
VSAVTSEGS DGKKHPYYSCHVCGFETELNVQFVSHMSLHVDKEQWMFSCCTACDFVTMEEAEIKTHIGTKH  
TGDDRKTPESENPSSSSLSTLSDSANGKDDSDSSQKNKGNNLLVIVSVVPGSQPSLNNEEKPEKGFECVFCN  
FVCKTKNMFERHLQIHLITRMFECVCHKFMKTPEQLLEHKKCHTVPTGGLNSGQW\*

>rs226857452\_ENSMUSP00000113199\_c.2470:G>T\_p.G824V  
ENSMUST00000119254.8|zfp827-203|ENSMUSG00000071064|+|chr8:g.79902558:G>T  
MPRRKQEQPKRLPSHVSQRQDEAEQDFSEGEQWYGNSSSETPSEASYGEVQENYKLSLEDRIQEQTSPDTSLSGS  
ATPSSHTLELVALDGEVLRDSLQCQGHLSPGVSSVCDDDDPPSSNKPLSSNLRLRLLLEAGSLKLDGTANGRVESPV  
VNVGPSLSFSPPSHHAQQLSVLARKLAEKQDQSDQFTPSNRFIWNQGWLPNSTTTTCGLSPDSAILKKAAN  
AVLQDKSLSRTEESLRFESFSSPFSSQSASSTLAALSCKVSESLTPGQEHPPASSFSLASMTSSAALLKE  
VAARAAGSLLAEKSSLLPDDPLPLPSSSEKKPEKVTPPPPPPPTAQPPQSLELLLLPVSKGRASKPSNSAPEE  
ESGKPFQCPICGLVIKRSYWKRMVHTGLKSHQCPLCPFRCAKDNLKSMMKVVHQDRGETFQCQLCPFT  
SSRHFSKLHMRCHQHFLRTEAKVKEEIPDPDVKGSPLSDSGCLGQQREGGGTELVTMTSNTPERTGQGG  
AGVAPLLVKEEPKEDNGLPTSFTLNAADR PANHTKLDKDPSEYVSNAAVLFSDISVKMASDFLMLKLSAANQK  
EPMNLNFKVKEEPKEEESLSMPLPRSSYVFSPEPEVSTPSVSEDPLTPQEGKGSVLRDMSAKAASELLMKLS  
AESYKETQAVTVKEEPMEVDIQDSPASISPSRNIGYSTLMGREKTEPLQKLEGRVPPERNLFSQDISVKMAS  
ELLFQLSEKVSKEHNHTKENAMRTTTSPPFFSEDTFRQSPFTSNSKDLLPGESVLHGRVSAPETEKIVLEAGNG  
LPSWKFNQDLFPCDVCVKVFRQQLSRHLSLHTEERKYKCHLCPYAAKCRANLNQHLTVHSVKLVSTDTEDI  
VSAVTSEGS DGKKHPYYSCHVCGFETELNVQFVSHMSLHVDKEQWMF SICCTACDFVTMEEAEIKTHIGTKH  
TGDDRKTPESENPSSSSLSTLSDSANGKDDSDSSQKNKGGNNLLVISVVPGSQPSLNNEEKPEKGFECVFCN  
FVCKTKNMFERHLQIHLITRMFECVCHKFMKTPEQLLEHKKCHTVPTGGLK\*  
>rs226857452\_ENSMUSP00000158613\_c.2470:G>T\_p.G824V  
ENSMUST00000238669.2|zfp827-209|ENSMUSG00000071064|+|chr8:g.79902558:G>T  
MPRRKQEQPKRLPSHVSQRQDEAEQDFSEGEQWYGNSSSETPSEASYGEVQENYKLSLEDRIQEQTSPDTSLSGS  
ATPSSHTLELVALDGEVLRDSLQCQGHLSPGVSSVCDDDDPPSSNKPLSSNLRLRLLLEAGSLKLDGTANGRVESPV  
VNVGPSLSFSPPSHHAQQLSVLARKLAEKQDQSDQFTPSNRFIWNQGWLPNSTTTTCGLSPDSAILKKAAN  
AVLQDKSLSRTEESLRFESFSSPFSSQSASSTLAALSCKVSESLTPGQEHPPASSFSLASMTSSAALLKE  
VAARAAGSLLAEKSSLLPDDPLPLPSSSEKKPEKVTPPPPPPPTAQPPQSLELLLLPVSKGRASKPSNSAPEE  
ESGKPFQCPICGLVIKRSYWKRMVHTGLKSHQCPLCPFRCAKDNLKSMMKVVHQDRGETFQCQLCPFT  
SSRHFSKLHMRCHQHFLRTEAKVKEEIPDPDVKGSPLSDSGCLGQQREGGGTELVTMTSNTPERTGQGG  
AGVAPLLVKEEPKEDNGLPTSFTLNAADR PANHTKLDKDPSEYVSNAAVLFSDISVKMASDFLMLKLSAANQK  
EPMNLNFKVKEEPKEEESLSMPLPRSSYVFSPEPEVSTPSVSEDPLTPQEGKGSVLRDMSAKAASELLMKLS  
AESYKETQAVTVKEEPMEVDIQDSPASISPSRNIGYSTLMGREKTEPLQKLEGRVPPERNLFSQDISVKMAS  
ELLFQLSEKVSKEHNHTKENAMRTTTSPPFFSEDTFRQSPFTSNSKDLLPGESVLHGRVSAPETEKIVLEAGNG  
LPSWKFNQDLFPCDVCVKVFRQQLSRHLSLHTEERKYKCHLCPYAAKCRANLNQHLTVHSVKLVSTDTEDI  
VSAVTSEGS DGKKHPYYSCHVCGFETELNVQFVSHMSLHVDKEQWMF SICCTACDFVTMEEAEIKTHIGTKH  
TGDDRKTPESENPSSSSLSTLSDSANGKDDSDSSQKNKGGNNLLVISVVPGSQPSLNNEEKPEKGFECVFCN  
FVCKTKNMFERHLQIHLITRMFECVCHKFMKTPEQLLEHKKCHTVPTGGLKCPFCIYSTNRPAAMECHLKTH  
YKMEYKCRICQTVKANQLELEHTREHRLGNHYKCEQCGLYLSKTANKLIEHVRVHTGERPFHCDQCSYSCKRK  
DNLNLHKKLKHAPRQTFSCGECLFKTTHPFVSRHVKKHQSGDGEEDKKGSLSPASREPAGPGAPLLVVGGR  
SLLSPLSVMSASQALQTVALSAAHGSSEPNLALKALAFSGSPLHLDKYRNSDVAHLIPLTMLYPRNHLDLTF  
HPPRPQTAPPSIPSPKHSFLAYLGLRERAGTV\*  
>rs226857452\_ENSMUSP00000120913\_c.346:G>T\_p.G116V  
ENSMUST00000148713.8|zfp827-206|ENSMUSG00000071064|+|chr8:g.79902558:G>T  
PEGRVPPERNLFSQDISVKMASELLFQLSEKVSKEHNHTKENAMRTTTSPPFFSEDTFRQSPFTSNSKDLLPGE  
SVLHGRVSAPETEKIVLEAGNGLPSWKFNQDLFPCDVCVKVFRQQLSRHLSLHTEERKYKCHLCPYAAKCR  
ANLNQHLTVHSVKLVSTDTEDIVSAVTSEGS DGKKHPYYSCHVCGFETELNVQFVSHMSLHVDKEQWMF SIC  
CTACDFVTMEEAEIKTHIGTKHTGDDRKTPESENPSSSSLSTLSDSANGKDDSDSSQKNKGGNNLLVISVVP  
GSQPSLNNEEKPEKGFECVFCNFVCKTKNMFERHLQIHLITRMFECVCHKFMKTPEQLLEHKKCHTVPTGGL  
NSGQW\*  
>rs226857452\_ENSMUSP00000114208\_c.259:G>T\_p.G87V  
ENSMUST00000145827.8|zfp827-205|ENSMUSG00000071064|+|chr8:g.79902558:G>T  
XKVSKEHNHTKENAMRTTTSPPFFSEDTFRQSPFTSNSKDLLPGESVLHGRVSAPETEKIVLEAGNGLPSWKFN  
DQLFPCDVCVKVFRQQLSRHLSLHTVLVSPPEERKYKCHLCPYAAKCRANLNQHLTVHSVKLVSTDTEDIV  
SAVTSEGS DGKKHPYYSCHVCGFETELNVQFVSHMSLHVDKEQWMF SICCTACDFVTMEEAEIKTHIGTKHT  
GDDRKTPESENPSSSSLSTLSDSANGKDDSDSSQKNKGGNNLLVISVVPGSQPSLNNEEKPEKGFECVFCNF  
VCKTKNMFERHLQIHLITRMFECVCHKFMKTPEQLLEHKKCHTVPTGGLK\*  
>rs226857452\_ENSMUSP00000096214\_c.2470:G>T\_p.G824V  
ENSMUST00000098614.9|zfp827-202|ENSMUSG00000071064|+|chr8:g.79902558:G>T  
MPRRKQEQPKRLPSHVSQRQDEAEQDFSEGEQWYGNSSSETPSEASYGEVQENYKLSLEDRIQEQTSPDTSLSGS  
ATPSSHTLELVALDGEVLRDSLQCQGHLSPGVSSVCDDDDPPSSNKPLSSNLRLRLLLEAGSLKLDGTANGRVESPV  
VNVGPSLSFSPPSHHAQQLSVLARKLAEKQDQSDQFTPSNRFIWNQGWLPNSTTTTCGLSPDSAILKKAAN

AVLQDKSLSRTEESLRFESFSSPFSSQSASSTLAALSCKVRSERSLTPGQEHPPPASSFSLASMTSSAALLKE  
VAARAAGSLLAEKSSLLPDDPLPLPSSEKKPEKVTPPPPPPPTAQPQSELELLLLPVSKGRASKPSNSAPEE  
ESGKPFQCPICGLVIKRKSYWKRHMVIHTGLKSHQCPLCPFRCAKDNLKSMMKVVHQHQRGETFQCQLCPFT  
SSRHFSCLKHMRCHQHFLRTEAKVKEEIPDPDVKGSPLSDSGCLGQREGGGTELVTMTSNTPERTGQGG  
AGVAPLLVKEEPKEDNGLPTSFTLNAADR PANHTKLDKDPSEYVNSAAVLFSDISVKMASDFLMKLSAANQK  
EPMNLNFKVKEEPKEEESLSMPLPRSSYVFSPEPEVSTPSVSEDPLTPQEGKGSVLRDRMSAKAASELLMKLS  
AESYKETQAVTVKEEPMEVDIQDSPASISPSRNIGYSTLMGREKTEPLQKLPEGRVPPERNLFSQDISVKMAS  
ELLFQLSEKVSKEHNHTKENAMRTTSPFFSEDFTFRQSPFTSNKDLLPGESVLHGRVSAPETEKIVLEAGNG  
LPSWKFNQDLFPCDVCGKVFGRQHTLSRHLSLHTEERKYKCHLCPYAAKCRANLNQHLLTVHSVKLVSTDTEDI  
VSAVTSEGS DGKKHPYYSCHVCGFETELNVQFVSHMSLHVDKEQWMF SICCTACDFVTMEEAEIKTHIGTKH  
TGDDRKTPESENPSSSSSLSLSDSANGKDDSDSSQKNKGNNLLVIVSVVPGSQPSLNNEEKPEKGFECVFCN  
FVCKTKNMFERHLQIHLITRMFECVDVCHKFMKTPEQLLEHKKCHTVPTGGLNSGQW\*

>rs247337923\_ENSMUSP00000113199\_c.2480:G>T\_p.Q827H  
ENSMUST00000119254.8|zfp827-203|ENSMUSG00000071064|+|chr8:g.79902568:G>T  
MPRRKQEQPKRLPSHVSQRDEAEGDFSEGEQWYGNSSSETPSEASYGEVQENYKLSLEDRIQEQTSPDTSLGS  
ATPSSHTLELVALDGEVLRDLSLQCGHLSPGVSSVCDDPPSSNKPLSSNLRRLLEAGSLKLDGTANGRVES  
VNVGPSLSFSPPSHHAQQLSVLARKLAEKQDQSDQFTPSNRFIWNQGWLPNSTTTTCGLSPDSAILKKAAN  
AVLQDKSLSRTEESLRFESFSSPFSSQSASSTLAALSCKVRSERSLTPGQEHPPPASSFSLASMTSSAALLKE  
VAARAAGSLLAEKSSLLPDDPLPLPSSEKKPEKVTPPPPPPPTAQPQSELELLLLPVSKGRASKPSNSAPEE  
ESGKPFQCPICGLVIKRKSYWKRHMVIHTGLKSHQCPLCPFRCAKDNLKSMMKVVHQHQRGETFQCQLCPFT  
SSRHFSCLKHMRCHQHFLRTEAKVKEEIPDPDVKGSPLSDSGCLGQREGGGTELVTMTSNTPERTGQGG  
AGVAPLLVKEEPKEDNGLPTSFTLNAADR PANHTKLDKDPSEYVNSAAVLFSDISVKMASDFLMKLSAANQK  
EPMNLNFKVKEEPKEEESLSMPLPRSSYVFSPEPEVSTPSVSEDPLTPQEGKGSVLRDRMSAKAASELLMKLS  
AESYKETQAVTVKEEPMEVDIQDSPASISPSRNIGYSTLMGREKTEPLQKLPEGRVPPERNLFSQDISVKMAS  
ELLFQLSEKVSKEHNHTKENAMRTTSPFFSEDFTFRQSPFTSNKDLLPGESVLHGRVSAPETEKIVLEAGNG  
LPSWKFNQDLFPCDVCGKVFGRQHTLSRHLSLHTEERKYKCHLCPYAAKCRANLNQHLLTVHSVKLVSTDTEDI  
VSAVTSEGS DGKKHPYYSCHVCGFETELNVQFVSHMSLHVDKEQWMF SICCTACDFVTMEEAEIKTHIGTKH  
TGDDRKTPESENPSSSSSLSLSDSANGKDDSDSSQKNKGNNLLVIVSVVPGSQPSLNNEEKPEKGFECVFCN  
FVCKTKNMFERHLQIHLITRMFECVDVCHKFMKTPEQLLEHKKCHTVPTGGLK\*

>rs247337923\_ENSMUSP00000158613\_c.2480:G>T\_p.Q827H  
ENSMUST00000238669.2|zfp827-209|ENSMUSG00000071064|+|chr8:g.79902568:G>T  
MPRRKQEQPKRLPSHVSQRDEAEGDFSEGEQWYGNSSSETPSEASYGEVQENYKLSLEDRIQEQTSPDTSLGS  
ATPSSHTLELVALDGEVLRDLSLQCGHLSPGVSSVCDDPPSSNKPLSSNLRRLLEAGSLKLDGTANGRVES  
VNVGPSLSFSPPSHHAQQLSVLARKLAEKQDQSDQFTPSNRFIWNQGWLPNSTTTTCGLSPDSAILKKAAN  
AVLQDKSLSRTEESLRFESFSSPFSSQSASSTLAALSCKVRSERSLTPGQEHPPPASSFSLASMTSSAALLKE  
VAARAAGSLLAEKSSLLPDDPLPLPSSEKKPEKVTPPPPPPPTAQPQSELELLLLPVSKGRASKPSNSAPEE  
ESGKPFQCPICGLVIKRKSYWKRHMVIHTGLKSHQCPLCPFRCAKDNLKSMMKVVHQHQRGETFQCQLCPFT  
SSRHFSCLKHMRCHQHFLRTEAKVKEEIPDPDVKGSPLSDSGCLGQREGGGTELVTMTSNTPERTGQGG  
AGVAPLLVKEEPKEDNGLPTSFTLNAADR PANHTKLDKDPSEYVNSAAVLFSDISVKMASDFLMKLSAANQK  
EPMNLNFKVKEEPKEEESLSMPLPRSSYVFSPEPEVSTPSVSEDPLTPQEGKGSVLRDRMSAKAASELLMKLS  
AESYKETQAVTVKEEPMEVDIQDSPASISPSRNIGYSTLMGREKTEPLQKLPEGRVPPERNLFSQDISVKMAS  
ELLFQLSEKVSKEHNHTKENAMRTTSPFFSEDFTFRQSPFTSNKDLLPGESVLHGRVSAPETEKIVLEAGNG  
LPSWKFNQDLFPCDVCGKVFGRQHTLSRHLSLHTEERKYKCHLCPYAAKCRANLNQHLLTVHSVKLVSTDTEDI  
VSAVTSEGS DGKKHPYYSCHVCGFETELNVQFVSHMSLHVDKEQWMF SICCTACDFVTMEEAEIKTHIGTKH  
TGDDRKTPESENPSSSSSLSLSDSANGKDDSDSSQKNKGNNLLVIVSVVPGSQPSLNNEEKPEKGFECVFCN  
FVCKTKNMFERHLQIHLITRMFECVDVCHKFMKTPEQLLEHKKCHTVPTGGLKCPFCIYSTNRPAAMECHLKTH  
YKMEYKCRICQTVKANQLELETHTREHRLGNHYKCEQCGYLSKTANKLIEHVRVHTGERPFHCDQCSYSCKRK  
DNLNLHKKLKHAPRQTFSCGECLFKTTHPFVFSRHVKKHQSGDGPEDDKGLSPASREPAGPGAPLLVGGGR  
SLLSPLSVMSASQALQTVALSAAHGSSEPNLALKALAFSGSPLHLDKYRNSDVAHLIPLTMLYPRNHLDLTF  
HPRPQTAPPSIPSPKHSFLAYLGLRERAGTV\*

>rs247337923\_ENSMUSP00000120913\_c.356:G>T\_p.Q119H  
ENSMUST00000148713.8|zfp827-206|ENSMUSG00000071064|+|chr8:g.79902568:G>T  
PEGRVPPERNLFSQDISVKMASELLFQLSEKVSKEHNHTKENAMRTTSPFFSEDFTFRQSPFTSNKDLLPGE  
SVLHGRVSAPETEKIVLEAGNGLPSWKFNQDLFPCDVCGKVFGRQHTLSRHLSLHTEERKYKCHLCPYAAKCR  
ANLNQHLLTVHSVKLVSTDTEDI VSAVTSEGS DGKKHPYYSCHVCGFETELNVQFVSHMSLHVDKEQWMF SIC  
CTACDFVTMEEAEIKTHIGTKHTGDDRKTPESENPSSSSSLSLSDSANGKDDSDSSQKNKGNNLLVIVSVV  
GSQPSLNNEEKPEKGFECVFCNFVCKTKNMFERHLQIHLITRMFECVDVCHKFMKTPEQLLEHKKCHTVPTGGL  
NSGQW\*

>rs247337923\_ENSMUSP00000114208\_c.269:G>T\_p.Q90H  
ENSMUST00000145827.8|zfp827-205|ENSMUSG00000071064|+|chr8:g.79902568:G>T  
XKVSKEHNHTKENAMRTTTSPPFFSEDTFRQSPFTSNKDLLPGESVLHGRVSAPETEKIVLEAGNGLPSWKFN  
DQLFPCDVCVKVFRQHTLSRHLSTLHTVLSVPPPEERKYKCHLCPYAAKCRANLNQHLTIVHSVKLVSTDTEDIV  
SAVTSEGS DGKKHPYYYSCHVCGFETELNVQFVSHMSLHVDKEQWMF SICCTACDFVTMEEAEIKTHIGTKHT  
GDDRKTPSESNSPSSSSSLSTLSDSANGKDDSDSSQKNKGGNNLLVISVVPGSQPSLNNEEKPEKGFECVFCNF  
VCKTKNMFERHLQIHLITRMFECVCHKFMKTPEQLLEHKKCHTVPTGGLK\*  
>rs247337923\_ENSMUSP00000096214\_c.2480:G>T\_p.Q827H  
ENSMUST00000098614.9|zfp827-202|ENSMUSG00000071064|+|chr8:g.79902568:G>T  
MPRRKQEQPKRLPSHVSQRDEAEGDFSEGEQWYGNSETPSEASYGEVQENYKLSLEDRIQEQTSPDTSLSGS  
ATPSSHTLELVALDGEVLRDLSLQCQGHLSPGVSSVCDPPSSNKPLSSNLRLLEAGSLKLDGTANGRVESP  
VNVGPSLSFSPPSHHAQQLSVLARKLAEKQDQSDQFTPSNRFIWNQGWLPNSTTTTCGLSPDASAILKKAAN  
AVLQDKSLSRTEESLRFESFSSPSSQSASSTLAALS KKVSESLTPGQEHPPPASSFLSLASMTSSAALLKE  
VAARAAGSLLAEKSSLLPDDPLPLPSSEKKPEKVTPPPPPPPTAQPPQSLELLLLLPVSKGRASKPSNSAPEE  
ESGKPFQCPICGLVIKRSYWKRMVIHTGLKSHQCPLCPFRCAKDNLKSMMKVHQQDRGETFQCQLCPFT  
SSRHFSKLHMRCHQHFLRTEAKVKEEIPDPDVKGSPLSDSGCLGQQREGGTELVTMTSNTPERTGQGG  
AGVAPLLVKEEKPENGLPTSFTLNAADR PANHTKLDKDPSEYVNSAAVLFSDISVKMASDFLMLKLSAANQK  
EPMNLNFKVKEEPEKEEESLSPMLPRSSYVFSPEPEVSTPSVSEDLPTPQEGKGSVLRDMSAKAASELLMKLS  
AESYKETQAVTVKEEPMVVDIQDSPASISPSRNIGYSTLMGREKTEPLQKLPEGRVPPERNLFSQDISVKMAS  
ELLFQLSEKVSKEHNHTKENAMRTTTSPPFFSEDTFRQSPFTSNKDLLPGESVLHGRVSAPETEKIVLEAGNG  
LPSWKFN DQLFPCDVCVKVFRQHTLSRHLSTLHTVLSVPPPEERKYKCHLCPYAAKCRANLNQHLTIVHSVKLVSTDTEDI  
VSAVTSEGS DGKKHPYYYSCHVCGFETELNVQFVSHMSLHVDKEQWMF SICCTACDFVTMEEAEIKTHIGTKH  
TGDDRKTPSESNSPSSSSSLSTLSDSANGKDDSDSSQKNKGGNNLLVISVVPGSQPSLNNEEKPEKGFECVFCNF  
FVCKTKNMFERHLQIHLITRMFECVCHKFMKTPEQLLEHKKCHTVPTGGLNSGQW\*  
>rs253661095\_ENSMUSP00000114208\_c.318:G>C\_p.E107Q  
ENSMUST00000145827.8|zfp827-205|ENSMUSG00000071064|+|chr8:g.79905536:G>C  
XKVSKEHNHTKENAMRTTTSPPFFSEDTFRQSPFTSNKDLLPGESVLHGRVSAPETEKIVLEAGNGLPSWKFN  
DQLFPCDVCVKVFRQHTLSRHLSTLHTVLSVPPQERKYKCHLCPYAAKCRANLNQHLTIVHSVKLVSTDTEDIV  
SAVTSEGS DGKKHPYYYSCHVCGFETELNVQFVSHMSLHVDKEQWMF SICCTACDFVTMEEAEIKTHIGTKHT  
GDDRKTPSESNSPSSSSSLSTLSDSANGKDDSDSSQKNKGGNNLLVISVVPGSQPSLNNEEKPEKGFECVFCNF  
VCKTKNMFERHLQIHLITRMFECVCHKFMKTPEQLLEHKKCHTVPTGGLK\*  
>rs38121230\_ENSMUSP00000071035\_c.1198:T>G\_p.F400C  
ENSMUST00000066091.14|Smad1-202|ENSMUSG00000031681|-|chr8:g.80070338:A>C  
MNVTSLSFSFTSPAVKRLGKQGDDEEKWAEKAVDALVKKLKKKKGAMEELEKALSCPGQPSNCVTIPRSLDG  
RLQVSHRKGKGLPHVIYCRVWRWPDLSHHEKPLECCEFPFGSKQKEVCINPYHYKRVPSPVLPVPRHSEY  
NPQHSLLAQFRNLGQNEPHMPLNATFPDSFQPNSHFPSPNSYPNSPGSSSTYPHSPSTSDPGSPFQMP  
ADTPPPAYLPPEDPMAQDGSQPMDTNMMAAPLPAEISRGDVQAVAYEEPKHWCSIVYYELNRRVGEAFHASST  
SVLVDGFTDPSNKNRFLGLLSNVNRNSTIENTRRHIGKGVHLYYVGGEVYAECLSDSSIFVQSRNCNYHHG  
FHPTTVCKIPSGCSLKI FNNQEFQLLAQSVNHGCETVYELTKMCTIRMSFVKGWGAEYHRQDVTSTPCWIEI  
HLHGPLQWLDKVLQMGSPHNPISSVS\*  
>rs38121230\_ENSMUSP00000105511\_c.1198:T>G\_p.F400C  
ENSMUST00000109885.8|Smad1-203|ENSMUSG00000031681|-|chr8:g.80070338:A>C  
MNVTSLSFSFTSPAVKRLGKQGDDEEKWAEKAVDALVKKLKKKKGAMEELEKALSCPGQPSNCVTIPRSLDG  
RLQVSHRKGKGLPHVIYCRVWRWPDLSHHEKPLECCEFPFGSKQKEVCINPYHYKRVPSPVLPVPRHSEY  
NPQHSLLAQFRNLGQNEPHMPLNATFPDSFQPNSHFPSPNSYPNSPGSSSTYPHSPSTSDPGSPFQMP  
ADTPPPAYLPPEDPMAQDGSQPMDTNMMAAPLPAEISRGDVQAVAYEEPKHWCSIVYYELNRRVGEAFHASST  
SVLVDGFTDPSNKNRFLGLLSNVNRNSTIENTRRHIGKGVHLYYVGGEVYAECLSDSSIFVQSRNCNYHHG  
FHPTTVCKIPSGCSLKI FNNQEFQLLAQSVNHGCETVYELTKMCTIRMSFVKVSSAHPHSHG\*  
>rs50549994\_ENSMUSP00000149251\_c.268:A>G\_p.K90R  
ENSMUST00000214156.2|O1fr370-203|ENSMUSG00000047286|+|chr8:g.84268043:A>G  
MECVNDTVVREFVFLGFSSLAELQLLLFAIFLSLYLFTLSTNAVIVSTIVLDRALHTPMYFFLSVLSSETCY  
TFVIVPKMLVDLLARKRSISFLGCAIQMFTFLFLGCSHSFLLAAMGYDRYVAICHPLRYTVLMGHRVCVGLVA  
AACVCGFTVAQVITSLVFRLPFRSSNLHFFCDISPVLQLASHHPHSTQITIFLLCALVLPFLFLILVSYI  
HIISTILQFPSTLGRYKAFSTCASHLIVVIVHYGCASFIYLRPKSSYSSSQDALISVSYTILTPLFNFVIYSL  
RNKDFKSALHRVIGRTVTLRQH\*  
>rs50549994\_ENSMUSP00000147834\_c.268:A>G\_p.K90R  
ENSMUST00000209408.4|O1fr370-202|ENSMUSG00000047286|+|chr8:g.84268043:A>G

MECVNDTVVREFVFLGFSSLAELQLLLFAIFLSLYLFTLSTNAVIVSTIVLDRALHTPMYFFLSVLSCSETCY  
TFVIVPKMLVDLLARKRSISFLGCAIQMFTFLFLGCSHSLFLAAMGYDRYVAICHPLRYTVLMGHRVCVGLVA  
AACVCGFTVAQVITSLVFRLLPFRSSNLHFFFCDISPVLQLASHHPHSTQITIFLLCALVLPFLFLILVSYI  
HIISTILQFPSTLGRYKAFSTCASHLIVVIVHYGCASFIYLRPKSSYSSSQDALISVSYTILTPLFNPVIYSL  
RNKDFKSALHRVIGRTVTLRQH\*

>rs50549994\_ENSMUSP00000055435\_c.268:A>G\_p.K90R  
ENSMUST00000058609.5|Olfr370-201|ENSMUSG00000047286|+|chr8:g.84268043:A>G  
MECVNDTVVREFVFLGFSSLAELQLLLFAIFLSLYLFTLSTNAVIVSTIVLDRALHTPMYFFLSVLSCSETCY  
TFVIVPKMLVDLLARKRSISFLGCAIQMFTFLFLGCSHSLFLAAMGYDRYVAICHPLRYTVLMGHRVCVGLVA  
AACVCGFTVAQVITSLVFRLLPFRSSNLHFFFCDISPVLQLASHHPHSTQITIFLLCALVLPFLFLILVSYI  
HIISTILQFPSTLGRYKAFSTCASHLIVVIVHYGCASFIYLRPKSSYSSSQDALISVSYTILTPLFNPVIYSL  
RNKDFKSALHRVIGRTVTLRQH\*

>rs48118666\_ENSMUSP00000019577\_c.930:T>A\_p.F311I  
ENSMUST00000019577.10|Gipc1-201|ENSMUSG00000019433|+|chr8:g.84390827:T>A  
MPLGLGRKKAPPLVENEAEPSRSGLVGEPGLGSSAAGESQMGLPPPPAALRPLRVFHTQLAHGSPTGRI  
EGFTNVKELYGKIAEAFRLPAAEVMFCTLNTHKVDMDKLLGGQIGLEDFIFAHVKGQRKEVEVFKSEALGLT  
ITDNGAGYAFIKRIKEGVIDHIQLISVGMIEAINGQSLGCRHYEVARLLKELPRGRTFTLKLTEPRKAFD  
MISQRSAGGHPGSGPQLGTGRGTLRLRSRGPATVDELPSAFEEKAIEKVDDLLESYMGIRDTELAATMVVELGK  
DKRNPDELAELDERLGDIAFPDEFVFDVWGAIGDAKVGRY\*

>rs36969597\_ENSMUSP00000019608\_c.277:C>T\_p.P93L  
ENSMUST00000019608.7|Ptger1-201|ENSMUSG00000019464|+|chr8:g.84394802:C>T  
MSPCGLNLSLADEAATCATPRLPNTSVVLPTGDNGTSPALPIFSMTLGAVSNVLALALLAQVAGRMRRRRSAA  
TFLLFVASLLAIDLGHVILGALVLRLYTAGRAPAGGACHFLGGCMVFFGLCPLLGGMAVERCVGTQPLI  
HAARVSVARARLALAVLAAMALAVALLPLVHVGRYELQYPGTWCFISLGPGRGWQALLAGLFAGLGLAALLA  
ALVCNTLSGLALLRARWRRRRRRFRKTAGPDDRRRWSRGPRLASASSASSITSATATLRSSRGGGSARRVH  
AHDVEMVQVLVIMVSCICWSPLLVVLVAIGGWNNSLQRPFLAVRLASWNQILDWPVYIILRQAMLRLQL  
LRLPLRVSACKGPTLGLTKSAWEASSLRSSRHSFSLH\*

>rs50201871\_ENSMUSP00000005616\_c.2582:G>C\_p.R861S  
ENSMUST00000005616.16|Pkn1-201|ENSMUSG00000057672|-|chr8:g.84397422:C>G  
MAGDAVQSEPRSWSLLEQLGLAGADLAAPGVQQOLELERERLKRERKELKLKEGAENLRATDGLRSLAPV  
ELLLRGSARRLDLLHQQLQELHAHVLPDPAAGSDATQSLAEGSPICSSSTNLSRVAGLEKQLAIELKVKQGAE  
NMIQTYSNGSSKDRKLLLTAAQMLQDSKTKIDIRMQLRRALQALQAGELESQAAPDEAQGDPELGAVELRIE  
ELRHHRFVEHAVAEGAENVLRLLSGAKAPDRKAVSEAQEKLTESNQKLGLLRESLERRLGELPADHPKGRLLR  
EELTAASSSAFSAIILPGPFPPATHYSTLSKPAPLTGTLEVRVVGCKNLPETIPWSPPPSVGASGTPESRTPFLS  
RPARGLYSRSGSLGRSSLRGEAENATEVSTVLKLDNTVVGQTAWKPCGNPAWDQSFTLELERARELELAVFW  
RDQRGLCALFKLEDFLDNERHEVQLDMEPQGCLVAEVTFRNPIIERIPRLQRQKKIFSKQQGAFQRRARQM  
NIDVATWVRLRLRILPSAVATGTFSPNASPGAIEIRHTGDISMEKLNLGADSDSSSQKSPGGLPSTSCSLSSPT  
HESTTSPPELSETQETPGPGLCSPLRKSPLTLEDFKFLAVLGRGHFGKVLLESEFRSSGELFAIKALKKGDIVA  
RDEVESLMCEKRILAAVTRAGHPFLVNLFGCFQTPHEVCFVMEYSAGGDLMLHIHSDVDFSEPRAVFYSACVVL  
GLQFLHEHKIVYRDLKLDNLLDTEGYVKIADFGLCKEGMGYGDRTSTFCGTPPEFLAPEVLTDTSYTRAVDWW  
GLGVLLYEMLVGESPFPGDDEEEVFDSIVNDEVRYPRFLSAEAI GIMRRLRRNPERSLGSTERDAEDVKKQP  
FFRSLGWDVLLARRLPPPFVPTLSGRTDVSNFDEEFTGEAPTLSPPRDARPLTAAEQAAFRDFDFVAGGY\*

>rs50201871\_ENSMUSP00000116235\_c.2597:G>C\_p.R866S  
ENSMUST00000114258.8|Pkn1-208|ENSMUSG00000057672|-|chr8:g.84397422:C>G  
MAADPPLDSELESEPRSWSLLEQLGLAGADLAAPGVQQOLELERERLKRERKELKLKEGAENLRATDGLR  
SLAPVELLLRGSARRLDLLHQQLQELHAHVLPDPAAGSDATQSLAEGSPICSSSTNLSRVAGLEKQLAIELKV  
KQGAENMIQTYSNGSSKDRKLLLTAAQMLQDSKTKIDIRMQLRRALQALQAGELESQAAPDEAQGDPELGA  
ELRIEELRHHRFVEHAVAEGAENVLRLLSGAKAPDRKAVSEAQEKLTESNQKLGLLRESLERRLGELPADHPK  
GRLLREELTAASSSAFSAIILPGPFPPATHYSTLSKPAPLTGTLEVRVVGCKNLPETIPWSPPPSVGASGTPESR  
TPFLSRPARGLYSRSGSLGRSSLRGEAENATEVSTVLKLDNTVVGQTAWKPCGNPAWDQSFTLELERARELE  
LAVFWRDQRGLCALFKLEDFLDNERHEVQLDMEPQGCLVAEVTFRNPIIERIPRLQRQKKIFSKQQGKAFQ  
RARQMNIDVATWVRLRLRILPSAVATGTFSPNASPGAIEIRHTGDISMEKLNLGADSDSSSQKSPGGLPSTSCS  
LSSPTHESTTSPPELSETQETPGPGLCSPLRKSPLTLEDFKFLAVLGRGHFGKVLLESEFRSSGELFAIKALKK  
GDIVARDEVESLMCEKRILAAVTRAGHPFLVNLFGCFQTPHEVCFVMEYSAGGDLMLHIHSDVDFSEPRAVFYS  
ACVVLGLQFLHEHKIVYRDLKLDNLLDTEGYVKIADFGLCKEGMGYGDRTSTFCGTPPEFLAPEVLTDTSYTR  
AVDWWGLGVLLYEMLVGESPFPGDDEEEVFDSIVNDEVRYPRFLSAEAI GIMRRLRRNPERSLGSTERDAED  
VKKQPFFRSLGWDVLLARRLPPPFVPTLSGRTDVSNFDEEFTGEAPTLSPPRDARPLTAAEQAAFRDFDFVAG  
GY\*



>ENSMUSP00000005616\_c.2137:G>A\_p.S713N ENSMUST00000005616.16|Pkn1-201|ENSMUSG000000057672|-|chr8:g.84398812:C>T  
MAGDAVQSEPRSWSLLEQLGLAGADLAAPGVQQQLELERERLKRERIRKELKLKEGAENLRATTDLGRSLAPV  
ELLLRGSARRLDLLHQQLQELHAHVLPDPAAGSDATQSLAEGSPICSSSTNLSRVAGLEKQLAIELKVKQGAE  
NMIQTYSNGSSKDRKLLLTAAQMLQDSKTKIDI I RMQLRRALQALQAGELESQAAPDEAQQDPELGAVELRIE  
ELRHHRFRVEHAVAEGAKNVLRLLSGAKAPDRKAVSEAQEKLTESNQKLGLLRESLERRLGELPADHPKGRLLR  
EELTAASSSAFSAIILPGPFPPATHYSTLSKPAPLTGTLEVRVVGCKNLPETIPWSPPPSVGASGTPESRTPFLS  
RPARGLYSRSGSLSGRSSLRGEAENATEVSTVLKLDNTVVGQTAWKPCGPNAWDQSFTELELERARELELAVFW  
RDQRGLCALFKLEDFLDNERHEVQLDMEPQGCLVAEVTFRNPI IERI PRLQRQKKIFSKQQGKAFQARQM  
NIDVATWVRLRLRRLIPSAVATGTFSPNASPGAIEIRHTGDISMEKLNLGADSDSSSQKSPGGLPSTSCSLSSPT  
HESTTSPPELSETQETPGPGLCSPLRKSPLTLEDFKFLAVLGRGHFGKVLLESEFRSSGELFAIKALKKGDIVA  
RDEVESLMCEKRILAAVTRAGHPFLVNLFGCFQTPHEVCFVMEYSAGGDLMLHIHNDVFSEPRAVFYSACVV  
LGLQFLHEHKIVYRDLKLDNLLDTEGYVKIADFGLCKEGMGYGDRTSTFCGTPEFLAPEVLTDTSYTRAVDWW  
GLGVLLYEMLVGESPFPGDDEEEVFDSIVNDEVRYPRFLSAEAI GIMRRLRRNPERRLGSTERDAEDVKKQP  
FFRSLGWDVLLARLLPPFPVPTLSGRTDVSNFDEEFTGEAPTLSPPRDARPLTAAEQAAFRDFDFVAGGY\*  
>ENSMUSP00000116235\_c.2152:G>A\_p.S718N ENSMUST00000144258.8|Pkn1-208|ENSMUSG000000057672|-|chr8:g.84398812:C>T  
MAADPPLDSELESEPRSWSLLEQLGLAGADLAAPGVQQQLELERERLKRERIRKELKLKEGAENLRATTDLGR  
SLAPVELLLRGSARRLDLLHQQLQELHAHVLPDPAAGSDATQSLAEGSPICSSSTNLSRVAGLEKQLAIELKV  
KQGAENMIQTYSNGSSKDRKLLLTAAQMLQDSKTKIDI I RMQLRRALQALQAGELESQAAPDEAQQDPELGAV  
ELRIEELRHHRFRVEHAVAEGAKNVLRLLSGAKAPDRKAVSEAQEKLTESNQKLGLLRESLERRLGELPADHPK  
GRLLREELTAASSSAFSAIILPGPFPPATHYSTLSKPAPLTGTLEVRVVGCKNLPETIPWSPPPSVGASGTPESR  
TPFLSRPARGLYSRSGSLSGRSSLRGEAENATEVSTVLKLDNTVVGQTAWKPCGPNAWDQSFTELELERARELE  
LAVFWRDQRGLCALFKLEDFLDNERHEVQLDMEPQGCLVAEVTFRNPI IERI PRLQRQKKIFSKQQGKAFQ  
RARQMNIDVATWVRLRLRRLIPSAVATGTFSPNASPGAIEIRHTGDISMEKLNLGADSDSSSQKSPGGLPSTSCS  
LSSPTHESTTSPPELSETQETPGPGLCSPLRKSPLTLEDFKFLAVLGRGHFGKVLLESEFRSSGELFAIKALKK  
GDIVARDEVESLMCEKRILAAVTRAGHPFLVNLFGCFQTPHEVCFVMEYSAGGDLMLHIHNDVFSEPRAVFYS  
ACVVLLGLQFLHEHKIVYRDLKLDNLLDTEGYVKIADFGLCKEGMGYGDRTSTFCGTPEFLAPEVLTDTSYTR  
AVDWWGLGVLLYEMLVGESPFPGDDEEEVFDSIVNDEVRYPRFLSAEAI GIMRRLRRNPERRLGSTERDAED  
VKKQPFPRSLGWDVLLARLLPPFPVPTLSGRTDVSNFDEEFTGEAPTLSPPRDARPLTAAEQAAFRDFDFVAG  
GY\*  
>ENSMUSP00000115054\_c.2173:G>A\_p.S725N ENSMUST00000132945.8|Pkn1-204|ENSMUSG000000057672|-|chr8:g.84398812:C>T  
MACRPCRAGRIWCCRSHKSEPRSWSLLEQLGLAGADLAAPGVQQQLELERERLKRERIRKELKLKEGAENLR  
ATTDLGRSLAPVELLLRGSARRLDLLHQQLQELHAHVLPDPAAGSDATQSLAEGSPICSSSTNLSRVAGLEKQ  
LAIELKVKQGAENMIQTYSNGSSKDRKLLLTAAQMLQDSKTKIDI I RMQLRRALQALQAGELESQAAPDEAQQ  
DPELGAVELRIEELRHHRFRVEHAVAEGAKNVLRLLSGAKAPDRKAVSEAQEKLTESNQKLGLLRESLERRLGE  
LPADHPKGRLLREELTAASSSAFSAIILPGPFPPATHYSTLSKPAPLTGTLEVRVVGCKNLPETIPWSPPPSVGA  
SGTPESRTPFLSRPARGLYSRSGSLSGRSSLRGEAENATEVSTVLKLDNTVVGQTAWKPCGPNAWDQSFTELE  
ERARELELAVFWRDQRGLCALFKLEDFLDNERHEVQLDMEPQGCLVAEVTFRNPI IERI PRLQRQKKIFSK  
QQGKAFQARQMNI DVATWVRLRLRRLIPSAVATGTFSPNASPGAIEIRHTGDISMEKLNLGADSDSSSQKSPG  
LPSTSCSLSSPTHESTTSPPELSETQETPGPGLCSPLRKSPLTLEDFKFLAVLGRGHFGKVLLESEFRSSGEL  
FAIKALKKGDIVARDEVESLMCEKRILAAVTRAGHPFLVNLFGCFQTPHEVCFVMEYSAGGDLMLHIHNDVFSE  
PRAVFYSACVVLLGLQFLHEHKIVYRDLGLWGPDQHVLRNSGVPGAGSAHRHILHASSGLVGTGRAAL\*  
>rs47450140\_ENSMUSP00000005616\_c.1764:A>G\_p.T589A  
ENSMUST00000005616.16|Pkn1-201|ENSMUSG000000057672|-|chr8:g.84400315:T>C  
MAGDAVQSEPRSWSLLEQLGLAGADLAAPGVQQQLELERERLKRERIRKELKLKEGAENLRATTDLGRSLAPV  
ELLLRGSARRLDLLHQQLQELHAHVLPDPAAGSDATQSLAEGSPICSSSTNLSRVAGLEKQLAIELKVKQGAE  
NMIQTYSNGSSKDRKLLLTAAQMLQDSKTKIDI I RMQLRRALQALQAGELESQAAPDEAQQDPELGAVELRIE  
ELRHHRFRVEHAVAEGAKNVLRLLSGAKAPDRKAVSEAQEKLTESNQKLGLLRESLERRLGELPADHPKGRLLR  
EELTAASSSAFSAIILPGPFPPATHYSTLSKPAPLTGTLEVRVVGCKNLPETIPWSPPPSVGASGTPESRTPFLS  
RPARGLYSRSGSLSGRSSLRGEAENATEVSTVLKLDNTVVGQTAWKPCGPNAWDQSFTELELERARELELAVFW  
RDQRGLCALFKLEDFLDNERHEVQLDMEPQGCLVAEVTFRNPI IERI PRLQRQKKIFSKQQGKAFQARQM  
NIDVATWVRLRLRRLIPSAVATGTFSPNASPGAIEIRHTGDISMEKLNLGADSDSSSQKSPGGLPSTSCSLSSPT  
HESTASPPELSETQETPGPGLCSPLRKSPLTLEDFKFLAVLGRGHFGKVLLESEFRSSGELFAIKALKKGDIVA  
RDEVESLMCEKRILAAVTRAGHPFLVNLFGCFQTPHEVCFVMEYSAGGDLMLHIHSDVFSEPRAVFYSACVV  
LGLQFLHEHKIVYRDLKLDNLLDTEGYVKIADFGLCKEGMGYGDRTSTFCGTPEFLAPEVLTDTSYTRAVDWW

GLGVLLYEMLVGESPFPGDDEEEVFDIVNDEVRYPRFLSAEAI GIMRRLRRNPERRLGSTERDAEDVKKQP  
FFRSLGWDVLLARRLPPPFVPTLSGRTDVSNFDEEFTGEAPTLSPPRDARPLTAAEQAAFRDFDFVAGGY\*  
>rs47450140\_ENSMUSP00000116235\_c.1779:A>G\_p.T594A  
ENSMUST00000144258.8|Pkn1-208|ENSMUSG00000057672|-|chr8:g.84400315:T>C  
MAADPPLDSELESEPRWSLLEQLGLAGADLAAPGVQQQLELERERLKREIRKELKLKEGAENLRRATTDLGR  
SLAPVELLLRGSARRLDLLHQQQLQELHAHVVLDPDPAAGSDATQSLAEGSPICSSSTNLSRVAGLEKQLAIELKV  
KQGAENMIQTYSNSSKDRKLLLTAAQMLQDSKTKIDIIRMQLRRALQALQAGELESQAAPDEAQDPELGAV  
ELRIEELRHHFRVEHAVAEGAKNVRLRLLSGAKAPDRKAVSEAQEKLTESNQKLGLLRESLERRLGELPADHPK  
GRLLEELTAASSSAFSAIILPGFPFATHYSTLSKPAPLTGTLEVRVVGCKNLPETIPWSPPPSVGASGTPESR  
TPFLSRPARGLYSRGSLSGRSSLRGEAENATEVSTVLKLDNTVVGQTAWKPCGNPAWDQSFTLELERARELE  
LAVFWRDQRGLCALFKLEDFLDNERHEVQLDMEPQGCLVAEVTFRNPIIERIPRLQRQKKIFSKQQGKAFQ  
RARQMNI DVATWVRLRLRRLIPSAVATGTFSPNASPGAEIRHTGDISMEKLN LGADSDSSSQSPGGLPSTSCS  
LSSPTHESTASPEL PSETQETPGPGLCSPLRKSPLTLEDFKFLAVLGRGHFGKVL LSEFRSSGELFAIKALKK  
GDIVARDEVESLMCEKRILAAVTRAGHPFLVNLFGCFQTPHVCVFM EYSAGGDLMLHIHSDVFSEPRAVFYS  
ACVVVLGLQFLHEHKIVYRD LKLDNLLDTEGYVKIADFLCKE GMYGDR TSTFCGTP EFLAPEVLTDTSYTR  
AVDWWGLGVLLYEMLVGESPFPGDDEEEVFDIVNDEVRYPRFLSAEAI GIMRRLRRNPERRLGSTERDAED  
VKKQPF FFRSLGWDVLLARRLPPPFVPTLSGRTDVSNFDEEFTGEAPTLSPPRDARPLTAAEQAAFRDFDFVAG  
GY\*

>rs47450140\_ENSMUSP00000115054\_c.1800:A>G\_p.T601A  
ENSMUST00000132945.8|Pkn1-204|ENSMUSG00000057672|-|chr8:g.84400315:T>C  
MACRPCRAGRIWCCRSHKSEPRWSLLEQLGLAGADLAAPGVQQQLELERERLKREIRKELKLKEGAENLRR  
ATTDLGRSLAPVELLLRGSARRLDLLHQQQLQELHAHVVLDPDPAAGSDATQSLAEGSPICSSSTNLSRVAGLEKQ  
LAIELKVKQGAENMIQTYSNSSKDRKLLLTAAQMLQDSKTKIDIIRMQLRRALQALQAGELESQAAPDEAQQ  
DPELGAVELRIEELRHHFRVEHAVAEGAKNVRLRLLSGAKAPDRKAVSEAQEKLTESNQKLGLLRESLERRLGE  
LPADHPKGRLLREELTAASSSAFSAIILPGFPFATHYSTLSKPAPLTGTLEVRVVGCKNLPETIPWSPPPSVGA  
SGTPESTRTPFLSRPARGLYSRGSLSGRSSLRGEAENATEVSTVLKLDNTVVGQTAWKPCGNPAWDQSFTLE  
ERARELELAVFWRDQRGLCALFKLEDFLDNERHEVQLDMEPQGCLVAEVTFRNPIIERIPRLQRQKKIFSK  
QQGKAFQ RARQMNI DVATWVRLRLRRLIPSAVATGTFSPNASPGAEIRHTGDISMEKLN LGADSDSSSQSPG  
LPSTSCSLSSPTHESTASPEL PSETQETPGPGLCSPLRKSPLTLEDFKFLAVLGRGHFGKVL LSEFRSSGELF  
AIKALKKGDIVARDEVESLMCEKRILAAVTRAGHPFLVNLFGCFQTPHVCVFM EYSAGGDLMLHIHSDVFSE  
PRAVFYSACVVVLGLQFLHEHKIVYRDGLWGPDQHVLRNSGVPGAGSAHRHILHASSGLVGTGRAAL\*

>rs33561266\_ENSMUSP00000005616\_c.862:G>A\_p.G288E  
ENSMUST00000005616.16|Pkn1-201|ENSMUSG00000057672|-|chr8:g.84410748:C>T  
MAGDAVQSEPRWSLLEQLGLAGADLAAPGVQQQLELERERLKREIRKELKLKEGAENLRRATTDLGRSLAPV  
ELLLRGSARRLDLLHQQQLQELHAHVVLDPDPAAGSDATQSLAEGSPICSSSTNLSRVAGLEKQLAIELKVKQGA  
NMIQTYSNSSKDRKLLLTAAQMLQDSKTKIDIIRMQLRRALQALQAGELESQAAPDEAQQDPELGAVELRIE  
ELRHHFRVEHAVAEGAKNVRLRLLSGAKAPDRKAVSEAQEKLTESNQKLGLLRESLERRLGELPADHPKERLLR  
EELTAASSSAFSAIILPGFPFATHYSTLSKPAPLTGTLEVRVVGCKNLPETIPWSPPPSVGASGTPESRTPFLS  
RPARGLYSRGSLSGRSSLRGEAENATEVSTVLKLDNTVVGQTAWKPCGNPAWDQSFTLELERARELELAVFW  
RDQRGLCALFKLEDFLDNERHEVQLDMEPQGCLVAEVTFRNPIIERIPRLQRQKKIFSKQQGKAFQ RARQM  
NIDVATWVRLRLRRLIPSAVATGTFSPNASPGAEIRHTGDISMEKLN LGADSDSSSQSPGGLPSTSCSLSSPT  
HESTTSP ELPSETQETPGPGLCSPLRKSPLTLEDFKFLAVLGRGHFGKVL LSEFRSSGELFAIKALKKGDIVA  
RDEVESLMCEKRILAAVTRAGHPFLVNLFGCFQTPHVCVFM EYSAGGDLMLHIHSDVFSEPRAVFYSACVV  
LGLQFLHEHKIVYRD LKLDNLLDTEGYVKIADFLCKE GMYGDR TSTFCGTP EFLAPEVLTDTSYTRAVDWW  
GLGVLLYEMLVGESPFPGDDEEEVFDIVNDEVRYPRFLSAEAI GIMRRLRRNPERRLGSTERDAEDVKKQP  
FFRSLGWDVLLARRLPPPFVPTLSGRTDVSNFDEEFTGEAPTLSPPRDARPLTAAEQAAFRDFDFVAGGY\*  
>rs33561266\_ENSMUSP00000116235\_c.877:G>A\_p.G293E  
ENSMUST00000144258.8|Pkn1-208|ENSMUSG00000057672|-|chr8:g.84410748:C>T  
MAADPPLDSELESEPRWSLLEQLGLAGADLAAPGVQQQLELERERLKREIRKELKLKEGAENLRRATTDLGR  
SLAPVELLLRGSARRLDLLHQQQLQELHAHVVLDPDPAAGSDATQSLAEGSPICSSSTNLSRVAGLEKQLAIELKV  
KQGAENMIQTYSNSSKDRKLLLTAAQMLQDSKTKIDIIRMQLRRALQALQAGELESQAAPDEAQDPELGAV  
ELRIEELRHHFRVEHAVAEGAKNVRLRLLSGAKAPDRKAVSEAQEKLTESNQKLGLLRESLERRLGELPADHPK  
ERLLREELTAASSSAFSAIILPGFPFATHYSTLSKPAPLTGTLEVRVVGCKNLPETIPWSPPPSVGASGTPESR  
TPFLSRPARGLYSRGSLSGRSSLRGEAENATEVSTVLKLDNTVVGQTAWKPCGNPAWDQSFTLELERARELE  
LAVFWRDQRGLCALFKLEDFLDNERHEVQLDMEPQGCLVAEVTFRNPIIERIPRLQRQKKIFSKQQGKAFQ  
RARQMNI DVATWVRLRLRRLIPSAVATGTFSPNASPGAEIRHTGDISMEKLN LGADSDSSSQSPGGLPSTSCS  
LSSPTHESTTSP ELPSETQETPGPGLCSPLRKSPLTLEDFKFLAVLGRGHFGKVL LSEFRSSGELFAIKALKK  
GDIVARDEVESLMCEKRILAAVTRAGHPFLVNLFGCFQTPHVCVFM EYSAGGDLMLHIHSDVFSEPRAVFYS

ACVVVLGLQFLHEHKIVYRDLKLDNLLLDTEGYVKIADFLGCKEGMGYGDRSTSTFCGTPEFLAPEVLTDTSYTR  
AVDWWGLGVLLYEMLVGESPFPGDDEEEVFDIVNDEVRYPRFLSAEAI GIMRLLRRNPERRLGSTERDAED  
VKKQPFFRSLGWDVLLARRLPPPFVPTLSGRTDVSNFDEEFTGEAPTLSPPRDARPLTAAEQAAFDFDFVAG  
GY\*

>rs33561266\_ENSMUSP00000115054\_c.898:G>A\_p.G300E  
ENSMUST00000132945.8|Pkn1-204|ENSMUSG00000057672|-|chr8:g.84410748:C>T  
MACRPCRAGRIWCCRSHKSEPRSWSLLEQLGLAGADLAAPGVQQLELERERLKRERKELKKEGAENLRR  
ATDLDGRSLAPVELLLRGSARRLDLHQQLQELHAHVLPDPAAGSDATQSLAEGSPICSSSTNLSRVAGLEKQ  
LAIELKVKQGAENMIQTYNSGSSKDRKLLLTAAQQMLQDSKTKIDIIRMQLRRALQALQAGELESQAAPDEAQQ  
DPELGAVELRIEELRHHRFVEHAVAEGAKNVLRLLSGAKAPDRKAVSEAEQKLTESNQKLGLLRESLERRLGE  
LPADHPKERLLREELTAASSSAFSAIILPGFPFATHYSTLSKPAPLTGTLEVRVVGCKNLPETIPWSPPPSVGA  
SGTPESRTPFLSRPARGLYSRSGSLSGRSSLRGEAENATEVSTVLKLDNTVVGQTAWKPCGNQWDSFTLEL  
ERARELELAVFWRDQRGLCALKFLKLEDFLDNERHEVQLDMEPQGCLVAEVTFRNPIIERIPRLQRQKKIFSK  
QQGKAFQARQMNIDVATVWVLLRRLIPSAVATGTFSPNASPGAIEIRHTGDISMEKLNLGADSDSSSQKSPPG  
LPSTSCSLSSPHESTTPELPESETQETPGPGLCSPLRKSPLTLEDFKFLAVLGRGHFGKVLSEFRSSGELF  
AIKALKKGDIVARDEVESLMCEKRI LAAVTRAGHPFLVNLFGCFQTPHVCFVMEYSAGGDLMLHIHSDVDFSE  
PRAVFYSACVVVLGLQFLHEHKIVYRDLGWPDPQHVLRNSGVPVPGAGSAHRHILHASSGLVGTGRAAL\*

>rs46055145\_ENSMUSP0000019576\_c.198:C>G\_p.P67A  
ENSMUST0000019576.15|Ddx39a-201|ENSMUSG00000005481|+|chr8:g.84446218:C>G  
MAEQDVENELLDYDEDEEPQAPQESTPAPPKKDVKGSYVSIHSSGFRDFLLKPELLRAIVDCGFHASEVQHE  
CIPQAILGMDVLCQAKSGMGKTAVFVLATLQQIEPVNGQVSVLVMCHTRELAFQISKEYERFSKYMPVSVKVS  
FFGGLSIKKDEDVLLKKNCPHVVVGTPGRILALVRSRSLNLRNVKHFVLDCECDKMLEQLDMRRDVQEIFRLTPH  
EKQCMFMSATLSKEIRPVCRKFMQDPEMEVFVDDTKLTLHGLQQYYVKLKDSEKNRKLFDLLDVLEFNQVVI  
VKSQVRCMALAQLLVEQNFPPIAIAHRGMAQEERLSRYQQFKDFQRRILVATNLFGRGMDIERNVIVFNQVVI  
DSDTYLHRVARAGRFGTKGLAVTFVSDENDAKILNDVQDRFEVNVVAELPEEIDISTYIEQSR\*

>rs46055145\_ENSMUSP00000116101\_c.198:C>G\_p.P67A  
ENSMUST00000140521.8|Ddx39a-205|ENSMUSG00000005481|+|chr8:g.84446218:C>G  
MAEQDVENELLDYDEDEEPQAPQESTPAPPKKDVKGSYVSIHSSGFRDFLLKPELLRAIVDCGFHASEVQHE  
CIPQAILGMDVLCQAKSGMGKTAVFVLATLQQIEPVNGQVSVLVMCHTRELAFQISKEYERFSKYMPVSVKVS  
FFGGLSIKKDEDVLLKKNCPHVVVGTPGRILALVRSRSLNLRNVKHFVLDCECDKMLEQLGSL\*

>rs46055145\_ENSMUSP00000148329\_c.198:C>G\_p.P67A  
ENSMUST00000212949.2|Ddx39a-207|ENSMUSG00000005481|+|chr8:g.84446218:C>G  
MAEQDVENELLDYDEDEEPQAPQESTPAPPKKDVKGSYVSIHSSGFRDFLLKPELLRAIVDCGFHASEVQHE  
CIPQAILGMDVLCQAKSGMGKTAVFVLATLQQIEPVNGQVSVLVMCHTRELAFQISKEYERFSKYMPVSVKVS  
FFGGLSIKKDEDVLLKKNCPHVVVGTPGRILALVRSRSLNLRNVKHFVLDCECDKMLEQLDMRRDVQEIFRLTPH  
EKQCMFMSATLSKEIRPVCRKFMQDPEMEVFVDDTKLTLHGLQQYYVKLKDSEKNRKLFDLLDVLEFNQVVI  
VKSQVRCMALAQLLVEQNFPPIAIAHRGMAQEERLSRYQQFKDFQRRILVATNLFGRGMDIERNVIVFNQVVI  
DSDTYLHRVARAGRFGTKGLAVTFVSDENDAKILNDVQDRFEVNVVAELPEEIDISTYIEQSR\*

>rs46055145\_ENSMUSP00000105435\_c.198:C>G\_p.P67A  
ENSMUST00000109810.2|Ddx39a-202|ENSMUSG00000005481|+|chr8:g.84446218:C>G  
MAEQDVENELLDYDEDEEPQAPQESTPAPPKKDVKGSYVSIHSSGFRDFLLKPELLRAIVDCGFHASEVQHE  
CIPQAILGMDVLCQAKSGMGKTAVFVLATLQQIEPVNGQVSVLVMCHTRELAFQISKEYERFSKYMPVSVKVS  
FFGGLSIKKDEDVLLKKNCPHVVVGTPGRILALVRSRSLNLRNVKHFVLDCECDKMLEQLDMRRDVQEIFRLTPH  
EKQCMFMSATLSKEIRPVCRKFMQDPEMEVFVDDTKLTLHGLQQYYVKLKDSEKNRKLFDLLDVLEFNQVVI  
VKSQVRCMALAQLLVEQNFPPIAIAHRGMAQEERLSRYQQFKDFQRRILVATNLFGRGMDIERNVIVFNQVVI  
DSDTYLHRVARAGRFGTKGLAVTFVSDENDAKILNDVQDRFEVNVVAELPEEIDISTYIEQSR\*

>rs46055145\_ENSMUSP00000132222\_c.198:C>G\_p.P67A  
ENSMUST00000172396.8|Ddx39a-206|ENSMUSG00000005481|+|chr8:g.84446218:C>G  
MAEQDVENELLDYDEDEEPQAPQESTPAPPKKDVKGSYVSIHSSGFRDFLLKPELLRAIVDCGFHASEVQHE  
CIPQAILGMDVLCQAKSGMGKTAVFVLATLQQIEPVNGQVSVLVMCHTRELAFQISKEYERFSKYMPVSVKVS  
FFGGLSIKKDEDVLLKKNCPHVVVGTPGRILALVRSRSLNLRNVKHFVLDCECDKMLEQLDMRRDVQEIFRLTPH  
EKQCMFMSATLSKEIRPVCRKFMQDPEMEVFVDDTKLTLHGLQQYYVKLKDSEKNRKLFDLLDVLEFNQVVI  
VKSQVRCMALAQLLVEQNFPPIAIAHRGMAQEERLSRYQQFKDFQRRILVATNLFGRGMDIERNVIVFNQVVI  
DSDTYLHRVARAGRFGTKGLAVTFVSDENDAKILNDVQDRFEVNVVAELPEEIDISTYIEQSR\*

>ENSMUSP00000128220\_c.1528:T>ATGTCATGAGGCAGGCTCTGCCTT\_p.L510ins-fs  
ENSMUST00000166939.8|Adgre5-208|ENSMUSG00000002885|-  
|chr8:g.84451578:A>AAGCAAGACCCTGCCTCATGTACAT



>rs47983638\_ENSMUSP00000002964\_c.1494:C>T\_p.R499C  
ENSMUST00000002964.14|Adgre5-201|ENSMUSG00000002885|-|chr8:g.84451618:G>A  
MRGVRCPLLVCILLSLSGAGTQKAESKNCAKWCIPINSKCVSNRSCVCKPGFSSEKELITNPAESCEDINEC  
LLPGFSCGDFAMCKNSEGSYTCVCNLGYKLLSGAESFVNESENTCQDVDECSSGQHQCCHNSTVCKNTVGSYKC  
HCRPGWKPTSGLRGPDTICQEPFPTWTLLPTAHSQTLLRFSVEVQNLLRDFNPATVNYTIQKLEAVDKLL  
EDPMETETQQVAAQLLSNLEQSLRRTLAQFLPKGPFYTSPSNTELSLMVKEQDNKDVTTVHHGQTMELDWAV  
TAGAKISENGSSVAGILSSPNMEKLLGNTPLNLEQRRASLEDFYGSPIPSVSLKLLSNINSVFLTNTNTEKLA  
SNVTFKFDFTSVESIEPRHELICAFWKAHNGNGYWDTDGCSMNGTGFCCHNLT SFAILMAQYHVQDPRLELI  
TKVGLLLSLICLLLCILTFLLVKPIQSSRTMVHLHLICICLFLGSIIFLVGVENEGGEVGLCCRLVAVMLHFCF  
LAAFCWMALEGEVLYFLVVRVFGQGLSTWQRCLIGYGVPLLIVAI SMAVVKMDGYGHATYCWLD FRKQGF  
LWSFSGPVAFIIFCNAAIFVITVWKLTKKFSEINPNMKLKRARVLTITSAQLLVLGCTWGFGLFLFNPHSTW  
LSYIFTLLNCLQGLFLYVMLCLLNKVVREYWKWACMVTGSKYTEFNSTTGTGTSQTRALRSSESGM\*

>rs47983638\_ENSMUSP00000075240\_c.1776:C>T\_p.R593C  
ENSMUST00000075240.13|Adgre5-202|ENSMUSG00000002885|-|chr8:g.84451618:G>A  
MRGVRCPLLVCILLSLSGAGTQKAESKNCAKWCIPINSKCVSNRSCVCKPGFSSEKELITNPAESCEDINEC  
LLPGFSCGDFAMCKNSEGSYTCVCNLGYKLLSGAESFVNESENTCQASVNTGMTVPVPSRIHTVTTAPGNLPEQ  
TTTVHQTMGDSEERTPKDVNECISGQNHCHQSTHCINKLGGYSCICRQGWKVPVPGSPNGPVSTVCEDEVDECS  
SGQHQCCHNSTVCKNTVGSYKCHCRPGWKPTSGLRGPDTICQEPFPTWTLLPTAHSQTLLRFSVEVQNLLR  
DFNPATVNYTIQKLEAVDKLLEDPMETETQQVAAQLLSNLEQSLRRTLAQFLPKGPFYTSPSNTELSLMVKEQ  
DNKDVTTVHHGQTMELDWAVTAGAKISENGSSVAGILSSPNMEKLLGNTPLNLEQRRASLEDFYGSPIPSV  
SLKLLSNINSVFLTNTNTEKLASNVTFKFDFTSVESIEPRHELICAFWKAHNGNGYWDTDGCSMNGTGFCCHN  
LTSFAILMAQYHVQDPRLELITKVGLLLSLICLLLCILTFLLVKPIQSSRTMVHLHLICICLFLGSIIFLVGVE  
NEGGEVGLCCRLVAVMLHFCFLAAFCWMALEGEVLYFLVVRVFGQGLSTWQRCLIGYGVPLLIVAI SMAVVK  
MDGYGHATYCWLD FRKQGF LWSFSGPVAFIIFCNAAIFVITVWKLTKKFSEINPNMKLKRARVLTITSAQL  
LVLGCTWGFGLFLFNPHSTWLSYIFTLLNCLQGLFLYVMLCLLNKVVREYWKWACMVTGSKYTEFNSTTGT  
GTSQTRALRSSESGM\*

>rs47983638\_ENSMUSP00000105427\_c.1641:C>T\_p.R548C  
ENSMUST00000105427.3|Adgre5-203|ENSMUSG00000002885|-|chr8:g.84451618:G>A  
MRGVRCPLLVCILLSLSGAGTQKAESKNCAKWCIPINSKCVSNRSCVCKPGFSSEKELITNPAESCEDINEC  
LLPGFSCGDFAMCKNSEGSYTCVCNLGYKLLSGAESFVNESENTCQDVNECISGQNHCHQSTHCINKLGGYSC  
ICRQGWKVPVPGSPNGPVSTVCEDEVDECSGQHQCCHNSTVCKNTVGSYKCHCRPGWKPTSGLRGPDTICQEP  
FPTWTLLPTAHSQTLLRFSVEVQNLLRDFNPATVNYTIQKLEAVDKLLEDPMETETQQVAAQLLSNLEQSLR  
TLAQFLPKGPFYTSPSNTELSLMVKEQDNKDVTTVHHGQTMELDWAVTAGAKISENGSSVAGILSSPNMEK  
LLGNTPLNLEQRRASLEDFYGSPIPSVSLKLLSNINSVFLTNTNTEKLASNVTFKFDFTSVESIEPRHELIC  
AFWKAHNGNGYWDTDGCSMNGTGFCCHNLT SFAILMAQYHVQDPRLELITKVGLLLSLICLLLCILTFLLVK  
PIQSSRTMVHLHLICICLFLGSIIFLVGVENEGGEVGLCCRLVAVMLHFCFLAAFCWMALEGEVLYFLVVRV  
FGQGLSTWQRCLIGYGVPLLIVAI SMAVVKMDGYGHATYCWLD FRKQGF LWSFSGPVAFIIFCNAAIFVITV  
WKLTKKFSEINPNMKLKRARVLTITSAQLLVLGCTWGFGLFLFNPHSTWLSYIFTLLNCLQGLFLYVMLCL  
LNKVVREYWKWACMVTGSKYTEFNSTTGTGTSQTRALRSSESGM\*

>rs32903748\_ENSMUSP00000075240\_c.445:C>A\_p.T149K  
ENSMUST00000075240.13|Adgre5-202|ENSMUSG00000002885|-|chr8:g.84458579:G>T  
MRGVRCPLLVCILLSLSGAGTQKAESKNCAKWCIPINSKCVSNRSCVCKPGFSSEKELITNPAESCEDINEC  
LLPGFSCGDFAMCKNSEGSYTCVCNLGYKLLSGAESFVNESENTCQASVNTGMTVPVPSRIHTVTTAPGNLPEQ  
TTKVHQTMGDSEERTPKDVNECISGQNHCHQSTHCINKLGGYSCICRQGWKVPVPGSPNGPVSTVCEDEVDECS  
SGQHQCCHNSTVCKNTVGSYKCHCRPGWKPTSGLRGPDTICQEPFPTWTLLPTAHSQTLLRFSVEVQNLLR  
DFNPATVNYTIQKLEAVDKLLEDPMETETQQVAAQLLSNLEQSLRRTLAQFLPKGPFYTSPSNTELSLMVKEQ  
DNKDVTTVHHGQTMELDWAVTAGAKISENGSSVAGILSSPNMEKLLGNTPLNLEQRRASLEDFYGSPIPSV  
SLKLLSNINSVFLTNTNTEKLASNVTFKFDFTSVESIEPRHELICAFWKAHNGNGYWDTDGCSMNGTGFCCHN  
LTSFAILMAQYHVQDPRLELITKVGLLLSLICLLLCILTFLLVKPIQSSRTMVHLHLICICLFLGSIIFLVGVE  
NEGGEVGLRCLVAVMLHFCFLAAFCWMALEGEVLYFLVVRVFGQGLSTWQRCLIGYGVPLLIVAI SMAVVK  
MDGYGHATYCWLD FRKQGF LWSFSGPVAFIIFCNAAIFVITVWKLTKKFSEINPNMKLKRARVLTITSAQL  
LVLGCTWGFGLFLFNPHSTWLSYIFTLLNCLQGLFLYVMLCLLNKVVREYWKWACMVTGSKYTEFNSTTGT  
GTSQTRALRSSESGM\*

>rs49019694\_ENSMUSP00000075240\_c.373:G>A\_p.G125E  
ENSMUST00000075240.13|Adgre5-202|ENSMUSG00000002885|-|chr8:g.84458651:C>T  
MRGVRCPLLVCILLSLSGAGTQKAESKNCAKWCIPINSKCVSNRSCVCKPGFSSEKELITNPAESCEDINEC  
LLPGFSCGDFAMCKNSEGSYTCVCNLGYKLLSGAESFVNESENTCQASVNTMTVPVPSRIHTVTTAPGNLPEQ  
TTTVHQTMGDSEERTPKDVNECISGQNHCHQSTHCINKLGGYSCICRQGWKVPVPGSPNGPVSTVCEDEVDECS



SGQHQCCHNSTVCKNTVGSYKCHCRPGWKPTSGLRGPDTICQEPFPFTWTLPTAHSQTLLRFSVEVQNLLRD  
FNPATVNYTIQKLI EAVDKLLEDPMETETQQVAAQLLSNLEQSLRSLAQFLPKGPFTYTSPTSNTLSLMVKEQ  
DNKDVTTVHHGQTMWELDWAVTAGAKISENGSSVAGILSSPNMEKLLGNTPLNLEQRRASLEDFYGSPIPSVS  
LKLLSNINSVFLTNTNTEKLASNVTFKFDFTSVESIEPRHELICAFWKAHNGNGYWDTDGCSMNGTGFCCHCNH  
LTSFAILMAQYHVQDPRLELITKVGLLLSLICLLCILTFLLVKPIQSSRTMVHLHLICICLFLGSIIFLVGVE  
NEGGEVGLRCLVAVMLHFCFLAAFCWMALEGEVLYFLVVRVFGQGLSTWQRCLIGYGVPLLIVAIMAVVK  
MDGYGHATYCWLD FRKQGF LWSFSGPFVAFIIFCNAAFVITVWKLTKKFSEINPNMKKLRKARVLTITSTIAQL  
LVLGCTWGFGLFLFNPHSTWLSYIFTLNCLQGLFLYVMLCLLNKKVREEYWKWACMVTGSKYTEFNSSTTGT  
GTSQTRALRSSESGM\*

>rs33291739\_ENSMUSP00000118452\_c.104:G>A\_p.M35I

ENSMUST00000141158.8|Adgr11-207|ENSMUSG0000013033|+|chr8:g.84645483:G>A  
MARLAAALWLSLCVTTVLVTSATQGLSRAGLPFGLIRRELACEGYPIELRCPGSDVIMVENANYGRD DDKICDA  
DPFQ MENVQCYLPDAFKIMSQR CNNR TQC VV VAGSDA FPDPCPGTYKYLEVQYDCVPYIFVCPGTLQK VLEPT  
STHESEHQSGAWCKDPLQAGDRIYVMPWIPYRTDTL TEYASWEDYVAARHTTTTYRLPNRVDGTGFVVYDGA V  
Y NKERTRNIVKYDLRTRIKSGETVINTANYHDTSPYRWGGKTDIDLAVDENGLWVIYATEGNNGRLVVSQ LNP  
YTLRFEGTWTETGYDKRSASNAFMVCGVLYVLR SVYVDDDSEAAGNRVDYAFNTNANREEPVSLAFP NPYQFVS  
SVDYNPRDNQLVWNNYFVVRYSLEFGPPDPSAGPATSPPLSTTTTARPTPLTSTASPAATPLRRAPLTTHP  
VGAINQLGPDLPATAPAPSTRPPAPNLHVSPELFCEPREVRRVQWPATQQGMLVERPCPKGTRG IASFQCL  
PALGLWNPRGPDLSNCTSPWVNQVAQKIKSGENAANIASELARHTRGSIYAGDVSSSVKLMEQLLDILDAQLQ  
ALRPIERESAGKNYNKMKRERTCKDYIKAVVETVDNLLRPEALESWKDMNATEQVHTATMLLDVLEEGAFLL  
ADNVREPARFLAAKQNVVLEVTVLNTEGQVQELVFPQEYPSSENSIQLSANTIKQNSRNGVVKVVFILYNLGL  
FLSTENATVKLAGEAGTGGPGGASLVVNSQVIAASINKESSRVFLMDPVI FTVAHLEAKNHFNANC SFWNYSE  
RSMGLGYWSTQGCR LVE SNKTHHTCACSHLTNF AVLMAHREIYQGRINELL SVITWVGIVISLVCLAI CISTF  
CFLRGLQTD RNTIHKNL CINFLAELLFLV GIDKTYEVACPIFAGLLHYFFLAAFSWLCLEGVHLYLLLVEV  
FESEYSRTKYYLGGYCFPALVVGIAAAIDYRSYGTEKACWLRVDNYFIWSFIGPVSFVI VVNLVFLM VTLHK  
MIRSSSVLKP DSSRLDNIKSWALGAIALLFLLGLT WAFGLLFINKESVVMAYLFTTFNAFQGVFI FV FHCALQ  
KKVHKYSKLRDHSYCCIRSPGGTHGSLKTSAMRSNTRYTGTQSRIRRMWNDTVRKQTESSFMAGDINSTP  
TLNRGTMGNHLLTNPVLQPRGGTSPYNTLIAESVGFNPSSPPVFNSPGSYREPKHPLGGREACMDTLPLNGN  
FNNSYSLRSGDFPPGDGGPEPPRGRNLADAAAF EKMI ISELVHNNLRGASGGAKGPPPEPPVPPVPGVSEDEA  
GGPGSADRAEIELLYKALEEPLLLPRAQSVLYQSDLDESE SCTAEDGATSRPLSSPPGRD SLYASGANLRD SP  
SYPDSSPEGPNEALPPPPAPPGPEIYYTSRPPALVARNPLQGYQVRRPSHEGYLAAPSLEGPGPDGDGQM  
QLVTSL\*

>rs33291739\_ENSMUSP00000116064\_c.104:G>A\_p.M35I

ENSMUST00000124355.8|Adgr11-202|ENSMUSG0000013033|+|chr8:g.84645483:G>A  
MARLAAALWLSLCVTTVLVTSATQGLSRAGLPFGLIRRELACEGYPIELRCPGSDVIMVENANYGRD DDKICDA  
DPFQ MENVQCYLPDAFKIMSQR CNNR TQC VV VAGSDA FPDPCPGTYKYLEVQYDCVPYINGGVS PGDRE\*

>rs33291739\_ENSMUSP00000048422\_c.104:G>A\_p.M35I

ENSMUST00000045393.15|Adgr11-201|ENSMUSG0000013033|+|chr8:g.84645483:G>A  
MARLAAALWLSLCVTTVLVTSATQGLSRAGLPFGLIRRELACEGYPIELRCPGSDVIMVENANYGRD DDKICDA  
DPFQ MENVQCYLPDAFKIMSQR CNNR TQC VV VAGSDA FPDPCPGTYKYLEVQYDCVPYKVEQKVFCPGLQK  
VLEPTSTHESEHQSGAWCKDPLQAGDRIYVMPWIPYRTDTL TEYASWEDYVAARHTTTTYRLPNRVDGTGFVVY  
DGA VFY NKERTRNIVKYDLRTRIKSGETVINTANYHDTSPYRWGGKTDIDLAVDENGLWVIYATEGNNGRLV V  
SQLNPYTLRFEGTWTETGYDKRSASNAFMVCGVLYVLR SVYVDDDSEAAGNRVDYAFNTNANREEPVSLAFP NP  
YQFVSSVDYNPRDNQLVWNNYFVVRYSLEFGPPDPSAGPATSPPLSTTTTARPTPLTSTASPAATPLRRAP  
LTTHPVGAINQLGPDLPATAPAPSTRPPAPNLHVSPELFCEPREVRRVQWPATQQGMLVERPCPKGTRG IAS  
SFQCLPALGLWNPRGPDLSNCTSPWVNQVAQKIKSGENAANIASELARHTRGSIYAGDVSSSVKLMEQLLDIL  
DAQLQALRPIERESAGKNYNKMKRERTCKDYIKAVVETVDNLLRPEALESWKDMNATEQVHTATMLLDVLEE  
GAFLLADNVREPARFLAAKQNVVLEVTVLNTEGQVQELVFPQEYPSSENSIQLSANTIKQNSRNGVVKVVFILY  
NNLGLFLSTENATVKLAGEAGTGGPGGASLVVNSQVIAASINKESSRVFLMDPVI FTVAHLEAKNHFNANC SF  
WNYSERSMGLGYWSTQGCR LVE SNKTHHTCACSHLTNF AVLMAHREIYQGRINELL SVITWVGIVISLVCLAI  
CISTF CFLRGLQTD RNTIHKNL CINFLAELLFLV GIDKTYEVACPIFAGLLHYFFLAAFSWLCLEGVHLYL  
LLVEVFESEYSRTKYYLGGYCFPALVVGIAAAIDYRSYGTEKACWLRVDNYFIWSFIGPVSFVI VVNLVFLM  
VTLHKMIRSSSVLKP DSSRLDNIKSWALGAIALLFLLGLT WAFGLLFINKESVVMAYLFTTFNAFQGVFI FV F  
HICALQKKVHKYSKLRDHSYCCIRSPGGTHGSLKTSAMRSNTRYTGTQSRIRRMWNDTVRKQTESSFMAGD  
INSTPTLNRGTMGNHLLTNPVLQPRGGTSPYNTLIAESVGFNPSSPPVFNSPGSYREPKHPLGGREACMDTL  
PLNGNFNNSYSLRSGDFPPGDGGPEPPRGRNLADAAAF EKMI ISELVHNNLRGASGGAKGPPPEPPVPPVPGV  
SEDEAGGPGSADRAEIELLYKALEEPLLLPRAQSVLYQSDLDESE SCTAEDGATSRPLSSPPGRD SLYASGAN

LRDPSYPDSSPEGPNEALPPPPAPPGPPEIYYTSRPPALVARNPLQGYQVRRPSHEGYLAAPSLEGPGPD  
GDGQMQLVTSL\*  
>rs33291739\_ENSMUSP00000119100\_c.104:G>A\_p.M35I  
ENSMUST00000132500.8|Adgr11-205|ENSMUSG0000013033|+|chr8:g.84645483:G>A  
MARLAAALWLSLVCVTTVLVTSATQGLSRAGLPFGLIRRELACEGYPIELRCPGSDVIMVENANYGRD  
DDKICDADPFQMVENVQCYLPDAFKIMSQRCCNNRTQCVVAVGSDAFDPDPCPGTYKYLEVQYDCV  
PFI FVCPGTLQKVLEPTSTHESEHQSGAWCKDPLQAGDRIYVMPWIPYRTDTLLEYASWEDYVAARHT  
TTYRLPNRVDGTGFVVYDGA VFYNKERTRNIVKYDLRTRIKSGETVINTANYHDTSPYRWGKTDIDLAVD  
ENGLWVIYATEGNNGRLVVSQ LNPYTLRFEGTWETGYDKRSASNAFMVCGVLYVLRVSVYVDDDSEAA  
GNRVDYAFNTNANREEPVSLAFPNPYQFVVSVDYVNRDNQLYVWNNYFVVRYSLFEGPPDPSAG  
PATSPPLSTTTTARPTPLTSTASPAATTPLRRAPLTHPVGAINQLGPDLPATAPAPSTRRPPAP  
NLHVSPELFCEPREVRRVQWPATQQGMLVERPCPKGTRGIA SFQCLPALGLWNPRGPDLSNCTSP  
WVNQVAQKIKSGENAANIASELARHTRGSIYAGDVSSSVKLMQQLLDILDAQLOALRPIERESAG  
KNYKMKRERTCKDYIKAVVETVDNLLRPEALESWKDMNATEQVHTATMLLDVLEEGAFLLADNVRE  
PARFLAAKQNVVLEVTVLNTEGQVQELVFPQEYPSSENSIQLSANTIKQNSRNGVVKVVFILYNLGL  
FLSTENATVKLAGEAGTGGPGGASLVVNSQVIAASINKESSRVFLMDPVI FTVAHLEAKNHFNANCS  
FWNYSERMLGYWSTQGCRLVESNKTHHTCACSHLTNFAVLMAREIYQGRINELLSVITWVGIVISLV  
CLAICISTFCFLRGLQTDNRNTIHKNLCLNLF LAELLFLVGDIKTQYEVACPIFAGLLHYFFLAAF  
SWLCLLEGVHLYLLVEVFESEYSRTKYYYLGGYCFPALVVGIAAAIDYRSYGTEKACWLRVDNYFI  
WSF IG PVSFVI VVNLVFLMVTLHKMIRSSSVLKPDPSSRLDNIKSWALGAIALLFLLGLTWA  
FGLLFINKESVVMAYLFTTFNAFQGVFI FV FHCALQKKVHKEYSKCLRHSYCCIRSPGGTHGSL  
KTSAMRSNTRYTGTQVPGQGRHIHQVSLGPRGRSTLPE SQKDPGGQSGPRDPLMFGLCPQSRIR  
RMWNDTVRKQTESSFMAGDINSTPTLNRGTMGNHLLTNPVLQPRGGTSPYNTLIAESVGFNPS  
PPVFNPSPGSYREP KHP LGGREACGMDTLP L N G N F N N S Y S L R S G D F P P G D G G P E  
P P R G R N L A D A A A F E K M I I S E L V H N N L R G A S G G A K G P P P E P P V P V  
P V G V S E D E A G G P G S A D R A E I E L L Y K A L E E P L L L P R A Q S V L Y Q S D L  
D E S E S C T A E D G A T S R P L S S P P G R D S L Y A S G A N L R D S P S Y P D S S  
P E G P N E A L P P P P P A P P G P P E I Y Y T S R P P A L V A R N P L Q G Y Y Q V R R P S  
H E G Y L A A P S L E G P G P D G D G Q M Q L V T S L \*  
>rs33291739\_ENSMUSP00000115295\_c.104:G>A\_p.M35I  
ENSMUST00000152978.8|Adgr11-210|ENSMUSG0000013033|+|chr8:g.84645483:G>A  
MARLAAALWLSLVCVTTVLVTSATQGLSRAGLPFGLIRRELACEGYPIELRCPGSDVIMVENANYGRD  
DDKICDADPFQMVENVQCYLPDAFKIMSQRCCNNRTQCVVAVGSDAFDPDPCPGTYKYLEVQYDCV  
PFI FVCPGTLQKVLEPTSTHESEHQSGAWCKDPLQAGDRIYVMPWIPYRTDTLLEYASWEDYVAARHT  
TTYRLPNRVDGTGFVVYDGA VFYNKERTRNIVKYDLRTRIKSGETVINTANYHDTSPYRWGKTDIDLAVD  
ENGLWVIYATEGNNGRLVVSQ LNPYTLRFEGTWETGYDKRSASNAFMVCGVLYVLRVSVYVDDDSEAA  
GNRVDYAFNTNANREEPVSLAFPNPYQFVVSVDYVNRDNQLYVWNNYFVVRYSLFEGPPDPSAG  
PATSPPLSTTTTARPTPLTSTASPAATTPLRRAPLTHPVGAINQLGPDLPATAPAPSTRRPPAP  
NLHVSPELFCEPREVRRVQWPATQQGMLVERPCPKGTRGIA SFQCLPALGLWNPRGPDLSNCTSP  
WVNQVAQKIKSGENAANIASELARHTRGSIYAGDVSSSVKLMQQLLDILDAQLOALRPIERESAG  
KNYKMKRERTCKDYIKAVVETVDNLLRPEALESWKDMNATEQVHTATMLLDVLEEGAFLLADNVRE  
PARFLAAKQNVVLEVTVLNTEGQVQELVFPQEYPSSENSIQLSANTIKQNSRNGVVKVVFILY  
NNLGLFLSTENATVKLAGEAGTGGPGGASLVVNSQVIAASINKESSRVFLMDPVI FTVAHLEAKNHF  
NANCSFWNYSERMLGYWSTQGCRLVESNKTHHTCACSHLTNFAVLMAREIYQGRINELLSVITWVG  
IVISLVCLAICISTFCFLRGLQTDNRNTIHKNLCLNLF LAELLFLVGDIKTQYEVACPIFAGLLHY  
FFLAAFSWLCLLEGVHLYLLVEVFESEYSRTKYYYLGGYCFPALVVGIAAAIDYRSYGTEKACWLR  
VDNYFIWSF IG PVSFVI VVNLVFLMVTLHKMIRSSSVLKPDPSSRLDNIKSWALGAIALLFLLGL  
TWA FGLLFINKESVVMAYLFTTFNAFQGVFI FV FHCALQKKVHKEYSKCLRHSYCCIRSPGGTHG  
SLKTSAMRSNTRYTGTQVPGQGRHIHQVSLGPRGRSTLPE SQKDPGGQSGPRDPLMFGLCPQSRIR  
RMWNDTVRKQTESSFMAGDINSTPTLNRGTMGNHLLTNPVLQPRGGTSPYNTLIAESVGFNPS  
PPVFNPSPGSYREP KHP LGGREACGMDTLP L N G N F N N S Y S L R S G D F P P G D G G P E  
P P R G R N L A D A A A F E K M I I S E L V H N N L R G A S G G A K G P P P E P P V P V  
P V G V S E D E A G G P G S A D R A E I E L L Y K A L E E P L L L P R A Q S V L Y Q S D L  
D E S E S C T A E D G A T S R P L S S P P G R D S L Y A S G A N L R D S P S Y P D S S  
P E G P N E A L P P P P P A P P G P P E I Y Y T S R P P A L V A R N P L Q G Y Y Q V R R P S  
H E G Y L A A P S L E G P G P D G D G Q M Q L V T S L \*  
>rs32753131\_ENSMUSP00000118452\_c.1872:C>T\_p.P625S  
ENSMUST00000141158.8|Adgr11-207|ENSMUSG0000013033|+|chr8:g.84659170:C>T  
MARLAAALWLSLVCVTTVLVTSATQGLSRAGLPFGLMRELACEGYPIELRCPGSDVIMVENANYGRD  
DDKICDADPFQMVENVQCYLPDAFKIMSQRCCNNRTQCVVAVGSDAFDPDPCPGTYKYLEVQYDCV  
PFI FVCPGTLQKVLEPTSTHESEHQSGAWCKDPLQAGDRIYVMPWIPYRTDTLLEYASWEDYVAARHT  
TTYRLPNRVDGTGFVVYDGA VFYNKERTRNIVKYDLRTRIKSGETVINTANYHDTSPYRWGKTDIDLAVD  
ENGLWVIYATEGNNGRLVVSQ LNPYTLRFEGTWETGYDKRSASNAFMVCGVLYVLRVSVYVDDDSEAA  
GNRVDYAFNTNANREEPVSLAFPNPYQFVVSVDYVNRDNQLYVWNNYFVVRYSLFEGPPDPSAG  
PATSPPLSTTTTARPTPLTSTASPAATTPLRRAPLTHPVGAINQLGPDLPATAPAPSTRRPPAP  
NLHVSPELFCEPREVRRVQWPATQQGMLVERPCPKGTRGIA SFQCLPALGLWNPRGPDLSNCTSP  
WVNQVAQKIKSGENAANIASELARHTRGSIYAGDVSSSVKLMQQLLDILDAQLOALRPIERESAG  
KNYKMKRERTCKDYIKAVVETVDNLLRPEALESWKDMNATEQVHTATMLLDVLEEGAFLLADNVRE  
PARFLAAKQNVVLEVTVLNTEGQVQELVFPQEYPSSENSIQLSANTIKQNSRNGVVKVVFILY  
NNLGLFLSTENATVKLAGEAGTGGPGGASLVVNSQVIAASINKESSRVFLMDPVI FTVAHLEAKNHF  
NANCSFWNYSERMLGYWSTQGCRLVESNKTHHTCACSHLTNFAVLMAREIYQGRINELLSVITWVG  
IVISLVCLAICISTFCFLRGLQTDNRNTIHKNLCLNLF LAELLFLVGDIKTQYEVACPIFAGLLHY  
FFLAAFSWLCLLEGVHLYLLVEVFESEYSRTKYYYLGGYCFPALVVGIAAAIDYRSYGTEKACWLR  
VDNYFIWSF IG PVSFVI VVNLVFLMVTLHKMIRSSSVLKPDPSSRLDNIKSWALGAIALLFLLGL  
TWA FGLLFINKESVVMAYLFTTFNAFQGVFI FV FHCALQKKVHKEYSKCLRHSYCCIRSPGGTHG  
SLKTSAMRSNTRYTGTQVPGQGRHIHQVSLGPRGRSTLPE SQKDPGGQSGPRDPLMFGLCPQSRIR  
RMWNDTVRKQTESSFMAGDINSTPTLNRGTMGNHLLTNPVLQPRGGTSPYNTLIAESVGFNPS  
PPVFNPSPGSYREP KHP LGGREACGMDTLP L N G N F N N S Y S L R S G D F P P G D G G P E  
P P R G R N L A D A A A F E K M I I S E L V H N N L R G A S G G A K G P P P E P P V P V  
P V G V S E D E A G G P G S A D R A E I E L L Y K A L E E P L L L P R A Q S V L Y Q S D L  
D E S E S C T A E D G A T S R P L S S P P G R D S L Y A S G A N L R D S P S Y P D S S  
P E G P N E A L P P P P P A P P G P P E I Y Y T S R P P A L V A R N P L Q G Y Y Q V R R P S  
H E G Y L A A P S L E G P G P D G D G Q M Q L V T S L \*

ALRPIERESAGKNYNKMKHRERTCKDYIKAVVETVDNLLRSEALESWKDMNATEQVHTATMLLDVLEEGAFLL  
ADNVREPARFLAAKQNVVLEVTVLNTEGQVQELVFPQEYPSSENSIQLSANTIKQNSRNGVVKVVFILYNNLGL  
FLSTENATVKLAGEAGTGGPGGASLVVNSQVIAASINKESSRVFLMDPVI FTVAHLEAKNHFNANCSFWNYSE  
RSMLGYWSTQGCRLVESNKHTTTCACSHLTNFAVLMHAREIYQGRINELLLSVITWVGIVISLVCLAICISTF  
CFLRGLQTDNRNTHKNLNCINLFLAELLFLVGDIDKTQYEVACPIFAGLLHYFFLAAFSWLCLLEGVHLYLLLVEV  
FESEYSRTKYYYYLGGYCFPALVVGIAAAIDYRSYGTEKACWLRVDNYFIWSFIGPVSFVIVVNLVFLMVTLHK  
MIRSSSVLKPDSRDLNKSALGAIALLFLLGLTWFAGLLFINKESVVMAYLFTTFNAFQGVFI FVFHICALQ  
KKVHKEYSKCLRHSYCCIRSPPGGTHGSLKTSAMRSNTRYTGTQSRIRRMWNTVTRKQTESSFMAGDINSTP  
TLNRGTMGNHLLTNPVLQPRGGTSPYNTLIAESVGFNPSSPPVFNSPGSYREPKHPLGGREACGMDTLPLNGN  
FNNSYSLRSGDFPPGDGGPEPPRGRNLADAAAFEKMI I SELVHNNLRGASGGAKGPPPEPPVPPVPGVSEDEA  
GGPGSADRAEIELLYKALEEPLLLPRAQSVLYQSDLDESECTAEDGATSRPLSSPPGRDSLYASGANLRDSP  
SYPDSSPEGPNEALPPPPAPPGPPEIYYTSRPPALVARNPLQGYQVRRPSHEGYLAAPSLEGPGPDGDGM  
QLVTSL\*

>rs32753131\_ENSMUSP00000048422\_c.1887:C>T\_p.P630S

ENSMUST00000045393.15|Adgr11-201|ENSMUSG00000013033|+|chr8:g.84659170:C>T  
MARLAAALWLSLVCVTTVLVTSATQGLSRAGLPFGLMRRELACEGYPIELRCPGSDVIMVENANYGRDDEKICDA  
DPFQMENTVQCYLPDAFKIMSQRNNRTQCVVAVGSDAFDPDPCPGTYKYLEVQYDCVPIYFVCPGTLQK  
VLEPTSTHSEHQSGAWCKDPLQAGDRIYVMPWI PYRTDTLLEYASWEDYVAARHTTTYRPLNRVDGTGFVY  
DGAVFYNKERTRNIVKYDLRTRIKSGETVINTANYHDTSPYRWGGKTDIDLAVDENGLWVIYATEGNNGRLVV  
SQLNPYTLRFEGTWETGYDKRSASNAFMVCGVLYVLRVYVDDDDSEAAGNRVDYAFNTNANREEPVSLAFPNP  
YQFVSSVDYNPRDNQLYVWNNYFVVRYSLEFGPPDPSAGPATSPPLSTTTTARPTPLTSTASPAATPLRRAP  
LTHPVGAINQLGPDLPATAPAPSTRPPAPNLHVSPELFCPEVRRVQWPATQQGMLVERPCPKGTRGIA  
SFQCLPALGLWNPGRDLSNCTSPWVNQVAQKIKSGENAANIASELARHTRGSIYAGDVSSSVKLMEQLLDIL  
DAQLQALRPIERESAGKNYNKMKHRERTCKDYIKAVVETVDNLLRSEALESWKDMNATEQVHTATMLLDVLEE  
GAFLLADNVREPARFLAAKQNVVLEVTVLNTEGQVQELVFPQEYPSSENSIQLSANTIKQNSRNGVVKVVFILY  
NNLGLFLSTENATVKLAGEAGTGGPGGASLVVNSQVIAASINKESSRVFLMDPVI FTVAHLEAKNHFNANCSF  
WNYSERMGLHLLTNPVLQPRGGTSPYNTLIAESVGFNPSSPPVFNSPGSYREPKHPLGGREACGMDTL  
CISTFCCFLRGLQTDNRNTHKNLNCINLFLAELLFLVGDIDKTQYEVACPIFAGLLHYFFLAAFSWLCLLEGVHLYL  
LLVEVFSEYSRTKYYYYLGGYCFPALVVGIAAAIDYRSYGTEKACWLRVDNYFIWSFIGPVSFVIVVNLVFLM  
VTLHKMIRSSSVLKPDSRDLNKSALGAIALLFLLGLTWFAGLLFINKESVVMAYLFTTFNAFQGVFI FVF  
HICALQKKVHKEYSKCLRHSYCCIRSPPGGTHGSLKTSAMRSNTRYTGTQSRIRRMWNTVTRKQTESSFMAGD  
INSTPTLNRGTMGNHLLTNPVLQPRGGTSPYNTLIAESVGFNPSSPPVFNSPGSYREPKHPLGGREACGMDTL  
PLNGNFNNSYSLRSGDFPPGDGGPEPPRGRNLADAAAFEKMI I SELVHNNLRGASGGAKGPPPEPPVPPVPGV  
SEDEAGGPGSADRAEIELLYKALEEPLLLPRAQSVLYQSDLDESECTAEDGATSRPLSSPPGRDSLYASGAN  
LRDSPSYPDSSPEGPNEALPPPPAPPGPPEIYYTSRPPALVARNPLQGYQVRRPSHEGYLAAPSLEGPGPD  
GDGMQLVTSL\*

>rs32753131\_ENSMUSP00000119100\_c.1872:C>T\_p.P625S

ENSMUST00000132500.8|Adgr11-205|ENSMUSG00000013033|+|chr8:g.84659170:C>T  
MARLAAALWLSLVCVTTVLVTSATQGLSRAGLPFGLMRRELACEGYPIELRCPGSDVIMVENANYGRDDEKICDA  
DPFQMENTVQCYLPDAFKIMSQRNNRTQCVVAVGSDAFDPDPCPGTYKYLEVQYDCVPIYFVCPGTLQK  
VLEPTSTHSEHQSGAWCKDPLQAGDRIYVMPWI PYRTDTLLEYASWEDYVAARHTTTYRPLNRVDGTGFVY  
YDKERTRNIVKYDLRTRIKSGETVINTANYHDTSPYRWGGKTDIDLAVDENGLWVIYATEGNNGRLVVSQ  
YTLRFEGTWETGYDKRSASNAFMVCGVLYVLRVYVDDDDSEAAGNRVDYAFNTNANREEPVSLAFPNPYQFVS  
VSDYNPRDNQLYVWNNYFVVRYSLEFGPPDPSAGPATSPPLSTTTTARPTPLTSTASPAATPLRRAPLTHP  
VGAINGLGPDLPPATAPAPSTRPPAPNLHVSPELFCPEVRRVQWPATQQGMLVERPCPKGTRGIA SFQCL  
PALGLWNPGRDLSNCTSPWVNQVAQKIKSGENAANIASELARHTRGSIYAGDVSSSVKLMEQLLDILDAQ  
ALRPIERESAGKNYNKMKHRERTCKDYIKAVVETVDNLLRSEALESWKDMNATEQVHTATMLLDVLEEGAFLL  
ADNVREPARFLAAKQNVVLEVTVLNTEGQVQELVFPQEYPSSENSIQLSANTIKQNSRNGVVKVVFILYNNLGL  
FLSTENATVKLAGEAGTGGPGGASLVVNSQVIAASINKESSRVFLMDPVI FTVAHLEAKNHFNANCSFWNYSE  
RSMLGYWSTQGCRLVESNKHTTTCACSHLTNFAVLMHAREIYQGRINELLLSVITWVGIVISLVCLAICISTF  
CFLRGLQTDNRNTHKNLNCINLFLAELLFLVGDIDKTQYEVACPIFAGLLHYFFLAAFSWLCLLEGVHLYLLLVEV  
FESEYSRTKYYYYLGGYCFPALVVGIAAAIDYRSYGTEKACWLRVDNYFIWSFIGPVSFVIVVNLVFLMVTLHK  
MIRSSSVLKPDSRDLNKSALGAIALLFLLGLTWFAGLLFINKESVVMAYLFTTFNAFQGVFI FVFHICALQ  
KKVHKEYSKCLRHSYCCIRSPPGGTHGSLKTSAMRSNTRYTGTQVPGQRHIIHQVSLGRSTLPESQKDP  
GGQSGPRDPLMFGLCPQSRIRRMWNTVTRKQTESSFMAGDINSTPTLNRGTMGNHLLTNPVLQPRGGTSPYNT  
LIAESVGFNPSSPPVFNSPGSYREPKHPLGGREACGMDTLPLNGNFNNSYSLRSGDFPPGDGGPEPPRGRNLA  
DAAAFEKMI I SELVHNNLRGASGGAKGPPPEPPVPPVPGVSEDEAGGPGSADRAEIELLYKALEEPLLLPRAQ

SVLYQSDLDESESCAEDGATSRPLSSPPGRDLSYASGANLRDSSPSYPDSSPEGPNEALPPPPPPAPPGPPEIY  
YTSRPPALVARNPLQGYQVRRPSHEGYLAAPSLEGPGPDGDGQMQLVTSL\*  
>rs32753131\_ENSMUSP00000115295\_c.1887:C>T\_p.P630S  
ENSMUST00000152978.8|Adgr11-210|ENSMUSG00000013033|+|chr8:g.84659170:C>T  
MARLAAALWLSLCVTTVLVTSATQGLSRAGLPFGLMRRELACEGYPIELRCPGSDVIMVENANYGRDDKICDA  
DPFQMVENVQCYLPDAFKIMSQRNNRTQCVVVGASDAFPDPCPGTYKYLEVQYDCVPYKVEQKVFVCPGTLQK  
VLEPTSTHESEHQSGAWCKDPLQAGDRIYVMPWI PYRTDTLLEYASWEDYVAARHTTTYRLPNRVDGTGFVVY  
DGAVFYNKERTRNIVKYDLRTRIKSGETVINTANYHDTSPYRWGGKTDIDLAVDENGLWVIYATEGNNGRLVV  
SQLNPHYTLRFEGTWETGYDKRSASNAFMVCGVLYVLRVSVYVDDDDSEAAGNRVDYAFNTNANREEPVSLAFPNP  
YQFVSSVDYNPRDNQLYVWNNYFVVRYSLEFGPPDPSAGPATSPPLSTTTTARPTPLTSTASPAATTPLRRAP  
LTHPVGAINQLGPDLPATAPAPSTRPPAPNLHVSPELFCEPREVRRVQWPATQQGMLVERPCPKGTRGIA  
SFQCLPALGLWNPRGPDLSNCTSPWVNQVAQKIKSGENAANIASELARHTRGSIYAGDVSSSVKLMEQLLDIL  
DAQLQALRPIERESAGKNYNKMHKRERTCKDYIKAVVETVDNLLRSEALESWKDMNATEQVHTATMLLDVLEE  
GAFLLADNVREPARFLAAKQNVVLEVTVLNTEGQVQELVFPQEYPSENSIQLSANTIKQNSRNGVVKVVFILY  
NNLGLFLSTENATVKLAGEAGTGGPGGASLVVNSQVIAASINKESSRVFLMDPVI FTVAHLEAKNHFNANCSF  
WNYSESRMLGYWSTQGCRLVESNKTHHTCACSHLTNFAVLMAREIYQGRINELLSSVITWVGIVISLVCLAI  
CISTFCFLRGLQTDNRNTHKNLCINLFLAEALLFLVGDIKTQYEVACPIFAGLLHYFFLAASFCLGEGVHLYL  
LLVEVFESEYSRTKYLLGGYCFPALVVGIAAAIDYRSYGTEKACWLRVDNYFIWSFIGPVSFVI VVNLVFLM  
VTLHKMIRSSSVLKPDSRDLNLIKSWALGAIALLFLGLTWFAGLLFINKESVVMAYLFTTFNAFQGVFIFVF  
HCALQKKVHKEYSKCLRHSYCCIRSPGGTHGSLKTSAMRSNTRYTGTQVPGQGRHIHQVSLGPRGRSTLPE  
SQKDPGGQSGPRDPLMFLGCPQSRIRRMWNDTVRKQTESSFMAGDINSTPTLNRRGTMGNHLLTNPVLPQPRGGT  
SPYNTLIAESVGFNPSSPPVFNSPGSYREPKHPLGGREACGMDTLPNGNFNNSYSLRSGDFPPGDGGPEPPR  
GRNLADAAAFEKMI ISELVHNNLRGASGGAKGPPPEPPVPPVPGVSEDEAGGPGSADRAEIELLYKALEEPLL  
LPRAQSVLYQSDLDESESCAEDGATSRPLSSPPGRDLSYASGANLRDSSPSYPDSSPEGPNEALPPPPPPAPP  
PPEIYYTSRPPALVARNPLQGYQVRRPSHEGYLAAPSLEGPGPDGDGQMQLVTSL\*  
>rs32753131\_ENSMUSP00000118579\_c.1359:C>T\_p.P454S  
ENSMUST00000131717.2|Adgr11-204|ENSMUSG00000013033|+|chr8:g.84659170:C>T  
MPWI PYRTDTLLEYASWEDYVAARHTTTYRLPNRVDGTGFVVYDGAVFYNKERTRNIVKYDLRTRIKSGETVI  
NTANYHDTSPYRWGGKTDIDLAVDENGLWVIYATEGNNGRLVVSQVLYVLRVSVYVDDDDSEAAGNRVDYAFNTNANREEPVSLAFPNPYQFVSSVDYNPRDNQLYVWNNYFVVRYSLE  
FGPPDPSAGPATSPPLSTTTTARPTPLTSTASPAATTPLRRAPLTHPVGAINQLGPDLPATAPAPSTRPP  
APNLHVSPELFCEPREVRRVQWPATQQGMLVERPCPKGTRGIA SFQCLPALGLWNPRGPDLSNCTSPWVNQVA  
QKIKSGENAANIASELARHTRGSIYAGDVSSSVKLMEQLLDILDAQLQALRPIERESAGKNYNKMHKRERTCK  
DYIKAVVETVDNLLRSEALESWKDMNATEQVHTATMLLDVLEEGAFLLADNVREPARFLAAKQNVVLEVTVLN  
TEGQVQELVFPQEYPSENSIQLSANTIKQNSRNGVVKVVFILYNNLGLFLSTENATVKLAGEAGTGGPGGASL  
VVNSQVIAASINKESSRVFLMDPVI FTVAHLEAKNHFNANCSF WNYSESRMLGYWSTQGCRLVESNKTHHTTCA  
CSHLTNFAVLMAREIYQGRINELLSSVITWVGIVISLVCLAI CISTFCFLRGLQTDNRNTHKNLCINLFLAE  
LLFLVGDIKTQYEVACPIFAGLLHYFFLAASFCLGEGVHLYLLVEVFESEYSRTKYLLGGYCFPALVVGI  
AAAIIDYRSYGTEKACWLRVDNYFIWSFIGPVSFVI VVNLVFLMVTLHKMIRSSSVLKPDSRDLNLIKSWALGA  
IALLLFLGLTWFAGLLFINKESVVMAYLFTTFNAFQGVFIFVHFCALQKKVHKEYSKCLRHSYCCIRSPGGT  
HGSGLKTSAMRSNTRYTGTQSRIRRMWNDTVRKQTESSFMAGDINSTPTLNRRGTMGNHLLTNPVLPQPRGGTSP  
YNTLIAESVGFNPSSPPVFNSPGSYREPKHPLGGREACGMDTLPNGNFNNSYSLRSGDFPPGDGGPEPPRGR  
NLADAAAFEKMI ISELVHNNLRGASGGAKGPPPEPPVPPVPGVSEDEAGGPGSADRAEIELLYKALEEPLLLP  
RAQSVLYQSDLDESESCAEDGATSRPLSSPPGRDLSYASGANLRDSSPSYPDSSPEGPNEALPPPPPPAPP  
EIIYYTSRPPALVARNPLQGYQVRRPSHEGYLAAPSLEGPGPDGDGQMQLVTSL\*  
>rs212477295\_ENSMUSP00000118452\_c.2568:A>G\_p.I857V  
ENSMUST00000141158.8|Adgr11-207|ENSMUSG00000013033|+|chr8:g.84661092:A>G  
MARLAAALWLSLCVTTVLVTSATQGLSRAGLPFGLMRRELACEGYPIELRCPGSDVIMVENANYGRDDKICDA  
DPFQMVENVQCYLPDAFKIMSQRNNRTQCVVVGASDAFPDPCPGTYKYLEVQYDCVPYIFVCPGTLQK VLEPT  
STHESEHQSGAWCKDPLQAGDRIYVMPWI PYRTDTLLEYASWEDYVAARHTTTYRLPNRVDGTGFVVYDGAVF  
YNKERTRNIVKYDLRTRIKSGETVINTANYHDTSPYRWGGKTDIDLAVDENGLWVIYATEGNNGRLVVSQVLYVLRVSVYVDDDDSEAAGNRVDYAFNTNANREEPVSLAFPNPYQFVS  
SVDYNPRDNQLYVWNNYFVVRYSLEFGPPDPSAGPATSPPLSTTTTARPTPLTSTASPAATTPLRRAPLTHP  
VGAINQLGPDLPATAPAPSTRPPAPNLHVSPELFCEPREVRRVQWPATQQGMLVERPCPKGTRGIA SFQCL  
PALGLWNPRGPDLSNCTSPWVNQVAQKIKSGENAANIASELARHTRGSIYAGDVSSSVKLMEQLLDILDAQLQ  
ALRPIERESAGKNYNKMHKRERTCKDYIKAVVETVDNLLRPEALESWKDMNATEQVHTATMLLDVLEEGAFLL  
ADNVREPARFLAAKQNVVLEVTVLNTEGQVQELVFPQEYPSENSIQLSANTIKQNSRNGVVKVVFILYNNLGL  
FLSTENATVKLAGEAGTGGPGGASLVVNSQVIAASINKESSRVFLMDPVI FTVAHLEAKNHFNANCSFWNYSE

RSMGLGYWSTQGCR LVESNKTHHTTACSHLTNF AVLMAHREIYQGRINELLLSVVTWVGIVISLVCLAICISTF  
CFLRGLQTD RNTIHKNL CINFLAELLFLV GIDKTYEVACPIFAGLLHYFFLA AFSWLCLEGVHLYLLLVEV  
FESEYSRTKYYYYLGGYCF PALVVGIAAAIDYRSYGT EKACWLRVDNYFIWSFIGPVSFVI VVNLVFLMVT LHK  
MIRSSSVLKP DSSRLDN IKS WALGAIALLFLLGLT WAFGLLF INKESVVMAYLFTTTFNAFQGVFI FVFH CALQ  
KKVHKEYSKCLRH SYCCIRSP PGGTHGSLKTSAMRSNTRY YTGTSRIRRMWNDTVRKQTES SFMAGDINSTP  
TLNRGTMGNHLLTNPVLQPRGGTSPYNTLIAESVGFNPSSPPVFNSPGSYREPKHPLGGREACGMDTLPLNGN  
FNNSYSLRSGDFPPGDGGPEPPRGRNLADAAAF EKMI ISELVHNNLRGASGGAKGPPPEPPVPPVPGVSEDEA  
GGPGSADRAEIELLYKALEEPLLLPRAQSVLYQSDLDESE SCTAEDGATSRPLSSPPGRD SLYASGANLRD SP  
SYPDSSEPEGNEALPPPPAPPGPPEIYYTSRPPALVARNPLQGY YQVRRPSHEGYLAAPSLEGPDPDGDGM  
QLVTSL\*

>rs212477295\_ENSMUSP00000048422\_c.2583:A>G\_p.I862V

ENSMUST00000045393.15|Adgr11-201|ENSMUSG00000013033|+|chr8:g.84661092:A>G  
MARLAAALWSLCVTTVLVTSATQGLSRAGLPFGLMRRELACEGYPIELRCPGSDVIMVENANYGR TDDKICDA  
DPFQ MENVQCYLPDAFKIMSQR CNNR TQC VV VAGSDA FPDPCPGTYKYLEVQYDCVPYKVEQKVFVCPGTLQK  
VLEPTSTHESEHQSGAWCKDPLQAGDRIYVMPWIPYRTDTL TEYASWEDYVAARHTT TYR LPNRVDGTGFVVY  
DGA VFY NKERTRNIVKYDLRTRIKSGETVINTANYHDTSPYRWGGKTDIDLAVDENGLWVIYATEGNNGRLV V  
SQLNPYTLRFEGTWETGYDKRSASNAFMVCGVLYVLR SVYVDDDSEAAGNRVDYAFNTNANREEPVSLAFPNP  
YQFVSSVDYNPRDNQLYVWNNYFVVRYSLEFGPPDPSAGPATSPPLSTTTTARPTPLTSTASPAATTP LRRAP  
LTTHPVGAINQLGPDLPATAPAPSTRRPPAPNLHVSPELFC EPREVRVQWPATQQGMLVERPCPKGTRGIA  
SFQCLPALGLWNPRGPDLSNCTSPWVNQVAQKIKSGENAANIASELARHTRGSIYAGDVSSSVKLMEQLLDIL  
DAQLQALRPIERESAGKNYNM HKRERTCKDYIKAVVETVDNLLRPEALESWKDMNATEQVHTATMLLDVLEE  
GAFLLADNVREPARFLAAKQNVVLEVTVLNTEGQVQELVFPQ EYPSENSIQLSANTIKQNSRNGVVKVVFILY  
NNLGLFLSTENATVKLAGEAGTGGPGGASLVVNSQVIAASINKESSRVFLMDPVI FTVAHLEAKNHFNANCSF  
WNYSESRMLGYWSTQGCR LVESNKTHHTTACSHLTNF AVLMAHREIYQGRINELLLSVVTWVGIVISLVCLAI  
CISTF CFLRGLQTD RNTIHKNL CINFLAELLFLV GIDKTYEVACPIFAGLLHYFFLA AFSWLCLEGVHLYL  
LLVEVFESEYSRTKYYYYLGGYCF PALVVGIAAAIDYRSYGT EKACWLRVDNYFIWSFIGPVSFVI VVNLVFLM  
VTLHKMIRSSSVLKP DSSRLDN IKS WALGAIALLFLLGLT WAFGLLF INKESVVMAYLFTTTFNAFQGVFI FVF  
H CALQKKVHKEYSKCLRH SYCCIRSP PGGTHGSLKTSAMRSNTRY YTGTSRIRRMWNDTVRKQTES SFMAGD  
INSTP TLNRGTMGNHLLTNPVLQPRGGTSPYNTLIAESVGFNPSSPPVFNSPGSYREPKHPLGGREACGMDTL  
PLNGNFNNSYSLRSGDFPPGDGGPEPPRGRNLADAAAF EKMI ISELVHNNLRGASGGAKGPPPEPPVPPVPGV  
SEDEAGGPGSADRAEIELLYKALEEPLLLPRAQSVLYQSDLDESE SCTAEDGATSRPLSSPPGRD SLYASGAN  
LRDSPSYPDSSEPEGNEALPPPPAPPGPPEIYYTSRPPALVARNPLQGY YQVRRPSHEGYLAAPSLEGPDP  
DGDGMQLVTSL\*

>rs212477295\_ENSMUSP00000119100\_c.2568:A>G\_p.I857V

ENSMUST00000132500.8|Adgr11-205|ENSMUSG00000013033|+|chr8:g.84661092:A>G  
MARLAAALWSLCVTTVLVTSATQGLSRAGLPFGLMRRELACEGYPIELRCPGSDVIMVENANYGR TDDKICDA  
DPFQ MENVQCYLPDAFKIMSQR CNNR TQC VV VAGSDA FPDPCPGTYKYLEVQYDCVPYIFVCPGTLQKVLEPT  
STHESEHQSGAWCKDPLQAGDRIYVMPWIPYRTDTL TEYASWEDYVAARHTT TYR LPNRVDGTGFVVYDGA V  
Y NKERTRNIVKYDLRTRIKSGETVINTANYHDTSPYRWGGKTDIDLAVDENGLWVIYATEGNNGRLVVSQ LNP  
YTLRFEGTWETGYDKRSASNAFMVCGVLYVLR SVYVDDDSEAAGNRVDYAFNTNANREEPVSLAFPNPYQFVS  
SVDYNPRDNQLYVWNNYFVVRYSLEFGPPDPSAGPATSPPLSTTTTARPTPLTSTASPAATTP LRRAPLTTHP  
VGAINQLGPDLPATAPAPSTRRPPAPNLHVSPELFC EPREVRVQWPATQQGMLVERPCPKGTRGIA SFQCL  
PALGLWNPRGPDLSNCTSPWVNQVAQKIKSGENAANIASELARHTRGSIYAGDVSSSVKLMEQLLDILDAQLQ  
ALRPIERESAGKNYNM HKRERTCKDYIKAVVETVDNLLRPEALESWKDMNATEQVHTATMLLDVLEEGAFLL  
ADNVREPARFLAAKQNVVLEVTVLNTEGQVQELVFPQ EYPSENSIQLSANTIKQNSRNGVVKVVFILYNNLGL  
FLSTENATVKLAGEAGTGGPGGASLVVNSQVIAASINKESSRVFLMDPVI FTVAHLEAKNHFNANCSFWNYSE  
RSMGLGYWSTQGCR LVESNKTHHTTACSHLTNF AVLMAHREIYQGRINELLLSVVTWVGIVISLVCLAICISTF  
CFLRGLQTD RNTIHKNL CINFLAELLFLV GIDKTYEVACPIFAGLLHYFFLA AFSWLCLEGVHLYLLLVEV  
FESEYSRTKYYYYLGGYCF PALVVGIAAAIDYRSYGT EKACWLRVDNYFIWSFIGPVSFVI VVNLVFLMVT LHK  
MIRSSSVLKP DSSRLDN IKS WALGAIALLFLLGLT WAFGLLF INKESVVMAYLFTTTFNAFQGVFI FVFH CALQ  
KKVHKEYSKCLRH SYCCIRSP PGGTHGSLKTSAMRSNTRY YTGTVPGQGRHIHQVSLGPRGRSTLPESQKDP  
GGQSGPRDPLMFGLCPQSRIRRMWNDTVRKQTES SFMAGDINSTP TLNRGTMGNHLLTNPVLQPRGGTSPYNT  
LIAESVGFNPSSPPVFNSPGSYREPKHPLGGREACGMDTLPLNGNFNNSYSLRSGDFPPGDGGPEPPRGRNL  
ADAAFEKMI ISELVHNNLRGASGGAKGPPPEPPVPPVPGVSEDEAGGPGSADRAEIELLYKALEEPLLLPRAQ  
SVLYQSDLDESE SCTAEDGATSRPLSSPPGRD SLYASGANLRDSPSYPDSSEPEGNEALPPPPAPPGPPEIY  
YTSRPPALVARNPLQGY YQVRRPSHEGYLAAPSLEGPDPDGDGMQLVTSL\*

>rs212477295\_ENSMUSP00000115295\_c.2583:A>G\_p.I862V

ENSMUST00000152978.8|Adgr11-210|ENSMUSG00000013033|+|chr8:g.84661092:A>G



MARLAAALWSLCVTTVLVTSATQGLSRAGLPFGLMRRELACEGYPIELRCPGSDVIMVENANYGRDDKICDA  
DPFQMNVCYLPDAFKIMSQRCCNRTQCVVAGSDAFDPDPCPGTYKYLEVQYDCVPYKVEQKVFVCPGTLQK  
VLEPTSTHSEHQSGAWCKDPLQAGDRIYVMPWIPIYRTDTLLEYASWEDYVAARHTTTTYRLPNRVDGTGFVVY  
DGAVFYKERTRNIVKYDLRTRIKSGETVINTANYHDTSPYRWGGKTDIDLAVDENGLWVIYATEGNNGRLVVS  
SQLNPYTLRFEGTWETGYDKRSASNAFMVCGVLYVLRVSVYVDDDDSEAAGNRVDYAFNTNANREEPVSLAFPNP  
YQFVSSVDYNPRDNQLYVWNNYFVVRYSLFEGPPDPSAGPATSPPLSTTTTARPTPLTSTASPAATTPLRRAP  
LTHPVGAINQLGPDLPATAPAPSTRPPAPNLHVSPELFCEPREVRRVQWPATQQGMLVERPCPKGTRGIA  
SFQCLPALGLWNPGRPDLSNCTSPWVNQVAQKIKSGENAANIASELARHTRGSIYAGDVSSSVKLMELLDLIL  
DAQLQALRPIERESAGKNYNKMKRERTCKDYIKAVVETVDNLLRPEALESWKDMNATEQVHTATMLLDVLEE  
GAFLLADNVREPARFLAAKQNVVLEVTVLNTEGQVQELVFPQEYPSSENSIQLSANTIKQNSRNGVVKVVFILY  
NNLGLFLSTENATVKLAGEAGTGGPGGASLVVNSQVIAASINKESSRVFLMDPVIFTVAHLEAKNHFNANCSF  
WNYSERMGLGWSTQGCRLVESNKTHHTCACSHLTNFVAVLMAHREIYQGRINELLLSVVTWVGIVISLVCLAIC  
ISTFCFLRGLQTDNRNTHKNLCLINFLAEELLFLVGDKTQYEVACPIFAGLLHYFFLAAFSWLCLEGVHLYL  
LLVEVFSEYSRTKYLLGGYCFPALVVGIAAAIDYRSYGTEKACWLRVDNYFIWSFIGPVSFVIIVNLVFLM  
VTLHKMIRSSSVLKPDSRLDNIKSWALGAIALLFLLGLTWFAGLLFINKESVVMAYLFTTFNAFQGVFIFV  
HCALQKQVHKEYSKCLRHSYCCIRSPGGTHGSLKTSAMRSNTRYTGTQVPGQGRHIHQVSLGPRGRSTLPE  
SQKDPGGQSGPRDPLMFGCLPQSRIRRMWNTVTRKQTESSFMAGDINSTPTLNRGTMGNHLLTNPVLQPRGGT  
SPYNTLIAESVGFNPSSPPVFNSPGSYREPKHPLGGREACGMDTLP LNGNFNNSYSLRSGDFPPGDGPEPPR  
GRNLADAAFEKMIISELVHNNLRGASGGAKGPPPEPPVPPVPGVSEDEAGGPGSADRAEIELLYKALEEPLL  
LPRAQSVLYQSDLDESECTAEDGATSRPLSSPPGRDSLYASGANLRDPSYPDSSPEGPNEALPPPPAPP  
PPEIYYTSRPPALVARNPLQGYQVRRPSHEGYLAAPSLEGPGPDGDGQMLVTSL\*

>rs212477295\_ENSMUSP00000118579\_c.2055:A>G\_p.I686V  
ENSMUST00000131717.2|Adgr11-204|ENSMUSG0000013033|+|chr8:g.84661092:A>G  
MPWIPIYRTDTLLEYASWEDYVAARHTTTTYRLPNRVDGTGFVVYDGAVFYKERTRNIVKYDLRTRIKSGETVI  
NTANYHDTSPYRWGGKTDIDLAVDENGLWVIYATEGNNGRLVVSQVLYVLRVSVYVDDDDSEAAGNRVDYAFNTNANREEPVSLAFPNPYQFVSSVDYNPRDNQLYVWNNYFVVRYSLFEGPPDPSAGPATSPPLSTTTTARPTPLTSTASPAATTPLRRAPLTHPVGAINQLGPDLPATAPAPSTRPPAPNLHVSPELFCEPREVRRVQWPATQQGMLVERPCPKGTRGIA  
SFQCLPALGLWNPGRPDLSNCTSPWVNQVAQKIKSGENAANIASELARHTRGSIYAGDVSSSVKLMELLDLILDAQALRPIERESAGKNYNKMKRERTCKDYIKAVVETVDNLLRPEALESWKDMNATEQVHTATMLLDVLEEGAFLLADNVREPARFLAAKQNVVLEVTVLNTEGQVQELVFPQEYPSSENSIQLSANTIKQNSRNGVVKVVFILYNNLGLFLSTENATVKLAGEAGTGGPGGASLVVNSQVIAASINKESSRVFLMDPVIFTVAHLEAKNHFNANCSFWNYSERMGLGWSTQGCRLVESNKTHHTCACSHLTNFVAVLMAHREIYQGRINELLLSVVTWVGIVISLVCLAICISTFCFLRGLQTDNRNTHKNLCLINFLAEELLFLVGDKTQYEVACPIFAGLLHYFFLAAFSWLCLEGVHLYL  
LLVEVFSEYSRTKYLLGGYCFPALVVGIAAAIDYRSYGTEKACWLRVDNYFIWSFIGPVSFVIIVNLVFLM  
VTLHKMIRSSSVLKPDSRLDNIKSWALGAIALLFLLGLTWFAGLLFINKESVVMAYLFTTFNAFQGVFIFV  
HCALQKQVHKEYSKCLRHSYCCIRSPGGTHGSLKTSAMRSNTRYTGTQVPGQGRHIHQVSLGPRGRSTLPE  
SQKDPGGQSGPRDPLMFGCLPQSRIRRMWNTVTRKQTESSFMAGDINSTPTLNRGTMGNHLLTNPVLQPRGGT  
SPYNTLIAESVGFNPSSPPVFNSPGSYREPKHPLGGREACGMDTLP LNGNFNNSYSLRSGDFPPGDGPEPPR  
GRNLADAAFEKMIISELVHNNLRGASGGAKGPPPEPPVPPVPGVSEDEAGGPGSADRAEIELLYKALEEPLL  
LPRAQSVLYQSDLDESECTAEDGATSRPLSSPPGRDSLYASGANLRDPSYPDSSPEGPNEALPPPPAPP  
PPEIYYTSRPPALVARNPLQGYQVRRPSHEGYLAAPSLEGPGPDGDGQMLVTSL\*

>rs6405173\_ENSMUSP00000119100\_c.3540:G>A\_p.G1181R  
ENSMUST00000132500.8|Adgr11-205|ENSMUSG0000013033|+|chr8:g.84664075:G>A  
MARLAAALWSLCVTTVLVTSATQGLSRAGLPFGLMRRELACEGYPIELRCPGSDVIMVENANYGRDDKICDA  
DPFQMNVCYLPDAFKIMSQRCCNRTQCVVAGSDAFDPDPCPGTYKYLEVQYDCVPYIFVCPGTLQKQVLEPT  
STHSEHQSGAWCKDPLQAGDRIYVMPWIPIYRTDTLLEYASWEDYVAARHTTTTYRLPNRVDGTGFVVYDGAVF  
YKERTRNIVKYDLRTRIKSGETVINTANYHDTSPYRWGGKTDIDLAVDENGLWVIYATEGNNGRLVVSQVLYVLRVSVYVDDDDSEAAGNRVDYAFNTNANREEPVSLAFPNPYQFVSSVDYNPRDNQLYVWNNYFVVRYSLFEGPPDPSAGPATSPPLSTTTTARPTPLTSTASPAATTPLRRAPLTHPVGAINQLGPDLPATAPAPSTRPPAPNLHVSPELFCEPREVRRVQWPATQQGMLVERPCPKGTRGIA  
SFQCLPALGLWNPGRPDLSNCTSPWVNQVAQKIKSGENAANIASELARHTRGSIYAGDVSSSVKLMELLDLILDAQALRPIERESAGKNYNKMKRERTCKDYIKAVVETVDNLLRPEALESWKDMNATEQVHTATMLLDVLEEGAFLLADNVREPARFLAAKQNVVLEVTVLNTEGQVQELVFPQEYPSSENSIQLSANTIKQNSRNGVVKVVFILYNNLGLFLSTENATVKLAGEAGTGGPGGASLVVNSQVIAASINKESSRVFLMDPVIFTVAHLEAKNHFNANCSFWNYSERMGLGWSTQGCRLVESNKTHHTCACSHLTNFVAVLMAHREIYQGRINELLLSVVTWVGIVISLVCLAICISTFCFLRGLQTDNRNTHKNLCLINFLAEELLFLVGDKTQYEVACPIFAGLLHYFFLAAFSWLCLEGVHLYL  
LLVEVFSEYSRTKYLLGGYCFPALVVGIAAAIDYRSYGTEKACWLRVDNYFIWSFIGPVSFVIIVNLVFLM  
VTLHKMIRSSSVLKPDSRLDNIKSWALGAIALLFLLGLTWFAGLLFINKESVVMAYLFTTFNAFQGVFIFV  
HCALQKQVHKEYSKCLRHSYCCIRSPGGTHGSLKTSAMRSNTRYTGTQVPGQGRHIHQVSLGPRGRSTLPE  
SQKDPGGQSGPRDPLMFGCLPQSRIRRMWNTVTRKQTESSFMAGDINSTPTLNRGTMGNHLLTNPVLQPRGGT  
SPYNTLIAESVGFNPSSPPVFNSPGSYREPKHPLGGREACGMDTLP LNGNFNNSYSLRSGDFPPGDGPEPPR  
GRNLADAAFEKMIISELVHNNLRGASGGAKGPPPEPPVPPVPGVSEDEAGGPGSADRAEIELLYKALEEPLL  
LPRAQSVLYQSDLDESECTAEDGATSRPLSSPPGRDSLYASGANLRDPSYPDSSPEGPNEALPPPPAPP  
PPEIYYTSRPPALVARNPLQGYQVRRPSHEGYLAAPSLEGPGPDGDGQMLVTSL\*

KKVHKEYSKCLRHSYCCIRSPGGTHGSLKTSAMRSNTRYTGTQVPGQGRHIHQVSLGPRGRSTLPESQKDP  
GGQSGPRDPLMFRLCPQSRIRRMWNTVVRKQTESSFMAGDINSTPTLNRTGMGNHLLTNPVLQPRGGTSPYNT  
LIAESVGFNPPSSPPVFNPSGYSYREPKHPLGGREACGMDTLPNGNFNNSYSLRSGDFPPGDDGGPEPPRGRNLA  
DAAAFEKMIISELVHNNLRGASGGAKGPPPEPPVPPVPGVSEDEAGGPGSADRAEIEELLYKALEEPLLLPRAQ  
SVLYQSDLDESECTAEDGATSRPLSSPPGRDLSYASGANLRDPSYDSSPEGPNEALPPPPAPPGPPEIY  
YTSRPPALVARNPLQGYQVRRPSHEGYLAAPSLEGGPDGDGQMLVTSL\*  
>rs6405173\_ENSMUSP00000115295\_c.3555:G>A\_p.G1186R  
ENSMUST00000152978.8|Adgr11-210|ENSMUSG00000013033|+|chr8:g.84664075:G>A  
MARLAAALWLSLCTVTTVLVTSATQGLSRAGLPFGLMRRELACEGYPIELRCPGSDVIMVENANYGRDCKICDA  
DPFQEMENVQCYLPDAFKIMSQRCCNRTQCVVVGASDAFPDPCPGTYKYLEVQYDCVPYKVEQKVFVCPGTLQK  
VLEPTSTHESEHQSGAWCKDPLQAGDRIYVMPWIPIYRDTLLEYASWEDYVAARHTTYYRLPNRVDGTGFVVY  
DGAVFYKERTRNIVKYDLRTRIKSGETVINTANYHDTSPYRWGKTDIDLAVDENGWLVIYATEGNNGRLVV  
SQLNPYTLRFEGTWETGYDKRSASNAFMVCGVLYVLRVSVYVDDSEAGNRVDYAFNTNANREEPVSLAFPNP  
YQFVSSVDYNPRDNQLYVWNNYFVVRYSLEFGPPDPSAGPATSPPLSTTTTARPTPLTSTASPAATPLRRAP  
LTHPVGAINQLGPDLPAPAPSTRPPAPNLHVSPLEFCEPREVRRVQWPATQQGMLVERPCPKGTRGIA  
SFQCLPALGLWNPRGPDLSNCTSPWVNQVAQKIKSGENAANIASELARHTRGSIYAGDVSSSVKLMEQLLDIL  
DAQLQALRPIERESAGKNYKMKRERTCKDYIKAVVETVNDLLRPEALESWKDMNATEQVHTATMLLDVLEE  
GAFLLADNVREPARFLAAKQNVVLEVTVLNTEGQVQELVFPQYEPSSENSIQLSANTIKQNSRNGVVKVVFILY  
NNLGLFLSTENATVKLAGEAGTGGPGGASLVVNSQVIAASINKESSRVFLMDPVIIFTVAHLEAKNHFNANCSF  
WNYSERMLGYWSTQGCRLVESNKTHHTCACSHLTNFVAVLMAHREIYQGRINELLSVITWVGIVISLVCLAI  
CISTFCLRGLQTDNRNTHKNCINLFLAELLFLVIGDKTQYEVACPIFAGLLHYFFLAAFSWLCEGVHLYL  
LLVEVFSEYSRTKYYYLGGYCFPALVVGIAAAIDYRSYGTEKACWLRVDNYFIWSFIGPVSFVIVVNLVFLM  
VTLHKMIRSSSVLKPDSRLDNKISWALGAIALLFLLGLTWAFGLLFINKESVVMAYLFTTFNAFQGVFIFVF  
HCALQKKVHKEYSKCLRHSYCCIRSPGGTHGSLKTSAMRSNTRYTGTQVPGQGRHIHQVSLGPRGRSTLPE  
SQKDPGGQSGPRDPLMFRLCPQSRIRRMWNTVVRKQTESSFMAGDINSTPTLNRTGMGNHLLTNPVLQPRGGT  
SPYNTLIAESVGFNPPSSPPVFNPSGYSYREPKHPLGGREACGMDTLPNGNFNNSYSLRSGDFPPGDDGGPEPPR  
GRNLADAAAFEKMIISELVHNNLRGASGGAKGPPPEPPVPPVPGVSEDEAGGPGSADRAEIEELLYKALEEPLL  
LPRAQSVLYQSDLDESECTAEDGATSRPLSSPPGRDLSYASGANLRDPSYDSSPEGPNEALPPPPAPPG  
PPEIYYTSRPPALVARNPLQGYQVRRPSHEGYLAAPSLEGGPDGDGQMLVTSL\*  
>rs46894143\_ENSMUSP00000062468\_c.178:C>T\_p.P60L  
ENSMUST00000060357.15|1700067K01Rik-  
201|ENSMUSG00000046408|+|chr8:g.84728384:C>T  
MAAEPWFTGSLALGPGEAPPSEELGPGPPPYGDPSWSPAGRPE TSAEQEPQRAQPMMEALASTSSREPLAAEL  
GPAPARLPDLSMFSPITDQLRYLLRKADDFQSYLLYRDRVQKEQLAKAMPTFLTMCEPYFLYLEAAARSVPP  
IYGALQELVRKGLLEISQQLTLRLEQLVLMYASFGFVDLEETNPLSISCFFCGRFSISPSHDVSI FRYCTPAA  
YTASHFPYLYKKMRWNLETTTEASSQGADSHVDYFVFLCYRDTWEDAGQGPANSCPQIQKLWSIGRWMP LGPA  
EDDLD SWILCPQPPGDYQQLLTIGFEESHVLTADLLVQIILLGQAGPARPPSAAGPAAWAAPAS\*  
>rs46894143\_ENSMUSP00000134486\_c.178:C>T\_p.P60L  
ENSMUST00000174570.9|1700067K01Rik-  
203|ENSMUSG00000046408|+|chr8:g.84728384:C>T  
MAAEPWFTGSLALGPGEAPPSEELGPGPPPYGDPSWSPAGRPE TSAEQEPQRAQPMMEALASTSSREPLAAEL  
GPAPARLPDLSMFSPITDQLRYLLRKADDFQSYLLYRDRVQKEQLAKAMPTFLTMCEPYFLYLEAAARSVPP  
IYGALQELVRKGLLEISQQLTLRLEQLVLMYASFGFVDLEETNPLSISCFFCGRFSISPSHDVSI FRYCTPAA  
TASHFPYLYKKMRWNLETTTEASSQGADSHVDYFVFLCYRDTWEDAGQGPANSCPQIQKLWSIGRWMP LGPAE  
DDLDSW\*  
>rs46894143\_ENSMUSP00000159263\_c.178:C>T\_p.P60L  
ENSMUST00000239176.2|1700067K01Rik-  
204|ENSMUSG00000046408|+|chr8:g.84728384:C>T  
MAAEPWFTGSLALGPGEAPPSEELGPGPPPYGDPSWSPAGRPE TSAEQEPQRAQPMMEALASTSSREPLAAEL  
GPAPARLPDLSMFSPITDQLRYLLRKADDFQSYLLYRDRVQKEQLAKAMPTFLTMCEPYFLYLEAAARSVPP  
IYGALQELVRKGLLEISQQLTLRLEQLVLMYASFGFVDLEETNPLSISCFFCGRFSISPSHDVSI FRYCTPAA  
TASHFPYLYKKMRWNLETTTEASSQGADSHVDYFVFLCYRDTWEDAGQGPANSCPQIQKLWSIGRWMP LGPAE  
DDLDSWILCPQPPGDYQQLLTIGFEESHVLTADLLVQIILLGQAGPARPPSAAGPAAWAAPAS\*  
>rs33228486\_ENSMUSP00000051396\_c.67:G>A\_p.R23Q  
ENSMUST00000055077.7|Pal3-201|ENSMUSG00000047986|+|chr8:g.84751007:G>A  
MALQTPVLSPATPTVMAESALYQQRLEVIAEKRRLEEEIGAARRELEEEKLRVERLKRKSLRERWLMDGAAEG  
PERPEEPASKDPQSPGQAQARIRNLEDSLFLSLSQLQLLQASASTGAQHRPAGRPAPWRREGPRPLSQSAMEAA  
PTAPTVDVKRTSLPDAPVGMSPESPDPREESIAVLPASRPSTEAI GTSSEANGPCPGHSPLPEQLSLGVSSV

TKAKGDGAVEVVWAGLRATENSATGPTDVELEAKVEEVVLEAIGARQGTSSPELPTWVKEGRGVVEVVWEGLG  
GRDL DVTGESGRDAEATHTSSRR LQE QFEAETCRKEEGASRDSLEGVGQGGPGVEEGSFIWVERVALSEDWEE  
ILMEGLEAPQGAGSAGEPEALIGAQPRGGEASWEVEKREVEKVEGIEEKGRAEKLGAEREDGVAVLPDETQGR  
EENEAEKVERKDSEGPFAE IATDEEKWEVKTTEGEE SLEVEKGGAE PVTTTEKPLVTEKKPEGSLETERKGS  
EMPLDQEKDGEGLDRESKTTEILLDGEIGDKSSLDDETKGSKLLDEKTTGGEGSLDEEAEGSKLLDREADGI  
EPFSEVDKTS GAKDDVSPEEQGKANEGAEFQAEDASPPGATVVCVQDEPRSEEQGGQPEKQEGLEVEGAASKPE  
PCTEREGPPGDATLLLAETPAPEQPVESQPLLHQEASSTNPGDHPAPTYAPAQOLELAEAKEASGPKQKTCQC  
CVM\*

>rs32670996\_ENSMUSP00000051396\_c.1578:A>G\_p.R527G  
ENSMUST00000055077.7|Pal m3-201|ENSMUSG00000047986|+|chr8:g.84756068:A>G  
MALQTPVLS PATPTVMAESALYRQRLEVIAEKRR LQEEIGAARRELEEEKLRVERLKRKSLRERWLMDGAAEG  
PERPEEPASKDPQSP EGQAQARIRNLEDSLFLSLSQLQLLQASASTGAQH RPAGRP AWRREGPRPLS QSAMEAA  
PTAPTVDVKRTSLP DAPVGMSPESPDPREESI AVL PASRPSTEAI GTSSEANGPCPGHSPLPEQLSLGVSSV  
TKAKGDGAVEVVWAGLRATENSATGPTDVELEAKVEEVVLEAIGARQGTSSPELPTWVKEGRGVVEVVWEGLG  
GRDL DVTGESGRDAEATHTSSRR LQE QFEAETCRKEEGASRDSLEGVGQGGPGVEEGSFIWVERVALSEDWEE  
ILMEGLEAPQGAGSAGEPEALIGAQPRGGEASWEVEKREVEKVEGIEEKGRAEKLGAEREDGVAVLPDETQGR  
EENEAEKVERKDSEGPFAE IATDEEKWEVKTTEGEE SLEVEKGGAE PVTTTEKPLVTEKKPEGSLETERKGS  
EMPLDQEKDGEGLDRESKTTEILLDGEIGDKSSLDDETKGSKLLDEKTTGGEGSLDEEAEGSKLLDREADGI  
EPFSEVDKTS GAKDDVSPEEQGKANEGAEFQAEDASPPGATVVCVQDEPRSEEQGGQPEKQEGLEVEGAASKPE  
PCTEREGPPGDATLLLAETPAPEQPVESQPLLHQEASSTNPGDHPAPTYAPAQOLELAEAKEASGPKQKTCQC  
CVM\*

>rs33480646\_ENSMUSP00000051396\_c.1621:G>A\_p.G541E  
ENSMUST00000055077.7|Pal m3-201|ENSMUSG00000047986|+|chr8:g.84756111:G>A  
MALQTPVLS PATPTVMAESALYRQRLEVIAEKRR LQEEIGAARRELEEEKLRVERLKRKSLRERWLMDGAAEG  
PERPEEPASKDPQSP EGQAQARIRNLEDSLFLSLSQLQLLQASASTGAQH RPAGRP AWRREGPRPLS QSAMEAA  
PTAPTVDVKRTSLP DAPVGMSPESPDPREESI AVL PASRPSTEAI GTSSEANGPCPGHSPLPEQLSLGVSSV  
TKAKGDGAVEVVWAGLRATENSATGPTDVELEAKVEEVVLEAIGARQGTSSPELPTWVKEGRGVVEVVWEGLG  
GRDL DVTGESGRDAEATHTSSRR LQE QFEAETCRKEEGASRDSLEGVGQGGPGVEEGSFIWVERVALSEDWEE  
ILMEGLEAPQGAGSAGEPEALIGAQPRGGEASWEVEKREVEKVEGIEEKGRAEKLGAEREDGVAVLPDETQGR  
EENEAEKVERKDSEGPFAE IATDEEKWEVKTTEGEE SLEVEKGGAE PVTTTEKPLVTEKKPEGSLETERKGS  
EMPLDQEKDGEGLDRESKTTEILLDGEIEDKSSLDDETKGSKLLDEKTTGGEGSLDEEAEGSKLLDREADGI  
EPFSEVDKTS GAKDDVSPEEQGKANEGAEFQAEDASPPGATVVCVQDEPRSEEQGGQPEKQEGLEVEGAASKPE  
PCTEREGPPGDATLLLAETPAPEQPVESQPLLHQEASSTNPGDHPAPTYAPAQOLELAEAKEASGPKQKTCQC  
CVM\*

>rs33092929\_ENSMUSP0000005601\_c.430:T>C\_p.V144A  
ENSMUST0000005601.9|I127ra-201|ENSMUSG0000005465|-|chr8:g.84767391:A>G  
MNRLRVARLTPLELLLSLMSLLLGT RPHGSPGLQCYSVGLGILNCSWEPLGDLETPPVLYHQSQKYHPNRV  
WEVKVPSKQSWVTI PREQFTMADKLLIWGTQKGRPLWSSVSVNLETQMKPDPQIFSQVDISEEATLEATAQW  
APPVWPPQKVLICQFRYKECQAE TWTRLEPQLKTDGLTPVEMQNLEPGTCYQVSGRCQVENGYPWGEWSSPLS  
FQTPFLDPEDVWVSGTVCETSGKRAALLVWKDPRPCVQVYTYVWFGAGDITTTQEEVPCCKSPVP AWMEWAVV  
SPGNSTSWVPPTNLSLVCLAPESAPCDVGVSSADGSPGIKVTWKQGT RKPLEYVVDWAQDGDSDLKLNWTRLP  
PGNLSTLLPGEFKGGVPIRYITVAVYSGGLAAAPSVWGFREELVPLAGPAVWRLPDDPPGTPVVAWGEVPRHQ  
LRGQATHYTFICIQRGLSTVCRNVSSQTQTATLPNLHLG SFKLVWTVSTVAGQGGPPGNLSLHLPDNRIRWKA  
LPWFLSLWGLLLMGCGLSLASTRCLQARCLHWRHKL LPQWIWERVDPANSNSGQPYIKEVSLPQPPKDGPI L  
EVEEVELQPVVESPKASAPIYSGYEKHF LPTPEELGLLV\*

>rs50881156\_ENSMUSP00000147677\_c.780:C>A\_p.L261M  
ENSMUST00000211046.2|Rfx1-204|ENSMUSG00000031706|+|chr8:g.84810777:C>A  
MATQSYVTELOAAPQASQPPQAPPQALPQPPPPAAPQPPAAATPQPQYVTELOSPQPQTQPPGSQKYVAELP  
AAPAPSPQATPAPSPVAQQYIVVTVSEGAMRASET VSEASPSSTASQTGVPTQVVQVQVGTQQRLLVQASVQA  
KPGHVSPQLTNIQVPQQAIP TQHLVVQSPAPGTSKGVSLTVHSAQQVHSAPERSPVQANNSTSKTAGTPAA  
TVQQLVQVSVQVSPVPTQERSVVQATPQT KAGPVQQLTVQGMQPVHVAQEVQQLPQVPVPHVYSSQVQYVEGG  
DASYTASAIRSSTYQYPETPIYTQTAGTSY YEASGTAAQVSTPATSQT VASSGSVPMYVSGSPIVASSSSSEA  
GASNSVYAGGNGGGSSGGSSGGSGGAGTYIVMGGYMLGNASQSYSH TTRASPATVQWLLDNYETAEGVS  
LPRSTLYCHYLHCQEOKLEPVNAASF GKLI RSVFGLRTRRLGTRGN SKYHYGLRIKASSPLLRLMEDQOH  
MAMRQFPFSQKQRLKPIQKMEGVANGVAVGQSTGLSDI SAQVQYQQFLDASRSLP DFAELDLQGVLP EGV  
GPGDIKAFQVLYREHCEAIVDVMVNLQFTLVETLWKT FWRYNLSQPSEAPPLAVHDEAEKRLPRASLVLLSKF  
QPVLQWTKHCDNVLYQGLVEI LIPDVL RPIPSALTQAIRNFAKSLSWLTHAMVNIPEEMLRVKVAAAGAF AQ  
TLRRYTSLNHLAQAAAVLQNTAQINQMLS DLRVDFANVQE QASWVCRCE DRVVQRLEQDFKVTLQQNSLE

QWAAWLDGVVSVQLKPYQGSSGFPKAAKLFLLKWSFYSSMVIRDLTLRSAASFGSFHLIRLLYDEYMYLIEH  
RVAQAKGETPIAVMGEFANLATSINPLDPDKVCR\*  
>rs50881156\_ENSMUSP0000005600\_c.780:C>A\_p.L261M  
ENSMUST0000005600.6|Rfx1-201|ENSMUSG00000031706|+|chr8:g.84810777:C>A  
MATQSYVTELQAAPQASQPPQAPQALPQPPPAAPQPPAAATPQPQYVTELQSPQPQTQPPGSQKQYVAELP  
AAPAPSQPATPAPSPVAQQYIVTVVSEGAMRASETVSEASPSSTASQTGVPTQVVQQVQGTQQRLLVQASVQA  
KPGHVSPLQLTNIQVPPQAIPTQHLVQSPAPGTKSGQVSLTVHSAQQVHSAPERSFPVQANNSTSKTAGTPAA  
TVQQLQVHVSQQSVPTQERSVVQATPQTKAGPVQQLTVQGMQPVHVAQEVQQLPQVPVPHVYSSQVQYVEGG  
DASYTASAIRSSTYQY PETPIY TQTAGTSY YEASGTAAQVSTPATSQTVASSGSPVMYVSGSPIVASSSSSEA  
GASNSSVGAGNGGGSSGGSSGSSGAGTYVIQGGYMLGNASQSYSHTTTRASPATVQWLLDNYETAEGVS  
LPRSTLYCHYLLHCQEOKLEPVNAASFGKLIRSVFMGLRTRRLGTRGNSKYHYGLRIKASSPLRLMEDQQH  
MAMRGQFFSQKQRLKPIQKMEGVANGVAVGQQSTGLSDISAQVQQYQQLDASRSLPDFAELDLQGVLPPEGV  
GPGDIKAFQVLYREHCEAIVDMVNLQFTLVETLWKTFWRYNLSQPSEAPPLAVHDEAEKRLPRASLVLLSKF  
QPVLQWTKHCDNVLYQGLVEILIPDVLRLPISALTAIRNFAKSLESWLTHAMVNIPEEMLRVKVAAGAFQAQ  
TLRRYTSLNHLAQAARAVLQNTAQINQMLSDLN RVDFANVQEASWVCRCEDRVVQRLEQDFKVTLQQNSLE  
QWAAWLDGVVSVQLKPYQGSSGFPKAAKLFLLKWSFYSSMVIRDLTLRSAASFGSFHLIRLLYDEYMYLIEH  
RVAQAKGETPIAVMGEFANLATSINPLDPDKDEEEEEEESEDEL PQDISLAAGSESPALGPEALEPPAKLAR  
TDRGLFVQALPSS\*  
>rs32854560\_ENSMUSP00000112556\_c.2683:T>C\_p.L895P  
ENSMUST00000117424.9|Cc2d1a-202|ENSMUSG00000036686|-|chr8:g.84859876:A>G  
MHKRNGPQAPPGRGAVTARQLGLLVDFSPDGLMIPEDGINEEELEAEFLALVGGQPQALEKLGQGPLPMEAI  
EKMARLCMRDLDEDEEGTDEDDVEADEDLAELNEVLGEEQKAVEPLMPVAQTLENLLVS AKKGN I INEADIP  
PPVASGKGAAGHSHTQATSQ LASVSPPAPES SGTLEAPSTTTPTSAKQLPPDPCSPLARLQSLQHEYKLA  
LRAKHQDDTATATRHRLRIAKS FDFVLEALS R GELVDLSRLPPPPDQLSPEPPLPAAQPLTSASTLTRPEVPQ  
PRNLLEALEQRMERYHVAAAQAKAKGDQRKARMHERIVKQYQDAIRAHKAGRAVDVAELPVPFGFPMPQGLES  
AEPSSQSLVGVLETAMRLANHDEGSDDEEETPKKNTPAASTTQLKSSPSKAPPSGPAPAGKAAPKGTSNRAQ  
QQLAFLEGRKKQLLQAALRAKQKNDVEGAKMHLRQAKGLEPMLASRNGLPVDIAKVPPAPV NKDDFVLVQRP  
GPGLSQEAVRRY GELTKLLRQQHEMCLNHSTQFTHLGNIAETIKFEKLAEDCKRSM DTLKQAFARSLPTPAAR  
FEQRTFSVIKVFDPDLSNSDMLL FIVKGINLPTPTGLSPSDDLDAFVRFDFPYPNVEEAQKDKTSVIKNTDSPEF  
KEQFKLCINRGRHGFRRAIQTGKIKFEVVHKGGLFKTDRVLGTAQLKLG TLETACEVHEILEVLDGRRPTGGR  
LEV MVR IREPLTAQQLETTTERWLVIDHI PAAMPTVTGPKAKAPLI PASSREAGNRSARPLHSLSVLAFDQER  
LERKILALRQARRPVPPEVAQQYQDVVQRSQWQRAQLEQGG AALRREYASHLERQLHFYTEAARRLGYDGSRE  
AAKEALYRRNLVESELQRRR\*  
>rs32854560\_ENSMUSP00000046449\_c.2821:T>C\_p.L941P  
ENSMUST00000040383.9|Cc2d1a-201|ENSMUSG00000036686|-|chr8:g.84859876:A>G  
MHKRNGPQAPPGRGAVTARQLGLLVDFSPDGLMIPEDGINEEELEAEFLALVGGQPQALEKLGQGPLPMEAI  
EKMARLCMRDLDEDEEGTDEDDVEADEDLAELNEVLGEEQKAVEPLMPVAQPKPSGPNPGVEATLQERLTLY  
QSALESARQAGDSAKMRRYDRGLKTLENLLVS AKKGN I INEADIPPPVASGKGAAGHSHTQATSQ LASVSPP  
APES SGTLEAPSTTTPTSAKQLPPDPCSPLARLQSLQHEYKLAALRAKHQDDTATATRHRLRIAKS FDFVLEA  
LSRGELVDLSRLPPPPDQLSPEPPLPAAQPLTSASTLTRPEVPQPRNLLEALEQRMERYHVAAAQAKAKGDQ  
RKARMHERIVKQYQDAIRAHKAGRAVDVAELPVPFGFPMPQGLES AEPSSQSLVGVLETAMRLANHDEGSDDE  
EETPKKQNTPAASTTQLKSSPSKAPPSGPAPAGKAAPKGTSNRAQQQLAFLEGRKKQLLQAALRAKQKNDVE  
GAKMHLRQAKGLEPMLASRNGLPVDIAKVPPAPV NKDDFVLVQRP GPGLSQEAVRRY GELTKLLRQQHEMCL  
NHSTQFTHLGNIAETIKFEKLAEDCKRSM DTLKQAFARSLPTPAARFEQRTFSVIKVFDPDLSNSDMLL FIVK  
INLPTPTGLSPSDDLDAFVRFDFPYPNVEEAQKDKTSVIKNTDSPEFKEQFKLCINRGRHGFRRAIQTGKIKFE  
VVHKGGLFKTDRVLGTAQLKLG TLETACEVHEILEVLDGRRPTGGRLEV MVR IREPLTAQQLETTTERWLVID  
HIPAAMPTVTGPKAKAPLI PASSREAGNRSARPLHSLSVLAFDQERLERKILALRQARRPVPPEVAQQYQDVV  
QRSQWQRAQLEQGG AALRREYASHLERQLHFYTEAARRLGYDGSREAAKEALYRRNLVESELQRRR\*  
>rs32547577\_ENSMUSP00000112556\_c.2005:A>C\_p.H669P  
ENSMUST00000117424.9|Cc2d1a-202|ENSMUSG00000036686|-|chr8:g.84861751:T>G  
MHKRNGPQAPPGRGAVTARQLGLLVDFSPDGLMIPEDGINEEELEAEFLALVGGQPQALEKLGQGPLPMEAI  
EKMARLCMRDLDEDEEGTDEDDVEADEDLAELNEVLGEEQKAVEPLMPVAQTLENLLVS AKKGN I INEADIP  
PPVASGKGAAGHSHTQATSQ LASVSPPAPES SGTLEAPSTTTPTSAKQLPPDPCSPLARLQSLQHEYKLA  
LRAKHQDDTATATRHRLRIAKS FDFVLEALS R GELVDLSRLPPPPDQLSPEPPLPAAQPLTSASTLTRPEVPQ  
PRNLLEALEQRMERYHVAAAQAKAKGDQRKARMHERIVKQYQDAIRAHKAGRAVDVAELPVPFGFPMPQGLES  
AEPSSQSLVGVLETAMRLANHDEGSDDEEETPKKNTPAASTTQLKSSPSKAPPSGPAPAGKAAPKGTSNRAQ  
QQLAFLEGRKKQLLQAALRAKQKNDVEGAKMHLRQAKGLEPMLASRNGLPVDIAKVPPAPV NKDDFVLVQRP  
GPGLSQEAVRRY GELTKLLRQQHEMCLNHSTQFTHLGNIAETIKFEKLAEDCKRSM DTLKQAFARSLPTPAAR

FEQRTFSVIKVFDPDLSNSDMLLFIVKGINLPTPTGLSPSDDLDAFVRFDFPYPNVEEAQKDKTSVIKNTDSPEF  
KEQFKLCINRGPRGFRRRAIQTKGIKFEVVHKGGLFKTDRVLGTAQLKLGTLTACEVHEILEVLGDGRRPTGGR  
LEVMVRIREPLTAQQLETTTERWLVIDHI PAAMPTVTGPKAKAPLI PASSREAGNRSARPLHSLSVLAFDQER  
LERKILALRQARRPVPPEVAQQYQDVVQRSQWQRAQLEQGGAAALRREYASHLERQLHFYTEAARRLGYDGSRE  
AAKEALYRRNLVESELQRLRR\*

>rs32547577\_ENSMUSP00000046449\_c.2143:A>C\_p.H715P  
ENSMUST00000040383.9|Cc2d1a-201|ENSMUSG00000036686|-|chr8:g.84861751:T>G  
MHKRNGPQAPPGRGAVTARQLGLLVDFSPDGLMIPEDGINEEELEAEFLALVGGQPQALEKLGQGPLPMEAI  
EKMARLRCMRDLDEDEEGTDEDVDEADEDLAELNEVLGEEQKAVEPLMPVAQPKPSGPNPVEATLQERLTLY  
QSALESARQAGDSAKMRRYDRGLKLTLENLLVS AKKGNINEADI PPPV ASGKGAAAGHSHTQATSQ LASVSPP  
APESSTLEAPSTTTPTS AKPQLPPDPCSPLARLQSLQHEYKLAALRAKHQDDTATATRHLRIAKSFDPVLEA  
LSRGELVDLSRLPPPPDQLSPEPPLPAAQPLTSASTLTRPEVPQPPRNLEALEQRMERYHVAAAQAKAKGDQ  
RKARMHERIVKQYQDAIRAHKAGRAVDVAELPVPPGFPMPQGLES AEPSQQSLVGVLETAMRLANHDEGSDE  
EETPKKQNTPAASTTQLKSSPSKAPPSGPAPAGKAAPKGTSNRAQQQLAFLEGRKKQLLQAALRAKQKNDVE  
GAKMHLRQAKGLEPMLASRNLVVDIAKVPPAPVKNDDFVLRPQPGPGLSQAQVRRYGE LTKLLRQQHEMCL  
NHSTQFTHLGNIAETIKFEKLAEDCKRSM DTLKQAFARSLPTPAARFEQRTFSVIKVFDPDLSNSDMLLFIVK  
INLPTPTGLSPSDDLDAFVRFDFPYPNVEEAQKDKTSVIKNTDSPEFKEQFKLCINRGPRGFRRRAIQTKGIKFE  
VVHKGGLFKTDRVLGTAQLKLGTLTACEVHEILEVLGDGRRPTGGRLEVMVRIREPLTAQQLETTTERWLVID  
HIPAAMPTVTGPKAKAPLI PASSREAGNRSARPLHSLSVLAFDQERLERKILALRQARRPVPPEVAQQYQDVV  
QRSQWQRAQLEQGGAAALRREYASHLERQLHFYTEAARRLGYDGSREAAKEALYRRNLVESELQRLRR\*

>rs33110810\_ENSMUSP00000112556\_c.1987:T>C\_p.L663P  
ENSMUST00000117424.9|Cc2d1a-202|ENSMUSG00000036686|-|chr8:g.84861769:A>G  
MHKRNGPQAPPGRGAVTARQLGLLVDFSPDGLMIPEDGINEEELEAEFLALVGGQPQALEKLGQGPLPMEAI  
EKMARLRCMRDLDEDEEGTDEDVDEADEDLAELNEVLGEEQKAVEPLMPVAQTLENLLVS AKKGNINEADI P  
PPV ASGKGAAAGHSHTQATSQ LASVSPPAPESSTLEAPSTTTPTS AKPQLPPDPCSPLARLQSLQHEYKLA  
LRAKHQDDTATATRHLRIAKSFDPVLEALS R GELVDLSRLPPPPDQLSPEPPLPAAQPLTSASTLTRPEVPQ  
PPRNLEALEQRMERYHVAAAQAKAKGDQRKARMHERIVKQYQDAIRAHKAGRAVDVAELPVPPGFPMPQGLS  
AEPSQQSLVGVLETAMRLANHDEGSDEEETPKKNTPAASTTQLKSSPSKAPPSGPAPAGKAAPKGTSNRAQ  
QQQLAFLEGRKKQLLQAALRAKQKNDVEGAKMHLRQAKGLEPMLASRNLVVDIAKVPPAPVKNDDFVLRP  
GPGLSQAQVRRYGE LTKLLRQQHEMCLNHSTQFTHLGNIAETIKFEKLAEDCKRSM DTLKQAFARSLPTPAAR  
FEQRTFSVIKVFDPDLSNSDMLLFIVKGINLPTPTGLSPSDDLDAFVRFDFPYPNVEEAQKDKTSVIKNTDSPEF  
KEQFKPCINRGHRGFRRRAIQTKGIKFEVVHKGGLFKTDRVLGTAQLKLGTLTACEVHEILEVLGDGRRPTGGR  
LEVMVRIREPLTAQQLETTTERWLVIDHI PAAMPTVTGPKAKAPLI PASSREAGNRSARPLHSLSVLAFDQER  
LERKILALRQARRPVPPEVAQQYQDVVQRSQWQRAQLEQGGAAALRREYASHLERQLHFYTEAARRLGYDGSRE  
AAKEALYRRNLVESELQRLRR\*

>rs33110810\_ENSMUSP00000046449\_c.2125:T>C\_p.L709P  
ENSMUST00000040383.9|Cc2d1a-201|ENSMUSG00000036686|-|chr8:g.84861769:A>G  
MHKRNGPQAPPGRGAVTARQLGLLVDFSPDGLMIPEDGINEEELEAEFLALVGGQPQALEKLGQGPLPMEAI  
EKMARLRCMRDLDEDEEGTDEDVDEADEDLAELNEVLGEEQKAVEPLMPVAQPKPSGPNPVEATLQERLTLY  
QSALESARQAGDSAKMRRYDRGLKLTLENLLVS AKKGNINEADI PPPV ASGKGAAAGHSHTQATSQ LASVSPP  
APESSTLEAPSTTTPTS AKPQLPPDPCSPLARLQSLQHEYKLAALRAKHQDDTATATRHLRIAKSFDPVLEA  
LSRGELVDLSRLPPPPDQLSPEPPLPAAQPLTSASTLTRPEVPQPPRNLEALEQRMERYHVAAAQAKAKGDQ  
RKARMHERIVKQYQDAIRAHKAGRAVDVAELPVPPGFPMPQGLES AEPSQQSLVGVLETAMRLANHDEGSDE  
EETPKKQNTPAASTTQLKSSPSKAPPSGPAPAGKAAPKGTSNRAQQQLAFLEGRKKQLLQAALRAKQKNDVE  
GAKMHLRQAKGLEPMLASRNLVVDIAKVPPAPVKNDDFVLRPQPGPGLSQAQVRRYGE LTKLLRQQHEMCL  
NHSTQFTHLGNIAETIKFEKLAEDCKRSM DTLKQAFARSLPTPAARFEQRTFSVIKVFDPDLSNSDMLLFIVK  
INLPTPTGLSPSDDLDAFVRFDFPYPNVEEAQKDKTSVIKNTDSPEFKEQFKPCINRGHRGFRRRAIQTKGIKFE  
VVHKGGLFKTDRVLGTAQLKLGTLTACEVHEILEVLGDGRRPTGGRLEVMVRIREPLTAQQLETTTERWLVID  
HIPAAMPTVTGPKAKAPLI PASSREAGNRSARPLHSLSVLAFDQERLERKILALRQARRPVPPEVAQQYQDVV  
QRSQWQRAQLEQGGAAALRREYASHLERQLHFYTEAARRLGYDGSREAAKEALYRRNLVESELQRLRR\*

>rs46610077\_ENSMUSP00000112556\_c.1372:C>A\_p.A458D  
ENSMUST00000117424.9|Cc2d1a-202|ENSMUSG00000036686|-|chr8:g.84865199:G>T  
MHKRNGPQAPPGRGAVTARQLGLLVDFSPDGLMIPEDGINEEELEAEFLALVGGQPQALEKLGQGPLPMEAI  
EKMARLRCMRDLDEDEEGTDEDVDEADEDLAELNEVLGEEQKAVEPLMPVAQTLENLLVS AKKGNINEADI P  
PPV ASGKGAAAGHSHTQATSQ LASVSPPAPESSTLEAPSTTTPTS AKPQLPPDPCSPLARLQSLQHEYKLA  
LRAKHQDDTATATRHLRIAKSFDPVLEALS R GELVDLSRLPPPPDQLSPEPPLPAAQPLTSASTLTRPEVPQ  
PPRNLEALEQRMERYHVAAAQAKAKGDQRKARMHERIVKQYQDAIRAHKAGRAVDVAELPVPPGFPMPQGLS  
AEPSQQSLVGVLETAMRLANHDEGSDEEETPKKNTPAASTTQLKSSPSKAPPSGPAPAGKAAPKGTSNRAQ



QQLAFLEGRKKQLLQAALRDKQKNDVEGAKMHLRQAKGLEPMLEASRNGLPVDIAKVPPAPVKNDDFVLVQRP  
 GPGLSQEAVRRYGELTKLLRQHEMCLNHSTQFTHLGNIAETIKFEKLAEDCKRSMDTLKQAFARSLPTPAAR  
 FEQRTFSVIKVFDPDLSNSDMLLFIVKGINLPTPTGLSPSDDLDAFVRFDFPYPNVEEAQKDKTSVIKNTDSPEF  
 KEQFKLCINRGHRGFRRAIQTKGIKFEVVHKGGLFKTDRVLGTAQLKLGTLTETACEVHEILEVLDGRRPTGGR  
 LEVMVRIREPLTAQQLETTTERWLVIDHI PAAMPTVTGPKAKAPLI PASSREAGNRSARPLHSLSVLAFDQER  
 LERKILALRQARRPVPPEVAQQYQDVVQRSQWQRAQLEQGGGAALRREYASHLERQLHFYTEAARRLGYDGSRE  
 AAKEALYRRNLVESELQRLRR\*  
 >rs46610077\_ENSMUSP00000046449\_c.1510:C>A\_p.A504D  
 ENSMUST00000040383.9|Cc2d1a-201|ENSMUSG00000036686|-|chr8:g.84865199:G>T  
 MHKRNGPQAPPGRGAVTARQLGLLVDFSPDGLMIPEDGINEEELEAEFLALVGGQPQALEKLGQGPLPMEAI  
 EKMARLDCMRDLDEDEEGTDEDDVEADEDLAELNEVLGEEQKAVEPLMPVAQPKPSGPNPGVEATLQERLTLY  
 QSALESARQAGDSAKMRRYDRGLKTLENLLVSAKKNINEADI PPPVASGKGAAGHSHTQATSQLASVSPP  
 APESSTLEAPSTTTTPTSAPQLPPDPCSPLARLQSLQHEYKLAALRAKHQDDTATATRHLRIAKSFDPVLEA  
 LSRGELVDLSRLPPPPDQLSPEPPLPAAQPLTSASTLTRPEVPQPPRNLEALEQRMERYHVAAAQAKAKGDQ  
 RKARMHERIVKQYQDAIRAHKAGRAVDVAELPVPPGFPMPQGLESAEPSQQSLVGVLETAMRLANHDEGSDE  
 EETPKKQNTPAASTTQLKSSPSKAPPSGPAPAGKAAPKGTSNRAQQQLAFLEGRKKQLLQAALRDKQKNDVE  
 GAKMHLRQAKGLEPMLEASRNGLPVDIAKVPPAPVKNDDFVLVQRP GPGLSQEAVRRYGELTKLLRQHEMCL  
 NHSTQFTHLGNIAETIKFEKLAEDCKRSMDTLKQAFARSLPTPAARFEQRTFSVIKVFDPDLSNSDMLLFIVK  
 INLPTPTGLSPSDDLDAFVRFDFPYPNVEEAQKDKTSVIKNTDSPEFKEQFKLCINRGHRGFRRAIQTKGIKFE  
 VVHKGGLFKTDRVLGTAQLKLGTLTETACEVHEILEVLDGRRPTGGRLEVMVRIREPLTAQQLETTTERWLVID  
 HI PAAMPTVTGPKAKAPLI PASSREAGNRSARPLHSLSVLAFDQERLERKILALRQARRPVPPEVAQQYQDVV  
 QRSQWQRAQLEQGGGAALRREYASHLERQLHFYTEAARRLGYDGSREAAKEALYRRNLVESELQRLRR\*  
 >rs33365678\_ENSMUSP00000112556\_c.912:G>A\_p.E305K  
 ENSMUST00000117424.9|Cc2d1a-202|ENSMUSG00000036686|-|chr8:g.84867093:C>T  
 MHKRNGPQAPPGRGAVTARQLGLLVDFSPDGLMIPEDGINEEELEAEFLALVGGQPQALEKLGQGPLPMEAI  
 EKMARLDCMRDLDEDEEGTDEDDVEADEDLAELNEVLGEEQKAVEPLMPVAQTLENLLVSAKKNINEADI P  
 PVASGKGAAGHSHTQATSQLASVSPPAPESSTLEAPSTTTTPTSAPQLPPDPCSPLARLQSLQHEYKLAAL  
 LRAKHQDDTATATRHLRIAKSFDPVLEALSRGELVDLSRLPPPPDQLSPEPPLPAAQPLTSASTLTRPEVPQ  
 PRNLEALEQRMKRYHVAAAQAKAKGDQRKARMHERIVKQYQDAIRAHKAGRAVDVAELPVPPGFPMPQGLE  
 AEPSSQSLVGVLETAMRLANHDEGSDEEEETPKKQNTPAASTTQLKSSPSKAPPSGPAPAGKAAPKGTSNRAQ  
 QQLAFLEGRKKQLLQAALRAKQKNDVEGAKMHLRQAKGLEPMLEASRNGLPVDIAKVPPAPVKNDDFVLVQRP  
 GPGLSQEAVRRYGELTKLLRQHEMCLNHSTQFTHLGNIAETIKFEKLAEDCKRSMDTLKQAFARSLPTPAAR  
 FEQRTFSVIKVFDPDLSNSDMLLFIVKGINLPTPTGLSPSDDLDAFVRFDFPYPNVEEAQKDKTSVIKNTDSPEF  
 KEQFKLCINRGHRGFRRAIQTKGIKFEVVHKGGLFKTDRVLGTAQLKLGTLTETACEVHEILEVLDGRRPTGGR  
 LEVMVRIREPLTAQQLETTTERWLVIDHI PAAMPTVTGPKAKAPLI PASSREAGNRSARPLHSLSVLAFDQER  
 LERKILALRQARRPVPPEVAQQYQDVVQRSQWQRAQLEQGGGAALRREYASHLERQLHFYTEAARRLGYDGSRE  
 AAKEALYRRNLVESELQRLRR\*  
 >rs33365678\_ENSMUSP00000046449\_c.1047:G>A\_p.E350K  
 ENSMUST00000040383.9|Cc2d1a-201|ENSMUSG00000036686|-|chr8:g.84867093:C>T  
 MHKRNGPQAPPGRGAVTARQLGLLVDFSPDGLMIPEDGINEEELEAEFLALVGGQPQALEKLGQGPLPMEAI  
 EKMARLDCMRDLDEDEEGTDEDDVEADEDLAELNEVLGEEQKAVEPLMPVAQPKPSGPNPGVEATLQERLTLY  
 QSALESARQAGDSAKMRRYDRGLKTLENLLVSAKKNINEADI PPPVASGKGAAGHSHTQATSQLASVSPP  
 APESSTLEAPSTTTTPTSAPQLPPDPCSPLARLQSLQHEYKLAALRAKHQDDTATATRHLRIAKSFDPVLEA  
 LSRGELVDLSRLPPPPDQLSPEPPLPAAQPLTSASTLTRPEVPQPPRNLEALEQRMKRYHVAAAQAKAKGDQ  
 RKARMHERIVKQYQDAIRAHKAGRAVDVAELPVPPGFPMPQGLESAEPSQQSLVGVLETAMRLANHDEGSDE  
 EETPKKQNTPAASTTQLKSSPSKAPPSGPAPAGKAAPKGTSNRAQQQLAFLEGRKKQLLQAALRAKQKNDVE  
 GAKMHLRQAKGLEPMLEASRNGLPVDIAKVPPAPVKNDDFVLVQRP GPGLSQEAVRRYGELTKLLRQHEMCL  
 NHSTQFTHLGNIAETIKFEKLAEDCKRSMDTLKQAFARSLPTPAARFEQRTFSVIKVFDPDLSNSDMLLFIVK  
 INLPTPTGLSPSDDLDAFVRFDFPYPNVEEAQKDKTSVIKNTDSPEFKEQFKLCINRGHRGFRRAIQTKGIKFE  
 VVHKGGLFKTDRVLGTAQLKLGTLTETACEVHEILEVLDGRRPTGGRLEVMVRIREPLTAQQLETTTERWLVID  
 HI PAAMPTVTGPKAKAPLI PASSREAGNRSARPLHSLSVLAFDQERLERKILALRQARRPVPPEVAQQYQDVV  
 QRSQWQRAQLEQGGGAALRREYASHLERQLHFYTEAARRLGYDGSREAAKEALYRRNLVESELQRLRR\*  
 >rs33064505\_ENSMUSP00000112556\_c.835:C>T\_p.T279I  
 ENSMUST00000117424.9|Cc2d1a-202|ENSMUSG00000036686|-|chr8:g.84867261:G>A  
 MHKRNGPQAPPGRGAVTARQLGLLVDFSPDGLMIPEDGINEEELEAEFLALVGGQPQALEKLGQGPLPMEAI  
 EKMARLDCMRDLDEDEEGTDEDDVEADEDLAELNEVLGEEQKAVEPLMPVAQTLENLLVSAKKNINEADI P  
 PVASGKGAAGHSHTQATSQLASVSPPAPESSTLEAPSTTTTPTSAPQLPPDPCSPLARLQSLQHEYKLAAL  
 LRAKHQDDTATATRHLRIAKSFDPVLEALSRGELVDLSRLPPPPDQLSPEPPLPAAQPLISASTLTRPEVPQ

PRNLLEALEQRMERYHVAAAQAKAKGDQKARMHERIVKQYQDAIRAHKAGRAVDVAELPVPPGFPMPQGLES  
 AEPSQQSLVGVLETAMRLANHDEGSDEEEETPKKNTPAASTTQLKSSPSKAPPSGPAPAGKAAPKGTSNRAQ  
 QQLAFLEGRKKQLLQAALRAKQKNDVEGAKMHLRQAKGLEPMLASRNLGPVDIAKVPPAPVKNKDDFVVLVQRP  
 GPGLSQEAVRRYGELTKLLRQHEMCLNHSTQFTHLGNIAETIKFEKLAEDCKRSMDTLTKQAFARSLPTPAAR  
 FEQRTFSVIKVFDPDLSNSDMLLFIVKGINLPTPTGLSPSDDLDAFVRFDFPYPNVEEAQKDKTSVIKNTDSPEF  
 KEQFKLCINRGHRGFRRAIQTKGKIKFEVVHKGGLFKTDRVLGTAQLKLGTLTACEVHEILEVLDGRRPTGGR  
 LEVMVRIREPLTAQQLETTTERWLVIDHI PAAMPTVTGPKAKAPLI PASSREAGNRSARPLHLSVLAFDQER  
 LERKILALRQARRPVPPEVAQQYQDVVQRSQWQRAQLEQGGAAALRREYASHLERQLHFYTEAARRLGYDGSRE  
 AAKEALYRRNLVESELQRLRR\*

>rs33064505\_ENSMUSP00000046449\_c.970:C>T\_p.T324I  
 ENSMUST00000040383.9|Cc2d1a-201|ENSMUSG00000036686|-|chr8:g.84867261:G>A  
 MHKRNGPQAPPGRGAVTARQLGLLVDFSPDGLMIPEDGINEEELEAEFLALVGGQPQALEKLGQGPLPMEAI  
 EKMARLRCMRDLDEDEEGTDEDDVEADEDLAELNEVLGEEQKAVEPLMPVAQPKPSGPNPVGVEATLQERLTLY  
 QSALESARQAGDSAKMRRYDRGLKTLENLLVS AKKGNINEADI PPPV ASGKGAAAGHSHTQATSQ LASVSPP  
 APESSTLEAPSTTTPTS AKPQLPPDPCSPLARLQSLQHEYKLAALRAKHQDDTATATRHLRIAKSFDPVLEA  
 LSRGELVDLSRLPPPPDQLSPEPPLPAAQPLISASTLTRPEVPQP PRNLLEALEQRMERYHVAAAQAKAKGDQ  
 RKARMHERIVKQYQDAIRAHKAGRAVDVAELPVPPGFPMPQGLES AEPSQQSLVGVLETAMRLANHDEGSDE  
 EETPKKQNTPAASTTQLKSSPSKAPPSGPAPAGKAAPKGTSNRAQQQLAFLEGRKKQLLQAALRAKQKNDVE  
 GAKMHLRQAKGLEPMLASRNLGPVDIAKVPPAPVKNKDDFVVLVQRP GPGLSQEAVRRYGELTKLLRQHEMCL  
 NHSTQFTHLGNIAETIKFEKLAEDCKRSMDTLTKQAFARSLPTPAARFEQRTFSVIKVFDPDLSNSDMLLFIVK  
 INLPTPTGLSPSDDLDAFVRFDFPYPNVEEAQKDKTSVIKNTDSPEFKEQFKLCINRGHRGFRRAIQTKGKIKFE  
 VVHKGGLFKTDRVLGTAQLKLGTLTACEVHEILEVLDGRRPTGGRLEVMVRIREPLTAQQLETTTERWLVID  
 HI PAAMPTVTGPKAKAPLI PASSREAGNRSARPLHLSVLAFDQERLERKILALRQARRPVPPEVAQQYQDVV  
 QRSQWQRAQLEQGGAAALRREYASHLERQLHFYTEAARRLGYDGSREAAKEALYRRNLVESELQRLRR\*

>rs33598727\_ENSMUSP00000112556\_c.463:C>T\_p.A155V  
 ENSMUST000000117424.9|Cc2d1a-202|ENSMUSG00000036686|-|chr8:g.84870050:G>A  
 MHKRNGPQAPPGRGAVTARQLGLLVDFSPDGLMIPEDGINEEELEAEFLALVGGQPQALEKLGQGPLPMEAI  
 EKMARLRCMRDLDEDEEGTDEDDVEADEDLAELNEVLGEEQKAVEPLMPVAQTLENLLVS AKKGNINEADI P  
 PVASGKGVAAGHSHTQATSQ LASVSPPAPESSTLEAPSTTTPTS AKPQLPPDPCSPLARLQSLQHEYKLA  
 LRAKHQDDTATATRHLRIAKSFDPVLEALSRGELVDLSRLPPPPDQLSPEPPLPAAQPLTSASTLTRPEVPQP  
 PRNLLEALEQRMERYHVAAAQAKAKGDQKARMHERIVKQYQDAIRAHKAGRAVDVAELPVPPGFPMPQGLES  
 AEPSQQSLVGVLETAMRLANHDEGSDEEEETPKKNTPAASTTQLKSSPSKAPPSGPAPAGKAAPKGTSNRAQ  
 QQLAFLEGRKKQLLQAALRAKQKNDVEGAKMHLRQAKGLEPMLASRNLGPVDIAKVPPAPVKNKDDFVVLVQRP  
 GPGLSQEAVRRYGELTKLLRQHEMCLNHSTQFTHLGNIAETIKFEKLAEDCKRSMDTLTKQAFARSLPTPAAR  
 FEQRTFSVIKVFDPDLSNSDMLLFIVKGINLPTPTGLSPSDDLDAFVRFDFPYPNVEEAQKDKTSVIKNTDSPEF  
 KEQFKLCINRGHRGFRRAIQTKGKIKFEVVHKGGLFKTDRVLGTAQLKLGTLTACEVHEILEVLDGRRPTGGR  
 LEVMVRIREPLTAQQLETTTERWLVIDHI PAAMPTVTGPKAKAPLI PASSREAGNRSARPLHLSVLAFDQER  
 LERKILALRQARRPVPPEVAQQYQDVVQRSQWQRAQLEQGGAAALRREYASHLERQLHFYTEAARRLGYDGSRE  
 AAKEALYRRNLVESELQRLRR\*

>rs33598727\_ENSMUSP00000046449\_c.598:C>T\_p.A200V  
 ENSMUST00000040383.9|Cc2d1a-201|ENSMUSG00000036686|-|chr8:g.84870050:G>A  
 MHKRNGPQAPPGRGAVTARQLGLLVDFSPDGLMIPEDGINEEELEAEFLALVGGQPQALEKLGQGPLPMEAI  
 EKMARLRCMRDLDEDEEGTDEDDVEADEDLAELNEVLGEEQKAVEPLMPVAQPKPSGPNPVGVEATLQERLTLY  
 QSALESARQAGDSAKMRRYDRGLKTLENLLVS AKKGNINEADI PPPV ASGKGVAAGHSHTQATSQ LASVSPP  
 APESSTLEAPSTTTPTS AKPQLPPDPCSPLARLQSLQHEYKLAALRAKHQDDTATATRHLRIAKSFDPVLEA  
 LSRGELVDLSRLPPPPDQLSPEPPLPAAQPLTSASTLTRPEVPQP PRNLLEALEQRMERYHVAAAQAKAKGDQ  
 RKARMHERIVKQYQDAIRAHKAGRAVDVAELPVPPGFPMPQGLES AEPSQQSLVGVLETAMRLANHDEGSDE  
 EETPKKQNTPAASTTQLKSSPSKAPPSGPAPAGKAAPKGTSNRAQQQLAFLEGRKKQLLQAALRAKQKNDVE  
 GAKMHLRQAKGLEPMLASRNLGPVDIAKVPPAPVKNKDDFVVLVQRP GPGLSQEAVRRYGELTKLLRQHEMCL  
 NHSTQFTHLGNIAETIKFEKLAEDCKRSMDTLTKQAFARSLPTPAARFEQRTFSVIKVFDPDLSNSDMLLFIVK  
 INLPTPTGLSPSDDLDAFVRFDFPYPNVEEAQKDKTSVIKNTDSPEFKEQFKLCINRGHRGFRRAIQTKGKIKFE  
 VVHKGGLFKTDRVLGTAQLKLGTLTACEVHEILEVLDGRRPTGGRLEVMVRIREPLTAQQLETTTERWLVID  
 HI PAAMPTVTGPKAKAPLI PASSREAGNRSARPLHLSVLAFDQERLERKILALRQARRPVPPEVAQQYQDVV  
 QRSQWQRAQLEQGGAAALRREYASHLERQLHFYTEAARRLGYDGSREAAKEALYRRNLVESELQRLRR\*

>rs254259087\_ENSMUSP00000113651\_c.405:GC>G\_p.A136del-fs  
 ENSMUST00000118856.8|Brme1-202|ENSMUSG00000008129|+|chr8:g.84893240:GC>G  
 MNKKKQRNSGVLHPSKSPKNPRLRDSQSSMMVHSHYSRESEDSSE PAPSVELGGEEPLHEAFSCPVEDTGAA  
 SDLAGSPKELVPLPPSQNSVGKVFVQFAKPRKTVTRKAKAWEEDELEGCSTTSQETRPEL GALKEPASHRESP

>rs254259087\_ENSMUSP00000091067\_c.300:GC>G\_p.A101del-fs  
ENSMUST00000093375.5|Brme1-201|ENSMUSG00000008129|+|chr8:g.84893240:GC>G  
MNKKKQRNSGVGLHPSKPSKNPRLRDSQSSMMVHSHYSRESEDSSEPA P SVELGGEEPLHEAFSCPVEDTGAA  
SDLAGSPKELVPLPPSQETRP ELGALKEPASHRESP  
>rs32694707\_ENSMUSP00000113651\_c.663:C>T\_p.Q222\*  
ENSMUST00000118856.8|Brme1-202|ENSMUSG00000008129|+|chr8:g.84893498:C>T  
MNKKKQRNSGVGLHPSKPSKNPRLRDSQSSMMVHSHYSRESEDSSEPA P SVELGGEEPLHEAFSCPVEDTGAA  
SDLAGSPKELVPLPPSQNSVGK FVPQFAKPRKTVTRKAKAW EEDLEGCTTSQETRP ELGALKAASQPQRESLR  
FPPHDIRPEVQTQPDGTL SKERTISLDNRS LGNNGFEMATVQDSSSPLSDAAAEGREADSRDPQERDAQGGEA  
GA\*HSGEPQEGEDILYTSALAPASEPTWSVAQDLSVPTYT LSSSTAAAPSSTSPADASLMDTVITEVSLDPSVL  
QQSAPQVAKLLGSLDEQIPDGGCIGTLLSSTPLAEETTAGREEARWEERCHGDTLASFTETEPEKQEPVTEAG  
DSGHIAQEMDPVVKTKDSGSDEQSPGDIGMLPLPAQSMNQMLVELRGLTCDQDLEGLSTPHTSSQLEHTCAAS  
DPPQSTKDC HSSPGIPVHLAAPCPRDQA AWQESSAMELDFLPDSQIQDALDATNMEQGFPSPGSM PDLGWVPS  
SQSIGGSPKAVTKPQSRSHVETWAQET YRMQDATD TVRGLVVELSGLNRLIMSTHRDLEAFKRRKTKSLPYLT  
KGLGSLPRGDQSWRDL\*  
>rs32694707\_ENSMUSP00000091067\_c.558:C>T\_p.Q187\*  
ENSMUST00000093375.5|Brme1-201|ENSMUSG00000008129|+|chr8:g.84893498:C>T  
MNKKKQRNSGVGLHPSKPSKNPRLRDSQSSMMVHSHYSRESEDSSEPA P SVELGGEEPLHEAFSCPVEDTGAA  
SDLAGSPKELVPLPPSQETRP ELGALKAASQPQRESLRFP PHDIRPEVQTQPDGTL SKERTISLDNRS LGNNG  
FEMATVQDSSSPLSDAAAEGREADSRDPQERDAQGGEAGA\*HSGEPQEGEDILYTSALAPASEPTWSVAQDLS  
VPTYT LSSSTAAAPSSTSPADASLMDTVITEVSLDPSVLQQSAPQVAKLLGSLDEQIPDGGCIGTLLSSTPLAE  
ETTAGREEARWEERCHGDTLASFTETEPEKQEPVTEAGDSGHIAQEMDPVVKTKDSGSDEQSPGDIGMLPLPA  
QSMNQMLVELRGLTCDQDLEGLSTPHTSSQLEHTCAASDPPQSTKDC HSSPGIPVHLAAPCPRDQA AWQESSA  
MELDFLPDSQIQDALDATNMEQGFPSPGSM PDLGWVPSQSIGGSPKAVTKPQSRSHVETWAQET YRMQDATD  
TVRGLVVELSGLNRLIMSTHRDLEAFKRRKTKSLPYLT KGLGSLPRGDQSWRDL\*  
>rs6355997\_ENSMUSP00000040078\_c.1231:A>G\_p.Q411R  
ENSMUST00000039480.7|Zswim4-201|ENSMUSG00000035671|-|chr8:g.84952729:T>C  
MEPPAAKRSRGC PAGDEPGTGARRSRPEPLLDLSAKRVAESWAF EQVEERFSRVPEPVQKRIVFWSFPRSERE  
ICMYSSLGYPPEGEQDTRVPFTRGLHLLQSGAVDRVLQVGFHLSGNIREVGGPGEPEHLYHVSISFDRCKIT  
SVSCGCDNRDLFYCAHVVALS L YRIRHARQVELR LPISETLSQMN RDQLQKFVQY LISAHHT E V LPTAQR LAD  
EILLGSEINLVHGAPDPTAGAGTEDANCWHLDEEQIQEQVKQLLSNGGHYGASQQLRSMF SKVREMLRARDS  
NGARMLIILMTEQFLQDPR LALWRQQGAGMTDKCRQLWDELGALWVCVILSPHCKPDERSGWLQLLGTWDKLDV  
CPLEEGNYSLDIPSLQPALTSRTGSEDEEEVTAASPRRTVFSRALRAGELHWNDSHLQRI L AS DSCGPTLTGS  
MGSDKPTFDPQGHPIWLGEPFPTACARVDTLRAHGYPHKALRLACAIINTLRLQRRHQLESYKQK KELLQKG  
ATGVTSTEGWVGHPLDPIGCLCRALLEACRLEEEPHSLFPDSAPEKRKLAYQHVLVPGSPGESYLALALEVAL  
LGLGQQRALPEGLYAQDKVVRNEEQLLALLEVELEDERLVQVLRKQAGLLLEGGPFSGFGEVI FRESVPMHTC  
ARYLFTALLPHDPDLAFRLALRAMRLPVLETTFFPAGE SHPNPLDSIMSNRFPWFILGHLETRQCELASTMLT  
AAKGDTKWLHAVLGSVQQNIHSPALLFKLAQDACKTATPASAPPD TVLLGIALELGLQVMRMTLNTMTWRRRE  
MVRWLVSCATEIGPPALMSIMKNWYSLFTPVEAVTIVAVTGTTHATLLRLQLD TAGREELWACARTLALQCAM  
KDPQNCALPALTLCEKNHAAFEAAYQIVLDAAGGLGHAHLFTVARYMEHRGLPLRAYKLATLALALQLSIAFN  
QD SHPAVNDVLWACSLSHSLGRHEL SAIVPLIIRS IHCAPMLSDILRRWTL SAPGLGPLGARRATKPLGTDRA  
PLCQLLDAAVAAYITTSHSRLTHISPRHYGDFIEFLGKARETFLLAPDGH LQFAQFLENLQTYKGGKKLMLL  
VREFRFG\*  
>rs50242115\_ENSMUSP00000040078\_c.1018:T>C\_p.I340T  
ENSMUST00000039480.7|Zswim4-201|ENSMUSG00000035671|-|chr8:g.84953447:A>G  
MEPPAAKRSRGC PAGDEPGTGARRSRPEPLLDLSAKRVAESWAF EQVEERFSRVPEPVQKRIVFWSFPRSERE  
ICMYSSLGYPPEGEQDTRVPFTRGLHLLQSGAVDRVLQVGFHLSGNIREVGGPGEPEHLYHVSISFDRCKIT  
SVSCGCDNRDLFYCAHVVALS L YRIRHARQVELR LPISETLSQMN RDQLQKFVQY LISAHHT E V LPTAQR LAD  
EILLGSEINLVHGAPDPTAGAGTEDANCWHLDEEQIQEQVKQLLSNGGHYGASQQLRSMF SKVREMLRARDS  
NGARMLIILMTEQFLQDPR LALWRQQGAGMTDKCRQLWDELGALWVCVTLSPHCKPDERSGWLQLLGTWDKLDV  
CPLEEGNYSLDIPSLQPALTSRTGSEDEEEVTAASPRRTVFSRALQAGELHWNDSHLQRI L AS DSCGPTLTGS  
MGSDKPTFDPQGHPIWLGEPFPTACARVDTLRAHGYPHKALRLACAIINTLRLQRRHQLESYKQK KELLQKG  
ATGVTSTEGWVGHPLDPIGCLCRALLEACRLEEEPHSLFPDSAPEKRKLAYQHVLVPGSPGESYLALALEVAL  
LGLGQQRALPEGLYAQDKVVRNEEQLLALLEVELEDERLVQVLRKQAGLLLEGGPFSGFGEVI FRESVPMHTC  
ARYLFTALLPHDPDLAFRLALRAMRLPVLETTFFPAGE SHPNPLDSIMSNRFPWFILGHLETRQCELASTMLT  
AAKGDTKWLHAVLGSVQQNIHSPALLFKLAQDACKTATPASAPPD TVLLGIALELGLQVMRMTLNTMTWRRRE  
MVRWLVSCATEIGPPALMSIMKNWYSLFTPVEAVTIVAVTGTTHATLLRLQLD TAGREELWACARTLALQCAM  
KDPQNCALPALTLCEKNHAAFEAAYQIVLDAAGGLGHAHLFTVARYMEHRGLPLRAYKLATLALALQLSIAFN

QDSHPAVNDVLWACSLSHSLGRHELSAIVPLIIRSIHCAPMLSDILRRWTL SAPGLGPLGARRATKPLGTDRA  
PLCQLLDAVAAYITTSRSLTHISPRHYGDFIEFLGKARETFLLAPDGHQFAQFLENLKQTYKGKKLMLL  
VRERFG\*

>rs51157904\_ENSMUSP00000040078\_c.910:A>G\_p.Q304R

ENSMUST00000039480.7|Zswim4-201|ENSMUSG00000035671|-|chr8:g.84955507:T>C  
MEPPAAKRSRGC PAGDEPGTGARRSRPEPLLDLSAKRVAESWAFEQVEERFSRVPEPVQKRIVFWSFPRSERE  
ICMYSSLGYQPPEGEQDTRVPFTRGLHLLQSGAVDRVLQVGFHLNGNIREVGGPGEPEHLYHVSISFDRCKIT  
SVSCGCDNRDLFYCAHVVALSLYRIRHARQVELRLPISETLSQMNRDQLQKFVQYLISAHHTEVLP TAQRLAD  
EILLGSEINLVHGAPDPTAGAGTEDANCWHLDEEQIQEQVKQLLSNGGHYGASQQLRSMFSKVREMLRARDS  
NGARMLILMTERFLQDPRALWRQQGAGMTDKCRQLWDELGALWVCVILSPHCKPDERSGWLQLLGTWDKLDV  
CPLEEGNYSLDIPSLQPALTSRTGSEDEEEVTAASPRRTVFSRALQAGELHWNDSHLQRI LASDSCGPTLTGS  
MGSDKPTFDPOGHPIWLGEFPPTACARVDTLRAHGYPHKALRLACAIINTLRLQRRHQLESYKQKQKELLQKG  
ATGVTSTEGWVGHPLDPIGICLCRALLEACRLEEEPHSLFPD SAPEKRKRAYQHVLVPGSPGESYLALALEVAL  
LGLGQQRALPEGLYAQDKVVRNEEQLLALLEEVELDERLVQVLRKQAGLLLEGGPFSGFGEVIFRESVPMHTC  
ARYLFTALLPHDPDLAFLRALRAMRLPVLETTFPAGESHPNPLDSIMSNRFPRWFILGHLETRQCELASTMLT  
AAKGDTKWLHAVLGSVQQNIHSPALLFKLAQDACKTATPASAPPDVTLLGIALELGLQVMRMTLNTMTWRRRE  
MVRWLVSCLATEIGPPALMSIMKNWYSLFTPVEAVTIVAVTGTTHATLLRLQLD TAGREELWACARTLALQCAM  
KDPQNCALPALTLCEKNHAAFEAYQIVLDAAGGLGHAHLFTVARYMEHRGLPLRAYKLATLALAQLSIAFN  
QDSHPAVNDVLWACSLSHSLGRHELSAIVPLIIRSIHCAPMLSDILRRWTL SAPGLGPLGARRATKPLGTDRA  
PLCQLLDAVAAYITTSRSLTHISPRHYGDFIEFLGKARETFLLAPDGHQFAQFLENLKQTYKGKKLMLL  
VRERFG\*

>rs48900740\_ENSMUSP00000040078\_c.352:G>A\_p.S118N

ENSMUST00000039480.7|Zswim4-201|ENSMUSG00000035671|-|chr8:g.84957714:C>T  
MEPPAAKRSRGC PAGDEPGTGARRSRPEPLLDLSAKRVAESWAFEQVEERFSRVPEPVQKRIVFWSFPRSERE  
ICMYSSLGYQPPEGEQDTRVPFTRGLHLLQSGAVDRVLQVGFHLNGNIREVGGPGEPEHLYHVSISFDRCKIT  
SVSCGCDNRDLFYCAHVVALSLYRIRHARQVELRLPISETLSQMNRDQLQKFVQYLISAHHTEVLP TAQRLAD  
EILLGSEINLVHGAPDPTAGAGTEDANCWHLDEEQIQEQVKQLLSNGGHYGASQQLRSMFSKVREMLRARDS  
NGARMLILMTEQFLQDPRALWRQQGAGMTDKCRQLWDELGALWVCVILSPHCKPDERSGWLQLLGTWDKLDV  
CPLEEGNYSLDIPSLQPALTSRTGSEDEEEVTAASPRRTVFSRALQAGELHWNDSHLQRI LASDSCGPTLTGS  
MGSDKPTFDPOGHPIWLGEFPPTACARVDTLRAHGYPHKALRLACAIINTLRLQRRHQLESYKQKQKELLQKG  
ATGVTSTEGWVGHPLDPIGICLCRALLEACRLEEEPHSLFPD SAPEKRKRAYQHVLVPGSPGESYLALALEVAL  
LGLGQQRALPEGLYAQDKVVRNEEQLLALLEEVELDERLVQVLRKQAGLLLEGGPFSGFGEVIFRESVPMHTC  
ARYLFTALLPHDPDLAFLRALRAMRLPVLETTFPAGESHPNPLDSIMSNRFPRWFILGHLETRQCELASTMLT  
AAKGDTKWLHAVLGSVQQNIHSPALLFKLAQDACKTATPASAPPDVTLLGIALELGLQVMRMTLNTMTWRRRE  
MVRWLVSCLATEIGPPALMSIMKNWYSLFTPVEAVTIVAVTGTTHATLLRLQLD TAGREELWACARTLALQCAM  
KDPQNCALPALTLCEKNHAAFEAYQIVLDAAGGLGHAHLFTVARYMEHRGLPLRAYKLATLALAQLSIAFN  
QDSHPAVNDVLWACSLSHSLGRHELSAIVPLIIRSIHCAPMLSDILRRWTL SAPGLGPLGARRATKPLGTDRA  
PLCQLLDAVAAYITTSRSLTHISPRHYGDFIEFLGKARETFLLAPDGHQFAQFLENLKQTYKGKKLMLL  
VRERFG\*

>rs51323625\_ENSMUSP00000019506\_c.6:C>T\_p.Q3\*

ENSMUST00000019506.9|D8Ert d738e-201|ENSMUSG00000019362|-

|chr8:g.84976326:G>A

MA\*GQRKFQAQKPKSKAAAERSRGPGRKGRVIAPKKARVVQQKLLKKSLEVGIRKKIEHDVVMKASSSLPKR  
LALLKGASKKSEATIPGKTPS\*

>rs32623436\_ENSMUSP000000122623\_c.769:C>T\_p.A257V

ENSMUST000000126435.8|Mri1-203|ENSMUSG00000004996|-|chr8:g.84980671:G>A  
MTLEAIRYSPGSLQILDQLLPEHCHYEALSSVQQASEAIRAMKVRGAPAIALVGC LSLAVELRAGAGGPGLA  
ALVAFVRDQLRLVAARPTAVNMARAARDLGQVAAQEAEREGATEETVREVRIRFAEDMLEKDLKDNRSIGDL  
GARHLLAQTNPRGGKVTVLTHCNTGALATAGYGTALGVIRSLHEMGRLEHTFCTETRPYNQGARLTAFELVYE  
QIPATLITDSMAAAAMAHRGVSAVVVGADRVVANGDVTNKGITYQLAIVAKHHGVFPFYVAAPSSCDLHLETG  
KEIVIEERPSQELTDLNGVRIAAQGIRVWNP AFDVT PHELITGGIITELGVFAPEELRGALSASVFSEGTLD  
SPWV\*

>rs32623436\_ENSMUSP000000117115\_c.385:C>T\_p.A129V

ENSMUST000000125498.2|Mri1-202|ENSMUSG00000004996|-|chr8:g.84980671:G>A  
XRF AEDMLEKDLKDNRSIGDLGARHLLAQTNPRGGKVTVLTHCNTGALATAGYGTALGVIRSLHEMGRLEHTF  
CTETRPYNQGARLTAFELVYEQIPATLITDSMAAAAMAHRAVVVGADRVVANGDVTNKGITYQLAIVAKHHGV  
PFYVAAPSSCDLHLETGKEIVIEERPSQELTDLNGVRIAAQDRIFLCLLGYPGTICRSGWLQTRSSCLCLP  
SAGIKCMHH

>rs33104670\_ENSMUSP00000096177\_c.139:G>A\_p.R47Q  
ENSMUST00000098578.10|Ccdc130-202|ENSMUSG0000004994|-  
|chr8:g.84990491:C>T  
MGERKQNKYYPDFNPEKHGSLNRYHNSHPLRERARKLSQGILVIQFEMPYNIWCDGCKNHIGMGRVRYNAEK  
KKVGNYYTTPYRFRMKCHLCVNYIEMQTD PANCDYVIVSGASRKEERWDMEDNEQVLTTEHEKKEKLET DAM  
FRLEHGADRSTLKKALPTLSHIQEAQNAWKDDFALNSMLRRHFREKKKAMQEEEEKDQALQAKASLAIPLVP  
ESEDRLAALLRLHTLDSYEDKQRMKRTEI IHRSWFPSAQGPSASSSKASSVLKCLCQGRPPPSSTGTVDG  
LGI VRRKSRDVPESPQCAADNSLSEEQRPPGTTQGSKTLEEAEEASRTSKTSESKRNCSDQAFPLGSSQEDL  
LNPNTPNASLVADYSDSESE\*

>rs33104670\_ENSMUSP00000005120\_c.139:G>A\_p.R47Q  
ENSMUST00000005120.12|Ccdc130-201|ENSMUSG0000004994|-  
|chr8:g.84990491:C>T  
MGERKQNKYYPDFNPEKHGSLNRYHNSHPLRERARKLSQGILVIQFEMPYNIWCDGCKNHIGMGRVRYNAEK  
KKVGNYYTTPYRFRMKCHLCVNYIEMQTD PANCDYVIVSGASRKEERWDMEDNEQVLTTEHEKKEKLET DAM  
FRLEHGADRSTLKKALPTLSHIQEAQNAWKDDFALNSMLRRHFRLMRTSSE\*

>rs33104670\_ENSMUSP00000128605\_c.139:G>A\_p.R47Q  
ENSMUST00000172320.2|Ccdc130-207|ENSMUSG0000004994|-|chr8:g.84990491:C>T  
MGERKQNKYYPDFNPEKHGSLNRYHNSHPLRERARKLSQGILVIQFEMPYNIWCDGCKNHIGMGERG\*  
>ENSMUSP00000158803\_c.1027:T>C\_p.F343S ENSMUST00000238701.2|Cacna1a-  
213|ENSMUSG00000034656|+|chr8:g.85245363:T>C  
MPRASWGS D PMLSPLSHELLHSPRYPGTDCTLAGSSRTLHPVWSQQMSGSLGPTLKRGGVVDHRDVI LAHQ  
AHKMHSTPQARRKEWEMARFGDEMPGRYGAGGGGSGPAAGVVGAAGGRGAGGSRQGGQPGAQRMYKQSMAQR  
ARTMALYNPI PVRQNC LTVNRS LFLFSEDNVVRKYAKKI TEWPPFEYMILATI IANCI VLAL EQHL PDDDKTP  
MSERLDDTEPYFIGIFCFEAGIKIVALGF AFHKGSYLRNGWNVMD FVVVLTGILATVGTEFDLRTLRAVRVLR  
PLKLVSGI PSLQVVLKSIKAMI PLLQIGLLFFAILIFAIIGLEFYMGKSHTTCFEEGTDDIQGES P APCGT  
EEPARTCPNGTKCQFYWEGPNNGITQFDNILFAVLTVFQCITMEGWTDLLYNSNDASGNTWNWLYFIPLIIG  
SFMLNLVLGVLSGEFAKERERVENRRAFLKLRQQQIERELNGYMEWISKAEEVILAEDETDVEQRHPFDGA  
LRRATLKKSKTDL LNPEEAEDQLADIASVGS PFARASIKS AKLENSTFFHKKERRMRFYIRRMVKTQAFYWTV  
LSLVALNTLCVAIVHYNQPEWLSDFLYAEFIFLGLFMSEMF IKMYGLTRPHYHSSFNCFDCGVIIGSIFEV  
IWAVIKPGTSFGISVLRALRLRIFKVTKYASLRNLVSVLLNSMKSISLLFLLFLFIVVFALLGMQLFGGQ  
FNFDEGTPPTNFDTFPAAIMTVFQILTGEDWNEVMYDGIKSQGGVQGMVFSIYFIVLTLFGNYTLLNVFLAI  
AVDNLANAQELTKDEQEEEEANQKLALQKAKEVAEVSPLSAANMSI AVKEQQKNQKPTKSVWEQRTSEMRKQ  
NLLASREALYGDAERWPTPYARPLRPDVKTHLDRPLVDPQENRNNNTNKSRAPEALRPTARPRESARDPDA  
RRAWPGSPERAPGREGPYGRESE PQQREHAPPREHAPWDADTERAKAGDAPRRHTRHPVAEGEP RRHRARRR  
GDEPDRPERRRPRDTRPARAADGEGDDGERKRRHRHGPPAHDDRERRRRRRKENQSGSVPSGPNLSTTR  
PIQQDLGRQDLPLAEDLDNMKNKLATGEPASPHDSLHSGLSGLPPSPAKIGNSTNPGPALATNPVNAASRRTPN  
NPGNPSNPGPKTPENSLIVTNPSSQPNSAKTARKPEHMAVEIPACPLNHTVVQVNKNANPDLPKKEEE  
KKEEEEADPGEDGPKMPYPYSSMFI LSTTNPLRRLCHYIILNRYFEMCILMVIAMSSIALAAEDVPQPNAPRN  
NVLRYFDYVFTGVFTFEMVIK MIDLGLVLHQGAYFRDLWNILDFIVVSGALVAF AFTGNSKGDINTIKSLRV  
LRVLRPLKTIKRLPKLKA VFCVNSLKNVFNILIVYMLFMFI FAVVAVQLFKGKFFHCTDESKEFERDCRGK  
YLLYEKNEVKARDREWKKYEFHYDNVLWALLTLFTVSTGEGWPQLKHSVDATFENQGPS PGYRMEMSIFYVV  
YFVVFVFFVNI FVALIITFQEQGDKMMEEYSLEKNERACIDFAISAKPLTRHMPQNKQSFQYRMWQFVVS  
PFEYTIMAMIALNTIVLMMKFY GASVAYENALRVFNIVFTSLFSL ECVLKVMAFGILNYFRDAWNIFDFVTVL  
GSITDILVTEFGNNFINLSFLRLFRAARLIKLLRQGYTIRILLWTFVQSFKALPYVCLLIAMLFFIYAIIGMQ  
VFGNIGIDGEDEDSDEDEFQITEHNNFRFFFQALMLLFRSATGEAWHNIMLSCLSGKPCDKNSGILTADCGNE  
FAYFYFVSFI FLCSFLMLNLFVAVIMDNFEYLTRDSSILGPHHLDEYVRVWAEYDPAACGRIHYKDMYSLLRV  
ISPPLGLGKCKPHRVACKRLLRMDLPVADDNTVHFNSTLMALIR TALDIKIAKGGADKQQMDAELRKEMMAIW  
PNLSQKTLDDLVT PHKSTDLTVGKIYAAMMIMEYYRQSKAKKLQAMREEQNRTPLMFQRMEPPSPTQEGGPSQ  
NALPSTQLDPGGGLMAHEGGMKESPSWVTQRAQEMFQKTGTWSPERGPPI DMPNSQPNSQS VEMREMGT DGYS  
DSEHYLPMEGQTRAASMPRLPAENQRRRGRPRGNDLSTISDTS PMKRSASVLGPKARRLDDYS LERVPEENQ  
RYHQRRRDRGHRTSERSLGRYTDVDTGLGTDLSMTTQSGDLPSKDRDQDRGRPKDRKRRPHHHHHHHHHPPA  
PDRDRYAQERPDTGRARAREQRWRSRSPSEGREHTTHRQSSSVSGSPAPSTSGTSTPRRGRRLPQTPTCTPRP  
LVSYSAPARRPAARRMAGPAAPP GGS PRGCRARPWAHAPEGPRPRGADYTEPDSPREPPGGAHDPA PRSPR  
TPRAAGCASPRHGRRPLNGY YAGHGAPRPR TARRGAHDAYSESEDDWC\*

>ENSMUSP00000112436\_c.760:T>C\_p.F254S ENSMUST00000121390.8|Cacna1a-  
201|ENSMUSG00000034656|+|chr8:g.85245363:T>C  
MARFGDEMPGRYGAGGGGSGPAAGVVGAAGGRGAGGSRQGGQPGAQRMYKQSMAQRARTMALYNPI PVRQNC  
LTVNRS LFLFSEDNVVRKYAKKI TEWPPFEYMILATI IANCI VLAL EQHL PDDDKTPMSERLDDTEPYFIGIF



CFEAGIKIVALGF AFHKG SYLRNGWNVMD FVVVLTGILATVGT EFDLRTLRAVRVLRPLKLVSGIPSLQVVLK  
SIMKAMIPLLQIGLLLFFAILIFAIIGLEFYMGKSHTTCFEEGTDDIQGES P APCGTEEPARTCPNGTKCQPY  
WEGPNNGITQFDNILFAVLT V FQCITMEGWTDLLYNSNDASGNTWNLWYFIPLIIIGSFFMLNLVLGVLGSGEF  
AKERERVENRRAFLKLRQQQIERELNGYMEWISKAEEVILA EDETDVEQRHPFDGALRRATLKKSKTDLLNP  
EEAEDQLADIASVGS PFARASIKSAKLENSTFFHKKERRMRFYIRRMVKTQAFYWTVLSLVALNTLCVAIVHY  
NQPEWLSDFLYAEFIFLGLFMSEMF IKMYGLGTRPYFHSSFNCFDCGVIIGSIFEVIWAVIKPGTSFGISVL  
RALRLLRIFKVTKYWASLRNLVVSLLNSMKSIIISLLFLLFLFIVV FALLGMLFGGQFNDFEGTPTNFDTFP  
AAIMTVFQILTGEDWNEVMYDGIKSQGGVQGGMVFSIYFIVLTLFGNYTLLNVFLAIAVDNLANAQELTKDEQ  
EEEEANQKLLALQKAKEVAEVSPLSAANMSIAVKEQQKNQKPTKSVWEQRTSEMRKQNLKASREALYGDAAER  
WPTPYARPLRPDVKTHLDRPLVVD PQENRNNNTNKSRAPEALRPTARPRE SARDPDARRAWPGSPERAPGREG  
PYGRESEPPQREHAPPREHAPWDADTERAKAGDAPRRHTRHPVAEAGEPRRHRARRRPGDEPDDRPERPRPRD  
ATRPARAADGEGDDGERKRRHRHGPPAHDDRERRRRRKENQGS GVPVSGPNLSTTRPIQQDLGRQDLPLAED  
LDNMKNNKLATGEPASPHDSLGHSGLPSPAKIGNSTNPGPALATNPQNAASRRTPNPNPNSPNP GPKTPEN  
SLIVTNPSSTQPN SAKTARKPEHMAVEIPPACPLNHTVVQVNKNANPDPLPKKEEEEKKEEEEADPGEDGPKP  
MPPYSSMFI LSTTNPLRRLCHYILNLRYFEMC ILMVIAMSSIALAAEDPVQPNAPRNNVLR YFDYVFTGVFTF  
EMVIK MIDLGLVLHQGAYFRDLWNI LDFIVVSGALVAF AFTGNSKGDINTIKSLRVLRLRPLKTIKRLPKL  
KAVFDCVNSLKNVFNILIVYMLFMFIFAVVAVQLFKGKFFHCTDESKEFERDCRGKYLLYEKNEVKARDREW  
KKEYEFHYDNVLWALLTLFTVSTGEGWPQVLKHSVDATFENQGPSGYRMEMSIFYVVYFVVFVFNIFVAL  
IITFQEQGDKMMEEYSLEKNERACIDFAISAKPLTRHMPQNKQSFQYRMWQFVVSPPFEYTIMAMIALNTIV  
LMMKFYGASVAYENALRVFNIVFTSLFSLECVLKVMAFGILNYFRDAWNI FDFVTVLGSITDILVTEFGNNFI  
NLSFLRLFRARLIKLLRQGYTIRILLWTFVQSFKALPYVCLLIAMLFFIYAIIGMQVFGNIGIDGEDSDSDE  
DEFQITEHNNFR TFFQALMLLFRSATGEAWHNIMLSCLSGKPCDKNSGILTADCGNEFAYFYFVSFIFLCSFL  
MLNLFVAVIMDNFEYLTRDSSILGPHHLD EYVRVWAEYDPAACGR IHYKMYSLLRVIS PPLGLGKCKPHRVA  
CKRLLRMDLPVADDNTVHFNSTLMALIRTALDIKIAKGGADKQQMDAELRKEEMAIWPNLSQKTLDLLVTPHK  
STDLTVGKIYAAMMIMEYYRQSKAKKLQAMREEQNRTPLMFQRM EPPSPTQEGGSPQNALPSTQLDPPGGGLMA  
HEGGMKESPSWVTQRAQEMFQKTGTWSPERGPIIDMPSNQPSQSVEMREMGTGDYSDSEHYLPMEGQTRAAS  
MPRLPAENQRRRGRPRGNDLSTISDTSMPKRSASVLGPKARRLDYSLERVPPEENQRYHQRRRDRGHRTSER  
SLGRYTDVDTGLGTDLSMTTQSGDLP SKDRDQDRGRPKDRKHRPHHHHHHHHHHPPAPDRDRYAQERPDGRA  
RAREQRWSRSPSEGREHTTHRQGS SVSGSPAPSTSGTSTPRRGRRLPQTPCTPRPLVSYSPAPRRPAARM  
AGPAAPP GGS PRGCRRAPRWP AHAP EGP RP R GADYTEPDS PREPPGGAHDPAPRSRPTPRAAGCASPRHGRRL  
PNGYYAGHGAPRPRRTARRGAHDAYSESEDDWC\*

>ENSMUSP00000114055\_c.619:T>C\_p.F207S ENSMUST00000122053.2|Cacna1a-  
202|ENSMUSG00000034656|+|chr8:g.85245363:T>C

MARFGDEMPGRY GAGGGGSGPAAGVVVGAAGGRGAGGSRQGGQPGAQRMYKQSMARARTMALYNPIPVQRNC  
LTVNRSFLFSEDNDDETEPYFIGIFCFEAGIKIVALGF AFHKG SYLRNGWNVMD FVVVLTGILATVGT EFDL  
RTLRAVRVLRPLKLVSGIPSLQVVLK SIMKAMIPLLQIGLLLFFAILIFAIIGLEFYMGKSHTTCFEEGTDDI  
QGESPAPCGTEEPARTCPNGTKCQPYWEGPNNGITQFDNILFAVLT V FQCITMEGWTDLLYNSNDASGNTWNL  
LYFIPLIIIGSFFMLNLVLGVLGSGEFAKERERVENRRAFLKLRQQQIERELNGYMEWISKAEEVILA EDETD  
VEQRHPFDGALRRATLKKSKTDLLNPEEAEDQLADIASVGS PFARASIKSAKLENSTFFHKKERRMRFYIRRM  
VKTQAFYWTVLSLVALNTLCVAIVHYNQPEWLSDFLYAEFIFLGLFMSEMF IKMYGLGTRPYFHSSFNCFDC  
GVIIGSIFEVIWAVIKPGTSFGISVLRALRLLRIFKVTKYWASLRNLVVSLLNSMKSIIISLLFLLFLFIVVFA  
LLGMLFGGQFNDFEGTPTNFDTFPAAIMTVFQILTGEDWNEVMYDGIKSQGGVQGGMVFSIYFIVLTLFGN  
YTLNVLFLAIAVDNLANAQELTKDEQEEEEANQKLLALQKAKEVAEVSPLSAANMSIAVKEQQKNQKPTKSVW  
EQRTSEMRKQNLKASREALYGDAAERWPTPYARPLRPDVKTHLDRPLVVD PQENRNNNTNKSRAPEALRPTAR  
PRESARDPDARRAWPGSPERAPGREGPYGRESEPPQREHAPPREHAPWDADTERAKAGDAPRRHTRHPVAEAGE  
PRRHRARRRPGDEPDDRPERPRPRDATRPARAADGEGDDGERKRRHRHGPPAHDDRERRRRRKENQGS GVP  
VSGPNLSTTRPIQQDLGRQDLPLAEDLDNMKNNKLATGEPASPHDSLGHSGLPSPAKIGNSTNPGPALATNP  
QNAASRRTPNPNPNSPNP GPKTPENSLIVTNPSSTQPN SAKTARKPEHMAVEIPPACPLNHTVVQVNKNAN  
PDPLPKKEEEEKKEEEEADPGEDGPKMPPYSSMFI LSTTNPLRRLCHYILNLRYFEMC ILMVIAMSSIALAAE  
DPVQPNAPRNNVLR YFDYVFTGVFTFEMVIK MIDLGLVLHQGAYFRDLWNI LDFIVVSGALVAF AFTGNSKGD  
DINTIKSLRVLRLRPLKTIKRLPKL KAVFDCVNSLKNVFNILIVYMLFMFIFAVVAVQLFKGKFFHCTDES  
KEFERDCRGKYLLYEKNEVKARDREW KKEYEFHYDNVLWALLTLFTVSTGEGWPQVLKHSVDATFENQGPSGY  
RMEMSIFYVVYFVVFVFNIFVALIITFQEQGDKMMEEYSLEKNERACIDFAISAKPLTRHMPQNKQSFQ  
YRMWQFVVSPPFEYTIMAMIALNTIVLMMKFYGASVAYENALRVFNIVFTSLFSLECVLKVMAFGILNYFRDA  
WNI FDFVTVLGSITDILVTEFGNNFINLSFLRLFRARLIKLLRQGYTIRILLWTFVQSFKALPYVCLLIAML  
FFIYAIIGMQVFGNIGIDGEDSDSDEDEFQITEHNNFR TFFQALMLLFRSATGEAWHNIMLSCLSGKPCDKNS  
GILTADCGNEFAYFYFVSFIFLCSFLMLNLFVAVIMDNFEYLTRDSSILGPHHLD EYVRVWAEYDPAACGR I  
HYKMYSLLRVIS PPLGLGKCKPHRVACKRLLRMDLPVADDNTVHFNSTLMALIRTALDIKIAKGGADKQQMDA

ELRKEMMAIWPNLSQKTLDDLVTPHKSTDLTVGKIYAAMMIMEYYRQSKAKKLQAMREEQNRTPLMFQRMPEPP  
SPTQEGGSPQNALPSTQLDPPGGGLMAHEGGMKESPSWVTQRAQEMFQKTGTWSPERGPPIDMPNSQPNSQSVE  
MREMGTGYSYDSEHYLPMEGQTRAASMPRLPAENQRRRGRPRGNDLSTISDTPMKRSASVLGPKARRLDDYS  
LERVPPEENQRYHQRRRDRGHRTSERSLGRYTDVDTGLGTDLSMTTQSGDLPSKDRDQDRGRPKDRKHRPHHH  
HHHHHHHPAPDRDRYAQERPDTGRARAREQRWSRSPSEGREHTTHRQSSSVSGSPAPSTSGTSTPRRGRRO  
LPQTPTPRPLVSYSPAPRRPAARRMAGPAAPPGGSPRGCRRAPRWPAHAPEGPRPRGADYTEPDSPREPPGG  
AHDPA PRSPRT PRAAGCASPRHGRRLPNGYYAGHGAPRPRRTARRGAHDAYSESEDDWC\*  
>ENSMUSP00000149242\_c.622:T>C\_p.F208S ENSMUST00000215756.2|Cacna1a-  
211|ENSMUSG00000034656|+|chr8:g.85245363:T>C  
XRMYKQSMARARTMALYNPIPVRQNCLTVNRSFLFSEDNVVRKYAKKITEWPPFEYMI LATI IANCIVLAL  
EQHLPDDDKTPMSERLDDTEPYFIGIFCFEAGIKIVALGF AFHKGSYLRNGWNVMD FVVVLTGILATVGTEFD  
LRTLRAVRVLRPLKLVSGIPSLQVVLKSIKAMIPLLQIGLLFFAILIFAIIGLEFYMGKSHHTTCFEEGTDD  
IQGES PAPCGTEEPARTCPNGTKCQPYWEGPNNGITQFDNILFAVLTVFQCITMEGWTDLLYNSNDASGNTWN  
WLYFIFLIIGSFFMLNLVGLVLSGEFAKERERVENRRAFLKLRQQQIERELNGYMEWISKAEEVILAEDET  
DVEQRHPFDALRRATLKKSKTDLNPEEAEDQLADIASVGSPPFARASIKSAKLENSTFFHKKERRMRFYIRRM  
VKTQAFYWTVLSLVALNTLCVAIVHYNQPEWLSDFLYAAEFIFLGLFMSEMF IKMYGLGTRPYFHSSFNCFDC  
GVIIGSIFEVIWAVIKPGTSFGISVLRALRLLRIFKVTKYASLRNLVVSLLNSMKSII SLLFLLFLFIVVFA  
LLGMQLFGGQFNFDGTPPTNFDTFPAAIMTVFQILTGEDWNEVMYDGIKSQGGVQGMVFSIYFIVLTLFGN  
YTLNLFVLAIAVDNLANAQELTKDEQEEEEAAANQKLALQKAKEVAEVSPLSAANMSI AVKEQQKNQKPTKSVW  
EQRTSEMRKQNLASREALYGDAERWPTPYARPLRPDVKTHLDRPLVVDPPQENRNNNTNKSRAPEALRPTAR  
PRESARDPDARRAWPGSPERAPGREGPYGRESEPPQREHAPPREHAPWDADTERAKAGDAPRRHTRHPVAEGE  
PRRHRARRRRPGDEPDRPERRRPRDATRPARAADGEGDDGERKRRHRHGPPAHDDRERRRHRRRKENQGSVP  
VSGPNLSTTRPIQQDLGRQDLPLAEDLDNMKNNKLATGEPASPHDSLGHSGLPSPAKIGNSTNPGPALATNP  
QNAASRRTPNPNPNSNPGPKTPENSLIVTNPSSQPNSAKTARKPEHMAVEIPACPLNHTVVQVKNAN  
PDPLPKKEEKEEKEEADPGEDGPKMPYPSSMFI LSTTNPLRRLCHYILNLRVYFEMCILMVIAMSSIALAAE  
DPVQPNAPRNVLRYFDYVFTGVFTFEMVIKMDLGLVLHGAYFRDLWNILDFIVVSGALVAFVAFVFTGNSKKG  
DINTIKSLRVLRLPLKTIKRLPKLKA VFD CVNLSKNVFNILLVYMLFMFIFAVVAVQLFKGKFFHCTDES  
KEFERDCRGKYLLEYEKNEVKARDREWKKYEFHYDNVLLWALLTLFTVSTGEGWPQVLKHSVDATFENQGPSGY  
RMEMSIFYVVVYFVVPFFVNFVALIITFQEQGDKMMEEYSLEKNERACIDFAISAKPLTRHMPQNKQSFQ  
YRMWQFVVSPPFEYTIMAMIALNTIVLMMKFY GASVAYENALRVFNIVFTSLFSLECVLKVMAFGILNYFRDA  
WNIFDFVTVLGSITDILVTEFGNNFINLSFLRLFRAARLIKLLRQGYTIRILLWTFVQSFKALPYVCLLIAML  
FFIYAIIGMQVFGNIGIDGEDSDEDEFQITEHNNFRFFQALMLLFRSATGEAWHNIMLSCLSGKPCDKNS  
GILTADCGNEFAYFYFVSFIFLCSFLMLNLFVAVIMDNFEYLTRDSSILGPHHLDEYVRVWAEYDPAACGRIH  
YKDMYSLLRVISPPGLGKCKPHRVACKRLLRMDLPVADDNTVHFNSTLMALIRTALDIKIAKGGADKQMDA  
ELRKEMMAIWPNLSQKTLDDLVTPHKSTDLTVGKIYAAMMIMEYYRQSKAKKLQAMREEQNRTPLMFQRMPEPP  
SPTQEGGSPQNALPSTQLDPPGGGLMAHEGGMKESPSWVTQRAQEMFQKTGTWSPERGPPIDMPNSQPNSQSVE  
MREMGTGYSYDSEHYLPMEGQTRAASMPRLPAENQRRRGRPRGNDLSTISDTPMKRSASVLGPKARRLDDYS  
LERVPPEENQRYHQRRRDRGHRTSERSLGRYTDVDTGLGTDLSMTTQSGDLPSKDRDQDRGRPKDRKHRPHHH  
HHHHHHHPAPDRDRYAQERPDTGRARAREQRWSRSPSEGREHTTHRQSSSVSGSPAPSTSGTSTPRRGRRO  
LPQTPTPRPLVSYSPAPRRPAARRMAGPAAPPGGSPRGCRRAPRWPAHAPEGPRPRGADYTEPDSPREPPGG  
AHDPA PRSPRT PRAAGCASPRHGRRLPNGYYAGHGAPRPRRTARRGAHDAYSESEDDWC\*  
>rs38793291\_ENSMUSP00000158803\_c.3165:A>G\_p.K1056E  
ENSMUST00000238701.2|Cacna1a-213|ENSMUSG00000034656|+|chr8:g.85286255:A>G  
MPRASWGS DPMLSPLSHELLHSRYPGT DCTLAGSSRTLHVPWSQQMSGSLGPTLKRGGVVDHRDVI LAHQ  
AHKMHS TPQARRKEWEMARFGDEM PGRY GAGGGSGPAAGVVVGAAGGRGAGGSRQGGQPGAQRM YKQ SMAQR  
ARTMALYNPIPVRQNCLTVNRSFLFSEDNVVRKYAKKITEWPPFEYMI LATI IANCIVLAL EQHLPDDDKTP  
MSERLDDTEPYFIGIFCFEAGIKIVALGF AFHKGSYLRNGWNVMD FVVVLTGILATVGTEFDLRTLRAVRVLR  
PLKLVSGIPSLQVVLKSIKAMIPLLQIGLLFFAILIFAIIGLEFYMGKFHTTCFEEGTDDIQGES PAPCGT  
EEPARTCPNGTKCQPYWEGPNNGITQFDNILFAVLTVFQCITMEGWTDLLYNSNDASGNTWNWLYFIFLIIG  
SFFMLNLVGLVLSGEFAKERERVENRRAFLKLRQQQIERELNGYMEWISKAEEVILAEDET DVEQRHPFDGA  
LRRATLKKSKTDLNPEEAEDQLADIASVGSPPFARASIKSAKLENSTFFHKKERRMRFYIRRMVKTQAFYWTV  
LSLVALNTLCVAIVHYNQPEWLSDFLYAAEFIFLGLFMSEMF IKMYGLGTRPYFHSSFNCFDCGVIIGSIFEV  
IWAVIKPGTSFGISVLRALRLLRIFKVTKYASLRNLVVSLLNSMKSII SLLFLLFLFIVV FALLGMQLFGGQ  
FNFDEGTPPTNFDTFPAAIMTVFQILTGEDWNEVMYDGIKSQGGVQGMVFSIYFIVLTLFGNYTLNLFVLA  
AVDNLANAQELTKDEQEEEEAAANQKLALQKAKEVAEVSPLSAANMSI AVKEQQKNQKPTKSVWEQRTSEMRKQ  
NLLASREALYGDAERWPTPYARPLRPDVKTHLDRPLVVDPPQENRNNNTNKSRAPEALRPTARPRESARDPDA  
RRAWPGSPERAPGREGPYGRESEPPQREHAPPREHAPWDADTERAKAGDAPRRHTRHPVAEGEPRRHRARRR  
GDEPDRPERRRPRDATRPARAADGEGDDGERERRRHRHGPPAHDDRERRRHRRRKENQGSVPVSGPNLSTTR

PIQQDLGRQDLPLAEDLDNMKNKLATGEPASPHDSLGHSGLPPSPAKIGNSTNPGPALATNPQNAASRRTPN  
 NPGNPSNPGPKTPENSLIVTNPSSTQPNsAKTARKPEHMAVEIPPACPLNHTVVQVNKNANPDPLPKKEEE  
 KKEEEADPGEDGPKMPYPYSSMFI LSTTNPLRRLCHYI LNLRYFEMCILMVIAMSSIALAAEDPVQPNAPRN  
 NVLRYFDYVFTGVFTFEMVIKMI DLGLVLHQGAYFRDLWNI LDFIVVSGALVAFaftGNSKGDINTIKSLRV  
 LRVLRPLKTIKRLPKLKAVFDCVVNSLKNVFNILIVYMLFMFIFAVVAVQLFKGKFFHCTDESKEFERDCRGK  
 YLLYEKNEVKARDREWKKYEFHYDNVLWALLTLFTVSTGEGWPQVLKHSVDATFENQGPSGYRMEMSIFYVV  
 YFVVFVFFVNI FVALIIITFQEQGDKMMEEYSLEKNERACIDFAISAKPLTRHMPQNKQSFQYRMWQFVVS  
 PFEYTIMAMIALNTIVLMMKFY GASVAYENALRVFNIVFTSLFSLECVLKVMAFGILNYFRDAWNIFDFVTVL  
 GSITDILVTEFGNNFINLSFLRLFRARLIKLLRQGYTIRILLWTFVQSFKALPYVCLLIAMLFFIYAIIGMQ  
 VFGNIGIDGEDSDDEDEFQITEHNNFRFFQALMLLFRSATGEAWHNIMLSCLSGKPCDKNSGILTADCGNE  
 FAYFYFVSFIFLCSFLMLNLFVAVIMDNFEYLTRDSSILGPHHLDEYVRVWAEYDPAACGRIHYKDMYSLLRV  
 ISPPLGLGKCKPHRVACKRLLRMDLPVADDNTVHFNSTLMALIRTALDIKIAKGGADKQQMDAELRKEMMAIW  
 PNLSQKTLDDLVTPhKSTDLTVGKIYAAMMIMEYYRQSKAKKLQAMREEQNRTPLMFQRMESPTQEGGSPQ  
 NALPSTQLDPGGGLMAHEGGMKESSWVTQRAQEMFQKTGTWSPERGPPIDMPSNQNSQSVEMREMGTDGYS  
 DSEHYLPMEGQTRAASMPRLPAENQRRRGRPRGNDLSTISDTSMPKRSASVLGPKARLLDDYSLERVPEENQ  
 RYHQRRDRGRHRTSERSLGRYTDVDTGLGTDLSMTTQSGDLP SKDRDQDRGRPKDRKHRPHHHHHHHHHPPA  
 PDRDRYAQERPTDGRARAREQRWSRSPSEGREHTTHRQSSSVSGSPAPSTSGTSTPRRGRRLPQTPCTPRP  
 LVSYSPAPRRPAARRMAGPAAPPGGSPRGCRRAPRWPAAHAPEGPRPRGADYTEPDSPREPPGGAHDPAPRSR  
 TPRAAGCASPRHGRRLPNGYYAGHGAPRPRRTARRGAHDAYSESEDDWC\*

>rs38793291\_ENSMUSP00000112436\_c.2898:A>G\_p.K967E  
 ENSMUST000001121390.8|Cacna1a-201|ENSMUSG00000034656|+|chr8:g.85286255:A>G  
 MARFGDEMPGRYGAGGGGSGPAAGVVVGAAGGRGAGGSRQGGQPGAQRMYSMAQARARTMALYNPIVVRQNC  
 LTVNRSFLFLFSEDNVVRKYAKKITEWPPFEYMI LATI IANCI VLALQHL PDDDKTPM SERLDDTEPYFIGIF  
 CFEAGIKIVALGF AFHKGSYLRNGWNVMDFVVVLTGILATVGT EFDLRTLRAVRVLRPLKLVSGIPSLQVVLK  
 SIMKAMIPLLQIGLLLFFAILIFAIIGLEFYMGKFHTTCFEEGTDI QGESPAPCGTEEPARTCPNGTKCQPY  
 WEGPNNGITQFDNIFLAVLTVFQCITMEGWTDLLYNSNDASGNTWNWLYFIPLIIGSFFMLNLVLGVLSEGF  
 AKERERVENRRAFLKLRQQQIERELNGYMEWISKAENVILAEDETDVEQRHPFDGALRRATLKKSKTDLNLP  
 EEAEDQLADIASVGSPPARASIKSAKLENSTFFHKERRMRFYIRRMVKTQAFYWTVLSLVALNTLCVAIVHY  
 NQPEWLSDFLYAEFIFLGLFMSEMIKMYGLGTRPYFHSSFNCFDCGVIIGSIFEVIWAVIKPGTSFGISVL  
 RALRLLRIFKVTKYASLRNLVVSLLNSMKSIIISLLFLLFLFIVVFALLGMQLFGGQFNFDEGTPPTNFDTFP  
 AAIMTVFQILTGEDWNEVMYDGIKSQGGVQGGMVFSIYFIVLTLFGNYTLLNVFLAIAVDNLANAQELTKDEQ  
 EEEEEANQKLALQKAKEVAEVSPLSAANMSIAVKEQQKNQKPTKSVWEQRTSEMRKQNL LASREALYGDAAER  
 WPTPYARPLRPDVKTHLDRPLVVDPQENRNNNTNKSRAPEALRPTARPRESARDPDARRAWPGSPERAPGREG  
 PYGRESEPOQREHAPPREHAPWDADTERAKAGDAPRRHTRHPVAEGEP RRRHRARRRPGDEPDRPERPRPRD  
 ATRPARAADGEGDDGERERRRHRGPPAHDDRERRRRRRKENQGSVGVSGPNLSTTRPIQQDLGRQDLPLAED  
 LDNMKNKLATGEPASPHDSLGHSGLPPSPAKIGNSTNPGPALATNPQNAASRRTPNPNPNPNPNPNPKTPEN  
 SLIVTNPSSTQPNsAKTARKPEHMAVEIPPACPLNHTVVQVNKNANPDPLPKKEEEKKEEEADPGEDGPKP  
 MPPYSSMFI LSTTNPLRRLCHYI LNLRYFEMCILMVIAMSSIALAAEDPVQPNAPRN NVLRYFDYVFTGVFTF  
 EMVIKMI DLGLVLHQGAYFRDLWNI LDFIVVSGALVAFaftGNSKGDINTIKSLRVLRVLRPLKTIKRLPKL  
 KAVFDCVVNSLKNVFNILIVYMLFMFIFAVVAVQLFKGKFFHCTDESKEFERDCRGKYLLEYEKNEVKARDREW  
 KKYEFHYDNVLWALLTLFTVSTGEGWPQVLKHSVDATFENQGPSGYRMEMSIFYVVYFVVFVFFVNI FVAL  
 I IITFQEQGDKMMEEYSLEKNERACIDFAISAKPLTRHMPQNKQSFQYRMWQFVVSPPFEYTIMAMIALNTIV  
 LMMKFY GASVAYENALRVFNIVFTSLFSLECVLKVMAFGILNYFRDAWNIFDFVTVLGSITDILVTEFGNNFI  
 NLSFLRLFRARLIKLLRQGYTIRILLWTFVQSFKALPYVCLLIAMLFFIYAIIGMQVFGNIGIDGEDSDDE  
 DEFQITEHNNFRFFQALMLLFRSATGEAWHNIMLSCLSGKPCDKNSGILTADCGNEFAYFYFVSFIFLCSFL  
 MLNLFVAVIMDNFEYLTRDSSILGPHHLDEYVRVWAEYDPAACGRIHYKDMYSLLRVISPPLGLGKCKPHRVA  
 CKRLLRMDLPVADDNTVHFNSTLMALIRTALDIKIAKGGADKQQMDAELRKEMMAIWPNLSQKTLDDLVTPhK  
 STDLTGKIYAAMMIMEYYRQSKAKKLQAMREEQNRTPLMFQRMESPTQEGGSPQNALPSTQLDPGGGLMA  
 HEGGMKESPSWVTQRAQEMFQKTGTWSPERGPPIDMPSNQNSQSVEMREMGTDGYS DSEHYLPMEGQTRAAS  
 MPRLPAENQRRRGRPRGNDLSTISDTSMPKRSASVLGPKARLLDDYSLERVPEENQRYHQRRDRGRHRTSER  
 SLGRYTDVDTGLGTDLSMTTQSGDLP SKDRDQDRGRPKDRKHRPHHHHHHHHHPPAPDRDRYAQERPTDGR  
 RAREQRWSRSPSEGREHTTHRQSSSVSGSPAPSTSGTSTPRRGRRLPQTPCTPRPLVSYSPAPRRPAARRM  
 AGPAAPPGGSPRGCRRAPRWPAAHAPEGPRPRGADYTEPDSPREPPGGAHDPAPRSRPTPRAAGCASPRHGRRL  
 PNGYYAGHGAPRPRRTARRGAHDAYSESEDDWC\*

>rs38793291\_ENSMUSP00000114055\_c.2757:A>G\_p.K920E  
 ENSMUST000001122053.2|Cacna1a-202|ENSMUSG00000034656|+|chr8:g.85286255:A>G  
 MARFGDEMPGRYGAGGGGSGPAAGVVVGAAGGRGAGGSRQGGQPGAQRMYSMAQARARTMALYNPIVVRQNC  
 LTVNRSFLFLFSEDNVDDTEPYFIGIFCFEAGIKIVALGF AFHKGSYLRNGWNVMDFVVVLTGILATVGT EFDL

RTRLRAVRVLRPLKLVSGIPSLQVVLKSIKAMIPLLQIGLLFFAILIFAIIGLEFYMGKFHTTCFEEGTDDI  
 QGESAPCGTEEPARTCPNGTKCQPYWEGPNNGITQFDNIFLAVLTVFQCITMEGWTDLLYNSNDASGNTWNW  
 LYFIFLIIGSFFMLNLVGLVLSGEFAKERERVENRRRAFLKLRQQQIERELNGYMEWISKAEEVILAEDET  
 VEQRHFPFDGALRRATLKKSKTDLNPEEAEDQLADIASVGSPPFARASIKSAKLENSTFFHKKERRMRFYIRRM  
 VKTQAFYWTVLSLVALNTLCVAIVHYNQPEWLSDFLYYAEFIFLGLFMSEMFIKMYGLGTRPYFHSFNCFCDC  
 GVIIGSIFEVIWAVIKPGTSFGISVLRALRLLRIFKVTKYWASLRNLVVSLLNSMKSIIISLLFLLFLFIVVFA  
 LLGMQLFGGQFNFDGTPPTNFDTFPAAIMTVFQILTGEDWNEVMYDGIKSQGGVQGGMVFSIYFIVLTLFGN  
 YTLNVLFLAIAVDNLANAQELTKDEQEEEEEAANQKLLAQKAKEVAEVSPLSAANMSIAVKEQQKNQKPTKSVW  
 EQRTSEMRKQNLASREALYGDAERWPTPYARPLRPDVKTHLDRPLVVDQPENRNNNTNKSRAPEALRPTAR  
 PRESARDPDARRAWPGSPERAPGREGPYGRESEPPQREHAPPREHAPWDADTERAKAGDAPRRHTRHPVAEGE  
 PRRHRARRRPGDEPDDRPERRPRPRDATRPARAADGEGDDGERERRHRHGPPAHDDRERRRRRRKENQSGV  
 VSGPNLSTTRPIQQDLGRQDLPLAEDLDNMKNNKLATGEPASPHDSLGHSGLPSPAKIGNSTNPGPALATNP  
 QNAASRRTPNPNPNSNPGPPKTPENSLIVTNPSSTQPNSAKTARKPEHMAVEIPPACPLNHTVVQVKNAN  
 PDPLPKKEEEKKEEEEADPGEDGPKMPPYSSMFI LSTTNPLRRLCHYILNLRVYFEMCILMVIAMSSIALAAE  
 DPVQPNAPRNNVLRVYFDYVFTGVFTFEMVIKIMIDLGLVLHQGAYFRDLWNILDFIVVSGALVAFVFTGNSKKG  
 DINTIKSLRVLRLVLRPLKTIKRLPKLKAVFDCVNVNSLKNVFNILIVYMLFMFIFAVVAVQLFKGKFFHCTDES  
 KEFERDCRGKYLLEYKNEVKARDREWKKYEFHYDNVWALLTLFTVSTGEGWPQVLKHSVDATFENQGPSGY  
 RMEMSIFYVVYFVVFPPFFVNI FVALI IITFQEQGDKMEEYSLEKNERACIDFAISAKPLTRHMPQNKQSFQ  
 YRMWQFVVSPPFEYTIMAMIALNTIVLMMKFYGASVAYENALRVFNIVFTSLFSLECVLKVMAFGILNYFRDA  
 WNI FDFVTVLGSITDILVTEFGNNFINLSFLRLFRAARLIKLLRQGYTIRILLWTFVQSFKALPYVCLLIAML  
 FFYIAIIGMQVFGNIGIDGEDSDDEDEFQITEHNNFRFTFFQALMLLFRSATGEAWHNIMLSCLSGKPCDKNS  
 GILTADCGNEFAYFYFVSFIFLCSFLMLNLFVAVIMDNFEYLTRDSSILGPHHLDEYVRVWAEYDPAACGRIH  
 YKDMYSLLRVISPPLGLGKCKPHRVACKRLLRMDLPVADDNTVHFNSTLMALIRTALDIKIAKGGADKQMDA  
 ELRKEMMAIWPNLSQKTLDLLVTPHKSTDLTVGKIIYAAMMIMEYYRQSKAKKLQAMREEQNRTPLMFQRMEPP  
 SPTQEGGPNQNALPSTQLDPGGGLMAHEGGMKESPSWVTQRAQEMFQKTGTWSPERGGPIDMPNSQPNQSVE  
 MREMGTDGYSDSEHYLPMEGQTRAASMPRLPAENQRRRGRPRGNDLSTISDTPMKRASVLPKARRLDDYS  
 LERVPEENQNLRYHQRRDRGHRTSERSLGRYTDVDTDLGTLDSMTTQSGDLP SKDRDQDRGRPKDRKRRPHHH  
 HHHHHHHPPAPDRDRYAQERPDTRARAREQRWSRSPSEGREHTTHRQSSSVSGSPAPSTSGTSTPRRGRRO  
 LPQTPCTPRPLVSYSPAPRRPAARRMAGPAAPPGGSPRGCRRAPRWPAPAHAPEGPRPRGADYTEPDSPREPPGG  
 AHDPA PRSPRT PRAAGCASPRHGRRLPNGYYAGHGAPRPRRTARRGAHDAYSESEDDWC\*  
 >rs38793291\_ENSMUSP00000149242\_c.2757:A>G\_p.K920E  
 ENSMUST00000215756.2|Cacna1a-211|ENSMUSG00000034656|+|chr8:g.85286255:A>G  
 XRMKQKSMARARTMALYNPIVVRQNCCLTVNRSFLFSEDNVVRKYAKKITEWPPFEYMI LATI IANCIVLAL  
 EQHLPDDDKTPMSERLDDTEPYFIFIGFCFEAGIKIVALGFHFKGSYLRNGWNVMDFFVVVLTGILATVGTED  
 LRTLRAVRVLRPLKLVSGIPSLQVVLKSIKAMIPLLQIGLLFFAILIFAIIGLEFYMGKFHTTCFEEGTDDI  
 IQGESAPCGTEEPARTCPNGTKCQPYWEGPNNGITQFDNIFLAVLTVFQCITMEGWTDLLYNSNDASGNTWN  
 WLYFIFLIIGSFFMLNLVGLVLSGEFAKERERVENRRRAFLKLRQQQIERELNGYMEWISKAEEVILAEDET  
 DVEQRHFPFDALRRATLKKSKTDLNPEEAEDQLADIASVGSPPFARASIKSAKLENSTFFHKKERRMRFYIRRM  
 VKTQAFYWTVLSLVALNTLCVAIVHYNQPEWLSDFLYYAEFIFLGLFMSEMFIKMYGLGTRPYFHSFNCFCDC  
 GVIIGSIFEVIWAVIKPGTSFGISVLRALRLLRIFKVTKYWASLRNLVVSLLNSMKSIIISLLFLLFLFIVVFA  
 LLGMQLFGGQFNFDGTPPTNFDTFPAAIMTVFQILTGEDWNEVMYDGIKSQGGVQGGMVFSIYFIVLTLFGN  
 YTLNVLFLAIAVDNLANAQELTKDEQEEEEEAANQKLLAQKAKEVAEVSPLSAANMSIAVKEQQKNQKPTKSVW  
 EQRTSEMRKQNLASREALYGDAERWPTPYARPLRPDVKTHLDRPLVVDQPENRNNNTNKSRAPEALRPTAR  
 PRESARDPDARRAWPGSPERAPGREGPYGRESEPPQREHAPPREHAPWDADTERAKAGDAPRRHTRHPVAEGE  
 PRRHRARRRPGDEPDDRPERRPRPRDATRPARAADGEGDDGERERRHRHGPPAHDDRERRRRRRKENQSGV  
 VSGPNLSTTRPIQQDLGRQDLPLAEDLDNMKNNKLATGEPASPHDSLGHSGLPSPAKIGNSTNPGPALATNP  
 QNAASRRTPNPNPNSNPGPPKTPENSLIVTNPSSTQPNSAKTARKPEHMAVEIPPACPLNHTVVQVKNAN  
 PDPLPKKEEEKKEEEEADPGEDGPKMPPYSSMFI LSTTNPLRRLCHYILNLRVYFEMCILMVIAMSSIALAAE  
 DPVQPNAPRNNVLRVYFDYVFTGVFTFEMVIKIMIDLGLVLHQGAYFRDLWNILDFIVVSGALVAFVFTGNSKKG  
 DINTIKSLRVLRLVLRPLKTIKRLPKLKAVFDCVNVNSLKNVFNILIVYMLFMFIFAVVAVQLFKGKFFHCTDES  
 KEFERDCRGKYLLEYKNEVKARDREWKKYEFHYDNVWALLTLFTVSTGEGWPQVLKHSVDATFENQGPSGY  
 RMEMSIFYVVYFVVFPPFFVNI FVALI IITFQEQGDKMEEYSLEKNERACIDFAISAKPLTRHMPQNKQSFQ  
 YRMWQFVVSPPFEYTIMAMIALNTIVLMMKFYGASVAYENALRVFNIVFTSLFSLECVLKVMAFGILNYFRDA  
 WNI FDFVTVLGSITDILVTEFGNNFINLSFLRLFRAARLIKLLRQGYTIRILLWTFVQSFKALPYVCLLIAML  
 FFYIAIIGMQVFGNIGIDGEDSDDEDEFQITEHNNFRFTFFQALMLLFRSATGEAWHNIMLSCLSGKPCDKNS  
 GILTADCGNEFAYFYFVSFIFLCSFLMLNLFVAVIMDNFEYLTRDSSILGPHHLDEYVRVWAEYDPAACGRIH  
 YKDMYSLLRVISPPLGLGKCKPHRVACKRLLRMDLPVADDNTVHFNSTLMALIRTALDIKIAKGGADKQMDA  
 ELRKEMMAIWPNLSQKTLDLLVTPHKSTDLTVGKIIYAAMMIMEYYRQSKAKKLQAMREEQNRTPLMFQRMEPP

SPTQEGGSPQNALPSTQLDPPGGGLMAHEGGMKESPSWVTQRAQEMFQKTGTWSPERGPPIDMPNSQPNSQSVE  
MREMGTDGYSDEHYLPMEGQTRAASMPRLPAENQRRRGRPRGNDLSTISDTPMKRSASVLGPKARRLDDYS  
LERVPPPEENQRYHQRRRDRGHRTSERSLGRYTDVDTGLGTDLSMTTQSGDLPKDRDQDRGRPKDRKRRPHHH  
HHHHHHHPAPDRDRYAQERPDTGRARAREQRWSRSPSEGREHTTHRQSSSVSGSPAPSTSGTSTPRRGRRQ  
LPQTPTCTPRPLVSYSPAPRRPAARRMAGPAAPPGGSPRGCRRAPRWPAAHAPEGPRPRGADYTEPDSPREPPGG  
AHDPAFRSPRTPRAAGCASPRHGRRLPNGYYAGHGAPRPRRTARRGAHDAYSESEDDWC\*  
>rs32648021\_ENSMUSP00000158803\_c.4146:A>G\_p.K1383E  
ENSMUST00000238701.2|Cacna1a-213|ENSMUSG00000034656|+|chr8:g.85306133:A>G  
MPRASWSDPMLSPLSHELLHSRYPGTDCITLAGSSRTLHVPWSQQMSGSLGPTLKRGGVVDHRDVI LAHQ  
AHKMHSTPQARRKEWEMARFGDEMPGRYGAGGGGSGPAAGVVVGAAGGRGAGGSRQGGQPGAQRMKYQSMAQR  
ARTMALYNPIPVRQNCCLTVNRSFLFSEDNVVRKYAKKITEWPPFEYMILATIIANCIVLALEQHLPDDDKTP  
MSERLDDTEPYFIGIFCFEAGIKIVALGF AFHKGSYLRNGWNVMDFVVVLTGILATVGTDFDLRTLRAVRVLR  
PLKLVSGIPSLQVVLKSIMKAMIPLLQIGLLFFAILIFAIIGLEFYMGKFHTTTCFEEGTDDIQGESAPCGT  
EEPARTCPNGTKCQPYWEGPNNGITQFDNIFAVLTVFQCITMEGWTDLLYNSNDASGNTWNWLYFIPLIIIG  
SFFMLNLVGLVLSGEFAKERERVENRRAFLKLRQQQIERELNGYMEWISKAEEVILAEDETDVEQRHFPDGA  
LRRATLKKSKTDLLNPEEAEDQLADIASVGSPPFARASIKSAKLENSTFFHKKERRMRFYIRRMVKTQAFYWT  
VLSLVALNTLCVAIVHYNQPEWLSDFLYYAEFIFLGLFMSEFMKMYGLGTRPYFHSSFNCFDCGVIIGSIFEV  
IWAIVKPGTSFGISVLRALRLLRIFKVTKYWASLRNLVSVLLNSMKSIIISLLFLLFLFIVVFALLGMQLFGGQ  
FNFDEGTPPTNFDTFPAAIMTVFQILTGEDWNEVMYDGIKSQGGVQGGMVFSIYFIVLTLFGNYTLLNVFLAI  
AVDNLANAQELTKDEQEEEEAAQKALQKAKEVAEVSPLSAANMSI AVKEQQKNQKPTKSVWEQRTSEMRKQ  
NLLASREALYGDAAERWPTPYARPLRPDVKTHLDRPLVVDQENRNNNTNKSRAPEALRPTARPRESARDPDA  
RRAWPGSPERAPGREGPYGRESEPPQREHAPPREHAPWDADTERAKAGDAPRRHTRHPVAEAGEPRRHRARRR  
GDEPDDRPERRPRPRDTRPARAADGEGDDGERKRRHRHGPPAHDDRERRHRRRKENQGSVPVSGPNLSTTR  
PIQQDLGRQDLPLAEDLDNMKNKLATGEPASPHDSLGHSGLPPSPAKIGNSTNPGPALATNPQNAASRRTPN  
NPGNPSNPGPKTPENSLIVTNPSSQPNSAKTARKPEHMAVEIPPACPLNHTVVQVNKNANPDPLPKKEE  
KKEEEADPGEDGPKMPYPYSSMFI LSTTNPLRRLCHYI LNLRYFEMCILMVIAMSSIALAEDPVQPNAPRN  
NVLRIFYDYVFTGVFTFEMVIKIMIDLGLVLHQGAYFRDLWNILDFIVVSGALVAFVAFVAFVAFVAFVAFVAFV  
LRLVLRPLKTIKRLPKLKA VFDVNVSLKNVFNILIVYMLFMFIFAVVAVQLFKGKFFHCTDESKEFERDCRGK  
YLLYEKNEVKARDREWKKYEFHYDNVLWALLTLFTVSTGEGWPQVLKHSVDATFENQGPSGYRMEMSIFYVV  
YFVVFVFFVNI FVALIIITFQEQGDKMMEEYSLEKNERACIDFAISAKPLTRHMPQNKQSFQYRMWQFVVS  
PFYTIMAMIALNTIVLMMKFGYASVAYENALRVFNIVFTSLFSLCIVLKVMAFGILNYFRDAWNIFDFVTVL  
GSTIDILVTEFGNNFINLSFLRLFRARLIKLLRQGYTIRILLWTFVQSFKALPYVCLLIAMLFFIYAIIGMQ  
VFGNIGIDGEDSDDEDEFQITEHNNFRFTFFQALMLLFRSATGEAWHNIMLSCLSGKPCDKNSGILTADCGNE  
FAYFYFVSFIFLCSFLMLNLFVAVIMDNFEYLTRDSSILGPHHLDEYVRVWAEYDPAACGRIHYKDMYSLLRV  
ISPPLGLGKCKPHRVACKRLLRMDLPVADDNTVHFNSTLMALIRTALDIKIAKGGADKQMDAELRKEMMAIW  
PNLSQKTLDDLVTPHKSTDLTVGKIYAAMMIMEYYRQSKAKKLQAMREEQNRTPLMFQRMPEPSPTEQGGPSQ  
NALPSTQLDPPGGGLMAHEGGMKESPSWVTQRAQEMFQKTGTWSPERGPPIDMPNSQPNSQSVE  
MREMGTDGYSDEHYLPMEGQTRAASMPRLPAENQRRRGRPRGNDLSTISDTPMKRSASVLGPKARRLDDYS  
LERVPPPEENQRYHQRRRDRGHRTSERSLGRYTDVDTGLGTDLSMTTQSGDLPKDRDQDRGRPKDRKRRPHHH  
HHHHHHHPAPDRDRYAQERPDTGRARAREQRWSRSPSEGREHTTHRQSSSVSGSPAPSTSGTSTPRRGRRQ  
LPQTPTCTPRPLVSYSPAPRRPAARRMAGPAAPPGGSPRGCRRAPRWPAAHAPEGPRPRGADYTEPDSPREPPGG  
AHDPAFRSPRTPRAAGCASPRHGRRLPNGYYAGHGAPRPRRTARRGAHDAYSESEDDWC\*  
>rs32648021\_ENSMUSP00000112436\_c.3879:A>G\_p.K1294E  
ENSMUST00000121390.8|Cacna1a-201|ENSMUSG00000034656|+|chr8:g.85306133:A>G  
MARFGDEMPGRYGAGGGGSGPAAGVVVGAAGGRGAGGSRQGGQPGAQRMKYQSMAQRARTMALYNPIPVRQNC  
LTVNRSFLFSEDNVVRKYAKKITEWPPFEYMILATIIANCIVLALEQHLPDDDKTPMSERLDDTEPYFIGIF  
CFEAGIKIVALGF AFHKGSYLRNGWNVMDFVVVLTGILATVGTDFDLRTLRAVRVLRPLKLVSGIPSLQVVLK  
SIMKAMIPLLQIGLLFFAILIFAIIGLEFYMGKFHTTTCFEEGTDDIQGESAPCGTEEPARTCPNGTKCQPY  
WEGPNNGITQFDNIFAVLTVFQCITMEGWTDLLYNSNDASGNTWNWLYFIPLIIIGSFFMLNLVGLVLSGEF  
AKERERVENRRAFLKLRQQQIERELNGYMEWISKAEEVILAEDETDVEQRHFPDGA LRRATLKKSKTDLLN  
PEEAEDQLADIASVGSPPFARASIKSAKLENSTFFHKKERRMRFYIRRMVKTQAFYWTVLSLVALNTLCVAIVHY  
NQPEWLSDFLYYAEFIFLGLFMSEFMKMYGLGTRPYFHSSFNCFDCGVIIGSIFEVIWAVIKPGTSFGISVL  
RALRLLRIFKVTKYWASLRNLVSVLLNSMKSIIISLLFLLFLFIVVFALLGMQLFGGQFNFDEGTPPTNFDTF  
PAAIMTVFQILTGEDWNEVMYDGIKSQGGVQGGMVFSIYFIVLTLFGNYTLLNVFLAIAVDNLANAQELTKDEQ  
EEEEAAQKALQKAKEVAEVSPLSAANMSI AVKEQQKNQKPTKSVWEQRTSEMRKQ NLLASREALYGDAAER  
WPTPYARPLRPDVKTHLDRPLVVDQENRNNNTNKSRAPEALRPTARPRESARDPDARRAWPGSPERAPGREG  
PYGRESEPPQREHAPPREHAPWDADTERAKAGDAPRRHTRHPVAEAGEPRRHRARRRPGDEPDDRPERRPRPRD  
ATRPARAADGEGDDGERKRRHRHGPPAHDDRERRHRRRKENQGSVPVSGPNLSTTRPIQQDLGRQDLPLAED



LDNMKNKLATGEPASPHDSLGHSGLPSPAKIGNSTNPGPALATNPQNAASRRTPNPNPGNPSNPGPPKTPEN
SLIVTNPSSTQPNsAKTARKPEHMAVEIPPACPLNHTVVQVNKNANPDPLPKKEEEEKKEEEEADPGEDGPKP
MPPYSSMFI LSTTNPLRRLCHYILNLRVYFEMCILMVIAMSSIALAAEDPVQPNAPRNNVLRVYFDYVFTGVFTF
EMVIK MIDLGLVLHQGAYFRDLWNILDFIVVSGALVAFaftGNSKGDINTIESLRVLRVLRPLKTIKRLPKL
KAVFDCVVNSLKNVFNILIVYMLFMFIFAVVAVQLFKGKFFHCTDESKEFERDCRGKYLLEYKNEVKARDREW
KKYEFHYDNVLWALLTLFTVSTGEGWPQVLKHSVDATFENQGPSGYRMEMSIFYVVYFVVFVFFVNI FVAL
IIITFQEQGDKMMEEYSLEKNERACIDFAISAKPLTRHMPQNKQSFQYRMWQFVVSPPFEYTIMAMIALNTIV
LMMKFYGASVAYENALRVFNIVFTSLFSLECVLKVMAFGILNYFRDAWNIFDFVTVLGSITDILVTEFGNNFI
NLSFLRFLRAARLIKLLRQGYTIRILLWTFVQSFKALPYVCLLIAMLFFIYAIIGMQVFGNIGIDGEDSDSE
DEFQITEHNNFRFTFFQALMLLFRSATGEAWHNIMLSCLSGKPCDKNSGILTADCGNEFAYFYFVSFIFLCSFL
MLNLFVAVIMDNFEYLTRDSSILGPHHLDEYVRVWAEYDPAACGRIHYKMYSLLRVISPLGLGKCKPHRVA
CKRLLRMDLPVADDNTVHFNSTLMALIRTALDIKIAKGGADKQMDAELRKEMMAIWPNLSQKTLDLLVTPHK
STDLTVGKIYAAMMIMEYYRQSKAKKLQAMREEQNRTPLMFQRMPEPPSPTQEGGQSNALPSTQLDPPGGGLMA
HEGGMKESPSWVTQRAQEMFQKTGTWSPERGGPIDMNSQPNSSQVEMREMGTGYSYDSEHYLPMEGQTRAAS
MPRLPAENQRRRGRPRGNDLSTISDTPMKRSASVLGPKARRLDDYSLERVPEENQRYHQRRDRGHRTSER
SLGRYTDVDTGLGTDLSMTTQSGDLPSKDRDQDRGRPKDRKHRPHHHHHHHHHPPAPDRDRYAQERPDGRA
RAREQRWSRSPSEGREHTTHRQGS SVSGSPAPSTSGTSTPRRGRRLPQTPCTPRPLVSYSPAPRRPAARRM
AGPAAPPGGSPRGCRRAPRWPAAHAPEGPRPRGADYTEPDSPREPPGGAHPAPRSPTPRAAGCASPRHGRRL
PNGYYAGHGAPRPRRTARRGAHDAYSESEDDWC\*

>rs32648021\_ENSMUSP00000114055\_c.3738:A>G\_p.K1247E
ENSMUST00000122053.2|Cacna1a-202|ENSMUSG00000034656|+|chr8:g.85306133:A>G
MARFGDEMPGRYGAGGGGSGPAAGVVVGAAGGRGAGGSRQGGQPGAQRMYKQSMARARTMALYNPIVVRQNC
LTVNRSFLFSEDNVDDTEPYFIGIFCFEAGIKIVALGF AFHKGSYLRNGWNVMDFFVVLGTGILATVGTDFDL
RTLRAVRVLRPLKLVSGIPSLQVVLKSIKAMIPLLQIGLLFFAILIFAIIGLEFYMGKFHTTCFEEGTDDI
QGESPAPCGTEEPARTCPNGTKCQPYWEGPNNGITQFDNIFLAVLTVFQCITMEGWTDLLYNSNDASGNTWNW
LYFIFLIIIGSFFMLNLVGLVLSGEFAKERERVENRRALFKLRRQQQIERELNGYMEWISKAEEVILAEDETD
VEQRHFPFDGALRRLIKLKSCTDLLNPEEAEDQLADIASVSGSPFARASIKSAKLENSTFFHKKERMRMYIRRM
VKTQAFYWTVLSLVALNTLCVAIVHYNQPEWLSDFLYAEFIFLGLFMSEMFIKMYGLGTRPYFHSSFCNCFDC
GVIIGSIFEVIWAVIKPGTSFGISVLRALRLRIFKVTKYWASLRNLVVSLLNSMKSIIISLLFLFLFIVVFA
LLGMQLFGGQFNDFEGTPTNFDTFPAAIMTVFQILTGEDWNEVMYDGIKSQGGVQGGMVFSIYFIVLTLFGN
YTLNVLFLAIAVDNLANAQELTKDEQEEEEANQKLLALQKAKEVAEVSPLSAANMSIAVKEQQKNQKPTKSVW
EQRTSEMRKQNLASREALYGDAERWPTPYARPLRPDVKTHLDRPLVVDPOENRNNNTNKSRAPEALRPTAR
PRESARDPDARRAWPGSPERAPGREGPYGRESEPOQREHAPPREHAPWDADTERAKAGDAPRRHTRHPVAEGE
PRRHRARRRPGDEPDRPRERRPRPRDATRPARAADGEGDDGERKRRHRHGPPAHDDRERRRRRKENQGSQV
VSGPNLSTTRPIQDLGRQDLPLAEDLDNMKNKLATGEPASPHDSLGHSGLPSPAKIGNSTNPGPALATNP
QNAASRRTPNPNPGNPSNPGPPKTPENSLIVTNPSSTQPNsAKTARKPEHMAVEIPPACPLNHTVVQVNKNAN
PDPLPKKEEEEKKEEEEADPGEDGPKMPPYSSMFI LSTTNPLRRLCHYILNLRVYFEMCILMVIAMSSIALAAE
DPVQPNAPRNNVLRVYFDYVFTGVFTFEMVIK MIDLGLVLHQGAYFRDLWNILDFIVVSGALVAFaftGNSKGD
DINTIESLRVLRVLRPLKTIKRLPKL KAVFDCVVNSLKNVFNILIVYMLFMFIFAVVAVQLFKGKFFHCTDES
KEFERDCRGKYLLEYKNEVKARDREWKKYEFHYDNVLWALLTLFTVSTGEGWPQVLKHSVDATFENQGPSGY
RMEMSIFYVVYFVVFVFFVNI FVALIIITFQEQGDKMMEEYSLEKNERACIDFAISAKPLTRHMPQNKQSFQ
YRMWQFVVSPPFEYTIMAMIALNTIVLMMKFYGASVAYENALRVFNIVFTSLFSLECVLKVMAFGILNYFRDA
WNIFDFVTVLGSITDILVTEFGNNFINLSFLRFLRAARLIKLLRQGYTIRILLWTFVQSFKALPYVCLLIAML
FFIYAIIGMQVFGNIGIDGEDSDSEDEFQITEHNNFRFTFFQALMLLFRSATGEAWHNIMLSCLSGKPCDKNS
GILTADCGNEFAYFYFVSFIFLCSFLMLNLFVAVIMDNFEYLTRDSSILGPHHLDEYVRVWAEYDPAACGRIH
YKMYSLLRVISPLGLGKCKPHRVACKRLLRMDLPVADDNTVHFNSTLMALIRTALDIKIAKGGADKQMDA
ELRKEMMAIWPNLSQKTLDLLVTPHKSTDLTVGKIYAAMMIMEYYRQSKAKKLQAMREEQNRTPLMFQRMPEPP
SPTQEGGQSNALPSTQLDPPGGGLMAHEGGMKESPSWVTQRAQEMFQKTGTWSPERGGPIDMNSQPNSSQVEM
REMGTGYSYDSEHYLPMEGQTRAASMPRLPAENQRRRGRPRGNDLSTISDTPMKRSASVLGPKARRLDDYS
LERVPEENQRYHQRRDRGHRTSERSLGRYTDVDTGLGTDLSMTTQSGDLPSKDRDQDRGRPKDRKHRPHHH
HHHHHHHPAPDRDRYAQERPDTRARAREQRWSRSPSEGREHTTHRQGS SVSGSPAPSTSGTSTPRRGRRL
LPQTPCTPRPLVSYSPAPRRPAARRMAGPAAPPGGSPRGCRRAPRWPAAHAPEGPRPRGADYTEPDSPREPPGG
AHPAPRSPTPRAAGCASPRHGRRL PNGYYAGHGAPRPRRTARRGAHDAYSESEDDWC\*

>rs32648021\_ENSMUSP00000149242\_c.3738:A>G\_p.K1247E
ENSMUST000001215756.2|Cacna1a-211|ENSMUSG00000034656|+|chr8:g.85306133:A>G
XRMKYKQSMARARTMALYNPIVVRQNC LTVNRSFLFSEDNVVRKYAKKITEWPPFEYMILATI IANCIVLAL
EQHLPPDDDKTPMSERLDDTEPYFIGIFCFEAGIKIVALGF AFHKGSYLRNGWNVMDFFVVLGTGILATVGTDFD
LRTLRAVRVLRPLKLVSGIPSLQVVLKSIKAMIPLLQIGLLFFAILIFAIIGLEFYMGKFHTTCFEEGTDD

IQGESAPCGTEEPARTCPNGTKCQPYWEGPNNGITQFDNILFAVLTVFQCITMEGWTDLLYNSNDASGNTWN  
WLYFIPLIIIGSFFMLNLVGLVSGEFAKERERVENRRRAFLKLRQQQIERELNGYMEWISKAEVILAEDET  
DVEQRHPPFDALRRATLKKSKTDLNPEEAEDQLADIASVGSPPFARASIKSAKLENSTFFHKKERRMRFYIRRM  
VKTQAFYWTVLSLVALNTLCVAIVHYNQPEWLSDFLYAAEFIFLGLFMSEMFIKMYGLGTRPYFHSSFNCFDC  
GVIIIGSIFEVIWAVIKPGTSFGISVLRALRLLRIFKVTKYWASLRNLVVSLLNSMKSIIISLLFLLFLFIVVFA  
LLGMQLFGGQFNFDGTPPTNFDTFPAAIMTVFQILTGEDWNEVMYDGIKSQGGVQGGMVFSIYFIVLTLFGN  
YTLNVLFLAIAVDNLANAQELTKDEQEEEEAAANQKLALQKAKEVAEVSPLSAANMSIAVKEQQKNQKPTKSVW  
EQTSEMRKQNLASREALYGDAAERWPTPYARPLRPDVKTHLDRPLVVDPQENRNNNTNKSRAPEALRPTAR  
PRESARDPDARRAWPGSPERAPGREGPYGRESEPPQREHAPPREHAPWDADTERAKAGDAPRRHTRPVAEAGE  
PRRHRARRRPGDEPDDRPERRPRPRDATRPARAADGEGDDGERKRRHRHGPPAHDDRERRRRRKENQSGGVP  
VSGPNLSTTRPIQQDLGRQDLPLAEDLDNMKNNKLATGEPASPHDSLGHSGLPPSPAKIGNSTNPGPALATNP  
QNAASRRTPNPNPNSNPSPKTPENSLIVTNPSSTQPNSAKTARKPEHMAVEIPPACPLNHTVVQVKNAN  
PDPLPKKEEEEKKEEEEADPGEDGPKMPPYSSMFI LSTTNPLRRLCHYI LNLRVFEMC ILMVIAMSSIALAAE  
DPVQPNAPRNVLRYFDYVFTGVFTFEMVIK MIDLGLVLHQGAYFRDLWNILDFIVVSGALVAFVFTGNSK GK  
DINTIESLRVLRVLRPLKTIKRLPKLKAVFDCVVNSLKNVFNILIVYMLFMFIFAVVAVQLFKGKFFHCTDES  
KEFERDCRGKYLLEYKNEVKARDREWKKYEFHYDNVLWALLTLFTVSTGEGWPQVLKHSVDATFENQGPSGY  
RMEMSIFVYVYFVVFVFFVNI FVALIIITFQEQQDKMMEEYSLEKNERACIDFAISAKPLTRHMPQNKQSFQ  
YRMWQFVVSPPEFYTIMAMIALNTIVLMMKFYGASVAYENALRVFNIVFTSLFSLCIVLKVMAFGILNYFRDA  
WNIFDFVTVLGSITDILVTEFGNNFINLSFLRFLRAARLIKLLRQGYTIRILLWTFVQSFKALPYVCLLIAML  
FFIYAIIGMQVFGNIGIDGEDSDEDEFQITEHNNFRFFQALMLLFRSATGEAWHNIMLSCLSGKPCDKNS  
GILTADCGNEFAYFYFVSFIFLCSFLMLNLFVAVIMDNFEYLTRDSSILGPHHLDEYVRVWAEYDPAACGRIH  
YKDMYSLLRVISPPLGLGKCKPHRVACKRLLRMDLPVADDNTVHFNSTLMALIRTALDIKIAKGGADKQMDA  
ELRKEMMAIWPNLSQKTLDLLVTPHKSTDLTVGKIYAAMMIMEYRQSKAKKLQAMREEQNRTPLMFQRMEPP  
SPTQEGGSPQNALPSTQLDPGGGLMAHEGGMKESPSWVTQRAQEMFQKTGTWSPERGGPIDMPNSQPNSQSVE  
MREMGTDGYSDEHYLPMEGQTRAASMPRLPAENQRRRGRPRGNDLSTISDTSMPKRSASVLGPKARRLDDYS  
LERVPPDENRQYHRDRGRHRTSERSLGRYTDVSDTGLTDLSTTQSGDLP SKDRDQDRGRPKDRKHRPHHH  
HHHHHHHPAPDRDRAQERPDTRARAREQRWSRSPSEGGREHTTHRQGSSSVSGSPAPSTSGTSPRRGRRQ  
LPQTPCTPRPLVSYSPAPRRPAARRMAGPAAPPGGSPRGCRRAPRWPAAHAPEGPRPRGADYTEPDSPREPPGG  
AHDPA PRSPRT PRAAGCASPRHGRRLPNGYYAGHGAPRRTARRGAHDAYSESEDDWC\*  
>rs260693369\_ENSMUSP00000158803\_c.5967:G>GTAGTT\_p.D1990ins-fs  
ENSMUST00000238701.2|Cacnala-  
213|ENSMUSG00000034656|+|chr8:g.85356459:G>GTAGTT  
MPRASWGS DPMLSPLSHELLHS PRYPGTDCTLAGSSRTLHVPWSQQMSGSLGPTLKRGGVVDHRDVI LAHQ  
AHKMHSTPQARRKEWEMARFGDEMPGRYGAGGGGSGPAAGVVVGAAGGRGAGGSRQGGQPGAQRMYKQSMQR  
ARTMALYNPIPVRQCLTVNRSFLFSEDNVVRKYAKKI TEWPPFEYMI LATIIANCIVLALEQHL PDDDKTP  
MSERLDDTEPYFIFIGFCFEAGIKIVALGF AFHKGSYLRNGWNVMDFV VVLTGILATVGTDFLRTLRAVRVLR  
PLKLVSGIPSLQVVLKSIKAMI PLLQIGLLFFAILIFAIIGLEFYMGKFHTTTCFEEGTD DDIQGESAPCGT  
EEPARTCPNGTKCQPYWEGPNNGITQFDNILFAVLTVFQCITMEGWTDLLYNSNDASGNTWNWLYFIPLIIIG  
SFFMLNLVGLVSGEFAKERERVENRRRAFLKLRQQQIERELNGYMEWISKAEVILAEDET DVEQRHPPFDGA  
LRRATLKKSKTDLNPEEAEDQLADIASVGSPPFARASIKSAKLENSTFFHKKERRMRFYIRRMVKTQAFYWTV  
LSLVALNTLCVAIVHYNQPEWLSDFLYAAEFIFLGLFMSEMFIKMYGLGTRPYFHSSFNCFDCGVIIIGSIFEV  
IWAVIKPGTSFGISVLRALRLLRIFKVTKYWASLRNLVVSLLNSMKSIIISLLFLLFLFIVV FALLGMQLFGGQ  
FNFDEGTPPTNFDTFPAAIMTVFQILTGEDWNEVMYDGIKSQGGVQGGMVFSIYFIVLTLFGNYTLLNVFLAI  
AVDNLANAQELTKDEQEEEEAAANQKLALQKAKEVAEVSPLSAANMSIAVKEQQKNQKPTKSVWEQRTSEMRKQ  
NLLASREALYGDAAERWPTPYARPLRPDVKTHLDRPLVVDPQENRNNNTNKSRAPEALRPTARPRESARDPDA  
RRAWPGSPERAPGREGPYGRESEPPQREHAPPREHAPWDADTERAKAGDAPRRHTRPVAEAGEPRRHRARRR  
GDEPDDRPERRPRPRDATRPARAADGEGDDGERKRRHRHGPPAHDDRERRRRRKENQSGGVPVSGPNLSTTR  
PIQQDLGRQDLPLAEDLDNMKNNKLATGEPASPHDSLGHSGLPPSPAKIGNSTNPGPALATNPQNAASRRTPN  
NPNPNSNPSPKTPENSLIVTNPSSTQPNSAKTARKPEHMAVEIPPACPLNHTVVQVKNANPDPLPKKEEEE  
KKEEEEADPGEDGPKMPPYSSMFI LSTTNPLRRLCHYI LNLRVFEMC ILMVIAMSSIALAAEADPVQPNAPRN  
NVLRYFDYVFTGVFTFEMVIK MIDLGLVLHQGAYFRDLWNILDFIVVSGALVAFVFTGNSK GKDINTIKSLRV  
LRVLRPLKTIKRLPKLKAVFDCVVNSLKNVFNILIVYMLFMFIFAVVAVQLFKGKFFHCTDESKEFERDCRGK  
YLLYEKNEVKARDREWKKYEFHYDNVLWALLTLFTVSTGEGWPQVLKHSVDATFENQGPSGYRMEMSIFVYV  
YFVYVFFVVFVNI FVALIIITFQEQQDKMMEEYSLEKNERACIDFAISAKPLTRHMPQNKQSFQYRMWQFVVSP  
PFEYTIMAMIALNTIVLMMKFYGASVAYENALRVFNIVFTSLFSLCIVLKVMAFGILNYFRDAWNIFDFVTVL  
GSITDILVTEFGNNFINLSFLRFLRAARLIKLLRQGYTIRILLWTFVQSFKALPYVCLLIAMLFFIYAIIGMQ  
VFGNIGIDGEDSDEDEFQITEHNNFRFFQALMLLFRSATGEAWHNIMLSCLSGKPCDKNSGILTADCGNE  
FAYFYFVSFIFLCSFLMLNLFVAVIMDNFEYLTRDSSILGPHHLDEYVRVWAEYDPAACGRIHYKDMYSLLRV

ISPLLGLGKCKPHRVACKRLLRMDLPVADDNTVHFNSTLMALIRRTALDIKIAKGGADKQQMDAELRKEMMAIW  
PNLSQKTLDDLVTPHKSTVVT  
>rs260693369\_ENSMUSP00000112436\_c.5700:G>GTAGTT\_p.D1901ins-fs  
ENSMUST00000121390.8|Cacnala-  
201|ENSMUSG00000034656|+|chr8:g.85356459:G>GTAGTT  
MARFGDEMPGRYGAGGGGSGPAAGVVVGAAGGRGAGGSRQGGQPGAQRMYKQSMAQRARTMALYNPIVPRQNC  
LTVNRSLFLFSEDNVVRKYAKKITEWPPFEYMI LATIIANCIVLALQHLPPDDDKTPMSERLDDTEPYFIGIF  
CFEAGIKIVALGFAFHKGSYLRNGWNVMDVFFVVLGTGILATVGTDFDLRTRLRAVRVLRPLKLVSGIPSLQVVLK  
SIMKAMIPLLQIGLLFFAILIFAIIGLEFYMGKFHTTCFEEGTDI QGESAPCGTEEPARTCPNGTKCQPY  
WEGPNNGITQFDNILFAVLTVFQCI TMEGWTDLLYNSNDASGNTWNWLYFIPLIIIGSFFMLNLVLGVLGSEF  
AKERERVENRRAFLKLRQQQIERELNGYMEWISKAEEVILAEDETDVEQRHPFDGALRRATLKKSKTDLLNP  
EEAEDQLADIASVGSPPARASIKSAKLENSTFFHKKERRMRFYIRRMVKTQAFYWTVLSLVALNTLCVAIVHY  
NQPEWLSDFLYYAEFIFLGLFMSEMIKMYGLGTRPYFHSSFNCFCGVIIGSIFEVIWAVIKPGTSFGISVL  
RALRLLRIFKVTKYWASLRNLVVSLNSMKSIIISLLFLLFLFIVVFA LLGMLFGGQFNFDGTPPTNFDTFP  
AAIMTVFQILTGEDWNEVMYDGIKSQGGVQGGMVFSIYFIVLTLFGNYTLLNVFLAIAVDNLANAQELTKDEQ  
EEEEEAANQKLALQKAKEVAEVSPLSAANMSIAVKEQQKNQKPTKSVWEQRTSEMRKQNLLASREALYGDAER  
WPTPYARPLRPDVKTHLDRPLVVDPQENRNNNTNKSRAPEALRPTARPRESARDPDARRAWPGSPERAPGREG  
PYGRESEPQQREHAPPREHAPWDADTERAKAGDAPRRHTRHPVAEGEPRRHRARRRPGDEPDRRPRRPRD  
ATRPARAADGEGDDGERKRRHRHGPPAHDDRERRRRRKENQSGVVPVSGPNLSTTRPIQQDLGRQDLPLAED  
LDNMKNKLATGEPASPHDSLGHSLPSPAKIGNSTNPGPALATNPQNAASRRTPNPNPNPNPSPGPKTPEN  
SLIVTNPSSTQPNSAKTARKPEHMAVEIPPACPLNHTVVQVNKNANPDPLPKKEEEEKKEEEEADPGEDGPKP  
MPPYSSMFI LSTTNPLRRLCHYILNLRIFEMCILMVIAMSSIALAAEDPVQPNAPRNNVLRVFDYVFTGVFTF  
EMVIK MIDLGLVLHQGAYFRDLWNILDFIVVSGALVAFVAFGTGNSKGDINTIKSLRVLRLRPLKTIKRLPKL  
KAVFDCVVNSLKNVFNILIVYMLFMFIFAVVAVQLFKGKFFHCTDESKEFERDCRGKYLLEYKNEVKARDREW  
KKYEFHYDNVLLWALLTLFTVSTGEGWPQVLKHSVDATFENQGPSGYRMEMSIFYVVYFVVFVFFVNI FVAL  
IIITTFQEQGDMMEEYSLEKNERACIDFAISAKPLTRHMPQNKQSFQYRMWQFVVSPPFEYTIMAMIALNTIV  
LMMKFY GASVAYENALRVFNIVFTSLFSLECVLKVMAFGILNYFRDAWNI FDFVTVLGSITDILVTEFGNNFI  
NLSFLRLFRAARLIKLLRQGYTIRILLWTFVQSFKALPYVCLLIAMLFFIYAIIGMQVFGNIGIDGEDSDE  
DEFQITEHNNFRFTFFQALMLLFRSATGEAWHNIMLSCLSGKPCDKNSGILTADCGNEFAYFYVFSIFLCSFL  
MLNLFVAVIMDNFEYLTRDSSILGPHHLDEYVRVWAEYDPAACGRIHYKDMYSLLRVISPLGLGKCKPHRVA  
CKRLLRMDLPVADDNTVHFNSTLMALIRRTALDIKIAKGGADKQQMDAELRKEMMAIWPNLSQKTLDDLVTPHK  
STVVT  
>rs260693369\_ENSMUSP00000114055\_c.5559:G>GTAGTT\_p.D1854ins-fs  
ENSMUST00000122053.2|Cacnala-  
202|ENSMUSG00000034656|+|chr8:g.85356459:G>GTAGTT  
MARFGDEMPGRYGAGGGGSGPAAGVVVGAAGGRGAGGSRQGGQPGAQRMYKQSMAQRARTMALYNPIVPRQNC  
LTVNRSLFLFSEDNVDDTEPYFIGIFCFEAGIKIVALGFAFHKGSYLRNGWNVMDVFFVVLGTGILATVGTDFDL  
RTRLRAVRVLRPLKLVSGIPSLQVVLKSIMKAMIPLLQIGLLFFAILIFAIIGLEFYMGKFHTTCFEEGTDI  
QGESAPCGTEEPARTCPNGTKCQPYWEGPNNGITQFDNILFAVLTVFQCI TMEGWTDLLYNSNDASGNTWNW  
LYFIPLIIIGSFFMLNLVLGVLGSEFAKERERVENRRAFLKLRQQQIERELNGYMEWISKAEEVILAEDETD  
VEQRHPFDGALRRATLKKSKTDLLNPEEAEDQLADIASVGSPPARASIKSAKLENSTFFHKKERRMRFYIRRM  
VKTQAFYWTVLSLVALNTLCVAIVHYNQPEWLSDFLYYAEFIFLGLFMSEMIKMYGLGTRPYFHSSFNCFC  
GVIIGSIFEVIWAVIKPGTSFGISVLRALRLLRIFKVTKYWASLRNLVVSLNSMKSIIISLLFLLFLFIVVFA  
LLGMLFGGQFNFDGTPPTNFDTFPAAIMTVFQILTGEDWNEVMYDGIKSQGGVQGGMVFSIYFIVLTLFGN  
YTLNLVFLAIAVDNLANAQELTKDEQEEEEEAANQKLALQKAKEVAEVSPLSAANMSIAVKEQQKNQKPTKSVW  
EQRTSEMRKQNLLASREALYGDAERWPTPYARPLRPDVKTHLDRPLVVDPQENRNNNTNKSRAPEALRPTAR  
PRESARDPDARRAWPGSPERAPGREGPYGRESEPQQREHAPPREHAPWDADTERAKAGDAPRRHTRHPVAEGE  
PRRHRARRRPGDEPDRRPRRPRDATRPARAADGEGDDGERKRRHRHGPPAHDDRERRRRRKENQSGVVP  
VSGPNLSTTRPIQQDLGRQDLPLAEDLDNMKNKLATGEPASPHDSLGHSLPSPAKIGNSTNPGPALATNP  
QNAASRRTPNPNPNPNPSPGPKTPENSLIVTNPSSTQPNSAKTARKPEHMAVEIPPACPLNHTVVQVNKNAN  
PDPLPKKEEEEKKEEEEADPGEDGPKMPYSSMFI LSTTNPLRRLCHYILNLRIFEMCILMVIAMSSIALAAE  
DPVQPNAPRNNVLRVFDYVFTGVFTFEMVIK MIDLGLVLHQGAYFRDLWNILDFIVVSGALVAFVAFGTGNSK  
GDINTIKSLRVLRLRPLKTIKRLPKL KAVFDCVVNSLKNVFNILIVYMLFMFIFAVVAVQLFKGKFFHCTDES  
KEFERDCRGKYLLEYKNEVKARDREWKKYEFHYDNVLLWALLTLFTVSTGEGWPQVLKHSVDATFENQGPSGY  
RMEMSIFYVVYFVVFVFFVNI FVALIIITTFQEQGDMMEEYSLEKNERACIDFAISAKPLTRHMPQNKQSFQ  
YRMWQFVVSPPFEYTIMAMIALNTIVLMMKFY GASVAYENALRVFNIVFTSLFSLECVLKVMAFGILNYFRDA  
WNI FDFVTVLGSITDILVTEFGNNFINLSFLRLFRAARLIKLLRQGYTIRILLWTFVQSFKALPYVCLLIAML  
FFIYAIIGMQVFGNIGIDGEDSDEDEFQITEHNNFRFTFFQALMLLFRSATGEAWHNIMLSCLSGKPCDKNS

GIL TADCGNEFAYFYFVSFIFLCSF LMLNLFVAVIMDNFEYLTRDSSILGPHHLDEYVRVWAEYDPAACGRIH  
YKDMYSLLRVISPPGLGKCKPHRVACKRLLRMDLPVADDNTVHFNSTLMALIRTALDIKIAKGGADKQQMDA  
ELRKEMMAIWP NLSQKTLDLLVTPHKSTVVT  
>rs260693369\_ENSMUSP00000149242\_c.5559:G>GTAGTT\_p.D1854ins-fs  
ENSMUST00000215756.2|Cacna1a-  
211|ENSMUSG00000034656|+|chr8:g.85356459:G>GTAGTT  
XRMYKQSMARARTMALYNPIPVQRNCLTVNRSFLFSEDNVVRKYAKKITEWPPFEYMLATIIANCIVLAL  
EQHLPDDDKTPMSERLDDTEPYFIGIFCFEAGIKIVALGF AFHKGSYLRNGWNVMD FVVVLTGILATVGT EFD  
LRTLRAVRVLRPLKLVSGIPSLQVVLKSIKAMIPLLQIGLLFFAILIFAIIGLEFYMGKFHTTCFEEGTDD  
IQGESPAPCGTEEPARTCPNGTKCQPYWEGPNNGITQFDNILFAVLTVFQCITMEGWTDLLYNSNDASGNTWN  
WLYFIPLIIIGSFFMLNLVGLVSGEFAKERERVENRR AFLKLRQQQIERELNGYMEWISKAEEVILAEDET  
DVEQRHFPFDALRRATLKKSKTDLNPEEAEDQLADIASVGS PFARASIKSAKLENSTFFHKKERRMRFYIRRM  
VKTQAFYWTVLSLVALNTLCVAIVHYNQPEWLSDFLYYAEFIFLGLFMSEMF IKMYGLGTRPYFHSSFNCFDC  
GVIIGSIFEVIWAVIKPGTSFGISVLRALRLLRIFKVTKY WASLRNLVVSLLNSMKSII SLLFLLFLFIVVFA  
LLGMQLFGGQFNFD EGTPTNFDTFPAAIMTVFQILTGEDWNEVMYDGIKSQGGVQGGMVFSIYFIVLTLFGN  
YTLNVLFLAIAVDNLANAQELTKDEQEEEEAA NQKLALQKAKEVAEVSPLSAANMSI AVKEQQKNQKPTKSVW  
EQR TSEMRKQNL LASREALYGDAAERWPTPYARPLRPDVKTHLDRPLVVD PQENRNNNTNKSRAPEALRPTAR  
PRESARDPDARRAWPGSPERAPGREGYPGRESE PQQREHAPPREHAPWDADTERAKAGDAPRRHTRHPVAEAGE  
PRRHRARRRPGDEPDRPRERRPRPRDATRPARAADGEGDDGERKRRHRHGPPAHDDRERRRRRRKENQSGV P  
VSGPNLSTTRPIQQDLGRQDLPLAEDLDNMKNNK LATGEPASPHDSLGHSGLPSPAKIGNSTNPGPALATNP  
QNAASRRTPNPNPNSPNP PKTPENSLIVTNPSS TQPN SAKTARKPEHMAVEIPPACPLNHTVVQVNKNAN  
PDPLPKKEEKKKEE EADPGEDGPKPMPPYSSMFI LSTTNPLRRLCHYILNLR YFEMC ILMVIAMSSIALAAE  
DVPQPNAPRNNVLR YFDYVFTGVFTFEMVIKMI DLGLVLHQGAYFRDLWNILDFIVVSGALVAF AFTGNSK GK  
DINTIKSLRVLRLRPLKTIKRLPKLKA VFDCVVNSLKNVFNILIVYMLFMFIFAVVAVQLFKGKFFHCTDES  
KEFERDCRGKYLLEYKNEVKARDREWKKYEFHYDNVLWALLTFTVSTGEGWPQVLKHSVDATFENQGPS PGY  
RMEMSIFVYVYFVYFVFFVNI FVALIIITFQEQGD KMMEEYSLEKNERACIDFAISAKPLTRHMPQNKQSFQ  
YRMWQFYYVSPPEFYTIMAMIALNTIVLMMK FYGASVAYENALRVFNIVFTSLFSLECVLKVMAFGILN YFRDA  
WNIFDFVTVLGSITDILVTEFGN NFINLSFLRLFRAARLIKLLRQGYTIRILLWTFVQSFKALPYVCLLIAML  
FFIYAIIGMQVFGNIGIDGEDSDEDEFQITEHNNFR TFFQALMLLFRSATGEAWHNIMLSCLSGKPCDKNS  
GIL TADCGNEFAYFYFVSFIFLCSF LMLNLFVAVIMDNFEYLTRDSSILGPHHLDEYVRVWAEYDPAACGRIH  
YKDMYSLLRVISPPGLGKCKPHRVACKRLLRMDLPVADDNTVHFNSTLMALIRTALDIKIAKGGADKQQMDA  
ELRKEMMAIWP NLSQKTLDLLVTPHKSTVVT  
>rs260693369\_ENSMUSP00000158675\_c.924:G>GTAGTT\_p.D309ins-fs  
ENSMUST00000238337.2|Cacna1a-  
212|ENSMUSG00000034656|+|chr8:g.85356459:G>GTAGTT  
MHLLRLSGQRGLTLQPNSPSSLPSPLAKGN NFINLSFLRLFRAARLIKLLRQGYTIRILLWTFVQSFKVF  
GNIGIDGEDSDEDEFQITEHNNFR TFFQALMLLFRSATGEAWHNIMLSCLSGKPCDKNSGIL TADCGNEFA  
YFYFVSFIFLCSF LMLNLFVAVIMDNFEYLTRDSSILGPHHLDEYVRVWAEYDPAACGRIHYKDMYSLLRVIS  
PPLGLGKCKPHRVACKRLLRMDLPVADDNTVHFNSTLMALIRTALDIKIAKGGADKQQMDAELRKEMMAIWP N  
LSQKTLDLLVTPHKSTVVT  
>rs39142910\_ENSMUSP00000158803\_c.6529:A>T\_p.D2177V  
ENSMUST00000238701.2|Cacna1a-213|ENSMUSG00000034656|+|chr8:g.85363208:A>T  
MPRASWGS DPMLSPLSHELLHS PRYPGTDCTLAGSSRTLHVPWSQQMSG SLEGPTLKRGGVVDHRDVI LAHQ  
AHKMHS TPQARRKEWEMARFGDEMPGRY GAGGGSGPAAGVVVGAAGGRGAGGSRQGGQPGAQRMYKQSMAR  
ARTMALYNPIPVQRNCLTVNRSFLFSEDNVVRKYAKKITEWPPFEYMLATIIANCIVLAL EQHLPDDDKTP  
MSERLDDTEPYFIGIFCFEAGIKIVALGF AFHKGSYLRNGWNVMD FVVVLTGILATVGT EFDLRTLRAVRVLR  
PLKLVSGIPSLQVVLKSIKAMIPLLQIGLLFFAILIFAIIGLEFYMGKFHTTCFEEGTDDIQGESPAPCGT  
EEPARTCPNGTKCQPYWEGPNNGITQFDNILFAVLTVFQCITMEGWTDLLYNSNDASGNTWNWLYFIPLIIIG  
SFFMLNLVGLVSGEFAKERERVENRR AFLKLRQQQIERELNGYMEWISKAEEVILAEDET DVEQRHFPDGA  
LRRATLKKSKTDLNPEEAEDQLADIASVGS PFARASIKSAKLENSTFFHKKERRMRFYIRRMVKTQAFYWTV  
LSLVALNTLCVAIVHYNQPEWLSDFLYYAEFIFLGLFMSEMF IKMYGLGTRPYFHSSFNCFDCGVIIGSIFEV  
IWAVIKPGTSFGISVLRALRLLRIFKVTKY WASLRNLVVSLLNSMKSII SLLFLLFLFIVV FALLGMQLFGGQ  
FNFDEGTPTNFDTFPAAIMTVFQILTGEDWNEVMYDGIKSQGGVQGGMVFSIYFIVLTLFGNYTLLNVFLAI  
AVDNLANAQELTKDEQEEEEAA NQKLALQKAKEVAEVSPLSAANMSI AVKEQQKNQKPTKSVWEQR TSEMRKQ  
NLLASREALYGDAAERWPTPYARPLRPDVKTHLDRPLVVD PQENRNNNTNKSRAPEALRPTARPRESARDPDA  
RRAWPGSPERAPGREGYPGRESE PQQREHAPPREHAPWDADTERAKAGDAPRRHTRHPVAEAGEPRRHRARRR  
GDEPDRPRERRPRPRDATRPARAADGEGDDGERKRRHRHGPPAHDDRERRRRRRKENQSGV PVS GPNLSTTR  
PIQQDLGRQDLPLAEDLDNMKNNK LATGEPASPHDSLGHSGLPSPAKIGNSTNPGPALATNPQNAASRRTPN

NPGNPSNPGPPKTPENSLIVTNPSSTQPNSAKTARKPEHMAVEIPPACPLNHTVVQVNKNANPDPLPKKEEE  
KKEEEADPGEDGPKMPPYSSMFI LSTTNPLRRLCHYI LNLRYFEMCILMVIAMSSIALAAEDPVQPNAPRN  
NVLRYFDYVFTGVFTFEMVIKIMIDLGLVLHQGAYFRDLWNI LDFIVVSGALVAFaftGNSKGDINTIKSLRV  
LRVLRPLKTIKRLPKLKA VFDVVNSLKNVFNILIVYMLFMFI FAVVAVQLFKGKFFHCTDESKEFERDCRGK  
YLLYEKNEVKARDREWKKYEFHYDNVLWALLTLFTVSTGEGWPQVLKHSVDATFENQGPS PGYRMEMSIFYV  
YFVVFVFFVNI FVAL I I I T F Q E Q G D K M M E E Y S L E K N E R A C I D F A I S A K P L T R H M P Q N K Q S F Q Y R M W Q F V V S P  
PFEYTIMAMIALNTIVLMMKFY GASVAYENALRVFNIVFTSLFSLECVLKVMAFGILNYFRDAWNIFDFVTVL  
GSI TDILVTEFGNFI NLSFLRLFRAARLIKLLRQGYTIRILLWTFVQSFKALPYVCLLIAMLFFIYAIIGMQ  
VFGNIGIDGEDSDEDEFQITEHNNFRTFFQALMLLFRSATGEAWHNIMLSCLSGKPCDKNSGILTADCGNE  
FAYFYFVSFI FLCSFLMLNLFVAVIMDNFEYLTRDSSILGPHHLDEYVRVWAEYDPAACGRIHYKDMYSLLRV  
ISPPLGLGKCKPHRVACKRLLRMDLPVADDNTVHFNSTLMALIRTALDIKIAKGGADKQMDAELRKEMMAIW  
PNLSQKTLDLLVTPHKSTDLTVGKIYAAMMIMEYYRQSKAKKLQAMREEQNRTPLMFQRMPPSPTQEGGSPQ  
NALPSTQLDPGGGLMAHEGGMKESPSWVTQRAQEMFQKTGTWSPERGPPIDMPNSQPNSSQSVEMREMGTGYS  
DSEHYLPMEGQTRAASMPRLPAENQRRRGRPRGNDLSTISDTS PMKRSASVLGPKARRLVDYSLERVVPEENQ  
RYHQRRDRGHRTSERSLGRYTDVDTGLGTDLSMTTQSGDLPSKDRDQDRGRPKDRKHRPHHHHHHHHHPPA  
PDRDRYAQERPDTGRARAREQRWSRSPSEGREHTTHRQSSSVSGSPAPSTSGTSTPRRGRRLPQTPTCTPRP  
LVSYSPAPRRPAARRMAGPAAPPGGSPRGCRRAPRWAHAPEGPRPRGADYTEPDSPREPPGGAHDPAPRSR  
TPRAAGCASPRHGRRLPNGYYAGHGAPRPRRTARRGAHDAYSESEDDWC\*

>rs39142910\_ENSMUSP00000112436\_c.6262:A>T\_p.D2088V  
ENSMUST00000121390.8|Cacna1a-201|ENSMUSG00000034656|+|chr8:g.85363208:A>T  
MARFGDEMPGRYGAGGGGSGPAAGVVGAAGGRGAGGSRQGGQPGAQRMYKQSMARARTMALYNPIVVRQNC  
LTVNRSFLFLFSEDNVVRKYAKKI TEWPPFEYMI LATI IANCI VLAL EQHL PDDDKT PMSERLDDTEPYFIGIF  
CFEAGIKI VALGF AFHKGSYLRNGWNVMDFVVVLTGILATVGT EFDLRTLRAVRVLRPLKLVSGIPSLQVVLK  
SIMKAMIPLLQIGLLFFAILIFAIIGLEFYMGKFHTTTCFEEGTDDIQGES PAPCGTEEPARTCPNGTKCQPY  
WEGPNNGITQFDNILFAVLTVFQCI TMEGWTDLLYNSNDASGNTWNWLYFIPLI IIGSFFMLNLVLGVLGSEF  
AKERERVENRRAFLKLRQQQIERELNGYMEWISKAEEVILAEDET DVEQRHFPFDGALRRATLKKSKTDLNLP  
EEAEDQLADIASVSGSPFARASIKSAKLENSTFFHKKERRMRFYIRRMVKTQAFYWTVLSLVALNLTLCVAIVHY  
NQPEWLSDFLYYAEFI FLGLFMSEMF IKMYGLGTRPYFHSSFNCFDCGVIIGSIFEVIWAVIKPGTSFGISVL  
RALRLLRIFKVTKYWASLRNLVVSLLNSMKSII SLLFLLFLFIVVFALLGMQLFGGQFNDFEGTPTNFDTFP  
AAIMTVFQILTGEDWNEVMDGIKSQGGVQGGMVFSIYFIVLTLFGNYTLNVLFLAIAVDNLANAQELTKDEQ  
EEEEANQKLALQKAKEVAEVSPLSAANMSIAVKEQQKNQKPTKSVWEQRTSEMRKQNLLASREALYGDAAER  
WPTPYARPLRPDVKTHLDRPLVVDPQENRNNNTNKSRAPEALRPTARPRE SARDPDARRAWPGSPERAPGREG  
PYGRESEPPQREHAPPREHAPWDADTERAKAGDAPRRHTRHPVAEGEPRRHRARRRRPGDEPDDRPERRPRPRD  
ATRPARAADGEGDDGERKRRHRHGPPAHDDRERRRRRKENQSGSVVSGPNLSTTRPIQQDLGRQDLPLAED  
LDNMKNKLATGEPASPHDSLHSGLPSPAKI GNSTNPGPALATNPQNAASRRTPNNGNPSNPGPKTPEN  
SLIVTNPSSTQPNSAKTARKPEHMAVEIPPACPLNHTVVQVNKNANPDPLPKKEEEKKEEEADPGEDGPKP  
MPPYSSMFI LSTTNPLRRLCHYI LNLRYFEMCILMVIAMSSIALAAEDPVQPNAPRN NVLRYFDYVFTGVFTF  
EMVIKIMIDLGLVLHQGAYFRDLWNI LDFIVVSGALVAFaftGNSKGDINTIKSLRVLRVLRPLKTIKRLPKL  
KAVFDVVNSLKNVFNILIVYMLFMFI FAVVAVQLFKGKFFHCTDESKEFERDCRGKYLLEYEKNEVKARDREW  
KKYEFHYDNVLWALLTLFTVSTGEGWPQVLKHSVDATFENQGPS PGYRMEMSIFYV VYFVVFVFFVNI FVAL  
I I I T F Q E Q G D K M M E E Y S L E K N E R A C I D F A I S A K P L T R H M P Q N K Q S F Q Y R M W Q F V V S P P F E Y T I M A M I A L N T I V  
LMMKFY GASVAYENALRVFNIVFTSLFSLECVLKVMAFGILNYFRDAWNIFDFVTVLGSITDILVTEFGNFI  
NLSFLRLFRAARLIKLLRQGYTIRILLWTFVQSFKALPYVCLLIAMLFFIYAIIGMQVFGNIGIDGEDSDE  
DEFQITEHNNFRTFFQALMLLFRSATGEAWHNIMLSCLSGKPCDKNSGILTADCGNEFAYFYFVSFI FLCSFL  
MLNLFVAVIMDNFEYLTRDSSILGPHHLDEYVRVWAEYDPAACGRIHYKDMYSLLRVISPPLGLGKCKPHRVA  
CKRLLRMDLPVADDNTVHFNSTLMALIRTALDIKIAKGGADKQMDAELRKEMMAIWPNLSTQLDLLVTPHK  
STDLTVGKIYAAMMIMEYYRQSKAKKLQAMREEQNRTPLMFQRMPPSPTQEGGSPQNALPSTQLDPGGGLMA  
HEGGMKESPSWVTQRAQEMFQKTGTWSPERGPPIDMPNSQPNSSQSVEMREMGTGYS DSEHYLPMEGQTRAAS  
MPRLPAENQRRRGRPRGNDLSTISDTS PMKRSASVLGPKARRLVDYSLERVVPEENQRYHQRRDRGHRTSER  
SLGRYTDVDTGLGTDLSMTTQSGDLPSKDRDQDRGRPKDRKHRPHHHHHHHHHPPAPDRDRYAQERPDTGRA  
RAREQRWSRSPSEGREHTTHRQSSSVSGSPAPSTSGTSTPRRGRRLPQTPTCTPRPLVSYSPAPRRPAARRM  
AGPAAPPGGSPRGCRRAPRWAHAPEGPRPRGADYTEPDSPREPPGGAHDPAPRSRPTPRAAGCASPRHGRR  
LPNGYYAGHGAPRPRRTARRGAHDAYSESEDDWC\*

>rs39142910\_ENSMUSP00000114055\_c.6121:A>T\_p.D2041V  
ENSMUST00000122053.2|Cacna1a-202|ENSMUSG00000034656|+|chr8:g.85363208:A>T  
MARFGDEMPGRYGAGGGGSGPAAGVVGAAGGRGAGGSRQGGQPGAQRMYKQSMARARTMALYNPIVVRQNC  
LTVNRSFLFLFSEDNVDDTEPYFIGIFCFEAGIKI VALGF AFHKGSYLRNGWNVMDFVVVLTGILATVGT EFDL  
RTLRAVRVLRPLKLVSGIPSLQVVLKSIMKAMIPLLQIGLLFFAILIFAIIGLEFYMGKFHTTTCFEEGTDDI



QGESAPCGTEEPARTCPNGTKCQPYWEGPNNGITQFDNILFAVLTVFQCITMEGWTDLLYNSNDASGNTWNW  
 LYFIFPLIIIGSFFMLNLVLGVLGSEFAKERERVENRRRAFLKLRQQQIERELNGYMEWISKAEVILAEDETD  
 VEQRHPFDGALRRATLKKSKTDLLNPEEAEDQLADIASVGSPPFARASIKSAKLENSTFFHKKERRRMFYIRRM  
 VKTQAFYWTVLSLVALNTLCVAIVHYNQPEWLSDFLYAAEFIFLGLFMSEMFIKMYGLGTRPYFHSSFNCFCDC  
 GVIIGSIFEVIWAVIKPGTSFGISVLRALRLLRIKFKVTKYWASLRNLVVSLLNSMKSIIISLLFLLFLFIVVFA  
 LLGMQLFGGQFNFDGTPPTNFDTFPAAIMTVFQILTGEDWNEVMYDGIKSQGGVQGGMVFSIYFIVLTLFGN  
 YTLNVLFLAIAVDNLANAQELTKDEQEEEEAAANQKLALQKAKEVAEVSPLSAANMSIAVKEQQKNQKPTKSVW  
 EQRTSEMRKQNLASREALYGDAERWPTPYARPLRPDVKTHLDRPLVVDQPENRNNNTNKSRAPEALRPTAR  
 PRESARDPDARRAWPGSPERAPGREGPGYGRESEPPQREHAPPREHAPWDADTERAKAGDAPRRHTRPVAEAGE  
 PRRHRARRRPGDEPDDRPERRPRPRDATRPARAADGEGDDGERKRRHRHGPPAHDDRERRRRRKENQGSQV  
 VSGPNLSTTRPIQDDLGRQDLPLAEDLDNMKNNKLATGEPASPHDSLGHSGLPPSPAKIGNSTNPGPALATNP  
 QNAASRRTPNPNPNSNPGPKTPENSLIVTNPSSQPNSAKTARKPEHMAVEIPPACPLNHTVVQVNKNAN  
 PDPLPKKEEEEKKEEEEADPGEDGPKMPYPSSMFI LSTTNPLRRLCHYILNLRVYFEMCILMVIAMSSIALAAE  
 DPVQPNAPRNNVLRVYFDYVFTGVFTFEMVIKMI DLGLVLHQGAYFRDLWNILDFIVVSGALVAFVFTGNSK GK  
 DINTIKSLRVLRLRPLKTIKRLPKLKAVFDCVVNSLKNVFNILIVYMLFMFIFAVVAVQLFKGKFFHCTDES  
 KEFERDCRGKYLLEYEKNEVKARDREWKKYEFHYDNVLWALLTLFTVSTGEGWPQVLKHSVDATFENQGPSQY  
 RMEMSIFYVVVYFVVPFFVFNIFVALIIITFQEQGDKMMEEYSLEKNERACIDFAISAKPLTRHMPQNKQSFQ  
 YRMWQFVVSPPFEYTIMAMIALNTIVLMMKFYGASVAYENALRVFNIVFTSLFSLECVLKVMAFGILNYFRDA  
 WNI FDFVTVLGSITDILVTEFGNNFINLSFLRFLFRAARLIKLLRQGYTIRILLWTFVQSFKALPYVCLLIAML  
 FFYIYAIIGMQVFGNIGIDGEDSDEDEFQITEHNNFRFFQALMLLFRSATGEAWHNIMLSCLSGKPCDKNS  
 GILTADCGNEFAYFYFVSFIFLCSFLMLNLFVAVIMDNFEYLTRDSSILGPHHLDEYVRVWAEYDPAACGRIH  
 YKDMYSLLRVISPPLGLGKCKPHRVACKRLLRMDLPVADDNTVHFNSTLMALIRTALDIKIAKGGADKQMDA  
 ELRKEMMAIWPNLSQKTLDLLVTPHKSTDLTVGKIYAAMMIMEYRQSKAKKLQAMREEQNRTPLMFQRMPEP  
 SPTQEGGSPQNALPSTQLDPGGGLMAHEGGMKESPSWVTQRAQEMFQKTGTWSPERGGPIDMPNSQPNSSQVE  
 MREMGTDGYSDEHYLPMEGQTRAASMPRLPAENQRRRGRPRGNDLSTISDTSMPKRSASVLGPKARRLVDYS  
 LERVPPDENQRYHRDRGRHRTSERSLGRYTDVSDTGLTDLSTMTQSGDLPKDRDQDRGRKDRKHRPHHH  
 HHHHHHPAPDRDRYAQERPDTRARAREQRQWSPSEGEHRTTHRQSSSVSGSPAPSTSGTSPRRGRQ  
 LPQTPCTPRPLVSYSPAPRRPAARRMAGPAAPPGGSPRGCRRAPRWPAAHAPEGPRPRGADYTEPDSPREPPGG  
 AHDPA PRSPRT PRAAGCASPRHGRRLPNGYYAGHGAPRRTARRGAHDAYSESEDDWC\*  
 >rs39142910\_ENSMUSP00000149242\_c.6121:A>T\_p.D2041V  
 ENSMUST00000215756.2|Cacna1a-211|ENSMUSG0000034656|+|chr8:g.85363208:A>T  
 XRMXKQSMARARTMALYNPIVVRQNCITVNRSLFLFSEDNVVRKYAKKI TEWPPFEYMI LATI IANCIVLAL  
 EQHLPDDDKTPMSERLDDTEPYFIGIFCFEAGIKIVALGF AFHKGSYLRNGWNVMDV VVLTGILATVGT EFD  
 LRTLRAVRVLRPLKLVSGIPSLQVVLKSIKAMIPLLQIGLLFFAILIFAIIGLEFYMGKFHTTCFEEGTDD  
 IQGESAPCGTEEPARTCPNGTKCQPYWEGPNNGITQFDNILFAVLTVFQCITMEGWTDLLYNSNDASGNTWN  
 WLYFIFPLIIIGSFFMLNLVLGVLGSEFAKERERVENRRRAFLKLRQQQIERELNGYMEWISKAEVILAEDETD  
 DVEQRHPFDALRRATLKKSKTDLLNPEEAEDQLADIASVGSPPFARASIKSAKLENSTFFHKKERRRMFYIRRM  
 VKTQAFYWTVLSLVALNTLCVAIVHYNQPEWLSDFLYAAEFIFLGLFMSEMFIKMYGLGTRPYFHSSFNCFCDC  
 GVIIGSIFEVIWAVIKPGTSFGISVLRALRLLRIKFKVTKYWASLRNLVVSLLNSMKSIIISLLFLLFLFIVVFA  
 LLGMQLFGGQFNFDGTPPTNFDTFPAAIMTVFQILTGEDWNEVMYDGIKSQGGVQGGMVFSIYFIVLTLFGN  
 YTLNVLFLAIAVDNLANAQELTKDEQEEEEAAANQKLALQKAKEVAEVSPLSAANMSIAVKEQQKNQKPTKSVW  
 EQRTSEMRKQNLASREALYGDAERWPTPYARPLRPDVKTHLDRPLVVDQPENRNNNTNKSRAPEALRPTAR  
 PRESARDPDARRAWPGSPERAPGREGPGYGRESEPPQREHAPPREHAPWDADTERAKAGDAPRRHTRPVAEAGE  
 PRRHRARRRPGDEPDDRPERRPRPRDATRPARAADGEGDDGERKRRHRHGPPAHDDRERRRRRKENQGSQV  
 VSGPNLSTTRPIQDDLGRQDLPLAEDLDNMKNNKLATGEPASPHDSLGHSGLPPSPAKIGNSTNPGPALATNP  
 QNAASRRTPNPNPNSNPGPKTPENSLIVTNPSSQPNSAKTARKPEHMAVEIPPACPLNHTVVQVNKNAN  
 PDPLPKKEEEEKKEEEEADPGEDGPKMPYPSSMFI LSTTNPLRRLCHYILNLRVYFEMCILMVIAMSSIALAAE  
 DPVQPNAPRNNVLRVYFDYVFTGVFTFEMVIKMI DLGLVLHQGAYFRDLWNILDFIVVSGALVAFVFTGNSK GK  
 DINTIKSLRVLRLRPLKTIKRLPKLKAVFDCVVNSLKNVFNILIVYMLFMFIFAVVAVQLFKGKFFHCTDES  
 KEFERDCRGKYLLEYEKNEVKARDREWKKYEFHYDNVLWALLTLFTVSTGEGWPQVLKHSVDATFENQGPSQY  
 RMEMSIFYVVVYFVVPFFVFNIFVALIIITFQEQGDKMMEEYSLEKNERACIDFAISAKPLTRHMPQNKQSFQ  
 YRMWQFVVSPPFEYTIMAMIALNTIVLMMKFYGASVAYENALRVFNIVFTSLFSLECVLKVMAFGILNYFRDA  
 WNI FDFVTVLGSITDILVTEFGNNFINLSFLRFLFRAARLIKLLRQGYTIRILLWTFVQSFKALPYVCLLIAML  
 FFYIYAIIGMQVFGNIGIDGEDSDEDEFQITEHNNFRFFQALMLLFRSATGEAWHNIMLSCLSGKPCDKNS  
 GILTADCGNEFAYFYFVSFIFLCSFLMLNLFVAVIMDNFEYLTRDSSILGPHHLDEYVRVWAEYDPAACGRIH  
 YKDMYSLLRVISPPLGLGKCKPHRVACKRLLRMDLPVADDNTVHFNSTLMALIRTALDIKIAKGGADKQMDA  
 ELRKEMMAIWPNLSQKTLDLLVTPHKSTDLTVGKIYAAMMIMEYRQSKAKKLQAMREEQNRTPLMFQRMPEP  
 SPTQEGGSPQNALPSTQLDPGGGLMAHEGGMKESPSWVTQRAQEMFQKTGTWSPERGGPIDMPNSQPNSSQVE

MREMGTDGYS DSEHYLPMEGQTRAASMPRLPAENQRRRGRPRGNDLSTISDTSMPKRSASVLGPKARRLDVYS  
LERVPPEENQRYHQRRDRGRHRTSERSLGRYTDVDTGLGTDLSMTTQSGDLPSKDRDQDRGRPKDRKHRPHHH  
HHHHHHHPAPDRDRYAQERPDTRARAREQRWSRSPSEGREHTTHRQSSSVSGSPAPSTSGTSTPRRGRRQ  
LPQTPTPRPLVSYSPAPRRPAARRMAGPAAPPGGSPRGCRRAPRWPAHAPEGPRPRGADYTEPDSPREPPGG  
AHDPA PRSPRT PRAAGCASPRHGRRLPNGYYAGHGAPRRTARRGAHDAYSESEDDWC\*  
>rs39142910\_ENSMUSP00000158675\_c.1486:A>T\_p.D496V  
ENSMUST00000238337.2|Cacna1a-212|ENSMUSG00000034656|+|chr8:g.85363208:A>T  
MHLRLSGQRGLTLQPNSSLPSSPFFPLAKGNFNINLSFLRFLFRAARLIKLLRQGYTIRILLWTFVQSFKVF  
GNIGIDGEDSDSEDEFQITEHNNFRFFFQALMLLFRSATGEAWHNIMLSCLSGKPCDKNSGILTADCGNEFA  
YFYFVSFIFLCSFLMLNLFVAVIMDNFEYLTRDSSILGPHHLDEYVRVWAEYDPAACGRIHYKDMYSLLRVIS  
PPLGLGKCKPHRVACKRLLRMDLPVADDNTVHFNSTLMALIRTAIDIKIAKGGADKQMDAELRKEMMAIWP  
LSQKTLDDLVTPHKSTDLTVGKIYAAMMIMEYYRQSKAKKLQAMREEQNRTPLMFQRMPEPPSPTQEGGSPQNA  
LPSTQLDPPGGGLMAHEGGMKESPSWVTQRAQEMFQKTGTWSPERGPPIIDMPNSQPNSQSVMEMREMGTDGYS  
DSEHYLPMEGQTRAASMPRLPAENQRRRGRPRGNDLSTISDTSMPKRSASVLGPKARRLDVYSLERVPPEENQRY  
HQRRDRGRHRTSERSLGRYTDVDTGLGTDLSMTTQSGDLPSKDRDQDRGRPKDRKHRPHHHHHHHHPAPD  
RDRYAQERPDTRARAREQRWSRSPSEGREHTTHRQSSSVSGSPAPSTSGTSTPRRGRRQLPQTPTPRPLV  
SYSPAPRRPAARRMAGPAAPPGGSPRGCRRAPRWPAHAPEGPRPRGADYTEPDSPREPPGGAHDPAPRSRPT  
RAAGCASPRHGRRLPNGYYAGHGAPRRTARRGAHDAYSESEDDWC\*  
>ENSMUSP00000158803\_c.6586:GC>AA\_p.R2196Q\_ENSMUST00000238701.2|Cacna1a-  
213|ENSMUSG00000034656|+|chr8:g.85363265:GC>AA  
MPRASWGS DPMLSPLSHELLHSPRYPGTDCTLAGSSRTLHVPWSQQMSGSLGPTLKRGGVVDHRDVI LAHQ  
AHKMHSTPQARRKEWEMARFGDEMPGRYGAGGGGSGPAAGVVGAAGGRGAGGSRQGGQPGAQRMYKQSMQR  
ARTMALYNPI PVRQNC LTVNRS LFLFSEDNVVRKYAKKI TEWPPFEYMI LATI IANCI VLAL EQHL PDDDKTP  
MSERLDDTEPYFIGIFCFEAGIKIVALGF AFHKGSYLRNGWNVMD FVVVLTGILATVGTEFDLRLTRAVRVL R  
PLKLVSGIPSLQVVLKSIKAMIPLLQIGLLFFAILIFAIIGLEFYMGKFHTTCFEEGTDDIQGESPA PCGT  
EEPARTCPNGTKCQFYWEGPNNGITQFDNIFLFAVLTVFQCITMEGWTDLLYNSNDASGNTWNWLYFIFLIIG  
SFMLNVLVLSGEFVAKERERVENRRAFLKLRQGYTIRILLWTFVQSFKVF  
LRRATLKKSKTDLNPEEAEDQLADIASVGS PFARASIKS AKLENSTFFHKKERRMRFYIRRMVKTQAFYWTV  
LSLVALNTLCVAIVHYNQPEWLSDFLYAEFIFLGLFMSEMF IKMYGLTRPHYHSSFNCFDCGVIIGSIFEV  
IWAVIKPGTSFGISVLRALRLRIFKVTKYASLRNLVSVLLNSMKSISLLFLLFLFIVVFALLGMQLFGGQ  
FNFDEGTPPTNFDTFPAAIMTVFQILTGEDWNEVMYDGIKSQGGVQGMVFSIYFIVLTLFGNYTLLNVFLAI  
AVDNLANAQELTKDEQEEEEANQKLALQKAKEVAEVSPLSAANMSI AVKEQQKNQKPTKSVWEQRTSEMRKQ  
NLLASREALYGDAERWPTPYARPLRPDVKTHLDRPLVDPQENRNNNTNKSRAPEALRPTARPRESARDPDA  
RRAWPGSPERAPGREGPYGRESEPPQREHAPPREHAPWDADTERAKAGDAPRRHTRHPVAEGEP RRHRARRR  
GDEPDRRERRRPRDTRPARAADGEGDDGERKRRHRHGGPPAHDDRERRRRRRKENQGSVPSGPNLSTTR  
PIQDLGRQDLPLAEDLDNMKNK LATGEPASPHDSLGHSGLPPSPAKIGNSTNPGPALATNPQNAASRRTPN  
NPGNPSNPGPKTPENSLIVTNPSSQPN SAKTARKPEHMAVEIPACPLNHTVVQVNKNANPDP LPKKEEE  
KKEEEEADPGEDGPKMPYPYSSMFI LSTTNPLRRLCHYIILNRYFEMCILMVIAMSSIALAAEDPVQPNAPRN  
NVLRYFDYVFTGVFTFEMVIK MIDLGLVLHQGAYFRDLWNILDFIVVSGALVAF AFTGNSKGDINTIKSLRV  
LRVLRPLKTIKRLPKLKA VFCVNSLKNVFNILIVYMLFMFI FAVVAVQLFKGKFFHCTDESKEFERDCRGK  
YLLYEKNEVKARDREWKKYEFHYDNVLWALLTLFTVSTGEGWPVQLKHSVDATFENQGPS PGYRMEMSIFYVV  
YFVVFPPFFVNI FVALIITFQEQGDKMMEEYSLEKNERACIDFAISAKPLTRHMPQNKQSFQYRMWQFVVS  
PFEYTIMAMIALNTIVLMMKFY GASVAYENALRVFNIVFTSLFSL ECVLKVMAFGILNYFRDAWNIFDFVTVL  
GSITDILVTEFGNNFINLSFLRFLFRAARLIKLLRQGYTIRILLWTFVQSFKALPYVCLLIAMLFFIYAIIGMQ  
VFGNIGIDGEDSDSEDEFQITEHNNFRFFFQALMLLFRSATGEAWHNIMLSCLSGKPCDKNSGILTADCGNE  
FAYFYFVSFIFLCSFLMLNLFVAVIMDNFEYLTRDSSILGPHHLDEYVRVWAEYDPAACGRIHYKDMYSLLRV  
ISPPLGLGKCKPHRVACKRLLRMDLPVADDNTVHFNSTLMALIRTAIDIKIAKGGADKQMDAELRKEMMAI  
PNLSQKTLDDLVTPHKSTDLTVGKIYAAMMIMEYYRQSKAKKLQAMREEQNRTPLMFQRMPEPPSPTQEGGSPQ  
NALPSTQLDPPGGGLMAHEGGMKESPSWVTQRAQEMFQKTGTWSPERGPPIIDMPNSQPNSQSVMEMREMGTDGYS  
DSEHYLPMEGQTRAASMPRLPAENQRRRGRPRGNDLSTISDTSMPKRSASVLGPKARRLDVYSLERVPPEENQ  
RYHQRPQPGWPPHL\*ALSGPIH\*CGHRFGRDRSEHDHPIG\*PALQRS GPGPGPTQGP EASATPPPPPPSSSSPG  
PRPGSLRTGAAGHRPGAGPGAALVPLAQRSGAHDQTGQ\*FRQWKPSPLYVRHQHAAARPPAPDPLHPAA  
ACVLLARSQAACGAGGGSRSAPWRLAAGLPPCAALACACA\*GPAAARCLHRARQPARAARGRARSRAVAQ  
DSARRGLRVTA PRPQAAQWLLRGARRAAAAHSPQGRARRVQRERGRVLV  
>ENSMUSP00000112436\_c.6319:GC>AA\_p.R2107Q\_ENSMUST00000121390.8|Cacna1a-  
201|ENSMUSG00000034656|+|chr8:g.85363265:GC>AA  
MARFGDEMPGRYGAGGGGSGPAAGVVGAAGGRGAGGSRQGGQPGAQRMYKQSMQRARTMALYNPI PVRQNC  
LTVNRS LFLFSEDNVVRKYAKKI TEWPPFEYMI LATI IANCI VLAL EQHL PDDDKTPMSERLDDTEPYFIGIF

CFEAGIKIVALGF AFHKGSYLRNGWNVMD FVVVLTGILATVGT EFDLRTLRAVRVLRPLKLVSGIPSLQVVLK  
SIMKAMIPLLQIGLLFFAILIFAIIGLEFYMGKFHTTCFEEGTDDIQGES P APCGTEEPARTCPNGTKCQPY  
WEGPNNGITQFDNILFAVLT V FQCITMEGWTDLLYNSNDASGNTWNWLYFIPLIIIGSFFMLNLVLGVLGSGEF  
AKERERVENRRAFLKLRQQQIERELNGYMEWISKAEEVILAEDETDVEQRHPPFDGALRRATLKKSKTDLLNP  
EEAEDQLADIASVGS PFARASIKSAKLENSTFFHKKERRMRFYIRRMVKTQAFYWTVLSLVALNTLCVAIVHY  
NQPEWLSDFLYYAEFIFLGLFMSEMF IKMYGLGTRPYFHSSFNCFDCGVIIGSIFEVIWAVIKPGTSFGISVL  
RALRLLRIFKVTKYWASLRNLVVSLLNSMKSIIISLLFLLFLFIVV FALLGMLQFGGQFNDFEGTPTNFDTFP  
AAIMTVFQILTGEDWNEVMYDGIKSQGGVQGGMVFSIYFIVLTLFGNYTLLNVFLAIAVDNLANAQELTKDEQ  
EEEEANQKLLALQKAKEVAEVSPLSAANMSI AVKEQQKNQKPTKSVWEQRTSEMRKQNLASREALYGDAAER  
WPTPYARPLRPDVKTHLDRPLVVD PQENRNNNTNKSRAPEALRPTARPRESARDPDARRAWPGSPERAPGREG  
PYGRESEPPQREHAPPREHAPWDADTERAKAGDAPRRHTRHPVAEAGEPRRHRARRRPGDEPDDRPERPRPRD  
ATRPARAADGEGDDGERKRRHRHGPPAHDDRERRRRRKENQSGVFPVSGPNLSTTRPIQQDLGRQDLPLAED  
LDNMKNK LATGEPASPHDSLGHSGLPSPAKIGNSTNPGPALATNPQNAASRRTPNPNPNSNPGPKTPEN  
SLIVTNPSSTQPN SAKTARKPEHMAVEIPPACPLNHTVVQVNKNANPDPLPKKEEEEKKEEEEADPGEDGPKP  
MPPYSSMFI LSTTNPLRRLCHYILNLRYFEMC ILMVIAMSSIALAAEDPVQPNAPRNNVLRVFDYVFTGVFTF  
EMVIK MIDLGLVLHQGAYFRDLWNI LDFIVVSGALVAF AFTGNSKGDINTIKSLRVLRLPLKTIKRLPKL  
KAVFDCVNSLKNVFNILIVYMLFMFIFAVVAVQLFKGKFFHCTDESKEFERDCRGKYLLYEKNEVKARDREW  
KKYEFHYDNVLWALLTLFTVSTGEGWPQVLKHSVDATFENQGPSGYRMEMSIFYVVYFVVPFFVNI FVAL  
IITFQEQGDKMMEEYSLEKNERACIDFAISAKPLTRHMPQNKQSFQYRMWQFVVSPPFEYTIMAMIALNTIV  
LMMKFY GASVAYENALRVFNIVFTSLFSLECVLKVMAFGILNYFRDAWNI FDFVTVLGSITDILVTEFGNFI  
NLSFLRLFRARLIKLLRQGYTIRILLWTFVQSFKALPYVCLLIAMLFFIYAIIGMQVFGNIGIDGEDSDSDE  
DEFQITEHNNFR TFFQALMLLFRSATGEAWHNIMLSCLSGKPCDKNSGILTADCGNEFAYFYFVSFIFLCSFL  
MLNLFVAVIMDNFEYLTRDSSILGPHHLD EYVRVWAEYDPAACGR IHYKMYSLLRVIS PPLGLGKCKPHRVA  
CKRLLRMDLPVADDNTVHFNSTLMALIRTALDIKIAKGGADKQQMDAELRKEEMAIWPNLSQKTLDLLVTPHK  
STDLTVGKIYAAMMIMEYYRQSKAKKLQAMREEQNRTPLMFQRM EPPSPTQEGGSPQNALPSTQLDPPGGGLMA  
HEGGMKESPSWVTQRAQEMFQKTGTWSPERGGPIDMPSNQPSQSVEMREMGTGDYSDSEHYLPMEGQTRAAS  
MPRLPAENQRRRGRPGNDLSTISDTSMPKRSASV LQGPARRLDYSLERVPPEENQRYHQRPQGPWPHL\* A  
LSGPIH\*CGHRFGDRSEHDHPIG\*PALQRSGPGPGPTQGPEASATPPPPPPSSSSPGPRPGSLRTGAAGHRPG  
AGPGAALVPLAQRRSGAHDQTGQ\*FRQWKPSPLYVRHQHAAARPPAPPDPLHPAAACVLLARSQAACGAQD  
GGSRSAPWRLAAGLPPCAALACACA\*GPAAARCRLHRARQPARAARGRARSRAAVAQDSARRGLRVTA PRPQA  
AQWLLRGARRAAAHS PQGRARRVQRERGRVLV  
>ENSMUSP00000114055\_c.6178:GC>AA\_p.R2060Q ENSMUST00000122053.2|Cacna1a-  
202|ENSMUSG00000034656|+|chr8:g.85363265:GC>AA  
MARFGDEMPGRYGAGGGGSGPAGVVVGAAGGRGAGGSRQGGQPGAQRMYKQSMARARTMALYNPIPVQRNC  
LTVNRSFLFSEDNDDETEPYFIGIFCFEAGIKIVALGF AFHKGSYLRNGWNVMD FVVVLTGILATVGT EFDL  
RTLRAVRVLRPLKLVSGIPSLQVVLK SIMKAMIPLLQIGLLFFAILIFAIIGLEFYMGKFHTTCFEEGTDDI  
QGESPAPCGTEEPARTCPNGTKCQPYWEGPNNGITQFDNILFAVLT V FQCITMEGWTDLLYNSNDASGNTWNW  
LYFIPLIIIGSFFMLNLVLGVLGSGEFAKERERVENRRAFLKLRQQQIERELNGYMEWISKAEEVILAEDETD  
VEQRHPPFDGALRRATLKKSKTDLLNPEEAEDQLADIASVGS PFARASIKSAKLENSTFFHKKERRMRFYIRRM  
VKTQAFYWTVLSLVALNTLCVAIVHYNQPEWLSDFLYYAEFIFLGLFMSEMF IKMYGLGTRPYFHSSFNCFDC  
GVIIGSIFEVIWAVIKPGTSFGISVLRALRLLRIFKVTKYWASLRNLVVSLLNSMKSIIISLLFLLFLFIVVFA  
LLGMLQFGGQFNDFEGTPTNFDTFPAAIMTVFQILTGEDWNEVMYDGIKSQGGVQGGMVFSIYFIVLTLFGN  
YTLNVLFLAIAVDNLANAQELTKDEQEEEEANQKLLALQKAKEVAEVSPLSAANMSI AVKEQQKNQKPTKSVW  
EQRTSEMRKQNLASREALYGDAAERWPTPYARPLRPDVKTHLDRPLVVD PQENRNNNTNKSRAPEALRPTAR  
PRESARDPDARRAWPGSPERAPGREGPYGRESEPPQREHAPPREHAPWDADTERAKAGDAPRRHTRHPVAEAGE  
PRRHRARRRPGDEPDDRPERPRPRDATRPARAADGEGDDGERKRRHRHGPPAHDDRERRRRRKENQSGVFP  
VSGPNLSTTRPIQQDLGRQDLPLAEDLDNMKNK LATGEPASPHDSLGHSGLPSPAKIGNSTNPGPALATNP  
QNAASRRTPNPNPNSNPGPKTPENSLIVTNPSSTQPN SAKTARKPEHMAVEIPPACPLNHTVVQVNKNAN  
PDPLPKKEEEEKKEEEEADPGEDGPKMPPYSSMFI LSTTNPLRRLCHYILNLRYFEMC ILMVIAMSSIALAAE  
DPVQPNAPRNNVLRVFDYVFTGVFTFEMVIK MIDLGLVLHQGAYFRDLWNI LDFIVVSGALVAF AFTGNSKGD  
DINTIKSLRVLRLPLKTIKRLPKL KAVFDCVNSLKNVFNILIVYMLFMFIFAVVAVQLFKGKFFHCTDES  
KEFERDCRGKYLLYEKNEVKARDREWKKYEFHYDNVLWALLTLFTVSTGEGWPQVLKHSVDATFENQGPSGY  
RMEMSIFYVVYFVVPFFVNI FVALIITFQEQGDKMMEEYSLEKNERACIDFAISAKPLTRHMPQNKQSFQ  
YRMWQFVVSPPFEYTIMAMIALNTIVLMMKFY GASVAYENALRVFNIVFTSLFSLECVLKVMAFGILNYFRDA  
WNI FDFVTVLGSITDILVTEFGNFINLSFLRLFRARLIKLLRQGYTIRILLWTFVQSFKALPYVCLLIAML  
FFIYAIIGMQVFGNIGIDGEDSDSDEDEFQITEHNNFR TFFQALMLLFRSATGEAWHNIMLSCLSGKPCDKNS  
GILTADCGNEFAYFYFVSFIFLCSFLMLNLFVAVIMDNFEYLTRDSSILGPHHLD EYVRVWAEYDPAACGR I  
HYKMYSLLRVIS PPLGLGKCKPHRVACKRLLRMDLPVADDNTVHFNSTLMALIRTALDIKIAKGGADKQQMDA

ELRKEMMAIWPNLSQKTLDDLVTPHKSTDLTVGKIYAAMMIMEYYRQSKAKKLQAMREEQNRTPLMFQRMPEPP  
SPTQEGGSPQNALPSTQLDPPGGGLMAHEGGMKESPSWVTQRAQEMFQKTGTWSPERGPPIDMPNSQPNSQSVE  
MREMGTGYSYDSEHYLPMEGQTRAASMPRLPAENQRRRGRPRGNDLSTISDTSMPKRSASVLGPKARRLDDYS  
LERVPPEENQRYHQRPQPGWPPHL\*ALSGPIH\*CGHRFGDRSEHDHPIG\*PALQRSRSGPGPPTQGPEASATPP  
PPPPSSSSPGPRPGSLRTGAAGHRPGAGPGAALVPLAQRSGAHDQTGTG\*FRQWKPSPLYVRHQHAAARPPP  
APPDPLHPAAACVLLARSAQACGAQDGGRSAPWRLAAGLPPCAALACACA\*GPAAARCLHRARQPARAARG  
RARSRAAVAQDSARRGLRVTAPRPQAAQWLLRGARRAAAAHS PQGRARRVQREGRRLVL  
>ENSMUSP00000149242\_c.6178:GC>AA\_p.R2060Q ENSMUST00000215756.2|Cacna1a-  
211|ENSMUSG00000034656|+|chr8:g.85363265:GC>AA  
XRMYKQSMARARTMALYNPIVVRQNCCLTVNRSFLFSEDNVVRKYAKKITEWPPFEYMI LATI IANCIVLAL  
EQHLPDDDKTPMSERLDDTEPYFIGIFCFEAGIKIVALGFHFKGSYLRNGWNVMDFFVVLTGILATVGTDFD  
LRTLRAVRVLRPLKLVSGIPSLQVVLKSIKAMIPLLQIGLFFAILIFAIIGLEFYMGKFHTTCFEEGTD  
IQGES PAPCGTEEPARTCPNGTKCQPYWEGPNNGITQFDNILFAVLTVFQCITMEGWTDLNNSNDASGNTWN  
WLYFIFLIIGSFFMLNLVGLVLSGEFAKERERVENRRAFLKLRQQQIERELNGYMEWISKAEVILAEDET  
DVEQRHPFDALRRATLKKSKTDLNPEEAEDQLADIASVGSPPFARASIKSAKLENSTFFHKKERRMRFYIRRM  
VKTQAFYWTVLSLVALNLTLCVAIVHYNQPEWLSDFLYAEFIFLGLFMSEMIKMYGLGTRPYFHSSFNCFCDC  
GVIIGSIFEVIWAVIKPGTSFGISVLRALRLLRIFKVTKYWASLRNLVVSLLNSMKSIIISLLFLFLFIVVFA  
LLGMQLFGGQFNFDGTPPTNFDTFPAAIMTVFQILTGDWNEVMYDGIKSQGGVQGGMVFSIYFIVLTLFGN  
YTLNLFVLAIAVDNLANAQELTKDEQEEEEAAANQKALQKAKEVAEVSPLSAANMSIAVKEQQKNQKPTKSVW  
EQRTSEMRKQNLASREALYGDAERWPTPYARPLRPDVKTHLDRPLVVDPPQENRNNNTNKSRAPEALRPTAR  
PRESARDPDARRAWPGSPERAPGREPGYGRESEPPQREHAPPREHAPWDADTERAKAGDAPRRHTRPVAEGE  
PRRHRARRRPGDEPDRPRERRPRPRDATRPARAADGEGDDGERKRRHRHGPPAHDDRERRRRRRKENQSGVP  
VSGPNLSTTRPIQQDLGRQDLPLAEDLDNMKNNKLATGEPASPHDSLGHSGLPSPAKIGNSTNPGPALATNP  
QNAASRRTPNPNPNSNPGPKTPENSLIVTNPSSQPNSAKTARKPEHMAVEIPPACPLNHTVVQVKNAN  
PDPLPKKEEKEEKEEADPGEDGPKMPPYSSMFI LSTTNPLRRLCHYILNLRVYFEMCILMVIAMSSIALAAE  
DPVQPNAPRNNVLRVYFDYVFTGVFTFEMVIKMDLGLVLHQGAYFRDLWNILDFIVVSGALVAFVAFVGNKSKGK  
DINTIKSLRVLRLPLKTIKRLPKLKA VFDVNVSLKNVFNILLVYMLFMFIFAVVAVQLFKGKFFHCTDES  
KEFERDCRGKYLLEYKNEVKARDREWKKYEFHYDNVLWALLTLFTVSTGEGWPQVLKHSVDATFENQGPSPGY  
RMEMSIFYVVVYFVFPFFVNFVALIITFQEQGDKMMEEYSLEKNERACIDFAISAKPLTRHMPQNKQSFQ  
YRMWQFVVSPPFEYTIMAMIALNTIVLMMKFY GASVAYENALRVFNIVFTSLFSLECVLKVMAFGILNYFRDA  
WNIFDFVTVLGSITDILVTEFGNNFINLSFLRLFRAARLIKLLRQGYTIRILLWTFVQSFKALPVVCLLIAML  
FFIYAIIGMQVFGNIGIDGEDSDEDEFQITEHNNFRTFFQALMLLFRSATGEAWHNIMLSCLSGKPCDKNS  
GILTADCGNEFAYFYFVSFIFLCSFLMLNLFVAVIMDNFEYLTRDSSILGPHHLDEYVRVWAEYDPAACGRIH  
YKDMYSLLRVISPPPLGLGKKCPHRVACKRLLRMDLPVADDNTVHFNSTLMALIRTALDIKIAKGGADKQMDA  
ELRKEMMAIWPNLSQKTLDDLVTPHKSTDLTVGKIYAAMMIMEYYRQSKAKKLQAMREEQNRTPLMFQRMPEPP  
SPTQEGGSPQNALPSTQLDPPGGGLMAHEGGMKESPSWVTQRAQEMFQKTGTWSPERGPPIDMPNSQPNSQSVE  
MREMGTGYSYDSEHYLPMEGQTRAASMPRLPAENQRRRGRPRGNDLSTISDTSMPKRSASVLGPKARRLDDYS  
LERVPPEENQRYHQRPQPGWPPHL\*ALSGPIH\*CGHRFGDRSEHDHPIG\*PALQRSRSGPGPPTQGPEASATPP  
PPPPSSSSPGPRPGSLRTGAAGHRPGAGPGAALVPLAQRSGAHDQTGTG\*FRQWKPSPLYVRHQHAAARPPP  
APPDPLHPAAACVLLARSAQACGAQDGGRSAPWRLAAGLPPCAALACACA\*GPAAARCLHRARQPARAARG  
RARSRAAVAQDSARRGLRVTAPRPQAAQWLLRGARRAAAAHS PQGRARRVQREGRRLVL  
>ENSMUSP00000158675\_c.1543:GC>AA\_p.R515Q ENSMUST00000238337.2|Cacna1a-  
212|ENSMUSG00000034656|+|chr8:g.85363265:GC>AA  
MHLRLLSGQRGLTLQPNPSSLPSSPFLAKGNFNINLSFLRLFRAARLIKLLRQGYTIRILLWTFVQSFKVF  
GNIGIDGEDSDEDEFQITEHNNFRTFFQALMLLFRSATGEAWHNIMLSCLSGKPCDKNSGILTADCGNEFA  
YFYFVSFIFLCSFLMLNLFVAVIMDNFEYLTRDSSILGPHHLDEYVRVWAEYDPAACGRIHYKDMYSLLRVIS  
PPLGLGKKCPHRVACKRLLRMDLPVADDNTVHFNSTLMALIRTALDIKIAKGGADKQMDAELRKEMMAIWPN  
LSQKTLDDLVTPHKSTDLTVGKIYAAMMIMEYYRQSKAKKLQAMREEQNRTPLMFQRMPEPPSPTQEGGSPQNA  
LPSTQLDPPGGGLMAHEGGMKESPSWVTQRAQEMFQKTGTWSPERGPPIDMPNSQPNSQSVE  
MREMGTGYSYDSEHYLPMEGQTRAASMPRLPAENQRRRGRPRGNDLSTISDTSMPKRSASVLGPKARRLDDYS  
LERVPPEENQRYHQRPQPGWPPHL\*ALSGPIH\*CGHRFGDRSEHDHPIG\*PALQRSRSGPGPPTQGPEASATPP  
PPPPSSSSPGPRPGSLRTGAAGHRPGAGPGAALVPLAQRSGAHDQTGTG\*FRQWKPSPLYVRHQHAAARPPP  
APPDPLHPAAACVLLARSAQACGAQDGGRSAPWRLAAGLPPCAALACACA\*GPAAARCLHRARQPARAARG  
RARSRAAVAQDSARRGLRVTAPRPQAAQWLLRGARRAAAAHS PQGRARRVQREGRRLVL  
ARRGLRVTAPRPQAAQWLLRGARRAAAAHS PQGRARRVQREGRRLVL  
>rs240959951 ENSMUSP00000158803\_c.6595:G>C\_p.R2199P  
ENSMUST00000238701.2|Cacna1a-213|ENSMUSG00000034656|+|chr8:g.85363274:G>C  
MPRASWGS DPMLSPLSHELLHSPRYPGTDCTLAGSSRTLHVPWSQQMSGSLGPTLKRGGVVDHRDVI LAHQ  
AHKMHS TPQARRKEWEMARFGDEMPGRYGAGGGGSGPAAGVVVGAAGGRGAGGSRQGGQPGAQRMKYQSMAQR

ARTMALYNPIPVRQNCCLTVNRSFLFSEDNVVRKYAKKITEWPPFEYMI LATIIANCIVLALAQHLPDDDKTP  
MSERLDDTEPYFIGIFCFEAGIKIVALGF AFHKGSYLRNGWNVMDFVVVLTGILATVGT EFDLRTLRAVRVLR  
PLKLVSGIPSLQVVLKSIMKAMIPLLQIGLLFFAILIFAIIGLEFYMGKFHTTTCFEEGTDDIQGES PAPCGT  
EEPARTCPNGTKCQPYWEGPNNGITQFDNILFAVLT VFCITMEGWTDLLYNSNDASGNTWNWLYFIPLIIIG  
SFFMLNLVLGVLVSGEFAKERERVENRRAFLKLRQQQIERELNGYMEWISKAEEVILAEDET DVEQRHFPFDGA  
LRRATLKKSKTDLNPEEAEDQLADIASVGS PFARASIKSAKLENSTFFHKKERRMRFYIRRMVKTQAFYWTV  
LSLVALNTLCVAIVHYNQPEWLSDFLYYAEFIFLGLFMSEMF IKMYGLGTRPYFHSSFNCFDCGVIIGSIFEV  
IWAVIKPGTSFGISVLRALRLLRIFKVTKYWASLRNLVVSLLNSMKSII SLLFLLFLFIVVFALLGMQLFGGQ  
FNFDEGTPPTNFDTFPAAIMTVFQILTGEDWNEVMYDGIKSQGGVQGGMVFSIYFIVLTLFGNYTLLNVFLAI  
AVDNLANAQELTKDEQEEEEEAANQKLALQKAKEVAEVSPLSAANMSIAVKEQQKNQKPTKSVWEQRTSEMRKQ  
NLLASREALYGDAERWPTPYARPLRPDVKTHLDRPLVVDPQENRNNNTNKSRAPEALRPTARPRESARDPDA  
RRAWPGSPERAPGREGPYGRESE PQQREHAPPREHAPWDADTERAKAGDAPRRHTRHPVAEGEP RRHRARRRP  
GDEPDRPERRRPRDATRPARAADGEGDDGERKRRHRHGPPAHDDRERRHRRRKENQGS GVPVSGPNLSTTR  
PIQQDLGRQDLPLAEDLDNMKNK LATGEPASPHDSLGHSGLPSPAKIGNSTNPGPALATNPQNAASRRTPN  
NPGNPSNPGPKTPENSLIVTNPSSTQPNSAKTARKPEHMAVEIPPACPLNHTVVQVKNANPDPLPKKEEE  
KKEEEEADPGEDGPKPMPPYSSMFI LSTTNPLRRLCHYILNLR YFEMCILMVIAMSSIALAAEDPVQPNAPRN  
NVLRYFDYVFTGVFTFEMVIK MIDLGLVLHQGAYFRDLWNI LDFIVVSGALVAF AFTGNSKGDINTIKSLRV  
LRVLRPLKTIKRLPKLKAVFDCVVNSLKNVFNILIVYMLFMFIFAVVAVQLFKGKFHCTDESKEFERDCRGK  
YLLYEKNEVKARDREWKKYEFHYDNVLWALLTLFTVSTGEGWPQVLKHSVDATFENQGPS PGYRMEMSIFYVV  
YFVVFVFFVNI FVALIIITFQE QGDKMMEEYSLEKNERACIDFAISAKPLTRHMPQNKQSFQYRMWQFVVS  
PFEYTIMAMIALNTIVLMMKFY GASVAYENALRVFNIVFTSLSFLEC VLKVMAFGILNYFRDAWNIFDFVTVL  
GSITDILVTEFGNNFINLSFLRLFRAARLIKLLRQGYTIRILLWTFVQSFKALPYVCLLIAMLFFIYAIIGMQ  
VFGNIGIDGEDSDEDEFQITEHNNFRTFFQALMLLFRSATGEAWHNIMLSCLSGKPCDKNSGILTADCGNE  
FAYFYFVSFIFLCSFLMLNLFVAVIMDNFEYLTRDSSILGPHHLDEYVRVWAEYDPAACGRIHYKDMYSLLRV  
ISPPLGLGKCKPHRVACKRLLRMDLPVADDNTVHFNSTLMALIR TALDIKIAKGGADKQMDAELRKEMMAIW  
PNLSQKTLDDLVTPHKSTDLTVGKIYAAMMIEYRQSKAKKLQAMREEQNRTPLMFQRMEPPSPTQEGGGSQ  
NALPSTQLDPPGGMLMAHEGGMKESPSWVTQRAEQMFKTGTWSPERGPPI DMPNSQPNSQVEMREMTDGY  
DSEHYLPMEGQTRAASMPRLPAENQRRRGRPRGNDLSTISDTS PMKRSASVLGPKARRLDDYSLE RVPEENQ  
RYHQRRRDPGHRTSERSLGRYTDVDTGLGTDLSMTTQSGDLPSKDRDQDRGRPKDRKHRPHHHHHHHHHPPA  
PDRDRYAQERPDTGRARAREQRWSRSPSEGREHTTHRQSSSVSGSPAPSTSGTSTPRRGRRLPQTPCTPRP  
LVSYS PARRRPAARRMAGPAAPP GGS PRGCRRAPRWP AHAPGPRPRGADYTEPDSPREPPGGAHD PAPRSR  
TPRAAGCASPRHGRRPNGYYAGHAPRPR TARRGAHDAYSESEDDWC\*

>rs240959951\_ENSMUSP00000112436\_c.6328:G>C\_p.R2110P  
ENSMUST00000121390.8|Cacna1a-201|ENSMUSG00000034656|+|chr8:g.85363274:G>C  
MARFGDEMPGRYGAGGGGSGPAAAGVVGAAGGRGAGGSRQGGQPGAQRMYKQSMARARTMALYNPIPVRQNC  
LTVNRSFLFSEDNVVRKYAKKITEWPPFEYMI LATIIANCIVLALAQHLPDDDKTPMSERLDDTEPYFIGIF  
CFEAGIKIVALGF AFHKGSYLRNGWNVMDFVVVLTGILATVGT EFDLRTLRAVRVLRPLKLVSGIPSLQVVLK  
SIMKAMIPLLQIGLLFFAILIFAIIGLEFYMGKFHTTTCFEEGTDDIQGES PAPCGTTEEPARTCPNGTKCQPY  
WEGPNNGITQFDNILFAVLT VFCITMEGWTDLLYNSNDASGNTWNWLYFIPLIIIGSFFMLNLVLGVLVSGEF  
AKERERVENRRAFLKLRQQQIERELNGYMEWISKAEEVILAEDET DVEQRHFPFDGALRRATLKKSKTDLNPN  
EEAEDQLADIASVGS PFARASIKSAKLENSTFFHKKERRMRFYIRRMVKTQAFYWTVLSLVALNTLCVAIVHY  
NQPEWLSDFLYYAEFIFLGLFMSEMF IKMYGLGTRPYFHSSFNCFDCGVIIGSIFEVIWAVIKPGTSFGISV  
RALRLLRIFKVTKYWASLRNLVVSLLNSMKSII SLLFLLFLFIVVFALLGMQLFGGQFNFDEGTPPTNFDTFP  
AAIMTVFQILTGEDWNEVMYDGIKSQGGVQGGMVFSIYFIVLTLFGNYTLLNVFLAI AVDNLANAQELTKDEQ  
EEEEEAANQKLALQKAKEVAEVSPLSAANMSIAVKEQQKNQKPTKSVWEQRTSEMRKQNLLASREALYGDAER  
WPTPYARPLRPDVKTHLDRPLVVDPQENRNNNTNKSRAPEALRPTARPRESARDPDARRAWPGSPERAPGREG  
PYGRESE PQQREHAPPREHAPWDADTERAKAGDAPRRHTRHPVAEGEP RRHRARRRRPGDEPDRPERRRPRD  
ATRPARAADGEGDDGERKRRHRHGPPAHDDRERRHRRRKENQGS GVPVSGPNLSTTRPIQQDLGRQDLPLAED  
LDNMKNK LATGEPASPHDSLGHSGLPSPAKIGNSTNPGPALATNPQNAASRRTPNNPGNPSNPGPKTPEN  
SLIVTNPSSTQPNSAKTARKPEHMAVEIPPACPLNHTVVQVKNANPDPLPKKEEEKKEEEEADPGEDGPKP  
MPPYSSMFI LSTTNPLRRLCHYILNLR YFEMCILMVIAMSSIALAAEDPVQPNAPRN NVLRYFDYVFTGVFTF  
EMVIK MIDLGLVLHQGAYFRDLWNI LDFIVVSGALVAF AFTGNSKGDINTIKSLRVLRVLRPLKTIKRLPKL  
KAVFDCVVNSLKNVFNILIVYMLFMFIFAVVAVQLFKGKFHCTDESKEFERDCRGKYLLYEKNEVKARDREW  
KKYEFHYDNVLWALLTLFTVSTGEGWPQVLKHSVDATFENQGPS PGYRMEMSIFYVVVFVFFVNI FVAL  
IIITFQE QGDKMMEEYSLEKNERACIDFAISAKPLTRHMPQNKQSFQYRMWQFVVS PFEYTIMAMIALNTIV  
LMMKFY GASVAYENALRVFNIVFTSLSFLEC VLKVMAFGILNYFRDAWNIFDFVTVLGSITDILVTEFGNNFI  
NLSFLRLFRAARLIKLLRQGYTIRILLWTFVQSFKALPYVCLLIAMLFFIYAIIGMQVFGNIGIDGEDSDE  
DEFQITEHNNFRTFFQALMLLFRSATGEAWHNIMLSCLSGKPCDKNSGILTADCGNEFAYFYFVSFIFLCSFL



MLNLFVAVIMDNFEYLTRDSSILGPHHLDEYVRVWAEYDPAACGRIHYKDMYSLLRVISPLGLGKCKPHRVA  
 CKRLLRMDLPVADDNTVHFNSTLMALIRTALDIKIAKGGADKQQMDAELRKEMMAIWPNLSQKTLDDLVTPHK  
 STDLTVGKIYAAMMIMEYYRQSKAKKLQAMREEQNRTPLMFQRMPEPPSPTQEGGQPSQNALPSTQLDPPGGGLMA  
 HEGGMKESPSWVTQRAQEMFQKTGTWSPERGPPIDMPNSQPNSQSVEMREMGTGYSYDSEHYLPMEGQTRAAS  
 MPRLPAENQRRRGRPRGNDLSTISDTSMPKRSASVLGPKARRLDDYSLERVPPPEENQRYHQRRRDPGHRTSER  
 SLGRYTDVDTGLGTDLSMTTQSGDLPSKDRDQDRGRPKDRKHRPHHHHHHHHHHPPAPDRDRYAQERPDGRA  
 RAREQRWSRSPSEGREHTTHRQSSSVSGSPAPSTSGTSTPRRGRRLPQTPCTPRPLVSYSPAPRRPAARRM  
 AGPAAPPGGSPRGCRRAPRWPAHAPEGPRPRGADYTEPDSPREPPGGAHDPAPRSPTPRAAGCASPRHGRRLL  
 PNGYYAGHGAPRPRRTARRGAHDAYSESEDDWC\*

>rs240959951\_ENSMUSP00000114055\_c.6187:G>C\_p.R2063P  
 ENSMUST00000122053.2|Cacna1a-202|ENSMUSG00000034656|+|chr8:g.85363274:G>C  
 MARFGDEMPGRYGAGGGGSGPAAGVVVGAAGGRGAGGSRQGGQPGAQRMYKQSMARARTMALYNPIVVRQNC  
 LTVNRSFLFSEDNVDDTEPYFIGIFCFEAGIKIVALGFHFHKGSYLRNGWNVMDFFVVVLTGILATVGTDFDL  
 RTLRAVRVLRPLKLVSGIPSLQVVLKSIKAMIPLLQIGLLFFAILIFAIIGLEFYMGKFHTTCFEEGTDDI  
 QGESAPCGTEEPARTCPNGTKCQPYWEGPNNGITQFDNIFAVLTVFQCITMEGWTDLLYNSNDASGNTWNW  
 LYFIFLIIGSFFMLNLVGLVLSGEFAKERERVENRRRAFLKLRQQQIERELNGYMEWISKAEEVILAEDET  
 VEQRHFFDGLRRATLKKSKTDLLNPEEAEDQLADIASVGSPPFARASIKSAKLENSTFFHKKERRMRFYIRRM  
 VKTQAFYWTVLSLVALNTLCVAIVHYNQPEWLSDFLYAAEFIFLGLFMSEMFIKMYGLGTRPYFHSSFNCFDC  
 GVIIGSIFEVIWAVIKPGTSFGISVLRALRLLRIFKVTKYASLRNLVVSLLNSMKSIIISLLFLFLFIVVFA  
 LLGMQLFGGQFNFDGTPPTNFDTFPAAIMTVFQILTGEDWNEVMYDGIKSQGGVQGGMVFSIYFIVLTLFGN  
 YTLNVLFLAIAVDNLANAQELTKDEQEEEEAAANQKLLALQKAKEVAEVSPLSAANMSIIVKEQQKNQKPTKSVW  
 EQRTSEMRKQNLASREALYGDAERWPTPYARPLRPDVKTHLDRPLVVDPOENRNNNTNKSRAPEALRPTAR  
 PRESARDPDARRAWPGSPERAPGREGPYGRESEPPQREHAPPREHAPWDADTERAKAGDAPRRHTRHPVAEAGE  
 PRRHRARRRPGDEPDRPERRPRPRDATRPARAADGEGDDGERKRRHRHGPPAHDDRERRRRRRKENQGGSGVP  
 VSGPNLSTTRPIQDDLGRQDLPLAEDLDNMKNKSLATGEPASPHDSLHSGLPPSPAKIGNSTNPGPALATNP  
 QNAASRTTNNPNNPNSNPGPKTPENSLIVTNPSTQNSAKTARKPEHMAVEIPPACPLNHTVVQVKNKAN  
 PDLPLPKKEEKEEEEEADPGEDGPKMPYPYSMFIILSTTNPLRRLCHYILNLRVYFEMCIIIMVIAMSIALAAE  
 DPVQPNAPRNNVLRVYFDYVFTGVFTFEMVIKMIIDLGLVLHQGAYFRDLWNILDFIVVSGALVAFVFTGNSKKG  
 DINTIKSLRVLRLRPLKTIKRLPKLKAIVFDCVNSLKNVFNILIVYMLFMFIFAVVAVQLFKGKFFHCTDES  
 KEFERDCRGKYLLEYKNEVKARDREWKKYEFHYDNVLWALLTLFTVSTGEGWPQVLKHSVDATFENQGPSPGY  
 RMEMSIFYVVYFVVFVFFVNI FVALIITFQEQGDKMMEEYSLEKNERACIDFAISAKPLTRHMPQNKQSFQ  
 YRMWQFVVSPPEYTIMAMIALNTIVLMMKFY GASVAYENALRVFNIVFTSLFSLECVLKVMAFGIILNYFRDA  
 WNI FDFVTVLGSITDILVTEFGNNFINLSFLRLFRAARLIKLLRQGYTIRILLWTFVQSFKALPYVCLLIAML  
 FFIIYAIIGMQVFGNIGIDGEDSDEDEFQITEHNNFRFFQALMLLFRSATGEAWHNIMLSCLSGKPCDKNS  
 GILTADCGNEFAYFYVFSIFLCSFLMLNLFVAVIMDNFEYLTRDSSILGPHHLDEYVRVWAEYDPAACGRIH  
 YKDMYSLLRVISPLGLGKCKPHRVACKRLLRMDLPVADDNTVHFNSTLMALIRTALDIKIAKGGADKQQMDA  
 ELRKEMMAIWPNLSQKTLDDLVTPHKSTDLTVGKIYAAMMIMEYYRQSKAKKLQAMREEQNRTPLMFQRMPEPP  
 SPTQEGGQPSQNALPSTQLDPPGGGLMAHEGGMKESPSWVTQRAQEMFQKTGTWSPERGPPIDMPNSQPNSQSV  
 MREMGTGYSYDSEHYLPMEGQTRAASMPRLPAENQRRRGRPRGNDLSTISDTSMPKRSASVLGPKARRLDDYS  
 LERVPPPEENQRYHQRRRDPGHRTSERSLGRYTDVDTGLGTDLSMTTQSGDLPSKDRDQDRGRPKDRKHRPHH  
 HHHHHHHPPAPDRDRYAQERPDGRARAREQRWSRSPSEGREHTTHRQSSSVSGSPAPSTSGTSTPRRGRRL  
 LPQTPCTPRPLVSYSPAPRRPAARRMAGPAAPPGGSPRGCRRAPRWPAHAPEGPRPRGADYTEPDSPREPPGG  
 AHDPAAPRSPTPRAAGCASPRHGRRLLPNGYYAGHGAPRPRRTARRGAHDAYSESEDDWC\*

>rs240959951\_ENSMUSP00000149242\_c.6187:G>C\_p.R2063P  
 ENSMUST00000215756.2|Cacna1a-211|ENSMUSG00000034656|+|chr8:g.85363274:G>C  
 XRMKYKQSMARARTMALYNPIVVRQNC LTVNRSFLFSEDNVVRKYAKKITEWPPFEYMI LATI IANCI VLAL  
 EQHLPPDDDKTPMSERLDDTEPYFIGIFCFEAGIKIVALGFHFHKGSYLRNGWNVMDFFVVVLTGILATVGTDFD  
 LRTLRAVRVLRPLKLVSGIPSLQVVLKSIKAMIPLLQIGLLFFAILIFAIIGLEFYMGKFHTTCFEEGTDD  
 IQGESAPCGTEEPARTCPNGTKCQPYWEGPNNGITQFDNIFAVLTVFQCITMEGWTDLLYNSNDASGNTWN  
 WLYFIFLIIGSFFMLNLVGLVLSGEFAKERERVENRRRAFLKLRQQQIERELNGYMEWISKAEEVILAEDET  
 DVEQRHFFDALRRATLKKSKTDLLNPEEAEDQLADIASVGSPPFARASIKSAKLENSTFFHKKERRMRFYIRRM  
 VKTQAFYWTVLSLVALNTLCVAIVHYNQPEWLSDFLYAAEFIFLGLFMSEMFIKMYGLGTRPYFHSSFNCFDC  
 GVIIGSIFEVIWAVIKPGTSFGISVLRALRLLRIFKVTKYASLRNLVVSLLNSMKSIIISLLFLFLFIVVFA  
 LLGMQLFGGQFNFDGTPPTNFDTFPAAIMTVFQILTGEDWNEVMYDGIKSQGGVQGGMVFSIYFIVLTLFGN  
 YTLNVLFLAIAVDNLANAQELTKDEQEEEEAAANQKLLALQKAKEVAEVSPLSAANMSIIVKEQQKNQKPTKSVW  
 EQRTSEMRKQNLASREALYGDAERWPTPYARPLRPDVKTHLDRPLVVDPOENRNNNTNKSRAPEALRPTAR  
 PRESARDPDARRAWPGSPERAPGREGPYGRESEPPQREHAPPREHAPWDADTERAKAGDAPRRHTRHPVAEAGE  
 PRRHRARRRPGDEPDRPERRPRPRDATRPARAADGEGDDGERKRRHRHGPPAHDDRERRRRRRKENQGGSGVP



VFGNIGIDGEDSDSEDEFQITEHNNFRTEFFQALMLLFRSATGEAWHNIMLSCLSGKPCDKNSGILTADCGNE  
FAYFYFVSFIFLCSFLMLNLFVAVIMDNFEYLTRDSSILGPHHLDEYVRVWAEYDPAACGRIHYKDMYSLLRV  
ISPPLGLGKCKPHRVACKRLLRMDLPVADDNTVHFNSTLMALIRTAIDIKIAKGGADKQQMDAELRKEMMAIW  
PNLSQKTLDDLVTTPHKSTDLTVGKIYAAMMIMEYYRQSKAKKLQAMREEQNRTPLMFQRMPEPPSPTQEGGSPQ  
NALPSTQLDPPGGGLMAHEGGMKESPSWVTQRAQEMFQKTGTWSPERGPPIDMPNSQPNSQSVEMREMGTDGYS  
DSEHYLPMEGQTRAASMPRLPAENQRRRGRPRGNDLSTISDTSMPKRSASVLGPKARLLDDYSLERVPPEENQ  
RYHQRRDRRGHHTSERSLGRYTDVDTGLGTDLSMTTQSGDLPKDRDQDRGRPKDRKHRPHHHHHHHHHPPA  
PDRDRYAQERPDTRARAREQRWSRSPSEGREHTTHRQSSSVSGSPAPSTSGTSTPRRGRRQLPQTPCTPRP  
LVSYSPAPRRPAARRMAGPAAPPGGSPRGCRRAPRWPAAHAPEGPRPRGADYTEPDSPREPPGGAHDPAPRSR  
TPRAAGCASPRHGRRLPNGYYAGHGAPRPRRTARRGAHDAYSESEDDWC\*

>rs230834853\_ENSMUSP00000112436\_c.6337:G>A\_p.R2113H

ENSMUST00000121390.8|Cacna1a-201|ENSMUSG00000034656|+|chr8:g.85363283:G>A  
MARFGDEMPGRYGAGGGGSGPAAGVVVGAAGGRGAGGSRQGGQPGAQRMKQSMARARTMALYNPIVVRQNC  
LTVNRSFLFLFSEDNVVRKYAKKITEWPPFEYMLATI IANCIVLALQHLRDDDKTPMSERLDDTEPYFIGIF  
CFEAGIKIVALGF AFHKGSYLRNGWNVMDFVVVLTGILATVGTDFDLRTRAVRVLRLPLKLVSGIPSLQVVLK  
SIMKAMIPLLQIGLLFFAILIFAIIGLEFYMGKFHTTCFEEGTDIQQGESAPPCGTEEPARTCPNGTKCQPY  
WEGPNNGITQFDNIFAVLTVFQCITMEGWTDLLYNSNDASGNTWNWLYFIPLIIIGSFFMLNLVLGVLGSEF  
AKERERVENRRFLKLRQQQIERELNGYMEWISKAEEVILAEDETDVEQRHFDGALRRATLKKSKTDLLNP  
EEAEDQLADIASVSGSPFARASIKSAKLENSTFFHKKERRMRFYIRRMVKTQAFYWTVLSLVALNTLCVAIVHY  
NQPEWLSDFLYAEFIFLGLFMSEFMKMYGLGTRPYFHSSFNCFDCGVIIGSIFEVIWAVIKPGTSGFISVL  
RALRLLRIFKVTKYWASLRNLVVSLLNSMKSIIISLLFLLFLFIVVFALLGMQLFGGQFNDFDEGTPPTNFDTFP  
AAIMTVFQILTGEDWNEVMYDGIKSQGGVQGGMVFSIYFIVLTLFGNYTLLNVFLAIAVDNLANAQELTKDEQ  
EEEEAANQKLALQKAKEVAEVSPLSAANMSIAVKEQQKNQKPTKSVWEQRTSEMRKQNLLASREALYGDAER  
WPTPYARPLRPDVKTHLDRPLVVDPQENRNNNTNKSRAPEALRPTARPRESARDPDARRAWPGSPERAPGREG  
PYGRESEPOQREHAPPREHAPWDADTERAKAGDAPRRHTRHPVAEGEPRRHRARRRPGDEPDRPERRPRPRD  
ATRPARAADGEGDDGERKRRHRHGPFAHDDRERRRRRKNQSGSVVSGPNLSTTRPIQQDLGRQDLPLAED  
LDNMKNKALGATPHDSLHSGGLPPSPAKIGNSTNPGPALATNPQNAASRRTPNPNPNSPNPSPGPKTPEN  
SLIVTNPSSTQPNSAKTARKPEHMAVEIPPACPLNHTVVQVKNANPDPLPKKEEEEKKEEEEADPGEDGPKP  
MPPYSSMFI LSTTNPLRRLCHYI LNLRYFEMCILMVIAMSSIALAAEDPVQPNAPRNNVLRVFDYVFTGVFTF  
EMVIK MIDLGLVLHQGAYFRDLWNI LDFIVVSGALVAF AFTGNSKGDINTIKSLRVLRLVRLPLKTIKRLPKL  
KAVFDCVVNSLKNVFNILIVYMLFMFIFAVVAVQLFKGKFFHCTDESKEFERDCRGKYLLEYKNEVKARDREW  
KKEYEFHYDNVLWALLTLFTVSTGEGWPQVLKHSVDATFENQGPSGYRMEMSIFVYVYFVVFPPFFVNI FVAL  
I IITFQEQGDKMMEEYSLEKNERACIDFAISAKPLTRHMPQNKQSFQYRMWQFVVSPPFEYTIMAMIALNTIV  
LMMKFY GASVAYENALRVFNIVFTSLFSLECVLKVMAFGILNYFRDAWNIFDFVTVLGSI TIDLIVTEFGNFI  
NLSFLRLFRARLRIKLLRQGYTIRILLWTFVQSFKALPYVCLLIAMLFFIYAIIGMQVFGNIGIDGEDSDSE  
DEFQITEHNNFRTEFFQALMLLFRSATGEAWHNIMLSCLSGKPCDKNSGILTADCGNEFAYFYFVSFIFLCSFL  
MLNLFVAVIMDNFEYLTRDSSILGPHHLDEYVRVWAEYDPAACGRIHYKDMYSLLRVISPPLGLGKCKPHRVA  
CKRLLRMDLPVADDNTVHFNSTLMALIRTAIDIKIAKGGADKQQMDAELRKEMMAIWPNSQKTLDDLVTTPHK  
STDLTGKIYAAMMIMEYYRQSKAKKLQAMREEQNRTPLMFQRMPEPPSPTQEGGSPQNALPSTQLDPPGGGLMA  
HEGGMKESPSWVTQRAQEMFQKTGTWSPERGPPIDMPNSQPNSQSVEMREMGTDGYS DSEHYLPMEGQTRAAS  
MPRLPAENQRRRGRPRGNDLSTISDTSMPKRSASVLGPKARLLDDYSLERVPPEENQRYHQRRDRGHHTSER  
SLGRYTDVDTGLGTDLSMTTQSGDLPKDRDQDRGRPKDRKHRPHHHHHHHHHPPAPDRDRYAQERPDTRAR  
RAREQRWSRSPSEGREHTTHRQSSSVSGSPAPSTSGTSTPRRGRRQLPQTPCTPRPLVSYSPAPRRPAARRM  
AGPAAPPGGSPRGCRRAPRWPAAHAPEGPRPRGADYTEPDSPREPPGGAHDPAPRSRPTPRAAGCASPRHGRRL  
PNGYYAGHGAPRPRRTARRGAHDAYSESEDDWC\*

>rs230834853\_ENSMUSP00000114055\_c.6196:G>A\_p.R2066H

ENSMUST00000122053.2|Cacna1a-202|ENSMUSG00000034656|+|chr8:g.85363283:G>A  
MARFGDEMPGRYGAGGGGSGPAAGVVVGAAGGRGAGGSRQGGQPGAQRMKQSMARARTMALYNPIVVRQNC  
LTVNRSFLFLFSEDNVDDTEPYFIGIFCFEAGIKIVALGF AFHKGSYLRNGWNVMDFVVVLTGILATVGTDFDL  
RTRAVRVLRLPLKLVSGIPSLQVVLKSIKAMIPLLQIGLLFFAILIFAIIGLEFYMGKFHTTCFEEGTDI  
QGESAPPCGTEEPARTCPNGTKCQPYWEGPNNGITQFDNIFAVLTVFQCITMEGWTDLLYNSNDASGNTWNW  
LYFIPLIIIGSFFMLNLVLGVLGSEFAKERERVENRRFLKLRQQQIERELNGYMEWISKAEEVILAEDETD  
VEQRHFDGALRRATLKKSKTDLLNPEEAEDQLADIASVSGSPFARASIKSAKLENSTFFHKKERRMRFYIRRM  
VKTQAFYWTVLSLVALNTLCVAIVHYNQPEWLSDFLYAEFIFLGLFMSEFMKMYGLGTRPYFHSSFNCFDC  
GVIIGSIFEVIWAVIKPGTSGFISVLRALRLLRIFKVTKYWASLRNLVVSLLNSMKSIIISLLFLLFLFIVVFA  
LLGMQLFGGQFNDFDEGTPPTNFDTFPAAIMTVFQILTGEDWNEVMYDGIKSQGGVQGGMVFSIYFIVLTLFGN  
YTLNVLFLAIAVDNLANAQELTKDEQEEEEAANQKLALQKAKEVAEVSPLSAANMSIAVKEQQKNQKPTKSVW  
EQRTSEMRKQNLLASREALYGDAERWPTPYARPLRPDVKTHLDRPLVVDPQENRNNNTNKSRAPEALRPTAR

PRESARDPDARRAWPGSPERAPGREGPYGRESEPOQREHAPPREHAPWDADTERAKAGDAPRRHTHRVAEAGE  
 PRRHRARRRPGDEPDDRPERRRPRDATRPARAADGEGDDGERKRRHRHGPPAHDDRERRHRRRKENQGSQV  
 VSGPNLSTTRPIQQDLGRQDLPLAEDLDNMKNNKLATGEPASPHDSLGHSGLPSPAKIGNSTNPGPALATNP  
 QNAASRRTPNPNPNSNPGPPKTPENSLIVTNPSSTQPNsAKTARKPEHMAVEIPPACPLNHTVVQVKNAN  
 PDPLPKKEEEEKKEEEEADPGEDGPKMPPYSSMFI LSTTNPLRRLCHYILNLRYFEMCILMVIAMSSIALAAE  
 DPVQPNAPRNNVLRVFDYVFTGVFTFEMVIKIMIDLGLVLHQGAYFRDLWNILDFIVVSGALVAFVFTGNSKKG  
 DINTIKSLRVLRLVRLPLKTIKRLPKLKA VFD CVVNSLKNVFNILIVYMLFMFIFAVVAVQLFKGKFFHCTDES  
 KEFERDCRGKYLLEYKNEVKARDREWKKYEFHYDNVLWALLTLFTVSTGEGWPQVLKHSVDATFENQGPSQV  
 RMEMSIFYVVYFVVFVFFVNI FVALI I I TFQEQQDKMMEEYSLEKNERACIDFAISAKPLTRHMPQNKQSFQ  
 YRMWQFVVSPPFEYTIMAMIALNTIVLMMKFY GASVAYENALRVFNIVFTSLFSLECVLKVMAFGILNYFRDA  
 WNI FDFVTVLGSITDILVTEFGNNFINLSFLRLFRAARLIKLLRQGYTIRILLWTFVQSFKALPYVCLLIAML  
 FFYAIIGMQVFGNIGIDGEDSDEDEFQITEHNNFRFTFFQALMLLFRSATGEAWHNIMLSCLSGKPCDKNS  
 GILTADCGNEFAYFYFVSFIFLCSFLMLNLFVAVIMDNFEYLTRDSSILGPHHLDEYVRVWAEYDPAACGRIH  
 YKDMYSLLRVISPPGLGKCKPHRVACKRLLRMDLPVADDNTVHFNSTLMALIRTALDIKIAKGGADKQMDA  
 ELRKEMMAIWPNLSQKTLDDLVTPHKSTDLTVGKIYAAMMIMEYRQSKAKKLQAMREEQNRTPLMFQRMPEP  
 SPTQEGGQSNALPSTQLDPGGGLMAHEGGMKESPSWVTQRAQEMFQKTGTWSPERGGPIDMPNSQPNsQSVE  
 MREMGTGYS DSEHYLPMEGQTRAASMPRLPAENQRRRGRPRGNDLSTISDTPMKRSASVLGPKARRLDDYS  
 LERVPEENQRYHQRRDRGHHTSERSLGRYTDVDTGLGTDLSMTTQSGDLP SKDRDQDRGRPKDRKHPHHH  
 HHHHHHHPAPDRDRIAQERPDTRARAREQRWSRSPSEGREHTTHRQSSSVSGSPAPSTSGTSTPRRGRRO  
 LPQTPCTPRPLVSYSPAPRRPAARRMAGPAAPPGGSPRGCRRAPRWPAAHAPEGPRPRGADYTEPDSPREPPGG  
 AHDPA PRSPRT PRAAGCASPRHGRRLPNGYYAGHGAPRPRRTARRGAHDAYSESEDDWC\*  
 >rs230834853\_ENSMUSP00000149242\_c.6196:G>A\_p.R2066H  
 ENSMUST00000215756.2|Cacna1a-211|ENSMUSG00000034656|+|chr8:g.85363283:G>A  
 XRMKQKSMAQRARTMALYNPIVVRQNCCLTVNRSFLFSEDNVVRKYAKKITEWPPFEYMI LATI IANCIVLAL  
 EQHLPDDDKTPMSERLDDTEPYFIGIFCFEAGIKIVALGF AFHKGSYLRNGWNVMDFFVVLTGILATVGTDFD  
 LRTLRAVRVLRKLKLVSGIPSLQVVLKSIKAMKAPLLQIGLLFFAILIFAIIGLEFYMGKFHTTCFEEGTDD  
 IQGESPAPCVGTEEPARTCPNGTKCQPYWEGPNNGITQFDNILFVAVLTVFQCITMEGYMDLLYNSNDASGNTWN  
 WLYFIPLI IIGSFFMLNLVGLVLSGEFAKERERVENRRRAFLKLRQQQIERELNGYMEWISKAEEVILAEDET  
 DVEQRHPFDALRRATLKKSKTDLLNPEEAEDQLADIASVGS PFARASIKSAKLENSTFFHKKERRMRFYIRRM  
 VKTQAFYWTVLSLVALNTLCVAIVHYNQPEWLSDFLYAEFIFLGLFMSEMIKMYGLGTRPYFHSSFNCFCDC  
 GVIIGSIFEVIWAVIKPGTSFGISVLRALRLLRIFKVTKYWASLRNLVVSLLNSMKSIIISLLFLLFLFIVVFA  
 LLGMQLFGGQFNDFEGTPTNFDTFFPAAIMTVFQILTGEDWNEVMYDGIKSQGGVQGGMVFSIYFIVLTLFGN  
 YTLNVLFLAIAVDNLANAQELTKDEQEEEEANQKALQKAKEVAEVSPLSAANMSI AVKEQQKNQKPTKSVW  
 EQRTSEMRKQNLASREALYGDAERWPTPYARPLRPDVKTHLDRPLVVDPOENRNNNTNKSRAPEALRPTAR  
 PRESARDPDARRAWPGSPERAPGREGPYGRESEPOQREHAPPREHAPWDADTERAKAGDAPRRHTHRVAEAGE  
 PRRHRARRRPGDEPDDRPERRRPRDATRPARAADGEGDDGERKRRHRHGPPAHDDRERRHRRRKENQGSQV  
 VSGPNLSTTRPIQQDLGRQDLPLAEDLDNMKNNKLATGEPASPHDSLGHSGLPSPAKIGNSTNPGPALATNP  
 QNAASRRTPNPNPNSNPGPPKTPENSLIVTNPSSTQPNsAKTARKPEHMAVEIPPACPLNHTVVQVKNAN  
 PDPLPKKEEEEKKEEEEADPGEDGPKMPPYSSMFI LSTTNPLRRLCHYILNLRYFEMCILMVIAMSSIALAAE  
 DPVQPNAPRNNVLRVFDYVFTGVFTFEMVIKIMIDLGLVLHQGAYFRDLWNILDFIVVSGALVAFVFTGNSKKG  
 DINTIKSLRVLRLVRLPLKTIKRLPKLKA VFD CVVNSLKNVFNILIVYMLFMFIFAVVAVQLFKGKFFHCTDES  
 KEFERDCRGKYLLEYKNEVKARDREWKKYEFHYDNVLWALLTLFTVSTGEGWPQVLKHSVDATFENQGPSQV  
 RMEMSIFYVVYFVVFVFFVNI FVALI I I TFQEQQDKMMEEYSLEKNERACIDFAISAKPLTRHMPQNKQSFQ  
 YRMWQFVVSPPFEYTIMAMIALNTIVLMMKFY GASVAYENALRVFNIVFTSLFSLECVLKVMAFGILNYFRDA  
 WNI FDFVTVLGSITDILVTEFGNNFINLSFLRLFRAARLIKLLRQGYTIRILLWTFVQSFKALPYVCLLIAML  
 FFYAIIGMQVFGNIGIDGEDSDEDEFQITEHNNFRFTFFQALMLLFRSATGEAWHNIMLSCLSGKPCDKNS  
 GILTADCGNEFAYFYFVSFIFLCSFLMLNLFVAVIMDNFEYLTRDSSILGPHHLDEYVRVWAEYDPAACGRIH  
 YKDMYSLLRVISPPGLGKCKPHRVACKRLLRMDLPVADDNTVHFNSTLMALIRTALDIKIAKGGADKQMDA  
 ELRKEMMAIWPNLSQKTLDDLVTPHKSTDLTVGKIYAAMMIMEYRQSKAKKLQAMREEQNRTPLMFQRMPEP  
 SPTQEGGQSNALPSTQLDPGGGLMAHEGGMKESPSWVTQRAQEMFQKTGTWSPERGGPIDMPNSQPNsQSVE  
 MREMGTGYS DSEHYLPMEGQTRAASMPRLPAENQRRRGRPRGNDLSTISDTPMKRSASVLGPKARRLDDYS  
 LERVPEENQRYHQRRDRGHHTSERSLGRYTDVDTGLGTDLSMTTQSGDLP SKDRDQDRGRPKDRKHPHHH  
 HHHHHHHPAPDRDRIAQERPDTRARAREQRWSRSPSEGREHTTHRQSSSVSGSPAPSTSGTSTPRRGRRO  
 LPQTPCTPRPLVSYSPAPRRPAARRMAGPAAPPGGSPRGCRRAPRWPAAHAPEGPRPRGADYTEPDSPREPPGG  
 AHDPA PRSPRT PRAAGCASPRHGRRLPNGYYAGHGAPRPRRTARRGAHDAYSESEDDWC\*  
 >rs230834853\_ENSMUSP00000158675\_c.1561:G>A\_p.R521H  
 ENSMUST00000238337.2|Cacna1a-212|ENSMUSG00000034656|+|chr8:g.85363283:G>A

MHLLRLSGQRGLTLQPNSSPSSLPSSPFPLAKGNFNLSFLRLFRAARLIKLLRQGYTIRILLWTFVQSFKVF  
GNIGIDGEDSDSEDEFQITEHNNFRTFFQALMLLFRSATGEAWHNIMLSCLSGKPCDKNSGILTADCGNEFA  
YFYFVSFIIFLCSFLMLNLFVAVIMDNFEYLTRDSSILGPHHLEDEYVRVWAEYDPAACGRIHYKDMYSLLRVIS  
PPLGLGKKCPHRVACKRLLRMDLPVADDNTVHFNSTLMALIRTALDIKIAKGGADKQQMDAELRKEMMAIWP  
LSQKTLDDLVTPHKSTDLTVGKIYAAMMIMEYYRQSKAKKLQAMREEQNRTPLMFQRMPEPPSPTQEGGSPQNA  
LPSTQLDPPGGGLMAHEGGMKESPSWVTQRAQEMFQKTGTWSPERGPPIDMPNSQPNSQSVEMREMGTGYS  
EHLPMEGQTRAASMPRLPAENQRRRGRPRGNDLSTISDTSMPKRSASVLGPKARRLDDYSLERVPEENQRY  
HQRRDRGRHHTSERSLGRYTDVDTGLGTDLSMTTQSGDLPSKDRDQDRGRPKDRKRRPHHHHHHHHHHPAPD  
RDRYAQERPDTRARAREQRWSRSPSEGREHTTHRQSSSVSGSPAPSTSGTSTPRRGRRLPQTCTPRPLV  
SYSPAPRRPAARMAGPAAPPGGSPRGCRRAPRWPAHAPEGPRPRGADYTEPDSPREPPGGAHDPAPRSRPTP  
RAAGCASPRHGRRLPNGYYAGHGAPRPTARRGAHDAYSESEDDWC\*  
>ENSMUSP00000158803\_c.6604:g>ATGAGGCAGTGGTCAGTCTGGGACTATAGTTCAAAGGCAGGCC  
ACCTGTCTTGTATACA\_p.R2202ins-fs ENSMUST00000238701.2|Cacna1a-  
213|ENSMUSG00000034656|+|chr8:g.85363283:g>ATGAGGCAGTGGTCAGTCTGGGACTATAG  
TTCAAAGGCAGGCCACCTGTCTTGTATACA  
MPRASWGS DPMLSPLSHELLHS PRYPGTDCTLAGSSRTLHVPWSQQMSGSLGPTLKRGGVVDHRDVI LAHQ  
AHKMHSTPQARRKEWEMARFGDEMPGRYGAGGGGSGPAAGVVGAAGGRGAGGSRQGGQPGAQRMYKQSMAQR  
ARTMALYNPIPVRQNC LTVNRS LFLFSEDNVVRKYAKKITEWPPFEYMI LATI IANCI VLAL EQHLPDDDKTP  
MSERLDDTEPYFIGIFCFEAGIKIVALGF AFHKGSYLRNGWNVMD FVVVLTGILATVGT EFDLRTLRAVRVLR  
PLKLVSGIPSLQVVLKSIMKAMIPLLQIGLLFFAILIFAIIGLEFYMGKFHTTCFEEGTDDIQGESPA PCGT  
EEPARTCPNGTKCQPYWEGPNNGITQFDNILFAVLTVFQCITMEGWTDLLYNSNDASGNTWNWLYFIPLIIG  
SFFMLNLVLGVLSGEFAKERERVENRRAFLKLRQQQIERELNGYMEWISKAEEVILAEDET DVEQRHPFDGA  
LRRATLKKSKTDLLNPEEAEDQLADIASVGS PFARASIKSAKLENSTFFHKKERRMRFYIRRMVKTQAFYWTV  
LSLVALNTLCVAIVHYNQPEWLSDFLYYAEFI FLGLFMSEMF IKMYGLGTRPYFHSSFNCFDCGVIIGSIFEV  
IWAVIKPGTSFGISVLRALRLLRIFKVTKYWASLRNLVSLNSMKSII SLLFLLFLFIVV FALLGMQLFGGQ  
FNFDEGTPPTNFDTFPAAIMTVFQILTGEDWNEVMEYDVISKQGGVQGGMVFSIYFIVLTLFGNYTLLNVFLAI  
AVDNLANAQELTKDEQEEEEANQKLALQKAKEVAEVSPLSAANMSI AVKEQQKNQKPTKSVWEQRTSEMRKQ  
NLLASREALYGDAERWPTPYARPLRPDVKTHLDRPLVDPQENRNNNTNKSRAPEALRPTARPRESARDPDA  
RRAWPGSPERAPGREGPYGRESEPPQREHAPPREHAPWDADTERAKAGDAPRRHTRHPVAEGEP RRHRARRRP  
GDEPDRPERRRPRDATRPARAADGEGDDGERKRRHRHGPAPHDDRERRHRRRKENQGGSPVSGPNLSTTR  
PIQQDLGRQDLPLAEDLDNMKNKLATGEPASPHDSLGHSGLPSPAKIGNSTNPGPALATNPQNAASRRTPN  
NPGNPSNP GP PKTPENSLIVTNPSS TQPN SAKTARKPEHMAVEI PPACPLNHTVVQVNKNANPDPLPKKEE  
KKEEEEDPGE DGPKMP PYS S MFI LSTTNPLRRLCHYI LNLRYFEMC ILMVIAMSSIALAAEDVPQPNAPRN  
NVLRYFDYVFTGVFTFEMVIK MIDLGLVLHQGAYFRDLWNILDFIVVSGALVAF AFTGNSKGDINTIKSLRV  
LRVLRPLKTIKRLPKLKA VFD CVVNSLKNVFNILIVYMLFMFIFAVVAVQLFKGKFFHCTDESKEFERDCRGK  
YLLYEKNEVKARDREWKKYEFHYDNVLWALLTLFTVSTEGEWQVQLKHSVDATFENQGGPSPGYRMEMSIFYVV  
YFVVFVFFVNI FVALI IITFQE QGDKMEEYSLEKNERACIDFAISAKPLTRHMPQNKQSFQYRMWQFV VSP  
PFEYTIMAMIALNTIVLMMKFYGASVAYENALRVFNIVFTSLFSLECVLKVMAFGILNYFRDAWNIFDFVTVL  
GSITDILVTEFGNFINLSFLRLFRAARLIKLLRQGYTIRILLWTFVQSFKALPYVCLLIAMLFFIYAIIGMQ  
VFGNIGIDGEDSDSEDEFQITEHNNFRTFFQALMLLFRSATGEAWHNIMLSCLSGKPCDKNSGILTADCGNE  
FAYFYFVSFIIFLCSFLMLNLFVAVIMDNFEYLTRDSSILGPHHLEDEYVRVWAEYDPAACGRIHYKDMYSLLRV  
ISPPLGLGKKCPHRVACKRLLRMDLPVADDNTVHFNSTLMALIRTALDIKIAKGGADKQQMDAELRKEMMAI  
PNLSQKTLDDLVTPHKSTDLTVGKIYAAMMIMEYYRQSKAKKLQAMREEQNRTPLMFQRMPEPPSPTQEGGSPQ  
NALPSTQLDPPGGGLMAHEGGMKESPSWVTQRAQEMFQKTGTWSPERGPPIDMPNSQPNSQSVEMREMGTGYS  
DSEHYLPMEGQTRAASMPRLPAENQRRRGRPRGNDLSTISDTSMPKRSASVLGPKARRLDDYSLERVPEENQ  
RYHQRRDRGRHHEAVVSAGTIVQRQATCLVYTPLSALWADTLMWTQVWGQI  
>ENSMUSP00000112436\_c.6337:g>ATGAGGCAGTGGTCAGTCTGGGACTATAGTTCAAAGGCAGGCC  
ACCTGTCTTGTATACA\_p.R2113ins-fs ENSMUST00000121390.8|Cacna1a-  
201|ENSMUSG00000034656|+|chr8:g.85363283:g>ATGAGGCAGTGGTCAGTCTGGGACTATAG  
TTCAAAGGCAGGCCACCTGTCTTGTATACA  
MARFGDEMPGRYGAGGGGSGPAAGVVGAAGGRGAGGSRQGGQPGAQRMYKQSMAQRARTMALYNPIPVRQNC  
LTVNRS LFLFSEDNVVRKYAKKITEWPPFEYMI LATI IANCI VLAL EQHLPDDDKTPMSERLDDTEPYFIGIF  
CFEAGIKIVALGF AFHKGSYLRNGWNVMD FVVVLTGILATVGT EFDLRTLRAVRVLRPLKLVSGIPSLQVVLK  
SIMKAMIPLLQIGLLFFAILIFAIIGLEFYMGKFHTTCFEEGTDDIQGESPA PCGTTEEPARTCPNGTKCQPY  
WEGPNNGITQFDNILFAVLTVFQCITMEGWTDLLYNSNDASGNTWNWLYFIPLIIGSFFMLNLVLGVLSGEF  
AKERERVENRRAFLKLRQQQIERELNGYMEWISKAEEVILAEDET DVEQRHPFDGALRRATLKKSKTDLLN  
PEEAEDQLADIASVGS PFARASIKSAKLENSTFFHKKERRMRFYIRRMVKTQAFYWTVLSLVALNTLCVAIVHY  
NQPEWLSDFLYYAEFI FLGLFMSEMF IKMYGLGTRPYFHSSFNCFDCGVIIGSIFEVIWAVIKPGTSFGISVL



RALRLLRIFKVTKYWASLRNLVSVLLNSMKSIIISLLFLLFLFIVVVFALLGMQLFGGQFNFDEGTPPTNFDTFF  
AAIMTVFQILTGEDWNEVMYDGIKSQGGVQGGMVFSIYFIVLTLFNGYTLNVLFLAIAVDNLANAQELTKDEQ  
EEEEANQKLALQKAKEVAEVSPLSAANMSIAVKEQQKNQKPTKSVWEQRTSEMRKQNLLASREALYGDAEER  
WPTYARPLRPDVKTHLDRPLVVDPQENRNNNTNKSRAPEALRPTARPRESARDPDARRAWPGSPERAPGREG  
PYGRESEPPQREHAPPREHAPWDADTERAKAGDAPRRHTRHPVAEGERRRHRARRRPGDEPDDRPERPRPRD  
ATRPARAADGEGDDGERKRRHRHGPPAHDDRERRRRRKENQSGVFPVSGPNLSTTRPIQQDLGRQDLPLAED  
LDNMKNNKLATGEPASPHDSLGHSLPSPAKIGNSTNPGPALATNPQNAASRRTPNPNPNSNPSPGPKTPEN  
SLIVTNPSSSTQPNSAKTARKPEHMAVEIPPACPLNHTVVQVKNANPDPLPKKEEEKKEEEEADPGEDGPKP  
MPYSSMFI LSTTNPLRRLCHYILNLRVYFEMCILMVIAMSSIALAAEDVPQPNAPRNNVLRVYFDYVFTGVFTF  
EMVIKIMIDLGLVLHQGAYFRDLWNI LDFIVVSGALVAFVFTGNSKGDINTIKSLRVLRLPLKTIKRLPKL  
KAVFDCVVNSLKNVFNILIVYMLFMFIFAVVAVQLFKGKFFHCTDESKEFERDCRGKYLLEYKNEVKARDREW  
KKYEFHYDNVLWALLTLFTVSTGEGWPQVLKHSVDATFENQGPSPGYRMEMSIFYVVYFVVFPPFFVNI FVAL  
IIITFQEQGDKMMEEYSLEKNERACIDFAISAKPLTRHMPQNKQSFQYRMWQFVVSPPFEYTIMAMIALNTIV  
LMMKFY GASVAYENALRVFNIVFTSLFSLECVLKVMAFGILNYFRDAWNIFDFVTVLGSITDILVTEFGNFI  
NLSFLRLFRAARLIKLLRQGYTIRILLWTFVQSFKALPYVCLLIAMLFFIYAIIGMQVFGNIGIDGEDSDSDE  
DEFQITEHNNFRFTFFQALMLLFRSATGEAWHNIMLSCLSGKPCDKNSGILTADCGNEFAYFYFVSFIFLCSFL  
MLNLFVAVIMDNFEYLTRDSSILGPHHLDEYVRVWAEYDPAACGRH HYKDMYSLLRVISPPLGLGKKCPHRVA  
CKRLLRMDLPVADDNTVHFNSTLMALIRTALDIKIAKGGADKQMDAELRKEMMAIWPNSQKTLDLLVTPHK  
STDLTVGKIYAAMMIMEYYRQSKAKKLQAMREEQNRTPLMFQRMPPSPTQEGGQPSQNALPSTQLDPPGGGLMA  
HEGGMKESPSWVTQRAQEMFQKTGTWSPERGPPIDMPNSQPNSSVEMREMGTGYSYSDSEHYLPMEGQTRAAS  
MPRLPAENQRRRGRPRGNDLSTISDTSMPKRSASVLPKARRLDDYSLERVPPEENQRYHQRRRDRGHHEAVV  
SAGTIVQRQATCLVYTPLSALWADTLMWTVVWGQI  
>ENSMUSP00000114055\_c.6196:g>ATGAGGCAGTGGTCAGTGCTGGGACTATAGTTCAAAGGCAGGCC  
ACCTGTCTTGTATACA\_p.R2066ins-fs ENSMUST00000122053.2|Cacna1a-  
202|ENSMUSG00000034656|+|chr8:g.85363283:g>ATGAGGCAGTGGTCAGTGCTGGGACTATAG  
TTCAAAGGCAGGCCACCTGTCTTGTATACA  
MARFGDEMPGRYGAGGGSGPAAGVVVGAAGGRGAGGSRQGGQPGAQRMYKQSMARARTMALYNPIVVRQNC  
LTVNRSFLFSEDNVDDETEPYFIGIFCFEAGIKIVALGFHFKGSYLRNGWNVMDVFFVLTGILATVGTDFDL  
RTLRAVRVLRPLKLVSGIPSLQVVLKSIKAMIPLLQIGLLFFAILIFAIIGLEFYMGKFHTTCFEEGTDDI  
QGESPAPCGTEEPARTCPNGTKCQPYWEGPNNGITQFDNIFLAVLTVFQCITMEGWTDLLYNSNDASGNTWNW  
LYFIPLIIGSFFMLNLVLGVLSEFAKERERVENRRAFLKLRQQQIERELNGYMEWISKAEEVILAEDETD  
VEQRHPFDGALRRATLKKSKTDLLNPEEAEDQLADIASVGSPPFARASIKSAKLENSTFFHKKERMRFYIRRM  
VKTQAFYWTVLSLVALNTLCVAIVHYNQPEWLSDFLYAEFIFLGLFMSEMIKMYGLGTRPYFHSSFCFCDC  
GVIIGSIFEVIWAVIKPGTSFGISVLRALRLLRIFKVTKYWASLRNLVSVLLNSMKSIIISLLFLLFLFIVVFA  
LLGMQLFGGQFNFDEGTPPTNFDTFFAAIMTVFQILTGEDWNEVMYDGIKSQGGVQGGMVFSIYFIVLTLFNGY  
YTLNVLFLAIAVDNLANAQELTKDEQEEEEANQKLALQKAKEVAEVSPLSAANMSIAVKEQQKNQKPTKSVW  
EQRTSEMRKQNLLASREALYGDAEERWPTYARPLRPDVKTHLDRPLVVDPQENRNNNTNKSRAPEALRPTAR  
PRESARDPDARRAWPGSPERAPGREGPYGRESEPPQREHAPPREHAPWDADTERAKAGDAPRRHTRHPVAEGER  
RRHRARRRPGDEPDDRPERPRPRDATRPARAADGEGDDGERKRRHRHGPPAHDDRERRRRRKENQSGVFP  
VSGPNLSTTRPIQQDLGRQDLPLAEDLDNMKNNKLATGEPASPHDSLGHSLPSPAKIGNSTNPGPALATNP  
QNAASRRTPNPNPNSNPSPGPKTPENSLIVTNPSSSTQPNSAKTARKPEHMAVEIPPACPLNHTVVQVKNAN  
PDPLPKKEEEKKEEEEADPGEDGPKMPYSSMFI LSTTNPLRRLCHYILNLRVYFEMCILMVIAMSSIALAAE  
DPVQPNAPRNNVLRVYFDYVFTGVFTFEMVIKIMIDLGLVLHQGAYFRDLWNI LDFIVVSGALVAFVFTGNSKGD  
DINTIKSLRVLRLPLKTIKRLPKLAVFDCVVNSLKNVFNILIVYMLFMFIFAVVAVQLFKGKFFHCTDES  
KEFERDCRGKYLLEYKNEVKARDREWKKYEFHYDNVLWALLTLFTVSTGEGWPQVLKHSVDATFENQGPSPGY  
RMEMSIFYVVYFVVFPPFFVNI FVALIIITFQEQGDKMMEEYSLEKNERACIDFAISAKPLTRHMPQNKQSFQ  
YRMWQFVVSPPFEYTIMAMIALNTIVLMMKFY GASVAYENALRVFNIVFTSLFSLECVLKVMAFGILNYFRDA  
WNIFDFVTVLGSITDILVTEFGNFI NLSFLRLFRAARLIKLLRQGYTIRILLWTFVQSFKALPYVCLLIAML  
FFIYAIIGMQVFGNIGIDGEDSDSDEDEFQITEHNNFRFTFFQALMLLFRSATGEAWHNIMLSCLSGKPCDKNS  
GILTADCGNEFAYFYFVSFIFLCSFLMLNLFVAVIMDNFEYLTRDSSILGPHHLDEYVRVWAEYDPAACGRH  
YKDMYSLLRVISPPLGLGKKCPHRVACKRLLRMDLPVADDNTVHFNSTLMALIRTALDIKIAKGGADKQMDA  
ELRKEMMAIWPNSQKTLDLLVTPHKSTDLTVGKIYAAMMIMEYYRQSKAKKLQAMREEQNRTPLMFQRMPP  
SPTQEGGQPSQNALPSTQLDPPGGGLMAHEGGMKESPSWVTQRAQEMFQKTGTWSPERGPPIDMPNSQPNSSV  
EMREMGTGYSYSDSEHYLPMEGQTRAASMPRLPAENQRRRGRPRGNDLSTISDTSMPKRSASVLPKARRLDDY  
SLERVPPEENQRYHQRRRDRGHHEAVVSAGTIVQRQATCLVYTPLSALWADTLMWTVVWGQI  
>ENSMUSP00000149242\_c.6196:g>ATGAGGCAGTGGTCAGTGCTGGGACTATAGTTCAAAGGCAGGCC  
ACCTGTCTTGTATACA\_p.R2066ins-fs ENSMUST00000215756.2|Cacna1a-

211 | ENSMUSG00000034656 | + | chr8:g.85363283:G>ATGAGGCAGTGGTCAGTGCTGGGACTATAG  
TTCAAAGGCAGGCCACCTGTCTTGATACA  
XRMYKQSMARARTMALYNPI PVRQNCLTVNRSFLFSEDNVVRKYAKKITEWPPFEYMILATIIANCIVLAL  
EQHLPDDDKTPMSERLDDTEPYFIGIFCFEAGIKIVALGFHKGSYLRNGWNVMDVFFVVLGTGILATVGTGTEFD  
LRTLRAVRVLRPLKLVSGIPSLQVVLKSIKAMIPLLQIGLLFFAILIFAIIGLEFYMGKFHTTCFEEGTDD  
IQGESAPCGTEEPARTCPNGTKCQPYWEGPNNGITQFDNILFAVLTVFQCITMEGWTDLLYNSNDASGNTWN  
WLYFIPLIIIGSFFMLNLVGLVLSGEFAKERERVENRRAFLKLRQQQIERELNGYMEWISKAEEVILAEDET  
DVEQRHPPFDALRRATLKKSKTDLLNPEEAEDQLADIASVGSPPARASIKSAKLENSTFFHKKERRMRFYIRRM  
VKTQAFYWTVLSLVALNTLCVAIVHYNQPEWLSDFLYYAEFIFLGLFMSEMF IKMYGLGTRPYFHSSFNCFDC  
GVIIGSIFEVIWAVIKPGTSFGISVLRALRLLRIFKVTKYASLRNLVVSLLNSMKSII SLLFLLFLFIVVFA  
LLGMQLFGGQFNDFEGTPTNFDTFPAAIMTVFQILTGEDWNEVMDGIKSQGGVQGGMVFSIYFIVLTLFGN  
YTLNLVFLAIAVDNLANAQELTKDEQEEEEAAANQKLALQKAKEVAEVSPLSAANMSI AVKEQQKNQKPTKSVW  
EQRTSEMRKQNLASREALYGDAERWPTPYARPLRPDVKTHLDRPLVVDPQENRNNNTNKSRAPEALRPTAR  
PRESARDPDARRAWPGSPERAPGREPGYGRESEPPQREHAPPREHAPWDADTERAKAGDAPRRHTRHPVAEAGE  
PRRHRARRRPGDEPDDRPERRPRPRDATRPARAADGEGDDGERKRRHRHGPAAHDDRERRRRRRKENQSGSVP  
VSGPNLSTTRPIQQDLGRQDLPLAEDLDNMKNKSLATGEPASPHDSLGHSGLPPSPAKIGNSTNPGPALATNP  
QNAASRRTPNPNPGNPSNPGPKTPENSLIVTNPSSTQPNSAKTARKPEHMAVEIPACPLNHTVVQVKNAN  
PDLPLPKKEEEKKEEEDDPGEDGPKMPPYSSMFI LSTTNPLRRLCHYILNLRIFYEMCII LMVIAMSSIALAAE  
DPVQPNAPRNVLRYFDYVFTGVFTFEMVIK MIDLGLVLHQGAYFRDLWNILDFIVVSGALVAFVFTGNSK GK  
DINTIKSLRVLRLRPLKTIKRLPKLKA VFD CVVNSLKNVFNILIVYMLFMFIFAVVAVQLFKGKFFHCTDES  
KEFERDCRGKYLLEYKNEVKARDREWKKYEFHYDNVLLWALLTFTVSTGEGWPQVLKHSVDATFENQGPSGY  
RMEMSIFYVVYFVVFVFFVNI FVALIIITFQEQGDMMEEYSLEKNERACIDFAISAKPLTRHMPQNKQSFQ  
YRMWQFVVSPPFEYTIMAMIALNTIVLMMKFY GASVAYENALRVFNIVFTSLFSLECVLKVMAFGI LNYFRDA  
WNIFDFVTVLGSITDILVTEFGNNFINLSFLRLFRAARLIKLLRQGYTIRILLWTFVQSFKALPYVCLLIAML  
FFIYAIIGMQVFGNIGIDGEDSDEDEFQITEHNNFRTFFQALMLLFRSATGEAWHNIMLSCLSGKPCDKNS  
GILTADCGNEFAYFYFVFSIFLCSFMLNLVAVIMDNFEYLTRDSSILGPHHLDEYVRVWAEYDPAACGR I H  
YKDMYSLLRVIS PPLGLGKKCPHRVACKRLLRMDLPVADDNTVHFNSTLMALIRTALDIKIAKGGADKQMDA  
ELRKEMMAIWP NLSQKTLDLLVTPHKSTDLTVGKIYAAMMIMEYYRQSKAKKLQAMREEQNRTPLMFQRM EPP  
SPTQEGGQSQNALPSTQLDPPGGGLMAHEGGMKESPSWVTQRAQEMFQKTGTWSPERGPPIDMPNSQPNSQSVE  
MREMGTDGYS DSEHYLPMEGQTRAASMPRLPAENQRRRGRPRGNDLSTISDTSMPKRSASVLGPKARRLDDYS  
LERVPPEENQRYHQRRDRGHHEAVVSAGTIVQRQATCLVYTPLSALWADTLMWTQVWGQI  
>ENSMUSP00000158675\_c.1561:G>ATGAGGCAGTGGTCAGTGCTGGGACTATAGTTCAAAGGCAGGCC  
ACCTGTCTTGATACA\_p.R521ins-fs ENSMUST00000238337.2|Cacna1a-  
212 | ENSMUSG00000034656 | + | chr8:g.85363283:G>ATGAGGCAGTGGTCAGTGCTGGGACTATAG  
TTCAAAGGCAGGCCACCTGTCTTGATACA  
MHLRLVSGQRGLTLQPNSSPPLAKGNF INLSFLRLFRAARLIKLLRQGYTIRILLWTFVQSFKVF  
GNIGIDGEDSDEDEFQITEHNNFRTFFQALMLLFRSATGEAWHNIMLSCLSGKPCDKNSGILTADCGNEFA  
YFYFVFSIFLCSFMLNLVAVIMDNFEYLTRDSSILGPHHLDEYVRVWAEYDPAACGR I HYKDMYSLLRVIS  
PPLGLGKKCPHRVACKRLLRMDLPVADDNTVHFNSTLMALIRTALDIKIAKGGADKQMDAELRKEMMAIWP N  
LSQKTLDLLVTPHKSTDLTVGKIYAAMMIMEYYRQSKAKKLQAMREEQNRTPLMFQRM EPPSPTQEGGQSQNA  
LPSTQLDPPGGGLMAHEGGMKESPSWVTQRAQEMFQKTGTWSPERGPPIDMPNSQPNSQSVE MREMGTDGYS  
DSEHYLPMEGQTRAASMPRLPAENQRRRGRPRGNDLSTISDTSMPKRSASVLGPKARRLDDYS LERVPPEENQRY  
HQRRDRGHHEAVVSAGTIVQRQATCLVYTPLSALWADTLMWTQVWGQI  
>rs252377326\_ENSMUSP00000158803\_c.6615:C>T\_p.R2206C  
ENSMUST00000238701.2|Cacna1a-213|ENSMUSG00000034656|+|chr8:g.85363294:C>T  
MPRASWGS DPMLSPLSHELLHSPRYPGTDCTLAGSSRTLHVPWSQQMSGSLGPTLKRGGVVDHRDVI LAHQ  
AHKMHSTPQARRKEWEMARFGDEMPGRYGAGGGGSPAAGVVVGAAGGRGAGGSRQGGQPGAQRMYKQSMAR  
ARTMALYNPI PVRQNCLTVNRSFLFSEDNVVRKYAKKITEWPPFEYMILATIIANCIVLALAEQHL PDDDKTP  
MSERLDDTEPYFIGIFCFEAGIKIVALGFHKGSYLRNGWNVMDVFFVVLGTGILATVGTGTEFDLRTLRAVRVLR  
PLKLVSGIPSLQVVLKSIKAMIPLLQIGLLFFAILIFAIIGLEFYMGKFHTTCFEEGTDDIQGESAPCGT  
EEPARTCPNGTKCQPYWEGPNNGITQFDNILFAVLTVFQCITMEGWTDLLYNSNDASGNTWNWLYFIPLIIIG  
SFFMLNLVGLVLSGEFAKERERVENRRAFLKLRQQQIERELNGYMEWISKAEEVILAEDET DVEQRHPPFDGA  
LRRATLKKSKTDLLNPEEAEDQLADIASVGSPPARASIKSAKLENSTFFHKKERRMRFYIRRMVKTQAFYWTV  
LSLVALNTLCVAIVHYNQPEWLSDFLYYAEFIFLGLFMSEMF IKMYGLGTRPYFHSSFNCFDCGVIIGSIFEV  
I WAVIKPGTSFGISVLRALRLLRIFKVTKYASLRNLVVSLLNSMKSII SLLFLLFLFIVV FALLGMQLFGGQ  
FNDFEGTPTNFDTFPAAIMTVFQILTGEDWNEVMDGIKSQGGVQGGMVFSIYFIVLTLFGNYTLNLVFLAIA  
AVDNLANAQELTKDEQEEEEAAANQKLALQKAKEVAEVSPLSAANMSI AVKEQQKNQKPTKSVWEQRTSEMRKQ  
NLLASREALYGDAERWPTPYARPLRPDVKTHLDRPLVVDPQENRNNNTNKSRAPEALRPTARPRESARDPDA

RRAWPGSPERAPGREGPYGRESEPPQREHAPPREHAPWDADTERAKAGDAPRRHTRHPVAEGEPRRHRARRRP  
 GDEPDDRPERRRPRDTRPARAADGEGDDGERKRRHRHGPPAHDDRERRRHRRRKENQGSQVPSGPNLSTTR  
 PIQQDLGRQDLPLAEDLDNMKNKLATGEPASPHDSLGHSLPSPAKIGNSTNPGPALATNPQNAASRRTPN  
 NPGNPSNPGPPTPENSLIVTNPSSTQPNSAKTARKPEHMAVEIPPACPLNHTVVQVNKNANPDPLPKKEEE  
 KKEEEEADPGEDGPKMPPYSSMFI LSTTNPLRRLCHYI LNLRYFEMC ILMVIAMSSIALAAEDPVQPNAPRN  
 NVLRYFDYVFTGVFTFEMVIK MIDLGLVLHQGAYFRDLWNILDFIVVSGALVAFVFTGNSKGDINTIKSLRV  
 LRVLRPLKTIKRLPKLKAVFDCVVNSLKNVFNILIVYMLFMFIFAVVAVQLFKGKFFHCTDESKEFERDCRGK  
 YLLYEKNEVKARDREWKKYEFHYDNVLWALLTLFTVSTGEGWPQVLKHSVDATFENQGPSGYRMEMSIFYVV  
 YFVVFPFFVNI FVALIIITFQEQGDKMMEEYSLEKNERACIDFAISAKPLTRHMPQNKQSFQYRMWQFVVS  
 PFEYTIMAMIALNTIVLMMKFYGASVAYENALRVFNIVFTSLFSLCFLKVMVAFGILNYFRDAWNIFDFVTVL  
 GSITDILVTEFGNNFINLSFLRLFRAARLIKLLRQGYTIRILLWTFVQSFKALPYVCLLIAMLFFIYAIIGMQ  
 VFGNIGIDGEDSDSDEDEFQITEHNNFRFTFFQALMLLFRSATGEAWHNIMLSCLSGKPCDKNSGILTADCGNE  
 FAYFYFVSFIFLCSFLMLNLFVAVIMDNFEYLTRDSSILGPHHLDEYVRVWAEYDPAACGRIHYKDMYSLLRV  
 ISPPLGLGKCKPHRVACKRLLRMDLPVADDNTVHFNSTLMALIRTALDIKIAKGGADKQQMDAELRKEMMAIW  
 PNLSQKTLDDLVTPHKSTDLTVGKIYAAMMIMEYYRQSKAKKLQAMREEQNRTPLMFQRMPEPSPQTQEGGSPQ  
 NALPSTQLDPPGGGLMAHEGGMKESPSWVTQRAQEMFQKTGTWSPERGPPIDMPSNQNSQSVEMREMGTDGYS  
 DSEHYLPMEGQTRAASMPRLPAENQRRRGRPRGNDLSTISDTSMPKRSASVGLPKARRLDDYSLERVPEENQ  
 RYHQRRDRGHRTSECSLGRYTDVDTGLGTDLSMTTQSGDLPSKDRDQDRGRPKDRKHPHHHHHHHHHPA  
 PDRDRYAQERPDTGRARAREQRWSRSPSEGREHTTHRQSSSVSGSPAPSTSGTSTPRRGRRLPQTPCTPRP  
 LVSYSAPRRRPAARRMAGPAAPPGGSPRGCRRAPRWPAAHAPEGPRPRGADYTEPDSPREPPGGAHDPAPRSPR  
 TPRAAGCASPRHGRRLPNGYYAGHGAPRPRRTARRGAHDAYSESEDDWC\*  
 >rs252377326\_ENSMUSP00000112436\_c.6348:C>T\_p.R2117C  
 ENSMUST00000121390.8|Cacna1a-201|ENSMUSG00000034656|+|chr8:g.85363294:C>T  
 MARFGDEMPGRYGAGGGGSGPAAAGVVGAAGGRGAGGSRQGGQPGAQRMYKQSMARARTMALYNPIVPRQNC  
 LTVNRSLFLVSEDNVVRKYAKKITEWPPFEYMI LATI IANCI VLALQHL PDDDKT PMSERLDDTEPYFIGIF  
 CFEAGIKIVALGFAFHKGSYLRNGWNVMDFFVVLTGILATGTEFDLRTLRAVRVLRPLKLVSGIPSLQVVLK  
 SIMKAMIPLLQIGLFFAILIFAIIGLEFYMGKFHTTCFEEGTDDIQGESPACVGTTEEPARTCNGTQCPY  
 WEGPNNGITQFDNILFAVLTVFQCI TMEGWTDLLYNSNDASGNTWNWLYFIPLIIIGSFFMLNLVLGVLGSEF  
 AKERERVENRRAFLKLRQQQIERELNGYMEWISKAEEVILAEDET DVEQRHPFDGALRRATLKKSKTDLLNP  
 EEAEDQLADIASVGSPPARASIKSAKLENSTFFHKKERRMRYIRRMVKTQAFYWTVLSLVALNTLCVAIVHY  
 NQPEWLSDFLYYAEFIFLGLFMSEMIKMYGLGTRPYFHSSFNCFDCGVIIGSIFEVIWAVIKPGTSGFISVL  
 RALRLLRIFKVTKYWASLRNLVVSLLNSMKSIIISLLFLLFLFIVV FALLGMQLFGGQFNFDGTPPTNFDTFP  
 AAIMTVFQILTGEDWNEVMYDGIKSQGGVQGGMVFSIYFIVLTLFGNYTLLNVFLAIAVDNLANAQELTKDEQ  
 EEEEEANQKLALQKAKEVAEVSPLSAANMSIAVKEQQKNQPKTSVWEQRTSEMRKQNLLASREALYGDAER  
 WPTPYARPLRPDVKTHLDRPLVVDPQENRNNNTNKSRAPEALRPTARPRESDARDARRAWPGSPERAPGREG  
 PYGRESEPPQREHAPPREHAPWDADTERAKAGDAPRRHTRHPVAEGEPRRHRARRRPGDEPDRPERRPRPRD  
 ATRPARAADGEGDDGERKRRHRHGPPAHDDRERRRHRRRKENQGSQVPSGPNLSTTRPIQQDLGRQDLPLAED  
 LDNMKNKLATGEPASPHDSLGHSLPSPAKIGNSTNPGPALATNPQNAASRRTPNPNNPGNPSNPGPPTPEN  
 SLIVTNPSSTQPNSAKTARKPEHMAVEIPPACPLNHTVVQVNKNANPDPLPKKEEEKKEEEEADPGEDGPKP  
 MPPYSSMFI LSTTNPLRRLCHYI LNLRYFEMC ILMVIAMSSIALAAEDPVQPNAPRN NVLRYFDYVFTGVFTF  
 EMVIK MIDLGLVLHQGAYFRDLWNILDFIVVSGALVAFVFTGNSKGDINTIKSLRVLRVLRPLKTIKRLPKL  
 KAVFDCVVNSLKNVFNILIVYMLFMFIFAVVAVQLFKGKFFHCTDESKEFERDCRGKYLLEYEKNEVKARDREW  
 KKYEFHYDNVLWALLTLFTVSTGEGWPQVLKHSVDATFENQGPSGYRMEMSIFYVVYFVVFVNI FVAL  
 I IITFQEQGDKMMEEYSLEKNERACIDFAISAKPLTRHMPQNKQSFQYRMWQFVVSPPFEYTIMAMIALNTIV  
 LMMKFYGASVAYENALRVFNIVFTSLFSLCFLKVMVAFGILNYFRDAWNIFDFVTVLGSITDILVTEFGNNFI  
 NLSFLRLFRAARLIKLLRQGYTIRILLWTFVQSFKALPYVCLLIAMLFFIYAIIGMQVFGNIGIDGEDSDS  
 DEFQITEHNNFRFTFFQALMLLFRSATGEAWHNIMLSCLSGKPCDKNSGILTADCGNEFAYFYFVSFIFLCSFL  
 MLNLFVAVIMDNFEYLTRDSSILGPHHLDEYVRVWAEYDPAACGRIHYKDMYSLLRVISPPLGLGKCKPHRVA  
 CKRLLRMDLPVADDNTVHFNSTLMALIRTALDIKIAKGGADKQQMDAELRKEMMAIWPNLSQKTLDDLVT  
 PHKSTDLTVGKIYAAMMIMEYYRQSKAKKLQAMREEQNRTPLMFQRMPEPSPQTQEGGSPQNALPSTQLDPPGGGLMA  
 HEGGMKESPSWVTQRAQEMFQKTGTWSPERGPPIDMPSNQNSQSVEMREMGTDGYS DSEHYLPMEGQTRAAS  
 MPRLPAENQRRRGRPRGNDLSTISDTSMPKRSASVGLPKARRLDDYSLERVPEENQRYHQRRDRGHRTSEC  
 SLGRYTDVDTGLGTDLSMTTQSGDLPSKDRDQDRGRPKDRKHPHHHHHHHHHPAPDRDRYAQERPDTGRA  
 RAREQRWSRSPSEGREHTTHRQSSSVSGSPAPSTSGTSTPRRGRRLPQTPCTPRPLVSYSPAPRRRPAARRM  
 AGPAAPPGGSPRGCRRAPRWPAAHAPEGPRPRGADYTEPDSPREPPGGAHDPAPRSPRTPRAAGCASPRHGRRL  
 PNGYYAGHGAPRPRRTARRGAHDAYSESEDDWC\*  
 >rs252377326\_ENSMUSP00000114055\_c.6207:C>T\_p.R2070C  
 ENSMUST00000122053.2|Cacna1a-202|ENSMUSG00000034656|+|chr8:g.85363294:C>T



YKDMYSLLRVISPPGLGKCKPHRVACKRLLRMDLPVADDNTVHFNSTLMALIRTDALDIKIAKGGADKQOMDA  
ELRKEMMAIWPNLQKTLDLLVTPHKSTDLTVGKIYAAMMIMEYYRQSKAKKLQAMREEQNRTPLMFQRMPEPP  
SPTQEGGSPQNALPSTQLDPPGGGLMAHEGGMKESPSWVTQRAQEMFQKTGTWSPERGGPIDMPNSQPNSSQVE  
MREMGTGYSDEHYLPMEGQTRAASMPRLPAENQRRRGRPRGNDLSTISDTPMKRSASVLGPKARRLDDYS  
LERVPPPEENQRYHQRRDRGHRTSECSLGRYTDVDTGLGTDLSMTTQSGDLPSKDRDQDRGRPKDRKHPHHH  
HHHHHHHPAPDRDRYAQERPDTGRARAREQRWSRSPSEGREHTTHRQSSSVSGSPAPSTSGTSTPRRGRRQ  
LPQTPTPRPLVSYSPAPRRPAARRMAGPAAPPGGSPRGCRRAPRWPAAHAPEGPRPRGADYTEPDSPREPPGG  
AHDPAFRSPRTPRAAGCASPRHGRRLPNGYYAGHGAPRPRRTARRGAHDAYSESEDDWC\*

>rs252377326\_ENSMUSP00000158675\_c.1572:C>T\_p.R525C  
ENSMUST00000238337.2|Cacna1a-212|ENSMUSG00000034656|+|chr8:g.85363294:C>T  
MHLRLSLGQRLTLQPNSSLPSSPFLAKGNFINLSFLRLFRAARLIKLLRQGYTIRILLWTFVQSFQVF  
GNIGIDGEDSDSDEDEFQITEHNNFRFTFFQALMLLFRSATGEAWHNIMLSCLSGKPCDKNSGILTADCGNEFA  
YFYFVSFIFLCSFLMLNLFVAVIMDNFEYLTRDSSILGPHHLDEYVRVWAEYDPAACGRIHYKDMYSLLRVIS  
PPLGLGKCKPHRVACKRLLRMDLPVADDNTVHFNSTLMALIRTDALDIKIAKGGADKQOMDAELRKEMMAIWP  
LSQKTLDLLVTPHKSTDLTVGKIYAAMMIMEYYRQSKAKKLQAMREEQNRTPLMFQRMPEPPSPTQEGGSPQNA  
LPSTQLDPPGGGLMAHEGGMKESPSWVTQRAQEMFQKTGTWSPERGGPIDMPNSQPNSSQVEMREMGTGYS  
EHYLPMEGQTRAASMPRLPAENQRRRGRPRGNDLSTISDTPMKRSASVLGPKARRLDDYSLERVPPPEENQRY  
HQRRDRGHRTSECSLGRYTDVDTGLGTDLSMTTQSGDLPSKDRDQDRGRPKDRKHPHHHHHHHPAPD  
RDRYAQERPDTGRARAREQRWSRSPSEGREHTTHRQSSSVSGSPAPSTSGTSTPRRGRRQLPQTPTPRPLV  
SYSPAPRRPAARRMAGPAAPPGGSPRGCRRAPRWPAAHAPEGPRPRGADYTEPDSPREPPGGAHDPAPRSRTP  
RAAGCASPRHGRRLPNGYYAGHGAPRPRRTARRGAHDAYSESEDDWC\*

>rs37482583\_ENSMUSP00000158803\_c.7356:G>C\_p.E2453Q  
ENSMUST00000238701.2|Cacna1a-213|ENSMUSG00000034656|+|chr8:g.85366320:G>C  
MPRASWGS D P M L S P L S H E L L H S P R Y P G T D C T L A G S S R T L H V P W S Q Q M S G S L E G P T L K R R G G V D H R D V I L A H Q  
A H K M H S T P Q A R R K E W E M A R F G D E M P G R Y G A G G G S G P A A G V V G A A G G R G A G G S R Q G G Q P G A Q R M Y K Q S M A Q R  
A R T M A L Y N P I P V R Q N C L T V N R S L F L F S E D N V V R K Y A K K I T E W P P F E Y M I L A T I I A N C I V L A L E Q H L P D D D K T P  
M S E R L D D T E P Y F I G I F C F E A G I K I V A L G F A F H K G S Y L R N G W N V M D F V V V L T G I L A T V G T E F D L R T L R A V R V L R  
P L K L V S G I P S L Q V V L K S I M K A M I P L L Q I G L L L F F A I L I F A I I G L E F Y M G K F H T T C F E E G T D D I Q G E S P A P C G T  
E E P A R T C P N G T K C Q P Y W E G P N N G I T Q F D N I L F A V L T V F Q C I T M E G W T D L L Y N S N D A S G N T W N W L Y F I P L I I G  
S F F M L N L V L G V L S G E F A K E R E R V E N R R A F L K L R R Q Q I E R E L N G Y M E W I S K A E E V I L A E D E T D V E Q R H P F D G A  
L R R A T L K K S K T D L L N P E E A E D Q L A D I A S V G S P F A R A S I K S A K L E N S T F F H K K E R R M R F Y I R R M V K T Q A F Y W T V  
L S I V A L N T L C V A I V H Y N Q P E W L S D F L Y A E F I F L G L F M S E M F I K M Y G L G T R P Y F H S S F N C F D C G V I G S I F E V  
I W A V I K P G T S F G I S V L R A L R L L R I F K V T K Y W A S L R N L V V S L L N S M K S I I S L L F L L F L F I V V F A L L G M Q L F G G Q  
F N F D E G T P P T N F D T F P A A I M T V F Q I L T G E D W N E V M Y D G I K S Q G G V Q G G M V F S I Y F I V L T L F G N Y T L L N V F L A I  
A V D N L A N A Q E L T K D E Q E E E E A A N Q K L A L Q K A K E V A E V S P L S A A N M S I A V K E Q Q K N Q K P T K S V W E Q R T S E M R K Q  
N L L A S R E A L Y G D A A E R W P T P Y A R P L R P D V K T H L D R P L V V D P Q E N R N N N T N K S R A P E A L R P T A R P R E S A R D P D A  
R R A W P G S P E R A P G R E G P Y G R E S E P Q Q R E H A P P R E H A P W D A D T E R A K A G D A P R R H T H R P V A E G E P R R H R A R R R P  
G D E P D D R P E R R P R P R D A T R P A R A A D G E G D D G E R K R R R H G P P A H D D R E R R H R R R K E N Q G S G V P V S G P N L S T T R  
P I Q Q D L G R Q D L P L A E D L D N M K N K L A T G E P A S P H D S L G H S G L P P S P A K I G N S T N P G P A L A T N P Q N A A S R R T P N  
N P G N P S N P G P P K T P E N S L I V T N P S S T Q P N S A K T A R K P E H M A V E I P P A C P L N H T V V Q V N K N A N P D P L P K K E E E  
K K E E E E A D P G E D G P K P M P P Y S M F I L S T T N P L R R L C H Y I L N L R Y F E M C I L M V I A M S S I A L A A E D P V Q P N A P R N  
N V L R Y F D Y V F T G V F T F E M V I K M I D L G L V L H Q G A Y F R D L W N I L D F I V V S G A L V A F A F T G N S K G K D I N T I K S L R V  
L R V L R P L K T I K R L P K L K A V F D C V V N S L K N V F N I L I V Y M L F M F I F A V V A V Q L F K G K F F H C T D E S K E F E R D C R G K  
Y L L Y E K N E V K A R D R E W K K Y E F H Y D N V L W A L L T L F T V S T G E G W P Q V L K H S V D A T F E N Q G P S P G Y R M E M S I F Y V V  
Y F V V F P F F F V N I F V A L I I I T F Q E Q G D K M M E E Y S L E K N E R A C I D F A I S A K P L T R H M P Q N K S F Q Y R M W Q F V V S P  
P F E Y T I M A M I A L N T I V L M M K F Y G A S V A Y E N A L R V F N I V F T S L F S L E C V L K V M A F G I L N Y F R D A W N I F D F V T V L  
G S I T D I L V T E F G N N F I N L S F L R L F R A A R L I K L L R Q G Y T I R I L L W T F V Q S F K A L P Y V C L L I A M L F F I Y A I G M Q  
V F G N I G I D G E D E D S D E D E F Q I T E H N N F R T F F Q A L M L L F R S A T G E A W H N I M L S C L S G K P C D K N S G I L T A D C G N E  
F A Y F Y F V S F I F L C S F L M L N L F V A V I M D N F E Y L T R D S S I L G P H H L D E Y V R V W A E Y D P A A C G R I H Y K D M Y S L L R V  
I S P P L G L G K C K P H R V A C K R L L R M D L P V A D D N T V H F N S T L M A L I R T A L D I K I A K G G A D K Q O M D A E L R K E M M A I W  
P N L S Q K T L D L L V T P H K S T D L T V G K I Y A A M M I M E Y Y R Q S K A K K L Q A M R E E Q N R T P L M F Q R M E P P S P T Q E G G S P Q  
N A L P S T Q L D P P G G L M A H E G G M K E S P S W V T Q R A Q E M F Q K T G T W S P E R G P P I D M P N S Q P N S S Q V E M R E M G T D G Y S  
D S E H Y L P M E G Q T R A A S M P R L P A E N Q R R R G R P R G N D L S T I S D T S P M K R S A S V L G P K A R R L D D Y S L E R V P P E E N Q  
R Y H Q R R R D R G H R T S E R S L G R Y T D V D T G L G T D L S M T T Q S G D L P S K D R D Q D R G R P K D R K H R P H H H H H H H H P P A  
P D R D R Y A Q E R P D T G R A R A R E Q R W S R S P S E G R E H T T H R Q S S S V S G S P A P S T S G T S T P R R G R R Q L P Q T P C T P R P  
L V S Y S P A P R R P A A R R M A G P A A P P G G S P R G C R R A P R W P A H A P E G P R P R G A D Y T E P D S P R E P P G G A H D P A P R S P R  
T P R A A G C A S P R H G R R L P N G Y Y A G H G A P R P R T A R R G A H D A Y S E S Q D D W C \*



>rs37482583\_ENSMUSP00000112436\_c.7089:G>C\_p.E2364Q  
 ENSMUST00000121390.8|Cacna1a-201|ENSMUSG00000034656|+|chr8:g.85366320:G>C  
 MARFGDEMPGRYGAGGGGSGPAAGVVVGAAGGRGAGGSRQGGQPGAQRMYKQSMARARTMALYNPIVVRQNC  
 LTVNRSLFLFSEDNVVRKYAKKITEWPPFEYMI LATI IANCI VLAL EQHL PDDDKTPMSERLDDTEPYFIGIF  
 CFEAGIKIVALGF AFHKGSYLRNGWNVMD FVVVLTGILATVGT EFDLRTLRAVRVLRPLKLVSGIPSLQVVLK  
 SIMKAMIPLLQIGLLFFAILIFAIIGLEFYMGKFHTTTCFEEGTD DDIQGESPAPCGTEEPARTCPNGTKCQPY  
 WEGPNNGITQFDNILFAVLT VFCITMEGWTDLLYNSNDASGNTWNWLYFIPLIIIGSFFMLNLVLGVLSGEF  
 AKERERVENRRAFLKLRQQQIERELNGYMEWISKAEEVILA EDETDVEQRHFPFDGALRRATLKKSKTDLNLP  
 EEAE DQLADIASVGSPPFARASIKSAKLENSTFFHKKERRMRFYIRRMVKTQAFYWTVLSLVALNLCVAIVHY  
 NQPEWLSDFLYYAEFIFLGLFMSEMF IKMYGLGTRPYFHSSFNCFDCGVIIGSIFEVIWAVIKPGTSFGISVL  
 RALRLLRIFKVTKYWASLRNLVVSLLNSMKSII SLLFLLFLFIVVFALLGMQLFGGQFNFDGPTPTNFDTFP  
 AAIMTVFQILTGEDWNEVMYDGIKSQGGVQGGMVFSIYFIVLTLFGNYTLNVLFLAIAVDNLANAQELTKDEQ  
 EEEEEANQKLALQKAKEVAEVSPLSAANMSIAVKEQQKNQKPTKSVWEQRTSEMRKQNLLASREALYGDAAE  
 WPTPYARPLRPDVKTHLDRPLVVD PQENRNNNTNKSRAPEALRPTARPRESARDPDARRAWPGSPERAPGREG  
 PYGRESEPPQREHAPPREHAPWDADTERAKAGDAPRRHTRHPVAEAGEPRRHRARRRPGDEPDDRPERPRPRD  
 ATRPARAADGEGDDGERKRRHRHGPPAHDDRERRRRRKENQGSVFPVSGPNLSTTRPIQQDLGRQDLPLAED  
 LDNMKNKLATGEPASPHDSLGHSLGPPSPAKIGNSTNPGPALATNPQNAASRTPNNPNSNPGPKTPEN  
 SLIVTNPSSTQPNSAKTARKPEHMAVEIPPACPLNHTVQVQVKNANPDPLPKKEEKKKEEEDPGE DGPKP  
 MPPYSSMFI LSTTNPLRRLCHYI LNLR YFEMCILMVIAMSSIALAAEDPVQPNAPRNNVLR YFDYVFTGVFTF  
 EMVIK MIDLGLVLHQGAYFRDLWNI LDFIVVSGALVAF AFTGNSKGDINTIKSLRVLRLRPLKTIKRLPKL  
 KAVFDCVVNSLKNVFNILIVYMLFMFIFAVVAVQLFKGKFFHCTDESKEFERDCRGKYLLEYKNEVKARDREW  
 KKYEFHYDNVLWALLTLFTVSTGEGWPQVLKHSVDATFENQGPSPGYRMEMSIFYVVYFVVFPPFFVNI FVAL  
 I IITFQEQGDKMMEEYSLEKNERACIDFAISAKPLTRHMPQNKQSFQYRMWQFVVSPPFEYTIMAMIALNTIV  
 LMMKFY GASVAYENALRVFNIVFTSLFSLECVLKVMAFGILNYFRDAWNI FDFVTVLGSITDILVTEFGNFI  
 NLSFLRFLFRAARLIKLLRQGYTIRILLWTFVQSFKALPYVCLLIAMLFFIYAIIGMQVFGNIGIDGEDSDS  
 DEFQITEHNNDFEYLQALMLLFRSATGEAWHNIMLSCLSGKPCDKNSGILTADCGNEFAYFYFVSFIFLCSFL  
 MLNLFVAVIMDNFFYLTRDSSLGPHHLDEYVVRWAEYDPAACGR IHYKDMYSLLRVISPPLGLGKCPHRVA  
 CKRLLRMDLPVADDNTVHFNSTLMALIRALTALDIKIAKGGADKQQMDAELRKEEMAIWPNL SQTLDDLVT  
 PHKSTDLTVGKIYAAMMIMEYYRQSKAKKLQAMREEQNRTPLMFQRMPPSPTQEGGSPQNALPSTQLD  
 PGGGLMAHEGGMKESPSWVTQRAQEMFQKTGTWSPERGPPIDMPSQPNQSQSVEMREMGTGYS  
 DSEHYLPMEGQTRAASMPRLPAENQRRRGRPRGNDLSTISDTSMPKRSASVLGPKARRLDYSLERVP  
 PEENQRYHQRRDRGHRTSERSLGRYTDVDTGLGTDLSMTTQSGDLPSKDRDQDRGRPKDRK  
 HRRHHHHHHHHHPPAPDRDRYAQERPDTGRA RAREQRWSRSPSEGREHTHRQGS  
 SSVSGSPAPSTSGTSTPRRGRRLPQTPCTPRPLVSYSPAPRRPAARMAGPAAPP  
 GSGPRGCRRAPRWPAPHAPEGPRPRGADYTEPDSPREPPGGAHPAPRSPTPRAAGCASPRHGRRL  
 PNGYYAGHGAPRPRTARRGAHDAYSESQDDWC\*

>rs37482583\_ENSMUSP00000114055\_c.6948:G>C\_p.E2317Q  
 ENSMUST00000122053.2|Cacna1a-202|ENSMUSG00000034656|+|chr8:g.85366320:G>C  
 MARFGDEMPGRYGAGGGGSGPAAGVVVGAAGGRGAGGSRQGGQPGAQRMYKQSMARARTMALYNPIVVRQNC  
 LTVNRSLFLFSEDNVDDTEPYFIGIFCFEAGIKIVALGF AFHKGSYLRNGWNVMD FVVVLTGILATVGT EFDL  
 RTLRAVRVLRPLKLVSGIPSLQVVLKSIMKAMIPLLQIGLLFFAILIFAIIGLEFYMGKFHTTTCFEEGTD  
 DDIQGESPAPCGTEEPARTCPNGTKCQPYWEGPNNGITQFDNILFAVLT VFCITMEGWTDLLYNSNDASGNTWN  
 WLYFIPLIIIGSFFMLNLVLGVLSGEFAKERERVENRRAFLKLRQQQIERELNGYMEWISKAEEVILA EDETD  
 VEQRHFPFDGALRRATLKKSKTDLNPEEAEDQLADIASVGSPPFARASIKSAKLENSTFFHKKERRMRFYIRRM  
 VKTQAFYWTVLSLVALNLCVAIVHYNQPEWLSDFLYYAEFIFLGLFMSEMF IKMYGLGTRPYFHSSFNCFDC  
 GVIIGSIFEVIWAVIKPGTSFGISVLRALRLLRIFKVTKYWASLRNLVVSLLNSMKSII SLLFLLFLFIVVFA  
 LLGMQLFGGQFNFDGPTPTNFDTFPAAIMTVFQILTGEDWNEVMYDGIKSQGGVQGGMVFSIYFIVLTLFGN  
 YTLNVLFLAIAVDNLANAQELTKDEQEEEEANQKLALQKAKEVAEVSPLSAANMSIAVKEQQKNQKPTKSVW  
 EQRTSEMRKQNLLASREALYGDAAEWPTPYARPLRPDVKTHLDRPLVVD PQENRNNNTNKSRAPEALRPTAR  
 PRESARDPDARRAWPGSPERAPGREGPYGRESEPPQREHAPPREHAPWDADTERAKAGDAPRRHTRHPVAEAGE  
 PRRHRARRRPGDEPDDRPERPRPRDATRPARAADGEGDDGERKRRHRHGPPAHDDRERRRRRKENQGSVFP  
 VSGPNLSTTRPIQQDLGRQDLPLAEDLDNMKNKLATGEPASPHDSLGHSLGPPSPAKIGNSTNPGPALATNP  
 QNAASRTPNNPNSNPGPKTPENSLIVTNPSSTQPNSAKTARKPEHMAVEIPPACPLNHTVQVQVKNAN  
 PDPLPKKEEKKKEEEDPGE DGPKMPYSSMFI LSTTNPLRRLCHYI LNLR YFEMCILMVIAMSSIALAAE  
 DPVQPNAPRNNVLR YFDYVFTGVFTFEMVIK MIDLGLVLHQGAYFRDLWNI LDFIVVSGALVAF AFTGNSKGD  
 INTIKSLRVLRLRPLKTIKRLPKL KAVFDCVVNSLKNVFNILIVYMLFMFIFAVVAVQLFKGKFFHCTDES  
 KEFERDCRGKYLLEYKNEVKARDREWKKYEFHYDNVLWALLTLFTVSTGEGWPQVLKHSVDATFENQGPS  
 PGYRMEMSIFYVVYFVVFPPFFVNI FVALI IITFQEQGDKMMEEYSLEKNERACIDFAISAKPLTRHMPQNKQSFQ  
 YRMWQFVVSPPFEYTIMAMIALNTIVLMMKFY GASVAYENALRVFNIVFTSLFSLECVLKVMAFGILNYFRDA

WNIFDFVTVLGSITDILVTEFGNNFINLSFLRFLFRAARLIKLLRQGYTIRILLWTFVQSFKALPYVCLLIAML  
FFIYAIIGMQVFGNIGIDGEDSDEDEFQITEHNNFRFFFQALMLLFRSATGEAWHNIMLSCLSGKPCDKNS  
GILTADCGNEFAYFYFVSFIFLCSFLMLNLFVAVIMDNFEYLTRDSSILGPHHLDEYVRVWAEYDPAACGRIH  
YKDMYSLLRVISPPGLGKCKPHRVACKRLLRMDLPVADDNTVHFNSTLMALIRTALDIKIAKGGADKQMDA  
ELRKEMMAIWPNLSQKTLDLLVTPHKSTDLTVGKIYAAMMIMEYYRQSKAKKLQAMREEQNRTPLMFQRMPP  
SPTQEGGSPQNALPSTQLDPGGGLMAHEGGMKESPSWVTQRAQEMFQKTGTWSPERGPPIDMPNSQPNSQSVE  
MREMGTGYSDEHYLPMEGQTRAASMPRLPAENQRRRGRPRGNDLSTISDTPMKRSASVLGPKARRLDDYS  
LERVPPPEENQRYHQRRDRGRHRTSERSLGRYTDVDTGLGTDLSMTTQSGDLPSKDRDQDRGRPKDRKHRPHHH  
HHHHHHHPAPDRDRYAQERPDTGRARAREQRWSRSPSEGREHTHTRQGSSSVSGSPAPSTSGTSTPRRGRRQ  
LPQTPCTPRPLVSYSPAPRRPAARRMAGPAAPPGGSPRGCRRAPRWPAAHAPEGPRPRGADYTEPDSPREPPGG  
AHDPA PRSPRT PRAAGCASPRHGRRLPNGYYAGHGAPRPRRTARRGAHDAYSSESQDDWC\*  
>rs37482583\_ENSMUSP00000149242\_c.6948:G>C\_p.E2317Q  
ENSMUST00000215756.2|Cacna1a-211|ENSMUSG00000034656|+|chr8:g.85366320:G>C  
XRMYKQSMARARTMALYNPIPVQNCCLTVNRSFLFSEDNVVRKYAKKITEWPPFEYMI LATI IANCIVLAL  
EQHLPDDDKTPMSERLDDTEPYFIGIFCFEAGIKIVALGFHFHKS YLRNGWNVMDV VVLTGILATVGT EFD  
LRTLRAVRVLRPLKLVSGIPSLQVVLKSIKAMIPLLQIGLLFFAILIFAIIGLEFYMGKFHTTCFEEGTDD  
IQGESPAPCGTEEPARTCPNGTKCQPYWEGPNNGITQFDNILFAVLTVFQCI TMEGWTDLLYNSNDASGNTWN  
WLYFIPLIIIGSFFMLNLVGLVLSGEFAKERERVENRRAFLLKRLRQQQIERELNGYMEWISKAEEVILAEDET  
DVEQRHPFDALRRATLKKSKTDLNPEEAEDQLADIASVGSPPFARASIKSAKLENSTFFHKKERRMRFYIRRM  
VKTQAFYWTVLSLVALNTLCVAIVHYNQPEWLSDFLYAAEFIFLGLFMSEMF IKMYGLGTRPYFHSSFCNFCDC  
GVIIGSIFEVIWAVIKPGTSFGISVLRALRLLRIFKVTKYWASLRNLVVSLLNSMKSIIISLLFLFLFIVVFA  
LLGMQLFGGQFNDFDEGTPPTNFDTFPAAIMTVFQILTGEDWNEVMYDGIKSQGGVQGGMVFSIYFIVLTLFGN  
YTLNVLFLAIAVDNLANAQELTKDEQEEEEAAANQKALQKAKEVAEVSPLSAANMSIAVKEQQKNQKPTKSVW  
EQRTSEMRKQNLASREALYGDAERWPTPYARPLRPDVKTHLDRPLVVDQENRNNNTNKSRAPEALRPTAR  
PRESARDPDARAWPGSPERAPGREGPGYRESEPOQREHAPPREHAPWDADTERAKAGDAPRRHTRHPVAEGE  
PRRHRARRRPGDEPDRRERRRPRDATRPARAADGEGGERKRRHRHGGPPAHDDRERRRRRKENQGSQV  
VSGPNLSTTRPIQQDLGRQDLPLAEDLDNMKNKATLGDGPASPHDSLGHSGLPPSPAKIGNSTNPGPALATNP  
QNAASRRTPNNPGNPSNPGPPKTPENSLIVTNPSSTQPNSAKTARKPEHMAVEIPPACPLNHTVVQVKNAN  
PDPLPKKEEKEEKEEADPGEDGPKPMPPYSSMFI LSTTNPLRRLCHYILNLR YFEMCILMVIAMSSIALAAE  
DPVQPNAPRNNVLR YFDYVFTGVFTFEMVIK MIDLGLVLHQGAYFRDLWNILDFIVVSGALVAF AFTGNSK GK  
DINTIKSLRVLRLRPLKTIKRLPKLKA VFD CVVNSLKNVFNILIVYMLFMFIFAVVAVQLFKGKFFHCTDES  
KEFERDCRGKYLLEYEKNEVKARDREWKKYEFHYDNVLWALLTLFTVSTGEGWPQVLKHSVDATFENQGPSGY  
RMEMSIFYVVVYFVVFVFFVNI FVALI IITFQEQGDKMMEEYSLEKNERACIDFAISAKPLTRHMPQNKQSFQ  
YRMWQFVVSPPFEYTIMAMIALNTIVLMMKFY GASVAYENALRVFNIVFTSLFSLECVLKVMAFGILNYFRDA  
WNIFDFVTVLGSITDILVTEFGNNFINLSFLRFLFRAARLIKLLRQGYTIRILLWTFVQSFKALPYVCLLIAML  
FFIYAIIGMQVFGNIGIDGEDSDEDEFQITEHNNFRFFFQALMLLFRSATGEAWHNIMLSCLSGKPCDKNS  
GILTADCGNEFAYFYFVSFIFLCSFLMLNLFVAVIMDNFEYLTRDSSILGPHHLDEYVRVWAEYDPAACGRIH  
YKDMYSLLRVISPPGLGKCKPHRVACKRLLRMDLPVADDNTVHFNSTLMALIRTALDIKIAKGGADKQMDA  
ELRKEMMAIWPNLSQKTLDLLVTPHKSTDLTVGKIYAAMMIMEYYRQSKAKKLQAMREEQNRTPLMFQRMPP  
SPTQEGGSPQNALPSTQLDPGGGLMAHEGGMKESPSWVTQRAQEMFQKTGTWSPERGPPIDMPNSQPNSQSVE  
MREMGTGYSDEHYLPMEGQTRAASMPRLPAENQRRRGRPRGNDLSTISDTPMKRSASVLGPKARRLDDYS  
LERVPPPEENQRYHQRRDRGRHRTSERSLGRYTDVDTGLGTDLSMTTQSGDLPSKDRDQDRGRPKDRKHRPHHH  
HHHHHHHPAPDRDRYAQERPDTGRARAREQRWSRSPSEGREHTHTRQGSSSVSGSPAPSTSGTSTPRRGRRQ  
LPQTPCTPRPLVSYSPAPRRPAARRMAGPAAPPGGSPRGCRRAPRWPAAHAPEGPRPRGADYTEPDSPREPPGG  
AHDPA PRSPRT PRAAGCASPRHGRRLPNGYYAGHGAPRPRRTARRGAHDAYSSESQDDWC\*  
>rs37482583\_ENSMUSP00000158675\_c.2313:G>C\_p.E772Q  
ENSMUST00000238337.2|Cacna1a-212|ENSMUSG00000034656|+|chr8:g.85366320:G>C  
MHLRLSGQRGLTLQPNSSLPSSPFPLAKGNFINLSFLRFLFRAARLIKLLRQGYTIRILLWTFVQSFKVF  
GNIGIDGEDSDEDEFQITEHNNFRFFFQALMLLFRSATGEAWHNIMLSCLSGKPCDKNSGILTADCGNEFA  
YFYFVSFIFLCSFLMLNLFVAVIMDNFEYLTRDSSILGPHHLDEYVRVWAEYDPAACGRIH YKDMYSLLRVIS  
PPLGLGKCKPHRVACKRLLRMDLPVADDNTVHFNSTLMALIRTALDIKIAKGGADKQMDAELRKEMMAIWPN  
LSQKTLDLLVTPHKSTDLTVGKIYAAMMIMEYYRQSKAKKLQAMREEQNRTPLMFQRMPPSPTQEGGSPQNA  
LPSTQLDPGGGLMAHEGGMKESPSWVTQRAQEMFQKTGTWSPERGPPIDMPNSQPNSQSVEMREMGTGYS  
DEHYLPMEGQTRAASMPRLPAENQRRRGRPRGNDLSTISDTPMKRSASVLGPKARRLDDYSLEHYLPMEGQ  
RYHQRRDRGRHRTSERSLGRYTDVDTGLGTDLSMTTQSGDLPSKDRDQDRGRPKDRKHRPHHHHHHHHPAPD  
RDRYAQERPDTGRARAREQRWSRSPSEGREHTHTRQGSSSVSGSPAPSTSGTSTPRRGRRQLPQTPCTPRPLV  
SYSPAPRRPAARRMAGPAAPPGGSPRGCRRAPRWPAAHAPEGPRPRGADYTEPDSPREPPGGAHDPA PRSPRT  
RAAGCASPRHGRRLPNGYYAGHGAPRPRRTARRGAHDAYSSESQDDWC\*

>rs220446334\_ENSMUSP00000060275\_c.654:G>A\_p.V219M  
ENSMUST00000060427.6|Ier2-201|ENSMUSG00000053560|-|chr8:g.85388726:C>T  
MEVQKEAQRIMTSLVWKMYHSRMRQGGRLRLHRSLLQSLVMRSAREVYLSAKVEAHQPEFPSSRRALDPRHLHPP  
REAEVAVEVASPEAVQPPEPMDTQEVLRVQETPALCDPPPAPVSRKRRSSDDLSDGSDAGLVPSKKARLEEV  
EGEATSEVPDRLQLPPAQSEGAFPNLARVLQRRFSSLLNCGPAVPPPTPTCEAKPACRPADNMLNVLVRAVM  
AF\*

>rs52044482\_ENSMUSP00000060275\_c.242:A>C\_p.E81D  
ENSMUST00000060427.6|Ier2-201|ENSMUSG00000053560|-|chr8:g.85389138:T>G  
MEVQKEAQRIMTSLVWKMYHSRMRQGGRLRLHRSLLQSLVMRSAREVYLSAKVEAHQPEFPSSRRALDPRHLHPP  
REAEVAVDVASPEAVQPPEPMDTQEVLRVQETPALCDPPPAPVSRKRRSSDDLSDGSDAGLVPSKKARLEEV  
EGEATSEVPDRLQLPPAQSEGAFPNLARVLQRRFSSLLNCGPAVPPPTPTCEAKPACRPADNMLNVLVRAVV  
AF\*

>rs32757845\_ENSMUSP0000001975\_c.688:T>C\_p.V230A  
ENSMUST0000001975.6|Nacc1-201|ENSMUSG0000001910|-|chr8:g.85403185:A>G  
MAQTLQMEIPNFGNSILECLNEQRLQGLYCDVSVVVKGHAFKAHRAVLAASSSYFRDLFNSSRSASVELPAAV  
QPQSFQQILTFCYTGRLSMNMGDQFLLIYTAGFLQIQEIMEKGTEFFLKVSSPSCDSQGLHPEEAPSSEFPQSP  
VAQTLGWPAACSTPLPLVSRVKTEQELDSVQCTPMAKRLWDSSQKEAGSGGNNGSRKMAKFSTPDLALNRMPQ  
PLSMATATAAAAVVAVGGCVSGPMSERTSPGTSSAYTSDSPSSYHNEEDEEEDAGEEGTDEQYRQICNMYTM  
YMLNNGVQTAEKVEALPEQVVLERSRIRVRQDLASLPAELINQIGNRCHPKLYDEGDPSEKLELVGTNVYI  
TRAQLMNCHVSAGTRHKVLLRLLASFFDRNTLANSCGTGIRSSSTNDPRRKLDSRVLHAVKYQCQNFAPNFK  
ESEMNAIAADMCTNARRVVRKSWLPKTKPLHLVEGDNYSFISDTCKIEPDMMSMEHSFETASHDGEAGPSAE  
VLQ\*

>rs32757845\_ENSMUSP00000158606\_c.439:T>C\_p.V147A  
ENSMUST00000238434.2|Nacc1-203|ENSMUSG0000001910|-|chr8:g.85403185:A>G  
FCYTGRLSMNMGDQFLLIYTAGFLQIQEIMEKGTEFFLKVSSPSCDSQGLHPEEAPSSEFPQSPVAQTLGWPAAC  
STPLPLVSRVKTEQELDSVQCTPMAKRLWDSSQKEAGSGGNNGSRKMAKFSTPDLALNRMPQPLSMATATAA  
AAVVAVGGCVSGPMSERTSPGTSSAYTSDSPSSYHNEEDEEEDAEKVEALPEQVVLERSRIRVRQDLASL  
PAELINQIGNRCHPKLYDEGDPSEKLELVGTNVYI TRAQLMNCHVSAGTRHKVLLRLLASFFDRNTLANSC  
GTGIRSSSTNDPRRKLDSRVLHAVKYQCQNFAPNFK ESEMNAIAADMCTNARRVVRKSWLPKTKPLHLVEGDN  
YSSFISD

>rs36775818\_ENSMUSP0000001974\_c.1561:T>G\_p.I521S  
ENSMUST0000001974.11|Trmt1-201|ENSMUSG0000001909|+|chr8:g.85425080:T>G  
MSLARTILWLSRPLRPAHSLCRAQFMERKAQKPPSPAMENGRSWEERPPADPVATVTEGAAKIVFPSANEV  
FYNPVQEFNRDLTCAVITEFARIHLGAKGIQIKVPGEKDSEKIAVDLSDQEEETAGKNENLAPGDWPRTAAVG  
EICEEGLRVLEGLAASGLRSIRFALEVPGLQSVVANDASARAVELMHRNVELNGVAHLVQPNQADARMLMYQH  
QKAPERFDVIDLDPYGSPPAPFLDAAVQAVSDGGLLCVTCTDMAVLAGNSGETCYSKYGAMALKSRACHEMALR  
IVLHSLDLHANCYQRYIVPLLSISADFYIRVFRVFTGQAKVKSSASKQALVFQCVGCGAFYLRQLGKASGDP  
GGRIKFS AACGPPVTPECEHCGQRHQLGGPMWAEPIHDLDFVGRVLDVTTNPGRFHTSMRIQGVLSVVTEEL  
PDVPLYTTLDQLSSTIHCNTPRLLQLRSALLHAGFRVLSLHACKNAVKT DAPPEALWDIMRCWEKECPVKRER  
LSESSPAFRSLAVEPRLKANFNIRE DANPSSRQRLKRFQANPEANWGPRPRARPGGAASEDLAGRRLQLN  
KRKEPAEDPAQRAARLKTFPCKRFKEGTCQLGDQCCYSHSPAAPVASGDIPIEECPETTTKISPGPKAAAGGI  
PGPGVD\*

>rs36775818\_ENSMUSP00000105389\_c.1561:T>G\_p.I521S  
ENSMUST00000109767.9|Trmt1-203|ENSMUSG0000001909|+|chr8:g.85425080:T>G  
MSLARTILWLSRPLRPAHSLCRAQFMERKAQKPPSPAMENGRSWEERPPADPVATVTEGAAKIVFPSANEV  
FYNPVQEFNRDLTCAVITEFARIHLGAKGIQIKVPGEKDSEKIAVDLSDQEEETAGKNENLAPGDWPRTAAVG  
EICEEGLRVLEGLAASGLRSIRFALEVPGLQSVVANDASARAVELMHRNVELNGVAHLVQPNQADARMLMYQH  
QKAPERFDVIDLDPYGSPPAPFLDAAVQAVSDGGLLCVTCTDMAVLAGNSGETCYSKYGAMALKSRACHEMALR  
IVLHSLDLHANCYQRYIVPLLSISADFYIRVFRVFTGQAKVKSSASKQALVFQCVGCGAFYLRQLGKASGDP  
GGRIKFS AACGPPVTPECEHCGQRHQLGGPMWAEPIHDLDFVGRVLDVTTNPGRFHTSMRIQGVLSVVTEEL  
PDVPLYTTLDQLSSTIHCNTPRLLQLRSALLHAGFRVLSLHACKNAVKT DAPPEALWDIMRCWEKECPVKRER  
LSESSPAFRSLAVEPRLKANFNIRE DANPSSRQRLKRFQANPEANWGPRPRARPGGAASEDLAGRRLQLN  
KRKEPAEDPAQRAARLKTFPCKRFKEGTCQLGDQCCYSHSPAAPVASGDIPIEECPETTTKISPGPKAAAGGI  
PGPGVD\*

>rs36775818\_ENSMUSP00000105390\_c.1540:T>G\_p.I514S  
ENSMUST00000109768.9|Trmt1-204|ENSMUSG0000001909|+|chr8:g.85425080:T>G  
MREACTVTRWILLCRAQFMERKAQKPPSPAMENGRSWEERPPADPVATVTEGAAKIVFPSANEV FYNPVQEF  
NRDLTCAVITEFARIHLGAKGIQIKVPGEKDSEKIAVDLSDQEEETAGKNENLAPGDWPRTAAVGEICEEGL

RVLEGLAASGLRSIRFALEVPGLQSVVANDASARAVELMHRNVELNGVAHLVQPNQADARMLMYQHOKAPERF  
DVIDLDPYGSPAPFLDAAVQAVSDGGLLCVTCTDMAVLAGNSGETCYSKYGAMALKSRACHEMALRIVLHSLD  
LHANCYQRYIVPLLSISADFYIRVFRVFTGQAKVKSSASKQALVFQCVGCGAFYLQRLGKASGDPGGRKIFS  
AACGPPVTPECEHCGQRHQLGGPMWAEPIHDLDFVGRVLDVTTNPGRFHTSMRIQGVLVSVVTEELPDVPLYY  
TLDQLSSTIHCNTPRLLQLRSALLHAGFRVLSLHACKNAVKTDAPEALWDIMRCWEKECPVKRERLSESSPA  
FRSLAVEPRLKANFNIREANPSSRQRGLKRFQANPEANWGPRPRARPGGKAASEDLAGRRLQLNKRKEPAE  
DPAQRAARLKTFFCKRFKEGTCQLGDQCCYSHSPAAPVASGDIPIEECPETTTKISPGPKAAAGGIPGPGVD\*  
>rs36775818\_ENSMUSP00000135510\_c.1474:T>G\_p.I492S  
ENSMUST00000125370.10|Trmt1-205|ENSMUSG00000001909|+|chr8:g.85425080:T>G  
MSLARTILWLSRPLRPAHSLCRAQFMERKAQKPPSPAMENGTRSWEEERPPADPVATVTEGAAKIVFPSANEV  
FYNPVQEFNRDLTCAVITEFARIHLGAKGIQIKVPGEKDSEKIAVDLSDQEEETAGKNENLAPGDWPRTAAVG  
EICEEGLRVLEGLAASGLRSIRFALEVPGLQSVVANDASARAVELMHRNVELNGVAHLVQPNQADARMLMYQH  
QKAPERFDVIDLDPYGSPAPFLDAAVQAVSDGGLLCVTCTDMAVLAGNSGETCYSKYGAMALKSRACHEMALR  
IVLHSLDLHANCYQRYIVPLLSISADFYIRVFRVFTGQAKVKSSARIKFS AACGPPVTPECEHCGQRHQLGG  
PMWAEPIHDLDFVGRVLDVTTNPGRFHTSMRIQGVLVSVVTEELPDVPLYYTLDQLSSTIHCNTPRLLQLRSA  
LLHAGFRVLSLHACKNAVKTDAPEALWDIMRCWEKECPVKRERLSESSPAFRSLAVEPRLKANFNIREANP  
SSRQRGLKRFQANPEANWGPRPRARPGGKAASEDLAGRRLQLNKRKEPAEDPAQRAARLKTFFCKRFKEGTC  
QLGDQCCYSHSPAAPVASGDIPIEECPETTTKISPGPKAAAGGIPGPGVD\*  
>rs36775818\_ENSMUSP00000134723\_c.55:T>G\_p.I19S  
ENSMUST00000136423.3|Trmt1-210|ENSMUSG00000001909|+|chr8:g.85425080:T>G  
XCEPVKRERLSESSPAFRSLAVEPRLKANFNIREANPSSRQRGLKRFQANPEANWGPRPRARPGGKAASEDL  
AGRRLQLNKRKEPAEDPAQRAARLKTFFCKRFKEVISPSTFHATGPRGLLWHSWGQRLRKETQLCAHSLGLH  
TLFSSHQGTQQLGDQCCYSHSPAAPVASGDIPIEECPETTTKISPGPKAAAGGIPGPGVD\*  
>rs32665800\_ENSMUSP00000001974\_c.1969:T>C\_p.I657T  
ENSMUST00000001974.11|Trmt1-201|ENSMUSG00000001909|+|chr8:g.85426371:T>C  
MSLARTILWLSRPLRPAHSLCRAQFMERKAQKPPSPAMENGTRSWEEERPPADPVATVTEGAAKIVFPSANEV  
FYNPVQEFNRDLTCAVITEFARIHLGAKGIQIKVPGEKDSEKIAVDLSDQEEETAGKNENLAPGDWPRTAAVG  
EICEEGLRVLEGLAASGLRSIRFALEVPGLQSVVANDASARAVELMHRNVELNGVAHLVQPNQADARMLMYQH  
QKAPERFDVIDLDPYGSPAPFLDAAVQAVSDGGLLCVTCTDMAVLAGNSGETCYSKYGAMALKSRACHEMALR  
IVLHSLDLHANCYQRYIVPLLSISADFYIRVFRVFTGQAKVKSSASKQALVFQCVGCGAFYLQRLGKASGDP  
GGRIKFS AACGPPVTPECEHCGQRHQLGGPMWAEPIHDLDFVGRVLDVTTNPGRFHTSMRIQGVLVSVVTEEL  
PDVPLYYTLDQLSSTIHCNTPRLLQLRSALLHAGFRVLSLHACKNAVKTDAPEALWDIMRCWEKECPVKRER  
LSESSPAFRILAVEPRLKANFNIREANPSSRQRGLKRFQANPEANWGPRPRARPGGKAASEDLAGRRLQLN  
KRKEPAEDPAQRAARLKTFFCKRFKEGTCQLGDQCCYSHSPAAPVASGDIPIEECPETTTKISPGPKAAAGGT  
PGPGVD\*  
>rs32665800\_ENSMUSP00000105389\_c.1969:T>C\_p.I657T  
ENSMUST00000109767.9|Trmt1-203|ENSMUSG00000001909|+|chr8:g.85426371:T>C  
MSLARTILWLSRPLRPAHSLCRAQFMERKAQKPPSPAMENGTRSWEEERPPADPVATVTEGAAKIVFPSANEV  
FYNPVQEFNRDLTCAVITEFARIHLGAKGIQIKVPGEKDSEKIAVDLSDQEEETAGKNENLAPGDWPRTAAVG  
EICEEGLRVLEGLAASGLRSIRFALEVPGLQSVVANDASARAVELMHRNVELNGVAHLVQPNQADARMLMYQH  
QKAPERFDVIDLDPYGSPAPFLDAAVQAVSDGGLLCVTCTDMAVLAGNSGETCYSKYGAMALKSRACHEMALR  
IVLHSLDLHANCYQRYIVPLLSISADFYIRVFRVFTGQAKVKSSASKQALVFQCVGCGAFYLQRLGKASGDP  
GGRIKFS AACGPPVTPECEHCGQRHQLGGPMWAEPIHDLDFVGRVLDVTTNPGRFHTSMRIQGVLVSVVTEEL  
PDVPLYYTLDQLSSTIHCNTPRLLQLRSALLHAGFRVLSLHACKNAVKTDAPEALWDIMRCWEKECPVKRER  
LSESSPAFRILAVEPRLKANFNIREANPSSRQRGLKRFQANPEANWGPRPRARPGGKAASEDLAGRRLQLN  
KRKEPAEDPAQRAARLKTFFCKRFKEGTCQLGDQCCYSHSPAAPVASGDIPIEECPETTTKISPGPKAAAGGT  
PGPGVD\*  
>rs32665800\_ENSMUSP00000105390\_c.1948:T>C\_p.I650T  
ENSMUST00000109768.9|Trmt1-204|ENSMUSG00000001909|+|chr8:g.85426371:T>C  
MREACTVTRWILLCRAQFMERKAQKPPSPAMENGTRSWEEERPPADPVATVTEGAAKIVFPSANEFYFYNPVQEF  
NRDLTCAVITEFARIHLGAKGIQIKVPGEKDSEKIAVDLSDQEEETAGKNENLAPGDWPRTAAVGEICEEGL  
RVLEGLAASGLRSIRFALEVPGLQSVVANDASARAVELMHRNVELNGVAHLVQPNQADARMLMYQHOKAPERF  
DVIDLDPYGSPAPFLDAAVQAVSDGGLLCVTCTDMAVLAGNSGETCYSKYGAMALKSRACHEMALRIVLHSLD  
LHANCYQRYIVPLLSISADFYIRVFRVFTGQAKVKSSASKQALVFQCVGCGAFYLQRLGKASGDPGGRKIFS  
AACGPPVTPECEHCGQRHQLGGPMWAEPIHDLDFVGRVLDVTTNPGRFHTSMRIQGVLVSVVTEELPDVPLYY  
TLDQLSSTIHCNTPRLLQLRSALLHAGFRVLSLHACKNAVKTDAPEALWDIMRCWEKECPVKRERLSESSPA  
FRILAVEPRLKANFNIREANPSSRQRGLKRFQANPEANWGPRPRARPGGKAASEDLAGRRLQLNKRKEPAE  
DPAQRAARLKTFFCKRFKEGTCQLGDQCCYSHSPAAPVASGDIPIEECPETTTKISPGPKAAAGGTPGPGVD\*

>rs32665800\_ENSMUSP00000135510\_c.1882:T>C\_p.I628T  
ENSMUST00000125370.10|Trmt1-205|ENSMUSG00000001909|+|chr8:g.85426371:T>C  
MSLARTILWLSRPLRPAHSLCRAQFMERKAQKPPSPAMENGTRSWEEERPPADPVATVTEGAAKIVFPSANEV  
FYNPVQEFNRDLTCAVITEFARIHLGAKGIQIKVPGEKDSEKIAVDLSDQEEETAGKNENLAPGDWPRTAAVG  
EICEEGLRVLEGLAASGLRSIRFALEVPLQSVVANDASARAVELMHRNVELNGVAHLVQPNQADARMLMYQH  
QKAPERFDVIDLDPYGGSPAPFLDAAVQAVSDGGLLCVCTCTDMAVLAGNSGETCYSKYGAMALKSRACHEMALR  
IVLHSLDLHANCYQRYIVPLLSISADFYIRVFRVFTGQAKVKSSARIKFS AACGPPVTPCECEHCGRHQLGG  
PMWAEPIHDLDFVGRVLDVAVTTPNPRFHTSMRIQGVLSVTEELPDVPLYTLDQLSSTIHCNTPRLLQLRSA  
LLHAGFRVSLSHACKNAVKTDAPPEALWDIMRCWEKECPVKRERLSESSPAFRILAVEPRLKANFNIREDANP  
SSRQRGLKRFQANPEANWGPRPRARPGGKAASEDLARRRLLQNKRKEPAEDPAQRAARLKTFFCKRFKEGTC  
QLGDQCCYSHSPAAPVASGDIPIEECPETTTKISPGPKAAAGGTPGPGVD\*

>rs32665800\_ENSMUSP00000134723\_c.595:T>C\_p.I199T  
ENSMUST00000136423.3|Trmt1-210|ENSMUSG00000001909|+|chr8:g.85426371:T>C  
XECPVKRELRSESSPAFRILAVEPRLKANFNIREDANPSSRQRGLKRFQANPEANWGPRPRARPGGKAASEDL  
ARRRLLQNKRKEPAEDPAQRAARLKTFFCKRFKEVISPTFHATGPRLLGLWHSWGQRLRKETQLCAHSLGLH  
TLFSHQGTQQLGDQCCYSHSPAAPVASGDIPIEECPETTTKISPGPKAAAGGTPGPGVD\*

>rs47830455\_ENSMUSP00000158636\_c.513:G>T\_p.A172S  
ENSMUST00000238562.2|Ly11-204|ENSMUSG000000034041|+|chr8:g.85430832:G>T  
MPTTELSAFRPSLLQLTALGRAPPTLAVHYHHPHFLNSVYIGPAGPFSIFPNSRLKRRPSHSELDLADGHQPQ  
KVARRVFTNSRERWRQHVNGAFAELRKLTPHPDRKLSKNEVLR LAMKYIGFLVRLLRDQTAVLTSGPSAP  
GSRKPPARRGVEGSARFGAGHRVEASRSQPVLPGDCDGDPNGSVRPIKLEQTSLSPEVR\*

>rs47830455\_ENSMUSP00000046010\_c.732:G>T\_p.A245S  
ENSMUST00000037165.6|Ly11-201|ENSMUSG000000034041|+|chr8:g.85430832:G>T  
MCPQARAEEVGSAMTEKTEMVCASSPAPAPPSKSPASPGPLSTEEVDHRNTCTPWLPPGVPVINLGHTRPIGAA  
MPTTELSAFRPSLLQLTALGRAPPTLAVHYHHPHFLNSVYIGPAGPFSIFPNSRLKRRPSHSELDLADGHQPQ  
KVARRVFTNSRERWRQHVNGAFAELRKLTPHPDRKLSKNEVLR LAMKYIGFLVRLLRDQTAVLTSGPSAP  
GSRKPPARRGVEGSARFGAGHRVEASRSQPVLPGDCDGDPNGSVRPIKLEQTSLSPEVR\*

>rs37437752\_ENSMUSP00000105386\_c.675:C>T\_p.P226S  
ENSMUST00000109764.8|Nfix-204|ENSMUSG00000001911|-|chr8:g.85453871:G>A  
MDEFHFPFIEALLPHVRAFSYTWFNLQARKRKYFKKHEKRMSKDEERAVKDELLGEKPEIKQKWRSLAKLRK  
DIRPEFREDFVLTITGKKPPCCVLSNPDQKGIKIRRIDCLRQADKVVRLDLVMVILFKGIPLESTDGERLYKSP  
QCSNPGLCVQPHHIGVTIKELDLYLAYFVHTPESGQSDSSNQGDADIKPLPNGHLSFQDCFVTSGVWNVTEL  
VRVSVQTSVATASGPNFSLADLESPSYINQVTLGRRSITSPSTSSSTKRPKSIDDSEMESPVDVDFYPGTGR  
SPAAGSSQSSGWPNDVDAGPASLKKSGKLDLFCALSSQSSPRMAFTHHPLPVLAVRPGSPRATASALHFPST  
SIIQQSSPYFTHPTIRYHHHHGQDSLKEFVQFVCSGQATGQPNGSGQKVPVGSFLLPPPPVAVRVPVPLP  
MPDSKTTSTAPDGAALTTPSPSFTTTGASSANRFVIGSRDGNFLNIPQSSQSWFL\*

>rs37437752\_ENSMUSP00000076005\_c.699:C>T\_p.P234S  
ENSMUST00000076715.13|Nfix-201|ENSMUSG00000001911|-|chr8:g.85453871:G>A  
MYSPLYCTQDEFHFPFIEALLPHVRAFSYTWFNLQARKRKYFKKHEKRMSKDEERAVKDELLGEKPEIKQKWR  
SLAKLRKDIRPEFREDFVLTITGKKPPCCVLSNPDQKGIKIRRIDCLRQADKVVRLDLVMVILFKGIPLESTD  
GERLYKSPQCSNPGLCVQPHHIGVTIKELDLYLAYFVHTPESGQSDSSNQGDADIKPLPNGHLSFQDCFVTS  
GVWNVTELVRSVQTSVATASGPNFSLADLESPSYINQVTLGRRSITSPSTSSSTKRPKSIDDSEMESPVDV  
VFYPGTGRSPAAGSSQSSGWPNDVDAGSPRATASALHFPSTSIQQSSPYFTHPTIRYHHHHGQDSLKEFVQF  
VCSGQATGQHSQRQAPPLPTGLSASDPGTATF\*

>rs37437752\_ENSMUSP00000096669\_c.699:C>T\_p.P234S  
ENSMUST00000099070.10|Nfix-202|ENSMUSG00000001911|-|chr8:g.85453871:G>A  
MYSPLYCTQDEFHFPFIEALLPHVRAFSYTWFNLQARKRKYFKKHEKRMSKDEERAVKDELLGEKPEIKQKWR  
SLAKLRKDIRPEFREDFVLTITGKKPPCCVLSNPDQKGIKIRRIDCLRQADKVVRLDLVMVILFKGIPLESTD  
GERLYKSPQCSNPGLCVQPHHIGVTIKELDLYLAYFVHTPESGQSDSSNQGDADIKPLPNGHLSFQDCFVTS  
GVWNVTELVRSVQTSVATASGPNFSLADLESPSYINQVTLGRRSITSPSTSSSTKRPKSIDDSEMESPVDV  
VFYPGTGRSPAAGSSQSSGWPNDVDAGPASLKKSGKLDLFCALSSQSSPRMAFTHHPLPVLAVRPGSPRAT  
ASALHFPSTSIQQSSPYFTHPTIRYHHHHGQDSLKEFVQFVCSGQATGQHSQRQAPPLPTGLSASDPGT  
ATF\*

>rs37437752\_ENSMUSP00000105384\_c.675:C>T\_p.P226S  
ENSMUST00000109762.8|Nfix-203|ENSMUSG00000001911|-|chr8:g.85453871:G>A  
MDEFHFPFIEALLPHVRAFSYTWFNLQARKRKYFKKHEKRMSKDEERAVKDELLGEKPEIKQKWRSLAKLRK  
DIRPEFREDFVLTITGKKPPCCVLSNPDQKGIKIRRIDCLRQADKVVRLDLVMVILFKGIPLESTDGERLYKSP  
QCSNPGLCVQPHHIGVTIKELDLYLAYFVHTPESGQSDSSNQGDADIKPLPNGHLSFQDCFVTSGVWNVTEL



VRVSVQTSVATASGNPFLADLESFSPYNNINQVTLGRRSITSPSTSTKRPKSIDDSEMESPVDVDFYPTGTRS  
PAAGSSQSSGWPNDVDAGSPRATASALHFPSTSI IQQSSPYFTHPTIRYHHHHGQDSLKEFVQFVCSGSGQA  
TGQHSQRQAPPLPTGLSASDPGTATF\*

>rs37437752\_ENSMUSP00000115691\_c.699:C>T\_p.P234S  
ENSMUST00000126806.2|Nfix-205|ENSMUSG00000001911|-|chr8:g.85453871:G>A  
MYSPLYCLTQDEFHFPFIEALLPHVRAFSYTFWNLQARKRKYFKKHEKRMKDEERAVKDELLGEKPEIKQKWA  
RLLAKLRKDIRPEFREDFVLTITGKKPPCCVLSNPDQKGIKRRIDCLRQADKVVRLDLVMVILFKGIPLESTD  
GERLYKSPQCSNPGLCVQPHHIGVTIKELDLYLAYFVHTPESEGQSDSSNQGDADIKPLPNGHLSFQDCFVTS  
GVWNVTELVRSQTSVATASGNPFLADLESFSPYNNINQVTLGRRSITSPSTSTKRPKSIDDSEMESPVDV  
VFYPTGTRSPAAGSSQSSGWPNDVDAGPASLKKSGKLDLFCALSSQSSPRMAFTHHPLPVLAVRPGSPRAT  
ASALHFPSTSI IQQSSPYFTHPTIRYHHHHGQDSLKEFVQFVCSGSGQATGQPNGSGQKVPVGSFLLPPPPP  
VARPVPLPMPDSTTTSTAPDGAALTTPSPSFTTTGASSANRFVSI GSRDG

>rs230210937\_ENSMUSP00000070057\_c.423:A>TTTTA\_p.N142ins-fs  
ENSMUST00000065539.6|Dand5-201|ENSMUSG00000053226|-  
|chr8:g.85543051:T>TAAAA  
MFRSQFTLLGLFSGAWLPTGSGRPGAPATPVQSGTAINQSWTLDPLVPI SALGSWEAFGLQNKQOGTGELO  
GGQRVAAGVPLPLAPQEVLTQETCKALS FVQVISRPGCTSARVLNHLFCGRCSSFYIPSSDPTPVVFCF

>rs33207714\_ENSMUSP00000037783\_c.453:C>T\_p.R152W  
ENSMUST00000036734.6|Gadd45gip1-  
201|ENSMUSG00000033751|+|chr8:g.85560840:C>T  
MAALAMRSGYLLRSLVALGPRRSYRAPP PRRRPGPHSPDENLLTPRWQLTPRYVAKQFGRHGAISGVPPA  
SLWPTPEQLRELEAEQEWEYPSLATMQESLRLLQQALEARRQAREQRIAECKMAKMPQMIENWRKQKRERWEKI  
QADKEWRARLQAEAQERLGYHVDPRSARFQELLQDLKQQRKRLKEERQQRKKEARIAAMASAEAQDSAVSGE  
PSS\*

>rs46809451\_ENSMUSP0000003906\_c.25:T>C\_p.L9P  
ENSMUST0000003906.13|Farsa-201|ENSMUSG0000003808|+|chr8:g.85583689:T>C  
MADNPVLEPLLRLEVADGGLD SAELATQLGVEHQAVVGAVKSLQALGEVIEAELRSTKWCWELTTEGEEIARE  
GSHEARVFRSIPLEGLVQSELMHLP SGKVGFSKAMSNKWIRVDKSAADGPRVFRVVDSDIEDEVQKRLQLVQAG  
QAEKLAEKERNELRKRKLLTEVILKTYWVSKGKAFSTSVSKQEAELSPEMISGSRDRPFKPYNFSARGVLP  
DSGHLHPLLKVRSQFRQIFLEMGFTEMPD NFI ESSFWNF DALFQPPQHPARDQHDTFFLRDPAEALQLPMGY  
VQRVKRTHSQGGYGSQGYKYTWKLEEARKNLLRTHTTAASARALYQLAQKPFPTPAKYFSIDRVFRNETLDAT  
HLAEFHQIEGVIADHGLTLGHLMGVLREFFTKL GITQLRFKPAYNPYTEPSMEVFSYHQGLKWKWVEVGN SGVF  
RPEMLLPMGLPENVS VIAWGLSLERPTMIKYGINNIRELVGHKVNLMQVYD SPVCRDLIEPRSSKTQEAA\*

>rs46809451\_ENSMUSP00000105376\_c.25:T>C\_p.L9P ENSMUST00000109754.2|Farsa-  
202|ENSMUSG0000003808|+|chr8:g.85583689:T>C  
MADNPVLEPLLRLEVADGGLD SAELATQLGVEHQAVVGAVKSLQALGEVIEAELRSTKWCWELTTEGEEIARE  
GSHEARVFRSIPLEGLVQSELMHLP SGKVGFSKAMSNKWIRVDKSAADGPRVFRVVDSDIEDEVQKRLQLVQAG  
QAEKLAEKERNELRKRKLLTEVILKTYWVSKGKAFSTSVSKQEAELSPEMISGSRDRPFKPYNFSARGVLP  
DSGHLHPLLKVRSQFRQIFLEMGFTEMPD NFI ESSFWNF DALFQPPQHPARDQHDTFFLRDPAEALQLPMGY  
VQRVKRTHSQGGYGSQGYKYTWKLEEARKNLLRTHTTAASARALYQLAQKPFPTPAKYFSIDRVFRNETLDATH  
LAEFHQIEGVIADHGLTLGHLMGVLREFFTKL GITQLRFKPAYNPYTEPSMEVFSYHQGLKWKWVEVGN SGVF  
RPEMLLPMGLPENVS VIAWGLSLERPTMIKYGINNIRELVGHKVNLMQVYD SPVCRDLIEPRSSKTQEAA\*

>rs46809451\_ENSMUSP00000120609\_c.25:T>C\_p.L9P ENSMUST00000156970.8|Farsa-  
206|ENSMUSG0000003808|+|chr8:g.85583689:T>C  
MADNPVLEPLLRLEVADGGLD SAELATQLGVEHQAVVGAVKSLQALGEVIEAELRSTKWCWELTTEAPAQRQG  
GLQQGHVQQVDPSGQECRRRAPGVPSGGQYRG\*

>rs32726273\_ENSMUSP0000003906\_c.1205:G>C\_p.Q402H  
ENSMUST0000003906.13|Farsa-201|ENSMUSG0000003808|+|chr8:g.85594648:G>C  
MADNPVLELLLRLEVADGGLD SAELATQLGVEHQAVVGAVKSLQALGEVIEAELRSTKWCWELTTEGEEIARE  
GSHEARVFRSIPLEGLVQSELMHLP SGKVGFSKAMSNKWIRVDKSAADGPRVFRVVDSDIEDEVQKRLQLVQAG  
QAEKLAEKERNELRKRKLLTEVILKTYWVSKGKAFSTSVSKQEAELSPEMISGSRDRPFKPYNFSARGVLP  
DSGHLHPLLKVRSQFRQIFLEMGFTEMPD NFI ESSFWNF DALFQPPQHPARDQHDTFFLRDPAEALQLPMGY  
VQRVKRTHSQGGYGSQGYKYTWKLEEARKNLLRTHTTAASARALYQLAQKPFPTPAKYFSIDRVFRNETLDAT  
HLAEFHQIEGVIADHGLTLGHLMGVLREFFTKL GITHLRFKPAYNPYTEPSMEVFSYHQGLKWKWVEVGN SGVF  
RPEMLLPMGLPENVS VIAWGLSLERPTMIKYGINNIRELVGHKVNLMQVYD SPVCRDLIEPRSSKTQEAA\*

>rs32726273\_ENSMUSP00000105376\_c.1202:G>C\_p.Q401H  
ENSMUST00000109754.2|Farsa-202|ENSMUSG0000003808|+|chr8:g.85594648:G>C

MADNPVLELLLRLEVADGGLDLSDAELATQLGVEHQAVVGAVKSLQALGEVIEAELRSTKCWELTTEGEEIARE  
GSHEARVFRSIPLEGLVQSELMHLPSGKVGFSKAMS NKWIRVDKSAADGPRVFRVVDSDIEDEVQKRLQLVQAG  
QAEKLAEKERNELRKRKLLTEVILKTYWVSKGKAFSTSVSKQEAELSPEMISSGSRDRPFKPYNFSARGVLP  
DSGHLHPLLKVR SQFRQIFLEMGFTEMPDNDNFIESSFWNF DALFQPQQHPARDQHDTFFLRDPAEALQLPMGY  
VQRVKRTHSQGGYGSQGYKYTWKLEEARKNLLRTHTTAASARALYQLAQKPFPAKYFSIDRVFRNETLDATH  
LAEFHQIEGVIADHGLTLGHLMGVLRFFFTKLGITHLRFKPAYNPYTEPSMEVFSYHQGLKKWVEVNGSGVFR  
PEMLLPMPENSVIAWGLSLERPTMIKYGINNIRELVGHKVNLMVYDSDPVCRLDIEPRSSKTQEAA\*  
>ENSMUSP0000003906\_c.1222:C>CAAGA\_p.A408ins-fs  
ENSMUST0000003906.13|Farsa-  
201|ENSMUSG0000003808|+|chr8:g.85594665:C>CAAGA  
MADNPVLELLLRLEVADGGLDLSDAELATQLGVEHQAVVGAVKSLQALGEVIEAELRSTKCWELTTEGEEIARE  
GSHEARVFRSIPLEGLVQSELMHLPSGKVGFSKAMS NKWIRVDKSAADGPRVFRVVDSDIEDEVQKRLQLVQAG  
QAEKLAEKERNELRKRKLLTEVILKTYWVSKGKAFSTSVSKQEAELSPEMISSGSRDRPFKPYNFSARGVLP  
DSGHLHPLLKVR SQFRQIFLEMGFTEMPDNDNFIESSFWNF DALFQPQQHPARDQHDTFFLRDPAEALQLPMGY  
VQRVKRTHSQGGYGSQGYKYTWKLEEARKNLLRTHTTAASARALYQLAQKPFPAKYFSIDRVFRNETLDATH  
HLAEFHQIEGVIADHGLTLGHLMGVLRFFFTKLGITQLRFKPARLQPLHRAQHGSVQLPPRSKEVG  
>ENSMUSP00000105376\_c.1219:C>CAAGA\_p.A407ins-fs  
ENSMUST00000109754.2|Farsa-  
202|ENSMUSG0000003808|+|chr8:g.85594665:C>CAAGA  
MADNPVLELLLRLEVADGGLDLSDAELATQLGVEHQAVVGAVKSLQALGEVIEAELRSTKCWELTTEGEEIARE  
GSHEARVFRSIPLEGLVQSELMHLPSGKVGFSKAMS NKWIRVDKSAADGPRVFRVVDSDIEDEVQKRLQLVQAG  
QAEKLAEKERNELRKRKLLTEVILKTYWVSKGKAFSTSVSKQEAELSPEMISSGSRDRPFKPYNFSARGVLP  
DSGHLHPLLKVR SQFRQIFLEMGFTEMPDNDNFIESSFWNF DALFQPQQHPARDQHDTFFLRDPAEALQLPMGY  
VQRVKRTHSQGGYGSQGYKYTWKLEEARKNLLRTHTTAASARALYQLAQKPFPAKYFSIDRVFRNETLDATH  
LAEFHQIEGVIADHGLTLGHLMGVLRFFFTKLGITQLRFKPARLQPLHRAQHGSVQLPPRSKEVG  
>rs49360904\_ENSMUSP00000122159\_c.205:T>C\_p.L69P  
ENSMUST00000136026.8|Syce2-202|ENSMUSG00000003824|+|chr8:g.85610137:T>C  
MERHGVAAPPVELKDQEPPIAVESGEHRQSENHEETPGSVAPSASCQLPGPFSSLDSSIETLKKKAQEP IENI  
NESRQKDHALMTNFRDSLKMKVSDLTEKLEERMYQVYSHHSKI IQERLQEFQKMAKINHLEMELKQVCQTVE  
TVYKDLQVQSEVPTCEEQNYKDGE C\*  
>rs49360904\_ENSMUSP00000131438\_c.223:T>C\_p.L75P  
ENSMUST00000170296.2|Syce2-204|ENSMUSG00000003824|+|chr8:g.85610137:T>C  
MERHGSWLR SQVAAPPVELKDQEPPIAVESGEHRQSENHEETPGSVAPSASCQLPGPFSSLDSSIETLKKKAQ  
EPIENINESRQKDHALMTNFRDSLKMKVSDLTEKLEERMYQVYSHHSKI IQERLQEFQKMAKINHLEMELKQ  
VCQTVETVYKDLQVQSEVPTCEEQNYKDGE C\*  
>rs47589652\_ENSMUSP00000003907\_c.594:G>A\_p.G199S  
ENSMUST00000003907.14|Gcdh-201|ENSMUSG00000003809|-|chr8:g.85617709:C>T  
MVPAMLTGYMSLRGVSARLLSRRSGLRFRPFRTWSSAAAHEKTEKQIRPAKSSRPVFDWKDPLILEEQTLTAD E  
KLIRD TFRNYCQERLMSRILLANRNEVFHRDIVYEMGELGVLGPTIKGYCAGVSSVAYGLLTRELERVDSGY  
RSMMSVQSS LVMHPIIYTYGSEEQRQKYL PGLAKGELLGCFGLTEPNHGSDPGSMETRARRHNPSNQSYTL SGT  
K TWITNSPVADLFI VWARCEDN CIRGF ILEKGMRLSAPRIEGKFSLRASATGMIIMDSVEVPEENVLPNVSS L  
AGPFGCLNTARYGITWGV LGAAEFCLHTARQYALDRIQFGVPLARNQLVQKKLADMLTEITLGLHACLQLGRL  
KDQDKATPEMVSMLKRNCGKALDIARQARDILGGNGISDEYHVIRHAMNLEAVNTYEGTHDIHALILGRAIT  
GIAFTVVGK\*  
>rs47589652\_ENSMUSP00000105367\_c.567:G>A\_p.G190S  
ENSMUST00000109745.8|Gcdh-202|ENSMUSG00000003809|-|chr8:g.85617709:C>T  
MSLRGVSARLLSRRSGLRFRPFRTWSSAAAHEKTEKQIRPAKSSRPVFDWKDPLILEEQTLTAD EKLIRD TFRN  
YCQERLMSRILLANRNEVFHRDIVYEMGELGVLGPTIKGYCAGVSSVAYGLLTRELERVDSGYRSMMSVQSS  
LVMHPIIYTYGSEEQRQKYL PGLAKGELLGCFGLTEPNHGSDPGSMETRARRHNPSNQSYTL SGT KTWITNSPVA  
DLFI VWARCEDN CIRGF ILEKGMRLSAPRIEGKFSLRASATGMIIMDSVEVPEENVLPNVSS LAGPFGCLNT  
ARYGITWGV LGAAEFCLHTARQYALDRIQFGVPLARNQLVQKKLADMLTEITLGLHACLQLGRLKDQDKATPE  
MVSMLKRNCGKALDIARQARDILGGNGISDEYHVIRHAMNLEAVNTYEGTHDIHALILGRAITGIAFTVVGK  
\*  
>rs47393345\_ENSMUSP00000003907\_c.544:T>A\_p.L182H  
ENSMUST00000003907.14|Gcdh-201|ENSMUSG00000003809|-|chr8:g.85617759:A>T  
MVPAMLTGYMSLRGVSARLLSRRSGLRFRPFRTWSSAAAHEKTEKQIRPAKSSRPVFDWKDPLILEEQTLTAD E  
KLIRD TFRNYCQERLMSRILLANRNEVFHRDIVYEMGELGVLGPTIKGYCAGVSSVAYGLLTRELERVDSGY  
RSMMSVQSS LVMHPIIYTYGSEEQRQKYL PGLAKGELLGCFGLTEPNHGSDPGSMETRARRHNPSNQSYTL SGT  
K TWITNSPVADLFI VWARCEDN CIRGF ILEKGMRLSAPRIEGKFSLRASATGMIIMDSVEVPEENVLPNVSS LAGPFGCLNT  
ARYGITWGV LGAAEFCLHTARQYALDRIQFGVPLARNQLVQKKLADMLTEITLGLHACLQLGRLKDQDKATPE  
MVSMLKRNCGKALDIARQARDILGGNGISDEYHVIRHAMNLEAVNTYEGTHDIHALILGRAITGIAFTVVGK  
\*

TWITNSPVADLFIVWARCEDNCIRGFILEKGMRGLSAPRIEGKFSLRASATGMIIMDSVEVPEENVLPNVSSL  
AGPFGCLNTARYGITWGVLGAAEFCLHTARQYALDRIQFGVPLARNQLVQKKLADMLTEITLGLHACLQLGRL  
KDQDKATPEMVSMLKRNNCGKALDIARQARDILGGNGISDEYHVIRHAMNLEAVNTYEGTHDIIHALILGRAIT  
GIQAFTVVK\*

>rs47393345\_ENSMUSP00000105367\_c.517:T>A\_p.L173H  
ENSMUST00000109745.8|Gcdh-202|ENSMUSG0000003809|-|chr8:g.85617759:A>T  
MSLRGVSARLLSRRSGLRFRFRPTWSSAAAHEKTKQIRPAKSSRPVFDWKDPLILEEQLTAEKLIRDTRFN  
YQERLMSRILLANRNEVFHRDIVYEMGELGVLGPTIKGYGCAGVSSVAYGLLRELERASDGYRSMMSVQSS  
LVMHPIYTYGSEEQRQKYLPLGLAKGEHLGCFGLTEPNHGSDDPGMETRARHNPNSQSYTLGKTIWITNSPVA  
DLFIVWARCEDNCIRGFILEKGMRGLSAPRIEGKFSLRASATGMIIMDSVEVPEENVLPNVSSLAGPFGCLNT  
ARYGITWGVLGAAEFCLHTARQYALDRIQFGVPLARNQLVQKKLADMLTEITLGLHACLQLGRLKDQDKATPE  
MVSMLKRNNCGKALDIARQARDILGGNGISDEYHVIRHAMNLEAVNTYEGTHDIIHALILGRAITGIQAFTVVK  
\*

>rs4137992\_ENSMUSP00000105363\_c.2420:C>A\_p.S807R  
ENSMUST00000109741.9|Mast1-201|ENSMUSG00000053693|-|chr8:g.85644507:G>T  
MSDSLWTALS NFMSPFPGGSMFRRTKSCRTSNRKSILITSTSPTLRPHSPLPGHLGSSPLDSPRNFSPNT  
AHFSFASRRADGRRWSLASLPSGSGYGTNTPSSTVSSSCSSQERLHQLPYQPTVDELHFLSKHFGSTESITDE  
DGGRRSPAVRPRSRLSPGRSPSSYDNEIVMMNHVYKERFPKATAQMEEKLRDFARAYEPDSVLPPLADGVLSF  
IHHQI IELARDCLTKSRDGLITTVYFYELQENLEKLLQDAYERSESLEVAFVTQLVKKLLIIISRPARLLECL  
EFNPEEFYHLLAAEGHAKGHLVKTIDIPRYIIRQLGLTRDPFPDVRLEEQDSGGSNTPEQDDTSEGRSSTS  
KAKKPPGESDFDTIKLISNGAYGAVYLVRHRDTRQRFAMKKINKQNLILRNQIQQAFVERDILTFAENPFVVG  
MFCSFETRRLCMVMEYVEGGDCATLLKNIGALPVEMARMYFAETVLALEYLHNYGIVHRDLKPDNLLITSMG  
HIKLTDFGLSKMGLMSLTNLYEGHIEKDAREFLDKQVCGTPEYI APEVILRQGYGKPVDDWWAMGIILYEFV  
GCVPPFGDTPPELFGQVISDDILWPEGDEALPTDAQLLISLLQTNPLVRLGAGGAFEVKQHSFFRDLDDWTGL  
LRQKAEFI PHLESEDDTSYFDRSDRYHHVNSYDEDDTTEEEPEVIRQFSSCSPRFSKVYSMEQLSQHEPKT  
PVSASGASKRDPESAKEKREGLGGLTLREKTRWGGSPKIRFSAEASFLEGEASPLGARRRFSAL  
LEPRRFTAPQEDEARLRPRRPSDDPSSLDTRVPKEAVQGEGETSTPGEPEATERSHPGDLGPPSKDGDPS  
GPRATNDLVLRRARHQQLSGDLAVEKRPSRTGGKVIKASATALSVMIPAVDPHGGSPPLASPMSPRSLSSNPS  
SRDSSPSRDYSPAVSGLRSPITIQRSKGYFTLRAIRVYMGSDVYSVHHIVVHVEEGGPAQEAGLCAGDLI  
THVNGEPVHGMVHPEVVELILKSGNKVAVTTTFFENTSIRIGPARRSSYKAKMARRNKRPSAKDQGESKKRSS  
LFRKIKTQSNLLHTSRSLSSLNRLSSSDSLPGSPTHGLPARSPHYSRSTPDSAYLGASSQSSPASSTPNS  
PASSASHHIRPSTLHGLSPKLRQYRSARCKSAGNIPLSPLAHTPSPTQASPPPLPGHTVGSSTTQSFPAKL  
HSSPPVVRPRPKSAEPPRSPLLRVQSAEKLGLASLGADKKGALRKHSLLEVGHPDFRKFHGEALHLSLAESDG  
ETPPIEGPATRQVAVRRLGRQESPLSLGADPLLPDGVQRPMASSKEDSAGGTEACTPPRATTPGSRTLERDS  
GCTRHQSVQTEDGPGGVARALAKAALSVPQEHETGRSSSGEAGTPVPPIVVEPARPGVKTPAQPLGTDKSG  
LKEPVAQMPMPDAPRGRERWVLEVEERTTSLGSLRSPKSPKLSPPDPTPLVPTKNVPRSAAPSVPPASLM  
VPGTKPEAGLNSRCPAEAVTPAGLTKTGAPSPASLGP\*

>rs46189481\_ENSMUSP00000064680\_c.169:G>A\_p.G57D  
ENSMUST00000064922.7|Junb-201|ENSMUSG00000052837|-|chr8:g.85704889:C>T  
MCTKMEQPFYHDDSYAAAGYGRSPGSLSLHDYKLLKPTLALNLADPYRGLKGPARGDPGPEGSGAGSYFSGQG  
SDTGASLKLASTELELRLIVPNSNGVITTTPTPPGQYFYPRGGGSGGTGGGVTEEQEGFADGFVKALDDLHKM  
NHVTPPNVSLGASGGPQAGPGGVYAGPEPPPVYTNLSSYSPASAPSGSGTAVGTGSSYPTATISYLPHAPPF  
AGGHPAQLGLSRGASAFKEEPQTVPEARSRDATPPVSPINMEDQERIKVERKRLRNRLAATKCRKRKLERIAR  
LEDKVKTLKAENAGLSSAAGLLREQVAQLKQKVMTHVSNQCQLLLGVKGHAF\*

>ENSMUSP00000148237\_c.247:C>T\_p.S83L ENSMUST00000209764.2|Hook2-  
203|ENSMUSG00000052566|+|chr8:g.85719856:C>T  
MSVDKAEKCGSLTLWLTQTFQVSPPCASPQDLSSGLAIAHVLNQIDPSWFFNNEWLQGISSEDSSPSWRLKVRKLE  
KILQSLVEYLKKNVLGHPVSDQHLPDVSLIGEFNSPAELGKLLQLVLGCAISCEKKQEIYIQRIMTLEESVQHVV  
MEAIQELMTKDTPDLSPENYGNFDTQSRYYFLSEEVEEGDHLQHYLDLERQLLLLSEEKQNLAQENAAALR  
ERVGRSEVESAPGLTAKKLLLQSQLEQLQEENFRLESSREDDRLRCLERELEREVAELQQRNQLTSLSQEAQA  
LKDEMDELROSSERARQLEERNAGHAERTRQLEELRRAGSLRAQLEAQRQVQELQGGQWQEEAMKAEKWLF  
CRNLEEKCDLVTKERLTERDSLREANEELRCAQLQPRGLAQADLSLDPTPSGLENLAAEILPAELRETLV  
RLQLENKRLCQEAADRERQEELQRHLEBANRARGHLEAQQRINQQQLSELRAQVEELQKALQEQQGKTEDPT  
LLKRKLEDHLQQLHEADLELQRKREYIEELEPPTDSSTARRIEELQDLSLQKKDADLRAMEERYRYYVDKARTV  
IQTLEPKQRPPVVSPEFHTRLRSQWERNLRIQMEMDYEKSRRRQEQEELKLLISAWYSMGMALEHRAGEEHA  
PAHAQSFLAQORLATNARRGPLGRQALSRLPTDKH\*

>ENSMUSP00000067752\_c.247:C>T\_p.S83L ENSMUST00000064495.8|Hook2-  
201|ENSMUSG00000052566|+|chr8:g.85719856:C>T

MSVDKAEKCGSLLTLWLQTFQVSPPCASPQDLSSGLAIAHVLNQIDPSWFNNEWLQGISSEDSSPSWRLKVRKLE  
KILQSLVEYLNKLVGHPVSDQHLPDVSLIGEFNSPAELGKLLQLVLGCAISCEKKQEIYIQRIMTLEESVQHVV  
MEAIQELMTKDTDPDSLSPENYGNFDTQSRYYFLSEEVVEEGDHLQHYLDLERQLLLLSEEKQNLAQENAAALR  
ERVGRSEVESAPGLTAKKLLLLQSLEQLQEENFRLESSREDDRLRCLLELREVAELQQRNQALTSLSQEAQA  
LKDEMDELRSSEARQLEATLNSCRRRLGELQELRRQVRQLEERNAGHAERTRQLEELRRAGSLRAQLEAQ  
RRQVQELQGQWQEEAMKAEKWLFECRNLEEKCDLVTKEKERLLTERDSLREANEELRCAQLQPRGLAQADLSL  
DPTPSGLENLAAEILPAELRETLVRLQLENKRLCQQAADRERQEELQRHLEENRARRHGLEAQQRNLNQQQLS  
ELRAQVEELQKALQEQQGKTEDPTLLKRRKLEDHLQKLHEADLELQKREYIEELEPPTDSSTARRIEELQDSL  
QKKDADLRAMEERYRRYVDKARTVIQTLEPKQRPTTVSPEFHTRLRSQLWERNLRIRQMEMDYEKSRRRQEQE  
EKLLISAWYSMGMALEHRAGEEHAHAQAQSFLAQORLATNARRGPLGRQALSRLPTDKH\*  
>ENSMUSP00000148078\_c.247:C>T\_p.S83L ENSMUST00000210326.2|Hook2-  
204|ENSMUSG00000052566|+|chr8:g.85719856:C>T  
MSVDKAEKCGSLLTLWLQTFQVSPPCASPQDLSSGLAIAHVLNQIDPSWFNNEWLQGISSEDSSPSWRLKVRKLE  
KILQSLVEYLNKLVGHPVSDQHLPDVSLIGEFNSPAELGKLLQLVLGCAISCEKKQEIYIQRIMTLEESVQHVV  
MEAIQELMTKDTDPDSLSPENYGNFDTQSRYYFLSEEVVEEGDHLQHYLDLERQLLLLSEEKQNLAQENAAALR  
ERVGRSEVESAPGLTAKKLLLLQSLEQLQEENFRLESSREDDRLRCLLELREVAELQQRNQALTSLSQEAQA  
LKDEMDELRSSEARQLEATLNSCRRRLGELQELRRQVRQLEERNAGHAERTRQLEELRRAGSLRAQLEAQ  
RRQVQELQGQWQEEAMKAEKWLFECRNLEEKCDLVTKEKERLLTERDSLREANEELRCAQLQPRGLAQADLSL  
DPTPSGLENLAAEILPAELRETLVRLQLENKRLCQQAADRERQEELQRHLEENRARRHGLEAQQRNLNQQQLS  
ELRAQVEELQKALQEQQGKTEDVSAACLLPAWPSLVLPSPFPPLPCCPMPEEGHCEYHGSREAHHCYLHSFS  
DLVPVPSLPAASLPQPTLLKRRKLEDHL\*  
>rs254660594\_ENSMUSP00000148237\_c.345:C>T\_p.Q116\*  
ENSMUST00000209764.2|Hook2-203|ENSMUSG00000052566|+|chr8:g.85720043:C>T  
MSVDKAEKCGSLLTLWLQTFQVSPPCASPQDLSSGLAIAHVLNQIDPSWFNNEWLQGISSEDSSPSWRLKVRKLE  
KILQSLVEYLNKLVGHPVSDQHLPDVSLIGEFNSPAELGKLLQLVLGCAISCEKKQEIYIQRIMTLEESVQHVV  
MEAIQELMTKDTDPDSLSPENYGNFDTQSRYYFLSEEVVEEGDHLQHYLDLERQLLLLSEEKQNLAQENAAALR  
ERVGRSEVESAPGLTAKKLLLLQSLEQLQEENFRLESSREDDRLRCLLELREVAELQQRNQALTSLSQEAQA  
LKDEMDELRSSEARQLEATLNSCRRRLGELQELRRQVRQLEERNAGHAERTRQLEELRRAGSLRAQLEAQ  
RRQVQELQGQWQEEAMKAEKWLFECRNLEEKCDLVTKEKERLLTERDSLREANEELRCAQLQPRGLAQADLSL  
DPTPSGLENLAAEILPAELRETLVRLQLENKRLCQQAADRERQEELQRHLEENRARRHGLEAQQRNLNQQQLS  
ELRAQVEELQKALQEQQGKTEDVSAACLLPAWPSLVLPSPFPPLPCCPMPEEGHCEYHGSREAHHCYLHSFS  
DLVPVPSLPAASLPQPTLLKRRKLEDHL\*  
>rs254660594\_ENSMUSP00000067752\_c.345:C>T\_p.Q116\*  
ENSMUST00000064495.8|Hook2-201|ENSMUSG00000052566|+|chr8:g.85720043:C>T  
MSVDKAEKCGSLLTLWLQTFQVSPPCASPQDLSSGLAIAHVLNQIDPSWFNNEWLQGISSEDSSPSWRLKVRKLE  
KILQSLVEYLNKLVGHPVSDQHLPDVSLIGEFNSPAELGKLLQLVLGCAISCEKKQEIYIQRIMTLEESVQHVV  
MEAIQELMTKDTDPDSLSPENYGNFDTQSRYYFLSEEVVEEGDHLQHYLDLERQLLLLSEEKQNLAQENAAALR  
ERVGRSEVESAPGLTAKKLLLLQSLEQLQEENFRLESSREDDRLRCLLELREVAELQQRNQALTSLSQEAQA  
LKDEMDELRSSEARQLEATLNSCRRRLGELQELRRQVRQLEERNAGHAERTRQLEELRRAGSLRAQLEAQ  
RRQVQELQGQWQEEAMKAEKWLFECRNLEEKCDLVTKEKERLLTERDSLREANEELRCAQLQPRGLAQADLSL  
DPTPSGLENLAAEILPAELRETLVRLQLENKRLCQQAADRERQEELQRHLEENRARRHGLEAQQRNLNQQQLS  
ELRAQVEELQKALQEQQGKTEDPTLLKRRKLEDHLQKLHEADLELQKREYIEELEPPTDSSTARRIEELQDSL  
QKKDADLRAMEERYRRYVDKARTVIQTLEPKQRPTTVSPEFHTRLRSQLWERNLRIRQMEMDYEKSRRRQEQE  
EKLLISAWYSMGMALEHRAGEEHAHAQAQSFLAQORLATNARRGPLGRQALSRLPTDKH\*  
>rs254660594\_ENSMUSP00000148078\_c.345:C>T\_p.Q116\*  
ENSMUST00000210326.2|Hook2-204|ENSMUSG00000052566|+|chr8:g.85720043:C>T  
MSVDKAEKCGSLLTLWLQTFQVSPPCASPQDLSSGLAIAHVLNQIDPSWFNNEWLQGISSEDSSPSWRLKVRKLE  
KILQSLVEYLNKLVGHPVSDQHLPDVSLIGEFNSPAELGKLLQLVLGCAISCEKKQEIYIQRIMTLEESVQHVV  
MEAIQELMTKDTDPDSLSPENYGNFDTQSRYYFLSEEVVEEGDHLQHYLDLERQLLLLSEEKQNLAQENAAALR  
ERVGRSEVESAPGLTAKKLLLLQSLEQLQEENFRLESSREDDRLRCLLELREVAELQQRNQALTSLSQEAQA  
LKDEMDELRSSEARQLEATLNSCRRRLGELQELRRQVRQLEERNAGHAERTRQLEELRRAGSLRAQLEAQ  
RRQVQELQGQWQEEAMKAEKWLFECRNLEEKCDLVTKEKERLLTERDSLREANEELRCAQLQPRGLAQADLSL  
DPTPSGLENLAAEILPAELRETLVRLQLENKRLCQQAADRERQEELQRHLEENRARRHGLEAQQRNLNQQQLS  
ELRAQVEELQKALQEQQGKTEDPTLLKRRKLEDHLQKLHEADLELQKREYIEELEPPTDSSTARRIEELQDSL  
QKKDADLRAMEERYRRYVDKARTVIQTLEPKQRPTTVSPEFHTRLRSQLWERNLRIRQMEMDYEKSRRRQEQE  
EKLLISAWYSMGMALEHRAGEEHAHAQAQSFLAQORLATNARRGPLGRQALSRLPTDKH\*  
>rs32597233\_ENSMUSP00000147580\_c.693:A>G\_p.I232V  
ENSMUST00000209322.2|Best2-202|ENSMUSG00000052819|-|chr8:g.85737412:T>C

MTVTTYTARVANARFGGFSQLLLLWRGSIYKLLWRELLCFLGLYMAALSAAAYRFLLAEEQKRYFEKLVICYDQYA  
SLIPVSVLGFYVTLVVRWNNQYLCMPLDALMCIVAGTVHGRDDRGRLYRRTLMRYAGLSAVLILRSVSTA  
VFKRFPTIDHVEAGFMTREERKKFENLNSSYNKYWVPCVWFSSLAAQARREGRIIRDNSALKLLEELNVFRS  
KCGMLFHYDWISVPLVYTQVVTIAVYSYFLACLIGRQFLDPAQGYKDHTLDLCVPIFTLLQFFFYAGWLKVAE  
QLINPFGEDDDDFETNFLIDRNFQVSMVADEMYDDLAMLEKDLYWDAAEARAPYTAATAFLLQQPSFQGSTF  
DIALAKEDMQFQRLDGVGDPLGEVHGDFLQRLLPAGAGSVGPLGRRLSLLRRKNSCVSEASTAASCAGCAAD  
GGGVECGCGDPLDPSLREPELESPACPEPPAPIPGTPEPFTTVSIPGPRAPAPPWLPSPIGEEEEESPA\*  
>rs32597233\_ENSMUSP00000053408\_c.693:A>G\_p.I232V  
ENSMUST00000059072.6|Best2-201|ENSMUSG00000052819|-|chr8:g.85737412:T>C  
MTVTTYTARVANARFGGFSQLLLLWRGSIYKLLWRELLCFLGLYMAALSAAAYRFLLAEEQKRYFEKLVICYDQYA  
SLIPVSVLGFYVTLVVRWNNQYLCMPLDALMCIVAGTVHGRDDRGRLYRRTLMRYAGLSAVLILRSVSTA  
VFKRFPTIDHVEAGFMTREERKKFENLNSSYNKYWVPCVWFSSLAAQARREGRIIRDNSALKLLEELNVFRS  
KCGMLFHYDWISVPLVYTQVVTIAVYSYFLACLIGRQFLDPAQGYKDHTLDLCVPIFTLLQFFFYAGWLKVAE  
QLINPFGEDDDDFETNFLIDRNFQVSMVADEMYDDLAMLEKDLYWDAAEARAPYTAATAFLLQQPSFQGSTF  
DIALAKEDMQFQRLDGVGDPLGEVHGDFLQRLLPAGAGSVGPLGRRLSLLRRKNSCVSEASTAASCAGCAAD  
GGGVECGCGDPLDPSLREPELESPACPEPPAPIPGTPEPFTTVSIPGPRAPAPPWLPSPIGEEEEESPA\*  
>rs32597233\_ENSMUSP00000147837\_c.693:A>G\_p.I232V  
ENSMUST00000209421.2|Best2-203|ENSMUSG00000052819|-|chr8:g.85737412:T>C  
MTVTTYTARVANARFGGFSQLLLLWRGSIYKLLWRELLCFLGLYMAALSAAAYRFLLAEEQKRYFEKLVICYDQYA  
SLIPVSVLGFYVTLVVRWNNQYLCMPLDALMCIVAGTVHGRDDRGRLYRRTLMRYAGLSAVLILRSVSTA  
VFKRFPTIDHVEAGFMTREERKKFENLNSSYNKYWVPCVWFSSLAAQARREGRIIRDNSALKLLEELNVFRS  
KCGMLFHYDWISVPLVYTQVVTIAVYSYFLACLIGRQFLDPAQGYKDHTLDLCVPIFTLLQFFFYAGWLKVAE  
QLINPFGEDDDDFETNFLIDRNFQVSMVADEMYDDLAMLEKDLYWDAAEARAPYTAATAFLLQQPSFQGSTF  
DIALAKEDMQFQRLDGVGDPLGEVHGDFLQRLLPAGAGSVGPLGRRLSLLRRKNSCVSEASTAASCAGCAAD  
GGGVECGCGDPLDPSLREPELESPACPEPPAPIPGTPEPFTTVSIPGPRAPAPPWLPSPIGEEEEESPA\*  
>rs49088296\_ENSMUSP00000092845\_c.84:C>T\_p.Q29\*  
ENSMUST00000095220.4|Fbxw9-201|ENSMUSG00000008167|+|chr8:g.85786841:C>T  
MDLSSGRSGDPRSCEEEEDPEPDPDPDT\*AEAYVARVLTTPKLGTPRRSSLQSMFSASLGVPERKAASKVPA  
VRLPGLLSLPELLEICAYLDARVVLQVLPVCVQALHDLVDRVTRWLRARVRAPYPVVEEENFDWPAAC  
IELEQHLARWAEDGQRTEYFCLADGHFASIDAVLLLQGGALCLSGSRDRNVNLWDLRHLGKDP SRVLVKALGT  
QGNSTHKGWVWSLAAQDHRVCSGSWDSTVKLWDMADGQQFGEIKGKA AVLCLSYQPDILVTGT YDKKVTIYD  
PRAGLALVKSRRLHSSAVLAVLADDRHVI SGSEHSLVVFDRRANSVLQRLQLDSYLLCMSYQEPQLWAGDNQ  
GLLHVAFANRDGCFQLVRSFDVGHQSQITGIKHS LGTLYTTSTDKTIRVHVPTDPPRTICTRSHHNVLNGICAE  
GNVVVAASGGLSLEWVWRLLA\*  
>rs50985175\_ENSMUSP00000077733\_c.63:T>C\_p.S22P  
ENSMUST00000078665.13|Dhps-201|ENSMUSG00000060038|+|chr8:g.85798539:T>C  
MEGTPPGAAPSSALAAVLKHS PALPPESAQVQGYDFNRGVDYHALLDAYRTTG FQATNFGRAVQQVNAMIEKK  
LEPLAVDEDDHADLTQSRRLTGCTIFLGYTSNLISSGIRETIRYLVQHNMDVLTVTAGGVEEDLIKCLAPT  
YLGEFSLRGKELRESGINRIGNLLVPNDNYCKFEDWLMPI LDQMVLEQNTGKVT P SKMISRLGKEINNPDS  
VYYWAHKNH IPVLSPALTDGSLGDMIFFHSYKNPGLVLDIVEDLRLINTQAI FAKRSGMI I LGGGVVKHHIAN  
ANLMRNGADYAVYINTAQEFDGSDSGARPDEAVSWGKIRMDAQPVKVYADASLVFLLVAETFAQKADAFRAE  
KNED\*  
>rs50985175\_ENSMUSP00000120308\_c.114:T>C\_p.S39P  
ENSMUST00000152871.8|Dhps-207|ENSMUSG00000060038|+|chr8:g.85798539:T>C  
AGLRAPRLLRPESGREHMEGTPPGAAPSSALAAVLKHS PALPPESAQVQGYDFNRGVDYHALLDAYRTTG FQA  
TNFGRAVQQVNAMIEKKLEPLAVDEDDHADLTQSRRLTGCTIFLGYTSNLISSGIRETIRYLVQHNMDWKA  
GAE\*  
>rs49986977\_ENSMUSP00000147335\_c.693:T>G\_p.F232V  
ENSMUST00000211109.2|Zfp791-202|ENSMUSG00000074194|-|chr8:g.85837169:A>C  
MDSVTFEDVCVTFTQEEDLLRPVQKLYKDVWETVRNLASVASELEDQDVSNQYRIQEENVRSYVIQRLYE  
SKEVIEHGESFSQIPNTGAAKITSGGKPYSCSVCGKGFMLCSSLTRHVRAHPGHELAFKCGEKRFKCKECRA  
TFSYLKSFQRHERTHAGESPYRCKHCGKTFIYFPFQOTHERTHIGEQLYQCKHCGKGLSSPGSLRIHQRIHTG  
EKPYVCEKCGKAVKCPSSIQIHERTHTGEKPYKCKGKAFKAFISRTSVKTHMVTHSGDANKPHKCEHC GKAF LR  
PCFLRVHTRIHTGEKPYVCKQCGKAFRCSTSMQIHKRHTHTGEKPYKCKGKAFSAHSAFVHRVHTHTGEKPY  
KCRDCGKAFICLTYCRAHERKHSGEKSYECDQCCKGAFVLENFRRHVKTHAEDTPYKCKGKAFVFLSALQA  
HERIHTGEKPYECEQCCKTFRCSYVQVHRRHTHTGEKPYECKGKTFIYSTSFRGHMRMHTGEKPYKCKGCE  
KAFRLGSSLKRHERTHS\*



>rs49986977\_ENSMUSP00000096150\_c.693:T>G\_p.F232V  
ENSMUST00000098550.4|Zfp791-201|ENSMUSG00000074194|-|chr8:g.85837169:A>C  
MDSVTFEDVVCVTFTEQEEWDLRPVQKKLYKDVMMWETVRNLSVASELEDQDVSNQYRIQEENVRSYVIQRLYE  
SKEVIEHGESFSQIPNTGAAKITSGGKPYSCSVCGKGFMLCSSLTRHVRAHPGHELALAGFKCGEKRFKCKECRA  
TFSYLKSFQRHERTHAGESPYRCKHCGKTFIYFQFPQOTHERTHIGEQLYQCKHCGKGLSSPGSLRIHQRIHTG  
EKPYVCEKCGKAVSCPSSIQIHERHTHTGEKPYKCKEKGKAFISRTSVKTHMVTTHSGDANKPHKCEHCCKAFLR  
PCFLRVHTRIHTGEKPYVCKQCGKAFRCSTSMQIHKRTHHTGEKPYKCKEKGKAFSAHSAFRVHRRVHTGEKPY  
KCRDCGKAFICLTYCRAHERKHSGEKSYECDQCGKAFVSLNFRRHVKTHAEDTPYKCKEKGKAFVFLSALQA  
HERIHTGEKPYECEQCGKTFRCSSYVQVHRIHTGEKPYECKEKGKTFIYSTSFRGHMRMHTGEKPYKCKGCE  
KAFRLGSSLKRHERTHS\*

>rs256780963\_ENSMUSP00000151714\_c.34:T>C\_p.F12S  
ENSMUST00000218663.2|Olfr371-202|ENSMUSG00000051952|+|chr8:g.85957160:T>C  
MEPENHTGIPESYLLGLSENPEIQSVLFGFLFLSLYLVTVFGNLLIILAIIVSDPKLHTPMYLFSLNLSFSDICF  
TSTTVPKMLLGIQTQSKLITYAGCITQMYFFTFVGLLDNLLLTVMAYDRFVAICHPLHYTVLMNPKLCSQLLL  
LAWLISILGALPESLTALRLSFCVAVVEIPHYFCELPEVLKLCSDTFINNVLVYIVTGIMGFFPLAGILFSYS  
QIVTSVLRISTVGGKYKAFSTCGSHLSVVSLFYGTCLGVYLSSIWTQASWAGVFASVLYTVVTPMMPFIYSL  
RNRDMKRALNTLLCSVPSSS\*

>rs256780963\_ENSMUSP00000077921\_c.34:T>C\_p.F12S  
ENSMUST00000070849.6|Olfr371-201|ENSMUSG00000051952|+|chr8:g.85957160:T>C  
MEPENHTGIPESYLLGLSENPEIQSVLFGFLFLSLYLVTVFGNLLIILAIIVSDPKLHTPMYLFSLNLSFSDICF  
TSTTVPKMLLGIQTQSKLITYAGCITQMYFFTFVGLLDNLLLTVMAYDRFVAICHPLHYTVLMNPKLCSQLLL  
LAWLISILGALPESLTALRLSFCVAVVEIPHYFCELPEVLKLCSDTFINNVLVYIVTGIMGFFPLAGILFSYS  
QIVTSVLRISTVGGKYKAFSTCGSHLSVVSLFYGTCLGVYLSSIWTQASWAGVFASVLYTVVTPMMPFIYSL  
RNRDMKRALNTLLCSVPSSS\*

>rs33534398\_ENSMUSP00000151714\_c.45:G>A\_p.G16R  
ENSMUST000000218663.2|Olfr371-202|ENSMUSG00000051952|+|chr8:g.85957171:G>A  
MEPENHTGIPEFYLLRLSENPEIQSVLFGFLFLSLYLVTVFGNLLIILAIIVSDPKLHTPMYLFSLNLSFSDICF  
TSTTVPKMLLGIQTQSKLITYAGCITQMYFFTFVGLLDNLLLTVMAYDRFVAICHPLHYTVLMNPKLCSQLLL  
LAWLISILGALPESLTALRLSFCVAVVEIPHYFCELPEVLKLCSDTFINNVLVYIVTGIMGFFPLAGILFSYS  
QIVTSVLRISTVGGKYKAFSTCGSHLSVVSLFYGTCLGVYLSSIWTQASWAGVFASVLYTVVTPMMPFIYSL  
RNRDMKRALNTLLCSVPSSS\*

>rs33534398\_ENSMUSP00000077921\_c.45:G>A\_p.G16R  
ENSMUST00000070849.6|Olfr371-201|ENSMUSG00000051952|+|chr8:g.85957171:G>A  
MEPENHTGIPEFYLLRLSENPEIQSVLFGFLFLSLYLVTVFGNLLIILAIIVSDPKLHTPMYLFSLNLSFSDICF  
TSTTVPKMLLGIQTQSKLITYAGCITQMYFFTFVGLLDNLLLTVMAYDRFVAICHPLHYTVLMNPKLCSQLLL  
LAWLISILGALPESLTALRLSFCVAVVEIPHYFCELPEVLKLCSDTFINNVLVYIVTGIMGFFPLAGILFSYS  
QIVTSVLRISTVGGKYKAFSTCGSHLSVVSLFYGTCLGVYLSSIWTQASWAGVFASVLYTVVTPMMPFIYSL  
RNRDMKRALNTLLCSVPSSS\*

>rs32548947\_ENSMUSP00000034131\_c.2217:A>G\_p.I740V  
ENSMUST00000034131.10|Vps35-201|ENSMUSG00000031696|-|chr8:g.85987932:T>C  
MPTTQQSPQDEQEKLLEDAIQAVKVQSFQMKRCLDKNKLM DALKHASNMLGELRTSMLSPKSYELYMAISDE  
LHYLEVYLTDEFAGKRVADLYELVQYAGNIIPRLYLLITVGVVYVKSFPQSRKDILKDLVEMCRGVQHPLRG  
LFLRNYLLQCTRNLIPDEGEPTDEETTGDISDSMDFVLLNFAEMNKLWVRMQHQGHSRDREKREKREKREKREK  
VGTNLVRLSQLEGVNVERYKQIVLTGILEQVVCNCRDALAQEYLMECIQVFPDEFHQLTLNPFRLACAEHLQ  
VNVKNI I IALIDRLALFAHREDGPGIPAEIKLFDIFSQVATVIQSRQDMPSEDVVS LQVSLINLAMKCYPDR  
VDYVDKVLTEITVEIFNKLNLHEIATSSAVSKELTRLLKI PVDTYNNIITVLKLLKHFHPLFEYFDYESRKSMS  
YVLSNVLDYNTIIVSQDQVDSIMNLVSTLIQDQDPQVEDPDPEDFADEQSLVGRFIHLLRSDDPDQYQYLILN  
TARKHFAGGNQRIRFTLPLVFAAYQLAFRYKENSQMDKWEKCKQKIFSAHQITISALIKAEALAEPLRLFL  
LQGALAAGEIGFENHETVAYEFMSQAFSLYEDEISDSKAQLAAITLIIGTFERMKCFSEENHEPLRTQCALAA  
SKLLKPKDQGRAVSTCAHLFWSGRNTDKNGEELHGGKRVMECKKALKIANQCMDPSLQVQLFIEILNRYIYF  
YEKENDAVTVQVLNQLIQKIREDLNLESSEETEQINKHFHNTLEHLRSRRESPESEGPYIEGLIIL\*

>rs32770262\_ENSMUSP00000034131\_c.1743:A>G\_p.R582G  
ENSMUST00000034131.10|Vps35-201|ENSMUSG00000031696|-|chr8:g.85990856:T>C  
MPTTQQSPQDEQEKLLEDAIQAVKVQSFQMKRCLDKNKLM DALKHASNMLGELRTSMLSPKSYELYMAISDE  
LHYLEVYLTDEFAGKRVADLYELVQYAGNIIPRLYLLITVGVVYVKSFPQSRKDILKDLVEMCRGVQHPLRG  
LFLRNYLLQCTRNLIPDEGEPTDEETTGDISDSMDFVLLNFAEMNKLWVRMQHQGHSRDREKREKREKREK  
VGTNLVRLSQLEGVNVERYKQIVLTGILEQVVCNCRDALAQEYLMECIQVFPDEFHQLTLNPFRLACAEHLQ  
VNVKNI I IALIDRLALFAHREDGPGIPAEIKLFDIFSQVATVIQSRQDMPSEDVVS LQVSLINLAMKCYPDR

VDYVDKVLTTVEIFNKNLLEHIATSSAVSKELTRLLKIPVDTYNNILTVLKLKHFHPLFEYFDYESRKSMS  
 YVLSNVLDYNTTEIVSQDQVDSIMNLVSTLIQDQDPDQVEDPDPEDFADEQSLVGRFIHLLRSDDPDQYLI  
 LNTARKHFGAGGNQRIRFTLPLVFAAYQLAFRYKENSQMDKWEKKCKIFSAHQITISALIKAEALPLGLF  
 LQGALAAGEIGFENHETVAYEFMSQAFSLYEDEISDSKAQLAAITLIIGTFERMKCFSEENHEPLRTQCALAA  
 SKLLKPKDQGRAVSTCAHLFWSGRNTDKNGEELHGGKRVMECLKALKIANQCMDPSLQVQLFIEILNRYIYF  
 YEKENDAVTIQVLNQLIQKIREDLNLESSEETEQINKHFHNTLEHLRSRRESPESEGPPIYEGGLIL\*  
 >ENSMUSP00000040975\_c.441:A>G\_p.1148V ENSMUST00000047749.7|4921524J17Rik-  
 201|ENSMUSG00000036934|-|chr8:g.86136424:T>C  
 MSATRAKKVKMATKSCPECDQQIPVACKSCPCGYIFISRKLLNAKHSEKSPSTENKHEAKRRRTERVRREKI  
 NSTVKNKDLENRKRSRNSHSDHIRRGRGRPKSSSAKKHEEEREKQEKEIDIYANLSDEKAFVFSVALAEINRK  
 IVNQRLLIL\*  
 >rs52070708\_ENSMUSP00000040975\_c.384:T>A\_p.S129T  
 ENSMUST00000047749.7|4921524J17Rik-201|ENSMUSG00000036934|-  
 |chr8:g.86136481:A>T  
 MSATRAKKVKMATKSCPECDQQIPVACKSCPCGYIFISRKLLNAKHSEKSPSTENKHEAKRRRTERVRREKI  
 NSTVKNKDLENRKRSRNSHSDHIRRGRGRPKSSSAKKHEEEREKQEKEIDIYANLTDEKAFVFSVALAEINRK  
 IINQRLLIL\*  
 >rs3709028\_ENSMUSP00000129724\_c.781:T>C\_p.V261A  
 ENSMUST00000165770.9|zfp423-203|ENSMUSG00000045333|-|chr8:g.88509186:A>G  
 MIGDGC DLGLGEEEGGTGLPYPCQFCDKSFIRLSYLKRHEQIHSKLPFKCTFCSRLFKHKRSRDRHIKLTG  
 DKKYHCHECEAAFSRSDHLKIHLKTHSSSKPFCVSKRGFSSTSSLQSHMQAHKKNKEHLAKSEKEAKKDDF  
 MCDYCEDTFSQTEELEKHVLT LHPQLSEKADLQCIHCPEVVFVDESTLLAHIHQAHANQKHKCPMCPQFSSVE  
 GYVCHLDSHRQPDSSNHSVSPDVLGVSASMSSATPDSSASAERGSTPDSTLKLPLRGQKMRDDGQSWPKVY  
 SCPYCSKRDFTS LAVLEIHLKTIHADKPQQSHTCQICLDSMPTLYNLNEHVRLKHSKSHAYPVMQFGNISAFHC  
 NYCPEMFADINSLQEHIRVSHCGPNANPPDGNAFFCNQCSMGFLTESLTHEIQAHCSVGSSTKLESFVQPTQ  
 SFMEVYSCPYCTNSPIFGSILKLTKHIKENHKNIPLAHSKSKAEQSPVSSDVEVSSPKRQRLSGSANSIS  
 NGEYPCNQCDLKFNFESFQTHLKLHLELLLRKQACQCKEDFDSQESLLQHLTVHYMTTSTHYVCECDKQF  
 SSVDDLQKHLDMHTFVLYHCTLCQEVFDSKVS IQVHLAVKHSNEKKMYRCTACNWDNRKEADLQVHVKSHL  
 GNPAAKHKCFCGETFSTEVE LQCHITTHSKYNCRFCSKAFHAVILLEKHLREKHCVFDAEAENG TANGVPP  
 TSTKKAEPADLQGMMLKNPEAPNSHEASEDDVDASEPMYGC DICGAAYTMEVLLQNHRLRDNIRPGEDDGS  
 RKAEFIKGSHKCNVCSRTFFSENGLREHLQTHRGP AKHYMCPICGERFPSLLTLTEHKVTHSKSLDTGT  
 CRICKMPLQSEEEFIEHCQMHPDLRNSLTGFRVCMQTVTSTLELKIHGTFHMQLAGSSAASSPNGQLQKLYK  
 CALCLKEFRSKQDLVRLDVNGLPYGLCAGCMARSANGQVGG LAPPEPADRPCAGLRCPENVKFESAEDLES  
 HMQVDHRDLTPETSGPRKGAQTSVPRKTYQC IKQMTFENEREQI IHVANHMIIEGINHECKLNCQMFDS  
 PAKLLCHLIEHSFEGMGGTFKCPVCFVQANKLQHI FAVHGQEDKIYDCSQCPQKFFQTELQNHMTMSQHAQ\*  
 >rs3709028\_ENSMUSP00000105282\_c.1156:T>C\_p.V386A  
 ENSMUST00000109655.9|zfp423-202|ENSMUSG00000045333|-|chr8:g.88509186:A>G  
 MSRRKQAKPRSVKVEEGEASDFSLAWDSSVAAAGGLEGEPECDRKT SRALEDNRNSVTSQEERNEDEDE  
 VEDESIYTCDCQDFESLADLTDHRAHRC PGDGD DDPQLSWVASSPSSKDVASPTQMI GDGCDLGLGEEEGGT  
 GLPYPCQFCDKSFIRLSYLKRHEQIHSKLPFKCTFCSRLFKHKRSRDRHIKLTGDKKYHCHECEAAFSRSD  
 HLKIHLKTHSSSKPFCVSKRGFSSTSSLQSHMQAHKKNKEHLAKSEKEAKKDDFMCDYCEDTFSQTEELE  
 KHVLT LHPQLSEKADLQCIHCPEVVFVDESTLLAHIHQAHANQKHKCPMCPQFSSVEGVYCHLDSHRQ  
 PDSSNHSVSPDVLGVSASMSSATPDSSASAERGSTPDSTLKLPLRGQKMRDDGQSWPKVYSCP  
 YCSKRDFTS LAVLEIHLKTIHADKPQQSHTCQICLDSMPTLYNLNEHVRLKHSKSHAYPVMQFGNISAF  
 HCNYPCEMFADINSLQEHIRVSHCGPNANPPDGNAFFCNQCSMGFLTESLTHEIQAHCSVGSSTKLESFV  
 QPTQSFMEVYSCPYCTNSPIFGSILKLTKHIKENHKNIPLAHSKSKAEQSPVSSDVEVSSPKRQRLSGS  
 ANSISNGEYPCNQCDLKFNFESFQTHLKLHLELLLRKQACQCKEDFDSQESLLQHLTVHYMTTSTHYVCE  
 CDKQFSSVDDLQKHLDMHTFVLYHCTLCQEVFDSKVS IQVHLAVKHSNEKKMYRCTACNWDNRKEADLQV  
 HVKSHLGNPAAKHKCFCGETFSTEVE LQCHITTHSKYNCRFCSKAFHAVILLEKHLREKHCVFDAEAENG  
 TANGVPP TSTKKAEPADLQGMMLKNPEAPNSHEASEDDVDASEPMYGC DICGAAYTMEVLLQNHRLRDN  
 IRPGEDDGSRKAEFIKGSHKCNVCSRTFFSENGLREHLQTHRGP AKHYMCPICGERFPSLLTLTEHKVTH  
 SKSLDTGT CRICKMPLQSEEEFIEHCQMHPDLRNSLTGFRVCMQTVTSTLELKIHGTFHMQLAGSSAASS  
 PNGQLQKLYKCALCLKEFRSKQDLVRLDVNGLPYGLCAGCMARSANGQVGG LAPPEPADRPCAGLRCPEN  
 VKFESAEDLES HMQVDHRDLTPETSGPRKGAQTSVPRKTYQC IKQMTFENEREQI IHVANHMIIEGIN  
 HECKLNCQMFDS PAKLLCHLIEHSFEGMGGTFKCPVCFVQANKLQHI FAVHGQEDKIYDCSQCPQKFFQ  
 TELQNHMTMSQHAQ\*  
 >rs3709028\_ENSMUSP00000052379\_c.1093:T>C\_p.V365A  
 ENSMUST00000052250.15|zfp423-201|ENSMUSG00000045333|-|chr8:g.88509186:A>G

MTGAERGPLCYHGGLEGEPECDRKTSTRALEDNRNSVTSQEERNEDEDEDVEDES IYTCDHCCQDFESLADLTDHR  
AHRCPGDGDDDPQLSWVASSPSSKDVASPTQMIGDGC DLGLGEEEGGTGLPYPCQFCDKSFIRLSYLKRHEQI  
HSDKLFPKCTFCSRLFKHKRSRDRHIKLTGDKKYHCHECEAAFSRSDHLKIHLKTHSSSKPFCVCKRGFS  
STSSLQSHMQAHKKNKEHLAKSEKEAKKDDFMCDYCEDTFSQTEELEKHVLT LHPQLSEKADLQCIHCPEVVFV  
DESTLLAHIHQAHANQKHKCPMCPEQFSSVEGVYCHLDSHRQPDSSNHSVSPDPVLGVSASMSSATPDSSASA  
ERGSTPDSTLKLPLRGQKKMRDDGQSWPKVVYSCPYPYCKRDFTS LAVLEIHLKTIHADKPQQSHTCQICLDSMP  
TLYNLNEHVRKHLKSHAYPVMQFGNISAFHCNYCPEMFADINSLQEHIRVSHCGPNANPPDGNAFFCNQCSM  
GFLTESSLTEHIQQAHC SVGSKLESFPVVQPTQSFMEVYSCPYCTNSPIFGSILKLTKH IKENHKNIPLAHSK  
KSKAEQSPVSSDVEVSSPKRQRLSGSANSISNGEYPCNQCDLKF SNFESFQTHLKLHLELLLRKQACPKCKED  
FDSQESLLQHLTVHYMTTSTHYVCE SCDKQFSSVDDLQKHLDMHTFVLYHCTLCQEVFDSKVS IQVHLAVKH  
SNEKKMYRCTACNWD FRKEADLQVHVKSHLGNPAKAHKC IFCGETFSTEVELQCHITTHSKY NCRFC SKAF  
HAVILLEKHLREKHC VFDA AENGTANGVPP TSTKKAEPADLQGM L LKNPEAPNSHEASEDDVDASEPMY GCD  
ICGAAYTMEVLLQNHRLRDHNIRPGEDDGSRKA EFIKGS HKCNVCSRTFFSENGLREHLQTHRGP AKHYMCP  
ICGERFPSLLTLTEHKVTHSKSLDTGT CRICKMPLQSEEEFIEHCQMHPDLRNSLTGFR CVVCMQTVTSTLEL  
KIHGTFHMQLAGSSAASSP NGQLQKLYKCALCLKEFRSKQDLVRLDVNGLPYGLCAGCMARSANGQVGG LA  
PPEPADRPCAGLRCP E CNVKFESAEDLES HMQVDHRDLTPETSGPRKGAQTS PVPRK KTYQC IKCQMTFENER  
EIQIHVANHMIEEGINHECKLCNQMFDSPAKLLCHLIEHSFEGMGGTFKCPVCFTV FVQANKLQQHI FAVHGO  
EDKIYDCSQCPQKFFFQTE LQNHTMSQHAQ\*

>rs3710159\_ENSMUSP00000129724\_c.634:C>T\_p.P212L  
ENSMUST00000165770.9|Zfp423-203|ENSMUSG00000045333|-|chr8:g.88509333:G>A  
MIGDGC DLGLGEEEGGTGLPYPCQFCDKSFIRLSYLKRHEQI HSDKLFPKCTFCSRLFKHKRSRDRHIKLTG  
DKKYHCHECEAAFSRSDHLKIHLKTHSSSKPFCVCKRGFSSTSSLQSHMQAHKKNKEHLAKSEKEAKKDDF  
MCDYCEDTFSQTEELEKHVLT LHPQLSEKADLQCIHCPEVVFVDESTLLAHIHQAHANQKHKCPMCLEQFSSVE  
GVYCHLDSHRQPDSSNHSVSPDPVLGVSASMSSATPDSSASVERGSTPDSTLKLPLRGQKKMRDDGQSWPKVVY  
SCPYPYCKRDFTS LAVLEIHLKTIHADKPQQSHTCQICLDSMPTLYNLNEHVRKHLKSHAYPVMQFGNISAFHC  
NYCPEMFADINSLQEHIRVSHCGPNANPPDGNAFFCNQCSMGFLTESSLTEHIQQAHC SVGSKLESFPVVQPT  
TQSFMEVYSCPYCTNSPIFGSILKLTKH IKENHKNIPLAHSKSKAEQSPVSSDVEVSSPKRQRLSGSANSIS  
NGEYPCNQCDLKF SNFESFQTHLKLHLELLLRKQACPKCKEDFDSQESLLQHLTVHYMTTSTHYVCE SCDKQF  
SSVDDLQKHLDMHTFVLYHCTLCQEVFDSKVS IQVHLAVKHSNEKKMYRCTACNWD FRKEADLQVHVKSHL  
GNPAKAHKC IFCGETFSTEVELQCHITTHSKY NCRFC SKAFHAVILLEKHLREKHC VFDA AENGTANGVPP  
TSTKKAEPADLQGM L LKNPEAPNSHEASEDDVDASEPMY GCDICGAAYTMEVLLQNHRLRDHNIRPGEDDGSR  
KKA EFIKGS HKCNVCSRTFFSENGLREHLQTHRGP AKHYMCPICGERFPSLLTLTEHKVTHSKSLDTGT CRIC  
KMPLQSEEEFIEHCQMHPDLRNSLTGFR CVVCMQTVTSTLELKIHGTFHMQLAGSSAASSP NGQLQKLYK  
ALCLKEFRSKQDLVRLDVNGLPYGLCAGCMARSANGQVGG LAPPEPADRPCAGLRCP E CNVKFESAEDLES HM  
QVDHRDLTPETSGPRKGAQTS PVPRK KTYQC IKCQMTFENEREIQIHVANHMIEEGINHECKLCNQMFDSPAK  
LLCHLIEHSFEGMGGTFKCPVCFTV FVQANKLQQHI FAVHGOEDKIYDCSQCPQKFFFQTE LQNHTMSQHAQ\*

>rs3710159\_ENSMUSP00000105282\_c.1009:C>T\_p.P337L  
ENSMUST00000109655.9|Zfp423-202|ENSMUSG00000045333|-|chr8:g.88509333:G>A  
MSRRQAKPRSVKVEGEASDFSLAWDSSVAAAGGLEGEPECDRKTSTRALEDNRNSVTSQEERNEDEDEDVEDES  
IYTCDHCCQDFESLADLTDHRAHRCPGDGDDDPQLSWVASSPSSKDVASPTQMIGDGC DLGLGEEEGGTGLPY  
PCQFCDKSFIRLSYLKRHEQI HSDKLFPKCTFCSRLFKHKRSRDRHIKLTGDKKYHCHECEAAFSRSDHLKI  
HLKTHSSSKPFCVCKRGFSSTSSLQSHMQAHKKNKEHLAKSEKEAKKDDFMCDYCEDTFSQTEELEKHVLT  
LHPQLSEKADLQCIHCPEVVFVDESTLLAHIHQAHANQKHKCPMCLEQFSSVEGVYCHLDSHRQPDSSNHSVSP  
DPVLGVSASMSSATPDSSASVERGSTPDSTLKLPLRGQKKMRDDGQSWPKVVYSCPYPYCKRDFTS LAVLEIHLK  
TIHADKPQQSHTCQICLDSMPTLYNLNEHVRKHLKSHAYPVMQFGNISAFHCNYCPEMFADINSLQEHIRVSH  
CGPNANPPDGNAFFCNQCSMGFLTESSLTEHIQQAHC SVGSKLESFPVVQPTQSFMEVYSCPYCTNSPIFGS  
ILKLTKH IKENHKNIPLAHSKSKAEQSPVSSDVEVSSPKRQRLSGSANSISNGEYPCNQCDLKF SNFESFQ  
HLKLHLELLLRKQACPKCKEDFDSQESLLQHLTVHYMTTSTHYVCE SCDKQFSSVDDLQKHLDMHTFVLYH  
CTLCQEVFDSKVS IQVHLAVKHSNEKKMYRCTACNWD FRKEADLQVHVKSHLGNPAKAHKC IFCGETFSTEVE  
LQCHITTHSKY NCRFC SKAFHAVILLEKHLREKHC VFDA AENGTANGVPP TSTKKAEPADLQGM L LKNPEA  
PNSHEASEDDVDASEPMY GCDICGAAYTMEVLLQNHRLRDHNIRPGEDDGSRKA EFIKGS HKCNVCSRTFFS  
ENGLREHLQTHRGP AKHYMCPICGERFPSLLTLTEHKVTHSKSLDTGT CRICKMPLQSEEEFIEHCQMHPDLR  
NSLTGFR CVVCMQTVTSTLELKIHGTFHMQLAGSSAASSP NGQLQKLYKCALCLKEFRSKQDLVRLDVNGL  
PYGLCAGCMARSANGQVGG LAPPEPADRPCAGLRCP E CNVKFESAEDLES HMQVDHRDLTPETSGPRKGAQTS  
PVPRK KTYQC IKCQMTFENEREIQIHVANHMIEEGINHECKLCNQMFDSPAKLLCHLIEHSFEGMGGTFKCPV  
CFTV FVQANKLQQHI FAVHGOEDKIYDCSQCPQKFFFQTE LQNHTMSQHAQ\*

>rs3710159\_ENSMUSP00000052379\_c.946:C>T\_p.P316L  
ENSMUST00000052250.15|Zfp423-201|ENSMUSG00000045333|-|chr8:g.88509333:G>A

MTGAERGPLCYHGGLEGEPECDRKTSTRALEDNRNSVTSQEERNEDEDEDVEDES IYTCDHCCQDFESLADLTDHR  
AHRCPGDGDDDPQLSWVASSPSSKDVASPTQMIGDGC DLGLGEEEGGTGLPYPCQFCDKSFIRLSYLKRHEQI  
HSDKLPFKCTFCSRLFKHKRSRDRHIKLTGDKKYHCHECEAAFSRSDHLKIHLKTHSSSKPFKCSVCKRGFS  
STSSLQSHMQAHKKNKEHLAKSEKEAKKDDFMC DYCEDTFSQTEELEKHVLT LHPQLSEKADLQCIHCPEV FV  
DESTLLAHIHQAHANQKHKCPMCLEQFSSVEGVYCHLDSHRQPDSSNHSVSPDPV LGSVASMSSATPDSSASV  
ERGSTPDSTLKLPLRGQKKMRDDGQSWPKVVYSCPYCKRDF TSLAVLEIHLKTIHADKPQQSHTCQICLDSMP  
TLYNLNEHVRKLHKSHAYPVMQFGNISAFHCNYCPEMFADINS LQEHIRVSHCGPNANPPDGNAFFCNQCSM  
GFLTESSLTEHIQQAHCSVGSTKLESFVVQPTQSFMEVYSCPYCTNSPIFGSILKLT KHIKENHKNIPLAHSK  
KSKAEQSPVSSDVEVSSPKRQRLSGSANSISNGEYPCNQCDLKF SNFESFQTHLKLHLELLLRLKQACPOCKED  
FDSQESLLQHLTVHYMTTSTHYVCE SCDKQFSSVDDLQKHLDMHTFVLYHCTLCQEVFDSKVS IQVHLAVKH  
SNEKKMYRCTACNWD FRKEADLQVHVKSHLGNPAKAHKC IFCGETFSTEVE LQCHITTHSKY NCRFC SKAF  
HAVILLEKHLREKHCVF DAAAENGTANGVPPTSTKKAEPADLQGM L LKNPEAPNSHEASEDDVDASEPMY GCD  
ICGAAATMEVLLQNHR LRDHNIRPGEDDGSRKA EFKGSHKCNVCSRTFFSENGLREHLQTHRGP AKHYMCP  
ICGERFPSLLTLTEHKVTHSKSLDTGT CRICKMPLQSEEEFIEHCQMHPDLRNSLTGFR CVVMQTVTSTLEL  
KIHGTFHMQLAGSSAASSPNGQLQKLYKCALCLKEFRSKQDLVRLDVNGLPYGLCAGCMARSANGQVGG LA  
PPEPADRPCAGLRCP ECNVKFESAEDLES HMQVDHRDLTPETSGPRKGAQTS PVPRK KTYQC IKCQMTFENER  
EIQIHVANHMIEEGINHECKLCNQMFDS PAKLLCHLIEHSFEGMGGTFKCPVCFTV FVQANKLQQHI FAVHGQ  
EDKIYDCSQCPQKFFFQTE LQNHTMSQHAQ\*

>rs50410189\_ENSMUSP00000105282\_c.181:A>T\_p.E61V  
ENSMUST00000109655.9|Zfp423-202|ENSMUSG00000045333|-|chr8:g.88586031:T>A  
MSRRKQAKPRSVKVEEGEASDFSLAWDSSVAAAGGLEGEPECDRKTSTRALEDNRNSVTSQEVRNEDEDEDVEDES  
IYTCDHCCQDFESLADLTDHRAHRCPGDGDDDPQLSWVASSPSSKDVASPTQMIGDGC DLGLGEEEGGTGLPY  
PCQFCDKSFIRLSYLKRHEQIHSDKLPFKCTFCSRLFKHKRSRDRHIKLTGDKKYHCHECEAAFSRSDHLKI  
HLKTHSSSKPFKCSVCKRGFSSTSSLQSHMQAHKKNKEHLAKSEKEAKKDDFMC DYCEDTFSQTEELEKHVLT  
LHPQLSEKADLQCIHCPEV FVDESTLLAHIHQAHANQKHKCPMCPEQFSSVEGVYCHLDSHRQPDSSNHSVSP  
DPV LGSVASMSSATPDSSASVERGSTPDSTLKLPLRGQKKMRDDGQSWPKVVYSCPYCKRDF TSLAVLEIHLK  
TIHADKPQQSHTCQICLDSMP TLYNLNEHVRKLHKSHAYPVMQFGNISAFHCNYCPEMFADINS LQEHIRVSH  
CGPNANPPDGNAFFCNQCSMGFLTESSLTEHIQQAHCSVGSTKLESFVVQPTQSFMEVYSCPYCTNSPIFGS  
ILKLT KHIKENHKNIPLAHSKSKAEQSPVSSDVEVSSPKRQRLSGSANSISNGEYPCNQCDLKF SNFESFQTHL  
KLHLELLLRLKQACPOCKEDFDSQESLLQHLTVHYMTTSTHYVCE SCDKQFSSVDDLQKHLDMHTFVLYHC  
TLCQEVFDSKVS IQVHLAVKHSNEKKMYRCTACNWD FRKEADLQVHVKSHLGNPAKAHKC IFCGETFSTEVE  
LQCHITTHSKY NCRFC SKAFHAVILLEKHLREKHCVF DAAAENGTANGVPPTSTKKAEPADLQGM L LKNPEA  
PNSHEASEDDVDASEPMY GCDICGAAATMEVLLQNHR LRDHNIRPGEDDGSRKA EFKGSHKCNVCSRTFFS  
ENGLREHLQTHRGP AKHYMCPICGERFPSLLTLTEHKVTHSKSLDTGT CRICKMPLQSEEEFIEHCQMHPDLR  
NSLTGFR CVVMQTVTSTLELKIHGTFHMQLAGSSAASSPNGQLQKLYKCALCLKEFRSKQDLVRLDVNGL  
PYGLCAGCMARSANGVGG LAPPEPADRPCAGLRCP ECNVKFESAEDLES HMQVDHRDLTPETSGPRKGAQTS  
PVPRK KTYQC IKCQMTFENEREIQIHVANHMIEEGINHECKLCNQMFDS PAKLLCHLIEHSFEGMGGTFKCPV  
CFTV FVQANKLQQHIFAVHGQEDKIYDCSQCPQKFFFQTE LQNHTMSQHAQ\*

>rs50410189\_ENSMUSP00000052379\_c.118:A>T\_p.E40V  
ENSMUST00000052250.15|Zfp423-201|ENSMUSG00000045333|-|chr8:g.88586031:T>A  
MTGAERGPLCYHGGLEGEPECDRKTSTRALEDNRNSVTSQEVRNEDEDEDVEDES IYTCDHCCQDFESLADLTDHR  
AHRCPGDGDDDPQLSWVASSPSSKDVASPTQMIGDGC DLGLGEEEGGTGLPYPCQFCDKSFIRLSYLKRHEQI  
HSDKLPFKCTFCSRLFKHKRSRDRHIKLTGDKKYHCHECEAAFSRSDHLKIHLKTHSSSKPFKCSVCKRGFS  
STSSLQSHMQAHKKNKEHLAKSEKEAKKDDFMC DYCEDTFSQTEELEKHVLT LHPQLSEKADLQCIHCPEV FV  
DESTLLAHIHQAHANQKHKCPMCPEQFSSVEGVYCHLDSHRQPDSSNHSVSPDPV LGSVASMSSATPDSSASV  
ERGSTPDSTLKLPLRGQKKMRDDGQSWPKVVYSCPYCKRDF TSLAVLEIHLKTIHADKPQQSHTCQICLDSMP  
TLYNLNEHVRKLHKSHAYPVMQFGNISAFHCNYCPEMFADINS LQEHIRVSHCGPNANPPDGNAFFCNQCSM  
GFLTESSLTEHIQQAHCSVGSTKLESFVVQPTQSFMEVYSCPYCTNSPIFGSILKLT KHIKENHKNIPLAHSK  
KSKAEQSPVSSDVEVSSPKRQRLSGSANSISNGEYPCNQCDLKF SNFESFQTHLKLHLELLLRLKQACPOCKED  
FDSQESLLQHLTVHYMTTSTHYVCE SCDKQFSSVDDLQKHLDMHTFVLYHCTLCQEVFDSKVS IQVHLAVKH  
SNEKKMYRCTACNWD FRKEADLQVHVKSHLGNPAKAHKC IFCGETFSTEVE LQCHITTHSKY NCRFC SKAF  
HAVILLEKHLREKHCVF DAAAENGTANGVPPTSTKKAEPADLQGM L LKNPEAPNSHEASEDDVDASEPMY GCD  
ICGAAATMEVLLQNHR LRDHNIRPGEDDGSRKA EFKGSHKCNVCSRTFFSENGLREHLQTHRGP AKHYMCP  
ICGERFPSLLTLTEHKVTHSKSLDTGT CRICKMPLQSEEEFIEHCQMHPDLRNSLTGFR CVVMQTVTSTLEL  
KIHGTFHMQLAGSSAASSPNGQLQKLYKCALCLKEFRSKQDLVRLDVNGLPYGLCAGCMARSANGQVGG LA  
PPEPADRPCAGLRCP ECNVKFESAEDLES HMQVDHRDLTPETSGPRKGAQTS PVPRK KTYQC IKCQMTFENER  
EIQIHVANHMIEEGINHECKLCNQMFDS PAKLLCHLIEHSFEGMGGTFKCPVCFTV FVQANKLQQHI FAVHGQ  
EDKIYDCSQCPQKFFFQTE LQNHTMSQHAQ\*

>rs50410189\_ENSMUSP00000134575\_c.190:A>T\_p.E64V  
ENSMUST00000174764.2|zfp423-207|ENSMUSG00000045333|-|chr8:g.88586031:T>A  
MAVFKESGGLPIFISYKVEEGEASDFSLAWDSSVAAAGGLEGEPECDRKTSSRALEDNRNSVTIQEERNEDEDEDVE  
DESIYTCDHCCQDFESLADLTDHRAHRCPCGDGDDDPQLSWVASSPSSKDVASPTQMIGDGC DLGLGEEEGGTG  
LPYPCQFCDKSFIRLSYLKRHEQIHSDKLPFKCTFCSRLFKHKRSRDRHIKLTGDKKYHCHECEAAFSRSDH  
LKIHLKTHSSSKPFKCSVCKRGFSS

>rs45696557\_ENSMUSP00000105282\_c.172:G>T\_p.S58I  
ENSMUST00000109655.9|zfp423-202|ENSMUSG00000045333|-|chr8:g.88586040:C>A  
MSRRKQAKPRSVKVEEGEASDFSLAWDSSVAAAGGLEGEPECDRKTSSRALEDNRNSVTIQEERNEDEDEDVEDES  
IYTCDHCCQDFESLADLTDHRAHRCPCGDGDDDPQLSWVASSPSSKDVASPTQMIGDGC DLGLGEEEGGTGLPY  
PCQFCDKSFIRLSYLKRHEQIHSDKLPFKCTFCSRLFKHKRSRDRHIKLTGDKKYHCHECEAAFSRSDHLKI  
HLKTHSSSKPFKCSVCKRGFSSSTSLQSHMQAHKKNKEHLAKSEKEAKKDDFMC DYCEDTFSQTEELEKHVLT  
LHPQLSEKADLQCIHCPEV FVDESTLLAHIHQAHANQKHKCPMCP EQFSSVEGVYCHLDSHRQPDSSNH SVSP  
DPVLG SVASMS SATPDSSASVERGSTPDSTLKLPLRGQKKMRDDGQSWPKV VYSCPYCSKRDFTS LAVLEIHLK  
TIHADKPQQSHTCQICLDSMPTLYNLNEHVRLKHSKSHAYPVMQFGNISAFHCNYCPEMFADINSLQEHIRVSH  
CGPNANPPDGNAFFCNQCSMGFLTESSLTEHIQQAHC SVGSKLES PVVQPTQSFMEVYSCPYCTNSPIFGS  
ILKLTKH IKENHKNIPLAHSKSKAEQSPVSDVEVSSPKRQRLSGSANSISNGEYPCNQCDLKF SNFESFQT  
HLKLHLELLLRKQACQCKEDFDSQESLLQHLTVHYMTTSTHYVCE SCDKQFSSVDDLQKHLDMHTFVLYHC  
TLCQEVFDSKVS IQVHLAVKHSNEKKMYRCTACNWD FRKEADLQVHVKSHLGNPAKAHKC IFCGETFSTEVE  
LQCHITTHSKYNCRFCSKAFHAVILLEKHLREKHC VFDA AENGTANGVPPTSTKKAEPADLQGM LKNPEA  
PNSHEASEDDVDASEPMYGCICGAA YTM EVLLQNHRLRDHNIRPGEDDGSRKKAEFIKGS HKCNVCSRTFFS  
ENGLREHLQTHRGP AKHYMCPICGERFPSLLTLTEHKVTHSKSLDTGT CRICKMPLQSEEEFIEHCQMHPDLR  
NSLTGFRVCVCMQTVTSTLELKIHGTFHMQKLAGSSAASSPNGQLQKLYKCALCLKEFRSKQDLVRLDVNGL  
PYGLCAGCMARSANGQVGG LAPPEPADRPCAGLRCP ECNVKFESAEDLES HMQVDHRDLTPETSGPRKGAQTS  
PVP RKKTYQC IKCQMTFENEREIQIHVANHMIEEGINHECKLCNQMFDS PAKLLCHLIEHSFEGMGGTFKCPV  
CFTV FVQANKLQQHI FAVHGOEDKIYDCSQCPQKFFFQTE LQNHTMSQHAQ\*

>rs45696557\_ENSMUSP00000052379\_c.109:G>T\_p.S37I  
ENSMUST00000052250.15|zfp423-201|ENSMUSG00000045333|-|chr8:g.88586040:C>A  
MTGAERGPLCYHGGLEGEPECDRKTSSRALEDNRNSVTIQEERNEDEDEDVEDES IYTCDHCCQDFESLADLTDHR  
AHRCPCGDGDDDPQLSWVASSPSSKDVASPTQMIGDGC DLGLGEEEGGTGLPYPCQFCDKSFIRLSYLKRHEQI  
HSDKLPFKCTFCSRLFKHKRSRDRHIKLTGDKKYHCHECEAAFSRSDHLKIHLKTHSSSKPFKCSVCKRGFS  
STSLQSHMQAHKKNKEHLAKSEKEAKKDDFMC DYCEDTFSQTEELEKHVLT LHPQLSEKADLQCIHCPEV FV  
DESTLLAHIHQAHANQKHKCPMCP EQFSSVEGVYCHLDSHRQPDSSNH SVSPDPVLG SVASMS SATPDSSASV  
ERGSTPDSTLKLPLRGQKKMRDDGQSWPKV VYSCPYCSKRDFTS LAVLEIHLKTIHADKPQQSHTCQICLDSM  
TLYNLNEHVRLKHSKSHAYPVMQFGNISAFHCNYCPEMFADINSLQEHIRVSHCGPNANPPDGNAFFCNQCSM  
GFLTESSLTEHIQQAHC SVGSKLES PVVQPTQSFMEVYSCPYCTNSPIFGS ILKLTKH IKENHKNIPLAHSK  
KSKAEQSPVSDVEVSSPKRQRLSGSANSISNGEYPCNQCDLKF SNFESFQTHLKLHLELLLRKQACQCKED  
FDSQESLLQHLTVHYMTTSTHYVCE SCDKQFSSVDDLQKHLDMHTFVLYHCTLCQEVFDSKVS IQVHLAVKH  
SNEKKMYRCTACNWD FRKEADLQVHVKSHLGNPAKAHKC IFCGETFSTEVE LQCHITTHSKYNCRFCSKAF  
HAVILLEKHLREKHC VFDA AENGTANGVPPTSTKKAEPADLQGM LKNPEA P NSHEASEDDVDASEPMYGC  
ICGAA YTM EVLLQNHRLRDHNIRPGEDDGSRKKAEFIKGS HKCNVCSRTFFSENGLREHLQTHRGP AKHYMCP  
ICGERFPSLLTLTEHKVTHSKSLDTGT CRICKMPLQSEEEFIEHCQMHPDLRNSLTGFRVCVCMQTVTSTLEL  
KIHGTFHMQKLAGSSAASSPNGQLQKLYKCALCLKEFRSKQDLVRLDVNGLPYGLCAGCMARSANGQVGG LA  
PPEPADRPCAGLRCP ECNVKFESAEDLES HMQVDHRDLTPETSGPRKGAQTS PVP RKKTYQC IKCQMTFENER  
EIQIHVANHMIEEGINHECKLCNQMFDS PAKLLCHLIEHSFEGMGGTFKCPVCFTV FVQANKLQQHI FAVHGO  
EDKIYDCSQCPQKFFFQTE LQNHTMSQHAQ\*

>rs45696557\_ENSMUSP00000134575\_c.181:G>T\_p.S61I  
ENSMUST00000174764.2|zfp423-207|ENSMUSG00000045333|-|chr8:g.88586040:C>A  
MAVFKESGGLPIFISYKVEEGEASDFSLAWDSSVAAAGGLEGEPECDRKTSSRALEDNRNSVTIQEERNEDEDEDVE  
DESIYTCDHCCQDFESLADLTDHRAHRCPCGDGDDDPQLSWVASSPSSKDVASPTQMIGDGC DLGLGEEEGGTG  
LPYPCQFCDKSFIRLSYLKRHEQIHSDKLPFKCTFCSRLFKHKRSRDRHIKLTGDKKYHCHECEAAFSRSDH  
LKIHLKTHSSSKPFKCSVCKRGFSS

>rs260982584\_ENSMUSP00000105282\_c.135:A>CAAATACCATCTCTAGTA\_p.T46ins-fs  
ENSMUST00000109655.9|zfp423-202|ENSMUSG00000045333|-  
|chr8:g.88586077:T>TACTAGAGATGGTATTTG  
MSRRKQAKPRSVKVEEGEASDFSLAWDSSVAAAGGLEGEPECDRQIPSLVPAVRWKTGTA



>rs260982584\_ENSMUSP00000052379\_c.72:A>CAAATACCATCTCTAGTA\_p.T25ins-fs  
ENSMUST00000052250.15|Zfp423-201|ENSMUSG00000045333|-  
|chr8:g.88586077:T>TACTAGAGATGGTATTTG  
MTGAERGPLYHGGLEGEPECDRKQIPSLVPAVRWKTGTA  
>rs260982584\_ENSMUSP00000134575\_c.144:A>CAAATACCATCTCTAGTA\_p.T49ins-fs  
ENSMUST00000174764.2|Zfp423-207|ENSMUSG00000045333|-  
|chr8:g.88586077:T>TACTAGAGATGGTATTTG  
MAVFKESGPLPIFSYKVEEGEASDFSLAWDSSVAAAGGLEGEPECDRKQIPSLVPAVRWKTGTA  
>rs45714081\_ENSMUSP00000092839\_c.7:C>T\_p.S3L  
ENSMUST00000095214.10|Cnep1r1-  
201|ENSMUSG00000036810|+|chr8:g.88845480:C>T  
MNLLEQAEDLKAFERRLT EYIHCLQPATGRWRMLLIVVSVCTATGAWNWLIDPETQKVSFFTSLWNHPFFTTIS  
CITLIGLFFAGIHKRVVAPSI IAARCRTVLA EYNMSCDDTGKLLKPRPHVQ\*  
>rs45714081\_ENSMUSP00000120121\_c.7:C>T\_p.S3L  
ENSMUST00000127490.8|Cnep1r1-204|ENSMUSG00000036810|+|chr8:g.88845480:C>T  
MNLLEQAEDLKAFERRLT EYIHCLQPATGRWRVLLHVIMEPSVFHY\*  
>rs45714081\_ENSMUSP00000113435\_c.7:C>T\_p.S3L  
ENSMUST00000121097.8|Cnep1r1-203|ENSMUSG00000036810|+|chr8:g.88845480:C>T  
MNLLEQAEDLKAFERRLT EYIHCLQPATGRWRMLLIVVSVCTATGAWNWLIDPETQKVSFFTSLWNHPFFTTIS  
CITLIGLFFAGIHKRVVAPSMYPLPRVEFCYHN\*  
>rs45714081\_ENSMUSP00000113207\_c.7:C>T\_p.S3L  
ENSMUST00000117775.2|Cnep1r1-202|ENSMUSG00000036810|+|chr8:g.88845480:C>T  
MNLLEQAEDLKAFERRLT EYIHCLQPATGRWRMLLIVVSVCTATGAWNWLIDPETQKVSFFTSLWNHPFFTTIS  
CITLIGLFFAGIHKRVVAPSI IAARCRTVLA EYNMSCDDP\*  
>rs49014380\_ENSMUSP00000034079\_c.1122:A>G\_p.S375G  
ENSMUST00000034079.14|Heatr3-201|ENSMUSG00000031657|+|chr8:g.88883174:A>G  
MGKSRTKRFRKRPQFSPICESQAEAAAASNGTGDEEDDGPAAELLEKLQHP SAEVRECACAGLARLVQQRPALP  
DLARRDAVRRLLGPLLLDSSLAVRETAAGALRNLSACGGFDVCDMVAKDIMTPLVALLRECLSGLD SNEMSPQ  
EKADKRN PVE SI ANEAVNVLWNVCECSGRAVSI FNKEGCLEIVLQYLRRFP T SIDLAVSVAYCLQTVTEDNPE  
LLKSF DGTALRVLESALLCPV ASMEY ILLKTLVAGTIWNLKDI I PSKSQAEI INAILGALSEVLGMNTGNMVI  
QMKEAETQRLKTA AESEDI LANANGDDLVEDDEMEEI PHKRKLRKRTFISDLLPPTDKELREAMALLTAQQT A  
LEVIVNMCCGEDPSDDEWEELSSSDESEAFMENSFSECSGHLMSPLCLSHEIHSALTNCLIPEKVFEKTSSPN  
SVAVDICSKNPTWKPLIRKMNTIQCRALMCLQSLVSLLDIDH LGGAPALQTLAQHLSQILFSQPDFAKHDDDFL  
EAISSALRALLQTMASKNIPQCMTPEQLMTLCREGIHSSSIGVRVNVVSI LGITGSVLAKDDGTLDTLKTIGC  
FLLEVATKDP SLVVTGEALDALFDVFADGEAAEKASVQIKLLAALKEFQPVFKMKIRKEGRGKYS PDQLCVLD  
NVKMNLRRFIAYQETVEKRLTS\*  
>rs49014380\_ENSMUSP00000112812\_c.771:A>G\_p.S258G  
ENSMUST00000121949.2|Heatr3-202|ENSMUSG00000031657|+|chr8:g.88883174:A>G  
MVAKDIMTPLVALLRECLSGLD SNEMSPQEKADKRN PVE SI ANEAVNVLWNVCECSGRAVSI FNKEGCLEIVL  
QYLRRFP T SIDLAVSVAYCLQTVTEDNPELLKSF DGTALRVLESALLCPV ASMEY ILLKTLVAGTIWNLKDI I  
PSKSQAEI INAILGALSEVLGMNTGNMVI QMKEAETQRLKTA AESEDI LANANGDDLVEDDEMEEI PHKRKLR  
RRTFISDLLPPTDKELREAMALLTAQQT ALEVIVNMCCGEDPSDDEWEELSSSDESEAFMENSFSECSGHLMS  
PLCLSHEIHSALTNCLIPEKVFEKTSSPNSVAVDICSKNPTWKPLIRKMNTIQCRALMCLQSLVSLLDIDH LG  
GAPALQTLAQHLSQILFSQPDFAKHDDDFLEA ISSALRALLQTMASKNIPQCMTPEQLMTLCREGIHSSSIGVR  
VNVVSI LGITGSVLAKDDGTLDTLKTIGCFLLEVATKDP SLVVTGEALDALFDVFADGEAAEKASVQIKLLAA  
LKEFQPVFKMKIRKEGRGKYS PDQLCVLDNVKMNLRRFIAYQETVEKRLTS\*  
>rs48401410\_ENSMUSP00000034079\_c.1617:A>G\_p.M540V  
ENSMUST00000034079.14|Heatr3-201|ENSMUSG00000031657|+|chr8:g.88891537:A>G  
MGKSRTKRFRKRPQFSPICESQAEAAAASNGTGDEEDDGPAAELLEKLQHP SAEVRECACAGLARLVQQRPALP  
DLARRDAVRRLLGPLLLDSSLAVRETAAGALRNLSACGGFDVCDMVAKDIMTPLVALLRECLSGLD SNEMSPQ  
EKADKRN PVE SI ANEAVNVLWNVCECSGRAVSI FNKEGCLEIVLQYLRRFP T SIDLAVSVAYCLQTVTEDNPE  
LLKSF DGTALRVLESALLCPV ASMEY ILLKTLVAGTIWNLKDI I PSKSQAEI INAILGALSEVLGMNTGNMVI  
QMKEAETQRLKTA AESEDI LANANGDDLVEDDEMEEI PHKRKLRKRTFISDLLPPTDKELREAMALLTAQQT A  
LEVIVNMCCGEDPSDDEWEELSSSDESEAFMENSFSECSGHLMSPLCLSHEIHSALTNCLIPEKVFEKTSSPN  
SVAVDICSKNPTWKPLIRKMNTIQCRALMCLQSLVSLLDIDH LGGAPALQTLAQHLSQILFSQPDFAKHDDDFL  
EAISSALRALLQTMASKNIPQCMTPEQLVTLTCREGIHSSSIGVRVNVVSI LGITGSVLAKDDGTLDTLKTIGC  
FLLEVATKDP SLVVTGEALDALFDVFADGEAAEKASVQIKLLAALKEFQPVFKMKIRKEGRGKYS PDQLCVLD  
NVKMNLRRFIAYQETVEKRLTS\*

>rs48401410\_ENSMUSP00000112812\_c.1266:A>G\_p.M423V  
ENSMUST00000121949.2|Heatr3-202|ENSMUSG00000031657|+|chr8:g.88891537:A>G  
MVAKDIMTPLVALLRECLSGLDSEVLSNEMSPQEKADKRNPFVSIANEAVNLWNVCECSGRAVSI FNKEGCLEIVL  
QYLRFPPTSIDLAVSVAYCLQTVTEDNPELLKSFDTALRVLESALLCPVASMEYILLKTLVAGTIWNLKDI I  
PSKSQAEI INAILGALSEVLGMNTGNMVIQMKEAETQRLKTAASEDILANANGDDLVEDDEMEEIPHKRKL  
RKTTFISDLLPPTDKELREAMALLTAQQTALVIVNMCCSEDPSPDDEWEELSSSDESEAFMENSFSECSGHLMS  
PLCLSHEIHSALTNCLIPKVFKEKTSSPNSVAVDICSKNPTWKPLIRKMNTIQCRALMCLQSLVSLDDIDHLG  
GAPALQTLAQHLSQILFSQPDFAKHDDFLEAISSALRALLQTMASKNIPQCMTPEQLVTLCREGIHSSSIGVR  
VNVVSI LGITG SVLAKDDGTLDTLKTIGCFLLLEVATKDP SLVVTGEALDALFDV FADGEEAEKASVQIKLLAA  
LKEFQPVFKMKIRKEGRGKYS PDQLCVLDNVKMNLRRFIAYQETVEKRLTS\*  
>rs238749623\_ENSMUSP00000034079\_c.1848:G>GAATAA\_p.E617ins-fs  
ENSMUST00000034079.14|Heatr3-  
201|ENSMUSG00000031657|+|chr8:g.88893732:G>GAATAA  
MGKSRTKRFKRPQFSPIESCQAEAAAASNGTGDEEDDGPAAELLEKLQHPSAEVREACAGLARLVQQRPALP  
DLARRDAVRRGLPLLLDSSSLAVRETAAGALRNLSACGGFDVCCDMVAKDIMTPLVALLRECLSGLDSEVLSNEMSPQ  
EKADKRNPFVSIANEAVNLWNVCECSGRAVSI FNKEGCLEIVLQYLRFPPTSIDLAVSVAYCLQTVTEDNPE  
LLKSFDTALRVLESALLCPVASMEYILLKTLVAGTIWNLKDI I PSKSQAEI INAILGALSEVLGMNTGNMVI  
QMKEAETQRLKTAASEDILANANGDDLVEDDEMEEIPHKRKL RKTTFISDLLPPTDKELREAMALLTAQQTAL  
VIVNMCCSEDPSPDDEWEELSSSDESEAFMENSFSECSGHLMSPLCLSHEIHSALTNCLIPKVFKEKTSSP  
NSVAVDICSKNPTWKPLIRKMNTIQCRALMCLQSLVSLDDIDHLGGAPALQTLAQHLSQILFSQPDFAKHDDF  
LEAISSALRALLQTMASKNIPQCMTPEQLM TLCREGIHSSSIGVRVNVVSI LGITG SVLAKDDGTLDTLKTIG  
CFLLLEVATKDP SLVVTGEALDALFDV FADGEEAE  
>rs238749623\_ENSMUSP00000112812\_c.1497:G>GAATAA\_p.E500ins-fs  
ENSMUST00000121949.2|Heatr3-  
202|ENSMUSG00000031657|+|chr8:g.88893732:G>GAATAA  
MVAKDIMTPLVALLRECLSGLDSEVLSNEMSPQEKADKRNPFVSIANEAVNLWNVCECSGRAVSI FNKEGCLEIVL  
QYLRFPPTSIDLAVSVAYCLQTVTEDNPELLKSFDTALRVLESALLCPVASMEYILLKTLVAGTIWNLKDI I  
PSKSQAEI INAILGALSEVLGMNTGNMVIQMKEAETQRLKTAASEDILANANGDDLVEDDEMEEIPHKRKL  
RKTTFISDLLPPTDKELREAMALLTAQQTALVIVNMCCSEDPSPDDEWEELSSSDESEAFMENSFSECSGHLMS  
PLCLSHEIHSALTNCLIPKVFKEKTSSPNSVAVDICSKNPTWKPLIRKMNTIQCRALMCLQSLVSLDDIDHLG  
GAPALQTLAQHLSQILFSQPDFAKHDDFLEAISSALRALLQTMASKNIPQCMTPEQLM TLCREGIHSSSIGVR  
VNVVSI LGITG SVLAKDDGTLDTLKTIGCFLLLEVATKDP SLVVTGEALDALFDV FADGEEAE  
>rs50253664\_ENSMUSP00000112766\_c.157:A>C\_p.E53A  
ENSMUST00000119033.8|Tent4b-203|ENSMUSG00000036779|+|chr8:g.88926749:A>C  
MQIWETTQGLRNLYFNHHCSSGASSASGGSGSGPGGTAPAPAGMFRSGARPLGGLAVPAEQRDFLPLET  
TNNNNNHQPAAWARRASAGPSASPVPSAPSSPRPAAALPASESTDPASGSSNKRKRDNKASTYGLNYSLLQP  
SGGRAAGGGRADGGGGVSGTGWKRRNYNQGVVGLHEEISDFY EYMSRPEEEKMRMEVVSRIESVIKELWPS  
ADVQIFGSKTGLYLPTSIDL VVFGK WENLPLWTL EEALRKHKVADEDSVKVLDKATVPI I KLTDSFTEVKV  
DISFNVQNGVRAADLIKDFTKKYPVLPYLVLV LKQFLLQ RDLNEVFTGGIGSYSLFLMAVSFLQLHPREDACI  
PNTNYGVLLIEFFELYGRHFNYLKTGIRIKDGGSYVAKDEVQKNMLDGYRPSMLYIEDPLQPGNDVGRSSYGA  
MQVKQAFDYAYVVL SHAVSPIAKYYPNNETESILGRI IRVTDEVATYRDWISKQWGLQNRPEPSCNGNGVTLI  
VDTQQLDKCNLSEEKEALGKCRSNASEPLSKHSSNSSSGPVSSSSATQSSSSDVDS DATPCKTPKQLL CRP  
PTVTRVGSQDVSLEVSQAVGKMQSTQTTNTPNNANKSQHGSARLFRSSSKGFQGT AQTSHGALMTSKQHOGKS  
NTQYYHGKRRRHRKRDAPLSEL CR\*  
>rs50253664\_ENSMUSP00000112608\_c.157:A>C\_p.E53A  
ENSMUST00000118952.8|Tent4b-202|ENSMUSG00000036779|+|chr8:g.88926749:A>C  
MQIWETTQGLRNLYFNHHCSSGASSASGGSGSGPGGTAPAPAGMFRSGARPLGGLAVPAEQRDFLPLET  
TNNNNNHQPAAWARRASAGPSASPVPSAPSSPRPAAALPASESTDPASGSSNKRKRDNKASTYGLNYSLLQP  
SGGRAAGGGRADGGGGVSGTGWKRRNYNQGVVGLHEEISDFY EYMSRPEEEKMRMEVVSRIESVIKELWPS  
ADVQIFGSKTGLYLPTSIDL VVFGK WENLPLWTL EEALRKHKVADEDSVKVLDKATVPI I KLTDSFTEVKV  
DISFNVQNGVRAADLIKDFTKKYPVLPYLVLV LKQFLLQ RDLNEVFTGGIGSYSLFLMAVSFLQLHPREDACI  
PNTNYGVLLIEFFELYGRHFNYLKTGIRIKDGGSYVAKDEVQKNMLDGYRPSMLYIEDPLQPGNDVGRSSYGA  
MQVKQAFDYAYVVL SHAVSPIAKYYPNNETESILGRI IRVTDEVATYRDWISKQWGLQNRPEPSCNGNGVTLI  
VDTQQLDKCNLSEEKEALGKCRSNASEPLSKHSSNSSSGPVSSSSATQSSSSDVDS DATPCKTPKQLL CRP  
PTVTRVGSQDVSLEVSQAVGKMQSTQTTNTPNNANKSQHGSARLFRSSSKGFQGT AQTSHGALMTSKQHOGKS  
NTQYYHGKRRRHRKRDAPLSEL CR\*  
>rs50253664\_ENSMUSP00000067971\_c.157:A>C\_p.E53A  
ENSMUST00000066748.10|Tent4b-201|ENSMUSG00000036779|+|chr8:g.88926749:A>C

MQIWETTQGLRNLYFNHCHSSGASSASGGSGSGPGSPGGTAPAPAGMFRSGARPLGGLAVPAEQRDFLPLET  
 TNNNNHHQPAAWARRASAGPSASPVPSAPSSPRPAAALPASESTDPASGSSNKRKRDNKASTYGLNYSLLQP  
 SGGRAAGGGRADGGGGVYSGTPWKRRNYNQGVVGLHEEISDFYEYMSRPEEEKMRMEVVSRIESVIKELWPS  
 ADVQIFGSFKTGLYLPTSDIDLVVFGKWENLPLWTLLEEALRKHKVADEDSVKVLDKATVPIIKLTDSTFEVKV  
 DISFNVQNGVRAADLIKDFTKLHPREDACIPNTNYGVLLIEFFELYGRHFNYLKTGIRIKDGGSYVAKDEVQK  
 NMLDGYRPSMLYIEDPLQPGNDVGRSSYGAMQVKQAFDYAYVVLHAVSPIAKYYPNNETESILGRIIRVTDE  
 VATYRDWISKQWGLQNRPEPSCNGNGVTIIVDTQQLDKCNLSEEKEALGKCRSNASEPLSKHSSNSSSGPV  
 SSSSATQSSSSDVSDATPCKTPKQLLCPPTVTRVGSQDVSLEVSQAVGKMOSTQTTNTPNANKSQHGSAR  
 LFRSSSKGFQGTQTSHGALMTSKQHOGKSNTQYYHGKRRRHRKRDAPLSELCR\*  
 >rs50420322\_ENSMUSP00000112766\_c.174:C>T\_p.L59F  
 ENSMUST00000119033.8|Tent4b-203|ENSMUSG00000036779|+|chr8:g.88926766:C>T  
 MQIWETTQGLRNLYFNHCHSSGASSASGGSGSGPGSPGGTAPAPAGMFRSGERPLGGFAVPAEQRDFLPLET  
 TNNNNHHQPAAWARRASAGPSASPVPSAPSSPRPAAALPASESTDPASGSSNKRKRDNKASTYGLNYSLLQP  
 SGGRAAGGGRADGGGGVYSGTPWKRRNYNQGVVGLHEEISDFYEYMSRPEEEKMRMEVVSRIESVIKELWPS  
 ADVQIFGSFKTGLYLPTSDIDLVVFGKWENLPLWTLLEEALRKHKVADEDSVKVLDKATVPIIKLTDSTFEVKV  
 DISFNVQNGVRAADLIKDFTKKYPVLPYLVLVQLKQFLLQRLDNEVFTGGIGSYSLFLMAVSLQLHPREDACI  
 PNTNYGVLLIEFFELYGRHFNYLKTGIRIKDGGSYVAKDEVQKNMLDGYRPSMLYIEDPLQPGNDVGRSSYGA  
 MQVKQAFDYAYVVLHAVSPIAKYYPNNETESILGRIIRVTDEVATYRDWISKQWGLQNRPEPSCNGNGVTI  
 VDTQQLDKCNLSEEKEALGKCRSNASEPLSKHSSNSSSGPVSSSSATQSSSSDVSDATPCKTPKQLLCP  
 PTVTRVGSQDVSLEVSQAVGKMOSTQTTNTPNANKSQHGSARLFRSSSKGFQGTQTSHGALMTSKQHOGKS  
 NTQYYHGKRRRHRKRDAPLSELCR\*  
 >rs50420322\_ENSMUSP00000112608\_c.174:C>T\_p.L59F  
 ENSMUST00000118952.8|Tent4b-202|ENSMUSG00000036779|+|chr8:g.88926766:C>T  
 MQIWETTQGLRNLYFNHCHSSGASSASGGSGSGPGSPGGTAPAPAGMFRSGERPLGGFAVPAEQRDFLPLET  
 TNNNNHHQPAAWARRASAGPSASPVPSAPSSPRPAAALPASESTDPASGSSNKRKRDNKASTYGLNYSLLQP  
 SGGRAAGGGRADGGGGVYSGTPWKRRNYNQGVVGLHEEISDFYEYMSRPEEEKMRMEVVSRIESVIKELWPS  
 ADVQIFGSFKTGLYLPTSDIDLVVFGKWENLPLWTLLEEALRKHKVADEDSVKVLDKATVPIIKLTDSTFEVKV  
 DISFNVQNGVRAADLIKDFTKKYPVLPYLVLVQLKQFLLQRLDNEVFTGGIGSYSLFLMAVSLQLHPREDACI  
 PNTNYGVLLIEFFELYGRHFNYLKTGIRIKDGGSYVAKDEVQKNMLDGYRPSMLYIEDPLQPGNDVGRSSYGA  
 MQVKQAFDYAYVVLHAVSPIAKYYPNNETESILGRIIRVTDEVATYRDWISKQWGLQNRPEPSCNGNGVTI  
 VDTQQLDKCNLSEEKEALGKCRSNASEPLSKHSSNSSSGPVSSSSATQSSSSDVSDATPCKTPKQLLCP  
 PTVTRVGSQDVSLEVSQAVGKMOSTQTTNTPNANKSQHGSARLFRSSSKGFQGTQTSHGALMTSKQHOGKS  
 NTQYYHGKRRRHRKRDAPLSELCR\*  
 >rs50420322\_ENSMUSP00000067971\_c.174:C>T\_p.L59F  
 ENSMUST00000066748.10|Tent4b-201|ENSMUSG00000036779|+|chr8:g.88926766:C>T  
 MQIWETTQGLRNLYFNHCHSSGASSASGGSGSGPGSPGGTAPAPAGMFRSGERPLGGFAVPAEQRDFLPLET  
 TNNNNHHQPAAWARRASAGPSASPVPSAPSSPRPAAALPASESTDPASGSSNKRKRDNKASTYGLNYSLLQP  
 SGGRAAGGGRADGGGGVYSGTPWKRRNYNQGVVGLHEEISDFYEYMSRPEEEKMRMEVVSRIESVIKELWPS  
 ADVQIFGSFKTGLYLPTSDIDLVVFGKWENLPLWTLLEEALRKHKVADEDSVKVLDKATVPIIKLTDSTFEVKV  
 DISFNVQNGVRAADLIKDFTKLHPREDACIPNTNYGVLLIEFFELYGRHFNYLKTGIRIKDGGSYVAKDEVQK  
 NMLDGYRPSMLYIEDPLQPGNDVGRSSYGAMQVKQAFDYAYVVLHAVSPIAKYYPNNETESILGRIIRVTDE  
 VATYRDWISKQWGLQNRPEPSCNGNGVTIIVDTQQLDKCNLSEEKEALGKCRSNASEPLSKHSSNSSSGPV  
 SSSSATQSSSSDVSDATPCKTPKQLLCPPTVTRVGSQDVSLEVSQAVGKMOSTQTTNTPNANKSQHGSAR  
 LFRSSSKGFQGTQTSHGALMTSKQHOGKSNTQYYHGKRRRHRKRDAPLSELCR\*  
 >rs48197139\_ENSMUSP00000112766\_c.295:T>A\_p.V99D  
 ENSMUST00000119033.8|Tent4b-203|ENSMUSG00000036779|+|chr8:g.88926887:T>A  
 MQIWETTQGLRNLYFNHCHSSGASSASGGSGSGPGSPGGTAPAPAGMFRSGERPLGGLAVPAEQRDFLPLET  
 TNNNNHHQPAAWARRASAGPSASPDPSAPSSPRPAAALPASESTDPASGSSNKRKRDNKASTYGLNYSLLQP  
 SGGRAAGGGRADGGGGVYSGTPWKRRNYNQGVVGLHEEISDFYEYMSRPEEEKMRMEVVSRIESVIKELWPS  
 ADVQIFGSFKTGLYLPTSDIDLVVFGKWENLPLWTLLEEALRKHKVADEDSVKVLDKATVPIIKLTDSTFEVKV  
 DISFNVQNGVRAADLIKDFTKKYPVLPYLVLVQLKQFLLQRLDNEVFTGGIGSYSLFLMAVSLQLHPREDACI  
 PNTNYGVLLIEFFELYGRHFNYLKTGIRIKDGGSYVAKDEVQKNMLDGYRPSMLYIEDPLQPGNDVGRSSYGA  
 MQVKQAFDYAYVVLHAVSPIAKYYPNNETESILGRIIRVTDEVATYRDWISKQWGLQNRPEPSCNGNGVTI  
 VDTQQLDKCNLSEEKEALGKCRSNASEPLSKHSSNSSSGPVSSSSATQSSSSDVSDATPCKTPKQLLCP  
 PTVTRVGSQDVSLEVSQAVGKMOSTQTTNTPNANKSQHGSARLFRSSSKGFQGTQTSHGALMTSKQHOGKS  
 NTQYYHGKRRRHRKRDAPLSELCR\*  
 >rs48197139\_ENSMUSP00000112608\_c.295:T>A\_p.V99D  
 ENSMUST00000118952.8|Tent4b-202|ENSMUSG00000036779|+|chr8:g.88926887:T>A

MQIWETTQGLRNLYFNHCHSSGASSASGGSGSGPGSPGGTAPAPAGMFRSGERPLGGLAVPAEQRDFLPLET  
 TNNNNHHQPAAWARRASAGPSASPDPSPAPSSPRPAAALPASESTDPASGSSNKRKRDNKASTYGLNYSLLQP  
 SGGRAAGGGRADGGGGVYSGTPWKRRNYNQGVVGLHEEISDFYEYMSRPEEEKMRMEVVSRIESVIKELWPS  
 ADVQIFGSFKTGLYLPTSDIDLVVFGKWENLPLWTLLEALRKHKVADEDSVKVLDKATVPIIKLTDSTFEVKV  
 DISFNVQNGVRAADLIKDFTKKYVPLPYLVVLKQFLLQRDLENEVFTGGIGSYSLFLMAVSFLQLHPREDACI  
 PNTNYGVLLIEFFELYGRHFNYLKTGIRIKDGGSYVAKDEVQKNMLDGYRPSMLYIEDPLQPGNDVGRSSYGA  
 MQVKQAFDYAYVVLSHAVSPIAKYYPNNETESILGRIIRVTDEVATYRDWISKQWGLQNRPEPSCNGNGVTLI  
 VDTQQLDKCNNNLSEEKEALGKCRSNASEPLSKHSSNSSSGPVSSSSATQSSSSDVDSDATPCKTPKQLLCP  
 PTVTRVGSQDVSLEVSQAVGKMOSTQTTNTPNANKSQHGSARLFRSSSKGFQGTQTSHGALMTSKQHOGKS  
 NTQYYHGKRRHRKRDAPLSELCR\*  
 >rs48197139\_ENSMUSP00000067971\_c.295:T>A\_p.V99D  
 ENSMUST00000066748.10|Tent4b-201|ENSMUSG00000036779|+|chr8:g.88926887:T>A  
 MQIWETTQGLRNLYFNHCHSSGASSASGGSGSGPGSPGGTAPAPAGMFRSGERPLGGLAVPAEQRDFLPLET  
 TNNNNHHQPAAWARRASAGPSASPDPSPAPSSPRPAAALPASESTDPASGSSNKRKRDNKASTYGLNYSLLQP  
 SGGRAAGGGRADGGGGVYSGTPWKRRNYNQGVVGLHEEISDFYEYMSRPEEEKMRMEVVSRIESVIKELWPS  
 ADVQIFGSFKTGLYLPTSDIDLVVFGKWENLPLWTLLEALRKHKVADEDSVKVLDKATVPIIKLTDSTFEVKV  
 DISFNVQNGVRAADLIKDFTKLHPREDACIPNTNYGVLLIEFFELYGRHFNYLKTGIRIKDGGSYVAKDEVQK  
 NMLDGYRPSMLYIEDPLQPGNDVGRSSYGA MQVKQAFDYAYVVLSHAVSPIAKYYPNNETESILGRIIRVTDE  
 VATYRDWISKQWGLQNRPEPSCNGNGVTLIVDTQQLDKCNNNLSEEKEALGKCRSNASEPLSKHSSNSSSGPV  
 SSSSATQSSSSDVDSDATPCKTPKQLLCPPTVTRVGSQDVSLEVSQAVGKMOSTQTTNTPNANKSQHGSAR  
 LFRSSSKGFQGTQTSHGALMTSKQHOGKSNTQYYHGKRRHRKRDAPLSELCR\*  
 >rs46128864\_ENSMUSP00000112766\_c.496:G>A\_p.G166E  
 ENSMUST00000119033.8|Tent4b-203|ENSMUSG00000036779|+|chr8:g.88927088:G>A  
 MQIWETTQGLRNLYFNHCHSSGASSASGGSGSGPGSPGGTAPAPAGMFRSGERPLGGLAVPAEQRDFLPLET  
 TNNNNHHQPAAWARRASAGPSASPVPSPAPSSPRPAAALPASESTDPASGSSNKRKRDNKASTYGLNYSLLQP  
 SGGRAAGGGRADGGGGVYSETPWKRRNYNQGVVGLHEEISDFYEYMSRPEEEKMRMEVVSRIESVIKELWPS  
 ADVQIFGSFKTGLYLPTSDIDLVVFGKWENLPLWTLLEALRKHKVADEDSVKVLDKATVPIIKLTDSTFEVKV  
 DISFNVQNGVRAADLIKDFTKKYVPLPYLVVLKQFLLQRDLENEVFTGGIGSYSLFLMAVSFLQLHPREDACI  
 PNTNYGVLLIEFFELYGRHFNYLKTGIRIKDGGSYVAKDEVQKNMLDGYRPSMLYIEDPLQPGNDVGRSSYGA  
 MQVKQAFDYAYVVLSHAVSPIAKYYPNNETESILGRIIRVTDEVATYRDWISKQWGLQNRPEPSCNGNGVTLI  
 VDTQQLDKCNNNLSEEKEALGKCRSNASEPLSKHSSNSSSGPVSSSSATQSSSSDVDSDATPCKTPKQLLCP  
 PTVTRVGSQDVSLEVSQAVGKMOSTQTTNTPNANKSQHGSARLFRSSSKGFQGTQTSHGALMTSKQHOGKS  
 NTQYYHGKRRHRKRDAPLSELCR\*  
 >rs46128864\_ENSMUSP00000112608\_c.496:G>A\_p.G166E  
 ENSMUST00000118952.8|Tent4b-202|ENSMUSG00000036779|+|chr8:g.88927088:G>A  
 MQIWETTQGLRNLYFNHCHSSGASSASGGSGSGPGSPGGTAPAPAGMFRSGERPLGGLAVPAEQRDFLPLET  
 TNNNNHHQPAAWARRASAGPSASPVPSPAPSSPRPAAALPASESTDPASGSSNKRKRDNKASTYGLNYSLLQP  
 SGGRAAGGGRADGGGGVYSETPWKRRNYNQGVVGLHEEISDFYEYMSRPEEEKMRMEVVSRIESVIKELWPS  
 ADVQIFGSFKTGLYLPTSDIDLVVFGKWENLPLWTLLEALRKHKVADEDSVKVLDKATVPIIKLTDSTFEVKV  
 DISFNVQNGVRAADLIKDFTKKYVPLPYLVVLKQFLLQRDLENEVFTGGIGSYSLFLMAVSFLQLHPREDACI  
 PNTNYGVLLIEFFELYGRHFNYLKTGIRIKDGGSYVAKDEVQKNMLDGYRPSMLYIEDPLQPGNDVGRSSYGA  
 MQVKQAFDYAYVVLSHAVSPIAKYYPNNETESILGRIIRVTDEVATYRDWISKQWGLQNRPEPSCNGNGVTLI  
 VDTQQLDKCNNNLSEEKEALGKCRSNASEPLSKHSSNSSSGPVSSSSATQSSSSDVDSDATPCKTPKQLLCP  
 PTVTRVGSQDVSLEVSQAVGKMOSTQTTNTPNANKSQHGSARLFRSSSKGFQGTQTSHGALMTSKQHOGKS  
 NTQYYHGKRRHRKRDAPLSELCR\*  
 >rs46128864\_ENSMUSP00000067971\_c.496:G>A\_p.G166E  
 ENSMUST00000066748.10|Tent4b-201|ENSMUSG00000036779|+|chr8:g.88927088:G>A  
 MQIWETTQGLRNLYFNHCHSSGASSASGGSGSGPGSPGGTAPAPAGMFRSGERPLGGLAVPAEQRDFLPLET  
 TNNNNHHQPAAWARRASAGPSASPVPSPAPSSPRPAAALPASESTDPASGSSNKRKRDNKASTYGLNYSLLQP  
 SGGRAAGGGRADGGGGVYSETPWKRRNYNQGVVGLHEEISDFYEYMSRPEEEKMRMEVVSRIESVIKELWPS  
 ADVQIFGSFKTGLYLPTSDIDLVVFGKWENLPLWTLLEALRKHKVADEDSVKVLDKATVPIIKLTDSTFEVKV  
 DISFNVQNGVRAADLIKDFTKLHPREDACIPNTNYGVLLIEFFELYGRHFNYLKTGIRIKDGGSYVAKDEVQK  
 NMLDGYRPSMLYIEDPLQPGNDVGRSSYGA MQVKQAFDYAYVVLSHAVSPIAKYYPNNETESILGRIIRVTDE  
 VATYRDWISKQWGLQNRPEPSCNGNGVTLIVDTQQLDKCNNNLSEEKEALGKCRSNASEPLSKHSSNSSSGPV  
 SSSSATQSSSSDVDSDATPCKTPKQLLCPPTVTRVGSQDVSLEVSQAVGKMOSTQTTNTPNANKSQHGSAR  
 LFRSSSKGFQGTQTSHGALMTSKQHOGKSNTQYYHGKRRHRKRDAPLSELCR\*  
 >rs50051979\_ENSMUSP00000112766\_c.876:G>A\_p.D293N  
 ENSMUST00000119033.8|Tent4b-203|ENSMUSG00000036779|+|chr8:g.88974182:G>A

MQIWETTQGLRNLYFNHCHSSGASSASGGSGSGPGSPGGTAPAPAGMFRSGERPLGGLAVPAEQRDFLPLET  
TNNNNHHQPAAWARRASAGPSASPVPSPAPSSPRPAAALPASESTDPASGSSNKRKRDNKASTYGLNYSLLQP  
SGGRAAGGGRADGGGGVYSGTPWKRRNYNQGVVGLHEEISDFYEYMSRPEEEKMRMEVVSRIESVIKELWPS  
ADVQIFGSFKTGLYLPTSDIDLVVFGKWENLPLWTLLEALRKHKVADEDSVKVLDKATVPIIKLTDSFTEVKV  
NISFNVQNGVRAADLIKDFTKKYVPLPYLVLVKQFLLQRDLENEVFTGGIGSYSLFLMAVSFLQLHPREDACI  
PNTNYGVLLIEFFELYGRHFNYLKTGIRIKDGGSYVAKDEVQKNMLDGYRPSMLYIEDPLQPGNDVGRSSYGA  
MQVKQAFDYAYVVLHAVSPIAKYYPNNETESILGRIIRVTDEVATYRDWISKQWGLQNRPEPSCNGNGVTLI  
VDTQQLDKCNLSEEKEALGKCRSNASEPLSKHSSNSSSGPVSSSSATQSSSSDVSDATPCKTPKQLLCP  
PTVTRVGSQDVSLEVSQAVGKMOSTQTTNTPNNANKSQHGSARLFRSSSKGFQGTQTSHGALMTSKQHOGKS  
NTQYYHGKRRRHRDAPLSELCR\*

>rs50051979\_ENSMUSP00000112608\_c.876:G>A\_p.D293N

ENSMUST00000118952.8|Tent4b-202|ENSMUSG00000036779|+|chr8:g.88974182:G>A  
MQIWETTQGLRNLYFNHCHSSGASSASGGSGSGPGSPGGTAPAPAGMFRSGERPLGGLAVPAEQRDFLPLET  
TNNNNHHQPAAWARRASAGPSASPVPSPAPSSPRPAAALPASESTDPASGSSNKRKRDNKASTYGLNYSLLQP  
SGGRAAGGGRADGGGGVYSGTPWKRRNYNQGVVGLHEEISDFYEYMSRPEEEKMRMEVVSRIESVIKELWPS  
ADVQIFGSFKTGLYLPTSDIDLVVFGKWENLPLWTLLEALRKHKVADEDSVKVLDKATVPIIKLTDSFTEVKV  
NISFNVQNGVRAADLIKDFTKKYVPLPYLVLVKQFLLQRDLENEVFTGGIGSYSLFLMAVSFLQLHPREDACI  
PNTNYGVLLIEFFELYGRHFNYLKTGIRIKDGGSYVAKDEVQKNMLDGYRPSMLYIEDPLQPGNDVGRSSYGA  
MQVKQAFDYAYVVLHAVSPIAKYYPNNETESILGRIIRVTDEVATYRDWISKQWGLQNRPEPSCNGNGVTLI  
VDTQQLDKCNLSEEKEALGKCRSNASEPLSKHSSNSSSGPVSSSSATQSSSSDVSDATPCKTPKQLLCP  
PTVTRVGSQDVSLEVSQAVGKMOSTQTTNTPNNANKSQHGSARLFRSSSKGFQGTQTSHGALMTSKQHOGKS  
NTQYYHGKRRRHRDAPLSELCR\*

>rs50051979\_ENSMUSP00000067971\_c.876:G>A\_p.D293N

ENSMUST00000066748.10|Tent4b-201|ENSMUSG00000036779|+|chr8:g.88974182:G>A  
MQIWETTQGLRNLYFNHCHSSGASSASGGSGSGPGSPGGTAPAPAGMFRSGERPLGGLAVPAEQRDFLPLET  
TNNNNHHQPAAWARRASAGPSASPVPSPAPSSPRPAAALPASESTDPASGSSNKRKRDNKASTYGLNYSLLQP  
SGGRAAGGGRADGGGGVYSGTPWKRRNYNQGVVGLHEEISDFYEYMSRPEEEKMRMEVVSRIESVIKELWPS  
ADVQIFGSFKTGLYLPTSDIDLVVFGKWENLPLWTLLEALRKHKVADEDSVKVLDKATVPIIKLTDSFTEVKV  
NISFNVQNGVRAADLIKDFTKLHPREDACIPNTNYGVLLIEFFELYGRHFNYLKTGIRIKDGGSYVAKDEVQK  
NMLDGYRPSMLYIEDPLQPGNDVGRSSYGAMQVKQAFDYAYVVLHAVSPIAKYYPNNETESILGRIIRVTDE  
VATYRDWISKQWGLQNRPEPSCNGNGVTLIVDTQQLDKCNLSEEKEALGKCRSNASEPLSKHSSNSSSGPV  
SSSSATQSSSSDVSDATPCKTPKQLLCPPTVTRVGSQDVSLEVSQAVGKMOSTQTTNTPNNANKSQHGSAR  
LFRSSSKGFQGTQTSHGALMTSKQHOGKSNTQYYHGKRRRHRDAPLSELCR\*

>rs49186190\_ENSMUSP00000112766\_c.1335:G>A\_p.D446N

ENSMUST00000119033.8|Tent4b-203|ENSMUSG00000036779|+|chr8:g.88978636:G>A  
MQIWETTQGLRNLYFNHCHSSGASSASGGSGSGPGSPGGTAPAPAGMFRSGERPLGGLAVPAEQRDFLPLET  
TNNNNHHQPAAWARRASAGPSASPVPSPAPSSPRPAAALPASESTDPASGSSNKRKRDNKASTYGLNYSLLQP  
SGGRAAGGGRADGGGGVYSGTPWKRRNYNQGVVGLHEEISDFYEYMSRPEEEKMRMEVVSRIESVIKELWPS  
ADVQIFGSFKTGLYLPTSDIDLVVFGKWENLPLWTLLEALRKHKVADEDSVKVLDKATVPIIKLTDSFTEVKV  
DISFNVQNGVRAADLIKDFTKKYVPLPYLVLVKQFLLQRDLENEVFTGGIGSYSLFLMAVSFLQLHPREDACI  
PNTNYGVLLIEFFELYGRHFNYLKTGIRIKDGGSYVAKDEVQKNMLDGYRPSMLYIEDPLQPGNDVGRSSYGA  
MQVKQAFNYAYVVLHAVSPIAKYYPNNETESILGRIIRVTDEVATYRDWISKQWGLQNRPEPSCNGNGVTLI  
VDTQQLDKCNLSEEKEALGKCRSNASEPLSKHSSNSSSGPVSSSSATQSSSSDVSDATPCKTPKQLLCP  
PTVTRVGSQDVSLEVSQAVGKMOSTQTTNTPNNANKSQHGSARLFRSSSKGFQGTQTSHGALMTSKQHOGKS  
NTQYYHGKRRRHRDAPLSELCR\*

>rs49186190\_ENSMUSP00000112608\_c.1335:G>A\_p.D446N

ENSMUST00000118952.8|Tent4b-202|ENSMUSG00000036779|+|chr8:g.88978636:G>A  
MQIWETTQGLRNLYFNHCHSSGASSASGGSGSGPGSPGGTAPAPAGMFRSGERPLGGLAVPAEQRDFLPLET  
TNNNNHHQPAAWARRASAGPSASPVPSPAPSSPRPAAALPASESTDPASGSSNKRKRDNKASTYGLNYSLLQP  
SGGRAAGGGRADGGGGVYSGTPWKRRNYNQGVVGLHEEISDFYEYMSRPEEEKMRMEVVSRIESVIKELWPS  
ADVQIFGSFKTGLYLPTSDIDLVVFGKWENLPLWTLLEALRKHKVADEDSVKVLDKATVPIIKLTDSFTEVKV  
DISFNVQNGVRAADLIKDFTKKYVPLPYLVLVKQFLLQRDLENEVFTGGIGSYSLFLMAVSFLQLHPREDACI  
PNTNYGVLLIEFFELYGRHFNYLKTGIRIKDGGSYVAKDEVQKNMLDGYRPSMLYIEDPLQPGNDVGRSSYGA  
MQVKQAFNYAYVVLHAVSPIAKYYPNNETESILGRIIRVTDEVATYRDWISKQWGLQNRPEPSCNGNGVTLI  
VDTQQLDKCNLSEEKEALGKCRSNASEPLSKHSSNSSSGPVSSSSATQSSSSDVSDATPCKTPKQLLCP  
PTVTRVGSQDVSLEVSQAVGKMOSTQTTNTPNNANKSQHGSARLFRSSSKGFQGTQTSHGALMTSKQHOGKS  
NTQYYHGKRRRHRDAPLSELCR\*



>rs49186190\_ENSMUSP00000120503\_c.36:G>A\_p.D13N  
ENSMUST00000154115.2|Tent4b-205|ENSMUSG00000036779|+|chr8:g.88978636:G>A  
SSYGAMQVQKQAFNYAYVVLSHAVSPIAKYYPNNETESILGRIIRVTDEVATYRDWISKQWGLQNRPEPSCNGP  
VSSSSATQSSSSDVS DATPCKTPKQLLCRPPTVTRVGSQDVSLEVSQAVGKMQSTQTTNTPNNANKSQHGSA  
RLFRSSSKGFQGTQATSHGALMTSKQHQQKSNTQYYHGKRRRHRKRDAPLSELCR\*  
>rs49186190\_ENSMUSP00000067971\_c.1206:G>A\_p.D403N  
ENSMUST00000066748.10|Tent4b-201|ENSMUSG00000036779|+|chr8:g.88978636:G>A  
MQIWETTQGLRNLYFNHCHSSGASSASGSGSGPGSPGGTAPAPAGMFRSGERPLGGLAVPAEQRDFLPLET  
TNNNNHHQPAAWARRASAGPSASPVPSAPSSPRPAAALPASESTDPASGSSNKRRKRDNKASTYGLNYSLLQP  
SGGRAAGGGRADGGGGVYSGTPWKRRNYNQGVVGLHEEISDFYEMYSPRPEEEKMRMEVVSRIESVIKELWPS  
ADVQIFGSKTGLYLPTSDIDL VVFGKVENLPLWTLLEALRKHKVADEDSVKVLDKATVPIIKLTD SFTEVKV  
DISFNVQNGVRAADLIKDFTKLHPREDACIPNTNYGVLLIEFFELYGRHFNYLKTGIRIKDGGSYVAKDEVQK  
NMLDGYRPSMLYIEDPLQPGNDVGRSSYGAMQVQKQAFNYAYVVLSHAVSPIAKYYPNNETESILGRIIRVTDE  
VATYRDWISKQWGLQNRPEPSCNGVTLIVDTQQLDKCINNLSSEEKEALGKCRSNASEPLSKHSSNSSSGPV  
SSSSATQSSSSDVS DATPCKTPKQLLCRPPTVTRVGSQDVSLEVSQAVGKMQSTQTTNTPNNANKSQHGSA  
LFRSSSKGFQGTQATSHGALMTSKQHQQKSNTQYYHGKRRRHRKRDAPLSELCR\*  
>ENSMUSP00000112766\_c.1415:AG>TA\_p.L472F ENSMUST00000119033.8|Tent4b-  
203|ENSMUSG00000036779|+|chr8:g.88978816:AG>TA  
MQIWETTQGLRNLYFNHCHSSGASSASGSGSGPGSPGGTAPAPAGMFRSGERPLGGLAVPAEQRDFLPLET  
TNNNNHHQPAAWARRASAGPSASPVPSAPSSPRPAAALPASESTDPASGSSNKRRKRDNKASTYGLNYSLLQP  
SGGRAAGGGRADGGGGVYSGTPWKRRNYNQGVVGLHEEISDFYEMYSPRPEEEKMRMEVVSRIESVIKELWPS  
ADVQIFGSKTGLYLPTSDIDL VVFGKVENLPLWTLLEALRKHKVADEDSVKVLDKATVPIIKLTD SFTEVKV  
DISFNVQNGVRAADLIKDFTKKYPVLPYLVLVLKQFLLQRLDNEVFTGGIGSYSLFLMAVSLQLHPREDACI  
PNTNYGVLLIEFFELYGRHFNYLKTGIRIKDGGSYVAKDEVQKNMLDGYRPSMLYIEDPLQPGNDVGRSSYGA  
MQVKQAFDYAYVVLSHAVSPIAKYYPNNETESIFR\*NN\*SDG\*SCHV\*RLDIKTVGLAE\*ARAIMQRKWCYLD  
SRYSAVR\*V\*\*\*SV\*RKGS PWKM\*K\*RLGTS\*\*TLFKLFI RSVVLLLCHAVQL\*\*RRF\*CNAMQNPQTAALPS  
THCHPGRLTGCLLGGLSGSWENAEHSNH\*HTQQRQQITAWISKALPFFQQRQLPRYSSNQPWGLDDKQTASRQI  
QYSVLPWQKEETQEGRAPLRAL\*I  
>ENSMUSP00000112608\_c.1415:AG>TA\_p.L472F ENSMUST00000118952.8|Tent4b-  
202|ENSMUSG00000036779|+|chr8:g.88978816:AG>TA  
MQIWETTQGLRNLYFNHCHSSGASSASGSGSGPGSPGGTAPAPAGMFRSGERPLGGLAVPAEQRDFLPLET  
TNNNNHHQPAAWARRASAGPSASPVPSAPSSPRPAAALPASESTDPASGSSNKRRKRDNKASTYGLNYSLLQP  
SGGRAAGGGRADGGGGVYSGTPWKRRNYNQGVVGLHEEISDFYEMYSPRPEEEKMRMEVVSRIESVIKELWPS  
ADVQIFGSKTGLYLPTSDIDL VVFGKVENLPLWTLLEALRKHKVADEDSVKVLDKATVPIIKLTD SFTEVKV  
DISFNVQNGVRAADLIKDFTKKYPVLPYLVLVLKQFLLQRLDNEVFTGGIGSYSLFLMAVSLQLHPREDACI  
PNTNYGVLLIEFFELYGRHFNYLKTGIRIKDGGSYVAKDEVQKNMLDGYRPSMLYIEDPLQPGNDVGRSSYGA  
MQVKQAFDYAYVVLSHAVSPIAKYYPNNETESIFR\*NN\*SDG\*SCHV\*RLDIKTVGLAE\*ARAIMQRKWCYLD  
SRYSAVR\*V\*\*\*SV\*RKGS PWKM\*K\*RLGTS\*\*TLFKLFI RSVVLLLCHAVQL\*\*RRF\*CNAMQNPQTAALPS  
THCHPGRLTGCLLGGLSGSWENAEHSNH\*HTQQRQQITAWISKALPFFQQRQLPRYSSNQPWGLDDKQTASRQI  
QYSVLPWQKEETQEGRAPLRAL\*I  
>ENSMUSP00000120503\_c.116:AG>TA\_p.L39F ENSMUST00000154115.2|Tent4b-  
205|ENSMUSG00000036779|+|chr8:g.88978816:AG>TA  
SSYGAMQVQKQAFDYAYVVLSHAVSPIAKYYPNNETESIFR\*NN\*SDG\*SCHV\*RLDIKTVGLAE\*ARAIMQRS  
SVLLLCHAVQL\*\*RRF\*CNAMQNPQTAALPSTHCHPGRLTGCLLGGLSGSWENAEHSNH\*HTQQRQQITAWIS  
KALPFFQQRQLPRYSSNQPWGLDDKQTASRQIQYSVLPWQKEETQEGRAPLRAL\*I  
>ENSMUSP00000067971\_c.1286:AG>TA\_p.L429F ENSMUST00000066748.10|Tent4b-  
201|ENSMUSG00000036779|+|chr8:g.88978816:AG>TA  
MQIWETTQGLRNLYFNHCHSSGASSASGSGSGPGSPGGTAPAPAGMFRSGERPLGGLAVPAEQRDFLPLET  
TNNNNHHQPAAWARRASAGPSASPVPSAPSSPRPAAALPASESTDPASGSSNKRRKRDNKASTYGLNYSLLQP  
SGGRAAGGGRADGGGGVYSGTPWKRRNYNQGVVGLHEEISDFYEMYSPRPEEEKMRMEVVSRIESVIKELWPS  
ADVQIFGSKTGLYLPTSDIDL VVFGKVENLPLWTLLEALRKHKVADEDSVKVLDKATVPIIKLTD SFTEVKV  
DISFNVQNGVRAADLIKDFTKLHPREDACIPNTNYGVLLIEFFELYGRHFNYLKTGIRIKDGGSYVAKDEVQK  
NMLDGYRPSMLYIEDPLQPGNDVGRSSYGAMQVQKQAFDYAYVVLSHAVSPIAKYYPNNETESIFR\*NN\*SDG\*  
SCHV\*RLDIKTVGLAE\*ARAIMQRKWCYLD SRYSAVR\*V\*\*\*SV\*RKGS PWKM\*K\*RLGTS\*\*TLFKLFI RSV  
VLLLCHAVQL\*\*RRF\*CNAMQNPQTAALPSTHCHPGRLTGCLLGGLSGSWENAEHSNH\*HTQQRQQITAWISK  
ALPFFQQRQLPRYSSNQPWGLDDKQTASRQIQYSVLPWQKEETQEGRAPLRAL\*I  
>rs47266984\_ENSMUSP00000112766\_c.1806:G>A\_p.V603I  
ENSMUST00000119033.8|Tent4b-203|ENSMUSG00000036779|+|chr8:g.88981842:G>A

MQIWETTQGLRNLYFNHHCHSSGASSASGGSGSGPGSPGGTAPAPAGMFRSGERPLGGLAVPAEQRDFLPLET  
 TNNNNHHQPAAWARRASAGPSASPVPSPAPSSPRPAAALPASESTDPASGSSNKRKRDNKASTYGLNYSLLQP  
 SGGRAAGGGRADGGGGVYSGTPWKRRNYNQGVVGLHEEISDFYEYMSRPEEEKMRMEVVSRIESVIKELWPS  
 ADVQIFGSFKTGLYLPTSDIDLTVVFGKWENLPLWTLLEALRKHKVADEDSVKVLDKATVPIIKLTDSFTEVKV  
 DISFNVQNGVRAADLIKDFTKKYVPLPYLVVLVKQFLLQRDLNEVFTGGIGSYSLFLMAVSFLQLHPREDACI  
 PNTNYGVLLIEFFELYGRHFNYLKTGIRIKDGGSYVAKDEVQKNMLDGYRPSMLYIEDPLQPGNDVGRSSYGA  
 MQVKQAFDYAYVVLSSHAVSPIAKYYPNNETESILGRIIRVTDEVATYRDWISKQWGLQNRPEPSCNGNGVTLI  
 VDTQQLDKCNLSEEKEALGKCRSNASEPLSKHSSNSSSGPVSSSSATQSSSSDVSDATPCKTPKQLLCP  
 PTVTRVGSQDVSLEVSQAIGKMOSTQTTNTPNANKSQHGSARLFRSSSKGFQGTQTSHGALMTSKQHOGKS  
 NTQYYHGKRRRHRDAPLSELCR\*  
 >rs47266984\_ENSMUSP00000112608\_c.1806:G>A\_p.V603I  
 ENSMUST00000118952.8|Tent4b-202|ENSMUSG00000036779|+|chr8:g.88981842:G>A  
 MQIWETTQGLRNLYFNHHCHSSGASSASGGSGSGPGSPGGTAPAPAGMFRSGERPLGGLAVPAEQRDFLPLET  
 TNNNNHHQPAAWARRASAGPSASPVPSPAPSSPRPAAALPASESTDPASGSSNKRKRDNKASTYGLNYSLLQP  
 SGGRAAGGGRADGGGGVYSGTPWKRRNYNQGVVGLHEEISDFYEYMSRPEEEKMRMEVVSRIESVIKELWPS  
 ADVQIFGSFKTGLYLPTSDIDLTVVFGKWENLPLWTLLEALRKHKVADEDSVKVLDKATVPIIKLTDSFTEVKV  
 DISFNVQNGVRAADLIKDFTKKYVPLPYLVVLVKQFLLQRDLNEVFTGGIGSYSLFLMAVSFLQLHPREDACI  
 PNTNYGVLLIEFFELYGRHFNYLKTGIRIKDGGSYVAKDEVQKNMLDGYRPSMLYIEDPLQPGNDVGRSSYGA  
 MQVKQAFDYAYVVLSSHAVSPIAKYYPNNETESILGRIIRVTDEVATYRDWISKQWGLQNRPEPSCNGNGVTLI  
 VDTQQLDKCNLSEEKEALGKCRSNASEPLSKHSSNSSSGPVSSSSATQSSSSDVSDATPCKTPKQLLCP  
 PTVTRVGSQDVSLEVSQAIGKMOSTQTTNTPNANKSQHGSARLFRSSSKGFQGTQTSHGALMTSKQHOGKS  
 NTQYYHGKRRRHRDAPLSELCR\*  
 >rs47266984\_ENSMUSP00000120503\_c.366:G>A\_p.V123I  
 ENSMUST00000154115.2|Tent4b-205|ENSMUSG00000036779|+|chr8:g.88981842:G>A  
 SSYGAMQVKQAFDYAYVVLSSHAVSPIAKYYPNNETESILGRIIRVTDEVATYRDWISKQWGLQNRPEPSCNGP  
 VSSSSATQSSSSDVSDATPCKTPKQLLCPPTVTRVGSQDVSLEVSQAIGKMOSTQTTNTPNANKSQHGSAR  
 LFRSSSKGFQGTQTSHGALMTSKQHOGKSNTQYYHGKRRRHRDAPLSELCR\*  
 >rs47266984\_ENSMUSP00000067971\_c.1677:G>A\_p.V560I  
 ENSMUST00000066748.10|Tent4b-201|ENSMUSG00000036779|+|chr8:g.88981842:G>A  
 MQIWETTQGLRNLYFNHHCHSSGASSASGGSGSGPGSPGGTAPAPAGMFRSGERPLGGLAVPAEQRDFLPLET  
 TNNNNHHQPAAWARRASAGPSASPVPSPAPSSPRPAAALPASESTDPASGSSNKRKRDNKASTYGLNYSLLQP  
 SGGRAAGGGRADGGGGVYSGTPWKRRNYNQGVVGLHEEISDFYEYMSRPEEEKMRMEVVSRIESVIKELWPS  
 ADVQIFGSFKTGLYLPTSDIDLTVVFGKWENLPLWTLLEALRKHKVADEDSVKVLDKATVPIIKLTDSFTEVKV  
 DISFNVQNGVRAADLIKDFTKLHPREDACIPNTNYGVLLIEFFELYGRHFNYLKTGIRIKDGGSYVAKDEVQK  
 NMLDGYRPSMLYIEDPLQPGNDVGRSSYGAMQVKQAFDYAYVVLSSHAVSPIAKYYPNNETESILGRIIRVTDE  
 VATYRDWISKQWGLQNRPEPSCNGNGVTLIVDTQQLDKCNLSEEKEALGKCRSNASEPLSKHSSNSSSGPV  
 SSSSATQSSSDVSDATPCKTPKQLLCPPTVTRVGSQDVSLEVSQAIGKMOSTQTTNTPNANKSQHGSAR  
 LFRSSSKGFQGTQTSHGALMTSKQHOGKSNTQYYHGKRRRHRDAPLSELCR\*  
 >rs52496465\_ENSMUSP00000112766\_c.1989:G>A\_p.G664S  
 ENSMUST00000119033.8|Tent4b-203|ENSMUSG00000036779|+|chr8:g.88983850:G>A  
 MQIWETTQGLRNLYFNHHCHSSGASSASGGSGSGPGSPGGTAPAPAGMFRSGERPLGGLAVPAEQRDFLPLET  
 TNNNNHHQPAAWARRASAGPSASPVPSPAPSSPRPAAALPASESTDPASGSSNKRKRDNKASTYGLNYSLLQP  
 SGGRAAGGGRADGGGGVYSGTPWKRRNYNQGVVGLHEEISDFYEYMSRPEEEKMRMEVVSRIESVIKELWPS  
 ADVQIFGSFKTGLYLPTSDIDLTVVFGKWENLPLWTLLEALRKHKVADEDSVKVLDKATVPIIKLTDSFTEVKV  
 DISFNVQNGVRAADLIKDFTKKYVPLPYLVVLVKQFLLQRDLNEVFTGGIGSYSLFLMAVSFLQLHPREDACI  
 PNTNYGVLLIEFFELYGRHFNYLKTGIRIKDGGSYVAKDEVQKNMLDGYRPSMLYIEDPLQPGNDVGRSSYGA  
 MQVKQAFDYAYVVLSSHAVSPIAKYYPNNETESILGRIIRVTDEVATYRDWISKQWGLQNRPEPSCNGNGVTLI  
 VDTQQLDKCNLSEEKEALGKCRSNASEPLSKHSSNSSSGPVSSSSATQSSSDVSDATPCKTPKQLLCP  
 PTVTRVGSQDVSLEVSQAIGKMOSTQTTNTPNANKSQHGSARLFRSSSKGFQGTQTSHGALMTSKQHOGKS  
 NTQYYHSHKRRRHRDAPLSELCR\*  
 >rs52496465\_ENSMUSP00000112608\_c.1989:G>A\_p.G664S  
 ENSMUST00000118952.8|Tent4b-202|ENSMUSG00000036779|+|chr8:g.88983850:G>A  
 MQIWETTQGLRNLYFNHHCHSSGASSASGGSGSGPGSPGGTAPAPAGMFRSGERPLGGLAVPAEQRDFLPLET  
 TNNNNHHQPAAWARRASAGPSASPVPSPAPSSPRPAAALPASESTDPASGSSNKRKRDNKASTYGLNYSLLQP  
 SGGRAAGGGRADGGGGVYSGTPWKRRNYNQGVVGLHEEISDFYEYMSRPEEEKMRMEVVSRIESVIKELWPS  
 ADVQIFGSFKTGLYLPTSDIDLTVVFGKWENLPLWTLLEALRKHKVADEDSVKVLDKATVPIIKLTDSFTEVKV  
 DISFNVQNGVRAADLIKDFTKKYVPLPYLVVLVKQFLLQRDLNEVFTGGIGSYSLFLMAVSFLQLHPREDACI  
 PNTNYGVLLIEFFELYGRHFNYLKTGIRIKDGGSYVAKDEVQKNMLDGYRPSMLYIEDPLQPGNDVGRSSYGA

MQVQKQAFDYAYVVLSSHAVSPIAKYYPNNETESILGRIIRVTDEVATYRDWISKQWGLQNRPEPSCNGNGVTLI  
VDTQQLDKCNNNLSEEKEALGKCRSNASEPLSKHSSNSSSSGPVSSSSATQSSSSDVSDATPCKTTPKQLLCP  
PTVTRVGSQDVSLEVSQAVGKMOSTQTTNTPNANKSQHGSARLFRSSSKGFQGTQTSHGALMTSKQHOGKS  
NTQYYHSHKRRHRKRDAPLSELCR\*

>rs52496465\_ENSMUSP00000120503\_c.549:G>A\_p.G184S  
ENSMUST00000154115.2|Tent4b-205|ENSMUSG00000036779|+|chr8:g.88983850:G>A  
SSYGAMQVQKQAFDYAYVVLSSHAVSPIAKYYPNNETESILGRIIRVTDEVATYRDWISKQWGLQNRPEPSCNGP  
VSSSSATQSSSSDVSDATPCKTTPKQLLCPPTVTRVGSQDVSLEVSQAVGKMOSTQTTNTPNANKSQHGSAR  
LFRSSSKGFQGTQTSHGALMTSKQHOGKSNTQYYHSHKRRHRKRDAPLSELCR\*

>rs52496465\_ENSMUSP00000067971\_c.1860:G>A\_p.G621S  
ENSMUST00000066748.10|Tent4b-201|ENSMUSG00000036779|+|chr8:g.88983850:G>A  
MQIWETTQGLRNLYFNHCHSSGASSASGGSGSGPGGTAPAPAGMFRSGERPLGGLAVPAEQDFLPLET  
TNNNNHHQPAAWARRASAGPSASVPSPAPSSPRPAAALPASESTDPASGSSNKRKRDNKASTYGLNYSLLOP  
SGGRAAGGGRADGGGGVSGTGWKRRNYNQGVVGLHEEISDFYEMSPRPEEEKMRMEVVSRIESVIKELWPS  
ADVQIFGSFKTGLYLPTSDIDLTVFVGKWNELPLWTLLEALRKHKVADEDSVKVLDKATVPIIKLTDSTFEVKV  
DISFNVQNGVRAADLIKDFTKLHPREDACIPNTNYGVLLIEFFELYGRHFNYLKTGIRIKDGGSYVAKDEVQK  
NMLDGYRPSMLYIEDPLQPGNDVGRSSYGAMQVQKQAFDYAYVVLSSHAVSPIAKYYPNNETESILGRIIRVTDE  
VATYRDWISKQWGLQNRPEPSCNGNGVTLIVDTQQLDKCNNNLSEEKEALGKCRSNASEPLSKHSSNSSSGPV  
SSSSATQSSSSDVSDATPCKTTPKQLLCPPTVTRVGSQDVSLEVSQAVGKMOSTQTTNTPNANKSQHGSAR  
LFRSSSKGFQGTQTSHGALMTSKQHOGKSNTQYYHSHKRRHRKRDAPLSELCR\*

>rs33615446\_ENSMUSP00000130594\_c.46:C>T\_p.P16L  
ENSMUST00000169037.9|Adcy7-203|ENSMUSG00000031659|+|chr8:g.89033274:C>T  
MPAKGRYFLNEGDEGLDQAALYEKYRLTSLHGPLLLLLLLLLVAAATCIALISIAFSHEDLRRHQVVLGTAFLML  
TLFVALYVLVYVECLVQRWLRALALLTWACLMVLGSLVMWDSLENEAHAWEQVPFFLFVVFVYVYALLPLSRRA  
AIVAGVTSTVSHLLVFGAVTRAFQTSMSSTQLGLQLLANAVILLGGNFTGAFHKKQLQDASRDLFIYTVKCIQ  
IRKLRVEKRRQENLLLLSVLPAHISMGMKLAIIERLKEGGDRHYMPDNNFHSLYVKKRQNVSIYADIVGFTR  
LASDCSPKELVVVLNELFGKFDQIAKANECMRKIKILGDCYCVSGLPVSLPTHARNVCVMGLDICEAIKQVRE  
ATGVDISMRVGIHSGNVLCGVI GLRKWQYDVWSDVSLANRMEAGVPGRVHITEATLNHLDKAYEVEDGHGE  
QRDPYLKEMNIRTYLVIDPRSQQPPPPSHHLSKPKGDATLKMRAVTRVRYLESWGAARPF AHLNHRESVSSS  
ETPISNGRRQKAIPLRRHRAPDRSASPGRLEDDCDEMLSAIEGLSSTRPCCSKSDDFHTFGPIFLEKGFER  
EYRLVPIPRARYDFACASLVFVCILLVHLLVMPMATLGVSFGLVACLLGLVLSFCFATEFSCRFPSTRLQA  
ISESVETQPLVRLVLVVLTVGSLTVAIINMPLTLNPGPEQPGDNKTSPLAAQNRVGTPECELLPYTCSCILG  
FIACSVFLRMSLELKAMLLTVALVAYLLLFLNLSPCWHVSGNSTETNGTQRTRLLLSDAQSMPSHTLAPGARET  
APSPSYLERDLKIMVNFYLLIFATLILLSRQIDYICRLDCLWKKKFKKEHEEFETMENVNRLLENVLPAHV  
AAHFIDGKAAEDWYHQSYDCVCMFASVPDFKVFYTECDVNKEGLECLRLNEIIADFDLLELLKPKFSGVEKI  
KTIGSTYMAAAGLSAPSGHENQDLERKHHVIGVLVEFSMALMSKLDGINRHSFNFRLRVGINHGVPVIAGVIG  
ARKPQYDIWGNVTNVASRMESTGELGKIQVTEETCTILQGLGYSCPCRGLINVKGKGLRITYFVCTDTAKFQG  
LGLN\*

>rs33615446\_ENSMUSP00000132528\_c.46:C>T\_p.P16L  
ENSMUST00000171456.9|Adcy7-204|ENSMUSG00000031659|+|chr8:g.89033274:C>T  
MPAKGRYFLNEGDEGLDQAALYEKYRLTSLHGPLLLLLLLLLVAAATCIALISIAFSHEDLRRHQVVLGTAFLML  
TLFVALYVLVYVECLVQRWLRALALLTWACLMVLGSLVMWDSLENEAHAWEQVPFFLFVVFVYVYALLPLSRRA  
AIVAGVTSTVSHLLVFGAVTRAFQTSMSSTQLGLQLLANAVILLGGNFTGAFHKKQLQDASRDLFIYTVKCIQ  
IRKLRVEKRRQENLLLLSVLPAHISMGMKLAIIERLKEGGDRHYMPDNNFHSLYVKKRQNVSIYADIVGFTR  
LASDCSPKELVVVLNELFGKFDQIAKANECMRKIKILGDCYCVSGLPVSLPTHARNVCVMGLDICEAIKQVRE  
ATGVDISMRVGIHSGNVLCGVI GLRKWQYDVWSDVSLANRMEAGVPGRVHITEATLNHLDKAYEVEDGHGE  
QRDPYLKEMNIRTYLVIDPRSQQPPPPSHHLSKPKGDATLKMRAVTRVRYLESWGAARPF AHLNHRESVSSS  
ETPISNGRRQKAIPLRRHRAPDRSASPGRLEDDCDEMLSAIEGLSSTRPCCSKSDDFHTFGPIFLEKGFER  
EYRLVPIPRARYDFACASLVFVCILLVHLLVMPMATLGVSFGLVACLLGLVLSFCFATEFSCRFPSTRLQA  
ISESVETQPLVRLVLVVLTVGSLTVAIINMPLTLNPGPEQPGDNKTSPLAAQNRVGTPECELLPYTCSCILG  
FIACSVFLRMSLELKAMLLTVALVAYLLLFLNLSPCWHVSGNSTETNGTQRTRLLLSDAQSMPSHTLAPGARET  
APSPSYLERDLKIMVNFYLLIFATLILLSRQIDYICRLDCLWKKKFKKEHEEFETMENVNRLLENVLPAHV  
AAHFIDGKAAEDWYHQSYDCVCMFASVPDFKVFYTECDVNKEGLECLRLNEIIADFDLLELLKPKFSGVEKI  
KTIGSTYMAAAGLSAPSGHENQDLERKHHVIGVLVEFSMALMSKLDGINRHSFNFRLRVGINHGVPVIAGVIG  
ARKPQYDIWGNVTNVASRMESTGELGKIQVTEETCTILQGLGYSCPCRGLINVKGKGLRITYFVCTDTAKFQG  
LGLN\*

>rs33615446\_ENSMUSP00000096122\_c.46:C>T\_p.P16L  
ENSMUST00000098521.4|Adcy7-201|ENSMUSG00000031659|+|chr8:g.89033274:C>T

MPAKGRYFLNEGDEGLDQAALYEKYRLTSLHGPLLLLLLLLLVAAATCIALISIAFSHEDLRRHQVVLGTAFLML  
TLFVALYVVLVVECLVQRWLRALALLTWACLMVLSVLMWDSLENEAHAWEQVPPFFLVVVFVYALLPLSRRA  
AIVAGVSTVSHLLVFGAVTRAFQTSMSSTQLGLQLLANAVILLGNGFTGAFHKKHQLQDASRDLFIYTVKCIQ  
IRKLRVEKRRQENLLLSVLPAAHISMGMKLAIIERLKEGGDRHYMPDNNFHSLYVKKRQNVSIYADIVGFTR  
LASDCSPKELVVVLNLELFGKFDQIAKANECMRIKILGDCYCVSGLPVSLPTHARNVCVMGLDICEAIAKQVRE  
ATGVDISMRVGIHSGNVLCGVI GLRKWQYDVWSDVSLANRMEAGVPGRVHITTEATLNHLDKAYEVEDGHGE  
QRDPYKEMNIRTYLVIDPRSQQPPPPSHHLSKPKGDATLKMRAVSVTRYLESWGAARPPFAHLNHRESVSSS  
ETPISNGRRQKAIPLRRHRAPDRSASPCKGRLEDDCDEMLSAIEGLSSTRPCCSKSDDFHTFGPIFLEKGFER  
EYRLVPIPRARYDFACASLVFVCILLVHLLVMPMATLGVSFGLVACLLGLVLSFCFATEFSRCFSPRSTLQA  
ISESVETQPLVRLVVLTVGSLTVAIINMPLTLNPGPEQPGDNKTSPLAAQNRVGTPECELLPYTCSILG  
FIACSVFLRMSLELKAMLLTVALVAYLLLNLSPCWHVSGNSTETNGTQRTRLLLSDAQSMPSHTLAPGARET  
APSPSYLERDLKIMVNFYLIIFYATLILLSRQIDYYCRDLCLWKKKFKKEHEEFETMENVNRLLENVLPAAHV  
AAHFIGDKAAEDWYHQSYDCVCMFASVPDFKVFYTECDVNKEGLECLRLLEI IADDFELLLKPKFSGVEKI  
KTIGSTYMAAAGLSAPSGHENQDLERKXVHI GVLVEFSMALMSKLDGINRHSFNSFRLRVGINHGPVIAVIG  
ARKPQYDIWGNVTNVASRMESTGELGKIQVTEETCTILQGLGYSCECRGLINVKKGKELRITYFVCTDTAKFQG  
LGLN\*

>rs33615446\_ENSMUSP00000129252\_c.46:C>T\_p.P16L

ENSMUST00000168545.8|Adcy7-202|ENSMUSG00000031659|+|chr8:g.89033274:C>T  
MPAKGRYFLNEGDEGLDQAALYEKYRLTSLHGPLLLLLLLLLVAAATCIALISIAFSHEDLRRHQVVLGTAFLML  
TLFVALYVVLVVECLVQRWLRALALLTWACLMVLSVLMWDSLENEAHAWEQVPPFFLVVVFVYALLPLSRRA  
AIVAGVSTVSHLLVFGAVTRAFQTSMSSTQLGLQLLANAVILLGNGFTGAFHKKHQLQDASRDLFIYTVKCIQ  
IRKLRVEKRRQENLLLSVLPAAHISMGMKLAIIERLKEGGDRHYMPDNNFHSLYVKKRQNVSIYADIVGFTR  
LASDCSPKELVVVLNLELFGKFDQIAKANECMRIKILGDCYCVSGLPVSLPTHARNVCVMGLDICEAIAKQVRE  
ATGVDISMRVGIHSGNVLCGVI GLRKWQYDVWSDVSLANRMEAGVPGRVHITTEATLNHLDKAYEVEDGHGE  
QRDPYKEMNIRTYLVIDPRSQQPPPPSHHLSKPKGDATLKMRAVSVTRYLESWGAARPPFAHLNHRESVSSS  
ETPISNGRRQKAIPLRRHRAPDRSASPCKGRLEDDCDEMLSAIEGLSSTRPCCSKSDDFHTFGPIFLEKGFER  
EYRLVPIPRARYDFACASLVFVCILLVHLLVMPMATLGVSFGLVACLLGLVLSFCFATEFSRCFSPRSTLQA  
ISESVETQPLVRLVVLTVGSLTVAIINMPLTLNPGPEQPGDNKTSPLAAQNRVGTPECELLPYTCSILG  
FIACSVFLRMSLELKAMLLTVALVAYLLLNLSPCWHVSGNSTETNGTQRTRLLLSDAQSMPSHTLAPGARET  
APSPSYLERDLKIMVNFYLIIFYATLILLSRQIDYYCRDLCLWKKKFKKEHEEFETMENVNRLLENVLPAAHV  
AAHFIGDKAAEDWYHQSYDCVCMFASVPDFKVFYTECDVNKEGLECLRLLEI IADDFELLLKPKFSGVEKI  
KTIGSTYMAAAGLSAPSGHENQDLERKXVHI GVLVEFSMALMSKLDGINRHSFNSFRLRVGINHGPVIAVIG  
ARKPQYDIWGNVTNVASRMESTGELGKIQVTEETCTILQGLGYSCECRGLINVKKGKELRITYFVCTDTAKFQG  
LGLN\*

>rs51766230\_ENSMUSP00000034085\_c.1525:G>T\_p.R509L

ENSMUST00000034085.8|Brd7-201|ENSMUSG00000031660|-|chr8:g.89060819:C>A  
MGKHKHKKHSDRHFYEEYVEKPLKLVKLVGGSEVTELSTGSSGHDSLFEEDRSDHDKHKDRKRKRKKEKQQA  
PGEKGRKRRRVKEDKRRDRDRAENEVDRDLQCHVPIRLDLPEKPLTSSLAKQEEVEQTPLQEALNQLMRQ  
LQRKDP SAFFSFPVTD FIA PGYSMI IKHPMDFSTMKEKIKNNDYQSIEELKDNFKLMCTNAMIYKPKETIYYK  
AAKLLHSGMKILSQERIQSLKQSIDFMSDLQKTRKQKERTDACQSGEDSGCQWREREDSGDAETQAFRSPAK  
DNKRKDKDVLLEDKWRSSNSEREHEQIERVVQESGGKLTRRLANSQCEFERRKPDGTTTTLGLLHPVDPVIVGEPG  
YCPVRLGMTTGRLOSGVNTLQGFKEDKRN RVTPVLYLNYGPYSSYAPHYDSTFANISKDSDLIYSTYGEDSD  
LPNNFSISEFLATCQDYPYVMADSLLDVLTGGHRSRLQDLDMSSPEDEGQTRALDTAKEAEITQIEPTGLE  
SSSQDRLTALQAVTTFGAPAEVFDSEEA EVFQRKLD ETTRLLRELQEAQNERLSTRPPNMI CLLGPSYREMY  
LAEQVTNNLKELTQQVTPGDVVS IHGVRKAMGISVPSPIVGN SFVDLTGECEEPKETSTAECGP DAS\*

>rs47501089\_ENSMUSP00000034085\_c.1444:C>T\_p.S482L

ENSMUST00000034085.8|Brd7-201|ENSMUSG00000031660|-|chr8:g.89063764:G>A  
MGKHKHKKHSDRHFYEEYVEKPLKLVKLVGGSEVTELSTGSSGHDSLFEEDRSDHDKHKDRKRKRKKEKQQA  
PGEKGRKRRRVKEDKRRDRDRAENEVDRDLQCHVPIRLDLPEKPLTSSLAKQEEVEQTPLQEALNQLMRQ  
LQRKDP SAFFSFPVTD FIA PGYSMI IKHPMDFSTMKEKIKNNDYQSIEELKDNFKLMCTNAMIYKPKETIYYK  
AAKLLHSGMKILSQERIQSLKQSIDFMSDLQKTRKQKERTDACQSGEDSGCQWREREDSGDAETQAFRSPAK  
DNKRKDKDVLLEDKWRSSNSEREHEQIERVVQESGGKLTRRLANSQCEFERRKPDGTTTTLGLLHPVDPVIVGEPG  
YCPVRLGMTTGRLOSGVNTLQGFKEDKRN RVTPVLYLNYGPYSSYAPHYDSTFANISKDSDLIYSTYGEDSD  
LPNNFSISEFLATCQDYPYVMADSLLDVLTGGHRSRLQDLDMSSPEDEGQTRALDTAKEAEITQIEPTGLE  
SSSQDRLTALQAVTTFGAPAEVFDSEEA EVFQRKLD ETTRLLRELQEAQNERLSTRPPNMI CLLGPSYREMY  
LAEQVTNNLKELTQQVTPGDVVS IHGVRKAMGISVPSPIVGN SFVDLTGECEEPKETSTAECGP DAS\*

>rs250965619\_ENSMUSP00000034085\_c.1219:A>G\_p.Y407C

ENSMUST00000034085.8|Brd7-201|ENSMUSG00000031660|-|chr8:g.89069474:T>C

MGKHKHKKHSDRHFYEEYVEKPLKLVKLVGGSEVTELTSTGSSGHDSLFFEDRSDDHDKHKDRKRKRKKGKQQA  
 PGEEKGRKRRRVKEDDKKRRDRRAENEVDRDLQCHVPIRLDLPPEKPLTSSSLAKQEEVEQTPLQEALNQLMRQ  
 LQRKDPSAFFSFPVTDFAIAGYSMIKHPMDFSTMKEKIKNNDYQSIIEELKDNFKLMCTNAMIYKPKETIYYK  
 AAKKLLHSGMKILSQERIQSLKQSIDFMSDLQKTRKQKERTDACQSGEDSGCWQREREDSGDAETQAFRSPAK  
 DNKRKDKDVLLEDKWRSSNSEREHEQIERVVQESGGKLTTRRLANSQCEFFERRKPDGTTTTLGLLHPVDPVIVGEPG  
 YCPVRLGMTTGRQLQSGVNTLQGFKEDKRNRVTPVLYLNYGPCSSYAPHYDSTFANISKDDSDLIYSTYGEDSD  
 LPNNFSISEFLATCQDYPYVMADSLLDVLTGGHRSRSLQDLDMSSPEDEGQTRALDTAKEAEITQIEPTGRLE  
 SSSQDRLTALQAVTTFGAPAEVFDSEEAIEVFORKLEDETRLLRELQEAQNERLSTRPPPNMICLLGPSYREMY  
 LAEQVTNNLKELTQQVTPGDVVS IHGVRKAMGISVPSPIVGNFVVDLTGECEEPKETSTAECGPDAS\*  
 >rs48313211\_ENSMUSP00000034085\_c.700:A>T\_p.Q234L  
 ENSMUST00000034085.8|Brd7-201|ENSMUSG00000031660|-|chr8:g.89078429:T>A  
 MGKHKHKKHSDRHFYEEYVEKPLKLVKLVGGSEVTELTSTGSSGHDSLFFEDRSDDHDKHKDRKRKRKKGKQQA  
 PGEEKGRKRRRVKEDDKKRRDRRAENEVDRDLQCHVPIRLDLPPEKPLTSSSLAKQEEVEQTPLQEALNQLMRQ  
 LQRKDPSAFFSFPVTDFAIAGYSMIKHPMDFSTMKEKIKNNDYQSIIEELKDNFKLMCTNAMIYKPKETIYYK  
 AAKKLLHSGMKILSLERIQSLKQSIDFMSDLQKTRKQKERTDACQSGEDSGCWQREREDSGDAETQAFRSPAK  
 DNKRKDKDVLLEDKWRSSNSEREHEQIERVVQESGGKLTTRRLANSQCEFFERRKPDGTTTTLGLLHPVDPVIVGEPG  
 YCPVRLGMTTGRQLQSGVNTLQGFKEDKRNRVTPVLYLNYGPYSSYAPHYDSTFANISKDDSDLIYSTYGEDSD  
 LPNNFSISEFLATCQDYPYVMADSLLDVLTGGHRSRSLQDLDMSSPEDEGQTRALDTAKEAEITQIEPTGRLE  
 SSSQDRLTALQAVTTFGAPAEVFDSEEAIEVFORKLEDETRLLRELQEAQNERLSTRPPPNMICLLGPSYREMY  
 LAEQVTNNLKELTQQVTPGDVVS IHGVRKAMGISVPSPIVGNFVVDLTGECEEPKETSTAECGPDAS\*  
 >rs263208908\_ENSMUSP00000034085\_c.408:C>T\_p.Q137\*  
 ENSMUST00000034085.8|Brd7-201|ENSMUSG00000031660|-|chr8:g.89084202:G>A  
 MGKHKHKKHSDRHFYEEYVEKPLKLVKLVGGSEVTELTSTGSSGHDSLFFEDRSDDHDKHKDRKRKRKKGKQQA  
 PGEEKGRKRRRVKEDDKKRRDRRAENEVDRDLQCHVPIRLDLPPEKPLTSSSLAKQEEVEQTPL\*EALNQLMRQ  
 LQRKDPSAFFSFPVTDFAIAGYSMIKHPMDFSTMKEKIKNNDYQSIIEELKDNFKLMCTNAMIYKPKETIYYK  
 AAKKLLHSGMKILSQERIQSLKQSIDFMSDLQKTRKQKERTDACQSGEDSGCWQREREDSGDAETQAFRSPAK  
 DNKRKDKDVLLEDKWRSSNSEREHEQIERVVQESGGKLTTRRLANSQCEFFERRKPDGTTTTLGLLHPVDPVIVGEPG  
 YCPVRLGMTTGRQLQSGVNTLQGFKEDKRNRVTPVLYLNYGPYSSYAPHYDSTFANISKDDSDLIYSTYGEDSD  
 LPNNFSISEFLATCQDYPYVMADSLLDVLTGGHRSRSLQDLDMSSPEDEGQTRALDTAKEAEITQIEPTGRLE  
 SSSQDRLTALQAVTTFGAPAEVFDSEEAIEVFORKLEDETRLLRELQEAQNERLSTRPPPNMICLLGPSYREMY  
 LAEQVTNNLKELTQQVTPGDVVS IHGVRKAMGISVPSPIVGNFVVDLTGECEEPKETSTAECGPDAS\*  
 >rs49846526\_ENSMUSP00000034086\_c.220:C>T\_p.A74V  
 ENSMUST00000034086.13|Nkd1-201|ENSMUSG00000031661|+|chr8:g.89300854:C>T  
 MGKLSKPAAVCKRRESPEGDSFAVSAAWARKGIEEWIGRQRCPGSVSGPRQLRLAGTVGRGTRELVGDTSRE  
 VLGEEDDDDFPLEVALPPEKIDSLGSGDEKRMERLSEPGQASKKQLKFEELQCDVSVEDSRQEWTFITLYDFD  
 NNGKVTREDITSLLHTIYEVVDSVNHSPSTSSKTLRVKLTVPDGSQSKRSVLFNHTDLQTRPADTKPAEE  
 LRGEWKKQRAPLRFQGDHLEQPCYHHCVDENIERNHYLDLAGIENYTSQFGPGSPSVAQKSELPPRISNP  
 TRSRSHPEAAHPIHRRPQGVDPGSFHLLDTPFAKASELQQLRGTQDGSKHFVRSPPKAQGNMGMHGARGA  
 RSKPPLVPTTHTVSPSAHLATSPALLPTLAPLGHKHKHRAKESQASCRGLQGPLAAGGSTVMGREQVRELPA  
 VVVYESQAGQAVQRHEHHHHHHHHHHHHYHFFYQP\*  
 >rs45974600\_ENSMUSP00000113773\_c.1839:G>A\_p.G614R  
 ENSMUST00000118370.8|Nod2-203|ENSMUSG00000055994|+|chr8:g.89391600:G>A  
 MCSQEEFQAQRSQVALLISGSLEGFESILDWLLSWDVLRSREDEGLSLPGQPLSHSARRLLDVTWVNGVWGC  
 QKLEAVQEAQANSHTFELYGSWDTHSLHPTRDLSHRPAIVRRLYNHVEAMLELAREGGFLSQYECIEIRLP  
 IFTSSQRARRLLDLAAVKANGLAAFLQLQHVRELPAFLPYEAAECQKFI SKLRMTMVLTSRFLSTYDGENL  
 CLEDIYTENILELQTEVGTAGALQKSPAIIIGLEDLFDTHGHLNRDADTILVVGEAGSGKSTLLQRLHLLWATG  
 RSFQEFLLFIFPFSCRQLQCVAKPLSLRLLFEHCCWPDVAQDDVVFQFLLDHPDRVLLTFDGLDEFKFRFTDRE  
 RHCSPIDPTSVQTLFLNLLQGNLLKNACKVLTSRPDAVSALLRKFVRTELQLKGFSEEGIQLYLRKHHREPGV  
 ADRLIQLIQATSALHGLCHLPVFSWVSRCHRELLLNRFPTTSTDMYLLILQHFLHLLHASPPDSSPLGLGPG  
 LLQSRLSTLLHLGHLALRGLAMSCYVFSQQQLQAAQVDSDDISLGLVRAQSSVPGSKAPLEFLHITFCQFFA  
 AFYLAVSADTSVASLKHFLFCGRGLGSSLLRLLPNLCIQGSRVKKGSEAALLQKAEPHNLQITAAFLAGLLSQ  
 QHRDLLAACQVSERVLLQRQARARSLAHSREHFHSIPPAVPGETKSMHAMPGFIIWLIRSLYEMQEEQLAQE  
 AVRRLDIGHLKLTFCRVGPAECAALAFVLQHLQRPVALQLDYNSVGDVGVQEQLRPAAGVETALYLRDNNISDR  
 GARTLVECALRCEQLKALFNNKLTDACACSMAKLLAHKQNFSLRVLGNNHITAAGEAVLQAQGLKSNSTSLKF  
 LGFWGNSVGDKGTQALAEVVADHQNLKWLSLVGNINIGSMGAEALALMLEKNKSLEELCLEENHICDEGVYSLA  
 EGLKRNSTLKLKLSNNGITYRGAEALLQALSNSAILEVWLRGNTFSLEEIQTLSRRDARLLL\*  
 >rs45974600\_ENSMUSP00000105262\_c.1860:G>A\_p.G621R  
 ENSMUST00000109634.3|Nod2-202|ENSMUSG00000055994|+|chr8:g.89391600:G>A



MRSSCCDMCSQEEFQAQRSQLVALLISGSLEGFESILDWLLSWDVLRSREYEGLSLPGQPLSHSARRLLDVTW  
 NKGWGCQKLEAVQEAQANSHTFELYGSWDTHSLHPTDRDLQSHRPAIVRRLYNHVEAMLELAREGGFLSQYE  
 CEEIRLPIFTSSQRARRLLDLAAVKANGLAAFLQHVRELPAPLPLPYEAAECQKFISKLRTMVLTSRFLST  
 YDGSENLCEDIYTENILELQTEVGTAGALQKSPAILGLEDLFDTHGHLNRDADTILVVGEAGSGKSTLLQRL  
 HLLWATGRSFQEFLLFIFFPSCRQLQCVAKPLSLRLLFEHCCWPDVAQDDVFQFLLDHPDRVLLTFDGLDEFK  
 FRFTDRERHCSPIDPTSVQTLLENLQGNLLKNACKVLTSRPDAVSALLRKFVTELQKGFSEEGIQLYLRK  
 HHREPGVADRLIQLIQATSALHGLCHLPVFSWVSRCHRELLQNRGFPTTSTDMYLLILQHFLHASPDPSS  
 PLGLGPGLLQSRLLSTLLHLGHLALRGLAMSCYVFSQAQQLQAAQVSDDISLGFLVRAQSSVPGSKAPLEFLHI  
 TFQCFFAAFYLAVSADTSVASLKHLLFSCGRLGSSLLRLLPNLCIQGSRVKKGSEAALLQKAEPHNLQITAAF  
 LAGLLSQQHRDLAACQVSEVLLQRQARARSCLAHSREHFHSIPPAVPGETKSMHAMPGFIVLIRSLYEMQ  
 EEQLAQEAVRRLDIGHLKLTFCRVGPAECAALAFVLQHLQRPVALQLDYNSVGDVGVQELRPLGVCTALYLR  
 DNNSDRGARTLVECALRCEQLQKALFNNKLTACACSMAKLLAHKQNFSLRVGNNHITAAGAEVLAQGLK  
 SNTSLKFLGFWGNVSGDKGTQALAEVVADHQNLKWLVLGNNIGSMGAEALALMLEKNKSLEELCLEENHICD  
 EGVYSLAEGLRNSTLKFLLKLSNNGITYRGAEALLQALSNSAILEVWLRGNTFSLEEIQTLSSRDARLLL\*  
 >rs45974600\_ENSMUSP00000050538\_c.1905:G>A\_p.G636R  
 ENSMUST00000054324.15|Nod2-201|ENSMUSG00000055994|+|chr8:g.89391600:G>A  
 MCSQEEFQAQRSQLVALLISGSLEGFESILDWLLSWDVLRSREYEGLSLPGQPLSHSARRLLDVTWVWGC  
 QKLEAVQEAQANSHTFELYGSWDTHSLHPTDRDLQSHRPAIVRRLYNHVEAMLELAREGGFLSQYEC  
 EIRLPIFTSSQRARRLLDLAAVKANGLAAFLQHVRELPAPLPLPYEGYSLCRSRCDRGFTLICFLCILAECQKFIS  
 KLRTMVLTSRFLSTYDGSENLCEDIYTENILELQTEVGTAGALQKSPAILGLEDLFDTHGHLNRDADTILV  
 VGEAGSGKSTLLQRLHLLWATGRSFQEFLLFIFFPSCRQLQCVAKPLSLRLLFEHCCWPDVAQDDVFQFLLDH  
 PDRVLLTFDGLDEFKFRFTDRERHCSPIDPTSVQTLLENLQGNLLKNACKVLTSRPDAVSALLRKFVTELQ  
 LKGFSEEGIQLYLRKHHREPGVADRLIQLIQATSALHGLCHLPVFSWVSRCHRELLQNRGFPTTSTDMYLL  
 ILQHFLHASPDPSSPLGLGPGLLQSRLLSTLLHLGHLALRGLAMSCYVFSQAQQLQAAQVSDDISLGFLVRAQ  
 SSVPGSKAPLEFLHITFQCFFAAFYLAVSADTSVASLKHLLFSCGRLGSSLLRLLPNLCIQGSRVKKGSEAAL  
 LQKAEPHNLQITAAFLAGLLSQQHRDLAACQVSEVLLQRQARARSCLAHSREHFHSIPPAVPGETKSMHA  
 MPGFIVLIRSLYEMQEEQLAQEAVRRLDIGHLKLTFCRVGPAECAALAFVLQHLQRPVALQLDYNSVGDVGV  
 QLRPCLGVCTALYLRDNNSDRGARTLVECALRCEQLQKALFNNKLTACACSMAKLLAHKQNFSLRVGNN  
 HITAAGAEVLAQGLKSNTSLKFLGFWGNVSGDKGTQALAEVVADHQNLKWLVLGNNIGSMGAEALALMLEKN  
 KSLEELCLEENHICDEGVYSLAEGLRNSTLKFLLKLSNNGITYRGAEALLQALSNSAILEVWLRGNTFSLEE  
 IQTLSSRDARLLL\*  
 >rs52365090\_ENSMUSP00000113773\_c.2427:G>A\_p.E810K  
 ENSMUST00000118370.8|Nod2-203|ENSMUSG00000055994|+|chr8:g.89397085:G>A  
 MCSQEEFQAQRSQLVALLISGSLEGFESILDWLLSWDVLRSREYEGLSLPGQPLSHSARRLLDVTWVWGC  
 QKLEAVQEAQANSHTFELYGSWDTHSLHPTDRDLQSHRPAIVRRLYNHVEAMLELAREGGFLSQYEC  
 EIRLPIFTSSQRARRLLDLAAVKANGLAAFLQHVRELPAPLPLPYEAAECQKFISKLRTMVLTSRFLSTYD  
 GSENLCEDIYTENILELQTEVGTAGALQKSPAILGLEDLFDTHGHLNRDADTILVVGEAGSGKSTLLQRLHLL  
 WATGRSFQEFLLFIFFPSCRQLQCVAKPLSLRLLFEHCCWPDVAQDDVFQFLLDHPDRVLLTFDGLDEFK  
 FRFTDRERHCSPIDPTSVQTLLENLQGNLLKNACKVLTSRPDAVSALLRKFVTELQKGFSEEGIQLYLRK  
 HHREPGVADRLIQLIQATSALHGLCHLPVFSWVSRCHRELLQNRGFPTTSTDMYLLILQHFLHASPDPSS  
 PLGLGPGLLQSRLLSTLLHLGHLALRGLAMSCYVFSQAQQLQAAQVSDDISLGFLVRAQSSVPGSKAPLEFL  
 HITFQCFFAAFYLAVSADTSVASLKHLLFSCGRLGSSLLRLLPNLCIQGSRVKKGSEAALLQKAEPHNLQIT  
 AAFLAGLLSQQHRDLAACQVSEVLLQRQARARSCLAHSREHFHSIPPAVPGETKSMHAMPGFIVLIRSLYEM  
 QEEQLAQEAVRRLDIGHLKLTFCRVGPAECAALAFVLQHLQRPVALQLDYNSVGDVGVQELRPLGVCTALYLR  
 DNNSDRGARTLVKCALRCEQLQKALFNNKLTACACSMAKLLAHKQNFSLRVGNNHITAAGAEVLAQGLKSNT  
 SLKFLGFWGNVSGDKGTQALAEVVADHQNLKWLVLGNNIGSMGAEALALMLEKNKSLEELCLEENHICDEGV  
 YSLAEGLRNSTLKFLLKLSNNGITYRGAEALLQALSNSAILEVWLRGNTFSLEEIQTLSSRDARLLL\*  
 >rs52365090\_ENSMUSP00000105262\_c.2448:G>A\_p.E817K  
 ENSMUST00000109634.3|Nod2-202|ENSMUSG00000055994|+|chr8:g.89397085:G>A  
 MRSSCCDMCSQEEFQAQRSQLVALLISGSLEGFESILDWLLSWDVLRSREYEGLSLPGQPLSHSARRLLDVTW  
 NKGWGCQKLEAVQEAQANSHTFELYGSWDTHSLHPTDRDLQSHRPAIVRRLYNHVEAMLELAREGGFLSQYE  
 CEEIRLPIFTSSQRARRLLDLAAVKANGLAAFLQHVRELPAPLPLPYEAAECQKFISKLRTMVLTSRFLST  
 YDGSENLCEDIYTENILELQTEVGTAGALQKSPAILGLEDLFDTHGHLNRDADTILVVGEAGSGKSTLLQRL  
 HLLWATGRSFQEFLLFIFFPSCRQLQCVAKPLSLRLLFEHCCWPDVAQDDVFQFLLDHPDRVLLTFDGLDEFK  
 FRFTDRERHCSPIDPTSVQTLLENLQGNLLKNACKVLTSRPDAVSALLRKFVTELQKGFSEEGIQLYLRK  
 HHREPGVADRLIQLIQATSALHGLCHLPVFSWVSRCHRELLQNRGFPTTSTDMYLLILQHFLHASPDPSS  
 PLGLGPGLLQSRLLSTLLHLGHLALRGLAMSCYVFSQAQQLQAAQVSDDISLGFLVRAQSSVPGSKAPLEFLHI  
 TFQCFFAAFYLAVSADTSVASLKHLLFSCGRLGSSLLRLLPNLCIQGSRVKKGSEAALLQKAEPHNLQITAAF

LAGLLSQHRDLAACQVSEVLLQRQARARSCLAHSREHFHSIPPAVPGETKSMHAMPGFIWLIIRSLYEMQ  
EEQLAQEA VRRLDIGHLKLTF CRVGP AECAALAFVLQHLQRPVALQLDYNSVGDVGVQEQLRPLCVGTALYLR  
DNNISDRGARTLVKCALRCEQLQKALFNNKLT DACACSMAKLLAHKQNFSLRVGNNHITAAGAEVLAQGLK  
SNTSLKFLGFWGNSVGDGKTQALAEVVADHQNLKWL SVLGN NIGSMGAEALALMLEKNKSLEELCLEENHICD  
EGVYSLAEG LKRNSTL KFLKLSNNGITYRGAEALLQALS RNAI LEVWLRGNTFSLEEIQTLSSRDARLLL\*  
>rs52365090\_ENSMUSP00000050538\_c.2493:G>A\_p.E832K  
ENSMUST00000054324.15|Nod2-201|ENSMUSG00000055994|+|chr8:g.89397085:G>A  
MCSQEEFQAQRSQVLVALLISGSLEGFESILDWLLSWDVL SREDYEGLSLPGQPLSHSARRLLD TVWNGVWGC  
QKLEAVQEAQANSHTFELYGSWDTHSLHPT RD LQSHRPAIVRRLYNHVEAMLELAREGGFLSQYEC EIRLP  
IFTSSQRARRLLDLAAVKANGLAAFL LQH VRELPA PLPLPYEGYSLCRSRCDRGFTLICLFCILAAECQKFIS  
KLRTMVL TQSRFLSTYD GSENL CLEDIY TENILELQTEVGTAGALQKSPAILGLEDLFDTHGHLNRDADTILV  
VGEAGSGKSTLLQRLHLLWATGRSFQEF LFI FPFSCRQLQCVAKPLSLR TLLFEHCCWPDVAQDDVFQFLLDH  
PDRVLLTFDGLDEFKFRFTDRERHCSPI DPTSVQ TLLFNLLQGNLLKNACKVLT SRPDAVSALLRKFV RTELQ  
LKG FSEEGIQLYLRKHHREP GVDRLIQ LIQATSALHGLCHLPVFSW MVSRCHRELL LQNRGFPTTSTDMYLL  
ILQHFL HASPPDSSPLGLGPGLLQSRLSTLLHLGHLALRGLAMSCYV FSAQQQLQAAQVDSDDISLGFLVRAQ  
SSVPGSKAPLEFLHITFQCFFAAFYLAVSADTSVASLKH L FSCGRLGSSLLGRLLPNLCIQGSRVKKGSEAA  
LQKAEPHNLQITAAFLAGLLSQHRDLAACQVSEVLLQRQARARSCLAHSREHFHSIPPAVPGETKSMHA  
MPGFIWLIIRSLYEMQEEQLAQEA VRRLDIGHLKLTF CRVGP AECAALAFVLQHLQRPVALQLDYNSVGDVGVQE  
QLRPLCVGTALYLRDNNISDRGARTLVKCALRCEQLQKALFNNKLT DACACSMAKLLAHKQNFSLRVGNN  
HITAAGAEVLAQGLKSN TSLKFLGFWGNSVGDGKTQALAEVVADHQNLKWL SVLGN NIGSMGAEALALMLEKN  
KSLEELCLEENHICDEGVYSLAEG LKRNSTL KFLKLSNNGITYRGAEALLQALS RNAI LEVWLRGNTFSLEE  
IQTLSSRDARLLL\*  
>rs46944186\_ENSMUSP00000113773\_c.2544:C>A\_p.L849M  
ENSMUST00000118370.8|Nod2-203|ENSMUSG00000055994|+|chr8:g.89397370:C>A  
MCSQEEFQAQRSQVLVALLISGSLEGFESILDWLLSWDVL SREDYEGLSLPGQPLSHSARRLLD TVWNGVWGC  
QKLEAVQEAQANSHTFELYGSWDTHSLHPT RD LQSHRPAIVRRLYNHVEAMLELAREGGFLSQYEC EIRLP  
IFTSSQRARRLLDLAAVKANGLAAFL LQH VRELPA PLPLPYEAAECQKFISKLRTMVL TQSRFLSTYD GSENL  
CLEDIY TENILELQTEVGTAGALQKSPAILGLEDLFDTHGHLNRDADTILVVGEAGSGKSTLLQRLHLLWATG  
RSFQEF LFI FPFSCRQLQCVAKPLSLR TLLFEHCCWPDVAQDDVFQFLLDHPDRVLLTFDGLDEFKFRFTDRE  
RHCSPI DPTSVQ TLLFNLLQGNLLKNACKVLT SRPDAVSALLRKFV RTELQ LKGFSEEGIQLYLRKHHREP G  
VDRLIQ LIQATSALHGLCHLPVFSW MVSRCHRELL LQNRGFPTTSTDMYLLILQHFL HASPPDSSPLGLGPG  
LLQSRLSTLLHLGHLALRGLAMSCYV FSAQQQLQAAQVDSDDISLGFLVRAQSSVPGSKAPLEFLHITFQCFFA  
AFYLAVSADTSVASLKH L FSCGRLGSSLLGRLLPNLCIQGSRVKKGSEAA LLQKAEPHNLQITAAFLAGLLSQ  
QHRDLAACQVSEVLLQRQARARSCLAHSREHFHSIPPAVPGETKSMHAMPGFIWLIIRSLYEMQEEQLAQEA  
AVRRLDIGHLKLTF CRVGP AECAALAFVLQHLQRPVALQLDYNSVGDVGVQEQLRPLCVGTALYLRDNNISDR  
GARTLVECALRCEQLQKALFNNKLT DACACSMAKLLAHKQNFSLMRVGN NHITAAGAEVLAQGLKSN TSLKF  
LGFWGNSVGDGKTQALAEVVADHQNLKWL SVLGN NIGSMGAEALALMLEKNKSLEELCLEENHICDEGVYSLA  
EGLKRNSTL KFLKLSNNGITYRGAEALLQALS RNAI LEVWLRGNTFSLEEIQTLSSRDARLLL\*  
>rs46944186\_ENSMUSP00000105262\_c.2565:C>A\_p.L856M  
ENSMUST00000109634.3|Nod2-202|ENSMUSG00000055994|+|chr8:g.89397370:C>A  
MRS SCCDMCSQEEFQAQRSQVLVALLISGSLEGFESILDWLLSWDVL SREDYEGLSLPGQPLSHSARRLLD TVW  
NKG VWCQKLEAVQEAQANSHTFELYGSWDTHSLHPT RD LQSHRPAIVRRLYNHVEAMLELAREGGFLSQYE  
CEEIRLP IFTSSQRARRLLDLAAVKANGLAAFL LQH VRELPA PLPLPYEAAECQKFISKLRTMVL TQSRFLST  
YD GSENL CLEDIY TENILELQTEVGTAGALQKSPAILGLEDLFDTHGHLNRDADTILVVGEAGSGKSTLLQRL  
HLLWATGRSFQEF LFI FPFSCRQLQCVAKPLSLR TLLFEHCCWPDVAQDDVFQFLLDHPDRVLLTFDGLDEFK  
FRFTDRERHCSPI DPTSVQ TLLFNLLQGNLLKNACKVLT SRPDAVSALLRKFV RTELQ LKGFSEEGIQLYLRK  
HHREP GVDRLIQ LIQATSALHGLCHLPVFSW MVSRCHRELL LQNRGFPTTSTDMYLLILQHFL HASPPDSS  
PLGLGPGLLQSRLSTLLHLGHLALRGLAMSCYV FSAQQQLQAAQVDSDDISLGFLVRAQSSVPGSKAPLEFLHI  
TFQCFFAAFYLAVSADTSVASLKH L FSCGRLGSSLLGRLLPNLCIQGSRVKKGSEAA LLQKAEPHNLQITAAFL  
LAGLLSQHRDLAACQVSEVLLQRQARARSCLAHSREHFHSIPPAVPGETKSMHAMPGFIWLIIRSLYEMQ  
EEQLAQEA VRRLDIGHLKLTF CRVGP AECAALAFVLQHLQRPVALQLDYNSVGDVGVQEQLRPLCVGTALYLR  
DNNISDRGARTLVECALRCEQLQKALFNNKLT DACACSMAKLLAHKQNFSLMRVGN NHITAAGAEVLAQGLK  
SNTSLKFLGFWGNSVGDGKTQALAEVVADHQNLKWL SVLGN NIGSMGAEALALMLEKNKSLEELCLEENHICD  
EGVYSLAEG LKRNSTL KFLKLSNNGITYRGAEALLQALS RNAI LEVWLRGNTFSLEEIQTLSSRDARLLL\*  
>rs46944186\_ENSMUSP00000050538\_c.2610:C>A\_p.L871M  
ENSMUST00000054324.15|Nod2-201|ENSMUSG00000055994|+|chr8:g.89397370:C>A  
MCSQEEFQAQRSQVLVALLISGSLEGFESILDWLLSWDVL SREDYEGLSLPGQPLSHSARRLLD TVWNGVWGC  
QKLEAVQEAQANSHTFELYGSWDTHSLHPT RD LQSHRPAIVRRLYNHVEAMLELAREGGFLSQYEC EIRLP

I FTSSQRARRLLDLAAVKANGLAAFLQHVRELPAPLPLPYEGYSLCRSRCDRGFTLICLFCILAECQKFIS  
KLRTMVL TQSRFLSTYDGS ENLCLEDIYTENILELQTEVGTAGALQKSPAILGLEDLFDTHGHLNRDADTILV  
VGEAGSGKSTLLQRLHLLWATGRSFQEFLLFI FPFSCRQLQCVAKPLSLR TLLFEHCCWPDVAQDDVFQFLLDH  
PDRVLLTFDGLDEFKFRFTDRERHCSPIDPTSVQ TLLFNLLQGNLLKNACKVLT SRPDAVSALLRKFV RTELQ  
LKG FSEEGIQLYLRKHHREPGVADRLIQ LIQATSALHGLCHLPVFSW MVSRCHRELLLQNRGFPTTSTDMYLL  
ILQHFL HASPPDSSPLGLGPGLLQSRLSTLLHLGHLALRGLAMSCYV FSAQQQLQAAQVDSDDISLGFLVRAQ  
SSVPGSKAPLEFLHITFQCFFAAFYLAVSADTSVASLKH L FSCGRLGSSLLGRLLPNLCIQGSRVKKGSEAAL  
LQKAEPHNLQITAAFLAGLLSQQHRDLLAACQVSE RVLLQRQARARSCLAHS LREHFHSIPP AVPGETKSMHA  
MPGFIW LIRSLYEMQEEQLAQEA VRRLDIGHLKLTFCRVGPAECAALAFV LQHLQRPVALQLDYN SVGDVGVE  
QLR PCLGVCTALYLRDNNISDRGARTLVECALRCEQLQK LALFN NKLTDACACSMAKLLAHKQNF L SMRVGNN  
HIT AAGAEVLAQGLKSN TSLKFLGFWGNSVGDKGTQALAEV VADHQNLK WLSLVGNNIGSMGAEALALMLEKN  
KSLEELCLEENHICDEGVYSLAEGLKRNSTL KFLKLSNNGITYRGAEALLQALS RN SAILEVWLRGNTFSLEE  
IQTLSRRDARLLL\*

>rs50374660\_ENSMUSP00000113773\_c.2563:A>T\_p.H855L

ENSMUST00000118370.8|Nod2-203|ENSMUSG00000055994|+|chr8:g.89399317:A>T  
MCSQEEFQAQRSQ L VALLISGSLEGFESILDWLLS WDVLSREDEGLSLPGQPLSHSARRLLDTVW NKGVWGC  
QKLEAVQEAQANSHTFELYGSWDTHSLHPT RD LQSHRPAIVRRLYNHVEAMLELAREGGF L SQYECEEIRLP  
I FTSSQRARRLLDLAAVKANGLAAFLQHVRELPAPLPLPYEAAECQKFISKLRTMVL TQSRFLSTYDGS ENL  
CLEDIYTENILELQTEVGTAGALQKSPAILGLEDLFDTHGHLNRDADTILV VGEAGSGKSTLLQRLHLLWATG  
RSFQEFLLFI FPFSCRQLQCVAKPLSLR TLLFEHCCWPDVAQDDVFQFLLDH PDRVLLTFDGLDEFKFRFTDRE  
RHCSPI DPTSVQ TLLFNLLQGNLLKNACKVLT SRPDAVSALLRKFV RTELQ LKG FSEEGIQLYLRKHHREPGV  
ADRLIQ LIQATSALHGLCHLPVFSW MVSRCHRELLLQNRGFPTTSTDMYLLILQHFL HASPPDSSPLGLGPG  
LLQSRLSTLLHLGHLALRGLAMSCYV FSAQQQLQAAQVDSDDISLGFLVRAQSSVPGSKAPLEFLHITFQCFFA  
AFYLAVSADTSVASLKH L FSCGRLGSSLLGRLLPNLCIQGSRVKKGSEAALLQKAEPHNLQITAAFLAGLLSQ  
QHRDLLAACQVSE RVLLQRQARARSCLAHS LREHFHSIPP AVPGETKSMHAMPGFIW LIRSLYEMQEEQLAQE  
AVRRLDIGHLKLTFCRVGPAECAALAFV LQHLQRPVALQLDYN SVGDVGVEQLR PCLGVCTALYLRDNNISDR  
GARTLVECALRCEQLQK LALFN NKLTDACACSMAKLLAHKQNF L SLRVGNNLIT AAGAEVLAQGLKSN TSLKFL  
GFWGNSVGDKGTQALAEV VADHQNLK WLSLVGNNIGSMGAEALALMLEKNKSLEELCLEENHICDEGVYSLA  
EGLKRNSTL KFLKLSNNGITYRGAEALLQALS RN SAILEVWLRGNTFSLEE IQTLSRRDARLLL\*

>rs50374660\_ENSMUSP00000105262\_c.2584:A>T\_p.H862L

ENSMUST00000109634.3|Nod2-202|ENSMUSG00000055994|+|chr8:g.89399317:A>T  
MRS SCCDMCSQEEFQAQRSQ L VALLISGSLEGFESILDWLLS WDVLSREDEGLSLPGQPLSHSARRLLDTVW  
NKGVWGCQKLEAVQEAQANSHTFELYGSWDTHSLHPT RD LQSHRPAIVRRLYNHVEAMLELAREGGF L SQYE  
CEEIRLP I FTSSQRARRLLDLAAVKANGLAAFLQHVRELPAPLPLPYEAAECQKFISKLRTMVL TQSRFLST  
YDGS ENLCLEDIYTENILELQTEVGTAGALQKSPAILGLEDLFDTHGHLNRDADTILV VGEAGSGKSTLLQRL  
HLLWATGRSFQEFLLFI FPFSCRQLQCVAKPLSLR TLLFEHCCWPDVAQDDVFQFLLDH PDRVLLTFDGLDEFK  
FRFTDRERHCSPIDPTSVQ TLLFNLLQGNLLKNACKVLT SRPDAVSALLRKFV RTELQ LKG FSEEGIQLYLRK  
HHREPGVADRLIQ LIQATSALHGLCHLPVFSW MVSRCHRELLLQNRGFPTTSTDMYLLILQHFL HASPPDSS  
PLGLGPGLLQSRLSTLLHLGHLALRGLAMSCYV FSAQQQLQAAQVDSDDISLGFLVRAQSSVPGSKAPLEFLHI  
TFQCFFAAFYLAVSADTSVASLKH L FSCGRLGSSLLGRLLPNLCIQGSRVKKGSEAALLQKAEPHNLQITAAFL  
LAGLLSQQHRDLLAACQVSE RVLLQRQARARSCLAHS LREHFHSIPP AVPGETKSMHAMPGFIW LIRSLYEMQ  
EEQLAQEA VRRLDIGHLKLTFCRVGPAECAALAFV LQHLQRPVALQLDYN SVGDVGVEQLR PCLGVCTALYLR  
DNNISDRGARTLVECALRCEQLQK LALFN NKLTDACACSMAKLLAHKQNF L SLRVGNNLIT AAGAEVLAQGLK  
SNTSLKFLGFWGNSVGDKGTQALAEV VADHQNLK WLSLVGNNIGSMGAEALALMLEKNKSLEELCLEENHICD  
EGVYSLAEGLKRNSTL KFLKLSNNGITYRGAEALLQALS RN SAILEVWLRGNTFSLEE IQTLSRRDARLLL\*

>rs50374660\_ENSMUSP00000050538\_c.2629:A>T\_p.H877L

ENSMUST00000054324.15|Nod2-201|ENSMUSG00000055994|+|chr8:g.89399317:A>T  
MCSQEEFQAQRSQ L VALLISGSLEGFESILDWLLS WDVLSREDEGLSLPGQPLSHSARRLLDTVW NKGVWGC  
QKLEAVQEAQANSHTFELYGSWDTHSLHPT RD LQSHRPAIVRRLYNHVEAMLELAREGGF L SQYECEEIRLP  
I FTSSQRARRLLDLAAVKANGLAAFLQHVRELPAPLPLPYEGYSLCRSRCDRGFTLICLFCILAECQKFIS  
KLRTMVL TQSRFLSTYDGS ENLCLEDIYTENILELQTEVGTAGALQKSPAILGLEDLFDTHGHLNRDADTILV  
VGEAGSGKSTLLQRLHLLWATGRSFQEFLLFI FPFSCRQLQCVAKPLSLR TLLFEHCCWPDVAQDDVFQFLLDH  
PDRVLLTFDGLDEFKFRFTDRERHCSPIDPTSVQ TLLFNLLQGNLLKNACKVLT SRPDAVSALLRKFV RTELQ  
LKG FSEEGIQLYLRKHHREPGVADRLIQ LIQATSALHGLCHLPVFSW MVSRCHRELLLQNRGFPTTSTDMYLL  
ILQHFL HASPPDSSPLGLGPGLLQSRLSTLLHLGHLALRGLAMSCYV FSAQQQLQAAQVDSDDISLGFLVRAQ  
SSVPGSKAPLEFLHITFQCFFAAFYLAVSADTSVASLKH L FSCGRLGSSLLGRLLPNLCIQGSRVKKGSEAAL  
LQKAEPHNLQITAAFLAGLLSQQHRDLLAACQVSE RVLLQRQARARSCLAHS LREHFHSIPP AVPGETKSMHA  
MPGFIW LIRSLYEMQEEQLAQEA VRRLDIGHLKLTFCRVGPAECAALAFV LQHLQRPVALQLDYN SVGDVGVE

QLRPCLGVCTALYLRDNNISDRGARTLVECALRCEQLQKALFNNKLTDACACSMAKLLAHKQNFSLRVGNN  
LITAAGAEVLAQGLKSNTSLKFLGFWGNSVGDGKTQALAEVVADHQNLKWLVLVGNNGISMGAEALALMLEKN  
KSLEELCLEENHICDEGVYSLAEGLRNSTLKFLLKLSNNGITYRGAEALLQALSNSAILEVWLRGNTFSLEE  
IQTLSRRDARLLL\*

>rs33277582\_ENSMUSP00000113773\_c.2770:T>C\_p.L924P  
ENSMUST00000118370.8|Nod2-203|ENSMUSG00000055994|+|chr8:g.89402128:T>C  
MCSQEEFQAQRSQVALLISGSLEGFESILDWLLSWDVLRSREDEGLSLPGQPLSHSARRLLDVTWVWGC  
QKLEAVQEAQANSHTFELYGSWDTHSLHPTDRLQSHRPAIVRRLYNHVEAMLELAREGGFLSQYECIEIRLP  
IFTSSQRARRLLDLAAVKANGLAAFLQHVRELPAPLPLPYEAAECQKFI SKLRMTVLTQSRFLSTYDGENL  
CLEDIYTENILELQTEVGTAGALQKSPAILGLEDLFDTHGHLNRDADTILVVGEAGSGKSTLLQRLHLLWATG  
RSFQEFLLIFPFSCRQLQCVAKPLSLRLLFEHCCWPDVAQDDVFQFLLDHPDRVLLTFDGLDEFKFRFTDRE  
RHCSPIIDPTSVQTLFNLQGNLLKNACKVLTSRPDVAVALLRKFVRETELQKGFSEEGIQLYLRKHHREPGV  
ADRLIQLIQATSALHGLCHLPVFSWVSRCHRELLQNRGFPPTSTDMYLLILQHFLHASPDDSSPLGLGPG  
LLQSRLLSTLLHLGLALRGLAMSCYVFSQAQQLQAAQVDSDDISLGFLVRAQSSVPGSKAPLEFLHITFQCFFA  
AFYLAVSADTSVASLKHFLSCGRLGSSLLGRLLPNLCIQGSRVKKGSEAALLQKAEPHNLQITAAFLAGLLSQ  
QHRDLAACQVSEVLLQRQARARSCLAHSREHFHSIPPAVPGETKSMHAMPGFIVLIRSLYEMQEEQLAQE  
AVRRLDIGHLKLTFCRVGPAECAALAFVLQHLQRPVALQLDYNSVGDVGEVQLRPLCGVCTALYLRDNNISDR  
GARTLVECALRCEQLQKALFNNKLTDACACSMAKLLAHKQNFSLRVGNNHITAAGAEVLAQGLKSNTSLKFL  
GFWGNSVGDGKTQALAEVVADHQNLKWLVLVGNNGISMGAEALALMPEKNKSLEELCLEENHICDEGVYSLA  
EGLKRNSTLKFLLKLSNNGITYRGAEALLQALSNSAILEVWLRGNTFSLEEIQTLSSRDARLLL\*

>rs33277582\_ENSMUSP00000105262\_c.2791:T>C\_p.L931P  
ENSMUST00000109634.3|Nod2-202|ENSMUSG00000055994|+|chr8:g.89402128:T>C  
MRSSCDMCSQEEFQAQRSQVALLISGSLEGFESILDWLLSWDVLRSREDEGLSLPGQPLSHSARRLLDVTW  
NKGWGCQKLEAVQEAQANSHTFELYGSWDTHSLHPTDRLQSHRPAIVRRLYNHVEAMLELAREGGFLSQYE  
CEEIRLPIFTSSQRARRLLDLAAVKANGLAAFLQHVRELPAPLPLPYEAAECQKFI SKLRMTVLTQSRFLST  
YDGENLCLEDIYTENILELQTEVGTAGALQKSPAILGLEDLFDTHGHLNRDADTILVVGEAGSGKSTLLQRL  
HLLWATGRSFEFLFI PFPCRQLQCVAKPLSLRLLFEHCCWPDVAQDDVFQFLLDHPDRVLLTFDGLDEFK  
FRFTDRERHCSPIIDPTSVQTLFNLQGNLLKNACKVLTSRPDVAVALLRKFVRETELQKGFSEEGIQLYLRK  
HHREPGVADRLIQLIQATSALHGLCHLPVFSWVSRCHRELLQNRGFPPTSTDMYLLILQHFLHASPDDSS  
PLGLGPGLLQSRLLSTLLHLGLALRGLAMSCYVFSQAQQLQAAQVDSDDISLGFLVRAQSSVPGSKAPLEFLH  
ITFQCFFAAFYLAVSADTSVASLKHFLSCGRLGSSLLGRLLPNLCIQGSRVKKGSEAALLQKAEPHNLQITAA  
FLAGLLSQQHRDLAACQVSEVLLQRQARARSCLAHSREHFHSIPPAVPGETKSMHAMPGFIVLIRSLYEMQ  
EEQLAQEA VRRLDIGHLKLTFCRVGPAECAALAFVLQHLQRPVALQLDYNSVGDVGEVQLRPLCGVCTALYLR  
DNNISDRGARTLVECALRCEQLQKALFNNKLTDACACSMAKLLAHKQNFSLRVGNNHITAAGAEVLAQGLK  
SNTSLKFLGFWGNSVGDGKTQALAEVVADHQNLKWLVLVGNNGISMGAEALALMPEKNKSLEELCLEENHICD  
EGYSLAEGLRNSTLKFLLKLSNNGITYRGAEALLQALSNSAILEVWLRGNTFSLEEIQTLSSRDARLLL\*

>rs33277582\_ENSMUSP00000050538\_c.2836:T>C\_p.L946P  
ENSMUST00000054324.15|Nod2-201|ENSMUSG00000055994|+|chr8:g.89402128:T>C  
MCSQEEFQAQRSQVALLISGSLEGFESILDWLLSWDVLRSREDEGLSLPGQPLSHSARRLLDVTWVWGC  
QKLEAVQEAQANSHTFELYGSWDTHSLHPTDRLQSHRPAIVRRLYNHVEAMLELAREGGFLSQYECIEIRLP  
IFTSSQRARRLLDLAAVKANGLAAFLQHVRELPAPLPLPYEGYSLCRSRRCDRGFTLICFLCILAECQKFI S  
KLRTMTVLTQSRFLSTYDGENLCLEDIYTENILELQTEVGTAGALQKSPAILGLEDLFDTHGHLNRDADTILV  
VGEAGSGKSTLLQRLHLLWATGRSFEFLFI PFPCRQLQCVAKPLSLRLLFEHCCWPDVAQDDVFQFLLDH  
PDRVLLTFDGLDEFKFRFTDRERHCSPIIDPTSVQTLFNLQGNLLKNACKVLTSRPDVAVALLRKFVRETELQ  
LKGFESEGIQLYLRKHHREPGVADRLIQLIQATSALHGLCHLPVFSWVSRCHRELLQNRGFPPTSTDMYLL  
ILQHFLHASPDDSSPLGLGPGLLQSRLLSTLLHLGLALRGLAMSCYVFSQAQQLQAAQVDSDDISLGFLVRAQ  
SSVPGSKAPLEFLHITFQCFFAAFYLAVSADTSVASLKHFLSCGRLGSSLLGRLLPNLCIQGSRVKKGSEAAL  
LQKAEPHNLQITAAFLAGLLSQQHRDLAACQVSEVLLQRQARARSCLAHSREHFHSIPPAVPGETKSMHA  
MPGFIVLIRSLYEMQEEQLAQEA VRRLDIGHLKLTFCRVGPAECAALAFVLQHLQRPVALQLDYNSVGDVGE  
QLRPCLGVCTALYLRDNNISDRGARTLVECALRCEQLQKALFNNKLTDACACSMAKLLAHKQNFSLRVGNN  
HITAAGAEVLAQGLKSNTSLKFLGFWGNSVGDGKTQALAEVVADHQNLKWLVLVGNNGISMGAEALALMPEKN  
KSLEELCLEENHICDEGVYSLAEGLRNSTLKFLLKLSNNGITYRGAEALLQALSNSAILEVWLRGNTFSLEE  
IQTLSRRDARLLL\*

>rs229254609\_ENSMUSP00000148037\_c.1710:ACT>A\_p.T571del-fs  
ENSMUST00000211554.2|CylD-210|ENSMUSG00000036712|+|chr8:g.89458341:ACT>A  
MSSGLWSQEKVTSPLYWEERIFYLLQECVTDKQTKLLKVPKGSIGQYIQDRSVGHSRVPSTKGGKNQIGLK  
ILEQPFAVLVFDKDVVEINEKFTELLAITNCEERLSLFRNRLRLSKGLQVDVGSVPKVQLRSGEKFPVGV  
RFRGPLLAERTVSGIFFGVELLEEGRGQFTDGVYQKQLFQCDEDCGVFVALDKLELIEDDDNGLESDFAGP

GDTMQVEPPPLEINSRVSLKVGESTESGTVIFCDVLPKGESLGYFVGVMDNPIGNWDGRFDGVQLCSFASVE  
STILLHINDIIPDSVTQERRPPKLAFMSRGGVGDGKSSSHNPKPKVTGSTSDPGSRNRSELYFTLNSSVDSQQS  
KSKNPWYIDEVAEDPAKSLTESSDFGHSSPPPQPPSMNSLSENRFHSLPFSLTKMPNTNGSMAHSPLSLSV  
QSVMGELNSTPVQESPLPISSGNAHGLEVGSLAEVKENPPFYGVIRWIGQPPGLSDVLAGLELEDEDECAGCTD  
GTFRGTRYFTCALKKALFVKLKSCRPDSTRFASLQPVSNQIERCNSLAFGGYLSEVVEENTT  
>rs229254609\_ENSMUSP00000147654\_c.1719:ACT>A\_p.T574del-fs  
ENSMUST00000209532.2|Cyl-d-205|ENSMUSG00000036712|+|chr8:g.89458341:ACT>A  
MSSGLWSQEKVTSFYWEERIFYLLQECVTDKQTKLLKVPKGSIGQYIQDRSVGHSRVPSTKGKKNQIGLK  
ILEQPHAVLFVDEKDVVEINEKFTELLLAITNCEERLSLFRNRLRLSKGLQVDVGVSPVKVQLRSGEKFPFPGVV  
RFRGPLLAERTVSGIFFGVELLEEGRGQGFDTGVYQKQLFQCDEDCGVFVALDKLELIEDDDNGLESDFAGP  
GDTMQVEPPPLEINSRVSLKVGESTESGTVIFCDVLPKGESLGYFVGVMDNPIGNWDGRFDGVQLCSFASVE  
STILLHINDIIPALSDSVTQERRPPKLAFMSRGGVGDGKSSSHNPKPKVTGSTSDPGSRNRSELYFTLNSSVDS  
QQSKSKNPWYIDEVAEDPAKSLTESSDFGHSSPPPQPPSMNSLSENRFHSLPFSLTKMPNTNGSMAHSPLS  
LSVQSVMGELNSTPVQESPLPISSGNAHGLEVGSLAEVKENPPFYGVIRWIGQPPGLSDVLAGLELEDEDECAG  
CTDGTFRGTRYFTCALKKALFVKLKSCRPDSTRFASLQPVSNQIERCNSLAFGGYLSEVVEENTT  
>rs229254609\_ENSMUSP00000147426\_c.1710:ACT>A\_p.T571del-fs  
ENSMUST00000209559.2|Cyl-d-206|ENSMUSG00000036712|+|chr8:g.89458341:ACT>A  
MSSGLWSQEKVTSFYWEERIFYLLQECVTDKQTKLLKVPKGSIGQYIQDRSVGHSRVPSTKGKKNQIGLK  
ILEQPHAVLFVDEKDVVEINEKFTELLLAITNCEERLSLFRNRLRLSKGLQVDVGVSPVKVQLRSGEKFPFPGVV  
RFRGPLLAERTVSGIFFGVELLEEGRGQGFDTGVYQKQLFQCDEDCGVFVALDKLELIEDDDNGLESDFAGP  
GDTMQVEPPPLEINSRVSLKVGESTESGTVIFCDVLPKGESLGYFVGVMDNPIGNWDGRFDGVQLCSFASVE  
STILLHINDIIPDSVTQERRPPKLAFMSRGGVGDGKSSSHNPKPKVTGSTSDPGSRNRSELYFTLNSSVDSQQS  
KSKNPWYIDEVAEDPAKSLTESSDFGHSSPPPQPPSMNSLSENRFHSLPFSLTKMPNTNGSMAHSPLSLSV  
QSVMGELNSTPVQESPLPISSGNAHGLEVGSLAEVKENPPFYGVIRWIGQPPGLSDVLAGLELEDEDECAGCTD  
GTFRGTRYFTCALKKALFVKLKSCRPDSTRFASLQPVSNQIERCNSLAFGGYLSEVVEENTT  
>rs229254609\_ENSMUSP00000147904\_c.1164:ACT>A\_p.T389del-fs  
ENSMUST00000209206.2|Cyl-d-204|ENSMUSG00000036712|+|chr8:g.89458341:ACT>A  
MSSGLWSQEKVTSFYWEERIFYLLQECVTDKQTKLLKVPKGSIGQYIQDRSVGHSRVPSTKGKKNQIGLK  
ILEQPHAVLFVDEKDVVEINEKFTELLLAITNCEERLSLFRNRLRLSKGLQVDVGVSPVKVQLRSGEKFPFPGVV  
RFRGPLLAERTVSGIFFGVELLEEGRGQGFDTGVYQKQLFQCDEDCGVFVALDKLELIEDDDNGLESDFAGP  
GDTMQVEPPPLEINSRVSLKVGESTESGTVIFCDVLPKGESLGYFVGVMDNPIGNWDGRFDGVQLCSFASVE  
STILLHINDIIPDSVTQERRPPKLAFMSRGGVGDGKSSSHNPKPKVTGSTSDPGSRNRSELYFTLNSSVDSQQS  
KSKNPWYIDEVAEDPAKSLTESSDFGHSSPPPQPPSMNSLSENRFHSLPFSLTKMPNTNGSMAHSPLSLSV  
QSVMGELNSTPVQESPLPISSGNAHGLEVGSLAEVKENPPFYGVIRWIGQPPGLSDVLAGLELEDEDECAGCTD  
GTFRGTRYFTCALKKALFVKLKSCRPDSTRFASLQPVSNQIERCNSLAFGGYLSEVVEENTT  
>rs229254609\_ENSMUSP00000105254\_c.1710:ACT>A\_p.T571del-fs  
ENSMUST00000109626.4|Cyl-d-203|ENSMUSG00000036712|+|chr8:g.89458341:ACT>A  
MSSGLWSQEKVTSFYWEERIFYLLQECVTDKQTKLLKVPKGSIGQYIQDRSVGHSRVPSTKGKKNQIGLK  
ILEQPHAVLFVDEKDVVEINEKFTELLLAITNCEERLSLFRNRLRLSKGLQVDVGVSPVKVQLRSGEKFPFPGVV  
RFRGPLLAERTVSGIFFGVELLEEGRGQGFDTGVYQKQLFQCDEDCGVFVALDKLELIEDDDNGLESDFAGP  
GDTMQVEPPPLEINSRVSLKVGESTESGTVIFCDVLPKGESLGYFVGVMDNPIGNWDGRFDGVQLCSFASVE  
STILLHINDIIPDSVTQERRPPKLAFMSRGGVGDGKSSSHNPKPKVTGSTSDPGSRNRSELYFTLNSSVDSQQS  
KSKNPWYIDEVAEDPAKSLTESSDFGHSSPPPQPPSMNSLSENRFHSLPFSLTKMPNTNGSMAHSPLSLSV  
QSVMGELNSTPVQESPLPISSGNAHGLEVGSLAEVKENPPFYGVIRWIGQPPGLSDVLAGLELEDEDECAGCTD  
GTFRGTRYFTCALKKALFVKLKSCRPDSTRFASLQPVSNQIERCNSLAFGGYLSEVVEENTT  
>rs229254609\_ENSMUSP00000096119\_c.1719:ACT>A\_p.T574del-fs  
ENSMUST00000098519.11|Cyl-d-202|ENSMUSG00000036712|+|chr8:g.89458341:ACT>A  
MSSGLWSQEKVTSFYWEERIFYLLQECVTDKQTKLLKVPKGSIGQYIQDRSVGHSRVPSTKGKKNQIGLK  
ILEQPHAVLFVDEKDVVEINEKFTELLLAITNCEERLSLFRNRLRLSKGLQVDVGVSPVKVQLRSGEKFPFPGVV  
RFRGPLLAERTVSGIFFGVELLEEGRGQGFDTGVYQKQLFQCDEDCGVFVALDKLELIEDDDNGLESDFAGP  
GDTMQVEPPPLEINSRVSLKVGESTESGTVIFCDVLPKGESLGYFVGVMDNPIGNWDGRFDGVQLCSFASVE  
STILLHINDIIPALSDSVTQERRPPKLAFMSRGGVGDGKSSSHNPKPKVTGSTSDPGSRNRSELYFTLNSSVDS  
QQSKSKNPWYIDEVAEDPAKSLTESSDFGHSSPPPQPPSMNSLSENRFHSLPFSLTKMPNTNGSMAHSPLS  
LSVQSVMGELNSTPVQESPLPISSGNAHGLEVGSLAEVKENPPFYGVIRWIGQPPGLSDVLAGLELEDEDECAG  
CTDGTFRGTRYFTCALKKALFVKLKSCRPDSTRFASLQPVSNQIERCNSLAFGGYLSEVVEENTT  
>rs229254609\_ENSMUSP00000039834\_c.1719:ACT>A\_p.T574del-fs  
ENSMUST00000043526.15|Cyl-d-201|ENSMUSG00000036712|+|chr8:g.89458341:ACT>A  
MSSGLWSQEKVTSFYWEERIFYLLQECVTDKQTKLLKVPKGSIGQYIQDRSVGHSRVPSTKGKKNQIGLK  
ILEQPHAVLFVDEKDVVEINEKFTELLLAITNCEERLSLFRNRLRLSKGLQVDVGVSPVKVQLRSGEKFPFPGVV  
RFRGPLLAERTVSGIFFGVELLEEGRGQGFDTGVYQKQLFQCDEDCGVFVALDKLELIEDDDNGLESDFAGP



GDTMQVEPPPLEINSRVSLKVGESTESGTVIFCDVLPKGESLGYFVGVMDNPIGNWDGRFDGVQLCSFASVE  
STILLHINDIIPAVSDSVTQERRPPKLAFMSSRGVGDGKSSSHNPKPKVTGSTSDPGSRNRSELFYTLNGSSVDS  
QQSKSKNPWYIDEVAEDPAKSLTEMSSDFGHSSPPPQPPSMNSLSENRFHSLPFSLTKMPNTNGSMAHSPLS  
LSVQSVMGELNSTPVQESPLPISSGNAHGLEVGSLAEVKENPPFYGVIRWIGQPPGLSDVLAGLELEDECAG  
CTDGTFRGTRYFTCALKKALFVKLSCRPDSPFASLQPVSNQIERCNSLAFGGYLSEVVEENTT  
>rs32562371\_ENSMUSP00000148037\_c.2737:A>G\_p.K913R  
ENSMUST00000211554.2|Cyl-210|ENSMUSG00000036712|+|chr8:g.89473520:A>G  
MSSGLWSQEKVTSPIWEERIFYLLQLQECVTDKQTKLLKVPKGSIGQYIQDRSVGHSRVPSTKGKKNQIGLK  
ILEQPHAVLFDVDEKDVVEINEKFTELLLAITNCEERLSLFRNRLRLSKGLQVDVGVSPVKVQLRSGEKFPFVGV  
RFRGPLLAERTVSGIFFGVELLEEGRGQGFTDGVYQKQLFQCDEDCGVFVALDKLELIEDDDNGLESDFAGP  
GDTMQVEPPPLEINSRVSLKVGESTESGTVIFCDVLPKGESLGYFVGVMDNPIGNWDGRFDGVQLCSFASVE  
STILLHINDIIPDSVTQERRPPKLAFMSSRGVGDGKSSSHNPKPKVTGSTSDPGSRNRSELFYTLNGSSVDSQQS  
KSKNPWYIDEVAEDPAKSLTEMSSDFGHSSPPPQPPSMNSLSENRFHSLPFSLTKMPNTNGSMAHSPLSLSV  
QSVMGELNSTPVQESPLPISSGNAHGLEVGSLAEVKENPPFYGVIRWIGQPPGLSDVLAGLELEDECAGCTD  
GTFRGRTRYFTCALKKALFVKLSCRPDSPFASLQPVSNQIERCNSLAFGGYLSEVVEENTPPKMEKEGLEIMI  
GKKKGIQGHYNSCYLDSTLFCLEAFSSALDVTLLRPKEKNDIEYYSETQELLRTEIVNPLRIYGYVCATKIMK  
LRKILEKVEAASGFTSEEKDPPEEFLNLFHDILRVEPLLKIRSAGQKQVDCNFYQIFMEKNEKVGVPYTIQQLL  
EWSFINSNLKFAEAPSCLIIQMPRFGKDFKLFKKIFPSLELNI TDLEDTPRQCRI CGGLAMYECRECYDDPD  
ISAGKIKQFCKTCSTQVHLHPRRLNHSYHPVSLPKDLPDWDWRHGCIPCQKMEFVALCIEETSHYVAFVKYK  
DDSAWLFDFSMADRDGGQNGFNIPQVTPCPEVGEYLRMSLEDLHSLDSRRIQGCARRLLCDAYMCMYQSPTMS  
LYK\*

>rs32562371\_ENSMUSP00000147654\_c.2746:A>G\_p.K916R  
ENSMUST00000209532.2|Cyl-205|ENSMUSG00000036712|+|chr8:g.89473520:A>G  
MSSGLWSQEKVTSPIWEERIFYLLQLQECVTDKQTKLLKVPKGSIGQYIQDRSVGHSRVPSTKGKKNQIGLK  
ILEQPHAVLFDVDEKDVVEINEKFTELLLAITNCEERLSLFRNRLRLSKGLQVDVGVSPVKVQLRSGEKFPFVGV  
RFRGPLLAERTVSGIFFGVELLEEGRGQGFTDGVYQKQLFQCDEDCGVFVALDKLELIEDDDNGLESDFAGP  
GDTMQVEPPPLEINSRVSLKVGESTESGTVIFCDVLPKGESLGYFVGVMDNPIGNWDGRFDGVQLCSFASVE  
STILLHINDIIPALSDSVTQERRPPKLAFMSSRGVGDGKSSSHNPKPKVTGSTSDPGSRNRSELFYTLNGSSVDS  
QQSKSKNPWYIDEVAEDPAKSLTEMSSDFGHSSPPPQPPSMNSLSENRFHSLPFSLTKMPNTNGSMAHSPLS  
LSVQSVMGELNSTPVQESPLPISSGNAHGLEVGSLAEVKENPPFYGVIRWIGQPPGLSDVLAGLELEDECAG  
CTDGTFRGTRYFTCALKKALFVKLSCRPDSPFASLQPVSNQIERCNSLAFGGYLSEVVEENTPPKMEKEGLE  
IMIGKKKGIQGHYNSCYLDSTLFCLEAFSSALDVTLLRPKEKNDIEYYSETQELLRTEIVNPLRIYGYVCATK  
IMKLRKILEKVEAASGFTSEEKDPPEEFLNLFHDILRVEPLLKIRSAGQKQVDCNFYQIFMEKNEKVGVPYTIQ  
QLEWSFINSNLKFAEAPSCLIIQMPRFGKDFKLFKKIFPSLELNI TDLEDTPRQCRI CGGLAMYECRECYD  
DPDI SAGKIKQFCKTCSTQVHLHPRRLNHSYHPVSLPKDLPDWDWRHGCIPCQKMEFVALCIEETSHYVAFVK  
YKDDSAWLFDFSMADRDGGQNGFNIPQVTPCPEVGEYLRMSLEDLHSLDSRRIQGCARRLLCDAYMCMYQSP  
TMSLYK\*

>rs32562371\_ENSMUSP00000147426\_c.2737:A>G\_p.K913R  
ENSMUST00000209559.2|Cyl-206|ENSMUSG00000036712|+|chr8:g.89473520:A>G  
MSSGLWSQEKVTSPIWEERIFYLLQLQECVTDKQTKLLKVPKGSIGQYIQDRSVGHSRVPSTKGKKNQIGLK  
ILEQPHAVLFDVDEKDVVEINEKFTELLLAITNCEERLSLFRNRLRLSKGLQVDVGVSPVKVQLRSGEKFPFVGV  
RFRGPLLAERTVSGIFFGVELLEEGRGQGFTDGVYQKQLFQCDEDCGVFVALDKLELIEDDDNGLESDFAGP  
GDTMQVEPPPLEINSRVSLKVGESTESGTVIFCDVLPKGESLGYFVGVMDNPIGNWDGRFDGVQLCSFASVE  
STILLHINDIIPDSVTQERRPPKLAFMSSRGVGDGKSSSHNPKPKVTGSTSDPGSRNRSELFYTLNGSSVDSQQS  
KSKNPWYIDEVAEDPAKSLTEMSSDFGHSSPPPQPPSMNSLSENRFHSLPFSLTKMPNTNGSMAHSPLSLSV  
QSVMGELNSTPVQESPLPISSGNAHGLEVGSLAEVKENPPFYGVIRWIGQPPGLSDVLAGLELEDECAGCTD  
GTFRGRTRYFTCALKKALFVKLSCRPDSPFASLQPVSNQIERCNSLAFGGYLSEVVEENTPPKMEKEGLEIMI  
GKKKGIQGHYNSCYLDSTLFCLEAFSSALDVTLLRPKEKNDIEYYSETQELLRTEIVNPLRIYGYVCATKIMK  
LRKILEKVEAASGFTSEEKDPPEEFLNLFHDILRVEPLLKIRSAGQKQVDCNFYQIFMEKNEKVGVPYTIQQLL  
EWSFINSNLKFAEAPSCLIIQMPRFGKDFKLFKKIFPSLELNI TDLEDTPRQCRI CGGLAMYECRECYDDPD  
ISAGKIKQFCKTCSTQVHLHPRRLNHSYHPVSLPKDLPDWDWRHGCIPCQKMEFVALCIEETSHYVAFVKYK  
DDSAWLFDFSMADRDGGQNGFNIPQVTPCPEVGEYLRMSLEDLHSLDSRRIQGCARRLLCDAYMCMYQSPTMS  
LYK\*

>rs32562371\_ENSMUSP00000147904\_c.2191:A>G\_p.K731R  
ENSMUST00000209206.2|Cyl-204|ENSMUSG00000036712|+|chr8:g.89473520:A>G  
MSSGLWSQEKVTSPIWEERIFYLLQLQECVTDKQTKLLKVPKGSIGQYIQDRSVGHSRVPSTKGKKNQIGLK  
ILEQPHAVLFDVDEKDVVEINEKFTELLLAITNCEERLSLFRNRLRLSKGLQVDVGVSPVKVQLRSGEKFPFVGV  
RFRGPLLAERTVSGIFFGVELLEEGRGQGFTDGVYQKQLFQCDEDCGVFVALDKLELIEDDDNGLESDFAGP

GDTMQVEPPPLEINSRVSLKVGESTESGTVIFCDVLPKGESLGYFVGVMDNPIGNWDGRFDGVQLCSFASVE  
STILLHINDIIPDSVTQERRPPKLAFMSRGGVGDGKSSSHNKPKVTGSTDGSRNRSELYFTLNGSSVDSQQS  
KSKNPWYIDEAFGGYLSEVVEENTPPKMEKEGLEIMIGKKKGIQGHYNSCYLDSTLFLCLFAFSSALDVTLLRP  
KEKNDIEYYSETQELLRTEIVNPLRIYGYVCATKIMKLRKILEKVEAASGFTSEEKDPPEEFLNILFHDILRVE  
PLLKIRSAGQKVQDCNFYQIFMEKNEKVGVP TIQQLLEWSFINSNLKFAEAPSCLIIQMPRFGKDFKLFKKIF  
PSLELNITDLEDTPRQCRICGGLAMYECRECYDDPDISAGKIKQFCKTCSTQVHLHPRRLNHSYHPVSLPKD  
LPDWDWRHGCIPCQKMEFAVLCIETSHYVAVFKYKGDSDAWLFFDSMADRGGQNGFNIPQVTPCEVGEYLR  
MSLEDLHSLDSRRIQGCARRLLCDAYMCMYQSPTMSLYK\*

>rs32562371\_ENSMUSP00000105254\_c.2737:A>G\_p.K913R

ENSMUST00000109626.4|Cylid-203|ENSMUSG00000036712|+|chr8:g.89473520:A>G  
MSSGLWSQEKVTSPLYWEERIFYLLLQECVTDKQTKQLLKVPKGSIGQYIQDRSVGHSRVPSTKGKKNQIGLK  
ILEQPHAVLFLVDEKDVVEINEKFTELLALAITNCEERLSLFRNRLRLSKGLQVDVGSVPVKVQLRSGEKFP  
RFRGPLLAERTVSGIFFGVELLEEGRGQGFTDGVYQKQLFQCDEDCGVFVALDKLELIEDDDNGLESDFAGP  
GDTMQVEPPPLEINSRVSLKVGESTESGTVIFCDVLPKGESLGYFVGVMDNPIGNWDGRFDGVQLCSFASVE  
STILLHINDIIPDSVTQERRPPKLAFMSRGGVGDGKSSSHNKPKVTGSTDGSRNRSELYFTLNGSSVDSQQS  
KSKNPWYIDEVAEDPAKSLTEMSSDFGHSSPPPQPPSMNSLSENRFHSLPFLTKMPNTNGSMAHSPLSLSV  
QSVMGELNSTPVQESPLPISSGNAHGLEVGSLAEVKNPPFYGVIRWIGQPPGLSDVLAGLELEDECAGCTD  
GTRGTRYFTCALKKALFVKLSCRPDSTRFASLQPVSNQIERCNSLAFGGYLSEVVEENTPPKMEKEGLEIMI  
GKKKGIQGHYNSCYLDSTLFLCLFAFSSALDVTLLRPKEKNDIEYYSETQELLRTEIVNPLRIYGYVCATKIMK  
LRKILEKVEAASGFTSEEKDPPEEFLNILFHDILRVEPLLKIRSAGQKVQDCNFYQIFMEKNEKVGVP TIQQLL  
EWSFINSNLKFAEAPSCLIIQMPRFGKDFKLFKKIFPSLELNITDLEDTPRQCRICGGLAMYECRECYDDPD  
ISAGKIKQFCKTCSTQVHLHPRRLNHSYHPVSLPKDLPDWDWRHGCIPCQKMEFAVLCIETSHYVAVFKYK  
GKDDSAWLFFDSMADRGGQNGFNIPQVTPCEVGEYLRMSLEDLHSLDSRRIQGCARRLLCDAYMCMYQSPTMS  
LYK\*

>rs32562371\_ENSMUSP00000096119\_c.2746:A>G\_p.K916R

ENSMUST00000098519.11|Cylid-202|ENSMUSG00000036712|+|chr8:g.89473520:A>G  
MSSGLWSQEKVTSPLYWEERIFYLLLQECVTDKQTKQLLKVPKGSIGQYIQDRSVGHSRVPSTKGKKNQIGLK  
ILEQPHAVLFLVDEKDVVEINEKFTELLALAITNCEERLSLFRNRLRLSKGLQVDVGSVPVKVQLRSGEKFP  
RFRGPLLAERTVSGIFFGVELLEEGRGQGFTDGVYQKQLFQCDEDCGVFVALDKLELIEDDDNGLESDFAGP  
GDTMQVEPPPLEINSRVSLKVGESTESGTVIFCDVLPKGESLGYFVGVMDNPIGNWDGRFDGVQLCSFASVE  
STILLHINDIIPALSDSVTQERRPPKLAFMSRGGVGDGKSSSHNKPKVTGSTDGSRNRSELYFTLNGSSVDS  
QQSKSKNPWYIDEVAEDPAKSLTEMSSDFGHSSPPPQPPSMNSLSENRFHSLPFLTKMPNTNGSMAHSPLS  
LSVQSVMGELNSTPVQESPLPISSGNAHGLEVGSLAEVKNPPFYGVIRWIGQPPGLSDVLAGLELEDECAG  
CTDGTFRGTRYFTCALKKALFVKLSCRPDSTRFASLQPVSNQIERCNSLAFGGYLSEVVEENTPPKMEKEGLE  
IMIGKKKGIQGHYNSCYLDSTLFLCLFAFSSALDVTLLRPKEKNDIEYYSETQELLRTEIVNPLRIYGYVCATK  
IMKLRKILEKVEAASGFTSEEKDPPEEFLNILFHDILRVEPLLKIRSAGQKVQDCNFYQIFMEKNEKVGVP TIQ  
QLEWSFINSNLKFAEAPSCLIIQMPRFGKDFKLFKKIFPSLELNITDLEDTPRQCRICGGLAMYECRECYD  
DPDISAGKIKQFCKTCSTQVHLHPRRLNHSYHPVSLPKDLPDWDWRHGCIPCQKMEFAVLCIETSHYVAVFK  
YKDDSAWLFFDSMADRGGQNGFNIPQVTPCEVGEYLRMSLEDLHSLDSRRIQGCARRLLCDAYMCMYQSP  
TMSLYK\*

>rs32562371\_ENSMUSP00000039834\_c.2746:A>G\_p.K916R

ENSMUST00000043526.15|Cylid-201|ENSMUSG00000036712|+|chr8:g.89473520:A>G  
MSSGLWSQEKVTSPLYWEERIFYLLLQECVTDKQTKQLLKVPKGSIGQYIQDRSVGHSRVPSTKGKKNQIGLK  
ILEQPHAVLFLVDEKDVVEINEKFTELLALAITNCEERLSLFRNRLRLSKGLQVDVGSVPVKVQLRSGEKFP  
RFRGPLLAERTVSGIFFGVELLEEGRGQGFTDGVYQKQLFQCDEDCGVFVALDKLELIEDDDNGLESDFAGP  
GDTMQVEPPPLEINSRVSLKVGESTESGTVIFCDVLPKGESLGYFVGVMDNPIGNWDGRFDGVQLCSFASVE  
STILLHINDIIPAVSDSVTQERRPPKLAFMSRGGVGDGKSSSHNKPKVTGSTDGSRNRSELYFTLNGSSVDS  
QQSKSKNPWYIDEVAEDPAKSLTEMSSDFGHSSPPPQPPSMNSLSENRFHSLPFLTKMPNTNGSMAHSPLS  
LSVQSVMGELNSTPVQESPLPISSGNAHGLEVGSLAEVKNPPFYGVIRWIGQPPGLSDVLAGLELEDECAG  
CTDGTFRGTRYFTCALKKALFVKLSCRPDSTRFASLQPVSNQIERCNSLAFGGYLSEVVEENTPPKMEKEGLE  
IMIGKKKGIQGHYNSCYLDSTLFLCLFAFSSALDVTLLRPKEKNDIEYYSETQELLRTEIVNPLRIYGYVCATK  
IMKLRKILEKVEAASGFTSEEKDPPEEFLNILFHDILRVEPLLKIRSAGQKVQDCNFYQIFMEKNEKVGVP TIQ  
QLEWSFINSNLKFAEAPSCLIIQMPRFGKDFKLFKKIFPSLELNITDLEDTPRQCRICGGLAMYECRECYD  
DPDISAGKIKQFCKTCSTQVHLHPRRLNHSYHPVSLPKDLPDWDWRHGCIPCQKMEFAVLCIETSHYVAVFK  
YKDDSAWLFFDSMADRGGQNGFNIPQVTPCEVGEYLRMSLEDLHSLDSRRIQGCARRLLCDAYMCMYQSP  
TMSLYK\*

>rs33035272\_ENSMUSP00000034090\_c.2794:A>G\_p.N932S

ENSMUST00000034090.8|Sal11-201|ENSMUSG00000031665|-|chr8:g.89757308:T>C

MSRRKQAKPQHFQSDPEVASLPRRDGDTEKGQPSRPTKSKDAHVCGRCCAEFFELSDLLLLHKKSCTKNQVLVI  
 VNESPASPAPAKAFPPGSLNDPDDQMKDAANKADQEDCSLSEPKGLDREESMEVEVPVATTTTTTTGGSGGSG  
 GSTLSGVTNITTPSCHSGSSTGTSAITTSLPQLGDLTTLGNFVINSNVI IENLQSTKVAVAQFSQEARCGGA  
 SGGKLLISTLMEQLLALQQQQIHQLQLIEQIRHQILLASQSADLPAAPSIPSQGLTRTSANPLTTLSSHLSQ  
 QLAVAAGLAQSLASQSANISGVKQLPHVQLPQSSSGTSIVPPSGGTSFNMSIVTAAVPTPSSEKVASNAGASH  
 VSSPAVSASSSPAFAISSLLSPASNPLLPQPTPANAVFPTPLPNIATTAEDLNLSLALAQQQRKSKPPNVTAFE  
 AKSTSDEAFFKHKCRFCAKVFGSDSALQIHLRSHTGERPFKCNICGNRFSTKGNLKVHFQRHKEKYPHIQMNP  
 YPVPEHLDNVPTSTGIPYGMSIPPEKPVTSWLDTKPVLPTLTTSVGLPLPPTLPSLTPFIKTEEPAPIPI SHS  
 AASPQGSVKSDSGAPDLATRNP SGVPEEVEGSAVPPFGGKGEESNMASAVPTAGNSTLNSPVADGGPGGTTT  
 TNPLLLPLMSEQFKAKFPFGGLLDSAQASETSKQLQVLNIDKKATDPNECII CHRVLSCQSALKMHYRTHTGE  
 RPFKCKICGRAFTTKGNLKTHTSVHRAMPPLRVQHSCPICQKFTNAVVLQQHIRMHMGGOIPNTVPDNYPE  
 SMESDTGSFDEKNFDDLDNFDENMEECPEGSIPTPKSADASQDSLSSSPLPLEMSSIAALENQMKMINAGL  
 AEQLQASLKSVENGSMEGDVLTNDSSSVGGDMESQSAGSPAISESTSSMQALSPSSSTQEFHKSPGMEEKPQR  
 VGPGEFANGLSPTPVNGGALDLTSSHAEKIKEDSLGILFPFRDRGKFKNTACDICGKTFACQSALDIHYRSH  
 TKERPFICTVCNRGFSTKGNLQHM LTHQMRDLPSQLFEPSSNLGPNQNSAVIPANLSSSLIKTEVNGFVHVS  
 PQDSKDAPTSHPVQGPLSSSATS PVLLPALPRRTPKQHYCNTCGKTFSSSSALQIHERHTHTGEKPFAC TICGR  
 AFTTKGNLKVHMGTHMWNSTPARRGRRLSVDGPMFTLGGNPVKFPEMFQKDLAARSGSGDPSSFWNQYTAALS  
 NGLAMKANEISVIQNGGIPPIPGSLGSGSSSPI SGLTGNVEKLGNSEPSAPLAGLEKMASSENGTNFRFTRFV  
 EDSKEIVTS\*

>rs52511487\_ENSMUSP00000034090\_c.2497:A>G\_p.E833G

ENSMUST00000034090.8|Sal11-201|ENSMUSG00000031665|-|chr8:g.89757605:T>C  
 MSRRKQAKPQHFQSDPEVASLPRRDGDTEKGQPSRPTKSKDAHVCGRCCAEFFELSDLLLLHKKSCTKNQVLVI  
 VNESPASPAPAKAFPPGSLNDPDDQMKDAANKADQEDCSLSEPKGLDREESMEVEVPVATTTTTTTGGSGGSG  
 GSTLSGVTNITTPSCHSGSSTGTSAITTSLPQLGDLTTLGNFVINSNVI IENLQSTKVAVAQFSQEARCGGA  
 SGGKLLISTLMEQLLALQQQQIHQLQLIEQIRHQILLASQSADLPAAPSIPSQGLTRTSANPLTTLSSHLSQ  
 QLAVAAGLAQSLASQSANISGVKQLPHVQLPQSSSGTSIVPPSGGTSFNMSIVTAAVPTPSSEKVASNAGASH  
 VSSPAVSASSSPAFAISSLLSPASNPLLPQPTPANAVFPTPLPNIATTAEDLNLSLALAQQQRKSKPPNVTAFE  
 AKSTSDEAFFKHKCRFCAKVFGSDSALQIHLRSHTGERPFKCNICGNRFSTKGNLKVHFQRHKEKYPHIQMNP  
 YPVPEHLDNVPTSTGIPYGMSIPPEKPVTSWLDTKPVLPTLTTSVGLPLPPTLPSLTPFIKTEEPAPIPI SHS  
 AASPQGSVKSDSGAPDLATRNP SGVPEEVEGSAVPPFGGKGEESNMASAVPTAGNSTLNSPVADGGPGGTTT  
 TNPLLLPLMSEQFKAKFPFGGLLDSAQASETSKQLQVLNIDKKATDPNECII CHRVLSCQSALKMHYRTHTGE  
 RPFKCKICGRAFTTKGNLKTHTSVHRAMPPLRVQHSCPICQKFTNAVVLQQHIRMHMGGOIPNTVPDNYPE  
 SMESDTGSFDEKNFDDLDNFDENMEECPEGSIPTPKSADASQDSLSSSPLPLEMSSIAALENQMKMINAGL  
 AEQLQASLKSVENGSMEGDVLTNDSSSVGGDMESQSAGSPAISESTSSMQALSPSNSTQEFHKSPGMEEKPQR  
 VGPGEFANGLSPTPVNGGALDLTSSHAEKIKEDSLGILFPFRDRGKFKNTACDICGKTFACQSALDIHYRSH  
 TKERPFICTVCNRGFSTKGNLQHM LTHQMRDLPSQLFEPSSNLGPNQNSAVIPANLSSSLIKTEVNGFVHVS  
 PQDSKDAPTSHPVQGPLSSSATS PVLLPALPRRTPKQHYCNTCGKTFSSSSALQIHERHTHTGEKPFAC TICGR  
 AFTTKGNLKVHMGTHMWNSTPARRGRRLSVDGPMFTLGGNPVKFPEMFQKDLAARSGSGDPSSFWNQYTAALS  
 NGLAMKANEISVIQNGGIPPIPGSLGSGSSSPI SGLTGNVEKLGNSEPSAPLAGLEKMASSENGTNFRFTRFV  
 EDSKEIVTS\*

>rs214238730\_ENSMUSP00000034090\_c.2360:C>A\_p.H787Q

ENSMUST00000034090.8|Sal11-201|ENSMUSG00000031665|-|chr8:g.89757742:G>T  
 MSRRKQAKPQHFQSDPEVASLPRRDGDTEKGQPSRPTKSKDAHVCGRCCAEFFELSDLLLLHKKSCTKNQVLVI  
 VNESPASPAPAKAFPPGSLNDPDDQMKDAANKADQEDCSLSEPKGLDREESMEVEVPVATTTTTTTGGSGGSG  
 GSTLSGVTNITTPSCHSGSSTGTSAITTSLPQLGDLTTLGNFVINSNVI IENLQSTKVAVAQFSQEARCGGA  
 SGGKLLISTLMEQLLALQQQQIHQLQLIEQIRHQILLASQSADLPAAPSIPSQGLTRTSANPLTTLSSHLSQ  
 QLAVAAGLAQSLASQSANISGVKQLPHVQLPQSSSGTSIVPPSGGTSFNMSIVTAAVPTPSSEKVASNAGASH  
 VSSPAVSASSSPAFAISSLLSPASNPLLPQPTPANAVFPTPLPNIATTAEDLNLSLALAQQQRKSKPPNVTAFE  
 AKSTSDEAFFKHKCRFCAKVFGSDSALQIHLRSHTGERPFKCNICGNRFSTKGNLKVHFQRHKEKYPHIQMNP  
 YPVPEHLDNVPTSTGIPYGMSIPPEKPVTSWLDTKPVLPTLTTSVGLPLPPTLPSLTPFIKTEEPAPIPI SHS  
 AASPQGSVKSDSGAPDLATRNP SGVPEEVEGSAVPPFGGKGEESNMASAVPTAGNSTLNSPVADGGPGGTTT  
 TNPLLLPLMSEQFKAKFPFGGLLDSAQASETSKQLQVLNIDKKATDPNECII CHRVLSCQSALKMHYRTHTGE  
 RPFKCKICGRAFTTKGNLKTHTSVHRAMPPLRVQHSCPICQKFTNAVVLQQHIRMHMGGOIPNTVPDNYPE  
 SMESDTGSFDEKNFDDLDNFDENMEECPEGSIPTPKSADASQDSLSSSPLPLEMSSIAALENQMKMINAGL  
 AEQLQASLKSVENGSMEGDVLTNDSSSVGGDMESQSAGSPAISESTSSMQALSPSNSTQEFHKSPGMEEKPQR  
 VGPGEFANGLSPTPVNGGALDLTSSHAEKIKEDSLGILFPFRDRGKFKNTACDICGKTFACQSALDIHYRSH  
 TKERPFICTVCNRGFSTKGNLQHM LTHQMRDLPSQLFEPSSNLGPNQNSAVIPANLSSSLIKTEVNGFVHVS  
 PQDSKDAPTSHPVQGPLSSSATS PVLLPALPRRTPKQHYCNTCGKTFSSSSALQIHERHTHTGEKPFAC TICGR

AFTTKGNLKVHMGTHMWNSTPARRGRRLSVDGPMFTLGGNPKVFPPEMFQKDLAARSGSGDPSSFWNQYTAALS  
NGLAMKANEISVIQNGGIPPIPGSLGSGSSSPI SGLTGNVEKLGNSEPSAPLAGLEKMASSENGTNFRFTRFV  
EDSKEIVTS\*

>rs50405873\_ENSMUSP00000034090\_c.2273:G>A\_p.M758I

ENSMUST00000034090.8|Sal11-201|ENSMUSG00000031665|-|chr8:g.89757829:C>T  
MSRRKQAKPQHFQSDPEVASLPRRDGDEKQPSRPTKSKDAHVCGRCCAEFFELSDLLLHKKSKTKNQLVLI  
VNESPASPAKAFPPGSLNDPDDQMKDAANKADQEDCSLSEPKGLDREESMEVEVPVATTTTTTTGGSGGSG  
GSTLSGVTNITTPSCHSGSSGTSAITTSPLQLGDLTTLGNFVINSNVI IENLQSTKVAVAQFSQEARCGGA  
SGGKLLISTLMEQLLALQQQIHLQLIEQIRHQILLASQSADLPAAPSI PSQGLRRTSANPLTTLSSHLSQ  
QLAVAAGLAQSLASQSANISGVKQLPHVQLPQSSSGTIVPPSGGTSNMSIVTAAVPTPSSEKVASNAGASH  
VSSPAVSASSPAPAFAISSLLSPASNPLLPQPTPANAVFPTPLPNIATTAEDLNLSLALAQQQRKSKPPNVTAFE  
AKSTSDEAFFKHKCRFCAKVFSGDSALQIHLRSHTGERPFKCNICGNRFSTKGNLKVHFQRHKEYPHIQMNP  
YPVPEHLDNVPTSTGIPYGM SIPPEKPVTSWLDTKPVLPTLTTSVGLPLPPTLPSLTPFIKTEEPAPIPI SHS  
AASPQGSVKSDSGAPDLATRNPSGVPEEVEGSAVPPFGGKGEESNMASAVPTAGNSTLNSPVADGGPGGTT  
TNPLPLMSEQFKAKFPFGGLLDSAQASETSKLQQLVENIDKKATDPNECI ICHRVLSCQSALKMHYRTHTGE  
RPFKCKICGRAFTTKGNLKVHRAIPPLRVQHSCPICQKFTNAVVLQOHIRMHMGGQIPNTVPDNYPE  
SMESDTGSFDEKFDLDFDENMECEPEGSIPDTPKADASQDLSLSSPLPLEMSSIAALENQMKMINAGL  
AEQLQASLKSVENGSMEDVLTNDSSVGGDMESQSAGSPAISESTSSMQALSPSNSTQEFHKSFGMEEKPQR  
VGPGEFANGLSPTPVNGGALDLTSSHAEKI IKEDSLGILFPFRDRGKFKNTACDICGKTFACQSALDIHYRSH  
TKERPFICTVCNRGFSTKGNLKVHMLTHQMRDLPSQLFEPSSNLGPNQNSAVIPANLSSSLIKTEVNGFVHVS  
PQDSKDAPTSHVPQGPLSSSATS PVLLPALPRRTPKQHYCNTCGKTFSSSSALQIHERHTHTGEKPFAC TICGR  
AFTTKGNLKVHMGTHMWNSTPARRGRRLSVDGPMFTLGGNPKVFPPEMFQKDLAARSGSGDPSSFWNQYTAALS  
NGLAMKANEISVIQNGGIPPIPGSLGSGSSSPI SGLTGNVEKLGNSEPSAPLAGLEKMASSENGTNFRFTRFV  
EDSKEIVTS\*

>rs24769596\_ENSMUSP00000034090\_c.2169:CT>T\_p.Y724del-fs

ENSMUST00000034090.8|Sal11-201|ENSMUSG00000031665|-|chr8:g.89757933:AG>A  
MSRRKQAKPQHFQSDPEVASLPRRDGDEKQPSRPTKSKDAHVCGRCCAEFFELSDLLLHKKSKTKNQLVLI  
VNESPASPAKAFPPGSLNDPDDQMKDAANKADQEDCSLSEPKGLDREESMEVEVPVATTTTTTTGGSGGSG  
GSTLSGVTNITTPSCHSGSSGTSAITTSPLQLGDLTTLGNFVINSNVI IENLQSTKVAVAQFSQEARCGGA  
SGGKLLISTLMEQLLALQQQIHLQLIEQIRHQILLASQSADLPAAPSI PSQGLRRTSANPLTTLSSHLSQ  
QLAVAAGLAQSLASQSANISGVKQLPHVQLPQSSSGTIVPPSGGTSNMSIVTAAVPTPSSEKVASNAGASH  
VSSPAVSASSPAPAFAISSLLSPASNPLLPQPTPANAVFPTPLPNIATTAEDLNLSLALAQQQRKSKPPNVTAFE  
AKSTSDEAFFKHKCRFCAKVFSGDSALQIHLRSHTGERPFKCNICGNRFSTKGNLKVHFQRHKEYPHIQMNP  
YPVPEHLDNVPTSTGIPYGM SIPPEKPVTSWLDTKPVLPTLTTSVGLPLPPTLPSLTPFIKTEEPAPIPI SHS  
AASPQGSVKSDSGAPDLATRNPSGVPEEVEGSAVPPFGGKGEESNMASAVPTAGNSTLNSPVADGGPGGTT  
TNPLPLMSEQFKAKFPFGGLLDSAQASETSKLQQLVENIDKKATDPNECI ICHRVLSCQSALKMHTGHTLGR  
GPSSVRSAAAGLSPRKGTSRPTTASIGLCLHSESSI PAPSVRSSQTQWSSSIFVCTWEARSPTPQSLTTTTLS  
PWSLTQAPLMRKISTT

>rs224820615\_ENSMUSP00000034090\_c.1871:G>TG\_p.K624ins-fs

ENSMUST00000034090.8|Sal11-201|ENSMUSG00000031665|-|chr8:g.89758231:C>CA  
MSRRKQAKPQHFQSDPEVASLPRRDGDEKQPSRPTKSKDAHVCGRCCAEFFELSDLLLHKKSKTKNQLVLI  
VNESPASPAKAFPPGSLNDPDDQMKDAANKADQEDCSLSEPKGLDREESMEVEVPVATTTTTTTGGSGGSG  
GSTLSGVTNITTPSCHSGSSGTSAITTSPLQLGDLTTLGNFVINSNVI IENLQSTKVAVAQFSQEARCGGA  
SGGKLLISTLMEQLLALQQQIHLQLIEQIRHQILLASQSADLPAAPSI PSQGLRRTSANPLTTLSSHLSQ  
QLAVAAGLAQSLASQSANISGVKQLPHVQLPQSSSGTIVPPSGGTSNMSIVTAAVPTPSSEKVASNAGASH  
VSSPAVSASSPAPAFAISSLLSPASNPLLPQPTPANAVFPTPLPNIATTAEDLNLSLALAQQQRKSKPPNVTAFE  
AKSTSDEAFFKHKCRFCAKVFSGDSALQIHLRSHTGERPFKCNICGNRFSTKGNLKVHFQRHKEYPHIQMNP  
YPVPEHLDNVPTSTGIPYGM SIPPEKPVTSWLDTKPVLPTLTTSVGLPLPPTLPSLTPFIKTEEPAPIPI SHS  
AASPQGSVKSDSGAPDLATRNPSGVPEEVEGSAVPPFGGNG

>rs51089854\_ENSMUSP00000034090\_c.1852:T>C\_p.V618A

ENSMUST00000034090.8|Sal11-201|ENSMUSG00000031665|-|chr8:g.89758250:A>G  
MSRRKQAKPQHFQSDPEVASLPRRDGDEKQPSRPTKSKDAHVCGRCCAEFFELSDLLLHKKSKTKNQLVLI  
VNESPASPAKAFPPGSLNDPDDQMKDAANKADQEDCSLSEPKGLDREESMEVEVPVATTTTTTTGGSGGSG  
GSTLSGVTNITTPSCHSGSSGTSAITTSPLQLGDLTTLGNFVINSNVI IENLQSTKVAVAQFSQEARCGGA  
SGGKLLISTLMEQLLALQQQIHLQLIEQIRHQILLASQSADLPAAPSI PSQGLRRTSANPLTTLSSHLSQ  
QLAVAAGLAQSLASQSANISGVKQLPHVQLPQSSSGTIVPPSGGTSNMSIVTAAVPTPSSEKVASNAGASH  
VSSPAVSASSPAPAFAISSLLSPASNPLLPQPTPANAVFPTPLPNIATTAEDLNLSLALAQQQRKSKPPNVTAFE  
AKSTSDEAFFKHKCRFCAKVFSGDSALQIHLRSHTGERPFKCNICGNRFSTKGNLKVHFQRHKEYPHIQMNP

YPVPEHLDNVPTSTGIPYGM SIPPEKPVTSWLDTKPVLPTLTTSVGLPLPPTLPSLTPFIKTEEPAPIPI SHS  
AASPQGSVKSDSGAPDLATRNPSGVPEEVEGSAAPPFGGKGEESNMASAVPTAGNSTLNSPVADGGPGGTTT  
TNPLLLPLMSEQFKAKFPFGGLLDSAQASETSKLLQQLVENIDKKATDPNECII CHRVLSCQSALKMHYRTHTGE  
RPFKCKICGRAFTTKGNLKT HYSVHRAMPPLRVQHSCPICQKFTNAVVLQQHIRMHMGGOIPNTVPDNYPE  
SMESDTGSFDEKNFDDLDNFDENMEECPEGSI PDTPKSADASQDSLSSSPLPLEMSSIAALENQMKMINAGL  
AEQLQASLKSVENGSMEGDVLTNDSSSVGGDMESQSAGSPAISESTSSMQALSPSNSTQEFHKSPGMEEKPQR  
VGPGEFANGLSPTPVNGGALDLTSSHAEKI IKEDSLGILFPFRDRGKFKNTACDICGKTFACQSALDIHYRSH  
TKERPFICTVCNRFSTKGNLQHMLTHQMRDLPSQLFEPSSNLGPNQNSAVIPANLSSSLIKTEVNGFVHVS  
PQDSKDAPTSVHPQGPLSSSATS PVLLPALPRRTPKQHYCNTCGKTFSSSSALQIHERHTHTGEKPFAC TICGR  
AFTTKGNLKVHMGTHMWNSTPARRGRRLSVDGPMFTLGGNPVKFPPEMFQKDLAARSGSGDPSSFWNQYTAALS  
NGLAMKANEISVIQNGGIPPIPGSLGSGSSSPI SGLTGNVEKLGNSEPSAPLAGLEKMASSENGTNFRFTRFV  
EDSKEIVTS\*

>rs45920869\_ENSMUSP00000034090\_c.1533:T>C\_p.Y512H

ENSMUST00000034090.8|Sal11-201|ENSMUSG00000031665|-|chr8:g.89758569:A>G  
MSRRKQAKPQHFQSDPEVASLPRRDGDTEKGQPSRPTKSKDAHVCGRCCAEFFELSDLLLHKKSTKNQLVLI  
VNESPASPAKAFPPGSLNDPDDQMKDAANKADQEDCSDLSEPKGLDREESMEVEVPVATTTTTTTGGSGGSG  
GSTLSGVTNITTPSCHSGSSTGTSAITTSLPQLGDLTTLGNFVINSNVI IENLQSTKVAVAFQSFQEARCGGA  
SGGKLLISTLMEQLLALQQQQIHQLQLIEQIRHQILLASQSADLPAAPSIPSQGLRRTSANPLTTLSSHLSQ  
QLAVAAGLAQSLASQSANISGVKQLPHVQLPQSSSGTSIVPPSGGTSNMSIVTAAVPTPSSEKVASNAGASH  
VSSPAVSASSPFAFAISSLLSPASNPLLPQPTPANAVFPTPLPNIAATTAEDLNSLSALAQQRKSPPNVTAFE  
AKSTSDEAFFKHKCRFCAKVFSGDSALQIHLRSHTGERPFKCNICGNRFSTKGNLKVHFQRHKEYPHIQMNP  
HPVPEHLDNVPTSTGIPYGM SIPPEKPVTSWLDTKPVLPTLTTSVGLPLPPTLPSLTPFIKTEEPAPIPI SHS  
AASPQGSVKSDSGAPDLATRNPSGVPEEVEGSAVPPFGGKGEESNMASAVPTAGNSTLNSPVADGGPGGTTT  
TNPLLLPLMSEQFKAKFPFGGLLDSAQASETSKLLQQLVENIDKKATDPNECII CHRVLSCQSALKMHYRTHTGE  
RPFKCKICGRAFTTKGNLKT HYSVHRAMPPLRVQHSCPICQKFTNAVVLQQHIRMHMGGOIPNTVPDNYPE  
SMESDTGSFDEKNFDDLDNFDENMEECPEGSI PDTPKSADASQDSLSSSPLPLEMSSIAALENQMKMINAGL  
AEQLQASLKSVENGSMEGDVLTNDSSSVGGDMESQSAGSPAISESTSSMQALSPSNSTQEFHKSPGMEEKPQR  
VGPGEFANGLSPTPVNGGALDLTSSHAEKI IKEDSLGILFPFRDRGKFKNTACDICGKTFACQSALDIHYRSH  
TKERPFICTVCNRFSTKGNLQHMLTHQMRDLPSQLFEPSSNLGPNQNSAVIPANLSSSLIKTEVNGFVHVS  
PQDSKDAPTSVHPQGPLSSSATS PVLLPALPRRTPKQHYCNTCGKTFSSSSALQIHERHTHTGEKPFAC TICGR  
AFTTKGNLKVHMGTHMWNSTPARRGRRLSVDGPMFTLGGNPVKFPPEMFQKDLAARSGSGDPSSFWNQYTAALS  
NGLAMKANEISVIQNGGIPPIPGSLGSGSSSPI SGLTGNVEKLGNSEPSAPLAGLEKMASSENGTNFRFTRFV  
EDSKEIVTS\*

>rs46996426\_ENSMUSP00000034090\_c.1465:C>T\_p.T489I

ENSMUST00000034090.8|Sal11-201|ENSMUSG00000031665|-|chr8:g.89758637:G>A  
MSRRKQAKPQHFQSDPEVASLPRRDGDTEKGQPSRPTKSKDAHVCGRCCAEFFELSDLLLHKKSTKNQLVLI  
VNESPASPAKAFPPGSLNDPDDQMKDAANKADQEDCSDLSEPKGLDREESMEVEVPVATTTTTTTGGSGGSG  
GSTLSGVTNITTPSCHSGSSTGTSAITTSLPQLGDLTTLGNFVINSNVI IENLQSTKVAVAFQSFQEARCGGA  
SGGKLLISTLMEQLLALQQQQIHQLQLIEQIRHQILLASQSADLPAAPSIPSQGLRRTSANPLTTLSSHLSQ  
QLAVAAGLAQSLASQSANISGVKQLPHVQLPQSSSGTSIVPPSGGTSNMSIVTAAVPTPSSEKVASNAGASH  
VSSPAVSASSPFAFAISSLLSPASNPLLPQPTPANAVFPTPLPNIAATTAEDLNSLSALAQQRKSPPNVTAFE  
AKSTSDEAFFKHKCRFCAKVFSGDSALQIHLRSHTGERPFKCNICGNRFSTKGNLKVHFQRHKEYPHIQMNP  
YPVPEHLDNVPTSTGIPYGM SIPPEKPVTSWLDTKPVLPTLTTSVGLPLPPTLPSLTPFIKTEEPAPIPI SHS  
AASPQGSVKSDSGAPDLATRNPSGVPEEVEGSAVPPFGGKGEESNMASAVPTAGNSTLNSPVADGGPGGTTT  
TNPLLLPLMSEQFKAKFPFGGLLDSAQASETSKLLQQLVENIDKKATDPNECII CHRVLSCQSALKMHYRTHTGE  
RPFKCKICGRAFTTKGNLKT HYSVHRAMPPLRVQHSCPICQKFTNAVVLQQHIRMHMGGOIPNTVPDNYPE  
SMESDTGSFDEKNFDDLDNFDENMEECPEGSI PDTPKSADASQDSLSSSPLPLEMSSIAALENQMKMINAGL  
AEQLQASLKSVENGSMEGDVLTNDSSSVGGDMESQSAGSPAISESTSSMQALSPSNSTQEFHKSPGMEEKPQR  
VGPGEFANGLSPTPVNGGALDLTSSHAEKI IKEDSLGILFPFRDRGKFKNTACDICGKTFACQSALDIHYRSH  
TKERPFICTVCNRFSTKGNLQHMLTHQMRDLPSQLFEPSSNLGPNQNSAVIPANLSSSLIKTEVNGFVHVS  
PQDSKDAPTSVHPQGPLSSSATS PVLLPALPRRTPKQHYCNTCGKTFSSSSALQIHERHTHTGEKPFAC TICGR  
AFTTKGNLKVHMGTHMWNSTPARRGRRLSVDGPMFTLGGNPVKFPPEMFQKDLAARSGSGDPSSFWNQYTAALS  
NGLAMKANEISVIQNGGIPPIPGSLGSGSSSPI SGLTGNVEKLGNSEPSAPLAGLEKMASSENGTNFRFTRFV  
EDSKEIVTS\*

>rs46840751\_ENSMUSP00000034090\_c.1407:C>A\_p.R470S

ENSMUST00000034090.8|Sal11-201|ENSMUSG00000031665|-|chr8:g.89758695:G>T  
MSRRKQAKPQHFQSDPEVASLPRRDGDTEKGQPSRPTKSKDAHVCGRCCAEFFELSDLLLHKKSTKNQLVLI  
VNESPASPAKAFPPGSLNDPDDQMKDAANKADQEDCSDLSEPKGLDREESMEVEVPVATTTTTTTGGSGGSG



GSTLSGVTNITTPSCHSGSSTGTSAITTSLPQLGDLTTLGNFVSVINSNVI IENLQSTKVAVAQFSQEARCGGA  
 SGGKLLISTLMEQLLALQQQQIHQLQLIEQIRHQILLASQSADLPAAPSIPSQGLRTSANPLTTLSSHLSQ  
 QLAVAAGLAQSLASQSANISGVKQLPHVQLPQSSSGTSIVPPSGGTSFNMSIVTAAVPTPSSEKVASNAGASH  
 VSSPAVSASSSPAFAISSLLSPASNPLLPQPTPANAVFPTPLPNIATTAEDLNLSLALAQQQRKSKPPNVTAFE  
 AKSTSDEAFFKHKCRFCAKVFGSDSALQIHLSSHTGERPFKCNICGNRFSTKGNLKVHFQRHKEYPHIQMNP  
 YPVPEHLDNVPTSTGIPYGMSSIPPEKPVTSWLDTKPVLPTLTTSSVGLPLPPTLPSLTPFIKTEEPAPIPI SHS  
 AASPQGSVKSDSGAPDLATRNPSPGVPEEVEGSAVPPFGGKGEESNMASAVPTAGNSTLNSPVADGGPGGTTT  
 TNPLLLPLMSEQFKAKFPFGGLLDSAQASETSKLQQLVENIDKKATDPNECII CHRVLSCQSALKMHYRTHTGE  
 RPFKCKICGRAFTTKGNLKTHTSVHRAMPPLRVQHSCPICQKFTNAVVLQQHIRMHMGGOIPNTVPDNYPE  
 SMESDTGSFDEKNFDDLDNFDENMEECPEGSIPTPKSADASQDSLSSSPLPLEMSSIAALENQMKMINAGL  
 AEQLQASLKSVENGSMEGDVLTNDSSSVGGDMESQSAGSPAISESTSSMQALSPSNSTQEFHKS PGMEKPKQR  
 VGPGEFANGLSPTPVNGGALDLTSSHAEKI IKEDSLGILFPFRDRGKFKNTACDICGKTFACQSALDIHYRSH  
 TKERPFICTVCNRFSTKGNLQHMLTHQMRDLPSQLFEPSSNLGPNQNSAVIPANLSSSLIKTEVNGFVHVS  
 PQDSKDAPTSHPVQGPLSSSATS PVLLPALPRRTPKQHYCNTCGKTFSSSSALQIHERHTHTGEKPFAC TICGR  
 AFTTKGNLKVHMGTHMWNSTPARRGRRLSVDGPMTFLGGNPVKFPPEMFQKDLAARSGSGDPSSFWNQYTAALS  
 NGLAMKANEISVIQNGGIPPIPGSLGSGSSSPISGLTGNVEKLGNSEPSAPLAGLEKMASSENGTNFRFRTRFV  
 EDSKEIVTS\*

>rs49037112\_ENSMUSP00000034090\_c.325:A>T\_p.D109V

ENSMUST00000034090.8|Sal11-201|ENSMUSG00000031665|-|chr8:g.89759777:T>A  
 MSRRKQAKPQHFQSDPEVASLPRRDGDEKQPSRPTKSKDAHVCGRCCAEFFELSDLLLHKKSKTKNQLVLI  
 VNESPASPAKAFPPGSLNDPDDQMKDAANKADQEVCSLSEPKGLDREESMEVEVPVATTTTTTTGGSGGSG  
 GSTLSGVTNITTPSCHSGSSTGTSAITTSLPQLGDLTTLGNFVSVINSNVI IENLQSTKVAVAQFSQEARCGGA  
 SGGKLLISTLMEQLLALQQQQIHQLQLIEQIRHQILLASQSADLPAAPSIPSQGLRTSANPLTTLSSHLSQ  
 QLAVAAGLAQSLASQSANISGVKQLPHVQLPQSSSGTSIVPPSGGTSFNMSIVTAAVPTPSSEKVASNAGASH  
 VSSPAVSASSSPAFAISSLLSPASNPLLPQPTPANAVFPTPLPNIATTAEDLNLSLALAQQQRKSKPPNVTAFE  
 AKSTSDEAFFKHKCRFCAKVFGSDSALQIHLRSHTGERPFKCNICGNRFSTKGNLKVHFQRHKEYPHIQMNP  
 YPVPEHLDNVPTSTGIPYGMSSIPPEKPVTSWLDTKPVLPTLTTSSVGLPLPPTLPSLTPFIKTEEPAPIPI SHS  
 AASPQGSVKSDSGAPDLATRNPSPGVPEEVEGSAVPPFGGKGEESNMASAVPTAGNSTLNSPVADGGPGGTTT  
 TNPLLLPLMSEQFKAKFPFGGLLDSAQASETSKLQQLVENIDKKATDPNECII CHRVLSCQSALKMHYRTHTGE  
 RPFKCKICGRAFTTKGNLKTHTSVHRAMPPLRVQHSCPICQKFTNAVVLQQHIRMHMGGOIPNTVPDNYPE  
 SMESDTGSFDEKNFDDLDNFDENMEECPEGSIPTPKSADASQDSLSSSPLPLEMSSIAALENQMKMINAGL  
 AEQLQASLKSVENGSMEGDVLTNDSSSVGGDMESQSAGSPAISESTSSMQALSPSNSTQEFHKS PGMEKPKQR  
 VGPGEFANGLSPTPVNGGALDLTSSHAEKI IKEDSLGILFPFRDRGKFKNTACDICGKTFACQSALDIHYRSH  
 TKERPFICTVCNRFSTKGNLQHMLTHQMRDLPSQLFEPSSNLGPNQNSAVIPANLSSSLIKTEVNGFVHVS  
 PQDSKDAPTSHPVQGPLSSSATS PVLLPALPRRTPKQHYCNTCGKTFSSSSALQIHERHTHTGEKPFAC TICGR  
 AFTTKGNLKVHMGTHMWNSTPARRGRRLSVDGPMTFLGGNPVKFPPEMFQKDLAARSGSGDPSSFWNQYTAALS  
 NGLAMKANEISVIQNGGIPPIPGSLGSGSSSPISGLTGNVEKLGNSEPSAPLAGLEKMASSENGTNFRFRTRFV  
 EDSKEIVTS\*

>rs48147872\_ENSMUSP00000034090\_c.211:T>C\_p.V71A

ENSMUST00000034090.8|Sal11-201|ENSMUSG00000031665|-|chr8:g.89759891:A>G  
 MSRRKQAKPQHFQSDPEVASLPRRDGDEKQPSRPTKSKDAHVCGRCCAEFFELSDLLLHKKSKTKNQLALI  
 VNESPASPAKAFPPGSLNDPDDQMKDAANKADQEDCSLSEPKGLDREESMEVEVPVATTTTTTTGGSGGSG  
 GSTLSGVTNITTPSCHSGSSTGTSAITTSLPQLGDLTTLGNFVSVINSNVI IENLQSTKVAVAQFSQEARCGGA  
 SGGKLLISTLMEQLLALQQQQIHQLQLIEQIRHQILLASQSADLPAAPSIPSQGLRTSANPLTTLSSHLSQ  
 QLAVAAGLAQSLASQSANISGVKQLPHVQLPQSSSGTSIVPPSGGTSFNMSIVTAAVPTPSSEKVASNAGASH  
 VSSPAVSASSSPAFAISSLLSPASNPLLPQPTPANAVFPTPLPNIATTAEDLNLSLALAQQQRKSKPPNVTAFE  
 AKSTSDEAFFKHKCRFCAKVFGSDSALQIHLRSHTGERPFKCNICGNRFSTKGNLKVHFQRHKEYPHIQMNP  
 YPVPEHLDNVPTSTGIPYGMSSIPPEKPVTSWLDTKPVLPTLTTSSVGLPLPPTLPSLTPFIKTEEPAPIPI SHS  
 AASPQGSVKSDSGAPDLATRNPSPGVPEEVEGSAVPPFGGKGEESNMASAVPTAGNSTLNSPVADGGPGGTTT  
 TNPLLLPLMSEQFKAKFPFGGLLDSAQASETSKLQQLVENIDKKATDPNECII CHRVLSCQSALKMHYRTHTGE  
 RPFKCKICGRAFTTKGNLKTHTSVHRAMPPLRVQHSCPICQKFTNAVVLQQHIRMHMGGOIPNTVPDNYPE  
 SMESDTGSFDEKNFDDLDNFDENMEECPEGSIPTPKSADASQDSLSSSPLPLEMSSIAALENQMKMINAGL  
 AEQLQASLKSVENGSMEGDVLTNDSSSVGGDMESQSAGSPAISESTSSMQALSPSNSTQEFHKS PGMEKPKQR  
 VGPGEFANGLSPTPVNGGALDLTSSHAEKI IKEDSLGILFPFRDRGKFKNTACDICGKTFACQSALDIHYRSH  
 TKERPFICTVCNRFSTKGNLQHMLTHQMRDLPSQLFEPSSNLGPNQNSAVIPANLSSSLIKTEVNGFVHVS  
 PQDSKDAPTSHPVQGPLSSSATS PVLLPALPRRTPKQHYCNTCGKTFSSSSALQIHERHTHTGEKPFAC TICGR  
 AFTTKGNLKVHMGTHMWNSTPARRGRRLSVDGPMTFLGGNPVKFPPEMFQKDLAARSGSGDPSSFWNQYTAALS



MTDPMDDFFDDANLFGETLEGLSDDTFVQPGPVSLVDELNLGAEFEPLHIDSLNHVQGTPTHQKMADFEQLSQ  
FDSMKFHPVNSQFSGSPVEHVLSPHSQFNCSPIHPPNQPNGLFQDVADGSPMWHRTATGLANQNGSPFHQPGH  
SHSLHQNKSFVAHPDFALFQASEHQTCSSLSHQSRSNLNPQNSLGQAKNFLDANVSGAHRVNVNHLATAP  
SSQQTLPVQFSPTANPPAHFLKCSSHQEGNYNRPSMTSCSVNSQQFSPSHYSFSSGHVSPSSLLQSSAGLA  
PGHTNQALSDFAGSNFSFPHRGMKQEPHQHLLNPTPSLNSNNFQILHSSHPQGNYSNSKLSPVHMFNFPD  
GPPVGHFNDHAETNGFSSLEENLLHHVDSHAEPFAGLDPEDLLQEGLLPQFDESFPFGQDNSNHVLDHDLDRQF  
TSHLVSRPSDMAQTQLQYQARGWPSPLSTNHQHLHSRNLCLQRQPSSSKKSDGSGTYTKLQNTQVRVMSEKK  
PRKRVESESKQEKANRIISEAIAKAKERGERNIPRVMSPENFPASVEGKKEKRGRMKSPKDRDNKKPKTY  
SKLKEKTKIGKLIITLGGKHKRRNESSELSDAEQRSQHTFKEQHSQKRRSNRQIKRKKYAEAEAGQSEEEV  
KGSRLVKRNSAPPPGEQPLQLFVENPSEEDAAIVDKILACRTVKKEVSPGVMLDIEEFFVKYKNYSYLHCEWA  
TEQQLLKDKRIQQKIKRFLRQAQRAHFLADMEEPFNPDYVEVDRILEVSCFCEKDTGESVIYLVKWCSLP  
YEDSTWELKEDVDLAKIEEFEQLQASRPDTRHLDRPPSNIWKKIEQSREYKNGNQLREYQLEGLNWLFFNWN  
RRNCILADEMGLGKTIQSITFLYEILLTGIRGPFLLIAPLSTIANWEREFRTWTNDINVVVYHGSLSRQMIQQ  
YEMYFRDSQGRIRGAYRFQAIITTFEMILGGCGELNAIDWRCVIIDEAHRLKNKNCKLLEGLKLMNLEHKVL  
LTGTPLQNTVEELFSLHLFLEPLRFPESESTFMQEFGLDTEEQVQKLQAILKPMMLRRLKEDVEKKLAPKEET  
IIEVELTNIQKKYRAILEKNFSFLSKGAGQTNVNLVNTMELRKCCHNPHYLIKGAEEKILGEFRDYNPNSA  
SDFHLQAMIQSAGLVLIDKLLPKMKAGGHKVLIFSQMVRCLDILEDYLIHKRYLYERIDGRVGRNLRQA  
RFBKPDSDRDFVLLCTRAGGLINLTAADTCIIFDSDWNQNDLQAQARCHRIGQNKAVKYYRVLVTRNSYERE  
MFDRAKSLKGLDKAVLQSMGRSDSNVSGIQQLSKKEIEDLLRRGAYGAIMEEEDGSKFCEEDIDQILLRRTK  
TITIESEGRGSTFAKASFVAGNRTDISLDDPNFWQKAKKAELDIDTISGRNSLVIDTPRIRKQTRPFSATK  
DELAELSEAESEGEKPKLRPCDRSGGYGRTECFRVEKNLLVYGWRWREILSHGRFKRQLNEHDEVEICRA  
LLAYCLIHRYGDEKIKGFIWDLITPTEDGQTRQLNHLGLSAPVPRGRKGGKVKQTQSSFDIQKAEWLRKYNP  
EQLLQDEGYKHKVHKHCNKVLLRVRMLYYLQKQEVIGNESQKVFQDASDIDVWVPEPDHSEVPAAWWDFDAD  
KSLLIIGVFKHGYEKYNTIRADPALCFLEVRGKPDKAVAAEQRANDYMDGDVEDPEYKPAIAFKDDIEDDVS  
SPGDLVIADGEGQLMEGDKVYWPSPALTRRLRLITAYQRTNKNRHIQQMQPTFSLPANAMQPLYEATLNP  
KMAAKIERQWRNREEADFYRVVSTFGVVFDPDRGQFDWTKFRALARLHKKTDNSLEKILCAFMSMCRVCR  
LPSKEELVDPNIFIQPIITEERASRTLYRIELLRKVRQALRHPQLFERLKLCHPNPDLPIWWECEGSHDRDLI  
GAAKHGVSRTDYHILRDPPELSFMAAQRNYNQSKAAHSRTSAPLLQQYQVALSASPLTSLPRLGAKGTLLLED  
KVKSESLTEEPQSSEESMSMETRTRVKSEPVSPKNGVLSQATGDQKSGGKSETDRRMVAARTEPLTPNPAS  
KKPRVHKRGSQSSSDSDSARSSSSSSSSSSSSSSSSSSSSSSSSSSSSSSSSSSSSSSSSSSSSSSSSSSS  
SSSEESDSEEDVQKREGTPHRKAYDEESVASLSTTQDETQDSFQANNGTPESAYLLQGGYMLAASYWPKDRVM  
INRLDSICQTVLKGKWPARRHYDANTVASFYTTKLLDSPGAATERGEPVPTPPAVAVREEHEQSAQMSKEG  
GLKLTFOKQGLAQKRPFDGEDGALGQQYLRRLRELQSTSETSLVNLKPAVPASGTSIQPTLGANGAILDSQP  
IVKRRGRNRNVEGADILFLNRNKPPNIPTGMNPALSYQPQRIPTESVPPVINLKDGTLAGDDAPKRKD  
LDRWLKEHPYVEDLGAFIQVQLHEGRPKQKRHRCRNPNKLDINSLTGEERVQLINRRNARKVGGAFAPPLK  
DLCRFLKENSEYGVAPWGDVVKQSGFLPESMFERILITGPVVREEVSRGRPKSGIAKATTAATAAVPAGSVPG  
NPLLANGLLPGVDLTAALQALQQLNQLQSLQVTAGLMGPAGLSSGGETKNMAAMFPMFLSGMAGLPLNLLGMG  
GLLSKTAESGAEKRGNDKESLEGGKERTESQSPENGGERCVPSPSTSSSTAALSSAAAAPIALNPLLLSNI  
LYPGMLLTPGLNLHLPTLSQSNAFDVQKNKSDLLDSSKSVEIKEENSRVRDQEEKGGTEPSPLNENSTDEGSE  
RASSGSDSSSSSESDSSSNED\*

>rs33399640\_ENSMUSP00000147839\_c.382:A>G\_p.Q128R  
ENSMUST00000211403.2|Chd9-213|ENSMUSG00000056608|+|chr8:g.91659424:A>G  
MTDPMDDFFDDANLFGETLEGLSDDTFVQPGPVSLVDELNLGAEFEPLHIDSLNHVQGTPTHQKMADFEQLSQ  
FDSMKFHPVNSQFSGSPVEHVLSPHSQFNCSPIHPPNQPNGLFQDVADGSPMWHRTATGLANQNGSPFHQPGH  
SHSLHQNKSFVAHPDFALFQASEHQTCSSLSHQSRSNLNPQNSLGQAKNFLDANVSGAHRVNVNHLATAP  
SSQQTLPVQFSPTANPPAHFLKCSSHQEGNYNRPSMTSCSVNSQQFSPSHYSFSSGHVSPSSLLQSSAGLA  
PGHTNQALSDFAGSNFSFPHRGMKQEPHQHLLNPTPSLNSNNFQILHSSHPQGNYSNSKLSPVHMFNFPD  
GPPVGHFNDHAETNGFSSLEENLLHHVDSHAEPFAGLDPEDLLQEGLLPQFDESFPFGQDNSNHVLDHDLDRQF  
TSHLVSRPSDMAQTQLQYQARGWPSPLSTNHQHLHSRNLCLQRQPSSSKKSDGSGTYTKLQNTQVRVMSEKK  
PRKRVESESKQEKANRIISEAIAKAKERGERNIPRVMSPENFPASVEGKKEKRGRMKSPKDRDNKKPKTY  
SKLKEKTKIGKLIITLGGKHKRRNESSELSDAEQRSQHTFKEQHSQKRRSNRQIKR

>rs33399640\_ENSMUSP00000147407\_c.382:A>G\_p.Q128R  
ENSMUST00000209203.2|Chd9-203|ENSMUSG00000056608|+|chr8:g.91659424:A>G  
MTDPMDDFFDDANLFGETLEGLSDDTFVQPGPVSLVDELNLGAEFEPLHIDSLNHVQGTPTHQKMADFEQLSQ  
FDSMKFHPVNSQFSGSPVEHVLSPHSQFNCSPIHPPNQPNGLFQDVADGSPMWHRTATGLANQNGSPFHQPGH  
SHSLHQNKSFVAHPDFALFQASEHQTCSSLSHQSRSNLNPQNSLGQAKNFLDANVSGAHRVNVNHLATAP  
SSQQTLPVQFSPTANPPAHFLKCSSHQEGNYNRPSMTSCSVNSQQFSPSHYSFSSGHVSPSSLLQSSAGLA  
PGHTNQALSDFAGSNFSFPHRGMKQEPHQHLLNPTPSLNSNNFQILHSSHPQGNYSNSKLSPVHMFNFPD  
GPPVGHFNDHAETNGFSSLEENLLHHVDSHAEPFAGLDPEDLLQEGLLPQFDESFPFGQDNSNHVLDHDLDRQF



RRNARKVGGAFAPPLKDLRCRFLKENSEYGVAPWEGDVVKQSGFLPESMFERILTGPPVREEVSRGRPKSGI  
AKATTAAAVPAGSVPGNPLLGLLPGVDLTALQALQONLQNLQSLQVTAGLMGMPAGLSSGGGETKNMAAMFP  
MLFSGMAGLPNLLGMGGLLSKTAESGAEEKRGNDSKELEGKKERTESQSPENGGERCVPGPSSTSSSTAALSSA  
AAAKPIALNPLLLSNILYPGMLLTPGLNLHLPTLSQSNADFVQKNKSDDLDSKSVKEIKENSRVRDQEEKGG  
TEPSPLNENSTDEGSERASSGSDSSSSSESDSDSSNED\*  
>rs33399640\_ENSMUSP00000105243\_c.382:A>G\_p.Q128R  
ENSMUST00000109614.9|Chd9-202|ENSMUSG00000056608|+|chr8:g.91659424:A>G  
MTDPMDFDDANLFGETLEGLSDDTFVQPGPVSLVDELNLGAEFEPLHIDSLNHVQGTPTHQKMADFEQLSQ  
FDSMKFHPVNVQSFQSPVEHVLSPHSQFNCSPIHPPNQPNGLFQDVADGSPMWHGRTATGLANQNGSPFHQPGH  
SHSLHQNKSFVAHPDFALFQASEHQTCSSLSHSQQSRNLNPGQNSLGQAKNFLDANVSGAHRVNVNHLATAP  
SSQQTLPVQFSPTANPPAHFLKCSSHQEGNYNRPSMTSCSVNSQQFSPSHYSFSSGHVSPSSLLQSSAGLA  
PGHTNQALSDFAGSNSFSPHRGMKQEPHQHLLNPTPSLNSNPFQILHSSHPQGNYSNSKLSPVHMFDPVDA  
GPPVGHFNDHAETNGFSSLEENLLHHVDSHAEPFAGLDPEDDLQEGLLPQFDESFPFGQDNSNHVLDHDLDRQF  
TSHLVSRRPSDMAQTQLQYQARGWPSPLSTNHQHLHSRNLCLQRQPPSSKKS DGSGTYTKLQNTQVRVMSEKK  
PRKRVESESKQEKANRIISEAIARAKERGERNI PRVMS PENFPASVEGKEEKRGRMRMKS PKDRDNKKPKTY  
SKLKEKTKIGKLIITLGGKHKRRNESSELSDAEQRSQHTFKEQHSQKRRSNRQIKRKKYAEDAEGKQSEEEV  
KGLSRVKNRSAPPPGEQPLQLFVENPSEEDAAIVDKILACRTRVKKEVSPGVMLDIEEFFVKYKNYSYLHCEWA  
TEQQLLKDRIQKIKRFLKRAHFLADMEEPFNPDYVEVDRILEVFCEDKDTGESVIYYLVKWCSLP  
YEDSTWELKEDVDLAKIEEFEQLQASRPDTRHLDRPPSNIWKKIEQSREYKNGNQLREYQLEGLNWLFFNWN  
RRNCILADEMGLGKTIQSITFLYEILLTGIRGPFLLIAPLSTIANWEREFRTWTDINVVVYHGSLSRQMIQQ  
YEMYFRDSQGRIRGAYRFQAIITTFEMILGGCGELNAIDWRCVIIDEAHRLKNKNCKLLEGLKLMNLEHKVL  
LTGTPLQNTVEELFSLHLFLEPLRFPSESTFMQEFGLDTEEQVQKLAAILKPMMLRRLKEDVEKKLAPKEET  
IIEVELTNIQKYYRAILEKNFSFLSKGAGQTNVPLVNTMMELRKCNCNHPYLIKGAEEKILGEFRDTPNPSA  
SDFHLQAMIQSAGKLVLDKLLPKMKAGGHKVLIFSQMVRCLDILEDYLIHKRYLYERIDGRVGRNLRQAAID  
RFSKPDSDRFVLLCTRAGGLGINLTAADTCIIFDSWNPQNDLQAQARCHRIGQNKAVKVRVLRVTRNSYERE  
MFDRA SLKGLD KAVLQSMGRDSNVSGIQQLSKKEIEDLLRRGAYGAIMEEEDGSKFCEEDIDQILLRRTK  
TITIESEGRVSTFAKASFVAGNRDITSLDDPNFQWAKKAELDITISGRNSLVIDTPRIRKQTRFPFSAK  
DELAELSEAESEGEKPKLRRPCDRSGGYGRTECFRVEKNLLVYGWRWREILSHGRFKRQLNEHDVEVICRA  
LLAYCLIHRYGDEKIKGFIWDLITPTEDGQTRQLNHLGLSAPVPRGRKGGKVKQTSSFDIQAELWRKYNP  
EQLLQDEGYKHKHHCNKVLLRVRMLYLLKQEVIGNESQKVFQDGDASDIDVWVPEPDHSEVPAAWDFDAD  
KSLLIGVFKHGYEKYNTIRADPALCFLERVGKPDKAVAAEQRANDYMDGDVEDPEYKPAFAIKDDIEDDVS  
SPGDLVIADGEGQLMEGDKVYWPSPALTRRLRLITAYQRTNKNRHIQQMQPTFSLPANAMQPLYEATLNP  
KMAAKIERQQRWTRREEADFYRVVSTFGVVFDPDRGQFDWTKFRALARLHKKTDNSLEKYLCAFMSCRRVCR  
LPSKEELVDPNIFIQPI TEERASRTLYRIELLRKVREQALRHPQLFERLKLCHPNPDLPIWCEGSHDRDLI  
GAAKHGVSRTDYHILRDPESLMAAQRNYNQSKAAHSRTSAPLLQYQVALSASPLTSLPRLGAKGTLLEDM  
KVKSESLTEEPQSEEEESMSMETRTRVKSEPVSPKNVLSQATGDQKSGGKSETDRRMVAARTEPLTPNPAS  
KKPRVHKRGSQSSSDSDSARSSSSSSSSSSSSSSHSRSGSSSSSSSSSSSSSSSSSSSSSSSSSSSSSSSSSS  
SSSEESDSEEDVQKREGTPHRKAYDEESVASLSTTQDETQDSFQANNGTPESAYLLQGGYMLAASYPKDRVM  
INRLDSICQTVLKGKWPARRHYDANTVASFYTTKLLDSPAATERGEPVPTPPAVAVREEHEQSAQMSKVK  
KHVREKEFTVKIKDEGGLKLTQKQGLAQKRPFDGEDGALGQQQYLTRLRELQSTSETSLVNLPAKVPASGTS  
IQPTLGANGAILDSQPIVKKRRGRRRNVEGADILFLNRNKPNNHIPTGMNPAISYPQPQRI PDTESVPVINL  
KDGTRLAGDDAPKRKDLDRWLKEHPGYVEDLGAFIPRVQLHEGRPKQKRHRCRNPNKLDINSLTGEERVQLIN  
RRNARKVGGAFAPPLKDLRCRFLKENSEYGVAPWEGDVVKQSGFLPESMFERILTGPPVREEVSRGRPKSGI  
AKATTAAAVPAGSVPGNPLLGLLPGVDLTALQALQONLQNLQSLQVTAGLMGMPAGLSSGGGETKNMAAMFP  
MLFSGMAGLPNLLGMGGLLSKTAESGAEEKRGNDSKELEGKKERTESQSPENGGERCVPGPSSTSSSTAALSSA  
AAAKPIALNPLLLSNILYPGMLLTPGLNLHLPTLSQSNADFVQKNKSDDLDSKSVKEIKENSRVRDQEEKGG  
TEPSPLNENSTDEGSERASSGSDSSSSSESDSDSSNED\*  
>rs48347616\_ENSMUSP00000046356\_c.2422:C>T\_p.T808I  
ENSMUST00000048665.8|Chd9-201|ENSMUSG00000056608|+|chr8:g.91710948:C>T  
MTDPMDFDDANLFGETLEGLSDDTFVQPGPVSLVDELNLGAEFEPLHIDSLNHVQGTPTHQKMADFEQLSQ  
FDSMKFHPVNVQSFQSPVEHVLSPHSQFNCSPIHPPNQPNGLFQDVADGSPMWHGRTATGLANQNGSPFHQPGH  
SHSLHQNKSFVAHPDFALFQASEHQTCSSLSHSQQSRNLNPGQNSLGQAKNFLDANVSGAHRVNVNHLATAP  
SSQQTLPVQFSPTANPPAHFLKCSSHQEGNYNRPSMTSCSVNSQQFSPSHYSFSSGHVSPSSLLQSSAGLA  
PGHTNQALSDFAGSNSFSPHRGMKQEPHQHLLNPTPSLNSNPFQILHSSHPQGNYSNSKLSPVHMFDPVDA  
GPPVGHFNDHAETNGFSSLEENLLHHVDSHAEPFAGLDPEDDLQEGLLPQFDESFPFGQDNSNHVLDHDLDRQF  
TSHLVSRRPSDMAQTQLQYQARGWPSPLSTNHQHLHSRNLCLQRQPPSSKKS DGSGTYTKLQNTQVRVMSEKK  
PRKRVESESKQEKANRIISEAIARAKERGERNI PRVMS PENFPASVEGKEEKRGRMRMKS PKDRDNKKPKTY  
SKLKEKTKIGKLIITLGGKHKRRNESSELSDAEQRSQHTFKEQHSQKRRSNRQIKRKKYAEDAEGKQSEEEV





SPGDLVIADGEGQLMEGDKVYWPTPSALTTRLRRLITAYQRTNKNRHIQQMQPTFSLPANAMQPLYEEATLNP  
KMAAKIERQORIGRSKYFYSTNHRGTCF\*  
>rs48347616\_ENSMUSP00000148088\_c.2422:C>T\_p.T808I  
ENSMUST00000209423.2|Chd9-205|ENSMUSG00000056608|+|chr8:g.91710948:C>T  
MTDPMDDFFDDANLFGETLEGLSDDTFVQPGPVS LVDELNLGAEFEPLHIDSLNHVQGTPTHQKMADFEQLSQ  
FDSMKFHPVNVQSFSGSPVEHVLSPHSQFNCSPIHPPNQPNGLFQDVADGSPMWHGQTATGLANQNGSPFHQP  
SHSLHQNKSFVAHPDFALFQASEHQTCSSLSHSQQSRSNLNPQNSLGQAKNFLDANVSGAHRVNVNHLATAP  
SSQQTLPVQFSPPTANPPAHFLKCSSHQEGNYNRPSPSMTSCSVNSQQFPSSHYSFSSGHVSPSSLLQSSAGLA  
PGHTNQALSDFAGSNFSFPHRGMKQEP TQHLLNPTPSLNSNNFQILHSSHPQGNYSNSKLSPVHMNFDPVDA  
GPPVGHFNDAETNGFSSLEENLLHHVDSHAEPFAGLDPEDLLQEGLLPQFDESPFGQDNSNHVLDHDLDRQF  
TSHLVSRPSDMAQTQLQYQARGWPSPLSTNHQHLHSRNLCLQRQPSSKKS DSGSGTYTKLQNTQVRVMSEKK  
PRKRVESESKQEKANRI I SEAIARAKERGERNI PRVMS PENFP SASVEGKKEKRGRMRKSKPKDRDNKKPKTY  
SKLKEKTKIGKLIITLGGKHKRRNESSDELSDAEQRSQHTFKEQHSQKRRSNRQIKRKKYAEAEAGKQSEEEV  
KGSRLVKRNSAPPPGEQPLQLFVENPSEEDAAIVDKILACRTVKKEVSPGVMLDIEEFFVKYKNYSYLHCEWA  
TEQQLLKDKRIQQKIKRFLRQAQRAHFLADMEEEFPNPDYVEVDRI LEVSFCEDKDTGESVIYYLVKWC  
YEDSIWELKEDVDLAKIEEFEQLQASRPDTRHLDRPPSNIWKKIEQSREYKNGNQLREYQLEGLNWLLFNWYN  
RRNCILADEMGLGKTIQSITFLYEILLTGIRGPFLI IAPLSTIANWEREFRTWTDINVVVYHGSLSIRQMIQQ  
YEMYFRDSQGRIRGAYRFQAIITTFEMILGGCGELNAIDWRCV IIDEAHLRKNKNCKLLEGLKLMNLEHKVL  
LTGTPLQNTVEELFSLHFLERFSESTFMQEFGLDTEEQVQKLA IILKPMMLRRLKEDVEKKLAPKEET  
IIEVELTNIQKKYYRAILEKNFSFLSKGAGQTNVNLVNTMMELRKC CNHPYLIKGAEEKILGEFRDYNPSA  
SDFHLQAMIQSAGKLVLDKLLPKMKAGGHKVLIFSQMVRCLDILEDYLIHKRYLYERIDGRV RGNLRQA  
AIDRFSKPDSDRFVLLCTRAGGLGINLTAADTCIIFDSDWNPQNDLQAQARCHRIGQNKAVKYRLVTRNSYERE  
MFDRASLKLGLDKAVLQSMSGRDSNVSGIQQLSKKEIEDLLRRGAYGAIMEEDEGSKFCEEDIDQILLRRTK  
TITIESEGRGSTFAKASFVAGNRD TDISLDDPNFWQKWA KKAELDIDTISGRNSLVIDTPRIRKQTRPFSATK  
DELAELSEAESEGEKPKLRPCDRSGGYGRTECFRVEKNLLVYWGWRWREILSHGRFKRQLNEHDVEVICRA  
LLAYCLIHRYGDEKIKGFIWDLITPTEDGQTRELQHNHGLSAPVPRGRKGGKVKQTSSFDIQKAEWLKRYNP  
EQLLQDEGYKKHKHHCNKVLLRVRMLYLLKQEVIGNESQKVFVDGVDASDIDVWVPEPDHSEVPAAWDFDAD  
KSLLIGVFKHGYEKYNTIRADPALCFLEVRGKPD DKAVAAEQRANDYMDGDVEDPEYKPA PAIFKDDIEDDVS  
SPGDLVIADGEGQLMEGDKVYWPTPSALTTRLRRLITAYQRTNKNRHIQQMQPTFSLPANAMQPLYEEATLNP  
KMAAKIERQORWTRREEADFYRVVSTFGVVFDPDRGQFDWTKFRALARLHKKTDNSLEKYLCAFMSCRRVCR  
LPSKEELVDPNIFIQPI TEERASRTLYRIELLRKVREQALRHPQLFERLKLCHPNPDLPIWWECSHHRDILLI  
GAAKHGVSRTDYHILRDP ELSFMAAQRNYNQSKAAHSRTSAPLLQQYQVALSASPLTSLPRLLGAKGTLLED  
MVKKSESLTEEPQSSEEESSMSMETRTRVKSEPVSPKNGVLSQATGDQKSGGKSETDRRMVAARTEPLTPNPAS  
KKPRVHKRGSQSSSDSDSARS SCSSSSSSSSSSSSSSSHSRSGSSSSSSSSSSSSSASSSSSSSSSSSSSSSS  
SSSESDSEEDVQKREGTPHRKAYDEESVASLSTTQDETQDSFQANNGTPESAYLLGGYMLAASYPWKDRVM  
INRLDSICQTVLKGKWP SARHRYDANTVASFYTTKLLD SPGAATERGEP SVPTPPAVAVREEHESQSAQMSKVK  
KHVREKEFTV KIKDEGGLKLT FQKQGLAQKRPFDGEDGALGQQQYLTRLRELQSTSETSLVNLPKAVPASGTS  
IQPTLGANGA I LDSQPIVKKRRRGRNVEGADILFLNRNKPNNHIPTGMNPALSYPPQRI PDTESPVPVNL  
KDGTLAGDDAPKRKDLDRWLKEHPGYVEDLGAFI PRVQLHEGRPKQRHRCRNPNKLDINSLTGEERVQLIN  
RRNARKVGGAFAPPLKDLCRFLKENSEYGVAP EWGDVVKQSGFLPESMFERILTGPVVREEVSRGRPKSGI  
AKATTA AVPAGSVPGNPLLANGLLPGVDLTALQALQNLQNLQSLQV TAGLMGMPAGLSSGGETKNMAAMFP  
MLFSGMAGLPNLLGMGGLLSKTAESGAEEKRGNDSKELEGKKERTESQSPENGGERCVPGPSPTSSTAALSSA  
AAAKPIALNPLLLSNILYPGMLLTPGLNLHLPTLSQSNADFVQKNKSDDLDSKKSVEIKEENSRVRDQEEKGG  
TEPSPLNENSTDEGSERASSGSDSSSSSESDSSSNED\*  
>rs48347616\_ENSMUSP00000147741\_c.1003:C>T\_p.T335I  
ENSMUST00000210947.2|Chd9-210|ENSMUSG00000056608|+|chr8:g.91710948:C>T  
MSSVKRPRGRPPSSKKS DSGSGTYTKLQNTQVRVMSEKKPRKRVESESKQEKANRI I SEAIARAKERGERNI PR  
VMS PENFP SASVEGKKEKRGRMRKSKPKDRDNKKPKTY SKLKEKTKIGKLIITLGGKHKRRNESSDELSDAEQ  
RSQHTFKEQHSQKRRSNRQIKRKKYAEAEAGKQSEEEVKGSLRVKRN SAPPPGEQPLQLFVENPSEEDAAIVD  
KILACRTVKKEVSPGVMLDIEEFFVKYKNYSYLHCEWATEQQLLKDKRIQQKIKRFLRQAQRAHFLADMEEE  
FPNPDYVEVDRI LEVSFCEDKDTGESVIYYLVKWC SLPYEDSIWELKEDVDLAKIEEFEQLQASRPDTRHLDR  
PPSNIWKKIEQSREYKNGNQLREYQLEGLNWLLFNWYNRRNCILADEMGLGKTIQSITFLYEILLTGIRGPFL  
I IAPLSTIANWEREFRTWTDINVVVYHGSLSIRQMIQQYEMYFRDSQGRIRGAYRFQAIITTFEMILGGCGE  
LNAIDWRCV IIDEAHLRKNKNCKLLEGLKLMNLEHKVLLTGTPLQNTVEELFSLHFLERFSESTFMQEF  
GDLKTEEQVQKLA IILKPMMLRRLKEDVEKKLAPKEETIIEVELTNIQKKYYRAILEKNFSFLSKGAGQTNV  
NLVNTMMELRKC CNHPYLIKGAEEKILGEFRDYNPSASDFHLQAMIQSAGKLVLDKLLPKMKAGGHKVLIFS  
QMVRCLDILEDYLIHKRYLYERIDGRV RGNLRQA AIDRFSKPDSDRFVLLCTRAGGLGINLTAADTCIIFD  
SDWNPQNDLQAQARCHRIGQNKAVKYRLVTRNSYEREMFDRASLKLGLDKAVLQSMSGRDSNVSGIQQLS



LTGTPLQNTVEELFSLHFLFLEPLRFPSESTFMQEFGLDKTTEEQVQKQLQAILKPMMLRRLKEDVEKKLAPKEET  
 IIEVELTNIQKKYYRAILEKNFSFLSKGAGRNKCT  
 >rs261610524\_ENSMUSP00000147407\_c.3375:C>CG\_p.Q1126ins-fs  
 ENSMUST00000209203.2|Chd9-203|ENSMUSG00000056608|+|chr8:g.91723885:C>CG  
 MTDPMDDFFDDANLFGETLEGLSDDTFVQPGVSLVDELNLGAEFEPLHIDSLNHVQGTPTHQKMADFEQLSQ  
 FDSMKFHPVNVQSFSGSPVEHVLSPHSQFNCSPIHPPNQPNGLFQDVADGSPMWHQATATGLANQNGSPFHQPFGH  
 SHSLHQNKSFVAHPDFALFQASEHQTCSSLSHSQQSRSNLNPQNSLGQAKNFLDANVSGAHRVNVNHLATAP  
 SSQQTLPVQFSPTANPPAHFLKCSSHQEGNYNRPSPSMTSCSVNSQQFSPSHYSFSSGHVSPSSLLQSSAGLA  
 PGHTNQALSDFAGSNFSFPHRGMKQEPHQHLLNPTPSLNSNNFQILHSSHPQGNYSNSKLSPVHMNFPDPVDA  
 GPPVGHFNDHAETNGFSSLEENLLHHVDSHAEPFAGLDPEDLLQEGLLPQFDESFPFGQDNSNHVLDHDLDRQF  
 TSHLVS RPSDMAQTQLQYQARGWPSPLSTNHQHLHSRNLCLQRQPSSKKS DSGSGTYTKLQNTQVRVMSEKK  
 PRKRVESESKQEKANRIISEAIARAKERGERNI PRVMSPENFPASVEGKEEKRGRMRMKS KPKDRDNKKPKTY  
 SKLKEKTKIGKLIITLGGKHKRRNESSDELSDAEQRSQHTFKEQHSQKRRSNRQIKRKKYAEDAEGKQSEEEV  
 KGS LRVKRNSAPPPGEQPLQLFVENPSEEDAAIVDKILACRTVKKEVSPGVMLDIEEFFVKYKNYSYLHCEWA  
 TEQQLLKDKRIQQKIKRFLRQAQRAHFLADMEEEFPNPDYVEVDRILEV SFCEDKDTGESVIYYLVKWC SLP  
 YEDSTWELKEDVDLAKIEEFEQLQASRPDTRHLDRPPSNIWKKIEQSREYKNGNQLREYQLEGLNWLLFNWYN  
 RRNCILADEMGLGKTIQSITFLYEILLTGIRGPFLIIAPLSTIANWEREFRTWTDINVVVYHGSLISRQMIQQ  
 YEMYFRDSQGRIIRGAYRFQAIITTFEMILGGCGELNAIDWRCVIIDEAHRLKNKNCKLLEGLKLMNLEHKV L  
 LTGTPLQNTVEELFSLHFLFLEPLRFPSESTFMQEFGLDKTTEEQVQKQLQAILKPMMLRRLKEDVEKKLAPKEET  
 IIEVELTNIQKKYYRAILEKNFSFLSKGAGRNKCT  
 >rs261610524\_ENSMUSP00000148088\_c.3375:C>CG\_p.Q1126ins-fs  
 ENSMUST00000209423.2|Chd9-205|ENSMUSG00000056608|+|chr8:g.91723885:C>CG  
 MTDPMDDFFDDANLFGETLEGLSDDTFVQPGVSLVDELNLGAEFEPLHIDSLNHVQGTPTHQKMADFEQLSQ  
 FDSMKFHPVNVQSFSGSPVEHVLSPHSQFNCSPIHPPNQPNGLFQDVADGSPMWHQATATGLANQNGSPFHQPFGH  
 SHSLHQNKSFVAHPDFALFQASEHQTCSSLSHSQQSRSNLNPQNSLGQAKNFLDANVSGAHRVNVNHLATAP  
 SSQQTLPVQFSPTANPPAHFLKCSSHQEGNYNRPSPSMTSCSVNSQQFSPSHYSFSSGHVSPSSLLQSSAGLA  
 PGHTNQALSDFAGSNFSFPHRGMKQEPHQHLLNPTPSLNSNNFQILHSSHPQGNYSNSKLSPVHMNFPDPVDA  
 GPPVGHFNDHAETNGFSSLEENLLHHVDSHAEPFAGLDPEDLLQEGLLPQFDESFPFGQDNSNHVLDHDLDRQF  
 TSHLVS RPSDMAQTQLQYQARGWPSPLSTNHQHLHSRNLCLQRQPSSKKS DSGSGTYTKLQNTQVRVMSEKK  
 PRKRVESESKQEKANRIISEAIARAKERGERNI PRVMSPENFPASVEGKEEKRGRMRMKS KPKDRDNKKPKTY  
 SKLKEKTKIGKLIITLGGKHKRRNESSDELSDAEQRSQHTFKEQHSQKRRSNRQIKRKKYAEDAEGKQSEEEV  
 KGS LRVKRNSAPPPGEQPLQLFVENPSEEDAAIVDKILACRTVKKEVSPGVMLDIEEFFVKYKNYSYLHCEWA  
 TEQQLLKDKRIQQKIKRFLRQAQRAHFLADMEEEFPNPDYVEVDRILEV SFCEDKDTGESVIYYLVKWC SLP  
 YEDSTWELKEDVDLAKIEEFEQLQASRPDTRHLDRPPSNIWKKIEQSREYKNGNQLREYQLEGLNWLLFNWYN  
 RRNCILADEMGLGKTIQSITFLYEILLTGIRGPFLIIAPLSTIANWEREFRTWTDINVVVYHGSLISRQMIQQ  
 YEMYFRDSQGRIIRGAYRFQAIITTFEMILGGCGELNAIDWRCVIIDEAHRLKNKNCKLLEGLKLMNLEHKV L  
 LTGTPLQNTVEELFSLHFLFLEPLRFPSESTFMQEFGLDKTTEEQVQKQLQAILKPMMLRRLKEDVEKKLAPKEET  
 IIEVELTNIQKKYYRAILEKNFSFLSKGAGRNKCT  
 >rs261610524\_ENSMUSP00000147741\_c.1956:C>CG\_p.Q653ins-fs  
 ENSMUST00000210947.2|Chd9-210|ENSMUSG00000056608|+|chr8:g.91723885:C>CG  
 MSSVKRPRGRPPSSKKS DSGSGTYTKLQNTQVRVMSEKKPRKRVESESKQEKANRIISEAIARAKERGERNI PR  
 VMSPENFPASVEGKEEKRGRMRMKS KPKDRDNKKPKTYSKLKEKTKIGKLIITLGGKHKRRNESSDELSDAEQ  
 RSQHTFKEQHSQKRRSNRQIKRKKYAEDAEGKQSEEEVKGS LRVKRNSAPPPGEQPLQLFVENPSEEDAAIVD  
 KILACRTVKKEVSPGVMLDIEEFFVKYKNYSYLHCEWATEQQLLKDKRIQQKIKRFLRQAQRAHFLADMEEE  
 PFNPDYVEVDRILEV SFCEDKDTGESVIYYLVKWC SLPYEDSTWELKEDVDLAKIEEFEQLQASRPDTRHLDR  
 PPSNIWKKIEQSREYKNGNQLREYQLEGLNWLLFNWYNRRNCILADEMGLGKTIQSITFLYEILLTGIRGPFL  
 IIAPLSTIANWEREFRTWTDINVVVYHGSLISRQMIQQYEMYFRDSQGRIIRGAYRFQAIITTFEMILGGCGE  
 LNAIDWRCVIIDEAHRLKNKNCKLLEGLKLMNLEHKVLLTGTPLQNTVEELFSLHFLFLEPLRFPSESTFMQEF  
 GDLKTEEQVQKQLQAILKPMMLRRLKEDVEKKLAPKEETIIEVELTNIQKKYYRAILEKNFSFLSKGAGRNKCT  
 >rs261610524\_ENSMUSP00000105243\_c.3375:C>CG\_p.Q1126ins-fs  
 ENSMUST00000109614.9|Chd9-202|ENSMUSG00000056608|+|chr8:g.91723885:C>CG  
 MTDPMDDFFDDANLFGETLEGLSDDTFVQPGVSLVDELNLGAEFEPLHIDSLNHVQGTPTHQKMADFEQLSQ  
 FDSMKFHPVNVQSFSGSPVEHVLSPHSQFNCSPIHPPNQPNGLFQDVADGSPMWHQATATGLANQNGSPFHQPFGH  
 SHSLHQNKSFVAHPDFALFQASEHQTCSSLSHSQQSRSNLNPQNSLGQAKNFLDANVSGAHRVNVNHLATAP  
 SSQQTLPVQFSPTANPPAHFLKCSSHQEGNYNRPSPSMTSCSVNSQQFSPSHYSFSSGHVSPSSLLQSSAGLA  
 PGHTNQALSDFAGSNFSFPHRGMKQEPHQHLLNPTPSLNSNNFQILHSSHPQGNYSNSKLSPVHMNFPDPVDA  
 GPPVGHFNDHAETNGFSSLEENLLHHVDSHAEPFAGLDPEDLLQEGLLPQFDESFPFGQDNSNHVLDHDLDRQF  
 TSHLVS RPSDMAQTQLQYQARGWPSPLSTNHQHLHSRNLCLQRQPSSKKS DSGSGTYTKLQNTQVRVMSEKK

PRKRVESESKQEKANRI I SEAIARAKERGERNI PRVMS PENFSPASVEGKKEKRGRMRMKS KPDRDNKPKPTY  
SKLKEKTKIGKLIITLTKGKHKRRNESSELSDAEQRSQHTFKEQHSQKRRSNRQIKRKKYAEDAEGKQSEEEV  
KGLSLRVKRN SAPPPGEQPLQLFVENPSEEDAAIVDKILACRTVKKEVSPGVMLDIEEFFVKYKNYSYLHCEWA  
TEQQLLKDKRIQQKIKRFLRQAQRAHFLADMEEEFPNPDYVEVDRIEVSFCEDKDTGESVIYYLVKWC SLP  
YEDSTWELKEDVDLAKIEEFELQASRPDTRHLDRPPSNIWKKIEQSREYKNGNQLREYQLEGLNWLLFNWYN  
RRNCILADEMGLGKTIQSITFLYEILLTGIRGPFLLIAPLSTIANWEREFRTWT DINVVVYHGSLSISRQMIQQ  
YEMYFRDSQGRIIRGAYRFQAIITTFEMILGGCGELNAIDWRCVIIDEAHLRKNKNCKLLEGLKLMNLEHKVL  
LTGTPLQNTVEELFSLHFLFLEPLRFPESTFMQEFGLDTEEQVQKLAAILKPMMLRRLKEDVEKKLAPKEET  
IEVELTNIQKKYYRAILEKNFSFLSKGAGRNKCT  
>rs33410738\_ENSMUSP00000046356\_c.3379:C>A\_p.T1127K  
ENSMUST00000048665.8|Chd9-201|ENSMUSG00000056608|+|chr8:g.91723889:C>A  
MTDPMDDFFDDANLFGETLEGLSDDTFVQPGVSLVDELNLGAEFEPLHIDSLNHVQGTPTHQKMA DFEQLSQ  
FDSMKFHPVNQSFSGSPVEHVLSPHSQFNCSPIHPPNQPNGLFQDVADGSPMWHGQTATGLANQNGSPFHQPGH  
SHSLHQNKSFVAHPDFALFQASEHQTCSSLSHSQQSRNLNPGQNSLGQAKNFLDANVSGAHRVNVNHLATAP  
SSQQTLPVQFSPTANPPAHFLKCSSHQEGNYNRPSMTSCSVSNSQQFSPSHYSFSSGHVSPSSLLQSSAGLA  
PGHTNQALSDFAGSNSFSPHRGMKQEPHQHLLNPTPSLNSNPFQILHSSHPQGNYSNSKLSPVHMFDPVDA  
GPPVGHFNDAETNGFSSLEENLLHHVDSHAEPFAGLDPELLEGLLPQFDESPFGQDNSNHVLDHDLDRQF  
TSHLVS RPSDMAQTQLQYQARGWSPPLSTNHQHLHSRNLCLQRQPPSSKSDGSGTYTKLQNTQVRVMSEKK  
PRKRVESESKQEKANRI I SEAIARAKERGERNI PRVMS PENFSPASVEGKKEKRGRMRMKS KPDRDNKPKPTY  
SKLKEKTKIGKLIITLTKGKHKRRNESSELSDAEQRSQHTFKEQHSQKRRSNRQIKRKKYAEDAEGKQSEEEV  
KGLSLRVKRN SAPPPGEQPLQLFVENPSEEDAAIVDKILACRTVKKEVSPGVMLDIEEFFVKYKNYSYLHCEWA  
TEQQLLKDKRIQQKIKRFLRQAQRAHFLADMEEEFPNPDYVEVDRIEVSFCEDKDTGESVIYYLVKWC SLP  
YEDSTWELKEDVDLAKIEEFELQASRPDTRHLDRPPSNIWKKIEQSREYKNGNQLREYQLEGLNWLLFNWYN  
RRNCILADEMGLGKTIQSITFLYEILLTGIRGPFLLIAPLSTIANWEREFRTWT DINVVVYHGSLSISRQMIQQ  
YEMYFRDSQGRIIRGAYRFQAIITTFEMILGGCGELNAIDWRCVIIDEAHLRKNKNCKLLEGLKLMNLEHKVL  
LTGTPLQNTVEELFSLHFLFLEPLRFPESTFMQEFGLDTEEQVQKLAAILKPMMLRRLKEDVEKKLAPKEET  
IEVELTNIQKKYYRAILEKNFSFLSKGAGRNKCT  
SDFHLQAMIQSAGKLVLDKLLPKMKAGGHKVLIFSQMVRCLDILEDYLIHKRYLYERIDGRVRGNLRQAAID  
RFSKPDSDRFVLLCTRAGGLGINLTAADTCIIFDSDWNPQNDLQAQARCHRIGQNKAVKVYRLVTRNSYERE  
MFDRASLKLGLDKAVLQSMGRDSNVSGIQQLSKKEIEDLLRRGAYGAIMEEEDEGSKFCEEDIDQILLRRTK  
TITIESEGRGSTFAKASFVAGNRTDISLDDPNFWQKAKKAELDIDTISGRNSLVIDTPRIRKQTRPFSATK  
DELAELSEAESEGEKPKLRRPCDRSGGYGRTECFRVEKNLLVYGWRWREILSHGRFKRQLNEHDEVEICRA  
LLAYCLIHRYGDEKIKGFIWDLITPTEDGQTRRELQNHGLSAPVPRGRKGGKVKQTQTSSFDIQKAEWLKRYNP  
EQLLQDEGYKHKHVHHCNKVLLRVRMLYLLKQEVIGNESQKVFQDGDVADSIDVWVPEPDHSEVPAAWDFDAD  
KSLLIGVFKHGYEKYNTIRADPALCFLEVRGKPDKAVAAEQRANDYMDGDVEDPEYKPAIAFKDDIEDDVS  
SPGDLVIADGEGQLMEGDKVYWPSPALTTLRRLRITAYQRTNKNRHIQQMQPTFSLPANAMQPLYEEATLNP  
KMAAKIERQQRWTRREEADFYRVVSTFGVVFDPDRGQFDWTKFRALARLHKKTDNSLEKYLCAFMSCRRVCR  
LPSKEELVDPNIFIQPI TEERASRTLYRIELLRKVREQALRHPQLFERLKLCHPNPDLPIWWECSHHRDILLI  
GAAKHGVSRTDYHILRDPELS FMAAQRNYNQSKAAHSRTSAPLLQQYVALSASPLTSLPRLLGAKGTLLEDM  
KVKSESLTEEPQSSEEEESMSMETRTRVKSEPVSPKNGVLSQATGDQKSGGKSETDRRMVAARTEPLTPNPAS  
KKPRVHKRGSQSSSDSDSARS SCSSRSSSSSSSSSSSSSSSHSRSGSSSSSSSSSSSSSSSSSSSSSSSSSSSS  
SSSEESDSEEDVQKREGTPHRKAYDEESVASLSTTQDETQDSFQANNGTPESAYLLQGGYMLAASYWPKDRVM  
INRLDSICQTVLKGKWP SARRHYDANTVASFYTTKLLDSPAATERGEPVPTPPAVAVREEHEQSAQMSKEG  
GLKLTFOKQGLAQKRPFDGEDGALGQQYLTRLRELQSTSETSLVNLPKAVPASGTSIQPTLGANGAILDSQP  
IVKRRRGRRRNVEGADILFLNRNKP PNHIPTGMNPALSYPPQQRIPDTESPVPVINLKDGT RLAGDAPKRKD  
LDRWLKEHPGYVEDLGAFI PRVQLHEGRPKQKRHRCRNPNKLDINSLTGEERVQLINRRNARKVGGAFAPPLK  
DLCRFLKENSEYGAPEWGDVVKQSGFLPESMFERILTGPVVREEVSRGRPKSGIAKATTA AAVPAGSVPG  
NPLL ANGLPGVDLTALQALQONLQNLQSLQV TAGLMGPAGLSSGGETKNMAAMF PMLFSGMAGLPNLLGMG  
GLLSKTAESGAEKRGND SKELEGGKERTESQSPENGGERCVPSPSTSSSTAALSSAAA KPIALNPLLLSNI  
LYPGMLLT PGLNLHLPTLSQSNAFDVQKNKSDLDSSKSVEIKEENS RVRDQEEKGGTEPSPLNENSTDEGSE  
RASSGSDSSSSSEDS DSSNED\*  
>rs33410738\_ENSMUSP00000147407\_c.3379:C>A\_p.T1127K  
ENSMUST000000209203.2|Chd9-203|ENSMUSG00000056608|+|chr8:g.91723889:C>A  
MTDPMDDFFDDANLFGETLEGLSDDTFVQPGVSLVDELNLGAEFEPLHIDSLNHVQGTPTHQKMA DFEQLSQ  
FDSMKFHPVNQSFSGSPVEHVLSPHSQFNCSPIHPPNQPNGLFQDVADGSPMWHGQTATGLANQNGSPFHQPGH  
SHSLHQNKSFVAHPDFALFQASEHQTCSSLSHSQQSRNLNPGQNSLGQAKNFLDANVSGAHRVNVNHLATAP  
SSQQTLPVQFSPTANPPAHFLKCSSHQEGNYNRPSMTSCSVSNSQQFSPSHYSFSSGHVSPSSLLQSSAGLA  
PGHTNQALSDFAGSNSFSPHRGMKQEPHQHLLNPTPSLNSNPFQILHSSHPQGNYSNSKLSPVHMFDPVDA





RRNARKVGGAFAPPLKDLRCFLKENSEYGVAPWGDVVKQSGFLPESMFERILTGPVVREEVSRGRPKSGI  
AKATTAAVPAGSVPGNPLLANGLLPGVDLTALQALQONLQNLQSLQVVTAGLMGMPAGLSSGGGETKNMAAMFP  
MLFSGMAGLPNLLGMGGLLSKTAESGAEEKRGNDSKELEGKKERTESQSPENGGERCVPSPSTSSSTAALSSA  
AAAKPIALNPLLLSNILYPGMLLTPGLNLHLPTLSQSNADFVQKNKSDDLSSKSVKEIKEENSRVRDQEEKGG  
TEPSPLENSTDEGSEERASSGSDSSSSSSSEDSDSSNED\*

>rs33410738\_ENSMUSP00000147741\_c.1960:C>A\_p.T654K  
ENSMUST00000210947.2|Chd9-210|ENSMUSG00000056608|+|chr8:g.91723889:C>A  
MSSVKRPRGRPPSSKSDGSGTYTKLQNTQVRVMSEKKPRKRVESESKQEKANRIISEAIARAKERGERNI PR  
VMSPENFPASASVEGKEEKRRMRMKS PKDRDNKKPKTYSKLKEKTKIGKLIITLGKHKRRNESDELSDAEQ  
RSQHTFKEQHSQKRRSNRQIKRKKYAEDAEGKQSEEEVKGSLRVKRN SAPPPGEQPLQLFVENPSEEDAAIVD  
KILACRTVKKEVSPGVMLDIEEFFVKYKNYSYLHCEWATEQQLLKDKRIQQKIKRFLRQAQRAHF LADMEEE  
PFNPDYVEVDRILEV SFCEDKDTGESVIYYLVKWC SLPYEDSTWELKEDVDLAKIEEFEQLQASRPDTRHLDR  
PPSNIWKKIEQSREYKNGNQLREYQLEGLNWL LFNWYNRRNCILADEMGLGKTIQSITFLYEI LLTGIRGPFL  
IIAPLSTIANWEREFRTWTDINVVVYHGSLISRQMIQQYEMYFRDSQGRIRGAYRFQAIITTFEMILGGCGE  
LNAIDWRCVIIDEAHRLKNKNCKLLEGLKLMNLEHKVLLTGTPLQNTVEELFSLHLFLEPLRFPSESTFMQEF  
GDLKTEEQVQKLQAILKPMMLRRLKEDVEKKLAPKEETIEVELTNIQKKYYRAILEKNFSFLSKGAGQKNVP  
NLVNTMMELRKCCNHPYLIKGAEEKILGEFRD TYNPSASDFHLQAMIQSAGKLV LIDKLLPKMKAGGHKVLIF  
SQMVRCLDILEDYLIHKRYLYERIDGRVRGNLRQAAIDRF SKPDSDRFVFL LCTRAGGLINLTAADTCIIFD  
SDWNPQNDLQAQARCHRIGQNKAVKVYRLVTRNSYEREMFDRASLKLGLDKAVLQSMSGRDSNVSGIQQLS

>rs33410738\_ENSMUSP00000105243\_c.3379:C>A\_p.T1127K  
ENSMUST00000109614.9|Chd9-202|ENSMUSG00000056608|+|chr8:g.91723889:C>A  
MTDPMDDFFDDANLFGETLEGLSDDTFVQPGVSLVDELNLGAEFEPLHIDSLNHVQGTPTHQKMADFEQLSQ  
FDSMKFHPVNQSFSGSPVEHVLSPHSQFNCSPIHPPNQPNGLFQDVADGSPMWHGQTATGLANQNGSPFHPQGH  
SHSLHQNKSFVAHPDFALFQASEHQTCSSLSHSQQSRSNLNPQNSLQAKNFLDANVSGAHRVNVNHLATAP  
SSQOTLPVQFSPTANPPAHFLKCSSHQEGNYNRPSMSTSCSVNSQQFP SHYSFSSGHVSPSSLLQSSAGLA  
PGHTQALSDFAGNSFSPHRGMKQEP TQHLLNPTSLNSN NFQILHSSHPQGNYSNKLSVHMNFDPVDVA  
GPPVGHFNDHAETNGFSSLEENLHHVDSHAEPFAGLDPEDLLQEGLLPQFDES PFGQDNSNHVLDHDLDRQF  
TSHLVSRPSDMAQTQLQYQARGWPSPLSTNHQHLHSRNLCLQRQPSSKSDGSGTYTKLQNTQVRVMSEKK  
PRKRVESESKQEKANRIISEAIARAKERGERNI PRVMSPENFPASASVEGKEEKRRMRMKS PKDRDNKKPKTY  
SKLKEKTKIGKLIITLGKHKRRNESDELSDAEQRSQHTFKEQHSQKRRSNRQIKRKKYAEDAEGKQSEEEV  
KGSRLVKRN SAPPPGEQPLQLFVENPSEEDAAIVDKILACRTVKKEVSPGVMLDIEEFFVKYKNYSYLHCEWA  
TEQQLLKDKRIQQKIKRFLRQAQRAHF LADMEEE PFNPDYVEVDRILEV SFCEDKDTGESVIYYLVKWC SLP  
YEDSTWELKEDVDLAKIEEFEQLQASRPDTRHLDRPPSNIWKKIEQSREYKNGNQLREYQLEGLNWL LFNWYN  
RRNCILADEMGLGKTIQSITFLYEI LLTGIRGPFLIIAPLSTIANWEREFRTWTDINVVVYHGSLISRQMIQQ  
YEMYFRDSQGRIRGAYRFQAIITTFEMILGGCGELNAIDWRCVIIDEAHRLKNKNCKLLEGLKLMNLEHKVLL  
TGTPPLQNTVEELFSLHLFLEPLRFPSESTFMQEFGLDKEEQQVQKLQAILKPMMLRRLKEDVEKKLAPKEET  
IEVELTNIQKKYYRAILEKNFSFLSKGAGQKNVPNLVNTMMELRKCCNHPYLIKGAEEKILGEFRD TYNPSA  
SDFHLQAMIQSAGKLV LIDKLLPKMKAGGHKVLIFSQMVRCLDILEDYLIHKRYLYERIDGRVRGNLRQAAID  
RFSKPDSDRFVFL LCTRAGGLINLTAADTCIIFDSDWNPQNDLQAQARCHRIGQNKAVKVYRLVTRNSYERE  
MFDRASLKLGLDKAVLQSMSGRDSNVSGIQQLSKKEIEDLLRRGAYGAIMEEDEGSKFCEEDIDQILLRRTK  
TITIESEGRGSTFAKASFVAGNRTDISLDDPNFWQWAKKAELDIDTISGRNSLVIDTPRIRKQTRPFSATK  
DELAELSEAESEGEKPKLRPCDRSGGYGRTECFRVEKNLLVYGWRWREILSHGRFKRQLNEHDVEVICRA  
LLAYCLIHRYGDEKIKGFIWDLITPTEGQTR ELQNHGLSAPVPRGRKGGKVKQTSSFDIQKAEWLKRYNP  
EQLLQDEGYKHKVHKCNKVLRLVRMLYYLQKQEVIGNESQKVF DGDVADSIDVWVPEPDHSEVPAAWDFDAD  
KSLLI GVFKHGYEKYNTIRADPALCF LERVGKPD DKAVA AEQRANDYMDGDVEDPEYKPA PAIFKDDIEDDVS  
SPGDLVIADGEGQLMEGDKVYWP TFSALTTRLRRLITAYQRTNKNRHIQQMQPTFSLPANAMQPLYEEATLNP  
KMAAKIERQQRWTRREEADFYRVVSTFGVVFDPDRGQFDWTKFRALARLHKKTDNSLEKYLCAFMSCRRVCR  
LPSKEELVDPNIFIQPI TEERASRTLYRIELLRKVREQALRHPQLFERLKLCHPNPDLPIWWECSHRDRLLI  
GAAKHGVSRTDYHILRDP ELSFMAAQRNYNQSKAAHSRTSAPLLQQYQVALSASPLTSLPRLLGAKGTLLEDM  
KVKSESLTEEPQSSEEE SMSMETRTRVKSEPVSPKNGVLSQATGDQKSGGKSETDRRMVAARTEPLTPNPAS  
KKPRVHKRGSQSSSDSDSDSARS SCSSRSSSSSSSSSSSSSSSHSRSGSSSSSSSSSSSSSSSSSSSSSSSSSSSS  
SSSEEDSEEDVQKREGTPHRKAYDEESVASLSTTQDETQDSFQANNGTPESAYLLQGGYMLAASYWPKDRVM  
INRLDISICQTVLKKGKWP SARRHYDANTVASFYTTKLLDSPGAATERGEP SVPTPPAVAVREEHEQSAQMSKVK  
KHVREKEFTVLIKDEGGKLT FQKQGLAQKRPF DGEDGALGQQQY LTRLRELQSTSETSLVNL PKAVPASGTS  
IQPTL GANAILDSQPIVKKRRGRRRNVEGADILFLNRNKPNNHIPTGMNPALSYPQPQRIPDTESPVPVINL  
KDGTRLAGDDAPKRKDLDRWLKEHPGYVEDLGAFI PRVQLHEGRPKQRHRCRNPNKLDINSLTGEERVQLIN  
RRNARKVGGAFAPPLKDLRCFLKENSEYGVAPWGDVVKQSGFLPESMFERILTGPVVREEVSRGRPKSGI  
AKATTAAVPAGSVPGNPLLANGLLPGVDLTALQALQONLQNLQSLQVVTAGLMGMPAGLSSGGGETKNMAAMFP

MLFSGMAGLPNLLGMGGLLSKTAESGAEEKRGNDSSKELEGKKERTESQSPENGGERCVPGSPSTSSSTAALSSA  
AAAKPIALNPLLLSNILYPGMLLTPGLNLHLPTLSQSNADFVQKNKSDDLSSKSVEIKEENSRVRDQEEKGG  
TEPSPLENSTDEGSEERASSGSDSSSSSESDSSSNED\*

>rs48480191\_ENSMUSP00000046356\_c.4351:A>G\_p.K1451R

ENSMUST00000048665.8|Chd9-201|ENSMUSG00000056608|+|chr8:g.91737274:A>G  
MTDPMDDFFDDANLFGETLEGLSDDTFVQPGPVSLVDELNLGAEFEPLHIDSLNHVQGTPTHQKMADFEQLSQ  
FDSMKFHPVNVQSFQSPVEHVLSPHSQFNCSPIHPPNPNGLFQDVADGSPMWHQATATGLANQNGSPFHQPGH  
SHSLHQNKSFVAHPDFALFQASEHQTCSSSLHSQQSRSNLNPQGNSLGQAKNFLDANVSGAHRVNVNHLATAP  
SSQQTLPVQFSPTANPPAHFLKCSSHQEGNYNRPSMSTCSVNSQQFSPSHYSFSSGHVSPSSLLQSSAGLA  
PGHTNQALSDFAGSNSFSPHRGMKQEPQHLNPTPSLNSNNFQILHSSHPQGNYSNSKLSPVHMFNFPD  
GPPVGHFNDHAETNGFSSLEENLLHHVDSHAEPFAGLDPEDLLQEGLLPQFDESFPQGDNVNHVLDHDLDRQF  
TSHLVSRPSDMAQTQLQYQARGWPSPLSTNHQHLHSRNLCLQRQPPSSKKSQDGSQTYTKLQNTQVRVMSEKK  
PRKRVESESKQEKANRIISEA IARAKERGERNIPRVMSPENFPASVEGKKEKRGRMRMKS PKDRDNKKPKTY  
SKLKEKTKIGKLIITLGGKHKRRNESSDELSDAEQRSQHTFKEQHSQKRRSNRQIKRKKYAEAEAGKQSEEEV  
KGLSRVKNRSAPPPGEQPLQLFVENPSEEDAAIVDKILACRTVKKEVSPGVMLDIEEFFVKYKNYSYLHCEWA  
TEQQLLKDKRIQQKIKRFLRQAQRAHFLADMEEEFPNPDYVEVDRILEVSFCEDEKDTGESVIYYLVKWC  
YEDSTWELKEDVLDLAKIEEFELQASRPDTRHLDRPPSNWKKIEQSREYKNGNQLREYQLEGLNWLNFNWN  
RRNCILADEMGLKTIQSITFLYEILLTGIRGPFLLIAPLSTIANWEREFRTWTDINVVYHGSLISRQMIQQ  
YEMYFRDSQGRIRGAYRFQAIITTFEMILGGCGELNAIDWRCVIIDEAHRLKNKNCKLLEGLKLMNLEHKVL  
LTGTPLQNTVEELFSLHFLPLEPLRFPSESTFMQEFGLDTEEQVQKLQAILKPMMLRRLKEDVEKKLAPKEET  
IEVELTNIQKKYRAILEKNFSLSKGAGQTNVNLVNTMELRKCCHPYLIKGAEEKILGEFRDYNP  
SDFHLQAMIQSAGKLVLDKLLPKMKAGGHKVLIFSQMVRCLELDYLIHKRYLYERIDGRVGRNLRQA  
RFSKPDSDRFLVLLCTRAGGLGINLTAADTCIIFDSDWNPQNDLQAQARCHRIGQNKAVKYRLVTRNSYERE  
MFDRA SLKGLDKAVLQSMSGRDSNVSGIQQLSKKEIEDLLRRGAYGAIMEEEDGSKFCEEDIDQILLRRTK  
TITIESEGRSESTFAKASFVAGNRDIDSLDDPNFWQKAKKAELDIDTISGRNSLVIDTPRIRRQTRPFSATK  
DELAELSEAESEGEKPKLRPCDRSGGYGRTECFRVEKNLLVYWGWRWREILSHGRFRRKILNEHDVEVICRA  
LLAYCLIHRYGDEKIKGFIWDLITPTEDGQTRRELQNLHGLSAPVPRGRKGGKVKVTQTSFFDIQKAEWLKYNP  
EQLLQDEGYKHKHHCNKVLLRVRMLYLLKQEVIGNESQKVFQDGDVSDIDVWVPEPDHSEVPAAWWDFDAD  
KSLLIGVFKHGYEKYNTIRADPALCFLEVRGKPDKAVAAEQRANDYMDGDVEDPEYKPAIAIFKDDIEDDVS  
SPGDLVIADGEGQLMEGDKVYWPSPALTTLRRLITAYQRTNKNRHIQQMQPTFSLPANAMQPLYEEATLNP  
KMAAKIERQQRWTRREEADFYRVVSTFGVVFDPDRGQFDWTKFRALARLHKKTDNSLEKYLCAFMSCRRVCR  
LPSKEELVDPNIFIQPIITEERASRTLYRIELLRKVREQALRHPQLFERLKLCHPNPDLPIWWECSHHRDILLI  
GAAKHGVSRTDYHILRDPELSFMAAQRNYNQSKAAHSRTSAPLLQQYQVALSASPLTSLPRLGAKGTLLEDM  
KVKSESLTEEPQSSEEEEMSSMETRTRVKSEPVSPKNGVLSQATGDQKSGGKSETDRRMVAARTEPLTPNPAS  
KKPRVHKRGSQSSSDSDSARSSCSSRSSSSSSSSSSSSSHRSQSSSSSSSSSSSSSSSSSSSSSSSSSSSSSS  
SSSEESDSEEDVQKREGTPHRKAYDEESVASLSTTQDETQDSFQANNGTPE SAYLLQGGYMLAASYWPKDRVM  
INRLDSICQTVLKGKWPARRHYDANTVASFYTTKLLDSPAATERGEPVPTPPAVAVREEHEQSAQMSKEG  
GLKLTQKQGLAQKRPFDGEDGALGQQYLTRLRELQSTSETSLVNLPKAVPASGTSIQPTLGGANGAILDSQP  
IVKRRRGRNRNVEGADILFLNRNKPNNHIPTGMNPALSYQPQRIPTDESVPVNLKDGTRLAGDDAPKRKD  
LDRWLKEHPGYVEDLGAFI PRVQLHEGRPKQKRHRCRNPNKLDINSLTGEERVQLINRRNARKVGGAFAPPLK  
DLCRFLKENSEYGVAPWGDVVKQSGFLPESMFERILTGPVVREEVSRGRPKSGIAKATTA AVPAGSVPG  
NPLLANGLLPVLDLTAALQALQQLNLQSLQVQTAGLMGPAGLSSGGETKNMAAMFPMFLFSGMAGLPNLLGMG  
GLLSKTAESGAEEKRGNDSSKELEGKKERTESQSPENGGERCVPGSPSTSSSTAALSSAAAAPIALNPLLLSNI  
LYPGMLLTPGLNLHLPTLSQSNADFVQKNKSDDLSSKSVEIKEENSRVRDQEEKGGTEPSPLENSTDEGSE  
RASSGSDSSSSSESDSSSNED\*

>rs48480191\_ENSMUSP00000147407\_c.4351:A>G\_p.K1451R

ENSMUST000000209203.2|Chd9-203|ENSMUSG00000056608|+|chr8:g.91737274:A>G  
MTDPMDDFFDDANLFGETLEGLSDDTFVQPGPVSLVDELNLGAEFEPLHIDSLNHVQGTPTHQKMADFEQLSQ  
FDSMKFHPVNVQSFQSPVEHVLSPHSQFNCSPIHPPNPNGLFQDVADGSPMWHQATATGLANQNGSPFHQPGH  
SHSLHQNKSFVAHPDFALFQASEHQTCSSSLHSQQSRSNLNPQGNSLGQAKNFLDANVSGAHRVNVNHLATAP  
SSQQTLPVQFSPTANPPAHFLKCSSHQEGNYNRPSMSTCSVNSQQFSPSHYSFSSGHVSPSSLLQSSAGLA  
PGHTNQALSDFAGSNSFSPHRGMKQEPQHLNPTPSLNSNNFQILHSSHPQGNYSNSKLSPVHMFNFPD  
GPPVGHFNDHAETNGFSSLEENLLHHVDSHAEPFAGLDPEDLLQEGLLPQFDESFPQGDNVNHVLDHDLDRQF  
TSHLVSRPSDMAQTQLQYQARGWPSPLSTNHQHLHSRNLCLQRQPPSSKKSQDGSQTYTKLQNTQVRVMSEKK  
PRKRVESESKQEKANRIISEA IARAKERGERNIPRVMSPENFPASVEGKKEKRGRMRMKS PKDRDNKKPKTY  
SKLKEKTKIGKLIITLGGKHKRRNESSDELSDAEQRSQHTFKEQHSQKRRSNRQIKRKKYAEAEAGKQSEEEV  
KGLSRVKNRSAPPPGEQPLQLFVENPSEEDAAIVDKILACRTVKKEVSPGVMLDIEEFFVKYKNYSYLHCEWA  
TEQQLLKDKRIQQKIKRFLRQAQRAHFLADMEEEFPNPDYVEVDRILEVSFCEDEKDTGESVIYYLVKWC  
YEDSTWELKEDVLDLAKIEEFELQASRPDTRHLDRPPSNWKKIEQSREYKNGNQLREYQLEGLNWLNFNWN  
RRNCILADEMGLKTIQSITFLYEILLTGIRGPFLLIAPLSTIANWEREFRTWTDINVVYHGSLISRQMIQQ  
YEMYFRDSQGRIRGAYRFQAIITTFEMILGGCGELNAIDWRCVIIDEAHRLKNKNCKLLEGLKLMNLEHKVL  
LTGTPLQNTVEELFSLHFLPLEPLRFPSESTFMQEFGLDTEEQVQKLQAILKPMMLRRLKEDVEKKLAPKEET  
IEVELTNIQKKYRAILEKNFSLSKGAGQTNVNLVNTMELRKCCHPYLIKGAEEKILGEFRDYNP  
SDFHLQAMIQSAGKLVLDKLLPKMKAGGHKVLIFSQMVRCLELDYLIHKRYLYERIDGRVGRNLRQA  
RFSKPDSDRFLVLLCTRAGGLGINLTAADTCIIFDSDWNPQNDLQAQARCHRIGQNKAVKYRLVTRNSYERE  
MFDRA SLKGLDKAVLQSMSGRDSNVSGIQQLSKKEIEDLLRRGAYGAIMEEEDGSKFCEEDIDQILLRRTK  
TITIESEGRSESTFAKASFVAGNRDIDSLDDPNFWQKAKKAELDIDTISGRNSLVIDTPRIRRQTRPFSATK  
DELAELSEAESEGEKPKLRPCDRSGGYGRTECFRVEKNLLVYWGWRWREILSHGRFRRKILNEHDVEVICRA  
LLAYCLIHRYGDEKIKGFIWDLITPTEDGQTRRELQNLHGLSAPVPRGRKGGKVKVTQTSFFDIQKAEWLKYNP  
EQLLQDEGYKHKHHCNKVLLRVRMLYLLKQEVIGNESQKVFQDGDVSDIDVWVPEPDHSEVPAAWWDFDAD  
KSLLIGVFKHGYEKYNTIRADPALCFLEVRGKPDKAVAAEQRANDYMDGDVEDPEYKPAIAIFKDDIEDDVS  
SPGDLVIADGEGQLMEGDKVYWPSPALTTLRRLITAYQRTNKNRHIQQMQPTFSLPANAMQPLYEEATLNP  
KMAAKIERQQRWTRREEADFYRVVSTFGVVFDPDRGQFDWTKFRALARLHKKTDNSLEKYLCAFMSCRRVCR  
LPSKEELVDPNIFIQPIITEERASRTLYRIELLRKVREQALRHPQLFERLKLCHPNPDLPIWWECSHHRDILLI  
GAAKHGVSRTDYHILRDPELSFMAAQRNYNQSKAAHSRTSAPLLQQYQVALSASPLTSLPRLGAKGTLLEDM  
KVKSESLTEEPQSSEEEEMSSMETRTRVKSEPVSPKNGVLSQATGDQKSGGKSETDRRMVAARTEPLTPNPAS  
KKPRVHKRGSQSSSDSDSARSSCSSRSSSSSSSSSSSSSHRSQSSSSSSSSSSSSSSSSSSSSSSSSSSSSSS  
SSSEESDSEEDVQKREGTPHRKAYDEESVASLSTTQDETQDSFQANNGTPE SAYLLQGGYMLAASYWPKDRVM  
INRLDSICQTVLKGKWPARRHYDANTVASFYTTKLLDSPAATERGEPVPTPPAVAVREEHEQSAQMSKEG  
GLKLTQKQGLAQKRPFDGEDGALGQQYLTRLRELQSTSETSLVNLPKAVPASGTSIQPTLGGANGAILDSQP  
IVKRRRGRNRNVEGADILFLNRNKPNNHIPTGMNPALSYQPQRIPTDESVPVNLKDGTRLAGDDAPKRKD  
LDRWLKEHPGYVEDLGAFI PRVQLHEGRPKQKRHRCRNPNKLDINSLTGEERVQLINRRNARKVGGAFAPPLK  
DLCRFLKENSEYGVAPWGDVVKQSGFLPESMFERILTGPVVREEVSRGRPKSGIAKATTA AVPAGSVPG  
NPLLANGLLPVLDLTAALQALQQLNLQSLQVQTAGLMGPAGLSSGGETKNMAAMFPMFLFSGMAGLPNLLGMG  
GLLSKTAESGAEEKRGNDSSKELEGKKERTESQSPENGGERCVPGSPSTSSSTAALSSAAAAPIALNPLLLSNI  
LYPGMLLTPGLNLHLPTLSQSNADFVQKNKSDDLSSKSVEIKEENSRVRDQEEKGGTEPSPLENSTDEGSE  
RASSGSDSSSSSESDSSSNED\*



>rs48480191\_ENSMUSP00000105243\_c.4351:A>G\_p.K1451R  
 ENSMUST00000109614.9|Chd9-202|ENSMUSG00000056608|+|chr8:g.91737274:A>G  
 MTDPMDDFFDDANLFGETLEGLSDDTFVQPGPVSLVDELNLGAEFEPLHIDSLNHVQGTPTHQKMADFEQLSQ  
 FDSMKFHPVNQSFSGSPVEHVLSPHSQFNCSPIHPPNQPNGLFQDQVADGSPMWHGQTATGLANQNGSPFHQP  
 SHSLHQNKSFVAHPDFALFQASEHQTCSSLSHSQQSRNLNPGQNSLGQAKNFLDANVSGAHRVNVNHLATAP  
 SSQQTLPVQFSPTANPPAHFLKCSSHQEGNYNRPSPSMTSCSVSNSQQFSPSHYSFSSGHVSPSSLLQSSAGLA  
 PGHTNQALSDFAGSNSFSPHRGMKQEPHQHLLNPTPSLNSNNFQILHSSHPQGNYSNSKLSPVHMNFPDPVDA  
 GPPVGHFNDHAETNGFSSLEENLLHHVDSHAEPFAGLDPEDDLQEGLLPQFDES PFGQDNSNHVLDHDLDRQF  
 TSHLVSRPSDMAQTQLQYQARGWPSPLSTNHQHLHSRNLHCLQRQPPSSKKS DSGS GTYTKLQNTQVRVMSEKK  
 PRKRVESESKQEKANRI I SEAIARAKERGERNI PRVMS PENFPSASVEGKEEKRGRMRMKS PKDRDNKPKPTY  
 SKLKEKTKIGKLIITLGGKHKRRNESSEDELSDAEQRSQHTFKEQHSQKRRSNRQIKRKKYAEADAEKGQSEEEV  
 KGSLRVKRN SAPPPGEQPLQLFVENPSEEDAAIVDKILACRTVKKEVSPGVMLDIEEFFVKYKNYSYLHCEWA  
 TEQQLLKDKRIQQKIKRFLRQAQRAHFLADMEEPFNPDYVEVDRIEVSFCEDKDTGESVIYYLVKWC SLP  
 YEDSTWELKEDVDLAKIEEFELQASRPDTRHLDRPPSNIWKKIEQSREYKNGNQLREYQLEGLNWLLFNWYN  
 RRNCILADEMGLGKTIQSITFLYEILLTGIRGPFLLIAPLSTIANWEREFRTWTDINVVVYHGSLSIRQMIQQ  
 YEMYFRDSQGRIRGAYRFQAIITTFEMILGGCGELNAIDWRCVIIDEAHRLKKNCKLLEGLKLMNLEHKVL  
 LTGTPLQNTVEELFSLHLHFLRFPSESTFMQEFGLDTEEQVQLQAILKPMMLRRLKEDVEKKLAPKEET  
 IIEVELTNIQKKYRAILEKNFSLSKGAGQTNVNLVNTMMELRKCENHPYLIKGAEEKILGEFRDTPNSA  
 SDFHLQAMIQSAGKLVLDKLLPKMKAGGHKVLIFSQMVRCLDILEDYLIHKRYLYERIDGRVRGNLRQAAID  
 RFSKPDSDRFVLLCTRAGGLGINLTAADTCIIFDSDWNPQNDLQAQARCHRIGQNKAVKVRVLRVTRNSYERE  
 MFDRASLKLGLDKAVLQSMGRDSNVSGIQQLSKKEIEDLLRRGAYGAIMEEDEGSKFCEEDIDQILLRRTK  
 TITIESEGRGSTFAKASFVAGNRDIDSLDDPNFWQKAKKAELDIDTISGRNSLVIDTPRIRRTQTRPF SATK  
 DELAELSEAESEGEKPKLRPCDRSGGYGRTECFRVEKNLLVYGWRWREILSHGRFKRQLNEHDEVEICRA  
 LLAYCLIHRYGDEKIKGFIWDLITPTEDGQTRQLNHLGLSAPVPRGRKGGKVKQTQSSFDIQKAEWLKRYNP  
 EQLLQDEGYKHKVHHCNKVLLRVRMLYLLKQEVIGNESQKVFQDGDVADSIDVWVPEPDHSEVPAAWWDFDAD  
 KSLLIGVFKHGEYKNTIRADPALCFLERVGKPPDDKAVAAEQRANDYMDGDVEDPEYKPAIPAKDDIEDDVS  
 SPGLVIAADGEGYKQPIVKKRRGRRRNVEGADILFLNRNKPNNHPTGMNPALSYPQPQRIPTDESVPVINL  
 KMAAKIERQQRWTRREEADFYRVVSTFGVVFDPDRGQFDWTKFRALARLHKKTDNSLEKYLCAFMSCRRVCR  
 LPSKEELVDPNIFIQPIITEERASRTLYRIELLRKVREQALRHPQLFERLKLCHPNPDLPIWWECSHHRDILLI  
 GAAKHGVSRTDYHILRDPELSFMQAQRNYNQSKAAHSRTSAPLLQQYVALSASPLTSLPRLLAGKGTLL EDM  
 KVKSESLTEEPQSSEEEESMSMETRTRVKSEPVSPKNGVLSQATGDQKSGGKSETDRRMVAARTEPLTPNPAS  
 KKPRVHKRGSQSSSDSDSARS SCSSRSSSSSSSSSSSSSSSHSRSGSSSSSSSSSSSSSSSSSSSSSSSSSSSS  
 SSSEESDSEEDVQKREGTPHRKAYDEESVASLSTTQDETQDSFQANNGTPESAYLLQGGYMLAASYPKDRVM  
 INRLDSICQTVLKGKWPARRHYDANTVASFYTTKLLDSPAATERGEPVPTPPAVAVREEHEQSAQMSKVK  
 KHVREKEFTVKIKDEGGLKLTFOKQGLAQKRPFDGEDGALGQQYLTRLRELQSTSETSLVNLKAVPASGTS  
 IQPTLGANGAILDSPIVKKRRGRRRNVEGADILFLNRNKPNNHPTGMNPALSYPQPQRIPTDESVPVINL  
 KDGTRLAGDDAPKRKDLDRWLKEHPGYVEDLGAFI PRVQLHEGRPKQKRHRCRNPNKLDINSLTGEERVQLIN  
 RRNARKVGGAFAPPLKDLCRFLKENSEYGVAPWGDVVKQSGFLPESMFERILTGPVVREEVSRGRPKSGI  
 AKATTA AVPAGSVPGNPLLANGLLPGVDLTALQALQNLQNLQSLQVTAGLGMMPAGLSSGGETKNMAAMFP  
 MLFSGMAGLPNLLGMGGLLSKTAESGAEEKRGNDSKELEGKKERTESQSPENGGERCVPGPSSTSSSTAALSSA  
 AAAPIALNPLLLSNILYPGMLLTPGLNLHLPTLSQSNADFVQKNKSDDLDSKKSVEIKEENSRVRDQEEKGG  
 TEPSPLENSTDEGSEERASSGSDSSSSSESDSDSSNED\*

>rs32839533\_ENSMUSP0000046356\_c.4569:G>A\_p.E1524K  
 ENSMUST0000048665.8|Chd9-201|ENSMUSG00000056608|+|chr8:g.91737939:G>A  
 MTDPMDDFFDDANLFGETLEGLSDDTFVQPGPVSLVDELNLGAEFEPLHIDSLNHVQGTPTHQKMADFEQLSQ  
 FDSMKFHPVNQSFSGSPVEHVLSPHSQFNCSPIHPPNQPNGLFQDQVADGSPMWHGQTATGLANQNGSPFHQP  
 SHSLHQNKSFVAHPDFALFQASEHQTCSSLSHSQQSRNLNPGQNSLGQAKNFLDANVSGAHRVNVNHLATAP  
 SSQQTLPVQFSPTANPPAHFLKCSSHQEGNYNRPSPSMTSCSVSNSQQFSPSHYSFSSGHVSPSSLLQSSAGLA  
 PGHTNQALSDFAGSNSFSPHRGMKQEPHQHLLNPTPSLNSNNFQILHSSHPQGNYSNSKLSPVHMNFPDPVDA  
 GPPVGHFNDHAETNGFSSLEENLLHHVDSHAEPFAGLDPEDDLQEGLLPQFDES PFGQDNSNHVLDHDLDRQF  
 TSHLVSRPSDMAQTQLQYQARGWPSPLSTNHQHLHSRNLHCLQRQPPSSKKS DSGS GTYTKLQNTQVRVMSEKK  
 PRKRVESESKQEKANRI I SEAIARAKERGERNI PRVMS PENFPSASVEGKEEKRGRMRMKS PKDRDNKPKPTY  
 SKLKEKTKIGKLIITLGGKHKRRNESSEDELSDAEQRSQHTFKEQHSQKRRSNRQIKRKKYAEADAEKGQSEEEV  
 KGSLRVKRN SAPPPGEQPLQLFVENPSEEDAAIVDKILACRTVKKEVSPGVMLDIEEFFVKYKNYSYLHCEWA  
 TEQQLLKDKRIQQKIKRFLRQAQRAHFLADMEEPFNPDYVEVDRIEVSFCEDKDTGESVIYYLVKWC SLP  
 YEDSTWELKEDVDLAKIEEFELQASRPDTRHLDRPPSNIWKKIEQSREYKNGNQLREYQLEGLNWLLFNWYN  
 RRNCILADEMGLGKTIQSITFLYEILLTGIRGPFLLIAPLSTIANWEREFRTWTDINVVVYHGSLSIRQMIQQ  
 YEMYFRDSQGRIRGAYRFQAIITTFEMILGGCGELNAIDWRCVIIDEAHRLKKNCKLLEGLKLMNLEHKVL



LTGTPLQNTVEELFSLHFLFLEPLRFPSESTFMQEFGLDKTEEQVQKLQAILKPMMLRRLKEDVEKKLAPKEET  
 IIEVELTNIQKKYYRAILEKNFSLSKGAGQTNVNLVNTMMELRKCCHPYLIKGAEEKILGEFRDYNPSA  
 SDFHLQAMIQSAGKLVLDKLLPKMKAGGHKVLIFSQMVRCLDILEDYLIHKRYLYERIDGRVVRGNLRQA  
 RFSKPDSDRFVFLLCRAGGLGINLTAADTCIIFDSDWNPQNDLQAQARCHRIGQNKAVKVYRLVTRNSYERE  
 MFDRAKSLKGLDKAVLQSMGRDSNVSGIQQLSKKEIEDLLRRGAYGAIMEEEDGSKFCEEDIDQILLRRTK  
 TITIESEGRGSTFAKASFVAGNRTDISLDDPNFWQKAKKAELDIDTISGRNSLVIDTTPRIRKQTRPFSATK  
 DELAELSEAESEGEKPKLRRPCDRSGGYGRTECFRVEKNLLVYGWRWREILSHGRFRKQNLKHDVEVICRA  
 LLAYCLIHRYGDEKIKGFIWDLITPTEDGQTRELQNHGLSAPVPRGRKGGKVKVTQTSSFDIQKAEWLKRYNP  
 EQLLQDEGYKHKHHCNKVLLRVRMLYLYLKQEVIGNESQKVFDGVDASDIDVWVPEPDHSEVPAAWWDFDAD  
 KSLDIGVFKHGYEKYNTIRADPALCFLEVRGKPDKAVAAEQRANDYMDGDVEDPEYKPAPAIKDDIEDDVS  
 SPGLDVIADGEGQLMEGDKVYWPPTSALTTRRLRLITAYQRTNKNRHIQQMQPTFSLPANAMQPLYEATLNP  
 KMAAKIERQQRWTRREEADFYRVVSTFGVVFDPDRGQFDWTKFRALARLHKKTDNSLEKYLCAFMSCRRVCR  
 LPSKEELVDPNIFIQIPITEERASRTLYRIELLRKVREQALRHPQLFERLKLCHPNPDLPIWWECSHHRDILLI  
 GAAKHGVSRTDYHILRDELSFMAAQRYNQSKAAHSRTSAPLLQYQVALSASPLTSLPRLGAKGTLLLEDM  
 KVKSESLTEEPQSSEESMSMETRTRVKSEPVSPKNGVLSQATGDQKSGGKSETDRMVAARTEPLTPNPAS  
 KKPRVHKRGSQSSSDSDSARSSSSSSSSSSSSSSSSSSSSSSSSSSSSSSSSSSSSSSSSSSSSSSSSSSSSS  
 SSSESDSEEDVQKREGTPHRKAYDEESVASLSTTQDETQDSFQANNGTPESAYLLQGGYMLAASQWPKDRVM  
 INRLDSICQTVLKGKWPARRHYDANTVASFYTTKLLDSPGAATERGEPVPTPPAVAVREEHEQSAQMSKEG  
 GLKLTQKQGLAQKRPFDGEDGALGQQYLRRLRELQSTSETSLVNLPKAVPASGTSIQPTLGGANGAILDSQP  
 IVKRRRRRNVGADILFLNRNKPNIPTGMNPALSYPPQRIPTDESVPVNLKDGTRLAGDDAPKRKD  
 LDRWLKEHPGYVEDLGAIFPRVQLHEGRPKQKRHRCRNPNKLDINSLTGEERVQLINRRNARKVGGAFAPPLK  
 DLCRFLKENSEYGAPEWGDVVKQSGFLPESMFERILTGPVVREEVSRGRPKSGIAKATTAAVPAGSVPG  
 NPLLANGLLPGVDLTAQALQQLQNLQSLQVTAGLGMGPAGLSGGETKNMAAMFPMFSGMAGLPNLLGMG  
 GLLSKTAESGAEEKRGNDKELEGGKERTESQSPENGGERCVPSPSTSSSTAALSSAAAAPIALNPLLLSNI  
 LYPGMLLTPLNLHLPTLSQSNAFDVQKNKSDLLDSSKSVEIKEENSRVRDQEEKGGTEPSPLNENSTDEGSE  
 RASSGSDSSSSSESDSSSNED\*

>rs32839533\_ENSMUSP00000147407\_c.4569:G>A\_p.E1524K  
 ENSMUST00000209203.2|Chd9-203|ENSMUSG00000056608|+|chr8:g.91737939:G>A  
 MTDPMDDFFDDANLFGETLEGLSDDTFVQPGPVSLVDELNLGAEFEPLHIDSLNHVQGTPTHQKMADFEQLSQ  
 FDSMKFHPVNSQSFSGSPVEHVLSPHSQFNCSPIHPPNQPNGLFQDQVADGSPMWHQATATGLANQNGSPFHQPGH  
 SHSLHQNKSFVAHPDFALFQASEHQTCSSLSHSQQRSNLNPGQNSLGQAKNFLDANVSGAHRVNVNHLATAP  
 SSQQLPVQFSPTANPPAHFLKCSHQEGNYNRPSMSTCSVNSQFPSPSHYSFSSGHVSPSSLQSSAGLA  
 PGHTNQALSDFAGSNSFSPHRGMKQEPTQHLLNPTPSLNSNFFQILHSSHPQGNYSNSKLSPVHMFDPVDA  
 GPPVGHFNDHAETNGFSSLEENLLHHVDSHAEPFAGLDPELLEGLLQFDESPFGQDNSNHVLDHDLDRQF  
 TSHLVSRSQMAQTQLQYQARGWPSPLSTNHQHLHSRNLCLQRQPPSSKKSQDGSQTYTKLQNTQVRVMSEKK  
 PRKRVESESKQEKANRIISEAIAKAKERGERNIPRVMSPENFPASVEGKEEKRRMKSQPKDRNKKPKTY  
 SKLKEKTKIGKLIITLGGKHKRRNESSELSDAEQRSQHTFKEQHSQKRRSNRQIKRKKYAEAEAGKQSEEEV  
 KGLSRVKNRSAPPPGEQPLQLFVENPSEEDAAIVDKILACRTVKKEVSPGVMLDIEEFFVKYKNYSYLHCEWA  
 TEQQLLKDKRIQQKIKRFLRQAQRAHFLADMEEPFNPDYVEVDRILEVSFCEKDTGESVIYLVKWCSLP  
 YEDSTWELKEDVDLAKIEEFELQASRPDTRHLDRPPSNIWKKIEQSREYKNGNQLREYQLEGLNWLFWNWN  
 RRNCILADEMGLGKTIQSITFLYEILLTGIRGPFLLIAPLSTIANWEREFRTWTDINVVVYHGSLISRQMIQQ  
 YEMYFRDSQGRIRGAYRFQAIITTFEMILGGCGELNAIDWRCVIIDEAHRLKNKNCKLLEGLKLMNLEHKVL  
 LTGTPLQNTVEELFSLHFLFLEPLRFPSESTFMQEFGLDKTEEQVQKLQAILKPMMLRRLKEDVEKKLAPKEET  
 IIEVELTNIQKKYYRAILEKNFSLSKGAGQTNVNLVNTMMELRKCCHPYLIKGAEEKILGEFRDYNPSA  
 SDFHLQAMIQSAGKLVLDKLLPKMKAGGHKVLIFSQMVRCLDILEDYLIHKRYLYERIDGRVVRGNLRQA  
 RFSKPDSDRFVFLLCRAGGLGINLTAADTCIIFDSDWNPQNDLQAQARCHRIGQNKAVKVYRLVTRNSYERE  
 MFDRAKSLKGLDKAVLQSMGRDSNVSGIQQLSKKEIEDLLRRGAYGAIMEEEDGSKFCEEDIDQILLRRTK  
 TITIESEGRGSTFAKASFVAGNRTDISLDDPNFWQKAKKAELDIDTISGRNSLVIDTTPRIRKQTRPFSATK  
 DELAELSEAESEGEKPKLRRPCDRSGGYGRTECFRVEKNLLVYGWRWREILSHGRFRKQNLKHDVEVICRA  
 LLAYCLIHRYGDEKIKGFIWDLITPTEDGQTRELQNHGLSAPVPRGRKGGKVKVTQTSSFDIQKAEWLKRYNP  
 EQLLQDEGYKHKHHCNKVLLRVRMLYLYLKQEVIGNESQKVFDGVDASDIDVWVPEPDHSEVPAAWWDFDAD  
 KSLDIGVFKHGYEKYNTIRADPALCFLEVRGKPDKAVAAEQRANDYMDGDVEDPEYKPAPAIKDDIEDDVS  
 SPGLDVIADGEGQLMEGDKVYWPPTSALTTRRLRLITAYQRTNKNRHIQQMQPTFSLPANAMQPLYEATLNP  
 KMAAKIERQQRIGRSKYFYSTNHRGTCF\*

>rs32839533\_ENSMUSP00000148088\_c.4569:G>A\_p.E1524K  
 ENSMUST00000209423.2|Chd9-205|ENSMUSG00000056608|+|chr8:g.91737939:G>A  
 MTDPMDDFFDDANLFGETLEGLSDDTFVQPGPVSLVDELNLGAEFEPLHIDSLNHVQGTPTHQKMADFEQLSQ  
 FDSMKFHPVNSQSFSGSPVEHVLSPHSQFNCSPIHPPNQPNGLFQDQVADGSPMWHQATATGLANQNGSPFHQPGH

SHSLHQKNSFVAHPDFALFQASEHQTCSSLSHSQQSRSNLNPQGNSLGQAKNFLDANVSGAHRVNVNHLATAP  
SSQQTLPVQFSPTANPPAHFLKCSSHQEGNYNRPSMTSCSVNSQFP SHYSFSSGHVSPSSLLQSSAGLA  
PGHTNQALSDFAGSNSFSPHRGMKQEPHQHLLNPTPSLNSNNFQILHSSHPQGNYSNSKLSPVHMNFPDPVDA  
GPPVGHFNDAETNGFSSLEENLLHHVDSHAEPFAGLDPEDLLQEGLLPQFDESFPFGQDNSNHVLDHDLDRQF  
TSHLVSRPSDMAQTQLQYQARGWPSPLSTNHQHLHSRNLCLQRQPSSSKKSDGSGTYTKLQNTQVRVMSEKK  
PRKRVESESKQEKANRIISEAIARAKERGERNI PRVMSPENFP SASVEGKEEKGRMRMKS PKPDRDNKKPKTY  
SKLKEKTKIGKLIITLTKKHKRRNESSELSDAEQRSQHTFKEQHSQKRRSNRQIKRKKYAEDAEGKQSEEEV  
KGSRLVKRNSAPPPGEQPLQLFVENPSEEDAAIVDKILACRTVKKEVSPGVMLDIEEFFVKYKNSYLVHCEWA  
TEQQLLKDKRIQQKIKRFLRQAQRAHFADMEEEPFNPDYVEVDRILEVSFCEDKDTGESVIYYLVKWCSLP  
YEDSTWELKEDVDLAKIEEFEQLQASRPDTRHLDRPPSNIWKKIEQSREYKNGNQLREYQLEGLNWLLFNWYN  
RRNCILADEMGLGKTIQSITFLYEILLTGIRGPFLLIAPLSTIANWEREFRTWTDINVVVYHGSLSISRQMIQQ  
YEMYFRDSQGRIRGAYRFQAIITTFEMILGGCGELNAIDWRCVIIDEAHRLKKNCKLLEGLKLMNLEHKVL  
LTGTPLQNTVEELFSLHFLEPLRFPSESTFMQEFGLDTEEQVQKQLQAILKPMMLRRLKEDVEKKLAPKEET  
IIEVELTNIQKKYYRAILEKNFSFLSKGAGQTNVPLVNTMMELRKCCHNHPYLIKGAEEKILGEFRDTPNSA  
SDFHLQAMIQSAGKLVLDKLLPKMKAGGHKVLIFSQMVRCLEIDEDYLIHKRYLYERIDGRVGRNLRQAAD  
RFSKPDSDRFVLLCTRAGGLGINLTAADTCIIFDSWNPQNDLQAQARCHRIGONKAVKVYRLVTRNSYERE  
MFDRA SLKGLDKAVLQSMGRDSNVSGIQQLSKKEIEDLLRRGAYGAIMEEEDGSKFCEEDIDQILLRRTK  
TITIESEGRGSTFAKASFVAGNRDTISLDDPNFVQKWKAKAELDIDTISGRNSLVIDTPRIRKQTRPFSATK  
DELAELSEAESEGEKPKLRPCDRSGGYGRTECFRVEKNLLVYGWRWREILSHGRFKRQLNKHDVEVICRA  
LLAYCLIHRYGDEKIKGFIWDLITPTEDGQTRQLNHLGLSAPVPRGRKGGKVKQTSSFDIQAELWRKYNP  
EQLLQDEGYKHKHHCNKVLLRVRMLYYLQEVIGNESQKVFQVGDVSDIDVWVPEPDHSEVPAAWWDFDAD  
KSLLIGVFKHGYEKYNTIRADPALCFLEVRGKPDKAVAAEQRANDYMDGDVEDPEYKPAFAIKDDIEDDVS  
SPGDLVIADGEGQLMEGDKVYWPSPALTRRLRLITAYQRTNKNRHIQQMQPTFSLPANAMQPLYEEATLNP  
KMAAKIERQQRWTRREEADFYRVVSTFGVVFDPDRGQFDWTKFRALARLHKKTDNSLEKYLCAFMSCRRVCR  
LPSKEELVDPNIFIQPI TEERASRTLYRIELLRKVRQALRHPQLFERLKLCHPNPDLPIWWECEGSHDRDLI  
GAAKHGVSRTDYHILRDPELSFMQAQRNYNQSKAAHSRTSAPLLQQYQVALSASPLTSLPRLLAGAKTLEEDM  
KVKSESLTEEPQSSIEESMSMETRTRVKSEPNVSKNGVLSQATGDQKSGGKSETDRRMVAARTEPLTNPAS  
KKPRVHKRGSQSSSDSDSDSARSSCSSRSSSSSSSSSSSSSHSRSGSSSSSSSSSSSSASSSSSSSSSSSSSSSS  
SSSEESDSEEDVQKREGTPHRKAYDEESVASLSTTQDETQDSFQANNGTPESAYLLQGGYMLAASYWPKDRVM  
INRLDSICQTVLKGKWPARRHYDANTVASFYTTKLLDSPAATERGEPVPTPPAVAVREEHEQSAQMSKVK  
KHVREKEFTVKIKDEGGLKLTQKQGLAQKRPFDGEDGALGQQQYLTRLRELQSTSETSLVNLPAVPASGTS  
IQPTLGANGAILDSQPIVKKRRGRRRNVEGADILFLNRNKPNNHIPTGMNPAISYPQPQRI PDTESVPVINL  
KDGTRLAGDDAPKRKDLRDLRDLKEHPGYVEDLGAFI PRVQLHEGRPKQKRHRCRNPNKLDINSLTGEERVQLIN  
RRNARKVGGAFAPPLKDLCRFLKENSEYGVAPWGDVVKQSGFLPESMFERILTGPVVREEVSRGRPKSGI  
AKATTA AVPAGSVPGNPLLANGLLPGVDLTALQALQNLQNLQSLQVTAGLMGMPAGLSSGGETKNMAAMFP  
MLFSGMAGLPNLLGMGGLLSKTAESGAEEKRGNDSKELEGGKERTESQSPENGGERCVPGPSSTSTAALSSA  
AAAKPIALNPLLLSNILYPGMLLTPGLNLHLPTLSQSNADFVQKNKSDDLDSKSVI KEENSVRDQEELGG  
TEPSPLNENSTDEGSERASSGSDSSSSSESDSDSSNED\*

>rs32839533\_ENSMUSP00000105243\_c.4569:g>A\_p.E1524K  
ENSMUST00000109614.9|Chd9-202|ENSMUSG00000056608|+|chr8:g.91737939:g>A  
MTDPMDDFFDDANLFGETLEGLSDDTFVQPGVSLVDELNLGAEFEPLHIDSLNHVQGTPTHQKMADFEQLSQ  
FDSMKFHPVNSQFSGSPVEHVLSPHSQFNCSPIHPPNPNGLFQDVADGSPMWHGQTATGLANQNGSPFHQPGH  
SHSLHQKNSFVAHPDFALFQASEHQTCSSLSHSQQSRSNLNPQGNSLGQAKNFLDANVSGAHRVNVNHLATAP  
SSQQTLPVQFSPTANPPAHFLKCSSHQEGNYNRPSMTSCSVNSQFP SHYSFSSGHVSPSSLLQSSAGLA  
PGHTNQALSDFAGSNSFSPHRGMKQEPHQHLLNPTPSLNSNNFQILHSSHPQGNYSNSKLSPVHMNFPDPVDA  
GPPVGHFNDAETNGFSSLEENLLHHVDSHAEPFAGLDPEDLLQEGLLPQFDESFPFGQDNSNHVLDHDLDRQF  
TSHLVSRPSDMAQTQLQYQARGWPSPLSTNHQHLHSRNLCLQRQPSSSKKSDGSGTYTKLQNTQVRVMSEKK  
PRKRVESESKQEKANRIISEAIARAKERGERNI PRVMSPENFP SASVEGKEEKGRMRMKS PKPDRDNKKPKTY  
SKLKEKTKIGKLIITLTKKHKRRNESSELSDAEQRSQHTFKEQHSQKRRSNRQIKRKKYAEDAEGKQSEEEV  
KGSRLVKRNSAPPPGEQPLQLFVENPSEEDAAIVDKILACRTVKKEVSPGVMLDIEEFFVKYKNSYLVHCEWA  
TEQQLLKDKRIQQKIKRFLRQAQRAHFADMEEEPFNPDYVEVDRILEVSFCEDKDTGESVIYYLVKWCSLP  
YEDSTWELKEDVDLAKIEEFEQLQASRPDTRHLDRPPSNIWKKIEQSREYKNGNQLREYQLEGLNWLLFNWYN  
RRNCILADEMGLGKTIQSITFLYEILLTGIRGPFLLIAPLSTIANWEREFRTWTDINVVVYHGSLSISRQMIQQ  
YEMYFRDSQGRIRGAYRFQAIITTFEMILGGCGELNAIDWRCVIIDEAHRLKKNCKLLEGLKLMNLEHKVL  
LTGTPLQNTVEELFSLHFLEPLRFPSESTFMQEFGLDTEEQVQKQLQAILKPMMLRRLKEDVEKKLAPKEET  
IIEVELTNIQKKYYRAILEKNFSFLSKGAGQTNVPLVNTMMELRKCCHNHPYLIKGAEEKILGEFRDTPNSA  
SDFHLQAMIQSAGKLVLDKLLPKMKAGGHKVLIFSQMVRCLEIDEDYLIHKRYLYERIDGRVGRNLRQAAD  
RFSKPDSDRFVLLCTRAGGLGINLTAADTCIIFDSWNPQNDLQAQARCHRIGONKAVKVYRLVTRNSYERE

MFDRASLKLGLDKAVLQSMSGRDSNVSGIQQLSKKEIEDLLRRGAYGAIMEEEDGSKFCEEDIDQILLRRTK  
TITIESEGRGSTFAKASFVAGNRTDISLDDPNFWQKWAKKAELDIDTISGRNSLVIDTPRIRKQTRPFSATK  
DELAELSEAESEGEKPKLRRPCDRSGGYGRTECFRVEKNLLVYGWRWREILSHGRFKRQLNKHDEVEVICRA  
LLAYCLIHRYGDEKIKGFIWDLITPTEDGQTRELQNLHGLSAPVPRGRKGGKVKQTQTSSFDIQKAEWLRKYNP  
EQLLQDEGYKXKHKHCNKVLLRVRMLYLLKQEVIGNESQKVFVDGVDASDIDVWVPEPDHSEVPAAWWDFDAD  
KSLLIIGVFKHGYEKYNTIRADPALCFLEVRGKPDKAVAAEQRANDYMDGDVEDPEYKPAIAIFKDDIEDDVS  
SPGDLVIADGEGQLMEGDKVYWPSPALTTTLRRLITAYQRTNKNRHIQQMQPTFSLPANAMQPLYEATLNP  
KMAAKIERQQRWTRREADFYRVVSTFGVVFDPDRGQFDWTKFRALARLHKKTDNSLEKYLCAFMSCRRVCR  
LPSKEELVDPNIFIQPIITEERASRTLYRIELLRKVREQALRHPQLFERLKLCHPNPDLPIWWECSHHRDRLLI  
GAAKHGVSRTDYHILRDPELSFMQAQRNYNQSKAAHSRTSAPLLQQYQVALSASPLTSLPRLLAGKGTLL EDM  
KVKSESLTEEPQSSEESMSMETRTRVKSEPVSPKNGVLSQATGDQKSGGKSETDRRMVAARTEPLTPNPAS  
KKPRVHKRGSQSSSDSDSARSSCSSRSSSSSSSSSSSSSSSHSRSGSSSSSSSSSSSSSSSSSSSSSSSSSSSS  
SSSEESDSEEDVQKREGTPHRKAYDEESVASLSTTQDETQDSFQANNGTPESAYLLQGGYMLAASYWPKDRVM  
INRLDSICQTVLKGKWPARRHYDANTVASFYTTKLLDSPGAATERGEPVPTPPAVAVREEHEQSAQMSKVK  
KHVREKEFTVVKIKDEGGLKLTQKQGLAQKRPFDGEDGALGQQQYLTRLRELQSTSETSLVNLPKAVPASGTS  
IQPTLGANGAILDSQPIVKKRRRGRNRNVEGADILFLNRNKPNIPTGMNPALSYPPQRIPTDESVPVIVNL  
RNRARKVGGAFAPPLKDLRFLKENSEYGVAPWGDVVKQSGFLPESMFERILTGPVVREEVSRGRPKSGI  
AKATTAAVPAGSVPGNPLLANGLLPGVDLTALQALQNLQNLQSLQVTAGLMGMPAGLSSGGETKNMAAMFP  
MLFSGMAGLPNLLGMGGLSKTAESGAEEKRGNDSKELEGKERTESQSPENGGERCVPGPSSTSSSTAALSSA  
AAKPIALNPLLLSNILYPGMLLTPGLNLHLPTLSQSNADFVQKNKSDDLSSKSVEIKEENSVRDQEEKGG  
TEPSPLNENSTDEGSERASSGSDSSSSSESDSDSSNED\*  
>ENSMUSP00000046356\_c.4874:A>T\_p.K1625N ENSMUST00000048665.8|Chd9-  
201|ENSMUSG00000056608|+|chr8:g.91742463:A>T  
MTDPMDDFFDDANLFGETLEGLSDDTFVQPGPVSLVDELNLGAEFEPLHIDSLNHVQGTPTHQKMADFEQLSQ  
FDSMKHFHPVNFVSGFVVEHVLSPHSQFNCSPHPPNQPNGLFQDQVADGSPMWHQQTATGLANQNGSPFHQPGH  
SHSLHQNKSFVAHPDFALQASEHQTCCSSLHSQSRSLNPNPGQNSLQAKNFLDANVSGAHRVNVNHLATAP  
SSQQTLPVQFSPTANPPAHFLKCSHQEGNYNRPSPSMTSCSVSNQQFP SHYFSSSGHVSPSSLLQSSAGLA  
PGHTNQALSDFAGSNSFSPHRGMKQEPHQHLLNPTPSLNSNPFQILHSSHPQGNYSNSKLSPVHMFDPVDA  
GPPVGHFNDHAETNGFSSLEENLLHHVDSHAEPFAGLDPEDLLQEGLLPQFDESFPFGQDNSNHVLDHDLDRQF  
TSHLVSRPSDMAQTQLQYQARGWPSPLSTNHQHLHSRNLCLQRQPSSKKSQDGSQTYTKLQNTQVRVMSEKK  
PRKRVESESKQEKANRIISEAIAKAKERGERNIPRVMSPENFPASAVEGKEEKRRMRKSKPKDRDNKKPKTY  
SKLKEKTKIGKLIITLGGKHKRRNESSELSDAEQRSQHTFKEQHSQKRRSNRQIKRKKYAEDEAGKQSEEEV  
KGLSRVKNRSAPPPGEQPLQFLVENPSEEDAAIVDKILACRTVKKEVSPGMVLDIEEFFVKYKNYSYLHCEWA  
TEQQLLKDRIQKIKRFLRQAQRAHFLADMEEPFNPNDYVEVDRILEVSFCEDKDTGESVIYLVKWCSLP  
YEDSTWELKEDVDLAKIEEFEQLQASRPDTRHLDRPPSNWIKKIEQSREYKNGNQLREYQLEGLNLLFNWYN  
RRNCILADEMGLGKTIQSITFLYEILLTGIRGPFLLIAPLSTIANWEREFRTWTDINVVVYHGSLSISRQMIQQ  
YEMYFRDSQGRIRGAYRFQAIITTFEMILGGCGELNAIDWRCVIIDEAHRLKNKNCKLLEGLKLMNLEHKVL  
LTGTPLQNTVEELFSLHFLPLRFPSESTFMQEFGLDTEEQVQLQAILKPMMLRRLKEDVEKKLAPKEET  
IEVELTNIQKKYYRAILEKNFSFLSKGAGQTNVPLNVTMMELRKCENHPYLIKGAEEKILGEFRDTPNPSA  
SDFHLQAMIQSAGKLVLDKLLPKMKAGGHKVLIFSQMVRCLDILEDYLIHKRYLYERIDGRVRGNLQAAID  
RFSKPDSDRFVLLCTRAGGLGINLTAADTCIIFDSWNPQNDLQAQARCHRIGQNKAVKVVYRLVTRNSYERE  
MFDRASLKLGLDKAVLQSMSGRDSNVSGIQQLSKKEIEDLLRRGAYGAIMEEEDGSKFCEEDIDQILLRRTK  
TITIESEGRGSTFAKASFVAGNRTDISLDDPNFWQKWAKKAELDIDTISGRNSLVIDTPRIRKQTRPFSATK  
DELAELSEAESEGEKPKLRRPCDRSGGYGRTECFRVEKNLLVYGWRWREILSHGRFKRQLNKHDEVEVICRA  
LLAYCLIHRYGDEKIKGFIWDLITPTEDGQTRELQNLHGLSAPVPRGRKGGKVKQTQTSSFDIQKAEWLRKYNP  
EQLLQDEGYKXKHKHCNKVLLRVRMLYLLKQEVIGNESQKVFVDGVDASDIDVWVPEPDHSEVPAAWWDFDAD  
KSLLIIGVFKHGYEKYNTIRADPALCFLEVRGKPDKAVAAEQRANDYMDGDVEDPEYKPAIAIFKDDIEDDVS  
SPGDLVIADGEGQLMEGDKVYWPSPALTTTLRRLITAYQRTNKNRHIQQMQPTFSLPANAMQPLYEATLNP  
KMAAKIERQQRWTRREADFYRVVSTFGVVFDPDRGQFDWTKFRALARLHKKTDNSLEKYLCAFMSCRRVCR  
LPSKEELVDPNIFIQPIITEERASRTLYRIELLRKVREQALRHPQLFERLKLCHPNPDLPIWWECSHHRDRLLI  
GAAKHGVSRTDYHILRDPELSFMQAQRNYNQSKAAHSRTSAPLLQQYQVALSASPLTSLPRLLAGKGTLL EDM  
KVKSESLTEEPQSSEESMSMETRTRVKSEPVSPKNGVLSQATGDQKSGGKSETDRRMVAARTEPLTPNPAS  
KKPRVHKRGSQSSSDSDSARSSCSSRSSSSSSSSSSSSSSSHSRSGSSSSSSSSSSSSSSSSSSSSSSSSSSSS  
SSSEESDSEEDVQKREGTPHRKAYDEESVASLSTTQDETQDSFQANNGTPESAYLLQGGYMLAASYWPKDRVM  
INRLDSICQTVLKGKWPARRHYDANTVASFYTTKLLDSPGAATERGEPVPTPPAVAVREEHEQSAQMSKEG  
GLKLTQKQGLAQKRPFDGEDGALGQQQYLTRLRELQSTSETSLVNLPKAVPASGTSIQPTLGANGAILDSQP  
IVKRRRGRNRNVEGADILFLNRNKPNIPTGMNPALSYPPQRIPTDESVPVIVNLKDGTRLAGDDAPKRKD

LDRWLKEHPGYVEDLGAFIPRVQLHEGRPKQKRHRRCRNPKNKLDINSLTGEERVQLINRRNARKVGGAFAPPLK  
DLCRFLKENSEYGVAPPEWGDVVKQSGFLPESMFERILTGPVVREEVSRGRPKSGIAKATTA AVPAGSVPG  
NPLLANGLLPVGDVLTALQALQONLQNLQSLQVOTAGLMGMPAGLSSGGETKNMAAMFPMLFSGMAGLPNLLGMG  
GLLSKTAESGAEKRGNDKSKELEGGKERTESQSPENGGERCVPGPSSTSSSTAALSSAAAAPKIALNPLLNSNI  
LYPGMLLTPLNLHLPTLSQSNADFVQKNKSDLDSSKSVEIKEENSRVRDQEEKGGTEPSPNLNENSTDEGSE  
RASSGSDSSSSSSSESDSSSNED\*

>ENSMUSP00000147407\_c.4874:A>T\_p.K1625N ENSMUST00000209203.2|Chd9-  
203|ENSMUSG00000056608|+|chr8:g.91742463:A>T

MTDPMDDFFDDANLFGETLEGLSDDTFVQPGPVSLVDELNLGAEFEPLHIDSLNHVQGTPTHQKMADFEQLSQ  
FDSMKFHPVNVQSFSGSPVEHVLSPHSQFNCSPIHPPNPNGLFQDVADGSPMWHQTATGLANQNGSPFHQPGH  
SHSLHQNKSFVAHPDFALFQASEHQTCSSLSHSQQSRNLNPGQNSLGQAKNFLDANVSGAHRVNVNHLATAP  
SSQQTLPVQFSPTANPPAHFLKCSHQEGNYNRPSMTSCSVNSQFPSSHYSFSSGHVSPSSLLQSSAGLA  
PGHTNQALSDFAGSNSFSPHRGMKQEPHQHLLNPTPSLNSNNFQILHSSHPQGNYSNSKLSPVHMNFPDPVDA  
GPPVGHFNDHAETNGFSSLEENLLHHVDSHAEPFAGLDPEDLLQEGLLPQFDESFPFGQDNSNHVLDHDLDRQF  
TSHLVSRPSDMAQTQLQYQARGWPSPLSTNHQHLHSRNLHCLQRQPPSSKKS DGSGTYTKLQNTQVRVMSEKK  
PRKRVESESKQEKANRIISEAIARAKERGERNIPRVMSPENFPASVEGKEEKRGRMRMKS PKDRDNKKPKTY  
SKLKEKTKIGKLIITLGGKHKRRNESSELSDAEQRSQHTFKEQHSQKRRSNRQIKRKKYAEAEAGKQSEEEV  
KGS LRVKRNSAPPPGEQPLQLFVENPSEEDAAIVDKILACRTVKKEVSPGVMLDIEEFFVKYKNYSYLHCEWA  
TEQQLLKDKRIQQKIKRFLRQAQRAHFLADMEEPFNPDYVEVDRIEVSFCEDKDTGESVIYYLVKWCSLP  
YEDSTWELKEDVDLAKIEEFEQLQASRPDTRHLDRPPSNIWKKIEQSREYKNGNQLREYQLEGLNWLFFNWN  
RRNCILADEMGLGKTIQSITFLYEILLTGIRGPFLLIAPLSTIANWEREFRTWTDINVVVYHGSLSRQMIQQ  
YEMYFRDSQGRIRGAYRFQAIITTFEMILGGCGELNAIDWRCVIIDEAHRLKNKNCKLLEGLKLMNLEHKVL  
LTGTPLQNTVEELFSLHFLFLEPLRFPESESTFMQEFGDLKTEEQVQKLQAILKPMMLRRLKEDVEKKLAPKEET  
IEVELTNIQKKYYRAILEKNFSLSKGAGQTNVPLNVTMMELRKCNCNHPYLIKGAEEKILGEFRDTPNPSA  
SDFHLQAMIQSAGKLVLDKLLPKMKAGGHKVLIFSQMVRCLDILEDYLIHKRYLYERIDGRVGRNLRQAAID  
RFSKPDSDRFVLLCTRAGGLINLTAADTCIIFDSDWNPQNDLQAQARCHRIGONKAVKYRVLVTRNSYERE  
MFDRA SLKGLGLDKAVLQSMGRDSDNVSGIQQLSKKEIEDLLRRGAYGAIMEEDEGSKFCEEDIDQILLRRTK  
TITIESEGRGSTFAKASFVAGNRDIDSLDDPNFWQKAKKAELDIDTISGRNSLVIDTPRIRKQTRPFSATK  
DELAELSEAESEGEKPKLRPCDRSGGYGRTECFRVEKNLLVYGWRWREILSHGRFKRQLNEHDVEVICRA  
LLAYCLIHRYGDEKIKGFIWDLITPTEDGQTRQLNHLGLSAPVPRGRKGGKVKVTQTSSFDIQAELWRKYNP  
EQLLQDEGYKHKHHCNNVLLRVRMLYYLQEVIGNESQKVFVDGVDASDIDVWVPEPDHSEVPAAWWDFDAD  
KSL LIGVFKHGYEKYNTIRADPALCFLERVGKPD DKAVAAEQRANDYMDGDVEDPEYKPA PAIFKDDIEDDVS  
SPGDLVIADGEGQLMEGDKVYWP TPSALTTRRLRLITAYQRTNKNRHIQQMQPTFSLPANAMQPLYEEATLNP  
KMAAKIERQORIGRSKYFYSTNHRGTCF\*

>ENSMUSP00000148088\_c.4874:A>T\_p.K1625N ENSMUST00000209423.2|Chd9-  
205|ENSMUSG00000056608|+|chr8:g.91742463:A>T

MTDPMDDFFDDANLFGETLEGLSDDTFVQPGPVSLVDELNLGAEFEPLHIDSLNHVQGTPTHQKMADFEQLSQ  
FDSMKFHPVNVQSFSGSPVEHVLSPHSQFNCSPIHPPNPNGLFQDVADGSPMWHQTATGLANQNGSPFHQPGH  
SHSLHQNKSFVAHPDFALFQASEHQTCSSLSHSQQSRNLNPGQNSLGQAKNFLDANVSGAHRVNVNHLATAP  
SSQQTLPVQFSPTANPPAHFLKCSHQEGNYNRPSMTSCSVNSQFPSSHYSFSSGHVSPSSLLQSSAGLA  
PGHTNQALSDFAGSNSFSPHRGMKQEPHQHLLNPTPSLNSNNFQILHSSHPQGNYSNSKLSPVHMNFPDPVDA  
GPPVGHFNDHAETNGFSSLEENLLHHVDSHAEPFAGLDPEDLLQEGLLPQFDESFPFGQDNSNHVLDHDLDRQF  
TSHLVSRPSDMAQTQLQYQARGWPSPLSTNHQHLHSRNLHCLQRQPPSSKKS DGSGTYTKLQNTQVRVMSEKK  
PRKRVESESKQEKANRIISEAIARAKERGERNIPRVMSPENFPASVEGKEEKRGRMRMKS PKDRDNKKPKTY  
SKLKEKTKIGKLIITLGGKHKRRNESSELSDAEQRSQHTFKEQHSQKRRSNRQIKRKKYAEAEAGKQSEEEV  
KGS LRVKRNSAPPPGEQPLQLFVENPSEEDAAIVDKILACRTVKKEVSPGVMLDIEEFFVKYKNYSYLHCEWA  
TEQQLLKDKRIQQKIKRFLRQAQRAHFLADMEEPFNPDYVEVDRIEVSFCEDKDTGESVIYYLVKWCSLP  
YEDSTWELKEDVDLAKIEEFEQLQASRPDTRHLDRPPSNIWKKIEQSREYKNGNQLREYQLEGLNWLFFNWN  
RRNCILADEMGLGKTIQSITFLYEILLTGIRGPFLLIAPLSTIANWEREFRTWTDINVVVYHGSLSRQMIQQ  
YEMYFRDSQGRIRGAYRFQAIITTFEMILGGCGELNAIDWRCVIIDEAHRLKNKNCKLLEGLKLMNLEHKVL  
LTGTPLQNTVEELFSLHFLFLEPLRFPESESTFMQEFGDLKTEEQVQKLQAILKPMMLRRLKEDVEKKLAPKEET  
IEVELTNIQKKYYRAILEKNFSLSKGAGQTNVPLNVTMMELRKCNCNHPYLIKGAEEKILGEFRDTPNPSA  
SDFHLQAMIQSAGKLVLDKLLPKMKAGGHKVLIFSQMVRCLDILEDYLIHKRYLYERIDGRVGRNLRQAAID  
RFSKPDSDRFVLLCTRAGGLINLTAADTCIIFDSDWNPQNDLQAQARCHRIGONKAVKYRVLVTRNSYERE  
MFDRA SLKGLGLDKAVLQSMGRDSDNVSGIQQLSKKEIEDLLRRGAYGAIMEEDEGSKFCEEDIDQILLRRTK  
TITIESEGRGSTFAKASFVAGNRDIDSLDDPNFWQKAKKAELDIDTISGRNSLVIDTPRIRKQTRPFSATK  
DELAELSEAESEGEKPKLRPCDRSGGYGRTECFRVEKNLLVYGWRWREILSHGRFKRQLNEHDVEVICRA  
LLAYCLIHRYGDEKIKGFIWDLITPTEDGQTRQLNHLGLSAPVPRGRKGGKVKVTQTSSFDIQAELWRKYNP





AAAKPIALNPLLLSNILYPGMLLTPGLNLHLPTLSQSNADFVQKNKSDDLDSKKSVEIKEENSRVRDQEEKGG  
TEPSPLNENSTDEGSERASSGSDSSSSSESDSSSNED\*  
>rs49334146\_ENSMUSP00000046356\_c.5248:A>G\_p.D1750G  
ENSMUST00000048665.8|Chd9-201|ENSMUSG00000056608|+|chr8:g.91752012:A>G  
MTDPMDDFFDDANLFGETLEGLSDDTFVQPGPVS LVDELNLGAEFEPLHIDSLNHVQGTPTHQKMADFEQLSQ  
FDSMKFHPVNVQSFSGSPVEHVLSPHSQFNCSPIHPPNQPNGLFQDVADGSPMWHQTATGLANQNGSPFHQPGH  
SHSLHQNKSFVAHPDFALFQASEHQTCSSLSHSQQSRSNLNPQNLSLQAKNFLDANVSGAHRVNVNHLATAP  
SSQQTLPVQFSPTANPPAHFLKCSSHQEGNYNRPSPSMTSCSVNSQQFP SHYSFSSGHVSPSSLLQSSAGLA  
PGHTNQALSDFAGSNFSFPHRGMKQEP TQHLLNPTPSLNSNNFQILHSSHPQGNYSNSKLSPVHMNFPDPVDA  
GPPVGHFNDHAETNGFSSLEENLLHHVDSHAEPFAGLDPEDLLQEGLLPQFDES PFGQDNSNHVLDHDLDRQF  
TSHLVS RPSDMAQTQLQYQARGWPSPLSTNHQHLHSRNLCLQRQPSSKKS DSGSGTYTKLQNTQVRVMSEKK  
PRKRVESESKQEKANRI I SEAIARAKERGERNI PRVMS PENFP SASVEGKEEKRGRMRMKS PKDRDNKKPKTY  
SKLKEKTKIGKLIITLGGKHKRNESSDELSDAEQRSQHTFKEQHSQKRRSNRQIKRKKYAEAEAGKQSEEEV  
KGSRLVRKNSAPPPGEQPLQLFVENPSEEDAAIVDKILACRTVKKEVSPGVMLDIEEFFVKYKNYSYLHCEWA  
TEQQLLKDKRIQQKIKRFLRQAQRAHFLADMEEPFNPDYVEVDRI LEV SFCEDKDTGESVIYYLVKWC SLP  
YEDSTWELKEDVDLAKIEEFEQLQASRPDTRHLDRPPSNIWKKIEQSREYKNGNQLREYQLEGLNWL LFNWYN  
RRNCILADEMGLKGTIQSITFLYEILLTGIRGPFLLIAPLSTIANWEREFRTWTDINVVVYHGSLISRQMIQQ  
YEMYFRDSQGRIRGAYRFQAIITTFEMILGGCGELNAIDWRCV IIDEAHLRKNKNCKLLEGLKLMNLEHKVL  
LTGTPLQNTVEELFSLHLFLEPLRFPESESTFMQEFGLDTEEQVQKLA I LKPMMLRRLKEDVEKKLAPKEET  
IIEVELTNIQKKYRAILEKNFSFLSKGAGQTNVNLVNTMMELRKC CNHPYLIKGAEEKILGEFRDYNPSA  
SDFHLQAMIQSAGKLVLDKLLPKMKAGGHKVLIFSQMVRCLDILEDYLIHKRYLYERIDGRVGRNLRQA AID  
RFSKPDSDRFVLLCTRAGGLGINLTAADTCIIFDSDWNPQNDLQAQARCHRIGQNKAVKYRLVTRNSYERE  
MFDRASLKLGLDKAVLQSMSGRDSNVSGIQQLSKKEIEDLLRRGAYGAIMEEDEGSKFCEEDIDQILLRRTK  
TITIESEGRGSTFAKASFVAGNRD TDISLDDPNFWQKWA KKAELDIDTISGRNSLVIDTPRIRKQTRPFSATK  
DELAELSEAESEGEKPKLRPCDRSGGYGRTECFRVEKNLLVYWGWRWEILSHGRFKRQLNEHDVEVICRA  
LLAYCLIHYRGDEKIKGFIWDLITPTEDGQTR ELNHLGLSAPVPRGRKGGKVKQTQTSSFDIQA EAWLRKYNP  
EQLLQDEGYSDFAGSNFSFPHRGMKQEP TQHLLNPTPSLNSNNFQILHSSHPQGNYSNSKLSPVHMNFPDPVDA  
KSL LIGVFKHGYEKYNTIRADPALCFLE RVGKPD DKAVAAEQRANDYMDGDVEDPEYKPA PAIFKDDIEDGVS  
SPGDLVIADGEGQLMEGDKVYWP TPSALTTRLRRLITAYQRTNKNRHIQQMQPTFSLPANAMQPLYEEATLNP  
KMAAKIERQQRWTRREADFYRVVSTFGVVFDPDRGQFDWTKFRALARLHKKTDNSLEKYLCAFMSCRRVCR  
LPSKEELVDPNIFIQPI TEERASRTLYRIELLRKVREQALRHPQLFERLKLCHPNPDLPIWWECSHHRD LLI  
GAAKHGVSRTDYHILRDP ELSFMAAQRNYNQSKAAHSRTSAPLLQQYQVALSASPLTSLPRL LGAKTLL EDM  
KVKSESLTEEPQSSEEE SMSSMETRTRVKSEPVSPKNGVLSQATGDQKSGGKSETDRRMVAARTEPLTPNPAS  
KKPRVHKRGSQSSSDSDSDSARSSCSSRSSSSSSSSSSSSCSHSRSGSSSSSSSSSSSCSSASSSSSSSSSSSSSSSS  
SSSESDSEEDVQKREGTPHRKAYDEESVASLSTTKLQDQSFQANNGTPESAYLLQGGYMLAAS YWPKDRVM  
INRLDSICQTVLKGKWP SARHYDANTVASFYTTKLLD SPGAATERGEP SVPTPPAVAVREEHQESAQMSKEG  
GLKLTQKQGLAQKRPFDGEDGALGQQYLTRLRELQSTSETSLVNLPKAVPASGTSIQPTL LGANGA I LDSQP  
IVKRRRGRNRNVEGADILFLNRNKPPNHIPTGMNPALSYPPQRI PDTESPVPV INLKDGT RLAGDDAPKRKD  
LDRWLKEHPGYVEDLGA FIPRVQLHEGRPKQKRHRCRNPNKLDINSLTGEERVQLINRRNARKVGGAFAPPLK  
DLCRFLKENSEYGVAP EWGDVVKQSGFLPESMFERILTGPVVREEVSRRGRRPKSGIAKATTA AAVPAGSVPG  
NPLL ANGLLPGVDLTALQALQQLQNLQSLQV TAGLMGMPAGLSSGGETKNMAAMFPMLFSGMAGLPNLLGMG  
GLLSKTAESGAEKRGND SKELEGGKERTESQSPENGGERCVP GSPSTSS TAALSSAAA AAKPIALNPLLLSNI  
LYPGMLLTPGLNLHLPTLSQSNADFVQKNKSDDLDSKKSVEIKEENSRVRDQEEKGGTEPSPLNENSTDEGSE  
RASSGSDSSSSSESDSSSNED\*

>rs49334146\_ENSMUSP00000147407\_c.5248:A>G\_p.D1750G  
ENSMUST000000209203.2|Chd9-203|ENSMUSG00000056608|+|chr8:g.91752012:A>G  
MTDPMDDFFDDANLFGETLEGLSDDTFVQPGPVS LVDELNLGAEFEPLHIDSLNHVQGTPTHQKMADFEQLSQ  
FDSMKFHPVNVQSFSGSPVEHVLSPHSQFNCSPIHPPNQPNGLFQDVADGSPMWHQTATGLANQNGSPFHQPGH  
SHSLHQNKSFVAHPDFALFQASEHQTCSSLSHSQQSRSNLNPQNLSLQAKNFLDANVSGAHRVNVNHLATAP  
SSQQTLPVQFSPTANPPAHFLKCSSHQEGNYNRPSPSMTSCSVNSQQFP SHYSFSSGHVSPSSLLQSSAGLA  
PGHTNQALSDFAGSNFSFPHRGMKQEP TQHLLNPTPSLNSNNFQILHSSHPQGNYSNSKLSPVHMNFPDPVDA  
GPPVGHFNDHAETNGFSSLEENLLHHVDSHAEPFAGLDPEDLLQEGLLPQFDES PFGQDNSNHVLDHDLDRQF  
TSHLVS RPSDMAQTQLQYQARGWPSPLSTNHQHLHSRNLCLQRQPSSKKS DSGSGTYTKLQNTQVRVMSEKK  
PRKRVESESKQEKANRI I SEAIARAKERGERNI PRVMS PENFP SASVEGKEEKRGRMRMKS PKDRDNKKPKTY  
SKLKEKTKIGKLIITLGGKHKRNESSDELSDAEQRSQHTFKEQHSQKRRSNRQIKRKKYAEAEAGKQSEEEV  
KGSRLVRKNSAPPPGEQPLQLFVENPSEEDAAIVDKILACRTVKKEVSPGVMLDIEEFFVKYKNYSYLHCEWA  
TEQQLLKDKRIQQKIKRFLRQAQRAHFLADMEEPFNPDYVEVDRI LEV SFCEDKDTGESVIYYLVKWC SLP  
YEDSTWELKEDVDLAKIEEFEQLQASRPDTRHLDRPPSNIWKKIEQSREYKNGNQLREYQLEGLNWL LFNWYN

RRNCILADEMGLGKTIQSITFLYEILLTGIRGPFLIIAPLSTIANWEREFRTWTDINVVVYHGSLISRQMIQQ  
YEMYFRDSQGRIIRGAYRFQAIITTFEMILGGCGELNAIDWRCVIIDEAHLRKNKNCKLLEGLKLMNLEHKVL  
LTGTPLQNTVEELFSLHFLFLEPLRFPSESTFMQEFGLDKEEQVQKLAAILKPMMLRRLKEDVEKKLAPKEET  
IEVELTNIQKKYYRAILEKNFSLSKGAGQTNVPLVNTMMELRKCENHPYLIKGAEEKILGEFRDTPYNSA  
SDFHLQAMIQSAGKLVLDKLLPKMKAGGHKVLIFSQMVRCLDILEDYLIHKRYLYERIDGRVVRGNLRQAAID  
RFSKPDSDRFVLLCTRAGGLGINLTAADTCIIFDSDWNPQNDLQAQARCHRIGQNKAVKVYRLVTRNSYERE  
MFDRAKSLKGLDKAVLQSMGRSDSNVSGIQQLSKKEIEDLLRRGAYGAIMEEEDGSKFCEEDIDQILLRRTK  
TITIESEGRGSTFAKASFVAGNRDTISLDDPNFWQKWAKKAELDIDTISGRNSLVIDTPRIRKQTRPFSATK  
DELAELSEAESEGEKPKLRRPCDRSGGYGRTECFRVEKNLLVYGWRWREILSHGRFRRQLNEHDEVICRA  
LLAYCLIHRYGDEKIKGFIWDLITPTEDGQTRRELQNLHGLSAPVPRGRKGGKVKQTSSFDIQKAEWLRKYNP  
EQLLQDEGYKHKHVKHHCNKVLLRVRMLYLLKQEVIGNESQKVFVDGVDASDIDVWVPEPDHSEVPAAWDFDAD  
KSLLIIGVFKHGYEKYNTIRADPALCFLEVRGKPDKAVAAEQRANDYMDGDVEDPEYKPAPAIKDDIEDGVS  
SPGDLVIADGEGQLMEGDKVYWPSPALTTTLRRLITAYQRTNKNRHIQQMQPTFSLPANAMQPLYEATLNP  
KMAAKIERQQRIGRSKYFYSTNHRGTCF\*

>rs49334146\_ENSMUSP00000148088\_c.5248:A>G\_p.D1750G

ENSMUST00000209423.2|Chd9-205|ENSMUSG00000056608|+|chr8:g.91752012:A>G  
MTDPMMDFDDANLFGETLEGLSDDTFVQPGVSLVDELNLGAEFEPLHIDSLNHVQGTPTHQKMADFEQLSQ  
FDSMKFHPVNQSFSGSPVEHVLSPHSQFNCSPIHPPNQPNGLFQDQVADGSPMWHGQTATGLANQNGSPFHQPGH  
SHSLHQNKSFVAHPDFALFQASEHQTCSSLSHSQQRSRNLNPGQNSLGQAKNFLDANVSGAHRVNVNHLATAP  
SSQQTLPVQFSPTANPPAHFLKCSSHQEGNYNRPSMTSCSVSNSQQFSPHYFSSSGHVSPSSLLQSSAGLA  
PGHTNQALSDFAGSNSFSPHRGMKQEPHQHLLNPTPSLNSNFIQLHSSHPQGNYSNSKLSPVHMFDPVDA  
GPPVGHFNDHAETNGFSSLEENLHHVDSHAEPFAGLDPEDLLQEGLLPQFDESFPFGQDNSNHVLDHDLDRQF  
TSHLVSRPSDMAQTQLQYQARGWPSPLSTNHQHLHSRNLCLQRQPPSSKKS DSGSTYTKLQNTQVRVMSEKK  
PRKRVESESKQEKANRIISEAIARAKERGERNI PRVMS PENFSPASVEGKEEKRGRMRMKS PKDRDNKPKTY  
SKLKEKTKIGKLIITLKGKHKRRNESSELSDAEQRSQHTFKEQHSQKRRSNRQIKRKKYAEADAEKGQSEEEV  
KGLRVLKRN SAPPEQPLQLFVENPSEEDAAIVDKI LACRTVKKEVSPGVMLDIEEFFVYKKNYSYLHCEWA  
TEQQTLKDKRIQPKIKRFLRQAQRAHFLADMEEEPFPNDYVEVDRILEVSFCEDKDGTGESVIYYLVKWCSLP  
YEDQSTWELKEDVDLAKIEEFEQLQASRPDTRHLDRPPSNIWKKIEQSREYKNGNQLREYQLEGLNWLFFNWN  
RRNCILADEMGLGKTIQSITFLYEILLTGIRGPFLIIAPLSTIANWEREFRTWTDINVVVYHGSLISRQMIQQ  
YEMYFRDSQGRIIRGAYRFQAIITTFEMILGGCGELNAIDWRCVIIDEAHLRKNKNCKLLEGLKLMNLEHKVL  
LTGTPLQNTVEELFSLHFLFLEPLRFPSESTFMQEFGLDKEEQVQKLAAILKPMMLRRLKEDVEKKLAPKEET  
IEVELTNIQKKYYRAILEKNFSLSKGAGQTNVPLVNTMMELRKCENHPYLIKGAEEKILGEFRDTPYNSA  
SDFHLQAMIQSAGKLVLDKLLPKMKAGGHKVLIFSQMVRCLDILEDYLIHKRYLYERIDGRVVRGNLRQAAID  
RFSKPDSDRFVLLCTRAGGLGINLTAADTCIIFDSDWNPQNDLQAQARCHRIGQNKAVKVYRLVTRNSYERE  
MFDRAKSLKGLDKAVLQSMGRSDSNVSGIQQLSKKEIEDLLRRGAYGAIMEEEDGSKFCEEDIDQILLRRTK  
TITIESEGRGSTFAKASFVAGNRDTISLDDPNFWQKWAKKAELDIDTISGRNSLVIDTPRIRKQTRPFSATK  
DELAELSEAESEGEKPKLRRPCDRSGGYGRTECFRVEKNLLVYGWRWREILSHGRFRRQLNEHDEVICRA  
LLAYCLIHRYGDEKIKGFIWDLITPTEDGQTRRELQNLHGLSAPVPRGRKGGKVKQTSSFDIQKAEWLRKYNP  
EQLLQDEGYKHKHVKHHCNKVLLRVRMLYLLKQEVIGNESQKVFVDGVDASDIDVWVPEPDHSEVPAAWDFDAD  
KSLLIIGVFKHGYEKYNTIRADPALCFLEVRGKPDKAVAAEQRANDYMDGDVEDPEYKPAPAIKDDIEDGVS  
SPGDLVIADGEGQLMEGDKVYWPSPALTTTLRRLITAYQRTNKNRHIQQMQPTFSLPANAMQPLYEATLNP  
KMAAKIERQQRWTRREEADFYRVVSTFGVVFDPDRGQFDWTKFRALARLHKKTDNSLEKYLCAFMSCRRVCR  
LPSKEELVDPNIFIQPI TEERASRTLYRIELLRKVREQALRHPQLFERLKLCHPNPDLPIWWECEGSHDRDLI  
GAAKHGVSRTDYHILRDPELSFMQAQRNYNQSKAAHSRTSAPLLQYQVALSASPLTSLPRLLGAKGTLLEDM  
KVKSESLTEEPQSSSEESMSMETRTRVKSEPVSPKNGVLSQATGDQKSGGKSETDRRMVAARTEPLTPNPAS  
KKPRVHKRGSQSSSDSDSDSARSSCSSRSSSSSSSSSSSSSSSHSRSGSSSSSSSSSSSSASSSSSSSSSSSSSS  
SSSEESDSEEDVQKREGTPHRKAYDEESVASLSTTQDETQDSFQANNGTPESAYLLQGGYMLAASYPKDRVM  
INRLDSICQTVLKGKWPARRHYDANTVASFYTTKLLDSPAATERGEPVPTPPAVAVREEHEQSAQMSKVK  
KHVREKEFTVKIKDEGGLKLTQKQGLAQKRPFDGEDGALGQQQYLTRLRELQSTSETSLVNLPKAVPASGTS  
IQPTLGANGAILDSQPIVKKRRGRRRNVEGADILFLNRNKPNIPTGMNPALSYPQPQRI PDTESEVPVINL  
KDGTRLAGDDAPKRKDLDRWLKEHPGYVEDLGAFI PRVQLHEGRPKQKRHRCRNPNKLDINSLTGEERVQLIN  
RRNARKVGGAFAPPLKDLCRFLKENSEYGVAPWGDVVKQSGFLPESMFERILTGVPVREEVSRGRPKSGI  
AKATTAAVPAGSVPGNPLLANGLLPGVDLTALQALQNLQNLQSLQVTAGLMGMPAGLSSGGETKNMAAMFP  
MLFSGMAGLPNLLGMGGLL SKTAESGAEEKRGNDSKELEGNKERTESQSPENGGERCVPGPSPTSSTAALSSA  
AAKPIALNPLLLSNILYPGMLLTPGLNLHLPTLSQSNADFVQKNKSDDLDSKKSVEIKEENSRVDRDQEEKGG  
TEPSPLNENSTDEGSEERASSGSDSSSSSESDSSSNE\*

>rs49334146\_ENSMUSP00000105243\_c.5248:A>G\_p.D1750G

ENSMUST00000109614.9|Chd9-202|ENSMUSG00000056608|+|chr8:g.91752012:A>G

MTDPMDDFFDDANLFGETLEGLSDDTFVQPGPVSLVDELNLGAEFEPLHIDSLNHVQGTPTHQKMADFEQLSQ  
 FDSMKFHPVNVQSFQSPVEHVLSPHSQFNCSPIHPPNQPNGLFQDVADGSPMWHQATATGLANQNGSPFHQPGH  
 SHSLHQNKSFVAHPDFALFQASEHQTCSSLSHSQQSRNLNPGQNSLGQAKNFLDANVSGAHRVNVNHLATAP  
 SSQQTLPVQFSPTANPPAHFLKCSSHQEGNYNRPSPSMTSCSVNSQQFSPSHYSFSSGHVSPSSLLQSSAGLA  
 PGHTNQALSDFAGSNFSFPHRGMKQEPHQHLLNPTPSLNSNNFQILHSSHPQGNYSNSKLSPVHMNFPDPVDA  
 GPPVGHFNDHAETNGFSSLEENLLHHVDSHAEPFAGLDPEDLLQEGLLPQFDES PFGQDNSNHVLDHDLDRQF  
 TSHLVSRPSDMAQTQLQYQARGWPSPLSTNHQHLHSRNLHCLQRQPSSSKKSDGSGTYTKLQNTQVRVMSEKK  
 PRKRVESESKQEKANRI I SEAIARAKERGERNI PRVMS PENFP SASVEGKKEKRGRMRKSKPKDRDNKKPKTY  
 SKLKEKTKIGKLIITLGKKHKRRNESSELSDAEQRSQHTFKEQHSQKRRSNRQIKRKKYAEDEAGKQSEEEV  
 KGSRLVKRNSAPPPGEQPLQLFVENPSEEDAAIVDKILACRTVKKEVSPGVMLDIEEFFVKYKNYSYLHCEWA  
 TEQQLLKDKRIQQKIKRFLRQAQRAHFLADMEEPFNPDYVEVDRI LEVSFCEDKDTGESVIYYLVKWCSLP  
 YEDSTWELKEDVDLAKIEEFEQLQASRPDTRHLDRPPSNIWKKIEQSREYKNGNQLREYQLEGLNWLFFNWYN  
 RRNCILADEMGLGKTIQSITFLYEILLTGIRGPFLLIAPLSTIANWEREFRTWTNDINVVVYHGSLSRQMIQQ  
 YEMYFRDSQGRIRGAYRFQAIITTFEMILGGCGELNAIDWRCVIIDEAHRLKKNCKLLEGLKLMNLEHKVL  
 LTGTPLQNTVEELFSLHFLFLEPLRFPSESTFMQEFGLDKTEEQVQKLQAILKPMMLRRLKEDVEKKLAPKEET  
 IIEVELTNIQKKYYRAILEKNFSLSKGAGQTNVPLNVTMMELRKCCHNHPYLIKGAEEKILGEFRDTPNPSA  
 SDFHLQAMIQSAGKLVLIDKLLPKMKAGGHKVLIFSQMVRCLDILEDYLIHKRYLYERIDGRVRGNLRQA  
 IDRFSPDSDRDFVLLCTRAGGLINLTAADTCIIFDSDWNQNDLQAQARCHRIGQNKAVKVEYRLVTRNSYERE  
 MFDRASLKLGLDKAVLQSMSGRSDNSVSGIQQLSKKEIEDLLRRGAYGAIMEEEDGSKFCEEDIDQILLRRTK  
 TITIESEGRGSTFAKASFVAGNRTDISLDDPNFWQKAKKAELDIDTISGRNSLVIDTPRIRKQTRPFSATK  
 DELAELSEAESEGEKPKLRPCDRSGGYGRTECFRVEKNLLVYGWRWREILSHGRFKRQLNEHDVEVICRA  
 LLAYCLIHRYGDEKIKGFIWDLITPTEDGQTRQLNHLGLSAPVPRGRKGGKVKQTQSSFDIQKAEWLKYNP  
 EQLLQDEGYKHKVHKHCNKVLLRVRMLYYLQKEVIGNESQKVFQDGDASDIDVWVPEPDHSEVPAAWWDFDAD  
 KSLDIGVFKHGYEKYNTIRADPALCFLEVRGKPDKAVAAEQRANDYMDGDVEDPEYKPAFAIKDDIEDGVS  
 SPGLDVIADGEGQLMEGDKVYWPSPALTRRLRLITAYQRTNKNRHIQQMQPTFSLPANAMQPLYEATLNP  
 KMAAKIERQWRNTRREEDFYRVVSTFGVVFDPDRGQFDWTKFRALARLHKKTDNSLEKILCAFMSMCRRCR  
 LPSKEELVDPNIFIQPIEERASRTLYRIELLRKVRQALRHPQLFERLKLCHPNPDLPIWWECEGSHDRDLI  
 GAAKHGVSRTDYHILRDPELSFMQAQRNYNQSKAAHSRTSAPLLQQYQVALSASPLTSLPRLLAGKGTLLLED  
 KVKSESLTEEPQSSEESMSMETRTRVKSEPVSPKNGVLSQATGDQKSGGKSETDRRMVAARTEPLTPNPAS  
 KKPRVHKRGSQSSSDSDSARSSSSSSSSSSSSSSSSSSSSSSSSSSSSSSSSSSSSSSSSSSSSSSSSSSSSS  
 SSSEESDSEEDVQKREGTPHRKAYDEESVASLSTTQDETQDSFQANNGTPESAYLLQGGYMLAASYWPKDRVM  
 INRLDSICQTVLKGKWPARRHYDANTVASFYTTKLLDSPGAATERGEPVPTPPAVAVREEHEQSAQMSKVK  
 KHVREKEFTVVIKIDEGGLKLTQKQGLAQKRPFDGEDGALGQQQYLTRLRELQSTSETSLVNLPAVPASGTS  
 IQPTLGANGAILDSQPIVKKRRRGRNVEGADILFLNRNKPNNHIPGMNPAISYPQQRIPDTESPVPVNL  
 KDGTLAGDDAPKRKDLDRWLKEHPGYVEDLGAFIPRVQLHEGRPKQKRHRCRNPNKLDINSLTGEERVQLIN  
 RRNARKVGGAFAPPLKDLRFLKENSEYGVAPWGDVVKQSGFLPEMSFERILTGPPVREVEVSRGRPKSGI  
 AKATTAAVPAGSVPGNPLLANGLLPGVDLTAALQALQNLQNLQSLQVTAGLMGMPAGLSSGGETKNMAAMFP  
 MLFSGMAGLPNLLGMGGLLSKTAESGAEEKRGNDSKELEGKKERTESQSPENGGERCVPGPSSTSSSTAALSSA  
 AAAKPIALNPLLLSNILYPGMLLTPGLNLHLPTLSQSNADFVQKNKSDDLSSKKSVEIKEENSRVRDQEEKGG  
 TEPSPLENSTDEGSERASSGSDSSSSSESDSDSSNED\*

>rs33455121\_ENSMUSP00000046356\_c.5305:G>A\_p.G1769E  
 ENSMUST00000048665.8|Chd9-201|ENSMUSG00000056608|+|chr8:g.91753314:G>A  
 MTDPMDDFFDDANLFGETLEGLSDDTFVQPGPVSLVDELNLGAEFEPLHIDSLNHVQGTPTHQKMADFEQLSQ  
 FDSMKFHPVNVQSFQSPVEHVLSPHSQFNCSPIHPPNQPNGLFQDVADGSPMWHQATATGLANQNGSPFHQPGH  
 SHSLHQNKSFVAHPDFALFQASEHQTCSSLSHSQQSRNLNPGQNSLGQAKNFLDANVSGAHRVNVNHLATAP  
 SSQQTLPVQFSPTANPPAHFLKCSSHQEGNYNRPSPSMTSCSVNSQQFSPSHYSFSSGHVSPSSLLQSSAGLA  
 PGHTNQALSDFAGSNFSFPHRGMKQEPHQHLLNPTPSLNSNNFQILHSSHPQGNYSNSKLSPVHMNFPDPVDA  
 GPPVGHFNDHAETNGFSSLEENLLHHVDSHAEPFAGLDPEDLLQEGLLPQFDES PFGQDNSNHVLDHDLDRQF  
 TSHLVSRPSDMAQTQLQYQARGWPSPLSTNHQHLHSRNLHCLQRQPSSSKKSDGSGTYTKLQNTQVRVMSEKK  
 PRKRVESESKQEKANRI I SEAIARAKERGERNI PRVMS PENFP SASVEGKKEKRGRMRKSKPKDRDNKKPKTY  
 SKLKEKTKIGKLIITLGKKHKRRNESSELSDAEQRSQHTFKEQHSQKRRSNRQIKRKKYAEDEAGKQSEEEV  
 KGSRLVKRNSAPPPGEQPLQLFVENPSEEDAAIVDKILACRTVKKEVSPGVMLDIEEFFVKYKNYSYLHCEWA  
 TEQQLLKDKRIQQKIKRFLRQAQRAHFLADMEEPFNPDYVEVDRI LEVSFCEDKDTGESVIYYLVKWCSLP  
 YEDSTWELKEDVDLAKIEEFEQLQASRPDTRHLDRPPSNIWKKIEQSREYKNGNQLREYQLEGLNWLFFNWYN  
 RRNCILADEMGLGKTIQSITFLYEILLTGIRGPFLLIAPLSTIANWEREFRTWTNDINVVVYHGSLSRQMIQQ  
 YEMYFRDSQGRIRGAYRFQAIITTFEMILGGCGELNAIDWRCVIIDEAHRLKKNCKLLEGLKLMNLEHKVL  
 LTGTPLQNTVEELFSLHFLFLEPLRFPSESTFMQEFGLDKTEEQVQKLQAILKPMMLRRLKEDVEKKLAPKEET  
 IIEVELTNIQKKYYRAILEKNFSLSKGAGQTNVPLNVTMMELRKCCHNHPYLIKGAEEKILGEFRDTPNPSA

SDFHLQAMIQSAGKLVLDKLLPKMKAGGHKVLIFSQMVRCLDILEDYLIHKRYLYERIDGRVRGNLRQAAID  
RFSKPDSDRFVLLCTRAGGLGINLTAADTCIIFDSWNPQNDLQAQARCHRIGQNKAVKVYRLVTRNSYERE  
MFDRASLKLGLDKAVLQSMSGRDSNVSGIQQLSKKEIEDLLRRGAYGAIMEEEDGSKFCEEDIDQILLRRTK  
TITIESEGRGSTFAKASFVAGNRTDISLDDPNFWQKWAKKAELDIDTISGRNSLVIDTPRIRKQTRPFSATK  
DELAELSEAESEGEKPKLRRPCDRSGGYGRTECFRVEKNLLVYGWRWREILSHGRFKRQLNEHDVEVICRA  
LLAYCLIHRYGDEKIKGFIWDLITPTEDGQTRELQNHGLSAPVPRGRKGKVKQTSSFDIQKAEWLRYNYP  
EQLLQDEGYKXKHKHCKNVLLRVRMLYYLQKQEVIGNESQKVFQVGDASDIDVWVPEPDHSEVPAAWWDFDAD  
KSLLIQVFKHGYEKYNTIRADPALCFLEVRGKPDKAVAAEQRANDYMDGDVEDPEYKPAIAFKDDIEDDVS  
SPGDLVIADGEGQLMEEDKVYWPSPALTTTLRRLITAYQRTNKNRHIQQMQPTFSLPANAMQPLYEEATLNP  
KMAAKIERQQRWTRREEADFYRVVSTFGVVFDPDRGQFDWTKFRALARLHKKTDNSLEKYLCAFMSCRRVCR  
LPSKEELVDPNIFIQPIITEERASRTLYRIELLRKVREQALRHPQLFERLKLCHPNPDLPIWWECSHHRDILLI  
GAAKHGVSRTDYHILRDPELSFMARQNYNQSKAAHSRTSAPLLQQYQVALSASPLTSLPRLLAGAKTLLLEDM  
KVKSESLTEEPQSSEEEESMSSMETRTRVKSEPVSPKNGVLSQATGDQKSGGKSETDRRMVAARTEPLTPNPAS  
KKPRVHKRGSQSSSDSDSARSSCSSRSSSSSSSSSSSSSSSHSRSGSSSSSSSSSSSSSSSSSSSSSSSSSSSS  
SSSEESDSEEDVQKREGTPHRKAYDEESVASLSTTQDETQDSFQANNGTPESAYLLQGGYMLAASYPKDRVM  
INRLDSICQTVLKGKWPARRHYDANTVASFYTTKLLDSPAATERGEPVPTPPAVAVREEHEQSAQMSKEG  
GLKLTQKQGLAQKRPFDGEDGALGQQYLTRLRELQSTSETSLVNLPKAVPASGTSIQPTLGANGAILDSQP  
IVKKRRGRNRNVEGADILFLNRNKPENHIPTGMNPALSYQPQRIPDTESPVPVINLKDGTLAGDDAPKRKD  
LDRWLKEHPGYVEDLGAFIQVQLHEGRPKQKRHRCRNPNKLDINSLTGEERVQLINRRNARKVGGAFAPPLK  
DLCRFLKENSEYGVAPWGDVVKQSGFLPESMFERILTGPVREEVSRGRPKSGIAKATTAAVPAGSVPG  
NPLLANGLPGVDLTAQALQONLQNLQSLQVTAGLMGPAGLSSGGETKNMAAMPMLFSGMAGLPNLLGMG  
GLLSKTAESGAEKRGNDKESLEGGKERTESQSPENGGERCVPSPSTSSSTAALSSAAAAPIALNPLLLSNI  
LYPGMLLTPLNLHLPTLSQSNAFDVQKNKSDLLDSSKSVEIKEENSRVRDQEEKGGTEPSPLNENSTDEGSE  
RASSGSDSSSSSESDSSSNED\*

>rs33455121\_ENSMUSP00000147407\_c.5305:G>A\_p.G1769E  
ENSMUST00000209203.2|Chd9-203|ENSMUSG00000056608|+|chr8:g.91753314:G>A  
MTDPMDDFFDDANLFGETLEGLSDDTFVQPGVSLVDELNLGAEFEPPLHIDSLNHVQGTPTHQKMADFEQLSQ  
FDSMKFHPVNVQSFQSPVEHVLSPHSQFNCSPIHPPNPNGLFQDVADGSPMWHQTATGLANQNGSPFHQPGH  
SHSLHQNKSFVAHPDFALFQASEHQTCSSLSHSQQRSNLNPGQNSLGQAKNFLDANVSGAHRVNVNHLATAP  
SSQQTLPVQFSPTANPPAHFLKCSHQEGNYNRPSMTSCSVNSQFPSSHYSFSSGHVSPSSLLQSSAGLA  
PGHTNQALSDFAGSNSFSPHRGMKQEPQTQHLLNPTPSLNSNNFQILHSSHPQGNYSNSKLSPVHMFDPVDA  
GPPVGHFNDAETNGFSSLEENLLHHVDSHAEPFAGLDPELLEGLLQFQDESFPFGQDNSNHVLDHDLDRQF  
TSHLVSRPSDMAQTQLQYQARGWPSPLSTNHQHLHSRNLCLQRQPPSSKKSDBGSTYTKLQNTQVRVMSEKK  
PRKRVESESKQEKANRIISEAIARAKERGERNIPRVMSPENFPASVEGKEEKGRMRMKSPPKDRDNKKPKTY  
SKLKEKTKIGKLIITLGGKHKRRNESSEDELSDAEQRSQHTFKEQHSQKRRSNRQIKRKKYAEADAEKGQSEEEV  
KGSRLRVKRNAPPPEEQPLQLFVENPSEEDAAIVDKILACRTVKKEVSPGVMLDIEEFFVKYKNSYLHCEWA  
TEQQLLKDKRIQKIKRFLKRAQRAHFLADMEEPFNPDYVEVDRIEVSFCEDKDTGESVIYYLVKWCSLP  
YEDSTWELKEDVDLAKIEEFEQLQASRPDTRHLDRPPSNIWKKIEQSREYKNGNQLREYQLEGLNWLFFNWN  
RRNCILADEMGLGKTIQSITFLYEILLTGIRGPFLLIAPLSTIANWEREFRTWTDINVVVYHGSLSIRQMIQQ  
YEMYFRDSQGRIRGAYRFQAIITTFEMILGGCGELNAIDWRCVIIDEAHRLKKNCKLLEGLKLMNLEHKVL  
LTGTPLQNTVEELFSLHFLPLRFPSESTFMQEFGLKTEEQVQKLQAILKPMMLRRLKEDVEKKLAPKEET  
IIEVELTNIQKKYYRAILEKNFSFLSKGAGQTNVPLNVNTMMELRKCCHNPHYLIKGAEEKILGEFRDTPNPSA  
SDFHLQAMIQSAGKLVLDKLLPKMKAGGHKVLIFSQMVRCLDILEDYLIHKRYLYERIDGRVRGNLRQAAID  
RFSKPDSDRFVLLCTRAGGLGINLTAADTCIIFDSWNPQNDLQAQARCHRIGQNKAVKVYRLVTRNSYERE  
MFDRASLKLGLDKAVLQSMSGRDSNVSGIQQLSKKEIEDLLRRGAYGAIMEEEDGSKFCEEDIDQILLRRTK  
TITIESEGRGSTFAKASFVAGNRTDISLDDPNFWQKWAKKAELDIDTISGRNSLVIDTPRIRKQTRPFSATK  
DELAELSEAESEGEKPKLRRPCDRSGGYGRTECFRVEKNLLVYGWRWREILSHGRFKRQLNEHDVEVICRA  
LLAYCLIHRYGDEKIKGFIWDLITPTEDGQTRELQNHGLSAPVPRGRKGKVKQTSSFDIQKAEWLRYNYP  
EQLLQDEGYKXKHKHCKNVLLRVRMLYYLQKQEVIGNESQKVFQVGDASDIDVWVPEPDHSEVPAAWWDFDAD  
KSLLIQVFKHGYEKYNTIRADPALCFLEVRGKPDKAVAAEQRANDYMDGDVEDPEYKPAIAFKDDIEDDVS  
SPGDLVIADGEGQLMEEDKVYWPSPALTTTLRRLITAYQRTNKNRHIQQMQPTFSLPANAMQPLYEEATLNP  
KMAAKIERQQRIGRSKYFYSTNHRGTCF\*

>rs33455121\_ENSMUSP00000148088\_c.5305:G>A\_p.G1769E  
ENSMUST00000209423.2|Chd9-205|ENSMUSG00000056608|+|chr8:g.91753314:G>A  
MTDPMDDFFDDANLFGETLEGLSDDTFVQPGVSLVDELNLGAEFEPPLHIDSLNHVQGTPTHQKMADFEQLSQ  
FDSMKFHPVNVQSFQSPVEHVLSPHSQFNCSPIHPPNPNGLFQDVADGSPMWHQTATGLANQNGSPFHQPGH  
SHSLHQNKSFVAHPDFALFQASEHQTCSSLSHSQQRSNLNPGQNSLGQAKNFLDANVSGAHRVNVNHLATAP  
SSQQTLPVQFSPTANPPAHFLKCSHQEGNYNRPSMTSCSVNSQFPSSHYSFSSGHVSPSSLLQSSAGLA

PGHTNQALSDFAGSNFSFSPHRGMKQEPTQHLLNPTPSLNSNNFQILHSSHPQGNYSNSKLSPVHMNFPDPVDA  
 GPPVGHFNDHAETNGFSSLEENLLHHVDSHAEPFAGLDPEDLLQEGLLPQFDES PFGQDNSNHVLDHDLDRQF  
 TSHLVS RPSDMAQTQLQYQARGWPSPLSTNHQHLSRNLHCLQRQPSSSKSDGSGTYTKLQNTQVRVMSEKK  
 PRKRVESESKQEKANRI I SEAIARAKERGERNI PRVMS PENFPSASVEGKKEKRGRMRMKS PKDRDNKKPKTY  
 SKLKEKTKIGKLIITLGGKHKRRNESSELSDAEQRSQHTFKEQHSQKRRSNRQIKRKKYAEDAEGKQSEEEV  
 KGSLRVKRN SAPPPGEQPLQLFVENPSEEDAAIVDKILACRTVKKEVSPGVMLDIEEFFVKYKNYSYLHCEWA  
 TEQQLLKDKRIQQKIKRFLRQAQRAHFLADMEEEFPNDYVEVDRI LEVSFCEDKDTGESVIYYLVKWC SLP  
 YEDSTWELKEDVDLAKIEEFELQASRPDTRHLDRPPSNIWKKIEQSREYKNGNQLREYQLEGLNWL LFNWYN  
 RRNCILADEMGLGKTIQSITFLYEILLTGIRGPFLLIAPLSTIANWEREFRTWTDINVVVYHGSLSRQMIQQ  
 YEMYFRDSQGRIRGAYRFQAIITTFEMILGGCGELNAIDWRCV IIDEAHLRKNKNCKLLEGLKLMNLEHKVL  
 LTGTPLQNTVEELFSLHFLPLRFPSESTFMQEFGLDTEEQVQLQAI LKPMMLRRLKEDVEKKLAPKEET  
 IIEVELTNIQKYYRAILEKNFSLSKGAGQTNVNLVNTMMELRKC CNHPYLIKGAEEKILGEFRD TYNPSA  
 SDFHLQAMIQSAGKLVLDKLLPKMKAGGHKVLIFSQMVRCLDI LEDYLIHKRYLYERIDGRVRGNLRQA AID  
 RFSKPDSDRFVLLCTRAGGLGINLTAADTCIIFDSDWNPQNDLQAQARCHRIGQNKAVKYRLVTRNSYERE  
 MFDRASLKLGLDKAVLQSMSGRDSNVSGIQQLSKKEIEDLLRRGAYGAIMEEEDGSKFCEEDIDQILLRRTK  
 TITIESEGRGSTFAKASFVAGNRTDISLDDPNFWQKAKKAELDIDTISGRNSLVIDTPRIRKQTRPFSATK  
 DELAELSEASEGEKPKLRRPCDRSGGYGRTECFRVEKNLLVYGWGRWREILSHGRFKRQLNEHDVEVICRA  
 LLAYCLIHRYGDEKIKGFIWDLITPTEDGQTRRELQNHGLSAPVPRGRKGGKVKTKTSSFDIQKAEWLRKYNP  
 EQLLQDEGYKHKHHCNKVLLRVRMLYLLKQEVIGNESQKVFVDGVDASDIDVWVPEPDHSEVPAAWWDFDAD  
 KSL LIGVFKHGYEKYNTIRADPALCFLEVRGKPD DKAVAAEQRANDYMDGDVEDPEYKPA PAIFKDDIEDDVS  
 SPGDLVIADGEGQLMEEDKVYWP T PSALTTRLRRLITAYQRTNKNRHIQQMQPTFSLPANAMQPLYEATLNP  
 KMAAKIERQQRWTRREEADFYRVVSTFGVVFDPDRGQFDWTKFRALARLHKKTDNSLEKYLCAFMSCRRVCR  
 LPSKEELVDPNIFIQPI TEERASRTLYRIELLRKVREQALRHPQLFERLKLCHPNPDLPIWWECSHHRDILLI  
 GAAKHGVSRTDYHILRDP ELSFMAAQRNYNQSKAAHSRTSAPLLQQYQVALSASPLTSLPRLLGAKGTLLEDM  
 KVKSESLTEEPQSSEESMSMETRTRVKSEPVSPKNGVLSQATGDQKSGGKSETDRRMVAARTEPLTPNPAS  
 KKPRVHKRDSQSSSDSDSARS SCSSSSSSSSSSSSSSSSSSSSSSSSSSSSSSSSSSSSSSSSSSSSSSSSSS  
 SSSEEDSSEEDVQREGTPHRKAYDEESVASLSTTQDETQDSFQANNGTPE SAYLLQGGYMLAASYWPKDRVM  
 INRLDSICQTVLKGKWP SARRHYDANTVASFYTTKLLDSPGAATERGEPVPTPPAVAVREEHEQSAQMSKVK  
 KHVREKEFTVKIKDEGGLKLT FQKQGLAQKRPFDGEDGALGQQQY LTRLRELQSTSETSLVNLPKAVPASGTS  
 IQPTLGANGA ILDSQPIVKKRRRRRNVGADILFLNRNKPNNHIPTGMNPALSYPPQRI PDTESPVPVINL  
 KDGTRLAGDDAPKRKDLDRWLKEHPGYVEDLGAFI PRVQLHEGRPKQRHRRCRNPKNLDINSLTGEERVQLIN  
 RRNARKVGGAFAPPLKDLCRFLKENSEYGVAP EWGDVVKQSGFLPE SMFERILTGPVVREEVSRGRPKSGI  
 AKATTA AVPAGSVPGNPLL ANGLLPVLDLALQALQNLQNLQSLQV TAGL MGMPAGLSSGGETKNMAAMFP  
 MLFSGMAGLPNLLGMGGLLSKTAESGAEEKRGNDSKELEGKERTESQSPENGGERCVPGPSPTSSTAALSSA  
 AAAKPIALNPLLLSNILYPGMLLTPGLNLHLPTLSQSNAFDVQKNKSDDLDSKKSVEIKEENS RVRDQEEKGG  
 TEPSPLNENSTDEGSEERASSGSDSSSSSESDSSNED\*  
 >rs33455121\_ENSMUSP00000105243\_c.5305:G>A\_p.G1769E  
 ENSMUST00000109614.9|Chd9-202|ENSMUSG00000056608|+|chr8:g.91753314:G>A  
 MTDPMDDFFDDANLFGETLEGLSDDTFVQPGPVSLVDELNLGAEFEPLHIDSLNHVQGTPTHQKMA DFEQLSQ  
 FDSMKFHFPVNQSFSGSPVEHVLSPHSQFNCSPIHPPNPNGLFQD VADGSPMWHGQTATGLANQNGSPFHQPGH  
 SHSLHQNKSFVAHPDFALFQASEHQTQCSLHSQQSRNLNPGQNSLGQAKNFLDANVSGAHRVNVNHLATAP  
 SSQQTLPVQFSPTANPPAHFLKCSSHQEGNYNRPSMTSCSVSNSQQFP SHYSFSSGHVSPSSLLQSSAGLA  
 PGHTNQALSDFAGSNFSFSPHRGMKQEPTQHLLNPTPSLNSNNFQILHSSHPQGNYSNSKLSPVHMNFPDPVDA  
 GPPVGHFNDHAETNGFSSLEENLLHHVDSHAEPFAGLDPEDLLQEGLLPQFDES PFGQDNSNHVLDHDLDRQF  
 TSHLVS RPSDMAQTQLQYQARGWPSPLSTNHQHLSRNLHCLQRQPSSSKSDGSGTYTKLQNTQVRVMSEKK  
 PRKRVESESKQEKANRI I SEAIARAKERGERNI PRVMS PENFPSASVEGKKEKRGRMRMKS PKDRDNKKPKTY  
 SKLKEKTKIGKLIITLGGKHKRRNESSELSDAEQRSQHTFKEQHSQKRRSNRQIKRKKYAEDAEGKQSEEEV  
 KGSLRVKRN SAPPPGEQPLQLFVENPSEEDAAIVDKILACRTVKKEVSPGVMLDIEEFFVKYKNYSYLHCEWA  
 TEQQLLKDKRIQQKIKRFLRQAQRAHFLADMEEEFPNDYVEVDRI LEVSFCEDKDTGESVIYYLVKWC SLP  
 YEDSTWELKEDVDLAKIEEFELQASRPDTRHLDRPPSNIWKKIEQSREYKNGNQLREYQLEGLNWL LFNWYN  
 RRNCILADEMGLGKTIQSITFLYEILLTGIRGPFLLIAPLSTIANWEREFRTWTDINVVVYHGSLSRQMIQQ  
 YEMYFRDSQGRIRGAYRFQAIITTFEMILGGCGELNAIDWRCV IIDEAHLRKNKNCKLLEGLKLMNLEHKVL  
 LTGTPLQNTVEELFSLHFLPLRFPSESTFMQEFGLDTEEQVQLQAI LKPMMLRRLKEDVEKKLAPKEET  
 IIEVELTNIQKYYRAILEKNFSLSKGAGQTNVNLVNTMMELRKC CNHPYLIKGAEEKILGEFRD TYNPSA  
 SDFHLQAMIQSAGKLVLDKLLPKMKAGGHKVLIFSQMVRCLDI LEDYLIHKRYLYERIDGRVRGNLRQA AID  
 RFSKPDSDRFVLLCTRAGGLGINLTAADTCIIFDSDWNPQNDLQAQARCHRIGQNKAVKYRLVTRNSYERE  
 MFDRASLKLGLDKAVLQSMSGRDSNVSGIQQLSKKEIEDLLRRGAYGAIMEEEDGSKFCEEDIDQILLRRTK  
 TITIESEGRGSTFAKASFVAGNRTDISLDDPNFWQKAKKAELDIDTISGRNSLVIDTPRIRKQTRPFSATK











MTDPMDDFFDDANLFGETLEGLSDDTFVQPGPVSLVDELNLGAEFEPLHIDSLNHVQGTPTHQKMADFEQLSQ  
 FDSMKFHPVNVQSFQSPVEHVLSPHSQFNCSPIHPPNPNGLFQDQVADGSPMWHQATATGLANQNGSPFHQPGH  
 SHSLHQNKSFVAHPDFALFQASEHQTCSSLSHSQQSRNLNPGQNSLGQAKNFDANVSGAHRVNVNHLATAP  
 SSQQTLPVQFSPTANPPAHFLKCSSHQEGNYNRPSPSMTSCSVNSQQFSPSHYSFSSGHVSPSSLLQSSAGLA  
 PGHTNQALSDFAGSNSFSPHRGMKQEPHQHLLNPTPSLNSNNFQILHSSHPQGNYSNSKLSPVHMNFPDPVDA  
 GPPVGHFNDHAETNGFSSLEENLLHHVDSHAEPFAGLDPEDLLQEGLLPQFDESFPFGQDNSNHVLDHDLDRQF  
 TSHLVSRPSDMAQTQLQYQARGWPSPLSTNHQHLHSRNLHCLQRQPSSSKKSDGSGTYTKLQNTQVRVMSEKK  
 PRKRVESESKQEKANRIISEAIAKAKERGERNIPRVMSPENFPASVEGKKEKRGRMRKSKPKDRDNKKPKTY  
 SKLKEKTKIGKLIITLGGKHKRRNESSELSDAEQRSQHTFKEQHSQKRRSNRQIKRKKYAEDEAGKQSEEEV  
 KGSRLVKRNSAPPPGEQPLQLFVENPSEEDAAIVDKILACRTVKKEVSPGVMLDIEEFFVKYKNYSYLHCEWA  
 TEQQLLKDKRIQQKIKRFLRQAQRAHFLADMEEPFNPDYVEVDRILEVSFCEDKDTGESVIYYLVKWCSLP  
 YEDSTWELKEDVDLAKIEEFEQLQASRPDTRHLDRPPSNIWKKIEQSREYKNGNQLREYQLEGLNWLFLFNWYN  
 RRNCILADEMGLGKTIQSITFLYEILLTGIRGPFLLIAPLSTIANWEREFRTWTNDINVVVYHGSLSRQMIQQ  
 YEMYFRDSQGRIRGAYRFQAIITTFEMILGGCGELNAIDWRCVIIDEAHRLKKNCKLLEGLKLMNLEHKVL  
 LTGTPLQNTVEELFSLHFLFLEPLRFPESETFMQEFGDLKTEEQVQKLQAILKPMMLRRLKEDVEKKLAPKEET  
 IIEVELTNIQKYYRAILEKNFSFLSKGAGQTNVPLNVTMMELRKCCHNHPYLIKGAEEKILGEFRDTPNPSA  
 SDFHLQAMIQSAGKLVLIDKLLPKMKAGGHKVLIFSQMVRCLDILEDYLIHKRYLYERIDGRVGRNLRQA  
 IDRFKPDSDRDFVLLCTRAGGLINLTAADTCIIFDSQDWNQNDLQAQARCHRIGQNKAVKVEYRLVTRNSYERE  
 MFDRASLKLGLDKAVLQSMGRSDSNVSGIQQLSKKEIEDLLRRGAYGAIMEEEDGSKFCEEDIDQILLRRTK  
 TITIESEGRGSTFAKASFVAGNRTDISLDDPNFWQKAKKAELDIDTISGRNSLVIDTTPRIRKQTRPFSATK  
 DELAELSEAESEGEKPKLRPCDRSGGYGRTECFRVEKNLLVYGWRWREILSHGRFKRQLNEHDEVEICRA  
 LLAYCLIHRYGDEKIKGFIWDLITPTEDGQTRQLNHLGLSAPVPRGRKGGKVKQTQSSFDIQKAEWLKYNP  
 EQLLQDEGYKHKVHKHCNKVLLRVRMLYYLQEVIGNESQKVFQDGDASDIDVWVPEPDHSEVPAAWWDFDAD  
 KSLDIGVFKHGYEKYNTIRADPALCFLEVRGKPDKAVAAEQRANDYMDGDVEDPEYKPAIAIFKDDIEDDVS  
 SPGDLVIADGEGQLMEGDKVYWPSPALTTLRRLITAYQRTNKNRHIQQMQPTFSLPANAMQPLYEATLNP  
 KMAAKIERQWRNTRREEDFYRVVSTFGVVFDPDRGQFDWTKFRALARLHKKTDNSLEKLCAFMSMCRRCR  
 LPSKEELVDPNIFIQPIITEERASRTLYRIELLRKVRQALRHPQLFERLKLCHPNPDLPIWWECEGSHDRDLI  
 GAAKHGVSRTDYHILRDPELSFMAAQRNYNQSKAAHSRTSAPLLQQYQVALSASPLTSLPRLGKGTLLLEDM  
 KVKSESLTEEPQSSEEESSMETRTRVKSEPVSPKNGVLSQATGDQKSGGKSETDRRMVAARTEPLTPNPAS  
 KKPRVHKRGSQSSSDSDSARSSSSSSSSSSSSSSSSSSSSSSSSSSSSSSSSSSSSSSSSSSSSSSSSSSSSS  
 SSSEESDSEEDVQKREGTPHRKAYDEESVASLSTTQDETQDSFQANNGTPESAYLLQGGYMLAASYWPKDRVT  
 INRLDSICQTVLKGKWPARRHYDANTVASFYTTKLLDSPGAATERGEPVPTPPAVAVREEHEQSAQMSKVK  
 KHVREKEFTVVIKIDEGGLKLTQKQGLAQKRPFDGEDGALGQQQYLTRLRELQSTSETSLVNLKAVPASGTS  
 IQPTLGANGAILDSQPIVKKRRRGRNVEGADILFLNRNKPNNHIPGMNPALSYPQPQRIPTDESVPVIVNL  
 KDGTRLAGDDAPKRKDLDRWLKEHPGYVEDLGAFIPRVQLHEGRPKQKRHRCRNPNKLDINSLTGEERVQLIN  
 RRNARKVGGAFAPPLKDLRFLKENSEYGVAPWGDVVKQSGFLPESMFERILTGPVVREYVSRGRPKSGI  
 AKATTAAVPAGSVPGNPLLANGLLPGVDLTAALQALQNLQNLQSLQVTAGLMGMPAGLSSGGETKNMAAMFP  
 MLFSGMAGLPNLLGMGGLLSKTAESGAEEKRGNDSKELEGKKERTESQSPENGGERCVPGPSSTSSSTAALSSA  
 AAAKPIALNPLLLSNILYPGMLLTPGLNLHLPTLSQSNADFVQKNKSDDLSSKSVIEKEENSRVDRQEEKGG  
 TEPSPLENSTDEGSEERASSGSDSSSSSESDSDSSNED\*

>rs32816175\_ENSMUSP00000046356\_c.8340:C>A\_p.L2781I  
 ENSMUST00000048665.8|Chd9-201|ENSMUSG00000056608|+|chr8:g.91778331:C>A  
 MTDPMDDFFDDANLFGETLEGLSDDTFVQPGPVSLVDELNLGAEFEPLHIDSLNHVQGTPTHQKMADFEQLSQ  
 FDSMKFHPVNVQSFQSPVEHVLSPHSQFNCSPIHPPNPNGLFQDQVADGSPMWHQATATGLANQNGSPFHQPGH  
 SHSLHQNKSFVAHPDFALFQASEHQTCSSLSHSQQSRNLNPGQNSLGQAKNFDANVSGAHRVNVNHLATAP  
 SSQQTLPVQFSPTANPPAHFLKCSSHQEGNYNRPSPSMTSCSVNSQQFSPSHYSFSSGHVSPSSLLQSSAGLA  
 PGHTNQALSDFAGSNSFSPHRGMKQEPHQHLLNPTPSLNSNNFQILHSSHPQGNYSNSKLSPVHMNFPDPVDA  
 GPPVGHFNDHAETNGFSSLEENLLHHVDSHAEPFAGLDPEDLLQEGLLPQFDESFPFGQDNSNHVLDHDLDRQF  
 TSHLVSRPSDMAQTQLQYQARGWPSPLSTNHQHLHSRNLHCLQRQPSSSKKSDGSGTYTKLQNTQVRVMSEKK  
 PRKRVESESKQEKANRIISEAIAKAKERGERNIPRVMSPENFPASVEGKKEKRGRMRKSKPKDRDNKKPKTY  
 SKLKEKTKIGKLIITLGGKHKRRNESSELSDAEQRSQHTFKEQHSQKRRSNRQIKRKKYAEDEAGKQSEEEV  
 KGSRLVKRNSAPPPGEQPLQLFVENPSEEDAAIVDKILACRTVKKEVSPGVMLDIEEFFVKYKNYSYLHCEWA  
 TEQQLLKDKRIQQKIKRFLRQAQRAHFLADMEEPFNPDYVEVDRILEVSFCEDKDTGESVIYYLVKWCSLP  
 YEDSTWELKEDVDLAKIEEFEQLQASRPDTRHLDRPPSNIWKKIEQSREYKNGNQLREYQLEGLNWLFLFNWYN  
 RRNCILADEMGLGKTIQSITFLYEILLTGIRGPFLLIAPLSTIANWEREFRTWTNDINVVVYHGSLSRQMIQQ  
 YEMYFRDSQGRIRGAYRFQAIITTFEMILGGCGELNAIDWRCVIIDEAHRLKKNCKLLEGLKLMNLEHKVL  
 LTGTPLQNTVEELFSLHFLFLEPLRFPESETFMQEFGDLKTEEQVQKLQAILKPMMLRRLKEDVEKKLAPKEET  
 IIEVELTNIQKYYRAILEKNFSFLSKGAGQTNVPLNVTMMELRKCCHNHPYLIKGAEEKILGEFRDTPNPSA







EKLERILRSCSRDPTQAIADRLKEMYEIIYSQHFQPDENFSNCAKEIANKHFRFAEMLYYKVLESVIEQEOKRL  
 GDMDLSGVLEHDAFHRSLACCLEVVAFSHKPPGNFPFIAEIFDVPHYHFYKVIIEVFIRAEDGLCREVVKHLN  
 QIEEQILDHLAWKTKSPLWDRIRDNENRVPTCEEVMPQNLERDEIYIAGSPLTPRRVGEVRADAGGLGRS  
 TSPTTLYDRYSSPTVSTTRRRRLFENDSPSEGSTSGRI PPQPLVNAVVPQNVPGETVSVTPVPGQTLVMTATAT  
 VTANNGQTVTIPVQGIANENGGITFFFPVQVNVGGQAQAVAGSIQPLSAQALAGSLSSQQVTGTTLQVPGPVAI  
 QQISPGGQQQNPQPLTSSSIRPRKTSSLALFFRKVYLAGVRLRDLCKIKLDISDELKRIWTCFEFSIIQCT  
 ELMMDRHLQLLMCAIYVMAKVTKEDRSFQNMRCYRTQPQARSQVYRSVLIKGKRRNSGSSSRSHQNSPTE  
 LNTDRASRDSSPVMRSNSTLPVPQPSSAPPTPTRLTGASSDVEEEEERGDLIQFYNNIYRKQIQAFAMKYSQAN  
 AQTDTPPLSPYFPVRTGSPRRVQLSQSHPIYISPHNNEAMPSPREKIFYFYSNSPSKRLREINSMIRTGETPT  
 KKRGIILLDDGSESPAKRICPENHSALLRRLQDVANDRGSQ\*  
 >rs254579959\_ENSMUSP00000147579\_c.1072:C>G\_p.T358S  
 ENSMUST00000211136.2|Rb12-210|ENSMUSG00000031666|+|chr8:g.91816714:C>G  
 MASGGNQSPPPPPAAAASSEEEEEEDGDAADRAQPAGSPSHQIQORFEELCSRLNMDEAARAEAWSSYRSMSES  
 YTLEGNDLHLWALACALYVACRKSVPVTVSKGTAEAGNYVSLTRILRCSEQSLIEFFNKMKKWEDMANLPPHFRERT  
 ERLERNFTVSAVIFKKYEPIFQDIFKYPQEEQPRQQRGRKQRRQPCTTSEIFHFCWVLFYIYAKGLSEDCPKD  
 SKASSDPPCVIEKLCSLHDGLVLEAKGIKEHFWKPYIRKLFKLLKGKEENLTGFLEPGNFGESFKAVNKAY  
 EYVLAAGNLDERVFLGEDAEVEVGTLSRCLSAASGTESAERTQMRDILQOHLDKSKALRVCTPLSGVRYVQE  
 NSPCVTPVSTAAHLSRLHTMLSGLRNAPSEKLERILRSCSRDPTQAIADRLKEMYEIIYSQHFQPDENFSNCA  
 KEIANKHFRFAEMLYYKVLESVIEQEOKRLGDMDLSGVLEHDAFHRSLACCLEVVAFSHKPPGNFPFIAEIF  
 DVPHYHFYKVIIEVFIRAEDGLCREVVKHLNQIEEQILDHLAWKTKSPLWDRIRDNENRVPTCEEVMPQNLER  
 TDEIYIAGSPLTPRRVGEVRADAGGLGRSITSPTTLYDRYSSPTVSTTRRRRLFENDSPSEGSTSGRI PPQPLV  
 NAVVPQNVPGETVSVTPVPGQTLVMTATATVTANNGQTVTIPVQGIANENGGITFFFPVQVNVGGQAQAVAGSI  
 QPLSAQALAGSLSSQQVTGTTLQVPGPVAIQQISPGGQQQNPQPLTSSSIRPRKTSSLALFFRKVYLAGVRL  
 RDLCKIKLDISDELKRIWTCFEFSIIQCTELMMDRHLQLLMCAIYVMAKVTKEDRSFQNMRCYRTQPQAR  
 SQVYRSVLIKGKRRNSGSSSRSHQNSPTELNTDRASRDSSPVMRSNSTLPVPQPSSAPPTPTRLTGASSDVE  
 EEEERGDLIQFYNNIYRKQIQAFAMKYSQANAQTDTPPLSPYFPVRTGSPRRVQLSQSHPIYISPHNNEAMP  
 REKIFYFYSNSPSKRLREINSMIRTGETPTKKRGILLDDGSESPAKRICPENHSALLRRLQDVANDRGSQ\*  
 >rs254579959\_ENSMUSP00000147327\_c.1201:C>G\_p.T401S  
 ENSMUST00000209518.2|Rb12-208|ENSMUSG00000031666|+|chr8:g.91816714:C>G  
 MASGGNQSPPPPPAAAASSEEEEEEDGDAADRAQPAGSPSHQIQORFEELCSRLNMDEAARAEAWSSYRSMSES  
 YTLEGNDLHLWALACALYVACRKSVPVTVSKGTAEAGNYVSLTRILRCSEQSLIEFFNKMKKWEDMANLPPHFRERT  
 ERLERNFTVSAVIFKKYEPIFQDIFKYPQEEQPRQQRGRKQRRQPCTTSEIFHFCWVLFYIYAKGNFPMISDDL  
 VNSYHLLLCALDLVYGALQCSNRKELVNPVNFKGLSEDCPKDSSKASSDPPCVIEKLCSLHDGLVLEAKGIKE  
 HFWKPYIRKLFKLLKGKEENLTGFLEPGNFGESFKAVNKAYEYVLAAGNLDERVFLGEDAEVEVGTLSRCL  
 LSAASGTESAERTQMRDILQOHLDKSKALRVCTPLSGVRYVQENSPCVTPVSTAAHLSRLHTMLSGLRNAPS  
 EKLERILRSCSRDPTQAIADRLKEMYEIIYSQHFQPDENFSNCAKEMLYYKVLESVIEQEOKRLGDMDLSGVLE  
 HDAFHRSLACCLEVVAFSHKPPGNFPFIAEIFDVPHYHFYKVIIEVFIRAEDGLCREVVKHLNQIEEQILDHL  
 AWKTKSPLWDRIRDNENRVPTCEEVMPQNLERDEIYIAGSPLTPRRVGEVRADAGGLGRSITSPTTLYDRY  
 SSPTVSTTRRRRLFENDSPSEGSTSGRI PPQPLVNAVVPQNVPGETVSVTPVPGQTLVMTATATVTANNGQTVT  
 IPVQGIANENGGITFFFPVQVNVGGQAQAVAGSIQPLSAQALAGSLSSQQVTGTTLQVPGPVAIQQISPGGQQQ  
 NPQPLTSSSIRPRKTSSLALFFRKVYLAGVRLRDLCKIKLDISDELKRIWTCFEFSIIQCTELMMDRHLQD  
 LLMCAIYVMAKVTKEDRSFQNMRCYRTQPQARSQVYRSVLIKGKRRNSGSSSRSHQNSPTELNTDRASRD  
 SPVMRSNSTLPVPQPSSAPPTPTRLTGASSDVEEEEERGDLIQFYNNIYRKQIQAFAMKYSQANAQTDTPPLSP  
 YFPVRTGSPRRVQLSQSHPIYISPHNNEAMPSPREKIFYFYSNSPSKRLREINSMIRTGETPTKKRGILLDDG  
 SESPAKRICPENHSALLRRLQDVANDRGSQ\*  
 >rs33292293\_ENSMUSP00000034091\_c.1753:A>G\_p.Q585R  
 ENSMUST00000034091.8|Rb12-201|ENSMUSG00000031666|+|chr8:g.91828040:A>G  
 MASGGNQSPPPPPAAAASSEEEEEEDGDAADRAQPAGSPSHQIQORFEELCSRLNMDEAARAEAWSSYRSMSES  
 YTLEGNDLHLWALACALYVACRKSVPVTVSKGTAEAGNYVSLTRILRCSEQSLIEFFNKMKKWEDMANLPPHFRERT  
 ERLERNFTVSAVIFKKYEPIFQDIFKYPQEEQPRQQRGRKQRRQPCTTSEIFHFCWVLFYIYAKGNFPMISDDL  
 VNSYHLLLCALDLVYGALQCSNRKELVNPVNFKGLSEDCPKDSSKASSDPPCVIEKLCSLHDGLVLEAKGIKE  
 HFWKPYIRKLFKLLKGKEENLTGFLEPGNFGESFKAVNKAYEYVLAAGNLDERVFLGEDAEVEVGTLSRCL  
 LSAASGTESAERTQMRDILQOHLDKSKALRVCTPLTGVRVYQENSPCVTPVSTAAHLSRLHTMLSGLRNAPS  
 EKLERILRSCSRDPTQAIADRLKEMYEIIYSQHFQPDENFSNCAKEIANKHFRFAEMLYYKVLESVIEQEOKRL  
 GDMDLSGVLEHDAFHRSLACCLEVVAFSHKPPGNFPFIAEIFDVPHYHFYKVIIEVFIRAEDGLCREVVKHLN  
 RIEEQILDHLAWKTKSPLWDRIRDNENRVPTCEEVMPQNLERDEIYIAGSPLTPRRVGEVRADAGGLGRS  
 TSPTTLYDRYSSPTVSTTRRRRLFENDSPSEGSTSGRI PPQPLVNAVVPQNVPGETVSVTPVPGQTLVMTATAT  
 VTANNGQTVTIPVQGIANENGGITFFFPVQVNVGGQAQAVAGSIQPLSAQALAGSLSSQQVTGTTLQVPGPVAI

QQISPGGQQNPGQPLTSSSIRPRKTSSLALFFRKVYYLAGVRLRDLCLDKLIDISDELRRKIWTCTFEFSIIQCT  
 ELMMDRHLDQLLMCAIYVMAKVTKEDRSFQNIIMRCYRTQPQARSQVYRSVLIKGRNRSGSSESRSHQNSPTE  
 LNTDRASRDSSPVMRSNSTLPVPQPSSAPPTPTRLTGASSDVEEEERGDLIQFYNNIYRKQIQAFAMKYSQAN  
 AQTDTPLSPYPFVRTGSPRRVQLSQSHPIYISPHNNEAMPSPREKIFYFYSNSPSKRLREINSMIRTGETPT  
 KKRGIILLDDGSESPAKRICPENHSALLRRLQDVANDRGSQ\*  
 >rs33292293\_ENSMUSP00000147579\_c.1624:A>G\_p.Q542R  
 ENSMUST00000211136.2|Rb12-210|ENSMUSG00000031666|+|chr8:g.91828040:A>G  
 MASGGNQSPPPPPAAAASSEEEEEEDGDAADRAQPAGSPSHQIQRFEEELCSRLNMDEAARAEAWSSYRSMSES  
 YTLGNLHDLWALACALYVACRKSVPVTVSKGTAEAGNYVSLTRILRCSEQSLIEFFNKMKKWEDMANLPPHFRERT  
 ERLERNFTVSAVIFKKYEPIFQDIFKYPQEEQPRQRGRKQRRQPCTTSEIFHFCWVLFYIYAKGLSEDCPKD  
 SKASSDPPCVIEKLCSLHDGLVLEAKGIKEHFWKPYIRKLFKLLKKEENLTGFLEPGNFGESFKAVNKAY  
 EYVLAAGNLDERVFLGEDAEVGTLSRCLSAASGTESAERTQMRDILQQHLDKSKALRVCTPLTGVRVYQE  
 NSPCVTPVSTAAHLSRLHTMLSGLRNAPSEKLERILRSCSRDPTQAIADRLKEMYEIIYSQHFQPDENFSNCA  
 KEIANKHFRFAEMLYYKLVLESVIEQEQKRLGDMDLGVLHDAFHRSLACCLEVVAFSHKPPGNFPFIAEIF  
 DVPHYHFKYKIEVFIRAEDGLCREVVKHLNRIEEQILDHLAWKTKSPLWDRIRDNENRVPTCEEVMPQNLER  
 TDEIYIAGSPLTPRRVGEVRADAGGLGRSITSPTTLYDRYSSPTVSTTRRRLFENDSPSEGSTSGRIPPQPLV  
 NAVPVQNVPGETVSVTPVPGQTLVMTATATVTANNGQTVTIPVQGIANENGGITFFPVQNVVGGQAQAVAGSI  
 QPLSAQALAGSLSSQVGTGTTLQVPGPVAIQQISPGGQQNPGQPLTSSSIRPRKTSSLALFFRKVYYLAGV  
 LRDLCIKLDISDELRRKIWTCTFEFSIIQCTELMMDRHLDQLLMCAIYVMAKVTKEDRSFQNIIMRCYRTQPQAR  
 SQVYRSVLIKGRNRSGSSESRSHQNSPTELNTDRASRDSSPVMRSNSTLPVPQPSSAPPTPTRLTGASSDVE  
 EEEERGDLIQFYNNIYRKQIQAFAMKYSQANAQTDTPLSPYPFVRTGSPRRVQLSQSHPIYISPHNNEAMPSP  
 REKIFYFYSNSPSKRLREINSMIRTGETPTKKRGIILLDDGSESPAKRICPENHSALLRRLQDVANDRGSQ\*  
 >rs33292293\_ENSMUSP00000147327\_c.1723:A>G\_p.Q575R  
 ENSMUST00000209518.2|Rb12-208|ENSMUSG00000031666|+|chr8:g.91828040:A>G  
 MASGGNQSPPPPPAAAASSEEEEEEDGDAADRAQPAGSPSHQIQRFEEELCSRLNMDEAARAEAWSSYRSMSES  
 YTLGNLHDLWALACALYVACRKSVPVTVSKGTAEAGNYVSLTRILRCSEQSLIEFFNKMKKWEDMANLPPHFRERT  
 ERLERNFTVSAVIFKKYEPIFQDIFKYPQEEQPRQRGRKQRRQPCTTSEIFHFCWVLFYIYAKGNFPMISDDL  
 VNSYHLLLALDLVYGALQCSNRKELVNPVFKGLSEDCPKDSKASSDPPCVIEKLCSLHDGLVLEAKGIKE  
 HFWKPYIRKLFKLLKKEENLTGFLEPGNFGESFKAVNKAYEYVLAAGNLDERVFLGEDAEVGTLSRCL  
 LSAASGTESAERTQMRDILQQHLDKSKALRVCTPLTGVRVYQENSPCVTPVSTAAHLSRLHTMLSGLRNAPS  
 EKLERILRSCSRDPTQAIADRLKEMYEIIYSQHFQPDENFSNCAKEMLYYKLVLESVIEQEQKRLGDMDLGVL  
 HDAFHRSLACCLEVVAFSHKPPGNFPFIAEIFDVPHYHFKYKIEVFIRAEDGLCREVVKHLNRIEEQILDHL  
 AWKTKSPLWDRIRDNENRVPTCEEVMPQNLERTDEIYIAGSPLTPRRVGEVRADAGGLGRSITSPTTLYDRY  
 SSPTVSTTRRRLFENDSPSEGSTSGRIPPQPLVNAVVPVQNVPGETVSVTPVPGQTLVMTATATVTANNGQTVT  
 IPVQGIANENGGITFFPVQNVVGGQAQAVAGSIQPLSAQALAGSLSSQVGTGTTLQVPGPVAIQQISPGGQQ  
 NPGQPLTSSSIRPRKTSSLALFFRKVYYLAGVRLRDLCLDKLIDISDELRRKIWTCTFEFSIIQCTELMMDRHLDQ  
 LLMCAIYVMAKVTKEDRSFQNIIMRCYRTQPQARSQVYRSVLIKGRNRSGSSESRSHQNSPTELNTDRASRDS  
 SPVMRSNSTLPVPQPSSAPPTPTRLTGASSDVEEEERGDLIQFYNNIYRKQIQAFAMKYSQANAQTDTPLSP  
 YPFVRTGSPRRVQLSQSHPIYISPHNNEAMPSPREKIFYFYSNSPSKRLREINSMIRTGETPTKKRGIILLDDG  
 SESPAKRICPENHSALLRRLQDVANDRGSQ\*  
 >rs49005983\_ENSMUSP00000034091\_c.2462:C>G\_p.S821R  
 ENSMUST00000034091.8|Rb12-201|ENSMUSG00000031666|+|chr8:g.91833560:C>G  
 MASGGNQSPPPPPAAAASSEEEEEEDGDAADRAQPAGSPSHQIQRFEEELCSRLNMDEAARAEAWSSYRSMSES  
 YTLGNLHDLWALACALYVACRKSVPVTVSKGTAEAGNYVSLTRILRCSEQSLIEFFNKMKKWEDMANLPPHFRERT  
 ERLERNFTVSAVIFKKYEPIFQDIFKYPQEEQPRQRGRKQRRQPCTTSEIFHFCWVLFYIYAKGNFPMISDDL  
 VNSYHLLLALDLVYGALQCSNRKELVNPVFKGLSEDCPKDSKASSDPPCVIEKLCSLHDGLVLEAKGIKE  
 HFWKPYIRKLFKLLKKEENLTGFLEPGNFGESFKAVNKAYEYVLAAGNLDERVFLGEDAEVGTLSRCL  
 LSAASGTESAERTQMRDILQQHLDKSKALRVCTPLTGVRVYQENSPCVTPVSTAAHLSRLHTMLSGLRNAPS  
 EKLERILRSCSRDPTQAIADRLKEMYEIIYSQHFQPDENFSNCAKEIANKHFRFAEMLYYKLVLESVIEQEQKRL  
 GDMDLGVLHDAFHRSLACCLEVVAFSHKPPGNFPFIAEIFDVPHYHFKYKIEVFIRAEDGLCREVVKHLN  
 QIEEQILDHLAWKTKSPLWDRIRDNENRVPTCEEVMPQNLERTDEIYIAGSPLTPRRVGEVRADAGGLGRS  
 TSPTTLYDRYSSPTVSTTRRRLFENDSPSEGSTSGRIPPQPLVNAVVPVQNVPGETVSVTPVPGQTLVMTATAT  
 VTANNGQTVTIPVQGIANENGGITFFPVQNVVGGQAQAVAGSIQPLSAQALAGSLSSQVGTGTTLQVPGPVAI  
 QQISPGGQQNPGQPLTRSSIRPRKTSSLALFFRKVYYLAGVRLRDLCLDKLIDISDELRRKIWTCTFEFSIIQCT  
 ELMMDRHLDQLLMCAIYVMAKVTKEDRSFQNIIMRCYRTQPQARSQVYRSVLIKGRNRSGSSESRSHQNSPTE  
 LNTDRASRDSSPVMRSNSTLPVPQPSSAPPTPTRLTGASSDVEEEERGDLIQFYNNIYRKQIQAFAMKYSQAN  
 AQTDTPLSPYPFVRTGSPRRVQLSQSHPIYISPHNNEAMPSPREKIFYFYSNSPSKRLREINSMIRTGETPT  
 KKRGIILLDDGSESPAKRICPENHSALLRRLQDVANDRGSQ\*

>rs49005983\_ENSMUSP00000147579\_c.2333:C>G\_p.S778R  
ENSMUST00000211136.2|Rb12-210|ENSMUSG00000031666|+|chr8:g.91833560:C>G  
MASGGNQSPPPPPAAAASSEEEEEEDGDAADRAQPAGSPHQIQQRFEELCSRLNMDEAARAEAWSSYRSMSES  
YTLEGNDLHLWALACALYVACRKSVPVTVSKGTAEGNYVSLTRILRCSEQSLIEFFNKMKKWEDMANLPPHFRERT  
ERLERNFVSAVIFKKYEPIFQDIFKYPOEEQPRQQRGRKQRRQPCTTSEIFHFCWVLFYIYAKGLSEDCPKD  
SKASSDPPCVIEKLCSLHDGLVLEAKGIKEHFWKPYIRKLFKLLKGKEENLTGFLEPGNFGESFKAVNKAY  
EYVLAAGNLDERVFLGEDAEVEVGTLSRCLSAASGTESAERTQMRDILQOHLDKSKALRVCTPLTGVRYVQE  
NSPCVTPVSTAAHSLRSLHTMLSGLRNAPSEKLERILRSCSRDPTQAIADRLKEMYEIIYSQHFQPDENFNSCA  
KEIANKHFRFAEMLYYKLVESVIEQEQKRLGDMDSLGVLEHDAFHRSLACCLEVAVFVSHKPPGNFFIAEIF  
DVPYHYFYKVIIEVFIIRAEDGLCREVVKHLNQIEEQILDHLAWKTKSPLWDRIRDNENRVPTCEEVMPQNLER  
TDEIYIAGSPLTPRRVGEVRADAGGLGRSITSPTTLYDRYSSPTVSTTRRRLFENDSPSEGSTSGRIPPQPLV  
NAVVPQVNPGETVSVTPVPGQTLVTMATATVTANNGQTVTIPVQGIANENGGITFFPVQVNVGGQAQAVAGSI  
QPLSAQALAGSLSSQVGTGTTLQVPGPVAIQQISPGGQQQNPQPLTRSSIRPRKTSSLALFFRKVYYLAGVR  
LRDLCKIKLDISDELKKIWTCTFEFSIIQCTELMMDRHLDQLLMCAIYVMAKVTKEDRSFQNMRCYRTQPQAR  
SQVYRSVLIKGRNRSGSSESRSRSHQNSPTELNTDRASRDSPPVMRSNSTLPVPQPSAPPTPTRLTGASSDVE  
EEERGDLIQFYNNIYRKQIQAFAMKYSQANAQDTPPLSPYFPVVRTGSPRRVQLSQSHPIYISPHNNEAMPSP  
REKIFYYFSNSPSKRLREINSMIRTGETPTKKRGILLDDGSESPAKRICPENHSALLRRLQDVANDRGSQ\*  
>rs49005983\_ENSMUSP00000147327\_c.2432:C>G\_p.S811R  
ENSMUST00000209518.2|Rb12-208|ENSMUSG00000031666|+|chr8:g.91833560:C>G  
MASGGNQSPPPPPAAAASSEEEEEEDGDAADRAQPAGSPHQIQQRFEELCSRLNMDEAARAEAWSSYRSMSES  
YTLEGNDLHLWALACALYVACRKSVPVTVSKGTAEGNYVSLTRILRCSEQSLIEFFNKMKKWEDMANLPPHFRERT  
ERLERNFVSAVIFKKYEPIFQDIFKYPOEEQPRQQRGRKQRRQPCTTSEIFHFCWVLFYIYAKGNFPMISDDL  
VNSYHLLLCALDLVYGALQCSNRKELVNPVNFKGLSEDCPKDSSKASSDPPCVIEKLCSLHDGLVLEAKGIKE  
HFWKPYIRKLFKLLKGKEENLTGFLEPGNFGESFKAVNKAYEYVLAAGNLDERVFLGEDAEVEVGTLSRC  
LSAASGTESAERTQMRDILQOHLDKSKALRVCTPLTGVRYVQENSPCVTPVSTAAHSLRSLHTMLSGLRNAPS  
EKLERILRSCSRDPTQAIADRLKEMYEIIYSQHFQPDENFNSCAKEMLYYKLVESVIEQEQKRLGDMDSLGVLE  
HDAFHRSLACCLEVAVFVSHKPPGNFFIAEIFDVPYHYFYKVIIEVFIIRAEDGLCREVVKHLNQIEEQILDHL  
AWKTKSPLWDRIRDNENRVPTCEEVMPQNLERLERTDEIYIAGSPLTPRRVGEVRADAGGLGRSITSPTTLYDRY  
SSPTVSTTRRRLFENDSPSEGSTSGRIPPQPLVNAVVPQVNPGETVSVTPVPGQTLVTMATATVTANNGQTVT  
IPVQGIANENGGITFFPVQVNVGGQAQAVAGSIQPLSAQALAGSLSSQVGTGTTLQVPGPVAIQQISPGGQQQ  
NPQPLTRSSIRPRKTSSLALFFRKVYYLAGVRLRDLCKIKLDISDELKKIWTCTFEFSIIQCTELMMDRHLDQ  
LLMCAIYVMAKVTKEDRSFQNMRCYRTQPQARSQVYRSVLIKGRNRSGSSESRSRSHQNSPTELNTDRASRDS  
SPVMRSNSTLPVPQPSAPPTPTRLTGASSDVEEEERGDLIQFYNNIYRKQIQAFAMKYSQANAQDTPPLSP  
YFPVVRTGSPRRVQLSQSHPIYISPHNNEAMPSPREKIFYYFSNSPSKRLREINSMIRTGETPTKKRGILLDDG  
SESPAKRICPENHSALLRRLQDVANDRGSQ\*  
>rs51619191\_ENSMUSP00000034091\_c.2646:C>T\_p.H883Y  
ENSMUST00000034091.8|Rb12-201|ENSMUSG00000031666|+|chr8:g.91833818:C>T  
MASGGNQSPPPPPAAAASSEEEEEEDGDAADRAQPAGSPHQIQQRFEELCSRLNMDEAARAEAWSSYRSMSES  
YTLEGNDLHLWALACALYVACRKSVPVTVSKGTAEGNYVSLTRILRCSEQSLIEFFNKMKKWEDMANLPPHFRERT  
ERLERNFVSAVIFKKYEPIFQDIFKYPOEEQPRQQRGRKQRRQPCTTSEIFHFCWVLFYIYAKGNFPMISDDL  
VNSYHLLLCALDLVYGALQCSNRKELVNPVNFKGLSEDCPKDSSKASSDPPCVIEKLCSLHDGLVLEAKGIKE  
HFWKPYIRKLFKLLKGKEENLTGFLEPGNFGESFKAVNKAYEYVLAAGNLDERVFLGEDAEVEVGTLSRC  
LSAASGTESAERTQMRDILQOHLDKSKALRVCTPLTGVRYVQENSPCVTPVSTAAHSLRSLHTMLSGLRNAPS  
EKLERILRSCSRDPTQAIADRLKEMYEIIYSQHFQPDENFNSCAKEIANKHFRFAEMLYYKLVESVIEQEQKRL  
GDMDSLGVLEHDAFHRSLACCLEVAVFVSHKPPGNFFIAEIFDVPYHYFYKVIIEVFIIRAEDGLCREVVKHLN  
QIEEQILDHLAWKTKSPLWDRIRDNENRVPTCEEVMPQNLERLERTDEIYIAGSPLTPRRVGEVRADAGGLGRS  
TSPPTTLYDRYSSPTVSTTRRRLFENDSPSEGSTSGRIPPQPLVNAVVPQVNPGETVSVTPVPGQTLVTMATAT  
VTANNGQTVTIPVQGIANENGGITFFPVQVNVGGQAQAVAGSIQPLSAQALAGSLSSQVGTGTTLQVPGPVAI  
QQISPGGQQQNPQPLTSSSIRPRKTSSLALFFRKVYYLAGVRLRDLCKIKLDISDELKKIWTCTFEFSIIQCT  
ELMMDRYLDQLLMCAIYVMAKVTKEDRSFQNMRCYRTQPQARSQVYRSVLIKGRNRSGSSESRSRSHQNSPTE  
LNTDRASRDSPPVMRSNSTLPVPQPSAPPTPTRLTGASSDVEEEERGDLIQFYNNIYRKQIQAFAMKYSQAN  
AQDTPPLSPYFPVVRTGSPRRVQLSQSHPIYISPHNNEAMPSPREKIFYYFSNSPSKRLREINSMIRTGETPT  
KKRGILLDDGSESPAKRICPENHSALLRRLQDVANDRGSQ\*  
>rs51619191\_ENSMUSP00000147579\_c.2517:C>T\_p.H840Y  
ENSMUST00000211136.2|Rb12-210|ENSMUSG00000031666|+|chr8:g.91833818:C>T  
MASGGNQSPPPPPAAAASSEEEEEEDGDAADRAQPAGSPHQIQQRFEELCSRLNMDEAARAEAWSSYRSMSES  
YTLEGNDLHLWALACALYVACRKSVPVTVSKGTAEGNYVSLTRILRCSEQSLIEFFNKMKKWEDMANLPPHFRERT  
ERLERNFVSAVIFKKYEPIFQDIFKYPOEEQPRQQRGRKQRRQPCTTSEIFHFCWVLFYIYAKGLSEDCPKD



SKASSDPPCVIEKLCSLHDGLVLEAKGIKEHFWKPYIRKLFKLLKKEENLTGFLEPGNFGESFKAVNKAY  
 EYVLAAGNLDERVLGEDAEVEVGTLSRCLSAASGTESAERTQMRDILQQHLDKSKALRVCTPLTGVRVYQE  
 NSPCVTPVSTAAHLSRLHTMLSGLRNAPSEKLERILRSCSRDPTQAIADRLKEMYE IYSQHFPDENFNSCA  
 KEIANKHFRFAEMLYYKLVESVIEQEQKRLGDMDLSGVLEHDAFHRSLLACCLEVVAFSHKPPGNFPFIAE I  
 DVPHYHFKYKIEVFIRAEDGLCREVVKHLNQIEEQILDHLAWKTKSPLWDRI RDNENRVPTCEEVMPQNLER  
 TDEIYIAGSPLTPRRVGEVRADAGGLGRSITSPTTLYDRYSSPTVSTTRRRLFENDSPSEGSTSGRI PPQPLV  
 NAVPVQNVPGETVSVTPVPGQTLVTMATATVTANNGQTVTIPVQGIANENGGITFFPVQVNVGGQAQAVAGSI  
 QPLSAQALAGSLSSQVGTGTTLQVPGPVAIQQISPGGQQQNPQGQPLTSSSIRPRKTSSALFFRKVYYLAGVR  
 LRDLCKIKLDI SDELRKKIWTCTFEFSIIQCTELMMDRYLDQLLMCAIYVMAKVTKEDRSFQNMRCYRTQPQAR  
 SQVYRSVLIKGKRRNSGSSSRSHQNSPTELNTDRASRDS SPVMRSNSTLPVPQPSSAPPTPTRLTGASSDVE  
 EEERGLIQFYNNIYRKQIQAFAMKYSQANAQTDTPPLSPYFVRTGSPRRVQLSQSHPIYISPHNNEAMPSP  
 REKIFYFYSNSPSKRLREINSMIRTGETPTKKRGILLDDGSESPAKRICPENHSALLRRLQDVANDRGSQ\*  
 >rs51619191\_ENSMUSP00000147327\_c.2616:C>T\_p.H873Y  
 ENSMUST00000209518.2|Rb12-208|ENSMUSG00000031666|+|chr8:g.91833818:C>T  
 MASGGNQSPPPPPAAAASSEEEEEEDGDAADRAQPAGSPSHQIQQRFEELCSRLNMDEAARAEAWSSYRSMSES  
 YTLEGNLHLWALACALYVACRKSVPVTVSKGTAEAGNYVSLTRILRCSEQSLIEFFNKMKKWEDMANLPPHFRE  
 ERLERNFTVSAVIFKKYEP I FQDIFKY PQEEQPRQQRGRKQRRPCTTSEIFHFCWVLF IYAKGNFPMI SDDL  
 VNSYHLLLCALDLVYGNALQCSNRKELVNPNFKGLSEDCHPKSKASSDPPCVIEKLCSLHDGLVLEAKGIKE  
 HFWKPYIRKLFKLLKKEENLTGFLEPGNFGESFKAVNKAYEYVLAAGNLDERVLGEDAEVEVGTLSRCL  
 SAASGTESAERTQMRDILQQHLDKSKALRVCTPLTGVRVYQENSPCVTPVSTAAHLSRLHTMLSGLRNAPS  
 EKLERILRSCSRDPTQAIADRLKEMYE IYSQHFPDENFNSCAKEMLYYKLVESVIEQEQKRLGDMDLSGVLE  
 HDAFHRSLLACCLEVVAFSHKPPGNFPFIAE I F DVPHYHFKYKIEVFIRAEDGLCREVVKHLNQIEEQILDHL  
 AWKTKSPLWDRI RDNENRVPTCEEVMPQNLERTDEIYIAGSPLTPRRVGEVRADAGGLGRSITSPTTLYDRY  
 SSPTVSTTRRRLFENDSPSEGSTSGRI PPQPLVNAVVPVQNVPGETVSVTPVPGQTLVTMATATVTANNGQTVT  
 IPVQGIANENGGITFFPVQVNVGGQAQAVAGSIQPLSAQALAGSLSSQVGTGTTLQVPGPVAIQQISPGGQQQ  
 NPGQPLTSSSIRPRKTSSALFFRKVYYLAGVRLRDLCKIKLDI SDELRKKIWTCTFEFSIIQCTELMMDRYLDQ  
 LLMCAIYVMAKVTKEDRSFQNMRCYRTQPQARSVRSVLIKGKRRNSGSSSRSHQNSPTELNTDRASRDS  
 SPVMRSNSTLPVPQPSSAPPTPTRLTGASSDVEEEERGLIQFYNNIYRKQIQAFAMKYSQANAQTDTPPLSP  
 YPFVRTGSPRRVQLSQSHPIYISPHNNEAMPSPREKIFYFYSNSPSKRLREINSMIRTGETPTKKRGILLDDG  
 SESPAKRICPENHSALLRRLQDVANDRGSQ\*  
 >rs226649924\_ENSMUSP00000034091\_c.2653:ACC>A\_p.D885del-fs  
 ENSMUST00000034091.8|Rb12-201|ENSMUSG00000031666|+|chr8:g.91833825:ACC>A  
 MASGGNQSPPPPPAAAASSEEEEEEDGDAADRAQPAGSPSHQIQQRFEELCSRLNMDEAARAEAWSSYRSMSES  
 YTLEGNLHLWALACALYVACRKSVPVTVSKGTAEAGNYVSLTRILRCSEQSLIEFFNKMKKWEDMANLPPHFRE  
 ERLERNFTVSAVIFKKYEP I FQDIFKY PQEEQPRQQRGRKQRRPCTTSEIFHFCWVLF IYAKGNFPMI SDDL  
 VNSYHLLLCALDLVYGNALQCSNRKELVNPNFKGLSEDCHPKSKASSDPPCVIEKLCSLHDGLVLEAKGIKE  
 HFWKPYIRKLFKLLKKEENLTGFLEPGNFGESFKAVNKAYEYVLAAGNLDERVLGEDAEVEVGTLSRCL  
 SAASGTESAERTQMRDILQQHLDKSKALRVCTPLTGVRVYQENSPCVTPVSTAAHLSRLHTMLSGLRNAPS  
 EKLERILRSCSRDPTQAIADRLKEMYE IYSQHFPDENFNSCAKEIANKHFRFAEMLYYKLVESVIEQEQKRL  
 GDMDLSGVLEHDAFHRSLLACCLEVVAFSHKPPGNFPFIAE I F DVPHYHFKYKIEVFIRAEDGLCREVVKHLN  
 QIEEQILDHLAWKTKSPLWDRI RDNENRVPTCEEVMPQNLERTDEIYIAGSPLTPRRVGEVRADAGGLGRS I  
 TSPTTLYDRYSSPTVSTTRRRLFENDSPSEGSTSGRI PPQPLVNAVVPVQNVPGETVSVTPVPGQTLVTMATAT  
 VTANNGQTVTIPVQGIANENGGITFFPVQVNVGGQAQAVAGSIQPLSAQALAGSLSSQVGTGTTLQVPGPVAI  
 QQISPGGQQQNPQGQPLTSSSIRPRKTSSALFFRKVYYLAGVRLRDLCKIKLDI SDELRKKIWTCTFEFSIIQCT  
 ELMMDRHLEAVDVCHLCDGKGHKRRQVLEPHHALLQNSATGPEPGVQKCLDKREKKLWQQ  
 >rs226649924\_ENSMUSP00000147579\_c.2524:ACC>A\_p.D842del-fs  
 ENSMUST00000211136.2|Rb12-210|ENSMUSG00000031666|+|chr8:g.91833825:ACC>A  
 MASGGNQSPPPPPAAAASSEEEEEEDGDAADRAQPAGSPSHQIQQRFEELCSRLNMDEAARAEAWSSYRSMSES  
 YTLEGNLHLWALACALYVACRKSVPVTVSKGTAEAGNYVSLTRILRCSEQSLIEFFNKMKKWEDMANLPPHFRE  
 ERLERNFTVSAVIFKKYEP I FQDIFKY PQEEQPRQQRGRKQRRPCTTSEIFHFCWVLF IYAKGLEDCHPKD  
 SKASSDPPCVIEKLCSLHDGLVLEAKGIKEHFWKPYIRKLFKLLKKEENLTGFLEPGNFGESFKAVNKAY  
 EYVLAAGNLDERVLGEDAEVEVGTLSRCLSAASGTESAERTQMRDILQQHLDKSKALRVCTPLTGVRVYQE  
 NSPCVTPVSTAAHLSRLHTMLSGLRNAPSEKLERILRSCSRDPTQAIADRLKEMYE IYSQHFPDENFNSCA  
 KEIANKHFRFAEMLYYKLVESVIEQEQKRLGDMDLSGVLEHDAFHRSLLACCLEVVAFSHKPPGNFPFIAE I  
 DVPHYHFKYKIEVFIRAEDGLCREVVKHLNQIEEQILDHLAWKTKSPLWDRI RDNENRVPTCEEVMPQNLER  
 TDEIYIAGSPLTPRRVGEVRADAGGLGRSITSPTTLYDRYSSPTVSTTRRRLFENDSPSEGSTSGRI PPQPLV  
 NAVPVQNVPGETVSVTPVPGQTLVTMATATVTANNGQTVTIPVQGIANENGGITFFPVQVNVGGQAQAVAGSI  
 QPLSAQALAGSLSSQVGTGTTLQVPGPVAIQQISPGGQQQNPQGQPLTSSSIRPRKTSSALFFRKVYYLAGVR

LRDLCIKLDISDELRRKIWTCFEFSIIQCTELMMDRHLEAVDVCHLCDGKGHKRRQVLPEHHALLQNSATGPE  
 PGVQKCLDKREKKKLWQQ  
 >rs226649924\_ENSMUSP00000147327\_c.2623:ACC>A\_p.D875del-fs  
 ENSMUST00000209518.2|Rb12-208|ENSMUSG00000031666|+|chr8:g.91833825:ACC>A  
 MASGGNQSPPPPPAAAASSEEEEEEDGDAADRAQPAGSPHQIQQRFEELCSRLNMDEAARAEAWSSYRSMSES  
 YTLEGNDLHWLACALYVACRKSVPVTVSKGTAEGNYVSLTRILRCSEQSLIEFFNKMKKWEDMANLPPHFRERT  
 ERLERNFTVSAVIFKKYEPIFQDIFKYPQEEQPRQQRGRKQRRQPCTTSEIFHFCWVLFYIYAKGNFPMISDDL  
 VNSYHLLLALDLDVYGALQCSNRKELVNPVNFKGLSEDCPKDSKASSDPPCVIEKLCSLHDGLVLEAKGIKE  
 HFWKPYIRKLFKFKLLKGKEENLTGFLEPGNFGESFKAVNKAYEEYVLAAGNLDERVFLGEDAEEVGTLSRC  
 LSAASGTESAERTQMRDILQQHLDKSKALRVCTPLTGVRVYQENSPCVTPVSTAAHSLSRHLTMSGLRNAPS  
 EKLERILRSCSRDPTQAIADRLKEMYEIYSQHFQPDENFSNCAKEMLYYKLVESVIEQEQKRLGDMDLGVLVLE  
 HDAFHRSLLACCLEVVAFSHKPPGNFPFIAEIFDVPHYHFYKVIIEVFIRAEDGLCREVVKHLNQIEEQILDHL  
 AWKTKSPLWDRIRDNENRVPTCEEVMPQNLERLERTDEIYIAGSPLTPRRVGEVRADAGGLGRSITSPTTLYDRY  
 SSPTVSTTRRRRLFENDSPSEGSTSGRIPPQPLVNAVVPVQNVPGETVSVTPVPGQTLVTMATATVTANNGQTVT  
 IPVQGIANENGGITFFPVQVNVGGQAQAVAGSIQPLSAQALAGSLSSQQVVTGTTLQVPGPVAIQQISPGGQQQ  
 NPGQPLTSSSIRPRKTSSLALFFRKVYYLAGVRLDLCIKLDISDELRRKIWTCFEFSIIQCTELMMDRHLEA  
 VDVCHLCDGKGHKRRQVLPEHHALLQNSATGPEPGVQKCLDKREKKKLWQQ  
 >rs51979111\_ENSMUSP00000034091\_c.2671:C>T\_p.A891V  
 ENSMUST00000034091.8|Rb12-201|ENSMUSG00000031666|+|chr8:g.91833843:C>T  
 MASGGNQSPPPPPAAAASSEEEEEEDGDAADRAQPAGSPHQIQQRFEELCSRLNMDEAARAEAWSSYRSMSES  
 YTLEGNDLHWLACALYVACRKSVPVTVSKGTAEGNYVSLTRILRCSEQSLIEFFNKMKKWEDMANLPPHFRERT  
 ERLERNFTVSAVIFKKYEPIFQDIFKYPQEEQPRQQRGRKQRRQPCTTSEIFHFCWVLFYIYAKGNFPMISDDL  
 VNSYHLLLALDLDVYGALQCSNRKELVNPVNFKGLSEDCPKDSKASSDPPCVIEKLCSLHDGLVLEAKGIKE  
 HFWKPYIRKLFKFKLLKGKEENLTGFLEPGNFGESFKAVNKAYEEYVLAAGNLDERVFLGEDAEEVGTLSRC  
 LSAASGTESAERTQMRDILQQHLDKSKALRVCTPLTGVRVYQENSPCVTPVSTAAHSLSRHLTMSGLRNAPS  
 EKLERILRSCSRDPTQAIADRLKEMYEIYSQHFQPDENFSNCAKEIANKHFRFAEMLYYKLVESVIEQEQKRL  
 GDMDLGVLVLEHDAFHRSLLACCLEVVAFSHKPPGNFPFIAEIFDVPHYHFYKVIIEVFIRAEDGLCREVVKHLN  
 QIEEQILDHLAWKTKSPLWDRIRDNENRVPTCEEVMPQNLERLERTDEIYIAGSPLTPRRVGEVRADAGGLGRS  
 TSPTTLYDRYSSPTVSTTRRRRLFENDSPSEGSTSGRIPPQPLVNAVVPVQNVPGETVSVTPVPGQTLVTMATAT  
 VTANNGQTVTIPVQGIANENGGITFFPVQVNVGGQAQAVAGSIQPLSAQALAGSLSSQQVVTGTTLQVPGPVAI  
 QQISPGGQQQNPGQPLTSSSIRPRKTSSLALFFRKVYYLAGVRLDLCIKLDISDELRRKIWTCFEFSIIQCT  
 ELMMDRHLDQLLMCVIYVMAKVTKEDRSFQNMRCYRTPQARSQVYRSVLIKGRNRSGSSESRSQNSPTE  
 LNTDRASRDSSPVMRSNSTLVPVQPSSAPPTPTRLTGASSDVEEEERGDLIQFYNNIYRKQIQAFAMKYSQAN  
 AQTDTPLSPYPFVRTGSPRRVQLSQSHPIYISPHNNEAMPSPREKIFYFYSNSPSKRLREINSMIRTGETPT  
 KKRGIILLDDGSESPAKRICPENHSALLRRLQDVANDRGSQ\*  
 >rs51979111\_ENSMUSP00000147579\_c.2542:C>T\_p.A848V  
 ENSMUST00000211136.2|Rb12-210|ENSMUSG00000031666|+|chr8:g.91833843:C>T  
 MASGGNQSPPPPPAAAASSEEEEEEDGDAADRAQPAGSPHQIQQRFEELCSRLNMDEAARAEAWSSYRSMSES  
 YTLEGNDLHWLACALYVACRKSVPVTVSKGTAEGNYVSLTRILRCSEQSLIEFFNKMKKWEDMANLPPHFRERT  
 ERLERNFTVSAVIFKKYEPIFQDIFKYPQEEQPRQQRGRKQRRQPCTTSEIFHFCWVLFYIYAKGLEDCHPKD  
 SKASSDPPCVIEKLCSLHDGLVLEAKGIKEHFWKPYIRKLFKFKLLKGKEENLTGFLEPGNFGESFKAVNKAY  
 EEYVLAAGNLDERVFLGEDAEEVGTLSRCLSAASGTESAERTQMRDILQQHLDKSKALRVCTPLTGVRVYQ  
 NSPCVTPVSTAAHSLSRHLTMSGLRNAPSEKLERILRSCSRDPTQAIADRLKEMYEIYSQHFQPDENFSNCA  
 KEIANKHFRFAEMLYYKLVESVIEQEQKRLGDMDLGVLVLEHDAFHRSLLACCLEVVAFSHKPPGNFPFIAEIF  
 DVPHYHFYKVIIEVFIRAEDGLCREVVKHLNQIEEQILDHLAWKTKSPLWDRIRDNENRVPTCEEVMPQNLER  
 TDEIYIAGSPLTPRRVGEVRADAGGLGRSITSPTTLYDRYSSPTVSTTRRRRLFENDSPSEGSTSGRIPPQPLV  
 NAVVPVQNVPGETVSVTPVPGQTLVTMATATVTANNGQTVTIPVQGIANENGGITFFPVQVNVGGQAQAVAGSI  
 QPLSAQALAGSLSSQQVVTGTTLQVPGPVAIQQISPGGQQQNPGQPLTSSSIRPRKTSSLALFFRKVYYLAGV  
 RLRDLCIKLDISDELRRKIWTCFEFSIIQCTELMMDRHLDQLLMCVIYVMAKVTKEDRSFQNMRCYRTPQAR  
 SQVYRSVLIKGRNRSGSSESRSQNSPTELNDRASRDSSPVMRSNSTLVPVQPSSAPPTPTRLTGASSDVE  
 EEERGDLIQFYNNIYRKQIQAFAMKYSQANAQTDTPLSPYPFVRTGSPRRVQLSQSHPIYISPHNNEAMPSP  
 REKIFYFYSNSPSKRLREINSMIRTGETPTKKRGIILLDDGSESPAKRICPENHSALLRRLQDVANDRGSQ\*  
 >rs15979111\_ENSMUSP00000147327\_c.2641:C>T\_p.A881V  
 ENSMUST00000209518.2|Rb12-208|ENSMUSG00000031666|+|chr8:g.91833843:C>T  
 MASGGNQSPPPPPAAAASSEEEEEEDGDAADRAQPAGSPHQIQQRFEELCSRLNMDEAARAEAWSSYRSMSES  
 YTLEGNDLHWLACALYVACRKSVPVTVSKGTAEGNYVSLTRILRCSEQSLIEFFNKMKKWEDMANLPPHFRERT  
 ERLERNFTVSAVIFKKYEPIFQDIFKYPQEEQPRQQRGRKQRRQPCTTSEIFHFCWVLFYIYAKGNFPMISDDL  
 VNSYHLLLALDLDVYGALQCSNRKELVNPVNFKGLSEDCPKDSKASSDPPCVIEKLCSLHDGLVLEAKGIKE

HFWKPYIRKLFKFKLLKGKEENLTGFLEPGNFGESFKAVNKAYEEYVLAAGNLDERVFLGEDAEEEVGTLSRC  
LSAASGTEAERTQMRDILQQHLDKSKALRVCTPLTGVRVQENSPCVTPVSTAAHSLRSLHTMLSGLRNAPS  
EKLERILRSCSRDPTQAIADRLKEMYE IYSQHFQPDENFSNCAKEMLYYKLVESVIEQE QKRLGDMDL SGVLE  
HDAFHRSLLACCLEVVAFSHKPPGNFPFIAE I FDVPHYHYFYKVI EVFIRAEDGLCREVVKHLNQIEEQILDHL  
AWKTKSPLWDRIRDNENRVPTCEEVMPQNLERTDEIYIAGSPLTPRRVGEVRADAGGLGRSITSPTTLYDRY  
SSPTVSTTRRRRLFENDSPSEGSTSGRI PPQPLVNAVVPVQNVPGETVSVTPVPGQTLVTMATATVTANNGQTVT  
IPVQGIANENGGITFFPVQVNVGGQAQAVAGSIQPLSAQALAGSLSSQQVTGTTLQVPGPVAIQQISPGGQQQ  
NPGQPLTSSSIRPRKTSSALFFRKVYYLAGVRLRDLCKLDISDELRRKIWTCEFEFSIQCTELMMDRHLDDQ  
LLMCVYIVMAKVTKEDRSFQNMRCYRTQPQARSQVYRSVLIKGRNRNSGSSSRSHQNSPTELNTDRASRDS  
SPVMRSNSTLPVPQSSAPPTPTRLTGASSDVEEEERGDLIQFYNNIYRKQIQAFAMKYSQANAQTDTPLSP  
YFPVRTGSPRRVQLSQSHPIYISPHNNEAMPSPREKIFYFNSNSPSKRLREINSMIRTGETPTTKRGILLDDG  
SESPAKRICPENHSALLRRLQDVANDRGSQ\*

>rs32595399\_ENSMUSP00000034091\_c.2813:T>A\_p.S938R

ENSMUST00000034091.8|Rb12-201|ENSMUSG00000031666|+|chr8:g.91840663:T>A  
MASGGNQSPPPPPAAAASSEEEEDGDAADRAQPAGSPSHQIQQRFEELCSRLNMDEAARAEAWSSYRSMSES  
YTLEGNDLHLWALACALYVACRKSVPVTSKGTAEAGNYVSLTRILRCSEQSLIEFFNKMKKWEDMANLPPHFRE  
ERLERNFTVSAVIFKKYEPIFQDIFKYPQEEQPRQQRGRKQRRPCTTSEIFHF CWVLF IYAKGNFPMISDDL  
VNSYHLLLCALDLYGNALQCSNRKELVNPFNKGLSEDCHPKDSKASSDPPCVIEKLCSLHDGLVLEAKGIKE  
HFWKPYIRKLFKFKLLKGKEENLTGFLEPGNFGESFKAVNKAYEEYVLAAGNLDERVFLGEDAEEEVGTLSRC  
LSAASGTEAERTQMRDILQQHLDKSKALRVCTPLTGVRVQENSPCVTPVSTAAHSLRSLHTMLSGLRNAPS  
EKLERILRSCSRDPTQAIADRLKEMYE IYSQHFQPDENFSNCAKEIANKHFRFAEMLYYKLVESVIEQE QKRL  
GDMDL SGVLEHDAFHRSLLACCLEVVAFSHKPPGNFPFIAE I FDVPHYHYFYKVI EVFIRAEDGLCREVVKHLN  
QIEEQILDHLAWKTKSPLWDRIRDNENRVPTCEEVMPQNLERTDEIYIAGSPLTPRRVGEVRADAGGLGRS I  
TSPTTLYDRYSSPTVSTTRRRRLFENDSPSEGSTSGRI PPQPLVNAVVPVQNVPGETVSVTPVPGQTLVTMATAT  
VTANNGQTVTIPVQGIANENGGITFFPVQVNVGGQAQAVAGSIQPLSAQALAGSLSSQQVTGTTLQVPGPVAI  
QQISPGGQQQNPGQPLTSSSIRPRKTSSALFFRKVYYLAGVRLRDLCKLDISDELRRKIWTCEFEFSIQCT  
ELMMDRHLDDQLLMCAIYVMKVTKEDRSFQNMRCYRTQPQARSQVYRSVLIKGRNRNSGSSSRSHQNSPTE  
LNTDRASRDS SPVMRSNSTLPVPQSSAPPTPTRLTGASSDVEEEERGDLIQFYNNIYRKQIQAFAMKYSQAN  
AQTDTPLSPYFPVRTGSPRRVQLSQSHPIYISPHNNEAMPSPREKIFYFNSNSPSKRLREINSMIRTGETPT  
TKRGILLDDGSESPAKRICPENHSALLRRLQDVANDRGSQ\*

>rs32595399\_ENSMUSP00000147579\_c.2684:T>A\_p.S895R

ENSMUST00000211136.2|Rb12-210|ENSMUSG00000031666|+|chr8:g.91840663:T>A  
MASGGNQSPPPPPAAAASSEEEEDGDAADRAQPAGSPSHQIQQRFEELCSRLNMDEAARAEAWSSYRSMSES  
YTLEGNDLHLWALACALYVACRKSVPVTSKGTAEAGNYVSLTRILRCSEQSLIEFFNKMKKWEDMANLPPHFRE  
ERLERNFTVSAVIFKKYEPIFQDIFKYPQEEQPRQQRGRKQRRPCTTSEIFHF CWVLF IYAKGLSEDCHPK  
SKASSDPPCVIEKLCSLHDGLVLEAKGIKEHFWKPYIRKLFKFKLLKGKEENLTGFLEPGNFGESFKAVNKAY  
EEYVLAAGNLDERVFLGEDAEEEVGTLSRCLSAASGTEAERTQMRDILQQHLDKSKALRVCTPLTGVRVQ  
NSPCVTPVSTAAHSLRSLHTMLSGLRNAPSEKLERILRSCSRDPTQAIADRLKEMYE IYSQHFQPDENFSNCA  
KEIANKHFRFAEMLYYKLVESVIEQE QKRLGDMDL SGVLEHDAFHRSLLACCLEVVAFSHKPPGNFPFIAE I F  
DVPHYHYFYKVI EVFIRAEDGLCREVVKHLNQIEEQILDHLAWKTKSPLWDRIRDNENRVPTCEEVMPQNLER  
TDEIYIAGSPLTPRRVGEVRADAGGLGRSITSPTTLYDRYSSPTVSTTRRRRLFENDSPSEGSTSGRI PPQPLV  
NAVVPVQNVPGETVSVTPVPGQTLVTMATATVTANNGQTVTIPVQGIANENGGITFFPVQVNVGGQAQAVAGSI  
QPLSAQALAGSLSSQQVTGTTLQVPGPVAIQQISPGGQQQNPGQPLTSSSIRPRKTSSALFFRKVYYLAGV  
LRDLCKLDISDELRRKIWTCEFEFSIQCTELMMDRHLDDQLLMCAIYVMKVTKEDRSFQNMRCYRTQPQAR  
SQVYRSVLIKGRNRNSGSSSRSHQNSPTELNTDRASRDS SPVMRSNSTLPVPQSSAPPTPTRLTGASSDVE  
EEERGDLIQFYNNIYRKQIQAFAMKYSQANAQTDTPLSPYFPVRTGSPRRVQLSQSHPIYISPHNNEAMPSP  
REKIFYFNSNSPSKRLREINSMIRTGETPTTKRGILLDDGSESPAKRICPENHSALLRRLQDVANDRGSQ\*

>rs32595399\_ENSMUSP00000147327\_c.2783:T>A\_p.S928R

ENSMUST00000209518.2|Rb12-208|ENSMUSG00000031666|+|chr8:g.91840663:T>A  
MASGGNQSPPPPPAAAASSEEEEDGDAADRAQPAGSPSHQIQQRFEELCSRLNMDEAARAEAWSSYRSMSES  
YTLEGNDLHLWALACALYVACRKSVPVTSKGTAEAGNYVSLTRILRCSEQSLIEFFNKMKKWEDMANLPPHFRE  
ERLERNFTVSAVIFKKYEPIFQDIFKYPQEEQPRQQRGRKQRRPCTTSEIFHF CWVLF IYAKGNFPMISDDL  
VNSYHLLLCALDLYGNALQCSNRKELVNPFNKGLSEDCHPKDSKASSDPPCVIEKLCSLHDGLVLEAKGIKE  
HFWKPYIRKLFKFKLLKGKEENLTGFLEPGNFGESFKAVNKAYEEYVLAAGNLDERVFLGEDAEEEVGTLSRC  
LSAASGTEAERTQMRDILQQHLDKSKALRVCTPLTGVRVQENSPCVTPVSTAAHSLRSLHTMLSGLRNAPS  
EKLERILRSCSRDPTQAIADRLKEMYE IYSQHFQPDENFSNCAKEMLYYKLVESVIEQE QKRLGDMDL SGVLE  
HDAFHRSLLACCLEVVAFSHKPPGNFPFIAE I FDVPHYHYFYKVI EVFIRAEDGLCREVVKHLNQIEEQILDHL  
AWKTKSPLWDRIRDNENRVPTCEEVMPQNLERTDEIYIAGSPLTPRRVGEVRADAGGLGRSITSPTTLYDRY

SSPTVSTTRRRLFENDSPSEGSTSGRIPPQPLVNAVVPQVNPGETVSVTPVPGQTLVTMATATVTANNGQTVT  
IPVQGIANENGGITFFPVQVNVGGQAQAVAGSIQPLSAQALAGSLSSQVVTGTTLQVPGPVAIQQISPGGQQQ  
NPGQPLTSSSIRPRKTSLLALFFRKVYYLAGVRLRDLCKLDISDELRRKKIWTCEFFSIIQCTELMMDRHLDQ  
LLMCAIYVMAKVTKEDRSFQNIIMRCYRTQPQARSQVYRSVLIKGRNRNSGSRRESRSHQNSPTELNTDRASRDS  
SPVMRSNSTLVPVQPSAPPTPTRLTGASSDVEEEERGDLIQFYNNIYRKQIQAFAMKYSQANAQTDTPLSP  
YFPVRTGSPRRVQLSQSHPIYISPHNNEAMPSPREKIFYFYFNSPSKRLREINSMIRTGETPTKKRGILLDDG  
SESPAKRICPENHSALLRRLQDVANDRGSQ\*

>rs48045978\_ENSMUSP00000042702\_c.3409:T>C\_p.M1137T  
ENSMUST00000047783.14|Rpgrip11-201|ENSMUSG00000033282|-  
|chr8:g.91959489:A>G

MSGPSETAGDLPVKDTGLNLFVGGGLQETSTARTVKTRQAVSRVSREELEDRFLRLHDENILLKQHARKQED  
KIKRMA TKLIRLVNDKKRYERVGGGPKRLGRDVEMEEMIEQLQEKVHELERQNEVLKNRLISAKQQLQVQGHR  
QTSYSRVQARVNTGRRRASASAGSQECPGKGLRFQNVDEAETVQPTLTKEYSNSLLEEARGEIRNLENVIQSQR  
GQIEELEHLAEILKTQLKRKENEIELSLLQLREQQATDQRSNIRDNVETIKLHKQLVEKSNALSVIEGKFIQL  
QEKQRTLRI SHDALMANGDELNKQLKEQRLKCCSLEKQLHSVRFSEERRVEELQDRINDLEKERELLENYDKL  
YNSAFSAAHEEQWKLKEQQMKVQIAQLETALKSDLTDKTEVLDKDKTERDQNEKLVQENRDLQLQCLQKQRL  
HELQSRLLFFNQESDINADDLSEALLLIKAQKEQKNGDLSFLEKVDKINKDLDRSMKELQATHAETVQELEK  
TRNMLIMQHKINKDYQMEVETVTQKMNELQDYELKVEQYVHLLDIRAARIQKLEAQLKDIAGTKQYKFKPE  
IMPDDSVDEFDETIHLERGENLFEIHINKVTFSSSEVLRASGDKELVTFCTYAFYDFELQTTPIVRGLYPEYNF  
TSQYLVHVNDLFLQYIQKNTVTLELHQAHSSTDYETIAACQLRFHEILEKSGRIFCTTSLVGTGKDIPNFGTVE  
YWFRLRVPMDQAIRLYRERAKALGYITSNFKKPEKMQLSQQAATTAQISPAESTDGNLNLHVTVKCCTGLQ  
SRASYLQPHAYVYKFFDFPDHDTAIVPSSNDPQFDDHMCFPVPMNMDLDRYLKSESLSFYVFDSDTQENIY  
MGKVNVPPLISLAHDKCISGIFELMDKEKHAAGTIQVILKWKFTYLPSPSGSITTEDLGKFCVCREEPEAVQRLPP  
KSSDVTSVVAPKPKPRQLTFVDKKSFAADTISHPSPETSPPPKDIKDSSEVGPKEPENGLSAVAYPSKESGV  
AKVEENVGEMQQKEDDISFLSEGQLASGVSASSEDETEITEELEPEDEDRSASDSDDCIIPSSVSTNTKQPS  
EERIEI IALNLNDSQITREDTIQRLFIECRFYSLPAEETPMSLPKQSGQWVYNYNSNVIYLDKENNPAVRD  
ILKAILQRRELPHRSVRFTVSDPPEDEQDLECEDIGVAHVLDLADLFQKGRDIEQDIDVLDARTDGGTIGKL  
KVTVEALHALRSVYEQNRKDLEA\*

>rs51575997\_ENSMUSP00000042702\_c.3292:T>G\_p.I1098S  
ENSMUST00000047783.14|Rpgrip11-201|ENSMUSG00000033282|-  
|chr8:g.91959606:A>C

MSGPSETAGDLPVKDTGLNLFVGGGLQETSTARTVKTRQAVSRVSREELEDRFLRLHDENILLKQHARKQED  
KIKRMA TKLIRLVNDKKRYERVGGGPKRLGRDVEMEEMIEQLQEKVHELERQNEVLKNRLISAKQQLQVQGHR  
QTSYSRVQARVNTGRRRASASAGSQECPGKGLRFQNVDEAETVQPTLTKEYSNSLLEEARGEIRNLENVIQSQR  
GQIEELEHLAEILKTQLKRKENEIELSLLQLREQQATDQRSNIRDNVETIKLHKQLVEKSNALSVIEGKFIQL  
QEKQRTLRI SHDALMANGDELNKQLKEQRLKCCSLEKQLHSVRFSEERRVEELQDRINDLEKERELLENYDKL  
YNSAFSAAHEEQWKLKEQQMKVQIAQLETALKSDLTDKTEVLDKDKTERDQNEKLVQENRDLQLQCLQKQRL  
HELQSRLLFFNQESDINADDLSEALLLIKAQKEQKNGDLSFLEKVDKINKDLDRSMKELQATHAETVQELEK  
TRNMLIMQHKINKDYQMEVETVTQKMNELQDYELKVEQYVHLLDIRAARIQKLEAQLKDIAGTKQYKFKPE  
IMPDDSVDEFDETIHLERGENLFEIHINKVTFSSSEVLRASGDKELVTFCTYAFYDFELQTTPIVRGLYPEYNF  
TSQYLVHVNDLFLQYIQKNTVTLELHQAHSSTDYETIAACQLRFHEILEKSGRIFCTTSLVGTGKDIPNFGTVE  
YWFRLRVPMDQAIRLYRERAKALGYITSNFKKPEKMQLSQQAATTAQISPAESTDGNLNLHVTVKCCTGLQ  
SRASYLQPHAYVYKFFDFPDHDTAIVPSSNDPQFDDHMCFPVPMNMDLDRYLKSESLSFYVFDSDTQENIY  
MGKVNVPPLISLAHDKCISGIFELMDKEKHAAGTIQVILKWKFTYLPSPSGSITTEDLGKFCVCREEPEAVQRLPP  
KSSDVTSVVAPKPKPRQLTFVDKKSFAADTISHPSPETSPPPKDIKDSSEVGPKEPENGLSAVAYPSKESGV  
AKVEENVGEMQQKEDDISFLSEGQLASGVSASSEDETEITEELEPEDEDRSASDSDDCIIPSSVSTNTKQPS  
EESRIE I IALNLNDSQITREDTIQRLFIECRFYSLPAEETPMSLPKQSGQWVYNYNSNVIYLDKENNPAVRD  
ILKAILQRRELPHRSVRFTVSDPPEDEQDLECEDIGVAHVLDLADLFQKGRDIEQDIDVLDARTDGGTIGKL  
KVTVEALHALRSVYEQNRKDLEA\*

>rs248295175\_ENSMUSP00000042702\_c.2974:C>T\_p.P992L  
ENSMUST00000047783.14|Rpgrip11-201|ENSMUSG00000033282|-  
|chr8:g.91979189:G>A

MSGPSETAGDLPVKDTGLNLFVGGGLQETSTARTVKTRQAVSRVSREELEDRFLRLHDENILLKQHARKQED  
KIKRMA TKLIRLVNDKKRYERVGGGPKRLGRDVEMEEMIEQLQEKVHELERQNEVLKNRLISAKQQLQVQGHR  
QTSYSRVQARVNTGRRRASASAGSQECPGKGLRFQNVDEAETVQPTLTKEYSNSLLEEARGEIRNLENVIQSQR  
GQIEELEHLAEILKTQLKRKENEIELSLLQLREQQATDQRSNIRDNVETIKLHKQLVEKSNALSVIEGKFIQL  
QEKQRTLRI SHDALMANGDELNKQLKEQRLKCCSLEKQLHSVRFSEERRVEELQDRINDLEKERELLENYDKL  
YNSAFSAAHEEQWKLKEQQMKVQIAQLETALKSDLTDKTEVLDKDKTERDQNEKLVQENRDLQLQCLQKQRL

HELQSRLLKFFNQESDINADDLSEALLLIKAQKEQKNGDLSFLEKVDISKINKDLDRSMKELQATHAETVQELEK  
 TRNMLIMQHKINKDYQMEVETVTQKMENLQDDYELKVEQYVHLLDIRAARIQKLEAQLKDIAYGTKQYKFKPE  
 IMPDDSVDEFDETIHLERGENLFEIHINKVTFSSSEVLRASGDKELVTFCTYAFYDFELQTTPIVRGLYPEYNF  
 TSQYLVHVNDLFLQYIQKNTVTLELHQAHSTDYETIAACQLRFHEILEKSGRIFCTTSLVGTGKDI PNFGTVE  
 YWFRRLRVPMDQAIRLYRERAKALGYITSNFKKPEKMQLSSQQAATTAQISPAESTDGNLNLHVTVCCTGLQ  
 SRASYLQPHAYVYKFFDFPDHDTAIVPSSNDPQFDDHMCFFVPMNMDLDRYLKSELSFYVFDSDTQENIY  
 MGKVVNPLISLAHDKCISGIFELMDKEKHAAGTIQVILKWKFTYLPSPSGITTEDLGKFCVCREEPEAVQRLPP  
 KSSDVTSVVAPKPKPRQRLTFVDDKVSFADTISHPSPETSPPLKDIKDSSEVGPKEPENGLSAVAYPSKESGV  
 AKVEENVGEMQGGKEDDISFLSEGQLASGSVASSEDETEITEELEPEDEDRSASDSDDCIIPSSVSTNTKQPS  
 EEIRIEIIALNLNDSQITREDTIQRLFIIECRFYSLPAEETPMSLKPQSGQWVYYNYSNVIYLDKENNPAVRD  
 ILKAILQRRELPHRSVRFTVSDPPEDEQDLECEDIGVAHVLDLADLFQKGRDIEQDIDVLDARTDGGTIGKL  
 KVTVEALHALRSVYEQNRKDLEA\*

>rs248295175\_ENSMUSP00000147300\_c.637:C>T\_p.P213L

ENSMUST00000209616.2|Rpgrip11-206|ENSMUSG00000033282|-  
 |chr8:g.91979189:G>A

GENLFEIHINKVTFSSSEVLRASGDKELVTFCTYAFYDFELQTTPIVRGLYPEYNFTSQYLVHVNDLFLQYIQK  
 NVTLELHQAHSTDYETIAACQLRFHEILEKSGRIFCTTSLVGI FELMDKEKHAAGTIQVILKWKFTYLPSPSG  
 SITTEDLGKFCVCREEPEAVQRLPPKSSDVTSVVAPKPKPRQRLTFVDDKVSFADTISHPSPETSPPLKDIKDS  
 SPEVGPKEPENGLSAVAYPSKESGVAKVEENVGEM

>rs33211992\_ENSMUSP00000042702\_c.2043:C>T\_p.L682F

ENSMUST00000047783.14|Rpgrip11-201|ENSMUSG00000033282|-  
 |chr8:g.91996835:G>A

MSGPSDETAGDLPVKDTGLNLFVGGLOQETSTARTVKTRQAVSRVSREELEDRFLRLHDENILLKQHARKQED  
 KIKRMATKLIRLVNDKKRYERVGGGPKRLGRDVEMEEMIEQLQEKVHELERQNEVLKNRLISAKQQQLQVQGHR  
 QTSYSRVQARVNTGRRRASASAGSQECPGKGLRFQNVDEAETVQPTLTKYSNSLLEEARGEIRNLENVIQSQR  
 GQIEELEHLAEILKTLQKREKENEIELSLLQLRECCQATDQRSNIRDNVETIKLHKQLVDEKSNALSVIEGKFIQ  
 QEKQRTLRI SHDALMANGDELNKQLKEQRLKCSLEKQLHVSFRSERRVEELQDRINDLEKERELLKENYDKL  
 YNSAFSAAHAEQWKLKEQQMKVQIAQLE TALKSDLTDKTEVLDKLTERRDQNEKLVQENRDLQLQCLQQKQRL  
 HELQSRLLKFFNQESDINADDLSEALLLIKAQKEQKNGDLSFLEKVDISKINKDLDRSMKELQATHAETVQELEK  
 TRNMLIMQHKINKDYQMEVETVTQKMENLQDDYELKVEQYVHLLDIRAARIQKLEAQLKDIAYGTKQYKFKPE  
 IMPDDSVDEFDETIHLERGENLFEIHINKVTFSSSEVLRASGDKELVTFCTYAFYDFELQTTPIVRGLYPEYNF  
 TSQYLVHVNDLFLQYIQKNTVTLEFHQAHSSTDYETIAACQLRFHEILEKSGRIFCTTSLVGTGKDI PNFGTVE  
 YWFRRLRVPMDQAIRLYRERAKALGYITSNFKKPEKMQLSSQQAATTAQISPAESTDGNLNLHVTVCCTGLQ  
 SRASYLQPHAYVYKFFDFPDHDTAIVPSSNDPQFDDHMCFFVPMNMDLDRYLKSELSFYVFDSDTQENIY  
 MGKVVNPLISLAHDKCISGIFELMDKEKHAAGTIQVILKWKFTYLPSPSGITTEDLGKFCVCREEPEAVQRLPP  
 KSSDVTSVVAPKPKPRQRLTFVDDKVSFADTISHPSPETSPPPKDIKDSSEVGPKEPENGLSAVAYPSKESGV  
 AKVEENVGEMQGGKEDDISFLSEGQLASGSVASSEDETEITEELEPEDEDRSASDSDDCIIPSSVSTNTKQPS  
 EEIRIEIIALNLNDSQITREDTIQRLFIIECRFYSLPAEETPMSLKPQSGQWVYYNYSNVIYLDKENNPAVRD  
 ILKAILQRRELPHRSVRFTVSDPPEDEQDLECEDIGVAHVLDLADLFQKGRDIEQDIDVLDARTDGGTIGKL  
 KVTVEALHALRSVYEQNRKDLEA\*

>rs33211992\_ENSMUSP00000147300\_c.237:C>T\_p.L80F

ENSMUST00000209616.2|Rpgrip11-206|ENSMUSG00000033282|-  
 |chr8:g.91996835:G>A

GENLFEIHINKVTFSSSEVLRASGDKELVTFCTYAFYDFELQTTPIVRGLYPEYNFTSQYLVHVNDLFLQYIQK  
 NVTLEFHQAHSSTDYETIAACQLRFHEILEKSGRIFCTTSLVGI FELMDKEKHAAGTIQVILKWKFTYLPSPSG  
 SITTEDLGKFCVCREEPEAVQRLPPKSSDVTSVVAPKPKPRQRLTFVDDKVSFADTISHPSPETSPPPKDIKDS  
 SPEVGPKEPENGLSAVAYPSKESGVAKVEENVGEM

>rs47127351\_ENSMUSP00000068380\_c.411:A>C\_p.T138P

ENSMUST00000069718.15|Fto-201|ENSMUSG00000055932|+|chr8:g.92136139:A>C

MKRVQTAEEEREREAKKRLRLELEDTWLPLYLTPKDDEFYQQWQLKYPKLVFREAGSIPEELHKEVPEAFLLTLH  
 KHGCLFRDVVRIQGGKDLVTPVSRILIGDPGCTYKYLNTRLFVWPVVKGCTVKYTEAEIAAACQPFLKLNLYL  
 QVETIQALEELAVREKANEDAVPLCMAEFPRAGVGPSCDDEVDLKSRAAYNVTLNFMMDPQKMPYLKEEYFG  
 MGKMAVSWHHDENLVDRAVAVYSYSCGESEDESEFEGRDPDTWHVGFKISWDIETPGLTIPLHQGDCY  
 FMLDDLNATHQHCVLQAGSQPRFSSTRVAECSTGTLDYILERCQLALQNVNLNDSDDGDVSLKSFDPVAVLKQGE  
 EIHNEVEFEWLRQFVQGNRYKLC TDWWC EPMTHLEGLWKKMESMTNAVLREVKREGLPVEQRSEILSAILVP  
 LTVRQNLKKEWHARCQSRVVRTLPVQQKPDPCRPYWEKDDPSMPLPFDLTDVVSELRGQLLEARS\*

>rs47127351\_ENSMUSP00000147563\_c.411:A>C\_p.T138P

ENSMUST00000125471.8|Fto-202|ENSMUSG00000055932|+|chr8:g.92136139:A>C





```
>rs50127074_ENSMUSP00000135488_c.916:G>A_p.R306Q
ENSMUST00000175795.4|Irx3-202|ENSMUSG00000031734|-|chr8:g.92526786:C>T
MSFPQLGYQYIRPLYPPERPGAAGGGGGSSAGGRSGPGAGASELAASGSLSNVLSSVYGAPYAAAAAAAAAAAA
QGYGAFLPYATELPIFPQLGAQYELKDSPGVQHPATAAAFPHPHPAFYYPYQYQFGDPSRPNKATRESTSTLK
AWLNEHRKNPYPTKGEKIMLAIITKMTLTQVSTWTFANARRRLKKNKMTWAPRSRTDEEGNAYGSEREEEDDEE
EDEEESKRELEMEMEEELAGEEEDTGGEGLADDEDEEIDLNLDSAAAAGSELTLAGAAHRNGDFGLGPI SDCK
TSDSDSSEGLEDRPLSVLSLAPPPPPVARAPASPPSPSSLDPCAPAPAPSSALQKPKIWSLAETATSPDNP
RRSPPGAGGSPPGA AVAPPTLQLSPAAAAAAAHRVLSAPLGKFFAWTNRPFPGPPAGPRPHPLSMLGSAPQ
HLLGLPGAAGHPAAAAAAYARPAEPESGTDRCSALEVEKLLKTAQFQVPRRPNQNLDAALVLSALSSS*
>rs249655209_ENSMUSP00000091002_c.754:A>G_p.D252G
ENSMUST00000093312.6|Irx3-201|ENSMUSG00000031734|-|chr8:g.92526948:T>C
MSFPQLGYQYIRPLYPPERPGAAGGGGGSSAGGRSGPGAGASELAASGSLSNVLSSVYGAPYAAAAAAAAAAAA
QGYGAFLPYATELPIFPQLGAQYELKDSPGVQHPATAAAFPHPHPAFYYPYQYQFGDPSRPNKATRESTSTLK
AWLNEHRKNPYPTKGEKIMLAIITKMTLTQVSTWTFANARRRLKKNKMTWAPRSRTDEEGNAYGSEREEEDDEE
EDEEESKRELEMEMEEELAGEEEDTGGEGLADDEDEEIDLNLDSAAAAGSELTLAGAAHRNGDFGLGPI SDCK
TSDSDSSEGLEDRPLSVLSLAPPPPPVARAPASPPSPSSLDPCAPAPAPSSALQKPKIWSLAETATSPDNP
RRSPPGAGGSPPGA AVAPPTLQLSPAAAAAAAHRVLSAPLGKFFAWTNRPFPGPPAGPRPHPLSMLGSAPQ
HLLGLPGAAGHPAAAAAAYARPAEPESGTDKKNIAVVPWKWRKYSRQLSSRCQGGHRTIWTLLWSYQLSPR
LNFSTIFKSLY*
>rs249655209_ENSMUSP00000135488_c.754:A>G_p.D252G
ENSMUST00000175795.4|Irx3-202|ENSMUSG00000031734|-|chr8:g.92526948:T>C
MSFPQLGYQYIRPLYPPERPGAAGGGGGSSAGGRSGPGAGASELAASGSLSNVLSSVYGAPYAAAAAAAAAAAA
QGYGAFLPYATELPIFPQLGAQYELKDSPGVQHPATAAAFPHPHPAFYYPYQYQFGDPSRPNKATRESTSTLK
AWLNEHRKNPYPTKGEKIMLAIITKMTLTQVSTWTFANARRRLKKNKMTWAPRSRTDEEGNAYGSEREEEDDEE
EDEEESKRELEMEMEEELAGEEEDTGGEGLADDEDEEIDLNLDSAAAAGSELTLAGAAHRNGDFGLGPI SDCK
TSDSDSSEGLEDRPLSVLSLAPPPPPVARAPASPPSPSSLDPCAPAPAPSSALQKPKIWSLAETATSPDNP
RRSPPGAGGSPPGA AVAPPTLQLSPAAAAAAAHRVLSAPLGKFFAWTNRPFPGPPAGPRPHPLSMLGSAPQ
HLLGLPGAAGHPAAAAAAYARPAEPESGTDKKNIAVVPWKWRKYSRQLSSRCQGGHRTIWTLLWSYQLSPR
LNFSTIFKSLY*
>rs49504271_ENSMUSP00000091002_c.526:A>G_p.Q176R
ENSMUST00000093312.6|Irx3-201|ENSMUSG00000031734|-|chr8:g.92527176:T>C
MSFPQLGYQYIRPLYPPERPGAAGGGGGSSAGGRSGPGAGASELAASGSLSNVLSSVYGAPYAAAAAAAAAAAA
QGYGAFLPYATELPIFPQLGAQYELKDSPGVQHPATAAAFPHPHPAFYYPYQYQFGDPSRPNKATRESTSTLK
AWLNEHRKNPYPTKGEKIMLAIITKMTLTRVSTWTFANARRRLKKNKMTWAPRSRTDEEGNAYGSEREEEDDEE
EDEEESKRELEMEMEEELAGEEEDTGGEGLADDEDEEIDLNLDSAAAAGSELTLAGAAHRNGDFGLGPI SDCK
TSDSDSSEGLEDRPLSVLSLAPPPPPVARAPASPPSPSSLDPCAPAPAPSSALQKPKIWSLAETATSPDNP
RRSPPGAGGSPPGA AVAPPTLQLSPAAAAAAAHRVLSAPLGKFFAWTNRPFPGPPAGPRPHPLSMLGSAPQ
HLLGLPGAAGHPAAAAAAYARPAEPESGTDKKNIAVVPWKWRKYSRQLSSRCQGGHRTIWTLLWSYQLSPR
LNFSTIFKSLY*
>rs49504271_ENSMUSP00000135488_c.526:A>G_p.Q176R
ENSMUST00000175795.4|Irx3-202|ENSMUSG00000031734|-|chr8:g.92527176:T>C
MSFPQLGYQYIRPLYPPERPGAAGGGGGSSAGGRSGPGAGASELAASGSLSNVLSSVYGAPYAAAAAAAAAAAA
QGYGAFLPYATELPIFPQLGAQYELKDSPGVQHPATAAAFPHPHPAFYYPYQYQFGDPSRPNKATRESTSTLK
AWLNEHRKNPYPTKGEKIMLAIITKMTLTRVSTWTFANARRRLKKNKMTWAPRSRTDEEGNAYGSEREEEDDEE
EDEEESKRELEMEMEEELAGEEEDTGGEGLADDEDEEIDLNLDSAAAAGSELTLAGAAHRNGDFGLGPI SDCK
TSDSDSSEGLEDRPLSVLSLAPPPPPVARAPASPPSPSSLDPCAPAPAPSSALQKPKIWSLAETATSPDNP
RRSPPGAGGSPPGA AVAPPTLQLSPAAAAAAAHRVLSAPLGKFFAWTNRPFPGPPAGPRPHPLSMLGSAPQ
HLLGLPGAAGHPAAAAAAYARPAEPESGTDRCSALEVEKLLKTAQFQVPRRPNQNLDAALVLSALSSS*
>rs231460599_ENSMUSP00000147339_c.423:A>AG_p.K142ins-fs
ENSMUST00000210246.2|Irx5-202|ENSMUSG00000031737|+|chr8:g.93086342:A>AG
MSYPQGYLYQPSASLALYSCPAYSTSVISGPRTEDELGRSSSGSAFSPYAGSTAFTAPSPGYNSHLQYADPAA
AAAAAFSYVGSYPDHTPGMAGSLGYHPYAAPLGSYPYGDPAAYRKNATRDATAATLKAWLNEHRKNPYPTRGRED
HAGHYHQDDPHPGVHLVCQRAPAPQEREQDDVDATEPQRGRGGGGGEHRSGEERRGRATEARGQGRPRGRPRIRR
SRAEGDCGLRTAAGAAQPRRQDRRQPQLGF
>rs231460599_ENSMUSP00000034184_c.423:A>AG_p.K142ins-fs
ENSMUST00000034184.12|Irx5-201|ENSMUSG00000031737|+|chr8:g.93086342:A>AG
MSYPQGYLYQPSASLALYSCPAYSTSVISGPRTEDELGRSSSGSAFSPYAGSTAFTAPSPGYNSHLQYADPAA
AAAAAFSYVGSYPDHTPGMAGSLGYHPYAAPLGSYPYGDPAAYRKNATRDATAATLKAWLNEHRKNPYPTRGRED
```



MLLPVFTLKL RHKISPRMVAIGRYDGHPCLA AATQAGKVF IHNPHTRSQHFSASRVFQSPLES DVSL LNINQ  
TVSCLGSGV LNPELGYDTLLVGTQTSL LAYDIYNN SDFYREVSDGANAIVLGT LGDIAPPLA IIGNCALQG  
FDHEGNDFLFWT VTDGNVHSLALCDFDGDGKTELLVGS EDFDIRVFK EDEIVAEMTETEIVTSLCPMYGSRFGY  
ALSNGTVGVYDKTARYWRIKSKNHAMSIHAFDINS DGVC ELITGWSNGKVDARS DR TGEVIFKDNFSSAVAGV  
VEGDYRMDGHVQLICCSVDGEIRGYLPGTAE MKGNLLDTSVEQDLIRELSQKKQNLLLELRNYEESTKAE LSS  
PLNEADGQKGIIPANTRLHTALSVMNGNDLQDAHAELGISTSNDTIIRAVLI FAEGIFV GESHVVHPSIHNLS  
SSLRVPITPPKDV PVDLHLKTFVGYRSSTQFHVFELTRQLPRFTMYALTSPDAASEPVSYVNF SVAERTQRMV  
TWLNQNFLLPEDSNVQNSPFHVCFTSLRNGGQLYIKMKQSGEITVNTDDIDL AGDIIQSIASF FAIEDLQVEA  
DFPVYFEELRKVLVKVDEYHSVHQKLSADMADNSNLIRSLLVRAEDARLMRDMKTMKSRYMELYDLNKDLLNG  
YKIRCNNHTELLGNLKA VNQAIQRAGRLRVRKPKNQVISACRDAIRSNNINTLFRIMRVGTAPS\*  
>rs254620580\_ENSMUSP00000034206\_c.1899:A>G\_p.M634V  
ENSMUST00000034206.6|Bbs2-201|ENSMUSG00000031755|-|chr8:g.94800930:T>C  
MLLPVFTLKL RHKISPRMVAIGRYDGHPCLA AATQAGKVF IHNPHTRSQHFSASRVFQSPLES DVSL LNINQ  
TVSCLGSGV LNPELGYDTLLVGTQTSL LAYDIYNN SDFYREVSDGANAIVLGT LGDIAPPLA IIGNCALQG  
FDHEGNDFLFWT VTDGNVHSLALCDFDGDGKTELLVGS EDFDIRVFK EDEIVAEMTETEIVTSLCPMYGSRFGY  
ALSNGTVGVYDKTARYWRIKSKNHAMSIHAFDINS DGVC ELITGWSNGKVDARS DR TGEVIFKDNFSSAVAGV  
VEGDYRMDGHVQLICCSVDGEIRGYLPGTAE MKGNLLDTSVEQDLIRELSQKKQNLLLELRNYEESTKAE LSS  
PLNEADGQKGIIPANTRLHTALSVMNGNDLQDAHAELGISTSNDTIIRAVLI FAEGIFV GESHVVHPSIHNLS  
SSLRVPITPPKDV PVDLHLKTFVGYRSSTQFHVFELTRQLPRFTMYALTSPDAASEPVSYVNF SVAERTQRMV  
TWLNQNFLLPEDSNVQNSPFHVCFTSLRNGGQLYIKMKQSGEITVNTDDIDL AGDIIQSIASF FAIEDLQVEA  
DFPVYFEELRKVLVKVDEYHSVHQKLSADMADNSNLIRSLLVRAEDARLMRDMKTMKSRYMELYDLNKDLLNG  
YKIRCNNHTELLGNLKA VNQAIQRAGRLRVRGKPKNQVISACRDAIRSNNINTLFRIMRVGTAPS\*  
>rs33036013\_ENSMUSP00000034206\_c.943:G>A\_p.R315Q  
ENSMUST00000034206.6|Bbs2-201|ENSMUSG00000031755|-|chr8:g.94808762:C>T  
MLLPVFTLKL RHKISPRMVAIGRYDGHPCLA AATQAGKVF IHNPHTRSQHFSASRVFQSPLES DVSL LNINQ  
TVSCLGSGV LNPELGYDTLLVGTQTSL LAYDIYNN SDFYREVSDGANAIVLGT LGDIAPPLA IIGNCALQG  
FDHEGNDFLFWT VTDGNVHSLALCDFDGDGKTELLVGS EDFDIRVFK EDEIVAEMTETEIVTSLCPMYGSRFGY  
ALSNGTVGVYDKTARYWRIKSKNHAMSIHAFDINS DGVC ELITGWSNGKVDARS DR TGEVIFKDNFSSAVAGV  
VEGDYRMDGHVQLICCSVDGEIQGYLPGTAE MKGNLLDTSVEQDLIRELSQKKQNLLLELRNYEESTKAE LSS  
PLNEADGQKGIIPANTRLHTALSVMNGNDLQDAHAELGISTSNDTIIRAVLI FAEGIFV GESHVVHPSIHNLS  
SSLRVPITPPKDV PVDLHLKTFVGYRSSTQFHVFELTRQLPRFTMYALTSPDAASEPVSYVNF SVAERTQRMV  
TWLNQNFLLPEDSNVQNSPFHVCFTSLRNGGQLYIKMKQSGEITVNTDDIDL AGDIIQSIASF FAIEDLQVEA  
DFPVYFEELRKVLVKVDEYHSVHQKLSADMADNSNLIRSLLVRAEDARLMRDMKTMKSRYMELYDLNKDLLNG  
YKIRCNNHTELLGNLKA VNQAIQRAGRLRVRGKPKNQVISACRDAIRSNNINTLFRIMRVGTAPS\*  
>rs32128886\_ENSMUSP00000078878\_c.18:G>A\_p.G7S  
ENSMUST00000079961.14|Nup93-201|ENSMUSG00000032939|+|chr8:g.94954323:G>A  
MDTEGFSELLQQAELAAETEGISELPHVERN LQEIQQAGERLRSRTL TRTSQETADV KASVLLGSRGLDISH  
ISQRLESLSAATTFE PLEPVKDTDIQGFLKNEKDNALLSAIEESRKRTFGMAE EYHRESMLV EWEQVKQRILH  
TLLASGEDALDFTQESEPSYIGD VNPGRSSLDSIEMAYARQIYIYNEKIVSGHLQPNLV DLCASVAELDDKS  
ISDMWAMVKQMTDVVLT PATDALKSRSSVEVRMDFVKALGYLEQSYKNTLVTVFGNLHQ AQLGGVPGTYQL  
VRSFLNIKLPAPSPGLQDGEVEGHPVWALIYYCMRCGDLAASQVVSRAQHQLGEFKTWFQEYMN SKDRRLSP  
ATENKLR LHYRRALRNNTDPYKRAVYCIIGRCDITDNQSEVADKTEDYLWLKLNQVCFDDDDGTSSPQDR LTL S  
QFQKQLLEDY GESHFTVNQQPFLYFQVLF LTAQFEAAIAFLFRMERLRCHAVHVALVLFELK LLLKSSGQSAQ  
LLSHEPGDPPCMRRLNFVRLMLYTRKFESTDPREALQYFYFLRDEKDSQGENMFLRCVSELVIESREFDMIL  
GKLENDGSRKPGVIDKFTSDTKPIINKVASVAENKGLFEEAAKLYDLAKNADK VLELMNKL LSPVVPQISAPQ  
SNKERLKNMALSIAERYRAQG ISANKFVDSTFYLLDLITFFDEYHSGHIDRAFDIIDRLKLVPLNQESVEER  
VAAFRRNFSDEIRHNLSEVLLATMNI LFTQFKRLKGTSPSSATRPQRVIEDRDSQLRSQARALITFAGMIPYRT  
SGDTNARLVQMEVLMN\*  
>rs32128886\_ENSMUSP00000148700\_c.18:G>A\_p.G7S ENSMUST00000212824.2|Nup93-  
207|ENSMUSG00000032939|+|chr8:g.94954323:G>A  
MDTEGFSELLQQAELAAETEGISELPHVERN LQEIQQAGERLRSRTL TRTSQETADV KASVLLGSRGLDISH  
ISQRLESLSAATTFE PLEPVKDTDIQGFLKNEKDNALLSAIEESRKRTFGMAE EYHRESMLV EWEQVKQRILH  
TLLASGEDALDFTQESEPSYIGD VNPGRSSLDSIEMAYARQIYIYNEKIVSGHLQPNLV DLCASVAELDDKS  
ISDMWAMVKQMTDVVLT PATDALKSRSSVEVRMDFVKALGYLEQSYKNTLVTVFGNLHQ AQLGGVPGTYQL  
VRSFLNIKLPAPSPGLQDGEVEGHPVWALIYYCMRCGDLAASQVVSRAQHQLGEFKTWFQEYMN SKDRRLSP  
ATENKLR LHYRRALRNNTDPYKRAVYCIIGRCDITDNQSEVADKTEDYLWLKLNQVCFDDDDGTSSPQDR LTL S  
QFQKQLLEDY GESHFTVNQQPFLYFQVLF LTAQFEAAIAFLFRMERLRCHAVHVALVLFELK LLLKSSGQSAQ  
LLSHEPGDPPCMRRLNFVRLMLYTRKFESTDPREALQYFYFLRDEKDSQGENMFLRCVSELVIESREFDMIL

GKLENDGSRKPGVIDKFTSDTKPI INKVASVAENKGLFEEAAKLYDLAKNADKVLELMNKLLSPVVPQISAPQ  
SNKERLKNMALSIAERYRAQGISANKFVDSTFYLLDLITFFDEYHSGHIDRAFDIIDRLKLVPLNQESVEER  
VAAFRNFSDEIRHNLSEVLLATMNI LFTQFKRLKGTSPSSATRPQRVIEDRDSQLRSQARALITFAGMIPYRT  
SGDTNARLVQMEVLMN\*

>rs32128886\_ENSMUSP00000105174\_c.18:G>A\_p.G7S ENSMUST00000109547.2|Nup93-  
202|ENSMUSG00000032939|+|chr8:g.94954323:G>A  
MDTEGFSELLOQAEQLAAETEGISELPHVERNLOEIQQAGERLRSRTLRTSQTETADVKA SVLLGSRGLDISH  
ISQRLESLSAATTFEPELEPVKDTDIQGFLKNEKDNALLSAIEESRKRFTFGMAEYHRESMLVEWEQVKQRILH  
TLLASGEDALDFTQESEPSYIGDVNPPGRSSLDSIEMAYARQIYIYNEKIVSGHLQPNLVDLCASVAELDDKS  
ISDMWAMVKQMTDVLTPATDALKSRSSVEVRMDFVKQALGYLEQSYKNTLVTVFGNLHQALQGGVPGTYQL  
VRSFLNIKLPAPSPGLQDGEVEGHPVWALIYYCMRCGDLLAASQVVSRAQHQLGFEFKTWFQYEMNSKDRRLSP  
ATENKLRHLHYRRALRNNTDPYKRAVYCIIGRCDITDNQSEVADKTEDYLWLKLNQVCFDDGTSSPQDRLTLS  
QFQKQLLEDYGESHTVNQQPFLYFQVLFLLTAQFEAAIAFLFRMERLRCHAVHVALVLFELKLLKSSGQSAQ  
LLSHEPGDPPCMRRLNFVRLMLYTRKFESTDPREALQYFYFLRDEKDSQGENMFLRCVSELVIESREFDMIL  
GKLENDGSRKPGVIDKFTSDTKPI INKVASVAENKGLFEEAAKLYDLAKNADKVLELMNKLLSPVVPQISAPQ  
SNKERLKNMALSIAERYRAQGISANKFVDSTFYLLDLITFFDEYHSGHIDRAFDIIDRLKLVPLNQESVEER  
VAAFRNFSDEIRHNLSEVLLATMNI LFTQFKRLKGTSPSSATRPQRVIEDRDSQLRSQARALITFAGMIPYRT  
SGDTNARLVQMEVLMN\*

>rs48226225\_ENSMUSP00000124201\_c.1029:A>T\_p.M344L  
ENSMUST00000161576.8|Herpud1-205|ENSMUSG00000031770|+|chr8:g.95121237:A>T  
MEPEPQPEPVTLLVKSPNQRHRDLELSGDRSWSVSRLKAHLRSVYPERPRPEDQRLIYSGKLLLDHQCQLDILL  
PKQEKRHVHLHVCNVKNPSKMPETSTKGAESTE QPDNSNQTQHPGDS SSGDLRQREVLRNLSPSGWENISRPE  
AVQQTFFQGLGPGFSGYTTYGWLQLSWFQQIYARQYYMQYLAATAASGTFVPTPSAQEI PVVSTPAPAPIHNQF  
PAENQPANQNAQAQAVVNPANQNLRMNAQGGPLVEEDDEINRDWLDWTYSAATFSVFLSILYFYSSLSRFLM  
VMGATVVMYLHHVWGWFPRQRPVQNF PDDGGPRDAANQDPNNNLQGGMDPELEDPNRLLPPDREVLDPHEHTSPS  
FMSTAWLVFKTFFASLLPEGPPALAN\*

>rs48226225\_ENSMUSP00000034220\_c.1026:A>T\_p.M343L  
ENSMUST00000034220.8|Herpud1-201|ENSMUSG00000031770|+|chr8:g.95121237:A>T  
MEPEPQPEPVTLLVKSPNQRHRDLELSGDRSWSVSRLKAHLRSVYPERPRPEDQRLIYSGKLLLDHQCQLDILL  
PKEKRHLVHLHVCNVKNPSKMPETSTKGAESTE QPDNSNQTQHPGDS SSGDLRQREVLRNLSPSGWENISRPEA  
VQQTFFQGLGPGFSGYTTYGWLQLSWFQQIYARQYYMQYLAATAASGTFVPTPSAQEI PVVSTPAPAPIHNQFP  
AENQPANQNAQAQAVVNPANQNLRMNAQGGPLVEEDDEINRDWLDWTYSAATFSVFLSILYFYSSLSRFLMV  
MGATVVMYLHHVWGWFPRQRPVQNF PDDGGPRDAANQDPNNNLQGGMDPELEDPNRLLPPDREVLDPHEHTSPSF  
MSTAWLVFKTFFASLLPEGPPALAN\*

>rs33320749\_ENSMUSP00000045755\_c.1317:C>T\_p.L440F  
ENSMUST00000048653.10|Cpne2-201|ENSMUSG00000034361|+|chr8:g.95295234:C>T  
MAYIPDGGAPTAGAIPLGSQCCVCKVELSVSQNLDRDVTSKSDPFCVLFIEDNGRWMEFDRTEAVNNLNP  
AFSCKKFLVDYHFEEVQKLFALFDQDKSSAQLDEHDFLGQFSCSLGTIVSSKKITRPLLLMNDKPAKGVITI  
AAQELSDNRVITLSLAGRKLDDKDLFGKSDPFLEFYKPGDDGWMLVHRTEVIKYTLDPVWPKPFTVPLVSLCD  
GDLEKPIQVMCYDYDSNGGHDFIGEFQTSVLQMSSEARDGVPLEIECINPKKQRKKKSYKNSGIIILRCKIHR  
NYSFLDYILGGCQLMFTVIGIDFTASNGNPLDPSSLHYINPMGTNEYLSAIWAVGQIIQDYDSDKMFALGFGA  
QLPPDWKVSHEFAINFNPTNPFCSGVDGIAQAYSACLPHIRFYGPTNFSPIVNHVARFAAATQQQTATQYFI  
LFIITDGVISDMEETRHAHVQASKLPMSIIIVGVGNADFAAMEFLDGDNRRLRSHTGEEAARDIVQFVPFREF  
RNAAKETLAKAVLAELPQQVVQYFKHKNLPPTNSEPA\*

>rs33320749\_ENSMUSP00000105163\_c.1314:C>T\_p.L439F  
ENSMUST00000109537.2|Cpne2-202|ENSMUSG00000034361|+|chr8:g.95295234:C>T  
MAYIPDGGAPTAGAIPLGSQCCVCKVELSVSQNLDRDVTSKSDPFCVLFIEDNGRWMEFDRTEAVNNLNP  
AFSCKKFLVDYHFEEVQKLFALFDQDKSSAQLDEHDFLGQFSCSLGTIVSSKKITRPLLLMNDKPAKGVITI  
AAQELSDNRVITLSLAGRKLDDKDLFGKSDPFLEFYKPGDDGWMLVHRTEVIKYTLDPVWPKPFTVPLVSLCD  
GDLEKPIQVMCYDYDSNGGHDFIGEFQTSVLQMSSEARDGVPLEIECINPKKQRKKKSYKNSGIIILRCKIHR  
NYSFLDYILGGCQLMFTVIGIDFTASNGNPLDPSSLHYINPMGTNEYLSAIWAVGQIIQDYDSDKMFALGFGA  
QLPPDWKVSHEFAINFNPTNPFCSGVDGIAQAYSACLPHIRFYGPTNFSPIVNHVARFAAATQQQTATYFIFL  
FIITDGVISDMEETRHAHVQASKLPMSIIIVGVGNADFAAMEFLDGDNRRLRSHTGEEAARDIVQFVPFREFR  
NAAKETLAKAVLAELPQQVVQYFKHKNLPPTNSEPA\*

>ENSMUSP00000034226\_c.732:T>G\_p.F245V ENSMUST00000034226.8|Psm3ip1-  
201|ENSMUSG00000031774|-|chr8:g.95302297:A>C  
MDGEDDSNLVIKKRFVSEAELEDERRRRQEEWEKVRKPEDPKCEPEEAYDPRSLYERLQEQKDRKQEQYEEQF  
KFKNMVRLGDEDETNFLDEVSRQOELIEKQRREEELEELEKEYRNLNKVGISAEENKEVEKKLAVKPIETKNKF



SQAKLLAGAVKHKSSSESGNSVKRLKPD PDPDDKAQEAPSCMSLGSSSLSGPPSIHCPSAAVCIGILPGLGAYS  
GSSDSESSSDSEGTINATGKIVSSIVRTNTFLEAP\*  
>rs49000192\_ENSMUSP00000034226\_c.185:A>C\_p.K62N  
ENSMUST00000034226.8|Psm3ip1-201|ENSMUSG00000031774|-  
|chr8:g.95314671:T>G  
MDGEDDSNLVIKKRFVSEAE LDERRRRQEEWEKVRKPEDPKECP EEAYDPRSLYERLQEQNDRKQQEYEEQF  
KFKNMVRLDEDETNFLDEVSRQQELIEKQRREEEELEELKEYRSNLNKV GISAENKEVEKKLAVKPIETKNKF  
SQAKLLAGAVKHKSSSESGNSVKRLKPD PDPDDKAQEAPSCMSLGSSSLSGPPSIHCPSAAVCIGILPGLGAYS  
GSSDSESSSDSEGTINATGKIVSSIVRTNTFLEAP\*  
>rs49000192\_ENSMUSP000000148506\_c.185:A>C\_p.K62N  
ENSMUST000000212791.2|Psm3ip1-214|ENSMUSG00000031774|-  
|chr8:g.95314671:T>G  
MDGEDDSNLVIKKRFVSEAE LDERRRRQEEWEKVRKPEDPKECP EEAYDPRSLYERLQEQNDRKQQEYEEQF  
KFKNMVRLDEDETNFLDEVSRQQELIEKQRREEEELEELKEYRSNLNKV GISAENKEVEKKLAVKPIETKNKF  
SQAKLLAGAVKHKSSSESGNSVKRLKPD PDPDDKAQEAPSCMSLGSSSL  
>rs49000192\_ENSMUSP000000148524\_c.185:A>C\_p.K62N  
ENSMUST000000212507.2|Psm3ip1-209|ENSMUSG00000031774|-  
|chr8:g.95314671:T>G  
MDGEDDSNLVIKKRFVSEAE LDERRRRQEEWEKVRKPEDPKECP EEAYDPRSLYERLQEQNDRKQQEYEEQF  
KFKNMVRLDEDETNFLDEVSRQQELIEKQRREEEELEELKEYRSNLNKV GISAENKEVEKKLAVKPIETKNKF  
SQAKLLAGAVKHKSSSESGNSVKRLKPD  
>rs49000192\_ENSMUSP000000148543\_c.185:A>C\_p.K62N  
ENSMUST000000213022.2|Psm3ip1-216|ENSMUSG00000031774|-  
|chr8:g.95314671:T>G  
MDGEDDSNLVIKKRFVSEAE LDERRRRQEEWEKVRKPEDPKECP EEAYDPRSLYERLQEQNDRKQQEYEEQF  
KFKNMVRLDEDETNFLDEVSRQQELIEKQRREEEELEELKEYRSNLNKV GISAENKEVEKKLAVKPIETK  
>rs49000192\_ENSMUSP000000148547\_c.185:A>C\_p.K62N  
ENSMUST000000212083.2|Psm3ip1-203|ENSMUSG00000031774|-  
|chr8:g.95314671:T>G  
MDGEDDSNLVIKKRFVSEAE LDERRRRQEEWEKVRKPEDPKECP EEAYDPRSLYERLQEQNDRKQQEYEEQF  
KFKNMVRLDEDETNFLDEVSRQQELIEKQRREEEELEELKEYRSNLNKV GISAENK  
>rs49000192\_ENSMUSP000000148379\_c.185:A>C\_p.K62N  
ENSMUST000000213008.2|Psm3ip1-215|ENSMUSG00000031774|-  
|chr8:g.95314671:T>G  
MDGEDDSNLVIKKRFVSEAE LDERRRRQEEWEKVRKPEDPKECP EEAYDPRSLYERLQEQNDRKQQEYEEQF  
KFKNMVRLDEDETNFLDEVSRQQELIEKQRREEEELEELK  
>rs49000192\_ENSMUSP000000148342\_c.185:A>C\_p.K62N  
ENSMUST000000212159.2|Psm3ip1-204|ENSMUSG00000031774|-  
|chr8:g.95314671:T>G  
MDGEDDSNLVIKKRFVSEAE LDERRRRQEEWEKVRKPEDPKECP EEAYDPRSLYERLQEQNDRKQQEYEEQF  
KFKNMVRLDEDETNFLDEVSRQQELIEKQRREEEELE  
>rs49000192\_ENSMUSP000000148392\_c.185:A>C\_p.K62N  
ENSMUST000000212258.2|Psm3ip1-205|ENSMUSG00000031774|-  
|chr8:g.95314671:T>G  
MDGEDDSNLVIKKRFVSEAE LDERRRRQEEWEKVRKPEDPKECP EEAYDPRSLYERLQEQNDRKQQEYEEQF  
KFKNMVRLDEDETNFL  
>rs49000192\_ENSMUSP000000148497\_c.185:A>C\_p.K62N  
ENSMUST000000212765.2|Psm3ip1-212|ENSMUSG00000031774|-  
|chr8:g.95314671:T>G  
MDGEDDSNLVIKKRFVSEAE LDERRRRQEEWEKVRKPEDPKECP EEAYDPRSLYERLQEQNDRKQQEYEEQF  
KFKNMVRLDEDE  
>rs49000192\_ENSMUSP000000148325\_c.185:A>C\_p.K62N  
ENSMUST000000212788.2|Psm3ip1-213|ENSMUSG00000031774|-  
|chr8:g.95314671:T>G  
MDGEDDSNLVIKKRFVSEAE LDERRRRQEEWEKVRKPEDPKECP EEAYDPRSLYERLQEQNDRKQQEYEEQF  
KFKNMVRLD  
>ENSMUSP00000057275\_c.1204:A>C\_p.D402A ENSMUST00000060389.10|Rspry1-  
201|ENSMUSG00000050079|+|chr8:g.95373255:A>C

MIVFGWAVFLASRSLGQGLLLTLEEHIHLLGTTGATATMGNSCICRDDSGAEDNVDTHQQQAENSTVPTADS  
RSQPRDPVRRPRRGRGPHEPRRKKQNVLDGLVLDLAVIRTLVDNDQEPYPYSMITLHEMAETDEGWLDVQSLI  
RVIPLEDPGLPAVITLLLLDECPLPTKDALQKLTEILNLNGEVACQDSGHPAKHRNTSAVLGCLAELAGPASI  
GLLSPGILEYLLQCLKQSHPTVMLFALIALEKFAQTSENKLTISESSISDRLVTLELWADDPDYLRQVGFCA  
AQWSLDNLFLKEGRQLTYEKVDLNNIRAMLNSNDVSEYLYKISPHGLEARCDASSFESVRCTFCVDTGVWYYEV  
TVVTSGVMQIGWATRDSKFLNHEGYGIGDDEYSCAYAGCRQLIWIYNARSKPHVHPCWKEGDTVGFLLDLNEKQ  
MIFFLNGNQLPPEKQVFSSTVSGFFAAASFMSYQQCEFNFGARPFKYPPSMKFSTFNDYAFLLTAEKIIILPRH  
RRLLALLKQVSIRENCCSLCCDEVADTQLKPCGHSDLCDLQLETCPLCRKEIVSRIRQISHIS\*

>ENSMUSP00000148724\_c.832:A>C\_p.D278A ENSMUST00000212729.2|Rspryl-  
207|ENSMUSG00000050079|+|chr8:g.95373255:A>C

MITLHEMAETDEGWLDVQSLIRVIPLEDPGLPAVITLLLLDECPLPTKDALQKLTEILNLNGEVACQDSGHPA  
KHRNTSAVLGCLAELAGPASIGLLSPGILEYLLQCLKQSHPTVMLFALIALEKFAQTSENKLTISESSISD  
RLVTLELWADDPDYLRQVGFCAQWSLDNLFLKEGRQLTYEKVDLNNIRAMLNSNDVSEYLYKISPHGLEARCD  
ASSFESVRCTFCVDTGVWYYEVTVVTSGVMQIGWATRDSKFLNHEGYGIGDDEYSCAYAGCRQLIWIYNARSKP  
HVHPCWKEGDTVGFLLDLNEKQMIFFLNGNQLPPEKQVFSSTVSGFFAAASFMSYQQCEFNFGARPFKYPPSM  
KFSTFNDYAFLLTAEKIIILPRHRRLLALLKQVSIRENCCSLCCDEVADTQLKPCGHSDLCDLQLETCPLCR  
KEIVSRIRQISHIS\*

>ENSMUSP00000148737\_c.1204:A>C\_p.D402A ENSMUST00000211983.2|Rspryl-  
205|ENSMUSG00000050079|+|chr8:g.95373255:A>C

MIVFGWAVFLASRSLGQGLLLTLEEHIHLLGTTGATATMGNSCICRDDSGAEDNVDTHQQQAENSTVPTADS  
RSQPRDPVRRPRRGRGPHEPRRKKQNVLDGLVLDLAVIRTLVDNDQEPYPYSMITLHEMAETDEGWLDVQSLI  
RVIPLEDPGLPAVITLLLLDECPLPTKDALQKLTEILNLNGEVACQDSGHPAKHRNTSAVLGCLAELAGPASI  
GLLSPGILEYLLQCLKQSHPTVMLFALIALEKFAQTSENKLTISESSISDRLVTLELWADDPDYLRQVGFCA  
AQWSLDNLFLKEGRQLTYEKVDLNNIRAMLNSNDVSEYLYKISPHGLEARCDASSFESVRCTFCVDTGVWYYEV  
TVVTSGVMQIGWATRDSKFLNHEGYGIGDDEYSCAYAGCRQLIWIYNARSKPHVHPCWKEGDTVGFLLDLNEKQ  
MIFFLNGNQLPPEKQVFSSTVSGFFAAASFMSYQQCEFNFGARPFKYPPSMKFSTFNDYAFLLTAEKIIILPRH  
RRLLALLKQVSIRENCCSLCCDEVADTQLKPCGHSDLCDLQLETCPLCRKEIVSRIRQISHIS\*

>ENSMUSP00000034228\_c.49:CT>AG\_p.S17\* ENSMUST00000034228.16|Arl2bp-  
201|ENSMUSG00000031776|+|chr8:g.95394236:CT>AG

MDALEEESFALSFSFA\*\*CRI\*CCGWMFRGHYYG\*\*VPVIAEKLHGQVLPGI\*RHRRE\*THLYTHF\*\*IYLP  
REVH\*RAVAGAYPRLQHGGHLNHAAPQR\*GGWRHL\*HAAHIHGFSGFGQDVPGLQSRKGRPRTGLKQRLGCD  
FSV\*VIFYASFPEQPAAL

>ENSMUSP00000105153\_c.16:CT>AG\_p.S6\* ENSMUST00000109527.6|Arl2bp-  
202|ENSMUSG00000031776|+|chr8:g.95394236:CT>AG

MRSA\*\*CRI\*CCGWMFRGHYYG\*\*VPVIAEKLHGQVLPGI\*RHRRE\*THLYTHF\*\*IYLPGREVH\*RAVAGA  
YPRLQHGGHLNHAAPQR\*GGWRHL\*HAAHIHGFSGFGQDVPGLQSRKGRPRTGLKQRLGCDFSV\*VIFYASF  
PEQPAAL

>ENSMUSP00000148695\_c.49:CT>AG\_p.S17\* ENSMUST00000211858.2|Arl2bp-  
203|ENSMUSG00000031776|+|chr8:g.95394236:CT>AG

MDALEEESFALSFSFA\*\*CRI\*CCGWMFRGHYYG\*\*VPVIAEKLHGQVLPGI\*RHRRE\*THLYTHF\*\*IYLP  
REVH\*RAVAGAFPEQPAAL

>rs51191315\_ENSMUSP00000132628\_c.837:C>T\_p.H280Y  
ENSMUST00000166802.9|Adgrg5-205|ENSMUSG00000061577|+|chr8:g.95664229:C>T  
MDPHGALFFYLCLLAAQVVLVETLSDDLVLVLMKRLEQPVGRGLSSRARHIHSLEQKLLNASFGGHNLTLQTNSI  
QSLVFKLSCDFPGLSLSSSTTLTNVQVRAPHAMQFPAELTKGACVTSRPAELRLICIFYFFTAHLFQDDRNSL  
LNNYVLAGAQLDHRPVNNLQKPVNISFWHNRSLLEGYTVSCVFWKEGASKSSWGAWSPEGCYTEQPSATQVLC  
NHLTYFAVLMQLSGDPVPAELQVPLEYISFVGCISISIVASLLTILLYAQSRKQSDSTTRIYMNLNGSVLLLN  
VTFLLSSQMTLPTMPRPVCKVLA AVLHYALLSSTLWMAIEGFNLYLFLGRVYNAYIRRYLLKLCMLGWGF  
PALLVLLLMIKSSVYGPCVTSLSKSEQENGTGFQNVSMCWIRSPMVHSILVMGYGGFTSLFNLVLAWALWIL  
CRLRAREKALSPWAYRDTAMVGLTIVLLGTTWTLAFFSFGVFLPQLFLFTIFNSLYGFFLFLWFC  
SQRYSDAEAKAEMEAVSSSQMTH\*

>rs51191315\_ENSMUSP00000074155\_c.834:C>T\_p.H279Y  
ENSMUST00000074570.10|Adgrg5-201|ENSMUSG00000061577|+|chr8:g.95664229:C>T  
MDPHGALFFYLCLLAAQVVLVETLSDDLVLVLMKRLEQPVGRGLSSRARHIHSLEQKLLNASFGGHNLTLQTNSI  
QSLVFKLSCDFPGLSLSSSTTLTNVQVRAPHAMQFPAELTKGACVTSRPAELRLICIFYFFTAHLFQDDRNSL  
LNNYVLAGAQLDHRPVNNLQKPVNISFWHNRSLLEGYTVSCVFWKEGASKSSWGAWSPEGCYTEQPSATQVLC  
NHLTYFAVLMQLSGDPVPAELQVPLEYISFVGCISISIVASLLTILLYAQSRKQSDSTTRIYMNLNGSVLLLN  
VTFLLSSQMTLPTMPRPVCKVLA AVLHYALLSSTLWMAIEGFNLYLFLGRVYNAYIRRYLLKLCMLGWGF  
PALLV

LLLLMIKSSVYGPCVTSLSKSEQENGTGFQNVSMCWIRSPMVHSILVMGYGGFTSLFNLVVLAWALWILCRLRA  
REKALSPWAYRDTAMVLLGLTVLLGTTWTLAFFSFGVFLLPQLFLFTIFNSLYGFFLFLWFCSQKRYSDAEAKA  
EMEAVSSSQMTH\*

>ENSMUSP00000127427\_c.271:A>T\_p.K91I ENSMUST00000169353.3|Kifc3-

202|ENSMUSG00000031788|-|chr8:g.95836554:T>A

MPPLGPGSPQGGTDAEKHRDRMLVENEQLRQELRRCEVELQELRAQPVVPCGCEHSQESSQLRDKLSQLQLE  
VAENKGMSELNLEVVQITDRLAEVELRLKDCLAEKAQEEERLSRRLRDSHETIASLRAQSPVKYVIKTVEV  
ESSKTKQALSESQTRNQHLQEQVAMQORQVLKEMEQQQLQNSHQTLTVQLRAQIAMYEAELEAHERAHGQMLEEMQSLE  
EDKNRAIEEAFARAQVEMKAVHENLAGVRTNLLTLQPALRRTLNDYNGLKRQVRGFPLLLQALRSVKAEIGQ  
AIEEVNSNNQELLRKYRRELQLRKKCHNELVRLKGNIRVIARVRPVTKEGEGPEATNAVTFDPDDDSIHL  
LHKGKPVSFELDKVFPSPWASQQDVFQEVQALITSCIDGFNVCI FAYGQTGAGKTYTMEGTPENPGINQALQLL  
FSEVQEKASDWQYNITVSAE IYNEVLRDLLGKEPQEKLEIRLCPDGSQQLYVPGLTEFQVQSVDDINKVFEF  
GYNNRTTEFTNLNEHSSRSHALLIVTVRGVDCSTGLRTTGKLNLDLAGSERVKGSGAEGNRLREAQHINRSL  
SALGDVIAALRSRQGHVFPFRNSKLTYYLLQDLSGDSKTLMVVQVSPVEKNTSETLYSLRFAERVRVSVELGPGS  
RRETELGSWSSQEHLEWEPACQTPQPTARAH SAPGSGTSSRPGSIRRKLQPSA\*

>ENSMUSP00000034240\_c.616:A>T\_p.K206I ENSMUST00000034240.15|Kifc3-

201|ENSMUSG00000031788|-|chr8:g.95836554:T>A

MVPSRRTWNLGATPSLRGLWRVGRVQEPKPGMARPA PASPAARPFPHQTGQRLRTGRGKDI LPSGEEDSTSR  
AARPSLAQCRALSVDWPGPRSPHRLYLTVQVENLKEKLI SQAQEVSRRLRSELGGTDAEKHRDRMLVENEQLRQ  
ELRRCEVELQELRAQPVVPCGCEHSQESSQLRDKLSQLQLEVAENKGMSELNLEVVQITDRLAEVELRLKDC  
CLAEKAQEEERLSRRLRDSHETIASLRAQSPVKYVIKTVEVESKTKQALSESQTRNQHLQEQVAMQORQVLK  
EMEQQQLQNSHQTLTVQLRAQIAMYEAELEAHERAHGQMLEEMQSLEEDKNRAIEEAFARAQVEMKAVHENLAGVRTN  
LLTLQPALRRTLNDYNGLKRQVRGFPLLLQALRSVKAEIGQ AIEEVNSNNQELLRKYRRELQLRKKCHNELV  
RLKGNIRVIARVRPVTKEGEGPEATNAVTFDPDDDSIHL LHKGKPVSFELDKVFPSPWASQQDVFQEVQALI  
TSCIDGFNVCI FAYGQTGAGKTYTMEGTPENPGINQALQLL FSEVQEKASDWQYNITVSAE IYNEVLRDLL  
GKEPQEKLEIRLCPDGSQQLYVPGLTEFQVQSVDDINKVFEFGYNNRTTEFTNLNEHSSRSHALLIVTVRGV  
DCSTGLRRTTGKLNLDLAGSERVKGSGAEGNRLREAQHINRSLSALGDVIAALRSRQGHVFPFRNSKLTYYLLQD  
LSGDSKTLMVVQVSPVEKNTSETLYSLRFAERVRVSVELGPGSRRETELGSWSSQEHLEWEPACQTPQPTARAH  
SAPGSGTSSRPGSIRRKLQPSA\*

>ENSMUSP00000126784\_c.508:A>T\_p.K170I ENSMUST00000169748.9|Kifc3-

203|ENSMUSG00000031788|-|chr8:g.95836554:T>A

MNVENTGGRLFGIGRCSSLSGAPGDPVHRTVEAMSQLEELVVLRRERLALHSDRQATTTQLQNQVENLKE  
KLISQAQEVSRRLRSELGGTDAEKHRDRMLVENEQLRQELRRCEVELQELRAQPVVPCGCEHSQESSQLRDKL  
SQLQLEVAENKGMSELNLEVVQITDRLAEVELRLKDCLAEKAQEEERLSRRLRDSHETIASLRAQSPVKYV  
IKTVEVESKTKQALSESQTRNQHLQEQVAMQORQVLKEMEQQQLQNSHQTLTVQLRAQIAMYEAELEAHERAHGQML  
EMQSLEEDKNRAIEEAFARAQVEMKAVHENLAGVRTNLLTLQPALRRTLNDYNGLKRQVRGFPLLLQALRSV  
KAEIGQ AIEEVNSNNQELLRKYRRELQLRKKCHNELVRLKGNIRVIARVRPVTKEGEGPEATNAVTFDPDD  
DSIHL LHKGKPVSFELDKVFPSPWASQQDVFQEVQALITSCIDGFNVCI FAYGQTGAGKTYTMEGTPENPGINQALQLL  
FSEVQEKASDWQYNITVSAE IYNEVLRDLLGKEPQEKLEIRLCPDGSQQLYVPGLTEFQVQSVDDINKVFEFGYNN  
RTTEFTNLNEHSSRSHALLIVTVRGVDCSTGLRRTTGKLNLDLAGSERVKGSGAEGNRLREAQHINRSLSALG  
DVIAALRSRQGHVFPFRNSKLTYYLLQDLSGDSKTLMVVQVSPVEKNTSETLYSLRFAERVRVSVELGPGSRRE  
TELGSWSSQEHLEWEPACQTPQPTARAH SAPGSGTSSRPGSIRRKLQPSA\*

>ENSMUSP00000148425\_c.205:A>T\_p.K69I ENSMUST00000213004.2|Kifc3-

212|ENSMUSG00000031788|-|chr8:g.95836554:T>A

MVENEQLRQELRRCEVELQELRAQPVVPCGCEHSQESSQLRDKLSQLQLEVAENKGMSELNLEVVQITDRL  
AEVELRLKDCLAEKAQEEERLSRRLRDSHETIASLRAQSPVKYVIKTVEVESKTKQALSESQTRNQHLQEQ  
VAMQORQVLKEMEQQQLQNSHQTLTVQLRAQIAMYEAELEAHERAHGQMLEEMQSLEEDKNRAIEEAFARAQVEMKAVH  
ENLAGVRTNLLTLQPALRRTLNDYNGLKRQVRGFPLLLQALRSVKAEIGQ AIEEVNSNNQELLRKYRRELQL  
RKKCHNELVRLKGNIRVIARVRPVTKEGEGPEATNAVTFDPDDDSIHL LHKGKPVSFELDKVFPSPWASQQD  
VFQEVQALITSCIDGFNVCI FAYGQTGAGKTYTMEGTPENPGINQALQLL FSEVQEKASDWQYNITVSAE I  
YNEVLRDLLGKEPQEKLEIRLCPDGSQQLYVPGLTEFQVQSVDDINKVFEFGYNNRTTEFTNLNEHSSRSHAL  
LIVTVRGVDCSTGLRRTTGKLNLDLAGSERVKGSGAEGNRLREAQHINRSLSALGDVIAALRSRQGHVFPFRNS  
KLTYYLLQDLSGDSKTLMVVQVSPVEKNTSETLYSLRFAERVRVSVELGPGSRRETELGSWSSQEHLEWEPACQ  
TPQPTARAH SAPGSGTSSRPGSIRRKLQPSA\*

>ENSMUSP00000148754\_c.205:A>T\_p.K69I ENSMUST00000212787.2|Kifc3-

210|ENSMUSG00000031788|-|chr8:g.95836554:T>A







MFKNTFQSGFLSILYSIGSKPLQIWDKKVRNGHIKRITDNDIQSLVLEIEGTNVSTTYITCPADPKKTLGKIKL  
PFLVMI IKNLKKYLTTFEVQVLDKVNRRRFRASNYQSTTRVKPFICTMPMRLDDGWNQIQFNLSDFTRRAYGT  
NYIETLRVQVLLHLPRESHTGGFRTLWLANWLAYGPPWSRTM\*  
>rs228352088\_ENSMUSP00000148527\_c.180:T>G\_p.Y61D  
ENSMUST00000212684.2|Cfap20-205|ENSMUSG00000031796|-|chr8:g.96149426:A>C  
MFKNTFQSGFLSILYSIGSKPLQIWDKKYHIHVVSCGPQEDTGDQTAFFPCHDHQKLEEIFDL\*  
>rs228352088\_ENSMUSP00000148668\_c.260:T>G\_p.F87L  
ENSMUST00000211908.2|Cfap20-202|ENSMUSG00000031796|-|chr8:g.96149426:A>C  
MFKNTFQSGFLSILYSIGSKPLQIWDKKVRNGHIKRITDNDIQSLVLEIEGTNVSTTYITCPADPKKTLGKIKL  
PFLVMI IKNLKKYLTTFEVQVLDKVNRRRF  
>rs32172376\_ENSMUSP00000148608\_c.912:C>T\_p.Q305\*  
ENSMUST00000213096.2|Prss54-205|ENSMUSG00000048400|-|chr8:g.96286159:G>A  
MAEMRGMLLMLLYISHSSAICGIQKATIADKLENLVSSTFEFPWVSIQDKQYTHLAFGCILSEFWILSTAS  
ALQHRPEVIAVVGISNMDPRKTDHREYSVNTIIPHENFDNVSMGNNIALLKTESAMHFNDLVQAICFLGKKLH  
KPPALKNCWVAGWNPTSATGNHMTMSILRRI SVKDIEVCPLRRHQKTECASHTKEPNNVCLGEPGSPMMCQAK  
KLDLWILRGLLAYGGDSCPGFLYTSVADYSDWITAKTRKAGPSLSSLHLWEKLVFELPFHESNIALTTNSFS  
IHTYAEWPHSYS\*GQRMSTKSNKQKDAGQNFVRNRQPETSGPSKVAIQPMYYDYGGEAGEGGAVAGQNRHLHW  
SQERILMSFVLVFLGSGV\*  
>rs32172376\_ENSMUSP00000058859\_c.912:C>T\_p.Q305\*  
ENSMUST00000052690.13|Prss54-201|ENSMUSG00000048400|-|chr8:g.96286159:G>A  
MAEMRGMLLMLLYISHSSAICGIQKATIADKLENLVSSTFEFPWVSIQDKQYTHLAFGCILSEFWILSTAS  
ALQHRPEVIAVVGISNMDPRKTDHREYSVNTIIPHENFDNVSMGNNIALLKTESAMHFNDLVQAICFLGKKLH  
KPPALKNCWVAGWNPTSATGNHMTMSILRRI SVKDIEVCPLRRHQKTECASHTKEPNNVCLGEPGSPMMCQAK  
KLDLWILRGLLAYGGDSCPGFLYTSVADYSDWITAKTRKAGPSLSSLHLWEKLVFELPFHESNIALTTNSFS  
IHTYAEWPHSYS\*GQRMSTKSNKQKDAGQNFVRNRQPETSGPSKVAIQPMYYDYGGEAGEGGAVAGQNRHLHW  
SQERILMSFVLVFLGSGV\*  
>rs32172376\_ENSMUSP00000137577\_c.912:C>T\_p.Q305\*  
ENSMUST00000180075.2|Prss54-202|ENSMUSG00000048400|-|chr8:g.96286159:G>A  
MAEMRGMLLMLLYISHSSAICGIQKATIADKLENLVSSTFEFPWVSIQDKQYTHLAFGCILSEFWILSTAS  
ALQHRPEVIAVVGISNMDPRKTDHREYSVNTIIPHENFDNVSMGNNIALLKTESAMHFNDLVQAICFLGKKLH  
KPPALKNCWVAGWNPTSATGNHMTMSILRRI SVKDIEVCPLRRHQKTECASHTKEPNNVCLGEPGSPMMCQAK  
KLDLWILRGLLAYGGDSCPGFLYTSVADYSDWITAKTRKAGPSLSSLHLWEKLVFELPFHESNIALTTNSFS  
IHTYAEWPHSYS\*GQRMSTKSNKQKDAGQNFVRNRQPETSGPSKVAIQPMYYDYGGEAGEGGAVAGQNRHLHW  
SQERILMSFVLVFLGSGV\*  
>rs236239334\_ENSMUSP00000034096\_c.135:G>A\_p.V46M  
ENSMUST00000034096.6|Setd6-201|ENSMUSG00000031671|+|chr8:g.96442700:G>A  
MAAPAKRARVSGSPLVAPCPSPRAARAPLPLPAGSSGGEPEGDAMAGFLRWCRVGLLELSPKVTVSRQGTVA  
GYGMVARESVRAGELLFAVPRSALLSPHTCSISGLLERERGAQSLSGWVPLLLALLHELQAPASPWSPYFAL  
WPELGRLEHMPMFPEEERLRLKGTGVPEAVEKDLVNIRSEYYSIVLPMFMEAHSDLFSPSVRSLELYQQLVAL  
VMAYSFQEPLEEDDDEKEPNPLMVPAADILNHIANHNANLEYSADYLRMVATQPILEGHEIFNTYGMANWQ  
LIHMYGFAEPYPNNTDDTADIQMTVTRDAALQGTGKDETEKLLVCERWDFLCKQEMVGEAGAFVIGCEEVLTEE  
ELATTLKVLCPAEFRDYKERAGWGEETEDDSLAITDIPKLQESWKRLLRNSVLLTLQTYTTDLKTDQDLL  
SNKEAYATLSWREQQALQVRYGQKMLHRVLELNTN\*  
>rs262614519\_ENSMUSP00000034096\_c.451:G>C\_p.G151A  
ENSMUST00000034096.6|Setd6-201|ENSMUSG00000031671|+|chr8:g.96443098:G>C  
MAAPAKRARVSGSPLVAPCPSPRAARAPLPLPAGSSGGEPEGDAVAGFLRWCRVGLLELSPKVTVSRQGTVA  
GYGMVARESVRAGELLFAVPRSALLSPHTCSISGLLERERGAQSLSGWVPLLLALLHELQAPASPWSPYFAL  
WPELARLEHMPMFPEEERLRLKGTGVPEAVEKDLVNIRSEYYSIVLPMFMEAHSDLFSPSVRSLELYQQLVAL  
VMAYSFQEPLEEDDDEKEPNPLMVPAADILNHIANHNANLEYSADYLRMVATQPILEGHEIFNTYGMANWQ  
LIHMYGFAEPYPNNTDDTADIQMTVTRDAALQGTGKDETEKLLVCERWDFLCKQEMVGEAGAFVIGCEEVLTEE  
ELATTLKVLCPAEFRDYKERAGWGEETEDDSLAITDIPKLQESWKRLLRNSVLLTLQTYTTDLKTDQDLL  
SNKEAYATLSWREQQALQVRYGQKMLHRVLELNTN\*  
>rs215389823\_ENSMUSP00000034096\_c.555:A>G\_p.S186G  
ENSMUST00000034096.6|Setd6-201|ENSMUSG00000031671|+|chr8:g.96443314:A>G  
MAAPAKRARVSGSPLVAPCPSPRAARAPLPLPAGSSGGEPEGDAVAGFLRWCRVGLLELSPKVTVSRQGTVA  
GYGMVARESVRAGELLFAVPRSALLSPHTCSISGLLERERGAQSLSGWVPLLLALLHELQAPASPWSPYFAL  
WPELGRLEHMPMFPEEERLRLKGTGVPEAVEKDLVNIRGEYYSIVLPMFMEAHSDLFSPSVRSLELYQQLVAL  
VMAYSFQEPLEEDDDEKEPNPLMVPAADILNHIANHNANLEYSADYLRMVATQPILEGHEIFNTYGMANWQ

LIHMYGFAEYPYNNNTDDTADIQMVTVRDAALQGTDKDETEKLLVCERWDFLCKQEMVGEEGAFVIGCEEVLTEE  
ELATTLKVLKMPAAEFDRDYKERAGWGEETEDDSLAIITDIPKLQESWKRLLRNSVLLTLQTYTTDLKTDQDLL  
SNKEAYATLSWREQQALQVRYGQKMLHRVLELNTN\*

>rs215389823\_ENSMUSP00000148466\_c.75:A>G\_p.S26G  
ENSMUST00000141900.8|Setd6-203|ENSMUSG00000031671|+|chr8:g.96443314:A>G  
EEERLRLKGTGVPEAVEKDLVNIRGEYYSIVLPFMEAHSDLFSPSVRSLELYQQLVALVMAYRNKG\*

>rs215389823\_ENSMUSP00000148785\_c.66:A>G\_p.S23G  
ENSMUST00000148727.3|Setd6-204|ENSMUSG00000031671|+|chr8:g.96443314:A>G  
RLRLLKGTGVPEAVEKDLVNIRGEYYSIVLPFMEAHSDLFSPSVRSLELYQQLVALVMAYSFQEPLEEDDDEK  
EPNSPLMDYLRMVATQPILEGHEIFNTYGMANWQLIHMYGFAEYPYNNNTDDTAD

>rs213219203\_ENSMUSP00000034096\_c.625:C>T\_p.S209F  
ENSMUST00000034096.6|Setd6-201|ENSMUSG00000031671|+|chr8:g.96443384:C>T  
MAAPAKRARVSGGSPLVAPCPSRAARAPLPLPAGSSGGEPEGDAVAGFLRWCRRVGLELSPKVTVSRQGTVA  
GYGMVARESVRAGELLFAVPRSALLSPHTCSISGLLERERGAQLQSLSGWVPLLLALLHELQAPASPWSPYFAL  
WPELGRLEHPMFWPEEERLRLKGTGVPEAVEKDLVNIRSEYYSIVLPFMEAHSDLFSPSVRFLELYQQLVAL  
VMAYSFQEPLEEDDDEKEPNSPLMVPAADILNHIANHNANLEYSADYLRMVATQPILEGHEIFNTYGMANWQ  
LIHMYGFAEYPYNNNTDDTADIQMVTVRDAALQGTDETEKLLVCERWDFLCKQEMVGEEGAFVIGCEEVLTEE  
ELATTLKVLKMPAAEFDRDYKERAGWGEETEDDSLAIITDIPKLQESWKRLLRNSVLLTLQTYTTDLKTDQDLL  
SNKEAYATLSWREQQALQVRYGQKMLHRVLELNTN\*

>rs213219203\_ENSMUSP00000148466\_c.145:C>T\_p.S49F  
ENSMUST00000141900.8|Setd6-203|ENSMUSG00000031671|+|chr8:g.96443384:C>T  
EEERLRLKGTGVPEAVEKDLVNIRSEYYSIVLPFMEAHSDLFSPSVRFLELYQQLVALVMAYRNKG\*

>rs213219203\_ENSMUSP00000148785\_c.136:C>T\_p.S46F  
ENSMUST00000148727.3|Setd6-204|ENSMUSG00000031671|+|chr8:g.96443384:C>T  
RLRLLKGTGVPEAVEKDLVNIRSEYYSIVLPFMEAHSDLFSPSVRFLELYQQLVALVMAYSFQEPLEEDDDEK  
EPNSPLMDYLRMVATQPILEGHEIFNTYGMANWQLIHMYGFAEYPYNNNTDDTAD

>rs387317066\_ENSMUSP00000063565\_c.6872:C>A\_p.N2291K  
ENSMUST00000068452.10|Cnot1-201|ENSMUSG00000036550|-|chr8:g.96448163:G>T  
MNLDSLALSQISYLVNLTCKNYRASQQEIQHIVNRHGPEADRHLRCLFHVDFSGDGKSSGKDFHQTF  
LIQECASLITKPNFISTLSYAIIDNPLHYQKSLKPAPHLFAQLSKVLKLSKVQEVIFGLALLNSSSPDLRGFAA  
QFIKQKLPDLLRSYIDADVSGNQEGGFQDIAIEVLHLLLSHLLFGQKGAFGVQEQIDAFKTLRRDFPQERC  
PVLAPLLYPEKRDILMDRILPDSGGVAKTMMESSLADFMQEVGYGFCASIEECRNIIMQFGVREVTAAQVAR  
VLGMMARTHSGLTDGIPLQSIAPGSGIWSGDKKSEGAQHTWNVVLIIDVLKELNPSLNFKEVTYELDHPG  
FQIRDSKGLHNVVYGIQRGLGMEVFPVDFIYRPWKHAEGQLSFIQHSLINPEVFCFADYPCHTVATDILKAPP  
EDDNREIATWKSLLDIESLLRLAEVGGQYEQVQKQLFSFPIKHCPLMLVLLQINTSWHTLRHELISTLMPFI  
GNHPNSAILHYAWHGQGSPSIRQLIMHAMAEMYMRGEQYDQAKLSRILDVAQDLKALSMLLNGTFPAFVID  
LAALASRREYLKLDKWLTDKIREHGEFFIQACMTFLKRRCPSSLGGLAPEKDKPKSAQLPAETLATMLACLQA  
CAGSVSQELSETILTMVANCNVNMNARQPPPGVMPKGRPPSASSLDAISPVQIDPLAGMASLIGGSAAPHT  
QSMQGFPPNLGSAFSTPQSPAKAFPPPLSTPNQTTAFSGIGGLSSQLPVGGLGTGSLTGIGTGALGLPAVNNDF  
FVQRKLGTSGLNQPTFQQTDLQVWPEANQHFSKEIDDEANSYFQRIYNHPPHTMSVDEVLEMLQRFKSTI  
KREREVFNCLRNLFEEYRFFPQYDPKELHITACLFGGIEKGLVTYMALGLALRYVLEALRKPFGSKMYFYF  
IAALDRFKNRLKDYPPQYCHLASISHFMQFPHHLQEYIEYGGQSRDPPVKMQGSITTPGSIALAQAQAQAVP  
AKAPLAGQVNTMVTSTTTTVAKTVTVTKPTGVSFKKDVPPSINTNIDTLLVATDQTERIVEPPENIQEKIA  
FIFNNLSQSNMTQKVEELKETVKEEFMPWVSQYLVMKRVSIEPNFHSLSYNFLDTLKNPEFNKMLVNETYRNI  
KVLTLTSDKAAANFSDRSLLKNLGHWLGMITLAKNKPIIHTDLVKSLLLEAYVKGQOELLYVVPFAKVLESS  
IRSLVFRPPNPWTMAIMNVLAELHQEHDLKLNLKFEIEVLCKNLALDINELKPGNLLKDKDRKLNLDQQLSAP  
KKDKVQPEELPAITTTTTSTTPATSTTCTATVPPQPQYSYHDINVYSLAGLAPHITLNPTIPLFQAHPQLKQC  
VRQAIERAVQELVHPVVDRSIKIAMTTCEQIVRKDFALDSEESRMRIAAHHMMRNLTAGMAMITCREPLMSI  
STNLKNSFASALRTASPPQREMMDQAAAQLAQDNCELACCFIQKTAVEKAGPEMDKRLATEFELRKHARQEGR  
RYCDPVVLTYYAERMPEQIRLKVGGVDPKQLAVYEEFARNVPGFLPTNDLSQPTGFLAQPMQAWATDDVAQI  
YDKCITELEQHLHAIPPTLAMNPQAALRSLEVVVLSRNSRDAIAALGLLQKAVEGLLDATSGADADLLRY  
RECHLLVLKALQDGRAYGSPWCNKQITRCLIECRDEYKYNVEAVEELLIRNHLVNMQQYDLHLAQSMEGNLYM  
AVAFAMISQAVEIKILLVDPRSVAHITEADLFHTIETLMRINAAGRSRGAPEGLPQLMEVVRNSYNEAMIDRAHGGPNF  
MMHSGISQVSEYLDPPGLREKAEYLLREWVNLHSAAGRDSKAFSAFVGMHQQGIKTDLLITRFFRLCT  
EMCVEISYRAQAEQQHNPAANPTMIRAKYHNLDFAVRLIALLVKHSGEATNTVTKINLLNKVLGIVVGVLLQ  
DHDVRQSEFQQLPYHRIFIMLLELNAPEHVLETINFQTLTAFQNTFHLRPTKAPGFVYAWLELISHRIFIA  
RMLAHTPQQKGWPMYAQLLIDLFKYLAPFLRNVELTKPMQILYKGLTRVLLVLLHDFPEFLCDYHYGFCDVIP  
PNCIQLRNLILSAFPRNMRLPDPFTPNLKVDMLEINIAPRIITNFTGVMPPQFKKDLDSYKTRSPVTFSLD

LRSNLQVSNPEGNRYNLQLINALVLYVGTQAI AH IHNKGSTPSMSTITHSAHMDIFQNLAVDLDETEGRYLFNLN  
 AIANQLRYPNSHTHYFSC TMLYLFAEAKTEA IQEQITRLFQSVAQCCMGQKQAQQVMEGTGAS\*  
 >rs387317066\_ENSMUSP00000148807\_c.6866:C>A\_p.N2289K  
 ENSMUST00000211887.2|Cnot1-203|ENSMUSG00000036550|-|chr8:g.96448163:G>T  
 MNLDSLALSLALSQISYLVNDLTKKNYRASQQEIQHIVNRHGPEADRHLRLCLF SHVDFSGDGKSSGKDFHQFLI  
 QECASLITKPNFISTLSY AIDNPLHYQKSLKPAPHLFAQLSKVLKLSKVQEVIFGLALLNSSSPDLRGFAAQF  
 IKQKLPDLLRSYIDADVSGNQE GGFQDIAIEVLHLLLSHLLFGQKGAFGVGVQEQIDAF LKTLRRDFPQERC PV  
 VLAPLLYPEKRDILMDRILPDSGGVAKTMMESSLADFMQEVGYGFCASIEECRNIIMQFGVREVTAAQVARVL  
 GMMARTHSGLTDGIP LQSIAPGSGIWSDGKDKSEGAQAHTWNVEVLIDVLKELNPSLNFKEVTYELDHPGFQ  
 IRDSKGLHN VVYGIQRGLGMEVFPVDFIYRPWKHAEGQLSFIQHSLINPEVFCFADYPCHTVATDILKAPPED  
 DNREIATWKS LLDLIESLLRLAEVQYEQVKQLFSFPIKHC PDMLVLALLQINTSWHTLRHELISTLMPIFLGN  
 HPNSAII LHAWHGQGS PSIRQLIMHAMA EWYMRGEQYDQAKLSRILDVAQDLKALSMLLNGT PFAFVIDLA  
 ALASRREYLKLDKWLTDKIREHGEPFIQACMTFLKRRCP SILGGLAPEKDQPKSAQLPAETLATMLACLQACA  
 GSVSQELSETILTMVANC SNVMNKARQPPPGVMPKGRPPSASSLDAISP VQIDPLAGMASLSIGGSAAPHTQS  
 MQGFPPNLGSAFSTPQSPAKAF PPLSTPNQTTAFSGIGGLSSQLPVGGLGTGSLTGIGTGALGLPAVNNDFV  
 QRKLGTSGLNQPTFQQT DLSQVWPEANQHFSKEIDDEANSYFQRIYNHPPHPTMSVDEVLEMLQRFK DSTIKR  
 EREVFNCMLRNLFE EYRFFPQY PDKELHITACLFGGIIEKGLVTYMALGLALRYVLEALRKPFGSKMYFYGIA  
 ALDRFKNRLKDY PQYQCQLASISHFMQFPHHLQEYIEYGQQRDPVVKMQGSITTPGSIALAQAQAQVPAK  
 APLAGQVNTMVT TSTTTTVAKT VTVTKPTGV SFKKDVPPSINTTNIDTLLVATDQTERIVEPPENIQEKIAFI  
 FNNLSQSNMTQKVEELKETVKEEFMPWVSQYLV MKRVSIEPNFHSLSY SNFLDTLKNPEFNKMVLNETYRN IKV  
 LLTSDKAAANFSDRSLLK NLGHWLGMITLAKNKPI LHTDLDVKSLLLEAYVKGQOQELLYVVPFVAKVLESSIR  
 SLVFRPPNPWTMAIMNVLAELHQEHDLKLN LKFEIEVLCKNLALDINELKPGNLLKDKDR LKNLDEQLSAPKK  
 DVKQPEELPAITTTTTSTTPATSTTCTATVPPQPQYSYHDINVYSLAGLAPHITLNPTIPLFQAHPQLKQCVR  
 QAIERAVQELVHPVVDRSIKIAMTTC EQIVRKDFALDSEESRMRIAAHMMRNLTAGMAMITCREPLLSIST  
 NLKNSFASALRTAS PQQREMDQAAAQLA QDNCELACCFIQKTAVEKAGPEMDKRLATEFELRKHARQEGRRY  
 CDPVVLYTQAERMPEQIRLKVGGVDPKQLAVYEEFARNVPGFLPTNDLSQPTGFLAQPMKQAWATDDVAQIYD  
 KCITELQHLHAI PPTLAMNPQAQALRSLLLEVVLRSNRSDAIAALGLLQKAVEGLLDTSGADADLLLR YRE  
 CHLLVLKALQDGRAYGSPWCNKQITRCLIECRDEYKY NVEAVE LLIRNHLVNMQYDLHLAQSMENGLNYMAV  
 AFAMQLVKILLV DERSVAHI TEADLFHTIETLMRINAHSRGNAP EGLPQLMEVRSNYEAMIDRAHGPNFMM  
 HSGISQASEYDDPPGLREKAEYLLREWVNLYHSAAAGRDSTKAFSAFVGOMHQOGILKTDLLITRFFRLCTEM  
 CVEISYRAQAEQQHNPAANPTMIRAKCYHNLDAFVRLIALLVKHSGEATNTVTKINLLNKVLGIVGVLLQDH  
 DVRQSEFQQLPYHRIFIMLLLELNAPEHVLETINFQTLTAF CNTFHILRPTKAPGFVYAWLELISHRIF IARM  
 LAHTPQQKGWPMYAQLLIDLFKYLAPFLRNVELTKPMQILYKGTLRVLLVLLHDFPEFLCDYHYGFCDVIPP N  
 CIQLRNLILSAFPRNMRLPDPFTPNLKV DMLSEINIAPRILTNFTGVMPPQFKKDLDSYLKTRSPVTF LSDLR  
 SNLQVSNPEGNRYNLQLINALVLYVGTQAI AH IHNKGSTPSMSTITHSAHMDIFQNLAVDLDETEGRYLFNLN  
 ANQLRYPNSHTHYFSC TMLYLFAEAKTEA IQEQITRVLRLERLIVNRPHPWGLLITFIELIKNPAFKFWNHEFV  
 HCAPEIEKLFQSVAQCCMGQKQAQQVMEGTGAS\*  
 >rs387317066\_ENSMUSP00000096073\_c.6887:C>A\_p.N2296K  
 ENSMUST00000098473.11|Cnot1-202|ENSMUSG00000036550|-|chr8:g.96448163:G>T  
 MNLDSLALSLALSQISYLVNDLTKKNYRASQQEIQHIVNRHGPEADRHLRLCLF SHVDFSGDGKSSGKDFHQFQF  
 LIQECASLITKPNFISTLSY AIDNPLHYQKSLKPAPHLFAQLSKVLKLSKVQEVIFGLALLNSSSPDLRGFAA  
 QFIKQKLPDLLRSYIDADVSGNQE GGFQDIAIEVLHLLLSHLLFGQKGAFGVGVQEQIDAF LKTLRRDFPQERC  
 PVVLAPLLYPEKRDILMDRILPDSGGVAKTMMESSLADFMQEVGYGFCASIEECRNIIMQFGVREVTAAQVAR  
 VLGMMARTHSGLTDGIP LQSIAPGSGIWSDGKDKSEGAQAHTWNVEVLIDVLKELNPSLNFKEVTYELDHPG  
 FQIRDSKGLHN VVYGIQRGLGMEVFPVDFIYRPWKHAEGQLSFIQHSLINPEVFCFADYPCHTVATDILKAPP  
 EDDNREIATWKS LLDLIESLLRLAEVQYEQVKQLFSFPIKHC PDMLVLALLQINTSWHTLRHELISTLMPIFL  
 GNHPNSAII LHAWHGQGS PSIRQLIMHAMA EWYMRGEQYDQAKLSRILDVAQDLKALSMLLNGT PFAFVID  
 LAALASRREYLKLDKWLTDKIREHGEPFIQACMTFLKRRCP SILGGLAPEKDQPKSAQLPAETLATMLACLQACA  
 CAGSVSQELSETILTMVANC SNVMNKARQPPPGVMPKGRPPSASSLDAISP VQIDPLAGMASLSIGGSAAPHT  
 QSMQGFPPNLGSAFSTPQSPAKAF PPLSTPNQTTAFSGIGGLSSQLPVGGLGTGSLTGIGTGALGLPAVNNDF  
 FVQRKLGTSGLNQPTFQQSKMKPSDLSQVWPEANQHFSKEIDDEANSYFQRIYNHPPHPTMSVDEVLEMLQRF  
 KDSTIKREVFNCMLRNLFE EYRFFPQY PDKELHITACLFGGIIEKGLVTYMALGLALRYVLEALRKPFGSK  
 MYFYGIAALDRFKNRLKDY PQYQCQLASISHFMQFPHHLQEYIEYGQQRDPVVKMQGSITTPGSIALAQAQA  
 QAQVPAKAPLAGQVNTMVT TSTTTTVAKT VTVTKPTGV SFKKDVPPSINTTNIDTLLVATDQTERIVEPPENI  
 QEKIAFI FNNLSQSNMTQKVEELKETVKEEFMPWVSQYLV MKRVSIEPNFHSLSY SNFLDTLKNPEFNKMVLNE  
 TYRN IKVLLTSDKAAANFSDRSLLK NLGHWLGMITLAKNKPI LHTDLDVKSLLLEAYVKGQOQELLYVVPFVAK  
 VLESSIRSLVFRPPNPWTMAIMNVLAELHQEHDLKLN LKFEIEVLCKNLALDINELKPGNLLKDKDR LKNLDE  
 QLSAPKKDVKQPEELPAITTTTTSTTPATSTTCTATVPPQPQYSYHDINVYSLAGLAPHITLNPTIPLFQAHP

QLKQCVRQAIERAVQELVHPVVDRSIKIAMTTCSEQIVRKDFALDSEESRMRIAHHMMRNLTAGMAMITCREP  
LLMSISTNLKNSFASALRTASPQQREMMDQAAAQLAQDNCELACCFIQKTAVEKAGPEMDKRLATEFELRKHA  
RQEGRRYCDPVVLTYYAERMPEQIRLKVGGVDPKQLAVYEEFARNVPGFLPTNDLSQPTGFLAQPMKQAWATD  
DVAQIYDKCITELEQHLHAI PPTLAMNPQAQALRSLLLEVVLRSNSRDAIAALGLLQKAVEGLLDATSGADAD  
LLLRYPRECHLLVLKALQDGRAYGSPWCNKQITRCLIECRDEYKYNVEAVELLIRNHLVNMQQYDLHLAQSMEN  
GLNYMAVAFAMQLVKILLVDERSVAHI TEADLFHTIETLMRINAHSRGNAPGLPQLMEVVRSNYEAMIDRAH  
GGPNFMMHSGISQASEYDDPPGLREKAEYLLREWVNLYHSAAAGRDSTKAFSAFVGMHQGGI LKTDLLITRF  
FRLCTEMCVEISYRAQAEQQHNPAANPTMIRAKCYHNLD AFVRLIALLVKHSGEATNTVTKINLLNKVLGIVV  
GVLLQDHDVRSQSEFQQLPYHRIFIMLLELNAPEHVLETINFQTLTAFACNTFHILRPTKAPGFVYAWLELISH  
RIFFIARMLAHTPQQKGWPMYAQLLIDLKYLAPFLRNVELTKPMQI LYKGLTRVLLVLLHDFPEFLCDYHYGF  
CDVIPPNCIQLRNLI LSAFPRNMRLPDPFTPNLKVDMLSEINIAPRILTNFTGVMPPQFKKDLDSYLKTRSPV  
TFLSDLRSNLQVSNPEGNRYNLQLINALVLYVGTQAI AIAHINHGKSTPSMSTITHSAHMDIFQNLAVDLDTTEGR  
YLFNLAIANQLRYPNSHHTHYFSC TMLYLFAEAKTEAIQEQITRVLLERLIVNRPHPWGLLITFIELIKNPAFK  
FWNHEFVHCAPEIEKLFQSVACCMGQKQAQQVMEGTGAS\*

>rs107850230\_ENSMUSP00000063565\_c.6243:C>T\_p.P2082S

ENSMUST00000068452.10|Cnot1-201|ENSMUSG00000036550|-|chr8:g.96454231:G>A  
MNLDSLALSLSQISYLVNDLTKKNYRASQQEIQHIVNRHGPEADRHLRLCLFVSHVDFSGDGKSSGKDFHQTF  
LIQECASLITKPNFISTLSY AIDNPLHYQKSLKPAPHLFAQLSKVLKLSKVQEVIFGLALLNSSSPDLRGFAA  
QFIKQKLPDLLRSYIDADVSGNQEGGFQDIAIEVLHLLLSHLLFGQKGAFGVQEQIDAFKTLRRDFPQERC  
PVVLAPELLYPEKRDILMDRILPDSGGVAKTMMESSLADFMQEVGYGFCASIEECRNIIMQFGVREVTAAQVAR  
VLGMMARTHSGLTDGIPLQSI SAPGSGIWSDGKDKSEGAQAHTWNVEVLIDVLKELNPSLNFKEVTEYLDHFG  
FQIRDSKGLHNVVYGIQRGLGMEVFPVDFIYRPWKHAEGQLSFIQHSLINPEVFCFADYPCHTVAATDILKAPP  
EDDREIATWKSLLDIESLLRLAEVQYEQVKQLFSFPIKHC PDMLVLALLQINTSWHTLRHELISTLMPIFL  
GNHPNSAII LHAWHGQGS PSIRQLIMHAMA EWYMRGEQYDQAKLSRILDVAQDLKALSMLLNGT PFAFVID  
LAALASRREYLKLDKWLTDKIREHGEPFIQACMTFLKRRCP SILGGLAPEKDPKSAQLPAETLATMLACLQA  
CAGSVSQELSETILTMVANCNSVMNKARQPPPGVMPKGRPPSASSLDAISPQIDPLAGMASLIGSSAAPHT  
QSMQGFPPNLSGIFSTPQSPAKAFPPPLSTPNQTTAFSGIIGGLSSQLPVGGGLGTGSLTGIGTGALGLPAVNNDP  
FVQRKLGTSGLNQPTFQQTDL SQVWPEANQHFSKEIDDEANSYFQRINYHPPHPTMSVDEVLEMLQRFKSTI  
KREREVFNCLRNLFEEYRFFPQY PDKELHITACLFGGIEKGLVTYMALGLALRYVLEALRKPFGSKMYFYG  
IAALDRFKNRLKDY PQYCOHLASISHFMQFPHHLQEYIEYGGQSRDPPVKMGSITTPGSIALAQAQAQV  
AKAPLAGQVNTMVTSTTTTVAKTVTVTKPTGVSFKKDVPPSINTNIDTLLVATDQTERIVEPPENIQEKIA  
FIFNNLSQSNMTQKVEELKETVKEEFMPWVSQYLVMKRVSIEPNFHSLSYSNFLDTLKNPEFNKMLVNETYRNI  
KVLITSDKAAANFSDRSLLKNLGHWLGMITLAKNKPI LHDTLDVKSLLLEAYVKGQOQELLYVVPFAKVLESS  
IRSLVFRPPNPWTMAIMNVLAELHQEHDLKLNLFKFEIEVLCNKLALDINELKPGNLLKDKDRKLNLDQLSAP  
KKDVKQPEELPAITTTTTSTPATSTTCTATVPPQYQSYHYDINVYSLAGLAPHITLNPITPLFQAHQKQC  
VRQAIERAVQELVHPVVDRSIKIAMTTCSEQIVRKDFALDSEESRMRIAHHMMRNLTAGMAMITCREP  
STNLKNSFASALRTASPQQREMMDQAAAQLAQDNCELACCFIQKTAVEKAGPEMDKRLATEFELRKHARQEGR  
RYCDPVVLTYYAERMPEQIRLKVGGVDPKQLAVYEEFARNVPGFLPTNDLSQPTGFLAQPMKQAWATDDVAQI  
YDKCITELEQHLHAI PPTLAMNPQAQALRSLLLEVVLRSNSRDAIAALGLLQKAVEGLLDATSGADADLLRY  
RECHLLVLKALQDGRAYGSPWCNKQITRCLIECRDEYKYNVEAVELLIRNHLVNMQQYDLHLAQSMENGLNYM  
AVAFAMQLVKILLVDERSVAHI TEADLFHTIETLMRINAHSRGNAPGLPQLMEVVRSNYEAMIDRAHGGPNF  
MMHSGISQASEYDDPPGLREKAEYLLREWVNLYHSAAAGRDSTKAFSAFVGMHQGGI LKTDLLITRF  
FRLCTEMCVEISYRAQAEQQHNPAANPTMIRAKCYHNLD AFVRLIALLVKHSGEATNTVTKINLLNKVLGIVV  
GVLLQDHDVRSQSEFQQLPYHRIFIMLLELNAPEHVLETINFQTLTAFACNTFHILRPTKAPGFVYAWLELISH  
RIFFIARMLAHTPQQKGWPMYAQLLIDLKYLAPFLRNVELTKSMQI LYKGLTRVLLVLLHDFPEFLCDYHYGF  
CDVIPPNCIQLRNLI LSAFPRNMRLPDPFTPNLKVDMLSEINIAPRILTNFTGVMPPQFKKDLDSYLKTRSPV  
TFLSDLRSNLQVSNPEGNRYNLQLINALVLYVGTQAI AIAHINHGKSTPSMSTITHSAHMDIFQNLAVDLDTTEGR  
YLFNLAIANQLRYPNSHHTHYFSC TMLYLFAEANTEAIQEQITRVLLERLIVNRPHPWGLLITFIELIKNPAFK  
FWNHEFVHCAPEIEKLFQSVACCMGQKQAQQVMEGTGAS\*

>rs107850230\_ENSMUSP00000148807\_c.6237:C>T\_p.P2080S

ENSMUST00000211887.2|Cnot1-203|ENSMUSG00000036550|-|chr8:g.96454231:G>A  
MNLDSLALSLSQISYLVNDLTKKNYRASQQEIQHIVNRHGPEADRHLRLCLFVSHVDFSGDGKSSGKDFHQFLI  
QECASLITKPNFISTLSY AIDNPLHYQKSLKPAPHLFAQLSKVLKLSKVQEVIFGLALLNSSSPDLRGFAAQF  
IKQKLPDLLRSYIDADVSGNQEGGFQDIAIEVLHLLLSHLLFGQKGAFGVQEQIDAFKTLRRDFPQERC  
PVVLAPELLYPEKRDILMDRILPDSGGVAKTMMESSLADFMQEVGYGFCASIEECRNIIMQFGVREVTAAQVAR  
VLGMMARTHSGLTDGIPLQSI SAPGSGIWSDGKDKSEGAQAHTWNVEVLIDVLKELNPSLNFKEVTEYLDHFG  
FQIRDSKGLHNVVYGIQRGLGMEVFPVDFIYRPWKHAEGQLSFIQHSLINPEVFCFADYPCHTVAATDILKAPP  
EDDREIATWKSLLDIESLLRLAEVQYEQVKQLFSFPIKHC PDMLVLALLQINTSWHTLRHELISTLMPIFLGN  
HPNSAII LHAWHGQGS PSIRQLIMHAMA EWYMRGEQYDQAKLSRILDVAQDLKALSMLLNGT PFAFVIDLA

ALASRREYLKLDKWLTDKIREHGEPFIQACMTFLKRRCP SILGGLAPEKDPKSAQLPAETLATMLACLQACA  
GSVSQELSETILTMVANCNSVMNKARQPPPGVMPKGRPPSASSLDAISPVQIDPLAGMASLSIGGSAAPHTQS  
MQGFPPNLGSAFSTPQSPAKAFPPPLSTPNQTTAFSGIGGLSSQLPVGGLGTGSLTGIGTGALGLPAVNNDFV  
QRKLGTSGLNQPTFQQTDL SQVWPEANQHFSKEIDDEANSYFQRIYNHPPHTMSVDEVLEMLQRFKDKSTIKR  
EREVFNCLMRNLFEYRFFPQYDPKELHITACLFGGIIEKGLVTYMALGLALRYVLEALRKPFGSKMYFYFGIA  
ALDRFKNRLKDYPOYCQHLASISHFMQFPHHLQEYIEYGGQSRDPPVKMQGSITTPGSI ALAQAQAQVPAK  
APLAGQVNTMVTSTTTTVAKTVTVTKPTGVSFKKDVPPSINTTNI DTLVATDQTERIVEPPENIQEKIAFI  
FNNLSQSNMTQKVEELKETVKEEFMPWVSQYLVMKRVSIEPNFHSLSYSNFLD TLKNPEFNKMVLNETYRNIKV  
LLTSDKAAANFSDRSLLKNLGHWLGMITLAKNKPI LHDTLDVKSLLLEAYVKGQQEQLLYVVPFVAKVLESSIR  
SLVFRPPNPWTMAIMNVLAELHQEHDLKLNKFEIEVLCKNLALDINELKPGNLLKDKDRKLNLDLDEQLSAPKK  
DVQPEELPAITTTTTSTTPATSTTCTATVPPQPQYSYHDINVYSLAGLAPHITLNPTIPLFQAHPQLKQCVR  
QAIERAVQELVHPVVDRSIKIAMTTCEQIVRKDFALDSEESRMRIAHHMMRNLTAGMAMITCREP LLMSIST  
NLKNSFASALRTASPQQREMMDQAAAQLAQDNCELACCFIQKTAVEKAGPEMDKRLATEFELRKHARQEGRRY  
CDPVVLTQYQAERMPEQIRLKVGGVDPKQLAVYEEFARNVPGFLPTNDLSQPTGFLAQPMKQAWATDDVAQIYD  
KCITELEQHLHAI PPTLAMNPQAQALRSLLLEVVL SRNSRDAIAALGLLQKAVEGLLDATSGADADLLLRYRE  
CHLLVLKALQDGRAYGSPWCNKQITRCLIECRDEYKYNEAVE LLIRNHLVNMQQYDLHLAQSMENGLNYMAV  
AFAMQLVKILLVDERSVAHI TEADLFHTIETLMRINAHSRGNAPGLPQLMEVVRSNYEAMIDRAHGGPNFMM  
HSGISQASEYDDPPGLREKAEYLLREWVNLYHSAAAGRDSTKAFSAFVGQMHQQGILKTDLLITRFELRSTEM  
CVEISYRAQAEQQHNPAANPTMIRAKCYHNLDAFVRLIALLVKHSGEATNTVTKINLLNKVLGIVVGVLLQDH  
DVRQSEFQQLPYHRIFIMLLLELNAPEHVLETINFQTLTAFcntFHILRPTKAPGFVYAWLELISHRIF IARM  
LAHTPQQKGWPMYAQLLIDLFKYLAPFLRNVELTKSMQILYKGTLRVLLVLLHDFPEFLCDYHYGFCDVIPP  
CIQLRNLILSAFPRNMLPDPFTPNLKVDMLE INIAPRILTNFTGVMPPQFKKDLDSYLKTRSPVTF LSDLR  
SNLQVSNPGRNRYNLQ LINALVLYVGTQAI AIAHINKGSTPSMSTITHSAHMDIFQNLAVDLDTGGRYLF LNAI  
ANQLRYPNSHthyfSCTMLYLFAEANTEA IQEQITRVLLERLIVNRPHPWGLLITFIELIKNPAFKFWNHEFV  
HCAPEIEKLFQSV AQCCMGQKQAQQVMEGTGAS\*  
>rs107850230\_ENSMUSP0000096073\_c.6258:C>T\_p.P2087S  
ENSMUST0000098473.11|Cnot1-202|ENSMUSG00000036550|-|chr8:g.96454231:G>A  
MNLDSLALSQISYLVNDLTKKNYRASQQEIQHIVNRHGPEADRHLLRCLF SHVDFSGDGKSSGKDFHQTF  
LIQECASLITKPNFISTLSY AIDNPLHYQKSLKPAPHLFAQLSKVLKLSKVQEVIFGLALLNSSSPDLRGFAA  
QFIKQKLPDLLRSYIDADVSGNQEGGFQDIAIEVLHLLLSHLLFGQKGAFGVQEQIDAF LKTLRRDFPQERC  
PVLAPLLYPEKRDILMDRI LPDSGGVAKTMMESSLADFMQEVGYGFCASIEECRNIIMQFGVREVTAAQVAR  
VLGMMARTHSGLTDGIP LQSI SAPGSGIWSDGKDKSEGAQAHTWNVEVLI DVLKELNPSLNFKEVTYELDHPG  
FQIRDSKGLHNVVYGIQRGLGMEVFPVDFIYRPWKHAEGQLSFIQHSLINPEVFCFADYPCHTVA TDILKAPP  
EDDREIATWKS LDLESLLRLAEVQYEQVKQLFSFPIKHC PDMLVLALLQINTSWHTLRHELISTLMPIFL  
GNHPNSAILHYAWHGQGS PSIRQLIMHAMAEWYMRGEYDQAKLSRILDVAQDLKALSMLLNGT PFAFVID  
LAALASRREYLKLDKWLTDKIREHGEPFIQACMTFLKRRCP SILGGLAPEKDPKSAQLPAETLATMLACLQACA  
CAGSVSQELSETILTMVANCNSVMNKARQPPPGVMPKGRPPSASSLDAISPVQIDPLAGMASLSIGGSAAPHT  
QSMQGFPPNLGSAFSTPQSPAKAFPPPLSTPNQTTAFSGIGGLSSQLPVGGLGTGSLTGIGTGALGLPAVNNDF  
FVQRKLGTSGLNQPTFQQSKMKPSDLSQVWPEANQHFSKEIDDEANSYFQRIYNHPPHTMSVDEVLEMLQRF  
KDKSTIKREEVFNCLMRNLFEYRFFPQYDPKELHITACLFGGIIEKGLVTYMALGLALRYVLEALRKPFGSK  
MYFYFGIAALDRFKNRLKDYPOYCQHLASISHFMQFPHHLQEYIEYGGQSRDPPVKMQGSITTPGSI ALAQAQA  
QAQVPAKAPLAGQVNTMVTSTTTTVAKTVTVTKPTGVSFKKDVPPSINTTNI DTLVATDQTERIVEPPENI  
QEKIAFI FNNLSQSNMTQKVEELKETVKEEFMPWVSQYLVMKRVSIEPNFHSLSYSNFLD TLKNPEFNKMVLNE  
TYRNIKVL LLSDKAAANFSDRSLLKNLGHWLGMITLAKNKPI LHDTLDVKSLLLEAYVKGQQEQLLYVVPFVAK  
VLESSIRSLVFRPPNPWTMAIMNVLAELHQEHDLKLNKFEIEVLCKNLALDINELKPGNLLKDKDRKLNLDLDE  
QLSAPKKDVQPEELPAITTTTTSTTPATSTTCTATVPPQPQYSYHDINVYSLAGLAPHITLNPTIPLFQAHP  
QLKQCVRQAIERAVQELVHPVVDRSIKIAMTTCEQIVRKDFALDSEESRMRIAHHMMRNLTAGMAMITCREP  
LLMSISTNLKNSFASALRTASPQQREMMDQAAAQLAQDNCELACCFIQKTAVEKAGPEMDKRLATEFELRKHA  
RQEGRRYCDPVVLTQYQAERMPEQIRLKVGGVDPKQLAVYEEFARNVPGFLPTNDLSQPTGFLAQPMKQAWATD  
DVAQIYDKCITELEQHLHAI PPTLAMNPQAQALRSLLLEVVL SRNSRDAIAALGLLQKAVEGLLDATSGADAD  
LLLRYRECHLLVLKALQDGRAYGSPWCNKQITRCLIECRDEYKYNEAVE LLIRNHLVNMQQYDLHLAQSMEN  
GLNYMAVAFAMQLVKILLVDERSVAHI TEADLFHTIETLMRINAHSRGNAPGLPQLMEVVRSNYEAMIDRAH  
GGPNFMMHSGISQASEYDDPPGLREKAEYLLREWVNLYHSAAAGRDSTKAFSAFVGQMHQQGILKTDLLITRF  
FRLCTEMDCVEISYRAQAEQQHNPAANPTMIRAKCYHNLDAFVRLIALLVKHSGEATNTVTKINLLNKVLGIVV  
GVLLQDHDVQRSEFQQLPYHRIFIMLLLELNAPEHVLETINFQTLTAFcntFHILRPTKAPGFVYAWLELISH  
RIF IARMLAHTPQQKGWPMYAQLLIDLFKYLAPFLRNVELTKSMQILYKGTLRVLLVLLHDFPEFLCDYHYGFC  
CDVIPPNCIQLRNLILSAFPRNMLPDPFTPNLKVDMLE INIAPRILTNFTGVMPPQFKKDLDSYLKTRSPV  
TF LSDLRSNLQVSNPGRNRYNLQ LINALVLYVGTQAI AIAHINKGSTPSMSTITHSAHMDIFQNLAVDLDTGGRYLF LNAI



YLFNLAIANQLRYPNSHSHYFSCMTMLYLFAEANTEAIEQEQITRVLLERLIVNRPHPWGLLITFIELIKNPFAFK  
FWNHEFVHCAPEIEKLFQSVACCMGQKQAQQVMEGTGAS\*  
>rs46179737\_ENSMUSP00000063565\_c.6205:A>G\_p.Y2069C  
ENSMUST00000068452.10|Cnot1-201|ENSMUSG00000036550|-|chr8:g.96454269:T>C  
MNLDSLALSLSQISYLVNDLTKKNYRASQQEIQHIVNRHGPEADRHLRLCLFVSHVDFSGDGKSSGKDFHQTF  
LIQECASLITKPNFISTLSYAIIDNPLHYQKSLKPAPHLFAQLSKVLKLSKVQEVIFGLALLNSSSPDLRGFAA  
QFIKQKLPDLLRSYIDADVSGNQEGGFQDIAIEVLHLLLSHLLFGQKGAFGVGVQEQIDAFKTLRRDFPQERC  
PVLAPLLYPEKRDILMDRILPDSGGVAKTMMESSLADFMQEVGYGFCASIEECRNIIMQFGVREVTAAQVAR  
VLGMMARTHSGLTDGIPLOSIAPGSGIWSGDKDKSEGAQAHTWNVEVLIDVLKELNPSLNFKEVTEYELDHPG  
FQIRDSKGLHNVVYGIQIRGLGMEVFPVDFIYRPWKHAEGQLSFIQHSLINPEVFCFADYPCHTVATDILKAPP  
EDDREIATWKSLLDIESLLRLAEVQYEQVKQLFSFPIKHC PDMLVLALLQINTSWHTLRHELISLTMPIFL  
GNHPNSAII LHAWHGQGS PSIRQLIMHAMA EWYMRGEQYDQAKLSRILDVAQDLKALSMLLNGT PFAFVID  
LAALASRREYLKLDKWLTDKIREHGEPFIQACMTFLKRRCP SILGGLAPEKDPKSAQLPAETLATMLACLQA  
CAGSVSQELSETILTMVANC SNVMNKARQPPPGVMPKGRPPSASSLDAISPVQIDPLAGMASLSIGGSAAPHT  
QSMQGFPPNLGSAFSTPQSPAKAF PPLSTPNQTTAFSGIGGLSSQLPVGGLGTGSLTGIGTGALGLPAVNNDF  
FVQRKLGTSGLNQPTFQQTDL SQVWPEANQHFSKEIDDEANSYFQRIYNHPPHTMSVDEVLEMLQRFKSTI  
KREREFNCLRNLDFEYRFFPQYDPKELHITACLFGGIIEKGLVTYMALGLALRYVLEALRKPFGSKMYFFG  
IAALDRFKNRLKDY PQY CQHLS ISHF MQFP HHLQEY IEY GQQRDP PVKM QGS ITTPGSI ALAQAQAQV  
AKAPLAGQVNTMVTSTTTTVAKT VTVTKPTGV SFKKDV PPS INTTNIDTLLVATDQTERIVEPPENIQEKIA  
FIFNNLSQSNMTQKVEELKETVKEEFMPWVSQYLV MKRVS IEPNFHSLYSNFLDTLKNPEFNKMLVNETYRNI  
KVL L TSDKAAANFSDRSLLKNLGHWLGMITLAKNKPI LHTDLDVKSLLLEAYVKGQOELLYVVPFVAKVLESS  
IRSLVFRPPNPWTMAIMNVLAELHQEHDLKLNLFKFEIEVLCKNLALDINELKPGNLLKDKDRKLNLDQELSAP  
KKDKVQPEELPAITTTTTSTTPATSTTCTATVPPQPQYSYHDINVYSLAGLAPHITLNPTIPLFQAHPQLKQC  
VRQA IERAVQELVHPVVDRS IKIAMTTCEQIVRKDFALDSEESRMR IAAHHMMRNLTAGMAMITCREPLLSI  
STNLKNSFASALRTAS PQQREMDQAAAQLA QDNCELACCFIQKTAVEKAGPEMDKRLATEFELRKHARQEGR  
RYCDPVVLYQALRAMPEQIRLKVGGVDPKQLAVYEEFARNVPGFLPTNDLSQPTGFLAQPMPKQAWATDDVAQI  
YDKCITELHQHLHAI PPTLAMNPQAQALRSLLEVVL SRNSRDA I AALGLLQKAVEGLLDATSGADYLLRY  
RECHLLVLKALQDGRAYGSPWCNQITRCLIECRDEYKYNVEAVELLIRNHLVNMQQYDLHLAQSMENGLNYM  
AVAFAMQLVKIILLVDRSVAHIT EADLFHTIETLMRINAHSRGNAPEGLPQLMEVVRSNYEAMIDRAHGGPNF  
MMHSGISQASEYDDPPGLREKAEYLLREWVNLYHSAAAGRSTKAFSAFVGMHQGGILKTDLLITRFRCT  
EMCVEISYRAQAEQQHNPAANPTMIRAKCYHNLDAFVRLIALLVKHSGEATNTVTKINLLNKVLGIVVGVLLQ  
DHDVQRSEFQQLPYHRIFIMLLELNAPEHVLETINFQTLTAFCNTFHILRPTKAPGFVYAWLELISHRIFIA  
RMLAHTPQQKGWPMYAQLLIDLFKCLAPFLRNVELTKPMQILYKGTLRVLLVLLHDFPEFLCDYHYGFCDVIP  
PNCIQLRNLILSAFPRNMRLPDPFTPNLKVDMLEINIAPRI LTNFTGVMPPQFKKDLDSYLKTRSPVTF LSD  
LRSNLQVSNPEGNRYNLQLINALVLYVGTQAI AIAIHKNKSTPSMSTITHSAHMDIFQNLAVDLDTEGRYLFNL  
AIANQLRYPNSHSHYFSCMTMLYLFAEANTEAIEQEQITRFLFQSVACCMGQKQAQQVMEGTGAS\*  
>rs46179737\_ENSMUSP00000148807\_c.6199:A>G\_p.Y2067C  
ENSMUST00000211887.2|Cnot1-203|ENSMUSG00000036550|-|chr8:g.96454269:T>C  
MNLDSLALSLSQISYLVNDLTKKNYRASQQEIQHIVNRHGPEADRHLRLCLFVSHVDFSGDGKSSGKDFHQFLI  
QECASLITKPNFISTLSYAIIDNPLHYQKSLKPAPHLFAQLSKVLKLSKVQEVIFGLALLNSSSPDLRGFAAQF  
IKQKLPDLLRSYIDADVSGNQEGGFQDIAIEVLHLLLSHLLFGQKGAFGVGVQEQIDAFKTLRRDFPQERC  
VLAPLLYPEKRDILMDRILPDSGGVAKTMMESSLADFMQEVGYGFCASIEECRNIIMQFGVREVTAAQVARVL  
GMMARTHSGLTDGIPLOSIAPGSGIWSGDKDKSEGAQAHTWNVEVLIDVLKELNPSLNFKEVTEYELDHPGFQ  
IRDSKGLHNVVYGIQIRGLGMEVFPVDFIYRPWKHAEGQLSFIQHSLINPEVFCFADYPCHTVATDILKAPP  
DNREIATWKSLLDIESLLRLAEVQYEQVKQLFSFPIKHC PDMLVLALLQINTSWHTLRHELISLTMPIFLGN  
HPNSAII LHAWHGQGS PSIRQLIMHAMA EWYMRGEQYDQAKLSRILDVAQDLKALSMLLNGT PFAFVIDLA  
ALASRREYLKLDKWLTDKIREHGEPFIQACMTFLKRRCP SILGGLAPEKDPKSAQLPAETLATMLACLQACA  
GSVSVQELSETILTMVANC SNVMNKARQPPPGVMPKGRPPSASSLDAISPVQIDPLAGMASLSIGGSAAPHTQS  
MQGFPPNLGSAFSTPQSPAKAF PPLSTPNQTTAFSGIGGLSSQLPVGGLGTGSLTGIGTGALGLPAVNNDFPV  
QRKLGTSGLNQPTFQQTDL SQVWPEANQHFSKEIDDEANSYFQRIYNHPPHTMSVDEVLEMLQRFKSTI  
KREREFNCLRNLDFEYRFFPQYDPKELHITACLFGGIIEKGLVTYMALGLALRYVLEALRKPFGSKMYFFGIA  
ALDRFKNRLKDY PQY CQHLS ISHF MQFP HHLQEY IEY GQQRDP PVKM QGS ITTPGSI ALAQAQAQV  
AKAPLAGQVNTMVTSTTTTVAKT VTVTKPTGV SFKKDV PPS INTTNIDTLLVATDQTERIVEPPENIQEKIAFI  
FNNLSQSNMTQKVEELKETVKEEFMPWVSQYLV MKRVS IEPNFHSLYSNFLDTLKNPEFNKMLVNETYRNIKV  
LLTSDKAAANFSDRSLLKNLGHWLGMITLAKNKPI LHTDLDVKSLLLEAYVKGQOELLYVVPFVAKVLESSIR  
SLVFRPPNPWTMAIMNVLAELHQEHDLKLNLFKFEIEVLCKNLALDINELKPGNLLKDKDRKLNLDQELSAPKK  
DKVQPEELPAITTTTTSTTPATSTTCTATVPPQPQYSYHDINVYSLAGLAPHITLNPTIPLFQAHPQLKQCVR  
QA IERAVQELVHPVVDRS IKIAMTTCEQIVRKDFALDSEESRMR IAAHHMMRNLTAGMAMITCREPLLSIST

NLKN SFASALRTAS PQQREMMDQAAAQLAQDNCELACCFIQKTAVEKAGPEMDKRLATEFELRKHARQEGRRY  
CDPVVLT YQAERMPEQIRLKVGGVDPKQLAVYEEFARNVPGFLPTNDLSQPTGFLAQPMKQAWATDDVAQIYD  
KCITTELEQHLHAI PPTLAMNPQAQALRSLLLEVVLRSNRDAIAALGLLQKAVEGLLDATSGADADLLRYRE  
CHLLVLKALQDGRAYGSPWCNKQITRCLIECRDEYKYNVEAVE LLIRNHLVNMQQYDLHLAQSMENGLNYMAV  
AFAMQLVKIILLVDERSVAHITEADLFHTIETLMRINAHSRGNAP EGLPQLMEVVRSNYEAMI DRAHGGPNFMM  
HSGISQASEYDDPPGLREKAEYLLREWVNLYHSAAAGRDSTKAFSAFVGMHQGGILKTDDLI TRFFRLCTEM  
CVEISYRAQAEQQHNPAANPTMIRAKCYHNLD AFVRLIALLVKHSGEATNTVTKINLLNKVLGIVVGVLLQDH  
DVRQSEFQQLPYHRIFIMLLELNAP EHVLETINFQTLTAF CNTFHILRPTKAPGFVYAWLELISHRIFIARM  
LAHTPQQKGWPMYAQLLIDLDFKCLAPFLRNVELTKPMQILYKGTLRVLLVLLHDFPEFLCDYHYGFCDVIPPN  
CIQLRNLILSAFPRNMRLPDPFTP NLKVDMLSEINIAPRILTNFTGVMPPQFKKDLDSYLKTRSPVTFSLDLR  
SNLQVSN EPGNRYNLQLINALVLYVGTQAI AHIHNKGSTPSMSTITHSAHMDIFQNLAVDLDT EGRYLF LNAI  
ANQLRYPNSH THYFSC TMLYLFAEANTEA IQEQITRVLLERLIVNRPHPWGLLITFIELIKNPAFKFWNHEFV  
HCAPEIEKLFQSV AQCCMGQKQAQQVMEGTGAS\*

>rs46179737\_ENSMUSP00000096073\_c.6220:A>G\_p.Y2074C

ENSMUST00000098473.11|Cnot1-202|ENSMUSG00000036550|-|chr8:g.96454269:T>C  
MNLDSL SLSALSQISYLVNDLTKKNYRASQQEIQHIVNRHGPEADRHLRLCLF SHVDFSGDGKSSGKDFHQ TQF  
LIQECASLITKPNFISTLSY AIDNPLHYQKSLKPAPHLFAQLSKVLKLSKVQEVIFGLALLNSSPDLRGFAA  
QFIKQKLPDLLRSYIDADVSGNQE GGFQDIAIEVLHLLLSHLLFGQKGAFGVGVQEQIDAF LKTLRRDFPQERC  
PVVLAPLLLYPEKRDILMDRILPDSGGVAKTMMESSLADFMQEVGYGFCASIEECRNIIMQFGVREVTAAQVAR  
VLGMMARTHSGLTDGIP LQSI SAPGSGIWS DGKDKSEGAQAHTWNVEVLIDVLKELNPSLNFKEV TYELDHPG  
FQIRDSKGLHN VVYGIQRGLGMEVFPVDFIYRPWKHAEGQLSFIQHS LINPEVFCFADYPCHTVA TDILKAPP  
EDDNREIATWKS LLDLIESLLRLAEVGOYEQVKQLFSFPIKHC PDMLVLALLQINTSWHTLRHELIS TLMPIFL  
GNHPNSAIILHYAWHGQGS P S I RQLIMHAMA EWYMRGEQYDQAKLSRILDVAQDLKALSMLNGT PFAFVID  
LAALASRREY LKLDKWLTDKIREHGEPFIQACMTFLKRRCP S I LGGLAPEK DQPKSAQLPAETLATMLACLQA  
CAGSVSQELSETILT MVANCSNVMNKARQPPPGVMPKGRPPSASSLDAISP VQIDPLAGMASLSIGGSAAPHT  
QSMQGFPPNLGSAFSTPQSPAKAFPLSTPNQTTAFSGIIGLSSQLPVGGLGTGSLTGIGTGA LGLPAVNNDP  
FVQRKLGTSGLNSFASALRTAS PQQREMMDQAAAQLAQDNCELACCFIQKTAVEKAGPEMDKRLATEFELRKHA  
RQEGRRYCDPVVLT YQAERMPEQIRLKVGGVDPKQLAVYEEFARNVPGFLPTNDLSQPTGFLAQPMKQAWATD  
DVAQIYDKCITTELEQHLHAI PPTLAMNPQAQALRSLLLEVVLRSNRDAIAALGLLQKAVEGLLDATSGADAD  
LLRYRECHLLVLKALQDGRAYGSPWCNKQITRCLIECRDEYKYNVEAVE LLIRNHLVNMQQYDLHLAQSMEN  
GLNYMAVAFAMQLVKIILLVDERSVAHITEADLFHTIETLMRINAHSRGNAP EGLPQLMEVVRSNYEAMI DRAH  
GGPNFMMHSGISQASEYDDPPGLREKAEYLLREWVNLYHSAAAGRDSTKAFSAFVGMHQGGILKTDDLI TRF  
FRLCTEMCVEISYRAQAEQQHNPAANPTMIRAKCYHNLD AFVRLIALLVKHSGEATNTVTKINLLNKVLGIVV  
GVLLQDHDVVRQSEFQQLPYHRIFIMLLELNAP EHVLETINFQTLTAF CNTFHILRPTKAPGFVYAWLELISH  
RIFIARM LAHTPQQKGWPMYAQLLIDLDFKCLAPFLRNVELTKPMQILYKGTLRVLLVLLHDFPEFLCDYHYGFC  
CDVIPPNCIQLRNLILSAFPRNMRLPDPFTP NLKVDMLSEINIAPRILTNFTGVMPPQFKKDLDSYLKTRSPV  
TFSLDLRSNLQVSN EPGNRYNLQLINALVLYVGTQAI AHIHNKGSTPSMSTITHSAHMDIFQNLAVDLDT EGR  
YLF LNAIANQLRYPNSH THYFSC TMLYLFAEANTEA IQEQITRVLLERLIVNRPHPWGLLITFIELIKNPAFK  
FWNHEFVHCAPEIEKLFQSV AQCCMGQKQAQQVMEGTGAS\*

>rs264083360\_ENSMUSP00000063565\_c.6049:C>TTC\_p.T2017ins-fs

ENSMUST00000068452.10|Cnot1-201|ENSMUSG00000036550|-  
|chr8:g.96455355:G>GAA  
MNLDSL SLSALSQISYLVNDLTKKNYRASQQEIQHIVNRHGPEADRHLRLCLF SHVDFSGDGKSSGKDFHQ TQF  
LIQECASLITKPNFISTLSY AIDNPLHYQKSLKPAPHLFAQLSKVLKLSKVQEVIFGLALLNSSPDLRGFAA  
QFIKQKLPDLLRSYIDADVSGNQE GGFQDIAIEVLHLLLSHLLFGQKGAFGVGVQEQIDAF LKTLRRDFPQERC  
PVVLAPLLLYPEKRDILMDRILPDSGGVAKTMMESSLADFMQEVGYGFCASIEECRNIIMQFGVREVTAAQVAR  
VLGMMARTHSGLTDGIP LQSI SAPGSGIWS DGKDKSEGAQAHTWNVEVLIDVLKELNPSLNFKEV TYELDHPG  
FQIRDSKGLHN VVYGIQRGLGMEVFPVDFIYRPWKHAEGQLSFIQHS LINPEVFCFADYPCHTVA TDILKAPP  
EDDNREIATWKS LLDLIESLLRLAEVGOYEQVKQLFSFPIKHC PDMLVLALLQINTSWHTLRHELIS TLMPIFL

GNHPNSAIILHYAWHGQSQSPSIRQLIMHAMAWEYMRGEQYDQAKLSRILDVAQDLKALSMLLNGTPFAFVID  
LAALASRREYLKLDKWLTDKIREHGEPFIQACMTFLKRRCP SILGGLAPEKDPKSAQLPAETLATMLACLQA  
CAGSVSQELSETILTMVANCNSVMNKARQPPPGVMPKGRPPSASSLDAISPVQIDPLAGMASLSIGGSAAPHT  
QSMQGFPPNLGSAFSTPQSPAKAFPLSTPNQTTAFSGIGGLSSQLPVGGLGTGSLTGIGTGALGLPAVNNDP  
FVQRKLTSGLNQPTFQQTDLSQVWPEANQHFSKEIDDEANSYFQRIYNHPPHTMSVDEVLEMLQRFKDSI  
KREREVFNCLRNLFEEYRFFPQYDPKELHITACLFGGIIEKGLVTYMALGLALRYVLEALRKPFGSKMYFYG  
IAALDRFKNRLKDYQYQCQLASISHFMQFPHHLQEYIEYQQSRDPPVKMQGSITTPGSIALAQAQAQVPAK  
AKAPLAGQVNTMVTSTTTTVAKTVTVTKPTGVSFKKDVPPSINTTNIDTLLVATDQTERIVEPPENIQEKIA  
FIFNNLSQSNMTQKVEELKETVKEEFMPWVSQYLVMKRVSIEPNFHSLSYSNFLDTLKNPEFNKMLNETYRNI  
KVLTLSDKAAANFSDRSLLKLNGLHWLGMITLAKNKPI LHDTLDVKSLLLEAYVKGQQEELLYVVPFVAKVLESS  
IRSLVFRPPNPWTMAIMNVLAELHQEHDLKLNKFEIEVLCKNLALDINELKPGNLLKDKDRLKNLDEQLSAP  
KKDVQPEELPAITTTTTSTPATSTTCTATVPPQPQYSYHDINVYSLAGLAPHITLNPTIPLFQAHPQLKQC  
VRQAIERAVQELVHPVVDRSIIKIAMTTCEQIVRKDFALDSEESRMRIAAHHMMRNLTAGMAMITCREPLLSI  
STNLKNSFASALRTASPPQREMMDQAAAQLAQDNCELACCFIQKTAVEKAGPEMDKRLATEFELRKHARQEGR  
RYCDPVVLTQYQAERMPEQIRLKVGGVDPKQLAVYEEFARNVPGFLPTNDLSQPTGFLAQPMKQAWATDDVAQI  
YDKCITELEQHLHAIPPTLAMNPQAALRSLLLEVVLRSNSRDAIAALGLLQKAVEGLLDATSGADADLLRY  
RECHLLVLKALQDGRAYGSPWCNKQITRCLIECRDEYKYNVEAVEELLIRNHLVNMQQYDLHLAQSMENGLNYM  
AVAFAMQLVKILLVDERSVAHI TEADLFHTIETLMRINAHSRGNAPPEGLPQLMEVVRSNYEAMIDRAHGGPNF  
MMHSGISQASEYDDPPGLREKAEYLLREWVNLYHSAAAGRDSTKAFSAFVGMHQQGILKTDLLITRFFRLCT  
EMCVEISYRAQAEQQHNPAANPTMIRAKCYHNLDAFVRLIALLVKHSGEATNTVTKINLLNKVLGIVVGVLLQ  
DHDVRQSEFQQLPYHRIFIMLLELNAPEHVLETINFQTLTAFACNIHSTS  
>rs264083360\_ENSMUSP00000148807\_c.6043:C>TTC\_p.T2015ins-fs  
ENSMUST00000211887.2|Cnot1-203|ENSMUSG00000036550|-|chr8:g.96455355:G>GAA  
MNLDSLALSQISYLVNDLTKKNYRASQQEIQHIVNRHGPEADRHLRLCLFSHVDFSGDGKSSGKDFHQFLI  
QECASLITKPNFISTLSYAI DNPLHYQKSLKPAPHLFAQLSKVLKLSKVQEVIFGLALLNSSSPDLRGFAAQF  
IKQKLPDLLRSYIDADVSGNQEGGFQDIAIEVLHLLLSHLLFGQKGAFAVGVQEQIDAFLLKTLRRDFPQERC  
VLAPELLYPEKRDILMDRIIPDSGGVAKTMMESSLADFMQEVGVYGFACASIEECRNIIMQFGVREVTAAQVAR  
GMMARTHSGSLTDGIPLQSI SAPSGIWSGDKDKSEGAQAHTWNVEVLIDVLKELNPSLNFKEVYIELDHPGFQ  
IRDSKGLHNVVYGIQRGLGMEVFPVDFIYRPWKHAEGQLSFIQHSLINPEVFCFADYPCHTVATDILKAPPED  
DNREIATWKSLDLIESLLRLAEVQYEQVKQLFSFPIKHCPCDMLVLALLQINTSWHTLRHELISTLMPIFLGN  
HPNSAIILHYAWHGQSQSPSIRQLIMHAMAWEYMRGEQYDQAKLSRILDVAQDLKALSMLLNGTPFAFVIDLA  
ALASRREYLKLDKWLTDKIREHGEPFIQACMTFLKRRCP SILGGLAPEKDPKSAQLPAETLATMLACLQACA  
GSVSVQELSETILTMVANCNSVMNKARQPPPGVMPKGRPPSASSLDAISPVQIDPLAGMASLSIGGSAAPHTQS  
MQGFPPNLGSAFSTPQSPAKAFPLSTPNQTTAFSGIGGLSSQLPVGGLGTGSLTGIGTGALGLPAVNNDPFV  
QRKLTSGLNQPTFQQTDLSQVWPEANQHFSKEIDDEANSYFQRIYNHPPHTMSVDEVLEMLQRFKDSI  
KREREVFNCLRNLFEEYRFFPQYDPKELHITACLFGGIIEKGLVTYMALGLALRYVLEALRKPFGSKMYFYG  
IAALDRFKNRLKDYQYQCQLASISHFMQFPHHLQEYIEYQQSRDPPVKMQGSITTPGSIALAQAQAQVPAK  
APLAGQVNTMVTSTTTTVAKTVTVTKPTGVSFKKDVPPSINTTNIDTLLVATDQTERIVEPPENIQEKIAFI  
FNNLSQSNMTQKVEELKETVKEEFMPWVSQYLVMKRVSIEPNFHSLSYSNFLDTLKNPEFNKMLNETYRNI  
KVLTLSDKAAANFSDRSLLKLNGLHWLGMITLAKNKPI LHDTLDVKSLLLEAYVKGQQEELLYVVPFVAKVLESS  
IRSLVFRPPNPWTMAIMNVLAELHQEHDLKLNKFEIEVLCKNLALDINELKPGNLLKDKDRLKNLDEQLSAP  
KKDVQPEELPAITTTTTSTPATSTTCTATVPPQPQYSYHDINVYSLAGLAPHITLNPTIPLFQAHPQLKQC  
VRQAIERAVQELVHPVVDRSIIKIAMTTCEQIVRKDFALDSEESRMRIAAHHMMRNLTAGMAMITCREPLLSI  
STNLKNSFASALRTASPPQREMMDQAAAQLAQDNCELACCFIQKTAVEKAGPEMDKRLATEFELRKHARQEGR  
RYCDPVVLTQYQAERMPEQIRLKVGGVDPKQLAVYEEFARNVPGFLPTNDLSQPTGFLAQPMKQAWATDDVAQI  
YDKCITELEQHLHAIPPTLAMNPQAALRSLLLEVVLRSNSRDAIAALGLLQKAVEGLLDATSGADADLLRY  
RECHLLVLKALQDGRAYGSPWCNKQITRCLIECRDEYKYNVEAVEELLIRNHLVNMQQYDLHLAQSMENGLNYM  
AVAFAMQLVKILLVDERSVAHI TEADLFHTIETLMRINAHSRGNAPPEGLPQLMEVVRSNYEAMIDRAHGGPNF  
MMHSGISQASEYDDPPGLREKAEYLLREWVNLYHSAAAGRDSTKAFSAFVGMHQQGILKTDLLITRFFRLCT  
EMCVEISYRAQAEQQHNPAANPTMIRAKCYHNLDAFVRLIALLVKHSGEATNTVTKINLLNKVLGIVVGVLLQ  
DHDVRQSEFQQLPYHRIFIMLLELNAPEHVLETINFQTLTAFACNIHSTS  
>rs264083360\_ENSMUSP00000096073\_c.6064:C>TTC\_p.T2022ins-fs  
ENSMUST00000098473.11|Cnot1-202|ENSMUSG00000036550|-  
|chr8:g.96455355:G>GAA  
MNLDSLALSQISYLVNDLTKKNYRASQQEIQHIVNRHGPEADRHLRLCLFSHVDFSGDGKSSGKDFHQFQF  
LIQECASLITKPNFISTLSYAI DNPLHYQKSLKPAPHLFAQLSKVLKLSKVQEVIFGLALLNSSSPDLRGFAA  
QFIKQKLPDLLRSYIDADVSGNQEGGFQDIAIEVLHLLLSHLLFGQKGAFAVGVQEQIDAFLLKTLRRDFPQERC  
PVVLAPELLYPEKRDILMDRIIPDSGGVAKTMMESSLADFMQEVGVYGFACASIEECRNIIMQFGVREVTAAQVAR

VLGMMARTHSGSLTDGIPLQSIAPGSGIWSGDGKDKSEGAQAHTWNVEVLIDVLKELNPSLNFKEVITYELDHPG  
FQIRDSKGLHNVVYGIQRGLGMEVFPVDFIYRPWKHAEGQLSFIQHSLINPEVFCFADYPCHTVATDILKAPP  
EDDNREIATWKSLLDIESLLRLAEVGGQYEQVKQLFSFPIKHC PDMLVLALLQINTSWHTLRHELISTLMPIFL  
GNHPNSAIILHYAWHGQSQSPSIRQLIMHAMAWEYMRGEQYDQAKLSRILDVAQDLKALSMLLNGTFFAFVID  
LAALASRREYLKLDKWLTDKIREHGEPFIQACMTFLKRRCP SILGGLAPEKDPKSAQLPAETLATMLACLQA  
CAGSVSQELSETILTMVANCNSVMNKARQPPPGVMPKGRPPSASSLDAISPVQIDPLAGMASLSIGGSAAPHT  
QSMQGFPPNLGSAFSTPQSPAKAFPPPLSTPNQTTAFSGIGGLSSQLPVGGLGTGSLTGIGTGALGLPAVNNDF  
FVQRKLGTSGLNQPTFQQSKMKPSDLSQVWPEANQHFSKEIDDEANSYFQRIYNHPPHPTMSVDEVLEMLQRF  
KDSTIKREREVFNCLRNLFEEYRFFPQYDPKELHITACLFGGIIEKGLVTYMALGLALRYVLEALRKPFGSK  
MYYFGIAALDRFKNRLKDY PQY CQH LASI SHFMQFP HHLQ EYIEY GQQSRDPPVKMQGSITTPGSI ALAQAQA  
QAQVPAKAPLAGQVNTMVTSTTTTVAKTVTVTKPTGVSFKKDVPPSINTTNIDTLLVATDQTERIVEPPENI  
QEKIAFIFNNLSQSNMTQKVEELKETVKEEFMPWVSQYLV MKRVSIEPNFHSLSYSNFLD TLKNPEFNKMLVNE  
TYRNIVLLTSDKAAANFSDRSLLKNLGHWLGMITLAKNKPI LH TDLDVKSLLLEAYVKGQOELLYVVPFVAK  
VLESSIRSLVFRPPNPWTMAIMNVLAELHQEHDLKLNLFKFEIEVLCKNLALDINELKPGNLLKDKDRKLNLDE  
QLSAPKKDVKQPEELPAITTTTSTTTPATSTTCTATVPPQPQYSYHDINVYSLAGLAPHITLNPITPLFQAHP  
QLKQCVRQAIERAVQELVHPVVDRSIKIAMTTCEQIVRKDFALDSEESRMRIA AHHMMRNLTAGMAMITCREP  
LLMSISTNLKNSFASALRTAS PQQREMMDQAAAQLAQDNCELACCFIQKTAVEKAGPEMDKRLATEFELRKHAR  
RQEGRRYCDPVVLT YQAERMPEQIRLKVGGVDPKQLAVYEEFARNVPGFLPTNDLSQPTGFLAQPMKQAWATD  
DVAQIYDKCITELEQHLHAI PPTLAMNPQAQALRSLLLEVVL SRNSRDAIAALGLLQKAVEGLLDATSGADAD  
LLLRYRECHLLVLKALQDGRAYGSPWCNKQITRCLIECRDEYKYNVEAVELLIRNHLVNMQQYDLHLAQSMEN  
GLNYMAVAFAMQLVKILLVDERSVAHIT EADLFHTIETLMRINAHSRGAPEGLPQLMEVVRSNYEAMIDRAH  
GGPNFMMHSGISQASEYDDPPGLREKAEYLLREWVNLYHSAAAGRDSTKAFSAFVGMHQQGILKTDLITRF  
FRLCTEMCVEISYRAQAEQQHNPAANPTMIRAKCYHNLD AFVRLIALLVKHSGEATNTVTKINLLNKVLGIVV  
GVLLQDHDVQRQSEFQQLPYHRIFIMLLELNAPEHVLETINFQTLTAFCNHSTS  
>rs240993791\_ENSMUSP00000063565\_c.4114:A>G\_p.N1372S  
ENSMUST00000068452.10|Cnot1-201|ENSMUSG00000036550|-|chr8:g.96469739:T>C  
MNLDSLALSLALSQISYLVNDLTKKNYRASQQEIQHIVNRHGPEADRHLRLCLF SHVDFSGDGKSSGKDFHQTF  
LIQECASLITKPNFISTLSY AIDNPLHYQKSLKPAPHLFAQLSKVLKLSKVQEVIFGLALLNSSSPDLRGFAA  
QFIKQKLPDLLRSYIDADVSGNQEGGFQDIAIEVLHLLLSHLLFGQKGAFGVGGQEQIDAFKTLRRDFPQERC  
PVVLAPLLYPEKRDILMDRILPDSGGVAKTMMESSLADFMQEVGYGFCASIEECRNIIMQFGVREVTAAQVAR  
VLGMMARTHSGSLTDGIPLQSIAPGSGIWSGDGKDKSEGAQAHTWNVEVLIDVLKELNPSLNFKEVITYELDHPG  
FQIRDSKGLHNVVYGIQRGLGMEVFPVDFIYRPWKHAEGQLSFIQHSLINPEVFCFADYPCHTVATDILKAPP  
EDDNREIATWKSLLDIESLLRLAEVGGQYEQVKQLFSFPIKHC PDMLVLALLQINTSWHTLRHELISTLMPIFL  
GNHPNSAIILHYAWHGQSQSPSIRQLIMHAMAWEYMRGEQYDQAKLSRILDVAQDLKALSMLLNGTFFAFVID  
LAALASRREYLKLDKWLTDKIREHGEPFIQACMTFLKRRCP SILGGLAPEKDPKSAQLPAETLATMLACLQA  
CAGSVSQELSETILTMVANCNSVMNKARQPPPGVMPKGRPPSASSLDAISPVQIDPLAGMASLSIGGSAAPHT  
QSMQGFPPNLGSAFSTPQSPAKAFPPPLSTPNQTTAFSGIGGLSSQLPVGGLGTGSLTGIGTGALGLPAVNNDF  
FVQRKLGTSGLNQPTFQQTDLSQVWPEANQHFSKEIDDEANSYFQRIYNHPPHPTMSVDEVLEMLQRFKDS  
TIKREREVFNCLRNLFEEYRFFPQYDPKELHITACLFGGIIEKGLVTYMALGLALRYVLEALRKPFGSKMYYFG  
IAALDRFKNRLKDY PQY CQH LASI SHFMQFP HHLQ EYIEY GQQSRDPPVKMQGSITTPGSI ALAQAQAQAQV  
AKAPLAGQVNTMVTSTTTTVAKTVTVTKPTGVSFKKDVPPSINTTNIDTLLVATDQTERIVEPPENIQEKIA  
FIFNNLSQSNMTQKVEELKETVKEEFMPWVSQYLV MKRVSIEPNFHSLSYSNFLD TLKNPEFNKMLVNETYRNI  
KVLLTSDKAAANFSDRSLLKNLGHWLGMITLAKNKPI LH TDLDVKSLLLEAYVKGQOELLYVVPFVAKVLESS  
IRSLVFRPPNPWTMAIMNVLAELHQEHDLKLNLFKFEIEVLCKNLALDINELKPGNLLKDKDRKLNLDEQLSAP  
KKDVKQPEELPAITTTTSTTTPATSTTCTATVPPQPQYSYHDINVYSLAGLAPHITLSPITPLFQAHPQLKQC  
VRQAIERAVQELVHPVVDRSIKIAMTTCEQIVRKDFALDSEESRMRIA AHHMMRNLTAGMAMITCREP  
LLMSISTNLKNSFASALRTAS PQQREMMDQAAAQLAQDNCELACCFIQKTAVEKAGPEMDKRLATEFELRKHAR  
RQEGRRYCDPVVLT YQAERMPEQIRLKVGGVDPKQLAVYEEFARNVPGFLPTNDLSQPTGFLAQPMKQAWATD  
DVAQIYDKCITELEQHLHAI PPTLAMNPQAQALRSLLLEVVL SRNSRDAIAALGLLQKAVEGLLDATSGADAD  
LLLRYRECHLLVLKALQDGRAYGSPWCNKQITRCLIECRDEYKYNVEAVELLIRNHLVNMQQYDLHLAQSMEN  
GLNYMAVAFAMQLVKILLVDERSVAHIT EADLFHTIETLMRINAHSRGAPEGLPQLMEVVRSNYEAMIDRAH  
GGPNFMMHSGISQASEYDDPPGLREKAEYLLREWVNLYHSAAAGRDSTKAFSAFVGMHQQGILKTDLITRF  
FRLCTEMCVEISYRAQAEQQHNPAANPTMIRAKCYHNLD AFVRLIALLVKHSGEATNTVTKINLLNKVLGIVV  
GVLLQDHDVQRQSEFQQLPYHRIFIMLLELNAPEHVLETINFQTLTAFCNHSTS  
RMLAHTPQQKQWPMYAQLLIDLFKYLAPFLRNVELTKPMQILYKGLTRVLLVLLHDFEFLCDYHYGFCDVIP  
PNCIQLRNLI LSAFPRNMRLPDPFTPNLKV DMLSEINIAPRI LTNFTGVMPPQFKKDLDSYKTRSPVTF  
LSD LRSNLQVSNPEGNRYNLQLINALVLYVGTQAI AIAHIN KGS TSPMSSTITHSAHMDIFQNLAVDLDTEGRYLF  
FLN AIANQLRYPNSH THYF SCTMLYLFAEANTEA IQEQITRLFQSVAQC CMGQKQAQQVMEGTGAS\*

>rs240993791\_ENSMUSP00000148807\_c.4108:A>G\_p.N1370S  
 ENSMUST00000211887.2|Cnot1-203|ENSMUSG00000036550|-|chr8:g.96469739:T>C  
 MNLDLSLALSQISYLVNLTKKNYRASQQEIQHIVNRHGPEADRHLRCLFVDFSGDGKSSGKDFHQFLI  
 QECASLITKPNFISTLSYAIIDNPLHYQKSLKPAPHLFAQLSKVLKLSKVQEVIFGLALLNSSSPDLRGFAAQF  
 IKQKLPDLLRSYIDADVSGNQEGGFQDIAIEVLHLLLSHLLFGQKGAFGVQEQIDAFKTLRRDFPQERC  
 VLAPELLYPEKRDILMDRILPDSGGVAKTMMESSLADFMQEVGYGFCASIEECRNIIMQFGVREVTAAQVARV  
 GMMARTHSGSLTDGIPLOSIAPGSGIWSGDKDKSEGAQAHTWNVVLIIDVLKELNPSLNFKEVYELDHGPFQ  
 IRDSKGLHNVVYGIQIRGLGMEVFPVDFIYRPWKHAEGQLSFIQHSLINPEVFCFADYPCHTVATDILKAPP  
 DNREIATWKSLLDIESLLRLAEVQYEQVKQLFSFPIKHC PDMLV LALLQINTSWHTLRHELISTLMPIFLGN  
 HPNSAII LHAWHGQGS PSIRQLIMHAMA EWYMRGEQYDQAKLSRILDVAQDLKALSMLLNGTPFAFVIDLA  
 ALASRREYLKLDKWLTDKIREHGEPFIQACMTFLKRRCP SILGGLAPEKDKPKSAQLPAETLATMLACLQACA  
 GSVSQELSETILTMVANC SNVMNKARQPPPGVMPKGRPPSASSLDAISPVQIDPLAGMASLSIGGSAAPHTQS  
 MQGFPPNLGSAFSTPQSPAKAF PPLSTPNQTTAFSGIGGLSSQLPVGGLGTGSLTGIGTGALGLPAVNNDFV  
 QRKLGTSGLNQPTFQQTDL SQVWPEANQHFSKEIDDEANSYFQRIYNHPPHTMSVDEVLEMLQRFKDKSTIKR  
 EREVFNCMLRNLFE EYRFFPQY PDKELHITACLFGGIIEKGLVTYMALGLALRYVLEALRKPFGSKMYFVGI  
 ALDRFKNRLKDY PQY CQH LASHFMQFP HHLQ EYIEY GQSRDPPVKMQGSITTPGSI ALAQAQAQVPAK  
 APLAGQVNTMVTSTTTTVAKTVTVTKPTGVSFKKDVPPSINTTNIIDTLLVATDQTERIVEPPENIQEKIAFI  
 FNNLSQSNMTQKVEELKETVKEEFMPWVSQYLVMKRVSIEPNFHSLSYSNFLD TLKNPEFNKMLVNETYRNIKV  
 LLTSDKAAANFSDRSLLKNLGHWLGMITLAKNKPI LH TDLDVKSLLLEAYVKGQOQELLYVVPFVAKVLESSIR  
 SLVFRPPNPWTMAIMNVLAELHQEHDLKLNKFEIEVLCKNLALDINELKPGNLLKDKDRKLNLDLQSLAPKK  
 DVKQPEELPAITTTTTSTPATSTTCTATVPPQY SYHDINVYSLAGLAPHITLSPTIPLFQAHPQLKQCVR  
 QAIERAVQELVHPVVDRSIKIAMTTC EQIVRKDFALDSEESRMRIAAHMMRNLTAGMAMITCREP LLSMIST  
 NLKNSFASALRTAS PQQREMMDQAAAQLAQDNCELACCFIQKTAVEKAGPEMDKRLATEFELRKHARQEGRRY  
 CDPVVLTYQAERMPEQIRLKVGGVDPKQLAVYEEFARNVPGFLPTNDLSQPTGFLAQPMKQAWATDDVAQIYD  
 KCITELQHLHAI PPTLAMNPQAALRSLLLEVVL SRNSRDAIAALGLLQKAVEGLLDATSGADADLLRYRE  
 CHLLVLKALQDGRAYS PWCNKQITRCLIECRDEYKYNVEAVE LLIRNHLVNMQQYDLHLAQSMENGLNMYAV  
 AFAMQVLTVKILLVDERSVAHIT EADLFHTIETLMRINAHSRGNAP EGLPQLMEVVRNSY EAMIDRAHGPNFMM  
 HSGISQASEYDDPPGLREKAEYLLREWVNLYHSAAAGRDSTKAFSAFVGMHQOQGILKTDLLITRFFRLCTEM  
 CVEISYRAQAEQQHNPANPTMIRAKCYHNLDAFVRLIALLVKHSGEATNTVTKINLLNKVLGIVVGVLLQDH  
 DVRQSEFQQLPYHRIFIMLLLELNAPEHVLETINFQTLTAFNCNTFHILRPTKAPGFVYAWLELISHRIFIARM  
 LAHTPQQKGWPMYAQLLIDLFKYLA PFLRNVELTKPMQILYKGTLRVLLVLLHDFPEFLCDYHYGFCDVIPP  
 CIQLRNLIILSAFPRNMR LDPFPTNLKVDMLSEINIAPRILTNFTGVMPPQFKKDLDSYKTRSPVTFFLSDLR  
 SNLQVSNPEGNRYNLQLINALVLYVGTQAI AH IHKNGSTPSMSTITHSAHMDIFQNLAVDLDTTEGRYLFNAI  
 ANQLRYPNSH THYF SCTM LYLFAEANTEA IQEQITRVLLERLIVNRPHPWGLLITFIELIKNPAFKFWNHEFV  
 HCAPEIEKLFQSV AQCCMGQKQAQVMEGTGAS\*

>rs240993791\_ENSMUSP00000148735\_c.4129:A>G\_p.N1377S  
 ENSMUST00000213006.2|Cnot1-216|ENSMUSG00000036550|-|chr8:g.96469739:T>C  
 MNLDLSLALSQISYLVNLTKKNYRASQQEIQHIVNRHGPEADRHLRCLFVDFSGDGKSSGKDFHQFQF  
 LIQECASLITKPNFISTLSYAIIDNPLHYQKSLKPAPHLFAQLSKVLKLSKVQEVIFGLALLNSSSPDLRGF  
 AAQFQIKQKLPDLLRSYIDADVSGNQEGGFQDIAIEVLHLLLSHLLFGQKGAFGVQEQIDAFKTLRRDFPQ  
 ERCVVLAPLLYPEKRDILMDRILPDSGGVAKTMMESSLADFMQEVGYGFCASIEECRNIIMQFGVREVTAAQ  
 VARVLGMMARTHSGSLTDGIPLOSIAPGSGIWSGDKDKSEGAQAHTWNVVLIIDVLKELNPSLNFKEVYEL  
 DHGPFQIRDSKGLHNVVYGIQIRGLGMEVFPVDFIYRPWKHAEGQLSFIQHSLINPEVFCFADYPCHTVATD  
 ILKAPPEDDNREIATWKSLLDIESLLRLAEVQYEQVKQLFSFPIKHC PDMLV LALLQINTSWHTLRHELIS  
 TLMPIFLGNLAALASRREYLKLDKWLTDKIREHGEPFIQACMTFLKRRCP SILGGLAPEKDKPKSAQLPAET  
 LATMLACLQACAGSVSQELSETILTMVANC SNVMNKARQPPPGVMPKGRPPSASSLDAISPVQIDPLAGMA  
 SLSIGGSAAPHTQSMQGFPPNLGSAFSTPQSPAKAF PPLSTPNQTTAFSGIGGLSSQLPVGGLGTGSLTGIG  
 TGALGLPAVNNDFVQQRKLGTSGLNQPTFQQSKMPSDLSQVWPEANQHFSKEIDDEANSYFQRIYNHPPHT  
 MSVDEVLEMLQRFKDKSTIKREVFNCMLRNLFE EYRFFPQY PDKELHITACLFGGIIEKGLVTYMALGLAL  
 RYVLEALRKPFGSKMYFVGI AALDRFKNRLKDY PQY CQH LASHFMQFP HHLQ EYIEY GQSRDPPVKMQ  
 GSI TTPGSI ALAQAQAQVPAKAPLAGQVNTMVTSTTTTVAKTVTVTKPTGVSFKKDVPPSINTTNIIDTLL  
 VATDQTERIVEPPENIQEKIAFI FNNLSQSNMTQKVEELKETVKEEFMPWVSQYLVMKRVSIEPNFHSLSY  
 SNFLD TLKNPEFNKMLVNETYRNIKVLLTSDKAAANFSDRSLLKNLGHWLGMITLAKNKPI LH TDLDVKS  
 LLLEAYVKGQOQELLYVVPFVAKVLESSIRSLVFRPPNPWTMAIMNVLAELHQEHDLKLNKFEIEVLCKNL  
 ALDINELKPGNLLKDKDRKLNLDLQSLAPKKDVKQPEELPAITTTTTSTPATSTTCTATVPPQY SYHDINV  
 YSLAGLAPHITLSPTIPLFQAHPQLKQCVRQAIERAVQELVHPVVDRSIKIAMTTC EQIVRKDFALDSEES  
 RMRIAAHMMRNLTAGMAMITCREP LLSMISTNLKNSFASALRTAS PQQREMMDQAAAQLAQDNCELACCF  
 IQKTAVEKAGPEMDKRLATEFELRKHA



RQEGRRYCDPVVLTQYAERMPEQIRLKVGGVDPKQLAVYEEFARNVPGFLPTNDLSQPTGFLAQPMKNWSSTY  
 TPFHPLWP\*  
 >rs240993791\_ENSMUSP00000096073\_c.4129:A>G\_p.N1377S  
 ENSMUST00000098473.11|Cnot1-202|ENSMUSG00000036550|-|chr8:g.96469739:T>C  
 MNLDSLALSQISYLVNDLTKKNYRASQQEIQHIVNRHGPEADRHLRLCLFVSHVDFSGDGKSSGKDFHQTF  
 LIQECASLITKPNFISTLSYIDNPLHYQKSLKPAPHLFAQLSKVLKLSKVQEVIFGLALLNSSSPDLRGFAA  
 QFIKQKLPDLLRSYIDADVSGNQEGGFQDIAIEVLHLLLSHLLFGQKGAFGVQEQIDAFKTLRRDFPQERC  
 PVLAPLLYPEKRDILMDRILPDSGGVAKTMMESSLADFMQEVGYGFCASIEECRNIIMQFGVREVTAAQVAR  
 VLGMMARTHSGLTDGIPLQSIAPGSGIWSDGKDKSEGAQAHTWNVEVLIDVLKELNPSLNFKEVTEYELDHPG  
 FQIRDSKGLHNVVYGIQRGLGMEVFPVDFIYRPWKHAEGQLSFIQHSLINPEVFCFADYPCHTVATDILKAPP  
 EDDNREIATWKSLLDIESLLRLAEVQYEQVKQLFSFPIKHCPCDMLVLALLQINTSWHTLRHELISTLMPIFL  
 GNHPNSAIIHYAWHGQGSPIRQLIMHAMAEWYMRGEQYDQAKLSRILDVAQDLKALSMLLNGTFFAFVID  
 LAALASRREYLKLDKWLTDKIREHGEPFIQACMTFLKRRCP SILGGLAPEKDQPKSAQLPAETLATMLACLQA  
 CAGSVSQELSETILTMVANCNSVMNKARQPPPGVMPKGRPPSASSLDAISPVQIDPLAGMASLSIGGSAAPHT  
 QSMQGFPPNLGSAFSTPQSPAKAFPPPLSTPNQTTAFSGIGGLSSQLPVGGGGLTGSALTGIGTGALGLPAVNNDP  
 FVQRKLGTSGLNQPTFQQSKMKPSDLSQVWPEANQHFSSKEIDDEANSYFQRIYNHPPHPTMSVDEVLEMLQRF  
 KDSTIKRREVFNCMLRNLFEYRFFPQYDPKELHITACLFGGIEKGLVTYMALGLALRYVLEALRKPFGSK  
 MYYFGIAALDRFKNRLKDYPCYQHLASISHFMQFPHHLQEYIEYGQQRDPPVKMQGSIITTPGSIALAQAQA  
 QAQVPAKAPLAGQVNTMVTSTTTTVAKTVTVTKPTGVSFKKDVPPSINTTNIDTLLVATDQTERIVEPPENI  
 QEKIAFIFNNLSQSNMTQKVEELKETVKEEFMPWVSQYLVMKRVSIEPNFHSLSYNFLDITLKNPEFNKMLVNE  
 TYRNIKVLTSKAAANFSDRSLLKNLGHWLGMITLAKNKPI LHTDLVKSLLLEAYVKGQOQELLYVVPFVAK  
 VLESSIRSLVFRPPNPWTMAIMNVLAELHQEHDLKLNLFKFEIEVLCKNLALDINELKPGNLLKDKDRKLNLE  
 QLSAPKKDVQPEELPAITTTTTSTTPATSTTCTATVPPQPYSYHDINVYSLAGLAPHITLPTIPLFQAHP  
 QLKQCVRQAIERAVQELVHPVDRSIIKIAMTTCEQIVRKDFALDSEESRMRIAAHMMRNLTAGMAMITCREP  
 LLMSISTNLKNSFASALRTASPQQREMMDQAAAQLADNCELACCFIQKTAVEKAGPEMDKRLATEFELRKHA  
 RQEGRRYCDPVVLTQYAERMPEQIRLKVGGVDPKQLAVYEEFARNVPGFLPTNDLSQPTGFLAQPMKQAWATD  
 DVAQIYDKCITELYQHHLHAIPTLAMNPQAALRSLLLEVVLRSNRDAIAALGLLQKAVEGLLDATSGADAD  
 LLLRYRECHLLVLKALQDGRAYGSPWCNKQITRCLIECRDEYKYNVEAVELLIRNHLVNMQQYDLHLAQSMEN  
 GLNYMAVAFAMQLVKILLVDERSVAHITTEADLFHTIETLMRINAHSRGNAPGLPQLMEVVRNRYEAMIDRAH  
 GGNPFMMHSGISQASEYDDPPGLREKAEYLLREWVNLHSAAGRDSTKAFSAFVGMHQGGIILKTDLITRF  
 FRLCTEMCVEISYRAQAEQQHNPAANPTMIRAKCYHNLDAFVRLIALLVKHSGEATNTVTKINLLNKVLGIVV  
 GVLLQDHDVQRSEFQQLPYHRIFIMLLLELNAPEHVLETINFQTLTAFCNTFHILRPTKAPGFVYAWLELISH  
 RIFFIARMLAHTPQKQGWPMYAQLLIDLKYLAPFLRNVELTKPMQIILYKGTLRVLLVLLHDFPEFLCDYHYGF  
 CDVIPPNCIQLRNLILSAFPRNMLPDPFTPNLKVDMLEINIAPIRLTNFTGVMPPQFKKDLDSYLKTRSPV  
 TFLSDLRSNLQVSNPEGNRYNLQINALVLYVGTQAIHAIHNKGSTPSMSTITHSAHMDIFQNLAVDLDTTEGR  
 YLFLNAIANQLRYPNSHTHYFSCITMLYLFAEANTEAIEQEQITRVLLERLIVNRPHPWGLLITFIELIKNPAFK  
 FWNHEFVHCAPEIEKLFQSVQCCMGKQAQQVMEGTGAS\*  
 >rs32184217\_ENSMUSP00000063565\_c.1554:A>T\_p.I519F  
 ENSMUST00000068452.10|Cnot1-201|ENSMUSG00000036550|-|chr8:g.96489647:T>A  
 MNLDSLALSQISYLVNDLTKKNYRASQQEIQHIVNRHGPEADRHLRLCLFVSHVDFSGDGKSSGKDFHQTF  
 LIQECASLITKPNFISTLSYIDNPLHYQKSLKPAPHLFAQLSKVLKLSKVQEVIFGLALLNSSSPDLRGFAA  
 QFIKQKLPDLLRSYIDADVSGNQEGGFQDIAIEVLHLLLSHLLFGQKGAFGVQEQIDAFKTLRRDFPQERC  
 PVLAPLLYPEKRDILMDRILPDSGGVAKTMMESSLADFMQEVGYGFCASIEECRNIIMQFGVREVTAAQVAR  
 VLGMMARTHSGLTDGIPLQSIAPGSGIWSDGKDKSEGAQAHTWNVEVLIDVLKELNPSLNFKEVTEYELDHPG  
 FQIRDSKGLHNVVYGIQRGLGMEVFPVDFIYRPWKHAEGQLSFIQHSLINPEVFCFADYPCHTVATDILKAPP  
 EDDNREIATWKSLLDIESLLRLAEVQYEQVKQLFSFPIKHCPCDMLVLALLQINTSWHTLRHELISTLMPIFL  
 GNHPNSAFILHYAWHGQGSPIRQLIMHAMAEWYMRGEQYDQAKLSRILDVAQDLKALSMLLNGTFFAFVID  
 LAALASRREYLKLDKWLTDKIREHGEPFIQACMTFLKRRCP SILGGLAPEKDQPKSAQLPAETLATMLACLQA  
 CAGSVSQELSETILTMVANCNSVMNKARQPPPGVMPKGRPPSASSLDAISPVQIDPLAGMASLSIGGSAAPHT  
 QSMQGFPPNLGSAFSTPQSPAKAFPPPLSTPNQTTAFSGIGGLSSQLPVGGGGLTGSALTGIGTGALGLPAVNNDP  
 FVQRKLGTSGLNQPTFQQTDLQVWPEANQHFSSKEIDDEANSYFQRIYNHPPHPTMSVDEVLEMLQRFKDS  
 TIKRREVFNCMLRNLFEYRFFPQYDPKELHITACLFGGIEKGLVTYMALGLALRYVLEALRKPFGSKMYYFG  
 IAALDRFKNRLKDYPCYQHLASISHFMQFPHHLQEYIEYGQQRDPPVKMQGSIITTPGSIALAQAQAQAQV  
 AKAPLAGQVNTMVTSTTTTVAKTVTVTKPTGVSFKKDVPPSINTTNIDTLLVATDQTERIVEPPENIQEKIA  
 FIFNNLSQSNMTQKVEELKETVKEEFMPWVSQYLVMKRVSIEPNFHSLSYNFLDITLKNPEFNKMLVNETYRNI  
 KVLTSKAAANFSDRSLLKNLGHWLGMITLAKNKPI LHTDLVKSLLLEAYVKGQOQELLYVVPFVAKVLESS  
 IRSLVFRPPNPWTMAIMNVLAELHQEHDLKLNLFKFEIEVLCKNLALDINELKPGNLLKDKDRKLNLEQLSAP  
 KDKDVQPEELPAITTTTTSTTPATSTTCTATVPPQPYSYHDINVYSLAGLAPHITLNPITPLFQAHPQLKQC

VRQAIERAVQELVHPVVDRS IKIAMTTCEQIVRKDFALDSEESRMRIA AHMMRNLTAGMAMITCREP LLMSI  
STNLKNSFASALRTAS PQQREMMDQAAAQLAQDNCELACCFIQKTAVEKAGPEMDKRLATEFELRKHARQEGR  
RYCDPVVLTYYQAERMPEQIRLKVGGVDPKQLAVYEEFARNVPGFLPTNDLSQPTGFLAQPMKQAWATDDVAQI  
YDKCITELEQHLHAI PPTLAMNPQAQALRSLLEVVVLSRNSRDAIAALGLLQKAVEGLLDATSGADADLLLRY  
RECHLLVLKALQDGRAYGSPWCNKQITRCLIECRDEYKYNVEAVE LLIRNHLVNMQQYDLHLAQSMENGLNYM  
AVAFAMQLVKILLVDRSVAHIT EADLFHTIETLMRINAHSRGNAP EGLPQLMEVVRSNYEAMI DRAHGGPNF  
MMHSGISQASEYDDPPGLREKAEYLLREWVNLYHSAAAGRDSTKAFSAFVGMHQQGILKTDLLITRFFRLCT  
EMCVEISYRAQAEQQHNPAANPTMIRAKCYHNLDAFVRLIALLVKHSGEATNTVTKINLLNKVLGIVVGVLLQ  
DHDVRSQSEFQQLPYHRIFIMLLLELNAPEHVLETINFQTLTAFNCNTHILRPTKAPGFVYAWLELISHRIFIA  
RMLAHTPQQKGWPMYAQLLIDLFKYLAPFLRNVELTKPMQILYKGLTRVLLVLLHDFPEFLCDYHYGFCDVIP  
PNCIQLRNILSAFPRNMLPDPFTPNLKVDMLEINIAPRILTNFTGVMPPQFKKDLDSYKTRSPVTFSLD  
LRSNLQVSNPEGNRYNLQLINALVLYVGTQAI AIAHINKGSTPSMSTITHSAHMDIFQNLAVDLDT EGRYLF LN  
AIANQLRYPNSH THYFSC TMLYLFAEANTEA IQEQITRFLQSV AQCCMGQKQAQQVMEGTGAS\*

>rs32184217\_ENSMUSP00000148807\_c.1548:A>T\_p.1517F

ENSMUST00000211887.2|Cnot1-203|ENSMUSG00000036550|-|chr8:g.96489647:T>A  
MNLDSLALSLSQISYLVNDLTKKNYRASQQEIQHIVNRHGPEADRHLRLCLF SHVDFSGDGKSSGKDFHQFLI  
QECASLITKPNFISTLSY AIDNPLHYQKSLKPAPHLFAQLSKVLKLSKVQEVIFGLALLNSSSPDLRGFAAQF  
IKQKLPDLLRSYIDADVSGNQEGGFQDIAIEVLHLLSHLLFGQKGAFGVQEQIDAF LKTLRRDFPQERC  
VLAPLLYPEKRDILMDRILPDSGGVAKTMMESSLADFMQEVGYGFCASIEECRNIIMQFGVREVTAAQVARVL  
GMMARTHSGLTDGIP LQSI SAPGSGIWS DGDKSEGAQAHTWNVEVLIDVLKELNPSLNFKEVTYELDHGPFQ  
IRDSKGLHNVVYGIQRGLGMEVFPVDFIYRPWKHAEGQLSFIQHS LINPEVFCFADYPCHTVATDILKAPPED  
DNREIATWKS LDLIESLLRLAEVGYEQVKQLFSFPIKHC PDMLVLALLQINTSWHTLRHELISTLMPIFLGN  
HPNSAFILHYAWHGQGS PSIRQLIMHAMA EWYMRGEYDQAKLSRILDVAQDLKALSMLNGT PFAFVIDLA  
ALASRREY LKLDKWLTDKIREHGEFFIQACMTFLKRRCP SILGGLAPEKDPKSAQLPAETLATMLACLQACA  
GSVSQELSETILTMVANC SNVMNKARQPPPGVMPKGRPPSASSLDAISPVQIDPLAGMASLSIGGSAAPHTQS  
MQGFPPNLGSAFSTPQSPAKAFPPPLSTPNQTTAFSGIIGLSSQLPVGGLGTGSLTGIGTGA LGLPAVNNDPFV  
QRKLGTSGNLSTPQSTFDLSQVWPEANQHFSKIDDEANSYFQR IYNHPPHPTMAGLQREFKDSTIKR  
EREVFNCLMRNLFF EYRFFPQY PDKELHITACLFGGIIEKGLVTYMALGLALRYVLEALRKPFGSKMYFFGIA  
ALDRFKNRLKDY PQYCOHLASISHFMQFPHHLQ EYIEYQQSRDPPVKMQGSITTPGSIALAQAQAQVPAK  
APLAGQVNTMVTSTTTTVAKT VTKPTGVSFKKDVPPSINTT NIDTLLVATDQTERIVEPPENIQEKIAFI  
FNNLSQSNMTQKVEELKETVKEEFMPWVSQYLVMKRVSIEPNFHSLYSNFLDTLKNPEFNKMVLNETYRN IKV  
LLTSDKAAANFSDRSLLKNLGHWLGMITLAKNKPI LHTDLDVKSLLLEAYVKQQE LLYVVPFVAKVLESSIR  
SLVFRPPNPWTMAIMNVLAELHQEHDLKLNLFKFEIEVLCKNLALDINELKPGNLLKDKDR LKNLDEQLSAPKK  
DVKQPEELPAITTTTSTPATSTTCTATVPPQPQYSYHDINVYSLAGLAPHITLNPTIPLFQAHPQLKQCVR  
QAIERAVQELVHPVVDRS IKIAMTTCEQIVRKDFALDSEESRMRIA AHMMRNLTAGMAMITCREP LLMSI  
STNLKNSFASALRTAS PQQREMMDQAAAQLAQDNCELACCFIQKTAVEKAGPEMDKRLATEFELRKHARQEGR  
RYCDPVVLTYYQAERMPEQIRLKVGGVDPKQLAVYEEFARNVPGFLPTNDLSQPTGFLAQPMKQAWATDDVAQI  
YDKCITELEQHLHAI PPTLAMNPQAQALRSLLEVVVLSRNSRDAIAALGLLQKAVEGLLDATSGADADLLLRY  
RECHLLVLKALQDGRAYGSPWCNKQITRCLIECRDEYKYNVEAVE LLIRNHLVNMQQYDLHLAQSMENGLNYM  
AVAFAMQLVKILLVDRSVAHIT EADLFHTIETLMRINAHSRGNAP EGLPQLMEVVRSNYEAMI DRAHGGPNF  
MMHSGISQASEYDDPPGLREKAEYLLREWVNLYHSAAAGRDSTKAFSAFVGMHQQGILKTDLLITRFFRLCT  
EMCVEISYRAQAEQQHNPAANPTMIRAKCYHNLDAFVRLIALLVKHSGEATNTVTKINLLNKVLGIVVGVLLQ  
DHDVRSQSEFQQLPYHRIFIMLLLELNAPEHVLETINFQTLTAFNCNTHILRPTKAPGFVYAWLELISHRIFIA  
RMLAHTPQQKGWPMYAQLLIDLFKYLAPFLRNVELTKPMQILYKGLTRVLLVLLHDFPEFLCDYHYGFCDVIP  
PNCIQLRNILSAFPRNMLPDPFTPNLKVDMLEINIAPRILTNFTGVMPPQFKKDLDSYKTRSPVTFSLD  
LRSNLQVSNPEGNRYNLQLINALVLYVGTQAI AIAHINKGSTPSMSTITHSAHMDIFQNLAVDLDT EGRYLF LN  
AIANQLRYPNSH THYFSC TMLYLFAEANTEA IQEQITRFLQSV AQCCMGQKQAQQVMEGTGAS\*

>rs32184217\_ENSMUSP00000148735\_c.1554:A>T\_p.1519F

ENSMUST00000213006.2|Cnot1-216|ENSMUSG00000036550|-|chr8:g.96489647:T>A  
MNLDSLALSLSQISYLVNDLTKKNYRASQQEIQHIVNRHGPEADRHLRLCLF SHVDFSGDGKSSGKDFHQFQF  
LIQECASLITKPNFISTLSY AIDNPLHYQKSLKPAPHLFAQLSKVLKLSKVQEVIFGLALLNSSSPDLRGFAA  
QFIKQKLPDLLRSYIDADVSGNQEGGFQDIAIEVLHLLSHLLFGQKGAFGVQEQIDAF LKTLRRDFPQERC  
PVLAPLLYPEKRDILMDRILPDSGGVAKTMMESSLADFMQEVGYGFCASIEECRNIIMQFGVREVTAAQVAR  
VLGMMARTHSGLTDGIP LQSI SAPGSGIWS DGDKSEGAQAHTWNVEVLIDVLKELNPSLNFKEVTYELDHGPF  
FQIRDSKGLHNVVYGIQRGLGMEVFPVDFIYRPWKHAEGQLSFIQHS LINPEVFCFADYPCHTVATDILKAPP  
EDDNREIATWKS LDLIESLLRLAEVGYEQVKQLFSFPIKHC PDMLVLALLQINTSWHTLRHELISTLMPIFL  
GNHPNSAFILHYAWHGQGS PSIRQLIMHAMA EWYMRGEYDQAKLSRILDVAQDLKALSMLNGT PFAFVID

LAALASRREYLKLDKWLTDKIREHGEPFIQACMTFLKRRCP SILGGLAPEKDQPKSAQLPAETLATMLACLQA  
CAGSVSQELSETILTMVANCNSVMNKARQPPPGVMPKGRPPSASSLDAISPVQIDPLAGMASLIGGSAAPHT  
QSMQGFPPNLGSAFSTPQSPAKAF PPLSTPNQTTAFSGIGGLSSQLPVGGLGTGSLTGIGTGALGLPAVNNNDP  
FVQRKLGTSGLNQPTFQOSKMKPSDLSQVWPEANQHFSKEIDDEANSYFQRIYNHPPHPTMSVDEVLEMLQRF  
KDSTIKREREVFNCLRNLFEEYRFFPQYDPKELHITACFLGGIIEKGLVTYMALGLALRYVLEALRKPFGSK  
MYFYGIAALDRFKNRLKDYQYCQHLASISHFMQFPHHLQEYIEYQQSRDPPVKMQGSITTPGSI ALAQAQA  
QAQVPAKAPLAGQVNTMVTSTTTTVAKTVTVTKPTGVSFKKDVPPSINTTNIIDTLLVATDQTERIVEPPENI  
QEKIAFIFNNLSQSNMTQKVEELKETVKEEFMPVWSQYLVMKRVSIEPNFHSLSYNSFLDTLKNPEFNKMLVNE  
TYRNIKVLLTSDKAAANFSDRSLLKNLGHWLGMITLAKNKPI LHTDLDVKSLLLEAYVKGQOELLYVVPFVAK  
VLESSIRSLVFRPPNPWTMAIMNVLAELHQEHDLKLNLFKFEIEVLCKNLALDINELKPGNLLKDKDRLNKLNDE  
QLSAPKKDVKQPEELPAITTTTTSTTPATSTTCTATVPPQPQYSYHDINVYSLAGLAPHITLNPTIPLFQAHP  
QLKQCVRAIERAVQELVHPVVDRSIKIAMTTCEQIVRKDFALDSEESRMRIA AHHMMRNLTAGMAMITCREP  
LLMSISTNLKNSFASALRTAS PQQREMMDQAAAQLAQDNCELACCFIQKTAVEKAGPEMDKRLATEFELRKHA  
RQEGRRYCDPVVLTQYQERMPEQIRLKVGGVDPKQLAVYEEFARNVPGFLPTNDLSQPTGFLAQPMKNWSSTY  
TPFHPLWP\*

>rs32184217\_ENSMUSP00000096073\_c.1554:A>T\_p.1519F

ENSMUST00000098473.11|Cnot1-202|ENSMUSG00000036550|-|chr8:g.96489647:T>A  
MNLDSLALSQISYLVNLTCKNYRASQQEIQHIVNRHGPEADRHLRCLF SHVDFSGDGKSSGKDFHQTF  
LIQECASLITKPNFISTLSY AIDNPLHYQKSLKPAPHLFAQLSKVLKLSKVQEVIFGLALLNSSSPDLRGFAA  
QFIKQKLPDLLRSYIDADVSGNQEGGFQDIAIEVLHLLLSHLLFGQKGAFGVQEQIDAFKTLRRDFPQERC  
PVVLAPLLYPEKRDILMDRI LPDSGGVAKTMMESSLADFMQEVGYGFCASIEECRNIIMQFGVREVTAAQVAR  
VLGMMARTHSGLTDGIPLQSI SAPGSGIWSDGKDKSEGAQAHTWNVEVLIDVLKELNPSLNFKEVTEYELDHGP  
FQIRDSKGLHNVVYGIQRGLGMEVFPVDFIYRPWKHAEGQLSFIQHSLINPEVFCFADYPCHTVATDILKAPP  
EDDNREIATWKSLLDIESLLRLAEVQYEQVKQLFSFPIKHC PDMLVLALLQINTSWHTLRHELISLTPMIFL  
GNHPNSAFILHYAWHGQGSPIRQLIMHAMA EWYMRGEQYDQAKLSRILDVAQDLKALSMLNGT PFAFVID  
LAALASRREYLKLDKWLTDKIREHGEPFIQACMTFLKRRCP SILGGLAPEKDQPKSAQLPAETLATMLACLQA  
CAGSVSQELSETILTMVANCNSVMNKARQPPPGVMPKGRPPSASSLDAISPVQIDPLAGMASLIGGSAAPHT  
QSMQGFPPNLGSAFSTPQSPAKAF PPLSTPNQTTAFSGIGGLSSQLPVGGLGTGSLTGIGTGALGLPAVNNNDP  
FVQRKLGTSGLNQPTFQOSKMKPSDLSQVWPEANQHFSKEIDDEANSYFQRIYNHPPHPTMSVDEVLEMLQRF  
KDSTIKREREVFNCLRNLFEEYRFFPQYDPKELHITACFLGGIIEKGLVTYMALGLALRYVLEALRKPFGSK  
MYFYGIAALDRFKNRLKDYQYCQHLASISHFMQFPHHLQEYIEYQQSRDPPVKMQGSITTPGSI ALAQAQA  
QAQVPAKAPLAGQVNTMVTSTTTTVAKTVTVTKPTGVSFKKDVPPSINTTNIIDTLLVATDQTERIVEPPENI  
QEKIAFIFNNLSQSNMTQKVEELKETVKEEFMPVWSQYLVMKRVSIEPNFHSLSYNSFLDTLKNPEFNKMLVNE  
TYRNIKVLLTSDKAAANFSDRSLLKNLGHWLGMITLAKNKPI LHTDLDVKSLLLEAYVKGQOELLYVVPFVAK  
VLESSIRSLVFRPPNPWTMAIMNVLAELHQEHDLKLNLFKFEIEVLCKNLALDINELKPGNLLKDKDRLNKLNDE  
QLSAPKKDVKQPEELPAITTTTTSTTPATSTTCTATVPPQPQYSYHDINVYSLAGLAPHITLNPTIPLFQAHP  
QLKQCVRAIERAVQELVHPVVDRSIKIAMTTCEQIVRKDFALDSEESRMRIA AHHMMRNLTAGMAMITCREP  
LLMSISTNLKNSFASALRTAS PQQREMMDQAAAQLAQDNCELACCFIQKTAVEKAGPEMDKRLATEFELRKHA  
RQEGRRYCDPVVLTQYQERMPEQIRLKVGGVDPKQLAVYEEFARNVPGFLPTNDLSQPTGFLAQPMKQAWATD  
DVAQIYDKCITELEQHLHAI PPTLAMNPQAQALRSLLLEVVLRSNRDAIAALGLLQKAVEGLLDATSGADAD  
LLRYRECHLLVLKALQDGRAYGSPWCNKQITRCLIECRDEYKYNVEAVE LLIRNHLVNMQQYDLHLAQSMEN  
GLNYMAVAFAMQLVKILLVDERSVAHI TEADLFHTIETLMRINAHSRGAPEGLPQLMEVVRSNYEAMIDRAH  
GGPNFMMHSGISQASEYDDPPGLREKAEYLLREWVNLHYSAAAGRDSTKAFSAFVGMHQGGILKTDDLITRF  
FRLCTEMCVEISYRAQAEQQHNPAANPTMIRAKCYHNLD AFVRLIALLVKHSGEATNTVTKINLLNKVLGIVV  
GVLLQDHDVQRSEFQQLPYHRIFIMLLELNAPEHVLETINFQTLTAFCNTHILRPTKAPGFVYAWLELISH  
RIFIAQRLAHTPQKQGWPMYAQLLIDLKYLAPFLRNVELTKPMQILYKGLTRVLLVLLHDFPEFLCDYHYGF  
CDVIPPNCIQLRNLILSAFPRNMR LDPFPTPNLKVDM LSEINIAPRILTNFTGVMPPQFKKDLDSYKTRSPV  
TFLSDLRSNLQVSNEPGNRYNLQ LINALVLYVGTQAI AHIHNGGSTPSMSTITHSAHMDIFQNLAVDLDTTEGR  
YFLFLNAIANQLRYPNSH THYFSC TMLYLFAEANTEAIEQEQITRVLLERLIVNRPHPWGLLITFIELIKNPAFK  
FWNHFEVHCAPEIEKLFQSV AQCCMGQKQAQQVMEGTGAS\*

>rs33010259\_ENSMUSP00000063565\_c.1197:A>T\_p.K400\*

ENSMUST00000068452.10|Cnot1-201|ENSMUSG00000036550|-|chr8:g.96491625:T>A  
MNLDSLALSQISYLVNLTCKNYRASQQEIQHIVNRHGPEADRHLRCLF SHVDFSGDGKSSGKDFHQTF  
LIQECASLITKPNFISTLSY AIDNPLHYQKSLKPAPHLFAQLSKVLKLSKVQEVIFGLALLNSSSPDLRGFAA  
QFIKQKLPDLLRSYIDADVSGNQEGGFQDIAIEVLHLLLSHLLFGQKGAFGVQEQIDAFKTLRRDFPQERC  
PVVLAPLLYPEKRDILMDRI LPDSGGVAKTMMESSLADFMQEVGYGFCASIEECRNIIMQFGVREVTAAQVAR  
VLGMMARTHSGLTDGIPLQSI SAPGSGIWSDGKDKSEGAQAHTWNVEVLIDVLKELNPSLNFKEVTEYELDHGP  
FQIRDSKGLHNVVYGIQRGLGMEVFPVDFIYRPWKHAEGQLSFIQHSLINPEVFCFADYPCHTVATDILKAPP

EDDNREIATWKSLLDIESLLRLAEVGGQYEQVKQLFSFPIKHCPCDMLVLALLQINTSWHTLRHELISTLMPIFL  
GNHPNSAILHYAWHGQGSIRQLIMHAMAWEYMRGEQYDQAKLSRILDVAQDLKALSMLLNGTFFAFVID  
LAALASRREYLKLDKWLTDKIREHGEFFIQACMTFLKRRCPISILGGLAPEKQPKSAQLPAETLATMLACLQA  
CAGSVSQELSETILTMVANCNSVMNKARQPPPGVMPKGRPPSASSLDAISPVQIDPLAGMASLSIGGSAAPHT  
QSMQGFPPNLGSAFSTPQSPAKAFPLSTPNQTTAFSGIGGLSSQLPVGGLGTGSLTGTIGTGALGLPAVNNDP  
FVQRKLGTSGLNQPTFQQTDLSSQVWPEANQHFSKEIDDEANSYFQRIYNHPPHPTMSVDEVLEMLQRFKDSI  
KREREFVNCMLRNLFEYRFFPQYDKELHITACLFGGIEKGLVTYALGLALRYVLEALRKPFGSKMYFYG  
IAALDRFKNRLKDYQCYQHLSISHFMQFPHHLQEYIEYGGQSRDPPVKMQGSITTPGSIALAQAQAQVPAK  
AKAPLAGQVNTMVTSTTTTVAKTVTVTKPTGVSFKKDVPPSINTNIDTLLVATDQTERIVEPPENIQEKIAFI  
FNNLSQSNMTQKVEELKETVKEEFMPWVSQYLVMKRVSIEPNFHSLSYNSFLDTLKNPEFNKMLNETYRNI  
KVLSTSDKAAANFSDRSLLKNLGHWLGMITLAKNKPIIHTDLDVKSLLLEAYVKGQOQELLYVVPFVAKVLESS  
IRSLVFRPPNPWTMAIMNVLAELHQEHDLKLNLFKFEIEVLCKNLALDINELKPGNLLKDKDRLKLNLEQLSAP  
KKDVQPEELPAITTTTTSTTPATSTTCTATVPPQPQYSYHDINVYSLAGLAPHITLNPTIPLFQAHPQLKQCV  
RQAIERAVQELVHPVVDRSIIKIAMTTCEQIVRKDFALDSEESRMRIAAHMMRNLTAGMAMITCREPLLSI  
STNLKNSFASALRTASPPQREMMDQAAAQLAQDNCELACCFIQKTAVEKAGPEMDKRLATEFELRKHARQEGR  
RYCDPVVLTYYAERMPEQIRLKVGGVDPKQLAVYEEFARNVPGFLPTNDLSQPTGFLAQPMKQAWATDDVAQI  
YDKCITELEQHLHAIPTTLAMNPQAALRSLLLEVVLRSNRDAIAALGGLQKAVEGLLDATSGADADLLRYR  
RECHLLVLKALQDGRAYGSPWCNKQITRCLIECRDEYKYNVEAVEELLIRNHLVNMQQYDLHLAQSMENGLNYM  
AVAFAMQLVKILLVDRSVAHITADLFHTIETLMRINAHSRGAPEGLPQLMEVVRNSYEAMIDRAHGGPNF  
MMHSGISQASEYDDPPGLREKAEYLLREWVNLHSAAGRDSTKAFSAFVGMHQQGIKTDLLITRFFRLCT  
EMCVEISYRAQAEQQHNPAANPTMIRAKCYHNLDAFVRLIALLVKHSGEATNTVTKINLLNKVLGIVVGVLLQ  
DHDVRQSEFQQLPYHRIFIMLLELNAPEHVLETINFQTLTAFNCNTFHILRPTKAPGFVYAWLELISHRIFIA  
RMLAHTPQQKGWPMYAQLLIDLFKYLAPFLRNVELTKPMQILYKGLTRVLLVLLHDFPEFLCDYHYGFCDVIP  
PNCIQLRNLILSAFPRNMRLPDPFTPNLKVDMLESEINIAPRIILTNFTGVMPPQFKKDLDSYLKTRSPVTF  
LRSNLQVSNEPGRNRYNLQNLINALVLYVGTQAIAIHNGKSTPSMSTITHSAHMDIFQNLAVDLDETEGRYLF  
AIANQLRYPNSSHYFSCTMLYLFAEANTEAIEQEQITRFLQSVACCMGQKQAQQVMEGTGAS\*  
>rs33010259\_ENSMUSP00000148807\_c.1191:A>T\_p.K398\*  
ENSMUST00000211887.2|Cnot1-203|ENSMUSG00000036550|-|chr8:g.96491625:T>A  
MNLDSLALSQISYLVNDLTKKNYRASQQEIQHIVNRHGPEADRHLRLCLFSHVDFSGDGKSSGKDFHQFLI  
QECASLITKPNFISTLSYAIIDNPLHYQKSLKPAPHLFAQLSKVLKLSKVQEVIFGLALLNSSSPDLRGFAAQF  
IKQKLPDLLRSYIDADVSGNQEGGFQDIAIEVLHLLLSHLLFGQKGAFGVQEQIDAFKTLRRDFQERC  
VLAPELLYPEKRDILMDRIIPDSSGGVAKTMMESSLADFMQEVGYGFCASIEECRNIIMQFGVREVTAAQVARV  
GMMARTHSGLTDGIPLQSIAPSGSIWSDGDKKSEGAQAHWNVEVLIDVLKELNPSLNFKEVTEYELDHPGFQ  
IRDSKGLHNVVYGIQRGLGMEVFPVDFIYRPW\*HAEGQLSFIQHSLINPEVFCFADYPCHTAVATDILKAPPED  
DNREIATWKSLLDIESLLRLAEVGGQYEQVKQLFSFPIKHCPCDMLVLALLQINTSWHTLRHELISTLMPIFL  
GNHPNSAILHYAWHGQGSIRQLIMHAMAWEYMRGEQYDQAKLSRILDVAQDLKALSMLLNGTFFAFVIDLA  
ALASRREYLKLDKWLTDKIREHGEFFIQACMTFLKRRCPISILGGLAPEKQPKSAQLPAETLATMLACLQACA  
GSVSVQELSETILTMVANCNSVMNKARQPPPGVMPKGRPPSASSLDAISPVQIDPLAGMASLSIGGSAAPHTQ  
MQGFPPNLGSAFSTPQSPAKAFPLSTPNQTTAFSGIGGLSSQLPVGGLGTGSLTGTIGTGALGLPAVNNDP  
FVQRKLGTSGLNQPTFQQTDLSSQVWPEANQHFSKEIDDEANSYFQRIYNHPPHPTMSVDEVLEMLQRFKDSI  
KREREFVNCMLRNLFEYRFFPQYDKELHITACLFGGIEKGLVTYALGLALRYVLEALRKPFGSKMYFYGIA  
ALDRFKNRLKDYQCYQHLSISHFMQFPHHLQEYIEYGGQSRDPPVKMQGSITTPGSIALAQAQAQVPAK  
APLAGQVNTMVTSTTTTVAKTVTVTKPTGVSFKKDVPPSINTNIDTLLVATDQTERIVEPPENIQEKIAFI  
FNNLSQSNMTQKVEELKETVKEEFMPWVSQYLVMKRVSIEPNFHSLSYNSFLDTLKNPEFNKMLNETYRNI  
KVLSTSDKAAANFSDRSLLKNLGHWLGMITLAKNKPIIHTDLDVKSLLLEAYVKGQOQELLYVVPFVAKVLESS  
IRSLVFRPPNPWTMAIMNVLAELHQEHDLKLNLFKFEIEVLCKNLALDINELKPGNLLKDKDRLKLNLEQLSAP  
KKDVQPEELPAITTTTTSTTPATSTTCTATVPPQPQYSYHDINVYSLAGLAPHITLNPTIPLFQAHPQLKQCV  
RQAIERAVQELVHPVVDRSIIKIAMTTCEQIVRKDFALDSEESRMRIAAHMMRNLTAGMAMITCREPLLSI  
STNLKNSFASALRTASPPQREMMDQAAAQLAQDNCELACCFIQKTAVEKAGPEMDKRLATEFELRKHARQEGR  
RYCDPVVLTYYAERMPEQIRLKVGGVDPKQLAVYEEFARNVPGFLPTNDLSQPTGFLAQPMKQAWATDDVAQI  
YDKCITELEQHLHAIPTTLAMNPQAALRSLLLEVVLRSNRDAIAALGGLQKAVEGLLDATSGADADLLRYR  
RECHLLVLKALQDGRAYGSPWCNKQITRCLIECRDEYKYNVEAVEELLIRNHLVNMQQYDLHLAQSMENGLNYM  
AVAFAMQLVKILLVDRSVAHITADLFHTIETLMRINAHSRGAPEGLPQLMEVVRNSYEAMIDRAHGGPNFMM  
HSGISQASEYDDPPGLREKAEYLLREWVNLHSAAGRDSTKAFSAFVGMHQQGIKTDLLITRFFRLCTEM  
CVEISYRAQAEQQHNPAANPTMIRAKCYHNLDAFVRLIALLVKHSGEATNTVTKINLLNKVLGIVVGVLLQD  
HDVRQSEFQQLPYHRIFIMLLELNAPEHVLETINFQTLTAFNCNTFHILRPTKAPGFVYAWLELISHRIFIA  
RMLAHTPQQKGWPMYAQLLIDLFKYLAPFLRNVELTKPMQILYKGLTRVLLVLLHDFPEFLCDYHYGFCDVIP  
PNCIQLRNLILSAFPRNMRLPDPFTPNLKVDMLESEINIAPRIILTNFTGVMPPQFKKDLDSYLKTRSPVTF  
LRSNLQVSNEPGRNRYNLQNLINALVLYVGTQAIAIHNGKSTPSMSTITHSAHMDIFQNLAVDLDETEGRYLF  
AIANQLRYPNSSHYFSCTMLYLFAEANTEAIEQEQITRFLQSVACCMGQKQAQQVMEGTGAS\*  
CIQLRNLILSAFPRNMRLPDPFTPNLKVDMLESEINIAPRIILTNFTGVMPPQFKKDLDSYLKTRSPVTF  
LRSNLQVSNEPGRNRYNLQNLINALVLYVGTQAIAIHNGKSTPSMSTITHSAHMDIFQNLAVDLDETEGRYLF  
AIANQLRYPNSSHYFSCTMLYLFAEANTEAIEQEQITRFLQSVACCMGQKQAQQVMEGTGAS\*

SNLQVSNPEGNRYNLQNLINALVLYVGTQAIHAIHNKGSTPSMSTITHSAHMDIFQNLAVDLDTEGRYLFNNAI  
ANQLRYPNSHSTHYFSCSTMLYLF AEANTEA IQEQITRVLLERLIVNRPHPWGLLITFIELIKNPAFKFVNHEFV  
HCAPEIEKLFQSV AQCCMGQKQAQQVMEGTGAS\*

>rs33010259\_ENSMUSP00000148735\_c.1197:A>T\_p.K400\*

ENSMUST00000213006.2|Cnot1-216|ENSMUSG00000036550|-|chr8:g.96491625:T>A  
MNLDSLALSQISYLVNDLTKKNYRASQQEIQHIVNRHGPEADRHLRLCLFSHVDFSGDGKSSGKDFHQTF  
LIQECASLITKPNFISTLSYAI DNPLHYQKSLKPAPHLFAQLSKVLKLSKVQEVIFGLALLNSSSPDLRGFAA  
QFIKQKLPDLLRSYIDADVSGNQE GGFQDIAIEVLHLLLSHLLFGQKGAFGVQEQIDAF LKTLRRDFPQERC  
PVVLAPLLYPEKRDILMDRILPDSGGVAKTMMESSLADFMQEVGYGFCASIEECRNIIMQFGVREVTAAQVAR  
VLGMMARTHSGSLTDGIPLQSIAPGSGIWSGDGKDKSEGAQAHTWNVEVLIDVLKELNPSLNFKEVTYELDHG  
FQIRDSKGLHNVVYGIQRGLGMEVFPVDFIYRPW\*HAEGQLSFIQHSLINPEVFCFADYPCHTVATDILKAPP  
EDDNREIATWKS LLDLIESLLRLAEVQYEQVKQLFSFPIKHC PDMLVLALLQINTSWHTLRHELISTLMPIFL  
GNHPNSAIILHYAWHGQGS PSIRQLIMHAMA EWYMRGEQYDQAKLSRILDVAQDLKALSMLLNGTFFAFVID  
LAALASRREYLKLDKWLTDKIREHGEPFIQACMTFLKRRCP SILGGLAPEKDQPKSAQLPAETLATMLACLQA  
CAGSVSQELSETILTMVANC SNVMNKARQPPPGVMPKGRPPSASSLDAISPVQIDPLAGMASLSIGGSAAPHT  
QSMQGFPPNLGSAFSTPQSPAKAF PPLSTPNQTTAFSGIGGLSSQLPVGGLGTGSLTGIGTGALGLPAVNNDP  
FVQRKLGTSGLNQPTFQQSKMKPSDLSQVWPEANQHFSKEIDDEANSYFQRIYNHPPHPTMSVDEVLEMLQRF  
KDSTIKRREVFNCMLRNLFEEYRFFPQY PDKELHITACLFGGIIEKGLVTYMALGLALRYVLEALRKPFGSK  
MYYFGIAALDRFKNRLKDY PQCQHLASISHFMQFP HHLQEYIEYGOQSRDPPVKMQGSI TTPGSI ALAQAQA  
QAQVPAKAPLAGQVNTMVTSTTTTVAKTVTVTKPTGVSFKKDVPPSINTTNIDTLLVATDQTERIVEPPENI  
QEKIAFIFNNLSQSNMTQKVEELKETVKEEFMPWVSQYLV MKRVSIEPNFHSLSYSNFLD TLKNPEFNKMLVNE  
TYRNIVLLTSDKAAANFSDRSLLKNLGHWLGMITLAKNKPI LH TDLDVKSL LLEAYVKGQOQELLYVVPFVAK  
VLESSIRSLVFRPPNPWTMAIMNVLAELHQEHDLKLNLFKFEIEVLCKNLALDINELKPGNLLKDKDR LKNLDE  
QLSAPKKDVKQPEELPAITTTTSTTPATSTTCTATVPPQPQYSYHDINVYSLAGLAPHITLNP TPLFQAHP  
QLKQCVRQAIERAVQELVHPVVDRSIKIAMTTCEQIVRKDFALDSEESRMRIAAHMMRNLTAGMAMITCREP  
LLMSISTNLKNSFASALRTAS PQQREMMDQAAAQLAQDNCELACCFIQKTAVEKAGPEMDKRLATEFELRKHA  
RQEGRRYCDPVVLT YQAERMPEQIRLKVGGVDPKQLAVYEEFARNVPGFLPTNDLSQPTGFLAQPMKNWSSTY  
TPFHPLWP\*

>rs33010259\_ENSMUSP00000096073\_c.1197:A>T\_p.K400\*

ENSMUST00000098473.11|Cnot1-202|ENSMUSG00000036550|-|chr8:g.96491625:T>A  
MNLDSLALSQISYLVNDLTKKNYRASQQEIQHIVNRHGPEADRHLRLCLFSHVDFSGDGKSSGKDFHQTF  
LIQECASLITKPNFISTLSYAI DNPLHYQKSLKPAPHLFAQLSKVLKLSKVQEVIFGLALLNSSSPDLRGFAA  
QFIKQKLPDLLRSYIDADVSGNQE GGFQDIAIEVLHLLLSHLLFGQKGAFGVQEQIDAF LKTLRRDFPQERC  
PVVLAPLLYPEKRDILMDRILPDSGGVAKTMMESSLADFMQEVGYGFCASIEECRNIIMQFGVREVTAAQVAR  
VLGMMARTHSGSLTDGIPLQSIAPGSGIWSGDGKDKSEGAQAHTWNVEVLIDVLKELNPSLNFKEVTYELDHG  
FQIRDSKGLHNVVYGIQRGLGMEVFPVDFIYRPW\*HAEGQLSFIQHSLINPEVFCFADYPCHTVATDILKAPP  
EDDNREIATWKS LLDLIESLLRLAEVQYEQVKQLFSFPIKHC PDMLVLALLQINTSWHTLRHELISTLMPIFL  
GNHPNSAIILHYAWHGQGS PSIRQLIMHAMA EWYMRGEQYDQAKLSRILDVAQDLKALSMLLNGTFFAFVID  
LAALASRREYLKLDKWLTDKIREHGEPFIQACMTFLKRRCP SILGGLAPEKDQPKSAQLPAETLATMLACLQA  
CAGSVSQELSETILTMVANC SNVMNKARQPPPGVMPKGRPPSASSLDAISPVQIDPLAGMASLSIGGSAAPHT  
QSMQGFPPNLGSAFSTPQSPAKAF PPLSTPNQTTAFSGIGGLSSQLPVGGLGTGSLTGIGTGALGLPAVNNDP  
FVQRKLGTSGLNQPTFQQSKMKPSDLSQVWPEANQHFSKEIDDEANSYFQRIYNHPPHPTMSVDEVLEMLQRF  
KDSTIKRREVFNCMLRNLFEEYRFFPQY PDKELHITACLFGGIIEKGLVTYMALGLALRYVLEALRKPFGSK  
MYYFGIAALDRFKNRLKDY PQCQHLASISHFMQFP HHLQEYIEYGOQSRDPPVKMQGSI TTPGSI ALAQAQA  
QAQVPAKAPLAGQVNTMVTSTTTTVAKTVTVTKPTGVSFKKDVPPSINTTNIDTLLVATDQTERIVEPPENI  
QEKIAFIFNNLSQSNMTQKVEELKETVKEEFMPWVSQYLV MKRVSIEPNFHSLSYSNFLD TLKNPEFNKMLVNE  
TYRNIVLLTSDKAAANFSDRSLLKNLGHWLGMITLAKNKPI LH TDLDVKSL LLEAYVKGQOQELLYVVPFVAK  
VLESSIRSLVFRPPNPWTMAIMNVLAELHQEHDLKLNLFKFEIEVLCKNLALDINELKPGNLLKDKDR LKNLDE  
QLSAPKKDVKQPEELPAITTTTSTTPATSTTCTATVPPQPQYSYHDINVYSLAGLAPHITLNP TPLFQAHP  
QLKQCVRQAIERAVQELVHPVVDRSIKIAMTTCEQIVRKDFALDSEESRMRIAAHMMRNLTAGMAMITCREP  
LLMSISTNLKNSFASALRTAS PQQREMMDQAAAQLAQDNCELACCFIQKTAVEKAGPEMDKRLATEFELRKHA  
RQEGRRYCDPVVLT YQAERMPEQIRLKVGGVDPKQLAVYEEFARNVPGFLPTNDLSQPTGFLAQPMKQAWATD  
DVAQIYDKCITLEQLHLHAI PPTLAMNPQAQALRSLEVVLSRNSRDAIAALGLLQKAVEGLLDATSGADAD  
LLRYRECHLLVLKALQDGRAYGSPWCNKQITRCLIECRVDEYKYNVEAVELLIRNHLVNMQQYDLHLAQSMEN  
GLNYMAVAFAMQLVKILLVDEERSVAHIT EADLFHTIETLMRINAHSRGNAP EGLPQLMEVVRSNYEAMIDRAH  
GGPNFMMHSGISQASEYDDPPGLREKAEYLLREWVNLHYSAAAGR DSTKAFSAFVGMHQGGI LKTDLITRF  
FRLCTEMCVEISYRAQAEQQHNPAANPTMIRAKCYHNLD AFVRLIALLVKHSGEATNTVTKINLLNKVLGIVV  
GVLLQDHDVQRSEFQQLPYHRIFIMLLELNAPEHVLETINFQTLTAF CNTFHILRPTKAGFVYAWLELISH



RIFIAARMLAHTPQQKGWPMYAQLLIDLKYLAPFLRNVELTKPMQILYKGLTRVLLVLLHDFPEFLCDYHYGF  
 CDVIPPNCIQLRNLIILSAFPRNMRLPDPFTPNLKVDMLSEINIAPRILTNFTGVMPPQFKKDLDSYLKTRSPV  
 TFLSDLRSNLQVSNPEGNRYNLQLINALVLYVGTQAIHAIHNKGSTPSMSTITHSAHMDIFQNLAVDLDTTEGR  
 YLFLNAIANQLRYPNSHSHYFSCMTMLYLFAEANTEAIEQEQITRVLLERLIVNRPHWPGLLITFIELIKNPAFK  
 FWNHEFVHCAPEIEKLFQSVACCMGQKQAQQVMEGTGAS\*  
 >rs6249151\_ENSMUSP00000063565\_c.547:T>A\_p.L183H  
 ENSMUST00000068452.10|Cnot1-201|ENSMUSG00000036550|-|chr8:g.96498688:A>T  
 MNLDSLALSQISYLVNLTCKNYRASQQEIQHIVNRHGPEADRHLRLCLFVSHVDFSGDGKSSGKDFHQTF  
 LIQECASLITKPNFISTLSYAIIDNPLHYQKSLKPAPHLFAQLSKVLKLSKVQEVIFGLALLNSSPDLRGFAA  
 QFIKQKLPDLLRSYIDADVSGNQEQQGQDIAIEVLHLLSHLLFGQKGAFGVQEQIDAFKTLRRDFPQERC  
 PVVLAPELLYPEKRDILMDRILPDSGGVAKTMMESSLADFMQEVGYGFCASIEECRNIIMQFGVREVTAAQVAR  
 VLGMMARTHSGLTDGIPLQSIAPGSGIWSDGKDKSEGAQAHTWNVEVLIDVLKELNPSLNFKEVTEYLDHPG  
 FQIRDSKGLHNVVYGIQIRGLGMEVFPVDFIYRPWKHAEGQLSFIQHSLINPEVFCFADYPCHTVATDILKAPP  
 EDDNREIATWKSLLDIESLLRLAEVQYEQVKQLFSFPIKHCPCDMLVLLQINTSWHTLRHELISTLMPIFL  
 GNHPNSAILHYAWHGQGSPIRQLIMHAMAEWYMRGEQYDQAKLSRILDVAQDLKALSMLLNGTFFAFVID  
 LAALASRREYLKLDKWLTDKIREHGEPFIQACMTFLKRRCP SILGGLAPEKDPKSAQLPAETLATMLACLQA  
 CAGSVQELSETILTMVANCSNVMNKARQPPPGVMPKGRPPSASSLDAISPVQIDPLAGMASLIGSSAAPHT  
 QSMQGFPPNLGSAFSTPQSPAKAFPPPLSTPNQTTAFSGIGGLSSQLPVGGLGTGSLTGIGTGALGLPAVNDP  
 FVQRKLGTSGLNQPTFQQTDLQVWPEANQHFSKEIDDEANSYFQRIYNHPPHPTMSVDEVLEMLQRFKSTI  
 KREREVFNCLRNLFEEYRFFPQYDPKELHITACLFGGIEKGLVTYMALGLALRYVLEALRKPFGSKMYFYG  
 IAALDRFKNRLKDYQYQCQLASISHFMQFPHHLQYIEYEQQSRDPPVKMQGSITTPGSIALAQAQAQV  
 AKAPLAGQVNTMVTSTTTTVAKTVTVTKPTGVSFKKDVPPSINTTNIDTLLVATDQTERIVEPPENIQEKIA  
 FIFNNLSQSNMTQKVEELKETVKEEFMPWVSQYLVMKRVSIEPNFHSLSYNSFLDTLKNPEFNKMLNETYRNI  
 KVLITSDKAAANFSDRSLLKLNGLHGLMI TLAKNKPI LHDTLDVKSLLLEAYVKQEQELLYVVPFVAKVLESS  
 IRSLVFRPPNPWTMAIMNVLAELHQEHDLKLNLFKFEIEVLCKNLALDINELKPGNLLKDKDRKLNLEQLSAP  
 KKDVKQPEELPAITTTTTSTPATSTTCTATVPPQFQYSYHDINVYSLAGLAPHITLNPTIPLFQAHPLKQC  
 VRQAIERAVQELVHPVVDRSIKIAMTTCETQIVRKLQFALSDSESRMIAAHHMMRNLTAGMAMITCREPLLSMI  
 STNLKNSFASALRTASPPQREMMDQAAAQLAQDNCELACCFIQKTAVEKAGPEMDKRLATEFELRKHARQEGR  
 RYCDPVVLTQYQAERMPEQIRLKVGGVDPKQLAVYEEFARNVPGFLPTNDLSQPTGFLAQPMKQAWATDDVAQI  
 YDKCITELEQHLHAIPPTLAMNPQAQALRSLLLEVVLRSNRDAIAALGLLQKAVEGLLDATSGADADLLRY  
 RECHLLVLKALQDGRAYGSPWCNKQITRCLIECRDEYKYNVEAVEELLIRNHLVNMQQYDLHLAQSMENGLNYM  
 AVAFAMQLVKILLVDESVVAHTEADLFHTIETLMRINAHSRGNAPGLPQLMEVVRSNYEAMI DRAHGGPNF  
 MMHSGISQASEYDDPPGLREKAEYLLREWVNLHSAAGRDSTKAFSAFVGMHQQGIKTKTDDLI TRFFRLCT  
 EMCVEISYRAQAEQQHNPAANPTMIRAKCYHNLDAFVRLIALLVKHSGEATNTVTKINLLNKVLGIVVGVLLQ  
 DHDVRSQSEFQQLPYHRIFIMLLELNAPEHVLETINFQTLTAFACNTFHILRPTKAPGFVYAWLELISHRIFIA  
 RMLAHTPQQKGWPMYAQLLIDLKYLAPFLRNVELTKPMQILYKGLTRVLLVLLHDFPEFLCDYHYGFCDVIP  
 PNCIQLRNLIILSAFPRNMRLPDPFTPNLKVDMLSEINIAPRILTNFTGVMPPQFKKDLDSYLKTRSPVTF  
 LRSNLQVSNPEGNRYNLQLINALVLYVGTQAIHAIHNKGSTPSMSTITHSAHMDIFQNLAVDLDTTEGRYLFLN  
 AIANQLRYPNSHSHYFSCMTMLYLFAEANTEAIEQEQITRFLQSVACCMGQKQAQQVMEGTGAS\*  
 >rs6249151\_ENSMUSP00000148807\_c.541:T>A\_p.L181H  
 ENSMUST00000211887.2|Cnot1-203|ENSMUSG00000036550|-|chr8:g.96498688:A>T  
 MNLDSLALSQISYLVNLTCKNYRASQQEIQHIVNRHGPEADRHLRLCLFVSHVDFSGDGKSSGKDFHQFLI  
 QECASLITKPNFISTLSYAIIDNPLHYQKSLKPAPHLFAQLSKVLKLSKVQEVIFGLALLNSSPDLRGFAAQF  
 IKQKLPDLLRSYIDADVSGNQEQQGQDIAIEVLHLLSHLLFGQKGAFGVQEQIDAFKTLRRDFPQERC  
 PVVLAPELLYPEKRDILMDRILPDSGGVAKTMMESSLADFMQEVGYGFCASIEECRNIIMQFGVREVTAAQVARV  
 LGMARTHSGLTDGIPLQSIAPGSGIWSDGKDKSEGAQAHTWNVEVLIDVLKELNPSLNFKEVTEYLDHPGFQ  
 IRDSKGLHNVVYGIQIRGLGMEVFPVDFIYRPWKHAEGQLSFIQHSLINPEVFCFADYPCHTVATDILKAPP  
 DNREIATWKSLLDIESLLRLAEVQYEQVKQLFSFPIKHCPCDMLVLLQINTSWHTLRHELISTLMPIFLGN  
 HPNSAILHYAWHGQGSPIRQLIMHAMAEWYMRGEQYDQAKLSRILDVAQDLKALSMLLNGTFFAFVIDLA  
 ALASRREYLKLDKWLTDKIREHGEPFIQACMTFLKRRCP SILGGLAPEKDPKSAQLPAETLATMLACLQACA  
 GSVSQELSETILTMVANCSNVMNKARQPPPGVMPKGRPPSASSLDAISPVQIDPLAGMASLIGSSAAPHTQS  
 MQGFPPNLGSAFSTPQSPAKAFPPPLSTPNQTTAFSGIGGLSSQLPVGGLGTGSLTGIGTGALGLPAVNDP  
 FVQRKLGTSGLNQPTFQQTDLQVWPEANQHFSKEIDDEANSYFQRIYNHPPHPTMSVDEVLEMLQRFKSTI  
 KREREVFNCLRNLFEEYRFFPQYDPKELHITACLFGGIEKGLVTYMALGLALRYVLEALRKPFGSKMYFYG  
 IAALDRFKNRLKDYQYQCQLASISHFMQFPHHLQYIEYEQQSRDPPVKMQGSITTPGSIALAQAQAQVPAK  
 APLAGQVNTMVTSTTTTVAKTVTVTKPTGVSFKKDVPPSINTTNIDTLLVATDQTERIVEPPENIQEKIAFI  
 FNNLSQSNMTQKVEELKETVKEEFMPWVSQYLVMKRVSIEPNFHSLSYNSFLDTLKNPEFNKMLNETYRNIK  
 VLLITSDKAAANFSDRSLLKLNGLHGLMI TLAKNKPI LHDTLDVKSLLLEAYVKQEQELLYVVPFVAKVLESSIR

SLVFRPPNPWTMAIMNVLAELHQEHDLKLNKFEIEVLCKNLALDINELKPGNLLKDKDRLKLNLDLDEQLSAPKK  
DVKQPEELPAITTTTTSTTPATSTTCTATVPPQPQYSYHDINVYSLAGLAPHITLNPTIPLFQAHPQLKQCVR  
QAIERAVQELVHPVVDRSIKIAMTTCQIVRKDFALDSEESRMRIAHHMMRNLTAGMAMITCREP LLMSIST  
NLKNSFASALRTASPQQREMMDQAAAQLAQDNCELACCFIQKTAVEKAGPEMDKRLATEFELRKHARQEGRRY  
CDPVVLTYYQAERMPEQIRLKVGGVDPKQLAVYEEFARNVPGFLPTNDLSQPTGFLAQPMKQAWATDDVAQIYD  
KCITELEQHLHAIPPTLAMNPQAQALRSLLLEVVLRSNRDAIAALGLLQKAVEGLLDATSGADADLLLRYRE  
CHLLVLKALQDGRAYGSPWCNKQITRCLIECRDEYKYNVEAVELLIRNHLVNMQQYDLHLAQSMENGLNYMAV  
AFAMQLVKILLVDERSVAHITEADLFHTIETLMRINAHSRGNAPGLPQLMEVVRSNYEAMIDRAHGGPNFMM  
HSGISQASEYDDPPGLREKAEYLLREWVNLHSAAGRDSTKAFSAFVGMHQQGILKTDLLITRFRCLTEM  
CVEISYRAQAEQQHNPAANPTMIRAKCYHNLDAFVRLIALLVKHSGEATNTVTKINLLNKVLGIVVGVLLQDH  
DVRQSEFQQLPYHRIFIMLLLELNAPEHVLETINFQTLTAFNCNTHILRPTKAPGFVYAWLELISHRIFIAMR  
LAHTPQQKGWPMYAQLLIDLFKYLAPFLRNVELTKPMQILYKGTLRVLLVLLHDFPEFLCDYHYGFCDVIPP  
CIQLRNLILSAFPRNMRPLDPFTPNLKVDMLEINIAPRILTNFTGVMPPQFKKDLDSYLKTRSPVTFLSDLR  
SNLQVSNPEGNRYNLQLINALVLYVGTQAIHAIHNKGSTPSMSTITHSAHMDIFQNLAVDLDTEGRYLFNLAI  
ANQLRYPNSHSHYFSCMTMLYLFAEANTEAIEQEQITRVLLERLIVNRPHPWGLLITFIELIKNPAFKFWNHEFV  
HCAPEIEKLFQSVQCCMGQKQAQQVMEGTGAS\*

>rs6249151\_ENSMUSP00000148735\_c.547:T>A\_p.L183H

ENSMUST00000213006.2|Cnot1-216|ENSMUSG00000036550|-|chr8:g.96498688:A>T  
MNLDSLALSLSQISYLVLDNLTCKNYRASQQEIQHIVNRHGPEADRHLRLCLFHVDFSGDGKSSGKDFHQTF  
LIQECASLITKPNFISTLSYAIIDNPLHYQKSLKPAPHLFAQLSKVLKLSKVQEVIFGLALLNSSSPDLRGFAA  
QFIKQKLPDLLRSYIDADVSGNQEQQGQDIAIEVLHLLSHLLFGQKGAFGVQEQIDAFKTLRRDFPQERC  
PVLAPLLYPEKRDILMDRILPDSGGVAKTMMESSLADFMQEVGYGFCASIEECRNIIMQFGVREVTAAQVAR  
VLGMMARTHSGLTDGIPLQSIAPGSGIWSDGKDKSEGAQAHTWNVEVLIDVLKELNPSLNFKEVTEYELDHPG  
FQIRDSKGLHNVVYGIQIRGLGMEVFPVDFIYRPWKHAEGQLSFIQHSLINPEVFCFADYPCHTVAATDILKAPP  
EDDNREIATWKSLLDIESLLRLAEVQYEQVKQLFSFPIKHC PDMLVLALLQINTSWHTLRHELISTLMPIFL  
GNHPNSAILHYAWHGQGGQSPSIRQLIMHAMAEWYMRGEYDQAKLSRILDVAQDLKALSMLLNGTFFAFVID  
LAALASRREYLKLDKWLTDKIREHGEPFIQACMTFLKRRCP SILGGLAPEKDKPKSAQLPAETLATMLACLQA  
CAGSVSQELSETILTMVANCNVMNKARQPPPGVMPKGRPPSASSLDAISPVQIDPLAGMASLIGGSAAPHT  
QSMQGFPPNLGSAFSTPQSPAKAFPLSTPNQTTAFSGIGGLSSQLPVGGLGTGSLTGIGTGALGLPAVNNDF  
FVQRKLGTSGLNQPTFQSKMKPSDLSQVWPEANQHSKEIDDEANSYFQRIYNHPPHPTMSVDEVLEMLQRF  
KDSTIKREREVFNCMLRNLFEERYRFPQYPKDELHITACFLGGIEKGLVTYMALGLALRYVLEALRKPFGSK  
MYFYGIAALDRFKNRLKDYPCQHLASISHFMQFPHLLQEIYIEYQQSRDPPVKMQGSIITPGSIALAQAQA  
QAQVPAKAPLAGQVNTMVTSTTTTVAKTVTVTKPTGVSFKKDVPPSINTTNIDTLLVATDQTERIVEPPENI  
QEKIAFIFNNLSQSNMTQKVEELKETVKEEFMPVWSQYLVMKRVSIEPNFHSLSYSNFLDITLKNPEFNKMLVNE  
TYRNIKVLSTDKAAANFSDRSLLKLNGLHWMGITLAKNKPIIHTDLVKSLLLEAYVKGQEQELLYVVPFVAK  
VLESSIRSLVFRPPNPWTMAIMNVLAELHQEHDLKLNKFEIEVLCKNLALDINELKPGNLLKDKDRLKLNLDL  
QLSAPKKDVKQPEELPAITTTTTSTTPATSTTCTATVPPQPQYSYHDINVYSLAGLAPHITLNPTIPLFQAHP  
QLKQCVRQAIERAVQELVHPVVDRSIKIAMTTCQIVRKDFALDSEESRMRIAHHMMRNLTAGMAMITCREP  
LLMSISTNLKNSFASALRTASPQQREMMDQAAAQLAQDNCELACCFIQKTAVEKAGPEMDKRLATEFELRKHA  
RQEGRRYCDPVVLTYYQAERMPEQIRLKVGGVDPKQLAVYEEFARNVPGFLPTNDLSQPTGFLAQPMKNWSSTY  
TFHPLWP\*

>rs6249151\_ENSMUSP00000096073\_c.547:T>A\_p.L183H

ENSMUST00000098473.11|Cnot1-202|ENSMUSG00000036550|-|chr8:g.96498688:A>T  
MNLDSLALSLSQISYLVLDNLTCKNYRASQQEIQHIVNRHGPEADRHLRLCLFHVDFSGDGKSSGKDFHQTF  
LIQECASLITKPNFISTLSYAIIDNPLHYQKSLKPAPHLFAQLSKVLKLSKVQEVIFGLALLNSSSPDLRGFAA  
QFIKQKLPDLLRSYIDADVSGNQEQQGQDIAIEVLHLLSHLLFGQKGAFGVQEQIDAFKTLRRDFPQERC  
PVLAPLLYPEKRDILMDRILPDSGGVAKTMMESSLADFMQEVGYGFCASIEECRNIIMQFGVREVTAAQVAR  
VLGMMARTHSGLTDGIPLQSIAPGSGIWSDGKDKSEGAQAHTWNVEVLIDVLKELNPSLNFKEVTEYELDHPG  
FQIRDSKGLHNVVYGIQIRGLGMEVFPVDFIYRPWKHAEGQLSFIQHSLINPEVFCFADYPCHTVAATDILKAPP  
EDDNREIATWKSLLDIESLLRLAEVQYEQVKQLFSFPIKHC PDMLVLALLQINTSWHTLRHELISTLMPIFL  
GNHPNSAILHYAWHGQGGQSPSIRQLIMHAMAEWYMRGEYDQAKLSRILDVAQDLKALSMLLNGTFFAFVID  
LAALASRREYLKLDKWLTDKIREHGEPFIQACMTFLKRRCP SILGGLAPEKDKPKSAQLPAETLATMLACLQA  
CAGSVSQELSETILTMVANCNVMNKARQPPPGVMPKGRPPSASSLDAISPVQIDPLAGMASLIGGSAAPHT  
QSMQGFPPNLGSAFSTPQSPAKAFPLSTPNQTTAFSGIGGLSSQLPVGGLGTGSLTGIGTGALGLPAVNNDF  
FVQRKLGTSGLNQPTFQSKMKPSDLSQVWPEANQHSKEIDDEANSYFQRIYNHPPHPTMSVDEVLEMLQRF  
KDSTIKREREVFNCMLRNLFEERYRFPQYPKDELHITACFLGGIEKGLVTYMALGLALRYVLEALRKPFGSK  
MYFYGIAALDRFKNRLKDYPCQHLASISHFMQFPHLLQEIYIEYQQSRDPPVKMQGSIITPGSIALAQAQA  
QAQVPAKAPLAGQVNTMVTSTTTTVAKTVTVTKPTGVSFKKDVPPSINTTNIDTLLVATDQTERIVEPPENI

QEKIAFIFNNLSQSNMTQKVEELKETVKEEFMPWVSQYLVMKRVSIEPNFHSLSYSNFLDRTLKNPEFNKMLVNE  
 TYRNIKVLLTSDKAAANFSDRSLLKNLGHWLGMITLAKNKPI LHTDLVDKSLLEAYVKGQOQELLYVVPFVAK  
 VLESSIRSLVFRPPNPWTMAIMNVLAELHQEHDLKLNLFKFEIEVLCKNLALDINELKPGNLLKDKDRKLNLE  
 QLSAPKKDVKQPEELPAITTTTTSTPATSTTCTATVPPQPQYSYHDINVYSLAGLAPHITLNPTIPLFQAH  
 QLKQCVRQAIERAVQELVHPVVDRSIKIAMTTCEQIVRKDFALDSEESRMRIA AHHMMRNLTAGMAMITCREP  
 LLMSISTNLKNSFASALRTASPQQREMMDQAAAQLAQDNCELACCFIQKTAVEKAGPEMDKRLATEFELRKHA  
 RQEGRRYCDPVVLTQYAERMEQIRLKVGGVDPKQLAVYEEFARNVPGFLPTNDLSQPTGFLAQPMKQAWATD  
 DVAQIYDKCITELEQHLHAIPPTLAMNPQAALRSLLEVVVLSRNSRDAIAALGLLQKAVEGLLDATSGADAD  
 LLLRYRECHLLVLKALQDGRAYGSPWCNKQITRCLIECRDEYKYNVEAVELLIRNHLVNMQQYDLHLAQSMEN  
 GLNYMAVAFAMQLVKILLVDERSVAHI TEADLFHTIETLMRINAHSRGNAPPEGLPQLMEVVRSNYEAMIDRAH  
 GGNFMHSGISQASEYDDPPGLREKAEYLLREWVNLHSAAGRDSTKAFSAFVGMHQQGILKTDLLITRF  
 FRLCTEMCVEISYRAQAEQQHNPAANPTMIRAKCYHNLD AFVRLIALLVKHSGEATNTVTKINLLNKVLGIVV  
 GVLLQDHDVRSQEFQQLPYHRIFIMLLELNAPEHVLETINFQTLTAFNCNTFHILRPTKAPGFVYAWLELISH  
 RIFIA RMLAHTPQQKGWPMYAQLLIDLFKYLAPFLRNVELTKPMQILYKGTLRVLLVLLHDFPEFLCDYHYGF  
 CDVIPNCIQLRNLILSAFPRNMLPDPFTPNLKVDMLSEINIAPRILTNFTGVMPPQFKKDLDSYLKTRSPV  
 TFLSDLRSNLQVSNPEGNRYNLQ LINALVLYVGTQAI AHIHNGKSTPSMSTITHSAHMDIFQNLAVDLDTTEGR  
 YLFLNAIANQLRYPNSHTHYFSC TMLYLFAEANTEAIEQEQITRVLRLIVNRPHPWGLLITFIELIKNPAFK  
 FWNHEFVHCAPEIEKLFQSV AQCCMGQKQAQQVMEGTGAS\*  
 >rs32188968\_ENSMUSP00000063565\_c.220:T>C\_p.L74P  
 ENSMUST00000068452.10|Cnot1-201|ENSMUSG00000036550|-|chr8:g.96501346:A>G  
 MNLDSLALSQISYLVNDLTKKNYRASQQEIQHIVNRHGPEADRHLRCLF SHVDFSGDGKSSGKDFHQTF  
 PIQECASLITKPNFISTLSY AIDNPLHYQKSLKPAPHLFAQLSKVLKLSKVQEVIFGLALLNSSSPDLRGFAA  
 QFIKQKLPDLLRSYIDADVSGNQEGGFQDIAIEVLHLLLSHLLFGQKGAFGVQEQIDAFLKTLRRDFPQERC  
 PVVLA PLLYPEKRDILMDRILPDSGGVAKTMMESSLADFMQEVGYGFCASIEECRNIIMQFGVREVTAAQVAR  
 VLGMMKTHSGLTDGIPLOSI SAPGSGIWSDGKDKSEGAQAHTWNVEVLIDVLKELNPSLNFKEVYELDHPG  
 FQIRDSKGLHNVVYGIQRGLGMEVFPVDFIYRPWKHAEGQLSFIQHSLINPEVFCFADRYPCHTVA TDI LKAPP  
 EDDNREIATWLLDIESLLRLAEVGYEQVQVLFSPFIKHC PDMVLVALLQINTSWHTLRHELISTLMPIFL  
 GNHPNSAIILHYAWHGQGSPSIRQLIMHAMA EWYMRGEQYDQAKLSRILDVAQDLKALSMLLNGT PFAFVID  
 LAALASRREYLKLDKWLTDKIREHGEPFIQACMTFLKRRCP SILGGLAPEKDQPKSAQLPAETLATMLACLQA  
 CAGSVSQELSETILTMVANC SNVMNKARQPPPGVMPKGRPPSASSLDAISPVIDPLAGMASLIGGSAAPHT  
 QSMQGFPPNLGSAFSTPQSPAKAF PPLSTPNQTTAFSGIGGLSSQLPVGGLGTGSLTGIGTGALGLPAVNNDP  
 FVQRKLGTSGLNQPTFQQTDL SQVWPEANQHFSKEIDDEANSYFQRIYNHPPHPTMSVDEVLEM LQRFKDS TI  
 KREREVFNCLMRNL FEEYRFFPQYPDKELHITACLFGGIIEKGLVTYMALGLALRYVLEALRKPFGSKMYFYG  
 IAALDRFKNRLKDY PQYCYHLASISHFMQFPHHLQEYIEYGGQSRDPPVKM QGSITTPGSI ALAQAQAQAVP  
 AKAPLAGQVNTMVTSTTTTVAKTVTVTKPTGVSFKKDVPPSINTNIDTLLVATDQTERIVEPPENIQEKIA  
 FIFNNLSQSNMTQKVEELKETVKEEFMPWVSQYLVMKRVSIEPNFHSLSYSNFLDRTLKNPEFNKMLVNETYRNI  
 KVLLTSDKAAANFSDRSLLKNLGHWLGMITLAKNKPI LHTDLVDKSLLEAYVKGQOQELLYVVPFVAKVLESS  
 IRSLVFRPPNPWTMAIMNVLAELHQEHDLKLNLFKFEIEVLCKNLALDINELKPGNLLKDKDRKLNLEQLSAP  
 KKDVKQPEELPAITTTTTSTPATSTTCTATVPPQPQYSYHDINVYSLAGLAPHITLNPTIPLFQAHQQLKQC  
 VRQAIERAVQELVHPVVDRSIKIAMTTCEQIVRKDFALDSEESRMRIA AHHMMRNLTAGMAMITCREP LLMSI  
 STNLKNSFASALRTASPQQREMMDQAAAQLAQDNCELACCFIQKTAVEKAGPEMDKRLATEFELRKHARQEGR  
 RYCDPVVLTQYAERMEQIRLKVGGVDPKQLAVYEEFARNVPGFLPTNDLSQPTGFLAQPMKQAWATDDVAQI  
 YDKCITELEQHLHAIPPTLAMNPQAALRSLLEVVVLSRNSRDAIAALGLLQKAVEGLLDATSGADAD LLLRY  
 RECHLLVLKALQDGRAYGSPWCNKQITRCLIECRDEYKYNVEAVELLIRNHLVNMQQYDLHLAQSMENGLNYM  
 AVAFAMQLVKILLVDERSVAHI TEADLFHTIETLMRINAHSRGNAPPEGLPQLMEVVRSNYEAMIDRAHGGPNF  
 MMHSGISQASEYDDPPGLREKAEYLLREWVNLHSAAGRDSTKAFSAFVGMHQQGILKTDLLITRFFRLCT  
 EMCVEISYRAQAEQQHNPAANPTMIRAKCYHNLD AFVRLIALLVKHSGEATNTVTKINLLNKVLGIVVGVLLQ  
 DHDVRSQEFQQLPYHRIFIMLLELNAPEHVLETINFQTLTAFNCNTFHILRPTKAPGFVYAWLELISHRIFIA  
 RMLAHTPQQKGWPMYAQLLIDLFKYLAPFLRNVELTKPMQILYKGTLRVLLVLLHDFPEFLCDYHYGFCDVIP  
 PNCIQLRNLILSAFPRNMLPDPFTPNLKVDMLSEINIAPRILTNFTGVMPPQFKKDLDSYLKTRSPVTF LSD  
 LRSNLQVSNPEGNRYNLQ LINALVLYVGTQAI AHIHNGKSTPSMSTITHSAHMDIFQNLAVDLDTTEGR YLFLN  
 AIANQLRYPNSHTHYFSC TMLYLFAEANTEAIEQEQITRVLRLIVNRPHPWGLLITFIELIKNPAFK  
 FWNHEFVHCAPEIEKLFQSV AQCCMGQKQAQQVMEGTGAS\*  
 >rs32188968\_ENSMUSP00000148807\_c.214:T>C\_p.L72P  
 ENSMUST000000211887.2|Cnot1-203|ENSMUSG00000036550|-|chr8:g.96501346:A>G  
 MNLDSLALSQISYLVNDLTKKNYRASQQEIQHIVNRHGPEADRHLRCLF SHVDFSGDGKSSGKDFHQFP  
 IQECASLITKPNFISTLSY AIDNPLHYQKSLKPAPHLFAQLSKVLKLSKVQEVIFGLALLNSSSPDLRGFAAQF  
 IKQKLPDLLRSYIDADVSGNQEGGFQDIAIEVLHLLLSHLLFGQKGAFGVQEQIDAFLKTLRRDFPQERC  
 PVVLA PLLYPEKRDILMDRILPDSGGVAKTMMESSLADFMQEVGYGFCASIEECRNIIMQFGVREVTAAQVARVL

GMMARTHSGSLTDGIPLQSI SAPGSGIWSGDKDKSEGAQAHTWNVEVLIDVLKELNPSLNFKEVTYELDHGPGFQ  
IRDSKGLHNVVYGIQRGLGMEVFPVDFIYRPWKHAEGQLSFIQHSLINPEVFCFADYPCHTVATDILKAPPED  
DNREIATWKSLLDIESLLRLAEVQYEQVKQLFSFPIKHC PDMLVLALLQINTSWHTLRHELISLMPIFLGN  
HPNSAILHYAWHGQGS PSIRQLIMHAMA EWYMRGEQYDQAKLSRILDVAQDLKALSMLLNGTPFAFVIDLA  
ALASRREYLKLDKWLTDKIREHGEPFIQACMTFLKRRCP SILGGLAPEKDPKSAQLPAETLATMLACLQACA  
GSVQSQELSETILTMVANC SNVMNKARQPPPGVMPKGRPPSASSLDAISPVQIDPLAGMASLSIGGSAAPHTQS  
MQGFPPNLGSAFSTPQSPAKAF PPLSTPNQTTAFSGIGGLSSQLPVGGLGTGSLTGIGTGALGLPAVNNDFV  
QRKLGTSGLNQPTFQQTDL SQVWPEANQHFSKEIDDEANSYFQRIYNHPPHPTMSVDEVLEMLQRFKSTIKR  
EREVFNCLRNLFEEYRFFPQYDPKELHITACLFGGIIEKGLVTYMALGLALRYVLEALRKPFGSKMYYFGIA  
ALDRFKNRLKDY PQY CQHLASISHFMQFPHHLQEYIEYGQQRDPPVKMQGSITTPGSIALAQAQAQVPAK  
APLAGQVNTMVTSTTTTVAKT VTVTKPTGVSFKKDVPPSINTTNIDTLLVATDQTERIVEPPENIQEKIAFI  
FNNLSQSNMTQKVEELKETVKEEFMPWVSQYLVMKRVSIEPNFHSLSYSNFLDTLKNPEFNKMLVNETYRNKIV  
LLTSDKAAANFSDRSLLKNLGHWLGMITLAKNKPI LHTDLDVKSLLLEAYVKGQOQELLYVVPFVAKVLESSIR  
SLVFRPPNPWTMAIMNVLAELHQEHDLKLNKFEIEVLCKNLALDINELKPGNLLKDKDRKLNKDEQLSAPKK  
DVKQPEELPAITTTTTSTTPATSTTCTATVPPQPQYSYHDINVYSLAGLAPHITLNP TPLFQAHPQLKQCVR  
QAIERAVQELVHPVVDRS IKIAMTTCEQIVRKDFALDSEESRMRIA AHMMRNLTAGMAMITCREP LLMSIST  
NLKNSFASALRTAS PQQREMMDQAAAQLAQDNCELACCFIQKTAVEKAGPEMDKRLATEFELRKHARQEGRRY  
CDPVVLTYYQAERMPEQIRLKVGGVDPKQLAVYEEFARNVPGFLPTNDLSQPTGFLAQPMKQAWATDDVAQIYD  
KCITELEQHLHAI PPTLAMNPQAQALRSLLLEVVL SRNSRDAIAALGLLQKAVEGLLDATSGADADLLLRYRE  
CHLLVLKALQDGRAYGSPWCNKQITRCLIECRDEYKYNVEAVE LLIRNHLVNMQQYDLHLAQSMENGLNYMAV  
AFAMQLVKILLVDERSVAHI TEADLFHTIETLMRINAHSRGNAP EGLPQLMEVRSNYEAMI DRAHGGPNFMM  
HSGISQASEYDDPPGLREKAEYLLREWVNL YHSAAAGR DSTKAFSAFVGMHQGGILKTDDLI TRFR LCTEM  
CVEISYRAQAEQQHNPAANPTMIRAKCYHNLDAFVRLIALLVKHSGEATNTVTKINLLNKVLGIVVGVLLQDH  
DVRQSEFQQLPYHRIFIMLLLELNAPEHVLETINFQTLTAF CNTFHILRPTKAPGFVYAWLELISHRIF IARM  
LAHTPQQKGWPMYAQLLIDLFKYLAPFLRNVELTKPMQILYKGTLRVLLVLLHDFPEFLCDYHYGFCDVIPP N  
CIQLRNLILSAPFRNMLR LDPFPTPNLKVMDLSEINIAPRILTNFTGVMPPQFKKDLSDYSLKTRSPVTF LSDLR  
SNLQVSNCPGNRNQLINALVLYVGTQAIAHIHNKGSTPSMSTITHSAHMDIFQNLAVLDTEGRYLF LNAI  
ANQLRYPNSH THYFSC TMLYLF AEANTEA IQEQITRVLLERLIVNRPHPWGLLITFIELIKNPAFKFWNHEFV  
HCAPEIEKLFQSV AQCCMGQKQAQQVMEGTGAS\*

>rs32188968\_ENSMUSP00000148735\_c.220:T>C\_p.L74P

ENSMUST00000213006.2|Cnot1-216|ENSMUSG00000036550|-|chr8:g.96501346:A>G  
MNLDSLALSQISYLVNDLTKKNYRASQQEIQHIVNRHGPEADRHLRLCLFSHVDFSGDGKSSGKDFHQ TQF  
PIQECASLITKPNFISTLSY AIDNPLHYQKSLKPAPHLFAQLSKVLKLSKVQEVIFGLALLNSSSPDLRGFAA  
QFIKQKLPDLRSYIDADVSGNQEGGFQDIAIEVLHLLLSHLLFGQKGAFGVQEQIDAFKTLRRDFPQERC  
PVLAPLLYPEKRDILMDRILPDSGGVAKTMMESSLADFMQEVGYGFCASIEECRNIIMQFGVREVTAAQVAR  
VLMARTHSGSLTDGIPLQSI SAPGSGIWSGDKDKSEGAQAHTWNVEVLIDVLKELNPSLNFKEVTYELDHGPG  
FQIRDSKGLHNVVYGIQRGLGMEVFPVDFIYRPWKHAEGQLSFIQHSLINPEVFCFADYPCHTVATDILKAPP  
EDDNREIATWKSLLDIESLLRLAEVQYEQVKQLFSFPIKHC PDMLVLALLQINTSWHTLRHELISLMPIFL  
GNHPNSAILHYAWHGQGS PSIRQLIMHAMA EWYMRGEQYDQAKLSRILDVAQDLKALSMLLNGTPFAFVID  
LAALASRREYLKLDKWLTDKIREHGEPFIQACMTFLKRRCP SILGGLAPEKDPKSAQLPAETLATMLACLQACA  
CAGSVQSQELSETILTMVANC SNVMNKARQPPPGVMPKGRPPSASSLDAISPVQIDPLAGMASLSIGGSAAPHT  
QSMQGFPPNLGSAFSTPQSPAKAF PPLSTPNQTTAFSGIGGLSSQLPVGGLGTGSLTGIGTGALGLPAVNNDF  
FVQRKLGTSGLNQPTFQQSKMKPSDLSQVWPEANQHFSKEIDDEANSYFQRIYNHPPHPTMSVDEVLEMLQRF  
KDSTIKREVEVFNCLRNLFEEYRFFPQYDPKELHITACLFGGIIEKGLVTYMALGLALRYVLEALRKPFGSK  
MYYFGIAALDRFKNRLKDY PQY CQHLASISHFMQFPHHLQEYIEYGQQRDPPVKMQGSITTPGSIALAQAQA  
QAQVPAKAPLAGQVNTMVTSTTTTVAKT VTVTKPTGVSFKKDVPPSINTTNIDTLLVATDQTERIVEPPENI  
QEKIAFIFNNLSQSNMTQKVEELKETVKEEFMPWVSQYLVMKRVSIEPNFHSLSYSNFLDTLKNPEFNKMLVNE  
TYRNKIVLLTSDKAAANFSDRSLLKNLGHWLGMITLAKNKPI LHTDLDVKSLLLEAYVKGQOQELLYVVPFVAK  
VLESSIRSLVFRPPNPWTMAIMNVLAELHQEHDLKLNKFEIEVLCKNLALDINELKPGNLLKDKDRKLNKDE  
QLSAPKKDVKQPEELPAITTTTTSTTPATSTTCTATVPPQPQYSYHDINVYSLAGLAPHITLNP TPLFQAHP  
QLKQCVRQAIERAVQELVHPVVDRS IKIAMTTCEQIVRKDFALDSEESRMRIA AHMMRNLTAGMAMITCREP  
LLMSISTNLKNSFASALRTAS PQQREMMDQAAAQLAQDNCELACCFIQKTAVEKAGPEMDKRLATEFELRKHA  
RQEGRRYCDPVVLTYYQAERMPEQIRLKVGGVDPKQLAVYEEFARNVPGFLPTNDLSQPTGFLAQPMKNWSSTY  
TPFHPLWP\*

>rs32188968\_ENSMUSP00000148574\_c.220:T>C\_p.L74P

ENSMUST00000212323.2|Cnot1-209|ENSMUSG00000036550|-|chr8:g.96501346:A>G

MNLDLSLALSQISYLVNDLTKKNYRASQQEIQHIVNRHGPEADRHLRLCLFSHVDFSGDGKSSGKDFHQTF  
PIQECASLITKPNFISTLSYAIDNPLHYQKSLKPAPHLFAQLSKVLKLSKVQEVIFGLALLNSSSPDLRGGFK  
SLYPEYKTLPTPPSPFRLPSFLPPFLSFFSLSLSSSTPHPPFFIFVVLGIKSRALDKLYKQGLYL\*

>rs32188968\_ENSMUSP00000096073\_c.220:T>C\_p.L74P  
ENSMUST00000098473.11|Cnot1-202|ENSMUSG00000036550|-|chr8:g.96501346:A>G  
MNLDLSLALSQISYLVNDLTKKNYRASQQEIQHIVNRHGPEADRHLRLCLFSHVDFSGDGKSSGKDFHQTF  
PIQECASLITKPNFISTLSYAIDNPLHYQKSLKPAPHLFAQLSKVLKLSKVQEVIFGLALLNSSSPDLRGGFAA  
QFIKQKLPDLLRSYIDADVSGNQEGGFQDIAIEVLHLLLSHLLFGQKGAFGVQEQIDAFKTLRRDFPQERC  
PVVLAPELLYPEKRDILMDRILPDSGGVAKTMMESSLADFMQEVGYGFCASIEECRNIIMQFGVREVTAAQVAR  
VLGMMARTHSGGLTDGIPLQSIAPGSGIWSGDKDKSEGAQAHTWNVVLIIDVLKELNPSLNFKEVYELDHGPG  
FQIRDSKGLHNVVYGIQRGLGMEVFPVDFIYRPWKHAEGQLSFIQHSLINPEVFCFADYPCHTVAVDILKAPP  
EDDNREIATWKSLLDIESLLRLAEVQYEQVKQLFSFPIKHCPCDMLVALLQINTSWHTLRHELISLTMPIFL  
GNHPNSAILHYAWHGQGSPIRQLIMHAMAEWYMRGEQYDQAKLSRILDVAQDLKALSMLNGTFFAFVID  
LAALASRREYLKLDKWLTDKIREHGEPFIQACMTFLKRRCP SILGGLAPEKDPKSAQLPAETLATMLACLQA  
CAGSVSQELSETILTMVANCNSVMNKARQPPPGVMPKGRPPSASSLDAISPVQIDPLAGMASLIGGSAAPHT  
QSMQGFPPNLGSAFSTPQSPAKAFPPPLSTPNQTTAFSGIGGLSSQLPVGGLGTGSLTGIGTGALGLPAVNNDF  
FVQRKLGTSGLNQPTFQQSKMKPSDLSQVWPEANQHF SKEIDDEANSYFQRIYNHPPHPTMSVDEVLEMLQRF  
KDSTIKRREVFNCMLRNLFEYRFFPQYDPKELHITACLFGGIEKGLVTYMALGLALRYLEALRKPFGSK  
MYYFGIAALDRFKNRLKDYQYQCQHLASISHFMQFPHHLQEYIEYQQSRDPPVKMQGSITTPGSIALAQAQA  
QAQVPAKAPLAGQVNTMVTSTTTTVAKTVTVTKPTGVSFKKDVPPSINTTNIIDTLVATDQTERIVEPPENI  
QEKIAFIFNNLSQSNMTQKVEELKETVKEEFMPWVSQYLVMKRVSIEPNFHSLSYNSFLDTLKNPEFNKMLVNE  
TYRNKIVLLTSDKAAANFSDRSLLKNLGHWLGMITLAKNKPI LHTDLVKSLLLEAYVKGQOELLVVPFVAK  
VLESSIRSLVFRPPNPWTMAIMNVLAELHQEHDLKLNLFKFEIEVLCKNLALDINELKPGNLLKDKDLKLNDE  
QLSAPKKDVKQPEELPAITTTTSTTPATSTTCTATVPPQPYSYHDINVYSLAGLAPHITLNPITPLFQAHP  
QLKQCVRAIERAVQELVHPVVDRSIKIAMTTCEQIVRKDFALDSEESRMRIAAHMMRNLTAGMAMITCREP  
LLMSISTNLKNSFASALRTASPPQREMMDQAAAQQLADNCELACCFIQKTAVEKAGPEMDKRLATEFELRKAHA  
RQEGRRYCDPVVLTALYQERMPEQIRLKVGGVDPKQLAQVYEEFARNVPGFLPTNDLSQPTFLAQPMKQAWATD  
DVAQIYDKCITELEQLHAIPTPLAMNPQAQALRSLEVVVLSRNSRDAIAALGLLQKAVEGLLDATSGADAD  
LLRYRECHLLVLKALQDGRAYGSPWCNKQITRCLIECRDEYKYNVEAVELLIRNHLVNMQQYDLHLAQSMEN  
GLNYMAVAFAMQLVKILLVDERSVAHITEADLFHTIETLMRINAHSRGNAPGLPQLMEVVRSNYEAMIDRAH  
GGPNFMMHSGISQASEYDDPPGLREKAEYLLREWVNLVYHSAAGRDSTKAFSAFVGMHQQGI LKTDLITRF  
FRLCTEMCVEISYRAQAEQQHNPAANTMIRAKCYHNLDAFVRLIALLVKHSGEATNTVTKINLLNKVGLIVV  
GVLLQDHDVQRSEFQQLPYHRIFIMLLELNAPEHVLETINFQTLTAFCNTFHILRPTKAPGFVYAWLELISH  
RIFIARMLAHTPQQKGWPMYAQLLIDLKYLAPFLRNVELTKPMQILYKGTLRVLLVLLHDFPEFLCDYHYGF  
CDVIPNCIQLRNLILSAFPRNMRPLDPFPTNLKVDMLSEINIAPRILTNFTGMVPPQFKKDLDSYLKTRSPV  
TFLSDDLRSNLQVSNPEGNRYNLQLINALVLYVGTQAI AIAIHKNGSTPSMSTITHSAHMDIFQNLAVDLDTGR  
YLFNLAIANQLRYPNSHSHYFSCMTLYLFAEANTEAIEQEQITRVLLERLIVNRPHPWGLLITFIELIKNPAFK  
FWNHEFVHCAPEIEKLFQSV AQCCMGKQAQQVMEGTGAS\*

>rs46345668\_ENSMUSP00000037023\_c.975:C>T\_p.R326\*  
ENSMUST00000040481.4|Slc38a7-201|ENSMUSG00000036534|-|chr8:g.96568862:G>A  
MAQVSINSDYSEWASSTDAGERARLLQSPCVDVVPKSEGEASPGDPDSGTTSTLGAVFIVVNAACLGAGLLNFP  
AAFSTAGGVAAGIALQMGMLVFIISGLVILAYCSQASNERTYQEVVWAVCGKLTGVLCEVAIAVYTFGTCIAF  
LIIIGDQDQDKIIAVMSKEPDGASGSPWYTDKRFITISLTAFLFILPLSIPKEIGFKQYASFLSVVGTWYVTAII  
IIKYIWPDKEMRPGDILTRPASWMAVFNAMPTICFGFQCHVSSVPVFNMSMRQPEVKTWGGVVTAAMVIALAVY  
MGTGICGFLTFGAAVDPDVLRSYSESDVAVAVA\*AFIILSVLTSYPIILHFCGRAVVEGLWLRKGMPEVEDVG  
RERRRRVLQTLVWFLLTLLLALFIPDYGKVISVIGGLAACFIFIFPGLCLIQAKLSEMEEVKPAWVALVSYG  
VLLVTLGAFIFGQTTANAI FVDLLA\*

>rs46345668\_ENSMUSP00000148659\_c.975:C>T\_p.R326\*  
ENSMUST00000212270.2|Slc38a7-204|ENSMUSG00000036534|-|chr8:g.96568862:G>A  
MAQVSINSDYSEWASSTDAGERARLLQSPCVDVVPKSEGEASPGDPDSGTTSTLGAVFIVVNAACLGAGLLNFP  
AAFSTAGGVAAGIALQMGMLVFIISGLVILAYCSQASNERTYQEVVWAVCGKLTGVLCEVAIAVYTFGTCIAF  
LIIIGDQDQDKIIAVMSKEPDGASGSPWYTDKRFITISLTAFLFILPLSIPKEIGFKQYASFLSVVGTWYVTAII  
IIKYIWPDKEMRPGDILTRPASWMAVFNAMPTICFGFQCHVSSVPVFNMSMRQPEVKTWGGVVTAAMVIALAVY  
MGTGICGFLTFGAAVDPDVLRSYSESDVAVAVA\*AFIILSVLTSYPIILHFCGRAVVEGLWLRKGMPEVEDVG  
RERRRRVLQTLVWFLLTLLLALFIPDYGKVISVIGGLAACFIFIFPGLCLIQAKLSEMEEVKPAWVALVSYG  
VLLVTLGAFIFGQTTANAI FVDLLA\*

>rs46345668\_ENSMUSP00000148545\_c.975:C>T\_p.R326\*  
ENSMUST00000212628.2|Slc38a7-205|ENSMUSG00000036534|-|chr8:g.96568862:G>A



MAQVSINSDYSEWASSTDAGERARLLQSPCVDVVPKSEGEASPGDPDSGTTSTLGAVFIVVNAACLGLGALLNFP  
AAFSTAGGVAAGIALQMGMLVFIISGLVILAYCSQASNERTYQEVVWAVCGKLTGVLCEVAIAVYTFGTICIAF  
LIIIGDQDQDKIIAVMSKEPDGASGSPWYTDKRFITISLTAFLFILPLSIPKEIGFQKYASFLSVVGTWVYVTAII  
IIKYIWPDKEMRPGDILTRPASWMAVFNAMPTICFGFQCHVSSVPVFNMSRQPEVKTWGGVVTAAMVIALAVY  
MGTGICGFLTFGAAVDPDVLRSYPSEDVAVAVA\*AFIILSVLTSYPILHFCGRAVVEGLWLRKGMPEEDVVG  
RERRRRVLQTLVWFLLLTLLLFIPDIGKVISVIGGLAACFIFI  
>ENSMUSP00000017622\_c.334:C>T\_p.A112V ENSMUST00000017622.12|Zc3h18-  
201|ENSMUSG00000017478|+|chr8:g.123110487:C>T  
MDVAESPELDPHSPEDDEEQPALSDDILRESGSEQDLGAGERASDLEEEENATRVQSQEETRSDEEDRASEP  
KSQDQDSEAEHLRSGPAGSPCEEEDDVEEDGTSDLRDEVSSVTRELDEHELDYDEEVPEEPAPAAQEEEA  
GAEKEEKEGEGAPGEEGKPDVQSVGEQEPTEAAKEKKKEDDDGEIDDGEIDDDDLLEEVEKDPDRKVRPRPT  
CRFFMKDVVTPPLSTLLPPIPNISIPLRGQVKGNCWTGMSCRFIHPGVNDKGNYSLITKAEFPFPPNGAPPLGPH  
LMPANPWGGPVVDEILPPPPPEPPTESAWERGLRHAKEVLKATIRKEQEPDFEERFTVTIGEDDREFDKEN  
EVFRDWSRVPRDVRDRTTLEPYADPYDYEIERFWRGGQYENFRVQYTEAEPYHNYRERERERENRQRE  
RERERDRERERRQRERERERERERDKERQRRKEEWERERAKRDEKDRQHRDRDRDKDREKDKPKPRSPQPP  
SRQAEPKKESTSVGPQVKRADEWKDPWRRSKSPKPKLGVSVSPSRARRRRKTSASSASANSRSSSRSSSY  
SGSGSSRSRSSSYSSSRSSRHSSFSGSRSRSRSFSSSPSPPTPSPHRPPVRTKGEPAAPPKAGEKSI  
KKPAPPAPPQATKTTAPGPEPAKPGDLREARRKERQTRTPRRRRLSGSGSGSSSYSGSSRSRSLVSSV  
SSVSSATSSSSSVHSDVSDDDMYADLASPVSSASSRSPTPAQTKKERGKSKKEDGVREEKRRRDP  
SAQPPKSSKAPAGGKASQQAAPQPAVPGQPQQGSFVAHKEIKLTLNKAADKGSRKRYEPSDKDRQSP  
PAKKANLSPDRGSRDRKSGGRMGSPKPERQRGQNAKAPAAPADKRPLSPQSKGSSKVTVPKGATDTATAG  
TKSGKASTLSRRELLKQLKAVEDAIARKRAKIPGKV\*  
>ENSMUSP00000090761\_c.334:C>T\_p.A112V ENSMUST00000093073.12|Zc3h18-  
202|ENSMUSG00000017478|+|chr8:g.123110487:C>T  
MDVAESPELDPHSPEDDEEQPALSDDILRESGSEQDLGAGERASDLEEEENATRVQSQEETRSDEEDRASEP  
KSQDQDSEAEHLRSGPAGSPCEEEDDVEEDGTSDLRDEVSSVTRELDEHELDYDEEVPEEPAPAAQEEEA  
GAEKEEKEGEGAPGEEGKPDVQSVGEQEPTEAAKEKKKEDDDGEIDDGEIDDDDLLEEVEKDPDRKVRPRPT  
CRFFMKGNCTWGMSCRFIHPGVNDKGNYSLITKAEFPFPPNGAPPLGPHLMPANPWGGPVVDEILPPPPPEP  
TESAWERGLRHAKEVLKATIRKEQEPDFEERFTVTIGEDDREFDKENEVFRDWSRVPRDVRDRTTLEPYAD  
PYDYEIERFWRGGQYENFRVQYTEAEPYHNYRERERERENRQREERERERERERDRERERRQRERERERER  
DKERQRRKEEWERERAKRDEKDRQHRDRDRDKDREKDKPKPRSPQPPSRQAEPKKESTSVGPQVKRADEW  
KDPWRRSKSPKPKLGVSVSPSRARRRRKTSASSASANSRSSSRSSSYSGSGSSRSRSSSYSSYSSRSSR  
HSSFSGSRSRSRSFSSSPSPPTPSPHRPPVRTKGEPAAPPKAGEKSIKKPAPPAPPQATKTTAPGPEPAK  
PGDLREARRKERQTRTPRRRRLSGSGSGSGSSSYSGSSRSRSLVSSVSSVSSATSSSSSVHSDVSDDDMYAD  
LASPVSSASSRSPTPAQTKKERGKSKKEDGVREEKRRRDP  
SAQPPKSSKAPAGGKASQQAAPQPAVPGQPQQ  
GSFVAHKEIKLTLNKAADKGSRKRYEPSDKDRQSP  
PAKKANLSPDRGSRDRKSGGRMGSPKPERQRGQNA  
KAPAAPADKRPLSPQSKGSSKVTVPKGATDTATAGTKSGKASTLSRRELLKQLKAVEDAIARKRAKIPGKV\*  
>ENSMUSP00000134743\_c.334:C>T\_p.A112V ENSMUST00000176629.8|Zc3h18-  
205|ENSMUSG00000017478|+|chr8:g.123110487:C>T  
MDVAESPELDPHSPEDDEEQPALSDDILRESGSEQDLGAGERASDLEEEENATRVQSQEETRSDEEDRASEP  
KSQDQDSEAEHLRSGPAGSPCEEEDDVEEDGTSDLRDEVSSVTRELDEHELDYDEEVPEEPAPAAQEEEA  
GAEKEEKEGEGAPGEEGKPDVQSVGEQEPTEAAKEKKKEDDDGEIDDGEIDDDDLLEEVEKDPDRKVRPRPT  
CRFFMKDVVTPPLSTLLPPIPNISIPLRGQVKGNCWTGMSCRFIHPGVNDKGNYSLITKAEFPFPPNGAPPLGPH  
LMPANPWGGPVVDEILPPPPPEPPTESAWERGLRHAKEVLKATIRKEQEPDFEERFTVTIGEDDREFDKEN  
EVFRDWSRVPRDVRDRTTLEPYADPYDYEIERFWRGGQYENFRVQYTEAEPYHNYRERERERENRQRE  
RERERDRERERRQRERERERERERDKERQRRKEEWERERAKRDEKDRQHRDRDRDKDREKDKPKPRSPQPP  
SRQAEPKKESTSVGPQVKRADEWKDPWRRSKSPKPKLGVSVSPSRARRRRKTSASSASANSRSSSRSSSY  
SGSGSSRSRSSSYSSSRSSRHSSFSGSRSRSRSFSSSPSPPTPSPHRPPVRTKGEPAAPPKAGEKSI  
KKPAPPAPPQATKTTAPGPEPAKPGDLREARRKERQTRTPRRRRLSVSSVSSVSSATSSSSSVHSDVSDDDMY  
ADLASPVSSASSRSPTPAQTKKERGKSKKEDGVREEKRRRDP  
SAQPPKSSKAPAGGKASQQAAPQPAVPGQP  
QQGSFVAHKEIKLTLNKAADKGSRKRYEPSDKDRQSP  
PAKKANLSPDRGSRDRKSGGRMGSPKPERQRGQNA  
KAPAAPADKRPLSPQSKGSSKVTVPKGATDTATAGTKSGKASTLSRRELLKQLKAVEDAIARKRAKIPGK  
V\*  
>ENSMUSP00000095939\_c.4756:A>GGAGGGGAGA\_p.E1586GRGE-ins  
ENSMUST00000098334.13|Ankrd11-202|ENSMUSG00000035569|-  
|chr8:g.123619031:T>TCTCCCTCC  
MPKGGCSKTPQOEDFALSNDMVEKQTGKKDKDKVSLTKTPKLDKSDGGKEVREERATKRKLPFTVANGAQKDS  
DTEKQGPERRKRIKKEPVARKSGLLFGMGLSGIRAGYPLSERQQVALLMQMTAEESANSVPDTPKHPQSSTVC

QKGTTPNSASKTKDKVNKRNERGETRLHRAAIRGDARRIKELISEGADVNVKDFAGWTALHEACNRGYDDIAKQ  
 LLAAGAEVNTKGLDDDDTPLHDAANNNGHYKVVKLLRLRYGGNPQQSNRKGETPLKVANSPTMVNLLLKGKTYTSS  
 EESSTESSEEEEDAPSFAPSSSVGNNNTDSEFEKGLKLLKAKNPEPQKTVTPVKDEYEFDEDEQDRVPPVDDKH  
 LLKKDYRKEAKANSFISIPKMEVKSYSKNNTLAPKKAHRILSDTSDEEDVSVSIGAGEKLRLSAHTMLPGSK  
 ARESSSSRQQKEKNKLLKKRKKETKGEVRFVGRSDKFCSSGSESESESEEDDGDSDVSSGCLKGSPLVLKD  
 PSLFSSLSASSTSSHGSAVAQKHGSGHTDQHTKHWRTDNWKAISSPAWSEVSSLSDSSRTGLTSESDCSSEGS  
 SVESLKPTRRKQEHRRKRGVLQSAPESEKRSFHPCTDGAVPKLDKEGKVVKKHKTKKHKKHKEKGQCSVSVQELK  
 LKSFTYEDSKQKSDKAILLESDLSTENKLVKLDHREHLKEDKLGMRKPEDKDWLFKDEKVLKRIKDANK  
 DMSRAFREDKDRASKAERERATKDKSPKEEKLRLYKEERKKKSKDRASRLERKNDMKEDLSKEKEKAFKEDK  
 EKLKKEKLYREDAAFDDYCNKSQFLDHEDTKFSLSDDQQRWFSDLSDSSSFDFKGEDSWDSVTDYRDIKNDV  
 AKLILETVKEDSKEKKRDNKIREKRDFKDSFFRKRDRDCLDNSEKRRDQTEKHKSIPSYLSEKDKKRRESAE  
 GGRDRRDGRIRSEEVHREDLKECGFESSFKDKSDCDFPKNLEPWERPHAAREKEKKDALEKERKEKGRADKYK  
 EKSSERERSDKSTLDKQCQKDEFEKCFKEKKDGKEKHDIHSDRKAASFDQLREKKEKVFSSIISEDFSERKD  
 DRKGKEKSWYIADIFTDESEDEKDDCVAGSFKATEASDTQRVDGLPEKEEGREHPSDRHRKSSSDRQHTTEKPR  
 DKEPKEKKKDRGASEGGKDKKEKMEKIFEKHKEKKDKECAERYKDRKERASADSAPEKKNKQKLEPEKVEKKHF  
 AEDKVKSKHKEKPEKEHSRERERKPSRGPDVEKSLLEKLEEEALHDYREDSNDKISEVSSDSFADHGQEP  
 SLSTLLEVSFSEPPAEDKARDSACLSEKLEKERHRHSSSSSKSHERERAKKEKAEKKESEDYKDISSVRKDA  
 SQFEKDFLDAETYGVSYPTKADVEEELDKAIELFSSEKKDRSDPEREPAKRIEKELKPYGSSAISILKEKKR  
 EKHRERWREEKERHRDKHVDGFLRHHKDEPKPAAKDKDNPPNSFKEKSREESLKLSETKLKEKFKENTEREK  
 GDSIKMSNGNDKLVPSRDSGKKDRPREKLLGDGDLMMTSFERMLSQKDLIEGRGERHKKRHKRMKQMEKMRH  
 RSGDPKLEKKPTDGRKKSDFPSKKALGLDKVKEPAPTLTGESKPHSGPGTESKDWLSGQPLKEVLPAS  
 PRTEQSRPTGVPTPTS SVVSCPSYEEVMHTPRTSPSCSADDPDLVFDCTDSQHSMPVSTASTSACSPFFDRFS  
 VASSVVSENAAGQTPTRPISTNLYRSISVDIRRTPEEEFSAGDKLFRQQSVAPSSFDSPVQHLLLEEKAPLPP  
 VPAEKFACLSPGYSPDYGIPSPKVDTLHCPPTAVVSATPPPDSVFSNLPKSSPSPRGELLSPAIEGTLPPD  
 LGLPLDATEDQQATAAAILPQEPSYLEPLDEGPFPTTIVITEEPVEWHTAAEQGLSSSSSLIASASENPVSWPVGS  
 ELMLKSPQARFAESPXKHFPGESLHSTTPGPYSAEPTVPSPGSYPLPAPEPALEEVKGGTGAIPVAISAAE  
 GAAPYAAPARLESFFSNCKSHDPALDPTAPEPTGVTAVQAQVEALGPLESSFLDSNPSISITLSQVEPVSWHEAF  
 TSPEDDLDLGPFSLPELPLQAKDASDVEAEAAKASPVPPAESPPGPTGVLGGGDVPAPAAEPPAPPQEA  
 SPQLSTEPEPSEEPKLDVLEATVETEVLADDSAPEASISNSVPAPSPPPQQPPGGGDEEAETEDPSATPCCAPD  
 GPTTDGLAQAHNSAEASCVAAAEGPPGNVQAEATDPEPKPTSEVPKAPKVEEVPQRMTRNRAQMLASQSKQG  
 IPAAEKDPMPTPASRAKGRASEEEDAQAQHPRKRRFRQSSQQLQQQLNTSTQQTREVIQQTAAI VDAIKLDA  
 IEPYHSDRSNPFYELQIRKKIEEKRIKCCITPQAPQCYAEVYTYTGSYLLDGKPLSKLHIPVIA PPSLAE  
 PLKELFKQQA VARGKLRQLQHSIEREKLIVSCEQEILRVHCRAARTIANQAVPFSACTMLLDSEVYNMPLESQ  
 DENKSVRDRFNARQFISWLQDVDDKYDRMKTCLLMRQQHEAAALNAVQRMWQLKAQELDPAGHKSICVNEVP  
 SFYVPMVDVNDDFVLLPA\*

>ENSMUSP00000095938\_c.4819:A>GGAGGGGAGA\_p.E1607GRGE-ins  
 ENSMUST00000098333.5|Ankrd11-201|ENSMUSG00000035569|-  
 |chr8:g.123619031:T>TCTCCCTCC

MPKGGCSKTPQOEDFALSNDMVEKQGTGKKDKDKVSLTKTPKLDKRSDDGGKEVREERATKRKLPFTVANGEQKDS  
 DTDSFGHRTFNWGSPLPFLSCTHTEKQGPERRKRIKKEPVARKSGLLFGMGLSGIRAGYPLSERQQVALLMQMT  
 AEESSANSPTTPKHPSQSTVCQKGTTPNSASKTKDKVNKRNERGETRLHRAAIRGDARRIKELISEGADVNVKDF  
 FAGWTALHEACNRGYDDIAKQLLAAGAEVNTKGLDDDDTPLHDAANNNGHYKVVKLLRLRYGGNPQQSNRKGETPL  
 KVANSPTMVNLLLKGKTYTSSSEESSTESSEEEEDAPSFAPSSSVGNNNTDSEFEKGLKLLKAKNPEPQKTVTPVK  
 DEYEFDEDEQDRVPPVDDKHLKKDYRKEAKANSFISIPKMEVKSYSKNNTLAPKKAHRILSDTSDEEDVSV  
 SIGAGEKLRLSAHTMLPGSKARESSSSRQQKEKNKLLKKRKKETKGEVRFVGRSDKFCSSGSESESESESE  
 DDGDSDVSSGCLKGSPLVLKDP  
 PSLFSSLSASSTSSHGSAVAQKHGSGHTDQHTKHWRTDNWKAISSPAWSEVSS  
 LSDSSRTGLTSESDCSSEGS  
 SVESLKPTRRKQEHRRKRGVLQSAPESEKRSFHPCTDGAVPKLDKEGKVVKKH  
 KTKHKKHKKHKEKGQCSVSVQELKLSFTYEDSKQKSDKAILLESDLSTENKLVKLDHREHLKEDKLGMRK  
 PEDKDWLFKDEKVLKRIKDANKDMSRAFREDKDRASKAERERATKDKSPKEEKLRLYKEERKKKSKDRASRLER  
 KNDMKEDKLSKEKEKAFKEDKEKLLKKEKLYREDAAFDDYCNKSQFLDHEDTKFSLSDDQQRWFSDLSDSSSF  
 DFKGEDSWDSVTDYRDIKNDVAKLILETVKEDSKEKKRDNKIREKRDFKDSFFRKRDRDCLDNSEKRRDQTE  
 KHKSIPSYLSEKDKKRRESAEGGRDRRDGRIRSEEVHREDLKECGFESSFKDKSDCDFPKNLEPWERPHAARE  
 KEKKDALEKERKEKGRADKYKKEKSSERERSDKSTLDKQCQKDEFEKCFKEKKDGKEKHDIHSDRKAASFDQL  
 REKKEKVFSSIISEDFSERKDDRKGEKSWYIADIFTDESEDEKDDCVAGSFKATEASDTQRVDGLPEKEEGRE  
 HPSDRHRKSSSDRQHTTEKPRDKEPKEKKKDRGASEGGKDKKEKMEKIFEKHKEKKDKECAERYKDRKERASA  
 DSAPEKKNKQKLEPEKVEKKHFAEDKVKSKHKEKPEKEHSRERERKPSRGPDVEKSLLEKLEEEALHDYREDSN  
 DKISEVSSDSFADHGQEP  
 SLSTLLEVSFSEPPAEDKARDSACLSEKLEKERHRHSSSSSKSHERERAKKEK  
 AEKKEKSEDYKDISSVRKDASQFEKDFLDAETYGVSYPTKADVEEELDKAIELFSSEKKDRSDPEREPAKRI

EKELKPYGSSAISILKEKKKKREKHRERWREEKERHRDKHVDGFLRHHKDEPKPAKDKDNPPNSFKEKSREES  
LKLSETKLKEKFKENTEREKGDS IKMSNGNDKLVPSRDSGKKDSRPREKLLGDGDLMMTSFERMLSQKDLIE  
GRGERHHRKRMKQMEKMRHRSRSGDPKLKEKKPTEDGRKKSDFPSKKALGLDKKVKEPAPTLTTGESKPHSG  
PGTESKDWLSGQPLKEVLPASPRTEQSRPTGVPTPTS SVVSCPSYEEVMHTPRTTPSCSADDYPDLVFDCTDSQH  
SMPVSTASTSACSPFFDRFSVASSVVSENAAGQTPTRPISTNLYSRISVDIRRTPEEEFSAGDKLFRQQSVP  
APSSFDSPVQHLLLEEKAPLPPVPAEKFACLSPGYSPDYGIPSPKVDLHCPPTAVVSATPPPDSVFSNLPPK  
SSPSPRGELLSPAIEGTLPPDLGLPLDATEDQQATAAILPQEPSYLEPLDEGPFTTVITEEPVEWHTHAAEQG  
LSSSSLIASASENPVSWPVGSELMLKSPQRFAESPKHFPCGESLHSTTPGPYSAAEPTYVSPGSPYPLPAPEP  
ALEEVKDGGTGAIPVAISAAEGAAPYAAPARLESFFSNCKSHPDAPLDTAPEPTGVTAVAQVEALGPLLESSFL  
DSNPSISTLSQVEPVSWEAFTSPEDDLGLGPFSLPELPLQAKDASDVEAEAAKASPVPPAESPPGPTGVLGG  
GDVPAPAAEPPAPPPQEASQLSSTEPSEEPKLDVVLEATVETEVLADDSAPEASISNSVPAPSPQQQPP  
GGGDEEAETEDPSATPCCAPDGPTTDGLAQAHNSAEASCVAAAEGPPGNVQAEATDPEPKPTSEVPKAPKVE  
EVPQRMTRNRAQMLASQSKQGI PAEKDPMPTPASRAKGRASEEEDAQAQHPRKRRFQRSSQQLQQQLNTSTQ  
QTREVIQQTLLAAIVDAIKLDAIEPYHSDRSNPFYELQIRKKIEEKRIKILCCITPQAPQCYAEYVYTGSYLL  
DGKPLSKLHIPVIAPPPSLAEPLKELFKQQAVERGKLRQLQHSIEREKLIVSCEQEILRVHCRAARTIANQAVP  
FSACTMLLDSEVYNMPLESQGDENKSVRDRFNARQFISWLQDVDDKYDRMKTCLLMRQQHEAAAALNAVQRMW  
QLKAQELDPAGHKSCLVNEVPSFYVPMVDVNDDFVLLPA\*  
>ENSMUSP00000095939\_c.4605:A>G\_p.I1536V ENSMUST00000098334.13|Ankrd11-  
202|ENSMUSG00000035569|-|chr8:g.123619182:T>C  
MPKGGCSKTPQQEDFALSNDMVEKQTGKKDKDKVSLTKTPKLDKSDGGKEVREERATKRKLPFTVVGANGEQKDS  
DTEKQGPERRKRIKKEPVARKSGLLFGMGLSGIRAGYPLSERQQVALLMQMTAEESANSVPDTPKHPSQSTVC  
QKGT PNASKTKDKVNKRNERGETRLHRAAIRGDARRIKELISEGADVNVKDFAGWTALHEACNRGYDIAKQ  
LLAAGAEVNTKGLDDDTPLHDAANNNGHYKVVKLLLRYGNGPQQSNRKGETPLKVANSPTMVNLLLKGTYTSS  
EESSTESSEEDDAPSFAPSSVDGNNTDSEFEKGLKLLKAKNPEPQKTVPVKDEYEFDEDEQDRVPPVDDKH  
LLKKDYRKEAKANSFISIPKMEVKSYSKNNTLAPKKAHRILSDTSDEEDVSVSIGAGEKLRLSAHTMLPGSK  
ARESSSSRQQEKKNLKKRKKETKKGKEVRFGRKSDKFCSSGSESESESEEDDGDSDVSSGCLKGSPLVLKD  
PSLFSLSASSTSHGSAVAQKHGSGHTDQHTKHWRTDNWKAISSPAWSEVSSLSDSSRTGLTSESDCSSEGS  
SVESLKPTRRKQEHRRKRGVLQSAPESEKRSFHPCTDGAVPKLDKEGKVVKHKT KHKHKKHKEKGQCSVSQELK  
LKSFTYEDSKQKSDKAILLESDLSTENKLVKLDHREHLKEDKLGMRKPEDKDWLFKDEKVLKRIKDANK  
DMSRAFREDKDRASKAERERATKDKSPKEEKLRLYKEERKSKDRASRLERKNDMKEDKLSKEKEKAFKEDK  
EKLKKEKLYREDAAFDDYCNKSQFLDHEDTKFSLSDDQQRWFSDLSDSSDFDKGEDSWDSVTDYRDIKNSV  
AKLILLETVKEDSKEKKRDNKIREKRDFKDSFFRKRDRDCLDKNSEKRRDQTEKHKSI PSYLSEKDKKRRSAE  
GGRRDRDGRIRSEEVHREDLKECGFESSFKDKSDCDFPKNLEPWERPHAAREKEKKDALEKERKEKGRADKYK  
EKSSERERSDKSTLDKQCQKDEFEKCFKEKKDGKEKHKDIHSKDRKASFDQLREKKEKVFSSIISEDFSERKD  
DRKGKEKSWYIADIFTDESEDEKDDCVAGSFKATEASDTQRVDGLPEKEEGREHPSDRHRKSSSDRQHTKPR  
DKEPKKDKDRGASEGGKDKKEKMEKIFEKHKEKDKCEAERYKDRKERASADSAPKKNKQKLEKVEKHHF  
AEDKVKSKHKEKPEKEHSRERERKPSRGPDVEKSLLEKLEEEALHDYREDSNDKISEVSSDSFADHGQEPSLS  
TLLEVSFSEPPAEDKARDSACLSEKLEKERHRHSSSSSKSHERERAKKEKAEKKEKSEYKDSISSVRKDA  
SQFEKDFLDAETYGVSYPTKADVEEELDKAIELFSSEKDRSDPEREPAKRIEKELKPYGSSAISILKEKKKR  
EKHRERWREEKERHRDKHVDGFLRHHKDEPKPAKDKDNPPNSFKEKSREESLKLSETKLKEKFKENTEREKG  
DSVKMSNGNDKLVPSRDSGKKDSRPREKLLGDGDLMMTSFERMLSQKDLIEERHHRKRMKQMEKMRHRSR  
DPKLKEKKPTEDGRKKSDFPSKKALGLDKKVKEPAPTLTTGESKPHSGPGTESKDWLSGQPLKEVLPASPR  
EQSRPTGVPTPTS SVVSCPSYEEVMHTPRTTPSCSADDYPDLVFDCTDSQHSMPVSTASTSACSPFFDRFSV  
SVVSENAAGQTPTRPISTNLYSRISVDIRRTPEEEFSAGDKLFRQQSVPAPSSFDSPVQHLLLEEKAPLPPVPA  
EKFACLSPGYSPDYGIPSPKVDLHCPPTAVVSATPPPDSVFSNLPPKSSPSPRGELLSPAIEGTLPPDLGL  
PLDATEDQQATAAILPQEPSYLEPLDEGPFTTVITEEPVEWHTHAAEQGLSSSSLIASASENPVSWPVGSEL  
LKSPQRFAESPKHFPCGESLHSTTPGPYSAAEPTYVSPGSPYPLPAPEPALEEVKDGGTGAIPVAISAAEGAA  
PYAAPARLESFFSNCKSHPDAPLDTAPEPTGVTAVAQVEALGPLLESSFLDSNPSISTLSQVEPVSWEAFTSP  
EDDLGLGPFSLPELPLQAKDASDVEAEAAKASPVPPAESPPGPTGVLGGGDVPAPAAEPPAPPPQEASQLS  
TEPEPSEEPKLDVVLEATVETEVLADDSAPEASISNSVPAPSPQQQPPGGGDEEAETEDPSATPCCAPDGPT  
TDGLAQAHNSAEASCVAAAEGPPGNVQAEATDPEPKPTSEVPKAPKVEEVPQRMTRNRAQMLASQSKQGI PA  
AEKDPMPPTPASRAKGRASEEEDAQAQHPRKRRFQRSSQQLQQQLNTSTQQTREVIQQTLLAAIVDAIKLDAIE  
PYHSDRSNPFYELQIRKKIEEKRIKILCCITPQAPQCYAEYVYTGSYLLDGKPLSKLHIPVIAPPPSLAEPLK  
ELFKQQAVERGKLRQLQHSIEREKLIVSCEQEILRVHCRAARTIANQAVPFSACTMLLDSEVYNMPLESQGDEN  
KSVRDRFNARQFISWLQDVDDKYDRMKTCLLMRQQHEAAAALNAVQRMWQLKAQELDPAGHKSCLVNEVPSFY  
VPMVDVNDDFVLLPA\*  
>ENSMUSP00000095938\_c.4668:A>G\_p.I1557V ENSMUST00000098333.5|Ankrd11-  
201|ENSMUSG00000035569|-|chr8:g.123619182:T>C

MPKGGCSKTPQQEDFALSNDMVEKQTGKKDKDKVSLTKTPKLDKSDGGKEVRERATKRKLPFTVVGANGEQKDS  
DTDSFGHRTFNWGSPLPFLTCHTEKQGPERRKRIKKEPVARKSGLLFGMGLSGIRAGYPLSERQQVALLMQMT  
AEESANSPDTPPKHPSQSTVCQKGT PNSASKTKDKVNRNERGETRLHRAAIRGDARRIKELISEGADVNVKD  
FAGWTALHEACNRGYDIAKQLLAAGAEVNTKGLDDDTPLHDAANNNGHYKVVKLLRLRYGGNPQQSNRKGETPL  
KVANSPTMVNLLLKGKTYTSSEESSTESSEEDAPSFAPSSV DGNNTDSEFEKGLKLLKAKNPEPQKTVTPVK  
DEYEFDEDEQDRVPPVDDKHLKLDYRKEAKANSFISIPKMEVKSYSKNNTLAPKKAHRI LSDTSDEEDVS  
VSI GAGEKLRLSAHTMLPGSKARESSSSRQOKEKNLKKRKKETKGEVRFGRSDKFCSSGSESESESEE  
DGDSDSRTGLTSESDCSSEGS SVESLKPTRRKQEHRRKRGVLSAPSEKRS SFHPCTDGAVPKLDEKGVVKKH  
KTKHKKHKKHEKGCQSVSQELKLSFTY EYEDSKQKSDKAILLES DLSTENKLVKLDREHLKEDKLGMRKP  
EDKDWLFKDEKVLKRIKDANKMSRAFREDKDRASKAERERATKDKSPKEEKLRLYKEERKKKSKDRASRLER  
KNDMKEDKLSKEKEKAFKEDKELKKEKLYREDAAFDDYCNKSQFLDHEDTKFSLSDDQOERWFS DLSDSSFD  
FKGEDSWDSVTDYRDIKNDVAKLILETVKEDSKEKRDNKIREKRDFKDSFFRKRDRDCLDNSEKRRDQTE  
KHKSIPSYLSEKDKRRRESAEGGRDRRDGRI RSEEVHREDLKECGFESSFKDKSDCDFPKNLEPWERPHAARE  
KEKKDALEKERKEKGRADKYKEKSSERERSDKSTL DCKQKDEFEKCFEKKDGKEKHKDIH SKDRKASFDQL  
REKKEKVFSSIISEDFSERKDDRKGKEKSWYIADIF TDESEDEKDDCVAGSFKATEASDTQRVDGLPEKEEGR  
EHPSDRHRKSSSDRQHTTEKPRDKEPKKDRGASEGGKDKKEKMEKIFEKHKEKKDKECAERYKDRKERASA  
DSAPEKKNKQKLEKVEKKHFAEDKVKSKHKEKPEKHSRERERKPSRGPDVEKSLLEKLEEEALHDYREDSN  
DKISEVSSDSFADHGQEP SLSLLELVSFSEPPAEDKARDSACLSEKLEKERHRHSSSSSKSHERERAKKEK  
AEKKEKSEDYKDISSVRKDASQFEKDFLDAETYGVSYP TKADVEEELDKAIELFSSEKDRSDPEREPAKRI  
EKELKPYGSSAISILKEKKKREKHRERWREEKERHRDKHVDGFLRHHKDEPKPAKDKDNPNSFKESREES  
LKLSETKLKEKFKENTEREKGD SVKMSNGNDKLVPSRDSGKKDSRPREKLLGDGDLMMT SFERMLSQKDLIE  
ERHHRHKERMKQMEKMRHRS GPKLKEKPTEDGRKSLDFPSKALGLDKKVEPAPTLTTGESKPHSGPGT  
ESKDWLSGQPLKEVLPASPRTEQSRPTGVPTPTSVVSCPSYEEVMHTPRT PSCSADDY PDLVFDCTDSQHSMF  
VSTASTSACSPFFDFRFSVASSVSENAAGQTPTRPISTNL YRSISVDIRRTPEE EFSAGDKLFRQOSVPAPS  
SFDSPVQHLLEEKAPLPVPAEKFACLSPGYSPDYIGIPSPKVDTLHCPPTAVVSATPPPDVSFVNLPPKSSP  
SRGELLSPAIEGTLPPDLGLPLDATEDQQATAAAILPQEP SYLEPLDEGPFTTVITEEPVEWHTAAEQGLSS  
SSLIASASENPVSWPVGSELMLKSPQRFAESP KHFPCGESLHSTTPGPYSAAEPTYPVSPG SYPLPAPEPALE  
EVKDGGTGAI PVAISAAEGAAPYAAPARLESFFSNCKSHPDAPLDTAPEPTGVTAVAQVEALGPLESSFLDSN  
PSISTLSQVEPVSWHEAFTSPEDDLGLGPFSLPELPLQAKDASDVEAEAAKASPVPPAESPPGPTGVLGGGDV  
PAPAAEPPAPPPQEASQ LSTEPEPSEEPKLDVVLEATVETEVLADDSAPEASISNSVPAPSPPPQQPPGGG  
DEEAETEDPSATPCCAPDGP TTDGLAQAHNSAEASC VAAAE GPGNVQAEATDPEPKPTSEVPKAPKVEEVP  
QRMTRNRAQMLASQSKQGI PAAEKDPMPTPASRAKGRASEEEDAQAQHPRKRRFQRSSQQLQQQLNTSTQOQTR  
EVIQQT LAAI VDAIKLDAIEPYHSDRSNPYFEYLQIRKKIEEKRI LCCITPQAPQCYAEYVYTYG SYLLDGK  
PLSKLHIPVIAPPPSLAEPLKELFKQOEA VRGKRLQLHSIEREKLIVSCEQEILRVHCRAARTIANQAVPFS A  
CTMLLDSEVYNMPLS QGDENKSVRDRFNARQFISWLQDVDDKYDRMKTCLLMRQQHEAAALNAVQRMEWQLK  
AQELDPAGHKS LCVNEVPSFYVPMVDVND DVFLLPA\*  
>ENSMUSP00000095939\_c.4552:C>G\_p.T15188 ENSMUST00000098334.13|Ankrd11-  
202|ENSMUSG00000035569|-|chr8:g.123619235:G>C  
MPKGGCSKTPQQEDFALSNDMVEKQTGKKDKDKVSLTKTPKLDKSDGGKEVRERATKRKLPFTVVGANGEQKDS  
DTEKQGPERRKRIKKEPVARKSGLLFGMGLSGIRAGYPLSERQQVALLMQMTAEESANSPVDTPPKHPSQSTVC  
QKGT PNSASKTKDKVNRNERGETRLHRAAIRGDARRIKELISEGADVNVKDFAGWTALHEACNRGYDIAKQ  
LLAAGAEVNTKGLDDDTPLHDAANNNGHYKVVKLLRLRYGGNPQQSNRKGETPLKVANSPTMVNLLLKGKTYTSS  
EESSTESSEEDAPSFAPSSV DGNNTDSEFEKGLKLLKAKNPEPQKTVTPVKDEYEFDEDEQDRVPPVDDKH  
LLKLDYRKEAKANSFISIPKMEVKSYSKNNTLAPKKAHRI LSDTSDEEDVS VSI GAGEKLRLSAHTMLPGSK  
ARESSSSRQOKEKNLKKRKKETKGEVRFGRSDKFCSSGSESESESEEDDGDSDVSGSSGCLKGSPLVLKD  
PSLFSLSASSTSSHGSAVAQKHGSGHTDQHTKHWRTDNWKAISSPAWSEVSSLSDSRTGLTSESDCSSEGS  
SVESLKPTRRKQEHRRKRGVLSAPSEKRS SFHPCTDGAVPKLDEKGVVKKHKT KKKHKKHEKGCQSVSQELK  
LKSFTY EYEDSKQKSDKAILLES DLSTENKLVKLDREHLKEDKLGMRKPEDKDWLFKDEKVLKRIKDANK  
DMSRAFREDKDRASKAERERATKDKSPKEEKLRLYKEERKKKSKDRASRLERKNDMKEDKLSKEKEKAFKEDK  
EKLKKEKLYREDAAFDDYCNKSQFLDHEDTKFSLSDDQOERWFS DLSDSSFD FKGEDSWDSVTDYRDIKNDV  
AKLILETVKEDSKEKRDNKIREKRDFKDSFFRKRDRDCLDNSEKRRDQTEKHKSIPSYLSEKDKRRRESAE  
GGRDRDRGRI RSEEVHREDLKECGFESSFKDKSDCDFPKNLEPWERPHAAREKEKKDALEKERKEKGRADKY  
EKSSERERSDKSTL DCKQKDEFEKCFEKKDGKEKHKDIH SKDRKASFDQLREKKEKVFSSIISEDFSERK  
DRKGKESWYIADIF TDESEDEKDDCVAGSFKATEASDTQRVDGLPEKEE GREHPSDRHRKSSSDRQHTTEKPR  
DKEPKKDRGASEGGKDKKEKMEKIFEKHKEKKDKECAERYKDRKERASADSAP EKKNKQKLEKVEKKHF  
AEDKVKSKHKEKPEKHSRERERKPSRGPDVEKSLLEKLEEEALHDYREDSNDKISEVSSDSFADHGQEP SLS  
TLLELVSFSEPPAEDKARDSACLSEKLEKERHRHSSSSSKSHERERAKKEKA EKKEKSEDYKDISSVRKDA

SQFEKDFLDAETYGVSYPTKADVEEELDKAIELFSSEKKDRSDPEREPAKRIEKELKPYGSSAISILKEKKKR  
EKHRERWREEKERHRDKHVDGFLRHHKDEPKPAKDKDNPPNSFKEKSREESLKLSESKLKEKFKENTEREKG  
DSIKMSNGNDKLVPSRDSGKKDSRPREKLLGDGDLMMTSFERMLSQKDLIEERHHRKRMKQMEKMRHRS  
DPKLKEKKPTEDGRKSLDFPSKKALGLDKKVKEPAPTLTTGESKPHSGPGTESKDWLSGQPLKEVLPASPRT  
EQRPTGVPTPTS SVVSCPSYEEVMHTPRT PSCSADDY PDLVFDCTDSQHSMPVSTASTSACSPPFFDRFSVAS  
SVVSENAAGQTPTRPISTNLYRSISVDIRRTPPEEFSAGDKLFRQQSV PAPS SFDSVPVQHLLLEEKAPLPPVPA  
EKFACLSPGYSPDYGIPSPKVDTLHCPPTAVVSATPPPDSVFNLPKSSSPRGE LLSPAIEGTLPPDLGL  
PLDATEDQQATAAILPQEPSYLEPLDEGPFTTVITEEPVEWHTAAEQGLSSSSLIASASENPVSWPVGSELM  
LKS PQRFAESPKHFCPGESLHSTTPGPYSAAEPTYVSPG SYPLPAPEPALEEVKDGGTGAI PVAISAAEGAA  
PYAAPARLESFFSNCKSHPDAPLDTAPEPTGVTAVAQVEALGPLESSFLDSNPSISTLSQVEPVSWHEAFTSP  
EDDLDLGPFSLPELPLQAKDASDVEAEAAKASPVPPAESPPGPTGVLGGGDVPAPAAEPPAPPPQEASQLS  
TEPEPSEEPKLDVVLEATVETEVLADDSAPEASISNSVPAPSPQQQPPGGGDEEAETEDPSATPCCAPDGPT  
TDGLAQAHNSAEASCVAAGP PGNVQAEATDPEPKPTSEVPKAPKVEEVPQRMTRNRAQMLASQSKQGI PA  
AEKDPMPPTPASRAKGRASEEEDAQAQHPRKRRFQRSSQQLQQQLNTSTQQTREVIQQT LAAI VDAIKLDAIEP  
YHSDRSNPYFEYLQIRKKIEEKRI LCCITPQAPQCYAEYVYTG SYLLDGKPLSKLHIPVIAPPPSLAEPLK  
ELFKQOEAVRGKRLRLQHSIEREKLIVSCEQEILRVHCRAARTIANQAVPFSACTMLLDSEVYNMPLESQGDEN  
KSVRDRFNARQFISWLQDVDDKYDRMKTCLLMRQQHEAAAALNAVQRM EWQLKAQELDPAGHKS LCVNEVPSFY  
VPMVDVNDDFVLLPA\*  
>ENSMUSP00000095938\_c.4615:C>G\_p.T1539S ENSMUST00000098333.5|Ankrd11-  
201|ENSMUSG00000035569|-|chr8:g.123619235:G>C  
MPKGGCSKTPQOEDFALSNDMVEKQTGKKDKDKVSLTKTPKLD RSDGGKEVRERATKRKLPFTV GANGEQKDS  
DTDSFGHRTFNWGSPLPFLS LCHTEKQGP ERKRIKKEPV ARKSGLLFGMGLSGIRAGYPLSERQQVALLMQMT  
AEE SANS P D T T P K H P S Q S T V C Q K G T P N S A S K T K D K V N K R N E R G E T R L H R A A I R G D A R R I K E L I S E G A D V N V K D  
F A G W T A L H E A C N R G Y Y D I A K Q L L A A G A E V N T K G L D D D T P L H D A A N N G H Y K V V K L L L R Y G G N P Q Q S N R K G E T P L  
K V A N S P T M V N L L L G K G T Y T S E E S T E S E S E E D A P S F A P S S S V D G N N T D S E F E K G L K L K A N P E P Q K T V T P V K  
D E Y E F D E D D E Q D R V P V D D K H L L K K D Y R K E A K A N S F I S I P K M E V K S Y S K N N T L A P K K A H R I L S D T S D E E D V S  
V S I G A G E K L R L S A H T M L P G S K A R E S S S R Q Q K E K N K K K R K E T K G K E V R F G K R S D K F C S S G S E S E S E S E E  
D D G S V G S S G C L K G S P L V L K D P S L F S S L S A S T S S H G S A V A Q K H G S G H T D Q H T K H W R T D N W K A I S S P A W S E V S  
S L S D S S R T G L T S E S D C S S E G S S V E S L K P T R R K Q E H R K R G V L Q S A P S E K R S S F H P C T D G A V P K L D K E G K V V K K H  
K T K H K H K H K E K G Q C S V S Q E L K L K S F T Y E Y E D S K Q S D K A I L L E S D L S T E N K L K V L K H D R E H L K K E D K L G R M K P  
E D K D W L F K D E K V L K R I K D A N K D M S R A F R E D K D R A S K A E R E R A T K D K S P K E E K L R L Y K E E R K K K S K D R A S R L E R  
K N D M K E D K L S K E K E K A F K E D K E K L K K E K L Y R E D A A F D D Y C N K S Q F L D H E D T K F S L S D D Q Q E R W F S D L S D S S F D  
F K G E D S W D S V T D Y R D I K N D S V A K L I L E T V K E D S K E K K R D N K I R E K R D F K D S F F R K R D R D C L D K N S E K R R D Q T E  
K H K S I P S Y L S E K D K K R R E S A E G G R D R R D G R I R S E E V H R E D L K E C G F E S S F K D K S D C D F P K N L P W E R P H A A R E  
K E K K D A L E K R E K E K G R A D K Y K E K S S E R E R S D K S T L D K C Q K D K E F E K C F K E K K D G K E K H K D I H S K D R K A S F D Q L  
R E K K E K V F S S I I S E D F S E R K D D R K G K E K S W Y I A D I F T D E S E D E K D D C V A G S F K A T E A S D T Q R V D G L P E K E E G R  
E H P S D R H R K S S S D R Q H T E K P R D K E P K E K K D R G A S E G G K D K K E K M E K I F E K H K E K K D K E C A E R Y K D R K E R A S A  
D S A P E K K N Q K L P E K V E K K H F A E D K V K S K H K E K P E K E H S R E R E R K P S R G P D V E K S L L E K L E E E A L H D Y R E D S N  
D K I S E V S S D S F A D H G Q E P S L S T L L E V S F S E P P A E D K A R D S A C L S E K L R E K E R H R H S S S S K S S H E R E R A K K E K  
A E K K E K S E D Y K D S I S S V R K D A S Q F E K D F L D A E T Y G V S Y P T K A D V E E E L D K A I E L F S S E K K D R S D P E R E P A K R I  
E K E L K P Y G S S A I S I L K E K K K R E K H R E R W R E E K E R H R D K H V D G F L R H H K D E P K P A A K D K D N P P N S F K E K S R E E S  
L K L S E S K L K E K F K E N T E R E K G D S I K M S N G N D K L V P S R D S G K K D S R P R E K L L G D G D L M M T S F E R M L S Q K D L E I E  
E R H R K R H K E R M K Q M E K M R H R S G D P K L K E K K P T E D G R K K S L D F P S K K A L G L D K K V K E P A P T L T T G E S K P H S G P G T  
E S K D W L S G Q P L K E V L P A S P R T E Q S R P T G V P T P T S V V S C P S Y E E V M H T P R T P S C S A D D Y P D L V F D C T D S Q H S M P  
V S T A S T S A C S P P F F D R F S V A S S V V S E N A A G Q T P T R P I S T N L Y R S I S V D I R R T P E E E F S A G D K L F R Q Q S V P A P S  
S F D S P V Q H L L E E K A P L P P V P A E K F A C L S P G Y S P D Y G I P S P K V D T L H C P P T A V V S A T P P P D S V F N L P P K S S P  
S P R G E L L S P A I E G T L P P D L G L P L D A T E D Q Q A T A A I L P Q E P S Y L E P L D E G P F T T V I T E E P V E W H T A A E Q G L S S  
S S L I A S A S E N P V S W P V G S E L M L K S P Q R F A E S P K H F C P G E S L H S T T P G P Y S A A E P T Y P V S P G S Y P L P A P E P A L E  
E V K D G G T G A I P V A I S A A E G A A P Y A A P A R L E S F F S N C K S H P D A P L D T A P E P T G V T A V A Q V E A L G P L E S S F L D S N  
P S I S T L S Q V E P V S W H E A F T S P E D D L D L G P F S L P E L P L Q A K D A S D V E A E A A K A S P V P P A E S P P G P T G V L G G G D V  
P A P A A E E P P A P P P Q E A S P Q L S T E P E P S E E P K L D V V L E A T V E T E V L A D D S A P E A S I S N S V P A P S P P Q Q P P G G G  
D E E A E T E D P S A T P C C A P D G P T T D G L A Q A H N S A E A S C V A A A E G P P G N V Q A E A T D P E P K P T S E V P K A P K V E E V P  
Q R M T R N R A Q M L A S Q K G I P A A E K D P M P T P A S R A K G R A S E E E D A Q A Q H P R K R R F Q R S S Q Q L Q Q Q L N T S T Q Q T R  
E V I Q Q T L A A I V D A I K L D A I E P Y H S D R S N P Y F E Y L Q I R K K I E E K R I L C C I T P Q A P Q C Y A E Y V Y T G S Y L L D G K  
P L S K L H I P V I A P P P S L A E P L K E L F K Q Q E A V R G K L R L Q H S I E R E K L I V S C E Q E I L R V H C R A A R T I A N Q A V P F S A  
C T M L L D S E V Y N M P L E S Q G D E N K S V R D R F N A R Q F I S W L Q D V D D K Y D R M K T C L L M R Q Q H E A A A L N A V Q R M E W Q L K  
A Q E L D P A G H K S L C V N E V P S F Y V P M V D V N D D F V L L P A \*



>ENSMUSP00000095939\_c.3858:G>T\_p.D1287Y ENSMUST00000098334.13|Ankrd11-202|ENSMUSG00000035569|-|chr8:g.123619929:C>A  
MPKGGCCKTPQQEDFALSNDMVEKQTGKKDKDKVSLTKTPKLDKSDGGKEVRERATKRKLPFTVVGANGEQKDS  
DTEKQGPERRKRIKKEPVARKSGLLFGMGLSGIRAGYPLSERQQVALLMQMTAEESANS PVDTPKHPSQSTVC  
QKGT PNASASKTKDKVNKRNERGETRLHRAAIRGDARRIKELISEGADVNVKDFAGWTALHEACNRGYDIAKQ  
LLAAGAENVTKGLDDDTPLHDAANNNGHYKVVKLLRLRYGGNPQQSNRKGETPLKVANSPTMVNLLLKGKTYTSS  
EESSTESSEEDAPSFAPSSVDGNNTDSEFEKGLKLLKAKNPEPQKTVTPVKDEYEFDEDEQDRVPPVDDKH  
LLKKDYRKEAKANSFISIPKMEVKSYSKNNTLAPKKAHRILSDTSDEEDVSVSIGAGEKLRLSAHTMLPGSK  
ARESSSRQKKEKNLKKRKKETKGEVRFGRSDKFCSSGSESESESEEDDGDSDVSSGCLKGSPLVLKD  
PSLFSLSASSTSSHGSAVAQKHGSGHTDQHTKHWRTDNWKAISSPAWSEVSSLSDSSRTGLTSESDCSSEGS  
SVESLKPTRRKQEHRRKRGVLQSAPEKRS SFHPCTDGAVPKLDEKGVVKKHKT KKKHKKHKEKGQCSVSVQELK  
LKSFTY EYEDSKQKSDKAILLES DLSTENKLVKLDHREHLKEDKLGMRKPEDKDWLFKDEKVLKRIKDANK  
DMSRAFREDKDRASKAERERATKDKSPKEEKLRLYKEERKSKDRASRLERKNDMKEDKLSKEKEKAFKEDK  
EKLKKEKLYREDAAFDDYCNKSQFLDHEDTKFSLSDDQQRWFS DLSDSSFDKFGEDSWDSVTDYRDIKNSV  
AKLILETVKEDSKEKRDNKIREKRDFKDSFFRKRDRDCLDNKSEKRRDQTEKHKSIPSYLSEKDKKRRESAE  
GGRDRDRGRIRSEEVHREDLKECGFESSFKDKSDCDFPNKLEPWERPHAAREKEKDDALEKERKEKGRADKYK  
EKSSERERSDKSTLTKCQKDEFEKCFKEKKGKEKHKDIHSDRKA SFDQLREKKEKVFSSIISEDFSERKD  
DRKGKEKSWYIADIFTDESEDEKDDCVAGSFKATEASDTQRVDGLPEKEEGREHPSDRHRKSSDRQHTTEKPR  
DKEPKEKDKDRGASEGGKDKKEKMEKIFEKHKEKDKCEAERYKDRKERASADSAPKKNKQKLPKVEKHHF  
AEDKVKSKHKEKPEKEHSRERERKPSRGPDVEKSLLEKLEEEALHYREDSNDKISEVSSDSFADHGQEP SLS  
TLLEVSFSEPPAEDKARDSACLSEKLEKERHRHSSSSSSKSHERERAKKEKA EKKEKSEDYKDISSVRKA  
SQFEKDFLDAETYGVSYPTKADVEEELDKAIELFSSEKDRSDPEREPAKRIEKELKPYGSSAISILKEKKR  
EKHRERWREEKERHRDKHVDGFLRHHKDEPKPAKDKDNPNSFKEKSREESLKLSETKLEKFKENTEREK  
DSIKMSNGNDKLVPSRDSGKDRPREKLLGDGLMMSFERMLSQKDLIEERHHRKERMKQMEKMRHRSG  
DPKLKEKKTEDGRKSLDFPSSKALGLDKKVKPEAPTLTGESKPHSGPGTESKDWLSGQPLKEVLPASPRT  
EQSRPTGVPTPTSVVSCPSYEEVMHTPRTSPCSADDPDLVDFDCTDSQHSMPVSTASTSACSPFFDRF SVAS  
SVVSENAAGQTPTRPISTNLYSISVDIRRTPEEEFSAGDKLFRQQSVPA PSSFDSVQHLLLEEKAPLPVPA  
EKFACLSPGYSPDYGIPSPKVDLHCPPTAVVSATPPPDSVFNLPKSSPSPRGELLSPAIEGTLPPDLGL  
PLDATEDQQATAAILPQEPSYLEPLDEGPFTTVITEEPVEWHTHAAEQGLSSSSLIASASENPVSWPVGSELM  
LKSPQRFAESPKHFCPGESLHSTTPGPYSAAEPTYVSPGYSYPLPAPEPALEEVKGGTGAI PVAISAAEGAA  
PYAAPARLESFFSNCKSHDPALDTAPEPTGVTAVAQVEALGPLLESSFLDSNPSISTLSQVEPVSWHEAFTSP  
EDDLDLGPFSLPELPLQAKDASDVEAEAAKASPVPPAESPPGPTGVLGGGDVPAPAAEPPAPPQEQEASQLS  
TEPEPSEEPKLDVVLEATVETEVLADDSAPEASISNSVPAPSPQQQPPGGGDEEAETEDPSATPCCAPDGPT  
TDGLAQAHNSAEASCVVAAAEPPGNVQAEATDPEPKPTSEVPKAPKVEEVPQRMTRNRAQMLASQSKQGI PA  
AEKDPMPPTPASRAKGRASEEDAQAQHPRKRFRQRSSQQLQQQLNTSTQQTREVIQQT LAIVDAIKLDAIEP  
YHSDRSNPYFEYLQIRKKIEEKRI LCCITPQAPQCYAEYVTYTGSYLLDGGKPLSKLHI PVIAPPSLAEPK  
ELFKQQEA VRGKLRQLHSIEREKLIVSCEQEILRVHCRAARTIANQAVPFSACTMLLDSEVYNMPLESQGDEN  
KSVRDRFNARQFISWLQDVDDKYDRMKTCLLMRQQHEAAALNAVQRMEWQLKAQELDPAGHKS LCVNEVPSFY  
VPMVDVNDDFVLLPA\*

>ENSMUSP00000095938\_c.3921:G>T\_p.D1308Y ENSMUST00000098333.5|Ankrd11-201|ENSMUSG00000035569|-|chr8:g.123619929:C>A  
MPKGGCCKTPQQEDFALSNDMVEKQTGKKDKDKVSLTKTPKLDKSDGGKEVRERATKRKLPFTVVGANGEQKDS  
DTDSFGHRTFNWGSPLPFLTCHTEKQGPERRKRIKKEPVARKSGLLFGMGLSGIRAGYPLSERQQVALLMQMT  
AEESANS PVDTPKHPSQSTVCQKGT PNASASKTKDKVNKRNERGETRLHRAAIRGDARRIKELISEGADVNVKDF  
FAGWTALHEACNRGYDIAKQLLAAGAENVTKGLDDDTPLHDAANNNGHYKVVKLLRLRYGGNPQQSNRKGETPL  
KVANSPTMVNLLLKGKTYTSSSEESSTESSEEDAPSFAPSSVDGNNTDSEFEKGLKLLKAKNPEPQKTVTPVK  
DEYEFDEDEQDRVPPVDDKHLLKKDYRKEAKANSFISIPKMEVKSYSKNNTLAPKKAHRILSDTSDEEDVSV  
VSIGAGEKLRLSAHTMLPGSKARESSSRQKKEKNLKKRKKETKGEVRFGRSDKFCSSGSESESESESE  
DDGDSDVSSGCLKGSPLVLKDP LFSLSASSTSSHGSAVAQKHGSGHTDQHTKHWRTDNWKAISSPAWSEVSV  
SLSDSSRTGLTSESDCSSEGS SVESLKPTRRKQEHRRKRGVLQSAPEKRS SFHPCTDGAVPKLDEKGVVKKH  
KTKHKKHKKHKEKGQCSVSVQELKLSFTY EYEDSKQKSDKAILLES DLSTENKLVKLDHREHLKEDKLGMRK  
EDKDWLFKDEKVLKRIKDANKDMSRAFREDKDRASKAERERATKDKSPKEEKLRLYKEERKSKDRASRLER  
KNDMKEDKLSKEKEKAFKEDKEKLLKKEKLYREDAAFDDYCNKSQFLDHEDTKFSLSDDQQRWFS DLSDSSFD  
FKGEDSWDSVTDYRDIKNSVAKLILETVKEDSKEKRDNKIREKRDFKDSFFRKRDRDCLDNKSEKRRDQTE  
KHKSIPSYLSEKDKKRRESAEGGRDRDRGRIRSEEVHREDLKECGFESSFKDKSDCDFPNKLEPWERPHAARE  
KEKDDALEKERKEKGRADKYKESSEERERSDKSTLTKCQKDEFEKCFKEKKGKEKHKDIHSDRKA SFDQL  
REKKEKVFSSIISEDFSERKDRKGKEKSWYIADIFTDESEDEKDDCVAGSFKATEASDTQRVDGLPEKEEGR  
EHPSDRHRKSSSDRQHTTEKPRDKEPKEKDKDRGASEGGKDKKEKMEKIFEKHKEKDKCEAERYKDRKERASA

DSAPEKKNKQKLPEKVEKKHFAEDKVKSKHKEKPEKEHSRERERKPSRGPDVEKSLLEKLEEEALHYREDSDN  
 DKISEVSSDSFADHGQEPSSLTLLLEVFSFSEPPAEDKARDSACLSEKLEKERHRHSSSSSSKKSHERERAKKEK  
 AEKKEKSEYKDSISSVRKDAQFEKDFLDAETYGVSYPTKADVEEELDKAIELFSSEKDRSDPEREPAKRI  
 EKELKPYGSSAISILKEKKKREKHRERWREEKERHRDKHVDGFLRHHKDEPKPAAKDKDNPPNSFKEKSREES  
 LKLESETKLEKFKENTEREKGDSIKMSNGNDKLVPSRDSGKKDSRPREKLLGDGDLMMTSFERMLSQKDLIE  
 ERHHRKERMKQMEKMRHRSRSDPKLKEKPTEDGRKSLDFPSKALGLDKKVKEPAPTLTGESKPHSGPGT  
 ESKDWLSGQPLKEVLPASPRTEQSRPTGVPTPTS SVVSCPSYEEVMHTPRT PSCSADDY PDLVFDCTDSQHSMP  
 VSTASTSACSPFFDRFSVASSVSENAAGQTPTRPISTNLYRSISVDIRRTPEEEFSAGDKLFRQQSV PAPS  
 SFDSPVQHLLLEEKAPLPPVPAEKFACLSPGYSPDYGI PPKVDTLHCPPTAVVSATPPPDSVFSNLPPKSSP  
 SPRGELLSPAIEGTLPPDLGLPLDATEDQQATAAILPQEPSYLEPLDEGPFTTVITEEPVEWHTHAAEQGLSS  
 SSSLIASASENPSVWPVSGSELMLKSPQRFASPKHFCPGESLHSTTPGPYSAAEPTYPVSPGSLPAPPEPALE  
 EVKDGGTGAI PVAISAAEGAAPYAAPARLESFFSNCKSHPDAPLDTAPEPTGVTAVAQVEALGPLSSFLDSN  
 PSISTLSQVEPVSWHEAFTSPEDDLGLGPFSLPELPLQAKDASDVEAEAAKASPVPPAESPPGPTGVLGGGDV  
 PAPAEEPPAPPQEASQLSSTEPSEPKLDVLEATVETEVLADDSAPEASISNSVPAPSPQQQPPGGG  
 DEEAETEDPSATPCCAPDGP TTDGLAQAHNSAEASCVVAAAE GPPGNVQAEATDPEPKPTSEVPKAPKVEEVP  
 QRMTRNRAQMLASQSKQGI PAEKDPMPTPASRAKGRASEEEDAQAQHPRKRRFQRSSQQLQQQLNTSTQOTR  
 EVIQOTLAAIVDAIKLDAIEPYHSDRSNPFYEYLQIRKKIEEKRI LCCITPQAPQCYAEYVTYTGSYLLDGK  
 PLSKHLPIVPIAPPPLAEPLKELFKQQA VRGKLRQLQHSIEREKLI VSCQEILRVHCRAARTIANQAVPFS  
 CTMLLDSEVYNMPLESQGDENKSVRDRFNARQFISWLQDVDDKYDRMKTCLLMRQQHEAAALNAVQRMEWQLK  
 AQELDPAGHKS LCVNEVPSFYVPMVDVNDDFVLLPA\*  
 >ENSMUSP00000095939\_c.1203:G>A\_p.A402T ENSMUST00000098334.13|Ankrdl1-  
 202|ENSMUSG00000035569|-|chr8:g.123622584:C>T  
 MPKGGCSKTPQQEDFALSNDMVEKQTGKKDKDKVSLTKTKPLDRSDGGKEVRERATKRKLPFTV GANGEQKDS  
 DTEKQGP ERKRIKKEPVARKSGLLFGMGLSGIRAGYPLSERQQVALLMQMTAEESANS PVDTTPKHPSQSTVC  
 QKGT PNASKTKDKVNKRNERGETRLHRAAIRGDARRIKELI SEGADVNVKDFAGWTALHEACNRGYDIAKQ  
 LLAAGAEVNTKGLDDDTPLHDAANNNGHYKVVKLLLR YGNNPQQSNRKG ETPLVKANSPTMVNLLLGKGYDTS  
 EESSTESSEEDFAPSSVDGNNTDSEFEKGLKAKNPEPQKTVTPVKDEYEFDEDEQDRVPEVDDKH  
 LLKKDYRKEAKANSFISIPKMEVKSYSKNNTLAPKKT AHRILSDTSDEEDVSVSIGAGEKRLLSAHTMLPGSK  
 ARESSSSRQKKEKNLKKRKKETKGKEVRFGKRSDKFCSSGSESESESEEDDGD SVGSSGCLKGSPLVLKD  
 PSLFSSLSASSTSSHGSAVAQKHGSGHTDQHTKHWRTDNWKAISSPAWSEVSSLS DSSRTGLTSESDCSSEGS  
 SVESLKPTRRKQEHRRKGVLSAPSEKRS SFHPCTDGAVPKLDEKGVVKKHKT KKKHKKHKEKGQCSVSOELK  
 LKSFTY EYEDSKQKSDKAILLES DLSTENKLVKLDREHLKKEKDKLGRMKPEDKDWLFKDEKVLKRIKDANK  
 DMSRAFREDKDRASKAERERATKDKSPKEEKLRLYKEERKKSKDRASRLERKNDMKEDKLSKEKEKAFKEDK  
 EKLKKEKLYREDAAFDDYCNKSQFLDHEDTKFSLSDDQQRWFSDLS DSSFDKGEDSWDSVTDYRDIKNDV  
 AKLILETVKEDSKEKRDNKIREKRDFKDSFFRKRDRDCLDNSEKRRDQTEKHKSI PSYLSEKDKKRRESAE  
 GGRDRRDGRI RSEEVHREDLKECFESSFKDKSDCDFPNLEPWERPHAAREKEKDDALEKERKEKGRADKYK  
 EKSSERERSDKSTL DKCQKDKFEKCFEKKDGKEKHKDI HSKDRKASFDQLREKKEKVFSSII SEDF SERKD  
 DRKGKEKSWYIADIFTDESEDEKDDCVAGSFKATEASDTQRVDGLPEKEEGREHPSDRHRKSSSDRQHTEKPR  
 DKEPKEKKKDRGASEGGKDKKEKMEKIFEKHKEKKDKCAERYKDRKERASADSAPEKKNKQKLPEKVEKKHF  
 AEDKVKSKHKEKPEKEHSRERERKPSRGPDVEKSLLEKLEEEALHYREDSDN DKISEVSSDSFADHGQEPSSL  
 TLLLEVFSFSEPPAEDKARDSACLSEKLEKERHRHSSSSSSKKSHERERAKKEKA EKKEKSEYKDSISSVRKDA  
 SQFEKDFLDAETYGVSYPTKADVEEELDKAIELFSSEKDRSDPEREPAKRIEKELKPYGSSAISILKEKKR  
 EKHRERWREEKERHRDKHVDGFLRHHKDEPKPAAKDKDNPPNSFKEKSREESLKLSETKLEKFKENTEREK  
 DSIKMSNGNDKLVPSRDSGKKDSRPREKLLGDGDLMMTSFERMLSQKDLIEERHHRKERMKQMEKMRHRSR  
 DPKLKEKPTEDGRKSLDFPSKALGLDKKVKEPAPTLTGESKPHSGPGTESKDWLSGQPLKEVLPASPRTE  
 EQSRPTGVPTPTS SVVSCPSYEEVMHTPRT PSCSADDY PDLVFDCTDSQHSMPVSTASTSACSPFFDRFSVAS  
 SVVSENAAGQTPTRPISTNLYRSISVDIRRTPEEEFSAGDKLFRQQSV PAPS SFDSPVQHLLLEEKAPLPPVPA  
 EKFACLSPGYSPDYGI PPKVDTLHCPPTAVVSATPPPDSVFSNLPPKSSP SPRGELLSPAIEGTLPPDLGL  
 PLDATEDQQATAAILPQEPSYLEPLDEGPFTTVITEEPVEWHTHAAEQGLSSSSSSLIASASENPSVWPVSGSEL  
 LKSPQRFASPKHFCPGESLHSTTPGPYSAAEPTYPVSPGSLPAPPEPALEEVKDGGTGAI PVAISAAEGAA  
 PYAAPARLESFFSNCKSHPDAPLDTAPEPTGVTAVAQVEALGPLSSFLDSNPSISTLSQVEPVSWHEAFTSP  
 EDDLGLGPFSLPELPLQAKDASDVEAEAAKASPVPPAESPPGPTGVLGGGDV PAPAEEPPAPPQEASQLS  
 TEPEPSEPKLDVLEATVETEVLADDSAPEASISNSVPAPSPQQQPPGGGDEEAETEDPSATPCCAPDGP  
 TTDGLAQAHNSAEASCVVAAAE GPPGNVQAEATDPEPKPTSEVPKAPKVEEVPQRMTRNRAQMLASQSKQGI PA  
 AEKDPMPPTPASRAKGRASEEEDAQAQHPRKRRFQRSSQQLQQQLNTSTQOTREVIQOTLAAIVDAIKLDAIEP  
 YHSDRSNPFYEYLQIRKKIEEKRI LCCITPQAPQCYAEYVTYTGSYLLDGKPLSKHLPIVPIAPPPLAEPLK  
 ELFKQQA VRGKLRQLQHSIEREKLI VSCQEILRVHCRAARTIANQAVPFSACTMLLDSEVYNMPLESQGDEN

KSVDRDRFNARQFISWLQDVDDKYDRMKTCLLMRQQHEAAALNAVQRMEWQLKAQELDPAGHKS LCVNEVPSFY  
VPMVDVNDDFVLLPA\*  
>ENSMUSP00000095938\_c.1266:G>A\_p.A423T ENSMUST00000098333.5|Ankrdl1-  
201|ENSMUSG00000035569|-|chr8:g.123622584:C>T  
MPKGGCSKTPQQEDFALSNDMVEKQTGKKDKDKVSLTKTPKLDSDGGKEVRERATKRKLPFTVVGANGEQKDS  
DTDSFGHRTFNWGSPLPFLSFTCHTEKQGPERRKRIKKEPVARKSGLLFGMGLSGIRAGYPLSERQQVALLMQMT  
AEESANSPTDTPKHPQSQTVCQKGT PNSASKTKDKVNKRNERGETRLHRAAIRGDARRIKELISEGADVNVKD  
FAGWTALHEACNRGYDIAKQLLAAGAEVNTKGLDDDTPLHDAANNHGYKVVKLLRLRYGGNPQQSNRKGETPL  
KVANSPTMVNLLLGKGTYSSEESSTESSEEDAPSFAPSSSDVGNNTDSEFEKGLKLLKAKNPEPQKTVTPVK  
DEYEFDEDEQDRVPPVDDKHLKLDYRKEAKANSFISIPKMEVKSYSKNNTLAPKTAHRILSDTSDEEDVS  
VSI GAGEKLRLSAHTMLPGSKARESSSSRQKKEKNKLLKRRKKEKTKGKEVRFGRSDKFCSSGSESESESEE  
DDGDSVGSGLKGSPLVLKDP SLFSSLSASSTSSHGSAVAQKHGSGHTDQHTKHWRTDNWKAISSPAWSEVS  
SLSDSSRTGLTSESDCSSEGSVESLKPTRRKQEHRRKRGVLQSAPEKRS SFHPCTDGAVPKLDEKGVVKKH  
KTKHKKHKKHEKQCSVSQELKLSFTYEDSKQKSDKAILLES DLSTENKLVKLDREHLKKEKDKLGRMKP  
EDKDWLFKDEKVLKRIKDANKDMSRAFREDKDRASKAERERATKDKSPKEEKLRLYKEERKKKSKDRASRLER  
KNDMKEDKLSKEKEKAFKEDKEKLLKKEKLYREDAAFDDYCNKSQFLDHEDTKFSLSDDQQRWFS DLSDSSFD  
FKGEDSWDSVTDYRDIKNDVAKLILETVKEDSKEKRDNKIREKRDFKDSFFRKRDRDCLDNKSEKRRDQTE  
KHKSIPSYLSEKDKRRRESAEGGRDRRDGRI RSEEVHREDLKECGFESSFKDKSDCDFPKNLEPWERPHAARE  
KEKKDALEKERKEKGRADKYKEKSSERERSDKSTL DKCQKDKFEKCFKEKKDGKEKHKDIHSDRKRASFDQL  
REKKEKVFSSIISEDFSERKDRKGKEKSWYIADIFTDESEDEKDDCVAGSFKATEASDTQRVDGLPEKEEGR  
EHPDRHRKSSSDRQHTKEPRDKEPKKKKDRGASEGGKDKKEKMEKIFEKHKEKKDKCAERYKDRKERASA  
DSAPEKKNKQKLPEKVEKHHFAEDKVKSKHKEKPEKEHSRERERKPSRGPDVEKSLLEKLEEEALHDYREDSN  
DKISEVSSDSFADHGQEP SLSTLLEVSFSEPPAEDKARDSACLSEKLEKERHRHSSSSSKSHERERAKKEK  
AEKKEKSEDKDSISSVRK DASQFEKDFLDAETYGVSYPTKADVEEELDKAIELFSSEKDRSDPEREPAKRI  
EKELKPYGSSAISILKEKKKREKHRERWREEKERHRDKHVDFLRHHKDEPKPAAKDKDNPPNSFKEKSREES  
LKLSETKLKEKFKENTEREKGDSIKMSNGNDKLVSRSDSGKKDSRPREKLLGDGDLMTSFERMLSQKDLIE  
ERHKKRHKERMKMRHRS GPKLKEKKPTEDGRKSLDFPSPKALGLDKKVEKAPMTLTGTGSEKPHSGPGT  
ESKDWLSGQPLKEVLPASPRTEQSRPTGVPTPTS SVVSCPSYEEVMHTPRT PSCSADDY PDLVFDCTDSQHSMP  
VSTASTSACSPFFDFRFSVASSVSENAAGQTPTRPISTNLYRSISVDIRRTPEEEFSAGDKLFRQQSV PAPS  
SFDSPVQHLLEEKAPLPPVPAEKFACLSPGYSPDYGIPSPKVDTLHCPPTAVVSATPPPDSVFNLPKSSP  
SPRGELLSPAIEGLTLPDGLPLDATEDQQATAAILPQEPSYLEPLDEGPFTTVITEEPVEWHTAAEQGLSS  
SSLIASASENPVSWPVGSELMLKSPQRFAESPKHFCPGESLHSTTPGPYSAAEPTYPVSPGSPYPLPAPEPALE  
EVKDGGTGAI PVAISAAEGAAPYAAPARLESFFSNCKSHPDAPLDTAPEPTGVTAVAQVEALGPLESSFLDSN  
PSISTLSQVEPVSWHEAFTSPEDDLDLGPFSLPELPLQAKDASDVEAEAAKASPVPPAESPPGPTGVLGGGDV  
PAPAAEPPAPPPEASPOLSTEPEPSEPKLDVVLEATVETEVLADDSAPEASISNSVPAPSPPPQQPPGGG  
DEEAETEDPSATPCCAPDGP TTDGLAQAHNSAEASCVAAAEGPPGNVQAEATDPEPKPTSEVPKAPKVEEVP  
QRMRNRAQMLASQSKQGI PAAEKDPMPTPASRAKGRASEEEDAQAQHPRKRRFQRSSQQLQQQLNTSTQQTR  
EVIQQT LAIIVDAIKLDAIEPHYSDRSNPYFEYLQIRKKIEEKRI LCCITPQAPQCYAEYVYTYG SYLLDGK  
PLSKLHIPVIA PPPSLAEPLKELFKQAEAVRGKLR LQHSIEREKLIVSCEQEILRVHCRAARTIANQAVPFS A  
CTMLLDSEVYNMPLESQGDENKSVRDRFNARQFISWLQDVDDKYDRMKTCLLMRQQHEAAALNAVQRMEWQLK  
AQELDPAGHKS LCVNEVPSFYVPMVDVNDDFVLLPA\*  
>ENSMUSP00000114043\_c.876:ATG>TTA\_p.D293L ENSMUST00000117624.9|Ttc13-  
202|ENSMUSG00000037300|-|chr8:g.125415327:CAT>TAA  
MAPAGCGCGCSGSLGAAVVRPLLLLLGALACARATEHYSPLSLLKQELQHRQQEAPAGGGCPQSGDWADQYP  
ECESFSLNFHESDCELRGSAPCDSL LSLNTEKILSQA KSI AEQKRFPFATDNDSTNEELAIAYVLVGSGLYDE  
AIRHFSTMLQEEPDLSAIYGRGIAYGKGLHEAIEAFKEALQKQVDFIDAYKSLGQAYRELGNFDAATESFQ  
KALLLNQNHVQTLQLRGMMLYHHGSLQEALKNFKRCLQLEPYNEVCQYMKGLSHVAMGQFYEGIKAQTKVMLN  
LTLFQARRPAQST\*GSSTYESILDICTHTS IPL\*RNITLTRIYRAASRTTGPRTCLSS\*TAMKSSPACSLTLE  
MCYIRISRATSLKSRS\*SV\*LTAWAR\*CSMKHRGSCPTRGYTEPWAWQHWKSCRPIVPGPTQRFA\*MEKQGC  
CSGGTCSTLL\*SGEGLIRTSLSGWCIRQLQVSAEGSITTTST\*SGVK\*SI\*DIWNILRKYFILLKIEFLFIT  
EQI IQRAYWKSEKLWKRYTKWTSFQL\*SSLIPKQRTGSP\*TPKSPASKIKGRNMTASPSQETRS AISYFL  
WKLKPKQRGHSCITLK\*MHFIKT\*QRRAKY\*PSRQNSGRMLMSAT\*SY\*P\*CITFII\*CPCLEDLVSLRIQSLW  
ER\*WPVAKKWLGRSPKGS\*STLKP\*QPLAQRPSAK\*QKAG\*TRVFP LPTRPC HQYQRRSRL\*GP\*SRCSTRI  
PPHGV\*RNS  
>ENSMUSP00000156040\_c.810:ATG>TTA\_p.D271L ENSMUST00000231984.2|Ttc13-  
212|ENSMUSG00000037300|-|chr8:g.125415327:CAT>TAA  
MAPAGCGCGCSGSLGAAVVRPLLLLLGALACARATEHYSPLSLLKQELQHRQQEAPAGGGCPQSGDWADQYP  
ECESFSLNFHESDCELRGSAPCDSL LSLNTEKILSQA KSI AEQKRFPFATDNDSTNEELAIAYVLVGSGLYDE

AIRHFSTMLQEAIEAFKEALKQKVDVFIDAYKSLGQAYRELGNFDDAATESFQKALLLNQNHVQTLQLRGMMLYH  
 HGSLQEALKNFKRCLQLEPYNEVCQYMKGLSHVAMGQFYEGIKAQTKVMLNLTFLQARRPAQST\*GSSTYESI  
 LDICTHTSIPL\*RNITLTRIYRAASRTTGPRTCLSS\*TAMKSSPACSLTLEMCIYIRISRATSLKRS\*SV\*LT  
 AWAR\*CSMKHRGSCPTRGYTEPWAWQHWKSCRPIVPGPTQRFA\*MEKQGCCSGGTCSTLL\*SGEGLIRTSL  
 SCGWIRCQLQVSAEGSITTTST\*SGVK\*SI\*DIWNILRKYFILLKIEFLFITEQIIQRAYWKSEKLWKRYTKWK  
 TSFQL\*SLIPKQRTGSP\*TPKSPASKIKGRNMTASPPSQETRSASISYFLWKLKPKQKRGHSCITLK\*MHF  
 IKT\*QRRAKY\*PSRQNSGRMLMSAT\*SYP\*CITFII\*CPCLEDLVSLRIQSLWER\*WPVAKKWLGRSPKGS\*STLK  
 P\*QPLAQRPSAK\*QKAG\*T\*RVFPLPTRPCHQYQRRSRL\*GP\*SRCSTRIPPHGV\*RNS  
 >ENSMUSP00000149848\_c.1197:ATG>TTA\_p.D400L ENSMUST00000214828.2|Ttc13-  
 210|ENSMUSG00000037300|-|chr8:g.125415327:CAT>TAA  
 MAPAGCGCGSGSLGAAVVRPLLLLLGALACARATEHYSPLSLLKQELQHRQQQEAPAGGGCPQSGDWADQYP  
 ECESFFLNPHESDCELRSAPCDSLLSLNTEKILSQAISIAEQKRFPFATDNDSTNEELAIAYVLVGSGLYDE  
 AIRHFSTMLQEEPDVLSAIYGRGIAYGKGLHDIKNAELALFELSRVIALEPDRPEVFEQRAEILSPLGRINE  
 AVNDLTKAIQLQPSARLYRHRGTYLFI SEDYATAHEDFQOSLELNRNQPTAMLYKGLTFFHRRGLLKEAIEAFK  
 EALKQKVDVFIDAYKSLGQAYRELGNFDDAATESFQKALLLNQNHVQTLQLRGMMLYHHGSLQEALKNFKRCLQ  
 EPYNEVCQYMKGLSHVAMGQFYEGIKAQTKVMLNLTFLQARRPAQST\*GSSTYESILDICTHTSIPL\*RNITL  
 TRIYRAASRTTGPRTCLSS\*TAMKSSPACSLTLEMCIYIRISRATSLKRS\*SV\*LTAWAR\*CSMKHRGSCPTR  
 GYTEPWAWQHWKSCRPIVPGPTQRFA\*MEKQGCCSGGTCSTLL\*SGEGLIRTSLSCGWIRCQLQVSAEGSI  
 TTST\*SGVK\*SI\*DIWNILRKYFILLKIEFLFITEQIIQRAYWKSEKLWKRYTKWKTSFQL\*SLIPKQRTGSP  
 \*TPKSPASKIKGRNMTASPPSQETRSASISYFLWKLKPKQKRGHSCITLK\*MHF  
 IKT\*QRRAKY\*PSRQNSGRMLMSAT\*SYP\*CITFII\*CPCLEDLVSLRIQSLWER\*WPVAKKWLGRSPKGS\*STLK  
 P\*QPLAQRPSAK\*QKAG\*T\*RVFPLPTRPCHQYQRRSRL\*GP\*SRCSTRIPPHGV\*RNS  
 >ENSMUSP00000038484\_c.810:ATG>TTA\_p.D271L ENSMUST00000041614.15|Ttc13-  
 201|ENSMUSG00000037300|-|chr8:g.125415327:CAT>TAA  
 MAPAGCGCGSGSLGAAVVRPLLLLLGALACARATEHYSPLSLLKQELQHRQQQEAPAGGGCPQSGDWADQYP  
 ECESFFLNPHESDCELRSAPCDSLLSLNTEKILSQAISIAEQKRFPFATDNDSTNEELAIAYVLVGSGLYDE  
 AIRHFSTMLQEAIEAFKEALKQKVDVFIDAYKSLGQAYRELGNFDDAATESFQKALLLNQNHVQTLQLRGMMLYH  
 HGSLQEALKNFKRCLQLEPYNEVCQYMKGLSHVAMGQFYEGIKAQTKVMLNLTFLQARRPAQST\*GSSTYESI  
 LDICTHTSIPL\*RNITLTRIYRAASRTTGPRTCLSS\*TAMKSSPACSLTLEMCIYIRISRATSLKRS\*SV\*LT  
 AWAR\*CSMKHRGSCPTRGYTEPWAWQHWKSCRPIVPGPTQRFA\*MEKQGCCSGGTCSTLL\*SGEGLIRTSL  
 SCGWIRCQLQVSAEGSITTTST\*SGVK\*SI\*DIWNILRKYFILLKIEFLFITEQIIQRAYWKSEKLWKRYTKWK  
 TSFQL\*SSLIPKQRTGSP\*TPKSPASKIKGRNMTASPPSQETRSASISYFLWKLKPKQKRGHSCITLK\*MHF  
 IKT\*QRRAKY\*PSRQNSGRMLMSAT\*SYP\*CITFII\*CPCLEDLVSLRIQSLWER\*WPVAKKWLGRSPKGRYAGL  
 AEAQAWLHLAPGFWLWTACELDPTFPFSFYHVLRLLFSS\*STLKP\*QPLAQRPSAK\*QKAG\*T\*RVFPLPTRP  
 CHQYQRRSRL\*GP\*SRCSTRIPPHGV\*RNS  
 >ENSMUSP00000113383\_c.1038:ATG>TTA\_p.D347L ENSMUST00000118134.3|Ttc13-  
 203|ENSMUSG00000037300|-|chr8:g.125415327:CAT>TAA  
 MAPAGCGCGSGSLGAAVVRPLLLLLGALACARATEHYSPLSLLKQELQHRQQQEAPAGGGCPQSGDWADQYP  
 ECESFFLNPHESDCELRSAPCDSLLSLNTEKILSQAISIAEQKRFPFATDNDSTNEELAIAYVLVGSGLYDE  
 AIRHFSTMLQILSPLGRINEAVNDLTKAIQLQPSARLYRHRGTYLFI SEDYATAHEDFQOSLELNRNQPTAML  
 YKGLTFFHRRGLLKEAIEAFKEALKQKVDVFIDAYKSLGQAYRELGNFDDAATESFQKALLLNQNHVQTLQLRGM  
 LYHHGSLQEALKNFKRCLQLEPYNEVCQYMKGLSHVAMGQFYEGIKAQTKVMLNLTFLQARRPAQST\*GSSTY  
 ESILDICTHTSIPL\*RNITLTRIYRAASRTTGPRTCLSS\*TAMKSSPACSLTLEMCIYIRISRATSLKRS\*SV  
 \*LTAWAR\*CSMKHRGSCPTRGYTEPWAWQHWKSCRPIVPGPTQRFA\*MEKQGCCSGGTCSTLL\*SGEGLIR  
 TSLSCGWIRCQLQVSAEGSITTTST\*SGVK\*SI\*DIWNILRKYFILLKIEFLFITEQIIQRAYWKSEKLWKRYT  
 KWKTSFQL\*SSLIPKQRTGSP\*TPKSPASKIKGRNMTASPPSQETRSASISYFLWKLKPKQKRGHSCITLK\*MH  
 FIKT\*QRRAKY\*PSRQNSGRMLMSAT\*SYP\*CITFII\*CPCLEDLVSLRIQSLWER\*WPVAKKWLGRSPKGS\*  
 STLKP\*QPLAQRPSAK\*QKAG\*T\*RVFPLPTRPCHQYQRRSRL\*GP\*SRCSTRIPPHGV\*RNS  
 >ENSMUSP00000132394\_c.15:T>C\_p.C6R ENSMUST00000151376.3|Gm10722-  
 201|ENSMUSG00000091028|+|chr9:g.3000937:T>C  
 SCHIPRPTVDISFPFVFLAIFHVLKCVFLIFRDFQFYRQIPGPTVCIFHISRFSVILSFFKLSTACFSFSM  
 IFSFLAIFHVLQWTFNFPFVFLAIFHVLKCVFLIFSDFLSRHIPGPTVCISHFSRFSVILSFFKLSSGC  
 FFSFMIFSFLAIFHVLQWTFNFPFVFLAIFHVLKCVFLIFSDFLSRHIPGPTVCISHFSRFSVILSFFKLSSGC  
 >ENSMUSP00000132394\_c.42:C>A\_p.P15T ENSMUST00000151376.3|Gm10722-  
 201|ENSMUSG00000091028|+|chr9:g.3000968:C>A  
 SCHIPCPTVDISFPFVFLAIFHVLKCVFLIFRDFQFYRQIPGPTVCIFHISRFSVILSFFKLSTACFSFSM  
 IFSFLAIFHVLQWTFNFPFVFLAIFHVLKCVFLIFSDFLSRHIPGPTVCISHFSRFSVILSFFKLSSGC  
 FFSFMIFSFLAIFHVLQWTFNFPFVFLAIFHVLKCVFLIFSDFLSRHIPGPTVCISHFSRFSVILSFFKLSSGC

>ENSMUSP00000132394\_c.99:C>T\_p.R34C ENSMUST00000151376.3|Gm10722-201|ENSMUSG00000091028|+|chr9:g.3001025:C>T  
SCHIPCPTVDISFPPFSVFLAIFHVLKCVFLIFRDFQFYRQIPGPTVCIFHISRFSVILSFFKLSTACFSFSM  
IFSFLAIFHVLQWTFNLNPPFSSVFLAIFHVLKCVFLIFSDFLFSRHIPGPTVCISHFSRFSVILSFFKLSSGC  
FSFSMIFSFLAIFHVLQWTFNLNPPFSSSIFSPYSRSYSVHFSFFTFSSDFVIFQVVKWMFLIFHDFQFSC  
>ENSMUSP00000132394\_c.115:A>C\_p.Y39S ENSMUST00000151376.3|Gm10722-201|ENSMUSG00000091028|+|chr9:g.3001041:A>C  
SCHIPCPTVDISFPPFSVFLAIFHVLKCVFLIFRDFQFYRQIPGPTVCIFHISRFSVILSFFKLSTACFSFSM  
IFSFLAIFHVLQWTFNLNPPFSSVFLAIFHVLKCVFLIFSDFLFSRHIPGPTVCISHFSRFSVILSFFKLSSGC  
FSFSMIFSFLAIFHVLQWTFNLNPPFSSSIFSPYSRSYSVHFSFFTFSSDFVIFQVVKWMFLIFHDFQFSC  
>ENSMUSP00000132394\_c.122:G>C\_p.Q41H ENSMUST00000151376.3|Gm10722-201|ENSMUSG00000091028|+|chr9:g.3001048:G>C  
SCHIPCPTVDISFPPFSVFLAIFHVLKCVFLIFRDFQFYRHIPGPTVCIFHISRFSVILSFFKLSTACFSFSM  
IFSFLAIFHVLQWTFNLNPPFSSVFLAIFHVLKCVFLIFSDFLFSRHIPGPTVCISHFSRFSVILSFFKLSSGC  
FSFSMIFSFLAIFHVLQWTFNLNPPFSSSIFSPYSRSYSVHFSFFTFSSDFVIFQVVKWMFLIFHDFQFSC  
>rs221766350\_ENSMUSP00000132394\_c.122:G>T\_p.Q41H  
ENSMUST00000151376.3|Gm10722-201|ENSMUSG00000091028|+|chr9:g.3001048:G>T  
SCHIPCPTVDISFPPFSVFLAIFHVLKCVFLIFRDFQFYRHIPGPTVCIFHISRFSVILSFFKLSTACFSFSM  
IFSFLAIFHVLQWTFNLNPPFSSVFLAIFHVLKCVFLIFSDFLFSRHIPGPTVCISHFSRFSVILSFFKLSSGC  
FSFSMIFSFLAIFHVLQWTFNLNPPFSSSIFSPYSRSYSVHFSFFTFSSDFVIFQVVKWMFLIFHDFQFSC  
>ENSMUSP00000132394\_c.135:ACG>TCA\_p.T46S ENSMUST00000151376.3|Gm10722-201|ENSMUSG00000091028|+|chr9:g.3001061:ACG>TCA  
SCHIPCPTVDISFPPFSVFLAIFHVLKCVFLIFRDFQFYRQIPGPTVCIFHISRFSVILSFFKLSTACFSFSM  
\*FSVFLPYSMSYSGHF\*IFHLQFSSPYFMS\*SVYFSFSVIFCFLAIFQVLCQAFILFHVFQ\*FRHFSSCQVD  
VSHFP\*FSVFLPYSMSYNGHF\*IFHLFHRQFSRHIPGPTVCISHFSRFSVILSFFKLSSGCFSFFMIFSFL  
>ENSMUSP00000132394\_c.148:T>A\_p.F50Y ENSMUST00000151376.3|Gm10722-201|ENSMUSG00000091028|+|chr9:g.3001074:T>A  
SCHIPCPTVDISFPPFSVFLAIFHVLKCVFLIFRDFQFYRQIPGPTVCIFHISRFSVILSFFKLSTACFSFSM  
IFSFLAIFHVLQWTFNLNPPFSSVFLAIFHVLKCVFLIFSDFLFSRHIPGPTVCISHFSRFSVILSFFKLSSGC  
FSFSMIFSFLAIFHVLQWTFNLNPPFSSSIFSPYSRSYSVHFSFFTFSSDFVIFQVVKWMFLIFHDFQFSC  
>ENSMUSP00000132394\_c.148:T>C\_p.F50S ENSMUST00000151376.3|Gm10722-201|ENSMUSG00000091028|+|chr9:g.3001074:T>C  
SCHIPCPTVDISFPPFSVFLAIFHVLKCVFLIFRDFQFYRQIPGPTVCISHISRFSVILSFFKLSTACFSFSM  
IFSFLAIFHVLQWTFNLNPPFSSVFLAIFHVLKCVFLIFSDFLFSRHIPGPTVCISHFSRFSVILSFFKLSSGC  
FSFSMIFSFLAIFHVLQWTFNLNPPFSSSIFSPYSRSYSVHFSFFTFSSDFVIFQVVKWMFLIFHDFQFSC  
>ENSMUSP00000132394\_c.152:TA>T\_p.H51del-fs ENSMUST00000151376.3|Gm10722-201|ENSMUSG00000091028|+|chr9:g.3001078:TA>T  
SCHIPCPTVDISFPPFSVFLAIFHVLKCVFLIFRDFQFYRQIPGPTVCIFHIFHVFQ  
>ENSMUSP00000132394\_c.153:A>T\_p.I52F ENSMUST00000151376.3|Gm10722-201|ENSMUSG00000091028|+|chr9:g.3001079:A>T  
SCHIPCPTVDISFPPFSVFLAIFHVLKCVFLIFRDFQFYRQIPGPTVCIFHISRFSVILSFFKLSTACFSFSM  
IFSFLAIFHVLQWTFNLNPPFSSVFLAIFHVLKCVFLIFSDFLFSRHIPGPTVCISHFSRFSVILSFFKLSSGC  
FSFSMIFSFLAIFHVLQWTFNLNPPFSSSIFSPYSRSYSVHFSFFTFSSDFVIFQVVKWMFLIFHDFQFSC  
>ENSMUSP00000132394\_c.159:C>T\_p.R54C ENSMUST00000151376.3|Gm10722-201|ENSMUSG00000091028|+|chr9:g.3001085:C>T  
SCHIPCPTVDISFPPFSVFLAIFHVLKCVFLIFRDFQFYRQIPGPTVCIFHISCFVILSFFKLSTACFSFSM  
IFSFLAIFHVLQWTFNLNPPFSSVFLAIFHVLKCVFLIFSDFLFSRHIPGPTVCISHFSRFSVILSFFKLSSGC  
FSFSMIFSFLAIFHVLQWTFNLNPPFSSSIFSPYSRSYSVHFSFFTFSSDFVIFQVVKWMFLIFHDFQFSC  
>ENSMUSP00000132394\_c.166:C>T\_p.S56L ENSMUST00000151376.3|Gm10722-201|ENSMUSG00000091028|+|chr9:g.3001092:C>T  
SCHIPCPTVDISFPPFSVFLAIFHVLKCVFLIFRDFQFYRQIPGPTVCIFHISRFLVILSFFKLSTACFSFSM  
IFSFLAIFHVLQWTFNLNPPFSSVFLAIFHVLKCVFLIFSDFLFSRHIPGPTVCISHFSRFSVILSFFKLSSGC  
FSFSMIFSFLAIFHVLQWTFNLNPPFSSSIFSPYSRSYSVHFSFFTFSSDFVIFQVVKWMFLIFHDFQFSC  
>ENSMUSP00000132394\_c.175:T>C\_p.L59S ENSMUST00000151376.3|Gm10722-201|ENSMUSG00000091028|+|chr9:g.3001101:T>C  
SCHIPCPTVDISFPPFSVFLAIFHVLKCVFLIFRDFQFYRQIPGPTVCIFHISRFSVILSFFKLSTACFSFSM  
IFSFLAIFHVLQWTFNLNPPFSSVFLAIFHVLKCVFLIFSDFLFSRHIPGPTVCISHFSRFSVILSFFKLSSGC  
FSFSMIFSFLAIFHVLQWTFNLNPPFSSSIFSPYSRSYSVHFSFFTFSSDFVIFQVVKWMFLIFHDFQFSC



>ENSMUSP00000132394\_c.190:T>G\_p.L64W ENSMUST00000151376.3|Gm10722-201|ENSMUSG00000091028|+|chr9:g.3001116:T>G  
SCHIPCPTVDISFPPFSVFLAIFHVLKCVFLIFRDFQFYRQIPGPTVCIFHISRFSVILSFFKWSTACFSFSM  
IFSFLAIFHVLQWTFNLNPPFSSVFLAIFHVLKCVFLIFSDFLFSRHIPGPTVCISHFSRFSVISSFFKLSSGC  
FSFSMIFSFLAIFHVLQWTFNLNPPFSSSIFSPYSRSYSVHFSFFTFSSDFVIFQVVKWMFLIFHDFQFSC  
>rs236908461\_ENSMUSP00000132394\_c.190:T>C\_p.L64S  
ENSMUST00000151376.3|Gm10722-201|ENSMUSG00000091028|+|chr9:g.3001116:T>C  
SCHIPCPTVDISFPPFSVFLAIFHVLKCVFLIFRDFQFYRQIPGPTVCIFHISRFSVILSFFKSSTACFSFSM  
IFSFLAIFHVLQWTFNLNPPFSSVFLAIFHVLKCVFLIFSDFLFSRHIPGPTVCISHFSRFSVISSFFKLSSGC  
FSFSMIFSFLAIFHVLQWTFNLNPPFSSSIFSPYSRSYSVHFSFFTFSSDFVIFQVVKWMFLIFHDFQFSC  
>ENSMUSP00000132394\_c.196:C>G\_p.T66S ENSMUST00000151376.3|Gm10722-201|ENSMUSG00000091028|+|chr9:g.3001122:C>G  
SCHIPCPTVDISFPPFSVFLAIFHVLKCVFLIFRDFQFYRQIPGPTVCIFHISRFSVILSFFKLSSACFSFSM  
IFSFLAIFHVLQWTFNLNPPFSSVFLAIFHVLKCVFLIFSDFLFSRHIPGPTVCISHFSRFSVISSFFKLSSGC  
FSFSMIFSFLAIFHVLQWTFNLNPPFSSSIFSPYSRSYSVHFSFFTFSSDFVIFQVVKWMFLIFHDFQFSC  
>ENSMUSP00000132394\_c.196:CTGC>GTGT\_p.T66S ENSMUST00000151376.3|Gm10722-201|ENSMUSG00000091028|+|chr9:g.3001122:CTGC>GTGT  
SCHIPCPTVDISFPPFSVFLAIFHVLKCVFLIFRDFQFYRQIPGPTVCIFHISRFSVILSFFKLSSVACFSFS  
MIFSFLAIFHVLQWTFNLNPPFSSVFLAIFHVLKCVFLIFSDFLFSRHIPGPTVCISHFSRFSVISSFFKLSSG  
CFSFSMIFSFLAIFHVLQWTFNLNPPFSSSIFSPYSRSYSVHFSFFTFSSDFVIFQVVKWMFLIFHDFQFSC  
>ENSMUSP00000132394\_c.196:CTGC>GTGG\_p.T66S ENSMUST00000151376.3|Gm10722-201|ENSMUSG00000091028|+|chr9:g.3001122:CTGC>GTGG  
SCHIPCPTVDISFPPFSVFLAIFHVLKCVFLIFRDFQFYRQIPGPTVCIFHISRFSVILSFFKLSSGACFSFS  
MIFSFLAIFHVLQWTFNLNPPFSSVFLAIFHVLKCVFLIFSDFLFSRHIPGPTVCISHFSRFSVISSFFKLSSG  
CFSFSMIFSFLAIFHVLQWTFNLNPPFSSSIFSPYSRSYSVHFSFFTFSSDFVIFQVVKWMFLIFHDFQFSC  
>ENSMUSP00000132394\_c.199:C>G\_p.A67G ENSMUST00000151376.3|Gm10722-201|ENSMUSG00000091028|+|chr9:g.3001125:C>G  
SCHIPCPTVDISFPPFSVFLAIFHVLKCVFLIFRDFQFYRQIPGPTVCIFHISRFSVILSFFKLSTGCFFSM  
IFSFLAIFHVLQWTFNLNPPFSSVFLAIFHVLKCVFLIFSDFLFSRHIPGPTVCISHFSRFSVISSFFKLSSGC  
FSFSMIFSFLAIFHVLQWTFNLNPPFSSSIFSPYSRSYSVHFSFFTFSSDFVIFQVVKWMFLIFHDFQFSC  
>ENSMUSP00000132394\_c.216:A>G\_p.M73V ENSMUST00000151376.3|Gm10722-201|ENSMUSG00000091028|+|chr9:g.3001142:A>G  
SCHIPCPTVDISFPPFSVFLAIFHVLKCVFLIFRDFQFYRQIPGPTVCIFHISRFSVILSFFKLSTACFSFSV  
IFSFLAIFHVLQWTFNLNPPFSSVFLAIFHVLKCVFLIFSDFLFSRHIPGPTVCISHFSRFSVISSFFKLSSGC  
FSFSMIFSFLAIFHVLQWTFNLNPPFSSSIFSPYSRSYSVHFSFFTFSSDFVIFQVVKWMFLIFHDFQFSC  
>ENSMUSP00000132394\_c.305:T>A\_p.H102Q ENSMUST00000151376.3|Gm10722-201|ENSMUSG00000091028|+|chr9:g.3001231:T>A  
SCHIPCPTVDISFPPFSVFLAIFHVLKCVFLIFRDFQFYRQIPGPTVCIFHISRFSVILSFFKLSTACFSFSM  
IFSFLAIFHVLQWTFNLNPPFSSVFLAIFQVLKCVFLIFSDFLFSRHIPGPTVCISHFSRFSVISSFFKLSSGC  
FSFSMIFSFLAIFHVLQWTFNLNPPFSSSIFSPYSRSYSVHFSFFTFSSDFVIFQVVKWMFLIFHDFQFSC  
>rs255289761\_ENSMUSP00000132394\_c.333:A>C\_p.S112R  
ENSMUST00000151376.3|Gm10722-201|ENSMUSG00000091028|+|chr9:g.3001259:A>C  
SCHIPCPTVDISFPPFSVFLAIFHVLKCVFLIFRDFQFYRQIPGPTVCIFHISRFSVILSFFKLSTACFSFSM  
IFSFLAIFHVLQWTFNLNPPFSSVFLAIFHVLKCVFLIFRDFLFSRHIPGPTVCISHFSRFSVISSFFKLSSGC  
FSFSMIFSFLAIFHVLQWTFNLNPPFSSSIFSPYSRSYSVHFSFFTFSSDFVIFQVVKWMFLIFHDFQFSC  
>ENSMUSP00000132394\_c.333:A>T\_p.S112C ENSMUST00000151376.3|Gm10722-201|ENSMUSG00000091028|+|chr9:g.3001259:A>T  
SCHIPCPTVDISFPPFSVFLAIFHVLKCVFLIFRDFQFYRQIPGPTVCIFHISRFSVILSFFKLSTACFSFSM  
IFSFLAIFHVLQWTFNLNPPFSSVFLAIFHVLKCVFLIFCDFLFSRHIPGPTVCISHFSRFSVISSFFKLSSGC  
FSFSMIFSFLAIFHVLQWTFNLNPPFSSSIFSPYSRSYSVHFSFFTFSSDFVIFQVVKWMFLIFHDFQFSC  
>ENSMUSP00000132394\_c.343:T>A\_p.L115Q ENSMUST00000151376.3|Gm10722-201|ENSMUSG00000091028|+|chr9:g.3001269:T>A  
SCHIPCPTVDISFPPFSVFLAIFHVLKCVFLIFRDFQFYRQIPGPTVCIFHISRFSVILSFFKLSTACFSFSM  
IFSFLAIFHVLQWTFNLNPPFSSVFLAIFHVLKCVFLIFSDFLFSRHIPGPTVCISHFSRFSVISSFFKLSSGC  
FSFSMIFSFLAIFHVLQWTFNLNPPFSSSIFSPYSRSYSVHFSFFTFSSDFVIFQVVKWMFLIFHDFQFSC  
>ENSMUSP00000132394\_c.369:A>T\_p.T124S ENSMUST00000151376.3|Gm10722-201|ENSMUSG00000091028|+|chr9:g.3001295:A>T

SCHIPCPTVDISFPPFSVFLAIFHVLKCVFLIFRDFQFYRQIPGPTVCIFHISRFSVILSFFKLSTACFSFSM  
IFSFLAIFHVLQWTFNLNPPFSVFLAIFHVLKCVFLIFSDFLFSRHIPGPTVCISHFSRFSVILSFFKLSSGC  
FSSMIFSLAIFHVLQWTFNLNPPFSSSIFSPYSRSYSVHFSFFTFSSDFVIFQVVKWMFLIFHDFQFSC  
>ENSMUSP00000132394\_c.400:C>T\_p.S134L ENSMUST00000151376.3|Gm10722-  
201|ENSMUSG00000091028|+|chr9:g.3001326:C>T  
SCHIPCPTVDISFPPFSVFLAIFHVLKCVFLIFRDFQFYRQIPGPTVCIFHISRFSVILSFFKLSTACFSFSM  
IFSFLAIFHVLQWTFNLNPPFSVFLAIFHVLKCVFLIFSDFLFSRHIPGPTVCISHFSRFLVISSFFKLSSGC  
FSSMIFSLAIFHVLQWTFNLNPPFSSSIFSPYSRSYSVHFSFFTFSSDFVIFQVVKWMFLIFHDFQFSC  
>ENSMUSP00000132394\_c.424:T>C\_p.L142S ENSMUST00000151376.3|Gm10722-  
201|ENSMUSG00000091028|+|chr9:g.3001350:T>C  
SCHIPCPTVDISFPPFSVFLAIFHVLKCVFLIFRDFQFYRQIPGPTVCIFHISRFSVILSFFKLSTACFSFSM  
IFSFLAIFHVLQWTFNLNPPFSVFLAIFHVLKCVFLIFSDFLFSRHIPGPTVCISHFSRFSVILSFFKSSSGC  
FSSMIFSLAIFHVLQWTFNLNPPFSSSIFSPYSRSYSVHFSFFTFSSDFVIFQVVKWMFLIFHDFQFSC  
>ENSMUSP00000132394\_c.424:T>G\_p.L142W ENSMUST00000151376.3|Gm10722-  
201|ENSMUSG00000091028|+|chr9:g.3001350:T>G  
SCHIPCPTVDISFPPFSVFLAIFHVLKCVFLIFRDFQFYRQIPGPTVCIFHISRFSVILSFFKLSTACFSFSM  
IFSFLAIFHVLQWTFNLNPPFSVFLAIFHVLKCVFLIFSDFLFSRHIPGPTVCISHFSRFSVILSFFKWSSGC  
FSSMIFSLAIFHVLQWTFNLNPPFSSSIFSPYSRSYSVHFSFFTFSSDFVIFQVVKWMFLIFHDFQFSC  
>ENSMUSP00000132394\_c.488:A>T\_p.Q163H ENSMUST00000151376.3|Gm10722-  
201|ENSMUSG00000091028|+|chr9:g.3001414:A>T  
SCHIPCPTVDISFPPFSVFLAIFHVLKCVFLIFRDFQFYRQIPGPTVCIFHISRFSVILSFFKLSTACFSFSM  
IFSFLAIFHVLQWTFNLNPPFSVFLAIFHVLKCVFLIFSDFLFSRHIPGPTVCISHFSRFSVILSFFKLSSGC  
FSSMIFSLAIFHVLQWTFNLNPPFSSSIFSPYSRSYSVHFSFFTFSSDFVIFQVVKWMFLIFHDFQFSC  
>ENSMUSP00000132394\_c.520:C>G\_p.S174W ENSMUST00000151376.3|Gm10722-  
201|ENSMUSG00000091028|+|chr9:g.3002051:C>G  
SCHIPCPTVDISFPPFSVFLAIFHVLKCVFLIFRDFQFYRQIPGPTVCIFHISRFSVILSFFKLSTACFSFSM  
IFSFLAIFHVLQWTFNLNPPFSVFLAIFHVLKCVFLIFSDFLFSRHIPGPTVCISHFSRFSVILSFFKLSSGC  
FSSMIFSLAIFHVLQWTFNLNPPFSSSIFSPYSRSYSVHFSFFTFSSDFVIFQVVKWMFLIFHDFQFSC  
>ENSMUSP00000132394\_c.550:A>T\_p.Y184F ENSMUST00000151376.3|Gm10722-  
201|ENSMUSG00000091028|+|chr9:g.3002230:A>T  
SCHIPCPTVDISFPPFSVFLAIFHVLKCVFLIFRDFQFYRQIPGPTVCIFHISRFSVILSFFKLSTACFSFSM  
IFSFLAIFHVLQWTFNLNPPFSVFLAIFHVLKCVFLIFSDFLFSRHIPGPTVCISHFSRFSVILSFFKLSSGC  
FSSMIFSLAIFHVLQWTFNLNPPFSSSIFSPYSRSYSVHFSFFTFSSDFVIFQVVKWMFLIFHDFQFSC  
>ENSMUSP00000132394\_c.580:T>G\_p.F194C ENSMUST00000151376.3|Gm10722-  
201|ENSMUSG00000091028|+|chr9:g.3002260:T>G  
SCHIPCPTVDISFPPFSVFLAIFHVLKCVFLIFRDFQFYRQIPGPTVCIFHISRFSVILSFFKLSTACFSFSM  
IFSFLAIFHVLQWTFNLNPPFSVFLAIFHVLKCVFLIFSDFLFSRHIPGPTVCISHFSRFSVILSFFKLSSGC  
FSSMIFSLAIFHVLQWTFNLNPPFSSSIFSPYSRSYSVHFSFFTFSSDFVIFQVVKWMFLIFHDFQFSC  
>ENSMUSP00000132394\_c.615:A>T\_p.M206L ENSMUST00000151376.3|Gm10722-  
201|ENSMUSG00000091028|+|chr9:g.3002295:A>T  
SCHIPCPTVDISFPPFSVFLAIFHVLKCVFLIFRDFQFYRQIPGPTVCIFHISRFSVILSFFKLSTACFSFSM  
IFSFLAIFHVLQWTFNLNPPFSVFLAIFHVLKCVFLIFSDFLFSRHIPGPTVCISHFSRFSVILSFFKLSSGC  
FSSMIFSLAIFHVLQWTFNLNPPFSSSIFSPYSRSYSVHFSFFTFSSDFVIFQVVKWFLIFHDFQFSC  
>ENSMUSP00000132394\_c.617:G>T\_p.M206I ENSMUST00000151376.3|Gm10722-  
201|ENSMUSG00000091028|+|chr9:g.3002297:G>T  
SCHIPCPTVDISFPPFSVFLAIFHVLKCVFLIFRDFQFYRQIPGPTVCIFHISRFSVILSFFKLSTACFSFSM  
IFSFLAIFHVLQWTFNLNPPFSVFLAIFHVLKCVFLIFSDFLFSRHIPGPTVCISHFSRFSVILSFFKLSSGC  
FSSMIFSLAIFHVLQWTFNLNPPFSSSIFSPYSRSYSVHFSFFTFSSDFVIFQVVKWIFLIFHDFQFSC  
>ENSMUSP00000132394\_c.630:C>T\_p.H211Y ENSMUST00000151376.3|Gm10722-  
201|ENSMUSG00000091028|+|chr9:g.3002310:C>T  
SCHIPCPTVDISFPPFSVFLAIFHVLKCVFLIFRDFQFYRQIPGPTVCIFHISRFSVILSFFKLSTACFSFSM  
IFSFLAIFHVLQWTFNLNPPFSVFLAIFHVLKCVFLIFSDFLFSRHIPGPTVCISHFSRFSVILSFFKLSSGC  
FSSMIFSLAIFHVLQWTFNLNPPFSSSIFSPYSRSYSVHFSFFTFSSDFVIFQVVKWMFLIFYDFQFSC  
>ENSMUSP00000136598\_c.45:T>C\_p.C16R ENSMUST00000177722.8|Gm11168-  
201|ENSMUSG00000096385|+|chr9:g.3003391:T>C  
MFLIFHDFQFSCHIPRPTVDISFPPFSVFLAIFHVLKCVFLIFSDQFSRHIPGPTVCISHFSRFSVILSFFK  
LSSGCFSLIFSLAIFHVLQWTFNLNPPFSVFLAIFHVLKCCVFLIFRDFQFPRHIPGPTVCISHFSRFSV

ISSFFKSSSGCFSFSMIFSLAIFHVLQWTFNFPFSSYSFSPYSRSYSVHFSFSTFFSDFVIFQVVKWMFL  
IFLDFQFSC  
>ENSMUSP00000136598\_c.72:C>A\_p.P25T ENSMUST00000177722.8|Gm11168-  
201|ENSMUSG00000096385|+|chr9:g.3003422:C>A  
MFLIFHDFQFSCHIPCPTVDISFPFVSFLAIFHVLKCVFLIFSDQFSRHIPGPTVCISHFSRFSVILSFFK  
LSSGCFSSFLIFSFLAIFHVLQWTFNFPFSSVFLAIFHVLKCCVFLIFRDFQFPRHIPGPTVCISHFSRFSV  
ISSFFKSSSGCFSFSMIFSLAIFHVLQWTFNFPFSSYSFSPYSRSYSVHFSFSTFFSDFVIFQVVKWMFL  
IFLDFQFSC  
>ENSMUSP00000136598\_c.101:T>A\_p.H34Q ENSMUST00000177722.8|Gm11168-  
201|ENSMUSG00000096385|+|chr9:g.3003451:T>A  
MFLIFHDFQFSCHIPCPTVDISFPFVSFLAIFQVLKCVFLIFSDQFSRHIPGPTVCISHFSRFSVILSFFK  
LSSGCFSSFLIFSFLAIFHVLQWTFNFPFSSVFLAIFHVLKCCVFLIFRDFQFPRHIPGPTVCISHFSRFSV  
ISSFFKSSSGCFSFSMIFSLAIFHVLQWTFNFPFSSYSFSPYSRSYSVHFSFSTFFSDFVIFQVVKWMFL  
IFLDFQFSC  
>rs228881908\_ENSMUSP00000136598\_c.129:A>T\_p.S44C  
ENSMUST00000177722.8|Gm11168-201|ENSMUSG00000096385|+|chr9:g.3003479:A>T  
MFLIFHDFQFSCHIPCPTVDISFPFVSFLAIFHVLKCVFLIFCDFQFSRHIPGPTVCISHFSRFSVILSFFK  
LSSGCFSSFLIFSFLAIFHVLQWTFNFPFSSVFLAIFHVLKCCVFLIFRDFQFPRHIPGPTVCISHFSRFSV  
ISSFFKSSSGCFSFSMIFSLAIFHVLQWTFNFPFSSYSFSPYSRSYSVHFSFSTFFSDFVIFQVVKWMFL  
IFLDFQFSC  
>ENSMUSP00000136598\_c.129:A>C\_p.S44R ENSMUST00000177722.8|Gm11168-  
201|ENSMUSG00000096385|+|chr9:g.3003479:A>C  
MFLIFHDFQFSCHIPCPTVDISFPFVSFLAIFHVLKCVFLIFRDFQFSRHIPGPTVCISHFSRFSVILSFFK  
LSSGCFSSFLIFSFLAIFHVLQWTFNFPFSSVFLAIFHVLKCCVFLIFRDFQFPRHIPGPTVCISHFSRFSV  
ISSFFKSSSGCFSFSMIFSLAIFHVLQWTFNFPFSSYSFSPYSRSYSVHFSFSTFFSDFVIFQVVKWMFL  
IFLDFQFSC  
>ENSMUSP00000136598\_c.165:A>T\_p.T56S ENSMUST00000177722.8|Gm11168-  
201|ENSMUSG00000096385|+|chr9:g.3003515:A>T  
MFLIFHDFQFSCHIPCPTVDISFPFVSFLAIFHVLKCVFLIFSDQFSRHIPGPSVCISHFSRFSVILSFFK  
LSSGCFSSFLIFSFLAIFHVLQWTFNFPFSSVFLAIFHVLKCCVFLIFRDFQFPRHIPGPTVCISHFSRFSV  
ISSFFKSSSGCFSFSMIFSLAIFHVLQWTFNFPFSSYSFSPYSRSYSVHFSFSTFFSDFVIFQVVKWMFL  
IFLDFQFSC  
>ENSMUSP00000136598\_c.186:T>C\_p.S63P ENSMUST00000177722.8|Gm11168-  
201|ENSMUSG00000096385|+|chr9:g.3003536:T>C  
MFLIFHDFQFSCHIPCPTVDISFPFVSFLAIFHVLKCVFLIFSDQFSRHIPGPTVCISHFPFRFSVILSFFK  
LSSGCFSSFLIFSFLAIFHVLQWTFNFPFSSVFLAIFHVLKCCVFLIFRDFQFPRHIPGPTVCISHFSRFSV  
ISSFFKSSSGCFSFSMIFSLAIFHVLQWTFNFPFSSYSFSPYSRSYSVHFSFSTFFSDFVIFQVVKWMFL  
IFLDFQFSC  
>ENSMUSP00000136598\_c.195:T>G\_p.S66A ENSMUST00000177722.8|Gm11168-  
201|ENSMUSG00000096385|+|chr9:g.3003545:T>G  
MFLIFHDFQFSCHIPCPTVDISFPFVSFLAIFHVLKCVFLIFSDQFSRHIPGPTVCISHFSRFAVILSFFK  
LSSGCFSSFLIFSFLAIFHVLQWTFNFPFSSVFLAIFHVLKCCVFLIFRDFQFPRHIPGPTVCISHFSRFSV  
ISSFFKSSSGCFSFSMIFSLAIFHVLQWTFNFPFSSYSFSPYSRSYSVHFSFSTFFSDFVIFQVVKWMFL  
IFLDFQFSC  
>ENSMUSP00000136598\_c.196:C>T\_p.S66L ENSMUST00000177722.8|Gm11168-  
201|ENSMUSG00000096385|+|chr9:g.3003546:C>T  
MFLIFHDFQFSCHIPCPTVDISFPFVSFLAIFHVLKCVFLIFSDQFSRHIPGPTVCISHFSRFLVILSFFK  
LSSGCFSSFLIFSFLAIFHVLQWTFNFPFSSVFLAIFHVLKCCVFLIFRDFQFPRHIPGPTVCISHFSRFSV  
ISSFFKSSSGCFSFSMIFSLAIFHVLQWTFNFPFSSYSFSPYSRSYSVHFSFSTFFSDFVIFQVVKWMFL  
IFLDFQFSC  
>ENSMUSP00000136598\_c.199:T>G\_p.V67G ENSMUST00000177722.8|Gm11168-  
201|ENSMUSG00000096385|+|chr9:g.3003549:T>G  
MFLIFHDFQFSCHIPCPTVDISFPFVSFLAIFHVLKCVFLIFSDQFSRHIPGPTVCISHFSRFSGILSFFK  
LSSGCFSSFLIFSFLAIFHVLQWTFNFPFSSVFLAIFHVLKCCVFLIFRDFQFPRHIPGPTVCISHFSRFSV  
ISSFFKSSSGCFSFSMIFSLAIFHVLQWTFNFPFSSYSFSPYSRSYSVHFSFSTFFSDFVIFQVVKWMFL  
IFLDFQFSC  
>ENSMUSP00000136598\_c.205:T>C\_p.L69S ENSMUST00000177722.8|Gm11168-  
201|ENSMUSG00000096385|+|chr9:g.3003555:T>C

MFLIFHDFQFSCHIPCPTVDISFPPFSVFLAIFHVLKCVFLIFSDQFSRHIPGPTVCISHFSRFSVILSFFK  
LSSGCFSSFLIFSLAIFHVLQWTFNLNPPFSVFLAIFHVLKCCVFLIFRDFQFPRHIPGPTVCISHFSRFSV  
ISSFFKSSSGCFSSMIFSLAIFHVLQWTFNLNPPFSSYSFSPYRSYSVHFSFSTFFSDFVIFQVVKWMFL  
IFLDFQFSC  
>rs252934463\_ENSMUSP00000136598\_c.220:T>G\_p.L74W  
ENSMUST00000177722.8|Gm11168-201|ENSMUSG00000096385|+|chr9:g.3003570:T>G  
MFLIFHDFQFSCHIPCPTVDISFPPFSVFLAIFHVLKCVFLIFSDQFSRHIPGPTVCISHFSRFSVILSFFK  
WSSGCFSSFLIFSLAIFHVLQWTFNLNPPFSVFLAIFHVLKCCVFLIFRDFQFPRHIPGPTVCISHFSRFSV  
ISSFFKSSSGCFSSMIFSLAIFHVLQWTFNLNPPFSSYSFSPYRSYSVHFSFSTFFSDFVIFQVVKWMFL  
IFLDFQFSC  
>ENSMUSP00000136598\_c.220:T>C\_p.L74S ENSMUST00000177722.8|Gm11168-  
201|ENSMUSG00000096385|+|chr9:g.3003570:T>C  
MFLIFHDFQFSCHIPCPTVDISFPPFSVFLAIFHVLKCVFLIFSDQFSRHIPGPTVCISHFSRFSVILSFFK  
SSSGCFSSFLIFSLAIFHVLQWTFNLNPPFSVFLAIFHVLKCCVFLIFRDFQFPRHIPGPTVCISHFSRFSV  
ISSFFKSSSGCFSSMIFSLAIFHVLQWTFNLNPPFSSYSFSPYRSYSVHFSFSTFFSDFVIFQVVKWMFL  
IFLDFQFSC  
>ENSMUSP00000136598\_c.232:G>T\_p.C78F ENSMUST00000177722.8|Gm11168-  
201|ENSMUSG00000096385|+|chr9:g.3003582:G>T  
MFLIFHDFQFSCHIPCPTVDISFPPFSVFLAIFHVLKCVFLIFSDQFSRHIPGPTVCISHFSRFSVILSFFK  
LSSGFFSFLIFSLAIFHVLQWTFNLNPPFSVFLAIFHVLKCCVFLIFRDFQFPRHIPGPTVCISHFSRFSV  
ISSFFKSSSGCFSSMIFSLAIFHVLQWTFNLNPPFSSYSFSPYRSYSVHFSFSTFFSDFVIFQVVKWMFL  
IFLDFQFSC  
>ENSMUSP00000136761\_c.2:G>T\_p.M1I ENSMUST00000178077.2|Gm11168-  
202|ENSMUSG00000096385|+|chr9:g.3003582:G>T  
IFLIFLDFQFSCHIPCPTVDISFPPFSVFLAIFHVLKCVFLIFSDQFSRHIPGPTVCISHFFRFFMISSTFF  
LSSGCFSSSIIFTFLAIFHVLQWTFNLNPPFSVFLAIFHILKCCVFLIFRDFQFPRHIPGPTVCISHFSRFSV  
ISSFFKSSSGCFSSMIFSLAIFHVLQWTFNLNPPFSSYSFSPYRSYSVHFSFSTFFSDFVIFQVVKWMFL  
IFLDFQFSC  
>ENSMUSP00000136598\_c.246:T>G\_p.L83V ENSMUST00000177722.8|Gm11168-  
201|ENSMUSG00000096385|+|chr9:g.3003596:T>G  
MFLIFHDFQFSCHIPCPTVDISFPPFSVFLAIFHVLKCVFLIFSDQFSRHIPGPTVCISHFSRFSVILSFFK  
LSSGCFSSSVIFSLAIFHVLQWTFNLNPPFSVFLAIFHVLKCCVFLIFRDFQFPRHIPGPTVCISHFSRFSV  
ISSFFKSSSGCFSSMIFSLAIFHVLQWTFNLNPPFSSYSFSPYRSYSVHFSFSTFFSDFVIFQVVKWMFL  
IFLDFQFSC  
>ENSMUSP00000136761\_c.16:T>G\_p.L6R ENSMUST00000178077.2|Gm11168-  
202|ENSMUSG00000096385|+|chr9:g.3003596:T>G  
MFLIFRDFQFSCHIPCPTVDISFPPFSVFLAIFHVLKCVFLIFSDQFSRHIPGPTVCISHFFRFFMISSTFF  
LSSGCFSSSIIFTFLAIFHVLQWTFNLNPPFSVFLAIFHILKCCVFLIFRDFQFPRHIPGPTVCISHFSRFSV  
ISSFFKSSSGCFSSMIFSLAIFHVLQWTFNLNPPFSSYSFSPYRSYSVHFSFSTFFSDFVIFQVVKWMFL  
IFLDFQFSC  
>ENSMUSP00000136598\_c.246:T>A\_p.L83M ENSMUST00000177722.8|Gm11168-  
201|ENSMUSG00000096385|+|chr9:g.3003596:T>A  
MFLIFHDFQFSCHIPCPTVDISFPPFSVFLAIFHVLKCVFLIFSDQFSRHIPGPTVCISHFSRFSVILSFFK  
LSSGCFSSMIFSLAIFHVLQWTFNLNPPFSVFLAIFHVLKCCVFLIFRDFQFPRHIPGPTVCISHFSRFSV  
ISSFFKSSSGCFSSMIFSLAIFHVLQWTFNLNPPFSSYSFSPYRSYSVHFSFSTFFSDFVIFQVVKWMFL  
IFLDFQFSC  
>ENSMUSP00000136761\_c.16:T>A\_p.L6H ENSMUST00000178077.2|Gm11168-  
202|ENSMUSG00000096385|+|chr9:g.3003596:T>A  
MFLIFHDFQFSCHIPCPTVDISFPPFSVFLAIFHVLKCVFLIFSDQFSRHIPGPTVCISHFFRFFMISSTFF  
LSSGCFSSSIIFTFLAIFHVLQWTFNLNPPFSVFLAIFHILKCCVFLIFRDFQFPRHIPGPTVCISHFSRFSV  
ISSFFKSSSGCFSSMIFSLAIFHVLQWTFNLNPPFSSYSFSPYRSYSVHFSFSTFFSDFVIFQVVKWMFL  
IFLDFQFSC  
>ENSMUSP00000136598\_c.257:T>A\_p.S86R ENSMUST00000177722.8|Gm11168-  
201|ENSMUSG00000096385|+|chr9:g.3003607:T>A  
MFLIFHDFQFSCHIPCPTVDISFPPFSVFLAIFHVLKCVFLIFSDQFSRHIPGPTVCISHFSRFSVILSFFK  
LSSGCFSSFLIFRFLAIFHVLQWTFNLNPPFSVFLAIFHVLKCCVFLIFRDFQFPRHIPGPTVCISHFSRFSV  
ISSFFKSSSGCFSSMIFSLAIFHVLQWTFNLNPPFSSYSFSPYRSYSVHFSFSTFFSDFVIFQVVKWMFL  
IFLDFQFSC

>ENSMUSP00000136761\_c.27:T>A\_p.F10I ENSMUST00000178077.2|Gm11168-  
202|ENSMUSG00000096385|+|chr9:g.3003607:T>A  
MFLIFLDFQFSCHIPCPTVDISFPPFSVFLAIFHVLKCVFLIFSDQFSRHIPGPTVCISHFFRFFMISFFFT  
LSSGCFSSFSIIFTFLAIFHVLQWTFNLNPPFSVFLAIFHILKCCVFLIFRDFQFPRHIPGPTVCISHFSRFSV  
ISSFFKSSSGCFSFSMIFSLAIFHVLQWTFNLNPPFSSYSFSPYRSYSVHFSFFTFSSDFVIFQVVKWMFL  
IFLDFQFSC  
>ENSMUSP00000136761\_c.45:T>C\_p.C16R ENSMUST00000178077.2|Gm11168-  
202|ENSMUSG00000096385|+|chr9:g.3003625:T>C  
MFLIFLDFQFSCHIPRPTVDISFPPFSVFLAIFHVLKCVFLIFSDQFSRHIPGPTVCISHFFRFFMISFFFT  
LSSGCFSSFSIIFTFLAIFHVLQWTFNLNPPFSVFLAIFHILKCCVFLIFRDFQFPRHIPGPTVCISHFSRFSV  
ISSFFKSSSGCFSFSMIFSLAIFHVLQWTFNLNPPFSSYSFSPYRSYSVHFSFFTFSSDFVIFQVVKWMFL  
IFLDFQFSC  
>ENSMUSP00000136598\_c.275:T>G\_p.H92Q ENSMUST00000177722.8|Gm11168-  
201|ENSMUSG00000096385|+|chr9:g.3003625:T>G  
MFLIFHDFQFSCHIPCPTVDISFPPFSVFLAIFHVLKCVFLIFSDQFSRHIPGPTVCISHFSRFSVILSFFK  
LSSGCFSSFLIFSLAIFHVLQWTFNLNPPFSVFLAIFHVLKCCVFLIFRDFQFPRHIPGPTVCISHFSRFSV  
ISSFFKSSSGCFSFSMIFSLAIFHVLQWTFNLNPPFSSYSFSPYRSYSVHFSFFTFSSDFVIFQVVKWMFL  
IFLDFQFSC  
>ENSMUSP00000136761\_c.45:T>G\_p.C16G ENSMUST00000178077.2|Gm11168-  
202|ENSMUSG00000096385|+|chr9:g.3003625:T>G  
MFLIFLDFQFSCHIPGPTVDISFPPFSVFLAIFHVLKCVFLIFSDQFSRHIPGPTVCISHFFRFFMISFFFT  
LSSGCFSSFSIIFTFLAIFHVLQWTFNLNPPFSVFLAIFHILKCCVFLIFRDFQFPRHIPGPTVCISHFSRFSV  
ISSFFKSSSGCFSFSMIFSLAIFHVLQWTFNLNPPFSSYSFSPYRSYSVHFSFFTFSSDFVIFQVVKWMFL  
IFLDFQFSC  
>ENSMUSP00000136598\_c.306:C>A\_p.P103T ENSMUST00000177722.8|Gm11168-  
201|ENSMUSG00000096385|+|chr9:g.3003656:C>A  
MFLIFHDFQFSCHIPCPTVDISFPPFSVFLAIFHVLKCVFLIFSDQFSRHIPGPTVCISHFSRFSVILSFFK  
LSSGCFSSFLIFSLAIFHVLQWTFNLNPTFSVFLAIFHVLKCCVFLIFRDFQFPRHIPGPTVCISHFSRFSV  
ISSFFKSSSGCFSFSMIFSLAIFHVLQWTFNLNPPFSSYSFSPYRSYSVHFSFFTFSSDFVIFQVVKWMFL  
IFLDFQFSC  
>ENSMUSP00000136761\_c.72:C>A\_p.P25T ENSMUST00000178077.2|Gm11168-  
202|ENSMUSG00000096385|+|chr9:g.3003656:C>A  
MFLIFLDFQFSCHIPCPTVDISFPTFSVFLAIFHVLKCVFLIFSDQFSRHIPGPTVCISHFFRFFMISFFFT  
LSSGCFSSFSIIFTFLAIFHVLQWTFNLNPPFSVFLAIFHILKCCVFLIFRDFQFPRHIPGPTVCISHFSRFSV  
ISSFFKSSSGCFSFSMIFSLAIFHVLQWTFNLNPPFSSYSFSPYRSYSVHFSFFTFSSDFVIFQVVKWMFL  
IFLDFQFSC  
>ENSMUSP00000136598\_c.335:T>A\_p.H112Q ENSMUST00000177722.8|Gm11168-  
201|ENSMUSG00000096385|+|chr9:g.3003685:T>A  
MFLIFHDFQFSCHIPCPTVDISFPPFSVFLAIFHVLKCVFLIFSDQFSRHIPGPTVCISHFSRFSVILSFFK  
LSSGCFSSFLIFSLAIFHVLQWTFNLNPPFSVFLAIFQVLKCCVFLIFRDFQFPRHIPGPTVCISHFSRFSV  
ISSFFKSSSGCFSFSMIFSLAIFHVLQWTFNLNPPFSSYSFSPYRSYSVHFSFFTFSSDFVIFQVVKWMFL  
IFLDFQFSC  
>ENSMUSP00000136761\_c.101:T>A\_p.H34Q ENSMUST00000178077.2|Gm11168-  
202|ENSMUSG00000096385|+|chr9:g.3003685:T>A  
MFLIFLDFQFSCHIPCPTVDISFPPFSVFLAIFQVLKCVFLIFSDQFSRHIPGPTVCISHFFRFFMISFFFT  
LSSGCFSSFSIIFTFLAIFHVLQWTFNLNPPFSVFLAIFHILKCCVFLIFRDFQFPRHIPGPTVCISHFSRFSV  
ISSFFKSSSGCFSFSMIFSLAIFHVLQWTFNLNPPFSSYSFSPYRSYSVHFSFFTFSSDFVIFQVVKWMFL  
IFLDFQFSC  
>ENSMUSP00000136761\_c.129:A>C\_p.S44R ENSMUST00000178077.2|Gm11168-  
202|ENSMUSG00000096385|+|chr9:g.3003713:A>C  
MFLIFLDFQFSCHIPCPTVDISFPPFSVFLAIFHVLKCVFLIFRDFQFSRHIPGPTVCISHFFRFFMISFFFT  
LSSGCFSSFSIIFTFLAIFHVLQWTFNLNPPFSVFLAIFHILKCCVFLIFRDFQFPRHIPGPTVCISHFSRFSV  
ISSFFKSSSGCFSFSMIFSLAIFHVLQWTFNLNPPFSSYSFSPYRSYSVHFSFFTFSSDFVIFQVVKWMFL  
IFLDFQFSC  
>ENSMUSP00000136761\_c.129:A>T\_p.S44C ENSMUST00000178077.2|Gm11168-  
202|ENSMUSG00000096385|+|chr9:g.3003713:A>T  
MFLIFLDFQFSCHIPCPTVDISFPPFSVFLAIFHVLKCVFLIFCDFQFSRHIPGPTVCISHFFRFFMISFFFT  
LSSGCFSSFSIIFTFLAIFHVLQWTFNLNPPFSVFLAIFHILKCCVFLIFRDFQFPRHIPGPTVCISHFSRFSV



ISSFFKSSSGCFSFSMIFSLAIFHVLQWTFNLNPPFSSYSFSPYRSYSVHFSFSTFFSDFVIFQVVKWMFL  
IFLDFQFSC  
>ENSMUSP00000136761\_c.165:A>T\_p.T56S ENSMUST00000178077.2|Gm11168-  
202|ENSMUSG00000096385|+|chr9:g.3003749:A>T  
MFLIFLDFQFSCCHIPCPTVDISFPPFSVFLAIFHVLKCVFLIFSDQFQSRHIPGPSVCISHFFRFFMISFFFT  
LSSGCFSSFSIIIFTFLAIFHVLQWTFNLNPPFSSVFLAIFHILKCCVFLIFRDFQFPRHIPGPTVCISHFSRFSV  
ISSFFKSSSGCFSFSMIFSLAIFHVLQWTFNLNPPFSSYSFSPYRSYSVHFSFSTFFSDFVIFQVVKWMFL  
IFLDFQFSC  
>ENSMUSP00000136761\_c.171:T>G\_p.C58G ENSMUST00000178077.2|Gm11168-  
202|ENSMUSG00000096385|+|chr9:g.3003755:T>G  
MFLIFLDFQFSCCHIPCPTVDISFPPFSVFLAIFHVLKCVFLIFSDQFQSRHIPGPTVGISHFFRFFMISFFFT  
LSSGCFSSFSIIIFTFLAIFHVLQWTFNLNPPFSSVFLAIFHILKCCVFLIFRDFQFPRHIPGPTVCISHFSRFSV  
ISSFFKSSSGCFSFSMIFSLAIFHVLQWTFNLNPPFSSYSFSPYRSYSVHFSFSTFFSDFVIFQVVKWMFL  
IFLDFQFSC  
>ENSMUSP00000136761\_c.181:AT>A\_p.H61del-fs ENSMUST00000178077.2|Gm11168-  
202|ENSMUSG00000096385|+|chr9:g.3003765:AT>A  
MFLIFLDFQFSCCHIPCPTVDISFPPFSVFLAIFHVLKCVFLIFSDQFQSRHIPGPTVCISHFSGFS  
>ENSMUSP00000136761\_c.181:ATT>A\_p.H61del-fs ENSMUST00000178077.2|Gm11168-  
202|ENSMUSG00000096385|+|chr9:g.3003765:ATT>A  
MFLIFLDFQFSCCHIPCPTVDISFPPFSVFLAIFHVLKCVFLIFSDQFQSRHIPGPTVCISHFQVFHDFVIFHV  
VKWMFLIFHYFHFSCHISCPTVDISKFSTFFCFPRHISHPKVLCISHFP  
>ENSMUSP00000136761\_c.190:G>C\_p.R64T ENSMUST00000178077.2|Gm11168-  
202|ENSMUSG00000096385|+|chr9:g.3003774:G>C  
MFLIFLDFQFSCCHIPCPTVDISFPPFSVFLAIFHVLKCVFLIFSDQFQSRHIPGPTVCISHFFRFFMISFFFT  
LSSGCFSSFSIIIFTFLAIFHVLQWTFNLNPPFSSVFLAIFHILKCCVFLIFRDFQFPRHIPGPTVCISHFSRFSV  
ISSFFKSSSGCFSFSMIFSLAIFHVLQWTFNLNPPFSSYSFSPYRSYSVHFSFSTFFSDFVIFQVVKWMFL  
IFLDFQFSC  
>ENSMUSP00000136761\_c.214:TCAC>CCAA\_p.F72S ENSMUST00000178077.2|Gm11168-  
202|ENSMUSG00000096385|+|chr9:g.3003974:TCAC>CCAA  
MFLIFLDFQFSCCHIPCPTVDISFPPFSVFLAIFHVLKCVFLIFSDQFQSRHIPGPTVCISHFFRFFMISFFSN  
TLSSGCFSSFSIIIFTFLAIFHVLQWTFNLNPPFSSVFLAIFHILKCCVFLIFRDFQFPRHIPGPTVCISHFSRFS  
VSSFFKSSSGCFSFSMIFSLAIFHVLQWTFNLNPPFSSYSFSPYRSYSVHFSFSTFFSDFVIFQVVKWMFL  
LIFLDFQFSC  
>ENSMUSP00000136761\_c.217:C>A\_p.T73K ENSMUST00000178077.2|Gm11168-  
202|ENSMUSG00000096385|+|chr9:g.3003977:C>A  
MFLIFLDFQFSCCHIPCPTVDISFPPFSVFLAIFHVLKCVFLIFSDQFQSRHIPGPTVCISHFFRFFMISFFFK  
LSSGCFSSFSIIIFTFLAIFHVLQWTFNLNPPFSSVFLAIFHILKCCVFLIFRDFQFPRHIPGPTVCISHFSRFSV  
ISSFFKSSSGCFSFSMIFSLAIFHVLQWTFNLNPPFSSYSFSPYRSYSVHFSFSTFFSDFVIFQVVKWMFL  
IFLDFQFSC  
>ENSMUSP00000136761\_c.217:CGTT>AGTC\_p.T73K ENSMUST00000178077.2|Gm11168-  
202|ENSMUSG00000096385|+|chr9:g.3003977:CGTT>AGTC  
MFLIFLDFQFSCCHIPCPTVDISFPPFSVFLAIFHVLKCVFLIFSDQFQSRHIPGPTVCISHFFRFFMISFFFK  
SLSSGCFSSFSIIIFTFLAIFHVLQWTFNLNPPFSSVFLAIFHILKCCVFLIFRDFQFPRHIPGPTVCISHFSRFS  
VSSFFKSSSGCFSFSMIFSLAIFHVLQWTFNLNPPFSSYSFSPYRSYSVHFSFSTFFSDFVIFQVVKWMFL  
LIFLDFQFSC  
>ENSMUSP00000136761\_c.221:G>T\_p.L74F ENSMUST00000178077.2|Gm11168-  
202|ENSMUSG00000096385|+|chr9:g.3003981:G>T  
MFLIFLDFQFSCCHIPCPTVDISFPPFSVFLAIFHVLKCVFLIFSDQFQSRHIPGPTVCISHFFRFFMISFFFT  
FSSGCFSSFSIIIFTFLAIFHVLQWTFNLNPPFSSVFLAIFHILKCCVFLIFRDFQFPRHIPGPTVCISHFSRFSV  
ISSFFKSSSGCFSFSMIFSLAIFHVLQWTFNLNPPFSSYSFSPYRSYSVHFSFSTFFSDFVIFQVVKWMFL  
IFLDFQFSC  
>ENSMUSP00000136761\_c.256:C>G\_p.T86S ENSMUST00000178077.2|Gm11168-  
202|ENSMUSG00000096385|+|chr9:g.3004016:C>G  
MFLIFLDFQFSCCHIPCPTVDISFPPFSVFLAIFHVLKCVFLIFSDQFQSRHIPGPTVCISHFFRFFMISFFFT  
LSSGCFSSFSIIIFSFLAIFHVLQWTFNLNPPFSSVFLAIFHILKCCVFLIFRDFQFPRHIPGPTVCISHFSRFSV  
ISSFFKSSSGCFSFSMIFSLAIFHVLQWTFNLNPPFSSYSFSPYRSYSVHFSFSTFFSDFVIFQVVKWMFL  
IFLDFQFSC

>ENSMUSP00000136761\_c.307:C>T\_p.P103L ENSMUST00000178077.2|Gm11168-202|ENSMUSG00000096385|+|chr9:g.3004067:C>T  
MFLIFLDFQFSCHIPCPTVDISFPPFSVFLAIFHVLKCVFLIFSDQFSRHIPGPTVCISHFFRFFMISFFFT  
LSSGCFSSFSIIFTFLAIFHVLQWTFNLFPFVFLAIFHILKCCVFLIFRDFQFPRHIPGPTVCISHFSRFSV  
ISSFFKSSSGCFSSMIFSLAIFHVLQWTFNLFPFSSYSFSPYSRSYSVHFSFFTFSSDFVIFQVVKWMFL  
IFLDFQFSC  
>ENSMUSP00000136761\_c.336:A>G\_p.I113V ENSMUST00000178077.2|Gm11168-202|ENSMUSG00000096385|+|chr9:g.3004096:A>G  
MFLIFLDFQFSCHIPCPTVDISFPPFSVFLAIFHVLKCVFLIFSDQFSRHIPGPTVCISHFFRFFMISFFFT  
LSSGCFSSFSIIFTFLAIFHVLQWTFNLFPFVFLAIFHVLKCCVFLIFRDFQFPRHIPGPTVCISHFSRFSV  
ISSFFKSSSGCFSSMIFSLAIFHVLQWTFNLFPFSSYSFSPYSRSYSVHFSFFTFSSDFVIFQVVKWMFL  
IFLDFQFSC  
>rs253463892\_ENSMUSP00000137273\_c.15:A>C\_p.N6H  
ENSMUST00000178348.2|Gm11168-203|ENSMUSG00000096385|+|chr9:g.3004472:A>C  
MFLIFHDFHFSCHIPRPIVDISFPPFSVFFAIFHVPKCVFLIFRDFQFPRHIPGPTVCISHFSRFSVISSFFK  
SSSGCFSSMIFSLAIFHVLQWTFNLFPFVFLAIFHVLKCVFLIYRDFQFSCYIPSPPTVCISHFSRFSLI  
LSLFLKSTACFSFSMIFSLAIFHVLQWKFLYFPTFSVSPYSRSYSVHFSFFTFSSDFVIFQVVKWMFLIFLD  
FQFSC  
>rs215471772\_ENSMUSP00000137273\_c.26:T>G\_p.H9Q  
ENSMUST00000178348.2|Gm11168-203|ENSMUSG00000096385|+|chr9:g.3004483:T>G  
MFLIFNDFQFSCHIPRPIVDISFPPFSVFFAIFHVPKCVFLIFRDFQFPRHIPGPTVCISHFSRFSVISSFFK  
SSSGCFSSMIFSLAIFHVLQWTFNLFPFVFLAIFHVLKCVFLIYRDFQFSCYIPSPPTVCISHFSRFSLI  
LSLFLKSTACFSFSMIFSLAIFHVLQWKFLYFPTFSVSPYSRSYSVHFSFFTFSSDFVIFQVVKWMFLIFLD  
FQFSC  
>rs235490158\_ENSMUSP00000137273\_c.52:T>C\_p.I18T  
ENSMUST00000178348.2|Gm11168-203|ENSMUSG00000096385|+|chr9:g.3004509:T>C  
MFLIFNDFHFSCHIPRPTVDISFPPFSVFFAIFHVPKCVFLIFRDFQFPRHIPGPTVCISHFSRFSVISSFFK  
SSSGCFSSMIFSLAIFHVLQWTFNLFPFVFLAIFHVLKCVFLIYRDFQFSCYIPSPPTVCISHFSRFSLI  
LSLFLKSTACFSFSMIFSLAIFHVLQWKFLYFPTFSVSPYSRSYSVHFSFFTFSSDFVIFQVVKWMFLIFLD  
FQFSC  
>ENSMUSP00000137273\_c.87:T>C\_p.F30L ENSMUST00000178348.2|Gm11168-203|ENSMUSG00000096385|+|chr9:g.3004548:T>C  
MFLIFNDFHFSCHIPRPIVDISFPPFSVFLAIFHVPKCVFLIFRDFQFPRHIPGPTVCISHFSRFSVISSFFK  
SSSGCFSSMIFSLAIFHVLQWTFNLFPFVFLAIFHVLKCVFLIYRDFQFSCYIPSPPTVCISHFSRFSLI  
LSLFLKSTACFSFSMIFSLAIFHVLQWKFLYFPTFSVSPYSRSYSVHFSFFTFSSDFVIFQVVKWMFLIFLD  
FQFSC  
>ENSMUSP00000137273\_c.87:TTCGC>CTTGT\_p.F30L ENSMUST00000178348.2|Gm11168-203|ENSMUSG00000096385|+|chr9:g.3004548:TTCGC>CTTGT  
MFLIFNDFHFSCHIPRPIVDISFPPFSVFLVRHISRPKVCISHFP\*FSVSSPYSRSYSVHFSFFTFSSDFVFF  
QVVKWMFLIFHDFQFSCHIPCPTVDISKSTFFCFPRHISRPKVCISHLP\*FSVFLLYSKSYSVHFSFFTFFT  
DFVIVQVNCMFLIFHDFQFSCHIPCPTVEISIFSNFFSFAIFQVLQCAFLIFHVFQ\*FCNFSSCQVDVSHFP  
\*FSVFL  
>ENSMUSP00000137273\_c.106:C>T\_p.P36L ENSMUST00000178348.2|Gm11168-203|ENSMUSG00000096385|+|chr9:g.3004567:C>T  
MFLIFNDFHFSCHIPRPIVDISFPPFSVFFAIFHVLKCVFLIFRDFQFPRHIPGPTVCISHFSRFSVISSFFK  
SSSGCFSSMIFSLAIFHVLQWTFNLFPFVFLAIFHVLKCVFLIYRDFQFSCYIPSPPTVCISHFSRFSLI  
LSLFLKSTACFSFSMIFSLAIFHVLQWKFLYFPTFSVSPYSRSYSVHFSFFTFSSDFVIFQVVKWMFLIFLD  
FQFSC  
>ENSMUSP00000137273\_c.106:CAA>TAT\_p.P36L ENSMUST00000178348.2|Gm11168-203|ENSMUSG00000096385|+|chr9:g.3004567:CAA>TAT  
MFLIFNDFHFSCHIPRPIVDISFPPFSVFFAIFHVL\*SVYFSFSVIFSLAIFQVLQCAFLIFHVFQ\*FRLFS  
SRQVDVSHFP\*FSVFLPYMSYSGHF\*IFHLFLFSSPYFTS\*SVYFSFTVIFSLAIFQVLQCAFLIFHVFH\*  
FCHCSSCQLHVSHFP\*FSVFLPYMSYSGNFYIFQLFQFRHIPGPTVCISHFSRFSVIL\*FFKLSSGCFSSFL  
IFSL  
>ENSMUSP00000136598\_c.351:G>A\_p.V118I ENSMUST00000177722.8|Gm11168-201|ENSMUSG00000096385|+|chr9:g.3004575:G>A  
MFLIFHDFQFSCHIPCPTVDISFPPFSVFLAIFHVLKCVFLIFSDQFSRHIPGPTVCISHFSRFSVILSFFK  
LSSGCFSSFLIFSLAIFHVLQWTFNLFPFVFLAIFHVLKCCIFLIFRDFQFPRHIPGPTVCISHFSRFSV

ISSFFKSSSGCFSFSMIFSLAIFHVLQWTFNFPFSSYSFSPYSRSYSVHFSFSTFFSDFVIFQVVKWMFL  
IFLDFQFSC  
>ENSMUSP00000136761\_c.351:G>A\_p.V118I ENSMUST00000178077.2|Gm11168-  
202|ENSMUSG00000096385|+|chr9:g.3004575:G>A  
MFLIFLDFQFSCCHIPCPTVDISFPFVFLAIFHVLKCVFLIFSDQFQSRHIPGPTVCISHFFRFFMISSTFF  
LSSGCFSSSIIIFTFLAIFHVLQWTFNFPFSSVFLAIFHILKCCIFLIFRDFQFPRHIPGPTVCISHFSRFSV  
ISSFFKSSSGCFSFSMIFSLAIFHVLQWTFNFPFSSYSFSPYSRSYSVHFSFSTFFSDFVIFQVVKWMFL  
IFLDFQFSC  
>ENSMUSP00000137273\_c.114:G>A\_p.V39I ENSMUST00000178348.2|Gm11168-  
203|ENSMUSG00000096385|+|chr9:g.3004575:G>A  
MFLIFNDFHFSCHIPRPIVDISFPFVFFAIFHVPKCFILIFRDFQFPRHIPGPTVCISHFSRFSVVISSTFFK  
SSSGCFSSSIIIFTFLAIFHVLQWTFNFPFSSVFLAIFHVLKCVFLIYRDFQFSCYIPSPPTVCISHFSRFSLI  
LSLFLKSTACFSFSMIFSLAIFHVLQWKFLYFPTFSVSPYSRSYSVHFSFSTFFSDFVIFQVVKWMFLIFLD  
FQFSC  
>ENSMUSP00000136598\_c.356:T>A\_p.F119L ENSMUST00000177722.8|Gm11168-  
201|ENSMUSG00000096385|+|chr9:g.3004580:T>A  
MFLIFHDFQFSCCHIPCPTVDISFPFVFLAIFHVLKCVFLIFSDQFQSRHIPGPTVCISHFSRFSVILSSTFFK  
LSSGCFSSSIIIFTFLAIFHVLQWTFNFPFSSVFLAIFHVLKCVLLIFRDFQFPRHIPGPTVCISHFSRFSV  
ISSFFKSSSGCFSFSMIFSLAIFHVLQWTFNFPFSSYSFSPYSRSYSVHFSFSTFFSDFVIFQVVKWMFL  
IFLDFQFSC  
>ENSMUSP00000136761\_c.356:T>A\_p.F119L ENSMUST00000178077.2|Gm11168-  
202|ENSMUSG00000096385|+|chr9:g.3004580:T>A  
MFLIFLDFQFSCCHIPCPTVDISFPFVFLAIFHVLKCVFLIFSDQFQSRHIPGPTVCISHFFRFFMISSTFF  
LSSGCFSSSIIIFTFLAIFHVLQWTFNFPFSSVFLAIFHILKCCVLLIFRDFQFPRHIPGPTVCISHFSRFSV  
ISSFFKSSSGCFSFSMIFSLAIFHVLQWTFNFPFSSYSFSPYSRSYSVHFSFSTFFSDFVIFQVVKWMFL  
IFLDFQFSC  
>ENSMUSP00000137273\_c.119:T>A\_p.F40L ENSMUST00000178348.2|Gm11168-  
203|ENSMUSG00000096385|+|chr9:g.3004580:T>A  
MFLIFNDFHFSCHIPRPIVDISFPFVFFAIFHVPKCVLLIFRDFQFPRHIPGPTVCISHFSRFSVVISSTFFK  
SSSGCFSSSIIIFTFLAIFHVLQWTFNFPFSSVFLAIFHVLKCVFLIYRDFQFSCYIPSPPTVCISHFSRFSLI  
LSLFLKSTACFSFSMIFSLAIFHVLQWKFLYFPTFSVSPYSRSYSVHFSFSTFFSDFVIFQVVKWMFLIFLD  
FQFSC  
>ENSMUSP00000136598\_c.366:C>T\_p.R123C ENSMUST00000177722.8|Gm11168-  
201|ENSMUSG00000096385|+|chr9:g.3004590:C>T  
MFLIFHDFQFSCCHIPCPTVDISFPFVFLAIFHVLKCVFLIFSDQFQSRHIPGPTVCISHFSRFSVILSSTFFK  
LSSGCFSSSIIIFTFLAIFHVLQWTFNFPFSSVFLAIFHVLKCVLLIFCDFQFPRHIPGPTVCISHFSRFSV  
ISSFFKSSSGCFSFSMIFSLAIFHVLQWTFNFPFSSYSFSPYSRSYSVHFSFSTFFSDFVIFQVVKWMFL  
IFLDFQFSC  
>ENSMUSP00000136761\_c.366:C>T\_p.R123C ENSMUST00000178077.2|Gm11168-  
202|ENSMUSG00000096385|+|chr9:g.3004590:C>T  
MFLIFLDFQFSCCHIPCPTVDISFPFVFLAIFHVLKCVFLIFSDQFQSRHIPGPTVCISHFFRFFMISSTFF  
LSSGCFSSSIIIFTFLAIFHVLQWTFNFPFSSVFLAIFHILKCCVLLIFCDFQFPRHIPGPTVCISHFSRFSV  
ISSFFKSSSGCFSFSMIFSLAIFHVLQWTFNFPFSSYSFSPYSRSYSVHFSFSTFFSDFVIFQVVKWMFL  
IFLDFQFSC  
>ENSMUSP00000137273\_c.129:C>T\_p.R44C ENSMUST00000178348.2|Gm11168-  
203|ENSMUSG00000096385|+|chr9:g.3004590:C>T  
MFLIFNDFHFSCHIPRPIVDISFPFVFFAIFHVPKCVLLIFCDFQFPRHIPGPTVCISHFSRFSVVISSTFFK  
SSSGCFSSSIIIFTFLAIFHVLQWTFNFPFSSVFLAIFHVLKCVFLIYRDFQFSCYIPSPPTVCISHFSRFSLI  
LSLFLKSTACFSFSMIFSLAIFHVLQWKFLYFPTFSVSPYSRSYSVHFSFSTFFSDFVIFQVVKWMFLIFLD  
FQFSC  
>ENSMUSP00000136598\_c.381:C>T\_p.P128S ENSMUST00000177722.8|Gm11168-  
201|ENSMUSG00000096385|+|chr9:g.3004605:C>T  
MFLIFHDFQFSCCHIPCPTVDISFPFVFLAIFHVLKCVFLIFSDQFQSRHIPGPTVCISHFSRFSVILSSTFFK  
LSSGCFSSSIIIFTFLAIFHVLQWTFNFPFSSVFLAIFHVLKCVLLIFRDFQFQSRHIPGPTVCISHFSRFSV  
ISSFFKSSSGCFSFSMIFSLAIFHVLQWTFNFPFSSYSFSPYSRSYSVHFSFSTFFSDFVIFQVVKWMFL  
IFLDFQFSC  
>ENSMUSP00000136761\_c.381:C>T\_p.P128S ENSMUST00000178077.2|Gm11168-  
202|ENSMUSG00000096385|+|chr9:g.3004605:C>T

MFLIFLDFQFSCHIPCPTVDISFPPFSVFLAIFHVLKCVFLIFSDQFSRHPGPTVCISHFFRFFMISFFFT  
LSSGCFSSFSIIIFTFLAIFHVLQWTFLNFPFSSVFLAIFHILKCCVFLIFRDFQFSRHPGPTVCISHFSRFSV  
ISSFFKSSSGCFSSMIFSLAIFHVLQWTFLNFPFSSYSFSPYSRSYSVHFSFFTFSSDFVIFQVVKWMFL  
IFLDFQFSC  
>ENSMUSP00000137273\_c.144:C>T\_p.P49S ENSMUST00000178348.2|Gm11168-  
203|ENSMUSG00000096385|+|chr9:g.3004605:C>T  
MFLIFNDFHFSCHIPPRPIVDISFPPFSVFFAIFHVPKCVFLIFRDFQFSRHPGPTVCISHFSRFSV  
SSSGCFSSMIFSLAIFHVLQWTFLNFPFSSVFLAIFHVLKCVFLIYRDFQFSCYIPSPPTVCISHFSRFSLI  
LSLFKLSTACFSFSMIFSLAIFHVLQWKFLYFPTFSVSPYSRSYSVHFSFFTFSSDFVIFQVVKWMFLIFLD  
FQFSC  
>ENSMUSP00000136598\_c.402:A>T\_p.T135S ENSMUST00000177722.8|Gm11168-  
201|ENSMUSG00000096385|+|chr9:g.3004626:A>T  
MFLIFHDFQFSCHIPCPTVDISFPPFSVFLAIFHVLKCVFLIFSDQFSRHPGPTVCISHFSRFSVILSFFK  
LSSGCFSSSLIFSLAIFHVLQWTFLNFPFSSVFLAIFHVLKCCVFLIFRDFQFPRHPGPTVCISHFSRFSV  
ISSFFKSSSGCFSSMIFSLAIFHVLQWTFLNFPFSSYSFSPYSRSYSVHFSFFTFSSDFVIFQVVKWMFL  
IFLDFQFSC  
>ENSMUSP00000136761\_c.402:A>T\_p.T135S ENSMUST00000178077.2|Gm11168-  
202|ENSMUSG00000096385|+|chr9:g.3004626:A>T  
MFLIFLDFQFSCHIPCPTVDISFPPFSVFLAIFHVLKCVFLIFSDQFSRHPGPTVCISHFFRFFMISFFFT  
LSSGCFSSFSIIIFTFLAIFHVLQWTFLNFPFSSVFLAIFHILKCCVFLIFRDFQFPRHPGPTVCISHFSRFSV  
ISSFFKSSSGCFSSMIFSLAIFHVLQWTFLNFPFSSYSFSPYSRSYSVHFSFFTFSSDFVIFQVVKWMFL  
IFLDFQFSC  
>ENSMUSP00000137273\_c.165:A>T\_p.T56S ENSMUST00000178348.2|Gm11168-  
203|ENSMUSG00000096385|+|chr9:g.3004626:A>T  
MFLIFNDFHFSCHIPPRPIVDISFPPFSVFFAIFHVPKCVFLIFRDFQFPRHPGPTVCISHFSRFSVILSFFK  
SSSGCFSSMIFSLAIFHVLQWTFLNFPFSSVFLAIFHVLKCVFLIYRDFQFSCYIPSPPTVCISHFSRFSLI  
LSLFKLSTACFSFSMIFSLAIFHVLQWKFLYFPTFSVSPYSRSYSVHFSFFTFSSDFVIFQVVKWMFLIFLD  
FQFSC  
>rs33899290\_ENSMUSP00000136598\_c.427:G>A\_p.R143H  
ENSMUST00000177722.8|Gm11168-201|ENSMUSG00000096385|+|chr9:g.3004651:G>A  
MFLIFHDFQFSCHIPCPTVDISFPPFSVFLAIFHVLKCVFLIFSDQFSRHPGPTVCISHFSRFSVILSFFK  
LSSGCFSSSLIFSLAIFHVLQWTFLNFPFSSVFLAIFHVLKCCVFLIFRDFQFPRHPGPTVCISHFSRFSV  
ISSFFKSSSGCFSSMIFSLAIFHVLQWTFLNFPFSSYSFSPYSRSYSVHFSFFTFSSDFVIFQVVKWMFL  
IFLDFQFSC  
>rs33899290\_ENSMUSP00000136761\_c.427:G>A\_p.R143H  
ENSMUST00000178077.2|Gm11168-202|ENSMUSG00000096385|+|chr9:g.3004651:G>A  
MFLIFLDFQFSCHIPCPTVDISFPPFSVFLAIFHVLKCVFLIFSDQFSRHPGPTVCISHFFRFFMISFFFT  
LSSGCFSSFSIIIFTFLAIFHVLQWTFLNFPFSSVFLAIFHILKCCVFLIFRDFQFPRHPGPTVCISHFSRFSV  
ISSFFKSSSGCFSSMIFSLAIFHVLQWTFLNFPFSSYSFSPYSRSYSVHFSFFTFSSDFVIFQVVKWMFL  
IFLDFQFSC  
>rs33899290\_ENSMUSP00000137273\_c.190:G>A\_p.R64H  
ENSMUST00000178348.2|Gm11168-203|ENSMUSG00000096385|+|chr9:g.3004651:G>A  
MFLIFNDFHFSCHIPPRPIVDISFPPFSVFFAIFHVPKCVFLIFRDFQFPRHPGPTVCISHFSRFSVILSFFK  
SSSGCFSSMIFSLAIFHVLQWTFLNFPFSSVFLAIFHVLKCVFLIYRDFQFSCYIPSPPTVCISHFSRFSLI  
LSLFKLSTACFSFSMIFSLAIFHVLQWKFLYFPTFSVSPYSRSYSVHFSFFTFSSDFVIFQVVKWMFLIFLD  
FQFSC  
>rs30685709\_ENSMUSP00000136598\_c.433:C>T\_p.S145L  
ENSMUST00000177722.8|Gm11168-201|ENSMUSG00000096385|+|chr9:g.3004657:C>T  
MFLIFHDFQFSCHIPCPTVDISFPPFSVFLAIFHVLKCVFLIFSDQFSRHPGPTVCISHFSRFSVILSFFK  
LSSGCFSSSLIFSLAIFHVLQWTFLNFPFSSVFLAIFHVLKCCVFLIFRDFQFPRHPGPTVCISHFSRFLV  
ISSFFKSSSGCFSSMIFSLAIFHVLQWTFLNFPFSSYSFSPYSRSYSVHFSFFTFSSDFVIFQVVKWMFL  
IFLDFQFSC  
>rs30685709\_ENSMUSP00000136761\_c.433:C>T\_p.S145L  
ENSMUST00000178077.2|Gm11168-202|ENSMUSG00000096385|+|chr9:g.3004657:C>T  
MFLIFLDFQFSCHIPCPTVDISFPPFSVFLAIFHVLKCVFLIFSDQFSRHPGPTVCISHFFRFFMISFFFT  
LSSGCFSSFSIIIFTFLAIFHVLQWTFLNFPFSSVFLAIFHILKCCVFLIFRDFQFPRHPGPTVCISHFSRFLV  
ISSFFKSSSGCFSSMIFSLAIFHVLQWTFLNFPFSSYSFSPYSRSYSVHFSFFTFSSDFVIFQVVKWMFL  
IFLDFQFSC

>rs30685709\_ENSMUSP00000137273\_c.196:C>T\_p.S66L  
ENSMUST00000178348.2|Gm11168-203|ENSMUSG00000096385|+|chr9:g.3004657:C>T  
MFLIFHDFQFSCHIPPCPTVDISFPPFSVFFAIFHVPKCVFLIFRDFQFPRHIPGPTVCISHFSRFLVISSFFK  
SSSGCFSFSMIFSFLAIFHVLQWTFNLNFPFVSFLAIFHVLKCVFLIYRDFQFSCYIPSPPTVCISHFSRFSLI  
LSLFKLSTACFSFSMIFSFLAIFHVLQWKFLYFPTFSVSPYSRSYSVHFSFSTFFSDFVIFQVVKWMFLIFLD  
FQFSC  
>ENSMUSP00000136598\_c.442:C>T\_p.S148L ENSMUST00000177722.8|Gm11168-  
201|ENSMUSG00000096385|+|chr9:g.3004666:C>T  
MFLIFHDFQFSCHIPPCPTVDISFPPFSVFLAIFHVLKCVFLIFSDQFQSRHIPGPTVCISHFSRFSVILSFFK  
LSSGCFSFSLIFSFLAIFHVLQWTFNLNFPFVSFLAIFHVLKCCVFLIFRDFQFPRHIPGPTVCISHFSRFSV  
ILSFFKSSSGCFSFSMIFSFLAIFHVLQWTFNLNFPFSSYSFSPYSRSYSVHFSFSTFFSDFVIFQVVKWMFL  
IFLDFQFSC  
>ENSMUSP00000136761\_c.442:C>T\_p.S148L ENSMUST00000178077.2|Gm11168-  
202|ENSMUSG00000096385|+|chr9:g.3004666:C>T  
MFLIFLDFQFSCHIPPCPTVDISFPPFSVFLAIFHVLKCVFLIFSDQFQSRHIPGPTVCISHFFRFFMISFFFT  
LSSGCFSFSIIFTFLAIFHVLQWTFNLNFPFVSFLAIFHILKCCVFLIFRDFQFPRHIPGPTVCISHFSRFSV  
ILSFFKSSSGCFSFSMIFSFLAIFHVLQWTFNLNFPFSSYSFSPYSRSYSVHFSFSTFFSDFVIFQVVKWMFL  
IFLDFQFSC  
>ENSMUSP00000137273\_c.205:C>T\_p.S69L ENSMUST00000178348.2|Gm11168-  
203|ENSMUSG00000096385|+|chr9:g.3004666:C>T  
MFLIFHDFQFSCHIPPCPTVDISFPPFSVFFAIFHVPKCVFLIFRDFQFPRHIPGPTVCISHFSRFSVILSFFK  
SSSGCFSFSMIFSFLAIFHVLQWTFNLNFPFVSFLAIFHVLKCVFLIYRDFQFSCYIPSPPTVCISHFSRFSLI  
LSLFKLSTACFSFSMIFSFLAIFHVLQWKFLYFPTFSVSPYSRSYSVHFSFSTFFSDFVIFQVVKWMFLIFLD  
FQFSC  
>ENSMUSP00000136598\_c.445:C>G\_p.S149C ENSMUST00000177722.8|Gm11168-  
201|ENSMUSG00000096385|+|chr9:g.3004669:C>G  
MFLIFHDFQFSCHIPPCPTVDISFPPFSVFLAIFHVLKCVFLIFSDQFQSRHIPGPTVCISHFSRFSVILSFFK  
LSSGCFSFSLIFSFLAIFHVLQWTFNLNFPFVSFLAIFHVLKCCVFLIFRDFQFPRHIPGPTVCISHFSRFSV  
ISCFFKSSSGCFSFSMIFSFLAIFHVLQWTFNLNFPFSSYSFSPYSRSYSVHFSFSTFFSDFVIFQVVKWMFL  
IFLDFQFSC  
>ENSMUSP00000136761\_c.445:C>G\_p.S149C ENSMUST00000178077.2|Gm11168-  
202|ENSMUSG00000096385|+|chr9:g.3004669:C>G  
MFLIFLDFQFSCHIPPCPTVDISFPPFSVFLAIFHVLKCVFLIFSDQFQSRHIPGPTVCISHFFRFFMISFFFT  
LSSGCFSFSIIFTFLAIFHVLQWTFNLNFPFVSFLAIFHILKCCVFLIFRDFQFPRHIPGPTVCISHFSRFSV  
ISCFFKSSSGCFSFSMIFSFLAIFHVLQWTFNLNFPFSSYSFSPYSRSYSVHFSFSTFFSDFVIFQVVKWMFL  
IFLDFQFSC  
>ENSMUSP00000137273\_c.208:C>G\_p.S70C ENSMUST00000178348.2|Gm11168-  
203|ENSMUSG00000096385|+|chr9:g.3004669:C>G  
MFLIFHDFQFSCHIPPCPTVDISFPPFSVFFAIFHVPKCVFLIFRDFQFPRHIPGPTVCISHFSRFSVISCFFK  
SSSGCFSFSMIFSFLAIFHVLQWTFNLNFPFVSFLAIFHVLKCVFLIYRDFQFSCYIPSPPTVCISHFSRFSLI  
LSLFKLSTACFSFSMIFSFLAIFHVLQWKFLYFPTFSVSPYSRSYSVHFSFSTFFSDFVIFQVVKWMFLIFLD  
FQFSC  
>ENSMUSP00000136598\_c.543:C>A\_p.P182T ENSMUST00000177722.8|Gm11168-  
201|ENSMUSG00000096385|+|chr9:g.3004767:C>A  
MFLIFHDFQFSCHIPPCPTVDISFPPFSVFLAIFHVLKCVFLIFSDQFQSRHIPGPTVCISHFSRFSVILSFFK  
LSSGCFSFSLIFSFLAIFHVLQWTFNLNFPFVSFLAIFHVLKCCVFLIFRDFQFPRHIPGPTVCISHFSRFSV  
ISSFFKSSSGCFSFSMIFSFLAIFHVLQWTFNLNFPFSSYSFSPYSRSYSVHFSFSTFFSDFVIFQVVKWMFL  
IFLDFQFSC  
>ENSMUSP00000136761\_c.543:C>A\_p.P182T ENSMUST00000178077.2|Gm11168-  
202|ENSMUSG00000096385|+|chr9:g.3004767:C>A  
MFLIFLDFQFSCHIPPCPTVDISFPPFSVFLAIFHVLKCVFLIFSDQFQSRHIPGPTVCISHFFRFFMISFFFT  
LSSGCFSFSIIFTFLAIFHVLQWTFNLNFPFVSFLAIFHILKCCVFLIFRDFQFPRHIPGPTVCISHFSRFSV  
ISSFFKSSSGCFSFSMIFSFLAIFHVLQWTFNLNFPFSSYSFSPYSRSYSVHFSFSTFFSDFVIFQVVKWMFL  
IFLDFQFSC  
>ENSMUSP00000137273\_c.306:C>A\_p.P103T ENSMUST00000178348.2|Gm11168-  
203|ENSMUSG00000096385|+|chr9:g.3004767:C>A  
MFLIFHDFQFSCHIPPCPTVDISFPPFSVFFAIFHVPKCVFLIFRDFQFPRHIPGPTVCISHFSRFSVILSFFK  
SSSGCFSFSMIFSFLAIFHVLQWTFNLNFPFVSFLAIFHVLKCVFLIYRDFQFSCYIPSPPTVCISHFSRFSLI



LSLFKLSTACFSFSMIFSLAIFHVLQWKFLYFPTFSVSPYSRSYSVHFSFSTFFSDFVIFQVVKWMFLIFLD  
FQFSC  
>ENSMUSP00000136598\_c.544:C>T\_p.P182L ENSMUST00000177722.8|Gm11168-  
201|ENSMUSG00000096385|+|chr9:g.3004768:C>T  
MFLIFHDFQFSCHIPCPTVDISFPFVSFLAIFHVLKCVFLIFSDQFSRHIPGPTVCISHFSRFSVILSFFK  
LSSGCFSSFLIFSLAIFHVLQWTFNLNFPFVSFLAIFHVLKCCVFLIFRDFQFPRHIPGPTVCISHFSRFSV  
ISSFFKSSSGCFSSMIFSLAIFHVLQWTFNLNPLFSSYSFSPYSRSYSVHFSFSTFFSDFVIFQVVKWMFL  
IFLDFQFSC  
>ENSMUSP00000136761\_c.544:C>T\_p.P182L ENSMUST00000178077.2|Gm11168-  
202|ENSMUSG00000096385|+|chr9:g.3004768:C>T  
MFLIFLDFQFSCHIPCPTVDISFPFVSFLAIFHVLKCVFLIFSDQFSRHIPGPTVCISHFFRFFMISSFFT  
LSSGCFSSSIIFTFLAIFHVLQWTFNLNFPFVSFLAIFHILKCCVFLIFRDFQFPRHIPGPTVCISHFSRFSV  
ISSFFKSSSGCFSSMIFSLAIFHVLQWTFNLNPLFSSYSFSPYSRSYSVHFSFSTFFSDFVIFQVVKWMFL  
IFLDFQFSC  
>ENSMUSP00000137273\_c.307:C>T\_p.P103L ENSMUST00000178348.2|Gm11168-  
203|ENSMUSG00000096385|+|chr9:g.3004768:C>T  
MFLIFNDFHFSCHIPRPIVDISFPFVSFFAIFHVPKCVFLIFRDFQFPRHIPGPTVCISHFSRFSVISSFFK  
SSSGCFSSMIFSLAIFHVLQWTFNLNPLFVSFLAIFHVLKCVFLIYRDFQFSCYIPSPPTVCISHFSRFSLI  
LSLFLKSTACFSFSMIFSLAIFHVLQWKFLYFPTFSVSPYSRSYSVHFSFSTFFSDFVIFQVVKWMFLIFLD  
FQFSC  
>ENSMUSP00000137273\_c.361:A>T\_p.Y121F ENSMUST00000178348.2|Gm11168-  
203|ENSMUSG00000096385|+|chr9:g.3004822:A>T  
MFLIFNDFHFSCHIPRPIVDISFPFVSFFAIFHVPKCVFLIFRDFQFPRHIPGPTVCISHFSRFSVISSFFK  
SSSGCFSSMIFSLAIFHVLQWTFNLNFPFVSFLAIFHVLKCVFLIFRDFQFSCYIPSPPTVCISHFSRFSLI  
LSLFLKSTACFSFSMIFSLAIFHVLQWKFLYFPTFSVSPYSRSYSVHFSFSTFFSDFVIFQVVKWMFLIFLD  
FQFSC  
>ENSMUSP00000137273\_c.364:G>A\_p.R122H ENSMUST00000178348.2|Gm11168-  
203|ENSMUSG00000096385|+|chr9:g.3004825:G>A  
MFLIFNDFHFSCHIPRPIVDISFPFVSFFAIFHVPKCVFLIFRDFQFPRHIPGPTVCISHFSRFSVISSFFK  
SSSGCFSSMIFSLAIFHVLQWTFNLNFPFVSFLAIFHVLKCVFLIYHDFQFSCYIPSPPTVCISHFSRFSLI  
LSLFLKSTACFSFSMIFSLAIFHVLQWKFLYFPTFSVSPYSRSYSVHFSFSTFFSDFVIFQVVKWMFLIFLD  
FQFSC  
>ENSMUSP00000137273\_c.373:A>T\_p.Q125L ENSMUST00000178348.2|Gm11168-  
203|ENSMUSG00000096385|+|chr9:g.3004834:A>T  
MFLIFNDFHFSCHIPRPIVDISFPFVSFFAIFHVPKCVFLIFRDFQFPRHIPGPTVCISHFSRFSVISSFFK  
SSSGCFSSMIFSLAIFHVLQWTFNLNFPFVSFLAIFHVLKCVFLIYRDFLQFSCYIPSPPTVCISHFSRFSLI  
LSLFLKSTACFSFSMIFSLAIFHVLQWKFLYFPTFSVSPYSRSYSVHFSFSTFFSDFVIFQVVKWMFLIFLD  
FQFSC  
>ENSMUSP00000137273\_c.374:G>T\_p.Q125H ENSMUST00000178348.2|Gm11168-  
203|ENSMUSG00000096385|+|chr9:g.3004835:G>T  
MFLIFNDFHFSCHIPRPIVDISFPFVSFFAIFHVPKCVFLIFRDFQFPRHIPGPTVCISHFSRFSVISSFFK  
SSSGCFSSMIFSLAIFHVLQWTFNLNFPFVSFLAIFHVLKCVFLIYRDFHFSYIPSPPTVCISHFSRFSLI  
LSLFLKSTACFSFSMIFSLAIFHVLQWKFLYFPTFSVSPYSRSYSVHFSFSTFFSDFVIFQVVKWMFLIFLD  
FQFSC  
>ENSMUSP00000137273\_c.381:TGCT>CGCC\_p.C128R ENSMUST00000178348.2|Gm11168-  
203|ENSMUSG00000096385|+|chr9:g.3004842:TGCT>CGCC  
MFLIFNDFHFSCHIPRPIVDISFPFVSFFAIFHVPKCVFLIFRDFQFPRHIPGPTVCISHFSRFSVISSFFK  
SSSGCFSSMIFSLAIFHVLQWTFNLNFPFVSFLAIFHVLKCVFLIYRDFQFSRRYIPSPPTVCISHFSRFSL  
ILSLFKLSTACFSFSMIFSLAIFHVLQWKFLYFPTFSVSPYSRSYSVHFSFSTFFSDFVIFQVVKWMFLIFL  
DFQFSC  
>ENSMUSP00000137273\_c.384:T>C\_p.Y129H ENSMUST00000178348.2|Gm11168-  
203|ENSMUSG00000096385|+|chr9:g.3004845:T>C  
MFLIFNDFHFSCHIPRPIVDISFPFVSFFAIFHVPKCVFLIFRDFQFPRHIPGPTVCISHFSRFSVISSFFK  
SSSGCFSSMIFSLAIFHVLQWTFNLNFPFVSFLAIFHVLKCVFLIYRDFQFSCHIPSPPTVCISHFSRFSLI  
LSLFLKSTACFSFSMIFSLAIFHVLQWKFLYFPTFSVSPYSRSYSVHFSFSTFFSDFVIFQVVKWMFLIFLD  
FQFSC  
>ENSMUSP00000137273\_c.390:CAA>TCAC\_p.P131S ENSMUST00000178348.2|Gm11168-  
203|ENSMUSG00000096385|+|chr9:g.3004851:CAA>TCAC

MFLIFNDFHFSCHIPRPIVDISFPPFSVFFAIFHVPKCVFLIFRDFQFPRHIPGPTVCISHFSRFSVISSFFK  
SSSGCFSFSMIFSLAIFHVLQWTFLNFPFVSFLAIFHVLKCVFLIYRDFQFSCYISPSPTVCISHFSRFSL  
ILSLFKLSTACFSFSMIFSLAIFHVLQWKFLYFPTFSVSPYSRSYSVHFSFSTFFSDFVIFQVVKWMFLIFL  
DFQFSC  
>ENSMUSP00000137273\_c.393:A>G\_p.S132G ENSMUST00000178348.2|Gm11168-  
203|ENSMUSG00000096385|+|chr9:g.3004854:A>G  
MFLIFNDFHFSCHIPRPIVDISFPPFSVFFAIFHVPKCVFLIFRDFQFPRHIPGPTVCISHFSRFSVISSFFK  
SSSGCFSFSMIFSLAIFHVLQWTFLNFPFVSFLAIFHVLKCVFLIYRDFQFSCYIPGPTVCISHFSRFSLI  
LSLFLKSTACFSFSMIFSLAIFHVLQWKFLYFPTFSVSPYSRSYSVHFSFSTFFSDFVIFQVVKWMFLIFLD  
FQFSC  
>ENSMUSP00000137273\_c.393:A>T\_p.S132C ENSMUST00000178348.2|Gm11168-  
203|ENSMUSG00000096385|+|chr9:g.3004854:A>T  
MFLIFNDFHFSCHIPRPIVDISFPPFSVFFAIFHVPKCVFLIFRDFQFPRHIPGPTVCISHFSRFSVISSFFK  
SSSGCFSFSMIFSLAIFHVLQWTFLNFPFVSFLAIFHVLKCVFLIYRDFQFSCYIPCPTVCISHFSRFSLI  
LSLFLKSTACFSFSMIFSLAIFHVLQWKFLYFPTFSVSPYSRSYSVHFSFSTFFSDFVIFQVVKWMFLIFLD  
FQFSC  
>ENSMUSP00000137273\_c.394:G>T\_p.S132I ENSMUST00000178348.2|Gm11168-  
203|ENSMUSG00000096385|+|chr9:g.3004855:G>T  
MFLIFNDFHFSCHIPRPIVDISFPPFSVFFAIFHVPKCVFLIFRDFQFPRHIPGPTVCISHFSRFSVISSFFK  
SSSGCFSFSMIFSLAIFHVLQWTFLNFPFVSFLAIFHVLKCVFLIYRDFQFSCYIPIPTVCISHFSRFSLI  
LSLFLKSTACFSFSMIFSLAIFHVLQWKFLYFPTFSVSPYSRSYSVHFSFSTFFSDFVIFQVVKWMFLIFLD  
FQFSC  
>ENSMUSP00000136598\_c.556:A>T\_p.Y186F ENSMUST00000177722.8|Gm11168-  
201|ENSMUSG00000096385|+|chr9:g.3004860:A>T  
MFLIFHDFQFSCHIPCPTVDISFPPFSVFLAIFHVLKCVFLIFSDQFSRHIPGPTVCISHFSRFSVILSFFK  
LSSGCFSFSLIFSFLAIFHVLQWTFLNFPFVSFLAIFHVLKCCVFLIFRDFQFPRHIPGPTVCISHFSRFSV  
ISSFFKSSSGCFSFSMIFSLAIFHVLQWTFLNFPFSSFSFSPYSRSYSVHFSFSTFFSDFVIFQVVKWMFL  
IFLDFQFSC  
>ENSMUSP00000136761\_c.556:A>T\_p.Y186F ENSMUST00000178077.2|Gm11168-  
202|ENSMUSG00000096385|+|chr9:g.3004860:A>T  
MFLIFLDFQFSCHIPCPTVDISFPPFSVFLAIFHVLKCVFLIFSDQFSRHIPGPTVCISHFFRFFMISFFFT  
LSSGCFSFSIIIFTFLAIFHVLQWTFLNFPFVSFLAIFHILKCCVFLIFRDFQFPRHIPGPTVCISHFSRFSV  
ISSFFKSSSGCFSFSMIFSLAIFHVLQWTFLNFPFSSFSFSPYSRSYSVHFSFSTFFSDFVIFQVVKWMFL  
IFLDFQFSC  
>ENSMUSP00000137273\_c.399:A>T\_p.T134S ENSMUST00000178348.2|Gm11168-  
203|ENSMUSG00000096385|+|chr9:g.3004860:A>T  
MFLIFNDFHFSCHIPRPIVDISFPPFSVFFAIFHVPKCVFLIFRDFQFPRHIPGPTVCISHFSRFSVISSFFK  
SSSGCFSFSMIFSLAIFHVLQWTFLNFPFVSFLAIFHVLKCVFLIYRDFQFSCYIPSPVCISHFSRFSLI  
LSLFLKSTACFSFSMIFSLAIFHVLQWKFLYFPTFSVSPYSRSYSVHFSFSTFFSDFVIFQVVKWMFLIFLD  
FQFSC  
>ENSMUSP00000136598\_c.558:A>C\_p.S187R ENSMUST00000177722.8|Gm11168-  
201|ENSMUSG00000096385|+|chr9:g.3004862:A>C  
MFLIFHDFQFSCHIPCPTVDISFPPFSVFLAIFHVLKCVFLIFSDQFSRHIPGPTVCISHFSRFSVILSFFK  
LSSGCFSFSLIFSFLAIFHVLQWTFLNFPFVSFLAIFHVLKCCVFLIFRDFQFPRHIPGPTVCISHFSRFSV  
ISSFFKSSSGCFSFSMIFSLAIFHVLQWTFLNFPFSSYRFSPYSRSYSVHFSFSTFFSDFVIFQVVKWMFL  
IFLDFQFSC  
>ENSMUSP00000136761\_c.558:A>C\_p.S187R ENSMUST00000178077.2|Gm11168-  
202|ENSMUSG00000096385|+|chr9:g.3004862:A>C  
MFLIFLDFQFSCHIPCPTVDISFPPFSVFLAIFHVLKCVFLIFSDQFSRHIPGPTVCISHFFRFFMISFFFT  
LSSGCFSFSIIIFTFLAIFHVLQWTFLNFPFVSFLAIFHILKCCVFLIFRDFQFPRHIPGPTVCISHFSRFSV  
ISSFFKSSSGCFSFSMIFSLAIFHVLQWTFLNFPFSSYRFSPYSRSYSVHFSFSTFFSDFVIFQVVKWMFL  
IFLDFQFSC  
>ENSMUSP00000136598\_c.558:AG>CA\_p.S187Q ENSMUST00000177722.8|Gm11168-  
201|ENSMUSG00000096385|+|chr9:g.3004862:AG>CA  
MFLIFHDFQFSCHIPCPTVDISFPPFSVFLAIFHVLKCVFLIFSDQFSRHIPGPTVCISHFSRFSVILSFFK  
LSSGCFSFSLIFSFLAIFHVLQWTFLNFPFVSFLAIFHVLKCCVFLIFRDFQFPRHIPGPTVCISHFSRFSV  
ISSFFKSSSGCFSFSMIFSLAIFHVLQWTFLNFPFSSYQFLAIFQVLQCAFLIFHVQ\*FCNFSQCQVDVS  
HFP\*FSVFL

>ENSMUSP00000136761\_c.558:AG>CA\_p.S187Q ENSMUST00000178077.2|Gm11168-202|ENSMUSG00000096385|+|chr9:g.3004862:AG>CA  
MFLIFLDFQFSCHIPCPTVDISFPPFSVFLAIFHVLKCVFLIFSDQFSRHPGPTVCISHFFRFFMISFFFT  
LSSGCFSSFSIIFTFLAIFHVLQWTFLNFPFSSVFLAIFHILKCCVFLIFRDFQFPRHPGPTVCISHFSRFSV  
ISSFFKSSSGCFSSMIFSFSLAIFHVLQWTFLNFPFSSYQFLAIFQVLQCAFLIFHVQ\*FCNFSSCQVDVS  
HFP\*FSVFL  
>ENSMUSP00000137273\_c.414:C>T\_p.H139Y ENSMUST00000178348.2|Gm11168-203|ENSMUSG00000096385|+|chr9:g.3004875:C>T  
MFLIFNDFHFSCHIPRPIVDISFPPFSVFFAIFHVPKCVFLIFRDFQFPRHPGPTVCISHFSRFSVISSFFK  
SSSGCFSSMIFSFSLAIFHVLQWTFLNFPFSSVFLAIFHVLKCVFLIYRDFQFSCYIPSPPTVCISYFSRFSLI  
LSLFLKSTACFSFSMIFSFSLAIFHVLQWKFLYFPTFSVSPYSRSYSVHFSFFTFSSDFVIFQVVKWMFLIFLD  
FQFSC  
>ENSMUSP00000137273\_c.415:A>T\_p.H139L ENSMUST00000178348.2|Gm11168-203|ENSMUSG00000096385|+|chr9:g.3004876:A>T  
MFLIFNDFHFSCHIPRPIVDISFPPFSVFFAIFHVPKCVFLIFRDFQFPRHPGPTVCISHFSRFSVISSFFK  
SSSGCFSSMIFSFSLAIFHVLQWTFLNFPFSSVFLAIFHVLKCVFLIYRDFQFSCYIPSPPTVCISLFSRFSLI  
LSLFLKSTACFSFSMIFSFSLAIFHVLQWKFLYFPTFSVSPYSRSYSVHFSFFTFSSDFVIFQVVKWMFLIFLD  
FQFSC  
>ENSMUSP00000137273\_c.420:T>C\_p.S141P ENSMUST00000178348.2|Gm11168-203|ENSMUSG00000096385|+|chr9:g.3004881:T>C  
MFLIFNDFHFSCHIPRPIVDISFPPFSVFFAIFHVPKCVFLIFRDFQFPRHPGPTVCISHFSRFSVISSFFK  
SSSGCFSSMIFSFSLAIFHVLQWTFLNFPFSSVFLAIFHVLKCVFLIYRDFQFSCYIPSPPTVCISHFPRFSLI  
LSLFLKSTACFSFSMIFSFSLAIFHVLQWKFLYFPTFSVSPYSRSYSVHFSFFTFSSDFVIFQVVKWMFLIFLD  
FQFSC  
>ENSMUSP00000137273\_c.423:C>T\_p.R142C ENSMUST00000178348.2|Gm11168-203|ENSMUSG00000096385|+|chr9:g.3004884:C>T  
MFLIFNDFHFSCHIPRPIVDISFPPFSVFFAIFHVPKCVFLIFRDFQFPRHPGPTVCISHFSRFSVISSFFK  
SSSGCFSSMIFSFSLAIFHVLQWTFLNFPFSSVFLAIFHVLKCVFLIYRDFQFSCYIPSPPTVCISHFSCFSLI  
LSLFLKSTACFSFSMIFSFSLAIFHVLQWKFLYFPTFSVSPYSRSYSVHFSFFTFSSDFVIFQVVKWMFLIFLD  
FQFSC  
>ENSMUSP00000137273\_c.432:C>G\_p.L145V ENSMUST00000178348.2|Gm11168-203|ENSMUSG00000096385|+|chr9:g.3004893:C>G  
MFLIFNDFHFSCHIPRPIVDISFPPFSVFFAIFHVPKCVFLIFRDFQFPRHPGPTVCISHFSRFSVISSFFK  
SSSGCFSSMIFSFSLAIFHVLQWTFLNFPFSSVFLAIFHVLKCVFLIYRDFQFSCYIPSPPTVCISHFSRFSVI  
LSLFLKSTACFSFSMIFSFSLAIFHVLQWKFLYFPTFSVSPYSRSYSVHFSFFTFSSDFVIFQVVKWMFLIFLD  
FQFSC  
>ENSMUSP00000137273\_c.440:G>C\_p.L147F ENSMUST00000178348.2|Gm11168-203|ENSMUSG00000096385|+|chr9:g.3004901:G>C  
MFLIFNDFHFSCHIPRPIVDISFPPFSVFFAIFHVPKCVFLIFRDFQFPRHPGPTVCISHFSRFSVISSFFK  
SSSGCFSSMIFSFSLAIFHVLQWTFLNFPFSSVFLAIFHVLKCVFLIYRDFQFSCYIPSPPTVCISHFSRFSLI  
FSLFLKSTACFSFSMIFSFSLAIFHVLQWKFLYFPTFSVSPYSRSYSVHFSFFTFSSDFVIFQVVKWMFLIFLD  
FQFSC  
>ENSMUSP00000137273\_c.446:G>T\_p.L149F ENSMUST00000178348.2|Gm11168-203|ENSMUSG00000096385|+|chr9:g.3004907:G>T  
MFLIFNDFHFSCHIPRPIVDISFPPFSVFFAIFHVPKCVFLIFRDFQFPRHPGPTVCISHFSRFSVISSFFK  
SSSGCFSSMIFSFSLAIFHVLQWTFLNFPFSSVFLAIFHVLKCVFLIYRDFQFSCYIPSPPTVCISHFSRFSLI  
LSFFKLSTACFSFSMIFSFSLAIFHVLQWKFLYFPTFSVSPYSRSYSVHFSFFTFSSDFVIFQVVKWMFLIFLD  
FQFSC  
>ENSMUSP00000137273\_c.454:T>A\_p.L152\* ENSMUST00000178348.2|Gm11168-203|ENSMUSG00000096385|+|chr9:g.3004915:T>A  
MFLIFNDFHFSCHIPRPIVDISFPPFSVFFAIFHVPKCVFLIFRDFQFPRHPGPTVCISHFSRFSVISSFFK  
SSSGCFSSMIFSFSLAIFHVLQWTFLNFPFSSVFLAIFHVLKCVFLIYRDFQFSCYIPSPPTVCISHFSRFSLI  
LSLFLK\*STACFSFSMIFSFSLAIFHVLQWKFLYFPTFSVSPYSRSYSVHFSFFTFSSDFVIFQVVKWMFLIFLD  
FQFSC  
>rs247048029\_ENSMUSP00000137273\_c.523:A>C\_p.K175T  
ENSMUST00000178348.2|Gm11168-203|ENSMUSG00000096385|+|chr9:g.3004984:A>C  
MFLIFNDFHFSCHIPRPIVDISFPPFSVFFAIFHVPKCVFLIFRDFQFPRHPGPTVCISHFSRFSVISSFFK  
SSSGCFSSMIFSFSLAIFHVLQWTFLNFPFSSVFLAIFHVLKCVFLIYRDFQFSCYIPSPPTVCISHFSRFSLI

LSLFLKSTACFSFSMIFSLAIFHVLQWTFLYFPTFSVSPYSRSYSVHFSFSTFFSDFVIFQVVKWMFLIFLD  
FQFSC  
>ENSMUSP00000137273\_c.531:T>A\_p.Y178N ENSMUST00000178348.2|Gm11168-  
203|ENSMUSG00000096385|+|chr9:g.3004992:T>A  
MFLIFNDFHFSCHIPRPIVDISFPPFSVFFAIFHVPKCVFLIFRDFQFPRHIPGPTVCISHFSRFSVISSFFK  
SSSGCFSFSMIFSLAIFHVLQWTFNLNPPFSVFLAIFHVLKCVFLIYRDFQFSCYIPSPPTVCISHFSRFSLI  
LSLFLKSTACFSFSMIFSLAIFHVLQWKFLNFPPTFSVSPYSRSYSVHFSFSTFFSDFVIFQVVKWMFLIFLD  
FQFSC  
>ENSMUSP00000137273\_c.535:T>C\_p.F179S ENSMUST00000178348.2|Gm11168-  
203|ENSMUSG00000096385|+|chr9:g.3004996:T>C  
MFLIFNDFHFSCHIPRPIVDISFPPFSVFFAIFHVPKCVFLIFRDFQFPRHIPGPTVCISHFSRFSVISSFFK  
SSSGCFSFSMIFSLAIFHVLQWTFNLNPPFSVFLAIFHVLKCVFLIYRDFQFSCYIPSPPTVCISHFSRFSLI  
LSLFLKSTACFSFSMIFSLAIFHVLQWKFLYSPTFSVSPYSRSYSVHFSFSTFFSDFVIFQVVKWMFLIFLD  
FQFSC  
>ENSMUSP00000137273\_c.541:CT>C\_p.T181del-fs ENSMUST00000178348.2|Gm11168-  
203|ENSMUSG00000096385|+|chr9:g.3005002:CT>C  
MFLIFNDFHFSCHIPRPIVDISFPPFSVFFAIFHVPKCVFLIFRDFQFPRHIPGPTVCISHFSRFSVISSFFK  
SSSGCFSFSMIFSLAIFHVLQWTFNLNPPFSVFLAIFHVLKCVFLIYRDFQFSCYIPSPPTVCISHFSRFSLI  
LSLFLKSTACFSFSMIFSLAIFHVLQWKFLYFPTFQFRHIPGPTVCISHFSRFSVIL  
>ENSMUSP00000136598\_c.559:G>T\_p.S187I ENSMUST00000177722.8|Gm11168-  
201|ENSMUSG00000096385|+|chr9:g.3005070:G>T  
MFLIFHDFQFSCHIPCPTVDISFPPFSVFLAIFHVLKCVFLIFSDQFQSRHIPGPTVCISHFSRFSVILSFFK  
LSSGCFSSLIIFSFLAIFHVLQWTFNLNPPFSVFLAIFHVLKCCVFLIFRDFQFPRHIPGPTVCISHFSRFSV  
ISSFFKSSSGCFSFSMIFSLAIFHVLQWTFNLNPPFSSYIFSPYSRSYSVHFSFSTFFSDFVIFQVVKWMFL  
IFLDFQFSC  
>ENSMUSP00000136761\_c.559:G>T\_p.S187I ENSMUST00000178077.2|Gm11168-  
202|ENSMUSG00000096385|+|chr9:g.3005070:G>T  
MFLIFLDFQFSCHIPCPTVDISFPPFSVFLAIFHVLKCVFLIFSDQFQSRHIPGPTVCISHFFRFFMISSTFF  
LSSGCFSSIIIFTFLAIFHVLQWTFNLNPPFSVFLAIFHILKCCVFLIFRDFQFPRHIPGPTVCISHFSRFSV  
ISSFFKSSSGCFSFSMIFSLAIFHVLQWTFNLNPPFSSYIFSPYSRSYSVHFSFSTFFSDFVIFQVVKWMFL  
IFLDFQFSC  
>ENSMUSP00000137273\_c.549:G>T\_p.V184F ENSMUST00000178348.2|Gm11168-  
203|ENSMUSG00000096385|+|chr9:g.3005070:G>T  
MFLIFNDFHFSCHIPRPIVDISFPPFSVFFAIFHVPKCVFLIFRDFQFPRHIPGPTVCISHFSRFSVISSFFK  
SSSGCFSFSMIFSLAIFHVLQWTFNLNPPFSVFLAIFHVLKCVFLIYRDFQFSCYIPSPPTVCISHFSRFSLI  
LSLFLKSTACFSFSMIFSLAIFHVLQWKFLYFPTFSFSPYSRSYSVHFSFSTFFSDFVIFQVVKWMFLIFLD  
FQFSC  
>ENSMUSP00000136598\_c.617:T>G\_p.S206R ENSMUST00000177722.8|Gm11168-  
201|ENSMUSG00000096385|+|chr9:g.3005128:T>G  
MFLIFHDFQFSCHIPCPTVDISFPPFSVFLAIFHVLKCVFLIFSDQFQSRHIPGPTVCISHFSRFSVILSFFK  
LSSGCFSSLIIFSFLAIFHVLQWTFNLNPPFSVFLAIFHVLKCCVFLIFRDFQFPRHIPGPTVCISHFSRFSV  
ISSFFKSSSGCFSFSMIFSLAIFHVLQWTFNLNPPFSSYSFSPYSRSYSVHFSFSTFFRDFVIFQVVKWMFL  
IFLDFQFSC  
>ENSMUSP00000136761\_c.617:T>G\_p.S206R ENSMUST00000178077.2|Gm11168-  
202|ENSMUSG00000096385|+|chr9:g.3005128:T>G  
MFLIFLDFQFSCHIPCPTVDISFPPFSVFLAIFHVLKCVFLIFSDQFQSRHIPGPTVCISHFFRFFMISSTFF  
LSSGCFSSIIIFTFLAIFHVLQWTFNLNPPFSVFLAIFHILKCCVFLIFRDFQFPRHIPGPTVCISHFSRFSV  
ISSFFKSSSGCFSFSMIFSLAIFHVLQWTFNLNPPFSSYSFSPYSRSYSVHFSFSTFFRDFVIFQVVKWMFL  
IFLDFQFSC  
>ENSMUSP00000137273\_c.605:T>G\_p.S202R ENSMUST00000178348.2|Gm11168-  
203|ENSMUSG00000096385|+|chr9:g.3005128:T>G  
MFLIFNDFHFSCHIPRPIVDISFPPFSVFFAIFHVPKCVFLIFRDFQFPRHIPGPTVCISHFSRFSVISSFFK  
SSSGCFSFSMIFSLAIFHVLQWTFNLNPPFSVFLAIFHVLKCVFLIYRDFQFSCYIPSPPTVCISHFSRFSLI  
LSLFLKSTACFSFSMIFSLAIFHVLQWKFLYFPTFSVSPYSRSYSVHFSFSTFFRDFVIFQVVKWMFLIFLD  
FQFSC  
>rs223163006\_ENSMUSP00000136598\_c.664:T>A\_p.L222H  
ENSMUST00000177722.8|Gm11168-201|ENSMUSG00000096385|+|chr9:g.3005175:T>A

MFLIFHDFQFSCHIPCPTVDISFPPFSVFLAIFHVLKCVFLIFSDQFSRHPGPTVCISHFSRFSVILSFFK  
LSSGCFSSFLIFSLAIFHVLQWTFNLFPFSSVFLAIFHVLKCCVFLIFRDFQFPRHIPGPTVCISHFSRFSV  
ISSFFKSSSGCFSSMIFSLAIFHVLQWTFNLFPFSSYSFSPYSRSYSVHFSFSTFFSDFVIFQVVKWMFL  
IFHDFQFSC  
>rs223163006\_ENSMUSP00000136761\_c.664:T>A\_p.L222H  
ENSMUST00000178077.2|Gm11168-202|ENSMUSG00000096385|+|chr9:g.3005175:T>A  
MFLIFLDFQFSCHIPCPTVDISFPPFSVFLAIFHVLKCVFLIFSDQFSRHPGPTVCISHFFRFFMILSFFK  
LSSGCFSSSIIFTFLAIFHVLQWTFNLFPFSSVFLAIFHILKCCVFLIFRDFQFPRHIPGPTVCISHFSRFSV  
ISSFFKSSSGCFSSMIFSLAIFHVLQWTFNLFPFSSYSFSPYSRSYSVHFSFSTFFSDFVIFQVVKWMFL  
IFHDFQFSC  
>rs223163006\_ENSMUSP00000137273\_c.652:T>A\_p.L218H  
ENSMUST00000178348.2|Gm11168-203|ENSMUSG00000096385|+|chr9:g.3005175:T>A  
MFLIFNDFHFSCHIPRPIVDISFPPFSVFFAIFHVPKCVFLIFRDFQFPRHIPGPTVCISHFSRFSVILSFFK  
SSSGCFSSMIFSLAIFHVLQWTFNLFPFSSVFLAIFHVLKCVFLIYRDFQFSCYIPSPPTVCISHFSRFSLI  
LSLFLKSTACFSFSMIFSLAIFHVLQWKFLYFPTFSVSPYSRSYSVHFSFSTFFSDFVIFQVVKWMFLIFHD  
FQFSC  
>rs223163006\_ENSMUSP00000136541\_c.16:T>A\_p.L6H  
ENSMUST00000179881.2|Gm11168-204|ENSMUSG00000096385|+|chr9:g.3005175:T>A  
MFLIFHDFQFSCHIPCPTVDISFPPFSVFLAIFHVLKCVFLIFSDQFSRNIPGPTVCISHFFRFFMILSFFK  
LSTACFSFSMIFSLAIFHVLQWTFNLFPFSSVFLAIFHVLKCVFLIFSDFLFSRHIPGPTVCISNFSRFSVI  
SSFFKLSSGCFSSMIFSLAIFHVLQWTFNLFPFSSIFPYFTSYSVHFSFSTFFSDFVIFQVNCMFLIFHD  
FQFSC  
>ENSMUSP00000136541\_c.45:T>C\_p.C16R ENSMUST00000179881.2|Gm11168-  
204|ENSMUSG00000096385|+|chr9:g.3005204:T>C  
MFLIFLDFQFSCHIPRPTVDISFPPFSVFLAIFHVLKCVFLIFSDQFSRNIPGPTVCISHFFRFFMILSFFK  
LSTACFSFSMIFSLAIFHVLQWTFNLFPFSSVFLAIFHVLKCVFLIFSDFLFSRHIPGPTVCISNFSRFSVI  
SSFFKLSSGCFSSMIFSLAIFHVLQWTFNLFPFSSIFPYFTSYSVHFSFSTFFSDFVIFQVNCMFLIFHD  
FQFSC  
>ENSMUSP00000136541\_c.52:C>T\_p.T18I ENSMUST00000179881.2|Gm11168-  
204|ENSMUSG00000096385|+|chr9:g.3005211:C>T  
MFLIFLDFQFSCHIPCPIVDISFPPFSVFLAIFHVLKCVFLIFSDQFSRNIPGPTVCISHFFRFFMILSFFK  
LSTACFSFSMIFSLAIFHVLQWTFNLFPFSSVFLAIFHVLKCVFLIFSDFLFSRHIPGPTVCISNFSRFSVI  
SSFFKLSSGCFSSMIFSLAIFHVLQWTFNLFPFSSIFPYFTSYSVHFSFSTFFSDFVIFQVNCMFLIFHD  
FQFSC  
>ENSMUSP00000136541\_c.124:T>A\_p.I42N ENSMUST00000179881.2|Gm11168-  
204|ENSMUSG00000096385|+|chr9:g.3005287:T>A  
MFLIFLDFQFSCHIPCPTVDISFPPFSVFLAIFHVLKCVFLNFSDQFSRNIPGPTVCISHFFRFFMILSFFK  
LSTACFSFSMIFSLAIFHVLQWTFNLFPFSSVFLAIFHVLKCVFLIFSDFLFSRHIPGPTVCISNFSRFSVI  
SSFFKLSSGCFSSMIFSLAIFHVLQWTFNLFPFSSIFPYFTSYSVHFSFSTFFSDFVIFQVNCMFLIFHD  
FQFSC  
>rs253464051\_ENSMUSP00000136541\_c.129:A>C\_p.S44R  
ENSMUST00000179881.2|Gm11168-204|ENSMUSG00000096385|+|chr9:g.3005292:A>C  
MFLIFLDFQFSCHIPCPTVDISFPPFSVFLAIFHVLKCVFLIFRDFQFSRNIPGPTVCISHFFRFFMILSFFK  
LSTACFSFSMIFSLAIFHVLQWTFNLFPFSSVFLAIFHVLKCVFLIFSDFLFSRHIPGPTVCISNFSRFSVI  
SSFFKLSSGCFSSMIFSLAIFHVLQWTFNLFPFSSIFPYFTSYSVHFSFSTFFSDFVIFQVNCMFLIFHD  
FQFSC  
>ENSMUSP00000136541\_c.129:A>T\_p.S44C ENSMUST00000179881.2|Gm11168-  
204|ENSMUSG00000096385|+|chr9:g.3005292:A>T  
MFLIFLDFQFSCHIPCPTVDISFPPFSVFLAIFHVLKCVFLIFCDFQFSRNIPGPTVCISHFFRFFMILSFFK  
LSTACFSFSMIFSLAIFHVLQWTFNLFPFSSVFLAIFHVLKCVFLIFSDFLFSRHIPGPTVCISNFSRFSVI  
SSFFKLSSGCFSSMIFSLAIFHVLQWTFNLFPFSSIFPYFTSYSVHFSFSTFFSDFVIFQVNCMFLIFHD  
FQFSC  
>ENSMUSP00000136541\_c.140:GT>A\_p.Q47del-fs ENSMUST00000179881.2|Gm11168-  
204|ENSMUSG00000096385|+|chr9:g.3005303:GT>A  
MFLIFLDFQFSCHIPCPTVDISFPPFSVFLAIFHVLKCVFLIFSDQFLAIFQVLQCAFLIFSGFS  
>ENSMUSP00000136541\_c.150:A>C\_p.N51H ENSMUST00000179881.2|Gm11168-  
204|ENSMUSG00000096385|+|chr9:g.3005313:A>C



MFLIFLDFQFSCHIPCPTVDISFPPFSVFLAIFHVLKCVFLIFSDQFSRHIPGPTVCISHFFRFFMILSFFK  
LSTACFSFSMIFSLAIFHVLLWTFNLNPTFSVFLAIFHVLKCVFLIFSDFLFSRHIPGPTVCISNFSRFSVI  
SSFFKLSSGCFSFSMIFSLAIFHVLQWTFNLNPTFSIFPYFTSYSVHFSFSTFFSDFVIFQVNCMFLIFHD  
FQFSC  
>ENSMUSP00000136541\_c.165:A>T\_p.T56S ENSMUST00000179881.2|Gm11168-  
204|ENSMUSG00000096385|+|chr9:g.3005328:A>T  
MFLIFLDFQFSCHIPCPTVDISFPPFSVFLAIFHVLKCVFLIFSDQFSRNIPGPTVCISHFFRFFMILSFFK  
LSTACFSFSMIFSLAIFHVLLWTFNLNPTFSVFLAIFHVLKCVFLIFSDFLFSRHIPGPTVCISNFSRFSVI  
SSFFKLSSGCFSFSMIFSLAIFHVLQWTFNLNPTFSIFPYFTSYSVHFSFSTFFSDFVIFQVNCMFLIFHD  
FQFSC  
>ENSMUSP00000136541\_c.181:AT>A\_p.H61del-fs ENSMUST00000179881.2|Gm11168-  
204|ENSMUSG00000096385|+|chr9:g.3005344:AT>A  
MFLIFLDFQFSCHIPCPTVDISFPPFSVFLAIFHVLKCVFLIFSDQFSRNIPGPTVCISHFSGFS  
>ENSMUSP00000136541\_c.190:G>C\_p.R64T ENSMUST00000179881.2|Gm11168-  
204|ENSMUSG00000096385|+|chr9:g.3005353:G>C  
MFLIFLDFQFSCHIPCPTVDISFPPFSVFLAIFHVLKCVFLIFSDQFSRNIPGPTVCISHFFRFFMILSFFK  
LSTACFSFSMIFSLAIFHVLLWTFNLNPTFSVFLAIFHVLKCVFLIFSDFLFSRHIPGPTVCISNFSRFSVI  
SSFFKLSSGCFSFSMIFSLAIFHVLQWTFNLNPTFSIFPYFTSYSVHFSFSTFFSDFVIFQVNCMFLIFHD  
FQFSC  
>ENSMUSP00000136541\_c.205:T>C\_p.L69S ENSMUST00000179881.2|Gm11168-  
204|ENSMUSG00000096385|+|chr9:g.3006187:T>C  
MFLIFLDFQFSCHIPCPTVDISFPPFSVFLAIFHVLKCVFLIFSDQFSRNIPGPTVCISHFFRFFMISFFK  
LSTACFSFSMIFSLAIFHVLLWTFNLNPTFSVFLAIFHVLKCVFLIFSDFLFSRHIPGPTVCISNFSRFSVI  
SSFFKLSSGCFSFSMIFSLAIFHVLQWTFNLNPTFSIFPYFTSYSVHFSFSTFFSDFVIFQVNCMFLIFHD  
FQFSC  
>ENSMUSP00000136541\_c.220:T>A\_p.L74\* ENSMUST00000179881.2|Gm11168-  
204|ENSMUSG00000096385|+|chr9:g.3006202:T>A  
MFLIFLDFQFSCHIPCPTVDISFPPFSVFLAIFHVLKCVFLIFSDQFSRNIPGPTVCISHFFRFFMILSFFK  
\*STACFSFSMIFSLAIFHVLLWTFNLNPTFSVFLAIFHVLKCVFLIFSDFLFSRHIPGPTVCISNFSRFSVI  
SSFFKLSSGCFSFSMIFSLAIFHVLQWTFNLNPTFSIFPYFTSYSVHFSFSTFFSDFVIFQVNCMFLIFHD  
FQFSC  
>ENSMUSP00000136541\_c.220:T>G\_p.L74W ENSMUST00000179881.2|Gm11168-  
204|ENSMUSG00000096385|+|chr9:g.3006202:T>G  
MFLIFLDFQFSCHIPCPTVDISFPPFSVFLAIFHVLKCVFLIFSDQFSRNIPGPTVCISHFFRFFMILSFFK  
WSTACFSFSMIFSLAIFHVLLWTFNLNPTFSVFLAIFHVLKCVFLIFSDFLFSRHIPGPTVCISNFSRFSVI  
SSFFKLSSGCFSFSMIFSLAIFHVLQWTFNLNPTFSIFPYFTSYSVHFSFSTFFSDFVIFQVNCMFLIFHD  
FQFSC  
>ENSMUSP00000136541\_c.226:CTGC>ATGG\_p.T76N ENSMUST00000179881.2|Gm11168-  
204|ENSMUSG00000096385|+|chr9:g.3006208:CTGC>ATGG  
MFLIFLDFQFSCHIPCPTVDISFPPFSVFLAIFHVLKCVFLIFSDQFSRNIPGPTVCISHFFRFFMILSFFK  
LSNGACFSFSMIFSLAIFHVLLWTFNLNPTFSVFLAIFHVLKCVFLIFSDFLFSRHIPGPTVCISNFSRFSV  
ISSFFKLSSGCFSFSMIFSLAIFHVLQWTFNLNPTFSIFPYFTSYSVHFSFSTFFSDFVIFQVNCMFLIFH  
DFQFSC  
>ENSMUSP00000136541\_c.226:CTGC>GTGG\_p.T76S ENSMUST00000179881.2|Gm11168-  
204|ENSMUSG00000096385|+|chr9:g.3006208:CTGC>GTGG  
MFLIFLDFQFSCHIPCPTVDISFPPFSVFLAIFHVLKCVFLIFSDQFSRNIPGPTVCISHFFRFFMILSFFK  
LSSGACFSFSMIFSLAIFHVLLWTFNLNPTFSVFLAIFHVLKCVFLIFSDFLFSRHIPGPTVCISNFSRFSV  
ISSFFKLSSGCFSFSMIFSLAIFHVLQWTFNLNPTFSIFPYFTSYSVHFSFSTFFSDFVIFQVNCMFLIFH  
DFQFSC  
>ENSMUSP00000136541\_c.226:CTGCATG>GTGGATT\_p.T76S  
ENSMUST00000179881.2|Gm11168-  
204|ENSMUSG00000096385|+|chr9:g.3006208:CTGCATG>GTGGATT  
MFLIFLDFQFSCHIPCPTVDISFPPFSVFLAIFHVLKCVFLIFSDQFSRNIPGPTVCISHFFRFFMILSFFK  
LSSGFACFSFSMIFSLAIFHVLLWTFNLNPTFSVFLAIFHVLKCVFLIFSDFLFSRHIPGPTVCISNFSRFS  
VSSFFKLSSGCFSFSMIFSLAIFHVLQWTFNLNPTFSIFPYFTSYSVHFSFSTFFSDFVIFQVNCMFLIF  
HDFQFSC  
>ENSMUSP00000136541\_c.246:A>G\_p.M83V ENSMUST00000179881.2|Gm11168-  
204|ENSMUSG00000096385|+|chr9:g.3006228:A>G

MFLIFLDFQFSCHIPCPTVDISFPPFSVFLAIFHVLKCVFLIFSDQFSRNIPGPTVCISHFFRFFMILSFFK  
LSTACFSFSVIFSLAIFHVLWTFLNFPPTFSVFLAIFHVLKCVFLIFSDFLFSRHIPGPTVCISNFSRFSVI  
SSFFKLSSGCFSFSMIFSLAIFHVLQWTFLNFPPTFSIFPYFTSYSVHFSFSTFFSDFVIFQVNCMFLIFHD  
FQFSC  
>ENSMUSP00000136541\_c.283:T>C\_p.L95P ENSMUST00000179881.2|Gm11168-  
204|ENSMUSG00000096385|+|chr9:g.3006265:T>C  
MFLIFLDFQFSCHIPCPTVDISFPPFSVFLAIFHVLKCVFLIFSDQFSRNIPGPTVCISHFFRFFMILSFFK  
LSTACFSFSMIFSLAIFHVLWTFLNFPPTFSVFLAIFHVLKCVFLIFSDFLFSRHIPGPTVCISNFSRFSVI  
SSFFKLSSGCFSFSMIFSLAIFHVLQWTFLNFPPTFSIFPYFTSYSVHFSFSTFFSDFVIFQVNCMFLIFHD  
FQFSC  
>ENSMUSP00000136541\_c.283:T>A\_p.L95Q ENSMUST00000179881.2|Gm11168-  
204|ENSMUSG00000096385|+|chr9:g.3006265:T>A  
MFLIFLDFQFSCHIPCPTVDISFPPFSVFLAIFHVLKCVFLIFSDQFSRNIPGPTVCISHFFRFFMILSFFK  
LSTACFSFSMIFSLAIFHVLQWTFLNFPPTFSVFLAIFHVLKCVFLIFSDFLFSRHIPGPTVCISNFSRFSVI  
SSFFKLSSGCFSFSMIFSLAIFHVLQWTFLNFPPTFSIFPYFTSYSVHFSFSTFFSDFVIFQVNCMFLIFHD  
FQFSC  
>ENSMUSP00000136541\_c.301:T>A\_p.F101Y ENSMUST00000179881.2|Gm11168-  
204|ENSMUSG00000096385|+|chr9:g.3006283:T>A  
MFLIFLDFQFSCHIPCPTVDISFPPFSVFLAIFHVLKCVFLIFSDQFSRNIPGPTVCISHFFRFFMILSFFK  
LSTACFSFSMIFSLAIFHVLWTFLNFPPTFSVFLAIFHVLKCVFLIFSDFLFSRHIPGPTVCISNFSRFSVI  
SSFFKLSSGCFSFSMIFSLAIFHVLQWTFLNFPPTFSIFPYFTSYSVHFSFSTFFSDFVIFQVNCMFLIFHD  
FQFSC  
>ENSMUSP00000136541\_c.306:A>C\_p.T103P ENSMUST00000179881.2|Gm11168-  
204|ENSMUSG00000096385|+|chr9:g.3006288:A>C  
MFLIFLDFQFSCHIPCPTVDISFPPFSVFLAIFHVLKCVFLIFSDQFSRNIPGPTVCISHFFRFFMILSFFK  
LSTACFSFSMIFSLAIFHVLWTFLNFPPTFSVFLAIFHVLKCVFLIFSDFLFSRHIPGPTVCISNFSRFSVI  
SSFFKLSSGCFSFSMIFSLAIFHVLQWTFLNFPPTFSIFPYFTSYSVHFSFSTFFSDFVIFQVNCMFLIFHD  
FQFSC  
>ENSMUSP00000136541\_c.324:G>T\_p.A109S ENSMUST00000179881.2|Gm11168-  
204|ENSMUSG00000096385|+|chr9:g.3006306:G>T  
MFLIFLDFQFSCHIPCPTVDISFPPFSVFLAIFHVLKCVFLIFSDQFSRNIPGPTVCISHFFRFFMILSFFK  
LSTACFSFSMIFSLAIFHVLWTFLNFPPTFSVFLSIFHVLKCVFLIFSDFLFSRHIPGPTVCISNFSRFSVI  
SSFFKLSSGCFSFSMIFSLAIFHVLQWTFLNFPPTFSIFPYFTSYSVHFSFSTFFSDFVIFQVNCMFLIFHD  
FQFSC  
>ENSMUSP00000136541\_c.335:T>A\_p.H112Q ENSMUST00000179881.2|Gm11168-  
204|ENSMUSG00000096385|+|chr9:g.3006317:T>A  
MFLIFLDFQFSCHIPCPTVDISFPPFSVFLAIFHVLKCVFLIFSDQFSRNIPGPTVCISHFFRFFMILSFFK  
LSTACFSFSMIFSLAIFHVLWTFLNFPPTFSVFLAIFQVLKCVFLIFSDFLFSRHIPGPTVCISNFSRFSVI  
SSFFKLSSGCFSFSMIFSLAIFHVLQWTFLNFPPTFSIFPYFTSYSVHFSFSTFFSDFVIFQVNCMFLIFHD  
FQFSC  
>ENSMUSP00000136541\_c.343:A>T\_p.K115M ENSMUST00000179881.2|Gm11168-  
204|ENSMUSG00000096385|+|chr9:g.3006325:A>T  
MFLIFLDFQFSCHIPCPTVDISFPPFSVFLAIFHVLKCVFLIFSDQFSRNIPGPTVCISHFFRFFMILSFFK  
LSTACFSFSMIFSLAIFHVLWTFLNFPPTFSVFLAIFHVLKCVFLIFSDFLFSRHIPGPTVCISNFSRFSVI  
SSFFKLSSGCFSFSMIFSLAIFHVLQWTFLNFPPTFSIFPYFTSYSVHFSFSTFFSDFVIFQVNCMFLIFHD  
FQFSC  
>ENSMUSP00000136541\_c.346:G>A\_p.C116Y ENSMUST00000179881.2|Gm11168-  
204|ENSMUSG00000096385|+|chr9:g.3006328:G>A  
MFLIFLDFQFSCHIPCPTVDISFPPFSVFLAIFHVLKCVFLIFSDQFSRNIPGPTVCISHFFRFFMILSFFK  
LSTACFSFSMIFSLAIFHVLWTFLNFPPTFSVFLAIFHVLKCVFLIFSDFLFSRHIPGPTVCISNFSRFSVI  
SSFFKLSSGCFSFSMIFSLAIFHVLQWTFLNFPPTFSIFPYFTSYSVHFSFSTFFSDFVIFQVNCMFLIFHD  
FQFSC  
>ENSMUSP00000136541\_c.348:G>A\_p.V117I ENSMUST00000179881.2|Gm11168-  
204|ENSMUSG00000096385|+|chr9:g.3006330:G>A  
MFLIFLDFQFSCHIPCPTVDISFPPFSVFLAIFHVLKCVFLIFSDQFSRNIPGPTVCISHFFRFFMILSFFK  
LSTACFSFSMIFSLAIFHVLWTFLNFPPTFSVFLAIFHVLKCVFLIFSDFLFSRHIPGPTVCISNFSRFSVI  
SSFFKLSSGCFSFSMIFSLAIFHVLQWTFLNFPPTFSIFPYFTSYSVHFSFSTFFSDFVIFQVNCMFLIFHD  
FQFSC

>ENSMUSP00000136541\_c.363:A>T\_p.S122C ENSMUST00000179881.2|Gm11168-204|ENSMUSG00000096385|+|chr9:g.3006345:A>T  
MFLIFLDFQFSCHIPCPTVDISFPPFSVFLAIFHVLKCVFLIFSDQFSRNIPGPTVCISHFFRFFMILSFFK  
LSTACFSFSMIFSFLAIFHVLLWTFNLNPTFSVFLAIFHVLKCVFLIFCDFLFSRHIPGPTVCISNFSRFSVI  
SSFFKLSSGCFSFSMIFSFLAIFHVLQWTFNLNPTFSIFPYFTSYSVHFSFSTFFSDVFIFQVNCMFLIFHD  
FQFSC  
>ENSMUSP00000136541\_c.363:A>C\_p.S122R ENSMUST00000179881.2|Gm11168-204|ENSMUSG00000096385|+|chr9:g.3006345:A>C  
MFLIFLDFQFSCHIPCPTVDISFPPFSVFLAIFHVLKCVFLIFSDQFSRNIPGPTVCISHFFRFFMILSFFK  
LSTACFSFSMIFSFLAIFHVLLWTFNLNPTFSVFLAIFHVLKCVFLIFRDFLFSRHIPGPTVCISNFSRFSVI  
SSFFKLSSGCFSFSMIFSFLAIFHVLQWTFNLNPTFSIFPYFTSYSVHFSFSTFFSDVFIFQVNCMFLIFHD  
FQFSC  
>ENSMUSP00000136541\_c.373:T>A\_p.L125Q ENSMUST00000179881.2|Gm11168-204|ENSMUSG00000096385|+|chr9:g.3006355:T>A  
MFLIFLDFQFSCHIPCPTVDISFPPFSVFLAIFHVLKCVFLIFSDQFSRNIPGPTVCISHFFRFFMILSFFK  
LSTACFSFSMIFSFLAIFHVLLWTFNLNPTFSVFLAIFHVLKCVFLIFSDQFSRNIPGPTVCISNFSRFSVI  
SSFFKLSSGCFSFSMIFSFLAIFHVLQWTFNLNPTFSIFPYFTSYSVHFSFSTFFSDVFIFQVNCMFLIFHD  
FQFSC  
>ENSMUSP00000136541\_c.399:A>T\_p.T134S ENSMUST00000179881.2|Gm11168-204|ENSMUSG00000096385|+|chr9:g.3006381:A>T  
MFLIFLDFQFSCHIPCPTVDISFPPFSVFLAIFHVLKCVFLIFSDQFSRNIPGPTVCISHFFRFFMILSFFK  
LSTACFSFSMIFSFLAIFHVLLWTFNLNPTFSVFLAIFHVLKCVFLIFSDFLFSRHIPGPTVCISNFSRFSVI  
SSFFKLSSGCFSFSMIFSFLAIFHVLQWTFNLNPTFSIFPYFTSYSVHFSFSTFFSDVFIFQVNCMFLIFHD  
FQFSC  
>ENSMUSP00000136541\_c.414:A>T\_p.N139Y ENSMUST00000179881.2|Gm11168-204|ENSMUSG00000096385|+|chr9:g.3006396:A>T  
MFLIFLDFQFSCHIPCPTVDISFPPFSVFLAIFHVLKCVFLIFSDQFSRNIPGPTVCISHFFRFFMILSFFK  
LSTACFSFSMIFSFLAIFHVLLWTFNLNPTFSVFLAIFHVLKCVFLIFSDFLFSRHIPGPTVCISYFSRFSVI  
SSFFKLSSGCFSFSMIFSFLAIFHVLQWTFNLNPTFSIFPYFTSYSVHFSFSTFFSDVFIFQVNCMFLIFHD  
FQFSC  
>ENSMUSP00000136541\_c.414:A>C\_p.N139H ENSMUST00000179881.2|Gm11168-204|ENSMUSG00000096385|+|chr9:g.3006396:A>C  
MFLIFLDFQFSCHIPCPTVDISFPPFSVFLAIFHVLKCVFLIFSDQFSRNIPGPTVCISHFFRFFMILSFFK  
LSTACFSFSMIFSFLAIFHVLLWTFNLNPTFSVFLAIFHVLKCVFLIFSDFLFSRHIPGPTVCISHFSRFSVI  
SSFFKLSSGCFSFSMIFSFLAIFHVLQWTFNLNPTFSIFPYFTSYSVHFSFSTFFSDVFIFQVNCMFLIFHD  
FQFSC  
>ENSMUSP00000136541\_c.416:T>A\_p.N139K ENSMUST00000179881.2|Gm11168-204|ENSMUSG00000096385|+|chr9:g.3006398:T>A  
MFLIFLDFQFSCHIPCPTVDISFPPFSVFLAIFHVLKCVFLIFSDQFSRNIPGPTVCISHFFRFFMILSFFK  
LSTACFSFSMIFSFLAIFHVLLWTFNLNPTFSVFLAIFHVLKCVFLIFSDFLFSRHIPGPTVCISKFSRFSVI  
SSFFKLSSGCFSFSMIFSFLAIFHVLQWTFNLNPTFSIFPYFTSYSVHFSFSTFFSDVFIFQVNCMFLIFHD  
FQFSC  
>ENSMUSP00000136541\_c.429:T>G\_p.S144A ENSMUST00000179881.2|Gm11168-204|ENSMUSG00000096385|+|chr9:g.3006411:T>G  
MFLIFLDFQFSCHIPCPTVDISFPPFSVFLAIFHVLKCVFLIFSDQFSRNIPGPTVCISHFFRFFMILSFFK  
LSTACFSFSMIFSFLAIFHVLLWTFNLNPTFSVFLAIFHVLKCVFLIFSDFLFSRHIPGPTVCISNFSRFAVI  
SSFFKLSSGCFSFSMIFSFLAIFHVLQWTFNLNPTFSIFPYFTSYSVHFSFSTFFSDVFIFQVNCMFLIFHD  
FQFSC  
>ENSMUSP00000136541\_c.430:C>T\_p.S144L ENSMUST00000179881.2|Gm11168-204|ENSMUSG00000096385|+|chr9:g.3006412:C>T  
MFLIFLDFQFSCHIPCPTVDISFPPFSVFLAIFHVLKCVFLIFSDQFSRNIPGPTVCISHFFRFFMILSFFK  
LSTACFSFSMIFSFLAIFHVLLWTFNLNPTFSVFLAIFHVLKCVFLIFSDFLFSRHIPGPTVCISNFSRFLVI  
SSFFKLSSGCFSFSMIFSFLAIFHVLQWTFNLNPTFSIFPYFTSYSVHFSFSTFFSDVFIFQVNCMFLIFHD  
FQFSC  
>ENSMUSP00000136541\_c.439:C>T\_p.S147L ENSMUST00000179881.2|Gm11168-204|ENSMUSG00000096385|+|chr9:g.3006421:C>T  
MFLIFLDFQFSCHIPCPTVDISFPPFSVFLAIFHVLKCVFLIFSDQFSRNIPGPTVCISHFFRFFMILSFFK  
LSTACFSFSMIFSFLAIFHVLLWTFNLNPTFSVFLAIFHVLKCVFLIFSDFLFSRHIPGPTVCISNFSRFSVI

LSFFKLSSGCFSFSMIFSLAIFHVLQWTFNLNPTFSIFPYFTSYSVHFSFSTFFSDFVIFQVNCMFLIFHD  
FQFSC  
>ENSMUSP00000136541\_c.454:T>C\_p.L152S ENSMUST00000179881.2|Gm11168-  
204|ENSMUSG00000096385|+|chr9:g.3006436:T>C  
MFLIFLDFQFSCHIPCPTVDISFPPFSVFLAIFHVLKCVFLIFSDQFSRNIPGPTVCISHFFRFFMILSFFK  
LSTACFSFSMIFSLAIFHVLLWTFNLNPTFSVFLAIFHVLKCVFLIFSDFLFSRHIPGPTVCISNFSRFSVI  
SSFFKLSSGCFSFSMIFSLAIFHVLQWTFNLNPTFSIFPYFTSYSVHFSFSTFFSDFVIFQVNCMFLIFHD  
FQFSC  
>ENSMUSP00000136541\_c.454:T>G\_p.L152W ENSMUST00000179881.2|Gm11168-  
204|ENSMUSG00000096385|+|chr9:g.3006436:T>G  
MFLIFLDFQFSCHIPCPTVDISFPPFSVFLAIFHVLKCVFLIFSDQFSRNIPGPTVCISHFFRFFMILSFFK  
LSTACFSFSMIFSLAIFHVLLWTFNLNPTFSVFLAIFHVLKCVFLIFSDFLFSRHIPGPTVCISNFSRFSVI  
SSFFKWSSGCFSFSMIFSLAIFHVLQWTFNLNPTFSIFPYFTSYSVHFSFSTFFSDFVIFQVNCMFLIFHD  
FQFSC  
>ENSMUSP00000136541\_c.516:C>T\_p.Q173\* ENSMUST00000179881.2|Gm11168-  
204|ENSMUSG00000096385|+|chr9:g.3006498:C>T  
MFLIFLDFQFSCHIPCPTVDISFPPFSVFLAIFHVLKCVFLIFSDQFSRNIPGPTVCISHFFRFFMILSFFK  
LSTACFSFSMIFSLAIFHVLLWTFNLNPTFSVFLAIFHVLKCVFLIFSDFLFSRHIPGPTVCISNFSRFSVI  
SSFFKLSSGCFSFSMIFSLAIFHVL\*WTFNLNPTFSIFPYFTSYSVHFSFSTFFSDFVIFQVNCMFLIFHD  
FQFSC  
>ENSMUSP00000136541\_c.535:T>A\_p.F179Y ENSMUST00000179881.2|Gm11168-  
204|ENSMUSG00000096385|+|chr9:g.3006517:T>A  
MFLIFLDFQFSCHIPCPTVDISFPPFSVFLAIFHVLKCVFLIFSDQFSRNIPGPTVCISHFFRFFMILSFFK  
LSTACFSFSMIFSLAIFHVLLWTFNLNPTFSVFLAIFHVLKCVFLIFSDFLFSRHIPGPTVCISNFSRFSVI  
SSFFKLSSGCFSFSMIFSLAIFHVLQWTFNLNPTFSIFPYFTSYSVHFSFSTFFSDFVIFQVNCMFLIFHD  
FQFSC  
>ENSMUSP00000136541\_c.540:A>C\_p.T181P ENSMUST00000179881.2|Gm11168-  
204|ENSMUSG00000096385|+|chr9:g.3006522:A>C  
MFLIFLDFQFSCHIPCPTVDISFPPFSVFLAIFHVLKCVFLIFSDQFSRNIPGPTVCISHFFRFFMILSFFK  
LSTACFSFSMIFSLAIFHVLLWTFNLNPTFSVFLAIFHVLKCVFLIFSDFLFSRHIPGPTVCISNFSRFSVI  
SSFFKLSSGCFSFSMIFSLAIFHVLQWTFNLNPTFSIFPYFTSYSVHFSFSTFFSDFVIFQVNCMFLIFHD  
FQFSC  
>ENSMUSP00000136541\_c.571:A>T\_p.Y191F ENSMUST00000179881.2|Gm11168-  
204|ENSMUSG00000096385|+|chr9:g.3006848:A>T  
MFLIFLDFQFSCHIPCPTVDISFPPFSVFLAIFHVLKCVFLIFSDQFSRNIPGPTVCISHFFRFFMILSFFK  
LSTACFSFSMIFSLAIFHVLLWTFNLNPTFSVFLAIFHVLKCVFLIFSDFLFSRHIPGPTVCISNFSRFSVI  
SSFFKLSSGCFSFSMIFSLAIFHVLQWTFNLNPTFSIFPYFTSYSVHFSFSTFFSDFVIFQVNCMFLIFHD  
FQFSC  
>ENSMUSP00000136541\_c.601:T>G\_p.F201C ENSMUST00000179881.2|Gm11168-  
204|ENSMUSG00000096385|+|chr9:g.3006878:T>G  
MFLIFLDFQFSCHIPCPTVDISFPPFSVFLAIFHVLKCVFLIFSDQFSRNIPGPTVCISHFFRFFMILSFFK  
LSTACFSFSMIFSLAIFHVLLWTFNLNPTFSVFLAIFHVLKCVFLIFSDFLFSRHIPGPTVCISNFSRFSVI  
SSFFKLSSGCFSFSMIFSLAIFHVLQWTFNLNPTFSIFPYFTSYSVHFSFSTFFSDFVIFQVNCMFLIFHD  
FQFSC  
>ENSMUSP00000136541\_c.632:C>A\_p.N211K ENSMUST00000179881.2|Gm11168-  
204|ENSMUSG00000096385|+|chr9:g.3006909:C>A  
MFLIFLDFQFSCHIPCPTVDISFPPFSVFLAIFHVLKCVFLIFSDQFSRNIPGPTVCISHFFRFFMILSFFK  
LSTACFSFSMIFSLAIFHVLLWTFNLNPTFSVFLAIFHVLKCVFLIFSDFLFSRHIPGPTVCISNFSRFSVI  
SSFFKLSSGCFSFSMIFSLAIFHVLQWTFNLNPTFSIFPYFTSYSVHFSFSTFFSDFVIFQVNCMFLIFHD  
FQFSC  
>ENSMUSP00000136541\_c.632:C>G\_p.N211K ENSMUST00000179881.2|Gm11168-  
204|ENSMUSG00000096385|+|chr9:g.3006909:C>G  
MFLIFLDFQFSCHIPCPTVDISFPPFSVFLAIFHVLKCVFLIFSDQFSRNIPGPTVCISHFFRFFMILSFFK  
LSTACFSFSMIFSLAIFHVLLWTFNLNPTFSVFLAIFHVLKCVFLIFSDFLFSRHIPGPTVCISNFSRFSVI  
SSFFKLSSGCFSFSMIFSLAIFHVLQWTFNLNPTFSIFPYFTSYSVHFSFSTFFSDFVIFQVNCMFLIFHD  
FQFSC  
>ENSMUSP00000136541\_c.632:CTGC>GTGG\_p.N211K ENSMUST00000179881.2|Gm11168-  
204|ENSMUSG00000096385|+|chr9:g.3006909:CTGC>GTGG

MFLIFLDFQFSCHIPCPTVDISFPPFSVFLAIFHVLKCVFLIFSDQFSRNIPGPTVCISHFFRFFMILSFFK  
LSTACFSFSMIFSLAIFHVLWTFNLNPTFSVFLAIFHVLKCVFLIFSDFLFSRHIPGPTVCISNFSRFSVI  
SSFFKLSSGCFSFSMIFSLAIFHVLQWTFNLNPTFSIFPYFTSYSVHFSFFTFSSDFVIFQVVKWCMFLIFH  
DFQFSC  
>ENSMUSP00000136541\_c.635:C>G\_p.C212W ENSMUST00000179881.2|Gm11168-  
204|ENSMUSG00000096385|+|chr9:g.3006912:C>G  
MFLIFLDFQFSCHIPCPTVDISFPPFSVFLAIFHVLKCVFLIFSDQFSRNIPGPTVCISHFFRFFMILSFFK  
LSTACFSFSMIFSLAIFHVLWTFNLNPTFSVFLAIFHVLKCVFLIFSDFLFSRHIPGPTVCISNFSRFSVI  
SSFFKLSSGCFSFSMIFSLAIFHVLQWTFNLNPTFSIFPYFTSYSVHFSFFTFSSDFVIFQVNVWMFLIFHD  
FQFSC  
>ENSMUSP00000136541\_c.636:A>C\_p.M213L ENSMUST00000179881.2|Gm11168-  
204|ENSMUSG00000096385|+|chr9:g.3006913:A>C  
MFLIFLDFQFSCHIPCPTVDISFPPFSVFLAIFHVLKCVFLIFSDQFSRNIPGPTVCISHFFRFFMILSFFK  
LSTACFSFSMIFSLAIFHVLWTFNLNPTFSVFLAIFHVLKCVFLIFSDFLFSRHIPGPTVCISNFSRFSVI  
SSFFKLSSGCFSFSMIFSLAIFHVLQWTFNLNPTFSIFPYFTSYSVHFSFFTFSSDFVIFQVNVCLFLIFHD  
FQFSC  
>ENSMUSP00000136541\_c.639:T>A\_p.F214I ENSMUST00000179881.2|Gm11168-  
204|ENSMUSG00000096385|+|chr9:g.3006916:T>A  
MFLIFLDFQFSCHIPCPTVDISFPPFSVFLAIFHVLKCVFLIFSDQFSRNIPGPTVCISHFFRFFMILSFFK  
LSTACFSFSMIFSLAIFHVLWTFNLNPTFSVFLAIFHVLKCVFLIFSDFLFSRHIPGPTVCISNFSRFSVI  
SSFFKLSSGCFSFSMIFSLAIFHVLQWTFNLNPTFSIFPYFTSYSVHFSFFTFSSDFVIFQVNVCMILIFHD  
FQFSC  
>ENSMUSP00000136541\_c.660:C>A\_p.Q221K ENSMUST00000179881.2|Gm11168-  
204|ENSMUSG00000096385|+|chr9:g.3006937:C>A  
MFLIFLDFQFSCHIPCPTVDISFPPFSVFLAIFHVLKCVFLIFSDQFSRNIPGPTVCISHFFRFFMILSFFK  
LSTACFSFSMIFSLAIFHVLWTFNLNPTFSVFLAIFHVLKCVFLIFSDFLFSRHIPGPTVCISNFSRFSVI  
SSFFKLSSGCFSFSMIFSLAIFHVLQWTFNLNPTFSIFPYFTSYSVHFSFFTFSSDFVIFQVNVCMFLIFHD  
FKFSC  
>ENSMUSP00000137330\_c.14:C>A\_p.F5L ENSMUST00000143083.3|Gm10721-  
201|ENSMUSG00000096519|+|chr9:g.3013154:C>A  
LFLILHDFQFSCHIPCPTLDISFPPFSVFLAIFHVLKCVFLIFRDFQFSCHIPGPTVCISHFSRFSVILSFFK  
LSTACFSFSMIFSLAIFHVLQWKFLNFPFVFLAIFHVLKCVFLIFRDFQFSRHIPGPTVCISHFSGFSVI  
SSFFKSSSGCFSFSMIFSLAIFHVLQWTFNLNFPFSPYSRSYSVHFSFFTFSSDFVIFQVVKWMLIFHDF  
QFSC  
>ENSMUSP00000137330\_c.15:C>T\_p.H6Y ENSMUST00000143083.3|Gm10721-  
201|ENSMUSG00000096519|+|chr9:g.3013155:C>T  
LFLIFYDFQFSCHIPCPTLDISFPPFSVFLAIFHVLKCVFLIFRDFQFSCHIPGPTVCISHFSRFSVILSFFK  
LSTACFSFSMIFSLAIFHVLQWKFLNFPFVFLAIFHVLKCVFLIFRDFQFSRHIPGPTVCISHFSGFSVI  
SSFFKSSSGCFSFSMIFSLAIFHVLQWTFNLNFPFSPYSRSYSVHFSFFTFSSDFVIFQVVKWMLIFHDF  
QFSC  
>ENSMUSP00000137330\_c.26:G>T\_p.Q9H ENSMUST00000143083.3|Gm10721-  
201|ENSMUSG00000096519|+|chr9:g.3013166:G>T  
LFLIFHDFHFSCHIPCPTLDISFPPFSVFLAIFHVLKCVFLIFRDFQFSCHIPGPTVCISHFSRFSVILSFFK  
LSTACFSFSMIFSLAIFHVLQWKFLNFPFVFLAIFHVLKCVFLIFRDFQFSRHIPGPTVCISHFSGFSVI  
SSFFKSSSGCFSFSMIFSLAIFHVLQWTFNLNFPFSPYSRSYSVHFSFFTFSSDFVIFQVVKWMLIFHDF  
QFSC  
>ENSMUSP00000137330\_c.33:T>C\_p.C12R ENSMUST00000143083.3|Gm10721-  
201|ENSMUSG00000096519|+|chr9:g.3013173:T>C  
LFLIFHDFQFSRHIPCPTLDISFPPFSVFLAIFHVLKCVFLIFRDFQFSCHIPGPTVCISHFSRFSVILSFFK  
LSTACFSFSMIFSLAIFHVLQWKFLNFPFVFLAIFHVLKCVFLIFRDFQFSRHIPGPTVCISHFSGFSVI  
SSFFKSSSGCFSFSMIFSLAIFHVLQWTFNLNFPFSPYSRSYSVHFSFFTFSSDFVIFQVVKWMLIFHDF  
QFSC  
>ENSMUSP00000137330\_c.36:C>A\_p.H13N ENSMUST00000143083.3|Gm10721-  
201|ENSMUSG00000096519|+|chr9:g.3013176:C>A  
LFLIFHDFQFSCNIPCPTLDISFPPFSVFLAIFHVLKCVFLIFRDFQFSCHIPGPTVCISHFSRFSVILSFFK  
LSTACFSFSMIFSLAIFHVLQWKFLNFPFVFLAIFHVLKCVFLIFRDFQFSRHIPGPTVCISHFSGFSVI  
SSFFKSSSGCFSFSMIFSLAIFHVLQWTFNLNFPFSPYSRSYSVHFSFFTFSSDFVIFQVVKWMLIFHDF  
QFSC



>ENSMUSP00000137330\_c.45:T>A\_p.C16S ENSMUST00000143083.3|Gm10721-  
201|ENSMUSG00000096519|+|chr9:g.3013185:T>A  
LFLIFHDFQFSCHIPSPPTLDISFPFVSFLAIFHVLKCVFLIFRDFQFSCHIPGPTVCISHFSRFSVILSFFK  
LSTACFSFSMIFSLAIFHVLQWKFLNFPFVSFLAIFHVLKCVFLIFRDFQFSRHIPGPTVCISHFSGFSVI  
SSFFKSSSGCFSFSMIFSLAIFHVLQWTFNLNFPFSPYSRSYSVHFSFFTFFSDFVIFQVVKWMFLIFHDF  
QFSC  
>ENSMUSP00000137330\_c.45:T>C\_p.C16R ENSMUST00000143083.3|Gm10721-  
201|ENSMUSG00000096519|+|chr9:g.3013185:T>C  
LFLIFHDFQFSCHIPRPTLDISFPFVSFLAIFHVLKCVFLIFRDFQFSCHIPGPTVCISHFSRFSVILSFFK  
LSTACFSFSMIFSLAIFHVLQWKFLNFPFVSFLAIFHVLKCVFLIFRDFQFSRHIPGPTVCISHFSGFSVI  
SSFFKSSSGCFSFSMIFSLAIFHVLQWTFNLNFPFSPYSRSYSVHFSFFTFFSDFVIFQVVKWMFLIFHDF  
QFSC  
>ENSMUSP00000137330\_c.45:T>G\_p.C16G ENSMUST00000143083.3|Gm10721-  
201|ENSMUSG00000096519|+|chr9:g.3013185:T>G  
LFLIFHDFQFSCHIPGPTLDISFPFVSFLAIFHVLKCVFLIFRDFQFSCHIPGPTVCISHFSRFSVILSFFK  
LSTACFSFSMIFSLAIFHVLQWKFLNFPFVSFLAIFHVLKCVFLIFRDFQFSRHIPGPTVCISHFSGFSVI  
SSFFKSSSGCFSFSMIFSLAIFHVLQWTFNLNFPFSPYSRSYSVHFSFFTFFSDFVIFQVVKWMFLIFHDF  
QFSC  
>ENSMUSP00000137330\_c.54:C>G\_p.L19V ENSMUST00000143083.3|Gm10721-  
201|ENSMUSG00000096519|+|chr9:g.3013194:C>G  
LFLIFHDFQFSCHIPCPTVDISFPFVSFLAIFHVLKCVFLIFRDFQFSCHIPGPTVCISHFSRFSVILSFFK  
LSTACFSFSMIFSLAIFHVLQWKFLNFPFVSFLAIFHVLKCVFLIFRDFQFSRHIPGPTVCISHFSGFSVI  
SSFFKSSSGCFSFSMIFSLAIFHVLQWTFNLNFPFSPYSRSYSVHFSFFTFFSDFVIFQVVKWMFLIFHDF  
QFSC  
>ENSMUSP00000137330\_c.129:C>T\_p.R44C ENSMUST00000143083.3|Gm10721-  
201|ENSMUSG00000096519|+|chr9:g.3013273:C>T  
LFLIFHDFQFSCHIPCPTLDISFPFVSFLAIFHVLKCVFLIFRDFQFSCHIPGPTVCISHFSRFSVILSFFK  
LSTACFSFSMIFSLAIFHVLQWKFLNFPFVSFLAIFHVLKCVFLIFRDFQFSRHIPGPTVCISHFSGFSVI  
SSFFKSSSGCFSFSMIFSLAIFHVLQWTFNLNFPFSPYSRSYSVHFSFFTFFSDFVIFQVVKWMFLIFHDF  
QFSC  
>ENSMUSP00000137330\_c.147:T>C\_p.C50R ENSMUST00000143083.3|Gm10721-  
201|ENSMUSG00000096519|+|chr9:g.3013291:T>C  
LFLIFHDFQFSCHIPCPTLDISFPFVSFLAIFHVLKCVFLIFRDFQFSRHIPGPTVCISHFSRFSVILSFFK  
LSTACFSFSMIFSLAIFHVLQWKFLNFPFVSFLAIFHVLKCVFLIFRDFQFSRHIPGPTVCISHFSGFSVI  
SSFFKSSSGCFSFSMIFSLAIFHVLQWTFNLNFPFSPYSRSYSVHFSFFTFFSDFVIFQVVKWMFLIFHDF  
QFSC  
>ENSMUSP00000137330\_c.165:A>T\_p.T56S ENSMUST00000143083.3|Gm10721-  
201|ENSMUSG00000096519|+|chr9:g.3013309:A>T  
LFLIFHDFQFSCHIPCPTLDISFPFVSFLAIFHVLKCVFLIFRDFQFSCHIPGPTVCISHFSRFSVILSFFK  
LSTACFSFSMIFSLAIFHVLQWKFLNFPFVSFLAIFHVLKCVFLIFRDFQFSRHIPGPTVCISHFSGFSVI  
SSFFKSSSGCFSFSMIFSLAIFHVLQWTFNLNFPFSPYSRSYSVHFSFFTFFSDFVIFQVVKWMFLIFHDF  
QFSC  
>ENSMUSP00000137330\_c.178:C>T\_p.S60F ENSMUST00000143083.3|Gm10721-  
201|ENSMUSG00000096519|+|chr9:g.3013322:C>T  
LFLIFHDFQFSCHIPCPTLDISFPFVSFLAIFHVLKCVFLIFRDFQFSCHIPGPTVCIFHFSRFSVILSFFK  
LSTACFSFSMIFSLAIFHVLQWKFLNFPFVSFLAIFHVLKCVFLIFRDFQFSRHIPGPTVCISHFSGFSVI  
SSFFKSSSGCFSFSMIFSLAIFHVLQWTFNLNFPFSPYSRSYSVHFSFFTFFSDFVIFQVVKWMFLIFHDF  
QFSC  
>ENSMUSP00000137330\_c.186:T>C\_p.S63P ENSMUST00000143083.3|Gm10721-  
201|ENSMUSG00000096519|+|chr9:g.3013330:T>C  
LFLIFHDFQFSCHIPCPTLDISFPFVSFLAIFHVLKCVFLIFRDFQFSCHIPGPTVCISHFPFVSVILSFFK  
LSTACFSFSMIFSLAIFHVLQWKFLNFPFVSFLAIFHVLKCVFLIFRDFQFSRHIPGPTVCISHFSGFSVI  
SSFFKSSSGCFSFSMIFSLAIFHVLQWTFNLNFPFSPYSRSYSVHFSFFTFFSDFVIFQVVKWMFLIFHDF  
QFSC  
>ENSMUSP00000137330\_c.199:T>G\_p.V67G ENSMUST00000143083.3|Gm10721-  
201|ENSMUSG00000096519|+|chr9:g.3013343:T>G  
LFLIFHDFQFSCHIPCPTLDISFPFVSFLAIFHVLKCVFLIFRDFQFSCHIPGPTVCISHFSRFSGILSFFK  
LSTACFSFSMIFSLAIFHVLQWKFLNFPFVSFLAIFHVLKCVFLIFRDFQFSRHIPGPTVCISHFSGFSVI

SSFFKSSSGCFSFSMIFSFLAIFHVLQWTFLNFPFFSPYSRSYSVHFSFFTFSSDFVIFQVVKWMFLIFHDF  
QFSC  
>ENSMUSP00000137330\_c.205:T>C\_p.L69S ENSMUST00000143083.3|Gm10721-  
201|ENSMUSG00000096519|+|chr9:g.3013349:T>C  
LFLIFHDFQFSCHIPCPTLDISFPPFSVFLAIFHVLKCVFLIFRDFQFSCHIPGPTVCISHFSRFSVILSFFK  
LSTACFSFSMIFSFLAIFHVLQWKFLNFPFFSVFLAIFHVLKCVFLIFRDFQFSRHIPGPTVCISHFSGFSVI  
SSFFKSSSGCFSFSMIFSFLAIFHVLQWTFLNFPFFSPYSRSYSVHFSFFTFSSDFVIFQVVKWMFLIFHDF  
QFSC  
>ENSMUSP00000137330\_c.220:T>G\_p.L74W ENSMUST00000143083.3|Gm10721-  
201|ENSMUSG00000096519|+|chr9:g.3013364:T>G  
LFLIFHDFQFSCHIPCPTLDISFPPFSVFLAIFHVLKCVFLIFRDFQFSCHIPGPTVCISHFSRFSVILSFFK  
WSTACFSFSMIFSFLAIFHVLQWKFLNFPFFSVFLAIFHVLKCVFLIFRDFQFSRHIPGPTVCISHFSGFSVI  
SSFFKSSSGCFSFSMIFSFLAIFHVLQWTFLNFPFFSPYSRSYSVHFSFFTFSSDFVIFQVVKWMFLIFHDF  
QFSC  
>ENSMUSP00000137330\_c.220:T>C\_p.L74S ENSMUST00000143083.3|Gm10721-  
201|ENSMUSG00000096519|+|chr9:g.3013364:T>C  
LFLIFHDFQFSCHIPCPTLDISFPPFSVFLAIFHVLKCVFLIFRDFQFSCHIPGPTVCISHFSRFSVILSFFK  
SSTACFSFSMIFSFLAIFHVLQWKFLNFPFFSVFLAIFHVLKCVFLIFRDFQFSRHIPGPTVCISHFSGFSVI  
SSFFKSSSGCFSFSMIFSFLAIFHVLQWTFLNFPFFSPYSRSYSVHFSFFTFSSDFVIFQVVKWMFLIFHDF  
QFSC  
>ENSMUSP00000137330\_c.226:C>G\_p.T76S ENSMUST00000143083.3|Gm10721-  
201|ENSMUSG00000096519|+|chr9:g.3013370:C>G  
LFLIFHDFQFSCHIPCPTLDISFPPFSVFLAIFHVLKCVFLIFRDFQFSCHIPGPTVCISHFSRFSVILSFFK  
LSSACFSFSMIFSFLAIFHVLQWKFLNFPFFSVFLAIFHVLKCVFLIFRDFQFSRHIPGPTVCISHFSGFSVI  
SSFFKSSSGCFSFSMIFSFLAIFHVLQWTFLNFPFFSPYSRSYSVHFSFFTFSSDFVIFQVVKWMFLIFHDF  
QFSC  
>ENSMUSP00000137330\_c.226:CTGC>GTGT\_p.T76S ENSMUST00000143083.3|Gm10721-  
201|ENSMUSG00000096519|+|chr9:g.3013370:CTGC>GTGT  
LFLIFHDFQFSCHIPCPTLDISFPPFSVFLAIFHVLKCVFLIFRDFQFSCHIPGPTVCISHFSRFSVILSFFK  
LSSVACFSFSMIFSFLAIFHVLQWKFLNFPFFSVFLAIFHVLKCVFLIFRDFQFSRHIPGPTVCISHFSGFSV  
ISSFFKSSSGCFSFSMIFSFLAIFHVLQWTFLNFPFFSPYSRSYSVHFSFFTFSSDFVIFQVVKWMFLIFHD  
FQFSC  
>ENSMUSP00000137330\_c.226:CTGC>GTGG\_p.T76S ENSMUST00000143083.3|Gm10721-  
201|ENSMUSG00000096519|+|chr9:g.3013370:CTGC>GTGG  
LFLIFHDFQFSCHIPCPTLDISFPPFSVFLAIFHVLKCVFLIFRDFQFSCHIPGPTVCISHFSRFSVILSFFK  
LSSGACFSFSMIFSFLAIFHVLQWKFLNFPFFSVFLAIFHVLKCVFLIFRDFQFSRHIPGPTVCISHFSGFSV  
ISSFFKSSSGCFSFSMIFSFLAIFHVLQWTFLNFPFFSPYSRSYSVHFSFFTFSSDFVIFQVVKWMFLIFHD  
FQFSC  
>ENSMUSP00000137330\_c.289:A>C\_p.K97T ENSMUST00000143083.3|Gm10721-  
201|ENSMUSG00000096519|+|chr9:g.3013433:A>C  
LFLIFHDFQFSCHIPCPTLDISFPPFSVFLAIFHVLKCVFLIFRDFQFSCHIPGPTVCISHFSRFSVILSFFK  
LSTACFSFSMIFSFLAIFHVLQWTFLNFPFFSVFLAIFHVLKCVFLIFRDFQFSRHIPGPTVCISHFSGFSVI  
SSFFKSSSGCFSFSMIFSFLAIFHVLQWTFLNFPFFSPYSRSYSVHFSFFTFSSDFVIFQVVKWMFLIFHDF  
QFSC  
>ENSMUSP00000137330\_c.289:A>T\_p.K97I ENSMUST00000143083.3|Gm10721-  
201|ENSMUSG00000096519|+|chr9:g.3013433:A>T  
LFLIFHDFQFSCHIPCPTLDISFPPFSVFLAIFHVLKCVFLIFRDFQFSCHIPGPTVCISHFSRFSVILSFFK  
LSTACFSFSMIFSFLAIFHVLQWTFLNFPFFSVFLAIFHVLKCVFLIFRDFQFSRHIPGPTVCISHFSGFSVI  
SSFFKSSSGCFSFSMIFSFLAIFHVLQWTFLNFPFFSPYSRSYSVHFSFFTFSSDFVIFQVVKWMFLIFHDF  
QFSC  
>ENSMUSP00000137330\_c.336:G>A\_p.V113I ENSMUST00000143083.3|Gm10721-  
201|ENSMUSG00000096519|+|chr9:g.3013480:G>A  
LFLIFHDFQFSCHIPCPTLDISFPPFSVFLAIFHVLKCVFLIFRDFQFSCHIPGPTVCISHFSRFSVILSFFK  
LSTACFSFSMIFSFLAIFHVLQWKFLNFPFFSVFLAIFHILKCVFLIFRDFQFSRHIPGPTVCISHFSGFSVI  
SSFFKSSSGCFSFSMIFSFLAIFHVLQWTFLNFPFFSPYSRSYSVHFSFFTFSSDFVIFQVVKWMFLIFHDF  
QFSC  
>ENSMUSP00000137330\_c.344:G>T\_p.K115N ENSMUST00000143083.3|Gm10721-  
201|ENSMUSG00000096519|+|chr9:g.3013488:G>T

LFLIFHDFQFSCHIPCPTLDISFPPFSVFLAIFHVLKCVFLIFRDFQFSCHIPGPTVCISHFSRFSVILSFFK  
LSTACFSFSMIFSLAIFHVLQWKFLNFPFVSFLAIFHVLKCVFLIFRDFQFSRHIPGPTVCISHFSGFSVI  
SSFFKSSSGCFSFSMIFSLAIFHVLQWTFLNFPFVSFYSRSYSVHFSFSTFFSDFVIFQVVKWMFLIFHDF  
QFSC  
>ENSMUSP00000137330\_c.393:G>T\_p.G132C ENSMUST00000143083.3|Gm10721-  
201|ENSMUSG00000096519|+|chr9:g.3013537:G>T  
LFLIFHDFQFSCHIPCPTLDISFPPFSVFLAIFHVLKCVFLIFRDFQFSCHIPGPTVCISHFSRFSVILSFFK  
LSTACFSFSMIFSLAIFHVLQWKFLNFPFVSFLAIFHVLKCVFLIFRDFQFSRHIPGPTVCISHFSGFSVI  
SSFFKSSSGCFSFSMIFSLAIFHVLQWTFLNFPFVSFYSRSYSVHFSFSTFFSDFVIFQVVKWMFLIFHDF  
QFSC  
>ENSMUSP00000137330\_c.399:A>T\_p.T134S ENSMUST00000143083.3|Gm10721-  
201|ENSMUSG00000096519|+|chr9:g.3014010:A>T  
LFLIFHDFQFSCHIPCPTLDISFPPFSVFLAIFHVLKCVFLIFRDFQFSCHIPGPTVCISHFSRFSVILSFFK  
LSTACFSFSMIFSLAIFHVLQWKFLNFPFVSFLAIFHVLKCVFLIFRDFQFSRHIPGPTVCISHFSGFSVI  
SSFFKSSSGCFSFSMIFSLAIFHVLQWTFLNFPFVSFYSRSYSVHFSFSTFFSDFVIFQVVKWMFLIFHDF  
QFSC  
>ENSMUSP00000137330\_c.400:C>G\_p.T134R ENSMUST00000143083.3|Gm10721-  
201|ENSMUSG00000096519|+|chr9:g.3014011:C>G  
LFLIFHDFQFSCHIPCPTLDISFPPFSVFLAIFHVLKCVFLIFRDFQFSCHIPGPTVCISHFSRFSVILSFFK  
LSTACFSFSMIFSLAIFHVLQWKFLNFPFVSFLAIFHVLKCVFLIFRDFQFSRHIPGPTVCISHFSGFSVI  
SSFFKSSSGCFSFSMIFSLAIFHVLQWTFLNFPFVSFYSRSYSVHFSFSTFFSDFVIFQVVKWMFLIFHDF  
QFSC  
>ENSMUSP00000137330\_c.423:G>T\_p.G142C ENSMUST00000143083.3|Gm10721-  
201|ENSMUSG00000096519|+|chr9:g.3014034:G>T  
LFLIFHDFQFSCHIPCPTLDISFPPFSVFLAIFHVLKCVFLIFRDFQFSCHIPGPTVCISHFSRFSVILSFFK  
LSTACFSFSMIFSLAIFHVLQWKFLNFPFVSFLAIFHVLKCVFLIFRDFQFSRHIPGPTVCISHFSCFSVI  
SSFFKSSSGCFSFSMIFSLAIFHVLQWTFLNFPFVSFYSRSYSVHFSFSTFFSDFVIFQVVKWMFLIFHDF  
QFSC  
>ENSMUSP00000137330\_c.423:G>C\_p.G142R ENSMUST00000143083.3|Gm10721-  
201|ENSMUSG00000096519|+|chr9:g.3014034:G>C  
LFLIFHDFQFSCHIPCPTLDISFPPFSVFLAIFHVLKCVFLIFRDFQFSCHIPGPTVCISHFSRFSVILSFFK  
LSTACFSFSMIFSLAIFHVLQWKFLNFPFVSFLAIFHVLKCVFLIFRDFQFSRHIPGPTVCISHFSRFSVI  
SSFFKSSSGCFSFSMIFSLAIFHVLQWTFLNFPFVSFYSRSYSVHFSFSTFFSDFVIFQVVKWMFLIFHDF  
QFSC  
>ENSMUSP00000137330\_c.430:C>T\_p.S144L ENSMUST00000143083.3|Gm10721-  
201|ENSMUSG00000096519|+|chr9:g.3014041:C>T  
LFLIFHDFQFSCHIPCPTLDISFPPFSVFLAIFHVLKCVFLIFRDFQFSCHIPGPTVCISHFSRFSVILSFFK  
LSTACFSFSMIFSLAIFHVLQWKFLNFPFVSFLAIFHVLKCVFLIFRDFQFSRHIPGPTVCISHFSGFLVI  
SSFFKSSSGCFSFSMIFSLAIFHVLQWTFLNFPFVSFYSRSYSVHFSFSTFFSDFVIFQVVKWMFLIFHDF  
QFSC  
>ENSMUSP00000137330\_c.454:C>G\_p.S152W ENSMUST00000143083.3|Gm10721-  
201|ENSMUSG00000096519|+|chr9:g.3014065:C>G  
LFLIFHDFQFSCHIPCPTLDISFPPFSVFLAIFHVLKCVFLIFRDFQFSCHIPGPTVCISHFSRFSVILSFFK  
LSTACFSFSMIFSLAIFHVLQWKFLNFPFVSFLAIFHVLKCVFLIFRDFQFSRHIPGPTVCISHFSGFSVI  
SSFFKSSSGCFSFSMIFSLAIFHVLQWTFLNFPFVSFYSRSYSVHFSFSTFFSDFVIFQVVKWMFLIFHDF  
QFSC  
>ENSMUSP00000137330\_c.491:T>A\_p.S164R ENSMUST00000143083.3|Gm10721-  
201|ENSMUSG00000096519|+|chr9:g.3014102:T>A  
LFLIFHDFQFSCHIPCPTLDISFPPFSVFLAIFHVLKCVFLIFRDFQFSCHIPGPTVCISHFSRFSVILSFFK  
LSTACFSFSMIFSLAIFHVLQWKFLNFPFVSFLAIFHVLKCVFLIFRDFQFSRHIPGPTVCISHFSGFSVI  
SSFFKSSSGCFSFSMIFSLAIFHVLQWTFLNFPFVSFYSRSYSVHFSFSTFFSDFVIFQVVKWMFLIFHDF  
QFSC  
>ENSMUSP00000137330\_c.540:C>A\_p.P181T ENSMUST00000143083.3|Gm10721-  
201|ENSMUSG00000096519|+|chr9:g.3014151:C>A  
LFLIFHDFQFSCHIPCPTLDISFPPFSVFLAIFHVLKCVFLIFRDFQFSCHIPGPTVCISHFSRFSVILSFFK  
LSTACFSFSMIFSLAIFHVLQWKFLNFPFVSFLAIFHVLKCVFLIFRDFQFSRHIPGPTVCISHFSGFSVI  
SSFFKSSSGCFSFSMIFSLAIFHVLQWTFLNFPFVSFYSRSYSVHFSFSTFFSDFVIFQVVKWMFLIFHDF  
QFSC

>ENSMUSP00000137330\_c.541:C>T\_p.P181L ENSMUST00000143083.3|Gm10721-201|ENSMUSG00000096519|+|chr9:g.3014152:C>T  
LFLIFHDFQFSCHIPCPTLDISFPFVFLAIFHVLKCVFLIFRDFQFSCHIPGPTVCISHFSRFSVILSFFK  
LSTACFSFSMIFSLAIFHVLQWKFLNFPFVFLAIFHVLKCVFLIFRDFQFSRHIPGPTVCISHFSGFSVI  
SSFFKSSSGCFSFSMIFSLAIFHVLQWTFNLNFPFSPYSRSYSVHFSFFTFFSDFVIFQVVKWMFLIFHDF  
QFSC  
>ENSMUSP00000137330\_c.563:G>T\_p.R188S ENSMUST00000143083.3|Gm10721-201|ENSMUSG00000096519|+|chr9:g.3014239:G>T  
LFLIFHDFQFSCHIPCPTLDISFPFVFLAIFHVLKCVFLIFRDFQFSCHIPGPTVCISHFSRFSVILSFFK  
LSTACFSFSMIFSLAIFHVLQWKFLNFPFVFLAIFHVLKCVFLIFRDFQFSRHIPGPTVCISHFSGFSVI  
SSFFKSSSGCFSFSMIFSLAIFHVLQWTFNLNFPFSPYSSYSVHFSFFTFFSDFVIFQVVKWMFLIFHDF  
QFSC  
>ENSMUSP00000137330\_c.568:A>T\_p.Y190F ENSMUST00000143083.3|Gm10721-201|ENSMUSG00000096519|+|chr9:g.3014244:A>T  
LFLIFHDFQFSCHIPCPTLDISFPFVFLAIFHVLKCVFLIFRDFQFSCHIPGPTVCISHFSRFSVILSFFK  
LSTACFSFSMIFSLAIFHVLQWKFLNFPFVFLAIFHVLKCVFLIFRDFQFSRHIPGPTVCISHFSGFSVI  
SSFFKSSSGCFSFSMIFSLAIFHVLQWTFNLNFPFSPYSRSYSVHFSFFTFFSDFVIFQVVKWMFLIFHDF  
QFSC  
>ENSMUSP00000137330\_c.642:A>T\_p.I215F ENSMUST00000143083.3|Gm10721-201|ENSMUSG00000096519|+|chr9:g.3014318:A>T  
LFLIFHDFQFSCHIPCPTLDISFPFVFLAIFHVLKCVFLIFRDFQFSCHIPGPTVCISHFSRFSVILSFFK  
LSTACFSFSMIFSLAIFHVLQWKFLNFPFVFLAIFHVLKCVFLIFRDFQFSRHIPGPTVCISHFSGFSVI  
SSFFKSSSGCFSFSMIFSLAIFHVLQWTFNLNFPFSPYSRSYSVHFSFFTFFSDFVIFQVVKWMFLIFHDF  
QFSC  
>ENSMUSP00000096649\_c.15:A>C\_p.N6H ENSMUST00000099050.4|Gm10720-201|ENSMUSG00000074564|+|chr9:g.3015669:A>C  
MFLIFHDFHFSCHIPCPTVDISKFPFVFLAIFHVLKCVFLIFSDQFSRHIPGPTVCISHFSRFSVILSFFK  
LSSGCFSLIFSLAIFHVLQWTFNLNFPFVFLAIFHVLKCVFLIFSDQFSRHIPGPTVCISHFFRFFMI  
SSFFTLSSGCFSFSMIFTFLAIFHVLQWTFNLNFPFPLPYSRSYSVHFSFFTFFSDFVIFQVVKWMFLIFHDF  
QFSR  
>ENSMUSP00000096649\_c.15:A>T\_p.N6Y ENSMUST00000099050.4|Gm10720-201|ENSMUSG00000074564|+|chr9:g.3015669:A>T  
MFLIFYDFHFSCHIPCPTVDISKFPFVFLAIFHVLKCVFLIFSDQFSRHIPGPTVCISHFSRFSVILSFFK  
LSSGCFSLIFSLAIFHVLQWTFNLNFPFVFLAIFHVLKCVFLIFSDQFSRHIPGPTVCISHFFRFFMI  
SSFFTLSSGCFSFSMIFTFLAIFHVLQWTFNLNFPFPLPYSRSYSVHFSFFTFFSDFVIFQVVKWMFLIFHDF  
QFSR  
>rs212664173\_ENSMUSP00000096649\_c.26:T>G\_p.H9Q  
ENSMUST00000099050.4|Gm10720-201|ENSMUSG00000074564|+|chr9:g.3015680:T>G  
MFLIFNDFQFSCHIPCPTVDISKFPFVFLAIFHVLKCVFLIFSDQFSRHIPGPTVCISHFSRFSVILSFFK  
LSSGCFSLIFSLAIFHVLQWTFNLNFPFVFLAIFHVLKCVFLIFSDQFSRHIPGPTVCISHFFRFFMI  
SSFFTLSSGCFSFSMIFTFLAIFHVLQWTFNLNFPFPLPYSRSYSVHFSFFTFFSDFVIFQVVKWMFLIFHDF  
QFSR  
>ENSMUSP00000096649\_c.26:TTTT>GTTA\_p.H9Q ENSMUST00000099050.4|Gm10720-201|ENSMUSG00000074564|+|chr9:g.3015680:TTTT>GTTA  
MFLIFNDFQLFSCHIPCPTVDISKFPFVFLAIFHVLKCVFLIFSDQFSRHIPGPTVCISHFSRFSVILSFF  
KLSSGCFSFLIFSLAIFHVLQWTFNLNFPFVFLAIFHVLKCVFLIFSDQFSRHIPGPTVCISHFFRFFMI  
ISSFFTLSSGCFSFSMIFTFLAIFHVLQWTFNLNFPFPLPYSRSYSVHFSFFTFFSDFVIFQVVKWMFLIFHD  
FQFSR  
>ENSMUSP00000096649\_c.45:T>C\_p.C16R ENSMUST00000099050.4|Gm10720-201|ENSMUSG00000074564|+|chr9:g.3015699:T>C  
MFLIFNDFHFSCHIPRPTVDISKFPFVFLAIFHVLKCVFLIFSDQFSRHIPGPTVCISHFSRFSVILSFFK  
LSSGCFSLIFSLAIFHVLQWTFNLNFPFVFLAIFHVLKCVFLIFSDQFSRHIPGPTVCISHFFRFFMI  
SSFFTLSSGCFSFSMIFTFLAIFHVLQWTFNLNFPFPLPYSRSYSVHFSFFTFFSDFVIFQVVKWMFLIFHDF  
QFSR  
>ENSMUSP00000096649\_c.90:G>T\_p.A31S ENSMUST00000099050.4|Gm10720-201|ENSMUSG00000074564|+|chr9:g.3015748:G>T  
MFLIFNDFHFSCHIPCPTVDISKFPFVFLSIFHVLKCVFLIFSDQFSRHIPGPTVCISHFSRFSVILSFFK  
LSSGCFSLIFSLAIFHVLQWTFNLNFPFVFLAIFHVLKCVFLIFSDQFSRHIPGPTVCISHFFRFFMI

SSFFTLSSGCFSFSMIFTFLAIFHVLQWTFNLNPPFFLPYSRSYSVHFSFFTTFFSDFVIFQVVKWMFLIFHDF  
QFSR  
>ENSMUSP00000096649\_c.101:T>A\_p.H34Q ENSMUST00000099050.4|Gm10720-  
201|ENSMUSG00000074564|+|chr9:g.3015759:T>A  
MFLIFNDFHFSCHIPCPTVDISKFPFSVFLAIFHVLKCVFLIFSDQFSRHIPGPTVCISHFSRFSVILSFFK  
LSSGCFSSFLIFSFLAIFHVLQWTFNLNPPFSVFLAIFHVLKCVFLIFSDQFSRHIPGPTVCISHFFRFFMI  
SSFFTLSSGCFSFSMIFTFLAIFHVLQWTFNLNPPFFLPYSRSYSVHFSFFTTFFSDFVIFQVVKWMFLIFHDF  
QFSR  
>rs236115139\_ENSMUSP00000096649\_c.129:A>C\_p.S44R  
ENSMUST00000099050.4|Gm10720-201|ENSMUSG00000074564|+|chr9:g.3015787:A>C  
MFLIFNDFHFSCHIPCPTVDISKFPFSVFLAIFHVLKCVFLIFRDFQFSRHIPGPTVCISHFSRFSVILSFFK  
LSSGCFSSFLIFSFLAIFHVLQWTFNLNPPFSVFLAIFHVLKCVFLIFSDQFSRHIPGPTVCISHFFRFFMI  
SSFFTLSSGCFSFSMIFTFLAIFHVLQWTFNLNPPFFLPYSRSYSVHFSFFTTFFSDFVIFQVVKWMFLIFHDF  
QFSR  
>ENSMUSP00000096649\_c.129:A>T\_p.S44C ENSMUST00000099050.4|Gm10720-  
201|ENSMUSG00000074564|+|chr9:g.3015787:A>T  
MFLIFNDFHFSCHIPCPTVDISKFPFSVFLAIFHVLKCVFLIFCDFQFSRHIPGPTVCISHFSRFSVILSFFK  
LSSGCFSSFLIFSFLAIFHVLQWTFNLNPPFSVFLAIFHVLKCVFLIFSDQFSRHIPGPTVCISHFFRFFMI  
SSFFTLSSGCFSFSMIFTFLAIFHVLQWTFNLNPPFFLPYSRSYSVHFSFFTTFFSDFVIFQVVKWMFLIFHDF  
QFSR  
>ENSMUSP00000096649\_c.165:A>T\_p.T56S ENSMUST00000099050.4|Gm10720-  
201|ENSMUSG00000074564|+|chr9:g.3016466:A>T  
MFLIFNDFHFSCHIPCPTVDISKFPFSVFLAIFHVLKCVFLIFSDQFSRHIPGPSVCISHFSRFSVILSFFK  
LSSGCFSSFLIFSFLAIFHVLQWTFNLNPPFSVFLAIFHVLKCVFLIFSDQFSRHIPGPTVCISHFFRFFMI  
SSFFTLSSGCFSFSMIFTFLAIFHVLQWTFNLNPPFFLPYSRSYSVHFSFFTTFFSDFVIFQVVKWMFLIFHDF  
QFSR  
>ENSMUSP00000096649\_c.186:T>C\_p.S63P ENSMUST00000099050.4|Gm10720-  
201|ENSMUSG00000074564|+|chr9:g.3016487:T>C  
MFLIFNDFHFSCHIPCPTVDISKFPFSVFLAIFHVLKCVFLIFSDQFSRHIPGPTVCISHFPFSVILSFFK  
LSSGCFSSFLIFSFLAIFHVLQWTFNLNPPFSVFLAIFHVLKCVFLIFSDQFSRHIPGPTVCISHFFRFFMI  
SSFFTLSSGCFSFSMIFTFLAIFHVLQWTFNLNPPFFLPYSRSYSVHFSFFTTFFSDFVIFQVVKWMFLIFHDF  
QFSR  
>ENSMUSP00000096649\_c.195:T>G\_p.S66A ENSMUST00000099050.4|Gm10720-  
201|ENSMUSG00000074564|+|chr9:g.3016496:T>G  
MFLIFNDFHFSCHIPCPTVDISKFPFSVFLAIFHVLKCVFLIFSDQFSRHIPGPTVCISHFSRFAVILSFFK  
LSSGCFSSFLIFSFLAIFHVLQWTFNLNPPFSVFLAIFHVLKCVFLIFSDQFSRHIPGPTVCISHFFRFFMI  
SSFFTLSSGCFSFSMIFTFLAIFHVLQWTFNLNPPFFLPYSRSYSVHFSFFTTFFSDFVIFQVVKWMFLIFHDF  
QFSR  
>ENSMUSP00000096649\_c.196:C>T\_p.S66L ENSMUST00000099050.4|Gm10720-  
201|ENSMUSG00000074564|+|chr9:g.3016497:C>T  
MFLIFNDFHFSCHIPCPTVDISKFPFSVFLAIFHVLKCVFLIFSDQFSRHIPGPTVCISHFSRFLVILSFFK  
LSSGCFSSFLIFSFLAIFHVLQWTFNLNPPFSVFLAIFHVLKCVFLIFSDQFSRHIPGPTVCISHFFRFFMI  
SSFFTLSSGCFSFSMIFTFLAIFHVLQWTFNLNPPFFLPYSRSYSVHFSFFTTFFSDFVIFQVVKWMFLIFHDF  
QFSR  
>ENSMUSP00000096649\_c.205:T>C\_p.L69S ENSMUST00000099050.4|Gm10720-  
201|ENSMUSG00000074564|+|chr9:g.3016506:T>C  
MFLIFNDFHFSCHIPCPTVDISKFPFSVFLAIFHVLKCVFLIFSDQFSRHIPGPTVCISHFSRFSVILSFFK  
LSSGCFSSFLIFSFLAIFHVLQWTFNLNPPFSVFLAIFHVLKCVFLIFSDQFSRHIPGPTVCISHFFRFFMI  
SSFFTLSSGCFSFSMIFTFLAIFHVLQWTFNLNPPFFLPYSRSYSVHFSFFTTFFSDFVIFQVVKWMFLIFHDF  
QFSR  
>ENSMUSP00000096649\_c.220:T>C\_p.L74S ENSMUST00000099050.4|Gm10720-  
201|ENSMUSG00000074564|+|chr9:g.3016521:T>C  
MFLIFNDFHFSCHIPCPTVDISKFPFSVFLAIFHVLKCVFLIFSDQFSRHIPGPTVCISHFSRFSVILSFFK  
SSGCFSSFLIFSFLAIFHVLQWTFNLNPPFSVFLAIFHVLKCVFLIFSDQFSRHIPGPTVCISHFFRFFMI  
SSFFTLSSGCFSFSMIFTFLAIFHVLQWTFNLNPPFFLPYSRSYSVHFSFFTTFFSDFVIFQVVKWMFLIFHDF  
QFSR  
>rs234484759\_ENSMUSP00000096649\_c.220:T>G\_p.L74W  
ENSMUST00000099050.4|Gm10720-201|ENSMUSG00000074564|+|chr9:g.3016521:T>G



MFLIFNDFHFSCHIPCPTVDISKFPFSVFLAIFHVLKCVFLIFSDQFSRHIPGPTVCISHFSRFSVILSFFK  
WSSGCFSSFLIFSLAIFHVLQWTFLNFPFVSFLAIFHVLKCVFLIFSDQFSRHIPGPTVCISHFRFFMI  
SSFFTLSSGCFSSMIFTFLAIFHVLQWTFLNFPFVFLAIFHVLKCVFLIFSDQFSRHIPGPTVCISHFRFFMI  
QFSR  
>ENSMUSP00000096649\_c.246:T>A\_p.L83M ENSMUST00000099050.4|Gm10720-  
201|ENSMUSG00000074564|+|chr9:g.3016547:T>A  
MFLIFNDFHFSCHIPCPTVDISKFPFSVFLAIFHVLKCVFLIFSDQFSRHIPGPTVCISHFSRFSVILSFFK  
LSSGCFSSFLIFSLAIFHVLQWTFLNFPFVSFLAIFHVLKCVFLIFSDQFSRHIPGPTVCISHFRFFMI  
SSFFTLSSGCFSSMIFTFLAIFHVLQWTFLNFPFVFLAIFHVLKCVFLIFSDQFSRHIPGPTVCISHFRFFMI  
QFSR  
>ENSMUSP00000096649\_c.257:T>A\_p.S86R ENSMUST00000099050.4|Gm10720-  
201|ENSMUSG00000074564|+|chr9:g.3016558:T>A  
MFLIFNDFHFSCHIPCPTVDISKFPFSVFLAIFHVLKCVFLIFSDQFSRHIPGPTVCISHFSRFSVILSFFK  
LSSGCFSSFLIFSLAIFHVLQWTFLNFPFVSFLAIFHVLKCVFLIFSDQFSRHIPGPTVCISHFRFFMI  
SSFFTLSSGCFSSMIFTFLAIFHVLQWTFLNFPFVFLAIFHVLKCVFLIFSDQFSRHIPGPTVCISHFRFFMI  
QFSR  
>ENSMUSP00000096649\_c.275:T>G\_p.H92Q ENSMUST00000099050.4|Gm10720-  
201|ENSMUSG00000074564|+|chr9:g.3016576:T>G  
MFLIFNDFHFSCHIPCPTVDISKFPFSVFLAIFHVLKCVFLIFSDQFSRHIPGPTVCISHFSRFSVILSFFK  
LSSGCFSSFLIFSLAIFHVLQWTFLNFPFVSFLAIFHVLKCVFLIFSDQFSRHIPGPTVCISHFRFFMI  
SSFFTLSSGCFSSMIFTFLAIFHVLQWTFLNFPFVFLAIFHVLKCVFLIFSDQFSRHIPGPTVCISHFRFFMI  
QFSR  
>ENSMUSP00000096649\_c.286:G>T\_p.W96L ENSMUST00000099050.4|Gm10720-  
201|ENSMUSG00000074564|+|chr9:g.3016587:G>T  
MFLIFNDFHFSCHIPCPTVDISKFPFSVFLAIFHVLKCVFLIFSDQFSRHIPGPTVCISHFSRFSVILSFFK  
LSSGCFSSFLIFSLAIFHVLQWTFLNFPFVSFLAIFHVLKCVFLIFSDQFSRHIPGPTVCISHFRFFMI  
SSFFTLSSGCFSSMIFTFLAIFHVLQWTFLNFPFVFLAIFHVLKCVFLIFSDQFSRHIPGPTVCISHFRFFMI  
QFSR  
>ENSMUSP00000096649\_c.301:T>A\_p.F101Y ENSMUST00000099050.4|Gm10720-  
201|ENSMUSG00000074564|+|chr9:g.3016602:T>A  
MFLIFNDFHFSCHIPCPTVDISKFPFSVFLAIFHVLKCVFLIFSDQFSRHIPGPTVCISHFSRFSVILSFFK  
LSSGCFSSFLIFSLAIFHVLQWTFLNFPFVSFLAIFHVLKCVFLIFSDQFSRHIPGPTVCISHFRFFMI  
SSFFTLSSGCFSSMIFTFLAIFHVLQWTFLNFPFVFLAIFHVLKCVFLIFSDQFSRHIPGPTVCISHFRFFMI  
QFSR  
>ENSMUSP00000096649\_c.306:C>A\_p.P103T ENSMUST00000099050.4|Gm10720-  
201|ENSMUSG00000074564|+|chr9:g.3016607:C>A  
MFLIFNDFHFSCHIPCPTVDISKFPFSVFLAIFHVLKCVFLIFSDQFSRHIPGPTVCISHFSRFSVILSFFK  
LSSGCFSSFLIFSLAIFHVLQWTFLNFPFVSFLAIFHVLKCVFLIFSDQFSRHIPGPTVCISHFRFFMI  
SSFFTLSSGCFSSMIFTFLAIFHVLQWTFLNFPFVFLAIFHVLKCVFLIFSDQFSRHIPGPTVCISHFRFFMI  
QFSR  
>ENSMUSP00000096649\_c.335:T>A\_p.H112Q ENSMUST00000099050.4|Gm10720-  
201|ENSMUSG00000074564|+|chr9:g.3016636:T>A  
MFLIFNDFHFSCHIPCPTVDISKFPFSVFLAIFHVLKCVFLIFSDQFSRHIPGPTVCISHFSRFSVILSFFK  
LSSGCFSSFLIFSLAIFHVLQWTFLNFPFVSFLAIFHVLKCVFLIFSDQFSRHIPGPTVCISHFRFFMI  
SSFFTLSSGCFSSMIFTFLAIFHVLQWTFLNFPFVFLAIFHVLKCVFLIFSDQFSRHIPGPTVCISHFRFFMI  
QFSR  
>ENSMUSP00000096649\_c.340:T>C\_p.L114P ENSMUST00000099050.4|Gm10720-  
201|ENSMUSG00000074564|+|chr9:g.3016641:T>C  
MFLIFNDFHFSCHIPCPTVDISKFPFSVFLAIFHVLKCVFLIFSDQFSRHIPGPTVCISHFSRFSVILSFFK  
LSSGCFSSFLIFSLAIFHVLQWTFLNFPFVSFLAIFHVPKCVFLIFSDQFSRHIPGPTVCISHFRFFMI  
SSFFTLSSGCFSSMIFTFLAIFHVLQWTFLNFPFVFLAIFHVLKCVFLIFSDQFSRHIPGPTVCISHFRFFMI  
QFSR  
>ENSMUSP00000096649\_c.363:A>C\_p.S122R ENSMUST00000099050.4|Gm10720-  
201|ENSMUSG00000074564|+|chr9:g.3016664:A>C  
MFLIFNDFHFSCHIPCPTVDISKFPFSVFLAIFHVLKCVFLIFSDQFSRHIPGPTVCISHFSRFSVILSFFK  
LSSGCFSSFLIFSLAIFHVLQWTFLNFPFVSFLAIFHVLKCVFLIFRDFQFSRHIPGPTVCISHFRFFMI  
SSFFTLSSGCFSSMIFTFLAIFHVLQWTFLNFPFVFLAIFHVLKCVFLIFRDFQFSRHIPGPTVCISHFRFFMI  
QFSR

>rs261664597\_ENSMUSP00000096649\_c.363:A>T\_p.S122C  
ENSMUST00000099050.4|Gm10720-201|ENSMUSG00000074564|+|chr9:g.3016664:A>T  
MFLIFNDFHFSCHIPCPTVDISKFPFSVFLAIFHVLKCVFLIFSDQFSRHIPGPTVCISHFSRFSVILSFFK  
LSSGCFSLIFSFLAIFHVLQWTFNLFPFVFLAIFHVLKCVFLIFSDQFSRHIPGPTVCISHFRFFMI  
SSFFTLSSGCFSSMIFTFLAIFHVLQWTFNLFPFVFLAIFHVLKCVFLIFSDQFSRHIPGPTVCISHFRFFMI  
QFSR  
>ENSMUSP00000096649\_c.399:A>T\_p.T134S ENSMUST00000099050.4|Gm10720-  
201|ENSMUSG00000074564|+|chr9:g.3016700:A>T  
MFLIFNDFHFSCHIPCPTVDISKFPFSVFLAIFHVLKCVFLIFSDQFSRHIPGPTVCISHFSRFSVILSFFK  
LSSGCFSLIFSFLAIFHVLQWTFNLFPFVFLAIFHVLKCVFLIFSDQFSRHIPGPTVCISHFRFFMI  
SSFFTLSSGCFSSMIFTFLAIFHVLQWTFNLFPFVFLAIFHVLKCVFLIFSDQFSRHIPGPTVCISHFRFFMI  
QFSR  
>ENSMUSP00000096649\_c.400:C>T\_p.T134I ENSMUST00000099050.4|Gm10720-  
201|ENSMUSG00000074564|+|chr9:g.3016701:C>T  
MFLIFNDFHFSCHIPCPTVDISKFPFSVFLAIFHVLKCVFLIFSDQFSRHIPGPTVCISHFSRFSVILSFFK  
LSSGCFSLIFSFLAIFHVLQWTFNLFPFVFLAIFHVLKCVFLIFSDQFSRHIPGPTVCISHFRFFMI  
SSFFTLSSGCFSSMIFTFLAIFHVLQWTFNLFPFVFLAIFHVLKCVFLIFSDQFSRHIPGPTVCISHFRFFMI  
QFSR  
>ENSMUSP00000096649\_c.415:ATT>A\_p.H139del-fs  
ENSMUST00000099050.4|Gm10720-  
201|ENSMUSG00000074564|+|chr9:g.3016716:ATT>A  
MFLIFNDFHFSCHIPCPTVDISKFPFSVFLAIFHVLKCVFLIFSDQFSRHIPGPTVCISHFSRFSVILSFFK  
LSSGCFSLIFSFLAIFHVLQWTFNLFPFVFLAIFHVLKCVFLIFSDQFSRHIPGPTVCISHFRFFMI  
VIFHVVKWMFLIFHDFHFSCHISCPDVDISKFSTFFLAIFQVLQCAFLIFHVQ  
>ENSMUSP00000096649\_c.424:G>C\_p.R142T ENSMUST00000099050.4|Gm10720-  
201|ENSMUSG00000074564|+|chr9:g.3016725:G>C  
MFLIFNDFHFSCHIPCPTVDISKFPFSVFLAIFHVLKCVFLIFSDQFSRHIPGPTVCISHFSRFSVILSFFK  
LSSGCFSLIFSFLAIFHVLQWTFNLFPFVFLAIFHVLKCVFLIFSDQFSRHIPGPTVCISHFRFFMI  
SSFFTLSSGCFSSMIFTFLAIFHVLQWTFNLFPFVFLAIFHVLKCVFLIFSDQFSRHIPGPTVCISHFRFFMI  
QFSR  
>ENSMUSP00000096649\_c.439:C>T\_p.S147L ENSMUST00000099050.4|Gm10720-  
201|ENSMUSG00000074564|+|chr9:g.3016916:C>T  
MFLIFNDFHFSCHIPCPTVDISKFPFSVFLAIFHVLKCVFLIFSDQFSRHIPGPTVCISHFSRFSVILSFFK  
LSSGCFSLIFSFLAIFHVLQWTFNLFPFVFLAIFHVLKCVFLIFSDQFSRHIPGPTVCISHFRFFMI  
LSFFTLSSGCFSSMIFTFLAIFHVLQWTFNLFPFVFLAIFHVLKCVFLIFSDQFSRHIPGPTVCISHFRFFMI  
QFSR  
>ENSMUSP00000096649\_c.451:CGTT>AGTC\_p.T151K ENSMUST00000099050.4|Gm10720-  
201|ENSMUSG00000074564|+|chr9:g.3016928:CGTT>AGTC  
MFLIFNDFHFSCHIPCPTVDISKFPFSVFLAIFHVLKCVFLIFSDQFSRHIPGPTVCISHFSRFSVILSFFK  
LSSGCFSLIFSFLAIFHVLQWTFNLFPFVFLAIFHVLKCVFLIFSDQFSRHIPGPTVCISHFRFFMI  
SSFFKSLSSGCFSSMIFTFLAIFHVLQWTFNLFPFVFLAIFHVLKCVFLIFSDQFSRHIPGPTVCISHFRFFMI  
FQFSR  
>ENSMUSP00000096649\_c.451:CGTT>AGTG\_p.T151K ENSMUST00000099050.4|Gm10720-  
201|ENSMUSG00000074564|+|chr9:g.3016928:CGTT>AGTG  
MFLIFNDFHFSCHIPCPTVDISKFPFSVFLAIFHVLKCVFLIFSDQFSRHIPGPTVCISHFSRFSVILSFFK  
LSSGCFSLIFSFLAIFHVLQWTFNLFPFVFLAIFHVLKCVFLIFSDQFSRHIPGPTVCISHFRFFMI  
SSFFKWLSSGCFSSMIFTFLAIFHVLQWTFNLFPFVFLAIFHVLKCVFLIFSDQFSRHIPGPTVCISHFRFFMI  
FQFSR  
>ENSMUSP00000096649\_c.451:CGTTG>TGTA\_p.T151M  
ENSMUST00000099050.4|Gm10720-  
201|ENSMUSG00000074564|+|chr9:g.3016928:CGTTG>TGTA  
MFLIFNDFHFSCHIPCPTVDISKFPFSVFLAIFHVLKCVFLIFSDQFSRHIPGPTVCISHFSRFSVILSFFK  
LSSGCFSLIFSFLAIFHVLQWTFNLFPFVFLAIFHVLKCVFLIFSDQFSRHIPGPTVCISHFRFFMI  
SSFFM\*VVKWMFLIFHDFHFSCHISCPDVDISKFSTFFLAIFQVLQCAFLIFHVQ\*FRHFSSRQVDVSHFP\*  
FSVFS  
>ENSMUSP00000096649\_c.490:C>G\_p.T164S ENSMUST00000099050.4|Gm10720-  
201|ENSMUSG00000074564|+|chr9:g.3016967:C>G

MFLIFNDFHFSCHIPCPTVDISKFPFSVFLAIFHVLKCVFLIFSDQFSRHIPGPTVCISHFSRFSVILSFFK  
LSSGCFSSFLIFSLAIFHVLQWTFLNFPFVSFLAIFHVLKCVFLIFSDQFSRHIPGPTVCISHFFRFFMI  
SSFFTLSSGCFSSMIFSLAIFHVLQWTFLNFPFVFLPYSRSYSVHFSFFTFSSDFVIFQVVKWMFLIFHDF  
QFSR  
>ENSMUSP00000096649\_c.499:C>T\_p.A167V ENSMUST00000099050.4|Gm10720-  
201|ENSMUSG00000074564|+|chr9:g.3016976:C>T  
MFLIFNDFHFSCHIPCPTVDISKFPFSVFLAIFHVLKCVFLIFSDQFSRHIPGPTVCISHFSRFSVILSFFK  
LSSGCFSSFLIFSLAIFHVLQWTFLNFPFVSFLAIFHVLKCVFLIFSDQFSRHIPGPTVCISHFFRFFMI  
SSFFTLSSGCFSSMIFTLVIFHVLQWTFLNFPFVFLPYSRSYSVHFSFFTFSSDFVIFQVVKWMFLIFHDF  
QFSR  
>ENSMUSP00000096649\_c.550:T>C\_p.L184S ENSMUST00000099050.4|Gm10720-  
201|ENSMUSG00000074564|+|chr9:g.3017092:T>C  
MFLIFNDFHFSCHIPCPTVDISKFPFSVFLAIFHVLKCVFLIFSDQFSRHIPGPTVCISHFSRFSVILSFFK  
LSSGCFSSFLIFSLAIFHVLQWTFLNFPFVSFLAIFHVLKCVFLIFSDQFSRHIPGPTVCISHFFRFFMI  
SSFFTLSSGCFSSMIFTLAIFHVLQWTFLNFPFVFLPYSRSYSVHFSFFTFSSDFVIFQVVKWMFLIFHDF  
QFSR  
>ENSMUSP00000096649\_c.568:A>T\_p.Y190F ENSMUST00000099050.4|Gm10720-  
201|ENSMUSG00000074564|+|chr9:g.3017110:A>T  
MFLIFNDFHFSCHIPCPTVDISKFPFSVFLAIFHVLKCVFLIFSDQFSRHIPGPTVCISHFSRFSVILSFFK  
LSSGCFSSFLIFSLAIFHVLQWTFLNFPFVSFLAIFHVLKCVFLIFSDQFSRHIPGPTVCISHFFRFFMI  
SSFFTLSSGCFSSMIFTLAIFHVLQWTFLNFPFVFLPYSRSYSVHFSFFTFSSDFVIFQVVKWMFLIFHDF  
QFSR  
>ENSMUSP00000096649\_c.666:C>T\_p.R223C ENSMUST00000099050.4|Gm10720-  
201|ENSMUSG00000074564|+|chr9:g.3017208:C>T  
MFLIFNDFHFSCHIPCPTVDISKFPFSVFLAIFHVLKCVFLIFSDQFSRHIPGPTVCISHFSRFSVILSFFK  
LSSGCFSSFLIFSLAIFHVLQWTFLNFPFVSFLAIFHVLKCVFLIFSDQFSRHIPGPTVCISHFFRFFMI  
SSFFTLSSGCFSSMIFTLAIFHVLQWTFLNFPFVFLPYSRSYSVHFSFFTFSSDFVIFQVVKWMFLIFHDF  
QFSC  
>rs262556314\_ENSMUSP00000096648\_c.15:A>C\_p.N6H  
ENSMUST00000099049.4|Gm10719-202|ENSMUSG00000095547|+|chr9:g.3017423:A>C  
MFLIFHDFHFSCHIPCPTVDISFPFVSFLAIFHVLKCVFLIFRDFQFSRHIPGPTVCISHFFRFFMISFFFT  
LSSGCFSSMIFTFLAIFHVLQWTFLNFPFVSFLAIFHILKCVFLIFRDFQFSCHIPGPTVCISHFSRFSVI  
SSFFKSSSGCFSSMIFSLAIFQVLQTLTFLNFPFLSFSYRSYSVHFSFFTFSSDFVIFQVVKWLFILFL  
DFQFSC  
>ENSMUSP00000096648\_c.16:A>G\_p.N6S ENSMUST00000099049.4|Gm10719-  
202|ENSMUSG00000095547|+|chr9:g.3017424:A>G  
MFLIFSDFHFSCHIPCPTVDISFPFVSFLAIFHVLKCVFLIFRDFQFSRHIPGPTVCISHFFRFFMISFFFT  
LSSGCFSSMIFTFLAIFHVLQWTFLNFPFVSFLAIFHILKCVFLIFRDFQFSCHIPGPTVCISHFSRFSVI  
SSFFKSSSGCFSSMIFSLAIFQVLQTLTFLNFPFLSFSYRSYSVHFSFFTFSSDFVIFQVVKWLFILFL  
DFQFSC  
>ENSMUSP00000096648\_c.26:T>G\_p.H9Q ENSMUST00000099049.4|Gm10719-  
202|ENSMUSG00000095547|+|chr9:g.3017434:T>G  
MFLIFNDFQFSCHIPCPTVDISFPFVSFLAIFHVLKCVFLIFRDFQFSRHIPGPTVCISHFFRFFMISFFFT  
LSSGCFSSMIFTFLAIFHVLQWTFLNFPFVSFLAIFHILKCVFLIFRDFQFSCHIPGPTVCISHFSRFSVI  
SSFFKSSSGCFSSMIFSLAIFQVLQTLTFLNFPFLSFSYRSYSVHFSFFTFSSDFVIFQVVKWLFILFL  
DFQFSC  
>ENSMUSP00000096648\_c.45:T>C\_p.C16R ENSMUST00000099049.4|Gm10719-  
202|ENSMUSG00000095547|+|chr9:g.3017453:T>C  
MFLIFNDFHFSCHIPRPTVDISFPFVSFLAIFHVLKCVFLIFRDFQFSRHIPGPTVCISHFFRFFMISFFFT  
LSSGCFSSMIFTFLAIFHVLQWTFLNFPFVSFLAIFHILKCVFLIFRDFQFSCHIPGPTVCISHFSRFSVI  
SSFFKSSSGCFSSMIFSLAIFQVLQTLTFLNFPFLSFSYRSYSVHFSFFTFSSDFVIFQVVKWLFILFL  
DFQFSC  
>ENSMUSP00000096648\_c.72:C>A\_p.P25T ENSMUST00000099049.4|Gm10719-  
202|ENSMUSG00000095547|+|chr9:g.3017484:C>A  
MFLIFNDFHFSCHIPCPTVDISFPFVSFLAIFHVLKCVFLIFRDFQFSRHIPGPTVCISHFFRFFMISFFFT  
LSSGCFSSMIFTFLAIFHVLQWTFLNFPFVSFLAIFHILKCVFLIFRDFQFSCHIPGPTVCISHFSRFSVI  
SSFFKSSSGCFSSMIFSLAIFQVLQTLTFLNFPFLSFSYRSYSVHFSFFTFSSDFVIFQVVKWLFILFL  
DFQFSC

>ENSMUSP00000096648\_c.113:T>G\_p.C38W ENSMUST00000099049.4|Gm10719-  
202|ENSMUSG00000095547|+|chr9:g.3017525:T>G  
MFLIFNDFHFSCHIPCPTVDISFPPFSVFLAIFHVLKQWTFVFLIFRDFQFSRHIPGPTVCISHFFRFFMISFFFT  
LSSGCFSSMIFTFLAIFHVLQWTFVFLNFPFVFLAIFHILKCVFLIFRDFQFSCHIPGPTVCISHFSRFSVI  
SSFFKSSSGCFSSMIFSLAIFQVLQTLTFLNFPFLSFSPPYRSYSVHFSFFFTFFSDFVIFQVVKWLFLLIFL  
DFQFSC  
>ENSMUSP00000096648\_c.119:T>A\_p.F40L ENSMUST00000099049.4|Gm10719-  
202|ENSMUSG00000095547|+|chr9:g.3017531:T>A  
MFLIFNDFHFSCHIPCPTVDISFPPFSVFLAIFHVLKCVLLIFRDFQFSRHIPGPTVCISHFFRFFMISFFFT  
LSSGCFSSMIFTFLAIFHVLQWTFVFLNFPFVFLAIFHILKCVFLIFRDFQFSCHIPGPTVCISHFSRFSVI  
SSFFKSSSGCFSSMIFSLAIFQVLQTLTFLNFPFLSFSPPYRSYSVHFSFFFTFFSDFVIFQVVKWLFLLIFL  
DFQFSC  
>ENSMUSP00000096648\_c.129:A>T\_p.R44W ENSMUST00000099049.4|Gm10719-  
202|ENSMUSG00000095547|+|chr9:g.3017541:A>T  
MFLIFNDFHFSCHIPCPTVDISFPPFSVFLAIFHVLKCVFLIFWDFQFSRHIPGPTVCISHFFRFFMISFFFT  
LSSGCFSSMIFTFLAIFHVLQWTFVFLNFPFVFLAIFHILKCVFLIFRDFQFSCHIPGPTVCISHFSRFSVI  
SSFFKSSSGCFSSMIFSLAIFQVLQTLTFLNFPFLSFSPPYRSYSVHFSFFFTFFSDFVIFQVVKWLFLLIFL  
DFQFSC  
>ENSMUSP00000096648\_c.165:A>T\_p.T56S ENSMUST00000099049.4|Gm10719-  
202|ENSMUSG00000095547|+|chr9:g.3017577:A>T  
MFLIFNDFHFSCHIPCPTVDISFPPFSVFLAIFHVLKCVFLIFRDFQFSRHIPGPSVCISHFFRFFMISFFFT  
LSSGCFSSMIFTFLAIFHVLQWTFVFLNFPFVFLAIFHILKCVFLIFRDFQFSCHIPGPTVCISHFSRFSVI  
SSFFKSSSGCFSSMIFSLAIFQVLQTLTFLNFPFLSFSPPYRSYSVHFSFFFTFFSDFVIFQVVKWLFLLIFL  
DFQFSC  
>ENSMUSP00000096648\_c.181:AT>A\_p.H61del-fs ENSMUST00000099049.4|Gm10719-  
202|ENSMUSG00000095547|+|chr9:g.3017593:AT>A  
MFLIFNDFHFSCHIPCPTVDISFPPFSVFLAIFHVLKCVFLIFRDFQFSRHIPGPTVCISHFSGFS  
>ENSMUSP00000096648\_c.190:G>C\_p.R64T ENSMUST00000099049.4|Gm10719-  
202|ENSMUSG00000095547|+|chr9:g.3017602:G>C  
MFLIFNDFHFSCHIPCPTVDISFPPFSVFLAIFHVLKCVFLIFRDFQFSRHIPGPTVCISHFFFTFFMISFFFT  
LSSGCFSSMIFTFLAIFHVLQWTFVFLNFPFVFLAIFHILKCVFLIFRDFQFSCHIPGPTVCISHFSRFSVI  
SSFFKSSSGCFSSMIFSLAIFQVLQTLTFLNFPFLSFSPPYRSYSVHFSFFFTFFSDFVIFQVVKWLFLLIFL  
DFQFSC  
>ENSMUSP00000096648\_c.190:G>A\_p.R64K ENSMUST00000099049.4|Gm10719-  
202|ENSMUSG00000095547|+|chr9:g.3017602:G>A  
MFLIFNDFHFSCHIPCPTVDISFPPFSVFLAIFHVLKCVFLIFRDFQFSRHIPGPTVCISHFFKFFMISFFFT  
LSSGCFSSMIFTFLAIFHVLQWTFVFLNFPFVFLAIFHILKCVFLIFRDFQFSCHIPGPTVCISHFSRFSVI  
SSFFKSSSGCFSSMIFSLAIFQVLQTLTFLNFPFLSFSPPYRSYSVHFSFFFTFFSDFVIFQVVKWLFLLIFL  
DFQFSC  
>ENSMUSP00000096648\_c.217:C>A\_p.T73K ENSMUST00000099049.4|Gm10719-  
202|ENSMUSG00000095547|+|chr9:g.3017805:C>A  
MFLIFNDFHFSCHIPCPTVDISFPPFSVFLAIFHVLKCVFLIFRDFQFSRHIPGPTVCISHFFRFFMISFFFK  
LSSGCFSSMIFTFLAIFHVLQWTFVFLNFPFVFLAIFHILKCVFLIFRDFQFSCHIPGPTVCISHFSRFSVI  
SSFFKSSSGCFSSMIFSLAIFQVLQTLTFLNFPFLSFSPPYRSYSVHFSFFFTFFSDFVIFQVVKWLFLLIFL  
DFQFSC  
>ENSMUSP00000096648\_c.217:CGTT>A\_p.TL73del ENSMUST00000099049.4|Gm10719-  
202|ENSMUSG00000095547|+|chr9:g.3017805:CGTT>A  
MFLIFNDFHFSCHIPCPTVDISFPPFSVFLAIFHVLKCVFLIFRDFQFSRHIPGPTVCISHFFRFFMISFFFK  
SSGCFSSMIFTFLAIFHVLQWTFVFLNFPFVFLAIFHILKCVFLIFRDFQFSCHIPGPTVCISHFSRFSVIS  
SFFKSSSGCFSSMIFSLAIFQVLQTLTFLNFPFLSFSPPYRSYSVHFSFFFTFFSDFVIFQVVKWLFLLIFL  
DFQFSC  
>ENSMUSP00000096648\_c.217:CGTT>AGTC\_p.T73K ENSMUST00000099049.4|Gm10719-  
202|ENSMUSG00000095547|+|chr9:g.3017805:CGTT>AGTC  
MFLIFNDFHFSCHIPCPTVDISFPPFSVFLAIFHVLKCVFLIFRDFQFSRHIPGPTVCISHFFRFFMISFFFK  
SLSSGCFSSMIFTFLAIFHVLQWTFVFLNFPFVFLAIFHILKCVFLIFRDFQFSCHIPGPTVCISHFSRFSV  
ISSFFKSSSGCFSSMIFSLAIFQVLQTLTFLNFPFLSFSPPYRSYSVHFSFFFTFFSDFVIFQVVKWLFLLIF  
LDFQFSC

>ENSMUSP00000096648\_c.217:CGTT>AGTG\_p.T73K ENSMUST00000099049.4|Gm10719-202|ENSMUSG00000095547|+|chr9:g.3017805:CGTT>AGTG  
MFLIFNDFHFSCHIPCPTVDISFPPFSVFLAIFHVLKCVFLIFRDFQFSRHIPGPTVCISHFFRFFMISFFK  
WLSSGCFSSMIFTFLAIFHVLQWTFLNFPFVSFLAIFHILKCVFLIFRDFQFSCHIPGPTVCISHFSRFSV  
ISSFFKSSSGCFSSMIFSLAIFQVLQTLTFLNFPFLSFSPPYSRSYSVHFSFFTFSSDFVIFQVVKWFLIFL  
LDFQFSC  
>ENSMUSP00000096648\_c.256:C>G\_p.T86S ENSMUST00000099049.4|Gm10719-202|ENSMUSG00000095547|+|chr9:g.3017844:C>G  
MFLIFNDFHFSCHIPCPTVDISFPPFSVFLAIFHVLKCVFLIFRDFQFSRHIPGPTVCISHFFRFFMISFFFT  
LSSGCFSSMIFSLAIFHVLQWTFLNFPFVSFLAIFHILKCVFLIFRDFQFSCHIPGPTVCISHFSRFSVI  
SSFFKSSSGCFSSMIFSLAIFQVLQTLTFLNFPFLSFSPPYSRSYSVHFSFFTFSSDFVIFQVVKWFLIFL  
DFQFSC  
>ENSMUSP00000096648\_c.256:CT>TA\_p.T86I ENSMUST00000099049.4|Gm10719-202|ENSMUSG00000095547|+|chr9:g.3017844:CT>TA  
MFLIFNDFHFSCHIPCPTVDISFPPFSVFLAIFHVLKCVFLIFRDFQFSRHIPGPTVCISHFFRFFMISFFFT  
LSSGCFSSMIFIFSCHISCPDVDISKFSTFFCFPRHISHPKVCISHFP\*FVFLPYSRSYSVHFSFFTFSSD  
FVIFQVVKWMFLIFHDFQFSRHIPGPTVDISKFSTFFKFLAIFQVLQCAFLIFHVFQ\*FCHFSSCQVVVSHFP  
\*FSVFL  
>ENSMUSP00000096648\_c.265:C>T\_p.A89V ENSMUST00000099049.4|Gm10719-202|ENSMUSG00000095547|+|chr9:g.3017853:C>T  
MFLIFNDFHFSCHIPCPTVDISFPPFSVFLAIFHVLKCVFLIFRDFQFSRHIPGPTVCISHFFRFFMISFFFT  
LSSGCFSSMIFTFLVIFHVLQWTFLNFPFVSFLAIFHILKCVFLIFRDFQFSCHIPGPTVCISHFSRFSVI  
SSFFKSSSGCFSSMIFSLAIFQVLQTLTFLNFPFLSFSPPYSRSYSVHFSFFTFSSDFVIFQVVKWFLIFL  
DFQFSC  
>ENSMUSP00000096648\_c.307:C>T\_p.P103L ENSMUST00000099049.4|Gm10719-202|ENSMUSG00000095547|+|chr9:g.3017895:C>T  
MFLIFNDFHFSCHIPCPTVDISFPPFSVFLAIFHVLKCVFLIFRDFQFSRHIPGPTVCISHFFRFFMISFFFT  
LSSGCFSSMIFTFLAIFHVLQWTFLNFPFVSFLAIFHILKCVFLIFRDFQFSCHIPGPTVCISHFSRFSVI  
SSFFKSSSGCFSSMIFSLAIFQVLQTLTFLNFPFLSFSPPYSRSYSVHFSFFTFSSDFVIFQVVKWFLIFL  
DFQFSC  
>ENSMUSP00000096648\_c.336:A>G\_p.I113V ENSMUST00000099049.4|Gm10719-202|ENSMUSG00000095547|+|chr9:g.3017924:A>G  
MFLIFNDFHFSCHIPCPTVDISFPPFSVFLAIFHVLKCVFLIFRDFQFSRHIPGPTVCISHFFRFFMISFFFT  
LSSGCFSSMIFTFLAIFHVLQWTFLNFPFVSFLAIFHVLKCVFLIFRDFQFSCHIPGPTVCISHFSRFSVI  
SSFFKSSSGCFSSMIFSLAIFQVLQTLTFLNFPFLSFSPPYSRSYSVHFSFFTFSSDFVIFQVVKWFLIFL  
DFQFSC  
>ENSMUSP00000096648\_c.344:G>T\_p.K115N ENSMUST00000099049.4|Gm10719-202|ENSMUSG00000095547|+|chr9:g.3017932:G>T  
MFLIFNDFHFSCHIPCPTVDISFPPFSVFLAIFHVLKCVFLIFRDFQFSRHIPGPTVCISHFFRFFMISFFFT  
LSSGCFSSMIFTFLAIFHVLQWTFLNFPFVSFLAIFHILNVCVFLIFRDFQFSCHIPGPTVCISHFSRFSVI  
SSFFKSSSGCFSSMIFSLAIFQVLQTLTFLNFPFLSFSPPYSRSYSVHFSFFTFSSDFVIFQVVKWFLIFL  
DFQFSC  
>ENSMUSP00000096648\_c.363:C>T\_p.R122C ENSMUST00000099049.4|Gm10719-202|ENSMUSG00000095547|+|chr9:g.3017951:C>T  
MFLIFNDFHFSCHIPCPTVDISFPPFSVFLAIFHVLKCVFLIFRDFQFSRHIPGPTVCISHFFRFFMISFFFT  
LSSGCFSSMIFTFLAIFHVLQWTFLNFPFVSFLAIFHILKCVFLIFCDFQFSCHIPGPTVCISHFSRFSVI  
SSFFKSSSGCFSSMIFSLAIFQVLQTLTFLNFPFLSFSPPYSRSYSVHFSFFTFSSDFVIFQVVKWFLIFL  
DFQFSC  
>ENSMUSP00000096648\_c.364:G>A\_p.R122H ENSMUST00000099049.4|Gm10719-202|ENSMUSG00000095547|+|chr9:g.3017952:G>A  
MFLIFNDFHFSCHIPCPTVDISFPPFSVFLAIFHVLKCVFLIFRDFQFSRHIPGPTVCISHFFRFFMISFFFT  
LSSGCFSSMIFTFLAIFHVLQWTFLNFPFVSFLAIFHILKCVFLIFHDFQFSCHIPGPTVCISHFSRFSVI  
SSFFKSSSGCFSSMIFSLAIFQVLQTLTFLNFPFLSFSPPYSRSYSVHFSFFTFSSDFVIFQVVKWFLIFL  
DFQFSC  
>ENSMUSP00000096648\_c.381:T>C\_p.C128R ENSMUST00000099049.4|Gm10719-202|ENSMUSG00000095547|+|chr9:g.3017969:T>C  
MFLIFNDFHFSCHIPCPTVDISFPPFSVFLAIFHVLKCVFLIFRDFQFSRHIPGPTVCISHFFRFFMISFFFT  
LSSGCFSSMIFTFLAIFHVLQWTFLNFPFVSFLAIFHILKCVFLIFRDFQFSRHIPGPTVCISHFSRFSVI



SSFFKSSSGCFSFSMIFSLAIFQVLQTLTFLNFPFLSFSPPYSRSYSVHFSFFTFSSDFVIFQVVKWLFLLIFL  
DFQFSC  
>ENSMUSP00000096648\_c.399:A>T\_p.T134S ENSMUST00000099049.4|Gm10719-  
202|ENSMUSG00000095547|+|chr9:g.3017987:A>T  
MFLIFNDFHFSCHIPCPTVDISFPFVFLAIFHVLKCVFLIFRDFQFSRHIPGPTVCISHFFRFFMISFFFT  
LSSGCFSSMIFTFLAIFHVLQWTFLNFPFVFLAIFHILKCVFLIFRDFQFSCHIPGPTVCISHFSRFSVI  
SSFFKSSSGCFSFSMIFSLAIFQVLQTLTFLNFPFLSFSPPYSRSYSVHFSFFTFSSDFVIFQVVKWLFLLIFL  
DFQFSC  
>ENSMUSP00000096648\_c.420:T>C\_p.S141P ENSMUST00000099049.4|Gm10719-  
202|ENSMUSG00000095547|+|chr9:g.3018008:T>C  
MFLIFNDFHFSCHIPCPTVDISFPFVFLAIFHVLKCVFLIFRDFQFSRHIPGPTVCISHFFRFFMISFFFT  
LSSGCFSSMIFTFLAIFHVLQWTFLNFPFVFLAIFHILKCVFLIFRDFQFSCHIPGPTVCISHFPRFSVI  
SSFFKSSSGCFSFSMIFSLAIFQVLQTLTFLNFPFLSFSPPYSRSYSVHFSFFTFSSDFVIFQVVKWLFLLIFL  
DFQFSC  
>ENSMUSP00000096648\_c.430:C>T\_p.S144L ENSMUST00000099049.4|Gm10719-  
202|ENSMUSG00000095547|+|chr9:g.3018018:C>T  
MFLIFNDFHFSCHIPCPTVDISFPFVFLAIFHVLKCVFLIFRDFQFSRHIPGPTVCISHFFRFFMISFFFT  
LSSGCFSSMIFTFLAIFHVLQWTFLNFPFVFLAIFHILKCVFLIFRDFQFSCHIPGPTVCISHFSRFLVI  
SSFFKSSSGCFSFSMIFSLAIFQVLQTLTFLNFPFLSFSPPYSRSYSVHFSFFTFSSDFVIFQVVKWLFLLIFL  
DFQFSC  
>ENSMUSP00000096648\_c.439:C>T\_p.S147L ENSMUST00000099049.4|Gm10719-  
202|ENSMUSG00000095547|+|chr9:g.3018027:C>T  
MFLIFNDFHFSCHIPCPTVDISFPFVFLAIFHVLKCVFLIFRDFQFSRHIPGPTVCISHFFRFFMISFFFT  
LSSGCFSSMIFTFLAIFHVLQWTFLNFPFVFLAIFHILKCVFLIFRDFQFSCHIPGPTVCISHFSRFSVI  
LSFFKSSSGCFSFSMIFSLAIFQVLQTLTFLNFPFLSFSPPYSRSYSVHFSFFTFSSDFVIFQVVKWLFLLIFL  
DFQFSC  
>ENSMUSP00000096648\_c.509:G>C\_p.Q170H ENSMUST00000099049.4|Gm10719-  
202|ENSMUSG00000095547|+|chr9:g.3018097:G>C  
MFLIFNDFHFSCHIPCPTVDISFPFVFLAIFHVLKCVFLIFRDFQFSRHIPGPTVCISHFFRFFMISFFFT  
LSSGCFSSMIFTFLAIFHVLQWTFLNFPFVFLAIFHILKCVFLIFRDFQFSCHIPGPTVCISHFSRFSVI  
SSFFKSSSGCFSFSMIFSLAIFHVLQTLTFLNFPFLSFSPPYSRSYSVHFSFFTFSSDFVIFQVVKWLFLLIFL  
DFQFSC  
>ENSMUSP00000096648\_c.520:T>G\_p.L174W ENSMUST00000099049.4|Gm10719-  
202|ENSMUSG00000095547|+|chr9:g.3018108:T>G  
MFLIFNDFHFSCHIPCPTVDISFPFVFLAIFHVLKCVFLIFRDFQFSRHIPGPTVCISHFFRFFMISFFFT  
LSSGCFSSMIFTFLAIFHVLQWTFLNFPFVFLAIFHILKCVFLIFRDFQFSCHIPGPTVCISHFSRFSVI  
SSFFKSSSGCFSFSMIFSLAIFQVLQWTFLNFPFLSFSPPYSRSYSVHFSFFTFSSDFVIFQVVKWLFLLIFL  
DFQFSC  
>ENSMUSP00000096648\_c.533:T>A\_p.N178K ENSMUST00000099049.4|Gm10719-  
202|ENSMUSG00000095547|+|chr9:g.3018121:T>A  
MFLIFNDFHFSCHIPCPTVDISFPFVFLAIFHVLKCVFLIFRDFQFSRHIPGPTVCISHFFRFFMISFFFT  
LSSGCFSSMIFTFLAIFHVLQWTFLNFPFVFLAIFHILKCVFLIFRDFQFSCHIPGPTVCISHFSRFSVI  
SSFFKSSSGCFSFSMIFSLAIFQVLQTLTFLKFPFLSFSPPYSRSYSVHFSFFTFSSDFVIFQVVKWLFLLIFL  
DFQFSC  
>ENSMUSP00000136170\_c.45:T>C\_p.C16R ENSMUST00000179272.2|Gm10719-  
203|ENSMUSG00000095547|+|chr9:g.3018798:T>C  
MFLIFHDFQFSCHIPRPTVEISFPTFSVFLAIFHVLKCVFLIFRVFQVSRHIPGPTVCISHFSRFSVILSFFK  
LSSGCFSSLIFSFLAIFHVLQWTFLNFPFVFLAIFHVLKCCVFLIFRDFQFSRHIPSPPTVCISHFSRFSV  
ISSFFKLSSGCFSSMIFSLAIFKVLQWTFLNFRPLSFSPPYSRSYSVHFSFFRFFSDFVFFQVVKWMFLIFH  
DFQFSC  
>ENSMUSP00000136170\_c.59:A>C\_p.E20D ENSMUST00000179272.2|Gm10719-  
203|ENSMUSG00000095547|+|chr9:g.3018812:A>C  
MFLIFHDFQFSCHIPCPTVDISFPTFSVFLAIFHVLKCVFLIFRVFQVSRHIPGPTVCISHFSRFSVILSFFK  
LSSGCFSSLIFSFLAIFHVLQWTFLNFPFVFLAIFHVLKCCVFLIFRDFQFSRHIPSPPTVCISHFSRFSV  
ISSFFKLSSGCFSSMIFSLAIFKVLQWTFLNFRPLSFSPPYSRSYSVHFSFFRFFSDFVFFQVVKWMFLIFH  
DFQFSC  
>ENSMUSP00000136170\_c.67:T>A\_p.F23Y ENSMUST00000179272.2|Gm10719-  
203|ENSMUSG00000095547|+|chr9:g.3018824:T>A

MFLIFHDFQFSCHIPCPTVEISYPTFSVFLAIFHVLKCVFLIFRVFQVSRHIPGPTVCISHFSRFSVILSFFK  
LSSGCFSSFLIFSFLAIFHVLLWTFLNFPFVSFLAIFHVLKCCVFLIFRDFQFSRHIPSPPTVCISHFSRFSV  
ISSFFKLSSGCFSSMIFSFSLAIFKVLQWTFLNFRPLSFSPYSRSYSVHFSFFRFFSDFVFFQVVKWMFLIFH  
DFQFSC  
>ENSMUSP00000136170\_c.133:T>A\_p.V45D ENSMUST00000179272.2|Gm10719-  
203|ENSMUSG00000095547|+|chr9:g.3018890:T>A  
MFLIFHDFQFSCHIPCPTVEISFPTFSVFLAIFHVLKCVFLIFRDFQVSRHIPGPTVCISHFSRFSVILSFFK  
LSSGCFSSFLIFSFLAIFHVLLWTFLNFPFVSFLAIFHVLKCCVFLIFRDFQFSRHIPSPPTVCISHFSRFSV  
ISSFFKLSSGCFSSMIFSFSLAIFKVLQWTFLNFRPLSFSPYSRSYSVHFSFFRFFSDFVFFQVVKWMFLIFH  
DFQFSC  
>ENSMUSP00000096648\_c.550:G>T\_p.S184I ENSMUST00000099049.4|Gm10719-  
202|ENSMUSG00000095547|+|chr9:g.3018898:G>T  
MFLIFNDFHFSCHIPCPTVDISFPFVSFLAIFHVLKCVFLIFRDFQFSRHIPGPTVCISHFFRFFMISFFFT  
LSSGCFSSMIFTFLAIFHVLLWTFLNFPFVSFLAIFHILKCVFLIFRDFQFSCHIPGPTVCISHFSRFSVI  
SSFFKSSSGCFSSMIFSFSLAIFQVLQTLTFLNFPFLIFSPYSRSYSVHFSFFTFSSDFVIFQVVKWLFLIFL  
DFQFSC  
>ENSMUSP00000136170\_c.141:G>T\_p.V48F ENSMUST00000179272.2|Gm10719-  
203|ENSMUSG00000095547|+|chr9:g.3018898:G>T  
MFLIFHDFQFSCHIPCPTVEISFPTFSVFLAIFHVLKCVFLIFRVFQVSRHIPGPTVCISHFSRFSVILSFFK  
LSSGCFSSFLIFSFLAIFHVLLWTFLNFPFVSFLAIFHVLKCCVFLIFRDFQFSRHIPSPPTVCISHFSRFSV  
ISSFFKLSSGCFSSMIFSFSLAIFKVLQWTFLNFRPLSFSPYSRSYSVHFSFFRFFSDFVFFQVVKWMFLIFH  
DFQFSC  
>ENSMUSP00000096648\_c.574:A>T\_p.Y192F ENSMUST00000099049.4|Gm10719-  
202|ENSMUSG00000095547|+|chr9:g.3018922:A>T  
MFLIFNDFHFSCHIPCPTVDISFPFVSFLAIFHVLKCVFLIFRDFQFSRHIPGPTVCISHFFRFFMISFFFT  
LSSGCFSSMIFTFLAIFHVLLWTFLNFPFVSFLAIFHILKCVFLIFRDFQFSCHIPGPTVCISHFSRFSVI  
SSFFKSSSGCFSSMIFSFSLAIFQVLQTLTFLNFPFLIFSPYSRSYSVHFSFFTFSSDFVIFQVVKWLFLIFL  
DFQFSC  
>ENSMUSP00000136170\_c.165:A>T\_p.T56S ENSMUST00000179272.2|Gm10719-  
203|ENSMUSG00000095547|+|chr9:g.3018922:A>T  
MFLIFHDFQFSCHIPCPTVEISFPTFSVFLAIFHVLKCVFLIFRVFQVSRHIPGPSVCISHFSRFSVILSFFK  
LSSGCFSSFLIFSFLAIFHVLLWTFLNFPFVSFLAIFHVLKCCVFLIFRDFQFSRHIPSPPTVCISHFSRFSV  
ISSFFKLSSGCFSSMIFSFSLAIFKVLQWTFLNFRPLSFSPYSRSYSVHFSFFRFFSDFVFFQVVKWMFLIFH  
DFQFSC  
>ENSMUSP00000096648\_c.576:A>C\_p.S193R ENSMUST00000099049.4|Gm10719-  
202|ENSMUSG00000095547|+|chr9:g.3018924:A>C  
MFLIFNDFHFSCHIPCPTVDISFPFVSFLAIFHVLKCVFLIFRDFQFSRHIPGPTVCISHFFRFFMISFFFT  
LSSGCFSSMIFTFLAIFHVLLWTFLNFPFVSFLAIFHILKCVFLIFRDFQFSCHIPGPTVCISHFSRFSVI  
SSFFKSSSGCFSSMIFSFSLAIFQVLQTLTFLNFPFLIFSPYSRSYSVHFSFFTFSSDFVIFQVVKWLFLIFL  
DFQFSC  
>ENSMUSP00000096648\_c.595:T>C\_p.F199S ENSMUST00000099049.4|Gm10719-  
202|ENSMUSG00000095547|+|chr9:g.3018943:T>C  
MFLIFNDFHFSCHIPCPTVDISFPFVSFLAIFHVLKCVFLIFRDFQFSRHIPGPTVCISHFFRFFMISFFFT  
LSSGCFSSMIFTFLAIFHVLLWTFLNFPFVSFLAIFHILKCVFLIFRDFQFSCHIPGPTVCISHFSRFSVI  
SSFFKSSSGCFSSMIFSFSLAIFQVLQTLTFLNFPFLIFSPYSRSYSVHFSFFTFSSDFVIFQVVKWLFLIFL  
DFQFSC  
>ENSMUSP00000136170\_c.186:T>C\_p.S63P ENSMUST00000179272.2|Gm10719-  
203|ENSMUSG00000095547|+|chr9:g.3018943:T>C  
MFLIFHDFQFSCHIPCPTVEISFPTFSVFLAIFHVLKCVFLIFRVFQVSRHIPGPTVCISHFPFRFSVILSFFK  
LSSGCFSSFLIFSFLAIFHVLLWTFLNFPFVSFLAIFHVLKCCVFLIFRDFQFSRHIPSPPTVCISHFSRFSV  
ISSFFKLSSGCFSSMIFSFSLAIFKVLQWTFLNFRPLSFSPYSRSYSVHFSFFRFFSDFVFFQVVKWMFLIFH  
DFQFSC  
>ENSMUSP00000096648\_c.595:TCAC>CCAA\_p.F199S ENSMUST00000099049.4|Gm10719-  
202|ENSMUSG00000095547|+|chr9:g.3018943:TCAC>CCAA  
MFLIFNDFHFSCHIPCPTVDISFPFVSFLAIFHVLKCVFLIFRDFQFSRHIPGPTVCISHFFRFFMISFFFT  
LSSGCFSSMIFTFLAIFHVLLWTFLNFPFVSFLAIFHILKCVFLIFRDFQFSCHIPGPTVCISHFSRFSVI  
SSFFKSSSGCFSSMIFSFSLAIFQVLQTLTFLNFPFLIFSPYSRSYSVHFSFFSNTFFSDFVIFQVVKWLFLIF  
LDFQFSC

>ENSMUSP00000136170\_c.186:TCAC>CCAA\_p.S63P ENSMUST00000179272.2|Gm10719-203|ENSMUSG00000095547|+|chr9:g.3018943:TCAC>CCAA  
MFLIFHDFQFSCHIPCPTVEISFPTFSVFLAIFHVLKCVFLIFRVFQVSRHIPGPTVCISHFPTRFSVILSFF  
KLSSGCFSSFLIFSFLAIFHVLWTFLNFPFVSFLAIFHVLKCCVFLIFRDFQFSRHIPSPPTVCISHFSRFS  
VISSFFKLSSGCFSSMIFSFLAIFKVLQWTFLNFRPLSFSPYSRSYSVHFSFFRFFSDFVFFQVVKWMFLIF  
HDFQFSC  
>ENSMUSP00000136170\_c.196:C>T\_p.S66L ENSMUST00000179272.2|Gm10719-203|ENSMUSG00000095547|+|chr9:g.3018953:C>T  
MFLIFHDFQFSCHIPCPTVEISFPTFSVFLAIFHVLKCVFLIFRVFQVSRHIPGPTVCISHFSRFLVILSFFK  
LSSGCFSSFLIFSFLAIFHVLWTFLNFPFVSFLAIFHVLKCCVFLIFRDFQFSRHIPSPPTVCISHFSRFSV  
ISSFFKLSSGCFSSMIFSFLAIFKVLQWTFLNFRPLSFSPYSRSYSVHFSFFRFFSDFVFFQVVKWMFLIFH  
DFQFSC  
>ENSMUSP00000136170\_c.205:T>C\_p.L69S ENSMUST00000179272.2|Gm10719-203|ENSMUSG00000095547|+|chr9:g.3018962:T>C  
MFLIFHDFQFSCHIPCPTVEISFPTFSVFLAIFHVLKCVFLIFRVFQVSRHIPGPTVCISHFSRFSVISSFFK  
LSSGCFSSFLIFSFLAIFHVLWTFLNFPFVSFLAIFHVLKCCVFLIFRDFQFSRHIPSPPTVCISHFSRFSV  
ISSFFKLSSGCFSSMIFSFLAIFKVLQWTFLNFRPLSFSPYSRSYSVHFSFFRFFSDFVFFQVVKWMFLIFH  
DFQFSC  
>ENSMUSP00000136170\_c.220:T>C\_p.L74S ENSMUST00000179272.2|Gm10719-203|ENSMUSG00000095547|+|chr9:g.3018977:T>C  
MFLIFHDFQFSCHIPCPTVEISFPTFSVFLAIFHVLKCVFLIFRVFQVSRHIPGPTVCISHFSRFSVILSFFK  
SSSGCFSSFLIFSFLAIFHVLWTFLNFPFVSFLAIFHVLKCCVFLIFRDFQFSRHIPSPPTVCISHFSRFSV  
ISSFFKLSSGCFSSMIFSFLAIFKVLQWTFLNFRPLSFSPYSRSYSVHFSFFRFFSDFVFFQVVKWMFLIFH  
DFQFSC  
>ENSMUSP00000136170\_c.220:T>G\_p.L74W ENSMUST00000179272.2|Gm10719-203|ENSMUSG00000095547|+|chr9:g.3018977:T>G  
MFLIFHDFQFSCHIPCPTVEISFPTFSVFLAIFHVLKCVFLIFRVFQVSRHIPGPTVCISHFSRFSVILSFFK  
WSSGCFSSFLIFSFLAIFHVLWTFLNFPFVSFLAIFHVLKCCVFLIFRDFQFSRHIPSPPTVCISHFSRFSV  
ISSFFKLSSGCFSSMIFSFLAIFKVLQWTFLNFRPLSFSPYSRSYSVHFSFFRFFSDFVFFQVVKWMFLIFH  
DFQFSC  
>ENSMUSP00000136170\_c.220:TG>GA\_p.L74\* ENSMUST00000179272.2|Gm10719-203|ENSMUSG00000095547|+|chr9:g.3018977:TG>GA  
MFLIFHDFQFSCHIPCPTVEISFPTFSVFLAIFHVLKCVFLIFRVFQVSRHIPGPTVCISHFSRFSVILSFFK  
\*VKWLFLIFLDFQFSCHIPCPTVDISKFSTFFSFPCHISCPKVLCSHF\*FSVFSPPYSKSYSVHFSFFTFSS  
DFVIFQVVKWMFLIFHDFQFSCHIPCPTVDISKFSTFIIFAIF\*VLQCAFLIFQVFQ\*FRLFSSRQVDVSHFP  
\*FSVFL  
>ENSMUSP00000096648\_c.639:T>A\_p.L214M ENSMUST00000099049.4|Gm10719-202|ENSMUSG00000095547|+|chr9:g.3018987:T>A  
MFLIFNDFHFSCHIPCPTVDISFPFVSFLAIFHVLKCVFLIFRDFQFSRHIPGPTVCISHFFRFFMISFFFT  
LSSGCFSSMIFTFLAIFHVLQWTFLNFPFVSFLAIFHILKCVFLIFRDFQFSCHIPGPTVCISHFSRFSVI  
SSFFKSSSGCFSSMIFSFLAIFQVLQTLTFLNFPFLSFSPPYSRSYSVHFSFFTFSSDFVIFQVVKWMFLIFL  
DFQFSC  
>ENSMUSP00000096648\_c.655:T>C\_p.L219P ENSMUST00000099049.4|Gm10719-202|ENSMUSG00000095547|+|chr9:g.3019003:T>C  
MFLIFNDFHFSCHIPCPTVDISFPFVSFLAIFHVLKCVFLIFRDFQFSRHIPGPTVCISHFFRFFMISFFFT  
LSSGCFSSMIFTFLAIFHVLQWTFLNFPFVSFLAIFHILKCVFLIFRDFQFSCHIPGPTVCISHFSRFSVI  
SSFFKSSSGCFSSMIFSFLAIFQVLQTLTFLNFPFLSFSPPYSRSYSVHFSFFTFSSDFVIFQVVKWLFLIFP  
DFQFSC  
>rs227483733\_ENSMUSP00000096648\_c.655:T>A\_p.L219H  
ENSMUST00000099049.4|Gm10719-202|ENSMUSG00000095547|+|chr9:g.3019003:T>A  
MFLIFNDFHFSCHIPCPTVDISFPFVSFLAIFHVLKCVFLIFRDFQFSRHIPGPTVCISHFFRFFMISFFFT  
LSSGCFSSMIFTFLAIFHVLQWTFLNFPFVSFLAIFHILKCVFLIFRDFQFSCHIPGPTVCISHFSRFSVI  
SSFFKSSSGCFSSMIFSFLAIFQVLQTLTFLNFPFLSFSPPYSRSYSVHFSFFTFSSDFVIFQVVKWLFLIFH  
DFQFSC  
>rs227483733\_ENSMUSP00000136170\_c.246:T>A\_p.L83M  
ENSMUST00000179272.2|Gm10719-203|ENSMUSG00000095547|+|chr9:g.3019003:T>A  
MFLIFHDFQFSCHIPCPTVEISFPTFSVFLAIFHVLKCVFLIFRVFQVSRHIPGPTVCISHFSRFSVILSFFK  
LSSGCFSSMIFSFLAIFHVLWTFLNFPFVSFLAIFHVLKCCVFLIFRDFQFSRHIPSPPTVCISHFSRFSV

ISSFFKLSSGCFSSMIFSLAIFKVLQWTFNFRPLSFSPYSRSYSVHFSFFRFFSDFVFFQVVKWMFLIFH  
DFQFSC  
>ENSMUSP00000136170\_c.283:T>A\_p.L95Q ENSMUST00000179272.2|Gm10719-  
203|ENSMUSG00000095547|+|chr9:g.3019040:T>A  
MFLIFHDFQFSCHIPCPTVEISFPTFSVFLAIFHVLKCVFLIFRVFQVSRHIPGPTVCISHFSRFSVILSFFK  
LSSGCFSSFLIFSLAIFHVLQWTFNFPFVSFLAIFHVLKCCVFLIFRDFQFSRHIPSPPTVCISHFSRFSV  
ISSFFKLSSGCFSSMIFSLAIFKVLQWTFNFRPLSFSPYSRSYSVHFSFFRFFSDFVFFQVVKWMFLIFH  
DFQFSC  
>ENSMUSP00000136170\_c.286:G>T\_p.W96L ENSMUST00000179272.2|Gm10719-  
203|ENSMUSG00000095547|+|chr9:g.3019043:G>T  
MFLIFHDFQFSCHIPCPTVEISFPTFSVFLAIFHVLKCVFLIFRVFQVSRHIPGPTVCISHFSRFSVILSFFK  
LSSGCFSSFLIFSLAIFHVLQWTFNFPFVSFLAIFHVLKCCVFLIFRDFQFSRHIPSPPTVCISHFSRFSV  
ISSFFKLSSGCFSSMIFSLAIFKVLQWTFNFRPLSFSPYSRSYSVHFSFFRFFSDFVFFQVVKWMFLIFH  
DFQFSC  
>ENSMUSP00000136170\_c.306:C>A\_p.P103T ENSMUST00000179272.2|Gm10719-  
203|ENSMUSG00000095547|+|chr9:g.3019063:C>A  
MFLIFHDFQFSCHIPCPTVEISFPTFSVFLAIFHVLKCVFLIFRVFQVSRHIPGPTVCISHFSRFSVILSFFK  
LSSGCFSSFLIFSLAIFHVLQWTFNFPFVSFLAIFHVLKCCVFLIFRDFQFSRHIPSPPTVCISHFSRFSV  
ISSFFKLSSGCFSSMIFSLAIFKVLQWTFNFRPLSFSPYSRSYSVHFSFFRFFSDFVFFQVVKWMFLIFH  
DFQFSC  
>ENSMUSP00000096646\_c.45:T>C\_p.C16R ENSMUST00000099047.4|Gm10719-  
201|ENSMUSG00000095547|+|chr9:g.3020200:T>C  
MFLIFHDFQFSCHIPRPTMDISFPTFSVFLAIFHVLKCVFLIFRDFQFSRHIPGPTVCISHFSGFSVILSFFK  
SSSGCFSSMIFSLAIFHVLQWTFNFPFVSFLAIFHVLKCVFLIFSDQFSRHIPGPTVCISHFSRFSVI  
SSFFKLSSGCFSSMIFSLAIFHVPQWTFNFPFSSYSFSPYSRSYSVHFSFFRFFSDFVIFQVVKWMFLI  
FLDFQFSC  
>ENSMUSP00000096646\_c.54:A>T\_p.M19L ENSMUST00000099047.4|Gm10719-  
201|ENSMUSG00000095547|+|chr9:g.3020209:A>T  
MFLIFHDFQFSCHIPCPTLDISFPTFSVFLAIFHVLKCVFLIFRDFQFSRHIPGPTVCISHFSGFSVILSFFK  
SSSGCFSSMIFSLAIFHVLQWTFNFPFVSFLAIFHVLKCVFLIFSDQFSRHIPGPTVCISHFSRFSVI  
SSFFKLSSGCFSSMIFSLAIFHVPQWTFNFPFSSYSFSPYSRSYSVHFSFFRFFSDFVIFQVVKWMFLI  
FLDFQFSC  
>ENSMUSP00000096646\_c.54:A>C\_p.M19L ENSMUST00000099047.4|Gm10719-  
201|ENSMUSG00000095547|+|chr9:g.3020209:A>C  
MFLIFHDFQFSCHIPCPTLDISFPTFSVFLAIFHVLKCVFLIFRDFQFSRHIPGPTVCISHFSGFSVILSFFK  
SSSGCFSSMIFSLAIFHVLQWTFNFPFVSFLAIFHVLKCVFLIFSDQFSRHIPGPTVCISHFSRFSVI  
SSFFKLSSGCFSSMIFSLAIFHVPQWTFNFPFSSYSFSPYSRSYSVHFSFFRFFSDFVIFQVVKWMFLI  
FLDFQFSC  
>ENSMUSP00000096646\_c.54:A>G\_p.M19V ENSMUST00000099047.4|Gm10719-  
201|ENSMUSG00000095547|+|chr9:g.3020209:A>G  
MFLIFHDFQFSCHIPCPTVDISFPTFSVFLAIFHVLKCVFLIFRDFQFSRHIPGPTVCISHFSGFSVILSFFK  
SSSGCFSSMIFSLAIFHVLQWTFNFPFVSFLAIFHVLKCVFLIFSDQFSRHIPGPTVCISHFSRFSVI  
SSFFKLSSGCFSSMIFSLAIFHVPQWTFNFPFSSYSFSPYSRSYSVHFSFFRFFSDFVIFQVVKWMFLI  
FLDFQFSC  
>ENSMUSP00000096646\_c.67:T>A\_p.F23Y ENSMUST00000099047.4|Gm10719-  
201|ENSMUSG00000095547|+|chr9:g.3020226:T>A  
MFLIFHDFQFSCHIPCPTMDISYPTFSVFLAIFHVLKCVFLIFRDFQFSRHIPGPTVCISHFSGFSVILSFFK  
SSSGCFSSMIFSLAIFHVLQWTFNFPFVSFLAIFHVLKCVFLIFSDQFSRHIPGPTVCISHFSRFSVI  
SSFFKLSSGCFSSMIFSLAIFHVPQWTFNFPFSSYSFSPYSRSYSVHFSFFRFFSDFVIFQVVKWMFLI  
FLDFQFSC  
>ENSMUSP00000096646\_c.72:A>C\_p.T25P ENSMUST00000099047.4|Gm10719-  
201|ENSMUSG00000095547|+|chr9:g.3020231:A>C  
MFLIFHDFQFSCHIPCPTMDISFPFVSFLAIFHVLKCVFLIFRDFQFSRHIPGPTVCISHFSGFSVILSFFK  
SSSGCFSSMIFSLAIFHVLQWTFNFPFVSFLAIFHVLKCVFLIFSDQFSRHIPGPTVCISHFSRFSVI  
SSFFKLSSGCFSSMIFSLAIFHVPQWTFNFPFSSYSFSPYSRSYSVHFSFFRFFSDFVIFQVVKWMFLI  
FLDFQFSC  
>ENSMUSP00000096646\_c.112:G>A\_p.C38Y ENSMUST00000099047.4|Gm10719-  
201|ENSMUSG00000095547|+|chr9:g.3020271:G>A

MFLIFHDFQFSCHIPCPTMDISFPTFSVFLAIFHVLKYVFLIFRDFQFSRHIPGPTVCISHFSGFSVISSFFK  
SSSGCFSFSMIFSLAIFHVLQWTFLNFPFVSFLAIFHVLKCVFLIFSDQFSRHIPGPTVCISHFSRFSVI  
SSFFKLSSGCFSFSMIFSLAIFHVPQWTFLNFPFSSYSFSPYSRSYSVHFSFFTFSDFVIFQVVKWMFLI  
FLDFQFSC  
>ENSMUSP0000096646\_c.129:C>T\_p.R44C ENSMUST0000099047.4|Gm10719-  
201|ENSMUSG0000095547|+|chr9:g.3020288:C>T  
MFLIFHDFQFSCHIPCPTMDISFPTFSVFLAIFHVLKCVFLIFCDFQFSRHIPGPTVCISHFSGFSVISSFFK  
SSSGCFSFSMIFSLAIFHVLQWTFLNFPFVSFLAIFHVLKCVFLIFSDQFSRHIPGPTVCISHFSRFSVI  
SSFFKLSSGCFSFSMIFSLAIFHVPQWTFLNFPFSSYSFSPYSRSYSVHFSFFTFSDFVIFQVVKWMFLI  
FLDFQFSC  
>ENSMUSP00000136170\_c.366:C>T\_p.R123C ENSMUST00000179272.2|Gm10719-  
203|ENSMUSG0000095547|+|chr9:g.3020521:C>T  
MFLIFHDFQFSCHIPCPTVEISFPTFSVFLAIFHVLKCVFLIFRVFQVSRHIPGPTVCISHFSRFSVILSFFK  
LSSGCFSFSLIFSFLAIFHVLLWTFLNFPFVSFLAIFHVLKCCVFLIFCDFQFSRHIPSPPTVCISHFSRFSV  
ISSFFKLSSGCFSFSMIFSLAIFKVLQWTFLNFRPLSFSPYSRSYSVHFSFFRFFSDFVFFQVVKWMFLIFH  
DFQFSC  
>ENSMUSP00000136170\_c.367:G>A\_p.R123H ENSMUST00000179272.2|Gm10719-  
203|ENSMUSG0000095547|+|chr9:g.3020522:G>A  
MFLIFHDFQFSCHIPCPTVEISFPTFSVFLAIFHVLKCVFLIFRVFQVSRHIPGPTVCISHFSRFSVILSFFK  
LSSGCFSFSLIFSFLAIFHVLLWTFLNFPFVSFLAIFHVLKCCVFLIFHDFQFSRHIPSPPTVCISHFSRFSV  
ISSFFKLSSGCFSFSMIFSLAIFKVLQWTFLNFRPLSFSPYSRSYSVHFSFFRFFSDFVFFQVVKWMFLIFH  
DFQFSC  
>ENSMUSP00000136170\_c.384:C>T\_p.R129C ENSMUST00000179272.2|Gm10719-  
203|ENSMUSG0000095547|+|chr9:g.3020539:C>T  
MFLIFHDFQFSCHIPCPTVEISFPTFSVFLAIFHVLKCVFLIFRVFQVSRHIPGPTVCISHFSRFSVILSFFK  
LSSGCFSFSLIFSFLAIFHVLLWTFLNFPFVSFLAIFHVLKCCVFLIFRDFQFSCHIPSPPTVCISHFSRFSV  
ISSFFKLSSGCFSFSMIFSLAIFKVLQWTFLNFRPLSFSPYSRSYSVHFSFFRFFSDFVFFQVVKWMFLIFH  
DFQFSC  
>ENSMUSP00000136170\_c.396:A>G\_p.S133G ENSMUST00000179272.2|Gm10719-  
203|ENSMUSG0000095547|+|chr9:g.3020551:A>G  
MFLIFHDFQFSCHIPCPTVEISFPTFSVFLAIFHVLKCVFLIFRVFQVSRHIPGPTVCISHFSRFSVILSFFK  
LSSGCFSFSLIFSFLAIFHVLLWTFLNFPFVSFLAIFHVLKCCVFLIFRDFQFSRHIPGPTVCISHFSRFSV  
ISSFFKLSSGCFSFSMIFSLAIFKVLQWTFLNFRPLSFSPYSRSYSVHFSFFRFFSDFVFFQVVKWMFLIFH  
DFQFSC  
>ENSMUSP00000136170\_c.396:A>T\_p.S133C ENSMUST00000179272.2|Gm10719-  
203|ENSMUSG0000095547|+|chr9:g.3020551:A>T  
MFLIFHDFQFSCHIPCPTVEISFPTFSVFLAIFHVLKCVFLIFRVFQVSRHIPGPTVCISHFSRFSVILSFFK  
LSSGCFSFSLIFSFLAIFHVLLWTFLNFPFVSFLAIFHVLKCCVFLIFRDFQFSRHIPSPPTVCISHFSRFSV  
ISSFFKLSSGCFSFSMIFSLAIFKVLQWTFLNFRPLSFSPYSRSYSVHFSFFRFFSDFVFFQVVKWMFLIFH  
DFQFSC  
>ENSMUSP00000136170\_c.402:A>T\_p.T135S ENSMUST00000179272.2|Gm10719-  
203|ENSMUSG0000095547|+|chr9:g.3020557:A>T  
MFLIFHDFQFSCHIPCPTVEISFPTFSVFLAIFHVLKCVFLIFRVFQVSRHIPGPTVCISHFSRFSVILSFFK  
LSSGCFSFSLIFSFLAIFHVLLWTFLNFPFVSFLAIFHVLKCCVFLIFRDFQFSRHIPSPVCISHFSRFSV  
ISSFFKLSSGCFSFSMIFSLAIFKVLQWTFLNFRPLSFSPYSRSYSVHFSFFRFFSDFVFFQVVKWMFLIFH  
DFQFSC  
>ENSMUSP00000136170\_c.433:C>T\_p.S145L ENSMUST00000179272.2|Gm10719-  
203|ENSMUSG0000095547|+|chr9:g.3020588:C>T  
MFLIFHDFQFSCHIPCPTVEISFPTFSVFLAIFHVLKCVFLIFRVFQVSRHIPGPTVCISHFSRFSVILSFFK  
LSSGCFSFSLIFSFLAIFHVLLWTFLNFPFVSFLAIFHVLKCCVFLIFRDFQFSRHIPSPPTVCISHFSRFLV  
ISSFFKLSSGCFSFSMIFSLAIFKVLQWTFLNFRPLSFSPYSRSYSVHFSFFRFFSDFVFFQVVKWMFLIFH  
DFQFSC  
>ENSMUSP00000136170\_c.442:C>T\_p.S148L ENSMUST00000179272.2|Gm10719-  
203|ENSMUSG0000095547|+|chr9:g.3020597:C>T  
MFLIFHDFQFSCHIPCPTVEISFPTFSVFLAIFHVLKCVFLIFRVFQVSRHIPGPTVCISHFSRFSVILSFFK  
LSSGCFSFSLIFSFLAIFHVLLWTFLNFPFVSFLAIFHVLKCCVFLIFRDFQFSRHIPSPPTVCISHFSRFSV  
ILSFFKLSSGCFSFSMIFSLAIFKVLQWTFLNFRPLSFSPYSRSYSVHFSFFRFFSDFVFFQVVKWMFLIFH  
DFQFSC



>ENSMUSP00000136170\_c.457:T>G\_p.L153W ENSMUST00000179272.2|Gm10719-203|ENSMUSG00000095547|+|chr9:g.3020612:T>G  
MFLIFHDFQFSCHIPCPTVEISFPTFSVFLAIFHVLKCVFLIFRVFQVSRHIPGPTVCISHFSRFSVILSFFK  
LSSGCFSSFLIFSFLAIFHVLLWTFNFPFVSFLAIFHVLKCCVFLIFRDFQFSRHIPSPPTVCISHFSRFSV  
ISSFFKWSSGCFSSMIFSFLAIFKVLQWTFNFRPLSFSPYSRSYSVHFSFFRFFSDFVFFQVVKWMFLIFH  
DFQFSC  
>ENSMUSP00000136170\_c.457:T>C\_p.L153S ENSMUST00000179272.2|Gm10719-203|ENSMUSG00000095547|+|chr9:g.3020612:T>C  
MFLIFHDFQFSCHIPCPTVEISFPTFSVFLAIFHVLKCVFLIFRVFQVSRHIPGPTVCISHFSRFSVILSFFK  
LSSGCFSSFLIFSFLAIFHVLLWTFNFPFVSFLAIFHVLKCCVFLIFRDFQFSRHIPSPPTVCISHFSRFSV  
ISSFFKSSGCFSSMIFSFLAIFKVLQWTFNFRPLSFSPYSRSYSVHFSFFRFFSDFVFFQVVKWMFLIFH  
DFQFSC  
>ENSMUSP00000136170\_c.494:C>A\_p.S165R ENSMUST00000179272.2|Gm10719-203|ENSMUSG00000095547|+|chr9:g.3020649:C>A  
MFLIFHDFQFSCHIPCPTVEISFPTFSVFLAIFHVLKCVFLIFRVFQVSRHIPGPTVCISHFSRFSVILSFFK  
LSSGCFSSFLIFSFLAIFHVLLWTFNFPFVSFLAIFHVLKCCVFLIFRDFQFSRHIPSPPTVCISHFSRFSV  
ISSFFKLSSGCFSSMIFRFLAIFKVLQWTFNFRPLSFSPYSRSYSVHFSFFRFFSDFVFFQVVKWMFLIFH  
DFQFSC  
>ENSMUSP00000136170\_c.510:A>C\_p.K171Q ENSMUST00000179272.2|Gm10719-203|ENSMUSG00000095547|+|chr9:g.3020665:A>C  
MFLIFHDFQFSCHIPCPTVEISFPTFSVFLAIFHVLKCVFLIFRVFQVSRHIPGPTVCISHFSRFSVILSFFK  
LSSGCFSSFLIFSFLAIFHVLLWTFNFPFVSFLAIFHVLKCCVFLIFRDFQFSRHIPSPPTVCISHFSRFSV  
ISSFFKLSSGCFSSMIFSFLAIFQVLQWTFNFRPLSFSPYSRSYSVHFSFFRFFSDFVFFQVVKWMFLIFH  
DFQFSC  
>ENSMUSP00000136170\_c.510:AAA>CAC\_p.K171H ENSMUST00000179272.2|Gm10719-203|ENSMUSG00000095547|+|chr9:g.3020665:AAA>CAC  
MFLIFHDFQFSCHIPCPTVEISFPTFSVFLAIFHVLKCVFLIFRVFQVSRHIPGPTVCISHFSRFSVILSFFK  
LSSGCFSSFLIFSFLAIFHVLLWTFNFPFVSFLAIFHVLKCCVFLIFRDFQFSRHIPSPPTVCISHFSRFSV  
ISSFFKLSSGCFSSMIFSFLAIFHKSYSGHF\*IFDLYHFRHILGPTVCISHFSGFSVISSFFKSSGCFSS  
MIFSFL  
>ENSMUSP00000136170\_c.526:C>A\_p.T176K ENSMUST00000179272.2|Gm10719-203|ENSMUSG00000095547|+|chr9:g.3020681:C>A  
MFLIFHDFQFSCHIPCPTVEISFPTFSVFLAIFHVLKCVFLIFRVFQVSRHIPGPTVCISHFSRFSVILSFFK  
LSSGCFSSFLIFSFLAIFHVLLWTFNFPFVSFLAIFHVLKCCVFLIFRDFQFSRHIPSPPTVCISHFSRFSV  
ISSFFKLSSGCFSSMIFSFLAIFKVLQWKFLNFRPLSFSPYSRSYSVHFSFFRFFSDFVFFQVVKWMFLIFH  
DFQFSC  
>ENSMUSP00000136170\_c.541:G>A\_p.R181Q ENSMUST00000179272.2|Gm10719-203|ENSMUSG00000095547|+|chr9:g.3020696:G>A  
MFLIFHDFQFSCHIPCPTVEISFPTFSVFLAIFHVLKCVFLIFRVFQVSRHIPGPTVCISHFSRFSVILSFFK  
LSSGCFSSFLIFSFLAIFHVLLWTFNFPFVSFLAIFHVLKCCVFLIFRDFQFSRHIPSPPTVCISHFSRFSV  
ISSFFKLSSGCFSSMIFSFLAIFKVLQWTFNFRPLSFSPYSRSYSVHFSFFRFFSDFVFFQVVKWMFLIFH  
DFQFSC  
>ENSMUSP00000136170\_c.548:A>T\_p.L183F ENSMUST00000179272.2|Gm10719-203|ENSMUSG00000095547|+|chr9:g.3020703:A>T  
MFLIFHDFQFSCHIPCPTVEISFPTFSVFLAIFHVLKCVFLIFRVFQVSRHIPGPTVCISHFSRFSVILSFFK  
LSSGCFSSFLIFSFLAIFHVLLWTFNFPFVSFLAIFHVLKCCVFLIFRDFQFSRHIPSPPTVCISHFSRFSV  
ISSFFKLSSGCFSSMIFSFLAIFKVLQWTFNFRPLSFSPYSRSYSVHFSFFRFFSDFVFFQVVKWMFLIFH  
DFQFSC  
>ENSMUSP00000136170\_c.574:A>T\_p.Y192F ENSMUST00000179272.2|Gm10719-203|ENSMUSG00000095547|+|chr9:g.3020791:A>T  
MFLIFHDFQFSCHIPCPTVEISFPTFSVFLAIFHVLKCVFLIFRVFQVSRHIPGPTVCISHFSRFSVILSFFK  
LSSGCFSSFLIFSFLAIFHVLLWTFNFPFVSFLAIFHVLKCCVFLIFRDFQFSRHIPSPPTVCISHFSRFSV  
ISSFFKLSSGCFSSMIFSFLAIFKVLQWTFNFRPLSFSPYSRSYSVHFSFFRFFSDFVFFQVVKWMFLIFH  
DFQFSC  
>ENSMUSP00000096646\_c.165:A>T\_p.T56S ENSMUST00000099047.4|Gm10719-201|ENSMUSG00000095547|+|chr9:g.3020791:A>T  
MFLIFHDFQFSCHIPCPTMDISFPTFSVFLAIFHVLKCVFLIFRDFQFSRHIPGPSVCISHFSGFSVISSFFK  
SSSGCFSSMIFSFLAIFHVLLQWTFNFPFVSFLAIFHVLKCVFLIFRDFQFSRHIPGPTVCISHFSRFSVI

SSFFKLSSGCFSFSMIFSLAIFHVPQWTFNLNPPFSSYSFSPYSRSYSVHFSFFTFSSDFVIFQVVKWMFLI  
FLDFQFSC  
>ENSMUSP00000136170\_c.598:G>T\_p.R200M ENSMUST00000179272.2|Gm10719-  
203|ENSMUSG00000095547|+|chr9:g.3020815:G>T  
MFLIFHDFQFSCHIPCPTVEISFPTFSVFLAIFHVLKCVFLIFRVFQVSRHIPGPTVCISHFSRFSVILSFFK  
LSSGCFSSFLIFSLAIFHVLQWTFNLNPPFSSVFLAIFHVLKCCVFLIFRDFQFSRHIPSPPTVCISHFSRFSV  
ISSFFKLSSGCFSFSMIFSLAIFKVLQWTFNLNFRPLSFSPYSRSYSVHFSFFMFFSDFVFFQVVKWMFLIFH  
DFQFSC  
>ENSMUSP00000096646\_c.189:G>T\_p.G64C ENSMUST00000099047.4|Gm10719-  
201|ENSMUSG00000095547|+|chr9:g.3020815:G>T  
MFLIFHDFQFSCHIPCPTMDISFPTFSVFLAIFHVLKCVFLIFRDFQFSRHIPGPTVCISHFSRFSVILSFFK  
SSSGCFSSMIFSLAIFHVLQWTFNLNPPFSSVFLAIFHVLKCVFLIFSDQFSRHIPGPTVCISHFSRFSVI  
SSFFKLSSGCFSFSMIFSLAIFHVPQWTFNLNPPFSSYSFSPYSRSYSVHFSFFTFSSDFVIFQVVKWMFLI  
FLDFQFSC  
>ENSMUSP00000136170\_c.598:G>C\_p.R200T ENSMUST00000179272.2|Gm10719-  
203|ENSMUSG00000095547|+|chr9:g.3020815:G>C  
MFLIFHDFQFSCHIPCPTVEISFPTFSVFLAIFHVLKCVFLIFRVFQVSRHIPGPTVCISHFSRFSVILSFFK  
LSSGCFSSFLIFSLAIFHVLQWTFNLNPPFSSVFLAIFHVLKCCVFLIFRDFQFSRHIPSPPTVCISHFSRFSV  
ISSFFKLSSGCFSFSMIFSLAIFKVLQWTFNLNFRPLSFSPYSRSYSVHFSFFTFSSDFVIFQVVKWMFLIFH  
DFQFSC  
>ENSMUSP00000096646\_c.189:G>C\_p.G64R ENSMUST00000099047.4|Gm10719-  
201|ENSMUSG00000095547|+|chr9:g.3020815:G>C  
MFLIFHDFQFSCHIPCPTMDISFPTFSVFLAIFHVLKCVFLIFRDFQFSRHIPGPTVCISHFSRFSVILSFFK  
SSSGCFSSMIFSLAIFHVLQWTFNLNPPFSSVFLAIFHVLKCVFLIFSDQFSRHIPGPTVCISHFSRFSVI  
SSFFKLSSGCFSFSMIFSLAIFHVPQWTFNLNPPFSSYSFSPYSRSYSVHFSFFTFSSDFVIFQVVKWMFLI  
FLDFQFSC  
>ENSMUSP00000096646\_c.196:C>T\_p.S66L ENSMUST00000099047.4|Gm10719-  
201|ENSMUSG00000095547|+|chr9:g.3020822:C>T  
MFLIFHDFQFSCHIPCPTMDISFPTFSVFLAIFHVLKCVFLIFRDFQFSRHIPGPTVCISHFSRFSVILSFFK  
SSSGCFSSMIFSLAIFHVLQWTFNLNPPFSSVFLAIFHVLKCVFLIFSDQFSRHIPGPTVCISHFSRFSVI  
SSFFKLSSGCFSFSMIFSLAIFHVPQWTFNLNPPFSSYSFSPYSRSYSVHFSFFTFSSDFVIFQVVKWMFLI  
FLDFQFSC  
>ENSMUSP00000136170\_c.618:T>A\_p.F207I ENSMUST00000179272.2|Gm10719-  
203|ENSMUSG00000095547|+|chr9:g.3020835:T>A  
MFLIFHDFQFSCHIPCPTVEISFPTFSVFLAIFHVLKCVFLIFRVFQVSRHIPGPTVCISHFSRFSVILSFFK  
LSSGCFSSFLIFSLAIFHVLQWTFNLNPPFSSVFLAIFHVLKCCVFLIFRDFQFSRHIPSPPTVCISHFSRFSV  
ISSFFKLSSGCFSFSMIFSLAIFKVLQWTFNLNFRPLSFSPYSRSYSVHFSFFRFFSDFVIFQVVKWMFLIFH  
DFQFSC  
>ENSMUSP00000096646\_c.285:T>C\_p.W96R ENSMUST00000099047.4|Gm10719-  
201|ENSMUSG00000095547|+|chr9:g.3020911:T>C  
MFLIFHDFQFSCHIPCPTMDISFPTFSVFLAIFHVLKCVFLIFRDFQFSRHIPGPTVCISHFSRFSVILSFFK  
SSSGCFSSMIFSLAIFHVLQWTFNLNPPFSSVFLAIFHVLKCVFLIFSDQFSRHIPGPTVCISHFSRFSVI  
SSFFKLSSGCFSFSMIFSLAIFHVPQWTFNLNPPFSSYSFSPYSRSYSVHFSFFTFSSDFVIFQVVKWMFLI  
FLDFQFSC  
>ENSMUSP00000096646\_c.335:T>A\_p.H112Q ENSMUST00000099047.4|Gm10719-  
201|ENSMUSG00000095547|+|chr9:g.3020961:T>A  
MFLIFHDFQFSCHIPCPTMDISFPTFSVFLAIFHVLKCVFLIFRDFQFSRHIPGPTVCISHFSRFSVILSFFK  
SSSGCFSSMIFSLAIFHVLQWTFNLNPPFSSVFLAIFQVLKCVFLIFSDQFSRHIPGPTVCISHFSRFSVI  
SSFFKLSSGCFSFSMIFSLAIFHVPQWTFNLNPPFSSYSFSPYSRSYSVHFSFFTFSSDFVIFQVVKWMFLI  
FLDFQFSC  
>ENSMUSP00000096646\_c.363:A>T\_p.S122C ENSMUST00000099047.4|Gm10719-  
201|ENSMUSG00000095547|+|chr9:g.3020989:A>T  
MFLIFHDFQFSCHIPCPTMDISFPTFSVFLAIFHVLKCVFLIFRDFQFSRHIPGPTVCISHFSRFSVILSFFK  
SSSGCFSSMIFSLAIFHVLQWTFNLNPPFSSVFLAIFHVLKCVFLIFCDFQFSRHIPGPTVCISHFSRFSVI  
SSFFKLSSGCFSFSMIFSLAIFHVPQWTFNLNPPFSSYSFSPYSRSYSVHFSFFTFSSDFVIFQVVKWMFLI  
FLDFQFSC  
>ENSMUSP00000096646\_c.363:A>C\_p.S122R ENSMUST00000099047.4|Gm10719-  
201|ENSMUSG00000095547|+|chr9:g.3020989:A>C

MFLIFHDFQFSCHIPCPTMDISFPTFSVFLAIFHVLKCVFLIFRDFQFSRHIPGPTVCISHFSGFSVISSFFK  
SSSGCFSFSMIFSFSLAIFHVLQWTFLNFPFSSVFLAIFHVLKCVFLIFRDFQFSRHIPGPTVCISHFSRFSVI  
SSFFKLSSGCFSFSMIFSFSLAIFHVPQWTFLNFPFSSYSFSPYRSYSVHFSFFTFFSDFVIFQVVKWMFLI  
FLDFQFSC  
>ENSMUSP00000096646\_c.399:A>T\_p.T134S ENSMUST00000099047.4|Gm10719-  
201|ENSMUSG00000095547|+|chr9:g.3021025:A>T  
MFLIFHDFQFSCHIPCPTMDISFPTFSVFLAIFHVLKCVFLIFRDFQFSRHIPGPTVCISHFSGFSVISSFFK  
SSSGCFSFSMIFSFSLAIFHVLQWTFLNFPFSSVFLAIFHVLKCVFLIFSDQFSRHIPGPTVCISHFSRFSVI  
SSFFKLSSGCFSFSMIFSFSLAIFHVPQWTFLNFPFSSYSFSPYRSYSVHFSFFTFFSDFVIFQVVKWMFLI  
FLDFQFSC  
>ENSMUSP00000096646\_c.430:C>T\_p.S144L ENSMUST00000099047.4|Gm10719-  
201|ENSMUSG00000095547|+|chr9:g.3021056:C>T  
MFLIFHDFQFSCHIPCPTMDISFPTFSVFLAIFHVLKCVFLIFRDFQFSRHIPGPTVCISHFSGFSVISSFFK  
SSSGCFSFSMIFSFSLAIFHVLQWTFLNFPFSSVFLAIFHVLKCVFLIFSDQFSRHIPGPTVCISHFSRFLVI  
SSFFKLSSGCFSFSMIFSFSLAIFHVPQWTFLNFPFSSYSFSPYRSYSVHFSFFTFFSDFVIFQVVKWMFLI  
FLDFQFSC  
>ENSMUSP00000096646\_c.454:T>C\_p.L152S ENSMUST00000099047.4|Gm10719-  
201|ENSMUSG00000095547|+|chr9:g.3021080:T>C  
MFLIFHDFQFSCHIPCPTMDISFPTFSVFLAIFHVLKCVFLIFRDFQFSRHIPGPTVCISHFSGFSVISSFFK  
SSSGCFSFSMIFSFSLAIFHVLQWTFLNFPFSSVFLAIFHVLKCVFLIFSDQFSRHIPGPTVCISHFSRFSVI  
SSFFKLSSGCFSFSMIFSFSLAIFHVPQWTFLNFPFSSYSFSPYRSYSVHFSFFTFFSDFVIFQVVKWMFLI  
FLDFQFSC  
>ENSMUSP00000096646\_c.454:T>G\_p.L152W ENSMUST00000099047.4|Gm10719-  
201|ENSMUSG00000095547|+|chr9:g.3021080:T>G  
MFLIFHDFQFSCHIPCPTMDISFPTFSVFLAIFHVLKCVFLIFRDFQFSRHIPGPTVCISHFSGFSVISSFFK  
SSSGCFSFSMIFSFSLAIFHVLQWTFLNFPFSSVFLAIFHVLKCVFLIFSDQFSRHIPGPTVCISHFSRFSVI  
SSFFKLSSGCFSFSMIFSFSLAIFHVPQWTFLNFPFSSYSFSPYRSYSVHFSFFTFFSDFVIFQVVKWMFLI  
FLDFQFSC  
>ENSMUSP00000096646\_c.490:G>T\_p.S164I ENSMUST00000099047.4|Gm10719-  
201|ENSMUSG00000095547|+|chr9:g.3021116:G>T  
MFLIFHDFQFSCHIPCPTMDISFPTFSVFLAIFHVLKCVFLIFRDFQFSRHIPGPTVCISHFSGFSVISSFFK  
SSSGCFSFSMIFSFSLAIFHVLQWTFLNFPFSSVFLAIFHVLKCVFLIFSDQFSRHIPGPTVCISHFSRFSVI  
SSFFKLSSGCFSFSMIFSFSLAIFHVPQWTFLNFPFSSYSFSPYRSYSVHFSFFTFFSDFVIFQVVKWMFLI  
FLDFQFSC  
>ENSMUSP00000096646\_c.514:C>T\_p.P172L ENSMUST00000099047.4|Gm10719-  
201|ENSMUSG00000095547|+|chr9:g.3021140:C>T  
MFLIFHDFQFSCHIPCPTMDISFPTFSVFLAIFHVLKCVFLIFRDFQFSRHIPGPTVCISHFSGFSVISSFFK  
SSSGCFSFSMIFSFSLAIFHVLQWTFLNFPFSSVFLAIFHVLKCVFLIFSDQFSRHIPGPTVCISHFSRFSVI  
SSFFKLSSGCFSFSMIFSFSLAIFHVLQWTFLNFPFSSYSFSPYRSYSVHFSFFTFFSDFVIFQVVKWMFLI  
FLDFQFSC  
>ENSMUSP00000096646\_c.535:T>A\_p.F179Y ENSMUST00000099047.4|Gm10719-  
201|ENSMUSG00000095547|+|chr9:g.3021161:T>A  
MFLIFHDFQFSCHIPCPTMDISFPTFSVFLAIFHVLKCVFLIFRDFQFSRHIPGPTVCISHFSGFSVISSFFK  
SSSGCFSFSMIFSFSLAIFHVLQWTFLNFPFSSVFLAIFHVLKCVFLIFSDQFSRHIPGPTVCISHFSRFSVI  
SSFFKLSSGCFSFSMIFSFSLAIFHVPQWTFLNFPFSSYSFSPYRSYSVHFSFFTFFSDFVIFQVVKWMFLI  
FLDFQFSC  
>ENSMUSP00000096646\_c.540:C>A\_p.P181T ENSMUST00000099047.4|Gm10719-  
201|ENSMUSG00000095547|+|chr9:g.3021166:C>A  
MFLIFHDFQFSCHIPCPTMDISFPTFSVFLAIFHVLKCVFLIFRDFQFSRHIPGPTVCISHFSGFSVISSFFK  
SSSGCFSFSMIFSFSLAIFHVLQWTFLNFPFSSVFLAIFHVLKCVFLIFSDQFSRHIPGPTVCISHFSRFSVI  
SSFFKLSSGCFSFSMIFSFSLAIFHVPQWTFLNFPFSSYSFSPYRSYSVHFSFFTFFSDFVIFQVVKWMFLI  
FLDFQFSC  
>ENSMUSP00000096646\_c.553:A>T\_p.Y185F ENSMUST00000099047.4|Gm10719-  
201|ENSMUSG00000095547|+|chr9:g.3021259:A>T  
MFLIFHDFQFSCHIPCPTMDISFPTFSVFLAIFHVLKCVFLIFRDFQFSRHIPGPTVCISHFSGFSVISSFFK  
SSSGCFSFSMIFSFSLAIFHVLQWTFLNFPFSSVFLAIFHVLKCVFLIFSDQFSRHIPGPTVCISHFSRFSVI  
SSFFKLSSGCFSFSMIFSFSLAIFHVPQWTFLNFPFSSYSFSPYRSYSVHFSFFTFFSDFVIFQVVKWMFLI  
FLDFQFSC

>ENSMUSP00000096646\_c.571:C>T\_p.S191F ENSMUST00000099047.4|Gm10719-201|ENSMUSG00000095547|+|chr9:g.3021484:C>T  
MFLIFHDFQFSCHIPCPTMDISFPTFSVFLAIFHVLKCVFLIFRDFQFSRHIPGPTVCISHFSGFSVISSFFK  
SSSGCFSFSMIFSFLAIFHVLQWTFLNFPFVSFLAIFHVLKCVFLIFSDQFSRHIPGPTVCISHFSRFSVI  
SSFFKLSSGCFSFSMIFSFLAIFHVPQWTFLNFPFSSYSFSPYFRSYSVHFSFSTFFSDFVIFQVVKWMFLI  
FLDFQFSC  
>ENSMUSP00000096646\_c.580:A>T\_p.Y194F ENSMUST00000099047.4|Gm10719-201|ENSMUSG00000095547|+|chr9:g.3021493:A>T  
MFLIFHDFQFSCHIPCPTMDISFPTFSVFLAIFHVLKCVFLIFRDFQFSRHIPGPTVCISHFSGFSVISSFFK  
SSSGCFSFSMIFSFLAIFHVLQWTFLNFPFVSFLAIFHVLKCVFLIFSDQFSRHIPGPTVCISHFSRFSVI  
SSFFKLSSGCFSFSMIFSFLAIFHVPQWTFLNFPFSSYSFSPYRSRFSVHFSFSTFFSDFVIFQVVKWMFLI  
FLDFQFSC  
>ENSMUSP00000096646\_c.582:A>C\_p.S195R ENSMUST00000099047.4|Gm10719-201|ENSMUSG00000095547|+|chr9:g.3021495:A>C  
MFLIFHDFQFSCHIPCPTMDISFPTFSVFLAIFHVLKCVFLIFRDFQFSRHIPGPTVCISHFSGFSVISSFFK  
SSSGCFSFSMIFSFLAIFHVLQWTFLNFPFVSFLAIFHVLKCVFLIFSDQFSRHIPGPTVCISHFSRFSVI  
SSFFKLSSGCFSFSMIFSFLAIFHVPQWTFLNFPFSSYSFSPYRSRYSRVHFSFSTFFSDFVIFQVVKWMFLI  
FLDFQFSC  
>ENSMUSP00000096646\_c.585:G>T\_p.V196L ENSMUST00000099047.4|Gm10719-201|ENSMUSG00000095547|+|chr9:g.3021498:G>T  
MFLIFHDFQFSCHIPCPTMDISFPTFSVFLAIFHVLKCVFLIFRDFQFSRHIPGPTVCISHFSGFSVISSFFK  
SSSGCFSFSMIFSFLAIFHVLQWTFLNFPFVSFLAIFHVLKCVFLIFSDQFSRHIPGPTVCISHFSRFSVI  
SSFFKLSSGCFSFSMIFSFLAIFHVPQWTFLNFPFSSYSFSPYRSRYSVHFSFSTFFSDFVIFQVVKWMFLI  
FLDFQFSC  
>ENSMUSP00000096646\_c.601:T>C\_p.F201S ENSMUST00000099047.4|Gm10719-201|ENSMUSG00000095547|+|chr9:g.3021514:T>C  
MFLIFHDFQFSCHIPCPTMDISFPTFSVFLAIFHVLKCVFLIFRDFQFSRHIPGPTVCISHFSGFSVISSFFK  
SSSGCFSFSMIFSFLAIFHVLQWTFLNFPFVSFLAIFHVLKCVFLIFSDQFSRHIPGPTVCISHFSRFSVI  
SSFFKLSSGCFSFSMIFSFLAIFHVPQWTFLNFPFSSYSFSPYRSRYSVHFSFSTFFSDFVIFQVVKWMFLI  
FLDFQFSC  
>ENSMUSP00000096646\_c.661:T>A\_p.L221H ENSMUST00000099047.4|Gm10719-201|ENSMUSG00000095547|+|chr9:g.3021574:T>A  
MFLIFHDFQFSCHIPCPTMDISFPTFSVFLAIFHVLKCVFLIFRDFQFSRHIPGPTVCISHFSGFSVISSFFK  
SSSGCFSFSMIFSFLAIFHVLQWTFLNFPFVSFLAIFHVLKCVFLIFSDQFSRHIPGPTVCISHFSRFSVI  
SSFFKLSSGCFSFSMIFSFLAIFHVPQWTFLNFPFSSYSFSPYRSRYSVHFSFSTFFSDFVIFQVVKWMFLI  
FHDFQFSC  
>ENSMUSP00000096646\_c.672:T>A\_p.F225I ENSMUST00000099047.4|Gm10719-201|ENSMUSG00000095547|+|chr9:g.3021585:T>A  
MFLIFHDFQFSCHIPCPTMDISFPTFSVFLAIFHVLKCVFLIFRDFQFSRHIPGPTVCISHFSGFSVISSFFK  
SSSGCFSFSMIFSFLAIFHVLQWTFLNFPFVSFLAIFHVLKCVFLIFSDQFSRHIPGPTVCISHFSRFSVI  
SSFFKLSSGCFSFSMIFSFLAIFHVPQWTFLNFPFSSYSFSPYRSRYSVHFSFSTFFSDFVIFQVVKWMFLI  
FLDFQISC  
>ENSMUSP00000096645\_c.45:T>C\_p.C16R ENSMUST00000099046.4|Gm10718-201|ENSMUSG00000095186|+|chr9:g.3023592:T>C  
MFLIFHDFQFSCHIPRPTVDISFPFVSFLAIFHVLKCVFLIFRDFQFSCHIPGPTVCISHFSRFSLILSFFK  
LSTACFSFSMIFSFLAIFHVLQWKFLNFPFVSFLAIFHVLKCVFLIFRDFQFSRHIPGPTVCISHFSRFSVI  
SSFFKLSSGCFSFSMIFSFLAIFHVLQWTFLNFPFVSFLFSPYRSRYSVHFSFSTFFSDFDIFQVVKWMFLI  
FHDFQLSC  
>ENSMUSP00000096645\_c.72:C>A\_p.P25T ENSMUST00000099046.4|Gm10718-201|ENSMUSG00000095186|+|chr9:g.3023623:C>A  
MFLIFHDFQFSCHIPCPTVDISFPTFSVFLAIFHVLKCVFLIFRDFQFSCHIPGPTVCISHFSRFSLILSFFK  
LSTACFSFSMIFSFLAIFHVLQWKFLNFPFVSFLAIFHVLKCVFLIFRDFQFSRHIPGPTVCISHFSRFSVI  
SSFFKLSSGCFSFSMIFSFLAIFHVLQWTFLNFPFVSFLFSPYRSRYSVHFSFSTFFSDFDIFQVVKWMFLI  
FHDFQLSC  
>ENSMUSP00000096645\_c.129:C>T\_p.R44C ENSMUST00000099046.4|Gm10718-201|ENSMUSG00000095186|+|chr9:g.3023680:C>T  
MFLIFHDFQFSCHIPCPTVDISFPFVSFLAIFHVLKCVFLIFCDFQFSCHIPGPTVCISHFSRFSLILSFFK  
LSTACFSFSMIFSFLAIFHVLQWKFLNFPFVSFLAIFHVLKCVFLIFRDFQFSRHIPGPTVCISHFSRFSVI

SSFFKSSSGCFSFSMIFSLAIFHVLQWTFLNFPFVSFLFFSPYSRSYSVHFSFFTFFSDFDIFQVVKWMFLI  
FHDFQLSC  
>ENSMUSP00000096645\_c.147:T>C\_p.C50R ENSMUST00000099046.4|Gm10718-  
201|ENSMUSG00000095186|+|chr9:g.3023698:T>C  
MFLIFHDFQFSCHIPCPTVDISFPFVSFLAIFHVLKCVFLIFRDFQFSRHIPGPTVCISHFSRFSLILSFFK  
LSTACFSFSMIFSLAIFHVLQWKFLNFPFVSFLAIFHVLKCVFLIFRDFQFSRHIPGPTVCISHFSRFSVI  
SSFFKSSSGCFSFSMIFSLAIFHVLQWTFLNFPFVSFLFFSPYSRSYSVHFSFFTFFSDFDIFQVVKWMFLI  
FHDFQLSC  
>ENSMUSP00000096645\_c.159:G>C\_p.G54R ENSMUST00000099046.4|Gm10718-  
201|ENSMUSG00000095186|+|chr9:g.3023710:G>C  
MFLIFHDFQFSCHIPCPTVDISFPFVSFLAIFHVLKCVFLIFRDFQFSCHIPRPTVCISHFSRFSLILSFFK  
LSTACFSFSMIFSLAIFHVLQWKFLNFPFVSFLAIFHVLKCVFLIFRDFQFSRHIPGPTVCISHFSRFSVI  
SSFFKSSSGCFSFSMIFSLAIFHVLQWTFLNFPFVSFLFFSPYSRSYSVHFSFFTFFSDFDIFQVVKWMFLI  
FHDFQLSC  
>ENSMUSP00000096645\_c.165:A>T\_p.T56S ENSMUST00000099046.4|Gm10718-  
201|ENSMUSG00000095186|+|chr9:g.3023716:A>T  
MFLIFHDFQFSCHIPCPTVDISFPFVSFLAIFHVLKCVFLIFRDFQFSCHIPGPSVCISHFSRFSLILSFFK  
LSTACFSFSMIFSLAIFHVLQWKFLNFPFVSFLAIFHVLKCVFLIFRDFQFSRHIPGPTVCISHFSRFSVI  
SSFFKSSSGCFSFSMIFSLAIFHVLQWTFLNFPFVSFLFFSPYSRSYSVHFSFFTFFSDFDIFQVVKWMFLI  
FHDFQLSC  
>ENSMUSP00000096645\_c.186:T>C\_p.S63P ENSMUST00000099046.4|Gm10718-  
201|ENSMUSG00000095186|+|chr9:g.3023737:T>C  
MFLIFHDFQFSCHIPCPTVDISFPFVSFLAIFHVLKCVFLIFRDFQFSCHIPGPTVCISHFPRFSLILSFFK  
LSTACFSFSMIFSLAIFHVLQWKFLNFPFVSFLAIFHVLKCVFLIFRDFQFSRHIPGPTVCISHFSRFSVI  
SSFFKSSSGCFSFSMIFSLAIFHVLQWTFLNFPFVSFLFFSPYSRSYSVHFSFFTFFSDFDIFQVVKWMFLI  
FHDFQLSC  
>ENSMUSP00000096645\_c.189:C>T\_p.R64C ENSMUST00000099046.4|Gm10718-  
201|ENSMUSG00000095186|+|chr9:g.3023740:C>T  
MFLIFHDFQFSCHIPCPTVDISFPFVSFLAIFHVLKCVFLIFRDFQFSCHIPGPTVCISHFSCFSLILSFFK  
LSTACFSFSMIFSLAIFHVLQWKFLNFPFVSFLAIFHVLKCVFLIFRDFQFSRHIPGPTVCISHFSRFSVI  
SSFFKSSSGCFSFSMIFSLAIFHVLQWTFLNFPFVSFLFFSPYSRSYSVHFSFFTFFSDFDIFQVVKWMFLI  
FHDFQLSC  
>ENSMUSP00000096645\_c.198:C>G\_p.L67V ENSMUST00000099046.4|Gm10718-  
201|ENSMUSG00000095186|+|chr9:g.3023749:C>G  
MFLIFHDFQFSCHIPCPTVDISFPFVSFLAIFHVLKCVFLIFRDFQFSCHIPGPTVCISHFSRFSVILSFFK  
LSTACFSFSMIFSLAIFHVLQWKFLNFPFVSFLAIFHVLKCVFLIFRDFQFSRHIPGPTVCISHFSRFSVI  
SSFFKSSSGCFSFSMIFSLAIFHVLQWTFLNFPFVSFLFFSPYSRSYSVHFSFFTFFSDFDIFQVVKWMFLI  
FHDFQLSC  
>ENSMUSP00000096645\_c.198:C>A\_p.L67M ENSMUST00000099046.4|Gm10718-  
201|ENSMUSG00000095186|+|chr9:g.3023749:C>A  
MFLIFHDFQFSCHIPCPTVDISFPFVSFLAIFHVLKCVFLIFRDFQFSCHIPGPTVCISHFSRFSMILSFFK  
LSTACFSFSMIFSLAIFHVLQWKFLNFPFVSFLAIFHVLKCVFLIFRDFQFSRHIPGPTVCISHFSRFSVI  
SSFFKSSSGCFSFSMIFSLAIFHVLQWTFLNFPFVSFLFFSPYSRSYSVHFSFFTFFSDFDIFQVVKWMFLI  
FHDFQLSC  
>ENSMUSP00000096645\_c.205:T>C\_p.L69S ENSMUST00000099046.4|Gm10718-  
201|ENSMUSG00000095186|+|chr9:g.3023756:T>C  
MFLIFHDFQFSCHIPCPTVDISFPFVSFLAIFHVLKCVFLIFRDFQFSCHIPGPTVCISHFSRFSLILSFFK  
LSTACFSFSMIFSLAIFHVLQWKFLNFPFVSFLAIFHVLKCVFLIFRDFQFSRHIPGPTVCISHFSRFSVI  
SSFFKSSSGCFSFSMIFSLAIFHVLQWTFLNFPFVSFLFFSPYSRSYSVHFSFFTFFSDFDIFQVVKWMFLI  
FHDFQLSC  
>ENSMUSP00000096645\_c.220:T>G\_p.L74W ENSMUST00000099046.4|Gm10718-  
201|ENSMUSG00000095186|+|chr9:g.3023771:T>G  
MFLIFHDFQFSCHIPCPTVDISFPFVSFLAIFHVLKCVFLIFRDFQFSCHIPGPTVCISHFSRFSLILSFFK  
WSTACFSFSMIFSLAIFHVLQWKFLNFPFVSFLAIFHVLKCVFLIFRDFQFSRHIPGPTVCISHFSRFSVI  
SSFFKSSSGCFSFSMIFSLAIFHVLQWTFLNFPFVSFLFFSPYSRSYSVHFSFFTFFSDFDIFQVVKWMFLI  
FHDFQLSC  
>ENSMUSP00000096645\_c.220:T>C\_p.L74S ENSMUST00000099046.4|Gm10718-  
201|ENSMUSG00000095186|+|chr9:g.3023771:T>C



MFLIFHDFQFSCHIPCPTVDISFPPFSVFLAIFHVLKCVFLIFRDFQFSCHIPGPTVCISHFSRFSLILSFFK  
SSTACFSFSMIFSLAIFHVLQWKFLNFPFVSFLAIFHVLKCVFLIFRDFQFSRHIPGPTVCISHFSRFSVI  
SSFFKSSSGCFSFSMIFSLAIFHVLQWTFLNFPFVSFLFFSPYSRSYSVHFSFSTFFSDFDIFQVVKWMFLI  
FHDFQLSC  
>ENSMUSP0000096645\_c.226:CTGC>GTGG\_p.T76S ENSMUST0000099046.4|Gm10718-  
201|ENSMUSG0000095186|+|chr9:g.3023777:CTGC>GTGG  
MFLIFHDFQFSCHIPCPTVDISFPPFSVFLAIFHVLKCVFLIFRDFQFSCHIPGPTVCISHFSRFSLILSFFK  
LSSGACFSFSMIFSLAIFHVLQWKFLNFPFVSFLAIFHVLKCVFLIFRDFQFSRHIPGPTVCISHFSRFSVI  
ISSFFKSSSGCFSFSMIFSLAIFHVLQWTFLNFPFVSFLFFSPYSRSYSVHFSFSTFFSDFDIFQVVKWMFLI  
IFHDFQLSC  
>ENSMUSP0000096645\_c.226:CTGC>GTGT\_p.T76S ENSMUST0000099046.4|Gm10718-  
201|ENSMUSG0000095186|+|chr9:g.3023777:CTGC>GTGT  
MFLIFHDFQFSCHIPCPTVDISFPPFSVFLAIFHVLKCVFLIFRDFQFSCHIPGPTVCISHFSRFSLILSFFK  
LSSVACFSFSMIFSLAIFHVLQWKFLNFPFVSFLAIFHVLKCVFLIFRDFQFSRHIPGPTVCISHFSRFSVI  
ISSFFKSSSGCFSFSMIFSLAIFHVLQWTFLNFPFVSFLFFSPYSRSYSVHFSFSTFFSDFDIFQVVKWMFLI  
IFHDFQLSC  
>ENSMUSP0000096645\_c.275:T>A\_p.H92Q ENSMUST0000099046.4|Gm10718-  
201|ENSMUSG0000095186|+|chr9:g.3023826:T>A  
MFLIFHDFQFSCHIPCPTVDISFPPFSVFLAIFHVLKCVFLIFRDFQFSCHIPGPTVCISHFSRFSLILSFFK  
LSTACFSFSMIFSLAIFHVLQWKFLNFPFVSFLAIFHVLKCVFLIFRDFQFSRHIPGPTVCISHFSRFSVI  
SSFFKSSSGCFSFSMIFSLAIFHVLQWTFLNFPFVSFLFFSPYSRSYSVHFSFSTFFSDFDIFQVVKWMFLI  
FHDFQLSC  
>ENSMUSP0000096645\_c.289:A>C\_p.K97T ENSMUST0000099046.4|Gm10718-  
201|ENSMUSG0000095186|+|chr9:g.3023840:A>C  
MFLIFHDFQFSCHIPCPTVDISFPPFSVFLAIFHVLKCVFLIFRDFQFSCHIPGPTVCISHFSRFSLILSFFK  
LSTACFSFSMIFSLAIFHVLQWTFLNFPFVSFLAIFHVLKCVFLIFRDFQFSRHIPGPTVCISHFSRFSVI  
SSFFKSSSGCFSFSMIFSLAIFHVLQWTFLNFPFVSFLFFSPYSRSYSVHFSFSTFFSDFDIFQVVKWMFLI  
FHDFQLSC  
>ENSMUSP0000096645\_c.289:A>T\_p.K97I ENSMUST0000099046.4|Gm10718-  
201|ENSMUSG0000095186|+|chr9:g.3023840:A>T  
MFLIFHDFQFSCHIPCPTVDISFPPFSVFLAIFHVLKCVFLIFRDFQFSCHIPGPTVCISHFSRFSLILSFFK  
LSTACFSFSMIFSLAIFHVLQWTFLNFPFVSFLAIFHVLKCVFLIFRDFQFSRHIPGPTVCISHFSRFSVI  
SSFFKSSSGCFSFSMIFSLAIFHVLQWTFLNFPFVSFLFFSPYSRSYSVHFSFSTFFSDFDIFQVVKWMFLI  
FHDFQLSC  
>ENSMUSP0000096645\_c.306:C>A\_p.P103T ENSMUST0000099046.4|Gm10718-  
201|ENSMUSG0000095186|+|chr9:g.3023857:C>A  
MFLIFHDFQFSCHIPCPTVDISFPPFSVFLAIFHVLKCVFLIFRDFQFSCHIPGPTVCISHFSRFSLILSFFK  
LSTACFSFSMIFSLAIFHVLQWKFLNFPFVSFLAIFHVLKCVFLIFRDFQFSRHIPGPTVCISHFSRFSVI  
SSFFKSSSGCFSFSMIFSLAIFHVLQWTFLNFPFVSFLFFSPYSRSYSVHFSFSTFFSDFDIFQVVKWMFLI  
FHDFQLSC  
>ENSMUSP0000096645\_c.325:C>A\_p.A109D ENSMUST0000099046.4|Gm10718-  
201|ENSMUSG0000095186|+|chr9:g.3023876:C>A  
MFLIFHDFQFSCHIPCPTVDISFPPFSVFLAIFHVLKCVFLIFRDFQFSCHIPGPTVCISHFSRFSLILSFFK  
LSTACFSFSMIFSLAIFHVLQWKFLNFPFVSFLDIFHVLKCVFLIFRDFQFSRHIPGPTVCISHFSRFSVI  
SSFFKSSSGCFSFSMIFSLAIFHVLQWTFLNFPFVSFLFFSPYSRSYSVHFSFSTFFSDFDIFQVVKWMFLI  
FHDFQLSC  
>ENSMUSP0000096645\_c.339:C>A\_p.L114M ENSMUST0000099046.4|Gm10718-  
201|ENSMUSG0000095186|+|chr9:g.3023890:C>A  
MFLIFHDFQFSCHIPCPTVDISFPPFSVFLAIFHVLKCVFLIFRDFQFSCHIPGPTVCISHFSRFSLILSFFK  
LSTACFSFSMIFSLAIFHVLQWKFLNFPFVSFLAIFHVMKCVFLIFRDFQFSRHIPGPTVCISHFSRFSVI  
SSFFKSSSGCFSFSMIFSLAIFHVLQWTFLNFPFVSFLFFSPYSRSYSVHFSFSTFFSDFDIFQVVKWMFLI  
FHDFQLSC  
>ENSMUSP0000096645\_c.363:C>T\_p.R122C ENSMUST0000099046.4|Gm10718-  
201|ENSMUSG0000095186|+|chr9:g.3023914:C>T  
MFLIFHDFQFSCHIPCPTVDISFPPFSVFLAIFHVLKCVFLIFRDFQFSCHIPGPTVCISHFSRFSLILSFFK  
LSTACFSFSMIFSLAIFHVLQWKFLNFPFVSFLAIFHVLKCVFLIFRDFQFSRHIPGPTVCISHFSRFSVI  
SSFFKSSSGCFSFSMIFSLAIFHVLQWTFLNFPFVSFLFFSPYSRSYSVHFSFSTFFSDFDIFQVVKWMFLI  
FHDFQLSC

>ENSMUSP00000096645\_c.399:A>T\_p.T134S ENSMUST00000099046.4|Gm10718-201|ENSMUSG00000095186|+|chr9:g.3024417:A>T  
MFLIFHDFQFSCHIPCPTVDISFPPFSVFLAIFHVLKCVFLIFRDFQFSCHIPGPTVCISHFSRFSLILSFFK  
LSTACFSFSMIFSFLAIFHVLQWKFLNFPFVSFLAIFHVLKCVFLIFRDFQFSRHIPGPTVCISHFSRFSVI  
SSFFKSSSGCFSFSMIFSFLAIFHVLQWTFLNFPFVSFLFFSPYSRSYSVHFSFFTFFSDFDIFQVVKWMFLI  
FHDFQLSC  
>ENSMUSP00000096645\_c.405:T>G\_p.C136G ENSMUST00000099046.4|Gm10718-201|ENSMUSG00000095186|+|chr9:g.3024423:T>G  
MFLIFHDFQFSCHIPCPTVDISFPPFSVFLAIFHVLKCVFLIFRDFQFSCHIPGPTVCISHFSRFSLILSFFK  
LSTACFSFSMIFSFLAIFHVLQWKFLNFPFVSFLAIFHVLKCVFLIFRDFQFSRHIPGPTVGIHFSRFSVI  
SSFFKSSSGCFSFSMIFSFLAIFHVLQWTFLNFPFVSFLFFSPYSRSYSVHFSFFTFFSDFDIFQVVKWMFLI  
FHDFQLSC  
>ENSMUSP00000096645\_c.430:C>T\_p.S144L ENSMUST00000099046.4|Gm10718-201|ENSMUSG00000095186|+|chr9:g.3024448:C>T  
MFLIFHDFQFSCHIPCPTVDISFPPFSVFLAIFHVLKCVFLIFRDFQFSCHIPGPTVCISHFSRFSLILSFFK  
LSTACFSFSMIFSFLAIFHVLQWKFLNFPFVSFLAIFHVLKCVFLIFRDFQFSRHIPGPTVCISHFSRFLVI  
SSFFKSSSGCFSFSMIFSFLAIFHVLQWTFLNFPFVSFLFFSPYSRSYSVHFSFFTFFSDFDIFQVVKWMFLI  
FHDFQLSC  
>ENSMUSP00000096645\_c.540:C>A\_p.P181T ENSMUST00000099046.4|Gm10718-201|ENSMUSG00000095186|+|chr9:g.3024558:C>A  
MFLIFHDFQFSCHIPCPTVDISFPPFSVFLAIFHVLKCVFLIFRDFQFSCHIPGPTVCISHFSRFSLILSFFK  
LSTACFSFSMIFSFLAIFHVLQWKFLNFPFVSFLAIFHVLKCVFLIFRDFQFSRHIPGPTVCISHFSRFSVI  
SSFFKSSSGCFSFSMIFSFLAIFHVLQWTFLNFPFVSFLFFSPYSRSYSVHFSFFTFFSDFDIFQVVKWMFLI  
FHDFQLSC  
>ENSMUSP00000096645\_c.553:T>TAC\_p.L185ins-fs  
ENSMUST00000099046.4|Gm10718-201|ENSMUSG00000095186|+|chr9:g.3024884:T>TAC  
MFLIFHDFQFSCHIPCPTVDISFPPFSVFLAIFHVLKCVFLIFRDFQFSCHIPGPTVCISHFSRFSLILSFFK  
LSTACFSFSMIFSFLAIFHVLQWKFLNFPFVSFLAIFHVLKCVFLIFRDFQFSRHIPGPTVCISHFSRFSVI  
SSFFKSSSGCFSFSMIFSFLAIFHVLQWTFLNFPFVSFLHFSRHIPGPTVCISHFSRFSVISTFFKLSSGCFS  
FSMIFSFL  
>ENSMUSP00000096645\_c.554:AT>A\_p.L185del-fs ENSMUST00000099046.4|Gm10718-201|ENSMUSG00000095186|+|chr9:g.3024885:AT>A  
MFLIFHDFQFSCHIPCPTVDISFPPFSVFLAIFHVLKCVFLIFRDFQFSCHIPGPTVCISHFSRFSLILSFFK  
LSTACFSFSMIFSFLAIFHVLQWKFLNFPFVSFLAIFHVLKCVFLIFRDFQFSRHIPGPTVCISHFSRFSVI  
SSFFKSSSGCFSFSMIFSFLAIFHVLQWTFLNFPFVSFLFSRHIPGPTVCISHFSRFSVISTFFKLSSGCFS  
SMIFSFL  
>ENSMUSP00000096645\_c.555:T>TA\_p.F186ins-fs ENSMUST00000099046.4|Gm10718-201|ENSMUSG00000095186|+|chr9:g.3024886:T>TA  
MFLIFHDFQFSCHIPCPTVDISFPPFSVFLAIFHVLKCVFLIFRDFQFSCHIPGPTVCISHFSRFSLILSFFK  
LSTACFSFSMIFSFLAIFHVLQWKFLNFPFVSFLAIFHVLKCVFLIFRDFQFSRHIPGPTVCISHFSRFSVI  
SSFFKSSSGCFSFSMIFSFLAIFHVLQWTFLNFPFVSFLYFLAIFQVLQCAFLIFHVQ  
>ENSMUSP00000096645\_c.580:A>T\_p.Y194F ENSMUST00000099046.4|Gm10718-201|ENSMUSG00000095186|+|chr9:g.3025118:A>T  
MFLIFHDFQFSCHIPCPTVDISFPPFSVFLAIFHVLKCVFLIFRDFQFSCHIPGPTVCISHFSRFSLILSFFK  
LSTACFSFSMIFSFLAIFHVLQWKFLNFPFVSFLAIFHVLKCVFLIFRDFQFSRHIPGPTVCISHFSRFSVI  
SSFFKSSSGCFSFSMIFSFLAIFHVLQWTFLNFPFVSFLFFSPYSRSYSVHFSFFTFFSDFDIFQVVKWMFLI  
FHDFQLSC  
>ENSMUSP00000096645\_c.622:A>C\_p.D208A ENSMUST00000099046.4|Gm10718-201|ENSMUSG00000095186|+|chr9:g.3025160:A>C  
MFLIFHDFQFSCHIPCPTVDISFPPFSVFLAIFHVLKCVFLIFRDFQFSCHIPGPTVCISHFSRFSLILSFFK  
LSTACFSFSMIFSFLAIFHVLQWKFLNFPFVSFLAIFHVLKCVFLIFRDFQFSRHIPGPTVCISHFSRFSVI  
SSFFKSSSGCFSFSMIFSFLAIFHVLQWTFLNFPFVSFLFFSPYSRSYSVHFSFFTFFSDFAIQVVKWMFLI  
FHDFQLSC  
>ENSMUSP00000096645\_c.622:A>T\_p.D208V ENSMUST00000099046.4|Gm10718-201|ENSMUSG00000095186|+|chr9:g.3025160:A>T  
MFLIFHDFQFSCHIPCPTVDISFPPFSVFLAIFHVLKCVFLIFRDFQFSCHIPGPTVCISHFSRFSLILSFFK  
LSTACFSFSMIFSFLAIFHVLQWKFLNFPFVSFLAIFHVLKCVFLIFRDFQFSRHIPGPTVCISHFSRFSVI

SSFFKSSSGCFSFSMIFSLAIFHVLQWTFNLNPPFSVLFSPYSRSYSVHFSFSTFFSDFVIFQVVKWMFLI  
FHDFQLSC  
>ENSMUSP00000096645\_c.654:A>G\_p.I219V ENSMUST00000099046.4|Gm10718-  
201|ENSMUSG00000095186|+|chr9:g.3025192:A>G  
MFLIFHDFQFSCHIPCPTVDISFPPFSVFLAIFHVLKCVFLIFRDFQFSCHIPGPTVCISHFSRFSLILSFFK  
LSTACFSFSMIFSLAIFHVLQWKFLNFPFVSFLAIFHVLKCVFLIFRDFQFSRHIPGPTVCISHFSRFSVI  
SSFFKSSSGCFSFSMIFSLAIFHVLQWTFNLNPPFSVLFSPYSRSYSVHFSFSTFFSDFDIFQVVKWMFLV  
FHDFQLSC  
>ENSMUSP00000096645\_c.654:A>T\_p.I219F ENSMUST00000099046.4|Gm10718-  
201|ENSMUSG00000095186|+|chr9:g.3025192:A>T  
MFLIFHDFQFSCHIPCPTVDISFPPFSVFLAIFHVLKCVFLIFRDFQFSCHIPGPTVCISHFSRFSLILSFFK  
LSTACFSFSMIFSLAIFHVLQWKFLNFPFVSFLAIFHVLKCVFLIFRDFQFSRHIPGPTVCISHFSRFSVI  
SSFFKSSSGCFSFSMIFSLAIFHVLQWTFNLNPPFSVLFSPYSRSYSVHFSFSTFFSDFDIFQVVKWMFLF  
FHDFQLSC  
>ENSMUSP00000096645\_c.672:C>T\_p.L225F ENSMUST00000099046.4|Gm10718-  
201|ENSMUSG00000095186|+|chr9:g.3025210:C>T  
MFLIFHDFQFSCHIPCPTVDISFPPFSVFLAIFHVLKCVFLIFRDFQFSCHIPGPTVCISHFSRFSLILSFFK  
LSTACFSFSMIFSLAIFHVLQWKFLNFPFVSFLAIFHVLKCVFLIFRDFQFSRHIPGPTVCISHFSRFSVI  
SSFFKSSSGCFSFSMIFSLAIFHVLQWTFNLNPPFSVLFSPYSRSYSVHFSFSTFFSDFDIFQVVKWMFLI  
FHDFQFSC  
>ENSMUSP00000096645\_c.672:C>A\_p.L225I ENSMUST00000099046.4|Gm10718-  
201|ENSMUSG00000095186|+|chr9:g.3025210:C>A  
MFLIFHDFQFSCHIPCPTVDISFPPFSVFLAIFHVLKCVFLIFRDFQFSCHIPGPTVCISHFSRFSLILSFFK  
LSTACFSFSMIFSLAIFHVLQWKFLNFPFVSFLAIFHVLKCVFLIFRDFQFSRHIPGPTVCISHFSRFSVI  
SSFFKSSSGCFSFSMIFSLAIFHVLQWTFNLNPPFSVLFSPYSRSYSVHFSFSTFFSDFDIFQVVKWMFLI  
FHDFQISC  
>ENSMUSP00000096644\_c.0:A>C\_p.M1L ENSMUST00000075573.7|Gm10717-  
201|ENSMUSG00000095891|+|chr9:g.3025417:A>C  
LFLIFHDFQFSCHIPCPTVEICKFPFVSFLAIFHVLKYVFLIFRDFQFSRHIPGPTVCISHFSRFSVILSFF  
KFSSGCFSFSLIFSFLAIFHVLQWTFNLNPPFSVFLAIFHVLKCVFLIFSDQFSRHIPGPTVCISHFSRFSV  
ISSFFKVSSGCFSFSMIFSLAIFHVLQWTFNLNPPFSYSFSPYSRSYSVHFSFSTFFSDFVIFQVFKWMFL  
IFLDFQFSC  
>ENSMUSP00000096644\_c.3:T>A\_p.F2I ENSMUST00000075573.7|Gm10717-  
201|ENSMUSG00000095891|+|chr9:g.3025420:T>A  
MILIFHDFQFSCHIPCPTVEICKFPFVSFLAIFHVLKYVFLIFRDFQFSRHIPGPTVCISHFSRFSVILSFF  
KFSSGCFSFSLIFSFLAIFHVLQWTFNLNPPFSVFLAIFHVLKCVFLIFSDQFSRHIPGPTVCISHFSRFSV  
ISSFFKVSSGCFSFSMIFSLAIFHVLQWTFNLNPPFSYSFSPYSRSYSVHFSFSTFFSDFVIFQVFKWMFL  
IFLDFQFSC  
>ENSMUSP00000096644\_c.9:A>T\_p.I4F ENSMUST00000075573.7|Gm10717-  
201|ENSMUSG00000095891|+|chr9:g.3025426:A>T  
MFLFFHDFQFSCHIPCPTVEICKFPFVSFLAIFHVLKYVFLIFRDFQFSRHIPGPTVCISHFSRFSVILSFF  
KFSSGCFSFSLIFSFLAIFHVLQWTFNLNPPFSVFLAIFHVLKCVFLIFSDQFSRHIPGPTVCISHFSRFSV  
ISSFFKVSSGCFSFSMIFSLAIFHVLQWTFNLNPPFSYSFSPYSRSYSVHFSFSTFFSDFVIFQVFKWMFL  
IFLDFQFSC  
>ENSMUSP00000096644\_c.45:T>A\_p.C16S ENSMUST00000075573.7|Gm10717-  
201|ENSMUSG00000095891|+|chr9:g.3025462:T>A  
MFLIFHDFQFSCHIPSPPTVEICKFPFVSFLAIFHVLKYVFLIFRDFQFSRHIPGPTVCISHFSRFSVILSFF  
KFSSGCFSFSLIFSFLAIFHVLQWTFNLNPPFSVFLAIFHVLKCVFLIFSDQFSRHIPGPTVCISHFSRFSV  
ISSFFKVSSGCFSFSMIFSLAIFHVLQWTFNLNPPFSYSFSPYSRSYSVHFSFSTFFSDFVIFQVFKWMFL  
IFLDFQFSC  
>ENSMUSP00000096644\_c.45:T>C\_p.C16R ENSMUST00000075573.7|Gm10717-  
201|ENSMUSG00000095891|+|chr9:g.3025462:T>C  
MFLIFHDFQFSCHIPRPTVEICKFPFVSFLAIFHVLKYVFLIFRDFQFSRHIPGPTVCISHFSRFSVILSFF  
KFSSGCFSFSLIFSFLAIFHVLQWTFNLNPPFSVFLAIFHVLKCVFLIFSDQFSRHIPGPTVCISHFSRFSV  
ISSFFKVSSGCFSFSMIFSLAIFHVLQWTFNLNPPFSYSFSPYSRSYSVHFSFSTFFSDFVIFQVFKWMFL  
IFLDFQFSC  
>ENSMUSP00000096644\_c.59:A>T\_p.E20D ENSMUST00000075573.7|Gm10717-  
201|ENSMUSG00000095891|+|chr9:g.3025476:A>T

MFLIFHDFQFSCHIPCPTVDICKFPPFSVFLAIFHVLKYVFLIFRDFQFSRHIPGPTVCISHFSRFSVILSFF  
KFSSGCFSSFLIFSFLAIFHVLQWTFNLNPPFSVFLAIFHVLKCVFLIFSDQFSRHIPGPTVCISHFSRFSV  
ISSFFKVSSGCFSSMIFSFLAIFHVLQWTFNLNPPFSSYSFSPYRSYSVHFSFSTFFSDFVIFQVFKWMFL  
IFLDFQFSC  
>ENSMUSP00000096644\_c.59:A>C\_p.E20D ENSMUST00000075573.7|Gm10717-  
201|ENSMUSG00000095891|+|chr9:g.3025476:A>C  
MFLIFHDFQFSCHIPCPTVDICKFPPFSVFLAIFHVLKYVFLIFRDFQFSRHIPGPTVCISHFSRFSVILSFF  
KFSSGCFSSFLIFSFLAIFHVLQWTFNLNPPFSVFLAIFHVLKCVFLIFSDQFSRHIPGPTVCISHFSRFSV  
ISSFFKVSSGCFSSMIFSFLAIFHVLQWTFNLNPPFSSYSFSPYRSYSVHFSFSTFFSDFVIFQVFKWMFL  
IFLDFQFSC  
>ENSMUSP00000096644\_c.64:G>C\_p.C22S ENSMUST00000075573.7|Gm10717-  
201|ENSMUSG00000095891|+|chr9:g.3025481:G>C  
MFLIFHDFQFSCHIPCPTVEISKFPFVFLAIFHVLKYVFLIFRDFQFSRHIPGPTVCISHFSRFSVILSFF  
KFSSGCFSSFLIFSFLAIFHVLQWTFNLNPPFSVFLAIFHVLKCVFLIFSDQFSRHIPGPTVCISHFSRFSV  
ISSFFKVSSGCFSSMIFSFLAIFHVLQWTFNLNPPFSSYSFSPYRSYSVHFSFSTFFSDFVIFQVFKWMFL  
IFLDFQFSC  
>ENSMUSP00000096644\_c.64:G>A\_p.C22Y ENSMUST00000075573.7|Gm10717-  
201|ENSMUSG00000095891|+|chr9:g.3025481:G>A  
MFLIFHDFQFSCHIPCPTVEIYKFPFVFLAIFHVLKYVFLIFRDFQFSRHIPGPTVCISHFSRFSVILSFF  
KFSSGCFSSFLIFSFLAIFHVLQWTFNLNPPFSVFLAIFHVLKCVFLIFSDQFSRHIPGPTVCISHFSRFSV  
ISSFFKVSSGCFSSMIFSFLAIFHVLQWTFNLNPPFSSYSFSPYRSYSVHFSFSTFFSDFVIFQVFKWMFL  
IFLDFQFSC  
>ENSMUSP00000096644\_c.68:A>AT\_p.K23ins-fs ENSMUST00000075573.7|Gm10717-  
201|ENSMUSG00000095891|+|chr9:g.3025485:A>AT  
MFLIFHDFQFSCHIPCPTVEICKFSTFFSFRHISRPKVCISHFP  
>ENSMUSP00000096644\_c.70:T>TA\_p.F24ins-fs ENSMUST00000075573.7|Gm10717-  
201|ENSMUSG00000095891|+|chr9:g.3025487:T>TA  
MFLIFHDFQFSCHIPCPTVEICKLSTFFSFRHISRPKVCISHFP  
>ENSMUSP00000096644\_c.75:C>A\_p.P26T ENSMUST00000075573.7|Gm10717-  
201|ENSMUSG00000095891|+|chr9:g.3025492:C>A  
MFLIFHDFQFSCHIPCPTVEICKFPFVFLAIFHVLKYVFLIFRDFQFSRHIPGPTVCISHFSRFSVILSFF  
KFSSGCFSSFLIFSFLAIFHVLQWTFNLNPPFSVFLAIFHVLKCVFLIFSDQFSRHIPGPTVCISHFSRFSV  
ISSFFKVSSGCFSSMIFSFLAIFHVLQWTFNLNPPFSSYSFSPYRSYSVHFSFSTFFSDFVIFQVFKWMFL  
IFLDFQFSC  
>ENSMUSP00000096644\_c.89:C>A\_p.F30L ENSMUST00000075573.7|Gm10717-  
201|ENSMUSG00000095891|+|chr9:g.3025506:C>A  
MFLIFHDFQFSCHIPCPTVEICKFPFVLLAIFHVLKYVFLIFRDFQFSRHIPGPTVCISHFSRFSVILSFF  
KFSSGCFSSFLIFSFLAIFHVLQWTFNLNPPFSVFLAIFHVLKCVFLIFSDQFSRHIPGPTVCISHFSRFSV  
ISSFFKVSSGCFSSMIFSFLAIFHVLQWTFNLNPPFSSYSFSPYRSYSVHFSFSTFFSDFVIFQVFKWMFL  
IFLDFQFSC  
>ENSMUSP00000096644\_c.94:C>A\_p.A32D ENSMUST00000075573.7|Gm10717-  
201|ENSMUSG00000095891|+|chr9:g.3025511:C>A  
MFLIFHDFQFSCHIPCPTVEICKFPFVFLDIFHVLKYVFLIFRDFQFSRHIPGPTVCISHFSRFSVILSFF  
KFSSGCFSSFLIFSFLAIFHVLQWTFNLNPPFSVFLAIFHVLKCVFLIFSDQFSRHIPGPTVCISHFSRFSV  
ISSFFKVSSGCFSSMIFSFLAIFHVLQWTFNLNPPFSSYSFSPYRSYSVHFSFSTFFSDFVIFQVFKWMFL  
IFLDFQFSC  
>ENSMUSP00000096644\_c.115:A>G\_p.Y39C ENSMUST00000075573.7|Gm10717-  
201|ENSMUSG00000095891|+|chr9:g.3025532:A>G  
MFLIFHDFQFSCHIPCPTVEICKFPFVFLAIFHVLKCVFLIFRDFQFSRHIPGPTVCISHFSRFSVILSFF  
KFSSGCFSSFLIFSFLAIFHVLQWTFNLNPPFSVFLAIFHVLKCVFLIFSDQFSRHIPGPTVCISHFSRFSV  
ISSFFKVSSGCFSSMIFSFLAIFHVLQWTFNLNPPFSSYSFSPYRSYSVHFSFSTFFSDFVIFQVFKWMFL  
IFLDFQFSC  
>ENSMUSP00000096644\_c.143:G>C\_p.Q48H ENSMUST00000075573.7|Gm10717-  
201|ENSMUSG00000095891|+|chr9:g.3025560:G>C  
MFLIFHDFQFSCHIPCPTVEICKFPFVFLAIFHVLKYVFLIFRDFHFSRHIPGPTVCISHFSRFSVILSFF  
KFSSGCFSSFLIFSFLAIFHVLQWTFNLNPPFSVFLAIFHVLKCVFLIFSDQFSRHIPGPTVCISHFSRFSV  
ISSFFKVSSGCFSSMIFSFLAIFHVLQWTFNLNPPFSSYSFSPYRSYSVHFSFSTFFSDFVIFQVFKWMFL  
IFLDFQFSC

>ENSMUSP00000096644\_c.163:G>T\_p.G55V ENSMUST00000075573.7|Gm10717-  
201|ENSMUSG00000095891|+|chr9:g.3025580:G>T  
MFLIFHDFQFSCHIPCPTVEICKFPPFSVFLAIFHVLKYVFLIFRDFQFSRHIPVPTVCISHFSRFSVILSFF  
KFSSGCFSSFLIFSFLAIFHVLQWTFNLNPPFSVFLAIFHVLKCVFLIFSDFQFSRHIPGPTVCISHFSRFSV  
ISSFFKVSSGCFSSMIFSFLAIFHVLQWTFNLNPPFSSYSFSPYRSYSVHFSFSTFFSDFVIFQVFKWMFL  
IFLDFQFSC  
>ENSMUSP00000096644\_c.168:A>T\_p.T57S ENSMUST00000075573.7|Gm10717-  
201|ENSMUSG00000095891|+|chr9:g.3025585:A>T  
MFLIFHDFQFSCHIPCPTVEICKFPPFSVFLAIFHVLKYVFLIFRDFQFSRHIPGSPVCISHFSRFSVILSFF  
KFSSGCFSSFLIFSFLAIFHVLQWTFNLNPPFSVFLAIFHVLKCVFLIFSDFQFSRHIPGPTVCISHFSRFSV  
ISSFFKVSSGCFSSMIFSFLAIFHVLQWTFNLNPPFSSYSFSPYRSYSVHFSFSTFFSDFVIFQVFKWMFL  
IFLDFQFSC  
>ENSMUSP00000096644\_c.183:C>A\_p.H62N ENSMUST00000075573.7|Gm10717-  
201|ENSMUSG00000095891|+|chr9:g.3025600:C>A  
MFLIFHDFQFSCHIPCPTVEICKFPPFSVFLAIFHVLKYVFLIFRDFQFSRHIPGPTVCISNFSRFSVILSFF  
KFSSGCFSSFLIFSFLAIFHVLQWTFNLNPPFSVFLAIFHVLKCVFLIFSDFQFSRHIPGPTVCISHFSRFSV  
ISSFFKVSSGCFSSMIFSFLAIFHVLQWTFNLNPPFSSYSFSPYRSYSVHFSFSTFFSDFVIFQVFKWMFL  
IFLDFQFSC  
>ENSMUSP00000096644\_c.198:T>G\_p.S67A ENSMUST00000075573.7|Gm10717-  
201|ENSMUSG00000095891|+|chr9:g.3025615:T>G  
MFLIFHDFQFSCHIPCPTVEICKFPPFSVFLAIFHVLKYVFLIFRDFQFSRHIPGPTVCISHFSRFAVILSFF  
KFSSGCFSSFLIFSFLAIFHVLQWTFNLNPPFSVFLAIFHVLKCVFLIFSDFQFSRHIPGPTVCISHFSRFSV  
ISSFFKVSSGCFSSMIFSFLAIFHVLQWTFNLNPPFSSYSFSPYRSYSVHFSFSTFFSDFVIFQVFKWMFL  
IFLDFQFSC  
>ENSMUSP00000096644\_c.199:C>T\_p.S67L ENSMUST00000075573.7|Gm10717-  
201|ENSMUSG00000095891|+|chr9:g.3025616:C>T  
MFLIFHDFQFSCHIPCPTVEICKFPPFSVFLAIFHVLKYVFLIFRDFQFSRHIPGPTVCISHFSRFLVILSFF  
KFSSGCFSSFLIFSFLAIFHVLQWTFNLNPPFSVFLAIFHVLKCVFLIFSDFQFSRHIPGPTVCISHFSRFSV  
ISSFFKVSSGCFSSMIFSFLAIFHVLQWTFNLNPPFSSYSFSPYRSYSVHFSFSTFFSDFVIFQVFKWMFL  
IFLDFQFSC  
>ENSMUSP00000096644\_c.202:T>G\_p.V68G ENSMUST00000075573.7|Gm10717-  
201|ENSMUSG00000095891|+|chr9:g.3025619:T>G  
MFLIFHDFQFSCHIPCPTVEICKFPPFSVFLAIFHVLKYVFLIFRDFQFSRHIPGPTVCISHFSRFSGILSFF  
KFSSGCFSSFLIFSFLAIFHVLQWTFNLNPPFSVFLAIFHVLKCVFLIFSDFQFSRHIPGPTVCISHFSRFSV  
ISSFFKVSSGCFSSMIFSFLAIFHVLQWTFNLNPPFSSYSFSPYRSYSVHFSFSTFFSDFVIFQVFKWMFL  
IFLDFQFSC  
>ENSMUSP00000096644\_c.208:T>C\_p.L70S ENSMUST00000075573.7|Gm10717-  
201|ENSMUSG00000095891|+|chr9:g.3025625:T>C  
MFLIFHDFQFSCHIPCPTVEICKFPPFSVFLAIFHVLKYVFLIFRDFQFSRHIPGPTVCISHFSRFSVILSFF  
KFSSGCFSSFLIFSFLAIFHVLQWTFNLNPPFSVFLAIFHVLKCVFLIFSDFQFSRHIPGPTVCISHFSRFSV  
ISSFFKVSSGCFSSMIFSFLAIFHVLQWTFNLNPPFSSYSFSPYRSYSVHFSFSTFFSDFVIFQVFKWMFL  
IFLDFQFSC  
>ENSMUSP00000096644\_c.209:G>T\_p.L70F ENSMUST00000075573.7|Gm10717-  
201|ENSMUSG00000095891|+|chr9:g.3025626:G>T  
MFLIFHDFQFSCHIPCPTVEICKFPPFSVFLAIFHVLKYVFLIFRDFQFSRHIPGPTVCISHFSRFSVILSFF  
KFSSGCFSSFLIFSFLAIFHVLQWTFNLNPPFSVFLAIFHVLKCVFLIFSDFQFSRHIPGPTVCISHFSRFSV  
ISSFFKVSSGCFSSMIFSFLAIFHVLQWTFNLNPPFSSYSFSPYRSYSVHFSFSTFFSDFVIFQVFKWMFL  
IFLDFQFSC  
>ENSMUSP00000096644\_c.223:T>C\_p.F75S ENSMUST00000075573.7|Gm10717-  
201|ENSMUSG00000095891|+|chr9:g.3025640:T>C  
MFLIFHDFQFSCHIPCPTVEICKFPPFSVFLAIFHVLKYVFLIFRDFQFSRHIPGPTVCISHFSRFSVILSFF  
KSSSGCFSSFLIFSFLAIFHVLQWTFNLNPPFSVFLAIFHVLKCVFLIFSDFQFSRHIPGPTVCISHFSRFSV  
ISSFFKVSSGCFSSMIFSFLAIFHVLQWTFNLNPPFSSYSFSPYRSYSVHFSFSTFFSDFVIFQVFKWMFL  
IFLDFQFSC  
>ENSMUSP00000096644\_c.223:T>G\_p.F75C ENSMUST00000075573.7|Gm10717-  
201|ENSMUSG00000095891|+|chr9:g.3025640:T>G  
MFLIFHDFQFSCHIPCPTVEICKFPPFSVFLAIFHVLKYVFLIFRDFQFSRHIPGPTVCISHFSRFSVILSFF  
KCSSGCFSSFLIFSFLAIFHVLQWTFNLNPPFSVFLAIFHVLKCVFLIFSDFQFSRHIPGPTVCISHFSRFSV



ISSFFKVSSGCFSSMIFSLAIFHVLQWTFNFPFSSYSFSPYSRSYSVHFSFFTFSSDFVIFQVFKWMFL  
IFLDFQFSC  
>ENSMUSP00000096644\_c.223:TT>CA\_p.F75S ENSMUST00000075573.7|Gm10717-  
201|ENSMUSG00000095891|+|chr9:g.3025640:TT>CA  
MFLIFHDFQFSCHIPCPTVEICKFPPFSVFLAIFHVLKYVFLIFRDFQFSRHIPGPTVCISHFSRFSVILSFF  
KSFKWMFLIFLDFQFSCHIPCPTVDISKFSTFFSFPRHISC PKVCISHFQ\*FSVFSPPYSRSYSVHFSFFTFSS  
DFVIFQGVKWMFLIFHDFQFSCHIPCPTVDISKFSTFFFLQFLAIFQVLQCAFLIFHV FQ\*FCHFSSSQVDVS  
HFP\*FSVFL  
>ENSMUSP00000096644\_c.223:TT>CG\_p.F75S ENSMUST00000075573.7|Gm10717-  
201|ENSMUSG00000095891|+|chr9:g.3025640:TT>CG  
MFLIFHDFQFSCHIPCPTVEICKFPPFSVFLAIFHVLKYVFLIFRDFQFSRHIPGPTVCISHFSRFSVILSFF  
KSFKWMFLIFLDFQFSCHIPCPTVDISKFSTFFSFPRHISC PKVCISHFQ\*FSVFSPPYSRSYSVHFSFFTFSS  
DFVIFQGVKWMFLIFHDFQFSCHIPCPTVDISKFSTFFFLQFLAIFQVLQCAFLIFHV FQ\*FCHFSSSQVDVS  
HFP\*FSVFL  
>ENSMUSP00000096644\_c.235:G>T\_p.C79F ENSMUST00000075573.7|Gm10717-  
201|ENSMUSG00000095891|+|chr9:g.3025652:G>T  
MFLIFHDFQFSCHIPCPTVEICKFPPFSVFLAIFHVLKYVFLIFRDFQFSRHIPGPTVCISHFSRFSVILSFF  
KFSSGFFSFLIFSLAIFHVLQWTFNFPFSSVFLAIFHVLKCVFLIFSDQFSRHIPGPTVCISHFSRFSV  
ISSFFKVSSGCFSSMIFSLAIFHVLQWTFNFPFSSYSFSPYSRSYSVHFSFFTFSSDFVIFQVFKWMFL  
IFLDFQFSC  
>ENSMUSP00000096644\_c.237:T>A\_p.F80I ENSMUST00000075573.7|Gm10717-  
201|ENSMUSG00000095891|+|chr9:g.3025654:T>A  
MFLIFHDFQFSCHIPCPTVEICKFPPFSVFLAIFHVLKYVFLIFRDFQFSRHIPGPTVCISHFSRFSVILSFF  
KFSSGCISFSLIFSLAIFHVLQWTFNFPFSSVFLAIFHVLKCVFLIFSDQFSRHIPGPTVCISHFSRFSV  
ISSFFKVSSGCFSSMIFSLAIFHVLQWTFNFPFSSYSFSPYSRSYSVHFSFFTFSSDFVIFQVFKWMFL  
IFLDFQFSC  
>ENSMUSP00000096644\_c.249:T>A\_p.L84M ENSMUST00000075573.7|Gm10717-  
201|ENSMUSG00000095891|+|chr9:g.3025666:T>A  
MFLIFHDFQFSCHIPCPTVEICKFPPFSVFLAIFHVLKYVFLIFRDFQFSRHIPGPTVCISHFSRFSVILSFF  
KFSSGCFSSMIFSLAIFHVLQWTFNFPFSSVFLAIFHVLKCVFLIFSDQFSRHIPGPTVCISHFSRFSV  
ISSFFKVSSGCFSSMIFSLAIFHVLQWTFNFPFSSYSFSPYSRSYSVHFSFFTFSSDFVIFQVFKWMFL  
IFLDFQFSC  
>ENSMUSP00000096644\_c.249:T>G\_p.L84V ENSMUST00000075573.7|Gm10717-  
201|ENSMUSG00000095891|+|chr9:g.3025666:T>G  
MFLIFHDFQFSCHIPCPTVEICKFPPFSVFLAIFHVLKYVFLIFRDFQFSRHIPGPTVCISHFSRFSVILSFF  
KFSSGCFSSVIFSLAIFHVLQWTFNFPFSSVFLAIFHVLKCVFLIFSDQFSRHIPGPTVCISHFSRFSV  
ISSFFKVSSGCFSSMIFSLAIFHVLQWTFNFPFSSYSFSPYSRSYSVHFSFFTFSSDFVIFQVFKWMFL  
IFLDFQFSC  
>ENSMUSP00000096644\_c.260:T>A\_p.S87R ENSMUST00000075573.7|Gm10717-  
201|ENSMUSG00000095891|+|chr9:g.3025677:T>A  
MFLIFHDFQFSCHIPCPTVEICKFPPFSVFLAIFHVLKYVFLIFRDFQFSRHIPGPTVCISHFSRFSVILSFF  
KFSSGCFSSFLIFRFLAIFHVLQWTFNFPFSSVFLAIFHVLKCVFLIFSDQFSRHIPGPTVCISHFSRFSV  
ISSFFKVSSGCFSSMIFSLAIFHVLQWTFNFPFSSYSFSPYSRSYSVHFSFFTFSSDFVIFQVFKWMFL  
IFLDFQFSC  
>ENSMUSP00000096644\_c.278:T>G\_p.H93Q ENSMUST00000075573.7|Gm10717-  
201|ENSMUSG00000095891|+|chr9:g.3025695:T>G  
MFLIFHDFQFSCHIPCPTVEICKFPPFSVFLAIFHVLKYVFLIFRDFQFSRHIPGPTVCISHFSRFSVILSFF  
KFSSGCFSSFLIFSLAIFQVLQWTFNFPFSSVFLAIFHVLKCVFLIFSDQFSRHIPGPTVCISHFSRFSV  
ISSFFKVSSGCFSSMIFSLAIFHVLQWTFNFPFSSYSFSPYSRSYSVHFSFFTFSSDFVIFQVFKWMFL  
IFLDFQFSC  
>ENSMUSP00000096644\_c.289:G>T\_p.W97L ENSMUST00000075573.7|Gm10717-  
201|ENSMUSG00000095891|+|chr9:g.3025706:G>T  
MFLIFHDFQFSCHIPCPTVEICKFPPFSVFLAIFHVLKYVFLIFRDFQFSRHIPGPTVCISHFSRFSVILSFF  
KFSSGCFSSFLIFSLAIFHVLQLTFLNFPFSSVFLAIFHVLKCVFLIFSDQFSRHIPGPTVCISHFSRFSV  
ISSFFKVSSGCFSSMIFSLAIFHVLQWTFNFPFSSYSFSPYSRSYSVHFSFFTFSSDFVIFQVFKWMFL  
IFLDFQFSC  
>ENSMUSP00000096644\_c.309:C>A\_p.P104T ENSMUST00000075573.7|Gm10717-  
201|ENSMUSG00000095891|+|chr9:g.3025726:C>A

MFLIFHDFQFSCHIPCPTVEICKFPPFSVFLAIFHVLKYVFLIFRDFQFSRHIPGPTVCISHFSRFSVILSFF  
KFSSGCFSSFLIFSFLAIFHVLQWTFNLNPPFSVFLAIFHVLKCVFLIFSDQFSRHIPGPTVCISHFSRFSV  
ISSFFKVSSGCFSSMIFSFLAIFHVLQWTFNLNPPFSSYSFSPYRSYSVHFSFSTFFSDFVIFQVFKWMFL  
IFLDFQFSC  
>ENSMUSP00000096644\_c.330:A>T\_p.I111L ENSMUST00000075573.7|Gm10717-  
201|ENSMUSG00000095891|+|chr9:g.3025747:A>T  
MFLIFHDFQFSCHIPCPTVEICKFPPFSVFLAIFHVLKYVFLIFRDFQFSRHIPGPTVCISHFSRFSVILSFF  
KFSSGCFSSFLIFSFLAIFHVLQWTFNLNPPFSVFLAIFHVLKCVFLIFSDQFSRHIPGPTVCISHFSRFSV  
ISSFFKVSSGCFSSMIFSFLAIFHVLQWTFNLNPPFSSYSFSPYRSYSVHFSFSTFFSDFVIFQVFKWMFL  
IFLDFQFSC  
>ENSMUSP00000096644\_c.338:T>A\_p.H113Q ENSMUST00000075573.7|Gm10717-  
201|ENSMUSG00000095891|+|chr9:g.3025755:T>A  
MFLIFHDFQFSCHIPCPTVEICKFPPFSVFLAIFHVLKYVFLIFRDFQFSRHIPGPTVCISHFSRFSVILSFF  
KFSSGCFSSFLIFSFLAIFHVLQWTFNLNPPFSVFLAIFHVLKCVFLIFSDQFSRHIPGPTVCISHFSRFSV  
ISSFFKVSSGCFSSMIFSFLAIFHVLQWTFNLNPPFSSYSFSPYRSYSVHFSFSTFFSDFVIFQVFKWMFL  
IFLDFQFSC  
>ENSMUSP00000096644\_c.356:T>A\_p.F119L ENSMUST00000075573.7|Gm10717-  
201|ENSMUSG00000095891|+|chr9:g.3025773:T>A  
MFLIFHDFQFSCHIPCPTVEICKFPPFSVFLAIFHVLKYVFLIFRDFQFSRHIPGPTVCISHFSRFSVILSFF  
KFSSGCFSSFLIFSFLAIFHVLQWTFNLNPPFSVFLAIFHVLKCVLLIFSDQFSRHIPGPTVCISHFSRFSV  
ISSFFKVSSGCFSSMIFSFLAIFHVLQWTFNLNPPFSSYSFSPYRSYSVHFSFSTFFSDFVIFQVFKWMFL  
IFLDFQFSC  
>ENSMUSP00000096644\_c.366:A>T\_p.S123C ENSMUST00000075573.7|Gm10717-  
201|ENSMUSG00000095891|+|chr9:g.3025783:A>T  
MFLIFHDFQFSCHIPCPTVEICKFPPFSVFLAIFHVLKYVFLIFRDFQFSRHIPGPTVCISHFSRFSVILSFF  
KFSSGCFSSFLIFSFLAIFHVLQWTFNLNPPFSVFLAIFHVLKCVFLIFCQFSRHIPGPTVCISHFSRFSV  
ISSFFKVSSGCFSSMIFSFLAIFHVLQWTFNLNPPFSSYSFSPYRSYSVHFSFSTFFSDFVIFQVFKWMFL  
IFLDFQFSC  
>ENSMUSP00000096644\_c.366:A>C\_p.S123R ENSMUST00000075573.7|Gm10717-  
201|ENSMUSG00000095891|+|chr9:g.3025783:A>C  
MFLIFHDFQFSCHIPCPTVEICKFPPFSVFLAIFHVLKYVFLIFRDFQFSRHIPGPTVCISHFSRFSVILSFF  
KFSSGCFSSFLIFSFLAIFHVLQWTFNLNPPFSVFLAIFHVLKCVFLIFRDFQFSRHIPGPTVCISHFSRFSV  
ISSFFKVSSGCFSSMIFSFLAIFHVLQWTFNLNPPFSSYSFSPYRSYSVHFSFSTFFSDFVIFQVFKWMFL  
IFLDFQFSC  
>ENSMUSP00000096644\_c.397:G>T\_p.G133V ENSMUST00000075573.7|Gm10717-  
201|ENSMUSG00000095891|+|chr9:g.3025814:G>T  
MFLIFHDFQFSCHIPCPTVEICKFPPFSVFLAIFHVLKYVFLIFRDFQFSRHIPGPTVCISHFSRFSVILSFF  
KFSSGCFSSFLIFSFLAIFHVLQWTFNLNPPFSVFLAIFHVLKCVFLIFSDQFSRHIPVPTVCISHFSRFSV  
ISSFFKVSSGCFSSMIFSFLAIFHVLQWTFNLNPPFSSYSFSPYRSYSVHFSFSTFFSDFVIFQVFKWMFL  
IFLDFQFSC  
>ENSMUSP00000096644\_c.402:A>T\_p.T135S ENSMUST00000075573.7|Gm10717-  
201|ENSMUSG00000095891|+|chr9:g.3025819:A>T  
MFLIFHDFQFSCHIPCPTVEICKFPPFSVFLAIFHVLKYVFLIFRDFQFSRHIPGPTVCISHFSRFSVILSFF  
KFSSGCFSSFLIFSFLAIFHVLQWTFNLNPPFSVFLAIFHVLKCVFLIFSDQFSRHIPGPTVCISHFSRFSV  
ISSFFKVSSGCFSSMIFSFLAIFHVLQWTFNLNPPFSSYSFSPYRSYSVHFSFSTFFSDFVIFQVFKWMFL  
IFLDFQFSC  
>ENSMUSP00000096644\_c.433:C>T\_p.S145L ENSMUST00000075573.7|Gm10717-  
201|ENSMUSG00000095891|+|chr9:g.3025850:C>T  
MFLIFHDFQFSCHIPCPTVEICKFPPFSVFLAIFHVLKYVFLIFRDFQFSRHIPGPTVCISHFSRFSVILSFF  
KFSSGCFSSFLIFSFLAIFHVLQWTFNLNPPFSVFLAIFHVLKCVFLIFSDQFSRHIPGPTVCISHFSRFLV  
ISSFFKVSSGCFSSMIFSFLAIFHVLQWTFNLNPPFSSYSFSPYRSYSVHFSFSTFFSDFVIFQVFKWMFL  
IFLDFQFSC  
>ENSMUSP00000096644\_c.456:G>T\_p.V153L ENSMUST00000075573.7|Gm10717-  
201|ENSMUSG00000095891|+|chr9:g.3025873:G>T  
MFLIFHDFQFSCHIPCPTVEICKFPPFSVFLAIFHVLKYVFLIFRDFQFSRHIPGPTVCISHFSRFSVILSFF  
KFSSGCFSSFLIFSFLAIFHVLQWTFNLNPPFSVFLAIFHVLKCVFLIFSDQFSRHIPGPTVCISHFSRFSV  
ISSFFKLSSGCFSSMIFSFLAIFHVLQWTFNLNPPFSSYSFSPYRSYSVHFSFSTFFSDFVIFQVFKWMFL  
IFLDFQFSC

>ENSMUSP00000096644\_c.457:T>G\_p.V153G ENSMUST00000075573.7|Gm10717-201|ENSMUSG00000095891|+|chr9:g.3025874:T>G  
MFLIFHDFQFSCHIPCPTVEICKFPPFSVFLAIFHVLKYVFLIFRDFQFSRHIPGPTVCISHFSRFSVILSFF  
KFSSGCFSSFLIFSFLAIFHVLQWTFNLNPPFSVFLAIFHVLKCVFLIFSDFQFSRHIPGPTVCISHFSRFSV  
ISSFFKVGSSGCFSSMIFSFLAIFHVLQWTFNLNPPFSSYSFSPYSRSYSVHFSFSTFFSDFVIFQVFKWMFL  
IFLDFQFSC  
>ENSMUSP00000096644\_c.519:C>T\_p.Q174\* ENSMUST00000075573.7|Gm10717-201|ENSMUSG00000095891|+|chr9:g.3025936:C>T  
MFLIFHDFQFSCHIPCPTVEICKFPPFSVFLAIFHVLKYVFLIFRDFQFSRHIPGPTVCISHFSRFSVILSFF  
KFSSGCFSSFLIFSFLAIFHVLQWTFNLNPPFSVFLAIFHVLKCVFLIFSDFQFSRHIPGPTVCISHFSRFSV  
ISSFFKVSSGCFSSMIFSFLAIFHVL\*WTFNLNPPFSSYSFSPYSRSYSVHFSFSTFFSDFVIFQVFKWMFL  
IFLDFQFSC  
>ENSMUSP00000096644\_c.522:T>C\_p.W175R ENSMUST00000075573.7|Gm10717-201|ENSMUSG00000095891|+|chr9:g.3025939:T>C  
MFLIFHDFQFSCHIPCPTVEICKFPPFSVFLAIFHVLKYVFLIFRDFQFSRHIPGPTVCISHFSRFSVILSFF  
KFSSGCFSSFLIFSFLAIFHVLQWTFNLNPPFSVFLAIFHVLKCVFLIFSDFQFSRHIPGPTVCISHFSRFSV  
ISSFFKVSSGCFSSMIFSFLAIFHVLQRTFLNPPFSSYSFSPYSRSYSVHFSFSTFFSDFVIFQVFKWMFL  
IFLDFQFSC  
>ENSMUSP00000096644\_c.543:C>A\_p.P182T ENSMUST00000075573.7|Gm10717-201|ENSMUSG00000095891|+|chr9:g.3025960:C>A  
MFLIFHDFQFSCHIPCPTVEICKFPPFSVFLAIFHVLKYVFLIFRDFQFSRHIPGPTVCISHFSRFSVILSFF  
KFSSGCFSSFLIFSFLAIFHVLQWTFNLNPPFSVFLAIFHVLKCVFLIFSDFQFSRHIPGPTVCISHFSRFSV  
ISSFFKVSSGCFSSMIFSFLAIFHVLQWTFNLNPTFSSYSFSPYSRSYSVHFSFSTFFSDFVIFQVFKWMFL  
IFLDFQFSC  
>ENSMUSP00000096644\_c.558:A>C\_p.S187R ENSMUST00000075573.7|Gm10717-201|ENSMUSG00000095891|+|chr9:g.3026055:A>C  
MFLIFHDFQFSCHIPCPTVEICKFPPFSVFLAIFHVLKYVFLIFRDFQFSRHIPGPTVCISHFSRFSVILSFF  
KFSSGCFSSFLIFSFLAIFHVLQWTFNLNPPFSVFLAIFHVLKCVFLIFSDFQFSRHIPGPTVCISHFSRFSV  
ISSFFKVSSGCFSSMIFSFLAIFHVLQWTFNLNPPFSSYSRSPYSRSYSVHFSFSTFFSDFVIFQVFKWMFL  
IFLDFQFSC  
>ENSMUSP00000136755\_c.1:G>A\_p.C1Y ENSMUST00000177601.2|Gm10717-205|ENSMUSG00000095891|+|chr9:g.3026152:G>A  
YHIPCPTVEISFPPFSVFLAIFHVLKCVFLIFRVFQVSRHIPGPTVCISHFSRFSVILSFFKFSSGCFSSFLI  
FSFLAIFHVLQWTFNLNPPFSVFLAIFHVLKCCVFLIFRDFQFSCHIPGPTVCISHFSRFSVILSFFNLSTAC  
FSFSIIFSFLAIFHVLQWTFNLNPPFSSYSPPYSRSYRHMHSFSTFFSDFIIFQVVKCMFLIFNDFHFSC  
>ENSMUSP00000136755\_c.19:C>A\_p.T7N ENSMUST00000177601.2|Gm10717-205|ENSMUSG00000095891|+|chr9:g.3026170:C>A  
CHIPCPNVEISFPPFSVFLAIFHVLKCVFLIFRVFQVSRHIPGPTVCISHFSRFSVILSFFKFSSGCFSSFLI  
FSFLAIFHVLQWTFNLNPPFSVFLAIFHVLKCCVFLIFRDFQFSCHIPGPTVCISHFSRFSVILSFFNLSTAC  
FSFSIIFSFLAIFHVLQWTFNLNPPFSSYSPPYSRSYRHMHSFSTFFSDFIIFQVVKCMFLIFNDFHFSC  
>ENSMUSP00000136755\_c.26:A>C\_p.E9D ENSMUST00000177601.2|Gm10717-205|ENSMUSG00000095891|+|chr9:g.3026177:A>C  
CHIPCPTVDISFPPFSVFLAIFHVLKCVFLIFRVFQVSRHIPGPTVCISHFSRFSVILSFFKFSSGCFSSFLI  
FSFLAIFHVLQWTFNLNPPFSVFLAIFHVLKCCVFLIFRDFQFSCHIPGPTVCISHFSRFSVILSFFNLSTAC  
FSFSIIFSFLAIFHVLQWTFNLNPPFSSYSPPYSRSYRHMHSFSTFFSDFIIFQVVKCMFLIFNDFHFSC  
>ENSMUSP00000136755\_c.88:T>A\_p.L30H ENSMUST00000177601.2|Gm10717-205|ENSMUSG00000095891|+|chr9:g.3026243:T>A  
CHIPCPTVEISFPPFSVFLAIFHVLKCVFHFIFRVFQVSRHIPGPTVCISHFSRFSVILSFFKFSSGCFSSFLI  
FSFLAIFHVLQWTFNLNPPFSVFLAIFHVLKCCVFLIFRDFQFSCHIPGPTVCISHFSRFSVILSFFNLSTAC  
FSFSIIFSFLAIFHVLQWTFNLNPPFSSYSPPYSRSYRHMHSFSTFFSDFIIFQVVKCMFLIFNDFHFSC  
>ENSMUSP00000136755\_c.95:TC>T\_p.F32del-fs ENSMUST00000177601.2|Gm10717-205|ENSMUSG00000095891|+|chr9:g.3026250:TC>T  
CHIPCPTVEISFPPFSVFLAIFHVLKCVFLIFVFFRFLAIFQVLQCAFLIFHVFQ  
>ENSMUSP00000136755\_c.100:T>A\_p.V34D ENSMUST00000177601.2|Gm10717-205|ENSMUSG00000095891|+|chr9:g.3026255:T>A  
CHIPCPTVEISFPPFSVFLAIFHVLKCVFLIFRDFQVSRHIPGPTVCISHFSRFSVILSFFKFSSGCFSSFLI  
FSFLAIFHVLQWTFNLNPPFSVFLAIFHVLKCCVFLIFRDFQFSCHIPGPTVCISHFSRFSVILSFFNLSTAC  
FSFSIIFSFLAIFHVLQWTFNLNPPFSSYSPPYSRSYRHMHSFSTFFSDFIIFQVVKCMFLIFNDFHFSC

>ENSMUSP00000096644\_c.559:G>T\_p.S187I ENSMUST00000075573.7|Gm10717-201|ENSMUSG00000095891|+|chr9:g.3026263:G>T  
MFLIFHDFQFSCHIPCPTVEICKFPPFSVFLAIFHVLKYVFLIFRDFQFSRHIPGPTVCISHFSRFSVILSFF  
KFSSGCFSSFLIFSFLAIFHVLQWTFNLNPPFSVFLAIFHVLKCVFLIFSDQFSRHIPGPTVCISHFSRFSV  
ISSFFKVSSGCFSSMIFSFLAIFHVLQWTFNLNPPFSSYIFSPYSRSYSVHFSFSTFFSDFVIFQVFKWMFL  
IFLDFQFSC  
>ENSMUSP000000136755\_c.108:G>T\_p.V37F ENSMUST00000177601.2|Gm10717-205|ENSMUSG00000095891|+|chr9:g.3026263:G>T  
CHIPCPTVEISFPPFSVFLAIFHVLKCVFLIFRVFQFSRHIPGPTVCISHFSRFSVILSFFKFSSGCFSSFLI  
FSFLAIFHVLQWTFNLNPPFSVFLAIFHVLKCCVFLIFRDFQFSCHIPGPTVCISHFSRFSVILSFFNLSTAC  
FSFSIIFSFLAIFHVLQWTFNLNPPFSSYSPYSRSYRMHFSFSTFFSDFIIFQVVKCMFLIFNDFHFSC  
>ENSMUSP00000096644\_c.565:CGCC>TGTT\_p.S189L ENSMUST00000075573.7|Gm10717-201|ENSMUSG00000095891|+|chr9:g.3026269:CGCC>TGTT  
MFLIFHDFQFSCHIPCPTVEICKFPPFSVFLAIFHVLKYVFLIFRDFQFSRHIPGPTVCISHFSRFSVILSFF  
KFSSGCFSSFLIFSFLAIFHVLQWTFNLNPPFSVFLAIFHVLKCVFLIFSDQFSRHIPGPTVCISHFSRFSV  
ISSFFKVSSGCFSSMIFSFLAIFHVLQWTFNLNPPFSSYSFLLPYSRSYSVHFSFSTFFSDFVIFQVFKWMFL  
LIFLDFQFSC  
>ENSMUSP000000136755\_c.114:CGCC>TGTT\_p.R39C ENSMUST00000177601.2|Gm10717-205|ENSMUSG00000095891|+|chr9:g.3026269:CGCC>TGTT  
CHIPCPTVEISFPPFSVFLAIFHVLKCVFLIFRVFQVSCCHIPGPTVCISHFSRFSVILSFFKFSSGCFSSFLI  
IFSFLAIFHVLQWTFNLNPPFSVFLAIFHVLKCCVFLIFRDFQFSCHIPGPTVCISHFSRFSVILSFFNLSTA  
CFSFSIIFSFLAIFHVLQWTFNLNPPFSSYSPYSRSYRMHFSFSTFFSDFIIFQVVKCMFLIFNDFHFSC  
>ENSMUSP00000096644\_c.583:A>T\_p.Y195F ENSMUST00000075573.7|Gm10717-201|ENSMUSG00000095891|+|chr9:g.3026287:A>T  
MFLIFHDFQFSCHIPCPTVEICKFPPFSVFLAIFHVLKYVFLIFRDFQFSRHIPGPTVCISHFSRFSVILSFF  
KFSSGCFSSFLIFSFLAIFHVLQWTFNLNPPFSVFLAIFHVLKCVFLIFSDQFSRHIPGPTVCISHFSRFSV  
ISSFFKVSSGCFSSMIFSFLAIFHVLQWTFNLNPPFSSYSFSPYSRSYSVHFSFSTFFSDFVIFQVFKWMFL  
IFLDFQFSC  
>ENSMUSP000000136755\_c.132:A>T\_p.T45S ENSMUST00000177601.2|Gm10717-205|ENSMUSG00000095891|+|chr9:g.3026287:A>T  
CHIPCPTVEISFPPFSVFLAIFHVLKCVFLIFRVFQVSRHIPGPSVCISHFSRFSVILSFFKFSSGCFSSFLI  
FSFLAIFHVLQWTFNLNPPFSVFLAIFHVLKCCVFLIFRDFQFSCHIPGPTVCISHFSRFSVILSFFNLSTAC  
FSFSIIFSFLAIFHVLQWTFNLNPPFSSYSPYSRSYRMHFSFSTFFSDFIIFQVVKCMFLIFNDFHFSC  
>ENSMUSP00000096644\_c.604:T>C\_p.F202S ENSMUST00000075573.7|Gm10717-201|ENSMUSG00000095891|+|chr9:g.3026308:T>C  
MFLIFHDFQFSCHIPCPTVEICKFPPFSVFLAIFHVLKYVFLIFRDFQFSRHIPGPTVCISHFSRFSVILSFF  
KFSSGCFSSFLIFSFLAIFHVLQWTFNLNPPFSVFLAIFHVLKCVFLIFSDQFSRHIPGPTVCISHFSRFSV  
ISSFFKVSSGCFSSMIFSFLAIFHVLQWTFNLNPPFSSYSFSPYSRSYSVHFSFSTFFSDFVIFQVFKWMFL  
IFLDFQFSC  
>ENSMUSP000000136755\_c.153:T>C\_p.S52P ENSMUST00000177601.2|Gm10717-205|ENSMUSG00000095891|+|chr9:g.3026308:T>C  
CHIPCPTVEISFPPFSVFLAIFHVLKCVFLIFRVFQVSRHIPGPTVCISHFPRFSVILSFFKFSSGCFSSFLI  
FSFLAIFHVLQWTFNLNPPFSVFLAIFHVLKCCVFLIFRDFQFSCHIPGPTVCISHFSRFSVILSFFNLSTAC  
FSFSIIFSFLAIFHVLQWTFNLNPPFSSYSPYSRSYRMHFSFSTFFSDFIIFQVVKCMFLIFNDFHFSC  
>ENSMUSP00000096644\_c.613:T>G\_p.F205C ENSMUST00000075573.7|Gm10717-201|ENSMUSG00000095891|+|chr9:g.3026317:T>G  
MFLIFHDFQFSCHIPCPTVEICKFPPFSVFLAIFHVLKYVFLIFRDFQFSRHIPGPTVCISHFSRFSVILSFF  
KFSSGCFSSFLIFSFLAIFHVLQWTFNLNPPFSVFLAIFHVLKCVFLIFSDQFSRHIPGPTVCISHFSRFSV  
ISSFFKVSSGCFSSMIFSFLAIFHVLQWTFNLNPPFSSYSFSPYSRSYSVHFSFSTFFSDFVIFQVFKWMFL  
IFLDFQFSC  
>ENSMUSP000000136755\_c.162:T>G\_p.S55A ENSMUST00000177601.2|Gm10717-205|ENSMUSG00000095891|+|chr9:g.3026317:T>G  
CHIPCPTVEISFPPFSVFLAIFHVLKCVFLIFRVFQVSRHIPGPTVCISHFSRFAVILSFFKFSSGCFSSFLI  
FSFLAIFHVLQWTFNLNPPFSVFLAIFHVLKCCVFLIFRDFQFSCHIPGPTVCISHFSRFSVILSFFNLSTAC  
FSFSIIFSFLAIFHVLQWTFNLNPPFSSYSPYSRSYRMHFSFSTFFSDFIIFQVVKCMFLIFNDFHFSC  
>ENSMUSP000000136755\_c.163:C>T\_p.S55L ENSMUST00000177601.2|Gm10717-205|ENSMUSG00000095891|+|chr9:g.3026318:C>T

CHIPCPTVEISFPPFSVFLAIFHVLKCVFLIFRVFQVSRHIPGPTVCISHFSRFLVILSFFKFSSGCFSSFLI  
FSFLAIFHVLQWTFNLNPPFSVFLAIFHVLKCCVFLIFRDFQFSCHIPGPTVCISHFSRFSVILSFFNLSTAC  
FSFSIIFSFLAIFHVLQWTFNLNPPFSYSPYSRYSRHMHSFFTFSSDFIIFQVVKCMFLIFNDFHFSC  
>ENSMUSP00000136755\_c.172:T>C\_p.L58S ENSMUST00000177601.2|Gm10717-  
205|ENSMUSG00000095891|+|chr9:g.3026327:T>C  
CHIPCPTVEISFPPFSVFLAIFHVLKCVFLIFRVFQVSRHIPGPTVCISHFSRFSVILSFFKFSSGCFSSFLI  
FSFLAIFHVLQWTFNLNPPFSVFLAIFHVLKCCVFLIFRDFQFSCHIPGPTVCISHFSRFSVILSFFNLSTAC  
FSFSIIFSFLAIFHVLQWTFNLNPPFSYSPYSRYSRHMHSFFTFSSDFIIFQVVKCMFLIFNDFHFSC  
>ENSMUSP00000136755\_c.187:T>G\_p.F63C ENSMUST00000177601.2|Gm10717-  
205|ENSMUSG00000095891|+|chr9:g.3026342:T>G  
CHIPCPTVEISFPPFSVFLAIFHVLKCVFLIFRVFQVSRHIPGPTVCISHFSRFSVILSFFKSSGCFSSFLI  
FSFLAIFHVLQWTFNLNPPFSVFLAIFHVLKCCVFLIFRDFQFSCHIPGPTVCISHFSRFSVILSFFNLSTAC  
FSFSIIFSFLAIFHVLQWTFNLNPPFSYSPYSRYSRHMHSFFTFSSDFIIFQVVKCMFLIFNDFHFSC  
>ENSMUSP00000136755\_c.187:T>C\_p.F63S ENSMUST00000177601.2|Gm10717-  
205|ENSMUSG00000095891|+|chr9:g.3026342:T>C  
CHIPCPTVEISFPPFSVFLAIFHVLKCVFLIFRVFQVSRHIPGPTVCISHFSRFSVILSFFKSSGCFSSFLI  
FSFLAIFHVLQWTFNLNPPFSVFLAIFHVLKCCVFLIFRDFQFSCHIPGPTVCISHFSRFSVILSFFNLSTAC  
FSFSIIFSFLAIFHVLQWTFNLNPPFSYSPYSRYSRHMHSFFTFSSDFIIFQVVKCMFLIFNDFHFSC  
>ENSMUSP00000096644\_c.650:G>T\_p.M217I ENSMUST00000075573.7|Gm10717-  
201|ENSMUSG00000095891|+|chr9:g.3026354:G>T  
MFLIFHDFQFSCHIPCPTVEICKFPPFSVFLAIFHVLKYVFLIFRDFQFSRHIPGPTVCISHFSRFSVILSFF  
KFSSGCFSSFLIIFSFLAIFHVLQWTFNLNPPFSVFLAIFHVLKCVFLIFSDQFSRHIPGPTVCISHFSRFSV  
ISSFFKVSSGCFSSMIFSFLAIFHVLQWTFNLNPPFSYSPYSRYSRVHHSFFTFSSDFVIFQVFKWIFL  
IFLDFQFSC  
>ENSMUSP00000136755\_c.199:G>T\_p.C67F ENSMUST00000177601.2|Gm10717-  
205|ENSMUSG00000095891|+|chr9:g.3026354:G>T  
CHIPCPTVEISFPPFSVFLAIFHVLKCVFLIFRVFQVSRHIPGPTVCISHFSRFSVILSFFKFSSGCFSSFLI  
FSFLAIFHVLQWTFNLNPPFSVFLAIFHVLKCCVFLIFRDFQFSCHIPGPTVCISHFSRFSVILSFFNLSTAC  
FSFSIIFSFLAIFHVLQWTFNLNPPFSYSPYSRYSRHMHSFFTFSSDFIIFQVVKCMFLIFNDFHFSC  
>ENSMUSP00000096644\_c.657:A>G\_p.I220V ENSMUST00000075573.7|Gm10717-  
201|ENSMUSG00000095891|+|chr9:g.3026361:A>G  
MFLIFHDFQFSCHIPCPTVEICKFPPFSVFLAIFHVLKYVFLIFRDFQFSRHIPGPTVCISHFSRFSVILSFF  
KFSSGCFSSFLIIFSFLAIFHVLQWTFNLNPPFSVFLAIFHVLKCVFLIFSDQFSRHIPGPTVCISHFSRFSV  
ISSFFKVSSGCFSSMIFSFLAIFHVLQWTFNLNPPFSYSPYSRYSRVHHSFFTFSSDFVIFQVFKWIFL  
VFLDFQFSC  
>ENSMUSP00000096644\_c.664:T>A\_p.L222H ENSMUST00000075573.7|Gm10717-  
201|ENSMUSG00000095891|+|chr9:g.3026368:T>A  
MFLIFHDFQFSCHIPCPTVEICKFPPFSVFLAIFHVLKYVFLIFRDFQFSRHIPGPTVCISHFSRFSVILSFF  
KFSSGCFSSFLIIFSFLAIFHVLQWTFNLNPPFSVFLAIFHVLKCVFLIFSDQFSRHIPGPTVCISHFSRFSV  
ISSFFKVSSGCFSSMIFSFLAIFHVLQWTFNLNPPFSYSPYSRYSRVHHSFFTFSSDFVIFQVFKWIFL  
IFHDFQFSC  
>ENSMUSP00000136755\_c.213:T>A\_p.L72M ENSMUST00000177601.2|Gm10717-  
205|ENSMUSG00000095891|+|chr9:g.3026368:T>A  
CHIPCPTVEISFPPFSVFLAIFHVLKCVFLIFRVFQVSRHIPGPTVCISHFSRFSVILSFFKFSSGCFSSMI  
FSFLAIFHVLQWTFNLNPPFSVFLAIFHVLKCCVFLIFRDFQFSCHIPGPTVCISHFSRFSVILSFFNLSTAC  
FSFSIIFSFLAIFHVLQWTFNLNPPFSYSPYSRYSRHMHSFFTFSSDFIIFQVVKCMFLIFNDFHFSC  
>ENSMUSP00000096644\_c.664:T>G\_p.L222R ENSMUST00000075573.7|Gm10717-  
201|ENSMUSG00000095891|+|chr9:g.3026368:T>G  
MFLIFHDFQFSCHIPCPTVEICKFPPFSVFLAIFHVLKYVFLIFRDFQFSRHIPGPTVCISHFSRFSVILSFF  
KFSSGCFSSFLIIFSFLAIFHVLQWTFNLNPPFSVFLAIFHVLKCVFLIFSDQFSRHIPGPTVCISHFSRFSV  
ISSFFKVSSGCFSSMIFSFLAIFHVLQWTFNLNPPFSYSPYSRYSRVHHSFFTFSSDFVIFQVFKWIFL  
IFRDFQFSC  
>ENSMUSP00000136755\_c.213:T>G\_p.L72V ENSMUST00000177601.2|Gm10717-  
205|ENSMUSG00000095891|+|chr9:g.3026368:T>G  
CHIPCPTVEISFPPFSVFLAIFHVLKCVFLIFRVFQVSRHIPGPTVCISHFSRFSVILSFFKFSSGCFSSVI  
FSFLAIFHVLQWTFNLNPPFSVFLAIFHVLKCCVFLIFRDFQFSCHIPGPTVCISHFSRFSVILSFFNLSTAC  
FSFSIIFSFLAIFHVLQWTFNLNPPFSYSPYSRYSRHMHSFFTFSSDFIIFQVVKCMFLIFNDFHFSC



>ENSMUSP00000096644\_c.675:T>A\_p.F226I ENSMUST00000075573.7|Gm10717-201|ENSMUSG00000095891|+|chr9:g.3026379:T>A  
MFLIFHDFQFSCHIPCPTVEICKFPPFSVFLAIFHVLKYVFLIFRDFQFSRHIPGPTVCISHFSRFSVILSFF  
KFSSGCFSSFLIFSFLAIFHVLQWTFNLNPPFSVFLAIFHVLKCVFLIFRDFQFSRHIPGPTVCISHFSRFSV  
ISSFFKVSSGCFSSMIFSFLAIFHVLQWTFNLNPPFSSYSFSPYSRSYSVHFSFFTFSSDFVIFQVVKWMFL  
IFLDFQISC  
>ENSMUSP000000136755\_c.224:T>A\_p.S75R ENSMUST00000177601.2|Gm10717-205|ENSMUSG00000095891|+|chr9:g.3026379:T>A  
CHIPCPTVEISFPPFSVFLAIFHVLKCVFLIFRVFQVSRHIPGPTVCISHFSRFSVILSFFKFSSGCFSSFLI  
FRFLAIFHVLQWTFNLNPPFSVFLAIFHVLKCCVFLIFRDFQFSCHIPGPTVCISHFSRFSVILSFFNLSTAC  
FSFSIIFSFLAIFHVLQWTFNLNPPFSSYSPYSRSYRHMHSFFTFSSDFIIFQVVKCMFLIFNDFHFSC  
>ENSMUSP000000136755\_c.242:T>G\_p.H81Q ENSMUST00000177601.2|Gm10717-205|ENSMUSG00000095891|+|chr9:g.3026397:T>G  
CHIPCPTVEISFPPFSVFLAIFHVLKCVFLIFRVFQVSRHIPGPTVCISHFSRFSVILSFFKFSSGCFSSFLI  
FSFLAIFHVLQWTFNLNPPFSVFLAIFHVLKCCVFLIFRDFQFSCHIPGPTVCISHFSRFSVILSFFNLSTAC  
FSFSIIFSFLAIFHVLQWTFNLNPPFSSYSPYSRSYRHMHSFFTFSSDFIIFQVVKCMFLIFNDFHFSC  
>ENSMUSP000000136755\_c.292:C>T\_p.A98V ENSMUST00000177601.2|Gm10717-205|ENSMUSG00000095891|+|chr9:g.3026447:C>T  
CHIPCPTVEISFPPFSVFLAIFHVLKCVFLIFRVFQVSRHIPGPTVCISHFSRFSVILSFFKFSSGCFSSFLI  
FSFLAIFHVLQWTFNLNPPFSVFLVIFHVLKCCVFLIFRDFQFSCHIPGPTVCISHFSRFSVILSFFNLSTAC  
FSFSIIFSFLAIFHVLQWTFNLNPPFSSYSPYSRSYRHMHSFFTFSSDFIIFQVVKCMFLIFNDFHFSC  
>ENSMUSP000000136755\_c.302:T>A\_p.H101Q ENSMUST00000177601.2|Gm10717-205|ENSMUSG00000095891|+|chr9:g.3026457:T>A  
CHIPCPTVEISFPPFSVFLAIFHVLKCVFLIFRVFQVSRHIPGPTVCISHFSRFSVILSFFKFSSGCFSSFLI  
FSFLAIFHVLQWTFNLNPPFSVFLAIFQVLKCCVFLIFRDFQFSCHIPGPTVCISHFSRFSVILSFFNLSTAC  
FSFSIIFSFLAIFHVLQWTFNLNPPFSSYSPYSRSYRHMHSFFTFSSDFIIFQVVKCMFLIFNDFHFSC  
>ENSMUSP000000136755\_c.309:A>T\_p.K104\* ENSMUST00000177601.2|Gm10717-205|ENSMUSG00000095891|+|chr9:g.3026464:A>T  
CHIPCPTVEISFPPFSVFLAIFHVLKCVFLIFRVFQVSRHIPGPTVCISHFSRFSVILSFFKFSSGCFSSFLI  
FSFLAIFHVLQWTFNLNPPFSVFLAIFHVL\*CCVFLIFRDFQFSCHIPGPTVCISHFSRFSVILSFFNLSTAC  
FSFSIIFSFLAIFHVLQWTFNLNPPFSSYSPYSRSYRHMHSFFTFSSDFIIFQVVKCMFLIFNDFHFSC  
>ENSMUSP000000137419\_c.2:G>T\_p.M1I ENSMUST00000177875.8|Gm10717-206|ENSMUSG00000095891|+|chr9:g.3027525:G>T  
IFLIFHDFQFSCHIPCPTVDISFPPFSVFLAIFHVLKCVFLIFRDFQFSCHIPGPTVCISHFSRFSVILSFFN  
LSTACFSFSIIFSFLAIFHVLQWTFNLNPPFSVFLAIFHVLKCCVFLIFRDFQFSCHIPGPTVCISHFSRFSV  
ILSFFNLSTACFSFSMIFSFLAIFHVLQWKFLNPPFSVSPYSRSYSVHFSFFTFSSDFVIFQVVKWMFPIFL  
DFQFSY  
>ENSMUSP000000136365\_c.2:G>T\_p.M1I ENSMUST00000179982.2|Gm10717-209|ENSMUSG00000095891|+|chr9:g.3027525:G>T  
IFLIFHDFQFSCHIPCPTVDISFPPFSVFLAIFHVLKCVFLIFRDFQFSCHIPGPTVCISHFSRFSVILSFFN  
LSTACFSFSIIFSFLAIFHVLQWTFNLNPPFSVFLAIFHVLKCVFLIFRDFQFSCHIPGPTVCISHFSRFSV  
LSFFNLSTACFSFSMIFSFFAIFHVLQWKFLYFPPFSSSIFSPYSRSYSVHFSFFTFSSDFVIFQVVKWKFLI  
FHDFQLSS  
>ENSMUSP000000137419\_c.45:T>C\_p.C16R ENSMUST00000177875.8|Gm10717-206|ENSMUSG00000095891|+|chr9:g.3027568:T>C  
MFLIFHDFQFSCHIPRPTVDISFPPFSVFLAIFHVLKCVFLIFRDFQFSCHIPGPTVCISHFSRFSVILSFFN  
LSTACFSFSIIFSFLAIFHVLQWTFNLNPPFSVFLAIFHVLKCCVFLIFRDFQFSCHIPGPTVCISHFSRFSV  
ILSFFNLSTACFSFSMIFSFLAIFHVLQWKFLNPPFSVSPYSRSYSVHFSFFTFSSDFVIFQVVKWMFPIFL  
DFQFSY  
>ENSMUSP000000136365\_c.45:T>C\_p.C16R ENSMUST00000179982.2|Gm10717-209|ENSMUSG00000095891|+|chr9:g.3027568:T>C  
MFLIFHDFQFSCHIPRPTVDISFPPFSVFLAIFHVLKCVFLIFRDFQFSCHIPGPTVCISHFSRFSVILSFFN  
LSTACFSFSIIFSFLAIFHVLQWTFNLNPPFSVFLAIFHVLKCVFLIFRDFQFSCHIPGPTVCISHFSRFSV  
LSFFNLSTACFSFSMIFSFFAIFHVLQWKFLYFPPFSSSIFSPYSRSYSVHFSFFTFSSDFVIFQVVKWKFLI  
FHDFQLSS  
>ENSMUSP000000136755\_c.333:C>T\_p.R112C ENSMUST00000177601.2|Gm10717-205|ENSMUSG00000095891|+|chr9:g.3027656:C>T

CHIPCPTVEISFPPFSVFLAIFHVLKCVFLIFRVFQVSRHIPGPTVCISHFSRFSVILSFFKFSSGCFSSFLI  
FSFLAIFHVLQWTFNLNPPFSVFLAIFHVLKCCVFLIFCDFQFSCHIPGPTVCISHFSRFSVILSFFNLSTAC  
FSFSIIFSFLAIFHVLQWTFNLNPPFSSYSPYSRSYRMHFSFFTFSSDFIIFQVVKCMFLIFNDFHFSC  
>ENSMUSP00000137419\_c.129:C>T\_p.R44C ENSMUST00000177875.8|Gm10717-  
206|ENSMUSG00000095891|+|chr9:g.3027656:C>T  
MFLIFHDFQFSCHIPCPTVDISFPPFSVFLAIFHVLKCVFLIFCDFQFSCHIPGPTVCISHFSRFSVILSFFN  
LSTACFSFSIIFSFLAIFHVLQWTFNLNPPFSVFLAIFHVLKCCVFLIFRDFQFSCHIPGPTVCISHFSRFSV  
ILSFFNLSTACFSFSMIFSFLAIFHVLQWKFLNPPFSVSPYSRSYSVHFSFFTFSSDFVIFQVVKWMFPIFL  
DFQFSY  
>ENSMUSP00000136365\_c.129:C>T\_p.R44C ENSMUST00000179982.2|Gm10717-  
209|ENSMUSG00000095891|+|chr9:g.3027656:C>T  
MFLIFHDFQFSCHIPCPTVDISFPPFSVFLAIFHVLKCVFLIFCDFQFSCHIPGPTVCISHFSRFSVILSFFN  
LSTACFSFSIIFSFLAIFHVLQWTFNLNPPFSVFLAIFHVLKCVFLIFRDFQFSCHIPGPTVCISHFSRFSV  
ILSFFNLSTACFSFSMIFSFAIFHVLQGKFLYFPPFSSSIFSPYSRSYSVHFSFFTFSSDFVIFQVVKWFLI  
FHDFQLSS  
>ENSMUSP00000136755\_c.334:G>A\_p.R112H ENSMUST00000177601.2|Gm10717-  
205|ENSMUSG00000095891|+|chr9:g.3027657:G>A  
CHIPCPTVEISFPPFSVFLAIFHVLKCVFLIFRVFQVSRHIPGPTVCISHFSRFSVILSFFKFSSGCFSSFLI  
FSFLAIFHVLQWTFNLNPPFSVFLAIFHVLKCCVFLIFHDFQFSCHIPGPTVCISHFSRFSVILSFFNLSTAC  
FSFSIIFSFLAIFHVLQWTFNLNPPFSSYSPYSRSYRMHFSFFTFSSDFIIFQVVKCMFLIFNDFHFSC  
>ENSMUSP00000137419\_c.130:G>A\_p.R44H ENSMUST00000177875.8|Gm10717-  
206|ENSMUSG00000095891|+|chr9:g.3027657:G>A  
MFLIFHDFQFSCHIPCPTVDISFPPFSVFLAIFHVLKCVFLIFHDFQFSCHIPGPTVCISHFSRFSVILSFFN  
LSTACFSFSIIFSFLAIFHVLQWTFNLNPPFSVFLAIFHVLKCCVFLIFRDFQFSCHIPGPTVCISHFSRFSV  
ILSFFNLSTACFSFSMIFSFAIFHVLQGKFLYFPPFSSSIFSPYSRSYSVHFSFFTFSSDFVIFQVVKWFLI  
FHDFQLSS  
>ENSMUSP00000136365\_c.130:G>A\_p.R44H ENSMUST00000179982.2|Gm10717-  
209|ENSMUSG00000095891|+|chr9:g.3027657:G>A  
MFLIFHDFQFSCHIPCPTVDISFPPFSVFLAIFHVLKCVFLIFHDFQFSCHIPGPTVCISHFSRFSVILSFFN  
LSTACFSFSIIFSFLAIFHVLQWTFNLNPPFSVFLAIFHVLKCVFLIFRDFQFSCHIPGPTVCISHFSRFSV  
ILSFFNLSTACFSFSMIFSFAIFHVLQGKFLYFPPFSSSIFSPYSRSYSVHFSFFTFSSDFVIFQVVKWFLI  
FHDFQLSS  
>ENSMUSP00000136755\_c.351:T>C\_p.C118R ENSMUST00000177601.2|Gm10717-  
205|ENSMUSG00000095891|+|chr9:g.3027674:T>C  
CHIPCPTVEISFPPFSVFLAIFHVLKCVFLIFRVFQVSRHIPGPTVCISHFSRFSVILSFFKFSSGCFSSFLI  
FSFLAIFHVLQWTFNLNPPFSVFLAIFHVLKCCVFLIFRDFQFSRSHIPGPTVCISHFSRFSVILSFFNLSTAC  
FSFSIIFSFLAIFHVLQWTFNLNPPFSSYSPYSRSYRMHFSFFTFSSDFIIFQVVKCMFLIFNDFHFSC  
>ENSMUSP00000137419\_c.147:T>C\_p.C50R ENSMUST00000177875.8|Gm10717-  
206|ENSMUSG00000095891|+|chr9:g.3027674:T>C  
MFLIFHDFQFSCHIPCPTVDISFPPFSVFLAIFHVLKCVFLIFRDFQFSRSHIPGPTVCISHFSRFSVILSFFN  
LSTACFSFSIIFSFLAIFHVLQWTFNLNPPFSVFLAIFHVLKCCVFLIFRDFQFSCHIPGPTVCISHFSRFSV  
ILSFFNLSTACFSFSMIFSFLAIFHVLQWKFLNPPFSVSPYSRSYSVHFSFFTFSSDFVIFQVVKWMFPIFL  
DFQFSY  
>ENSMUSP00000136365\_c.147:T>C\_p.C50R ENSMUST00000179982.2|Gm10717-  
209|ENSMUSG00000095891|+|chr9:g.3027674:T>C  
MFLIFHDFQFSCHIPCPTVDISFPPFSVFLAIFHVLKCVFLIFRDFQFSRSHIPGPTVCISHFSRFSVILSFFN  
LSTACFSFSIIFSFLAIFHVLQWTFNLNPPFSVFLAIFHVLKCVFLIFRDFQFSCHIPGPTVCISHFSRFSV  
ILSFFNLSTACFSFSMIFSFAIFHVLQGKFLYFPPFSSSIFSPYSRSYSVHFSFFTFSSDFVIFQVVKWFLI  
FHDFQLSS  
>ENSMUSP00000136755\_c.369:A>T\_p.T124S ENSMUST00000177601.2|Gm10717-  
205|ENSMUSG00000095891|+|chr9:g.3027692:A>T  
CHIPCPTVEISFPPFSVFLAIFHVLKCVFLIFRVFQVSRHIPGPTVCISHFSRFSVILSFFKFSSGCFSSFLI  
FSFLAIFHVLQWTFNLNPPFSVFLAIFHVLKCCVFLIFRDFQFSCHIPGPSVCISHFSRFSVILSFFNLSTAC  
FSFSIIFSFLAIFHVLQWTFNLNPPFSSYSPYSRSYRMHFSFFTFSSDFIIFQVVKCMFLIFNDFHFSC  
>ENSMUSP00000137419\_c.165:A>T\_p.T56S ENSMUST00000177875.8|Gm10717-  
206|ENSMUSG00000095891|+|chr9:g.3027692:A>T  
MFLIFHDFQFSCHIPCPTVDISFPPFSVFLAIFHVLKCVFLIFRDFQFSCHIPGPSVCISHFSRFSVILSFFN  
LSTACFSFSIIFSFLAIFHVLQWTFNLNPPFSVFLAIFHVLKCCVFLIFRDFQFSCHIPGPTVCISHFSRFSV

ILSFFNLSTACFSFSMIFSLAIFHVLQWKFLNFPPFSVSPYSRSYSVHFSFFTFSSDFVIFQVVKWMFPIFL  
DFQFSY  
>ENSMUSP00000136365\_c.165:A>T\_p.T56S ENSMUST00000179982.2|Gm10717-  
209|ENSMUSG00000095891|+|chr9:g.3027692:A>T  
MFLIFHDFQFSCHIPCPTVDISFPPFSVFLAIFHVLKCVFLIFRDFQFSCHIPGPSVCISHFSRFSVILSFFN  
LSTACFSFSIIIFSFLAIFHVLQWTFNLFPFVSFLAIFHVLKCVFLIFRDFQFSCYIPSPPTVCISHFSRFSVI  
LSFFNLSTACFSFSMIFSFFAIFHVLQGKFLYFPPFSSSIFSPYSRSYSVHFSFFTFSSDFVIFQVVKWMFPIFL  
FHDFQLSS  
>ENSMUSP00000136755\_c.409:T>C\_p.L137S ENSMUST00000177601.2|Gm10717-  
205|ENSMUSG00000095891|+|chr9:g.3027732:T>C  
CHIPCPTVEISFPPFSVFLAIFHVLKCVFLIFRVFQVSRHIPGPTVCISHFSRFSVILSFFKFSSGCFSSFLI  
FSFLAIFHVLQWTFNLFPFVSFLAIFHVLKCCVFLIFRDFQFSCHIPGPTVCISHFSRFSVISSFFNLSTAC  
FSFSIIFSFLAIFHVLQWTFNLFPFSSYSPYSRSYRHMFSFFTFSSDFIIFQVVKCMFLIFNDFHFSC  
>ENSMUSP00000137419\_c.205:T>C\_p.L69S ENSMUST00000177875.8|Gm10717-  
206|ENSMUSG00000095891|+|chr9:g.3027732:T>C  
MFLIFHDFQFSCHIPCPTVDISFPPFSVFLAIFHVLKCVFLIFRDFQFSCHIPGPTVCISHFSRFSVISSFFN  
LSTACFSFSIIIFSFLAIFHVLQWTFNLFPFVSFLAIFHVLKCCVFLIFRDFQFSCHIPGPTVCISHFSRFSV  
ILSFFNLSTACFSFSMIFSFFAIFHVLQGKFLYFPPFSSSIFSPYSRSYSVHFSFFTFSSDFVIFQVVKWMFPIFL  
DFQFSY  
>ENSMUSP00000136365\_c.205:T>C\_p.L69S ENSMUST00000179982.2|Gm10717-  
209|ENSMUSG00000095891|+|chr9:g.3027732:T>C  
MFLIFHDFQFSCHIPCPTVDISFPPFSVFLAIFHVLKCVFLIFRDFQFSCHIPGPTVCISHFSRFSVISSFFN  
LSTACFSFSIIIFSFLAIFHVLQWTFNLFPFVSFLAIFHVLKCVFLIFRDFQFSCYIPSPPTVCISHFSRFSVI  
LSFFNLSTACFSFSMIFSFFAIFHVLQGKFLYFPPFSSSIFSPYSRSYSVHFSFFTFSSDFVIFQVVKWMFPIFL  
FHDFQLSS  
>ENSMUSP00000136755\_c.422:T>G\_p.N141K ENSMUST00000177601.2|Gm10717-  
205|ENSMUSG00000095891|+|chr9:g.3027745:T>G  
CHIPCPTVEISFPPFSVFLAIFHVLKCVFLIFRVFQVSRHIPGPTVCISHFSRFSVILSFFKFSSGCFSSFLI  
FSFLAIFHVLQWTFNLFPFVSFLAIFHVLKCCVFLIFRDFQFSCHIPGPTVCISHFSRFSVILSFFKLSTAC  
FSFSIIFSFLAIFHVLQWTFNLFPFSSYSPYSRSYRHMFSFFTFSSDFIIFQVVKCMFLIFNDFHFSC  
>ENSMUSP00000137419\_c.218:T>G\_p.N73K ENSMUST00000177875.8|Gm10717-  
206|ENSMUSG00000095891|+|chr9:g.3027745:T>G  
MFLIFHDFQFSCHIPCPTVDISFPPFSVFLAIFHVLKCVFLIFRDFQFSCHIPGPTVCISHFSRFSVILSFFK  
LSTACFSFSIIIFSFLAIFHVLQWTFNLFPFVSFLAIFHVLKCCVFLIFRDFQFSCHIPGPTVCISHFSRFSV  
ILSFFNLSTACFSFSMIFSFFAIFHVLQGKFLYFPPFSSSIFSPYSRSYSVHFSFFTFSSDFVIFQVVKWMFPIFL  
DFQFSY  
>ENSMUSP00000136365\_c.218:T>G\_p.N73K ENSMUST00000179982.2|Gm10717-  
209|ENSMUSG00000095891|+|chr9:g.3027745:T>G  
MFLIFHDFQFSCHIPCPTVDISFPPFSVFLAIFHVLKCVFLIFRDFQFSCHIPGPTVCISHFSRFSVILSFFK  
LSTACFSFSIIIFSFLAIFHVLQWTFNLFPFVSFLAIFHVLKCVFLIFRDFQFSCYIPSPPTVCISHFSRFSVI  
LSFFNLSTACFSFSMIFSFFAIFHVLQGKFLYFPPFSSSIFSPYSRSYSVHFSFFTFSSDFVIFQVVKWMFPIFL  
FHDFQLSS  
>ENSMUSP00000136755\_c.430:C>G\_p.T144S ENSMUST00000177601.2|Gm10717-  
205|ENSMUSG00000095891|+|chr9:g.3027753:C>G  
CHIPCPTVEISFPPFSVFLAIFHVLKCVFLIFRVFQVSRHIPGPTVCISHFSRFSVILSFFKFSSGCFSSFLI  
FSFLAIFHVLQWTFNLFPFVSFLAIFHVLKCCVFLIFRDFQFSCHIPGPTVCISHFSRFSVILSFFNLSSAC  
FSFSIIFSFLAIFHVLQWTFNLFPFSSYSPYSRSYRHMFSFFTFSSDFIIFQVVKCMFLIFNDFHFSC  
>ENSMUSP00000137419\_c.226:C>G\_p.T76S ENSMUST00000177875.8|Gm10717-  
206|ENSMUSG00000095891|+|chr9:g.3027753:C>G  
MFLIFHDFQFSCHIPCPTVDISFPPFSVFLAIFHVLKCVFLIFRDFQFSCHIPGPTVCISHFSRFSVILSFFN  
LSSACFSFSIIIFSFLAIFHVLQWTFNLFPFVSFLAIFHVLKCCVFLIFRDFQFSCHIPGPTVCISHFSRFSV  
ILSFFNLSTACFSFSMIFSFFAIFHVLQGKFLYFPPFSSSIFSPYSRSYSVHFSFFTFSSDFVIFQVVKWMFPIFL  
DFQFSY  
>ENSMUSP00000136365\_c.226:C>G\_p.T76S ENSMUST00000179982.2|Gm10717-  
209|ENSMUSG00000095891|+|chr9:g.3027753:C>G  
MFLIFHDFQFSCHIPCPTVDISFPPFSVFLAIFHVLKCVFLIFRDFQFSCHIPGPTVCISHFSRFSVILSFFN  
LSSACFSFSIIIFSFLAIFHVLQWTFNLFPFVSFLAIFHVLKCVFLIFRDFQFSCYIPSPPTVCISHFSRFSVI

LSFFNLSTACFSFSMIFSFFAIFHVLQGKFLYFPPFSSSIFSPYSRSYSVHFSFSTFFSDFVIFQVVKWKFLI  
FHDFQLSS  
>ENSMUSP00000136755\_c.430:CTGC>GTGG\_p.T144S ENSMUST00000177601.2|Gm10717-  
205|ENSMUSG00000095891|+|chr9:g.3027753:CTGC>GTGG  
CHIPCPTVEISFPPFSVFLAIFHVLKCVFLIFRVFQVSRHIPGPTVCISHFSRFSVILSFFKFSSGCFSSFLI  
FSFLAIFHVLQWTFNLNPPFSVFLAIFHVLKCCVFLIFRDFQFSCHIPGPTVCISHFSRFSVILSFFNLSSGA  
CFSFSIIFSFLAIFHVLQWTFNLNPPFSSYSYSPYSRSYRMHFSFSTFFSDFIIFQVVKCMFLIFNDFHFSC  
>ENSMUSP00000137419\_c.226:CTGC>GTGG\_p.T76S ENSMUST00000177875.8|Gm10717-  
206|ENSMUSG00000095891|+|chr9:g.3027753:CTGC>GTGG  
MFLIFHDFQFSCHIPCPTVDISFPPFSVFLAIFHVLKCVFLIFRDFQFSCHIPGPTVCISHFSRFSVILSFFN  
LSSGACFSFSIIFSFLAIFHVLQWTFNLNPPFSVFLAIFHVLKCCVFLIFRDFQFSCHIPGPTVCISHFSRFS  
VILSFFNLSTACFSFSMIFSFLAIFHVLQWKFLNPPFSSVSPYSRSYSVHFSFSTFFSDFVIFQVVKWMPPIF  
LDFQFSY  
>ENSMUSP00000136365\_c.226:CTGC>GTGG\_p.T76S ENSMUST00000179982.2|Gm10717-  
209|ENSMUSG00000095891|+|chr9:g.3027753:CTGC>GTGG  
MFLIFHDFQFSCHIPCPTVDISFPPFSVFLAIFHVLKCVFLIFRDFQFSCHIPGPTVCISHFSRFSVILSFFN  
LSSGACFSFSIIFSFLAIFHVLQWTFNLNPPFSVFLAIFHVLKCVFLIFRDFQFSCHIPGPTVCISHFSRFSV  
ILSFFNLSTACFSFSMIFSFFAIFHVLQGKFLYFPPFSSSIFSPYSRSYSVHFSFSTFFSDFVIFQVVKWKFL  
IFHDFQLSS  
>ENSMUSP00000136755\_c.430:CTGC>GTGT\_p.T144S ENSMUST00000177601.2|Gm10717-  
205|ENSMUSG00000095891|+|chr9:g.3027753:CTGC>GTGT  
CHIPCPTVEISFPPFSVFLAIFHVLKCVFLIFRVFQVSRHIPGPTVCISHFSRFSVILSFFKFSSGCFSSFLI  
FSFLAIFHVLQWTFNLNPPFSVFLAIFHVLKCCVFLIFRDFQFSCHIPGPTVCISHFSRFSVILSFFNLSSVA  
CFSFSIIFSFLAIFHVLQWTFNLNPPFSSYSYSPYSRSYRMHFSFSTFFSDFIIFQVVKCMFLIFNDFHFSC  
>ENSMUSP00000137419\_c.226:CTGC>GTGT\_p.T76S ENSMUST00000177875.8|Gm10717-  
206|ENSMUSG00000095891|+|chr9:g.3027753:CTGC>GTGT  
MFLIFHDFQFSCHIPCPTVDISFPPFSVFLAIFHVLKCVFLIFRDFQFSCHIPGPTVCISHFSRFSVILSFFN  
LSSVACFSFSIIFSFLAIFHVLQWTFNLNPPFSVFLAIFHVLKCCVFLIFRDFQFSCHIPGPTVCISHFSRFS  
VILSFFNLSTACFSFSMIFSFLAIFHVLQWKFLNPPFSSVSPYSRSYSVHFSFSTFFSDFVIFQVVKWMPPIF  
LDFQFSY  
>ENSMUSP00000136365\_c.226:CTGC>GTGT\_p.T76S ENSMUST00000179982.2|Gm10717-  
209|ENSMUSG00000095891|+|chr9:g.3027753:CTGC>GTGT  
MFLIFHDFQFSCHIPCPTVDISFPPFSVFLAIFHVLKCVFLIFRDFQFSCHIPGPTVCISHFSRFSVILSFFN  
LSSVACFSFSIIFSFLAIFHVLQWTFNLNPPFSVFLAIFHVLKCVFLIFRDFQFSCHIPGPTVCISHFSRFSV  
ILSFFNLSTACFSFSMIFSFFAIFHVLQGKFLYFPPFSSSIFSPYSRSYSVHFSFSTFFSDFVIFQVVKWKFL  
IFHDFQLSS  
>ENSMUSP00000136755\_c.452:T>G\_p.I151M ENSMUST00000177601.2|Gm10717-  
205|ENSMUSG00000095891|+|chr9:g.3027775:T>G  
CHIPCPTVEISFPPFSVFLAIFHVLKCVFLIFRVFQVSRHIPGPTVCISHFSRFSVILSFFKFSSGCFSSFLI  
FSFLAIFHVLQWTFNLNPPFSVFLAIFHVLKCCVFLIFRDFQFSCHIPGPTVCISHFSRFSVILSFFNLSTAC  
FSFSMIFSFLAIFHVLQWTFNLNPPFSSYSYSPYSRSYRMHFSFSTFFSDFIIFQVVKCMFLIFNDFHFSC  
>ENSMUSP00000137419\_c.248:T>G\_p.I83M ENSMUST00000177875.8|Gm10717-  
206|ENSMUSG00000095891|+|chr9:g.3027775:T>G  
MFLIFHDFQFSCHIPCPTVDISFPPFSVFLAIFHVLKCVFLIFRDFQFSCHIPGPTVCISHFSRFSVILSFFN  
LSTACFSFSMIFSFLAIFHVLQWTFNLNPPFSVFLAIFHVLKCCVFLIFRDFQFSCHIPGPTVCISHFSRFSV  
ILSFFNLSTACFSFSMIFSFLAIFHVLQWKFLNPPFSSVSPYSRSYSVHFSFSTFFSDFVIFQVVKWMPPIFL  
DFQFSY  
>ENSMUSP00000136365\_c.248:T>G\_p.I83M ENSMUST00000179982.2|Gm10717-  
209|ENSMUSG00000095891|+|chr9:g.3027775:T>G  
MFLIFHDFQFSCHIPCPTVDISFPPFSVFLAIFHVLKCVFLIFRDFQFSCHIPGPTVCISHFSRFSVILSFFN  
LSTACFSFSMIFSFLAIFHVLQWTFNLNPPFSVFLAIFHVLKCVFLIFRDFQFSCHIPGPTVCISHFSRFSV  
ILSFFNLSTACFSFSMIFSFFAIFHVLQGKFLYFPPFSSSIFSPYSRSYSVHFSFSTFFSDFVIFQVVKWKFLI  
FHDFQLSS  
>ENSMUSP00000136755\_c.511:C>T\_p.P171L ENSMUST00000177601.2|Gm10717-  
205|ENSMUSG00000095891|+|chr9:g.3027834:C>T  
CHIPCPTVEISFPPFSVFLAIFHVLKCVFLIFRVFQVSRHIPGPTVCISHFSRFSVILSFFKFSSGCFSSFLI  
FSFLAIFHVLQWTFNLNPPFSVFLAIFHVLKCCVFLIFRDFQFSCHIPGPTVCISHFSRFSVILSFFNLSTAC  
FSFSIIFSFLAIFHVLQWTFNLNPPFSSYSYSPYSRSYRMHFSFSTFFSDFIIFQVVKCMFLIFNDFHFSC

>ENSMUSP00000137419\_c.307:C>T\_p.P103L ENSMUST00000177875.8|Gm10717-206|ENSMUSG00000095891|+|chr9:g.3027834:C>T  
MFLIFHDFQFSCHIPCPTVDISFPPFSVFLAIFHVLKCVFLIFRDFQFSCHIPGPTVCISHFSRFSVILSFFN  
LSTACFSFSIIIFSFLAIFHVLQWTFNLFPPLFSVFLAIFHVLKCCVFLIFRDFQFSCHIPGPTVCISHFSRFSV  
ILSFFNLSTACFSFSMIFSFLAIFHVLQWKFLNFPFVSVPYSRSYSVHFSFFTFFSDFVIFQVVKWMPFIPL  
DFQFSY  
>ENSMUSP00000136365\_c.307:C>T\_p.P103L ENSMUST00000179982.2|Gm10717-209|ENSMUSG00000095891|+|chr9:g.3027834:C>T  
MFLIFHDFQFSCHIPCPTVDISFPPFSVFLAIFHVLKCVFLIFRDFQFSCHIPGPTVCISHFSRFSVILSFFN  
LSTACFSFSIIIFSFLAIFHVLQWTFNLFPPLFSVFLAIFHVLKCVFLIFRDFQFSCHIPGPTVCISHFSRFSV  
LSFFNLSTACFSFSMIFSFFAIFHVLQWKFLYFPFSSSIFSPYSRSYSVHFSFFTFFSDFVIFQVVKWFLI  
FHDFQLSS  
>ENSMUSP00000136365\_c.348:G>A\_p.V117I ENSMUST00000179982.2|Gm10717-209|ENSMUSG00000095891|+|chr9:g.3027875:G>A  
MFLIFHDFQFSCHIPCPTVDISFPPFSVFLAIFHVLKCVFLIFRDFQFSCHIPGPTVCISHFSRFSVILSFFN  
LSTACFSFSIIIFSFLAIFHVLQWTFNLFPPLFSVFLAIFHVLKCVFLIFRDFQFSCHIPGPTVCISHFSRFSV  
LSFFNLSTACFSFSMIFSFFAIFHVLQWKFLYFPFSSSIFSPYSRSYSVHFSFFTFFSDFVIFQVVKWFLI  
FHDFQLSS  
>ENSMUSP00000136365\_c.364:G>T\_p.R122L ENSMUST00000179982.2|Gm10717-209|ENSMUSG00000095891|+|chr9:g.3027891:G>T  
MFLIFHDFQFSCHIPCPTVDISFPPFSVFLAIFHVLKCVFLIFRDFQFSCHIPGPTVCISHFSRFSVILSFFN  
LSTACFSFSIIIFSFLAIFHVLQWTFNLFPPLFSVFLAIFHVLKCVFLIFRDFQFSCHIPGPTVCISHFSRFSV  
LSFFNLSTACFSFSMIFSFFAIFHVLQWKFLYFPFSSSIFSPYSRSYSVHFSFFTFFSDFVIFQVVKWFLI  
FHDFQLSS  
>ENSMUSP00000136365\_c.384:T>C\_p.Y129H ENSMUST00000179982.2|Gm10717-209|ENSMUSG00000095891|+|chr9:g.3027911:T>C  
MFLIFHDFQFSCHIPCPTVDISFPPFSVFLAIFHVLKCVFLIFRDFQFSCHIPGPTVCISHFSRFSVILSFFN  
LSTACFSFSIIIFSFLAIFHVLQWTFNLFPPLFSVFLAIFHVLKCVFLIFRDFQFSCHIPGPTVCISHFSRFSV  
LSFFNLSTACFSFSMIFSFFAIFHVLQWKFLYFPFSSSIFSPYSRSYSVHFSFFTFFSDFVIFQVVKWFLI  
FHDFQLSS  
>rs237508806\_ENSMUSP00000136365\_c.393:A>G\_p.S132G  
ENSMUST00000179982.2|Gm10717-209|ENSMUSG00000095891|+|chr9:g.3027920:A>G  
MFLIFHDFQFSCHIPCPTVDISFPPFSVFLAIFHVLKCVFLIFRDFQFSCHIPGPTVCISHFSRFSVILSFFN  
LSTACFSFSIIIFSFLAIFHVLQWTFNLFPPLFSVFLAIFHVLKCVFLIFRDFQFSCHIPGPTVCISHFSRFSV  
LSFFNLSTACFSFSMIFSFFAIFHVLQWKFLYFPFSSSIFSPYSRSYSVHFSFFTFFSDFVIFQVVKWFLI  
FHDFQLSS  
>ENSMUSP00000136365\_c.393:A>T\_p.S132C ENSMUST00000179982.2|Gm10717-209|ENSMUSG00000095891|+|chr9:g.3027920:A>T  
MFLIFHDFQFSCHIPCPTVDISFPPFSVFLAIFHVLKCVFLIFRDFQFSCHIPGPTVCISHFSRFSVILSFFN  
LSTACFSFSIIIFSFLAIFHVLQWTFNLFPPLFSVFLAIFHVLKCVFLIFRDFQFSCHIPGPTVCISHFSRFSV  
LSFFNLSTACFSFSMIFSFFAIFHVLQWKFLYFPFSSSIFSPYSRSYSVHFSFFTFFSDFVIFQVVKWFLI  
FHDFQLSS  
>ENSMUSP00000136755\_c.525:A>C\_p.S176R ENSMUST00000177601.2|Gm10717-205|ENSMUSG00000095891|+|chr9:g.3027928:A>C  
CHIPCPTVEISFPPFSVFLAIFHVLKCVFLIFRVFQVSRHIPGPTVCISHFSRFSVILSFFKFSGCFSSFLI  
FSFLAIFHVLQWTFNLFPPLFSVFLAIFHVLKCCVFLIFRDFQFSCHIPGPTVCISHFSRFSVILSFFNLSTAC  
FSFSIIIFSFLAIFHVLQWTFNLFPPLFSYRPSYRSMHFSFFTFFSDFIIFQVVKCMFLIFNDFHFSC  
>ENSMUSP00000136755\_c.525:AG>CA\_p.S176Q ENSMUST00000177601.2|Gm10717-205|ENSMUSG00000095891|+|chr9:g.3027928:AG>CA  
CHIPCPTVEISFPPFSVFLAIFHVLKCVFLIFRVFQVSRHIPGPTVCISHFSRFSVILSFFKFSGCFSSFLI  
FSFLAIFHVLQWTFNLFPPLFSVFLAIFHVLKCCVFLIFRDFQFSCHIPGPTVCISHFSRFSVILSFFNLSTAC  
FSFSIIIFSFLAIFHVLQWTFNLFPPLFSYQSIFQVLQDAFLIFHVQ\*FHHFSSRQVYVSHFQ\*FSFFL  
>ENSMUSP00000136365\_c.420:T>C\_p.S141P ENSMUST00000179982.2|Gm10717-209|ENSMUSG00000095891|+|chr9:g.3027947:T>C  
MFLIFHDFQFSCHIPCPTVDISFPPFSVFLAIFHVLKCVFLIFRDFQFSCHIPGPTVCISHFSRFSVILSFFN  
LSTACFSFSIIIFSFLAIFHVLQWTFNLFPPLFSVFLAIFHVLKCVFLIFRDFQFSCHIPGPTVCISHFSRFSV  
LSFFNLSTACFSFSMIFSFFAIFHVLQWKFLYFPFSSSIFSPYSRSYSVHFSFFTFFSDFVIFQVVKWFLI  
FHDFQLSS



>ENSMUSP00000136365\_c.490:GT>G\_p.S164del-fs ENSMUST00000179982.2|Gm10717-209|ENSMUSG00000095891|+|chr9:g.3028017:GT>G  
MFLIFHDFQFSCHIPCPTVDISFPPFSVFLAIFHVLKCVFLIFRDFQFSCHIPGPTVCISHFSRFSVILSFFN  
LSTACFSFSIIIFSFLAIFHVLQWTFNLNFPFVFLAIFHVLKCVFLIFRDFQFSCYIPSPPTVCISHFSRFSVI  
LSFFNLSTACFSFSMIFSFPLPYMSYRGNFYIFHLFHRQFSHHIPGPTVCISHFSRFSVLISSFFKLSSGFSFSF  
SMIFSFL  
>ENSMUSP00000136365\_c.495:T>C\_p.F166L ENSMUST00000179982.2|Gm10717-209|ENSMUSG00000095891|+|chr9:g.3028022:T>C  
MFLIFHDFQFSCHIPCPTVDISFPPFSVFLAIFHVLKCVFLIFRDFQFSCHIPGPTVCISHFSRFSVILSFFN  
LSTACFSFSIIIFSFLAIFHVLQWTFNLNFPFVFLAIFHVLKCVFLIFRDFQFSCYIPSPPTVCISHFSRFSVI  
LSFFNLSTACFSFSMIFSFLLAIFHVLQKFLYFPFSSSIFSPYSRSYSVHFSFFTFSDFVIFQVVKWKFLI  
FHDFQLSS  
>ENSMUSP00000136365\_c.519:G>T\_p.G174W ENSMUST00000179982.2|Gm10717-209|ENSMUSG00000095891|+|chr9:g.3028046:G>T  
MFLIFHDFQFSCHIPCPTVDISFPPFSVFLAIFHVLKCVFLIFRDFQFSCHIPGPTVCISHFSRFSVILSFFN  
LSTACFSFSIIIFSFLAIFHVLQWTFNLNFPFVFLAIFHVLKCVFLIFRDFQFSCYIPSPPTVCISHFSRFSVI  
LSFFNLSTACFSFSMIFSFLLAIFHVLQKFLYFPFSSSIFSPYSRSYSVHFSFFTFSDFVIFQVVKWKFLI  
FHDFQLSS  
>rs231884288\_ENSMUSP00000136365\_c.523:A>C\_p.K175T  
ENSMUST00000179982.2|Gm10717-209|ENSMUSG00000095891|+|chr9:g.3028050:A>C  
MFLIFHDFQFSCHIPCPTVDISFPPFSVFLAIFHVLKCVFLIFRDFQFSCHIPGPTVCISHFSRFSVILSFFN  
LSTACFSFSIIIFSFLAIFHVLQWTFNLNFPFVFLAIFHVLKCVFLIFRDFQFSCYIPSPPTVCISHFSRFSVI  
LSFFNLSTACFSFSMIFSFLLAIFHVLQKFLYFPFSSSIFSPYSRSYSVHFSFFTFSDFVIFQVVKWKFLI  
FHDFQLSS  
>ENSMUSP00000136365\_c.531:T>A\_p.Y178N ENSMUST00000179982.2|Gm10717-209|ENSMUSG00000095891|+|chr9:g.3028058:T>A  
MFLIFHDFQFSCHIPCPTVDISFPPFSVFLAIFHVLKCVFLIFRDFQFSCHIPGPTVCISHFSRFSVILSFFN  
LSTACFSFSIIIFSFLAIFHVLQWTFNLNFPFVFLAIFHVLKCVFLIFRDFQFSCYIPSPPTVCISHFSRFSVI  
LSFFNLSTACFSFSMIFSFLLAIFHVLQKFLNFPFSSSIFSPYSRSYSVHFSFFTFSDFVIFQVVKWKFLI  
FHDFQLSS  
>ENSMUSP00000136755\_c.532:A>C\_p.Y178S ENSMUST00000177601.2|Gm10717-205|ENSMUSG00000095891|+|chr9:g.3028382:A>C  
CHIPCPTVEISFPPFSVFLAIFHVLKCVFLIFRVFQVSRHIPGPTVCISHFSRFSVILSFFKFSSGCFSSLI  
FSFLAIFHVLQWTFNLNFPFVFLAIFHVLKCCVFLIFRDFQFSCHIPGPTVCISHFSRFSVILSFFNLSTAC  
FSFSIIIFSFLAIFHVLQWTFNLNFPFSSYSPSSRSYRHMFSFFTFSDFIIFQVVKCMFLIFNDFHFSC  
>ENSMUSP00000136755\_c.548:G>T\_p.R183S ENSMUST00000177601.2|Gm10717-205|ENSMUSG00000095891|+|chr9:g.3028398:G>T  
CHIPCPTVEISFPPFSVFLAIFHVLKCVFLIFRVFQVSRHIPGPTVCISHFSRFSVILSFFKFSSGCFSSLI  
FSFLAIFHVLQWTFNLNFPFVFLAIFHVLKCCVFLIFRDFQFSCHIPGPTVCISHFSRFSVILSFFNLSTAC  
FSFSIIIFSFLAIFHVLQWTFNLNFPFSSYSPYSRSYSRHMFSFFTFSDFIIFQVVKCMFLIFNDFHFSC  
>ENSMUSP00000136755\_c.548:GA>TG\_p.R183S ENSMUST00000177601.2|Gm10717-205|ENSMUSG00000095891|+|chr9:g.3028398:GA>TG  
CHIPCPTVEISFPPFSVFLAIFHVLKCVFLIFRVFQVSRHIPGPTVCISHFSRFSVILSFFKFSSGCFSSLI  
FSFLAIFHVLQWTFNLNFPFVFLAIFHVLKCCVFLIFRDFQFSCHIPGPTVCISHFSRFSVILSFFNLSTAC  
FSFSIIIFSFLAIFHVLQWTFNLNFPFSSYSPYSRSYSRHMFSFFTFSDFIIFQVVKCMFLIFNDFHFSC  
>ENSMUSP00000136755\_c.585:A>G\_p.I196V ENSMUST00000177601.2|Gm10717-205|ENSMUSG00000095891|+|chr9:g.3028435:A>G  
CHIPCPTVEISFPPFSVFLAIFHVLKCVFLIFRVFQVSRHIPGPTVCISHFSRFSVILSFFKFSSGCFSSLI  
FSFLAIFHVLQWTFNLNFPFVFLAIFHVLKCCVFLIFRDFQFSCHIPGPTVCISHFSRFSVILSFFNLSTAC  
FSFSIIIFSFLAIFHVLQWTFNLNFPFSSYSPYSRSYSRHMFSFFTFSDFIIFQVVKCMFLIFNDFHFSC  
>ENSMUSP00000136755\_c.607:G>T\_p.C203F ENSMUST00000177601.2|Gm10717-205|ENSMUSG00000095891|+|chr9:g.3028457:G>T  
CHIPCPTVEISFPPFSVFLAIFHVLKCVFLIFRVFQVSRHIPGPTVCISHFSRFSVILSFFKFSSGCFSSLI  
FSFLAIFHVLQWTFNLNFPFVFLAIFHVLKCCVFLIFRDFQFSCHIPGPTVCISHFSRFSVILSFFNLSTAC  
FSFSIIIFSFLAIFHVLQWTFNLNFPFSSYSPYSRSYSRHMFSFFTFSDFIIFQVVKCMFLIFNDFHFSC  
>rs221236237\_ENSMUSP00000136755\_c.624:A>C\_p.N209H  
ENSMUST00000177601.2|Gm10717-205|ENSMUSG00000095891|+|chr9:g.3028474:A>C

CHIPCPTVEISFPPFSVFLAIFHVLKCVFLIFRVFQVSRHIPGPTVCISHFSRFSVILSFFKFSSGCFSSFLI  
FSFLAIFHVLQWTFNLNPPFSVFLAIFHVLKCCVFLIFRDFQFSCHIPGPTVCISHFSRFSVILSFFNLSTAC  
FSFSIIFSFLAIFHVLQWTFNLNPPFSYSPYSRYSRHMHSFFTFSSDFIIFQVVKCMFLIFHDFHFSC  
>ENSMUSP00000136755\_c.624:AATG>CATA\_p.N209H ENSMUST00000177601.2|Gm10717-  
205|ENSMUSG00000095891|+|chr9:g.3028474:AATG>CATA  
CHIPCPTVEISFPPFSVFLAIFHVLKCVFLIFRVFQVSRHIPGPTVCISHFSRFSVILSFFKFSSGCFSSFLI  
FSFLAIFHVLQWTFNLNPPFSVFLAIFHVLKCCVFLIFRDFQFSCHIPGPTVCISHFSRFSVILSFFNLSTAC  
FSFSIIFSFLAIFHVLQWTFNLNPPFSYSPYSRYSRHMHSFFTFSSDFIIFQVVKCMFLIFHNDHFHSC  
>ENSMUSP00000136755\_c.632:T>A\_p.F211L ENSMUST00000177601.2|Gm10717-  
205|ENSMUSG00000095891|+|chr9:g.3028482:T>A  
CHIPCPTVEISFPPFSVFLAIFHVLKCVFLIFRVFQVSRHIPGPTVCISHFSRFSVILSFFKFSSGCFSSFLI  
FSFLAIFHVLQWTFNLNPPFSVFLAIFHVLKCCVFLIFRDFQFSCHIPGPTVCISHFSRFSVILSFFNLSTAC  
FSFSIIFSFLAIFHVLQWTFNLNPPFSYSPYSRYSRHMHSFFTFSSDFIIFQVVKCMFLIFNDLHFHSC  
>ENSMUSP00000136755\_c.635:T>G\_p.H212Q ENSMUST00000177601.2|Gm10717-  
205|ENSMUSG00000095891|+|chr9:g.3028485:T>G  
CHIPCPTVEISFPPFSVFLAIFHVLKCVFLIFRVFQVSRHIPGPTVCISHFSRFSVILSFFKFSSGCFSSFLI  
FSFLAIFHVLQWTFNLNPPFSVFLAIFHVLKCCVFLIFRDFQFSCHIPGPTVCISHFSRFSVILSFFNLSTAC  
FSFSIIFSFLAIFHVLQWTFNLNPPFSYSPYSRYSRHMHSFFTFSSDFIIFQVVKCMFLIFNDFQFSC  
>ENSMUSP00000136755\_c.639:TC>T\_p.S214del-fs ENSMUST00000177601.2|Gm10717-  
205|ENSMUSG00000095891|+|chr9:g.3028489:TC>T  
CHIPCPTVEISFPPFSVFLAIFHVLKCVFLIFRVFQVSRHIPGPTVCISHFSRFSVILSFFKFSSGCFSSFLI  
FSFLAIFHVLQWTFNLNPPFSVFLAIFHVLKCCVFLIFRDFQFSCHIPGPTVCISHFSRFSVILSFFNLSTAC  
FSFSIIFSFLAIFHVLQWTFNLNPPFSYSPYSRYSRHMHSFFTFSSDFIIFQVVKCMFLIFNDFHFH  
>ENSMUSP00000136365\_c.646:A>T\_p.K216M ENSMUST00000179982.2|Gm10717-  
209|ENSMUSG00000095891|+|chr9:g.3028694:A>T  
MFLIFHDFQFSCHIPCPTVDISFPPFSVFLAIFHVLKCVFLIFRDFQFSCHIPGPTVCISHFSRFSVILSFFN  
LSTACFSFSIIFSFLAIFHVLQWTFNLNPPFSVFLAIFHVLKCVFLIFRDFQFSCYIPSPPTVCISHFSRFSVI  
LSFFNLSTACFSFSMIFSFFAIFHVLQKFLYFPPFSSSIFSPYSRYSVHFSFFTFSSDFVIFQVVKWMFLI  
FHDFQLSS  
>ENSMUSP00000136365\_c.654:A>T\_p.I219F ENSMUST00000179982.2|Gm10717-  
209|ENSMUSG00000095891|+|chr9:g.3028702:A>T  
MFLIFHDFQFSCHIPCPTVDISFPPFSVFLAIFHVLKCVFLIFRDFQFSCHIPGPTVCISHFSRFSVILSFFN  
LSTACFSFSIIFSFLAIFHVLQWTFNLNPPFSVFLAIFHVLKCVFLIFRDFQFSCYIPSPPTVCISHFSRFSVI  
LSFFNLSTACFSFSMIFSFFAIFHVLQKFLYFPPFSSSIFSPYSRYSVHFSFFTFSSDFVIFQVVKWKFLF  
FHDFQLSS  
>ENSMUSP00000136365\_c.678:A>T\_p.S227C ENSMUST00000179982.2|Gm10717-  
209|ENSMUSG00000095891|+|chr9:g.3028726:A>T  
MFLIFHDFQFSCHIPCPTVDISFPPFSVFLAIFHVLKCVFLIFRDFQFSCHIPGPTVCISHFSRFSVILSFFN  
LSTACFSFSIIFSFLAIFHVLQWTFNLNPPFSVFLAIFHVLKCVFLIFRDFQFSCYIPSPPTVCISHFSRFSVI  
LSFFNLSTACFSFSMIFSFFAIFHVLQKFLYFPPFSSSIFSPYSRYSVHFSFFTFSSDFVIFQVVKWKFLI  
FHDFQLSC  
>ENSMUSP00000137419\_c.366:C>T\_p.R123C ENSMUST00000177875.8|Gm10717-  
206|ENSMUSG00000095891|+|chr9:g.3028826:C>T  
MFLIFHDFQFSCHIPCPTVDISFPPFSVFLAIFHVLKCVFLIFRDFQFSCHIPGPTVCISHFSRFSVILSFFN  
LSTACFSFSIIFSFLAIFHVLQWTFNLNPPFSVFLAIFHVLKCCVFLIFCDEFQFSCHIPGPTVCISHFSRFSV  
ILSFFNLSTACFSFSMIFSFFLAIFHVLQWKFNLNPPFSVSPYSRYSVHFSFFTFSSDFVIFQVVKWMPFI  
DFQFSY  
>ENSMUSP00000137419\_c.367:G>A\_p.R123H ENSMUST00000177875.8|Gm10717-  
206|ENSMUSG00000095891|+|chr9:g.3028827:G>A  
MFLIFHDFQFSCHIPCPTVDISFPPFSVFLAIFHVLKCVFLIFRDFQFSCHIPGPTVCISHFSRFSVILSFFN  
LSTACFSFSIIFSFLAIFHVLQWTFNLNPPFSVFLAIFHVLKCCVFLIFHDFQFSCHIPGPTVCISHFSRFSV  
ILSFFNLSTACFSFSMIFSFFLAIFHVLQWKFNLNPPFSVSPYSRYSVHFSFFTFSSDFVIFQVVKWMPFI  
DFQFSY  
>ENSMUSP00000137419\_c.384:T>C\_p.C129R ENSMUST00000177875.8|Gm10717-  
206|ENSMUSG00000095891|+|chr9:g.3028844:T>C  
MFLIFHDFQFSCHIPCPTVDISFPPFSVFLAIFHVLKCVFLIFRDFQFSCHIPGPTVCISHFSRFSVILSFFN  
LSTACFSFSIIFSFLAIFHVLQWTFNLNPPFSVFLAIFHVLKCCVFLIFRDFQFSRHIPGPTVCISHFSRFSV

ILSFFNLSTACFSFSMIFSLAIFHVLQWKFLNFPPFSVSPYSRSYSVHFSFSTFFSDFVIFQVVKWMPPIFL  
DFQFSY  
>ENSMUSP00000137419\_c.396:G>C\_p.G133R ENSMUST00000177875.8|Gm10717-  
206|ENSMUSG00000095891|+|chr9:g.3028856:G>C  
MFLIFHDFQFSCHIPCPTVDISFPPFSVFLAIFHVLKCVFLIFRDFQFSCHIPGPTVCISHFSRFSVILSFFN  
LSTACFSFSIIIFSFLAIFHVLQWTFLNFPFVSFLAIFHVLKCCVFLIFRDFQFSCHIPRPTVCISHFSRFSV  
ILSFFNLSTACFSFSMIFSLAIFHVLQWKFLNFPPFSVSPYSRSYSVHFSFSTFFSDFVIFQVVKWMPPIFL  
DFQFSY  
>ENSMUSP00000137419\_c.402:A>T\_p.T135S ENSMUST00000177875.8|Gm10717-  
206|ENSMUSG00000095891|+|chr9:g.3028862:A>T  
MFLIFHDFQFSCHIPCPTVDISFPPFSVFLAIFHVLKCVFLIFRDFQFSCHIPGPTVCISHFSRFSVILSFFN  
LSTACFSFSIIIFSFLAIFHVLQWTFLNFPFVSFLAIFHVLKCCVFLIFRDFQFSCHIPGPSVCISHFSRFSV  
ILSFFNLSTACFSFSMIFSLAIFHVLQWKFLNFPPFSVSPYSRSYSVHFSFSTFFSDFVIFQVVKWMPPIFL  
DFQFSY  
>ENSMUSP00000137419\_c.423:T>C\_p.S142P ENSMUST00000177875.8|Gm10717-  
206|ENSMUSG00000095891|+|chr9:g.3028883:T>C  
MFLIFHDFQFSCHIPCPTVDISFPPFSVFLAIFHVLKCVFLIFRDFQFSCHIPGPTVCISHFSRFSVILSFFN  
LSTACFSFSIIIFSFLAIFHVLQWTFLNFPFVSFLAIFHVLKCCVFLIFRDFQFSCHIPGPTVCISHFRFSV  
ILSFFNLSTACFSFSMIFSLAIFHVLQWKFLNFPPFSVSPYSRSYSVHFSFSTFFSDFVIFQVVKWMPPIFL  
DFQFSY  
>ENSMUSP00000137419\_c.426:C>T\_p.R143C ENSMUST00000177875.8|Gm10717-  
206|ENSMUSG00000095891|+|chr9:g.3028886:C>T  
MFLIFHDFQFSCHIPCPTVDISFPPFSVFLAIFHVLKCVFLIFRDFQFSCHIPGPTVCISHFSRFSVILSFFN  
LSTACFSFSIIIFSFLAIFHVLQWTFLNFPFVSFLAIFHVLKCCVFLIFRDFQFSCHIPGPTVCISHFSCFSV  
ILSFFNLSTACFSFSMIFSLAIFHVLQWKFLNFPPFSVSPYSRSYSVHFSFSTFFSDFVIFQVVKWMPPIFL  
DFQFSY  
>ENSMUSP00000137419\_c.436:T>G\_p.V146G ENSMUST00000177875.8|Gm10717-  
206|ENSMUSG00000095891|+|chr9:g.3028896:T>G  
MFLIFHDFQFSCHIPCPTVDISFPPFSVFLAIFHVLKCVFLIFRDFQFSCHIPGPTVCISHFSRFSVILSFFN  
LSTACFSFSIIIFSFLAIFHVLQWTFLNFPFVSFLAIFHVLKCCVFLIFRDFQFSCHIPGPTVCISHFSRFSG  
ILSFFNLSTACFSFSMIFSLAIFHVLQWKFLNFPPFSVSPYSRSYSVHFSFSTFFSDFVIFQVVKWMPPIFL  
DFQFSY  
>ENSMUSP00000137419\_c.442:T>C\_p.L148S ENSMUST00000177875.8|Gm10717-  
206|ENSMUSG00000095891|+|chr9:g.3028902:T>C  
MFLIFHDFQFSCHIPCPTVDISFPPFSVFLAIFHVLKCVFLIFRDFQFSCHIPGPTVCISHFSRFSVILSFFN  
LSTACFSFSIIIFSFLAIFHVLQWTFLNFPFVSFLAIFHVLKCCVFLIFRDFQFSCHIPGPTVCISHFSRFSV  
ISSFFNLSTACFSFSMIFSLAIFHVLQWKFLNFPPFSVSPYSRSYSVHFSFSTFFSDFVIFQVVKWMPPIFL  
DFQFSY  
>ENSMUSP00000137419\_c.455:TTT>GTC\_p.N152K ENSMUST00000177875.8|Gm10717-  
206|ENSMUSG00000095891|+|chr9:g.3028915:TTT>GTC  
MFLIFHDFQFSCHIPCPTVDISFPPFSVFLAIFHVLKCVFLIFRDFQFSCHIPGPTVCISHFSRFSVILSFFN  
LSTACFSFSIIIFSFLAIFHVLQWTFLNFPFVSFLAIFHVLKCCVFLIFRDFQFSCHIPGPTVCISHFSRFSV  
ILSFFKSCQLHVSHFP\*FLVFLLYSMSYSGNF\*IFHLQFRHIPGPTVCISHFSRFSVILSFFKLSSGCFPFS  
LIFSFL  
>ENSMUSP00000137419\_c.455:TTT>GTG\_p.N152K ENSMUST00000177875.8|Gm10717-  
206|ENSMUSG00000095891|+|chr9:g.3028915:TTT>GTG  
MFLIFHDFQFSCHIPCPTVDISFPPFSVFLAIFHVLKCVFLIFRDFQFSCHIPGPTVCISHFSRFSVILSFFN  
LSTACFSFSIIIFSFLAIFHVLQWTFLNFPFVSFLAIFHVLKCCVFLIFRDFQFSCHIPGPTVCISHFSRFSV  
ILSFFKCCQLHVSHFP\*FLVFLLYSMSYSGNF\*IFHLQFRHIPGPTVCISHFSRFSVILSFFKLSSGCFPFS  
LIFSFL  
>ENSMUSP00000137419\_c.463:CTGC>GTGA\_p.T155S ENSMUST00000177875.8|Gm10717-  
206|ENSMUSG00000095891|+|chr9:g.3028923:CTGC>GTGA  
MFLIFHDFQFSCHIPCPTVDISFPPFSVFLAIFHVLKCVFLIFRDFQFSCHIPGPTVCISHFSRFSVILSFFN  
LSTACFSFSIIIFSFLAIFHVLQWTFLNFPFVSFLAIFHVLKCCVFLIFRDFQFSCHIPGPTVCISHFSRFSV  
ILSFFNLSSDACFSFSMIFSLAIFHVLQWKFLNFPPFSVSPYSRSYSVHFSFSTFFSDFVIFQVVKWMPPIFL  
LDFQFSY  
>ENSMUSP00000137419\_c.463:CTGC>GTGG\_p.T155S ENSMUST00000177875.8|Gm10717-  
206|ENSMUSG00000095891|+|chr9:g.3028923:CTGC>GTGG

MFLIFHDFQFSCHIPCPTVDISFPPFSVFLAIFHVLKCVFLIFRDFQFSCHIPGPTVCISHFSRFSVILSFFN  
LSTACFSFSIIFSFLAIFHVLQWTFLNFPFVSFLAIFHVLKCCVFLIFRDFQFSCHIPGPTVCISHFSRFSV  
ILSFFNLSSGACFSFSMIFSFLAIFHVLQWKFLNFPFVSVPYSRSYSVHFSFSTFFSDFVIFQVVKWMPPIFL  
LDFQFSY  
>ENSMUSP00000137419\_c.463:CTGC>GTTT\_p.T155S ENSMUST00000177875.8|Gm10717-  
206|ENSMUSG00000095891|+|chr9:g.3028923:CTGC>GTTT  
MFLIFHDFQFSCHIPCPTVDISFPPFSVFLAIFHVLKCVFLIFRDFQFSCHIPGPTVCISHFSRFSVILSFFN  
LSTACFSFSIIFSFLAIFHVLQWTFLNFPFVSFLAIFHVLKCCVFLIFRDFQFSCHIPGPTVCISHFSRFSV  
ILSFFNLSSFACFSFSMIFSFLAIFHVLQWKFLNFPFVSVPYSRSYSVHFSFSTFFSDFVIFQVVKWMPPIFL  
LDFQFSY  
>ENSMUSP00000137419\_c.475:C>A\_p.S159\* ENSMUST00000177875.8|Gm10717-  
206|ENSMUSG00000095891|+|chr9:g.3028935:C>A  
MFLIFHDFQFSCHIPCPTVDISFPPFSVFLAIFHVLKCVFLIFRDFQFSCHIPGPTVCISHFSRFSVILSFFN  
LSTACFSFSIIFSFLAIFHVLQWTFLNFPFVSFLAIFHVLKCCVFLIFRDFQFSCHIPGPTVCISHFSRFSV  
ILSFFNLSTACF\*FSMIFSFLAIFHVLQWKFLNFPFVSVPYSRSYSVHFSFSTFFSDFVIFQVVKWMPPIFL  
DFQFSY  
>ENSMUSP00000137419\_c.483:A>G\_p.M162V ENSMUST00000177875.8|Gm10717-  
206|ENSMUSG00000095891|+|chr9:g.3028943:A>G  
MFLIFHDFQFSCHIPCPTVDISFPPFSVFLAIFHVLKCVFLIFRDFQFSCHIPGPTVCISHFSRFSVILSFFN  
LSTACFSFSIIFSFLAIFHVLQWTFLNFPFVSFLAIFHVLKCCVFLIFRDFQFSCHIPGPTVCISHFSRFSV  
ILSFFNLSTACFSFSVIFSFLAIFHVLQWKFLNFPFVSVPYSRSYSVHFSFSTFFSDFVIFQVVKWMPPIFL  
DFQFSY  
>ENSMUSP00000137419\_c.526:A>C\_p.K176T ENSMUST00000177875.8|Gm10717-  
206|ENSMUSG00000095891|+|chr9:g.3028986:A>C  
MFLIFHDFQFSCHIPCPTVDISFPPFSVFLAIFHVLKCVFLIFRDFQFSCHIPGPTVCISHFSRFSVILSFFN  
LSTACFSFSIIFSFLAIFHVLQWTFLNFPFVSFLAIFHVLKCCVFLIFRDFQFSCHIPGPTVCISHFSRFSV  
ILSFFNLSTACFSFSMIFSFLAIFHVLQWTFLNFPFVSVPYSRSYSVHFSFSTFFSDFVIFQVVKWMPPIFL  
DFQFSY  
>ENSMUSP00000137419\_c.544:C>T\_p.P182L ENSMUST00000177875.8|Gm10717-  
206|ENSMUSG00000095891|+|chr9:g.3029004:C>T  
MFLIFHDFQFSCHIPCPTVDISFPPFSVFLAIFHVLKCVFLIFRDFQFSCHIPGPTVCISHFSRFSVILSFFN  
LSTACFSFSIIFSFLAIFHVLQWTFLNFPFVSFLAIFHVLKCCVFLIFRDFQFSCHIPGPTVCISHFSRFSV  
ILSFFNLSTACFSFSMIFSFLAIFHVLQWKFLNFPFVSVPYSRSYSVHFSFSTFFSDFVIFQVVKWMPPIFL  
DFQFSY  
>rs245098628\_ENSMUSP00000096650\_c.100:T>A\_p.V34D  
ENSMUST00000099051.11|Gm10717-203|ENSMUSG00000095891|+|chr9:g.3029299:T>A  
CHIPCPTVEISFPPFSVFLAIFHVLKCVFLIFRDFQVSRHIPGPTVCISHFSRFSVILSFFKLSGCFPPSLI  
FSFLTIFHVLQWTFLNFPFVSFLAIFHVLKCVFLIFSDQFPRHIPGPTVCISHFSRFSVSISSFFKTSSGCF  
SFFMIFSFLAIFHVLQWTFLNFPFVSVPYSRSYSVHFSFSTFFSDFVIFQVVKWMPPIFLDFHFSC  
>ENSMUSP00000096650\_c.100:TTT>ATA\_p.V34D ENSMUST00000099051.11|Gm10717-  
203|ENSMUSG00000095891|+|chr9:g.3029299:TTT>ATA  
CHIPCPTVEISFPPFSVFLAIFHVLKCVFLIFRDFRFLAIFQVLQCAFLIFHVQ\*FCHFSSCQVDVSHFP\*  
FSVFLPYSMSYSGHF\*IFHLFQFSLPYFMS\*SVYFSFSVIFSFLAIFQVLQCAFLIFHVQ\*FRLEFRRQVDV  
SHFS\*FSVFLPYSMSYSGHF\*IFHLFLFRHIPGPTVCISHFSRFSVILSFFKLSGCFSPSLIFTFL  
>ENSMUSP00000137419\_c.552:G>T\_p.V185F ENSMUST00000177875.8|Gm10717-  
206|ENSMUSG00000095891|+|chr9:g.3029307:G>T  
MFLIFHDFQFSCHIPCPTVDISFPPFSVFLAIFHVLKCVFLIFRDFQFSCHIPGPTVCISHFSRFSVILSFFN  
LSTACFSFSIIFSFLAIFHVLQWTFLNFPFVSFLAIFHVLKCCVFLIFRDFQFSCHIPGPTVCISHFSRFSV  
ILSFFNLSTACFSFSMIFSFLAIFHVLQWKFLNFPFVSFSPYSRSYSVHFSFSTFFSDFVIFQVVKWMPPIFL  
DFQFSY  
>ENSMUSP00000096650\_c.108:G>T\_p.V37F ENSMUST00000099051.11|Gm10717-  
203|ENSMUSG00000095891|+|chr9:g.3029307:G>T  
CHIPCPTVEISFPPFSVFLAIFHVLKCVFLIFRVFQSRHIPGPTVCISHFSRFSVILSFFKLSGCFPPSLI  
FSFLTIFHVLQWTFLNFPFVSFLAIFHVLKCVFLIFSDQFPRHIPGPTVCISHFSRFSVSISSFFKTSSGCF  
SFFMIFSFLAIFHVLQWTFLNFPFVSVPYSRSYSVHFSFSTFFSDFVIFQVVKWMPPIFLDFHFSC  
>ENSMUSP00000137419\_c.576:A>C\_p.S193R ENSMUST00000177875.8|Gm10717-  
206|ENSMUSG00000095891|+|chr9:g.3029333:A>C

MFLIFHDFQFSCHIPCPTVDISFPPFSVFLAIFHVLKCVFLIFRDFQFSCHIPGPTVCISHFSRFSVILSFFN  
LSTACFSFSIIFSFLAIFHVLQWTFNLNPPFSVFLAIFHVLKCCVFLIFRDFQFSCHIPGPTVCISHFSRFSV  
ILSFFNLSTACFSFSMIFSFLAIFHVLQWKFLNPPFSVSPYSRSYRVHFSFSTFFSDFVIFQVVKWMPFIPL  
DFQFSY  
>ENSMUSP00000137419\_c.595:T>C\_p.F199S ENSMUST00000177875.8|Gm10717-  
206|ENSMUSG00000095891|+|chr9:g.3029352:T>C  
MFLIFHDFQFSCHIPCPTVDISFPPFSVFLAIFHVLKCVFLIFRDFQFSCHIPGPTVCISHFSRFSVILSFFN  
LSTACFSFSIIFSFLAIFHVLQWTFNLNPPFSVFLAIFHVLKCCVFLIFRDFQFSCHIPGPTVCISHFSRFSV  
ILSFFNLSTACFSFSMIFSFLAIFHVLQWKFLNPPFSVSPYSRSYSVHFSFSTFFSDFVIFQVVKWMPFIPL  
DFQFSY  
>ENSMUSP00000096650\_c.153:T>C\_p.S52P ENSMUST00000099051.11|Gm10717-  
203|ENSMUSG00000095891|+|chr9:g.3029352:T>C  
CHIPCPTVEISFPPFSVFLAIFHVLKCVFLIFRVFQVSRHIPGPTVCISHFPRFSVILSFFKLSSGCFPFSLI  
FSFLTIFHVLQWTFNLNPPFSVFLAIFHVLKCVFLIFSDQFPRHIPGPTVCISHFSRFSVILSFFKTS  
SFFMIFSFLAIFHVLQWTFNLNPPFSVSPYSRSYSVHFSFSTFFSDFVIFQVVKWMPFIPLDFHFSC  
>ENSMUSP00000096650\_c.163:C>T\_p.S55L ENSMUST00000099051.11|Gm10717-  
203|ENSMUSG00000095891|+|chr9:g.3029362:C>T  
CHIPCPTVEISFPPFSVFLAIFHVLKCVFLIFRVFQVSRHIPGPTVCISHFSRFLVILSFFKLSSGCFPFSLI  
FSFLTIFHVLQWTFNLNPPFSVFLAIFHVLKCVFLIFSDQFPRHIPGPTVCISHFSRFSVILSFFKTS  
SFFMIFSFLAIFHVLQWTFNLNPPFSVSPYSRSYSVHFSFSTFFSDFVIFQVVKWMPFIPLDFHFSC  
>ENSMUSP00000096650\_c.172:T>C\_p.L58S ENSMUST00000099051.11|Gm10717-  
203|ENSMUSG00000095891|+|chr9:g.3029371:T>C  
CHIPCPTVEISFPPFSVFLAIFHVLKCVFLIFRVFQVSRHIPGPTVCISHFSRFSVILSFFKLSSGCFPFSLI  
FSFLTIFHVLQWTFNLNPPFSVFLAIFHVLKCVFLIFSDQFPRHIPGPTVCISHFSRFSVILSFFKTS  
SFFMIFSFLAIFHVLQWTFNLNPPFSVSPYSRSYSVHFSFSTFFSDFVIFQVVKWMPFIPLDFHFSC  
>rs260015946\_ENSMUSP00000096650\_c.187:T>C\_p.L63S  
ENSMUST00000099051.11|Gm10717-203|ENSMUSG00000095891|+|chr9:g.3029386:T>C  
CHIPCPTVEISFPPFSVFLAIFHVLKCVFLIFRVFQVSRHIPGPTVCISHFSRFSVILSFFKLSSGCFPFSLI  
FSFLTIFHVLQWTFNLNPPFSVFLAIFHVLKCVFLIFSDQFPRHIPGPTVCISHFSRFSVILSFFKTS  
SFFMIFSFLAIFHVLQWTFNLNPPFSVSPYSRSYSVHFSFSTFFSDFVIFQVVKWMPFIPLDFHFSC  
>ENSMUSP00000137419\_c.646:C>T\_p.P216L ENSMUST00000177875.8|Gm10717-  
206|ENSMUSG00000095891|+|chr9:g.3029403:C>T  
MFLIFHDFQFSCHIPCPTVDISFPPFSVFLAIFHVLKCVFLIFRDFQFSCHIPGPTVCISHFSRFSVILSFFN  
LSTACFSFSIIFSFLAIFHVLQWTFNLNPPFSVFLAIFHVLKCCVFLIFRDFQFSCHIPGPTVCISHFSRFSV  
ILSFFNLSTACFSFSMIFSFLAIFHVLQWKFLNPPFSVSPYSRSYSVHFSFSTFFSDFVIFQVVKWMPFIPL  
DFQFSY  
>ENSMUSP00000096650\_c.204:C>T\_p.P69S ENSMUST00000099051.11|Gm10717-  
203|ENSMUSG00000095891|+|chr9:g.3029403:C>T  
CHIPCPTVEISFPPFSVFLAIFHVLKCVFLIFRVFQVSRHIPGPTVCISHFSRFSVILSFFKLSSGCFPFSLI  
FSFLTIFHVLQWTFNLNPPFSVFLAIFHVLKCVFLIFSDQFPRHIPGPTVCISHFSRFSVILSFFKTS  
SFFMIFSFLAIFHVLQWTFNLNPPFSVSPYSRSYSVHFSFSTFFSDFVIFQVVKWMPFIPLDFHFSC  
>rs227499457\_ENSMUSP00000137419\_c.655:T>A\_p.L219H  
ENSMUST00000177875.8|Gm10717-206|ENSMUSG00000095891|+|chr9:g.3029412:T>A  
MFLIFHDFQFSCHIPCPTVDISFPPFSVFLAIFHVLKCVFLIFRDFQFSCHIPGPTVCISHFSRFSVILSFFN  
LSTACFSFSIIFSFLAIFHVLQWTFNLNPPFSVFLAIFHVLKCCVFLIFRDFQFSCHIPGPTVCISHFSRFSV  
ILSFFNLSTACFSFSMIFSFLAIFHVLQWKFLNPPFSVSPYSRSYSVHFSFSTFFSDFVIFQVVKWMPFIH  
DFQFSY  
>rs227499457\_ENSMUSP00000096650\_c.213:T>A\_p.L72M  
ENSMUST00000099051.11|Gm10717-203|ENSMUSG00000095891|+|chr9:g.3029412:T>A  
CHIPCPTVEISFPPFSVFLAIFHVLKCVFLIFRVFQVSRHIPGPTVCISHFSRFSVILSFFKLSSGCFPFSMI  
FSFLTIFHVLQWTFNLNPPFSVFLAIFHVLKCVFLIFSDQFPRHIPGPTVCISHFSRFSVILSFFKTS  
SFFMIFSFLAIFHVLQWTFNLNPPFSVSPYSRSYSVHFSFSTFFSDFVIFQVVKWMPFIPLDFHFSC  
>ENSMUSP00000137419\_c.666:T>A\_p.F223I ENSMUST00000177875.8|Gm10717-  
206|ENSMUSG00000095891|+|chr9:g.3029423:T>A  
MFLIFHDFQFSCHIPCPTVDISFPPFSVFLAIFHVLKCVFLIFRDFQFSCHIPGPTVCISHFSRFSVILSFFN  
LSTACFSFSIIFSFLAIFHVLQWTFNLNPPFSVFLAIFHVLKCCVFLIFRDFQFSCHIPGPTVCISHFSRFSV  
ILSFFNLSTACFSFSMIFSFLAIFHVLQWKFLNPPFSVSPYSRSYSVHFSFSTFFSDFVIFQVVKWMPFIPL  
DFQISY



>ENSMUSP00000096650\_c.224:T>A\_p.S75R ENSMUST00000099051.11|Gm10717-203|ENSMUSG00000095891|+|chr9:g.3029423:T>A  
CHIPCPTVEISFPPFSVFLAIFHVLKCVFLIFRVFQVSRHIPGPTVCISHFSRFSVILSFFKLSSGCFPPFSLI  
FRFLTIFHVLQWTFNLNPPFSVFLAIFHVLKCVFLIFSDQFPRHIPGPTVCISHFSRFSVILSFFKTS  
SFFMIFSFLAIFHVLQWTFNLNPPFSVSPYSRSYSVHFSFFTFSDVIFQVVKWMFLIFLDFHFSC  
>ENSMUSP00000137419\_c.673:A>G\_p.Y225C ENSMUST00000177875.8|Gm10717-206|ENSMUSG00000095891|+|chr9:g.3029430:A>G  
MFLIFHDFQFSCHIPCPTVDISFPPFSVFLAIFHVLKCVFLIFRDFQFSCHIPGPTVCISHFSRFSVILSFFN  
LSTACFSFSIIFSFLAIFHVLQWTFNLNPPFSVFLAIFHVLKCCVFLIFRDFQFSCHIPGPTVCISHFSRFSV  
ILSFFNLSTACFSFSMIFSFLAIFHVLQWKFNLNPPFSVSPYSRSYSVHFSFFTFSDVIFQVVKWMFP  
DFQFSC  
>ENSMUSP00000096650\_c.231:A>G\_p.T78A ENSMUST00000099051.11|Gm10717-203|ENSMUSG00000095891|+|chr9:g.3029430:A>G  
CHIPCPTVEISFPPFSVFLAIFHVLKCVFLIFRVFQVSRHIPGPTVCISHFSRFSVILSFFKLSSGCFPPFSLI  
FSFLAIFHVLQWTFNLNPPFSVFLAIFHVLKCVFLIFSDQFPRHIPGPTVCISHFSRFSVILSFFKTS  
SFFMIFSFLAIFHVLQWTFNLNPPFSVSPYSRSYSVHFSFFTFSDVIFQVVKWMFLIFLDFHFSC  
>ENSMUSP00000096650\_c.268:T>A\_p.F90Y ENSMUST00000099051.11|Gm10717-203|ENSMUSG00000095891|+|chr9:g.3029467:T>A  
CHIPCPTVEISFPPFSVFLAIFHVLKCVFLIFRVFQVSRHIPGPTVCISHFSRFSVILSFFKLSSGCFPPFSLI  
FSFLTIFHVLQWTFNLNPPFSVFLAIFHVLKCVFLIFSDQFPRHIPGPTVCISHFSRFSVILSFFKTS  
SFFMIFSFLAIFHVLQWTFNLNPPFSVSPYSRSYSVHFSFFTFSDVIFQVVKWMFLIFLDFHFSC  
>ENSMUSP00000096650\_c.273:C>T\_p.P92S ENSMUST00000099051.11|Gm10717-203|ENSMUSG00000095891|+|chr9:g.3029472:C>T  
CHIPCPTVEISFPPFSVFLAIFHVLKCVFLIFRVFQVSRHIPGPTVCISHFSRFSVILSFFKLSSGCFPPFSLI  
FSFLTIFHVLQWTFNLNPPFSVFLAIFHVLKCVFLIFSDQFPRHIPGPTVCISHFSRFSVILSFFKTS  
SFFMIFSFLAIFHVLQWTFNLNPPFSVSPYSRSYSVHFSFFTFSDVIFQVVKWMFLIFLDFHFSC  
>ENSMUSP00000096650\_c.292:C>T\_p.A98V ENSMUST00000099051.11|Gm10717-203|ENSMUSG00000095891|+|chr9:g.3029491:C>T  
CHIPCPTVEISFPPFSVFLAIFHVLKCVFLIFRVFQVSRHIPGPTVCISHFSRFSVILSFFKLSSGCFPPFSLI  
FSFLTIFHVLQWTFNLNPPFSVFLVIFHVLKCVFLIFSDQFPRHIPGPTVCISHFSRFSVILSFFKTS  
SFFMIFSFLAIFHVLQWTFNLNPPFSVSPYSRSYSVHFSFFTFSDVIFQVVKWMFLIFLDFHFSC  
>ENSMUSP00000096650\_c.309:A>T\_p.K104\* ENSMUST00000099051.11|Gm10717-203|ENSMUSG00000095891|+|chr9:g.3029508:A>T  
CHIPCPTVEISFPPFSVFLAIFHVLKCVFLIFRVFQVSRHIPGPTVCISHFSRFSVILSFFKLSSGCFPPFSLI  
FSFLTIFHVLQWTFNLNPPFSVFLAIFHVL\*CVFLIFSDQFPRHIPGPTVCISHFSRFSVILSFFKTS  
SFFMIFSFLAIFHVLQWTFNLNPPFSVSPYSRSYSVHFSFFTFSDVIFQVVKWMFLIFLDFHFSC  
>ENSMUSP00000096650\_c.315:G>A\_p.V106I ENSMUST00000099051.11|Gm10717-203|ENSMUSG00000095891|+|chr9:g.3029514:G>A  
CHIPCPTVEISFPPFSVFLAIFHVLKCVFLIFRVFQVSRHIPGPTVCISHFSRFSVILSFFKLSSGCFPPFSLI  
FSFLTIFHVLQWTFNLNPPFSVFLAIFHVLKCVFLIFSDQFPRHIPGPTVCISHFSRFSVILSFFKTS  
SFFMIFSFLAIFHVLQWTFNLNPPFSVSPYSRSYSVHFSFFTFSDVIFQVVKWMFLIFLDFHFSC  
>ENSMUSP00000096650\_c.330:A>C\_p.S111R ENSMUST00000099051.11|Gm10717-203|ENSMUSG00000095891|+|chr9:g.3029529:A>C  
CHIPCPTVEISFPPFSVFLAIFHVLKCVFLIFRVFQVSRHIPGPTVCISHFSRFSVILSFFKLSSGCFPPFSLI  
FSFLTIFHVLQWTFNLNPPFSVFLAIFHVLKCVFLIFRDFQFPRHIPGPTVCISHFSRFSVILSFFKTS  
SFFMIFSFLAIFHVLQWTFNLNPPFSVSPYSRSYSVHFSFFTFSDVIFQVVKWMFLIFLDFHFSC  
>ENSMUSP00000096650\_c.330:A>T\_p.S111C ENSMUST00000099051.11|Gm10717-203|ENSMUSG00000095891|+|chr9:g.3029529:A>T  
CHIPCPTVEISFPPFSVFLAIFHVLKCVFLIFRVFQVSRHIPGPTVCISHFSRFSVILSFFKLSSGCFPPFSLI  
FSFLTIFHVLQWTFNLNPPFSVFLAIFHVLKCVFLIFCDFQFPRHIPGPTVCISHFSRFSVILSFFKTS  
SFFMIFSFLAIFHVLQWTFNLNPPFSVSPYSRSYSVHFSFFTFSDVIFQVVKWMFLIFLDFHFSC  
>ENSMUSP00000096640\_c.6:A>T\_p.I3F ENSMUST00000099042.4|Gm10717-202|ENSMUSG00000095891|+|chr9:g.3030343:A>T  
FLFFHDFQSSHIPGPTVDISFRPLSVFLAIFHVPKCVFLIFHDFQFPRHIPGPTVCISHFSRFSVILSFFKTS  
SSGCFSSFFMIFSFLAIFHVLQWTFNLNPPFSVFLAIFHVLKCVFLIFRDFQFSCHIPGPTVCISHFSRFSVIL  
SFFNLSTACFSFSMIFSFLAIFHVLQWTFNLNPPFSVSPYSRSYSVHFSFFTFSDVIFQVVKWMFLIFLDF  
HFSC

>ENSMUSP00000096640\_c.24:C>T\_p.L9F ENSMUST00000099042.4|Gm10717-  
202|ENSMUSG00000095891|+|chr9:g.3030361:C>T  
FLIFHDFQFSSHIPGPTVDISFRPLSVFLAIFHVPKCVFLIFHDFQFPRHIPGPTVCISHFSRFSVSISSFFKT  
SSGCFSSFFMIFSFLAIFHVLQWTFNLNPPFSVFLAIFHVLKCVFLIFRDFQFSCHIPGPTVCISHFSRFSVIL  
SFFNLSTACFSFSMIFSFLAIFHVLQWTFNLNPPFSVSPYSRSYSVHFSFFTFSSDFVIFQVVKWMFLIFLDF  
HFSC  
>ENSMUSP00000096640\_c.30:A>C\_p.S11R ENSMUST00000099042.4|Gm10717-  
202|ENSMUSG00000095891|+|chr9:g.3030367:A>C  
FLIFHDFQLSRHIPGPTVDISFRPLSVFLAIFHVPKCVFLIFHDFQFPRHIPGPTVCISHFSRFSVSISSFFKT  
SSGCFSSFFMIFSFLAIFHVLQWTFNLNPPFSVFLAIFHVLKCVFLIFRDFQFSCHIPGPTVCISHFSRFSVIL  
SFFNLSTACFSFSMIFSFLAIFHVLQWTFNLNPPFSVSPYSRSYSVHFSFFTFSSDFVIFQVVKWMFLIFLDF  
HFSC  
>ENSMUSP00000096640\_c.30:A>T\_p.S11C ENSMUST00000099042.4|Gm10717-  
202|ENSMUSG00000095891|+|chr9:g.3030367:A>T  
FLIFHDFQLSCHIPGPTVDISFRPLSVFLAIFHVPKCVFLIFHDFQFPRHIPGPTVCISHFSRFSVSISSFFKT  
SSGCFSSFFMIFSFLAIFHVLQWTFNLNPPFSVFLAIFHVLKCVFLIFRDFQFSCHIPGPTVCISHFSRFSVIL  
SFFNLSTACFSFSMIFSFLAIFHVLQWTFNLNPPFSVSPYSRSYSVHFSFFTFSSDFVIFQVVKWMFLIFLDF  
HFSC  
>rs260741822\_ENSMUSP00000096640\_c.42:G>C\_p.G15R  
ENSMUST00000099042.4|Gm10717-202|ENSMUSG00000095891|+|chr9:g.3030379:G>C  
FLIFHDFQLSSHIPRPTVDISFRPLSVFLAIFHVPKCVFLIFHDFQFPRHIPGPTVCISHFSRFSVSISSFFKT  
SSGCFSSFFMIFSFLAIFHVLQWTFNLNPPFSVFLAIFHVLKCVFLIFRDFQFSCHIPGPTVCISHFSRFSVIL  
SFFNLSTACFSFSMIFSFLAIFHVLQWTFNLNPPFSVSPYSRSYSVHFSFFTFSSDFVIFQVVKWMFLIFLDF  
HFSC  
>ENSMUSP00000096640\_c.67:G>C\_p.R23P ENSMUST00000099042.4|Gm10717-  
202|ENSMUSG00000095891|+|chr9:g.3030408:G>C  
FLIFHDFQLSSHIPGPTVDISFPPLSVFLAIFHVPKCVFLIFHDFQFPRHIPGPTVCISHFSRFSVSISSFFKT  
SSGCFSSFFMIFSFLAIFHVLQWTFNLNPPFSVFLAIFHVLKCVFLIFRDFQFSCHIPGPTVCISHFSRFSVIL  
SFFNLSTACFSFSMIFSFLAIFHVLQWTFNLNPPFSVSPYSRSYSVHFSFFTFSSDFVIFQVVKWMFLIFLDF  
HFSC  
>ENSMUSP00000096640\_c.141:C>T\_p.P48S ENSMUST00000099042.4|Gm10717-  
202|ENSMUSG00000095891|+|chr9:g.3030482:C>T  
FLIFHDFQLSSHIPGPTVDISFRPLSVFLAIFHVPKCVFLIFHDFQFSRHIPGPTVCISHFSRFSVSISSFFKT  
SSGCFSSFFMIFSFLAIFHVLQWTFNLNPPFSVFLAIFHVLKCVFLIFRDFQFSCHIPGPTVCISHFSRFSVIL  
SFFNLSTACFSFSMIFSFLAIFHVLQWTFNLNPPFSVSPYSRSYSVHFSFFTFSSDFVIFQVVKWMFLIFLDF  
HFSC  
>ENSMUSP00000096650\_c.390:C>T\_p.R131C ENSMUST00000099051.11|Gm10717-  
203|ENSMUSG00000095891|+|chr9:g.3030527:C>T  
CHIPCPTVEISFPPFSVFLAIFHVLKCVFLIFRVFQVSRHIPGPTVCISHFSRFSVILSFFKLSSGCFPPSLI  
FSFLTIFHVLQWTFNLNPPFSVFLAIFHVLKCVFLIFSDQFPRHIPGPTVCISHFSRFSVSISSFFKTSSGCF  
SFFMIFSFLAIFHVLQWTFNLNPPFSVSPYSRSYSVHFSFFTFSSDFVIFQVVKWMFLIFLDFHFSC  
>ENSMUSP00000096640\_c.186:C>T\_p.R63C ENSMUST00000099042.4|Gm10717-  
202|ENSMUSG00000095891|+|chr9:g.3030527:C>T  
FLIFHDFQLSSHIPGPTVDISFRPLSVFLAIFHVPKCVFLIFHDFQFPRHIPGPTVCISHFSRFSVSISSFFKT  
SSGCFSSFFMIFSFLAIFHVLQWTFNLNPPFSVFLAIFHVLKCVFLIFRDFQFSCHIPGPTVCISHFSRFSVIL  
SFFNLSTACFSFSMIFSFLAIFHVLQWTFNLNPPFSVSPYSRSYSVHFSFFTFSSDFVIFQVVKWMFLIFLDF  
HFSC  
>ENSMUSP00000096650\_c.390:C>A\_p.R131S ENSMUST00000099051.11|Gm10717-  
203|ENSMUSG00000095891|+|chr9:g.3030527:C>A  
CHIPCPTVEISFPPFSVFLAIFHVLKCVFLIFRVFQVSRHIPGPTVCISHFSRFSVILSFFKLSSGCFPPSLI  
FSFLTIFHVLQWTFNLNPPFSVFLAIFHVLKCVFLIFSDQFPRHIPGPTVCISHFSRFSVSISSFFKTSSGCF  
SFFMIFSFLAIFHVLQWTFNLNPPFSVSPYSRSYSVHFSFFTFSSDFVIFQVVKWMFLIFLDFHFSC  
>ENSMUSP00000096640\_c.186:C>A\_p.R63S ENSMUST00000099042.4|Gm10717-  
202|ENSMUSG00000095891|+|chr9:g.3030527:C>A  
FLIFHDFQLSSHIPGPTVDISFRPLSVFLAIFHVPKCVFLIFHDFQFPRHIPGPTVCISHFSRFSVSISSFFKT  
SSGCFSSFFMIFSFLAIFHVLQWTFNLNPPFSVFLAIFHVLKCVFLIFRDFQFSCHIPGPTVCISHFSRFSVIL  
SFFNLSTACFSFSMIFSFLAIFHVLQWTFNLNPPFSVSPYSRSYSVHFSFFTFSSDFVIFQVVKWMFLIFLDF  
HFSC

>ENSMUSP00000096650\_c.397:C>T\_p.S133L ENSMUST00000099051.11|Gm10717-203|ENSMUSG00000095891|+|chr9:g.3030534:C>T  
CHIPCPTVEISFPPFSVFLAIFHVLKCVFLIFRVFQVSRHIPGPTVCISHFSRFSVILSFFKLSSGCFPPFSLI  
FSFLTIFHVLQWTFNLNFPFVSFLAIFHVLKCVFLIFSDQFPRHIPGPTVCISHFSRFLVISSFFKTSSGCF  
SFFMIFSFLAIFHVLQWTFNLNFPFVSVPYSRYSVHFSFFTFSSDFVIFQVVKWMFLIFLDFHFSC  
>ENSMUSP00000096640\_c.193:C>T\_p.S65L ENSMUST00000099042.4|Gm10717-202|ENSMUSG00000095891|+|chr9:g.3030534:C>T  
FLIFHDFQLSSHIPGPTVDISFRPLSVFLAIFHVPKCVFLIFHDFQFPRHIPGPTVCISHFSRFLVISSFFKT  
SSGCFSSFFMIFSFLAIFHVLQWTFNLNFPFVSFLAIFHVLKCVFLIFRDFQFSCHIPGPTVCISHFSRFSVIL  
SFFNLSTACFSFSMIFSFLAIFHVLQWTFNLNFPFVSVPYSRYSVHFSFFTFSSDFVIFQVVKWMFLIFLDF  
HFSC  
>rs226036698\_ENSMUSP00000096650\_c.420:A>T\_p.T141S  
ENSMUST00000099051.11|Gm10717-203|ENSMUSG00000095891|+|chr9:g.3030557:A>T  
CHIPCPTVEISFPPFSVFLAIFHVLKCVFLIFRVFQVSRHIPGPTVCISHFSRFSVILSFFKLSSGCFPPFSLI  
FSFLTIFHVLQWTFNLNFPFVSFLAIFHVLKCVFLIFSDQFPRHIPGPTVCISHFSRFSVILSFFKSSGCF  
SFFMIFSFLAIFHVLQWTFNLNFPFVSVPYSRYSVHFSFFTFSSDFVIFQVVKWMFLIFLDFHFSC  
>rs226036698\_ENSMUSP00000096640\_c.216:A>T\_p.T73S  
ENSMUST00000099042.4|Gm10717-202|ENSMUSG00000095891|+|chr9:g.3030557:A>T  
FLIFHDFQLSSHIPGPTVDISFRPLSVFLAIFHVPKCVFLIFHDFQFPRHIPGPTVCISHFSRFSVILSFFKS  
SSGCFSSFFMIFSFLAIFHVLQWTFNLNFPFVSFLAIFHVLKCVFLIFRDFQFSCHIPGPTVCISHFSRFSVIL  
SFFNLSTACFSFSMIFSFLAIFHVLQWTFNLNFPFVSVPYSRYSVHFSFFTFSSDFVIFQVVKWMFLIFLDF  
HFSC  
>ENSMUSP00000137451\_c.12:TTTC>CTTT\_p.F5L ENSMUST00000179264.2|Gm10717-207|ENSMUSG00000095891|+|chr9:g.3030580:TTTC>CTTT  
MFLILFHDQFQFSCHIPCPTVDISFPPFSVFLAIFHVLKCVFLIFRDFQFSCHIPGPTVCISHFSRFSVILSFF  
NLSTACFSFSMIFSFLAIFHVLQWTFNLNFPFVSFLAIFHVLKCVFLIFRVFQFPRHIPGPTVCICYHFSRFSV  
ISSFFKTSSGCFSSFFMIFSFLAIFHVLQWTFNLNFPFVSVPYSRYSVHFSFFTFSSDFVIFQVVKWMFLIFL  
DFHFSC  
>ENSMUSP00000096650\_c.445:T>C\_p.F149S ENSMUST00000099051.11|Gm10717-203|ENSMUSG00000095891|+|chr9:g.3030582:T>C  
CHIPCPTVEISFPPFSVFLAIFHVLKCVFLIFRVFQVSRHIPGPTVCISHFSRFSVILSFFKLSSGCFPPFSLI  
FSFLTIFHVLQWTFNLNFPFVSFLAIFHVLKCVFLIFSDQFPRHIPGPTVCISHFSRFSVILSFFKTSSGCF  
SFSMIFSFLAIFHVLQWTFNLNFPFVSVPYSRYSVHFSFFTFSSDFVIFQVVKWMFLIFLDFHFSC  
>ENSMUSP00000096640\_c.241:T>C\_p.F81S ENSMUST00000099042.4|Gm10717-202|ENSMUSG00000095891|+|chr9:g.3030582:T>C  
FLIFHDFQLSSHIPGPTVDISFRPLSVFLAIFHVPKCVFLIFHDFQFPRHIPGPTVCISHFSRFSVILSFFKT  
SSGCFSSMIFSFLAIFHVLQWTFNLNFPFVSFLAIFHVLKCVFLIFRDFQFSCHIPGPTVCISHFSRFSVIL  
SFFNLSTACFSFSMIFSFLAIFHVLQWTFNLNFPFVSVPYSRYSVHFSFFTFSSDFVIFQVVKWMFLIFLDF  
HFSC  
>ENSMUSP00000096650\_c.445:TC>CT\_p.F149S ENSMUST00000099051.11|Gm10717-203|ENSMUSG00000095891|+|chr9:g.3030582:TC>CT  
CHIPCPTVEISFPPFSVFLAIFHVLKCVFLIFRVFQVSRHIPGPTVCISHFSRFSVILSFFKLSSGCFPPFSLI  
FSFLTIFHVLQWTFNLNFPFVSFLAIFHVLKCVFLIFSDQFPRHIPGPTVCISHFSRFSVILSFFKTSSGCF  
SFSHDFQFSCHIPCPTVDISKFSTFFCFQVFLQCAFLIFHVFQ\*FCHFSSCQVDVSHFP\*FSLFL  
>ENSMUSP00000096640\_c.241:TC>CT\_p.F81S ENSMUST00000099042.4|Gm10717-202|ENSMUSG00000095891|+|chr9:g.3030582:TC>CT  
FLIFHDFQLSSHIPGPTVDISFRPLSVFLAIFHVPKCVFLIFHDFQFPRHIPGPTVCISHFSRFSVILSFFKT  
SSGCFSSHDFQFSCHIPCPTVDISKFSTFFCFPRHISRPKVCISHFP\*FSVFLPYSWSYSVHFSFFTFSSDF  
VIFQFVNCMFLIFHDFQFSCHIPCPTVDISKFSTFFSFAIFQVFLQCAFLIFHVFQ\*FCHFSSCQVDVSHFP\*F  
SLFL  
>ENSMUSP00000096650\_c.468:A>C\_p.I157L ENSMUST00000099051.11|Gm10717-203|ENSMUSG00000095891|+|chr9:g.3030605:A>C  
CHIPCPTVEISFPPFSVFLAIFHVLKCVFLIFRVFQVSRHIPGPTVCISHFSRFSVILSFFKLSSGCFPPFSLI  
FSFLTIFHVLQWTFNLNFPFVSFLAIFHVLKCVFLIFSDQFPRHIPGPTVCISHFSRFSVILSFFKTSSGCF  
SFFMIFSFLAIFHVLQWTFNLNFPFVSVPYSRYSVHFSFFTFSSDFVIFQVVKWMFLIFLDFHFSC  
>ENSMUSP00000096640\_c.264:A>C\_p.I89L ENSMUST00000099042.4|Gm10717-202|ENSMUSG00000095891|+|chr9:g.3030605:A>C

FLIFHDFQLSSHIPGPTVDISFRPLSVFLAIFHVPKCVFLIFHDFQFPRHIPGPTVCISHFSRFSVILSFFKT  
SSGCFSEFMIFSLALFHVLTQWTFNLNPPFSVFLAIFHVLKCVFLIFRDFQFSCHIPGPTVCISHFSRFSVIL  
SFFNLSTACFSFSMIFSLAIFHVLQWTFNLNPPFSVSPYSRSYSVHFSFFTFSSDFVIFQVVKWMFLIFLDF  
HFSC  
>ENSMUSP00000137451\_c.37:A>C\_p.H13P ENSMUST00000179264.2|Gm10717-  
207|ENSMUSG00000095891|+|chr9:g.3030605:A>C  
MFLIFHDFQFSCPIPCPTVDISFPPFSVFLAIFHVLKCVFLIFRDFQFSCHIPGPTVCISHFSRFSVILSFFN  
LSTACFSFSMIFSLAIFHVLQWTFNLNPPFSVFLAIFHVLKCVFLIFRVFQFPRHIPGPTVCISHFSRFSVI  
SFFKTSSGCFSEFMIFSLAIFHVLQWTFNLNPPFSVSPYSRSYSVHFSFFTFSSDFVIFQVVKWMFLIFLDF  
HFSC  
>ENSMUSP00000096650\_c.474:CAT>AAA\_p.H159K ENSMUST00000099051.11|Gm10717-  
203|ENSMUSG00000095891|+|chr9:g.3030611:CAT>AAA  
CHIPCPTVEISFPPFSVFLAIFHVLKCVFLIFRVFQVSRHIPGPTVCISHFSRFSVILSFFKLSSGCFPFSLI  
FSFLTIFHVLQWTFNLNPPFSVFLAIFHVLKCVFLIFSDQFPRHIPGPTVCISHFSRFSVILSFFKTSSGCF  
SFFMIFSLAIFKMSYSGHF\*IFHLFLFRHIPGPTVCISHFSRFSVILSFFKLSSGCFSEFLIFTF  
>ENSMUSP00000096640\_c.270:CAT>AAA\_p.H91K ENSMUST00000099042.4|Gm10717-  
202|ENSMUSG00000095891|+|chr9:g.3030611:CAT>AAA  
FLIFHDFQLSSHIPGPTVDISFRPLSVFLAIFHVPKCVFLIFHDFQFPRHIPGPTVCISHFSRFSVILSFFKT  
SSGCFSEFMIFSLAIFKMSYSGHF\*IFHLFLFSSPYFTS\*SVYFSFSVIFSLAIFLVLQCAFLIFHVQ\*F  
CHFISICQLHVSHFP\*FSVFLPYSMSYSGHF\*IFHLQFRHIPGPTVCISHFSRFSVILSFFKLSSGCFSESLI  
FTFL  
>ENSMUSP00000137451\_c.43:CAT>AAA\_p.P15Q ENSMUST00000179264.2|Gm10717-  
207|ENSMUSG00000095891|+|chr9:g.3030611:CAT>AAA  
MFLIFHDFQFSCHIQLVLTQWTFHLFLFSSPYFTS\*SVYFSFSVIFSLAIFLVLQCAFLIFHVQ\*FCHFS  
ICQLHVSHFP\*FSVFLPYSMSYSGHF\*IFHLQFSSPYFTC\*SVYFSFFVFFSFLAIFQVLTQCAFIFHVQ\*  
FRLFSRRQVDVSHFS\*FSVFLPYSMSYSGHF\*IFHLFLFRHIPGPTVCISHFSRFSVILSFFKLSSGCFSESLI  
FTFL  
>ENSMUSP00000137451\_c.45:T>C\_p.C16R ENSMUST00000179264.2|Gm10717-  
207|ENSMUSG00000095891|+|chr9:g.3030613:T>C  
MFLIFHDFQFSCHIPRPTVDISFPPFSVFLAIFHVLKCVFLIFRDFQFSCHIPGPTVCISHFSRFSVILSFFN  
LSTACFSFSMIFSLAIFHVLQWTFNLNPPFSVFLAIFHVLKCVFLIFRVFQFPRHIPGPTVCISHFSRFSVI  
SFFKTSSGCFSEFMIFSLAIFHVLQWTFNLNPPFSVSPYSRSYSVHFSFFTFSSDFVIFQVVKWMFLIFLDF  
HFSC  
>ENSMUSP00000096650\_c.508:C>A\_p.P170H ENSMUST00000099051.11|Gm10717-  
203|ENSMUSG00000095891|+|chr9:g.3030645:C>A  
CHIPCPTVEISFPPFSVFLAIFHVLKCVFLIFRVFQVSRHIPGPTVCISHFSRFSVILSFFKLSSGCFPFSLI  
FSFLTIFHVLQWTFNLNPPFSVFLAIFHVLKCVFLIFSDQFPRHIPGPTVCISHFSRFSVILSFFKTSSGCF  
SFFMIFSLAIFHVLQWTFNLNPPHFSVSPYSRSYSVHFSFFTFSSDFVIFQVVKWMFLIFLDFHFSC  
>ENSMUSP00000096640\_c.304:C>A\_p.P102H ENSMUST00000099042.4|Gm10717-  
202|ENSMUSG00000095891|+|chr9:g.3030645:C>A  
FLIFHDFQLSSHIPGPTVDISFRPLSVFLAIFHVPKCVFLIFHDFQFPRHIPGPTVCISHFSRFSVILSFFKT  
SSGCFSEFMIFSLAIFHVLQWTFNLNPPHFSVFLAIFHVLKCVFLIFRDFQFSCHIPGPTVCISHFSRFSVIL  
SFFNLSTACFSFSMIFSLAIFHVLQWTFNLNPPFSVSPYSRSYSVHFSFFTFSSDFVIFQVVKWMFLIFLDF  
HFSC  
>ENSMUSP00000137451\_c.73:C>A\_p.P25H ENSMUST00000179264.2|Gm10717-  
207|ENSMUSG00000095891|+|chr9:g.3030645:C>A  
MFLIFHDFQFSCHIPCPTVDISFPHFSVFLAIFHVLKCVFLIFRDFQFSCHIPGPTVCISHFSRFSVILSFFN  
LSTACFSFSMIFSLAIFHVLQWTFNLNPPFSVFLAIFHVLKCVFLIFRVFQFPRHIPGPTVCISHFSRFSVI  
SFFKTSSGCFSEFMIFSLAIFHVLQWTFNLNPPFSVSPYSRSYSVHFSFFTFSSDFVIFQVVKWMFLIFLDF  
HFSC  
>ENSMUSP00000096640\_c.333:G>A\_p.V112I ENSMUST00000099042.4|Gm10717-  
202|ENSMUSG00000095891|+|chr9:g.3030674:G>A  
FLIFHDFQLSSHIPGPTVDISFRPLSVFLAIFHVPKCVFLIFHDFQFPRHIPGPTVCISHFSRFSVILSFFKT  
SSGCFSEFMIFSLAIFHVLQWTFNLNPPFSVFLAIFHILKCVFLIFRDFQFSCHIPGPTVCISHFSRFSVIL  
SFFNLSTACFSFSMIFSLAIFHVLQWTFNLNPPFSVSPYSRSYSVHFSFFTFSSDFVIFQVVKWMFLIFLDF  
HFSC  
>ENSMUSP00000137451\_c.102:G>A\_p.V35I ENSMUST00000179264.2|Gm10717-  
207|ENSMUSG00000095891|+|chr9:g.3030674:G>A

MFLIFHDFQFSCHIPCPTVDISFPPFSVFLAIFHILKCVFLIFRDFQFSCHIPGPTVCISHFSRFSVILSFFN  
LSTACFSFSMIFSFSLAIFHVLQWTFLNFPFVSFLAIFHVLKCVFLIFRVFQFPRHIPGPTVCYHFSRFSVI  
SSFFKTSSGCFSFFMIFSFSLAIFHVLQWTFLNFPFVSVPYSRSYSVHFSFSTFFSDFVIFQVVKWMFLIFLDF  
HFSC  
>ENSMUSP00000096640\_c.360:C>T\_p.R121C ENSMUST00000099042.4|Gm10717-  
202|ENSMUSG00000095891|+|chr9:g.3030701:C>T  
FLIFHDFQLSSHIPGPTVDISFRPLSVFLAIFHVPKCVFLIFHDFQFPRHIPGPTVCISHFSRFSVILSFFKT  
SSGCFSFFMIFSFSLAIFHVLQWTFLNFPFVSFLAIFHVLKCVFLIFCDFQFSCHIPGPTVCISHFSRFSVIL  
SFFNLSTACFSFSMIFSFSLAIFHVLQWTFLNFPFVSVPYSRSYSVHFSFSTFFSDFVIFQVVKWMFLIFLDF  
HFSC  
>ENSMUSP00000137451\_c.129:C>T\_p.R44C ENSMUST00000179264.2|Gm10717-  
207|ENSMUSG00000095891|+|chr9:g.3030701:C>T  
MFLIFHDFQFSCHIPCPTVDISFPPFSVFLAIFHVLKCVFLIFCDFQFSCHIPGPTVCISHFSRFSVILSFFN  
LSTACFSFSMIFSFSLAIFHVLQWTFLNFPFVSFLAIFHVLKCVFLIFRVFQFPRHIPGPTVCYHFSRFSVI  
SSFFKTSSGCFSFFMIFSFSLAIFHVLQWTFLNFPFVSVPYSRSYSVHFSFSTFFSDFVIFQVVKWMFLIFLDF  
HFSC  
>ENSMUSP00000096640\_c.361:G>A\_p.R121H ENSMUST00000099042.4|Gm10717-  
202|ENSMUSG00000095891|+|chr9:g.3030702:G>A  
FLIFHDFQLSSHIPGPTVDISFRPLSVFLAIFHVPKCVFLIFHDFQFPRHIPGPTVCISHFSRFSVILSFFKT  
SSGCFSFFMIFSFSLAIFHVLQWTFLNFPFVSFLAIFHVLKCVFLIFHDFQFSCHIPGPTVCISHFSRFSVIL  
SFFNLSTACFSFSMIFSFSLAIFHVLQWTFLNFPFVSVPYSRSYSVHFSFSTFFSDFVIFQVVKWMFLIFLDF  
HFSC  
>ENSMUSP00000137451\_c.130:G>A\_p.R44H ENSMUST00000179264.2|Gm10717-  
207|ENSMUSG00000095891|+|chr9:g.3030702:G>A  
MFLIFHDFQFSCHIPCPTVDISFPPFSVFLAIFHVLKCVFLIFHDFQFSCHIPGPTVCISHFSRFSVILSFFN  
LSTACFSFSMIFSFSLAIFHVLQWTFLNFPFVSFLAIFHVLKCVFLIFRVFQFPRHIPGPTVCYHFSRFSVI  
SSFFKTSSGCFSFFMIFSFSLAIFHVLQWTFLNFPFVSVPYSRSYSVHFSFSTFFSDFVIFQVVKWMFLIFLDF  
HFSC  
>ENSMUSP00000096640\_c.378:T>C\_p.C127R ENSMUST00000099042.4|Gm10717-  
202|ENSMUSG00000095891|+|chr9:g.3030719:T>C  
FLIFHDFQLSSHIPGPTVDISFRPLSVFLAIFHVPKCVFLIFHDFQFPRHIPGPTVCISHFSRFSVILSFFKT  
SSGCFSFFMIFSFSLAIFHVLQWTFLNFPFVSFLAIFHVLKCVFLIFRDFQFSRHIPGPTVCISHFSRFSVIL  
SFFNLSTACFSFSMIFSFSLAIFHVLQWTFLNFPFVSVPYSRSYSVHFSFSTFFSDFVIFQVVKWMFLIFLDF  
HFSC  
>ENSMUSP00000137451\_c.147:T>C\_p.C50R ENSMUST00000179264.2|Gm10717-  
207|ENSMUSG00000095891|+|chr9:g.3030719:T>C  
MFLIFHDFQFSCHIPCPTVDISFPPFSVFLAIFHVLKCVFLIFRDFQFSRHIPGPTVCISHFSRFSVILSFFN  
LSTACFSFSMIFSFSLAIFHVLQWTFLNFPFVSFLAIFHVLKCVFLIFRVFQFPRHIPGPTVCYHFSRFSVI  
SSFFKTSSGCFSFFMIFSFSLAIFHVLQWTFLNFPFVSVPYSRSYSVHFSFSTFFSDFVIFQVVKWMFLIFLDF  
HFSC  
>ENSMUSP00000096640\_c.396:A>T\_p.T133S ENSMUST00000099042.4|Gm10717-  
202|ENSMUSG00000095891|+|chr9:g.3030737:A>T  
FLIFHDFQLSSHIPGPTVDISFRPLSVFLAIFHVPKCVFLIFHDFQFPRHIPGPTVCISHFSRFSVILSFFKT  
SSGCFSFFMIFSFSLAIFHVLQWTFLNFPFVSFLAIFHVLKCVFLIFRDFQFSCHIPGPTVCISHFSRFSVIL  
SFFNLSTACFSFSMIFSFSLAIFHVLQWTFLNFPFVSVPYSRSYSVHFSFSTFFSDFVIFQVVKWMFLIFLDF  
HFSC  
>ENSMUSP00000137451\_c.165:A>T\_p.T56S ENSMUST00000179264.2|Gm10717-  
207|ENSMUSG00000095891|+|chr9:g.3030737:A>T  
MFLIFHDFQFSCHIPCPTVDISFPPFSVFLAIFHVLKCVFLIFRDFQFSCHIPGPTVCISHFSRFSVILSFFN  
LSTACFSFSMIFSFSLAIFHVLQWTFLNFPFVSFLAIFHVLKCVFLIFRVFQFPRHIPGPTVCYHFSRFSVI  
SSFFKTSSGCFSFFMIFSFSLAIFHVLQWTFLNFPFVSVPYSRSYSVHFSFSTFFSDFVIFQVVKWMFLIFLDF  
HFSC  
>ENSMUSP00000096640\_c.411:C>T\_p.H138Y ENSMUST00000099042.4|Gm10717-  
202|ENSMUSG00000095891|+|chr9:g.3030752:C>T  
FLIFHDFQLSSHIPGPTVDISFRPLSVFLAIFHVPKCVFLIFHDFQFPRHIPGPTVCISHFSRFSVILSFFKT  
SSGCFSFFMIFSFSLAIFHVLQWTFLNFPFVSFLAIFHVLKCVFLIFRDFQFSCHIPGPTVCISYFSRFSVIL  
SFFNLSTACFSFSMIFSFSLAIFHVLQWTFLNFPFVSVPYSRSYSVHFSFSTFFSDFVIFQVVKWMFLIFLDF  
HFSC



>ENSMUSP00000137451\_c.180:C>T\_p.H61Y ENSMUST00000179264.2|Gm10717-207|ENSMUSG00000095891|+|chr9:g.3030752:C>T  
MFLIFHDFQFSCHIPCPTVDISFPFVFLAIFHVLKCVFLIFRDFQFSCHIPGPTVCISYFSRFSVILSFFN  
LSTACFSFSMIFSLAIFHVLQWTFNLNFPFVFLAIFHVLKCVFLIFRVFQFPRHIPGPTVCYHFSRFSVI  
SSFFKTSSGCFSFFMIFSLAIFHVLQWTFNLNFPFVSPYSRSYSVHFSFSTFFSDFVIFQVVKWMFLIFLD  
HFSC  
>ENSMUSP00000096640\_c.427:C>T\_p.S143L ENSMUST00000099042.4|Gm10717-202|ENSMUSG00000095891|+|chr9:g.3030768:C>T  
FLIFHDFQLSSSHIPGPTVDISFRPLSVFLAIFHVPKCVFLIFHDFQFPRHIPGPTVCISHFSRFSVILSFFKT  
SSGCFSFFMIFSLAIFHVLQWTFNLNFPFVFLAIFHVLKCVFLIFRDFQFSCHIPGPTVCISHFSRFLVIL  
SFFNLSTACFSFSMIFSLAIFHVLQWTFNLNFPFVSPYSRSYSVHFSFSTFFSDFVIFQVVKWMFLIFLDF  
HFSC  
>ENSMUSP00000137451\_c.196:C>T\_p.S66L ENSMUST00000179264.2|Gm10717-207|ENSMUSG00000095891|+|chr9:g.3030768:C>T  
MFLIFHDFQFSCHIPCPTVDISFPFVFLAIFHVLKCVFLIFRDFQFSCHIPGPTVCISHFSRFLVILSFFN  
LSTACFSFSMIFSLAIFHVLQWTFNLNFPFVFLAIFHVLKCVFLIFRVFQFPRHIPGPTVCYHFSRFSVI  
SSFFKTSSGCFSFFMIFSLAIFHVLQWTFNLNFPFVSPYSRSYSVHFSFSTFFSDFVIFQVVKWMFLIFLD  
HFSC  
>ENSMUSP00000096640\_c.429:G>T\_p.V144L ENSMUST00000099042.4|Gm10717-202|ENSMUSG00000095891|+|chr9:g.3030770:G>T  
FLIFHDFQLSSSHIPGPTVDISFRPLSVFLAIFHVPKCVFLIFHDFQFPRHIPGPTVCISHFSRFSVILSFFKT  
SSGCFSFFMIFSLAIFHVLQWTFNLNFPFVFLAIFHVLKCVFLIFRDFQFSCHIPGPTVCISHFSRFLVIL  
SFFNLSTACFSFSMIFSLAIFHVLQWTFNLNFPFVSPYSRSYSVHFSFSTFFSDFVIFQVVKWMFLIFLDF  
HFSC  
>ENSMUSP00000137451\_c.198:G>T\_p.V67L ENSMUST00000179264.2|Gm10717-207|ENSMUSG00000095891|+|chr9:g.3030770:G>T  
MFLIFHDFQFSCHIPCPTVDISFPFVFLAIFHVLKCVFLIFRDFQFSCHIPGPTVCISHFSRFLVILSFFN  
LSTACFSFSMIFSLAIFHVLQWTFNLNFPFVFLAIFHVLKCVFLIFRVFQFPRHIPGPTVCYHFSRFSVI  
SSFFKTSSGCFSFFMIFSLAIFHVLQWTFNLNFPFVSPYSRSYSVHFSFSTFFSDFVIFQVVKWMFLIFLD  
HFSC  
>ENSMUSP00000096640\_c.445:TC>AA\_p.F149\* ENSMUST00000099042.4|Gm10717-202|ENSMUSG00000095891|+|chr9:g.3030786:TC>AA  
FLIFHDFQLSSSHIPGPTVDISFRPLSVFLAIFHVPKCVFLIFHDFQFPRHIPGPTVCISHFSRFSVILSFFKT  
SSGCFSFFMIFSLAIFHVLQWTFNLNFPFVFLAIFHVLKCVFLIFRDFQFSCHIPGPTVCISHFSRFSVIL  
SF\*QVNCMFLIFHDFQFSCHIPCPTVDISKFSTFFSFAIFQVLQCAFLIFHVFQ\*FCHFSSCQVDVSHFP\*F  
SLFL  
>ENSMUSP00000137451\_c.214:TC>AA\_p.F72\* ENSMUST00000179264.2|Gm10717-207|ENSMUSG00000095891|+|chr9:g.3030786:TC>AA  
MFLIFHDFQFSCHIPCPTVDISFPFVFLAIFHVLKCVFLIFRDFQFSCHIPGPTVCISHFSRFSVILSFF\*Q  
FVNCMFLIFHDFQFSCHIPCPTVDISKFSTFFSFPRHISRKVCISHFSCFSVSSPYSRSYSVHLSFFSTFFSD  
FVFFQDVKWMFLIFHDFQFSCHIPCPTVDISKFSTFFCFQVQLQCAFLIFHVFQ\*FCHFSSCQVDVSHFP\*  
FSLFL  
>ENSMUSP00000096640\_c.449:T>G\_p.N150K ENSMUST00000099042.4|Gm10717-202|ENSMUSG00000095891|+|chr9:g.3030790:T>G  
FLIFHDFQLSSSHIPGPTVDISFRPLSVFLAIFHVPKCVFLIFHDFQFPRHIPGPTVCISHFSRFSVILSFFKT  
SSGCFSFFMIFSLAIFHVLQWTFNLNFPFVFLAIFHVLKCVFLIFRDFQFSCHIPGPTVCISHFSRFSVIL  
SFFKLSTACFSFSMIFSLAIFHVLQWTFNLNFPFVSPYSRSYSVHFSFSTFFSDFVIFQVVKWMFLIFLDF  
HFSC  
>ENSMUSP00000137451\_c.218:T>G\_p.N73K ENSMUST00000179264.2|Gm10717-207|ENSMUSG00000095891|+|chr9:g.3030790:T>G  
MFLIFHDFQFSCHIPCPTVDISFPFVFLAIFHVLKCVFLIFRDFQFSCHIPGPTVCISHFSRFSVILSFFK  
LSTACFSFSMIFSLAIFHVLQWTFNLNFPFVFLAIFHVLKCVFLIFRVFQFPRHIPGPTVCYHFSRFSVI  
SSFFKTSSGCFSFFMIFSLAIFHVLQWTFNLNFPFVSPYSRSYSVHFSFSTFFSDFVIFQVVKWMFLIFLD  
HFSC  
>ENSMUSP00000096640\_c.449:TTT>GTC\_p.N150K ENSMUST00000099042.4|Gm10717-202|ENSMUSG00000095891|+|chr9:g.3030790:TTT>GTC  
FLIFHDFQLSSSHIPGPTVDISFRPLSVFLAIFHVPKCVFLIFHDFQFPRHIPGPTVCISHFSRFSVILSFFKT  
SSGCFSFFMIFSLAIFHVLQWTFNLNFPFVFLAIFHVLKCVFLIFRDFQFSCHIPGPTVCISHFSRFSVIL

SFFKSCQLHVSHFP\*FSVFLPYSMSYSGHF\*IFHLFQFRHIPGPTVCISHFSRFSVILSFFKLSSGCFSSFLI  
FTFL  
>ENSMUSP00000137451\_c.218:TTT>GTC\_p.N73K ENSMUST00000179264.2|Gm10717-  
207|ENSMUSG00000095891|+|chr9:g.3030790:TTT>GTC  
MFLIFHDFQFSCHIPCPTVDISFPPFSVFLAIFHVLKCVFLIFRDFQFSCHIPGPTVCISHFSRFSVILSFFK  
SCQLHVSHFP\*FSVFLPYSMSYSGHF\*IFHLFQFSPPYFTC\*SVYFSFFVFFSFLAIFQVLQCAFIIHFVQ\*  
FRLFSRRQVDVSHFS\*FSVFLPYSMSYSGHF\*IFHLFLFRHIPGPTVCISHFSRFSVILSFFKLSSGCFSSFLI  
FTFL  
>rs242073667\_ENSMUSP00000096640\_c.451:T>C\_p.L151S  
ENSMUST00000099042.4|Gm10717-202|ENSMUSG00000095891|+|chr9:g.3030792:T>C  
FLIFHDFQLSSHIPGPTVDISFRPLSVFLAIFHVPKCVFLIFHDFQFPRHIPGPTVCISHFSRFSVILSFFKT  
SSGCFSSFFMIFSLAIFHVLQWTFLNFPFVSFLAIFHVLKCVFLIFRDFQFSCHIPGPTVCISHFSRFSVIL  
SFFNLSSTACFSFSMIFSLAIFHVLQWTFLNFPFVSVPYSRSYSVHFSFFTFSSDFVIFQVVKWMFLIFLDF  
HFSC  
>rs242073667\_ENSMUSP00000137451\_c.220:T>C\_p.L74S  
ENSMUST00000179264.2|Gm10717-207|ENSMUSG00000095891|+|chr9:g.3030792:T>C  
MFLIFHDFQFSCHIPCPTVDISFPPFSVFLAIFHVLKCVFLIFRDFQFSCHIPGPTVCISHFSRFSVILSFFN  
SSTACFSFSMIFSLAIFHVLQWTFLNFPFVSFLAIFHVLKCVFLIFRVFQFPRHIPGPTVCIIYHFSRFSVI  
SSFFKTSSGCFSSFFMIFSLAIFHVLQWTFLNFPFVSVPYSRSYSVHFSFFTFSSDFVIFQVVKWMFLIFLD  
FHFSC  
>ENSMUSP00000096640\_c.456:A>C\_p.T153P ENSMUST00000099042.4|Gm10717-  
202|ENSMUSG00000095891|+|chr9:g.3030797:A>C  
FLIFHDFQLSSHIPGPTVDISFRPLSVFLAIFHVPKCVFLIFHDFQFPRHIPGPTVCISHFSRFSVILSFFKT  
SSGCFSSFFMIFSLAIFHVLQWTFLNFPFVSFLAIFHVLKCVFLIFRDFQFSCHIPGPTVCISHFSRFSVIL  
SFFNLSACFSFSMIFSLAIFHVLQWTFLNFPFVSVPYSRSYSVHFSFFTFSSDFVIFQVVKWMFLIFLDF  
HFSC  
>ENSMUSP00000137451\_c.225:A>C\_p.T76P ENSMUST00000179264.2|Gm10717-  
207|ENSMUSG00000095891|+|chr9:g.3030797:A>C  
MFLIFHDFQFSCHIPCPTVDISFPPFSVFLAIFHVLKCVFLIFRDFQFSCHIPGPTVCISHFSRFSVILSFFN  
LSPACFSFSMIFSLAIFHVLQWTFLNFPFVSFLAIFHVLKCVFLIFRVFQFPRHIPGPTVCIIYHFSRFSVI  
SSFFKTSSGCFSSFFMIFSLAIFHVLQWTFLNFPFVSVPYSRSYSVHFSFFTFSSDFVIFQVVKWMFLIFLD  
FHFSC  
>rs264641761\_ENSMUSP00000096640\_c.457:C>G\_p.T153S  
ENSMUST00000099042.4|Gm10717-202|ENSMUSG00000095891|+|chr9:g.3030798:C>G  
FLIFHDFQLSSHIPGPTVDISFRPLSVFLAIFHVPKCVFLIFHDFQFPRHIPGPTVCISHFSRFSVILSFFKT  
SSGCFSSFFMIFSLAIFHVLQWTFLNFPFVSFLAIFHVLKCVFLIFRDFQFSCHIPGPTVCISHFSRFSVIL  
SFFNLSACFSFSMIFSLAIFHVLQWTFLNFPFVSVPYSRSYSVHFSFFTFSSDFVIFQVVKWMFLIFLDF  
HFSC  
>rs264641761\_ENSMUSP00000137451\_c.226:C>G\_p.T76S  
ENSMUST00000179264.2|Gm10717-207|ENSMUSG00000095891|+|chr9:g.3030798:C>G  
MFLIFHDFQFSCHIPCPTVDISFPPFSVFLAIFHVLKCVFLIFRDFQFSCHIPGPTVCISHFSRFSVILSFFN  
LSSACFSFSMIFSLAIFHVLQWTFLNFPFVSFLAIFHVLKCVFLIFRVFQFPRHIPGPTVCIIYHFSRFSVI  
SSFFKTSSGCFSSFFMIFSLAIFHVLQWTFLNFPFVSVPYSRSYSVHFSFFTFSSDFVIFQVVKWMFLIFLD  
FHFSC  
>ENSMUSP00000096640\_c.457:CTGC>GTGT\_p.T153S ENSMUST00000099042.4|Gm10717-  
202|ENSMUSG00000095891|+|chr9:g.3030798:CTGC>GTGT  
FLIFHDFQLSSHIPGPTVDISFRPLSVFLAIFHVPKCVFLIFHDFQFPRHIPGPTVCISHFSRFSVILSFFKT  
SSGCFSSFFMIFSLAIFHVLQWTFLNFPFVSFLAIFHVLKCVFLIFRDFQFSCHIPGPTVCISHFSRFSVIL  
SFFNLSVACFSFSMIFSLAIFHVLQWTFLNFPFVSVPYSRSYSVHFSFFTFSSDFVIFQVVKWMFLIFLD  
FHFSC  
>ENSMUSP00000137451\_c.226:CTGC>GTGT\_p.T76S ENSMUST00000179264.2|Gm10717-  
207|ENSMUSG00000095891|+|chr9:g.3030798:CTGC>GTGT  
MFLIFHDFQFSCHIPCPTVDISFPPFSVFLAIFHVLKCVFLIFRDFQFSCHIPGPTVCISHFSRFSVILSFFN  
LSSVACFSFSMIFSLAIFHVLQWTFLNFPFVSFLAIFHVLKCVFLIFRVFQFPRHIPGPTVCIIYHFSRFSV  
ISSFFKTSSGCFSSFFMIFSLAIFHVLQWTFLNFPFVSVPYSRSYSVHFSFFTFSSDFVIFQVVKWMFLIFL  
DFHFSC  
>ENSMUSP00000096640\_c.457:CTGC>GTGG\_p.T153S ENSMUST00000099042.4|Gm10717-  
202|ENSMUSG00000095891|+|chr9:g.3030798:CTGC>GTGG

FLIFHDFQLSSHIPGPTVDISFRPLSVFLAIFHVPKCVFLIFHDFQFPRHIPGPTVCISHFSRFSVSISSFFKT  
SSGCFSEFFMIFSLAIFHVLQWTFLNFPFVSFLAIFHVLKCVFLIFRDFQFSCHIPGPTVCISHFSRFSVIL  
SFFNLSSGACFSFSMIFSLAIFHVLQWTFLNFPFVSVPYSRSYSVHFSFFTFSSDFVIFQVVKWMFLIFLD  
FHFSC  
>ENSMUSP00000137451\_c.226:CTGC>GTGG\_p.T76S ENSMUST00000179264.2|Gm10717-  
207|ENSMUSG00000095891|+|chr9:g.3030798:CTGC>GTGG  
MFLIFHDFQFSCHIPCPTVDISFPFVSFLAIFHVLKCVFLIFRDFQFSCHIPGPTVCISHFSRFSVILSFFN  
LSSGACFSFSMIFSLAIFHVLQWTFLNFPFVSFLAIFHVLKCVFLIFRVFQFPRHIPGPTVCYHFSRFSV  
ISSFFKTSSGCFSEFFMIFSLAIFHVLQWTFLNFPFVSVPYSRSYSVHFSFFTFSSDFVIFQVVKWMFLIFL  
DFHFSC  
>rs220228475\_ENSMUSP00000096640\_c.460:C>G\_p.A154G  
ENSMUST00000099042.4|Gm10717-202|ENSMUSG00000095891|+|chr9:g.3030801:C>G  
FLIFHDFQLSSHIPGPTVDISFRPLSVFLAIFHVPKCVFLIFHDFQFPRHIPGPTVCISHFSRFSVSISSFFKT  
SSGCFSEFFMIFSLAIFHVLQWTFLNFPFVSFLAIFHVLKCVFLIFRDFQFSCHIPGPTVCISHFSRFSVIL  
SFFNLSTGCFSEFSMIFSLAIFHVLQWTFLNFPFVSVPYSRSYSVHFSFFTFSSDFVIFQVVKWMFLIFLDF  
HFSC  
>rs220228475\_ENSMUSP00000137451\_c.229:C>G\_p.A77G  
ENSMUST00000179264.2|Gm10717-207|ENSMUSG00000095891|+|chr9:g.3030801:C>G  
MFLIFHDFQFSCHIPCPTVDISFPFVSFLAIFHVLKCVFLIFRDFQFSCHIPGPTVCISHFSRFSVILSFFN  
LSTGCFSEFSMIFSLAIFHVLQWTFLNFPFVSFLAIFHVLKCVFLIFRVFQFPRHIPGPTVCYHFSRFSVI  
SSFFKTSSGCFSEFFMIFSLAIFHVLQWTFLNFPFVSVPYSRSYSVHFSFFTFSSDFVIFQVVKWMFLIFLD  
FHFSC  
>ENSMUSP00000096640\_c.537:C>A\_p.P180T ENSMUST00000099042.4|Gm10717-  
202|ENSMUSG00000095891|+|chr9:g.3030878:C>A  
FLIFHDFQLSSHIPGPTVDISFRPLSVFLAIFHVPKCVFLIFHDFQFPRHIPGPTVCISHFSRFSVSISSFFKT  
SSGCFSEFFMIFSLAIFHVLQWTFLNFPFVSFLAIFHVLKCVFLIFRDFQFSCHIPGPTVCISHFSRFSVIL  
SFFNLSTACFSFSMIFSLAIFHVLQWTFLNFPFVSVPYSRSYSVHFSFFTFSSDFVIFQVVKWMFLIFLDF  
HFSC  
>ENSMUSP00000137451\_c.306:C>A\_p.P103T ENSMUST00000179264.2|Gm10717-  
207|ENSMUSG00000095891|+|chr9:g.3030878:C>A  
MFLIFHDFQFSCHIPCPTVDISFPFVSFLAIFHVLKCVFLIFRDFQFSCHIPGPTVCISHFSRFSVILSFFN  
LSTACFSFSMIFSLAIFHVLQWTFLNFPFVSFLAIFHVLKCVFLIFRVFQFPRHIPGPTVCYHFSRFSVI  
SSFFKTSSGCFSEFFMIFSLAIFHVLQWTFLNFPFVSVPYSRSYSVHFSFFTFSSDFVIFQVVKWMFLIFLD  
FHFSC  
>ENSMUSP00000137451\_c.344:G>T\_p.K115N ENSMUST00000179264.2|Gm10717-  
207|ENSMUSG00000095891|+|chr9:g.3030916:G>T  
MFLIFHDFQFSCHIPCPTVDISFPFVSFLAIFHVLKCVFLIFRDFQFSCHIPGPTVCISHFSRFSVILSFFN  
LSTACFSFSMIFSLAIFHVLQWTFLNFPFVSFLAIFHVLKCVFLIFRVFQFPRHIPGPTVCYHFSRFSVI  
SSFFKTSSGCFSEFFMIFSLAIFHVLQWTFLNFPFVSVPYSRSYSVHFSFFTFSSDFVIFQVVKWMFLIFLD  
FHFSC  
>ENSMUSP00000137451\_c.362:TC>T\_p.F121del-fs ENSMUST00000179264.2|Gm10717-  
207|ENSMUSG00000095891|+|chr9:g.3030934:TC>T  
MFLIFHDFQFSCHIPCPTVDISFPFVSFLAIFHVLKCVFLIFRDFQFSCHIPGPTVCISHFSRFSVILSFFN  
LSTACFSFSMIFSLAIFHVLQWTFLNFPFVSFLAIFHVLKCVFLIFVFFSFLAIFQVLQCAFIIFHVQ  
>rs238860127\_ENSMUSP00000137451\_c.367:T>A\_p.V123D  
ENSMUST00000179264.2|Gm10717-207|ENSMUSG00000095891|+|chr9:g.3030939:T>A  
MFLIFHDFQFSCHIPCPTVDISFPFVSFLAIFHVLKCVFLIFRDFQFSCHIPGPTVCISHFSRFSVILSFFN  
LSTACFSFSMIFSLAIFHVLQWTFLNFPFVSFLAIFHVLKCVFLIFRDFQFPRHIPGPTVCYHFSRFSVI  
SSFFKTSSGCFSEFFMIFSLAIFHVLQWTFLNFPFVSVPYSRSYSVHFSFFTFSSDFVIFQVVKWMFLIFLD  
FHFSC  
>ENSMUSP00000096650\_c.516:G>C\_p.V173L ENSMUST00000099051.11|Gm10717-  
203|ENSMUSG00000095891|+|chr9:g.3030947:G>C  
CHIPCPTVEISFPFVSFLAIFHVLKCVFLIFRVFQVSRHIPGPTVCISHFSRFSVILSFFKLSSGCFPFSLI  
FSFLTIFHVLQWTFLNFPFVSFLAIFHVLKCVFLIFSDQFPRHIPGPTVCISHFSRFSVSISSFFKTSSGCF  
SFFMIFSLAIFHVLQWTFLNFPFVSLSPYSRSYSVHFSFFTFSSDFVIFQVVKWMFLIFLDFHFSC  
>ENSMUSP00000096640\_c.546:G>C\_p.V183L ENSMUST00000099042.4|Gm10717-  
202|ENSMUSG00000095891|+|chr9:g.3030947:G>C

FLIFHDFQLSSSHIPGPTVDISFRPLSVFLAIFHVPKCVFLIFHDFQFPRHIPGPTVCISHFSRFSVSISSFFKT  
SSGCFSSFFMIFSFLAIFHVLQWTFNLNPPFSVFLAIFHVLKCVFLIFRDFQFSCHIPGPTVCISHFSRFSVIL  
SFFNLSTACFSFSMIFSFLAIFHVLQWTFNLNPPFSLSPYSRYSVHFSFFTFSSDFVIFQVVKWMFLIFLDF  
HFSC  
>rs259953757\_ENSMUSP00000096650\_c.516:G>T\_p.V173F  
ENSMUST00000099051.11|Gm10717-203|ENSMUSG00000095891|+|chr9:g.3030947:G>T  
CHIPCPTVEISFPPFSVFLAIFHVLKCVFLIFRVFQVSRHIPGPTVCISHFSRFSVILSFFKLSSGCFPFSLI  
FSFLTIFHVLQWTFNLNPPFSVFLAIFHVLKCVFLIFSDQFPRHIPGPTVCISHFSRFSVSISSFFKTSSGCF  
SFFMIFSFLAIFHVLQWTFNLNPPFSVSPYSRYSVHFSFFTFSSDFVIFQVVKWMFLIFLDFHFSC  
>rs259953757\_ENSMUSP00000096640\_c.546:G>T\_p.V183F  
ENSMUST00000099042.4|Gm10717-202|ENSMUSG00000095891|+|chr9:g.3030947:G>T  
FLIFHDFQLSSSHIPGPTVDISFRPLSVFLAIFHVPKCVFLIFHDFQFPRHIPGPTVCISHFSRFSVSISSFFKT  
SSGCFSSFFMIFSFLAIFHVLQWTFNLNPPFSVFLAIFHVLKCVFLIFRDFQFSCHIPGPTVCISHFSRFSVIL  
SFFNLSTACFSFSMIFSFLAIFHVLQWTFNLNPPFSVSPYSRYSVHFSFFTFSSDFVIFQVVKWMFLIFLDF  
HFSC  
>ENSMUSP00000096650\_c.527:T>A\_p.Y176\* ENSMUST00000099051.11|Gm10717-  
203|ENSMUSG00000095891|+|chr9:g.3030960:T>A  
CHIPCPTVEISFPPFSVFLAIFHVLKCVFLIFRVFQVSRHIPGPTVCISHFSRFSVILSFFKLSSGCFPFSLI  
FSFLTIFHVLQWTFNLNPPFSVFLAIFHVLKCVFLIFSDQFPRHIPGPTVCISHFSRFSVSISSFFKTSSGCF  
SFFMIFSFLAIFHVLQWTFNLNPPFSVSP\*SRYSVHFSFFTFSSDFVIFQVVKWMFLIFLDFHFSC  
>ENSMUSP00000096640\_c.557:T>A\_p.Y186\* ENSMUST00000099042.4|Gm10717-  
202|ENSMUSG00000095891|+|chr9:g.3030960:T>A  
FLIFHDFQLSSSHIPGPTVDISFRPLSVFLAIFHVPKCVFLIFHDFQFPRHIPGPTVCISHFSRFSVSISSFFKT  
SSGCFSSFFMIFSFLAIFHVLQWTFNLNPPFSVFLAIFHVLKCVFLIFRDFQFSCHIPGPTVCISHFSRFSVIL  
SFFNLSTACFSFSMIFSFLAIFHVLQWTFNLNPPFSVSP\*SRYSVHFSFFTFSSDFVIFQVVKWMFLIFLDF  
HFSC  
>ENSMUSP00000096650\_c.531:A>T\_p.R178W ENSMUST00000099051.11|Gm10717-  
203|ENSMUSG00000095891|+|chr9:g.3030964:A>T  
CHIPCPTVEISFPPFSVFLAIFHVLKCVFLIFRVFQVSRHIPGPTVCISHFSRFSVILSFFKLSSGCFPFSLI  
FSFLTIFHVLQWTFNLNPPFSVFLAIFHVLKCVFLIFSDQFPRHIPGPTVCISHFSRFSVSISSFFKTSSGCF  
SFFMIFSFLAIFHVLQWTFNLNPPFSVSPYSWSYSVHFSFFTFSSDFVIFQVVKWMFLIFLDFHFSC  
>ENSMUSP00000096640\_c.561:A>T\_p.R188W ENSMUST00000099042.4|Gm10717-  
202|ENSMUSG00000095891|+|chr9:g.3030964:A>T  
FLIFHDFQLSSSHIPGPTVDISFRPLSVFLAIFHVPKCVFLIFHDFQFPRHIPGPTVCISHFSRFSVSISSFFKT  
SSGCFSSFFMIFSFLAIFHVLQWTFNLNPPFSVFLAIFHVLKCVFLIFRDFQFSCHIPGPTVCISHFSRFSVIL  
SFFNLSTACFSFSMIFSFLAIFHVLQWTFNLNPPFSVSPYSWSYSVHFSFFTFSSDFVIFQVVKWMFLIFLDF  
HFSC  
>ENSMUSP00000096650\_c.559:T>C\_p.F187S ENSMUST00000099051.11|Gm10717-  
203|ENSMUSG00000095891|+|chr9:g.3030992:T>C  
CHIPCPTVEISFPPFSVFLAIFHVLKCVFLIFRVFQVSRHIPGPTVCISHFSRFSVILSFFKLSSGCFPFSLI  
FSFLTIFHVLQWTFNLNPPFSVFLAIFHVLKCVFLIFSDQFPRHIPGPTVCISHFSRFSVSISSFFKTSSGCF  
SFFMIFSFLAIFHVLQWTFNLNPPFSVSPYSRYSVHFSFSTFFSDFVIFQVVKWMFLIFLDFHFSC  
>ENSMUSP00000096640\_c.589:T>C\_p.F197S ENSMUST00000099042.4|Gm10717-  
202|ENSMUSG00000095891|+|chr9:g.3030992:T>C  
FLIFHDFQLSSSHIPGPTVDISFRPLSVFLAIFHVPKCVFLIFHDFQFPRHIPGPTVCISHFSRFSVSISSFFKT  
SSGCFSSFFMIFSFLAIFHVLQWTFNLNPPFSVFLAIFHVLKCVFLIFRDFQFSCHIPGPTVCISHFSRFSVIL  
SFFNLSTACFSFSMIFSFLAIFHVLQWTFNLNPPFSVSPYSRYSVHFSFSTFFSDFVIFQVVKWMFLIFLDF  
HFSC  
>ENSMUSP00000096650\_c.629:C>G\_p.H210Q ENSMUST00000099051.11|Gm10717-  
203|ENSMUSG00000095891|+|chr9:g.3031062:C>G  
CHIPCPTVEISFPPFSVFLAIFHVLKCVFLIFRVFQVSRHIPGPTVCISHFSRFSVILSFFKLSSGCFPFSLI  
FSFLTIFHVLQWTFNLNPPFSVFLAIFHVLKCVFLIFSDQFPRHIPGPTVCISHFSRFSVSISSFFKTSSGCF  
SFFMIFSFLAIFHVLQWTFNLNPPFSVSPYSRYSVHFSFSTFFSDFVIFQVVKWMFLIFLDFHFSC  
>ENSMUSP00000096640\_c.659:C>G\_p.H220Q ENSMUST00000099042.4|Gm10717-  
202|ENSMUSG00000095891|+|chr9:g.3031062:C>G  
FLIFHDFQLSSSHIPGPTVDISFRPLSVFLAIFHVPKCVFLIFHDFQFPRHIPGPTVCISHFSRFSVSISSFFKT  
SSGCFSSFFMIFSFLAIFHVLQWTFNLNPPFSVFLAIFHVLKCVFLIFRDFQFSCHIPGPTVCISHFSRFSVIL

SFFNLSTACFSFSMIFSLAIFHVLQWTFNLNPPFSVSPYSRSYSVHFSFSTFFSDFVIFQVVKWMFLIFLDF  
QFSC  
>ENSMUSP00000137451\_c.378:C>T\_p.P127S ENSMUST00000179264.2|Gm10717-  
207|ENSMUSG00000095891|+|chr9:g.3031999:C>T  
MFLIFHDFQFSCHIPCPTVDISFPPFSVFLAIFHVLKCVFLIFRDFQFSCHIPGPTVCISHFSRFSVILSFFN  
LSTACFSFSMIFSLAIFHVLQWTFNLNPPFSVFLAIFHVLKCVFLIFRVFQFSRHIPGPTVCIYHFSRFSVI  
SSFFKTSSGCFSFFMIFSLAIFHVLQWTFNLNPPFSVSPYSRSYSVHFSFSTFFSDFVIFQVVKWMFLIFLD  
FHFSC  
>ENSMUSP00000137451\_c.389:T>G\_p.I130M ENSMUST00000179264.2|Gm10717-  
207|ENSMUSG00000095891|+|chr9:g.3032010:T>G  
MFLIFHDFQFSCHIPCPTVDISFPPFSVFLAIFHVLKCVFLIFRDFQFSCHIPGPTVCISHFSRFSVILSFFN  
LSTACFSFSMIFSLAIFHVLQWTFNLNPPFSVFLAIFHVLKCVFLIFRVFQFPRHMPGPTVCIYHFSRFSVI  
SSFFKTSSGCFSFFMIFSLAIFHVLQWTFNLNPPFSVSPYSRSYSVHFSFSTFFSDFVIFQVVKWMFLIFLD  
FHFSC  
>ENSMUSP00000137451\_c.399:A>T\_p.T134S ENSMUST00000179264.2|Gm10717-  
207|ENSMUSG00000095891|+|chr9:g.3032020:A>T  
MFLIFHDFQFSCHIPCPTVDISFPPFSVFLAIFHVLKCVFLIFRDFQFSCHIPGPTVCISHFSRFSVILSFFN  
LSTACFSFSMIFSLAIFHVLQWTFNLNPPFSVFLAIFHVLKCVFLIFRVFQFPRHIPGPSVCIYHFSRFSVI  
SSFFKTSSGCFSFFMIFSLAIFHVLQWTFNLNPPFSVSPYSRSYSVHFSFSTFFSDFVIFQVVKWMFLIFLD  
FHFSC  
>ENSMUSP00000137451\_c.406:G>A\_p.C136Y ENSMUST00000179264.2|Gm10717-  
207|ENSMUSG00000095891|+|chr9:g.3032027:G>A  
MFLIFHDFQFSCHIPCPTVDISFPPFSVFLAIFHVLKCVFLIFRDFQFSCHIPGPTVCISHFSRFSVILSFFN  
LSTACFSFSMIFSLAIFHVLQWTFNLNPPFSVFLAIFHVLKCVFLIFRVFQFPRHIPGPTVYIYHFSRFSVI  
SSFFKTSSGCFSFFMIFSLAIFHVLQWTFNLNPPFSVSPYSRSYSVHFSFSTFFSDFVIFQVVKWMFLIFLD  
FHFSC  
>ENSMUSP00000137451\_c.423:C>T\_p.R142C ENSMUST00000179264.2|Gm10717-  
207|ENSMUSG00000095891|+|chr9:g.3032044:C>T  
MFLIFHDFQFSCHIPCPTVDISFPPFSVFLAIFHVLKCVFLIFRDFQFSCHIPGPTVCISHFSRFSVILSFFN  
LSTACFSFSMIFSLAIFHVLQWTFNLNPPFSVFLAIFHVLKCVFLIFRVFQFPRHIPGPTVCIYHFSRFSVI  
SSFFKTSSGCFSFFMIFSLAIFHVLQWTFNLNPPFSVSPYSRSYSVHFSFSTFFSDFVIFQVVKWMFLIFLD  
FHFSC  
>ENSMUSP00000137451\_c.430:C>T\_p.S144L ENSMUST00000179264.2|Gm10717-  
207|ENSMUSG00000095891|+|chr9:g.3032051:C>T  
MFLIFHDFQFSCHIPCPTVDISFPPFSVFLAIFHVLKCVFLIFRDFQFSCHIPGPTVCISHFSRFSVILSFFN  
LSTACFSFSMIFSLAIFHVLQWTFNLNPPFSVFLAIFHVLKCVFLIFRVFQFPRHIPGPTVCIYHFSRFLVI  
SSFFKTSSGCFSFFMIFSLAIFHVLQWTFNLNPPFSVSPYSRSYSVHFSFSTFFSDFVIFQVVKWMFLIFLD  
FHFSC  
>rs246324318\_ENSMUSP00000137451\_c.453:A>T\_p.T152S  
ENSMUST00000179264.2|Gm10717-207|ENSMUSG00000095891|+|chr9:g.3032074:A>T  
MFLIFHDFQFSCHIPCPTVDISFPPFSVFLAIFHVLKCVFLIFRDFQFSCHIPGPTVCISHFSRFSVILSFFN  
LSTACFSFSMIFSLAIFHVLQWTFNLNPPFSVFLAIFHVLKCVFLIFRVFQFPRHIPGPTVCIYHFSRFSVI  
SSFFKTSSGCFSFFMIFSLAIFHVLQWTFNLNPPFSVSPYSRSYSVHFSFSTFFSDFVIFQVVKWMFLIFLD  
FHFSC  
>ENSMUSP00000137451\_c.478:T>C\_p.F160S ENSMUST00000179264.2|Gm10717-  
207|ENSMUSG00000095891|+|chr9:g.3032099:T>C  
MFLIFHDFQFSCHIPCPTVDISFPPFSVFLAIFHVLKCVFLIFRDFQFSCHIPGPTVCISHFSRFSVILSFFN  
LSTACFSFSMIFSLAIFHVLQWTFNLNPPFSVFLAIFHVLKCVFLIFRVFQFPRHIPGPTVCIYHFSRFSVI  
SSFFKTSSGCFSFFMIFSLAIFHVLQWTFNLNPPFSVSPYSRSYSVHFSFSTFFSDFVIFQVVKWMFLIFLD  
FHFSC  
>ENSMUSP00000136837\_c.45:T>C\_p.C16R ENSMUST00000179839.8|Gm10717-  
208|ENSMUSG00000095891|+|chr9:g.3032130:T>C  
MFLIFHDFQFSCHIPRPTVDISFPPFSVFLAIFHVLKCVFLIFRDFQFSCHIPGPTVCISHFSRFSVILSFFK  
LSSGCFSSSLIFTFLAIFHVLQWTFLYFPFSSVFLAIFHVLKCVFLIFRDFQVSRHIPGPTVCISHFSRFSVI  
LSFFKLSSGCFSSSLIFTFLAIFHVLQWTFNLNPPFSVLYFSPYSKSYSVHFSFSTFFSDFVIFQVVKWMFLI  
FHDFQLSC  
>ENSMUSP00000096655\_c.45:T>C\_p.C16R ENSMUST00000099056.4|Gm10717-  
204|ENSMUSG00000095891|+|chr9:g.3032130:T>C



MFLIFHDFQFSCHIPRPTVDISFPPFSVFLAIFHVLKCVFLIFRDFQFSCHIPGPTVCISHFSRFSVILSFFK  
LSSGCFSSFLIFTFLAIFHVLQWTFLYFPPFSVFLAIFHVLKCVFLIFRDFQVSRHIPGPTVCISHFSRFSVI  
LSFFKLSSGCFSSFLIFTFLAIFHVLQWTFLNFPFFFLPYRSYSVHFSFFTFSSDFVIFQVNCMFLIFYDF  
QFSC  
>ENSMUSP00000137451\_c.541:C>T\_p.P181L ENSMUST00000179264.2|Gm10717-  
207|ENSMUSG00000095891|+|chr9:g.3032162:C>T  
MFLIFHDFQFSCHIPCPTVDISFPPFSVFLAIFHVLKCVFLIFRDFQFSCHIPGPTVCISHFSRFSVILSFFN  
LSTACFSFSMIFSLAIFHVLQWTFLNFPFFSVFLAIFHVLKCVFLIFRVFQFPRHIPGPTVCISHFSRFSVI  
SSFFKLSSGCFSSFMIFSLAIFHVLQWTFLNFPFLFSVSPYSRSYSVHFSFFTFSSDFVIFQVVKWMFLIFLD  
FHFSC  
>ENSMUSP00000136837\_c.73:C>T\_p.P25L ENSMUST00000179839.8|Gm10717-  
208|ENSMUSG00000095891|+|chr9:g.3032162:C>T  
MFLIFHDFQFSCHIPCPTVDISFPLFSVFLAIFHVLKCVFLIFRDFQFSCHIPGPTVCISHFSRFSVILSFFK  
LSSGCFSSFLIFTFLAIFHVLQWTFLYFPPFSVFLAIFHVLKCVFLIFRDFQVSRHIPGPTVCISHFSRFSVI  
LSFFKLSSGCFSSFLIFTFLAIFHVLQWTFLNFPFFSVLYFSPYSKSYSVHFSFFTFSSDFVIFQVVKWMFLI  
FHDFQLSC  
>ENSMUSP00000096655\_c.73:C>T\_p.P25L ENSMUST00000099056.4|Gm10717-  
204|ENSMUSG00000095891|+|chr9:g.3032162:C>T  
MFLIFHDFQFSCHIPCPTVDISFPLFSVFLAIFHVLKCVFLIFRDFQFSCHIPGPTVCISHFSRFSVILSFFK  
LSSGCFSSFLIFTFLAIFHVLQWTFLYFPPFSVFLAIFHVLKCVFLIFRDFQVSRHIPGPTVCISHFSRFSVI  
LSFFKLSSGCFSSFLIFTFLAIFHVLQWTFLNFPFFSVLYFSPYSKSYSVHFSFFTFSSDFVIFQVVKWMFLI  
FHDFQLSC  
>ENSMUSP00000136837\_c.130:G>A\_p.R44H ENSMUST00000179839.8|Gm10717-  
208|ENSMUSG00000095891|+|chr9:g.3032219:G>A  
MFLIFHDFQFSCHIPCPTVDISFPPFSVFLAIFHVLKCVFLIFHDFQFSCHIPGPTVCISHFSRFSVILSFFK  
LSSGCFSSFLIFTFLAIFHVLQWTFLYFPPFSVFLAIFHVLKCVFLIFRDFQVSRHIPGPTVCISHFSRFSVI  
LSFFKLSSGCFSSFLIFTFLAIFHVLQWTFLNFPFFSVLYFSPYSKSYSVHFSFFTFSSDFVIFQVVKWMFLI  
FHDFQLSC  
>ENSMUSP00000096655\_c.130:G>A\_p.R44H ENSMUST00000099056.4|Gm10717-  
204|ENSMUSG00000095891|+|chr9:g.3032219:G>A  
MFLIFHDFQFSCHIPCPTVDISFPPFSVFLAIFHVLKCVFLIFHDFQFSCHIPGPTVCISHFSRFSVILSFFK  
LSSGCFSSFLIFTFLAIFHVLQWTFLYFPPFSVFLAIFHVLKCVFLIFRDFQVSRHIPGPTVCISHFSRFSVI  
LSFFKLSSGCFSSFLIFTFLAIFHVLQWTFLNFPFFSVLYFSPYSKSYSVHFSFFTFSSDFVIFQVVKWMFLI  
FHDFQLSC  
>ENSMUSP00000136837\_c.147:T>C\_p.C50R ENSMUST00000179839.8|Gm10717-  
208|ENSMUSG00000095891|+|chr9:g.3032236:T>C  
MFLIFHDFQFSCHIPCPTVDISFPPFSVFLAIFHVLKCVFLIFRDFQFSRHIPGPTVCISHFSRFSVILSFFK  
LSSGCFSSFLIFTFLAIFHVLQWTFLYFPPFSVFLAIFHVLKCVFLIFRDFQVSRHIPGPTVCISHFSRFSVI  
LSFFKLSSGCFSSFLIFTFLAIFHVLQWTFLNFPFFSVLYFSPYSKSYSVHFSFFTFSSDFVIFQVVKWMFLI  
FHDFQLSC  
>ENSMUSP00000096655\_c.147:T>C\_p.C50R ENSMUST00000099056.4|Gm10717-  
204|ENSMUSG00000095891|+|chr9:g.3032236:T>C  
MFLIFHDFQFSCHIPCPTVDISFPPFSVFLAIFHVLKCVFLIFRDFQFSRHIPGPTVCISHFSRFSVILSFFK  
LSSGCFSSFLIFTFLAIFHVLQWTFLYFPPFSVFLAIFHVLKCVFLIFRDFQVSRHIPGPTVCISHFSRFSVI  
LSFFKLSSGCFSSFLIFTFLAIFHVLQWTFLNFPFFSVLYFSPYSKSYSVHFSFFTFSSDFVIFQVVKWMFLI  
FHDFQLSC  
>ENSMUSP00000136837\_c.165:A>T\_p.T56S ENSMUST00000179839.8|Gm10717-  
208|ENSMUSG00000095891|+|chr9:g.3032254:A>T  
MFLIFHDFQFSCHIPCPTVDISFPPFSVFLAIFHVLKCVFLIFRDFQFSCHIPGPSVCISHFSRFSVILSFFK  
LSSGCFSSFLIFTFLAIFHVLQWTFLYFPPFSVFLAIFHVLKCVFLIFRDFQVSRHIPGPTVCISHFSRFSVI  
LSFFKLSSGCFSSFLIFTFLAIFHVLQWTFLNFPFFSVLYFSPYSKSYSVHFSFFTFSSDFVIFQVVKWMFLI  
FHDFQLSC  
>ENSMUSP00000096655\_c.165:A>T\_p.T56S ENSMUST00000099056.4|Gm10717-  
204|ENSMUSG00000095891|+|chr9:g.3032254:A>T  
MFLIFHDFQFSCHIPCPTVDISFPPFSVFLAIFHVLKCVFLIFRDFQFSCHIPGPSVCISHFSRFSVILSFFK  
LSSGCFSSFLIFTFLAIFHVLQWTFLYFPPFSVFLAIFHVLKCVFLIFRDFQVSRHIPGPTVCISHFSRFSVI  
LSFFKLSSGCFSSFLIFTFLAIFHVLQWTFLNFPFFSVLYFSPYSKSYSVHFSFFTFSSDFVIFQVVKWMFLI  
FHDFQLSC

>ENSMUSP00000136837\_c.178:C>T\_p.S60F ENSMUST00000179839.8|Gm10717-208|ENSMUSG00000095891|+|chr9:g.3032267:C>T  
MFLIFHDFQFSCHIPCPTVDISFPPFSVFLAIFHVLKCVFLIFRDFQFSCHIPGPTVCISHFSRFSVILSFFK  
LSSGCFSSSLIFTFLAIFHVLQWTFLYFPPFSVFLAIFHVLKCVFLIFRDFQVSRHIPGPTVCISHFSRFSVI  
LSFFKLSSGCFSSSLIFTFLAIFHVLQWTFNLNFPFVSFLYFSPYSKSYSVHFSFSTFFSDFVIFQVVKWMFLI  
FHDFQLSC  
>ENSMUSP00000096655\_c.178:C>T\_p.S60F ENSMUST00000099056.4|Gm10717-204|ENSMUSG00000095891|+|chr9:g.3032267:C>T  
MFLIFHDFQFSCHIPCPTVDISFPPFSVFLAIFHVLKCVFLIFRDFQFSCHIPGPTVCISHFSRFSVILSFFK  
LSSGCFSSSLIFTFLAIFHVLQWTFLYFPPFSVFLAIFHVLKCVFLIFRDFQVSRHIPGPTVCISHFSRFSVI  
LSFFKLSSGCFSSSLIFTFLAIFHVLQWTFNLNFPFVSFLYFSPYSKSYSVHFSFSTFFSDFVIFQVVKWMFLI  
FHDFQLSC  
>ENSMUSP00000136837\_c.186:T>C\_p.S63P ENSMUST00000179839.8|Gm10717-208|ENSMUSG00000095891|+|chr9:g.3032275:T>C  
MFLIFHDFQFSCHIPCPTVDISFPPFSVFLAIFHVLKCVFLIFRDFQFSCHIPGPTVCISHFPRFSVILSFFK  
LSSGCFSSSLIFTFLAIFHVLQWTFLYFPPFSVFLAIFHVLKCVFLIFRDFQVSRHIPGPTVCISHFSRFSVI  
LSFFKLSSGCFSSSLIFTFLAIFHVLQWTFNLNFPFVSFLYFSPYSKSYSVHFSFSTFFSDFVIFQVVKWMFLI  
FHDFQLSC  
>ENSMUSP00000096655\_c.186:T>C\_p.S63P ENSMUST00000099056.4|Gm10717-204|ENSMUSG00000095891|+|chr9:g.3032275:T>C  
MFLIFHDFQFSCHIPCPTVDISFPPFSVFLAIFHVLKCVFLIFRDFQFSCHIPGPTVCISHFPRFSVILSFFK  
LSSGCFSSSLIFTFLAIFHVLQWTFLYFPPFSVFLAIFHVLKCVFLIFRDFQVSRHIPGPTVCISHFSRFSVI  
LSFFKLSSGCFSSSLIFTFLAIFHVLQWTFNLNFPFVSFLYFSPYSKSYSVHFSFSTFFSDFVIFQVVKWMFLI  
FHDFQLSC  
>ENSMUSP00000136837\_c.205:T>C\_p.L69S ENSMUST00000179839.8|Gm10717-208|ENSMUSG00000095891|+|chr9:g.3032294:T>C  
MFLIFHDFQFSCHIPCPTVDISFPPFSVFLAIFHVLKCVFLIFRDFQFSCHIPGPTVCISHFSRFSVILSFFK  
LSSGCFSSSLIFTFLAIFHVLQWTFLYFPPFSVFLAIFHVLKCVFLIFRDFQVSRHIPGPTVCISHFSRFSVI  
LSFFKLSSGCFSSSLIFTFLAIFHVLQWTFNLNFPFVSFLYFSPYSKSYSVHFSFSTFFSDFVIFQVVKWMFLI  
FHDFQLSC  
>ENSMUSP00000096655\_c.205:T>C\_p.L69S ENSMUST00000099056.4|Gm10717-204|ENSMUSG00000095891|+|chr9:g.3032294:T>C  
MFLIFHDFQFSCHIPCPTVDISFPPFSVFLAIFHVLKCVFLIFRDFQFSCHIPGPTVCISHFSRFSVILSFFK  
LSSGCFSSSLIFTFLAIFHVLQWTFLYFPPFSVFLAIFHVLKCVFLIFRDFQVSRHIPGPTVCISHFSRFSVI  
LSFFKLSSGCFSSSLIFTFLAIFHVLQWTFNLNFPFVSFLYFSPYSKSYSVHFSFSTFFSDFVIFQVVKWMFLI  
FHDFQLSC  
>ENSMUSP00000136837\_c.220:T>C\_p.L74S ENSMUST00000179839.8|Gm10717-208|ENSMUSG00000095891|+|chr9:g.3032309:T>C  
MFLIFHDFQFSCHIPCPTVDISFPPFSVFLAIFHVLKCVFLIFRDFQFSCHIPGPTVCISHFSRFSVILSFFK  
SSSGCFSSSLIFTFLAIFHVLQWTFLYFPPFSVFLAIFHVLKCVFLIFRDFQVSRHIPGPTVCISHFSRFSVI  
LSFFKLSSGCFSSSLIFTFLAIFHVLQWTFNLNFPFVSFLYFSPYSKSYSVHFSFSTFFSDFVIFQVVKWMFLI  
FHDFQLSC  
>ENSMUSP00000096655\_c.220:T>C\_p.L74S ENSMUST00000099056.4|Gm10717-204|ENSMUSG00000095891|+|chr9:g.3032309:T>C  
MFLIFHDFQFSCHIPCPTVDISFPPFSVFLAIFHVLKCVFLIFRDFQFSCHIPGPTVCISHFSRFSVILSFFK  
SSSGCFSSSLIFTFLAIFHVLQWTFLYFPPFSVFLAIFHVLKCVFLIFRDFQVSRHIPGPTVCISHFSRFSVI  
LSFFKLSSGCFSSSLIFTFLAIFHVLQWTFNLNFPFVSFLYFSPYSKSYSVHFSFSTFFSDFVIFQVVKWMFLI  
FHDFQLSC  
>ENSMUSP00000136837\_c.220:T>G\_p.L74W ENSMUST00000179839.8|Gm10717-208|ENSMUSG00000095891|+|chr9:g.3032309:T>G  
MFLIFHDFQFSCHIPCPTVDISFPPFSVFLAIFHVLKCVFLIFRDFQFSCHIPGPTVCISHFSRFSVILSFFK  
WSSGCFSSSLIFTFLAIFHVLQWTFLYFPPFSVFLAIFHVLKCVFLIFRDFQVSRHIPGPTVCISHFSRFSVI  
LSFFKLSSGCFSSSLIFTFLAIFHVLQWTFNLNFPFVSFLYFSPYSKSYSVHFSFSTFFSDFVIFQVVKWMFLI  
FHDFQLSC  
>ENSMUSP00000096655\_c.220:T>G\_p.L74W ENSMUST00000099056.4|Gm10717-204|ENSMUSG00000095891|+|chr9:g.3032309:T>G  
MFLIFHDFQFSCHIPCPTVDISFPPFSVFLAIFHVLKCVFLIFRDFQFSCHIPGPTVCISHFSRFSVILSFFK  
WSSGCFSSSLIFTFLAIFHVLQWTFLYFPPFSVFLAIFHVLKCVFLIFRDFQVSRHIPGPTVCISHFSRFSVI

LSFFKLSSGCFSSFLIFTFLAIFHVLQWTFNLNFPFFFLPYRSYSVHFSFFFTFFSDFVIFQVNCMFLIFYDF  
QFSC  
>ENSMUSP00000136837\_c.246:T>A\_p.L83M ENSMUST00000179839.8|Gm10717-  
208|ENSMUSG00000095891|+|chr9:g.3032335:T>A  
MFLIFHDFQFSCHIPCPTVDISFPPFSVFLAIFHVLKCVFLIFRDFQFSCHIPGPTVCISHFSRFSVILSFFK  
LSSGCFSSFLIFTFLAIFHVLQWTFLYFPPFSVFLAIFHVLKCVFLIFRDFQVSRHIPGPTVCISHFSRFSVI  
LSFFKLSSGCFSSFLIFTFLAIFHVLQWTFNLNFPFFSVLYFSPYSKSYSVHFSFFFTFFSDFVIFQVVKWMFLI  
FHDFQLSC  
>ENSMUSP00000096655\_c.246:T>A\_p.L83M ENSMUST00000099056.4|Gm10717-  
204|ENSMUSG00000095891|+|chr9:g.3032335:T>A  
MFLIFHDFQFSCHIPCPTVDISFPPFSVFLAIFHVLKCVFLIFRDFQFSCHIPGPTVCISHFSRFSVILSFFK  
LSSGCFSSFLIFTFLAIFHVLQWTFLYFPPFSVFLAIFHVLKCVFLIFRDFQVSRHIPGPTVCISHFSRFSVI  
LSFFKLSSGCFSSFLIFTFLAIFHVLQWTFNLNFPFFFLPYRSYSVHFSFFFTFFSDFVIFQVNCMFLIFYDF  
QFSC  
>ENSMUSP00000136837\_c.256:C>G\_p.T86S ENSMUST00000179839.8|Gm10717-  
208|ENSMUSG00000095891|+|chr9:g.3032345:C>G  
MFLIFHDFQFSCHIPCPTVDISFPPFSVFLAIFHVLKCVFLIFRDFQFSCHIPGPTVCISHFSRFSVILSFFK  
LSSGCFSSFLIFSLAIFHVLQWTFLYFPPFSVFLAIFHVLKCVFLIFRDFQVSRHIPGPTVCISHFSRFSVI  
LSFFKLSSGCFSSFLIFTFLAIFHVLQWTFNLNFPFFSVLYFSPYSKSYSVHFSFFFTFFSDFVIFQVVKWMFLI  
FHDFQLSC  
>ENSMUSP00000096655\_c.256:C>G\_p.T86S ENSMUST00000099056.4|Gm10717-  
204|ENSMUSG00000095891|+|chr9:g.3032345:C>G  
MFLIFHDFQFSCHIPCPTVDISFPPFSVFLAIFHVLKCVFLIFRDFQFSCHIPGPTVCISHFSRFSVILSFFK  
LSSGCFSSFLIFSLAIFHVLQWTFLYFPPFSVFLAIFHVLKCVFLIFRDFQVSRHIPGPTVCISHFSRFSVI  
LSFFKLSSGCFSSFLIFTFLAIFHVLQWTFNLNFPFFFLPYRSYSVHFSFFFTFFSDFVIFQVNCMFLIFYDF  
QFSC  
>ENSMUSP00000136837\_c.256:CT>GA\_p.T86R ENSMUST00000179839.8|Gm10717-  
208|ENSMUSG00000095891|+|chr9:g.3032345:CT>GA  
MFLIFHDFQFSCHIPCPTVDISFPPFSVFLAIFHVLKCVFLIFRDFQFSCHIPGPTVCISHFSRFSVILSFFK  
LSSGCFSSFLIFRFSCHIPCPTVDISIFSTFFRFPCHISRPKVCISHFP\*FSGFSPYSRSYSVHFSFFFTFFSD  
FVIFQVVKWMFLIFLDFHFSCHIPCPTVDISKFSTFFFLAIFQVLQCAFLIFHVQ\*FRHFSSCQVDVSH  
FP\*FSAFL  
>ENSMUSP00000096655\_c.256:CT>GA\_p.T86R ENSMUST00000099056.4|Gm10717-  
204|ENSMUSG00000095891|+|chr9:g.3032345:CT>GA  
MFLIFHDFQFSCHIPCPTVDISFPPFSVFLAIFHVLKCVFLIFRDFQFSCHIPGPTVCISHFSRFSVILSFFK  
LSSGCFSSFLIFRFSCHIPCPTVDISIFSTFFRFPCHISRPKVCISHFP\*FSGFSPYSRSYSVHFSFFFTFFSD  
FVIFQVVKWMFLIFLDFHFSCHIPCPTVDISKFSTFFFLAIFQVLQCAFLIFHVQ\*FCHFSSCQLHVSHFL\*F  
SVFL  
>ENSMUSP00000136837\_c.265:C>T\_p.A89V ENSMUST00000179839.8|Gm10717-  
208|ENSMUSG00000095891|+|chr9:g.3032354:C>T  
MFLIFHDFQFSCHIPCPTVDISFPPFSVFLAIFHVLKCVFLIFRDFQFSCHIPGPTVCISHFSRFSVILSFFK  
LSSGCFSSFLIFTFLVIFHVLQWTFLYFPPFSVFLAIFHVLKCVFLIFRDFQVSRHIPGPTVCISHFSRFSVI  
LSFFKLSSGCFSSFLIFTFLAIFHVLQWTFNLNFPFFSVLYFSPYSKSYSVHFSFFFTFFSDFVIFQVVKWMFLI  
FHDFQLSC  
>ENSMUSP00000096655\_c.265:C>T\_p.A89V ENSMUST00000099056.4|Gm10717-  
204|ENSMUSG00000095891|+|chr9:g.3032354:C>T  
MFLIFHDFQFSCHIPCPTVDISFPPFSVFLAIFHVLKCVFLIFRDFQFSCHIPGPTVCISHFSRFSVILSFFK  
LSSGCFSSFLIFTFLVIFHVLQWTFLYFPPFSVFLAIFHVLKCVFLIFRDFQVSRHIPGPTVCISHFSRFSVI  
LSFFKLSSGCFSSFLIFTFLAIFHVLQWTFNLNFPFFFLPYRSYSVHFSFFFTFFSDFVIFQVNCMFLIFYDF  
QFSC  
>ENSMUSP00000136837\_c.297:T>A\_p.Y100N ENSMUST00000179839.8|Gm10717-  
208|ENSMUSG00000095891|+|chr9:g.3032386:T>A  
MFLIFHDFQFSCHIPCPTVDISFPPFSVFLAIFHVLKCVFLIFRDFQFSCHIPGPTVCISHFSRFSVILSFFK  
LSSGCFSSFLIFTFLAIFHVLQWTFNLNFPFFSVFLAIFHVLKCVFLIFRDFQVSRHIPGPTVCISHFSRFSVI  
LSFFKLSSGCFSSFLIFTFLAIFHVLQWTFNLNFPFFSVLYFSPYSKSYSVHFSFFFTFFSDFVIFQVVKWMFLI  
FHDFQLSC  
>ENSMUSP00000096655\_c.297:T>A\_p.Y100N ENSMUST00000099056.4|Gm10717-  
204|ENSMUSG00000095891|+|chr9:g.3032386:T>A

MFLIFHDFQFSCHIPCPTVDISFPPFSVFLAIFHVLKCVFLIFRDFQFSCHIPGPTVCISHFSRFSVILSFFK  
LSSGCFSSFLIFTFLAIFHVLQWTFNLNFPFVSFLAIFHVLKCVFLIFRDFQVSRHIPGPTVCISHFSRFSVI  
LSFFKLSSGCFSSFLIFTFLAIFHVLQWTFNLNFPFVFLYSPYSKSYSVHFSFFTFSSDFVIFQVNCMFLIFYDF  
QFSC  
>ENSMUSP00000136837\_c.325:C>T\_p.A109V ENSMUST00000179839.8|Gm10717-  
208|ENSMUSG00000095891|+|chr9:g.3032414:C>T  
MFLIFHDFQFSCHIPCPTVDISFPPFSVFLAIFHVLKCVFLIFRDFQFSCHIPGPTVCISHFSRFSVILSFFK  
LSSGCFSSFLIFTFLAIFHVLQWTFLYFPFVSFLVIFHVLKCVFLIFRDFQVSRHIPGPTVCISHFSRFSVI  
LSFFKLSSGCFSSFLIFTFLAIFHVLQWTFNLNFPFVSFLYSPYSKSYSVHFSFFTFSSDFVIFQVVKWMFLI  
FHDFQLSC  
>ENSMUSP00000096655\_c.325:C>T\_p.A109V ENSMUST00000099056.4|Gm10717-  
204|ENSMUSG00000095891|+|chr9:g.3032414:C>T  
MFLIFHDFQFSCHIPCPTVDISFPPFSVFLAIFHVLKCVFLIFRDFQFSCHIPGPTVCISHFSRFSVILSFFK  
LSSGCFSSFLIFTFLAIFHVLQWTFLYFPFVSFLVIFHVLKCVFLIFRDFQVSRHIPGPTVCISHFSRFSVI  
LSFFKLSSGCFSSFLIFTFLAIFHVLQWTFNLNFPFVFLYSPYSKSYSVHFSFFTFSSDFVIFQVNCMFLIFYDF  
QFSC  
>ENSMUSP00000136837\_c.342:A>T\_p.K115\* ENSMUST00000179839.8|Gm10717-  
208|ENSMUSG00000095891|+|chr9:g.3032431:A>T  
MFLIFHDFQFSCHIPCPTVDISFPPFSVFLAIFHVLKCVFLIFRDFQFSCHIPGPTVCISHFSRFSVILSFFK  
LSSGCFSSFLIFTFLAIFHVLQWTFLYFPFVSFLAIFHVL\*CVFLIFRDFQVSRHIPGPTVCISHFSRFSVI  
LSFFKLSSGCFSSFLIFTFLAIFHVLQWTFNLNFPFVSFLYSPYSKSYSVHFSFFTFSSDFVIFQVVKWMFLI  
FHDFQLSC  
>ENSMUSP00000096655\_c.342:A>T\_p.K115\* ENSMUST00000099056.4|Gm10717-  
204|ENSMUSG00000095891|+|chr9:g.3032431:A>T  
MFLIFHDFQFSCHIPCPTVDISFPPFSVFLAIFHVLKCVFLIFRDFQFSCHIPGPTVCISHFSRFSVILSFFK  
LSSGCFSSFLIFTFLAIFHVLQWTFLYFPFVSFLAIFHVL\*CVFLIFRDFQVSRHIPGPTVCISHFSRFSVI  
LSFFKLSSGCFSSFLIFTFLAIFHVLQWTFNLNFPFVFLYSPYSKSYSVHFSFFTFSSDFVIFQVVKWMFLI  
FHDFQLSC  
>ENSMUSP00000136837\_c.344:G>T\_p.K115N ENSMUST00000179839.8|Gm10717-  
208|ENSMUSG00000095891|+|chr9:g.3032433:G>T  
MFLIFHDFQFSCHIPCPTVDISFPPFSVFLAIFHVLKCVFLIFRDFQFSCHIPGPTVCISHFSRFSVILSFFK  
LSSGCFSSFLIFTFLAIFHVLQWTFLYFPFVSFLAIFHVLNCFVFLIFRDFQVSRHIPGPTVCISHFSRFSVI  
LSFFKLSSGCFSSFLIFTFLAIFHVLQWTFNLNFPFVSFLYSPYSKSYSVHFSFFTFSSDFVIFQVVKWMFLI  
FHDFQLSC  
>ENSMUSP00000096655\_c.344:G>T\_p.K115N ENSMUST00000099056.4|Gm10717-  
204|ENSMUSG00000095891|+|chr9:g.3032433:G>T  
MFLIFHDFQFSCHIPCPTVDISFPPFSVFLAIFHVLKCVFLIFRDFQFSCHIPGPTVCISHFSRFSVILSFFK  
LSSGCFSSFLIFTFLAIFHVLQWTFLYFPFVSFLAIFHVLNCFVFLIFRDFQVSRHIPGPTVCISHFSRFSVI  
LSFFKLSSGCFSSFLIFTFLAIFHVLQWTFNLNFPFVFLYSPYSKSYSVHFSFFTFSSDFVIFQVNCMFLIFYDF  
QFSC  
>ENSMUSP00000136837\_c.363:C>T\_p.R122C ENSMUST00000179839.8|Gm10717-  
208|ENSMUSG00000095891|+|chr9:g.3032452:C>T  
MFLIFHDFQFSCHIPCPTVDISFPPFSVFLAIFHVLKCVFLIFRDFQFSCHIPGPTVCISHFSRFSVILSFFK  
LSSGCFSSFLIFTFLAIFHVLQWTFLYFPFVSFLAIFHVLKCVFLIFCDFQVSRHIPGPTVCISHFSRFSVI  
LSFFKLSSGCFSSFLIFTFLAIFHVLQWTFNLNFPFVSFLYSPYSKSYSVHFSFFTFSSDFVIFQVVKWMFLI  
FHDFQLSC  
>ENSMUSP00000096655\_c.363:C>T\_p.R122C ENSMUST00000099056.4|Gm10717-  
204|ENSMUSG00000095891|+|chr9:g.3032452:C>T  
MFLIFHDFQFSCHIPCPTVDISFPPFSVFLAIFHVLKCVFLIFRDFQFSCHIPGPTVCISHFSRFSVILSFFK  
LSSGCFSSFLIFTFLAIFHVLQWTFLYFPFVSFLAIFHVLKCVFLIFCDFQVSRHIPGPTVCISHFSRFSVI  
LSFFKLSSGCFSSFLIFTFLAIFHVLQWTFNLNFPFVFLYSPYSKSYSVHFSFFTFSSDFVIFQVNCMFLIFYDF  
QFSC  
>ENSMUSP00000137451\_c.549:G>T\_p.V184F ENSMUST00000179264.2|Gm10717-  
207|ENSMUSG00000095891|+|chr9:g.3032464:G>T  
MFLIFHDFQFSCHIPCPTVDISFPPFSVFLAIFHVLKCVFLIFRDFQFSCHIPGPTVCISHFSRFSVILSFFN  
LSTACFSFSMIFSLAIFHVLQWTFNLNFPFVSFLAIFHVLKCVFLIFRVFQFPRHIPGPTVCYHFSRFSVI  
SSFFKTSSGCFSSMIFSLAIFHVLQWTFNLNFPFVSFLYSPYSKSYSVHFSFFTFSSDFVIFQVVKWMFLIFLD  
FHFS

>ENSMUSP00000136837\_c.375:G>T\_p.V126F ENSMUST00000179839.8|Gm10717-208|ENSMUSG00000095891|+|chr9:g.3032464:G>T  
MFLIFHDFQFSCHIPCPTVDISFPPFSVFLAIFHVLKCVFLIFRDFQFSCHIPGPTVCISHFSRFSVILSFFK  
LSSGCFSSFLIFTFLAIFHVLQWTFLYFPPFSVFLAIFHVLKCVFLIFRDFQFSRHIPGPTVCISHFSRFSVI  
LSFFKLSSGCFSSFLIFTFLAIFHVLQWTFNLNFPFVSFLYFSPYSKSYSVHFSFSTFFSDFVIFQVVKWMFLI  
FHDFQLSC  
>ENSMUSP00000096655\_c.375:G>T\_p.V126F ENSMUST00000099056.4|Gm10717-204|ENSMUSG00000095891|+|chr9:g.3032464:G>T  
MFLIFHDFQFSCHIPCPTVDISFPPFSVFLAIFHVLKCVFLIFRDFQFSCHIPGPTVCISHFSRFSVILSFFK  
LSSGCFSSFLIFTFLAIFHVLQWTFLYFPPFSVFLAIFHVLKCVFLIFRDFQFSRHIPGPTVCISHFSRFSVI  
LSFFKLSSGCFSSFLIFTFLAIFHVLQWTFNLNFPFVFLPYRSYSVHFSFSTFFSDFVIFQVNCMFLIFYDF  
QFSC  
>ENSMUSP00000137451\_c.571:A>T\_p.Y191F ENSMUST00000179264.2|Gm10717-207|ENSMUSG00000095891|+|chr9:g.3032488:A>T  
MFLIFHDFQFSCHIPCPTVDISFPPFSVFLAIFHVLKCVFLIFRDFQFSCHIPGPTVCISHFSRFSVILSFFN  
LSTACFSFSMIFSFSLAIFHVLQWTFNLNFPFVSFLAIFHVLKCVFLIFRVFQFPRHIPGPTVCYHFSRFSVI  
SSFFKTSSGCFSSFMIFSFSLAIFHVLQWTFNLNFPFVSVPYSRSFSVHFSFSTFFSDFVIFQVVKWMFLIFLD  
FHFSC  
>ENSMUSP00000136837\_c.399:A>T\_p.T134S ENSMUST00000179839.8|Gm10717-208|ENSMUSG00000095891|+|chr9:g.3032488:A>T  
MFLIFHDFQFSCHIPCPTVDISFPPFSVFLAIFHVLKCVFLIFRDFQFSCHIPGPTVCISHFSRFSVILSFFK  
LSSGCFSSFLIFTFLAIFHVLQWTFLYFPPFSVFLAIFHVLKCVFLIFRDFQVSRHIPGPSVCISHFSRFSVI  
LSFFKLSSGCFSSFLIFTFLAIFHVLQWTFNLNFPFVSFLYFSPYSKSYSVHFSFSTFFSDFVIFQVVKWMFLI  
FHDFQLSC  
>ENSMUSP00000096655\_c.399:A>T\_p.T134S ENSMUST00000099056.4|Gm10717-204|ENSMUSG00000095891|+|chr9:g.3032488:A>T  
MFLIFHDFQFSCHIPCPTVDISFPPFSVFLAIFHVLKCVFLIFRDFQFSCHIPGPTVCISHFSRFSVILSFFK  
LSSGCFSSFLIFTFLAIFHVLQWTFLYFPPFSVFLAIFHVLKCVFLIFRDFQVSRHIPGPSVCISHFSRFSVI  
LSFFKLSSGCFSSFLIFTFLAIFHVLQWTFNLNFPFVFLPYRSYSVHFSFSTFFSDFVIFQVNCMFLIFYDF  
QFSC  
>ENSMUSP00000136837\_c.400:C>T\_p.T134I ENSMUST00000179839.8|Gm10717-208|ENSMUSG00000095891|+|chr9:g.3032489:C>T  
MFLIFHDFQFSCHIPCPTVDISFPPFSVFLAIFHVLKCVFLIFRDFQFSCHIPGPTVCISHFSRFSVILSFFK  
LSSGCFSSFLIFTFLAIFHVLQWTFLYFPPFSVFLAIFHVLKCVFLIFRDFQVSRHIPGPVIVCISHFSRFSVI  
LSFFKLSSGCFSSFLIFTFLAIFHVLQWTFNLNFPFVSFLYFSPYSKSYSVHFSFSTFFSDFVIFQVVKWMFLI  
FHDFQLSC  
>ENSMUSP00000096655\_c.400:C>T\_p.T134I ENSMUST00000099056.4|Gm10717-204|ENSMUSG00000095891|+|chr9:g.3032489:C>T  
MFLIFHDFQFSCHIPCPTVDISFPPFSVFLAIFHVLKCVFLIFRDFQFSCHIPGPTVCISHFSRFSVILSFFK  
LSSGCFSSFLIFTFLAIFHVLQWTFLYFPPFSVFLAIFHVLKCVFLIFRDFQVSRHIPGPVIVCISHFSRFSVI  
LSFFKLSSGCFSSFLIFTFLAIFHVLQWTFNLNFPFVFLPYRSYSVHFSFSTFFSDFVIFQVNCMFLIFYDF  
QFSC  
>ENSMUSP00000137451\_c.577:T>G\_p.V193G ENSMUST00000179264.2|Gm10717-207|ENSMUSG00000095891|+|chr9:g.3032494:T>G  
MFLIFHDFQFSCHIPCPTVDISFPPFSVFLAIFHVLKCVFLIFRDFQFSCHIPGPTVCISHFSRFSVILSFFN  
LSTACFSFSMIFSFSLAIFHVLQWTFNLNFPFVSFLAIFHVLKCVFLIFRVFQFPRHIPGPTVCYHFSRFSVI  
SSFFKTSSGCFSSFMIFSFSLAIFHVLQWTFNLNFPFVSVPYSRSYSVHFSFSTFFSDFVIFQVVKWMFLIFLD  
FHFSC  
>ENSMUSP00000136837\_c.405:T>G\_p.C136G ENSMUST00000179839.8|Gm10717-208|ENSMUSG00000095891|+|chr9:g.3032494:T>G  
MFLIFHDFQFSCHIPCPTVDISFPPFSVFLAIFHVLKCVFLIFRDFQFSCHIPGPTVCISHFSRFSVILSFFK  
LSSGCFSSFLIFTFLAIFHVLQWTFLYFPPFSVFLAIFHVLKCVFLIFRDFQVSRHIPGPTVIVCISHFSRFSVI  
LSFFKLSSGCFSSFLIFTFLAIFHVLQWTFNLNFPFVSFLYFSPYSKSYSVHFSFSTFFSDFVIFQVVKWMFLI  
FHDFQLSC  
>ENSMUSP00000096655\_c.405:T>G\_p.C136G ENSMUST00000099056.4|Gm10717-204|ENSMUSG00000095891|+|chr9:g.3032494:T>G  
MFLIFHDFQFSCHIPCPTVDISFPPFSVFLAIFHVLKCVFLIFRDFQFSCHIPGPTVCISHFSRFSVILSFFK  
LSSGCFSSFLIFTFLAIFHVLQWTFLYFPPFSVFLAIFHVLKCVFLIFRDFQVSRHIPGPTVIVCISHFSRFSVI



LSFFKLSSGCFSFSLIFTFLAIFHVLQWTFNLNFPFPLPYSRSYSVHFSFSTFFSDFVIFQVNCMFLIFYDF  
QFSC  
>ENSMUSP00000137451\_c.592:T>C\_p.F198S ENSMUST00000179264.2|Gm10717-  
207|ENSMUSG00000095891|+|chr9:g.3032509:T>C  
MFLIFHDFQFSCHIPCPTVDISFPFVSFLAIFHVLKCVFLIFRDFQFSCHIPGPTVCISHFSRFSVILSFFN  
LSTACFSFSMIFSFSLAIFHVLQWTFNLNFPFVSFLAIFHVLKCVFLIFRVFQFPRHIPGPTVCIYHFSRFSVI  
SSFFKTSSGCFSFFMIFSFSLAIFHVLQWTFNLNFPFVSVPYSRSYSVHFSFSTFFSDFVIFQVVKWMFLIFLD  
FHFS  
>ENSMUSP00000136837\_c.420:T>C\_p.S141P ENSMUST00000179839.8|Gm10717-  
208|ENSMUSG00000095891|+|chr9:g.3032509:T>C  
MFLIFHDFQFSCHIPCPTVDISFPFVSFLAIFHVLKCVFLIFRDFQFSCHIPGPTVCISHFSRFSVILSFFK  
LSSGCFSSSLIFTFLAIFHVLQWTFLYFPFVSFLAIFHVLKCVFLIFRDFQVSRHIPGPTVCISHFPRFSVI  
LSFFKLSSGCFSFSLIFTFLAIFHVLQWTFNLNFPFVSFLYFSPYSKSYSVHFSFSTFFSDFVIFQVVKWMFLI  
FHDFQLSC  
>ENSMUSP00000096655\_c.420:T>C\_p.S141P ENSMUST00000099056.4|Gm10717-  
204|ENSMUSG00000095891|+|chr9:g.3032509:T>C  
MFLIFHDFQFSCHIPCPTVDISFPFVSFLAIFHVLKCVFLIFRDFQFSCHIPGPTVCISHFSRFSVILSFFK  
LSSGCFSSSLIFTFLAIFHVLQWTFLYFPFVSFLAIFHVLKCVFLIFRDFQVSRHIPGPTVCISHFPRFSVI  
LSFFKLSSGCFSFSLIFTFLAIFHVLQWTFNLNFPFVSFLYFSPYSKSYSVHFSFSTFFSDFVIFQVVKWMFLI  
FHDFQLSC  
>ENSMUSP00000137451\_c.597:T>G\_p.F200V ENSMUST00000179264.2|Gm10717-  
207|ENSMUSG00000095891|+|chr9:g.3032514:T>G  
MFLIFHDFQFSCHIPCPTVDISFPFVSFLAIFHVLKCVFLIFRDFQFSCHIPGPTVCISHFSRFSVILSFFN  
LSTACFSFSMIFSFSLAIFHVLQWTFNLNFPFVSFLAIFHVLKCVFLIFRVFQFPRHIPGPTVCIYHFSRFSVI  
SSFFKTSSGCFSFFMIFSFSLAIFHVLQWTFNLNFPFVSVPYSRSYSVHFSFSTVFSDFVIFQVVKWMFLIFLD  
FHFS  
>ENSMUSP00000137451\_c.605:T>G\_p.S202R ENSMUST00000179264.2|Gm10717-  
207|ENSMUSG00000095891|+|chr9:g.3032522:T>G  
MFLIFHDFQFSCHIPCPTVDISFPFVSFLAIFHVLKCVFLIFRDFQFSCHIPGPTVCISHFSRFSVILSFFN  
LSTACFSFSMIFSFSLAIFHVLQWTFNLNFPFVSFLAIFHVLKCVFLIFRVFQFPRHIPGPTVCIYHFSRFSVI  
SSFFKTSSGCFSFFMIFSFSLAIFHVLQWTFNLNFPFVSVPYSRSYSVHFSFSTFFRDFVIFQVVKWMFLIFLD  
FHFS  
>ENSMUSP00000136837\_c.433:T>G\_p.V145G ENSMUST00000179839.8|Gm10717-  
208|ENSMUSG00000095891|+|chr9:g.3032522:T>G  
MFLIFHDFQFSCHIPCPTVDISFPFVSFLAIFHVLKCVFLIFRDFQFSCHIPGPTVCISHFSRFSVILSFFK  
LSSGCFSSSLIFTFLAIFHVLQWTFLYFPFVSFLAIFHVLKCVFLIFRDFQVSRHIPGPTVCISHFSRFSGI  
LSFFKLSSGCFSFSLIFTFLAIFHVLQWTFNLNFPFVSFLYFSPYSKSYSVHFSFSTFFSDFVIFQVVKWMFLI  
FHDFQLSC  
>ENSMUSP00000096655\_c.433:T>G\_p.V145G ENSMUST00000099056.4|Gm10717-  
204|ENSMUSG00000095891|+|chr9:g.3032522:T>G  
MFLIFHDFQFSCHIPCPTVDISFPFVSFLAIFHVLKCVFLIFRDFQFSCHIPGPTVCISHFSRFSVILSFFK  
LSSGCFSSSLIFTFLAIFHVLQWTFLYFPFVSFLAIFHVLKCVFLIFRDFQVSRHIPGPTVCISHFSRFSGI  
LSFFKLSSGCFSFSLIFTFLAIFHVLQWTFNLNFPFPLPYSRSYSVHFSFSTFFSDFVIFQVNCMFLIFYDF  
QFSC  
>ENSMUSP00000136837\_c.439:T>C\_p.L147S ENSMUST00000179839.8|Gm10717-  
208|ENSMUSG00000095891|+|chr9:g.3032528:T>C  
MFLIFHDFQFSCHIPCPTVDISFPFVSFLAIFHVLKCVFLIFRDFQFSCHIPGPTVCISHFSRFSVILSFFK  
LSSGCFSSSLIFTFLAIFHVLQWTFLYFPFVSFLAIFHVLKCVFLIFRDFQVSRHIPGPTVCISHFSRFSVI  
SSFFKLSSGCFSFSLIFTFLAIFHVLQWTFNLNFPFVSFLYFSPYSKSYSVHFSFSTFFSDFVIFQVVKWMFLI  
FHDFQLSC  
>ENSMUSP00000096655\_c.439:T>C\_p.L147S ENSMUST00000099056.4|Gm10717-  
204|ENSMUSG00000095891|+|chr9:g.3032528:T>C  
MFLIFHDFQFSCHIPCPTVDISFPFVSFLAIFHVLKCVFLIFRDFQFSCHIPGPTVCISHFSRFSVILSFFK  
LSSGCFSSSLIFTFLAIFHVLQWTFLYFPFVSFLAIFHVLKCVFLIFRDFQVSRHIPGPTVCISHFSRFSVI  
SSFFKLSSGCFSFSLIFTFLAIFHVLQWTFNLNFPFPLPYSRSYSVHFSFSTFFSDFVIFQVNCMFLIFYDF  
QFSC  
>ENSMUSP00000136837\_c.454:T>G\_p.L152W ENSMUST00000179839.8|Gm10717-  
208|ENSMUSG00000095891|+|chr9:g.3032543:T>G

MFLIFHDFQFSCHIPCPTVDISFPPFSVFLAIFHVLKCVFLIFRDFQFSCHIPGPTVCISHFSRFSVILSFFK  
LSSGCFSSFLIFTFLAIFHVLQWTFLYFPPFSVFLAIFHVLKCVFLIFRDFQVSRHIPGPTVCISHFSRFSVI  
LSFFKWSSGCFSSFLIFTFLAIFHVLQWTFNLNPPFSVLYFSPYSKSYSVHFSFSTFFSDFVIFQVVKWMFLI  
FHDFQLSC  
>ENSMUSP00000096655\_c.454:T>G\_p.L152W ENSMUST00000099056.4|Gm10717-  
204|ENSMUSG00000095891|+|chr9:g.3032543:T>G  
MFLIFHDFQFSCHIPCPTVDISFPPFSVFLAIFHVLKCVFLIFRDFQFSCHIPGPTVCISHFSRFSVILSFFK  
LSSGCFSSFLIFTFLAIFHVLQWTFLYFPPFSVFLAIFHVLKCVFLIFRDFQVSRHIPGPTVCISHFSRFSVI  
LSFFKWSSGCFSSFLIFTFLAIFHVLQWTFNLNPPFSVLYFSPYSKSYSVHFSFSTFFSDFVIFQVVKWMFLI  
QFSC  
>ENSMUSP00000136837\_c.454:T>C\_p.L152S ENSMUST00000179839.8|Gm10717-  
208|ENSMUSG00000095891|+|chr9:g.3032543:T>C  
MFLIFHDFQFSCHIPCPTVDISFPPFSVFLAIFHVLKCVFLIFRDFQFSCHIPGPTVCISHFSRFSVILSFFK  
LSSGCFSSFLIFTFLAIFHVLQWTFLYFPPFSVFLAIFHVLKCVFLIFRDFQVSRHIPGPTVCISHFSRFSVI  
LSFFKSSSGCFSSFLIFTFLAIFHVLQWTFNLNPPFSVLYFSPYSKSYSVHFSFSTFFSDFVIFQVVKWMFLI  
FHDFQLSC  
>ENSMUSP00000096655\_c.454:T>C\_p.L152S ENSMUST00000099056.4|Gm10717-  
204|ENSMUSG00000095891|+|chr9:g.3032543:T>C  
MFLIFHDFQFSCHIPCPTVDISFPPFSVFLAIFHVLKCVFLIFRDFQFSCHIPGPTVCISHFSRFSVILSFFK  
LSSGCFSSFLIFTFLAIFHVLQWTFLYFPPFSVFLAIFHVLKCVFLIFRDFQVSRHIPGPTVCISHFSRFSVI  
LSFFKSSSGCFSSFLIFTFLAIFHVLQWTFNLNPPFSVLYFSPYSKSYSVHFSFSTFFSDFVIFQVVKWMFLI  
QFSC  
>ENSMUSP00000137451\_c.652:T>A\_p.L218H ENSMUST00000179264.2|Gm10717-  
207|ENSMUSG00000095891|+|chr9:g.3032569:T>A  
MFLIFHDFQFSCHIPCPTVDISFPPFSVFLAIFHVLKCVFLIFRDFQFSCHIPGPTVCISHFSRFSVILSFFN  
LSTACFSFSMIFSLAIFHVLQWTFNLNPPFSVFLAIFHVLKCVFLIFRVFQFPRHIPGPTVCYHFSRFSVI  
SSFFKTSSGCFSSFMIFSLAIFHVLQWTFNLNPPFSVSPYSRYSVHFSFSTFFSDFVIFQVVKWMFLIFHD  
FHSC  
>ENSMUSP00000136837\_c.480:T>A\_p.L161M ENSMUST00000179839.8|Gm10717-  
208|ENSMUSG00000095891|+|chr9:g.3032569:T>A  
MFLIFHDFQFSCHIPCPTVDISFPPFSVFLAIFHVLKCVFLIFRDFQFSCHIPGPTVCISHFSRFSVILSFFK  
LSSGCFSSFLIFTFLAIFHVLQWTFLYFPPFSVFLAIFHVLKCVFLIFRDFQVSRHIPGPTVCISHFSRFSVI  
LSFFKLSSGCFSSFMIFSLAIFHVLQWTFNLNPPFSVLYFSPYSKSYSVHFSFSTFFSDFVIFQVVKWMFLI  
FHDFQLSC  
>ENSMUSP00000096655\_c.480:T>A\_p.L161M ENSMUST00000099056.4|Gm10717-  
204|ENSMUSG00000095891|+|chr9:g.3032569:T>A  
MFLIFHDFQFSCHIPCPTVDISFPPFSVFLAIFHVLKCVFLIFRDFQFSCHIPGPTVCISHFSRFSVILSFFK  
LSSGCFSSFLIFTFLAIFHVLQWTFLYFPPFSVFLAIFHVLKCVFLIFRDFQVSRHIPGPTVCISHFSRFSVI  
LSFFKLSSGCFSSFMIFSLAIFHVLQWTFNLNPPFSVLYFSPYSKSYSVHFSFSTFFSDFVIFQVVKWMFLI  
QFSC  
>ENSMUSP00000137451\_c.662:C>G\_p.H221Q ENSMUST00000179264.2|Gm10717-  
207|ENSMUSG00000095891|+|chr9:g.3032579:C>G  
MFLIFHDFQFSCHIPCPTVDISFPPFSVFLAIFHVLKCVFLIFRDFQFSCHIPGPTVCISHFSRFSVILSFFN  
LSTACFSFSMIFSLAIFHVLQWTFNLNPPFSVFLAIFHVLKCVFLIFRVFQFPRHIPGPTVCYHFSRFSVI  
SSFFKTSSGCFSSFMIFSLAIFHVLQWTFNLNPPFSVSPYSRYSVHFSFSTFFSDFVIFQVVKWMFLIFLD  
FQFSC  
>ENSMUSP00000136837\_c.490:C>G\_p.T164S ENSMUST00000179839.8|Gm10717-  
208|ENSMUSG00000095891|+|chr9:g.3032579:C>G  
MFLIFHDFQFSCHIPCPTVDISFPPFSVFLAIFHVLKCVFLIFRDFQFSCHIPGPTVCISHFSRFSVILSFFK  
LSSGCFSSFLIFTFLAIFHVLQWTFLYFPPFSVFLAIFHVLKCVFLIFRDFQVSRHIPGPTVCISHFSRFSVI  
LSFFKLSSGCFSSFLIFSFLAIFHVLQWTFNLNPPFSVLYFSPYSKSYSVHFSFSTFFSDFVIFQVVKWMFLI  
FHDFQLSC  
>ENSMUSP00000096655\_c.490:C>G\_p.T164S ENSMUST00000099056.4|Gm10717-  
204|ENSMUSG00000095891|+|chr9:g.3032579:C>G  
MFLIFHDFQFSCHIPCPTVDISFPPFSVFLAIFHVLKCVFLIFRDFQFSCHIPGPTVCISHFSRFSVILSFFK  
LSSGCFSSFLIFTFLAIFHVLQWTFLYFPPFSVFLAIFHVLKCVFLIFRDFQVSRHIPGPTVCISHFSRFSVI  
LSFFKLSSGCFSSFLIFSFLAIFHVLQWTFNLNPPFSVLYFSPYSKSYSVHFSFSTFFSDFVIFQVVKWMFLI  
QFSC

>ENSMUSP00000137451\_c.662:CT>GA\_p.H221Q ENSMUST00000179264.2|Gm10717-207|ENSMUSG00000095891|+|chr9:g.3032579:CT>GA  
MFLIFHDFQFSCHIPCPTVDISFPPFSVFLAIFHVLKCVFLIFRDFQFSCHIPGPTVCISHFSRFSVILSFFN  
LSTACFSFSMIFSFLAIFHVLQWTFNLNFPFVSFLAIFHVLKCVFLIFRVFQFPRHIPGPTVCYHFSRFSVI  
SSFFKTSSGCFSFFMIFSFLAIFHVLQWTFNLNFPFVSVPYSRSYSVHFSFSTFFSDFVIFQVVKWMFLIFLD  
FQIFL  
>ENSMUSP00000136837\_c.490:CT>GA\_p.T164R ENSMUST00000179839.8|Gm10717-208|ENSMUSG00000095891|+|chr9:g.3032579:CT>GA  
MFLIFHDFQFSCHIPCPTVDISFPPFSVFLAIFHVLKCVFLIFRDFQFSCHIPGPTVCISHFSRFSVILSFFK  
LSSGCFSSFLIFTFLAIFHVLQWTFLYFPFVSFLAIFHVLKCVFLIFRDFQVSRHIPGPTVCISHFSRFSVI  
LSFFKLSSGCFSFSLIFRFSCHIPCPTVDISKFSTFFSPIFLAIFQVLQCAFLIFHVFQ\*FRHFSSCQVDVSH  
FP\*FSAFL  
>ENSMUSP00000096655\_c.490:CT>GA\_p.T164R ENSMUST00000099056.4|Gm10717-204|ENSMUSG00000095891|+|chr9:g.3032579:CT>GA  
MFLIFHDFQFSCHIPCPTVDISFPPFSVFLAIFHVLKCVFLIFRDFQFSCHIPGPTVCISHFSRFSVILSFFK  
LSSGCFSSFLIFTFLAIFHVLQWTFLYFPFVSFLAIFHVLKCVFLIFRDFQVSRHIPGPTVCISHFSRFSVI  
LSFFKLSSGCFSFSLIFRFSCHIPCPTVDISKFSTFFFLAIFQVLQCAFLIFHVFQ\*FCHFSSCQLHVSHFL\*F  
SVFL  
>ENSMUSP00000136837\_c.499:C>T\_p.A167V ENSMUST00000179839.8|Gm10717-208|ENSMUSG00000095891|+|chr9:g.3032588:C>T  
MFLIFHDFQFSCHIPCPTVDISFPPFSVFLAIFHVLKCVFLIFRDFQFSCHIPGPTVCISHFSRFSVILSFFK  
LSSGCFSSFLIFTFLAIFHVLQWTFLYFPFVSFLAIFHVLKCVFLIFRDFQVSRHIPGPTVCISHFSRFSVI  
LSFFKLSSGCFSFSLIFTFLVIFHVLQWTFNLNFPFVSFLYFSPYSKSYSVHFSFSTFFSDFVIFQVVKWMFLI  
FHDFQLSC  
>ENSMUSP00000096655\_c.499:C>T\_p.A167V ENSMUST00000099056.4|Gm10717-204|ENSMUSG00000095891|+|chr9:g.3032588:C>T  
MFLIFHDFQFSCHIPCPTVDISFPPFSVFLAIFHVLKCVFLIFRDFQFSCHIPGPTVCISHFSRFSVILSFFK  
LSSGCFSSFLIFTFLAIFHVLQWTFLYFPFVSFLAIFHVLKCVFLIFRDFQVSRHIPGPTVCISHFSRFSVI  
LSFFKLSSGCFSFSLIFTFLVIFHVLQWTFNLNFPFVFLPYSRSYSVHFSFSTFFSDFVIFQVVNCMFLIFYDF  
QFSC  
>ENSMUSP00000136837\_c.509:T>G\_p.H170Q ENSMUST00000179839.8|Gm10717-208|ENSMUSG00000095891|+|chr9:g.3032598:T>G  
MFLIFHDFQFSCHIPCPTVDISFPPFSVFLAIFHVLKCVFLIFRDFQFSCHIPGPTVCISHFSRFSVILSFFK  
LSSGCFSSFLIFTFLAIFHVLQWTFLYFPFVSFLAIFHVLKCVFLIFRDFQVSRHIPGPTVCISHFSRFSVI  
LSFFKLSSGCFSFSLIFTFLAIFQVLQWTFNLNFPFVSFLYFSPYSKSYSVHFSFSTFFSDFVIFQVVKWMFLI  
FHDFQLSC  
>ENSMUSP00000096655\_c.509:T>G\_p.H170Q ENSMUST00000099056.4|Gm10717-204|ENSMUSG00000095891|+|chr9:g.3032598:T>G  
MFLIFHDFQFSCHIPCPTVDISFPPFSVFLAIFHVLKCVFLIFRDFQFSCHIPGPTVCISHFSRFSVILSFFK  
LSSGCFSSFLIFTFLAIFHVLQWTFLYFPFVSFLAIFHVLKCVFLIFRDFQVSRHIPGPTVCISHFSRFSVI  
LSFFKLSSGCFSFSLIFTFLAIFQVLQWTFNLNFPFVFLPYSRSYSVHFSFSTFFSDFVIFQVVNCMFLIFYDF  
QFSC  
>ENSMUSP00000136837\_c.541:C>T\_p.P181L ENSMUST00000179839.8|Gm10717-208|ENSMUSG00000095891|+|chr9:g.3032630:C>T  
MFLIFHDFQFSCHIPCPTVDISFPPFSVFLAIFHVLKCVFLIFRDFQFSCHIPGPTVCISHFSRFSVILSFFK  
LSSGCFSSFLIFTFLAIFHVLQWTFLYFPFVSFLAIFHVLKCVFLIFRDFQVSRHIPGPTVCISHFSRFSVI  
LSFFKLSSGCFSFSLIFTFLAIFHVLQWTFNLNFPFVFLYFSPYSKSYSVHFSFSTFFSDFVIFQVVKWMFLI  
FHDFQLSC  
>ENSMUSP00000096655\_c.541:C>T\_p.P181L ENSMUST00000099056.4|Gm10717-204|ENSMUSG00000095891|+|chr9:g.3032630:C>T  
MFLIFHDFQFSCHIPCPTVDISFPPFSVFLAIFHVLKCVFLIFRDFQFSCHIPGPTVCISHFSRFSVILSFFK  
LSSGCFSSFLIFTFLAIFHVLQWTFLYFPFVSFLAIFHVLKCVFLIFRDFQVSRHIPGPTVCISHFSRFSVI  
LSFFKLSSGCFSFSLIFTFLAIFHVLQWTFNLNFPFVFLYFSPYSRSYSVHFSFSTFFSDFVIFQVVNCMFLIFYDF  
QFSC  
>ENSMUSP00000096655\_c.550:T>C\_p.L184S ENSMUST00000099056.4|Gm10717-204|ENSMUSG00000095891|+|chr9:g.3032704:T>C  
MFLIFHDFQFSCHIPCPTVDISFPPFSVFLAIFHVLKCVFLIFRDFQFSCHIPGPTVCISHFSRFSVILSFFK  
LSSGCFSSFLIFTFLAIFHVLQWTFLYFPFVSFLAIFHVLKCVFLIFRDFQVSRHIPGPTVCISHFSRFSVI

LSFFKLSSGCFSSFLIFTFLAIFHVLQWTFNLNFPFFSPYSRSYSVHFSFFTFSSDFVIFQVNCMFLIFYDF  
QFSC  
>ENSMUSP00000096655\_c.552:CC>TT\_p.P185F ENSMUST00000099056.4|Gm10717-  
204|ENSMUSG00000095891|+|chr9:g.3032706:CC>TT  
MFLIFHDFQFSCHIPCPTVDISFPPFSVFLAIFHVLKCVFLIFRDFQFSCHIPGPTVCISHFSRFSVILSFFK  
LSSGCFSSFLIFTFLAIFHVLQWTFLYFPPFSVFLAIFHVLKCVFLIFRDFQVSRHIPGPTVCISHFSRFSVI  
LSFFKLSSGCFSSFLIFTFLAIFHVLQWTFNLNFPFFFLFIFQVLQCAFLIFHVFQ\*FCHFSSCQLHVSHFL\*F  
SVFL  
>ENSMUSP00000096655\_c.562:G>T\_p.R188M ENSMUST00000099056.4|Gm10717-  
204|ENSMUSG00000095891|+|chr9:g.3032716:G>T  
MFLIFHDFQFSCHIPCPTVDISFPPFSVFLAIFHVLKCVFLIFRDFQFSCHIPGPTVCISHFSRFSVILSFFK  
LSSGCFSSFLIFTFLAIFHVLQWTFLYFPPFSVFLAIFHVLKCVFLIFRDFQVSRHIPGPTVCISHFSRFSVI  
LSFFKLSSGCFSSFLIFTFLAIFHVLQWTFNLNFPFFFLPYSMSYSVHFSFFTFSSDFVIFQVNCMFLIFYDF  
QFSC  
>ENSMUSP00000096655\_c.562:G>C\_p.R188T ENSMUST00000099056.4|Gm10717-  
204|ENSMUSG00000095891|+|chr9:g.3032716:G>C  
MFLIFHDFQFSCHIPCPTVDISFPPFSVFLAIFHVLKCVFLIFRDFQFSCHIPGPTVCISHFSRFSVILSFFK  
LSSGCFSSFLIFTFLAIFHVLQWTFLYFPPFSVFLAIFHVLKCVFLIFRDFQVSRHIPGPTVCISHFSRFSVI  
LSFFKLSSGCFSSFLIFTFLAIFHVLQWTFNLNFPFFFLPYSTYSVHFSFFTFSSDFVIFQVNCMFLIFYDF  
QFSC  
>ENSMUSP00000096655\_c.568:A>T\_p.Y190F ENSMUST00000099056.4|Gm10717-  
204|ENSMUSG00000095891|+|chr9:g.3032722:A>T  
MFLIFHDFQFSCHIPCPTVDISFPPFSVFLAIFHVLKCVFLIFRDFQFSCHIPGPTVCISHFSRFSVILSFFK  
LSSGCFSSFLIFTFLAIFHVLQWTFLYFPPFSVFLAIFHVLKCVFLIFRDFQVSRHIPGPTVCISHFSRFSVI  
LSFFKLSSGCFSSFLIFTFLAIFHVLQWTFNLNFPFFFLPYRSYSVHFSFFTFSSDFVIFQVNCMFLIFYDF  
QFSC  
>ENSMUSP00000096655\_c.589:T>C\_p.F197S ENSMUST00000099056.4|Gm10717-  
204|ENSMUSG00000095891|+|chr9:g.3032743:T>C  
MFLIFHDFQFSCHIPCPTVDISFPPFSVFLAIFHVLKCVFLIFRDFQFSCHIPGPTVCISHFSRFSVILSFFK  
LSSGCFSSFLIFTFLAIFHVLQWTFLYFPPFSVFLAIFHVLKCVFLIFRDFQVSRHIPGPTVCISHFSRFSVI  
LSFFKLSSGCFSSFLIFTFLAIFHVLQWTFNLNFPFFFLPYRSYSVHFSFFTFSSDFVIFQVNCMFLIFYDF  
QFSC  
>ENSMUSP00000096655\_c.602:T>G\_p.S201R ENSMUST00000099056.4|Gm10717-  
204|ENSMUSG00000095891|+|chr9:g.3032756:T>G  
MFLIFHDFQFSCHIPCPTVDISFPPFSVFLAIFHVLKCVFLIFRDFQFSCHIPGPTVCISHFSRFSVILSFFK  
LSSGCFSSFLIFTFLAIFHVLQWTFLYFPPFSVFLAIFHVLKCVFLIFRDFQVSRHIPGPTVCISHFSRFSVI  
LSFFKLSSGCFSSFLIFTFLAIFHVLQWTFNLNFPFFFLPYRSYSVHFSFFTFSSDFVIFQVNCMFLIFYDF  
QFSC  
>ENSMUSP00000096655\_c.629:CTGC>GTGT\_p.N210K ENSMUST00000099056.4|Gm10717-  
204|ENSMUSG00000095891|+|chr9:g.3032783:CTGC>GTGT  
MFLIFHDFQFSCHIPCPTVDISFPPFSVFLAIFHVLKCVFLIFRDFQFSCHIPGPTVCISHFSRFSVILSFFK  
LSSGCFSSFLIFTFLAIFHVLQWTFLYFPPFSVFLAIFHVLKCVFLIFRDFQVSRHIPGPTVCISHFSRFSVI  
LSFFKLSSGCFSSFLIFTFLAIFHVLQWTFNLNFPFFFLPYRSYSVHFSFFTFSSDFVIFQVVKCCMFLIFYD  
FQFSC  
>ENSMUSP00000096655\_c.629:CTGC>GTGG\_p.N210K ENSMUST00000099056.4|Gm10717-  
204|ENSMUSG00000095891|+|chr9:g.3032783:CTGC>GTGG  
MFLIFHDFQFSCHIPCPTVDISFPPFSVFLAIFHVLKCVFLIFRDFQFSCHIPGPTVCISHFSRFSVILSFFK  
LSSGCFSSFLIFTFLAIFHVLQWTFLYFPPFSVFLAIFHVLKCVFLIFRDFQVSRHIPGPTVCISHFSRFSVI  
LSFFKLSSGCFSSFLIFTFLAIFHVLQWTFNLNFPFFFLPYRSYSVHFSFFTFSSDFVIFQVVKCMFLIFYD  
FQFSC  
>ENSMUSP00000096655\_c.632:C>A\_p.C211\* ENSMUST00000099056.4|Gm10717-  
204|ENSMUSG00000095891|+|chr9:g.3032786:C>A  
MFLIFHDFQFSCHIPCPTVDISFPPFSVFLAIFHVLKCVFLIFRDFQFSCHIPGPTVCISHFSRFSVILSFFK  
LSSGCFSSFLIFTFLAIFHVLQWTFLYFPPFSVFLAIFHVLKCVFLIFRDFQVSRHIPGPTVCISHFSRFSVI  
LSFFKLSSGCFSSFLIFTFLAIFHVLQWTFNLNFPFFFLPYRSYSVHFSFFTFSSDFVIFQVNCMFLIFYDF  
QFSC  
>ENSMUSP00000096655\_c.633:A>C\_p.M212L ENSMUST00000099056.4|Gm10717-  
204|ENSMUSG00000095891|+|chr9:g.3032787:A>C

MFLIFHDFQFSCHIPCPTVDISFPPFSVFLAIFHVLKCVFLIFRDFQFSCHIPGPTVCISHFSRFSVILSFFK  
LSSGCFSSFLIFTFLAIFHVLQWTFLYFPPFSVFLAIFHVLKCVFLIFRDFQVSRHIPGPTVCISHFSRFSVI  
LSFFKLSSGCFSSFLIFTFLAIFHVLQWTFNLNPPFFLPYSRSYSVHFSFFTFSSDFVIFQVNVNCLFLIFYDF  
QFSC  
>ENSMUSP00000096655\_c.648:T>C\_p.Y217H ENSMUST00000099056.4|Gm10717-  
204|ENSMUSG00000095891|+|chr9:g.3032802:T>C  
MFLIFHDFQFSCHIPCPTVDISFPPFSVFLAIFHVLKCVFLIFRDFQFSCHIPGPTVCISHFSRFSVILSFFK  
LSSGCFSSFLIFTFLAIFHVLQWTFLYFPPFSVFLAIFHVLKCVFLIFRDFQVSRHIPGPTVCISHFSRFSVI  
LSFFKLSSGCFSSFLIFTFLAIFHVLQWTFNLNPPFFLPYSRSYSVHFSFFTFSSDFVIFQVNVNCLFLIFHDF  
QFSC  
>ENSMUSP00000096655\_c.648:T>G\_p.Y217D ENSMUST00000099056.4|Gm10717-  
204|ENSMUSG00000095891|+|chr9:g.3032802:T>G  
MFLIFHDFQFSCHIPCPTVDISFPPFSVFLAIFHVLKCVFLIFRDFQFSCHIPGPTVCISHFSRFSVILSFFK  
LSSGCFSSFLIFTFLAIFHVLQWTFLYFPPFSVFLAIFHVLKCVFLIFRDFQVSRHIPGPTVCISHFSRFSVI  
LSFFKLSSGCFSSFLIFTFLAIFHVLQWTFNLNPPFFLPYSRSYSVHFSFFTFSSDFVIFQVNVNCLFLIFDDF  
QFSC  
>ENSMUSP00000136837\_c.555:T>TA\_p.Y186ins-fs ENSMUST00000179839.8|Gm10717-  
208|ENSMUSG00000095891|+|chr9:g.3032957:T>TA  
MFLIFHDFQFSCHIPCPTVDISFPPFSVFLAIFHVLKCVFLIFRDFQFSCHIPGPTVCISHFSRFSVILSFFK  
LSSGCFSSFLIFTFLAIFHVLQWTFLYFPPFSVFLAIFHVLKCVFLIFRDFQVSRHIPGPTVCISHFSRFSVI  
LSFFKLSSGCFSSFLIFTFLAIFHVLQWTFNLNPPFFSVL  
>ENSMUSP00000136837\_c.556:A>T\_p.Y186F ENSMUST00000179839.8|Gm10717-  
208|ENSMUSG00000095891|+|chr9:g.3033165:A>T  
MFLIFHDFQFSCHIPCPTVDISFPPFSVFLAIFHVLKCVFLIFRDFQFSCHIPGPTVCISHFSRFSVILSFFK  
LSSGCFSSFLIFTFLAIFHVLQWTFLYFPPFSVFLAIFHVLKCVFLIFRDFQVSRHIPGPTVCISHFSRFSVI  
LSFFKLSSGCFSSFLIFTFLAIFHVLQWTFNLNPPFSVLFSPYSKSYSVHFSFFTFSSDFVIFQVVKWMFLI  
FHDFQLSC  
>ENSMUSP00000136837\_c.574:A>G\_p.K192R ENSMUST00000179839.8|Gm10717-  
208|ENSMUSG00000095891|+|chr9:g.3033183:A>G  
MFLIFHDFQFSCHIPCPTVDISFPPFSVFLAIFHVLKCVFLIFRDFQFSCHIPGPTVCISHFSRFSVILSFFK  
LSSGCFSSFLIFTFLAIFHVLQWTFLYFPPFSVFLAIFHVLKCVFLIFRDFQVSRHIPGPTVCISHFSRFSVI  
LSFFKLSSGCFSSFLIFTFLAIFHVLQWTFNLNPPFSVLYFSPYSKSYSVHFSFFTFSSDFVIFQVVKWMFLI  
FHDFQLSC  
>ENSMUSP00000136837\_c.574:A>T\_p.K192M ENSMUST00000179839.8|Gm10717-  
208|ENSMUSG00000095891|+|chr9:g.3033183:A>T  
MFLIFHDFQFSCHIPCPTVDISFPPFSVFLAIFHVLKCVFLIFRDFQFSCHIPGPTVCISHFSRFSVILSFFK  
LSSGCFSSFLIFTFLAIFHVLQWTFLYFPPFSVFLAIFHVLKCVFLIFRDFQVSRHIPGPTVCISHFSRFSVI  
LSFFKLSSGCFSSFLIFTFLAIFHVLQWTFNLNPPFSVLYFSPYSMSYSVHFSFFTFSSDFVIFQVVKWMFLI  
FHDFQLSC  
>ENSMUSP00000136837\_c.580:A>T\_p.Y194F ENSMUST00000179839.8|Gm10717-  
208|ENSMUSG00000095891|+|chr9:g.3033189:A>T  
MFLIFHDFQFSCHIPCPTVDISFPPFSVFLAIFHVLKCVFLIFRDFQFSCHIPGPTVCISHFSRFSVILSFFK  
LSSGCFSSFLIFTFLAIFHVLQWTFLYFPPFSVFLAIFHVLKCVFLIFRDFQVSRHIPGPTVCISHFSRFSVI  
LSFFKLSSGCFSSFLIFTFLAIFHVLQWTFNLNPPFSVLYFSPYSKSYSVHFSFFTFSSDFVIFQVVKWMFLI  
FHDFQLSC  
>ENSMUSP00000136837\_c.604:C>T\_p.T202M ENSMUST00000179839.8|Gm10717-  
208|ENSMUSG00000095891|+|chr9:g.3033213:C>T  
MFLIFHDFQFSCHIPCPTVDISFPPFSVFLAIFHVLKCVFLIFRDFQFSCHIPGPTVCISHFSRFSVILSFFK  
LSSGCFSSFLIFTFLAIFHVLQWTFLYFPPFSVFLAIFHVLKCVFLIFRDFQVSRHIPGPTVCISHFSRFSVI  
LSFFKLSSGCFSSFLIFTFLAIFHVLQWTFNLNPPFSVLYFSPYSKSYSVHFSFFMFFSDFVIFQVVKWMFLI  
FHDFQLSC  
>ENSMUSP00000136837\_c.672:C>T\_p.L225F ENSMUST00000179839.8|Gm10717-  
208|ENSMUSG00000095891|+|chr9:g.3033281:C>T  
MFLIFHDFQFSCHIPCPTVDISFPPFSVFLAIFHVLKCVFLIFRDFQFSCHIPGPTVCISHFSRFSVILSFFK  
LSSGCFSSFLIFTFLAIFHVLQWTFLYFPPFSVFLAIFHVLKCVFLIFRDFQVSRHIPGPTVCISHFSRFSVI  
LSFFKLSSGCFSSFLIFTFLAIFHVLQWTFNLNPPFSVLYFSPYSKSYSVHFSFFTFSSDFVIFQVVKWMFLI  
FHDFQFSC



>ENSMUSP00000135988\_c.16:A>G\_p.H6R ENSMUST00000178641.2|Gm17535-201|ENSMUSG00000096736|+|chr9:g.3034615:A>G  
MFLIFRDFQFSCHIPCPTVDISFPPFSVFLAIFHVLKCVFLIFRVFQVSRHIPGPTVCISHFSRFSVILSFFK  
LSSGCFSSLSLIFTFLAIFHVLQWTFNLNFPFSSVFLAIFHVLKCVFLIFSDQFSRHIPGPTVCISHFSRFSVI  
SSFFKTSSGCFSSMIFSLAIFHVLQWTFNLNFPFSSVSPYSRSYSVHFSFSTFFCDFVIFQVVKWMFLIFLD  
FQFSY  
>ENSMUSP00000135988\_c.45:T>C\_p.C16R ENSMUST00000178641.2|Gm17535-201|ENSMUSG00000096736|+|chr9:g.3034644:T>C  
MFLIFHDFQFSCHIPRPTVDISFPPFSVFLAIFHVLKCVFLIFRVFQVSRHIPGPTVCISHFSRFSVILSFFK  
LSSGCFSSLSLIFTFLAIFHVLQWTFNLNFPFSSVFLAIFHVLKCVFLIFSDQFSRHIPGPTVCISHFSRFSVI  
SSFFKTSSGCFSSMIFSLAIFHVLQWTFNLNFPFSSVSPYSRSYSVHFSFSTFFCDFVIFQVVKWMFLIFLD  
FQFSY  
>ENSMUSP00000135988\_c.128:TC>T\_p.F43del-fs ENSMUST00000178641.2|Gm17535-201|ENSMUSG00000096736|+|chr9:g.3034731:TC>T  
MFLIFHDFQFSCHIPCPTVDISFPPFSVFLAIFHVLKCVFLIFVFFRFLAIFQVLQCAFLIFHVFQ  
>ENSMUSP00000135988\_c.133:T>A\_p.V45D ENSMUST00000178641.2|Gm17535-201|ENSMUSG00000096736|+|chr9:g.3034736:T>A  
MFLIFHDFQFSCHIPCPTVDISFPPFSVFLAIFHVLKCVFLIFRDFQVSRHIPGPTVCISHFSRFSVILSFFK  
LSSGCFSSLSLIFTFLAIFHVLQWTFNLNFPFSSVFLAIFHVLKCVFLIFSDQFSRHIPGPTVCISHFSRFSVI  
SSFFKTSSGCFSSMIFSLAIFHVLQWTFNLNFPFSSVSPYSRSYSVHFSFSTFFCDFVIFQVVKWMFLIFLD  
FQFSY  
>ENSMUSP00000135988\_c.141:G>T\_p.V48F ENSMUST00000178641.2|Gm17535-201|ENSMUSG00000096736|+|chr9:g.3034744:G>T  
MFLIFHDFQFSCHIPCPTVDISFPPFSVFLAIFHVLKCVFLIFRVFQVSRHIPGPTVCISHFSRFSVILSFFK  
LSSGCFSSLSLIFTFLAIFHVLQWTFNLNFPFSSVFLAIFHVLKCVFLIFSDQFSRHIPGPTVCISHFSRFSVI  
SSFFKTSSGCFSSMIFSLAIFHVLQWTFNLNFPFSSVSPYSRSYSVHFSFSTFFCDFVIFQVVKWMFLIFLD  
FQFSY  
>ENSMUSP00000135988\_c.154:T>A\_p.I52N ENSMUST00000178641.2|Gm17535-201|ENSMUSG00000096736|+|chr9:g.3034757:T>A  
MFLIFHDFQFSCHIPCPTVDISFPPFSVFLAIFHVLKCVFLIFRVFQVSRHNPPTVCISHFSRFSVILSFFK  
LSSGCFSSLSLIFTFLAIFHVLQWTFNLNFPFSSVFLAIFHVLKCVFLIFSDQFSRHIPGPTVCISHFSRFSVI  
SSFFKTSSGCFSSMIFSLAIFHVLQWTFNLNFPFSSVSPYSRSYSVHFSFSTFFCDFVIFQVVKWMFLIFLD  
FQFSY  
>rs254349492\_ENSMUSP00000135988\_c.165:A>T\_p.T56S  
ENSMUST00000178641.2|Gm17535-201|ENSMUSG00000096736|+|chr9:g.3034768:A>T  
MFLIFHDFQFSCHIPCPTVDISFPPFSVFLAIFHVLKCVFLIFRVFQVSRHIPGPSVCISHFSRFSVILSFFK  
LSSGCFSSLSLIFTFLAIFHVLQWTFNLNFPFSSVFLAIFHVLKCVFLIFSDQFSRHIPGPTVCISHFSRFSVI  
SSFFKTSSGCFSSMIFSLAIFHVLQWTFNLNFPFSSVSPYSRSYSVHFSFSTFFCDFVIFQVVKWMFLIFLD  
FQFSY  
>ENSMUSP00000135988\_c.186:T>C\_p.S63P ENSMUST00000178641.2|Gm17535-201|ENSMUSG00000096736|+|chr9:g.3034789:T>C  
MFLIFHDFQFSCHIPCPTVDISFPPFSVFLAIFHVLKCVFLIFRVFQVSRHIPGPTVCISHFPFSVILSFFK  
LSSGCFSSLSLIFTFLAIFHVLQWTFNLNFPFSSVFLAIFHVLKCVFLIFSDQFSRHIPGPTVCISHFSRFSVI  
SSFFKTSSGCFSSMIFSLAIFHVLQWTFNLNFPFSSVSPYSRSYSVHFSFSTFFCDFVIFQVVKWMFLIFLD  
FQFSY  
>ENSMUSP00000135988\_c.196:C>T\_p.S66L ENSMUST00000178641.2|Gm17535-201|ENSMUSG00000096736|+|chr9:g.3034799:C>T  
MFLIFHDFQFSCHIPCPTVDISFPPFSVFLAIFHVLKCVFLIFRVFQVSRHIPGPTVCISHFSRFLVILSFFK  
LSSGCFSSLSLIFTFLAIFHVLQWTFNLNFPFSSVFLAIFHVLKCVFLIFSDQFSRHIPGPTVCISHFSRFSVI  
SSFFKTSSGCFSSMIFSLAIFHVLQWTFNLNFPFSSVSPYSRSYSVHFSFSTFFCDFVIFQVVKWMFLIFLD  
FQFSY  
>ENSMUSP00000135988\_c.205:T>C\_p.L69S ENSMUST00000178641.2|Gm17535-201|ENSMUSG00000096736|+|chr9:g.3034808:T>C  
MFLIFHDFQFSCHIPCPTVDISFPPFSVFLAIFHVLKCVFLIFRVFQVSRHIPGPTVCISHFSRFSVILSFFK  
LSSGCFSSLSLIFTFLAIFHVLQWTFNLNFPFSSVFLAIFHVLKCVFLIFSDQFSRHIPGPTVCISHFSRFSVI  
SSFFKTSSGCFSSMIFSLAIFHVLQWTFNLNFPFSSVSPYSRSYSVHFSFSTFFCDFVIFQVVKWMFLIFLD  
FQFSY

>rs217741387\_ENSMUSP00000135988\_c.220:T>C\_p.L74S  
ENSMUST00000178641.2|Gm17535-201|ENSMUSG00000096736|+|chr9:g.3034823:T>C  
MFLIFHDFQFSCHIPCPTVDISFPPFSVFLAIFHVLKCVFLIFRVFQVSRHIPGPTVCISHFSRFSVILSFFK  
SSSGCFSFSLIFTFLAIFHVLQWTFLNFPFVSFLAIFHVLKCVFLIFSDQFSRHIPGPTVCISHFSRFSVI  
SSFFKTSSGCFSFSMIFSLAIFHVLQWTFLNFPFVSVPYSRSYSVHFSFFTFCCDFVIFQVVKWMFLIFLD  
FQFSY  
>ENSMUSP00000135988\_c.220:T>G\_p.L74W ENSMUST00000178641.2|Gm17535-  
201|ENSMUSG00000096736|+|chr9:g.3034823:T>G  
MFLIFHDFQFSCHIPCPTVDISFPPFSVFLAIFHVLKCVFLIFRVFQVSRHIPGPTVCISHFSRFSVILSFFK  
WSSGCFSFSLIFTFLAIFHVLQWTFLNFPFVSFLAIFHVLKCVFLIFSDQFSRHIPGPTVCISHFSRFSVI  
SSFFKTSSGCFSFSMIFSLAIFHVLQWTFLNFPFVSVPYSRSYSVHFSFFTFCCDFVIFQVVKWMFLIFLD  
FQFSY  
>ENSMUSP00000135988\_c.246:T>G\_p.L83V ENSMUST00000178641.2|Gm17535-  
201|ENSMUSG00000096736|+|chr9:g.3034849:T>G  
MFLIFHDFQFSCHIPCPTVDISFPPFSVFLAIFHVLKCVFLIFRVFQVSRHIPGPTVCISHFSRFSVILSFFK  
LSSGCFSFSLIFTFLAIFHVLQWTFLNFPFVSFLAIFHVLKCVFLIFSDQFSRHIPGPTVCISHFSRFSVI  
SSFFKTSSGCFSFSMIFSLAIFHVLQWTFLNFPFVSVPYSRSYSVHFSFFTFCCDFVIFQVVKWMFLIFLD  
FQFSY  
>ENSMUSP00000135988\_c.246:T>A\_p.L83M ENSMUST00000178641.2|Gm17535-  
201|ENSMUSG00000096736|+|chr9:g.3034849:T>A  
MFLIFHDFQFSCHIPCPTVDISFPPFSVFLAIFHVLKCVFLIFRVFQVSRHIPGPTVCISHFSRFSVILSFFK  
LSSGCFSFSLIFTFLAIFHVLQWTFLNFPFVSFLAIFHVLKCVFLIFSDQFSRHIPGPTVCISHFSRFSVI  
SSFFKTSSGCFSFSMIFSLAIFHVLQWTFLNFPFVSVPYSRSYSVHFSFFTFCCDFVIFQVVKWMFLIFLD  
FQFSY  
>ENSMUSP00000135988\_c.256:C>G\_p.T86S ENSMUST00000178641.2|Gm17535-  
201|ENSMUSG00000096736|+|chr9:g.3034859:C>G  
MFLIFHDFQFSCHIPCPTVDISFPPFSVFLAIFHVLKCVFLIFRVFQVSRHIPGPTVCISHFSRFSVILSFFK  
LSSGCFSFSLIFSLAIFHVLQWTFLNFPFVSFLAIFHVLKCVFLIFSDQFSRHIPGPTVCISHFSRFSVI  
SSFFKTSSGCFSFSMIFSLAIFHVLQWTFLNFPFVSVPYSRSYSVHFSFFTFCCDFVIFQVVKWMFLIFLD  
FQFSY  
>ENSMUSP00000135988\_c.256:CT>GA\_p.T86R ENSMUST00000178641.2|Gm17535-  
201|ENSMUSG00000096736|+|chr9:g.3034859:CT>GA  
MFLIFHDFQFSCHIPCPTVDISFPPFSVFLAIFHVLKCVFLIFRVFQVSRHIPGPTVCISHFSRFSVILSFFK  
LSSGCFSFSLIFRFSCHIPCPTVDISKFSTFFSFPRHISC PKVCISHFQ\*FVFSVPYSRSYSVHFSFFTFSD  
FVFFQDVVKWMFLIFHDFQFSCHIPCPTVDISKFSTFFCF AIFQVLQCAFLIFHVFL\*FCHFSSCQVDVSHFP\*  
FVFL  
>ENSMUSP00000135988\_c.265:C>T\_p.A89V ENSMUST00000178641.2|Gm17535-  
201|ENSMUSG00000096736|+|chr9:g.3034868:C>T  
MFLIFHDFQFSCHIPCPTVDISFPPFSVFLAIFHVLKCVFLIFRVFQVSRHIPGPTVCISHFSRFSVILSFFK  
LSSGCFSFSLIFTFLVIFHVLQWTFLNFPFVSFLAIFHVLKCVFLIFSDQFSRHIPGPTVCISHFSRFSVI  
SSFFKTSSGCFSFSMIFSLAIFHVLQWTFLNFPFVSVPYSRSYSVHFSFFTFCCDFVIFQVVKWMFLIFLD  
FQFSY  
>ENSMUSP00000135988\_c.275:T>G\_p.H92Q ENSMUST00000178641.2|Gm17535-  
201|ENSMUSG00000096736|+|chr9:g.3034878:T>G  
MFLIFHDFQFSCHIPCPTVDISFPPFSVFLAIFHVLKCVFLIFRVFQVSRHIPGPTVCISHFSRFSVILSFFK  
LSSGCFSFSLIFTFLAIFQVLQWTFLNFPFVSFLAIFHVLKCVFLIFSDQFSRHIPGPTVCISHFSRFSVI  
SSFFKTSSGCFSFSMIFSLAIFHVLQWTFLNFPFVSVPYSRSYSVHFSFFTFCCDFVIFQVVKWMFLIFLD  
FQFSY  
>ENSMUSP00000135988\_c.286:G>T\_p.W96L ENSMUST00000178641.2|Gm17535-  
201|ENSMUSG00000096736|+|chr9:g.3034889:G>T  
MFLIFHDFQFSCHIPCPTVDISFPPFSVFLAIFHVLKCVFLIFRVFQVSRHIPGPTVCISHFSRFSVILSFFK  
LSSGCFSFSLIFTFLAIFHVLQWTFLNFPFVSFLAIFHVLKCVFLIFSDQFSRHIPGPTVCISHFSRFSVI  
SSFFKTSSGCFSFSMIFSLAIFHVLQWTFLNFPFVSVPYSRSYSVHFSFFTFCCDFVIFQVVKWMFLIFLD  
FQFSY  
>ENSMUSP00000135988\_c.307:C>T\_p.P103L ENSMUST00000178641.2|Gm17535-  
201|ENSMUSG00000096736|+|chr9:g.3034910:C>T  
MFLIFHDFQFSCHIPCPTVDISFPPFSVFLAIFHVLKCVFLIFRVFQVSRHIPGPTVCISHFSRFSVILSFFK  
LSSGCFSFSLIFTFLAIFHVLQWTFLNFPFVSFLAIFHVLKCVFLIFSDQFSRHIPGPTVCISHFSRFSVI

SSFFKTSSGCFSFSMIFSLAIFHVLQWTFNLNPPFSVSPYSRSYSVHFSFSTFFCDFVIFQVVKWMFLIFLD  
FQFSY  
>ENSMUSP00000135988\_c.335:T>A\_p.H112Q ENSMUST00000178641.2|Gm17535-  
201|ENSMUSG00000096736|+|chr9:g.3034938:T>A  
MFLIFHDFQFSCHIPCPTVDISFPPFSVFLAIFHVLKCVFLIFRVFQVSRHIPGPTVCISHFSRFSVILSFFK  
LSSGCFSSSLIFTFLAIFHVLQWTFNLNPPFSVFLAIFHVLKCVFLIFSDQFSRHIPGPTVCISHFSRFSVI  
SSFFKTSSGCFSFSMIFSLAIFHVLQWTFNLNPPFSVSPYSRSYSVHFSFSTFFCDFVIFQVVKWMFLIFLD  
FQFSY  
>ENSMUSP00000135988\_c.344:G>T\_p.K115N ENSMUST00000178641.2|Gm17535-  
201|ENSMUSG00000096736|+|chr9:g.3034947:G>T  
MFLIFHDFQFSCHIPCPTVDISFPPFSVFLAIFHVLKCVFLIFRVFQVSRHIPGPTVCISHFSRFSVILSFFK  
LSSGCFSSSLIFTFLAIFHVLQWTFNLNPPFSVFLAIFHVLKCVFLIFSDQFSRHIPGPTVCISHFSRFSVI  
SSFFKTSSGCFSFSMIFSLAIFHVLQWTFNLNPPFSVSPYSRSYSVHFSFSTFFCDFVIFQVVKWMFLIFLD  
FQFSY  
>ENSMUSP00000135988\_c.347:T>G\_p.C116W ENSMUST00000178641.2|Gm17535-  
201|ENSMUSG00000096736|+|chr9:g.3034950:T>G  
MFLIFHDFQFSCHIPCPTVDISFPPFSVFLAIFHVLKCVFLIFRVFQVSRHIPGPTVCISHFSRFSVILSFFK  
LSSGCFSSSLIFTFLAIFHVLQWTFNLNPPFSVFLAIFHVLKCVFLIFSDQFSRHIPGPTVCISHFSRFSVI  
SSFFKTSSGCFSFSMIFSLAIFHVLQWTFNLNPPFSVSPYSRSYSVHFSFSTFFCDFVIFQVVKWMFLIFLD  
FQFSY  
>ENSMUSP00000135988\_c.353:T>A\_p.F118L ENSMUST00000178641.2|Gm17535-  
201|ENSMUSG00000096736|+|chr9:g.3034956:T>A  
MFLIFHDFQFSCHIPCPTVDISFPPFSVFLAIFHVLKCVFLIFRVFQVSRHIPGPTVCISHFSRFSVILSFFK  
LSSGCFSSSLIFTFLAIFHVLQWTFNLNPPFSVFLAIFHVLKCVLLIFSDQFSRHIPGPTVCISHFSRFSVI  
SSFFKTSSGCFSFSMIFSLAIFHVLQWTFNLNPPFSVSPYSRSYSVHFSFSTFFCDFVIFQVVKWMFLIFLD  
FQFSY  
>ENSMUSP00000135988\_c.363:A>C\_p.S122R ENSMUST00000178641.2|Gm17535-  
201|ENSMUSG00000096736|+|chr9:g.3034966:A>C  
MFLIFHDFQFSCHIPCPTVDISFPPFSVFLAIFHVLKCVFLIFRVFQVSRHIPGPTVCISHFSRFSVILSFFK  
LSSGCFSSSLIFTFLAIFHVLQWTFNLNPPFSVFLAIFHVLKCVFLIFRDFQFSRHIPGPTVCISHFSRFSVI  
SSFFKTSSGCFSFSMIFSLAIFHVLQWTFNLNPPFSVSPYSRSYSVHFSFSTFFCDFVIFQVVKWMFLIFLD  
FQFSY  
>ENSMUSP00000135988\_c.363:A>T\_p.S122C ENSMUST00000178641.2|Gm17535-  
201|ENSMUSG00000096736|+|chr9:g.3034966:A>T  
MFLIFHDFQFSCHIPCPTVDISFPPFSVFLAIFHVLKCVFLIFRVFQVSRHIPGPTVCISHFSRFSVILSFFK  
LSSGCFSSSLIFTFLAIFHVLQWTFNLNPPFSVFLAIFHVLKCVFLIFCDFQFSRHIPGPTVCISHFSRFSVI  
SSFFKTSSGCFSFSMIFSLAIFHVLQWTFNLNPPFSVSPYSRSYSVHFSFSTFFCDFVIFQVVKWMFLIFLD  
FQFSY  
>ENSMUSP00000135988\_c.363:A>G\_p.S122G ENSMUST00000178641.2|Gm17535-  
201|ENSMUSG00000096736|+|chr9:g.3034966:A>G  
MFLIFHDFQFSCHIPCPTVDISFPPFSVFLAIFHVLKCVFLIFRVFQVSRHIPGPTVCISHFSRFSVILSFFK  
LSSGCFSSSLIFTFLAIFHVLQWTFNLNPPFSVFLAIFHVLKCVFLIFGDFQFSRHIPGPTVCISHFSRFSVI  
SSFFKTSSGCFSFSMIFSLAIFHVLQWTFNLNPPFSVSPYSRSYSVHFSFSTFFCDFVIFQVVKWMFLIFLD  
FQFSY  
>ENSMUSP00000135988\_c.399:A>T\_p.T134S ENSMUST00000178641.2|Gm17535-  
201|ENSMUSG00000096736|+|chr9:g.3035002:A>T  
MFLIFHDFQFSCHIPCPTVDISFPPFSVFLAIFHVLKCVFLIFRVFQVSRHIPGPTVCISHFSRFSVILSFFK  
LSSGCFSSSLIFTFLAIFHVLQWTFNLNPPFSVFLAIFHVLKCVFLIFSDQFSRHIPGPTVCISHFSRFSVI  
SSFFKTSSGCFSFSMIFSLAIFHVLQWTFNLNPPFSVSPYSRSYSVHFSFSTFFCDFVIFQVVKWMFLIFLD  
FQFSY  
>ENSMUSP00000135988\_c.424:G>A\_p.R142H ENSMUST00000178641.2|Gm17535-  
201|ENSMUSG00000096736|+|chr9:g.3035027:G>A  
MFLIFHDFQFSCHIPCPTVDISFPPFSVFLAIFHVLKCVFLIFRVFQVSRHIPGPTVCISHFSRFSVILSFFK  
LSSGCFSSSLIFTFLAIFHVLQWTFNLNPPFSVFLAIFHVLKCVFLIFSDQFSRHIPGPTVCISHFSRFSVI  
SSFFKTSSGCFSFSMIFSLAIFHVLQWTFNLNPPFSVSPYSRSYSVHFSFSTFFCDFVIFQVVKWMFLIFLD  
FQFSY  
>ENSMUSP00000135988\_c.430:C>T\_p.S144L ENSMUST00000178641.2|Gm17535-  
201|ENSMUSG00000096736|+|chr9:g.3035033:C>T

MFLIFHDFQFSCHIPCPTVDISFPPFSVFLAIFHVLKCVFLIFRVFQVSRHIPGPTVCISHFSRFSVILSFFK  
LSSGCFSSLSLIFTFLAIFHVLQWTFLNFPFVSFLAIFHVLKCVFLIFSDQFSRHIPGPTVCISHFSRFLVI  
SSFFKTSSGCFSSMIFSFLAIFHVLQWTFLNFPFVSVPYSRSYSVHFSFSTFFCDFVIFQVVKWMFLIFLD  
FQFSY  
>ENSMUSP00000135988\_c.439:C>T\_p.S147L ENSMUST00000178641.2|Gm17535-  
201|ENSMUSG00000096736|+|chr9:g.3035042:C>T  
MFLIFHDFQFSCHIPCPTVDISFPPFSVFLAIFHVLKCVFLIFRVFQVSRHIPGPTVCISHFSRFSVILSFFK  
LSSGCFSSLSLIFTFLAIFHVLQWTFLNFPFVSFLAIFHVLKCVFLIFSDQFSRHIPGPTVCISHFSRFSVI  
LSSGCFSSLSLIFTFLAIFHVLQWTFLNFPFVSVPYSRSYSVHFSFSTFFCDFVIFQVVKWMFLIFLD  
FQFSY  
>rs235217004\_ENSMUSP00000135988\_c.453:A>T\_p.T152S  
ENSMUST00000178641.2|Gm17535-201|ENSMUSG00000096736|+|chr9:g.3035056:A>T  
MFLIFHDFQFSCHIPCPTVDISFPPFSVFLAIFHVLKCVFLIFRVFQVSRHIPGPTVCISHFSRFSVILSFFK  
LSSGCFSSLSLIFTFLAIFHVLQWTFLNFPFVSFLAIFHVLKCVFLIFSDQFSRHIPGPTVCISHFSRFSVI  
SSFFKTSSGCFSSMIFSFLAIFHVLQWTFLNFPFVSVPYSRSYSVHFSFSTFFCDFVIFQVVKWMFLIFLD  
FQFSY  
>ENSMUSP00000135988\_c.490:G>C\_p.S164T ENSMUST00000178641.2|Gm17535-  
201|ENSMUSG00000096736|+|chr9:g.3035093:G>C  
MFLIFHDFQFSCHIPCPTVDISFPPFSVFLAIFHVLKCVFLIFRVFQVSRHIPGPTVCISHFSRFSVILSFFK  
LSSGCFSSLSLIFTFLAIFHVLQWTFLNFPFVSFLAIFHVLKCVFLIFSDQFSRHIPGPTVCISHFSRFSVI  
SSFFKTSSGCFSSMIFTFLAIFHVLQWTFLNFPFVSVPYSRSYSVHFSFSTFFCDFVIFQVVKWMFLIFLD  
FQFSY  
>ENSMUSP00000135988\_c.540:C>A\_p.P181T ENSMUST00000178641.2|Gm17535-  
201|ENSMUSG00000096736|+|chr9:g.3035143:C>A  
MFLIFHDFQFSCHIPCPTVDISFPPFSVFLAIFHVLKCVFLIFRVFQVSRHIPGPTVCISHFSRFSVILSFFK  
LSSGCFSSLSLIFTFLAIFHVLQWTFLNFPFVSFLAIFHVLKCVFLIFSDQFSRHIPGPTVCISHFSRFSVI  
SSFFKTSSGCFSSMIFSFLAIFHVLQWTFLNFPFVSVPYSRSYSVHFSFSTFFCDFVIFQVVKWMFLIFLD  
FQFSY  
>ENSMUSP00000135988\_c.541:C>T\_p.P181L ENSMUST00000178641.2|Gm17535-  
201|ENSMUSG00000096736|+|chr9:g.3035144:C>T  
MFLIFHDFQFSCHIPCPTVDISFPPFSVFLAIFHVLKCVFLIFRVFQVSRHIPGPTVCISHFSRFSVILSFFK  
LSSGCFSSLSLIFTFLAIFHVLQWTFLNFPFVSFLAIFHVLKCVFLIFSDQFSRHIPGPTVCISHFSRFSVI  
SSFFKTSSGCFSSMIFSFLAIFHVLQWTFLNFPFVSVPYSRSYSVHFSFSTFFCDFVIFQVVKWMFLIFLD  
FQFSY  
>ENSMUSP00000135988\_c.549:G>T\_p.V184F ENSMUST00000178641.2|Gm17535-  
201|ENSMUSG00000096736|+|chr9:g.3035681:G>T  
MFLIFHDFQFSCHIPCPTVDISFPPFSVFLAIFHVLKCVFLIFRVFQVSRHIPGPTVCISHFSRFSVILSFFK  
LSSGCFSSLSLIFTFLAIFHVLQWTFLNFPFVSFLAIFHVLKCVFLIFSDQFSRHIPGPTVCISHFSRFSVI  
SSFFKTSSGCFSSMIFSFLAIFHVLQWTFLNFPFVSFPYSRSYSVHFSFSTFFCDFVIFQVVKWMFLIFLD  
FQFSY  
>ENSMUSP00000135988\_c.566:G>T\_p.R189S ENSMUST00000178641.2|Gm17535-  
201|ENSMUSG00000096736|+|chr9:g.3035700:G>T  
MFLIFHDFQFSCHIPCPTVDISFPPFSVFLAIFHVLKCVFLIFRVFQVSRHIPGPTVCISHFSRFSVILSFFK  
LSSGCFSSLSLIFTFLAIFHVLQWTFLNFPFVSFLAIFHVLKCVFLIFSDQFSRHIPGPTVCISHFSRFSVI  
SSFFKTSSGCFSSMIFSFLAIFHVLQWTFLNFPFVSVPYSSYSVHFSFSTFFCDFVIFQVVKWMFLIFLD  
FQFSY  
>ENSMUSP00000135988\_c.573:A>C\_p.S192R ENSMUST00000178641.2|Gm17535-  
201|ENSMUSG00000096736|+|chr9:g.3035707:A>C  
MFLIFHDFQFSCHIPCPTVDISFPPFSVFLAIFHVLKCVFLIFRVFQVSRHIPGPTVCISHFSRFSVILSFFK  
LSSGCFSSLSLIFTFLAIFHVLQWTFLNFPFVSFLAIFHVLKCVFLIFSDQFSRHIPGPTVCISHFSRFSVI  
SSFFKTSSGCFSSMIFSFLAIFHVLQWTFLNFPFVSVPYSRSYSRVHFSFSTFFCDFVIFQVVKWMFLIFLD  
FQFSY  
>ENSMUSP00000135988\_c.592:T>C\_p.F198S ENSMUST00000178641.2|Gm17535-  
201|ENSMUSG00000096736|+|chr9:g.3035726:T>C  
MFLIFHDFQFSCHIPCPTVDISFPPFSVFLAIFHVLKCVFLIFRVFQVSRHIPGPTVCISHFSRFSVILSFFK  
LSSGCFSSLSLIFTFLAIFHVLQWTFLNFPFVSFLAIFHVLKCVFLIFSDQFSRHIPGPTVCISHFSRFSVI  
SSFFKTSSGCFSSMIFSFLAIFHVLQWTFLNFPFVSVPYSRSYSVHFSFSTFFCDFVIFQVVKWMFLIFLD  
FQFSY

>ENSMUSP00000135988\_c.601:T>A\_p.F201Y ENSMUST00000178641.2|Gm17535-201|ENSMUSG00000096736|+|chr9:g.3035735:T>A  
MFLIFHDFQFSCHIPCPTVDISFPPFSVFLAIFHVLKCVFLIFRVFQVSRHIPGPTVCISHFSRFSVILSFFK  
LSSGCFSSFLIFTFLAIFHVLQWTFLNFPFVSFLAIFHVLKCVFLIFSDQFSRHIPGPTVCISHFSRFSVI  
SSFFKTSSGCFSSMIFSFSLAIFHVLQWTFLNFPFVSVPYSRSYSVHFSFFTFYCDFVIFQVVKWMFLIFLD  
FQFSY  
>ENSMUSP00000135988\_c.601:T>G\_p.F201C ENSMUST00000178641.2|Gm17535-201|ENSMUSG00000096736|+|chr9:g.3035735:T>G  
MFLIFHDFQFSCHIPCPTVDISFPPFSVFLAIFHVLKCVFLIFRVFQVSRHIPGPTVCISHFSRFSVILSFFK  
LSSGCFSSFLIFTFLAIFHVLQWTFLNFPFVSFLAIFHVLKCVFLIFSDQFSRHIPGPTVCISHFSRFSVI  
SSFFKTSSGCFSSMIFSFSLAIFHVLQWTFLNFPFVSVPYSRSYSVHFSFFTFCCDFVIFQVVKWMFLIFLD  
FQFSY  
>ENSMUSP00000135988\_c.638:G>T\_p.M213I ENSMUST00000178641.2|Gm17535-201|ENSMUSG00000096736|+|chr9:g.3035772:G>T  
MFLIFHDFQFSCHIPCPTVDISFPPFSVFLAIFHVLKCVFLIFRVFQVSRHIPGPTVCISHFSRFSVILSFFK  
LSSGCFSSFLIFTFLAIFHVLQWTFLNFPFVSFLAIFHVLKCVFLIFSDQFSRHIPGPTVCISHFSRFSVI  
SSFFKTSSGCFSSMIFSFSLAIFHVLQWTFLNFPFVSVPYSRSYSVHFSFFTFCCDFVIFQVVKWIFLIFLD  
FQFSY  
>ENSMUSP00000135988\_c.652:T>A\_p.L218H ENSMUST00000178641.2|Gm17535-201|ENSMUSG00000096736|+|chr9:g.3035786:T>A  
MFLIFHDFQFSCHIPCPTVDISFPPFSVFLAIFHVLKCVFLIFRVFQVSRHIPGPTVCISHFSRFSVILSFFK  
LSSGCFSSFLIFTFLAIFHVLQWTFLNFPFVSFLAIFHVLKCVFLIFSDQFSRHIPGPTVCISHFSRFSVI  
SSFFKTSSGCFSSMIFSFSLAIFHVLQWTFLNFPFVSVPYSRSYSVHFSFFTFCCDFVIFQVVKWMFLIFHD  
FQFSY  
>ENSMUSP00000135988\_c.661:A>T\_p.Q221L ENSMUST00000178641.2|Gm17535-201|ENSMUSG00000096736|+|chr9:g.3035795:A>T  
MFLIFHDFQFSCHIPCPTVDISFPPFSVFLAIFHVLKCVFLIFRVFQVSRHIPGPTVCISHFSRFSVILSFFK  
LSSGCFSSFLIFTFLAIFHVLQWTFLNFPFVSFLAIFHVLKCVFLIFSDQFSRHIPGPTVCISHFSRFSVI  
SSFFKTSSGCFSSMIFSFSLAIFHVLQWTFLNFPFVSVPYSRSYSVHFSFFTFCCDFVIFQVVKWMFLIFLD  
FLFSY  
>ENSMUSP00000135988\_c.670:A>G\_p.Y224C ENSMUST00000178641.2|Gm17535-201|ENSMUSG00000096736|+|chr9:g.3035804:A>G  
MFLIFHDFQFSCHIPCPTVDISFPPFSVFLAIFHVLKCVFLIFRVFQVSRHIPGPTVCISHFSRFSVILSFFK  
LSSGCFSSFLIFTFLAIFHVLQWTFLNFPFVSFLAIFHVLKCVFLIFSDQFSRHIPGPTVCISHFSRFSVI  
SSFFKTSSGCFSSMIFSFSLAIFHVLQWTFLNFPFVSVPYSRSYSVHFSFFTFCCDFVIFQVVKWMFLIFLD  
FQFSC  
>rs257554234\_ENSMUSP00000136448\_c.15:A>C\_p.N6H  
ENSMUST00000155807.3|Gm10715-201|ENSMUSG00000096201|+|chr9:g.3036892:A>C  
MFLIFHDFHFSCLIPRPIVDISFPPFSVFLAIFHVPKCVFLIFHDFQFPRHIPGPTVCISHFSRFSVILSFFK  
TSSGCFSSFMIFSFSLAIFPVLQWTFLNFPFVSFLAIFHVLKCVFLIFRDFQFSRQIPGPTVCISHFSRFSVI  
LSFFNLSTACFSLSMIFSFSLAIFHVLQWTFLNFPFVSFFSPYFTSYSVHFSFFTFSSDFVFFQDVKWMFLIFH  
DFQFSC  
>rs234203612\_ENSMUSP00000136448\_c.26:T>G\_p.H9Q  
ENSMUST00000155807.3|Gm10715-201|ENSMUSG00000096201|+|chr9:g.3036903:T>G  
MFLIFNDFHFSCLIPRPIVDISFPPFSVFLAIFHVPKCVFLIFHDFQFPRHIPGPTVCISHFSRFSVILSFFK  
TSSGCFSSFMIFSFSLAIFPVLQWTFLNFPFVSFLAIFHVLKCVFLIFRDFQFSRQIPGPTVCISHFSRFSVI  
LSFFNLSTACFSLSMIFSFSLAIFHVLQWTFLNFPFVSFFSPYFTSYSVHFSFFTFSSDFVFFQDVKWMFLIFH  
DFQFSC  
>ENSMUSP00000136448\_c.37:T>A\_p.L13H ENSMUST00000155807.3|Gm10715-201|ENSMUSG00000096201|+|chr9:g.3036914:T>A  
MFLIFNDFHFSCHIPRPIVDISFPPFSVFLAIFHVPKCVFLIFHDFQFPRHIPGPTVCISHFSRFSVILSFFK  
TSSGCFSSFMIFSFSLAIFPVLQWTFLNFPFVSFLAIFHVLKCVFLIFRDFQFSRQIPGPTVCISHFSRFSVI  
LSFFNLSTACFSLSMIFSFSLAIFHVLQWTFLNFPFVSFFSPYFTSYSVHFSFFTFSSDFVFFQDVKWMFLIFH  
DFQFSC  
>ENSMUSP00000136448\_c.46:G>T\_p.R16L ENSMUST00000155807.3|Gm10715-201|ENSMUSG00000096201|+|chr9:g.3036923:G>T  
MFLIFNDFHFSCLIPRPIVDISFPPFSVFLAIFHVPKCVFLIFHDFQFPRHIPGPTVCISHFSRFSVILSFFK  
TSSGCFSSFMIFSFSLAIFPVLQWTFLNFPFVSFLAIFHVLKCVFLIFRDFQFSRQIPGPTVCISHFSRFSVI



LSFFNLSTACFSLSMIFSFLAIFHVLQWTFNLNPPFSFFSPYFTSYSVHFSFFTFFSDFVFFQDVKWMFLIFH  
DFQFSC  
>ENSMUSP00000136448\_c.52:T>C\_p.I18T ENSMUST00000155807.3|Gm10715-  
201|ENSMUSG00000096201|+|chr9:g.3036929:T>C  
MFLIFNDFHFSCLI PRPTVDISFPPFSVFLAIFHVPKCVFLIFHDFQFPRHIPGPTVCISHFSRFSVISSFFK  
TSSGCFSSFFMIFSFLAIFPVLQWTFNLNPPFSVFLAIFHVLKCVFLIFRDFQFSRQIPGPTVCISHFSRFSVI  
LSFFNLSTACFSLSMIFSFLAIFHVLQWTFNLNPPFSFFSPYFTSYSVHFSFFTFFSDFVFFQDVKWMFLIFH  
DFQFSC  
>ENSMUSP00000136448\_c.57:G>A\_p.D20N ENSMUST00000155807.3|Gm10715-  
201|ENSMUSG00000096201|+|chr9:g.3036934:G>A  
MFLIFNDFHFSCLI PRPIVNISFPPFSVFLAIFHVPKCVFLIFHDFQFPRHIPGPTVCISHFSRFSVISSFFK  
TSSGCFSSFFMIFSFLAIFPVLQWTFNLNPPFSVFLAIFHVLKCVFLIFRDFQFSRQIPGPTVCISHFSRFSVI  
LSFFNLSTACFSLSMIFSFLAIFHVLQWTFNLNPPFSFFSPYFTSYSVHFSFFTFFSDFVFFQDVKWMFLIFH  
DFQFSC  
>ENSMUSP00000136448\_c.58:A>G\_p.D20G ENSMUST00000155807.3|Gm10715-  
201|ENSMUSG00000096201|+|chr9:g.3036935:A>G  
MFLIFNDFHFSCLI PRPIVIGISFPPFSVFLAIFHVPKCVFLIFHDFQFPRHIPGPTVCISHFSRFSVISSFFK  
TSSGCFSSFFMIFSFLAIFPVLQWTFNLNPPFSVFLAIFHVLKCVFLIFRDFQFSRQIPGPTVCISHFSRFSVI  
LSFFNLSTACFSLSMIFSFLAIFHVLQWTFNLNPPFSFFSPYFTSYSVHFSFFTFFSDFVFFQDVKWMFLIFH  
DFQFSC  
>ENSMUSP00000136448\_c.143:TC>T\_p.F48del-fs ENSMUST00000155807.3|Gm10715-  
201|ENSMUSG00000096201|+|chr9:g.3037024:TC>T  
MFLIFNDFHFSCLI PRPIVDISFPPFSVFLAIFHVPKCVFLIFHDFQFLAIFQVLQCAFLIFHVQ  
>ENSMUSP00000136448\_c.146:TC>T\_p.P49del-fs ENSMUST00000155807.3|Gm10715-  
201|ENSMUSG00000096201|+|chr9:g.3037027:TC>T  
MFLIFNDFHFSCLI PRPIVDISFPPFSVFLAIFHVPKCVFLIFHDFQFPAIFQVLQCAFLIFHVQ  
>ENSMUSP00000136448\_c.159:GGTC>TGTG\_p.G54C ENSMUST00000155807.3|Gm10715-  
201|ENSMUSG00000096201|+|chr9:g.3037040:GGTC>TGTG  
MFLIFNDFHFSCLI PRPIVDISFPPFSVFLAIFHVPKCVFLIFHDFQFPRHIPGPTVCISHFSRFSVISSFF  
KTSSGCFSSFFMIFSFLAIFPVLQWTFNLNPPFSVFLAIFHVLKCVFLIFRDFQFSRQIPGPTVCISHFSRFSV  
ILSFFNLSTACFSLSMIFSFLAIFHVLQWTFNLNPPFSFFSPYFTSYSVHFSFFTFFSDFVFFQDVKWMFLIF  
HDFQFSC  
>ENSMUSP00000136448\_c.165:A>T\_p.T56S ENSMUST00000155807.3|Gm10715-  
201|ENSMUSG00000096201|+|chr9:g.3037046:A>T  
MFLIFNDFHFSCLI PRPIVDISFPPFSVFLAIFHVPKCVFLIFHDFQFPRHIPGPSVCISHFSRFSVISSFFK  
TSSGCFSSFFMIFSFLAIFPVLQWTFNLNPPFSVFLAIFHVLKCVFLIFRDFQFSRQIPGPTVCISHFSRFSVI  
LSFFNLSTACFSLSMIFSFLAIFHVLQWTFNLNPPFSFFSPYFTSYSVHFSFFTFFSDFVFFQDVKWMFLIFH  
DFQFSC  
>ENSMUSP00000136448\_c.166:C>A\_p.T56K ENSMUST00000155807.3|Gm10715-  
201|ENSMUSG00000096201|+|chr9:g.3037047:C>A  
MFLIFNDFHFSCLI PRPIVDISFPPFSVFLAIFHVPKCVFLIFHDFQFPRHIPGPKVCISHFSRFSVISSFFK  
TSSGCFSSFFMIFSFLAIFPVLQWTFNLNPPFSVFLAIFHVLKCVFLIFRDFQFSRQIPGPTVCISHFSRFSVI  
LSFFNLSTACFSLSMIFSFLAIFHVLQWTFNLNPPFSFFSPYFTSYSVHFSFFTFFSDFVFFQDVKWMFLIFH  
DFQFSC  
>ENSMUSP00000136448\_c.171:T>G\_p.C58G ENSMUST00000155807.3|Gm10715-  
201|ENSMUSG00000096201|+|chr9:g.3037052:T>G  
MFLIFNDFHFSCLI PRPIVDISFPPFSVFLAIFHVPKCVFLIFHDFQFPRHIPGPTVGISHFSRFSVISSFFK  
TSSGCFSSFFMIFSFLAIFPVLQWTFNLNPPFSVFLAIFHVLKCVFLIFRDFQFSRQIPGPTVCISHFSRFSVI  
LSFFNLSTACFSLSMIFSFLAIFHVLQWTFNLNPPFSFFSPYFTSYSVHFSFFTFFSDFVFFQDVKWMFLIFH  
DFQFSC  
>ENSMUSP00000136448\_c.171:TG>GA\_p.C58E ENSMUST00000155807.3|Gm10715-  
201|ENSMUSG00000096201|+|chr9:g.3037052:TG>GA  
MFLIFNDFHFSCLI PRPIVDISFPPFSVFLAIFHVPKCVFLIFHDFQFPRHIPGPTVEHFSFFTFFSDFVFFQ  
DVKWMFLIFHDFQFSCHIPCPTVDISKFSTFFCFPRHISRPKVCISHFP\*FVSFSPDSRSYSVHFSFFTFFSD  
FVIFQFVNCMFLSFHDFQFSCHIPCPTVDISKFSTFFIFLAIHVLQCAFLIFHVQ\*FRLFSRRQVDVSHFS  
\*FSVFL  
>ENSMUSP00000136448\_c.196:C>T\_p.S66L ENSMUST00000155807.3|Gm10715-  
201|ENSMUSG00000096201|+|chr9:g.3037077:C>T

MFLIFNDFHFSCLIPRPIVDISFPPFSVFLAIFHVPKCVFLIFHDFQFPRHIPGPTVCISHFSRFLVISSFFK  
TSSGCFSSFFMIFSFLAIFPVLQWTFLNFPFVSFLAIFHVLKCVFLIFRDFQFSRQIPGPTVCISHFSRFSVI  
LSFFNLSTACFSLSMIFSFLAIFHVLQWTFLNFPFVSFFSPYFTSYSVHFSFFTFSSDFVFFQDVKWMFLIFH  
DFQFSC  
>rs217447675\_ENSMUSP00000136448\_c.219:A>T\_p.T74S  
ENSMUST00000155807.3|Gm10715-201|ENSMUSG00000096201|+|chr9:g.3037100:A>T  
MFLIFNDFHFSCLIPRPIVDISFPPFSVFLAIFHVPKCVFLIFHDFQFPRHIPGPTVCISHFSRFSVISSFFK  
SSSGCFSSFFMIFSFLAIFPVLQWTFLNFPFVSFLAIFHVLKCVFLIFRDFQFSRQIPGPTVCISHFSRFSVI  
LSFFNLSTACFSLSMIFSFLAIFHVLQWTFLNFPFVSFFSPYFTSYSVHFSFFTFSSDFVFFQDVKWMFLIFH  
DFQFSC  
>ENSMUSP00000136448\_c.239:AT>A\_p.S80del-fs\_ENSMUST00000155807.3|Gm10715-  
201|ENSMUSG00000096201|+|chr9:g.3037120:AT>A  
MFLIFNDFHFSCLIPRPIVDISFPPFSVFLAIFHVPKCVFLIFHDFQFPRHIPGPTVCISHFSRFSVISSFFK  
TSSGCFSSFS  
>ENSMUSP00000137129\_c.9:AT>A\_p.I4del-fs\_ENSMUST00000177969.2|Gm10715-  
202|ENSMUSG00000096201|+|chr9:g.3037120:AT>A  
MFLIFMIFSFLAIFPVLQWTFLHFLFLSSPYFTS  
>ENSMUSP00000136448\_c.244:T>C\_p.F82S\_ENSMUST00000155807.3|Gm10715-  
201|ENSMUSG00000096201|+|chr9:g.3037125:T>C  
MFLIFNDFHFSCLIPRPIVDISFPPFSVFLAIFHVPKCVFLIFHDFQFPRHIPGPTVCISHFSRFSVISSFFK  
TSSGCFSSMIFSFLAIFPVLQWTFLNFPFVSFLAIFHVLKCVFLIFRDFQFSRQIPGPTVCISHFSRFSVI  
LSFFNLSTACFSLSMIFSFLAIFHVLQWTFLNFPFVSFFSPYFTSYSVHFSFFTFSSDFVFFQDVKWMFLIFH  
DFQFSC  
>ENSMUSP00000136448\_c.274:C>A\_p.P92H\_ENSMUST00000155807.3|Gm10715-  
201|ENSMUSG00000096201|+|chr9:g.3037155:C>A  
MFLIFNDFHFSCLIPRPIVDISFPPFSVFLAIFHVPKCVFLIFHDFQFPRHIPGPTVCISHFSRFSVISSFFK  
TSSGCFSSFFMIFSFLAIFHVLQWTFLNFPFVSFLAIFHVLKCVFLIFRDFQFSRQIPGPTVCISHFSRFSVI  
LSFFNLSTACFSLSMIFSFLAIFHVLQWTFLNFPFVSFFSPYFTSYSVHFSFFTFSSDFVFFQDVKWMFLIFH  
DFQFSC  
>ENSMUSP00000136448\_c.274:CT>AC\_p.P92H\_ENSMUST00000155807.3|Gm10715-  
201|ENSMUSG00000096201|+|chr9:g.3037155:CT>AC  
MFLIFNDFHFSCLIPRPIVDISFPPFSVFLAIFHVPKCVFLIFHDFQFPRHIPGPTVCISHFSRFSVISSFFK  
TSSGCFSSFFMIFSFLAIFHCPTVDISKFSTFFCFPRHISRPKVCISHFP\*FSVFSPPDRSRSVHFSFFTFSSD  
FVIFQFVNCMFLSFHDFQFSCHIPCPTVDISKFSTFFIFLAIHVLQCAFLIFHVQ\*FRLFSRRQVDVSHFS  
\*FSVFL  
>rs228898590\_ENSMUSP00000137129\_c.45:T>C\_p.C16R  
ENSMUST00000177969.2|Gm10715-202|ENSMUSG00000096201|+|chr9:g.3037156:T>C  
MFLIFHDFQFSCHIPRPTVDISFPPFSVFLAIFHVLKCVFLIFRDFQFSRQIPGPTVCISHFSRFSVILSFFN  
LSTACFSLSMIFSFLAIFHVLQWTFLNFPFVSFLAIFHVLKCVFLIFRVFQFPRHIPGPTVCISHFSRFSVI  
SSFFKTSSGCFSSFFMIFSFLAIFPVLQWTFLNFPFSSSIFLPYSRSYSVHFSFFTFSSDFVIFQVVKWFLI  
FHDFQLSS  
>ENSMUSP00000136448\_c.363:C>T\_p.R122C\_ENSMUST00000155807.3|Gm10715-  
201|ENSMUSG00000096201|+|chr9:g.3037244:C>T  
MFLIFNDFHFSCLIPRPIVDISFPPFSVFLAIFHVPKCVFLIFHDFQFPRHIPGPTVCISHFSRFSVISSFFK  
TSSGCFSSFFMIFSFLAIFPVLQWTFLNFPFVSFLAIFHVLKCVFLIFCDFQFSRQIPGPTVCISHFSRFSVI  
LSFFNLSTACFSLSMIFSFLAIFHVLQWTFLNFPFVSFFSPYFTSYSVHFSFFTFSSDFVFFQDVKWMFLIFH  
DFQFSC  
>ENSMUSP00000137129\_c.129:C>T\_p.R44C\_ENSMUST00000177969.2|Gm10715-  
202|ENSMUSG00000096201|+|chr9:g.3037244:C>T  
MFLIFHDFQFSCHIPCPTVDISFPPFSVFLAIFHVLKCVFLIFCDFQFSRQIPGPTVCISHFSRFSVILSFFN  
LSTACFSLSMIFSFLAIFHVLQWTFLNFPFVSFLAIFHVLKCVFLIFRVFQFPRHIPGPTVCISHFSRFSVI  
SSFFKTSSGCFSSFFMIFSFLAIFPVLQWTFLNFPFSSSIFLPYSRSYSVHFSFFTFSSDFVIFQVVKWFLI  
FHDFQLSS  
>ENSMUSP00000136448\_c.386:G>T\_p.Q129H\_ENSMUST00000155807.3|Gm10715-  
201|ENSMUSG00000096201|+|chr9:g.3037267:G>T  
MFLIFNDFHFSCLIPRPIVDISFPPFSVFLAIFHVPKCVFLIFHDFQFPRHIPGPTVCISHFSRFSVISSFFK  
TSSGCFSSFFMIFSFLAIFPVLQWTFLNFPFVSFLAIFHVLKCVFLIFRDFQFSRHIPGPTVCISHFSRFSVI

LSFFNLSTACFSLSMIFSFLAIFHVLQWTFLNFPFSSFFSPYFTSYSVHFSFFTFFSDFVFFQDVKWMFLIFH  
DFQFSC  
>ENSMUSP00000137129\_c.152:G>T\_p.Q51H ENSMUST00000177969.2|Gm10715-  
202|ENSMUSG00000096201|+|chr9:g.3037267:G>T  
MFLIFHDFQFSCHIPCPTVDISFPFVSFLAIFHVLKCVFLIFRDFQFSRHIPGPTVCISHFSRFSVILSFFN  
LSTACFSLSMIFSFLAIFHVLQWTFLNFPFVSFLAIFHVLKCVFLIFRVFQFPRHIPGPTVCISHFSRFSVI  
SSFFKTSSGCFSSFMIFSFLAIFPVLQWTFLNFPFSSSIFLPYSRSYSVHFSFFTFFSDFVIFQVVKWKFLI  
FHDFQLSS  
>ENSMUSP00000136448\_c.386:G>C\_p.Q129H ENSMUST00000155807.3|Gm10715-  
201|ENSMUSG00000096201|+|chr9:g.3037267:G>C  
MFLIFNDFHFSCLIPRPIVDISFPFVSFLAIFHVPKCVFLIFHDFQFPRHIPGPTVCISHFSRFSVISSFFK  
TSSGCFSSFMIFSFLAIFPVLQWTFLNFPFVSFLAIFHVLKCVFLIFRDFQFSRHIPGPTVCISHFSRFSVI  
LSFFNLSTACFSLSMIFSFLAIFHVLQWTFLNFPFSSFFSPYFTSYSVHFSFFTFFSDFVFFQDVKWMFLIFH  
DFQFSC  
>ENSMUSP00000137129\_c.152:G>C\_p.Q51H ENSMUST00000177969.2|Gm10715-  
202|ENSMUSG00000096201|+|chr9:g.3037267:G>C  
MFLIFHDFQFSCHIPCPTVDISFPFVSFLAIFHVLKCVFLIFRDFQFSRHIPGPTVCISHFSRFSVILSFFN  
LSTACFSLSMIFSFLAIFHVLQWTFLNFPFVSFLAIFHVLKCVFLIFRVFQFPRHIPGPTVCISHFSRFSVI  
SSFFKTSSGCFSSFMIFSFLAIFPVLQWTFLNFPFSSSIFLPYSRSYSVHFSFFTFFSDFVIFQVVKWKFLI  
FHDFQLSS  
>ENSMUSP00000136448\_c.394:G>T\_p.G132V ENSMUST00000155807.3|Gm10715-  
201|ENSMUSG00000096201|+|chr9:g.3037275:G>T  
MFLIFNDFHFSCLIPRPIVDISFPFVSFLAIFHVPKCVFLIFHDFQFPRHIPGPTVCISHFSRFSVISSFFK  
TSSGCFSSFMIFSFLAIFPVLQWTFLNFPFVSFLAIFHVLKCVFLIFRDFQFSRQIPVPTVCISHFSRFSVI  
LSFFNLSTACFSLSMIFSFLAIFHVLQWTFLNFPFSSFFSPYFTSYSVHFSFFTFFSDFVFFQDVKWMFLIFH  
DFQFSC  
>ENSMUSP00000137129\_c.160:G>T\_p.G54V ENSMUST00000177969.2|Gm10715-  
202|ENSMUSG00000096201|+|chr9:g.3037275:G>T  
MFLIFHDFQFSCHIPCPTVDISFPFVSFLAIFHVLKCVFLIFRDFQFSRQIPVPTVCISHFSRFSVILSFFN  
LSTACFSLSMIFSFLAIFHVLQWTFLNFPFVSFLAIFHVLKCVFLIFRVFQFPRHIPGPTVCISHFSRFSVI  
SSFFKTSSGCFSSFMIFSFLAIFPVLQWTFLNFPFSSSIFLPYSRSYSVHFSFFTFFSDFVIFQVVKWKFLI  
FHDFQLSS  
>ENSMUSP00000136448\_c.399:A>T\_p.T134S ENSMUST00000155807.3|Gm10715-  
201|ENSMUSG00000096201|+|chr9:g.3037280:A>T  
MFLIFNDFHFSCLIPRPIVDISFPFVSFLAIFHVPKCVFLIFHDFQFPRHIPGPTVCISHFSRFSVISSFFK  
TSSGCFSSFMIFSFLAIFPVLQWTFLNFPFVSFLAIFHVLKCVFLIFRDFQFSRQIPGPTVCISHFSRFSVI  
LSFFNLSTACFSLSMIFSFLAIFHVLQWTFLNFPFSSFFSPYFTSYSVHFSFFTFFSDFVFFQDVKWMFLIFH  
DFQFSC  
>ENSMUSP00000137129\_c.165:A>T\_p.T56S ENSMUST00000177969.2|Gm10715-  
202|ENSMUSG00000096201|+|chr9:g.3037280:A>T  
MFLIFHDFQFSCHIPCPTVDISFPFVSFLAIFHVLKCVFLIFRDFQFSRQIPGPTVCISHFSRFSVILSFFN  
LSTACFSLSMIFSFLAIFHVLQWTFLNFPFVSFLAIFHVLKCVFLIFRVFQFPRHIPGPTVCISHFSRFSVI  
SSFFKTSSGCFSSFMIFSFLAIFPVLQWTFLNFPFSSSIFLPYSRSYSVHFSFFTFFSDFVIFQVVKWKFLI  
FHDFQLSS  
>ENSMUSP00000136448\_c.433:T>G\_p.V145G ENSMUST00000155807.3|Gm10715-  
201|ENSMUSG00000096201|+|chr9:g.3037314:T>G  
MFLIFNDFHFSCLIPRPIVDISFPFVSFLAIFHVPKCVFLIFHDFQFPRHIPGPTVCISHFSRFSVISSFFK  
TSSGCFSSFMIFSFLAIFPVLQWTFLNFPFVSFLAIFHVLKCVFLIFRDFQFSRQIPGPTVCISHFSRFSGI  
LSFFNLSTACFSLSMIFSFLAIFHVLQWTFLNFPFSSFFSPYFTSYSVHFSFFTFFSDFVFFQDVKWMFLIFH  
DFQFSC  
>ENSMUSP00000137129\_c.199:T>G\_p.V67G ENSMUST00000177969.2|Gm10715-  
202|ENSMUSG00000096201|+|chr9:g.3037314:T>G  
MFLIFHDFQFSCHIPCPTVDISFPFVSFLAIFHVLKCVFLIFRDFQFSRQIPGPTVCISHFSRFSVILSFFN  
LSTACFSLSMIFSFLAIFHVLQWTFLNFPFVSFLAIFHVLKCVFLIFRVFQFPRHIPGPTVCISHFSRFSVI  
SSFFKTSSGCFSSFMIFSFLAIFPVLQWTFLNFPFSSSIFLPYSRSYSVHFSFFTFFSDFVIFQVVKWKFLI  
FHDFQLSS  
>ENSMUSP00000136448\_c.439:T>C\_p.L147S ENSMUST00000155807.3|Gm10715-  
201|ENSMUSG00000096201|+|chr9:g.3037320:T>C

MFLIFNDFHFSCLIIPRPIVDISFPPFSVFLAIFHVPKCVFLIFHDFQFPRHIPGPTVCISHFSRFSVISSFFK  
TSSGCFSSFFMIFSFLAIFPVLQWTFLNFPFVSFLAIFHVLKCVFLIFRDFQFSRQIPGPTVCISHFSRFSVI  
SSFFNLSTACFSLSMIFSFLAIFHVLQWTFLNFPFVSFFSPYFTSYSVHFSFFTFSSDFVFFQDVKWMFLIFH  
DFQFSC  
>ENSMUSP00000137129\_c.205:T>C\_p.L69S ENSMUST00000177969.2|Gm10715-  
202|ENSMUSG00000096201|+|chr9:g.3037320:T>C  
MFLIFHDFQFSCHIPCPTVDISFPPFSVFLAIFHVLKCVFLIFRDFQFSRQIPGPTVCISHFSRFSVISSFFN  
LSTACFSLSMIFSFLAIFHVLQWTFLNFPFVSFLAIFHVLKCVFLIFRVFQFPRHIPGPTVCISHFSRFSVI  
SSFFKTSSGCFSSFFMIFSFLAIFPVLQWTFLNFPFSSSIFLPYSRSYSVHFSFFTFSSDFVIFQVVKWKFLI  
FHDFQLSS  
>ENSMUSP00000136448\_c.452:T>G\_p.N151K ENSMUST00000155807.3|Gm10715-  
201|ENSMUSG00000096201|+|chr9:g.3037333:T>G  
MFLIFNDFHFSCLIIPRPIVDISFPPFSVFLAIFHVPKCVFLIFHDFQFPRHIPGPTVCISHFSRFSVISSFFK  
TSSGCFSSFFMIFSFLAIFPVLQWTFLNFPFVSFLAIFHVLKCVFLIFRDFQFSRQIPGPTVCISHFSRFSVI  
LSFFKLSTACFSLSMIFSFLAIFHVLQWTFLNFPFVSFFSPYFTSYSVHFSFFTFSSDFVFFQDVKWMFLIFH  
DFQFSC  
>ENSMUSP00000137129\_c.218:T>G\_p.N73K ENSMUST00000177969.2|Gm10715-  
202|ENSMUSG00000096201|+|chr9:g.3037333:T>G  
MFLIFHDFQFSCHIPCPTVDISFPPFSVFLAIFHVLKCVFLIFRDFQFSRQIPGPTVCISHFSRFSVILSFFK  
LSTACFSLSMIFSFLAIFHVLQWTFLNFPFVSFLAIFHVLKCVFLIFRVFQFPRHIPGPTVCISHFSRFSVI  
SSFFKTSSGCFSSFFMIFSFLAIFPVLQWTFLNFPFSSSIFLPYSRSYSVHFSFFTFSSDFVIFQVVKWKFLI  
FHDFQLSS  
>ENSMUSP00000136448\_c.454:T>C\_p.L152S ENSMUST00000155807.3|Gm10715-  
201|ENSMUSG00000096201|+|chr9:g.3037335:T>C  
MFLIFNDFHFSCLIIPRPIVDISFPPFSVFLAIFHVPKCVFLIFHDFQFPRHIPGPTVCISHFSRFSVISSFFK  
TSSGCFSSFFMIFSFLAIFPVLQWTFLNFPFVSFLAIFHVLKCVFLIFRDFQFSRQIPGPTVCISHFSRFSVI  
LSFFNSTACFSLSMIFSFLAIFHVLQWTFLNFPFVSFFSPYFTSYSVHFSFFTFSSDFVFFQDVKWMFLIFH  
DFQFSC  
>ENSMUSP00000137129\_c.220:T>C\_p.L74S ENSMUST00000177969.2|Gm10715-  
202|ENSMUSG00000096201|+|chr9:g.3037335:T>C  
MFLIFHDFQFSCHIPCPTVDISFPPFSVFLAIFHVLKCVFLIFRDFQFSRQIPGPTVCISHFSRFSVILSFFN  
SSTACFSLSMIFSFLAIFHVLQWTFLNFPFVSFLAIFHVLKCVFLIFRVFQFPRHIPGPTVCISHFSRFSVI  
SSFFKTSSGCFSSFFMIFSFLAIFPVLQWTFLNFPFSSSIFLPYSRSYSVHFSFFTFSSDFVIFQVVKWKFLI  
FHDFQLSS  
>ENSMUSP00000136448\_c.460:CT>GG\_p.T154R ENSMUST00000155807.3|Gm10715-  
201|ENSMUSG00000096201|+|chr9:g.3037341:CT>GG  
MFLIFNDFHFSCLIIPRPIVDISFPPFSVFLAIFHVPKCVFLIFHDFQFPRHIPGPTVCISHFSRFSVISSFFK  
TSSGCFSSFFMIFSFLAIFPVLQWTFLNFPFVSFLAIFHVLKCVFLIFRDFQFSRQIPGPTVCISHFSRFSVI  
LSFFNLSRCMFLSFHDFQFSCHIPCPTVDISKFSTFFIFLAIHVLQCAFLIFHVFQ\*FRLFSRRQVDVSHFS  
\*FSVFL  
>ENSMUSP00000137129\_c.226:CT>GG\_p.T76R ENSMUST00000177969.2|Gm10715-  
202|ENSMUSG00000096201|+|chr9:g.3037341:CT>GG  
MFLIFHDFQFSCHIPCPTVDISFPPFSVFLAIFHVLKCVFLIFRDFQFSRQIPGPTVCISHFSRFSVILSFFN  
LSRCMFLSFHDFQFSCHIPCPTVDISKFSTFFSFPRHISRAKVCISHFSCFSVSSPYSRSYSVHFSFFTFSSD  
FVFFQDVKWMFLIFHDFQFSCHIPCPTVDISKFSTFFFNFLTIFQVLQCAFLIFHVFQ\*FRHFSSCQVEVSH  
FP\*FSAF\*  
>ENSMUSP00000136448\_c.460:CTGC>GTGT\_p.T154S ENSMUST00000155807.3|Gm10715-  
201|ENSMUSG00000096201|+|chr9:g.3037341:CTGC>GTGT  
MFLIFNDFHFSCLIIPRPIVDISFPPFSVFLAIFHVPKCVFLIFHDFQFPRHIPGPTVCISHFSRFSVISSFFK  
TSSGCFSSFFMIFSFLAIFPVLQWTFLNFPFVSFLAIFHVLKCVFLIFRDFQFSRQIPGPTVCISHFSRFSVI  
LSFFNLSSVACFSLSMIFSFLAIFHVLQWTFLNFPFVSFFSPYFTSYSVHFSFFTFSSDFVFFQDVKWMFLIF  
HDFQFSC  
>ENSMUSP00000137129\_c.226:CTGC>GTGT\_p.T76S ENSMUST00000177969.2|Gm10715-  
202|ENSMUSG00000096201|+|chr9:g.3037341:CTGC>GTGT  
MFLIFHDFQFSCHIPCPTVDISFPPFSVFLAIFHVLKCVFLIFRDFQFSRQIPGPTVCISHFSRFSVILSFFN  
LSSVACFSLSMIFSFLAIFHVLQWTFLNFPFVSFLAIFHVLKCVFLIFRVFQFPRHIPGPTVCISHFSRFSV  
ISSFFKTSSGCFSSFFMIFSFLAIFPVLQWTFLNFPFSSSIFLPYSRSYSVHFSFFTFSSDFVIFQVVKWKFL  
IFHDFQLSS

>ENSMUSP00000136448\_c.460:CTGC>GTGG\_p.T154S ENSMUST00000155807.3|Gm10715-201|ENSMUSG00000096201|+|chr9:g.3037341:CTGC>GTGG  
MFLIFHDFHFSCLIPIPRIVDISFPPFSVFLAIFHVPKCVFLIFHDFQFPRHIPGPTVCISHFSRFSVISSFFK  
TSSGCFSSFFMIFSFLAIFPVLQWTFNLNFPFSSVFLAIFHVLKCVFLIFRDFQFSRQIPGPTVCISHFSRFSVI  
LSFFNLSSGACFSLSMIFSFLAIFHVLQWTFNLNFPFSSFFSPYFTSYSVHFSFFTFFSDFVFFQDVKWMFLIF  
HDFQFSC  
>ENSMUSP00000137129\_c.226:CTGC>GTGG\_p.T76S ENSMUST00000177969.2|Gm10715-202|ENSMUSG00000096201|+|chr9:g.3037341:CTGC>GTGG  
MFLIFHDFQFSCHIPCPTVDISFPPFSVFLAIFHVLKCVFLIFRDFQFSRQIPGPTVCISHFSRFSVILSFFN  
LSSGACFSLSMIFSFLAIFHVLQWTFNLNFPFSSVFLAIFHVLKCVFLIFRVFQFPRHIPGPTVCISHFSRFSV  
ISSFFKTSSGCFSSFFMIFSFLAIFPVLQWTFNLNFPFSSSIFLPYSRSYSVHFSFFTFFSDFVIFQVVKWKFL  
IFHDFQLSS  
>ENSMUSP00000136448\_c.474:C>T\_p.L159F ENSMUST00000155807.3|Gm10715-201|ENSMUSG00000096201|+|chr9:g.3037355:C>T  
MFLIFHDFHFSCLIPIPRIVDISFPPFSVFLAIFHVPKCVFLIFHDFQFPRHIPGPTVCISHFSRFSVISSFFK  
TSSGCFSSFFMIFSFLAIFPVLQWTFNLNFPFSSVFLAIFHVLKCVFLIFRDFQFSRQIPGPTVCISHFSRFSVI  
LSFFNLSTACFSFSMIFSFLAIFHVLQWTFNLNFPFSSFFSPYFTSYSVHFSFFTFFSDFVFFQDVKWMFLIFH  
DFQFSC  
>ENSMUSP00000137129\_c.240:C>T\_p.L81F ENSMUST00000177969.2|Gm10715-202|ENSMUSG00000096201|+|chr9:g.3037355:C>T  
MFLIFHDFQFSCHIPCPTVDISFPPFSVFLAIFHVLKCVFLIFRDFQFSRQIPGPTVCISHFSRFSVILSFFN  
LSTACFSFSMIFSFLAIFHVLQWTFNLNFPFSSVFLAIFHVLKCVFLIFRVFQFPRHIPGPTVCISHFSRFSVI  
SSFFKTSSGCFSSFFMIFSFLAIFPVLQWTFNLNFPFSSSIFLPYSRSYSVHFSFFTFFSDFVIFQVVKWKFLI  
FHDFQLSS  
>ENSMUSP00000137129\_c.362:TC>T\_p.F121del-fs ENSMUST00000177969.2|Gm10715-201|ENSMUSG00000096201|+|chr9:g.3037477:TC>T  
MFLIFHDFQFSCHIPCPTVDISFPPFSVFLAIFHVLKCVFLIFRDFQFSRQIPGPTVCISHFSRFSVILSFFN  
LSTACFSLSMIFSFLAIFHVLQWTFNLNFPFSSVFLAIFHVLKCVFLIFVFFSFLAIFQVLQCAFLIFHVQ  
>ENSMUSP00000137129\_c.367:T>A\_p.V123D ENSMUST00000177969.2|Gm10715-202|ENSMUSG00000096201|+|chr9:g.3037482:T>A  
MFLIFHDFQFSCHIPCPTVDISFPPFSVFLAIFHVLKCVFLIFRDFQFSRQIPGPTVCISHFSRFSVILSFFN  
LSTACFSLSMIFSFLAIFHVLQWTFNLNFPFSSVFLAIFHVLKCVFLIFRDFQFPRHIPGPTVCISHFSRFSVI  
SSFFKTSSGCFSSFFMIFSFLAIFPVLQWTFNLNFPFSSSIFLPYSRSYSVHFSFFTFFSDFVIFQVVKWKFLI  
FHDFQLSS  
>ENSMUSP00000136448\_c.553:T>C\_p.F185S ENSMUST00000155807.3|Gm10715-201|ENSMUSG00000096201|+|chr9:g.3037669:T>C  
MFLIFHDFHFSCLIPIPRIVDISFPPFSVFLAIFHVPKCVFLIFHDFQFPRHIPGPTVCISHFSRFSVISSFFK  
TSSGCFSSFFMIFSFLAIFPVLQWTFNLNFPFSSVFLAIFHVLKCVFLIFRDFQFSRQIPGPTVCISHFSRFSVI  
LSFFNLSTACFSLSMIFSFLAIFHVLQWTFNLNFPFSSSPYFTSYSVHFSFFTFFSDFVFFQDVKWMFLIFH  
DFQFSC  
>ENSMUSP00000137129\_c.378:C>T\_p.P127S ENSMUST00000177969.2|Gm10715-202|ENSMUSG00000096201|+|chr9:g.3037727:C>T  
MFLIFHDFQFSCHIPCPTVDISFPPFSVFLAIFHVLKCVFLIFRDFQFSRQIPGPTVCISHFSRFSVILSFFN  
LSTACFSLSMIFSFLAIFHVLQWTFNLNFPFSSVFLAIFHVLKCVFLIFRVFQFSRHIPGPTVCISHFSRFSVI  
SSFFKTSSGCFSSFFMIFSFLAIFPVLQWTFNLNFPFSSSIFLPYSRSYSVHFSFFTFFSDFVIFQVVKWKFLI  
FHDFQLSS  
>ENSMUSP00000136448\_c.574:A>T\_p.Y192F ENSMUST00000155807.3|Gm10715-201|ENSMUSG00000096201|+|chr9:g.3037748:A>T  
MFLIFHDFHFSCLIPIPRIVDISFPPFSVFLAIFHVPKCVFLIFHDFQFPRHIPGPTVCISHFSRFSVISSFFK  
TSSGCFSSFFMIFSFLAIFPVLQWTFNLNFPFSSVFLAIFHVLKCVFLIFRDFQFSRQIPGPTVCISHFSRFSVI  
LSFFNLSTACFSLSMIFSFLAIFHVLQWTFNLNFPFSSFFSPYFTSFSVHFSFFTFFSDFVFFQDVKWMFLIFH  
DFQFSC  
>ENSMUSP00000137129\_c.399:A>T\_p.T134S ENSMUST00000177969.2|Gm10715-202|ENSMUSG00000096201|+|chr9:g.3037748:A>T  
MFLIFHDFQFSCHIPCPTVDISFPPFSVFLAIFHVLKCVFLIFRDFQFSRQIPGPTVCISHFSRFSVILSFFN  
LSTACFSLSMIFSFLAIFHVLQWTFNLNFPFSSVFLAIFHVLKCVFLIFRVFQFPRHIPGPTVCISHFSRFSVI  
SSFFKTSSGCFSSFFMIFSFLAIFPVLQWTFNLNFPFSSSIFLPYSRSYSVHFSFFTFFSDFVIFQVVKWKFLI  
FHDFQLSS



>ENSMUSP00000137129\_c.430:C>T\_p.S144L ENSMUST00000177969.2|Gm10715-202|ENSMUSG00000096201|+|chr9:g.3037779:C>T  
MFLIFHDFQFSCHIPCPTVDISFPPFSVFLAIFHVLKCVFLIFRDFQFSRQIPGPTVCISHFSRFSVILSFFN  
LSTACFSLSMIFSFLAIFHVLQWTFLNFPFVSFLAIFHVLKCVFLIFRVFQFPRHIPGPTVCISHFSRFLVI  
SSFFKTSSGCFSSFFMIFSFLAIFPVLQWTFLNFPFSSSIFLPYSRSYSVHFSFFTFFSDFVIFQVVKWKFLI  
FHDFQLSS  
>rs215064382\_ENSMUSP00000136448\_c.618:T>A\_p.F207I  
ENSMUST00000155807.3|Gm10715-201|ENSMUSG00000096201|+|chr9:g.3037792:T>A  
MFLIFNDFHFSLIPRPIVDISFPPFSVFLAIFHVPKCVFLIFHDFQFPRHIPGPTVCISHFSRFSVILSFFK  
TSSGCFSSFFMIFSFLAIFPVLQWTFLNFPFVSFLAIFHVLKCVFLIFRDFQFSRQIPGPTVCISHFSRFSVI  
LSFFNLSTACFSLSMIFSFLAIFHVLQWTFLNFPFSSFFSPYFTSYSVHFSFFTFFSDFVIFQDVKWMFLIFH  
DFQFSC  
>ENSMUSP00000136448\_c.624:C>T\_p.Q209\* ENSMUST00000155807.3|Gm10715-201|ENSMUSG00000096201|+|chr9:g.3037798:C>T  
MFLIFNDFHFSLIPRPIVDISFPPFSVFLAIFHVPKCVFLIFHDFQFPRHIPGPTVCISHFSRFSVILSFFK  
TSSGCFSSFFMIFSFLAIFPVLQWTFLNFPFVSFLAIFHVLKCVFLIFRDFQFSRQIPGPTVCISHFSRFSVI  
LSFFNLSTACFSLSMIFSFLAIFHVLQWTFLNFPFSSFFSPYFTSYSVHFSFFTFFSDFVFF\*DVKWMFLIFH  
DFQFSC  
>rs240247081\_ENSMUSP00000136448\_c.628:A>T\_p.D210V  
ENSMUST00000155807.3|Gm10715-201|ENSMUSG00000096201|+|chr9:g.3037802:A>T  
MFLIFNDFHFSLIPRPIVDISFPPFSVFLAIFHVPKCVFLIFHDFQFPRHIPGPTVCISHFSRFSVILSFFK  
TSSGCFSSFFMIFSFLAIFPVLQWTFLNFPFVSFLAIFHVLKCVFLIFRDFQFSRQIPGPTVCISHFSRFSVI  
LSFFNLSTACFSLSMIFSFLAIFHVLQWTFLNFPFSSFFSPYFTSYSVHFSFFTFFSDFVFFQVVKWMFLIFH  
DFQFSC  
>rs240247081\_ENSMUSP00000137129\_c.453:A>T\_p.T152S  
ENSMUST00000177969.2|Gm10715-202|ENSMUSG00000096201|+|chr9:g.3037802:A>T  
MFLIFHDFQFSCHIPCPTVDISFPPFSVFLAIFHVLKCVFLIFRDFQFSRQIPGPTVCISHFSRFSVILSFFN  
LSTACFSLSMIFSFLAIFHVLQWTFLNFPFVSFLAIFHVLKCVFLIFRVFQFPRHIPGPTVCISHFSRFSVI  
SSFFKSSGCFSSFFMIFSFLAIFPVLQWTFLNFPFSSSIFLPYSRSYSVHFSFFTFFSDFVIFQVVKWKFLI  
FHDFQLSS  
>ENSMUSP00000136448\_c.628:AC>TG\_p.D210V ENSMUST00000155807.3|Gm10715-201|ENSMUSG00000096201|+|chr9:g.3037802:AC>TG  
MFLIFNDFHFSLIPRPIVDISFPPFSVFLAIFHVPKCVFLIFHDFQFPRHIPGPTVCISHFSRFSVILSFFK  
TSSGCFSSFFMIFSFLAIFPVLQWTFLNFPFVSFLAIFHVLKCVFLIFRDFQFSRQIPGPTVCISHFSRFSVI  
LSFFNLSTACFSLSMIFSFLAIFHVLQWTFLNFPFSSFFSPYFTSYSVHFSFFTFFSDFVFFQVQVQDVSHFS  
\*FSVFL  
>ENSMUSP00000137129\_c.453:AC>TG\_p.T152C ENSMUST00000177969.2|Gm10715-202|ENSMUSG00000096201|+|chr9:g.3037802:AC>TG  
MFLIFHDFQFSCHIPCPTVDISFPPFSVFLAIFHVLKCVFLIFRDFQFSRQIPGPTVCISHFSRFSVILSFFN  
LSTACFSLSMIFSFLAIFHVLQWTFLNFPFVSFLAIFHVLKCVFLIFRVFQFPRHIPGPTVCISHFSRFSVI  
SSFFKCVKWMFLIFHDFQFSCHIPCPTVDISKSTFFFNFLTIFQVLQCAFLIFHVFQ\*FRHFSQCQVEVSH  
FP\*FSAF\*  
>ENSMUSP00000136448\_c.641:G>T\_p.M214I ENSMUST00000155807.3|Gm10715-201|ENSMUSG00000096201|+|chr9:g.3037815:G>T  
MFLIFNDFHFSLIPRPIVDISFPPFSVFLAIFHVPKCVFLIFHDFQFPRHIPGPTVCISHFSRFSVILSFFK  
TSSGCFSSFFMIFSFLAIFPVLQWTFLNFPFVSFLAIFHVLKCVFLIFRDFQFSRQIPGPTVCISHFSRFSVI  
LSFFNLSTACFSLSMIFSFLAIFHVLQWTFLNFPFSSFFSPYFTSYSVHFSFFTFFSDFVFFQDVKWMFLIFH  
DFQFSC  
>ENSMUSP00000137129\_c.466:G>T\_p.C156F ENSMUST00000177969.2|Gm10715-202|ENSMUSG00000096201|+|chr9:g.3037815:G>T  
MFLIFHDFQFSCHIPCPTVDISFPPFSVFLAIFHVLKCVFLIFRDFQFSRQIPGPTVCISHFSRFSVILSFFN  
LSTACFSLSMIFSFLAIFHVLQWTFLNFPFVSFLAIFHVLKCVFLIFRVFQFPRHIPGPTVCISHFSRFSVI  
SSFFKTSSGFFSFFMIFSFLAIFPVLQWTFLNFPFSSSIFLPYSRSYSVHFSFFTFFSDFVIFQVVKWKFLI  
FHDFQLSS  
>ENSMUSP00000137129\_c.478:T>C\_p.F160S ENSMUST00000177969.2|Gm10715-202|ENSMUSG00000096201|+|chr9:g.3037827:T>C  
MFLIFHDFQFSCHIPCPTVDISFPPFSVFLAIFHVLKCVFLIFRDFQFSRQIPGPTVCISHFSRFSVILSFFN  
LSTACFSLSMIFSFLAIFHVLQWTFLNFPFVSFLAIFHVLKCVFLIFRVFQFPRHIPGPTVCISHFSRFSVI

SSFFKTSSGCFSFSMIFSLAIFPVLQWTFLNFPFSSSIFLPYSRSYSVHFSFFFTFFSDFVIFQVVKWKFLI  
FHDFQLSS  
>ENSMUSP00000137129\_c.508:C>A\_p.P170H ENSMUST00000177969.2|Gm10715-  
202|ENSMUSG00000096201|+|chr9:g.3037857:C>A  
MFLIFHDFQFSCHIPCPTVDISFPFVSFLAIFHVLKCVFLIFRDFQFSRQIPGPTVCISHFSRFSVILSFFN  
LSTACFSLSMIFSFLAIFHVLQWTFLNFPFVSFLAIFHVLKCVFLIFRVFQFPRHIPGPTVCISHFSRFSVI  
SSFFKTSSGCFSFFMIFSLAIFHVLQWTFLNFPFSSSIFLPYSRSYSVHFSFFFTFFSDFVIFQVVKWKFLI  
FHDFQLSS  
>ENSMUSP00000137129\_c.508:CT>AC\_p.P170H ENSMUST00000177969.2|Gm10715-  
202|ENSMUSG00000096201|+|chr9:g.3037857:CT>AC  
MFLIFHDFQFSCHIPCPTVDISFPFVSFLAIFHVLKCVFLIFRDFQFSRQIPGPTVCISHFSRFSVILSFFN  
LSTACFSLSMIFSFLAIFHVLQWTFLNFPFVSFLAIFHVLKCVFLIFRVFQFPRHIPGPTVCISHFSRFSVI  
SSFFKTSSGCFSFFMIFSLAIFHCPTVDISKSTFFFNFLTIFQVLQCAFLIFHVQ\*FRHFSQCQEVESH  
FP\*FSAF\*  
>ENSMUSP00000137129\_c.580:A>T\_p.Y194F ENSMUST00000177969.2|Gm10715-  
202|ENSMUSG00000096201|+|chr9:g.3038216:A>T  
MFLIFHDFQFSCHIPCPTVDISFPFVSFLAIFHVLKCVFLIFRDFQFSRQIPGPTVCISHFSRFSVILSFFN  
LSTACFSLSMIFSFLAIFHVLQWTFLNFPFVSFLAIFHVLKCVFLIFRVFQFPRHIPGPTVCISHFSRFSVI  
SSFFKTSSGCFSFFMIFSLAIFPVLQWTFLNFPFSSSIFLPYSRSYSVHFSFFFTFFSDFVIFQVVKWKFLI  
FHDFQLSS  
>ENSMUSP00000137129\_c.581:C>A\_p.Y194\* ENSMUST00000177969.2|Gm10715-  
202|ENSMUSG00000096201|+|chr9:g.3038217:C>A  
MFLIFHDFQFSCHIPCPTVDISFPFVSFLAIFHVLKCVFLIFRDFQFSRQIPGPTVCISHFSRFSVILSFFN  
LSTACFSLSMIFSFLAIFHVLQWTFLNFPFVSFLAIFHVLKCVFLIFRVFQFPRHIPGPTVCISHFSRFSVI  
SSFFKTSSGCFSFFMIFSLAIFPVLQWTFLNFPFSSSIFLPYSRS\*SVHFSFFFTFFSDFVIFQVVKWKFLI  
FHDFQLSS  
>ENSMUSP00000137129\_c.588:C>T\_p.H197Y ENSMUST00000177969.2|Gm10715-  
202|ENSMUSG00000096201|+|chr9:g.3038224:C>T  
MFLIFHDFQFSCHIPCPTVDISFPFVSFLAIFHVLKCVFLIFRDFQFSRQIPGPTVCISHFSRFSVILSFFN  
LSTACFSLSMIFSFLAIFHVLQWTFLNFPFVSFLAIFHVLKCVFLIFRVFQFPRHIPGPTVCISHFSRFSVI  
SSFFKTSSGCFSFFMIFSLAIFPVLQWTFLNFPFSSSIFLPYSRSYSVYFSFFFTFFSDFVIFQVVKWKFLI  
FHDFQLSS  
>ENSMUSP00000137129\_c.604:C>A\_p.T202K ENSMUST00000177969.2|Gm10715-  
202|ENSMUSG00000096201|+|chr9:g.3038240:C>A  
MFLIFHDFQFSCHIPCPTVDISFPFVSFLAIFHVLKCVFLIFRDFQFSRQIPGPTVCISHFSRFSVILSFFN  
LSTACFSLSMIFSFLAIFHVLQWTFLNFPFVSFLAIFHVLKCVFLIFRVFQFPRHIPGPTVCISHFSRFSVI  
SSFFKTSSGCFSFFMIFSLAIFPVLQWTFLNFPFSSSIFLPYSRSYSVHFSFFKFFSDFVIFQVVKWKFLI  
FHDFQLSS  
>ENSMUSP00000137129\_c.621:G>A\_p.V208I ENSMUST00000177969.2|Gm10715-  
202|ENSMUSG00000096201|+|chr9:g.3038257:G>A  
MFLIFHDFQFSCHIPCPTVDISFPFVSFLAIFHVLKCVFLIFRDFQFSRQIPGPTVCISHFSRFSVILSFFN  
LSTACFSLSMIFSFLAIFHVLQWTFLNFPFVSFLAIFHVLKCVFLIFRVFQFPRHIPGPTVCISHFSRFSVI  
SSFFKTSSGCFSFFMIFSLAIFPVLQWTFLNFPFSSSIFLPYSRSYSVHFSFFFTFFSDFVIFQVVKWKFLI  
FHDFQLSS  
>ENSMUSP00000137129\_c.646:A>T\_p.K216M ENSMUST00000177969.2|Gm10715-  
202|ENSMUSG00000096201|+|chr9:g.3038282:A>T  
MFLIFHDFQFSCHIPCPTVDISFPFVSFLAIFHVLKCVFLIFRDFQFSRQIPGPTVCISHFSRFSVILSFFN  
LSTACFSLSMIFSFLAIFHVLQWTFLNFPFVSFLAIFHVLKCVFLIFRVFQFPRHIPGPTVCISHFSRFSVI  
SSFFKTSSGCFSFFMIFSLAIFPVLQWTFLNFPFSSSIFLPYSRSYSVHFSFFFTFFSDFVIFQVVKWKFLI  
FHDFQLSS  
>ENSMUSP00000137129\_c.654:A>G\_p.I219V ENSMUST00000177969.2|Gm10715-  
202|ENSMUSG00000096201|+|chr9:g.3038290:A>G  
MFLIFHDFQFSCHIPCPTVDISFPFVSFLAIFHVLKCVFLIFRDFQFSRQIPGPTVCISHFSRFSVILSFFN  
LSTACFSLSMIFSFLAIFHVLQWTFLNFPFVSFLAIFHVLKCVFLIFRVFQFPRHIPGPTVCISHFSRFSVI  
SSFFKTSSGCFSFFMIFSLAIFPVLQWTFLNFPFSSSIFLPYSRSYSVHFSFFFTFFSDFVIFQVVKWKFLV  
FHDFQLSS  
>ENSMUSP00000137129\_c.672:C>T\_p.L225F ENSMUST00000177969.2|Gm10715-  
202|ENSMUSG00000096201|+|chr9:g.3038308:C>T

MFLIFHDFQFSCHIPCPTVDISFPFVSFLAIFHVLKCVFLIFRDFQFSRQIPGPTVCISHFSRFSVILSFFN  
LSTACFSLSMIFSFLAIFHVLQWTFLNFPFVSFLAIFHVLKCVFLIFRVFQFPRHIPGPTVCISHFSRFSVI  
SSFFKTSSGCFSFFMIFSFLAIFPVLQWTFLNFPFSSSIFLPYSRSYSVHFSFFTFFSDFVIFQVVKWKFLLI  
FHDFQFSS  
>rs244572871\_ENSMUSP00000151193\_c.315:T>TG\_p.W106ins-fs  
ENSMUST00000217651.3|Mmp1a-201|ENSMUSG00000043089|+|chr9:g.7465083:T>TG  
MPSLPLLLLLLWAASSYSFPVFHNGDRQNVETVWKYLENYNLGKNMQAKNVNGKEMMAEKLQMQQLFGLKVT  
GNSDPETLRAMKKPRCGVPDVAPYAITHNNPRWDQNTSDIQHFKLHTIFAKSSCGRCHRESL  
>ENSMUSP00000083459\_c.1139:T>A\_p.C380\* ENSMUST00000086278.7|Zfp810-  
201|ENSMUSG00000066829|-|chr9:g.22189767:A>T  
MVLVSFEDVAVDFTTWEWQALDAAQRTLYRDVMLETYSSLVSLGHCMAPELIFNLEQGLGPRSTAGASVWNL  
SGVNVSSSLVDTIQENDSRHFWQIEINSHTANEELVEAELEKIHHEEIHGAKSYECEVCEAFYLPQYSTKQS  
YHTCENPCDCKKCREAFYPKSTLSQYQRLERGERKPHACLECGKSFYCKSHLTVHQRTHTGKPYDCKEKRKAF  
YSKSQLNVHLRIHTGKPYECKDCRKAIFYRNSDLTVHQRTHTGKPYECKVCRKAIFYCNSQLTVHHRHTHTGK  
PYEQVCNKAFYCKSQLAVHHRHTHTGKPYQCKEKRKAFQCRSDLTRHQRTHTGERPYECPCKRKAIFYRKS  
DLTVHQRTHTGKPYE\*KECRKAIFYCNSQLTVHQRTHTGKPYECKDCGKAFQCKYELTRHQRTHTGKPYGCRE  
CKKAFYTKSDLTRHLKTHAGDKP\*  
>ENSMUSP00000083459\_c.1114:A>G\_p.H372R ENSMUST00000086278.7|Zfp810-  
201|ENSMUSG00000066829|-|chr9:g.22189792:T>C  
MVLVSFEDVAVDFTTWEWQALDAAQRTLYRDVMLETYSSLVSLGHCMAPELIFNLEQGLGPRSTAGASVWNL  
SGVNVSSSLVDTIQENDSRHFWQIEINSHTANEELVEAELEKIHHEEIHGAKSYECEVCEAFYLPQYSTKQS  
YHTCENPCDCKKCREAFYPKSTLSQYQRLERGERKPHACLECGKSFYCKSHLTVHQRTHTGKPYDCKEKRKAF  
YSKSQLNVHLRIHTGKPYECKDCRKAIFYRNSDLTVHQRTHTGKPYECKVCRKAIFYCNSQLTVHHRHTHTGK  
PYEQVCNKAFYCKSQLAVHHRHTHTGKPYQCKEKRKAFQCRSDLTRHQRTHTGERPYECPCKRKAIFYRKS  
DLTVHQRTHTGKPYE\*KECRKAIFYCNSQLTVHQRTHTGKPYECKDCGKAFQCKYELTRHQRTHTGKPYGCRE  
CKKAFYTKSDLTRHLKTHAGDKP\*  
>ENSMUSP00000150938\_c.160:C>A\_p.T54K ENSMUST00000216677.2|Ncapd3-  
205|ENSMUSG00000035024|+|chr9:g.26948380:C>A  
MALQDLGENLQPWCPLGLSLEWVKTVDLDFTEIEPLDPSIVGEILETGRDAFKKLYGSLFPFATDESGLSLES  
IWTFFTENDISSNTLVALFCHFVQEAHKKKSASAQYREYGLHAAGLYFLLEIIPGSVVNQVFHPVPMFDKCIQIL  
KRSWPQESNLTQKRKDHKSSKSDNYRKSRRKRGKPPRKEDYQVDELSREEEEEEEEEIYFSGRDLQIRDAIFN  
LLKNFLRLLPKFSLKEKPSIQTCIEVFVALTSFEPIPHKFLISQARNLNEVKHISELAYYGLYLLCSPVHGE  
ENKVIIGSIFHQMLNVILMLEVGEGRSAPLAITSQVINCRNQAQVQFVSSSLVDELQASVYPVLGTLQHCACAV  
VDKAEYRTYAAQSLVQLLTKLPSEYATFIAWLYKYSRSSKIPHRVFTLDVALALLTLPERELDDTVSLEHQK  
FLKHKFFVQEIIFDRCLDKAPTVRSKALSSFAHCLELSSNTSESIIEIFINSNLVPGIQNLSNTVNLNPSVPL  
TSRNGYSAQSRTHNNDEQTLPGERCFTMLRKRKIKDEKINVRKSALQVLMSEILKHCIDILSMEQDLILQDHCR  
DPAISVRKQALQSLTELVAQPTCVPVQKAWLMGVI PVVMDCESTVQEKALECLDQLLQNLKHHKHFHSADR  
SQVLAWSLALLTIENQDLRRYLKAFHIWSKKDKFSSTFINSVISHTDTERSAPAWMLLSKITCSPKLDYT  
KIIESWERLSREQSPNSNTLGYMLCVIGHIAKHLPGKTRDKITGVIKAKLNGFQWSPELISSVDALQKLCRA  
SAKTVLEEQGLLKQVCGDVLATCEQHLSNILLKEDGTGNMDEGLVVKCIFTGLGDIQALCPAIVEKRVFLLIQS  
ILASSAHSDDLPSQGTTDALDSQPPFQPRSSAMPVIRAHAIITLGLKCLQHEDLAKKSI PALVRELEVSED  
VAVRNVIIVICDLIRYTMVDNYIPNISVCLKSDPPIRQKTLVLLTNLLQEEYVVKWGSLLFFRFVSTLVD  
SHPDIASLGEFCLAHLLLRNPTMFFQHFIECFHFNSYKHEGQYNKFSQSERGKQLFLLKGTNKEKRMRIY  
KFLLEHFTDEQRFNVTSKICLNILACFTDGLPMDMEASELLSDTFDILNSKEIKLLAMRAQTSKDLLEEDDV  
ALANVVMQEAQMKIISQVQKRNFIENIPIIISLKTVLEKNKIPALRELMNYLREVMQDYRDEINDFFAVDKQ  
LASELEYDMKKYNEQLAQEQALTEHANATKGPEDSDRVPQAQVAPDLEAVPALAAAPMAAAAAAPMAAAAA  
AGQDNADVPTQSRPSAPRSNFTPTLPPISENGPLKIMSTRPMSLSTIAILNSVKKAVASKNRTRSLGALPF  
NVETGSPENPSSHESSLSLEKESDRTVNHVTKRAISTPENSISDVTFAAGVSYIGTPATFFTEKHEAQEQGS  
DILCLSLLDKRPQSPQVNVKSPARSHGSTRSSRRSLRKAPLKTAN\*  
>ENSMUSP00000072871\_c.160:C>A\_p.T54K ENSMUST00000073127.14|Ncapd3-  
201|ENSMUSG00000035024|+|chr9:g.26948380:C>A  
MALQDLGENLQPWCPLGLSLEWVKTVDLDFTEIEPLDPSIVGEILETGRDAFKKLYGSLFPFATDESGLSLES  
IWTFFTENDISSNTLVALFCHFVQEAHKKKSASAQYREYGLHAAGLYFLLEIIPGSVVNQVFHPVPMFDKCIQIL  
KRSWPQESNLTQKRKDHKSSKSDNYRKSRRKRGKPPRKEDYQVDELSREEEEEEEEEIYFSGRDLQIRDAIFN  
LLKNFLRLLPKFSLKEKPSIQTCIEVFVALTSFEPIPHKFLISQARNLNEVKHISELAYYGLYLLCSPVHGE  
ENKVIIGSIFHQMLNVILMLEVGEGRSAPLAITSQVINCRNQAQVQFVSSSLVDELQASVYPVLGTLQHCACAV  
VDKAEYRTYAAQSLVQLLTKLPSEYATFIAWLYKYSRSSKIPHRVFTLDVALALLTLPERELDDTVSLEHQK  
FLKHKFFVQEIIFDRCLDKAPTVRSKALSSFAHCLELSSNTSESIIEIFINSNLVPGIQNLSNTVNLNPSVPL

TSRNGYSAQSRTHNNDEQTLPGERCFTMLRKRRIKDEKINVRKSALQVLMSSILKHCDILSMEQDLLILQDHC  
 DPAISVRKQALQSLTELVAQPTCVPVQKAWLMGVI PVVMDCESTVQEKALECLDQLLLQNIKHHKKFHSADR  
 SQVLAWSLALLTIENQDLRRYLKAFHIWSKKDKFSSTFINSVISHTDTERSAPAWMLLSKITCSSPKLDYT  
 KIIESWERLSREQSPNSNTLGYMLCVIGHIAKHLPGKTRDKITGVIKAKLNGFQWSPELISSVDALQKLCRA  
 SAKTVLEEQGLLKQVCGDVLATCEQHLSNILLKEDGTGNMDEGLVVKCIFTLGDIAQLCPAIVEKRVFLLIQS  
 ILASSAHSDDLPSQGTDDALDSQPPFQPRSSAMPVIRAHAIITLGLKCLQHEDLAKKSIPALVRELEVSED  
 VAVRNNVIVICDLIRYTVMDVNYIPNISVCLKDSDFIRKQTLVLLTNLLQEEYVKKWGSFFRFVSTLVD  
 SHPDIASLGEFCLAHLLLKRNPMTFFQHFIECIFHFNSYEKHGQYNKFSQSERGKQLFLLKGTNKEKRMRIY  
 KFLEEHFTDEQRFNVTSKICLNILACFTDGIPLMDMEASELLSDTFDILNSKEIKLLAMRAQTSKDLLEEDDV  
 ALANVVMQEAQMKIISQVQKRNFIEENIPIIISLKTVLEKNKIPALRELMNYLREVMQDYRDEINDFFAVDKQ  
 LASELEYDMKKYNEQLAQEQALTEHANATKGPEDSDRVPVSAQVAPDLEAVPALAAAPMAAAAAAPMAAAAA  
 AGQDNADVPPQTQSRPSAPRSNFTPTLPPISENGPLKIMSSSTRPMSLSTIAILNSVKKAVASKNRTRSLGALPF  
 NVETGSPENPSSHESSLSLEKESDRTVNHVTKRAISTPENSISDVTFAAGVSYIGTPATFFTKEKHEAQEQGS  
 DILCLSLLDKRPPQSPQWNVKSPARSHGSTRSSRRSLRKAPLKTAN\*

>ENSMUSP0000083374\_c.160:C>A\_p.T54K ENSMUST0000086198.5|Ncapd3-  
 202|ENSMUSG0000035024|+|chr9:g.26948380:C>A  
 MALQDLGENLQPWCPGLSLEWVKTVDLDFTEIEPLDPSIVGEILETGRDAFKKLYGSLFPFATDESGSLES  
 IWTFFTENDISSNTLVALFCHFVQEAHKKASASAQYREYGLHAAGLYFLLLEIPGSVNVQVFPVPMFDKCIQIL  
 KRSWPQESNLTQKRKKDHSKSSKDNRYRKSRRKRGKPPRKEDYQVDELSREEEEEEEEEIYFSGRDLQCIRDAIFN  
 LLKNFLRLLPKFSLKEKQSIQTCIEVFVALTSFEPIPHKFLISQARNLNEVKHISELAYYGLYLLCSPVHGE  
 ENKVI GSI FHQMLNVILMLEVGEGRSAPLAITSQVINCRNQAQVQVSSSLVDELQASVYPVLTLLQHCIAKV  
 VDKAEYRTYAAQSLVQLLTKLPSEYATFIAWLYKYSRSSKI PHRVFTLDVALALLTLPERELDDTVSLEHQK  
 FLKHKFFVQEIIIFDRCLDKAPTVRSKALSSFAHCLELSSSNTSESI LEIFINSNLVPGIQNLSNTVNLNPSVPL  
 TSRNGYSAQSRTHNNDEQTLPGERCFTMLRKRRIKDEKINVRKSALQVLMSSILKHCDILSMEQDLLILQDHC  
 DPAISVRKQALQSLTELVAQPTCVPVQKAWLMGVI PVVMDCESTVQEKALECLDQLLLQNIKHHKKFHSADR  
 SQVLAWSLALLTIENQDLRRYLKAFHIWSKKDKFSSTFINSVISHTDTERSAPAWMLLSKITCSSPKLDYT  
 KIIESWERLSREQSPNSNTLGYMLCVIGHIAKHLPGKTRDKITGVIKAKLNGFQWSPELISSVDALQKLCRA  
 SAKTVLEEQGLLKQVCGDVLATCEQHLSNILLKEDGTGNMDEGLVVKCIFTLGDIAQLCPAIVEKRVFLLIQS  
 ILASSAHSDDLPSQGTDDALDSQPPFQPRSSAMPVIRAHAIITLGLKCLQHEDLAKKSIPALVRELEVSED  
 VAVRNNVIVICDLIRYTVMDVNYIPNISVCLKDSDFIRKQTLVLLTNLLQEEYVKKWGSFFRFVSTLVD  
 SHPDIASLGEFCLAHLLLKRNPMTFFQHFIECIFHFNSYEKHGQYNKFSQSERGKQLFLLKGTNKEKRMRIY  
 KFLEEHFTDEQRFNVTSKICLNILACFTDGIPLMDMEASELLSDTFDILNSKEIKLLAMRAQTSKDLLEEDDV  
 ALANVVMQEAQMKIISQVQKRNFIEENIPIIISTVERKVPSPQESRQHKIQPEVPS\*

>ENSMUSP00000150938\_c.4489:T>G\_p.L1497R ENSMUST00000216677.2|Ncapd3-  
 205|ENSMUSG0000035024|+|chr9:g.27006070:T>G  
 MALQDLGENLQPWCPGLSLEWVKTVDLDFTEIEPLDPSIVGEILETGRDAFTKLYGSLFPFATDESGSLES  
 IWTFFTENDISSNTLVALFCHFVQEAHKKASASAQYREYGLHAAGLYFLLLEIPGSVNVQVFPVPMFDKCIQIL  
 KRSWPQESNLTQKRKKDHSKSSKDNRYRKSRRKRGKPPRKEDYQVDELSREEEEEEEEEIYFSGRDLQCIRDAIFN  
 LLKNFLRLLPKFSLKEKQSIQTCIEVFVALTSFEPIPHKFLISQARNLNEVKHISELAYYGLYLLCSPVHGE  
 ENKVI GSI FHQMLNVILMLEVGEGRSAPLAITSQVINCRNQAQVQVSSSLVDELQASVYPVLTLLQHCIAKV  
 VDKAEYRTYAAQSLVQLLTKLPSEYATFIAWLYKYSRSSKI PHRVFTLDVALALLTLPERELDDTVSLEHQK  
 FLKHKFFVQEIIIFDRCLDKAPTVRSKALSSFAHCLELSSSNTSESI LEIFINSNLVPGIQNLSNTVNLNPSVPL  
 TSRNGYSAQSRTHNNDEQTLPGERCFTMLRKRRIKDEKINVRKSALQVLMSSILKHCDILSMEQDLLILQDHC  
 DPAISVRKQALQSLTELVAQPTCVPVQKAWLMGVI PVVMDCESTVQEKALECLDQLLLQNIKHHKKFHSADR  
 SQVLAWSLALLTIENQDLRRYLKAFHIWSKKDKFSSTFINSVISHTDTERSAPAWMLLSKITCSSPKLDYT  
 KIIESWERLSREQSPNSNTLGYMLCVIGHIAKHLPGKTRDKITGVIKAKLNGFQWSPELISSVDALQKLCRA  
 SAKTVLEEQGLLKQVCGDVLATCEQHLSNILLKEDGTGNMDEGLVVKCIFTLGDIAQLCPAIVEKRVFLLIQS  
 ILASSAHSDDLPSQGTDDALDSQPPFQPRSSAMPVIRAHAIITLGLKCLQHEDLAKKSIPALVRELEVSED  
 VAVRNNVIVICDLIRYTVMDVNYIPNISVCLKDSDFIRKQTLVLLTNLLQEEYVKKWGSFFRFVSTLVD  
 SHPDIASLGEFCLAHLLLKRNPMTFFQHFIECIFHFNSYEKHGQYNKFSQSERGKQLFLLKGTNKEKRMRIY  
 KFLEEHFTDEQRFNVTSKICLNILACFTDGIPLMDMEASELLSDTFDILNSKEIKLLAMRAQTSKDLLEEDDV  
 ALANVVMQEAQMKIISQVQKRNFIEENIPIIISTVERKVPSPQESRQHKIQPEVPS\*

>ENSMUSP00000072871\_c.4489:T>G\_p.L1497R ENSMUST00000073127.14|Ncapd3-  
 201|ENSMUSG0000035024|+|chr9:g.27006070:T>G

MALQDLGENLQPWCPGLSLEWVKTVDLDFTEIEPLDPSIVGEILETGRDAFTKLYGSLFPFATDESGLSES  
IWTFFFTENDISSNTLVALFCHFVQEAHKKSSASAQYREYGLHAAGLYFLLEIIPGSVVNQVHFHVMFDKCIQIL  
KRSWPQESNLTQKRKKDHSSKSKDNRYKSRKRGKPPRKEDYQVDELSREEEEEEEEEIEYFSGRDLCQIRDAIFN  
LLKNFLRLLPKFSLKEKQPQSIQTCIEVFVALTSFEPIPHKFLISQARNLNEVKHISELAYYGLYLLCSPVHGE  
ENKVIIGSIFHQMLNVLMLLEVGEGRSAPLAITSQVINCRNQAVQFVSSSLVDELQASVYPVLGTLQHCACAV  
VDKAEYRTYAAQSLVQLLTKLPSEEEYATFIAWLYKYSRSSKI PHRVFTLDVALALLTLPERELDDTVSLEHQK  
FLKHKFFVQEIIFDRCLDKAPTVRSKALSSFAHCLELSSSNTSESI LEIFINSNLVPGIQNLSNTVNLNPSVPL  
TSRNGYSAQSRTHNNDEQTLPGERCFTMLRKRRIKDEKINVRKSALQVLMSSILKHCIDILSMEQDLLILQDHCR  
DPAISVRKQALQSLTELVMAQPTCVVPQKAWLMGVI PVVMDCESTVQEKALECLDQLLLQNIKHHKFFHSADR  
SQVLAWSLALLTIENQDLRRYLKAFHIWSKKDKFSSTFINSVISHTDTERSAPAWMLLSKITCSSPKLDYT  
KIIESWERLSREQSPNSNTLGYMLCVIGHIAKHLPGKTRDKITGVIKAKLNGFQWSPELISSSVDALQKLCRA  
SAKTVLEEQGLLKQVCGDVLATCEQHLSNILLKEDGTGNMDEGLVVKCIFTGLDIAQLCPAIVEKRVFLLIQS  
ILASSAHSDDLPSQGTDDALDSQPPFQPRSSAMPVIRAHAIITLGLKCLQHEDLAKKSI PALVRELEVSED  
VAVRNNVIVICDLIRYTMVDNYIPNISVCLKSDSPFIRKQTLVLLTNLLQEEYVKKWKSLLFFRFVSTLVD  
SHPDIASLGEFCLAHLLLRNPTMFFQHFIECFHFNSYKHEGQYKNSQSSEKQFLFLKGTNKEKRMRIY  
KFLLEHFTDEQRFNVTSKICLNILACFTDGLIPMDMEASELLSDTFDILNSKEIKLLAMRAQTSKDLLEEDDV  
ALANVVMQEAQMKIISQVQKRNFIENIPIIISLKTVLEKNKI PALRELMNYLREVMQDYRDEINDFAVDKQ  
LASELEYDMKKYNEQLAQEQALTEHANATKGPEDSDRVPASAQVAPDLEAVPALAAAPMAAAAAA  
AGQDNADVPTQSRPSAPRSNFTPTLPPISENGPLKIMSSTRPMSLSTIAILNSVKKAVASKNRTRSLGALPF  
NVETGSPENPSSHESSLSLEKESDRTVNHVTKRAISTPENSISDVTFAAGVSYIGTPATFFTEKHEAQEQGS  
DILCLSLLDKRPQSPQWNVKSPARSHGSTRSSRRSRKAPLKTAN\*

>rs45708828\_ENSMUSP00000011262\_c.52:C>A\_p.P18H  
ENSMUST00000011262.4|Pax3-201|ENSMUSG00000011118|-|chr9:g.37580299:G>T  
MSLAHTAAEYMLSDALLHRRGRSRLKGLRLELPLDKMVKFITVGFPLLLMSLAFQAQEFSSGSPISCFSPSNFS  
VRQAAAYVDSSCWDSLAAHTQDKAGQYKVKSLWPHKALPYSLALAVAMYLPVLLWQYVAVPSSDLLFIIE  
LDKSYNRSIRLVQHMLQIRQSSSDPHVFWDEKARKERYFEFPLLERYLECKQRSHWLVAATYLLRNALLLLF  
TSATYLYLQFHLDFVFFQDEFNCFIKTGLLHDETHPELITCRLTSLSVFQIVSVSSAAIYITLVPVLIYNLT  
RLCRWDKGLLSIYEMLPADFLLSRKMLGCPINDLNVILLFLRANISELISFSWLSVLSVLKDTTTQKHNIDTV  
VDFMTFVAGLEPSKPKHLLTQHTYDEHA\*

>rs45708828\_ENSMUSP000000114539\_c.52:C>A\_p.P18H  
ENSMUST000000142228.2|Pax3-202|ENSMUSG00000011118|-|chr9:g.37580299:G>T  
MSLAHTAAEYMLSDALLHRRGRSRLKGLRLELPLDKMVKFITVGFPLLLMSLAFQAQEFSSIEQSLVLCALQNK  
RAFFQSGYGSHTICNRSIPEPEAEG\*

>ENSMUSP000000150357\_c.715:G>C\_p.S239T ENSMUST000000214377.2|Olf905-  
202|ENSMUSG000000096794|+|chr9:g.38384760:G>C  
MGFENGSSVTEFILVGLTKESDLQCPLFILFLMMYVVTVLGNQGLISLIGLNSHLHTPMYFFLNLFSVDLWY  
SSVFTPKMLESFISEKNTISYRGCAQLFFFCFFSISECYILTSMAYDRYVAICNPLLYNIVMSPKQCLILMF  
SSYMMAFSGAMAHTGCMLRLTFCDANTINHYFCDILPLLQLSCTSTYVNELEVFFVVGINIIIVPTITIFISYG  
FIIASIFRISSEKEDRSKAFTTCSHIIAVSLFFGSGAFMYLKPSSAESMNEGKISSIFYTNTVPLLNPLIYSL  
RNKDVKDALIKTLSKRKR\*

>ENSMUSP000000057998\_c.715:G>C\_p.S239T ENSMUST000000051111.3|Olf905-  
201|ENSMUSG000000096794|+|chr9:g.38384760:G>C  
MGFENGSSVTEFILVGLTKESDLQCPLFILFLMMYVVTVLGNQGLISLIGLNSHLHTPMYFFLNLFSVDLWY  
SSVFTPKMLESFISEKNTISYRGCAQLFFFCFFSISECYILTSMAYDRYVAICNPLLYNIVMSPKQCLILMF  
SSYMMAFSGAMAHTGCMLRLTFCDANTINHYFCDILPLLQLSCTSTYVNELEVFFVVGINIIIVPTITIFISYG  
FIIASIFRISSEKEDRSKAFTTCSHIIAVSLFFGSGAFMYLKPSSAESMNEGKISSIFYTNTVPLLNPLIYSL  
RNKDVKDALIKTLSKRKR\*

>ENSMUSP00000001544\_c.1083:G>A\_p.A362T ENSMUST00000001544.12|Vwa5a-  
201|ENSMUSG000000023186|+|chr9:g.38639354:G>A  
MEHHCGLITSNKETVPLKNI SVTLSINEFVAAVVATLNYENEEKVPLEATFVFPMDSDAVYSFEALVDGKKI  
VAELQDKMKAHSEYEEALSQGHQAYLLEEDDYSRDVFSNNGVNLQPGAKVAVTTLRYVQELPLETDGALRYLLP  
AILNPRYQLSEQSANSCLNIQKPTVPLEDLPYTLNMTATITISQHGIERVQSNCSLSPIQYLTDDKTSAQVSLT  
EGHKFDRDVELLIYYNEVHSPSAVAVEMGLMDKPDLSLGMGSSAMVSYFPIPEVEASKACGEFVFLMDRSGSM  
DSPMSTENNSQYKRIEAAKETLRLKSLPMGCFYNIYGFSSYEFKFPESVKYTQDTMEDAVKRVKALKTNLGL  
GTEILTPLCNIIYKASSIPGHPLQLFVFTDGEVSDTFVIREVKLNSKKHRCFSFGIGQGASTSLIKNIARVSG  
GTAVFITGKDRMQTKALGSLKFAQCQAVDNI SLSWDLPPGLSVKMLSPEQLTIFRQRLIIYAQLTGLMPQVE  
STGAVCLKHILQGRSLENRVTFSLQPKANDNFTIHRLAAKSLIQTKDFGSQEASKEEKEDVMNISIQSGVLSS  
FTAFIAINKELNKPVQGPLAHRVIRPVMAGSSSMRFYSSFSGGFKGFPQPRSLRVPAYDLCSAESANLVLKKS



ACSAIQKKKTNSSSTNKSNLKKEHKAFGENAVVQLISLQKANGSWELDEDLTKILGTSKSDIKAANPAKHEDPS  
 AWSTVLAVVWLHANGTDLKCEWELLERKAVAWLHDHAGSSIPMLVQAANSLKLSVNPVAVFGV\*  
 >ENSMUSP00000113596\_c.1083:G>A\_p.A362T ENSMUST00000118144.8|Vwa5a-  
 202|ENSMUSG00000023186|+|chr9:g.38639354:G>A  
 MEHHCGLITSNKETVPLKNISVTLSSINEFVAAVVATLNYENEEKVPLEATFVFPMEDEDSAVYSFEALVDGKKI  
 VAELQDKMKAHSEYEEALSQGHQAYLLEEDDYSRDVFCNVGNLQPGAKVAVTLRYVQELPLETDGALRYLLP  
 AILNPRYQLSEQSANSCLNIQKPTVPLEDLPYTLNMTATITTSQHGIERVQSNCSLSPIQYLTDDKTSAQVSLT  
 EGHKFRDRDVPELLIYYNEVHSPSVAVEMGMLDMKPDLSLGMGAPSAMVSFYDPDIPEVEASKACGEFVFLMDRSGSM  
 DSPMSTENNSQLRIEAAKETLLLLLKLSPMGCFNYIYGFSSYEKFFPESVKYTDQTMEDAVKRVKALKTNLG  
 GTEILTPLCNIYKASSIPGHPLQVLFVFTDGEVSDTFSVIREVKLNSKKHRCFSFGIGQGASTSLIKNIARVSG  
 GTAVFITGKDRMQTKALGSLKFAVQCAVDNISLSWDLPPGLSVKMLSPEQLTIFRGQRLLIYAQLTGLMPQVE  
 STGAVCLKHILQGRSLENRVTFSLQPKANDNFTIHRLAASKLIQTKDFGSQEASKEEKEDVMNISLQSGVLSS  
 FTAFIAINKELNKPVQGPLAHRVIRPVMAGSSSMRFYSSFSGGFKGPQPRSLRVPAYDLCSAESANLVLKKS  
 ACSAIQKKKTNSSSTNKSNLKKEHKAFGENAVVQLISLQKANGSWELDEDLTKILGTSKSDIKAANPAKHEDPS  
 AWSTVLAVVWLHANGTDLKCEWELLERKAVAWLHDHAGSSIPMLVQAANSLKLSVNPVAVFGV\*  
 >rs215248989\_ENSMUSP00000042582\_c.1925:G>A\_p.W642\*  
 ENSMUST00000042485.11|AW551984-201|ENSMUSG00000038112|-  
 |chr9:g.39502745:C>T  
 MVRSGLLTSIRDVVALKSIAVTSLINDFVAGVSATLNYENEEKSPLEAFFVFPMEDEDSAVYSFEAFVDGKKI  
 VAELQDKYQAHKRYEEALSGGYQAYLLEEDKCSRDFCCNVGNLQPGSKVSLTLRYVQELPLEDDGALRYVLP  
 AILNPRYHLSDGREDSNLDKMTPIVPLEELPYTLMSVATISSQLGISTIQSNCPNPIEYTGDNKTSAQVSLA  
 EGHKFRDRDVPELLIFYRKVHSPSVAVEMGMSGRPSDSLGMGAPSAMVSFYDPDIPEVETTTKCGEFVFLMDRSTRSM  
 NSPMSSKDKSQLRIDAAKETLILLLKSLPMGCFNYIYGFATHEEFFPDSVMYNQETMQIAVKKVKRLLADLG  
 GTELLTPLRKIFRKPPIPGHPLQVLFVFTDGEVVETFSVIREVMFQSKKHRCFSFGIGEGASTSLIKNLARVSG  
 GTAEFITGNDRMQSKALRSLRSLQSVVEDVLSWNLPPKMFAPMLSPEQTSIFRGQRLLIYSLIGKIPKEE  
 ATGEVCLSYKHLHGKSYEEKVTFSLQPKPDDNLTIHRLAASKMIQSKDFGFKETSMLYKRDVLDISLESGVMSS  
 FTAFVAINKELNEPIQGPLVHRDIPRPILLGAGPNRPSDGGYPKTLFCASAPVTLPP\*LKGSKGCVATILMPN  
 GTPQQRQNSQKKKCVVHTDTRPELPHLAKYDSYPQGSKEHSIAQLIYLQADGSDWMNEDLAKILSTSLEDIT  
 AACPTVELEPSAWATMLAVIWLHANGKELKDEWELLERKAVVWLHNNSVRGFNKLIRTANKLLKTSLSPSIFK  
 L\*  
 >rs215248989\_ENSMUSP00000113212\_c.1925:G>A\_p.W642\*  
 ENSMUST00000119722.8|AW551984-202|ENSMUSG00000038112|-  
 |chr9:g.39502745:C>T  
 MVRSGLLTSIRDVVALKSIAVTSLINDFVAGVSATLNYENEEKSPLEAFFVFPMEDEDSAVYSFEAFVDGKKI  
 VAELQDKYQAHKRYEEALSGGYQAYLLEEDKCSRDFCCNVGNLQPGSKVSLTLRYVQELPLEDDGALRYVLP  
 AILNPRYHLSDGREDSNLDKMTPIVPLEELPYTLMSVATISSQLGISTIQSNCPNPIEYTGDNKTSAQVSLA  
 EGHKFRDRDVPELLIFYRKVHSPSVAVEMGMSGRPSDSLGMGAPSAMVSFYDPDIPEVETTTKCGEFVFLMDRSTRSM  
 NSPMSSKDKSQLRIDAAKETLILLLKSLPMGCFNYIYGFATHEEFFPDSVMYNQETMQIAVKKVKRLLADLG  
 GTELLTPLRKIFRKPPIPGHPLQVLFVFTDGEVVETFSVIREVMFQSKKHRCFSFGIGEGASTSLIKNLARVSG  
 GTAEFITGNDRMQSKALRSLRSLQSVVEDVLSWNLPPKMFAPMLSPEQTSIFRGQRLLIYSLIGKIPKEE  
 ATGEVCLSYKHLHGKSYEEKVTFSLQPKPDDNLTIHRLAASKMIQSKDFGFKETSMLYKRDVLDISLESGVMSS  
 FTAFVAINKELNEPIQGPLVHRDIPRPILLGAGPNRPSDGGYPKTLFCASAPVTLPP\*LKGSKGCVATILMPN  
 GTPQQRQNSQKKKCVVHTDTRPELPHLAKYDSYPQGSKEHSIAQLIYLQADGSDWMNEDLAKILSTSLEDIT  
 AACPTVELEPSAWATMLAVIWLHANGKELKDEWELLERKAVVWLHNNSVRGFNKLIRTANKLLKTSLSPSIFK  
 L\*  
 >ENSMUSP00000034621\_c.1093:C>A\_p.A365D ENSMUST00000034621.16|Nlrx1-  
 201|ENSMUSG00000032109|-|chr9:g.44174106:G>T  
 MRWGCHLPRTSWGSGLRTPQLPDEHISFLIQSWPFGVHPLRPPRAFIRYHGNSADSAPPPGRHGQLFRSI  
 SATEAIQRHRRNLTEWFSRLPREERQFGPTFALDVTVHVPVIRESTPDELLRPSTELATGHQQTQAGLPPLAL  
 SQLFDPDSCGRRVQTVVLYGTGKSTLVRKMLVDWCYGRLPFAFELLIPFSCEDLSSLGSTPASLQVLTQR  
 YTPLKEVPLPLMTAAGSRLFLVHGLERLNLDFRLAGTGLCSDPEEPGPPAAIIVNLLRKYMLPEASILVTTTRP  
 STISRIPSKYVGRYGEICGFSDTNLQKLYFQLRLNQPDGCGYAGGASVSVTPAQRDNLIQMLSRNLEGHQID  
 AACFLPSYCWLVCATLHFLHAPTAPAGQTLTSIYTSFLRNLFSGETLDSHTSNLSLMSYAARTMGKLAYEGVS  
 SRKTYFSEEDVVRGCELEAGIKTEEEFQLLQIFRRDARLFFLAPCEVPHGLGTFVFTVPAMQEYLAALYIVLGLR  
 KTALQRVGKEVEFVGRVGEDVSLVLGIVAKLLPLRILPLLFNLLKVVPRVFGRMVSKSREAVAQAMVLEMFR  
 EEDYNDVDVLDQMGASILGVEGPRRHPDEPSEDEVFELFPMFMGGLLSAHNRAVLAQLGCPKIKNLDALENAQA  
 IKKKLGLKGRQVLPPELDDHLFFHYEFQNRQFSAEVLGSLRQLNLAGVRMTPLKCTVVASVLSGSRHPLDEV  
 NLASCQLDPAGLHTLMPVLLRARKLGLQLNLLGPEACRDLRDLLLHDQCQITTLRLSNNPLTAAGVGLLMDGL

AGNTSVTHLSLLHTDLGDEGLELLAAQLDRNKQLQELNVAYNGAGDTVALALAKAAREHPSLELLHLYFNELS  
SEGRQVLRDLGGSGEGGARVVASLTEGTAVSEYWSVILSEVQRNVHSDWPLRVQRHLKLLLRDLEDSRGATLN  
PWRKAQLLRVEGEVKTLLLEQLGGSGH\*

>ENSMUSP00000126555\_c.1093:C>A\_p.A365D ENSMUST00000169651.3|Nlrx1-  
203|ENSMUSG00000032109|-|chr9:g.44174106:G>T  
MRWGCHLPRTSWGSGLGRTPQLPDEHISFLIQSWPFGVHPLRPPRAFIRYHGNSADSAPPPGRHGQLFRSI  
SATEAIQRHRRNLTEWFSRLPREERQFGPTFALDVTVHVDPIREESTPDELLRPSTELATGHQQTQAGLPPLAL  
SQLFDPDSCGRRVQTVVLYGTGTGKSTLVRKMLVDWCYGRLPAPFELLIPFSCEDLSSLGSTPASLCQLVTQR  
YTPLKEVLPMLTAAGSRLFLVHLGLERLNLDFRLAGTGLCSDEEPGPPAAIIVNLLRKYMLPEASILVTTTRP  
STISRIPSKYVGRYGEICGFSDTNLQKLYFQLRLNQPDCGYGAGGASVSVTPAQRDNLIQMLSRNLEGGHQID  
AACFLPSYCWLVCATLHFLHAPTPAGQTLTSIYTSFLRLNFSGETLDSHTSNLSLMSYAARTMGKLAYEGVS  
SRKTYFSEEDVRCLEAGIKTEEEFQLLQIFRRDALRFFLAPCVEPGHLGTFVFTVPAMQEYLAALYIVLGLR  
KTALQVRGKEVVEFVGRVGEDVSLVLGIVAKLLPLRILPLLNLKVVPRVFGRMVSKSREAVAQAMVLEMFR  
EEDYNDVDVLDQMGASILGVEGPRRHPDEPSEDEVFELFPMFMGGLLSAHNRAVLAQLGCPKKNLDALENAQA  
IKKKLGLGRQVLPPESELLDHLFFHYEFQNRFSAEVLGSLRQLNLAGVRMTPLKCTVVASVLSGSRHPLDEV  
NLASCQLDPAGLHTLMPVLLRARKLGLQLNNLGPEACRDLRDLHLDQCQITTLRLSNNPLTAAGVGLLMDGL  
AGNTSVTHLSLLHTDLGDEGLELLAAQLDRNKQLQELNVAYNGAGDTVALALAKAAREHPSLELLHLYFNELS  
SEGRQVLRDLGGSGEGGARVVASLTEGTAVSEYWSVILSEVQRNVHSDWPLRVQRHLKLLLRDLEDSRGATLN  
PWRKAQLLRVEGEVKTLLLEQLGGSGH\*

>ENSMUSP00000127531\_c.1093:C>A\_p.A365D ENSMUST00000168499.9|Nlrx1-  
202|ENSMUSG00000032109|-|chr9:g.44174106:G>T  
MRWGCHLPRTSWGSGLGRTPQLPDEHISFLIQSWPFGVHPLRPPRAFIRYHGNSADSAPPPGRHGQLFRSI  
SATEAIQRHRRNLTEWFSRLPREERQFGPTFALDVTVHVDPIREESTPDELLRPSTELATGHQQTQAGLPPLAL  
SQLFDPDSCGRRVQTVVLYGTGTGKSTLVRKMLVDWCYGRLPAPFELLIPFSCEDLSSLGSTPASLCQLVTQR  
YTPLKEVLPMLTAAGSRLFLVHLGLERLNLDFRLAGTGLCSDEEPGPPAAIIVNLLRKYMLPEASILVTTTRP  
STISRIPSKYVGRYGEICGFSDTNLQKLYFQLRLNQPDCGYGAGGASVSVTPAQRDNLIQMLSRNLEGGHQID  
AACFLPSYCWLVCATLHFLHAPTPAGQTLTSIYTSFLRLNFSGETLDSHTSNLSLMSYAARTMGKLAYEGVS  
SRKTYFSEEDVRCLEAGIKTEEEFQLLQIFRRDALRFFLAPCVEPGHLGTFVFTVPAMQEYLAALYIVLGLR  
KTALQVRGKEVVEFVGRVGEDVSLVLGIVAKLLPLRILPLLNLKVVPRVFGRMVSKSREAVAQAMVLEMFR  
EEDYNDVDVLDQMGASILGVEGPRRHPDEPSEDEVFELFPMFMGGLLSAHNRAVLAQLGCPKKNLDALENAQA  
IKKKLGLGRQVLPPESELLDHLFFHYEFQNRFSAEVLGSLRQLNLAGVRMTPLKCTVVASVLSGSRHPLDEV  
NLASCQLDPAGLHTLMPVLLRARKLGLQLNNLGPEACRDLRDLHLDQCQITTLRLSNNPLTAAGVGLLMDGL  
AGNTSVTHLSLLHTDLGDEGLELLAAQLDRNKQLQELNVAYNGAGDTVALALAKAAREHPSLELLHLYFNELS  
SEGRQVLRDLGGSGEGGARVVASLTEGTAVSEYWSVILSEVQRNVHSDWPLRVQRHLKLLLRDLEDSRGATLN  
PWRKAQLLRVEGEVKTLLLEQLGGSGH\*

>ENSMUSP00000110337\_c.5083:T>C\_p.V1695A ENSMUST00000114689.8|Kmt2a-  
202|ENSMUSG00000002028|-|chr9:g.44742612:A>G  
MAHSCRWRFPARPGTTGGGGGGRRGLGGAPRQVPALLLPPGPQAGGGGPGAPSPPPAVAAAAAGSSGAGVP  
GGAAAAASAASSSSASSSSSSSSASSSGPALLRVGPGFDAALQVSAAI GTNLRRFRAVFGESGGGGGSGEDEQF  
LGFGSDEEVVRVRSPTSPSVKASPRKPRGRPRSGSDRNPAILSDPSVFSPLNKSETKSADKIKKKDKSISIEKK  
RGRPPTFPGVKIKITHGKDIAELTQGSKEDSLKVKRTPSAMFQQATKIKKLRAGKLSPLKSKFKTGKLGQIGR  
KGVQIVRRRGRPPSTERIKTPSGLLINSELEKPKQVVRKDEGTPPLTKEDKTVVRQSPRRIKPVRIIPSCKRT  
DATIAKQLLQRAKKAQKKEEAAQLQGRKVKTKVKNIRQFIMPVVAISSRIIKTPRRFIEDEYDPPMKI  
ARLESTPNSRFSATSCGSSEKSSAASQHSQMSDSSRSSSPSIDTSDSQASEEIQALPEERSNTPEVHTPL  
PISQSPENESNDRRSRRYSMSERSFGSRATKLLPTLQSAQQQTSSPPPLLTTPPPPLQPASGIDHTPWLM  
PPTIPLASPLPASAPMKGKRSILREPTFRWTSLKHSRSEPQYFSSAKYAKEGLIRKPIFDNFRPPPLTPE  
DVGFASGFSASGTAASARLFSPLHSGTRFDIHKRSPILRAPRFTPSEAHSRIFESVTLPSNRTSSGASSGVS  
NRKRKRKVFSPIRSEPRSPSHMRTRSGRLSTSELSPLTPPSSVSSLSIPVSPLAASALNPTFTFP SHSLTQ  
SGESTTEKNQRARKQTSALAEFSSNSPALFPWFPTPGSQTEKGRKDTAPEELSKDRDADKSVEKDKSRERDRE  
REKENKRESRKEKRKKSIDIQSSSALYPVGRVSKEKVAGEDVGTSSSAKKATGRKSSSLD SGADVAVPTLGD  
TTAVKAKILIKKGRNLEKNNLDLGAAPSLEKERTPCLSAPSSSTVKHSTSSIGSMLAQADKLPMTDKRVAS  
LLKAKAQCKIEKSKSLKQTDQPKAQGESDSSSETSVRGPRIKHVCRRAAVALGRKRAVFPDDMPTLSALPW  
EEREKILSSMGNDKSSVAGSEDAEPLAPPKIPKIPVTRNKAPQEPVKKGRRSRRCGQCPCGQVPEDCGICT  
NCLDKPKFGGRNIKKQCKMRKCQNLQWMPKSKASLQKQTKAVKKEKESKTEKESKESKSTAVKSPLEPAQKA  
APPPREEPAPKSSSEPPRPVVEEKSEEGGAPAPAPAPEPKQVSAPASRKSQVSPAAVVPQPPSTAPQ  
KKEAPKAVPSEP KKKQPPPEPGPEQSKQKQVAPRPSIPVKQKPKDKEKPPVSKQENAGTLNINLPLSNGIS  
SKQKIPADGVHRI RVD FKEDCEAENVWEMGGLGILTSVPI TPRVVCFLCASSGHVEFVYCQCCEPFHKFCLE  
ENERPLEDQLENWCCRRCKFCHVCGRQHQA TKQLLECNKCRNSYHPECLGPNYPTKPTKKKVVICTKCVRCK

SCGSTTPGKGWDAQWSHDFSLCHDCAKLFAGNFCPLCDKCYDDDDYESKMMQCGKCDRWVHSHKCESLSGTEDEMYEILSNLPEVAYTCVNCTERHPAEWRLALEKELQASLKQVLTALLNSRRTTSHLLRYRQAAPDLNPETEESIPSRSSPEGPDPALTEVSKQDEQQPLDLEGVKKRMDQGSYVSVLEFSDDIVKIIQAAINSDGGQPEIKKANSMVKSFFIRQMERYVFPWFVSVKSRFWEPNKVSNNSGMLPNAVLPPSLDHNYAQWQEREESHTEQPPLMKKIIPAPKPKGPGEPDSTPLHPPTPIILSTDRSREDSPELNPPGIDDRQCALCLMYGDDSSANDAGRLLYIGQNEWTHVNCALWSAEVFEDEDDGSLKNVHMAVIRGKQLRCEFCQKPGATVGCCLTSTCTSNYHFMCRAKNCVFLDDKVVYQQRHRDLIKGEVVPENGFEVFRVFDVDFEGISLRKFLNGLPENIHMMIGSMTIDCLGILNLDLSDCEDKLFPIGYQCSRVIWSTTDARKRCVYTKIMECRPPVVEPDINSTVEHDDNRTIAHSPSSFIASCKDSQSTAAILLSPSPDRPHSQTSGSCYYHVISKVPRIRTPLSYSPTRQSRPGCRPLPSAGSPTPTTHEIVTVGDPDLLSSGLRSIGSRRHSTSSLSPLRSKLRIMSPVRTGSAYSRSVSSVPSLGTATDPEASAKASDRGGLLSSSANLGHSAAPPSSSSQRTVGGSKTSHLDGSSPSEVKRCSASDLVPGKSLVKGEKNRTSSSKSTDGSAHSTAYPGIPKLTPOVHNA TPGELNISKIGSFAEPSTVPFSSKDTVSYPLHLRQGRSDRDQHMDPSQSVKPSPNEDGEIKTLKLPGMGHRP SILHEHIGSSSRDRRQKGGKSSKETCKEKHSSKSYLEPGQVTTGEEGNLKPFADEVLTGFLGQRPCNNVSS EKIGDKVPLPSGVKQSTQVEGSSKELQAPRKCSVKVTPKLMGEGENQSKNTQKESGPGSPAHEISVCPAEPV SASRSPGAGPGVQPSNNLTSQDPQSNNYQNLPEQDRNLMI PDGPKPQEDGSKRRYPRRSARARSNMFFGLT PLYGVRSYGEEDI PFYNSSTGKRGKRSAGQVDGADDLSTSEDDLYYFNTRTVISSGGEERLASHNLFRE EEQCCLKPKISQLDGVDDGTESDTSVTATSRKSSQIPKRNGKENGTEENLKI DRPEDAGEKEHVIKSAVGHKNEP KLDNCHSVSRVKAQGGQDSLEAQLSSLESSRRVHTSTPSDKNLLDTYNAELLKSDSDNNSDDCGNILLPSDIMD FVLKNTPSMQALGESPESSSELTLGEGGLDSDNREKDIGLFEVFSQQLPATEPVDSSVSSSISAEEQFELP LELPSDLSVLTTTRSPVPSQNPRLAVISDSGEKRVITITEKSVASSEGDPAALLSPGVDPAPEGHMTPDHFIQG HMDADHISPPCGSVEQGHGNSQDLTRNSGTPGLQVPVSPVQVQNKYVPSSTDSPGPSQISNAAVQTTPPH LKPAATEKLIVVNQNMQPLYVLTLPNGVTQKIQLTSPVSSTPSVMETNTSVLGPMGSGGLTLTGLNPLSPSP SLFPPASKGLLSVPHHQLHSFPAAQSSFPNISSPPSGLLIGVQPPDPQLLGEANQRTDLTTTAVATPSS GLKKRPI SRLHTRKNKKLAPSSAPSNIAPSDVVSMMTLINFTPSQLSNHPSLLDLGSLNPSHRTVPI IKRS KSGIMYFEQAPLLPQSVGGTAATAAGSSTISQDTSHTLSTGVPVSALASGSSVNLVSMQTTAAPTSSTSVPGH VTLANQRLGTPDIGSISHLLIKASHQSLGIQDQVALPSSGMFQGLTSTQTPSAAAMTAASSICVLPSSQT AGMTAASPGEAEHYKLRGNQLLLAGKTGTLTSDQRDRDPDSAPGTQPSNFTQTAEAPNGVRLEQNKTLPSAK PASSASPGSSPSSGQQSGSSVPGPTPKPKAKRIQLPLDKGSGKHKVSHLRTSSEAHIPHRDTPAPQPSV TRTPRANREQDAAGVEQPSQKECGQPAGPVAALPEVQATQNPANEQENAEPKAMEEEEESGFSSPLMLWLQOE QKRKESITERKPKKGLVFEISSDDGFQICAESIEDAWKSLTDKVVQEARSNARLKQLSFAGVNLRLMLGILHDA VVFLIEQLAGAKHCRNYKFRFHKPEEANEPLNPHGSARAETHLRQSAFDMFNFLASKHRQPPEYNPNDEEEE EVQLKSARRATSMDLPMRFRHLKKTKEAVGVYRSP IHGRGLFCKRNI DAGEMVIEYAGNVIRSIQTDKRE KYYSKIGICYMFRIDDSEVVDATMHGNAARFINHSCEPCNYSRVINIDGQKHIVIFAMRKIYRGEELTYDYK FPIEDASNKLPCNCGAKKCRKFLN\*

>ENSMUSP0000002095\_c.5074:T>C\_p.V1692A ENSMUST0000002095.11|Kmt2a-201|ENSMUSG0000002028|-|chr9:g.44742612:A>G

MAHSCRWRFPARPGTTGGGGGGRRGLGGAPRQVPAALLPPGPQAGGGGPGAPPSPPAVAAAAAGSSGAGVPGGAAAAASAASSSSASSSSSSSSASSSGPALLRVGPGFDAALQVSAAI GTNLRRFRAVFGESGGGGGSGEDEQFLGFGSDEEVVRVRSPTSPSVKASPRKPRGRPRSGSDRNPAILSDPSVFSPLNKSETKSADKIKKDKSISIEKGRGRPPTFPGVKIKITHGKDIAELTQGSKEDSLKVKRTPSAMFQQATKIKKLRAGKLSPLKSKFKTKGLQIGRKGVQIVRRRRGRPPSTERIKTPSGLLINSELEKPKQVRKDKEGTPELTKEDKTVVVRQSPRRIKPVRIIPSCKRTDATIAKQLLQRAKKAQKKEEAAQLQGRKVKTVKNIQRFIMPVVSIAISSRIKTPRRFIEDEYDPPMKIARLESTPNRSFATS CGSSEKSSAASQHSQMSDSSRSSSPSIDTTSDSQASEEIQALPEERSNTPEVHTPLPISQSPENESNDRRSRRYSMSERSFGSRATKKLPTLQSAPOQQTSSSPPPPLTPPPPLQPASGISDHTPWLMPPTIPLASPFPLPASAAPMQGRKSI LREPTFRWTSLKHSRSEPQYFSSAKYAKEGLIRKPIFDNFRPPLTPE DVGFASGFSASGTAASARLFSPLHSGTRFDIHKRSPI LRAPRFTPSEAHSRIFESVTLPSNRTSSGASSGVS NRKRKRKVFSPIRSEPRSPSHMRTRSGRLSTSELSPLTPPSSVSSLSIPVSPLAASALNPTFTFPSSHSLTQSGESTEKNRARKQTSALAEFFSSNSPALFPWFTPGSQTEKGRKDTAPEELSKDRDADKSVEKDKSRERDRE REKENKRESRKEKRRKGSIDIQSSALYPVGRVSKEKVAGEDVGTSSAKKATGRKSSSSLDGADVAVPTLGD TTAVKAKILIKKGRNLEKNNLDLGPAAAPSLEKERTPCLSA PSSSTVKHSTSSIGSMLAQADKLPMTDKRVAL LKKAQAQLCKIEKSKSLKQTDQPKAQGQESDSSSETSVRGPRIKHVCRRAAVALGRKRAVFPDDMPTLSALPWEEREKILSSMGNDDKSSVAGSEDAEPLAPPKIPKIPVTRNKAPQEPVVKGRRSRRCGQCPGCQVPEDCGICTNCLDKPKFGGRNIIKQCKMRKCQNLQWMPKSKASLQKQTKAVKKEKSKTTEKESKESSTAVKSPLEPAQKAPPPREAPAPKPKSSSEPPRPVVEEKSEEGGAPAPAPAPEPKQVSAPASRKSQKQVPAAVPPQPPSTAPQKKEAPKAVPSEPKKKQPPPEPGPEQSKQKQVAPRPSIPVKQPKDKKPPVSKQENAGTLNINLPLSNGISSKQKIPADGVHRI RVD FKEDCEAENVWEMGGLGILTSVPI TRVVCFLCASSGHVEFVYCQVCEPFHKFCLE ENERPLEDQLENWCCRCKFCHVCGRQHQA TKQLLECNKCRNSYHPECLGPNYPTKPTKKKVVICTKVRCK SCGSTTPGKGWDAQWSHDFSLCHDCAKLFAGNFCPLCDKCYDDDDYESKMMQCGKCDRWVHSHKCESLSDEMY

EILSNLPESVAYTCVNCTERHPAEWRLALEKELQASLKQVLTALLNSRTTSHLLRQRQAAPPDLPNETEESI  
PSRSSPEGPDPPALTEVSKQDEQQPLDLEGVKKRMDQGSYVSVLEFSDDIVKIIQAAINSDDGGQPEIKKANSM  
VKSFFIRQMERVFPWFVSVKKSREWFENKVSNNSGMLPNAVLPPLSLDHNIAQWQEREESSTEQPPLMKKIIIPA  
PKPKGPGEPDSPTPLHPPTPPIILSTDRSREDSPELNPPPGIDDNRQCALCLMYGDDSDANDAGRLLYIGQNEWT  
HVNICALWSAEVFEDDDGSLKNVHMAVIRGKQLRCEFCQKPGATVGCCLTSCTSNIYHFMCSRAKNCVFLDDKKV  
YQQRHRDLIKGEVVPENGFEVFRVFDVFEGLSLRRKFLNGLPENIHMMIGSMTIDCLGILNDLSDCEDKLF  
PIGYQCSRUYWSTTDARKRCVYTCKIMECRPPVVEPDINSTVEHDDNRTIAHSPSSFIDASCKDSQSTAAIILS  
PPSPDRPHSQTSGSCYHYHVISKVPRIIRTPSYSPTRQSRPGCRPLPSAGSPTPTTHEIVTVGDPLLSGLRSIGS  
RRHSTSSLSPLRSKLRIMSPVRTGSAYSRSVSVSPSLGTATDPEASAKASDRGGLSSANLGHSAAPPSSSS  
QRTVGGSKTSHLDGSSPSEVKRCSASDLVPGKSLVKEKNRTSSSKSTDGSAHSTAYPGIPKLTQPQVHNATPG  
ELNISKIGSFAEPSTVPPFSSKDTVSYVQLHLRGQRSDRDQHMDSQSVKPSPNEDGEIKTLKLPGMGHRPSIL  
HEHIGSSSRDRRQKGGKSSKETCKEKHSSKSYLEPGQVTTGEEGNLKEPEFADEVLTGFLGQRPCNNVSSEKI  
GDKVPLPSGVKPGQSTQVEGSSKELQAPRKCSVKVTPMKMEGENQSKNTQKESGPGSPAHIESVCPAEPVSAS  
RSPGAGPGVQPSNNLTSQDPQSNNYQNLPEQDRNLMI PDGPKPQEDGSFKRRYPRRSARARSNMFFGLTPLY  
GVRSYGEEDI PFYSNSTGKKRGRSAEQVDGADDLSTSEDDLYYNFTRTVISSGGEERLASHNLFREEEQ  
CDLPKISQLDGVDDGTESDTSVTATSRKSSQIPKRNGKENGENTENLKIDRPEDAGEKEHVIKSAVGHKNEPKLD  
NCHSVSRVKAQGDSELEAQLSSLESRRVHTSTPSDKNLLDTYNAELLKSDSDNNNSDDCGNII LPSDIMDFVL  
KNTPSMQALGESPESSSELTLLEGLGLDLSNREKDIGLFEVFSQQLPATEPVDSSVSSSI SAEEQFELPLEL  
PSDLSVLTTRSPVPSQNPRLAVISDSGEKRVITITEKSVASSEGDPALLSPGVDPAPEGHMTPDHFIQGHMD  
ADHISSPPCGSVEQGHGNSQDLTRNSGTPGLQVPVSPVQVQNKYVPSSTDSPGPSQISNAAVQVTPPHLKP  
ATEKLI VVNQNMQPLYVLQTL PNGVTQKIQLTSPVSSTPVMEVNTSVLGPMGSGTLTTLTGLNPSLPPSPSLF  
PPASKGLLSVPHHQLHLSFPAAAQSSFPNIISSPPSGLLIGVQPPDPQLLGSEANQRTDLTTTVA TPSSGLK  
KRPI SRLHTRKNKKLAPSSAPSN IAPSDVVSNM TLINFTPSQLSNHPSLLDLGSLNPS SHRTVPI I KRKSKG  
IMYFEQAPLLPPQSVGGTAATAAGSSTISQDTSHLTSGPVSAALASGSSVLNVVSMQTTAAPTSSSTVPGHVTL  
ANQRL LGTPDIGSI SHLLIKASHQSLGIQDQPVALPPSSGMFPQLGTSQTPSAAAMTAASSICVLPSSQTAGM  
TAASFPGEAEHEHYKLRGNQLLAGKTGTLTSQRDRDPDSAPGTQPSNFTQTAEAPNGVRLEQNKTLPSAKPAS  
SASPGSSPSSGSSSSVPGPTKPKPKAKRIQLPLDKGSGKHKHVSHLRTSSEAHIPHRDTPAPQPSVTRT  
PRANREQQDAAGVEQPSQKECGQPAGPVAALPEVQATQNPANEQENAEPKAMEEEEEESGFSSPLMLWLQQEQKR  
KESITERKPKKGLVFEISSDDGFQICAESIEDAWKSLTDKVQEARSNARLQKLSFAGVNGLRMLGILHDAVVF  
LIEQLAGAKHCRNYKFRFHKEEANEPPLNPHGSARA EVHLRQSAFDMFNFLASKHRQPPEYNPNDEEEEEVQ  
LKSARRATSMDLPMRFRHLKKT SKEAVGVYRSPIHGRGLFCKRNIDAGEMVIEYAGNVIRSIQTDKREKYY  
DSKIGICYMFRIDDSEVVDATMHGNAARFINHSCEPNCYSRVINIDGQKHIVIFAMRKIYRGEELTYDYKFP  
EDASNKLPNCNGAKKCRKFLN\*

>ENSMUSP00000047508\_c.1188:T>G\_p.C397G ENSMUST00000039059.8|Pcsk7-  
201|ENSMUSG00000035382|+|chr9:g.45830096:T>G

MPKGRQKVPHLDAHLGLPICLWLELAIFFLVPPQVMGLSEAGGLDILGTGGLSWAVHLDLSLEGERKEESLTQQA  
DAVAQAAGLVNAGRIGELQGHYLFVQPTGHRQAMEVEAMRQQAEEAVLARHEAVRWSEQTLLKRAKRSIHFN  
PKYPQQWHLNRRSPGRDINVTGVWERNVTGRGVTVVVDDGVEHTVQDIAPNYSPEGSYDLNSNDPDPMPHP  
DEENGNHGHTRCAGEIAAVPNSFCVAVGVA YGSRIAGIRVLDGPLTDSMEAVAFNKHYQINDIYSCSWGPD  
GKTVDGPHQLGKAALQHGVMAGRQGFSGIFVVASGNGGQHNDNCNYDGYANSIYTVTIGAVDEEGRMPFYAEE  
CASMLAVTFSSGDKMLRSIVTTDWDLQKGTGGTEGHTGTSAAAPLAAGMIALMLQVRPCLTWRDVQHIIVFTA  
IQYEDHHDWLTNEAGFSSHQHGFGLLNAWRLVNAAKIWTSPVYLASYVSPMLKENKAVPRSPHSLEVLWNV  
SRTDLEMSGLKTLHEVAVTVSI THPRRGSLELKLFCPSGMMSLIGAPRSMDSDPNGFNAWTFSTVRCWGERAR  
GVYRLVIRDVGDPELQMGILQQWQLTLYGSMWSPVDIKDRQSLLESAMSGKYLHDGFTLPCPPGLKIPEEDGY  
TITPNTLKTLLVLVGCFSVFWTIYMLEVCLSRQNKASTHGRKCGCPWAPRRQNSKDGTALESMPCLCSSKDL  
DGV DSEHGDC TTASSFLAPELDCPPHPDPLLQKSGQIC\*

>ENSMUSP00000150500\_c.1188:T>G\_p.C397G ENSMUST00000215189.2|Pcsk7-  
204|ENSMUSG00000035382|+|chr9:g.45830096:T>G

MPKGRQKVPHLDAHLGLPICLWLELAIFFLVPPQVMGLSEAGGLDILGTGGLSWAVHLDLSLEGERKEESLTQQA  
DAVAQAAGLVNAGRIGELQGHYLFVQPTGHRQAMEVEAMRQQAEEAVLARHEAVRWSEQTLLKRAKRSIHFN  
PKYPQQWHLNRRSPGRDINVTGVWERNVTGRGVTVVVDDGVEHTVQDIAPNYSPEGSYDLNSNDPDPMPHP  
DEENGNHGHTRCAGEIAAVPNSFCVAVGVA YGSRIAGIRVLDGPLTDSMEAVAFNKHYQINDIYSCSWGPD  
GKTVDGPHQLGKAALQHGVMAGRQGFSGIFVVASGNGGQHNDNCNYDGYANSIYTVTIGAVDEEGRMPFYAEE  
CASMLAVTFSSGDKMLRSIVTTDWDLQKGTGGTEGHTGTSAAAPLAAGMIALMLQVRPCLTWRDVQHIIVFTA  
IQYEDHHDWLTNEAGFSSHQHGFGLLNAWRLVNAAKIWTSPVYLASYVSPMLKENKAVPRSPHSLEVLWNG  
RTWRCRG\*

>ENSMUSP00000150393\_c.1188:T>G\_p.C397G ENSMUST00000216672.2|Pcsk7-  
209|ENSMUSG00000035382|+|chr9:g.45830096:T>G

MPKGRQKVPHLDAHLGLPICLWLELAIFFLVLPQVMGLSEAGGLDILGTGGLSWAVHLDLSLEGERKEESLTQQA  
 DAVAQAAGLVNAGRIGELQGHYLFVQPTGHRQAMEVEAMRQQAEEAVLARHEAVRWHEQTLKRAKRSIHFN  
 PKYPQQWHLNNRRSPGRDINVTGVWERNVTGRGVTVVVVDDGVEHTVQDIAPNYSPEGSYDLNSNDPDMPPH  
 DEENGNHHGTRCAGEIAAVPNNNSFCAVGVAYGSRIAGIRVLDGPLTDSMEAVAFNKHYQINDIYSCSWGPD  
 GKTVDGPHQLGKAALQHGVMAGRQGFSGIFVVASGNGGQHNDNCNYDGYANSIYTVTIGAVDEEGRMPFYAEE  
 CASMLAVTFSGGDKMLRSIVTTDWDLQKGTGGTEGHTGTSAAAPLAAGMIALMLQVRPCLTWRDVBQHIIVFTA  
 IQYEDHHDWLTNEAGFSSHQHGFGLLNAWRLVNAAKIWTSPYLAASYVSPMLKENKAVPRSPHSLEVLWNV  
 SRTDLEMSGLKTLKLEHVAVTVSITHPRRGSLELKLFCPSGMMSLIGAPRSMDSDPNGFNAWTFSTVRCWGERAR  
 GYRLVIRDVGDPELQMGILQQWQLTYGSMWSPVDIKDRQSLESAMSGKYLHDGFTLPCPPGLKIPPEEDGY  
 TITPNTLTKTLVLVGCFSVFWTIYYMLEVCLSQRNKASTHGCRKGCCPWAPRRQNSKDAGTALESMPCLCSSKDL  
 DGVDSEHGDC TTASSFLAPELDCPPHQPDDLQKSGQIC\*  
 >ENSMUSP00000037915\_c.2318:G>A\_p.W773\* ENSMUST00000038890.6|Dennd4a-  
 201|ENSMUSG00000053641|+|chr9:g.64796294:G>A  
 MIEDKGRVADYFVAVGLTDISKPLEEEIHFNDACHKVAKPKPEITDVSVI IKS LGEEVPRDYVICDVTPTGL  
 SADLNNGLSVGPQIYLCYKRGGRDKPPLTDLGVLYDWKERLKGQCEIIQSTPYGRPANISGSTSSQRIYITYRR  
 ASENTTQNTLAVTDICIIIPSKGESPPHTFCKVDKNLSNSMMWGSVAVLYCYKKSVAKTNTISYKAGLICRYPQE  
 DYESFSLPESVPLFCLPMGATIECWPPDSKYPLPVFSTFVLTGASAEKVYGAAIQFYEPYEEENLTKQRLL  
 GLTSLVLDGKSDSTRITHTNKCICLLSHWPFDAFRKFLTFLYRYSISGPHALPIEKHISHFMHKVFPFSPQRP  
 RILVQLSPHDNLILSQPVSSPLPLSGGKFSTLLQNLGPNNAVTLVFAVTEHKILIHSLRPSVLTSTVTEALVS  
 MIFPFHWPCPYVPLCPLALADVLSAPCPFIVGIDSRYFDLYDPPDVSCVDLDTNTISQTDGKKNVAVKILPK  
 KPCKNLMNTLNNLHQQLAKLQQRPRDDGLMDLAMNDYDFNSGKRLHMDLEIQEAFLLFMASILKGYRSYLRP  
 ITQAPSETATDATSLFALQAFRLSRDRSHQKFFYNMKTQMFIRFIEECSFVSDKDASLAFDCCVDKVDTDK  
 SGEVRLIELDASFKEHTVFVTPPEIHPHPNGEPPQLQSYNGFVFLRNNLFRPEGFQARKNKLPSKPS  
 GSPSPMFRRTKQEIKAHAKIARYSSIPQMWSRCLLRHCYGL\*FICLPAYVKVCHSKVRALKTAYDVLKMKQL  
 KKMDPPDEVCIYRILMQLCGQYDQPVLA VRVLFEMQKAGIDPNAITYGYNKAVLESTWPSRSRSGYFLWTKVR  
 NVVLGVAQFKRALKHPHLPQTALS GGRSDLGYNSLKDNRREGPSTEDIQGEKEKRGSDSSLSSENESTKG  
 SAECLEPTLSYQRASTIVRLNGAHNDSAGKTSGEESTPELLLMPSEDTNEAQTPSRCFRKRHSDDGSHL  
 QQQMPWGSRRNLSGGVLMGFMLNRTNQETS PGEMVEKLGADAKILSNVISKSTRPNSLDIGKPPARSKRDSL  
 EKESSDDDTPFHGSNCLDKVESPVIFDLEDLDTETDGSKVGVAQNPKRLQRRNSSFSVKPSEKTDVVTGFD  
 PLSLLVAETEQQQKVEEEDEDDNKS SVSTPSARRNLAAEIEMYMNMMSPLTSRTPSIDLQRACDDKLTNKS  
 PTLVKACRRSSLPPNSPRPVRLTKSKSYTKSEERPRDLWSSPAFSPTCFREGSQETLAHSSPSFNLDTLV  
 PKLDVLRHSVFTAGKGVAEKASKWYSRFTMYTTSSKDQSSDRSLSVGAQDSESTSLTDEDVCHLEGATSS  
 QESSAASGTKGIDVSRASLGSSASLEGLSKFALPGKSETASSLNTSNANIFQNYAMEVLISSCSRCTCDCL  
 VHDEEIMAGWTADDSNLNTTCPCFNLFLPFLNVEIRDLRRPGRYFLKSSSSTETMHFASRTRQSCISASAG  
 LDTSSLSVQGNFDLNNKSLQENPCARSIQIPAHRSKTVVSKCLPFMARSISTCGPLDKDDPGGQKLIPTGS  
 LPATLQGHTDSDLGLEWHLPSDPVTVPYLSPVWKELESLENEGDHAITVADFVDHHPVIVFVNLVWYFRRL  
 DLPSNLPGLILSSEHCNKYSKIPRCHMSSEDSKYVLIQMLWDNMKHLHQDPGQPLYILWNAHSQNRLLFETQKY  
 PMVHLLQKGDSDFNQELLSMVKS IKMNDVYGPMSQILETLNKC PHFKRQRSLYREILFLSLVALGRENIDID  
 AFDKEYKMAYDRLTPSQVKSTHNCDRPPSTGVMECRKTFGEPEYL\*  
 >rs33746359\_ENSMUSP00000077040\_c.8893:A>G\_p.Y2965C  
 ENSMUST00000077879.7|Vps13c-201|ENSMUSG00000035284|+|chr9:g.67862278:A>G  
 MVLESVVADLLNRFGLDYVENLNKSQLKLGWGNVALDNLQIKENALSELDVPFKVAKAGQIDKLTLPWKN  
 LYGEAVVATLEGLYLLVPGASIKYDAEKEEKSLQDIKQKELCRIEEALQKAAEKGAHSGEFMYGLENLLYKD  
 VKPGRKRKHKHKKHFKFRKGLDRSKDKPKKAKKDTFLEKLATQVIKNVQVKITDIHIKIEDDITDPERPLSFG  
 VTLREFSLTTNEHWTPCILNEAEKIIYKLVKLDLSAYWNVGCCMSYRGSREHILEQLKREILTSTNIIPDH  
 QYIFQPISASAKLYMNGAESELKTPKLDGNVEVQNI AIELTKPQYLSMIDFLES LDYMVNAPYRKYKPCLP  
 LHTNCRQWKKY AIDSVLEVHIRRYTQPWSWSNIKNHRQLLSYKMAKTKLTQAKVSEEIQKQIQDLEKSLDV  
 FNIILVRQQAQVEVIHSGQLRKRKSAEAGEKRGWFSGFWGKESKRDEESSVPETIDDLMTPEEKDKLFTAI  
 GYSENAYNLALPKQYVAHILTLKLVSTSI IIRENRNVEILRVQI IGLGTQVSQRPGAQALKIEAKLEHWYVT  
 GLRQQDIVPSLVAIGDTTSSLLKIEFETNPENSPADQTLIVQSQPVEVIYDAKTINAVVEFFQSNKGLDLEQ  
 ITSATLMKLEEI KERTATGLTHI IETRKVLDLRINLKPSYLIIPQTGFHHEKSNLLILDGFTQLNSKDQGAQ  
 KTANASLEEIIDKAYDKFDVEIRSVQLLFAKAEENWKKCRFQHPSTMHILQPMDIHVELAKAMVEKDVRMAKF  
 KVS GGLPLMHVARTQKIKDALCLINSIPLPQKSSLLTSPERQVASIPVLSGGTKALLGTSLLLDGVESESDDEE  
 FFDAEDGDMSQAARTVKAASELKAAEVPNEELVSLLEKFEIKEVLELTKQQKEEETILVFNVTQLGTEATMRT  
 FDLTAVSYLRKISTDYHDIKGSRKKPIHLISSDRPGLDLLKVEYIKVDRNGPSFQTTFEKTEQTVKVAFSSL  
 NLLLQQTALLSSLNLTTPVIPSQNTGVAKEVQAMPEKQKNSPLQKVMVPSRSDSVIGFRLFAKLNACVTV  
 CDEKSNIAEIKIQGLDSSLSLQSKKQSLFARLENIIVTDVDPKTIHKKAVSIVGNEVFRFNLDLYPDATEGDS  
 YTDMSTVDGVVALHVGCIQIVYLHKFLMSLLSFLNNFQVAKEALSAATAQAAEKAATS VKDLAQRSRFRVSDI



DLKAPVIVIPQSSSLSTNAVVDLGLIRVHNRFSLSVSGEDTANPPVIDKMEVQLTKLKLRSRTAIQPGTSHPDIO  
 LLHPINLEFFVSRNLANWYHKVPVVEIKGRLD SMNVSLNQEDLNLLFRILAENLGEATEDLDK GKPRIQERG  
 ETKACREVSTPQDVHTTQGVPAARVEETRPVDI INVLLNFEIKEVVVTLMKKAERKGS PFHELKI LHLGMEAK  
 VKAHDMTAAAYLRNISMRCFHFDPDSKGEPLRIVNTSDVSDGILLKLLFIKADSDGPDFKTIHDNTKQKLKVSF  
 SSLDLVLHLEALLSLMDFLSSAIPSSDSSSSEKEPELKPLVGESRSLAIRAVPSSYEGDAFDLKI TAE LNAFN  
 IFICDQKSNIAEIKIHGM DASI SVKPKQTDV FARLKNII VMNVD SLSIHKKAVSILGDEVFRFQMSLYPDATE  
 GENYGDMSKVDGRLSLKVGCIQIVYVHKFFMSLLSFLNNFQA AKEALSTATVQA AERAASSVKDLAQKSFRL  
 MDIDLKAPVITIPQSSVSPNVVIADLGLIRVENKFSLSVGEQLALPVADEM SIQLTQLKLARTVLAQADSPQH  
 DVEILKPVNMLLCIQRNLSAAWY TQIPGMEIKGELKPMQVALSQDDLTVLMKILLENLGEASSQPSPTQY AQE  
 AARVKRDRTRSGPDYLKEQELADPKPPGDQTVTLQDFDFHDSLSI ILYNSDSSQEPRLSFHND SFRLGELTLHL  
 MASAGKMFKDGSMNVSLKLTCTLDDLREGIERATSRMIDKKNQDNNSSMIDI SYSQDKNGS QVDAVLDKLY  
 VCASVEFLMTVADFFIKAMPQSPENIAKEIQIPSRQTAAGRVKMEKDDSVRPNMTLKAMITDPEVVFVASLTK  
 ADAPALTASFQCNLSLSTSKLEQMM EASVRDLKVLACPF LRERRGKSITTVLQPCSLFMEKCTWASGKQNI  
 VVKEFVIKISPIILNTVMTIMAAMSPKTKEDWKDTPKETDNLWAVKSI TDYNSWFLGVDMA TEVTENFRDSE  
 HPSIEENCVVAVESVQVTLECGLGHRTVPLLLAESKFSGNIKNWTS LMAAAADMTLEVHYYNETHAVWEPLIE  
 RVEGNKPSWKLKLVKKNPIQDKSLMPGDDFIPEPQTAVHISSGATMNI TISKCLNVFSLNLAGFSEGAESTF  
 DYSLKDRAPFTVKNALGVPMKVQPNRNLKVMGSP EKSIDIYDVGAGQHLELDYASLEPSRQKGLSILSRQESSL  
 FTLTFVPGYTEVASVPVARPGRRLYNVRNPSASHSDSVLVQIDATEGNKVVTLR SPLQIKNHFSIAFIYKF  
 VKNVKLLERIGIARPEEEFHVPLDSYRCQLYVQPAGGLEQQYTHSSTYISWKEELHRSREVR CMLQCPAVEVS  
 FLPLIVNTVALPDELSYIGAHGEDWDPAYVIHLYPPLTLRNL LPPYSLRYLLEGTAE THELAEGSSADVLHSRI  
 SGEI IELVLVKYLGKNWNGHFRICDTLPEFFLVCFSSDTAEVMTVDLSVHVRRI GCRMELSVFSPYWLINKTS  
 RVLQYRSEEIHVKHPADFRDIILFSFKKNI FSKNKVQLKISTAWSNGFSLDTVGSYGCVKCPATNMEYLVG  
 VSIKMSSENL SRVVTLPFCTVANKSSLDLEVEIASDGS IPTNKWHYVASSECI PFWPENLSGKLCVRVVG  
 EGSSKPFYFNQRDNGTLLSLEDLNGGILVDINTAEHSTVITFSDCHEGSAPALIMNHTQWDVLT YKQSGSQEE  
 LVLLPGETRLFAWADPTGIRKLTWN YAANFGEHDLKDECGQFPYDANIQIHWVSFLDGRQVRVLLFTDDVALV  
 SKALQAEEME QADHEVALS LHSGLSLVNNENKQEVSYVGI TSSGVVWEMKPKQKWKPF SQKQIMSLEQAYS  
 RLASQDRGWVKLDSNFVFDKVP MEMRLPIRCPIKRDFLSGIQVEFKQSPHQRS LRARLYWLQVDNQLPGTM  
 FFPVVFHPVAPPKSIALDSEPKPFIDVSVITRFNEYSKVLQFKYFMVLIQEMALKVDQGF LGAVISLFTPTTDP  
 EAERKRTKLIQQDIDALNTELMESSMTDMSILSFFEHFHISPVKLHLSLSLGSGGEESDKEKQEMIAIHSVNL  
 LLKSIGATLTDVDDLI FKLAYEIRYQFYKRDQLMWSVVRHYSEQFLKQMYVLVGLDVLGNPFGLIRGLSEG  
 VEALFYEPFQAGVQGP EFAEGLVIGVRSLVGHTVGGAGVVSRI TGSVKGGLAAITMDKEYQQKRREEMGRQ  
 PKDFGDSLARGGKGF LRGVVGGVTGIIITKPV EGAKEGAAGFFKGIGKGLVGAVARPTGGI IDMASTFQGIQ  
 RVAESTE EVSSLRPPRLIHEDGIIRPYDRQESEGS DLLENHIK KLEGEAYQFHCAVPGNKRAVLMITNRRALF  
 I KEVEILGHMSVDWQCLFEDFVCPPEVSENLLKISVKEQGLFHKKDSANIGHLRKIY LKDPITAKRAFDAIES  
 AQSARQQQKLMRQSSV KLLRPQGPS\*

>r33746359\_ENSMUSP00000149778\_c.295:A>G\_p.Y99C  
 ENSMUST00000213168.2|Vps13c-202|ENSMUSG00000035284|+|chr9:g.67862278:A>G  
 XTVANKSSLDLEVEIASDGS IPTNKWHYVASSECI PFWPENLSGKLCVRVVG YEGSSKPFYFNQRDNGTLLS  
 LEDLNGGILVDINTAEHSTVITFSDCHEGSAPALIMNHTQWDVLT YKQSGSQEELVLLPGETRLFAWADPTGI  
 RKLTWN YAANFGEHDLKDECGQFPYDANIQIHWVSFLDGRQVRVLLFTDDVALVSKALQAEEME QADHEVALS  
 LHSGLSLVNNENKQEVSYVGI TSSGVVWEMKPKQKWKPF SQKQIMSLEQAYS RLASQDRGWVKLDSNFVFN  
 FDKVP MEMRLPIRCPIKRDFLSGIQVEFKQSPHQRS LRARLYWLQVDNQLPGTMFPVVFHPVAPPKSIALDSE  
 PKPFIDVSVITRFNEYSKVLQFKYFMVLIQEMALKVDQGF LGAVISLFTPTTDP EAERKRTKLIQQDIDALNT  
 ELMESSMTDMSILSFFEHFHISPVKLHLSLSLGSGGEESDKEKQEMIAIHSVNL LLSIGATLTDVDDLI FKL  
 AYEIRYQFYKRDQLMWSVVRHYSEQFLKQMYVLVGLDVLGNPFGLIRGLSEGVEALFYEPFQAGVQGP EEF  
 AEGLVIGVRSLVGHTVGGAGVVSRI TGSVKGGLAAITMDKEYQQKRREEMGRQPKDFGDSLARGGKGF LRGV  
 VGGVTGIIITKPV EGAKEGAAGFFKGIGKGLVGAVARPTGGI IDMASTFQGIQ RVAESTE EVSSLRPPRLIH  
 EDGIIRPYDRQESEGS DLLEQEMGTQE\*

>ENSMUSP00000046111\_c.2377:T>A\_p.V793E ENSMUST00000044491.13|Minar1-  
 201|ENSMUSG00000039313|-|chr9:g.89478667:A>T  
 MEANQEASLFLVKILEELDSKQNTVSYQDLCKSLCAQFDLSQLAKLRSVLFYTA CLDPNFPATL FKDKMKCSV  
 NNQOSKKIMVAADIVTIFNLIQMNNGGTAK EKLPMSCHKVRKKEASFESCRSDTEVCSP TVCEPLNCELSERPF  
 SRGYPTRQSSKRCRMDCKECPQFVPASEPNFLLGVSKEVKNRAASLDRLQALS PYSVASPQCEMQR TYFPMN  
 IENEPMSDQDLSLPISQIKETFISSEEPFVVQSCVQKRNIFKEDFHNLMTVSPSLVGT TNKAEEGHGE PQSQK  
 ELHKPFFFNHSEMPYHNQYLN PVYSP I PDKRRAKHESLDDLQASTYFGPTPVMGTQDTRRCPGRSSKQTPWP  
 AKSWSLNT EEPDFERSFFNRNPSE EKLRYPNSGSQT PNFSGPDRHPVYLV PKDQKVL PAVYAVKPNGLKSK  
 EISSPVDLEKHEAVKFKDKSISCTSGQHSSDTSSVGTQTEQHVLDP PKCKDLCTSGQAKYGRHAMQSDDD  
 SEIVSDDISDIFRFLDDMSISGSTGVIQSSCYNSTGSLSQLHKSDCDSSPEHHLAKITNGVSSGKDKCNRPE

NVHHSEELKSSVCKLVLRIEIERKLESLSGVREEISQVLGKLNKLDQKIQQPEKVNQIDLNSLTSEAPSD  
DSASPRVFRAHSGSHGPKLENSPDWCCSDASGSNSESLRVKALKKSLFTRPSSRSLTEENSATESKIASISNS  
PRDWRITITYTNRMSLNEEEIKDAGPANNKDWHRKSKEADRQYDIPPOHRLPKQPKDGFVLEQEFSPHPYPTSL  
KGHMKSNNPLYTDMRLTELAEVKRGQPSWTIEEYARNSGDKGKLTALDLQEQESLNPNNLEYWMEIYTPGYDS  
LLKRKEAEFRRAKVCKIAALITAACTVILVIVVPICTMKS\*  
>ENSMUSP00000140942\_c.2377:T>A\_p.V793E ENSMUST00000191465.2|Minar1-  
202|ENSMUSG00000039313|-|chr9:g.89478667:A>T  
MEANQEASLFLVKILEELDSKQNTVSYQDLCKSLCAQFDLSQLAKLRSVLFYTAACLDPNFPATLFDKMKCSV  
NNQQSKKIMVAADIVTIFNLIQMNNGGTAKKLPMSCHKVRKKEASFESCRSDTEVCSPVCEPLNCELSEKPF  
SRGYPTRQSSKCRKMDCKECPQFVPASEPNFLLGVSKEVKNRAASLDRLQALSPYSVASPQPCEMQRTYFPMN  
IENEPMSDQDSLPIISQGIKETFISSEEPFVQSCVQKRNIFKEDFHNLMTVSPSLVGTNKAEEGHGEPQSOK  
ELHKPPFFNHSFEMPYHNQYLNVPVYSPIPKRRRAKHESLDDLQASTYFGPTPVMGTQDTRRCPGRSSKQTPWP  
AKSWSLNTEEVPDFERSFFNRPNSEKLRYPNSGSQTPNFSGPDRHPVYLVPKDQKQVLPAGYAVKPNGLKSK  
EISSPVDLEKHEAVKFKDKSISCTSGQHSSDTSVGTQTEQHVLDPPKCKDLCTSGQAKYGRHAKMSQSDDD  
SEIVSDDISDIFRFLDDMSISGSTGVIQSSCYNSTGSLSQLHKSDCDSPEHHLAKITNGVSSGKGDKNRPE  
NVHHSEELKSSVCKLVLRIEIERKLESLSGVREEISQVLGKLNKLDQKIQQPEKVNQIDLNSLTSEAPSD  
DSASPRVFRAHSGSHGPKLENSPDWCCSDASGSNSESLRVKALKKSLFTRPSSRSLTEENSATESKIASISNS  
PRDWRITITYTNRMSLNEEEIKDAGPANNKDWHRKSKEADRQYDIPPOHRLPKQPKDGFVLEQEFSPHPYPTSL  
KGHMKSNNPLYTDMRLTELAEVKRGQPSWTIEEYARNSGDKGKLTALDLQHV\*  
>ENSMUSP00000108264\_c.1110:A>G\_p.T371A ENSMUST00000112645.8|Trf-  
203|ENSMUSG00000032554|-|chr9:g.103098181:T>C  
MRLTVGALLACAALGLCLAVPDKTVKWCVAUSEHENTKCSIFRDHMKTVLPPDGPRLACVKKTSYPDCIKAIISA  
SEADAMTLDDGGWVYDAGLTPNNLKPVAAEFYGSVEHPQTYYYAVAVVKKGTDFQLNQLEGGKKSCHTGLGRSAG  
WVPIPIGLLFCKLSEPRSPLEKAVSSFFSGSCVPCADPVAFPKLCQLCPGCGCSSTQPFPGYVGAFAKCLKDGGG  
DVAFAVKHTTIFEVLPEKADRDQYELLCLDNTRKPVQYEDCYLARIPSHAVVARKNNGKEDLIWEILKVAQEH  
FGKGSKDFQLFSSPLGKDLLFKDSAFGLLRVPPRMDYRLYLGHNYVTAIRNQOEGVCPEGSIDNSPVKWCAL  
SHLERAKCDEWSIIISEGKIECESAETTEDCIEKIVNGEADAMTLDDGGHAYIAGQCGLVPVMAEYESSNCAIP  
SQQGIFPKGYAVAVVKASDTSITWNNLKGKKSCHTGVDRTAGWNI PMGMLYNRINHCKFDEFFSQGCAPGYE  
KNSTLCDLDCIGPLKCAPNNKEEYNGYTGAFRCLVEKGDVAFVKHQTVLDNTEGKNPAEWAKNLKQEDFELLCP  
DGTRKPVKDFASCHLAQAPNHVVSRKEKAARVKAVLTSQETLFGGSDCTGNFCLFKSTTKDLLFRDDTKCFV  
KLPEGTTPEKYLGAEYMQSVGNMRKCSTSRLLLEACTFHKH\*  
>ENSMUSP00000035158\_c.1110:A>G\_p.T371A ENSMUST00000035158.16|Trf-  
201|ENSMUSG00000032554|-|chr9:g.103098181:T>C  
MRLTVGALLACAALGLCLAVPDKTVKWCVAUSEHENTKCSIFRDHMKTVLPPDGPRLACVKKTSYPDCIKAIISA  
SEADAMTLDDGGWVYDAGLTPNNLKPVAAEFYGSVEHPQTYYYAVAVVKKGTDFQLNQLEGGKKSCHTGLGRSAG  
WVPIPIGLLFCKLSEPRSPLEKAVSSFFSGSCVPCADPVAFPKLCQLCPGCGCSSTQPFPGYVGAFAKCLKDGGG  
DVAFAVKHTTIFEVLPEKADRDQYELLCLDNTRKPVQYEDCYLARIPSHAVVARKNNGKEDLIWEILKVAQEH  
FGKGSKDFQLFSSPLGKDLLFKDSAFGLLRVPPRMDYRLYLGHNYVTAIRNQOEGVCPEGSIDNSPVKWCAL  
SHLERAKCDEWSIIISEGKIECESAETTEDCIEKIVNGEADAMTLDDGGHAYIAGQCGLVPVMAEYESSNCAIP  
SQQGIFPKGYAVAVVKASDTSITWNNLKGKKSCHTGVDRTAGWNI PMGMLYNRINHCKFDEFFSQGCAPGYE  
KNSTLCDLDCIGPLKCAPNNKEEYNGYTGAFRCLVEKGDVAFVKHQTVLDNTEGKNPAEWAKNLKQEDFELLCP  
DGTRKPVKDFASCHLAQAPNHVVSRKEKAARVKAVLTSQETLFGGSDCTGNFCLFKSTTKDLLFRDDTKCFV  
KLPEGTTPEKYLGAEYMQSVGNMRKCSTSRLLLEACTFHKH\*  
>ENSMUSP00000128390\_c.75:A>G\_p.T26A ENSMUST00000170904.2|Trf-  
208|ENSMUSG00000032554|-|chr9:g.103098181:T>C  
QEGVCPEGSIDNSPVKWCALSHLERAKCDEWSIIISEGKIECESAETTEDCIEKIVNGEADAMTLDDGGHAYIAG  
QCGLVPVMAEYGYAVAVVKASDTSITWNNLKGKKSCHTGVDRTAGWNI PMGMLYNRINHCKFDEFFSQGCA  
PGYEKNSTLCDLDCIGPLKCAPNNKEEYNGYTGAFRCLVEKGDVAFVKHQTVLDNTEGKNPAEWAKNLKQEDFE  
LLCPDGTRKPVKDFASCHLAQAPNHVVSRKEKAARVKAVLTSQETLFGGSDCTGNFCL  
>ENSMUSP00000071966\_c.5656:G>A\_p.S1886N ENSMUST00000072093.13|Plxnb1-  
201|ENSMUSG00000053646|+|chr9:g.108943415:G>A  
MSVLGVPVLLQVFWAGCVVTLRSLPAAFTANGTHLQHLARDPTTGTLYVGATNFLFQLSPGLQLEAVVSTGPV  
NDSRDCLPPVIPDECPQAQPTNPNQLLLVSPEALVVCVGSVHQICELRSLGQIRQLLLRPERPGDTQYVAAN  
DPAVSTGLVAQGLVGEPLLFVGRGYTSRGGVGGIPPIPTRALRPPDPQAQAFSYYEETAKLAVGRLESEYSHHFV  
SAFVRGASAYFLFLRRDLKAPSRAFRAYVSRVCLQDQHYYSYVELPLACQGGRYGLIQAAAVATSKEVARGDV  
LFAAFSSVAPPTVDWPLSASTGASGTSVLCAFPLEVDQLANYTRDACYTREGRAENGTKVADIAYDVLSDCA  
QLPVDTPDAFPCGSDHTPSPMVSCVPLEATPILELPGVQLTAVAVTMEDGHTIAFLGDSQGLHRVYLGPGRS  
AAPYSKQSIQPGSPVNRDLTFDGTFEHLYVATQTTLVKVPVAPCAQHLDCDSCLAHRDPYCGWCVLLGRCRR

SECSRDQGPEQWLWSFQPELGLCRVAVSPANISREERREVFLSVPGPLSLWPGESYFCYFGDQQSPALLTSS  
 GVMCPSDPSEAPVLQRGADHISVNVLELRFAGAVVIASSTLSFYDCVAVTASSPSAPCRACVSSRWGCNWCWVWQ  
 QLCTHKASCADAGPMVASQQSPLLPLIPPARDELTPFPPTVPQTTVTPTPNSFPPIEPRAPSTASDVLPGAKPSR  
 LSLWGPWAGPGPILSPTSTESPLHEKPLPPDPPTIPGTTVPAPTGLGPSTTPEDLLASYPFPSDAAAVSPAEP  
 GPEALPSMVALDQPPGTVPDPTTFPGAPGSMKPVLDWLTGGGELPEADEWMGGDTPAFSTSTLLSGDGSAAEH  
 EGPPAPLILLSSLDYQYDTPGLWELGEVNRVSSCPCVETVQGSLLIPVHVEREVQLRGRNLWLFQDGRSSE  
 CVLELGSREVAVEAQVECAPPPDVWCHIKCQQHQFSYEALKEPELQVGLFLRWAGGLRVDSADGLHVVLVYDCSV  
 GHGDCSRCQTAMPQYDCVWCEGERPRCVAREACNEAETVATQCPAPLIHSVDPLTGPIDGGTRVTIRGSNLGQ  
 HVQDVLDMVRVAGVPCAVDAGEYDVSSSLVCITGASGEEVTGTVAVEVPGRGHGVSEFSFAYQDPKVHSIFPA  
 RGPRAGGTRLTLHGSKLLTGRLEDIRVVVGDQPCHLLLEQQSEQLHCETGYPVPAELPVTVLFGATERRLQH  
 GQFKYTSDPNVT SVGPKSFFSFGGREIWWRGQDLDDVVQRPRIRVTVVPRQHGQGLAQKHVVPEKFEFPCLVN  
 SSHLLMCRTPALPGPPWDSGVQVEFILDNMVDFDAALSPTPFSYEADPTLRSLNPEDPSTPFRHKPGSVFSVE  
 GENLDLAMSKEEVVAMIGDGPCVVKTLTRNHLYCEPPVEQPLPHPHALREAPDALPEFTVQMGNLRFSLGHVQ  
 YDGESVPAFPVAAQVGLGVGTSLLALGVIIVLVIYRRKSKQALRDYKVKVQIQLENLESSVRDRCKKEFTDLMT  
 EMTDLTSDLLGSGIPFLDYKVAERVFFPGYRESPLHRDLGVPSRRPTVEQGLGQLSNLLNSKFLTKFIHT  
 LESQRTFSARDRAYVASLLTVALHGKLEYFTDILRLLS DLVAQYVAKNPKMLLRRTETVVEKLLTNWMSICL  
 YTFVRDSVGEPLYMLFRGIKHQVDKGFVDSVTGKAKYTLNDRNLLREDVEYRPLTLNALLAVGPGAGEAQCVP  
 VKVLDLDCDTISQAKEKMLDQLYKGVPLAQRPDSCITLDVEWRSVAGHLILSDEDVTSELQGLWRRLNTLQHYKV  
 PDGATVALVPCLTKHILRENQDYVPGERTPMLEDVDEGGIRPWHLVKPSDEPEPPRRRGNLGGGERERAKAI  
 PEIYLTRLLSMKGT LQKFVDDLFQVILSTSRPVPLAVKYFFDLDLDEQAQQHGISDQDTIHIWKTNSLPLRFWI  
 NI IKNPQVFVDVQTSNDMDAVLLVIAQTFMDACTLADHKLGRDSPINKLLYARDIPRYKQMVVERYADIRQTV  
 PASDQEMNSVLAELSRNCSADL GARVALHELYKYINKYYDQIITALEEDGTAQKMQLGYRLQQIAAAVENKVT  
 DL\*

>ENSMUSP00000071966\_c.5748:G>A\_p.V1917M ENSMUST00000072093.13|Plxnb1-  
 201|ENSMUSG00000053646|+|chr9:g.108943663:G>A

MSVLGPFVLLQVFWAGCVTLRSLPAAFTANGTHLQHLARDPTTGTLYVGATNFLFQLSPGLQLEAVVSTGPV  
 NDSRDLCLPPVIPDECPQAQPTNPNQLLLVSPREALVCGSVHQIGICELRSLGQIRQLLLRPERPGDTQYVAAN  
 DPAVSTVGLVAQGLVGEPLLFVGRGYTSRGGVGGIPIITRALRPPDPQAAFSYEETAKLAVGRLSEYSHHFV  
 SAFVRGASAYFLFLRRDLKAPSRAFRAVSRVCLQDQHYYSYVELPLACQGGRYGLIQAAAVATSKEVARGDV  
 LFAAFSSVAPPTVDWPLSASTGASGTSVLCAFPLEVDQLANYTRDACYTREGRAENGTKVADIAYDVLSDCA  
 QLPVDTPDAFPCGSDHTPSPMVSCVPLEATPILELPGVQLTAVAVTMEDGHTIAFLGDSQGLHRVYLGPGRS  
 AAPYSKQSIQPGSPVNRDLTDFDGTFEHLYVATQTTLVKVPVAPCAQHLDLDCDSL AHRDPYCGWCVLLGRCRR  
 SECSRDQGPEQWLWSFQPELGLCRVAVSPANISREERREVFLSVPGPLSLWPGESYFCYFGDQQSPALLTSS  
 GVMCPSDPSEAPVLQRGADHISVNVLELRFAGAVVIASSTLSFYDCVAVTASSPSAPCRACVSSRWGCNWCWVWQ  
 QLCTHKASCADAGPMVASQQSPLLPLIPPARDELTPFPPTVPQTTVTPTPNSFPPIEPRAPSTASDVLPGAKPSR  
 LSLWGPWAGPGPILSPTSTESPLHEKPLPPDPPTIPGTTVPAPTGLGPSTTPEDLLASYPFPSDAAAVSPAEP  
 GPEALPSMVALDQPPGTVPDPTTFPGAPGSMKPVLDWLTGGGELPEADEWMGGDTPAFSTSTLLSGDGSAAEH  
 EGPPAPLILLSSLDYQYDTPGLWELGEVNRVSSCPCVETVQGSLLIPVHVEREVQLRGRNLWLFQDGRSSE  
 CVLELGSREVAVEAQVECAPPPDVWCHIKCQQHQFSYEALKEPELQVGLFLRWAGGLRVDSADGLHVVLVYDCSV  
 GHGDCSRCQTAMPQYDCVWCEGERPRCVAREACNEAETVATQCPAPLIHSVDPLTGPIDGGTRVTIRGSNLGQ  
 HVQDVLDMVRVAGVPCAVDAGEYDVSSSLVCITGASGEEVTGTVAVEVPGRGHGVSEFSFAYQDPKVHSIFPA  
 RGPRAGGTRLTLHGSKLLTGRLEDIRVVVGDQPCHLLLEQQSEQLHCETGYPVPAELPVTVLFGATERRLQH  
 GQFKYTSDPNVT SVGPKSFFSFGGREIWWRGQDLDDVVQRPRIRVTVVPRQHGQGLAQKHVVPEKFEFPCLVN  
 SSHLLMCRTPALPGPPWDSGVQVEFILDNMVDFDAALSPTPFSYEADPTLRSLNPEDPSTPFRHKPGSVFSVE  
 GENLDLAMSKEEVVAMIGDGPCVVKTLTRNHLYCEPPVEQPLPHPHALREAPDALPEFTVQMGNLRFSLGHVQ  
 YDGESVPAFPVAAQVGLGVGTSLLALGVIIVLVIYRRKSKQALRDYKVKVQIQLENLESSVRDRCKKEFTDLMT  
 EMTDLTSDLLGSGIPFLDYKVAERVFFPGYRESPLHRDLGVPSRRPTVEQGLGQLSNLLNSKFLTKFIHT  
 LESQRTFSARDRAYVASLLTVALHGKLEYFTDILRLLS DLVAQYVAKNPKMLLRRTETVVEKLLTNWMSICL  
 YTFVRDSVGEPLYMLFRGIKHQVDKGFVDSVTGKAKYTLNDRNLLREDVEYRPLTLNALLAVGPGAGEAQCVP  
 VKVLDLDCDTISQAKEKMLDQLYKGVPLAQRPDSCITLDVEWRSVAGHLILSDEDVTSELQGLWRRLNTLQHYKV  
 PDGATVALVPCLTKHILRENQDYVPGERTPMLEDVDEGGIRPWHLVKPSDEPEPPRRRGNLGGGERERAKAI  
 PEIYLTRLLSMKGT LQKFVDDLFQVILSTSRPVPLAVKYFFDLDLDEQAQQHGISDQDTIHIWKTNSLPLRFWI  
 NI IKNPQVFVDVQTSNDMDAVLLVIAQTFMDACTLADHKLGRDSPINKLLYARDIPRYKQMVVERYADIRQTV  
 PASDQEMNSVLAELSRNCSADL GARVALHELYKYINKYYDQIITALEEDGTAQKMQLGYRLQQIAAAVENKVT  
 DL\*

>ENSMUSP00000055803\_c.454:A>C\_p.D152A ENSMUST00000063042.11|G1b1-  
 201|ENSMUSG00000045594|+|chr9:g.114250812:A>C

MLRVPLCTPLPLALLQLLGAHGIYNVTQRTFKLDYSRDRFLKDGQPFYRISGSIHYFRIPRFYWEDRLLKM  
 KMAGLNAIQMYVPPWFHEPQPGQYEFSGDRDVEHFIQLAHELGLLVILRPGPYICAEDWDMGGLPAWLLKQSI  
 VLRSSAPDYLVAVDKWLAVLLPKMKPLLYQNGGPIITVQVENEYGSYFACDYDYLRLVHRFRYHLGNDVILF  
 TTDGASEKMLKCGTLQDLYATVDFGTGNNITQAFVLVQRKFEPKGPLINSEFYTGWLDHWGKPHSTVKTKLAT  
 SLYNLLARGANVNLYMFIGGTNFAYWNGANTPYEPQPTS YDYDAPLSEAGDLTKKYFALREVIQMFKEVPEGP  
 IPPSTPKFAYGKVALRKFKTVAEALGILCPNGPVKSLYPLTFTQVKQYFGYVLYRRTTLPQDCSNPKPIFSSPF  
 NGVRDRAYVSVDGVPQGILDRNLMTALNIRGKAGATLDILVENMGRVNYGRFINDFKGLISNMTINSTVLTNW  
 TVFPLNTEAMVRNHLWGREADEGHLDGRSTSNSSDLILPTFYVGNFISIPSGIPDLPPQDTFIQFPGWSKGQVW  
 INGFNLGRYWPTMGPKTLFVPRNILLTTSAPNNITVLELEFAPCSEGTPPELCTVEFVDTPVIS\*  
 >ENSMUSP00000149937\_c.208:A>C\_p.D70A ENSMUST00000217583.2|Glb1-  
 202|ENSMUSG00000045594|+|chr9:g.114250812:A>C  
 MYVPPWFHEPQPGQYEFSGDRDVEHFIQLAHELGLLVILRPGPYICAEDWDMGGLPAWLLKQSI  
 VLRSSAPDYLVAVDKWLAVLLPKMKPLLYQNGGPIITVQVENEYGSYFACDYDYLRLVHRFRYHLGNDVILF  
 TTDGASEKMLKCGTLQDLYATVDFGTGNNITQAFVLVQRKFEPKGPLINSEFYTGWLDHWGKPHSTVKTKLAT  
 SLYNLLARGANVNLYMFIGGTNFAYWNGANTPYEPQPTS YDYDAPLSEAGDLTKKYFALREVIQMVGPSNSQ  
 RAGLLGGLL\*  
 >ENSMUSP00000107069\_c.97:A>T\_p.Q33L ENSMUST00000111442.3|Ccr5-  
 202|ENSMUSG00000079227|+|chr9:g.123924496:A>T  
 MDFQGSVPTYSDIDYGM SAPCQKINVKQIAALLLPPLYSLVFI FGFVGNMMVFLILISCKKLSVTDIYLLN  
 LAISDLLFLLTLPFWAHYAANEWVFGNIMCKVFTGLYHIGYFGGIFFIILLTIDRYLAIHVAVFALKVRTVNF  
 GVITSVVTWAVAVFASLPEIIFTRSQEGFHYTCSPHFPHTQYHFWSFQTLKMVILSLILPLLVMVICYSGI  
 LHTLFRRCRNEKKRHRVRLIFAIMIVYFLFWTPYINIVLLLTTFQEFFGLNNC SSSNRLDQAMQATETLGMTHC  
 CLNPVIYAFVGEKFRSYLSVFFRKHMVKRCKRCSIFQQDNPDRASSVYTRSTGEHEVSTGL\*  
 >ENSMUSP00000127328\_c.97:A>T\_p.Q33L ENSMUST00000171499.3|Ccr5-  
 205|ENSMUSG00000079227|+|chr9:g.123924496:A>T  
 MDFQGSVPTYSDIDYGM SAPCQKINVKQIAALLLPPLYSLVFI FGFVGNMMVFLILISCKKLSVTDIYLLN  
 LAISDLLFLLTLPFWAHYAANEWVFGNIMCKVFTGLYHIGYFGGIFFIILLTIDRYLAIHVAVFALKVRTVNF  
 GVITSVVTWAVAVFASLPEIIFTRSQEGFHYTCSPHFPHTQYHFWSFQTLKMVILSLILPLLVMVICYSGI  
 LHTLFRRCRNEKKRHRVRLIFAIMIVYFLFWTPYINIVLLLTTFQEFFGLNNC SSSNRLDQAMQATETLGMTHC  
 CLNPVIYAFVGEKFRSYLSVFFRKHMVKRCKRCSIFQQDNPDRASSVYTRSTGEHEVSTGL\*  
 >ENSMUSP00000107069\_c.728:G>A\_p.M243I ENSMUST00000111442.3|Ccr5-  
 202|ENSMUSG00000079227|+|chr9:g.123925127:G>A  
 MDFQGSVPTYSDIDYGM SAPCQKINVKQIAAQLLPPLYSLVFI FGFVGNMMVFLILISCKKLSVTDIYLLN  
 LAISDLLFLLTLPFWAHYAANEWVFGNIMCKVFTGLYHIGYFGGIFFIILLTIDRYLAIHVAVFALKVRTVNF  
 GVITSVVTWAVAVFASLPEIIFTRSQEGFHYTCSPHFPHTQYHFWSFQTLKMVILSLILPLLVMVICYSGI  
 LHTLFRRCRNEKKRHRVRLIFAIMIVYFLFWTPYINIVLLLTTFQEFFGLNNC SSSNRLDQAMQATETLGMTHC  
 CLNPVIYAFVGEKFRSYLSVFFRKHMVKRCKRCSIFQQDNPDRASSVYTRSTGEHEVSTGL\*  
 >ENSMUSP00000107069\_c.753:C>A\_p.P252T ENSMUST00000111442.3|Ccr5-  
 202|ENSMUSG00000079227|+|chr9:g.123925152:C>A  
 MDFQGSVPTYSDIDYGM SAPCQKINVKQIAAQLLPPLYSLVFI FGFVGNMMVFLILISCKKLSVTDIYLLN  
 LAISDLLFLLTLPFWAHYAANEWVFGNIMCKVFTGLYHIGYFGGIFFIILLTIDRYLAIHVAVFALKVRTVNF  
 GVITSVVTWAVAVFASLPEIIFTRSQEGFHYTCSPHFPHTQYHFWSFQTLKMVILSLILPLLVMVICYSGI  
 LHTLFRRCRNEKKRHRVRLIFAIMIVYFLFWTPYINIVLLLTTFQEFFGLNNC SSSNRLDQAMQATETLGMTHC  
 CLNPVIYAFVGEKFRSYLSVFFRKHMVKRCKRCSIFQQDNPDRASSVYTRSTGEHEVSTGL\*  
 >ENSMUSP00000152718\_c.860:T>G\_p.I287M ENSMUST00000223295.2|Sult3a2-  
 202|ENSMUSG00000090298|-|chr10:g.33642441:A>C  
 MDNKDEDIFKFKGYNFLRALVSM DIVKNMEDYEIRDDDI FIVTYPKSGTTWTQQILCLICFESH  
 RNGTENIATIDRIPSEFYNIHKLDYAKMPSPRIFTSHIPYLLVPKGLKDKKAKIIYVYRNP  
 KDVLI SFFHFSNLMVVLKASDTLENFMQRFLNGLVGS LWFHDHIRGWYEHHRDFNIMFMSFEDM  
 KDLRSSLVKICSFLEKELSEEDMDAVVRQATFEKMKADPRANNEHIKDELGTRNNTGAFLR  
 KGIVGDWKHYLTVDQSERFDKIFHMNMKNIPLKFMWNINEK\*  
 >ENSMUSP00000127159\_c.860:T>G\_p.I287M ENSMUST00000165904.2|Sult3a2-  
 201|ENSMUSG00000090298|-|chr10:g.33642441:A>C  
 MDNKDEDIFKFKGYNFLRALVSM DIVKNMEDYEIRDDDI FIVTYPKSGTTWTQQILCLICFESH  
 RNGTENIATIDRIPSEFYNIHKLDYAKMPSPRIFTSHIPYLLVPKGLKDKKAKIIYVYRNP  
 KDVLI SFFHFSNLMVVLKASDTLENFMQRFLNGLVGS LWFHDHIRGWYEHHRDFNIMFMSFEDM  
 KDLRSSLVKICSFLEKELSEEDMDAVVRQATFEKMKADPRANNEHIKDELGTRNNTGAFLR  
 KGIVGDWKHYLTVDQSERFDKIFHMNMKNIPLKFMWNINEK\*  
 >ENSMUSP00000143429\_c.1624:G>T\_p.R542M ENSMUST00000200401.2|Crybg1-  
 202|ENSMUSG00000019866|-|chr10:g.43879562:C>A  
 MPLSPSPSQGDPREASPSKAPKKHPTFHIWRSKKKQSPSSCGVFI PHPPGAFGETRAFLV  
 PDGSGQGPQELTLHGELQLSDTPSEVPGPSSTESAMLKKSRAQPPEDTRKPVLEKLGTLFTAGRRR  
 NTRNGLESPTNSNSKSAS

AKVPKTGSEKTKAQDNQLKATDAGEAGPRQEAEGQPVESCVQATPCDAEQSPCSSINVGVVQQCHSNDSAQLE  
 PLQAEGETFPDATTAAKELLHSSPGNRSRQESAETPARSPGEEALPGAGLQPETARGVSGSPPEEHLVGGVGE  
 APDGAPGVGAEAGSLGAPGDVPPGEPQAQDAETSRTAGSVDRAPHTKVLTLTDIYLSKTEVAQVDEPASIAPG  
 TDDCEDSDMEKRSSGRRSGRRRKSQKSTDSPGADAVAPESAADKDEAVFDDEVAPDAAAENCLAERKVKSVQA  
 VPDGGAAPVACPEPKASSCPRGQPRGEPDRSKPLSPTKRKGRSRVPEAVPSSPGSGSRAPAKESPPKRAPAAA  
 DSGEAGRVVPRELTVKSSSLLPEIKPEHKMGPLPHHFDSDRGDGGRRSGTGASDADGLKPRNQFGVGRSTVTT  
 KVTLPARPKHVELNLKTPKNPDSLGNHNSFSQPVHKGNTANKISLFENKRANSSPRHPDVRNTRNPPSSKT  
 FVGRAKLNLAKKAKEMEQQPEKKAVSTSHQNGLVVKEPSAEGKGTAVPVPREEIRPATRGGEGESTKDQVLRPE  
 PEQSDKLDVQTDAYPSHPGPTALVPVKDSELSGEGQPEAADS KGPVLNNTSDVAQDIAAICDAREAPPKPQD  
 AFSDSQPASAAESAESSLPSPAPISVDAPQDGCQVQVPCISVPCTALEVSENHNGCVSPVSPHTEKTPISKPG  
 VGEASPPSTPEHSPETMGKDCPSKVLVQVRSFVLPVENPQDVSSQVISESSEVREAQLPSCHSNEPEVSVVTT  
 CVPQHEDAPDTPSKDIHHREGHVAQSRPHITQSGPEKAPPIQSSSGMPQTAEFILTHSPSSRSHAEGPQRPGQ  
 DATSPLTPTRLLNISAGSDNSVLDSSSDMEKFTEI IKKMSAVCVQKKKKARVPNSPAPHFAMPPIHEDSLE  
 KVFDPNVFTIIGLKKKESLAEVSPALHLLQNHDPI SKLRAKRASTEQSIVFKSLHTNSNGKSEPQTTSEASDK  
 ENRDINSGGVKRSLENSTLFSSMLSSLPQDKVFSVSVTSMSTSFSTSQNSSVSVQSSVVQPRKEGGLPCG  
 SDKEQPHLAPHNSLKVFNFNSSNTSRLGSSHMEKYPQKEGSKEDVNSQGNLQLPENNLSDLPKLNKSDGVEGI  
 LKSNLPNVGSVDADFLGLFKASRYDPGHSFSGMSLSDSMTLRGSMHSKLNPRPGKVVI FSEPVDVSEECIEVFG  
 DIQDCSSWRSLSPVIVKVVVRCWILYEKANFEGHSLALEEGELELSSIWGTEEMLDEEAESDKPVVIGSIRHV  
 VQDYRISQIDLTFTEPEGLGLLNSYFDDTEEMQGFVPMQKTCISKVHWGTWLIYEEPGFQGVPFILPEGEYDPL  
 SFDWTEEAYIGSMRPLKMGGRKVEFPTDPKVVIYEKPSFEGRCMELETEMSSFIMEGGETEETTGNNNLPFTS  
 VGS MKVLRGVVWVAYEKCGFTGHQYLLEEGEYRDWNAWGGYNGELQSLRPILSDFSNAHMIMYSEKNFGSKGSS  
 IDVLGIVANLKETGYGVKTQSINVLSGVWVAYENPDTGEOYVLDKGFYTSFEDWGGKNCKISSVQPICLDSF  
 TGPRRRNQIHLFSEPFQGGQSQSFEETIDQIDDSFQTKSCRVLGGSWVAYDGENFSGNQYVLEEGHYPCLSAM  
 GCLPGATLKLRFIDFEFSEPTIILFERENFKGKIELNAETVNLRS LGFNTQIRSVRVVGGIIVWTYEYGNR  
 GRQFLLSPAEPVNWYEFSAQRQIGSLRPFQAQRIYFRLRNKATGLFMSTNGNLEDLKLRLVQVMEDVGDADDQI  
 WIYQEGCIKRIAEDCCLTIVGSLVTS GSKLGLALDQNVDSQFWCMKSDGRIYSKMKPNLVLDVKGGAQYDQN  
 HII LNTVST EKLTVQVWEAMVL\*

>ENSMUSP00000020017\_c.502:G>T\_p.R168M ENSMUST00000020017.14|Crybg1-  
 201|ENSMUSG00000019866|-|chr10:g.43879562:C>A  
 MEKRSSGRRSGRRRKSQKSTDSPGADAVAPESAADKDEAVFDDEVAPDAAAENCLAERKVKSVQAVPDGGAAPV  
 ACPEPKASSCPRGQPRGEPDRSKPLSPTKRKGRSRVPEAVPSSPGSGSRAPAKESPPKRAPAAAADSGEAGRV  
 VPRELTVKSSSLLPEIKPEHKMGPLPHHFDSDRGDGGRRSGTGASDADGLKPRNQFGVGRSTVTTKVTLPARPK  
 HVELNLKTPKNPDSLGNHNSFSQPVHKGNTANKISLFENKRANSSPRHPDVRNTRNPPSSKTFVGRAKLNLA  
 KAKAKEMEQQPEKKAVSTSHQNGLVVKEPSAEGKGTAVPVPREEIRPATRGGEGESTKDQVLRPEPEQSDKLDV  
 QTDAYPSHPGPTALVPVKDSELSGEGQPEAADS KGPVLNNTSDVAQDIAAICDAREAPPKPQDAFSDSQPAS  
 AAESAESSLPSPAPISVDAPQDGCQVQVPCISVPCTALEVSENHNGCVSPVSPHTEKTPISKPGVGEASPPST  
 PEHSPETMGKDCPSKVLVQVRSFVLPVENPQDVSSQVISESSEVREAQLPSCHSNEPEVSVVTT CVPQHEDAP  
 DTS PKDIHHREGHVAQSRPHITQSGPEKAPPIQSSSGMPQTAEFILTHSPSSRSHAEGPQRPGQDATSPLTP  
 RLLNISAGSDNSVLDSSSDMEKFTEI IKKMSAVCVQKKKKARVPNSPAPHFAMPPIHEDSLEKVFDPNVFT  
 IIGLKKKESLAEVSPALHLLQNHDPI SKLRAKRASTEQSIVFKSLHTNSNGKSEPQTTSEASDKENRDINSGG  
 VKRSLENSTLFSSMLSSLPQDKVFSVSVTSMSTSFSTSQNSSVSVQSSVVQPRKEGGLPCGSDKEQPHLA  
 PHNSLKVFNFNSSNTSRLGSSHMEKYPQKEGSKEDVNSQGNLQLPENNLSDLPKLNKSDGVEGI LKSNLPNV  
 SVDADFLGLFKASRYDPGHSFSGMSLSDSMTLRGSMHSKLNPRPGKVVI FSEPVDVSEECIEVFGDIQDCSSWR  
 LSPVIVKVVVRCWILYEKANFEGHSLALEEGELELSSIWGTEEMLDEEAESDKPVVIGSIRHVQDYRISQI  
 DLFTEPEGLGLLNSYFDDTEEMQGFVPMQKTCISKVHWGTWLIYEEPGFQGVPFILPEGEYDPLSFDWTEEAY  
 IGSMRPLKMGGRKVEFPTDPKVVIYEKPSFEGRCMELETEMSSFIMEGGETEETTGNNNLPFTS VGS MKVLRG  
 VVWVAYEKCGFTGHQYLLEEGEYRDWNAWGGYNGELQSLRPILSDFSNAHMIMYSEKNFGSKGSSIDVLGIVAN  
 LKETGYGVKTQSINVLSGVWVAYENPDTGEOYVLDKGFYTSFEDWGGKNCKISSVQPICLDSFTGPRRRNQI  
 HLFSEPFQGGQSQSFEETIDQIDDSFQTKSCRVLGGSWVAYDGENFSGNQYVLEEGHYPCLSAMGCLPGATL  
 SLRFIDFEFSEPTIILFERENFKGKIELNAETVNLRS LGFNTQIRSVRVVGGIIVWTYEYGNRGRQFLLSPA  
 EVPNWYEFSAQRQIGSLRPFQAQRIYFRLRNKATGLFMSTNGNLEDLKLRLVQVMEDVGDADDQIWIYQEGCIK  
 CRIAEDCCLTIVGSLVTS GSKLGLALDQNVDSQFWCMKSDGRIYSKMKPNLVLDVKGGAQYDQNHII LNTVST  
 EKLTVQVWEAMVL\*

>ENSMUSP00000122041\_c.256:A>T\_p.E86V ENSMUST00000151623.8|Smpdl3a-  
 203|ENSMUSG00000019872|+|chr10:g.57678545:A>T  
 MALSGQFWHVTDLHLDPTYHI TDDR TKVCASSKGANASNP GPF GDVLCDSPYQLILSAFDFIKNSGQEASFMI  
 WTGDSPPHVPVPLSTGTVIKVI TNMTMTVQ



>ENSMUSP00000020022\_c.346:A>T\_p.E116V ENSMUST00000020022.8|Smpd13a-201|ENSMUSG00000019872|+|chr10:g.57678545:A>T  
MALLGNFLCCLLVAWLCGPGGLVPLAPADRAPAVGQFWHVTDLHLDPTYHITDTRTKVCASSKGANASNPGPF  
GDVLCDSPLYQLILSAFDFIKNSGQEASFMIIWTGDSPPHVPVPLVSTGTVIKIVITNMTMTVQNLFPNLQVFPAL  
GNHDYWPQDQLPIVTSKVYSAVADLWKPWLGEAAISTLKKGGFYSQKVASNPGLRIISLNTNLYYGNIMTLN  
KTDPANQFEWLENTLNSSLWNKEKVYIIAHVPVGYLPYATDTPAIRQYYNEKLLDIFRRYSSVIAGQFYGHTH  
RDSLMLVSDKNGNPLNSVFPVAVTPVKGVLOKETNPNPGVRLFYKPGDYTLDMVQYYLNLTEANLKGESNW  
TLEYVLTQAYSVADLQPKSLYALVQQFATKDSKQFLKYYHYFVSYDSSATCDQHCKTLQVCAIMNLDMSYD  
DCLKQHL\*

>ENSMUSP00000020258\_c.2373:G>A\_p.V792I ENSMUST00000020258.10|Herc4-201|ENSMUSG00000020064|+|chr10:g.63147282:G>A  
MLCWGNASYGQLGLGGIDEIIVLEPRRSDFVFNKKVRDVGCGLRHTVFVLDGTVYTCGCNDLGLGHEKSRK  
KPEQVVALDAQNIVAVACGEAHTLALNDKGQVYAWGLDSDGQLGLQGSEECIRVPRNIKSLSDIQIVQVACGY  
YHSLALSKASEVFCWGQNKYQGLGLGIDCQKQTSPLIKSLLGIPFMQVAAGGAHSFVLTLSGAI FGWGRNKF  
GQLGLNDENDRYVPNLLKSLRSQKIVYICCGEDHTAALTKEGGVFTFGAGGYGQLGHNSTSHENPRKVFELM  
GSIVTQVACGRQHTSAFVPSSGRIYSFGLGGNGQLGTGSTS NRKSPFTVKGNWFSYNGQCPQDIGSEDFCVK  
RIFSGGDQSFSSHYSPPQNCPPDDFRCSDPKQIWTVNEALIQKWSYPSGRFPVEIANEIDGTFSSSGCLNG  
SFLAISNDHDYRTGTRFSGVDMNAARLLFHKLIIQPDHPQISQQVAASLEKNLIPKLTSSLDPVEALRFYLTLP  
ECPLMSDCNNFTTIAIPFGTALVNLEKAPLKVLENWWSVLEPPLFLKIVELFKEVHVHLLKLYKIGIPPSERR  
IFNSFLHTALKVLEILHRVNEKTGQLIQYDKFYIHEVQELIDIRNDYINWVQQQAYGVLDI PVTICTYPFV  
DAQAKTTLTQTDVAVLQMQMAIDQHRQNVSSFLPVIESVNPCLILVVRRENIVGDAMEVLRKTKNIDYKPKL  
KVI FVGEDAVDAGGVRKEFFLLIMRELLDPKYGMFRYYEDSRLIWFSDKTFEDSDLFHLIGIICGLAIYNFTI  
VDLHFPLALYKLLKRP SLDDLKELMPAVGRSMQQLLDYPEDDIEETFCLNFTITVENFGATEVKELVLNGA  
DTAVNRQNRQEFVDAYVDYIFNKSVASLFD AFHAGFHKVCGGKVL LLLFQPNELOAMVIGNTNYDWKELEKNT  
YKGEYWADHPTIKIFWEV FHELPLEKKKQFLLFLTGS DRIPILGMKSLKLV IQSTGGGESYLPVSHTCFNLLD  
LPKYTEKETLRCKLIQAIDHNEGFSLI\*

>ENSMUSP00000151886\_c.2397:G>A\_p.V800I ENSMUST00000219577.2|Herc4-208|ENSMUSG00000020064|+|chr10:g.63147282:G>A  
MLCWGNASYGQLGLGGIDEIIVLEPRRSDFVFNKKVRDVGCGLRHTVFVLDGTVYTCGCNDLGLGHEKSRK  
KPEQVVALDAQNIVAVACGEAHTLALNDKGQVYAWGLDSDGQLGLQGSEECIRVPRNIKSLSDIQIVQVACGY  
YHSLALSKASEVFCWGQNKYQGLGLGIDCQKQTSPLIKSLLGIPFMQVAAGGAHSFVLTLSGAI FGWGRNKF  
GQLGLNDENDRYVPNLLKSLRSQKIVYICCGEDHTAALTKEGGVFTFGAGGYGQLGHNSTSHENPRKVFELM  
GSIVTQVACGRQHTSAFVPSSGRIYSFGLGGNGQLGTGSTS NRKSPFTVKGNWFSYNGQCPQDIGSEDFCVK  
RIFSGGDQSFSSHYSPPQNCPPDDFRCSDPKQIWTVNEALIQKWSYPSGRFPVEIANEIDGTFSSSGCLNG  
SFLAISNDHDYRTGTRFSGVDMNAARLLFHKLIIQPDHPQISQQVAASLEKNLIPKLTSSLDPVEALRFYLTLP  
ECPLMSDCNNFTTIAIPFGTALVNLEKAPLKVLENWWSVLEPPLFLKIVELFKEVHVHLLKLYKIGIPPSERR  
IFNSFLHTALKVLEILHRVNEKTGQLIQYDKFYIHEVQELIDIRNDYINWVQQQAYGVDVSHGVTELDI PVT  
ICTYPFVFD AQAKTTLTQTDVAVLQMQMAIDQHRQNVSSFLPVIESVNPCLILVVRRENIVGDAMEVLRKTK  
NIDYKPKL KVI FVGEDAVDAGGVRKEFFLLIMRELLDPKYGMFRYYEDSRLIWFSDKTFEDSDLFHLIGIICG  
LAIYNFTI VDLHFPLALYKLLKRP SLDDLKELMPAVGRSMQQLLDYPEDDIEETFCLNFTITVENFGATEV  
KELVLNGADTAVNRQNRQEFVDAYVDYIFNKSVASLFD AFHAGFHKVCGGKVL LLLFQPNELOAMVIGNTNYDW  
KELEKNTYKGEYWADHPTIKIFWEV FHELPLEKKKQFLLFLTGS DRIPILGMKSLKLV IQSTGGGESYLPV  
HTCFNLLDLPKYTEKETLRCKLIQAIDHNEGFSLI\*

>ENSMUSP00000020258\_c.2955:A>C\_p.S986R ENSMUST00000020258.10|Herc4-201|ENSMUSG00000020064|+|chr10:g.63153073:A>C  
MLCWGNASYGQLGLGGIDEIIVLEPRRSDFVFNKKVRDVGCGLRHTVFVLDGTVYTCGCNDLGLGHEKSRK  
KPEQVVALDAQNIVAVACGEAHTLALNDKGQVYAWGLDSDGQLGLQGSEECIRVPRNIKSLSDIQIVQVACGY  
YHSLALSKASEVFCWGQNKYQGLGLGIDCQKQTSPLIKSLLGIPFMQVAAGGAHSFVLTLSGAI FGWGRNKF  
GQLGLNDENDRYVPNLLKSLRSQKIVYICCGEDHTAALTKEGGVFTFGAGGYGQLGHNSTSHENPRKVFELM  
GSIVTQVACGRQHTSAFVPSSGRIYSFGLGGNGQLGTGSTS NRKSPFTVKGNWFSYNGQCPQDIGSEDFCVK  
RIFSGGDQSFSSHYSPPQNCPPDDFRCSDPKQIWTVNEALIQKWSYPSGRFPVEIANEIDGTFSSSGCLNG  
SFLAISNDHDYRTGTRFSGVDMNAARLLFHKLIIQPDHPQISQQVAASLEKNLIPKLTSSLDPVEALRFYLTLP  
ECPLMSDCNNFTTIAIPFGTALVNLEKAPLKVLENWWSVLEPPLFLKIVELFKEVHVHLLKLYKIGIPPSERR  
IFNSFLHTALKVLEILHRVNEKTGQLIQYDKFYIHEVQELIDIRNDYINWVQQQAYGVLDI PVTICTYPFV  
DAQAKTTLTQTDVAVLQMQMAIDQHRQNVSSFLPVIESVNPCLILVVRRENIVGDAMEVLRKTKNIDYKPKL  
KVI FVGEDAVDAGGVRKEFFLLIMRELLDPKYGMFRYYEDSRLIWFSDKTFEDSDLFHLIGVICGLAIYNFTI  
VDLHFPLALYKLLKRP SLDDLKELMPAVGRSMQQLLDYPEDDIEETFCLNFTITVENFGATEVKELVLNGA  
DTAVNRQNRQEFVDAYVDYIFNKSVASLFD AFHAGFHKVCGGKVL LLLFQPNELOAMVIGNTNYDWKELEKNT

YKGEYWADHPTIKIFWEVVFHELPLEKKKQFLLFLTGRDRIPILGMKSLKLVIQSTGGGESYLPVSHTCFNLLD  
 LPKYTEKETLRCKLIQAIDHNEGFSLI\*  
 >ENSMUSP00000151886\_c.2979:A>C\_p.S994R ENSMUST00000219577.2|Herc4-  
 208|ENSMUSG00000020064|+|chr10:g.63153073:A>C  
 MLCWGNASYGQLGLGGIDEIIVLEPRRSDFVFNKKVRDVGCGLRHTVFLDDGTVYTCGCNDLGGQLGHEKSRK  
 KPEQVVALDAQNIVAVACGEAHTLALNDKGQVYAWGLDSDGQLGLQGSEECIRVPRNIKSLSDIQIVQVACGY  
 YHSLALS KASEVFCWGQNKYQQLGLGIDCQKQTSPLIKSLLGIPFMQVAAGGAHSFVLTLSGAI FGWGRNKF  
 GQLGLNDENDRYVPNLLKSLRSQKIVYICCGEDHTAALTKEGGVFTFGAGGYQLGHNSTSHENPRKVFELM  
 GSIVTQVACGRQHTSAFVPSGRIYSFGLGGNGQLGTGSTSNRKS PFTVKGNWFSYNGQCPQDIGSEDYFCVK  
 RIFSGGDQSF SHYSSPQNCGPPDDFRCS DPSKQIWTVNEALIQKWLSPSGRFPVEIANEIDGTFSSSGCLNG  
 SFLAISNDHRYRTGTRFSGVDMNAARLLFHKL IQPDHPQISQQVAASLEKNLIPKLTSSLPDVEALRFYLTLP  
 ECPLMSDCNNFTTIAIPFGTALVNLEKAPLKVLENWWSVLEPPLFLKIVELFKEVVVHLLKLYKIGIPPSERR  
 IFNSFLHTALKVLEILHRVNEKTGQLIQYDKFYIHEVQELIDIRNDYINWVQQQAYGVDVSHGVTELDIPVT  
 ICTYPFVFDQAQAKTTLLQTDVAVLQMQMAIDQAHQNVSSFLFVIESVNPCLILVVRRENI VGDAMEVLRKTK  
 NIDYKKPLKVI FVGEDAVDAGGRKEFFLLIMRELLDPKYGMFRYYEDSRLIWFSDKTFEDSDFHLIGVICG  
 LAIYNFTIVDLHFPLALYKLLKRRKPSLDDLKELMPAVGRSMQQLLDYPEDDIEETFCLNFTITVENFGATEV  
 KELVLNGADTAVNRQRQEFVDAVYDI FNKSVASLFDFAFHAGFHKVC GGKVL LLLFQPNELQAMVIGNTYNDW  
 KELEKNTEYKGEYWADHPTIKIFWEVVFHELPLEKKKQFLLFLTGRDRIPILGMKSLKLVIQSTGGGESYLPVS  
 HTCFNLLDLPKYTEKETLRCKLIQAIDHNEGFSLI\*  
 >ENSMUSP00000041298\_c.142:A>C\_p.E48A ENSMUST00000043317.7|Dnajc12-  
 201|ENSMUSG00000036764|+|chr10:g.63231628:A>C  
 MDAIILNYRPEGSEDYIALLGCDELSSVEQILAEFKIRALECHPDKHPANSKAVETFOQLQKAKEILCNAESRA  
 RYDHWRRSQMSMPFEQWEALADSVKTSMHWA VRSK KDLMLEGSGQFTTSSV PNKERSEQRET KKGDPDSNPEK  
 MKQKEPKFPPEEGISPQNPDSPLSDLNCGHLRFRWSGDAPSELLRKRFRNYEI\*  
 >ENSMUSP00000079789\_c.301:A>G\_p.Q101R ENSMUST00000080995.8|Tmem26-  
 201|ENSMUSG000000060044|+|chr10:g.68584237:A>G  
 MEGLVLLKALVTRLLFLLHSLVAVWRVTWVKEEHRYWLLALLNLLLVLETVLT LKFKRGRGYKWLSPAIFVYL  
 VNIMP SLW LLEMHHGNQY CSTQSERMARNFSRRGDVNQTLSSHRATNGMGNILELARGFVDNLSMVCEPVWTL  
 GLHQ TLLLIL IIGRWLLPIGGTITRDQLSEL LLMFVGTAA DILEFTTETLKENNVRTNPTLVSGILVVTWWSM  
 LQFPDLDAVQLKLVCPASVKARGFLRVFLCQYSADLWAIGLSFFIQDGPFLVVRVLVMIYFKVINHMLVFFAV  
 KNSLVMALHFYRLVALIMATRDFMRDHPESP KPEHSGPDQPSSESGPSEWEDASPEALPLRTSPVTSEESYPTT  
 P\*  
 >rs254345418\_ENSMUSP00000151917\_c.184:A>C\_p.D62A  
 ENSMUST00000219981.2|Fgf22-203|ENSMUSG00000020327|+|chr10:g.79591137:A>C  
 MRSRLWLGLAWLLLARAPGAPGGYPHLEGDVRRWRRLFSSTHFFLRVDLGGRVQGTWRWRHGQASIVEIRSVRVG  
 TVVIKAVYSGFYVAMNRRGRLYGSVPGAHRRERLQHIRLATLEAPRPTHVPGT\*  
 >rs254345418\_ENSMUSP00000151743\_c.184:A>C\_p.D62A  
 ENSMUST00000219228.2|Fgf22-202|ENSMUSG00000020327|+|chr10:g.79591137:A>C  
 MRSRLWLGLAWLLLARAPGAPGGYPHLEGDVRRWRRLFSSTHFFLRVDLGGRVQGTWRWRHGQASIVEIRSVRVG  
 TVVIKAVYSGFYVAMNRRGRLYGSRVYSVDCRFRERIEENGYNTYASRRWRHRGRPMFLALDSQGI PRQGRRT  
 RRHQLSTHFLPVLVSS\*  
 >rs254345418\_ENSMUSP00000020577\_c.166:A>C\_p.D56A  
 ENSMUST00000020577.4|Fgf22-201|ENSMUSG00000020327|+|chr10:g.79591137:A>C  
 LGLAWLLLARAPGAPGGYPHLEGDVRRWRRLFSSTHFFLRVDLGGRVQGTWRWRHGQASIVEIRSVRVGT VVIKA  
 VYSGFYVAMNRRGRLYGSVSDWRWAATGWQWSVVQTASLTHPPCSG STLWTVGSGSASRRATATHTPRDVGGT  
 AADPCS WHLTAKAFPGKADGHDG TNC PHTSCQSWSRLEGPANGSGMGGTQGLEDP ELNNQGPQRPWANTSL  
 YV  
 >rs242503166\_ENSMUSP00000005069\_c.244:C>T\_p.A82V  
 ENSMUST00000005069.8|Nmrk2-201|ENSMUSG00000004939|-|chr10:g.81036204:G>A  
 MKLIIIGIGVNTGGKTTLTNSLLKALPNCCVIHQDDFFKPDQI AVGEDGFKQWDVLES LDMETMLSTVQAWV  
 KDPHKFARVHGVSLQSGASDTHVLLLEGFLLYSYRPLVDLYSQRYFLTVPYEECKRRRRSRTYMVPDPPGLFD  
 GHVWPMYQKYRREMEQD GVEVVYLDGMKSP EGLFHQVLEDIQNRLLNTS\*  
 >rs108207416\_ENSMUSP000000059533\_c.1078:T>C\_p.V360A  
 ENSMUST000000050867.8|Cactin-201|ENSMUSG000000034889|+|chr10:g.81159581:T>C  
 MRGAGRQMGDRSRSRSVGRGRKQRSRSRGRSRSRSRSRSRSRSRSRSRSHGRSSRRRREHERRERKR  
 RSRGRSDSEGEQRQKSRRRS QSLRPPRWSQNQSSCSDS GEERAQGSWARKGHRRSWSPGSSASSLDSPRRS  
 RSPGTATLALSQQQSLQERLRLREERKQOEELLKAFETPEEKRRARLAKKEAKERKKREKMGWGEEMGYTNT  
 DNPFGDNNLLGTFIWNKALEKKGISHLEEKELKERNKRIQEDNRLELQKVKQLRLEREREKAMREQELELLQR

EKEAEHFKTWEEQEDSFHLRQAKLRSKIRIRDGRAKPIDLLAKYISAEDDDLAVEMHEPYTFLNGLTAADMED  
LLEDIQVYMELEQGKNVDFWRDMMTTITEDEIAKLRKLEASGKGPGERREGVNASVSSDVQSVFKGKTYNQLQV  
IFQIEGKIRAGGNPLDMGYWESLLQQLRAHMARARLRERHQDVLRLQKLFKFKQEQGVESEPLFPILKSEPSA  
AHSPEPEERPPSPGTSVDPVEPVEPEEATAPGEAEGEAEGEAVLMEEDLIQQSLADYDAGRYSRLLTAHELPL  
LDAHVLEPHEDLQRLQLSRQQLQATGDASESAEDIFFRRAREGMQDEAQFSVEMPLGGGRAYLWADKYRPRKP  
RFFNRVHTGFWEWNKYNQTHYDFDNPFPKIVQGYKFNIFYPDLIRKRATPEYFLEACADNRDFAILRFHAGPPY  
EDIAFKIVSREWEYSHRHGFRCQFANGIFQLWFHFKRYRYRR\*

>rs108207416\_ENSMUSP00000151248\_c.136:T>C\_p.V46A  
ENSMUST00000218120.2|Cactin-202|ENSMUSG00000034889|+|chr10:g.81159581:T>C  
QTCSKIRIRDGRAKPIDLLAKYISAEDDDLAVEMHEPYTFLNGLTAADMEDLLEDIQVYMELEQGKNVDFWRD  
MTTITEDEIAKLRKLEASGKGPGERREGVNASVSSDVQSVFKGKTYNQLQVIFQIEGKIRAGGNPLDMGYWE  
SLLQQLRAHMARARLRERHQDVLRLQKLFKFKQEQGVESEPLFPILKSEPSAAHSPEPEERPPSPGTSVDPVEP  
VEP

>ENSMUSP00000036690\_c.681:G>C\_p.D228H ENSMUST00000039956.6|Slc41a2-  
201|ENSMUSG00000034591|-|chr10:g.83140221:C>G  
MTHSKGRPVTYKTSASPESGGGFVDWTLNLTIQSDKFLNLLSMVPIYQKNQEDRHKVNGIWDGLSGAA  
QTFSKRSEPHLDYHEFSEQAFHSSSSGHTPASCSPKYDDYAGYNYCDGREASETTAMLQDEDLSEGGDDVIVE  
TSQRIPKESSGVMAQLILVFPFLLAGFGTVSAGMVDIVQHWVEFKNVTEVFILVPALLGLKGNLEMTLASRLS  
TAVNVGKMHSPIEKWNLIIGNLALKQVQATVVGFLAAVAIIIGWIEGKYLSHSILLCSSSVATAFIASLL  
QGIIMVGVIVGSKKTGINPDNVATPIAASFGDLITLAILAWISQGLYSCLETYIYISPLVCAFFLALTPWI  
IAAKHPATRTVLHSGWEPVITAMVISSIGGLILDTTVSDPNLVGIVVYTPVINGIGGNLVAIQASRISTYLHL  
HSIPGELPEEPKGCSPFRFTFFGSGVNNKSAQVLLLFVIPGHLIFLYTIHLMKSGHTSLTVVFFVVVYLFAAVL  
QVFTLLWIADWMVHRFWRKGDPSFSIPYLTALGDLLGTALLALSFFHLWLIGDRDGDVGD\*

>ENSMUSP00000076418\_c.1824:A>C\_p.K609Q ENSMUST00000077175.7|Polr3b-  
201|ENSMUSG00000034453|+|chr10:g.84515653:A>C  
MDVLAEEFSGLTPEQLTAPIPTVEEKWRLLPALFKVKGLVKQHIDSFNYFINVEIKKIMKANKEKVTSDADPMW  
YLKYLNIYVGLPDVEESFNVRPVPHECRLRDMTYSAPITVDIEYTRGSQRIIRNALPIGRMPIMLRSSNCV  
LTGKTPAEFAKLNECPLDPGGYFIVKGVKVLILIQEQLSKNRIIVEADRKGAVGASVTSSTHEKKSRTNMAVK  
QGRFYLRHNTLSEDIPIVIFKAMGVESDQEIQVMIGTEEHVMAAFGPSLEECQKAQIFTQMQUALKYGKVR  
RQRMWGGGPKKTKIEEARELLASTILTHVPVKEFNFRACIYTAVMVRRVILAQQDNKVDDRDYGNKRL  
GQLSLLFEDLFFKFNSEMKKIADQVIPKQRAAQFDVVKHMRQDQITNGMVNAISTGNWSLKRKFMDRQGV  
VLSRLSYISALGMMTRISSQFEKTRKVSQPRSLQPSQWMLCPSDTPGEACGLVKNLALMTHITDMDGPI  
IKLAGNLGVEDVNLCCGEELSPNVFLVFLNGNIGLVIRDHKKLVSTFRLMRRAGYINEFVSI  
TNTLTDRCVYISSDGGRLCRPYIIVKKQKPAVTNQHMEEAQQGYRNFEDFLHESLVEYLDVNEENDCNIALY  
EHTINKDTHLEIEPFTLLGVCAGLIPYPHNQSPRNTYQCAMGKQAMGTIGYNQRNIDTLMYLLAYPQKPMVKT  
KTIELIDFEKLPAGQNATVAVMSYSGYDIEDALVLNKSASLDRGFRCLVYKNAKCTLKRYTNQTFDKVMGP  
MLDAATRKPWRHEILDADGICSPGEKVENKQVLVNSMPTVTQIPLGNSVPPQYKDVPIYKYGATDSYIEK  
VMISSNAE DAFLIKMLLRQTRRPEIGDKFSSRHGQKGVCGLIVPQEDMPFCDSGICPDIIMNPHGFP  
SRMTVGKLIPELLAGKAGVLDGRFHYGTAFGGSKVKDVCEDLVRHGYNYLGDYVTSGITGEPL  
EAYIYFGPVYYQKPKHMVLDKMHARARGPRAVLTRQPTGRSRDGLRLGEMERDCLIGYGASMLL  
LERLMISSDAFEVDVCGQCGLLGYSGWCHYCKSSCHVSSLRIPYACKLLFQELQSMNII  
PRLKLAKYNE\*

>ENSMUSP00000020094\_c.9:C>A\_p.L4I ENSMUST00000020094.8|Epyc-  
201|ENSMUSG00000019936|+|chr10:g.97485571:C>A  
MGMIARVALGLIIIDAVLAAPTTELFNYDSEVYDAILEDGTFTFYNYEHIIPDNHVENEKV  
SERLSGNRELLTPG PQLGDNQDEDKDEESTPRLIDGSSPQEPFPGLLGPHNTNE  
DFPTCLLCTCISTTVYCDHDELDAIPLPKKTTYFYSRFRNIKKINKNDFASLNDLKRIDL  
TNSLISEIDEAFRKLPHLQELVLRDNKIKQLPELNTLTFIDISNNRLGRKGIKQEA  
FKDMYDLHLLYITDNSLDHIPLPLPESLRLALHLQNNDIEMHEDTFCNVKNLTYVRKALE  
DIRLDGNPINLSRTPQAYMCLPRLPIGSFI\*

>ENSMUSP00000100922\_c.9:C>A\_p.L4I ENSMUST00000105285.4|Epyc-  
202|ENSMUSG00000019936|+|chr10:g.97485571:C>A  
MGMIARVALGLIIIDAVLAAPTTELFNYDSEVYDAILEDGTFTFYNYEHIIPDNHVENEKV  
SERLSGNRELLTPG PQLGDNQDEDKDEESTPRLIDGSSPQEPFPGLLGPHNTNE  
DFPTCLLCTCISTTVYCDHDELDAIPLPKKTTYFYSRFRNIKKINKNDFASLNDLKRIDL  
TNSLISEIDEAFRKLPHLQELVLRDNKIKQLPELNTLTFIDISNNRLGRKGIKQEA  
FKDMYDLHLLYITDNSLDHIPLPLPESLRLALHLQNNDIEMHEDTFCNVKNLTYVRKALE  
DIRLDGNPINLSRTPQAYMCLPRLPIGSFI\*

>ENSMUSP00000151842\_c.2284:A>G\_p.E762G ENSMUST00000219263.2|Ppp1r12a-  
205|ENSMUSG00000019907|+|chr10:g.108096896:A>G

MKMADAKQKRNEQLKRWIGSETDLEPPVVKRQKTKVKFDDGAVFLAACSSGDTDEVLKLHHRGADINYANVDG  
 LTALHQACIDDNVDMVKFLVENGANINQPDNEGWIPLHAAASCGYLDIAEFLIGQGAHVAVNSEGDTPLDIA  
 EEEAMEELLQNEVNRQGV DIEAARKEEERVMLRDARQWLNHGHISDVRHAKSGGTALHVAAGKYTEVLKLLI  
 QAGYDVNIKDYDGTWPLHAAAHWGKEEACRILVDNLCDMETVNVKVGQTAFDVADEDILGYLEELQKKQTLHLS  
 EKRDKKSPLIESTANMENNQPQKAFKNKETLIEPEKNASRIESLEHEKADEEEEGKKDESSCSSEDEEDDS  
 ESEAETDKTKPMASVSNHTSSTQAAPAAVTAPTSSNQGTPTS PVKFFPISTTKISPKEEERKDESPASWRL  
 GLRKTGSYGALAEISASKEAQKEKDTAGVMRSASSPRLSSSLDNKEKEKDNKGTRLAYVTPTIPRRLASTSDI  
 EEKENRESSSLRTSSSYTRRKWEDDLKKNSSINEGSTYHRSCSFGRQDDLI SCVSPSTTSTPTVTSAAQLR  
 SLPSSTSTAAKTPPGSSSAGTQSSTSNRLWAEDSTEKEKDSAPTAVTIPVAPTIVVNAAPSTTTTLTTTAGTV  
 SEVRERRRSYLTPVRDEESESQRKARSRQARQSRSTQGVTLTDLQEAETIGRSRSTRTREQENEEKEKEEK  
 EKQDKEKQEEKKESEASREDEYKQKYSRTYDGYTRYRYPVSTSSSSAPSSSSLSTLGSTLYASSQLNRPNSLV  
 GITSAYSRGLAKENEREGEKEKEEGEDKSKQPKSIRERRRPREKRRSTGVSFWTQDSDENEQERQSDTEDGS  
 SKRETQTDVSRYDSSSTSSSDRYDSSLGRSASYSYLEDKPYSSRLEKDDSTDFKKLYEQILAENEKLAQL  
 HDTNMELTDLKLQLEKATQRQERFADRSQLEMEKRERRALERRISEMEEELKMLPDLKADNQRLLKDENGALIR  
 VISKLSK\*

>ENSMUSP00000069257\_c.2284:A>G\_p.E762G ENSMUST00000070663.6|Ppplr12a-  
 201|ENSMUSG00000019907|+|chr10:g.108096896:A>G

MKMADAKQKRNEQLKRWIGSETDLEPPVVKRQKTKVKFDDGAVFLAACSSGDTDEVLKLHHRGADINYANVDG  
 LTALHQACIDDNVDMVKFLVENGANINQPDNEGWIPLHAAASCGYLDIAEFLIGQGAHVAVNSEGDTPLDIA  
 EEEAMEELLQNEVNRQGV DIEAARKEEERVMLRDARQWLNHGHISDVRHAKSGGTALHVAAGKYTEVLKLLI  
 QAGYDVNIKDYDGTWPLHAAAHWGKEEACRILVDNLCDMETVNVKVGQTAFDVADEDILGYLEELQKKQTLHLS  
 EKRDKKSPLIESTANMENNQPQKAFKNKETLIEPEKNASRIESLEHEKADEEEEGKKDESSCSSEDEEDDS  
 ESEAETDKTKPMASVSNHTSSTQAAPAAVTAPTSSNQGTPTS PVKFFPISTTKISPKEEERKDESPASWRL  
 GLRKTGSYGALAEISASKEAQKEKDTAGVMRSASSPRLSSSLDNKEKEKDNKGTRLAYVTPTIPRRLASTSDI  
 EEKENRESSSLRTSSSYTRRKWEDDLKKNSSINEGSTYHRSCSFGRQDDLI SCVSPSTTSTPTVTSAAQLR  
 SLPSSTSTAAKTPPGSSSAGTQSSTSNRLWAEDSTEKEKDSAPTAVTIPVAPTIVVNAAPSTTTTLTTTAGTV  
 SEVRERRRSYLTPVRDEESESQRKARSRQARQSRSTQGVTLTDLQEAETIGRSRSTRTREQENEEKEKEEK  
 EKQDKEKQEEKKESEASREDEYKQKYSRTYDGYTRYRYPVSTSSSSAPSSSSLSTLGSTLYASSQLNRPNSLV  
 GITSAYSRGLAKENEREGEKEKEEGEDKSKQPKSIRERRRPREKRRSTGVSFWTQDSDENEQERQSDTEDGS  
 SKRETQTDVSRYDSSSTSSSDRYDSSLGRSASYSYLEDKPYSSRLEKDDSTDFKKLYEQILAENEKLAQL  
 HDTNMELTDLKLQLEKATQRQERFADRSQLEMEKRVAGKSYLLGGTKSSRKKNI\*

>ENSMUSP00000151478\_c.715:A>G\_p.E239G ENSMUST00000219759.2|Ppplr12a-  
 208|ENSMUSG00000019907|+|chr10:g.108096896:A>G

VMRSASSPRLSSSLDNKEKEKDNKGTRLAYVTPTIPRRLASTSDIEEKENRESSSLRTSSSYTRRKWEDDLK  
 NSSINEGSTYHRSCSFGRQDDLI SCVSPSTTSTPTVTSAAQLRSLPSSTSTAAKTPPGSSSAGTQSRSYLT  
 PVRDEESESQRKARSRQARQSRSTQGVTLTDLQEAETIGRSRSTRTREQENEEKEKEEKEKQDKEKQEEKK  
 ESEASREDEYKQKYSRTYDGYTRYRYPVSTSSSSAPSSSSLSTLGSTLYASSQLNRPNSLVGITSAYSRGLAK  
 ENEREGEKEKEEKEEGEDKSKQPKSIRERRRPREKRRSTGVSFWTQDSDENEQERQSDTEDGSSKRETQTDVSR  
 YDSSSTSSSDRYDSSLGRSASYSYLEDKPYSSRLEKDDSTDFKKLYEQILAENEKLAQLHDTNMELTDLKL  
 QLEKATQRQERFADRSQLEMEKRERRALERRISEMEEELKMLPDLKADNQRLLKDENGALIRVISKLSK\*

>ENSMUSP00000020315\_c.3421:G>T\_p.R1141M ENSMUST00000020315.13|Cand1-  
 201|ENSMUSG00000020114|-|chr10:g.119042667:C>A

MASASYHISNLEKMTSSDKDFRFRMATNDLMTLQKDSIKLDDDSERKVVKMILRLLLEDKNGEVQNLAVKCLG  
 PLVSKVKEYQVETIVDTLCTNMLSDKEQLRDISSIGLKTIVIGELPPASSGSALANVCKKITGRLTSIAKQE  
 DVSVQLEALDIMADMLSRQGGLLVNFHPSILTCLLPQLTSPRLAVRKRTI IALGHLVMSCGNI VFDLIEHLL  
 SELSKNDSMSTTRTYIQCIAAISRQAGHRIGEYLEKI I PLVVKFCNVDDDELREYCIQAFESFVRRCPKEVYP  
 HVSTI INICLKYLTYDPNINYDDEDEDENAMDADGGDDDDQGSDDDEYSDDDDMSWKVRRRAAKCLDAVVSTRH  
 EMLPEFYKTVSPALIARFKEREENVKADV FHAYLSLLKQTRPVQSWLCPDAMEQGDPTLTMLOSQVNPVKA  
 LHKQMKESVVKTRQCCFNMLTELNVLPGALTQHIPVLVPGIIFSLNDKSSSSNLKIDALSCLYVILCNHSPQ  
 VFHPHVQALVPPVACVGDPFYKITSEALLVTQQLVKVIRPLDQPSFDPATPYIKDLFTCTIKRKAADIDQE  
 VKERAI SCMQIICNLGDNLGPDLSENTLQIFLERLKNETRLTTVKALTLIAGSPLKIDLRPVLGEGVPIIAS  
 FLRKNQRALKGLTSLALDILIKNYSDSLTAAMIDAVLDELPLLISESDMHVSQMAISFLTTLAKVYPSSLSKI  
 SGSILNELI GLVPSPLLQGGALSAMLDFFQALVLTGTNNLGYMDLLRMLTGPVYSQSTALTHKQSYYSIAKCV  
 AALTRACPEKGPVAVGQFIQDVKNRSRSTDSIRLLVALLSLGVEGHHDLSGQLELKSIVILEAFSSPSEEVKSA  
 SYALGSI SVGNLPEYLPFVLQEI TSQPKRQYLLHSLKEI ISSASVAGLKPVENI WALLKHCECAEEGTRN  
 VVAECLGKLTLDIPETLLPRLKGYLISGSSYARSSVVTAVKFTISDHPQPIDPLKNCIGDFLKTLEDPLNV  
 RRVALVTFNSAAHNKPSLIRDLLDSVLPHLYNETKVRKELIREVEMGPFKHTVDDGLDIRKAAFECMYTLLDS

CLDRLDIFEFLNHVEDGLKDHYDIKMLTFLMLVRLSTLCPSAVLQMLDRLVEPLRATCTTKVKANSVKQEFEEK  
QDELKRSAMRAVAALLTIPEAEKSPMLSEFQSQISSNP ELAAIFESI QKSSSTNLESMDTS\*  
>ENSMUSP00000122669\_c.89:G>A\_p.W30\* ENSMUST00000152054.8|Tsfm-  
207|ENSMUSG00000040521|-|chr10:g.126866470:C>T  
MSLLRSLRFFPVACTGRSARAVLLQPSQP\*LT FHAGPSLSSAASSKELLMKLRRTGYSFVNCKKALET CGGD  
LKQAEDWLHKQAQKEGWSKAAKHLGRKTKEGLIGLLQEGNTAVLVEVVLCLSPQQKDVVGVGERGSRGRDLHCF  
GVGFVVPVDLEEPYWRVRLVSLPGSPALKSRVQTFRVLRELAAMNVRWTVYHLCPSGSP\*  
>ENSMUSP00000042134\_c.89:G>A\_p.W30\* ENSMUST00000040560.11|Tsfm-  
201|ENSMUSG00000040521|-|chr10:g.126866470:C>T  
MSLLRSLRFFPVACTGRSARAVLLQPSQP\*LT FHAGPSLSSAASSKELLMKLRRTGYSFVNCKKALET CGGD  
LKQAEDWLHKQAQKEGWSKAAKHLGRKTKEGLIGLLQEGNTAVLVEVNCETDFVSRNLKFQQLVQQVALGTMA  
HCQNLTDRLSTYSKGF LNSSELSELAAGPDREGSLKDQLALAI GK LGENMILKRAAWVKVPSGFYVGSYVHGV  
TQPSLQNLVLGKYGALVICETPEQIANLEEVGRR LGQHVGMAPLSVGS LDDEPGGETETRMLPQP YLLDPS  
ITLGQYVQPQGVTVVDFVRFECGEDEQVAEAE\*  
>ENSMUSP00000113446\_c.89:G>A\_p.W30\* ENSMUST00000120547.2|Tsfm-  
202|ENSMUSG00000040521|-|chr10:g.126866470:C>T  
MSLLRSLRFFPVACTGRSARAVLLQPSQP\*LT FHAGPSLSSAASSKELLMKLRRTGYSFVNCKKALET CGGD  
LKQAEDWLHKQAQKEGWSKAAKHLGRKTKEGLIGLLQEGNTAVLVEVNCETDFVSRNLKFQQLVQQVALGTMA  
HCQNLTDRLSTYSKGF LNSSELSELAAGPDREGSLKDQLALAI GEY L\*  
>ENSMUSP00000050300\_c.772:C>A\_p.T258N ENSMUST00000050901.5|Apof-  
201|ENSMUSG00000047631|+|chr10:g.128105653:C>A  
MHSRLILMSIQLLCYLLLC PVDATSHGEATSVSTVLPSPKLG YQM QTS DKPLSCQMLLPKSLPGFTYMP PVS  
KFLVGLALRNALEAAGCQAEVWALQLQLYRLGGVEATQALIHHLQELQKSGHTDREVSVDALSSALQLLAWEQ  
PGPKRAKRSISNTDCDNDQE QSVHNVVDLLPAVGTYYNLGTALYYAIKNCSDKAKERGRDGAIDLGYD LLMAM  
VGASGGPAGAVITAALKPAMKAGVQRLIQY Y YDEKEVTNPQPEVTT HQPETGKDATTDIGVVEEIAMSNFVSE  
VESTTSNWEWPLLKNYGV LAYKR\*  
>ENSMUSP00000158988\_c.805:C>A\_p.T269N ENSMUST00000238970.2|Apof-  
202|ENSMUSG00000047631|+|chr10:g.128105653:C>A  
MAGLYGCSAPDMHSRLILMSIQLLCYLLLC PVDATSHGEATSVSTVLPSPKLG YQM QTS DKPLSCQMLLPKSL  
LPGFTYMP PVS KFLVGLALRNALEAAGCQAEVWALQLQLYRLGGVEATQALIHHLQELQKSGHTDREVSVDAL  
SSALQLLAWEQPGPKRAKRSISNTDCDNDQE QSVHNVVDLLPAVGTYYNLGTALYYAIKNCSDKAKERGRDGA  
IDLGYD LLMAMVGASGGPAGAVITAALKPAMKAGVQRLIQY Y YDEKEVTNPQPEVTT HQPETGKDATTDIGV  
VEEIAMSNFVSEVESTTSNWEWPLLKNYGV LAYKR\*  
>ENSMUSP00000005825\_c.3072:G>T\_p.D1025Y ENSMUST00000005825.8|Pan2-  
201|ENSMUSG000000005682|+|chr10:g.128153876:G>T  
MNFEGLDPLAEFSPAMHSTLDPVLD AHLNPSLLQNVELDPEGVALEALPVQESVHIMEGVYSELH SVVAE V G  
VPVSVSHFDLHEEMLWVSGHGHATSFFGPALERYSSFQVNGGDDIRQIQSLENGILFLT KNNLKYMARGGLI  
IFDYLLDENEDMHSVLLTDNSTLLVGG LQNHVLEIDLNTVQETQKYAVETPGVTIMRQTNRFFFCGHTSGKVS  
LRDLRSFKVEHEFD AFSGSLSDFDVHG NLLAACGFSSRLTGLACDRFLK VYDLRMMRAITPLQVHVDPAFLRF  
IPTYTSRLAIISQSGQCQFCEPTGLANPADIFHVNVPVPLMTFDVSASKQALAFGDSEGCVHLWTDSP E P S F  
NPYSRETEFALPCLVDSL PPLDWSQDLLPLSLIPVPLTTDALLSDWPAANSAPAPRRAPPVDAEILRTMKKVG  
FIGYAPNPRTRLRNQIPYRLKESDHEFDNFSQVTE SPTGREEEPLHTVSKKYRKVTIKYSKLGL EDFDFKHYN  
KTLFAGLEPHIPNAYCNCMIQVLYFLEPVRLIQNHLCQKEFC LACELGFLFHMLDLSRGDPCQGSNFLRAFR  
TIPEASALGLILADSDEASGKGLARLIQRWNRFILTLQHDMQELEVPQAYRGAGGSFCSSGDSIIGQLFSC  
EMENCSLRCGSETVRASSTLLFTLSYPEDKTKGN YDFAQVLRKSICLEQNTQAWCDNCEKYQPTIQTRNIRH  
LPDILVINCEVNSSKEADFWRLQAEVAFKIAVKKYGGEMKSKEFALADRKELRSP EGF L CSSIEELKNVWLPF  
SIRMKMTKNKGLDVCNWADEHELSSLGAPSQWGPARAEELGVYVYDLMATVVHILDSRTGGSLVAHIKVGET  
YHQKKEGVTHQQWYLFNDFLIEPIDKYEAVQFDMNWKVPAI LYVVKRNLSRYNLNKNPIEASVLLAEASLA  
RKQRKTHTTFIPLMLNEMPQVGD LVGLDAEFVTLNEEEAE LRS DGT KSTIKPSQMSVARITCVRGQGPNEGIP  
FIYDYISTQE QVVDYLTQYSGIKPGDLDAKISSKHLTTLKSTY LKLRFLIDIGVKFVGHGLQKDFRVINLMVP  
KDQVLDTVYLFHMPRKRMI SLRFLAWYF LDKIQGETHDSIEDARTALQLYRKYLELSKNGTEPE SFHKVLKG  
LYEKGRKMDWKVPEPE SQTSPKNAAVFSVLAL\*  
>ENSMUSP00000151216\_c.3045:G>T\_p.D1016Y ENSMUST00000218315.2|Pan2-  
203|ENSMUSG000000005682|+|chr10:g.128153876:G>T  
MNFEGLDPLAEFSPAMHSTLDPVLD AHLNPSLLQNVELDPEGVALEALPVQESVHIMEGVYSELH SVVAE V G  
VPVSVSHFDLHEEMLWVSGHGHATSFFGPALERYSSFQVNGGDDIRQIQSLENGILFLT KNNLKYMARGGLI  
IFDYLLDENEDMHSVLLTDNSTLLVGG LQNHVLEIDLNTVQETQKYAVETPGVTIMRQTNRFFFCGHTSGKVS  
LRDLRSFKVEHEFD AFSGSLSDFDVHG NLLAACGFSSRLTGLACDRFLK VYDLRMMRAITPLQVHVDPAFLRF



IPTYTSRLAIISQSGQCQFCEPTGLANPADIFHVNVPVGPLLMTFDVVSASKQALAFGDSEGCVHLWTDSPSPFN  
NPYSRETEFALPCLVDSLPLDWSQDLLPLSLIPVPLTTDALLSDWPAANSAPAPRRAPPVDAEILRTMCKVGF  
FIGYAPNPRTRLRNQIPYRLKESDHEFDNFSQVTEPTGREEEPLHTVSKKYRKVTIKYSKLGLDFDFKHYN  
KTLFAGLEPHIPNAYCNCMIQVLYFLEPVRCLIQNHLCQKEFCLACELGFLFHMLDLSRGDPCQGSNFLRAFRT  
TIPEASALGLILADSDEASGKGLARLIQRWNRFILTLQHQMDELEVPQAYRGAGGSFCSSGDSIIGQLFSC  
EMENCSLCRCGSETVSRASSTLLFTLSYPEDKTGKNYDFAQVLKRSICLEQNTQAWCDNCEKYQPTIQTRNIRH  
LPDILVINCEVNSSKEADFWRLQAEVAFKIAVKKYGGEMKSKEFALADRKELRSPEGFLCSSIEELKNVWLPF  
SIRMKMTKNKGLDVCNWADEHEWGPAREEELGVYVYDLMATVVHILDSRTGGSLVAHIKVGETYHQKKEGVT  
HQQWYLFNDFLIEPIDKYEAVQFDMNWKVPAILLYVKNRNLNSRYNLNKNPIEASVLLAEASLARKQRKHTTT  
FIPLMLNEMPQVGDVGLDAEFVTLNEEEAELRSDGKSTIKPSQMSVARITCVRGQGPNEGIPFIYDYISTQ  
EQVVDYLTQYSGIKPGDLDAKISSKHLTTLKSTYLKLRFLIDIGVKFVGHGLQKDFRVINLMVPKDQVLDTVY  
LFHMPKRKMSLRFLAWYFLDLKIQGETHDSIEDARTALQLYRKYLELSKNGTEPESFHKVLKGLYEKGRKMD  
WKVPEPESQTSPKNAAVFSVLAL\*

>ENSMUSP00000151874\_c.2991:G>T\_p.D998Y ENSMUST00000219721.2|Pan2-  
206|ENSMUSG00000005682|+|chr10:g.128153876:G>T

MNFEGLDPLAEFSPAMHSTLDPVLD AHLNPSLLQNVLEDPEGVALEALPVQESVHIMEGVYSELHVSVAEVEG  
VPVSVSHFDLHEEMLWVGSNGGDDIRQIQSLENGILFLTKNLKYMARGGLIIFDYLLDENEDMHSVLLT  
DNSTLLVGGQLQNHVLEIDLNTVQETQKYAVETPGVTIMRQTNRFFFCGHTSGKVSRLDLRSFKVEHEFDASG  
SLSDFDVHGNLLAACGFSRSLTGLACDRFLKVDLMMRAITPLQVHVDPAFLRFIPTYTSRLAIISQSGQCQ  
FCEPTGLANPADIFHVNVPVGPLLMTFDVVSASKQALAFGDSEGCVHLWTDSPSPFNPNYSRETEFALPCLVDSL  
PPLDWSQDLLPLSLIPVPLTTDALLSDWPAANSAPAPRRAPPVDAEILRTMCKVGFFIGYAPNPRTRLRNQIPY  
RLKESDHEFDNFSQVTEPTGREEEPLHTVSKKYRKVTIKYSKLGLDFDFKHYNKTLFAGLEPHIPNAYCNC  
MIQVLYFLEPVRCLIQNHLCQKEFCLACELGFLFHMLDLSRGDPCQGSNFLRAFRTIPEASALGLILADSDEA  
SGKGLARLIQRWNRFILTLQHQMDELEVPQAYRGAGGSFCSSGDSIIGQLFSCEMENCSLCRCGSETVSRAS  
STLLFTLSYPEDKTGKNYDFAQVLKRSICLEQNTQAWCDNCEKYQPTIQTRNIRHLPDILVINCEVNSSKEAD  
FWRLQAEVAFKIAVKKYGGEMKSKEFALADRKELRSPEGFLCSSIEELKNVWLPFSIRMKMTKNKGLDVCNWA  
DEHEWGPAREEELGVYVYDLMATVVHILDSRTGGSLVAHIKVGETYHQKKEGVT HQWYLFNDFLIEPIDKY  
EAVQFDMNWKVPAILLYVKNRNLNSRYNLNKNPIEASVLLAEASLARKQRKHTTTFIPLMLNEMPQVGDVGL  
DAEFVTLNEEEAELRSDGKSTIKPSQMSVARITCVRGQGPNEGIPFIYDYISTQEQVVDYLTQYSGIKPGDL  
DAKISSKHLTTLKSTYLKLRFLIDIGVKFVGHGLQKDFRVINLMVPKDQVLDTVYLFHMPKRKMSLRFLAWY  
FLDLKIQGETHDSIEDARTALQLYRKYLELSKNGTEPESFHKVLKGLYEKGRKMDWKVPEPESQTSPKNAAVF  
SVLAL\*

>ENSMUSP00000149391\_c.880:A>G\_p.Q294R ENSMUST00000213329.2|Olfr787-  
202|ENSMUSG00000096497|+|chr10:g.129299427:A>G

MKNHNSVITEFVLLGISDDPEVQVVFILLFIAYILSVTGNLTIIILTLDDSQLKTPMYFFLQNFSLFLEIIFTS  
VSIPRFLESIIITKVTISYNNCLAQLYFFISMGVSEFFLLTAMS YDRYVAICKPLHYTLIMNQVCTLLVLAS  
WLAGFLTIFPPLMLVLKLDFCASNVIDHFS CDYFPILQLSCSDTRSLEMIGFYFAFITLLFTLALVILSYISI  
ISTILRFPSASQRKKAFASTCSSHMIVISISYGCIFMYVKPSANERASLTGKVAVLNTSIAPMLNPFYISLRN  
ERVKQAFKDLINKVVLYRSK\*

>ENSMUSP00000077005\_c.880:A>G\_p.Q294R ENSMUST00000077836.3|Olfr787-  
201|ENSMUSG00000096497|+|chr10:g.129299427:A>G

MKNHNSVITEFVLLGISDDPEVQVVFILLFIAYILSVTGNLTIIILTLDDSQLKTPMYFFLQNFSLFLEIIFTS  
VSIPRFLESIIITKVTISYNNCLAQLYFFISMGVSEFFLLTAMS YDRYVAICKPLHYTLIMNQVCTLLVLAS  
WLAGFLTIFPPLMLVLKLDFCASNVIDHFS CDYFPILQLSCSDTRSLEMIGFYFAFITLLFTLALVILSYISI  
ISTILRFPSASQRKKAFASTCSSHMIVISISYGCIFMYVKPSANERASLTGKVAVLNTSIAPMLNPFYISLRN  
ERVKQAFKDLINKVVLYRSK\*

>ENSMUSP00000099178\_c.832:T>C\_p.V278A ENSMUST00000101655.10|Sfi1-  
203|ENSMUSG00000023764|-|chr11:g.3114574:A>G

MEKKIGRSFRDGVVKKPCSPKTLPLKSSAFSGIQREPSRSCHSIYYHASQNWTRYRLQELRIRC VARKFLY  
LWIRVTFGRVTPSRARIFHEQKILLQKVFGEWREEWVVSQREWKL CVRADCHYRYLYNLIFQNWKTFVHQRE  
MRKRFRIAEHHTDKQKMCQAWKSWLIYVMSRRTKLHMKTTALEFRRQSVLCFVWWSKWRWRLGQAHAEHALHAV  
AVKHRALS LQLQGWLWRQEQLLISQRDRRKEATAVQHYQHWWQKQKRS LKAWLKYLQICRAKRWQNEMAVQFHRA  
TVLQIHFCDWQAWAEWRQSLSAHQALVVKLAGRMVLRRAFTHWKHYMLLQAEAAQREAAAEHRQHYLLYSCF  
RAFKNVNTQARLQQRKLAQQQLRDTLLHRFWNLWQSRIEQREERVQTPSLHAALSHYRVTVLHKCVRVWLR  
YVHKRQWQQLLRARADGHFQQRALPAAFYTWYRGNLWHQQRRILHTKAVRFHRGTLEKQVFWALWRQKMSQHRE  
NCLAERMAILQAEQQLRRRFVFWHQAAVCQLERQQQAMAI AHHHSGLLRRAFCIWKESTQGFRIERMGRAQ  
AAHFHSAQLLSRAWMSMRECLALRLEEQQKLC AALHSQCILLRRALQKWL VYQNRVRSVLRVAVARERQHNR  
QLLWWALHLWRENTMARLDGAKKTSQARVHYSRTLCSKVLVQWREVTSVQIYYRQKEAAALREARKALDRGRL

QNWFFQHWRFCSQRAAQRFQQLGQAAQHWWQLLMEAMARWKAHHLGCIIRKKFLQRQAAQLLAQRLSRACFCQW  
RKQLAVRKQEQWGATARALWLWAFSLQAKVWTAWLGFVLEERRRKKARLERAMQAYQQQLLQEGATRLRLRFTAGT  
KAFRQQLQAQQQVQAAHSLHCAVRHCAELWKKKVLGPGKTSQPPAPTTFSKRVTFKDSFSLGHAAEAGDATQE  
TKKLRAPPSQGVVLSLAGAAGEPCHLDLNAARSSRKQPRRPSFLLERLGSQRLEKPPPEESTALLGGSSLTRP  
FLPGVLPNVPGPPLPPTASPGLELLPSSIMPHAAGGTARVSAKPSIPGPQPWGCPSLPRDLDPQLLPGDSIS  
TRTEPVYGSEATGHTELEAELEGIQQQLQHYQTTKQNLWSCQRQANSLRRWLELSQEPEKSEDLHLEEQVKTE  
LEEVELQVQQLAKELEAQRQPVGTICARVRALRRALC\*

>ENSMUSP0000080066\_c.832:T>C\_p.V278A ENSMUST0000081318.13|Sfi1-  
202|ENSMUSG00000023764|-|chr11:g.3114574:A>G  
MEKKIGSRFRDGVVKKPCSPKTLPLKKSSAFSGIQREPSRSCHSIYYHASQNWTRYRLQELRIRCVARCKFLY  
LWIRVTFGRVTPSRARIFHEQKILQKVFGEWREEWVVSQREWKLVCVRADCHYRYLYNLIFQNWKTFFVHQRE  
MRKRFRIAEHHTDKQKMCQAWKSWLIYMVSRRTKLHMKTTALEFRQSVLCFWSKWRWRLGQAHAEHALHAV  
AVKHRALSLSLQGWLRWQEQLLISQRDRRKEATAVQHYQHWQKQKRSKAWLKYLQICRAKRWQNEMAVQFHRA  
TVLQIHFCDWQAWEWQSLSAHQALVVKLAGRMVLRRAFTHWKHYMLLQAEAAAQREAAAHRQHYLLYS  
RAFKDNVTQARLQOQTRKLAQQLRDTTLLHRFWNLWQSRIEQREERVQTPSLHAALSHYRVTVLHKCVRVWLR  
YVHKRWQQLLRARADGHFQQRALPAAFYTWYRGWLWHQQRRIILHTKAVRFHRGTLEKQVFALWRQKMSQHRE  
NCLAERMAILQAEQQLRRFVFWVWQQAAVCQLERQQQAMAIHHSGLLRRAFCIWKESTQGFRIERMGRAQ  
AAHFHSAQLLSRAWSMWRECLALRLEEQQKLCALHSQCILLRRALQKWLQVYQNRVRSVLRVAARERQHN  
QLLWALHLWRENTMARLDGAKKTSQARVHYSRTLCSKVLVQWREVTQVQIYYRQKEAAAALREARKALDRGRL  
QNWFFQHWRFCSQRAAQRFQQLGQAAQHWWQLLMEAMARWKAHHLGCIIRKKFLQRQAAQLLAQRLSRACFCQW  
RKQLAVRKQEQWGATARALWLWAFSLQAKVWTAWLGFVLEERRRKKARLERAMQAYQQQLLQEGATRLRLRFTAGT  
KAFRQQLQAQQQVQAAHSLHCAVRHCAELWKKKVLGPGKTSQPPAPTTFSKRVTFKDSFSLGHAAEAGDATQE  
TKKLRAPPSQGVVLSLAGAAGEPCHLDLNAARSSRKQPRRPSFLLERLGSQRSPEWYSLGEQQLEKPPPEEST  
ALLGGSSLTRPFLPGVLPNVPGPPLPPTASPGLELLPSSIMPHAAGGTARVSAKPSIPGPQPWGCPSLPRDL  
DPQLLPGDSISTRTEPVYGSEATGHTELEAELEGIQQQLQHYQTTKQNLWSCQRQANSLRRWLELSQEPEKSE  
DLHLEEQVKTELEEVELQVQQLAKELEAQRQPVGTICARVRALRRALC\*

>ENSMUSP0000067261\_c.832:T>C\_p.V278A ENSMUST0000066391.14|Sfi1-  
201|ENSMUSG00000023764|-|chr11:g.3114574:A>G  
MEKKIGSRFRDGVVKKPCSPKTLPLKKSSAFSGIQREPSRSCHSIYYHASQNWTRYRLQELRIRCVARCKFLY  
LWIRVTFGRVTPSRARIFHEQKILQKVFGEWREEWVVSQREWKLVCVRADCHYRYLYNLIFQNWKTFFVHQRE  
MRKRFRIAEHHTDKQKMCQAWKSWLIYMVSRRTKLHMKTTALEFRQSVLCFWSKWRWRLGQAHAEHALHAV  
AVKHRALSLSLQGWLRWQEQLLISQRDRRKEATAVQHYQHWQKQKRSKAWLKYLQICRAKRWQNEMAVQFHRA  
TVLQIHFCDWQAWEWQSLSAHQALVVKLAGRMVLRRAFTHWKHYMLLQAEAAAQREAAAHRQHYLLYS  
RAFKDNVTQARLQOQTRKLAQQLRDTTLLHRFWNLWQSRIEQREERVQTPSLHAALSHYRVTVLHKCVRVWLR  
YVHKRWQQLLRARADGHFQQRALPAAFYTWYRGWLWHQQRRIILHTKAVRFHRGTLEKQVFALWRQKMSQHRE  
NCLAERMAILQAEQQLRRFVFWVWQQAAVCQLERQQQAMAIHHSGLLRRAFCIWKESTQGFRIERMGRAQ  
AAHFHSAQLLSRAWSMWREVYQNRVRSVLRVAARERQHNRLQNWFFQHWRFCSQRAAQRFQQLGQAAQHWWQL  
LMEAMARWKAHHLGCIIRKKFLQRQAAQLLAQRLSRACFCQWRKQLAVRKQEQWGATARALWLWAFSLQAKVWTA  
WLGFLVLEERRRKKARLERAMQAYQQQLLQEGATRLRLRFTAGTKAFRQQLQAQQQVQAAHSLHCAVRHCAELWKK  
KVLGPGKTSQPPAPTTFSKRVTFKDSFSLGHAAEAGDATQETKKLRAPPSQGVVLSLAGAAGEPCHLDLNAAR  
SSRKQPRRPSFLLERLGSQRSPEWYSLGEQQLEKPPPEESTALLGGSSLTRPFLPGVLPNVPGPPLPPTASPG  
LELLPSSIMPHAAGGTARVSAKPSIPGPQPWGCPSLPRDLDPQLLPGDSISTRTEPVYGSEATGHTELEAELE  
EGIQQLQHYQTTKQNLWSCQRQANSLRRWLELSQEPEKSEDLHLEEQVKTELEEVELQVQQLAKELEAQRQPV  
GTICARVRALRRALC\*

>ENSMUSP00000121719\_c.832:T>C\_p.V278A ENSMUST00000153425.9|Sfi1-  
218|ENSMUSG00000023764|-|chr11:g.3114574:A>G  
MEKKIGSRFRDGVVKKPCSPKTLPLKKSSAFSGIQREPSRSCHSIYYHASQNWTRYRLQELRIRCVARCKFLY  
LWIRVTFGRVTPSRARIFHEQKILQKVFGEWREEWVVSQREWKLVCVRADCHYRYLYNLIFQNWKTFFVHQRE  
MRKRFRIAEHHTDKQKMCQAWKSWLIYMVSRRTKLHMKTTALEFRQSVLCFWSKWRWRLGQAHAEHALHAV  
AVKHRALSLSLQGWLRWQEQLLISQRDRRKEATAVQHYQHWQKQKRSKAWLKYLQICRAKRWQNEMAVQFHRA  
TVLQIHFCDWQAWEWQSLSAHQALVVKLAGRMVLRRAFTHWKHYMLLQAEAAAQREAAAHRQHYLLLR  
FWNLWQSRIEQREERVQTPSLHAALSHYRVTVLHKCVRVWLRVYVHKRWQQLLRARADGHFQQRALPAAFYTW  
YRGWLWHQQRRIILHTKAVRFHRGTLEKQVFALWRQKMSQHRENLAEERMAILQAEQQLRRFVFWVWQQA  
AVCQLERQQQAMAIHHSGLLRRAFCIWKESTQGFRIERMGRAQAAHFHSAQLLSRAWSMWRECLALRLEEQQK  
KCAALHSQCILLRRALQKWLQVYQNRVRSVLRVAARERQHNRLQNWFFQHWRFCSQRAAQRFQQLGQAAQHWWQ  
LMEAMARWKAHHLGCIIRKKFLQRQAAQLLAQRLSRACFCQWRKQLAVRKQEQWGATARALWLWAFSLQAKVW

AWLGFVLERRRKKARLERAMQAYQQQLLEQEGATRLRRFTAGTKAFRQQLQAQQQVQAAHSLHCAVRHCAELWK  
KKVLGPGKTSQPPAPTTFKRVTFKDSFLSGHAAEAGDATQETKKLRAPPSQGVVLSLAGAAGEPCHLDLNA  
RSSRQPRRPSFLLERLGSQRLEKPEEEESTALLGGSSLTRPFLPGVLPNVPKPLPPTASPGLELLPSSIM  
PHAAGGTARVSAKPSIPGPQWGPCSLPRDLDPQLLPGDSISTRTEPVYVYSEATGHTELEAELEGIQQQLQHY  
QTTKQNLWSCQRQANSLRRWLELSQEEPKSEDLHLEEQVKTELEEEVELQVQQLAKELEAQRQPVGTCIARVRA  
LRRALC\*

>ENSMUSP00000119905\_c.589:T>C\_p.V197A ENSMUST00000140846.9|sfi1-  
210|ENSMUSG00000023764|-|chr11:g.3114574:A>G

MEKKIGSRIFHEQKILQKVFGEWREWWVSQREWKLCVRADCHYRYLYLNLIHQNWKTFFVHQQREMRKFRRIA  
EHHDTKQKMCQAWKSWLIYMVSRRTKLHMKTTALEFRQSVLCFWSKWRWRLGQAHAHALHAVAVKHRALS  
LQIQGWLWRWQEQLLISQRDRRKEATAVQHYQHWQKQKSLKAWLKYLQICRAKRWQNEAVQFHRAATVLIHFC  
DWQWAWEWQSLSAHQALVVKLAGRMVLRRAFTHWKHYMLLQAEAAAQREAAAHRQHYLLYSCFRAFKNVNT  
QARLQQTRKKLAQQLRDTTLLHRFWNLWQSRIEQREERVQTPSLHAALSHYRVTVLHKCVRVWLVYVHKRQWQ  
QLLRARADGHFQQRALPAAFYTWYRGWLWHQQRRLIHTKAVRFHRTLEKQVFALWRQKMSQHRENCIAERMA  
ILQAEQQLLRRFWFVWHQQAAVCQLERQQQAMAIAHHHSGLLRRAFICWKESTQGFRIERMGRAQAAHFHSAQ  
LLSRAWSMWRECLALRLEEQQKLKCAALHSQCILLRRALQKWLQVYQNRVRSVLEVAARERQHNRLQWVQHW  
FCSQRAAQRFQQLGQAAQHWHWQLLMEAMARWKAHHLGCIRKKFLQQAQQLLAQRLSRACFCQWRKQLAVRK  
QEQWGTARALWLWAFSLQAKVWTAWLGFVLERRRKKARLERAMQAYQQQLLEQEGATRLRRFTAGTKAFRQQLQ  
AQQQVQAAHSLHCAVRHCAELWKKVGLGPGKTSQPPAPTTFKRVTFKDSFLSGHAAEAGDATQETKKLRAPP  
SQQVLSLAGAAGEPCHLDLNAARSSRQPRRPSFLLERLGSQRLEKPEEEESTALLGGSSLTRPFLPGVLPN  
VPGPKLPPTASPGLELLPSSIMPHAAGGTARVSAKPSIPGPQWGPCSLPRDLDPQLLPGDSISTRTEPVYVY  
SEATGHTELEAELEGIQQQLQHYQTTKQNLWSCQRQANSLRRWLELSQEEPKSEDLHLEEQVKTELEEEVELQV  
QQLAKELEAQRQPVGTCIARVRLRRALC\*

>ENSMUSP00000122002\_c.25:T>C\_p.V9A ENSMUST00000126746.9|sfi1-  
205|ENSMUSG00000023764|-|chr11:g.3114574:A>G

XKYLQICRAKRWQNEAVQFHRAATVLIHFCDWQWAWEWQSLSAHQALVVKLAGRMVLRRAFTHWKHYMLLQ  
AEAAAQREAAAHRQHYLLYSCFRAFKNVNTQARLQQTRKKLAQQLRDTTLLHRFWNLWQSRIEQREERVQTP  
SLHAALSHYRVTVLHKCVRVWLVYVHKRQWQQLLRARADGHFQQRALPAAFYTWYRGWLWHQQRRLIHTKAVR  
FHRGTLEKQVFALWRQKMSQHRENCIAERMAILQAEQQLLRRFWFVWHQQAAVCQLERQQQAMAIAHHHSGLL  
RRAFICWKESTQGFRIESSSSGERLLQCRYITDKRRQLPSGRPGKHWTGVVSRGTGFSTGDSAARGQPSRDSW  
DRRLSITTGSC\*

>ENSMUSP00000118419\_c.832:T>C\_p.V278A ENSMUST00000132893.8|sfi1-  
206|ENSMUSG00000023764|-|chr11:g.3114574:A>G

MEKKIGSRFDGTVVKKPCSPKTLPLKSSAFSGIQREPSRSCHSIYYHASQNWTRYRLQELRIRCVRKFLY  
LWIRVTFGRVTPSRARIFHEQKILQKVFGEWREWWVSQREWKLCVRADCHYRYLYLNLIHQNWKTFFVHQQRE  
MRKFRRIAHHHDTKQKMCQAWKSWLIYMVSRRTKLHMKTTALEFRQSVLCFWSKWRWRLGQAHAHALHAV  
AVKHRALSQIQGWLWRWQEQLLISQRDRRKEATAVQHYQHWQKQKSLKAWLKYLQICRAKRWQNVIAQQRWS  
FPAASTACCLLHVQRLAMAPAEETDPAHKSSAFFQORDIREASICSLEAEDVSASRKLKLGRENGYTAGRAAFA  
\*

>rs227559416\_ENSMUSP00000020734\_c.505:A>T\_p.H169L  
ENSMUST00000020734.11|Eif4enif1-

201|ENSMUSG00000020454|+|chr11:g.3170454:A>T

MEKSVAEETENGDAFLELKKLPTSKSPHRYTKEELLDIKERPYSKQRPSCLEKYDSDGVWDPEKWHASLYPAS  
GRSSPVESLKKESSEDRPSLVRIADPRERVKEDDLVVLSPQRRSFGGGCHVTAAVSSRRSGSPLKSDSDGL  
RLLGRRIGSGRIISARAFEKDLRLSDKDLRDLRDRDRERDYKDKRFRREFGDSKRVFGERRRNDSYTEEEPE  
WFSAGPTSQSETIELTGFDDKILEEDHKGRKRTRRRRTASVKEGIVECNGGVAEEDEVEVILAQEPSADQEVPR  
DVILPEQSPGFEFDFNEFFNLDKVPCLASMIEDVLGEGSVSASRFSRWFNSPNSRSGSRSSSLGSPHEELERLA  
GLEQAVLSPGQNSGNYFAPIPSEDHAENKVDILEMLQKAKVDLKLPLSSLSANKEKLEKSSHSGVVLSVEEVE  
AGLKGKLVQDQMKNSTPFMAEHLEETLSAASSNRQLKKGDMTAFNKLVNTMKASGTLPTQPKVSELLGQPVQ  
RPASSNLLSGLMGSLEATASLLSQRAPSPPMQVFRQAASADYLHPRIPSPIGFSPGQQLLGDPPQGMKRP  
MSPVSAQMSQLELQQAALGLALPHDLAVQTAPFYQPGFSKQVDRTRDGLRNRQQRMSKSPAMHGGNSSSP  
APAASITSMSSCSFTPTSVIRKMYESREKTEKEMAPGMVVPDGDGEDTQKTSEENLLSSNPINPTDQDSSTTN  
PKLSTLQRSSSSTPLSQTSTRYKEDYRPKTAGRKTPTLASVPVGTFFLRPTHQVPLVPHVPIVRPAHQVHPG  
LVQRLIAQGVHPQHLPSLLQAGVLPPIGIDMAPLQGLSGPLLGQPLYPLVSAASHPLLNPRPGTPLHLAVMQQQ  
LQRSVLHPPGSSQAAAISVQTPQNVPSRSGMPHMHSQLEHRTSQRSSSPVGLAKWFGSDVLQQLPLSPMPTKV  
ISVDELEYRQ\*

>rs227559416\_ENSMUSP00000105676\_c.505:A>T\_p.H169L  
ENSMUST00000110049.8|Eif4enif1-  
203|ENSMUSG00000020454|+|chr11:g.3170454:A>T  
MEKXVAETENGDAFLELKKLPTSKSPHRYTKEELLDIKERPYSKQRPSCLESEKYDSDGVWDPEKWHASLYPAS  
GRSSPVESLKKESSEDRPSLVRRADPRERVKEDDLVVLSPQRRSFGGGCHVTAAVSSRRSGSPLEKDS DGL  
RLLGRRIGSGRIISARAFEKDLRLSDKDLRDLRDRDRERDYKDKRFRREFGDSKR VFGERRRNDSTEEPE  
WFSAGPTSQSETIELTGFDDKILEEDHKGRKRTRRRRTASVKEGIVECNGGVAEEDEVEVILAQEPSADQEVPR  
DVILPEQSPGEFDFNEFFNLDKVPCLASMIEDVLGEGSVSASRFSRWFNSRSGSRSSSLGSTPHEELERLA  
GLEQAVLSPGQNSGNYFAPIPSEDHAENKVDILEMLQKAKVDLKP LLSLSANKEKLESSHSGVVLVSVEEVE  
AGLKGKLVQDQMKNSTPFMAEHLEETLSAASSNRQLKKGDMTAFNKL VNTMKASGTLPTQPKVSRNVE SHLL  
APAEIPGQPVSKNILQELLGQPVQRPASSNLLSGLMGSLEATASLLSQRAPSP PMSQVFRTQAASADYLHPRI  
PSPIGFPGSQQLLGD PFGMRKPMSPVSAQMSQLELQQAALGLALPHDLAVQTAPFYQPGF SKPQVDRTRD  
GLRNRQQRMSKSPAPMHGGNSSSPAPAASITSM LSPSFTPTSVIRKMYESREKTKEEMAPGMVVPD GKEDTQ  
KTSEENLLSSNPIPN TDQDSSTNPKLSTLQRSSCSTPLSQT SRYTKEQDYRPKTAGRKTPTLASPVPGT PFL  
RPTHQVPLVPHVPIVRPAHQ LHPGLVQRLIAQGVHPQHLP SLLQAGVLP PPGIDMAPLQGLSGPLLGQPLYPLV  
SAASHPLLNRPGT PLHLAVMQQQLQRSVLHPPGSSSQAAAI SVQTPQNVPSRSGMPHMHSQLEHRTSQRSSS  
PVGLAKWFGSDV LQQPLPSMPTKVISVDELEYRQ\*

>rs227559416\_ENSMUSP00000118527\_c.505:A>T\_p.H169L  
ENSMUST00000125637.8|Eif4enif1-  
206|ENSMUSG00000020454|+|chr11:g.3170454:A>T  
MEKXVAETENGDAFLELKKLPTSKSPHRYTKEELLDIKERPYSKQRPSCLESEKYDSDGVWDPEKWHASLYPAS  
GRSSPVESLKKESSEDRPSLVRRADPRERVKEDDLVVLSPQRRSFGGGCHVTAAVSSRRSGSPLEKDS DGL  
RLLGRRIGSGRIISARAFEKDLRLSDKDLRDLRDRDRERDYKDKRFR  
>rs227559416\_ENSMUSP00000105675\_c.505:A>T\_p.H169L  
ENSMUST00000110048.8|Eif4enif1-  
202|ENSMUSG00000020454|+|chr11:g.3170454:A>T  
MEKXVAETENGDAFLELKKLPTSKSPHRYTKEELLDIKERPYSKQRPSCLESEKYDSDGVWDPEKWHASLYPAS  
GRSSPVESLKKESSEDRPSLVRRADPRERVKEDDLVVLSPQRRSFGGGCHVTAAVSSRRSGSPLEKDS DGL  
RLLGRRIGSGRIISARAFEKDLRLSDKDLRDLRDRDRERDYKDKRFR  
WFSAGPTSQSETIELTGFDDKILEEDHKGRKRTRRRRTASVKEGIVECNGGVAEEDEVEVILAQEPSADQEVPR  
DVILPEQSPGEFDFNEFFNLDKVPCLASMIEDVLGEGSVSASRFSRWFNSRSGSRSSSLGSTPHEELERLA  
GLEQAVLSPGQNSGNYFAPIPSEDHAENKVDILEMLQKAKVDLKP LLSLSANKEKLESSHSGVVLVSVEEVE  
AGLKGKLVQDQMKNSTPFMAEHLEETLSAASSNRQLKKGDMTAFNKL VNTMKASGTLPTQPKVSELLGQPVQ  
RPASSNLLSGLMGSLEATASLLSQRAPSP PMSQVFRTQAASADYLHPRI PSPIGFPGSQQLLGD PFGMRK  
MSPVSAQMSQLELQQAALGLALPHDLAVQTAPFYQPGF SKPQVDRTRDGLRNRQQRMSKSPAPMHGGNSSS  
APAASITSM LSPSFTPTSVIRKMYESREKTKEEMAPGMVVPD GKEDTQKTSEENLLSSNPIPN TDQDSSTN  
PKLSTLQRSSCSTPLSQT SRYTKEQDYRPKTAGRKTPTLASPVPGT PFLRPTHQVPLVPHVPIVRPAHQ LHPG  
LVQRLIAQGVHPQHLP SLLQAGVLP PPGIDMAPLQGLSGPLLGQPLYPLVSAASHPLLNRPGT PLHLAVMQQQ  
LQRSVLHPPGSSSQAAAI SVQTPQNVPSRSGMPHMHSQLEHRTSQRSSSPVGLAKWFGSDV LQQPLPSMPTK  
VISVDELEYRQ\*

>rs227559416\_ENSMUSP00000136768\_c.505:A>T\_p.H169L  
ENSMUST00000179770.8|Eif4enif1-  
213|ENSMUSG00000020454|+|chr11:g.3170454:A>T  
MEKXVAETENGDAFLELKKLPTSKSPHRYTKEELLDIKERPYSKQRPSCLESEKYDSDGVWDPEKWHASLYPAS  
GRSSPVESLKKESSEDRPSLVRRADPRERVKEDDLVVLSPQRRSFGGGCHVTAAVSSRRSGSPLEKDS DGL  
RLLGRRIGSGRIISARAFEKDLRLSDKDLRDLRDRDRERDYKDKRFRREFGDSKR VFGERRRNDSTEEPE  
WFSAGPTSQSETIELTGFDDKILEEDHKGRKRTRRRRTASVKEGIVECNGGVAEEDEVEVILAQEPSADQEVPR  
DVILPEQSPGEFDFNEFFNLDKVPCLASMIEDVLGEGSVSASRFSRWFNSRSGSRSSSLGSTPHEELERLA  
GLEQAVLSPGQNSGNYFAPIPSEDHAENKVDILEMLQKAKVDLKP LLSLSANKEKLESSHSGVVLVSVEEVE  
AGLKGKLVQDQMKNSTPFMAEHLEETLSAASSNRQLKKGDMTAFNKL VNTMKASGTLPTQPKVSRNVE SHLL  
APAEIPGQPVSKNILQELLGQPVQRPASSNLLSGLMGSLEATASLLSQRAPSP PMSQVFRTQAASADYLHPRI  
PSPIGFPGSQQLLGD PFGMRKPMSPVSAQMSQLELQQAALGLALPHDLAVQTAPFYQPGF SKPQVDRTRD  
GLRNRQQRMSKSPAPMHGGNSSSPAPAASITSM LSPSFTPTSVIRKMYESREKTKEEMAPGMVVPD GKEDTQ  
KTSEENLLSSNPIPN TDQDSSTNPKLSTLQRSSCSTPLSQT SRYTKEQDYRPKTAGRKTPTLASPVPGT PFL  
RPTHQVPLVPHVPIVRPAHQ LHPGLVQRLIAQGVHPQHLP SLLQAGVLP PPGIDMAPLQGLSGPLLGQPLYPLV  
SAASHPLLNRPGT PLHLAVMQQQLQRSVLHPPGSSSQAAAI SVQTPQNVPSRSGMPHMHSQLEHRTSQRSSS  
PVGLAKWFGSDV LQQPLPSMPTKVISVDELEYRQ\*

```

>rs239307747_ENSMUSP00000020734_c.1423:A>G_p.K475R
ENSMUST00000020734.11|Eif4enif1-
201|ENSMUSG00000020454|+|chr11:g.3180016:A>G
MEKSV AETENGDAFLELKKLPTSKSPHRYTKEELLDIKERPYSKQRPSC LSEKYDSDGVWDPEKWHASLYPAS
GRSSPVESLKKESSEDRPSLVRR IADPRERVKEDDL DVVLS PQRRSFGGGCHVTA AVSSRRSGSPLEKDS DGL
RLLGGRRIGSGRIISARAFEKDHRLSDKDLRDLRDRDRERDYKDKRFRREFGDSKR VFGERRRND SYTEEEPE
WFSAGPTSQSETIELTGFDDKILEEDHKGRKRTRRRRTASVKEGIVECNGGVAEEDEVEVILAQEPSADQEVPR
DVILPEQSPGEFDFNEFFNL DKVPCLASMIEDVLGEGSVSASRFSRWF SNPSRSGSRSSSLG STPHEELERLA
GLEQAVLSPGQNSGNYFAPI PSEDHAENKVDILEMLQKAKVDLKP LLSLSANKEKLKESHSGV VLSVEEVE
AGLKGLKVDQQMKNSTPFMAEHLEETLSAASSNRQLRKDGDMTAFNKL VNTMKASGTLPTQPKVSELLGQP VQ
RPASSNLLSGLMGSLEATASLLSQRAPSP PMSQVFRTQAASADYLHPRI P SPIGFPSGPQQLLGD PPFQGM RKP
MSPVSAQMSQLELQQA ALEGLALPHDLAVQTAPFYQPGFSKPQVDRTRDGLRNRQQRMSKSPAPMHGNS SSP
APAASITSM LSPSFTPTS VIRKMYESREKTKEEMAPGMVVP GDGKEDTQKTSEENLLSSNPI PNTDQDSSTTN
PKLSTLQRSSCSTPLS QTSRYTKEQDYRPKTAGRKTPTLASPVPGT PFLRPTHQVPLVPHVPIVRPAHQLHPG
LVQRLIAQGVHPQHLP SLLQAGVLP PGIDMAPLQGLSGPLL GQPLYPLVSAASHPLLNPRPGT PLHLAVM QQQ
LQRSVLHPPGSSSQAA AISVQTPQNVP SRSGMPHMHSQLEHRTSQRSSSPVGLAKWFGSDVLQQPLPSMPTKV
ISVDELEYRQ*
>rs239307747_ENSMUSP00000105676_c.1423:A>G_p.K475R
ENSMUST00000110049.8|Eif4enif1-
203|ENSMUSG00000020454|+|chr11:g.3180016:A>G
MEKSV AETENGDAFLELKKLPTSKSPHRYTKEELLDIKERPYSKQRPSC LSEKYDSDGVWDPEKWHASLYPAS
GRSSPVESLKKESSEDRPSLVRR IADPRERVKEDDL DVVLS PQRRSFGGGCHVTA AVSSRRSGSPLEKDS DGL
RLLGGRRIGSGRIISARAFEKDHRLSDKDLRDLRDRDRERDYKDKRFRREFGDSKR VFGERRRND SYTEEEPE
WFSAGPTSQSETIELTGFDDKILEEDHKGRKRTRRRRTASVKEGIVECNGGVAEEDEVEVILAQEPSADQEVPR
DVILPEQSPGEFDFNEFFNL DKVPCLASMIEDVLGEGSVSASRFSRWF SNPSRSGSRSSSLG STPHEELERLA
GLEQAVLSPGQNSGNYFAPI PSEDHAENKVDILEMLQKAKVDLKP LLSLSANKEKLKESHSGV VLSVEEVE
AGLKGLKVDQQMKNSTPFMAEHLEETLSAASSNRQLRKDGDMTAFNKL VNTMKASGTLPTQPKVSRNVE SHLL
APAEIPGQPVSKNILQELLGQPVQRPASSNLLSGLMGSLEATASLLSQRAPSP PMSQVFRTQAASADYLHPRI
P SPIGFPSGPQQLLGD PPFQGM RKPMSPVSAQMSQLELQQA ALEGLALPHDLAVQTAPFYQPGFSKPQVDRTRD
GLRNRQQRMSKSPAPMHGNS SSPAPAASITSM LSPSFTPTS VIRKMYESREKTKEEMAPGMVVP GDGKEDTQ
KTSEENLLSSNPI PNTDQDSSTTNPKLSTLQRSSCSTPLS QTSRYTKEQDYRPKTAGRKTPTLASPVPGT PFL
RPTHQVPLVPHVPIVRPAHQLHPGLVQRLIAQGVHPQHLP SLLQAGVLP PGIDMAPLQGLSGPLL GQPLYPLV
SAASHPLLNPRPGT PLHLAVM QQQLQRSVLHPPGSSSQAA AISVQTPQNVP SRSGMPHMHSQLEHRTSQRSSS
PVGLAKWFGSDVLQQPLPSMPTKVISVDELEYRQ*
>rs239307747_ENSMUSP00000105675_c.1423:A>G_p.K475R
ENSMUST00000110048.8|Eif4enif1-
202|ENSMUSG00000020454|+|chr11:g.3180016:A>G
MEKSV AETENGDAFLELKKLPTSKSPHRYTKEELLDIKERPYSKQRPSC LSEKYDSDGVWDPEKWHASLYPAS
GRSSPVESLKKESSEDRPSLVRR IADPRERVKEDDL DVVLS PQRRSFGGGCHVTA AVSSRRSGSPLEKDS DGL
RLLGGRRIGSGRIISARAFEKDHRLSDKDLRDLRDRDRERDYKDKRFRREFGDSKR VFGERRRND SYTEEEPE
WFSAGPTSQSETIELTGFDDKILEEDHKGRKRTRRRRTASVKEGIVECNGGVAEEDEVEVILAQEPSADQEVPR
DVILPEQSPGEFDFNEFFNL DKVPCLASMIEDVLGEGSVSASRFSRWF SNPSRSGSRSSSLG STPHEELERLA
GLEQAVLSPGQNSGNYFAPI PSEDHAENKVDILEMLQKAKVDLKP LLSLSANKEKLKESHSGV VLSVEEVE
AGLKGLKVDQQMKNSTPFMAEHLEETLSAASSNRQLRKDGDMTAFNKL VNTMKASGTLPTQPKVSELLGQP VQ
RPASSNLLSGLMGSLEATASLLSQRAPSP PMSQVFRTQAASADYLHPRI P SPIGFPSGPQQLLGD PPFQGM RKP
MSPVSAQMSQLELQQA ALEGLALPHDLAVQTAPFYQPGFSKPQVDRTRDGLRNRQQRMSKSPAPMHGNS SSP
APAASITSM LSPSFTPTS VIRKMYESREKTKEEMAPGMVVP GDGKEDTQKTSEENLLSSNPI PNTDQDSSTTN
PKLSTLQRSSCSTPLS QTSRYTKEQDYRPKTAGRKTPTLASPVPGT PFLRPTHQVPLVPHVPIVRPAHQLHPG
LVQRLIAQGVHPQHLP SLLQAGVLP PGIDMAPLQGLSGPLL GQPLYPLVSAASHPLLNPRPGT PLHLAVM QQQ
LQRSVLHPPGSSSQAA AISVQTPQNVP SRSGMPHMHSQLEHRTSQRSSSPVGLAKWFGSDVLQQPLPSMPTKV
ISVDELEYRQ*
>rs239307747_ENSMUSP00000112550_c.934:A>G_p.K312R
ENSMUST00000120721.9|Eif4enif1-
204|ENSMUSG00000020454|+|chr11:g.3180016:A>G
MEKSV AETENGDAFLELKKLPTSKSPHRYTKEELLDIKERPYSKQRPSC LSEKYDSDGVWDPEKWHASLYPAS
GRSSPVESLKKESSEDRPSLVRR IAGIVECNGGVAEEDEVEVILAQEPSADQEVPRDVILPEQSPGEFDFNEF
FNLDKVPCLASMIEDVLGEGSVSASRFSRWF SNPSRSGSRSSSLG STPHEELERLAGLEQAVLSPGQNSGNYF
APIPSEDHAENKVDILEMLQKAKVDLKP LLSLSANKEKLKESHSGV VLSVEEVEAGLKGLKVDQQMKNSTP

```



FMAEHLEETLSAASSNRQLRKDGDMTAFNKLVTMKNRVESHLLAPAEIPGQPVSKNILQELLGQPVQRPASS  
NLLSGLMGSLEATASLLSQRAPSPPMQVFRTOAASADYLHPRI P SPIGFPSGPGQQLLGDPPFQGRMKPMSV  
AQMSQLELQQAALGLALPHDLAVQTAPFYQPGFQSKPQVDRTRDGLRNRQQRMSKSPAPMHGGNSSSPAPAAS  
ITSMSPSFTPTSVIRKMYESREKTKEEMAPGMVVPDGDGKEDTQKTSEENLLSSNPI PNTDQDSSTNPKLST  
LQRSSCSTPLSQTSTRYTKEDYRPKTAGRKTPTLASPVPGTFFLRPTHQVPLVPHVPIVRPAHQHLHPGLVQRL  
IAQGVHPQHLPSLLQAGVLPPIGIDMAPLQGLSGPLLGQPLYPLVSAASHPLLNRPGTPLHLAVMQQLQRSV  
LHPPGSSSQAAAISVQTPQNVPSRSRGMPHMSQLEHRTSQRSSSPVGLAKWFGSDVLQQLPLPSMPTKVISVDE  
LEYRQ\*

>rs239307747\_ENSMUSP00000122912\_c.220:A>G\_p.K74R

ENSMUST00000135223.2|Eif4enif1-  
210|ENSMUSG00000020454|+|chr11:g.3180016:A>G  
QKAKVDLKPILLSANKEKLKESHSGVVLVSVVEEVEAGLGLKVDQMKNSTPFMAEHLEETLSAASSNRQL  
RKDGDMTAFNKLVTMKNRVESHLLAPAEIPGQPVSKNILQVFRTOAASADYLHPRI P SPI  
GFPSGPGQQLLGDPPFQGRMKPMSVSAQMSQLELQQAALGLALPHDLAVQTAPFYQPGFQSKPQVDRTRDGLRNR  
QQRMSKSPAPMHGGNSSSP

>rs239307747\_ENSMUSP00000136768\_c.1423:A>G\_p.K475R

ENSMUST00000179770.8|Eif4enif1-  
213|ENSMUSG00000020454|+|chr11:g.3180016:A>G  
MEKSVAEETENGDAFLELKKLPTSKSPHRYTKEELLDIKERPYSKQRPSCLESEKYDSDGVWDPEKWHASLYPAS  
GRSSPVESLKKESSEDRPSLVRRADPRERVKEDDLVVLSPQRRSFGGGCHVTAAVSSRRSGSPLEKSDSGL  
RLGGRRIIGSGRIISARAFEKDHRLSDKDLRDLRDRDRERDYKDKRFRREFGDSKRVRFGERRRNDSTEEPE  
WFSAGPTSQSETIETLGFDDKILEEDHKGRKRTRRRRTASVKEGIVECNGGVAEEDEVEVILAQEPSADQEVPR  
DVILPEQSPGEFDFNEFFNLKVPCLASMIEDVLGEGSVSASRFRWFSNPSRSGSRSSSLGSTPHEELERLA  
GLEQAVLSPGQNSGNYFAPI PSEDHAENKVDILEMLQKAKVDLKPILLSANKEKLKESHSGVVLVSVVEEVE  
AGLGLKVDQMKNSTPFMAEHLEETLSAASSNRQLRKDGDMTAFNKLVTMKNRVESHLLAPAEIPGQPVSKNILQELLGQPVQRPASSNLLSGLMGSLEATASLLSQRAPSPPMQVFRTOAASADYLHPRI  
P SPIGFPSGPGQQLLGDPPFQGRMKPMSVSAQMSQLELQQAALGLALPHDLAVQTAPFYQPGFQSKPQVDRTRD  
GLRNRQQRMSKSPAPMHGGNSSSPAPAASITSMSPSFTPTSVIRKMYESREKTKEEMAPGMVVPDGDGKEDTQ  
KTSEENLLSSNPI PNTDQDSSTNPKLSTLQRSSCSTPLSQTSTRYTKEDYRPKTAGRKTPTLASPVPGTFFL  
RPTHQVPLVPHVPIVRPAHQHLHPGLVQRLIAQGVHPQHLPSLLQAGVLPPIGIDMAPLQGLSGPLLGQPLYPLV  
SAASHPLLNRPGTPLHLAVMQQLQRSVLHPPGSSSQAAAISVQTPQNVPSRSRGMPHMSQLEHRTSQRSSSPV  
GLAKWFGSDVLQQLPLPSMPTKVISVDELEYRQ\*

>rs228382181\_ENSMUSP00000105676\_c.1520:A>C\_p.E507D

ENSMUST00000110049.8|Eif4enif1-  
203|ENSMUSG00000020454|+|chr11:g.3183999:A>C  
MEKSVAEETENGDAFLELKKLPTSKSPHRYTKEELLDIKERPYSKQRPSCLESEKYDSDGVWDPEKWHASLYPAS  
GRSSPVESLKKESSEDRPSLVRRADPRERVKEDDLVVLSPQRRSFGGGCHVTAAVSSRRSGSPLEKSDSGL  
RLGGRRIIGSGRIISARAFEKDHRLSDKDLRDLRDRDRERDYKDKRFRREFGDSKRVRFGERRRNDSTEEPE  
WFSAGPTSQSETIETLGFDDKILEEDHKGRKRTRRRRTASVKEGIVECNGGVAEEDEVEVILAQEPSADQEVPR  
DVILPEQSPGEFDFNEFFNLKVPCLASMIEDVLGEGSVSASRFRWFSNPSRSGSRSSSLGSTPHEELERLA  
GLEQAVLSPGQNSGNYFAPI PSEDHAENKVDILEMLQKAKVDLKPILLSANKEKLKESHSGVVLVSVVEEVE  
AGLGLKVDQMKNSTPFMAEHLEETLSAASSNRQLKKGDMTAFNKLVTMKNRVESHLLAPAEIPGQPVSKNILQELLGQPVQRPASSNLLSGLMGSLEATASLLSQRAPSPPMQVFRTOAASADYLHPRI  
P SPIGFPSGPGQQLLGDPPFQGRMKPMSVSAQMSQLELQQAALGLALPHDLAVQTAPFYQPGFQSKPQVDRTRD  
GLRNRQQRMSKSPAPMHGGNSSSPAPAASITSMSPSFTPTSVIRKMYESREKTKEEMAPGMVVPDGDGKEDTQ  
KTSEENLLSSNPI PNTDQDSSTNPKLSTLQRSSCSTPLSQTSTRYTKEDYRPKTAGRKTPTLASPVPGTFFL  
RPTHQVPLVPHVPIVRPAHQHLHPGLVQRLIAQGVHPQHLPSLLQAGVLPPIGIDMAPLQGLSGPLLGQPLYPLV  
SAASHPLLNRPGTPLHLAVMQQLQRSVLHPPGSSSQAAAISVQTPQNVPSRSRGMPHMSQLEHRTSQRSSSPV  
GLAKWFGSDVLQQLPLPSMPTKVISVDELEYRQ\*

>rs228382181\_ENSMUSP00000112550\_c.995:A>C\_p.E332D

ENSMUST00000120721.9|Eif4enif1-  
204|ENSMUSG00000020454|+|chr11:g.3183999:A>C  
MEKSVAEETENGDAFLELKKLPTSKSPHRYTKEELLDIKERPYSKQRPSCLESEKYDSDGVWDPEKWHASLYPAS  
GRSSPVESLKKESSEDRPSLVRRADPRERVKEDDLVVLSPQRRSFGGGCHVTAAVSSRRSGSPLEKSDSGL  
FNLKVPCLASMIEDVLGEGSVSASRFRWFSNPSRSGSRSSSLGSTPHEELERLAGLEQAVLSPGQNSGNYF  
API PSEDHAENKVDILEMLQKAKVDLKPILLSANKEKLKESHSGVVLVSVVEEVEAGLGLKVDQMKNSTP  
FMAEHLEETLSAASSNRQLKKGDMTAFNKLVTMKNRVESHLLAPAEIPGQPVSKNILQELLGQPVQRPASS  
NLLSGLMGSLEATASLLSQRAPSPPMQVFRTOAASADYLHPRI P SPIGFPSGPGQQLLGDPPFQGRMKPMSV

AQMSQLELQQAALGLALPHDLAVQTAPFYQPGFSKPQVDRTRDGLRNRQQRMSKSPAPMHGGNSSSPAPAAS  
 ITSMSPSFTPTSVIRKMYESREKTKEEMAPGMVVPDGDGKEDTQKTSEENLLSSNPIPNTDQDSSTTNPKLST  
 LQRSSCSTPLSQTSTRYTKQDYRPKTAGRKTPTLASPVPGTFFLRPTHQVPLVPHVPIVRPAHQHPLGLVQRL  
 IAQGVHPQHLPSSLQAGVLPPIGDMAPLQGLSGPLLGQPLYPLVSAASHPLLNPRPGTPLHLAVMQQQLQRSV  
 LHPPGSSSQAAAISVQTPQNVPSRSGMPHMHSQLEHRTSQRSSSPVGLAKWFGSDVLQQLPLSMPTKVISVDE  
 LEYRQ\*

>rs228382181\_ENSMUSP00000122912\_c.317:A>C\_p.E106D  
 ENSMUST00000135223.2|Eif4enif1-  
 210|ENSMUSG00000020454|+|chr11:g.3183999:A>C  
 QKAKVDLKLPLSSLSANKEKLKESHSGVVLVSVVEEVEAGLKLKVDQMKNSTPFMAEHLEETLSAASSNRQL  
 KKDGMTAFNKLVTMKTASGTLPTQPKVSRNVDSHLLAPAEIPGQPVSKNILQVFRTOAASADYLHPRI  
 GPFSPGQQLLGDPPFQGMKRPMSPVSAQMSQLELQQAALGLALPHDLAVQTAPFYQPGFSKPQVDRTRDGLRNR  
 RQQRMSKSPAPMHGGNSSSP

>rs228382181\_ENSMUSP00000136768\_c.1520:A>C\_p.E507D  
 ENSMUST00000179770.8|Eif4enif1-  
 213|ENSMUSG00000020454|+|chr11:g.3183999:A>C  
 MEKVAETENGDAFLELKLPTSKSPHRYTKEELLDIKERPYSKQRPSCLEKYDSDGVWDPEKWHASLYPAS  
 GRSSPVESLKKESSEDRPSLVRRADPRERVKEDDLVVLSPQRSSFSGGGCHVTAAVSSRRSGSPLEKDS  
 RLLGGRRIGSGRIISARAFEKDHRLSDKDLRDLRDRDRERDYKDKRFRREFGDSKRVPFGERRRNDST  
 YTEEEPEWFSAGPTSQSETIELTGFDDKILEEDHKGRKRTRRRRTASVKEGIVECNGGVAEEDEVEVILA  
 QEPSADQEVPRDVILPEQSPGEFDFNEFFNLDKVPCLASMIEDVLGEGSVSASRFRWFSNPSRSGSRSS  
 SLGSPHEELERLAGLEQAVLSPGQNSGNYFAPIPSEDHAENKVDILEMLQKAKVDLKLPLSSLSANKEKL  
 KESHSGVVLVSVVEEVEAGLKLKVDQMKNSTPFMAEHLEETLSAASSNRQLKDGDMTAFNKLVTMKTAS  
 GTLPTQPKVSRNVDSHLLAPAEIPGQPVSKNILQELLGQPVQRPASSNLLSGLMGSLEATASLLSQRA  
 PSPMSQVFRTOAASADYLHPRI PSPIGFSPGQQLLGDPPFQGMKRPMSPVSAQMSQLELQQAALGLAL  
 PHDLAVQTAPFYQPGFSKPQVDRTRDGLRNRQQRMSKSPAPMHGGNSSSPAPAASITSMSPSFTPTSVIR  
 KMYESREKTKEEMAPGMVVPDGDGKEDTQKTSEENLLSSNPIPNTDQDSSTTNPKLSTLQRSSCSTPL  
 SQTSTRYTKQDYRPKTAGRKTPTLASPVPGTFFLRPTHQVPLVPHVPIVRPAHQHPLGLVQRLIAQGV  
 HPQHLPSSLQAGVLPPIGDMAPLQGLSGPLLGQPLYPLVSAASHPLLNPRPGTPLHLAVMQQQLQRSV  
 LHPPGSSSQAAAISVQTPQNVPSRSGMPHMHSQLEHRTSQRSSSPVGLAKWFGSDVLQQLPLSMPTKVI  
 SVDELEYRQ\*

>rs240891555\_ENSMUSP00000020734\_c.1836:G>A\_p.V613I  
 ENSMUST00000020734.11|Eif4enif1-  
 201|ENSMUSG00000020454|+|chr11:g.3186277:G>A  
 MEKVAETENGDAFLELKLPTSKSPHRYTKEELLDIKERPYSKQRPSCLEKYDSDGVWDPEKWHASLYPAS  
 GRSSPVESLKKESSEDRPSLVRRADPRERVKEDDLVVLSPQRSSFSGGGCHVTAAVSSRRSGSPLEKDS  
 RLLGGRRIGSGRIISARAFEKDHRLSDKDLRDLRDRDRERDYKDKRFRREFGDSKRVPFGERRRNDST  
 YTEEEPEWFSAGPTSQSETIELTGFDDKILEEDHKGRKRTRRRRTASVKEGIVECNGGVAEEDEVEVILA  
 QEPSADQEVPRDVILPEQSPGEFDFNEFFNLDKVPCLASMIEDVLGEGSVSASRFRWFSNPSRSGSRSS  
 SLGSPHEELERLAGLEQAVLSPGQNSGNYFAPIPSEDHAENKVDILEMLQKAKVDLKLPLSSLSANKEKL  
 KESHSGVVLVSVVEEVEAGLKLKVDQMKNSTPFMAEHLEETLSAASSNRQLKDGDMTAFNKLVTMKTAS  
 GTLPTQPKVSELLGQPVQRPASSNLLSGLMGSLEATASLLSQRAPSPMSQVFRTOAASADYLHPRI  
 PSPIGFSPGQQLLGDPPFQGMKRPMSPVSAQMSQLELQQAALGLALPHDLAIQTAPFYQPGFSKPQVDR  
 TRDGLRNRQQRMSKSPAPMHGGNSSSPAPAASITSMSPSFTPTSVIRKMYESREKTKEEMAPGMVVPD  
 GDGKEDTQKTSEENLLSSNPIPNTDQDSSTTNPKLSTLQRSSCSTPLSQTSTRYTKQDYRPKTAGRKTPT  
 LASPVPGTFFLRPTHQVPLVPHVPIVRPAHQHPLGLVQRLIAQGVHPQHLPSSLQAGVLPPIGDMAPLQGL  
 SGPLLGQPLYPLVSAASHPLLNPRPGTPLHLAVMQQQLQRSV LHPPGSSSQAAAISVQTPQNVPSRSGMP  
 HMHSQLEHRTSQRSSSPVGLAKWFGSDVLQQLPLSMPTKVISVDELEYRQ\*

>rs240891555\_ENSMUSP00000105676\_c.1908:G>A\_p.V637I  
 ENSMUST00000110049.8|Eif4enif1-  
 203|ENSMUSG00000020454|+|chr11:g.3186277:G>A  
 MEKVAETENGDAFLELKLPTSKSPHRYTKEELLDIKERPYSKQRPSCLEKYDSDGVWDPEKWHASLYPAS  
 GRSSPVESLKKESSEDRPSLVRRADPRERVKEDDLVVLSPQRSSFSGGGCHVTAAVSSRRSGSPLEKDS  
 RLLGGRRIGSGRIISARAFEKDHRLSDKDLRDLRDRDRERDYKDKRFRREFGDSKRVPFGERRRNDST  
 YTEEEPEWFSAGPTSQSETIELTGFDDKILEEDHKGRKRTRRRRTASVKEGIVECNGGVAEEDEVEVILA  
 QEPSADQEVPRDVILPEQSPGEFDFNEFFNLDKVPCLASMIEDVLGEGSVSASRFRWFSNPSRSGSRSS  
 SLGSPHEELERLAGLEQAVLSPGQNSGNYFAPIPSEDHAENKVDILEMLQKAKVDLKLPLSSLSANKEKL  
 KESHSGVVLVSVVEEVEAGLKLKVDQMKNSTPFMAEHLEETLSAASSNRQLKDGDMTAFNKLVTMKTAS  
 GTLPTQPKVSRNVESHLLAPAEIPGQPVSKNILQELLGQPVQRPASSNLLSGLMGSLEATASLLSQRA  
 PSPMSQVFRTOAASADYLHPRI

PSPIGFPSGPQQLLGDPPFQGMRKPMSPVSAQMSQLELQQAALGLALPHDLAIQTAPFYQPGFSPKQVDRTRD  
GLRNRQQRMSKSPAPMHGGNSSSPAPAASITSMSPSFTPTPTSVIRKMYESREKTKEEMAPGMVVPDGDGKEDTQ  
KTSEENLLSSNPIPNTDQDSSTTNPKLSTLQRSSCSTPLSQTSTRYKQDYRPKTAGRKTPTLASVPVPGTFFL  
RPTHQVPLVPHVPIVRPAHQHLPGLVQRLIAQGVHPQHLPSSLQAGVLPFGIDMAPLQGLSGPLLGQPLYPLV  
SAASHPLLNPRPGTPLHLAVMQQLQRSVLHPPGSSSQAAAI SVQTPQNVPSRSGMPMHMSQLEHRTSQRSSS  
PVGLAKWFGSDVLQQLPLPSMPTKVISVDELEYRQ\*

>rs240891555\_ENSMUSP00000105675\_c.1836:G>A\_p.V613I  
ENSMUST00000110048.8|Eif4enif1-  
202|ENSMUSG00000020454|+|chr11:g.3186277:G>A  
MEKVAETENGDAFLELKKLPTSKSPHRYTKEELLDIKERPYSKQRPSCLESEKYDSDGVWDPEKWHASLYPAS  
GRSSPVESLKKESESDRPSLVRRADPRERVKEDDLVVLSPQRRSFGGGCHVTAAVSSRRSGSPLEKSDGL  
RLLGRRIGSGRIISARAFEKDHRLSDKDLRDLRDRDRERDYKDKRFRREFGDSKRVPFGERRRNDSTYEEEEPE  
WFSAGPTSQSETIELTGFDDKILEEDHKGRKRTRRRRTASVKEGIVECNGGVAEEDEVEVILAQEPSADQEVPR  
DVILPEQSPGFEFDFNEFFNLKVPCLASMIEDVLGEGSVSASRFRWFNSPSRSGSRSSSLGSTPHEELERLA  
GLEQAVLSPGQNSGNYFAPIPSEDHAENKVDILEMLQKAKVDLKPILLSLSSANKEKLKESHSGVVLVSVVEEVE  
AGLGLKVDQQMKNSTPFMAEHLEETLSAASSNRQLKKGDMTAFNKLVTMKNVESHLLAPAEIPGQPVSKNIIQV  
RTPASSNLLSGLMGSLEATASLLSQRAPSPMMSQVFRTPQAASADYLHPRI PSPIGFPSGPQQLLGDPPFQGMRK  
MSPVSAQMSQLELQQAALGLALPHDLAIQTAPFYQPGFSPKQVDRTRDGLRNRQQRMSKSPAPMHGGNSSSP  
APAASITSMSPSFTPTPTSVIRKMYESREKTKEEMAPGMVVPDGDGKEDTQKTSEENLLSSNPIPNTDQDSSTTN  
PKLSTLQRSSCSTPLSQTSTRYKQDYRPKTAGRKTPTLASVPVPGTFFLRPTHQVPLVPHVPIVRPAHQHLPGL  
LVQRLIAQGVHPQHLPSSLQAGVLPFGIDMAPLQGLSGPLLGQPLYPLVSAASHPLLNPRPGTPLHLAVMQQL  
QRSVLHPPGSSSQAAAI SVQTPQNVPSRSGMPMHMSQLEHRTSQRSSSPVGLAKWFGSDVLQQLPLPSMPTKV  
ISVDELEYRQ\*

>rs240891555\_ENSMUSP00000112550\_c.1383:G>A\_p.V462I  
ENSMUST00000120721.9|Eif4enif1-  
204|ENSMUSG00000020454|+|chr11:g.3186277:G>A  
MEKVAETENGDAFLELKKLPTSKSPHRYTKEELLDIKERPYSKQRPSCLESEKYDSDGVWDPEKWHASLYPAS  
GRSSPVESLKKESESDRPSLVRRADPRERVKEDDLVVLSPQRRSFGGGCHVTAAVSSRRSGSPLEKSDGL  
FNLKVPCLASMIEDVLGEGSVSASRFRWFNSPSRSGSRSSSLGSTPHEELERLAGLEQAVLSPGQNSGNYF  
APIPSEDHAENKVDILEMLQKAKVDLKPILLSLSSANKEKLKESHSGVVLVSVVEEVEAGLGLKVDQQMKNSTP  
FMAEHLEETLSAASSNRQLKKGDMTAFNKLVTMKNVESHLLAPAEIPGQPVSKNIIQVLLGQPVQRPASS  
NLLSGLMGSLEATASLLSQRAPSPMMSQVFRTPQAASADYLHPRI PSPIGFPSGPQQLLGDPPFQGMRKPMSPV  
SAQMSQLELQQAALGLALPHDLAIQTAPFYQPGFSPKQVDRTRDGLRNRQQRMSKSPAPMHGGNSSSPAPAAS  
ITSMSPSFTPTPTSVIRKMYESREKTKEEMAPGMVVPDGDGKEDTQKTSEENLLSSNPIPNTDQDSSTTNPKLST  
LQRSSCSTPLSQTSTRYKQDYRPKTAGRKTPTLASVPVPGTFFLRPTHQVPLVPHVPIVRPAHQHLPGLVQRL  
IAQGVHPQHLPSSLQAGVLPFGIDMAPLQGLSGPLLGQPLYPLVSAASHPLLNPRPGTPLHLAVMQQLQRSV  
LHPPGSSSQAAAI SVQTPQNVPSRSGMPMHMSQLEHRTSQRSSSPVGLAKWFGSDVLQQLPLPSMPTKVISVDE  
LEYRQ\*

>rs240891555\_ENSMUSP00000122912\_c.582:G>A\_p.V195I  
ENSMUST00000135223.2|Eif4enif1-  
210|ENSMUSG00000020454|+|chr11:g.3186277:G>A  
QKAKVDLKPILLSLSSANKEKLKESHSGVVLVSVVEEVEAGLGLKVDQQMKNSTPFMAEHLEETLSAASSNRQL  
KKGDMTAFNKLVTMKNVESHLLAPAEIPGQPVSKNIIQVFRTPQAASADYLHPRI PSPIGFPSGPQQLLGDPPFQGM  
RKPMSPVSAQMSQLELQQAALGLALPHDLAIQTAPFYQPGFSPKQVDRTRDGLRNRQQRMSKSPAPMHGGNSSSP  
RQQRMSKSPAPMHGGNSSSP

>rs240891555\_ENSMUSP00000136768\_c.1908:G>A\_p.V637I  
ENSMUST00000179770.8|Eif4enif1-  
213|ENSMUSG00000020454|+|chr11:g.3186277:G>A  
MEKVAETENGDAFLELKKLPTSKSPHRYTKEELLDIKERPYSKQRPSCLESEKYDSDGVWDPEKWHASLYPAS  
GRSSPVESLKKESESDRPSLVRRADPRERVKEDDLVVLSPQRRSFGGGCHVTAAVSSRRSGSPLEKSDGL  
RLLGRRIGSGRIISARAFEKDHRLSDKDLRDLRDRDRERDYKDKRFRREFGDSKRVPFGERRRNDSTYEEEEPE  
WFSAGPTSQSETIELTGFDDKILEEDHKGRKRTRRRRTASVKEGIVECNGGVAEEDEVEVILAQEPSADQEVPR  
DVILPEQSPGFEFDFNEFFNLKVPCLASMIEDVLGEGSVSASRFRWFNSPSRSGSRSSSLGSTPHEELERLA  
GLEQAVLSPGQNSGNYFAPIPSEDHAENKVDILEMLQKAKVDLKPILLSLSSANKEKLKESHSGVVLVSVVEEVE  
AGLGLKVDQQMKNSTPFMAEHLEETLSAASSNRQLKKGDMTAFNKLVTMKNVESHLLAPAEIPGQPVSKNIIQV  
RTPASSNLLSGLMGSLEATASLLSQRAPSPMMSQVFRTPQAASADYLHPRI PSPIGFPSGPQQLLGDPPFQGMRK  
PMSPVSAQMSQLELQQAALGLALPHDLAIQTAPFYQPGFSPKQVDRTRDGLRNRQQRMSKSPAPMHGGNSSSP  
APAASITSMSPSFTPTPTPTSVIRKMYESREKTKEEMAPGMVVPDGDGKEDTQ

KTSEENLLSSNPIPNTDQDSSTNPKLSTLQRSSCSTPLSQTSTRYTKEQDYRPKTAGRKTPTLASVPVPGTFFL  
RPTHQVPLVPHVPIVRPAHQHPLVQRLIAQGVHPQHLPSSLQAGVLPPIGIDMAPLQGLSGPLLGQPLYPLV  
SAASHPLLNPRPGTPLHLAVMQQQLQRSVLHPPGSSSQAAAISVQTPQNVPSRSGMPMHMSQLEHRTSQRSSS  
PVGLAKWFGSDVLQQLPLSPMPTKVISVDELEYRQ\*

>ENSMUSP00000020734\_c.2694:C>T\_p.P899S ENSMUST00000020734.11|Eif4enif1-  
201|ENSMUSG00000020454|+|chr11:g.3193904:C>T  
MEKVAETENGDAFLELKKLPTSXSPHRYTKEELLDIKERPYSKQRPSCLEKYDSDGVWDPEKWHASLYPAS  
GRSSPVESLKKESSEDRPSLVRRADPRERVKEDDLVVLSPQRRSFGGGCHVTAAVSSRRSGSPLEKDSGDL  
RLLGGRRIGSGRIISARAFEKDHRLSDKDLRDLRDRDRERDYKDKRFRREFGDSKRVFGERRRNDSYTEEEPE  
WFSAGPTSQSETIELTGFDDKILEEDHKGRKRTRRRRTASVKEGIVECNGGVAEEDEVEVILAQEPSADQEVPR  
DVILPEQSPGEFDFNEFFNLKVPCLASMIEDVLGEGSVSASRFSRWFNSPNSRSGSRSSSLGSPHEELERLA  
GLEQAVLSPGQNSGNYFAPIPSEDHAENKVDILEMLQKAKVDLKPILLSLANSKEKLKESHSGVVLVSVVEVE  
AGLKGKLVDDQMKNSTPFMAEHLEETLSAASSNRQLKKGDMTAFNKLNTMKASGTLPTQPKVSELLGQPVQ  
RPASSNLLSGLMGSLEATASLLSQRAPSPMSQVFRTOAASADYLHPRI P SPIGFPSGPQQLGDPFQGMKRP  
MSPVSAQMSQLELQQAALGLALPHDLAVQTAPFYQPGFSKPVDRTRDGLRNRQQRMSKSPAPMHGNSSSP  
APAASITSMSPSFTPTSVIRKMYESREKTKEEMAPGMVVPDGKEDTQKTSEENLLSSNPIPNTDQDSSTTN  
PKLSTLQRSSCSTPLSQTSTRYTKEQDYRPKTAGRKTPTLASVPVPGTFFLRPTHQVPLVPHVPIVRPAHQHPLG  
LVQRLIAQGVHPQHLPSSLQAGVLPPIGIDMAPLQGLSGPLLGQPLYPLVSAASHPLLNPRPGTPLHLAVMQQ  
LQRSVLHPPGSSSQAAAISVQTSQNVPSRSGMPMHMSQLEHRTSQRSSSPVGLAKWFGSDVLQQLPLSPMPTKV  
ISVDELEYRQ\*

>ENSMUSP00000105676\_c.2766:C>T\_p.P923S ENSMUST00000110049.8|Eif4enif1-  
203|ENSMUSG00000020454|+|chr11:g.3193904:C>T  
MEKVAETENGDAFLELKKLPTSXSPHRYTKEELLDIKERPYSKQRPSCLEKYDSDGVWDPEKWHASLYPAS  
GRSSPVESLKKESSEDRPSLVRRADPRERVKEDDLVVLSPQRRSFGGGCHVTAAVSSRRSGSPLEKDSGDL  
RLLGGRRIGSGRIISARAFEKDHRLSDKDLRDLRDRDRERDYKDKRFRREFGDSKRVFGERRRNDSYTEEEPE  
WFSAGPTSQSETIELTGFDDKILEEDHKGRKRTRRRRTASVKEGIVECNGGVAEEDEVEVILAQEPSADQEVPR  
DVILPEQSPGEFDFNEFFNLKVPCLASMIEDVLGEGSVSASRFSRWFNSPNSRSGSRSSSLGSPHEELERLA  
GLEQAVLSPGQNSGNYFAPIPSEDHAENKVDILEMLQKAKVDLKPILLSLANSKEKLKESHSGVVLVSVVEVE  
AGLKGKLVDDQMKNSTPFMAEHLEETLSAASSNRQLKKGDMTAFNKLNTMKASGTLPTQPKVSRNVESHLL  
APAEIPGQPVSKNILQELLGQPVQRPASSNLLSGLMGSLEATASLLSQRAPSPMSQVFRTOAASADYLHPRI  
P SPIGFPSGPQQLGDPFQGMKRPMSPVSAQMSQLELQQAALGLALPHDLAVQTAPFYQPGFSKPVDRTRD  
GLRNRQQRMSKSPAPMHGNSSSPAPAASITSMSPSFTPTSVIRKMYESREKTKEEMAPGMVVPDGKEDTQ  
KTSEENLLSSNPIPNTDQDSSTNPKLSTLQRSSCSTPLSQTSTRYTKEQDYRPKTAGRKTPTLASVPVPGTFFL  
RPTHQVPLVPHVPIVRPAHQHPLVQRLIAQGVHPQHLPSSLQAGVLPPIGIDMAPLQGLSGPLLGQPLYPLV  
SAASHPLLNPRPGTPLHLAVMQQQLQRSVLHPPGSSSQAAAISVQTSQNVPSRSGMPMHMSQLEHRTSQRSSS  
PVGLAKWFGSDVLQQLPLSPMPTKVISVDELEYRQ\*

>ENSMUSP00000105675\_c.2694:C>T\_p.P899S ENSMUST00000110048.8|Eif4enif1-  
202|ENSMUSG00000020454|+|chr11:g.3193904:C>T  
MEKVAETENGDAFLELKKLPTSXSPHRYTKEELLDIKERPYSKQRPSCLEKYDSDGVWDPEKWHASLYPAS  
GRSSPVESLKKESSEDRPSLVRRADPRERVKEDDLVVLSPQRRSFGGGCHVTAAVSSRRSGSPLEKDSGDL  
RLLGGRRIGSGRIISARAFEKDHRLSDKDLRDLRDRDRERDYKDKRFRREFGDSKRVFGERRRNDSYTEEEPE  
WFSAGPTSQSETIELTGFDDKILEEDHKGRKRTRRRRTASVKEGIVECNGGVAEEDEVEVILAQEPSADQEVPR  
DVILPEQSPGEFDFNEFFNLKVPCLASMIEDVLGEGSVSASRFSRWFNSPNSRSGSRSSSLGSPHEELERLA  
GLEQAVLSPGQNSGNYFAPIPSEDHAENKVDILEMLQKAKVDLKPILLSLANSKEKLKESHSGVVLVSVVEVE  
AGLKGKLVDDQMKNSTPFMAEHLEETLSAASSNRQLKKGDMTAFNKLNTMKASGTLPTQPKVSELLGQPVQ  
RPASSNLLSGLMGSLEATASLLSQRAPSPMSQVFRTOAASADYLHPRI P SPIGFPSGPQQLGDPFQGMKRP  
MSPVSAQMSQLELQQAALGLALPHDLAVQTAPFYQPGFSKPVDRTRDGLRNRQQRMSKSPAPMHGNSSSP  
APAASITSMSPSFTPTSVIRKMYESREKTKEEMAPGMVVPDGKEDTQKTSEENLLSSNPIPNTDQDSSTTN  
PKLSTLQRSSCSTPLSQTSTRYTKEQDYRPKTAGRKTPTLASVPVPGTFFLRPTHQVPLVPHVPIVRPAHQHPLG  
LVQRLIAQGVHPQHLPSSLQAGVLPPIGIDMAPLQGLSGPLLGQPLYPLVSAASHPLLNPRPGTPLHLAVMQQ  
LQRSVLHPPGSSSQAAAISVQTSQNVPSRSGMPMHMSQLEHRTSQRSSSPVGLAKWFGSDVLQQLPLSPMPTKV  
ISVDELEYRQ\*

>ENSMUSP00000112550\_c.2241:C>T\_p.P748S ENSMUST00000120721.9|Eif4enif1-  
204|ENSMUSG00000020454|+|chr11:g.3193904:C>T  
MEKVAETENGDAFLELKKLPTSXSPHRYTKEELLDIKERPYSKQRPSCLEKYDSDGVWDPEKWHASLYPAS  
GRSSPVESLKKESSEDRPSLVRRADPRERVKEDDLVVLSPQRRSFGGGCHVTAAVSSRRSGSPLEKDSGDL  
RLLGGRRIGSGRIISARAFEKDHRLSDKDLRDLRDRDRERDYKDKRFRREFGDSKRVFGERRRNDSYTEEEPE  
WFSAGPTSQSETIELTGFDDKILEEDHKGRKRTRRRRTASVKEGIVECNGGVAEEDEVEVILAQEPSADQEVPR  
DVILPEQSPGEFDFNEFFNLKVPCLASMIEDVLGEGSVSASRFSRWFNSPNSRSGSRSSSLGSPHEELERLA  
GLEQAVLSPGQNSGNYFAPIPSEDHAENKVDILEMLQKAKVDLKPILLSLANSKEKLKESHSGVVLVSVVEVE  
AGLKGKLVDDQMKNSTPFMAEHLEETLSAASSNRQLKKGDMTAFNKLNTMKASGTLPTQPKVSELLGQPVQ  
RPASSNLLSGLMGSLEATASLLSQRAPSPMSQVFRTOAASADYLHPRI P SPIGFPSGPQQLGDPFQGMKRP  
MSPVSAQMSQLELQQAALGLALPHDLAVQTAPFYQPGFSKPVDRTRDGLRNRQQRMSKSPAPMHGNSSSP  
APAASITSMSPSFTPTSVIRKMYESREKTKEEMAPGMVVPDGKEDTQKTSEENLLSSNPIPNTDQDSSTTN  
PKLSTLQRSSCSTPLSQTSTRYTKEQDYRPKTAGRKTPTLASVPVPGTFFLRPTHQVPLVPHVPIVRPAHQHPLG  
LVQRLIAQGVHPQHLPSSLQAGVLPPIGIDMAPLQGLSGPLLGQPLYPLVSAASHPLLNPRPGTPLHLAVMQQ  
LQRSVLHPPGSSSQAAAISVQTSQNVPSRSGMPMHMSQLEHRTSQRSSSPVGLAKWFGSDVLQQLPLSPMPTKV  
ISVDELEYRQ\*

FMAEHLEETLSAASSNRQLKKDGMTAFNKLVTMKNRVESHLLAPAEIPGQPVSKNILQELLGQPQVQRPASS  
 NLLSGLMGSLEATASLLSQRAPSPPMQVFRTOAASADYLHPRI P SP I G F P S G P Q Q L L G D P F Q G M R K P M S P V S  
 AQMSQLELQQAALGLALPHDLAVQTAPFYQPGFSKPQVDRTRDGLRNRQQRMKSKSPAPMHGGNSSSPAPAAS  
 ITSMSPSFTPTSVIRKMYESREKTKEEMAPGMVVPDGDGKEDTQKTSEENLLSSNPI PNTDQDSSTNPKLST  
 LQRSSCSTPLSQTSTRYTKEDYRPKTAGRKTPTLASVPVGTFFLRPTHQVPLVPHVPIVRPAHQHLHPGLVQRL  
 IAQGVHPQHLPSSLQAGVLPPIGIDMAPLQGLSGPLLGQPLYPLVSAASHPLLNRPGTPLHLAVMQQQLQRSV  
 LHPPGSSSQAAAISVQTSQNVPSRSGMPMHMSQLEHRTSQRSSSPVGLAKWFGSDVLQQLPLSMP TKVISVDE  
 LEYRQ\*

>ENSMUSP00000136768\_c.2766:C>T\_p.P923S ENSMUST00000179770.8|Eif4enif1-  
 213|ENSMUSG00000020454|+|chr11:g.3193904:C>T  
 MEKSVAEETENGDAFLELKKLPTSKSPHRYTKEELLDIKERPYSKQRPSCLESEKYDSDGVVDPEKWHASLYPAS  
 GRSSPVESLKKESSEDRPSLVRRIADPRERVKEDDLVDVLSQRRSFGGGCHVTAAVSSRRSGSPLEKDS DGL  
 RLLGGRRIGSGRIISARAFEKDHRLSDKDLRDLRDRDRERDYKDKRFRREFGDSKR VFGERRRNDSYTEEEPE  
 WFSAGPTSQSETIELTGFDDKILEEDHKGRKRTRRRRTASVKEGIVECNGGVAEEDEVEVILAQEPSADQEVPR  
 DVILPEQSPGEFDFNEFFNLKDVPCLASMIEDVLGEGSVSASRFSRWFNSPNSRSGSRSSSLGSPHEELERLA  
 GLEQAVLSPGQNSGNYFAPIPSEDHAENKVDILEMLQKAKVDLKP LLSLSANKEKLEKESHSGVVLVSVVEVE  
 AGLKGLKVDQMKNSTPFMAEHLEETLSAASSNRQLKKDGMTAFNKLVTMKNRVESHLLAPAEIPGQPVSKNILQELLGQPQVQRPASS  
 NLLSGLMGSLEATASLLSQRAPSPPMQVFRTOAASADYLHPRI P SP I G F P S G P Q Q L L G D P F Q G M R K P M S P V S  
 AQMSQLELQQAALGLALPHDLAVQTAPFYQPGFSKPQVDRTRDGLRNRQQRMKSKSPAPMHGGNSSSPAPAAS  
 ITSMSPSFTPTSVIRKMYESREKTKEEMAPGMVVPDGDGKEDTQKTSEENLLSSNPI PNTDQDSSTNPKLST  
 LQRSSCSTPLSQTSTRYTKEDYRPKTAGRKTPTLASVPVGTFFLRPTHQVPLVPHVPIVRPAHQHLHPGLVQRL  
 IAQGVHPQHLPSSLQAGVLPPIGIDMAPLQGLSGPLLGQPLYPLVSAASHPLLNRPGTPLHLAVMQQQLQRSV  
 LHPPGSSSQAAAISVQTSQNVPSRSGMPMHMSQLEHRTSQRSSSPVGLAKWFGSDVLQQLPLSMP TKVISVDE  
 LEYRQ\*

>rs46909618\_ENSMUSP00000099865\_c.416:G>T\_p.R139S  
 ENSMUST00000102801.8|Tenm2-202|ENSMUSG00000049336|-|chr11:g.36755580:C>A  
 MDVKDRRHRSLTRGRCGKECRYTSSSLDSEDCRVPTQKSYSSSETL KAYDHDSRMHYGNRVTDLVHRESDEFS  
 RQGTNFTLAE LGICEPSPHRSGYCS DMGILHQYSLSTGSDADSDTEGGMSPEHAIRLWGRGIKSSRSSGLSS  
 RENSA LTLTDS DNENKSDDDNGRPI PPTSSSSLLPSAQLPSSHNPVSCQMPLLD SNTSHQIMDTNPDEEFS  
 PNSYLLRACSGPQQASSGPPNHHSQSTLRPPLPPPHNHTLSHHHSSANS LN RNSL TNRRS QI HAPAPAPNDL  
 ATTPESVQLQDSWV LNSNVPLETRHFLFKTSSGSTPLFSSSSPGYPLTSGTVYTPPPRLLPRNTFSRKA FKLK  
 KPSKYCSWKCAALSAIAAALLLAILLAYFIAMHLLGLNWQLQPADGHTFNNGVRTGLPGNDDVATVP SGGKVP  
 WSLKNSSIDSGEAEVGRVVTQEVPPGVFVRSQIHI SQPQFLKFNISLGKDALFGVYIRRG LPPSHAQYDFMER  
 LDGKEKSVVSESPRERSIQTLVQNEAVFVQYLDVGLWHLAFYNDGKDKEMVSFNTVVLD SVQDCPRNCHGNG  
 ECVSGLCHCFPGFLGADCAKACPVLC SGNQYKSGTCQCYSGWKGAEC DVP MNQCIDPSCGGHGSCIDGNVC  
 CAAGYKGEHCEEVDLPTCS SHGVCVNGECLCS PGWGLNCELARVQC PDQCSGHGTYLPDSGLCSDCNWMM  
 GPDCSVVCSVDCGTHGVCIGGACRCEEGW TGAACDQRVCHPRCIEHGTCKDGKCECREGWNGEHCTIDGCPDL  
 CNGNGRCTLGQNSWQCVCQTGW RGP GCNVAMETSCADNKDNEGDGLVDCLDPDCCLQSACQNSLLCRGSRDPL  
 DIIQQGQTDWPAVKSFYDRIKLLAGKDS TH I I PGD NPFNSSLVSLIRGQVVTMDGTPLVGVNVSFVKYPKYGY  
 TITRQDGTFDLIANGGSALT LHFERAPFMSQERTVWLPWNSFYAMDTLVMKTEENSIPSCDLSGFVRPDPII  
 SSPLSTFFSASPASNPIVPE TQVLHEEIELPGTNV KLRYLSSRTAGYKSLK I TMTQSTVPLN LIRVHLMVAV  
 EGHFLQKSFQASPNLAYTFIWDKTDAYGQRVYGLSDAVVSVGFYETCP SILLWEKRTALLQGFELDP SNLGG  
 WSLDKHHTLNVKSGILHKGTGENQFLTQQPAIITSIMGNRRRSISCPSCNGLAEGNKLLAPVALAVGIDGSL  
 FVGDFNYIRRI FPSRNVTSILELRNKEFKHSNSPGHKYYLAVDPVTGSLYVSDTNSRRIYRVKSLSGAKDLA  
 NSEVVAGTGEQCLPFDEARCGDGGKAVDATLMSPRGIAVDKNGLMYFVDATMIRKVDQNGIISTLLGSNDLTA  
 VRPLSCDSSMDVAQVRLEWPTDLAVNPMDNSLYVLENNVILRITENHQVSI IAGRP MHCQVPGIDYSLSKLAI  
 HSALESASAIASHTGVLYITETDEKKINRLRQVTTNGEICLLAGAASDCCKNDVNCICYSGD DAYATDAI L  
 NSPSSLAVAPDGTIYIADLGNIRIRAVSKNKPVLNAFNQYEAASPEQE LYVFNADGIHQYTVSLVTGEYLYN  
 FTYSADNDVTE LIDNNGNSLKI RRDSSGM PRHLLMPDNQIITLTVGTNGGLKAVSTQNLELGLMTYDGN TGLL  
 ATKSDETGWTTFYDYDHEGRLTNVTRPTGVV TSLHREMEKSIITIDIENSNRDDDVTVITNLSVVEASYTVVQD  
 QVRNSYQLCNGGTLRVMYANGMAV SFHSEPHVLAGTITPTIGRCNISLPMENGLNSIEWRLRKEQIKGKVTIF  
 GRKLRVHGRNLLSIDYDRNIRTEKIYDDHRKFTLR I IYDQVGRPF L WLPSSGLAAVNVSYFFNGRLAGLQ RGA  
 MSERTDIDKQGRIVSRMFADGK VWSYSYLDKSMGVL LLYQYRQYI FEYDSSDR LHAVT M P S V A R H S M S T H T S I G  
 YIRNIYNPPESNASVIFDYSDDGRILKTSFLGTGRQVFTYHYGKLSKLS EIVYDSTAVTFYDET TGV LK M V N L  
 QSGGF S C T I R Y R K V G P L V D K Q I Y R F S E E G M I N A R F D Y T Y H D N S F R I A S I K P V I S E T P L P V D L Y R Y D E I S G K V E  
 HF GK F G V I Y Y D I N Q I I T T A V M T L S K H F D T H G R I K E V Q Y E M F R S L M Y W M T V Q Y D S M G R V I K R E L K L G P Y A N T T K  
 Y T Y D Y D G D G Q L Q S V A V N D R P T W R Y S Y D L N G N L H L L N P G N S A R L M P L R Y D L R D R I T R L G D V Q Y K I D D D G Y L C Q R  
 G S D I F E Y N S K G L L T R A Y N K A S G W S V Q Y R Y D G V G R R A S Y K T N L G H H L Q Y F Y S D L H N P T R I T H V Y N H S N S E I T S L



YYDLQGHLFAMESSSGEEYYVASDNTGTPLAVFSINGLMIKQLQYTAYGEIYYDSNPDFQMVIGFHGGLYDPL  
TKLVHFTQRDYDVLAGRWTSPDYTMWRNVGKEPAPFNLYMFKNNNPLSNELDLKKNYVTDVKSWSLVMFGFQLSN  
IIPGFPRAKMYFVPPPYELSEQASENGQLITGVQQTTERHNQAF LALEGQVITKKLHASIREKAGHWFATTT  
PIIGKIMFAIKEGRVTTGVSSIASEDSRKVASVLNNAYYLDKMHYSIEGKDTHYFVKIGAADGDLVTLGTTI  
GRKVLSEGVNVTVSQPTLLVNGRTRRFTNIEFQYSTLLLSIRYGLTPDTLDEEKARVLDQARQALGTAWAKE  
QQKARDGREGSRLWTEGEKQQLLSTGRVQGYEGYVLPVEQYPELADSSSNIQFLRQNEGKR\*  
>rs46909618\_ENSMUSP0000052014\_c.416:g>T\_p.R139S  
ENSMUST00000057207.6|Tenm2-201|ENSMUSG00000049336|-|chr11:g.36755580:C>A  
MDVKDRRHRSLTRGRCGKECRYTSSSLDSEDCRVPTQKSYSSSETLKAYDHDSRMHYGNRVTDLVHRESDEFS  
RQGTNFTLAEELGICEPSPHRSGYCSMDGILHQYSLSTGSDADSDTEGGMSPEHAIRLWGRGKIKSSRSSLSS  
RENSALTLTDSNENKSDDDNGRPIPTSSSSLLPSAQLPSSHNPVSCQMPLLDSENTSHQIMDTPNDEEFS  
PNSYLLRACSGPQQASSSGPPNHHSQSTLRPPLPPPNNHTLSHHSSANS LNRRSLTNRRSQIHAPAPAPNDL  
ATTPESVQLQDSWVLNSNVPLETRHFLFKTSSGSTPLFSSSSPGYPLTSGTVYTPPPRLLPRNTFSRKAFKFK  
KPSKYCSWKCAALSAIAAALLLAILLAYFIAMHLLGLNWQLQPADGHTFNNGVRTGLPGNDDVATVPSGGKVP  
WSLKNSSIDSGEAEVGRVTVQEVPPGVFVRSQIHI SQPQFLKFNISLGKDALFGVYIRRGLPPSHAQYDFMER  
LDGKEKWSVVEsprerrsIQTLVQNEAVFVQYLDVGLWHLAFYNDGKDKEMVSFNTVVLDVSDQCPRNCHGNG  
ECVSGLCHCFPGFLGADCAKAACPVLCSGNGQYSGKTCQCYSGWKAECVPMNQCIDPSCGGHGSCIDGNVCV  
CAAGYKGEHCEEVDCLDPTCSSHGVCVNGECLCSPGWGGLNCELARVQCPDQCSGHGTYLPDSGLCSDPNWM  
GPDCSVEVCSVDCGTHGVCIGGACRCEEGWTGAACDQVCHPRCIEHGTCCKDGKCECREGWNGEHTIDGCPD  
LCNNGRCTLGQNSWQVCVQGTWRGPGCNVAMETSCADNKDNEGDGLVDCLDPDCCLQSACQNSLLCRGSRDP  
LDIIQQGQTDWPAVKSFYDRIKLLAGKDSSTHII PGDNPFNSSLVSLIRGQVVTMDGTPLVGVNVSFVKYPKYG  
YTI TRQDGTDFLIANGGSALT LHFERAPFMSQERTVWLPWNSFYAMD TLVMKTEENSI PSCDLSGFVRPDI I  
ISSPLSTFFSASPASNPIVPETQVLHEEIELPGTNVKLRYLSRTAGYKSLKITMTQSTVPLNLIRVHLMVA  
VEGHLFQKSFQASPNLAYTFIWDKTDAYGQRVYGLSDAVVSVGFYETCPSLILWEKRTALLQGFE LDP SNLG  
GWSLDKHHHTLVNKGSGILHKGTEGENQFLTQQPAIITSIMGNRRRSISCPSCNGLAEGNKLLAPVALAVGIDGS  
LFVGFDFNYIRRIFFSRNVTSILELRNKEFKHSLNSPGHKIYLAVDVPTGSLYVSDTNSRRIYRVKSLSGAKDLA  
GNSEVAVAGTEGQCLPFDEARCGDGGKAVDATLMSPRGIYAVDNKGLMYFVDATMIRKVDQNGIISTLLGSNDLT  
AVRPLSCDSSMDVAQVRLEWPTDLAVNPMDNSLYVLENNVILRITENHQVSI IAGRPMHCQVPGIDYSLSKLA  
IHSALASASAIASHTGVLYITETDEKKINRLRQVTTNGEICLLAGAASDCDCKNDVNCICYSGDDAYATDAI  
LNSPSSLAVAPDGTIYIADLGNIRIRAVSKNKPVLNAFNQYEAASPGEQELYVFNADGIHQYTVSLVTGEYLY  
NFTYSADNDVTELDNNGNSLKIIRDSSGMPRHLLMPDNQIITLTVGTNGGLKAVSTQNLGLMTYDGNTGL  
LATKSDETGWTTFYDYDHEGRLTNVTRPTGVVTSLHREMEKSIITIDIENSRDDDVTVITNLSVVEASYTVVQ  
DQVRNSYQLCNGTLRVMYANGMAVSFHFSEPHVLAGTITPTIGRCNISLPMENGLNSIEWRLRKEQIKGKVTI  
FGRKLRVHGRNLLSIDYDRNIRTEKIYDDHRKFTLRIYDQVGRPFLWLPSSGLAANVNSYFFNGRLAGLQRG  
AMSERTDIDKQGRIVSRMFADGKVVWSYSLDKSMVLLQLQSQRYIFEYDSSDRHLHAVTMPVARHSMSTHTSI  
GYIRNIYNPPESNASVIFDYSDGRILKTSFLGTGRQVYFYKGLSKLSEIYVDSTAVTFYDETTGV LKMN  
LQSGGFSC TIRYRKVGPLVDKQIYRFSEEGMINARFDYTYHDNSFR IASIKPVISETPLPVDLYRYDEISGKV  
EHFGKFGVIYYDINQIITTAVMTLSKHFDTHGRIKEVQYEMFRSLMYWMTVQYDSMGRVIKRELKLPYANTT  
KYTYDYDGDGQLQSVAVNDRPTWRYSYDLNGLHLLNPGNSARLMP LRYDLRDRITRLGDVQYKIDDDGYLCQ  
RGSDFEYNSKGLLTRAYNKASGWSVQYRYDGVGRRASYKTNLGHHLQYFYSDLHNPTRITHVYNHNSNEITS  
LYYDLQGHLFAMESSSGEEYYVASDNTGTPLAVFSINGLMIKQLQYTAYGEIYYDSNPDFQMVIGFHGGLYDPL  
TKLVHFTQRDYDVLAGRWTSPDYTMWRNVGKEPAPFNLYMFKNNNPLSNELDLKKNYVTDVKSWSLVMFGFQLS  
NIIPGFPRAKMYFVPPPYELSEQASENGQLITGVQQTTERHNQAF LALEGQVITKKLHASIREKAGHWFATT  
TPIIGKIMFAIKEGRVTTGVSSIASEDSRKVASVLNNAYYLDKMHYSIEGKDTHYFVKIGAADGDLVTLGTTI  
GRKVLSEGVNVTVSQPTLLVNGRTRRFTNIEFQYSTLLLSIRYGLTPDTLDEEKARVLDQARQALGTAWAK  
EQKARDGREGSRLWTEGEKQQLLSTGRVQGYEGYVLPVEQYPELADSSSNIQFLRQNEGKR\*  
>rs46909618\_ENSMUSP00000129951\_c.416:g>T\_p.R139S  
ENSMUST00000163524.8|Tenm2-208|ENSMUSG00000049336|-|chr11:g.36755580:C>A  
MDVKDRRHRSLTRGRCGKECRYTSSSLDSEDCRVPTQKSYSSSETLKAYDHDSRMHYGNRVTDLVHRESDEFS  
RQGTNFTLAEELGICEPSPHRSGYCSMDGILHQYSLSTGSDADSDTEGGMSPEHAIRLWGRGKIKSSRSSLSS  
RENSALTLTDSNENKSDDDNGRPIPTSSSSLLPSAQLPSSHNPVSCQMPLLDSENTSHQIMDTPNDEEFS  
PNSYLLRACSGPQQASSSGPPNHHSQSTLRPPLPPPNNHTLSHHSSANS LNRRSLTNRRSQIHAPAPAPNDL  
ATTPESVQLQDSWVLNSNVPLETRHFLFKTSSGSTPLFSSSSPGYPLTSGTVYTPPPRLLPRNTFSRKAFKFK  
KPSKYCSWKCAALSAIAAALLLAILLAYFIAMHLLGLNWQLQPADGHTFNNGVRTGLPGNDDVATVPSGGKVP  
WSLKNSSIDSGEAEVGRVTVQEVPPGVFVRSQIHI SQPQFLKFNISLGKDALFGVYIRRGLPPSHAQYDFMER  
LDGKEKWSVVEsprerrsIQTLVQNEAVFVQYLDVGLWHLAFYNDGKDKEMVSFNTVVLDVSDQCPRNCHGNG  
ECVSGLCHCFPGFLGADCAKAACPVLCSGNGQYSGKTCQCYSGWKAECVPMNQCIDPSCGGHGSCIDGNVCV  
CAAGYKGEHCEEVDCLDPTCSSHGVCVNGECLCSPGWGGLNCELARVQCPDQCSGHGTYLPDSGLCSDPNWM

GPDCSVVCSVDCGTHGVCIGGACRCEEGWTGAACDQRVCHPRCIEHGTCKDGKCECREGWNGEHCTIDGCPDL  
 CNGNGRCTLGQNSWQCVCQTGWGRGPCNVAMETSCADNKDNEGDGLVDCLDPDCCLQSACQNSLLCRGRSDPL  
 DI IQQGQTDWPAVKSFYDRIKLLAGKDSHTIIPGDNPFNSSLVSLIRGQVVTMDGTPLVGVNVSVFKYPKYGY  
 TITRQDGTFDLIANGGSALTLHFERAPFMSQERTVWLPWNSFYAMDTLVMKTEENSI PSCDLSGFVRPDPII  
 SSPLSTFFFASASPASNPIVPEQTQVLHEEIELPGTNVKRLYLSSRTAGYKSLKITMTQSTVPLNLI RVHLMVAV  
 EGHFLQKSFQASPNLAYTFIWDKTDAYGQRVYGLSDAVVSVGFYETCPSLILWEKRTALLQGFELDPNSLGG  
 WSLDKHHTLNVKSGILHKGTGENQFLTQQPAIITSIMGNRRRSISCPSCNGLAEGNKLLAPVALAVGIDGSL  
 FVGDFNYIRRIFFPSRNVTSILELRNKEFKHSNSPGHKYYLAVDPVTGSLYVSDTNSRRIYRVKSLSGAKDLA  
 NSEVVAGTGEQCLPFDEARCGDGGKAVDATLMSPRGIAVDKNGLMYFVDATMIRKVDQNGIISTLLGSDNLTA  
 VRPLSCDSSMDVAQVRLEWPTDLAVNPMDNSLYVLENNVILRITENHQVSI IAGRPMHCQVPGIDYSLSKLAI  
 HSALESASAI AISHTGVLYITETDEKKINRLRQVTTNGEICLLAGAASDCCKNDVNCICYSGDDAYATDAI  
 NSPSSLAVAPDGTIYIADLGNIRIRAVSKNKPVLNAFNQYEAASPEQEYLVFNADGIHQYTVSLVTGEYLYN  
 FTYSADNDVTELDNNGNSLKIIRDSSGMPRHLLMPDNQIITLTVGTNGGLKAVSTQNLELGLMTYDNGTGLL  
 ATKSDETGWTTFYDYDHEGRLTNVTRPTGVVTS LHREMEKSIITIDIENSRDDDDVTVITNLSSEASYTVVQD  
 QVRNSYQLCNGTLRVMYANGMAVSVFHSEPHVLAGTITPTIGRCNISLPMENGLNSIEWRLRKEQIKGKVTIF  
 GRKLRVHGRNLLSIDYDRNIRTEKIYDDHRKFTLR IYDQVGRPFVLPSSGLAAVNVSYFFNGRLAGLQORGA  
 MSERTDIDKQGRIVSRMEFADGKVVSYSLDKSMVLLLSQRQYIFEYDSSDRLHAVTMPVSRHMSMSTHTSIG  
 YIRNIYNPPESNASVIFDYSDGRILKTSFLGTGRQVFKYKGLSKLSEIVYDSTAVTFYDETTGVLMKMN  
 QSGGFSC TIRYRKVGPLVDKQIYRFSEEGMINARFDYTYHDNSFRIASIKPVISETPLPVDLYRYDEISGKVE  
 HFGKFGVIYYDINQIITTAVMTLSKHFDTHGRIKEVQYEMFRSLMYWMTVQYDSMGRVIKRELKLGPIYANTTK  
 YTYDYDGDGQLQSVAVNDRPTWRYSYDLNGLNHLNPNGN SARLMPRLYDLRDRITRLGDVQYKIDDDGYLCQR  
 GSDIFEYNSKGLLTRAYNKASGWSVQYRYDGVGRRASYKTNLGHHLQYFYSDLHNPTRITHVYNHSNSEITSL  
 YYDLQGHLFAMESSSGEEYVVDNTGTPLAVFVSINGLMIKQLQYTA YGEIYYDSNPDFQMVIGFHGGLYDPL  
 TKLVHFTQRDYDVLAGRWTSPDYTMWRNVGKEPAPFNLYMFKNNPLSNELDLKNYVTDVKS WLVMFGFQLSN  
 IIPGFPRAKMYFVPPPYELSESQASENGQLITGVQOTTERHNQAF LALEGQVITKKLHASIREKAGHWFATTT  
 PIGKIMFAIKESRVTGVSSIASEDSRKVASVNLNAYLDKMHSYIEGKDTHYFVKIGAADGLVTLGTTI  
 GRKVLSESGVNTVSQPTLLVNGRTRRFTNIEFQYSTLLLSIRYGLTPDPTLDEEKARVLDQARQALGTAWAKE  
 QQKARDGREGSRLWTEGEKQQLLSTGRVQGYEGYVLPVEQYPELADSSSNIQFLRQNE MGKR\*  
 >rs29434588\_ENSMUSP00000146133\_c.598:A>T\_p.E200V  
 ENSMUST00000205546.2|Gabra1-205|ENSMUSG00000010803|-|chr11:g.42038018:T>A  
 MKKSRGLSDYLWAWTLILSTLSGRSYGQPSQDELKDNTTVFTRILDRLLDGYDNRLRPGLGERVTEVKTDIFV  
 TSFGPVS DHDMEYTI DVFFRQSWKDERLKFKGPM TVLRLNLMASKI WTPDPTFFHNGKKSVAHNMTMPNKLLR  
 ITEDGTL LYTMRLTVRAECPMHLEDFPMDAHACPLKFGSYAYTRAEVVYEWTRV PARSVVVAEDGSRLNQYDL  
 LGQTVDSGIVQSSTGEYVVMTHFHLKRKIGYFVIQTYLPCIMTVILSQVSFWLNRESVPARTVFGVTTVLTMT  
 TTLSISARNSLPKVAYATAMDWFIAVCYAFVFSALIEFATVNYFTKRGYAWDGKSVVPEKPKKVKDPLIKKNN  
 TYAPTATSYPNLRGDPGLATI AKSATIEPKEVKPETKPEPKKTFNSVSKIDRLSRIAFPLLFGI FNLVYV  
 ATYLNREPQLKAPTPHQ\*  
 >rs29434588\_ENSMUSP00000020707\_c.598:A>T\_p.E200V  
 ENSMUST00000020707.12|Gabra1-201|ENSMUSG00000010803|-  
 |chr11:g.42038018:T>A  
 MKKSRGLSDYLWAWTLILSTLSGRSYGQPSQDELKDNTTVFTRILDRLLDGYDNRLRPGLGERVTEVKTDIFV  
 TSFGPVS DHDMEYTI DVFFRQSWKDERLKFKGPM TVLRLNLMASKI WTPDPTFFHNGKKSVAHNMTMPNKLLR  
 ITEDGTL LYTMRLTVRAECPMHLEDFPMDAHACPLKFGSYAYTRAEVVYEWTRV PARSVVVAEDGSRLNQYDL  
 LGQTVDSGIVQSSTGEYVVMTHFHLKRKIGYFVIQTYLPCIMTVILSQVSFWLNRESVPARTVFGVTTVLTMT  
 TTLSISARNSLPKVAYATAMDWFIAVCYAFVFSALIEFATVNYFTKRGYAWDGKSVVPEKPKKVKDPLIKKNN  
 TYAPTATSYPNLRGDPGLATI AKSATIEPKEVKPETKPEPKKTFNSVSKIDRLSRIAFPLLFGI FNLVYV  
 ATYLNREPQLKAPTPHQ\*  
 >rs29434588\_ENSMUSP00000145949\_c.598:A>T\_p.E200V  
 ENSMUST00000206105.2|Gabra1-207|ENSMUSG00000010803|-|chr11:g.42038018:T>A  
 MKKSRGLSDYLWAWTLILSTLSGRSYGQPSQDELKDNTTVFTRILDRLLDGYDNRLRPGLGERVTEVKTDIFV  
 TSFGPVS DHDMEYTI DVFFRQSWKDERLKFKGPM TVLRLNLMASKI WTPDPTFFHNGKKSVAHNMTMPNKLLR  
 ITEDGTL LYTMRLTVRAECPMHLEDFPMDAHACPLKFGSYAYTRAEVVYEWTRV PARSVVVAEDGSRLNQYDL  
 LGQTVDSGIVQSSTGEYVVMTHFHLKRKIGYFVIQTYLPCIMTVILSQVSFWLNRESVPARTVFGVTTVLTMT  
 TTLSISARNS  
 >rs29466007\_ENSMUSP00000146133\_c.556:A>G\_p.Y186C  
 ENSMUST00000205546.2|Gabra1-205|ENSMUSG00000010803|-|chr11:g.42038060:T>C  
 MKKSRGLSDYLWAWTLILSTLSGRSYGQPSQDELKDNTTVFTRILDRLLDGYDNRLRPGLGERVTEVKTDIFV  
 TSFGPVS DHDMEYTI DVFFRQSWKDERLKFKGPM TVLRLNLMASKI WTPDPTFFHNGKKSVAHNMTMPNKLLR

ITEDGTLTYMRLTVRAECPMHLEDFPMDAHACPLKFGSCAYTRAEVVYEWTPREPARSVVVAEDGSRNLNQYDL  
 LGQTVDSGIVQSSTGEYVVMTHFHLKRKIGYFVIQTYLPCIMTVILSQVSWFLNRESVPARTVFGVTTVLTM  
 TTLSISARNSLPKVAYATAMDWFIAVCYAFVFSALIEFATVNYFTKRGYAWDGKSVVPEKPKKVKDPLIKKNN  
 TYAPTATSYPNLRGDPGLATIAKSATIEPKEVKPETKPEPKKTFNSVSKIDRLSRIAPLLFGIFNLVYW  
 ATYLNREPQLKAPTPHQ\*

>rs29466007\_ENSMUSP00000020707\_c.556:A>G\_p.Y186C  
 ENSMUST00000020707.12|Gabra1-201|ENSMUSG00000010803|-  
 |chr11:g.42038060:T>C  
 MKKSRGLSDYLWAWTLILSTLSGRSYGQPSQDELKDNTTVFTRILDRLLDGYDNRLRPGLGERVTEVKTDIFV  
 TSFGPVSDDHMEYTI DVFFRQSWKDERLKFKGPM TVLRLNNLMASKI WTPD TFFHNGKKSVAHNMTMPNKLLR  
 ITEDGTLTYMRLTVRAECPMHLEDFPMDAHACPLKFGSCAYTRAEVVYEWTPREPARSVVVAEDGSRNLNQYDL  
 LGQTVDSGIVQSSTGEYVVMTHFHLKRKIGYFVIQTYLPCIMTVILSQVSWFLNRESVPARTVFGVTTVLTM  
 TTLSISARNSLPKVAYATAMDWFIAVCYAFVFSALIEFATVNYFTKRGYAWDGKSVVPEKPKKVKDPLIKKNN  
 TYAPTATSYPNLRGDPGLATIAKSATIEPKEVKPETKPEPKKTFNSVSKIDRLSRIAPLLFGIFNLVYW  
 ATYLNREPQLKAPTPHQ\*

>rs29466007\_ENSMUSP00000145949\_c.556:A>G\_p.Y186C  
 ENSMUST00000206105.2|Gabra1-207|ENSMUSG00000010803|-|chr11:g.42038060:T>C  
 MKKSRGLSDYLWAWTLILSTLSGRSYGQPSQDELKDNTTVFTRILDRLLDGYDNRLRPGLGERVTEVKTDIFV  
 TSFGPVSDDHMEYTI DVFFRQSWKDERLKFKGPM TVLRLNNLMASKI WTPD TFFHNGKKSVAHNMTMPNKLLR  
 ITEDGTLTYMRLTVRAECPMHLEDFPMDAHACPLKFGSCAYTRAEVVYEWTPREPARSVVVAEDGSRNLNQYDL  
 LGQTVDSGIVQSSTGEYVVMTHFHLKRKIGYFVIQTYLPCIMTVILSQVSWFLNRESVPARTVFGVTTVLTM  
 TTLSISARNSLPKVAYATAMDWFIAVCYAFVFSALIEFATVNYFTKRGYAWDGKSVVPEKPKKVKDPLIKKNN  
 TYAPTATSYPNLRGDPGLATIAKSATIEPKEVKPETKPEPKKTFNSVSKIDRLSRIAPLLFGIFNLVYW  
 ATYLNREPQLKAPTPHQ\*

>rs264326470\_ENSMUSP00000146133\_c.537:C>T\_p.P180S  
 ENSMUST00000205546.2|Gabra1-205|ENSMUSG00000010803|-|chr11:g.42044179:G>A  
 MKKSRGLSDYLWAWTLILSTLSGRSYGQPSQDELKDNTTVFTRILDRLLDGYDNRLRPGLGERVTEVKTDIFV  
 TSFGPVSDDHMEYTI DVFFRQSWKDERLKFKGPM TVLRLNNLMASKI WTPD TFFHNGKKSVAHNMTMPNKLLR  
 ITEDGTLTYMRLTVRAECPMHLEDFPMDAHACPLKFGSYAYTRAEVVYEWTPREPARSVVVAEDGSRNLNQYDL  
 LGQTVDSGIVQSSTGEYVVMTHFHLKRKIGYFVIQTYLPCIMTVILSQVSWFLNRESVPARTVFGVTTVLTM  
 TTLSISARNSLPKVAYATAMDWFIAVCYAFVFSALIEFATVNYFTKRGYAWDGKSVVPEKPKKVKDPLIKKNN  
 TYAPTATSYPNLRGDPGLATIAKSATIEPKEVKPETKPEPKKTFNSVSKIDRLSRIAPLLFGIFNLVYW  
 ATYLNREPQLKAPTPHQ\*

>rs264326470\_ENSMUSP00000020707\_c.537:C>T\_p.P180S  
 ENSMUST00000020707.12|Gabra1-201|ENSMUSG00000010803|-  
 |chr11:g.42044179:G>A  
 MKKSRGLSDYLWAWTLILSTLSGRSYGQPSQDELKDNTTVFTRILDRLLDGYDNRLRPGLGERVTEVKTDIFV  
 TSFGPVSDDHMEYTI DVFFRQSWKDERLKFKGPM TVLRLNNLMASKI WTPD TFFHNGKKSVAHNMTMPNKLLR  
 ITEDGTLTYMRLTVRAECPMHLEDFPMDAHACPLKFGSYAYTRAEVVYEWTPREPARSVVVAEDGSRNLNQYDL  
 LGQTVDSGIVQSSTGEYVVMTHFHLKRKIGYFVIQTYLPCIMTVILSQVSWFLNRESVPARTVFGVTTVLTM  
 TTLSISARNSLPKVAYATAMDWFIAVCYAFVFSALIEFATVNYFTKRGYAWDGKSVVPEKPKKVKDPLIKKNN  
 TYAPTATSYPNLRGDPGLATIAKSATIEPKEVKPETKPEPKKTFNSVSKIDRLSRIAPLLFGIFNLVYW  
 ATYLNREPQLKAPTPHQ\*

>rs264326470\_ENSMUSP00000145949\_c.537:C>T\_p.P180S  
 ENSMUST00000206105.2|Gabra1-207|ENSMUSG00000010803|-|chr11:g.42044179:G>A  
 MKKSRGLSDYLWAWTLILSTLSGRSYGQPSQDELKDNTTVFTRILDRLLDGYDNRLRPGLGERVTEVKTDIFV  
 TSFGPVSDDHMEYTI DVFFRQSWKDERLKFKGPM TVLRLNNLMASKI WTPD TFFHNGKKSVAHNMTMPNKLLR  
 ITEDGTLTYMRLTVRAECPMHLEDFPMDAHACPLKFGSYAYTRAEVVYEWTPREPARSVVVAEDGSRNLNQYDL  
 LGQTVDSGIVQSSTGEYVVMTHFHLKRKIGYFVIQTYLPCIMTVILSQVSWFLNRESVPARTVFGVTTVLTM  
 TTLSISARNSLPKVAYATAMDWFIAVCYAFVFSALIEFATVNYFTKRGYAWDGKSVVPEKPKKVKDPLIKKNN  
 TYAPTATSYPNLRGDPGLATIAKSATIEPKEVKPETKPEPKKTFNSVSKIDRLSRIAPLLFGIFNLVYW  
 ATYLNREPQLKAPTPHQ\*

>rs47442249\_ENSMUSP00000158770\_c.378:T>C\_p.Y127H  
 ENSMUST00000238415.2|Atp10b-203|ENSMUSG00000055415|+|chr11:g.43047100:T>C  
 MRKEGRKRKKKEDKKRVVSNLPEFEGWPYKPNRHRGNQVKT SKYTVLSFIPKNLFEQLHRFANLYFVGI  
 VILNFI PVVNAFQPGVSMVPVCAILTVTAIKDAWEDFRYKSDKVINNRESLVHSRKEQRYMLKRWDVRVGD  
 FVQMOCNEIVPADILLFSSDPGCVCHLETANLDEGTNLKQRVVKGFSQPEVQFQPEHFHSTIVCEKPNNH  
 SKFKGYMEHPDQTRTGFGSESLLRGCTIRNTEVAAGIVYAGHETKAMLNNSGPRYKRSKIERINTDIFFC  
 IGLLFMLCLIGAVGHSLWNGTFKEHPFDVPDADGNFLSLALGGFYMFLTMI ILLQVLI PISLYVSIELVKLG  
 QVFLHNDLDLYDEETDLSIQCRALNIT EDLGGIQYIFSDKTGTLTENKMFRRCTIVGSEYCHQENAKRLEM  
 PKELDSDGEEWTQYQCLSFP RWAQGSTTMR SQGGAQPLRRCHSARVPIQSHCRQRSVGRWETSQPPVAFSSS  
 IEKDVTPDKNLLSKVRDAALWLETSDTRPAKPSHSTTASIA DFFLAL TICNSVMVSTTTEPRKRVTPPANKA

LGTSLEKIQQLFQRLKLLSLSQSFSSSTAPSDTDLGESLGNLPTIDSDEKDDTSVCSGDCSTDGGYRSSTWEQ  
 GDILGSESGTSLEEGLEAPTLSQDEPELCEYAEASPDEAALVHAARAYSFTLVSRTPPEQVTVRLPQGICLTFDL  
 LFTLGFDSVRKRMSVVRHPLTDEIIVYTKGADSVIMDLLED PACESNIDVEKCLKRIRARTQKHLDLIYARDG  
 LRTLCAIAKKVVDEEDFQRWASFRREAEASLDNREELLMETAQHLENHLLTLLGATGIEDRLQEGVPDTIAALRE  
 AGIQLWVLTGDKQETAVNIAYSCKLLDQDTVYSINTENQETCESILNCTLEDIKRFHEPQQPARKLCGHRIP  
 PKMPSVNSGAMAPEIGLVIDGKTLNAIFQGKLENKFLELTQYCRSVLCCRSTPLQKSMIVKLVRDKLSVMTLS  
 IGDGANDVSMIQAADIGIGISGQEGMQAVMSSDFAIARFSLKLLLVHGHWCYSRLARMVVYFYKNCVYVN  
 LFWYQFFCGFSGSTMIDYWQMIFFNLFFTSPLPIIFGVLDKDVSAETLLALPELYKSGQNSECYNLPTFWVS  
 MADAFYQSLICFFIPLYTYRGSDDIVFTFGTPIINTISLTTILLHQAMEMKTWTVLHGLVLLGSFLMYFVVS  
 YNATCVTCNSPTNPYWVMERQLSDPTFYLICLLTPVVALLPYFLLSLQGTYGKSLISKAQKIDKLPIDKRNLE  
 IQNWRSKQRPAPASASASAPATGTVHTRPPCHPVPPEAQQNFGASTSKSSGPPRQKHVEDRVLQDPRCSR  
 EHSRDDTCTVDTLAKLSSGECLELDPNRTVAPTAYSRGQKDVSRHSSKSHRSQSSTLI\*  
 >rs250039360\_ENSMUSP00000076844\_c.4078:C>CTTAAT\_p.A1360ins-fs  
 ENSMUST00000077659.6|Atp10b-  
 201|ENSMUSG00000055415|+|chr11:g.43150382:C>CTTAAT  
 MTCSLDFSWLRWKWRTQDGFSSQSPSETTPLLSPETDRQSHNTAEQRVVYPNNSMCHQDWWKVCRRYPGNSICT  
 TKYTLTFLPQNLFEQFHRWANLYFLFLVILNWMPSMEVPHREITIFPLATVLLIIMVKDGIEDFKRYCFDRE  
 MNSASIQIYERKEQRYMLKRWDVVRVGDVQMQCNEIIVPADILLFSSDPGCVCHLETANLDGETNLKQRRVV  
 KGFSQPEVQFQPEHFHSTIVCEKPNHLSKFKGYMEHPDQTRTGFGSESLLRGCTIRNTEVAAGIVIYAGHE  
 TKAMLNNSGPRYKRSKIERRINTDIFFCIGLLFLMCLIGAVGHSWNGTFKEHPPFDVPDADGNFSLALGGF  
 YMFLTMIILLQVLIPIISLYVSELVKLGQVFLHNDLDLYDEETDLSIQCRALNITEDLGQIQYIFSDKTGT  
 TENKMFRRCTIVGSEYCHQENAKRLEMPKELSDSDEEWTQYQCLSFPPRWAQGSTTMRSQGAQPLRRCHSA  
 RVPIQSHCRQRSVGRWETSQPPVAFSSIEKDVTPDKNLLSKVRDAALWLETSDTRPAKPSHSTASIAFFL  
 ALTICNSVMVSTTTEPRKRVTPPANKALGTSLEKIQQLFQRLKLLSLSQSFSSSTAPSDTDLGESLGNLPTI  
 DSDEKDDTSVCSGDCSTDGGYRSSTWEQGDILGSESGTSLEEGLEAPTLSQDEPELCEYAEASPDEAALVHAAR  
 AYSFTLVSRTPPEQVTVRLPQGICLTFDLFTLGFDSVRKRMSVVRHPLTDEIIVYTKGADSVIMDLLED PAC  
 ESNIDVEKCLKRIRARTQKHLDLIYARDGLRTLCAIAKKVVDEEDFQRWASFRREAEASLDNREELLMETAQHL  
 EHLNHLTLLGATGIEDRLQEGVPDTIAALREAGIQLWVLTGDKQETAVNIAYSCKLLDQDTVYSINTENQETCES  
 ILNCTLEDIKRFHEPQQPARKLCGHRIPPKMPSVNSGAMAPEIGLVIDGKTLNAIFQGKLENKFLELTQYCRS  
 VLCCRSTPLQKSMIVKLVRDKLSVMTLSIGDGANDVSMIQAADIGIGISGQEGMQAVMSSDFAIARFSLKLL  
 LLVHGHWCYSRLARMVVYFYKNCVYVNLLFWYQFFCGFSGSTMIDYWQMIFFNLFFTSPLPIIFGVLDKDV  
 SAETLLALPELYKSGQNSECYNLPTFWVSMADAFYQSLICFFIPLYTYRGSDDIVFTFGTPIINTISLTTILLHQ  
 AMEMKTWTVLHGLVLLGSFLMYFVVSIIYNATCVTCNSPTNPYWVMERQLSDPTFYLICLLTPVVALLPYFL  
 LSLQGTYGKSLISKAQKIDKLPIDKRNLEIQNWRSKQRPAPASASA  
 >rs250039360\_ENSMUSP00000158770\_c.3994:C>CTTAAT\_p.A1332ins-fs  
 ENSMUST00000238415.2|Atp10b-  
 203|ENSMUSG00000055415|+|chr11:g.43150382:C>CTTAAT  
 MRKEGRKRKKKEDKKRVVSNLPEFEGWPYKENPNRHYRGNQVKTSKYTVLSFIPKNLFEQLHRFANLYFVGI  
 VILNFI PVVNAFQPGVSMVPCAILTVTAIKDAWEDFRYKSDKVINNRESLVYSRKEQRYMLKRWDVVRVGD  
 FVQMQCNEIIVPADILLFSSDPGCVCHLETANLDGETNLKQRRVVKGFSQPEVQFQPEHFHSTIVCEKPNH  
 SKFKGYMEHPDQTRTGFGSESLLRGCTIRNTEVAAGIVIYAGHETKAMLNNSGPRYKRSKIERRINTDIFFC  
 IGLLFLMCLIGAVGHSWNGTFKEHPPFDVPDADGNFSLALGGFYMFLTMIILLQVLIPIISLYVSELVKLG  
 QVFLHNDLDLYDEETDLSIQCRALNITEDLGQIQYIFSDKTGTLTENKMFRRCTIVGSEYCHQENAKRLE  
 MPKELSDSDEEWTQYQCLSFPPRWAQGSTTMRSQGAQPLRRCHSARVPIQSHCRQRSVGRWETSQPPVAFSS  
 IEKDVTPDKNLLSKVRDAALWLETSDTRPAKPSHSTASIAFFLALTICNSVMVSTTTEPRKRVTPPANKA  
 LGTSLEKIQQLFQRLKLLSLSQSFSSSTAPSDTDLGESLGNLPTIDSDEKDDTSVCSGDCSTDGGYRSSTWEQ  
 GDILGSESGTSLEEGLEAPTLSQDEPELCEYAEASPDEAALVHAARAYSFTLVSRTPPEQVTVRLPQGICLTFDL  
 LFTLGFDSVRKRMSVVRHPLTDEIIVYTKGADSVIMDLLED PACESNIDVEKCLKRIRARTQKHLDLIYARDG  
 LRTLCAIAKKVVDEEDFQRWASFRREAEASLDNREELLMETAQHLENHLLTLLGATGIEDRLQEGVPDTIAALRE  
 AGIQLWVLTGDKQETAVNIAYSCKLLDQDTVYSINTENQETCESILNCTLEDIKRFHEPQQPARKLCGHRIP  
 PKMPSVNSGAMAPEIGLVIDGKTLNAIFQGKLENKFLELTQYCRSVLCCRSTPLQKSMIVKLVRDKLSVMTLS  
 IGDGANDVSMIQAADIGIGISGQEGMQAVMSSDFAIARFSLKLLLVHGHWCYSRLARMVVYFYKNCVYVN  
 LFWYQFFCGFSGSTMIDYWQMIFFNLFFTSPLPIIFGVLDKDVSAETLLALPELYKSGQNSECYNLPTFWVS  
 MADAFYQSLICFFIPLYTYRGSDDIVFTFGTPIINTISLTTILLHQAMEMKTWTVLHGLVLLGSFLMYFVVS  
 YNATCVTCNSPTNPYWVMERQLSDPTFYLICLLTPVVALLPYFLLSLQGTYGKSLISKAQKIDKLPIDKRNLE  
 IQNWRSKQRPAPASASA  
 >rs49165270\_ENSMUSP00000020672\_c.376:G>A\_p.R126K  
 ENSMUST00000020672.5|Fabp6-201|ENSMUSG00000020405|-|chr11:g.43486949:C>T

MAFSGKYEFESEKNYDEFMKRLGLPGDVIERGRNFKIIITEVQQDGDFTWSQSYSGGNIMSNKFTIGKECEMQ  
 TMGGKFKFATVKMEGGKVVAEFPNYHOTSEVVGDKLVEISTIGDVTYERVSKKLA\*  
 >ENSMUSP00000104901\_c.609:A>G\_p.K204E ENSMUST00000109278.8|Ttc1-  
 202|ENSMUSG00000041278|-|chr11:g.43628774:T>C  
 MEEKSEDCKVPEDLFLNGLKVADPQEGESASPMVSDPKGQHCQSKLPKAAEAHPQDDHVEEECFHDCSASFEEE  
 QPGAHVAGSKASDDSSSELDEEYLIIELEKNMPEEEKQKRREESAKLKEEGNERFKRGDYMEAESSYSQALQMC  
 PACFQKDRSVLFSNRRAARMKQDKKETAITDCSKAIQLNPTYIRAILRRAELYEKTDELDEALEDYKSVLEKD  
 PSVHQAREACMRLPKQIEERNERLKEEMLGK\*  
 >ENSMUSP00000040779\_c.609:A>G\_p.K204E ENSMUST00000048578.3|Ttc1-  
 201|ENSMUSG00000041278|-|chr11:g.43628774:T>C  
 MEEKSEDCKVPEDLFLNGLKVADPQEGESASPMVSDPKGQHCQSKLPKAAEAHPQDDHVEEECFHDCSASFEEE  
 QPGAHVAGSKASDDSSSELDEEYLIIELEKNMPEEEKQKRREESAKLKEEGNERFKRGDYMEAESSYSQALQMC  
 PACFQKDRSVLFSNRRAARMKQDKKETAITDCSKAIQLNPTYIRAILRRAELYEKTDELDEALEDYKSVLEKD  
 PSVHQAREACMRLPKQIEERNERLKEEMLGKLDLGNLVLRFGLSTENFQIKQDSSTGSYSINFVQNPNNNR  
 \*  
 >rs264767124\_ENSMUSP00000104901\_c.366:G>TGAGCG\_p.G123ins-fs  
 ENSMUST00000109278.8|Ttc1-202|ENSMUSG00000041278|-  
 |chr11:g.43632612:C>CGCTCA  
 MEEKSEDCKVPEDLFLNGLKVADPQEGESASPMVSDPKGQHCQSKLPKAAEAHPQDDHVEEECFHDCSASFEEE  
 QPGAHVAGSKASDDSSSELDEEYLIIELEKNMPEEEKQKRREESAKLKEE  
 >rs264767124\_ENSMUSP00000040779\_c.366:G>TGAGCG\_p.G123ins-fs  
 ENSMUST00000048578.3|Ttc1-201|ENSMUSG00000041278|-  
 |chr11:g.43632612:C>CGCTCA  
 MEEKSEDCKVPEDLFLNGLKVADPQEGESASPMVSDPKGQHCQSKLPKAAEAHPQDDHVEEECFHDCSASFEEE  
 QPGAHVAGSKASDDSSSELDEEYLIIELEKNMPEEEKQKRREESAKLKEE  
 >rs51355143\_ENSMUSP00000098881\_c.447:T>G\_p.S150A  
 ENSMUST000000101327.3|Rnf145-202|ENSMUSG00000019189|+|chr11:g.44439653:T>G  
 MAAKEKLEAVLNVALRVPSIMLLDVLYRWDVSSFFQIQRSSLNNNPLFQYKYLALNMHYVGYILSVVLLTLP  
 RQHLVQLYLYFVTALLLYAGHQISRDYVRSELESAYEGPMYLEPLSMNRFTTALIGQLVVCTLCSCVMKTKQI  
 WLFSAHMLPLQARLCLVPLETIVI INKFAMIFTGLEVLYFLGNSLLVPYNLAKSAYRELVQVVEVYGLLALGM  
 SLWNQLVVPVLFMVFWLVLFALQIYSYFSTRDQPASRERLLFLFLTR\*  
 >rs51355143\_ENSMUSP00000019333\_c.447:T>G\_p.S150A  
 ENSMUST00000019333.10|Rnf145-  
 201|ENSMUSG00000019189|+|chr11:g.44439653:T>G  
 MAAKEKLEAVLNVALRVPSIMLLDVLYRWDVSSFFQIQRSSLNNNPLFQYKYLALNMHYVGYILSVVLLTLP  
 RQHLVQLYLYFVTALLLYAGHQISRDYVRSELESAYEGPMYLEPLSMNRFTTALIGQLVVCTLCSCVMKTKQI  
 WLFSAHMLPLQARLCLVPLETIVI INKFAMIFTGLEVLYFLGNSLLVPYNLAKSAYRELVQVVEVYGLLALGM  
 SLWNQLVVPVLFMVFWLVLFALQIYSYFSTRDQPASRERLLFLFLTSIAECCSTPYSLGLVFTVSFVALGVL  
 TLCKFYLQGYRAFMDNPAMNRGMTEGVTLILAVQTGLIELQVHRAFLLSIILFIVVASILQSMLEIADPIV  
 LALGASRDKSLWKHFRAVSLCLFLLVFPAYMAYMICQFFHMDFWLLIISSSILTSLQVLGTLFIYVLFMVEE  
 FRKEPVENMDDVIYYVNGTYRLLLEFVVALCVVAYGVSETIFGEWTVMGSMIIFIHSYYNVWLRALQGWKSFLL  
 RRDAVNKIKSLPVATQEQLEKHNDICAICYQDMKSAVITPCSHFFHAGCLKKWLYVQDTCPLCHCHLKNSSQL  
 PGLGTEAAPQPPAGAEQNIIVLQEGPEPPDHESPPGTGTQEGSGDSSEHINRGASQEGAADAGEGPQIPEGEV  
 CPVESA\*  
 >rs47986688\_ENSMUSP00000098881\_c.469:T>A\_p.L157Q  
 ENSMUST00000101327.3|Rnf145-202|ENSMUSG00000019189|+|chr11:g.44439675:T>A  
 MAAKEKLEAVLNVALRVPSIMLLDVLYRWDVSSFFQIQRSSLNNNPLFQYKYLALNMHYVGYILSVVLLTLP  
 RQHLVQLYLYFVTALLLYAGHQISRDYVRSELESAYEGPMYLEPLSMNRFTTALIGQLVVCTLCSCVMKTKQI  
 WLFSAHMLPLQARLCLVPLETIVI INKFAMIFTGLEVLYFLGNSLLVPYNLAKSAYRELVQVVEVYGLLALGM  
 SLWNQLVVPVLFMVFWLVLFALQIYSYFSTRDQPASRERLLFLFLTSIAECCSTPYSLGLVFTVSFVALGVL  
 TLCKFYLQGYRAFMDNPAMNRGMTEGVTLILAVQTGLIELQVHRAFLLSIILFIVVASILQSMLEIADPIV



LALGASRDKSLWKHFRAVSLCLFLLVFPAYMAYMICQFFHMDFWLLIISSSILTSLQVLGTLFIYVLFMVEE  
FRKEPVENMDDVIYYVNGTYRLLLEFVVALCVVAYGVSETIFGEWTVMGSMIIFIHSYYNVWLRALQGWKSFL  
RRDAVNKIKSLPVATQEQLEKHNDICAICYQDMKSAVITPCSHFFHAGCLKKWLYVQDTCPLCHCHLKNSSQL  
PGLGTEAAPQPPAGAEQNIIVLQEGPEPPDHESSPPGTGTQEGSGDSSEHINRGSSASQEGAADAGEGPQIPEGEV  
CPVESA\*

>rs249860048\_ENSMUSP00000098881\_c.557:C>CAAAAAAAAA\_p.F186ins-fs  
ENSMUST00000101327.3|Rnf145-  
202|ENSMUSG00000019189|+|chr11:g.44439763:C>CAAAAAAAAA  
MAAKEKLEAVLNVALRVPSIMLLDVLYRWDVSSFFQIQRSSLNNNPLFQYKYLALNMHYVGYILSVLLTLP  
RQHLVQLYLYFVTALLLYAGHQISRDYVRSELESAYEGPMYLEPLSMNRFTTALIGQLVVCTLCSCVMKTKQI  
WLFSAHMLPLLARLCLVPLETIVIINKFAMIFTGLEVLVYFKKN

>rs249860048\_ENSMUSP00000019333\_c.557:C>CAAAAAAAAA\_p.F186ins-fs  
ENSMUST00000019333.10|Rnf145-  
201|ENSMUSG00000019189|+|chr11:g.44439763:C>CAAAAAAAAA  
MAAKEKLEAVLNVALRVPSIMLLDVLYRWDVSSFFQIQRSSLNNNPLFQYKYLALNMHYVGYILSVLLTLP  
RQHLVQLYLYFVTALLLYAGHQISRDYVRSELESAYEGPMYLEPLSMNRFTTALIGQLVVCTLCSCVMKTKQI  
WLFSAHMLPLLARLCLVPLETIVIINKFAMIFTGLEVLVYFKKN

>rs52337589\_ENSMUSP00000019333\_c.1179:G>T\_p.A394S  
ENSMUST00000019333.10|Rnf145-  
201|ENSMUSG00000019189|+|chr11:g.44450857:G>T  
MAAKEKLEAVLNVALRVPSIMLLDVLYRWDVSSFFQIQRSSLNNNPLFQYKYLALNMHYVGYILSVLLTLP  
RQHLVQLYLYFVTALLLYAGHQISRDYVRSELESAYEGPMYLEPLSMNRFTTALIGQLVVCTLCSCVMKTKQI  
WLFSAHMLPLLARLCLVPLETIVIINKFAMIFTGLEVLVYFLGNSLLVVPYNLAKSAYRELQVVEVYGLLALGM  
SLWNQLVVPVLFMVFVWLVLFALQIYSYFSTRDQPASRERLLFLFLTSIAECCSTPYSLGLVFTVSVFVALGVL  
TLCKFYLQGYRAFNMNDPAMNRGMTEGVTLILAVQTGLIELQVVHRAFLLSIILFIVVASILQSMLEIADPIV  
LALGASRDKSLWKHFRAVSLCLFLLVFPAYMAYMICQFFHMDFWLLIISSSILTSLQVLGTLFIYVLFMVEE  
FRKEPVENMDDVIYYVNGTYRLLLEFVVALCVVAYGVSETIFGEWTVMGSMIIFIHSYYNVWLRALQGWKSFL  
RRDAVNKIKSLPVATQEQLEKHNDICAICYQDMKSAVITPCSHFFHAGCLKKWLYVQDTCPLCHCHLKNSSQL  
PGLGTEAAPQPPAGAEQNIIVLQEGPEPPDHESSPPGTGTQEGSGDSSEHINRGSSASQEGAADAGEGPQIPEGEV  
CPVESA\*

>ENSMUSP00000019333\_c.1367:CA>C\_p.G456del-fs  
ENSMUST00000019333.10|Rnf145-  
201|ENSMUSG00000019189|+|chr11:g.44452390:CA>C  
MAAKEKLEAVLNVALRVPSIMLLDVLYRWDVSSFFQIQRSSLNNNPLFQYKYLALNMHYVGYILSVLLTLP  
RQHLVQLYLYFVTALLLYAGHQISRDYVRSELESAYEGPMYLEPLSMNRFTTALIGQLVVCTLCSCVMKTKQI  
WLFSAHMLPLLARLCLVPLETIVIINKFAMIFTGLEVLVYFLGNSLLVVPYNLAKSAYRELQVVEVYGLLALGM  
SLWNQLVVPVLFMVFVWLVLFALQIYSYFSTRDQPASRERLLFLFLTSIAECCSTPYSLGLVFTVSVFVALGVL  
TLCKFYLQGYRAFNMNDPAMNRGMTEGVTLILAVQTGLIELQVVHRAFLLSIILFIVVASILQSMLEIADPIV  
LALGASRDKSLWKHFRAVSLCLFLLVFPAYMAYMICQFFHMDFWLLIISSSILTSLQVLGTLFIYVLFMVEE  
FRKEPVENMDDVIYYVNGLIVCWSLLWPSVWVWPTASQRPSLESGL

>rs250621053\_ENSMUSP00000080020\_c.215:G>GT\_p.L72ins-fs  
ENSMUST00000081265.12|Ebf1-201|ENSMUSG00000057098|+|chr11:g.44511322:G>GT  
MFGIQESIQRSGSSMKEEPLGSGMNAVRTWMQGAGVLDANTAAQSGVGLARAHFEKQPPSNLRKSNFFHFVLC  
PLRQTGPARGD

>rs250621053\_ENSMUSP00000099857\_c.215:G>GT\_p.L72ins-fs  
ENSMUST00000101326.10|Ebf1-202|ENSMUSG00000057098|+|chr11:g.44511322:G>GT  
MFGIQESIQRSGSSMKEEPLGSGMNAVRTWMQGAGVLDANTAAQSGVGLARAHFEKQPPSNLRKSNFFHFVLC  
PLRQTGPARGD

>rs250621053\_ENSMUSP00000104891\_c.215:G>GT\_p.L72ins-fs  
ENSMUST00000109268.2|Ebf1-203|ENSMUSG00000057098|+|chr11:g.44511322:G>GT  
MFGIQESIQRSGSSMKEEPLGSGMNAVRTWMQGAGVLDANTAAQSGVGLARAHFEKQPPSNLRKSNFFHFVLC  
PLRQTGPARGD

>ENSMUSP00000080020\_c.219:C>T\_p.L74F ENSMUST00000081265.12|Ebf1-  
201|ENSMUSG00000057098|+|chr11:g.44511326:C>T  
MFGIQESIQRSGSSMKEEPLGSGMNAVRTWMQGAGVLDANTAAQSGVGLARAHFEKQPPSNLRKSNFFHFVLA  
FYDRQGPVEIERTAFVGFVEKEKEANSEKTNNGIHYRLQLLYSNGIRTEQDFYVRLIDSMTKQAIYVEGQDK  
NPEMCRVLLTHEIMCSRCCDKKSCGNRNETPSPVIIDRFFLKFLLKCNQCNCLKNAGNPRDMRRFQVVVSTTV  
NVDGHVLAVSDNMFVHNSKHGRRARRLDPSEGTPSYLEHATPCIKAISPSEGWTGGATVIIIGDNFFDGLQ

VIFGTMLVWSELITPHAIRVQTTPRHIPGVVEVTLSEYKSKQFCKGTPGRFIYTALNEPTIDYGFQRLQKVI PR  
HPGDPERLPKEVILKRAADLVEALYGMPHNNQEI IILKRAADIAEALYSVPRNHNQLPALANTSVHAGMMGVNS  
FSGQLAVNVSEASQATNQGFTRNSSSVSPHGYVPSTTPQQTNYNSVTTSMNGYGSAAMSNLGGSPFLNGSAA  
NSPYAIVPSSPTMASSTSLPNSCSSSSGIFSFSPANMVS AVKQKSAFAPVVRPQTSPPPTCTSTNGNSLQAI  
GMIVPPM\*

>ENSMUSP00000099857\_c.219:C>T\_p.L74F ENSMUST00000101326.10|Ebf1-  
202|ENSMUSG00000057098|+|chr11:g.44511326:C>T

MFGIQESIQRSGSSMKEEPLGSGMNAVRTWMQGAGVLDANTAAQSGVGLARAHFEKQPPSNLRSNFFHFVLA  
FYDRQGQPVEIERTAFVGFVEKEKEANSEKTNNGIHYRLQLLYSNGIRTEQDFYVRLIDSMTKQAI VYEGQDK  
NPEMCRVLLTHEIMCSRCCDKKSCGNRNETPSDPV I I DRFFLKFFLKNQCNCLKNAGNPRDMRRFQVVVSTTV  
NVDGHVLAVSDNMFVHNNKSHGRRARRLDPSEGTPSYLEHAATPCIKAI SPSEGWTTGGATV I I IGDNFFDGL  
QVIFGTMLVWSELITPHAIRVQTTPRHIPGVVEVTLSEYKSKQFCKGTPGRFIYTALNEPTIDYGFQRLQKVI P  
RHPGDPERLPKEVILKRAADLVEALYGMPHNNQEI IILKRAADIAEALYSVPRNHNQLPALANTSVHAGMMGVN  
SFGQLAVNVSEASQATNQGFTRNSSSVSPHGYVPSTTPQQTNYNSVTTSMNGYGSAAMSNLGGSPFLNGSA  
ANSPYAIVPSSPTMASSTSLPNSCSSSSGIFSFSPANMVS AVKQKSAFAPVVRPQTSPPPTCTSTNGNSLQAI  
SGMIVPPM\*

>ENSMUSP00000104891\_c.219:C>T\_p.L74F ENSMUST00000109268.2|Ebf1-  
203|ENSMUSG00000057098|+|chr11:g.44511326:C>T

MFGIQESIQRSGSSMKEEPLGSGMNAVRTWMQGAGVLDANTAAQSGVGLARAHFEKQPPSNLRSNFFHFVLA  
FYDRQGQPVEIERTAFVGFVEKEKEANSEKTNNGIHYRLQLLYSNGIRTEQDFYVRLIDSMTKQAI VYEGQDK  
NPEMCRVLLTHEIMCSRCCDKKSCGNRNETPSDPV I I DRFFLKFFLKNQCNCLKNAGNPRDMRRFQVVVSTTV  
NVDGHVLAVSDNMFVHNNKSHGRRARRLDPSEAATPCIKAI SPSEGWTTGGATV I I IGDNFFDGLQVIFGTML  
VWSELITPHAIRVQTTPRHIPGVVEVTLSEYKSKQFCKGTPGRFIYTALNEPTIDYGFQRLQKVI PRHPGDPER  
LPKEVILKRAADLVEALYGMPHNNQEI IILKRAADIAEALYSVPRNHNQLPALANTSVHAGMMGVNSFSGQLAV  
NVSEASQATNQGFTRNSSSVSPHGYVPSTTPQQTNYNSVTTSMNGYGSAAMSNLGGSPFLNGSAA NSPYAIV  
PSSPTMASSTSLPNSCSSSSGIFSFSPANMVS AVKQKSAFAPVVRPQTSPPPTCTSTNGNSLQAI SGMIVPPM  
\*

>rs48661756\_ENSMUSP00000080020\_c.250:T>C\_p.I84T

ENSMUST00000081265.12|Ebf1-201|ENSMUSG00000057098|+|chr11:g.44511357:T>C  
MFGIQESIQRSGSSMKEEPLGSGMNAVRTWMQGAGVLDANTAAQSGVGLARAHFEKQPPSNLRSNFFHFVLA  
LYDRQGQPVEIERTAFVGFVEKEKEANSEKTNNGIHYRLQLLYSNGIRTEQDFYVRLIDSMTKQAI VYEGQDK  
NPEMCRVLLTHEIMCSRCCDKKSCGNRNETPSDPV I I DRFFLKFFLKNQCNCLKNAGNPRDMRRFQVVVSTTV  
NVDGHVLAVSDNMFVHNNKSHGRRARRLDPSEGTPSYLEHATPCIKAI SPSEGWTTGGATV I I IGDNFFDGLQ  
VIFGTMLVWSELITPHAIRVQTTPRHIPGVVEVTLSEYKSKQFCKGTPGRFIYTALNEPTIDYGFQRLQKVI PR  
HPGDPERLPKEVILKRAADLVEALYGMPHNNQEI IILKRAADIAEALYSVPRNHNQLPALANTSVHAGMMGVNS  
FSGQLAVNVSEASQATNQGFTRNSSSVSPHGYVPSTTPQQTNYNSVTTSMNGYGSAAMSNLGGSPFLNGSAA  
NSPYAIVPSSPTMASSTSLPNSCSSSSGIFSFSPANMVS AVKQKSAFAPVVRPQTSPPPTCTSTNGNSLQAI  
GMIVPPM\*

>rs48661756\_ENSMUSP00000099857\_c.250:T>C\_p.I84T

ENSMUST00000101326.10|Ebf1-202|ENSMUSG00000057098|+|chr11:g.44511357:T>C  
MFGIQESIQRSGSSMKEEPLGSGMNAVRTWMQGAGVLDANTAAQSGVGLARAHFEKQPPSNLRSNFFHFVLA  
LYDRQGQPVEIERTAFVGFVEKEKEANSEKTNNGIHYRLQLLYSNGIRTEQDFYVRLIDSMTKQAI VYEGQDK  
NPEMCRVLLTHEIMCSRCCDKKSCGNRNETPSDPV I I DRFFLKFFLKNQCNCLKNAGNPRDMRRFQVVVSTTV  
NVDGHVLAVSDNMFVHNNKSHGRRARRLDPSEGTPSYLEHAATPCIKAI SPSEGWTTGGATV I I IGDNFFDGL  
QVIFGTMLVWSELITPHAIRVQTTPRHIPGVVEVTLSEYKSKQFCKGTPGRFIYTALNEPTIDYGFQRLQKVI P  
RHPGDPERLPKEVILKRAADLVEALYGMPHNNQEI IILKRAADIAEALYSVPRNHNQLPALANTSVHAGMMGVN  
SFGQLAVNVSEASQATNQGFTRNSSSVSPHGYVPSTTPQQTNYNSVTTSMNGYGSAAMSNLGGSPFLNGSA  
ANSPYAIVPSSPTMASSTSLPNSCSSSSGIFSFSPANMVS AVKQKSAFAPVVRPQTSPPPTCTSTNGNSLQAI  
SGMIVPPM\*

>rs48661756\_ENSMUSP00000104891\_c.250:T>C\_p.I84T

ENSMUST00000109268.2|Ebf1-203|ENSMUSG00000057098|+|chr11:g.44511357:T>C  
MFGIQESIQRSGSSMKEEPLGSGMNAVRTWMQGAGVLDANTAAQSGVGLARAHFEKQPPSNLRSNFFHFVLA  
LYDRQGQPVEIERTAFVGFVEKEKEANSEKTNNGIHYRLQLLYSNGIRTEQDFYVRLIDSMTKQAI VYEGQDK  
NPEMCRVLLTHEIMCSRCCDKKSCGNRNETPSDPV I I DRFFLKFFLKNQCNCLKNAGNPRDMRRFQVVVSTTV  
NVDGHVLAVSDNMFVHNNKSHGRRARRLDPSEAATPCIKAI SPSEGWTTGGATV I I IGDNFFDGLQVIFGTML  
VWSELITPHAIRVQTTPRHIPGVVEVTLSEYKSKQFCKGTPGRFIYTALNEPTIDYGFQRLQKVI PRHPGDPER  
LPKEVILKRAADLVEALYGMPHNNQEI IILKRAADIAEALYSVPRNHNQLPALANTSVHAGMMGVNSFSGQLAV  
NVSEASQATNQGFTRNSSSVSPHGYVPSTTPQQTNYNSVTTSMNGYGSAAMSNLGGSPFLNGSAA NSPYAIV

PSSPTMASSTSLPSNCSSSSSGIFSFSPANMVSAVKQKSAFAPVVRPQTSPPPTCTSTNGNSLQAI SGMIVPPM  
 \*  
 >ENSMUSP00000104884\_c.698:C>G\_p.D233E ENSMUST00000109261.11|Clint1-  
 202|ENSMUSG00000006169|+|chr11:g.45784701:C>G  
 MLNMWKVRELVDKATNVVMNYSEIESKVREATNDDPWGPGSGLMGEIAKATFMYEQFPELMNMLWSRMLKDNK  
 KNWRRVYKSLLLLAYLIRNGSERVVTSAHEHIYDLRSLENYHFVDEHGKDQGINIRQVKVELVEFAQDDDRLR  
 EERKKAKKNKDKYVGVSSDSVGGFRYNERYDPEPKSKWDEEWDKNKSAFPFSDKLGELSDKIGSTIDDTISKF  
 RRDREDSPERCSESDEEKKARRGRSPKGEFKDEEETVTTKHIHITQATETTTTRHKRTANPSKTIDLGAAAH  
 YTGDKASPDQNASTHTPQSSAKPSVPSSKSSGDLVDLFDGSSQSAGGSADLFGGFADFGSAAASGNFPQSATS  
 GNGDFGDWSAFNQAPSGPVASGGELFGSAPQSAVELISASQPALGPPPAASNSADLFDLMGSSQATMTSSQSM  
 NFSLMSTNTVGLGLPMSRSQPLQNVSAVLQKPNPLYHQNTDMVQKSASKTLPSTWSDPSVNI SLDNLLPGMQP  
 SKPQQPSLNTMIQQQNMQQPLNVMTQSFQAVNLSSPSNMLPVRPQTNPLLLGGPMPMMPGVMGTGMGMAPLGN  
 SAGMSQGMVGMNMMNGMSASGMGLSGTMGMGMPMAMPSTVQPKQDAFANFANFSK\*  
 >ENSMUSP00000104883\_c.698:C>G\_p.D233E ENSMUST00000109260.3|Clint1-  
 201|ENSMUSG00000006169|+|chr11:g.45784701:C>G  
 MLNMWKVRELVDKATNVVMNYSEIESKVREATNDDPWGPGSGLMGEIAKATFMYEQFPELMNMLWSRMLKDNK  
 KNWRRVYKSLLLLAYLIRNGSERVVTSAHEHIYDLRSLENYHFVDEHGKDQGINIRQVKVELVEFAQDDDRLR  
 EERKKAKKNKDKYVGVSSDSVGGFRYNERYDPEPKSKWDEEWDKNKSAFPFSDKLGELSDKIGSTIDDTISKF  
 RRDREDSPERCSESDEEKKARRGRSPKGEFKDEEETVTTKHIHITQATETTTTRHKRTANPSKTIDLGAAAH  
 YTGDKASPDQNASTHTPQSSAKPSVPSSKSSGDLVDLFDGSSQSAGGSADLFGGFADFGSAAASGNFPQSATS  
 GNGDFGDWSAFNQAPSGPVASGGELFGSAPQSAVELISASQPALGPPPAASNSADLFDLMGSSQATMTSSQSM  
 NFSLMSTNTVGLGLPMSRSQNTDMVQKSASKTLPSTWSDPSVNI SLDNLLPGMQPSPKQPPSLNTMIQQQNMQ  
 QPLNVMTQSFQAVNLSSPSNMLPVRPQTNPLLLGGPMPMMPGVMGTGMGMAPLGN SAGMSQGMVGMNMMNGMS  
 ASGMGLSGTMGMGMPMAMPSTVQPKQDAFANFANFSK\*  
 >rs29395502\_ENSMUSP00000037519\_c.517:G>A\_p.G173D  
 ENSMUST00000049038.4|Sox30-201|ENSMUSG00000040489|+|chr11:g.45871664:G>A  
 MERARPEPPPPPPPPRQPPRPTPPRPLRPAPPAQVEAATFRAAAAERSQSPSAQATAAMA AVASSCGEAAA  
 AGAQAAGTRRLLQVKPEQVLLLPPGGPGVPPAPDEGAAAAAAAAAAAAASSAQARLLQLRPELLLLPPQSAADG  
 GPCRPELHPMQPRTLLVKAEQELGADLDLSVGSRRTEAGPRASRAAKLDGTGKALDGRSDEKKAKLEAEE  
 APRDALKGEGKSLLAIGEGVIKTEEPDRPRDDCRLGTEATSNGLVHSSKEAIIAQPPSAFGPHQDLRFPLT  
 LHTVPPGARIQFQGGPPSELIRLSKVPLTPVPIKMQSLLPEPSVKIETKDVPLTVLPSDAGIPDTPFSKDRNGH  
 VKREPMNAFMVWARIHRPALAKANPAANNAEISVQLGLEWNKLSSEEQKPPYDEAQKI KEKHREFFPGWVYQPR  
 PGKRKRFPPLSVSNVFSGTTQNIISTNPTTIYPYRSPTYYSVVI PGLQNTITHPVGEAPPAIQLPTPAVQRPSPI  
 TLFQPSVSSTGPVAVPPPSLTPRPSLPPQRFSGPSQTDIHRPLSGSSRSVVKRSTPGSLESTTRIPAGASTAHA  
 RFATSPIQPPKEYASVSTCPRSTPIPPATPIPHSHVYQPPPLGHPATLFGTTPRFSFHHPYFLPGPHYFPSST  
 CYSRPPFGYGNFPSSMEPECLGYEDRYQKHEAIFALNRDYPFRDYPDEHTHSEDSRSCESMDGPPYSSHG  
 HGGEYLNAMPTLDIGALENVFTAPASAPSGVQVNVVTDSDDEEEEEKVLRNL\*  
 >rs4996694\_ENSMUSP00000011400\_c.2665:C>T\_p.S889F  
 ENSMUST00000011400.8|Adam19-201|ENSMUSG00000011256|+|chr11:g.46033855:C>T  
 MPGRAGVARFCLLALALQLHWPLAACEPGWTTTRGSQEGSPPLQHELIIPQWRTSESPGRGKHPLRAELRVM AE  
 GRELIIDLKNEHLFAPAYTETCYTASGNPQTSTLKSEDFYHGTVRVDVDESSVTLSTCRGIRGLIIVRSNL  
 SYIIEPVPNSDSQHRIYRSEHLTLPPGNCGFEGHSGPTSKDWALQFTHQTKQPRRMKREDLHSMKYVELYLVA  
 DYAEFQKNRHDQDATKRKLMEIANYVDKFYRSLNIRIALVGLVWTHGDKCEVSENPYSTLWSFSLWRRKLLA  
 QKSHDNAQLITGRSFQGTITIGLAPLMAMCSVYQSGGVSMDSHENAIGVASTVAHEIGHNFGMSHSDSAHCCSAS  
 AADGGCIMAATGHPFPKVFWSWNRKELDRYLQTGGMCLSNMPDTRTYLGGRRCGNGYLEDGEECDGEEEEE  
 CKNPCCNASNCTLKEGAECAHGSCHQCKLVAPGTQCREQVRQCDLPEFCTGKSPHCPTNYQMDGTPCEGGQ  
 AYCYNMCLTYQECCQLWGPARGPALDLCFERVNAAGD TYGNCCKGLNGQYRKCSPRDAKCGKIQCCSTQAR  
 PLESNAVSIDTTITLNGRRIHCRGTHVYRGPEEEEEEGEDMLDPGLVMTGTKCGHNIHICFEGQCRNTSFFETEG  
 CGKKNCGHGVCCNNKNCFCFGWSPFCNTPGDGGSVDSGPLPPKSVGPVIAGVFSALFVLAVLVLVLLCHCYRQ  
 SHKLGKPSALPFLRHQFSCPFVRSQSGGTGHANPTFKLQTPQGRKVTNTPESLRKPSHPPRPPPDYLRVE  
 SPPAPLPAHLNRAAGSSPEAGARIERKESARRPPPSRPMPPAPNCLLSQDFSRPRPPQKALPANVPVPGQRTGP  
 RSGGTSLLQPPTFGPQPPRPPAVVPKLEPYRSQVRGAIISSKI\*  
 >rs49693271\_ENSMUSP00000011400\_c.2727:C>G\_p.Q910E  
 ENSMUST00000011400.8|Adam19-201|ENSMUSG00000011256|+|chr11:g.46034637:C>G  
 MPGRAGVARFCLLALALQLHWPLAACEPGWTTTRGSQEGSPPLQHELIIPQWRTSESPGRGKHPLRAELRVM AE  
 GRELIIDLKNEHLFAPAYTETCYTASGNPQTSTLKSEDFYHGTVRVDVDESSVTLSTCRGIRGLIIVRSNL  
 SYIIEPVPNSDSQHRIYRSEHLTLPPGNCGFEGHSGPTSKDWALQFTHQTKQPRRMKREDLHSMKYVELYLVA  
 DYAEFQKNRHDQDATKRKLMEIANYVDKFYRSLNIRIALVGLVWTHGDKCEVSENPYSTLWSFSLWRRKLLA

QKSHDNAQLITGRSFQGTITIGLAPLMAMCSVYQSGGVSMDSHSENAIGVASTVAHEIGHNFGMSHSDSAHCCSAS  
AADGGCIMA AATGHPFPKVFVSWCNKELDRYLQTTGGGMCLSNMPDTRTLYGGRRCGNGYLEEDGEEDCGEEEE  
CKNPCCNASNCTLKEGAECAHSCCHQCKLVAPGTQCREQVRQCDLPEFCTGKSPHCPTNYYQMDGTPCEGGGQ  
AYCYNGMCLTYQEQQQLWGPARGPALDLCFERVNAAGDTYGNCGKGLNGQYRKCSPRDAKCGKIQQCSTQAR  
PLESNAVSIDTTITLNGRRIHCRGTHVYRGP EEEEEEGDMLDPLVMTGTCKGHNHICFEGQCRNTSFFETEG  
CGKKCNHGVCNNNKNCHCFPGWSPFCNTPGDGGSVDSGPLPKSVGPV IAGVFSALFVLAVLVLCHCYRQ  
SHKLGKPSALPFKLRHQFSCPFVRSQSGGTGHANPTFKLQTPQGKRKVTNTPESLRKPSHPPRPPDYLRVE  
SPPAPLPAHLNRAAGSSPEAGARIERKESARRPPSRPMPAPNCLLSQDFSRPRPPQKALPANVPVPGORTGP  
RSGGTSLLQPPTSQPPRPPAVVPKLP EYRSERVGAI ISSKI \*  
>rs33850578\_ENSMUSP00000020679\_c.301:A>G\_p.Y101C  
ENSMUST00000020679.3|Nipal4-201|ENSMUSG00000020411|-|chr11:g.46047631:T>C  
MELRVANANGSCENGSI VSLYCSSQEVLCQIVRGISPEEPYNATLITWQERVRKKG YFYIGVGLAFLSCFLIG  
TSVILKKKGLIRLVATGATRAVNGGYGCLKDP MWWAGMATMSAGEVANFGAYAFAPATVVTPLGALSVLISAI  
FSSYCLGESLNLGKLGCVICMAGSTVMVIHAPKEEKVTTVAEMASKMKD TGFI VFAVLLVVSCLILIFIVAP  
RYGQRNIIYIIICSVIGSFSVTAVKGLGVTIRNFFQGLPVVRHPLPYILSLILGLSII IQVNFNLRALDIFN  
TSLVFPFIYVFFTTVVVASSIVLFKEWYTMSAVDIVGTLGSGFVTIILGVFMLHAFKDL DINDIQLPHTHKNPT  
PAPAPEPTVIKLEDKNVLDNIELASTPSPQQKPKVFMTDS\*  
>rs29482402\_ENSMUSP00000090854\_c.748:A>T\_p.E250V  
ENSMUST00000093166.11|Cyfip2-202|ENSMUSG00000020340|-  
|chr11:g.46167652:T>A  
MTHVTLEDALSNDLLEELPLPDQQPCIEPPSSIMYQANFDTNFEDRNAFVTGIARYIEQATVHSSMNEML  
EEGHDYAVMLYTWRS CSRAI PQVKCNEQPNRVEIYEKTVEVLEPEVTKLMKFM YFQRKAIERFCSEVKRLCHA  
ERRKDFVSEAYLLTLGKF INMFAVLDELKNMKCSVKNDHSAYKRAAQFLRKMADPQSIQESQNL SMFLANHNR  
ITQCLHQQLEVI PGYEELLADIVNICVDYVYVNMKMYLTPSEKHMLLKV MGFGLYLM DGNVSN IYKLD AKKRINL  
SKIDKFFKQLQV VPLFGDMQIELARYIKTSAHYEENKSKWCTQSSISPQYNICEQMVQIRDDHIRFISELAR  
YSNSEVVTGSGLDSQKSDEEYRELF DLALRGLQLLSKWSAHVMEVY SWKLVHPTDKFCNKDCPGTAE EYERAT  
RYNYTSEEKFAFVEVIAMIKGLQVLMGRMESVFNQAIRNTIYAALQDFAQVTLREPLRQAVRKKKNVLSVLQ  
AIRK TICDWE GGREPPNDPCLRGEKDPKGGFDIKVPRRAVGPSS TQLYMVRTMLES LIADKSGSKKTLRSSLD  
GPIVLAIEDFHKQS FFFTHLLNISEALQQCCDLSQLWFR EFFLELTMGRRIQFP IEMSPWILTDHI LETKEP  
SMMEYVLYPLDLYNDSAYYALTKFKKQFLYDEIEAEVNLCFDQFVYKLADQIFAYYKAMAGSVLLDKRFRAEC  
KNYGVII PYPPSNRYETLLKQRHVQLLGRSIDLNR LITQRISAAMYKSLDQAISRFESEDLT SIVELEW LLEI  
NRLTHRLLCKHMTLDSFDAMFREANHNVSAPYGRITLHVFWELNFDLFPNYCYNGSTNRFRVRTAIPFTQEPQR  
DKPANVQPYLYGSKPLNIAYSHIYSSYRNFVGP PPHFKTICRLLGYQGI AVVMEELLKIVKSL LQGTILQYVK  
TLIEVMPKICRLPRHEYGSPGILEFFHHQLKDI IEYAEKTDV FQSLREVGNAILFCLLIEQALSQE EVCDDL  
HAAPFQNILPRVYIKEGERLEVRMKRLEAKYAPLHLVPLIERLGT PQQIAIAREGDLLTKERLCCGLSMFEVI  
LTRIRSYLQDPIWRGPPPTNGVMHVDECV EFHRLWSAMQFVYCI PVGTNEFTA EQCFGDGLNWAGCS IIVLLG  
QQRFRDLDFDCYHLLKVRQDQKDEI IKNVPLKKMADRIRKYQ IILNNEVFAILNKYMKSVETDSSTVEHVRCF  
QPPIHQSLATTC\*  
>rs29482402\_ENSMUSP00000127586\_c.748:A>T\_p.E250V  
ENSMUST00000165599.9|Cyfip2-205|ENSMUSG00000020340|-|chr11:g.46167652:T>A  
MTHVTLEDALSNDLLEELPLPDQQPCIEPPSSIMYQANFDTNFEDRNAFVTGIARYIEQATVHSSMNEML  
EEGHDYAVMLYTWRS CSRAI PQVKCNEQPNRVEIYEKTVEVLEPEVTKLMKFM YFQRKAIERFCSEVKRLCHA  
ERRKDFVSEAYLLTLGKF INMFAVLDELKNMKCSVKNDHSAYKRAAQFLRKMADPQSIQESQNL SMFLANHNR  
ITQCLHQQLEVI PGYEELLADIVNICVDYVYVNMKMYLTPSEKHMLLKV MGFGLYLM DGNVSN IYKLD AKKRINL  
SKIDKFFKQLQV VPLFGDMQIELARYIKTSAHYEENKSKWCTQSSISPQYNICEQMVQIRDDHIRFISELAR  
YSNSEVVTGSGLDSQKSDEEYRELF DLALRGLQLLSKWSAHVMEVY SWKLVHPTDKFCNKDCPGTAE EYERAT  
RYNYTSEEKFAFVEVIAMIKGLQVLMGRMESVFNQAIRNTIYAALQDFAQVTLREPLRQAVRKKKNVLSVLQ  
AIRK TICDWE GGREPPNDPCLRGEKDPKGGFDIKVPRRAVGPSS TQLYMVRTMLES LIADKSGSKKTLRSSLD  
GPIVLAIEDFHKQS FFFTHLLNISEALQQCCDLSQLWFR EFFLELTMGRRIQFP IEMSPWILTDHI LETKEP  
SMMEYVLYPLDLYNDSAYYALTKFKKQFLYDEIEAEVNLCFDQFVYKLADQIFAYYKAMAGSVLLDKRFRAEC  
KNYGVII PYPPSNRYETLLKQRHVQLLGRSIDLNR LITQRISAAMYKSLDQAISRFESEDLT SIVELEW LLEI  
NRLTHRLLCKHMTLDSFDAMFREANHNVSAPYGRITLHVFWELNFDLFPNYCYNGSTNRFRVRTAIPFTQEPQR  
DKPANVQPYLYGSKPLNIAYSHIYSSYRNFVGP PPHFKTICRLLGYQGI AVVMEELLKIVKSL LQGTILQYVK  
TLIEVMPKICRLPRHEYGSPGILEFFHHQLKDI IEYAEKTDV FQSLREVGNAILFCLLIEQALSQE EVCDDL  
HAAPFQNILPRVYIKEGERLEVRMKRLEAKYAPLHLVPLIERLGT PQQIAIAREGDLLTKERLCCGLSMFEVI  
LTRIRSYLQDPIWRGPPPTNGVMHVDECV EFHRLWSAMQFVYCI PVGTNEFTA EQCFGDGLNWAGCS IIVLLG  
QQRFRDLDFDCYHLLKVRQDQKDEI IKNVPLKKMADRIRKYQ IILNNEVFAILNKYMKSVETDSSTVEHVRCF  
QPPIHQSLATTC\*

>rs29482402\_ENSMUSP00000090853\_c.748:A>T\_p.E250V  
ENSMUST00000093165.12|Cyfip2-201|ENSMUSG00000020340|-  
|chr11:g.46167652:T>A  
MTTHVTLEDALSNVDLLEELPLPDQQPCIEPPSSIMYQANFDTNFEDRNAFVTGIARYIEQATVHSSMNEML  
EEGHYAVMLYTWRSRRAIPQVKCNEQPNRVEIYEKTVLEVLEPEVTKLMKFMFYQRKAIERFCSEVKRLCHA  
ERRKDFVSEAYLLTLGKFINMFAVLDELKMNKCSVKNDHSAYKRAAQFLRKMADPQSIQESQNLMSFLANHNR  
ITQCLHQQLLEVI PGYEELLADIVNICVDYVYVNMKMYLTPSEKHMLLKVMGFGLYLMGDGNSNIYKLDKAKRINL  
SKIDKFFKQLQVVPLFGDMQIELARYIKTSAHYEENKSKWTCTQSSISPQYNICEQMVQIRDDHIRFISELAR  
YSNSEVVTGSGGLDSQKSDEEYRELFDLALRGLQLLSKWSAHVMEVYSWKLHVPTDKFCNKDCPGTAEYERAT  
RYNYTSEEKFAFVEVIAMIKGLQVLMGRMESVFNQAIRNTIYAALQDFAQVTLREPLRQAVRKKKNVLI SVLQ  
AIRKTCIDWEGGREPPNDPCLRGEKDPKGGFDIKVPRRAVGPSSQLYMVRTMLES LIADKSGSKKTLRSSLD  
GPIVLAIEDFHKQSF FFFTHLLNISEALQQCCDLSQLWFREFFLELTMGRRIQFP IEMSPWILTDHI LETKEP  
SMMEYVLYPLDLYNDSAYYALTKFKKQFLYDEIEAEVNLCFDQFVYKLDQIFAYYKAMAGSVLLDKRFRAEC  
KNYGVIIPYPPSNRYETLLKQRHVQLLGRSIDLNRLITQRISAAMYKSLDQAISRFESEDLT SIVELEWLEI  
NRLTHRLLCKHMTLDSFDAMFREANHNVSAPYGRITLHVFWELNFDLFPNYCYNGSTNRFVRTAIPFTQEPQR  
DKPANVQPYLYGSKPLNIAYSHIYSSYRNFGVPPHFKTCRLLGYQGI AVVMEELLKIVKSLQGTILQYVK  
TLIEVMPKICRLPRHEYGSPGILEFFHHQLKDI IEYAELKTDV FQSLREVGNAILFCLLIEQALSQEVECDLL  
HAAPFQNILPRVYIKEGERLEVRMKRLEAKYAPLHLVPLIERLGTQQIAIAREGDL LTKERLCCGLSMFEVI  
LTRIRSYLQDP IWRGPPPTNGVMHVDECVEFHRLWSAMQFVYCI PVGTNEFTA EQCFGDGLNWAGCSI IVLLG  
QQRFDLDFCYHLLKVRQDQKDEI IKNVPLKKMADRIRKYQILNNEVFAILNKYMKSVETDSS TVEHVRCF  
QPIHQSLATTC\*

>rs29383724\_ENSMUSP00000090854\_c.670:T>C\_p.L224P  
ENSMUST00000093166.11|Cyfip2-202|ENSMUSG00000020340|-  
|chr11:g.46167730:A>G  
MTTHVTLEDALSNVDLLEELPLPDQQPCIEPPSSIMYQANFDTNFEDRNAFVTGIARYIEQATVHSSMNEML  
EEGHYAVMLYTWRSRRAIPQVKCNEQPNRVEIYEKTVLEVLEPEVTKLMKFMFYQRKAIERFCSEVKRLCHA  
ERRKDFVSEAYLLTLGKFINMFAVLDELKMNKCSVKNDHSAYKRAAQFLRKMADPQSIQESQNLMSFLANHNR  
ITQCPHQQLLEVI PGYEELLADIVNICVDYENKMYLTPSEKHMLLKVMGFGLYLMGDGNSNIYKLDKAKRINL  
SKIDKFFKQLQVVPLFGDMQIELARYIKTSAHYEENKSKWTCTQSSISPQYNICEQMVQIRDDHIRFISELAR  
YSNSEVVTGSGGLDSQKSDEEYRELFDLALRGLQLLSKWSAHVMEVYSWKLHVPTDKFCNKDCPGTAEYERAT  
RYNYTSEEKFAFVEVIAMIKGLQVLMGRMESVFNQAIRNTIYAALQDFAQVTLREPLRQAVRKKKNVLI SVLQ  
AIRKTCIDWEGGREPPNDPCLRGEKDPKGGFDIKVPRRAVGPSSQLYMVRTMLES LIADKSGSKKTLRSSLD  
GPIVLAIEDFHKQSF FFFTHLLNISEALQQCCDLSQLWFREFFLELTMGRRIQFP IEMSPWILTDHI LETKEP  
SMMEYVLYPLDLYNDSAYYALTKFKKQFLYDEIEAEVNLCFDQFVYKLDQIFAYYKAMAGSVLLDKRFRAEC  
KNYGVIIPYPPSNRYETLLKQRHVQLLGRSIDLNRLITQRISAAMYKSLDQAISRFESEDLT SIVELEWLEI  
NRLTHRLLCKHMTLDSFDAMFREANHNVSAPYGRITLHVFWELNFDLFPNYCYNGSTNRFVRTAIPFTQEPQR  
DKPANVQPYLYGSKPLNIAYSHIYSSYRNFGVPPHFKTCRLLGYQGI AVVMEELLKIVKSLQGTILQYVK  
TLIEVMPKICRLPRHEYGSPGILEFFHHQLKDI IEYAELKTDV FQSLREVGNAILFCLLIEQALSQEVECDLL  
HAAPFQNILPRVYIKEGERLEVRMKRLEAKYAPLHLVPLIERLGTQQIAIAREGDL LTKERLCCGLSMFEVI  
LTRIRSYLQDP IWRGPPPTNGVMHVDECVEFHRLWSAMQFVYCI PVGTNEFTA EQCFGDGLNWAGCSI IVLLG  
QQRFDLDFCYHLLKVRQDQKDEI IKNVPLKKMADRIRKYQILNNEVFAILNKYMKSVETDSS TVEHVRCF  
QPIHQSLATTC\*

>rs29383724\_ENSMUSP00000127586\_c.670:T>C\_p.L224P  
ENSMUST00000165599.9|Cyfip2-205|ENSMUSG00000020340|-|chr11:g.46167730:A>G  
MTTHVTLEDALSNVDLLEELPLPDQQPCIEPPSSIMYQANFDTNFEDRNAFVTGIARYIEQATVHSSMNEML  
EEGHYAVMLYTWRSRRAIPQVKCNEQPNRVEIYEKTVLEVLEPEVTKLMKFMFYQRKAIERFCSEVKRLCHA  
ERRKDFVSEAYLLTLGKFINMFAVLDELKMNKCSVKNDHSAYKRAAQFLRKMADPQSIQESQNLMSFLANHNR  
ITQCPHQQLLEVI PGYEELLADIVNICVDYENKMYLTPSEKHMLLKVMGFGLYLMGDGNSNIYKLDKAKRINL  
SKIDKFFKQLQVVPLFGDMQIELARYIKTSAHYEENKSKWTCTQSSISPQYNICEQMVQIRDDHIRFISELAR  
YSNSEVVTGSGGLDSQKSDEEYRELFDLALRGLQLLSKWSAHVMEVYSWKLHVPTDKFCNKDCPGTAEYERAT  
RYNYTSEEKFAFVEVIAMIKGLQVLMGRMESVFNQAIRNTIYAALQDFAQVTLREPLRQAVRKKKNVLI SVLQ  
AIRKTCIDWEGGREPPNDPCLRGEKDPKGGFDIKVPRRAVGPSSQLYMVRTMLES LIADKSGSKKTLRSSLD  
GPIVLAIEDFHKQSF FFFTHLLNISEALQQCCDLSQLWFREFFLELTMGRRIQFP IEMSPWILTDHI LETKEP  
SMMEYVLYPLDLYNDSAYYALTKFKKQFLYDEIEAEVNLCFDQFVYKLDQIFAYYKAMAGSVLLDKRFRAEC  
KNYGVIIPYPPSNRYETLLKQRHVQLLGRSIDLNRLITQRISAAMYKSLDQAISRFESEDLT SIVELEWLEI  
NRLTHRLLCKHMTLDSFDAMFREANHNVSAPYGRITLHVFWELNFDLFPNYCYNGSTNRFVRTAIPFTQEPQR  
DKPANVQPYLYGSKPLNIAYSHIYSSYRNFGVPPHFKTCRLLGYQGI AVVMEELLKIVKSLQGTILQYVK  
TLIEVMPKICRLPRHEYGSPGILEFFHHQLKDI IEYAELKTDV FQSLREVGNAILFCLLIEQALSQEVECDLL



HAAPFQNILPRVYIKEGERLEVRMKRLEAKYAPLHLVPLIERLGTTPQQIAIAREGDLTKERLCCGLSMFEVI  
LTRIRSYLQDPIWRGPPPTNGVMHVDECVEFHRLWSAMQFVYCI PVGTNEFTAEOCFDGLNWAGCSII VLLG  
QQRFDLDFDFCYHLLKQVQDQKDEI IKNVPLKKMADRIRKYQI LNNEVFALNKYMKSVETDSSTVEHVRCF  
QPPIHQSLATTC\*

>rs29383724\_ENSMUSP00000090853\_c.670:T>C\_p.L224P  
ENSMUST00000093165.12|Cyfip2-201|ENSMUSG00000020340|-  
|chr11:g.46167730:A>G  
MTHVTLEDALSNDLLEELPLPDQQPCIEPPSSIMYQANFDTNFEDRNAFVTGIARYIEQATVHSSMNEML  
EEGHYAVMLYTWRSRRAIPQVKCNEQPNRVEIYEKTVEVLEPEVTKLMKFMFQRKAIERFCSEVKRLCHA  
ERRKDFVSEAYLLTLGKFINMFAVLDELKMKCSVKNDHSAYKRAAQFLRKMADPQSIQESQNLMSFLANHNR  
ITQCPHQLEVI PGYEELLADIVNICVDYENKMYLTPSEKHMMLKVMGFGLYLMGDNVSNYKLDKAKRINL  
SKIDKFFKQLQVPLFGDMQIELARYIKTSAHYEENKSKWCTQSSISPQYNICEQMVQIRDDHIRFISELAR  
YSNSEVVTGSGLDQSDEEYRELFDLALRGLQLLSKWSAHVMEVYSWKLVHPTDKFCNKDCPGTAEYERAT  
RYNYTSEEKFAFVEVIAMIKGLQVLMGRMESVFNQAIRNTIYAALQDFAQVTLREPLRQAVRKKKNVLSVLQ  
AIRKTI CDWEGGREPPNDPCLRGEKDPKGGFDIKVPRRAVGPSSQLYMVRTMLES LIADKSGSKKTLRSSLD  
GPIVLAIEDFHKQSF FFFTHLLNI SEALQQCCDLSQLWFREFFLELTMRRIQFP IEMSPWILTDHILETKEP  
SMMEYVLYPLDLYNDSAYYALTKFKKQFLYDEIEAEVNLCFDQFVYKLDQIFAYYKAMAGSVLLDKRFRAC  
KNYGVLIIPYPPSNRYETLLKQRHVQLLGRSIDLNRLITQRISAAMYKSLDQAI SRFESDLTSI VELEWLLI  
NRLTHRLLCKHMTLDSFDAMFREANHNVSAPYGRITLHVFWELNFDLFPNYCYNGSTNRFVRTAIPFTQEPQR  
DKPANVQPYLYGSKPLNIAYSHIYSSYRNFGVPPHFKTICRLLGYQGI AVVMEELLKIVKSLQGTILQYVK  
TLIEVMPKICRLPRHEYGSPGILEFFHHQLKDI IEYAEKTDVQSLREVGNAILFCLLIEQALSQEVCDDL  
HAAPFQNILPRVYIKEGERLEVRMKRLEAKYAPLHLVPLIERLGTTPQQIAIAREGDLTKERLCCGLSMFEVI  
LTRIRSYLQDPIWRGPPPTNGVMHVDECVEFHRLWSAMQFVYCI PVGTNEFTAEOCFDGLNWAGCSII VLLG  
QQRFDLDFDFCYHLLKQVQDQKDEI IKNVPLKKMADRIRKYQI LNNEVFALNKYMKSVETDSSTVEHVRCF  
QPPIHQSLATTC\*

>rs245339491\_ENSMUSP00000090854\_c.604:A>TA\_p.Q202ins-fs  
ENSMUST00000093166.11|Cyfip2-202|ENSMUSG00000020340|-  
|chr11:g.46168947:T>TA  
MTHVTLEDALSNDLLEELPLPDQQPCIEPPSSIMYQANFDTNFEDRNAFVTGIARYIEQATVHSSMNEML  
EEGHYAVMLYTWRSRRAIPQVKCNEQPNRVEIYEKTVEVLEPEVTKLMKFMFQRKAIERFCSEVKRLCHA  
ERRKDFVSEAYLLTLGKFINMFAVLDELKMKCSVKNDHSAYKRAAQFLRKMADPLVHPGISEPVHVPGSQO  
DHPVSSPATGSDPGL

>rs245339491\_ENSMUSP00000127586\_c.604:A>TA\_p.Q202ins-fs  
ENSMUST00000165599.9|Cyfip2-205|ENSMUSG00000020340|-  
|chr11:g.46168947:T>TA  
MTHVTLEDALSNDLLEELPLPDQQPCIEPPSSIMYQANFDTNFEDRNAFVTGIARYIEQATVHSSMNEML  
EEGHYAVMLYTWRSRRAIPQVKCNEQPNRVEIYEKTVEVLEPEVTKLMKFMFQRKAIERFCSEVKRLCHA  
ERRKDFVSEAYLLTLGKFINMFAVLDELKMKCSVKNDHSAYKRAAQFLRKMADPLVHPGISEPVHVPGSQO  
DHPVSSPATGSDPGL

>rs245339491\_ENSMUSP00000090853\_c.604:A>TA\_p.Q202ins-fs  
ENSMUST00000093165.12|Cyfip2-201|ENSMUSG00000020340|-  
|chr11:g.46168947:T>TA  
MTHVTLEDALSNDLLEELPLPDQQPCIEPPSSIMYQANFDTNFEDRNAFVTGIARYIEQATVHSSMNEML  
EEGHYAVMLYTWRSRRAIPQVKCNEQPNRVEIYEKTVEVLEPEVTKLMKFMFQRKAIERFCSEVKRLCHA  
ERRKDFVSEAYLLTLGKFINMFAVLDELKMKCSVKNDHSAYKRAAQFLRKMADPLVHPGISEPVHVPGSQO  
DHPVSSPATGSDPGL

>rs213016101\_ENSMUSP00000090854\_c.82:TG>G\_p.C28del-fs  
ENSMUST00000093166.11|Cyfip2-202|ENSMUSG00000020340|-  
|chr11:g.46182374:CA>C  
MTHVTLEDALSNDLLEELPLPDQQPVSSPRHPPSCTRLTLTRTSRTGMHLSRALQGTLSRQRSTPA

>rs213016101\_ENSMUSP00000127586\_c.82:TG>G\_p.C28del-fs  
ENSMUST00000165599.9|Cyfip2-205|ENSMUSG00000020340|-  
|chr11:g.46182374:CA>C  
MTHVTLEDALSNDLLEELPLPDQQPVSSPRHPPSCTRLTLTRTSRTGMHLSRALQGTLSRQRSTPA

>rs213016101\_ENSMUSP00000090853\_c.82:TG>G\_p.C28del-fs  
ENSMUST00000093165.12|Cyfip2-201|ENSMUSG00000020340|-  
|chr11:g.46182374:CA>C  
MTHVTLEDALSNDLLEELPLPDQQPVSSPRHPPSCTRLTLTRTSRTGMHLSRALQGTLSRQRSTPA

>rs46650668\_ENSMUSP00000020664\_c.1218:G>A\_p.E407K  
ENSMUST00000020664.13|Itk-201|ENSMUSG00000020395|-|chr11:g.46228942:C>T  
MNNFILLLEEQLIKKSSQQRRTSPSNFKVRFVLTAKSLAYFEDRHGKKRTLKGSIELSRIKCVIIVKSDISIP  
CHYKYPFQVVDNYLLYVFAPDCESRQRWVLTKEETRNNSLVSKYHPNFWMDGRWRCCSQLEKPAVGCAPY  
DPSKNASKKPLPPTPEDNRRSFQEP EETLVIALYDYQTNDPQELALRCDEEYLLDSSEIHWWRVQDKNGHEG  
YAPSSYLVEKSPNNLETYEWYNKSI SRDKAEKLLDGTGKEGAFMVRDSRTPGTYT VSVFTKAI ISENPCIKHY  
HIKETNDSPKRYVVAEKYVFDSPILLIQYHQYNGGLVTRLRYPVCSWRQKAPVTTAGLRYGKWWIQPSELTFV  
QEIGSGQFGLVHLGYWLNKDKVAIKTIQEGAMSEEDFIEEAKVMMKLSHPKLVQLYGVCLEQAPICLVFEFME  
HGCLSDYLRQRGLFAAETLLGMCLDVCEGMAYLEKACVIHRDLAARNCLVGENQVIKVSDFGMTRFVLDQY  
TSSTGTKFPVKWASPEVFSFSRYSSKSDVWSFGVLMWEVVFSEGKIPYENRSNSEVVEDISTGFRLYKPRLAS  
HVVQIMNHCWKEKPEDRPPFSQLLSQLAEIAEAGL\*  
>rs46650668\_ENSMUSP00000104860\_c.1236:G>A\_p.E413K  
ENSMUST00000109237.9|Itk-203|ENSMUSG00000020395|-|chr11:g.46228942:C>T  
MNNFILLLEEQLIKKSSQQRRTSPSNFKVRFVLTAKSLAYFEDRHGKKRTLKGSIELSRIKCVIIVKSDISIP  
CHYKYPFQTLVYLQVVDNYLLYVFAPDCESRQRWVLTKEETRNNSLVSKYHPNFWMDGRWRCCSQLEKPA  
VGCAPYDPSKNASKKPLPPTPEDNRRSFQEP EETLVIALYDYQTNDPQELALRCDEEYLLDSSEIHWWRVQD  
KNGHEGYAPSSYLVEKSPNNLETYEWYNKSI SRDKAEKLLDGTGKEGAFMVRDSRTPGTYT VSVFTKAI ISEN  
PCIKHYHIKETNDSPKRYVVAEKYVFDSPILLIQYHQYNGGLVTRLRYPVCSWRQKAPVTTAGLRYGKWWIQP  
SELTFVQEIGSGQFGLVHLGYWLNKDKVAIKTIQEGAMSEEDFIEEAKVMMKLSHPKLVQLYGVCLEQAPICL  
VFEFMEHGCLSDYLRQRGLFAAETLLGMCLDVCEGMAYLEKACVIHRDLAARNCLVGENQVIKVSDFGMTRF  
VLDQYTSSTGTKFPVKWASPEVFSFSRYSSKSDVWSFGVLMWEVVFSEGKIPYENRSNSEVVEDISTGFRLYK  
PRLASCHVYQIMNHCWKEKPEDRPPFSQLLSQLAEIAEAGL\*  
>ENSMUSP00000116997\_c.175:T>TAAA\_p.L59LK-ins ENSMUST00000128940.2|Med7-  
204|ENSMUSG00000020397|+|chr11:g.46331582:T>TAAA  
MGEPPQVSALPPPPMQYIKEYTDENIQEGLAPKPPPIKDSYMMFGNQFQCDDLIIRPLKESQGIERLHPMQF  
DHKKELRKLNMSILINFLDLDLILIRSPGSIKREEKLEDLKLFLVHVHHLINYEYRPHQARETLRVMMEVQKRQ  
RLETAERFQKHL  
>ENSMUSP00000104854\_c.175:T>TAAA\_p.L59LK-ins ENSMUST00000109231.2|Med7-  
202|ENSMUSG00000020397|+|chr11:g.46331582:T>TAAA  
MGEPPQVSALPPPPMQYIKEYTDENIQEGLAPKPPPIKDSYMMFGNQFQCDDLIIRPLKESQGIERLHPMQF  
DHKKELRKLNMSILINFLDLDLILIRSPGSIKREEKLEDLKLFLVHVHHLINYEYRPHQARETLRVMMEVQKRQ  
RLETAERFQKHLERVIEMIQNCLASLPD  
>ENSMUSP00000104855\_c.175:T>TAAA\_p.L59LK-ins ENSMUST00000109232.4|Med7-  
203|ENSMUSG00000020397|+|chr11:g.46331582:T>TAAA  
MGEPPQVSALPPPPMQYIKEYTDENIQEGLAPKPPPIKDSYMMFGNQFQCDDLIIRPLKESQGIERLHPMQF  
DHKKELRKLNMSILINFLDLDLILIRSPGSIKREEKLEDLKLFLVHVHHLINYEYRPHQARETLRVMMEVQKRQ  
RLETAERFQKHLERVIEMIQNCLASLPDDLP HSEAGMRVKAEPMDTDDNSNCPGQNEQQRESSGHRDQIEK  
DAALCVLIDEMNERP\*  
>ENSMUSP00000020665\_c.175:T>TAAA\_p.L59LK-ins ENSMUST00000020665.13|Med7-  
201|ENSMUSG00000020397|+|chr11:g.46331582:T>TAAA  
MGEPPQVSALPPPPMQYIKEYTDENIQEGLAPKPPPIKDSYMMFGNQFQCDDLIIRPLKESQGIERLHPMQF  
DHKKELRKLNMSILINFLDLDLILIRSPGSIKREEKLEDLKLFLVHVHHLINYEYRPHQARETLRVMMEVQKRQ  
RLETAERFQKHLERVIEMIQNCLASLPDDLP HSEAGMRVKAEPMDTDDNSNCPGQNEQQRESSGHRDQIEK  
DAALCVLIDEMNERP\*  
>ENSMUSP00000122182\_c.175:T>TAAA\_p.L59LK-ins ENSMUST00000152119.2|Med7-  
207|ENSMUSG00000020397|+|chr11:g.46331582:T>TAAA  
MGEPPQVSALPPPPMQYIKEYTDENIQEGLAPKPPPIKDSYMMFGNQFQCDDLIIRPLKESQGIERLHPMQF  
DHKKELRKLNMSILINFLDLDLILIRSPGSIKREEKLEDLKLFLVHVHHLINYEYRPHQARETLRVMMEVQKRQ  
>ENSMUSP00000120077\_c.175:T>TAAA\_p.L59LK-ins ENSMUST00000140027.8|Med7-  
206|ENSMUSG00000020397|+|chr11:g.46331582:T>TAAA  
MGEPPQVSALPPPPMQYIKEYTDENIQEGLAPKPPPIKDSYMMFGNQFQCDDLIIRPLKES  
>ENSMUSP00000120617\_c.175:T>TAAA\_p.L59LK-ins ENSMUST00000133635.2|Med7-  
205|ENSMUSG00000020397|+|chr11:g.46331582:T>TAAA  
MGEPPQVSALPPPPMQYIKEYTDENIQEGLAPKPPPIKDSYMMFGNQFQCDDLIIRPLKESQGIERLHPMQF  
DHKKELRKLNMSILINFLDLDLILIRSPGSIKREEKLEDLKLFLVHVHHLINYEYRPHQARE  
>ENSMUSP00000131852\_c.175:T>TAAA\_p.L59LK-ins ENSMUST00000170928.8|Med7-  
209|ENSMUSG00000020397|+|chr11:g.46331582:T>TAAA

MGEFQQVSALPPPPMQYIKEYTDENIQEGLAPKPPPIKDSYMMFGNQFQCDDLIIIRPLKESQGIERLHPMQF  
DHKKELRKLNMSILINFLDLDLILIRSPGSIKREEKLEDLKLFLVHVHHLINYEYRPHQARETLRVMMEVQKRQ  
RLETAERFQKHLERVIEMIQNCLASLPDDLPHSEAGMRVKAEPMDTDDNSNCPGQNEQQRESSGHRDQIIEK  
DAALCVLIDEMNERP\*

>rs227019036\_ENSMUSP00000069456\_c.18:C>A\_p.L7I  
ENSMUST00000068877.7|Timd4-201|ENSMUSG00000055546|+|chr11:g.46701657:C>A  
MSKGLLILWLVTTELWVLYLTPAASEDTIIGFLGQPVTLPCHYLSWSQSRNSMCWKGKSCPNKCNALLRTDG  
TRII SRKSTKYTLLGKVQFGEVSLTISNTNRGDSGVYCCRIEVPWFNDVKKNRLELRRATTTKKPTTTTRP  
TTTPYVTTTTPELLPTTVMTTSVLPTTTPPQTLATTAFASTAVTTCPSTTPGSFQSQETTKGSAFTTESETLPAS  
NHSQRSMMTISTDIAVLRPTGSNPGILPSTSQLTTQKTTLLTTSSESLQKTTKSHQINSRQTILIIACCVGFVLM  
VLLFLAFLLRGKVTGANCLQRHKRPDNTEDSDSVLNDMSHGRDDEDGIFTL\*

>rs50666259\_ENSMUSP00000069456\_c.144:C>T\_p.R49C  
ENSMUST00000068877.7|Timd4-201|ENSMUSG00000055546|+|chr11:g.46706344:C>T  
MSKGLLLLWLVTTELWVLYLTPAASEDTIIGFLGQPVTLPCHYLSWSQSCNSMCWKGKSCPNKCNALLRTDG  
TRII SRKSTKYTLLGKVQFGEVSLTISNTNRGDSGVYCCRIEVPWFNDVKKNRLELRRATTTKKPTTTTRP  
TTTPYVTTTTPELLPTTVMTTSVLPTTTPPQTLATTAFASTAVTTCPSTTPGSFQSQETTKGSAFTTESETLPAS  
NHSQRSMMTISTDIAVLRPTGSNPGILPSTSQLTTQKTTLLTTSSESLQKTTKSHQINSRQTILIIACCVGFVLM  
VLLFLAFLLRGKVTGANCLQRHKRPDNTEDSDSVLNDMSHGRDDEDGIFTL\*

>rs52482656\_ENSMUSP00000069456\_c.356:G>A\_p.W119\*  
ENSMUST00000068877.7|Timd4-201|ENSMUSG00000055546|+|chr11:g.46706556:G>A  
MSKGLLLLWLVTTELWVLYLTPAASEDTIIGFLGQPVTLPCHYLSWSQSRNSMCWKGKSCPNKCNALLRTDG  
TRII SRKSTKYTLLGKVQFGEVSLTISNTNRGDSGVYCCRIEVPWFNDVKKNRLELRRATTTKKPTTTTRP  
TTTPYVTTTTPELLPTTVMTTSVLPTTTPPQTLATTAFASTAVTTCPSTTPGSFQSQETTKGSAFTTESETLPAS  
NHSQRSMMTISTDIAVLRPTGSNPGILPSTSQLTTQKTTLLTTSSESLQKTTKSHQINSRQTILIIACCVGFVLM  
VLLFLAFLLRGKVTGANCLQRHKRPDNTEDSDSVLNDMSHGRDDEDGIFTL\*

>ENSMUSP00000019060\_c.154:A>G\_p.E52G ENSMUST00000019060.6|Csf2-  
201|ENSMUSG00000018916|-|chr11:g.54140185:T>C  
MWLQNLFLGIVVYLSAPTRSPITVTRPWKHVEAIKEALNLLDDMPVTLNGEVEVVSNEFSFKKLTVCVQTRL  
KIFEQGLRGNFTKLGALNMTASYQTYCPPTPETDCETQVTTYADFDISLKTFLTDIIPFECKKPGQK\*

>rs48718255\_ENSMUSP00000049026\_c.34:A>G\_p.K12R  
ENSMUST00000046835.14|Fnip1-201|ENSMUSG00000035992|+|chr11:g.54329157:A>G  
MAPTLFQKLFRRSGLGAPGRDARDPDCAFWSWLPPEFDPSQIRLIVYQDCERRGRNVLFDSSVKRKNEDTSVS  
KLCNDAQVKVFGKCCQLKPGGDSSSSLDSSITLSSDGKDQC PKYQGSRCSSDANMLGEMMFGSVAMSYKGSTL  
KIHQIRSPPLMLSKVFTARTGSSICGSLNLTQDSLEFINQDSNTLKAADSSTVSNGLLGNIGLSQFCSPPRAF  
SEQGPLRLIRASFFFAVHSNPMMDMPGRELNEDRDSGIARASLSLFLITFPFSPNSLTRSCASSYQRRWRRS  
QTTSLENGVFPWRSVEESFNLSDESCGPNPGIVRKKKIAIGVIFSLSKDEDENNKFNFFFSHFPLFESHMKN  
LKSAIEQAMKMSRRSADASQRSLAYNRILDALTEFRTTICNLYTMPRI GEPVWLTMMSGTPEKNQLCHRFMKE  
FTFLMENASKNQFLPALITAVLNTNHLAWVPTVMPNGQPPIKIFLEKHSSQSVGMLAKTHPYNPLWAQLGDLYG  
AIGSPVRLARTVVVGRQDLVQRLLYFLTYFIRCSELQETHLLENGEDEAIVMPGTVITTTLEKGEIEESEYV  
LITMHRNKSSLLFKESEETRTPCNCKYCSHPVLGQNTENVSQPEREDTQDNSKELLGISDECQKISPPDCQE  
ENAVDVQQYRDKLRCTCLDTKLETVVCTGSAPADKCVLSETCLEPREESWQNKELLSDSNHTGTAMRPTGIVVE  
KKPPDKNVPSAFSCEVTQTKVTFLLIGDSMSPDSDELRSQAVVDQINRHHSEPLKEDRGVADKHQESKITKDQ  
SESDTQNIIVSGESCELPWVSHSDPESMSLFDEYFNDDSIETRTIDDPVVKTSTDSKEYCCMLEYPKRLYTKT  
NKQKSELCKCIETVHQDSCNACFPQQDQRNSLSILVPHGDKESDKNNAVGTEWDI PRNESSDSALGDSESED  
TGPDIRRQAGGYCGGDQEDWTEDEIPFPGSKLIEVSAVQPNIANFGRSLLGGYCSSYVPDFVLQIGNDRERL  
RQCLVSDLSHAVQHPVLDEPIAEAVCI IADMDKWTQVASSQRRVTDNKLKGEVLVSSLSVNLHSTLQLYKH  
NLSPNFCVMHLEDRLQELYFKSKMLSEYLRGQMRVHVKELGVVGLIESSDLPLLA AVASTHSPYVAQILL\*

>rs26974040\_ENSMUSP00000104511\_c.1249:T>C\_p.L417P  
ENSMUST00000108883.10|Anxa6-202|ENSMUSG00000018340|-|chr11:g.54885390:A>G  
MAKIAQGAMYRGSVHDFPEFDANQDAEALYTAMKGFSGDKESILELITSRSNKQRQEICQNYKSLYGKDLIED  
LKYELTGKFERLIVNLMRPLAYCDAKEIKDAISGVGTDEKCLIEILASRTNEQMHLVAAYKDAYERDLES  
IGDTSGHFQKMLVLLQGTRENDVVSSEDLVQQDVQDLYEAGELKWTDEAQFIYILGNRSKQHLRLVDFEYL  
KTTGKPIEASIRGELSGDFEKLMLAVVKCIRSTPEYFAERLFKAMKGLGTRDNTLIRIMVSRSELMDLDIREI  
FRTKYEKSLYSMIKNDTSGEYKALLKLCGGDDAAGQFFPEAAQVAYQMWELSAVSRVELKGTVCAANDFN  
DADAKALRKAMKIGTDEATI IDIVTHRSNAQRQQIRQTFKSHFGRDLMDPKSEISGDLARLILGLMMPAH  
YDAKQLKAMEGAGTDEKTLIEILATRTRNAEIRAINAYKEDYHKSLEDALSSDTSGHFRRLISLATGNREE  
GGENRDQAQEDAQVA AEILEIADTPSGDKTSLETRFMTVLCRTRSYPHLRRVQEFIKKTNVDIEHVIKKEMSG

DVKDAFVAIVQSVKNKPLFFADKLYKSMKGAGTDEKTLTRVMVSRSEIDLNLNIRREFIEKYDKSLHQAIEGDT  
 SGDFMKALLALCGGED\*

>rs26974040\_ENSMUSP00000099788\_c.1249:T>C\_p.L417P  
 ENSMUST00000102727.3|Anxa6-201|ENSMUSG00000018340|-|chr11:g.54885390:A>G  
 MAKIAQGAMYRGSVHDFPEFDANQDAEALYTAMKGFSGDKESILELITSRSNKQRQEICQNYKSLYKDLIED  
 LKYEELTGKFERLIVNLMRPLAYCDAKEIKDAISGVGTDEKCLIEILASRTNEQMHQLVAAYKDAYERDLES  
 IGDTSGHFQKMLVLLQGTRENDVSEDLVQQDVQDLYEAGELKWTDEAQFIYILGNRSKQHLRLVDFEYL  
 KTTGKPIEASIRGELSGDFEKLMLAVVKCIRSTPEYFAERLFFKAMKGLGTRDNTLIRIMVSRSELMDLIREI  
 FRTKYEKSLYSMIKNDTSGEYKALLKLCGGDDAAGQFFPEAAQVAYQMWELSAVSRVELKGTVCAANDFNP  
 DADAKALRKAMKIGTDEATIIDIVTHRSNAQRQQIRQTFKSHFGRDLMDPKSEISGDLARLILGLMPPAH  
 YDAKQLKAMEGAGTDEKTLIEILATRTRNAEIRAINAYKEDYHKSLEDALSSDTSGHFRIRILISLATGNREE  
 GGENRDQAQEDAQEIADTPSGDKTSLTRFMTVLCSTRYPHLRRVQEFIKKTNIDIEHVIKKEMSGDVKDAF  
 VAIVQSVKNKPLFFADKLYKSMKGAGTDEKTLTRVMVSRSEIDLNLNIRREFIEKYDKSLHQAIEGDTSGDFMK  
 ALLALCGGED\*

>rs251828522\_ENSMUSP00000064960\_c.205:A>C\_p.E69A  
 ENSMUST00000069816.6|Slc36a3-202|ENSMUSG00000049491|-  
 |chr11:g.55040726:T>G  
 MGNVPLLREVGKQRNMFGSTASSKGSNSRSSSSTSPKKGPRREADALMEALWQQRGSPDPAWHSSAASSR  
 NPIFPAGRGATTRLIQPLLAPPRKFGSNP\*

>rs32973454\_ENSMUSP00000018727\_c.892:A>G\_p.D298G  
 ENSMUST00000018727.4|G3bp1-201|ENSMUSG00000018583|+|chr11:g.55388532:A>G  
 MVMEKPSPLLVGREFVRQYYTLLNQAPDMLHRFYGKNSSYAHGGLDSNGKPADAVYGQKEIHRKVMSONFTNC  
 HTKIRHVDAHATLNDGVVQVMGLLSNNQALRRFMQTFVLAPEGSVANKFYVHNDIFRYQDEVFGGFVTEPQ  
 EESEEEVEEPEERQQTPEVVPDDSGTFYDQTVSNDLEEHLEEPVVEPEPEPEPEPEPEVSDIQEDKPEAALE  
 EAAPDDVQKSTSPAPADVAPAQEDLRTFSWASVTSKNLPPSGAVPVTGTPPHVVKVPASQPRPESKPDQIPP  
 QRPQRGQVREQRINIPQQRGPRPIREAGEPGDVEPRMVRHPDASHQLFIGNLPHEVDKSELKDFQNFQNVV  
 ELRINSGGKLPNFGFVVVDDSEPVQKVLNRPIMFRGAVRLNVEEKKTRAAREGDRDRNRLRPGGPRGGPSG  
 GMRGPPRGGMVQKPGFVGRGITTPRQ\*

>rs26959816\_ENSMUSP000000104481\_c.1057:T>C\_p.I353T  
 ENSMUST00000108853.8|G1ra1-203|ENSMUSG00000000263|-|chr11:g.55405682:A>G  
 MDYRVNIFLRQQWNPRLAYNEYPDSDLDLPSMLDSIWKPDLFFANEKGAHFHEITTDNKLLRISRNGNVLY  
 SIRITLTLACPMDLKNFPMQVQTCIMQLESFGYTMNDLIFEWQEQGAVQVADGLTLPQFILKEEKDLRYCTKH  
 YNTGKFTCIERFHLEQMGYYLIQMYIPSLILVILSWISFWINMDAAPARVGLGITTVLTMTTQSSGSRASL  
 PKVSYVKAIDIWMAVCLLFFVSALLEYAANFVSRQHKELLRFRKRHRHKKDDEGGEGRFNFSAYGMGPACLO  
 AKDGISVKGANNNTTNPPAPSKSPEEMRKLFIQRAKKIDKISRIGFPM AFLIFNMFYWTIYKIVRREDVHN  
 K\*

>rs26959816\_ENSMUSP00000099777\_c.1306:T>C\_p.I436T  
 ENSMUST00000102716.10|G1ra1-202|ENSMUSG00000000263|-|chr11:g.55405682:A>G  
 MYSFNTRFYLWETIVFFSLAASKEAEAARSAPKPMSPDFLDKLMGRTSGYDARIRPNFKGPPVNVSCNIFI  
 NSFGSIAETTMDYRVNIFLRQQWNPRLAYNEYPDSDLDLPSMLDSIWKPDLFFANEKGAHFHEITTDNKLL  
 RISRNGNVLYSIRITLTLACPMDLKNFPMQVQTCIMQLESFGYTMNDLIFEWQEQGAVQVADGLTLPQFILKE  
 EKDLRYCTKHNTGKFTCIERFHLEQMGYYLIQMYIPSLILVILSWISFWINMDAAPARVGLGITTVLTMT  
 TQSSGSRASLPKVSYVKAIDIWMAVCLLFFVSALLEYAANFVSRQHKELLRFRKRHRHKKDDEGGEGRFNFS  
 AYGMGPACLOAKDGISVKGANNNTTNPPAPSKSPEEMRKLFIQRAKKIDKISRIGFPM AFLIFNMFYWTIY  
 KIVRREDVHNK\*

>rs26959816\_ENSMUSP00000075032\_c.1330:T>C\_p.I444T  
 ENSMUST00000075603.5|G1ra1-201|ENSMUSG00000000263|-|chr11:g.55405682:A>G  
 MYSFNTRFYLWETIVFFSLAASKEAEAARSAPKPMSPDFLDKLMGRTSGYDARIRPNFKGPPVNVSCNIFI  
 NSFGSIAETTMDYRVNIFLRQQWNPRLAYNEYPDSDLDLPSMLDSIWKPDLFFANEKGAHFHEITTDNKLL  
 RISRNGNVLYSIRITLTLACPMDLKNFPMQVQTCIMQLESFGYTMNDLIFEWQEQGAVQVADGLTLPQFILKE  
 EKDLRYCTKHNTGKFTCIERFHLEQMGYYLIQMYIPSLILVILSWISFWINMDAAPARVGLGITTVLTMT  
 TQSSGSRASLPKVSYVKAIDIWMAVCLLFFVSALLEYAANFVSRQHKELLRFRKRHRHKKSPMLNLFQDDEG  
 GEGRFNFSAYGMGPACLOAKDGISVKGANNNTTNPPAPSKSPEEMRKLFIQRAKKIDKISRIGFPM AFLIF  
 NMFYWTIYKIVRREDVHNK\*

>rs47776591\_ENSMUSP000000104481\_c.880:A>G\_p.K294R  
 ENSMUST00000108853.8|G1ra1-203|ENSMUSG00000000263|-|chr11:g.55405859:T>C  
 MDYRVNIFLRQQWNPRLAYNEYPDSDLDLPSMLDSIWKPDLFFANEKGAHFHEITTDNKLLRISRNGNVLY  
 SIRITLTLACPMDLKNFPMQVQTCIMQLESFGYTMNDLIFEWQEQGAVQVADGLTLPQFILKEEKDLRYCTKH

YNTGKFTCIEARFHLERQMGYYLIQMYIPSLILVILSWISFWINMDAAPARVGLGITTVLTMTTQSSGSRASL  
PKVSYVKAIDIWMAVCLLFFVSALLEYAANFVSRQHKELLRFRKRHRHKKDDEGGEGRFNFSAYGMGPACLO  
ARDGISVKGANNNTTNPPAPSKSPEEMRKLFIQRAKKIDKISRIGFPMFLIFNMFYWIIYKIVRREDVHN  
K\*

>rs47776591\_ENSMUSP00000099777\_c.1129:A>G\_p.K377R  
ENSMUST00000102716.10|G1ra1-202|ENSMUSG0000000263|-|chr11:g.55405859:T>C  
MYSFNTLRFYLLWETIVFFSLAASKEAEAARSAPKPMSPSDFLDKLMGRTSGYDARIRPNFKGPPVNVSCNIFI  
NSFGSIAETTMDYRVNIFLRQQWNPRLAYNEYPPDDSLDLDPSMLDSIWKPDLFFANEKGAHFHEITTDNKLL  
RISRNGNVLYSIRITLTLACPMDLKNFPMQVQTCIMQLESFGYTMNDLIFEWQEQGAVQVADGLTLPQFILKE  
EKDLRYCTKHYNTGKFTCIEARFHLERQMGYYLIQMYIPSLILVILSWISFWINMDAAPARVGLGITTVLTM  
TQSSGSRASLPKVSYVKAIDIWMAVCLLFFVSALLEYAANFVSRQHKELLRFRKRHRHKKDDEGGEGRFNFS  
AYGMGPACLOARDGISVKGANNNTTNPPAPSKSPEEMRKLFIQRAKKIDKISRIGFPMFLIFNMFYWIIY  
KIVRREDVHNK\*

>rs47776591\_ENSMUSP00000075032\_c.1153:A>G\_p.K385R  
ENSMUST00000075603.5|G1ra1-201|ENSMUSG0000000263|-|chr11:g.55405859:T>C  
MYSFNTLRFYLLWETIVFFSLAASKEAEAARSAPKPMSPSDFLDKLMGRTSGYDARIRPNFKGPPVNVSCNIFI  
NSFGSIAETTMDYRVNIFLRQQWNPRLAYNEYPPDDSLDLDPSMLDSIWKPDLFFANEKGAHFHEITTDNKLL  
RISRNGNVLYSIRITLTLACPMDLKNFPMQVQTCIMQLESFGYTMNDLIFEWQEQGAVQVADGLTLPQFILKE  
EKDLRYCTKHYNTGKFTCIEARFHLERQMGYYLIQMYIPSLILVILSWISFWINMDAAPARVGLGITTVLTM  
TQSSGSRASLPKVSYVKAIDIWMAVCLLFFVSALLEYAANFVSRQHKELLRFRKRHRHKKSPMLNLFQDDEG  
GEGRFNFSAYGMGPACLOARDGISVKGANNNTTNPPAPSKSPEEMRKLFIQRAKKIDKISRIGFPMFLIF  
NMFYWIIYKIVRREDVHNK\*

>rs45667969\_ENSMUSP00000044718\_c.1137:A>G\_p.I380V  
ENSMUST00000037682.3|Nmur2-201|ENSMUSG00000037393|-|chr11:g.55917850:T>C  
MGKLENASWIHDSLMLKYNLSTEEYLAYLCGPKRSDLSLPVSVVYALIFVVGVIIGNLLVCLVIARHQTLKTP  
TYLFLSLAVSDDLVLVLLGMPLEVEYELWHNYPFLFGPVGCGFKTALFETVCFASILSVTTVSIERYVAIVHPFRA  
KLESTRRRALRILSLVVSFVFLPNTSIHGKIFQCFNGSVPGSATCTVTKPIWVYNFIIQATSFLFYIL  
PMTLISVLYLMLGLRLKRDESLEADKVTVNIHRPSRKSVTKMLFVLVLFVFAICWTPFHVDRLFVDEWTE  
LAAVFNLIHVVGFFYLSSAVNPIIYNLLSRRFRAAFRNVVSPSCKWCHPQHRPQGPAPQKVIFFLTECHLVE  
LTEDAGPQFPQSSVHNTQLTTVPCVEEVP\*

>ENSMUSP00000044494\_c.1497:G>GTTTCCTGTAGC\_p.E500ins-fs  
ENSMUST00000036315.16|G1ra1-  
201|ENSMUSG00000020524|+|chr11:g.57133620:G>GTTTCCTGTAGC  
MPYIFAFFCTGFLGAVVGANFPNNIQIGGLFPNQSQEHAAFRALSQLEPPKLLPQIDIVNISDSFEMTYR  
FCSQFSKGVYAIFFGYERRTVNMLTSFCGALHVCFITPSFPVDTSNQFVLQRLPELQEALISIIDHYKWQTFV  
YIYDADRGLSVLQRVLDTAAEKNWQVTAVNILTTEEGYRMLFQDLEKKKERLVVVDCESERLNAILGQIVKL  
EKNIGYHYILANLGFMDIDLNKFESGANVTGFQLVNYTDTIPARIMQWRTSDARDHTRVDWKRPKYTSAL  
TYDGVKVMAEAFQSLRRQRIDISRRGNAGDCLANPAVPWGQGIDIQRALQVRFEGTLGNVQFNEKGRRTNYT  
LHVIEMKHDGIRKIGYWNEDDKFVPAATDAQAGDNSSVQNRITYIVTTILEDPYVMLKKNANQFEGNDRYEGY  
CVELAAEIAKHVGYSYRLEIVSDGKYGARDPDTKAWNGMVGELVYGRADVAVAPLTTITLVRVSCSRKSSTSPS  
HS

>ENSMUSP00000091731\_c.1497:G>GTTTCCTGTAGC\_p.E500ins-fs  
ENSMUST00000094179.11|G1ra1-  
202|ENSMUSG00000020524|+|chr11:g.57133620:G>GTTTCCTGTAGC  
MPYIFAFFCTGFLGAVVGANFPNNIQIGGLFPNQSQEHAAFRALSQLEPPKLLPQIDIVNISDSFEMTYR  
FCSQFSKGVYAIFFGYERRTVNMLTSFCGALHVCFITPSFPVDTSNQFVLQRLPELQEALISIIDHYKWQTFV  
YIYDADRGLSVLQRVLDTAAEKNWQVTAVNILTTEEGYRMLFQDLEKKKERLVVVDCESERLNAILGQIVKL  
EKNIGYHYILANLGFMDIDLNKFESGANVTGFQLVNYTDTIPARIMQWRTSDARDHTRVDWKRPKYTSAL  
TYDGVKVMAEAFQSLRRQRIDISRRGNAGDCLANPAVPWGQGIDIQRALQVRFEGTLGNVQFNEKGRRTNYT  
LHVIEMKHDGIRKIGYWNEDDKFVPAATDAQAGDNSSVQNRITYIVTTILEDPYVMLKKNANQFEGNDRYEGY  
CVELAAEIAKHVGYSYRLEIVSDGKYGARDPDTKAWNGMVGELVYGRADVAVAPLTTITLVRVSCSRKSSTSPS  
HS

>ENSMUSP00000117746\_c.1290:G>GTTTCCTGTAGC\_p.E431ins-fs  
ENSMUST00000151045.3|G1ra1-  
204|ENSMUSG00000020524|+|chr11:g.57133620:G>GTTTCCTGTAGC  
MTYRFSQFSKGVYAIFFGYERRTVNMLTSFCGALHVCFITPSFPVDTSNQFVLQRLPELQEALISIIDHYKW  
QTFVYIYDADRGLSVLQRVLDTAAEKNWQVTAVNILTTEEGYRMLFQDLEKKKERLVVVDCESERLNAILGQ  
IVKLEKNGIGYHYILANLGFMDIDLNKFESGANVTGFQLVNYTDTIPARIMQWRTSDARDHTRVDWKRPKY



TSALTYDGVKVMMAEAFQSLRRQRIDISRRGNAGDCLANPAVPWVGQGIDIQRALQQVRFEGTLGNVQFNEKGRR  
TNYTLHVIEMKHDGIRKIGYWNEDDKFVPAATDAQAGDNSSVQNRITYIVTTILEDPYVMLKKNANQFEGNDR  
YEGYCVELAAEIAKHVGYSYRLEIVSDGKYGARDPDTKAWNGMVGELVYGRADVAVAPLTTITLVREEVIDFSKPFMS  
TSPSHS

>rs33881482\_ENSMUSP00000044494\_c.1929:G>A\_p.V644M  
ENSMUST00000036315.16|Gria1-201|ENSMUSG00000020524|+|chr11:g.57174442:G>A  
MPYIFAFFCTGFLGAVVGANFPNNIQIGGLFPNQSQEHAAFRALSQLEPPKLLPQIDIVNISDSFEMTYR  
FCSQFSKGVYAI FGFYERRTVNMLTSFCGALHVCFITPSPFVDTSNQFVLQLRPELQEALISIIDHYKWQTFV  
YIYDADRGLSVLQVRVLDTAAEKNWQVTAVNILTTEEGYRMLFQDLEKKKERLVVVDCESERLNAILGQIVKL  
EKNIGYHYI LANLGFMDIDLNKFKESGANVTGFQLVNYTDTIPARIMQQWRTSDARDHTRVDWKRPKYTSAL  
TYDGVKVMMAEAFQSLRRQRIDISRRGNAGDCLANPAVPWVGQGIDIQRALQQVRFEGTLGNVQFNEKGRR  
LHVIEMKHDGIRKIGYWNEDDKFVPAATDAQAGDNSSVQNRITYIVTTILEDPYVMLKKNANQFEGNDRYEGY  
CVELAAEIAKHVGYSYRLEIVSDGKYGARDPDTKAWNGMVGELVYGRADVAVAPLTTITLVREEVIDFSKPFMS  
LGISIMIKKPQKSKPGVFSFLDPLAYE IWMCI VFAYIGVSVVFLVSRFSPYEWHSSEEFEEGRDQTTSDQSNE  
FGIFNSLWFSLGAFMQGCDISPRSLSGRIVGGVWVFFTLIIISSYTANLAAFLTVERMMSPIESAEDLAKQT  
EIAYGTLEAGSTKEFFRRSKIAVFEKMWTYMKSAEPSVVRTTEEGMIRVRKSKGKYAYLLESTMNEYIEQRK  
PCDTMKVGGNLDKSGYGIATPKGSALRGPVNLA VLKLEQGVLDKLSKWWYDKGECGSKDSGSKDKTSALS  
SNVAGVFYILIGGLGLAMLVALIEFCYKSRSESKRMKGFC LI PQQS INEAIRTSTLPRNSGAGASGGSGSGEN  
GRVVSQDFPKSMQSI PCMSHSSGMPLGATGL\*

>rs33881482\_ENSMUSP00000091731\_c.1929:G>A\_p.V644M  
ENSMUST00000094179.11|Gria1-202|ENSMUSG00000020524|+|chr11:g.57174442:G>A  
MPYIFAFFCTGFLGAVVGANFPNNIQIGGLFPNQSQEHAAFRALSQLEPPKLLPQIDIVNISDSFEMTYR  
FCSQFSKGVYAI FGFYERRTVNMLTSFCGALHVCFITPSPFVDTSNQFVLQLRPELQEALISIIDHYKWQTFV  
YIYDADRGLSVLQVRVLDTAAEKNWQVTAVNILTTEEGYRMLFQDLEKKKERLVVVDCESERLNAILGQIVKL  
EKNIGYHYI LANLGFMDIDLNKFKESGANVTGFQLVNYTDTIPARIMQQWRTSDARDHTRVDWKRPKYTSAL  
TYDGVKVMMAEAFQSLRRQRIDISRRGNAGDCLANPAVPWVGQGIDIQRALQQVRFEGTLGNVQFNEKGRR  
LHVIEMKHDGIRKIGYWNEDDKFVPAATDAQAGDNSSVQNRITYIVTTILEDPYVMLKKNANQFEGNDRYEGY  
CVELAAEIAKHVGYSYRLEIVSDGKYGARDPDTKAWNGMVGELVYGRADVAVAPLTTITLVREEVIDFSKPFMS  
LGISIMIKKPQKSKPGVFSFLDPLAYE IWMCI VFAYIGVSVVFLVSRFSPYEWHSSEEFEEGRDQTTSDQSNE  
FGIFNSLWFSLGAFMQGCDISPRSLSGRIVGGVWVFFTLIIISSYTANLAAFLTVERMMSPIESAEDLAKQT  
EIAYGTLEAGSTKEFFRRSKIAVFEKMWTYMKSAEPSVVRTTEEGMIRVRKSKGKYAYLLESTMNEYIEQRK  
PCDTMKVGGNLDKSGYGIATPKGSALRNPVNLA VLKLEQGLLDKLNKWWYDKGECGSGGSDSKDKTSALS  
SNVAGVFYILIGGLGLAMLVALIEFCYKSRSESKRMKGFC LI PQQS INEAIRTSTLPRNSGAGASGGSGSGEN  
GRVVSQDFPKSMQSI PCMSHSSGMPLGATGL\*

>rs33881482\_ENSMUSP00000117746\_c.1722:G>A\_p.V575M  
ENSMUST00000151045.3|Gria1-204|ENSMUSG00000020524|+|chr11:g.57174442:G>A  
MTYRFSQFSKGVYAI FGFYERRTVNMLTSFCGALHVCFITPSPFVDTSNQFVLQLRPELQEALISIIDHYKW  
QTFVYIYDADRGLSVLQVRVLDTAAEKNWQVTAVNILTTEEGYRMLFQDLEKKKERLVVVDCESERLNAILGQ  
IVKLEKNGIGYHYI LANLGFMDIDLNKFKESGANVTGFQLVNYTDTIPARIMQQWRTSDARDHTRVDWKRPKY  
TSALTYDGVKVMMAEAFQSLRRQRIDISRRGNAGDCLANPAVPWVGQGIDIQRALQQVRFEGTLGNVQFNEKGRR  
TNYTLHVIEMKHDGIRKIGYWNEDDKFVPAATDAQAGDNSSVQNRITYIVTTILEDPYVMLKKNANQFEGNDR  
YEGYCVELAAEIAKHVGYSYRLEIVSDGKYGARDPDTKAWNGMVGELVYGRADVAVAPLTTITLVREEVIDFSK  
PFMSLGISIMIKKPQKSKPGVFSFLDPLAYE IWMCI VFAYIGVSVVFLVSRFSPYEWHSSEEFEEGRDQTTSD  
QSNFEGIFNSLWFSLGAFMQGCDISPRSLSGRIVGGVWVFFTLIIISSYTANLAAFLTVERMMSPIESAEDL  
AKQTEIAYGTLEAGSTKEFFRRSKIAVFEKMWTYMKSAEPSVVRTTEEGMIRVRKSKGKYAYLLESTMNEYI  
EQRKPCDTMKVGGNLDKSGYGIATPKGSALRGPVNLA VLKLEQGVLDKLSKWWYDKGECGSKDSGSKDKTS  
ALSLSNVAGVFYILIGGLGLAMLVALIEFCYKSRSESKRMKGFC LI PQQS INEAIRTSTLPRNSGAGASGGSG  
SGENGRVVSQDFPKSMQSI PCMSHSSGMPLGATGL\*

>rs51805917\_ENSMUSP00000020831\_c.999:G>A\_p.A334T  
ENSMUST00000020831.13|Fam114a2-201|ENSMUSG00000020523|-  
|chr11:g.57383913:C>T  
MSDKDPPEPVVTVGASTLKDENCEPVEKPEDKSQPVVSTRKRPETKPSDLEASALPAQETASKDVPQTGWG  
YWGWSGKSLSSASATVATVGQGISNVIEKAETSLGIPSPTEISA EVKQAAGEKNAGENGSLVAAPFGMLST  
ISTAVQSTGLSSVISGGLDALEFIGKKTMDVIAEGDPGFKRTKGLMNRTSTLSQVLRKAKDKEEQRPSNEVTME  
TDKKTGYGLLDFEQGLSHLEALEMSRESEIKVKSILSSLSGEEQLQTRLELEQLKEVFSLAEFCEEEEEER  
QGDDNFTKEITDLFAQLHVSSRPEKLARARNTAYKWI RTSLTRPVAEKEEKESEAGNTEEAQKHSIEDIHA  
FAIRSLAELTACSIELFHKTAALVLHGQKQEV TALERSQTL SQTMLCKDLASLSKEFTTCLTTAGVREKAD  
VLNPVITAVFLEASNSASYIQDAFQ LLLPVLQISLIESKTESSTCEPQSRDL\*

>rs51805917\_ENSMUSP00000104478\_c.1020:G>A\_p.A341T  
ENSMUST00000108850.2|Fam114a2-202|ENSMUSG00000020523|-  
|chr11:g.57383913:C>T  
MSDKDPPESPVVTGVASTLKDENCEPVEKPEDKSPVAVSTRKRPEKPKSSDLEASALPAQVSLAVAKETASKD  
VPQTGWGYWGSWGSLLSSASATVATVGGGINSVIEKAETSLGIPSPTEISAEVKQAAGEKNAGENGSLVAA  
PFGMLSTISTAVQSTGKSVISGGLEDALEFIGKKTMDVIAEGDPGFKRTKGLMNRSTSTLSQVLEAKDKEEQRP  
SNEVTMETDKKTHYGLLFDEFQGLSHLEALEMLRSRESEIKVKSILSSLSGEELOTTTRLELEQLKEVFSLAEFC  
EEEEERQGGDNFTKEITDLFAQLHVSSRPEKLARARNTAYKWIWRTSLTRPVAEKEEKEESEAGNTEEAQKH  
SIEDIHAFAIRSLAELTACSIELFHKTAALVHLGQKQEVTALETSQTLTSMQTMVLMCKDLASLSKEFTTCLTTA  
GVREKADVLPVITAVFLEASNSASYIQDAFQQLLPVLQISLIESKTESSTCEPQSRDL\*  
>ENSMUSP00000104477\_c.167:T>TAAA\_p.I56K-ins ENSMUST00000108849.8|Mfap3-  
203|ENSMUSG00000020522|+|chr11:g.57419009:T>TAAA  
MKLHHCLSILLVVTLPVPAALGLEDVAPLGNQSSYNASFLPSFELSAGSYSGDDVIKIVKEGTNVSLECLLTV  
DQYGEVHWYNSKGGQLHSRGGKWLVDNFLNITSVAFDDRGLYTCIITSPARASYSVTLRVIFTSGDMSVYYM  
VVCLIAFTITLILNVTRCLMSTHLRKTAKAINEFFRTEGAEKLQKAFEIAKRIPIIITSAKTLELAKVTQFKT  
MEFARYIEELARSVPLPPLIILNCRAFVEEMFEAVRVDDPDDMGERIKERPALDAQSGIYVINPELGRSNSPGG  
DSDGSLSEQQQEIAVQVSVHLQSETKSIQDSDSSHFSPSPDPASAEGSIHHRVSI\*  
>ENSMUSP00000020830\_c.167:T>TAAA\_p.I56K-ins ENSMUST00000020830.14|Mfap3-  
201|ENSMUSG00000020522|+|chr11:g.57419009:T>TAAA  
MKLHHCLSILLVVTLPVPAALGLEDVAPLGNQSSYNASFLPSFELSAGSYSGDDVIKIVKEGTNVSLECLLTV  
DQYGEVHWYNSKGGQLHSRGGKWLVDNFLNITSVAFDDRGLYTCIITSPARASYSVTLRVIFTSGDMSVYYM  
VVCLIAFTITLILNVTRCLMSTHLRKTAKAINEFFRTEGAEKLQKAFEIAKRIPIIITSAKTLELAKVTQFKT  
MEFARYIEELARSVPLPPLIILNCRAFVEEMFEAVRVDDPDDMGERIKERPALDAQSGIYVINPELGRSNSPGG  
DSDGSLSEQQQEIAVQVSVHLQSETKSIQDSDSSHFSPSPDPASAEGSIHHRVSI\*  
>ENSMUSP00000104476\_c.167:T>TAAA\_p.I56K-ins ENSMUST00000108848.2|Mfap3-  
202|ENSMUSG00000020522|+|chr11:g.57419009:T>TAAA  
MKLHHCLSILLVVTLPVPAALGLEDVAPLGNQSSYNASFLPSFELSAGSYSGDDVIKIVKEGTNVSLECLLTV  
DQYGEVHWYNSKGGQLHSRGGKWLVDNFLNITSVAFD  
>rs49424190\_ENSMUSP00000104477\_c.523:A>G\_p.K175R  
ENSMUST00000108849.8|Mfap3-203|ENSMUSG00000020522|+|chr11:g.57420544:A>G  
MKLHHCLSILLVVTLPVPAALGLEDVAPLGNQSSYNASFLPSFELSAGSYSGDDVIVKEGTNVSLECLLTV  
DQYGEVHWYNSKGGQLHSRGGKWLVDNFLNITSVAFDDRGLYTCIITSPARASYSVTLRVIFTSGDMSVYYMV  
VCLIAFTITLILNVTRCLMSTHLRKTAKAINEFFRTEGAEKLQKAFEIAKRIPIIITSAKTLELAKVTQFKTM  
EFARYIEELARSVPLPPLIILNCRAFVEEMFEAVRVDDPDDMGERIKERPALDAQSGIYVINPELGRSNSPGG  
DSDGSLSEQQQEIAVQVSVHLQSETKSIQDSDSSHFSPSPDPASAEGSIHHRVSI\*  
>rs49424190\_ENSMUSP00000020830\_c.523:A>G\_p.K175R  
ENSMUST00000020830.14|Mfap3-201|ENSMUSG00000020522|+|chr11:g.57420544:A>G  
MKLHHCLSILLVVTLPVPAALGLEDVAPLGNQSSYNASFLPSFELSAGSYSGDDVIVKEGTNVSLECLLTV  
DQYGEVHWYNSKGGQLHSRGGKWLVDNFLNITSVAFDDRGLYTCIITSPARASYSVTLRVIFTSGDMSVYYMV  
VCLIAFTITLILNVTRCLMSTHLRKTAKAINEFFRTEGAEKLQKAFEIAKRIPIIITSAKTLELAKVTQFKTM  
EFARYIEELARSVPLPPLIILNCRAFVEEMFEAVRVDDPDDMGERIKERPALDAQSGIYVINPELGRSNSPGG  
DSDGSLSEQQQEIAVQVSVHLQSETKSIQDSDSSHFSPSPDPASAEGSIHHRVSI\*  
>rs49450509\_ENSMUSP00000104477\_c.673:T>C\_p.I225T  
ENSMUST00000108849.8|Mfap3-203|ENSMUSG00000020522|+|chr11:g.57420694:T>C  
MKLHHCLSILLVVTLPVPAALGLEDVAPLGNQSSYNASFLPSFELSAGSYSGDDVIVKEGTNVSLECLLTV  
DQYGEVHWYNSKGGQLHSRGGKWLVDNFLNITSVAFDDRGLYTCIITSPARASYSVTLRVIFTSGDMSVYYMV  
VCLIAFTITLILNVTRCLMSTHLRKTAKAINEFFRTEGAEKLQKAFEIAKRIPIIITSAKTLELAKVTQFKTM  
EFARYTEELARSVPLPPLIILNCRAFVEEMFEAVRVDDPDDMGERIKERPALDAQSGIYVINPELGRSNSPGG  
DSDGSLSEQQQEIAVQVSVHLQSETKSIQDSDSSHFSPSPDPASAEGSIHHRVSI\*  
>rs49450509\_ENSMUSP00000020830\_c.673:T>C\_p.I225T  
ENSMUST00000020830.14|Mfap3-201|ENSMUSG00000020522|+|chr11:g.57420694:T>C  
MKLHHCLSILLVVTLPVPAALGLEDVAPLGNQSSYNASFLPSFELSAGSYSGDDVIVKEGTNVSLECLLTV  
DQYGEVHWYNSKGGQLHSRGGKWLVDNFLNITSVAFDDRGLYTCIITSPARASYSVTLRVIFTSGDMSVYYMV  
VCLIAFTITLILNVTRCLMSTHLRKTAKAINEFFRTEGAEKLQKAFEIAKRIPIIITSAKTLELAKVTQFKTM  
EFARYTEELARSVPLPPLIILNCRAFVEEMFEAVRVDDPDDMGERIKERPALDAQSGIYVINPELGRSNSPGG  
DSDGSLSEQQQEIAVQVSVHLQSETKSIQDSDSSHFSPSPDPASAEGSIHHRVSI\*  
>rs3712502\_ENSMUSP00000104477\_c.858:A>C\_p.N287H  
ENSMUST00000108849.8|Mfap3-203|ENSMUSG00000020522|+|chr11:g.57420879:A>C

MKLHHCLSILLVVTLVPAALGLEDVAPLGGANQSSYNASFLPSFELSAGSYSGDDVIVKEGTNVSLECLLTVD  
QYGEVHWYNSKGGQQLHSRGGKWLVDNFLNITSVAFDDRGLYTCIITSPARASYSVTLRVIFTSGDMSVYYMV  
VCLIAFTITLILNVTRCLMSTHLRKTAKAINEFFRTEGAEKLQKAFEIAKRIPIITSAKTLELAKVTQFKTM  
EFARYIEELARSVPLPPLILNCRAFVEEMFEAVRVDDPDDMGERIKERPALDAQSGIYVINPELGRSHSPGGD  
SDDGSLSEQQQEIAVQVSVHLQSETKSIGTDSQDSSHFSPPSDPASAEGSIHHRVSI\*  
>rs3712502\_ENSMUSP00000020830\_c.858:A>C\_p.N287H  
ENSMUST00000020830.14|Mfap3-201|ENSMUSG00000020522|+|chr11:g.57420879:A>C  
MKLHHCLSILLVVTLVPAALGLEDVAPLGGANQSSYNASFLPSFELSAGSYSGDDVIVKEGTNVSLECLLTVD  
QYGEVHWYNSKGGQQLHSRGGKWLVDNFLNITSVAFDDRGLYTCIITSPARASYSVTLRVIFTSGDMSVYYMV  
VCLIAFTITLILNVTRCLMSTHLRKTAKAINEFFRTEGAEKLQKAFEIAKRIPIITSAKTLELAKVTQFKTM  
EFARYIEELARSVPLPPLILNCRAFVEEMFEAVRVDDPDDMGERIKERPALDAQSGIYVINPELGRSHSPGGD  
SDDGSLSEQQQEIAVQVSVHLQSETKSIGTDSQDSSHFSPPSDPASAEGSIHHRVSI\*  
>rs264395791\_ENSMUSP00000065096\_c.118:C>CA\_p.P40ins-fs  
ENSMUST00000066987.14|Galnt10-  
201|ENSMUSG00000020520|+|chr11:g.57536503:C>CA  
MRRKEKRLQAVALLAALVLLPNVGLWALYRERQPDGSPWGIGGGGGPRGGSGITQSTKKDIFLGS  
>rs264395791\_ENSMUSP00000104474\_c.118:C>CA\_p.P40ins-fs  
ENSMUST00000108846.2|Galnt10-  
202|ENSMUSG00000020520|+|chr11:g.57536503:C>CA  
MRRKEKRLQAVALLAALVLLPNVGLWALYRERQPDGSPWGIGGGGGPRGGSGITQSTKKDIFLGS  
>rs46886604\_ENSMUSP00000065096\_c.183:A>T\_p.T62S  
ENSMUST00000066987.14|Galnt10-  
201|ENSMUSG00000020520|+|chr11:g.57612145:A>T  
MRRKEKRLQAVALLAALVLLPNVGLWALYRERQPDGSPGGLGAAVAPAAVQELHSRQKKSFFLGAEQRLKD  
WHNKEAIRRDAQRVGYGEQKPYPMTDAERVDQAYRENGFNIVSDKISLNRSLPDIRHPNCNSKLYLETLPN  
TSIIIPFHNEGWSSLLRTVHSLVLRNSPPELVAEIVLVDDFSDREHLKPLEDYMALFPVSRILRTRKKREGLIR  
TRMLGASAATGDVVTFLDSDHCEANVNWLPPLLDRIARNRKTIVCPMIDVIDHDFFRYETQAGDAMRGAFDWEM  
YYKRIPPELQKADPSPDFESPVMAGGLFAVDRKWFELGGYDPGLEIWGGQEYIEISFKVWMCGRMEDIPC  
SRVGHYIRKYVPYKVPAGVSLARNLKRVAEVMDEYAEYIYQRRPEYRHLRHSAGDVVAQKCLRVS LNCKSFKWF  
MTKIAWDLPKFYPPVEPPAAAWGEIRNVGTGLCTDTKLGTLGSPRLRLETCIRGRGEAAWNSMQVFTFTWREDI  
RPGDPQHTKKKCFDAVSHSTPVTLYDCHSMKGNQLWKYRKDKTLYHPVSGSCMDCSESDHRVFMNTCNPSSLT  
QQWLFHTNSTVLENFNKN\*  
>rs46886604\_ENSMUSP00000104474\_c.183:A>T\_p.T62S  
ENSMUST00000108846.2|Galnt10-  
202|ENSMUSG00000020520|+|chr11:g.57612145:A>T  
MRRKEKRLQAVALLAALVLLPNVGLWALYRERQPDGSPGGLGAAVAPAAVQELHSRQKKSFFLGAEQRLKD  
WHNKEAIRRDAQRVGYGEQKPYPMTDAERVDQAYRENGFNIVSDKISLNRSLPDIRHPK\*  
>rs47128972\_ENSMUSP00000065096\_c.603:C>T\_p.L202F  
ENSMUST00000066987.14|Galnt10-  
201|ENSMUSG00000020520|+|chr11:g.57656421:C>T  
MRRKEKRLQAVALLAALVLLPNVGLWALYRERQPDGSPGGLGAAVAPAAVQELHSRQKKTFFLGAEQRLKD  
WHNKEAIRRDAQRVGYGEQKPYPMTDAERVDQAYRENGFNIVSDKISLNRSLPDIRHPNCNSKLYLETLPN  
TSIIIPFHNEGWSSLLRTVHSLVLRNSPPELVAEIVLVDDFSDREHLKPLEDYMAFFPVSRI LRTRKKREGLIR  
TRMLGASAATGDVVTFLDSDHCEANVNWLPPLLDRIARNRKTIVCPMIDVIDHDFFRYETQAGDAMRGAFDWEM  
YYKRIPPELQKADPSPDFESPVMAGGLFAVDRKWFELGGYDPGLEIWGGQEYIEISFKVWMCGRMEDIPC  
SRVGHYIRKYVPYKVPAGVSLARNLKRVAEVMDEYAEYIYQRRPEYRHLRHSAGDVVAQKCLRVS LNCKSFKWF  
MTKIAWDLPKFYPPVEPPAAAWGEIRNVGTGLCTDTKLGTLGSPRLRLETCIRGRGEAAWNSMQVFTFTWREDI  
RPGDPQHTKKKCFDAVSHSTPVTLYDCHSMKGNQLWKYRKDKTLYHPVSGSCMDCSESDHRVFMNTCNPSSLT  
QQWLFHTNSTVLENFNKN\*  
>rs29437286\_ENSMUSP00000020826\_c.171:A>G\_p.K58E  
ENSMUST00000020826.6|Sap301-201|ENSMUSG00000020519|+|chr11:g.57693089:A>G  
MNGFSTEEDESREGPPAAPAAAPGYGQSCCLADGERCVRPAGNASFSKRVQKSIISQKELKLDIDKSVRHLIYIC  
DFHKNFIQSVRNKRKRKASDDGGDSPEHDADIEVDLFLQLQVNTLRRYKRHYKLQTRPGFNKAQLAETVSRHF  
RNIPVNEKETLAYFIYMVKS NRSLDQKSEGSQLE\*  
>rs29434411\_ENSMUSP00000020826\_c.252:A>G\_p.N85D  
ENSMUST00000020826.6|Sap301-201|ENSMUSG00000020519|+|chr11:g.57696924:A>G

MNGFSTEEEDSREGPPAAPAAAPGYGQSCCLIADGERCVRPAGNASFSKRQKSISSQKKLKLDDIKSVRHLIYIC  
DFHKNFIQSVRDKRKRKASDDGGDSPEHDADIPEVDLFLQVNTLRRYKRHYKLQTRPGFNKAQLAETVSRHF  
RNIIPVNEKETLAYFIYMVKSNRSLDQKSEGSKQLE\*

>rs29431791\_ENSMUSP00000046999\_c.147:G>T\_p.A50S  
ENSMUST00000036917.3|Hand1-201|ENSMUSG00000037335|-|chr11:g.57722465:C>A  
MNLVGSYAHHHHHHSHPPHMLHEPFLFGPASRCHQERPYFQSWLLSPSDAAPDFPAGGPPPTTAVAAAAAYG  
PDARPSQSPGRLEALGSRPLPKRKGSGPKKERRRTEINSFAELRECI PNVPADTKLSKIKTLLRLATSYIAYL  
MDVLAKDAQAGDPEAFKAELKKTDDGGRESKRKRELPPQPESEFPASPAGPGEKRIKGRGTGWPQQVWALELNQ\*

>rs29431791\_ENSMUSP00000124951\_c.147:G>T\_p.A50S  
ENSMUST00000160392.9|Hand1-203|ENSMUSG00000037335|-|chr11:g.57722465:C>A  
MNLVGSYAHHHHHHSHPPHMLHEPFLFGPASRCHQERPYFQSWLLSPSDAAPDFPAGGPPPTTAVAAAAAYG  
PDARPSQSPGRLEALGSRPLPKRKGSGPKKERRRTEINSFAELRECI PNVPADTKLSKIKTLLRLATSYIAYL  
MDVLAKDAQAGDPEAFKAELKKTDDGGRESKRKRELPPQPESEFPASPAGPGEKRIKGRGTGWPQQVWALELNQ\*

>rs49487294\_ENSMUSP00000071421\_c.1896:C>T\_p.H633Y  
ENSMUST00000071487.13|Larp1-201|ENSMUSG00000037331|+|chr11:g.57940772:C>T  
MATQVEPLLPAAGAPLLQAEHGLARKKPAPDAQAESGPGDGGGEPDGGVRRPRPACARPGRDGAERESPRPPA  
AAEAPAGSDGEDGGRRDFVEAPPKVNPNWTKHAPPAAVNGQPPPEPSAPAKVVRAAAPKPRKGSKVGFDA  
VNWPTEPGEIAHKSVPQSHKPPARKLPPKKDMKEQEKDGSDSKESPKTKSDESGEEKNGDEDCQRRGGQKKK  
GNKHKWVPLQIDMKPEVPREKLASRPTRPQEPRTPAVRGEMKGSEPATYMPVSVAPPTPAWQPETKVEPAWH  
DQDETSSVKSDBGAGGARASFRGRGRGRGRGRGRGGTRTHFDYQFGYRKFQDGTGEGPRTHKYMNNITYYFDNV  
SSNEIYSMDQELLKDYIKRQIEYYFSDNLERDFFLRKMDADGFLPITLIASFHRVQALTDDISLIFAALKD  
SKVVEMVEEKVRRREEPEKWPLPGPPIDVYSQTDDFSQLLNCEPFPVPRQHYQKTESAPGSPRAVTPVPTKTEE  
VSNLKTLPKGLSASLPDLSESWIEVKKRPRPSPARPKKPEEPFRSHPTALPQQLPSQQLMSKDQDEQEELDF  
LFDEEMEQMDGRKNTFTAWSEEDSDYEIDDRDVNKKILIVTQTTPPYMRRYPGGDRTGNHTSRAKMSAELAKVIN  
DGLFYEQDLWTEKFEPEYSQIKQEVENFKKVNMI SREQFDTLTPEPPVDPNQEVPVPPRPFQVPTDALANK  
LFGAPEPSTIARSLPTTVPESPNYRNARTPRTPRTPQLKDSSTPRFYVVKEGRTLDAKMPRKRKTRHSSNP  
PLESHVGVWVMSREHRPRTASISSPSEGTAVGSGYCTPQSLPKFQHPHELLKENGFTQHVYHKYRRRCLN  
ERKRLGIGQSQEMNTLFRFWSFFLRDHFNKKMYEEFKQLALEDAKEGYRYGLECLFRYYSYGLEKKFRDLIFK  
DFQEETVKDYEAGQLYGLEKFWAFLKYSKAKNLDIDPKLQEYLGKFRRLDFRVDPPMGEEGNHHRHPVVAGG  
SGEGRKRCPSQSSSRPATGISQPPTTPTGQATREDAKWTSSQHSDTLTLRK\*

>rs49487294\_ENSMUSP00000136673\_c.1896:C>T\_p.H633Y  
ENSMUST00000178636.2|Larp1-203|ENSMUSG00000037331|+|chr11:g.57940772:C>T  
MATQVEPLLPAAGAPLLQAEHGLARKKPAPDAQAESGPGDGGGEPDGGVRRPRPACARPGRDGAERESPRPPA  
AAEAPAGSDGEDGGRRDFVEAPPKVNPNWTKHAPPAAVNGQPPPEPSAPAKVVRAAAPKPRKGSKVGFDA  
VNWPTEPGEIAHKSVPQSHKPPARKLPPKKDMKEQEKDGSDSKESPKTKSDESGEEKNGDEDCQRRGGQKKK  
GSKHKWVPLQIDMKPEVPREKLASRPTRPQEPRTPAVRGEMKGSEPATYMPVSVAPPTPAWQPETKVEPAWH  
DQDETSSVKSDBGAGGARASFRGRGRGRGRGRGRGGTRTHFDYQFGYRKFQDGTGEGPRTHKYMNNITYYFDNV  
SSNEIYSMDQELLKDYIKRQIEYYFSDNLERDFFLRKMDADGFLPITLIASFHRVQALTDDISLIFAALKD  
SKVVEMVEEKVRRREEPEKWPLPGPPIDVYSQTDDFSQLLNCEPFPVPRQHYQKTESAPGSPRAVTPVPTKTEE  
VSNLKTLPKGLSASLPDLSESWIEVKKRPRPSPARPKKPEEPFRSHPTALPQQLPSQQLMSKDQDEQEELDF  
LFDEEMEQMDGRKNTFTAWSEEDSDYEIDDRDVNKKILIVTQTTPPYMRRYPGGDRTGNHTSRAKMSAELAKVIN  
DGLFYEQDLWTEKFEPEYSQIKQEVENFKKVNMI SREQFDTLTPEPPVDPNQEVPVPPRPFQVPTDALANK  
LFGAPEPSTIARSLPTTVPESPNYRNARTPRTPRTPQLKDSSTPRFYVVKEGRTLDAKMPRKRKTRHSSNP  
PLESHVGVWVMSREHRPRTASISSPSEGTAVGSGYCTPQSLPKFQHPHELLKENGFTQHVYHKYRRRCLN  
ERKRLGIGQSQEMNTLFRFWSFFLRDHFNKKMYEEFKQLALEDAKEGYRYGLECLFRYYSYGLEKKFRDLIFK  
DFQEETVKDYEAGQLYGLEKFWAFLKYSKAKNLDIDPKLQEYLGKFRRLDFRVDPPMGEEGNHHRHPVVAGG  
SGEGRKRCPSQSSSRPATGISQPPTTPTGQATREDAKWTSSQHSDTLTLRK\*

>rs47101486\_ENSMUSP00000071421\_c.2512:G>A\_p.S838N  
ENSMUST00000071487.13|Larp1-201|ENSMUSG00000037331|+|chr11:g.57943441:G>A  
MATQVEPLLPAAGAPLLQAEHGLARKKPAPDAQAESGPGDGGGEPDGGVRRPRPACARPGRDGAERESPRPPA  
AAEAPAGSDGEDGGRRDFVEAPPKVNPNWTKHAPPAAVNGQPPPEPSAPAKVVRAAAPKPRKGSKVGFDA  
VNWPTEPGEIAHKSVPQSHKPPARKLPPKKDMKEQEKDGSDSKESPKTKSDESGEEKNGDEDCQRRGGQKKK  
GNKHKWVPLQIDMKPEVPREKLASRPTRPQEPRTPAVRGEMKGSEPATYMPVSVAPPTPAWQPETKVEPAWH  
DQDETSSVKSDBGAGGARASFRGRGRGRGRGRGRGGTRTHFDYQFGYRKFQDGTGEGPRTHKYMNNITYYFDNV  
SSNEIYSMDQELLKDYIKRQIEYYFSDNLERDFFLRKMDADGFLPITLIASFHRVQALTDDISLIFAALKD  
SKVVEMVEEKVRRREEPEKWPLPGPPIDVYSQTDDFSQLLNCEPFPVPRQHYQKTESAPGSPRAVTPVPTKTEE  
VSNLKTLPKGLSASLPDLSESWIEVKKRPRPSPARPKKPEEPFRSHPTALPQQLPSQQLMSKDQDEQEELDF  
LFDEEMEQMDGRKNTFTAWSEEDSDYEIDDRDVNKKILIVTQTTPPYMRRHPGGDRTGNHTSRAKMSAELAKVIN

DGLFYEQDLWTEKFEPEYSQIKQEVENFKKVNMI SREQFDTLTPEPPVDPNQEVPPGPPRFQVPTDALANK  
LFGAPEPSTIARSLPTTVPE SPNYRNARTPRTPTPQLKDSSTPRFYVVKEGRTLDAKMPKRKRTRHSSNP  
PLESHVGVWVMSREHRPRTASISSPSEGTPAVGNYGCTPQSLPKFQHP SHELLKENGFTQHVYHKYRRRCLN  
ERKRLGIGQSQEMNTLFRFWSFFLRDHFNKKMYEEFKQLALEDAKEGYRYGLECLFRYYSYGLEKKFRLDIFK  
DFQEETVKDYEAGQLYGLEKFWAFLKYSAKAKNLIDPKLQEYLGKFRRLEDFRVDPPMGEEGNHKKRHPVVAGG  
SGEGRKRCPSQSSSRPATGISQPPTTPTGQATREDAKWT SQHSDTLTLRK\*

>rs47101486\_ENSMUSP00000136673\_c.2512:G>A\_p.S838N  
ENSMUST00000178636.2|Larp1-203|ENSMUSG00000037331|+|chr11:g.57943441:G>A  
MATQVEPLL PAGAPLLQAEHGLARKKPAPDAQAESGPGDGGGEPDGGVRRPRPACARPGRDGAERESPRPPA  
AAEAPAGSDGEDGRRDFVEAPPKVNPTWKHAPPAVNGQPPEPSAPAKVVRAAPKPRKGSKVGDFGDA  
VNWPTPGEIAHKSVPQSHKQPARKLPPKKDMKEQEKGDGSDSKESPKTKSDESGEEKNGDEDCQGGQKKK  
GSKHKWVPLQIDMKPEVPREKLASRPTRPQEP RHTPAVRGEMKGSEPATYMPVSVAPPTPAWQPETKVEPAWH  
DQDETSVKS SDGAGGARASFRGRGRGRGRGRGRGGTRTHFDYQGYRKFDGTEGPRTHKYMNIITYYFDNV  
SSNEIYSMDQELLKDYIKRQIEYYSVDNLERDFFLRKMDADGFLPITLIASFHRVQALTDDISLIFAALKD  
SKVVEMVEEKVRRREEPEKWPLPGPIVDYSQTD FSQLLNCEPFPVRQHYQKETESAPGSRAVTPVPTKTEE  
VSNLKTLPKGLSASLPDL DSESWIEVKKRPRPSPARPKKPEEPFRSHPTALPQQLPSQQLMSKDQDEQEELDF  
LFDEEMEQMDGRKNFTTAWSEEDSDYEIDDRDVNKILIVTQTPPYMRRHPGGDRGTGNHTSRAKMSAELAKVIN  
DGLFYEQDLWTEKFEPEYSQIKQEVENFKKVNMI SREQFDTLTPEPPVDPNQEVPPGPPRFQVPTDALANK  
LFGAPEPSTIARSLPTTVPE SPNYRNARTPRTPTPQLKDSSTPRFYVVKEGRTLDAKMPKRKRTRHSSNP  
PLESHVGVWVMSREHRPRTASISSPSEGTPAVGNYGCTPQSLPKFQHP SHELLKENGFTQHVYHKYRRRCLN  
ERKRLGIGQSQEMNTLFRFWSFFLRDHFNKKMYEEFKQLALEDAKEGYRYGLECLFRYYSYGLEKKFRLDIFK  
DFQEETVKDYEAGQLYGLEKFWAFLKYSAKAKNLIDPKLQEYLGKFRRLEDFRVDPPMGEEGNHKKRHPVVAGG  
SGEGRKRCPSQSSSRPATGISQPPTTPTGQATREDAKWT SQHSDTLTLRK\*

>rs49332894\_ENSMUSP00000151952\_c.420:C>A\_p.Q141K  
ENSMUST00000218429.2|Gm12248-202|ENSMUSG00000086962|-  
|chr11:g.57957410:G>T  
MIFLPRHLQRFDASGYFCQTQWEKLLSTFEGYEWILYYIGVILVPLGFCFWGLSGLLLLLVDTTEKPTFISRYR  
IQRGKNEPVPDVKLRQAVLTVL FNQNFISIPMLVIYYPFLKWRDPCSRELPTFHWFVLEMAFFTLLEILFY  
YAHRLFHHPMLYKKS HKKHHEWTAPIGVVS IYADPPEHVANMLPVLVGLAMGSHLSSITVWLSMVLIVSII  
NHTGYHLPFLPSPEFH DYHHLKSNQCYGVLGLMDHLHGTDTLTKQTKAYERHVILLGFTPLSESI PDSPKKTR  
SAL\*

>rs49332894\_ENSMUSP00000151997\_c.474:C>A\_p.Q159K  
ENSMUST00000219877.2|Gm12248-203|ENSMUSG00000086962|-  
|chr11:g.57957410:G>T  
MRNTTLIQSGLLLLLVFWNSVTWHLQRFDASGYFCQTQWEKLLSTFEGYEWILYYIGVILVPLGFCFWGLS  
LLLLVDTTEKPTFISRYRIQRGKNEPVPDVKLRQAVLTVL FNQNFISIPMLVIYYPFLKWRDPCSRELPTFH  
WFLVLEMAFFTLLEILFYAHRLFHHPMLYKKS HKKHHEWTAPIGVVS IYADPPEHVANMLPVLVGLAMG  
HLSSITVWLSMVLIVSII NHTGYHLPFLPSPEFH DYHHLKSNQCYGVLGLMDHLHGTDTLTKQTKAYERHVIL  
LGFTPLSESI PDSPKKTR SAL\*

>rs49332894\_ENSMUSP00000151429\_c.477:C>A\_p.Q160K  
ENSMUST00000137124.3|Gm12248-201|ENSMUSG00000086962|-  
|chr11:g.57957410:G>T  
SMRNTTLIQSGLLLLLVFWNSVTWHLQRFDASGYFCQTQWEKLLSTFEGYEWILYYIGVILVPLGFCFWGLS  
GLLLLLVDTTEKPTFISRYRIQRGKNEPVPDVKLRQAVLTVL FNQNFISIPMLVIYYPFLKWRDPCSRELPTFH  
HWFLVLEMAFFTLLEILFYAHRLFHHPMLYKKS HKKHHEWTAPIGVVS IYADPPEHVANMLPVLVGLAMG  
SHLSSITVWLSMVLIVSII NHTGYHLPFLPSPEFH DYHHLKSNQCYGVLGLMDHLHGTDTLTKQTKAYERHVI  
LLGFTPLSESI PDSPKKTR

>rs212675617\_ENSMUSP0000020822\_c.717:A>G\_p.R240G  
ENSMUST0000020822.12|Cnot8-201|ENSMUSG0000020515|+|chr11:g.58006190:A>G  
MPAALVENSQV ICEVWASNLEEMRKIREIVLSYSYIAMDTEFPGVVVRPIGEFRSSIDYQYQLLR CNVDLLK  
IIQLGLTFTNEKGEYPSGINTWQFNFKFNLTEDMYSQDSIDLLANSGLQFQKHEEEGIDTLHFAELLMTSGVV  
LCDNVKWSLFSHSGYDFGYMVKLLTDSRLPEEEHEFFHILNLFPSIYDVKYLKMSCKNLKGGLEQEVADQLDQ  
RIGRQHQAGSDSLLTGMAFFGMKELFFEDSIDDAKYCGRLYGLGTGVAQKQNEVDVCAQEKMSILAMINNMQQ  
\*

>rs212675617\_ENSMUSP00000104471\_c.717:A>G\_p.R240G  
ENSMUST00000108843.8|Cnot8-202|ENSMUSG0000020515|+|chr11:g.58006190:A>G  
MPAALVENSQV ICEVWASNLEEMRKIREIVLSYSYIAMDTEFPGVVVRPIGEFRSSIDYQYQLLR CNVDLLK  
IIQLGLTFTNEKGEYPSGINTWQFNFKFNLTEDMYSQDSIDLLANSGLQFQKHEEEGIDTLHFAELLMTSGVV



LCDNVKWSLFHSGYDFGYMVKLLTDSRLPEEEHEFFHILNLFPSIYDVKYLKMKCKNLKGGQLQEVADQLDLQ  
RIGRQHQAGSDSLLTGMAFFGMKELFFEDSIDDAKYCGRLYGLGTGVAQKQNEVDVCAQEKMSILAMINMQQ  
\*

>rs29483150\_ENSMUSP00000036603\_c.3618:G>A\_p.D1207N  
ENSMUST00000035604.13|Gemin5-201|ENSMUSG00000037275|-  
|chr11:g.58017399:C>T

MKPEPRTLPPSPNWCYSRCSDAAPGGIFGFAARTSVFLVRVGPAGASPGAPPFRVVGELVGHTEVSGFTFS  
HHPGQYNLCATSSDDGTVKVVDVETKTVVTEHTLHQHTISALHWSPTVKDLIVSGDEKGVVFCYWLNRNDSQH  
LFTPEPTIFCLTCSPHHENLVAIGYKDGIVVIIDISKKGEVIHRLRGHDDEIHSIAWCPLSGEDCLISQEEEN  
SEEPDIPNGKLI AETPITKGCYLATGSKDQTIIRIWSCSRGRGVMVLKLPFLKRRSGVDPTVKERLWLT LHW  
KNQPTQLVSSCFGGELLWDLTQSWRRKYTLFSTSAEGHNHSRIVFNLC SLKTEDGKQLLLSTSMRDRVKCWD  
MATLECCWTLPSLGGFAYSLAFSPVDVGS LAIGVGDGMIRVWNTLSIKNNYDVKNFWQGVKSKVTALCWHPNK  
EGCLAFGTDDGKVG LYDTC SNKPPQISSTYHKKTVYRLAWGPPVPPMSLGEGEDRPSLTLYSCGEGEVVLQHN  
PWKLSGEAFDINKLVRD TNSIRYKLPVHTEISWKGDGKVLALGNEDGSIEIFQVPNLRLLLCTIQQHHKLVNAI  
VWHHEHGSRP ELSCLLASGSNNAVIYVHNLKAVLESNPESPIITITEPYRTLSGHTAKITSLAWSPHHDGRLVS  
ACYDGT AQVWDALREEP LFNFRGHRGRLLCVAWSPVDPECIYSGADDFCVYRWL TSMQDHSRPPQGGKCI ELE  
KKRLSQFKPKLKKKKKPTLRLPVKQDSSVGNEDSVKENS GPAENGLSDQDGE EEAQEPELPPSPVVCVEPVS  
CTDICS GF EKSKVTVSSKATSLKKEPAKEKPEALLKKRKARSMLPLSTSLDHR SKEELHRDCLVLATATHAKA  
ELNEDVSADLEERFHLGLFTDRATLYRMMETEGKGHLES GHPEL FHLQMLLWKGD LKGV LQAAAER GELTDSL V  
AVAPVAGYSVWLWAVEAF AKQLCFQDQYVKAASYLLSIHKVYEAV ELLKSNHLYREAI AVAKARLRPEDPVLK  
ELYLSWGSILERDGHYAI AAKCYLGATSAYDAAKVLARKGDAASLR TAAELAAIAGEHELAASLALRCAQELL  
LMKNWVGAQEALGLHESLQGQRLVFCLELLCRHLEEKQPLEVRGPSSIYHQWATGSEGLTVQRVTGVWRS AF  
SVDTPEQCQAALQKLQDVKYPSATSNTPF RQLLLHVCHNLTLAML SQQAAAWE EAVPALLQAVVRSYTSGNFT  
LMQEIYSAFLPGGCDHLRDKLGDLS PAMAAYKSLEAF CIYGGQLYEVWWSLCGPGPESSVWVLSAESTVSDKQS  
KPEDSASAEDMEQPPGPGPRLSAESERLLSACKELF SERHASLQTSQRTVAEVQETLAEMIRQH QKSQ LCKAT  
TNGPSRDEPSRDEPSQEAERAPSQPPSPTEERNAPVSLPEL TRRLTEANERIAEFPE SVKAWPFPDVLECCLV  
LHIGSQCPDAVDPEMQQAQELLH KYGHTRAYRRHCQSRHT\*

>rs29483150\_ENSMUSP00000099772\_c.3615:G>A\_p.D1206N  
ENSMUST00000102711.9|Gemin5-202|ENSMUSG00000037275|-|chr11:g.58017399:C>T

MKPEPRTLPPSPNWCYSRCSDAAPGGIFGFAARTSVFLVRVGPAGASPGAPPFRVVGELVGHTEVSGFTFS  
HHPGQYNLCATSSDDGTVKVVDVETKTVVTEHTLHQHTISALHWSPTVKDLIVSGDEKGVVFCYWLNRNDSQH  
LFTPEPTIFCLTCSPHHENLVAIGYKDGIVVIIDISKKGEVIHRLRGHDDEIHSIAWCPLSGEDCLISQEEEN  
SEEPDIPNGKLI AETPITKGCYLATGSKDQTIIRIWSCSRGRGVMVLKLPFLKRRSGVDPTVKERLWLT LHW  
KNQPTQLVSSCFGGELLWDLTQSWRRKYTLFSTSAEGHNHSRIVFNLC SLKTEDGKQLLLSTSMRDRVKCWD  
MATLECCWTLPSLGGFAYSLAFSPVDVGS LAIGVGDGMIRVWNTLSIKNNYDVKNFWQGVKSKVTALCWHPNK  
EGCLAFGTDDGKVG LYDTC SNKPPQISSTYHKKTVYRLAWGPPVPPMSLGEGEDRPSLTLYSCGEGEVVLQHN  
PWKLSGEAFDINKLVRD TNSIRYKLPVHTEISWKGDGKVLALGNEDGSIEIFQVPNLRLLLCTIQQHHKLVNAI  
VWHHEHGSRP ELSCLLASGSNNAVIYVHNLKAVLESNPESPIITITEPYRTLSGHTAKITSLAWSPHHDGRLVS  
ACYDGT AQVWDALREEP LFNFRGHRGRLLCVAWSPVDPECIYSGADDFCVYRWL TSMQDHSRPPQGGKCI ELE  
KKRLSQFKPKLKKKKKPTLRLPVKQDSSVGNEDSVKENS GPAENGLSDQDGE EEAQEPELPPSPVVCVEPVS  
CTDICS GF EKSKVTVSSKATSLKKEPAKEKPEALLKKRKARSMLPLSTSLDHR SKEELHRDCLVLATATHAKE  
LNEDVSADLEERFHLGLFTDRATLYRMMETEGKGHLES GHPEL FHLQMLLWKGD LKGV LQAAAER GELTDSLVA  
VAPVAGYSVWLWAVEAF AKQLCFQDQYVKAASYLLSIHKVYEAV ELLKSNHLYREAI AVAKARLRPEDPVLKE  
LYLSWGSILERDGHYAI AAKCYLGATSAYDAAKVLARKGDAASLR TAAELAAIAGEHELAASLALRCAQELL  
MKNWVGAQEALGLHESLQGQRLVFCLELLCRHLEEKQPLEVRGPSSIYHQWATGSEGLTVQRVTGVWRS AF  
VDTP EQCQAALQKLQDVKYPSATSNTPF RQLLLHVCHNLTLAML SQQAAAWE EAVPALLQAVVRSYTSGNFTL  
MQEIYSAFLPGGCDHLRDKLGDLS PAMAAYKSLEAF CIYGGQLYEVWWSLCGPGPESSVWVLSAESTVSDKQSK  
PEDSASAEDMEQPPGPGPRLSAESERLLSACKELF SERHASLQTSQRTVAEVQETLAEMIRQH QKSQ LCKATT  
NGPSRDEPSRDEPSQEAERAPSQPPSPTEERNAPVSLPEL TRRLTEANERIAEFPE SVKAWPFPDVLECCLV  
LHIGSQCPDAVDPEMQQAQELLH KYGHTRAYRRHCQSRHT\*

>rs29483150\_ENSMUSP00000131842\_c.3618:G>A\_p.D1207N  
ENSMUST00000172035.8|Gemin5-205|ENSMUSG00000037275|-|chr11:g.58017399:C>T

MKPEPRTLPPSPNWCYSRCSDAAPGGIFGFAARTSVFLVRVGPAGASPGAPPFRVVGELVGHTEVSGFTFS  
HHPGQYNLCATSSDDGTVKVVDVETKTVVTEHTLHQHTISALHWSPTVKDLIVSGDEKGVVFCYWLNRNDSQH  
LFTPEPTIFCLTCSPHHENLVAIGYKDGIVVIIDISKKGEVIHRLRGHDDEIHSIAWCPLSGEDCLISQEEEN  
SEEPDIPNGKLI AETPITKGCYLATGSKDQTIIRIWSCSRGRGVMVLKLPFLKRRSGVDPTVKERLWLT LHW  
KNQPTQLVSSCFGGELLWDLTQSWRRKYTLFSTSAEGHNHSRIVFNLC SLKTEDGKQLLLSTSMRDRVKCWD  
MATLECCWTLPSLGGFAYSLAFSPVDVGS LAIGVGDGMIRVWNTLSIKNNYDVKNFWQGVKSKVTALCWHPNK

EGCLAFGTDDGKVGLYDTC SNKPPQISSTYHKKTVYRLAWGPPVPPMSLGGEGRPSLTLYSCGGEVVLQHN  
PWKLSGEAFDINKLVRDNTSIRYKLPVHTEISWKGDKVLAIGNEDGSIEIFQVPNLRLLLCTIQQHHKLVNAI  
VWHHEHGSRPPELSCLLASGSNNAVIYVHNLKAVLESNPESPIITITEPYRTLSGHTAKITSLAWSPHHDGRLVS  
ACYDGT AQVWDALREEPLFNFRGHRGRLLCVAWSPVDPECIYSGADDFCVYRWLTSMQDHSRPPQGKKCIELE  
KKRLSQFKPKLKKKKKPTLRLPVKQDSSVGNEDSVKENSIPAENGLSDQDGEAAAQEPPELPPSPVVCVEPVS  
CTDICS GF EKSKVTVSSKATSLKKEPAKEKPEALLKKRKRSMPLPLSTSLDHRSKHEELHRDCLVLATATHAKA  
ELNEDVSADLEERFHLGLFTDRATLYRMMETEGKGHLESGHPELPHQLMLWKGDLDKGVLAQAERGETDSDLV  
AVAPVAGYSVWLWAVEAFKQLCFQDQYVKAASYLLSIHKVYEAVELLKSNHLYREAI AVAKARLRPEDPVLK  
ELYLSWGSILERDGHYAI AAKCYLGATSAYDAAKVLARKGDAASLRTAAELAAIAGEHELAASLALRCAQELL  
LMKNWVGAQEALGLHESLQGQRLVFCLELLCRHLEEKQPLEVRGPSSIYHQWATGSEGLTVQRTGVWRSAF  
SVDTPEQCQAALQKLQDVKYPSATSNTFFRQLLLHVCHNLT LAMLSQAAAWEAEVALLQAVVRSYTSGNFT  
LMQEIYSAFLPGGCDHLRDKLGDLSPAMAAYKSLEAFCIYQLYEVWWSLCPGPPESSVWVLSAESTVSDKQS  
KPEDSASAEDMEQPPGPGPRLSAESERLLSACKELFSERHASLQTSQRTVAEVQETLAEMIRQHQSOLCKAT  
TNGPSRDEPSRDEPSQEAERAPSQPPSPTEERNAPVSLPELTRRLTEANERIAEFPEESVKAWPFPDVLCECL  
VLLHIGSQCPDAVDPEMQQQAQELLHKYGHTRAYRRHCQSRHT\*

>rs51771045\_ENSMUSP00000036603\_c.3498:G>C\_p.A1167P  
ENSMUST00000035604.13|Gemin5-201|ENSMUSG00000037275|-  
|chr11:g.58019569:C>G  
MKPEPRTLPPSPNWYCSRCSDAAPGGIFGFAARTSVFLVRVGPAGASPGAPPFRVVGELVGHTEVSGFTFS  
HHPGQYNLCATSSDDGTVKVWDVETKT VVTEHTLHQHTISALHWSPTVKDLIVSGDEKGVVFCYWLNRNDSQH  
LFTFPTIFCLTCSPHHENLVAIGYKDGIVVIIDISKKGEVIHRLRGHDDEIHSIAWCPLSGEDCLISQEN  
SEEPDIPNGKLI AETPITKGCYLATGSKDQTI RIWSCSRGRGVMVLKLPFLKRRSGGVDPTVKERLWLT LHP  
KNQPTQLVSSCFGGELLWDLTQSWRRKYTLFSTSAEGHNHSRIVFNLC SLKTEDGKQLLLSTSMRDRVKCWD  
MATLECCWTLPSLGGFAYS LAFSPVDVGS LAIGVGDGMIRVWNTLSIKNNYDVKNFWQGVKSKVTALCWHPNK  
EGCLAFGTDDGKVGLYDTC SNKPPQISSTYHKKTVYRLAWGPPVPPMSLGGEGRPSLTLYSCGGEVVLQHN  
PWKLSGEAFDINKLVRDNTSIRYKLPVHTEISWKGDKVLAIGNEDGSIEIFQVPNLRLLLCTIQQHHKLVNAI  
VWHHEHGSRPPELSCLLASGSNNAVIYVHNLKAVLESNPESPIITITEPYRTLSGHTAKITSLAWSPHHDGRLVS  
ACYDGT AQVWDALREEPLFNFRGHRGRLLCVAWSPVDPECIYSGADDFCVYRWLTSMQDHSRPPQGKKCIELE  
KKRLSQFKPKLKKKKKPTLRLPVKQDSSVGNEDSVKENSIPAENGLSDQDGEAAAQEPPELPPSPVVCVEPVS  
CTDICS GF EKSKVTVSSKATSLKKEPAKEKPEALLKKRKRSMPLPLSTSLDHRSKHEELHRDCLVLATATHAKA  
ELNEDVSADLEERFHLGLFTDRATLYRMMETEGKGHLESGHPELPHQLMLWKGDLDKGVLAQAERGETDSDLV  
AVAPVAGYSVWLWAVEAFKQLCFQDQYVKAASYLLSIHKVYEAVELLKSNHLYREAI AVAKARLRPEDPVLK  
ELYLSWGSILERDGHYAI AAKCYLGATSAYDAAKVLARKGDAASLRTAAELAAIAGEHELAASLALRCAQELL  
LMKNWVGAQEALGLHESLQGQRLVFCLELLCRHLEEKQPLEVRGPSSIYHQWATGSEGLTVQRTGVWRSPF  
SVDTPEQCQAALQKLQDVKYPSATSNTFFRQLLLHVCHDLT LAMLSQAAAWEAEVALLQAVVRSYTSGNFT  
LMQEIYSAFLPGGCDHLRDKLGDLSPAMAAYKSLEAFCIYQLYEVWWSLCPGPPESSVWVLSAESTVSDKQS  
KPEDSASAEDMEQPPGPGPRLSAESERLLSACKELFSERHASLQTSQRTVAEVQETLAEMIRQHQSOLCKAT  
TNGPSRDEPSRDEPSQEAERAPSQPPSPTEERNAPVSLPELTRRLTEANERIAEFPEESVKAWPFPDVLCECLV  
LLHIGSQCPDAVDPEMQQQAQELLHKYGHTRAYRRHCQSRHT\*

>rs51771045\_ENSMUSP00000099772\_c.3495:G>C\_p.A1166P  
ENSMUST00000102711.9|Gemin5-202|ENSMUSG00000037275|-|chr11:g.58019569:C>G  
MKPEPRTLPPSPNWYCSRCSDAAPGGIFGFAARTSVFLVRVGPAGASPGAPPFRVVGELVGHTEVSGFTFS  
HHPGQYNLCATSSDDGTVKVWDVETKT VVTEHTLHQHTISALHWSPTVKDLIVSGDEKGVVFCYWLNRNDSQH  
LFTFPTIFCLTCSPHHENLVAIGYKDGIVVIIDISKKGEVIHRLRGHDDEIHSIAWCPLSGEDCLISQEN  
SEEPDIPNGKLI AETPITKGCYLATGSKDQTI RIWSCSRGRGVMVLKLPFLKRRSGGVDPTVKERLWLT LHP  
KNQPTQLVSSCFGGELLWDLTQSWRRKYTLFSTSAEGHNHSRIVFNLC SLKTEDGKQLLLSTSMRDRVKCWD  
MATLECCWTLPSLGGFAYS LAFSPVDVGS LAIGVGDGMIRVWNTLSIKNNYDVKNFWQGVKSKVTALCWHPNK  
EGCLAFGTDDGKVGLYDTC SNKPPQISSTYHKKTVYRLAWGPPVPPMSLGGEGRPSLTLYSCGGEVVLQHN  
PWKLSGEAFDINKLVRDNTSIRYKLPVHTEISWKGDKVLAIGNEDGSIEIFQVPNLRLLLCTIQQHHKLVNAI  
VWHHEHGSRPPELSCLLASGSNNAVIYVHNLKAVLESNPESPIITITEPYRTLSGHTAKITSLAWSPHHDGRLVS  
ACYDGT AQVWDALREEPLFNFRGHRGRLLCVAWSPVDPECIYSGADDFCVYRWLTSMQDHSRPPQGKKCIELE  
KKRLSQFKPKLKKKKKPTLRLPVKQDSSVGNEDSVKENSIPAENGLSDQDGEAAAQEPPELPPSPVVCVEPVS  
CTDICS GF EKSKVTVSSKATSLKKEPAKEKPEALLKKRKRSMPLPLSTSLDHRSKHEELHRDCLVLATATHAKE  
LNEDVSADLEERFHLGLFTDRATLYRMMETEGKGHLESGHPELPHQLMLWKGDLDKGVLAQAERGETDSDLV  
VAPVAGYSVWLWAVEAFKQLCFQDQYVKAASYLLSIHKVYEAVELLKSNHLYREAI AVAKARLRPEDPVLKE  
LYLSWGSILERDGHYAI AAKCYLGATSAYDAAKVLARKGDAASLRTAAELAAIAGEHELAASLALRCAQELL  
MKNWVGAQEALGLHESLQGQRLVFCLELLCRHLEEKQPLEVRGPSSIYHQWATGSEGLTVQRTGVWRSPFS  
VDTPEQCQAALQKLQDVKYPSATSNTFFRQLLLHVCHDLT LAMLSQAAAWEAEVALLQAVVRSYTSGNFTL

MQEIYSAFLPGGCDHLRDKLGDLSPAMAAKYSLAFCIYGQLYEVVWWSLCGPGPESSVWVLSAESTVSDKQSK  
PEDSASAEDMEQPPGPGPRLSAESERLLSACKELFSEERHASLQTSQRTVAEVQETLAEMIRQHQSOLCKATT  
NGPSRDEPSRDEPSQEAERAPSQPPSPTEERNAPVSLPELTRRLTEANERIAEFPEPESVKAWPFPDVLECCLLV  
LHIGSQCPDAVDPEMQQAQELLLHXYGHTRAYRRHCQSRHT\*

>rs51771045\_ENSMUSP00000131842\_c.3498:G>C\_p.A1167P  
ENSMUST00000172035.8|Gemin5-205|ENSMUSG00000037275|-|chr11:g.58019569:C>G  
MKPEPRTLPPSPNWCYSRCSDAAPGGIFGFAARTSVFLVRVGPAGASPGAPPFRVVGELVGHTEVSGFTFS  
HHPGQYNLCATSSDDGTVKVWDVETKTVVTEHTLHQHTISALHWSPTVKDLIVSGDEKGVVFCYWLNRNDSQH  
LFTPEPTIFCLTCSPHHENLVAIGYKDGIVVVIDISKKGEVIHRLRGHDDEIHSIAWCPLSGEDCLISQEN  
SEEPDIPNGKLI AETPITKGCYLATGSKDQTIIRIWSCSRGRGVMVLKLPFLKRRSGVDPTVKERLWLT  
KNQPTQLVSSCFGGELLLWDLTQSWRRKYTLFSTSAEGHNHSRIVFNLC SLKTEDGKQLLLSTSM  
DRDVKCWD  
MATLECCWTLPSLGGFAYSLAFSPVDVGS LAIGVGDGMIRVWNTLSIKNNYDVKNFWQGVKSKVTALC  
WHPNK  
EGCLAFGTDDGKVGGLYDTC SNKPPQISSTYHKKTIVYRLAWGPPVPPMSLGGEGDRPSLTLYSCG  
GEGVVLQHN  
PWKLSGEAFDINKLVRDNTSIRYKLPVHTEISWKG DGKVLALGNEDGSIEIFQV PNLRLLLCTIQ  
QHKL VNAI  
VWHHEHGSRP ELSCLLASGSNNAVIYVHNLKAVLESNPESPIITITEPYRTLSGHTAKITSLAWS  
PHHDGRLVS  
ACYDGT AQVWDALREEPLFNFRGHRGRLLCVAWSPVDPECIYSGADDFCVYRWLTSMDH SRPPQ  
GKCI ELE  
KKRLSQFKPKLKKKKKPTLRLPVKQDSSVGNEDSVKENS GPAENGLSDQDGE EEAQEP  
LPPSPVVCVEPVS  
CTDICS GF EKSKVTVSSKATSLKKEPAKEKPEALLKKRKARSMLPLSTSLDHR SKEELHRDCL  
VLATATHAKA  
ELNEDVSADLEERFHLGLFTDRATLYRMMETEGKGHLES GHPEL FHLMLWKGD LKGV LQAAA  
ERGETD  
SLV  
AVAPVAGYSVWLWAVEAF AKQLCFQDQYVKAASYLLSIHKVYEAV ELLKSNHLYREAI  
AVAKARLP  
EDPV LK  
ELYLSWGSILERDGHYAI AAKCYLGATSAYDAAKVLARKGDAASLR TAAELAAIAGEHE  
LAASLAL  
RCAQELL  
LMKNWVGAQEALGLHESLQGR L VFCLLELLCRHLEEKQPLEV RGPSSIYHQWATGSE  
GTLVQR  
VTGVWRSP  
F  
SVDTPEQCQAALQKLQDVKYPSATSNT PFRQLLLHVCHDLTLAML SQAAAWE EAVP  
ALLQAV  
VRSYTS  
GNFT  
LMQEIYSAFLPGGCDHLRDKLGDLSPAMAAKYSLAFCIYGQLYEVVWWSLCGPGPESSVWVLSAESTVSDKQSK  
KPEDSASAEDMEQPPGPGPRLSAESERLLSACKELFSEERHASLQTSQRTVAEVQETLAEMIRQHQSOLCKAT  
TNGPSRDEPSRDEPSQEAERAPSQPPSPTEERNAPVSLPELTRRLTEANERIAEFPEPESVKAWPFPDVLECC  
LLVLLHIGSQCPDAVDPEMQQAQELLLHXYGHTRAYRRHCQSRHT\*

>rs246725396\_ENSMUSP00000036603\_c.1996:T>ATAAATAAT\_p.V666ins-fs  
ENSMUST00000035604.13|Gemin5-201|ENSMUSG00000037275|-  
|chr11:g.58036345:A>ATTATTTAT  
MKPEPRTLPPSPNWCYSRCSDAAPGGIFGFAARTSVFLVRVGPAGASPGAPPFRVVGELVGHTEVSGFTFS  
HHPGQYNLCATSSDDGTVKVWDVETKTVVTEHTLHQHTISALHWSPTVKDLIVSGDEKGVVFCYWLNRNDSQH  
LFTPEPTIFCLTCSPHHENLVAIGYKDGIVVVIDISKKGEVIHRLRGHDDEIHSIAWCPLSGEDCLISQEN  
SEEPDIPNGKLI AETPITKGCYLATGSKDQTIIRIWSCSRGRGVMVLKLPFLKRRSGVDPTVKERLWLT  
KNQPTQLVSSCFGGELLLWDLTQSWRRKYTLFSTSAEGHNHSRIVFNLC SLKTEDGKQLLLSTSM  
DRDVKCWD  
MATLECCWTLPSLGGFAYSLAFSPVDVGS LAIGVGDGMIRVWNTLSIKNNYDVKNFWQGVKSKVTALC  
WHPNK  
EGCLAFGTDDGKVGGLYDTC SNKPPQISSTYHKKTIVYRLAWGPPVPPMSLGGEGDRPSLTLYSCG  
GEGVVLQHN  
PWKLSGEAFDINKLVRDNTSIRYKLPVHTEISWKG DGKVLALGNEDGSIEIFQV PNLRLLLCTIQ  
QHKL VNAI  
VWHHEHGSRP ELSCLLASGSNNAVIYVHNLKAVLESNPESPIITITEPYRTLSGHTAKITSLAWS  
PHHDGRLVS  
ACYDGT AQDK

>rs246725396\_ENSMUSP00000099772\_c.1996:T>ATAAATAAT\_p.V666ins-fs  
ENSMUST00000102711.9|Gemin5-202|ENSMUSG00000037275|-  
|chr11:g.58036345:A>ATTATTTAT  
MKPEPRTLPPSPNWCYSRCSDAAPGGIFGFAARTSVFLVRVGPAGASPGAPPFRVVGELVGHTEVSGFTFS  
HHPGQYNLCATSSDDGTVKVWDVETKTVVTEHTLHQHTISALHWSPTVKDLIVSGDEKGVVFCYWLNRNDSQH  
LFTPEPTIFCLTCSPHHENLVAIGYKDGIVVVIDISKKGEVIHRLRGHDDEIHSIAWCPLSGEDCLISQEN  
SEEPDIPNGKLI AETPITKGCYLATGSKDQTIIRIWSCSRGRGVMVLKLPFLKRRSGVDPTVKERLWLT  
KNQPTQLVSSCFGGELLLWDLTQSWRRKYTLFSTSAEGHNHSRIVFNLC SLKTEDGKQLLLSTSM  
DRDVKCWD  
MATLECCWTLPSLGGFAYSLAFSPVDVGS LAIGVGDGMIRVWNTLSIKNNYDVKNFWQGVKSKVTALC  
WHPNK  
EGCLAFGTDDGKVGGLYDTC SNKPPQISSTYHKKTIVYRLAWGPPVPPMSLGGEGDRPSLTLYSCG  
GEGVVLQHN  
PWKLSGEAFDINKLVRDNTSIRYKLPVHTEISWKG DGKVLALGNEDGSIEIFQV PNLRLLLCTIQ  
QHKL VNAI  
VWHHEHGSRP ELSCLLASGSNNAVIYVHNLKAVLESNPESPIITITEPYRTLSGHTAKITSLAWS  
PHHDGRLVS  
ACYDGT AQDK

>rs246725396\_ENSMUSP00000131842\_c.1996:T>ATAAATAAT\_p.V666ins-fs  
ENSMUST00000172035.8|Gemin5-205|ENSMUSG00000037275|-  
|chr11:g.58036345:A>ATTATTTAT  
MKPEPRTLPPSPNWCYSRCSDAAPGGIFGFAARTSVFLVRVGPAGASPGAPPFRVVGELVGHTEVSGFTFS  
HHPGQYNLCATSSDDGTVKVWDVETKTVVTEHTLHQHTISALHWSPTVKDLIVSGDEKGVVFCYWLNRNDSQH

LFTEPRTIFCLTCSPHHENLVAIGYKDGIVVIIDISKKGEVIHRLRGHDDEIHSIAWCPLSGEDCLSISQEEEN  
SEEPDIPNGKLI AETPITKGCYLATGSKDQTI RIWSCSRGRGVMVLKLPFLKRRSGVDPTVKERLWLT LHW P  
KNQPTQLVSSCFGGELLWDLTQSWRRKYTLFSTSAEGHNHSRIVFNLC SLKTEDGKQLLLSTSM DRDVK CWD  
MATLECCWTL PSLGGFAYSLAFSPVDVGS LAIGVGDGMIRVWNTLS IKNNYDVKNFWQGVKSKVTALCWHPNK  
EGCLAFGTDDGKVGLYDTC SNKPPQISSTYHKKT VYRLAWGPPVPPMSLG GEGDRPSLTLYSCG GEGVVLQHN  
PWKLSGEAFDINKLVRD TNSIRYKLPVHTEISWKG DGKVLALGNEDGSIEIFQV PNLRLLLCTIQ QHHKLVNAI  
VWHHEHGSRP ELSCLLASGSNNAVIYVHNLKAVLESNPESPIITITEPYRTL SGHTAKITSLAWS PHHDGRLVS  
ACYDGT AQDK

>rs29470941\_ENSMUSP00000036603\_c.1132:T>C\_p.L378P

ENSMUST00000035604.13|Gemin5-201|ENSMUSG00000037275|-  
|chr11:g.58046618:A>G

MKPEPRTLPPSPNWYCSRCSDAAPGGIFGFAARTSVFLVRVGP GAGASPGAPPFRVVGELVGHTE RVSGFTFS  
HHPGQYNLCATSSDDGT VKVVDVETKTVVTEHTLHQHTI SALHWSPTVKDLIVSGDEKGVVFCYWLNRNDSQH  
LFTEPRTIFCLTCSPHHENLVAIGYKDGIVVIIDISKKGEVIHRLRGHDDEIHSIAWCPLSGEDCLSISQEEEN  
SEEPDIPNGKLI AETPITKGCYLATGSKDQTI RIWSCSRGRGVMVLKLPFLKRRSGVDPTVKERLWLT LHW P  
KNQPTQLVSSCFGGELLWDLTQSWRRKYTLFSTSAEGHNHSRIVFNLC SLKTEDGKQLLLSTSM DRDVK CWD  
MATLECCWTL PSLGGFAYSLAFSPVDVGS LAIGVGDGMIRVWNTLS IKNNYDVKNFWQGVKSKVTALCWHPNK  
EGCLAFGTDDGKVGLYDTC SNKPPQISSTYHKKT VYRLAWGPPVPPMSLG GEGDRPSLTLYSCG GEGVVLQHN  
PWKLSGEAFDINKLVRD TNSIRYKLPVHTEISWKG DGKVLALGNEDGSIEIFQV PNLRLLLCTIQ QHHKLVNAI  
VWHHEHGSRP ELSCLLASGSNNAVIYVHNLKAVLESNPESPIITITEPYRTL SGHTAKITSLAWS PHHDGRLVS  
ACYDGT AQVWDALREEPLFNFRGHRGRLLCVAWSPVDPECIYSGADDFCVYRWLTSMQDHSRPPQ GKK CIELE  
KKRLSQFKPKLKKKKKPTLRLPVKQDSSVGNEDSVKENS GPAENGLSDQDGE EEAQEP ELPSPVVCVEPVS  
CTDICS GF EKSKVTVSSKATSLKKEPAKEKPEALLKRRKARSMLPLSTSLDHR SKEELHRDCLVLATATHAKA  
ELNEDVSADLEERFHLGLFTDRATLYRMMETEGKGHLES GHPEL FHQLMLWKGD LKGVLQAAAER GELTDSL V  
AVAPVAGYSVWLWAVEAFAKQLCFQDQYVKAASYLLSIHKVYEAV ELLKSNHLYREAI AVAKARLRPEDPVLK  
ELYLSWGSIL ERDGHY AIAAKCYLGATSAYDAAKVLARKGDAASLR TAAELAAIAGEHELAASLALRCAQELL  
LMKNWVGAQEAALGLHESLQGQRLVFCLELLLCRHLEEKQPLEVRGPSSIYHQWATGSEGTLVQRVTGVWRS AF  
SVDTP EQCQAALQKLQDVKYPSATSNTPF RQLLLHVCHDLTLAML SQQAAAWEEAVPALLQAVVRSYTSGNFT  
LMQEIYSAFLPGGCDHLRDLKGLDLSPAMAAYKSLEAF CIYQGLYEVWWSLCGPGPESSVWVLSAESTVSDKQS  
KPEDSASAEDMEQPPGPGPRLSAESERLLSACKELF SERHASLQTSQRTVAEVQETLAEMIRQH QKSQ LCKAT  
TNGPSRDEPSRDEPSQEAERAPSQPPSPTEERNAPVSLPELTRRLTEANERIAEFPE SVKAWPFPDVL ECLCLV  
LLHIGSQCPDAVDPEMQQAQELLHKYGHTRAYRRHCQSRHT\*

>rs29470941\_ENSMUSP00000099772\_c.1132:T>C\_p.L378P

ENSMUST00000102711.9|Gemin5-202|ENSMUSG00000037275|-|chr11:g.58046618:A>G  
MKPEPRTLPPSPNWYCSRCSDAAPGGIFGFAARTSVFLVRVGP GAGASPGAPPFRVVGELVGHTE RVSGFTFS  
HHPGQYNLCATSSDDGT VKVVDVETKTVVTEHTLHQHTI SALHWSPTVKDLIVSGDEKGVVFCYWLNRNDSQH  
LFTEPRTIFCLTCSPHHENLVAIGYKDGIVVIIDISKKGEVIHRLRGHDDEIHSIAWCPLSGEDCLSISQEEEN  
SEEPDIPNGKLI AETPITKGCYLATGSKDQTI RIWSCSRGRGVMVLKLPFLKRRSGVDPTVKERLWLT LHW P  
KNQPTQLVSSCFGGELLWDLTQSWRRKYTLFSTSAEGHNHSRIVFNLC SLKTEDGKQLLLSTSM DRDVK CWD  
MATLECCWTL PSLGGFAYSLAFSPVDVGS LAIGVGDGMIRVWNTLS IKNNYDVKNFWQGVKSKVTALCWHPNK  
EGCLAFGTDDGKVGLYDTC SNKPPQISSTYHKKT VYRLAWGPPVPPMSLG GEGDRPSLTLYSCG GEGVVLQHN  
PWKLSGEAFDINKLVRD TNSIRYKLPVHTEISWKG DGKVLALGNEDGSIEIFQV PNLRLLLCTIQ QHHKLVNAI  
VWHHEHGSRP ELSCLLASGSNNAVIYVHNLKAVLESNPESPIITITEPYRTL SGHTAKITSLAWS PHHDGRLVS  
ACYDGT AQVWDALREEPLFNFRGHRGRLLCVAWSPVDPECIYSGADDFCVYRWLTSMQDHSRPPQ GKK CIELE  
KKRLSQFKPKLKKKKKPTLRLPVKQDSSVGNEDSVKENS GPAENGLSDQDGE EEAQEP ELPSPVVCVEPVS  
CTDICS GF EKSKVTVSSKATSLKKEPAKEKPEALLKRRKARSMLPLSTSLDHR SKEELHRDCLVLATATHAKE  
LNEDVSADLEERFHLGLFTDRATLYRMMETEGKGHLES GHPEL FHQLMLWKGD LKGVLQAAAER GELTDSLVA  
VAPVAGYSVWLWAVEAFAKQLCFQDQYVKAASYLLSIHKVYEAV ELLKSNHLYREAI AVAKARLRPEDPVLKE  
LYLSWGSIL ERDGHY AIAAKCYLGATSAYDAAKVLARKGDAASLR TAAELAAIAGEHELAASLALRCAQELL  
MKNWVGAQEAALGLHESLQGQRLVFCLELLLCRHLEEKQPLEVRGPSSIYHQWATGSEGTLVQRVTGVWRS AF  
SVDTP EQCQAALQKLQDVKYPSATSNTPF RQLLLHVCHDLTLAML SQQAAAWEEAVPALLQAVVRSYTSGNFTL  
MQEIYSAFLPGGCDHLRDLKGLDLSPAMAAYKSLEAF CIYQGLYEVWWSLCGPGPESSVWVLSAESTVSDKQSK  
PEDSASAEDMEQPPGPGPRLSAESERLLSACKELF SERHASLQTSQRTVAEVQETLAEMIRQH QKSQ LCKAT  
TNGPSRDEPSRDEPSQEAERAPSQPPSPTEERNAPVSLPELTRRLTEANERIAEFPE SVKAWPFPDVL ECLCLV  
LLHIGSQCPDAVDPEMQQAQELLHKYGHTRAYRRHCQSRHT\*

>rs29470941\_ENSMUSP00000116600\_c.283:T>C\_p.L95P

ENSMUST00000134953.2|Gemin5-204|ENSMUSG00000037275|-|chr11:g.58046618:A>G

XLWLTlHWPKNQPTQLVSSCFGGELLLWDLTQSWRRKYTLFSTSAEGHNHSRIVFNLCslKtEDGKQLLLSTSMDRDVKCWD  
 MDRDVKCWD MATLECCWTLPSGGFAYSLAFSPVDVGS LAIGVGDGMIRVWNTLSIKNNYDVKNFWQGVKSKV  
 TALCWHPNKEGCLAFGTDDGKVGlyDTCsnk\*

>rs29470941\_ENSMUSP00000131842\_c.1132:T>C\_p.L378P  
 ENSMUST00000172035.8|Gemin5-205|ENSMUSG00000037275|-|chr11:g.58046618:A>G  
 MKPEPRTLPPSPNWYCSRCSDAAPGGIFGFAARTSVFLVRVGPAGASPGAPPFRVVGELVGHTERVSGFTFS  
 HHPGQYNLCATSSDDGTVKVWDVETKTVVTEHTLHQHTISALHWSPTVKDLIVSGDEKGVVFCYWLNRNDSQH  
 LFTEPRTIFCLTCSPHHENLVAIGYKDGIVVIIDISKKGEVIHRLRGHDDEIHSIAWCPLSGEDCLISQEEEN  
 SEEPDIPNGKLI AETPITKGCYLATGSKDQTIRIWSCSRGRGVMVLKLPFLKRRSSGGVDPTVKERLWLTlHWP  
 KNQPTQLVSSCFGGELLLWDLTQSWRRKYTLFSTSAEGHNHSRIVFNLCslKtEDGKQLLLSTSMDRDVKCWD  
 MATLECCWTLPSGGFAYSLAFSPVDVGS LAIGVGDGMIRVWNTLSIKNNYDVKNFWQGVKSKVTALCWHPNK  
 EGCLAFGTDDGKVGlyDTCsnkPPQISSTYHKKTVYRLAWGPPVPPMSLGGEGDRPSLTLYSCGEGGVVLQHN  
 PWKLSGEAFDINKLVRDNTSIRYKLPVHTEISWKG DGKVLALGNEDGSIEIFQVPNLRLLLCTIQQHHKLVNAI  
 VWHHEHGSRP ELSCLLASGSNNAVIYVHNLKAVLESNPESPIITITEPYRTLSGHTAKITSLAWSPHHDGRLVS  
 ACYDGT AQVWDALREEP LFNFRGHRGRLLCVAWSPVDPECIYSGADDFCVYRWLTSMQDHSRPPQGGKCI ELE  
 KKRLSQFKPKLKKKKKPTLRLPVKQDSSVGNEDSVKENS GPAENGLSDQDGE EEAQEP ELPSPVVCVEPVS  
 CTDICS GF EKSKVTVSSKATSLKKEPAKEKPEALLKKR KARSMLPLSTSLDHR SKEELHRDCLVLATATHAKA  
 ELNEDVSADLEERFHLGLFTDRATLYRMMETEGKGHLES GHPEL FHLQMLWKGD LKGV LQAAAER GELTDSL V  
 AVAPVAGYSVWLWAVEAF AKQLCFQDQYVKAASYLLSIHKVYEAV ELLKSNHLYREAI AVAKARLRPEDPVLK  
 ELYLSWGSILERDGHYAI AAKCYLGATSAYDAAKV LARKGDAASLR TAAELAAIAGEHELAASLALRCAQELL  
 LMKNWVGAQEALGLHESLQGQRLVFCLELLCRHLEEKQPLEVRGPSSIYHQWATGSEGLTVQRVTGVWRSF  
 SVDTPEQCQAALQKLDVKYPSATSNTPFQRLLLHVCHDLTLAMLSQQA AAWEEAVPALLQAVVRSYTSGNFT  
 LMQEIYSAFLPGGCDHLRDKLGDLSPAMAAYKSLEAF CIYGQLYEVWWSL CGPGPESSVWVLSAESTVSDKQS  
 KPEDSASAEDMEQPPGPGPRLSAESERLLSACKELF SERHASLQTSQRTVAEVQETLAEMIRQHQS QLCKAT  
 TNGPSRDEPSRDEPSQEAERAPSQPPSPTEERNAPVSLPELTRRLEANERIAEFPE SVKAWPFPDVL ECLL  
 VLLHIGSQCPDAVDPEMQQAQELLHKYGHTRAYRRHCQSRHT\*

>rs29461142\_ENSMUSP00000036603\_c.853:T>G\_p.L285R  
 ENSMUST00000035604.13|Gemin5-201|ENSMUSG00000037275|-  
 |chr11:g.58051592:A>C  
 MKPEPRTLPPSPNWYCSRCSDAAPGGIFGFAARTSVFLVRVGPAGASPGAPPFRVVGELVGHTERVSGFTFS  
 HHPGQYNLCATSSDDGTVKVWDVETKTVVTEHTLHQHTISALHWSPTVKDLIVSGDEKGVVFCYWLNRNDSQH  
 LFTEPRTIFCLTCSPHHENLVAIGYKDGIVVIIDISKKGEVIHRLRGHDDEIHSIAWCPLSGEDCLISQEEEN  
 SEEPDIPNGKLI AETPITKGCYLATGSKDQTIRIWSCSRGRGVMVLKLPFLKRRSSGGVDPTVKERRWLTlHWP  
 KNQPTQLVSSCFGGELLLWDLTQSWRRKYTLFSTSAEGHNHSRIVFNLCslKtEDGKQLLLSTSMDRDVKCWD  
 MATLECCWTLPSLGGFAYSLAFSPVDVGS LAIGVGDGMIRVWNTLSIKNNYDVKNFWQGVKSKVTALCWHPNK  
 EGCLAFGTDDGKVGlyDTCsnkPPQISSTYHKKTVYRLAWGPPVPPMSLGGEGDRPSLTLYSCGEGGVVLQHN  
 PWKLSGEAFDINKLVRDNTSIRYKLPVHTEISWKG DGKVLALGNEDGSIEIFQVPNLRLLLCTIQQHHKLVNAI  
 VWHHEHGSRP ELSCLLASGSNNAVIYVHNLKAVLESNPESPIITITEPYRTLSGHTAKITSLAWSPHHDGRLVS  
 ACYDGT AQVWDALREEP LFNFRGHRGRLLCVAWSPVDPECIYSGADDFCVYRWLTSMQDHSRPPQGGKCI ELE  
 KKRLSQFKPKLKKKKKPTLRLPVKQDSSVGNEDSVKENS GPAENGLSDQDGE EEAQEP ELPSPVVCVEPVS  
 CTDICS GF EKSKVTVSSKATSLKKEPAKEKPEALLKKR KARSMLPLSTSLDHR SKEELHRDCLVLATATHAKA  
 ELNEDVSADLEERFHLGLFTDRATLYRMMETEGKGHLES GHPEL FHLQMLWKGD LKGV LQAAAER GELTDSL V  
 AVAPVAGYSVWLWAVEAF AKQLCFQDQYVKAASYLLSIHKVYEAV ELLKSNHLYREAI AVAKARLRPEDPVLK  
 ELYLSWGSILERDGHYAI AAKCYLGATSAYDAAKV LARKGDAASLR TAAELAAIAGEHELAASLALRCAQELL  
 LMKNWVGAQEALGLHESLQGQRLVFCLELLCRHLEEKQPLEVRGPSSIYHQWATGSEGLTVQRVTGVWRSF  
 SVDTPEQCQAALQKLDVKYPSATSNTPFQRLLLHVCHDLTLAMLSQQA AAWEEAVPALLQAVVRSYTSGNFT  
 LMQEIYSAFLPGGCDHLRDKLGDLSPAMAAYKSLEAF CIYGQLYEVWWSL CGPGPESSVWVLSAESTVSDKQS  
 KPEDSASAEDMEQPPGPGPRLSAESERLLSACKELF SERHASLQTSQRTVAEVQETLAEMIRQHQS QLCKAT  
 TNGPSRDEPSRDEPSQEAERAPSQPPSPTEERNAPVSLPELTRRLEANERIAEFPE SVKAWPFPDVL ECLL  
 LLLHIGSQCPDAVDPEMQQAQELLHKYGHTRAYRRHCQSRHT\*

>rs29461142\_ENSMUSP00000099772\_c.853:T>G\_p.L285R  
 ENSMUST00000102711.9|Gemin5-202|ENSMUSG00000037275|-|chr11:g.58051592:A>C  
 MKPEPRTLPPSPNWYCSRCSDAAPGGIFGFAARTSVFLVRVGPAGASPGAPPFRVVGELVGHTERVSGFTFS  
 HHPGQYNLCATSSDDGTVKVWDVETKTVVTEHTLHQHTISALHWSPTVKDLIVSGDEKGVVFCYWLNRNDSQH  
 LFTEPRTIFCLTCSPHHENLVAIGYKDGIVVIIDISKKGEVIHRLRGHDDEIHSIAWCPLSGEDCLISQEEEN  
 SEEPDIPNGKLI AETPITKGCYLATGSKDQTIRIWSCSRGRGVMVLKLPFLKRRSSGGVDPTVKERRWLTlHWP  
 KNQPTQLVSSCFGGELLLWDLTQSWRRKYTLFSTSAEGHNHSRIVFNLCslKtEDGKQLLLSTSMDRDVKCWD  
 MATLECCWTLPSLGGFAYSLAFSPVDVGS LAIGVGDGMIRVWNTLSIKNNYDVKNFWQGVKSKVTALCWHPNK



EGCLAFGTDDGKVGLYDTC SNKPPQISSTYHKKTVYRLAWGPPVPPMSLGGEGDRPSLTLYSCGGEGVVLQHN  
PWKLSGEAFDINKLVRDNTSIRYKLPVHTEISWKGDKVLALGNEDGSIEIFQVPNLRLLLCTIQQHHKLVNAI  
VWHHEHGSRPPELSCLLASGSNNAVIYVHNLKAVLESNPESPIITITEPYRTLSTGHTAKITSLAWSPHHDGRLVS  
ACYDGT AQVWDALREEPLFNFRGHRGRLLCVAWSPVDPECIYSGADDFCVYRWLTSMQDHSRPPQGKKCIELE  
KKRLSQFKPKLKKKKKPTLRLPVKQDSSVGNEDSVKENSIPAENGLSDQDGEAAAQEPPELPPSPVVCVEPVS  
CTDICS GF EKSKVTVSSKATSLKKEPAKEKPEALLKKRKRSMPLPLSTSLDHRSKHEELHRDCLVLATATHAKE  
LNEDVSADLEERFHLGLFTDRATLYRMMETEGKGHLESGHPELPHQLMLWKGDLDKGVLQAAAERGETDLSLVA  
VAPVAGYSVWLWAVEAFKQQLCFQDQYVKAASYLLSIHKVYEAVELLKSNHLYREAI AVAKARLRPEDPVLKE  
LYLSWGSILERDGHYAI AAKCYLGATSAYDAAKVLARKGDAASLR TAAELAAIAGEHELAASLALRCAQELLL  
MKNWVGAQEALGLHESLQGQRLVFCLELLLCRHLEEKQPLEVRGPSSIIHQWATGSEGLTVQRTGVWRSASF  
VDTP EQCQAALQKLQDVKYPSATSNTPFRLQLLHVCHDLTLAMLSQAAAWEAEVALLQAVVRSYTSGNFTL  
MQEIIYSAFLPGGCDHLRDKLGDLSPAMAAYKSLEAFCIYQGLYEVVWWSLCPGPESSVWVLSAESTVSDKQSK  
PEDSASAEDMEQPPGPGPRLSAESERLLSACKELFSERHASLQTSQRTVAEVQETLAEMIRQHQSOLCKATT  
NGPSRDEPSRDEPSQEAERAPSQPPSPTEERNAPVSLPELTRRLTEANERIAEFPE SVKAWPFDPVLECCLVL  
LHIGSQCPDAVDPEMQQQAQELLLHKYGHTRAYRRHCQSRHT\*

>rs29461142\_ENSMUSP00000116600\_c.4:T>G\_p.L2R ENSMUST00000134953.2|Gemin5-  
204|ENSMUSG00000037275|-|chr11:g.58051592:A>C  
XRWLT LHWPKNQPTQLVSSCFGELLLWDLTQSWRRKYTLFSTSAEGHNHSRIVFNLC SLKTEDGKQLLLSTS  
MDRDVKCWD MATLECCWTLPSLGGFAYS LAFSPVDVGS LAIGVGDGMIRVWNTLSIKNNYDVKNFWQGVKSKV  
TALCWHPNKEGCLAFGTDDGKVGLYDTC SNK\*

>rs29461142\_ENSMUSP00000131842\_c.853:T>G\_p.L285R  
ENSMUST00000172035.8|Gemin5-205|ENSMUSG00000037275|-|chr11:g.58051592:A>C  
MKPEPRTLPPSPNWYCSRCSDAAPGGIFGFAARTSVFLVRVGPAGASPGAPPFRVVGELVGHTE RVSGFTFS  
HHPGQYNLCATSSDDGTVKVWDVETKTVVTEHTLHQHTISALHWSPTVKDLIVSGDEKGVVFCYWLNRNDSQH  
LFTEPRTIFCLTCSPHHENLVAIGYKDGIVVIIDISKKGEVIHRLRGHDDEIHSIAWCPLSGEDCLSI SQEEN  
SEEPDIPNGKLI AETPIITKGCYLATGSKDQTI RIWCSRGRGVMVLKLPFLKRRSGGVDPVTKERRWLT LHW  
KNQPTQLVSSCFGELLLWDLTQSWRRKYTLFSTSAEGHNHSRIVFNLC SLKTEDGKQLLLSTSMDRDVKCWD  
MATLECCWTLPSLGGFAYS LAFSPVDVGS LAIGVGDGMIRVWNTLSIKNNYDVKNFWQGVKSKVTALCWHPNK  
EGCLAFGTDDGKVGLYDTC SNKPPQISSTYHKKTVYRLAWGPPVPPMSLGGEGDRPSLTLYSCGGEGVVLQHN  
PWKLSGEAFDINKLVRDNTSIRYKLPVHTEISWKGDKVLALGNEDGSIEIFQVPNLRLLLCTIQQHHKLVNAI  
VWHHEHGSRPPELSCLLASGSNNAVIYVHNLKAVLESNPESPIITITEPYRTLSTGHTAKITSLAWSPHHDGRLVS  
ACYDGT AQVWDALREEPLFNFRGHRGRLLCVAWSPVDPECIYSGADDFCVYRWLTSMQDHSRPPQGKKCIELE  
KKRLSQFKPKLKKKKKPTLRLPVKQDSSVGNEDSVKENSIPAENGLSDQDGEAAAQEPPELPPSPVVCVEPVS  
CTDICS GF EKSKVTVSSKATSLKKEPAKEKPEALLKKRKRSMPLPLSTSLDHRSKHEELHRDCLVLATATHAKA  
ELNEDVSADLEERFHLGLFTDRATLYRMMETEGKGHLESGHPELPHQLMLWKGDLDKGVLQAAAERGETDLSLVA  
AVAPVAGYSVWLWAVEAFKQQLCFQDQYVKAASYLLSIHKVYEAVELLKSNHLYREAI AVAKARLRPEDPVLK  
ELYLSWGSILERDGHYAI AAKCYLGATSAYDAAKVLARKGDAASLR TAAELAAIAGEHELAASLALRCAQELL  
LMKNWVGAQEALGLHESLQGQRLVFCLELLLCRHLEEKQPLEVRGPSSIIHQWATGSEGLTVQRTGVWRSASF  
SVDTPEQCQAALQKLQDVKYPSATSNTPFRLQLLHVCHDLTLAMLSQAAAWEAEVALLQAVVRSYTSGNFTL  
LMQEIYSAFLPGGCDHLRDKLGDLSPAMAAYKSLEAFCIYQGLYEVVWWSLCPGPESSVWVLSAESTVSDKQS  
KPEDSASAEDMEQPPGPGPRLSAESERLLSACKELFSERHASLQTSQRTVAEVQETLAEMIRQHQSOLCKAT  
TNGPSRDEPSRDEPSQEAERAPSQPPSPTEERNAPVSLPELTRRLTEANERIAEFPE SVKAWPFDPVLECCLV  
VLLHIGSQCPDAVDPEMQQQAQELLLHKYGHTRAYRRHCQSRHT\*

>rs218507294\_ENSMUSP00000036603\_c.682:G>AAG\_p.G228ins-fs  
ENSMUST00000035604.13|Gemin5-201|ENSMUSG00000037275|-  
|chr11:g.58054718:C>CTT  
MKPEPRTLPPSPNWYCSRCSDAAPGGIFGFAARTSVFLVRVGPAGASPGAPPFRVVGELVGHTE RVSGFTFS  
HHPGQYNLCATSSDDGTVKVWDVETKTVVTEHTLHQHTISALHWSPTVKDLIVSGDEKGVVFCYWLNRNDSQH  
LFTEPRTIFCLTCSPHHENLVAIGYKDGIVVIIDISKKGEVIHRLRGHDDEIHSIAWCPLSGEDCLSI SQEEN  
SEEPDIPNEGSL

>rs218507294\_ENSMUSP00000099772\_c.682:G>AAG\_p.G228ins-fs  
ENSMUST00000102711.9|Gemin5-202|ENSMUSG00000037275|-  
|chr11:g.58054718:C>CTT  
MKPEPRTLPPSPNWYCSRCSDAAPGGIFGFAARTSVFLVRVGPAGASPGAPPFRVVGELVGHTE RVSGFTFS  
HHPGQYNLCATSSDDGTVKVWDVETKTVVTEHTLHQHTISALHWSPTVKDLIVSGDEKGVVFCYWLNRNDSQH  
LFTEPRTIFCLTCSPHHENLVAIGYKDGIVVIIDISKKGEVIHRLRGHDDEIHSIAWCPLSGEDCLSI SQEEN  
SEEPDIPNEGSL

>rs218507294\_ENSMUSP00000131842\_c.682:G>AAG\_p.G228ins-fs  
ENSMUST00000172035.8|Gemin5-205|ENSMUSG00000037275|-  
|chr11:g.58054718:C>CTT  
MKPEPRTLPPSPNWYCSRCSDAAPGGIFGFAARTSVFLVRVGPAGASPGAPPFRVVGELVGHTErvSGFTFS  
HHPGQYNLCATSSDDGTVKVVDVETKTVVTEHTLHQHTISALHWSPTVKDLIVSGDEKGVVFCYWLNRNDSQH  
LFTEPRTIFCLTCSPPHENLVAIGYKDGIVVVIDISKKEVIHRLRGRHDEIHSIAWCPLSGEDCLISISQEEN  
SEEPDIPNEGSL  
>rs50868671\_ENSMUSP00000020820\_c.489:G>A\_p.V164I  
ENSMUST00000020820.2|Mrp122-201|ENSMUSG00000020514|+|chr11:g.58070184:G>A  
MAAALLRELGALRVPNLRIWATQTLRVLPSCIHTSASLDISRKWEKKNKIVYPPQLPGEPRRPAEIIYHCRRQ  
IKYSKDKMWWYLAQMIRGMSIDQALAQLEFNDKKGAI I KEVLLAQDMAVRDHNVEFRSNLHIAESTSGRGQC  
LKRIRYHGRGRFGIMEKIYCHYFVKLVGEGPPPPPEVPKTAVDHAKDYIQQLRSTIIHTL\*  
>rs46633950\_ENSMUSP00000020820\_c.576:T>C\_p.Y193H  
ENSMUST00000020820.2|Mrp122-201|ENSMUSG00000020514|+|chr11:g.58070271:T>C  
MAAALLRELGALRVPNLRIWATQTLRVLPSCIHTSASLDISRKWEKKNKIVYPPQLPGEPRRPAEIIYHCRRQ  
IKYSKDKMWWYLAQMIRGMSIDQALAQLEFNDKKGAI I KEVLLAQDMAVRDHNVEFRSNLHIAESTSGRGQC  
LKRIRYHGRGRFGIMEKVYCHYFVKLVGEGPPPPPEVPKTAVDHAKDHIQQLRSTIIHTL\*  
>rs26966377\_ENSMUSP00000146805\_c.552:T>A\_p.F185I  
ENSMUST00000209079.2|Irgm2-203|ENSMUSG00000069874|+|chr11:g.58110827:T>A  
MPTSRVAPLLDNMEEAVESPEVKEFEYFSDAVFIPKDGNTLSVGVKRIETAVKEGEVVKVVSIVKEIIQNVS  
RNKIKIAVTGDSNGMSSFINALRLIGHEEKDSAPTGVVVRTTQKPTCYFSSHFYVELWDLPLGLGATAQSVES  
YLEEMQISIIYDLIIIVASEQFSLNHVKLAITMQRMRKRIYVWVTKLDRDLSTSTFPPEPQLLQSIQRNIRDLSLQ  
KEKVKEHPMFLVSVFKPESHDFPKLRETLQKDLVVIKYHGLVETLYQVCEKTVNERVESIKKSIDEDNLHTEF  
GISDPGNAIEIRKAFQKTFGLDDISLHLVALEMKNKHFNTSMESQETQRYQQDDWVLARLYRTGTRVGSIGFD  
YMKCCFTSHHSRCKQQKDILDETAAKAKEVLLKILRLSIPHP\*  
>rs26966377\_ENSMUSP00000104464\_c.516:T>A\_p.F173I  
ENSMUST00000108836.2|Irgm2-202|ENSMUSG00000069874|+|chr11:g.58110827:T>A  
MEEAVESPEVKEFEYFSDAVFIPKDGNTLSVGVKRIETAVKEGEVVKVVSIVKEIIQNVS RNKIKIAVTGDS  
GNGMSSFINALRLIGHEEKDSAPTGVVVRTTQKPTCYFSSHFYVELWDLPLGLGATAQSVESYLEEMQISIIYDL  
IIIVASEQFSLNHVKLAITMQRMRKRIYVWVTKLDRDLSTSTFPPEPQLLQSIQRNIRDLSLQKEKVKEHPMFLV  
SVFKPESHDFPKLRETLQKDLVVIKYHGLVETLYQVCEKTVNERVESIKKSIDEDNLHTEFGISDPGNAIEIR  
KAFQKTFGLDDISLHLVALEMKNKHFNTSMESQETQRYQQDDWVLARLYRTGTRVGSIGFDYMKCCFTSHHSR  
CKQQKDILDETAAKAKEVLLKILRLSIPHP\*  
>rs26966377\_ENSMUSP00000056001\_c.516:T>A\_p.F173I  
ENSMUST00000058704.9|Irgm2-201|ENSMUSG00000069874|+|chr11:g.58110827:T>A  
MEEAVESPEVKEFEYFSDAVFIPKDGNTLSVGVKRIETAVKEGEVVKVVSIVKEIIQNVS RNKIKIAVTGDS  
GNGMSSFINALRLIGHEEKDSAPTGVVVRTTQKPTCYFSSHFYVELWDLPLGLGATAQSVESYLEEMQISIIYDL  
IIIVASEQFSLNHVKLAITMQRMRKRIYVWVTKLDRDLSTSTFPPEPQLLQSIQRNIRDLSLQKEKVKEHPMFLV  
SVFKPESHDFPKLRETLQKDLVVIKYHGLVETLYQVCEKTVNERVESIKKSIDEDNLHTEFGISDPGNAIEIR  
KAFQKTFGLDDISLHLVALEMKNKHFNTSMESQETQRYQQDDWVLARLYRTGTRVGSIGFDYMKCCFTSHHSR  
CKQQKDILDETAAKAKEVLLKILRLSIPHP\*  
>rs49881478\_ENSMUSP00000146805\_c.1116:T>C\_p.S373P  
ENSMUST00000209079.2|Irgm2-203|ENSMUSG00000069874|+|chr11:g.58111391:T>C  
MPTSRVAPLLDNMEEAVESPEVKEFEYFSDAVFIPKDGNTLSVGVKRIETAVKEGEVVKVVSIVKEIIQNVS  
RNKIKIAVTGDSNGMSSFINALRLIGHEEKDSAPTGVVVRTTQKPTCYFSSHFYVELWDLPLGLGATAQSVES  
YLEEMQISIIYDLIIIVASEQFSLNHVKLAITMQRMRKRFYVWVTKLDRDLSTSTFPPEPQLLQSIQRNIRDLSLQ  
KEKVKEHPMFLVSVFKPESHDFPKLRETLQKDLVVIKYHGLVETLYQVCEKTVNERVESIKKSIDEDNLHTEF  
GISDPGNAIEIRKAFQKTFGLDDISLHLVALEMKNKHFNTSMESQETQRYQQDDWVLARLYRTGTRVGSIGFD  
YMKCCFTPHHSRCKQQKDILDETAAKAKEVLLKILRLSIPHP\*  
>rs49881478\_ENSMUSP00000104464\_c.1080:T>C\_p.S361P  
ENSMUST00000108836.2|Irgm2-202|ENSMUSG00000069874|+|chr11:g.58111391:T>C  
MEEAVESPEVKEFEYFSDAVFIPKDGNTLSVGVKRIETAVKEGEVVKVVSIVKEIIQNVS RNKIKIAVTGDS  
GNGMSSFINALRLIGHEEKDSAPTGVVVRTTQKPTCYFSSHFYVELWDLPLGLGATAQSVESYLEEMQISIIYDL  
IIIVASEQFSLNHVKLAITMQRMRKRFYVWVTKLDRDLSTSTFPPEPQLLQSIQRNIRDLSLQKEKVKEHPMFLV  
SVFKPESHDFPKLRETLQKDLVVIKYHGLVETLYQVCEKTVNERVESIKKSIDEDNLHTEFGISDPGNAIEIR  
KAFQKTFGLDDISLHLVALEMKNKHFNTSMESQETQRYQQDDWVLARLYRTGTRVGSIGFDYMKCCFTPHHSR  
CKQQKDILDETAAKAKEVLLKILRLSIPHP\*

>rs49881478\_ENSMUSP00000056001\_c.1080:T>C\_p.S361P  
ENSMUST00000058704.9|Irgm2-201|ENSMUSG00000069874|+|chr11:g.58111391:T>C  
MEEAVESPEVKEFEYFSDAVFIPKDGNTLSVGVKRIETAVKEGEVVKVVSIVKEIIQNVSRNKIKIAVTGDS  
GNGMSSFINALRLIGHEEKDSAPTGVVRTTQKPTCYFSSHFYVELWDLPLGLGATAQSVESYLEEMQISYDL  
IIIVASEQFSLNHVKLAITMQRMRKRFYVVTWTKLDRDLSTSTFPPEQLLQSIQRNIRDSLQKEKVEHPMFLV  
SVFKPESHDFPKLRETLQKDLPIKHYHGLVETLYQVCEKTVNERVESIKKSIDEDNLHTEFGISDPGNAIEIR  
KAFQKTFGLDDISLHLVALEMKNKHFNTSMESQETQRYQQDDWVLARLYRTGTRVGSIGFDYMKCCFTPHHSR  
CKQQKDILDETAAKAKEVLLKILRLSIPHP\*  
>ENSMUSP00000104462\_c.811:T>G\_p.L271R ENSMUST00000108834.3|4930438A08Rik-  
201|ENSMUSG00000069873|+|chr11:g.58184095:T>G  
MLPAPGRLLAMFPGWLALIFLSVLSLDTQAFNRKLVKCFEDPQYEELLQLARNGLGQTAERKQVVVIGAGMAG  
LTAAKILQDAGHQVTVLEASGRVGGRIETHRVPGAHWYIELGAMRIPINHRLSHELKIKFGLMLKEFCPCNNQ  
TWVLVNGVRQRSQAVQADPGLLGYSVRADEVGKTAEQLFASLRKIVEELKNSSCQEVLEKYDSFSTKEYLIK  
VGNLSRGAVQMIGDMLNTDSGYEAFETETLRGIISFFQDPRFDEIVGGFDQRPQALHNSLLPGTVWFYSPAEE  
VEMSGDCVHVTYRTPDPLLRARLTADFVVVATTAKAARLLRFQPPSLNKQDALRSVHYNSATKVI LACTQR  
FWERDGI FSGKSSTDRPSRFIYYPNHIFPNGAGVILASYTELDDSDVFFTDALDHTQVVDIVLDDLAALHSRAKE  
ELRALCPYSAIKNWSQDPYSMGGFAFFTPYQYVDYAQELSQPEGLVFFAGEHTDLPHGWIDTAIKSGLRVAKN  
IQESVDLALTRNPRNTKEYFSKSEL\*  
>ENSMUSP00000147249\_c.780:T>G\_p.S261A ENSMUST00000208022.2|4930438A08Rik-  
202|ENSMUSG00000069873|+|chr11:g.58184095:T>G  
MLPAPGRLLAMFPGWLALIFLSVLSLDTQAFNRKLVKCFEDPQYEELLQLARNGLGQTAERKQVVVIGAGMAG  
LTAAKILQDAGHQVTVLEASGRVGGRIETHRVPGAHWYIELGAMRIPINHRLSHELKIKFGLMLKEFCPCNNQ  
TWVLVNGVRQRSQAVQADPGLLGYSVRADEVGKTAEQLFASLRKIVEELKNSSCQEVLEKYDSFSTKEYLIK  
VGNLSRGAVQMIGDMLNTDSGYEAFETETLRSMKSLEALTNAPRLCTILSSQGLFGSTHQQRKWKCLETVFTS  
PTGHLTLCCPGRG\*  
>ENSMUSP00000131896\_c.584:G>T\_p.E195D ENSMUST00000049353.9|Zfp692-  
201|ENSMUSG00000037243|+|chr11:g.58200417:G>T  
MASPVADASRRRREKRRQLDARRSKCRIRLGGHMEQWCLLKERLGFSLHSQLAKFLLDRYTSSGCVLCAAPEP  
GPRKGLQYLVLLSHTHSRECGLVPLRGPGGGEGELVWECASAGHTFSWEP SLIPAPSDVPKQAPLTHTTTERAW  
CSEARRKQEAQGLECEQRERTQETRLSRRVDSPLEIDPPLGEDQDVEEDEEEEEEEEEELSDASPWTYSSSPD  
DSEPDVPRPPSPVTHTPKEGEVSPVPATLPTPCAVLASVGS PDALTSDEVRLELSRTPQVPAELHMTESLE  
SPGSQAQSAPNPTWDEDTAQIGLRRIRKAAKRELMPCDFPGCGRIFSNRQYLNHHKKYQHIHQKSFCCPEPAC  
GKSFNFKKHLKEHVKLHSDTRDYICEFCARSFRTSSNLVIHRRHTGEKPLQCEICGFTCRQKASLNWHRRKH  
AETAALRFPCEFCGRKFEKPDSSVVAHCSKSHPALLPQAEPPGSLVSSPSISAPESLQSPEGASISTTSDSNP  
ASSTSISSPGVDPDRNREKS\*  
>ENSMUSP00000126674\_c.584:G>T\_p.E195D ENSMUST00000153510.9|Zfp692-  
202|ENSMUSG00000037243|+|chr11:g.58200417:G>T  
MASPVADASRRRREKRRQLDARRSKCRIRLGGHMEQWCLLKERLGFSLHSQLAKFLLDRYTSSGCVLCAAPEP  
GPRKGLQYLVLLSHTHSRECGLVPLRGPGGGEGELVWECASAGHTFSWEP SLIPAPSDVPKQAPLTHTTTERAW  
CSEARRKQEAQGLECEQRERTQETRLSRRVDSPLEIDPPLGEDQDVEEDEEEEEEEEEELSDASPWTYSSSPD  
DSEPDVPRPPSPVTHTPKEGEVSPVPATLPTPCAVLASVGS PDALTSDEVRLELSRTPQVPAELHMTESLE  
SPGSQAQSAPNPTWDEDTAQIGLRRIRKAAKRELMPCDFPGCGRIFSNRQYLNHHKKYQHIHQKSFCCPEPAC  
GKSFNFKKHLKEHVKLHSDTRDYICEFCARSFRTSSNLVIHRRHTGEKPLQCEICGFTCRQKASLNWHRRKH  
AETAALRFPCEFCGRKFEKPDSSVVAHCSKSHPALLPQAEPPGSLVSSPSISAPESLQSPEGASISTTSDSNP  
ASSTSISSPGVDPDRNREKS\*  
>ENSMUSP00000070680\_c.185:C>A\_p.Y62\* ENSMUST00000065533.3|Zfp672-  
203|ENSMUSG00000049755|-|chr11:g.58220412:G>T  
MRMEEDGVPOSEVKGIPVLPVVRVQESPHKPOEYQSQSDRDSVLNAHPTVGRHSLDSGTEC\*YHELRFVRSLY  
RQKPI MNSQAIAGRACRVIGLFPSCVCVCLNNDITVQVDFYLA\*  
>ENSMUSP00000013787\_c.108:G>T\_p.A37S ENSMUST00000013787.11|Lypd8-  
201|ENSMUSG00000013643|+|chr11:g.58273631:G>T  
MRGVFIAGVIAAFAITVVDLSLNTQCCTYNSTCDGQSTECNEQSFSCVSESSINSTLGGFLHVYQNKFCASANC  
TENSTEVAFVTHLFDQRYHFASQCCQGESCNATHSESGTQNVTDMQCMSCYGHNKTLCEEKPKCYEGEQCV  
FIIAEMVNGSRVELKGCSDISNSTCQFLSPGNTHVGEFVFKSVECTQPTTEYTNSTTTTIPITNTSLTSVTRP  
GIKTSFASVTPQASMGTKASFTSSIFGSLLLKLLF\*  
>ENSMUSP00000104454\_c.108:G>T\_p.A37S ENSMUST00000108826.3|Lypd8-  
202|ENSMUSG00000013643|+|chr11:g.58273631:G>T

MRGVFIAGVIAAFAITVVDSLNCCTQCYTYNSTCDGQSTECNEQSFSCVSESSINSTLGGFLHVYQNKFCASANC  
TENSTEVAFTVHLFDDQRYHFASQCCQGESCNATHSESGTQNVTDQMCMSCYGHNKTLCEEKPKCYEGEQCV  
FIIAEMVNGSGRVELKGCSDISNSTCQFLSPGNNTTVGEFVFKSVECTQPTEYTNSTTTIIPPITNTSLTSVTRP  
GIKTSPASVTPQASMGTKASFTSSIFGSLLLLKLLF\*

>ENSMUSP0000013787\_c.232:C>T\_p.T78M ENSMUST0000013787.11|Lypd8-  
201|ENSMUSG00000013643|+|chr11:g.58275499:C>T

MRGVFIAGVIAAFAITVVDSLNCCTQCYTYNSTCDGQATECNEQSFSCVSESSINSTLGGFLHVYQNKFCASANC  
TENSMVAFTVHLFDDQRYHFASQCCQGESCNATHSESGTQNVTDQMCMSCYGHNKTLCEEKPKCYEGEQCV  
FIIAEMVNGSGRVELKGCSDISNSTCQFLSPGNNTTVGEFVFKSVECTQPTEYTNSTTTIIPPITNTSLTSVTRP  
GIKTSPASVTPQASMGTKASFTSSIFGSLLLLKLLF\*

>ENSMUSP00000104454\_c.232:C>T\_p.T78M ENSMUST00000108826.3|Lypd8-  
202|ENSMUSG00000013643|+|chr11:g.58275499:C>T

MRGVFIAGVIAAFAITVVDSLNCCTQCYTYNSTCDGQATECNEQSFSCVSESSINSTLGGFLHVYQNKFCASANC  
TENSMVAFTVHLFDDQRYHFASQCCQGESCNATHSESGTQNVTDQMCMSCYGHNKTLCEEKPKCYEGEQCV  
FIIAEMVNGSGRVELKGCSDISNSTCQFLSPGNNTTVGEFVFKSVECTQPTEYTNSTTTIIPPITNTSLTSVTRP  
GIKTSPASVTPQASMGTKASFTSSIFGSLLLLKLLF\*

>ENSMUSP0000013787\_c.586:C>A\_p.T196N ENSMUST0000013787.11|Lypd8-  
201|ENSMUSG00000013643|+|chr11:g.58281026:C>A

MRGVFIAGVIAAFAITVVDSLNCCTQCYTYNSTCDGQATECNEQSFSCVSESSINSTLGGFLHVYQNKFCASANC  
TENSTEVAFTVHLFDDQRYHFASQCCQGESCNATHSESGTQNVTDQMCMSCYGHNKTLCEEKPKCYEGEQCV  
FIIAEMVNGSGRVELKGCSDISNSTCQFLSPGNNTTVGEFVFKSVECTQPNEYTNSTTTIIPPITNTSLTSVTRP  
GIKTSPASVTPQASMGTKASFTSSIFGSLLLLKLLF\*

>ENSMUSP00000104454\_c.586:C>A\_p.T196N ENSMUST00000108826.3|Lypd8-  
202|ENSMUSG00000013643|+|chr11:g.58281026:C>A

MRGVFIAGVIAAFAITVVDSLNCCTQCYTYNSTCDGQATECNEQSFSCVSESSINSTLGGFLHVYQNKFCASANC  
TENSTEVAFTVHLFDDQRYHFASQCCQGESCNATHSESGTQNVTDQMCMSCYGHNKTLCEEKPKCYEGEQCV  
FIIAEMVNGSGRVELKGCSDISNSTCQFLSPGNNTTVGEFVFKSVECTQPNEYTNSTTTIIPPITNTSLTSVTRP  
GIKTSPASVTPQASMGTKASFTSSIFGSLLLLKLLF\*

>ENSMUSP0000013787\_c.741:C>T\_p.L248F ENSMUST0000013787.11|Lypd8-  
201|ENSMUSG00000013643|+|chr11:g.58281181:C>T

MRGVFIAGVIAAFAITVVDSLNCCTQCYTYNSTCDGQATECNEQSFSCVSESSINSTLGGFLHVYQNKFCASANC  
TENSTEVAFTVHLFDDQRYHFASQCCQGESCNATHSESGTQNVTDQMCMSCYGHNKTLCEEKPKCYEGEQCV  
FIIAEMVNGSGRVELKGCSDISNSTCQFLSPGNNTTVGEFVFKSVECTQPTEYTNSTTTIIPPITNTSLTSVTRP  
GIKTSPASVTPQASMGTKASFTSSIFGSLLLLKLLF\*

>ENSMUSP00000104454\_c.741:C>T\_p.L248F ENSMUST00000108826.3|Lypd8-  
202|ENSMUSG00000013643|+|chr11:g.58281181:C>T

MRGVFIAGVIAAFAITVVDSLNCCTQCYTYNSTCDGQATECNEQSFSCVSESSINSTLGGFLHVYQNKFCASANC  
TENSTEVAFTVHLFDDQRYHFASQCCQGESCNATHSESGTQNVTDQMCMSCYGHNKTLCEEKPKCYEGEQCV  
FIIAEMVNGSGRVELKGCSDISNSTCQFLSPGNNTTVGEFVFKSVECTQPTEYTNSTTTIIPPITNTSLTSVTRP  
GIKTSPASVTPQASMGTKASFTSSIFGSLLLLKLLF\*

>rs29446775\_ENSMUSP00000104453\_c.538:C>T\_p.T180M  
ENSMUST00000108825.2|Gm12253-  
201|ENSMUSG00000058287|+|chr11:g.58330781:C>T

MEVTMSWFLVLLKSLAVCIISHLSVSSVESYACIQEPPFNKECYPNSSTCESSKGCFLWLELGAHQTYVQK  
GCSEDSCTGLEFSVTVERHLALSVDHRCCYTEHCSKEPIKVPALSSEPNGVECPACFSECGTCRPVLLKCTGE  
ETMCIKATARDI IKLQAMGCATKTACNLKNVTIMDNLFKFDTSVNGSPLLSSRLLLQHHACLPAATLPAMTVM  
ELSSGTVSPQ\*

>rs29395894\_ENSMUSP00000063665\_c.114:G>A\_p.E39K  
ENSMUST00000064614.4|Lypd9-201|ENSMUSG00000052642|-|chr11:g.58338276:C>T  
MHPATPSRLLLVCSLAFMPFSTDPWEITMNEIEEKEVDKFNSSGLKCPCTFTVKGRECSPELKWCTDKIKCV  
ELSGIINTGVNNVPIQLMKCITIEQCKDTATAYMGFTISNKSEICKSAIRNGARVRPPTPIFFVFLFKLLH\*

>rs47817785\_ENSMUSP00000136008\_c.659:A>G\_p.I220M  
ENSMUST00000180165.3|O1fr332-201|ENSMUSG00000050813|-  
|chr11:g.58380920:T>C

MDLKNKTTSSFILLGLFPSCRYPNLLISFILLIYTLASAGNSLLILLIWLDPRLHTPMYFLLSLSVIDLAYI  
SCTVPKAAINYFTGRQNI SFFACATQMFSLTLGLAECILLTLMAYDRYVAVCNPLRYTILMSPKVCIMMAAS  
TWIGAVAAALVHTVYPNMFPCGSREINHYFCEMPAILRMSCVDTSVYEMVKFVSTIIFLLTPFTLILTSYTL

MFLTVMRNSPKGRNKALATCSSHLTVVSLYFGQAIIFIYMTPTSSHTPDQDQVGAVLGTIVTPMLNPLIYSLR  
NKEVIGALQKCTGRCCSRDRVGSRLRCCCTQKCPILHLKSEFKSKEIQIGNRAL\*  
>rs47370459\_ENSMUSP00000136008\_c.496:C>G\_p.P166R  
ENSMUST00000180165.3|Olfr332-201|ENSMUSG00000050813|-  
|chr11:g.58381083:G>C  
MDLKNKTTSSFILLGLFPSCRYPNLLISFILLIYTLASAGNSLLILLIWLDPRLHTPMYFLLSQLSVIDLAYI  
SCTVPKAAINYFTGRQNI SFFACATQMF SFLTGLAECILLTLMAYDRYVAVCNPLRYTILMSPKVCMMMAAS  
TWIGAVAAALVHTVYPMNFRICGSREINHYFCEMPAILRMSCVDTSVYEMVKFVSTIIIFLLTPFTLILTSYTL  
IFLTVLRMNSPKGRNKALATCSSHLTVVSLYFGQAIIFIYMTPTSSHTPDQDQVGAVLGTIVTPMLNPLIYSLR  
NKEVIGALQKCTGRCCSRDRVGSRLRCCCTQKCPILHLKSEFKSKEIQIGNRAL\*  
>rs46574752\_ENSMUSP00000136008\_c.385:T>C\_p.L129P  
ENSMUST00000180165.3|Olfr332-201|ENSMUSG00000050813|-  
|chr11:g.58381194:A>G  
MDLKNKTTSSFILLGLFPSCRYPNLLISFILLIYTLASAGNSLLILLIWLDPRLHTPMYFLLSQLSVIDLAYI  
SCTVPKAAINYFTGRQNI SFFACATQMF SFLTGLAECILLTLMAYDRYVAVCNPPRYTILMSPKVCMMMAAS  
TWIGAVAAALVHTVYPMNFPICGSREINHYFCEMPAILRMSCVDTSVYEMVKFVSTIIIFLLTPFTLILTSYTL  
IFLTVLRMNSPKGRNKALATCSSHLTVVSLYFGQAIIFIYMTPTSSHTPDQDQVGAVLGTIVTPMLNPLIYSLR  
NKEVIGALQKCTGRCCSRDRVGSRLRCCCTQKCPILHLKSEFKSKEIQIGNRAL\*  
>rs46574752\_ENSMUSP00000144797\_c.88:T>C\_p.L30P  
ENSMUST00000203744.2|Olfr332-202|ENSMUSG00000050813|-  
|chr11:g.58381194:A>G  
MFSFLTGLAECILLTLMAYDRYVAVCNPPRYT  
>ENSMUSP00000080440\_c.721:G>AG\_p.G241ins-fs ENSMUST00000081743.3|Olfr331-  
201|ENSMUSG00000058807|-|chr11:g.58392677:C>CT  
MDLTTWMNNTTQSDFTLVGFFS QSKHPALLAVVIFVVFLMALSGNALLILLILSDIHIPIHLHIPMYFFISQ  
LSLMDMMYISVTVPKMLMDQVLGSHKISAAACGMQMFLYLTLAGSEYFLLAAMS YDHYVAICHPLQYPVLMNH  
RVCLLLMSVCWILGSLDGMFTPVMTMFPFCGSREIHHFFCEVPAVTKLSCSDTWLYETLMYVCCVLMLLIPV  
TVISGSYTSILLTVLRMNSAEEQEEG PCHLLLP HDCGHP LLWCCYLYLHFPCLSPHP  
>ENSMUSP00000132693\_c.703:G>AG\_p.G235ins-fs ENSMUST00000170501.3|Olfr331-  
202|ENSMUSG00000058807|-|chr11:g.58392677:C>CT  
MNNYTTQSDFTLVGFFS QSKHPALLAVVIFVVFLMALSGNALLILLILSDIHIPIHLHIPMYFFISQLSLMDM  
MYISVTVPKMLMDQVLGSHKISAAACGMQMFLYLTLAGSEYFLLAAMS YDHYVAICHPLQYPVLMNHRVCLLL  
MSVCWILGSLDGMFTPVMTMFPFCGSREIHHFFCEVPAVTKLSCSDTWLYETLMYVCCVLMLLIPVTVISGS  
YTSILLTVLRMNSAEEQEEG PCHLLLP HDCGHP LLWCCYLYLHFPCLSPHP  
>rs261360536\_ENSMUSP00000149073\_c.286:T>CT\_p.I96ins-fs  
ENSMUST00000213188.3|Olfr330-202|ENSMUSG00000050818|-  
|chr11:g.58420524:A>AG  
MDLTTWMNNTTQSDFTLVGFFS QSKHSALLAVVIFVVFLMALSGNALLILLVLS DTHLHTPMYFFISQLSLM  
DDMYISVTVPKMLMDQVLGSHKTLSCCLWDADVPLCDTSRFRIFPSGCHVLRPLCGHLPSTPVSCPHELQGLS  
PPDVCLLDPGIFGWLHVHPCHHDL P ILWIPGDPSLLL  
>rs261360536\_ENSMUSP00000145126\_c.286:T>CT\_p.I96ins-fs  
ENSMUST00000134055.3|Olfr330-201|ENSMUSG00000050818|-  
|chr11:g.58420524:A>AG  
MDLTTWMNNTTQSDFTLVGFFS QSKHSALLAVVIFVVFLMALSGNALLILLVLS DTHLHTPMYFFISQLSLM  
DDMYISVTVPKMLMDQVLGSHKTLSCCLWDADVPLCDTSRFRIFPSGCHVLRPLCGHLPSTPVSCPHELQGLS  
PPDVCLLDPGIFGWLHVHPCHHDL P ILWIPGDPSLLL  
>rs51951760\_ENSMUSP00000150086\_c.511:G>T\_p.R171L  
ENSMUST00000216725.2|Olfr328-204|ENSMUSG00000057654|-  
|chr11:g.58442552:C>A  
MSNYTGQFSDFTLVGFFS QSKHPALLAVVIFVVFLMALSGNALLILLILSDTHLHTPMYFFISQLSLMDMMYI  
SVTVPKMLMDQVLGSHKISAAACGMQMFYLSIGGSEFLLAAMS YDRYVAICHPLRYPVLMNHRICLLLSV  
CWLLGSLDGMFTPVMTMFPICGSLEIHHFFCEVPAVTKLSCSDTWLYETLMYVCCVLMILIPVTVISGSYSS  
ILLTVLKMNSAEGRKKALATCSSHMTVVTLFYGAAYTYMLPASLHTPEKDMVVS VFYTI VTPLLNPLIYSFR  
NKNVTEAMKLLGV SIPH\*  
>rs51951760\_ENSMUSP00000149506\_c.511:G>T\_p.R171L  
ENSMUST00000215717.2|Olfr328-203|ENSMUSG00000057654|-  
|chr11:g.58442552:C>A



MSNYTGQFSDFTLVGFFSQQSKHPALLAVVIFVVFLMALSGNALLILLILSDTHLHTPMYFFISQLSLMDDMMYI  
SVTVPKMLMDQVLGSHKISAAACGMQMFYLYLSIGGSEFLLLAAMSYDRYVAICHPLRYPVLMNHRICLLLLSV  
CWLLGSLDGFMLTPVTMTFPICGSLEIHFFCEVPAVTKLSCSDTWLYETLMYVCCVLMILIPVTVISGSYSS  
ILLTVLKMNSAEGRKKALATCSSHMTVVTLFYGAAVTYMLPASLHTPEKDMVSVFYTIVTPLLNPLIYSFR  
NKNVTEAMKLLGVSIPIH\*

>rs51951760\_ENSMUSP00000104452\_c.511:G>T\_p.R171L  
ENSMUST00000108824.3|Olfr328-202|ENSMUSG00000057654|-  
|chr11:g.58442552:C>A

MSNYTGQFSDFTLVGFFSQQSKHPALLAVVIFVVFLMALSGNALLILLILSDTHLHTPMYFFISQLSLMDDMMYI  
SVTVPKMLMDQVLGSHKISAAACGMQMFYLYLSIGGSEFLLLAAMSYDRYVAICHPLRYPVLMNHRICLLLLSV  
CWLLGSLDGFMLTPVTMTFPICGSLEIHFFCEVPAVTKLSCSDTWLYETLMYVCCVLMILIPVTVISGSYSS  
ILLTVLKMNSAEGRKKALATCSSHMTVVTLFYGAAVTYMLPASLHTPEKDMVSVFYTIVTPLLNPLIYSFR  
NKNVTEAMKLLGVSIPIH\*

>rs51951760\_ENSMUSP00000073588\_c.511:G>T\_p.R171L  
ENSMUST00000073933.2|Olfr328-201|ENSMUSG00000057654|-  
|chr11:g.58442552:C>A

MSNYTGQFSDFTLVGFFSQQSKHPALLAVVIFVVFLMALSGNALLILLILSDTHLHTPMYFFISQLSLMDDMMYI  
SVTVPKMLMDQVLGSHKISAAACGMQMFYLYLSIGGSEFLLLAAMSYDRYVAICHPLRYPVLMNHRICLLLLSV  
CWLLGSLDGFMLTPVTMTFPICGSLEIHFFCEVPAVTKLSCSDTWLYETLMYVCCVLMILIPVTVISGSYSS  
ILLTVLKMNSAEGRKKALATCSSHMTVVTLFYGAAVTYMLPASLHTPEKDMVSVFYTIVTPLLNPLIYSFR  
NKNVTEAMKLLGVSIPIH\*

>rs49802583\_ENSMUSP00000150086\_c.393:C>A\_p.P132T  
ENSMUST00000216725.2|Olfr328-204|ENSMUSG00000057654|-  
|chr11:g.58442670:G>T

MSNYTGQFSDFTLVGFFSQQSKHPALLAVVIFVVFLMALSGNALLILLILSDTHLHTPMYFFISQLSLMDDMMYI  
SVTVPKMLMDQVLGSHKISAAACGMQMFYLYLSIGGSEFLLLAAMSYDRYVAICHPLRYTVLMNHRICLLLLSV  
CWLLGSLDGFMLTPVTMTFPICGSREIHFFCEVPAVTKLSCSDTWLYETLMYVCCVLMILIPVTVISGSYSS  
ILLTVLKMNSAEGRKKALATCSSHMTVVTLFYGAAVTYMLPASLHTPEKDMVSVFYTIVTPLLNPLIYSFR  
NKNVTEAMKLLGVSIPIH\*

>rs49802583\_ENSMUSP00000149506\_c.393:C>A\_p.P132T  
ENSMUST00000215717.2|Olfr328-203|ENSMUSG00000057654|-  
|chr11:g.58442670:G>T

MSNYTGQFSDFTLVGFFSQQSKHPALLAVVIFVVFLMALSGNALLILLILSDTHLHTPMYFFISQLSLMDDMMYI  
SVTVPKMLMDQVLGSHKISAAACGMQMFYLYLSIGGSEFLLLAAMSYDRYVAICHPLRYTVLMNHRICLLLLSV  
CWLLGSLDGFMLTPVTMTFPICGSREIHFFCEVPAVTKLSCSDTWLYETLMYVCCVLMILIPVTVISGSYSS  
ILLTVLKMNSAEGRKKALATCSSHMTVVTLFYGAAVTYMLPASLHTPEKDMVSVFYTIVTPLLNPLIYSFR  
NKNVTEAMKLLGVSIPIH\*

>rs49802583\_ENSMUSP00000104452\_c.393:C>A\_p.P132T  
ENSMUST00000108824.3|Olfr328-202|ENSMUSG00000057654|-  
|chr11:g.58442670:G>T

MSNYTGQFSDFTLVGFFSQQSKHPALLAVVIFVVFLMALSGNALLILLILSDTHLHTPMYFFISQLSLMDDMMYI  
SVTVPKMLMDQVLGSHKISAAACGMQMFYLYLSIGGSEFLLLAAMSYDRYVAICHPLRYTVLMNHRICLLLLSV  
CWLLGSLDGFMLTPVTMTFPICGSREIHFFCEVPAVTKLSCSDTWLYETLMYVCCVLMILIPVTVISGSYSS  
ILLTVLKMNSAEGRKKALATCSSHMTVVTLFYGAAVTYMLPASLHTPEKDMVSVFYTIVTPLLNPLIYSFR  
NKNVTEAMKLLGVSIPIH\*

>rs49802583\_ENSMUSP00000073588\_c.393:C>A\_p.P132T  
ENSMUST00000073933.2|Olfr328-201|ENSMUSG00000057654|-  
|chr11:g.58442670:G>T

MSNYTGQFSDFTLVGFFSQQSKHPALLAVVIFVVFLMALSGNALLILLILSDTHLHTPMYFFISQLSLMDDMMYI  
SVTVPKMLMDQVLGSHKISAAACGMQMFYLYLSIGGSEFLLLAAMSYDRYVAICHPLRYTVLMNHRICLLLLSV  
CWLLGSLDGFMLTPVTMTFPICGSREIHFFCEVPAVTKLSCSDTWLYETLMYVCCVLMILIPVTVISGSYSS  
ILLTVLKMNSAEGRKKALATCSSHMTVVTLFYGAAVTYMLPASLHTPEKDMVSVFYTIVTPLLNPLIYSFR  
NKNVTEAMKLLGVSIPIH\*

>rs29402353\_ENSMUSP00000150140\_c.675:A>C\_p.M226L  
ENSMUST00000216758.2|Olfr224-203|ENSMUSG00000059279|-  
|chr11:g.58457494:T>G

MSNYTGQSYFTLVGLFSQSKHPALLAVVIFVVFLMSLSGNALLILLILSDTHLHTPMYFFISQLSLMDDMMYIS  
VTVPKMLMDRVLGNHKISAAACGMQMFYLYMSLGSEFLLLAAMSYDRYVAICHPLRYPVLMNHRVCLLLIISTC

WILGSLDGMFTPVMTTFPFCGSREIHHFFCEAPAVTKLSCSDTWLYETLMYVCCVLMILIPVTVISGSYSSI  
LLTVLRLNSAEGRKKALATCSSHMTVVTLFYGAAIYTYIFPASLHSPEKDMVVSVFYITILTPLLNPLIYSLRN  
KNVTEAMKLLGIRLHFPEVTK\*

>rs29402353\_ENSMUSP00000150268\_c.675:A>C\_p.M226L  
ENSMUST00000217009.2|Olfr224-204|ENSMUSG00000059279|-  
|chr11:g.58457494:T>G  
MSNYTGQSYFTLVGLFSQSKHPALLAVVIFVVFLMSLSGNALLILLILSDTHLHTPMYFFISQLSLMDMMYIS  
VTVPKMLMDRVLGNHKKISAAACGMQMFYMSLGGSEFLLLAAMS YDRYVAICHPLRYPVLMNHRVCLLLISTC  
WILGSLDGMFTPVMTTFPFCGSREIHHFFCEAPAVTKLSCSDTWLYETLMYVCCVLMILIPVTVISGSYSSI  
LLTVLRLNSAEGRKKALATCSSHMTVVTLFYGAAIYTYIFPASLHSPEKDMVVSVFYITILTPLLNPLIYSLRN  
KNVTEAMKLLGIRLHFPEVTK\*

>rs29402353\_ENSMUSP00000150143\_c.675:A>C\_p.M226L  
ENSMUST00000215322.2|Olfr224-202|ENSMUSG00000059279|-  
|chr11:g.58457494:T>G  
MSNYTGQSYFTLVGLFSQSKHPALLAVVIFVVFLMSLSGNALLILLILSDTHLHTPMYFFISQLSLMDMMYIS  
VTVPKMLMDRVLGNHKKISAAACGMQMFYMSLGGSEFLLLAAMS YDRYVAICHPLRYPVLMNHRVCLLLISTC  
WILGSLDGMFTPVMTTFPFCGSREIHHFFCEAPAVTKLSCSDTWLYETLMYVCCVLMILIPVTVISGSYSSI  
LLTVLRLNSAEGRKKALATCSSHMTVVTLFYGAAIYTYIFPASLHSPEKDMVVSVFYITILTPLLNPLIYSLRN  
KNVTEAMKLLGIRLHFPEVTK\*

>rs29402353\_ENSMUSP00000079881\_c.675:A>C\_p.M226L  
ENSMUST00000081102.5|Olfr224-201|ENSMUSG00000059279|-  
|chr11:g.58457494:T>G  
MSNYTGQSYFTLVGLFSQSKHPALLAVVIFVVFLMSLSGNALLILLILSDTHLHTPMYFFISQLSLMDMMYIS  
VTVPKMLMDRVLGNHKKISAAACGMQMFYMSLGGSEFLLLAAMS YDRYVAICHPLRYPVLMNHRVCLLLISTC  
WILGSLDGMFTPVMTTFPFCGSREIHHFFCEAPAVTKLSCSDTWLYETLMYVCCVLMILIPVTVISGSYSSI  
LLTVLRLNSAEGRKKALATCSSHMTVVTLFYGAAIYTYIFPASLHSPEKDMVVSVFYITILTPLLNPLIYSLRN  
KNVTEAMKLLGIRLHFPEVTK\*

>rs46544151\_ENSMUSP00000154189\_c.237:A>C\_p.N80H  
ENSMUST00000214990.2|Olfr324-  
202|ENSMUSG00000056564|+|chr11:g.58488479:A>C  
MEPRYGAAGLSPENSSTITELVLVGFSDQPQTEIPLFIFFSLVYLASCLGNTAVVILVALDVSLQTPMYFFL  
CHLAFLHGFFSTVVTVPKMLFNFLASRKVISYPFCLAQTYLTLFLESTECFLLAVMAIDRYVAICYPLRYLLIM  
SWAVCIALAVAVVWTGFCASVPLCFMILPLCSPYVVDYLFCELPILLHLFCADTSLQEAMMAVGGAGTVLVP  
FLLIALSYLRILVTVIRIDSAEGRKKAFSTCASHLAVVTIYYGTGLIRYLRPKSLYSAEGDKLISVFYAVIGP  
ALNPFYISLRNKEVQGAVRRVVERYRKS PRIAF\*

>rs46544151\_ENSMUSP00000154149\_c.255:A>C\_p.N86H  
ENSMUST00000216965.2|Olfr324-  
203|ENSMUSG00000056564|+|chr11:g.58488479:A>C  
MLPHIRTLGRYGAAGLSPENSSTITELVLVGFSDQPQTEIPLFIFFSLVYLASCLGNTAVVILVALDVSLQTP  
MYFFLCHLAFLHGFFSTVVTVPKMLFNFLASRKVISYPFCLAQTYLTLFLESTECFLLAVMAIDRYVAICYPL  
RYLLIMSWAVCIALAVAVVWTGFCASVPLCFMILPLCSPYVVDYLFCELPILLHLFCADTSLQEAMMAVGG  
GAGTVLVPFLLIALSYLRILVTVIRIDSAEGRKKAFSTCASHLAVVTIYYGTGLIRYLRPKSLYSAEGDKLIS  
VFYAVIGPALNPFYISLRNKEVQGAVRRVVERYRKS PRIAF\*

>rs46544151\_ENSMUSP00000056457\_c.261:A>C\_p.N88H  
ENSMUST000000054683.8|Olfr324-  
201|ENSMUSG00000056564|+|chr11:g.58488479:A>C  
MWGPSISSRLDRYGAAGLSPENSSTITELVLVGFSDQPQTEIPLFIFFSLVYLASCLGNTAVVILVALDVSL  
QTPMYFFLCHLAFLHGFFSTVVTVPKMLFNFLASRKVISYPFCLAQTYLTLFLESTECFLLAVMAIDRYVAICY  
PLRYLLIMSWAVCIALAVAVVWTGFCASVPLCFMILPLCSPYVVDYLFCELPILLHLFCADTSLQEAMMAV  
GAGTVLVPFLLIALSYLRILVTVIRIDSAEGRKKAFSTCASHLAVVTIYYGTGLIRYLRPKSLYSAEGDKLIS  
VFYAVIGPALNPFYISLRNKEVQGAVRRVVERYRKS PRIAF\*

>rs49647928\_ENSMUSP00000154189\_c.343:T>C\_p.L115P  
ENSMUST00000214990.2|Olfr324-  
202|ENSMUSG00000056564|+|chr11:g.58488585:T>C  
MEPRYGAAGLSPENSSTITELVLVGFSDQPQTEIPLFIFFSLVYLASCLGNTAVVILVALDVSLQTPMYFFL  
CHLAFLNGFFSTVVTVPKMLFNFLASRKVISYPFCLAQTYLTLFLESTECFLLAVMAIDRYVAICYPLRYLLIM  
SWAVCIALAVAVVWTGFCASVPLCFMILPLCSPYVVDYLFCELPILLHLFCADTSLQEAMMAVGGAGTVLVP

FLLIALSYLRILVTVIRIDSAEGRKKAFASTCASHLAVVTIYYGTGLIRYLRPKSLYSAEGDKLISVFYAVIGP  
 ALNPFYISLRNKEVQGAVRRVVERYRKS PRIAF\*  
 >rs49647928\_ENSMUSP00000154149\_c.361:T>C\_p.L121P  
 ENSMUST00000216965.2|Olfr324-  
 203|ENSMUSG00000056564|+|chr11:g.58488585:T>C  
 MLPHIRTLGRYGSAAGLSPENSSTITELVLVGFSDQPQTEIPLFIFFSLVYLASCLGNTAVVILVALDVSLQT  
 PMYFFLCHLAFLNGFFSTVVT PKMLFNFLASRKVISYPFCLAQTYLTPFLESTECFLLAVMAIDRYVAICYPL  
 RYLLIMSWAVCIALAVAVVWTGFCASVLPFCMILPLCSPYVVDYLFCELPILLHLFCADTSLQEAMMAVGGA  
 GTVLVPFLLIALSYLRILVTVIRIDSAEGRKKAFASTCASHLAVVTIYYGTGLIRYLRPKSLYSAEGDKLISVF  
 YAVIGPALNPFYISLRNKEVQGAVRRVVERYRKS PRIAF\*  
 >rs49647928\_ENSMUSP00000056457\_c.367:T>C\_p.L123P  
 ENSMUST00000054683.8|Olfr324-  
 201|ENSMUSG00000056564|+|chr11:g.58488585:T>C  
 MWGPSISSRLDRYGSAAGLSPENSSTITELVLVGFSDQPQTEIPLFIFFSLVYLASCLGNTAVVILVALDVSL  
 QTPMYFFLCHLAFLNGFFSTVVT PKMLFNFLASRKVISYPFCLAQTYLTPFLESTECFLLAVMAIDRYVAICY  
 PLRYLLIMSWAVCIALAVAVVWTGFCASVLPFCMILPLCSPYVVDYLFCELPILLHLFCADTSLQEAMMAVG  
 GAGTVLVPFLLIALSYLRILVTVIRIDSAEGRKKAFASTCASHLAVVTIYYGTGLIRYLRPKSLYSAEGDKLIS  
 VFYAVIGPALNPFYISLRNKEVQGAVRRVVERYRKS PRIAF\*  
 >rs50958699\_ENSMUSP00000154189\_c.772:C>G\_p.T258S  
 ENSMUST00000214990.2|Olfr324-  
 202|ENSMUSG00000056564|+|chr11:g.58489014:C>G  
 MEPRYGAAGLSPENSSTITELVLVGFSDQPQTEIPLFIFFSLVYLASCLGNTAVVILVALDVSLQT  
 CHLAFLNGFFSTVVT PKMLFNFLASRKVISYPFCLAQTYLTPFLESTECFLLAVMAIDRYVAICYPLRYLLIM  
 SWAVCIALAVAVVWTGFCASVLPFCMILPLCSPYVVDYLFCELPILLHLFCADTSLQEAMMAVG  
 GAGTVLVPFLLIALSYLRILVTVIRIDSAEGRKKAFASTCASHLAVVSIYYGTGLIRYLRPKSLYSAEGDKLISVF  
 YAVIGPALNPFYISLRNKEVQGAVRRVVERYRKS PRIAF\*  
 >rs50958699\_ENSMUSP00000154149\_c.790:C>G\_p.T264S  
 ENSMUST00000216965.2|Olfr324-  
 203|ENSMUSG00000056564|+|chr11:g.58489014:C>G  
 MLPHIRTLGRYGSAAGLSPENSSTITELVLVGFSDQPQTEIPLFIFFSLVYLASCLGNTAVVILVALDVSLQT  
 PMYFFLCHLAFLNGFFSTVVT PKMLFNFLASRKVISYPFCLAQTYLTPFLESTECFLLAVMAIDRYVAICYPL  
 RYLLIMSWAVCIALAVAVVWTGFCASVLPFCMILPLCSPYVVDYLFCELPILLHLFCADTSLQEAMMAVGGA  
 GTVLVPFLLIALSYLRILVTVIRIDSAEGRKKAFASTCASHLAVVSIYYGTGLIRYLRPKSLYSAEGDKLISVF  
 YAVIGPALNPFYISLRNKEVQGAVRRVVERYRKS PRIAF\*  
 >rs50958699\_ENSMUSP00000056457\_c.796:C>G\_p.T266S  
 ENSMUST00000054683.8|Olfr324-  
 201|ENSMUSG00000056564|+|chr11:g.58489014:C>G  
 MWGPSISSRLDRYGSAAGLSPENSSTITELVLVGFSDQPQTEIPLFIFFSLVYLASCLGNTAVVILVALDVSL  
 QTPMYFFLCHLAFLNGFFSTVVT PKMLFNFLASRKVISYPFCLAQTYLTPFLESTECFLLAVMAIDRYVAICY  
 PLRYLLIMSWAVCIALAVAVVWTGFCASVLPFCMILPLCSPYVVDYLFCELPILLHLFCADTSLQEAMMAVG  
 GAGTVLVPFLLIALSYLRILVTVIRIDSAEGRKKAFASTCASHLAVVSIYYGTGLIRYLRPKSLYSAEGDKLIS  
 VFYAVIGPALNPFYISLRNKEVQGAVRRVVERYRKS PRIAF\*  
 >rs259189485\_ENSMUSP00000151137\_c.805:A>G\_p.E269G  
 ENSMUST00000214132.2|Olfr323-203|ENSMUSG00000043880|-  
 |chr11:g.58516065:T>C  
 MEPQNL SKVTEFQLLGFQNLLEWQSLLF AIFLCFYLLTITGNMVIICV VSEDPRLRAPMYTFLQHLSFLEIWIY  
 TSTTVPLLLSKLASWGHMLSFPACMAQLYFFVFFGATECFLLAAMAYDRYLAICHPLHYSLMSPDNCAALVT  
 VSWVTGVTGFLPSLLISKLDFCGPNRINHFFCDLPLLIQLSCSSVYVTEMAIFVLSIAVLCICFLLTLVSYV  
 FIVSSILRIPSTSGRMKTFSTCGSHLAVVTIYYGTMI SMYVRPNAHLS PGLNKVISVFYTVVTPLLNPVIYSL  
 RNKDFKEAVRKIVRTKCGVYRARKGSALTT\*  
 >rs259189485\_ENSMUSP00000068147\_c.805:A>G\_p.E269G  
 ENSMUST00000070804.3|Olfr323-201|ENSMUSG00000043880|-  
 |chr11:g.58516065:T>C  
 MEPQNL SKVTEFQLLGFQNLLEWQSLLF AIFLCFYLLTITGNMVIICV VSEDPRLRAPMYTFLQHLSFLEIWIY  
 TSTTVPLLLSKLASWGHMLSFPACMAQLYFFVFFGATECFLLAAMAYDRYLAICHPLHYSLMSPDNCAALVT  
 VSWVTGVTGFLPSLLISKLDFCGPNRINHFFCDLPLLIQLSCSSVYVTEMAIFVLSIAVLCICFLLTLVSYV  
 FIVSSILRIPSTSGRMKTFSTCGSHLAVVTIYYGTMI SMYVRPNAHLS PGLNKVISVFYTVVTPLLNPVIYSL  
 RNKDFKEAVRKIVRTKCGVYRARKGSALTT\*

>rs46530477\_ENSMUSP00000151137\_c.795:C>G\_p.L266V  
ENSMUST00000214132.2|Olfr323-203|ENSMUSG00000043880|-  
|chr11:g.58516075:G>C  
MEPQNLSKVTEFQLLGFQNLLEWQSLLFALFLCFYLLTITGNMVIICVVSEDPRLRAPMYTFLQHLSFLEIYW  
TSTTVPLLLSKLASWGHMLSFPACMAQLYFFVFFGATECFLLAAMAYDRYLAICHPLHYSLMSPDNCAALVT  
VSWVTGVTGFLPSELLISKLDFCGPNRINHFFCDLPLLIQLSCSSVYVTEMAIFVLSIAVLCICFLLTLVSYV  
FIVSSILRIPSTSGRMKTFSTCGSHLAVVTIYYGTMISMVYRPNNAHVSPELNKVISVFYTVVTPLLNPVIYSL  
RNKDFKEAVRKIVRTKCGVYRVRVKGSAITT\*  
>rs46530477\_ENSMUSP00000145459\_c.235:C>G\_p.S79C  
ENSMUST00000203173.2|Olfr323-202|ENSMUSG00000043880|-  
|chr11:g.58516075:G>C  
EPQNLSKVTEFQLLGFQNLLEWQSLLFALFLCFYLLTITGNMVIICVDEDVFYMWFPFGCGHLLRDHDLHVC  
APKCTCVTGTQQGHFCLLRHGHSTAEPYSLQPEEQRLQRSCEKNRENQVWGLQSQSERKCPHYV  
>rs46530477\_ENSMUSP00000068147\_c.795:C>G\_p.L266V  
ENSMUST00000070804.3|Olfr323-201|ENSMUSG00000043880|-  
|chr11:g.58516075:G>C  
MEPQNLSKVTEFQLLGFQNLLEWQSLLFALFLCFYLLTITGNMVIICVVSEDPRLRAPMYTFLQHLSFLEIYW  
TSTTVPLLLSKLASWGHMLSFPACMAQLYFFVFFGATECFLLAAMAYDRYLAICHPLHYSLMSPDNCAALVT  
VSWVTGVTGFLPSELLISKLDFCGPNRINHFFCDLPLLIQLSCSSVYVTEMAIFVLSIAVLCICFLLTLVSYV  
FIVSSILRIPSTSGRMKTFSTCGSHLAVVTIYYGTMISMVYRPNNAHVSPELNKVISVFYTVVTPLLNPVIYSL  
RNKDFKEAVRKIVRTKCGVYRVRVKGSAITT\*  
>rs29481153\_ENSMUSP00000150916\_c.529:T>C\_p.F177S  
ENSMUST00000214400.2|Olfr322-  
205|ENSMUSG00000063549|+|chr11:g.58556916:T>C  
MGATNDSTFSSHFILIGFSDRPELERVLFALILPAYLLTLLGNSIIILVSRLDPLHPTMYFFLTHLSFLDLSF  
TSSSIPQLLYNLGSPDKTISYVGCALQLVLFGLGGVECLLLAVMAYDRFVAVCKPLHYMVIMSPRLCVGLVS  
VAWSCGVANSLAMSPVTLSPRCGHRRVDHSLCEMPALIRTACVNTAAVEGTVFVLAIGIVLSPLVFIIVSYG  
YIVRAVLQIRSAAGRQKAFNTCGSHLTVVSLFYGNIIYMYMQPGNSSSQDQGKFLTLFYNIIVTPLLNPLIYTL  
RNKEVKGALRRLLLGSRETGKVRAGSIRTRGKLSW\*  
>rs29481153\_ENSMUSP00000150410\_c.529:T>C\_p.F177S  
ENSMUST00000216442.2|Olfr322-  
206|ENSMUSG00000063549|+|chr11:g.58556916:T>C  
MGATNDSTFSSHFILIGFSDRPELERVLFALILPAYLLTLLGNSIIILVSRLDPLHPTMYFFLTHLSFLDLSF  
TSSSIPQLLYNLGSPDKTISYVGCALQLVLFGLGGVECLLLAVMAYDRFVAVCKPLHYMVIMSPRLCVGLVS  
VAWSCGVANSLAMSPVTLSPRCGHRRVDHSLCEMPALIRTACVNTAAVEGTVFVLAIGIVLSPLVFIIVSYG  
YIVRAVLQIRSAAGRQKAFNTCGSHLTVVSLFYGNIIYMYMQPGNSSSQDQGKFLTLFYNIIVTPLLNPLIYTL  
RNKEVKGALRRLLLGSRETGKVRAGSIRTRGKLSW\*  
>rs29481153\_ENSMUSP00000149062\_c.529:T>C\_p.F177S  
ENSMUST00000217399.2|Olfr322-  
207|ENSMUSG00000063549|+|chr11:g.58556916:T>C  
MGATNDSTFSSHFILIGFSDRPELERVLFALILPAYLLTLLGNSIIILVSRLDPLHPTMYFFLTHLSFLDLSF  
TSSSIPQLLYNLGSPDKTISYVGCALQLVLFGLGGVECLLLAVMAYDRFVAVCKPLHYMVIMSPRLCVGLVS  
VAWSCGVANSLAMSPVTLSPRCGHRRVDHSLCEMPALIRTACVNTAAVEGTVFVLAIGIVLSPLVFIIVSYG  
YIVRAVLQIRSAAGRQKAFNTCGSHLTVVSLFYGNIIYMYMQPGNSSSQDQGKFLTLFYNIIVTPLLNPLIYTL  
RNKEVKGALRRLLLGSRETGKVRAGSIRTRGKLSW\*  
>rs29481153\_ENSMUSP00000150990\_c.529:T>C\_p.F177S  
ENSMUST00000214392.2|Olfr322-  
204|ENSMUSG00000063549|+|chr11:g.58556916:T>C  
MGATNDSTFSSHFILIGFSDRPELERVLFALILPAYLLTLLGNSIIILVSRLDPLHPTMYFFLTHLSFLDLSF  
TSSSIPQLLYNLGSPDKTISYVGCALQLVLFGLGGVECLLLAVMAYDRFVAVCKPLHYMVIMSPRLCVGLVS  
VAWSCGVANSLAMSPVTLSPRCGHRRVDHSLCEMPALIRTACVNTAAVEGTVFVLAIGIVLSPLVFIIVSYG  
YIVRAVLQIRSAAGRQKAFNTCGSHLTVVSLFYGNIIYMYMQPGNSSSQDQGKFLTLFYNIIVTPLLNPLIYTL  
RNKEVKGALRRLLLGSRETGKVRAGSIRTRGKLSW\*  
>rs29481153\_ENSMUSP00000150004\_c.529:T>C\_p.F177S  
ENSMUST00000213793.2|Olfr322-  
203|ENSMUSG00000063549|+|chr11:g.58556916:T>C  
MGATNDSTFSSHFILIGFSDRPELERVLFALILPAYLLTLLGNSIIILVSRLDPLHPTMYFFLTHLSFLDLSF  
TSSSIPQLLYNLGSPDKTISYVGCALQLVLFGLGGVECLLLAVMAYDRFVAVCKPLHYMVIMSPRLCVGLVS

VAWSCGVANSLAMSPVTLTSLPRCGHRRVDHSLCEMPALIRTACVNTAAVEGTVFVLAIGIVLSPLVFIIVSYG  
YIVRAVLQIRSAAGRQKAFNTCGSHLTVVSLFYGNIIYMYMQPGNSSSQDQGKFLTLFYNIIVTPLLNPLIYTL  
RNKEVKGALRLLLLGSRETGKVRAGSIRTRGKLSW\*  
>rs29481153\_ENSMUSP00000150953\_c.529:T>C\_p.F177S  
ENSMUST00000213232.2|Olfr322-  
202|ENSMUSG00000063549|+|chr11:g.58556916:T>C  
MGATNDSTFSSHFILIGFSDRPELERVLFAIILPAYLLTLLGNSIIILVSRLDPLHPTMYFFLTHLSFLDLSF  
TSSSIPQLLYNLGSPDKTISYVGCALQLVFLGLGGVECLLLAVMAYDRFVAVCKPLHYMVIMSPRLCVGLVS  
VAWSCGVANSLAMSPVTLTSLPRCGHRRVDHSLCEMPALIRTACVNTAAVEGTVFVLAIGIVLSPLVFIIVSYG  
YIVRAVLQIRSAAGRQKAFNTCGSHLTVVSLFYGNIIYMYMQPGNSSSQDQGKFLTLFYNIIVTPLLNPLIYTL  
RNKEVKGALRLLLLGSRETGKVRAGSIRTRGKLSW\*  
>rs29481153\_ENSMUSP00000071913\_c.529:T>C\_p.F177S  
ENSMUST00000072030.4|Olfr322-  
201|ENSMUSG00000063549|+|chr11:g.58556916:T>C  
MGATNDSTFSSHFILIGFSDRPELERVLFAIILPAYLLTLLGNSIIILVSRLDPLHPTMYFFLTHLSFLDLSF  
TSSSIPQLLYNLGSPDKTISYVGCALQLVFLGLGGVECLLLAVMAYDRFVAVCKPLHYMVIMSPRLCVGLVS  
VAWSCGVANSLAMSPVTLTSLPRCGHRRVDHSLCEMPALIRTACVNTAAVEGTVFVLAIGIVLSPLVFIIVSYG  
YIVRAVLQIRSAAGRQKAFNTCGSHLTVVSLFYGNIIYMYMQPGNSSSQDQGKFLTLFYNIIVTPLLNPLIYTL  
RNKEVKGALRLLLLGSRETGKVRAGSIRTRGKLSW\*  
>rs29484354\_ENSMUSP00000150916\_c.624:T>A\_p.S209T  
ENSMUST00000214400.2|Olfr322-  
205|ENSMUSG00000063549|+|chr11:g.58557011:T>A  
MGATNDSTFSSHFILIGFSDRPELERVLFAIILPAYLLTLLGNSIIILVSRLDPLHPTMYFFLTHLSFLDLSF  
TSSSIPQLLYNLGSPDKTISYVGCALQLVFLGLGGVECLLLAVMAYDRFVAVCKPLHYMVIMSPRLCVGLVS  
VAWSCGVANSLAMSPVTLTSLPRCGHRRVDHFLCEMPALIRTACVNTAAVEGTVFVLAIGIVLTPLVFIIVSYG  
YIVRAVLQIRSAAGRQKAFNTCGSHLTVVSLFYGNIIYMYMQPGNSSSQDQGKFLTLFYNIIVTPLLNPLIYTL  
RNKEVKGALRLLLLGSRETGKVRAGSIRTRGKLSW\*  
>rs29484354\_ENSMUSP00000150410\_c.624:T>A\_p.S209T  
ENSMUST00000216442.2|Olfr322-  
206|ENSMUSG00000063549|+|chr11:g.58557011:T>A  
MGATNDSTFSSHFILIGFSDRPELERVLFAIILPAYLLTLLGNSIIILVSRLDPLHPTMYFFLTHLSFLDLSF  
TSSSIPQLLYNLGSPDKTISYVGCALQLVFLGLGGVECLLLAVMAYDRFVAVCKPLHYMVIMSPRLCVGLVS  
VAWSCGVANSLAMSPVTLTSLPRCGHRRVDHFLCEMPALIRTACVNTAAVEGTVFVLAIGIVLTPLVFIIVSYG  
YIVRAVLQIRSAAGRQKAFNTCGSHLTVVSLFYGNIIYMYMQPGNSSSQDQGKFLTLFYNIIVTPLLNPLIYTL  
RNKEVKGALRLLLLGSRETGKVRAGSIRTRGKLSW\*  
>rs29484354\_ENSMUSP00000149062\_c.624:T>A\_p.S209T  
ENSMUST00000217399.2|Olfr322-  
207|ENSMUSG00000063549|+|chr11:g.58557011:T>A  
MGATNDSTFSSHFILIGFSDRPELERVLFAIILPAYLLTLLGNSIIILVSRLDPLHPTMYFFLTHLSFLDLSF  
TSSSIPQLLYNLGSPDKTISYVGCALQLVFLGLGGVECLLLAVMAYDRFVAVCKPLHYMVIMSPRLCVGLVS  
VAWSCGVANSLAMSPVTLTSLPRCGHRRVDHFLCEMPALIRTACVNTAAVEGTVFVLAIGIVLTPLVFIIVSYG  
YIVRAVLQIRSAAGRQKAFNTCGSHLTVVSLFYGNIIYMYMQPGNSSSQDQGKFLTLFYNIIVTPLLNPLIYTL  
RNKEVKGALRLLLLGSRETGKVRAGSIRTRGKLSW\*  
>rs29484354\_ENSMUSP00000150990\_c.624:T>A\_p.S209T  
ENSMUST00000214392.2|Olfr322-  
204|ENSMUSG00000063549|+|chr11:g.58557011:T>A  
MGATNDSTFSSHFILIGFSDRPELERVLFAIILPAYLLTLLGNSIIILVSRLDPLHPTMYFFLTHLSFLDLSF  
TSSSIPQLLYNLGSPDKTISYVGCALQLVFLGLGGVECLLLAVMAYDRFVAVCKPLHYMVIMSPRLCVGLVS  
VAWSCGVANSLAMSPVTLTSLPRCGHRRVDHFLCEMPALIRTACVNTAAVEGTVFVLAIGIVLTPLVFIIVSYG  
YIVRAVLQIRSAAGRQKAFNTCGSHLTVVSLFYGNIIYMYMQPGNSSSQDQGKFLTLFYNIIVTPLLNPLIYTL  
RNKEVKGALRLLLLGSRETGKVRAGSIRTRGKLSW\*  
>rs29484354\_ENSMUSP00000150004\_c.624:T>A\_p.S209T  
ENSMUST00000213793.2|Olfr322-  
203|ENSMUSG00000063549|+|chr11:g.58557011:T>A  
MGATNDSTFSSHFILIGFSDRPELERVLFAIILPAYLLTLLGNSIIILVSRLDPLHPTMYFFLTHLSFLDLSF  
TSSSIPQLLYNLGSPDKTISYVGCALQLVFLGLGGVECLLLAVMAYDRFVAVCKPLHYMVIMSPRLCVGLVS  
VAWSCGVANSLAMSPVTLTSLPRCGHRRVDHFLCEMPALIRTACVNTAAVEGTVFVLAIGIVLTPLVFIIVSYG



YIVRAVLQIRSAAGRQKAFNTCGSHLTVVSLFYGNIIYMYMQPGNSSSSQDQGKFLTLFYNIIVTPLLNPLIYTL  
RNKEVKGALRRLLLGSRETGKVRAGSIRTRGKLSW\*  
>rs29484354\_ENSMUSP00000150953\_c.624:T>A\_p.S209T  
ENSMUST00000213232.2|Olfr322-  
202|ENSMUSG00000063549|+|chr11:g.58557011:T>A  
MGATNDSTFHSFILIGFSDRPELERVLFAIILPAYLLTLLGNSIIILVSRLDPLHHTPMYFFLTHLSFLDLSF  
TSSSIPQLLYNLGSPDKTISYVGCALQLVFLFLGLGGVECLLLAVMAYDRFVAVCKPLHYMVIMSPRLCVGLVS  
VAWSCGVANSLAMSPVTLSPRCGHRRVDHFLCEMPALIRTACVNTAAVEGTVFVLAIGIVLTPLVFILVSYG  
YIVRAVLQIRSAAGRQKAFNTCGSHLTVVSLFYGNIIYMYMQPGNSSSSQDQGKFLTLFYNIIVTPLLNPLIYTL  
RNKEVKGALRRLLLGSRETGKVRAGSIRTRGKLSW\*  
>rs29484354\_ENSMUSP00000071913\_c.624:T>A\_p.S209T  
ENSMUST00000072030.4|Olfr322-  
201|ENSMUSG00000063549|+|chr11:g.58557011:T>A  
MGATNDSTFHSFILIGFSDRPELERVLFAIILPAYLLTLLGNSIIILVSRLDPLHHTPMYFFLTHLSFLDLSF  
TSSSIPQLLYNLGSPDKTISYVGCALQLVFLFLGLGGVECLLLAVMAYDRFVAVCKPLHYMVIMSPRLCVGLVS  
VAWSCGVANSLAMSPVTLSPRCGHRRVDHFLCEMPALIRTACVNTAAVEGTVFVLAIGIVLTPLVFILVSYG  
YIVRAVLQIRSAAGRQKAFNTCGSHLTVVSLFYGNIIYMYMQPGNSSSSQDQGKFLTLFYNIIVTPLLNPLIYTL  
RNKEVKGALRRLLLGSRETGKVRAGSIRTRGKLSW\*  
>rs29405718\_ENSMUSP00000150916\_c.934:G>A\_p.G312E  
ENSMUST00000214400.2|Olfr322-  
205|ENSMUSG00000063549|+|chr11:g.58557321:G>A  
MGATNDSTFHSFILIGFSDRPELERVLFAIILPAYLLTLLGNSIIILVSRLDPLHHTPMYFFLTHLSFLDLSF  
TSSSIPQLLYNLGSPDKTISYVGCALQLVFLFLGLGGVECLLLAVMAYDRFVAVCKPLHYMVIMSPRLCVGLVS  
VAWSCGVANSLAMSPVTLSPRCGHRRVDHFLCEMPALIRTACVNTAAVEGTVFVLAIGIVLSPLVFILVSYG  
YIVRAVLQIRSAAGRQKAFNTCGSHLTVVSLFYGNIIYMYMQPGNSSSSQDQGKFLTLFYNIIVTPLLNPLIYTL  
RNKEVKGALRRLLLGSRETEKVRAGSIRTRGKLSW\*  
>rs29405718\_ENSMUSP00000150410\_c.934:G>A\_p.G312E  
ENSMUST00000216442.2|Olfr322-  
206|ENSMUSG00000063549|+|chr11:g.58557321:G>A  
MGATNDSTFHSFILIGFSDRPELERVLFAIILPAYLLTLLGNSIIILVSRLDPLHHTPMYFFLTHLSFLDLSF  
TSSSIPQLLYNLGSPDKTISYVGCALQLVFLFLGLGGVECLLLAVMAYDRFVAVCKPLHYMVIMSPRLCVGLVS  
VAWSCGVANSLAMSPVTLSPRCGHRRVDHFLCEMPALIRTACVNTAAVEGTVFVLAIGIVLSPLVFILVSYG  
YIVRAVLQIRSAAGRQKAFNTCGSHLTVVSLFYGNIIYMYMQPGNSSSSQDQGKFLTLFYNIIVTPLLNPLIYTL  
RNKEVKGALRRLLLGSRETEKVRAGSIRTRGKLSW\*  
>rs29405718\_ENSMUSP00000149062\_c.934:G>A\_p.G312E  
ENSMUST00000217399.2|Olfr322-  
207|ENSMUSG00000063549|+|chr11:g.58557321:G>A  
MGATNDSTFHSFILIGFSDRPELERVLFAIILPAYLLTLLGNSIIILVSRLDPLHHTPMYFFLTHLSFLDLSF  
TSSSIPQLLYNLGSPDKTISYVGCALQLVFLFLGLGGVECLLLAVMAYDRFVAVCKPLHYMVIMSPRLCVGLVS  
VAWSCGVANSLAMSPVTLSPRCGHRRVDHFLCEMPALIRTACVNTAAVEGTVFVLAIGIVLSPLVFILVSYG  
YIVRAVLQIRSAAGRQKAFNTCGSHLTVVSLFYGNIIYMYMQPGNSSSSQDQGKFLTLFYNIIVTPLLNPLIYTL  
RNKEVKGALRRLLLGSRETEKVRAGSIRTRGKLSW\*  
>rs29405718\_ENSMUSP00000150990\_c.934:G>A\_p.G312E  
ENSMUST00000214392.2|Olfr322-  
204|ENSMUSG00000063549|+|chr11:g.58557321:G>A  
MGATNDSTFHSFILIGFSDRPELERVLFAIILPAYLLTLLGNSIIILVSRLDPLHHTPMYFFLTHLSFLDLSF  
TSSSIPQLLYNLGSPDKTISYVGCALQLVFLFLGLGGVECLLLAVMAYDRFVAVCKPLHYMVIMSPRLCVGLVS  
VAWSCGVANSLAMSPVTLSPRCGHRRVDHFLCEMPALIRTACVNTAAVEGTVFVLAIGIVLSPLVFILVSYG  
YIVRAVLQIRSAAGRQKAFNTCGSHLTVVSLFYGNIIYMYMQPGNSSSSQDQGKFLTLFYNIIVTPLLNPLIYTL  
RNKEVKGALRRLLLGSRETEKVRAGSIRTRGKLSW\*  
>rs29405718\_ENSMUSP00000150004\_c.934:G>A\_p.G312E  
ENSMUST00000213793.2|Olfr322-  
203|ENSMUSG00000063549|+|chr11:g.58557321:G>A  
MGATNDSTFHSFILIGFSDRPELERVLFAIILPAYLLTLLGNSIIILVSRLDPLHHTPMYFFLTHLSFLDLSF  
TSSSIPQLLYNLGSPDKTISYVGCALQLVFLFLGLGGVECLLLAVMAYDRFVAVCKPLHYMVIMSPRLCVGLVS  
VAWSCGVANSLAMSPVTLSPRCGHRRVDHFLCEMPALIRTACVNTAAVEGTVFVLAIGIVLSPLVFILVSYG  
YIVRAVLQIRSAAGRQKAFNTCGSHLTVVSLFYGNIIYMYMQPGNSSSSQDQGKFLTLFYNIIVTPLLNPLIYTL  
RNKEVKGALRRLLLGSRETEKVRAGSIRTRGKLSW\*

>rs29405718\_ENSMUSP00000150953\_c.934:G>A\_p.G312E  
ENSMUST00000213232.2|Olfr322-  
202|ENSMUSG00000063549|+|chr11:g.58557321:G>A  
MGATNDSTFSSHFILIGFSDRPELERVLFMAILPAYLLTLLGNSIIILVSRDLPHLHTPMYFFLTHLSFLDLSF  
TSSSIPQLLYNLSPGDKTISYVGCALQLVFLGLGGVECLLLAVMAYDRFVAVCKPLHYMVIMSRLCVGLVS  
VAWSCGVANSLAMSPVTLSPRCGHRVDHFLCEMPALIRTACVNTAAVEGTVFVLAIGIVLSPLVFIIVSYG  
YIVRAVLQIRSAAGRQKAFNTEGSHLTVVSLFYGNIIYMYMQPGNSSSQDQGKFLTLFYNIIVTPLLNPLIYTL  
RNKEVKGALRRLLLGSRETEKVRAGSIRTRGKLSW\*  
>rs29405718\_ENSMUSP00000071913\_c.934:G>A\_p.G312E  
ENSMUST00000072030.4|Olfr322-  
201|ENSMUSG00000063549|+|chr11:g.58557321:G>A  
MGATNDSTFSSHFILIGFSDRPELERVLFMAILPAYLLTLLGNSIIILVSRDLPHLHTPMYFFLTHLSFLDLSF  
TSSSIPQLLYNLSPGDKTISYVGCALQLVFLGLGGVECLLLAVMAYDRFVAVCKPLHYMVIMSRLCVGLVS  
VAWSCGVANSLAMSPVTLSPRCGHRVDHFLCEMPALIRTACVNTAAVEGTVFVLAIGIVLSPLVFIIVSYG  
YIVRAVLQIRSAAGRQKAFNTEGSHLTVVSLFYGNIIYMYMQPGNSSSQDQGKFLTLFYNIIVTPLLNPLIYTL  
RNKEVKGALRRLLLGSRETEKVRAGSIRTRGKLSW\*  
>rs26962585\_ENSMUSP00000150051\_c.42:G>A\_p.V15I  
ENSMUST00000214662.2|Olfr320-  
202|ENSMUSG00000107711|+|chr11:g.58574743:G>A  
METGNRSCGTDFSLIGLGFQDGHMDTFLFTLIAILFAVAFIGNITLVLLIRLDCRLHTPMYFLLSQLSIIDMMY  
ISTTVPKVAANFLSDTKAISFLGCAVQAFVFLTLGGSEALLGFMSYDRYIAICRPLHYPVLMRSRKCICSMVA  
GAWSSSSINAFMHTVYVFQLPFCGSRMVNHHFFCEVPSLLPLVCEDTSQYEHTVLVSGLVILLPLFLAILASYA  
RVLVVVLQMGSGKGQSRVAVSTCSSHLTVASLFYVTGLSTYTPHSLHSPGRDKVVAVLYSIVTLVLPFIYSL  
RNKEVMGALRRQMG\*  
>rs26962585\_ENSMUSP00000145531\_c.42:G>A\_p.V15I  
ENSMUST00000204718.3|Olfr320-  
201|ENSMUSG00000107711|+|chr11:g.58574743:G>A  
METGNRSCGTDFSLIGLGFQDGHMDTFLFTLIAILFAVAFIGNITLVLLIRLDCRLHTPMYFLLSQLSIIDMMY  
ISTTVPKVAANFLSDTKAISFLGCAVQAFVFLTLGGSEALLGFMSYDRYIAICRPLHYPVLMRSRKCICSMVA  
GAWSSSSINAFMHTVYVFQLPFCGSRMVNHHFFCEVPSLLPLVCEDTSQYEHTVLVSGLVILLPLFLAILASYA  
RVLVVVLQMGSGKGQSRVAVSTCSSHLTVASLFYVTGLSTYTPHSLHSPGRDKVVAVLYSIVTLVLPFIYSL  
RNKEVMGALRRQMG\*  
>rs26962582\_ENSMUSP00000150051\_c.228:A>C\_p.T77P  
ENSMUST00000214662.2|Olfr320-  
202|ENSMUSG00000107711|+|chr11:g.58574929:A>C  
METGNRSCGTDFSLVGLGFQDGHMDTFLFTLIAILFAVAFIGNITLVLLIRLDCRLHTPMYFLLSQLSIIDMMY  
ISTPVPKVAANFLSDTKAISFLGCAVQAFVFLTLGGSEALLGFMSYDRYIAICRPLHYPVLMRSRKCICSMVA  
GAWSSSSINAFMHTVYVFQLPFCGSRMVNHHFFCEVPSLLPLVCEDTSQYEHTVLVSGLVILLPLFLAILASYA  
RVLVVVLQMGSGKGQSRVAVSTCSSHLTVASLFYVTGLSTYTPHSLHSPGRDKVVAVLYSIVTLVLPFIYSL  
RNKEVMGALRRQMG\*  
>rs26962582\_ENSMUSP00000145531\_c.228:A>C\_p.T77P  
ENSMUST00000204718.3|Olfr320-  
201|ENSMUSG00000107711|+|chr11:g.58574929:A>C  
METGNRSCGTDFSLVGLGFQDGHMDTFLFTLIAILFAVAFIGNITLVLLIRLDCRLHTPMYFLLSQLSIIDMMY  
ISTPVPKVAANFLSDTKAISFLGCAVQAFVFLTLGGSEALLGFMSYDRYIAICRPLHYPVLMRSRKCICSMVA  
GAWSSSSINAFMHTVYVFQLPFCGSRMVNHHFFCEVPSLLPLVCEDTSQYEHTVLVSGLVILLPLFLAILASYA  
RVLVVVLQMGSGKGQSRVAVSTCSSHLTVASLFYVTGLSTYTPHSLHSPGRDKVVAVLYSIVTLVLPFIYSL  
RNKEVMGALRRQMG\*  
>rs46167475\_ENSMUSP00000150051\_c.576:T>C\_p.S193P  
ENSMUST00000214662.2|Olfr320-  
202|ENSMUSG00000107711|+|chr11:g.58575277:T>C  
METGNRSCGTDFSLVGLGFQDGHMDTFLFTLIAILFAVAFIGNITLVLLIRLDCRLHTPMYFLLSQLSIIDMMY  
ISTTVPKVAANFLSDTKAISFLGCAVQAFVFLTLGGSEALLGFMSYDRYIAICRPLHYPVLMRSRKCICSMVA  
GAWSSSSINAFMHTVYVFQLPFCGSRMVNHHFFCEVPSLLPLVCEDTPOYEHTVLVSGLVILLPLFLAILASYA  
RVLVVVLQMGSGKGQSRVAVSTCSSHLTVASLFYVTGLSTYTPHSLHSPGRDKVVAVLYSIVTLVLPFIYSL  
RNKEVMGALRRQMG\*

>rs46167475\_ENSMUSP00000145531\_c.576:T>C\_p.S193P  
ENSMUST00000204718.3|Olfr320-  
201|ENSMUSG00000107711|+|chr11:g.58575277:T>C  
METGNRSCGTDFSLVGLFQDGHMDTFLFTLIAILFAVAFIGNITLVLLIIRLDCRLHTPMYFLLSOLSIIIDMMY  
ISTTVPKVAANFLSDTKAISFLGCAVQAFVFLTLGGSEALLLGFMSYDRYIAICRPLHYPVLMRSKICCSMVA  
GAWSSSSINAFMHTVYVVFQLPFCGSRMVNHHFFCEVPSLLPLVCEDTPQYEHTVLVSGLVILLPLFLAILASYA  
RVLVVVLMQMSGQGSRAVSTCSSHLTVASLFYVTGLSTYTQPHSLHSPGRDKVVAVLYSIVTIVLNPFIYSL  
RNKEVMGALRRQMG\*

>rs26962562\_ENSMUSP00000150883\_c.120:G>T\_p.G41C  
ENSMUST00000215962.2|Olfr319-  
203|ENSMUSG00000064044|+|chr11:g.58592649:G>T  
METGNHSCGTDFTLVGLFQYGHMDTFLFTVISILFAVALICNITLVLLIIRLDRRLHTPMYFFLSOLSIIIDMMC  
ISTTVPKMGANFISDTKAISVLGCEIQVFMFMSLAGCEALLLGFMSYDRYIAICQPLHYPVLMRSKICCSMVA  
SAWSSSSINALAHTVYVVFQLPFCGSRMVNHHFFCEVPSLLPLVCEDTSQYEHMIVMSVLVVLVLLPFLAILASYA  
RVLVVVFMQMSGQGSRAVSTCSSHLTVASLFYVTGLCTYTQPHSLHSPGRDKVVAVLYSIVTIVLNPFIYSL  
RNKEVIGALRRQMG\*

>rs26962562\_ENSMUSP00000076232\_c.120:G>T\_p.G41C  
ENSMUST00000076965.2|Olfr319-  
201|ENSMUSG00000064044|+|chr11:g.58592649:G>T  
METGNHSCGTDFTLVGLFQYGHMDTFLFTVISILFAVALICNITLVLLIIRLDRRLHTPMYFFLSOLSIIIDMMC  
ISTTVPKMGANFISDTKAISVLGCEIQVFMFMSLAGCEALLLGFMSYDRYIAICQPLHYPVLMRSKICCSMVA  
SAWSSSSINALAHTVYVVFQLPFCGSRMVNHHFFCEVPSLLPLVCEDTSQYEHMIVMSVLVVLVLLPFLAILASYA  
RVLVVVFMQMSGQGSRAVSTCSSHLTVASLFYVTGLCTYTQPHSLHSPGRDKVVAVLYSIVTIVLNPFIYSL  
RNKEVIGALRRQMG\*

>rs29425081\_ENSMUSP00000150883\_c.160:G>T\_p.R54I  
ENSMUST00000215962.2|Olfr319-  
203|ENSMUSG00000064044|+|chr11:g.58592689:G>T  
METGNHSCGTDFTLVGLFQYGHMDTFLFTVISILFAVALIGNITLVLLIIRLDRILHTPMYFFLSOLSIIIDMMC  
ISTTVPKMGANFISDTKAISVLGCEIQVFMFMSLAGCEALLLGFMSYDRYIAICQPLHYPVLMRSKICCSMVA  
SAWSSSSINALAHTVYVVFQLPFCGSRMVNHHFFCEVPSLLPLVCEDTSQYEHMIVMSVLVVLVLLPFLAILASYA  
RVLVVVFMQMSGQGSRAVSTCSSHLTVASLFYVTGLCTYTQPHSLHSPGRDKVVAVLYSIVTIVLNPFIYSL  
RNKEVIGALRRQMG\*

>rs29425081\_ENSMUSP00000076232\_c.160:G>T\_p.R54I  
ENSMUST00000076965.2|Olfr319-  
201|ENSMUSG00000064044|+|chr11:g.58592689:G>T  
METGNHSCGTDFTLVGLFQYGHMDTFLFTVISILFAVALIGNITLVLLIIRLDRILHTPMYFFLSOLSIIIDMMC  
ISTTVPKMGANFISDTKAISVLGCEIQVFMFMSLAGCEALLLGFMSYDRYIAICQPLHYPVLMRSKICCSMVA  
SAWSSSSINALAHTVYVVFQLPFCGSRMVNHHFFCEVPSLLPLVCEDTSQYEHMIVMSVLVVLVLLPFLAILASYA  
RVLVVVFMQMSGQGSRAVSTCSSHLTVASLFYVTGLCTYTQPHSLHSPGRDKVVAVLYSIVTIVLNPFIYSL  
RNKEVIGALRRQMG\*

>rs48879405\_ENSMUSP00000150883\_c.175:T>C\_p.M59T  
ENSMUST00000215962.2|Olfr319-  
203|ENSMUSG00000064044|+|chr11:g.58592704:T>C  
METGNHSCGTDFTLVGLFQYGHMDTFLFTVISILFAVALIGNITLVLLIIRLDRRLHTPTYFFLSOLSIIIDMMC  
ISTTVPKMGANFISDTKAISVLGCEIQVFMFMSLAGCEALLLGFMSYDRYIAICQPLHYPVLMRSKICCSMVA  
SAWSSSSINALAHTVYVVFQLPFCGSRMVNHHFFCEVPSLLPLVCEDTSQYEHMIVMSVLVVLVLLPFLAILASYA  
RVLVVVFMQMSGQGSRAVSTCSSHLTVASLFYVTGLCTYTQPHSLHSPGRDKVVAVLYSIVTIVLNPFIYSL  
RNKEVIGALRRQMG\*

>rs48879405\_ENSMUSP00000076232\_c.175:T>C\_p.M59T  
ENSMUST00000076965.2|Olfr319-  
201|ENSMUSG00000064044|+|chr11:g.58592704:T>C  
METGNHSCGTDFTLVGLFQYGHMDTFLFTVISILFAVALIGNITLVLLIIRLDRRLHTPTYFFLSOLSIIIDMMC  
ISTTVPKMGANFISDTKAISVLGCEIQVFMFMSLAGCEALLLGFMSYDRYIAICQPLHYPVLMRSKICCSMVA  
SAWSSSSINALAHTVYVVFQLPFCGSRMVNHHFFCEVPSLLPLVCEDTSQYEHMIVMSVLVVLVLLPFLAILASYA  
RVLVVVFMQMSGQGSRAVSTCSSHLTVASLFYVTGLCTYTQPHSLHSPGRDKVVAVLYSIVTIVLNPFIYSL  
RNKEVIGALRRQMG\*

```

>rs29394878_ENSMUSP00000150883_c.530:T>A_p.F177L
ENSMUST00000215962.2|Olfr319-
203|ENSMUSG00000064044|+|chr11:g.58593059:T>A
METGNHSCGTDFTLVGLFQYGHMDTFLFTVISILFAVALIGNITLVLLIRLDRRLHTPMYFFLSQLSIIDMMC
ISTTVPKMGANFISDTKAIISVLGCEIQVFMFMSLAGCEALLGFMSYDRYIAICQPLHYPVLMRSKICCSMVA
SAWSSSSINALAHTVYVVFQLPFCGSRMVNHLFCEVPSLLPLVCEDTSQYEHMIVMSVLVLLVLLPFLAILASYA
RVLVVVFQMGSGQGQSRVAVSTCSSHLTVASLFYVTGLCTYTPHSLHSPGRDKVAVLYSIVTPVLNPFIIYSL
RNKEVIGALRRQMG*
>rs29394878_ENSMUSP00000076232_c.530:T>A_p.F177L
ENSMUST00000076965.2|Olfr319-
201|ENSMUSG00000064044|+|chr11:g.58593059:T>A
METGNHSCGTDFTLVGLFQYGHMDTFLFTVISILFAVALIGNITLVLLIRLDRRLHTPMYFFLSQLSIIDMMC
ISTTVPKMGANFISDTKAIISVLGCEIQVFMFMSLAGCEALLGFMSYDRYIAICQPLHYPVLMRSKICCSMVA
SAWSSSSINALAHTVYVVFQLPFCGSRMVNHLFCEVPSLLPLVCEDTSQYEHMIVMSVLVLLVLLPFLAILASYA
RVLVVVFQMGSGQGQSRVAVSTCSSHLTVASLFYVTGLCTYTPHSLHSPGRDKVAVLYSIVTPVLNPFIIYSL
RNKEVIGALRRQMG*
>rs48062366_ENSMUSP00000150883_c.906:A>G_p.R303G
ENSMUST00000215962.2|Olfr319-
203|ENSMUSG00000064044|+|chr11:g.58593435:A>G
METGNHSCGTDFTLVGLFQYGHMDTFLFTVISILFAVALIGNITLVLLIRLDRRLHTPMYFFLSQLSIIDMMC
ISTTVPKMGANFISDTKAIISVLGCEIQVFMFMSLAGCEALLGFMSYDRYIAICQPLHYPVLMRSKICCSMVA
SAWSSSSINALAHTVYVVFQLPFCGSRMVNHLFCEVPSLLPLVCEDTSQYEHMIVMSVLVLLVLLPFLAILASYA
RVLVVVFQMGSGQGQSRVAVSTCSSHLTVASLFYVTGLCTYTPHSLHSPGRDKVAVLYSIVTPVLNPFIIYSL
RNKEVIGALRRQMG*
>rs48062366_ENSMUSP00000076232_c.906:A>G_p.R303G
ENSMUST00000076965.2|Olfr319-
201|ENSMUSG00000064044|+|chr11:g.58593435:A>G
METGNHSCGTDFTLVGLFQYGHMDTFLFTVISILFAVALIGNITLVLLIRLDRRLHTPMYFFLSQLSIIDMMC
ISTTVPKMGANFISDTKAIISVLGCEIQVFMFMSLAGCEALLGFMSYDRYIAICQPLHYPVLMRSKICCSMVA
SAWSSSSINALAHTVYVVFQLPFCGSRMVNHLFCEVPSLLPLVCEDTSQYEHMIVMSVLVLLVLLPFLAILASYA
RVLVVVFQMGSGQGQSRVAVSTCSSHLTVASLFYVTGLCTYTPHSLHSPGRDKVAVLYSIVTPVLNPFIIYSL
RNKEVIGALRRQMG*
>ENSMUSP00000150575_c.655:G>A_p.G219D ENSMUST00000215513.2|Olfr317-
202|ENSMUSG00000060030|-|chr11:g.58623334:C>T
MGATNDSTFHSFILTGFSDRPELERVLFAILLPAYLLTLLGNSTIILVSRDPLHHTPMYFFLTHLSFLDLSF
TSSSIPQLLYNLGSPDKTISYVGCALQLVFLGLGGVECLLLAVMAYDRFVAICKPLHYMVIMSRLCVGLVS
VAWSCGVANSLAMSPATLSLPRCGHHRVDHFLCEMPALIRMACVNTAVVEGIAFILAIIGIVLSPLVFIILVSYD
YIVRAVLRISSAAGRQKAFNTCGSHLTVVSLFYGNIIYMYMQPGNSSSQDQGKFLTLFYNIIVTPLLNPLIYTL
RNKEVKGALRRLLLGSRETGKVRASSRWTRGKLSW*
>ENSMUSP00000150027_c.655:G>A_p.G219D ENSMUST00000216196.2|Olfr317-
203|ENSMUSG00000060030|-|chr11:g.58623334:C>T
MGATNDSTFHSFILTGFSDRPELERVLFAILLPAYLLTLLGNSTIILVSRDPLHHTPMYFFLTHLSFLDLSF
TSSSIPQLLYNLGSPDKTISYVGCALQLVFLGLGGVECLLLAVMAYDRFVAICKPLHYMVIMSRLCVGLVS
VAWSCGVANSLAMSPATLSLPRCGHHRVDHFLCEMPALIRMACVNTAVVEGIAFILAIIGIVLSPLVFIILVSYD
YIVRAVLRISSAAGRQKAFNTCGSHLTVVSLFYGNIIYMYMQPGNSSSQDQGKFLTLFYNIIVTPLLNPLIYTL
RNKEVKGALRRLLLGSRETGKVRASSRWTRGKLSW*
>ENSMUSP00000075034_c.655:G>A_p.G219D ENSMUST00000075607.5|Olfr317-
201|ENSMUSG00000060030|-|chr11:g.58623334:C>T
MGATNDSTFHSFILTGFSDRPELERVLFAILLPAYLLTLLGNSTIILVSRDPLHHTPMYFFLTHLSFLDLSF
TSSSIPQLLYNLGSPDKTISYVGCALQLVFLGLGGVECLLLAVMAYDRFVAICKPLHYMVIMSRLCVGLVS
VAWSCGVANSLAMSPATLSLPRCGHHRVDHFLCEMPALIRMACVNTAVVEGIAFILAIIGIVLSPLVFIILVSYD
YIVRAVLRISSAAGRQKAFNTCGSHLTVVSLFYGNIIYMYMQPGNSSSQDQGKFLTLFYNIIVTPLLNPLIYTL
RNKEVKGALRRLLLGSRETGKVRASSRWTRGKLSW*
>ENSMUSP00000150575_c.34:T>C_p.F12S ENSMUST00000215513.2|Olfr317-
202|ENSMUSG00000060030|-|chr11:g.58623955:A>G
MGATNDSTFHSILTGFSDRPELERVLFAILLPAYLLTLLGNSTIILVSRDPLHHTPMYFFLTHLSFLDLSF
TSSSIPQLLYNLGSPDKTISYVGCALQLVFLGLGGVECLLLAVMAYDRFVAICKPLHYMVIMSRLCVGLVS
VAWSCGVANSLAMSPATLSLPRCGHHRVDHFLCEMPALIRMACVNTAVVEGIAFILAIIGIVLSPLVFIILVSYG

```

YIVRAVLRISAAAGRQKAFNTCGSHLTVVSLFYGNIIYMYMQPGNSSSQDQGKFLTLFYNIIVTPLLNPLIYTL  
RNKEVKGALRRLLLGSRETGKVRASSRWTRGKLSW\*  
>ENSMUSP00000150027\_c.34:T>C\_p.F12S ENSMUST00000216196.2|Olfr317-  
203|ENSMUSG00000060030|-|chr11:g.58623955:A>G  
MGATNDSTFSSHILTGFSDRPELERVLFALLPAYLLTLLGNSTIILVSRLDPLHPTMYFFLTHLSFLDLSF  
TSSSIPQLLYNLGSPDKTISYVGCALQLVLFGLGGVECLLLAVMAYDRFVAICKPLHYMVIMSPRLCVGLVS  
VAWSCGVANSLAMSPATLSLPRCGHHRVDHFLCEMPALIRMACVNTAVVEGIAFILAIIGIVLSPLVFIILVSYG  
YIVRAVLRISAAAGRQKAFNTCGSHLTVVSLFYGNIIYMYMQPGNSSSQDQGKFLTLFYNIIVTPLLNPLIYTL  
RNKEVKGALRRLLLGSRETGKVRASSRWTRGKLSW\*  
>ENSMUSP00000075034\_c.34:T>C\_p.F12S ENSMUST00000075607.5|Olfr317-  
201|ENSMUSG00000060030|-|chr11:g.58623955:A>G  
MGATNDSTFSSHILTGFSDRPELERVLFALLPAYLLTLLGNSTIILVSRLDPLHPTMYFFLTHLSFLDLSF  
TSSSIPQLLYNLGSPDKTISYVGCALQLVLFGLGGVECLLLAVMAYDRFVAICKPLHYMVIMSPRLCVGLVS  
VAWSCGVANSLAMSPATLSLPRCGHHRVDHFLCEMPALIRMACVNTAVVEGIAFILAIIGIVLSPLVFIILVSYG  
YIVRAVLRISAAAGRQKAFNTCGSHLTVVSLFYGNIIYMYMQPGNSSSQDQGKFLTLFYNIIVTPLLNPLIYTL  
RNKEVKGALRRLLLGSRETGKVRASSRWTRGKLSW\*  
>ENSMUSP00000150575\_c.7:C>T\_p.A3V ENSMUST00000215513.2|Olfr317-  
202|ENSMUSG00000060030|-|chr11:g.58623982:G>A  
MGVTNDSTFSHFILTGFSDRPELERVLFALLPAYLLTLLGNSTIILVSRLDPLHPTMYFFLTHLSFLDLSF  
TSSSIPQLLYNLGSPDKTISYVGCALQLVLFGLGGVECLLLAVMAYDRFVAICKPLHYMVIMSPRLCVGLVS  
VAWSCGVANSLAMSPATLSLPRCGHHRVDHFLCEMPALIRMACVNTAVVEGIAFILAIIGIVLSPLVFIILVSYG  
YIVRAVLRISAAAGRQKAFNTCGSHLTVVSLFYGNIIYMYMQPGNSSSQDQGKFLTLFYNIIVTPLLNPLIYTL  
RNKEVKGALRRLLLGSRETGKVRASSRWTRGKLSW\*  
>ENSMUSP00000150027\_c.7:C>T\_p.A3V ENSMUST00000216196.2|Olfr317-  
203|ENSMUSG00000060030|-|chr11:g.58623982:G>A  
MGVTNDSTFSHFILTGFSDRPELERVLFALLPAYLLTLLGNSTIILVSRLDPLHPTMYFFLTHLSFLDLSF  
TSSSIPQLLYNLGSPDKTISYVGCALQLVLFGLGGVECLLLAVMAYDRFVAICKPLHYMVIMSPRLCVGLVS  
VAWSCGVANSLAMSPATLSLPRCGHHRVDHFLCEMPALIRMACVNTAVVEGIAFILAIIGIVLSPLVFIILVSYG  
YIVRAVLRISAAAGRQKAFNTCGSHLTVVSLFYGNIIYMYMQPGNSSSQDQGKFLTLFYNIIVTPLLNPLIYTL  
RNKEVKGALRRLLLGSRETGKVRASSRWTRGKLSW\*  
>ENSMUSP00000075034\_c.7:C>T\_p.A3V ENSMUST00000075607.5|Olfr317-  
201|ENSMUSG00000060030|-|chr11:g.58623982:G>A  
MGVTNDSTFSHFILTGFSDRPELERVLFALLPAYLLTLLGNSTIILVSRLDPLHPTMYFFLTHLSFLDLSF  
TSSSIPQLLYNLGSPDKTISYVGCALQLVLFGLGGVECLLLAVMAYDRFVAICKPLHYMVIMSPRLCVGLVS  
VAWSCGVANSLAMSPATLSLPRCGHHRVDHFLCEMPALIRMACVNTAVVEGIAFILAIIGIVLSPLVFIILVSYG  
YIVRAVLRISAAAGRQKAFNTCGSHLTVVSLFYGNIIYMYMQPGNSSSQDQGKFLTLFYNIIVTPLLNPLIYTL  
RNKEVKGALRRLLLGSRETGKVRASSRWTRGKLSW\*  
>ENSMUSP00000151136\_c.413:G>T\_p.R138S ENSMUST00000215071.2|Olfr316-  
202|ENSMUSG00000107677|+|chr11:g.58648906:G>T  
MESGNRSCGTDFTLVGLFQDGHMDTFLFTVISILFAVALIGNITLVILIRLDQRLHPTMYFLLSOLSIMDDMY  
ISTTVPKMAANFLSDTKAISFLGCVIQAFVFLTLGGSEALLGFMSYDRYIAICRPLHYVPLMSSKICCSMVA  
SAWSSSSITASVHTVYVVFQLPFCGSRMVNHHFFCEVPSLLPLVCEDTSQYEHTVLVSGLVILLPLFLAILASYA  
RVLVVVIQMGSGKGQSRVAVSTCSSHLTVASLFYVTTTSTYTPHTLHSPGRDKVVAVLYSIVTPVLNPFYISL  
RNKEVMGALRRQMK\*  
>ENSMUSP00000145187\_c.413:G>T\_p.R138S ENSMUST00000203731.2|Olfr316-  
201|ENSMUSG00000107677|+|chr11:g.58648906:G>T  
MESGNRSCGTDFTLVGLFQDGHMDTFLFTVISILFAVALIGNITLVILIRLDQRLHPTMYFLLSOLSIMDDMY  
ISTTVPKMAANFLSDTKAISFLGCVIQAFVFLTLGGSEALLGFMSYDRYIAICRPLHYVPLMSSKICCSMVA  
SAWSSSSITASVHTVYVVFQLPFCGSRMVNHHFFCEVPSLLPLVCEDTSQYEHTVLVSGLVILLPLFLAILASYA  
RVLVVVIQMGSGKGQSRVAVSTCSSHLTVASLFYVTTTSTYTPHTLHSPGRDKVVAVLYSIVTPVLNPFYISL  
RNKEVMGALRRQMK\*  
>ENSMUSP00000151136\_c.438:A>G\_p.S147G ENSMUST00000215071.2|Olfr316-  
202|ENSMUSG00000107677|+|chr11:g.58648931:A>G  
MESGNRSCGTDFTLVGLFQDGHMDTFLFTVISILFAVALIGNITLVILIRLDQRLHPTMYFLLSOLSIMDDMY  
ISTTVPKMAANFLSDTKAISFLGCVIQAFVFLTLGGSEALLGFMSYDRYIAICRPLHYVPLMSSKICCSMVA  
GAWSSSSITASVHTVYVVFQLPFCGSRMVNHHFFCEVPSLLPLVCEDTSQYEHTVLVSGLVILLPLFLAILASYA  
RVLVVVIQMGSGKGQSRVAVSTCSSHLTVASLFYVTTTSTYTPHTLHSPGRDKVVAVLYSIVTPVLNPFYISL  
RNKEVMGALRRQMK\*



>ENSMUSP00000145187\_c.438:A>G\_p.S147G ENSMUST00000203731.2|Olfr316-201|ENSMUSG00000107677|+|chr11:g.58648931:A>G  
MESGNRSCGTDFTLVGLFQDGHMDTFLFTVISILFAVALIGNITLVILIRLDQRLHTPMYFLLSOLSIMDDMMY  
ISTTVPKMAANFLSDTKAISFLGCVIQAFVFLTLGGSEALLLGFMSYDRYIAICRPLHYPVLMRSRKICCSMVA  
GAWSSSSITASVHTVYVFQLPFCGSRMVNHHFFCEVPSLLPLVCEDTSQYEHTVLVSGLVILLPLFLAILASYA  
RVLVVVIQMGSGKGQSRVAVSTCSSHLTVASLFYVTTLSTYTPHPTLHSPGRDKVVAVLYSIVTPVLNPFIIYSL  
RNKEVMGALRRQMK\*  
>ENSMUSP00000151136\_c.887:GG>A\_p.E296del-fs ENSMUST00000215071.2|Olfr316-202|ENSMUSG00000107677|+|chr11:g.58649380:GG>A  
MESGNRSCGTDFTLVGLFQDGHMDTFLFTVISILFAVALIGNITLVILIRLDQRLHTPMYFLLSOLSIMDDMMY  
ISTTVPKMAANFLSDTKAISFLGCVIQAFVFLTLGGSEALLLGFMSYDRYIAICRPLHYPVLMRSRKICCSMVA  
SAWSSSSITASVHTVYVFQLPFCGSRMVNHHFFCEVPSLLPLVCEDTSQYEHTVLVSGLVILLPLFLAILASYA  
RVLVVVIQMGSGKGQSRVAVSTCSSHLTVASLFYVTTLSTYTPHPTLHSPGRDKVVAVLYSIVTPVLNPFIIYSL  
RNKESWGP  
>ENSMUSP00000145187\_c.887:GG>A\_p.E296del-fs ENSMUST00000203731.2|Olfr316-201|ENSMUSG00000107677|+|chr11:g.58649380:GG>A  
MESGNRSCGTDFTLVGLFQDGHMDTFLFTVISILFAVALIGNITLVILIRLDQRLHTPMYFLLSOLSIMDDMMY  
ISTTVPKMAANFLSDTKAISFLGCVIQAFVFLTLGGSEALLLGFMSYDRYIAICRPLHYPVLMRSRKICCSMVA  
SAWSSSSITASVHTVYVFQLPFCGSRMVNHHFFCEVPSLLPLVCEDTSQYEHTVLVSGLVILLPLFLAILASYA  
RVLVVVIQMGSGKGQSRVAVSTCSSHLTVASLFYVTTLSTYTPHPTLHSPGRDKVVAVLYSIVTPVLNPFIIYSL  
RNKESWGP  
>ENSMUSP00000144944\_c.176:G>A\_p.M59I ENSMUST00000203256.4|Olfr315-202|ENSMUSG00000056959|+|chr11:g.58669131:G>A  
MKTSPNSSTEADFILLGLFSHTHAHSLLSVVLVIFTASLMGNTLMILLICRDPRLHTPIYFLLSOLSIMDDMMY  
VSTIVPKMAANYLTSTRSISPAGCGSQIFLFLTLGGCEFLLAAMSYDRYVAICFPLRYHVLNPNKLCAYLTV  
GSWLLGAADGLMQAGTILSFPPFCHSRTINHHFFCEAPSLVRLACADTKVFEFFMYICILMLLIPLSLVLASYS  
LILATVLRMRSSAARKKAFTTCCSHLAVVGLFYGAIIFIYMRPKSHQPGKSDKVVSAFYTIPTPVLNPLIYSV  
RNKEVKGALRKWLQKTV\*  
>ENSMUSP00000080248\_c.176:G>A\_p.M59I ENSMUST00000081533.5|Olfr315-201|ENSMUSG00000056959|+|chr11:g.58669131:G>A  
MKTSPNSSTEADFILLGLFSHTHAHSLLSVVLVIFTASLMGNTLMILLICRDPRLHTPIYFLLSOLSIMDDMMY  
VSTIVPKMAANYLTSTRSISPAGCGSQIFLFLTLGGCEFLLAAMSYDRYVAICFPLRYHVLNPNKLCAYLTV  
GSWLLGAADGLMQAGTILSFPPFCHSRTINHHFFCEAPSLVRLACADTKVFEFFMYICILMLLIPLSLVLASYS  
LILATVLRMRSSAARKKAFTTCCSHLAVVGLFYGAIIFIYMRPKSHQPGKSDKVVSAFYTIPTPVLNPLIYSV  
RNKEVKGALRKWLQKTV\*  
>ENSMUSP00000144944\_c.633:T>C\_p.S212P ENSMUST00000203256.4|Olfr315-202|ENSMUSG00000056959|+|chr11:g.58669588:T>C  
MKTSPNSSTEADFILLGLFSHTHAHSLLSVVLVIFTASLMGNTLMILLICRDPRLHTPMYFLLSOLSIMDDMMY  
VSTIVPKMAANYLTSTRSISPAGCGSQIFLFLTLGGCEFLLAAMSYDRYVAICFPLRYHVLNPNKLCAYLTV  
GSWLLGAADGLMQAGTILSFPPFCHSRTINHHFFCEAPSLVRLACADTKVFEFFMYICILMLLIPLSLVLASYS  
LILATVLRMRSSAARKKAFTTCCSHLAVVGLFYGAIIFIYMRPKSHQPGKSDKVVSAFYTIPTPVLNPLIYSV  
RNKEVKGALRKWLQKTV\*  
>ENSMUSP00000080248\_c.633:T>C\_p.S212P ENSMUST00000081533.5|Olfr315-201|ENSMUSG00000056959|+|chr11:g.58669588:T>C  
MKTSPNSSTEADFILLGLFSHTHAHSLLSVVLVIFTASLMGNTLMILLICRDPRLHTPMYFLLSOLSIMDDMMY  
VSTIVPKMAANYLTSTRSISPAGCGSQIFLFLTLGGCEFLLAAMSYDRYVAICFPLRYHVLNPNKLCAYLTV  
GSWLLGAADGLMQAGTILSFPPFCHSRTINHHFFCEAPSLVRLACADTKVFEFFMYICILMLLIPLSLVLASYS  
LILATVLRMRSSAARKKAFTTCCSHLAVVGLFYGAIIFIYMRPKSHQPGKSDKVVSAFYTIPTPVLNPLIYSV  
RNKEVKGALRKWLQKTV\*  
>ENSMUSP00000144944\_c.781:G>T\_p.R261I ENSMUST00000203256.4|Olfr315-202|ENSMUSG00000056959|+|chr11:g.58669736:G>T  
MKTSPNSSTEADFILLGLFSHTHAHSLLSVVLVIFTASLMGNTLMILLICRDPRLHTPMYFLLSOLSIMDDMMY  
VSTIVPKMAANYLTSTRSISPAGCGSQIFLFLTLGGCEFLLAAMSYDRYVAICFPLRYHVLNPNKLCAYLTV  
GSWLLGAADGLMQAGTILSFPPFCHSRTINHHFFCEAPSLVRLACADTKVFEFFMYICILMLLIPLSLVLASYS  
LILATVLRMRSSAARKKAFTTCCSHLAVVGLFYGAIIFIYMRPKSHQPGKSDKVVSAFYTIPTPVLNPLIYSV  
RNKEVKGALRKWLQKTV\*  
>ENSMUSP00000080248\_c.781:G>T\_p.R261I ENSMUST00000081533.5|Olfr315-201|ENSMUSG00000056959|+|chr11:g.58669736:G>T

MKTPSNSTEADFILLGLFSHTHAHSLLSVVLVIFTASLMGNTLMILLICRDPRLHTPMYFLLSQLSLMDMML  
VSTIVPKMAANYLTSTRSISPAGCGSQIFLFLTLGAGCEFLLAAMSYDRYVAICFPLRYHVLNPKLCAYLTV  
GSWLLGAADGLMQAGTILSFPFCHSRTINHHFFCEAPSLVRLACADTKVFEFFMYICILMLLIPLSLVLASYS  
LILATVLRMRSSAARKKAFTTCSHSLAVVGLFYGAIIFIYMI PKSHQPGKSDKVVSFAFYTIFT PVLNPLIYSV  
RNKEVKGALRKWLQKTV\*  
>ENSMUSP00000091708\_c.366:G>A\_p.A123T ENSMUST00000094156.12|Fam183b-  
202|ENSMUSG00000049154|-|chr11:g.58683756:C>T  
MAGRVGQMKNQDEVHQNQILRELFKELRAQKLYTQYHVNPLRKVHTITRKPMSWHDNLEEPEDAKFLNLIHH  
AAQGPKKKYSETQTEAQEIGWDPNPLINPDRQDHRLNHFRVYHDITLYKTKLWSLGEDDHQK\*  
>ENSMUSP00000051960\_c.306:G>A\_p.A103T ENSMUST00000060581.5|Fam183b-  
201|ENSMUSG00000049154|-|chr11:g.58683756:C>T  
MAGRVGQMKNQDEVHQNQILRELFKELRAQKLYTQYHVNPLRKAKFLNLIHHAAGPKKKYSETQTEAQEIG  
WDPNPLINPDRQDHRLNHFRVYHDITLYKTKLWSLGEDDHQK\*  
>ENSMUSP00000159142\_c.372:G>A\_p.A125T ENSMUST00000239007.2|Fam183b-  
204|ENSMUSG00000049154|-|chr11:g.58683756:C>T  
MAMAGRVGQMKNQDEVHQNQILRELFKELRAQKLYTQYHVNPLRKVHTITRKPMSWHDNLEEPEDAKFLNLI  
HHAAGPKKKYSETQTEAQEIGWDPNPLINPDRQDHRLNHFRVYHDITLYKTKLWSLGEDDHQK\*  
>ENSMUSP00000159184\_c.312:G>A\_p.A105T ENSMUST00000238886.2|Fam183b-  
203|ENSMUSG00000049154|-|chr11:g.58683756:C>T  
MAMAGRVGQMKNQDEVHQNQILRELFKELRAQKLYTQYHVNPLRKAKFLNLIHHAAGPKKKYSETQTEAQE  
IGWDPNPLINPDRQDHRLNHFRVYHDITLYKTKLWSLGEDDHQK\*  
>ENSMUSP00000091708\_c.327:A>C\_p.N110H ENSMUST00000094156.12|Fam183b-  
202|ENSMUSG00000049154|-|chr11:g.58683795:T>G  
MAGRVGQMKNQDEVHQNQILRELFKELRAQKLYTQYHVNPLRKVHTITRKPMSWHDNLEEPEDAKFLNLIHH  
AAQGPKKKYSETQTEAQEIGWDPNPLINPDRQDHRLHFRVYHDITLYKAKLWSLGEDDHQK\*  
>ENSMUSP00000051960\_c.267:A>C\_p.N90H ENSMUST00000060581.5|Fam183b-  
201|ENSMUSG00000049154|-|chr11:g.58683795:T>G  
MAGRVGQMKNQDEVHQNQILRELFKELRAQKLYTQYHVNPLRKAKFLNLIHHAAGPKKKYSETQTEAQEIG  
WDPNPLINPDRQDHRLHFRVYHDITLYKAKLWSLGEDDHQK\*  
>ENSMUSP00000159142\_c.333:A>C\_p.N112H ENSMUST00000239007.2|Fam183b-  
204|ENSMUSG00000049154|-|chr11:g.58683795:T>G  
MAMAGRVGQMKNQDEVHQNQILRELFKELRAQKLYTQYHVNPLRKVHTITRKPMSWHDNLEEPEDAKFLNLI  
HHAAGPKKKYSETQTEAQEIGWDPNPLINPDRQDHRLHFRVYHDITLYKAKLWSLGEDDHQK\*  
>ENSMUSP00000159184\_c.273:A>C\_p.N92H ENSMUST00000238886.2|Fam183b-  
203|ENSMUSG00000049154|-|chr11:g.58683795:T>G  
MAMAGRVGQMKNQDEVHQNQILRELFKELRAQKLYTQYHVNPLRKAKFLNLIHHAAGPKKKYSETQTEAQE  
IGWDPNPLINPDRQDHRLHFRVYHDITLYKAKLWSLGEDDHQK\*  
>rs265601560\_ENSMUSP00000091708\_c.4:C>AC\_p.A2ins-fs  
ENSMUST00000094156.12|Fam183b-202|ENSMUSG00000049154|-  
|chr11:g.58692715:G>GT  
MDRTCGADEESG  
>rs265601560\_ENSMUSP00000051960\_c.4:C>AC\_p.A2ins-fs  
ENSMUST00000060581.5|Fam183b-201|ENSMUSG00000049154|-  
|chr11:g.58692715:G>GT  
MDRTCGADEESG  
>rs265601560\_ENSMUSP00000159142\_c.10:C>AC\_p.A4ins-fs  
ENSMUST00000239007.2|Fam183b-204|ENSMUSG00000049154|-  
|chr11:g.58692715:G>GT  
MAMDRTCGADEESG  
>rs265601560\_ENSMUSP00000159184\_c.10:C>AC\_p.A4ins-fs  
ENSMUST00000238886.2|Fam183b-203|ENSMUSG00000049154|-  
|chr11:g.58692715:G>GT  
MAMDRTCGADEESG  
>rs232871506\_ENSMUSP00000150529\_c.24:C>T\_p.H9Y  
ENSMUST00000217506.2|O1fr313-  
202|ENSMUSG00000070438|+|chr11:g.58707860:C>T  
MSNHTRVITYFILRGFSDIPQLRLMAIPVFLLIYTFGLLNLSIITAVTRDSRLHSPMYFFLKNLSFLDICYTS  
ATIPKAVVISLTGSGVISYQECVAQLYIFLTFSSSECFLLTAMAYDRCLAAILRPLIYGTIMSHKYCSALVVTA

WVGGAIYSAFHTFNTFSLPYCGPNVIDHFFCDIPPMRLSCTDYHLSEEVGFAVSSCIVMSSFALTVVSYIGI  
VATVLCIPSVEGRWKAFSTCSSHLTTVILFYGTGSFVYLRPASQYSPTLGPLASIFYSVVTPSLNPVYCLRN  
KDMKFALQKLYCGRKY\*  
>rs232871506\_ENSMUSP00000080852\_c.24:C>T\_p.H9Y  
ENSMUST00000082220.5|01fr313-  
201|ENSMUSG00000070438|+|chr11:g.58707860:C>T  
MSNHTRVTFILRGFSDIPQLRLMAIPVFLLIYTFGLLGNLSIITAVTRDSRLHSPMYFFLNLSFLDICYTS  
ATIPKAVVISLTGSGVISYQECVAQLYIFLTFSSSECFLLTAMAYDRCLAAILRPLIYGTIMSHKYCSALVVTA  
WVGGAIYSAFHTFNTFSLPYCGPNVIDHFFCDIPPMRLSCTDYHLSEEVGFAVSSCIVMSSFALTVVSYIGI  
VATVLCIPSVEGRWKAFSTCSSHLTTVILFYGTGSFVYLRPASQYSPTLGPLASIFYSVVTPSLNPVYCLRN  
KDMKFALQKLYCGRKY\*  
>rs252040486\_ENSMUSP00000150529\_c.34:T>C\_p.L12P  
ENSMUST00000217506.2|01fr313-  
202|ENSMUSG00000070438|+|chr11:g.58707870:T>C  
MSNHTRVTHFIPRGFSDIPQLRLMAIPVFLLIYTFGLLGNLSIITAVTRDSRLHSPMYFFLNLSFLDICYTS  
ATIPKAVVISLTGSGVISYQECVAQLYIFLTFSSSECFLLTAMAYDRCLAAILRPLIYGTIMSHKYCSALVVTA  
WVGGAIYSAFHTFNTFSLPYCGPNVIDHFFCDIPPMRLSCTDYHLSEEVGFAVSSCIVMSSFALTVVSYIGI  
VATVLCIPSVEGRWKAFSTCSSHLTTVILFYGTGSFVYLRPASQYSPTLGPLASIFYSVVTPSLNPVYCLRN  
KDMKFALQKLYCGRKY\*  
>rs252040486\_ENSMUSP00000080852\_c.34:T>C\_p.L12P  
ENSMUST00000082220.5|01fr313-  
201|ENSMUSG00000070438|+|chr11:g.58707870:T>C  
MSNHTRVTHFIPRGFSDIPQLRLMAIPVFLLIYTFGLLGNLSIITAVTRDSRLHSPMYFFLNLSFLDICYTS  
ATIPKAVVISLTGSGVISYQECVAQLYIFLTFSSSECFLLTAMAYDRCLAAILRPLIYGTIMSHKYCSALVVTA  
WVGGAIYSAFHTFNTFSLPYCGPNVIDHFFCDIPPMRLSCTDYHLSEEVGFAVSSCIVMSSFALTVVSYIGI  
VATVLCIPSVEGRWKAFSTCSSHLTTVILFYGTGSFVYLRPASQYSPTLGPLASIFYSVVTPSLNPVYCLRN  
KDMKFALQKLYCGRKY\*  
>ENSMUSP00000150529\_c.49:A>AAATAATAATAATAATAAT\_p.D17EIIIIII-ins  
ENSMUST00000217506.2|01fr313-  
202|ENSMUSG00000070438|+|chr11:g.58707885:A>AAATAATAATAATAATAAT  
MSNHTRVTHFIPRGFSEIIIIIIIPQLRLMAIPVFLLIYTFGLLGNLSIITAVTRDSRLHSPMYFFLNLSFL  
DICYTSATIPKAVVISLTGSGVISYQECVAQLYIFLTFSSSECFLLTAMAYDRCLAAILRPLIYGTIMSHKYCS  
ALVVTAWVGGAIYSAFHTFNTFSLPYCGPNVIDHFFCDIPPMRLSCTDYHLSEEVGFAVSSCIVMSSFALTV  
VSYIGIVATVLCIPSVEGRWKAFSTCSSHLTTVILFYGTGSFVYLRPASQYSPTLGPLASIFYSVVTPSLNPV  
VYCLRNKDMKFALQKLYCGRKY\*  
>ENSMUSP00000080852\_c.49:A>AAATAATAATAATAATAAT\_p.D17EIIIIII-ins  
ENSMUST00000082220.5|01fr313-  
201|ENSMUSG00000070438|+|chr11:g.58707885:A>AAATAATAATAATAATAAT  
MSNHTRVTHFIPRGFSEIIIIIIIPQLRLMAIPVFLLIYTFGLLGNLSIITAVTRDSRLHSPMYFFLNLSFL  
DICYTSATIPKAVVISLTGSGVISYQECVAQLYIFLTFSSSECFLLTAMAYDRCLAAILRPLIYGTIMSHKYCS  
ALVVTAWVGGAIYSAFHTFNTFSLPYCGPNVIDHFFCDIPPMRLSCTDYHLSEEVGFAVSSCIVMSSFALTV  
VSYIGIVATVLCIPSVEGRWKAFSTCSSHLTTVILFYGTGSFVYLRPASQYSPTLGPLASIFYSVVTPSLNPV  
VYCLRNKDMKFALQKLYCGRKY\*  
>rs249513274\_ENSMUSP00000150529\_c.103:T>G\_p.F35C  
ENSMUST00000217506.2|01fr313-  
202|ENSMUSG00000070438|+|chr11:g.58707939:T>G  
MSNHTRVTHFIPRGFSDIPQLRLMAIPVFLLIYTCGLLGNLSIITAVTRDSRLHSPMYFFLNLSFLDICYTS  
ATIPKAVVISLTGSGVISYQECVAQLYIFLTFSSSECFLLTAMAYDRCLAAILRPLIYGTIMSHKYCSALVVTA  
WVGGAIYSAFHTFNTFSLPYCGPNVIDHFFCDIPPMRLSCTDYHLSEEVGFAVSSCIVMSSFALTVVSYIGI  
VATVLCIPSVEGRWKAFSTCSSHLTTVILFYGTGSFVYLRPASQYSPTLGPLASIFYSVVTPSLNPVYCLRN  
KDMKFALQKLYCGRKY\*  
>rs249513274\_ENSMUSP00000080852\_c.103:T>G\_p.F35C  
ENSMUST00000082220.5|01fr313-  
201|ENSMUSG00000070438|+|chr11:g.58707939:T>G  
MSNHTRVTHFIPRGFSDIPQLRLMAIPVFLLIYTCGLLGNLSIITAVTRDSRLHSPMYFFLNLSFLDICYTS  
ATIPKAVVISLTGSGVISYQECVAQLYIFLTFSSSECFLLTAMAYDRCLAAILRPLIYGTIMSHKYCSALVVTA  
WVGGAIYSAFHTFNTFSLPYCGPNVIDHFFCDIPPMRLSCTDYHLSEEVGFAVSSCIVMSSFALTVVSYIGI

VATVLCIPSVTEGRWKAFSTCSSHLTTVILFYGTGSFVYLRPASQYSPTLGPLASIFYSVVTPSLNPVVYCLRN  
KDMKFALQKLYCGRKY\*  
>rs258477531\_ENSMUSP00000150529\_c.279:G>A\_p.E94K  
ENSMUST00000217506.2|Olfr313-  
202|ENSMUSG00000070438|+|chr11:g.58708115:G>A  
MSNHTRVTHFILRGFSDIPQLRLMAIPVFLLIYTFGLLGNLSIITAVTRDSRLHSPMYFFLKNLSFLDICYTS  
ATIPKAVVISLTGSGVISYQKCAVQLYIFLTFSSSECFLLTAMAYDRCLAAILRPLIYGTIMSHKYCSALVVTA  
WVGGAIFYSAFHTFNTFSLPYCGPNVIDHFFCDIPPMRLSCTDYHLSEEVGFAVSSCIVMSSFALTVVSYIGI  
VATVLCIPSVTEGRWKAFSTCSSHLTTVILFYGTGSFVYLRPASQYSPTLGPLASIFYSVVTPSLNPVVYCLRN  
KDMKFALQKLYCGRKY\*  
>rs258477531\_ENSMUSP00000080852\_c.279:G>A\_p.E94K  
ENSMUST00000082220.5|Olfr313-  
201|ENSMUSG00000070438|+|chr11:g.58708115:G>A  
MSNHTRVTHFILRGFSDIPQLRLMAIPVFLLIYTFGLLGNLSIITAVTRDSRLHSPMYFFLKNLSFLDICYTS  
ATIPKAVVISLTGSGVISYQKCAVQLYIFLTFSSSECFLLTAMAYDRCLAAILRPLIYGTIMSHKYCSALVVTA  
WVGGAIFYSAFHTFNTFSLPYCGPNVIDHFFCDIPPMRLSCTDYHLSEEVGFAVSSCIVMSSFALTVVSYIGI  
VATVLCIPSVTEGRWKAFSTCSSHLTTVILFYGTGSFVYLRPASQYSPTLGPLASIFYSVVTPSLNPVVYCLRN  
KDMKFALQKLYCGRKY\*  
>rs245110369\_ENSMUSP00000150529\_c.306:C>G\_p.L103V  
ENSMUST00000217506.2|Olfr313-  
202|ENSMUSG00000070438|+|chr11:g.58708142:C>G  
MSNHTRVTHFILRGFSDIPQLRLMAIPVFLLIYTFGLLGNLSIITAVTRDSRLHSPMYFFLKNLSFLDICYTS  
ATIPKAVVISLTGSGVISYQECVAQLYIFVTFSSSECFLLTAMAYDRCLAAILRPLIYGTIMSHKYCSALVVTA  
WVGGAIFYSAFHTFNTFSLPYCGPNVIDHFFCDIPPMRLSCTDYHLSEEVGFAVSSCIVMSSFALTVVSYIGI  
VATVLCIPSVTEGRWKAFSTCSSHLTTVILFYGTGSFVYLRPASQYSPTLGPLASIFYSVVTPSLNPVVYCLRN  
KDMKFALQKLYCGRKY\*  
>rs245110369\_ENSMUSP00000080852\_c.306:C>G\_p.L103V  
ENSMUST00000082220.5|Olfr313-  
201|ENSMUSG00000070438|+|chr11:g.58708142:C>G  
MSNHTRVTHFILRGFSDIPQLRLMAIPVFLLIYTFGLLGNLSIITAVTRDSRLHSPMYFFLKNLSFLDICYTS  
ATIPKAVVISLTGSGVISYQECVAQLYIFVTFSSSECFLLTAMAYDRCLAAILRPLIYGTIMSHKYCSALVVTA  
WVGGAIFYSAFHTFNTFSLPYCGPNVIDHFFCDIPPMRLSCTDYHLSEEVGFAVSSCIVMSSFALTVVSYIGI  
VATVLCIPSVTEGRWKAFSTCSSHLTTVILFYGTGSFVYLRPASQYSPTLGPLASIFYSVVTPSLNPVVYCLRN  
KDMKFALQKLYCGRKY\*  
>rs259366413\_ENSMUSP00000150529\_c.609:A>C\_p.I204L  
ENSMUST00000217506.2|Olfr313-  
202|ENSMUSG00000070438|+|chr11:g.58708445:A>C  
MSNHTRVTHFILRGFSDIPQLRLMAIPVFLLIYTFGLLGNLSIITAVTRDSRLHSPMYFFLKNLSFLDICYTS  
ATIPKAVVISLTGSGVISYQECVAQLYIFLTFSSSECFLLTAMAYDRCLAAILRPLIYGTIMSHKYCSALVVTA  
WVGGAIFYSAFHTFNTFSLPYCGPNVIDHFFCDIPPMRLSCTDYHLSEEVGFAVSSCLVMSSFALTVVSYIGI  
VATVLCIPSVTEGRWKAFSTCSSHLTTVILFYGTGSFVYLRPASQYSPTLGPLASIFYSVVTPSLNPVVYCLRN  
KDMKFALQKLYCGRKY\*  
>rs259366413\_ENSMUSP00000080852\_c.609:A>C\_p.I204L  
ENSMUST00000082220.5|Olfr313-  
201|ENSMUSG00000070438|+|chr11:g.58708445:A>C  
MSNHTRVTHFILRGFSDIPQLRLMAIPVFLLIYTFGLLGNLSIITAVTRDSRLHSPMYFFLKNLSFLDICYTS  
ATIPKAVVISLTGSGVISYQECVAQLYIFLTFSSSECFLLTAMAYDRCLAAILRPLIYGTIMSHKYCSALVVTA  
WVGGAIFYSAFHTFNTFSLPYCGPNVIDHFFCDIPPMRLSCTDYHLSEEVGFAVSSCLVMSSFALTVVSYIGI  
VATVLCIPSVTEGRWKAFSTCSSHLTTVILFYGTGSFVYLRPASQYSPTLGPLASIFYSVVTPSLNPVVYCLRN  
KDMKFALQKLYCGRKY\*  
>ENSMUSP00000150529\_c.878:A>CTCAGACAG\_p.K293ins-fs  
ENSMUST00000217506.2|Olfr313-  
202|ENSMUSG00000070438|+|chr11:g.58708714:A>CTCAGACAG  
MSNHTRVTHFILRGFSDIPQLRLMAIPVFLLIYTFGLLGNLSIITAVTRDSRLHSPMYFFLKNLSFLDICYTS  
ATIPKAVVISLTGSGVISYQECVAQLYIFLTFSSSECFLLTAMAYDRCLAAILRPLIYGTIMSHKYCSALVVTA  
WVGGAIFYSAFHTFNTFSLPYCGPNVIDHFFCDIPPMRLSCTDYHLSEEVGFAVSSCIVMSSFALTVVSYIGI  
VATVLCIPSVTEGRWKAFSTCSSHLTTVILFYGTGSFVYLRPASQYSPTLGPLASIFYSVVTPSLNPVVYCLRN  
NSDRI

>ENSMUSP00000080852\_c.878:A>CTCAGACAG\_p.K293ins-fs  
ENSMUST00000082220.5|Olfr313-  
201|ENSMUSG00000070438|+|chr11:g.58708714:A>CTCAGACAG  
MSNHTRVTHFILRGFSDIPQLRLMAIPVFLLIYTFGLLGNLSIIITAVTRDSRLHSPMYFFLKNLSFLDICYTS  
ATIPKAVVISLGTSGVISYQECVAQLYIIFLTFSSSECFLLTAMAYDRCLAAILRPLIYGTIMSHKYCSALVVTA  
WVGAIYSAFHTFNTFSLPYCGPNVIDHFFCDIPPMRLSCTDYHLSEEVGFVAVSSCIVMSSFALTVVSYIGI  
VATVLCIPSVVEGRWKAFASTCSSHLTTVILFYGTGSFVYLRPASQYSPTLGPLASIFYSVVTPLSNPVPVYCLRN  
NSDRI  
>ENSMUSP00000149697\_c.524:C>G\_p.F175L ENSMUST00000216407.2|Olfr312-  
202|ENSMUSG00000096806|+|chr11:g.58722506:C>G  
MSNHTRVTHFILRGFSDVPQLRLVLIIPFFLFFYTFGILGNFSIIITAVTRDSRLHSPMYFFLKNLSFLDICYTS  
ATIPKAVVISLGTSGVISYQECAAQLYIIFTFACTECFLLTAMAYDRCLAAILRPLIYGTIMSQKYCSALVVTA  
WVGAIYSAFHTFNTFSLPYCGPNVIDHFLFCMPVRLSCTDYHLTEEVGFVAVSSCIVMSSFVLTVVSYIGI  
VATVLRIPSVVEGRWKAFASTCSSHLTTVILFYGTGSFVYLRPASQYSPTLGRLASIFYSVVTPLSNPVPVYCLRN  
KDMKFALQKLYCGRKY\*  
>ENSMUSP00000077344\_c.524:C>G\_p.F175L ENSMUST00000078217.2|Olfr312-  
201|ENSMUSG00000096806|+|chr11:g.58722506:C>G  
MSNHTRVTHFILRGFSDVPQLRLVLIIPFFLFFYTFGILGNFSIIITAVTRDSRLHSPMYFFLKNLSFLDICYTS  
ATIPKAVVISLGTSGVISYQECAAQLYIIFTFACTECFLLTAMAYDRCLAAILRPLIYGTIMSQKYCSALVVTA  
WVGAIYSAFHTFNTFSLPYCGPNVIDHFLFCMPVRLSCTDYHLTEEVGFVAVSSCIVMSSFVLTVVSYIGI  
VATVLRIPSVVEGRWKAFASTCSSHLTTVILFYGTGSFVYLRPASQYSPTLGRLASIFYSVVTPLSNPVPVYCLRN  
KDMKFALQKLYCGRKY\*  
>ENSMUSP00000149697\_c.679:C>T\_p.P227L ENSMUST00000216407.2|Olfr312-  
202|ENSMUSG00000096806|+|chr11:g.58722661:C>T  
MSNHTRVTHFILRGFSDVPQLRLVLIIPFFLFFYTFGILGNFSIIITAVTRDSRLHSPMYFFLKNLSFLDICYTS  
ATIPKAVVISLGTSGVISYQECAAQLYIIFTFACTECFLLTAMAYDRCLAAILRPLIYGTIMSQKYCSALVVTA  
WVGAIYSAFHTFNTFSLPYCGPNVIDHFFCDIPPMRLSCTDYHLTEEVGFVAVSSCIVMSSFVLTVVSYIGI  
VATVLRILSVVEGRWKAFASTCSSHLTTVILFYGTGSFVYLRPASQYSPTLGRLASIFYSVVTPLSNPVPVYCLRN  
KDMKFALQKLYCGRKY\*  
>ENSMUSP00000077344\_c.679:C>T\_p.P227L ENSMUST00000078217.2|Olfr312-  
201|ENSMUSG00000096806|+|chr11:g.58722661:C>T  
MSNHTRVTHFILRGFSDVPQLRLVLIIPFFLFFYTFGILGNFSIIITAVTRDSRLHSPMYFFLKNLSFLDICYTS  
ATIPKAVVISLGTSGVISYQECAAQLYIIFTFACTECFLLTAMAYDRCLAAILRPLIYGTIMSQKYCSALVVTA  
WVGAIYSAFHTFNTFSLPYCGPNVIDHFFCDIPPMRLSCTDYHLTEEVGFVAVSSCIVMSSFVLTVVSYIGI  
VATVLRILSVVEGRWKAFASTCSSHLTTVILFYGTGSFVYLRPASQYSPTLGRLASIFYSVVTPLSNPVPVYCLRN  
KDMKFALQKLYCGRKY\*  
>ENSMUSP00000149697\_c.689:A>AT\_p.E230ins-fs ENSMUST00000216407.2|Olfr312-  
202|ENSMUSG00000096806|+|chr11:g.58722671:A>AT  
MSNHTRVTHFILRGFSDVPQLRLVLIIPFFLFFYTFGILGNFSIIITAVTRDSRLHSPMYFFLKNLSFLDICYTS  
ATIPKAVVISLGTSGVISYQECAAQLYIIFTFACTECFLLTAMAYDRCLAAILRPLIYGTIMSQKYCSALVVTA  
WVGAIYSAFHTFNTFSLPYCGPNVIDHFFCDIPPMRLSCTDYHLTEEVGFVAVSSCIVMSSFVLTVVSYIGI  
VATVLRIPSVVEWQVESLFYLLSPDHSHLVLWLNWKLVCSEARLSVLPDPGSPGIYFLLCSHTISESSCLLSEE  
QRYEVCSTETLLWEKVL  
>ENSMUSP00000077344\_c.689:A>AT\_p.E230ins-fs ENSMUST00000078217.2|Olfr312-  
201|ENSMUSG00000096806|+|chr11:g.58722671:A>AT  
MSNHTRVTHFILRGFSDVPQLRLVLIIPFFLFFYTFGILGNFSIIITAVTRDSRLHSPMYFFLKNLSFLDICYTS  
ATIPKAVVISLGTSGVISYQECAAQLYIIFTFACTECFLLTAMAYDRCLAAILRPLIYGTIMSQKYCSALVVTA  
WVGAIYSAFHTFNTFSLPYCGPNVIDHFFCDIPPMRLSCTDYHLTEEVGFVAVSSCIVMSSFVLTVVSYIGI  
VATVLRIPSVVEWQVESLFYLLSPDHSHLVLWLNWKLVCSEARLSVLPDPGSPGIYFLLCSHTISESSCLLSEE  
QRYEVCSTETLLWEKVL  
>ENSMUSP00000149697\_c.900:A>G\_p.K301E ENSMUST00000216407.2|Olfr312-  
202|ENSMUSG00000096806|+|chr11:g.58722882:A>G  
MSNHTRVTHFILRGFSDVPQLRLVLIIPFFLFFYTFGILGNFSIIITAVTRDSRLHSPMYFFLKNLSFLDICYTS  
ATIPKAVVISLGTSGVISYQECAAQLYIIFTFACTECFLLTAMAYDRCLAAILRPLIYGTIMSQKYCSALVVTA  
WVGAIYSAFHTFNTFSLPYCGPNVIDHFFCDIPPMRLSCTDYHLTEEVGFVAVSSCIVMSSFVLTVVSYIGI  
VATVLRIPSVVEGRWKAFASTCSSHLTTVILFYGTGSFVYLRPASQYSPTLGRLASIFYSVVTPLSNPVPVYCLRN  
KDMKFALQELYCGRKY\*



```

>ENSMUSP00000077344_c.900:A>G_p.K301E ENSMUST00000078217.2|Olfr312-
201|ENSMUSG00000096806|+|chr11:g.58722882:A>G
MSNHTRVTHFILRGFSDVPQLRLVLI PFFLLFYTFGILGNFSIITAVTRDSRLHSPMYFFLKNLSFLDICYTS
ATIPKAVVISLGTSGVISYQECQAQLYIIFTFACTECFLLTAMAYDRCLAAILRPLIYGTIMSQKYCSALVVTA
WVGGAIIYSAFHFTNTFSLPYCGPNVIDHFFCDMPPVMRLSCTDYHLTEEVGFVAVSSCIVMSSFVLTVVSYIGI
VATVLRIPSVEGRWKAFSTCSSHLTTVILFYGTGSFVYLRPASQYSPTLGRLASIFYSVVTPLSNPVIYCLRN
KDMKFALQELYCGRKY*
>ENSMUSP00000150870_c.173:C>A_p.Y58* ENSMUST00000216473.2|Olfr311-
203|ENSMUSG00000094805|+|chr11:g.58732115:C>A
MANHTRVTHFILRGFSDVPQLRLVLI PFFLLFYTFGILGNFSIITAVIRDSRLHSPM*FFLKNLSFLDICYTS
ATIPKAVVISLGTSGVISYQECVAQLYMFITLCGTECFLLTAMAYDRCLAAILRPLIYGTIMSHKYCSALVVTA
WVGGAIIYSAFHFTNTFSLPYCGPNVDHFFCDMPPVMRLSCTDYHLNEEVGFVAVIGCIIMSSFALTVVSYIGI
VATVLRIPSVEGRWKAFSTCSSHLTTVILFYGTGSFVYLRPASQYSPTLDPLASIFYSVVTPLSNPVIYCLRN
KDMKFALQKLYCGRKY*
>ENSMUSP00000071553_c.173:C>A_p.Y58* ENSMUST00000071625.2|Olfr311-
201|ENSMUSG00000094805|+|chr11:g.58732115:C>A
MANHTRVTHFILRGFSDVPQLRLVLI PFFLLFYTFGILGNFSIITAVIRDSRLHSPM*FFLKNLSFLDICYTS
ATIPKAVVISLGTSGVISYQECVAQLYMFITLCGTECFLLTAMAYDRCLAAILRPLIYGTIMSHKYCSALVVTA
WVGGAIIYSAFHFTNTFSLPYCGPNVDHFFCDMPPVMRLSCTDYHLNEEVGFVAVIGCIIMSSFALTVVSYIGI
VATVLRIPSVEGRWKAFSTCSSHLTTVILFYGTGSFVYLRPASQYSPTLDPLASIFYSVVTPLSNPVIYCLRN
KDMKFALQKLYCGRKY*
>ENSMUSP00000150870_c.273:T>C_p.Y92H ENSMUST00000216473.2|Olfr311-
203|ENSMUSG00000094805|+|chr11:g.58732215:T>C
MANHTRVTHFILRGFSDVPQLRLVLI PFFLLFYTFGILGNFSIITAVIRDSRLHSPMYFFLKNLSFLDICYTS
ATIPKAVVISLGTSGVISYQECVAQLYMFITLCGTECFLLTAMAYDRCLAAILRPLIYGTIMSHKYCSALVVTA
WVGGAIIYSAFHFTNTFSLPYCGPNVDHFFCDMPPVMRLSCTDYHLNEEVGFVAVIGCIIMSSFALTVVSYIGI
VATVLRIPSVEGRWKAFSTCSSHLTTVILFYGTGSFVYLRPASQYSPTLDPLASIFYSVVTPLSNPVIYCLRN
KDMKFALQKLYCGRKY*
>ENSMUSP00000071553_c.273:T>C_p.Y92H ENSMUST00000071625.2|Olfr311-
201|ENSMUSG00000094805|+|chr11:g.58732215:T>C
MANHTRVTHFILRGFSDVPQLRLVLI PFFLLFYTFGILGNFSIITAVIRDSRLHSPMYFFLKNLSFLDICYTS
ATIPKAVVISLGTSGVISYQECVAQLYMFITLCGTECFLLTAMAYDRCLAAILRPLIYGTIMSHKYCSALVVTA
WVGGAIIYSAFHFTNTFSLPYCGPNVDHFFCDMPPVMRLSCTDYHLNEEVGFVAVIGCIIMSSFALTVVSYIGI
VATVLRIPSVEGRWKAFSTCSSHLTTVILFYGTGSFVYLRPASQYSPTLDPLASIFYSVVTPLSNPVIYCLRN
KDMKFALQKLYCGRKY*
>ENSMUSP00000150870_c.436:C>G_p.A146G ENSMUST00000216473.2|Olfr311-
203|ENSMUSG00000094805|+|chr11:g.58732378:C>G
MANHTRVTHFILRGFSDVPQLRLVLI PFFLLFYTFGILGNFSIITAVIRDSRLHSPMYFFLKNLSFLDICYTS
ATIPKAVVISLGTSGVISYQECVAQLYMFITLCGTECFLLTAMAYDRCLAAILRPLIYGTIMSHKYCSALVVTA
WVGGAIIYSAFHFTNTFSLPYCGPNVDHFFCDMPPVMRLSCTDYHLNEEVGFVAVIGCIIMSSFALTVVSYIGI
VATVLRIPSVEGRWKAFSTCSSHLTTVILFYGTGSFVYLRPASQYSPTLDPLASIFYSVVTPLSNPVIYCLRN
KDMKFALQKLYCGRKY*
>ENSMUSP00000071553_c.436:C>G_p.A146G ENSMUST00000071625.2|Olfr311-
201|ENSMUSG00000094805|+|chr11:g.58732378:C>G
MANHTRVTHFILRGFSDVPQLRLVLI PFFLLFYTFGILGNFSIITAVIRDSRLHSPMYFFLKNLSFLDICYTS
ATIPKAVVISLGTSGVISYQECVAQLYMFITLCGTECFLLTAMAYDRCLAAILRPLIYGTIMSHKYCSALVVTA
WVGGAIIYSAFHFTNTFSLPYCGPNVDHFFCDMPPVMRLSCTDYHLNEEVGFVAVIGCIIMSSFALTVVSYIGI
VATVLRIPSVEGRWKAFSTCSSHLTTVILFYGTGSFVYLRPASQYSPTLDPLASIFYSVVTPLSNPVIYCLRN
KDMKFALQKLYCGRKY*
>ENSMUSP00000150870_c.511:T>C_p.V171A ENSMUST00000216473.2|Olfr311-
203|ENSMUSG00000094805|+|chr11:g.58732453:T>C
MANHTRVTHFILRGFSDVPQLRLVLI PFFLLFYTFGILGNFSIITAVIRDSRLHSPMYFFLKNLSFLDICYTS
ATIPKAVVISLGTSGVISYQECVAQLYMFITLCGTECFLLTAMAYDRCLAAILRPLIYGTIMSHKYCSALVVTA
WVGGAIIYSAFHFTNTFSLPYCGPNVDHFFCDMPPVMRLSCTDYHLNEEVGFVAVIGCIIMSSFALTVVSYIGI
VATVLRIPSVEGRWKAFSTCSSHLTTVILFYGTGSFVYLRPASQYSPTLDPLASIFYSVVTPLSNPVIYCLRN
KDMKFALQKLYCGRKY*
>ENSMUSP00000071553_c.511:T>C_p.V171A ENSMUST00000071625.2|Olfr311-
201|ENSMUSG00000094805|+|chr11:g.58732453:T>C

```

MANHTRVTHFILRGFSDVPQLRLVLIPIFFLLFYTFGILGNFSIITAVIRDSRLHSPMYFFLKNLSFLDICYTS  
ATIPKAVVISLTGSGVISYQECVAQLYMFITLCGTECFLLTAMAYDRCLAILRPLIYGTIMSHKYCSALVVTA  
WVGGAIIYSAFHTFNTFSLPYCGPNAVDHFFCDMPVPMRLSCTDYHLNNEEVGFAVIGCIIMSSFALTVVSYIGI  
VATVLHIPSVEGRWKAFASTCSSHLTTVILFYGTGSFVYLRPASQYSPTLDPLASIFYSVVTPSLNPVIYCLRN  
KDMKFALQKLYCGRKY\*

>ENSMUSP00000117644\_c.352:C>T\_p.A118V ENSMUST00000139337.3|Gm12258-  
202|ENSMUSG00000072915|+|chr11:g.58749179:C>T  
MDTSEGLVSVFEDVSVDFTWDEWQDLDDSQRKLYRDVMLETYSSLLSLNQCDAPKELILKLEKEAEPWKEDDAP  
DQSLPDMQNVDDRNEVSQDSQKIRRCSLVIAKSSVSAERAPAGKVLSSSHRVLDLAIKNSTSSGMSPGPLNMR  
DRMLLPREPSEMQARKEGLPDVTRVSPRLPEPLSLYRSTEECEQHVQYCGPSEAFHVKPVWLQKAFPMNSPS  
SKLRDYRKELEKLALPAKGETRAQVQTFECKVCGKLFCKNSHLTQHLKMHKEKRCYKGSNCEPILNIQPKLPK  
HQSLRAGEELYTCNGDEKYIRPKSGKSVQOKIIGDGRIVCGKTECSKLNCSVEQNPLKHEETHEFSLAGKTVR  
KSDLHQLETPHRYERYECSACGKTFSSHYPHVSPPSGAEKPYECEDCQQSKLVVSPAPTQEKRYVCNVCGKA  
FYKRAHLHAHQRTHTGKPYDCQECGKSFRLKSFVHVHQRHTGKPFACDTCGKSFQRTSLYTHIRIHTGE  
KPYECKEKRKSFILKSYLTVHQRTHSGEKPYECDVCGKSFQNSHLHAHKRHTHTSEKPYECIVCGKSYKQSPS  
LYTHKKIHTSEKPYECKQCRKSFSLKFHLTRHQRTHSGEKHYQ\*

>ENSMUSP00000117644\_c.687:G>A\_p.E230K ENSMUST00000139337.3|Gm12258-  
202|ENSMUSG00000072915|+|chr11:g.58749514:G>A  
MDTSEGLVSVFEDVSVDFTWDEWQDLDDSQRKLYRDVMLETYSSLLSLNQCDAPKELILKLEKEAEPWKEDDAP  
DQSLPDMQNVDDRNEVSQDSQKIRRCSLVIAKSSVSAERAPAGKALSSSHRVLDLAIKNSTSSGMSPGPLNMR  
DRMLLPREPSEMQARKEGLPDVTRVSPRLPEPLSLYRSTEECEQHVQYCGPSEAFHVKPVWLQKAFPMNSPS  
SKLRDYRKELEKLALPAKGETRAQVQTFECKVCGKLFCKNSHLTQHLKMHKEKRCYKGSNCEPILNIQPKLPK  
HQSLRAGEELYTCNGDEKYIRPKSGKSVQOKIIGDGRIVCGKTECSKLNCSVEQNPLKHEETHEFSLAGKTVR  
KSDLHQLETPHRYERYECSACGKTFSSHYPHVSPPSGAEKPYECEDCQQSKLVVSPAPTQEKRYVCNVCGKA  
FYKRAHLHAHQRTHTGKPYDCQECGKSFRLKSFVHVHQRHTGKPFACDTCGKSFQRTSLYTHIRIHTGE  
KPYECKEKRKSFILKSYLTVHQRTHSGEKPYECDVCGKSFQNSHLHAHKRHTHTSEKPYECIVCGKSYKQSPS  
LYTHKKIHTSEKPYECKQCRKSFSLKFHLTRHQRTHSGEKHYQ\*

>ENSMUSP00000117644\_c.1351:C>A\_p.T451N ENSMUST00000139337.3|Gm12258-  
202|ENSMUSG00000072915|+|chr11:g.58750178:C>A  
MDTSEGLVSVFEDVSVDFTWDEWQDLDDSQRKLYRDVMLETYSSLLSLNQCDAPKELILKLEKEAEPWKEDDAP  
DQSLPDMQNVDDRNEVSQDSQKIRRCSLVIAKSSVSAERAPAGKALSSSHRVLDLAIKNSTSSGMSPGPLNMR  
DRMLLPREPSEMQARKEGLPDVTRVSPRLPEPLSLYRSTEECEQHVQYCGPSEAFHVKPVWLQKAFPMNSPS  
SKLRDYRKELEKLALPAKGETRAQVQTFECKVCGKLFCKNSHLTQHLKMHKEKRCYKGSNCEPILNIQPKLPK  
HQSLRAGEELYTCNGDEKYIRPKSGKSVQOKIIGDGRIVCGKTECSKLNCSVEQNPLKHEETHEFSLAGKTVR  
KSDLHQLETPHRYERYECSACGKTFSSHYPHVSPPSGAEKPYECEDCQQSKLVVSPAPTQEKRYVCNVCGKA  
FYKRAHLHAHQRTHTGKPYDCQECGKSFRLKSFVHVHQRHTGKPFACDTCGKSFQRTSLYTHIRIHTGE  
KPYECKEKRKSFILKSYLTVHQRTHSGEKPYECDVCGKSFQNSHLHAHKRHTHTSEKPYECIVCGKSYKQSPS  
LYTHKKIHTSEKPYECKQCRKSFSLKFHLTRHQRTHSGEKHYQ\*

>ENSMUSP00000117644\_c.1740:C>T\_p.Q581\* ENSMUST00000139337.3|Gm12258-  
202|ENSMUSG00000072915|+|chr11:g.58750567:C>T  
MDTSEGLVSVFEDVSVDFTWDEWQDLDDSQRKLYRDVMLETYSSLLSLNQCDAPKELILKLEKEAEPWKEDDAP  
DQSLPDMQNVDDRNEVSQDSQKIRRCSLVIAKSSVSAERAPAGKALSSSHRVLDLAIKNSTSSGMSPGPLNMR  
DRMLLPREPSEMQARKEGLPDVTRVSPRLPEPLSLYRSTEECEQHVQYCGPSEAFHVKPVWLQKAFPMNSPS  
SKLRDYRKELEKLALPAKGETRAQVQTFECKVCGKLFCKNSHLTQHLKMHKEKRCYKGSNCEPILNIQPKLPK  
HQSLRAGEELYTCNGDEKYIRPKSGKSVQOKIIGDGRIVCGKTECSKLNCSVEQNPLKHEETHEFSLAGKTVR  
KSDLHQLETPHRYERYECSACGKTFSSHYPHVSPPSGAEKPYECEDCQQSKLVVSPAPTQEKRYVCNVCGKA  
FYKRAHLHAHQRTHTGKPYDCQECGKSFRLKSFVHVHQRHTGKPFACDTCGKSFQRTSLYTHIRIHTGE  
KPYECKEKRKSFILKSYLTVHQRTHSGEKPYECDVCGKSFQNSHLHAHKRHTHTSEKPYECIVCGKSYK\*SPS  
LYTHKKIHTSEKPYECKQCRKSFSLKFHLTRHQRTHSGEKHYQ\*

>ENSMUSP00000091282\_c.306:C>T\_p.Q103\* ENSMUST00000093768.4|Gm12258-  
201|ENSMUSG00000072915|+|chr11:g.58750567:C>T  
IHTGKPFACDTCGKSFQRTSLYTHIRIHTGKPYECKEKRKSFILKSYLTVHQRTHSGEKPYECDVCGKSF  
QNSHLHAHKRHTHTSEKPYECIVCGKSYK\*SPSLYTHKKIHTSEKPYECKQCRKSFSLKFHLTRHQRTHSGEK  
HYQ\*

>ENSMUSP00000120692\_c.181:A>G\_p.D61G ENSMUST00000132570.2|2810021J22Rik-  
202|ENSMUSG00000020491|+|chr11:g.58768808:A>G  
MSSIVGLVSVFEDVSVDFTWDEWQDLDDSQRKLYRDVMLETYSSLLSLSAGQASTVSKFLTGFCSHGLW

>ENSMUSP00000073579\_c.579:G>A\_p.G194S  
ENSMUST00000073924.10|2810021J22Rik-  
201|ENSMUSG00000020491|+|chr11:g.58771099:G>A  
MSSIVGLVSFEDVSVDFTWDEWQDLDDSQRKLYRDVMLETYSSLLSLNQCDAKPELILKLEQGAGPWKEDNAP  
DQSLPALQPMKSLKEARRDTGKKHLSHLLVTGSASAEERGLGEILSMNSNHVLHLALKTRSTSRMRSEVLD  
WGDVYLPGGPIEMQATEELDHLNPSKMLPRPPAPLSLDFSAERGPQHSQCAQHGEAFDVRTVWTRTVFPLGDS  
STNAFDKLALTAQEGTHIREETFDCNMCKKPFSDTCNHRHLKPHLKKQCGKCPDGEPAFRAKAGLQHTLHSW  
GKPRGCNDNKKCVHQMPKPRSNQSVFSSKESNCVKTFPCDSTLSVQQRPHGTGKKPQESSTPVKINSQPRRRHR  
CGRTYQCKVCGKAFKHTONLYLHHRHTHTGEKPYECKECKKLFSAKSNLSVHQKTHTGEKPYECNICGNAFKRR  
CDLTIHQRVHTGEKPYECKECKRTFSIKSGLIVHQRIHTGEKPYECSVCGKRFNQKSNLSTHEKIHTGEKPF  
CKECSKAFSVKSYLTIHQKTHVGEKPHS\*  
>ENSMUSP00000073579\_c.1225:T>C\_p.V409A  
ENSMUST00000073924.10|2810021J22Rik-  
201|ENSMUSG00000020491|+|chr11:g.58771745:T>C  
MSSIVGLVSFEDVSVDFTWDEWQDLDDSQRKLYRDVMLETYSSLLSLNQCDAKPELILKLEQGAGPWKEDNAP  
DQSLPALQPMKSLKEARRDTGKKHLSHLLVTGSASAEERGLGEILSMNSNHVLHLALKTRSTSRMRSEVLD  
WGDVYLPGGPIEMQATEELDHLNPSKMLPRPPAPLSLDFSAERGPQHGQCAQHGEAFDVRTVWTRTVFPLGDS  
STNAFDKLALTAQEGTHIREETFDCNMCKKPFSDTCNHRHLKPHLKKQCGKCPDGEPAFRAKAGLQHTLHSW  
GKPRGCNDNKKCVHQMPKPRSNQSVFSSKESNCVKTFPCDSTLSVQQRPHGTGKKPQESSTPVKINSQPRRRHR  
CGRTYQCKVCGKAFKHTONLYLHHRHTHTGEKPYECKECKKLFSAKSNLSVHQKTHTGEKPYECNICGNAFKRR  
CDLTIHQRVHTGEKPYECKECKRTFSIKSGLIVHQRIHTGEKPYECSVCGKRFNQKSNLSTHEKIHTGEKPF  
CKECSKAFSVKSYLTIHQKTHVGEKPHS\*  
>ENSMUSP00000099764\_c.2092:T>A\_p.F698Y ENSMUST00000102703.2|Zfp39-  
201|ENSMUSG00000037001|-|chr11:g.58780668:A>T  
MRNLQPDSVENSLSQLPSRCLERTRKRKRSYKKRPVITYSYWRRTRQRNRARKHKAPVKGLVSFEDVSVDFTWDEW  
QDLDDSQRKLYRDVMLETYSSLES LGHCITKPEVIFKLEQGAEPWRAEDVPKQSRADVQKITELNETSQDNEE  
RHLWHHAITYSNKSTEEKVKLGNIVNVSSNCVSNLTVKNGNSGMRPVALTVWQSVLPPNKPDDTRIGEELDA  
SLTSEPPPIHAHEHPGLYSRAPGTGQQFQCCMQEVT CNTKALWTKRFHIAHGSSKFGSEKVPDEVALHAQDVSW  
VRAETFEC SICKKTFC TKCELMKHKKIHKGQQYYTCRDCEKTFIKESYHTDQRVHAGVGS HRCKQCEKCFHQK  
NQQNVHERVPREARLWEVYQSENSFGEKPNLRRYQRTRAGYKPYGCNLCGKAFYRKSHLGRHQKIHTGEKPYG  
CEECKKTFYHKSSSLTIHQRTHTGEKPYECKKCRKTFYCKSDLN VHHRTHTGEKPYECECRKTFYKSHLVIH  
QKVHTGDKPYECEECQKAFSRKSNLTVHQKTHTGEKPYECNVCGKTFHRQSHLNMHQGTHTGQKPYQCEECGK  
AFYQKSSLRHRHQRNHTGSRPYACEE CRKTF LHKSSLT VHQRSHTGYKPYSC EECRKT FYKSHLTVHQRTHTG  
EKPYECKLCKKAFHQKSYLNRHQVTHGSEKRFECQE CRKTFYHKSSLT VHQRIHLRELLCV\*  
>ENSMUSP00000099764\_c.1947:G>A\_p.V650I ENSMUST00000102703.2|Zfp39-  
201|ENSMUSG00000037001|-|chr11:g.58780813:C>T  
MRNLQPDSVENSLSQLPSRCLERTRKRKRSYKKRPVITYSYWRRTRQRNRARKHKAPVKGLVSFEDVSVDFTWDEW  
QDLDDSQRKLYRDVMLETYSSLES LGHCITKPEVIFKLEQGAEPWRAEDVPKQSRADVQKITELNETSQDNEE  
RHLWHHAITYSNKSTEEKVKLGNIVNVSSNCVSNLTVKNGNSGMRPVALTVWQSVLPPNKPDDTRIGEELDA  
SLTSEPPPIHAHEHPGLYSRAPGTGQQFQCCMQEVT CNTKALWTKRFHIAHGSSKFGSEKVPDEVALHAQDVSW  
VRAETFEC SICKKTFC TKCELMKHKKIHKGQQYYTCRDCEKTFIKESYHTDQRVHAGVGS HRCKQCEKCFHQK  
NQQNVHERVPREARLWEVYQSENSFGEKPNLRRYQRTRAGYKPYGCNLCGKAFYRKSHLGRHQKIHTGEKPYG  
CEECKKTFYHKSSSLTIHQRTHTGEKPYECKKCRKTFYCKSDLN VHHRTHTGEKPYECECRKTFYKSHLVIH  
QKVHTGDKPYECEECQKAFSRKSNLTVHQKTHTGEKPYECNVCGKTFHRQSHLNMHQGTHTGQKPYQCEECGK  
AFYQKSSLRHRHQRNHTGSRPYACEE CRKTF LHKSSLT VHQRSHTGYKPYSC EECRKT FYKSHLTIHQRTHTG  
EKPYECKLCKKAFHQKSYLNRHQVTHGSEKRFECQE CRKTFYHKSSLT VHQRIHLRELLCV\*  
>ENSMUSP00000099764\_c.1196:T>G\_p.Y399\* ENSMUST00000102703.2|Zfp39-  
201|ENSMUSG00000037001|-|chr11:g.58781564:A>C  
MRNLQPDSVENSLSQLPSRCLERTRKRKRSYKKRPVITYSYWRRTRQRNRARKHKAPVKGLVSFEDVSVDFTWDEW  
QDLDDSQRKLYRDVMLETYSSLES LGHCITKPEVIFKLEQGAEPWRAEDVPKQSRADVQKITELNETSQDNEE  
RHLWHHAITYSNKSTEEKVKLGNIVNVSSNCVSNLTVKNGNSGMRPVALTVWQSVLPPNKPDDTRIGEELDA  
SLTSEPPPIHAHEHPGLYSRAPGTGQQFQCCMQEVT CNTKALWTKRFHIAHGSSKFGSEKVPDEVALHAQDVSW  
VRAETFEC SICKKTFC TKCELMKHKKIHKGQQYYTCRDCEKTFIKESYHTDQRVHAGVGS HRCKQCEKCFHQK  
NQQNVHERVPREARLWEVYQSENSFGEKPNLRRYQRTRAGYKPYGCNLCGKAFYRKSHLGRHQKIHTGEKPYG  
CEECKKTFYHKSSSLTIHQRTHTGEKPYECKKCRKTFYCKSDLN VHHRTHTGEKPYECECRKTFYKSHLVIH  
QKVHTGDKPYECEECQKAFSRKSNLTVHQKTHTGEKPYECNVCGKTFHRQSHLNMHQGTHTGQKPYQCEECGK  
AFYQKSSLRHRHQRNHTGSRPYACEE CRKTF LHKSSLT VHQRSHTGYKPYSC EECRKT FYKSHLTVHQRTHTG  
EKPYECKLCKKAFHQKSYLNRHQVTHGSEKRFECQE CRKTFYHKSSLT VHQRIHLRELLCV\*

>ENSMUSP00000099764\_c.1174:A>C\_p.E392A ENSMUST00000102703.2|zfp39-201|ENSMUSG00000037001|-|chr11:g.58781586:T>G  
MRNLQPDSVENSLSQLPSRCLSTRKRKRSYKKRPVITYSYWRRRTQRNRARKHKAPVKGLVSFEDVSVDFTWDEW  
QDLDDSQRKLYRDVMLETYSSLES LGHCITKPEVIFKLEQGAEPWRAEDVPKQSRADVQKITELNETSQDNEE  
RHLWHHAITYSNKSTEEKVKLGNIVNVSSNCVSNLTVKNGNSSGMRPVALTVMQSVLPPNKPDDTRIGEELDA  
SLTSEPPPIHAHEHPGLYSRAPGTGQQFQCCMQEVT CNTKALWTKRFHIAHGSSKFGSESEKVPDEVALHAQDVSW  
VRAETFECISICKKTFCTKCELMKHKKIHKGQQYYTCRDCEKTFIKESYHTDQRVHAGVGS HRCKQCEKCFHQK  
NQQNVHERVPREARLWEVYQSENSFGEKPNLRRYQRTRAGYKPYGCNLCGKAFYRKSHLGRHQKIHTGEKPYG  
CEECKKTFYHKSSSLTIHQRTHTGEKPYECKKCRKTFYCKSDLNVHHRHTHTGEKPYECDECRKTFYKSHLVIH  
QKVHTGDKPYECEECQKAFSRKSNLTVHQKTHTGEKPYECNVCCKTFHRQSHLNMHQGTHTGQKPYQCEECGK  
AFYQKSSLRHRQRNHTGSRPYACEECCRKTF LHKSSLTVHQRSHHTGYKPYSCCEEKRTFYKSHLTVHQRTHTG  
EKPYECKLCKKAFHQKSYLNRHQVTHGSEKRFECQECCRKTFYHKSSLTVHQRIHLRELLCV\*  
>ENSMUSP00000099764\_c.1137:C>T\_p.L380F ENSMUST00000102703.2|zfp39-201|ENSMUSG00000037001|-|chr11:g.58781623:G>A  
MRNLQPDSVENSLSQLPSRCLSTRKRKRSYKKRPVITYSYWRRRTQRNRARKHKAPVKGLVSFEDVSVDFTWDEW  
QDLDDSQRKLYRDVMLETYSSLES LGHCITKPEVIFKLEQGAEPWRAEDVPKQSRADVQKITELNETSQDNEE  
RHLWHHAITYSNKSTEEKVKLGNIVNVSSNCVSNLTVKNGNSSGMRPVALTVMQSVLPPNKPDDTRIGEELDA  
SLTSEPPPIHAHEHPGLYSRAPGTGQQFQCCMQEVT CNTKALWTKRFHIAHGSSKFGSESEKVPDEVALHAQDVSW  
VRAETFECISICKKTFCTKCELMKHKKIHKGQQYYTCRDCEKTFIKESYHTDQRVHAGVGS HRCKQCEKCFHQK  
NQQNVHERVPREARLWEVYQSENSFGEKPNLRRYQRTRAGYKPYGCNLCGKAFYRKSHLGRHQKIHTGEKPYG  
CEECKKTFYHKSSSLTIHQRTHTGEKPYECKKCRKTFYCKSDLNVHHRHTHTGEKPYECDECRKTFYKSHLVIH  
QKVHTGDKPYECEECQKAFSRKSNLTVHQKTHTGEKPYECNVCCKTFHRQSHLNMHQGTHTGQKPYQCEECGK  
AFYQKSSLRHRQRNHTGSRPYACEECCRKTF LHKSSLTVHQRSHHTGYKPYSCCEEKRTFYKSHLTVHQRTHTG  
EKPYECKLCKKAFHQKSYLNRHQVTHGSEKRFECQECCRKTFYHKSSLTVHQRIHLRELLCV\*  
>ENSMUSP00000099764\_c.925:C>G\_p.T309R ENSMUST00000102703.2|zfp39-201|ENSMUSG00000037001|-|chr11:g.58781835:G>C  
MRNLQPDSVENSLSQLPSRCLSTRKRKRSYKKRPVITYSYWRRRTQRNRARKHKAPVKGLVSFEDVSVDFTWDEW  
QDLDDSQRKLYRDVMLETYSSLES LGHCITKPEVIFKLEQGAEPWRAEDVPKQSRADVQKITELNETSQDNEE  
RHLWHHAITYSNKSTEEKVKLGNIVNVSSNCVSNLTVKNGNSSGMRPVALTVMQSVLPPNKPDDTRIGEELDA  
SLTSEPPPIHAHEHPGLYSRAPGTGQQFQCCMQEVT CNTKALWTKRFHIAHGSSKFGSESEKVPDEVALHAQDVSW  
VRAETFECISICKKTFCTKCELMKHKKIHKGQQYYTCRDCEKTFIKESYHTDQRVHAGVGS HRCKQCEKCFHQK  
NQQNVHERVPREARLWEVYQSENSFGEKPNLRRYQRTRAGYKPYGCNLCGKAFYRKSHLGRHQKIHTGEKPYG  
CEECKKTFYHKSSSLTIHQRTHTGEKPYECKKCRKTFYCKSDLNVHHRHTHTGEKPYECDECRKTFYKSHLVIH  
QKVHTGDKPYECEECQKAFSRKSNLTVHQKTHTGEKPYECNVCCKTFHRQSHLNMHQGTHTGQKPYQCEECGK  
AFYQKSSLRHRQRNHTGSRPYACEECCRKTF LHKSSLTVHQRSHHTGYKPYSCCEEKRTFYKSHLTVHQRTHTG  
EKPYECKLCKKAFHQKSYLNRHQVTHGSEKRFECQECCRKTFYHKSSLTVHQRIHLRELLCV\*  
>rs49084133\_ENSMUSP00000099764\_c.186:G>A\_p.D63N  
ENSMUST00000102703.2|zfp39-201|ENSMUSG00000037001|-|chr11:g.58791499:C>T  
MRNLQPDSVENSLSQLPSRCLSTRKRKRSYKKRPVITYSYWRRRTQRNRARKHKAPVKGLVSFENVSVDFTWDEW  
QDLDDSQRKLYRDVMLETYSSLES LGHCITKPEVIFKLEQGAEPWRAEDVPKQSRADVQKITELNETSQDNEE  
RHLWHHAITYSNKSTEEKVKLGNIVNVSSNCVSNLTVKNGNSSGMRPVALTVMQSVLPPNKPDDTRIGEELDA  
SLTSEPPPIHAHEHPGLYSRAPGTGQQFQCCMQEVT CNTKALWTKRFHIAHGSSKFGSESEKVPDEVALHAQDVSW  
VRAETFECISICKKTFCTKCELMKHKKIHKGQQYYTCRDCEKTFIKESYHTDQRVHAGVGS HRCKQCEKCFHQK  
NQQNVHERVPREARLWEVYQSENSFGEKPNLRRYQRTRAGYKPYGCNLCGKAFYRKSHLGRHQKIHTGEKPYG  
CEECKKTFYHKSSSLTIHQRTHTGEKPYECKKCRKTFYCKSDLNVHHRHTHTGEKPYECDECRKTFYKSHLVIH  
QKVHTGDKPYECEECQKAFSRKSNLTVHQKTHTGEKPYECNVCCKTFHRQSHLNMHQGTHTGQKPYQCEECGK  
AFYQKSSLRHRQRNHTGSRPYACEECCRKTF LHKSSLTVHQRSHHTGYKPYSCCEEKRTFYKSHLTVHQRTHTG  
EKPYECKLCKKAFHQKSYLNRHQVTHGSEKRFECQECCRKTFYHKSSLTVHQRIHLRELLCV\*  
>rs29406722\_ENSMUSP00000063279\_c.882:G>A\_p.E295K  
ENSMUST00000069941.13|Btln110-202|ENSMUSG00000020490|+|chr11:g.58813255:G>A  
MARAHPGDATLPSILVFSIFLQLLTSNGKSDFLVLGPPHPLLAIVGQDKELPCKLSLNI SAEGMELRWYRDK  
PSSVVHVYKNGEDVYDEQMV EYKGRTSFNNGSHVAGEAAKVIHNVTVFDNGTYHCVFKEYTSHSQATLWLKVA  
GRGSSPRIRVTDTQDKGIRAECT SAGWYPEPKVARELDLKGQPVSAESHFSVSASTGLVALLSIVTPQDTAVGG  
LTCISISNPLLPEKVTETYLLASLSRRPLSTESGPALPLI L TALGLVSAAIACAFGKCHKEEHKTNQEEEDPGA  
RDKAGLFHVLSLDPETASPKLMVSEDQKSVKRLFLDQDVFPSSRRFNQDPCILAQERFEAGRHYWEVEVGDR  
RAWILGVCLESLVREGRI PKSPQHGLWALEFYKKKQLQALSYPRTCLSPPEPLRRVGILLDFEAGQISFYNSTN  
GSLIYVFSGFSFSGPLQPFCLWTHDRPLTICSVVTETKDTESSGDPGLPGDS\*

>rs29406722\_ENSMUSP00000124234\_c.882:G>A\_p.E295K  
ENSMUST00000142499.8|Btln110-204|ENSMUSG00000020490|+|chr11:g.58813255:G>A  
MARAHPGDATLPSILVSFIFLQLLTSGNGKSDFLVLGPPHPLLAIVGQDKELPCKLSLNISAEGMELRWYRDK  
PSSVVHVYKNGEDVYDEQMVVEYKGRTSFNNGSHVARGEAAVKIHNVTVFDNGTYHCVFKEYTSHSQATLWLKVA  
GRGSSPRIVRTDTQDKGIRAECSAGWYEPKVEWLDLKGQPVSAESHFSVSASTGLVALLSIVTPQDQDTAVGG  
LTCSISNPLLPEKVTETETYLASLSRRPLSTESGPALPLILITLALGLVSAAIACAFGKCHKEEHKTNQEEEDPGA  
RDKAGLFHVSLSLDPETASPKLMVSEDQKSVKRLFLDQDVFSSRRFNQDPCILAQERFEAGRHYWEVEVGD  
RAWILGVCSLESLVREGRIKSPQHGLWALEFYKKKLQALSYPRTCLSPPEPLRRVGIILLDFEAGQISFYNSTN  
GSLIYVFSGFSFSGPLQPFCLWTHDPRPLTICSVVTETKDTESGDPGLPGDS\*  
>rs46049392\_ENSMUSP00000063279\_c.1237:C>T\_p.P413L  
ENSMUST00000069941.13|Btln110-  
202|ENSMUSG00000020490|+|chr11:g.58814559:C>T  
MARAHPGDATLPSILVSFIFLQLLTSGNGKSDFLVLGPPHPLLAIVGQDKELPCKLSLNISAEGMELRWYRDK  
PSSVVHVYKNGEDVYDEQMVVEYKGRTSFNNGSHVARGEAAVKIHNVTVFDNGTYHCVFKEYTSHSQATLWLKVA  
GRGSSPRIVRTDTQDKGIRAECSAGWYEPKVEWLDLKGQPVSAESHFSVSASTGLVALLSIVTPQDQDTAVGG  
LTCSISNPLLPEKVTETETYLASLSRRPLSTESGPALPLILITLALGLVSAAIACAFGKCHKEEHKTNQEEEDPGA  
RDEAGLFHVSLSLDPETASPKLMVSEDQKSVKRLFLDQDVFSSRRFNQDPCILAQERFEAGRHYWEVEVGD  
RAWILGVCSLESLVREGRIKSPQHGLWALEFYKKKLQALSYPRTCLSLPEPLRRVGIILLDFEAGQISFYNSTN  
GSLIYVFSGFSFSGPLQPFCLWTHDPRPLTICSVVTETKDTESGDPGLPGDS\*  
>rs46049392\_ENSMUSP00000124234\_c.1237:C>T\_p.P413L  
ENSMUST00000142499.8|Btln110-204|ENSMUSG00000020490|+|chr11:g.58814559:C>T  
MARAHPGDATLPSILVSFIFLQLLTSGNGKSDFLVLGPPHPLLAIVGQDKELPCKLSLNISAEGMELRWYRDK  
PSSVVHVYKNGEDVYDEQMVVEYKGRTSFNNGSHVARGEAAVKIHNVTVFDNGTYHCVFKEYTSHSQATLWLKVA  
GRGSSPRIVRTDTQDKGIRAECSAGWYEPKVEWLDLKGQPVSAESHFSVSASTGLVALLSIVTPQDQDTAVGG  
LTCSISNPLLPEKVTETETYLASLSRRPLSTESGPALPLILITLALGLVSAAIACAFGKCHKEEHKTNQEEEDPGA  
RDEAGLFHVSLSLDPETASPKLMVSEDQKSVKRLFLDQDVFSSRRFNQDPCILAQERFEAGRHYWEVEVGD  
RAWILGVCSLESLVREGRIKSPQHGLWALEFYKKKLQALSYPRTCLSLPEPLRRVGIILLDFEAGQISFYNSTN  
GSLIYVFSGFSFSGPLQPFCLWTHDPRPLTICSVVTETKDTESGDPGLPGDS\*  
>rs26987335\_ENSMUSP00000091703\_c.356:G>A\_p.W119\*  
ENSMUST00000094151.6|Rnf187-201|ENSMUSG00000020496|-|chr11:g.58829254:C>T  
LALPAGPADAICALCQRAPREPVADCGHRFCRACVVRWFVAEEDGPFPCPECADDCQRAVEPSRPLSRLL  
ALEEAAAAPARDGPASEAALQLLRCRADGDPLCSACRMAAGPEPPE\*EPRWRKALRGKENKGSVEIMRKDLNDA  
RDLHGQAESAAAVWKGHVMDRRKKALTDYKKLRAFFVEEEHFLEAEKDEGASEDDELADPADRFRSLLQAV  
SELEKKHRLGLSMLLQ\*  
>ENSMUSP00000091703\_c.243:C>TT\_p.P82ins-fs ENSMUST00000094151.6|Rnf187-  
201|ENSMUSG00000020496|-|chr11:g.58829367:G>AA  
LALPAGPADAICALCQRAPREPVADCGHRFCRACVVRWFVAEEDGPFPCPECADDCQRAVEPSRPLSRLL  
ALEEAAAAPGARWPCQRGAAAAALSRRRGSVAVLRLPHGRWPGAAGVGTALEEGPARQGEQGLCGNHEEGLK  
>rs244794510\_ENSMUSP00000076397\_c.94:G>A\_p.R32Q  
ENSMUST00000078267.5|H2bu2-201|ENSMUSG00000056895|+|chr11:g.58839860:G>A  
MPEPSRSTPAPKKGSKKAITKAQKKGKRRKGRKESYSIYVYKVLKQVHPDTGISSKAMGIMNSFVNDIFER  
IASEASRLAHYNKRSTITSREVTAVRLLLPGELAKHAVSEGTKAVTKYTSSK\*  
>rs260573336\_ENSMUSP00000076397\_c.321:G>C\_p.A108P  
ENSMUST00000078267.5|H2bu2-201|ENSMUSG00000056895|+|chr11:g.58840087:G>C  
MPEPSRSTPAPKKGSKKAITKAQKKGKRRKGRKESYSIYVYKVLKQVHPDTGISSKAMGIMNSFVNDIFER  
IASEASRLAHYNKRSTITSREVTAVRLLLPGELPKHAVSEGTKAVTKYTSSK\*  
>rs108669903\_ENSMUSP00000037248\_c.811:C>T\_p.S271F  
ENSMUST00000047697.12|Trim17-  
201|ENSMUSG00000036964|+|chr11:g.58861404:C>T  
MDAVELARRLQEEATCSICLDYFTDPVMTACGHNFCRECIQMSWEKGVKKGKQKGSFPCPECREMSPQRN  
LRPNRLLTKVAEMARQHPGLQKRDLCQAHQEPLKLFQDQDQSPICVVCREAQEHMRHVRVLPDEAAREYKLLK  
EEDIKYLREEMMKTETLQAKEEQTLTEWQERVKERRERILEEFQKVVFLVVEEERRILQVLKKEEEDTLGKLQ  
DSKASLDHQSRSLDLILLQLEERSQQEPLQMLQDVKDTLNRASACSTQRWFSRPLSRPCAIEFQDR\*  
>rs227763149\_ENSMUSP00000074639\_c.861:G>A\_p.E288K  
ENSMUST00000075141.7|Trim17-202|ENSMUSG00000036964|+|chr11:g.58861450:G>A  
MDAVELARRLQEEATCSICLDYFTDPVMTACGHNFCRECIQMSWEKGVKKGKQKGSFPCPECREMSPQRN  
LRPNRLLTKVAEMARQHPGLQKRDLCQAHQEPLKLFQDQDQSPICVVCREAQEHMRHVRVLPDEAAREYKLLK  
EEDIKYLREEMMKTETLQAKEEQTLTEWQERVKERRERILEEFQKVVFLVVEEERRILQVLKKEEEDTLGKLQ



DSKASLDHQSRSLDLILLQLEERSQQEPLQMLQDVKDTLNRKESFSVQYPEVVLPAAIKTLCRVPGQIKVLKS  
 FQEDVMPDPSSAYPYLLLLYESRQRRYLSPPPEGSAPYSKDRFVAYPCAVGQKSFSSGRHYWEVGMNLTGDALW  
 ALGVCARDNVSARKDRVLKSPENGFVWVQLSKGKKQLSLLPNSTLVTLTEPPSHMGIFLDFQAGEVSVFYSVNDGS  
 HLHSFSQAAPPGPLLPFFCLGAPKSGQMVISTVVMWVKG\*  
 >ENSMUSP00000074639\_c.1225:T>AAA\_p.V409ins-fs  
 ENSMUST00000075141.7|Trim17-  
 202|ENSMUSG00000036964|+|chr11:g.58862195:T>AAA  
 MDAVELARRLQEEATCSICLDYFTDPVMTACGHNFCRECIQMSWEKGVKKGKQKGSFPCPECREMSPQRN  
 LRPNRLLTKVAEMARQHPGLQKRDLCAHQEPLKLFQDDQSPICVVCREAQEHMRHVRVLPDEAAREYKLLK  
 EEDIKYLREEMMKTETLQAKEEQTLTEWQERVKERRERILEEFQKVVFLVVEEERRILQVLKKEEEDTLGKLO  
 DSKASLDHQSRSLDLILLQLEERSQQEPLQMLQDVKDTLNRKESFSVQYPEVVLPAAIKTLCRVPGQIEVLKS  
 FQEDVMPDPSSAYPYLLLLYESRQRRYLSPPPEGSAPYSKDRFVAYPCAVGQKSFSSGRHYWEVGMNLTGDALW  
 ALGVCARDNVSARKDRVLKSPENGFVWVQLSKGKKQLSLLPNSTLETLQSPLPATWGSSTSRLEPCPSTA  
 >rs29437620\_ENSMUSP00000074639\_c.1416:A>G\_p.M473V  
 ENSMUST00000075141.7|Trim17-202|ENSMUSG00000036964|+|chr11:g.58862386:A>G  
 MDAVELARRLQEEATCSICLDYFTDPVMTACGHNFCRECIQMSWEKGVKKGKQKGSFPCPECREMSPQRN  
 LRPNRLLTKVAEMARQHPGLQKRDLCAHQEPLKLFQDDQSPICVVCREAQEHMRHVRVLPDEAAREYKLLK  
 EEDIKYLREEMMKTETLQAKEEQTLTEWQERVKERRERILEEFQKVVFLVVEEERRILQVLKKEEEDTLGKLO  
 DSKASLDHQSRSLDLILLQLEERSQQEPLQMLQDVKDTLNRKESFSVQYPEVVLPAAIKTLCRVPGQIEVLKS  
 FQEDVMPDPSSAYPYLLLLYESRQRRYLSPPPEGSAPYSKDRFVAYPCAVGQKSFSSGRHYWEVGMNLTGDALW  
 ALGVCARDNVSARKDRVLKSPENGFVWVQLSKGKKQLSLLPNSTLVTLTEPPSHMGIFLDFQAGEVSVFYSVNDGS  
 HLHSFSQAAPPGPLLPFFCLGAPKSGQMVISTVVMWVKG\*  
 >rs107962877\_ENSMUSP00000104437\_c.586:T>C\_p.L196P  
 ENSMUST00000108809.8|Trim11-202|ENSMUSG00000020455|+|chr11:g.58872904:T>C  
 MAAPDLSTNLQEEATCAICLDYFTDPVMTDCGHNFCRECIIRRCWGQPEGPYACPECRELSAQRNLRPNRPLAK  
 MAEMARRLHPPSPVPPQGVCAAHREPLTTFCGDLSLLCPICERSEHWTHRVRPLQEAADDLKGRLKLSLEHLR  
 KQMEDAMLFOQAQAEETCALWQKMOVESQRQNVLGEFERLRRLLAEEEEQQLPQKLEEEEELEVLPRLREGAARLGO  
 QSTQLAALISELESRCQLPALGLLQDIKDALCRM\*  
 >rs107962877\_ENSMUSP00000104438\_c.586:T>C\_p.L196P  
 ENSMUST00000108810.10|Trim11-  
 203|ENSMUSG00000020455|+|chr11:g.58872904:T>C  
 MAAPDLSTNLQEEATCAICLDYFTDPVMTDCGHNFCRECIIRRCWGQPEGPYACPECRELSAQRNLRPNRPLAK  
 MAEMARRLHPPSPVPPQGVCAAHREPLTTFCGDLSLLCPICERSEHWTHRVRPLQEAADDLKGRLKLSLEHLR  
 KQMEDAMLFOQAQAEETCALWQKMOVESQRQNVLGEFERLRRLLAEEEEQQLPQKLEEEEELEVLPRLREGAARLGO  
 QSTQLAALISELESRCQLPALGLLQDIKDALCRVQDVKLOPPAVVPMELRTVCRVPG  
 LVETLRRFRGDITLDPDTANPELVLSEDRRSVQRGEQRQALPDNPERFDPGPCVLGQERITSGRHYWEVEVGD  
 QTSWALGVCKETANRKEKGELESAGNGFWILVFLGFSFYNSNEPAFSPLRDPPKRVGIFLDYEAGHLSFYSATDG  
 SLLFIFPETLFSGLTRPLFSPLSSSPTMTICRLIGVSGDTLGPQ\*  
 >rs107962877\_ENSMUSP00000090749\_c.586:T>C\_p.L196P  
 ENSMUST00000093061.7|Trim11-201|ENSMUSG00000020455|+|chr11:g.58872904:T>C  
 MAAPDLSTNLQEEATCAICLDYFTDPVMTDCGHNFCRECIIRRCWGQPEGPYACPECRELSAQRNLRPNRPLAK  
 MAEMARRLHPPSPVPPQGVCAAHREPLTTFCGDLSLLCPICERSEHWTHRVRPLQEAADDLKGRLKLSLEHLR  
 KQMEDAMLFOQAQAEETCALWQKMOVESQRQNVLGEFERLRRLLAEEEEQQLPQKLEEEEELEVLPRLREGAARLGO  
 QSTQLAALISELESRCQLPALGLLQDIKDALCRVQDVKLOPPAVVPMELRTVCRVPGVETLRRFRGDITLDP  
 DTANPELVLSEDRRSVQRGEQRQALPDNPERFDPGPCVLGQERITSGRHYWEVEVGDQTSWALGVCKETANR  
 EKGELESAGNGFWILVFLGFSFYNSNEPAFSPLRDPPKRVGIFLDYEAGHLSFYSATDGSLFFIFPETLFSGLTR  
 PLFSPLSSSPTMTICRLIGVSGDTLGPQ\*  
 >rs51849424\_ENSMUSP00000121092\_c.1479:A>G\_p.N494D  
 ENSMUST00000138587.9|Obscn-206|ENSMUSG00000061462|-|chr11:g.58888846:T>C  
 KQEGSSQDSCRGKPASSCHSELGSGSQEGCGPPSSQSLGSLPQSLKKESTSCGPLFSEQPQAAPFPTQVSP  
 LLGSEKEPQDGLSEGPVPPVSSSPGSASQVDASLDTEGLSEAGDTCDFTPPPQRPQEQATTRKFSLESRRGGY  
 AGVAGYGTFAFGGDAGGMLGQGPLWARMAWAVSQSSEEQDEAATESPQPLESLGPIAEASGVPLRTSPSLTPW  
 EEVEQVSLVQIRDLSGDAEAAADTISLDISEVDPAYLNLSLDYDIKYLPEFEMIFRRVVKPIEQPESPGSETEA  
 GQGLADFLEEAAWPWPGEGLRAGLEITEEPEEPGLDEALLGEAAVGRKRKWSPSRGLFQFPGRCLSGEEPVE  
 LGLRQRVKASMAHISRILKGRPEGPEREGPPRKKAGLASFRLSGLKGRDQAPSFLRELSDEAVVLGQSVTLAC  
 QVLAQPTAQATWSKDGVLLESSEGHLLISSTLKNFQLLTIIVVKEEDLGTYTCCVSDPLGTAVTTGVLKKAERP  
 SSSPRPEVGEYKDAVLLVWKPVESCGPVTYIVQCCIEGGSWTTLASDISDCCYLTGKLSRGGMYIFRTACVS  
 KAGMGFYSSPSEQVLLGGPNHLASEEESRRGRPAQLLPSTKTFMQQIRRRGRFSVVRQCREKASGRALAAKI

VPYQPEDKTAVLREYEALKRLHHPHLAQLHAAAYLSPRHLVLI LELCSGPPELLPSLAERESYSESDVKDYLWQM  
 LSATQYLHAQHILHLDLRSENMMVTEYNLLKVIDLGNQSLDQEKVPAPENFKDYLETMAPELLEGQAVPQT  
 DIWAIGVTAIFIMLSGEYEPESSEGRDLQKGLRKLIRLSRCYAGLSGGAVAFLOSSLCAQPWGRPCASTCLOQC  
 GWLTEEGPTGSRPTPVTFPTVRLRAFVREKRRALLYKKNLAQVR\*  
 >rs51849424\_ENSMUSP00000158795\_c.25368:A>G\_p.N8457D  
 ENSMUST00000238536.2|Obscn-210|ENSMUSG00000061462|-|chr11:g.58888846:T>C  
 MDHSFSGAPRFLTRPKAFVSVGKDATLSCQIVGNPTPHVSWEKDRQFVEAGARFRLAQDGDVYRLTILDLAL  
 GDSGQYVCRARNAIGEFAAVGLRVDSEGTCAEQAPHFLLRPTSIRVREGADATFRCRVGGSPQPAVSWSKDG  
 RRLGPPDAPHVRVEEHGESSALRIRSARPRDGGTYEVRAENPLGSASAAAALVVDSDAEVAGPPGTSTATLLA  
 HLQORREAMRAEGIPPSPPGAGTRTCTVTEGKHARLSCFVTGEPKPEVWKKDGQLVTEGRRHVVEDEQENF  
 VLKILFCKQSDRGLYTCTASNLVGQTYSSVLVVVREPTVPFKKRLQDLEVREKESATFQCEVAQPAEAAWFK  
 EETRLWASAKYDIEEGETERRLTVRNVSADDDAVYICETTEGSRVVAELSVQGNLTKLPRKTAVRTGDTAIF  
 WVVELAVPEGPVWRNRNQEEMVAGGRVAITAEGTCHTLTI FQCTLEDMGEVAFVSGGCRTTTQFCVSAAPRRPPL  
 YPADPVVKAKTESVTLWSAPPHGDRPVTIDGYVLEKRLGAYAWSRCHEAGWLATTEFTITGVAAEEDGFQ  
 FRVSAINHFGQGPYLEFPGTMHLVPLAVKTPKAVEAVEGGEVTFVSDLTVASSGEWFLDGEALKASSIYVI  
 RCDRTRHMLTIREVPARLHGAQLKVFANGIETSIQMVVRAALGLPSSKLPAAAAREVLAQLHHEEAQLLAEALS  
 QAAAATWLKDGRELSLGPKYEMQVSAGRRALLVRDVAQDDAGLYECVSRGSRRTAYQLLVQDITDGYRWDWGPAG  
 PQKHMCKCAGAKIARYLGSSCYRFLQYDKGVVHWEAALDTRQKGTSSCSLHEKPKLVFAKQQAHSEVKA  
 AGNSATLSCEVTQAQTEVTFWKDGKLLSSSSKVRMEASGCSRRLVVQQAGKADAGEYSCEAGGQKLSFRLDVA  
 EPKLVFAKQQAHSEVKAEGASATLSCEVAQAQTEVTFWKDGKLLSSSSKVRMEASGCSRRLVVQQAGKADA  
 GEYSCEAGGQKLSFRLDVAEPKMFVFAKEQQARSEVKAEGASATLSCEVAQAQTEVTFWKDGKLLSSSSKVRM  
 EASGCSRRLVVQQAGKADAGEYSCEAGGQKLSFRLDVTEPKLVFAKEQQARSEVKAEGVNSATLSCEVAQAQ  
 ETVTFWKDGKLLSSSSKVRMEASGCSRRLVVQQAGKADAGEYSCEAGGQKLSFRLDVAEPKLVFAKEQQARSEV  
 KAEAGNSATLSCEVAQAQTEVTFWKDGKLLSSSSKVRMEASGCSRRLVVQQAGKADAGEYSCEAGGQKLSFHL  
 DVTEPKLVFAKEQQAHSEVKAEGASATLSCEVAQAQTEVTFWKDGKLLSSSSKVRMEASGCSRRLVVQQAGK  
 ADAGEYSCEAGGQKLSFRLDVAEPKLVFAKEQQARSEVKAEGASATLSCEVAQAQTEVTFWKDGKLLSSSSK  
 VRVEASGCSRRLVVQQAGKADAGEYSCEAGGQKLSFRLDVAEPKLVFAKEQQANSEVKAEGASATLSCEVAQ  
 AQTEVTFWKDGKLLSSSSKVRVEASGCSRRLVVQQAGKADAGEYSCEAGGQKLSFRLDVAEPKLAFAKEQQAH  
 SEVKAEGASATLSCEVAQAQTEVTFWKDGKLLSSSSKVRVEASGCSRRLVVQQAGKADAGEYSCEAGGQKLS  
 FRLDVAEPKLAFAKEQQAHSEVKAEGASATLSCEVAQAQTEVTFWKDGKLLSSSSKVRVEASGCSRRLVVQQ  
 AGKADAGEYSCEAGGQKLSFRLDVAEPKLAFAKEQQAHSEVKAEGASATLSCEVAQAQTEVTFWKDGKLLSS  
 SSKVRVEASGCSRRLVVQQAGKADAGEYSCEAGGQKLFRLDVAEPKLMFAKEQQAHSEVKAEGASATLSCE  
 VAQAQTEVTFWKDGKLLSSSSKVRVEASGCSRRLVVQQAGKADAGEYSCEAGGQKLSFRLDVAEPKLVFAKEQ  
 QAHSEVKAEGASATLSCEVAQAQTEVTFWKDGKLLSSSSKVRVEASGCSRRLVVQQVQKADAGEYSCEARGQ  
 KLSFRLDVADTRLMFAKEQQARTEVKAEGNSATLSCEVAQAQTEVTFWKDGKLLSSSSKVRVEASGCSRRLV  
 VQQAGKADAGEYSCEAGGQKLSFRLDVAEAEASQIPEPVSREPLVVKHEHETIILTATIAAPSVAAVTLKDG  
 EIRRSKRHEATSLGDTHTLTVRGAQVLDIAIYSCRVGKEGQDFPVQVEEVAAKFSKPLEPVEGELGGTVMLVC  
 ELSPEQAEVWRCGNTQLRPGKRFQMTSEGPRRTLTVSGLREDDAEYVCESRDDRTSARLTVKVPVVKFTS  
 GLSAMVAEEGQEQATFQCVVSPSDAGVTWYKDGMLQPSKFMVMEVSGASRSLTILGLTLEDAGQVTEAEGAS  
 SSAALRVREAPVLFKKLEPQTEVEERTSVTLEVELTRPWPEVKWTRNAAVLTPSENVEIRAEGARHCLVLRV  
 GFADRGFFGCETPDDKTQAKLNVEMRQVRLVRLGLQEVEAKEQGTASMDVELSHAEEVGSWTRDGLRQLPQPKC  
 HLAVQGPVHILTLALSALQPQDSGLVAFRAEGVHTSARLIVTELPSVSTRVLQDVVATQKEKVTLECELSRPVDV  
 RWLKDGVLELRAGKAIIGIVAQGTCSRSLVIYRCETGDQGVYVCDALDAQTSASLRVQGRTYTLIFRRVLAEDAGE  
 VKFVAENAESRAHLRVKELPVTLLRPLRDKIAMEKHRGVLECCQVSRASAQVRWFKGGVELQSGPKYEVVSDGL  
 YRKLVINVDVQPEDEDTYCDAGNVKTSAQFFVEEQSITIVRGLKDMTVMPEPAPAWFECETSIPSVRPPKLLG  
 KTVLQAGGNVLEQDGTVHRLTLHKTCSTMTGPVHFTIGKSRSSAQLVVSDIPVVLTRPLEPKAGRELQSVVL  
 SCDFRPAPKAVQWYKDDTPLSPSEKFKMALEGQMAELRILRLTPADAGVYRCQAGSAQSSAEVTEAREVTVI  
 QPLQDAEAMEEGRVCFSCELSHKDEDEIWSLNGTPLYNDSFHEISHEGCLHTLVLSVSRQADTGTVCATSPKV  
 SVSARLVVKGKPVVFLKALDDVSAEERGTLLTQCEVSDPEARVVWRKDGVELGSPDKYDFLHKAGARGLTVHD  
 LSHEDAGLYTCQVGSKETQSKVSVHDLHVGITKRLKTVLEVLEGECSFECVLSHESPSDPAVWTVGGKTVGGS  
 GHFHAVRQGRKYTLTVKDAALSDAGEVVSFVGLTSSKASLIIRERPVDITKPLEDQRTTLGEDVMLSCELSRA  
 GTSVRWLKDGKAIRKSQKYDLLSEGTRAVLVVRKASLKDSGEYTCETEASKSTAKLCVEEKANRFTEELADLQ  
 VEEKGRAVFTCKTEHPASVVTWRKGLLELRASGKHVPVSEGLTLKLTINALERTDSDTYTCDIGQARTQARLL  
 VHGGQKVRVIEDLEDTASVQEGSSAKFCCRIAPADYGVPHWFHLDKTPHLSNELNEITVQPGGYHVLTLRQLAKD  
 SGTVYFEAGDQRTSAALRVTEKPSIFSRPLTDVTVTEGEDTLVCETTTTVDSVSRWTKDGKTLRPSARCQLSH  
 EGCQAQLLITATTPQDGGRYKCEIGGASSSSIVRVHALPVRFRRESLKDVEVPEGKAATLRCVLSVVAAPVEWR  
 HGDDVLKSSNKYSLRQEGAVLELVIRDLQPDQSGQYSCSFGDQTTSATLTVKTSQAQFVGLKRNKEATEGTTV  
 TLRCELTKAPVEWKKGTETLRNGDKYSLKQDGAVCLEQICSLLVADAGEYSCVCGQEKTSATLTVKALLVHF

VRRLRSKEATEGDTTTLQCELSKAAPVEWRKGTETLRDGDYSLKQDQAVCELQIRSLTIADAGEYLCTCGQE  
KTSATLTVRALPAKFKDSLKNEEATEGTTATLSCELSKAAPVTWKKGPKTLQSGDKYVLRQDQAVCGLQIHGL  
TMADAGEYSCVCGQEKTSATLTVRGLPAKFIEDLRSQEATEGATAILRCELSKAAPVEWRKGSSETLKDGDYR  
LRQDQAVCELQIRGLAVVDGTYSLSPTKFTTEGLRNEEATEGTMATLRCQMSKAAPVEWRKGSSETLRDGDYR  
LRQDQAVCELQIRGLTIEDSGEYTCVCGQEKTSATLSVKALPSRFIEDLRSQEATEGTMATLRCQMSKTAPVE  
WKKGSETLRDGGYSLRQDGPVCELQICDLAVEDAGEYSCVCGQEKTSATLSIKALPPRFIEDLRSQEATEG  
MATLRCQMSKAAPVEWRKGSSETLGDGGYSLRQNGAVCELQIHDLAVEDTGEYSCVCGQEKTSATLNVKALPP  
RFIEDLRSQEATEGTMATLRCQMSKAAPVEWRKGSSETLRDGGYSLRQDQAVCELQIHDLVEDAGQYSCVCG  
QEKTSAVLTVDALPPKFTTEGLKKEEATEGTMVTLRCQMSKEATVEWRKGAKTLDGGYSLRQDQAVCELQIC  
GLAVEDAGEYSCVCGQEKTSATLSVKALPPRFIEDLRSQEATEGTMATLRCQMSKAAPVEWRKGSSETLRDGD  
YSLRQDQAVCELQIRDLAVEDAGEYLCVCGQEKTSATLSVKALPPRFIEDLRSQEATEGTMATLRCQMSKAAP  
VEWRKGSSETLRDGDYSLRQDQAVCELQICDLAVEDTGDYSCVCGQEKTSATLSVKALPPRFIEDLRSQEARE  
GTVATLRCRMSKAAPVEWRKGSSETLKDGDYSLRQEGNLCELQIRDLAVEDTEEYSCVCGQEKTSATLSVKAL  
PAKFIEDLRSQEAPESSTVTLRCKLSKKASVVWKKGSETLRNGARYSLRQDQAVCELEIRDLTVEDTGEYSCT  
CGQERTSATLSIMAPQVVFQQLQNLQAEEGSMASLRCELSVPAAMVWSKGGLELQGDTRREARQQGCVAEL  
LLRDLRREDAGEYSCVCGQEKTSATLMVTAAPVRFLELQAQDVDEGATARLRCELSREAVSVEWRKGSLSQLF  
PCAKYQMVQEGTTAELLVHGVEQEDAGEYTCDAHTQSIARLSVRAPKPKFKTDLQSTEQEAGGTARLCCQLS  
EABPGTVPQWLKEGVELHVGSKYEMRRQGAVERCELLIHGLEAKDTGEYACLVGGQKTLASLRVKEPEVTVIRGL  
VDMEVQADEDEFTCKVSAQATDVQWHLQGLPLQSNVTEVAVLADGCTHVLQKGVTLLEDAGTVSFHVGGL  
SSSAQLTVRVPEVTVLEPLKDVQVLESEGQDAHFRCLRSRAGQEARWALGGVPLQCNEMNDITVEQGTLYLLTL  
HKVTVLEDAGITTLQVGSSEEAQLKVTAKNTVLRGLENVDALEGGEALFECQLSQPEVAHAHTWLLDDEPVHTS  
EKVEVVYFENGLRHLLLLKLNKPKQDSCRVTFLAGDVVTSFAFLTVRGWRLEVLEPPHDASVKAGMQVRFCTCILS  
EAVPVGEATWYINGAAIQPDDTWTVTDDGSHHALTLSNAQPQHAGEVTFFAARDAVASARLSVLALPDPEDA  
EUVGRSDHSVTLVSWVAPMSDGGGGLCGYRVMKEASTGQWQLCHDLVPGPECVVDDLVPGKTYRFRVAAVGPA  
GAGEPVHLPQMVKIAPAPAPAPAPAPAPAPETRAVAVGDEDICILELEVAADGGEVVWHKGTERRIQPGGHFEVLS  
RGQRQMLVIKGFRTEDQGEYRCGPIQGLPSSGAATFNVMVTSVSGSDEVPAQPSLPPPEAAQEDLHLLWEALAR  
KRMSREPLTDSISELPEEDSRVQHLRQEAETAPDLSEGYSTADELARTGEADLSHTSSDDESAGTPELSVT  
YLKKAAGPGISPLASKHEAQVTTSVKPKQKQEPVPTCPGGDLAADLMDPSLDKAAVKIQAAFKGYKVRKE  
MKQQEGPVFSRTFGDTEAQVGDVLRLECVLATKTDMRACWLKDGIELTDGRHYHIDQLKDGTCSSLVTVGLAPT  
DSGRYTCQVSTKSGRVSHSACVVVSGTESEAESSSGGELDDAFRRAARRLHRLFRTKSPAELSEELFLSADE  
GPGEPEEPADWQTYREDENFVCIRFESLAEARQAVTCFRNMFMATMGIGVEISLGEQGPGRVEMRIGKVAPTVT  
PAVPLAKTPGLQTSDAAPVFLTELQNDVQDGYPMSFDCVVTGQVPSVRWFKDGKLEEDDHVMINEDQQGG  
HQLIITAVVPADMGVYRCLAENSMGVSSTKAELRVELTSTDYDTAADATETSSYFSAQGYLSSREQEGTESDE  
GQLPQVLEELKDLQVAPGTRLAKFQLKVKGYPAKLYWFKDGGQPLTSDHIRMTDKKTLHLEIVSVTREDSG  
QYAAIYINAAGAAYSARLLVRGPSEPEEKPASDVHERLVPRILEKFTPKKVKRGSSTIFSVKVEGHPAPSV  
HWLKEEAEGVVLWIGPDTPGYTMASSSKQHSVLVLDVGRQHGTQTYTCIATNPAGQALCSASLHISGLAKEEEEQ  
ERVKEALISSFLQGTSAQVSAQMSSEAGFADLVGQSKGESLVAAEAHSHLSLAEVGTEEFQKLTSSQITEMVS  
AKISQAKLQVPGGDSDEETKTPSASPRHGRSRPSSSVQESSSESEDGDSRGEIFDIYVVTADYLPPLGAEQDAI  
ILREGQYVEVLDSAHPLRWLVRTKPTKSSPSRQGWVSPAYLDRKRLKLSPEWGPTEAPEFPGEAVSEDEYRTRL  
SSVIQELLSSEQAFVQELQFLESHHMKHLERSPRVPAAVASQKTVIFRNVQDISHFHSSFLKELQCGTDDDDV  
AMCFIKNQEAFAEKYLEFLVGRVQAESVVVSTPVQEFYKKYAEETLSAKDPTQPPPPPLQHYLEQVVERVQKYQ  
ALLKELIRNKARNRQNCALLEQAYAVVSALPQRAENKLVSLMENYPGTLEALGEPHQGHFIVWEGAPGARM  
PWKGHNHRVFLFRNYLVICKPRRDSRTDFTSYVFRNMMLSSIDLNDQVEGDDRAFEVWHEREDSVRKYLLQA  
RTVVIKNSWVKEICIGIQORLAQPVWRPPEFEEELADCTAELGETVKLACRVTGTPKPIVSWYKDGKPEVVDPH  
HILIEDPDGSCSTLILDNLTGIDSGYMCFAASAAGNASTLGKILVQVPPRFVNVKVRATPFVEGEDAQITCTVE  
GAPYPQIRWYKDGTLTLLAPGNRYRMLNEPRSGVLVVIQAASKEDLGHYECELVNRLGSTRGGGELYMQSPALR  
ARDQHHREQIVAAVEDTSVEGSAHSAQDQADQAAASVLWRLGSEALGPSGDLPNTRQSEPPAFEEAASQIP  
GAASGTPEVSPQPGTHKGLEQETTSSGSQGWTPVIRVEGTAWPGAGTGQLLDDVHSQVIMETTQRTYVCQAPDT  
GVTRAPSMQVTIEDVQVQVGDMAQFDAVIEGHPPPIVTVWYKGSTQLTSSARLSQRQDGTYSVLVTDVAPHDA  
GVYTCVANNAGGQVLCKAELLVHGGDKLDAENQVYRRKLHSFYDVQEEIGRGVFGFVKRVQHKGNMFCAAKF  
IPLRSKTRAQAYQERDILATLGHPLVTGLLDQFETRKTLLILILELCSSEELLDRFLKKGVTAEAEVKVYIQQ  
VEGLHYLHSHGILHLDIKPPNILMVHPAREDIKICDFGFAQKITPSEPQYSKYGSPEFVSPEIIEQNPVSEGS  
DIWAMGVI SYLSTLCCSSPFAGESDRATLLNVLEGRVSWSSPTAAHLSSEDAKDFIKATLQRTPRARPSTSQCLA  
HPWFLKSMPEAAEAFINTKQLKFLARSRWQRSLMSYKSI LVMRSIPELLQGPDPSPSLGVARHRLGEASGAS  
SSSSSDNELAPFARAKSLPPSPVTHSPLLHPRGFLRPSASLPEETEASMPADAAPASPOSAGPPASPGCV  
PRHSVSISSLFYQQAGEGAERGNKTSGAKRHPARRRHLLKGGYIARALPGLREPLMEYSLLEEEAAREEQASLM  
TKTSPFETALRLPSSSVREVPGRSHSLDNPPVTTGPSPEACKEQLLFPSTGLTHETTAKDRGHKEGFLQESV  
PFPMSGDSRPGKQEGSSQDSCRGKPASSCHSELGSGSQEGCGPPSSQSLGSLPPQSLKELSTSCGFLFSEQ

PQAAPFPTQVSPLLGSEKEPQDGSLSSEGPVVPVSSSPGSASQVDASLDTEGLSEAGDTCDFTPPPQRPQEQAT  
TRKFSLESRGGYAGVAGYGTFAFGGDAGGMLGQGPLWARMAWAVSQSSEEQDEAATESPQPLESIGPIAEASG  
VPLRTSPSLTPWEEVEQVSLVQIRDLSDGDAEAADTISLDISEVDPAYLNLSLDYDIKYLPEFEMI FRRVFKPI  
EQPESPGSETEAGQGLADFLLEAAWPWPGEGLGLRAGLEITEEPEEPGDLEALLGEEAAVGRKRKWSPSRGLFQF  
PGRCLSGEEPVELGLRQRVKASMAHISRILKGRPEGPEREPPRKKAGLASFRLSGLKGRDQELSDEAVVLGQ  
SVTLACQVLAQPTAQATWSKDGVLLESSGHLLISSTLKNFQLLTILVVKEEDLGTYTCCVSDPLGTAVTTGVL  
RKAERPSSSPRPEVGELEKDAVLLVWKPVESECGPVYIVQCCIEGGSWTTLASDISDCCYLTKLSRGGMYIF  
RTACVSKAGMGPIYSSPSEQVLLGGPNHLASEEESSRGRPAQLLPSTKTFQMQIRRRGRFSVVRQCREKASGR  
ALAAKIVPYQPEDKTAVLREYEALKRHLHPHLAQLHAAYLSRHLVLIILELCSGPELLPSLAERESYSESDVK  
DYLWQMLSATQYLHAQHILHLDLRSENMMVTEYNLLKVIDLGNQSLDQEKVPAPENFKDYLETMAPELLEGGQ  
GAVPQTDIWAIGVTAFIGLSGEYPESESETRDLQKGLRKLIRLSRCYAGLSGGAVAFLOSSLCAQPWGRPCA  
STCLQCGLWTEEGPTGSRPTPVTFTVRLRAFVREKRRRALLYKKNLAQVR\*  
>rs51849424\_ENSMUSP00000038264\_c.22806:A>G\_p.N7603D  
ENSMUST00000047441.14|Obscn-202|ENSMUSG00000061462|-|chr11:g.58888846:T>C  
MDHSFSGAPRFLTRPKAFVSVGKDATLSCQIVGNPTPHVSWEKDRQPVVEAGARFRLAQDGDVYRLTILDLAL  
GDSGQYVCRARNAIGEFAAVGLRVDSEGTCAEQAPHFLLRPTSIRVREGADATFRCRVGGSPPAVSWSKDG  
RRLGPPDAPHVRVEEHGESSALRIR SARPRDGGTYEVRAENPLGSASAAAALVVDSDAEVAGPPGTSTATLLA  
HLQQRREAMRAEGIPSPPGAGTRTCTVTEGKHARLSCFVTGEPKPEVTVWKKDGLVTEGRRHVVEDEQENF  
VLKILFCKQSDRGLYTCTASNLVGQTYSSVLVVVREPTVPFKKRLQDLEVREKESATFQCEVAQPAEEAAWFK  
EETRLWASAKYDIEEGTERRLTVRNVSADDDAVYICETTEGSRVVAELSVQGNLTKLPRKTAVRTGDTAIF  
WVELAVPEGPVWRWRNQEEMVAGGRVAITAEGTCHTLTI FQCTLEDMGEVAFVSGGCRTTTQFCVSAPRRPPL  
YPPADPVVKAKTESSVTLSSWAPPHGDRPVTIDGYVLEKRKLGAYAWSRCHEAGWLATTEFTITGVAAEGDFQ  
FRVSAINHFGQGPYLEFPGMTMLVPLAVKTPKAVEAVEGGEVTFVSDLTVASSGEWFLDGEALKASSIYVI  
RCDRTRHMLTIREVPARLHGAQLKFVANGIETSIQMVVRAALGLPSSKLPAAAAAREVLAQLHEEAQLLAE LSD  
QAAA VTWLKDGRELSLGPKEYMQVSAGRALLVVRDVAQDDAGLYECVSRGSRRTAYQLLVQDITDGYRDWGPAG  
PQKHMCKCAEKIARYLGS SCYRFLQYDKGVWHWLEAALDTRQKGTSSCSLHEKPKLVFAKQQAHSEVKAE  
AGASATLSCEVAQAQTEVTWFKDGKLLSSSSKVRMEASGCSRRLVVQQAGKADAGEYSCEAGGQKLSFRLDVA  
EPKMFVFAKEQQARSEVKAEGASATLSCEVAQAQTEVTWFKDGKLLSSSSKVRMEASGCSRRLVVQQAGKADA  
GEYSCEAGGQKLSFRLDVTEPKLVFAKEQQARSEVKAEGNSATLSCEVAQAQTEVTWFKDGKLLSSSSKVRM  
EASGCSRRLVVQQAGKADAGEYSCEAGGQKLSFRLDVAEPKLVFAKEQQARSEVKAEGNSATLSCEVAQAQ  
EVTWFKDGKLLSSSSKVRMEASGCSRRLVVQQAGKADAGEYSCEAGGQKLSFHLDVTEPKLVFAKEQQAHSEV  
KAEAGASATLSCEVAQAQTEVTWFKDGKLLSSSSKVRMEASGCSRRLVVQQAGKADAGEYSCEAGGQKLSFR  
LDVAEPKLVFAKEQQARSEVKAEGASATLSCEVAQAQTEVTWFKDGKLLSSSSKVRVEASGCSRRLVVQQAGK  
ADAGEYSCEAGGQKLSFRLDVAEPKLVFAKEQQANSEVKAEGASATLSCEVAQAQTEVTWFKDGKLLSSSSK  
VRVEASGCSRRLVVQQAGKADAGEYSCEAGGQKLSFRLDVAEPKLVFAKEQQAHSEVKAEGASATLSCEVAQA  
QTEVTWFKDGKLLSSSSKVRVEASGCSRRLVVQQAGKADAGEYSCEAGGQKLSFRLDVAEPKLVFAKEQQAH  
SEVKAEGASATLSCEVAQAQTEVTWFKDGKLLSSSSKVRVEASGCSRRLVVQQAGKADAGEYSCEAGGQKLS  
FRLDVAEPKLVFAKEQQAHSEVKAEGASATLSCEVAQAQTEVTWFKDGKLLSSSSKVRVEASGCSRRLVVQQ  
AGKADAGEYSCEAGGQKLSFRLDVAEPKLVFAKEQQAHSEVKAEGASATLSCEVAQAQTEVTWFKDGKLLSS  
SSKVRVEASGCSRRLVVQQAGKADAGEYSCEAGGQKLSFRLDVAEAEBSQI PERPSRREPLVVEKHETIILTAT  
IAAPSVAAVTWLKDGVEIRRSKRHEATSLGDTHLTVRGAQVLD SAIYSCRVGKEGQDFPVQVEEVAAKFSKP  
LEPVEGELGGTVMLVCELSPEQA EVVWRCNGTQLRPGKRFQMTSEGPRRTLTVSGLREDDAE EYVCE SRDDRT  
SARLTVKVPVVKFTSGLSAMVAEEGQEATFQCVVSPSDAGVTWYKDGMLQLPSEKFMVMEVSGASRSLTILGL  
TLEDAGQVTVEAEGASSAALRVREAPVLFKKKLEPQTVEERTSVTLEVELTRPWPEVKWTRNAAVLTPSENV  
EIRAEGARHCLVLRVSGFADRGGFCETPDDKTQAKLNVMRQVRLVRLGLQEVEAKEQGTASMDVELSHAEVE  
GSWTRDGLRLQPGPKCHLAVQGPVHILTL SALQPQDSGLVAFRAEGVHTSARLIVTEL PVSFTRVLQDVVATQ  
KEKVTLECELSRPVDVRWLKDGVELRAGKAI GIVAQGTCSRSLVIYRCETGDQGVVCDALDAQTSASLRVQGR  
TYTLIFRRVLAEDAGEVKFVAENAESRAHLRVKELPVTLLRPLRDKIAMEKHRGVLECVSRSASAQVRWFKGG  
VELQSGPKYEVVSDGLYRKLVIN DVQPEDEDTYTCDAGNVKTSAQFFVEEQSITIVRGLKDMTVMEPAPAWFE  
CETSI PSVRPPKWLKGKTVLQAGNVGLEQDGTVHRLTLHKTCSTMTGPVHFTIGKSRSSAQLVVS DIPVVL  
RPLEPKAGRELQSVVLSCDFRPAPKAVQWYKDDTPLSPSEKFKMALEGQMAELRILRLTPADAGVYRCQAGSA  
QSSAEVTVAREVTVIQPLQDAEAMEEGRVCFSCELSHKDEDI EWSLNGTPLYNDSFHEISHEGLHTLVLKS  
VRQADTGTVCATLSPVSVSARLVVKGPVVVFKALDDVSAEERGTTLQCEVSDPEARVWVRKDGVELGSPDK  
YDFLHKAGARGLTVHDLSHEDAGLYTCQVGSKETQKSVSVHDLHVGITKRLKTVLEVLEGESCFECLVSHES  
SDPAVWTVGGKTVGGSGHFHAVRQGRKYTLTKVDAALSDAGEVVVFSVLGLTSKASLIRERPVDI TKPLEDQR  
TTLGEDVMLSCELSRAGTSVRWLKDGKAI RKSQKYDLLSEGTRAVLVVRKASLKDSGEYTCETEASKSTAKLC  
VEEKANRFTEELADLQVEEKGRAVFTCKTEHPASVVTWRKGLLELRASGKHVPSQEGTLTKLTINALERTDSD  
TYTCDIGQARTQARLLVHGQKVRVIEDLED TAVQEGSSAKFCCR IAPADYGPVHWF LDKTPLHSNELNEITVQ

PGGYHVLTLRQLALKDSGTVYFEAGDQRTSAALRVTEKPSIFSRPLTDVTVTEGEDLTLVCETTTVDSSVRWT
KDGKTLRPSARCQLSHEGCQAQLLI TATTPQDGGRYKCEIGGASSSSIVRVHALPVRFRESLKDVEVPEGKAA
TLRCVLSVAAPVEWRHGDDVLKSSNKYSLRQEGAVLELVIRDLQPDQSGQYSCSFGDQTTSATLTVKTSQAQ
FVGKLRNKEATEGTTVTLRCELTKAPVEWKKGTTETLRNGDKYSLKQDGAVCELQICSLLVADAGEYSCVCGQ
EKT SATLTVKALLVHFVRLRSKEATEGDTTTLQCELSKAAPVEWRKGTETLRDGDYSLKQDGAVCELQIRS
LT IADAGEYLCTCGQEKT SATLTVRALPAKFKDSLKNEEATEGTTATLSCELSKAAPVTWKKGPKTLQSGDKY
VLRQDGAVCGLQIHGLTMADAGEYSCVCGQEKT SATLTVRGLPAKFIEDLRSQEATEGATAILRCELSKAAPV
EWRKGSSETLRDGDYSLRQDGAMCELQIRGLTIEDSGEYTCVCGQEKT SATLSVKALPPRFIEDLRSQEATEG
TMATLRCQMSKAAPVEWRKGSSETLGDGGYSLRQNGAVCELQIHDLAVEDTGEYSCVCGQEKT SATLNVKALP
PRFIEDLRSQEATEGTMATLRCQMSKAAPVEWRKGSSETLRDGGYSLRQDGAVCELQIHDLVEDAGQYSCVC
GQEKTSAVLTVDALPPKFTEGLKKEEATEGTMVTLRCQMSKEATVEWRKGAKTSLDGGYSLRQDGAMCELQI
CGLAVEDAGEYSCVCGQEKT SATLSVKALPPRFIEDLRSQEATEGTMATLRCQMSKAAPVEWRKGSKTLRDGD
RYSLRQDGAMCELQICDLAVEDTGDYSCVCGQEKT SATLSVKAPQVVFQQPLQNLQAEEGSMASLRCELSVFN
AAMVWSKGGLELQGDTRREARQQCVAELLLRDLRREDAGEYSCCTGSQTT SATLMVTAAPVRFRLRLQAQDV
DEGATARLRCELSREAVSVEWRKGS LQFPKAKYQMVQEGTTAE LLVHGVEQEDAGEYTC DAGHTQS IARLSV
RAPKPKFKTDLQSTEQEAGGTARLCCQLSEAEPTPVQWLKEGVELHVGSKYEMRRQGAVCELLIHGLEAKDT
GEYACLVGQKTLASLRVKEPEVTI VRGLVDMEVQDVEDVEFTCKV SQAGATDVQWHLQGLPLQSNEVEVAV
LADGCTHVLQKGVTL EDAGTVSFHVGGLSSSAQLTVRVPVTVLEPLKDVQLSEGQDAHFRCRLSRASGQEA
RWALGGVPLQCNEMNDITVEQGTLYLLTLHKVTLEDAGTITLQVGCSSAEQLKVTAKNVTLRGLNVDALLEG
GEALFECQLSQPEVA AHTWLLDDEPVHTSEKVEVVYFENGLRHLLLLKNLKPQDSCRVTFLAGDVVTS AFLTV
RALPDPPEDAEVVGRSDHSVTL SWVAPMSDGGGGLCGYRVMKEASTGQWQLCHDLVPGPECVDDLVPGKTY
RFRVAAVGPAGAGEPVHLPQMVKIAPAPAPAPAPAPAPAPETRAVVGEDI CLELEVAADGGEVVWHKGTERRI
QPGGHFEVLSRQQRQMLVIKGFRTEDQGEYRCGPIQGLPSSGAATFNVMVTS GSGDEVPAQPSLPPEAAQEGD
LHLLWEALARKRRMSREPTLDSISELPEEDSRVQHLRQEAEETAPDLSEGYSTADELARTGEADLSHTSSDDE
SRAGT PSLVTYLKKGAGGPGISPLASKHEAQVTT SVKQJQPEVVPVTCPPPGLD SAADLMDPSLDKAAVKIQA
AFKGYKVRKEMKQEGPVFSRTFGDTEAQVGDVLRLECVLATKTD MRACWLKDGIELTDGRHYHIDQLKDGTC
SLLVVTGLAPTDSGRYTCQVSTKSGRVSHSACVVVSGTSEAESSSGGELDDAFRRAARRLHRLFRTKSPAELS
EEELFLSADEGPGEPEEPADWQTYREDENFVCIRFESLAEARQAVTCFRNMFMATMGIGVEISLGEQGRGVEM
RIGKVAPT VTPAVPLAKTPGLQTS DAAPVFLTELQNDVQDGYPMSFDCVVTGQPVPSVRWFKDGKLL EEDDH
YMINEDQQGGHQLIITAVVPADMGVYRCLAENSMGVSSTKAE LRVELTSTDYDTAADATETSSYFSAQGYLSS
REQEGTESDEGQLPQVLEELKDLQVAPGTRLAKFQLKVKGYPA PKLYWFKDGQPLTSDHIRM TDKKT LH TLE
IVSVTREDSGQYAAYSNAVGAAYSSARLLVRGPSEPEEK PASDVHERLVPPRILEKFTPKKVKRGSSITFSV
KVEGHPAPSVHWLKEEA EKGVLWIGPDTPGYTMASSSKQHSLVLLDVGRQHOGTYTCIATNPAGQALCSASLH
ISGLAKEEEQERVKEALISSFLQGT SQAVSAQMSSESAGFADLVGQSKGESLVAAEEAHSHLSLAEVGT EEFLOK
LTSQITEMVSAKISQAKLVQVPGGDSDEETKTPSASPRHGRSRPSSVQJESSESESDGDSRGEIFDIYVVVTADY
LPLGAEQDAIILREGQYVEVLDSAHPLRWLVRTKPTKSSPSRQGWVSPAYLDKRLKLSPEWGPTEAPEFPGEA
VSEDEYRTRLSSVIQELLSSEQAFV GELQFLESHHMKHLERSPRVPAAVASQKT VIFRNVQDISHFHSSFLKE
LQCGCTDDDVAMCFIKNQEA FEKYLEFLVGRVQAE SVVSTPVQEFYKKYAEETLSAKDPTQPPPPLOHYLE
QPVERVQKYQALLKELIRNKARNRQNCALLEQAYAVVSALPQRAENKLVSLMENYPGTLEALGEP IROGHFI
VWEGAPGAMPWKGNHRHVFLFRNYLVICKPRRDSRTDTFSYVFRNMMKLSSIDLNDQVEGDDRAFEVWHERE
DSVRKYLLQARTVIKNSWVKEICGIQORLAQPVWRPPEFEEELADCTAELGETVKLACRVGTGPKPIVSWYK
DGKPEVEVDPHHILIEDPDGSC TLLDNLGTGIDSGQYMCFAASAAGNASTLGKILVQVPPRFVNKVRATPFVEG
EDAQITCTVEGAPYPQIRWYKDG TLLAPGNRYRMLNEPRSGVLVLIQAASKEDLGHYECELVNR LGS TRGGG
ELYMQSPALRARDQHREQIVAAVEGAPSMQVTIEDVQVQVGDMAQF DAVIEGHPPPIV TWYKGSTQLTSSAR
LSQRQDGT TYSLVLT DVAPHDAGVYTCVANNAGQVLCKAELLVHGGDKLDAENQVYRRKLHSFYDVQEEIGR
GVFGFVKRVQHKGKMFCAAKFIPLRSKTRAQAYQERDILATLGHPLVTGLLDQFETRKTLLILILELCSSEEL
LDRLFKKGVVTEAEVKVYIQQLVEGLHYLHSHGILHLDIKPPNIMVHPAREDIKICDFGFAQKITPSEPOYS
KYGSPFVVSPEIIEQNPVSEGS DIWAMGVISYLSLTCSSPFAGESDRATLLNVLEGRVSWSSPTAAHLS EDAK
DFIKATLQRTPRARPSTSQC LAHPWFLKSMPAAEHAHFINTKQLKFL LARSRWQRSLMSYKSI LVMRSIP ELLQ
GPPDPSPLGVARHLRGEASGASSSSSSSDNELAPFARAKSLPPSPVTHSPLLHPRGFRLRPSASLPEETEASMP
TADAAVPASPQASAGPPASPGCVPRHSV ISSLFYQQAGEGAERGNKTS GAKRHPARRRHLKGGYIARALPGLR
EPLMEYSLLEEEAAREEQASLMTKTPSFETALRPLSSSVREVPGRSHSLDNPPVTTGSPPEACKEQLLFPST
GLTHETTAKDRGHKEGFLQESVFPFPMMSGDSRPGKQEGSSQVDSRCRGKPASSCHSELGSGSQEGCGPPSSQSLG
SLPQPQLKELSTSCGP L FSEQPQAAPFP TQVSPLLGSEKEPQDGS LSEGVPVPSSSPGSAQVDA SLDT EG
LSEAGDTCDFTPPPQRPEQATTRKFSLESRGGYAGVAGYGTFAFGGDAGGMLGQGPLWARMWAVS QSSEEQ
DEAATESPQPLES LGPIAEASGVPLRTSPSLTPWEEVEQVSLVQIRDLSGDAEAADTISLDISEVDPAYLNLS
DLYDIKYL PFEFMI FRRV PKPIEQPESPGSETEAGQGLADFL EEAAWPWP GELGLRAGLEITEEPEEPGDLEA





GLSAMVAEEGQEATFQCVVSPSDAGVTWYKDGMLQPSSEKFMVVEGASRSLTILGLTLEDAGQVTVAEAGAS  
 SAAALRVREAPVLFKKKLEPQTVVEERTSVTLEVELTRPWPEVKWTRNAAVLTPSENVEIRAEGARHCLVLRV  
 GFADRGFFGCETPDDKTQAKLNVEMRQVRLVRLGLEVEAKEQGTASMDVELSHAEEVGSWTRDGLRQLQPGPKC  
 HLAVQGPVHILTLALSALQPQDSGLVAFRAEGVHTSARLIVTELVSFTRVLQDVVATQKEKVTLECELSRPVDV  
 RWLKDGVLELRAGKAIIGIVAQGTCSRSLVIYRCETGDQGVYVCDALDAQTSASLRVQGRITYTLIFRVLAEADAGE  
 VKFVAENAESRAHLRVKELPVTLLRPLRDKIAMEKHRGVLECCQVSRASAQVRWFKGGVELQSGPKYEVVSDGL  
 YRKLVINOVPEDEDTYTCDAGNVKTSAQFFVVEEQSITIVRGLKDMTVMPPAWFECETSIPSVRPPKWLIG  
 KTVLQAGGNVGLQDGTVHRLTLHKTCSTMTGPVHFTIGKSRSSAQLVVSDI PVVLTLPLEPKAGRELVSVL  
 SCDFRPAPKAVQWYKDDTPLSPSEKFKMALEGQMAELRI LRLLTPADAGVYRCQAGSAQSSAEVTVAREVTVI  
 QPLQDAEAMEEGRVCFSCELSHKDEDIEWSLNGLTPLYNDSFHEISHGCLHTLVLKSVRQADTGTVCATSPKV  
 SVSARLVVKGKPVVFLKALDDVSAEERGLTLQCEVSDPEARVVRKDGVELGPSDKYDFLHKAGARGLTVHD  
 LSHEDAGLYTCQVGSKETQSKVSVHDLHVGITKRLKTVVEVLEGESECFEVLSSHESPSDPAVWTVGGKTVGGS  
 GHFHAVRQGRKYTLTVKDAALSDAGEVVFSVLGLTSKASLI IRERPVDITKPLEDQRTTGLGEDVMLSCELSRA  
 GTSVRWLKDGKAIRKSQKYDLLSEGTRAVLVVRKASLKDSGEYTCETEASKSTAKLCVEEKANRFTTEELADLQ  
 VEEKGRAVFTCKTEHPASVVTWRKGLLELRASGKHVPSQEGTLTKLTINALERTDSDTYTCDIGQARTQARLL  
 VHQQKVRVIEDLEDTAVQEGSSAKFCRIAPADYGPVHWFLLDKTPLHSNELNEITVQPGGYHVLTLRQLALKD  
 SGTVYFEAGDQRTSAAALRVTEKPSIFSRPLTDVTVTEGEDLTLVCETTTVDSVVRWTKDGTLRPSARCQLSH  
 EGCAQQLLITATTPQDGGRYKCEIGGASSSIVRVHALPVRFRFRESLKDVEVPEGKAATLRVLSVAAPVEWR  
 HGDDVLLKSSNKYSLRQEGAVLELVIRDLPQDSGQYSCSFGDQTTSATLTVKTSQAQFVGKLNKEATEGTTV  
 TLRCELKEAPVEWKKGTETLRNGDKYSLKQDGAVCELOICSLLVADAGEYSCVCGQEKTSATLTVKALLVHF  
 VRRLRSKEATEGDTTTLQCELSKAAPVEWRKGTETLRDGDYSLKQDGAVCELOIRSLTIADAGEYLCTCGQE  
 KTSATLTVRALPAKFKDSLKNEEATEGTTATLSCELSKAAPVTWKKGPKTLQSGDKYVLRQDGAVCGLQIHGL  
 TMADAGEYSCVCGQEKTSATLTVRGLPAKFIEDLRSQEATEGATAILRCELSKAAPVEWRKGSSETLKDGDYR  
 LRQDGAVCELOIRGLAVVDTGTYSLLPTKFTTEGLRNEEATEGTMATLRCQMSKAAPVEWRKGSSETLRDGDYR  
 LRQDGAMCELOIRGLTIEDSGEYTCVCGQEKTSATLSVKALPSRFIEDLRSQEATEGTMATLRCQMSKAPVE  
 WKKGSSETLRCQMSKAAPVEWRKGSSETLRDGGYSLRQDGAVCELOIHLDAVEDTGEYSCVCGQEKTSATLNVKALPP  
 RFIEDLRSQEATEGTMATLRCQMSKAAPVEWRKGSSETLRDGGYSLRQDGAVCELOIHLDDVEDAGQYSCVCG  
 QEKTSAVLTVDALPPKFTTEGLKKEEATEGTMATLRCQMSKATVEWRKGAKTLSDGGYSLRQDGAMCELOIC  
 GLAVEDAGEYSCVCGQEKTSATLSVKALPPRFIEDLRSQEATEGTMATLRCQMSKAAPVEWRKGSSETLRDGD  
 YSLRQDGAVCELOIRDLAVEDAGEYLCVCGQEKTSATLSVKALPPRFIEDLRSQEATEGTMATLRCQMSKAAP  
 VEWRKGSSETLRDGDYSLRQDGAMCELOICDLAVEDTGDYSCVCGQEKTSATLSVKALPPRFIEDLRSQEARE  
 GTVATLRCRMSKAAPVEWRKGSSETLKDGDYSLRQEGNLCELOIRDLAVEDTEEYSCVCGQEKTSATLSVKAL  
 PAKFIEDLRSQEAPESSTVTLRCKLSKASVWVWKKGSSETLRNGARYSLRQDGAVCELEIRDLTVEDTGEYSCT  
 CGQERTSATLSIMAPVVFQQLQNLQAEEGSMASLRCELSPNAMVWSKGGLELQGDTRREARQQGCVAEL  
 LLRDLRREDAGEYSCVCGSQTTSATLMVTAAPVRFRLRELQAQDVDEGATARLRCELREAVSVEWRKGSGLQF  
 PCAKYQMVQEGTTAELLVHGVEQEDAGEYTCDAQHTQSIARLSVRAPKPKFKTDLQSTEQEAAGGTARLCCQLS  
 EAEPGTPVQWLKEGVELHVGSKYEMRRQGAUCELLIHGLEAKDTGEYACLVGQKTLASLRVKEPEVTVRGL  
 VDMEVQADEDVEFTCKVSQAGATDVQWHLQGLPLQSNVTEVAVLADGCTHVLQKGVTLLEDAGTVSFHVGGL  
 SSSAQLTVRVPEVTVLEPLKDVQLESEGQDAHFRCRLSRASGQEARWALGGVPLQCNEMNDITVEQGTLYLLTL  
 HKVTLEDAGTITLQVGSSEALQKVTAKNTVLRGLENVDALLEGGEALFECQLSQPEVAHAHTWLLDDEPVHTS  
 EKVEVVYFENGLRHLLLLKLNKPQDSCRVTFLAGDVVTS AFLTVRGRLEVLPPHDASVKAGMQRVFTCILS  
 EAVPVGEATWYINGAAIQPDDTDWTVTTDGSHHALTL SNAQPQHAGEVTF AARDAVASARLSVLALPDPPEDA  
 GEPVHLPMVKIAPAPAPAPAPAPAPAPAPAPETRQAVVGEDICLELEVAADGGEVWVHKGTERIQPGGHFEVLS  
 RGQRQMLVIKGFRTEDQGEYRCGPIQGLPSSGAATFNVMVMTSGSGDEVPAQPSLPPEAAQEGDLHLLWEALAR  
 KRRMSREPTLDSISELPEEDSRVQHLRQEAEEETAPDLSEGYSTADELARTGEADLSHTSSDDESRACTPSLVT  
 YLKKAGGPGI SPLASKHEAQVTT SVKPQKQPEPVVPTCPPPGDLSAADLMDPSLDKAAVKIQAAFKGKVKRKE  
 MKQQEGPVFSRFTFGDTEAQVGDVLRLECVLATKTD MRACWLKDGIELTDGRHYHIDQLKDGTCSSLVTVGLAPT  
 DSGRYTCQVSTKSGRVSHSACVVVSGTESEAESSSGGELDDAFRAARRLHRLFRTKSPAELSEELFLSADE  
 GPGEPEEPADWQTYREDFVFCIRFESLAEARQAVTCFRNMFMATMGIGVEISLGEQGGPRGVEMRIGKVAPTVT  
 PAVPLAKTPGLQTS DAAPVFLTELQNDVQDGYPMSFDCVVTGQVPVSVRWFKDGKLEEDDHYMINEDQQGG  
 HQLIITAVVPADMGVYRCLAENSMGVSSTKAELRVELTSTDYDTAADATETSSYFSAQKGLYLSREQEGTESDE  
 GQLPQVLEELKDLQYVAGTRLAKFQLKVKGYAPKLYWFKDQGLPTSDHIRMTRDKKTLHTLEIVSVTREDSG  
 QYAAIYI SNAVGAAYSSARLLVRGSEPEEK PASDVHERLVPPRILEKFTPKKVKRGSSTIFSVKVEGHPAPSV  
 HWLKEEAKEKGLVWIGPDPGTGYSMASSSKQHSLVLLDVGRQHQGTYTCIATNPAGQALCSASLHISGLAKEEEQ  
 ERVKEALISSFLQGTSAQVSAQMSESAGFADLVGQSKGSESLVAEEAHSHLSLAEVGTTEFLQKLTSTQITEMVS  
 AKISQAKLQVPGGDSDEETKTPSASPRHGRSRPSSSVQESSSESEDGDSRGEIFDIYVVVTADYLPPLGAEQDAI

ILREGQYVEVLDSAHPLRWLVRTKPTKSSPSRQGWVSPAYLDRKRLKLSPEWGPTEAPEFPGEAVSEDEYRTRL  
 SSVIQEELLSSEQAFVQELQFLESHHMKHLERSPRVPAAVASQKTVI FRNVQDISHFHSSFLKELQGCCTDDDV  
 AMCFIKNQEAFEKYLEFLVGRVQAESVVVSTPVQEFYKKYAEETLSAKDPTQPPPPPLQHYLEQPVERVQKYQ  
 ALLKELIRNKARNRQNCALLEQAYAVVSALPQRAENKLVSLMENYPGTLEALGEPHQGHFIVWEGAPGARM  
 PWKGNHRVFLFRNYLVICKPRRDSRTDTFSYVFRNMMKLS SIDLNDQVEGDDRAFEVWHEREDSVRKYLLQA  
 RTVI IKNSWVKEICGIQQLAQPVWRPPEFEEELADCTAELGETVKLACRVTGTPKPIVSWYKDGKPVVEVDPH  
 HILIEDPDGSCCTLILDNLTGIDSGQYMCFAASAAGNASTLGKILVQVPPRFVNVKVRATPFVEGEDAQITCTVE  
 GAPYQQIRWYKDGTTLLAPGNRYRMLNEPRSGVLVVIQAASKEDLGHYECELVNRLGSTRGGGELYMOSPALR  
 ARDQHHREQIVAAVEDTSEVGSASHAQDQADQQAASVLWRLLGSEALGPS PGDLNTRQSEPPAFEEAASQIP  
 GAASGTPEVSPQPGTHKGLEQETTSSGSQGWTPVIRVEGTAWPGAGTGQLLLDVHSQVIMETTQRTYVCQAPDT  
 GVTRAPSMQVTIEDVQVQVGDMAQF DAVIEGHPPP IVTWYKGSTQLTSSARLSQRQDGTYSVLVTDVAPHDA  
 GVYTCVANNAGGQVLCKAELLVHGGDKLDAENQVYRRKLHSFYDVQEE IGRGVFGFVKRVQHKGNMFCAAKF  
 IPLRSKTRAQAYQERDILATLGHPLVTGLLDQFETRKTLLI LILELCSSEELLDRLFKKGVVTEAEVKVYIQQL  
 VEGHLHLHSHGILHLDIKPPNILMVHPAREDIKICDFGFAQKI TPSEPQYSKYGSPEFVSPEI IEQNPVSEGS  
 DIWAMGVI SYLSLTCSSPFAGESDRATLLNVLEGRVSWSSPTAAHLSSEDAKDFIKATLQRTPRARPSTSQCLA  
 HPWFLKSMPEAAEHFINTKQLKFLARSRWQRSLMSYKSILVMRSIPELLOQPPDPSPLGVARHLRGEASGAS  
 SSSSSDNELAPFARAKSLPPSPVTHSPLLHPRGFLRPSASLPEETEASMP TADAAPVSPQSAGPPASPGCV  
 PRHSVSSSLFYQQAGEGAERGNKTS GAKRHPARRRHLLKGGYIARALPGLREPLMEYSLLEEEAAREEQASLM  
 TKTPSFETALRLPSSSVREVPGRSHSLDNPVTTGPSPEACKEQLLFPSTGLTHEHTAKDRGHKEGFLQESV  
 PFPMSGDSRPGKQEGSSQDSCRKGPASSCHSELGSGSQEGCGPPSSQSLGSLPPQSLKELSTSCGPLFSEQ  
 PQAAPFPTQVSPLLGSEKEPQDGS LSEGPVVPVSSSPGSASQVDASLDTEGLSEAGDTCDFTPPPQRPQEQAT  
 TRKFSLESRGGYAGVAGYGTFAFSGDAGGMLGQGPLWARMAWAVSQSSEEQDEAATESPQPLES LGPIAEASG  
 VPLRTSPSLTPWEEVEQVSLVQIRDLSGDAEAADTISLDISEVDPAYLNLSLDLYDIKYL PFEFMI FRRVFKPI  
 EQPESPGSETEAGQGLADFL EEAAPWPPELGLRAGLEITEEPEEPGDLEALLGEEAVGRKRKWSPSRGLFQF  
 PGRCLSGEEPVELGLRQVRKASMAHISRILKGRPEGEREGPPRKKAGLASFRLSGLKGRDQELSDEAVVLGQ  
 SVTLACQVLAQPTAQATWSKDGVLLESSEGHLLISSTLKNVQQLLTILVVKEEDLGTITCCVSNPLGTAVTTGVL  
 RKAERPSSSRARNAIGEAFAAVGLRVDSEGTCAEQAPHFLLRPTSIRVREGADATFRCRVGGSPQPAVSWSKDG  
 RRLGPPDAPHVRVEEHGESSALRIRSARPRDGGTYEVRAENPLGSASAAAAALVVDSDAEVAGPPGTSTATLLA  
 HLQQRREAMRAEGIPPSPPGAGTRTCTVTEGKHARLSCFVTGEPKPE TVWKKDQGLVTEGRRHVVEDEQENF  
 VLKILFCKQSDRGLYTCTASNLVQTYSSVLVVREPTVPFKKRLQDLEVREKESATFQCEVAQPAEAAWFK  
 EETRLWASAKYDIEEEGETERRLTVRNVSADDDAVYICETTEGSRVVAELSVQGNLTKLPRKTAVRTGDTAIF  
 WVELAVPEGPVRWLRNQEEMVAGGRVAITAEGTCHTLTI FQCTLEDMGEVAFVSGGCRTTTFQFCVSAPRRPPL  
 YPPADPVVKAKTESVTLWSAPPHGDRPVTIDGYVLEKRKLGAYAWSRCHEAGWLATTEFTITGVAAEEDGFQ  
 FRVSAINHFGQGPYLEFPGTMHLVPLAVKTPKAVEAVEGGEVTFVSDLTVASSGEWFLDGEALKASSIYVI  
 RCDRTRHMLTIREV PARLHGAQLKFVANGIETS IQMVVRAALGLPSSKLPAAAAREVLAQLHHEAQLLAE LSD  
 QAAAVTWLKDGRELSLGPKYEMQVSAGRRALLVRDVAQDDAGLYECVSRGSR TAYQLLVQDITDGYRDWGPAG  
 PQKHMCKCAGAKIARYLGSSCYRFLQYDKGVWHLEAALDTRQKGKTS SCSLHEKPKLVFAKQQAHSEVKA  
 AGASATLSCEVAQAQTEVTWFKDGKLLSSSSKVRMEASGCSRRLVVQQAGKADAGEYSCEAGGQKLSFRLDVA  
 EPKMFVFAKEQQARSEVKAEGASATLSCEVAQAQTEVTWFKDGKLLSSSSKVRMEASGCSRRLVVQQAGKADA  
 GEYSCEAGGQKLSFRLDVTEPKLVFAKEQQARSEVKAEGNSATLSCEVAQAQTEVTWFKDGKLLSSSSKVRM  
 EASGCSRRLVVQQAGKADAGEYSCEAGGQKLSFRLDVAEPKLVFAKEQQARSEVKAEGNSATLSCEVAQAQ  
 EVTWFKDGKLLSSSSKVRMEASGCSRRLVVQQAGKADAGEYSCEAGGQKLSFRLDVTEPKLVFAKEQQAHSEV  
 KAEAGASATLSCEVAQAQTEVTWFKDGKLLSSSSKVRMEASGCSRRLVVQQAGKADAGEYSCEAGGQKLSFR  
 DVAEPKLVFAKEQQARSEVKAEGASATLSCEVAQAQTEVTWFKDGKLLSSSSKVRVEASGCSRRLVVQQAGK  
 ADAGEYSCEAGGQKLSFRLDVAEPKLVFAKEQQANSEVKAEGASATLSCEVAQAQTEVTWFKDGKLLSSSSK  
 VRVEASGCSRRLVVQQAGKADAGEYSCEAGGQKLSFRLDVAEPKLVFAKEQQAHSEVKAEGASATLSCEVAQ  
 AQTEVTWFKDGKLLSSSSKVRVEASGCSRRLVVQQAGKADAGEYSCEAGGQKLSFRLDVAEPKLVFAKEQQAH  
 SEVKAEGASATLSCEVAQAQTEVTWFKDGKLLSSSSKVRVEASGCSRRLVVQQAGKADAGEYSCEAGGQKLS  
 FRLDVAEPKLVFAKEQQAHSEVKAEGASATLSCEVAQAQTEVTWFKDGKLLSSSSKVRVEASGCSRRLVVQQ

AGKADAGEYSCEAGGQKLFRLDVAEPKLVFAKEQQAHSVEKAEAGASATLSCEVAQAQTEVTFWKDGKLLSS  
SSKVRVEASGCSRRLVVQQVGKADAGEYSCEARGQKLSFRLDVAEAEESQIPERPSRREPLVVEKHETIILTAT  
IAAPSVAAVTWLKDGVEIRRSKRHEATSLGDTHLTVRGAQVLDIAIYSCRVGKEGQDFPVQVEEVAAKFSKP  
LEPVEGELGGTVMLVCELSPEQAEVWRCGNTQLRPGKRFQMTSEGPRTTLTVSGLREDDAEYVCESRDDRT  
SARLTVKVPVVKFTSGLSAMVAEEGQEATFQCVVSPSDAGVTWYKDGMLQPSSEKFMVMEVGASRSILTILGL  
TLEDAGQVTVAEAGASSAALRVREAPVLFKKKLEPQTVEERTSVTLEVELTRPWPEVKWTRNAAVLTPSENV  
EIRAEGARHCLVLRVSGFADRGGFFGCETPDDKTQAKLNVEMRQVRLVVRGLQEVEAKEQGTASMDVELSHAEVE  
GSWTRDGLRLQPGPKCHLAVQGPVHILTLALSALQPQDSGLVAFRAEGVHTSARLIVTELPVSAFTRVLQDQVATQ  
KEKVTLECELSRPVDRWLKDGVELRAGKAIGIVAQGTCSRSLVIYRCETGDQGVYVCDALDAIIRCELSLRVQGR  
TYTLIFRRVLAEDAGEVKFVAENAESRAHLRVKELPVTLLRPLRDKIAMEKHRGVLECVSRASQAQRVWFKGG  
VELQSGPKYEVVSDGLYRKLVINQVPEDEDTYTCDAGNVKTSAQFFVEEQSITIVRGLKDMTVMEPAPAWFE  
CETSIPSVRPPKWLKGKTVLQAGNVGLEQDGTVHRLTLHKTCSTMTGPFVHFTIGKSRSSAQLVSDIPVVL  
RPLEPKAGRELQSVVLSCDFRPAPKAVQWYKDDTPLSPSEKFKMALEGQMAELRILRLTPADAGVYRCQAGSA  
QSSAEVTVAREVTVIQPLQDAEAMEEGRVCFSCELSHKDEDEIWSLNGTPLYNDSFHEISHEGCLHTLVLKS  
VRQADTGTVCATSPKVSVSARLVVKGKPVVFLKALDDVSAEERGTTLQCEVSDPEARVWVRKDGVELGPSDK  
YDFLHKAGARGLTVHDLSDHEDAGLYTCQVGSKETQSKVSVHDLHVGITKRLKTVEVLEGESECFVLSHESP  
SDPAVWTVGGKTVGGSGHFHAVRQGRKYTLTVKDAALSDAGEVVFVSVLGLTSKASLIIRERPVDIKPLEDQR  
TTLGEDVMLSCELSRAGTSVRWLKDGKAIKRSQKYDLSSEGTRAVLVVRKASLKDSEYTCETEASKSTAKLC  
VEEKANRFTEELADLQVEEKGRAVFTCKTEHPASVVTWRKGLLELRASGKHVPSQEGTLKLTINALERTDSD  
TYTCDIGQARTQARLLVHGQKVRVIEDLEDTAVQEGSSAKFCCRIPADYGPVHWFLDKTPLHSNELNEITVQ  
PGGYHVLTLRQLALKDSGTVYFEAGDQRTSAALRVTEKPSIFSRPLTDVTVTEGEDTLVLCETTTVDSSVRWT  
KDGTLRPSARCQLSHEGCAQLLIATATTPQDGGRYKCEIGGASSSIVRVHALPVRFRSLKDVVEVPEGKAA  
TLRCVLSVAAPVEWRHGDDVLKSSNKYSLRQEGAVLELVIDRLQPDQSGQYSCSFGDQTTSATLTVKTSQAQ  
FVGLKRNKEATEGTTVTLRCELTKEAPVEWKKGTETLRNGDKYSLKQDGAVCELQICSLLVADAGEYSCVCGQ  
EKTSATLTVKALLVHFVRRLSKEATEGDTTTLQCELSKAAPVEWRKGTETLRDGDYSLKQDGAVCELQIRS  
LTIADAGEYLCTCGEKTSATLTVRALPAKFKDSLKNEEATEGTTATLSCELSKAAPVTWKKGPKTLQSGDKY  
VLRQDGAVCGLQIHGLTMADAGEYSCVCGQEKTSATLTVRGLPAKFIEDLRSQEATEGATAILRCELSKAAPV  
EWRKGETLTKDGDYTLRQDGAVCELQIRGLAVVDTGTYSLPTKFTTEGLRNEEATEGTMATLRCQMSKAAPV  
EWRKGETLTDGDYSLRQDGAMCELQIRGLTIEDSGEYTCVCGQEKTSATLSVKALPPRFIEDLRSQEATEG  
TMATLRCQMSKAAPVEWRKGETLTDGGYSLRQNGAVCELQIHDLAVEDTGEYSCVCGQEKTSATLNVKALP  
PRFIEDLRSQEATEGTMATLRCQMSKAAPVEWRKGETLTDGGYSLRQDGAVCELQIHDLVDEDAGQYSCVC  
GQEKTSAVLTVDALPPKFTTEGLKKEEATEGTMVTLRQMSKEATVEWRKGAKTLDGGYSLRQDGAMCELQI  
CGLAVEDAGEYSCVCGQEKTSATLSVKALPPRFIEDLRSQEATEGTMATLRCQMSKAAPVEWRKGSKTLRDG  
RYSLRQDGAMCELQICDLAVEDTGDYSCVCGQEKTSATLSVKAPQVVFQQLQNLQAEEGSMASLRCELSVFN  
AAMVWSKGGLELQGDTRREARQQCVAEALLRLDRLEDAGEYSCVCGQEKTSATLMVTAAPVRFRLQAOQDV  
DEGATARLRCELSREAVSVEWRKGSGLQFLPFCAKYQMVQEGTTAELLVHGVEQEDAGEYSCVCGQEKTSATL  
RAPKPKFKTDLQSTEQEAGGTARLCCQLSEAEPTPVQWLKEGVELHVGSKYEMRRQGAVCELLIHGLEAKDT  
GEYACLVGQKTLASLRVKEPEVTIVRGLVDMVEQADEDEFTCKVVSQAGATDVQWHLQGLPLQSNVTEVAV  
LADGCTHVLQKGVTLLEDAGTVSFHVGGLSSSAQLTVRVPEVTVLEPLKDVQLSEGQDAHFRCLSRASGQEA  
RWALGGVPLQCNEMNDITVEQGTLYLLTLHKVTLLEDAGTITLQVGSSESAQLKVTAKNTVLRGLENVDALEG  
GEALFECQLSQPEVAHTWLLDDEPVHTSEKVEVVYFENGLRHLLLLKLNKLPQDSCRVTFLAGDVVTSAPLTV  
RALPDPPEDAEVVGRSDHSVTLVWVAPMSDGGGGLCGYRVEMKEASTGQWQLCHDLVPGPECVDDLVPGKTY  
RFRVAAVGPAGAGEPVHLPQMVKIAPAPAPAPAPAPAPAPETRQAVVGEDICLELEVAADGGEVWHKGTERRI  
QPGGHFEVLSRGQRQMLVIKGFRTEDQGEYRCGPIQGLPSSGAATFNVVMTSGSGDEVPAQPSLPPEAAQEGD  
LHLLWEALARKRRMSREPTLDSISELPEEDSRVQHLRQEAETAPDLSEGYSTADELARTGEADLSHTSSDDE  
SRAGTPSLVTYLKKAGGPGISPLASKHEAQVTTSVKPKQKQEPVVPVTPCPPGDLSAADLMDPSLDKAAVKIQA  
AFKGYKVRKEMKQOEGPVFSRFTFGDTEAQVGDVLRLECVLATKTDMRACWLKDGIELTDGRHYHIDQLKDGTC  
SLLVTVGLAPTDSGRYTCQVSTKSGRVSHSACVVVSGTESEAESSSGGELDDAFRRAARLHRLFRTKSPAELS  
EELFLSADEGPEPEPADWQTYREDENFVCIRFESLAEARQAVTCFRNMFMATMGIGVEISLGEQGPVGVEM  
RIGKVAPTPTPAVPLAKTPGLQTSDAAPVFLTELQNDVQDGYPMSFDCVVTGQPVPSVRWFKDGLLEEDDH  
YMINEDQGGHQLIITAVVPADMGVYRCLAENSMGVSSTKAELRVELTSTDYDTAADATETSSYFSAQGYLSS  
REQEGTESDEGQLPQVLEELKDLQVAPGTRAKFQLKVKGYAPKLYWFKDGQPLTSDHIRMTDKKTLHTLE  
IVSVTRESQVYAAIYIENAVGAAYSARLLVVRGPEPEEKPASDVHERLVPPRILEKFTPKKVKRGSITFSV  
KVEGHPAPSVHHLKKEEAEGVLIWIGPDTPGYTMASSSQHSLVLLDVGQRHQGTYTCIATNPAGQALCSASLH  
ISGLAKEEEQERVKEALISSFLQGTSAQVSAQMSSEAGFADLVGQSKGSLVAEEAHSHLSLAEVGTTEEFLOK  
LTSQITEMVSAKISQAKLQVPGGDSDEETKTPSASPRHGRSRPSSSVQESSSESEDGDSRGEIFDIYVVTADY  
LPLGAEQDAIILREGQYVEVLDLPLRVLVVRTKPTKSSPSRQGWVSPAYLDKRLKLSPEWGPTEAPEFPGEA  
VSEDEYRTRLSSVIQELLSSEQAFVQELQFLESHHMKHLERSPRVPAAVASQKTVIIFRNVQDISHFHSSFLKE

LQCGCTDDDVAMCFIKNQEAFAEKYLEFLVGRVQAESVVVSTPVQEFYKKYAEETLSAKDPTQPPPPPLQHYLE
QPVERVQKYQALLKELIRNKARNRQNCALLEQAYAVVSALPQRAENKLVHSLMENYPGTLEALGEPVIRQGHFI
VWEGAPGARMPPWKGNHRHVFVFRNYLVICKPRRDSRTDTFSYVFRNMMKLSSIDLNDQVEGDDRAFEVWHERE
DSVRKYLQARTVIKNSVWKEICGIQQRLAQPVWRPPEFEELADCTAELGETVKLACRVTGTGPKPIVSWYK
DGKPVVEVDPHHILIEDPDGSCSTLILDNLTGIDSGQYMCFAASAAGNASTLGKILVQVPPRFVNVKVRATPFVEG
EDAQITCTVEGAPYPQIRWYKDGTLAPGNRYRMLNEPRSGVVLVVIQAASKEDLGHYECELVNRLGSTRGGG
ELYMOSPALRARDQHHREQIVAAVEGAPSMQVTIEDVQVQVGDMAQFDAVIEGHPPPVTWYKGSTQLTSSAR
LSQRQDGTYSVLVTDVAPHDAGVYTCVANNAGGQVLCCKAELLVHGGDKLDAENQVYRRKLSHSFYDVQEEIGR
GVFGFVKRVQHKGNMFCFAAKFIPLRSKTRAQAYQERDILATLGHPLVTGLLDQFETRKTLILILELCSSEEL
LDRLFKKGVVTEAEVKVYIQQLVEGLHYLHSHGILHLDIKPPNIIIMVHPAREDIKICDFGFAQKITPSEPYQS
KYGSPFVVSPEIIEQNPNVSEGSIDIWAMGVISYLSLTCSSPFAGESDRATLLNVLEGRVSWSSPTAAHLSDAK
DFIKATLQRTPRARPSTSQC LAHPWFLKSMPAAEAHFINTKQLKFLARSRWQRSLMSYKSIIVMRSIPPELLQ
GPPDSPSLGVARHLRGEASGASSSSSSDNELAPFARAKSLPPSPVTHSPLLHPRGFLRPSASLPEETEASMP
TADAAPVSPASQAGPPASPGCVPRHSVSSLFYQQAGEGAERGNKTSKAKRHPARRRHLKGGYIARALPGLR
EPLMEYSLLEEEAAREEQASLMTKTPSFETALRLPSSSVREVPGRSHSLDNPPVTTGSPPEACKEQLLFPST
GLTHETAKDRGHKEGFLQESVFPFPMMSGDSRPGKQEGSSQDSCRGKPASSCHSELGSGSQEGCGPPSSQSLG
SLPQQSLKKESTSCGPLFSEQPQAAPFPTQVSPLLGSEKPEPQDGSLEGPVVPVSSSPGSASQVDAASLDTEG
LSEAGDTCDFTPPPQRPQEQATTRKFSLESRGGYAGVAGYGTFAFSGDAGGMLGQGPLWARMVAVSQSSEEQ
DEAATESPQPLESGLPIAEASGVPLRTSPSLTPWEEVEQVSLVQIRDLSDGAEAAADTISLDISEVDPAYLNLS
DLYDIKYLPPFEFMI FRRVPKPIEQPESPGSETEAGQGLADFLLEAAWPWPGEGLRAGLEITEEPEEPGDLEA
LLGEAAVGRKRKWSPSRGLFQFPGRCLSGEEPVELGLRQRVKASMAHISRIKGRPEGPEREPPRKKAGLAS
FRLSGLKGRDQELSDEAVVLGQSVTLACQVLAQPTAQATWSKDGVLLESSGHLLISSTLKNFQLLTIIVVKEE
DLGTYTCCVSNPLGTAVTTGVLKKAERPSSSPRPEVGEYKDAVLLVWKPVE SCGPVTYIVQCCIEGGSWTTL
ASDISDCCYLTGKLSRGGMYIFRTACVSKAGMGPYSSPSEQVLLGGPNHLASEEESSRGRPAQLLPSTKTFAP
QMQIRGRFVSVRQCREKASGRALAAKIVPYQPEDKTAVLRVYEAALKRLLHHPHLAQLHAAYLSPRHLVLI LEL
CSGPELLFSLAERESYSESVDKDYLWQMLSATQYLHAQHIHLDLRSENMMVTEYNLLKVIDLGNASQLDQEK
VPAPENFKDYLETMAPELLEGQAVPQTDIWAIGVTAHIFIMLSGEYPESESEGTDLQKGLIRLSRCSYAGL
SGGAVAFVQLSSLCAQPWGRPCASTCLQCGWLTEEGPTGSRPTVPTVPTVRLRAVFREREKRRALLYKKNHNAQ
VR\*

>rs26971901\_ENSMUSP00000158795\_c.23857:T>C\_p.L7953S
ENSMUST00000238536.2|Obscn-210|ENSMUSG00000061462|-|chr11:g.58891235:A>G
MDHSFSGAPRFLTRPKAFVSVGKDATLSCQIVGNPTPHVSWEKDRQPVEAGARFRLAQDGDVYRLTILDLAL
GDSGQYVCRARNAIGEAFAAVGLRVDSEGTCAEQAPHFLLRPTSIRVREGADATFRCRVGGSPQPAVSWSKDG
RRLGPPDAPHVRVEEHGESSALRIR SARPRDGGTYEVRAENPLGSASAAAAALVVDSDAEVAGPPGTSTATLLA
HLQORREAMRAEGIPSPPGAGTRTCTVTEGKHARLSCFVTGEPKPEVTVWKKDGLVTEGRRHVVEDEQENF
VLKILFECKQSDRGLYTCASNLVGGQTYSSVLVVVREPTVFPFKRLQDLEVREKESATFQCEVAQPATEAAWFK
EETRLWASAKYDIEEEGTERRLTVRNVSADDDAVYICETTEGSRVVAELSVQGNLTKLPRKTAVRTGDTAIF
WVELAVPEGPVWRWRNQEEMVAGGRVAITAEGTCHTLTIFQCTLEDMGEVAFVSGGCRTTTQFCVSAPRRPPL
YPPADPVVAKATESVTLWSAPPHGDRPVTIDGYVLEKRKLGAYAWSRCHEAGWLATTEFTITGVAAEGDFQ
FRVSAINHFGQGPYLEFPGTMHLVPLAVKTPKAVEAVEGGEVTFVSDLTVASSGEWFLDGEALKASSIYVI
RCDRTRHMLTIREV PARLHGAQLKFVANGIETS IQMVVRAALGLPS SKLPAAAAAREVLAQLHHEEAQLLAELSD
QAAA VTWLKDGRELSLGPKEYMQVSAGRRALLVRDVAQDDAGLYECVSRGSRTAYQLLVQDITDGYRDWGPAG
PQKHMCKCAGAKIARYLGSSCYRFLQYDKGVWHLEAALDTRQGGTSSCSLHEKPKLVFAKQQAHSEVKA
AGNSATLSCEVTQAQTEVTFWKDGKLLSSSSKVRMEASGCSRRLVVQQAGKADAGEYSCEAGGQKLSFRLDVA
EPKLVFAKQQAHSEVKAEGASATLSCEVAQAQTEVTFWKDGKLLSSSSKVRMEASGCSRRLVVQQAGKADA
GEYSCEAGGQKLSFRLDVAEPKLVFAKEQQARSEVKAEGASATLSCEVAQAQTEVTFWKDGKLLSSSSKVRM
EASGCSRRLVVQQAGKADAGEYSCEAGGQKLSFRLDVTEPKLVFAKEQQARSEVKAEGVNSATLSCEVAQAQ
EVTWFKDGKLLSSSSKVRMEASGCSRRLVVQQAGKADAGEYSCEAGGQKLSFRLDVAEPKLVFAKEQQARSE
VKAEGNSATLSCEVAQAQTEVTFWKDGKLLSSSSKVRMEASGCSRRLVVQQAGKADAGEYSCEAGGQKLSFHL
DVTEPKLVFAKEQQAHSEVKAEGASATLSCEVAQAQTEVTFWKDGKLLSSSSKVRMEASGCSRRLVVQQAGK
ADAGEYSCEAEGQKLSFRLDVAEPKLVFAKEQQARSEVKAEGASATLSCEVAQAQTEVTFWKDGKLLSSSSK
VRVEASGCSRRLVVQQAGKADAGEYSCEAGGQKLSFRLDVAEPKLVFAKEQQANSEVKAEGASATLSCEVAQ
AQTEVTFWAGDAGKLLSSSSKVRVEASGCSRRLVVQQAGKADAGEYSCEAGGQKLSFRLDVAEPKLVFAKEQQAH
SEVKAEGASATLSCEVAQAQTEVTFWKDGKLLSSSSKVRVEASGCSRRLVVQQAGKADAGEYSCEAGGQKLS
FRLDVAEPKLVFAKEQQAHSEVKAEGASATLSCEVAQAQTEVTFWKDGKLLSSSSKVRVEASGCSRRLVVQQ
AGKADAGEYSCEAGGQKLSFRLDVAEPKLVFAKEQQAHSEVKAEGASATLSCEVAQAQTEVTFWKDGKLLSS
SSKVRVEASGCSRRLVVQQAGKADAGEYSCEAGGQKLFRLDVAEPKLVFAKEQQAHSEVKAEGASATLSCE
VAQAQTEVTFWKDGKLLSSSSKVRVEASGCSRRLVVQQAGKADAGEYSCEAGGQKLSFRLDVAEPKLVFAKEQ



QAHSEVKAEAGASATLSCEVAQAQTEVTFWKDGKLLSSSSKVRVEASGCSRRLVVQQVQVKADAGEYSCEARGQ
KLSFRLDVADTRLMFAKEQQARTEVKAEAGNSATLSCEVAQAQTEVTFWKDGKLLSSSSKVRVEASGCSRRLV
VQQAGKADAGEYSCEAGGQKLSFRLDVAEAEESQIPERPSRREPLVVKEHETIILTATIAAPSVAAVTWLKDGV
EIRRSKRHEATSLGDTHTLTVRGAQVLDIAIYSCRVGKEGQDFPVQVEEVAAKFSKPLEPVEGELGGTVMLVC
ELSPQAEVWRCGNTQLRPGKRFQMTSEGPRTTLTVSGLREDDAEYVCESTRDDRTSARLTVKVPVVKFTS
GLSAMVAEEGQEAATFQCVVSPSDAGVTWYKDGMLQVQSEKFMVESGASRSLTILGLTLEDAGQVTVAEAGAS
SSAALRVREAPVLFKFKKLEPQVTEERTSVTLEVELTRPWPEVKWTRNAAVLTPSENVEIRAEGARHCLVLRV
GFADRGFFGCETPDDKTQAKLNVEMRQVRLVRLVGLQEVEAKEQGTASMDVELSHAEEVGSWTRDGLRLQVGPKC
HLAVQGPVHILTLALQPDQSLVAFRAEGVHTSARLIVTELPVSTFTRVLQDVVATQKEKVTLECELSRQVVDV
RWLKDGVLELRAGKAIIGIVAQGTCSRSLVIYRCETGDQGVYVCDALDAQTSASLRVQGRYTLIFRRLVLAEDAGE
VKFVAENAESRAHLRVKELPVTLLRPLRDKIAMEKHRGVLECCQVSRASQVRWFKGGVELQSGPKYEVVSDGL
YRKLVINVDVQPEDEDTYTCDAENVKTSAQFFVVEQSITIVRGLKDMTVMEPAPAWFECETSIPSVRPPKWLIG
KTVLQAGGNVGLQDGTVHRLTLHKTCSTMTGVPVHFTIGKSRSSAQLVVSDIPVVLTRPLEPKAGRELQSVVL
SCDFRPAPKAVQWYKDDTPLSPSEKFKMALEGGMAELRILRLTPADAGVYRCQAGSAQSSAEVTVAREVTVI
QPLQDAEAMEEGRVCFSCELSHKDEDIEWSLNGTPLYNDSFHEISHGCLHTLVLSKSVRQADTGTVCATSPKV
SVSARLVVKGKPVVFLKALDDVSAEERGLTLQCEVSDPEARVWVRKDGVELGSPDKYDFLHKAGARGLTVHD
LSHEDAGLYTCQVGSKETQSKVSVHDLHVGITKRLKTVEVLEGESECSFECVLSHESPSDPVAVWTVGGKTVGGS
GHFHAVRQGRKYTLTVKDAALS DAGEVVFVSVLGLTSKASLIIRERPVDIKPLEDQRTTLGEDVMLSCELSRA
GTSVRWLKDGKAIKRSQKYDLLSEGTRAVLVVRKASLKDSSGEYTCETEASKSTAKLCVEEKANRFTTEELADLQ
VEEKGRAVFTCKTEHPASVVTWRKGLLELRASGKHVPSQEGTLTKLTINALERTDSDTYTCDIGQARTQARLL
VHGQKVRVIEDLEDTAVQEGSSAKFCRIAPADYGPVHWFLLDKTPLHSNELNEITVQPGGYHVLTLRQLALKD
SGTVYFEAGDQRTSALRVTEKPSIFSRPLTDVTVTEGEDTLVCEVTTVDSVVRWTKDGKTLRPSARCQLSH
EGCQAQLLITATTPQDGGRYKCEIGGASSSSIVRVHALPVRFRESLKDVVEPEGKAATLRCVLSVAAPVEWR
HGDDVLKSSNKYSLRQEGAVLELVIRDLQPDQSGQYSCSFGDQTTSATLTVKTSQAQFVGLKRNKEATEGTTV
TLRCELTKAEAPVEWKKGTETLRNGDKYSLKQDGA VCELQICSLLVADAGEYSCVCGQEKTSATLTVKALLVHF
VRLRSKEATEGDTTTLQCELSKAAPVEWRKGTETLRDGDYSLKQDGA VCELQIRSLTIADAGEYLCTCGQE
KTSATLTVRALPAKFKDSLKNEEATEGTTATLSELSKAAPVTVWKKGPKTLQSGDKYVLRQDGA VCGLQIHGL
TMADAGEYSCVCGQEKTSATLTVRGLPAKFIEDLRSQEATEGATAILRCELSKAAPVEWRKGSSETLKDGDYR
LRQDGA VCELQIRGLAVVDGTGYSLSLPTKFTEGLRNEEATEGTMATLRCQMSKAAPVEWRKGSSETLRDGDYR
LRQDGA MCELQIRGLTIEDSGEYTCVCGQEKTSATLSVKALPSRFIEDLRSQEATEGTMATLRCQMSKTAPVE
WKKGSETLRDGGRYSLRQDGPVCELQICDLAVEDAGEYSCVCGQEKTSATLSIKALPPRFIEDLRSQEATEG
MATLRCQMSKAAPVEWRKGSSETLGDGGYSLRQNGAVCELQIHDLAVEDTGEYSCVCGQEKTSATLNVKALPP
RFIEDLRSQEATEGTMATLRCQMSKAAPVEWRKGSSETLRDGGYSLRQDGA VCELQIHDLVDVEDAGQYSCVCG
QEKTSAVLTVDALPPKFTEGLKKEEATEGTMVTLRCQMSKEATVEWRKGAKTSLDGGYSLRQDGA MCELQIC
GLAVEDAGEYSCVCGQEKTSATLSVKALPPRFIEDLRSQEATEGTMATLRCQMSKAAPVEWRKGSSETLRDGD
YSLRQDGA VCELQIRDLAVEDAGEYLCVCGQEKTSATLSVKALPPRFIEDLRSQEATEGTMATLRCQMSKAAP
VEWRKGSKTLRDGDYSLRQDGA MCELQICDLAVEDTGDYSCVCGQEKTSATLSVKALPPRFIEDLRSQEARE
GTVATLRCRMSKAAPVEWRKGSSETLKDGDYSLRQEGNLCELQIRDLAVEDTEEYSCVCGQEKTSATLSVKAL
PAKFIEDLRSQEAPESSTVTLRCKLSKASVWKKGSETLRNGARYSLRQDGA VCELEIRDLTVEDTGEYSCT
CGQERTSATLSIMAPQVVFQQPLQNLQAEEGSMASLRCELSVPNAAMVWSKGGLELQGDTRREARQQGCVAEL
LLRDLRREDAGEYSCTCGSQTTSATLMVTAAPVRFLRELQAQDVDEGATARLRCELSREAVSVEWRKGSLLQF
PCAKYQMVQEGTTAELLVHGVEQEDAGEYTCDAHTQSIARLSVRAPKPKFKTDLQSTEQEAGGTARLCCQLS
EAEPTFPVQWLKEGVELHVGSKYEMRRQGA VCELLIHGLEAKDTGEYACLVGGQKTLASLRVKEPEVTIVRGL
VDMEVQADEDVEFTCKVSQAGATDVQWHLQGLPLQSNVTEVAVLADGCTHVLQKGVTLLEDAGTVSFHVGG
SSSATLTVRVPEVTVLEPLKDVQVLESEGQDAHFRCRLSRASGQEARWALGGVPLQCNEMNDITVEQGTLYLLTL
HKVTLLEDAGTITLQVGSSESQAQLKVTAKNTVLRGLENVDALLEGGEALFECQLSQPEVAHAHTWLLDDEPVHTS
EKVEVVYFENGLRHLLLLKNLKPQDSCRVTFLAGDVVTSFAFLTVRGRLEVLLEPPHDASVKAGMQVRFTCILS
EAVPVGEATWYINGAAIQPDDTDWTVTTDGSHHALTLSNAQPQHAGEVTF AARDAVASARLSVLALPDPPEDA
EAVGRSDHSVTLVSWVAPMSDGGGGLCGYRVMKEASTGQWQLCHDLVPGPECVDDLVPGKTYRFRVAAVGPA
GAGEPVHLPQMVKIAPAPAPAPAPAPAPAPETRAVVGEDICLELEVAADGGEVVWHKGTERRIQPGHFVLS
RGQRQMLVIKGFRTEDQGEYRCGPIQGLPSSGAATFNVMVMTSGSGDEVPAQPSLPPEAAQEGDLHLLWEALAR
KRRMSREPTLDSISELPEEDSRVQHLRQEAEEETAPDLSEGYSTADELARTGEADLSHTSSDDESAGTPSLVT
YLKAGGPGISPLASKHEAQVTTSVKPKQKQAEKPVVPTCCPPGDLSAADLMDPSLDKAAVKIQAAFQYKVRKE
MKQEGPVRTSRTFGDTEAQVGDVLRLECEVLAETKTDMAKWLKDGIELTDGRHYHIDQLKDGTCSSLVTVGLAPT
DSGRYTCQVSTKSGRVSHSACVVVSGTSEAESSSGGELDDAFRAARRLHRLFRKSPAELESEELFLSADE
GPGEPEEPADWQTYREDENFVCIREFESLAEARQAVTCFRNMFMATMIGIVEISLGEQGPVEMRIGKVAPTVT
PAVPLAKTPGLQTSDAAPVFLTELQNDVQDGYPMSFDCVVTGQPVPSVRWFKDGKLEEDDHYMINEDQGG
HQLIITAVVPADMGVYRCLAENSMGVSSTKAELRVELTSTDYDTAADATETSSYFSAQGYLSSREQEGTESDE

GQLPQVLEELKDLQVAPGTRLAKFQLKVKGYPAKLYWFKDGGQPLTTSDHIRMTDKKTLHTLEIVSVTREDSG  
QYAAYSNAVGAAYSSARLLVVRGPSEPEEKPASDVHERLVPPRILEKFTPKKVKRGSSITFSVKVEGHPAPSV  
HWLKEEAKEKGVLLWIGPDTPGYTMASSSKQHSLLVLLDVGRHQGTYTTCIATNPAGQALCSASLHISGLAKEEEQ  
ERVKEALISSFLQGTSAQVSAQMSSESAGFADLVGQSKGESLVAEEAHSHLSLAEVGTEEFQKLTSTQITEMVS  
AKISQAKLQVPGGDSDEETKTPSASPRHGRSRPSSSVQESSSEEDGDSRGEIFDIYVVTADYLPGLAEQDAI  
ILREGQYVEVLDSAHPLRWLVRTKPTKSSPSRQGWVSPAYLDKRLKLSPEWGPTEAPEFPGEAVSEDEYRTRL  
SSVIQELLSSEQAFVQELQFLESHHMKHLERSPRVPAAVASQKTVIFRNVQDISHFHSSFLKELQCGCTDDDV  
AMCFIKNQEAFAFEKYLEFLVGRVQAESVVVSTPVQEFYKKAEEETLSAKDPTQPPPPPLQHYLEQPVERVQKYQ  
ALLKELIRNKARNRQNCALLEQAYAVVSALPQRAENKLVSLMENYPGTLEALGEPHQGHFIVWEGAPGARM  
PWKGHNHRVFLFRNYLVICKPRRDSRTDTFSYVFRNMMKLSSIDLNDQVEGDDRAFEVWHEREDSVRKYLLQA  
RTVVIKNSWVKEICGIQORLAQPVWRPPEFEEELADCTAELGETVKLACRVTGTPKPIVSWYKDGKPVVDPH  
HILIEDPDGSCCTLILDNLTGIDSGQYMCFAASAAGNASTLGKILVQVPPRFVNVKVRATPFVEGEDAQITCTVE  
GAPYPQIRWYKDGTLTLLAPGNRYRMLNEPRSGVLVLIQAASKEDLGHYECELVNRLGSTRGGELYMQSPALR  
ARDQHHREQIVAAVEDTSVEGSAHSAQDQADQQAASVLWRLLGSEALGSPSPGDLNTRQSEPPAFEEAASQIP  
GAASGTPEVSPQPGTHKGLEQETSSSGSQGWTPVIRVEGTAWPGAGTGQLLLDVHSQVIMETTQRTYVCQAPDT  
GVTRAPSMQVTIEDVQVQVGDMAQFDAVIEGHPPPIVTVWYKGSTQLTSSARLSQRQDGTYSVLVTDVAPHA  
GVYTCVANNAGGQVLCKAELLVHGGDKLDAENQVYRRLKLSFYDVQEEIGRGVFGFVKRVQHKGNKMFCAAKF  
IPLRSKTRAQAYQERDILATLGHPLVTGLLDQFETRKTLLIILELCSSEELLDRLFKKGVVTEAEVKVYIQQL  
VEGLHYLHSHGILHLHDIKPPNILMVHPAREDIKICDFGFAQKITPSEPQYSKYGSPEFVSPEIIEQNPVSEGS  
DIWAMGVISYLSLTCSSPFAGESDRATLLNVLEGRVSWSSPTAAHLSSEDAKDFIKATLQRTPRARPSTSQCLA  
HPWFLKSMPAEEAHFINTKQKFLARSRWQRSLMSYKSI LVMRSIPPELLQGPPDSPSLGVARHLRGEASGAS  
SSSSSSDNELAPFARAKSLPPSPVTHSPLLHPRGFLRPSASLPEETEASMPPTADA AVPAS PQSAGPPASPGCV  
PRHSVSISSLFYQQAGEGAERGNKTS GAKRHPARRRHLKGGYIARALPGLREPLMEYSLEEEEAAREEQASIM  
TKTPSFETALRLPSSSVREVPGRSHSLDNPPVTGSPPEACKEQLLFPSTGLTHETAKDRGHKEGFSQESV  
PFPMSGDSRPGKQEGSSQDSRCRGPASSCHSELGSGSGEGCGPPSSQSLGSLPPQSLKKELESTSCGPLFSEQ  
PQAAPFPTQVSPLLGSEKQDQGLSEGVVPPVSSPGSASQVDASLDTEGLSEAGDTCDFTPPPQRPQEQAT  
TRKFSLSRGGYAGVAGYGTFAFGDAGGMLGQGPLWARMAWAVSQSSEEQDEAATESQPLESGLPIAEASG  
VPLRTSPSLTPWEEVEQVSLVQIRDLSDGDAEAADTISLDISEVDPAYLNLSDLYDIKYLPEFEMI FRRVPKPI  
EQPESPGSETEAGQGLADFL EEAAWPWPGEGLGLRAGLEITEEPEEPGDLEALLGEAAVGRKRKWSPSRGLFQF  
PGRCLSGEEPVELGLRQRVKASMAHISRIKGRPEGPEREPPRKKAGLASFRLSGLKGRDQELSDEAVVLGQ  
SVTLACQVLAQPTAQTWSKDGVLLESSGHLLISSTLKNFQLLTI LVVKEEDLGTYTCCVSNPLGTAVTTGVL  
RKAERPSSSPREVGELYKDAVLLVWKPVEESCGPVYIVQCCIEGGSWTTLASDISDCCYLTGKLSRGGMYIF  
RTACVSKAGMGPISSPSEQVLLGGPNHLASEEESRRGRPAQLLPSTKTFAFQMQIRRRGRFSVVRQCREKASGR  
ALAAKIVPYQPEDKTAVLR EYEAALKRHLHPLHAQLHAAYLSRHLVLIILELCSGPELLPSLAERESYSESDVK  
DYLWQMSATQYLHAHQHILHLDLRS ENMMVTEYNLLKVIDLGN AQSLDQEKVPAPENFKDYLETMAPELLEGG  
GAVPQTDIWAIGVTA FIMLSGEY PESSSEGRDLQKGLRKLIRLSRCYAGLSGGAVAFLOSSLCAQPWGRPCA  
STCLQCGLWTEEGPTGSRPTVTFPTVRLRAFVREKRRRALLYKKNLAQVR\*

>rs26971901\_ENSMUSP00000038264\_c.21295:T>C\_p.L7099S  
ENSMUST00000047441.14|Obscn-202|ENSMUSG00000061462|-|chr11:g.58891235:A>G  
MDHSFSGAPRFLTRPKAFVSVGKDATLSCQIVGNPTPHVSWEKDRQFVEAGARFRLAQDGDVYRLTILDLAL  
GDSGQYVCRARNAIGEFAAVGLRVDSEGTCAEQAPHLLRPTSIRVREGADATFRCRVGGSPPAVSWSKDG  
RRLGPPDAPHVRVEEHGESSALRIRSARPRDGGTYEVRAENPLGSASAAAALVVDSDAEVAGPPGTSTATLLA  
HLQORREAMRAEGIPSPPGAGTRTCTVTEGKHARLSCFVTGEPKPEVWKKDQGLVTEGRRHVVEDEQENF  
VLKILFCKQSDRGLYTCASNLVGQTYSSVLVVVREPTVPFKKRLQDLEVREKESATFQCEVAQAPATEAAWFK  
EETRLWASAKYDIEEEGTERRLTVRNVSADDDAVYICETTEGSRVAELSVQGNLTKLPRKTAVRTGDTAIF  
WVELAVPEGPVRWLRNQEEMVAGGRVAITAEGTCHTLTI FQCTLEDMGEVAFVSGGCRTTTQFCVSAPRRPPL  
YPPADPVVKAKTESSVTLWSAPPHGDRPVTIDGYVLEKRKLGAYAWSRCHEAGWLATTEFTITGVAAEEGDFQ  
FRVSAINHFGQGPYLEFPGMTMLVPLAVKTPKAVEAVEGGEVTFVSDLTVASSGEWFLDGEALKASSIYVI  
RCDRTRHMLTIREV PARLHGAQLK FVANGIETS IQMVVRAALGLPSSKLPAAAAREVLAQLHEEAQLLAELSD  
QAAAVTWLKDGRELSLGPKEYMQVSAGRRALLVRDVAQDDAGLYECVSRGSR TAYQLLVQDITDGYRDWGPAG  
PQKHMCKCAGAKIARYLGS SCYRFLQYDKGVWHLEAALDTRQKGKTS SCSLHEKPKLVFAKQQAHSEVKA  
AGASATLSCEVAQAQTEVTFWKDGGKLS SSSSKVRMEASGCSRRLVVQQAGKADAGEYSCEAGGQKLSFRLDVA  
EPKMFVFAKEQQARSEVKA EAGASATLSCEVAQAQTEVTFWKDGGKLS SSSSKVRMEASGCSRRLVVQQAGKAD  
GEYSCEAGGQKLSFRLDVTEPKLVFAKEQQARSEVKA EAGASATLSCEVAQAQTEVTFWKDGGKLS SSSSKVRM  
EASGCSRRLVVQQAGKADAGEYSCEAGGQKLSFRLDVAEPKLVFAKEQQARSEVKA EAGASATLSCEVAQAQ  
EVTWFKDGGKLS SSSSKVRMEASGCSRRLVVQQAGKADAGEYSCEAGGQKLSFRLDVTEPKLVFAKEQQAHSEV  
KAEAGASATLSCEVAQAQTEVTFWKDGGKLS SSSSKVRMEASGCSRRLVVQQAGKADAGEYSCEAGGQKLSFRL  
DVAEPKLVFAKEQQARSEVKA EAGASATLSCEVAQAQTEVTFWKDGGKLS SSSSKVRMEASGCSRRLVVQQAGK

ADAGEYSCEAGGQKLSFRLDVAEPKLVFAKEQQANSEVKAEAGASATLSCEVAQAQTEVTFWKDGGKLSSSSK
VRVEASGCSRRLVVQQAGKADAGEYSCEAGGQKLSFRLDVAEPKLAFAKEQQAHSEVKAEAGASATLSCEVAQ
AQTEVTFWKDGGKLSSSSKVRVEASGCSRRLVVQQAGKADAGEYSCEAGGQKLSFRLDVAEPKLAFAKEQQAH
SEVKAEAGASATLSCEVAQAQTEVTFWKDGGKLSSSSKVRVEASGCSRRLVVQQAGKADAGEYSCEAGGQKLS
FRLDVAEPKLAFAKEQQAHSEVKAEAGASATLSCEVAQAQTEVTFWKDGGKLSSSSKVRVEASGCSRRLVVQQ
AGKADAGEYSCEAGGQKLSFRLDVAEPKLVFAKEQQAHSEVKAEAGASATLSCEVAQAQTEVTFWKDGGKLS
SSKVRVEASGCSRRLVVQQVQKADAGEYSCEARGQKLSFRLDVAEAEESQI PERPSRREPLVVEKHETI I LTAT
IAAPSVAAVTWLKDGEVIRRSKRHEATSLGDTHLTTRVGAQVLD SAIYSCRVGKEGQDFPVQVEEVAAKFSKP
LEPVEGELGGTVMLVCELSPEQAEEVWRCGNTPQLRPGKRFQMTSEGPRTTLTVSGLREDDAEYVCESRDDRT
SARLTVKVPRVVKFTSGLSAMVAEEGQEATFQCVVSPSDAGVTWYKDGMLQPSSEKFMVMEVSGASRSLTILGL
TLEDAGQVTVEAEGASSAALRVREAPVLFKKKLEPQTVEERTSVTLEVELTRPWPEVKWTRNAAVLTPSENV
EIRAEGARHCLVLRVGFADRGFFGCETPDDKTQAKLNVEMRQVRLVVRGLQEVEAKEQGTASMDVELSHAEVE
GSWTRDGLRQLQPGPKCHLAVQGPVHILTL SALQPQDSGLVAFRAEGVHTSARLIVTEL PVSFTRVLQDVVATQ
KEKVTLECELSRPVDVRLKDGVELRAGKAI GIVAQGTCSRSLVIYRCETGDQGVYVCDALDAQTSASLRVQGR
TYTLIFRRVLAEDAGEVKFVAENAESRAHLRVKELPVTLLRPLRDKIAMEKHRGVLEQCQVSRASAQVRWFKGG
VELQSGPKYEVVSDGLYRKLVIN DVQPEDEDTYTC DAGNVKTSAQFFVEEQSITIVRGLKDMTVM EPAPAWFE
CETSI PSVRPPKWL LKGTVLQAGNVGLEQDGTVHRLTLHKTCSTMTGPFVHFTIGKSRSSAQLVVSDI PVVLT
RPLEPKAGRELQSVVLSCDFRPAKAVQWYKDDT PLSPEKFKMALEGO MAELRILRLTPADAGVYRCQAGSA
QSSAEVTVAREVTVIQPLQDAEAMEEGRVCFSCELSHKDEDI EWSLNGTPLYNDSFHEISHEGCLHTLV LKS
VRQADTGTVCATSPKVSVSARLVVKGKPVVFLKALDDVSAEERGTTLQCEVSDPEARVVWRKDGVELGPSDK
YDFLHKAGARGLTVHDLSDHEDAGLYTCQVGSKETQSKVSVHDLHVGITKRLKTVEVLEGESECSFECVLSHESP
SDPAVWTVGGKTVGGSGHFHAVRQGRKYTLTVKDAALSDAGEVVFVSVLGLTSKASLIIRERPVDITKPLEDQR
TTLGEDVMLSCELSRAGTSVRWLKDGKAI RKSQKYDLLSEGTRAVLVVRKASLKDSGEYTCETEASKSTAKLC
VEEKANRFTEELADLQVEEKGRAVFTCKTEHPASVVTWRKGLLELRASGKHVPSQEGTLTKLTINALERTDSD
TYTCDIGQARTQARLLVHGQKVRVIEDLEDTAVQEGSSAKFCCRIPADYGPVHWF LDKTPLHSNELNEITVQ
PGYHVLTLRQLALQLKLVYFEAGDQRTSAALRVTEKPSIFSRPLTDVTVTEGEDLTLVCEKTTVDVSDGRWT
KDGKTLRPSARCLQSHSGCQAQLLITATTPQDGGRYKESIGGASSSIVRVHALPVRFRESLKDVEVPEGKAA
TLRCVLSVAAPVEWRHGDDVLKSSNKYSLRQEGAVLELVIRDLQPDQSGQYSCSFGDQTT SATLTVKTS SAQ
FVGKLRNKEATEGTTVTLRCELTK EAPVEWKGTETLRNGDKYSLKQDGAVCELQICSLLVADAGEYSCVCGQ
EKTSATLTVKALLVHFVRR LRSKEATEGDTTTLQCELSKAAPVEWRKGTETLRDGD RYSLKQDGAVCELQIRS
LTIADAGEYLCTCGQEKTSATLTVRALPAKFKDSLKNEEATEGTATLSCELSKAAPVTWKKGPKTLQSGDKY
VLRQDGAVCGLQIHGLTMADAGEYSCVCGQEKTSATLTVRGLPAKFIEDLRSQEATEGATAILRCELSKAAPV
EWRKGSETLTKDGD RYTLRQDGAVCELQIRGLAVVDGTYS SLP TKFTEGLRNEEATEGTMATLRCQMSKAAPV
EWRKGSETLRDGD RYSLRQDGAMCELQIRGLTIEDSGEYTCVCGQEKTSATLSVKALPPRFIEDLRSQEATEG
TMATLRCQMSKAAPVEWRKGTETLGDGGRYSLRQNGAVCELQI HDLAVEDTGEYSCVCGQEKTSATLNVKALP
PRFIEDLRSQEATEGTMATLRCQMSKAAPVEWRKGTETLRDGGRYSLRQDGAVCELQI HDLVEDAGQYSCVC
GQEKTSAVLTVDALPPKFTEGLKKEEATEGTMVTLRQMSKEATVEWRKGAKT LSDGGRYSLRQDGAMCELQI
CGLAVEDAGEYSCVCGQEKTSATLSVKALPPRFIEDLRSQEATEGTMATLRCQMSKAAPVEWRKGSKTLRDGD
RYSRLRQDGAMCELQICDLAVEDTGDYSCVCGQEKTSATLSVKAPQVVFQQLQNLQAEEGSMASLRCELSVFN
AAMVWSKGGLELQGDTRREARQQGCVAELLLRDLRREDAGEYSCTCGSQTTSATLMVTAAPVRFRLRQLAQDV
DEGATARLRCELSREAVSVEWRKGS LQLFPCA KYQMVQEGTTAELLVHGVEQEDAGEYTC DAGHTQS IARLSV
RAPKPKFKTDLQSTEQEAGGTARLCCQLSEAE PGTPVQWLKEGVELHVGSKYEMRRQGAVCELLIHGLEAKDT
GEYACL VGGQKT L ASLRVKEPEVTIVRGLVDMEVQADEVFEFTCKVSQAGATDVQWHLQGLPLQSNVTEVAV
LADGCTHV LQLKGV TLEDAGTVSFHVGG LSSSAQLTVRVPEVTVLEPLKDVQLSEGQDAHFRCRLSRASGQEA
RWALGGVPLQC NEMNDITVEQGTLYLTLHLKVTLEDAGTITLQV GSCSSEAQLKVTAKNTVLRGLENVDALEG
GEALFECQLSQPEVA AHTWLLDDEPVHTSEKVEVYFENGLRHLL LKLNKLPQDSCRVTFLAGDVVTS AFLTV
RALPDPPEDAEVVGRSDHSVTL SWAPMSDGGGGLCGYRVMKEASTGQWQLCHDLVPGPECVDDLVPGKTY
RFRVAAVGPAGAGEPVHLPQMVKIAPAPAPAPAPAPAPAPETRQAVVGEDICLELEVAADGGVEVWHKGTERRI
QPGGHFEVLSRGRQMLVIKGFRTEDQGEYRCGPIQGLPSSGAATFNVVMTSGSGDEVPAQPSLPPEAAQEGD
LHLLWEALARKRRMSREPTLDSISELPEEDSRVQHLRQEA EETAPDLSEGYS TADELARTGEADLSHTSSDDE
SRAGTPSLV TYLKKAGGPGISPLASKHEAQVTT SVKPKQKQEPVVP TCPPPGDLSAADLMDPSLDKAAVKIQA
AFKGYKVRKEMKQEGPVFSRTFGDTEAQVGDVLRLECVLATKTD MRACWLKDGIELTDGRHYHIDQLKDGTC
SLLVTGLAPTDGPRYTCQVSTKSGRVSHSACVVVSGTESAEASSSGGELDDAFRRAARRLHRLFRTKSPAELS
EEELFLSADEGPEEPEPADWQTYREDENFVCIRFESLAEARQAVTCFRNMFATMGIV EISLGEQGPGRVEM
RIGKVAPT VTPAVPLAKTPGLQTS DAAPVFLTELQNQDVQDGYPMSFDCVVTGQPVPSVRWFKDGKLL EEDDH
YMINEDQQGGHQLIITAVVPADMGVYRCLAENSMGVSSTKAE LRVELTSTDYD TAADATETSSYFSAQGYLSS
REQEGTESDEGQLPQVLEELKDLQVAPGTR LAKFQLKVKGY PAKLYWFKDGQPLTSDHIRMTDKKTLHTLE
IVSVTREDSGQYAAIYI SNAVGAAYSSARLLVVRGPSEPEEK PASDVHERLVPPRI LEKFTPKKVKRGSITFSV

KVEGHPAPSVHVLKEEAEGVWLWIGPDTPGYTMASSSKQHSVLVLLDVGRQHOGTYTTCIATNPAGQALCSASLH  
 ISGLAKEEEQERVKEALISSFLQGTSQAVSAQMSEAGFADLVGQSKGESLVAAEEAHSHLSLAEVGTTEEFLQK  
 LTSQITMVSAKISQAKLQVPGGDSDEETKTPSASPRHGRSRPSSSVQESSSESEDGDSRGEIFDIYVVTADY  
 LPLGAEQDAIILREGQYVEVLDSAHPLRWLVRTKPTKSSPSRQGWVSPAYLDKRLKLSPEWGPTEAPEFPGEA  
 VSEDEYRTRLSSVIQELLSSEQAFVQFVLESHHMKHLERSPRVPAAVASQKTVIFRNVQDISHFHSSFLKE  
 LQCGCTDDDVAMCFIKNQEAFAFEKYLEFLVGRVQAESVVVSTPVQEFYKKYAEETLSAKDPTQPPPPPLQHYLE  
 QPVERVQKYQALLKELIRNKARNRQNCALLEQAYAVVSALPQRAENKLVHSLMENYPGTLEALGEPVIRQGHFI  
 VWEGAPGARMPPWKGNHRHVFLFRNYLVICPKRRDSRTDTFSYVFRNMMKLSSIDLNDQVEGDDRAFEVWHERE  
 DSVRKYLLQARTVIKNSWVKEICGIQORLAQPVWRPPEFEELADCTAELGETVKLACRVTGTPKPIVSWYK  
 DGKPVVDPHHLIEDPDGSCSTLILDNLGTIDSGQYMCFAASAAGNASTLGKILVQVPPRFVNVKVRATPFVVEG  
 EDAQITCTVEGAPYPQIRWYKDGTLAPGNRYRMLNEPRSGVLVLIQAASKEDLGHYECELVNRLGSTRGGG  
 ELYMQSPALRARDQHHREQIVAAVEGAPSMQVTIEDVQVQVGDMAQFDAVIEGHPPPVTWYKGTQLTSSAR  
 LSQRQDGTYSVLVLTVDVAPHDAGVYTCVANNAGGQVLCCKAELLVHGGDKLDAENQVYRRLKHSFYDVQEEIGR  
 GVFGFVQVQHKGNKMFCAAKFIPLRSKTRAQAYQERDILATLGHPLVTGLLDQFETRKTLLILELCSSEEL  
 LDRLFKKGVVTEAEVKVYIQQLVEGLHYLHSHGILHLDIKPPNIIIMVHPAREDIKICDFGFAQKITPSEPQYS  
 KYGSPFVSPETIEQNPVSEGSIDIWAMGVI SYLSLTCSSPFAGESDRATLLNVLEGRVSWSSPTAAHLSERDAK  
 DFIKATLQRTPRARPSTQCLAHFWFLKSMPEAAEHFINTKQLKFLRLARSRWQRSLMSYKSIIVMRSIPPELLQ  
 GPDSPSLGVARHLRGEASGASSSSSSDNELAPFARAKSLPPSPVTHSPLLHPRGFLRPSASLPEETEASMP  
 TADAAPVSPQASAGPPASPGCVPRHSVIVSSLFYQQAGEGAERGNKTSGAKRHPARRRHLKGGYIARALPGLR  
 EPLMEYSLLEEEAAREEQASLMTKTPSFETALRLPSSSVREVPGRSHSLDNPPVTTGSPPEACKEQLLFPST  
 GLTHETAKDRGHKEGFSQESVPPFMSGDSRPGKQEGSSQDSCRGKPASSCHSELGSGSQEGCGPPSSQSLG  
 SLPPQSLKKELESTSCGPLFSEQPQAAPFTQVSPLLGSEKEPQDGSLESGVPPVPSSSPGSASQVDAASLDTEG  
 LSEAGDTCDFTPPPQRPQEQATRKFSLSRGGYAGVAGYGTFAFGGDAGGMLGQGPLWARMWAVVQSSEEQ  
 DEAAATESPQPLESGLPIAEASGVPLRTSPSLTPWEEVEQVSLVQIRDLSGDAEAAADTISLDISEVDPAYLNLS  
 DLYDIKYLPEFEMI FRRVPKPIEQPESPGSETEAGQGLADFLLEAAWPWPGEGLGLRAGLEITEEPEEPGDLEA  
 LLGEEAVGRKRKWSRGLFQFPGRCLSGEEPVELGLRQRVKASMAHISRIKGRPEGEREPGRKAGLAS  
 FRLSGLKGRDQELSDAEAVVLGQSVTLACQVLAQPTAQVLAQVLAQVLAQVLAQVLAQVLAQVLAQVLAQVLAQV  
 DLGTYTCCVSNPLGTAVTTGVLKAERPSSSPRPEVGEVLYKDAVLLVWKPVESECGPVTYIVQCCIEGGSWTTL  
 ASDISDCCYLTKLSRGGMYIFRTACVSKAGMGYSSPSEQVLLGGPNHLASEEESSRGRPAQLLPSTKTFAF  
 QMQIRRRGRFVVRQCREKASGRALAAKIVPYQPEDKTAVLRVYEAALKRLHHPHLAQLHAAYLSPRHLVLI LEL  
 CSGPELLPSLAERESYSESDVKDYLWQMLSATQYLHAQHILHLDLRSENMMVTEYNLLKVIDLGNASLDQEK  
 VPAPENFKDYLETMAPELLEGQAVPQTDIWAIGVTAIFIMLSGEY PESSGTRDLQKGLRKLIRLSRCYAGL  
 SGGAVAFLOSSLCAQPWGRPCASTCLQCGWLTEEGPTGSRPTVPTFPTVRLRAFVREKRRALLYKKNHNAQ  
 VR\*

>rs48878909\_ENSMUSP00000158795\_c.23776:A>G\_p.K7926R  
 ENSMUST00000238536.2|Obscn-210|ENSMUSG00000061462|-|chr11:g.58891316:T>C  
 MDHSFSGAPRFLTRPKAFVSVGKDATLSCQIVGNPTPHVSWEKDRQPVEAGARFRLAQDGDVYRLTILDLAL  
 GDSGQYVCRARNAIGEAFVAVGLRVDSEGTCAEQAPHFLLRPTSIRVREGADATFRCRVGGSPQPAVSWSKDG  
 RRLGPPDAPHVRVEEHGESSALRIRSARPRDGGTYEVRAENPLGSASAAAALVVDSDAEVAGPPGTSTATLLA  
 HLQORREAMRAEGIPPSPPGAGTRTCTVTEGKHARLSCFVTGEPKPEVWKKDQGLVTEGRRHVVEDEQENF  
 VLKILFCKQSDRGLYTCTASNLVGTYSVVLVVREPTVPFKKRLQDLEVREKESATFQCEVAQPAEAAWFK  
 EETRLWASAKYDIEEGTERRLTVRNVSADDDAVYICETTEGSRVVAELSVQGNLTKLPRKTAVRTGDTAIF  
 WVVELAVPEGPVWRWRNQEEMVAGGRVAITAEGTCHTLTIFQCTLEDMGVAFVSGGCRTTTQFCVSAPRRPPL  
 YPPADPVVKAKTESSVTLWSAPPHGDRPVTIDGYVLEKRLKLGAYAWSRCHEAGWLATTEFTITGVAEEGDFQ  
 FRVSAINHFQGGPYLEFPGTMHLVPMPLAVKTPKAVEAVEGGEVTFVSDLTVASSGEWFLDGEALKASSIYVI  
 RCDRTRHMLTIREVPARLHGAQLKFVANGIETSIQMVVRAALGLPSSKLPAAAAREVLAQLHHEAQLLAEVSD  
 QAAAAVTWLKDGRELSLGPYEMQVSAGRRALLVRDVAQDDAGLYECVSRGSRTAYQLLVQDITDGYRDWGPAG  
 PQKHMCKCAGAKIARYLGSSCYRFLQYDKGVWHLEAALDTRQKGTSSCSLHEKPKLVFAKQQAHSEVKA  
 AGNSATLSCEVTQAQTEVTWFKDGKLLSSSSKVRMEASGCSRRLVVQQAGKADAGEYSCEAGGQKLSFRLDVA  
 EPKLVFAKQQAHSEVKAEGASATLSCEVAQAQTEVTWFKDGKLLSSSSKVRMEASGCSRRLVVQQAGKADA  
 GEYSCEAGGQKLSFRLDVAEPKLVFAKEQQARSEVKAEGASATLSCEVAQAQTEVTWFKDGKLLSSSSKVRM  
 EASGCSRRLVVQQAGKADAGEYSCEAGGQKLSFRLDVTEPKLVFAKEQQARSEVKAEGVNSATLSCEVAQAQ  
 EVTWFKDGKLLSSSSKVRMEASGCSRRLVVQQAGKADAGEYSCEAGGQKLSFRLDVAEPKLVFAKEQQARSEV  
 KAEAGNSATLSCEVAQAQTEVTWFKDGKLLSSSSKVRMEASGCSRRLVVQQAGKADAGEYSCEAGGQKLSFHL  
 DVTEPKLVFAKEQQAHSEVKAEGASATLSCEVAQAQTEVTWFKDGKLLSSSSKVRMEASGCSRRLVVQQAGK  
 ADAGEYSCEAGGQKLSFRLDVAEPKLVFAKEQQARSEVKAEGASATLSCEVAQAQTEVTWFKDGKLLSSSSK  
 VRVEASGCSRRLVVQQAGKADAGEYSCEAGGQKLSFRLDVAEPKLVFAKEQQANSEVKAEGASATLSCEVAQ  
 AQTEVTWFKDGKLLSSSSKVRVEASGCSRRLVVQQAGKADAGEYSCEAGGQKLSFRLDVAEPKLVFAKEQQAH

SEVKAEAGASATLSCEVAQAQTEVTFWFKDGKLLSSSSKVRVEASGCSRRLVVQQAGKADAGEYSCEAGGQKLS  
 FRLDVAEPKLAFAKEQQAHSEVKAEAGASATLSCEVAQAQTEVTFWFKDGKLLSSSSKVRVEASGCSRRLVVQQ  
 AGKADAGEYSCEAGGQKLSFRLDVAEPKLAFAKEQQAHSEVKAEAGASATLSCEVAQAQTEVTFWFKDGKLLSS  
 SSKVRVEASGCSRRLVVQQAGKADAGEYSCEAGGQKLFRLDVAEPKLMFAKEQQAHSEVKAEAGASATLSCE  
 VAQAQTEVTFWFKDGKLLSSSSKVRVEASGCSRRLVVQQAGKADAGEYSCEAGGQKLSFRLDVAEPKLVFAKEQ  
 QAHESEVKAEAGASATLSCEVAQAQTEVTFWFKDGKLLSSSSKVRVEASGCSRRLVVQQVQKADAGEYSCEARGQ  
 KLSFRLDVADTRLMFAKEQQARTEVKAEAGNSATLSCEVAQAQTEVTFWFKDGKLLSSSSKVRVEASGCSRRLV  
 VQQAGKADAGEYSCEAGGQKLSFRLDVAEAEESQIPERPSRREPLVVKEHETIILTATIAAPSVAAVTWLKDG  
 EIRRSKRHEATSLGDTHLTVRGAQVLDLSAIYSCRVGKEGDFVQVEEVAAKFSKPLEPVEGELGGTVMLVC  
 ELSPEQAQEVVWRCGNTQLRPGKRFQMTSEGPRRTLTVSGLREDDAEYVCESRDDRTSARLTVKVPVVKFTS  
 GLSAMVAEEGQEQATFQCVVSPSDAGVTWYKDGMLQPSKFMVVEGASRSLSLTLGLTLEDAGQVTEAEGAS  
 SSAALRVREAPVLFKKLEPQTEVEERTSVTLEVELTRPWPEVKWTRNAAVLTPSENVEIRAEGARHCLVLRV  
 GFADRGFFGCETPDDKTQAKLNVEMRQVRLVVRGLQVEEAKEQGTASMDVELSHAEEVGSWTRDGLRLQPGPKC  
 HLAVQGPVHILTLALSALQPQDSGLVAFRAEGVHTSARLIVTELPVSFTRVLQDVVATQKEKVTLECELSRPVDV  
 RWLKDGVLELRAGKAIIGIVAQGTCSRSLVIYRCETGDQGVYVCDALDAQTSASLRVQGRTYTLIFRRLAEDAGE  
 VKFVAENAESRAHLRVKELPVTLLRPLRDKIAMEKHRGVLECSQVRSASAQVRWFKGGVELQSGPKYEVVSDGL  
 YRKLVDVQPEDEDTYTCDAENVKTSAQFFVEEQSITIVRGLKDMTVMPEPAPAFECETSIPSVRPPKWLGLG  
 KTVLQAGGNVGLQDGTVHRLTLHKTCSTMTGPVHFTIGKSRSSAQLVVSDIPVVLTRPLEPKAGRELQSVVL  
 SCDFRPAPKAVQWYKDDTPLSPSEKFKMALEGQMAELRILRLTPADAGVYRCQAGSAQSSAEVTEAREVTVI  
 QPLQDAEAMEEGRVCFSCELSHKDEDEIWSLNGTPLYNDSFHEISHGCLHTLVLSVRQADTGTVCATSPKV  
 SVSARLVVKGKPVVFLKALDDVSAEERGLTLQCEVSDPEARVVRKDGVELGSPDKYDFLHKAGARGLTVHD  
 LSHEDAGLYTCQVGSKETQSKVSVHDLHVGITKRLKTVEVLEGESECFEVLSHESPSDPAVWTVGGKTVGGS  
 GHFHAVRQGRKYTLTVKDAALS DAGEVVFVSVLGLTSKASLI IRERPVDITKPLEDQRTTLGEDVMLSCELSRA  
 GTSVRWLKDGKAIRKSQKYDLLSEGTRAVLVVRKASLKDSSGEYTCETEASKSTAKLCVEEKANRFTTEELADLQ  
 VEEKGRAVFTCKTEHPASVVTWRKGLLELRASGKHVPSQEGTLKLTINALERTDSDTYTCDIGQARTQARLL  
 VHGGKVRVIEDLEDTAVQEGSSAKFCRIAPADYVGVHWFLDKTPHLSNELNEITVQPGGYHVLTLRQLALKD  
 SGTVYFEAGDQRTSALRVTEKPSIFSRPLTDVTVTEGDELTLVCETTTVDSSVRWTKDGKTLRQAGLQLSH  
 EGCQAQLLITATTPQDGGRYKCEIGGASSSSIVRVHALPVRFRFESLKDVEVPEGKAATLRCVLSVAAPVEWR  
 HGDDVLKSSNKYSLRQEGAVLELVIRDLQPDQSGQYSCSFGDQTTSATLTVKTSQAQFVGLRKNKEATEGTTV  
 TLRCELTKAPVEWKKGTETLRNGDKYSLKQDGA VCELQICSLLVADAGEYSCVCGQEKTSATLTVKALLVHF  
 VRRLSKEATEGDTTTLQCELSKAAPVEWRKGTETLRDGDYSLKQDGA VCELQIRSLTIADAGEYLCTCGQE  
 KTSATLTVRALPAKFKDSLKNEEATEGTTATLSCELSKAAPVWKKGPKTLQSGDKYVLRQDGA VCGLQIHGL  
 TMADAGEYSCVCGQEKTSATLTVRGLPAKFIEDLRSQEATEGATAILRCELSKAAPVEWRKGSSETLKDGDYR  
 LRQDGA VCELQIRGLAVVDGTYSLSLPTKFTTEGLRNEEATEGTMATLRCQMSKAAPVEWRKGSSETLRDGDYR  
 LRQDGA MCELQIRGLTIEDSGEYTCVCGQEKTSATLSVKALPSRFIEDLRSQEATEGTMATLRCQMSKATAPVE  
 WKKQSETLRDGGRYSLRQDGPVCELQICDLAVEDAGEYSCVCGQEKTSATLSIKALPPRFIEDLRSQEATEG  
 MATLRCQMSKAAPVEWRKGSSETLGDGGYSLRQNGAVCELQIHDLAVEDTGEYSCVCGQEKTSATLNVKALPP  
 RFIEDLRSQEATEGTMATLRCQMSKAAPVEWRKGSSETLRDGGYSLRQDGA VCELQIHDLVEDAGQYSCVCG  
 QEKTSAVLTVDALPPKFTTEGLKKEEATEGTMVTLRCQMSKATVEWRKGAKTLSDGGRYSLRQDGA MCELQIC  
 GLAVEDAGEYSCVCGQEKTSATLSVKALPPRFIEDLRSQEATEGTMATLRCQMSKAAPVEWRKGSSETLRDGD  
 YSLRQDGA VCELQIRDLAVEDAGEYLCVCGQEKTSATLSVKALPPRFIEDLRSQEATEGTMATLRCQMSKAAP  
 VEWRKGSKTLRDGDYSLRQDGA MCELQICDLAVEDTGDYSCVCGQEKTSATLSVKALPPRFIEDLRSQEARE  
 GTVATLRCRMSKAAPVEWRKGSSETLKDGDYSLRQEGNLCELQIRDLAVEDTEEYSCVCGQEKTSATLSVKAL  
 PAKFIEDLRSQEAPESSTVTLRCKLSKKASVVWKKGSETLRNGARYSLRQDGA VCELEIRDLTVEDTGEYSCT  
 CGQERTSATLSIMAPQVVFQQPLQNLQAEEGSMASLRCELSVNAAMVWSKGGLELQGDTRREARQQCVAEL  
 LLRDLRREDAGEYSCTCGSQTTSATLMVTAAPVRFLRELQAQDVDEGATARLRCELSREAVSVEWRKGSQQLF  
 PCAKYQMVEGTTAELLVHGVEQEDAGEYTCDAHTQSIARLSVRAPKPKFKTDLQSTEQEAGGTARLCCQLS  
 EAEPGTPVQWLKEGVELHVGSKYEMRRQGA VCELLIHGLEAKDTGEYACLVGQKTLASLRVKEPEVTIVRGL  
 VDMEVQADEDEFTCKVSQAGATDVQWHLQGLPLQSNVTEVAVLADGCTHVLQKGVTLLEDAGTVSFHVGGL  
 SSSAQLTVRVPEVTVLEPLKDVQLSEGQDAHFRCRLSRASGQEARWALGGVPLQCNEMNDITVEQGTLYLLTL  
 HKVTLEDAGTITLQVGSCSSEAQLKVTAKNVTLRGLNVDVALEGGALFECQLSQPEVAHAHTWLLDDEPVHTS  
 EKVEVVYFENGLRHLLLLKNLKPQDSCRVTFLAGDVVTSFAFLTVRGWRLEVLPEPHDASVKAGMQVRFCTILS  
 EAVPVGEATSVYINGAAIQPDDTDWTVTTDGSHEALTLNSAQPHAGEVTFAAARDAVASARLSVLAALPDPEDA  
 EVVGRSDHSTVTLSSVAPMSDGGGLCGYRVEMKEASTGQWQPLCHDLVPGPECVVDDLVPKTYRFRVAAVGPA  
 GAGEPVHLPQMVKIAPAPAPAPAPAPAPAPAPAPAPAPAPAPAPAPAPAPAPAPAPAPAPAPAPAPAPAPAP  
 RGQRQMLVIKGFRTEDQGEYRCGPIQGLPSSGAATFNVMVMTSGSGDEVPAQPSLPPEAAQEGDLHLLWEALAR  
 KRRMSREPTLDSISELPEEDSRVQHLRQEAETAPDLSEGYSTADELARTGEADLSHTSSDDESRACTPSLV  
 YLKKAGGPGISPLASKHEAQVTTSVKPKQKQEPVVPTCPPPGDLSAADLMDPSLDKAAVKIQAAFQYKVRKE



MKQQEGPVFSRTFGDTEAQQVGDVLRLECVLATKTDMRACWLKDGIELTDGRHYHIDQLKDGTCSSLVTLGLAPT  
 DSGRYTCQVSTKSGRVSHSACVVVSGTESEAESSSGGELDDAFRRAARRLHRLFRTKSPAELSEEELFLSADE  
 GPGEPEEPADWQTYREDENFVCIRFESLAEARQAVTCFRNMFATMIGVEISLGEQGRGVEMRIGKVAPTVT  
 PAVPLAKTPGLQTSDAAPVFLTELQNDQVDQDGYPMSFDCVVTGQPVPSVRWFKDGLLEEDDHYMINEDQQGG  
 HQLIITAVVPADMGVYRCLAENSMGVSSSTKAELRVELTSTDYDTAADATETSSYFSAQGYLSSREQEGTESDE  
 GQLPQVLEELKDLQVAPGTRLAKFQLKVKGYPAKLYWFKDGGPLTSDHIRMTDKKTLHTLEIVSVTREDSG  
 QYAAYSNAVGAAYSSARLLVRGPSEPEEKPASDVHERLVPPRILEKFTPKKVKRGSSTIFSVKVEGHPAPSV  
 HWLKEEAKEKGVLVIGPDTPGYTMASSSKQHSVLVLDVGRQHQTTCIATNPAGQALCSASLHISGLAKEEEQ  
 ERVKEALISSFLQGTSAQVSAQMSSEAGFADLVGQSKGESLVAEEAHSHLSLAEVGTFFLQKLTSTQITMVS  
 AKISQAKLQVPGGDSDEETKTPSASPRHGRSRPSSSVQESSSEEDGDSRGEIFDIYVVTADYLPGLAEQDAI  
 ILREGQYVEVLDSAHPLRWLVRTKPTKSSPSRQGWVSPAYLDRKRLKLSPEWGPTEAPEFPGEAVSEDEYRTRL  
 SSVIQELLSSEQAFVQELQFLESHHMKHLERSPRVPAAVASQKTVIFRNVQDISHFHSSFLKELQCGCTDDDV  
 AMCFIKNQEAFEKYLEFLVGRVQAESVVVSTPVQEFYKKYAEETLSAKDPTQPPPPPLQHYLEQPVVERVQKYQ  
 ALLKELIRNKARNRQNCALLEQAYAVVSALPQRAENKLHVSLMENYPGTLEALGEPTRQGHFIVWEGAPGARM  
 PWKGHNHRVFLFRNYLVICKPRRDSRTDTFSYVFRNMMKLSSIDLNDQVEGDDRAFEVWHEREDSVRKYLLQA  
 RTVIKNSWVKEICIGIQORLAQPVWRPPEFEEELADCTAELGETVKLACRVTGTPKPIVSWYKDGKPEVEVDPH  
 HILIEDPDGSCCTLILDNLTGIDSGQYMCFAASAAGNASTLGKILVQVPPRFVNVKVRATPFVEGEDAQITCTVE  
 GAPPYQIRWYKDGTLTLAGPNRYRMLNEPRSGVLVVIQAASKEDLGHYECELVNRLGSTRGGEDALYMQSPALR  
 ARDQHHREQIVAAVEDTSVEGSAHSAQDQADQQAASVLWRLLGSEALGSPSPGDLPNTRQSEPPAFEEEAASQIP  
 GAASGTPEVSPQPGTHKLEQETTSSGSQGWTPVIRVEGTAWPGAGTGQLLDDVHSQVIMETTQRTYVCQAPDT  
 GVTRAPSMQVTIEDVQVQVGDMAQFDAVIEGHPPPITVWYKGSTQLTSSARLSQRQDGTYSVLVTDVAPHDA  
 GVYTCVANNAGGQVLCKAELLVHGGDKLDAENQVYRRKLHSFYDVQEEIGRGVFGFVKRVQHKGNKMFCAAKF  
 IPLRSKTRAQAYQERDILATLGHPLVTGLLDQFETRKTLLIILELCSSEELLDRFLKKGVVTEAEVKVYIQQL  
 VEGHLHLHSHGILHLDIKPPNILMVHPAREDIKICDFGFAQKITPSEPQYSKYGSPEFVSPETIEQNPVSEGS  
 DIWAMGVISYLSLTCSSPFAGESDRATLLNVLEGRVSWSSPTAAHLESDAKDFIKATLQRTPRARPSTSQCLA  
 HPWFLKSDNPAEEAHFINTKQLKFLLARSWRQSLMSYKSIIVMRSIPPELLQGPDPSPSLGVARHLRGEASGAS  
 SSSSSSSMELAPFARAKSLPPSPVTHSPLLHPRGLRPSASLPEETEASMTADAAPVSPASQAGPPASPGCV  
 PRHSVISSLFYQQAGEGAERGNKTSGAKRHPARRRHLLKGGYIARALPGLREPLMEYSLLEEEEAAREEQASLM  
 TKTPSFETALRLPSSSVREVPGRSHSLDNPVTTGSPPEACREQLLFPSTGLTHETTAKDRGHKEGFLQESV  
 PFPMSGDSRPGKQEGSSQDSCRGKPASSCHSELGSGSQEGCGPPSSQSLGSLPPQSLKELSTSCGPLFSEQ  
 PQAAPFPTQVSPLLGSEKEPQDGLSEGPVVPSSSPGSASQVDASLDTEGLSEAGDTCDFTPPPQRPQEQAT  
 TRKFSLESRGGYAGVAGYGTFAFGGDAGGMLQGGLWARMWAVVQSSEEQDEAATESPQPLESGLPIAEASG  
 VPLRTSPSLTPWEEVEQVSLVQIRDLSGDAEAADTISLDISEVDPAYLNLSDLYDIKYLPEFEMI FRRVPKPI  
 EQPESPGSETEAGQGLADFLLEAAWPWPGELGLRAGLEITEEPEEPGDLEALLGEAAVGRKRKWSPSRGLFQF  
 PGRCLSGEEPVELGLRQVRKASMAHISRIKGRPEPEREGPPRKKAGLASFRLSGLKGRQELSDEAVVLGQ  
 SVTLACQVLAQPTAATWSKDGVLLESSGHLLISSTLKNFQLLTLVVKEDLDGTYTCCVSNPLGTAVTTGVL  
 RKAERPSSSPREVEGELYKDAVLLVWKPVEVSCGPVTVYIVQCCIEGGSWTTLASDISDCCYLTGKLSRGGMYIF  
 RTACVSKAGMGPISSPSEQVLLGGPNHLASEEESSRGRPAQLLPSTKTFQFMQIRRRGRFSVVRQCREKASGR  
 ALAAKIVPYQPEDKTAVLREYEAALKRLHHPHLAQLHAAYLSPRHLVLIILELCSGPELLPSLAERESYSESDVK  
 DYLWQMLSATQYLHAQHILHLDLRSENMMVTEYNLLKVIDLGNALDQEKVPAPENFKDYLETMAPELLEGG  
 GAVPQTDIWAIGVTAIFIMLSGEYPESSSEGTRDLQKGLRKLIRLSRCYAGLSGGAVAFQSSSLCAQPWGRPCA  
 STCLQCGLWTEEGPTGSRPTVTFPTVRLRAVFREREKRRALLYKKNLAQVR\*  
 >rs48878909\_ENSMUSP00000038264\_c.21214:A>G\_p.K7072R  
 ENSMUST00000047441.14|Obscn-202|ENSMUSG00000061462|-|chr11:g.58891316:T>C  
 MDHSFSGAPRFLTRPKAFVVSVGKDATLSCQIVGNPTPHVSWEKDRQPVEAGARFLAQDGDVYRLTILDLAL  
 GDSGQYVCRARNAIGEFAAVGLRVDSEGTCAEQAPHLLRPTSIRVREGADATFRCRVGGSPQPAVSWSKDG  
 RRLGPPDAPHVRVEEHGESSALRIRSARPRDGGTYEVRAENPLGSASAAAALVVDSDAEVAGPPGTSTATLLA  
 HLQORREAMRAEGIPPSPPGAGTRTCTVTEGKHARLSCFVTGEPKPEVWKKDQGLVTEGRRHVVEDEQENF  
 VLKILFCKQSDRGLYTCTASNLVGQTYSSVLVVVREPTVPFKKRLQDLEVREKESATFQCEVAQPAEAAWFK  
 EETRLWASAKYDIEEEGTERRLTVRNVSADDDAVYICETTEGSRVAELSVQGNLTKLPRKTAVRTGDTAIF  
 WVELAVPEGPVRLRNQEEMVAGGRVAITAEGTCHTLTI FQCTLEDMGEVAFVSGGCRTTTQFCVSAPRRPPL  
 YPPADPVVKAKTESSVTLWSAPPHGDRPVTIDGYVLEKRLKLGAYAWSRCHEAGWLATTEFTITGVAAEEDGFQ  
 FRVSAINHFGQIREYLEFPGTMHLVPLAVKTLKAVEAVEAGGEVTFVSDLTVAASSGEWFLDGEALKASSIYVI  
 RCDRTRHMLTDREVPARLHGAQLKVFVANGIETSIQMVRAALGLPSSKLPAAAAREVLAQLHHEAQLLAELSD  
 QAAAVTWLKDRELSLGPKEYMQVSAGRRALLVRDVAQDDAGLYECVSRGSRRTAYQLLVQDITDGYRDWGPAG  
 PQKHMCKCAGAKIARYLGSSCYRFLQYDKGVWHWLEAALDTRQKGTSSCSLHEKPKLVFAKQQQAHSEVKA  
 AGASATLSCEVAQAQTEVTFWFKDGKLLSSSSKVRMEASGCSRRLVVQQAGKADAGEYSCEAGGQKLSFRLDVA  
 EPKVMFAKEQQARSEVKAEGASATLSCEVAQAQTEVTFWFKDGKLLSSSSKVRMEASGCSRRLVVQQAGKADA

GEYSCEAGGQKLSFRLDVTEPKLVFAKEQQARSEVKAEVGNSATLSCEVAQAQTEVTFWKDGKKLSSSSKVRM  
 EASGCSRRLVVQQAGKADAGEYSCEAGGQKLSFRLDVAEPKLVFAKEQQARSEVKAEGNSATLSCEVAQAQ  
 EVTWFKDGKKLSSSSKVRMEASGCSRRLVVQQAGKADAGEYSCEAGGQKLSFHLDVTEPKLVFAKEQQAHSEV  
 KAEAGASATLSCEVAQAQTEVTFWKDGKKLSSSSKVRMEASGCSRRLVVQQAGKADAGEYSCEAEGQKLSFRL  
 DVAEPKLVFAKEQQARSEVKAEGASATLSCEVAQAQTEVTFWKDGKKLSSSSKVRVEASGCSRRLVVQQAGK  
 ADAGEYSCEAGGQKLSFRLDVAEPKLVFAKEQQANSEVKAEGASATLSCEVAQAQTEVTFWKDGKKLSSSSK  
 VRVEASGCSRRLVVQQAGKADAGEYSCEAGGQKLSFRLDVAEPKLAFAKEQQAHSEVKAEGASATLSCEVAQ  
 AQTEVTFWKDGKKLSSSSKVRVEASGCSRRLVVQQAGKADAGEYSCEAGGQKLSFRLDVAEPKLAFAKEQQAH  
 SEVKAEGASATLSCEVAQAQTEVTFWKDGKKLSSSSKVRVEASGCSRRLVVQQAGKADAGEYSCEAGGQKLS  
 FRLDVAEPKLAFAKEQQAHSEVKAEGASATLSCEVAQAQTEVTFWKDGKKLSSSSKVRVEASGCSRRLVVQQ  
 AGKADAGEYSCEAGGQKLFRLDVAEPKLVFAKEQQAHSEVKAEGASATLSCEVAQAQTEVTFWKDGKKLSS  
 SSKVRVEASGCSRRLVVQQVQKADAGEYSCEARGQKLSFRLDVAEAEISQIPERPSRREPLVKEHETIILTAT  
 IAAPSVAAVTWLKDGVIEIRRSKRHEATSLGDTHLTVRGAQVLDIAIYSCRVGKEGQDFPVQVEEVAKFSP  
 LEVPEGELGGTVMLVCELSPEQAEVWRCNGTQLRPGKRFQMTSEGPRRTLTVSGLREDDAEYVCESRDDRT  
 SARLTVKVPVVKFTSGLSAMVAEEGQEATFQCVVSPSDAGVTWYKDGMLQVSEKFMVMEVSGASRSLTILGL  
 TLEDAGQVTEAEGASSAALRVREAPVLFKKKLEPQTVEERTSVTLEVELTRPWPEVKWTRNAAVLTPSENV  
 EIRAEGARHCLVLRSGVFADRGRFGCETPDDKTQAKLNVEMRQVRLVRLGQVEVEAQGTASMDVLESHAEVE  
 GSWTRDGLRLQPGPKCHLAVQGPVHILTLALSALQPQDSGLVAFRAEGVHTSARLIVTELPVSTFRLVQDVVATQ  
 KEKVTLECELSRPVDVRLKDGVELRAGKAIQIVAQGTCSLVIYRCETGDQGVYVCDALDAQTSASLRVQGR  
 TYTLIFRRLVAEDAGEVVFVAENAESRAHLRVKELPVTLLRPLRDKIAMEKHRGVLECVSRASAVRWFKGG  
 VELQSGPKYEVVSDGLYRKLVINQVPEDEDTYTCDAENVKTSAQFFVEEQSITIVRGLKDMTVMEPAPAWFE  
 CETSIPSVRPPKWLKGKTVLQAGNVGLEQDGTVHRLTLHKTCSMTGPFVHTIGKSRSSAQLVSDIPVVL  
 RPLEPKAGRELQSVVLSDFRPAKAVQWYKDDTPLSPSEKFMALLEGQMAELRILRLTPADAGVYRCQAGSA  
 QSSAEVTVAREVTVIQPLQDAEAMEEGRVCFSCELSHKDEDIEWSLNGTPLYNDSFHEISHEGLHTLVLSK  
 VRQADTGTVCATSPKVSVSARLVVKGKPVVFLKALDDVSAEERGTTLQCEVSDPEARVVRKDGVELGSPDK  
 YDFLHKAGARGLTVHDLSDHEDAGLYTCQVGSKETQSKVSVHDLHVGITKRLKTVLEVESFCFVLSHES  
 SDFPAVWTVGGKTVGGSGHFHAVRQGRKYTLTVKDAALSADAGEVVFVSVLGLTSHKASLIIRERPVDTKPLEDQR  
 TTLGEDVMLSCELSRAGTSVRWLKDGKAIKRSQKYDLLSEGTRAVLVVRKASLKDSGEYTCETEASKSTAKLC  
 VEEKANRFTEELADLQVEEKGRAVFTCKTEHPASVVTWRKGLLELRASGKHVPSQEGTLTKLTINALERTDSD  
 TYTCDIGQARTQARLLVHGQKVRVIEDLEDTAVQEGSSAKFCCRIPADYGPVHWFLLDKTPLHSNELNEITVQ  
 PGGYHVLTLRQLALKDSGTVYFEAGDQRTSAALRVTEKPSIFSRPLTDVTVTEGEDLTLVCETTTVDSVSRWT  
 KDGKTLRPSARCQLSHEGCAQLLITATTQDGGRYKCEIGGASSSSIVRVHALPVRFRSLKDVVEVPEGKAA  
 TLRCVLSVAAPVEWRHGDDVLKSSNKYSLRQEGAVLELVIRDLQPQDSGQYSCSFGDQTTSATLTVKTSQAQ  
 FVGKLRNKEATEGTTVTLRCELTKAEAPVEWKKGTETLRNGDKYSLKQDGAVCELQICSLLVADAGEYSCVCGQ  
 EKTSATLTVKALLVHFVRRRLRSKEATEGDTTLQCELSKAAPVEWRKGTETLRDGDYSLKQDGAVCELQIR  
 LTIADAGEYLCTCGEKTSATLTVRALPAKFKDSLKNEEATEGTTATLSCELSKAAPVTWKKGPKTLQSGDKY  
 VLRQDGAVCGLQIHGLTMADAGEYSCVCGQEKTSATLTVRGLPAKFIEDLRSQEATEGATAILRCELSKAAPV  
 EWRKGETLTKDGDYTLRQDGAVCELQIRGLAVVDTGTYSLPTKFTTEGLRNEEATEGTMATLRCQMSKAAPV  
 EWRKGETLTDGDYSLRQDGAVCELQIRGLTIEDSGEYTCVCGQEKTSATLSVKALPPRFIEDLRSQEATEG  
 TMATLRCQMSKAAPVEWRKGETLTDGGYSLRQNGAVCELQIHDLAVEDTGEYSCVCGQEKTSATLNVKALP  
 PRFIEDLRSQEATEGTMATLRCQMSKAAPVEWRKGETLTDGGYSLRQDGAVCELQIHDLVEDAGQYSCVC  
 GQEKTSAVLTVDALPPKFTTEGLKKEEATEGTMVTLRQMSKEATVEWRKGAKTLSDGGYSLRQDGAVCELQI  
 CGLAVEDAGEYSCVCGQEKTSATLSVKALPPRFIEDLRSQEATEGTMATLRCQMSKAAPVEWRKGSKTLRDG  
 RYSLRQDGAVCELQICDLAVEDTGDYSCVCGQEKTSATLSVKAPQVVFQQLQNLQAEEGSMASLRCELSVFN  
 AAMVWSKGGLELQGDTRREARQQGCVAEALLRDLRREDAGEYSCVCGQTSATLMTVAAPVRFRLRELQAQDV  
 DEGATARLRCELSREAVSVEWRKGSLLQFPKAKYQMVQEGTTAEALLVHGVEQEDAGEYTCDAHGHTQS IARLSV  
 RAPKPKFKTDLQSTEQEAGGTARLCCQLSEAEPTPVQWLKEGVELHVGSKYEMRRQGAVCELLIHGLEAKDT  
 GEYACLVGQKTLASLRVKEPEVTIVRGLVDMEVQADEDEFTCKVVSQAGATDVQWHLQGLPLQSNVTEVAV  
 LADGCTHVLQKGVTTLEDAGTVSFHVGGLSSSAQLTVRVPEVTVLEPLKDVQLSEGQDAHFRCLSRASGQEA  
 RWALGGVPLQCNEMNDITVEQGTLYLLTLHKVTTLEDAGTITLQVGSSESAQLKVTAKNTVLRGLENDVALEG  
 GEALFECQLSQPEVAHAHTWLLDDEPVHTSEKVEVVYFENGLRHLLLLKNLKPQDSCRVTFLAGDVVTSAFITV  
 RALPDPPEDAEVVGRSDHSVTLVWVAPMSDGGGGLCGYRVEKMEASTGQWQLCHDLVPGPECVDDLVPGKTY  
 RFRVAAVGPPAGAGEPVHLPQMVKIAAPAPAPAPAPAPAPETRQAVVGEDICLELEVAADGGEVWVHKGTERI  
 QPGHFEVLSRGQRMLVIKGFRTEDQGEYRCGPIQAPLPSGAAATFNVVMTSGSGDEVPAQPSLPPEAAQEGD  
 LHLLEALARKRRMSREPTLDSISELPEEDSRVQHLRQEAEEETAPDLSEGYSTADELARTGEADLSHTSSDDE  
 SRAGTPSLVTYLKKAGGPGISPLASKHEAQVTTSVKPKQKQEPVPTCPVPGDLAADLMDPSLDKAAVKIQA  
 AFKGYKVRKEMKQOEGPVFSRTFGDTEAQVGDVLRLECVLATKTDMRACWLKDGIELTDGRHYHIDQLKDGTC  
 SLLVTGLAPTDSGRYTCQVSTKSGRVSHSACVVVSGTESEAESSSGGELDDAFRRAARRLHRLFRTKSPAELS

EEELFLSADEGPEPEEPADWQTYREDENFVCIRFESLAEARQAVTCFRNMFATMGIGVEISLGEQGPGRVEM
RIGKVAPTPTPAVPLAKTPGLQTSDAAPVFLTELQNDVQDGYPMSFDCVVTGQPVPSVRWFKDGLLEEDDH
YMINEDQQGGHQLIITAVVPADMGVYRCLAENSMGVSSSTKAE LRVELTSTDYDTAADATETSSYFSAQGYLSS
REQEGTESDEGQLPQVLEELKDLQVAPGTRLAKFQKLVKGYPAKLYWFKDQPLTSDHIRMTDKKTLHTLE
IVSVTREDSDGQYAAIYI SNAVGAAYSSARLLVRGPSEPEEKPASDVHERLVPRILEKFTPKKVKGSSITFSV
KVEGHPAPSVHWLKEEAKEGVLWIGPDTPGYTMASSSKQHSLVLLDVGRHQGGTYTCIATNPAGQALCSASLH
ISGLAKEEEQERVKEALISSFLQGT SQAVSAQMSESA GFADLVGQSKGESLVAAEEAHSHLSLAEVGTETEFLOK
LTSQITEMVSAKISQAKLQVPGGDSDEETKTPSASPRHGRSRPSSSVQESSSESEDGDSRGEIFDIYVVTDY
LPLGAEQDAIILREGQYFEVLDSAHPLRWLVRTKPTKSSPSRQGWVSPAYLDRKRLKLSPEWGPTAEPEFPGA
VSEDEYRTRLSSVIQELLSSEQAFV GELQFLESHHMKHLERSPRVPAAVASQKTVIFRNVQDISHFHSSFLKE
LQCGCTDDDVAMCFIKNQEA FEKYLEFLVGRVQAESVVVSTPVQEFYKKYAEETLSAKDPTQPPPPPLQHYLE
QPVERVQKYQALLKELIRNKARNRQNCALLEQAYAVVSALPQRAENKLVSLMENYPGTLEALGEP I RQGHFI
VWEGAPGARM PWKGNHRHVF LFRNYLVICKPRRDSRTDTFSYVFRNMMKLSSIDLNDQVEGDRAFEVWHERE
DSVRKYLLQARTVI IKNSWVKEICGIQORLAQPVWRPPEFEEELADCTAELGETVKLACRVTGT PKPIVSWYK
DGKPVVEVDPHHILIEDPDGSC TLI LDNLGTIDSGQYMCFAASAAGNASTLGKILVQVPPRFVNKVRATPFVEG
EDAQITCTVEGAPYPQIRWYKDG TLLAPGNRYRMLNEPRSGVLVLIQAASKEDLGHYECELVNR LGSTRGGG
ELYMQSPALRARDQHREQIVAAVEGAPSMQV TIEDVQVQVGDMAQF DAVIEGHPPP I V TWYKGSTQLTSSAR
LSQRQDGTYSLVLT DVAPHDAGVYTCVANNAGGV LCKAELLVHGDKLDAENQVYRRKLFHSFYDVQEEI GR
GVFGFVKRVQHKGKMFCAAKFIPLRSKTRAQAYQERDILATLGHPLVTGLLDQFETRKTLLIILELCSSEEL
LDRLFKKGVVTEAEVKVYIQQLVEGLHYLHSHGILHLDIKPPN I LMVHPAREDIKICDFGFAQKITPSEPOYS
KYGSPFVVSPEIIEQN PVSEGS DIWAMGVI SYLSLTCSSPFAGESDRATLLNVLEGRVSWSSPTAAHLS EDAK
DFIKATLQRTPRARPSTSQC LAHPWFLKSMPAAEAHFINTKQLKFL LARSRWQRSLMSYKSI LVMRSIPELLQ
GPPDSPSLGVARHLRGEASGASSSSSSSDNELAPFARAKSL PPSVTHSPLLHPRGFLRPSASLPEETEASMP
TADAAVPASPQASAGPPASPGCVPRHSV ISSLFYQQAGEGAERGNKTS GAKRHPARRRHLKGGYIARALPGLR
EPLMEYSLLEEEAAREEQASLMTKT PSFETALRLPSSSVREV PGRSHSLDNPPVTTG P SPEACREQLLFPST
GLTHETTAKLRGHKEGFLQESV PFPMSGDSRPGKQEGSSQDSCRGKPASSCHSELGSGS QEGCGPPSSQSLG
SLPQSTLKKELSTSCGF L FSEQPQAAPFPTQVSP L LSGKEPQDGSLSSEGVPVPVSSPGSASLPEASLDTEG
LSEAGDTCDFTPPPQRPEQATTRKFSLESRGGYAGVAGYGTFAFGGDAGGMLGQGPLWARMWAVS QSSEEQ
DEAATESPQPLESGLPIAEASGVPLRTSPSLTPWEEVEQVSLVQIRDL SGDAEAADTISLDISEVDPAYLNL S
DLYDIKYL PFEFMI FRRV PKPIEQPESPGSETEAGQGLADFL EEAAWPWP GELGLRAGLEITEEPEEPDLEA
LLGEEAVGRKRKWSPSRGLFQFPGRCLSGEEPVELGLRQRVKASMAHISRILKGRPEGPEREGPPRKKAGLAS
FRLSGLKGRDQELSDEAVVLGQSVTLACQVLAQPTAQATWSKDGVLLES SGHLLISSTLKNFQLLTI L VVKEE
DLGTYTCCVSNPLGTAVTTGVL RKAERPSSSPRPEVGE LYKDAVLLVWKPVESCGPVTYIVQCCIEGGSWTTL
ASDISDCCYLTKLSRGGMYIFRTACVSKAGMGPYSSPSEQVLLGGPNHLASEEESSRGRPAQLLPSTKTFAF
QMQIRRRGRFSVVRQCREKASGRALAAKIVPYQPEDKTA VLREYEA LKRLHHPHLAQLLHAAYLSPRHLVLI LEL
CSGPPELLPSLAERESYSES DVKDYLWQMLSATQYLHAQHIHLDLRSENMMVTEYNLLKVIDLGN AQSLDQEK
VPAPENFKDYLETMAPELLEGQGAVPQTDIWAIGVTA FIMLSGEY P ESSEGETRDLQKGLRKLGLRISRCYAGL
SGGAVAFLQSSSLCAQPWGRPCASTCLQCGWLTEEGPTGSRPTVPTFPTVRLRAFVREREKRRALLYKKNLAQ
VR\*

>rs26971899\_ENSMUSP00000158795\_c.23760:T>C\_p.S7921P
ENSMUST00000238536.2|Obscn-210|ENSMUSG00000061462|-|chr11:g.58891332:A>G
MDHSFSGAPRFLTRPKAFVVS VGKDATLSCQIVGNPTPHVSWEKDRQPV EAGARFLAQDGDVYRLTILDLAL
GDSGQYVCRARNAIGEAFAAVGLRVDSEGTCAEQAPHFLLRPTSIRVREGADATFRCRVGGSPQPAVSWSKDG
RRLGPPDAPHVRVEEHGESSALRIRSARPRDGGTYEVRAENPLGSASAAAALVVDSDAEVAGPPGTSTATLLA
HLQQRREAMRAEGIPSPPGAGTRTCTVTEGKHARLSCFVTGEPKPE TVWKKDGQLVTEGRRHVVEDEQENF
VLKILFCQSDRGLYTCTASNLVGQTYSSVLVVREPTVPFKKRLQDLEVREKESATFQCEVAQPATEAAWFK
EETRLWASAKYDIEEEGTERRLTVRNVSADDDAVYICETTEGSR T VAE LSVQGNLTRKLPKRTAVRTGDTAIF
WVELAVPEGPVRWLRNQEEMVAGGRVAITAEGTCHTLTI FQCTLEDMGEVAFVSGGCRTTTQFCV SAPRRPPL
YPPADPVVKAKTESSVTL SWSAPPHGDRPVTIDGYVLEKRKLGAYAWSRCHEAGWLATTEFTITGVAAEGDFQ
FRVSAINHFGQGPYLEFPGTMHLVPLAVKTP LKAVEAVEGGEVTF SVDLTVASSGEWFLDGEALKASSIYVI
RCDRTRHMLTIREV PARLHGAQLKFVANGIETSIQMVVRAALGLPSSKLPAAAAREVLAQLHEEAQLLAE LSD
QAAA V TWLKDGRELSLGP KYEMQVSAGRRALLVRDVAQDDAGLYECVSRGSR TAYQLLVQDITDGYRDWGPAG
PQKHMCKCAGAKIARYLGS SCYRFLQYDKGVWHWLEAALDTRQKGKTS SCSLHEKPKLVFAKQQAHSEVKA E
AGNSATLSCEVTQAQTEVTWFKDGKLLSSSSKVRMEASGCSRRLLV VQQAGKADAGEYSCEAGGQKLSFRLDVA
EPKLVFAKQQAHSEVKA EAGASATLSCEVAQAQTEVTWFKDGKLLSSSSKVRMEASGCSRRLLV VQQAGKADA
GEYSCEAGGQKLSFRLDVAEPKMFVFAKEQQARSEVKA EAGASATLSCEVAQAQTEVTWFKDGKLLSSSSKVRM
EASGCSRRLLV VQQAGKADAGEYSCEAGGQKLSFRLDVTEPKLVFAKEQQARSEVKA E VGN SATLSCEVAQAQ T
EVTWFKDGKLLSSSSKVRMEASGCSRRLLV VQQAGKADAGEYSCEAGGQKLSFRLDVAEPKLVFAKEQQARSEV

KAEAGNSATLSCEVAQAQTEVTFWKDGKKLSSSSKVRMEASGCSRRLVVQQAGKADAGEYSCEAGGQKLSFHL  
DVTEPKLVFAKEQQAHSEVKAEAGASATLSCEVAQAQTEVTFWKDGKKLSSSSKVRMEASGCSRRLVVQQAGK  
ADAGEYSCEAEGQKLSFRLDVAEPKLVFAKEQQARSEVKAEAGASATLSCEVAQAQTEVTFWKDGKKLSSSSK  
VRVEASGCSRRLVVQQAGKADAGEYSCEAGGQKLSFRLDVAEPKLVFAKEQQANSEVKAEAGASATLSCEVAQ  
AQTEVTFWKDGKKLSSSSKVRVEASGCSRRLVVQQAGKADAGEYSCEAGGQKLSFRLDVAEPKLVFAKEQQAH  
SEVKAEAGASATLSCEVAQAQTEVTFWKDGKKLSSSSKVRVEASGCSRRLVVQQAGKADAGEYSCEAGGQKLS  
FRLDVAEPKLVFAKEQQAHSEVKAEAGASATLSCEVAQAQTEVTFWKDGKKLSSSSKVRVEASGCSRRLVVQQ  
AGKADAGEYSCEAGGQKLSFRLDVAEPKLVFAKEQQAHSEVKAEAGASATLSCEVAQAQTEVTFWKDGKKLSS  
SSKVRVEASGCSRRLVVQQAGKADAGEYSCEAGGQKLSFRLDVAEPKLVFAKEQQAHSEVKAEAGASATLSCE  
VAQAQTEVTFWKDGKKLSSSSKVRVEASGCSRRLVVQQAGKADAGEYSCEAGGQKLSFRLDVAEPKLVFAKEQ  
QAHSEVKAEAGASATLSCEVAQAQTEVTFWKDGKKLSSSSKVRVEASGCSRRLVVQQVQKADAGEYSCEARGQ  
KLSFRLDVADTRLMFAKEQQARTEVKAEAGNSATLSCEVAQAQTEVTFWKDGKKLSSSSKVRVEASGCSRRLV  
VQQAGKADAGEYSCEAGGQKLSFRLDVAEAEESQIPERPSRREPLVVKEHETIILTATIAAPSVAAVTWLKDG  
VEIRRSKRHEATSLGDTHTLTVRGAQVLDIAIYSCRVGKEGQDFPVQVEEVAAKFSKPLEPVEGELGGTVMLVC  
ELSPQAEVWRCGNTQLRPGKRFQMTSEGPRRTLTVSGLREDDAEYVCESTRDDRTSARLTVKVPVVKFTS  
GLSAMVAEEGQEAATFQCVVSPDAGVTWYKDGMLQPSKFKVMVESGASRSLTILGLTLEDAGQVTEAEGAS  
SSAALRVREAPVLFKCKLEPQTVERTSVTLEVELTRPWPEVKWTRNAAVLTPSENVEIRAEGARHCLVLRVSV  
GFADRGFFGCETPDDKTQAKLNVEMRQVRLVRLVGLQVEVAEQGTASMDVELSHAEEVGSVTRDGLRQLQPGPKC  
HLAVQGPVHILTLALSALQPDQSGLVAFRAEGVHTSARLIVTELPSVTRVLQDQVATQKEKVTLECELSRPVDV  
RWLKDGVLELRAGKAIIGIVAQGTCSRSLVIYRCETGDQGVYVCDALDAQTSASLRVQGRYTLIFRRLAEDAGE  
VKFVAENAESRAHLRVKELPVTLLRPLRDKIAMEKHRGVLECCQVSRASQVRWFKGGVELQSGPKYEVVSDGL  
YRKLVINVDQPEDEDTYTCDAENVKTSAQFFVVEQSITIVRGLKDMTVMEPAPAWFECETSIPSVRPPKWL  
KTVLQAGGNVGLQDGTVHRLTLHKTCSTMTGPVHFTIGKSRSSAQLVVSDIPVVLTRPLEPKAGRELQSVVL  
SCDFRPAPKAVQWYKDDTPLSPSEKFKMALEGQMAELRILRLTPADAGVYRCQAGSAQSSAEVTEAREVTVI  
QPLQDAEAMEEGRVCFSCELSHKDEDIEWSLNGTPLYNDSFHEISHGCLHTLVLSKVRQADTGTVCATSPKV  
SVSARLVVKGKPVVFLKALDDVSAEERGTLLTQCEVSDPEARVVWRKDGVELGSPDKYDFLHKAGARGLTVHD  
LSHEDAGLYTCQVSKVSVHDLHVGITKRLKTVEVLEGECSFECVLSHESPSDPAVMTVGGKTVGGS  
GHFHAVRQGRKYTLTVKDAALSDAGEVVSVLGLTSLKASLIIRERPVDTKPLEDQRTTLGEDVMLSCELSRA  
GTSVRWLKDGKAIRKSQKYDLLSEGTRAVLVVRKASLKDSEYTCETEASKSTAKLCVEEKANRFTTEELADLQ  
VEEKGRAVFTCKTEHPASVVTWRKGLLELRASGKHVPSQEGTLTKLTINALERTSDTYTCDIGQARTQARLL  
VHGQKRVIEDLEDTAVQEGSSAKFCRIAPADYGPVHWFLLDKTPLHSNELNEITVQPGGYHVLTLRQLALKD  
SGTVYFEAGDQRTSALRVTEKPSIFSRPLTDVTVTEGEDTLVCETTTVDSVSRWTKDGKTLRPSARCQLSH  
EGCQAQLLITATTPQDGGRYKCEIGGASSSSIVRVHALPVRFRRESLKDVEVPEGKAATLRCVLSVAAPVEWR  
HGDDVLKSSNKYSLRQEGAVLELVIRDLQPDQSGQYSCSFGDQTTSATLTVKTSQAQFVGLKRNKEATEGTTV  
TLRCELTKAEAPVEWKKGTETLRNGDKYSLKQDGAVCELQICSLLVADAGEYSCVCGQEKTSATLTVKALLVHF  
VRLRSKEATEGDTTTLQCELSKAAPVEWRKGTETLRDGDYSLKQDGAVCELQIRSLTIADAGEYLCTCGQE  
KTSATLTVRALPAKFKDSLKNEEATEGTTATLSCELSKAAPVTWKKGPKTLQSGDKYVLRQDGAVCGLQIHGL  
TMADAGEYSCVCGQEKTSATLTVRGLPAKFIEDLRSQEATEGATAILRCELSKAAPVEWRKGSSETLKDGDYR  
LRQDGAVCELQIRGLAVVDGTYSLSLPTKFTTEGLRNEEATEGTMATLRCQMSKAAPVEWRKGSSETLRDGDYR  
LRQDGAVCELQIRGLTIEDSGEYTCVCGQEKTSATLSVKALPSRFIEDLRSQEATEGTMATLRCQMSKTAPVE  
WKKGSETLRDGGYSLRQDGPVCELQICDLAVEDAGEYSCVCGQEKTSATLSIKALPPRFIEDLRSQEATEGT  
MATLRCQMSKAAPVEWRKGSSETLGDGGYSLRQNGAVCELQIHDLAVEDTGEYSCVCGQEKTSATLNVKALPP  
RFIEDLRSQEATEGTMATLRCQMSKAAPVEWRKGSSETLRDGGYSLRQDGAVCELQIHDLVEDAGQYSCVCG  
QEKTSAVLTVDALPPKFTTEGLKKEEATEGTMVTLRCQMSKEATVEWRKGAKTSLDGGYSLRQDGAVCELQIC  
GLAVEDAGEYSCVCGQEKTSATLSVKALPPRFIEDLRSQEATEGTMATLRCQMSKAAPVEWRKGSSETLRDGD  
YSLRQDGAVCELQIRDLAVEDAGEYLCVCGQEKTSATLSVKALPPRFIEDLRSQEATEGTMATLRCQMSKAAP  
VEWRKGSSETLRDGDYSLRQDGAVCELQICDLAVEDTGDYSCVCGQEKTSATLSVKALPPRFIEDLRSQEARE  
GTVATLRCMSKAAPVEWRKGSSETLKDGDYSLRQEGNLCELQIRDLAVEDTEEYSCVCGQEKTSATLSVKAL  
PAKFIEDLRSQEAPESSTVTLRCKLSKKASVVWKKGSETLRNGARYSLRQDGAVCELEIRDLTVEDTGEYSCT  
CGQERTSATLSIMAPQVVFQQPLQNLQAEEGSMASLRCELSVNAAMVWSKGGLELQGDTRREARQQGCVAEL  
LLRDLRREDAGEYSCTCGSQTTSATLMVTAAPVRFRLRELQAQDVDEGATARLRCELSREAVSVEWRKGSLLQF  
PCAKYQMVQEGTTAELLVHGVEQEDAGEYTCDAHTQSIARLSVRAPKPKFKTDLQSTEQEAGGTARLCCQLS  
EAEPGTPVQWLKEFTLVHGVGSKYEMRRQGAPELLIHGLEAKDTGEYACLVGGQKTLASLRVKEPEVTIVRGL  
VMEVQADEDEVEFTCKVSOAGATDVQWHLQGLLQSLNEVTEAVLADGCTHVLQLKGVTLLEDAGTVSFHVGGL  
SSSAQLTVRVPEVTVLEPLKDVQLSEGQDAHFRCRLSRASGQEARWALGGVPLQCNEMNDITVEQGTLYLLTL  
HKVTLLEDAGTITLQVGSSESQAQLKVTAKNTVLRGLENVDALEGGREALFECQLSQPEVAHAHTWLLDDEPVHTS  
EKVEVVYFENGLRHLLLLKNLKPQDSCRVTFLAGDVVTSFAFLTVRGRWLEVLPPHDASVKAGMQVRFCTILS  
EAVPVGEATWYINGAAIQPDDTDWTVTTDGSHHALTLNAQPPQHAGEVTFFAARDAVASARLSVLALPDPEDA

EVVGRSDHSVTLWSVAPMSDGGGGLCGYRVMKEASTGQWQLCHDLVPGPECVVDDLVPGKTYRFRVAAVGPA  
 GAGEPVHLPQMVKIAPAPAPAPAPAPAPAPETRQAVVGEDICLELEVAADGGEVVWHKGTERTIQPGGHFEVLS  
 RGQRQMLVIKGFRTEDQGEYRCGPIQGLPSSGAATFNVMVMTSGSGDEVPAQPSLPPEAAQEGDLHLLWEALAR  
 KRRMSREPTLDSISELPEEDSRVQHLRQEAETAPDLSEGYSTADELARTGEADLSHTSSDDESRACTPSLVT  
 YLKKAGGPGISPLASKHEAQVTTSVKPKQKQEPVPTCP PGDLAADLMDPSLDKAAVKIQAAFQYKVRKE  
 MKQQEGPVFSRTFGDTEAQVGDVLRLECVLATKTDMRACWLKDGIELTDGRHYHIDQLKDGTCSSLVVTGLAPT  
 DSGRYTCQVSTKSGRVSHSACVVVSGTESEAESSSGGELDDAFRAARRLHRLFRTKSPAELSEELFLSADE  
 GPGEPEEPADWQTYREDENFVCIRFESLAEARQAVTCFRNMFATMIGVEISLGEQGPGRVEMRIGKVAPTVT  
 PAVPLAKTPGLQTSDAAPVFLTELQNDVQDGYPMSFDCVVTGQVPVPSVRWFKDGKLEEDDHVMINEDQQGG  
 HQLIITAVVPADMGVYRCLAENSMGVSSTKAELRVELTSTDYDTAADATETSSYFSAQGYLSSREQEGTESDE  
 GQLPQVLEELKDLQVAPGTRLAKFQLKVKGYPAKLYWFKDGGPLTSDHIRMTDKKTLHTLEIVSVTREDSG  
 QYAAYSNAVGAAYSSARLLVRGPSEPEEKPASDVHERLVPPRILEKFTPKKVKRGSSTIFSVKVEGHPAPSV  
 HWLKEEAKEKGVLWIGPDTPGYTMASSSKQHSVLVLDVGRQHQTTCIATNPAGQALCSASLHISGLAKEEEEQ  
 ERVKEALISSFLQGTSAQVSAQMSSEAGFADLVGQSKGESLVAEEAHSHLSLAEVGTTEFLQKLTSTQITEMVS  
 AKISQAKLQVPGGDSDEETKTPSASPRHGRSRPSSSVQESSESESDGDSRGEIFDIYVVTADYLPGLAEQDAI  
 ILREGQYVEVLDSAHPLRWLVRTKPTKSSPSRQGWVSPAYLDRKRLKLSPEWGPTEAPEFPGEAVSEDEYRTRL  
 SSVIQELLSSEQAFVGELEFLSHHMKHLERSPRVPAVASQKTVIFRNVQDISHFHSSFLKELQCGCTDDDV  
 AMCFIKNQEAFAEKYLEFLVGRVQAESVVVSTPVQEFYKKYAEETLSAKDPTQPPPPPLQHYLEQVPERVQKYQ  
 ALLKELIRNKARNRQCALLEQAYAVVSALPQRAENKLVSLMENYPGTLEALGEPHQGHFIVWEGAPGARM  
 PWKGHNHRVFLFRNYLVICKPRRDSRTDTFSYVFRNMMKLSSIDLNDQVEGDDRAFEVWHEREDSVRKYLLQA  
 RTVIKNSWVKEICGIQQLAQPVWRPPEFEEELADCTAELGETVKLACRVTGTPKPIVSWYKDGKPEVDPH  
 HILIEDPDGSCITLILDNLTGIDSGQYMCFAASAAGNASTLGKILVQVPPRFVNVKVRATPFVEGEDAQITCTVE  
 GAPPYQIRWYKDGTLTLLAPGNRYRMLNEPRSGVLVVIQAASKEDLGHYECELVNRLGSTRGGGELYMQSPALR  
 ARDQHHREQIVAAVEDTSEVGEAHSADQDGAQQAASVLWRLLGSEALGPSPGDLPNTRQSEPPAFEEAASQIP  
 GAASGTPPEVSPQPGTHKGLEQETSSSGSQGWTVPIRVEGTAWPGAGTGQLLDDVHSQVIMETTQRTYVCQAPDT  
 GVTRAPSMQVTEIDVQVQVGDMAQFDAVIEGHPPPVRTWYKGSTQLTSSARLSQRQDGTTYSLVLTVDVAPHDA  
 GYVTCVANNAGGVLCKAELLVHGDKLDAENQVRYRKLHSHFYDVQEEIGRGVGFVYKRVQHKGNMFCAAKF  
 IPLRSKTRAQAYQERDILATLGHPLVTGLLDQFETRKTLLILILELCSSEELLDRFLFKKGVVTEAEVKVYIQQL  
 VEGHLHLHSHGILHLDIKPPNIMLVHPAREDIKICDFGFAQKITPSEPQYSKYGSPEFVSPEIIEQNPVSEGS  
 DIWAMGVISYLSLTCSSPFAGESDRATLLNVLEGRVSWSSPTAAHLSSEDAKDFIKATLQRTPRARPSTSQCLA  
 HPWFLLKSMPEAAHFINTKQLKFLARSRWQRSLMSYKSILVMRSIPPELLQGPDPSPSLGVARHLRGEASGAS  
 SSSSSSDNELAPFARAKSLPPSPVTHSPLLHPRGFLRPSASLPEETEASMTADAAVPASQPSAGPPASPGCV  
 PRHSVSISSLFYQQAGEGAERGNKTSGAKRHPARRRHLKGGYIARALPGLREPLMEYSLLEEEAAREEQASLM  
 TKTPSFETALRLPSSSVREVPGRSHSLDNPPVTGPPPEACKEQLLFPPSTGLTHETAKDRGHKEGFLQESV  
 PFPMSGDSRPGKQEGSSQDSCRKPASSCHSELGSGSQEGCGPPSSQSLGSLPPQSLKELSTSCGFLFSEQ  
 PQAAPFTQVSPLLGSEKPEQDGLSEGPVVPVSSSPGSASQVDASLDTEGLSEAGDCTDFTPPPQRPEQAT  
 TRKFSLESRGGYAGVAGYGTFAFGGDAGGMLGQGPLWARMAWAVSQSSEEQDEAATESQPPLSLGPIAEASG  
 VPLRTSPSLTPWEEVEQVSLVQIRDLSGDAEAADTISLDISEVDPAYLNLSDLYDIKYLPEFEMI FRRVPKPI  
 EQPESPGSETEAGQGLADFLLEAAWPWPGELGLRAGLEITEEPEEPGDLEALLGEAAVGRKRKWSPSRGLFQF  
 PGRCLSGEEPVELGLRQRVKASMAHISRIKGRPEGPREGPPRKKAGLASFRLSGLKGRDQELSDEAVVLGQ  
 SVTLACQVLAQPTAQATWSKDGVLLESSGHLLISSTLKNFQLLTILVVKEEDLGTYTCCVSNPLGTAVTTGVL  
 RKAERPSSSPRPEVGEYKDAVLLVWKPVESECGPVTVIVQCCIEGGSWTTLASDISDCCYLTGKLSRGGMYIF  
 RTACVSKAGMGPIYSSPSEQVLLGGPNHLASEEESRRGRPAQLLPSTKTFAFQMQIRRRGRFSVVRQCREKASGR  
 ALAAKIVPYQPEDKTAVLREYEAALKRHLHHPHLAQLHAAYLSRHLVLIILELCSGPELLPSLAERESYSESDVK  
 DYLWQMSLQYLHAQHIHLHLDRSENMMVTEYNLLKVIDLGNALDQEKVPAPENFKDYLETMAPELLEGGQ  
 GAVPQTDIWAIGVTAIFIMLSGEYPESESETRDLQKGLRKLGLIRLSRCYAGLSGGAVAFLOSSLCAQPWGRPCA  
 STCLQCGLWTEEGPTGSRPTVPTVPTVRLRAVFREREKRRRALLYKKNLAQVR\*  
 >rs26971899\_ENSMUSP00000038264\_c.21198:T>C\_p.s7067P  
 ENSMUST00000047441.14|Obscn-202|ENSMUSG00000061462|-|chr11:g.58891332:A>G  
 MDHSFSGAPRFLTRPKAFVSVGKDATLSCQIVGNPTPHVSWEKDRQVEAGARFRLAQDGDVYRLTILDLIAL  
 GDSGQYVCRARNAIGEFAAVGLRVDSEGTCAEQAPHFLLRPTSIRVREGADATFCRVRGGSPPAVSWSKDG  
 RRLGPPDAPHVRVEEHGESSALRIRRSARPRDGGTYEVRAENPLGSASAAAAALVVDSDAEVAGPPGTSTATLLA  
 HLQORREAMRAEGIPSPPGAGTRTCTVTEGKHARLSCFVTEGPKPETVWKKDGLVTEGRRHVVEDEQENF  
 VLKILFCKQSDRGLTYCTASNLVGQTYSSVLVVVREPTVFPFKKRLQDLEVRKEKESATFQCEVAQAPATEAAWFK  
 EETRLWASAKYDIEEGETERRLTVRNVSADDDAVICETTEGSRVVAELSVQGNLTKLPRKTAVRTGDTAIF  
 WVELAVPEGPVRLRNQEEMVAGGRVAITAEGTCHTLTIFQCTLEDMGEVAFVSGGCRTTTQFCVSAPRRPPL  
 YPPADPVVKAKTESSVTLWSAPPHGDRPVTIDGYVLEKRKLGAYAWSRCHEAGWLATTEFTITGVAAEEDGFQ  
 FRVSAINHFGQGPYLEFPGMTMLVPLAVKTPKAVEAVEGGEVTFVSVDLTVASSGEWFLDGEALKASSIYVI



RCDRTRHMLTIREV PARLHGAQLK FVANGIETS IQMVVRAALGLPSSKLPAAAAREVL AQLHEEAQLLAE LSD
QAAA V TWLKD GRELSLGP KYEMQVSAGRRALLVRDVAQDDAGLYECVSRGSR TAYQLLVQDITDGYRDWGPAG
PQKHMKCAGAKIARYLGSSCYRFLQYDKGVVHWEAALDTRQKGKTS SCSLHEKPKLVFAKQQAHSEVKA E
AGASATLSCEVAQAQTEV TWFKDGKLLSSSSKVRMEASGCSRRLVVQQAGKADAGEYSCEAGGQKLSFR LDVA
EPKMFVFAKEQQARSEVKA EAGASATLSCEVAQAQTEV TWFKDGKLLSSSSKVRMEASGCSRRLVVQQAGKADA
GEYSCEAGGQKLSFR LDVTEPKLVFAKEQQARSEVKA E VGN SATLSCEVAQAQTEV TWFKDGKLLSSSSKVRM
EASGCSRRLVVQQAGKADAGEYSCEAGGQKLSFR LDVAEPKLVFAKEQQARSEVKA EAGNSATLSCEVAQAQ T
EVTWFKDGKLLSSSSKVRMEASGCSRRLVVQQAGKADAGEYSCEAGGQKLSFHL DVTEPKLVFAKEQQAHSEV
KAEAGASATLSCEVAQAQTEV TWFKDGKLLSSSSKVRMEASGCSRRLVVQQAGKADAGEYSCEAEAGQKLSFR L
DVAEPKLVFAKEQQARSEVKA EAGASATLSCEVAQAQTEV TWFKDGKLLSSSSKVRVEASGCSRRLVVQQAGK
ADAGEYSCEAGGQKLSFR LDVAEPKLVFAKEQQANSEVKA EAGASATLSCEVAQAQTEV TWFKDGKLLSSSSK
VRVEASGCSRRLVVQQAGKADAGEYSCEAGGQKLSFR LDVAEPKLAFAKEQQAHSEVKA EAGASATLSCEVAQ
AQTEV TWFKDGKLLSSSSKVRVEASGCSRRLVVQQAGKADAGEYSCEAGGQKLSFR LDVAEPKLAFAKEQQAH
SEVKA EAGASATLSCEVAQAQTEV TWFKDGKLLSSSSKVRVEASGCSRRLVVQQAGKADAGEYSCEAGGQKLS
FR LDVAEPKLAFAKEQQAHSEVKA EAGASATLSCEVAQAQTEV TWFKDGKLLSSSSKVRVEASGCSRRLVVQQ
AGKADAGEYSCEAGGQKLFRL DVAEPKLVFAKEQQAHSEVKA EAGASATLSCEVAQAQTEV TWFKDGKLLSS
SSKVRVEASGCSRRLVVQQGKADAGEYSCEAR GQKLSFR LDVAEAEBSQI PERPSRREPLVKEHETI ILTAT
IAAPSVAAVTWLKD GVEIRRSKRHEATSLGDTHLTVRGAQVLD SAIYSCRVGKEGQDFPVQVEVA AKFSKP
LEPVEGELGGTVMLVCELSPEQAEV VWRGNTQLRPGKRFQMTSEGP RR TLTVSGLREDDAE EYVCE SRDDRT
SARLTVKVPRVVKFTSGLS AMVAEEGQEATFQCVVSPSDAGVTWYK DGMQLQPSEK FVMVESGASRSLTILGL
TLEDAGQVTVEAEGASSAALRVREAPVLFKKKLEPQTVEERTSVTLEVELTRPWPVEVKWTRNAAVLTPSENV
EIRAEGARHCLVLR SVGFADRGFFGCETPDDKTQAKLNVEMRQVRLV RGLQEVEAKEQGTASMDVELSHAEVE
GSWTRDGLRLQPGPKHLAVQGPVHILTL SALQPQDSGLVAFRAEGVHTSARLIVTEL PVSFTRVLQD VVATQ
KEKVTLECELSRPVDVRWLKDGVELRAGKAI GIVAQGTCSRSLVIYRCETGDQGVYVCDALDAQTSASLRVQGR
TYTLIFRRVLAEDAGEVKFVAENAESRAHLRVKELPVTLRLRDKIAMEKHRGVLECVSRASAQVRWFKGG
VELQSGPKYEVVSDGLYRKLVIN DVQPEDEDTYTC DAGNVKTSAQFFVEEQSITIVRGLKMDTVM EPAPAFE
CETSI PSVRPPKLLGKTVLQAGGNVGL EQDGT VHRLTLHKTCSTMTGPVHFTIGKSRSSA QMLTVSDIPVVL T
RPLEPKAGRELQSVVLSCDFRPA PKAVQWYKDDTPLSPSEKFKMALEGQMAELRILRLTPADAGVYRCQAGSA
QSSAEVTV EAREVTVIQPLQDAEAMEEGRVCFSCELSHKDEDI EWSLNGTPLYNDSFHEISHEGCLHTLV LKS
VRQADTGTVCATSPKVSVSARLVVKGKPVVFLKALDDVSAEERGTLTLQCEVSDPEARVVWRKDGVELGPS DK
YDFLHKAGARGLTVHDL SHEDAGLYTCQVGSKETQSKVSVHDLHVGITKRLKTVEVLEGESECSFECVLSHESP
SDPAVWTVGGKTVGGSGHFHAVRQGRKYTLTVKDAALSDAGEVVF SVLGLTSKASLIIRERPVDITKPLEDQR
TTLGEDVMLSCELSRAGTSVRWLKDGKAI RKSQKYDLLSEGTRAVLVVRKASLKDSGEYTCETEASKSTAKLC
VEEKANRFTTEELADLQVEEKGRAVFTCKTEHPASVVTWRKGLLELRASGKHVPSQEGTLTKLTINALERTDSD
TYTCDIGQARTQARLLVHGQKVRVIEDLEDTAVQEGSSAKFCCRIAPADYGPVHWF LDKTPLHSNELNEITVQ
PGYHVLT LRQLALKDSGTVYFEAGDQRTSAALRVTEKPSIFSRPLTDVTVTEGEDLTLVCE TTTVDSSVRWT
KDGKTLRPSARCQLSHEGCAQLLITATTPQDGGRYKCEIGGASSSSIVRVHALPVRFRESLKDVEVPEGKAA
TLRCVLSSVAAPVEWRHGDDVLKSSNKYSLRQEGAVLELVIRDLQPQDSGQYSCSFGDQTT SATLTVKTSSAQ
FVGKLRNKEATEGTTVTLRCELTK EAPVEWKGTETLRNGDKYSLKQDGAVCELQICSLLVADAGEYSCVCGQ
EKTSATLTVKALLVHFVRR LRSKEATEGDTTTLQCELSKAAPVEWRKGTETLRDGD RYSLKQDGAVCELQIRS
LTIADAGEYLCTCGQEKTSATLTVRALPAKFKDSLKNEEATEGTATLSCELSKAAPVTWKKGPKTLQSGDKY
VLRQDGAVCGLQIHGLTMADAGEYSCVCGQEKTSATLTVRGLPAKFIEDLRSQEATEGATAILRCELSKAAPV
EWRKGETLTKDGD RYTLRQDGAVCELQIRGLAVVDGTYS SLP TKFTEGLRNEEATEGTMATLRCQMSKAAPV
EWRKGETLRDGD RYSLRQDGAMCELQIRGLTIEDSGEYTCVCGQEKT SATLSVKALPPRFIEDLRSQEATEG
TMATLRCQMSKAAPVEWRKGETLGDGGRYSLRQNGAVCELQIHDLAVEDTGEYSCVCGQEKT SATLNVKALP
PRFIEDLRSQEATEGTMATLRCQMSKAAPVEWRKGETLRDGGRYSLRQDGAVCELQIHDL DVEDAGQYSCVC
GQEKTSAVLTVDALPPKFTEGLKKEEATEGTMVTLRCQMSKEATVEWRKGAKTLS DGGRYSLRQDGAMCELQI
CGLAVEDAGEYSCVCGQEKT SATLSVKALPPRFIEDLRSQEATEGTMATLRCQMSKAAPVEWRKGSKTLRDGD
RYSRLRQDGAMCELQICDLAVEDTGDYSCVCGQEKT SATLSVKAPQVVFQOPLQNLQAEEGSMASLRCELSVPN
AAMVWSKGGLELQGDTRREARQQGVAELLLRDLRREDAGEYSC TCGSQTT SATLMVTAAPVRFRLQLQAQDV
DEGATARLRCELSREAVSVEWRKGS LQLFPCA KYQMVQEGTTAELLVHGVEQEDAGEYTC DAGHTQS IARLSV
RAPKPKFKTDLQSTEQEAGGTARLCCQLSEAE PGTPVQWLKEGVELHVGSKYEMRRQGAVCELLIHGLEAKDT
GEYACLGVGQKTLASLRVKEPEVTIVRGLVDMVEQADEVEFTCKVSOAGATDVQWHLQGLPLQSN E VTEVAV
LADGCTHVLLQLKGLVEDAGTVSFHVGG LSSSAQLTVRVEVTVLEPLKDVQLSEGDQAHFRCLSRASGQEA
RWALGGVPLQC NEMNDITVEQGTLYLLTLHKVTLEDAGTITLQVGS CSSEAQLKVTAKNTVLRGL ENVLRDALEG
GEALFECQLSQPEVA AHTWLLDDEPVHTSEKVEVVYFENGLRHLLLLKNLKPQDSCRVTFLAGDVVTS AFLTV
RALPDPPEDA EVVGRSDHSVTL SWVAPMSDGGGGLCGYR VEMKEASTGQWQLCHDLVPGPECVDDLVPGKTY
RFRVAAVGPAGAGEPVHLPQMVKIAPAPAPAPAPAPAPAPETRQAVVGEDIC LELEVAADGGEVVWHK GTERI

QPGGHFEVLSRGRQMLVIKGFRTEDQGEYRCGPIQGLPSSGAATFNVVMTSGSGDEVPAQPSLPPPEAAQEGD
LHLLWEALARKRRMSREPTLDSISELPEEDSRVQHLRQEAETAPDLSEGYSTADELARTGEADLSHTSSDDE
SRAGTPSLVTYLKKAGGPGISPLASKHEAQVTTSVKPKQKQEPVVPVTPPPPGDLSAADLMDPSLDKAAVKIQA
AFKGYKVRKEMKQQEGPVFSRTFGDTEAQVGDVLRLECVLATKTDMRACWLKDGIELTDGRHYHIDQLKDGTC
SLLVLTGLAPTDSGRYTCCQVSTKSGRVSHSACVVVSGTESEAESSGGELDDAFRRAARLHRLFRKSPAEELS
EEELFLSADEGPEPEEPADWQTYREDENFVCIRFESLAEARQAVTCFRNMFMATMGIGVEISLGEQGRGVEM
RIGKVAPTVTPAVPLAKTPGLQTSDAAPVFLTELQNDVQDGYPMFDCVVTGQPVVPSVRWFKDGLLEDDH
YMINEDQQGGHQLIITAVVPADMGVYRCLAENSMGVSSSTKAEALRVELTSTDYDTAADATETSSYFSAQGYLSS
REQEGTESDEGQLPVLEELKDLQVAPGTRLAKFQLKVKGYPAKLYWFKDQPLTSDHIRMTDKKTLHTLE
IVSVTREDSGQYAAIISNAVGAAYSSARLLVRGPSEPEEKPASDVHERLVPPRILEKFTPKKVKRGSSITFSV
KVEGHPAPSVHHLKEEAKEGVLWIGPDTPGYTMASSSKQHSLVLLDVGRHQHGGTYTTCIATNPAGQALCSASLH
ISGLAKEEEQERVKEALISSFLQTSQAVSAQMSESAGFADLVGQSKGESLVAAEAHSHLSLAEVGTTEFLQK
LTSQITEMVSAKISQAKLQVPGGDSDEETKTPSASPRHGRSRPSSSVQESSSESEDGDSRGEIFDIYVVTADY
LPLGAEQDAIILREGQYVEVLDSAHPLRWLVRTKPTKSSPSRQGWVSPAYLDKRLKLSPEWGPTEAPEFPGEA
VSEDEYRTRLSSVIQELLSSEQAFVQFLESHHMKHLERSPRVPAAVASQKTVIFRNVQDISHFHSSFLKE
LQCGCTDDDVAMCFIKNQEAFAEKYLEFLVGRVQAESVVVSTPVQEFYKKYAEETLSAKDPTQPPPPPLQHYLE
QPVERVQKYQALLKELIRNKARNRQNCALLEQAYAVVSALPQRAENKLVSLMENYPTLEALGEPVIRQGHFI
VWEGAPGARMPWKGNHRHVFLFRNYLVICPKRRDSTDTFSYVFRNMMKLSIDLNDQVEGDDRAFVEMWHERE
DSVRKYLQARTVIKNSWVKEICGIQORLAQPVWRPPEFEEELADCTAELGETVKLACRVTGTPKPIVSWYK
DGKPEVDPHHLIEDPDGSCSTLILDNLTGIDSGQYMCFAASAAGNASTLGKILVQVPPRFVNVKVRATPFVEG
EDAQITCTVEGAPYPQIRWYKDGTLAPGNRYRMLNEPRSGVLVLIQAASKEDLGHYECELVNRGSTRGGG
ELYMQSPALRARDQHHREQIVAAVEGAPSMQVTIEDVQVQVGDMAQFDAVIEGHPPPPIVTWYKGSTQLTSSAR
LSQRQDGTYSVLVTDVAPHDAGVYTCVANNAGQVLCCKAELLVHGGDKLDAENQVYRRLKHSFYDVQEEIGR
GVFGFVKRVQHKGNMFCAAKFIPLRSKTRAQAYQERDILATLGHPLVTGLLDQFETRKTLLILELCSSEEL
LDRLFKKGVVTEAEVKVYIQQLVEGLHYLHSHGILHLDIKPPNIMVHPAREDIKICDFGFAQKITPSEPOYS
KYGSPFVSPPEIEQNPVSEGSDIWAMGVI SYLSLTCSSPFAGESDRATLLNVLEGRVSWSSPTAAHLSDEAK
DFIKATLQRTPRARPSTSQCLAHWPFLKSMPEAAEHFINTKQLKFLRLARSRWQRSLMSYKSLVMRSIPPELLQ
GPPDPSLGVARHLRGEASGASSSSSSSDNELAPFARAKSLPPSPVTHSPLLHPRGFLRPSASLPEETEASMP
TADAAPVSPQASAGPPASPGCVPRHSVSSLFYQQAGEGAERGNKTSGAKRHPARRRHLKGGYIARALPGLR
EPLMEYSLLEEEAAREEQASLMTKTPSFETALRLPSSSVREVPGRSHSLDNPPVTTGPPPEACKEQLLFPST
GLTHETTAKDRGHKEGFLQESVPPFPMGDSRPGKQEGSSQDSCRGKPASSCHSELGSGSQEGCGPPSSQSLG
SLPPQSLKKEKSTSCGPLFSEQQAAPFTQVSPLLGSEKEPQDGLSEGVPVPSSSPGSASQVDASLDTEG
LSEAGDTCDFTPPPQRPQEQATTRKFSLESRGGYAGVAGYGTFAFGGDAGGMLGQGPLWARMWAVSQSSEEQ
DEAATESPQPLESLGPIAEASGVPLRTSPSLTPWEEVEQVSLVQIRDLSGDAEAADTISLDISEVDPAYLNL
DLYDIKYLPPFEMIFRRVPKPIEQPESPGSETEAGQGLADFLLEAAWPWPGEGLGLRAGLEITEEPPEPGDLEA
LLGEAAVGRKRKWSPSRGLFQFPGRCLSGEEPVELGLRQVRKASMAHISRILKGRPEGPEREGPPRKKAGLAS
FRLSGLKGRDQELSDEAVVLGQSVTLACQVLAQPTAQTATWSKDGVLLESSGHLLISSTLKNFQLLTLIVVKEE
DLGTYTCCVSNPLGTAVTTGVLKRAERPSSSPRPEVGEYKDAVLLVWKPVESECGPVTYIVQCCIEGGSWTTL
ASDISDCCYLTKLSRGGMYIFRTACVSKAGMPYSSPSEQVLLGPNHLASEEESRGRPAQLLPSTKTFAF
QMQIRRRGRFSVVRQCREKASGRALAAKIVPYQPEDKTAVLREYEALKRLLHHPHLAQLHAAYLSPRHLVLI
CSGPELLPSLAERESYSESDVKDYLWQMLSATQYLHAQHILHLDLRSENMMVTEYNLLKVIDLGNASLDQEK
VPAPENFKDYLETMAPELLEGGQAVPQTDIWAIGVTAIFIMLSGEYPESSEGETRDLQKGLRKLIRLSRCYAGL
SGGAVAFQLQSSSLCAQPWGRPCASTCLQCGWLTEEGPTGSRPTVPTVPTVRLRAFVREEREKRRALLYKKNLAQ
VR\*

>rs254357296\_ENSMUSP00000158795\_c.23568:G>A\_p.A7857T
ENSMUST00000238536.2|obscn-210|ENSMUSG00000061462|-|chr11:g.58891524:c>T
MDHSFSGAPRFLTRPKAFVSVGKDATLSCQIVGNPTPHVSWEKDRQPVEAGARFLAQDGDVYRLTILDLAL
GDSGQYVCRARNAIGEFAAVGLRVDSEGTCAEQAPHLLRPTSIRVREGADATFRCRVGGSPQPAVSWSKDG
RRLGPPDAPHVRVEEHGESSALRIRSARPRDGGTYEVRAENPLGSASAAAALVVDSDAEVAGPPGTSTATLLA
HLQQRREAMRAEGIPPSPPGAGTRTCTVTEGKHARLSCFVTGEPKPEVWKKDQGLVTEGRRHVYVEDEQENF
VLKILFCKQSDRGLYTCTASNLVGQTYSSVLVVVREPTVPFKKRLQDLEVREKESATFQCEVAQPATEAAWFK
EETRLWASAKYDIEEGETERRLTVRNVSADDDAVYICETTEGSRVAELSVQGNLTKLPRKTAVRTGDTAIF
WVELAVPEGKVTESLRNQEEMVAGGRVAITAEGTCHTLTIQCTLEDMGEVAFVSGGCRTTTQFCVSAPRRPP
YPPADPVKAKTSSVTLSSWAPPHGDRPVTIDGYVLEKRLKLGAYAWSRCHEAGWLATTEFTITGVAEEGDFQ
FRVSAINHFGQPYLEFPGMTMLVPMPLAVKTPKAVEAVEGGEVTFVSDLTVASSGEWFLDGEALKASSIYVI
RCDRTRHMLTIREVPARLHGAQLKVFVANGIETSIQMVVRAALGLPSSKLPAAAAREVLAQLHEEAQLLAELSD
QAAAAVTWLKDGRELSLGPKYEMQVSAGRRALLVRDVAQDDAGLYECVSRGSRRTAYQLLVQDITDGYRDWGPAG
PQKHMCKCAGAKIARYLGSSCYRFLQYDKGVWHLEAALDTRQKGTSSCSLHEKPKLVFAKQQAHSEVKA

AGNSATLSCEVTQAQTEVTWFKDGKLLSSSSKVRMEASGCSRRLVVQQAGKADAGEYSCEAGGQKLSFRLDVA  
EPKLVFAKGOAHSEVKAEGASATLSCEVAQAQTEVTWFKDGKLLSSSSKVRMEASGCSRRLVVQQAGKADA  
GEYSCEAGGQKLSFRLDVAEPKMFVFAKEQQARSEVKAEGASATLSCEVAQAQTEVTWFKDGKLLSSSSKVRM  
EASGCSRRLVVQQAGKADAGEYSCEAGGQKLSFRLDVTEPKLVFAKEQQARSEVKAEVGNSATLSCEVAQAQ  
EVTWFKDGKLLSSSSKVRMEASGCSRRLVVQQAGKADAGEYSCEAGGQKLSFRLDVAEPKLVFAKEQQARSEV  
KAEAGNSATLSCEVAQAQTEVTWFKDGKLLSSSSKVRMEASGCSRRLVVQQAGKADAGEYSCEAGGQKLSFHL  
DVTEPKLVFAKEQQAHSEVKAEGASATLSCEVAQAQTEVTWFKDGKLLSSSSKVRMEASGCSRRLVVQQAGK  
ADAGEYSCEAGGQKLSFRLDVAEPKLVFAKEQQARSEVKAEGASATLSCEVAQAQTEVTWFKDGKLLSSSSK  
VRVEASGCSRRLVVQQAGKADAGEYSCEAGGQKLSFRLDVAEPKLVFAKEQQANSEVKAEGASATLSCEVAQ  
AQTEVTWFKDGKLLSSSSKVRVEASGCSRRLVVQQAGKADAGEYSCEAGGQKLSFRLDVAEPKLAFAKEQQAH  
SEVKAEGASATLSCEVAQAQTEVTWFKDGKLLSSSSKVRVEASGCSRRLVVQQAGKADAGEYSCEAGGQKLS  
FRLDVAEPKLAFAKEQQAHSEVKAEGASATLSCEVAQAQTEVTWFKDGKLLSSSSKVRVEASGCSRRLVVQQ  
AGKADAGEYSCEAGGQKLSFRLDVAEPKLAFAKEQQAHSEVKAEGASATLSCEVAQAQTEVTWFKDGKLLSS  
SSKVRVEASGCSRRLVVQQAGKADAGEYSCEAGGQKLFRLDVAEPKLMFAKEQQAHSEVKAEGASATLSCE  
VAQAQTEVTWFKDGKLLSSSSKVRVEASGCSRRLVVQQAGKADAGEYSCEAGGQKLSFRLDVAEPKLVFAKEQ  
QAHSEVKAEGASATLSCEVAQAQTEVTWFKDGKLLSSSSKVRVEASGCSRRLVVQQVQKADAGEYSCEARGQ  
KLSFRLDVADTRLMFAKEQQARTEVKAEGNSATLSCEVAQAQTEVTWFKDGKLLSSSSKVRVEASGCSRRLV  
VQQAGKADAGEYSCEAGGQKLSFRLDVAEAEASQIPERPSRREPLVVKHEHETIILTATIAAPSVAAVTWLKDG  
EIRRSKRHEATSLGDHTLTVRGAQVLDIAIYSCRVGKEGQDFPVQVEEVAAKFSKPLEPVEGELGGTVMLVC  
ELSPQAEVWRCGNTQLRPGKRFQMTSEGPRRTLTVSGLREDDAEYVCELRDDRTSARLTVKVPVVKFTS  
GLSAMVAEEGQEQATFQCVVSPSDAGVTWYKDGMLQPSKFKVMVESGASRSLTILGLTLEDAGQVTEAEGAS  
SSAALRVREAPVLFKKLEPQTVERTSVTLEVELTRPWPEVKWTRNAAVLTPSENVEIRAEGARHCLVLRV  
GFADRGFFGCETPDDKTQAKLNVEMRQVRLVVRGLQEVEAKEQGTASMDVELSHAEEVGSWTRDGLRQLQPGPK  
HLAVQGPVHILTLALSALQPDQSGLVAFRAEGVHTSARLIVTELPVSFTRVLQDVVATQKEKVTLECELSRPV  
RWLKDGVNELRAGKAIIGIVAQGTCSRSLVIYRCETGDQGVYVCDALDAQTSASLRVQGRTYTLIFRRLAEDAGE  
VKFVAENAESRAHLRVELPVTLLRPLRDKIAMEKRGVLEACQVSRASAQVRWFKGGVLEQSGPKYEVVSDGL  
YRKLVINDDVQPEDEDTYCTDAGNVKTSAQFFVEEQSITIVRGLKDMTVMPEPAPAWFECETSIPSVRPPKWL  
KTVLQAGGNVLEQDGTVHRLTLHKTCSTMTGPVHFTIGKSRSSAQLVSDIPVVLTRPLEPKAGRELQSVVL  
SCDFRPAPKAVQWYKDDTPLSPSEKFKMALEGQMAELRILRLTPADAGVYRCQAGSAQSSAEVTEAREVTVI  
QPLQDAEAMEEGRVCFSCELSHKDEDEIWSLNGTPLYNDSFHEISHEGCLHTLVLSVRQADTGTVCATSPKV  
SVSARLVVKGKPVVFLKALDDVSAEERGTTLTQCEVSDPEARVVWRKDGVELGSPDKYDFLHKAGARGLTVHD  
LSHEDAGLYTCQVGSKETQSKVSVHDLHVGITKRLKTVEVLEGECSFECVLSHESPSDPAVWTVGGKTVGGS  
GHFHAVRQGRKYTLTVKDAALSDAGEVVSVLGLTSKASLIIRERPVDITKPLEDQRTTLGEDVMLSCELSRA  
GTSVRWLKDGKAIRKSQKYDLLSEGTRAVLVVRKASLKDSEYTCETEASKSTAKLCVEEKANRFTTELADLQ  
VEEKGRAVTFCKTEHPASVVTWRKGLLELRASGKHVPSQEGTLKLTINALERTDSDTYCTDIGQARTQARLL  
VHGQKVRVIEDLEDTAVQEGSSAKFCRIAPADYGPVHWFLEDKTPLHSNELNEITVQPGGYHVLTLRQLALKD  
SGTVYFEAGDQRTSAALRVTEKPSIFSRPLTDVTVTEGEDTLVCETTTVDSVVRWTKDGKTLRPSARCQLSH  
EGCQAQLLITATTPQDGGRYKCEIGGASSSSIVRVHALPVRFRRESLKDVEVPEGKAATLRCVLSVAAPVEWR  
HGDDVLKSSNKYSLRQEGAVLELVIRDLQPDQSGQYSCSFGDQTTSATLTVKTSQAQFVGLRNKEATEGTTV  
TLRCELTKAEAPVEWKKGTETLRNGDKYSLKQDGAVCELQICSLLVADAGEYSCVCGQEKTSATLTVKALLVHF  
VRLRSKEATEGDTTLQCELSKAAPVEWRKGTETLRDGDYSLKQDGAVCELQIRSLTIADAGEYLCTCGQE  
KTSATLTVRALPAKFKDSLKNEEATEGTTATLSCELSKAAPVWKKGPKTLQSGDKYVLRQDGAVCGLQIHGL  
TMADAGEYSCVCGQEKTSATLTVRGLPAKFIEDLRSQEATEGATAILRCELSKAAPVEWRKGSSETLKDGDYR  
LRQDGAVCELQIRGLAVDTGTYSLSPTKFTTEGLRNEEATEGTMATLRCQMSKAAPVEWRKGSSETLRDGDYR  
LRQDGAVCELQIRGLTIEDSGEYTCVCGQEKTSATLSVKALPSRFIEDLRSQEATEGTMATLRCQMSKTA  
PVEWRKGSSETLRDGGYSLRQDGAVCELQICDLAVEDAGEYSCVCGQEKTSATLSIKALPPRFIEDLRSQE  
ATEGTMATLRCQMSKAAPVEWRKGSSETLGDGGYSLRQNGAVCELQIHDLAVEDTGEYSCVCGQEKTSATL  
NVKALPPRFIEDLRSQEATEGTMATLRCQMSKAAPVEWRKGSSETLRDGGYSLRQDGAVCELQIHDLVEDAG  
QYSCVCGQEKTSAVLTVDALPPKFTTEGLKKEEATEGTMVTLRCQMSKEATVEWRKGAKTLSDGGRYSLRQD  
GAMCELQICGLAVEDAGEYSCVCGQEKTSATLSVKALPPRFIEDLRSQEATEGTMATLRCQMSKAAPVEWR  
KGSSETLRDGDYSLRQDGAVCELQICDLAVEDAGEYLCVCGQEKTSATLSVKALPPRFIEDLRSQEATEG  
TMATLRCQMSKAAPVEWRKGSSETLKDGDYSLRQEGNLCELQIRDLAVEDTEEYSCVCGQEKTSATLSVK  
ALPAKFIEDLRSQEAPESSTVTLRCKLSKKASVWKKGSSETLRNGARYSLRQDGAVCELEIRDLTVEDTGEY  
SCTCGQERTSATLSIMAPQVVFQQPLQNLQAEEGSMASLRELSVNAAMVWSKGGLELQGDTRREARQQCV  
VAELLLRDLRREDAGEYSCTCGSQTTSATLMVTAAPVRFRLRELQAQDVDEGATARLRCELSREAVSVEWR  
KGSLSQLFPCAKYQMVQEGTTAELLVHGVEQEDAGEYTCDAHTQSIARLSVRAPKPKFKTDLQSTEQEA  
GGTARLCCQLSEAEFGTPVQWLKEGVELHVGSKYEMRRQGAVCELLIHGLEAKDTGEYACLVGGQKT  
LASLRVKEPEVTIVRGL

VDMEVQADEDVEFTCKVVSQAGATDVQWHLQGLPLQSNVTEVAVLADGCTHVLQKGVTLLEDAGTVSFHVGGL  
SSSAQLTVRVPEVTVLEPLKDVQLSEGDQAHFRCLRSRASGQEARWALGGVPLQCNEMNDITVEQGTLYLLTL  
HKVTLLEDAGTITLQVGSSESQAQLKVTAKNTVLRGLENVDALEGGEALFECQLSQPEVAHAHTWLLDDEPVHTS  
EKVEVVYFENGLRHLLLLKLNKPKQDSCRVTFLAGDVVTS AFLTVRGWRLEVLEPPHDASVKAGMQVRFTCILS  
EAVPVGEATWYINGAAIQPDDTDWTVTTDGSHHALTLSNAQPQHAGEVTFAARDAVASARLSVLALPDPEDA  
EAVGRSDHSVTLSSWVAPMSDGGGGLCGYRVMKEASTGQWQLCHDLVPGPECVDDLVPGKTYRFRVAAVGPA  
GAGEPVHLPQMVKIAPAPAPAPAPAPAPAPAPETRAVVGEDICLELEVAADGGEVVWHKGTERRIQPGGHFEVLS  
RGQRQMLVIKGFRTEDQGEYRCGPIQGLPSSGAATFNVMVMTSGSGDEVPAQPSPLPPEAAQEGDLHLLWEALAR  
KRRMSREPTLDSISELPEEDSRVQHLRQEAETAPDLSEGYSTADELARTGEADLSHTSSDDESAGTTPSLVT  
YLKKAAGGPGISPLASKHEAQVTTSVKPKQEQEPVVPTCPPPGDLSAADLMDPSLDKAAVKIQAAPFKGYKVRKE  
MKQQEGPVFSRTFGDTEAQVGDVLRLECVLATKTDMRACWLKDGIELTDGRHYHIDQLKDGTCSSLVTLGLAPT  
DSGRYTCQVSTKSGRVSHSACVVVSGTESEAESSGGELDDAFRRAARRLHRLFRTKSPAELSEELFLSADE  
GPGEPEEPADWQTYREDENFVCIRFESLAEARQAVTCFRNMFMATMIGVEISLGEQGPGRVEMRIGKVAPTVT  
PAVPLAKTPGLQTSDAAPVFLTELQNDVQDGYPMSFDCVVTGQVPVSVRWFKDGKLEEDDHYMINEDQQGG  
HQLIITAVVPADMGVYRCLAENSMGVSSTKAELRVELTSTDYDTAADATETSSYFSAQGYLSSREQEGTESDE  
GQLPQVLEELKDLQVAPGTRLAKFQKLVKGYPAKLYWFKDGGQPLTSDHIRMTDKKTLHLEIVSVTREDSG  
QYAAIISNAVGAAYSSARLLVVRGPSEPEEKPASDVHERLVPPRILEKFTPKKVKRGSSTIFSVKVEGHPAPSV  
HWLKEEAKEGVLWIGPDTPGYTMASSSKQHSVLVLDVGRHQGTYTICIAATNPAGQALCSASLHISGLAKEEEQ  
ERVKEALISSFLQGTSAQVSAQMSSEAGFADLVGQSKGESLVAEEAHSHLSLAEVGTEEFQKLTSSQITEMVS  
AKISQAKLQVPGGDSDEETKTPSASPRHGRSRPSSSVQESSSEEDGDSRGEIFDIYVVTADYLPGLAEQDAI  
ILREGQYVEVLDSAHPLRWLVRTKPTKSSPSRQGWVSPAYLDRKRLKLSPEWGPTEAPEFPGEAVSEDEYRTRL  
SSVIQELLSSEQAFVQELQFLESHHMKHLERSPRVPAAVASQKTVIFRNVQDISHFHSSFLKELQCGTDDDDV  
AMCFIKNQEAFAKEYLEFLVGRVQAESVVVSTPVQEFYKKYAETLSAKDPTQPPPPPLQHYLEQVPERVQKYQ  
ALLKELIRNKARNRQNCALLEQAYAVVSALPQRAENKLVSLMENYPGTLEALGEPHQGHFVWEGAPGARM  
PWKGHNHRVFLFRNYLVICKPRRDSRTDTSYVFRNMMLKSSIDLNDQVEGDDRAFEVWHEREDSVRKYLLQA  
RTVIKNSWVKEICIGIQRLAQPVWRPPEFEEELNACTAELGETVKLACRVTGTPKPIVSWYKDGKPVVEDPH  
HILLEDPDGSCITLIDNLTGIDSGQYMCFAASAAGNASTLGKILVQVPPRFVFNKVRATPFVVEGDAQITCTVE  
GAPYPQIRWYKDGTLAPGNRYRMLNEPRSGVLVVIQAASKEDLGHYECVLNRLGSTRGGGELYMQSPALR  
ARDQHHREQIVAAVEDTSVEGSAHSAQDQADQQAASVLWRLGSEALGSPSGDLNTRQSEPPAFEEAASQIP  
GAASGTPEVSPQPGTHKLEQETSSSGSQGWTPVIRVEGTAWPGAGTGQLLDDVHSQVIMETTQRTYVCQAPDT  
GVTRAPSMQVTIEDVQVQVGDMAQFDAVIEGHPPPITVWYKGSTQLTSSARLSQRQDGTYSVLVTDVAPHDA  
GVYTCVANNAGGQVLCKAELLVHGDKLDAENQVYRRKLHSFYDVQEEIGRGVFGFVKRVQHKGNMFCAAKF  
IPLRSKTRAQAYQERDILATLGHPLVTGLLDQFETRKTLLILILELCSSEELLDRLFKKGVVTEAEVKVYIQQL  
VEGLHYLHSHGILHLDIKPPNIMLVHPAREDIKICDFGFAQKITPSEPQYSKYGSPEFVSPEIIEQNVSSEGS  
DIWAMGVISYLSLTCSSPFAGESDRATLLNVLEGRVSWSSPTAAHLEDAKDFIKATLQRTPRARPSTSQCLA  
HPWFLKSMPAEEAHFINTKQLKFLARSRWQRSLMSYKSIIVMRSIPPELLQGGPPDSPSLGVARHLRGEASGAS  
SSSSSSDNELAPFARAKSLPPSPVTHSPLLHPRGFLRPSASLPEETEASMPATAAASPASQASAGPPASPGCV  
PRHSVISSLFYQQAGEGAERGNKTSGAKRHPARRRHLKGGYIARTLPGLREPLMEYSLLEEEAAREEQASLM  
TKTPSFETALRLPSSSVREVPGRSHSLDNPPVTTGPSPEACKEQLLFPSTGLTHETTAKDRGHKEGFLQESV  
PFPMSGDSRPGKQEGSSQDSCRKGPASSCHSELGSGSQEGCGPPSSQSLGSLPPQSLKELSTSCGPLFSEQ  
PQAAPFPPTQVSPLLGSEKEPQDGSLSSEGPVVPSSSPGSASQVDASLDTEGLSEAGDTCDFTPPPQRPQEQAT  
TRKFSLESRGGYAGVAGYGTFAFGGDAGGMLGQGPLWARMMAVVSQSSEEQDEAATESPQPLESGLPIAEASG  
VPLRTSPSLTPWEEVEQVSLVQIRDLSDGAEAAADTISLDISEVDPAYLNLSDLYDIKYLPEFEMI FRRVPKPI  
EQPESPGSETEAGQGLADFLLEAAWPWPGELGLRAGLEITTEPEEPGDLEALLGEEAAVGRKRKWSPSRGLFQF  
PGRCLSGEEPVELGLRQVRKASMAHISRIKGRPEGPEREGPPRKKAGLASFRLSGLKGRDQELSDAEVVLGQ  
SVTLACQVLAQPTAQATWSKDGVLLESSGHLLISSTLKNFQLLTIILVVKEEDLGTYTCCVSNPLGTAVTTGVL  
RKAERPSSSPREVEGELYKDAVLLVWKPVEESCGPVTYIVQCCIEGGSWTTLASDISDCCYLTGKLSRGGMYIF  
RTACVSKAGMGPISSPSEQVLLGGPNHLASEEESRGRPAQLLPSTKTFAFQMQIRRRGRFSVVRQCREKASGR  
ALAAKIVPYQPEDKTAVLREYEALKRHLHHPHLAQLHAAYLSPRHLVLIILELCSGPELLPSLAERESYSESDVK  
DYLWQMLSATQYLHAQHIHLHLDRSENMMVTEYNLLKVIDLGNQSLDQEKVPAPENFKDYLETMAPELLEGG  
GAVPQTDIWAIGVTAIFIMLSGEYPESESETRDLQKGLRKLIRLSRCYAGLSGGAVAFQSSSLCAQPWGRPCA  
STCLQCGWLTEEGPTGSRPTPVTFPTVRLRAVFREREKRRALLYKKNLAQVR\*

>rs254357296\_ENSMUSP00000038264\_c.21006:G>A\_p.A7003T  
ENSMUST00000047441.14|Obscn-202|ENSMUSG00000061462|-|chr11:g.58891524:C>T  
MDHSFSGAPRFLTRPKAFVSVGKDATALSCQIVGNPTPHVSWEKDRQPVVEAGARFLAQDGDVYRLTILDLAL  
GDSGQYVCRARNAIGEAFVAVGLRVDSEGTCAEQAPHLLRPTSIRVREGADATFRVCRVGGSPQPAVSWSKDG  
RRLGPPDAPHVRVEEHGESSALRIRSARPRDGGTYEVRAENPLGSASAAAALVVDSDAEVAGPPGTSTATLLA  
HLQQRREAMRAEGIPSPPGAGTRTCTVTEGKHARLSCFVTGEPKPEVTVWKKDQGLVTEGRRHVVEDEQENF

VLKILFCKQSDRGLYTCTASNLVGQTYSSVLVVVREPTVPFKKRLQDLEVREKESATFQCEVAQPATEAAWFK  
EETRLWASAKYDIEEEGETERRLTVRNVSADDDAVYICETTEGSRVAELSVQGNLTKRKLPRKTAVRTGDTAIF  
WVELAVPEGPVRWLRNQEEMVAGGRVAITAEGTCHTLTI FQCTLEDMGVAFVSGGCRTTTFQCVSAPRRPPL  
YPPADPVVKAKTESSVTLWSAPPHGDRPVTIDGYVLEKRKLGAYAWSRCHEAGWLATTEFTITGVAAEEDGFQ  
FRVSAINHFGQGPYLEFPGMTMLVPLAVKTPKAVEAVEGGEVTFVSDLTVASSGEWFLDGEALKASSIYVI  
RCDRTRHMLTIREVPARLHGAQLKFVANGIETSIQMVVRAALGLPSSKLPAAAAAREVLAQLHHEEAQLLAE LSD  
QAAAVTWLKDGRELSLGPKEYMQVSAGRRALLVRDVAQDDAGLYECVSRGSRRTAYQLLVQDITDGYRDWGPAG  
PQKHMCKCAGAKIARYLGSSCYRFLQYDKGVWHWLEAALDTRQGKGTSSCSLHEKPKLVFAKQQAHSEVKAE  
AGASATLSCEVAQAQTEVTFWKDGGKLLSSSSKVRMEASGCSRRLLVVQQAGKADAGEYSCEAGGQKLSFRLDVA  
EPKMFVFAKEQQARSEVKAEGASATLSCEVAQAQTEVTFWKDGGKLLSSSSKVRMEASGCSRRLLVVQQAGKADA  
GEYSCEAGGQKLSFRLDVTEPKLVFAKEQQARSEVKAEGVNSATLSCEVAQAQTEVTFWKDGGKLLSSSSKVRM  
EASGCSRRLLVVQQAGKADAGEYSCEAGGQKLSFRLDVAEPKLVFAKEQQARSEVKAEGNSATLSCEVAQAQT  
EVTWFKDGGKLLSSSSKVRMEASGCSRRLLVVQQAGKADAGEYSCEAGGQKLSFHLDVTEPKLVFAKEQQAHSEV  
KAEAGASATLSCEVAQAQTEVTFWKDGGKLLSSSSKVRMEASGCSRRLLVVQQAGKADAGEYSCEAGGQKLSFR  
LDVAEPKLVFAKEQQARSEVKAEGASATLSCEVAQAQTEVTFWKDGGKLLSSSSKVRVEASGCSRRLLVVQQAGK  
ADAGEYSCEAGGQKLSFRLDVAEPKLVFAKEQQANSEVKAEGASATLSCEVAQAQTEVTFWKDGGKLLSSSSK  
VRVEASGCSRRLLVVQQAGKADAGEYSCEAGGQKLSFRLDVAEPKLVFAKEQQAHSEVKAEGASATLSCEVAQA  
AQTEVTFWKDGGKLLSSSSKVRVEASGCSRRLLVVQQAGKADAGEYSCEAGGQKLSFRLDVAEPKLVFAKEQQAH  
SEVKAEGASATLSCEVAQAQTEVTFWKDGGKLLSSSSKVRVEASGCSRRLLVVQQAGKADAGEYSCEAGGQKLS  
FRLDVAEPKLVFAKEQQAHSEVKAEGASATLSCEVAQAQTEVTFWKDGGKLLSSSSKVRVEASGCSRRLLVVQQ  
AGKADAGEYSCEAGGQKLSFRLDVAEPKLVFAKEQQAHSEVKAEGASATLSCEVAQAQTEVTFWKDGGKLLSS  
SSKVRVEASGCSRRLLVVQQAGKADAGEYSCEAGGQKLSFRLDVAEAEESQI PERPSRREPLVVEKETIILTAT  
IAAPSVAAVTWLKDGVERRSKRHEATSLGDTHTLTVRGAQVLD SAIYSCRVGKEGQDFPVQVEEVAAKFSKP  
LEPVEGELGGTVMLVCELSPEQAEVWRCNGTQLRPGKRFQMTSEGPRRTLTVSGLREDDAEYVCESRDDRT  
SARLTVKVPVVKFTSGLSAMVAEEGQEA TFQCVVSPSDAGVTYKDGMLQLPSEKFMVMEVSGASRSLTILGL  
TLEDAGQVTVAEAGASSAALRVREAPVLFKKKLEPQTVERTSVTLEVELTRPWPEVKWTRNAAVLTPSENV  
EIRAEGARHCLTVHDLSDHEDAGLYTCQVGSKETQSKVSVHDLHVGITKRLKTVEVLEGECSFCEVLSHESP  
GSWTRDGLRLQPGPKCHLAVQGPVHILTL SALQPQDSGLVAFRAEGVHTSARLIVTEL PVSFTRVLQDQVATQ  
KEKVTLECELSRPVDVRWLKDGVELRAGKAI GIVAQGTCSRSLVIYRCETGDQGVYVCDALDAQTSASLRVQGR  
TYTLIFRRVLAEDAGEVKFVAENAESRAHLRVKELPVTLLRPLRDKIAMEKHRGVLECCQVSRASAQVRWFKGG  
VELQSGPKYEVVSDGLYRKLVIN DVQPEDEDTYTCDAGNVKTSAQFFVEEQSITIVRGLKDMTVMPEPAPAWFE  
CETSIPSVRPPKWL LKGTVLQAGGNVGLQDGTVHRLTLHKTCSTMTGPFVHFTIGKSRSSAQLVVS DIPVVL  
RPLEPKAGRELQSVVLSCDFRPAKAVQWYKDDTPLSPSEKFKMALEGQMAELRILRLTPADAGVYRCQAGSA  
QSSAEVTVAREVTVIQPLQDAEAMEEGRVCFSCELSHKDEDIEWSLNGTPLYNDSFHEISHEGCLHTLV LKS  
VRQADTGTVCATSPKVS SARLVVKGKPVVFLKALDDVSAEBERGTLTLQCEVSDPEARVWRKDGVELGSPDK  
YDFLHKAGARGLTVHDLSDHEDAGLYTCQVGSKETQSKVSVHDLHVGITKRLKTVEVLEGECSFCEVLSHESP  
SDPAVWTVGGKTVGGSGHFHAVRQGRKYTLTVKDAALSDAGEVVFVSVLGLTSKASLIIRERPVDTKPLEDQR  
TTLGEDVMLSCELSRAGTSVRWLKDGKAIKRSQKYDLLSEGTRAVLVVRKASLKDSGEYTCETEASKSTAKLC  
VEEKANRFTEELADLQVEEKGRAVFTCKTEHPASVVTWRKGLLELRASGKHVPSQEGTLKLTINALERTDSD  
TYTCDIGQARTQARLLVHGQKVRVIEDLEDTAVQEGSSAKFCCRIAPADYGPVHWF LDKTPLHSNELNEITVQ  
PGGYHVLTLRQLALKDSGTVYFEAGDQRTSAALRVTEKPSIFSRPLTDVTVTEGEDTLVCE TTTVDSSVRWT  
KDGTLRPSARCQLSHEGCAQLLITATTPQDGGRYKCEIGGASSSSIVRVHALPVRFRESLKDVEVPEGKAA  
TLRCVLSVAAPVEWRHGDDVLKSSNKYSLRQEGAVLELVIRDLQPDGSGQYSCSFGDQTT SATLTVKTSSAQ  
FVGKLRNKEATEGTTVTLRCELTK EAPVEWKKGTETLRNGDKYSLKQDGAVCELQICSLLVADAGEYSCVCGQ  
EKTSATLTVKALLVHFVRRRLRSKEATEGDTTLQCELSKAAPVEWRKGTETLRDGD RYSLKQDGAVCELQIRS  
LTIADAGEYLCTCGQEKT SATLTVRALPAKFKDSLKNEEATEGTATLSCELSKAAPVTWKKGPKTLQSGDKY  
VLRQDGAVCGLQIHGLTMADAGEYSCVCGQEKT SATLTVRGLPAKFIEDLRSQEATEGATAILRCELSKAAPV  
EWRKGSETLKDGD RYTLRQDGAVCELQIRGLAVVDTGTYS SLPKFTTEGLRNEEATEGTMATLRCQMSKAAPV  
EWRKGSETLRDGD RYSLRQDGAMCELQIRGLTIEDSGEYTCVCGQEKT SATLSVKALPPRFIEDLRSQEATEG  
TMATLRCQMSKAAPVEWRKGSETLGDGGRYSLRQNGAVCELQIHDLAVEDTGEYSCVCGQEKT SATLNVKALP  
PRFIEDLRSQEATEGTMATLRCQMSKAAPVEWRKGSETLRDGGRYSLRQDGAVCELQIHDL DVEDAGQYSCVC  
GQEKTSAVLTVDALPPKFTTEGLKKEEATEGTMVTLRQMSKEATVEWRKGAKT LSDGGRYSLRQDGAMCELQI  
CGLAVEDAGEYSCVCGQEKT SATLSVKALPPRFIEDLRSQEATEGTMATLRCQMSKAAPVEWRKGSKTLR DGD  
RYSLRQDGAMCELQICDLAVEDTGDYSCVCGQEKT SATLSVKAPQVVFQQLQNLQAEEGSMASLRCELSV PN  
AAMVWSKGGLELQGDTRREARQQCVAELLLRDLRREDAGEYSCTCGSQTT SATLMVTAAPVRFRLRELQAQDV  
DEGATARLRCELSREAVSVEWRKGS LQLFPCAQYQMVQEGTTAE LLVHGVEQEDAGEYTC DAGHTQS IARLSV  
RAPKPKFKTDLQSTEQEAGGTARLCCQLSEAE PGTPVQWLKEGVELHVGSKYEMRRQ GAVCELLIHGLEAKDT  
GEYACLVGQKTLASLRVKEPEVTIVRGLVDMEVQADE DVEFTCKVSOAGATDVQWHLQGLPLQSNVTEVAV



LADGCTHVLQKGVTLLEDAGTVSFHVGGGLSSSAQLTVRVPEVTVLEPLKDVQLSEGDQAHFRCRLSRASGQEA  
RWALGGVPLQCNEMNDITVEQGTLYLLTLHKVTLLEDAGTITLQVGSSEASQLKVTAKNTVLRGLENVDALLEG  
GEALFECQLSQPEVAHAHTWLLDDEPVHTSEKVEVVYFENGLRHLLLLLKNLKPQDSCRVTFLAGDVVTS AFLTV  
RALPDPPEDAEEVGRSDHSVTLVWVAPMSDGGGGLCGYRVMKEASTGQWQLCHDLVPGPECVDDLVPGKTY  
RFRVAAVGPAGAGEPVHLPQMVKIAPAPAPAPAPAPAPAPETRQAVVGEDICLELEVAADGGEVVWHKGTERRI  
QPGGHFEVLSRGQRQMLVIKGFRTEDQGEYRCGPIQGLPSSGAATFNVVMTSGSGDEVPAQPSLPPEAAQEGD  
LHLLWEALARKRRMSREPTLDSISELPEEDSRVQHLRQEAETAPDLSEGYSTADELARTGEADLSHTSSDDE  
SRAGTPSLVTYLKKAGGPGISPLASKHEAQVTTSVKPKQKQEPVVPTCPPPGDLAADLMDPSLDKAAVKIQA  
AFKGYKVRKEMKQQEGPVFSRTFGDTEAQVGDVLRLECVLATKTDMRACWLKDGIELTDGRHYHIDQLKDGTC  
SLLVVTGLAPTDSGRYTCQVSTKSGRVSHSACVVVSGTESEAESSSGGELDDAFRRAARRLHRLFRTRKSPAELS  
EEELFLSADEGPGPEEPADWQTYREDENFVCIRFESLAEARQAVTCFRNMFMATMGIGVEISLGEQGRGVEM  
RIGKVAPTVT PAVPLAKTPGLQTSDAAPVFLTELQNDVQDGYPMSFDCVVTGQPVPSVRWFKDGKLLLEDDH  
YMINEDQQGGHQLIITAVVPADMGVYRCLAENSMGVSSSTKAEALRVELTSTDYDTAADATETSSYFSAQGYLSS  
REQEGTESDEGQLPQVLEELKDLQVAPGTRLAKFQLKVKGYPAKLYWFKDQGPLTSDHIRMTDKKTLHTLE  
IVSVTREDSGQYAAIISNAVGAAYSSARLLVRGVPSEPEEKPASDVHERLVPPRILEKFTPKVKRGSSTITFSV  
KVEGHPAPSVHHLKEEAKEGVLWIGPDTPGYTMASSSKQHSVLVLDVGRQHOGTYTICIATNPAGQALCSASLH  
ISGLAKEEEQERVKALISSFLQGTSAVSAQMSASAGFADLVGQSKGSLVAEEAHSHLSLAEVGTAEFLQK  
LTSQITEMVSAKISQAKLQVPGGDSDEETKTPSASPRHGRSRPSSSVQESSSESEDGDSRGEIFDIYVVVTADY  
LPLGAEQDAIILREGQYVEVLDSAHPLRWLVRTKPTKSSPSRQGWVSPAYLDKRLKLSPEWGPTEAPEFPGEA  
VSEDEYRTRLSSVIQELLSSEQAFVQELQFLESHHMKHLERSPRVPAAVASQKTVIFRNVQDISHFHSSFLKE  
LQCGCTDDDVAMCFIKNQEA FEKYLEFLVGRVQAESVVVSTPVQEFYKKYAEETLSAKDPTQPPPPLOHYLE  
QPVERVQKYQALLKELIRNKARNRQNCALLEQAYAVVSALPQRAENKLVSLMENYPGTLEALGEPIRQGHFI  
VWEGAPGAMPWKGNHRHVFLFRNYLVICKPRRDSRTDTFSYVFRNMMKLSSIDLNDQVEGDDRAFEVWHERE  
DSVRKYLLQARTVIKNSWVKEICGIQORLAQPVWRPPEFEEELADCTAELGETVKLACRVGTGPKPIVSWYK  
DGKPEVEVDPHHILIEDPDGSCSTLIDLNLTGIDSGQYMCFAASAAGNASTLGKILVQVPPRFVNKVRATPFVVEG  
EDAQITCTVEGAPYPQIRWYKDGTLAPGNRYRMLNEPRSGVVLVLIQAASKEDLGHYICELVNRGSTRGGG  
ELYMQSPALRMEKQIHREQIVAAVEGAPSMQVTIEDVQVQVGDMAQFDAVIEGHPPPPIVETWYKGSQTLSAR  
LSQRQDGTYSLVLTVDVAPHDAGVYTCVANAGGQVLCCKAELLVHGGDKLDAENQVYRRLKHSFYDVQEEIGR  
GVFGFVKRVQHKGNMFCFAAKFIPLRSKTRAQAYQERDILATLGHPLVTGLLDQFETRKTLLILILELCSSEEL  
LDRLFKKGVVTEAEVKVYIQQLVEGLHYLHSHGILHLDIKPPNIMVHPAREDIKICDFGFAQKITPSEPOYS  
KYGSPFVVSPEIIEQNPVSEGSDIWAMGVISYLSLTCSSPFAGESDRATLLNVLEGRVSWSSPTAAHLSSEDAK  
DFIKATLQRTPRARPSTSQC LAHPWFLKSMPEAAEHFINTKQLKFLARSRWQRSLMSYKSI LVMRSIPPELLQ  
GPPDPSPLGVARHLRGEASGASSSSSSSDNELAPFARAKSLPPSPVTHSPLLHPRGFLRPSASLPEETEASMP  
TADAAPVSPQASAGPPASPGCVPRHSVSISSLFYQQAGEGAERGNKTSKAKRHPARRRHLKGGYIARTLPGLR  
EPLMEYSLLEEEAAREEQASLMTKTPSFETALRLPSSSVREVPRGSHSLDNPPVTTGSPPEACKEQLLFPST  
GLTHETTAKDRGHKEGFLQESVFPFPMSGDSRPGKQEGSSQDSCRGKPASSCHSELGSGSQEGCGPPSSQLG  
SLPPQSLKKELESTSCGPLFSEQPQAAPFPQTQVSPLLGSEKEPQDGSLSSEGVPVPSSSPGSASQVDASLDTEG  
LSEAGDTCDFTPPPQRPQEQATTRKFSLESRGGYAGVAGYGTFAFGGDAGGMLGQGPLWARMWAVSQSSEEQ  
DEAATESPQPLESLGPIAEASGVPLRTSPSLTPWEEVEQVSLVQIRDLSGDAEAADTISLDISEVDPAYLNL  
DLYDIKYLPPFEFMI FRRVPKPIEQPESPGSETEAGQGLADFLLEAAWPWPGEGLGLRAGLEITEEPEEPGDLEA  
LLGEAAVGRKRKWSPSRGLFQFPGRCLSGEEPVELGLRQRVKASMAHISRIKGRPEGPEREGPPRKKAGLAS  
FRLSGLKGRDQELSDEAVVLGQSVTLACQVLAQPTAQTATWSKDGVLLESSEGHLLISSTLKNFQLLTLIVVKEE  
DLGTYTCCVSNPLGTAVTTGVLKRAERPSSSPRPEVGEYKDAVLLVWKPVESECGPVTYIVQCCIEGGSWTTL  
ASDISDCCYLTKLSRGGMYIFRTACVSKAGMGPYSSPSEQVLLGPNHLASEEESSRGRPAQLLPSTKTFAF  
QMQIRRGFRFSVVRQCREKASGRALAAKIVPYQPEDKTAVLREYEAALKRHLHHPHLAQLHAAYLSRHLVLI  
LELCSGPELLPSLAERESYSESVDKDYLWQMSATQYLHAQHILHLDLRSENMMVTEYNLLKVIDLGNASLDQEK  
VPAPENFKDYLETMAPELLEGQGAVPQTDIWAIGVTAIFIMLSGEY PESSSEGTDLQKGLRKLIRLSRCYAGL  
SGGAVAFLOSSLCAQPWGRPCASTLQCGWLTEEGPTGSRPTPVTFTVRLRAFVREKRRALLYKXHNLAQ  
VR\*

>rs26971883\_ENSMUSP00000158795\_c.22431:C>T\_p.Q7478\*  
ENSMUST00000238536.2|Obscn-210|ENSMUSG00000061462|-|chr11:g.58898390:G>A  
MDHSFSGAPRFLTRPKAFVSVGKDATLSCQIVGNPTPHVSWEKDRQPVVEAGARFRLAQDGDVYRLTILDLAL  
GDSGQYVDARNAIIEGFAAVGLRVDSEGTCAEQAPHFLLRPTSIRVREGADATFCRUVGSGPQPAVSWSKDG  
RRLGPPDAPHRVVEHEGESSALRIRSARPRDGGTYEVRAENPLGSASAAAALVVDSDAEVAGPPGTSTATLLA  
HLQQRREAMRAEGIPSPPGAGTRTCTVTEGKHARLSCFVTGEPKPETVWKKDQGLVTEGRRHVVEDEQENF  
VLKILFCKQSDRGLYTCTASNLVGQTYSSVLVVVREPTVPFKKRLQDLEVREKESATFQCEVAQPAATEAAWFK  
EETRLWASAKYDIEEGTERRLTVRNVSADDDAVYICETTEGSRVAELSVQGNLTKRKLPRKTAVRTGDTAIF  
WVELAVPEGPVRWLRNQEEMVAGGRVAITAEGTCHTLTI FQCTLEDMGEVAFVSGGCRTTTQFCVSPARRPPL

YPPADPVVKAKTESSVTLSSWSAPPHGDRPVTTIDGYVLEKRKLGAYAWSRCHEAGWLATTEFTITGVAAEEGDFQ
FRVSAINHFGQGPYLEFPGTMHLVPLAVKTPKAVEAVEGGEVTFVSDLTVASSGEWFLDGEALKASSIYVI
RCDRTRHMLTIREVPARLHGAQLKVFVANGIETS IQMVVRAALGLPSSKLPAAAAREVLAQLHEEAQLLAE LSD
QAAA VTWLKDGRELSLGPYEMQVSAGRRALLVRDVAQDDAGLYECVSRGSRRTAYQLLVQDITDGYRDWGPAG
PQKHMCKCAGAKIARYLGSSCYRFLQYDKGVVHWEAALDTRQGKGTSSCSLHEKPKLVFAKGQQAHSSEVKA
AGNSATLSCEVTQAQTEVTFWKDGKLLSSSSKVRMEASGCSRRLVVQQAGKADAGEYSCEAGGQKLSFRLDVA
EPKLVFAKGQQAHSSEVKAEGASATLSCEVAQAQTEVTFWKDGKLLSSSSKVRMEASGCSRRLVVQQAGKAD
GEYSCEAGGQKLSFRLDVAEPKMFVFAKEQQARSEVKAEGASATLSCEVAQAQTEVTFWKDGKLLSSSSKVRM
EASGCSRRLVVQQAGKADAGEYSCEAGGQKLSFRLDVTEPKLVFAKEQQARSEVKAEGVNSATLSCEVAQAQ
EVTWFKDGKLLSSSSKVRMEASGCSRRLVVQQAGKADAGEYSCEAGGQKLSFRLDVAEPKLVFAKEQQARSE
KAEAGNSATLSCEVAQAQTEVTFWKDGKLLSSSSKVRMEASGCSRRLVVQQAGKADAGEYSCEAGGQKLSFHL
DVTEPKLVFAKEQQAHSEVKAEGASATLSCEVAQAQTEVTFWKDGKLLSSSSKVRMEASGCSRRLVVQQAGK
ADAGEYSCEAGGQKLSFRLDVAEPKLVFAKEQQARSEVKAEGASATLSCEVAQAQTEVTFWKDGKLLSSSSK
VRVEASGCSRRLVVQQAGKADAGEYSCEAGGQKLSFRLDVAEPKLVFAKEQQANSEVKAEGASATLSCEVAQ
AQTEVTFWKDGKLLSSSSKVRVEASGCSRRLVVQQAGKADAGEYSCEAGGQKLSFRLDVAEPKLVFAKEQQAH
SEVKAEGASATLSCEVAQAQTEVTFWKDGKLLSSSSKVRVEASGCSRRLVVQQAGKADAGEYSCEAGGQKLS
FRLDVAEPKLVFAKEQQAHSEVKAEGASATLSCEVAQAQTEVTFWKDGKLLSSSSKVRVEASGCSRRLVVQQ
AGKADAGEYSCEAGGQKLSFRLDVAEPKLVFAKEQQAHSEVKAEGASATLSCEVAQAQTEVTFWKDGKLLSS
SSKVRVEASGCSRRLVVQQAGKADAGEYSCEAGGQKLFRLDVAEPKLMFAKEQQAHSEVKAEGASATLSCE
VAQAQTEVTFWKDGKLLSSSSKVRVEASGCSRRLVVQQAGKADAGEYSCEAGGQKLSFRLDVAEPKLVFAKEQ
QAHSEVKAEGASATLSCEVAQAQTEVTFWKDGKLLSSSSKVRVEASGCSRRLVVQQVQKADAGEYSCEARGQ
KLSFRLDVADTRLMFAKEQQARTEVKAEGNSATLSCEVAQAQTEVTFWKDGKLLSSSSKVRVEASGCSRRLV
VQQAGKADAGEYSCEAGGQKLSFRLDVAEAE SQI PERPSRREPLVVKEHETI ILTATIAAPSVAAV TWLKDGV
EIRRSKRHEATSLGDTHTLTVRGAQVLD SAIYSCRVGKEGQDFPVQVEEVAAKFSKPLEPEVEGELGGTVMLVC
ELSPQAEVWRCNGTQLRPGKRFQMTSEGPRTTLTVSGLREDDAEYVCE SRDDRTSARLTVKVPVVKFTS
GLSAMVAEEGQEA TFCVSPSDAGVTWYKDGMLQPSKFMVVEGASRSLTILGLTLEDAGQVTEVAEGAS
SSAALRVREAPVFLFKKLEPQTVVEERTSVTLEVLTRPWEVWTRNAAVLTPSENVEI RAEGARHCLVLRV
GFADRGGFFGCETPDDKTQAKLVNEMRQVRLVRLGLQEVEAKEQGTASMDVELSHAEVEG SWTRDGLRLQPGPKC
HLAVQGPVHILTL SALQPQDSGLVAFRAEGVHTSARLIVTELPVSFTRVLQDVVATQKEKVTLECELSRPVDV
RWLKDGVLELRAGKAIGIVAQGTCSRSLVIYRCETGDQGVYVCDALDAQTSASLRVQGRTYTLIFRRVLAEDAGE
VKFVAENAESRAHLRVKELPVTLLRPLRDKIAMEKHRGVLECCQVSRASAQVRWFKGGVELQSGPKYEVVSDGL
YRKLVIN DVQPEDEDTYTC DAGNVKTSAQFFVVEQSITIVRGLKDMTVMEPAPAWFECETSIPSVRPPKWL LG
KTVLQAGGNVGLQDGTVHRLTLHKTCSTMTGPVHFTIGKSRSSAQLVVSDIPVVLTRPLEPKAGRELQSVVL
SCDFRPAPKAVQWYKDDTPLSPSEKFKMALEGQMAELRILRLTPADAGVYRCQAGSAQSSAEVTEAREVTVI
QPLQDAEAMEEGRVCFSCELSHKDEDIEWLSLNGTPLYNDSFHEISHEGLHTLVLKSVRQADTGTVCATSPKV
SVSARLVVKGKPVVFLKALDDVSAEERGTTLTQCEVSDPEARVVWRKDGVELGSPDKYDFLHKAGARGLTVHD
LSHEDAGLYTCQVGSKETQSKVSVHDLHVGITKRLKTVEVLEGE SCSFECVLSHESPSDPAVWTVGGKTVGGS
GHFHAVRQGRKYTLTVKDAALSDAGEVVSVLGLTSKASLIIRERPV DITKPLEDQRTTLGEDVMLSCELSRA
GTSVRWLKDGKAIRKSQKYDLLSEGTRAVLVVRKASLKDSGEYTCETEASKSTAKLCVEEKANRFTEELADLQ
VEEKGRAVFTCKTEHPASVVTWRKGLLELRASGKHVPSQEGTLKLTINALERTDSDTYTCDIGQARTQARLL
VHGQKVRVIEDLED TAVQEGSSAKFCCRIAPADYGPVHWFLDKTPLHSNELNEITVQPGGYHVLTLRQLAL KD
SGTVYFEAGDQRTS AALRVTEKPSIFSRPLTDVTVTEGEDTLVCE TTTVDSSVRWTKDGKTLRPSARCQLSH
EGCQAQLLITATTPQDGGRYKCEIGGASSSSIVRVHALPVRFRFRESLKDVEVPEGKAATLRCVLSVAAPVEWR
HGDDVLKSSNKYSLRQEGAVLELVIRDLQPDQSGQYSCSFGDQTT SATLTVKTS SAQFVFKLRNKEATEGTTV
TLRCELTK EAPVEWKKGTETLRNGDKYSLKQDGAVCELQICSLLVADAGEYS CVCGQEKTSATLTVKALLVHF
VRLRSKEATEGDTTTLQCELSKAAPVEWRKGTETLRDGD RYSLKQDGAVCELQIRSLTIADAGEYLCTCGQE
KTSATLTVRALPAKFKDSLKNEEATEGTTATLSCELSKAAPV TWKKGPKTLQSGDKYVLRQDGAVCGLQIHGL
TMADAGEYSCVCGQEKTSATLTVRGLPAKFIEDLRSQEATEGATAI LRCELSKAAPVEWRKGS ETLKDGDRYT
LRQDGAVCELQIRGLAVVDGTYS LPTKFTEGLRNEEATEGTMATLRCQMSKAAPVEWRKGS ETLR DGD RY S
LRQDGAMCELQIRGLTIEDSGEYTCVCGQEKTSATLSVKALPSRFIEDLRSQEATEGTMATLRCQMSKTAPVE
WKKGSETLRDGGRYSLRQDGPVCELQICDLAVEDAGEYSCVCGQEKTSATLSIKALPPRFIEDLRSQEATEGT
MATLRCQMSKAAPVEWRKGS ETLGDGGRYSLRQNGAVCELQIHDLAVEDTGEYSCVCGQEKTSATLNVKALPP
RFIEDLRSQEATEGTMATLRCQMSKAAPVEWRKGS ETLRDKGGRYSLRQDGAVCELQIHDLVEDAGQYSCVCG
QEKTSAVLTVDALETPPKFTEGLKKEEATEGTMVTLRCLMSKEATVEWRKGAKTLS DGGRYSLRQDGAMCELQIC
GLAVEDAGEYSCVCGQEKTSATLSVKALPPRFIEDLRSQEATEGTMATLRCQMSKAAPVEWRKGS ETLR DGD R
YSLRQDGAVCELQIRDLAVEDAGEYLCVCGQEKTSATLSVKALPPRFIEDLRSQEATEGTMATLRCQMSKAAP
VEWRKGS KTLR DGD RYSLRQDGAMCELQICDLAVEDTGDYSCVCGQEKTSATLSVKALPPRFIEDLRSQEARE
GTVATLRCRMSKAAPVEWRKGS ETLKDGDRYSLRQEGNLCELQIRDLAVEDTEEYSCVCGQEKTSATLSVKAL

PAKFIEDLRSQEAPESSTVTLRCKLSKKASVVWKKGSETLRNGARYSLRQDGAUCELEIRDLTVEEDTGEYSCT  
CGQERTSATLSIMAPQVVFQQPLQNLQAEEGSMASLRCELSVNPAAAMVWSKGGLELQGDTRREARQQGCVAEL  
LLRDLRREDAGEYSCTCGSQTTSATLMVTAAPVRFLRELQAQDVDEGATARLRCELSREAVSVEWRKGLQLF  
PCAKYQMVQEGTTAELLVHGVEQEDAGEYTCDAHGHTQSIARLSVRAPKPKFKTDLQSTEQEAGGTARLCCQLS  
EAEPGTPVQWLKEGVELHVGSKYEMRRQGAUCELLIHGLEAKDTGEYACLVGGQKTLASLRVKEPEVTIVRGL  
VDMEVQADEDEVEFTCKVVSQAGATDVQWHLQGLPLQSNVTEVAVLADGCTHVLQKGVTLLEDAGTVSFHVGGL  
SSSAQLTVRVPEVTVLEPLKDVQLSEGQDAHFRCRLSRASGQEARWALGGVPLQCNEMNDITVEQGTLYLLTL  
HKVTLEDAGTITLQVGSCESEAQLKVTAKNTVLRGLENVDLEGGALFECQLSQPEVAHAHTWLLDDEFPVHTS  
EKVEVVYFENGLRHLLLLKNLKPQDSCRVTFLAGDVVTS AFLTVRGRLEVLPPHDASVKAGMQVRFTCILS  
EAVPVGEATWYINGAAIQPDDTDWTVTTDGSHHALTLSNAQPQHAGEVTF AARDAVASARLSVLAALPDPEDA  
EAVGRSDHSVTLSWVAPMSDGGGGLCGYRVMKEASTGQWQLCHDLVPGPECVDDLVPGKTYRFRVAAVGPA  
GAGEPVHLPQMVKIAPAPAPAPAPAPAPAPAPETRQAVVGEDICLELEVAADGGEVVWHKGTERRIQPGHFVLS  
RGQRQMLVIKGFRTEDQGEYRCGPIQGLPSSGAATFNVMVMTSGSGDEVPAQPSLPPEAAQEGDLHLLWEALAR  
KRRMSREPTLDSISELPEEDSRVQHLRQEAETAPDLSEGYSTADELARTGEADLSHTSSDDESAGTPSLVT  
YLKKGAGGPGISPLASKHEAQVTTSVKPKQKQEPVVPTCPPGDLAADMPSLDKAAVKIQAAFKGYKVRKE  
MKQQEGPVFSRTFGDTEAQVGDVLRLECVLATKTDMRACWLKDGIELTDGRHYHIDQLKDGTCSSLVTLGLAPT  
DSGRYTCQVSTKSGRVSHSACVVVSGTESEAESSSGGELDDAFRRAARRLHRLFRTKSPAELSEELFLSADE  
GPGEPEEPADWQTYREDENFVCIREFESLAEARQAVTCFRNMFAFMGIGVEISLGEQGGPRGEMRIKGVAPT  
PAVPLAKTPGLQTSDAAPVFLTELQNDVQDGYPMSFDCVVTGQPVPSVRWFKDGKLEEDDHYMINEDQQGG  
HQLIITAVVPADMGVYRCLAENSMGVSSTKAELRVELTSTDYDTAADATETSSYFSAQGYLSSREQEGTESDE  
GQLPQVLEELKDLQVAPGTRLAKFQLKVKGYPAKLYWFKDGPPLTSDHIRMTDKKTLHTLEIVSVTREDSG  
QYAAYSNAVGAAYSSARLLVRGPSEPEEKPASDVHERLVPPRILEKFTPKKVKRGSSITFSVKVEGHPAPSV  
HWLKEEAKEKGLWIGPDTPGYTMASSSKQHSVLVLDVGRQHOGTYTCIATNPAGQALCSASLHISGLAKEEEQ  
ERVKEALISSFLQGTSAVSAQMSSEAGFADLVGQSKGESLVAAEAHSHLSLAEVGTTEFLQKLTSSQITEMVS  
AKISQAKLQVPGGDSDEETKTPSASPRHGRSRPSSSVQESSESEDGDSRGEIFDIYVVTADYLPGLAEQDAI  
ILREGQYVELLSDSAHPLRWLVRTKPTKSSPSRQWVSPAYLDRKRLKLSPEWGPTEAPEFPGEAVSEDEYRTRL  
SSVIEQLLESLQFLESHHMKHLERSPRVPAAVASQKTVIFRNVQDISHFHSSFLKELQCGCTDDDV  
AMCFIKNQEAFEKYLEFLVGRVQAESVVVSTPVQEFYKKYAEETLSAKDPTQPPPPPLQHYLEQPVVERVQKYQ  
ALLKELIRNKARNRQNCALLEQAYAVVSALPQRAENKLVSLMENYPGTLEALGEPTRQGHFIVWEGAPGARM  
PWKGHNHRVFLFRNYLVICKPRRDSRTDTSYVFRNMMLSSIDLNDQVEGDDRAFEVWHEREDSVRKYLLQA  
RTVLIKNSWVKEICGIQQLAQPVWRPPEFEEELADCTAELGETVKLACRVTGTPKPIVSWYKDGKPVVDPH  
HILLEDPDGSLTILDLNLTGIDSGQYMCFAASAAGNASTLGKILVQVPPRFVNVKVRATPFVEGEDAQITCTVE  
GAPYPQIRWYKDGTLAPGNRYRMLNEPRSGVLVVIQAASKEDLGHYECELVNRGLGSTRGGGELYMQSPALR  
ARDQHHREQIVAAVEDTSEVGSASHAQDQADQAAVSLWRLLGSEALGPS PGDLPNTRQSEPPAFEEAASQIP  
GAASGTPEVSQPETHKGLQETSSSGSQGWTPVIRVEGTAWPGAGTGQLLDVHVSQVIMETTQRTYVCQAPDT  
GVTRAPSMQVTIEDVQVQVGDMAQF DAVIEGHPPPIVVTWYKGSTQLTSSARLSQRQDGTYSVLVTDVAPHDA  
GVYTCVANNAGGQVLCKAELLVHGGDKLDAENQVYRRKLHSFYDVQEEIGRGVFGFVKRVQHKGNMFCAAKF  
IPLRSKTRAQAYQERDILATLGHPLVTGLLD\*FETRKTLLILILELCSSEELLDRLFKKGVVTEAEVKVYIQQL  
VEGLHYLHSHGILHLDIKPPNIMVHPAREDIKICDFGFAQKITPSEPQYSKYGSPEFVSPEIIEQNPVSEGS  
DIWAMGVISYLSLTCCSPFAGESDRATLLNVLEGRVSWSSPTAAHLSSEDAKDFIKATLQRTPRARPSTSQCLA  
HPWFLKSMPAEEAHFINTKQLKFLARSRWQRSLMSYKSI LVMRSIPELLQGPPDSPSLGVARHLRGEASGAS  
SSSSSSDNELAPFARAKSLPPSPVTHSPLLHPRGFLRPSASLPEETEASMTADA AVPASQPSAGPPASPGCV  
PRHSVSISSLFYQQAGEGAERGNKTS GAKRHPARRRHLKGGYIARALPGLREPLMEYSLLEEEAAREEQASLM  
TKTPSFETALRLPSSSVREVPGRSHSLDNPPVTGTPSPEACKEQLLFPSTGLTHETTAKDRGHKEGFLQESV  
PFPMSGDSRPGKQEGSSQDS CRGKPASSCHSELGSGSQEGCGPPSSQSLGSLPPQSLKKELESTSCGLFSEQ  
PQAAPFPTQVSPLLGSEKEPQDGSLEGPVVPSSSPGSASQVDASLDTEGLSEAGDTCDFTPPPQRPQEQAT  
TRKFSLESRGGYAGVAGYGTFAFGGDAGGMLGQGPLWARMAWAVS QSSEEQDEAATESPQPLES LGPIAEASG  
VPLRTSPSLTPWEEVEQVSLVQIRDLSGDAEAADTISLDISEVDPAYLNLSDLYDIKYL PPFEMI FRRVPKPI  
EQPESPGSETEAGQGLADFL EEAAWPWP GELGLRAGLEIT EEPPEPGDLEALLGEEAVGRKRKWSPSRGLFQF  
PGRCLSGEEPVELGLRQVRKASMAHISRI LKGRPEGP ERGPPRKKAGLASFRLSGLKGRDQELSDEAVVLGQ  
SVTLACQVLAQPTAQATWSKDGVLLESSGHLLISSTLKNFQLLTI LVVKEEDLGTYTCCVSNPLGTAVTTGVL  
RKAERPSSSRPEVGEELYKDAVLLVWKPVESECGPVYIVQCCIEGGSWTTLASDISDCCYLTGKLSRGGMYIF  
RTACVSKAGMGPPSSPEQVLLGGPNHLASEEESLRGRPAQLLPSTKTF AFQMQIRRRGRFSVVRQCREKASGR  
ALAAKIVPYQPEDKTAVLR EYEAALKRHLHHPHLAAYLSRHLVLSPRHLVLI LELCSGPELLPSLAERESYSESDVK  
DYLWQMLSATQYLHAQHILHLDLRSENMMVTEYNLLKVIDLGNAQSLDQEKVPAPENFKDYLETMAPELLEGGQ  
GAVPQTDIWAIGVTA FIMLSGEY PESSSEGTRDLQKGLRKLIRLSRCYAGLSGGAVAF LQSSSLCAQPWGRPCA  
STCLQCGLWTEEGPTGSRPTVTFPTVRLRA FVREKRRALLYKHNLAQVR\*

>rs26971883\_ENSMUSP00000038264\_c.19869:C>T\_p.Q6624\*  
ENSMUST00000047441.14|Obscn-202|ENSMUSG00000061462|-|chr11:g.58898390:G>A  
MDHSFSGAPRFLTRPKAFVSVGKDATLSCQIVGNPTPHVSWEKDRQVEAGARFRLAQDGDVYRLTILDIAL  
GDSGQYVCRARNAIGEFAAVGLRVDSEGTCAEQAPHFLLRPTSIRVREGADATFRCRVGGSPPAVSWSKDG  
RRLGPPDAPHVRVEEHGESSALRIRSARPRDGGTYEVRAENPLGSASAAAALVVDSDAEVAGPPGTSTATLLA  
HLQQRREAMRAEGIPPSPPGAGTRTCTVTEGKHARLSCFVTGEPKPEVWKKDGQLVTEGRRHVVEDEQENF  
VLKILFCKQSDRGLYTCTASNLVGQTYSSVLVVVREPTVPFKKRLQDLEVREKESATFQCEVAQAPATEAAWFK  
EETRLWASAKYDIEEEGETERRRLTVRNVASADDDAVYICETTEGSRVVAELSVQGNLTKLPRKTAVRTGDTAIF  
WVELAVPEGPVRWLRNQEEMVAGGRVAITAEGTCHTLTI FQCTLEDMGEVAFVSGGCRTTTFQCVSAPRRPPL  
YPPADPVVKAKTESSVTLSSWAPPHGDRPVTIDGYVLEKRLKLGAYAWSRCHEAGWLATTEFTITGVAAEGDFQ  
FRVSAINHFGQGPYLEFPGMTMLVPLAVKTPKAVEAVEGGEVTFVSDLTVASSGEWFLDGEALKASSIYVI  
RCDRTRHMLTIREVPARLHGAQLKVFANGIETS IQMVVRAALGLPSSKLPAAAAREVLAQLHEEAQLLAE LSD  
QAAA VTWLKDGRELSLGP KYEMQVSAGRRALLVRDVAQDDAGLYECVSRGSR TAYQLLVQDITDGYRDWGPAG  
PQKHMCKCAGAKIARYLGSSCYRFLQYDKGVWHLEAALDTRQGKGTSSCSLHEKPKLVFAKQQAHSEVKA  
AGASATLSCEVAQAQTEVTFWKDGKLLSSSSKVRMEASGCSRRLVVQQAGKADAGEYSCEAGGQKLSFRLDVA  
EPKMFVFAKEQQARSEVKA EAGASATLSCEVAQAQTEVTFWKDGKLLSSSSKVRMEASGCSRRLVVQQAGKAD  
GEYSCEAGGQKLSFRLDVTEPKLVFAKEQQARSEVKA EAGASATLSCEVAQAQTEVTFWKDGKLLSSSSKVRM  
EASGCSRRLVVQQAGKADAGEYSCEAGGQKLSFRLDVAEPEKLVFAKEQQARSEVKA EAGASATLSCEVAQAQ  
EVTWFKDGKLLSSSSKVRMEASGCSRRLVVQQAGKADAGEYSCEAGGQKLSFHLVDVTEPKLVFAKEQQAHSEV  
KAEAGASATLSCEVAQAQTEVTFWKDGKLLSSSSKVRMEASGCSRRLVVQQAGKADAGEYSCEAGGQKLSFR  
DVAEPEKLVFAKEQQARSEVKA EAGASATLSCEVAQAQTEVTFWKDGKLLSSSSKVRVEASGCSRRLVVQQAG  
ADAGEYSCEAGGQKLSFRLDVAEPEKLVFAKEQQANSEVKA EAGASATLSCEVAQAQTEVTFWKDGKLLSSSSK  
VRVEASGCSRRLVVQQAGKADAGEYSCEAGGQKLSFRLDVAEPEKLVFAKEQQAHSEVKA EAGASATLSCEVAQ  
AQTEVTFWKDGKLLSSSSKVRVEASGCSRRLVVQQAGKADAGEYSCEAGGQKLSFRLDVAEPEKLVFAKEQQAH  
SEVKA EAGASATLSCEVAQAQTEVTFWKDGKLLSSSSKVRVEASGCSRRLVVQQAGKADAGEYSCEAGGQKLS  
FRLDVAEPEKLVFAKEQQAHSEVKA EAGASATLSCEVAQAQTEVTFWKDGKLLSSSSKVRVEASGCSRRLVVQQ  
AGKADAGEYSCEAGGQKLSFRLDVAEPEKLVFAKEQQAHSEVKA EAGASATLSCEVAQAQTEVTFWKDGKLLSS  
SSKVRVEASGCSRRLVVQQVQKADAGEYSCEARGQKLSFRLDVAEAEESQIPERPSRREPLVVEKHETIILTAT  
IAAPSVAAVTWLKDGV EIRRSKRHEATSLGDHTLTVRGAQVLD SAIYSCRVGKEGQDFPVQVEEVA AKFSKP  
LEPVEGELGGTVMLVCELSPEQAEVWRCGNTQLRPGKRFQMTSEGPRRTLTVSGLREDDAEYVCESRDRT  
SARLTVKVPVVKFTSGLSAMVAEEGQ EATFQCVVSPSDAGVTWYKDGMLQ PSEKFMVMEVGASRSLTILGL  
TLEDAGQVTVAEAGASSAALRVREAPVLFKKKLEPQTVEERTSVTLEVELTRPWPEVKWTRNAAVLTPSENV  
EIRAEGARHCLVLRVSGFADRGFFGCETPDDKTQAKLNVEMRQVRLVVRGLQEVEAKEQGTASMDVELSHAEVE  
GSWTRDGLRQLQPGPKCHLAVQGPVHILTLSALQPQDSGLVAFRAEGVHTSARLIVTEL PVSFTRVLQDVVATQ  
KEKVTLECELSRPPVDVRLKDGVELRAGKAIGIVAQGTCSRSLVIYRCETGDQGVYVCDALDAQTSASLRVQGR  
TYTLIFRRVLAEDAGEV KFVAENAESRAHLRVKELPVTLLRPLRDKIAMEKHRGVLECVSRASAQVRWFKGG  
VELQSGPKYEVVSDGLYRKLVIN DVQPEDEDTYTC DAGNVKTS AQFFVEEQSITIVRGLKDMTVM EPAPAWFE  
CETSIPSVRPPKWL LGKTVLQAGGNVLEQDGT VHRLTLHKTCSTMTGPVHFTIGKSRSSAQLVVS DIPVVL  
RPLEPKAGRELQSVVLSCDFRPAPKAVQWYKDDTPLSPSEKFKMALEGQMAELRILRLTPADAGVYRCQAGSA  
QSSAEVTV EAREVTVIQPLQDAEAMEEGRVCFSCELSHKDEDIEWSLNGTPLYNDSFHEISHEGCLHTLVLS  
VRQADTGTVCATSPKVSVSARLVVKGKPVVFLKALDDVSAEERGTLTLQCEVSDPEARVVWRKDGVELGPSDK  
YDFLHKAGARGLTVHDL SHEDAGLYTCQVGSKETQSKVSVHDLHVGITKRLKTVEVLEGE SCSFECVLSHESP  
SDPAVWTVGGKTVGGSGHFHAVRQGRKYTLTVKDAALSDAGEVVFVSVLGLT SKASLIIRERPVDITKPLEDQR  
TTLGEDVMLSCELSRAGTSVRWLKDGKAIRKSQKYDLLSEGTRAVLVVRKASLKDSGEYTCETEASKSTAKLC  
VEEKANRFT EELADLQVEEKGRAVFTCKTEHPASVVTWRKGLLELRASGKHVPSQEGTLTKLTINALERTDSD  
TYTCDIGQARTQARLLVHGQKVRVIEDLEDTAVQEGSSAKFCCR IAPADYGPVHWFLDKTPLHSNELNEITVQ  
PGGYHVLT LRQLALKDSGTVYFEAGDQRTSAALRVTEKPSIFSRPLTDVTVTEGEDLTLVCETTTVDSSVRWT  
KDGKTLRPSARCQLSHEGCAQLLITATTPQDGGRYKCEIGGASSSSIVRVHALPVRFRESLKDVEVPEGKAA  
TLRCVLSVAAPVEWRHGDDVLKSSNKYSLRQEGAVLELVIRDLQPDGSGQYSCSFGDQTTSATLTVKTS SAQ  
FVGKLRNKEATEGTTVTLRCELTK EAPVEWKKGTETLRNGDKYSLKQDGAVCELQICSLLVADAGEYSCVCGQ  
EKTSATLTVKALLVHFVRRRLRSKEATEGDTTTLQCELSKAAPVEWRKGTETLRDGD RYSLKQDGAVCELQIRS  
LTIADAGEYLCTCGQEKTSATLTVRALPAKFKDSLKNEEATEGTTATLSCELSKAAPVTWKKGPKTLQSGDKY  
VLRQDGAVCGLQIHGLTMADAGEYSCVCGQEKTSATLTVRGLPAKFIEDLRSQEATEGATAILRCELSKAAPV  
EWRKGETLTKDGD RYTLRQDGAVCELQIRGLAVVDGTGYS LPTKFT EGLRNEEATEGTMATLRCQMSKAAPV  
EWRKGETLTDGD RYSLRQDGAMCELQIRGLTIEDSGEYTCVCGQEKTSATLSVKALPPRFIEDLRSQEATEG  
TMATLRCQMSKAAPVEWRKGETLGDGGRYSLRQNGAVCELQIHDLAVEDTGEYSCVCGQEKTSATLNVKALP  
PRFIEDLRSQEATEGTMATLRCQMSKAAPVEWRKGETLTDGGRYSLRQDGAVCELQIHDL DVEDAGQYSCVC  
GQEKTSAVLTVDALPPKFT EGLKKEEATEGTMVTLRCQMSKEATVEWRKGAKTLS DGGGRYSLRQDGAMCELQI

CGLAVEDAGEYSCVCGQEKTSATLSVKALPPRFIEDLRSQEATEGTMATLRCQMSKAAPVEWRKGSKTLRDGD  
RYSLRQDGMCELQICDLAVEDTGDYSCVCGQEKTSATLSVKAPQVVFQQPLQNLQAEEGSMASLRCELSVFN  
AAMVWSKGGLELQGDTRREARQQGCVAELLLRDLRREDAGEYSTCTGSGQTTSATLMVTAAPVRFRLRELQAQDV  
DEGATARLRCELSREAVSVEWRKGSLLQFPCAKYQMVQEGTTAELLVHGVQEEDAGEYTC DAGHTQS IARLSV  
RAPKPKFKTDLQSTEQEAGGTARLCCQLSEAEPTPVQWLKEGVELHVGSKYEMRRQGAVCELLIHGLEAKDT  
GEYACLVGQKTLASLRVKEPEVTIVRGLVDMEVQADEDEVEFTCKVSQAGATDVQWHLQGLPLQSNVTEVAV  
LADGCTHVLQKGVTLLEDAGTVSFHVGGLSSSAQLTVRVPEVTVLEPLKDVQLSEGDADHFRCLSRASGQEA  
RWALGGVPLQCNEMNDITVEQGTLYLLTLHKVTLLEDAGTITLQVGSSESAQLKVTAKNTVLRGLENVDALEG  
GEALFECQLSQPEVAHTWLLDDEPVHTSEKVEVYFENGLRHLLLLKLNKLPQDSCRVTFLAGDVVTS AFLTV  
RALPDPPEDAEVVGRSDHSVTLVWVAPMSDGGGGLCGYRVMKEASTGQWQLCHDLVPGPECVDDLVPGKTY  
RFRVAAVGPAGAGEPVHLPQMVKIAPAPAPAPAPAPAPAPETRQAVVGEDICLELEVAADGGVEVWHKGTERRI  
QPGGHFEVLSRGRQMLVIKGFRTEDQGEYRCGPIQGLPSSGAATFNVMVMTSGSGDEVPAQPSLPPEAAQEGD  
LHLLWEALARKRRMSREPTLDSISELPEEDSRVQHLRQEAEEETAPDLSEGYSTADELARTGEADLSHTSSDDE  
SRAGTPSLVTYLKKAGGPGISPLASKHEAQVTTSVKPKQKQEPVVPVTPCPPPGDLSAADLMDPSLDKAAVKIQA  
AFKGYKVRKEMKQEGPVFSRTFGDTEAQVGDVLRLECVLATKTDMRACWLKDGIELTDGRHYHIDQLKDGTC  
SLLVVTGLAPTDSGRYTCQVSTKSGRVSHSACVVVSGTESEAESSSGGELDDAFRAARRLHRLFRTKSPAELS  
EEELFLSADEGPGEPEPADWQTYREDENFVCIRFESLAEARQAVTCFRNMFATMGIGVEISLGEQGRGVEM  
RIGKVAPTPTPAVPLAKTPGLQTSDAAPVFLTELQNDVQDGYPMSFDCVVTGQPVPVSRVFKDKLLEEDDH  
YMINEDQQGGHQLIITAVVPADMGVYRCLAENSMGVSSTKAELRVELTSTDYDTAADATETSSYFSAQGYLSS  
REQEGTESDEGQLPQVLEELKDLQVAPGTRLAKFQLKVKGYPAKLYWFKDQPLTSDHIRMTDKKTLHTLE  
IVSVTREDSGQYAAIISNAVGAAYSARLLVRGPSEPEEKPASDVHERLVPPRILEKFTPKKVKRGSITFSV  
KVEGHPAPSVHHLKEEAKEKGLVWIGPDTPGYTMASSSKQHSLVLLDVGRQHOGTYTCIATNPAGQALCSASLH  
ISGLAKEEEQERVKEALISSFLQGTSAQVSAQMSSEAGFADLVGQSKGESLVAAEEAHSHLSLAEVGTTEEFLOK  
LTSQITEMVSAKISQAKLQVPGGDSDEETKTPSASPRHGRSRPSSSVQESSSESESDGDSRGEIFDIYVVTADY  
LPLGAEQDAIILREGQYVEVLDSAHPLRWLVRTKPTKSSPSRQGWVSPAYLDKRLKLSPEWGPTEAPEFPGEA  
VSEDEYTRLLSSVIEQLLSEQAFVGELOFLESHMKHLERSPRVPAAVASQKTVIFRNVQDISHFHSSFLKE  
LQCGCTDDDDVAMCFIKNQEAFEKYLEFLVGRVQAEVSVVSTPVQEFYKKYAEETLSAKDPTQPPPPPLQHYLE  
QPVERVQKYQALLKELIRNKARNRQNCALLEQAYAVVSALPQRAENKLVSLMENYPGTLEALGEPVIRQGHFI  
VWEGAPGARMPWKGNHRHVFVFRNYLVICKPRRDSRTDTFSYVFRNMMKLSSIDLNDQVEGDRAFEVWHERE  
DSVRKYLLOARTVIKNSWVKEICGIQQRLAQPVWRPPEFEEELADCTAELGETVKLACRVTGTPKPIVSWYK  
DGKPVVEVDPHHILIEDPDGSCITLIDNLTGIDSGQYMCFAASAAGNASTLGKILVQVPPRFVNVKVRATPFVEG  
EDAQITCTVEGAPYQIRWYKDGTLAPGNRYRMLNEPRSGVLVLIQAASKEDLGHYCELVNRLGSTRGGG  
ELYMQSPALRARDQHHRQIIVAAVEGAPSMQVTIEDVQVQVGDMAQFDAVIEGHPPPVTWYKGTSTQLTSSAR  
LSQRQDGTYSVLVTDVAPHDAGVYTCVANNAGGQVLCKAELLVHGGDKLDAENQVYRRLKHSFYDVQEEIGR  
GVFGFVKRVQHKGNMFCFAAKFIPLRSKTRAQAYQERDILATLGHPLVTGLLD\*FETRKTLLIILELCSSEEL  
LDRLFKKGVVTEAEVKVYIQQLVEGLHYLHSHGILHLDIKPPNIIIMVHPAREDIKICDFGFAQKITPSEPPQYS  
KYGSPFVVSPEIIEQNPNVSEGSDIWAMGVISYLSLTCSSPFAGESDRATLLNVLEGRVSWSSPTAAHLSSEDAK  
DFIKATLQRTPRARPSTSQC LAHPWFLKSMPAAEAHFINTKQLKFL LARSRWQRSLMSYKSI LVMRSIPELLQ  
GPPDSPSLGVARHLRGEASGASSSSSSSDNELAPFARAKSLPPSPVTHSPLLHPRGFLRPSASLPETEASMP  
TADA AVPAS PQSAGPPASPGCVPRHSV ISSLFYQQAGEGAERGNKTS GAKRHPARRRHLLKGGYIARALPGLR  
EPLMEYSLLEEEAAREEQASLMTKTPSFETALRLPSSSVREVPGRSHSLDNPPVTTGSPPEACKEQLLFPST  
GLTHETTAKDRGHKEGFLQESVFPFPMMSGDSRPGKQEGSSQDSCRGKPASSCHSELGSGSQEGCGPPSSQSLG  
SLPPQSLKKELESTSCGPLFSEQPQAAPFPQTQVSPLLGSEKEPQDGSLSSEGVPVPVSSSPGSASQVDASLDTEG  
LSEAGDTCDFTPPPQRPEQATTRKFSLESRGGYAGVAGYGTFAFGGDAGGMLGQGPLWARMAWAVSQSSEEQ  
DEAATESPQPLESLGPIAEASGVPLRTSPSLTPWEEVEQVSLVQIRDLSGDAEAADTISLDISEVDPAYLNL  
DLYDIKYLPPFEFMI FRRVPKPIEQPESPGSETEAGQGLADFLLEAAWPWPGEGLGLRAGLEITEEPEEPGDLEA  
LLGEAAVGRKRKWSPSRGLFQFPGRCLSGEEPVELGLRQRVKASMAHISRILKGRPEGPEREPPRRKAGLAS  
FRLSGLKGRDQELSDEAVVLGQSVTLACQVLAQPTAQATWSKDGVLLESSGHLLISSTLKNFQLLTLIVVKEE  
DLGTYTCCVSNPLGTAVTTGVLKKAERPSSSPRPEVGEYKDAVLLVWKPVESECGPVTYIVQCCIEGGSWTTL  
ASDISDCCYLTKGLSRGGMYIFRTACVSKAGMPYSSPSEQVLLGGPNHLASEEESRGRPAQLLPSTKTFAF  
QMQIRRGRFSVVRQCREKASGRALAAKIVPYQPEDKTAVLRREYEAALKRLLHHPHLAQLHAAYLSPRHLVLI  
CSGPELLPSLAERESYSESDVKDYLWQMSLQYLHAQHILHLDLRSENMMVTEYNLLKVIDLGNASLDQEK  
VPAPENFKDYLETMAPELLEGGQAVPQTDIWAIGVTAIFIMLSGEYEPESSEGETRDLQKGLRGLIRLSRCYAGL  
SGGAVAFQLSSSLCAQPWGRPCASTCLQCGWLTEEGPTGSRPTPVTFPTVRLRAFVREKRRRALLYKKNHLAQ  
VR\*

>rs47227203\_ENSMUSP00000158795\_c.21795:A>G\_p.T7266A  
ENSMUST00000238536.2|Obscn-210|ENSMUSG00000061462|-|chr11:g.58900038:T>C



MDHSFSGAPRFLTRPKAFVSVGKDATLSCQIVGNPTPHVSWEKDRQPVEAGARFRLAQDGDVYRLTILDLAL
GDSGQYVCRARNAIGEFAAVGLRVDSEGTCAEQAPHFLLRPTSIRVREGADATFRCRVGGSPQPAVSWSKDG
RRLGPPDAPHVRVEEHGESSALRIR SARPRDGGTYEVRAENPLGSASAAAALVVDSDAEVAGPPGTSTATLLA
HLQQRREAMRAEGIPSPPGAGTRTCTVTEGKHARLSCFVTGEPKPEVWKKDQGLVTEGRRHVVEDEQENF
VLKILFCKQSDRGLYTCTASNLVGQTYSSVLVVVREPTVPFKKRLQDLEVREKESATFQCEVAQPAEAAWFK
EETRLWASAKYDIEEEGETERRLTVRNVSADDDAVYICETTEGSRVVAELSVQGNLTKLPRKTAVRTGDTAIF
WVELAVPEGPPVRWLRNQEEMVAGGRVAITAEGTCHTLTI FQCTLEDMGEVAFVSGGCRTTTQFCVSAPRRPPL
YPPADPVVKAKTESSVTLWSAPPHGDRPVTIDGYVLEKRLGAYAWSRCHEAGWLATTEFTITGVAEEGDFQ
FRVSAINHFGQGPYLEFPGTMHLVPM LAVKTP LKAVEAVEGGEVTF SVDLTVASSGEWFLDGEALKASSIYVI
RCDRTRHMLTIREV PARLHGAQLKFVANGIETSIQMVVRAALGLPSSKLPAAAAAREVLAQLHEEAQLLAE LSD
QAAA VTWLKDGRELSLGPKEYMQVSAGRRALLVRDVAQDDAGLYECVSRGSR TAYQLLVQDITDGYRDWGPAG
PQKHMCKCAGAKIARYLGSSCYRFLQYDKGVWHLEAALDTRQKGKTS SCSLHEKPKLVFAKQQAHSEVKA E
AGNSATLSCEVTQAQTEVTWFKDGKLLSSSSKVRMEASGCSRRLVVQQAGKADAGEYSCEAGGQKLSFRLDVA
EPKLVFAKQQAHSEVKA EAGASATLSCEVAQAQTEVTWFKDGKLLSSSSKVRMEASGCSRRLVVQQAGKADA
GEYSCEAGGQKLSFRLDVAEPKMFVFAKEQQARSEVKA EAGASATLSCEVAQAQTEVTWFKDGKLLSSSSKVRM
EASGCSRRLVVQQAGKADAGEYSCEAGGQKLSFRLDVTEPKLVFAKEQQARSEVKA E VGN SATLSCEVAQAQ T
EVTWFKDGKLLSSSSKVRMEASGCSRRLVVQQAGKADAGEYSCEAGGQKLSFRLDVAEPKLVFAKEQQARSEV
KAEAGNSATLSCEVAQAQTEVTWFKDGKLLSSSSKVRMEASGCSRRLVVQQAGKADAGEYSCEAGGQKLSFHL
DVTEPKLVFAKEQQAHSEVKA EAGASATLSCEVAQAQTEVTWFKDGKLLSSSSKVRMEASGCSRRLVVQQAGK
ADAGEYSCEAEAGQKLSFRLDVAEPKLVFAKEQQARSEVKA EAGASATLSCEVAQAQTEVTWFKDGKLLSSSSK
VRVEASGCSRRLVVQQAGKADAGEYSCEAGGQKLSFRLDVAEPKLVFAKEQQANSEVKA EAGASATLSCEVAQ
AQTEVTWFKDGKLLSSSSKVRVEASGCSRRLVVQQAGKADAGEYSCEAGGQKLSFRLDVAEPKLAFAKEQQAH
SEVKA EAGASATLSCEVAQAQTEVTWFKDGKLLSSSSKVRVEASGCSRRLVVQQAGKADAGEYSCEAGGQKLS
FRLDVAEPKLAFAKEQQAHSEVKA EAGASATLSCEVAQAQTEVTWFKDGKLLSSSSKVRVEASGCSRRLVVQQ
AGKADAGEYSCEAGGQKLSFRLDVAEPKLAFAKEQQAHSEVKA EAGASATLSCEVAQAQTEVTWFKDGKLLSS
SSKVRVEASGCSRRLVVQQAGKADAGEYSCEAGGQKLFRLDVAEPKLMFAKEQQAHSEVKA EAGASATLSCE
VAQAQTEVTWFKDGKLLSSSSKVRVEASGCSRRLVVQQAGKADAGEYSCEAGGQKLSFRLDVAEPKLVFAKEQ
QAHSEVKA EAGASATLSCEVAQAQTEVTWFKDGKLLSSSSKVRVEASGCSRRLVVQQVQKADAGEYSCEARGQ
KLSFRLDVADTRLMFAKEQQARTEVKA EAGNSATLSCEVAQAQTEVTWFKDGKLLSSSSKVRVEASGCSRRLV
VQQAGKADAGEYSCEAGGQKLSFRLDVAEAE SQI PERPSRREPLVVKEHETIILTATIAAPSVAAVTWLKDG V
EIRRSKRHEATSLGDTHTLTVRGAQVLD SAIYSCRVGKEGQDFPVQVEEVA AKFSKPLEPVEGELGGTVMLVC
ELSP EQAEVWRCGNTQLRPGKRFQMTSEGPRRTLTVSGLREDDAE EYVCE SRDRTSARLT VKVPRVVKFTS
GLSAMVAEEGQEATFQCVVSPSDAGVTWYKDGMLQLPSEKFMVESGASRSLTILGLTLEDAGQVTEAEGAS
SSAALRVREAPVLFKKKLEPQTEVERTSVTLEVELTRPWPEVKWTRNAAVLTPSENVEIRAEGARHCLVLR SV
GFADRGGFFGCETPDDKTQAKLNVEMRQVRLVRLGQVEVEAKEQGTASMDVELSHAEVEGSWTRDGLRLQPGPKC
HLAVQGPVHILTL SALQPQDSGLVAFRAEGVHTSARLIVTELPVSFTRVLQDQVATQKEKVTLECELSRPFVDV
RWLKDGVELRAGKAIGIVAQGTCSRSLVIYRCETGDQGVYVCDALDAQTSASLRVQGRTYTLIFRRLAEDAGE
VKFVAENAESRAHLRVKELPVTLLRPLRDKIAMEKHGVLCEQVSRASAVRWFKGGVELQSGPKYEVVSDGL
YRKLVIN DVQPEDEDTYTC DAGNVKTS AQFFVEEQSITIVRGLKDMTVM EPAPAWFECETSIPSVRPPKWL LG
KTVLQAGGNVGL EQDGTVHRLTLHKTCSTMTGPVHFTIGKSRSSAQLVSDI PVVLT RPLEPKAGRELQSVVL
SCDFRPAPKAVQWYKDDT PLSPEKFKMALEGQMAELRILRLTPADAGVYRCQAGSAQSSAEVTV EAREVTVI
QPLQDAEAMEEGRVCFSCELSHKDEDIEWLSLNGTPLYNDSFHEISHEGCLHTLVLSVSRQADTGTVCATSPKV
SVSARLVVKGKPVVFLKALDDVSAEERGTLTLQCEVSDPEARVVWRKDGVELGSPDKYDFLHKAGARGLTVHD
LSHEDAGLYTCQVGSKETQSKVSVHDLHVGITKRLKTVEVLEGE SCSFECVLSHESPSDPAVWTVGGKT VVGS
GHFHAVRQGRKYTLTVKDAALSDAGEVVF SVLGLT SKASLI IRE RPVDITKPLEDQRTTLGEDVMLSCELSRA
GTSVRWLKDGKAIRKSQKYDLLSEGTRAVLVVRKASLKDSGEYTCETEASKSTAKLCEVEKANRFTEELADLQ
VEEKGRAVFTCKTEHPASVVTWRKGLLELRASGKHVPSQEGLTLKLTINALERTSDTYTCDIGQARTQARLL
VHGQKVRVIEDLED TAVQEGSSAKFCCRIAPADYGPVHWFLDKTPLHSNELNEITVQPGGYHVLTLRQLAL KD
SGTVYFEAGDQRTSAALRVTEKPSIFSRPLTDVTVTEGEDLTLVCETTTVDSSVRWTKDGKTLRPSARCQLSH
EGCQAQLLITATTPQDGGRYKCEIGGASSSIVRVHALPVRFRESLKDVEVPEGKAATLRCVLSVAAPVEWR
HGDDVLKSSNKYSLRQEGAVLELVIRDLPQDQSGQYSCSFGDQTTSATLTVKTS SAQFVGLRKNKEATEGTTV
TLRCELTK EAPVEWKKGTETLRNGDKYSLKQDGA VCELQICSLLVADAGEYSCVCGQEKTSATLTVKALLVHF
VRRLSRKEATEGDTTTLQCELSKAAPVEWRKGTETLRDGD RYSLKQDGA VCELQIRSLTIADAGEYLCTCGQE
KTSATLTVRALPAKFKDSLKNEEATEGTTATLSCELSKAAPVTWKKGPKTLQSGDQVATQKEKVTLECELSRPFVDV
TMADAGEYSCVCGQEKTSATLTVRGLPAKFIEDLRSQEATEGATAILRCELSKAAPVEWRKGS ETLKDGDRYT
LRQDGA VCELQIRGLAVVDGTGYS LPTKFTEGLRNEEATEGTMATLRCQMSKAAPVEWRKGS ETLR DGD RYS
LRQDGA MCELQIRGLTIEDSGEYTCVCGQEKTSATLSVKALPSRFIEDLRSQEATEGTMATLRCQMSK TAPVE
WKKGSETLRDGGRYSLRQDGPVCELQICDLAVEDAGEYSCVCGQEKTSATLSIKALPPRFIEDLRSQEATEG T

MATLRCQMSKAAPVEWRKGSSETLGDGGRYSLRQNGAVCELQIHDLAVEDTGEYSCVCGQEKTSATLNVKALPP  
RFIEDLRSQEATEGTMATLRCQMSKAAPVEWRKGSSETLRDGGRYSLRQDGA VCELQIHDLVEDAGQYSCVCG  
QEKTSAVLTVDALPPKFTTEGLKKEEATEGTMVTLRCQMSKEATVEWRKGAKTSLSDGGRYSLRQDGA MCELQIC  
GLAVEDAGEYSCVCGQEKTSATLSVKALPPRFIEDLRSQEATEGTMATLRCQMSKAAPVEWRKGSSETLRDGD  
YSLRQDGA VCELQIRDLAVEDAGEYLCVCGQEKTSATLSVKALPPRFIEDLRSQEATEGTMATLRCQMSKAAP  
VEWRKGSKTLRDGDYSLRQDGA MCELQICDLAVEDTDYSCVCGQEKTSATLSVKALPPRFIEDLRSQEARE  
GTVATLRCRMSKAAPVEWRKGSSETLKDGDYSLRQEGNLCELQIRDLAVEDTEEYSCVCGQEKTSATLSVKAL  
PAKFIEDLRSQEAPESSTVTLRCKLSKKASVWVWKKGSETLRNGARYSLRQDGA VCELEIRDLTVEDTGEYSCT  
CGQERTSATLSIMAPQVVFQQPLQNLQAEEGSMASLRCELSVNAAMVWSKGGLELQGDTRREARQQGCVAEL  
LLRDLRREDAGEYSCTCGSQTTSATLMVTAAPVRFRLRELQAQDVDEGATARLRCELSREAVSVEWRKGS LQLF  
PCAKYQMVQEGTTAELLVHGVEQEDAGEYTCDAHTQSIARLSVRAPKPKFKTDLQSTEQEAGGTARLCCQLS  
EAEFGTPVQWLKEGVELHVGSKYEMRRQGA VCELLIHGLEAKDTGEYACLVGQKTLASLRVKEPEVTIVRGL  
VDMEVQADEDEVEFTCKVQAGATDVQWHLQGLPLQSNVTEVAVLADGCTHVLQKGVTLLEDAGTVSFHVGG  
SSSAQLTVRVPEVTVLEPLKDVQLSEGQDAHFRCRLSRASGQEARWALGGVPLQCNEMNDITVEQGTLYLLTL  
HKVTLEDAGTITLQVGS CSSEAQLKVTAKNTVLRGLENVDALEGG EALFECQLSQPEVA AHTWLLDDEPVHTS  
EKVEVVYFENGLRHLLLLKNLKPQDSCRVTFLAGDVVTS AFLTVRGWRLEVLEPPHDASVKAGMQVRFTCILS  
EAVPVGEATWYINGAAIQPDDTDWTVTTDGS HHALTLSNAQPQHAGEVTF AARDAVASARLSVLALPDPPEDA  
EVVGRSDHSVTLSSWVAPMSDGGGGLCGYRVEMKEASTGQWQLCHDLVPGPECVVDDLVPKGHYFRFVAAVGA  
GAGEPVHLPQMVKIAPAPAPAPAPAPAPAPAPETRQAVVGEDICLELEVAADGGEVVWHKGTERRIQPGGHFEVLS  
RGQRQMLVIKGFRTEDQGEYRCGPIQGLPSSGAATFNVMVMTSGSGDEVPAQPSLPPEAAQEGDLHLLWEALAR  
KRRMSREPTLDSISELPEEDSRVQHLRQEAETAPDLSEGYSTADELARTGEADLSHTSSDDES RAGT PSLVT  
YLKAGGPGISPLASKHEAQVTSVKPQKQEPVPTCP PPGDLSAADLMDPSLDKAAVKIQAAF KYKVRKE  
MKQQEGPVFSRTFGDTEAQVGVLRLECVLATKTD MRACWLKDGIELTDGRHYHIDQLKDGTC SLLVTGLAPT  
DSGRYTCQVSTKSGRVSHSACVVVSGTESEAESSGGELDDAFRAARRLHRLFRTKSPAELSEEELFLSADE  
GPGEPEEPADWQTYREDENFVCIRFESLAEARQAVTCFRNMFATMGIGVEISLGEQGRGVEMRIGKVAPTVT  
PAVPLAKTPGLQTS DAAPVFLTELQNDVQDGYPMSFDCVVTGQVPVPSVRWFKDGKLEEDDHYMINEDQQGG  
HQLIITAVVPADMGVYRCLAE NSMGVSSSTKAELRVELTSTDYDTAADATETSSYFSAQDDESSREQEGTESDE  
GQLPQVLEELKDLQVAPGTR LAKFQLKVKGYPA PKLYWFKDGGQPLTSDHIRMTDKKTLHTLEIVSVTREDSG  
QYAAYSNAVGAAYSSARLLVRGPSEPEEK PASDVHERLVPPRI LEKFTPKKVKRGSSITFSVKVEGHPAPSV  
HWLKEEA EKGV LWIGPDTPGYTMASSSKQHS LVLVDVGRQHOGTYTCIATNPAGQALCSASLHISGLAKEEEQ  
ERVKEALISSFLQGTSAVSAQMSESA GFADLVGQSKGESLVAEEAHSHLSLAEVGT EEF LQKLT SQI TEMVS  
AKISQAKLQVPGGDSDEETKTPSASPRHGRSRPSSSVQESSSEEDGDSRGEIFDIYVVTADYLP LIGAEQDAI  
ILREGQYVEVLD SAHPLRWLVR TKPKSSPSRQGWVSPAYLDKRLKLSPEWGPTEAPEFPGEAVSEDEYRTRL  
SSVIQELLSSEQAFV GELQFLES HMKHLERSPRVPAVASQKTVIFRNVQDISHFHSSFLKELQCGCTDDD  
AMCFIKNQEA FEKYLELFLVGRVQAESVVVSTPVQEFYKKA EETLSAKDPTQPPPP LQHYLEQ PVERVQKYQ  
ALLKELIRNKARNRNCALLEQAYAVVSALPQRAENKLVSLMENYPGTLEALGEP I RQGHFIWEGAPGARM  
PWKGHNHRVFLFRNYLVIC KPRDRSRTD TFSYVFRNMMKLSIDLNDQVEGD DRAFEVWHEREDSVRKYLLQA  
RTVI IKNSWVKEICGIQORLAQP VWRPPEFEEELADCTAELGETVKLACRVTGT PKPIVSWYKDGK PVEVDPH  
HILIEDPDG SCTLILDNLTGIDSGQYMCFAASAAGNASTLGKILVQVPPRFVNVKVRATPFVEGEDAQITCTVE  
GAPYQIRWYKDG TLLAPGNRYRMLNEPRSGVLV LVIQAASKEDLGHYECELVNRLGSTRGGGELYMQSPALR  
ARDQHHREQIVAAVEDTSVEGSAHSAQDGA DQQAASVLWRLLGSEALGPS PGDLPNTRQSEPPAFEEAASQIP  
GAASGTPEVSPGTHKGLEQETTSSGSQGWTPVIRVEGAAWPGAGTGQLLLDVHSQVIMETTQRTYVCQAPDT  
GVTRAPSMQVTIEDVQVQVGDMAQF DAVIEGHPPP I V TWYKGSTQLTSSARLSQRQDGT TYSLVLTDVAPHDA  
GVYTCVANNAGGQV LCKAELLVHGDKLDAENQVYRRKLSHSFYDVQEE IGRGVFGFVKRVQHKGNMFC AAKF  
IPLRSKTRAQAYQYRIDLATLGHPLVTGLLDQFETRKTLLIILELCSSEELLDRLFKKGVVTEAEVKVYIQQL  
VEGLHYLHSHGILHLDIKPPN ILMVHPAREDIKICDFGFAQKITPSEPQYSKYGSPEFVSPEIIEQNPVSEGS  
DIWAMGVI SYLSLTCSSP FAGESDRATLLNVLEGRVSWSSPTAAHLS EDAKDFIKATLQRTPRARPSTSQCLA  
HPWFLKSMPAEEAHFINTKQLKFL LARSRWQRSLMSYKSI LVMRSIPELLQGPPDSPSLGVARHLRGEASGAS  
SSSSSSDNELAPFARAKSLPPSPVTHSPLLHPRGFLRPSASLPEETEASMTADAAVPASPQSAGPPASPGCV  
PRHSV ISSLFYQQAGEGA ERGNKTS GAKRHPARRRHLLKGGYIARALPGLREPLMEYS LLEEEAAREEQASIM  
TKTPSFETALRLPSSSVREVPGRSHSLDNPPVTTGPSPEACKEQLLFPSTGLTHETTAKDRGHKEGFLQESV  
PFPMSGDSRPGKQEGSSQDSRCRGPASSCHSELGSGS QEGCGPPSSQSLGSLPPQSLKKELTSCGPLFSEQ  
PQAAPFPTQVSPLLGSEKEPQDGS LSEGPVVPSSSPGASQVDASLDTEGLSEAGDTCDFTPPPQRPEQAT  
TRKFSLESRGGYAGVAGYGTFAFGDAGGMLGQGPLVARMAWAVSQSSEEQDEAATESQPLES LGPIAEASG  
VPLRTSPSLTPWEEVEQVSLVQIRDLSGDAEAADTISLDISEVDPAYLNLSDLYDIKYL PFEFMI FRRVPKPI  
EQPESPGSETEAGQGLADFL EEAAWPWP GELGLRAGLEITEEPEEPGDLEALLGEAAVGRKRKWSPSRGLFQF  
PGRCLSGEEPVELGLRQRVKASMAHISRILKGRPEGPEREPPRKKAGLASFRLSGLKGRDQELSDEAVVLGQ  
SVTLACQVLAQPTAQATWSKDGVLLESSGHLLISSTLKNFQLLTI LVVKEEDLGTYTCCVSNPLGTA VTTGVL

RKAERPSSSPRPEVGEELYKDAVLLVWKPVESCGPVTYIVQCCIEGGSWTTLASDISDCCYLTKGLSRGGMYIF  
RTACVSKAGMGPYSSPSEQVLLGGPNHLASEEESSRGRPAQLLPSTKTFAFQMQRIRGRFVSVRQCREKASGR  
ALAAKIVPYQPEDKTAVLREYEALRHLHHPHLAQLHAAYLSRHLVLI LELCSGPELLPSLAERESYSESDVK  
DYLWQMLSATQYLHAQHILHLDLRSNNMMVTEYNLLKVIDLGNALDQEKVPAPENFKDYLETMAPELLEGG  
GAVPQTDIWAIGVTAIFIMLSGEY PESSSEGTRDLQKGLRKLIRLSRCYAGLSGGAVAFLOSSLCAQPWGRPCA  
STCLQCGLWTEEGPTGSRPTPVTFPTVRLRAVFREREKRRALLYKKNLAQVR\*  
>rs256529946\_ENSMUSP00000158795\_c.21349:T>AATCAATCAATCT\_p.V7117ESINL-ins  
ENSMUST00000238536.2|Obscn-210|ENSMUSG00000061462|-  
|chr11:g.58912292:A>AGATTGATTGATT  
MDHSFSGAPRFLTRPKAFVSVGKDATLSCQIVGNPTPHVSWEKDRQPVEAGARFRLAQDGDVYRLTILDLAL  
GDSGQYVCRARNAIGEAFVAVGLRVDSEGTCAEQAPHFLLRPTSIRVREGADATFRCRVGGSPQPAVSWSKDG  
RRLGPPDAPHVRVEEHGESSALRIR SARPRDGGTYEVRAENPLGSASAAAALVVDSDAEVAGPPGTSTATLLA  
HLQQRREAMRAEGIPSPPGAGTRTCTVTEGKHARLSCFVTGEPKPEVWKKDQGLVTEGRRHVVEDEQENF  
VLKILFCQKSDRGLYTCTASNLVQTYSSVLVVVREPTVPFKKRLQDLEVREKESATFQCEVAQPAEAAWFK  
EETRLWASAKYDIEEGETERRLTVRNVSADDDAVYICETTEGSRVVAELSVQGNLTKLPRKTAVRTGDTAIF  
WVELAVPEGPVWRWRNQEEMVAGGRVAITAEGTCHTLTI FQCTLEDMGEVAFVSGGCRTTTQFCVSAPRRPPL  
YPPADFPVVKAKTESSVTLWSAPPHGDRPVITDGYVLEKRLKLGAYAWSRCHEAGWLATFTITGVAEEGDFQ  
FRVSAINHFGQGPYLEFPGTMHLVPLAVKTPKAVEAVEGGEVTFVSDLTAVASSGEWFLDGEALKASSIYVI  
RCDRTRHMLTIREVPARLHGAQLKFFVANGIETSIQMVVRAALGLPSSKLPAAAAAREVLAQLHEEAQLLAE LSD  
QAAA VTWLKDGRELSLGPYEMQVSAGRRALLVRDVAQDDAGLYECVSRGSR TAYQLLVQDITDGYRDWGPAG  
PQKHMCKCAGAKIARYLGSSCYRFLQYDKGVVHLEAALDTRQKGTSSCSLHEKPKLVFAKQQAHSEVKA  
AGNSATLSCEVTQAQTEVTWFKDGKLLSSSSKVRMEASGCSRRLVVQQAGKADAGEYSCEAGGQKLSFRLDVA  
EPKLVFAKQQAHSEVKAEGASATLSCEVAQAQTEVTWFKDGKLLSSSSKVRMEASGCSRRLVVQQAGKADA  
GEYSCEAGGQKLSFRLDVAEPKMFVFAKEQQARSEVKAEGASATLSCEVAQAQTEVTWFKDGKLLSSSSKVRM  
EASGCSRRLVVQQAGKADAGEYSCEAGGQKLSFRLDVTEPKLVFAKEQQARSEVKAEGVNSATLSCEVAQAQ  
EVTWFKDGKLLSSSSKVRMEASGCSRRLVVQQAGKADAGEYSCEAGGQKLSFRLDVAEPKLVFAKEQQARSEV  
KAEAGNSATLSCEVAQAQTEVTWFKDGKLLSSSSKVRMEASGCSRRLVVQQAGKADAGEYSCEAGGQKLSFHL  
DVTEPKLVFAKEQQAHSEVKAEGASATLSCEVAQAQTEVTWFKDGKLLSSSSKVRMEASGCSRRLVVQQAGK  
ADAGEYSCEAGGQKLSFRLDVAEPKLVFAKEQQARSEVKAEGASATLSCEVAQAQTEVTWFKDGKLLSSSSK  
VRVEASGCSRRLVVQQAGKADAGEYSCEAGGQKLSFRLDVAEPKLVFAKEQQANSEVKAEGASATLSCEVAQ  
AQTEVTWFKDGKLLSSSSKVRVEASGCSRRLVVQQAGKADAGEYSCEAGGQKLSFRLDVAEPKLAFAKEQQAH  
SEVKAEGASATLSCEVAQAQTEVTWFKDGKLLSSSSKVRVEASGCSRRLVVQQAGKADAGEYSCEAGGQKLS  
FRLDVAEPKLAFAKEQQAHSEVKAEGASATLSCEVAQAQTEVTWFKDGKLLSSSSKVRVEASGCSRRLVVQQ  
AGKADAGEYSCEAGGQKLSFRLDVAEPKLAFAKEQQAHSEVKAEGASATLSCEVAQAQTEVTWFKDGKLLSS  
SSKVRVEASGCSRRLVVQQAGKADAGEYSCEAGGQKLFRLDVAEPKLMFAKEQQAHSEVKAEGASATLSCE  
VAQAQTEVTWFKDGKLLSSSSKVRVEASGCSRRLVVQQAGKADAGEYSCEAGGQKLSFRLDVAEPKLVFAKEQ  
QAHSEVKAEGASATLSCEVAQAQTEVTWFKDGKLLSSSSKVRVEASGCSRRLVVQQVQKADAGEYSCEARGQ  
KLSFRLDVADTRLMFAKEQQARTEVKAEGNSATLSCEVAQAQTEVTWFKDGKLLSSSSKVRVEASGCSRRLV  
VQQAGKADAGEYSCEAGGQKLSFRLDVAEAEESQIPERPSRREPLVVKEHETIILTATIAAPSAAVTWLKDGV  
EIRRSKRHEATSLGDTHTLTVRGAQVLD SAIYSCRVGKEGQDFPVQVEEVAAKFSKPLEPVEGELGGTVMLVC  
ELSPQAEVWRCGNTQLRPGKRFQMTSEGPRRTLTVSGLREDDAEYVCE SRDDRTSARLTVKVPVVKFTS  
GLSAMVAEEGQEATFQCVVSPSDAGVTWYKDGMLQPSKFKVMVESGASRSLTILGLTLEDAGQVTVAEAGAS  
SSAALRVREAPVLFKKLEPQTEERTSVTLEVELTRPWPEVKWTRNAAVLTPSENVEIRAEGARHCLVLRV  
GFADRGGFFGCETPDDKTQAKLNVEMRQVRLVVRGLQVEEAKEQGTASMDVELSHAEEVGSWTRDGLRQLQPGPKC  
HLAVQGPVHILTL SALQPQDSGLVAFRAEGVHTSARLIVTEL PVSFTRVLQDVVATQKEKVTLECELSRPVDV  
RWLKDGVELRAGKAIGIVAQGTCSRSLVIYRCETGDQGVYVCDALDAQTSASLRVQGRTYTLIFRRLAEDAGE  
VKFVAENAESRAHLRVKELPVTLLRPLRDKIAMEKHRGVLECCQVSRASAVRWFKGGVELQSGPKYEVVSDGL  
YRKLVINVDQPEDEDTYTC DAGNVKTS AQFFVVEQSITIVRGLKDMTVMEPAPAWFECETSIPSVRPPKWL  
KTVLQAGGNVGLQDGTVHRLTLHKTCSTMTGPVHFTIGKSRSSAQLVSDIPVVLTRPLEPKAGRELQSVVL  
SCDFRPAPKAVQWYKDDTPLSPSEKFKMALEGMALRLRLTPADAGVYRCQAGSAQSSAEVTVAREVTVI  
QPLQDAEAMEEGRVCFSCELSHKDEDEI EWSLNGTPLYNDSFHEISHEGCLHTLVLSVSRQADTGTVCATSPKV  
SVSARLVVKGKPVVFLKALDDVSAEERGLTLTQCEVSDPEARVVRKDGVELGSPDKYDFLHKAGARGLTVHD  
LSHEDAGLTYCQVGTSTKTSKVSVDLHVGITKRLKTVEVLEGESECSFECVLSHESPSDPAVWTVGGKTVGGS  
GHFHAVRQRKTYTLTKVDAALSDAGEVVSGLVGLTASKASLIIRERPV DITKPLEDQRTTLGEDVMLSCELSRA  
GTSVRWLKDGKAIRKSQYD LLSSEGTRAVLVVRKASLKDSGEYTCETEASKSTAKLCEVEKANRFEELADLQ  
VEEKGRAVFTCKTEHPASVVTWRKGLLELRASGKHVPSQEGTLTKLTINALERTSDTYTCDIGQARTQARLL  
VHGQKVRVIEDLED TAVQEGSSAKFCRIAPADYGPVHWF LDKTPLHSNELNEITVQPGGYHVLTLRQLALKD  
SGTVYFEAGDQRTS AALRVTEKPSIFSRPLTDVTVTEGEDLTLVCE TTTVDSSVRWTKDGKTLRPSARCQLSH

EGCQAQLLITATTPQDGGRYKCEIGGASSSSIVRVHALPVRFRESLKDVEVPEGKAATLRCVLSVVAAPVEWR  
 HGDDVLKSSNKYSLRQEGAVLELVIRDLQPDQSGQYSCSFGDQTTSATLTVKTSQAQFVGLKRNKEATEGTTV  
 TLRCELTKAPVEWKKGTETLRNGDKYSLKQDQAVCELQICSLLVADAGEYSCVCGQEKTSATLTVKALLVHF  
 VRRLSKEATEGDTTTLQCELSKAAPVEWRKGTETLRDGDYSLKQDQAVCELQIRSLTIADAGEYLCTCGQE  
 KTSATLTVRALPAKFKDSLKNEEATEGTTATLSCELSKAAPVTWKKGPKTLQSGDKYVLRQDQAVCGLIHGL  
 TMADAGEYSCVCGQEKTSATLTVRGLPAKFIEDLRSQEATEGATAILRCELSKAAPVEWRKGSSETLKDGDYR  
 LRQDQAVCELQIRGLAVVDGTYSLSLPTKFTTEGLRNEEATEGTMATLRCQMSKAAPVEWRKGSSETLRDGDYR  
 LRQDQAVCELQIRGLTIEDSGEYTCVCGQEKTSATLSVKALPSRFIEDLRSQEATEGTMATLRCQMSKTA  
 PVEWKKGSETLRDGGYSLRQDQAVCELQICDLAVEDAGEYSCVCGQEKTSATLSIKALPPRFIEDLRSQEATEG  
 MATLRCQMSKAAPVEWRKGSSETLGDGGYSLRQNGAVCELQIHDLAVEDTGEYSCVCGQEKTSATLNVKALPP  
 RFIEDLRSQEATEGTMATLRCQMSKAAPVEWRKGSSETLRDGGYSLRQDQAVCELQIHDLVEDAGQYSCVCG  
 QEKTSAVLTVDALPPKFTTEGLKKEEATEGTMVTLRCQMSKEATVEWRKGAKTLSDDGGYSLRQDQAVCELQI  
 GLAVEDAGEYSCVCGQEKTSATLSVKALPPRFIEDLRSQEATEGTMATLRCQMSKAAPVEWRKGSSETLRDGD  
 YSLRQDQAVCELQIRDLAVEDAGEYLCVCGQEKTSATLSVKALPPRFIEDLRSQEATEGTMATLRCQMSKAAP  
 VEWRKGSKTLRDGDYSLRQDQAVCELQICDLAVEDTGDYSCVCGQEKTSATLSVKALPPRFIEDLRSQEARE  
 GTVATLRCRMSKAAPVEWRKGSSETLKDGDYSLRQEGNLCELQIRDLAVEDTEEYSCVCGQEKTSATLSVKAL  
 PAKFIEDLRSQEATEGTMVTLRCKLSKASVWKKGSETLRNGARYSLRQDQAVCELEIRDLTVEDTGEYSCT  
 CGQERTSATLSIMAPQVVFQQLQNLQAEEGSMASLRCELSVNAAMVWSKGGLELQGDTRREARQQCGVAEL  
 LLRDLRREDAGEYSCTCGSQTTSATLMVTAAPVRFRLRELQAQDVDEGATARLRCELSREAVSVEWRKGSQQLF  
 PCAKYQMVQEGTTAELLVHGVEQEDAGEYTCDAHTQSIARLSVRAPKPKFKTDLQSTEQEAAGTARLCCQLS  
 EAEPGTPVQWLKEGVELHVGSKYEMRRQAVCELLIHGLEAKDTGEYACLVGGQKTLASLRVKEPEVTIVRGL  
 VDMEVQADEDEFTCKVQAGATDVQWHLQGLPLQSNVTEVAVLADGCTHVLQKGVTLLEDAGTVSFHVGGL  
 SSSAQLTVRVPEVTVLEPLKDVQLSEGQDAHFRCRLSRASGQEARWALGGVPLQCNEMNDITVEQGTLYLLTL  
 HKVTLEDAGTITLQVGSSESQAQLKVTAKNTVLRGLENVDALEGGELFECQLSQPEVAHAHTWLLDDEPVHTS  
 EKVEVVYFENGLRHLLKLNKLPQDSCRVTFLAGDVVTSFAFLTVRGRLEVLPEPHDASVKAGMQVRFTCILS  
 EAVPVGEATWYINGAAIQPDDTDWTVTTDGSHHALTLNAQPHAGEVTFAAARDAVASARLSVLALEPDPPEDA  
 EYVGRSDHSVTLSWVAPMSDGGGLCGYRVEMKEASTQWQQLCHDLVPGPECVDDLVPGKTYRFRVAAVGPA  
 GAGEPVHLPQMVKIAPAPAPAPAPAPAPAPETRQAVVGEDICLELEVAADGGEVVWHKGTERRIQPGGHFEVLS  
 RGQRQMLVIKGFRTEDQGEYRCGPIQGLPSSGAATFNVMVMTSGSGDEVPAQPSLPPEAAQEGDLHLLWEALAR  
 KRRMSREPTLDSISELPEEDSRVQHLRQEAETAPDLSEGYSTADELARTGEADLSHTSSDDESRACTPSLVT  
 YLKKAGGPGISPLASKHEAQVTSVKPQKQEPVPTCPGGDLAADMPSLDKAAVKIQAAFQYKVRKE  
 MKQQEGPVFSRTFGDTEAQVGDVLRLECVLATKTDMRACWLKDGIELTDGRHYHIDQLKDGTCSSLVVTGLAPT  
 DSGRYTCQVSTKSGRVSHSACVVVSGTESEAESSGGELDDAFRAARRLHRLFRTKSPAELSEELFLSADE  
 GPGEPEPADWQTYREDENFVCIRFESLAEARQAVTCFRNMFATMGIGVEISLGEQGRGVEMRIGKVAPTVT  
 PAVLAKTPGLQTSDAAPVFLTELQNDVQDGYPMSFDCVVTGQVPSVRWFKDGLLEDDHYMINEDQQGG  
 HQLLITAVVPADMVYRCLAENSMGVSSTKAELRVELTSTDYDTAADATETSSYFSAQYLSRREQEGTESDE  
 GQLPQVLEELKDLQVAPGTRLAKFQLKVKGYPAKLYWFKDGGQPLTTSDHIRMTDKKTLHTLEIVSVTREDSG  
 QYAAYSNAVGAAYSSARLLVRGPSEPEEKPASDVHERLVPPRILEKFTPKKVKRGSSITFSVKVEGHPAPSV  
 HWLKEEAKEKGLWIGPDTPGYTMASSSKQHSVLVLDVGRQHQTTCIATNPAGQALCSASLHISGLAKEEEQ  
 ERVKEALISSFLQGTSAVSAQMSESAGFADLVGQSKGESLVAEEAHSHLSLAEVGTTEEFLQKLTQITMVS  
 AKISQAKLQVPGGDSDEETKTPSASPRHGRSRPSSSVQESSSEEDGDSRGEIFDIYVVTADYPLGAEQDAI  
 ILREGQYVEVLDSAHPLRWLVRTPKTKSSPSRQGWVSPAYLDKRLKLSPEWGPTEAPEFPGEAVSEDEYRTRL  
 SSVIQEELSSEQAFVQELQFLESHHMKHLERSPRVPAAVASQKTVIFRNVQDISHFHSSFLKELQCGTDDDDV  
 AMCFIKNQEAFAFEKYLEFLVGRVQAESVVVSTPVQEFYKKYAEETLSAKDPTQPPPPPLQHYLEQPVERVQKYQ  
 ALLKELIRNKARNRQNCALLEQAYAVVSALPQRAENKLVSLMENYPGTLEALGEPHQGHFIWVEGAPGARM  
 PWKGNHRHVFVFRNYLVICPRRDSRTDTFSYVFRNMMKLSSIDLNDQVEGDDRAFEVWHEREDSVRKYLLQA  
 RTVVIKNSWVKEICGIQQLRAQPVWRPPEFEEELADCTAELGETVKLACRVTGTPKPIVSWYKDGKPEVDPH  
 HILIEDPDGCTLILDNLTGIDSGQYMCFAASAAGNASTLGKILVQVPPRFVNVKVRATPFVEGEDAQITCTVE  
 GAPYPQIRWYKDGTLAPGNRYRMLNEPRSGVLVLESINLIQAASKEDLGHYECELVNRLGSTRGGGELYMQS  
 PALRARDQHHRQIIVAAVEDTSVEGSAHSAQDQAAASVLWRLGSEALGPSGDLPNTRQSEPPAFEEAAA  
 SQIPGAASGTPEVSPQPGTHKGLEQETTSSGSQGWTPVIRVEGTAWPGAGTQQLLLDVHSQVIMETTQRTYVQC  
 APDGTGVTTRAPSMQVTIEDVQVQVGDMAQFDAVIEGHPPPITVWYKGSTQLTSSARLSQRQDGTYSVLVTDVA  
 PHDAGVYTVKANNAAGQVLCKAELLVHGGDKLDAENQVYRRKLHSFYDVQEEIGRGVFGFVKRVQHKGNKMF  
 AAKFIPLRSKTRAQAYQERDILATLGHPLVTGLLDQFETRFKTLILILELCSSEELDLRFLFKKGVVTEAEVKVY  
 IQQLVEGLHYLHSHGILHLDIKPPNILMVHPAREDIKICDFGFAQKITPSEPQYSKYGSPEFVSPETIEQNPV  
 SEGSDIWMAGVISYLSLTCSSPFAGESDRATLLNVLEGRVSWSSPTAAHLSSEDAKDFIKATLQRTPRARPSTS  
 QCLAHPWFLKSMPAEEAHFINTKQLKFLARSRWQRSLMSYKSLVMRSIPPELLQGPDPSPSLGVARHLRGEA  
 SGASSSSSSSDNELAPFARAKSLPPSPVTHSPLLHPRGFLRPSASLPEETEASMTADAAVPASPQAGPPAS

PGCVPRHSVSISSLFYQQAGEGAERGKNTSGAKRHPARRRHLLKGGYIARALPGLREPLMEYSLLEEEAAREEQ  
ASLMTKTPSFETALRLPSSSVREVPGRSHSLDNPPVTTGPSPEACKQQLLFPSTGLTHETAKDRGHKEGFL  
QESVFPFPPMSGDSRPGKQEGSSQDSCRGPASSCHSELGSGSQEGCGPSSQSLGSLPPQSLKKELESTSCGPL  
FSEQPQAAPFPTQVSPLLGSEKEPQDGLSEGPVVPVSSSPGSASQVDASLDTEGLSEAGDTCDFTPPPQRPQ  
EQATTRKFSLESRRGGYAGVAGYGTFAFGGDAGGMLGQGPLWARMMAVVSQSSEEQDEAATESQPPLSLGPIA  
EASGVPLRTSPSLTPWEEVEQVSLVQIRDLSGDAAEADTISLDISEVDPAYLNLSDLYDIKYLPFEFMI FRRV  
PKPIEQPESPGSETEAGQGLADFLLEAAWFWPGEGLRAGLEITEEPPEPGDLEALLGEAAVGRKRKWSPSRG  
LFQFPGRCLSGEEPVELGLRQVRKASMAHISRIKGRPEGPEREGP PRKKAGLASFRLSGLKGRDQELSD EAV  
VLGQSVTLACQVLAQPTAQATWSKDGVLLES SGHLLISSTLKNFQLLTILVVKEEDLGTYTCCVSNLGTAVT  
TGVLKRAERPSSSPRPEVGEYKDAVLLVWKPVEESCGPVTYIVQCCIEGGSWTTLASDISDCCYLTGKLSRGG  
MYIFRTACVSKAGMGPYSSPSEQVLLGGPNHLASEEESRGRPAQLLPSTKTFAFQMQIRRGFRSVVRQCREK  
ASGRALAAKIVPYQPEDKTAVLREYEALKRHLHHPHLAQLHAAAYLSRHLVLI LELCSGPELLPSLAERESYSE  
SDVKDYLWQMLSATQYLHAQHILHLDLRSNNMMVTEYNLLKVIDLGNQSLDQEKVPAPENFKDYLETMAPEL  
LEGQGAVPQTDIWAIGVTAFMLSGEYPESEGETRDLQKGLRGLIRLSRCYAGLSGGAVAFQLQSSSLCAQPWG  
RPCASTCLQCGLWTEEGPTGSRPTPVTFPTVRLRAFVREKRRALLYKKNLAQVR\*  
>rs256529946\_ENSMUSP00000038264\_c.19189:T>AATCAATCAATCT\_p.V6397ESINL-ins  
ENSMUST00000047441.14|Obscn-202|ENSMUSG00000061462|-  
|chr11:g.58912292:A>AGATTGATTGATT  
MDHSFSGAPRFLTRPKAFVSVGKDATLSCQIVGNPTPHVSWEKDRQPVEAGARFLAQDGDVYRLTILDLAL  
GDSGQYVCRARNAIGEFAAVGLRVDSEGTCAEQAPHFLLRPTSIRVREGADATFRCRVGGSPQPAVSWSKDG  
RRLGPPDAPHVRVEEHGESSALRIRSARPRDGGTYEVRAENPLGSASAAAALVVDSDAEVAGPPGTSTATLLA  
HLQQRREAMRAEGIPPSPPGAGTRTCTVTEGKHARLSCFVTGEPKPEVWKKDQGLVTEGRRHVVEDEQENF  
VLKILFCKQSDRGLYTCTASNLVGQTYSSVLVVVREPTVPFKKRLQDLEVREKESATFQCEVAQPAEAAWFK  
EETRLWASAKYDIEEEGETERRLTVRNVSADDDAVYICETTEGSRVAELSVQGNLTKLPRKTAVRTGDTAIF  
WVELAVPEGPPVRWLRNQEEMVAGGRVAITAEGTCHTLTI FQCTLEDMGEVAFVSGGCRTTTQFCVSAPRRPPL  
YPPADPVVKAKTESVTLWSAPPHGDRPVTIDGYVLEKRLKLGAYAWSRCHEAGWLATFTITGVAEEDGFQ  
FRVSAINHFQKQPYLEFPGTMHLVPLAVKTPLKVAEVEGGEVTFVSDLTVASGSEWFLDGEALKASSIYVI  
RCDRTRHMLTIREVPARLHGAQLKFVANGIETSIQMVVRAALGLPSSKLPAAAAAREVLAQLHHEEAQLLAE LSD  
QAAA VTWLKDGRELSLGPKEYMQVSAGRRALLVRDVAQDDAGLYECVSRGSRTAYQLLVQDITDGYRDWGPAG  
PQKHMCKCAGAKIARYLGSSCYRFLQYDKGVWHLEAALDTRQKGTSSCSLHEKPKLVFAKQQAHSEVKA  
AGASATLSCEVAQAQTEVTFWKDGGKLSSSSKVRMEASGCSRRLVVQQAGKADAGEYSCEAGGQKLSFRLDVA  
EPKMFVFAKEQQARSEVKA EAGASATLSCEVAQAQTEVTFWKDGGKLSSSSKVRMEASGCSRRLVVQQAGKAD  
GEYSCEAGGQKLSFRLDVTEPKLVFAKEQQARSEVKA EAGASATLSCEVAQAQTEVTFWKDGGKLSSSSKVRM  
EASGCSRRLVVQQAGKADAGEYSCEAGGQKLSFRLDVAE PKLVFAKEQQARSEVKA EAGASATLSCEVAQAQ  
EVTWTFKDGKLSSSSKVRMEASGCSRRLVVQQAGKADAGEYSCEAGGQKLSFHLDVTEPKLVFAKEQQAHSEV  
KAEAGASATLSCEVAQAQTEVTFWKDGGKLSSSSKVRMEASGCSRRLVVQQAGKADAGEYSCEAGGQKLSFR  
DVAE PKLVFAKEQQARSEVKA EAGASATLSCEVAQAQTEVTFWKDGGKLSSSSKVRVEASGCSRRLVVQQAG  
ADAGEYSCEAGGQKLSFRLDVAE PKLVFAKEQQANSEVKA EAGASATLSCEVAQAQTEVTFWKDGGKLSSS  
VRVEASGCSRRLVVQQAGKADAGEYSCEAGGQKLSFRLDVAE PKLAFAKEQQAHSEVKA EAGASATLSCEVAQ  
AQTEVTFWKDGGKLSSSSKVRVEASGCSRRLVVQQAGKADAGEYSCEAGGQKLSFRLDVAE PKLAFAKEQQAH  
SEVKA EAGASATLSCEVAQAQTEVTFWKDGGKLSSSSKVRVEASGCSRRLVVQQAGKADAGEYSCEAGGQKLS  
FRLDVAE PKLAFAKEQQAHSEVKA EAGASATLSCEVAQAQTEVTFWKDGGKLSSSSKVRVEASGCSRRLVVQQ  
AGKADAGEYSCEAGGQKLSFRLDVAE PKLVFAKEQQAHSEVKA EAGASATLSCEVAQAQTEVTFWKDGGKLS  
SSSKVRVEASGCSRRLVVQQVQKADAGEYSCEARGQKLSFRLDVAEAEBSQIPERPSRREPLVVEKHETIILTAT  
IAAPSVAAAVTWLKDGV EIRRSKRHEATSLGDTHTLTVRGAQVLD SAIYSCRVGKEGQDFPVQVEEVA AKFSK  
LEPVGELGTVTMLVCELSPEQA EVVWRGNTQLRPGKRFQMTSEGPRRTLTVSGLREDDAE EYVCE SRDDRT  
SARLTVKVPVVKFTSGLSAMVAEEGQEATFQCVVSPSDAGVTWYKDGMLQPSSEKFMVMEVGASRSLTILGL  
TLEDAGQVTVAE GASSAALRVREAPVLFKKKLEPQTVEERTSVTLEVELTRPWPEVKWTRNAAVLTPSENV  
EIRAEGARHCLVLRVSGFADRGFFGCETPDDKTQAKLNVEMRQVRLVRLGQVEEAKQGTASMDVELSHAEVE  
GSWTRDGLRLQPGPKHLAVQGPVHILTL SALQPQDSGLVAFRAEGVHTSARLIVTEL PVSFTRVLQDVVATQ  
KEKVTLECELSRPVDVRLKDGVELRAGKAI GIVAQGTCSRSLVIYRCETGDQGVYVCDALDAQTSASLRVQGR  
TYTLIFRRVLAEDAGEVKFVAENAESRAHLRVKELPVTLLRPLRDKIAMEKHRGVLECVSRASAQVRWFKGG  
VELQSGPKYEVVSDGLYKRLVINDVQPEDEDYTGTC DAGNVKTSAQFFVEEQSITIVRGLKDMTVM EPAPAWFE  
CETSIPSVRPPKWLGLKTVLQAGGNVLEQDGTVHRLTLHKTCSTMTGPVHFTIGKSRSSAQLVSDIPVVL  
RPLEPKAGRELQSVVLSCDFRPAPKAVQWYKDDTPLSPSEKFKMALEGMALRILRLTPADAGVYRCQAGSA  
QSSAEVTVAREVTVIQPLQDAEAMEEGRVCFSCELSHKDEDI EWSLNGTPLYNDSFHEISHEGCLHTLVLKS  
VRQADTGTVCATSPKVSVSARLVVKGPVVF LKALDDVSAEERGTTLQCEVSDPEARVVWRKDGVELGPSDK  
YDFLHKAGARGLTVHDL SHEDAGLYTCQVGSKETQSKVSVHDLHVGITKRLKTVEVLEGESECSFCVLSHESP



SDPAVWTVGGKTVGGSGHFHAVRQGRKYTLTVKDAALSDAGEVVFVSVLGLTSKASLIIRERPVDITKPLEDQR
TTLGEDVMLSCELSRAGTSVRWLKDGKAIKRSQKYDLLSEGTRAVLVVRKASLKDSGEYTCETEASKSTAKLC
VEEKANRFTEELADLQVEEKGRAVFTCKTEHPASVVTWRKGLLELRASGKHVPSQEGTLTKLTINALERTDSD
TYTCDIGQARTQARLLVHGQKVRVIEDLEDTAVQEGSSAKFCCRIAPADYGPVHWFLLDKTPLHSNELNEITVQ
PGGYHVLTLRQLALKDSGTVYFEAGDQRTSAALRVTEKPSIFSRPLTDVTVTEGEDTLVCETTTVDSVSRWT
KDGTKLRPSARCQLSHEGCQAQLLITATTPQDGGRYKCEIGGASSSSIVRVHALPVRVRESLKDVEVPEGKAA
TLRCVLSVAAPVEWRHGDDVLKSSNKYSLRQEGAVLELVIRDLQPQDSGQYSCSFGDQTTSATLTVKTSQAQ
FVGKLRNKEATEGTTVTLRCELTKAPVEWKKGTETLRNGDKYSLKQDGAVCELQICSLLVADAGEYSCVCGQ
EKTSAITLVKALLVHFVRRRLRSKEATEGDTTTLQCELSKAAPVEWRKGTETLRDGDYSLKQDGAUCELOIRS
LTADAGEYLCTCGQEKTSATLTVRALPAKFKDSLKNEEATEGTTATLSCELSKAAPVTWKKGPKTLQSGDKY
VLRQDGAUCELOIHLTMADAGEYSCVCGQEKTSATLTVRGLPAKFIEDLRSQEATEGATAILRCELSKAAPV
EWRKGETLTKDGDYTLRQDGAUCELOIRGLAVVDTGTYSLSLPTKFTTEGLRNEEATEGTMATLRCQMSKAAPV
EWRKGETLRDGDYSLRQDGAUCELOIRGLTIEDSGEYTCVCGQEKTSATLSVKALPPRFIEDLRSQEATEG
TMATLRCQMSKAAPVEWRKGETLRDGGYSLRQNGAVCELQIHDLAVEDTGEYSCVCGQEKTSATLNVKALP
PRFIEDLRSQEATEGTMATLRCQMSKAAPVEWRKGETLRDGGYSLRQDGAUCELOIHDLDVEDAGQYSCVC
GQEKTSAVLTVDALPPKFTTEGLKKEEATEGTMVTLRQMSKEATVEWRKGAKTLSGGYSLRQDGAUCELOI
CGLAVEDAGEYSCVCGQEKTSATLSVKALPPRFIEDLRSQEATEGTMATLRCQMSKAAPVEWRKGETLRDGD
RYSLRQDGAUCELOICDLAVEDTGDYSCVCGQEKTSATLSVKAPQVVFQQPLQNLQAEEGSMASLRCELSDVPN
AAMVWSKGGLELQGDTRREARQQGCVAELLLRDLRREDAGEYSCVCGQEKTSATLMVTAAPVRFRLRQADV
DEGATARLRCELSREAVSVEWRKGSLLFPKAKYQMVQEGTTAEELLVHGVEQEDAGEYTCAGHTQSIARLSV
RAPKPKFKTDLQSTEQEAGGTARLCCQLSEAEPTPVQWLKEGVELHVGSKYEMRRQGAUCELLIHGLEAKDT
GEYACLVGQKTLASLRVKEPEVTIVRGLVDMEVQADEDEFTCKVSOAGATDVQWHLQGLPLQSNVEVAV
LADGCTHVLQKGVTLDEAGTVSFHVGGLSSAQLTVRVPEVTLEPLKDVQLSEGQDAHFRCRLSRASGQEA
RWALGGVPLQCNEMNDITVEQGTLYLLTLHKVTLDEAGTITLQVGSSEAEQKVTAKNTVLRGLENVDALEG
GEALFECQDSQPEVAHTWLLDDEPVHTSEKVEVVYFENGLRHLLLLKLNKLPQDSCRVTFLAGDVVTSAFITV
RALPDPPELDAEVVGRSDHVSVLSWVAPMSDGGGLCGYRVMKEASTGQWQLCHDLVPGPEVCVDDLVPGKTY
RFRVAAVGPAGAGEPVHLPQMVKIAAPAPAPAPAPAPAPAPAPETRQAVVGEDICLELEVAADGGEVWHKGTERRI
QPGGHFEVLSRQQRQMLVIKGFRTEDQGEYRCGPIQGLPSSGAATFNVMVTSVSGSDEVPAPQSLPPEAAQEGD
LHLLWEALARKRRMSREPTLDSISELPEEDSRVQHLRQEAEEAPDLSEGYSTADELARTGEADLSHTSSDDE
SRAGTPSLVTYLKKAGGPGISPLASKHEAQVTTSVKPKQKQEPVVPFCPPPGDLSAADLMDPSLDKAAVKIQA
AFKGYKVRKEMKQEGPVFSRTFGDTEAQVGDVLRLECVLATKTDMRACWLKDGIELTDGRHYHIDQLKDGTC
SLLVTVGLAPTDSGRYTCQVSTKSGRVSHSACVVVSGTESEAESSGGELDDAFRAARRLHRLFRFKSPAELS
EEELFLSADEGPEPEPADWQTYREDENFVCIRFESLAEARQAVTCFRNMFMATMGIGVEISLGEQGPGRVEM
RIGKVAPTVPVAVPLAKTPGLQTSDAAPVFLTELQNDVQDGYPMSFDCVVTGQPVVPSVRWFKDGLLEDDH
YMINEDQQGQHQLITAVVPADMGVYRCLAENSMGVSSTKAEIRVELTSTDYDTAADATTESTSYFSAQGYLSS
REQEGTESDEGQLPQVLEELKDLQVAPGTRLAKFQLKVKGYPAKPLYWFKDQPLTSDHIRMTDKKTLHTLE
IVSVTREDSGQYAAIYISNAVGAAYSSARLLVRGPSEPEEKPASDVHERLVPPRIKFKTPKKVKRGSSTFSV
KVEGHPAPSVHHLKEEAKEGVLWIGPDTPGYTMASSKQHSVLLLDVGRQHGGTYTCIATNPAGQALCSASLH
ISGLAKEEEQERVKEALISSFLQGTSAVSAQMSSEAGFADLVGQSKGESLVAAEAHSHLSLAEVGTTEFLQK
LTSQITEMVSAKISQAKLQVPGGDSDEETKTPSASPRHGRSRPSSSVQESSSESEDGDSRGEIFDIYVVTADY
LPLGAEQDAIILREGQYVEVLDSAHPLRWLVRTKPTKSSPSRQGWVSPAYLDKRLKLSPEWGPTEAPEFPGEA
VSEDEYRTRLSSVIQELLSSEQAFVGELOFLESHHMKHLERSPRVPAAVASQKTVIFRNVQDISHFHSSFLKE
LQCGCTDDDVAMCFIKNQEAFAFEKYLEFLVGRVQAESVVVSTPVQEFYKKYAEETLSAKDPTQPPPPPLQHYLE
QPVERVQKYQALLKELIRNKARNRQNCALLEQAYAVVSALPQRAENKLVSLMENYPGTLEALGEPVIRQGHFI
VWEGAPGARMPWKGNHRHVFVFRNYLVICKPRRDSRTDTFSYVFRNMMKLSSIDLNDQVEGDDRAFEVWHERE
DSVRKYLQARTVIKNSWVKEICGIQORLAQPVWRPPEFEEELADCTAELGETVKLACRVTGTPKPIVSWYK
DGKPVVEVDPHHILIEDPDGSCSTLILDNLTGIDSGQYMCFAASAAGNASTLGKILVQVPPRFVNVKVRATPFVEG
EDAQITCTVEGAPYPQIRWYKDGTLAPGNRYRMLNEPRSGVLVLESINLIQAASKEDLGHYECELVNRLGST
RGGGELYMQSPALRARDQHHREQIVAAVEGAPSMQVTIEDVQVQVGDMAQFDVAVIEGHPPPITVWYKGSTQLT
SSARLSQRQDGTYSVLVTDVAPHDAGVYTCVANNAGQVLCQAEELLVHGDKLDAENQVYRRKLHSFYDVQE
EIGRQVGFVQKRVQHKGNMFCFAAKFIPLRSKTRAQAYQERDILATLGHPLVTVGLLDQFETRKTLLILELCS
SEELLDRFLFKGVVTEAEVKVYIQQLVEGLHYLHSHGILHLDIKPPNIMVHPAREDIKICDFGFAQKITPSE
PQYSKYGSEPEFVSPETIEQNPVSEGSDIWAMGVIYSLYSLTCCSSPFAGESDRATLLNVLEGRVSWSSPTAAHLS
EDAKDFIKATLQRTPRARPSTSQCLAHPWFLKSMPEAAEEHFINTKQLFLLARSRWQRSLMSYKSLVMSRIP
ELLQGGPPDSPSLGVARHLRGEASGASSSSSSDNELAPFARAKSLPPSPVTHSPLLHPRGFLRPSASLPEETE
ASMPADAAPVSPASGPPASPGCVPRHSVIVSSLFYQQAGEGAERGNKTSGAKRHPARRRHLKGGYIARAL
PGLREPLMEYSLLEEEAAREEQASLMTKTPSFETALRLPSSSVREVPGRSHSLDNPPVTTGSPPEACKEQLLF
PPSTGLTHEHTAKDRGHKEGFLQESVFPFPPMSGDSRPGKQEGSSQDSCRGKPASSCHSELGSGSQEGCGPPSS

QSLGSLPPQSLKKELESTSCGPLFSEQPQAAPFPQTQVSPLLGSEKEPQDGLSEGPVVPVSSSPGSASQVDASL  
 DTEGLSEAGDTCDFTPPPQRPQEQATTRKFSLESRGGYAGVAGYGTFAFGGDAGGMLGQGPLWARMWAVSQS  
 SEEQDEAATESPQPLESGLPIAEASGVPLRTSPSLTPWEEVEQVSLVQIRDLSGDAEAADTISLDISEVDPAY  
 LNLSLDLYDIKYLPEFEMI FRRVPKPIEQPESPGSETEAGQGLADFL EEAAWPWPGEGLGLRAGLEIT EEPPEEPG  
 DLEALLGEAAVGRKRKWSPSRGLFQFPGRCLSGEEPVELGLRQVRKASMAHISRILKGRPEGPEREGP PRKKA  
 GLASFRLSGLKGRDQELSDEAVVLGQSVTLACQVLAQPTAQATWSKDGVLLESSGHLLISSTLKNFQLLTLV  
 VKEEDLGTYTCCVSNPLGTAVTTGVLKKAERPSSSPRPEVGEVLYKDAVLLVWKPVESECGPVTVYIVQCCIEGGS  
 WTTLASDISDCCYLTGKLSRGGMYIFRTACVSKAGMGPYSSPSEQVLLGGPNHLASEEESRRGRPAQLLPSTK  
 TFAFQMQUIRRGRFSVVRQCREKASGRALAAKIVPYQPEDKTAVLREYEALKRRLHHPHLAQLHAAYLSRHLVL  
 ILELCSGPELLPSLAERESYSESDVKDYLWQMSATQYLHAQHILHLDLRSNNMMVTEYNLLKVIDLGNQSL  
 DQEKVPAPENFKDYLETMAPELLEGQAVPQTDIWAIGVTAIFIMLSGEYPESSEGETRDLQKGLRKLIRLSRC  
 YAGLSGGAVAFLOSSLCAQPWGRPCASTCLOCGWLTEEGPTGSRPTPVTFPTVRLRAFVREKRRALLYKXH  
 NLAQVR\*  
 >rs256529946\_ENSMUSP00000049737\_c.21148:T>AATCAATCAATCT\_p.V7050ESINL-ins  
 ENSMUST00000052872.15|Obscn-203|ENSMUSG00000061462|-  
 |chr11:g.58912292:A>AGATTGATTGATT  
 MDHSFSGAPRFLTRPKAFVSVGKDATLSCQIVGNPTPHVSWEKDRQVVEAGARFRLAQDGDVYRLTILDLAL  
 GDSGQYVCRARNAIGEAFVAVGLRVDSEGTCAEQAPHFLLRPTSIRVREGADATFRCRVGGSQPAPVSWSKDG  
 RRLGPPDAPHVRVEEHGESSALRIRSARPRDGGTYEVRAENPLGSASAAAAALVVDSDAEVAGPPGTSTATLLA  
 HLQORREAMRAEGIPPSPPGAGTRTCTVTEGKHARLSCFVTGEPKPEVWKKDGQLVTEGRRHVVEDEQENF  
 VLKILFCKQSDRGLYTCTASNLVGTYSVSVLVVREPTVPFKKRLQDLEVREKESATFQCEVAQPAEAAWFK  
 EETRLWASAKYDIEEGETERRLTVRNVSADDDAVYICETTEGSRVVAELSVQGNLTKLPRKTAVRTGDTAIF  
 WVELAVPEGPVRWLRNQEEMVAGGRVAITAEGTCHTLTI FQCTLEDMGEVAFVSGGCRTTTTQFCVSAPRRPPL  
 YPPADPVVKAKTESSVTLWSAPPHGDRPVTIDGYVLEKRLKLGAYAWSRCHEAGWLATTEFTITGVAAEEDGFQ  
 FRVSAINHFGQGPYLEFPGTMHLVPLAVKTPKAVEAVEGGEVTFVSVDLTVASSGEWFLDGEALKASSIYVI  
 RCDRTRHMLTIREVPARLHGAQLKVFVANGIETSIQMVVRAALGLPSKLPAAAAREVLAQLHEEAQLLAELSD  
 QAAAVTWLKDGRSLGPKYEMQVSAGRRALLVDAVQADAGLYECVSRGSRRTAYQLLVQEPKLVFAKQQA  
 SEVKAEEAGNSATLSCEVTQAQTEVTWFKDGKLLSSSSKVRMEASGCSRRLVVQQAGKADAGEYSCEAGGQKLS  
 FRLDVAEPKLVFAKQQAHEVKAEEAGASATLSCEVAQAQTEVTWFKDGKLLSSSSKVRMEASGCSRRLVVQQ  
 AGKADAGEYSCEAGGQKLSFRLDVAEPMVFQEQARSEVKAEEAGASATLSCEVAQAQTEVTWFKDGKLLSS  
 SSKVRMEASGCSRRLVVQQAGKADAGEYSCEAGGQKLSFRLDVTEPKLVFAKEQQARSEVKAEEVNSATLSCE  
 VAQAQTEVTWFKDGKLLSSSSKVRMEASGCSRRLVVQQAGKADAGEYSCEAGGQKLSFRLDVAEPKLVFAKEQ  
 QARSEVKAEEAGNSATLSCEVAQAQTEVTWFKDGKLLSSSSKVRMEASGCSRRLVVQQAGKADAGEYSCEAGGQ  
 KLSFHLVDVTEPKLVFAKEQQAHSEVKAEEAGASATLSCEVAQAQTEVTWFKDGKLLSSSSKVRMEASGCSRRLV  
 VQQAGKADAGEYSCEAGGQKLSFRLDVAEPKLVFAKEQQARSEVKAEEAGASATLSCEVAQAQTEVTWFKDGKLL  
 LSSSSKVRVEASGCSRRLVVQQAGKADAGEYSCEAGGQKLSFRLDVAEPKLVFAKEQQANSEVKAEEAGASATL  
 SCEVAQAQTEVTWFKDGKLLSSSSKVRVEASGCSRRLVVQQAGKADAGEYSCEAGGQKLSFRLDVAEPKLAFA  
 KEQQAHSEVKAEEAGASATLSCEVAQAQTEVTWFKDGKLLSSSSKVRVEASGCSRRLVVQQAGKADAGEYSCEA  
 GGQKLSFRLDVAEPKLAFAKEQQAHSEVKAEEAGASATLSCEVAQAQTEVTWFKDGKLLSSSSKVRVEASGCSR  
 RLVVQQAGKADAGEYSCEAGGQKLSFRLDVAEPKLAFAKEQQAHSEVKAEEAGASATLSCEVAQAQTEVTWFKD  
 GKLLSSSSKVRVEASGCSRRLVVQQAGKADAGEYSCEAGGQKLFRLDVAEPKLMFAKEQQAHSEVKAEEAGAS  
 ATLSCEVAQAQTEVTWFKDGKLLSSSSKVRVEASGCSRRLVVQQAGKADAGEYSCEAGGQKLSFRLDVAEPKLV  
 VFAKEQQAHSEVKAEEAGASATLSCEVAQAQTEVTWFKDGKLLSSSSKVRVEASGCSRRLVVQQVQKADAGEYS  
 CEARGQKLSFRLDVADTRLMFQEQARTEVKAEEAGNSATLSCEVAQAQTEVTWFKDGKLLSSSSKVRVEASG  
 CSRRLVVQQAGKADAGEYSCEAGGQKLSFRLDVAEEAESQIPERPSRREPLVVKEHETIILTATIAAPSVAAVT  
 WLKDGEVIRRSKRHEATSLGDTHLTVRGAQVLDLSAIYSCRVGEGQDFPVQVEEVAAKFSKPLEPVEGELGG  
 TVMLVCELSPEQAEVWRCGNTQLRPGKRFQMTSEGPRRTLVSGLREDDAEYVCESRDDRTSARLTVKVP  
 VVKFTSGLSAMVAEEGQEQATFQCVVSPSDAGVTWYKDGMLQVQSEKFMVVEGASRSLTILGLTLEDAGQVTV  
 EAEGASSAALRVREAPVLFKFKLEPQTVTEERTSVTLEVELTRPWPVEVWTRNAAVLTPSENVEIRAEGARHC  
 LVLSVGFADRGFFGCETPDDKTQAKLVNEMRQVRLVRLGQVEVAKEQGTASMDVELSHAEEVGSWTRDGLRL  
 QPGPKCHLAVQGPVHILTLALSALQPDQSGLVAFRAEGVHTSARLIVTELPVSFTRVLQDVVATQKEKVTLECEL  
 SRPVDVRLKDGVELRAGKAI GIVAQGTCSRSLVIYRCETGDQGVYVCDALDAQTSASLRVQGRTYTLIFRRVL  
 AEDAGEVVKFAENAESRAHLRVKELPVTLLRPLRDKIAMEKHRGVLECVSRASAVRWFKGGVLEQSGPKYE  
 VVSDGLYRKLIVNDVQPEDEDTYTCDAGNVKTSQMTFVEEQSITIVRGLKDMVTMPEPAPAWFECETSIPSVRP  
 PKWLLGKTVLQAGGNVLEQDGTVHRLTLHKTCSTMTGPVHFTIGKSRSSAQLVVS DIPVVLTRPLEPKAGRE  
 LQSVVLSCDFRPAPKAVQWYKDDTPLSPSEKFKMALEGQMAELRILRLTPADAGVYRCQAGSAQSSAEVTVEA  
 REVTVIQPLQDAEAMEEGRVCFSCLELHKDEDI EWSLNGTPLYNDSFHEISHEGCLHTLVLKSVRQADTGTVC  
 ATSPKVSVSARLVVKGKPVVFLKALDDVSAEERGTLLTQCEVSDPEARVVWRKDGVELGPSDKYDFLHKAGAR

GLTVHDLSDHEDAGLYTCQVGSKETQSKVSVHDLHVGITKRLKTVEVLEGESECSFECVLSHESPSDPAVWTVGG
KTVGGSGHFHAVRQGRKYTLTVKDAALSDAGEVVSFLGLTSKASLIIRERPVDITKPLEDQRTTLGEDVMLS
CELSRAGTSVRWLKDGKAIKRSQKYDLLSEGTRAVLVVRKASLKDSGEYTCETEASKSTAKLCVEEKANRFTE
ELADLQVEEKGRAVFTCKTEHPASVVTWRKGLLELRASGKHVPSQEGTLKLTINALERTDSDTYTCDIGQAR
TQARLLVHGQKVRVIEDLEDTAVQEGSSAKFCCRIAPADYGPVHWFIDKTPHLSNELNEITVQPGGYHVLTLR
QLALKDSGTVYFEAGDQRTSAALRVTEKPSIFSRPLTDVTVTEGEDLTLVCETTTVDSSVVRWTKDGKTLRPSA
RCQLSHEGCAQLLITATTPQDGGRYKCEIGGASSSSIVRVHALPVRFRFRESLKDVEVPEGKAATLRCVLSVA
APVEWRHGDDVLKSSNKYSLRQEGAVLELVIRDLPQDQSGVYSCSFGDQTTSATLTVKTTSSAQFVKGKLRNKEA
TEGTTVTLRCELTKAPVEWKKGTETLRNGDKYSLKQDGAVCELQICSLLVADAGEYSCVCGQEKTSATLTVK
ALLVHFVRRLSKEATEGDTTTLQCELSKAAPVEWRKGTETLRDGDYSLKQDGAVCELQIRSLTIADAGEYL
CTCGQEKTSATLTVRALPAKFKDSLKNEEATEGTTATLSCELSKAAPVTWKKGPKTLQSGDKYVLRQDGAVCG
LQIHGLTMADAGEYSCVCGQEKTSATLTVRGLPAKFIEDLRSQEATEGATAILRCELSKAAPVEWRKGETL
DGDYTLRQDGAVCELQIRGLAVVDGTYSLSLPTKFTTEGLRNEEATEGTMATLRCQMSKAAPVEWRKGETL
DGDYSLRQDGAMCELQIRGLTIEDSGEYTCVCGQEKTSATLSVKALPSRFIEDLRSQEATEGTMATLRCQMS
KTAPVEWKKGSETLRDGGYSLRQDGPVCELQICDLAVEDAGEYSCVCGQEKTSATLSIKALPPRFIEDLRSQ
EATEGTMATLRCQMSKAAPVEWRKGETLGDGGYSLRQNGAVCELQIHDLAVEDTGEYSCVCGQEKTSATLN
VKALPPRFIEDLRSQEATEGTMATLRCQMSKAAPVEWRKGETLDRDGGYSLRQDQVAVCELQIHDLVEDAGQ
YSCVCGQEKTSAVLTVDALPPKFTTEGLKKEEATEGTMATLRCQMSKEATVEWRKGAKTLSDGGYSLRQDQV
CELQICGLAVEDAGEYSCVCGQEKTSATLSVKALPPRFIEDLRSQEATEGTMATLRCQMSKAAPVEWRKGET
LRDGDYSLRQDGAVCELQIRDLAVEDAGEYLCVCGQEKTSATLSVKALPPRFIEDLRSQEATEGTMATLRCQ
MSKAAPVEWRKGSKTLRQDGDYSLRQDQVAVCELQICDLAVEDTGDYSCVCGQEKTSATLSVKALPPRFIEDL
RQDQVAVCELQIRDLAVEDAGEYLCVCGQEKTSATLSVKALPPRFIEDLRSQEATEGTMATLRCQMSKAAP
VEWRKGSKTLRQDGDYSLRQDQVAVCELQICDLAVEDTGDYSCVCGQEKTSATLSVKALPPRFIEDLRSQ
EAREGTVATLRCRMSKAAPVEWRKGETLKDGDYSLRQEGNLCCELQIRDLAVEDTEEYSCVCGQEKTSAT
LSVKALPAKFIEDLRSQEAPESSTVTLRCKLSKKASVWKKGSETLRNGARYSLRQDQVAVCELEIRDLTVE
DTEGYSCTCGQERTSATLSIMAPQVVFQQLQNLQAEEGSMASLRCELSVPAAMVWSKGGLELQGDTRREARQ
GCVAELLLRDLRREDAGEYSCVCGQEKTSATLMVTAAPVRFRELAQDQVDEGATARLCELSREAVSVEWRK
GSLQLFPCAKYQMVQEGTTAELLVHGVEQEDAGEYTCDAHTQSIARLSVRAPKPKFKDLQSTEQEAGGTAR
LCCQLSEAEKPGTQVQWLKEGVELHVGSKYEMRQYAVCELQIHGLEAKDTGEYACLVGQKTLASLRVKEPEV
TIVRGLVDMEVQADEDEFTCKVSQAGATDVQWHLQGLPLQSNVTEVAVLADGCTHVLQKGVTLQEDAGTVS
FHVGGSSSAQLTVRVPEVTVLEPLKDVQLSEGQDAHFRCRLSRASGQEARWALGGVPLQCNEMNDITVEQGT
LYLLTLHKVTLQEDAGTITLQVGSSESAQLKVTAKNTVLRGLENVDALEGGALFECQLSQPEVAHTWLLDD
EPVHTSEKVEVVYFENGLRHLLLLKLNKPKQDSCRVTFLAGDVVTSVFLTVRGRWRLEVLPEPHDASVKAGMQR
FTCILLSEAVPVGEATWYINGAAIQPDDTDWTVTTDGSHHALTLSNAQPQHAGEVTFFAARDAVASARLSVLALP
DPPEDAEEVGRSDHSVTLVWVAPMSDGGGGLCGYRVMKEASTGQWQLCHDLVPGPECVVDDLVPGKTYRFRV
AAVGPAGAGEPVHLPQMVKIAPAPAPAPAPAPAPETRAVVGEDICLELEVAADGGVEVWHKGTERRIQPGG
HFEVLSRGQRQMLVIKGFRTEDQGEYRCGPIQGLPSSGAATFNVVMTSGSGDEVPAQPSLPEAAQEGDLHL
WEALARKRRMSREPTLDSISELPEEDSRVQHRLRQEAETAPDLSEGYSTADELARTGEADLSHTSSDDESRA
TPSLVTVLTKKAGGPGISPLASKHEAQVTVSVKPKQKQEPVVPTCPPPGDLSAADLMDPSLDKAAVKIQAAF
YKVRKEMKQQEGPVFSRFTFGDTEAQVGDVLRLECVLATKTDMRACWLKDGIELTDGRHYHIDQLKDGTC
TGLAPTDSGRYTCQVSTKSGRVSHSACVVVSGTESEAESSSGGELDDAFRRAARLHRLFRTKSPAELSEEEL
FLSADEGPGPEPEPADWQTYREDENFVCIRFESLAEARQAVTCFRNMFATMGIGVEISLGEQGPVEMRIGK
VAPTVPAPVPLAKTPGLQTSDAAPVFLTELQNDQVQDGYPMSFDCVVTGQPVPSVRWFKDGKLEDDHYMIN
EDQQGGHQLIITAVVPADMGVYRCLAENSMGVSSTKAELRVELTSTDYDTAADATETSSYFSAQGYLSSRQE
GTESDEGQLPQVLEELKDLQVAPGTRLAKFQKLVKGYPAKLYWFKDQGPLTSDHIRMTDKKTLHTLEIVSV
TREDSGQYAAIISNAVGAAYSSARLLVRGPSEPEEKPASDVHERLVPPRIEKFTPKKVKRGSSTFVSVKVEG
HPAPSVHHLKEEAEGVLWIGPDTPGYTMASSSKQHSVLVLDVGRQHOGTYTCIATNPAGQALCASLHISGL
AKEEEQERVKEALISSFLQGTSQAVSAQMSESAGFADLVGQSKGESLVAEEAHSHLSLAEVGTTEFLQKLSQ
ITEMVSAKISQAKLQVPGGDSDEETKTPSASPRHGRSRPSSSVQESSSESEDGDSRGEIFDIYVVTADYLP
AEQDAIILREGQYVEVLDSAHPLRWLVRTKPTKSSPSRQGWVSPAYLDKRLKLSPEWGPTEAPEFPGEAVS
EYRTRLSSVIQELLSSEQAFVGEQFLESHHMKHLERSPRVPAAVASQKTVIFRNVQDISHFHSSFLKELQGC
GTDDVAMCFIKNQEAKEYLEFLVGRVQAESVVVSTPVQEFYKKAETLSAKDPTQPPPPPLQHYLEQPV
RVQKYQALLKELIRNKARNRQNCALLEQAYAVVSALPQRAENKLVSLMENYPGTLEALGEPVIRQGHFVWEG
APGARMPPWKGNHRVFLFRNYLVICKPRRDSRTDFTSYVFRNMMKLSSIDLNDQVEGDDRAFEVWHEREDSV
KYLQARTVIEIKNSVWKEICGIQORLAQPVWRPPEFEELADCTAELGETVKLACRVGTGPKPIVSWYKDGK
VEVDPHHILIEDPDGSKTILIDLNLGTIDSGQYMCFAASAAGNASTLKGILVQVPPRFVKNVRATPFVEGEDAQ
ITCTVEGAPYPQIRWYKDGTLTLLAPGNRYRMLNEPRSGVLVLESINLIQAASKEDLGHYECELVNLRGSTRGG
ELYMQSPALRARDQHHREQIVAAVEVTEQETKVPKKTVIEETITTVVKS PRGRRQSPGKSPSRSPRRSASP
RRPGLLAPERLYPPGTSRRLRLEVEQGRKAPVPALYVTEAEVHAPASQSPKWLEVEETIEVRVKKTGSRGAS
PVREMTSRGEGILFTLPGGIPGRDPNANNNSNKS SVYQEARWGPVAVHVGEFFIFQVDSVGNVDVVAASPEPE

QVRASQKEENTERQEGCSGDENTFLMEEPQDQDSDLQGRDPKILTHNGRVLTLADLEDYVPOEGETFSGCDST  
PSTPDEPPCEVSVLQREISEPTVQGPVLLNVGRPPGTGATPSFFRPGSQVHSPESVSFLLREAWSGPVSAAPW  
TSSFHHTHVQSSVDGSHGSKTEVSTQTVSFGAVGETVTLHIDPDGGEAPGPSQG\*

>rs256529946\_ENSMUSP00000020732\_c.21349:T>AATCAATCAATCT\_p.V7117ESINL-ins  
ENSMUST00000020732.13|Obscn-201|ENSMUSG00000061462|-  
|chr11:g.58912292:A>AGATTGATTGATT

MDHSFSGAPRFLTRPKAFVSVGKDATLSCQIVGNPTPHVSWEKDRQVVEAGARFRLAQDGDVYRLTILDLAL  
RDLGPPDAPHVRVEEHGESSALRIRSARPRDGGTYEVRAENPLGSASAAAALVVDSAEVAGPPGTSTATLLA  
HLQORREAMRAEGIPPSPPGAGTRTCTVTEGKHARLSCFVTGEPKPEVWKKDGQLVTEGRRHVVEDEQENF  
VLKILFCKQSDRGLYTCTASNLVGQTYSSVLVVREPTVPFKKRLQDLEVREKESATFQCEVAQAPATEAAWFK  
EETRLWASAKYDIEEGETERRLTVRNVSADDDAVYICETTEGSRVVAELSVQGNLTKRKLPRKTAVRTGDTAIF  
WVELAVPEGPVRWLRNQEEMVAGGRVAITAEGTCHTLTI FQCTLEDMGEVAFVSGGCRTTTQFCVSAAPRRPPL  
YPPADPVVKAKTESVTLWSAPPHGDRPVTIDGYVLEKRKLGA YAWSRCHEAGWLATTEFTITGVAAEEDGFQ  
FRVSAINHFGQGPYLEFPGTMHLVPLAVKTPKAVEAVEGGEVTFVSDLTVASSGEWFLDGEALKASSIYVI  
RCDRTRHMLTIREVPARLHGAQLKVFANGIETSIQMVVRAALGLPSSKLPAAAAREVLAQLHHEEAQLLAE LSD  
QAAA VTWLKDGRELSLGPKYEMQVSAGRRALLVRDVAQDDAGLYECVSRGSRRTAYQLLVQDITDGYRDWGPAG  
PQKHMCKCAGAKIARYLGSSCYRFLQYDKGVVHWLEAALDTRQKGTSSCSLHEKPKLVFAKQQAHSVEKAE  
AGNSATLSCEVTQAQTEVTFWKDGKLLSSSSKVRMEASGCSRRLVVQQAGKADAGEYSCEAGGQKLSFRLDVA  
EPKLVFAKQQAHSVEKAEAGASATLSCEVAQAQTEVTFWKDGKLLSSSSKVRMEASGCSRRLVVQQAGKADA  
GEYSCEAGGQKLSFRLDVAEPKMFVFAKEQQARSEVKAEGASATLSCEVAQAQTEVTFWKDGKLLSSSSKVRM  
EASGCSRRLVVQQAGKADAGEYSCEAGGQKLSFRLDVTEPKLVFAKEQQARSEVKAEGVNSATLSCEVAQAQ  
EVTWFKDGKLLSSSSKVRMEASGCSRRLVVQQAGKADAGEYSCEAGGQKLSFRLDVAEPKLVFAKEQQARSEV  
KAEAGNSATLSCEVAQAQTEVTFWKDGKLLSSSSKVRMEASGCSRRLVVQQAGKADAGEYSCEAGGQKLSFHL  
DVTEPKLVFAKEQQAHSEVKAEGASATLSCEVAQAQTEVTFWKDGKLLSSSSKVRMEASGCSRRLVVQQAGK  
ADAGEYSCEAGGQKLSFRLDVAEPKLVFAKEQQARSEVKAEGASATLSCEVAQAQTEVTFWKDGKLLSSSSK  
VRVEASGCSRRLVVQQAGKADAGEYSCEAGGQKLSFRLDVAEPKLVFAKEQQANSEVKAEGASATLSCEVAQ  
AQTEVTFWKDGKLLSSSSKVRVEASGCSRRLVVQQAGKADAGEYSCEAGGQKLSFRLDVAEPKLVFAKEQQAH  
SEVKAEGASATLSCEVAQAQTEVTFWKDGKLLSSSSKVRVEASGCSRRLVVQQAGKADAGEYSCEAGGQKLS  
FRLDVAEPKLVFAKEQQAHSEVKAEGASATLSCEVAQAQTEVTFWKDGKLLSSSSKVRVEASGCSRRLVVQQ  
AGKADAGEYSCEAGGQKLSFRLDVAEPKLVFAKEQQAHSEVKAEGASATLSCEVAQAQTEVTFWKDGKLLSS  
SSKVRVEASGCSRRLVVQQAGKADAGEYSCEAGGQKLFRLDVAEPKLMFAKEQQAHSEVKAEGASATLSCE  
VAQAQTEVTFWKDGKLLSSSSKVRVEASGCSRRLVVQQAGKADAGEYSCEAGGQKLSFRLDVAEPKLVFAKEQ  
QAHSVEKAEAGASATLSCEVAQAQTEVTFWKDGKLLSSSSKVRVEASGCSRRLVVQQVQKADAGEYSCEARGQ  
KLSFRLDVADTRLMFAKEQQARTEVKAEGNSATLSCEVAQAQTEVTFWKDGKLLSSSSKVRVEASGCSRRLV  
VQQAGKADAGEYSCEAGGQKLSFRLDVAEAEASQIPERPSRREPLVVKEHETIILTATIAAPSVAAVTVLKDGV  
EIRRSKRHEATSLGDTHTLTVRGAQVLD SAIYSCRVGKEGQDFPVQVEEVAAKFSKPLEPVEGELGGTVMLVC  
ELSPQAEVWRCGNTQLRPGKRFQMTSEGPRRTLTVSGLREDDAEYVCESRDDRTSARLTVKVPVVKFTS  
GLSAMVAEEGQEQATFQCVVSPSDAGVTWYKDGMLQPSKFKVMVESGASRSLTILGLTLEDAGQVTEAEGAS  
SSAALRVREAPVFLFKKLEPQTVERTSVTLEVELTRPWPEVKWTRNAAVLTPSENVEIRAEGARHCLVLRV  
GFADRGFFGCETPDDKTQAKLNVEMRQVRLVRLQVEVEAKEQGTASMDVELSHAEEVGSWTRDGLRQLQPGPKC  
HLAVQGPVHILTLALSALQPQDSGLVAFRAEGVHTSARLIVTELPSFTRVLQDVVATQKEKVTLECELSRPVDV  
RWLKDGVLELRAGKAI GIVAQGTCSRSLVIYRCETGDQGVYVCDALDAQTSASLRVQGRTYTLIFRRVLAEDAGE  
VKFVAENAESRAHLRVKELPVTLLRPLRDKIAMEKHRGVLECCQVSRASAQVRWFKGGVELQSGPKYEVVSDGL  
YRKLVIN DVQPEDEDTYTCDAGNVKTSAQFFVEEQSITIVRGLKDMTVMPEPAPWFECETSIPSVRPPKLLG  
KTVLQAGGNVLEQDGTVHRLTLHKTCSTMTGPVHFTIGKSRSSAQLVVSDIPVVLTRPLEPKAGRELQSVVL  
SCDFRPAPKAVQWYKDDTPLSPSEKFKMALEGQMAELRILRLTPADAGVYRCQAGSAQSSAEVTEAREVTVI  
QPLQDAEAMEEGRVCFSCELSHKDEDEIWSLNGTPLYNDSFHEISHEGCLHTLVLSVRQADTGTVCATSPKV  
SVSARLVVKGKPVVFLKALDDVSAEERGTLTLQCEVSDPEARVVWRKDGVELGSPDKYDFLHKAGARGLTVHD  
LSHEDAGLYTCQVGSKETQSKVSVHDLHVGITKRLKTVLEVLEGECSFECVLSHESPSDPAVWTVGGKTVGGS  
GHFHAVRQGRKYTLTVKDAALSDAGEVVSFVLGLTSKASLIIRERPVDITKPLEDQRTTLGEDVMLSCELSRA  
GTSVRWLKDGKAIRKSQKYDLLSEGTRAVLVVRKASLKDSGEYTCETEASKSTAKLCVEEKANRFTEELADLQ  
VEEKGRAVFTCKTEHPASVVTWRKGLLELRASGKHVPSQEGTLKLTINALERTDSDTYTCDIGQARTQARLL  
VHGQKVRVIEDLEDRTA VQEGSSAKFCCRIAPADYGPVHWFLDKTPLHSNELNEITVQPGGYHVLTLRQLALD  
SGTVYFEAGDQRTSAALRVTEKPSIFSRPLTDVTVTEGEDLTLVCETTTVDSSVRWTKDGKTLRPSARCQLSH  
EGCQAQLLITATTPQDGGRYKCEIGGASSSSIVRVHALPVRFRRESLKDVEVPEGKAATLRCVLSVVAAPVEWR  
HGDDVLKSSNKYSLRQEGAVLELVIRDLQPDQSGQYSCSFGDQTTSATLTVKTSQAQFVGLRNKEATEGTTV  
TLRCELTKAEVWKKGTETLRNGDKYSLKQDGA VCELQICSLLVADAGEYSCVCGQEKTSATLTVKALLVHF

VRRLRSKEATEGDTTTLQCELSKAAPVEWRKGTETLRDGDYSLKQDQAVCELQIRSLTIADAGEYLCTCGQE  
KTSATLTVRALPAKFKDSLKNEEATEGTTATLSCELSKAAPVTWKKGPKTLQSGDKYVLRQDQAVCGLQIHGL  
TMADAGEYSCVCGQEKTSATLTVRGLPAKFIEDLRSQEATEGATAILRCELSKAAPVEWRKGSSETLKDGDYR  
LRQDQAVCELQIRGLAVVDGTYSLSPTKFTTEGLRNEEATEGTMATLRCQMSKAAPVEWRKGSSETLRDGDYR  
LRQDQAVCELQIRGLTIEDSGEYTCVCGQEKTSATLSVKALPSRFIEDLRSQEATEGTMATLRCQMSKTAPVE  
WKKGSETLRDGGYSLRQDGPVCELQICDLAVEDAGEYSCVCGQEKTSATLSIKALPPRFIEDLRSQEATEG  
MATLRCQMSKAAPVEWRKGSSETLGDGGYSLRQNGAVCELQIHDLAVEDTGEYSCVCGQEKTSATLNVKALPP  
RFIEDLRSQEATEGTMATLRCQMSKAAPVEWRKGSSETLRDGGYSLRQDQAVCELQIHDLVEDAGQYSCVCG  
QEKTSAVLTVDALPPKFTTEGLKKEEATEGTMVTLRCQMSKEATVEWRKGAKTLDGGYSLRQDQAVCELQIC  
GLAVEDAGEYSCVCGQEKTSATLSVKALPPRFIEDLRSQEATEGTMATLRCQMSKAAPVEWRKGSSETLRDGD  
YSLRQDQAVCELQIRDLAVEDAGEYLCVCGQEKTSATLSVKALPPRFIEDLRSQEATEGTMATLRCQMSKAAP  
VEWRKGSSETLRDGDYSLRQDQAVCELQICDLAVEDTGDYSCVCGQEKTSATLSVKALPPRFIEDLRSQEARE  
GTVATLRCRMSKAAPVEWRKGSSETLKDGDYSLRQEGNLCELQIRDLAVEDTEEYSCVCGQEKTSATLSVKAL  
PAKFIEDLRSQEAPESSTVTLRCKLSKKASVWKKGSETLRNGARYSLRQDQAVCELEIRDLTVEEDTGEYSCT  
CGQERTSATLSIMAPQVVFQQLQNLQAEEGSMASLRCELSVPNAAMVWSKGGLELQGDTRREARQQGCVAEL  
LLRDLRREDAGEYSCVCGQEKTSATLMVTAAPVRFLELQAQDVDEGATARLRCELSREAVSVEWRKGSLLQF  
PCAKYQMVQEGTTAELLVHGVEQEDAGEYTCDAHTQSIARLSVRAPKPKFKTDLQSTEQEAGGTARLCCQLS  
EABPGTPVQWLKEGVELHVGSKYEMRRQGAVALCELLIHGLEAKDTGEYACLVGGQKTLASLRVKEPEVTVIRGL  
VDMEVQADEDEFTCKVQAGATDVQWHLQGLPLQSNVTEVAVLADGCTHVLQKGVTLLEDAGTVSFHVGGL  
SSSAQLTVRVPEVTVLEPLKDVQVLESEGQDAHFRCLRSRSGQEARWALGGVPLQCNEMNDITVEQGTLYLLTL  
HKVTVLEDAGITTLQVGSSEEAQLKVTAKNTVLRGLENVDALEGGEALFECQLSQPEVAHAHTWLLDDEPVHTS  
EKVEVVYFENGLRHLLLLKLNKPKQDSCRVTFLAGDVVTSFAFLTVRGWRLEVLEPPHDASVKAGMQVRFCTILS  
EAVPVGEATWYINGAAIQPDDTWTVTDDGSHHALTLSNAQPQHAGEVTFFAARDAVASARLSVLALPDPEDA  
EUVGRSDHSVTLVSWVAPMSDGGGGLCGYRVMKEASTGQWQLCHDLVPGPECVVDDLVPGKTYRFRVAAVGPA  
GAGEPVHLPQMVKIAPAPAPAPAPAPAPAPETRAVAVGVEDICILELEVAADGGEVVWHKGTERRIQPGGHFEVLS  
RGQRQMLVIKGFRTEDQGEYRCGPIQGLPSSGAATFNVMVTSVSGSDEVPAPQSLPPEAAQEDLHLLWEALAR  
KRMSREPLTSLISELPEEDSRVQHLRQEAETAPDLSEGYSTADELARTGEADLSHTSSDDESAGTSPSLVT  
YLKKAAGGPGISPLASKHEAQVTTSVKPKQKQEPVPTCPGGDLAADLMDPSLDKAAVKIQAAFKGYKVRKE  
MKQQEGPVFSRTFGDTEAQVGDVLRLECVLATKTDMRACWLKDGIELTDGRHYHIDQLKDGTCSSLVTLGLAPT  
DSGRYTCQVSTKSGRVSHSACVVVSGTESEAESSSGGELDDAFRRAARRLHRLFRTKSPAELSEELFLSADE  
GPGEPEEPADWQTYREDENFVCIRFESLAEARQAVTCFRNMFMATMGIGVEISLGEQGPGRVEMRIGKVAPTVT  
PAVPLAKTPGLQTSDAAPVFLTELQNDVQDGYPMSFDCVVTGQVPSVRWFKDGKLEEDDHVMINEDQQGG  
HQLIITAVVPADMGVYRCLAENSMGVSSTKAELRVELTSTDYDTAADATETSSYFSAQGYLSSREQEGTESDE  
GQLPQVLEELKDLQVAPGTRLAKFQLKVKGYPAKLYWFKDGGQPLTSDHIRMTDKKTLHLEIVSVTREDSG  
QYAAIYI SNAVGAAYSSARLLVRGPSEPEEKPASDVHERLVPRILEKFTPKKVKRGSSTIFSVKVEGHPAPS  
HWLKEEAEGVVLWIGPDTPGYTMASSSKQHSVLVLLDVGRQHGTQTYTCIATNPAGQALCSASLHISGLAKEEEQ  
ERVKEALISSFLQGTSAQVSAQMSSEAGFADLVGQSKGESLVAAEAHSHLSLAEVGTEEFQKLTSSQITEMVS  
AKISQAKLQVPGGDSDEETKTPSASPRHGRSRPSSSVQESSSESEDGDSRGEIFDIYVVTADYLPGLGAEQDAI  
ILREGQYVEVLDSAHPLRWLVRTKPTKSSPSRQGWVSPAYLDRKRLKLSPEWGPTEAPEFPGEAVSEDEYRTRL  
SSVIQELLSSEQAFVQELQFLESHHMKHLERSPRVPAAVASQKTVIFRNVQDISHFHSSFLKELQCGTDDDDV  
AMCFIKNQEAFAEKYLEFLVGRVQAESVVVSTPVQEFYKKYAEETLSAKDPTQPPPPPLQHYLEQPVVERVQKYQ  
ALLKELIRNKARNRQNCALLEQAYAVVSALPQRAENKLVSLMENYPGTLEALGEPHQGHFIVWEGAPGARM  
PWKGHNHRVFLFRNYLVICKPRRDSRTDFTSYVFRNMMKLSSIDLNDQVEGDDRAFEVWHEREDSVRKYLLQA  
RTVILKNSWVKEICIGIQRLAQPVWRPPEFEEELADCTAELGETVKLACRVTGTPKPIVSWYKDGKPEVVDPH  
HILIEDPDGSLTILDNLTGIDSGYMCFAASAAGNASTLGLKILVQVPPRFVKNVRATPFVEGEDAQITCTVE  
GAPYPQIRWYKDGTLTLLAPGNRYRMLNEPRSGVLVLESINLIQAASKEDLGHYECELVNRGLGSTRGGELYMQS  
PALRARDQHHREQIVAAVEERRPSPP\*

>rs256529946\_ENSMUSP00000151217\_c.18643:T>AATCAATCAATCT\_p.V6215ESINL-ins  
ENSMUST00000219084.3|Obscn-207|ENSMUSG00000061462|-  
|chr11:g.58912292:A>AGATTGATTGATT  
MDHSFSGAPRFLTRPKAFVSVGKDATLSCQIVGNPTPHVSWEKDRQPVEAGARFRLAQDGDVYRLTILDLAL  
GDSGQYVCRARNAIGEFAAVGLRVDSEGTCAEQAPHFLLRPTSIRVREGADATFRCRVGGSPQPAVSWSKDG  
RRLGPPADAMRVEEHEGESSALRIR SARPRDGGTYEVRANPLGSASAAAAALVVDSDAEVAGPPGTSTATLLA  
HLQRRREAMRAEVI PPSPPGAGTRTCTVTTEGKHARLSCFVTGEPKPETVWKKDQGLVTEGRHVVEDEQENF  
VLKILFCKQSDRGLYCTASNLVQTYSSVLVVVREPTVPFKKRLQDLEVRKESATFQCEVAQPAEAAWFK  
EETRLWASAKYDIEEGETERRLTVRNVSADDDAVYICETTEGSRVAELSVQGNLTKLPRKTAVRTGDTAIF  
WVELAVPEGPVWRWRNQEEMVAGGRVAITAEGTCHTLTIFQCTLEDMGEVAFVSGGCRTTTQFCVSAPRRPPL  
YPPADPVVKAKTESSVTLVSWAPPHGDRPVTIDGYVLEKRLKLGAYAWSRCHEAGWLATTEFTITGVAAEEDGFQ



FRVSAINHFGQGPYLEFPGTMHLVPLAVKTPKAVEAVEGGEVTFVSDLTVASSGEWFLDGEALKASSIYVI  
RCDRTRHMLTIREVPARLHGAQLKFVANGIETSIQMVVRAALGLPSSKLPAAAAREVLQAQLHEEAQLLAELSD  
QAAAVTWLKDGRELSLGPKEYMQVSAGRRALLVRDVAQDDAGLYECVSRGSRRTAYQLLVQDITDGYRDWGPAG  
PQKHMCKCAGAKIARYLGSscyRFLQYDKGVVHLEAALDTRQKGTSSCSLHEKPKLVFAKQQAHSVEKAE  
AGNSATLSCEVTQAQTEVTFWKDGKLLSSSSKVRMEASGCSRRLVVQQAGKADAGEYSCEAGGQKLSFRLDVA  
EPKLVFAKQQAHSVEKAEAGASATLSCEVAQAQTEVTFWKDGKLLSSSSKVRMEASGCSRRLVVQQAGKADA  
GEYSCEAGGQKLSFRLDVAEPKMFVFAKEQQARSEVKAEGASATLSCEVAQAQTEVTFWKDGKLLSSSSKVRM  
EASGCSRRLVVQQAGKADAGEYSCEAGGQKLSFRLDVTEPKLVFAKEQQARSEVKAEGNSATLSCEVAQAQ  
EVTWFKDGKLLSSSSKVRMEASGCSRRLVVQQAGKADAGEYSCEAGGQKLSFHLDVTEPKLVFAKEQQAHSEV  
KAEAGASATLSCEVAQAQTEVTFWKDGKLLSSSSKVRMEASGCSRRLVVQQAGKADAGEYSCEAGGQKLSFR  
DVAEPKLVFAKEQQARSEVKAEGASATLSCEVAQAQTEVTFWKDGKLLSSSSKVRVEASGCSRRLVVQQAGK  
ADAGEYSCEAGGQKLSFRLDVAEPKLVFAKEQQANSEVKAEGASATLSCEVAQAQTEVTFWKDGKLLSSSSK  
VRVEASGCSRRLVVQQAGKADAGEYSCEAGGQKLSFRLDVAEPKLVFAKEQQAHSEVKAEGASATLSCEVAQ  
AQTEVTFWKDGKLLSSSSKVRVEASGCSRRLVVQQAGKADAGEYSCEAGGQKLSFRLDVAEPKLVFAKEQQAH  
SEVKAEGASATLSCEVAQAQTEVTFWKDGKLLSSSSKVRVEASGCSRRLVVQQVKGADAGEYSCEARGQKLS  
FRLDVAEAEIQIPERPSRREPLVVEKETIILTATIAAPSVAAVTWLKDGVETIRRSKRHEATSLGDTHLTVR  
GAQVLDIAIYSCRVKGEGQDFPVQVEEVAAKFSKPLEPVEGELGGTVMLVCELSPEQAEVWRCGNTQLRPGK  
RFQMTSEGRRTLTIVSGLREDDAEYVCESRDDRTSARLTVKVPRVVKFTSGLSAMVAEEGQEAFTQCVVSPS  
DAGVTWYKDGMLQPSSEKFMVVEGASRSILTILGLTLEDAGQVTEAEGASSAALRVREAPVLFKFKLEPQT  
VEERTSVTLEVELTRPWPVEKWRNAAVLTPSENVEIRAEGARHCLVLRVGFADRGFFGCETPDDKTQAKLN  
VEMRQVRLVRGLQEVVEAKEQGTASMDVELSHAEEVGSWTRDGLRQPGPKCHLAVQGPVHILTLALSALQFQDSG  
LVAFRAEGVHTSARLIVTELPSVFTRVLQDVVATQKEKVTLECELSRPVDVRWLKDGVELRAGKAI GIVAQGT  
CRSLVIYRCETGDQGVYCDALDAQTSASLRVQGRYTLIFRRLAEDAGEVKFVAENAESRAHLRVKELPVT  
LLRPLRDKIAMEKHRGVLECVSRASAQVRWFKGGVELQSGPKYEVVSDGLYRKLVINDDVQPEDEDTYTC DAG  
NVKTSAQFTFVEEQSITIVRGLKDMTVMEPAPAWFECETSIPSVRPPKWLKGKTVLQAGGNVLEQDGTVHRLT  
LHKTCSTMTGPVHFTIGKSRSSAQLVVS DIPVVLTRPLEPKAGRELQSVVLSCDFRPAPKAWQYKDDTFLSP  
SEKFKMALEGQMAELRILRLTPADAGVYRCQAGSAQSAEVTVEAREVTVIQPLQDAEAMEEGVCFCELSH  
KDEDIEWSLNGTPLYNDSFHEISHEGCLHTLVLKSVRQADTGTVCATSPKVS SARLVVKGKPVVFLKALDDV  
SAEERGTTLTQCEVSDPEARVVWRKDGVELGSPDKYDFLHKAGARGLTVHDLSHEDAGLYTCQVGSKETQSKV  
SVHDLHVGITKRLKTVEVLEGESECFEVLSSHESPSDPAVWTVGGKTVGGSGHFHAVRQGRKYTLTVKDAALS  
DAGEVVSVLGLTSKASLIIRERPVDITKPLEDQRTTLGEDVMLSCELSRAGTSVRWLKDGKAIKRSQKYDLL  
SEGTRAVLVVRKASLKDSGEYTCETEASKSTAKLCVEEKANRFTEELADLQVEEKGRAVFTCKTEHPASVVTW  
RKGLLELRASGKHVPSQEGTLTKLTINALERTSDSYTCDIGQARTQARLLVHGQKVRVIEDLEDTAVQEGSS  
AKFCCRIAPADYGPVHWFLDKTPHLSNELNEITVQPGGYHVLTLRQLALKDSGTVYFEAGDQRTSAAALRVTEK  
PSIFSRPLTDVTVTEGEDTLVCETTTVDSVSRWTKDGKTLRPSARCQLSHEGCAQLLITATTPQDGGRYKC  
EIGGASSSIVRVHALPVRFRESLKDVEVPEGKAATLRCVLSVAAPVEWRHGDDVLKSSNKYSLRQEGAVLE  
LVIRDLQPDGQYSCSFGDQTSATLTVKTSQAQFVGLKRNKEATEGTTVTLRCELTKEAPVEWKKGTETLR  
NGDKYSLKQDGA VCELQICSLLVADAGEYSCVCGQEKTSATLTVKALLVHFVRRLRSKEATEGDTTTLQCELS  
KAAPVEWRKGTETLRDGDYSLKQDGA VCELQIRSLTIADAGEYLCTCGQEKTSATLTVRGLPAKFIEDLRSQ  
EATEGATAILRCELSKAAPVEWRKGSSETLKDGDYTLRQDGA VCELQIRGLAVVDTGTYSLPTKFTGLRNE  
EATEGTMATLRCQMSKAAPVEWRKGSSETLRDGDYSLRQDGA MCELQIRGLTIEDSGEYTCVCGQEKTSATLS  
VKALPPRFIEDLRSQEATEGTMATLRCQMSKAAPVEWRKGSSETLGDGGYSLRQNGAVCELQIHDLAVEDTGE  
YSCVCGQEKTSATLNVKALPPKFTTEGLKKEEATEGTMVTLRCQMSKEATVEWRKGAKTLS DGGYSLRQDGA  
MCELQICGLAVEDAGEYSCVCGQEKTSATLSVKALPPRFIEDLRSQEATEGTMATLRCQMSKAAPVEWRKGS  
SETLRDGDYSLRQDGA VCELQIRDLAVEDAGEYLCVCGQEKTSATLSVKALPPRFIEDLRSQEATEGTMATLRCQ  
MSKAAPVEWRKGSSETLRDGDYSLRQDGA MCELQICDLAVEDTGDYSCVCGQEKTSATLSVKAPQVVFQQLQ  
NLQAEEGSMASLRCELSVPNAAMVWSKGGLELQGDTRREARQQGCVAELLLRDLRREDAGEYSCTCGSQTTSA  
TLMVTAAPVRFLRELQAQDVDEGATARLRCELSREAVSVEWRKGS LQFPKAKYQMVQEGTTAELLVHGVEQE  
DAGEYTC DAGHTQSIARLSVRAPKPKFKTDLQSTEQEAGGTARLCCQLSEAPGTPVQWLKEGVELHVGSKYE  
MRRQGA VCELLIHGLEAKDTGEYACL VGGQKTLASLRVKEPEVTIVRGLVDMEVQADEVFTCKV SQAGATD  
VQWHLQGLPLQSNEVTEVAVLADGCTHVLQLKGVTL EDAGTVSFHVGGSSSAQLTVRVPEVTVLEPLKDVQL  
SEGQDAHFRCLSRASGQEARWALGGVPLQCNEMNDITVEQGTLYLLTLHKVTL EDAGTITLQVGS CSSEAQL  
KVTAKNTVLRGLNVDALLEGGEALFECQLSQPEVAASHVWLLDDEPVHTSEKVEVVYFENGLRHLLLLKLNKLPQ  
DSCRVTFLAGDVNTSAFLTVRGWRLEVLEPPHDAASVKAGMQVRFTCILSEAVPVGEATVYINGAAIQPDDTDW  
TVTTDGS HHALTLSNAQPQHAGEVTF AARDAVASARLSVLALPDPPEDAEVVGRSDHSVTLSSWVAPMSDGGGG  
LCGYRVEMKEASTGQWQLCHDLVPGPECVVDDLVPKTYRFRVAAVGPAGAGEPVHLPQMVKIAPAPAPAPAP  
APAPETROAVVGEDICLELEVAADGGEVWHKGTERRIQPGGHFEVLSRGQRQMLVIKGFRTEDQGEYRCGPIQ  
GLPSSGAATFNVVMTSGSGDEVPAQPSLPPEAAQEGDLHLLWEALARKRRMSREPTLDSISELPEEDSRVQHL

RQEAEETAPDLSEGYSTADELARTGEADLSHTSSDDESRAGTPSLVTYLKKAGGPGISPLASKHEAQVTTSVK  
PQKQQEPVVPPTCPPPGDLAADLMDPSLDKAAVKIQAAFQYKVRKEMKQQEGPVFSRTFGDTEAQVGDVLRRL  
ECVLATKTKDMRACWLKDGIELTDGRHYHIDQLKDGTCSSLVTGLAPTDSGRYTCQVSTKSGRVSHSACVVVSG  
TESEAESSSGGELDDAFRRARLRHLRFRTKSPAELSEEELFLSADEGPGEPEEPADWQTYREDENFVCIRFE  
SLAEARQAVTCFRNMFATMGIGVEISLGEQGPGRVEMRIGKVAPVTPAVPLAKTPGLQTSDAAPVFLTELQN  
QDVQDGYPMSFDCVVTGQPVPSVRWFKDGKLEEDDHMINEDQQGGHQLIITAVVPPADMVYRCLAENSMGV  
SSTKAELRVELTSTDYDTAADATETSSYFSAQGYLSSREQEGTESDEGQLPQVLEELKDLQVAPGTRLAKFQL  
KVKGYPAKPLYWFKDGGPLTSDHIRMTDKKTLHTLEIVSVTREDSGQYAAIISNAVGAAYSSARLLVVRGPSE  
PEEKPASDVHERLVPPRILEKFTPKKVKRGSSITFSVKVEGHPAPSVHWLKEEAEGVLWIGPDPGTGYTMASS  
SKQHSLVLLDVGRRHQGTYTCTIATNPAGQALCSASLHISGLAKEEEQERVKEALISSFLQGTSAVSAQMSES  
AGFADLVGQSKGESLVAEEAHSHLSLAEVGTTEFLQKLTSTIEMVSAKISQAKLQVPGGDSDEETKTPSASP  
RHGRSRPSSSVQESSSESEDGDSRGEIFDIYVVTADYLPGLAEQDAIILREGQYVEVLDSAHPLRVLVTRTKPT  
KSSPSRQGWVSPAYLDKRLKLSPEWGPTEAPEFPGEAVSEDEYRTRLSVVIQELLSSEQAFVQVLESHHM  
KHLERSPRVPAAVASQKTVIFRNVQDISHFHSSFLKELQCGCTDDVAMCFIKNQEAFEKYLEFVGRVQAES  
VVVSTPVQEFYKKYAEETLSAKDPTQPPPPPLQHYLEQPVVERVQKYQALLKELIRNKARNRQNCALLEQAYAV  
VSALPQRAENKLVSLMENYPGTLEALGEPiRQGHFIVWEGAPGARMPWKGNHRHVFLFRNYLVIICKPRRDSR  
TDTFSYVFRNMMLKSSIDLNDQVEGDDRAFEVWHEREDSVRKYLQARTVIKNSWVKEICIGIQRLAQPVWR  
PEEFEEELADCTAELGETVKLACRVGTGPKPIVSVYKDGKPKVEVDPHHILIEDPDGSCSTLIIDLNTGIDSGQY  
MCFASAAGNASTLGKILVQVPPRFVNVKVRATPFVEGEDAQITCTVEGAPYPQIRWYKDGTLAPGNRYRMLN  
EPRSGVLVLESINLIQAASKEDLGHYECELVNRGSTRGGGELYMQSPALRARDQHHREQIVAAVEVTEQETK  
VPKKTVIIETITTVVKS PRGRRQSPGKSPSRSPRRSASPRRPGLLAPERLYPPGTSPSRRLEVEQGRKAPV  
PALYVTEAEVHAPASQSQPKWLEVEETIEVRVKKTGSRGASPVREMTSRGEGILFTLPGGIPGRDPNANNSNN  
KSVYQEQARTWGPVAVHVGEPFIFQVDSVGNVDVAASPEPEQVRSQKEENTERQEGCSDGDENTFLMEEPQD  
TDSLQGRDPKILTHNGRVLTADLEDYVPQEGETFQCGDSTPSTPDEPPCEVSVLQREI SEPTVGGQVLLNVG  
RPPGTGATPSFFRPGSQVHSPESVFLLEAWSGPVSAAPWTSSFHTHVQSSVDGSHGFSFKTEVSTQTVSFGA  
VGETVTLHIDPDGGEAPGPSQG\*

>rs50563985\_ENSMUSP00000158795\_c.21024:C>A\_p.H7009N  
ENSMUST00000238536.2|Obscn-210|ENSMUSG00000061462|-|chr11:g.58913192:G>T  
MDHSFSGAPRFLTRPKAFVSVGKDATLSCQIVGNPTPHVSWEKDRQPVEAGARFRLAQDGDVYRLTILDLAL  
GDSGQYVCRARNAIGEAFAAVGLRVDSEGTCAEQAPHFLLRPTSIRVREGADATFRCRVGGSPQPAVSWSKDG  
RRLGPPDAPHVRVEEHGESSALRIRSARPRDGGTYEVRAENPLGSASAAAALVVDSDAEVAGPPGTSTATLLA  
HLQQRREAMRAEGIPSPPGAGTRTCTVTEGKHARLSCFVTGEPKPKETVWKKDQQLVTEGRRHVVEDEQENF  
VLKILFCKQSDRGLYTCTASNLVGQTYSSVLVVVREPTVPFKKRLQDLEVREKESATFQCEVAQPAEAAWFK  
EETRLWASAKYDIEEGTERRLTVRNVSADDDAVYICETTEGSRVAELSVQGNLTKLPRKTAVRTGDTAIF  
WVELAVPEGPVWRWRNQEEMVAGGRVAITAEGTCHTLTIQCTLEDMGEVAFVSGGCRTTTTFCVSAAPRRPPL  
YPPADPVVKAKTESSVTLSSWAPPHGDRPVTIDGYVLEKRLGAYAWSRCHAEAGWLATTEFTITGVAAEGDFQ  
FRVSAINHFGQGPYLEFPGMTMLVPLAVKTPKAVEAVEGGEVTFVSDLTVASSGEWFLDGEALKASSIYVI  
RCDRTRHMLTIREVPARLHGAQLKVFVANGIETSIQMVVRAALGLPSSKLPAAAAREVLAQLHEEAQLLAELSD  
QAAAVTWLKDGRELSLGPKYEMQVSAGRRALLVRDVAQDDAGLYECVSRGSRRTAYQLLVQDITDGYRDWGPAG  
PQKHMCKCAGAKIARYLGSscyRFLQYDKGVWHWLEAALDTRQKGTSSCSLHEKPKLVFAKQQAHSEVKA  
AGNSATLSCEVTQAQTEVTWFKDGKLLSSSSKVRMEASGCSRRLVVQQAGKADAGEYSCEAGGQKLSFRLDVA  
EPKLVFAKQQAHSEVKAEGASATLSCEVAQAQTEVTWFKDGKLLSSSSKVRMEASGCSRRLVVQQAGKADA  
GEYSCEAGGQKLSFRLDVAEPKLVFAKEQQARSEVKAEGASATLSCEVAQAQTEVTWFKDGKLLSSSSKVRM  
EASGCSRRLVVQQAGKADAGEYSCEAGGQKLSFRLDVTEPKLVFAKEQQARSEVKAEGVNSATLSCEVAQAQ  
EVTWFKDGKLLSSSSKVRMEASGCSRRLVVQQAGKADAGEYSCEAGGQKLSFRLDVAEPKLVFAKEQQARSEV  
KAEAGNSATLSCEVAQAQTEVTWFKDGKLLSSSSKVRMEASGCSRRLVVQQAGKADAGEYSCEAGGQKLSFHL  
DVTEPKLVFAKEQQAHSEVKAEGASATLSCEVAQAQTEVTWFKDGKLLSSSSKVRMEASGCSRRLVVQQAGK  
ADAGEYSCEAEGQKLSFRLDVAEPKLVFAKEQQARSEVKAEGASATLSCEVAQAQTEVTWFKDGKLLSSSSK  
VRVEASGCSRRLVVQQAGKADAGEYSCEAGGQKLSFRLDVAEPKLVFAKEQQANSEVKAEGASATLSCEVAQ  
AQTEVTWFKDGKLLSSSSKVRVEASGCSRRLVVQQAGKADAGEYSCEAGGQKLSFRLDVAEPKLVFAKEQQAH  
SEVKAEGASATLSCEVAQAQTEVTWFKDGKLLSSSSKVRVEASGCSRRLVVQQAGKADAGEYSCEAGGQKLS  
FRLDVAEPKLVFAKEQQAHSEVKAEGASATLSCEVAQAQTEVTWFKDGKLLSSSSKVRVEASGCSRRLVVQQ  
AGKADAGEYSCEAGGQKLSFRLDVAEPKLVFAKEQQAHSEVKAEGASATLSCEVAQAQTEVTWFKDGKLLSS  
SSKVRVEASGCSRRLVVQQAGKADAGEYSCEAGGQKLFRLDVAEPKLVFAKEQQAHSEVKAEGASATLSCE  
VAQAQTEVTWFKDGKLLSSSSKVRVEASGCSRRLVVQQAGKADAGEYSCEAGGQKLSFRLDVAEPKLVFAKEQ  
QAHEVKAEGASATLSCEVAQAQTEVTWFKDGKLLSSSSKVRVEASGCSRRLVVQQVQKADAGEYSCEARGQ  
KLSFRLDVADTRLMFAKEQQARTEVKAEGNSATLSCEVAQAQTEVTWFKDGKLLSSSSKVRVEASGCSRRLV  
VQQAGKADAGEYSCEAGGQKLSFRLDVAEAEESQIPERPSRREPLVVKEHETIILTATIAAPSVAAVTWLKDG

EIRRSKRHEATSLGDTHTLTVRGAQVLDIAIYSCRVGKEGQDFPVQVEEVAAKFSKPLEPVEGELGGTVMLVC
ELSPQEAEVWRCGNTQLRPGKRFQMTSEGPRTTLTVSGLREDDAEYVCESTRDDRTSARLTVKVPVVKFTS
GLSAMVAEEGQEATFQCVVSPSDAGVTWYKDGMLQPSKFKVMVESGASRSLTILGLTLEDAGQVTEAEGAS
SSAALRVREAPVLFKKKLEPQTVERTSVTLEVELTRPWPEVKWTRNAAVLTPSENVEIRAEGARHCLVLRV
GFADRGFFGCETPDDKTQAKLNVEMRQVRLVVRGLQEVEAKEQGTASMDVELSHAEEVGSWTRDGLRLQPGPKC
HLAVQGPVHILTLALSALQPDQSGLVAFRAEGVHTSARLIVTELPVSFTRVLQDVVATQKEKVTLECELSRPVDV
RWLKDGVLELRAGKAIGIVAQGTCSRSLVIYRCETGDQGVYVCDALDAQTSASLRVQGRTYTLIFRRVLAEDAGE
VKFVAENAESRAHLRVKELPVTLLRPLRDKIAMEKHRGVLECCQVSRASAQVRWFKGGVLELQSGPKYEVVSDGL
YRKLVINLVQPEDEDTYTCDAENVKTSAQFFVEEQSITIVRGLKDMTVMPEPAPAWFECETSIPSVRPPKWLIG
KTVLQAGGNVLEQDGTVHRLTLHKTCSTMTGPVHFTIGKSRSSAQLVSDIPVVLTRPLEPKAGRELQSVVL
SCDFRPAPKAVQWYKDDTPLSPSEKFKMALEGQMAELRILRLTPADAGVYRCQAGSAQSSAEVTEAREVTVI
QPLQDAEAMEEGRVCFSCELSHKDEDIEWSLNGTPLYNDSFHEISHEGCLHTLVLSVRQADTGTVCATSPKV
SVSARLVVKGKPVVFLKALDDVSAEERGTTLQCEVSDPEARVVWRKDGVELGSPDKYDFLHKAGARGLTVHD
LSHEDAGLYTCQVGSKETQSKVSVHDLHVGITKRLKTVLEVLEGECSFECVLSHESPSDPAVWTVGGKTVGGS
GHFHAVRQGRKYTLTVKDAALSDAGEVVSVLGLTSKASLIIRERPVDITKPLEDQRTTLGEDVMLSCELSRA
GTSVRWLKDGKAIRKSQKYDLLSEGTRAVLVVRKASLKDSEYTCETEASKSTAKLCVEEKANRFTTEELADLQ
VEEKGRAVFTCKTEHPASVVTWRKGLLELRASGKHVPSQEGTLKLTINALERTSDSTYTCIDIGQARTQARLL
VHGQKVRVIEDLEDTAVQEGSSAKFCCRIAPADYGPVHWFLDKTPLHSNELNEITVQPGGYHVLTLRQLALKD
SGTVYFEAGDQRTSAALRVTEKPSIFSRPLTDVTVTEGEDTLVCEETTVDSSVRWTKDGKTLRPSARCQLSH
EGCQAQLLITATTPQDGGRYKCEIGGASSSSIVRVHALPVRFRRESLKDVEVPEGKAATLRCVLSVAAPVEWR
HGDDVLKSSNKYSLRQEGAVLELVIRDLQPDQSGQYSCSFGDQTTSATLTVKTSQAQFVGLRNKEATEGTTV
TLRCELTKEAPVEWKKGTETLRNGDKYSLKQDGAVCELQICSLVADAGEYSCVCGQEKTSATLTVKALLVHF
VRRLRSKEATEGDTTLQCELSKAAPVEWRKGTETLRDGDYSLKQDGAVCELQIRSLTIADAGEYLCTCGQE
KTSATLTVRALPAKFKDSLKNEEATEGTTATLSCELSKAAPVWKKGPKTLQSGDKYVLRQDGAVCGLQIHGL
TMADAGEYSCVCGQEKTSATLTVRGLPAKFIEDLRSQEATEGATAILRCELSKAAPVEWRKGETLKDGDYR
LRQDGAVCELQIRGLAVDTGTYSPLTKFTEGLRNEEATEGTMATLRCQMSKAAPVEWRKGETLRDGDYR
LRQDGAVCELQIRGLTIEDSGEYTCVCGQEKTSATLSVKALPSRFIEDLRSQEATEGTMATLRCQMSKAPVE
WKKGSETLRDGGYSLRQDGPVCELQICDLAVEDAGEYSCVCGQEKTSATLSIKALPPRFIEDLRSQEATEGT
MATLRCQMSKAAPVEWRKGETLGDGGYSLRQNGAVCELQIHDLAVEDTGEYSCVCGQEKTSATLNVKALPP
RFIEDLRSQEATEGTMATLRCQMSKAAPVEWRKGETLRDGGYSLRQDGAVCELQIHDLVEDAGQYSCVCG
QEKTSAVLTVDALPPKFTEGLKKEEATEGTMVTLRCQMSKEATVEWRKGAKTLSDGGRYSLRQDGAMCELQIC
GLAVEDAGEYSCVCGQEKTSATLSVKALPPRFIEDLRSQEATEGTMATLRCQMSKAAPVEWRKGETLRDGD
YSLRQDGAVCELQIRDLAVEDAGEYLCVCGQEKTSATLSVKALPPRFIEDLRSQEATEGTMATLRCQMSKAAP
VEWRKGSKTLRDGDYSLRQDGAMCELQICDLAVEDTGDYSCVCGQEKTSATLSVKALPPRFIEDLRSQEARE
GTVATLRCRMSKAAPVEWRKGETLKDGDYSLRQEGNLCELQIRDLAVEDTEEYSCVCGQEKTSATLSVKAL
PAKFIEDLRSQEAPESSTVTLRCKLSKKASVWVWKKGSETLRNGARYSLRQDGAVCELEIRDLTVEFTGEYSCT
CGQERTSATLSIMAPQVVFQQPLQNLQAEEGSMASLRCELSVNAAMVWSKGGLELQGDTRREARQQGCVAEL
LLRDLRREDAGEYSCTCGSQTTSATLMVTAAPVRFRLRELQAQDVDEGATARLRCELSREAVSVEWRKGSQQLF
PCAKYQMVQEGTTAELLVHGVEQEDAGEYTCDAHTQSIARLSVRAPKPKFKTDLQSTEQEAAGTARLCCQLS
EAEPGTPVQWLKEGVELHVGSKYEMRRQGAVALLEHGLEAKDTGEYACLVGGQKTLASLRVKEPEVTIVRGL
VDMEVQADEDEFTCKVSQAGATDVQWHLQGLPLQSNVTEVAVLADGCTHVLQLKGVTLLEDAGTVSFHVGGL
SSSAQLTVRVPEVTVLEPLKDVQLSEGQDAHFRCRLSRASGQEARWALGGVPLQCNEMNDITVEQGTLYLLTL
HKVTLEDAGTITLQVGSSESSEALQKVTAKNTVLRGLENVDALEGGELFECQLSQPEVAHAHTWLLDDEPVHTS
EKVEVYFENGLRHLLLLKLNKLPQDSCRVTFLAGDVVTS AFLTVRGWRLEVLEPPHDASVKAGMQVRFTCILS
EAVPVGEATWYINGAAIQPDDTDWTVTTDGSHHALTLNAQPPHAGEVTF AARDAVASARLSVLALPDPPEDA
EVVGRSDHSVTLVSWAPMSDGGGGLCGYRVMKEASTGQWQLCHDLVPGPECVDDLVPGKTYRFRVAAVGPA
GAGEPVHLPQMVKIAPAPAPAPAPAPAPAPETRQAVVGEDICLELEVAADGGEVVWHKGTERRIQPGGHFEVLS
RGQRQMLVIKGFRTEDQGEYRCGPIQGLPSSGAATFNVMVMTSGSGDEVPAQPSLPPEAAQEGDLHLLWEALAR
KRRMSREPTLDSISELPEEDSRVQHLRQEAETAPDLSEGYSTADELARTGEADLSHTSSDDESAGTPSLVT
YLKAGGPGISPLASKHEAQVTTSVKPKQKQEPVPTCP PPGDLSAADLMDPSLDKAAVKIQAAFQYKVRKE
MKQQEGPVFSRTFGDTEAQVGDVLRLECVLATKTDMRACWLKDGIELTDGRHYHIDQLKDGTCSSLVTVGLAPT
DSGRYTCQVSTKSGRVSHSACVVVSGTESEAESSSGGELDDAFRAARRLHRLFRTKSPAELSEELFLSADE
GPGEPEAPADLQTYREDENFVCIRFESLAEARQAVTCFRNMVATMGI GVEISLGEQGRGVEMRIGKVAPTVT
PAVPLAKTPGLQTSDAAPVFLTELQNDVQDGYPMSFDCVMTGQVPSVRWFKDGKLEEDDHVMINEDDQGG
HQLIITAVVPADMVYRCLAENSMGVSSTKAELRVELTSTDYDTAADATETSSYFSAQGYLSRREQETESDE
GQLPQVLEELKDLQVAPGTRLAKFQLKVKGYPAKLYWFKDQGPLTSDHIRMTDKKTLHTLEIVSVTREDSG
QYAAIYISNAVGAAYSSARLLVRGPSEPEEKPASDVHERLVPPRILEKFTPKKVKRGSSTIFSVKVEGHPAPSV
HWLKEEAKEKGLWIGPDTPGYTMASSSKQHSVLVLLDVGRQHGTTCIATNPAGQALCSASLHISGLAKEEQ

ERVKEALISSFLOGTSQAVSAQMSESAGFADLVGQSKGESLVAAEEAHSHLSLAIEVGTTEFLQKLTQSQITEMVS  
AKISQAKLQVPGGDSDEETKTPSASPRHGRSRPSSSVQESSSEEDGDSRGEIFDIYVVTADYLPGLGAEQDAI  
ILREGQYVEVLDSAHPLRWLVRTKPTKSSPSRQGWVSPAYLDRKRLKLSPEWGPTEAPEFPGEAVSEDEYRTRL  
SSVIQELLSSEQAFVQELQFLESHHMKHLERSPRVPAAVASQKTVIFRNVQDISHFHSSFLKELQCGGTDDDDV  
AMCFIKNQEAFAKEYLEFLVGRVQAEVSVVSTPVQEFYKKYAEETLSAKDPTQPPPPPLQHYLEQPVVERVQKYQ  
ALLKELIRNKARNRQNCALLEQAYAVVSALPQRAENKLVSLMENYPGTLEALGEPHQGHFVWEGAPGARM  
PWKGHNRHVFLFRNYLVICKPRRDSRTDTFSYVFRNMMKLSSIDLNDQVEGDRAFEVWHEREDSVRKYLLQA  
RTVI IKNSWVKEICGIIQORLAQPVWRPPEFEEELADCTAELGETVKLACRVGTGTPKPIVSWYKDGKPVVEVDPH  
NILIEDPDGSCTLILDNLGTIDSGQYMCFAASAAGNASTLGKILVQVPPRFVNVKVRATPFVEGDAQITCTVE  
GAPYPQIRWYKDGTLAPGNRYRMLNEPRSGVLVVIQAASKEDLGHYECELVNRLGSTRGGGELYMQSPALR  
ARDQHHREQIVAAVEDTSVEGSAHSAQDGADQQAASVLWRLGSEALGPS PGDLPNTRQSEPPAFEEAASQIP  
GAASGTPEVSQPGTHKGLEQETTSSGSQGWTVPIRVEGTAWPGAGTGQLLDDVHSQVIMETTQRTYVCQAPDT  
GVTRAPSMQVTIEDVQVQVGDMAQF DAVIEGHPPPIVTVWYKGSTQLTSSARLSQRQDGTYSVLVTDVAPHDA  
GVYTCVANNAGGQVLCKAELLVHGGDKLDAENQVYRRKLHSFYDVQEE IGRGVFGFVKRVQHKGNMFCAAKF  
IPLRSKTRAQAYQERDILATLGHPLVTGLLDQFETRKTLLI LELCSSEELLDRFLKKGVVTEAEVKVYIQQL  
VEGLHYLHSHGILHLDIKPPNIMLVHPAREDIKICDFGFAQKITPSEPQYSKYGSPEFVSPETIEQNPVSEGS  
DIWAMGVISYLSLTCSSPFAGESDRATLLNVLEGRVSWSSPTAAHLSSEDAKDFIKATLQRTPRARPSTSQCLA  
HPWFLKSMPAEEAHFINTKQLKFLLRARSRWQRSLMSYKSI LVMRSIPELLQGGPPDSPSLGVARHLRGEASGAS  
SSSSSSDNELAPFARAKSLPPSPVTHSPLLHPRGFLRPSASLPEETEASMP TADA AVPAS PQSAGPPASPGCV  
PRHSVISSLFYQQAGEGAERGNKTS GAKRHPARRRHLLKGGYIARALPGLREPLMEYSLLEEEAAREEQASLM  
TKTPSFETALRLPSSSVREVPGRSHSLDNPPVTTGPSPEACKEQLLFPSTGLTHETTAKDRGHKEGFLQESV  
PFPMSGDSRPGKQEGSSQDSCRGKPASSCHSELGSGSQEGCGPPSSQSLGSLPPQSLKELSTSCGPLFSEQ  
PQAAPFPTQVSPLLGEKEPQDGS LSEGPVVPVSSSPGSASQVDASLDTEGLSEAGDTCDFTPPPQRPQEQAT  
TRKFSLESRGGYAGVAGYGTFAFGGDAGGMLGQGPLWARMAWAVS QSSEEQDEAATESPQPLES LGPIAEASG  
VPLRTSPSLTPWEEVEQVSLVQIRDLSGDAEAADTISLDISEVDPAYLNLSDLYDIKYLPEFEMI FRRVPKPI  
EQPESPGSETEAGQLADFL EEAAPWPGELGLRAGLEIT EEPPEPGDLEALLGEAAVGRKRKWSPSRGLFQF  
PGRCLSGMPEAEHLGRLQRFVAKASMAHISRI LKGRPEGPEREGPPRKKAGLASFRLSGLKGRDQELSD EAVVLGQ  
SVTLACQVLAQPTAQATWSKDGVLLESSGHLIISSTLKNFQLLTI LVVKEEDLGTYTCCVSNPLGTAVTTGVL  
RKAERPSSSPREVEGELYKDAVLLVWKPVESECGPVTVYIVQCCIEGGSWTTLASDISDCCYLTGKLSRGGMYIF  
RTACVSKAGMGPYSSPSEQVLLGGPNHLASEEESSRGRPAQLLPSTKTF AFQMQIRRRGRFSVVRQCREKASGR  
ALAAKIVPYQPEDKTAVLREYEALKRHLHHPHLAQLHAAYLSPRHLVLI LELCSGPELLPSLAERESYSESDVK  
DYLWQMLSATQYLHAQHI LHLDLRSENMMVTEYNLLKVIDLGNQSLDQEKVPAPENFKDYLETMAPELLEGG  
GAVPQTDIWAIGVTA FIMLSGEY PESSSEGTRDLQKGLRKLIRLSRCYAGLSGGAVAF LQSSSLCAQPWGRPCA  
STCLQCGLWTEEGPTGSRPTVTFPTVRLRA FVREKRRRALLYKKNLAQVR\*  
>rs50563985\_ENSMUSP00000038264\_c.18864:C>A\_p.H6289N  
ENSMUST00000047441.14|Obscn-202|ENSMUSG00000061462|-|chr11:g.58913192:G>T  
MDHSFSGAPRFLTRPKAFVSVGKDATLSCQIVGNPTPHVSWEKDRQPEAGARFLAQDGDVYRLTILDLAL  
GDSGQYVCRARNAIGEAFAAVGLRVDSEGTCAEQAPHFLLRPTSIRVREGADATFRCRVGSGSPQPAVSWSKDG  
RRLGPPDAPHVRVEEHGESSALRIRSARPRDGGTYEVRAENPLGSASAAAALVVDSDAEVAGPPGTSTATLLA  
HLQORREAMRAEGIPPSPPGAGTRTCTVTEGKHARLSCFVTGEPKPEVWKKDGQLVTEGRRHVVEDEQENF  
VLKILFCKQSDRGLYTCTASNLVGQTYSSVLVVVREPTVPFKKRLQDLEVREKESATFQCEVAQPATEAAWFK  
EETRLWASAKYDIEEEGTERRLTVRNVSADDDAVYICETTEGSRVVAELSVQGNLTKLPRKTAVRTGDTAIF  
WVELAVPEGPVWRWRNQEEMVAGGRVAITAEGTCHTLTI FQCTLEDMGVAFVSGGCRTTTQFCVSAPRRPPL  
YPPADPVVKAKTESSVTLWSAPPHGDRPVTIDGYVLEKRLKLGAYAWSRCHEAGWLATTEFTITGVAEEGDFQ  
FRVSAINHFGQGPYLEFPGMTMLVPLAVKTPLKAVEAVEGGEVTF SVDLTVASSGEWFLDGEALKASSIYVI  
RCDRTRHMLTIREV PARLHGAQLKFVANGIETSIQMVRAALGLPSSKLPAAAAREVLAQLHHEAQLLAELSD  
QAAA VTWLKDGRELSLGPKYEMQVSAGRRALLVRDVAQDDAGLYECVSRGSRTAYQLLVQDITDGYRDWGPAG  
PQKHMCKCAGAKIARYLGSSCYRFLQYDKGVWHLEAALDTRQKGTSSCSLHEKPKLVFAKQQAHSEVKA  
AGASATLSCEVAQAQTEVTWFKDGKLLSSSSKVRMEASGCSRRLVVQQAGKADAGEYSCEAGGQKLSFRLDVA  
EPKMFVFAKEQQARSEVKA EAGASATLSCEVAQAQTEVTWFKDGKLLSSSSKVRMEASGCSRRLVVQQAGKADA  
GEYSCEAGGQKLSFRLDVTEPKLVFAKEQQARSEVKA EVGNSATLSCEVAQAQTEVTWFKDGKLLSSSSKVRM  
EASGCSRRLVVQQAGKADAGEYSCEAGGQKLSFRLDVAEPKLVFAKEQQARSEVKA EAGNSATLSCEVAQAQ  
EVTWFKDGKLLSSSSKVRMEASGCSRRLVVQQAGKADAGEYSCEAGGQKLSFHLVDVTEPKLVFAKEQQAHSEV  
KAEAGASATLSCEVAQAQTEVTWFKDGKLLSSSSKVRMEASGCSRRLVVQQAGKADAGEYSCEAGGQKLSFR  
DVAEPKLVFAKEQQARSEVKA EAGASATLSCEVAQAQTEVTWFKDGKLLSSSSKVRVEASGCSRRLVVQQAGK  
ADAGEYSCEAGGQKLSFRLDVAEPKLVFAKEQQANSEVKA EAGASATLSCEVAQAQTEVTWFKDGKLLSSSSK  
VRVEASGCSRRLVVQQAGKADAGEYSCEAGGQKLSFRLDVAEPKLVFAKEQQAHSEVKA EAGASATLSCEVAQ  
AQTEVTWFKDGKLLSSSSKVRVEASGCSRRLVVQQAGKADAGEYSCEAGGQKLSFRLDVAEPKLVFAKEQQAH

SEVKAEEAGASATLSCEVAQAQTEVTFWFKDGKLLSSSSKVRVEASGCSRRLVVQQAGKADAGEYSCEAGGQKLS  
 FRLDVAEPKLAFAKEQQAHSEVKAEEAGASATLSCEVAQAQTEVTFWFKDGKLLSSSSKVRVEASGCSRRLVVQQ  
 AGKADAGEYSCEAGGQKLFRLDVAEPKLVFAKEQQAHSEVKAEEAGASATLSCEVAQAQTEVTFWFKDGKLLSS  
 SSKVRVEASGCSRRLVVQQVQKADAGEYSCEARGQKLSFRLDVAEAEESQI PERPSRREPLVVKHEHETI I LTAT  
 IAAPSVAAVTWLKDGV EIRRSKRHEATSLGDTHTLTVRGAQVLD SAIYSCRVGKEGQDFPVQVEEVAAKFSKP  
 LEPVEGELGGTVMLVCELSPEQAEVWRCNGTQLRPGKRFQMTSEGPRRTLTVSGLREDDAEYVCESRDDRT  
 SARLTVKVPVVKFTSGLSAMVAEEGQEA TFQCVVSPSDAGVTWYKDGMLQOPSEKFMVMEVSGASRSLTILGL  
 TLEDAGQVTVEAEGASSAALRVREAPVLFKKKLEPQTVEERTSVTLEVELTRPWPVEVKWTRNAAVLTPSENV  
 EIRAEGARHCLVLRVGFADRGFCEPDDDKTQAKLNVEMRQVRLVRLGLQEVEAKEQGTASMDVLESHA EVE  
 GSWTRDGLRLQPGPKCHLAVQGPVHILTL SALQPQDSGLVAFRAEGVHTSARLIVTELPVSFTRVLQDQVATQ  
 KEKVTLECELSRPVDVRWLKDGVELRAGKAI GIVAQGTCSRSLVIYRCETGDQGVYVCDALDAQTSASLRVQGR  
 TYTILFRRLVAEDAGEVKFVAENAESRAHLRVKELPVTLLRPLRDKIAMEKHRGVLECCQVSRASAQVRWFKGG  
 VELQSGPKYEVVSDGLYRKLVIN DVQPEDEDTYTCDAGNVKTSAQFFVEEQSITIVRGLKDMTVMEPAPAWFE  
 CETSI PSVRPPKWL LKGTVLQAGNVGLEQDGTVHRLTLHKTCSTMTGPFVHFTIGKSRSSAQLVVS D I PVVLT  
 RPLEPKAGRELQSVVLSCDFRPAPKAVQWYKDDTPLSPSEKFKMALEGOAELRILRLTPADAGVYRCQAGSA  
 QSSAEVTVAREVTVIQPLQDAEAMEEGRVCFSCELSHKDEDI EWSLNGTPLYNDSFHEI SHEGCLHTLV LKS  
 VRQADTGTVCATSPKVS SARLVVKGKPVVFLKALDDVSAEERGTTLQCEVSDPEARVWVRKDGVELGPFSDK  
 YDFLHKAGARGLTVHDL SHEDAGLYTCQVGSKETQSKVSVHDLHVGITKRLKTVEVLEGECSDFEVLSSHESP  
 SDPAVWTVGGKTVGGSGHFHAVRQGRKYTLTVKDAALSDAGEVVF SVLGLTSKASLIIRERPV DITKPLEDQR  
 TTLGEDVMLSCELSRAGTSVRWLKDGKAI RKSQKYDLLSEGTRAVLVVRKASLKDSGEYTCETEASKSTAKLC  
 VEEKANRFTEELADLQVEEKGRAVFTCKTEHPASVVTWRKGLLELRASGKHVPSQEGTLTKLTINALERTDSD  
 TYTCDIGQARTQARLLVHGQKVRVIEDLED TAVQEGSSAKFCCR IAPADYGPVHWF LDKTPLHSNELNEITVQ  
 PGGYHVLTLRQLALKDSGTVYFEAGDQRTSAALRVTEKPSIFSRPLTDVTVTEGEDTLTVCE TTTVDSSVRWT  
 KDGKTLRPSARCQLSHEGCAQLLITATTPQDGGRYKCEIGGASSSSIVRVHALPVRFRESLKDVEVPEGKAA  
 TLRVLSVVAAPVEWRHGDDVLKSSNKYSLRQEGAVLELVIRDLQPDGSGQYSCSFGDQTTSATLTVKTS SAQ  
 FVGKLRNKEATEGTTVTLRCELTK EAPVEWKKGETELRNGDKYSLKQD GAVCELQICSLLVADAGEYSCVCGQ  
 EKT SATLTVKALLVHFVRLRSKEATEGDTTLQCELSKAAPVEWRKGTETLRDGD RYSLKQD GAVCELQIRS  
 LT IADAGEYLCTCGQEKT SATLTVRALPAKFKDSLKNEEATEGTTATLSCELSKAAPVTWKKGPKTLQSGDKY  
 VLRQD GAVCGLQIHGLTMADAGEYSCVCGQEKT SATLTVRGLPAKFIEDLRSQEATEGATAILRCELSKAAPV  
 EWRKGETLKDGD RYTLRQD GAVCELQIRGLAVVD TGTYS SLP TKFTEGLRNEEATEGTMATLRCQMSKAAPV  
 EWRKGETLRDGD RYSLRQD GAVCELQIRGLTIEDSGEYTCVCGQEKT SATLSVKALPPRFIEDLRSQEATEG  
 TMATLRCQMSKAAPVEWRKGETLGDGG RYSLRQNGAVCELQIHDLAVEDTGEYSCVCGQEKT SATLNVKALP  
 PRFIEDLRSQEATEGTMATLRCQMSKAAPVEWRKGETLRDGG RYSLRQD GAVCELQIHDL DVEDAGQYSCVC  
 GQEKTSAVLTVDALPPKFTEGLKKEEATEGTMVTLRCQMSKEATVEWRKGAKTLS DGG RYSLRQD GAVCELQI  
 CGLAVEDAGEYSCVCGQEKT SATLSVKALPPRFIEDLRSQEATEGTMATLRCQMSKAAPVEWRKGSKT LR DGD  
 RYSLRQD GAVCELQICDLAVEDTGDYSCVCGQEKT SATLSVKAPQVVFQQPLQNLQAEEGSMASLRCELSVFN  
 AAMVWSKGGLELQGDTRREARQQCVAELLLRDLRREDAGEYSC TCGSQTTSATLMVTAAPVRFRLRELQAQDV  
 DEGATARLRCELSREAVSVEWRKGS LQLFPCA K YQMVQEGTTAE LLVHGVEQEDAGEYTC DAGHTQS IARLSV  
 RAPKPKFKTDLQSTEQEAGGTARLCCQLSEAE PGT PVQWLKEGVELHVGS KYEMRRQ GAVCELLIHGLEAKDT  
 GEYACL VGGQKT LASLRVKEPEVTIVRGLVDMEVQADE DVEFTCKV SQAGATDVQWHLQGLPLQSNEVTEVAV  
 LADGCTHVLQLKGV TLEDAGTVSFHVGGLSSSAQLTVRVPEVTVLEPLKDVQLSEGQDAHFRCRLSRASGQEA  
 RWALGGVPLQCNEMNDITVEQGTLYLLTLHKVTLEDAGTITLQVGS CSSEAQLKVTAKN TVLRGLENDVALEG  
 GEALFECQLSQPEVA AHTWLLDDEPVHTSEKVEVVYFENGLRHLL LKLNKLPQDSCRVTFLAGDVVTS AFLTV  
 RALPDPPEDA EVVGRSDHSVTL SWVAPMSDGGGGLCGYR VEMKEASTGQWQLCHDLVPGPECVDDLVPGKTY  
 RFRVAAVGPAGAGEPVHLPQMVK IAPAPAPAPAPAPAPAPETRQAVVGEDICLELEVAADGGEV VWHKGTERRI  
 QPGGHFEVLSRGRQMLVIKGFRTEDQGEYRCGPIQGLPSSGAATFNVMVTS GSGDEVPAQPSLPPEAAQEGD  
 LHLLWEALARKRRMSREPTLDSISELPEEDSRVQHLRQEAEE TAPDLSEGYSTADELARTGEADLSHTSSDDE  
 SRAGT PSLV TYLKKAGGPGISPLASKHEAQVTT SVKPKQKQEPVVP TCPPPGDLSAADLMDPSLDKAAVKIQA  
 AFKGYKVRKEMKQEGPVFSRTFGDTEAQVGDVLRLECVLATKTD MRACWLKDGIELTDGRHYHIDQLKDGTC  
 SLLVTVGLAPTDSGRYTCQVSTKSGRVSHSACVVVSGTESEAE SSGGELDDAFRRAARRLHRLFRFKSPAELS  
 EEELFLSADEGPGEPEPADWQTYREDENFVCIRFESLAEARQAVTCFRNM FATMGIGVEISLGEQGPGRVEM  
 RIGKVAPT VTPAVPLAKTPGLQTS DAAPVFLTELQNDVQDGYPMSFDCVVTGQPVPSVRWFKDGKLL EEDDH  
 YMINEDQGGHQLIITAVVPADMGVYRCLAENSMGVSSTKAE LRVELTSTDYDTAADATETSSYFSAQGYLSS  
 REQEGTESDEGQPLPQVLEELKDLQVAPGTRLAKFVKVGY PAKLYWFKDGP LTTSDHIRMTDKKTLHTLE  
 IVSVTREDSGQYAAIYI SNAVGAAYSSARLLVRGPSEPEEK PASDVHERLVPPRILEKFTPKKVKRGS SIFTSV  
 KVEGHPAPSVHWLKEEA EKGVLWIGPDTPGYTMASSSKQHS LVLLDVGRQH QGTYT CIATNPAGQALCSASLH  
 ISGLAKEEEQERVKEALISSFLQGT SQAVSAQMSESAGFADLVGQSKGESLVAAEHAHSHLSLAEVGT EEFLOK  
 LTSQITEMVSAKISQAKLQVPGGDSDEETKTPSASPRHGRSRPSSSVQESSSESEDGDSRGEI FDIYVVTADY



LPLGAEQDAIILREGQYVEVLDSAHPLRLVVRTKPTKSSPSRQGWVSPAYLDKRLKLSPEWGPTEAPEFPGEA  
VSEDEYRTRLSSVIQELLSSEQAFVQELQFLESHHMKHLERSPRVPAAVASQKTVIFRNVQDISHFHSSFLKE  
LQCGTDDDDVAMCFIKNQEAFAEKYLEFLVGRVQAESVVVSTPVQEFYKKYAETLSAKDPTQPPPPLOHYLE  
QPVERVQKYQALLKELIRNKARNRQNCALLEQAYAVVSALPQRAENKLVSLMENYPGTLEALGEPIRQGHFI  
VWEGAPGARMPPWKGNHRHVFLFRNYLVICKPRRDSRTDTFSYVFRNMMKLSSIDLNDQVEGDDRAFEVWHERE  
DSVRKYLLQARTVIKNSWVKEICGIQQRLAQPVWRPPEFEEELADCTAELGETVKLACRVGTGPKPIVSWYK  
DGKPEVEVDPHNILIEDPDGSCSTLILDNLTGIDSGQYMCFAASAAGNASTLGKILVQVPPRFVNKVRATPFVEG  
EDAIITCTVEGAPYPQIRWYKDGTLAPGNRYRMLNEPRSGVLLVLIQAASKEDLGHYECVELVNRLGSTRGGG  
ELYMQSPALRARDQHHREQIVAAVEGAPSMQVTIEDVQVQVGDMAQFDAVIEGHPPPIVTWYKGSTQLTSAR  
LSQRQDGTYSLVLTVDVPHDAGVYTCVANNAGQVLCCKAELLVHGGDKLDAENQVYRRLKHSFYDVQEEIGR  
GVFGFVKRVQHKGNMFCAAKFIPLRSKTRAQAYQERDILATLGHPLVTGLLDQFETRKTLLILILELCSSEEL  
LDRLFKKGVVTEAEVKVYIQQLVEGLHYLHSHGILHLDIKPPNIMVHPAREDIKICDFGFAQKITPSEPOYS  
KYGSPFVVSPEIIEQNPVSEGSIDIWAMGVISYLSLTCSSPFAGESDRATLLNVLEGRVSWSSPTAAHLSSEDAK  
DFIKATLQRTPRARPSTSQC LAHPWFLKSMPEAAHFINTKQLKFLARSRWQRSLMSYKSIIVMRSIPELLQ  
GPPDSPSLGVARHLRGEASGASSSSSSSDNELAPFARAKSLPPSPVTHSPLLHPRGFLRPSASLPEETEASMP  
TADAAVPASPOASAGPPASPGCVPRHSVISSLFYQQAGEGAERGNKTSKAKRHPARRRHLLKGGYIARALPGLR  
EPLMEYSLLEEEAAREEQASLMTKTPSFETALRPLSSSVRELVPRGSHSLDNPPVTTGSPPEACKQLLFPST  
GLTHETTAKDRGHKEGFLQESVFPFPPMSGDSRPGKQEGSSQDSCRGKPASSCHSELGSGSQEGCPESSQSLG  
SLPPQSLKKELESTSCGPLFSEQPQAAPFPQTQVSPLLGSEKEPQDGSLSSEGPVVPVSSSPGSASQVDASLDTEG  
LSEAGDTCDFTPPPQRPQEQATTRKFSLESRGGYAGVAGYGTFAFGGDAGGMLGQGPLWARMWAVSQSSEEQ  
DEAATESPQPLESLGPIAEASGVPLRTSPSLTPWEEVEQVSLVQIRDLSGDAEAADTISLDISEVDPAYLNL  
DLYDIKYLPPFEFMI FRRVPKPIEQPESPGSETEAGQGLADFLLEAAWVWPWGPGLGLRAGLEITEEPPEPGDLEA  
LLGAAVGRKRKWSPSRGLFQFGRCLSGEEPVELGLRQRVKASMAHISRIKGRPEGPEREPPRKKAGLAS  
FRLSGLKGRDQELSDEAVVLGQSVTLACQVLAQPTAQTATWSKDGVLLESSGHLLISSTLKNFQLLTLIVVKEE  
DLGTYTCCVSNPLGTAVTTGVLKRAERPSSSPRPEVVELYKDAVLLVWKPVESECGPVTYIVQCCIEGGSWTTL  
ASDISDCCYLTGKLSRGGMYIFRTACVSKAGMGPYSSPSEQVLLGGPNHLASEEESRRRPAQLLPSTKTFAF  
QMQRIRRGFRVGRKREKASGRALAAKIVPYQPEDKTAVLEVEALKRLRHHPHLAQLHAAYLSRHLVLI LEL  
CSGPELLPSLAERESYSESDVKDYLWQMSATQYLHAQHILHLDLRSENMMVTEYNLLKVIDLGNASLDQEK  
VPAPENFKDYLETMAPELLEGGAVPQTDIWAIGVTAIFIMLSGEYPESEGETRDLQKGLRKLIRLSRCYAGL  
SGGAVAFLOSSLCAQPWGRPCASTCLOCGWLTEEGPTGSRPTPVTFTVRLRAFVREKRRALLYKKNHQAQ  
VR\*

>rs50563985\_ENSMUSP00000049737\_c.20823:C>A\_p.H6942N  
ENSMUST00000052872.15|Obscn-203|ENSMUSG00000061462|-|chr11:g.58913192:G>T  
MDHSFSGAPRFLTRPKAFVSVGKDATLSCQIVGNPTPHVSWEKDRQFVEAGARFRLAQDGDVYRLTILDLAL  
GDSGQYVCRARNAIGEAFAAVGLRVDSEGTCAEQAPHFLLRPTSIRVREGADATFRCRVGSSPQPAVSWSKDG  
RRLGPPDAPHVRVKEEHGESSALRIRSARPRDGGTYEVRAENPLGSASAAAALVVDSDAEVGPPGTSTATLLA  
HLQQRRREAMRAEGIPPSPPGAGTRTCTVTEGKHARLSCFVTGEPKPEVWKKDGQLVTEGRRHVVEDEQENF  
VLKILFCKQSDRGLYTCTASNLVGQTYSSVLVVVREPTVPFKKRLQDLEVREKESATFQCEVAQPATEAAWFK  
EETRLWASAKYDIEEGTERRLTVRNVSADDDAVYICETTEGSRVVAELSVQGNLTKLPRKTAVRTGDTAIF  
WVELAVPEGPVRWLRNQEEMVAGGRVAITAEGTCHTLTI FQCTLEDMGEVAFVSGGCRTTTQFCVSAAPRRPPL  
YPPADPVVKAKTESSVTLWSAPPHGDRPVTIDGYVLEKRLKLGAYAWSRCHEAGWLATTEFTITGVAAEGDFQ  
FRVSAINHFGQGPYLEFPGTMHLVPLAVKTPKAVEAVEGGEVTFVSDLTVASSGEWFLDGEALKASSIYVI  
RCDRTRHMLTIREVPARLHGAQLKFVANGIETSIQMVVRAALGLPSSKLPAAAAREVLAQLHEEAQLLAEALSD  
QAAAVTWLKDGRELSLGPKYEMQVSAGRRALLVRDVAQDDAGLYECVSRGSRRTAYQLLVQEPKLVFAKQQAH  
SEVKAEAGNSATLSCEVTQAQTEVTFWKDGKLLSSSSKVRMEASGCSRRLVVQQAGKADAGEYSCEAGGQKLS  
FRLDVAEPKLVFAKQQAHSEVKAEAGASATLSCEVAQAQTEVTFWKDGKLLSSSSKVRMEASGCSRRLVVQQ  
AGKADAGEYSCEAGGQKLSFRLDVAEPMVFAKEQQARSEVKAEAGASATLSCEVAQAQTEVTFWKDGKLLSS  
SSKVRMEASGCSRRLVVQQAGKADAGEYSCEAGGQKLSFRLDVTEPKLVFAKEQQARSEVKAEVGN SATLSCE  
VAQAQTEVTFWKDGKLLSSSSKVRMEASGCSRRLVVQQAGKADAGEYSCEAGGQKLSFRLDVAEPKLVFAKEQ  
QARSEVKAEAGNSATLSCEVAQAQTEVTFWKDGKLLSSSSKVRMEASGCSRRLVVQQAGKADAGEYSCEAGGQ  
KLSFHLVDVTEPKLVFAKEQQAHSEVKAEAGASATLSCEVAQAQTEVTFWKDGKLLSSSSKVRMEASGCSRRLV  
VQQAGKADAGEYSCEAGGQKLSFRLDVAEPKLVFAKEQQARSEVKAEAGASATLSCEVAQAQTEVTFWKDGK  
LSSSSKVRVEASGCSRRLVVQQAGKADAGEYSCEAGGQKLSFRLDVAEPKLVFAKEQQANSEVKAEAGASATL  
SCEVAQAQTEVTFWKDGKLLSSSSKVRVEASGCSRRLVVQQAGKADAGEYSCEAGGQKLSFRLDVAEPKLAFA  
KEQQAHSEVKAEAGASATLSCEVAQAQTEVTFWKDGKLLSSSSKVRVEASGCSRRLVVQQAGKADAGEYSCEA  
GGQKLSFRLDVAEPKLAFAKEQQAHSEVKAEAGASATLSCEVAQAQTEVTFWKDGKLLSSSSKVRVEASGCSR  
RLVVQQAGKADAGEYSCEAGGQKLSFRLDVAEPKLAFAKEQQAHSEVKAEAGASATLSCEVAQAQTEVTFWKD  
GKLLSSSSKVRVEASGCSRRLVVQQAGKADAGEYSCEAGGQKLFRLDVAEPKLMFAKEQQAHSEVKAEAGAS

ATLSCEVAQAQTEVTFWFKDGKLLSSSSKVRVEASGCSRRLLVVQQAGKADAGEYSCEAGGQKLSFRLDVAEPKL
VFAKEQQAHSSEVKAEGASATLSCEVAQAQTEVTFWFKDGKLLSSSSKVRVEASGCSRRLLVVQQVQKADAGEYS
CEARGQKLSFRLDVADTRLMFAKEQQAQTEVTKAEAGNSATLSCEVAQAQTEVTFWFKDGKLLSSSSKVRVEASG
CSRRLLVVQQAGKADAGEYSCEAGGQKLSFRLDVAEAEESQIPERPSRREPLVVKEHETIILTATIAAPSVAAVT
WLKDGVEIRRSKRHEATSLGDTHTLTVRGAQVLDIAIYSCRVGKEGQDFPVQVEEVAAKFSKPLEPVEGELGG
TVMLVCELSPEQAEVWRCGNTQLRPGKRFQMTSEGPRRTLTVSGLREDDAEYVCESTRDDRTSARLTVKVP
VVKFTSGLSAMVAEEGQEAATFQCVVSPSDAGVTWYKDGMLQPSSEKFMVMEVSGASRSLTILGLTLEDAGQVTV
EAEGASSAALRVREAPVLFKFKKLEPQTVEERTSVTLEVELTRPWEVVKWTRNAAVLTPSENVEIRAEGARHC
LVLRSVGFADRGFFGCETPDDKTQAKLNVEMRQVRLVRGLQVEVAKEQGTASMDVELSHAEEVGSWTRDGLRL
QPGPKCHLAVQGPVHILTLALSALQPQDSGLVAFRAEGVHTSARLIVTELPVSFTRVLQDVVATQKEKVTLECEL
SRPVDVRLKDGVELRAGKAI GIVAQGTCSRSLVIYRCETGDQGVYCDALDAQTSASLRVQGRTYTLIFRRVL
AEDAGEVVFVAENAESRAHLRVKELPVTLLRPLRDKIAMEKHRGVLECVSRASAQVRWFVKGGLVQSGPKYE
VVDGLYRKLVINVDVQPEDEDTYTCDAGNVKTSAQFFVVEEQSITIVRGLKDMTVMPEPAPAWFECETSIPSVRP
PKWLLGKTVLQAGGNVGLQDGTVHRLTLHKTCSTMTGPVHFTIGKSRSSAQLVVS DI PVVLTRPLEPKAGRE
LQSVVLSCDFRPAPKAVQWYKDDTPLSPSEKFKMALEGQMAELRILRLTPADAGVYRCQAGSAQSSAEVTVEA
REVTVIQPLQDAEAMEEGRVCFSCELSHKDEDI EWSLNGTPLYNDSFHEISHEGCLHTLVLKSVRQADTGTVC
ATSPKVSVSARLVVKGKPVVFLKALDDVSAEERGLTLQCEVSDPEARVWVRKDGVELGSPDKYDFLHKAGAR
GLTVHDLSHEDAGLYTCQVGSKETQSKVSVHDLHVGITKRLKTVLEVLEGE SCSFECVLSHESPSDPAVWTVGG
KTVGGSGHFHAVRQGRKYTLTVKDAALSDAGEVVSVLGLTSKASLIIRERPVDITKPLEDQRTTLGEDVMLS
CELSRAGTSVRWLKDGKAIKRSQKYDLLSEGTRAVLVVRKASLKDSGEYTCETEASKSTAKLCVEEKANRFT
ELADLQVEEKGRAVFTCKTEHPASVVTWRKGLLELRASGKHVPSQEGTLKLTINALERTDSDTYTCDIGQAR
TQARLLVHGQKVRVIEDLEDTAVQEGSSAKFCCRIAPADYGPVHWF LDKTPLHSNELNEITVQPGGYHVLTLR
QLALKDSGTVYFEAGDQRTSAAALRVTEKPSIFSRPLTDVTVTEGEDTLVCETTTVDSSVRWTKDGKTLRPSA
RCQLSHEGCAQLLITATTPQDGGRYKCEIGGASSSSIVRVHALPVRFRESLKDVEVPEGKAATLRCVLSSVA
APVEWRHGDDVLKSSNKYSLRQEGAVLELVIDRLQPDQSGQYSCSFGDQTTSATLTVKTSQAQFVGLKRNKEA
TEGTVTTLRCELTKAEAPVEWKKGTETLRNGDKYSLKQDGA VCELQICSLLVADAGEYSCVCGQEKTSATLTVK
ALLVHFVRRRLRKEATEGDTTLQCELSKAAPVYERKGTETLRDGDYSLKQDGA VCELQIRSLTADAGEYL
CTCGQEKTSATLTVRALPAKFKDSLKNEEATEGTTATLSCELSKAAPVTWKKGPKTLQSGDKYVLRQDGA VCG
LQIHGLTMADAGEYSCVCGQEKTSATLTVRGLPAKFIEDLRSQEATEGATAILRCELSKAAPVEWRKGETL
DGDRYTLRQDGA VCELQIRGLAVVDGTYSLLPTKFTTEGLRNEEATEGTMATLRCQMSKAAPVEWRKGETL
DGDRYSLRQDGA MCELQIRGLTIEDSGEYTCVCGQEKTSATLSVKALPSRFIEDLRSQEATEGTMATLRCQMS
KTAPVEWKKGSETLRDGGYSLRQDGPVCELQICDLAVEDAGEYSCVCGQEKTSATLSIKALPPRFIEDLRSQ
EATEGTMATLRCQMSKAAPVEWRKGETLGDGGYSLRQNGAVCELQIHDLAVEDTGEYSCVCGQEKTSATLN
VKALPPRFIEDLRSQEATEGTMATLRCQMSKAAPVEWRKGETLRDGGYSLRQDGA VCELQIHDLVEDAG
YSCVCGQEKTSAVLTVDALPPKFTTEGLKKEEATEGTMATLRCQMSKAEATVEWRKGA KTLSDGGYSLRQDGA
MCELQICGLAVEDAGEYSCVCGQEKTSATLSVKALPPRFIEDLRSQEATEGTMATLRCQMSKAAPVEWRKGET
LRDGDYSLRQDGA VCELQIRDLAVEDAGEYLCVCGQEKTSATLSVKALPPRFIEDLRSQEATEGTMATLRCQ
MSKAAPVEWRKGSKTLR DGDYSLRQDGA MCELQICDLAVEDTGDYSCVCGQEKTSATLSVKALPPRFIEDL
RQEAAREGTVATLRCMSKAAPVEWRKGETLKDGDYSLRQEGNLCELQIRDLAVEDTEEYSCVCGQEKTSAT
LSVKALPAKFIEDLRSQEAPESSTVTLRCKLSKKASVVWKKGSETLRNGARYSLRQDGA VCELEIRDLTVEDT
GEYSCTCGQERTSATLSIMAPQVVFQQPLQNLQAEEGSMASLRCEL SVPNAMVWSKGGLELQGDTRREARQQ
GCVAELLLRDLRREDAGEYSCCTCGSQTTSATLMVTAAPVRFRELQAQDVDEGATARLRCELSREAVSVEWRK
GSLQLFPKAKYQMVQEGTTAELLVHGVEQEDAGEYTC DAGHTQS IARLSVRAPKPKFKTDLQSTEQEAGGTAR
LCCQLSEAEPTPVQWLKEGVELHVGSKYEMRRQVAGCELLIHGLEAKDTGEYACL VGGQKTLASLRVKEPEV
TIVRGLVDMEVQADEDEFTCKVSQAGATDVQWHLQGLPLQSNVTEVAVLADGCTHVLQKGVTL EDAGTVS
FHVGGSSSAQLTVRVPEVTVLEPLKDVQLSEGDQAHFRCLRSRASGQEARWALGGVPLQCNEMNDITVEQGT
LYLLTLHKVTLEDAGTITLQVGS CSSEAQLKVTAKNTVLRGLENVDALEGGEALFECQLSQPEVA AHTWLLDD
EPVHTSEKVEVVYFENGLRHLLLLKLNKLPQDSCRVTFLAGDVVTS AFLTVRGRWLEVL EPPHDASVKAGMQVR
FTCILSEAVPVGEATWYINGAAIQPDDTDWTVTTDGS HHALTLSNAQPHAGEVTF AARDAVASARLSVLALP
DPEPEAEVVRSDHSVTL SWVAPMSDGGGGLCGYRVEK EAS TGQWQLCHDLVPGPECVVDLVP GKTYRFRV
AAVGPAGAGEPVHLPQMVKIAPAPAPAPAPAPAPAPETRQAVVGEDICLELEVAADGGEV VWHKGTERRIQPGG
HFEVLSRGRQMLVIKGFRTEDQGEYRCGPIQGLPSSGAATFNVMVTS GSGDEVPAQPSLPPEAAQEGDLHLL
WEALARKRRMSREPTLDSISELPEEDSRVQLHRQEAETAPDLSEGYSTADELARTGEADLSHTSSDDES RAG
TPSLVITYLKKAGGPGI SPLASKHEAQVTT SVKPKQEQEPVPTCPPGDLSAADLMDPSLDKAAVKIQAAFKG
YKVRKEMKQQEGPVFSRTFGDTEAQVGDVLRLECVLAKTKTDMRACWLKDGIELTDGRHYHIDQLKDGTC SLLV
TGLAPTDSGRYTCQVSTKSGRVSHSACVVVSGTESEAE SSSGGE LDDAFRRAARRLHRLFRTKSPAELSEEEL
FLSADEGPGEPEEPADWQTYREDENFVCIRFESLAEARQAVTCFRNMFATMGIGVEISLGEQGPRGVEMRIGK
VAPVTPAVPLAKTPGLQTS DAAPVFLTELQNDVQDGY PMSFDCVVTGQPVPSVRWFKDGKLL EEDDHYMIN

EDQQGGHQLIITAVVPADMGVYRCLAENSMGVSSTKAELRVELTSTDYDTAADATETSSYFSAQGYLSSREQE  
 GTESDEGQLPQVLEELKDLQVAPGTRLAKFQKLVKGYPAKLYWFKDQPLTSDHIRMTDKKTLHTLEIVSV  
 TREDSGQYAAIYISNAVGAAYSSARLLVGRGPSEPEEKPASDVHERLVPPRILEKFTPKKVKRGSSTIFSVKVEG  
 HPAPSVHWLKEEAKEGVLWIGPDTPGYTMASSSKQHSVLVLDVGRQHOGTYTCIATNPAGQALCSASLHISGL  
 AKEEQERVKEALISSFLQGTSAVSAQMSEAGFADLVGQSKGESLVAEEAHSHLSLAEVGTEEFQKLTSTQ  
 ITEMVSAKISQAKLQVPGGDSDEETKTPSASPRHGRSRPSSSVQESSSESEDGDSRGEIFDIYVVTADYLPGLG  
 AEQDAIILREGQYVEVLDSAHPLRWLVRTKPTKSSPSRQGWVSPAYLDKRLKLSPEWGPTEAPEFPGEAVSED  
 EYRTRLSSVIQELLSSEQAFVQELQFLESHHMKHLERSPRVPAAVASQKTVI FRNVQDI SHFHSSFLKELQGC  
 GTDDDVAMCFIKNQEAFAKEYLEFLVGRVQAESVVVSTPVQEFYKKYAEETLSAKDPTQPPPPPLQHYLEQVVE  
 RVQKYQALLKELIRNKARNRQNCALLEQAYAVVSALPQRAENKLVSLMENYPGTLEALGEPQRQGHFIVWEG  
 APGARMPWKGNHRHVFVLFNRNYLVICKPRRDSRTDFTSYVFRNMMKLSSIDLNDQVEGDDRAFEVWHEREDESVR  
 KYLLQARTVI IKNSWVKEICGIQORLAQPVWRPPEFEELADCTAELGETVKLACRVTGTPKPIVSWYKDGKP  
 VEVDPHNILIEDPDGSCCTLIIDNLGTIDSGQYMCFAASAAGNASTLGKILVQVPPRFVNVKVRATPFVEGEDAQ  
 ITCTVEGAPYPQIRWYKDGTLTLLAPGNRYRMLNEPRSGVLVLIQAASKEDLGHYECELVNRLGSTRGGGELYM  
 QSPALRARDQHHREQIVAAVEVTEQETKVPKKTVI IEEITITTVVKS PRGRRQSPGKSPSRSPRRSASPRRPG  
 LLAPERLYPPGTS PSRRLEVEQGRKAPV PALYVTEAEVHAPASQSQPKWLEVEETIEVRVKKTGSRGASPVRE  
 MTSRGEGLF LTPGGI PGRDPNANNNSNKSVYQEARTWGPVAVHVGEFFIFQVDSVGNVDVAASPEPEQVRA  
 SQKEENTERQEGCSDGDENTFLMEEPQDTSLSQGRDPKILTHNGRVLTLADLEDYVPQEGEFTGCGDSTPSTP  
 DEPPCEVSVLQREISEPTVGQPVLLNVGRPPGTGATPSFFRPGSQVHSPESVSFLLREAWSGPVSAAWPTSSSF  
 HTHVQSSVDGSHGSFKTEVSTQTVSFGAVGETVTLHIDPDGGEAPGPSQG\*  
 >rs50563985\_ENSMUSP00000020732\_c.21024:C>A\_p.H7009N  
 ENSMUST00000020732.13|Obscn-201|ENSMUSG00000061462|-|chr11:g.58913192:G>T  
 MDHSFSGAPRFLTRPKAFVSVGKDATLSCQIVGNPTPHVSWEKDRQPVEAGARFLAQDGDVYRLTILDLAL  
 GDSGQYVCRARNAIGEAFAAVGLRVDSEGTCAEQAPHFLLRPTSIRVREGADATFRCRVGGSPPAVSWSKDG  
 RRLGPPDAPHVRVEEHGESSALRIR SARPRDGGTYEVRAENPLGSASAAAALVVDSDAEVAGPPGTSTATLLA  
 HLQQRREAMRAEGIPSPPGAGTRTCTVTEGKHARLSCFVTEGPKPETVWKKDGQLVTEGRRHVVEDEQENF  
 VLKILLECKQSDRGLYCTASNLVGGQTYSSVLVVVREPTVPFKKRLQDLEVREKESATFQCEVAQPAEAAWFK  
 EETRLWASAKYDIEEEGTERRLTVRNVSADDDAVYICETTEGSRVVAELSVQGNLTKLPRKTAVRTGDTAIF  
 WVAVLAVPEGPVWRWRNQEEMVAGGRVAITAEGTCHTLTIFQCTLEDMGEVAFVSGGCRTTTQFCVSAPRRPPL  
 YPPADPVVKAKTESSVTLWSAPPHGDRPVTIDGYVLEKRLKLGAYAWSRCHEAGWLATTEFTITGVAAEGDFQ  
 FRVSAINHFGQGPYLEFPGTMHLVPLAVKTPKAVEAVEGGEVTFVSDLTVASSGEWFLDGEALKASSIYVI  
 RCDRTRHMLTIREV PARLHGAQLKFVANGIETS IQMVVRAALGLPSKLPAAAAREVLAQLHHEEAQLLAE LSD  
 QAAA VTWLKDGRELSLGPKEYMQVSAGRRALLVRDVAQDDAGLYECVSRGSR TAYQLLVQDITDGYRDWGPAG  
 PQKHMCKCAGAKIARYLGS SCYRFLQYDKGVWHWLEAALDTRQKGKTS SCSLHEKPKLVFAKQQAHSEVKA  
 AGNSATLSCEVTQAQTEVTWFKDGKLS SSSSKVRMEASGCSRRLVVQQAGKADAGEYSCEAGGQKLSFRLDVA  
 EPKLVFAKQQAHSEVKAEAGASATLSCEVAQAQTEVTWFKDGKLS SSSSKVRMEASGCSRRLVVQQAGKADA  
 GEYSCEAGGQKLSFRLDVAEPKLVFAKEQQARSEVKA EAGASATLSCEVAQAQTEVTWFKDGKLS SSSSKVRM  
 EASGCSRRLVVQQAGKADAGEYSCEAGGQKLSFRLDVTEPKLVFAKEQQARSEVKA EVGNSATLSCEVAQAQ  
 EVTWFKDGKLS SSSSKVRMEASGCSRRLVVQQAGKADAGEYSCEAGGQKLSFRLDVAEPKLVFAKEQQARSEV  
 KAEAGNSATLSCEVAQAQTEVTWFKDGKLS SSSSKVRMEASGCSRRLVVQQAGKADAGEYSCEAGGQKLSFHL  
 DVTEPKLVFAKEQQAHSEVKA EAGASATLSCEVAQAQTEVTWFKDGKLS SSSSKVRMEASGCSRRLVVQQAGK  
 ADAGEYSCEAEGQKLSFRLDVAEPKLVFAKEQQARSEVKA EAGASATLSCEVAQAQTEVTWFKDGKLS SSSSK  
 VRVEASGCSRRLVVQQAGKADAGEYSCEAGGQKLSFRLDVAEPKLVFAKEQQANSEVKA EAGASATLSCEVAQ  
 AQTEVTWFKDGKLS SSSSKVRVEASGCSRRLVVQQAGKADAGEYSCEAGGQKLSFRLDVAEPKLVFAKEQQAH  
 SEVKA EAGASATLSCEVAQAQTEVTWFKDGKLS SSSSKVRVEASGCSRRLVVQQAGKADAGEYSCEAGGQKLS  
 FRLDVAEPKLVFAKEQQAHSEVKA EAGASATLSCEVAQAQTEVTWFKDGKLS SSSSKVRVEASGCSRRLVVQQ  
 AGKADAGEYSCEAGGQKLSFRLDVAEPKLVFAKEQQAHSEVKA EAGASATLSCEVAQAQTEVTWFKDGKLS S  
 SSKVRVEASGCSRRLVVQQAGKADAGEYSCEAGGQKLFRLDVAEPKLVFAKEQQAHSEVKA EAGASATLSCE  
 VAQAQTEVTWFKDGKLS SSSSKVRVEASGCSRRLVVQQAGKADAGEYSCEAGGQKLSFRLDVAEPKLVFAKEQ  
 QAHSEVKA EAGASATLSCEVAQAQTEVTWFKDGKLS SSSSKVRVEASGCSRRLVVQQVQKADAGEYSCEARGQ  
 KLSFRLDVADTRLMFAKEQQARTEVKA EAGNSATLSCEVAQAQTEVTWFKDGKLS SSSSKVRVEASGCSRRLV  
 VQQAGKADAGEYSCEAGGQKLSFRLDVAEAE SQIPERPSRREPLVVKEHETIILTATIAAPSVAAV TWLKDGV  
 EIRRSKRHEATVSLGDTHTLTVRGAQVLD SAIYSCRVQGEKQDFPVQVEEVA AKFSKPLEPVEGELGTTVMLVC  
 ELSPEQAEVVWRGNTQLRPGKRFQMTSEGPRRTLTVSGLEDDAEYVCE SRDDRTSARLTIVKVP RVVFKFTS  
 GLSAMVAEEGQEATFQC VVSPSDAGVTWYKDGMLQPSK FVMVSESGASRSLTILGLTLEDAGQVTVAEAGAS  
 SSAALRVREAPVLFK KLEPQTVEERTSVTLEVELTRPWPEVKWTRNAAVLTPSENVEIRAEGARHCLVLR SV  
 GFADRGF FGCETPDDKTQAKLNVEMRQVRLV RGLQVEVEAKEQGTASMDVELSHA EVEGSWTRDGLRLQPGPKC  
 HLAVQGPVHILTL SALQPQDSGLVAFRAEGVHTSARLIVTEL PVSFTRVLQDVVATQKEKVTLECELSRPV DV

RWLKDGVELRAGKAIGIVAQGTCSRSLVIYRCETGDQGVYVCDALDAQTSASLRVQGRTYTLIFRRVLAEDAGE
VKFVAENAESRAHLRVKELPVTLLRPLRDKIAMEKHRGVLECCQVSRASAQVRWFKGGVELQSGPKYEVVSDGL
YRKLVINVDVQPEDEDTYTC DAGNVKTSAQFFVVEEQSITIVRGLKDMTVMEPAPAWFECETSIPSVRPPKWLIG
KTVLQAGGNVGLQDGTVHRLTLHKTCSTMTGTPVHFTIGKSRSSAQLVVSDIPVVLTRPLEPKAGRELQSVVL
SCDFRPAPKAVQWYKDDTPLSPSEKFKMALEGQMAELRILRLTPADAGVYRCQAGSAQSSAEVTVAREVTVI
QPLQDAEAMEEGRVCFSCELSHKDEDIEWSLNGTPLYNDSFHEISHEGCLHTLVLSVVRQADTGTVCATSPKV
SVSARLVVVKGKPVVFLKALDDVSAEERGLTLTQCEVSDPEARVVRKDGVELGSPDKYDFLHKAGARGLTVHD
LSHEDAGLYTCQVGSKETQSKVSVHDLHVGITKRLKTVEVLEGESECSFECVLSHESPSDPVAVTVGGKTVGGS
GHFHAVRQGRKYTLTVKDAALS DAGEVVFVSVLGLTSKASLIIRERPV DITKPLEDQRTTLGEDVMLSCELSA
GTSVRWLKDGKAIRKSQKYDLLSEGTRAVLVVRKASLKDSGEYTCETEASKSTAKLCVEEKANRFTEELADLQ
VEEKGRAVFTCKTEHPASVVTWRKGLLELRASGKHVPSQEGLTLKLTINALERTDSDTYTCDIGQARTQARLL
VHGQKVRVIEDLEDTAVQEGSSAKFCRIAPADYGPVHWFLDKTPLHSNELNEITVQPGGYHVLTLRQLALKD
SGTVYFEAGDQRTSAAALRVTEKPSIFSRPLTDVTVTEGEDTLTVCE TTTVDSSVRWTKDGKTLRPSARCQLSH
EGCQAQLLITATTPQDGGRYKCEIGGASSSSIVRVHALPVRFRESLKDVEVPEGKAATLRCVLSVAAPVEWR
HGDDVLKSSNKYSLRQEGAVLELVIRDLQPDQSGQYSCSFGDQTTSATLTVKTSQAQFVGLRKNKEATEGTTV
TLRCELTKEAPVEWKKGTETLRNGDKYSLKQDGA VCELQICSLLVADAGEYSCVCGQEKTSATLTVKALLVHF
VRLRSKEATEGDTTTLQCELSKAAPVEWRKGTETLRDGDYSLKQDGA VCELQIRSLTIADAGEYLCGQOE
KTSATLTVRALPAKFKDSLKNEATEGTTATLSCELSKAAPVTWKKGPKTLQSGDKYVLRQDGA VCYLHGL
TMADAGEYSCVCGQEKTSATLTVRGLPAKFIEDLRSQEATEGATAILRCELSKAAPVEWRKGSSETLKDGDYR
LRQDGA VCELQIRGLAVVDGTYSLSLPTKFTEGLRNEEATEGTMATLRCQMSKAAPVEWRKGSSETLRDGDYR
LRQDGA MCELQIRGLTIEDSGEYTCVCGQEKTSATLSVKALPSRFIEDLRSQEATEGTMATLRCQMSKTA
PVEWKKGSETLRDGGYSLRQDGPVCELQICDLAVEDAGEYSCVCGQEKTSATLSIKALPPRFIEDLRSQEATE
GTMATLRCQMSKAAPVEWRKGSSETLRDGGYSLRQNGAVCELQIHDLAVEDTGEYSCVCGQEKTSATLNV
KALPPRFIEDLRSQEATEGTMATLRCQMSKAAPVEWRKGSSETLRDGGYSLRQDGA VCELQIHDLDVEDAG
QYSCVCGQEKTSAVLTVDALPPKFTEGLKKEEATEGTMVTLRCQMSKEATVEWRKGA KTLSDGGYSLRQD
GAMCELQICGLAVEDAGEYSCVCGQEKTSATLSVKALPPRFIEDLRSQEATEGTMATLRCQMSKAAPVE
WRKGSSETLRDGDYSLRQDGA VCELQICDLAVEDAGEYLCVCGQEKTSATLSVKALPPRFIEDLRSQEATE
GTMATLRCQMSKAAPVEWRKGSSETLRDGDYSLRQDGA MCELQIHDLAVEDTGEYSCVCGQEKTSATLS
VKALPPRFIEDLRSQEAREGTVATLRCMSKAAPVEWRKGSSETLKDGDYSLRQEGNLCELQIRDLAVEDT
EEYSCVCGQEKTSATLSVKALPAKFIEDLRSQEAPESSTVTLRCKLSKKASVVWKKGSETLRNGARYSL
RQDGA VCELEIRDLTVEDTGEYSCTCGQERTSATLSIMAPQVVFQQPLQNLQAEEGSMASLRCELSV
PNAAMVWSKGGLELQGDTRREARQQGCVAELLLRDLRREDAGEYSCTCGSQTTSATLMVTAAPVRFL
RELQAQDVDEGATARLRCELSREAVSVEWRKGS LQFPCA KYQMVQEGTTAELLVHGVEQEDAGEYTC
DAGHTQSIARLSVRAPKPKFKTDLQSTEQEAGGTARLCCQLSEAEFGTPVQWLKEGVELHVGSKYEM
RRQGA VCELLIHGLEAKDTGEYACLVGGQKTLASLRVKEPEVTIVRGLVDMEVQADEVFEFTCKVSQ
AGATDVQWHLQGLPLQSNVETAVVLADGCTHVLQKGVTLLEDAGTVSFHVGGSSSAQLTVRVPEVT
VLEPLKDVQLSEGDQDAHFRCRLSRASQEARWALGGVPLQCNEMNDITVEQGTLYLLTLHKVTL
EDAGTITLQVGS CSSEAQLKVTA KNTVLRGLENVDALEGG EALFECQLSQPEVA AHTWLLDDEPVHTS
EKVEVVYFENGLRHLLLLLKNLKPQDSCRVTFLAGDVVTS AFLTVRGWRLEVL EPPHDASVKAGM
QVRFTCILSEAVPVGEATWYINGAAIQPDDTDWTVTTDGS HALTLSNAQPQHAGEVTF AARDAVASAR
LSVLALPDPPEDAEVVGRSDHSVTL SWVAPMSDGGG LCGYRVEMKEASTGQWQLCHDLVPGPECV
VDDLVPGKTYRFRVA AVGPA GAGEPVHLPQMVKIAPAPAPAPAPAPAPETRQAVVGEDICLELEVA
ADGGEVVWHKGTERRIQPGGHFEVLSRGQRQMLVIKGFRTEDQGEYRCGPIQGLPSSGAATFNVVMT
SGSGDEVPAQPSLPPEAAQEGDLHLLWEALARKRRMSREPTLDSISELPEEDSRVQHLRQEAEE
TAPDLSEGYSTADELARTGEADLSHTSSDDES RAGTPSLVTY LKKAGGPGISPLASKHEAQVTT
SVKPKQKQEPVPTCPPPGDLSAADLMDPSLDKAAVKIQAAF KGYKVRKEMKQEQGPVFSRTFGDTEA
QVGDVLRLECVLATKTD MRACWLKDGIELTDGRHYHIDQLKDGTC SLLVTVGLAPTDSGRYTCQV
STKSGRVSHSACVVVSGTESEAESSGGELDDAFRRAARRLHRLFRTKSPAELSEELFLSADEG
PGEPEEPADWQTYREDEFV CIRFESLAEARQAVTCFRNMFATMGIGVEISLGEQGP RGVEMRIG
KVAPTVP AVPLAKTPGLQTS DAAPVFLTELQNDVQDGYPMSFDCVVTGQPVPSVRWFKDGK
LLEDDHYMINEDQGGHQLIITAVVPADMGVYRCLAENSMGVSSTKAELRVELTSTDYDTAADAT
ETSSYFSAQGYLSSREQEGTESDEGQLPQVLEELKDLQVAPGTR LAKFQLKVKGYPAPKLYWFK
DQPLTTSDHIRMTDKKTLHTLEIVSVTREDSGQYAA YISNAVGAAYSSARLLVRGPSEPEEK
PASDVHERLVPPRILEKFTPKKVKRGSSITFSVKVEGHPAPSVHWLKEEA EKGVLWIGPDT
PGYTMASSSKQHSVLVLDVGRQHOGTYTCIATNPAGQALCSASLHISGLAKEEEQERVKEAL
ISSFLQGTSAVSAQMSESA GFADLRVQSKGESLVAAEEAHSHLSLAEVGT EEFLOKLTSSQIT
EMVSAKISQAKLVQVPGGDSDEETKTPSASPRHGRSRPSSSVQESSESEEDGDSRGEIFDIY
VVTADYLP LGAEQDAIILREGQYVEVLDSAHPLRWLVRTKPTKSSPSRQGWVSPAYLDKRLK
LSPEWGPTEAPEFPGEAVSEDEYRTRLSSVIQELLSSEQAFV GELQFLESHHMKHLERSPRV
PAAVASQKTVIFRNVDISHFHSSFLKELQCGCTDDDVAMCFIKNQEA FEKYLEFLVGRVQAE
SVVVSTPVQEFYKKYAEETLSAKDPTQPPPPPLQHYLEQPVERVQKYQALLKELIRNKARNR
QNCALLEQAYAVVSALPQRAENKLVSLMENYPGTLEALGEP IRQGHFIVWEGAPGARM

PWKGHNRHVFLFRNYLVICKPRRDSRTDTFSYVFRNMMKLSSIDLNDQVEGDDRAFEVWHEREDSVRKYLLQA  
RTVI IKNSWVKEICGIQQRLAQPVWRPPEFEEELADCTAELGETVKLACRVTGTPKPIVSWYKDGKPEVDPH  
NILIEDPDGSCCTLILDNLGTIDSGQYMCFAASAAGNASTLGKILVQVPPRFVNVKVRATPFVEGEDAQITCTVE  
GAPYPQIRWYKDGTLTLLAPGNRYRMLNEPRSGVLVVIQAASKEDLGHYECELVNRLGSTRGGGELYMQSPALR  
ARDQHHREQIVAAVEERRPSP\*  
>rs50563985\_ENSMUSP00000151217\_c.18318:C>A\_p.H6107N  
ENSMUST00000219084.3|Obscn-207|ENSMUSG00000061462|-|chr11:g.58913192:G>T  
MDHSFSGAPRFLTRPKAFVSVGKDATLSCQIVGNPTPHVSWEKDRQFVEAGARFRLAQDGDVYRLTILDLAL  
GDSGQYVCRARNAIGEAFVAVGLRVDSEGTCAEQAPHLLRPTSIRVREGADATFRCRVGGSPQPAPVWSKDG  
RRLGPPDAPHVRVEEHGESSALRIRSARPRDGGTYEVRAENPLGSASAAAAALVVDSDAEVAGPPGTSTATLLA  
HLQORREAMRAEGIPPSPPGAGTRTCTVTEGKHARLSCFVTGEPKPEVWKKDQGLVTEGRRHVVEDEQENF  
VLKILFCKQSDRGLYTCTASNLVGQTYSSVLVVREPTVPFKKRLQDLEVREKESATFQCEVAQAPATEAAWFK  
EETRLWASAKYDIEEEGETERRLTVRNVSADDDAVYICETTEGSRVVAELSVQGNLTKLPRKTAVRTGDTAIF  
WVELAVPEGPVRWLRNQEEMVAGGRVAITAEGTCHTLTI FQCTLEDMGEVAFVSGGCRTTTTQFCVSAPRRPPL  
YPPADPVVKAKTESSVTLSSWAPPHGDRPVTIDGYVLEKRKLGAAYAWSRCHEAGWLATTEFTITGVAAEEDGFQ  
FRVSAINHFGQGPYLEFPGTMHLVPLAVKTPKAVEAVEGGEVTFVSDLTVASSGEWFLDGEALKASSIYVI  
RCDRTRHMLTIREVPARLHGAQLKVFVANGIETS IQMVVRAALGLPSSKLPAAAAREVLAQLHEEAQLLAELSD  
QAAAVTWLKDGRELSLGPKYEMQVSAGRRALLVRDVAQDDAGLGYECVSRGSRRTAYQLLVQDITDGYRDWGPAG  
PQKHMCKCAGAKIARYLGSSCYRFLQYDKGVVHWEAALDTRQGKGTSSCSLHEKPKLVFAKQQAHSEVKA  
AGNSATLSCEVTQAQTEVTWFKDGKLLSSSSKVRMEASGCSRRLVVQQAGKADAGEYSCEAGGQKLSFRLDVA  
EPKLVFAKQQAHSEVKAEGASATLSCEVAQAQTEVTWFKDGKLLSSSSKVRMEASGCSRRLVVQQAGKADA  
GEYSCEAGGQKLSFRLDVAEPKMFVFAKEQQARSEVKAEGASATLSCEVAQAQTEVTWFKDGKLLSSSSKVRM  
EASGCSRRLVVQQAGKADAGEYSCEAGGQKLSFRLDVTEPKLVFAKEQQARSEVKAEGNSATLSCEVAQAQ  
EVTWFKDGKLLSSSSKVRMEASGCSRRLVVQQAGKADAGEYSCEAGGQKLSFHLDVTEPKLVFAKEQQAHSEV  
KAEAGASATLSCEVAQAQTEVTWFKDGKLLSSSSKVRMEASGCSRRLVVQQAGKADAGEYSCEAGGQKLSFR  
DVAEPKLVFAKEQQARSEVKAEGASATLSCEVAQAQTEVTWFKDGKLLSSSSKVRMEASGCSRRLVVQQAGK  
ADAGEYSCEAGGQKLSFRLDVAEPKLVFAKEQQANSEVKAEGASATLSCEVAQAQTEVTWFKDGKLLSSSSK  
VRVEASGCSRRLVVQQAGKADAGEYSCEAGGQKLSFRLDVAEPKLVFAKEQQAHSEVKAEGASATLSCEVAQ  
AQTEVTWFKDGKLLSSSSKVRVEASGCSRRLVVQQAGKADAGEYSCEAGGQKLSFRLDVAEPKLVFAKEQQAH  
SEVKAEGASATLSCEVAQAQTEVTWFKDGKLLSSSSKVRVEASGCSRRLVVQQVQKADAGEYSCEARGQKLS  
FRLDVAEAEESQIPERPSRREPLVVKHEHETIILTATIAAPSVAAVTWLKDGEIRRSKRHEATSLGDTHTLTVR  
GAQVLD SAIYSCRVGKEGQDFPVQVEEVAAKFSKPLEPVEGELGGTVMLVCELSPEQAEVVRCCGNTQLRPGK  
RFQMTSEGPRRTLTVSGLREDDAEYVCESRDDRTSARLTVKVPVVKFTSGLSAMVAEEGQEAFTQCVVSPS  
DAGVTWYKDGMLQVPEKFMVVESEGASRLTILGLTLEDAGQVTEAEGASSAALRVREAPVLFKKKLEPQT  
VEERTSVTLEVELTRPWPEVKWTRNAAVLTPSENVEIRAEGARHCLVLRVSGFADRGFFGCETPDDKTQAKLN  
VEMRQVRLVRLGQLEVEAKEQGTASMDVELSHAEEVGSWTRDGLRLQPGPKCHLAVQGPVHILTL SALQPQDSG  
LVAFRAEGVHTSARLIVTELPVSFTRVLQDVVATQKEKVTLECELSRPVDVRWLKDGVELRAGKAI GIVAQGT  
CRSLVIYRCETGDQGVYVCDALDAQTSASLRVQGRYTLIFRRVLAEDAGEVKFVAENAESRAHLRVKELPVT  
LLRPLRDKIAMEKHRGVLECCQVSRASAQVRWFKGGVLEQSGPKYEVVSDGLYRKLVIINDVQPEDEDTYTC DAG  
NVKTSAQFFVVEEQSITIVRGLKDMTVMEPAPAWFECETSIPSVRPPKWLKGKTVLQAGGNVLEQDGTVHRLT  
LHKTCSTMTGPVHFTIGKSRSSAQLVVSDIPVVLTRPLEPKAGRELQSVVLSCDFRPAPKAVQWYKDDTPLSP  
SEKFKMALEGQMAELRILRLTPADAGVYRCQAGSAQSSAEVTVAEAREVTVIQPLQDAEAMEEGRVCFSCELSH  
KDEDIEWSLNGTPLYNDSFHEISHEGCLHTLVLKSVRQADTGTVCATSPKVSVSARLVVKGKPVVFLKALDDV  
SAEERGLTLTQCEVSDPEARVVWRKDGVELGSPDKYDFLHKAGARGLTVHDLSHEDAGLYTCQVGSKETQSKV  
SVHDLHVGITKRLKTVEVLEGESCFECVLSHESPSDPAVWTVGGKTVGGSGHFHAVRQGRKYTLTVKDAALS  
DAGEVVFVSVLGLTSKASLIIRERPVDITKPLEDQRTTLGEDVMLSCELSRAGTSVRWLKDGKAIKRSQKYDLL  
SEGTRAVLVVRKASLKDSGEYTCETEASKSTAKLCVEEKANRFTEELADLQVEEKGRAVFTCKTEHPASVVTW  
RKGLLELRASGKHVPSQEGTLKLTINALERTSDTYTCDIGQARTQARLLVHGQKVRVIEDLEDTAVQEGSS  
AKFCCRIPADYGPVHWFLLDKTPLHSNELNEITVQPGYHVLTLRQLALKDSGTVYFEAGDQRTSAAALRVTEK  
PSIFSRPLTDVTVTEGEDTLVCETTTTVDSSVRWTKDGKTLRPSARCQLSHEGCAQLLITATTPQDGGRYKC  
EIGGASSSSIVRVHALPVRFRFRESLKDVEVPEGKAATLRCVLSVAAPVEWRHGDDVLKSSNKYSLRQEGAVLE  
LVIRDLQPQDSGQYSCSFGDQTTSATLTVKTSQAQFVGLKRNKEATEGTTVTLRCELTKAPVEWKKGTETLR  
NGDKYSLKQDGA VCELQICSLLVADAGEYSCVCGQEKTSATLTVKALLVHFVRRRLRSKEATEGEDTTTTQCELS  
KAAPVEWRKGTETLRDGDYSLKQDGA VCELQIRSLTIADAGEYLCTCGQEKTSATLTVRGLPAKFIEDLRSQ  
EATEGATAILRCELSKAAPVEWRKGETLKDGDYTLRQDGA VCELQIRGLAVVDGTYSLPTKFTTEGLRNE  
EATEGTMATLRCQMSKAAPVEWRKGETLRDGDYSLRQDGA MCELQIRGLTIEDSGEYTCVCGQEKTSATLS  
VKALPPRFIEDLRSQEATEGTMATLRCQMSKAAPVEWRKGETLGDGGYSLRQNGAVCELQIHDLAVEDTGE  
YSCVCGQEKTSATLNVKALPPKFTTEGLKKEEATEGTMVTLRCQMSKEATVEWRKGAKTSLDGGYSLRQDGA M



CELQICGLAVEDAGEYSCVCGQEKTSATLSVKALPPRFIEDLRSQEATEGTMATLRCQMSKAAPVEWRKGET  
LRDGDYSLRQDGA VCELQIRDLAVEDAGEYLCVCGQEKTSATLSVKALPPRFIEDLRSQEATEGTMATLRCQ  
MSKAAPVEWRKGSKTLRQDGDYSLRQDGA MCELQICDLAVEDTGDYSCVCGQEKTSATLSVKAPQVVFQOPLQ  
NLQAEEGSMASLRCELSVPNAAMVWSKGGLELQGDTRREARQQGCVAELLLRDLRREDAGEYSCTCGSQTTSA  
TLMVTAAPVRFRLRELQAQDVDEGATARLRCELSREAVSVEWRKGSILQFLPCAQYQMVQEGTTAELLVHGVEQE  
DAGEYTC DAGHTQSIARLSVRAPKPKFKTDLQSTEQEAGGTARLCCQLSEAEPTPVQWLKEGVELHVGSKYE  
MRRQGA VCELLIHGLEAKDTGEYACL VGGQKTLASLRVKEPEVTIVRGLVDMEVQADEDEVEFTCKVSQAGATD  
VQWHLQGLPLQSNVTEVAVLADGCTHVLQKGFVLELDAGTVSFHVGGLSSSAQLTVRVPEVTVLEPLKDVQL  
SEGQDAHFRCLSRASGQEARWALGGVPLQCNEMNDITVEQGTLYLLTLHKVTLEDAGTITLQVGCSSAQL  
KVTAKNTVLRGLENVDALEGGELFECQLSQPEVAHTWLLDDEPVHTSEKVEVVYFENGLRHLKLNKLPQ  
DSCRVTFLAGDVVTS AFLTVRGWRLEVLEPPHDASVKAGMQVRFTCILSEAVPVGEATWYINGAAIQPDDTDW  
TVTTD GSHHALTLSNAQPQHAGEVTF AARDAVASARLSVLALPDPPEDAEVVGRSDHSVTLWSVAPMSDGGGG  
LCGRVEMKEASTGQWQLCHDLVPGPECVVDLVP GKTYRFRVA AVGPAGAGEPVHLPQMVKIAPAPAPAPAP  
APAPETRQAVVGEDICLELEVAADGGEVVWHKGTERRIQGGHFEVLSRGRQMLVIKGFRTEDQGEYRCGP IQ  
GLPSSGAATFNVMVMTSGSGDEVPAQPSLPPEAAQEGDLHLLWEALARKRRMSREPTLDSISELPEEDSRVQHL  
RQEAETAPDLSEGYSTADELARTGEADLSHTSSDDESRAGT PSLVTYLKKAGGPGISPLASKHEAQVTTSVK  
PQKQEPVVPTCPPPGDL SAADLMDPSLDKA AVKIQA AFKGYKVRKEMKQEGPVFSRTFGDTEAQVGDVLR  
ECVLATKTD MRACWLKDGIELTDGRHYHIDQLKDGTC SLVLTGLAPTDSGRYTCQVSTKSGRVSHSACVVVSG  
TESEAESSSGELDDAFRRARLRHLRFRTKSPAELSEEEFLSADEGPGPEEPADWQTYREDEFV CIRFE  
SLAEARQAVTCFRNMFMATMIGIVEISLGEQGPGRVEMRIGKVAPTVTPAVPLAKTPGLQTS DAAPVFLTELQN  
QDVQDGYPMSFDCVVTGQPVPSVRWFKDGKLEEDDH YMINEDQQGGHQLIITAVVPADMGVYRCLAENSMGV  
SSTKAELRVELTSTDYDTAADATETSSYFSAQGYLSSREQEGTESDEGQLPQVLEELKDLQVAPGTRLAKFQL  
KVKGYPA PKLYWFKDGQPLTTS DHIRMTDKKTLHTLEIVSVTREDSGQYAAAYISNAVGAA YSSARLLVRGPSE  
PEEKPASDVHERLVPPRI LEKFTPKKVKRGSSITFSVKVEGHPAPSVHVLKKEEA EKGVLWIGPDP TPGYTMAS  
SKQHSVLVLDVGRQHOGTYTCIATNPAGQALCSASLHISGLAKEEEQERVKEALISSFLOGTSQAVSAQMS  
AGFADLVGSSKGSGLVAEEAHSHLSLAEVGTEEFLEKLT SQITEMVSAKISQAKLQVPGGDSDEETKTPSASP  
RHGRSRPSSQGESSEEDGSRGEIFDIYVVVTADY LPLGAEQDAIILREGQYVEVLD SAHPLRVLVVRTKPT  
KSSPSRQGWVSPAYLDKRLKLSPEWGPTEAPEFPGEAVSEDEYRTRLSSVIQELLSSEQAFVGGELQFL  
KHLERSPRVPAAVASQKT VIFRNVQDISHFHSSFLKELQCGCTDDDVAMCFIKNQEAF EKYLEFLVGRVQAES  
VVVSTPVQEFYKKYA EETLSAKDPTQPPPPPLQHYLEQPVERVQKYQALLKELIRNKARNRQNCALLEQAYAV  
VSALPQRAENKLVSLMENYPGTLEALGEP I RQGHFIVWEGAPGARM PWKGNHRHVFLFRNYLVIC PRRDSR  
TDTFSYVFRNMMLSSIDLNDQVEGDDRAFEVWHERE DSVRKYLLQARTVI IKNSWVKEICGIQQRLAQPVWR  
PPEFEEELADCTAELGETVKLACRVTGT PKPIVSWYKDGKPEVDPHNLIEDPDGSC TLI LDNLTGIDSGQY  
MCFASAAGNASTLGKILVQVPPRFVNKVRATPFVEGEDAQITCTVEGAPYPQIRWYKDGTL LAPGNRYRMLN  
EPRSGVLV LVIQAASKEDLGHYECELVNRLGSTRGGEL YMQSPALRARDQHHREQIVA AVEVTEQETKVPKK  
TVIIEETITTVVKS PRGRRQS PGKSPSRSPRSASPRRPGLLAPERLYPPGTSPSRRLEVEQGRKAPVPALY  
VTEAEVHAPASQS QPKWLEVEETIEVRVKKTGSRGASPVREMTSRGEGILFTLPGGIPGRDPNANN SNKSVY  
QEARTWGP AVVHVGEFFIFQVDSVGNVDVVAASPEPEQVRASQKEENTERQEGCSDGDENTFLMEEPQD TDSL  
QGRDPKILTHNGRVLT LADLEDYVPQEGETF GCGDSTPSTPDEPPCEVSVLQREI SEPTVGPVLLNVGRPPG  
TGATPSFFRPGSQVHSPESVSFLLREAWSGPVSAAPWTSSFH THVQSSVDGSHGSFKTEVSTQTVSFGAVGET  
VTLHIDPDGGEAPGPSQ\*

>rs50849759\_ENSMUSP00000158795\_c.21000:A>C\_p.K7001Q  
ENSMUST00000238536.2|Obscn-210|ENSMUSG00000061462|-|chr11:g.58913216:T>G  
MDHSFSGAPRFLTRPKAFVSVGKDATLSCQIVGNPTPHVSWEKDRQFVEAGARFRLAQDGDVYRLTILDLAL  
GDSGYVCRARNAIGEFAAVGLRVDSEGTC AEQAPHFLLRPTSIRVREGADATFRCRVGGSPPQPAVSWSKDG  
RRLGPPDAPHVRVEEHGESSALRIRSARPRDGGTYEVRAENPLGSASAAAALVVDSDAEVAGPPGTSTATLLA  
HLQORREAMRAEGIPPSPPGAGTRTCTVTEGKHARLSCFVTGEPKPEVWKKDGQLVTEGRRHVVEDEQENF  
VLKILFCKQSDRGLYTCTASNLVGQTYSSVLVVREPTVPFKKRLQDLEVREKESATFQCEVAQPA TEAAWFK  
EETRLWASAKYDIEEGETERRLTVRNVSADDDAVYICETTEGSRVVAELSVQGNLTKLPRKTAVRTGDTAIF  
WVELAVPEGPVRWLRNQEEMVAGGRVAITAEGTCHTLTI FQCTLEDMGEVAFVSGGCRTTTQFCVSAPRRPPL  
YPPADPVVKAKTESVTL SWSAPPHGDRPVTIDGYVLEKRKL GAYAWSRCHEAGWLATTEFTITGVAAEEDGFQ  
FRVSAINHFGQGPYLEFP GTMHLVPLAVKTP LKAVEAVEGGEVTF SVDLTVASSGEWFLDGEALKASSIYVI  
RCDRTRHMLTIREV PARLHGAQLK FVANGIETRSIQMVVRAALGLPSSKLPAAAAREVLAQLH EEAQLLAE LSD  
QAAAVTWLKDGRELSLGPKYEMQVSAGRRALLV RDVAQDDAGLYECVSRGSR TAYQLLVQDITDGYRDWGPAG  
PQKHMCKCAGAKIARYLGSSCYRFLQYDKGVVWHLEAALDTRQKGTSSCSLHEKPKLVFAKGQQA HSEVKA  
AGNSATLSCEVTQAQTEVTFWFKDGKLLSSSKVRMEASGCSRRLV VQAGKADAGEYSCEAGGQKLSFRLDVA  
EPKLVFAKGQQA HSEVKA EAGASATLSCEVAQAQTEVTFWFKDGKLLSSSKVRMEASGCSRRLV VQAGKADA  
GEYSCEAGGQKLSFRLDVAE PKMVFAKEQQARSEVKA EAGASATLSCEVAQAQTEVTFWFKDGKLLSSSKVRM

EASGCSRRLVVQQAGKADAGEYSCEAGGQKLSFRLDVTEPKLVFAKEQQARSEVKAEVGN SATLSCEVAQAQT  
EVTWFKDGGKLSSSSKVRMEASGCSRRLVVQQAGKADAGEYSCEAGGQKLSFRLDVAEPKLVFAKEQQARSEV  
KAEAGNSATLSCEVAQAQTEVTWFKDGGKLSSSSKVRMEASGCSRRLVVQQAGKADAGEYSCEAGGQKLSFHL  
DVTEPKLVFAKEQQAHSEVKAEAGASATLSCEVAQAQTEVTWFKDGGKLSSSSKVRMEASGCSRRLVVQQAGK  
ADAGEYSCEAEGQKLSFRLDVAEPKLVFAKEQQARSEVKAEAGASATLSCEVAQAQTEVTWFKDGGKLSSSSK  
VRVEASGCSRRLVVQQAGKADAGEYSCEAGGQKLSFRLDVAEPKLVFAKEQQANSEVKAEAGASATLSCEVAQ  
AQTEVTWFKDGGKLSSSSKVRVEASGCSRRLVVQQAGKADAGEYSCEAGGQKLSFRLDVAEPKLVFAKEQQAH  
SEVKAEAGASATLSCEVAQAQTEVTWFKDGGKLSSSSKVRVEASGCSRRLVVQQAGKADAGEYSCEAGGQKLS  
FRLDVAEPKLVFAKEQQAHSEVKAEAGASATLSCEVAQAQTEVTWFKDGGKLSSSSKVRVEASGCSRRLVVQQ  
AGKADAGEYSCEAGGQKLSFRLDVAEPKLVFAKEQQAHSEVKAEAGASATLSCEVAQAQTEVTWFKDGGKLS  
SSSKVRVEASGCSRRLVVQQAGKADAGEYSCEAGGQKLFRLDVAEPKLVFAKEQQAHSEVKAEAGASATLSCE  
VAQAQTEVTWFKDGGKLSSSSKVRVEASGCSRRLVVQQAGKADAGEYSCEAGGQKLSFRLDVAEPKLVFAKEQ  
QAHSEVKAEAGASATLSCEVAQAQTEVTWFKDGGKLSSSSKVRVEASGCSRRLVVQQVQKADAGEYSCEARGQ  
KLSFRLDVADTRLMFAKEQQARTEVKAEAGNSATLSCEVAQAQTEVTWFKDGGKLSSSSKVRVEASGCSRRLV  
VQQAGKADAGEYSCEAGGQKLSFRLDVAEAE SQIPERPSRREPLVVKEHETIILTATIAAPSVAAVTWLKDG  
V EIRRSKRHEATSLGDTHTLTVRGAQVLD SAIYSCRVGKEGQDFPVQVEEVAAKFSKPLEPVEGELGGTVMLVC  
ELSPQAEVWRCNGTQLRPGKRFQMTSEGPRRTLTVSGLEDDAEYVCE SRDDRTSARLTVKVPRVVKFTS  
GLSAMVAEEGQEAFTQC VVSPSDAGVTWYKDGMLQPSSEKFMVMEVSGASRSLTILGLTLEDAGQTVVEAGAS  
SSAALRVREAPVFLFKKLEPQTV EERTSVTLEVELTRPWPEVKWTRNAAVLTPSENVEIRAEGARHCLVLRV  
GFADRGGFFGCETPDDKTQAKLNVEMRQVRLV RGLQVEVEAKEQGTASMDVELSHA EVEG SWTRDGLRLQPGPKC  
HLAVQGPFVHILTL SALQPQDSGLVAFRAEGVHTSARLIVTEL PVSFTRVLQDVVATQKEKVTLECELSRPVDV  
RWLKDGVELRAGKAIGIVAQGTCSRSLVIYRCETGDQGVYVCDALDAQTSASLRVQGRTYTLIFRVLAE DAGE  
VKFVAENAESRAHLRVKELPVTLLRPLRDKIAMEKHRGVLECCQVSRASAQVRWFKGGV ELQSGPKYEVVSDGL  
YRKLVIN DVQPEDEDTYTC DAGNVKTSAQFFVEEQSITIVRGLKDMTVM EPAPAWFECETSIPSVRPPKWL LG  
KTVLQAGNVGLEQDGTVHRLTLHKTCSTMTGPVHFTIGKSRSSAQLVVSDI PVVLT RPLEPKAGRELQSVV L  
SCDFRPAPKAVYKDDT PLS PSEKFKMALEGGMAELNIRL LTPADAGVYRCQAGSAQSSAEVTV EAREVTVI  
QPLQDAEAMEEGRVCFSELSHKDEDI EWSLNGTPLYNDSFHEI SHEGCLHTLV LKSVRQADTGTVCATSPKV  
SVSARLVVKGKPVVFLKALDDVSAEERGTLT LQCEVSDPEARVVWRKDGVELG PSDKYDFLHKAGARGLTVHD  
LSHEDAGLYTCQVGSKETQSKVSVHDLHVGITKRLKTVEVLEGE SCSFECVLSHESPSDPAVWTVGGKTVGGS  
GHFHAVRQGRKYTLTVKDAALSDAGEV VFSVLGLT SKASLIIRERPV DITKPLEDQRTTLGEDVMLSCELSRA  
GTSVRWLKDGKAIRKSQKYDLLSEGTRAVLVVRKASL KDSGEYTCETEASKSTAKLCVEEKANRFTBELADLQ  
VEEKGRAVFTCKTEHPASVVTWRKGLLELRASGKHVPSQEG LTLKLTINALERTDSDTYTCDIGQARTQARLL  
VHGQKVRVIEDLEDTAVQEGSSAKFCCRIAPADYGPVHWFLDKT PLHSNELNEITVQPGGYHVLTLRQLALKD  
SGTVYFEAGDQRTS AALRVTEKPSIFSRPLTDVTVTEGEDLTLVCETTVDSSVRWTKDGKTLRPSARCQLSH  
EGCQAQLLITATTPQDGGRYKCEIGGASSSSIVRVHALPVRFR ES LKDVVEVPEGKAATLRCVLSVAAPVEWR  
HGDDVLKSSNKYSLRQEGAVLELVIRDLQPQDSGQYSCSFGDQTT SATLTVKTS SAQFVVGKLRNKEATEGTTV  
TLRCELTK EAPVEWKKGTETLRNGDKYSLKQD GAVCELQICSLLVADAGEYSCVCGQEKTSATLTVKALLVHF  
VRRLSKEATEGDTTTLQCELSKAAPVEWRKGTETLRDGD RYSLKQD GAVCELQIRSLTIADAGEYLCTCGQE  
KTSATLTVRALPAKFKDSLKNEEATEGTTATLSCELSKAAPVTWKKGPKTLQSGDKYVLRQD GAVCGLQIHGL  
TMADAGEYSCVCGQEKTSATLTVRGLPAKFIEDLRSQEATEGATAILRCELSKAAPVEWRK GSETLKDGD RYT  
LRQD GAVCELQIRGLAVVDGTYS SLPTKFTTEGLRNEEATEGTMATLRCQMSKAAPVEWRK GSETLRDGD RYS  
LRQD GAVCELQIRGLTIEDSGEYTCVCGQEKTSATLSVKALPSRFIEDLRSQEATEGTMATLRCQMSKTAPVE  
WKKGSETLRDGGRYSLRQDGPVCELQICDLAVEDAGEYSCVCGQEKTSATLSIKALPPRFIEDLRSQEATEGT  
MATLRCQMSKAAPVEWRK GSETLGDGGRYSLRQNGAVCELQIHDLAVEDTGEYSCVCGQEKTSATLNVKALPP  
RFIEDLRSQEATEGTMATLRCQMSKAAPVEWRK GSETLRDGGRYSLRQD GAVCELQIHDLVEDAGQYSCVCG  
QEKTSAVLTVDALPPKFTTEGLKKEEATEGTMVTLRCQMSKEATVEWRKGAKT LSDGGRYSLRQD GAVCELQIC  
GLAVEDAGEYSCVCGQEKTSATLSVKALPPRFIEDLRSQEATEGTMATLRCQMSKAAPVEWRK GSETLRDGD R  
YSLRQD GAVCELQIRDLAVEDAGEYLCVCGQEKTSATLSVKALPPRFIEDLRSQEATEGTMATLRCQMSKAAP  
VEWRK GSKTLRDGD RYSLRQD GAVCELQICDLAVEDTGDYSCVCGQEKTSATLSVKALPPRFIEDLRSQEARE  
GTVATLRCRMSKAAPVEWRK GSETLKDGD RYSLRQEGNLCELQIRDLAVEDTEEYSCVCGQEKTSATLSVKAL  
PAKFIEDLRSQEAPESSTVTLRCKLSKKASVVWKKGSETLRNGARYSLRQD GAVCELEIRDLTVEDTGEYSCT  
CGQERTSATLSIMAPQVVFQQPLQNLQAEEGSMASLRCELSVPNAAMVWSKGGLELQGDTRREARQQGCVAEL  
LLRDLRREAGEYSSCTCGSQTT SATLMVTAAPVRFLELQADQVDEGATARLRCELSREAVSVEWRK GSLQLF  
PCAKYQMVQEGTTAE LLVHGVEQEDAGEYTC DAGHTQS IARLSVRAPKPKFKTDLQSTEQEAGGTARLCCQLS  
EAEFGT PVQWLKEGVELHVGSKYEMRRQ GAVCELLIHGLEAKDTGEYACL VGGQKT LASLRVKEPEVTIVRGL  
VDMEVQADEDEFTCKV SQAGATDVQWHLQGLPLQSN EVTEVAVLADGCTHV LQLKGVTL EDAGTVSFHVGGL  
SSSAQLTVRVPEVTVLEPLKDVQLSEGD AHFRCRLSRASGQEARWALGGVPLQCNEMNDITVEQGTLYLLTL  
HKVTL EDAGTITLQVGS CSSEAQLKVTAKN TVLRGLE NVDALEGGEALFECQLSQPEVA AHTWLLDDEPVHTS

EKVEVVYFENGLRHLKLLKLNKLPQDSCRVTFLAGDVVTSFAFLTVRGWRLEVLLEPPHDASVKAGMQVRFCTILS  
EAVPVGEATWYINGAAIQPDDTDWTVTTDGSHHALTLSNAQPQHAGEVTF AARDAVASARLSVLALPDPPEDA  
EVVGRSDHSVTLSSWVAPMSDGGGGLCGYRVMKEASTGQWQLCHDLVPGPECVDDLDVPGKTYRFRVAAVGPA  
GAGEPVHLPQMVKIAPAPAPAPAPAPAPAPAPAPETRQAVVGEDICLELEVAADGGEVVWHKGTERRIQPGGHFEVLS  
RGQRQMLVIKGFRTEDQGEYRCGPIQGLPSSGAATFNVMVMTSGSGDEVPAQPSLPPEAAQEGDLHLLWEALAR  
KRRMSREPTLDSISELPEEDSRVQHLRQEAEEETAPDLSEGYSTADELARTGEADLSHTSSDDESRACTPSLVT  
YLKAGGPGISPLASKHEAQVTTSVKPKQKQEPVPTCPGGDLAADMPSLDKAAVKIQAFAFKGYKVRKE  
MKQQEGPVFSRTFGDTEAQVGDVLRLECVLATKTDMRACWLKDGIELTDGRHYHIDQLKDGTCSSLVTLGLAPT  
DSGRYTCQVSTKSGRVSHSACVVVSGTSEAESSSGGELDDAFRAARRLHRLFRTKSPAELSEELFLSADE  
GPGEPEEPADWQTYREDENFVCIRFESLAEARQAVTCFRNMFMATMIGIVEISLGEQGPGRVEMRIGKVAPTVT  
PAVPLAKTPGLQTSDAAPVFLTELQNDVQDGYPMSFDCVVTGQPVPSVRWFKDGKLEEDDHYMINEDQGGG  
HQLIITAVVPADMGVYRCLAENSMGVSSTKAELRVELTSTDYDTAADATETSSYFSAQGYLSSREQEGTESDE  
GQLPQVLEELKDLQVAPGTRLAKFQLKVKGYPAKLYWFKDGGPLTSDHIRMTDKKTLHTLEIVSVTREDSDG  
QYAAIISNAVGAAYSSARLLVRGPSEPEEKPASDVHERLVPPRILEKFTPKKVKRGSSITFSVKVEGHPAPSV  
HWLKEEAKEKGVLWIGPDTPGYTMASSSKQHSVLVLDVGRQHOGTYTCIATNPAGQALCSASLHISGLAKEEEQ  
ERVKEALISSFLOGTSQAVSAQMSSESAGFADLVGQSKGESLVAEEAHSHLSLAEVGTTEFLQKLTSTITEMVS  
AKISQAKLQVPGGDSDEETKTPSASPRHGRSRPSSSVQESSSESEDGDSRGEIFDIYVVTADYLPGLAEQDAI  
ILREGQYVEVLDSAHPLRWLVRTKPTKSSPSRQGVSPAYLDKRLKLSPEWGPTEAPEFPGEAVSEDEYRTRL  
SSVIQELLSSEQAFVQELQFLESHHMKHLERSPRVPAAVASQKTVIFRNVQDISHFHSSFLKELQCGCTDDDV  
AMCFIKNQEAFAKEYLEFLVGRVQAESVVVSTPVQEFYKKAEEETLSAKDPTQPPPPPLQHYLEQPVVERVQKYQ  
ALLKELIRNKARNRQNCALLEQAYAVVSALPQRAENKLVSLMENYPGTLEALGEPTRQGHFIVWEGAPGARM  
PWKGHNHRVFLFRNYLVICKPRRDSRTDFTSYVFRNMMLSSIDLNDQVEGDDRAFEVWHEREDSVRKYLLQA  
RTVLIKNSWVKEICGIQQLAQPVWRPPEFEEELADCTAELGETVKLACRVTGTPKPIVSWYKDGQPVVEVDPH  
HILIEDPDGSCTLILDNLGTIDSGQYMCFAASAAGNASTLGKILVQVPPRFVNVKVRATPFVEGEDAQITCTVE  
GAPYPQIRWYKDGTELLAPGNRYRMLNEPRSGVLVLIQAASKEDLGHYECELVNLGSTRGGGELYMQSPALR  
ARDQHHREQIVAAVEDTSEVGSASHAQDQADQAAVSLWRLLGSEALGPSPGDLNTRQSEPPAFEEAASQIP  
GAASGTPEVSLRPSVLRVLEPQETSSSGSQGWTVPIRVEGTAWPGAGTQQLLLDVHVSQVIMETTQRTYVVCQAPDT  
GVTRAPSMQVTIEDVQVQVGDMAQFDAVIEGHPPPITVWYKGSTQLTSSARLSQRQDGTYSVLVTDVAPHDA  
GVYTCVANNAGGQVLCKAELLVHGGDKLDAENQVYRRKLHSFYDVQEEIGRGVFGFVKRVQHKGNKMFCAAKF  
IPLRSKTRAQAYQERDILATLGHPLVTGLLDQFETRKTLLIILELCSSEELLDRLFKKGVVTEAEVKVYIQQL  
VEGLHYLHSHGILHLDIKPPNIMVHPAREDIKICDFGFAQKITPSEPQYSKYGSPEFVSPEIIEQNPFVSEGS  
DIWAMGVI SYLSLTCSSPFAGESDRATLLNVLEGRVSWSSPTAAHLSSEDAKDFIKATLQRTPRARPSTSQCLA  
HPWFLKSMPEAAEHFINTKQLKFLARSRWQRSLMSYKSILVMRSIPELLQGPPDPSPLGVARHLRGEASGAS  
SSSSSSDNELAPFARAKSLPPSPVTHSPLLHPRGFLRPSASLPEETEASMTADAAVPASPQASAGPPASPGCV  
PRHSVSSFLFYQQAGEGAERGNKTSKAKRHPARRRHLLKGGYIARALPGLREPLMEYSLLEEEAAREEQASLM  
TKTPSFETALRLPSSSVREVPGRSHSLDNPVTTGSPPEACKEQLLFPSTGLTHETTAKDRGHKEGFLQESV  
FFPPMSGDSRPGKQEGSSQDSCRKPASSCHSELGSGSQEGCGPPSSQSLGSLPPQSLKELSTSCGPLFSEQ  
PQAAPFPTQVSPLLGSEKEPQDGSLSSEGPVVPSSSPGSASQVDASLDTEGLSEAGDTCDFTPPPQRPQEQAT  
TRKFSLESRGGYAGVAGYGTFAFGGDAGGMLGQGPLWARMAWAVSQSSEEQDEAATESPQPLESIGPIAEASG  
VPLRTSPSLTPWEEVEQVSLVQIRDLSGDAEAADTISLIDISEVDPAYLNLSDLYDIKYLPEFEMI FRRVPKPI  
EQPESPGSETEAGQGLADFLLEAAWPWPGEGLGLRAGLEITTEPEEPGDLEALLGEEAVGRKRKWSPSRGLFQF  
PGRCLSGEEPVELGLRQVRKASMAHISRI LKGRPEGPEREPPRKKAGLASFRLSGLKGRDQELSDEAVVLGQ  
SVTLACQVLAQPTAQTWSKDGVLLESSGHLLISSTLKNFQLLTIILVVKEEDLGTYTCCVSNPLGTAVTTGVL  
RKAERPSSSPRPEVGELEKYDAVLLVWKPVESECGPVYIVQCCIEGGSWTTLASDISDCCYLTKLSRGGMYIF  
RTACVSKAGMPYSSPSEQVLLGGPNHLASEEESRRGPAQLLPSTKTFQMQIRRRGRFSVVRQCREKASGR  
ALAAKIVPYQPEDKTAVREYEAALKRLHHPHLAQLHAAYLSPRHLVLIILELCSGPELLPSLAERESYSESDVK  
DYLWQMLSATQYLHAQHILHLDLRSENMMVTEYNLLKVIDLGNASLDQEKVPAPENFKDYLETMAPELLEGG  
GAVPQTDIWAIGVTAIFIMLSGEYPESESETRDLQKGLRKLIRLSRCYAGLSGGAVAFLOSSLCAQPWGRPCA  
STCLQCGLWTEEGPTGSRPTVPTFPTVRLRAFVREKRRALLYKKNLAQVR\*

>rs50849759\_ENSMUSP00000038264\_c.18840:A>C\_p.K6281Q  
ENSMUST00000047441.14|Obscn-202|ENSMUSG00000061462|-|chr11:g.58913216:T>G  
MDHSFSGAPRFLTRPKAFVSVGKDATLSCQIVGNPTPHVSWEKDRQVVEAGARFRLAQDGDVYRLTILDLAL  
GDSGQYVCDARNAIIEGFAAVGLRVDSEGTCAEQYHFLRLRPTSIRVREGADATFCRCRVGSSPQPAVSWSKDG  
RRLGPPDAPHVRVEEHGESSALRIRSARPRDGGTIEVRAENPLGSASAAAALVVDSDAEAVGPPGTSTATLLA  
HLQQRREAMHVEEIGI PPSPPGAGTRTCTVTEGKHARLSCFVTGEPKPEVWKKDQGLVTEGRRHVVEDEQENF  
VLKILFCKQSDRGLYTCTASNLVGQTYSSVLVVVREPTVPFKKRLQDLEVREKESATFQCEVAQPATEAAWFK  
EETRLWASAKYDIEEGTERRLTVRNVSADDDAVYICETTEGSRVAELSVQGNLTKLPRKTAVRTGDTAIF  
WVELAVPEGPVRWLRNQEEMVAGGRVAITAEGTCHTLTI FQCTLEDMGEVAFVSGGCRTTTQFCVSPRRPPL

YPPADPVVKAKTESSVTLWSAPPHGDRPVITIDGYVLEKRKLGAYAWSRCHEAGWLATTEFTITGVAAEEGDFQ
FRVSAINHFGQGPYLEFPGTMHLVPLAVKTPKAVEAVEGGEVTFVSDLTVASSGEWFLDGEALKASSIYVI
RCDRTRHMLTIREVPARLHGAQLKVFVANGIETS IQMVVRAALGLPSSKLPAAAAREVLAQLHHEEAQLLAE LSD
QAAAVTWLKDGRELSLGPKYEMQVSAGRRALLVRDVAQDDAGLYECVSRGSRRTAYQLLVQDITDGYRDWGPAG
PQKHMCKCAGAKIARYLGSSCYRFLQYDKGVVHWEAALDTRQGKGTSSCSLHEKPKLVFAKGOQAHSEVKAE
AGASATLSCEVAQAQTEVTFWKDGKLLSSSSKVRMEASGCSRRLVVQQAGKADAGEYSCEAGGQKLSFRLDVA
EPKMFVFAKEQQARSEVKAEGASATLSCEVAQAQTEVTFWKDGKLLSSSSKVRMEASGCSRRLVVQQAGKADA
GEYSCEAGGQKLSFRLDVTEPKLVFAKEQQARSEVKAEGNSATLSCEVAQAQTEVTFWKDGKLLSSSSKVRM
EASGCSRRLVVQQAGKADAGEYSCEAGGQKLSFRLDVAEPKLVFAKEQQARSEVKAEGNSATLSCEVAQAQTE
EVTWFKDGKLLSSSSKVRMEASGCSRRLVVQQAGKADAGEYSCEAGGQKLSFHLVDVTEPKLVFAKEQQAHSEV
KAEAGASATLSCEVAQAQTEVTFWKDGKLLSSSSKVRMEASGCSRRLVVQQAGKADAGEYSCEAGGQKLSFRL
DVAEPKLVFAKEQQARSEVKAEGASATLSCEVAQAQTEVTFWKDGKLLSSSSKVRVEASGCSRRLVVQQAGK
ADAGEYSCEAGGQKLSFRLDVAEPKLVFAKEQQANSEVKAEGASATLSCEVAQAQTEVTFWKDGKLLSSSSK
VRVEASGCSRRLVVQQAGKADAGEYSCEAGGQKLSFRLDVAEPKLAFAKEQQAHSEVKAEGASATLSCEVAQ
AQTEVTFWKDGKLLSSSSKVRVEASGCSRRLVVQQAGKADAGEYSCEAGGQKLSFRLDVAEPKLAFAKEQQAH
SEVKAEGASATLSCEVAQAQTEVTFWKDGKLLSSSSKVRVEASGCSRRLVVQQAGKADAGEYSCEAGGQKLS
FRLDVAEPKLAFAKEQQAHSEVKAEGASATLSCEVAQAQTEVTFWKDGKLLSSSSKVRVEASGCSRRLVVQQ
AGKADAGEYSCEAGGQKLFRLDVAEPKLVFAKEQQAHSEVKAEGASATLSCEVAQAQTEVTFWKDGKLLSS
SSKVRVEASGCSRRLVVQQVQKADAGEYSCEARGQKLSFRLDVAEAEESQIPERPSRREPLVVEKHETIILTAT
IAAPSVAAVTWLKDGV EIRRSKRHEATSLGDHTLTVRGAQVLD SAIYSCRVGKEGQDFPVQVEEVAAKFSKP
LEPVEGELGGTVMLVCELSPEQAEVWRCGNTQLRPGKRFQMTSEGPRTLTVSGLREDDAEYVCESRDDRT
SARLTVKVPVVKFTSGLSAMVAEEGQEATFQCVVSPSDAGVTWYKDGMLQPSSEKFMVMEVGASRSLTILGL
TLEDAGQVTVAEAGASSAALRVREAPVLFKKKLEPQTVEERTSVTLEVELTRPWPVEVKWTRNAAVLTPSENV
EIRAEGARHCLVLRVSVGFADRGFFGCETPDDKTQAKLNVEMRQVRLVVRGLQVEEAKEQGTASMDVELSHAEVE
GSWTRDGLRQLQPGPKCHLAVQGPVHILTL SALQPQDSGLVAFRAEGVHTSARLIVTELPVSFTRVLQDVVATQ
KEKVTLECELSRPPVDVRLKDGVELRAGKAI GIVAQGTCSRSLVIYRCETGDQGVYVCDALDAQTSASLRVQGR
TYTLIFRRVLAEDAGEVFKVAENAESRAHLRVKELPVTLRLPLRDKIAMEKHARGVLECVSRSASQVRFVKG
VELQSGPKYEVVSDGLYRKLVIN DVQPEDEDTYTC DAGNVKTSAQFFVEEQSITIVRGLKDMTVM EPAPAWFE
CETSIPSVRPPKWL LGKTVLQAGGNVLEQDGTVHRLTLHKTCSTMTGPVHFTIGKSRSSAQLVVS DIPVVL
RPLEPKAGRELQSVVLSCDFRPAPKAVQWYKDDTPLSPSEKFKMALEGQMAELRILRLTPADAGVYRCQAGSA
QSSAEVTVAREVTVIQPLQDAEAMEEGRVCFSCELSHKDEDI EWSLNGTPLYNDSFHEISHEGCLHTLVLS
VRQADTGTVCATSPKVS SARLVVKGKPVVFLKALDDVSAEERGTTLTQCEVSDPEARVVWRKDGVELGPSDK
YDFLHKAGARGLTVHDL SHEDAGLYTCQVGSKETQSKVSVHDLHVGITKRLKTVEVLEGESECSFECVLSHESP
SDPAVWTVGGKTVGGSGHFHAVRQGRKYTLTVKDAALSDAGEVVFVSVLGLT SKASLIIRERPVDITKPLEDQR
TTLGEDVMSCELSRAGTSVRWLKDGKAI RKSQKYDLLSEGTRAVLVRKASLKDSEGYTCETEASKSTAKLC
VEEKANRFTHEELADLQVEEKGRAVFTCKTEHPASVVTWRKGLLELRASGKHVPSQEGTLTKLTINALERTDSD
TYTCDIGQARTQARLLVHGQKVRVIEDLEDTAVQEGSSAKFCCR IAPADYGPVHWF LDKTPLHSNELNEITVQ
PGGYHVLT LRQLALKDSGTVYFEAGDQRTS AALRVTEKPSIFSRPLTDVTVTEGEDLTLVCETTTVDSSVRWT
KDGKTLRPSARCQLSHEGCQAQLLITATTPQDGGRYKCEIGGASSSIVRVHALPVRFRESLKDVEVPEGKAA
TLRCVLSVAAPVEWRHGDDVLKSSNKYSLRQEGAVLELVIRDLQPDGSGQYSCSFGDQTTSATLTVKTSQAQ
FVGKLRNKEATEGTTVTLRCELTK EAPVEWKKGTETLRNGDKYSLKQDGAVCELQICSLLVADAGEYSCVCGQ
EKTSATLTVKALLVHFVRRRLRSKEATEGDTTTLQCELSKAAPVEWRKGTETLRDGD RYSLKQDGAVCELQIRS
LTIADAGEYLCTCGQEKT SATLTVRALPAKFKDSLKNEEATEGTTATLSCELSKAAPVTWKKGPKTLQSGDKY
VLRQDGAVCGLQIHGLTMADAGEYSCVCGQEKT SATLTVRGLPAKFIEDLRSQEATEGATAILRCELSKAAPV
EWRKGETLKDGD RYTLRQDGAVCELQIRGLAVDPTGTYSSLPTKFTEGLRNEEATEGTMATLRCQMSKAAPV
EWRKGETL RDGD RYSLRQDGAMCELQIRGLTIEDSGEYTCVCGQEKT SATLSVKALPPRFIEDLRSQEATEG
TMATLRCQMSKAAPVEWRKGETLGDGGRYSLRQNGAVCELQIHDLAVEDTGEYSCVCGQEKT SATLNVKALP
PRFIEDLRSQEATEGTMATLRCQMSKAAPVEWRKGETL RDGGRYSLRQDGAVCELQIHDL DVEDAGQYSCVC
GQEKTSAVLTVDALPPKFTEGLKKEEATEGTMVTLRCQMSKEATVEWRKGAKT LSDGGRYSLRQDGAMCELQI
CGLAVEDAGEYSCVCGQEKT SATLSVKALPPRFIEDLRSQEATEGTMATLRCQMSKAAPVEWRKGSKTLRDGD
RYSRLRQDGAMCELQICDLAVEDTGDYSCVCGQEKT SATLSVKAPQVVFQQLQNLQAEEGSMASLRCELSVPN
AAMVWSKGGLELQGDTRREARQQGCVAELLLRDLRREAGEYSCTCGSQTT SATLMVTAAPVRFRLRELQAQDV
DEGATARLRCLESTREAVSVEWRKGS LQLFPCAKYQMVQEGTTAELLVHGVEQEDAGEYTC DAGHTQS IARLSV
RAPKPKFKTDLQSTEQEAGGTARLCCQLSEAEPTPVQWLKEGVELHVGSKYEMRRQGVAVCELLIHGLEAKDT
GEYACLVGQKTLASLRVKEPEVTIVRGLVMEVQADEDFEFTCKV SQAGATDVQWHLQGLPLQSN EVTEVAV
LADGCTHV LQLKGV TLEDAGTVSFHVGGLSSSAQLTVRVPEVTVLEPLKDVQLSEGDQDAHFRCRLSRASGQEA
RWALGGVPLQCNEMNDITVEQGTLYLLTLHKVTLEDAGTITLQVGS CSSEAQLKVTAKNTVLRGLENVDALEG
GEALFECQLSQPEVA AHTWLLDDEPVHTSEKVEVVYFENGLRHLLLLKNLKPQDSCRVTFLAGDVVTS AFLTV

RALPDPPEAEVVGSRSDHVSVTLVSWVAPMSDGGGGLCGYRVMKEASTGQWQLCHDLVPGPECVDDLVPGKTY  
RFRVAAVGAPAGAGEPVHLPQMVKIAPAPAPAPAPAPAPAPETRQAVVGEDICLELEVAADGGVEVWHKGTERRI  
QPGGHFEVLSRQGRQMLVIKGFRTEDQGEYRCGPIQGLPSSGAATFNVMVMTSGSGDEVPAQPSLPPPEAAQEGD  
LHLLWEALARKRRMSREPTLDSISELPEEDSRVQHLRQEAEEETAPDLSEGYSTADELARTGEADLSHTSSDDE  
SRAGTPSLVTYLKKAGGPGISPLASKHEAQVTTSVKPKQKQEPVVPTCPPPGDLAADLMDPSLDKAAVKIQA  
AFKGYKVRKEMKQQEGPVFSRTFGDTEAQVGDVLRLECVLATKTDMRACWLKDGIELTDGRHYHIDQLKDGTC  
SLLVTGLAPTDSGRYTCQVSTKSGRVSHSACVVVSGTESEAESSSGGELDDAFRAARRLHRLFRTKSPAELS  
EELFLSADEGPEPEPADWQTYREDENFVCIRFESLAEARQAVTCFRNMFATMGIGVEISLGEQGPGRVEM  
RIGKVAPTVT PAVPLAKTPGLQTSDAAPVFLTELQNQDVQDGYPMSFDCVVTGQPVPSVRWFKDGKLLLEEDDH  
YMINEDQQGGHQLIITAVVPADMGVYRCLAENSMGVSSSTKAELRVELTSTDYDTAADATETSSYFSAQGYLSS  
REQEGTESDEGQLPQVLEELKDLQVAPGTRLAKFQKLVKGYPAKLYWFKDGQPLTSDHIRMTDKKTLHTLE  
IVSVTREDSGQYAAIYISNAVGAAYSARLLVGRGPSEPEEKPASDVHERLVPPRILEKFTPKKVKRGSITFSV  
KVEGHPAPSVHVLKEEAKEGVLWIGPDTPGYTMASSSKQHSVLVLDVGRQHOGTYTCIATNPAGQALCSASLH  
ISGLAKEEEQERVKEALISSFLQGTSAQVSAQMSSEAGFADLVGQSKGESLVAAEAHSHLSLAEVGTTEEFLOK  
LTSQITEMVSAKISQAKLQVPGGDSDEETKTPSASPRHGRSRPSSSVQESSSESEEDGDSRGEIFDIYVVTADY  
LPLGAEQDAIILREGQYVEVLDSAHPLRWLVRTKPTKSSPSRQGWVSPAYLDRKRLKLSPEWGPTEAPEFPGEA  
VSEDEYRTRLSSVIEQLLSEQAQFVGELOFLESHMKHLERSPRVPAAVASQKTVIFRNVQDISHFHSSFLKE  
LQCGCTDDDVAMCFIKNQEAFAKYLEFLVGRVQAESVVVSTPVQEFYKKYAEETLSAKDPTQPPPPPLQHYLE  
QPVERVQKYQALLKELIRNKARNRQNCALLEQAYAVVSALPQRAENKLVSLMENYPGTLEALGEPVIRQGHFI  
VWEGAPGARMFWKGNHRHVFVFRNYLVICKPRRDSRTDFTSYVFRNMMKLSSIDLNDQVEGDDRAFEVWHERE  
DSVRKYLLOARTVLIKNSWVKEICGIQQRLAQPVWRPPEFEELADCTAELGETVKLACRVTGTPKPIVSWYK  
DGQPVVEVDPHHILIEDPDGSCITLIDNLTGIDSGQYMCFAASAAGNASTLGKILVQVPPRFVNVKVRATPFVEG  
EDAQITCTVEGAPYQIRWYKDGTLAPGNRYRMLNEPRSGVLVVIQAASKEDLGHYCELVNRLGSTRGGG  
ELYMQSPALRARDQHHREQIVAAVEGAPSMQVTIEDVQVQVGDMAQFDAVIEGHPPPIVTWYKGSTQLTSSAR  
LSQRQDGTYSVLVTDVAPHDAGVYTCVANNAGGQVLCKAELLVHGGDKLDAENQVYRRLKHSFYDVQEEIGR  
GVFGFVKRVQHKGNMFCFAAKFIPLRSKTRAQAYQERDILATLGHPLVTGLLDQFETRKTLLIILELCSSEEL  
LDRLFKKGVVTEAEVVKVYIQQLVEGLHYLHSHGILHLDIKPPNILLMVHPAREDIKICDFGFAQKITPSEFPQYS  
KYGSPFVVSPEIIEQNPNVSEGSDIWAMGVISYLSLTCSSPFAGESDRATLLNVLEGRVSWSSPTAAHLSSEDAK  
DFIKATLQRTPRARPSTSQC LAHPWFLKSMPAAEAHFINTKQLKFLLRARSRWQRSLMSYKSI LVMRSIPELLQ  
GPPDPSLGVARHLRGEASGASSSSSSSDNELAPFARAKSLPSPVTHSPLLHPRGFLRPSASLPEETEASMP  
TADAAPVSPASQAGPPASPGCVPRHSVIVSSLFYQQAGEGAERGNKTSKAKRHPARRRHLLKGGYIARALPGLR  
EPLMEYSLLEEEAAREEQASLMTKTPSFETALRLPSSSVREVPGRSHSLDNPVTTGSPPEACKEQLLFPST  
GLTHETAKDRGHKEGFLQESVFPFPMMSGDSRPGKQEGSSQDSCRGKPASSCHSELGSGSQEGCGPPSSQSLG  
SLPPQSLKKELESTSCGPLFSEQPQAAPFPTQVSPLLGSEKEPQDGLSEGPVVPVSSSPGSASQVDASLDTEG  
LSEAGDTCDFTPPPQRPQEQATTRKFSLESRGGYAGVAGYGTFAFGGDAGGMLGQGLWARMAWAVSQSSEEQ  
DEAATESPQPLESLGPIAEASGVPLRTSPSLTPWEEVEVSLVQIRDLSGDAEAADTISLDISEVDPAYLNL  
DLYDIKYLPPFEFMI FRRVPKPIEQPESPGSETEAGQGLADFLLEAAWPWPGEGLGLRAGLEITEEPEEPGDLEA  
LLGEAAVGRKRKWSPSRGLFQFPGRCLSGEEPVELGLRQRVKASMAHISRIKGRPEGPEREPPRRKAGLAS  
FRLSGLKGRDQELSDEAVVLGQSVTLACQVLAQPTAQATWSKDGVLLESSGHLLISSTLKNFQLLTLIVVKEE  
DLGTYTCCVSNPLGTAVTTGVLKKAERPSSSPRPEVGEYKDAVLLVWKPVESECGPVTYIVQCCIEGGSWTTL  
ASDISDCCYLTGKLSRGGMYIFRTACVSKAGMGYSSPSEQVLLGGPNHLASEEESRGRPAQLLPSTKTFAF  
QMQIRRGRFSVVRQCREKASGRALAAKIVPYQPEDKTAVLRREYEAALKRLLHHPHLAQLHAAYLSPRHLVILEL  
CSGPELLPSLAERESYSESDVKDYLWQMSATQYLHAQHILHLDLRSENMMVTEYNLLKVIDLGNASLDQEK  
VPAPENFKDYLETMAPELLEGGQAVPQTDIWAIGVTAIFIMLSGEYPESESEGETRDLQKGLRKLIRLSRCYAGL  
SGGAVAFLOSSLCAQPWGRPCASTCLQCGWLTEEGPTGSRPTPVTFPTVRLRAFVREKRRRALLYKKNHQAQ  
VR\*

>rs50849759\_ENSMUSP00000049737\_c.20799:A>C\_p.K6934Q  
ENSMUST00000052872.15|Obscn-203|ENSMUSG00000061462|-|chr11:g.58913216:T>G  
MDHSFSGAPRFLTRPKAFVSVGKDATLSCQIVGNPTPHVSWEKDRQFVEAGARFRLAQDGDVYRLTILDLAL  
GDSGQYVCRARNAIGEAFAAVGLRVDSEGTCAEQAPHLLRPTSIRVREGADATFRCRVGGSPQPAVSWSKDG  
RRLGPPDAPHVRVEEHGESSALRIRRSARPRDGGTYEVRAENPLGSASAAAAALVVDSDAEVAGPPGTSTATLLA  
HLQORREAMRAEGIPSPPPGAGTRTCTVTEGKHARLSCFVTGEPKPEVWKKDGQLVTEGRRHVVEDEQENF  
VLKILFCKQSDRGLYECTASNLVGQTYSSVLDVVVREPTVFFKKRLQDLEVREKESATFQCEVAQVATEAAWFK  
EETRLWASAKYDIEEETERRLTVRNVSADDDAVYICETVETTESRTVAELSVQGNLTKRKLPRKTAVRTGDTAIF  
WVELAVPEGPVRWLRNQEEMVAGGRVAITAEGTCHTLTI FQCTLEDMGEVAFVSGGCTTTTQFCVSAAPRRPPL  
YPPADPVVKAKTESSVTLVSWAPPHGDRPVTIDGYVLEKRLKLGAYAWSRCHEAGWLATTEFTITGVAAEEDGFQ  
FRVSAINHFGQGPYLEFPGMTMHLVPLAVKTPKAVEAVEGGEVTFVSDLTVASSGEWFLDGEALKASSIYVI  
RCDRTRHMLTIREVPARLHGAQLKVFVANGIETS IQMVVRAALGLPSSKLPAAAAREVLAQLHEEAQLLAE LSD



QAAA V TWLKD GREL S L G P K Y E M Q V S A G R R A L L V R D V A Q D D A G L Y E C V S R G S R T A Y Q L L V Q E P K L V F A K G Q Q A H  
S E V K A E A G N S A T L S C E V T Q A Q T E V T W F K D G K K L S S S S K V R M E A S G C S R R L V V Q Q A G K A D A G E Y S C E A G G Q K L S  
F R L D V A E P K L V F A K G Q Q A H S E V K A E A G A S A T L S C E V A Q A Q T E V T W F K D G K K L S S S S K V R M E A S G C S R R L V V Q Q  
A G K A D A G E Y S C E A G G Q K L S F R L D V A E P K M V F A K E Q Q A R S E V K A E A G A S A T L S C E V A Q A Q T E V T W F K D G K K L S S  
S S K V R M E A S G C S R R L V V Q Q A G K A D A G E Y S C E A G G Q K L S F R L D V T E P K L V F A K E Q Q A R S E V K A E V G N S A T L S C E  
V A Q A Q T E V T W F K D G K K L S S S S K V R M E A S G C S R R L V V Q Q A G K A D A G E Y S C E A G G Q K L S F R L D V A E P K L V F A K E Q  
Q A R S E V K A E A G N S A T L S C E V A Q A Q T E V T W F K D G K K L S S S S K V R M E A S G C S R R L V V Q Q A G K A D A G E Y S C E A G G Q  
K L S F H L D V T E P K L V F A K E Q Q A H S E V K A E A G A S A T L S C E V A Q A Q T E V T W F K D G K K L S S S S K V R M E A S G C S R R L V  
V Q Q A G K A D A G E Y S C E A E G Q K L S F R L D V A E P K L V F A K E Q Q A R S E V K A E A G A S A T L S C E V A Q A Q T E V T W F K D G K K  
L S S S S K V R V E A S G C S R R L V V Q Q A G K A D A G E Y S C E A G G Q K L S F R L D V A E P K L V F A K E Q Q A N S E V K A E A G A S A T L  
S C E V A Q A Q T E V T W F K D G K K L S S S S K V R V E A S G C S R R L V V Q Q A G K A D A G E Y S C E A G G Q K L S F R L D V A E P K L A F A  
K E Q Q A H S E V K A E A G A S A T L S C E V A Q A Q T E V T W F K D G K K L S S S S K V R V E A S G C S R R L V V Q Q A G K A D A G E Y S C E A  
G G Q K L S F R L D V A E P K L A F A K E Q Q A H S E V K A E A G A S A T L S C E V A Q A Q T E V T W F K D G K K L S S S S K V R V E A S G C S R  
R L V V Q Q A G K A D A G E Y S C E A G G Q K L S F R L D V A E P K L A F A K E Q Q A H S E V K A E A G A S A T L S C E V A Q A Q T E V T W F K D  
G K K L S S S S K V R V E A S G C S R R L V V Q Q A G K A D A G E Y S C E A G G Q K L F F R L D V A E P K L M F A K E Q Q A H S E V K A E A G A S  
A T L S C E V A Q A Q T E V T W F K D G K K L S S S S K V R V E A S G C S R R L V V Q Q A G K A D A G E Y S C E A G G Q K L S F R L D V A E P K L  
V F A K E Q Q A H S E V K A E A G A S A T L S C E V A Q A Q T E V T W F K D G K K L S S S S K V R V E A S G C S R R L V V Q Q V G K A D A G E Y S  
C E A R G Q K L S F R L D V A D R L M F A K E Q Q A R T E V K A E A G N S A T L S C E V A Q A Q T E V T W F K D G K K L S S S S K V R V E A S G  
C S R R L V V Q Q A G K A D A G E Y S C E A G G Q K L S F R L D V A E A E S Q I P E R P S R R E P L V V K E H E T I I L T A T I A A P S V A A V T  
W L K D G V E I R R S K R H E A T S L G D T H T L T V R G A Q V L D S A I Y S C R V G K E G Q D F P V Q V E E V A A K F S K P L E P V E G E L G G  
T V M L V C E L S P E Q A E V V W R C G N T Q L R P G K R F Q M T S E G P R R T L T V S G L R E D D A E E Y V C E S R D D R T S A R L T V K V P R  
V V K F T S G L S A M V A E E G Q E A T F Q C V V S P S D A G V T W Y K D G M Q L Q P S E K F V M V E S G A S R S L T I L G L T L E D A G Q V T V  
E A E G A S S A A L R V R E A P V L F K K K L E P Q T V E E R T S V T L E V E L T R P W E V K W T R N A A V L T P S E N V E I R A E G A R H C  
L V L R S V G F A D R G F F G C E T P D D K T Q A K L N V E M R Q V R L V R G L Q E V E A K E Q G T A S M D V E L S H A E V E G S W T R D G L R L  
Q P G P K C H L A V Q G P V H I L T L S A L Q P Q D S G L V A F R A E G V H T S A R L I V T E L P V S F T R V L Q D V V A T Q K E K V T L E C E L  
S R P V D V R W L K D G V E L R A G K A I G I V A Q G T C R S L V I Y R C I E T A R G D Q V Y V C D A L D A Q T S A S L R V Q G R T Y T L I F R R V L  
A E D A G E V K F V A E N A E S R A H L R V K E L P V T L L R P L R D K I A M E K H R G V L E C Q V S R A S A Q V R W F K G G V E L Q S G P K Y E  
V V S D G L Y R K L V I N D V Q P E D E D T Y T C D A G N V K T S A Q F F V E E Q S I T I V R G L K D M T V M E P A P A W F E C E T S I P S V R P  
P K W L L G K T V L Q A G G N V G L E Q D G T V H R L T L H K T C S T M T G P V H F T I G K S R S S A Q L V V S D I P V V L T R P L E P K A G R E  
L Q S V V L S C D F R P A P K A V Q W Y K D D T P L S P S E K F K M A L E G Q M A E L R I L R L T P A D A G V Y R C Q A G S A Q S S A E V T V E A  
R E V T V I Q P L Q D A E A M E E G R V C F S C E L S H K D E D I E W S L N G T P L Y N D S F H E I S H E G C L H T L V L K S V R Q A D T G T V C  
A T S P K V S V S A R L V V K G P V V F L K A L D D V S A E E R G T L T L Q C E V S D P E A R V V W R K D G V E L G P S D K Y D F L H K A G A R  
G L T V H D L S H E D A G L Y T C Q V G S K E T Q S K V S V H D L H V G I T K R L K T V E V L E G E S C S F E C V L S H E S P S D P A V W T V G G  
K T V G G S G H F H A V R Q R K Y T L T V K D A A L S D A G E V V F S V L G L T S K A S L I I R E R P V D I T K P L E D Q R T T L G E D V M L S  
C E L S R A G T S V R W L K D G K A I R K S Q K Y D L L S E G T R A V L V R K A S L K D S G E Y T C E T E A S K S T A K L C V E E K A N R F T E  
E L A D L Q V E E K G R A V F T C K T E H P A S V V T W R K G L L E L R A S G K H V P S Q E G L T L K L T I N A L E R T D S D T Y T C D I G Q A R  
T Q A R L L V H G Q K V R V I E D L E D T A V Q E G S S A K F C C R I A P A D Y G P V H W F L D K T P L H S N E L N E I T V Q P G G Y H V L T L R  
Q L A L K D S G T V Y F E A G D Q R T S A A L R V T E K P S I F S R P L T D V T V T E G E D L T L V C E T T T V D S S V R W T K D G K T L R P S A  
R C Q L S H E G C Q A Q L L I T A T T P Q D G G R Y K C E I G G A S S S I V R V H A L P V R F R E S L K D V E V P E G K A A T L R C V L S S V A  
A P V E W R H G D D V L K S S N K Y S L R Q E G A V L E L V I R D L Q P Q D S G Q Y S C S F G D Q T T S A T L T V K T S S A Q F V G K L R N K E A  
T E G T T V T L R C E L T K E A P V E W K K G T E T L R N G D K Y S L K Q D G A V C E L Q I C S L L V A D A G E Y S C V C G Q E K T S A T L T V K  
A L L V H F V R R L R S K E A T E G D T T L Q C E L S K A A P V E W R K G T E T L R D G D R Y S L K Q D G A V C E L Q I R S L T I A D A G E Y L  
C T C G Q E K T S A T L T V R A L P A K F K D S L K N E E A T E G T T A T L S C E L S K A A P V T W K K G P K T L Q S G D K Y V L R Q D G A V C G  
L Q I H G L T M A D A G E Y S C V C G Q E K T S A T L T V R G L P A K F I E D L R S Q E A T E G A T A I L R C E L S K A A P V E W R K G S E T L K  
D G D R Y T L R Q D G A V C E L Q I R G L A V V D T G T Y S S L P T K F T E G L R N E E A T E G T M A T L R C Q M S K A A P V E W R K G S E T L R  
D G D R Y S L R Q D G A M C E L Q I R G L T I E D S G E Y T C V C G Q E K T S A T L S V K A L P S R F I E D L R S Q E A T E G T M A T L R C Q M S  
K T A P V E W K K G S E T L R D G G R Y S L R Q D G P V C E L Q I C D L A V E D A G E Y S C V C G Q E K T S A T L S I K A L P P R F I E D L R S Q  
E A T E G T M A T L R C Q M S K A A P V E W R K G S E T L G D G G R Y S L R Q N G A V C E L Q I H D L A V E D T G E Y S C V C G Q E K T S A T L N  
V K A L P P R F I E D L R S Q E A T E G T M A T L R C Q M S K A A P V E W R K G S E T L R D G G R Y S L R Q D G A V C E L Q I H D L D V E D A G Q  
Y S C V C G Q E K T S A V L T V D A L P P K F T E G L K K E E A T E G T M V T L R C Q M S K E A T V E W R K G A K T L S D G G R Y S L R Q D G A M  
C E L Q I C G L A V E D A G E Y S C V C G Q E K T S A T L S V K A L P P R F I E D L R S Q E A T E G T M A T L R C Q M S K A A P V E W R K G S E T  
L R D G D R Y S L R Q D G A V C E L Q I R D L A V E D A G E Y L C V C G Q E K T S A T L S V K A L P P R F I E D L R S Q E A T E G T M A T L R C Q  
M S K A A P V E W R K G S K T L R D G D R Y S L R Q D G A M C E L Q I C D L A V E D T G D Y S C V C G Q E K T S A T L S V K A L P P R F I E D L R  
S Q E A R E G T V A T L R C R M S K A A P V E W R K G S E T L K D G D R Y S L R Q E G N L C E L Q I R D L A V E D T E E Y S C V C G Q E K T S A T  
L S V K A L P A K F I E D L R S Q E A P E S T V T L R C K L S K K A S V V W K G S E T L R N G A R Y S L R Q D G A V C E L E I R D L T V E D T  
G E Y S C T C G Q E R T S A T L S I M A P Q V V F Q Q P L Q N L Q A E E G S M A S L R C E L S V P N A A M V W S K G G L E L Q G D T R R E A R Q Q  
G C V A E L L L R D L R R E D A G E Y S C T C G S Q T T S A T L M V T A A P V R F L R E L Q A Q D V D E G A T A R L R C E L S R E A V S V E W R K  
G S L Q L F P C A K Y Q M V Q E G T T A E L L V H G V E Q E D A G E Y T C D A G H T Q S I A R L S V R A P K P K F K T D L Q S T E Q E A G G T A R

LCCQLSEAEPTPVQWLKEGVELHVGSKYEMRRQGA VCELLIHGLEAKDTGEYACL VGGQKT LASLRVKEPEV  
TIVRGLVDMEVQADEDEFTCKVSOAGATDVQWHLQGLPLQSNVTEVAVLADGCTHVLQKGVTL EDAGTVS  
FHVGGSSSAQLTVRVPEVTVLEPLKDVQLSEGDQAHFRCLSRASGQEARWALGGVPLQCNEMNDITVEQGT  
LYLLTLHKVTLEDAGTITLQVGSSEAEQLKVTAKNTVLRGLENVDALEGGEALFECQLSQPEVAHAHTWLLDD  
EPVHTSEKVEVVYFENGLRHLLLLKNLKPQDSCRVTFLAGDVVTS AFLTVRGWRLEVL EPPHDASVKAGMQVR  
FTCILSEAVPVGEATWYINGAAIQPDDTDWTVTTDGS HHALTLSNAQPQHAGEVTF AARDAVASARLSVLALP  
DPPEDA EVVGRSDHSVTL SWVAPMSDGGGGLCGYRVEMKEASTGQWQLCHDLVPGPECVVDDLVP GKTYRFRV  
AAVGPAGAGEPVHL PQMVKIAPAPAPAPAPAPAPAPETRQAVVGEDICLELEVAADGDEVVWHKGTERTIQPGG  
HFEVLSRGQRQMLVIKGFRTEDQGEYRCGPIQGLPSSGAATFNVVMTSGSGDEVPAQPSLPPEAAQEGDLHLL  
WEALARKRRMSREPTLDSISELPEEDSRVQHLRQEAEEETAPDLSEGYSTADELARTGEADLSHTSSDDESRAG  
TPSLVTYLKKAGGPGISPLASKHEAQVTTSVKPKQKQEPVVPTCPPPGDLSAADLMDPSLDKAAVKIQAAFKG  
YKVRKEMKQOEGPVFSRTFGDTEAQVGDVLRLECVLATKTD MRACWLKDGIELTDGRHYHIDQLKDGTC SLIV  
TGLAPTDSGRYTQCVSTKSGRVSHSACVVVSGTESEAESSSGGELDDAFRRAARRLHRLFRTKSPAELSEEEL  
FLSADEGPGEPEEPADWQTYREDENFVCIRFESLAEARQAVTCFRNMFATMIGVEISLGEQGPVGVEMRIGK  
VAPT VTPAVPLAKTPGLQTS DAAPVFLTELQNDVQDGYPMSFDCVVTGQPVPSVRWFKDGLLEEDDHYMIN  
EDQQGGHQLIITAVVPADMGVYRCLAENSMGVSSTKAELRVELTSTDYDTAADATETSSYFSAQGYLSSREQE  
GTESDEGQLPQVLEELKDLQVAPGTR LAKFQLKVKGYPAKLYWFKDGOPLTTS DHIRMTDKKTLHTLEIVSV  
TREDSGQYAAAYISNAVGAAYSSARLLVRGSPSEPEEK PASDVHERLVP PRILEKFTPKKVKRGSSTF SVKVEG  
HPAPSVHWLKEEAKEGVLWIGPDTPGYTMASSSKQHSLVLLDVG RQHOGTYT CIATNPAGQALCSASLHISGL  
AKEEEQERVKEALISSFLQGTSQAVSAQMSE SAGFADLVGQSKGESLVAEEAHSHLSLAEVGT EEFQKLT SQ  
ITEMVSAKISQAKLQVPGGDSDEETKTPSASPRHGRSRPSSSVQESSSESEDGDSRGEIFDIYVVTADYLP LG  
AEQDAIILREGQYVEVLDSAHPLRVLVVRTKPTKSSPSRQGWVSPAYLDKRLKLSPEWGPTEAPEFPGEAVSED  
EYRTRLSSVIQELLSSEQAFVGLQFLESHHMKHLERSPRVPAAVASQKTVI FRNVQDI SHFHSSFLKELQGC  
GTDDDVAMCFIKNQEA FEKYLEFLVGRVQAESVVVSTPVQEFYKKYAEETLSAKDPTQPPPPPLQHYLEQ PVE  
RVQKYQALLKELIRNKARNRQNCALLEQAYAVVSALPQRAENKLVHSLMENYPGTLEALGEP IRQGHFIVWEG  
APGARMPWKGNHRVFLFRNYLVICKPRRDSRTDFTFSYFRNMMKLSIDLNDQVEGD DRAFEVWHEREDSVR  
KYLQARTVI IKNSAVKEICGIQQR LAQPVWRPPEFEELADCTAELGETVKLACRVDTGTPKPIVSWYKDGQP  
VEVDPHHILIEDPDG SCTLILDNLTGIDSGQYMCFAASAAGNASTLGKILVQVPPRFVNVKVRATPFVEGEDAQ  
ITCTVEGAPYPQIRWYKDGTL LAPGNRYRMLNEPRSGVLV LVIQAASKEDLGHYECELVNRLGSTRGGGELYM  
QSPALRARDQHHREQIVAAVEVTEQETKVPKKTVI IETITTVVKS PRGRRQSPGKSPSRSPRRSASPRRPG  
LLAPERLYPPGTSPSRRLVEVEQGRKAPVPALYVTEAEVHAPASQSQPKWLEVEETIEVRVKKTGSRGASPVRE  
MTRSGEGILFTLPGGI PGRDPNANN SNKSVYQEAR TWGPAVVHVGE PPIFQVDSVGNVDWVAASPEPEQVRA  
SQKEENTERQEGCS DGENTFLMEEPQD TDSLQGRDPKILTHNGRVLTLADLEDYVPQEGETFGCGDSTPSTP  
DEPPCEVSVLQREI SEPTVGQPVLLNVGRPPGTGATPSFFRPGSQVHSPESVSFLLREAWSGPVSAAPWTSS F  
HTHVQSSVDGSHGSKTEVSTQTVSFGAVGETVTLHIDPDGGEAPGPSQ\*

>rs50849759\_ENSMUSP0000020732\_c.21000:A>C\_p.K7001Q  
ENSMUST0000020732.13|Obscn-201|ENSMUSG00000061462|-|chr11:g.58913216:T>G  
MDHSFSGAPRFLTRPKAFVSVGKDATLSCQIVGNPTPHVSWEKDRQVPEAGARFRLAQDGDVYRLTILDLAL  
GDSGQYVCRARNAIGEAFVAVGLRVDSEGTCAEQAPHFLLRPTSIRVREGADATFRCRVGGSPQPAVSWSKDG  
RRLGPPDAPHVRVEEHGESSALRIRSARPRDGGTYEVRAENPLGSASAAAALVVDSDAEVAGPPGTSTATLLA  
HLQQRREAMRAEGIPPSPPGAGTRTCTVTEGKHARLSCFVTGEPKPKETVWKKDQQLVTEGRRHVYEDQENF  
VLKILFCKQSDRGLYTCTASNLVGQTYSSVLVVVREPTVPFKKRLQDLEVREKESATFQCEVAQ PATEAAWFK  
EETRLWASAKYDIEEGTERRLTVRNVSADDDAVYICETTEGSRVAELSVQGNLTRKLPKRTAVRTGDTAIF  
WVELAVPEGPVRWLRNQEEMVAGGRVAITAEGTCHTLTI FQCTLEDMGEVAFVSGGCRTTTQFCVSAPRRPPL  
YPPADPVVKAKTESSVTL SWSAPPHGDRPVTIDGYVLEKRKLGAYAWSRCHEAGWLATTEFTITGVAEEGDFQ  
FRVSAINHFGQGPYLEFPGMTMLVPLAVKTPKAVEAVEGGEVTF SVDLTVASSGEWFLDGEALKASSIYVI  
RCDRTRHMLTIREV PARLHGAQLKFVANGIETS IQMVVRAALGLPSSKLPAAAAREVLAQLHEEAQLLAELSD  
QAAA VTWLKDGRELSLGPKYEMQVSAGRRALLVRDVAQDDAGLYECVSRGSR TAYQLLVQDITDGYRDWGPAG  
PQKHMCKCAGAKIARYLGSSCYRFLQYDKGVWHWLEAALDTRQKGTSSCSLHEKPKLVFAKQQAHSEVKA E  
AGNSATLSCEVTQAQTEVTWFKDGKLLSSSSKVRMEASGCSRRLVVQQAGKADAGEYSCEAGGQKLSFRLDVA  
EPKLVFAKQQAHSEVKA EAGASATLSCEVAQAQTEVTWFKDGKLLSSSSKVRMEASGCSRRLVVQQAGKADA  
GEYSCEAGGQKLSFRLDVAE PKMVFQAEQQARSEVKA EAGASATLSCEVAQAQTEVTWFKDGKLLSSSSKVRM  
EASGCSRRLVVQQAGKADAGEYSCEAGGQKLSFRLDVTEPKLVFAKEQQARSEVKA EAGNSATLSCEVAQAQ  
EVTWFKDRGKLLSSSSKVRMEASGCSRRLVVQQAGKADAGEYSCEAGGQKLSFRLDVAE PKLVFAKEQQARSEV  
KAEAGNSATLSCEVAQAQTEVTWFKDGKLLSSSSKVRMEASGCSRRLVVQQAGKADAGEYSCEAGGQKLSFHL  
DVTEPKLVFAKEQQAHSEVKA EAGASATLSCEVAQAQTEVTWFKDGKLLSSSSKVRMEASGCSRRLVVQQAGK  
ADAGEYSCEAEAGQKLSFRLDVAE PKLVFAKEQQARSEVKA EAGASATLSCEVAQAQTEVTWFKDGKLLSSSSK  
VRVEASGCSRRLVVQQAGKADAGEYSCEAGGQKLSFRLDVAE PKLVFAKEQQANSEVKA EAGASATLSCEVAQ

AQTEVTFWFKDGKLLSSSSKVRVEASGCSRRLVVQQAGKADAGEYSCEAGGQKLSFRLDVAEPKLAFAKEQQAHS  
SEVKAEEAGASATLSCEVAQAQTEVTFWFKDGKLLSSSSKVRVEASGCSRRLVVQQAGKADAGEYSCEAGGQKLS  
FRLDVAEPKLAFAKEQQAHSSEVKAEEAGASATLSCEVAQAQTEVTFWFKDGKLLSSSSKVRVEASGCSRRLVVQQ  
AGKADAGEYSCEAGGQKLSFRLDVAEPKLAFAKEQQAHSSEVKAEEAGASATLSCEVAQAQTEVTFWFKDGKLLSS  
SSKVRVEASGCSRRLVVQQAGKADAGEYSCEAGGQKLFRLDVAEPKLMFAKEQQAHSSEVKAEEAGASATLSCE  
VAQAQTEVTFWFKDGKLLSSSSKVRVEASGCSRRLVVQQAGKADAGEYSCEAGGQKLSFRLDVAEPKLVFAKEQ  
QAHSSEVKAEEAGASATLSCEVAQAQTEVTFWFKDGKLLSSSSKVRVEASGCSRRLVVQQVQKADAGEYSCEARGQ  
KLSFRLDVADTRLMFAKEQQAHSSEVKAEEAGASATLSCEVAQAQTEVTFWFKDGKLLSSSSKVRVEASGCSRRLV  
VQQAGKADAGEYSCEAGGQKLSFRLDVAEAEASQIPERPSRREPLVVKEHETIILTATIAAPSVAAVTWLKDG  
EIRRSKRHEATSLGDTHTLTVRGAQVLDIAIYSCRVGKEGQDFPVQVEEVAAKFSKPLEPVEGELGGTVMLVC  
ELSPQAEVWRCGNTQLRPGKRFQMTSEGPRRTLTVSGLREDDAEYVCESRDDRTSARLTVKVPVVKFTS  
GLSAMVAEEGQEAFTQCVVSPSDAGVTWYKDGMLQPSKFKVMVESGASRSLTILGLTLEDAGQVTEAEGAS  
SSAALRVREAPVLFKKLEPQTVERTSVTLEVELTRPWPEVKWTRNAAVLTPSENVEIRAEGARHCLVLRV  
GFADRGFFGCETPDDKTQAKLNVEMRQVRLVRGLQEVEAKEQGTASMDVELSHAEEVGSWTRDGLRQLQPGPKC  
HLAVQGPVHILTLALSALQPDSSGLVAFRAEGVHTSARLIVTELPVSTFTRVLQDVVATQKEKVTLECELSRPVDV  
RWLKDGVNELRAGKAIIGIVAQGTCSRSLVIYRCETGDQGVYVCDALDAQTSASLRVQGRTYTLIFRRLAEDAGE  
VKFVAENAESRAHLRVKELPVTLLRPLRDKIAMEKHRGVLECCQVSRASAQVRWFKGGVLEQSGPKYEVVSDGL  
YRKLVINADVQPEDEDTYTCDAENVKTSAQFFVEEQSITIVRGLKDMTVMPEPAPAWFECETSIPSVRPEPKWLLG  
KTVLQAGGNVGLQDGTVHRLTLHKTCSTMTGPVHFTIGKSRSSAQLVSDIPVVLTRPLEPKAGRELQSVVL  
SCDFRPAPKAVQWYKDDTPLSPSEKFKMALEGQMAELRILRLTPADAGVYRCQAGSAQSSAEVTEAREVTVI  
QPLQDAEAMEEGRVCFSCELSHKDEDIEWSLNGTPLYNDSFHEISHEGCLHTLVLSVRQADTGTVCATSPKV  
SVSARLVVKGKPVVFLKALDDVSAEERGTTLTQCEVSDPEARVVRKDGVELGSPDKYDFLHKAGARGLTVHD  
LSHEDAGLYTCQVGSKETQSKVSVHDLHVGITKRLKTVEVLEGECSFECVLSHESPSDPAVWTVGGKTVGGS  
GHFHAVRQGRKYTLTVKDAALSDAGEVVSVLGLTSKASLIIRERPVDITKPLEDQRTTLGEDVMLSCELSRA  
GTSVRWLKDGKAIKRSQKYDLLSEGTRAVLVVRKASLKDSGEYTCETEASKSTAKLCVEEKANRFTEELADLQ  
VEEKGRAVFTCKTEHPASVVTWRKGLLELRASGKHPVSEGLTLKLTINALERTSDTYTCDIGQARTQARLL  
VHGQKRVIEDLEDTVAEQEGSSAKFCCRIAPADYGPVHWFLDKTPLHSNELNEITVQPGGYHVLTLRQLALKD  
SGTVYFEAGDQRTSAALRVTEKPSIFSRPLTDVTVTEGEDTLVCETTTVDSVVRWTKDGKTLRPSARCQLSH  
EGCQAQLLITATTPQDGGRYKCEIGGASSSSIVRVHALPVRFRRESLKDVEVPEGKAATLRCVLSVAAPVEWR  
HGDDVLKSSNKYSLRQEGAVLELVIRDLQPDQSGQYSCSFGDQTTSATLTVKTSSAQFVGLRNKEATEGTTV  
TLRCELTKAEAPVEWKKGTETLRNGDKYSLKQDGAVCELQICSLLVADAGEYSCVCGQEKTSATLTVKALLVHF  
VRLRSKEATEGDTTTLQCELSKAAPVEWRKGTETLRDGDYSLKQDGAVCELQIRSLTIADAGEYLCTCGQE  
KTSATLTVRALPAKFKDSLKNEEATEGTTATLSCELSKAAPVWKKGPKTLQSGDKYVLRQDGAVCGLQIHGL  
TMADAGEYSCVCGQEKTSATLTVRGLPAKFIEDLRSQEATEGATAILRCELSKAAPVEWRKGSSETLKDGDYR  
LRQDGAVCELQIRGLAVDTGTYSPLTKFTEGLRNEEATEGTMATLRCQMSKAAPVEWRKGSSETLRDGDYR  
LRQDGAVCELQIRGLTIEDSGEYTCVCGQEKTSATLSVKALPSRFIEDLRSQEATEGTMATLRCQMSKTA  
PVEWRKGSSETLRDGGYSLRQDGPVCELQICDLAVEDAGEYSCVCGQEKTSATLSIKALPPRFIEDLRSQEATEG  
MATLRCQMSKAAPVEWRKGSSETLGDGGYSLRQNGAVCELQIHDLAVEDTGEYSCVCGQEKTSATLNVKALPP  
RFIEDLRSQEATEGTMATLRCQMSKAAPVEWRKGSSETLRDGGYSLRQDGAVCELQIHDLVEDAGQYSCVCG  
QEKTSAVLTVDALPPKFTEGLKKEEATEGTMVTLRCQMSKAEATVEWRKGAKTLSDGGRYSLRQDGAMCELQIC  
GLAVEDAGEYSCVCGQEKTSATLSVKALPPRFIEDLRSQEATEGTMATLRCQMSKAAPVEWRKGSSETLRDGD  
YSLRQDGAVCELQIRDLAVEDAGEYLCVCGQEKTSATLSVKALPPRFIEDLRSQEATEGTMATLRCQMSKAAP  
VEWRKGSSETLRDGDYSLRQDGAMCELQICDLAVEDTGDYSCVCGQEKTSATLSVKALPPRFIEDLRSQEARE  
GTVATLRCRMSKAAPVEWRKGSSETLKDGDYSLRQEGNLCELQIRDLAVEDTEEYSCVCGQEKTSATLSVKAL  
PAKFIEDLRSQEAPESSTVTLRCKLSKKASVWKKGSETLRNGARYSLRQDGAVCELEIRDLTVEDTGEYSCT  
CGQERTSATLSIMAPQVVFQQLQNLQAEEGSMASLRCELSVNAAMVWSKGGLELQGDTRREARQQGCVAEL  
LLRDLRREDAGEYSCTCGSQTTSATLMVTAAPVRFRLRELQAQDVDEGATARLRCELSREAVSVEWRKGSQQLF  
PCAKYQMVQEGTTAELLVHGVEQEDAGEYTCDAHTQSIARLSVRAPKPKFKTDLQSTEQEAAGGTARLCCQLS  
EAEPGTPVQWLKEGVELHVGSKYEMRRQGAUCELLIHGLEAKDTGEYACLVGGQKTLASLRVKEPEVTIVRGL  
VDMEVQADEDVEFTCKVSQAGATDVQWHLQGLPLQSNVTEVAVLADGCTHVLQKGVTLLEDAGTVSFHVGGL  
SSSAQLTVRVPEVTVLEPLKDVQLSEGQDAHFRCRLSRASGQEARWALGGVPLQCNEMNDITVEQGTLYLLTL  
HKVTLEDAGTITLQVGSSESQAQLKVTAKNTVLRGLENVDALEGGELFECQLSQPEVAHAHTWLLDDEPVHTS  
EKVEVVEYFENGLRHLLLLKLNKLPQDSCRVTFLAGDVVTSFAFLTVRGWRLEVLPPHDASVWKAGMQRVFTCILS  
EAVPVGAEATVINGAAIQPDDTWTVTTDGSHHALTLSNAQPQHAGEVTFFAARDAVASARLSVLAALPDPPEDA  
EAVVGRSDHSVTLVSWVAPMSDGGGGLCGYRVMKEASTGNAQWQLCHDLVPGPECVVDDLVPKTYFRVAAVGA  
GAGEPVHLPQMVKIAPAPAPAPAPAPAPAPETRQAVVGEDICLELEVAADGGEVVWHKGTERRIQPGGHFEVLS  
RGQRQMLVIKGFRTEDQGEYRCGPIQGLPSSGAATFNVMVMTSGSGDEVPAQPSLPPEAAQEGDLHLLWEALAR  
KRRMSREPTLDSISELPEEDSRVQHLRQEAEEETAPDLSEGYSTADELARTGEADLSHTSSDDESRACTPSLVT

YLKKAGGPGISPLASKHEAQVTTSVKPKQKQEPVVPTCPPPGDLSAADLMDPSLDKAAVKIQAAFQKGYKVRKE  
MKQQEGPVFSRTFGDTEAQVGDVLRLECVLATKTDMRACWLKDGIELTDGRHYHIDQLKDGTCSSLVTLGLAPT  
DSGRYTCQVSTKSGRVSHSACVVVSGTESEAESSSSGGELDDAFRRAARRLHRLFRTKSPAELSEELFLSADE  
GPGEPEEPADWQTYREDENFVCIRFESLAEARQAVTCFRNMFATMIGVEISLGEQGPGRVEMRIGKVAPTVT  
PAVPLAKTPGLQTSDAAPVFLTELQNDVQDGYPMSFDCVVTGQPVPSVRWFKDGLLEEDDHYMINEDQQGG  
HQLIITAVVPADMGVYRCLAENSMGVSSTKAELRVELTSTDYDTAADATETSSYFSAQGYLSSREQEGTESDE  
GQLPQVLEELKDLQVAPGTRLAKFQLKVKGYPAKLYWFKDGGQPLTSDHIRMTDKKTLHTLEIVSVTREDSG  
QYAAIISNAVGAAYSSARLLVRGPSEPEEKPASDVHERLVPRILEKFTPKKVKRGSSTIFSVKVEGHPAPSV  
HWLKEEAEGVLDWIGPDTPGYTMASSSKQHSVLVLDVGRQHOGTYTCIATNPAGQALCSASLHISGLAKEEEQ  
ERVKEALISSFLQGTSAQVSAQMSSEAGFADLVGQSKGESLVAEEAHSHLSLAEVGTTEFLQKLSQITEMVS  
AKISQAKLQVPGGDSDEETKTPSASPRHGRSRPSSSVQESSESESDGSRGEIFDIYVVTADYLPGLAEQDAI  
ILREGQYVEVLD SAHPLRVLRTKPTKSSPSRQGWVSPAYLDRKRLKLSPEWGPTEAPEFPGEAVSEDEYRTRL  
SSVIQELLSSEQAFVQELQFLESHHMKHLERSPRVPAAVASQKTVIFRNVQDISHFHSSFLKELQCGTDDDDV  
AMCFIKNQEAFAKEYLEFLVGRVQAESVVVSTPVQEFYKKYAEETLSAKDPTQPPPPPLQHYLEQPVVERVQKYQ  
ALLKELIRNKARNRQNCALLEQAYAVVSALPQRAENKLVSLMENYPGTLEALGEPHQGHFVWEGAPGARM  
PWKGHNHRVFLFRNYLVICKPRRDSRTDTFSYVFRNMMKLSSIDLNDQVEGDDRAFEVWHEREDSVRKYLLQA  
RTVILKNSWVKEICIGIQORLAQPVWRPPEFEEELADCTAELGETVKLACRVTGTPKPIVSWYKDGQPVVEVDPH  
HLLIEDPDGSCSTLILDNLTGIDSGQYMCFAASAAGNASTLGKILVQVPPRFVKNVRATPFVYGEDAQITCTVE  
GAPYPQIRWYKDGTLTLLAPGNRYRMLNEPRSGVLVVIQAASKEDLGHYECELVNRLGSTRGGGELYMQSPALR  
ARDQHHREQIVAAVEERRPSP\*  
>rs50849759\_ENSMUSP00000151217\_c.18294:A>C\_p.K6099Q  
ENSMUST00000219084.3|Obscn-207|ENSMUSG00000061462|-|chr11:g.58913216:T>G  
MDHSFSGAPRFLTRPKAFVSVGKDATLSCQIVGNPTPHVSWEKDRQPVEAGARFLAQDGDVYRLTILDLAL  
GDSGQYVCRARNAIGEFAAVGLRVDSEGTCAEQAPHFLLRPTSIRVREGADATFRCRVGGSPQPAVSWSKDG  
RRLGPPDAPHVRVEEHGESSALRIR SARPRDGGTYEVRAENPLGSASAAAALVVDSDAEVAGPPGTSTATLLA  
HLQQRREAMRAEGIPSPPGAGTRTCTVTEGKHARLSCFVTEGPKPETVWKKDGLVTEGRRHVVEDEQENF  
VLKILFECKQSDRGLYCTASNLVGGQTYSSVLVVVREPTVPFKKRLQDLEVREKESATVFCEVAQAPATEAAWFK  
EETRLWASAKYDIEEEGTERRLTVRNVSADDDAVYICETTEGSRVAELSVQGNLTKLPRKTAVRTGDTAIF  
WVELAVPEGPVRWLRNQEEMVAGGRVAITAEGTCHTLTIFQCTLEDMGEVAFVSGGCRTTTQFCVSAPRRPPL  
YPPADPVVKAKTESSVTLWSAPPHGDRPVTIDGYVLEKRLKLGAYAWSRCHEAGWLATTEFTITGVAAEGDFQ  
FRVSAINHFGQGPYLEFPGTMHLVPLAVKTPKAVEAVEGGEVTFVSDLTVASSGEWFLDGEALKASSIYVI  
RCDRTRHMLTIREVPARLHGAQLKFFVANGIETS IQMVVRAALGLPSKLPAAAAREVLAQLHEEAQLLAE LSD  
QAAA VTWLKDGRELSLGPKEYMQVSAGRRALLVRDVAQDDAGLYECVSRGSRTAYQLLVQDITDGYRDWGPAG  
PQKHMCKCAGAKIARYLGS SCYRFLQYDKGVWHLEAALDTRQKGTSSCSLHEKPKLVFAKQQAHSEVKA  
AGNSATLSCEVTQAQTEVTWFKDGKLSSSSKVRMEASGCSRRLVVQQAGKADAGEYSCEAGGQKLSFRLDVA  
EPKLVFAKQQAHSEVKAEGASATLSCEVAQAQTEVTWFKDGKLSSSSKVRMEASGCSRRLVVQQAGKADA  
GEYSCEAGGQKLSFRLDVAEPKLVFAKEQQARSEVKAEGASATLSCEVAQAQTEVTWFKDGKLSSSSKVRM  
EASGCSRRLVVQQAGKADAGEYSCEAGGQKLSFRLDVTEPKLVFAKEQQARSEVKAEGNSATLSCEVAQAQ  
EVTWFKDGKLSSSSKVRMEASGCSRRLVVQQAGKADAGEYSCEAGGQKLSFRLDVTEPKLVFAKEQQAHSEV  
KAEAGASATLSCEVAQAQTEVTWFKDGKLSSSSKVRMEASGCSRRLVVQQAGKADAGEYSCEAGGQKLSFRL  
DVAEPKLVFAKEQQARSEVKAEGASATLSCEVAQAQTEVTWFKDGKLSSSSKVRVEASGCSRRLVVQQAGK  
ADAGEYSCEAGGQKLSFRLDVAEPKLVFAKEQQANSEVKAEGASATLSCEVAQAQTEVTWFKDGKLSSSSK  
VRVEASGCSRRLVVQQAGKADAGEYSCEAGGQKLSFRLDVAEPKLVFAKEQQAHSEVKAEGASATLSCEVAQ  
AQTEVTWFKDGKLSSSSKVRVEASGCSRRLVVQQAGKADAGEYSCEAGGQKLSFRLDVAEPKLVFAKEQQAH  
SEVKAEGASATLSCEVAQAQTEVTWFKDGKLSSSSKVRVEASGCSRRLVVQQVQKADAGEYSCEARGQKLS  
FRLDVAEAESQIPERPSRREPLVVKHEHETIILTATIAAPSVAAVTWLKDGVERRSKRHEATSLGDTHTLTVR  
GAQVLD SAIYSCRVGKEGQDFPVQVEEVAKF SKPLEPVEGELGGTVMLVCELSPEQAEVWRCGNTQLRPGK  
RFQMTSEGPRRTLTVSGLREDDAEYVCE SRDDRTSARLTVKVPVVKFTSGLSAMVAEEGQEATFCQVVS PS  
DAGVTWYKDGMLQLPSEKFMVVEGASRSILTILGLTLEDAGQVTEAEGASSAALRVREAPVLFKPKLEPQT  
VEERTSVTLEVELTRPWPVEKWRNAAVLTPSENVEIRAEGARHCLVLRVGFADRGFFGCETPDDKTQAKLN  
VEMRQVRLVRGLQEVEAKEQGTASMDVELSHAEEVGSWTRDGLRLQPGPKCHLAVQGPVHILTL SALQPQDSG  
LVAFRAEGVHTSARLIVTELPVSFTRVLQDVVATQKEKVTLECELSRPVDVRLKDGVELRAGKAI GIVAQGT  
CRSLVIYRCETGQGVYVCDALDAQTSASLRVQGRYTYLIFRVLAEADAGEVKFVAENAESRAHLRVKELPVT  
LLRPLRDKIAMEKHGVLLECQVSRASAQVRWFKGVELQSGPKYEVVSDGLYRKLKLVINDVQPEDEDTYTC DAG  
NVKTSAQFFVEEQSITIVRGLKDMTVMEPAPAWFECETSIPSVRPPKWLKGKTVLQAGGNVGLEQDGTVHRLT  
LHKTCSTMTGPVHFTIGKSRSSAQLVVS DIPVVLTRPLEPKAGRELQSVVLSCDFRPAPKAVQWYKDDTPLSP  
SEKFKMALEGQMAELRILRLTPADAGVYRCQAGSAQSSAEVTVAREVTVIQPLQDAEAMEEGRVCFSCELSH  
KDEIDIEWSLNGTPLYNDSFHEISHEGCLHTLVLKSVRQADTGTVCATSPKVS SARLVVKGPVVF LKALDDV

SAEERGLTLTQCEVSDPEARVVWRKDGVELGPSDKYDFLHKAGARGLTVHDLSDHEDAGLYTCQVGSKETQSKV  
SVHDLHVGITKRLKTVEVLEGESECFEVLSSHESPSDPAVWTVGGKTVGGSGHFHAVRQGRKYTLTVKDAALS  
DAGEVVFVSVLGLTSSKASLIIRERPVDTITKPLEDQRTTLGEDVMLSCELSRAGTSVRWLKDGKAIRKSQKYDLL  
SEGTRAVLVVRKASLKDSGEYTCETEASKSTAKLCVEEKANRFTEELADLQVEEKGRAVFTCKTEHPASVVTW  
RKGLELRASGKHVPSQEGTLTKLTINALERTSDTYTCDIGQARTQARLLVHGQKVRVIEDLEDTAVQEGSS  
AKFCRIAPADYGPVHWFLLDKTPLHSNELNEITVQPGGYHVLTLRQLALKDSGTVYFEAGDQRTSAAALRVTEK  
PSIFSRPLTDVTVTEGEDTLVCETTTVDSSVRWTKDGKTLRPSARCQLSHEGCAQLLITATTPQDGGRYKC  
EIGGASSSSIVRVHALPVRFRFRESLKDVEVPEGKAATLRCVLSVAAPVEWRHGDDVLKSSNKYSLRQEGAVLE  
LVIRDLQPDSDGQYSCSFGDQTTSATLTVKTSASAQFVGLRNKEATEGTTVTLRCELTKAPVEWKGTETLR  
NGDKYSLKQDGAVCELQICSLLVADAGEYSCVCGQEKTSATLTVKALLVHFVRRRLRSKEATEGDTTTLQCELS  
KAAPVEWRKGTETLRDGDYSLKQDGAVCELQIRSLTIADAGEYLCTCGQEKTSATLTVRGLPAKFIEDLRSQ  
EATEGATAILRCELSKAAPVEWRKGTETLRDGDYSLRQDGAMCELQIRGLTIEDSGEYTCVCGQEKTSATLS  
VKALPPRFIEDLRSQEATEGTMATLRCQMSKAAPVEWRKGTETLRDGGRYSLRQNGAVCELQIHDLAVEDTGE  
YSCVCGQEKTSATLNVKALPPKFTTEGLKKEEATEGTMVTLRCQMSKEATVEWRKGAKTSLDGGRYSLRQDGAM  
CELQICGLAVEDAGEYSCVCGQEKTSATLSVKALPPRFIEDLRSQEATEGTMATLRCQMSKAAPVEWRKGTET  
LRDGDYSLRQDGAVCELQIRDLAVEDAGEYLCVCGQEKTSATLSVKALPPRFIEDLRSQEATEGTMATLRCQ  
MSKAAPVEWRKGTETLRDGDYSLRQDGAMCELQICDLAVEDTGDYSCVCGQEKTSATLSVKAPVVFQOPLQ  
NLQAEEGSMASLRCELSVPNAAMVWSKGGLELQGDTRREARQQGCVAELLLRDLRREDAGEYSCVCGQEKTSAT  
TLMVTAAPVRFRLRELQAQDVDEGATARLRCELSREAVSVEWRKGSLLQFPKAKYQMVQEGTTAELLVHGVEQE  
DAGEYTCDAHTQSIARLSVRAPKPKFKTDLQSTEQEAGGTARLCCQLSEAPGTPVQWLKEGVELHVGSKYE  
MRRQGAVALLEHGLEAKDTGEYACLVGGQKTLASLRVKEPEVTIVRGLVDMEVQADEDEFTCKVSOAGATD  
VQWHLQGLPLQSNVETVAVLADGCTHVLQKGVTLDEAGTVSFHVGGSSSAQLTVRVPEVTVLEPLKDVQL  
SEGQDAHFRCLSRASGQEARWALGGVPLQCNEEMNDITVEQGTLYLLTLHKVTLDEAGTITLQVGSSESAQL  
KVTAKNTVLRGLENVDALLEGGEALFECQLSQPEVAHTWLLDDEPVHTSEKVEVVYFENGLRHLLLLKLNKLPQ  
DSCRVTFLAGDVVTSFAFLTVRGRLEVLEPPHDASVAKGMQVRFITLSEAVPVGEATWYINGAAIQPDTDW  
TVTDTGSHHALTLSNAQFQHAGEVTFFAARDAVASARLSVGLALPDPPEDAEVVGRSDHSVTLSWVAPMSDGGGG  
LCGYRVEMKEASTGQWQLCHDLVPGPECVDDLVPGKTYRFRVAAVGPAGAGEPVHLPQMVKIAPAPAPAPAP  
APAPETRQAVVGEDICLELEVAADGGEVVWHKGTERRIQPGGHFEVLSRGRQMLVIKGFRTEDQGEYRCGPIQ  
GLPSSGAATFNVVMTSGSGDEVPAQPSLPPEAAQEGDLHLLWEALARKRRMSREPTLDSISELPEEDSRVQHL  
RQEAEBETAPDLSEGYSTADELARTGEADLSHTSSDDESRAGTPSLVTYLKKAGGPGISPLASKHEAQVTTSVK  
PQKQQEPVVPTCPPPGDLSAADLMDPSLDKAAVKIQAAFQKGVKVRKEMKQOEGPVFSRTFGDTEAQVGDVLR  
ECVLATKTDMRACWLKDGIELTDGRHYHIDQLKDGTCSLLVTLGLAPTDSGRYTCQVSTKSGRVSHSACVVVSG  
TESEAESSSGGELDDAFRRARRLHRLFRTKSPAELSEELFLSADEGPGPEEPADWQTYREDEFVFCIRFE  
SLAEARQAVTCFRNMFATMGIGVEISLGEQGRGVMERIGKVAFTVTPAVPLAKTGPLQTSDAAPVFLTELQN  
QVDQDGYPMSEFDCVVTGQPVPSVRWFKDGLLEEDDHVMINEDQQQGHQLIITAVVPADMGVYRCLAENSMGV  
SSTKAELRVELTSTDYDTAADATETSSYFSAQGYLSSREQEGTESDEGQLPQVLEELKDLQVAPGTRLAKFQL  
KVKGYPAKLYWFKDQPLTTSDHIRMTDKKTLHTLEIVSVTREDSGQYAAYSNAVGAAYSSARLLVRGPSE  
PEEKPASDVHERLVPVPRILEKFTPKKVKRGSSITFSVKVEGHPAPSVHVLKEEAKEGVLWIGPDTPGYTMAS  
SKQHSVLVLLDVGRRHQGTYTICATNPAGQALCSASLHISGLAKEEEQERVKEALISSFLQGTSSQAVSAQMS  
AGFADLVGQSKGESLVAEEAHSLSLAEVGTEEFLLQKLTSTIEMVSAKISQAKLQVPGGDSDEETKTPSASP  
RHGRSRPSSSVQESSSESEDGDSRGEIFDIYVVTADYLPGLAEQDAIILREGQYVEVLDSAHPLRWLVRTKPT  
KSSPSRQGWVSPAYLDKRLKLSPEWGPTEAPEFPGEAVSEDEYRTRLSSVIEQLLSSEQAFVGVLEQLFLESHM  
KHLERSPRVPAAVASQKTIVIFRNVDISHFHSSFLKELQCGCTDDDVAMCFIKNQEAFAKEYLEFLVGRVQAES  
VVVSTPVQEFYKKAETLSAKDPTQPPPPPLQHYLEQPVERVQKYQALLKELIRNKARNRQCALLEQAYAV  
VSALPQRAENKLVSLMENYPGTLEALGEPVIRQGHFVWEGAPGARMPWKGNHRHVFLFRNYLVICKPRRDSR  
TDTFSYVFRNMMKLSSIDLNDQVEGDDRAFEVWHEREVSRKYLQARTVVIKNSWVKEICGIQQRQAQPVWR  
PPEFEEELADCTAELGETVKLACRVTGTPKPIVSWYKDGQVPEVDPHILIEDPDGSCTLILDNLGTIDSGQY  
MCFASAAGNASTLGKILVQVPPRFVNVKVRATPFVEGEDAQITCTVEGAPYPQIRWYKDGTLAPGNRYRMLN  
EPRSGVLVLIQAASKEDLGHYECVLNRLGSTRGGGELYMQSPALRARDQHREQIVAAVEVTEQETKVPKK  
TVIIEETITTVVKSPPRRRQSPGKSPSRSPRRSASPRRPLGAPERLYPPGTSPPRRLEVEQGRKAPVPALY  
VTEAEVHAPASQSQPKWLEVEETIEVRVKKTGSRGASPVREMTSRGEGILFTLPGGIPGRDPNANNNSNKS  
QVYQARTWGPVAVVHVEGPFIFQVDSVGNVDWVAASPEPEQVSRASQKEENTERQEGCSDGENTFLMEEPQD  
TSLQGRDPKILTRHNHGLTLADLEDYVPOEGETFGCGDSTPSTPDEPPCEVSVLQREI SEPTVQPVLLNVGRPPG  
TGATPSFFRPGSQVHSPESVSLFLREAWSGPVSAAPWTSSFHTHVQSSVDGSHGFSFKTEVSTQTVSFGAVGET  
VTLHIDPDGGEAPGPSQG\*

>rs26971834\_ENSMUSP00000158795\_c.20392:A>G\_p.N6798S  
ENSMUST00000238536.2|Obscn-210|ENSMUSG00000061462|-|chr11:g.58920178:T>C



MDHSFSGAPRFLTRPKAFVSVGKDATLSCQIVGNPTPHVSWEKDRQPVEAGARFRLAQDGDVYRLTILDLAL
GDSGQYVCRARNAIGEFAAVGLRVDSEGTCAEQAPHFLLRPTSIRVREGADATFRCRVGGSPQPAVSWSKDG
RRLGPPDAPHVRVEEHGESSALRIR SARPRDGGTYEVRAENPLGSASAAAALVVDSDAEVAGPPGTSTATLLA
HLQQRREAMRAEGIPSPPGAGTRTCTVTEGKHARLSCFVTGEPKPEVWKKDQGLVTEGRRHVVEDEQENF
VLKILFCKQSDRGLYTCTASNLVQTYSSVLVVVREPTVPFKKRLQDLEVREKESATFQCEVAQPAEAAWFK
EETRLWASAKYDIEEEGETERRLTVRNVSADDDAVYICETTEGSRVVAELSVQGNLTKLPRKTAVRTGDTAIF
WVELAVPEGPVWRWRNQEEMVAGGRVAITAEGTCHTLTI FQCTLEDMGEVAFVSGGCRTTTQFCVSAPRRPPL
YPPADPVVKAKTESSVTLWSAPPHGDRPVITIDGYVLEKRLGAYAWSRCHEAGWLATTEFTITGVAAEEDFQ
FRVSAINHFGQGPYLEFPGTMHLVPM LAVKTP LKAVEAVEGGEVTFVSDLTVASSGEWFLDGEALKASSIYVI
RCDRTRHMLTIREV PARLHGAQLKFVANGIETSIQMVVRAALGLPSSKLPAAAAAREVLAQLHEEAQLLAE LSD
QAAA VTWLKDGRELSLGPYEMQVSAGRRALLVRDVAQDDAGLYECVSRGSR TAYQLLVQDITDGYRDWGPAG
PQKHMCKCAGAKIARYLGSSCYRFLQYDKGVWHLEAALDTRQKGKTS SCSLHEKPKLVFAKQQAHSEVKA E
AGNSATLSCEVTQAQTEVTWFKDGKLLSSSSKVRMEASGCSRRLVVQQAGKADAGEYSCEAGGQKLSFRLDVA
EPKLVFAKQQAHSEVKA EAGASATLSCEVAQAQTEVTWFKDGKLLSSSSKVRMEASGCSRRLVVQQAGKADA
GEYSCEAGGQKLSFRLDVAEPKMFVFAKEQQARSEVKA EAGASATLSCEVAQAQTEVTWFKDGKLLSSSSKVRM
EASGCSRRLVVQQAGKADAGEYSCEAGGQKLSFRLDVTEPKLVFAKEQQARSEVKA EAGASATLSCEVAQAQ T
EVTWFKDGKLLSSSSKVRMEASGCSRRLVVQQAGKADAGEYSCEAGGQKLSFRLDVAEPKLVFAKEQQARSEV
KAEAGNSATLSCEVAQAQTEVTWFKDGKLLSSSSKVRMEASGCSRRLVVQQAGKADAGEYSCEAGGQKLSFHL
DVTEPKLVFAKEQQAHSEVKA EAGASATLSCEVAQAQTEVTWFKDGKLLSSSSKVRMEASGCSRRLVVQQAGK
ADAGEYSCEAGGQKLSFRLDVAEPKLVFAKEQQARSEVKA EAGASATLSCEVAQAQTEVTWFKDGKLLSSSSK
VRVEASGCSRRLVVQQAGKADAGEYSCEAGGQKLSFRLDVAEPKLVFAKEQQANSEVKA EAGASATLSCEVAQ
AQTEVTWFKDGKLLSSSSKVRVEASGCSRRLVVQQAGKADAGEYSCEAGGQKLSFRLDVAEPKLAFAKEQQAH
SEVKA EAGASATLSCEVAQAQTEVTWFKDGKLLSSSSKVRVEASGCSRRLVVQQAGKADAGEYSCEAGGQKLS
FRLDVAEPKLAFAKEQQAHSEVKA EAGASATLSCEVAQAQTEVTWFKDGKLLSSSSKVRVEASGCSRRLVVQQ
AGKADAGEYSCEAGGQKLSFRLDVAEPKLAFAKEQQAHSEVKA EAGASATLSCEVAQAQTEVTWFKDGKLLSS
SSKVRVEASGCSRRLVVQQAGKADAGEYSCEAGGQKLFRLDVAEPKLMFAKEQQAHSEVKA EAGASATLSCE
VAQAQTEVTWFKDGKLLSSSSKVRVEASGCSRRLVVQQAGKADAGEYSCEAGGQKLSFRLDVAEPKLVFAKEQ
QAHSEVKA EAGASATLSCEVAQAQTEVTWFKDGKLLSSSSKVRVEASGCSRRLVVQQVQKADAGEYSCEARGQ
KLSFRLDVADTRLMFAKEQQARTEVKA EAGNSATLSCEVAQAQTEVTWFKDGKLLSSSSKVRVEASGCSRRLV
VQQAGKADAGEYSCEAGGQKLSFRLDVAEAE SQIPERPSRREPLVVKEHETIILTATIAAPSVAAV TWLKDGV
EIRRSKRHEATSLGDTHTLTVRGAQVLD SAIYSCRVGKEGQDFPVQVEEVA AKFSKPLEPVEGELGGTVMLVC
ELSP EQAEVWRCGNTQLRPGKRFQMTSEGPRRTLTVSGLREDDAE EYVCE SRDDRTSARLT VKVPRVVKFTS
GLSAMVAEEGQEATFQCVVSPSDAGVTWYKDGMLQLPSEKFMVVEGASRSRLTILGLTLEDAGQVTEAEGAS
SSAALRVREAPVLFKKKLEPQTEVERTSVTLEVELTRPWPEVKWTRNAAVLTPSENVEIRAEGARHCLVLR SV
GFADRGGFFGCETPDDKTQAKLNVEMRQVRLVRLGQLEVEAKEQGTASMDVELSHAEVEGSWTRDGLRLQPGPKC
HLAVQGPVHILTL SALQPQDSGLVAFRAEGVHTSARLIVTELPVSFTRVLQDQVATQKEKVTLECELSRPFVDV
RWLKDGV ELRAGKAIGIVAQGTCSRSLVIYRCETGDQGVYVCDALDAQTSASLRVQGRTYTLIFRRLAEDAGE
VKFVAENAESRAHLRVKELPVTLLRPLRDKIAMEKHRGVLECCQVSRASAVRWFKGGVELQSGPKYEVVSDGL
YRKLVIN DVQPEDEDTYTC DAGNVKTS AQFFVEEQSITIVRGLKDMTVM EPAPAWFECETSIPSVRPPKWL LG
KTVLQAGGNVGL EQDGTVHRLTLHKTCSTMTGPVHFTIGKSRSSAQLVSDI PVVLT RPLEPKAGRELQSVVL
SCDFRPAPKAVQWYKDDT PLSPEKFKMALEGGMAELRILRLTPADAGVYRCQAGSAQSSAEVTV EAREVTVI
QPLQDAEAMEEGRVCFSC ELSHKDEDIEWLSLNGTPLYNDSFHEI SHEGCLHTLV LKSVRQADTGTVCATSPKV
SVSARLVVKGKPVVFLKALDDVSAEERGLTLTQCEVSDPEARVWVRKDGVELGSPDKYDFLHKAGARGLTVHD
LSHEDAGLYTCQVGSKETQSKVSVHDLHVGITKRLKTVEVLEGE SCSFECVLSHESPSDPAVWTVGGKTVGGS
GHFHAVRQGRKYTLTVKDAALSDAGEVVF SVLGLT SKASLI IRE RPVDITKPLEDQRTTLGEDVMLSCELSRA
GTSVRWLKDGKAIRKSQKYDLLSEGTRAVLVVRKASLKDSGEYTCETEASKSTAKLCEVEKANRFTEELADLQ
VEEKGRAVFTCKTEHPASVVTWRKGLLELRASGKHVPSQEGLTLKLTINALERTSDTYTCDIGQARTQARLL
VHGQKVRVIEDLED TAVQEGSSAKFCCRIAPADYGPVHWFLDKTPLHSNELNEITVQPGGYHVLTLRQLAL KD
SGTVYFEAGDQRTS AALRVTEKPSIFSRPLTDVTVTEGEDLTLVCETTTVDSSVRWTKDGKTLRPSARCQLSH
EGCQAQLLITATTPQDGGRYKCEIGGASSSIVRVHALPVRFRESLKDVEVPEGKAATLRCVLSVAAPVEWR
HGDDVLKSSNKYSLRQEGAVLELVIRDLQPQDSGQYSCSFGDQTT SATLTVKTS SAQFV GKL RNKEATEGTTV
TLRCELTK EAPVEWKKGTETLRNGDKYSLKQDGAVCELQICSLLVADAGEYSCVCGQEKTSATLTVKALLVHF
VRRLSRKEATEGDTTTLQCELSKAAPVEWRKGTETLRDGD RYSLKQDGAVCELQIRSLTIADAGEYLC TCGQE
KTSATLTVRALPAKFKDSLKNEEATEGTTATLSELSKAAPVTWKKGPKTLQSGDVKVLRQDGAVCGLQIHGL
TMADAGEYSCVCGQEKTSATLTVRGLPAKFIEDLRSQEATEGATAILRCELSKAAPVEWRKGS ETLKDGDRYT
LRQDGAVCELQIRGLAVVDGTGTYSSLPKFT EGLRNEEATEGTMATLRCQMSKAAPVEWRKGS ETLR DGD RYS
LRQDGAMCELQIRGLTIEDSGEYTCVCGQEKTSATLSVKALPSRFIEDLRSQEATEGTMATLRCQMSKTAPVE
WKKGSETLRDGGRYSLRQDGPVCELQICDLAVEDAGEYSCVCGQEKTSATLSIKALPPRFIEDLRSQEATEGT

MATLRCQMSKAAPVEWRKGSSETLGDGGRYSLRQNGAVCELQIHDLAVEDTGEYSCVCGQEKTSATLNVKALPP  
RFIEDLRSQEATEGTMATLRCQMSKAAPVEWRKGSSETLRDGGRYSLRQDGA VCELQIHDL DVEDAGQYSCVCG  
QEKTS AVLTV DALPPKFT EGLKKEEATEGTMVTLRCQMSKEATVEWRKGAKT LSDGGRYSLRQDGA MCELQIC  
GLAVEDAGEYSCVCGQEKTSATLSVKALPPRFIEDLRSQEATEGTMATLRCQMSKAAPVEWRKGSSETLRDGD  
YSLRQDGA VCELQIRDLAVEDAGEYLCVCGQEKTSATLSVKALPPRFIEDLRSQEATEGTMATLRCQMSKAAP  
VEWRKGSKT LRDGD RYSLRQDGA MCELQICDLAVEDTGDYSCVCGQEKTSATLSVKALPPRFIEDLRSQEARE  
GTVATLRCRMSKAAPVEWRKGSSETLKDGD RYSLRQEGNLCELQIRDLAVEDTEEYSCVCGQEKTSATLSVKAL  
PAKFIEDLRSQEAPESSTVTLRCKLSKKASVWKKGSETLRNGARYSLRQDGA VCELEIRDLTVEDTGEYSCT  
CGQERTSATLSIMAPQVV FQQPLQNLQAEEGSMASLRCELSVNAAMVWSKGGLELQGDTRREARQQGCVAEL  
LLRDLRREDAGEYSCTCGSQTT SATLMVTAAPVRFRELQAQDVDEGATARLRCELSREAVSVEWRKGS LQLF  
PCAKYQMVQEGTTAELLVHGVEQEDAGEYTC DAGHTQSIARLSVRAPKPKFKTDLQSTEQEAGGTARLCCQLS  
EAEPGTPVQWLKEGVELHVGSKYEMRRQGA VCELLIHGLEAKDTGEYACL VGGQKT LASLRVKEPEVTIVRGL  
VDMEVQADEDVEFTCKV SQAGATDVQWHLQGLPLQSN EVTEVAVLADGCTHVLQ LKGVTLEDAGTVSFHVGGL  
SSSAQLTVRVPEVTVLEPLKDVQLSEGQDAHFRCRLSRASGQEARWALGGVPLQCNEMNDITVEQGTLYLLTL  
HKVTLEDAGTITLQVGS CSSEAQLKVTAKN TVLRGLENVDALEGG EALFECQLSQPEVA AHTWLLDDEPVHTS  
EKVEVVYFENGLRHLL LKLNLPQDSCRVTFLAGDVVTS AFLTVRGWRLEVLEPPHDASVKAGMQVRF TCI LS  
EAVPVGEATWYINGAAIQPDDTDWTVTTDGS HHALT LLSNAQPQHAGEVTF AARDAVASARLSVLALPDPPEDA  
EVVGRSDHSVTL SWVAPMSDGGGGLCGYRVEMKEASTGQWQLCHDLVPGPECVVDDLVP GKTYFRFVA AVGPA  
GAGEPVHLPQMVKIAPAPAPAPAPAPAPAPAPETRQAVVGEDIC LELEVAADGGEVVWHKGT ERIQPGGHFEVLS  
RGQRQMLVIKGFRTEDQGEYRCGPIQGLPSSGAATFNVM TSGSGDEVPAQPSLPPEAAQEGDLHLLWEALAR  
KRRMSREPTLDSISELPEEDSRVQHLRQEA EETAPDLSEGYSTADELARTGEADLSHTSSDDES RAGT PSLVT  
YLK KAGGPGI SPLASKHEAQV TTSVKPQKQEPV VPTCPPPGDLSAADLMDPSLDKAAVKIQAAFKGYKVRKE  
MKQQEGPVFSRTFGDTEAQVGDVLRLECVLATK TDMRACWLKDGIELTDGRHYHIDQLKDG TCSLLVTGLAPT  
DSGRYTCQVSTKSGRVSHSACVVVSGTESEAESSSGGELDDAFRAARRLHRLFR TKSPAELSEELFLSADE  
GPGEPEEPADWQTYREDENFVCIRFESLAEARQAVTCFRNMFATMGIGVEISLGEQGRGVEMRIGKVAPTVT  
PAVPLAKTPGLQTS DAAPVFLTELQNDVQDGYPMSFDCVVTGQVPVSVRWFKDGKLEEDDHYMINEDQQGG  
HQLIITAVVPADMGVYRCLAE NSMGVSSSTKAELRVELTSTDYDTAADATETSSYFSAQGDHSSREQEGTESDE  
GQLPQVLEELKDLQVAPGTR LAKFQLKVKGYPAPKLYWFKDGGQPLT TSDHIRMTDKKTLHTLEIVSVTREDSG  
QYAAYSNAVGAAYSSARLLVRGPSEPEEK PASDVHERLVPPRI LEKFTPKKVKRGSSITFSVKVEGHPAPSV  
HWLKEEA EKGV LWIGPDTPGYTMASSSKQHS LVL LDVGRQH QGT YTCIATNPAGQALCSASLHISGLAKEEEQ  
ERVKEALISSFLQGT SQAVSAQMSESAGFADLVGQSKGESLVAEEAHSHLSLAEVGT EEF LQKLT SQITEMVS  
AKISQAKLQVPGGDSDEETKTPSASPRHGRSRPSSSVQESSSEEDGDSRGEIFDIYVVTADYLP LGAEQDAI  
ILREGQYVEVLDSAHPLRWLVR TKPKSSPSRQGWVSPAYLDKRLKLSPEWGPTEAPEFPGEAVSEDEYRTRL  
SSVIQELLSSEQAFV GELQFLESHHMKHLERSPRVPA AVASQKTVIFRNVQDISHFHSSFLKELQCGCTDDD  
AMCFIKNQEA FEKYLELFLVGRVQAESVVVSTPVQEFYKKYAEETLSAKDPTQPPPPPLQHYLEQVVERVQKYQ  
ALLKELIRSKARNRNCALLEQAYAVVSALPQRAENKLVSLMENYPGTLEALGEP I RQGHFIWEGAPGARM  
PWKGHNHRHVF LFRNYLVIC KPRRDSRTD TFSYVFRNMMKLSSIDLNDQVEGD DRAFEVWHEREDSVRKYLLQA  
RTVI IKNSWVKEICGIQORLAQP VWRPPEFEEELADCTAELGETVKLACRVTGT PKPIVSWYKDGKPV EVDPH  
HILIEDPDG SCTLILDNL TGIDSGQYMCFAASAAGNASTLGKILVQVPPRFVNVKVRATPFVEGEDAQITCTVE  
GAPYPQIRWYKDG TLLAPGNRYRMLNEPRSGVLV LVIQAASKEDLGHYECELVNRLGSTRGGGELYMQSPALR  
ARDQHHREQIVAAVEDTSVEGSAHSAQD GADQQAASVLWRLLGSEALGPS PGDLPNTRQSEPPAFEEAASQIP  
GAASGTPEV SQPGTHKGLEQETTSSGSQGWTVPIRVEGTAWPGAGTQQLLLDVHSQVIMETTQRTYVCQAPDT  
GVTRAPSMQVTIEDVQVQVGDMAQF DAVIEGHPPP I V TWYKGSTQLTSSARLSQRQDGT TYSLVLTDVAPHDA  
GVYTCVANNAGGQV LCKAELLVHGDKLDAENQVYRRKLSHSFYDVQEE IGRGVFGFVKRVQHKGNMFCAAKF  
IPLRSKTRAQAYQYR DILATLGHPLVTGLLDQFETRKTLLIILELCSSEELLDRLFKKGVVTEAEVKVYIQQL  
VEGLHYLHSHGILHLDIKPPN ILMVHPAREDIKICDFGFAQKITPSEPQYSKYGSPEFVSPEIIEQNPVSEGS  
DIWAMGVISYLSLTCSSPFAGESDRATLLNVLEGRVSWSSPTAAHLS EDAKDFIKATLQRTPRARPST SQCLA  
HPWFLKSMPAEEAHFINTKQLKFL LARSRWQRSLMSYKSI LVMRSIPELLQGPDPSPSLGVARHLRGEASGAS  
SSSSSSDNELAPFARAKSLPPSPVTHSPLLHPRGFLRPSASLPEETEASMTADAAVPASPQSAGPPASPGCV  
PRHSV ISSLFYQQAGEGA ERGNKTS GAKRHPARRRHLLKGGYIARALPGLREPLMEYS LLEEEAAREEQASIM  
TKTPSFETALRLPSSSVREVPGRSHSLDNPPVT TGPSPEACKEQLLFPSTGLTHETTAKDRGHKEGFLQESV  
PFPMSGDSRPGKQEGSSQDSCRGKPASSCHSELGSGS QEGCGPPSSQSLGSLPPQSLKKELTSCGPLFSEQ  
PQAAPFPTQVSPLLGSEKEPQDGS LSEGPVVPSSSPGASQVDASLDTEGLSEAGDTCDFTPPPQRPEQAT  
TRKFSLESRGGYAGVAGYGTFAFGDAGGMLGQGLPLARMAWAVS QSSEEQDEAATESQPLES LGPIAEASG  
VPLRTSPSLTPWEEVEQVSLVQIRDLSGDAEAADTISLDI SEVDPAYLNLSDLYDIKYL PFEFMI FRRVPKPI  
EQPESPGSETEAGQGLADFL EEAAWPWPGE LGLRAGLEITEEPEEPGDLEALLGEAAVGRKRKWSPSRGLFQF  
PGRCLSGEEPVELGLRQRVKASMAHISRILKGRPEGPERE GPPRKKAGLASFRLSGLKGRDQELSDEAVVLGQ  
SVTLACQVLAQPTAQATWSKDGVLLESSGHLLISSTLKNFQLLTI LVVKEEDLGTYTCCVSNPLGTA VTTGVL

RKAERPSSSPRPEVGEYKDAVLLVWKPVESECGPVTVYIVQCCIEGGSWTTLASDISDCCYLTGKLSRGGMYIF  
RTACVSKAGMGPYSSPSEQVLLGGPNHLASEEESSRRGPAQLLPSTKTFQFQMQIRRRGRFSVVRQCREKASGR  
ALAAKIVPYQPEDKTAVLREYEALRHLHHPHLAQLHAAYLSRHLVLI LELCSGPELLPSLAERESYSESDVK  
DYLWQMLSATQYLHAQHILHLDLRSNNMMVTEYNLLKVIDLGNALDQEKVPAPENFKDYLETMAPELLEGG  
GAVPQTDIWAIGVTAIFIMLSGEYPESESETRDLQKGLRKLIRLSRCYAGLSGGAVAFQSSSLCAQPWGRPCA  
STCLQCGLWTEEGPTGSRPTPVTFPTVRLRAVFREREKRRALLYKKNLAQVR\*  
>rs26971834\_ENSMUSP00000038264\_c.18232:A>G\_p.N6078S  
ENSMUST00000047441.14|Obscn-202|ENSMUSG00000061462|-|chr11:g.58920178:T>C  
MDHSFSGAPRFLTRPKAFVVSVGKDATLSCQIVGNPTPHVSWEKDRQPVEAGARFRLAQDGDVYRLTILDLAL  
GDSGQYVCRARNAIGEAFAAVGLRVDSEGTCAEQAPHFLLRPTSIRVREGADATFRCRVGGSPQPAVSWSKDG  
RRLGPPDAPHVRVEEHGESSALRIRSARPRDGGTYEVRAENPLGSASAAAALVVDSDAEVAGPPGTSTATLLA  
HLQORREAMRAEGIPPSPPGAGTRTCTVTEGKHARLSCFVTGEPKPEVWKKDQGLVTEGRRHVVEDEQENF  
VLKILFCKQSDRGLYTCTASNLVGQTYSSVLVVVREPTVPFKKRLQDLEVREKESATFQCEVAQPAEAAWFK  
EETRLWASAKYDIEEGETERRLTVRNVSADDDAVYICETTEGSRVVAELSVQGNLTKLPRKTAVRTGDTAIF  
WVELAVPEGPVRLRNQEEMVAGGRVAITAEGTCHTLTIFQCTLEDMGEVAFVSGGCRTTTQFCVSAPRRPPL  
YPPADPVVAKTESVTLWSAPPHGDRPVTIDGYVLEKRLKLGAYAWSRCHEAGWLATTEFTITGVAEEGDFQ  
FRVSAINHFGQGPYLEFPGTMHLVPLAVKTPKAVEAVEGGEVTFVSDLTVAASSGEWFLDGEALKASSIYVI  
RCDRTRHMLTIREVPARLHGAQLKFEVANGIETSIQMVVRAALGLPSSKLPAAAAREVLAQLHEEAQLLAE LSD  
QAAAVTWLKDGRELSLGPKEYMQVSAGRRALLVRDVAQDDAGLYECVSRGSRRTAYQLLVQDITDGYRDWGPAG  
PQKHMCKCAGAKIARYLGSSCYRFLQYDKGVWHLEAALDTRQKGTSSCSLHEKPKLVFAKQQAHSEVKA  
AGASATLSCEVAQAQTEVTFWFKDGKLLSSSSKVRMEASGCSRRLVVQQAGKADAGEYSCEAGGQKLSFRLDVA  
EPKMFVFAKEQQARSEVKAEGASATLSCEVAQAQTEVTFWFKDGKLLSSSSKVRMEASGCSRRLVVQQAGKAD  
GEYSCEAGGQKLSFRLDVTEPKLVFAKEQQARSEVKAEGNSATLSCEVAQAQTEVTFWFKDGKLLSSSSKVRM  
EASGCSRRLVVQQAGKADAGEYSCEAGGQKLSFRLDVAEPKLVFAKEQQARSEVKAEGNSATLSCEVAQAQ  
EVTWFKDGKLLSSSSKVRMEASGCSRRLVVQQAGKADAGEYSCEAGGQKLSFHLDVTEPKLVFAKEQQAHSE  
KAEAGASATLSCEVAQAQTEVTFWFKDGKLLSSSSKVRMEASGCSRRLVVQQAGKADAGEYSCEAGGQKLS  
DVAEPKLVFAKEQQARSEVKAEGASATLSCEVAQAQTEVTFWFKDGKLLSSSSKVRVEASGCSRRLVVQQAGK  
ADAGEYSCEAGGQKLSFRLDVAEPKLVFAKEQQANSEVKAEGASATLSCEVAQAQTEVTFWFKDGKLLSSSSK  
VRVEASGCSRRLVVQQAGKADAGEYSCEAGGQKLSFRLDVAEPKLAFAKEQQAHSEVKAEGASATLSCEVAQ  
AQTEVTFWFKDGKLLSSSSKVRVEASGCSRRLVVQQAGKADAGEYSCEAGGQKLSFRLDVAEPKLAFAKEQQAH  
SEVKAEGASATLSCEVAQAQTEVTFWFKDGKLLSSSSKVRVEASGCSRRLVVQQAGKADAGEYSCEAGGQKLS  
FRLDVAEPKLAFAKEQQAHSEVKAEGASATLSCEVAQAQTEVTFWFKDGKLLSSSSKVRVEASGCSRRLVVQQ  
AGKADAGEYSCEAGGQKLFRLDVAEPKLVFAKEQQAHSEVKAEGASATLSCEVAQAQTEVTFWFKDGKLLSS  
SSKVRVEASGCSRRLVVQQVQKADAGEYSCEARGQKLSFRLDVAEAEESQI PERPSRREPLVKEHETIILTAT  
IAAPSVAAVTWLKDGVEIRRSKRHEATSLGDTHLTVRGAQVLD SAIYSCRVGKEGQDFPVQVEEVAKF SKP  
LEPVEGELGGTVMLVCELSPEQAEEVWRCGNTQLRPGKRFQMTSEGPRTTLTVSGLREDDAEYVCE SRDDRT  
SARLTVKVPVVKFTSGLSAMVAEEGQEATFQCVVSPSDAGVTWYKDGMLQPSSEKFMVMEVSGASRSLTILGL  
TLEDAGQVTVEAEGASSAALRVREAPVLFKKKLEPQTVERTSVTLEVELTRPWPEVKWTRNAAVLTPSENV  
EIRAEGARHCLVLRVGFADRGFFGCETPDDKTQAKLNVEMRQVRLVRLQVEVEAKEQGTASMDVELSHAEVE  
GSWTRDGLRLQPGPKCHLAVQGPVHILTL SALQPQDSGLVAFRAEGVHTSARLIVTEL PVSFTRVLQDVVATQ  
KEKVTLECELSRPVDVRLKDGVELRAGKAIGIVAQGTCSRSLVIYRCETGDQGVYCDALDAQTSASLRVQGR  
TYTLIFRRVLAEDAGEVKFVAENAESRAHLRVKELPVTLLRPLRDKIAMEKHRGVLEQCQVSRASAQVRWFKGG  
VELQSGPKYEVVSDGLYRKLVIINDVQPEDEDTYTC DAGNVKTSAQFFVEEQSITIVRGLKDMTVMEPAPAWFE  
CETSIPSVRPPKWL LKTVLQAGGNVLEQDGTVHRLTLHKTCSTMTGVPVHFTIGKSRSSAQLVSDIPVVL  
RPLEPKAGRELQSVVLSCDFRPAPKAVQWYKDDTPLSPSEKFKMALEGGQMAELRILRLTPADAGVYRCQAGSA  
QSSAEVTVAREVTVIQPLQDAEAMEEGRVCFSCELSHKDEDIEWSLNGTPLYNDSFHEISHEGLHTLVLKS  
VRQADTGTVCATSPKVSVSARLVVKGKPVVFLKALDDVSAEERGTLTLQCEVSDPEARVVWRKDGVELGPSDK  
YDFLHKAGARGLTVHDLSDHEDAGLYTCQVGSKETQSKVSVHDLHVGITKRLKTVEVLEGESECFEVLSP  
SDPAVWTVGGKTVGGSGHFHAVRQGRKYTLTVKDAALSDAGEVVFVSLGLTSKASLIIRERPVDITKPLEDQR  
TTLGEDVMLSCELSRAGTSVRWLKDGKAIKRSQKYDLLSEGTRAVLVVRKASLKDSGEYTCETEASKSTAKLC  
VEEKANRFTTEELADLQVEEKGRAVFTCKTEHPASVVTWRKGLLELRASGKHVPSQEGTLTKLTINALERTDSD  
TYTCDIGQARTQARLLVHGQKVRVIEDLEDTAVQEGSSAKFCCRIPADYGPVHWFLLDKTPLHSNELNEITVQ  
PGGYHVLTLRQLALKDSGTVYFEAGDQRTSAALRVTEKPIFSRPLTDVTVTEGEDTLVCEKTTVDSDSVRWT  
KDGTTLRPSARQLSHEGCAQLLITATTPQDGGRYKECIGGASSSIVRVHALPVRFRESLTKDVEVPEGKAA  
TLRCVLSSVAAPVWHRHGDVLSNKYSRLQEGAVLELVIRDLQPDQSGYSCSFGDQTTSATLTVKTSQAQ  
FVGKLRNKEATEGTTVTLRCELTKEAPVEWKKGTETLRNGDKYSLKQDGA VCELQICSLLVADAGEYSCVCGQ  
EKTSATLTVKALLVHFVRRRLRSKEATEGDTTTLQCELSKAAPVEWRKGTETLRDGDYSLKQDGA VCELQIRS  
LTIADAGEYLCTCGQEKTSATLTVRALPAKFKDSLKNEEATEGTTATLSCELSKAAPVTWKKGPKTLQSGDKY

VLRQDGA VCGLQIHGLTMADAGEYSCVCGQEKTSATLTVRGLPAKFIEDLRSQEATEGATAILRCELSKAAAPV  
 EWRKGS ETLKDGDRYTLRQDGA VCELQIRGLAVVDTGTYS SLP TKFTEGLRNEEATEGTMATLRCQMSKAAAPV  
 EWRKGS ETLRQDGRYS LRQDGA MCELQIRGLTIEDSGEYTCVCGQEKTSATLSVKALPPRFIEDLRSQEATEG  
 TMATLRCQMSKAAAPVEWRKGS ETLRQDGRYS LRQDGA VCELQIHDLAVEDTGEYSCVCGQEKTSATLNVKALP  
 PRFIEDLRSQEATEGTMATLRCQMSKAAAPVEWRKGS ETLRQDGRYS LRQDGA VCELQIHDLVDVDAQYSCVC  
 GQEKTSAVLTVDALPPKFTEGLKKEEATEGTMVTLRQMSKEATVEWRKGAKTSLDGGRYSLRQDGA MCELQI  
 CGLAVEDAGEYSCVCGQEKTSATLSVKALPPRFIEDLRSQEATEGTMATLRCQMSKAAAPVEWRKGS KTLRQD  
 RYSLRQDGA MCELQICDLAVEDTGDYSCVCGQEKTSATLSVKAPQVVFQOPLQNLQAEEGSMASLRCELSVNP  
 AAMVWSKGGLELQGDTRREARQQGCVAELLLRDLRREDAGEYSCVCGQEKTSATLMTVTAAPVRFLELQAQDV  
 DEGATARLRCELSREAVSVEWRKGS LQFPCA KQMVQEGTTAE LLVHGVEQEDAGEYTC DAGHTQS IARLSV  
 RAPKPKFKTDLQSTEQEAGGTARLCCQLSEAE PGTPVQWLKEGVELHVGS KYEMRRQGA VCELLIHGLEAKDT  
 GEYACL VGGQKT LASLRVKEPEVTIVRGLVDMVQADE DVEFTCKVSQAGATDVQWHLQGLPLQSNVTEVAV  
 LADGCTHVLQ LKGV TLEDAGTVSFHVGG LSSSAQLTVRVPEVTVLEPLKDVQLSEGD ADFRCRLSRASGQEA  
 RWALGGVPLQCNEMNDITVEQGTLYLLTLHKVTLEDAGTITLQVGCSSQAQLKVTAKNTVLRGLENVDALEG  
 GEALFECQLSQPEVA AHTWLLDDEPVHTSEKVEVVYFENGLRHLLLLKNLKPQDSCRVTFLAGDVVTS AFLTV  
 RALPDPPEDAEVVGRSDHSVTL SVWAPMSDGGGGLCGYRVMKEASTGQWQLCHDLVPGPECVDDLVPGKTY  
 RFRVA AVGPAGAGEPRVHLPQMVK IAPAPAPAPAPAPAPAPETRAVVGEDICLELEVAADGGEVVWHKGTERTI  
 QPGGHFEVLSRGRQMLVIKGFRTEDQGEYRCGPIQGLPSSGAATFNVMVMTSGSGDEVPAPQPSLPEAAQEGD  
 LLLLWEALARKRRMSREPTLDSISELPEEDSRVQHLRQEAEEETAPDLSEGYSTADELARTGEADLSHTSSDDE  
 SRAGT PSLV TYLKKAGGPGISPLASKHEAQVTT SVKPKQKQEPVPTCPPPGDL SAADLMDPSLDKAAVKIQA  
 AFKGYKVRKEMKQQEGPVFSRTFGDTEAQVGDVLRLECVLATKTD MRACWLKDGIELTDGRHYHIDQLKDGTC  
 SLLVTGLAPTDSGRYTCQVSTKSGRVSHSACVVVSGTESEAESSSGGELDDAFRRAARRLHRLFRTKSPAELS  
 EELFLSADEGPGEPEPADWQTYREDENFVICRFESLAEARQAVTCFRNMFATMGIGVEISLGEQGRGVEM  
 RIGKVAPT VTPAVPLAKTPGLQTS DAAPVFLTELQNDVQDGYPMSFDCVVTGQPVPSVRWFKDGKLL EEDDH  
 YMINEDQGGHQLIITAVVPADMGVYRCLAENSMGVSTKAE LRVELTSTDYDTAADATETSSYFSAQGYLSS  
 REQEGTESDEGQLPVLEELKDLQVAPGTRLAKFVKVGPAPKLYWFKDGQPLTSDHIRMTDKKTLHTLE  
 IVSVTREDSGYAAAYISNAVGAAYSSARLLVRGPEPEEKPPASDVHERLVPPRILEKFTPKKVKRGSSTFSV  
 KVEGHPAPSVHWLKEEA EKGV LWIGPDTPGYTMASSSKQHSLVLLDVG RQHOGTYT CIATNPAGQALCSASLH  
 ISGLAKEEEQERVKEALISSFLQGTSQAVSAQMSE SAGFADLVGQSKGESLVAAEEAHSHLSLAEVGT EEFLOK  
 LTSQITEMVSAKISQAKLQVPGGDSDEETKTPSASPRHGRSRPSSSVQESSSESEDGDSRGEIFDIYVVTADY  
 LPLGAEQDAIILREGQYVEVLD SAHPLRVLVVRTKPTKSSPSRQGWVSPAYLDKRLKLSPEWGPTEAEPFGEA  
 VSEDEYRTRLSSVIQELLSSEQAFV GELQFLESHHMKHLERSPRVPAAVASQKT VIFRNVQDI SHFSSFLKE  
 LQCGCTDDDVAMCFIKNQEA FEKYLEFLVGRVQAESVVVSTPVQEFYKKYAEETLSAKDPTQPPPPPLQHYLE  
 QPVERVQKYQALLKELIRSKARNRQNCALLEQAYAVVSALPQRAENKLVHSLMENYPGTLEALGEP IROGHFI  
 VWEGAPGARMPKWHNRHVFLFRNYLVICKPRRDSRTDTFSEYFRNMMKLS SIDLNDQVEGDDRAFEVWHERE  
 DSVRKYLLQARTVI IKNSWVKEICGIQORLAQPVWRPPEFEEELADCTAELGETVKLACRVTGT PKPIVSWYK  
 DGKPV EVDPHHILIEDPDG SCTLILDNLTGIDSGQYMCFAASAAGNASTLGKILVQVPPRFVNVKVRATPFVEG  
 EDAQITCTVEGAPYPQIRWYKDG TLLAPGNRYRMLNEPRSGVLV LVIQAASKEDLGHYECELVNR LGSTRGGG  
 ELYMQSPALRARDQHHR EQI VAAVEGAPSMQVTIEDVQVQVGDMAQF DAVIEGHPPP IVTWYKGTQLTSSAR  
 LSQRQDGT TYSLVLT DVA PHDAGVYTCVANNAGQVLC KAE LLVHGDKLDAENQVYRRKLSHFYDVQEEIGR  
 GVFGFVKRVQHKG NKMFC AAKFIP LRSKTRAQAYQERDILATLGHPLVTGLLDQFETRKTLLIILELCSSEEL  
 LDRLFKKGVVTEAEVKVYIQQLVEGLHYLHSHGILHLDIKPPN ILMVHPAREDIKICDFGFAQKITPSEPQYS  
 KYGSP E FVSP EIEQN PVSEGS DIWAMGVISYLSLTCSSPFAGESDRATLLNVLEGRVSWSSPTAAHLS EDAK  
 DFIKATLQRTPRARPSTSQC LAHPWFLKSMPAAEEAHFINTKQLKFL LARSRWQRSLMSYKSI LVMRSIPELLQ  
 GPPDSPSLGVARHLRGEASGASSSSSSDNELAPFARAKSLPPSPVTHSPLLHPRGFRLPSASLPEETEASMP  
 TADA AVPAS PQSAGPPASPGCVPRHSV ISSLFYQQAGEGA ERGNKTS GAKRHPARRRHLKGGYIARALPGLR  
 EPLMEYSLLEEEAAREEQASLMTKT PSETALRLPSSSVREV PGRSHSLDNPPVTTG PSPEACKEQLLFPST  
 GLTHE TTA KDRGHKEGFLQESVFPFPPMSGDSRPGKQEGSSQDSCRGKPASSCHSELGSGSQEGCGPPSSQSLG  
 SLPPQSLKKE LSTSCGPLFSEQPQAAPFTQVSPLLGSEKEPQDGS LSEGVPVPSSSPGSASQVDA SLDTEG  
 LSEAGDTCDFTPPPQRPEQATTRKFSLESRGGYAGVAGYGTFAFGGDAGGMLGQGPLWARMAWAVSQSSEEQ  
 DEAAATESPQPLES LGPIAEASGVPLRTSPSLTPWEEVEQVSLVQIRDLSGDAEAAADTISLDISEVDPAYLNL  
 DLYDIKYL PFEFMI FRRVPKPIEQPESPGSETEAGQLADFL EEAAPWPGEGLGLRAGLEITEEPEEPGDLEA  
 LLGEAAKGRKRKWSPSRGLFQFPGRCLSGEEPVELGLRQRVKASMAHISRILKGRPEGPEREGRPRKAGLAS  
 FRLSGLVGRDQELSDEAVVLGQSVTLACQVLAQPTAQATWSKDGVLLESSGHLLISSTLKNFQLLTI LVVKEE  
 DLGTYTCCVSNPLGTA VTTGVL RKAERPSSSPRPEVEGELYKDAVLLVWKPVE SCGPVTYIVQCCIEGGSWTTL  
 ASDISDCCYL TGKLSRGGMYIFRTACVSKAGMPYSSPSEQVLLGGPNHLASEEESSRGRPAQLLPSTKTF AF  
 QMQIRGRF SVVRQCREKASGRALAAKIVPYQPEDKTA VLREYEALKRLHHPHLAQLHAAYLSPRHLVLI LEL  
 CSGPELLPSLAERESYSESDVKDYLWQMLSATQYLHAQHILHLDLRSENMMVTEYNLLKVIDLIGNAQSLDQEK

VPAPENFKDYLETMAPELLEGQGAVPQTDIWAIGVTAIFIMLSGEYPESSEGETRDLQKGLRKLIRLSRCYAGL  
SGGAVAFLOSSLCAQPWGRPCASTCLQCGWLTEEGPTGSRPTPVTFTVRLRAFVREKRRALLYKXHNLAQ  
VR\*

>rs26971834\_ENSMUSP00000049737\_c.20191:A>G\_p.N6731S

ENSMUST00000052872.15|Obscn-203|ENSMUSG00000061462|-|chr11:g.58920178:T>C  
MDHSFSGAPRFLTRPKAFVSVGKDATLSCQIVGNPTPHVSWEKDRQPVEAGARFRLAQDGDVYRLTILDLAL  
GDSGQYVCRARNAIGEFAAVGLRVDSEGTCAEQAPHFLLRPTSIRVREGADATFRCRVGSGPQPAVSWSKDG  
RRLGPPDAPHVRVEEHGESSALRIRSARPRDGGTYEVRAENPLGSASAAAALVVDSDAEVAGPPGTSTATLLA  
HLQQRRREAMAEGI PPSPPGAGTRTCTVTEGKHARLSCFVTGEPKPEVWKKDQQLVTEGRRHVVEYDEQENF  
VLKILFCKQSDRGLYTCTASNLVGGQTYSSVLVVVREPTVPFKKRLQDLEVREKESATFQCEVAQPATEAAWFK  
EETRLWASAKYDIEEGTERRLTVRNVSADDDAVYICETTEGSRVVAELSVQGNLTKLPRKTAVRTGDTAIF  
WVELAVPEGPVWRWRNQEEMVAGGRVAITAEGTCHTLTI FQCTLEDMGEVAFVSGGCRTTTQFCVSAPRRPPL  
YPPADPVVKAKTESSVTLWSAPPHGDRPVTIDGYVLEKRKLGAYAWSRCHEAGWLATTEFTITGVAEEGDFQ  
FRVSAINHFGQGPYLEFPGMTMLVPLAVKTPKAVEAVEGGEVTFVSVDLTVASSGEWFLDGEALKASSIYVI  
RCDRTRHMLTIREVPARLHGAQLKFVANGIETSIQMVVRAALGLPSSKLPAAAAREVLAQLHEEAQLLAE LSD  
QAAA VTLKDGRELSLGPYEMQVSAGRRALLVRDVAQDDAGLYECVSRGSRRTAYQLLVQEPKLVFAKQQAH  
SEVKAEGNSATLSCEVTQAQTEVTWFKDGKLLSSSSKVRMEASGCSRRLLVVQQAGKADAGEYSCEAGGQKLS  
FRLDVAEPKLVFAKQQAHSEVKAEGASATLSCEVAQAQTEVTWFKDGKLLSSSSKVRMEASGCSRRLLVVQQ  
AGKADAGEYSCEAGGQKLSFRLDVAEPMVFVFAKEQQARSEVKAEGASATLSCEVAQAQTEVTWFKDGKLLSS  
SSKVRMEASGCSRRLLVVQQAGKADAGEYSCEAGGQKLSFRLDVTEPKLVFAKEQQARSEVKAEGNSATLSCE  
VAQAQTEVTWFKDGKLLSSSSKVRMEASGCSRRLLVVQQAGKADAGEYSCEAGGQKLSFRLDVAEPMVFVFAKEQ  
QARSEVKAEGNSATLSCEVAQAQTEVTWFKDGKLLSSSSKVRMEASGCSRRLLVVQQAGKADAGEYSCEAGGQ  
KLSFHLVDVTEPKLVFAKEQQAHSEVKAEGASATLSCEVAQAQTEVTWFKDGKLLSSSSKVRMEASGCSRRLLV  
VQQAGKADAGEYSCEAGGQKLSFRLDVAEPMVFVFAKEQQARSEVKAEGASATLSCEVAQAQTEVTWFKDGK  
LSSSSKVRMEASGCSRRLLVVQQAGKADAGEYSCEAGGQKLSFRLDVAEPMVFVFAKEQQANSEVKAEGASATL  
SCEVAQAQTEVTWFKDGKLLSSSSKVRMEASGCSRRLLVVQQAGKADAGEYSCEAGGQKLSFRLDVAEPKLAFA  
KEQQAHEVKAEGASATLSCEVAQAQTEVTWFKDGKLLSSSSKVRMEASGCSRRLLVVQQAGKADAGEYSCEA  
GGQKLSFRLDVAEPMVFVFAKEQQAHSEVKAEGASATLSCEVAQAQTEVTWFKDGKLLSSSSKVRMEASGCSR  
RLVVQQAGKADAGEYSCEAGGQKLSFRLDVAEPMVFVFAKEQQAHSEVKAEGASATLSCEVAQAQTEVTWFKD  
GKLLSSSSKVRMEASGCSRRLLVVQQAGKADAGEYSCEAGGQKLFRLDVAEPMVFAKEQQAHSEVKAEGAS  
ATLSCEVAQAQTEVTWFKDGKLLSSSSKVRMEASGCSRRLLVVQQAGKADAGEYSCEAGGQKLSFRLDVAEPK  
VFAKEQQAHSEVKAEGASATLSCEVAQAQTEVTWFKDGKLLSSSSKVRMEASGCSRRLLVVQQVGLKADAGEYS  
CEARGQKLSFRLDVADTRLMFAKEQQARTEVKAEGNSATLSCEVAQAQTEVTWFKDGKLLSSSSKVRMEASG  
CSRRLLVVQQAGKADAGEYSCEAGGQKLSFRLDVAEAEESQI PERPSRREPLVVKEHETIILTATIAAPSVAAVT  
WLKDGEVIRRSKRHEATSLGDTHLTVRGAQVLDLSAIYSCRVGKEGQDFPQVVEEVAAKFSKPLEPVEGELGG  
TVMLVCELSPEQAQEVVWRCGNTQLRPGKRFQMTSEGRRTTLTVSGLREDDAEYVCEESRRDRTSARLTVKVP  
VVKFTSGLSAMVAEEGQEQATFQCVVSPSDAGVTWYKDGMLQLPSEKFMVMEVSGASRSLTILGLTLEDAGQVTV  
EAEGASSAALRVREAPVLFKKLEPQTEERTSVTLEVELTRPWPEVKWTRNAAVLTPSENVEIRAEGARHC  
LVLRSVGFADRGFFGCETPDDKTQAKLNVEMRQVRLVRLQVEVAKEQGTASMDVELSHAEVEGSWTRDGLRL  
QPGPKCHLAVQGPVHILTLALSALQPQDSGLVAFRAEGVHTSARLIVTELPSVFTTRVLQDVVATQKEKVTLECEL  
SRPVDVRLKDGVELRAGKAI GIVAQGTCSRSLVIYRCETGDQGVYVCDALDAQTSASLRVQGRTYTLIFRRVL  
AEDAGEVVFVAENAESRAHLRVKELPVTLLRPLRDKIAMEKHRGVLECVSRASAQVRWFVGGVLEQSGPKYE  
VVSDGLYRKLVINVDVQPEDEDYTC DAGNVKTSAQFFVEEQSITIVRGLKDMTVMPEPAPAWFECETSIPSVRP  
PKWLLGKTVLQAGGNVLEQDGTVHRLTLHKTCSTMTGPVHFTIGKSRSSAQLVVS D I PVVLRPLEPKAGRE  
LQSVVLSCDFRPAKAVQWYKDDTPLSPSEKFKMALEGQMAELRILRLTPADAGVYRCQAGSAQSSAEVTVEA  
REVTVIQPLQDAEAMEEGRVCFSCELSHKDEDIEWSLNGTPLYNDSFHEISHEGCLHTLVLSVRQADTGTVC  
ATSPKVSVSARLVVKGKPVVFLKALDDVSAEERGTLLTQCEVSDPEARVVRKDGVELGSPDKYDFLHKAGAR  
GLTVHDLSDHEDAGLYTCQVGSKETQSKVSVHDLHVGITKRLKTVLEVLEGECSFCVLSHESPSDPVAVTVGG  
KTVGGSGHFHAVRQGRKYTLTVKDAALSDAGEVVSVLGLTSKASLIIRERPVDITKPLEDQRTTLGEDVMLS  
CELSRAGTSVRWLKDGKAIKRSQYDLLSEGTRAVLVVRKASLKDSGEYTCETEASKSTAKLCVEEKANRFT  
ELADLQVEEKGRAVFTCKTEHPASVVTWRKGLLELRASGKHVPSQEGTLKLTINALERTDSDTYTCDIGQAR  
TQARLLVHGQKVRVIEDLEDTAVQEGSSAKFCRIAPADYGPVHWF LDKTPLHSNELNEITVQPGGYHVLT  
QLALKSHGCTVYFEAGDRTSALRVTEKPSIFSRPLTDVTVTEGEDTLVCEETTVDSSVRWTKDGKTLRPSA  
RCQLSHEGQAQLLITATTPQDGGRYKCEIGGASSSIVRVHALPVRFRSLKDVPEVPEGKAATLRCVLSVA  
APVEWRHGDDVLSNKYSLRQEGAVLELVI RDLQPDGQYSCSFGDQTTSATLTVKTSQAQFVGLRNKEA  
TEGTTVTLRCELTKAPVEWKKGTETLRNGDKYSLKQDGA VCELQICSLLVADAGEYSCVCGQEKTSATLTVK  
ALLVHVFVRLRSKEATEGDTTTLQCELSKAAPVEWRKGTETLRDGDYSLKQDGA VCELQIRSLTIADAGEYL  
CTCGQEKTSATLTVRALPAKFKDSLKNEEATEGTTATLSCELSKAAPVWKKGPKTLQSGDKYVLRQDGA VCG



LQIHGLTMADAGEYSCVCGQEKTSATLTVRGLPAKFIEDLRSQEATEGATAILRCELSKAAPVEWRKGETLK  
 DGDRYTLRQDGA VCELQIRGLAVVDGTYSLPTKFTTEGLRNEEATEGTMATLRCQMSKAAPVEWRKGETLR  
 DGDRYSLRQDGA MCELQIRGLTIEDSGEYTCVCGQEKTSATLSVKALPSRFIEDLRSQEATEGTMATLRCQMS  
 KTAPVVEWKKGSETLRDGGRYSLRQDGPVCELQICDLAVEDAGEYSCVCGQEKTSATLSIKALPPRFIEDLRSQ  
 EATEGTMATLRCQMSKAAPVEWRKGETLGDGGRYSLRQNGAVCELQIHDLAVEDTGEYSCVCGQEKTSATLN  
 VKALPPRFIEDLRSQEATEGTMATLRCQMSKAAPVEWRKGETLRDGGRYSLRQDGA VCELQIHDLVEDAGQ  
 YSCVCGQEKTSAVLTVDALPPKFTEGLKKEEATEGTMVTLRCQMSKEATVEWRKGA KTLSDGGRYSLRQDGA M  
 CELQICGLAVEDAGEYSCVCGQEKTSATLSVKALPPRFIEDLRSQEATEGTMATLRCQMSKAAPVEWRKGET  
 LRDGGRYSLRQDGA VCELQIRDLAVEDAGEYLCVCGQEKTSATLSVKALPPRFIEDLRSQEATEGTMATLRCQ  
 MSKAAPVEWRKGSKTLR DGGRYSLRQDGA MCELQICDLAVEDTGDYSCVCGQEKTSATLSVKALPPRFIEDLR  
 SQEAREGTVATLRCMSKAAPVEWRKGETLKDGGRYSLRQEGNLCELQIRDLAVEDTEEYSCVCGQEKTSAT  
 LSVKALPAKFIEDLRSQEAPESSTVTLRCKLSKKASVVWKKGSETLRNGARYSLRQDGA VCELEIRDLTVEDT  
 GEYSCTCGQERTSATLSIMAPQVVFQQPLQNLQAEEGSMASLRCELSVPNAAMVWSKGGLELQGDTRREARQQ  
 GCVAE LLLRDLRREDAGEYSC TCGSQTTSATLMVTAAPVRFLRELQAQDVDEGATARLRCELSREAVSVEWRK  
 GSIQLFPKAKYQMVQEGTAE LLLVHGVEQEDAGEYTC DAGHTQS IARLSVRAPKPKFKTDLQSTEQEAGGTAR  
 LCCQLSEAE PGTPVQWLKEGVELHVGSKYEMRRQGA VCELLIHGLEAKDTGEYACL VGGQKTLASLRVKEPEV  
 TIVRGLVDMVEVQADEVFTECKVSAQAGATDVQWHLQGLPLQNEVTEVA VLADGCTHVLQKGVTL EDAGTVS  
 FHVGLSSSAQLTVRVPEVTVLEPLKDVQLSEGDHAFRCRLSRASGQEARWALGGVPLQCNEMNDITVEQGT  
 LYLLTLHKVTL EDAGTITLQVGS CSSEAQLKVTAKNTVLRGLENVDALEGG EALFECQLSQPEVA AHTWLLDD  
 EPVHTSEKVEVVYFENGLRHLLLLKNLKPQDSCRVTFLAGDVVTS AFLTVRGWRLEVL EPPHDASVKAGMQVR  
 FTCILSEAVPVGEATWYINGAAIQPDDTDWTVTTDGS HHALTLSNAQPHAGEVTF AARDAVASARLSVLALP  
 DPPEDAEVVGRSDHSVTL SWVAPMSDGGGGLCGYRVMKEASTGQWQLCHDLVPGPECVDDLVPGKTYRFRV  
 AAVGPAGAGEPVHLPQMVKIAPAPAPAPAPAPAPAPETRAVVGEDICLELEVAADGGEV VWHKGTERRIQPGG  
 HFEVLSRGRQMLVIKGFRTEDQGEYRCGPIQGLPSSGAATFNVMVTS GSGDEVPAQPSLPPEAAQEGDLHLL  
 WEALARKRRMSREPTLDSISELPEEDSRVQHLRQEA EETAPDLSEGYSTADELARTGEADLSHTSSDDES RAG  
 TPSLVTYLKKAGGPGISPLASKHEAQVTT SVKPKQVLEQEPVVPVTCPPPGDL SAADLMDPSHDKAAVKIQAAFKG  
 YKVRKEMKQEGEFGSRTFGDTEAQVGDVLRLECLQATKTD MRACWLKDGIELTDGRHYHIDQLKDGTCSSLV  
 TGLAPTDSGRYTCQVSTKSGRVSHSACVVVSGTESEAE SSSGGELDDAFRRAARRLHRLFRTKSPAELSEEEL  
 FLSADEGPEPEEPADWQTYREDENFVCIRFESLAEARQAVTCFRNMFATMGIGVEISLGEQGPGRVEMRIGK  
 VAPTVPAPVPLAKTPGLQTS DAAPVFLTELQNDVQDGYPMSFDCVVTGQPVPSVRWFKDGKLEEDDHYMIN  
 EDQGGHQLIITAVVPADMGVYRCLAENSMGVSSTKAELRVELTSTDYDTAADATETSSYFSAQGYLSSREQE  
 GTESDEGQLPQVLEELKDLQVAPGTRLAKFQLKVKGY PAKLYWFKDQGPLTSDHIRMTDKKTLHTLEIVSV  
 TREDSGQYAAYSNAVGAAYSSARLLVRGPSEPEEK PASDVHERLVPRI LEKFTPKKVKRGS SITFSVKVEG  
 HPAPSVHWLKEEA EKGV LWIGPDTPGYTMAS SSKQHS LVLVDVGRQH QGTYT CIATNPAGQALCSASLHISGL  
 AKEEEQERVKEALISSFLQGTSQAVSAQMSE SAGFADLVGQSKGESLV AEEAHSHLSLAEVGTEEF LQKLT SQ  
 ITEMVSAKISQAKLQVPGGDSDEETKTPSASPRHGRSRPSSSVQESSSESEDGDSRGEI FDIYVVTADYLP LG  
 AEQDAIILREGQYVEVLDSAHPLRWLVRTKPTKSSPSRQGWVSPAYLDKRLKLSPEWGPTEAPEFPGEAVSED  
 EYRTRLSSVIQELLSSEQAFV GELQFLESHHMKHLERSPRVPAAVASQKTVI FRNVQDISHFHSSFLKELQGC  
 GTDDDVAMCFIKNQEAFEKYLEFLVGRVQAESVVVSTPVQEFYKKYAEETLSAKDPTQPPPPPLQHYLEQVVE  
 RVQKYQALLKELIRSKARNRQNCALLEQAYAVVSALPQRAENKLVSLMENYPGTLEALGEP IRQGHFIVWEG  
 APGARMPWKGNHRHVFLFRNYLVICKPRRDSRTDTFSYVFRNMMKLSSIDLNDQVEGD DRAFEVWHEREDSVR  
 KYLLQARTVI IKNSWVKEICGIQQRLAQPVWRPPEFEELADCTAELGETVKLACRVTGTPKPIVSWYKDGKP  
 VEVDPHHILIEDPDG SCTLILDNLTGIDSGQYMCFAASAAGNASTLGKILVQVPPRFVNVKVRATPFVEGEDAQ  
 ITCTVEGAPYPQIRWYKDGTL LLAGPNRYRMLNEPRSGVLVLV IQAASKEDLGHYECELVNR LRGSTRGGELLYM  
 QSPALRARDQHHREQIVA AVEVTEQETKVPKKTVI I EETITTVVKS PRGRRQSPGKSPSRSPRRSASPRRPG  
 LLAPERLYPPGTPSPRRLEVEQGRKAPVPALYVTEAEVHAPASQSQPKWLEVEETIEVRVKKTGSRGASPVRE  
 MTSRGE GILFTLPGGIPGRDPNANNNSNNSVYQEA RTWGP AVVHVGE PFI FQVDSVGNVDVVAASPEPEQVRA  
 SQKEENTERQEGCS DGDENTFLMEEPQD TDSLQGRDPKILTHNGRVLTLADLE DYVPQEGETFGCGDSTPSTP  
 DEPPCEVSVLQREI SEPTVGQPVL LNVRPPGTGATPSFFRPGSQVHSPESVSFLLREAWSGPVS AAWPTSSF  
 HTHVQSSVDGSHG SFKTEVSTQTVSFGAVGETVTLHIDPDGGEAPGPSQG\*  
 >rs26971834\_ENSMUSP00000020732\_c.20392:A>G\_p.N6798S  
 ENSMUST00000020732.13|Obscn-201|ENSMUSP00000061462|-|chr11:g.58920178:T>C  
 MDHSFSGAPRFLTRPKAFVSVGKDATLSCQIVGNPTPHVSWEKDRQFVEAGARFRLAQDGDVYRLTILDLAL  
 GDSGQYVCRARNAIEFAAVGLRVDSEGTCAEQAPHFLLRPTSIRVREGADATFRCRVGGSPPAVSWSKDG  
 RRLGPPDAPHVRVEEHGESSALRIRSARPRDGGTYEVRAENPLGSASAAAALVVDSDAEVAGPPGTSTATLLA  
 HLQQRREAMRAEGIPPSPPGAGTRTCTVTEGKHARLSCFVTGEPKPEVWKKDGQLVTEGRRHVVEDEQENF  
 VLKILFCKQSDRGLYTCTASNLVGQTYSSVLVVVREPTVPFKKRLQDLEVREKESATFQCEVAQPA TEAAWFK  
 EETRLWASAKYDIEEGTERRLTVRNVSADDDAVYICETTEGSRVVAELSVQGNLTKLPRKTAVRTGDTAIF

WVELAVPEGPVWRWRNQEEMVAGGRVAITAEGTCHTLTI FQCTLEDMGEVAFVSGGCRTTTTQFCVSAPRRPPL  
YPPADPVVKAKTESSVTLWSAPPHGDRPVTIDGYVLEKRKLGAYAWSRCHEAGWLATTEFTITGVAAEEDGFQ  
FRVSAINHFGQGPYLEFPGTMHLVPLAVKTPKAVEAVEGGEVTFVSDLTVASSGEWFLDGEALKASSIYVI  
RCDRTRHMLTIREVPARLHGAQLKVFVANGIETSIQMVVRAALGLPSSKLPAAAAAREVLAQLHEEAQLLAE LSD  
QAAAVTWLKDGRELSLGPKEYMQVSAGRRALLVRDVAQDDAGLYECVSRGSRRTAYQLLVQDITDGYRDWGPAG  
PQKHMCKCAGAKIARYLGSSCYRFLQYDKGVWHLEAALDTRQKGTSSCSLHEKPKLVFAKQQAHSEVKA  
AGNSATLSCEVTQAQTEVTFWFKDGKLLSSSSKVRMEASGCSRRLVVQQAGKADAGEYSCEAGGQKLSFRLDVA  
EPKLVFAKQQAHSEVKAEGASATLSCEVAQAQTEVTFWFKDGKLLSSSSKVRMEASGCSRRLVVQQAGKADA  
GEYSCEAGGQKLSFRLDVAEPKLVFAKEQQARSEVKAEGASATLSCEVAQAQTEVTFWFKDGKLLSSSSKVRM  
EASGCSRRLVVQQAGKADAGEYSCEAGGQKLSFRLDVTEPKLVFAKEQQARSEVKAEGVNSATLSCEVAQAQ  
EVTWFKDGKLLSSSSKVRMEASGCSRRLVVQQAGKADAGEYSCEAGGQKLSFRLDVAEPKLVFAKEQQARSEV  
KAEAGNSATLSCEVAQAQTEVTFWFKDGKLLSSSSKVRMEASGCSRRLVVQQAGKADAGEYSCEAGGQKLSFHL  
DVTEPKLVFAKEQQAHSEVKAEGASATLSCEVAQAQTEVTFWFKDGKLLSSSSKVRMEASGCSRRLVVQQAGK  
ADAGEYSCEAGGQKLSFRLDVAEPKLVFAKEQQARSEVKAEGASATLSCEVAQAQTEVTFWFKDGKLLSSSSK  
VRVEASGCSRRLVVQQAGKADAGEYSCEAGGQKLSFRLDVAEPKLVFAKEQQANSEVKAEGASATLSCEVAQ  
AQTEVTFWFKDGKLLSSSSKVRVEASGCSRRLVVQQAGKADAGEYSCEAGGQKLSFRLDVAEPKLVFAKEQQAH  
SEVKAEGASATLSCEVAQAQTEVTFWFKDGKLLSSSSKVRVEASGCSRRLVVQQAGKADAGEYSCEAGGQKLS  
FRLDVAEPKLVFAKEQQAHSEVKAEGASATLSCEVAQAQTEVTFWFKDGKLLSSSSKVRVEASGCSRRLVVQQ  
AGKADAGEYSCEAGGQKLSFRLDVAEPKLVFAKEQQAHSEVKAEGASATLSCEVAQAQTEVTFWFKDGKLLSS  
SSKVRVEASGCSRRLVVQQAGKADAGEYSCEAGGQKLFRLDVAEPKLVFAKEQQAHSEVKAEGASATLSCE  
VAQAQTEVTFWFKDGKLLSSSSKVRVEASGCSRRLVVQQAGKADAGEYSCEAGGQKLSFRLDVAEPKLVFAKEQ  
QAHSEVKAEGASATLSCEVAQAQTEVTFWFKDGKLLSSSSKVRVEASGCSRRLVVQQVQKADAGEYSCEARGQ  
KLSFRLDVADTRLMFAKEQQARTEVKAEGNSATLSCEVAQAQTEVTFWFKDGKLLSSSSKVRVEASGCSRRLV  
VQQAGKADAGEYSCEAGGQKLSFRLDVAEAEESQIPERPSRREPLVVKEHETIILTATIAAPSAAVTWLKDGV  
EIRRSKRHEATSLGDTHTLTVRGAQVLDIAIYSCRVGKEGQDFPVQVEEVAAKFSKPLEPVEGELGGTVMLVC  
ELSPAEVWRCENTQLRPGKRFQMTSEGRRTLTVSGLREDDAEYVCESRDDRTSARLTVKVRVVKFTS  
GLSAMVAEEGQVCFDFTQCQVSPSDAGVTWYKDGMLQPSEKFMVMEVSGASRSLTILGLTLEDAGQVTVAEAGAS  
SSAALRVREAPVFLFKKLEPQTVERTSVTLEVELTRPWPEVKWTRNAAVLTPSENVEIRAEGARHCLVLRV  
GFADRGGFFGCETPDDKTQAKLNVEMRQVRLVRLGLQVEEAKEQGTASMDVELSHAEEVGSWTRDGLRLQPGPKC  
HLAVQGPVHILTLALQPDQSGLVAFRAEGVHTSARLIVTELPSVTRVLQDVVATQKEKVTLECELSRPVDV  
RWLKDGVLELRAGKAIIGIVAQGTCSRSLVIYRCETGDQGVYCDALDAQTSASLRVQGRTYTLIFRVLAEADAGE  
VKFVAENAESRAHLRVKELPVTLLRPLRDKIAMEKHRGVLECCQVSRASQVRWFKGGVELQSGPKYEVVSDGL  
YRKLVINVDQPEDEDTYTCDAENVKTSAQFFVEEQSITIVRGLKDMTVMPEPAPAWFECETSIPSVRPPKWL  
KTVLQAGQNVGLEQDGTVHRLTLHKTCSTMTGPVHFTIGKSRSSAQLVVDI PVVLTTRPLEPKAGRELQSVVL  
SCDFRPAKPAQWYKDDTPLSPSEKFKMALEGGMAELRILRLTPADAGVYRCQAGSAQSSAEVTVAREVTVI  
QPLQDAEAMEEGRVCFSELSHKDEDEIWSLNGTPLYNDSFHEISHEGLHTLVLSKVRQADTGTVCATSPKV  
SVSARLVVKGKPVVFLKALDDVSAEERGLTLTQCEVSDPEARVVWRKDGVELGSPDKYDFLHKAGARGLTVHD  
LSHEDAGLYTCQVGSKETQSKVSVHDLHVGITKRLKTVLEVLEGESECFEVLSSHESPSDPAVWTVGGKTVGGS  
GHFHAVRQGRKYTLTVKDAALSDAGEVVFVGLGLTSKASLIIRERPVDTKPLEDQRTTLGEDVMLSCELSRA  
GTSVRWLKDGKAIRKSQKYDLLSEGTRAVLVVRKASLKDSSGEYTCETEASKSTAKLCVEEKANRFTBELADLQ  
VEEKGRAVFTCKTEHPASVVTWRKGLLELRASGKHVPSQEGTLKLTINALERTSDTYTCDIGQARTQARLL  
VHGQKVRVIEDLEDTAVQEGSSAKFCRIAPADYGPVHWFLLDKTPLHSNELNEITVQPGGYHVLTLRQLALKD  
SGTVYFEAGDQRTSALRVTEKPSIFSRPLTDVTVTEGEDTLVCETTTVDSVVRWTKDGKTLRPSARCQLSH  
EGCQAQLLITATTPQDGGRYKCEIGGASSSSIVRVHALPVRFRFRESLKDVEVPEGKAATLRCVLSVAAPVEWR  
HGDDVLKSSNKYSLRQEGAVLELVIRDLQPDQSGQYSCSFGDQTSATLTVKTSQAQFVGLKRNKEATEGTTV  
TLRCELTKAEAPVEWKKGTETLRNGDKYSLKQDGA VCELQICSLLVADAGEYSCVCGQEKT SATLTVKALLVHF  
VRRLRSKEATEGDTTLQCELSKAAPVEWRKGTETLRDGDYSLKQDGA VCELQIRSLTIADAGEYLCTCGQE  
KTSATLTVRALPAKFKDSLKNEEATEGTTATLSCELSKAAPVTKKGPKTQSGDKYVLRQDGA VCELQIHL  
TMADAGEYSCVCGQEKT SATLTVRGLPAKFIEDLRSQEATEGATAILRCELSKAAPVEWRKGSSETLKDGDYR  
LRQDGA VCELQIRGLAVVDTGTYSSLPTKFTTEGLRNEEATEGTMATLRCQMSKAAPVEWRKGSSETLRDGDYR  
LRQDGA MCELQIRGLTIEDSGEYTCVCGQEKT SATLSVKALPSRFIEDLRSQEATEGTMATLRCQMSKTAPVE  
WKKGSETLRDGGRYSLRQDGPVCELQICDLAVEDAGEYSCVCGQEKT SATLSIKALPPRFIEDLRSQEATEG  
MATLRCQMSKAAPVEWRKGSSETLGDGGYSLRQNGAVCELQIHDLAVEDTGEYSCVCGQEKT SATLNVKALPP  
RFIEDLRSQEATEGTMATLRCQMSKAAPVEWRKGSSETLRDGGYSLRQDGA VCELQIHDLVEDAGQYSCVCG  
QEKTSAVLTVDALPPKFTEGLKKEEATEGTMVTLRCQMSKEATVEWRKGAKTSLDGGYSLRQDGA MCELQIC  
GLAVEDAGEYSCVCGQEKT SATLSVKALPPRFIEDLRSQEATEGTMATLRCQMSKAAPVEWRKGSSETLRDGD  
YSLRQDGA VCELQIRDLAVEDAGEYLCVCGQEKT SATLSVKALPPRFIEDLRSQEATEGTMATLRCQMSKAAP  
VEWRKGSSETLRDGDYSLRQDGA MCELQICDLAVEDTGDYSCVCGQEKT SATLSVKALPPRFIEDLRSQEARE

GTVATLRCRMSKAAPVEWRKGSSETLKDGDYSLRQEGNLCELQIRDLAVEDTEEYSCVCGQEKTSATLSVKAL
PAKFIEDLRSQEAPESSTVTLRCKLSKKASVVWKKGSETLRNGARYSLRQDGAUCELEIRDLTVEDEDTGEYSCT
CGQERTSATLSIMAPQVVFQQPLQNLQAEEGSMASLRCELSVPNAAMVWSKGGLELQGDTRREARQQGCVAEL
LLRDLRREDAGEYSCTCGSQTTSATLMVTAAPVRFLRELQAQDVDEGATARLRCELSREAVSVEWRKGSQQLF
PCAKYQMVQEGTTAELLVHGVEQEDAGEYTCDAHGHTQSIARLSVRAPKPKFKTDLQSTEQEAGGTARLCCQLS
EAEFGPTVQWLKEGVELHVGSKYEMRRQGAUCELLIHGLEAKDTGEYACLVGGQKTLASLRVKEPEVTVIRGL
VDMEVQADEDEFTCKVSOAGATDVQWHLQGLPLQSNVTEVAVLADGCTHVLQKGVTLLEDAGTVSFHVGGGL
SSSAQLTVRVPVETVLEPLKDVQLSEGDQAHFRCLRSRASSGQEARWALGGVPLQCNEMNDITVEQGTLYLLTL
HKVTLEDAGTITLQVGSSEEAQLKVTAKNTVLRGLENVDALEGGALFECQLSQPEVAHAHTWLLDDEPVHTS
EKVEVVYFENGLRHLLLLKNLKPQDSCRVTFLAGDVVTSFAFLTVRGWRLEVLPEPHDASVKAGMQVRFCTILS
EAVPVGEATWYINGAAIQPDDTDWTVTTDGSHHALTLSNAQPQHAGEVTFAAARDAVASARLSVLALPDPPEDA
EUVGRSDHSVTLSSWVAPMSDGGGGLCGYRVMKEASTGQWQLCHDLVPGPECVDDDLVPGKTYRFRVAAVGPA
GAGEFVHLPQMVKIAPAPAPAPAPAPAPAPETRQAVVGEDICLELEVAADGGEVVWHKGTERRIQPGHFVLS
RGQRQMLVIKGFRTEDQGEYRCGPIQGLPSSGAATFNVMVMTSGSGDEVPAQPSLPPEAAQEGDLHLLWEALAR
KRRMSREPTLDSISELPEEDSRVQHLRQEAEEETAPDLSEGYSTADELARTGEADLSHTSSDDESAGTPSLVT
YLKAGGPGISPLASKHEAQVTTSVKPKQKQEPVPTCPGGDLAADMPLDKAARKVIAAFKGYKVRKE
MKQQEGPVFSRTFGDTEAQVDVLRLECVLATKTDMRACWLKDGIELTDGRHYHIDQLKDGTCSSLVTLGLAPT
DSGRYTCQVSTKSGRVSHSACVVVSGTESEAESSSGGELDDAFRRAARRLHRLFRTKSPAELSEELFLSADE
GPGEPEEPADWQTYREDENFVCIRFESLAEARQAVTCFRNMFATMGIGVEISLGEQGRGVEMRIGKVAPTVT
PAVPLAKTPGLQTSDAAPVFLTELQNDVQDGYPMSFDCVVTGQPVPSVRWFKDGKLEEDDHYMINEDQQGG
HQLIITAVVPADMVYRCLAENSMGVSSTKAELRVELTSTDYDTAADATETSSYFSAQGYLSSREQEGTESDE
GQLPQVLEELKDLQVAPGTRLAKFQLKVKGYPAKLYWFKDQGPLTSDHIRMTDKKTLHTLEIVSVTREDSG
QYAAIYISNAVGAAYSSARLLVRGPSEPEEKPASDVHERLVPPRILEKFTPKKVKRGSSITFSVKVEGHPAPSV
HWLKEEAKEKGLVWIGPDTPGYTMASSSKQHSLLVLDVGRQHOGTYTCIATNPAGQALCSASLHISGLAKEEEQ
ERVKEALISSFLOGTSQAVSAQMSSESAGFADLVGQSKGESLVAEEAHSHLSLAEVGTFFLQKLTSTQITEMVS
AKISQAKLQVPGGDSDEETKTPSASPRHGRSRPSSSVQSESSSESEDGDSRGEIFDIYVVVTADYLPGLAEQDAI
LLREGQYVEVLDLQVSAHPLRVLVTKPTKSSPSRQVSVSPAYLDRKRLKLSPEWGPTEAPEFPGAEVSEDEYTRTL
SSVIQELLSSEQAFVQELQFLESHHMKHLERSPRVPAAVASQKTVIFRNVQDISHFHSSFLKELQCGCTDDDV
AMCFIKNQEAFAEKYLEFLVGRVQAESVVVSTPVQEFYKKAEEETLSAKDPTQPPPPPLQHYLEQPVVERVQKYQ
ALLKELIRSKARNRQNCALLEQAYAVVSALPQRAENKLVSLMENYPGTLEALGEPHQGHFIVWEGAPGARM
PWKGHNHRVFLFRNYLVICKPRRDSRTDFTSYVFRNMMKLSSIDLNDQVEGDDRAFEVWHEREDSVRKYLLQA
RTVILKNSWVKEICGIQQLAQPVWRPPEFEEELADCTAELGETVKLACRVTGTPKPIVSWYKDGKPVVEVDPH
HILIEDPDGSCTLILDNLGTIDSGQYMCFAASAAGNASTLGKILVQVPPRFVNVKVRATPFVEGEDAQITCTVE
GAPYPQIRWYKDGTLTLLAPGNRYRMLNEPRSGVLVLIQAASKEDLGHYECELVNRLGSTRGGGELYMQSPALR
ARDQHHREQIVAAVEERRPSP\*
>rs26971834\_ENSMUSP00000151217\_c.17686:A>G\_p.N5896S
ENSMUST00000219084.3|Obscn-207|ENSMUSG00000061462|-|chr11:g.58920178:T>C
MDHSFSGAPRFLTRPKAFVSVGKDATLSCQIVGNPTPHVSWEKDRQPVVEAGARFLAQDGDVYRLTILDLAL
GDSGQYVCRARNAIGEAFVAVGLRVDSEGTCAEQAPHFLLRPTSIRVREGADATFRCRVGGSPPAVSWSKDG
RRLGPPDAPHVRVEEHGESSALRIRSARPRDGGTYEVRAENPLGSASAAAALVVDSDAEVAGPPGTSTATLLA
HLQQRREAMRAEGIPPSPPGAGTRTCTVTEGKHARLSCFVTGEPKPKETVWKKDQQLVTEGRRHVYEDQENF
VLKILFCKQSDRGLYTCTASNLVGQTYSSVLVVVREPTVPFKKRLQDLEVREKESATFQCEVAQPAEAAWFK
EETRLWASAKYDIEEETERRLTVRNVSADDDAVYICETTEGSRVVAELSVQGNLTKLPRKTAVRTGDTAIF
WVELAVPEGPPVRLRNQEMVAGGRVAITAEGTCHTLTIQCTLEDMGVAVFVSGGCRTTTTQFCVSAPRRPPL
YPPADPVVAKTESSVTLSSWAPPHGDRPVTIDGYVLEKRLKLGAYAWSRCHEAGWLATTEFTITGVAAEGDFQ
FRVSAINHFGQGPYLEFPGMTMLVPLAVKTPKAVEAVEGGEVTFVSDLTVASSGEWFLDGEALKASSIYVI
RCDRTRHMLTIREVPARLHGAQLKVFVANGIETSIQMVVRAALGLPSSKLPAAAAAREVLAQLHEEAQLLAELSD
QAAAVTWLKDGRELSLGPKYEMQVSAGRRALLVRDVAQDDAGLYECVSRGSRRTAYQLLVQDITDGYRDWGPAG
PQKHMCKCAGAKIARYLGSSCYRFLQYDKGVVHLEAALDTRQKGTSSCSLHEKPKLVFAKQQAHSVEKAE
AGNSATLSCEVTQAQTEVTWFKDGKLLSSSSKVRMEASGCSRRLVVQQAGKADAGEYSCEAGGQKLSFRLDVA
EPKLVFAKQQAHSVEKAEAGASATLSCEVAQAQTEVTWFKDGKLLSSSSKVRMEASGCSRRLVVQQAGKADA
GEYSCEAGGQKLSFRLDVAEPKMFVFAKEQQARSEVKAEGASATLSCEVAQAQTEVTWFKDGKLLSSSSKVRM
EASGCSRRLVVQQAGKADAGEYSCEAGGQKLSFRLDVTEPKLVFAKEQQARSEVKAEGASATLSCEVAQAQTE
EVTWFKDGLKLLSSSSKVRMEASGCSRRLVVQQAGKADAGEYSCEAGGQKLSFHLVTEPKLVFAKEQQAHSEV
KAEAGASATLSCEVAQAQTEVTWFKDGKLLSSSSKVRMEASGCSRRLVVQQAGKADAGEYSCEAGGQKLSFRL
DVAEPKLVFAKEQQARSEVKAEGASATLSCEVAQAQTEVTWFKDGKLLSSSSKVRMEASGCSRRLVVQQAGK
ADAGEYSCEAGGQKLSFRLDVAEPKLVFAKEQQANSEVKAEGASATLSCEVAQAQTEVTWFKDGKLLSSSSK
VRVEASGCSRRLVVQQAGKADAGEYSCEAGGQKLSFRLDVAEPKLVFAKEQQAHSEVKAEGASATLSCEVAQ

AQTEVTFWFKDGKLLSSSSKVRVEASGCSRRLVVQQAGKADAGEYSCEAGGQKLSFRLDVAEPKLVFAKEQQAH  
SEVKAEAGASATLSCEVAQAQTEVTFWFKDGKLLSSSSKVRVEASGCSRRLVVQQVGKADAGEYSCEARGQKLS  
FRLDVAEAEESQIPERPSRREPLVVKEHETIILTATIAAPSVAAVTWLKDGVERRSKRHEATSLGDTHTLTVR  
GAQVLDASAIYSCRVGKEGQDFPVQVEEVAAKFSKPLEPVEGELGGTVMLVCELSPEQAEVWRCGNTQLRPGK  
RFQMTSEGPRTTLTVSGLREDDAEYVCESRDDRTSARLTVKVPVVKFTSGLSAMVAEEGQEAATFQCVVSPS  
DAGVTWYKDGMLQVPESEKFMVVEGASRSLTILGLTLEDAGQVTVAEAGASSAALRVREAPVLFKFKLEPQT  
VEERTSVTLEVELTRPWPEVKWTRNAAVLTPSENVEIRAEGARHCLVLRVSGFADRGFFGCETPDDKTQAKLN  
VEMRQVRLVRGLQEVEAKEQGTASMDVELSHAEEVGSWTRDGLRLQPGPKCHLAVQGPVHILTLALSALQFQDSG  
LVAEFAEGVHTSARLIVTELPVSFTRVLQDVVATQKEKVTLECELSRPVDVRLWKDGVLELRAGKAIIGIVAQGT  
CRSLVIYRCETGDQGVYVCDALDAQTSASLRVQGRYTLIFRRVLAEDAGEVKFVAENAESRAHLRVKELPVT  
LLRPLRDKIAMEKHRGVLECVSRASAQVRWFKGGVELQSGPKYEVVSDGLYRKLVINDDVQPEDEDTYTC DAG  
NVKTSAQFFVEEQSITIVRGLKDMTVMEPAPAWFECETSIPSVRPPKWLGLKTVLQAGGNVLEQDGTVHRLT  
LHKTCSTMTGVPVHFTIGKSRSSAQLVVSDIPVVLTRPLEPKAGRELQSVVLSCDFRPAPKAVQWYKDDTPLSP  
SEKFKMALEGOAELRILRLTPADAGVYRCQAGSAQSSAEVTVAEAREVTVIQPLQDAEAMEEGRVCFSCELSH  
KDEDIEWSLNGTPLYNDSFHEISHEGCLHTLVLKSVRQADTGTVCATSPKVSARSARLVVKGKPVVFLKALDDV  
SAEERGLTLTQCEVSDPEARVWVRKDGVELGSPDKYDFLHKAGARGLTVHDLSDHEDAGLYTCQVGSKETQSKV  
SVHDLHVGITKRLKTVEVELEGESCFECVLSHESPSDPAVWTVGGKTVGGSGHFHAVRQGRKYTLTVKDAALS  
DAGEVVFVSVLGLTSKASLIIRERPVDTIKPLEDQRTTLGEDVMLSCELSRAGTSVRWLKDGKAIKRSQKYDLL  
SEGTRAVLVVRKASLKDSGEYTCETEASKSTAKLCVEEKANRFTTEELADLQVEEKGRAVFTCKTEHPASVVTW  
RKGLLELRASGKHVPSQEGTLTKLTINALERTSDTYTCDIGQARTQARLLVHGQKVRVIEDLEDTAVQEGSS  
AKFCCRIPADYGPVHWFLDKTPHLSNELNEITVQPGYHVLTLRQLALKDSGTVYFEAGDQRTSAAALRVTEK  
PSIFSRPLTDVTVTEGEDTLTVCETTTVDSSVRWTKDGKTLRPSARCQLSHEGCAQQLLITATTPQDGGRYKC  
EIGGASSSSIVRVHALPVRFRFRESLKDVEVPEGKAATLRCVLSVAAPVEWRHGDDVLKSSNKYSLRQEGAVLE  
LVIRDLQFQDSGQYSCSFGDQTTSATLTVKTSQAQFVGLKRNKEATEGTTVTLRCELTKAPVEWKKGTETLR  
NGDKYSLKQDGA VCELQICSLLVADAGEYSCVCGQEKTSATLTVKALLVHFVRRRLRSKEATEGDTTTLQCELS  
KAAPVEWRKGTETLRDGDYSLKQDGA VCELQIRSLTIADAGEYLCTCGQEKTSATLTVRGLPAKFIEDLRSQ  
EATEGATAILRCELSKAAPVEWRKGETLKDGDYRQDGA VCELQIRGLAVVDGTGYSSTLPKFTTEGLRNE  
EATEGTMATLRCQMSKAAPVEWRKGETLKDGDYRQDGA MCELQIRGLTIEDSGEYTCVCGQEKTSATLS  
VKALPPRFIEDLRSQEATEGTMATLRCQMSKAAPVEWRKGETLGDGGYSLRQNGAVCELQIHDLAVEDTGE  
YSCVCGQEKTSATLNVKALPPKFTTEGLKKEEATEGTMVTLRCQMSKEATVEWRKGAKTLSDDGGYSLRQDGA  
MCELQICGLAVEDAGEYSCVCGQEKTSATLSVKALPPRFIEDLRSQEATEGTMATLRCQMSKAAPVEWRKGET  
LRDGDYRQDGA VCELQIRDLAVEDAGEYLCVCGQEKTSATLSVKALPPRFIEDLRSQEATEGTMATLRCQ  
MSKAAPVEWRKGSKTLRDGDYRQDGA MCELQICDLAVEDTGDYSCVCGQEKTSATLSVKAPQVVFQQPLQ  
NLQAEEGSMASLRCELSVPAAMVWSKGGLELQGDTRREARQQGCVAELLLRDLRREDAGEYSCTCGSQTTSA  
TLMVTAAPVRFLRELQADVDEGATARLRCLELSREAVSVEWRKGSQFPCAKYQMVQEGTAEILLVHGVEQE  
DAGEYTC DAGTYSIARLSVRAPKPKFKTDLQSTEEAGGTARLCCQLSEAEPTPVQWLKEGVELHVGSKYE  
MRRQGA VCELLIHGLEAKDTGEYACL VGGQKTLASLRVKEPEVTIVRGLVDMEVQADEDEFTCKVVSQAGATD  
VQWHLQGLPLQSNEVTEVAVLADGCTHVQLKGVTLLEDAGTVSFHVGGSSSAQLTVRVPVTVLEPLKDVQL  
SEGQDAHFRCRLSRASGQEARWALGGVPLQCNEMNDITVEQGTLYLLTLHKVTLEDAGTITLQVGSSESAQL  
KVTAKNTVLRGLENDVALEGGAEALFECQLSQPEVAHTWLLDDEPVHTSEKVEVVYFENGLRHLLLLKLNKPKQ  
DSRVTFFLAGDVVTS AFLTVRGWRLEVLEPPHDASVKAGMQVRFTCILSEAVPVGEATWYINGAAIQPDDTDW  
TVTTDGS HHALTL SNAQPQHAGEVTF AARDAVASARLSVLALPDPPEDAEVVGRSDHSVTL SWSVAPMSDGGGG  
LCGYRVEMKEASTGQWQLCHDLVPGPECVVDDLVPKGTYRFRVAAVGPAGAGEPVHLPQMVKIAPAPAPAPAP  
APAPETRQAVVGEDICLELEVAADGGEVVWHKGTERRIQPGGHFEVLSRGRQMLVIKGFRTEDQGEYRCGPIQ  
GLPSSGAATFNVMVMTSGSGDEVPAQPSLPPEAAQEGDLHLLWEALARKRRMSREPTLDSISELPEEDSRVQHL  
RQEAETAPDLSEGYSTADELARTGEADLSHTSSDDESRAGTPSLVTYLKKAGGPGISPLASKHEAQVTTSVK  
PQKQQEPVVPCTPPPGDLSAADLMDPSLDKAAVKIQAAFKGYKVRKEMKQOEGPVFSRTFGDTEAQVGDVLR  
ECVLATKTD MRACWLKDGIELTDGRHYHIDQLKDGTC SLVLTGLAPTD SGRYTCQVSTKSGRVSHSACVVVSG  
TESEAESSSGGELDDAFRRARRLHRLFRTKSPAELSEELFLSADEGPGEPEEPADWQTYREDENFVCIRFE  
SLAEARQAVTCFRNMFATMGI GVEISLGEQGPVEMRIGKVAPVTPAVPLAKTPGLQTS DAAVFLTELQN  
QDVQDGYPMSFDCVVTGQPVPSVRWFKDGKLLLEEDDHMINEDQQGGHQLIITAVVPADMGVYRCLAENSMGV  
SSTKAELRVELTSTDYDTAADATETSSYFSAQGYLSSREQEGTESDEGQLPQVLEELKDLQVAPGTRLAKFQL  
KVKGYAPAKLVYFKDGPPLTSDHIRMTDKKTLTLEIVSVTREDSGQYAAIISNAVGAAYSSARLLVVRGPE  
PEEKPSADVHERLVPRILEKFTPKKVKRGSSITFVSVKEGHPAPSVHWLKEEAKEKGVLWIGPDTPGYTMASSE  
SKQHSVLVLDVGRQHGTYTICATNPAGQALCSASLHISGLAKEEEQERVKEALISSFLQGTSSQAVSAQMSSES  
AGFADLVGQSKGESLVAEEAHSHLSLAEVGT EEFLOKLTSTQI TEMVSAKISQAKLQVPGGDSDEETKTPSASP  
RHGRSRPSSSVQESSSESEDGDSRGEIFDIYVVTADYLP LGAEQDAIILREGQYVEVLDSAHPLRWLVRTKPT  
KSSPSRQGWVSPAYLDKRLKLSPEWGPTEAPEFPGEAVSEDEYRTRLSSVIQELLSSEQAFVQVLESHHM

KHLERSPRVPAAVASQKTVI FRNVQDI SHFHSSFLKELQCGCTDDDDVAMCFIKNQEAFAFEKYLEFLVGRVQAES  
VVVSTPVQEFYKKYAEETLSAKDPTQPPPPPLQHYLEQPVERVQKYQALLKELIRSKARNRQNCALLEQAYAV  
VSALPQRAENKLVSLMENYPGTLEALGEP I RQGHFIVWEGAPGARMFWKGNHRHVFLFRNYLVICKPRRDSR  
TDTFSYVFRNMMKLSSIDLNDQVEGDDRAFEVWHEREDESVRKYLLQARTVI IKNSWVKEICGIQQRLAQPVWR  
PEFEHEELADCTAELGETVKLACRVGTGPKPIVSWYKDGKPEVDPHHILIEDPDGSCSTLI LDNLTGIDSGQY  
MCFAASAAGNASTLGKILVQVPPRFVNKVRATPFVEGEDAQITCTVEGAPYPQIRWYKDGTLTLLAPGNRYRMLN  
EPRSGVLVLIQAASKEDLGHYECELVNRLGSTRGGGELYMQSPALRARDQHHREQIVA AVEVTEQETKVPKK  
TVIIEETITTVVKS PRGRRQSPGKSPSRSPSRSSASPRRPGGLLAPERLYPPGTSPSRRLVEVEQGRKAPVPALY  
VTEAEVHAPASQSQPKWLEVEETIEVVRVKKTGSRGASPVREMTSRGEGILFTLPGGIIPGRDPNANNNSNKS SVY  
QEARTWGPVAVHVGEFFIFQVDSVGNVDVVAASPEPEQVRASQKEENTERQEGCSDGDENTFLMEEPQD TDSL  
QGRDPKILTHNGRVLT LADLEDYVPQEGETF GCGDSTPSTPDEPPCEVSVLQREI SEPTVQPVLLNVGRPPG  
TGATPSFFRPGSQVHSPESVSFLLREAWSGPVSAAPWTSSFHTHVQSSVDGSHGSFKTEVSTQTVSFGAVGET  
VTLHIDPDGGEAPGPSQG\*

>rs47781492\_ENSMUSP00000158795\_c.19977:G>A\_p.E6660K

ENSMUST00000238536.2|Obscn-210|ENSMUSG00000061462|-|chr11:g.58921977:C>T  
MDHSFSGAPRFLTRPKAFVSVGKDATLSCQIVGNPTPHVSWEKDRQFVEAGARFRLAQDGDVYRLTILDLAL  
GDSGQYVCRARNAIGEAFVAVGLRVDSEGTCAEQAPHFLLRPTSIRVREGADATFRCRVGSGPPQPAVSWSKDG  
RRLGPPDAPHVRVEEHGESSALRIRSARPRDGGTYEVR AENPLGSASAAAALVVDSDAEVGAGPGTSTATLLA  
HLQQRRREAMRAEGIPPSPPGAGTRTCTVTEGKHARLSCFVTGEPKPEVWKKDGQLVTEGRRHVVEDEQENF  
VLKILFCKQSDRGLYTCTASNLVGQTYSSVLVVVREPTVPFKKRLQDLEVREKESATFQCEVAQ PATEAAWFK  
EETRLWASAKYDIEEGTERRLTVRNVSADDDAVYICETTEGSRVVAELSVQGNLTKLPRKTAVRTGDTAIF  
WVELAVPEGPVRWLRNQEEMVAGGRVAITAEGTCHTLTI FQCTLEDMGEVAFVSGGCRTTTQFCVSA PRRPPL  
YYPADPVVKAKTESVTLWSAPPHGDRPVTIDGYVLEKRLGAYAWSRCHEAGWLATTEFTITGV AEEGDFQ  
FRVSAINHFGQGPYLEFPGTMHLVPLAVKTPKAVEAVEGGEVTFVSDLTVASSGEWFLDGEALKASSIYVI  
RCDRTRHMLTIREV PARLHGAQLKFVANGIETSIQMVVRAALGLPSSKLPAAAAREVLAQLH EEAQLLAE LSD  
QAAAVTWLKDGRELSLGPKYEMQVSAGRALLVRDVAQDAGLYECVSRGSR TAYQLLVQDITDGYR DWGPAG  
PQKHMCCKAGAKIARYLGS SCYRFLQYDKGVVHWLEAALDTRQKGTSSCSLHEKPKLVFAKQQA HSEVKAE  
AGNSATLSCEVTQAQTEVTWFKDGKLLSSSSKVRMEASGCSRRLVVQQAGKADAGEYSCEAGGQKLSFR LDVA  
EPKLVFAKQQA HSEVKAEAGASATLSCEVAQAQTEVTWFKDGKLLSSSSKVRMEASGCSRRLVVQQAGKADA  
GEYSCEAGGQKLSFR LDVAEPKMFVFAKEQQARSEVKA EAGASATLSCEVAQAQTEVTWFKDGKLLSSSSKVRM  
EASGCSRRLVVQQAGKADAGEYSCEAGGQKLSFR LDVTEPKLVFAKEQQARSEVKA EVGNSATLSCEVAQAQ T  
EVTWFKDGKLLSSSSKVRMEASGCSRRLVVQQAGKADAGEYSCEAGGQKLSFR LDVAEPKLVFAKEQQARSEV  
KAEAGNSATLSCEVAQAQTEVTWFKDGKLLSSSSKVRMEASGCSRRLVVQQAGKADAGEYSCEAGGQKLSFHL  
DVTEPKLVFAKEQQAHSEVKA EAGASATLSCEVAQAQTEVTWFKDGKLLSSSSKVRMEASGCSRRLVVQQAGK  
ADAGEYSCEAGGQKLSFR LDVAEPKLVFAKEQQARSEVKA EAGASATLSCEVAQAQTEVTWFKDGKLLSSSSK  
VRVEASGCSRRLVVQQAGKADAGEYSCEAGGQKLSFR LDVAEPKLVFAKEQQANSEVKA EAGASATLSCEVAQ  
AQTEVTWFKDGKLLSSSSKVRVEASGCSRRLVVQQAGKADAGEYSCEAGGQKLSFR LDVAEPKLAFAKEQQAH  
SEVKA EAGASATLSCEVAQAQTEVTWFKDGKLLSSSSKVRVEASGCSRRLVVQQAGKADAGEYSCEAGGQKLS  
FR LDVAEPKLAFAKEQQAHSEVKA EAGASATLSCEVAQAQTEVTWFKDGKLLSSSSKVRVEASGCSRRLVVQQ  
AGKADAGEYSCEAGGQKLSFR LDVAEPKLAFAKEQQAHSEVKA EAGASATLSCEVAQAQTEVTWFKDGKLLSS  
SSKVRVEASGCSRRLVVQQAGKADAGEYSCEAGGQKLFRLDVAEPKLMFAKEQQAHSEVKA EAGASATLSCE  
VAQAQTEVTWFKDGKLLSSSSKVRVEASGCSRRLVVQQAGKADAGEYSCEAGGQKLSFR LDVAEPKLVFAKEQ  
QA HSEVKA EAGASATLSCEVAQAQTEVTWFKDGKLLSSSSKVRVEASGCSRRLVVQQV GKADAGEYSCEARGQ  
KLSFR LDVADTRLMFAKEQQARTEVKA EAGNSATLSCEVAQAQTEVTWFKDGKLLSSSSKVRVEASGCSRRLV  
VQQAGKADAGEYSCEAGGQKLSFR LDVAEAEASQI PERPSRREPLVVKHEHETIILTATIAAPSVAAVTW LKDG  
EIRRSKRHEATSLGDTHLT TVRGAQVLDSAIYSCRVGKEGQDFPVQVEEVA AKFSKPLEPVEGELGGTVMLVC  
ELSPQAEVWRCGNTQLRPGKRFQMTSEGPRRTLT VSGLREDDAE EYVCE SRDDRTSARLTVKVP RVVKFTS  
GLSAMVAEEGQEATFQCVVSPSDAGVTWYKDGMLQ PSEKFMVESGASRSLTILGLTLEDAGQVTEAEGAS  
SSAALRVREAPVLFKKLEPQTV EERTSVTLEVELTRPWPEVKWTRNAAVLTPSENVEIRAEGARHCLVLR SV  
GFADRGFFGCETPDDKTQAKLNVEMRQVRLVRGLQEVEAKEQGTASMDVELSHA EVEGSWTRDGLRLQPGPKC  
HLAVQGPVHILTL SALQPQDSGLVAFRAEGVHTSARLIVTELPVSFTRVLQDVVATQKEKVTLECELSRPVDV  
RWLKDGV ELRAGKAI GIVAQGTCSRSLVIYRCETGDQGVYVCDALDAQTSASLRVQGRTYTLIFRRVLAEDAGE  
VKFVAENAESRAHLRVKELPVTLLRPLRDKIAMEKHRGIVLECCQVSRASAQVRWFKGGV ELSQSGPKYEVVSDGL  
YRKLVIN DVQPEDEDTYCTDAGNVKTS AQFFVVEEQSITIVRGLKDMTVMEPAPAWFECETSIPSVRPPKWL LG  
KTVLQAGGNVGL EQDGTVHRLTLHKTCSTMTGPVHFTIGKSRSSAQLVVSDI PVVLRPLEPKAGRELQSVVL  
SCDFRPAPKAVQWYKDDTPLSPSEKFKMALEGM AELRILRLTPADAGVYRCQAGSAQSSAEVTEAREVTVI  
QPLQDAEAMEEGRVCFSCELSHKDEDIEW SLNGTPLYNDSFHEI SHEGCLHTLV LKSVRQADTGTVCATSPKV  
SVSARLVVKGKPVVFLKALDDVSAEERGTLLTQCEVSDPEARVVWRKDGVELG PSDKYDFLHKAGARGLTVHD



LSHEDAGLYTCQVGSKETQSKVSVHDLHVGITKRLKTVEVLEGESECSFECVLSHESPSDPAVWTVGGKTVGGS
GHFHAVRQGRKYTLTVKDAALSDAGEVVFVSVLGLTSKASLIIRERPVDIKPLEDQRTTLGEDVMLSCELSRA
GTSVRWLKDGKAIRKSQKYDLLSEGTRAVLVVRKASLKDSGEYTCETEASKSTAKLCVEEKANRFTTELADLQ
VEEKGRAVFTCKTEHPASVVTWRKGLLELRASGKHVPSQEGTLTKLTINALERTDSDTYTCDIGQARTQARLL
VHGQKVRVIEDLEDTAVQEGSSAKFCRIAPADYGPVHWFLDKTPLHSNELNEITVQPGGYHVLTLRQLALKD
SGTVYFEAGDQRTSAALRVTEKPSIFSRPLTDVTVTEGEDTLVCETTTVDSSVRWTKDGKTLRPSARCQLSH
EGCQAQLLITATTPQDGGRYKCEIGGASSSSIVRVHALPVRFRESLKDVEVPEGKAATLRCVLSVAAPVEWR
HGDDVLKSSNKYSLRQEGAVLELVIRDLQPDQSGQYSCSFGDQTTSATLTVKTTSSAQFVQKLRNKEATEGTTV
TLRCELTKAPVEWKKGTETLRNGDKYSLKQDGA VCELQICSLLVADAGEYSCVCGQEKTSATLTVKALLVHF
VRRLSKEATEGDTTTLQCELSKAAPVEWRKGTETLRDGDYSLKQDGA VCELQIRSLTIADAGEYLCTCGQE
KTSATLTVRALPAKFKDSLKNEEATEGTTATLSCELSKAAPVTWKKGPKTLQSGDKYVLRQDGA VCGLIHGL
TMADAGEYSCVCGQEKTSATLTVRGLPAKFIEDLRSQEATEGATAILRCELSKAAPVEWRKGSSETLKDGDYR
LRQDGA VCELQIRGLAVVDGTYSLSPTKFTTEGLRNEEATEGTMATLRCQMSKAAPVEWRKGSSETLRDGDYR
LRQDGA MCELQIRGLTIEDSGEYTCVCGQEKTSATLSVKALPSRFIEDLRSQEATEGTMATLRCQMSKTAPVE
WKKGSETLRDGGYSLRQDGPVCELQICDLAVEDAGEYSCVCGQEKTSATLSIKALPPRFIEDLRSQEATEG
MATLRCQMSKAAPVEWRKGSSETLGDGGYSLRQNGAVCELQIHDLAVEDTGEYSCVCGQEKTSATLNVKALPP
RFIEDLRSQEATEGTMATLRCQMSKAAPVEWRKGSSETLRDGGYSLRQDGA VCELQIHDLVEDAGQYSCVCG
QEKTSAVLTVDALPPKFTTEGLKKEEATEGTMVTLRCQMSKEATVEWRKGA KTLSDGGYSLRQDGA MCELQIC
GLAVEDAGEYSCVCGQEKTSATLSVKALPPRFIEDLRSQEATEGTMATLRCQMSKAAPVEWRKGSSETLRDGD
YSLRQDGA VCELQIRDLAVEDAGEYLCVCGQEKTSATLSVKALPPRFIEDLRSQEATEGTMATLRCQMSKAAP
VEWRKGSKTLRDGDYSLRQDGA MCELQICDLAVEDTGDYSCVCGQEKTSATLSVKALPPRFIEDLRSQEARE
GTVATLRCRMSKAAPVEWRKGSSETLKDGDYSLRQEGNLCELQIRDLAVEDTEEYSCVCGQEKTSATLSVKAL
PAKFIEDLRSQEAPESSTVTLRCKLSKKASVVWKKGSETLRNGARYSLRQDGA VCELEIRDLTVEDTGEYSCT
CGQERTSATLSIMAPQVVFQQLQNLQAEEGSMASLRCELSVPNAAMVWSKGGLELQGDTRREARQQGCV AEL
LLRDLRREDAGEYSCTCGSQTTSATLMVTAAPVRFLELQADVDEGATARLRCELSREAVSVEWRKGS LQLF
PCAKYQMVQEGTTAELLVHGVEQEDAGEYTCDAHELLIARLSVRAPKPKFKTDLQSTEQEAGGTARLCCQLS
EABPGTPVQWLKEGVELHVGSKYEMRRQGA VCELQIHGLEAKDTEYACLVGGQKTLASLRVKEPEVTVIRGL
VDMEVQADEDEFTCKVSAQATDVQWHLQGLPLQSNVTEVAVLADGCTHVLQKGVTLLEDAGTVSFHVGGL
SSSAQLTVRVPEVTVLEPLKDVQLSEGQDAHFRCLRSRASGQEARWALGGVPLQCNEMNDITVEQGTLYLLTL
HKVTLLEDAGTITLQVGSSEEAQLKVTAKNTVLRGLENVDALEGGEALFECQLSQPEVA AHTWLLDDEPVHTS
EKVEVVYFENGLRHLLLLKNLKPQDSCRVTFLAGDVVTS AFLTVRGWRLEVLEPPHDASVKAGMQVRFTCILS
EAVPVGEATWYINGAAIQPDDTDWTVTTDGS HHALTLSNAQPQHAGEVTF AARDAVASARLSVLALPDPEDA
EVVGRSDHSVTLSSWVAPMSDGGGGLCGYRVMKEASTGQWQLCHDLVPGPECVVDDLVPGKTYRFRVA AVGPA
GAGEPVHLPQMVKIAPAPAPAPAPAPAPAPETRAVVGEDICLELEVAADGGEVVWHKGTERRIQPGGHFEVLS
RGQRQMLVIKGFRTEDQGEYRCGPIQGLPSSGAATFNVVMTSGSGDEVPAQPSLPPEAAQEGDLHLLWEALAR
KRRMSREPTLDSISELPEEDSRVQHLRQEAETAPDLSEGYSTADELARTGEADLSHTSSDDES RAGTPSLVT
YLKKA GGPGISPLASKHEAQVTTSVKPKQKQEPVPTCPPPGDLSAADLMDPSLDKAAVKIQAAFKG YKVRKE
MKQQEGPVFSRTFGDTEAQVGDVLRLECVLATKTD MRACWLKDGIELTDGRHYHIDQLKDGTC SLLVTGLAPT
DSGRYTCQVSTKSGRVSHSACVVVSGTESEAE SSSGGELDDAFRRAARRLHRLFRTKSPAELSEELFLSADE
GPGEPEEPADWQTYREDENFVCIRFESLAEARQAVTCFRNM FATMIGVEISLGEQGPGRGEMRIGKVAPTVT
PAVPLAKTPGLQTS DAAPVFLTELQNDVQDGYPMSFDCVVTGQVPVSVRWFKDGKLEEDDH YMINEDQQGG
HQLIITAVVPADMGVYRCLAENSMGVSSTKAELRVELTSTDYDTA ADATETSSYFSAQGYLSSREQEGTESDE
GQLPQVLEELKDLQVAPGTR LAKFQLKVKGYPA PKLYWFKDGGQPLTSDHIRMTDKKTLHTLEIVSVTREDSG
QYAAYSNAVGAAYSSARLLVRGPSEPEEK PASDVHERLVPPRI LEKFTPKKVKRGS S ITFSVKVEGHPAPS
HWLKEEA EKGVLWIGPDTPGYTMASSSKQHS LVLLDVGRQH QGTYTCIATNPAGQALCSASLHISGLAKEEEQ
ERVKEALISSFLQGTSQAVSAQMSE SAGFADLVGQSKGESLV AEEAHSHLSLAEVGTEEF LQKLT SQI TEMVS
AKISQAKLQVPGGDSDEETKTPSASPRHRSRPS SSVQESSSESEDGDSRGEIFDIYVVTADYLP LGAEQDAI
ILREGQYVEVLD SAHPLRWLVRTKPTKSSPSRQGWVSPAYL DKRLKLSPEWGPTEAPEFPGEAVSEDEYRTRL
SSVIQELLSSEQAFVGLQLFLESHHMKHLERSPRVPA AVASQKTVI FRNVQDISHFHSSFLKELQCGTDDDDV
AMCFIKNQEA FEKYLEFLVGRVQAESVVVSTPVQEFYKKYAEETLSAKDPTQPPPP LQHYLEQPV ERVQKYQ
ALLKELIRNKARNRQNCALLEQAYAVVSALPQRAENK LHVSLMENYPGTLEALGEP IRQGHFIVWEGAPGARM
PWKGHNHRVFLFRNYLVICKPRRDSRTD TFSYVFRNMMKLSSIDLNDQVEGDDRAFEVWHEREDSVRKYLLQA
RTVI IKNSWVGEICIGIQRLAQPVWRPPEFEEELNACTAELGETVKLACRVTGT PKPIVSWYKDGKPEVVDPH
HILIEDPDG SCTLILDNLTGIDSGQYMCFAASAAGNASTLGKILVQVPPRFV NKVRATPFVEGEDAQITCTVE
GAPY PQIRWYKDG TLLAPGNRYRMLNEPRSGVLV LVIQAASKEDLGHYECELVNR LGSTRGGGEL YMQSPALR
ARDQHHREQIVA AVEDTSVEGSAHSAQDGA DQQAASVLWRLLGSEALGPS PGDLPNTRQSEPPAFEEAASQIP
GAASGTPEV SQPGTHKGLEQETTSSGSQGWTVPIRVEGTAWPGAGTGQLL LDVHSQVIMETTQRTYVCQAPDT
GVTRAPSMQVTIEDVQVQVGDMAQF DAVIEGHPPPIV TWYKGSTQLTSSARLSQRQDGT TYSVLVTDVAPHDA

GVYTCVANNAGGQVLCKAELLVHGGDKLDAENQVYRRKLHSFYDVQEEIGRGVFGFVKRVQHKGNKMFCAAKF  
IPLRSKTRAQAYQERDILATLGHPLVTGLLDQFETRKTLLILILELCSSEELLDRLFKKGVVTEAEVKVYIQQL  
VEGLHYLHSHGILHLDIKPPNIMVHPAREDIKICDFGFAQKITPSEPOYSKYGSPEFVSPEIIEQNPFVSEGS  
DIWAMGVISYLSLTCSSPFAGESDRATLLNVLEGRVSWSSPTAAHLESDAKDFIKATLQRTPRARPSTSQCLA  
HPWFLKSMPAEEAHFINTKQLKFLARSRWRQSLMSYKSIILVMRSIPPELLQGPPDSPSLGVARHLRGEASGAS  
SSSSSSDNELAPFARAKSLPPSPVTHSPLLHPRGFLRPSASLPEETEASMTADAAVPASPQASAGPPASPGCV  
PRHSVISSLFYQQAGEGAERGNKTSGAKRHPARRRHLKGGYIARALPGLREPLMEYSLLEEEAAREEQASLM  
TKTPSFETALRLPSSSVREVPGRSHSLDNPPVTTGSPPEACKQLLFPSTGLTHETTAKDRGHKEGFLQESV  
FFPPMSGDSRPGKQEGSSQDSCRGKPASSCHSELGSGSQEGCGPPSSQSLGSLPPQSLKKEKELSTSCGPLFSEQ  
PQAAPFPTQVSPLLGSEKEPQDGSLESGPVPVSPSSPGSASQVDASLDTEGLSEAGDTCDFTPPPQRPQEQAT  
TRKFSLESRGGYAGVAGYGTFAFGGDAGGMLGQGPLWARMAWAVSQSSEEQDEAATESPQPLESIGPIAEASG  
VPLRTPSPSLTPWEEVEQVSLVQIRDLSGDAEAADTISLDISEVDPAYLNLSLDYDIKYLPEFEMI FRRVFKPI  
EQPESPGSETEAGQGLADFLLEAAWPWPGEGLGLRAGLEITEEPEEPGDLEALLGEEAVGRKRKWSPSRGLFQF  
PGRCLSGEEPVELGLRQRVKASMAHISRILKGRPEGPREGPPRKKAGLASFRLSGLKGRDQELSDEAVVLGQ  
SVTLACQVLAQPTAQATWSKDGVLLESSGHLLISSTLKNFQLLTIILVVKEEDLGTYTCCVSNPLGTAVTTGVL  
RKAERPSSSPRPEVGEELYKDAVLLVWKPVESECGPVYIVQCCIEGGSWTTLASDISDCCYLTGKLSRGGMYIF  
RTACVSKAGMGPYSSPSEQVLLGGPNHLASEEISSRGRPAQLLPSTKTFQMQIRRGFRFVVRQCREKASGR  
ALAAKIVPYQPEDKTAVLRREYEAALKRLLHHPHLAQLHAAYLSPRHLVLIILELCSGPELLPSLAERESYSESDVK  
DYLWQMLSATQYLHAQHILHLDLRSENMMVTEYNLLKVIDLGNQSLDQEKVPAPENFKDYLETMAPELLEGGQ  
GAVPQTDIWAIGVTAIFIMLSGEYPESEGTDLQKGLRKLIRLSRCYAGLSGGAVAFLOSSLCAQPWGRPCA  
STCLQCGLWTEEGPTGSRPTPVTFTVRLRAFRVREKRRALLYKKNLAQVR\*  
>rs47781492\_ENSMUSP00000038264\_c.17817:G>A\_p.E5940K  
ENSMUST00000047441.14|Obscn-202|ENSMUSG00000061462|-|chr11:g.58921977:C>T  
MDHSFSGAPRFLTRPKAFVSVGKDATLSCQIVGNPTPHVSWEKDRQFVEAGARFLAQDGDVYRLTILDLAL  
GDSGQYVCRARNAIGEAFAAVGLRVDSEGTCAEQAPHFLLRPTSIRVREGADATFRCRVGGSPPAVSWSKDG  
RRLGPPDAPHRVVEEHGESSALRIR SARPRDGGTYEVRANPLGSASAAAALVVDSDAEVAGPPGTSTATLLA  
HLQQRREAMRAEGIPSPPGAGTRTCTVTTEGKHARLSCFVTEGPKPETVWKKDQGLVTEGRRHVVEYDEQENF  
VLKILFCKQSDRGLYTCTASNLVGQTYSSVLVVVREPTVPFKKRLQDLEVREKESATFQCEVAQPATEAAWFK  
EETRLWASAKYDIEEEGTERRLTVRNVSADDDAVYICETTEGSRVVAELSVQGNLTKLPRKTAVRTGDTAIF  
WVELAVPEGPVRWLRNQEEMVAGGRVAITAEGTCHTLTI FQCTLEDMGEVAFVSGGCRTTTTQFCVSAPRRPPL  
YPPADPVPVKAKTESSVTL SWSAPPHGDRPVTIDGYVLEKRKLGAYAWSRCHEAGWLATTEFTITGVABEGDFQ  
FRVSAINHFGQGPYLEFPGTMHLVPLAVKTPKAVEAVEGGEVTFVSDLTVASSGEWFLDGEALKASSIYVI  
RCDRTRHMLTIREVPARLHGAQLKFVANGIETSIQMVVRAALGLPSSKLPAAAAREVLAQLHEEAQLLAE LSD  
QAAA VTWLKDGRELSLGPYEMQVSAGRALLVRDVAQDDAGLYECVSRGSRRTAYQLLVQDITDGYRDWGPAG  
PQKHMCKCAGAKIARYLGSSCYRFLQYDKGVWHWLEAALDTRQGKGTSSCSLHEKPKLVFAKQQAHSEVKAE  
AGASATLSCEVAQAQTEVTWFKDGKLLSSSSKVRMEASGCSRRLLVVQQAGKADAGEYSCEAGGQKLSFRLDVA  
EPKMFVFAKEQQARSEVKAEGASATLSCEVAQAQTEVTWFKDGKLLSSSSKVRMEASGCSRRLLVVQQAGKADA  
GEYSCEAGGQKLSFRLDVTEPKLVFAKEQQARSEVKAEGVNSATLSCEVAQAQTEVTWFKDGKLLSSSSKVRM  
EASGCSRRLLVVQQAGKADAGEYSCEAGGQKLSFRLDVAEPKLVFAKEQQARSEVKAEGNSATLSCEVAQAQ  
EVTWFKDGKLLSSSSKVRMEASGCSRRLLVVQQAGKADAGEYSCEAGGQKLSFHLDVTEPKLVFAKEQQAHSEV  
KAEAGASATLSCEVAQAQTEVTWFKDGKLLSSSSKVRMEASGCSRRLLVVQQAGKADAGEYSCEAGGQKLSFR  
LDVAEPKLVFAKEQQARSEVKAEGASATLSCEVAQAQTEVTWFKDGKLLSSSSKVRVEASGCSRRLLVVQQAGK  
ADAGEYSCEAGGQKLSFRLDVAEPKLVFAKEQQANSEVKAEGASATLSCEVAQAQTEVTWFKDGKLLSSSSK  
VRVEASGCSRRLLVVQQAGKADAGEYSCEAGGQKLSFRLDVAEPKLVFAKEQQAHSEVKAEGASATLSCEVAQA  
QTEVTWFKDGKLLSSSSKVRVEASGCSRRLLVVQQAGKADAGEYSCEAGGQKLSFRLDVAEPKLVFAKEQQAH  
SEVKAEGASATLSCEVAQAQTEVTWFKDGKLLSSSSKVRVEASGCSRRLLVVQQAGKADAGEYSCEAGGQKLS  
FRLDVAEPKLVFAKEQQAHSEVKAEGASATLSCEVAQAQTEVTWFKDGKLLSSSSKVRVEASGCSRRLLVVQQ  
AGKADAGEYSCEAGGQKLSFRLDVAEPKLVFAKEQQAHSEVKAEGASATLSCEVAQAQTEVTWFKDGKLLSS  
SSKVRVEASGCSRRLLVVQQAGKADAGEYSCEARGQKLSFRLDVAEAEBSQIPERPSRREPLVVEKHETIILTAT  
IAAPSVAAVTWLKDGV EIRRSKRHEATSLGDTHLTVRGAQVLDSAIYSCRVGKEGQDFPVQVEEVAAKFSKP  
LEPVEGELGGTVMLVCELSPEQAEVVWRCNGTQLRPGKRFQMTSEGPRRTLTVSGLREDDAEYVCESRDDRT  
SARLTVKVPVVKFTSGLSAMVAEEGQEQATFQCVVSPSDAGVTWYKDGMLQLPSEKFMVMEVGASRSLTILGL  
TLEDAGQVHVEAEAGSSAALRVREAPVLFKKKLEPQTVEERTSVTLEVELTRPWEVVKWTRNAAVLTPSENV  
EIRAEGARTCLVLRSGVFADRGFEGCETPDDKTQAKLVNEMRQVRLVVRGLQEVAEQGTASMDVELSHA EVE  
GSWTRDGLRLQPGPKCHLAVQGPVHILTL SALQPQDSGLVAFRAEGVHTSARLIVTELPVSFTRVLQDVVATQ  
KEKVTLECELSRPVDVRWLKDGVELRAGKAI GIVAQGTCSLVIYRCETGDQGVYVCDALDAQTSASLRVQGR  
TYTLIFRRVLAEDAGEVKFVAENAESRAHLRVKELPVTLLRPLRDKIAMEKHRGVLECCQVSRASAVRWFKGG  
VELQSGPKYEVVSDGLYRKLVIN DVQPEDEDYTC DAGNVKTSAQFFVEEQSITIVRGLKDMTVMFPAPAWFE

CETSIPSVRPPKWLKGTVLQAGGNVLEQDGTVHRLTLHKTCSTMTGPHFTIGKSRSSAQLVVS DIPVVLTRPLEPKAGRELQSVVLSCDFRPAPKAVQWYKDDTPLSPSEKFKMALEGQMAELRILRLTPADAGVYRCQAGSAQSSAEVTVAREVTVIQPLQDAEAMEEGRVCFSCELSHKDEDEIWSLNGTPLYNDSFHEISHEGCLHTLVLKSVRQADTGTVCATSPKVSVSARLVVKGKPVVFLKALDDVSAEERGTTLQCEVSDPEARVVWRKDGVELGSPDKYDFLHKAGARGLTVHDLSDHEDAGLYTCQVGSKETQSKVSVHDLHVGITKRLKTVEVLEGESECSFECVLSHESPSDFAVWTVGGKTVGGSGHFHAVRQGRKYTLTVKDAALSDAGEVVFVGLGLTSKASLIIRERPVDITKPLEDQRTTLGEDVMLSCELSRAGTSVRWLKDGKAIKRSQKYDLLSEGTRAVLVVRKASLKDSGEYTCETEASKSTAKLCVEEKANRFTTEELADLQVEEKGRAVFTCKTEHPASVVTWRKGLLELRASGKHVPSQEGTLTKLTINALERTDSDTYTCDIGQARTQARLLVHGQKVRVIEDLEDTAVQEGSSAKFCCRIAPADYGPVHWFLDKTPLHSNELNEITVQPGGYHVLTLRQLALKDSGTVYFEAGDQRTSAALRVTEKPSIFSRPLTDVTVTEGEDLTLVCETTTVDSSVRWTKDGKTLRPSARCQLSHEGCAQLLITATTPQDGGRYKCEIGGASSSSIVRVHALPVRFRESLKDVEVPEGKAA TLRCVLSVAAPVEWRHGDDVLKSSNKYSLRQEGAVLELVIRDLQPDQSGQYSCSFGDQTTSATLTVKTSQAQFVGKLRNKEATEGTTVTLRCELTKEAPVEWKKGTETLRNGDKYSLKQDGAVCELQICSLLVADAGEYSCVCGQEKTSATLTVKALLVHFVRRLSKEATEGDTTTLQCELSKAAPVEWRKGTETLRDGDYSLKQDGAVCELQIRSLTIADAGEYLCTCGQEKTSATLTVRALPAKFKDSLKNEEATEGTTATLSCELSKAAPVTWKKGPKTLQSGDKYVLRQDGAVCGLQIHGLTMADAGEYSCVCGQEKTSATLTVRGLPAKFIEDLRSQEATEGATAILRCELSKAAPVEWRKGETLRDGDYSLRQDGAVCELQIRGLAVVDGTGYSLSLPTKFTTEGLRNEEATEGTMATLRQMSKAAPVEWRKSETLRDGDYSLRQDGAMCELQIRGLTIEDSGEYTCVCGQEKTSATLSVKALPPRFIEDLRSQEATEGTMATLRQMSKAAPVEWRKSETLRDGGRYSLRQNGAVCELQIHDLAVEDTGEYSCVCGQEKTSATLNVKALPPRFIEDLRSQEATEGTMATLRQMSKAAPVEWRKSETLRDGGRYSLRQDGAVCELQIHDLVEDAGQYSCVCGQEKTSAVLTVDALPPKFTTEGLKKEEATEGTMVTLRQMSKEATVEWRKGAKTSLDGGRYSLRQDGAMCELQICGLAVEDAGEYSCVCGQEKTSATLSVKALPPRFIEDLRSQEATEGTMATLRQMSKAAPVEWRKGSKTLRDGDRYSLRQDGAMCELQICDLAVEDTGDYSCVCGQEKTSATLSVKAPQVVFQQPLQNLQAEEGSMASLRCELSVPNAAMVWSKGGLELQGDTRREARQQCVAELLLRDLRREDAGEYSCCTCGSQTTSATLMVTAAPVRFRLRLQAQDVDEGATARLRCLEASREAVSVEWRKGSLLQFPKAKYQMVQEGTTAELLVHGVEQEDAGEYTC DAGHTQSIARLSVRAPKPKFKTDLQSTASEAGGTARLCCQLSEAEQVGTQVWLKEGVELHVGSKYEMRRQAVCELLIHGLEAKDTEYACLVGGQKTLASLRVKEPEVTVIRGLVDMEVQADEDEVEFTCKVVSQAGATDVQVHGLQVPLQSNNEVTEVAVLADGCTHVLQKGVTLLEDAGTVSFHVGGLSSAQLTVRVPEVTVLEPLKDVQLSEGDQDAHFRCLSRASGQEARWALGGVPLQCNEMNDITVEQGTLYLLTLHKVTLLEDAGTITLQVGSSESAQLKVTAKNTVLRGLENDVALEGEALFECQLSQPEVAHAHTWLLDDEPVHTSEKVEVVYFENGLRHLLLLKLNKPKQDSCRVTFLAGDVVTS AFLTVRALPDPPEDAEVVGRSDHSVTLVSWVAPMSDGGGGLCGYRVMKEASTGQWQLCHDLVPGPECVDDLVPGKTYRFRVAAVGPAGAGEPVHLPQMVKIAPAPAPAPAPAPAPAPETRAVVGEDICLELEVAADGGVEVWHKGTERRIQPGGHFEVLSRQQRQMLVIKGFRTEDQGEYRCGPIQGLPSSGAATFNVMVMTSGSGDEVPAQPSLPPEAAQEGDLHLLWEALARKRRMSREPTLDSISELPEEDSRVQHLRQEAETAPDLSEGYSTADELARTGEADLSHTSSDDESBRAGTTPSLVTYLKKAGGPGISPLASKHEAQVTTSVKPKQKQEPVVPVTPCPPPGDLSAADLMDPSLDKAAVKIQAFKGYKVRKEMKQEGPVFSRTFGDTEAQVGDVLRLECVLATKTDMRACWLKDGIELTDGRHYHIDQLKDGTC SLLVTVGLAPTDSGRYTCQVSTKSGRVSHSACVVVSGTESEAESSSGGELDDAFRRAARRLHRLFRTKSPAELS EEELFLSADEGPGEPEEPADWQTYREDENFVCIRFESLAEARQAVTCFRNMFMATMGIGVEISLGEQGPRGVEMRIGKVAPTPTPAVPLAKTPGLQTSDAAPVFLTELQNDVQDGYPMSFDCVVTGQPVPSVRWFKDGKLLLEDDHYMINEDQQGGHQLIITAVVPADMGVYRCLAENSMGVSSTKAELRVELTSTDYDTAADATETSSYFSAQGYLSSREQEGTESDEGQLPQVLEELKDLQVAPGTRLAKFQLKVKGYPAKLYWFKDGQPLTSDHIRMTDKKTLHTLEIVSVTREDSDGQYAAIISNAVGAAYSSARLLVRGPSEPEEKPASDVHERLVPPRILEKFTPKKVKRGSSITFSVKVEGHPAPSVHWLKEEAKEKGLVWIGPDTPGYTMASSSKQHSLVLLDVGQRHQGTYTICATNPAGQALCSASLHISGLAKEEEEQERVKEALISSFLQGTSAQVSAQMSSESAGFADLVGQSKGESLVAAEEAHSHLSLAEVGTETEFLOKLTQSQITEMVSAKISQAKLQVPGGDSDEETKTPSASPRHGRSRPSSSVQESSSESEDGDSRGEIFDIYVVVTADYLPLGAEQDAIILREGQYVEVLDSAHPLRWLVRTKPTKSSPSRQGWVSPAYLDKRLKLSPEWGPTEAPEFPGEAVSEDEYRTRLSSVIQELLSSEQAFVGLQFLESHHMKHLERSPRVPAAVASQKTVIFRNVQDISHFHSSFLKEIQCGCTDDDVAMCFIKNQEAFAKEYLEFLVGRVQAESVVVSTPVQEFYKKYAEETLSAKDPTQPPPPLOHYLEQPVERVQKYQALLKELIRNKARNRQNCALLEQAYAVVSALPQRAENKLVSLMENYPGTLEALGEPVIRQGHFIVWEGAPGARMPPWKGNHRHVFVFRNYLVICKPRRDSRTDFTSYVFRNMMKLSSIDLNDQVEGDDRAFEVWHEREDSVRKYLQARTVIKNSWVKEICGIQORLAQPVWRPPEFEEELADCTAELGETVKLACRVGTGPKPIVSWYKDGPVEVDPHHILIEDPDGSCSTLILDNLGTIGDSGQYMCFAASAAGNASTLGKILVQVPPRFVNVKVRATPFVEGEDAQITCTVEGAPYPQIRWYKDGTLAPGNRYRMLNEPRSGVVLVLIQAASKEDLGHYECELVNRILGSTRGGGELYMQSPALRARDQHHREQIVAAVEGAPSMQVTEIDVQVQVGDMAQFDAVIEGHPPPIVTVYKGSTQLTSSARLSQRQDGTYSLVLTVDVAPHDAVYTCVANNAGGVLCQAEELLVHGDKLDAENQVYRRKLSHFYDVQEEIGRGVFGFVKRVQHKGNMFCAAKFIPLRSKTRAQAYQERDILATLGHPLVTGLLDQFETRKTLLILILELCSSEELDLRLFKKGVVTEAEVKVYIQQLVEGLHYLHSHGILHLDIKPPNIMVHPAREDIKICDFGFAQKITPSEPOYSKYGSPFVVSPEIIEQNPVSEGSDIWAMGVISYLSLTCSSPFAGESDRATLLNVLEGRVSWSSPTAAHLSEDA

DFIKATLQRTPRARPSTSQCLAHPWFLKSMPAEAAHFINTKQLKFLLRASRWQRSLMSYKSI LVMRSIPELLQ  
 GPPDPSLGVARHLRGEASGASSSSSSDNE LAPFARAKSLPPSPVTHSPLLHPRGFLRPSASLPEETEASMP  
 TADAAVPASPQASAGPPASPGCVPRHSV ISSLFYQQAGEGAERGNKTS GAKRHPARRRHLLKGGYIARALPGLR  
 EPLMEYSLLEEEAAREEQASLMTKTPSFETALRLPSSSVREVPGRSHSLDNPPVTTGSPPEACKEQLLFPST  
 GLTHEHTAKDRGHKEGFLQESVFPFPMMSGDSRPGKQEGSSQDSCRGKPASSCHSELGSGSQEGCGPPSSQSLG  
 SLPPQSLKKELESTSCGPLFSEQPQAAPFPTQVSPLLGSEKEPQDGSLSSEGPVFPVSSSPGSASQVDASLDT  
 LSEAGDTCDFTPPPQRPQEQATTRKFSLESRRGGYAGVAGYGTFAFGGDAGGMLGQGPLWARMAWAVSOSSEEQ  
 DEAATESPQPLESLGPIAEASGVPLRTSPSLTPWEEVEQVSLVQIRDLSGDAEAADTISLDISEVDPAYLNLS  
 DLYDIKYLPPFEFMI FRRVPKPIEQPESPGSETEAGQLADFL EEAAPWPWGPGLRAGLEITEEPEEPGDLEA  
 LLGEAAVGRKRKWSPSRGLFQFPGRCLSGEELVGLRQRVKASMAHISRILKGRPEGPEREGPPRKKAGLAS  
 FRLSGLKGRDQELSDEAVVLGQSVTLACQVLAQPTAQATWSKDGVLLESSGHLLISSTLKNFQLLTLIVVKEE  
 DLGTYTCCVSNPLGTAVTTGVLKRAERPSSSPRPEVGEYKDAVLLVWKPVESECGPVTYIVQCCIEGGSWTTL  
 ASDISDCCYLTKLSRGGMYIFRTACVSKAGMPYSSPSEQVLLGGPNHLASEEESSRGRPAQLLPSTKTF  
 QMQIRRRGRFSVVRQCREKASGRALAAKIVPYQPEDKTAVLREYEALKRLHHPHLAQLHAAYLSPRHLVLI  
 LELCSGPELLPSLAERESYSESDVKDYLWQMSATQYLHAQHILHLLDRSENMMVTEYNLLKVIDLGNASLDQEK  
 VPAPENFKDYLETMAPELLEGQGAVPQTDIWAIGVTAIFIMLSGEY PESSSETRDLQKGLRKLIRLSRCYAGL  
 SGGAAVAFLOSSLCAQPWGRPCASTCLQCGWLTEEGPTGSRPTPVTFTVRLRAFVREKRRRALLYKKNH  
 LAQVR\*

>rs47781492\_ENSMUSP00000049737\_c.19776:G>A\_p.E6593K

ENSMUST00000052872.15|Obscn-203|ENSMUSG00000061462|-|chr11:g.58921977:C>T  
 MDHSFSGAPRFLTRPKAFVSVGKDATLSCQIVGNPTPHVSWEKDRQFVEAGARFRLAQDGDVYRLTILDLAL  
 GDSGQYVCRARNAIGEAFVAVGLRVDSEGTCAEQAPHLLRPTSIRVREGADATFRCRVGGSPQPAVSWSKDG  
 RRLGPPDAPHVRVEEHGESSALRIRSARPRDGGTYEVRAENPLGSASAAAALVVDSDAEVAGPPGTSTATLLA  
 HLQQRREAMRAEGIPPSPPGAGTRTCTVTEGKHARLSCFVTGEPKPKETVWKKDQGLVTEGRRHVVEDEQENF  
 VLKILFCCKQSDRGLYTCASNLVGQTYSSVLVVVREPTVPFKKRLQDLEVREKESATFQCEVAQPAATEAAWFK  
 EETRLWASAKYDIEEETERRLTVRNVSAADDAVYICETTEGSRVAELSVQGNLPRKTAVRTGDTAIF  
 WVLELAVPEGPVVRVLRVAITAEQDCHTTLTIFQCTLEDMGEVAFVSGGCRTTTQFCVSAAPRRPPL  
 YPPADPVVKAKTESSVTLWSAPPHGDRPVTIDGYVLEKRLKLGAYAWSRCHEAGWLATTEFTITGVAAEEDGFQ  
 FRVSAINHFGQGPYLEFPGMTMLVPLAVKTPKAVEAVEGGEVTFVSDLTVASSGEWFLDGEALKASSIYVI  
 RCDRTRHMLTIREVPARLHGAQLKVFANGIETSIQMVVRAALGLPSSKLPAAAAREVLAQLHEEAQLLAE  
 LSDQAAA VTLWKDGRELSLGPYEMQVSAGRRALLVRDVAQDDAGLYECVSRGSRRTAYQLLVQEPKLVFAKQQA  
 HSEVKAEGNSATLSCEVTQAQTEVTWFKDGKLLSSSSKVRMEASGCSRRLVVQQAGKADAGEYSCEAGGQKLS  
 FRLDVAEPKLVFAKQQAHSSEVKAEGASATLSCEVAQAQTEVTWFKDGKLLSSSSKVRMEASGCSRRLVVQQ  
 AGKADAGEYSCEAGGQKLSFRLDVAEPKMFVFAKEQQARSEVKAEGASATLSCEVAQAQTEVTWFKDGKLLS  
 SSKVRMEASGCSRRLVVQQAGKADAGEYSCEAGGQKLSFRLDVTEPKLVFAKEQQARSEVKAEGNSATLSCE  
 VAQAQTEVTWFKDGKLLSSSSKVRMEASGCSRRLVVQQAGKADAGEYSCEAGGQKLSFRLDVAEPKLVFAKEQ  
 QARSEVKAEGNSATLSCEVAQAQTEVTWFKDGKLLSSSSKVRMEASGCSRRLVVQQAGKADAGEYSCEAGGQ  
 KLSFHLDVTEPKLVFAKEQQAHSEVKAEGASATLSCEVAQAQTEVTWFKDGKLLSSSSKVRMEASGCSRRLV  
 VQQAGKADAGEYSCEAGGQKLSFRLDVAEPKLVFAKEQQARSEVKAEGASATLSCEVAQAQTEVTWFKDGK  
 LSSSSKVRVEASGCSRRLVVQQAGKADAGEYSCEAGGQKLSFRLDVAEPKLVFAKEQQANSEVKAEGASATL  
 SCEVAQAQTEVTWFKDGKLLSSSSKVRVEASGCSRRLVVQQAGKADAGEYSCEAGGQKLSFRLDVAEPKLAFA  
 KEQQAHSEVKAEGASATLSCEVAQAQTEVTWFKDGKLLSSSSKVRVEASGCSRRLVVQQAGKADAGEYSCEA  
 GGQKLSFRLDVAEPKLAFAKEQQAHSEVKAEGASATLSCEVAQAQTEVTWFKDGKLLSSSSKVRVEASGCSR  
 RLVVQQAGKADAGEYSCEAGGQKLSFRLDVAEPKLAFAKEQQAHSEVKAEGASATLSCEVAQAQTEVTWFKD  
 GKLLSSSSKVRVEASGCSRRLVVQQAGKADAGEYSCEAGGQKLFRLDVAEPKLMFAKEQQAHSEVKAEGAS  
 ATLSCEVAQAQTEVTWFKDGKLLSSSSKVRVEASGCSRRLVVQQAGKADAGEYSCEAGGQKLSFRLDVAEPK  
 LFAKEQQAHSEVKAEGASATLSCEVAQAQTEVTWFKDGKLLSSSSKVRVEASGCSRRLVVQQVQKADAGEYS  
 CEARGQKLSFRLDVADTRLMFAKEQQARTEVKAEGNSATLSCEVAQAQTEVTWFKDGKLLSSSSKVRVEASG  
 CSRRLVVQQAGKADAGEYSCEAGGQKLSFRLDVAEAESEI PERPSRREPLVVKEHETIILTATIAAPVAAVT  
 WLKDGVEIRRKRHEATSLGDTHLTVRGAQVLDSAIYSCRVGKEGQDFPVQVEEVAAKFSKPLEPVEGELGG  
 TVMLVCELSPEQAEVWRCGNTQLRPGKRFQMTSEGPRRTLTVSGLREDDAEYVCESRDDRTSARLTVKVP  
 VVKFTSGLSAMVAEEGQEAATFQCVVSPSDAGVTWYKDGMLQPSSEKFMVMEVSGASRSLTILGLTLEDAGQV  
 TVEAEASSAALRVREAPVLFKKKLEPQTVEERTSVLLEVELTRPWPEVKWTRNAAVLTPSENVEIRAEGARHC  
 LVLRVSGFADRGFFGCEPDDKTQAKLVNEMRQVRLVRLGVEVEAKEQGTASMDVLSHAEVEGSWTRDGLRL  
 QPGPKCHLAVQGPVHILTLALQPDSSGLVAFRAEGVHTSARLIVTELPVSFTRVLQDVVATQKEKVTLECEL  
 SRPVDVRWLKDGVELRAGKAI GIVAQGTCSRSLVIYRCETGDQGVVCDALDAQTSASLRVQGRTYTLIFRRVL  
 AEDAGEVVFVAENAESRAHLRVKELPVTLLRPLRDKIAMEKHRGVLECVSRASAQVRWFVGGVLEQSGPKYE  
 VVSDGLYRKLVINVDVQPEDEDTYTCDAENVKTSAQFFVEEQSITIVRGLKDMTVMPEPAPAWFECETSIPSVRP

PKWLLGKTVLQAGGNVGLQDGTVHRLTLHKTCSTMTGPVHFTIGKSRSSAQLVVSDDIPVVLTRPLEPKAGRE
LQSVVLSCDFRPAPKAVQWYKDDTPLSPSEKFKMALEGQMAELRILRLTPADAGVYRCQAGSAQSSAEVTVEA
REVTVIQPLQDAEAMEEGRVCFSCELSHKDEDEIWSLNGTPLYNDSFHEISHEGCLHTLVLSVVRQADTGTVC
ATSPKVSVSARLVVKGKPVVFLKALDDVSAEERGTLTLQCEVSDPEARVVWRKDGVELGPSDKYDFLHKAGAR
GLTVHDLSDHEDAGLYTCQVGSKETQSKVSVHDLHVGITKRLKTVEVLEGESECSFECVLSHESPSDPAVWTVGG
KTVGGSGHFHAVRQGRKYTLTVKDAALSDAGEVVSFLGLTSKASLIIRERPVDITKPLEDQRTTLGEDVMLS
CELSRAGTSVRWLKDGKAIKRSQKYDLLSEGTRAVLVVRKASLKDSGEYTCETEASKSTAKLCVEEKANRFTE
ELADLQVEEKGRAVFTCKTEHPASVVWTRKGLLELRASGKHVPSQEGTLKLTINALERTDSDTYTCDIGQAR
TQARLLVHGQKVRVIEDLEDTAVQEGSSAKFCCRIAPADYGPVHWFLDKTPHLSNELNEITVQPGGYHVLTLR
QLALKDSGTVYFEAGDQRTSAALRVTEKPSIFSRPLTDVTVTEGEDTLVCETTTTVDSSVRWTKDGKTLRPSA
RCQLSHEGCAQQLLITATTPQDGGRYKCEIGGASSSSIVRVHALPVRFRESLKDVEVPEGKAATLRCVLSSVA
APVEWRHGDDVLKSSNKYSLRQEGAVLELVIDRLQPDQSGQYSCSFGDQTTSATLTVKTSQAQVFGKLRNKEA
TEGTVTVLRCCLTKEAPVEWKKGTETLRNGDKYSLKQDGAVCELQICSLLVADAGEYSCVCGQEKTSATLTVK
ALLVHFVRRRLRSKEATEGDTTTLQCELSKAAPVEWRKGTETLRDGDYSLKQDGAVCELQIRSLTIADAGEYL
CTCGQEKTSATLTVRALPAKFKDSLKNEEATEGTTATLSCELSKAAPVTWKKGPKTLQSGDKYVLRQDGAVCG
LQIHGLTMADAGEYSCVCGQEKTSATLTVRGLPAKFIEDLRSQEATEGATAILRCELSKAAPVEWRKGSSETLK
DGDYRSLRQDGAVCELQIRGLAVVDGTYSLSLPTKFTTEGLRNEEATEGTMATLRCQMSKAAPVEWRKGSSETLR
DGDYRSLRQDGAVCELQIRGLTIEDSGEYTCVCGQEKTSATLSVKALPSRFIEDLRSQEATEGTMATLRCQMS
KTAPVEWKKGSETLRDGGYSLRQDGPVCELQICDLAVEDAGEYSCVCGQEKTSATLSIKALPPRFIEDLRSQ
EATEGTMATLRCQMSKAAPVEWRKGSSETLGDGGYSLRQNGAVCELQIHDLAVEDTGEYSCVCGQEKTSATLN
VKALPPRFIEDLRSQEATEGTMATLRCQMSKAAPVEWRKGSSETLRDGGYSLRQDGAVCELQIHDLVEDAGQ
YSCVCGQEKTSAVLTVDALPPKFTTEGLKKEEATEGTMVTLRCQMSKEATVEWRKGAKTLSDGGRYSLRQDGAM
CELQICGLAVEDAGEYSCVCGQEKTSATLSVKALPPRFIEDLRSQEATEGTMATLRCQMSKAAPVEWRKGSSET
LRDGDYRSLRQDGAVCELQIRDLAVEDAGEYLCVCGQEKTSATLSVKALPPRFIEDLRSQEATEGTMATLRCQ
MSKAAPVEWRKGSSETLRDGDYRSLRQDGAVCELQICDLAVEDTGDYSCVCGQEKTSATLSVKALPPRFIEDLR
SQEAREGTVATLRCRMSKAAPVEWRKGSSETLKDGDYRSLRQEGNLCELQIRDLAVEDTEEYSCVCGQEKTSAT
LSVKALPPRFIEDLRSQEAPESSTVTLRCKLSKASVWKKGSETLRNGARYSLRQDGAVCELEIRDLTVEDT
GEYSCTCGQERTSATLSIMAPQVVFQQPLQNLQAEEGSMASLRCELSVPNAAMVWSKGGLELQGDTRREARQQ
GCVAELLLRDLRREDAGEYSCCTCGSQTTSATLMVTAAPVRFLRELQAQDVDEGATARLRCELSREAVSVEWRK
GSLQLFPCAKYQMVQEGTTAELLVHGVEQEDAGEYTCDAHTQS IARLSVRAPKPKFKTDLQSTEQEAGGTAR
LCCQLSEAEPTPVQWLKEGVELHVGSKYEMRRQGAVCELLIHGLEAKDTGEYACLVGQKTLASLRVKEPEV
TIVRGLVDMEVQADEDEFTCKVSAQAGATDVQWHLQGLPLQSNVEVEVAVLADGCTHVLQKGVTLQDAGTVS
FHVGGSSSAQLTVRVPEVTVLEPLKDVQLSEGQDAHFRCRLSRASGQEARWALGGVPLQCNEEMNDITVEQGT
LYLLTLHKVTLEDAGTITLQVGSSEAEQLKVTAKNTVLRGLENVDALEGGALFECQLSQPEVAHTWLLDD
EPVHTSEKVEVVYFENGLRHLHLLKLNKPKQDSCRVTFLAGDVVTS AFLTVRGRWLEVLPPHDASVKAGMQVR
FTCILLSEAVPVGEATWYINGAAIQPDDTDWTVTTDGSHHALTLNAQPQHAGEVTFAAARDAVASARLSVLALP
DPPEDAEEVGRSDHSVTLVWVAPMSDGGGGLCGYRVMKEASTGQWQLCHDLVPGPECVDDLVPGKTYRFRV
AAVGPAGAGEPVHLPQMVKIAPAPAPAPAPAPAPAPETRQAVVGEDICLELEVAADGGVEVWHKGTERRIQPGG
HFEVLSRGRQMLVIKGFRTEDQGEYRCGPIQGLPSSGAATFNVVMTSGSGDEVPAQPSLPPEAAQEGDLHLL
WEALARKRRMSREPTLDSISELPEEDSRVQHLRQEAETAAPDLSEGYSTADELARTGEADLSHTSSDDESRAG
TPSLVTYLKAGGPGI SPLASKHEAQVTT SVKPKQKQEPVVPTCPPPGDLSAADLMDPSLDKAAVKIQAAFKG
YKVRKEMKQOEGPVFSRTFGDTEAQVGDVLRLECVLATKTDMRACWLKDGIELTDGRHYHIDQLKDGTCSSLLV
TGLAPTDSGRYTCQVSTKSGRVSHSACVVVSGTESEAESSSGGELDDAFRRRAARLHRLFRTKSPAELSEEEL
FLSADEGPGPEPEPADWQTYREDENFVCIRFESLAEARQAVTCFRNMFATMGIGVEISLGEQGPGRVEMRIGK
VAPTPTPAVPLAKTPGLQTSDAAPVFLTELQNDQDVQDGYPMSFDCVVTGQPVPSVRWFKDGKLEEDDHYMIN
EDQQGGHQLIITAVVPADMGVYRCLAENSMGVSSTKAELRVELTSTDYDTAADATETSSYFSAQGYLSSREQE
GTESDEGQLPQVLEELKDLQVAPGTRLAKFQKLVKGYPAKLYWFKDQPLTSDHIRMTDKKTLHLEIVSV
TREDSGQYAAYSNAVGAAYSARLLVRGPSEPEEKPASDVHERLVPPRILEKFTPKKVKRGSSTFVSVKVEG
HPAPSVHHLKEEAKEGVLWIGPDTPGYTMASSSKQHSVLVDVGRQHOGTYTCIATNPAGQALCSASLHISGL
AKEEEQERVKEALISSFLQGTSAVSAQMSEAGFADLVGQSKGESLVAEEAHSHLSLAEVGTTEFLQKLT SQ
ITEMVSAKISQAKLQVPGGDSDEETKTPSASPRHGRSRPSSSVQESSSESEDGDSRGEIFDIYVVTADYLPGLG
AEQDAIILREGQYVEVLDSAHPLRWLVRTKPTKSSPSRQGWVSPAYLDKRLKLSPEWGPTEAPEFPGEAVSED
EYRTRLSVVICQLLSSEQAFVGLKQFLESHEHMKHLVSRPVAASQKTVIFRNVQDISHFHSSFLKELQGC
GTDDDVAMVICIKNQEAFEKYLEFLVGRVQAESVHVSPTVQEFYKKYAEBETLSAKDTPQPPPPPLQHYLEQVPE
RVQKYQALLKELIRNKARNRQNCALLEQAYAVVSALPQRAENKLVHSLMENYPGTLEALGEP IRQGHFIVWEG
APGARMPWKGNHRHVFLFRNYLVICKPRRDSRTDFTSYVFRNMMKLSSIDLNDQVEGDDRAFEVWHEREDSVR
KYLQARTVVIKNSWVKEICGIQORLAQPVWRPPEFEELADCTAELGETVKLACRVTGTPKPIVSWYKDGKP
VEVDPHHILIEDPDGSCTLIIDNLTGIDSGQYMCFAASAAGNASTLGKILVQVPPRFVNVKVRATPFVEGEDAQ



ITCTVEGAPYPQIRWYKDGTLTLLAPGNRYRMLNEPRSGVLVVLVIQAASKEDLGHYECELVNRLGSTRGGGELYM  
 QSPALRARDQHHREQIVAAVEVTEQETKVPKKTVIIEETITTTVVKSPRGRRQSPGKSPSRSPRRSASPRRPG  
 LLAPERLYPPGTSPSRRLEVEQGRKAPVPALYVTEAEVHAPASQSQPKWLEVEETIEVRVKKTGSRGASPVRE  
 MTSRGEGLIFTLPGGI PGRDPNANNNSNKS SVYQEARTWGPVAVHVGEFFIFQVDSVGNVDVWAASPEPEQVRA  
 SQKEENTERQEGCSDGENTFLMEEPQDTSLQGRDPKILTHNGRVLTLADLEDYVPQEGETFQCGDSTPSTP  
 DEPPCEVSVLQREISEPTVGPVLLNVGRPPGTGATPSFFRPGSQVHSPESVSFLLREAWSGPVSAAPWTSSSF  
 HTHVQSSVDGSHGSFKTEVSTQTVSFGAVGETVTLHIDPDGGEAPGPSQG\*  
 >rs47781492\_ENSMUSP00000020732\_c.19977:G>A\_p.E6660K  
 ENSMUST00000020732.13|Obscn-201|ENSMUSG00000061462|-|chr11:g.58921977:C>T  
 MDHSFSGAPRFLTRPKAFVSVGKDATLSCQIVGNPTPHVSWEKDRQPVEAGARFRLAQDGDVYRLTILDLAL  
 GDSGQYVCRARNAIGEFAAVGLRVDSEGTCAEQAPHFLLRPTSIRVREGADATFRCRVGGSPQPAVSWSKDG  
 RRLGPPDAPHVRVEEHGESSALRIRSARPRDGGTYEVRAENPLGSASAAAALVVDSDAEVAGPPGTSTATLLA  
 HLQQRREAMRAEGIPPSPPGAGTRTCTVTEGKHARLSCFVTGEPKPEVWKKDQGLVTEGRRHVVEDEQENF  
 VLKILFCKQSDRGLYTCTASNLVGQTYSSVLVVVREPTVPPFKKRLQDLEVREKESATFQCEVAQPAEAAWFK  
 EETRLWASAKYDIEEEGETERRLTVRNVSADDDAVYICETTEGSRVVAELSVQGNLTKLPRKTAVRTGDTAIF  
 WVVELAVPEGPVWRWRNQEEMVAGGRVAITAEGTCHTLTI FQCTLEDMGEVAFVSGGCRTTTQFCVSAPRRPPL  
 YPPADFPVVKAKTESSVTLWSAPPHGDRPVTIDGYVLEKRLGAYAWSRCHEAGWLATFTTITGVAEEGDFQ  
 FRVSAINHFGQGPYLEFPGTMLHVPMLAVKTPKAVEAVEGGEVTFVSDLTVAASSGEWFLDGEALKASSIYVI  
 RCDRTRHMLTIREVPARLHGAQLKFVANGIETSIQMVVRAALGLPSSKLPAAAAAREVLAQLHEEAQLLAE LSD  
 QAAA VTWLKDGRELSLGPKEYMQVSAGRRALLVRDVAQDDAGLYECVSRGSRRTAYQLLVQDITDGYRDWGPAG  
 PQKHMCKCAGAKIARYLGSSCYRFLQYDKGVWHWLEAALDTRQKGTSSCSLHEKPKLVFAKQQAHSEVKA  
 AGNSATLSCEVTQAQTEVTWFKDGKLLSSSSKVRMEASGCSRRLVVQQAGKADAGEYSCEAGGQKLSFRLDVA  
 EPKLVFAKQQAHSEVKAEGASATLSCEVAQAQTEVTWFKDGKLLSSSSKVRMEASGCSRRLVVQQAGKADA  
 GEYSCEAGGQKLSFRLDVAEPKMFVFAKEQQARSEVKAEGASATLSCEVAQAQTEVTWFKDGKLLSSSSKVRM  
 EASGCSRRLVVQQAGKADAGEYSCEAGGQKLSFRLDVTEPKLVFAKEQQARSEVKAEGVNSATLSCEVAQAQ  
 EVTWFKDGKLLSSSSKVRMEASGCSRRLVVQQAGKADAGEYSCEAGGQKLSFRLDVAEPKLVFAKEQQARSEV  
 KAEAGNSATLSCEVAQAQTEVTWFKDGKLLSSSSKVRMEASGCSRRLVVQQAGKADAGEYSCEAGGQKLSFHL  
 DVTEPKLVFAKEQQAHSEVKAEGASATLSCEVAQAQTEVTWFKDGKLLSSSSKVRMEASGCSRRLVVQQAGK  
 ADAGEYSCEAGGQKLSFRLDVAEPKLVFAKEQQARSEVKAEGASATLSCEVAQAQTEVTWFKDGKLLSSSSK  
 VRVEASGCSRRLVVQQAGKADAGEYSCEAGGQKLSFRLDVAEPKLVFAKEQQANSEVKAEGASATLSCEVAQ  
 AQTEVTWFKDGKLLSSSSKVRVEASGCSRRLVVQQAGKADAGEYSCEAGGQKLSFRLDVAEPKLAFAKEQQAH  
 SEVKAEGASATLSCEVAQAQTEVTWFKDGKLLSSSSKVRVEASGCSRRLVVQQAGKADAGEYSCEAGGQKLS  
 FRLDVAEPKLAFAKEQQAHSEVKAEGASATLSCEVAQAQTEVTWFKDGKLLSSSSKVRVEASGCSRRLVVQQ  
 AGKADAGEYSCEAGGQKLSFRLDVAEPKLAFAKEQQAHSEVKAEGASATLSCEVAQAQTEVTWFKDGKLLSS  
 SSKVRVEASGCSRRLVVQQAGKADAGEYSCEAGGQKLFRLDVAEPKLMFAKEQQAHSEVKAEGASATLSCE  
 VAQAQTEVTWFKDGKLLSSSSKVRVEASGCSRRLVVQQAGKADAGEYSCEAGGQKLSFRLDVAEPKLVFAKEQ  
 QAHSEVKAEGASATLSCEVAQAQTEVTWFKDGKLLSSSSKVRVEASGCSRRLVVQQVQKADAGEYSCEARGQ  
 KLSFRLDVADTRLMFAKEQQARTEVKAEGNSATLSCEVAQAQTEVTWFKDGKLLSSSSKVRVEASGCSRRLV  
 VQQAGKADAGEYSCEAGGQKLSFRLDVAEAEESQIPERPSRREPLVVKEHETIILTATIAAPSAAVTWLKDGV  
 EIRRSKRHEATSLGDHTLTVRGAQVLDIAIYSCRVGKEGQDFPVQVEEVAAKFSKPLEPVEGELGGTVMLVC  
 ELSPEQAEVWRCGNTQLRPGKRFQMTSEGPRRTLTVSGLREDDAEYVCESRDDRTSARLTVKVPVVKFTS  
 GLSAMVAEEGQEATFQCVVSPSDAGVTWYKDGMLQLPSEKFMVVEGASRSRLTILGLTLEDAGQVTEAEGAS  
 SSAALRVREAPVLFKKLEPQTEERTSVTLEVELTRPWPEVKWTRNAAVLTPSENVEIRAEGARHCLVLRV  
 GFADRGGFFGCETPDDKTQAKLNVEMRQVRLVVRGLQVEVEAKEQGTASMDVELSHAEEVGSWTRDGLRLQPGPKC  
 HLAVQGPVHILTLALQPDQSLVAFRAEGVHTSARLIVTELPVSFTRVLQDVVATQKEKVTLECELSRPVDV  
 RWLKDGVELRAGKAIGIVAQGTCSRSLVIYRCETGDQGVYVCDALDAQTSASLRVQGRTYTLIFRRLAEDAGE  
 VKFVAENAESRAHLRVKELPVTLLRPLRDKIAMEKHGRVLECCQVSRASQVRWFKGGVELQSGPKYEVVSDGL  
 YRKLVINVDQPEDEDTYTCDAGNVKTSAQFFVEEQSITIVRGLKDMTVMPEPAPAWFECETSIPSVRPPKWL  
 LGKTVLQAGGNVGLQDGTVHRLTLHKTCSTMTGPVHFTIGKSRSSAQLVSDIPVVLTRPLEPKAGRELQSVVL  
 SCDFRPAPKAVQWYKDDTPLSPSEKFKMALEGMALRLRLTPADAGVYRCQAGSAQSSAEVTVAREVTVI  
 QPLQDAEAMEEGRVCFSCELSHKDEDIEWSLNGTPLYNDSFHEISHEGCLHTLVLSVSRQADTGTVCATSPKV  
 SVSARLVVKGKPVVFLKALDDVSAEERGLTLTQCEVSDPEARVWVRKDGVELGSPDKYDFLHKAGARGLTVHD  
 LSHEDAGLTYKQVTSKETQSKVSVHDLHVGITKRLKTVEVLEGESECSFECVLSHESPSDPAVWTVGGKTVGGS  
 GHFHAVRQRKTYTLTKVDAALSDAGEVVSGLVLTASKASLIIRERPVDTIKPLEDQRTTLGEDVMLSCELSRA  
 GTSVRWLKDGKAIRKSQYDLSSEGTRAVLVVRKASLKDSGEYTCETEASKSTAKLCEVEKANRFTEELADLQ  
 VEEKGRAVFTCKTEHPASVVTWRKGLLELRASGKHVPSQEGTLTKLTINALERTSDTYTCDIGQARTQARLL  
 VHGGKVRVIEDLEDTAVQEGSSAKFCRIAPADYGPVHWFLDKTPLHSNELNEITVQPGGYHVLTLRQLALKD  
 SGTVYFEAGDQRTSALRVTEKPSIFSRPLTDVTVTEGEDLTLVCETTTVDSVSRWTKDGKTLRPSARCQLSH

EGCQAQLLITATTPQDGGRYKCEIGGASSSSIVRVHALPVRFRRESLKDVEVPEGKAATLRCVLSVAAPVEWR  
 HGDDVLKSSNKYSLRQEGAVLELVIRDLQPQDSGQYSCSFGDQTTTSATLTVKTSQAQFVGKLRNKEATEGTTV  
 TLRCELTKAPVEWKKGTETLRNGDKYSLKQDGAVCELQICSLLVADAGEYSCVCGQEKTSAITLVKALLVHF  
 VRRLSKEATEGDTTTLQCELSKAAPVEWRKGTETLRDGDYSLKQDGAVCELQIRSLTIADAGEYLCTCGQE  
 KTSATLTVRALPAKFKDSLKNEEATEGTTATLSCELSKAAPVTWKKGPKTLQSGDKYVLRQDGAFCGLQIHGL  
 TMADAGEYSCVCGQEKTSAITLVVRLPAKFIEDLRSQEATEGATAILRCELSKAAPVEWRKGTETLRDGDYSL  
 LRQDGAFCGLQIRGLAVVDGTYSLSLPTKFTTEGLRNEEATEGTMATLRCQMSKAAPVEWRKGTETLRDGDYSL  
 LRQDGAFCGLQIRGLAVVDGTYSLSLPTKFTTEGLRNEEATEGTMATLRCQMSKAAPVEWRKGTETLRDGDYSL  
 WKKGSETLRDGGYSLRQDGPVCELQICDLAVEDAGEYSCVCGQEKTSAITLSEIKALPPRFIEDLRSQEATEG  
 MATLRCQMSKAAPVEWRKGTETLRDGGYSLRQNGAVCELQIHDLAVEDTGEYSCVCGQEKTSAITLVKALPP  
 RFIEDLRSQEATEGTMATLRCQMSKAAPVEWRKGTETLRDGGYSLRQDGAFCGLQIHDLVEDAGQYSCVCG  
 QEKTSAVLTVDALPPKFTTEGLKKEEATEGTMVTLRCQMSKEATVEWRKGAKTLSDDGGYSLRQDGAFCGLQI  
 GLAVEDAGEYSCVCGQEKTSAITLVKALPPRFIEDLRSQEATEGTMATLRCQMSKAAPVEWRKGTETLRDGDY  
 YSLRQDGAFCGLQIRDLAVEDAGEYLCVCGQEKTSAITLVKALPPRFIEDLRSQEATEGTMATLRCQMSKAAP  
 VEWRKGTETLRDGGYSLRQDGAFCGLQICDLAVEDTGDYSCVCGQEKTSAITLVKALPPRFIEDLRSQEARE  
 GTVATLRCRMSKAAPVEWRKGTETLRDGGYSLRQEGNLCELQIRDLAVEDTEEYSCVCGQEKTSAITLVKAL  
 PAKFIEDLRSQEATEGTMVTLRCKLSKASVWKKGSETLRNGARYSLRQDGAFCGLQIRDLVEDTGEYSCT  
 CGQERTSATLSIMAPQVVFQQLQNLQAEEGSMASLRCELSVNAAMVWSKGGLELQGDTRREARQQCGVAEL  
 LLRDLRREDAGEYSCTCGSQTTSAITLMVTAAPVRFLELQAQDQVDEGATARLRCELSREAVSVEWRKGSQQLF  
 PCAKYQMVQEGTTAELLVHGVEQEDAGEYTCDAHTQSIARLSVRAPKPKFKTDLQSTEQEAGGTARLCCQLS  
 EAEPGTPVQWLKEGVELHVGSKYEMRRQGAFCGLQIHGLEAKDTGEYACLVGGQKTLASLRVKEPEVTIVRGL  
 VDMEVQADEDEFTCKVQAGATDVQWHLQGLPLQSNVTEVAVLADGCTHVLQKGVTLQDAGTVSFHVGGL  
 SSSAQLTVRVPEVTVLEPLKDVQLSEGQDAHFRCRLSRASGQEARWALGGVPLQCNEMNDITVEQGTLYLLTL  
 HKVTLEDAGTITLQVGSSESQAQLKVTAKNTVLRGLENVDALEGGEALFECQLSQPEVAHAHTWLLDDEPVHTS  
 EKVEVVYFENGLRHLLLLKLNKPKQDSCRVTFLAGDVVTSFAITVVRGWRLEVLPEPHDASVKAGMQVRFTCILS  
 EAVPVGEATSWYINGAAIQPDDTDWTVTTDGSHHALTLSNAQPHAGEVTFAAARDAVASARLSVLALEPDPEDA  
 EYVGRSDHSVTLSWVAIPMSDGGGLCGYRVEMKEASTGQWQLCHDLVPGPECVDDLVPGKTYRFRVAAVGPA  
 GAGEPVHLPQMVKIAPAPAPAPAPAPAPAPAPETRAVVGEDICLELEVAADGGEVWVHKGTERIQPGGHFEVLS  
 RGQRQMLVIKGFRTEDQGEYRCGPIQGLPSSGAATFNVMVMTSGSGDEVPAQPSLPPEAAQEGDLHLLWEALAR  
 KRRMSREPTLDSISELPEEDSRVQHLRQEAETAPDLSEGYSTADELARTGEADLSHTSSDDESRACTPSLVT  
 YLKKAGGPGISPLASKHEAQVTSVKPQKQEPVPTCPGGDLAADMPSLDKAAVKIQAAFQYKVRKE  
 MKQQEGPVFSRTFGDTEAQVGDVLRLECVLATKTDMRACWLKDGIELTDGRHYHIDQLKDGTCSLLVTLGLAPT  
 DSGRYTCQVSTKSGRVSHSACVVVSGTESEAESSSGGELDDAFRAARRLHRLFRTKSPAELSEELFLSADE  
 GPGEPEPADWQTYREDENFVCIRFESLAEARQAVTCFRNMFATMGIGVEISLGEQGRGVEMRIGKVAPTVT  
 PAVPLAKTPGLQTSDAAPVFLTELQNDVQDGYPMSFDCVVTGQVPSVRWFKDGLLEDDHYMINEDQQGG  
 HQLLITAVVPADMVGYRCLAENSMGVSSTKAELRVELTSTDYDTAADATETSSYFSAQYLSREQEGTESDE  
 GQLPQVLEELKDLQVAPGTRLAKFQLKVKGYPAKLYWFKDGGQPLTSDHIRMTDKKTLHTLEIVSVTREDSG  
 QYAAYSNAVGAAYSSARLLVRGPSEPEEKPASDVHERLVPPRILEKFTPKKVKRGSSITFSVKVEGHPAPSV  
 HWLKEEAKEKGLVWIGPDTPGYTMASSSKQHSLLVLDVGRQHQTCTIATNPAGQALCSASLHISGLAKEEEQ  
 ERVKEALISSFLQGTSAVSAQMSAESAGFADLVGQSKGESLVAEEAHSHLSLAEVGTTEFLQKLTQITMVS  
 AKISQAKLQVPGGDSDEETKTPSASPRHGRSRPSSSVQESSSEEDGDSRGEIFDIYVVTADYPLGAEQDAI  
 ILREGQYVEVLDSAHPLRWLVRTPKTKSSPSRQGWVSPAYLDKRLKLSPEWGPTEAPEFPGEAVSEDEYRTRL  
 SSVIQELLSSEQAFVGLKQFLESHHMKHLERSPRVPAAVASQKTVIFRNVQDISHFHSSFLKELQCGCTDDDV  
 AMCFIKNQEAFAFEKYLEFLVGRVQAESVVVSTPVQEFYKKAETLSAKDPTQPPPPLOHYLEQPVERVQKYQ  
 ALLKELIRNKARNRQNCALLEQAYAVVSALPQRAENKLVSLMENYPTLEALGEPHQGHFIWVWEGAPGARM  
 PWKGNHRHVFVFRNYLVICPRRDSRTDTFSYVFRNMMKLSIDLNDQVEGDDRAFEVWHEREDSVRKYLLQA  
 RTVVIKNSWVKEICGIQQLAQPVWRPPEFEEELADCTAELGETVKLACRVTGTPKPIVSWYKDGKPEVDPH  
 HILIEDPDGCTLILDLNLTGIDSGQYMCFAASAAGNASTLGKILVQVPPRFVNVKVRATPFVEGEDAQITCTVE  
 GAPYQIRWYKDGTLTLLAPGNRYRMLNEPRSGVLVVIQAASKEDLGHYECELVNRLGSTRGGGELYMQSPALR  
 ARDQHHREQIVAAVEERRPSP\*

>rs47781492\_ENSMUSP00000151217\_c.17271:g>A\_p.E5758K  
 ENSMUST00000219084.3|Obscn-207|ENSMUSG00000061462|-|chr11:g.58921977:C>T  
 MDHSFSGAPRFLTRPKAFVVSVGKDATLSCQIVGNPTPHVSWEKDRQFVEAGARFRLAQDGDVYRLTILDLAL  
 GDSGQYVCRARNAIEGAFAVGLRVDSEGTCAEQAPHFLRLRPTSIRVREGADATFRCRVGGSPQPAVSWSKDG  
 RRLGPPDAPHVRVEEHGESSALRIRSAARPDGGTYEVRAENPLGSASAAAALVVDSDAEVAGPPGTSTATLLA  
 HLQORREAMRAEGIPSPPGAGTRTCTVTEGKHARLSCFVTGEPKPEVWKKDGLVTEGRRHVVEDEQENF  
 VLKILFCKQSDRGLYTCTASNLVGQTYSSVLVVVREPTVPFKKRLQDLEVREKESATFQCEVAQPAEAAWFK  
 EETRLWASAKYDIEEGTERRLTVRNVSADDDAVYICETTEGSRVVAELSVQGNLTKLPRKTAVRTGDTAIF

WVELAVPEGPVWRWRNQEEMVAGGRVAITAEGTCHTLTI FQCTLEDMGEVAFVSGGCRTTTQFCVSAAPRRPPL  
YPPADPVVKAKTESSVTLWSAPPHGDRPVTIDGYVLEKRKLGAYAWSRCHEAGWLATTEFTITGVAAEGDFQ  
FRVSAINHFGQGPYLEFPGTMHLVPLAVKTPKAVEAVEGGEVTFVSDLTVASSGEWFLDGEALKASSIYVI  
RCDRTRHMLTIREVPARLHGAQLKVFVANGIETSIQMVVRAALGLPSSKLPAAAAAREVLAQLHEEAQLLAE LSD  
QAAAVTWLKDGRELSLGPKEYMQVSAGRRALLVRDVAQDDAGLYECVSRGSRRTAYQLLVQDITDGYRDWGPAG  
PQKHMCKCAGAKIARYLGS SCYRFLQYDKGVWHLEAALDTRQKGKTS SCSLHEKPKLVFAKQQAHSEVKA  
AGNSATLSCEVTQAQTEVTFWKDGKLS SSSSKVRMEASGCSRRLVVQQAGKADAGEYSCEAGGQKLSFRLDVA  
EPKLVFAKQQAHSEVKAEGASATLSCEVAQAQTEVTFWKDGKLS SSSSKVRMEASGCSRRLVVQQAGKADA  
GEYSCEAGGQKLSFRLDVAEPKLVFAKEQQARSEVKAEGASATLSCEVAQAQTEVTFWKDGKLS SSSSKVRM  
EASGCSRRLVVQQAGKADAGEYSCEAGGQKLSFRLDVTEPKLVFAKEQQARSEVKAEGNSATLSCEVAQAQ  
EVTWFKDGKLS SSSSKVRMEASGCSRRLVVQQAGKADAGEYSCEAGGQKLSFHLDVTEPKLVFAKEQQAHSEV  
KAEAGASATLSCEVAQAQTEVTFWKDGKLS SSSSKVRMEASGCSRRLVVQQAGKADAGEYSCEAGGQKLSFRL  
DVAEPKLVFAKEQQARSEVKAEGASATLSCEVAQAQTEVTFWKDGKLS SSSSKVRVEASGCSRRLVVQQAGK  
ADAGEYSCEAGGQKLSFRLDVAEPKLVFAKEQQANSEVKAEGASATLSCEVAQAQTEVTFWKDGKLS SSSSK  
VRVEASGCSRRLVVQQAGKADAGEYSCEAGGQKLSFRLDVAEPKLFAFAKEQQAHSEVKAEGASATLSCEVAQ  
AQTEVTFWKDGKLS SSSSKVRVEASGCSRRLVVQQAGKADAGEYSCEAGGQKLSFRLDVAEPKLVFAKEQQAH  
SEVKAEGASATLSCEVAQAQTEVTFWKDGKLS SSSSKVRVEASGCSRRLVVQQVKGADAGEYSCEARGQKLS  
FRLDVAAEASQI PERPSRREPLVVKHEHETIILTATIAAPSVAAVTWLKDGV EIRRSKRHEATSLGDTHTLTVR  
GAQVLD SAIYSCRVGKEGQDFPVQVEEVAAKFSKPLEPVEGELGGTVMLVCELSPEQAEVWRCGNTQLRPGK  
RFQMTSEGPRTTLTVSGLREDDAEYVCE SRDDRTSARLTVKVRVVKFTSGLSAMVAEEGQEA TFQCVVSPS  
DAGVTWYKDGMLQ PSEKFMVVEGASRS LTI LGLTLEDAGQVTEAEGASSAALRVREAPVLFK KLEPQT  
VEERTSVTLEVELTRPWPVEVKWTRNAAVLTPSENVEIRAEGARHCLVLRVSGFADRGFFGCETPDDKTQAKLN  
VEMRQVRLVRGLQEVEAKEQGTASMDVELSHAEEVGSWTRDGLRLQPGPKCHLAVQGPVHILTL SALQPQDSG  
LVAFAREGVHTSARLIVTELPVSFTRVLQDVVATQKEKVTLECELSRPVDVRWLKDGVELRAGKAI GIVAQGT  
CRSLVIYRCIEMTDGQGVYVCDALDAQTSASLRVQGRYTLIFRRVLAEDAGEVKFVAENAESRAHLRVKELPVT  
LLRPLRDKIAMEKQVSRASAQVRWFKGGVELQSGPKYEVVSDGLYRKLVLINDVQPEDEDTYTC DAG  
NVKTSAGQFFVEEQSITIVRGLKDMTVMPEPAPAWFECETSIPSVRPPKWL LGKTVLQAGGNVGLQDGTVHRLT  
LHKTCSTMTGPVHFTIGKSRSSAQLVVS DIPVVLTRPLEPKAGRELQSVVLSCDFRPAPKAVQWYKDDTPLSP  
SEKFKMALEGQMAELRILRLTPADAGVYRCQAGSAQSSAEVTV EAREVTVIQPLQDAEAMEEGRVCFSCELSH  
KDEDIEWSLNGTPLYNDSFHEISHEGCLHTLVLKSVRQADTGTVCATSPKVSVSARLVVKGKPVVFLKALDDV  
SAEERGTTLTQCEVSDPEARVVWRKDGVELGPSDKYDFLHKAGARGLTVHDL SHEDAGLYTCQVGSKETQSKV  
SVHDLHVGITKRLKTVLEVLEGESCSFECVLSHESPSDPAVWTVGGKTVGGSGHFHAVRQGRKYTLTVKDAALS  
DAGEVVSFVLGLT SKASLIIRERPVDITKPLEDQRTTLGEDVMLSCELSRAGTSVRWLKDGKAIKRSQKYDLL  
SEGTRAVLVRKASLKDSGEYTCETEASKSTAKLCVEEKANRFTTEELADLQVEEKGRAVFTCKTEHPASVVTW  
RKGLLELRASGKHPVSEGLTLKLTINALERTSDTYTC DIGQARTQARLLVHGQKVRVIEDLEDTAVQEGSS  
AKFCCRIAPADYGPVHWF LDKTPLHSNELNETITVQPGYHVLT LRQLALKDSGTVYFEAGDQRTS AALRVTEK  
PSIFSRPLTDVTVTEGEDLTLVCETTTVDSSVRWTKDGKTLRPSARCQLSHEGCQAQLLITATTPQDGGRYKC  
EIGGASSSSIVRVHALPVRFRFRESLKDVEVPEGKAATLRCVLSVAAPVEWRHGDDVLKSSNKYSLRQEGAVLE  
LVIRDLPQDQSGQYSCSFGDQTT SATLTVKTS SAQFVGKLRNKEATEGTTVTLRCELTK EAPVEWKKGTETLR  
NGDKYSLKQD GAVCELQICSLLVADAGEYSCVCGQEKTSATLTVKALLVHFVRRRLRSKEATEGDTTLQCELS  
KAAPVEWRKGTETLRDGD RYSLKQD GAVCELQIRSLTIADAGEYLCTCGQEKTSATLTVRGLPAKFIEDLRSQ  
EATEGATAILRCELSKAAPVEWRK GSETLKDGD RYTLRQD GAVCELQIRGLAVVDGTGYSSLP TKFTEGLRNE  
EATEGTMATLRCQMSKAAPVEWRK GSETLRDGD RYSLRQD GAVCELQIRGLTIEDSGEYTCVCGQEKTSATLS  
VKALPPRFIEDLRSQEATEGTMATLRCQMSKAAPVEWRK GSETLGDGGRYSLRQNGAVCELQIHDLAVEDTGE  
YSCVCGQEKTSATLNVKALPPKFTEGLKKEEATEGTMVTLRCQMSKEATVEWRKGA KTLSDGGYSLRQD GAV  
CELQICGLAVEDAGEYSCVCGQEKTSATLSVKALPPRFIEDLRSQEATEGTMATLRCQMSKAAPVEWRK GSET  
LRDGD RYSLRQD GAVCELQIRDLAVEDAGEYLCVCGQEKTSATLSVKALPPRFIEDLRSQEATEGTMATLRCQ  
MSKAAPVEWRK GSKTLR DGD RYSLRQD GAVCELQICDLAVEDTGDYSCVCGQEKTSATLSVKAPQVVFQOPLQ  
NLQAEEGSMASLRCELSVPNAAMVWSKGGLELQGDTRREARQQGCVAELLLRDLRREDAGEYSCTCGSQT TSA  
TLMVTAAPVRFRLRELQAQDVDEGATARLRCELSREAVSVEWRKGS LQFLPCAQYQMVQEGTTAELLVHGVQE  
DAGEYTC DAGHTQSIARLSVRAPKPKFKTDLQSTEQEAGGTARLCCQLSEAE PGTPVQWLKEGVLEHVGSKYE  
MRRQ GAVCELLIHGLEAKDTGEYACL VGGQKTLASLRVKEPEVTIVRGLVDMEVQADEDEVEFTCKV SQAGATD  
VQWHLQGLPLQSNEVTEVAVLADGCTHV LQLKGVTLLEDAGTVSFHVGGLS SAQLTVRVPVETVLEPLKDVQL  
SEGQDAHFRCRLSRASGQEARWALGGVPLQC NEMNDITVEQGTLYLLTLHKVTLLEDAGTITLQVGS CSSEAAQL  
KVTAKNTVLRGL ENVDAL EGG EALFECQLSQPEVAHAHTWLLDDEPVHTSEKVEVYFENGLRHLLLLKLNKLPQ  
DSCRVTFLAGDVVTS AFLTVRGWRLEVLEPPHDASVKAGMQVRF TCILSEAVPVGEATWYINGAAIQPDDTDW  
TVTTD GSHHALT LSNAPQHAGEVTF AARDAVASARLSVLALPDPPEDAEVVGRSDHSVTLWSVAPMSDGGGG  
LCGYRVEMKEASTGQWQLCHDLVPGPECVVDDLVP GKTYRFRVAAVGPAGAGEPVHLPQMVKIAPAPAPAPAP

APAPETRQAVVGEDICLELEVAADGGEVVWHKGTERRIQPGGHFEVLSRGRQMLVIKGFRTEDQGEYRCGPIQ
GLPSSGAATFNVVMTSGSGDEVPAQPSLPPEAAQEGDLHLLWEALARKRRMSREPTLDSISELPEEDSRVQHL
RQEAEETAPDLSEGYSTADELARTGEADLSHTSSDDESRAGTPSLVTYLKKAGGPGISPLASKHEAQVTTSVK
PQKQQEPVVPTCPPPGDLSAADLMDPSLDKAAVKIQAAFQKGYKVRKEMKQQEGPVFSRTFGDTEAQVGDVLR
ECVLATKTKDMRACWLKDGIELTDGRHYHIDQLKDGTCSLLVTLGLAPTDSGRYTCQVSTKSGRVSHSACVVVSG
TESEAESSSGGELDDAFRRARRLHRLFRTKSPAELSEELFLSADEGPGEPEEPADWQTYREDENFVCIRFE
SLAEARQAVTCFRNMFATMGIGVEISLGEQGRGVEMRIGKVPVTPAVPLAKTPGLQTSDAAPVFLTELQN
QDVQDGYPMSFDCVVTGQPVPSVRWFKDGKLEEDDHYMINEDQQGGHQLIITAVVPADMGVYRCLAENSMGV
SSTKAELRVELTSTDYDTAADATETSSYFSAQGYLSSREQEGTESDEGQLPQVLEELKDLQVAPGTRLAKFQL
KVKGYPAKLYWFKDQPLTTSDHIRMTDKKTLHTLEIVSVTREDSGQYAAAYISNAVGAAYSSARLLVGRPSE
PEEKPASDVHERLVPVPRILEKFTPKKVKRGSSITFSVKVEGHPAPSVHWLKEEAKEGVLWIGPDPGTYTMASS
SKQHSVLVLLDVGRRHQGTYTICATNPAGQALCSASLHISGLAKEEEQERVKEALISSFLOGTSQAVSAQMSSES
AGFADLVGQSKGESLVAEEAHSHLSLAEVGTTEEFLQKLTSTQITEMVSAKISQAKLQVPGGDSDEETKTPSASP
RHGRSRPSSSVQESSSESEDGDSRGEIFDIYVVTADYLP LGAEQDAIILREGQYVEVLDSAHPLRWLVRTKPT
KSSPSRQGWVSPAYLDKRLKLSPEWGPTEAPEFPGEAVSEDEYRTRLSSVIQELLSSEQAFVQKLFLESHHM
KHLERSPRVPAAVASQKTVIFRNVDISHFHSSFLKELQCGCTDDVAMCFIKNQEAFAFEKYLEFLVGRVQAES
VVVTFVQEFYKKYAEETLSAKDPTQPPPPPLQHYLEQPVVERVQKYQALLKELIRNKARNRQNCALLEQQAYAV
VSALPQRAENKLVSLMENYPGTLEALGEPHQGHFIVWEGAPGARMWPKGHNHRHVFLFRNYLVICKPRRDSR
TDTFSYVFRNMMKLSSIDLNDQVEGDDRAFEVWHEREDESVRKYLLQARTVIKNSWVKEICGIQQRLAQPVWR
PPEFEEELADCTAELGETVKLACRVGTGPKPIVSWYKDGKPVVEVDPHHILIEDPDGSCSTLIDLNLGTIDSGQY
MCFASAAGNASTLGKILVQVPPRFVNVKVRATPFVEGEDAQITCTVEGAPYPQIRWYKDGTLAPGNRYRMLN
EPRSGVLVQVIAASKEDLGHYECLELVNRLGSTRGGGELYMQSPALRARDQHHREQIVAAVEVTEQETKVPKK
TVIIEETITTVVKS PRGRRQSPGKSPSRSPRRSASPRRPGLLAPERLYPPGTSPSRRLEVEQGRKAPVPALY
VTEAEVHAPASQSQPKWLEVEETIEVRVKKTGSRGASPVREMTSRGEGILFTLPGGIPGRDPNANNNSNKS VY
QEARTWGPVAVHVGEFFIFQVDSVGNVDWVAASPEPEQVRASQKEENTERQEGCSDGDENTFLMEEPQD TDSL
QGRDPKILTHNGRVLTLADLEDYVQEGETFQCGDSTPSTPDEPPCEVSVLQREI SEPTVGGQVLLNVGRPPG
TGATPSFFRPGSQVHSPESVFLREAWSGPVSAAPWTSSFHTHVQSSVDGSHGFSFKTEVSTQTVSFGAVGET
VTLHIDPDGGEAPGPSQG\*

>ENSMUSP00000158795\_c.18380:G>T\_p.E6127D ENSMUST00000238536.2|Obscn-
210|ENSMUSG00000061462|-|chr11:g.58928485:C>A
MDHSFSGAPRFLTRPKAFVSVGKDATLSCQIVGNPTPHVSWEKDRQFVEAGARFRLAQDGDVYRLTILDLAL
GDSGQYVCRARNAIGEFAAVGLRVDSEGTCAEQAPHLLRPTSIRVREGADATFRCRVGGSPQPAVSWSKDG
RRLGPPDAPHVRVEEHGESSALRIR SARPRDGGTYEVRAENPLGSASAAAALVVDSAEVAGPPGTSTATLLA
HLQORREAMRAEGIPSPPGAGTRTCTVTEGKHARLSCFVTGEPKPEVWKKDGQLVTEGRRHVVEDEQENF
VLKILFCKQSDRGLYCTASNLVQTYSSVLVVREPTVFPKKRLQDLEVREKESATFQCEVAQAPATEAAWFK
EETRLWASAKYDIEEEGTERRLTVRNVSADDDAVYICETTEGSRVVAELSVQGNLTKLPRKTAVRTGDTAIF
WVELAVPEGPVRWLRNQEEMVAGGRVAITAEGTCHTLTI FQCTLEDMGEVAFVSGGCRTTTTQFCVSAPRRPPL
YPPADPVVKAKTESSVTLWSAPPHGDRPVTIDGYVLEKRLKLGAYAWSRCHEAGWLATTEFTITGVAAEEDFQ
FRVSAINHFGQGPYLEFPGMTMLVPLAVKTPKAVEAVEGGEVTFVSDLTVASSGEWFLDGEALKASSIYVI
RCDRTRHMLTIREV PARLHGAQLK FVANGIETS IQMVVRAALGLPSSKLPAAAAREVLAQLHEEAQLLAELSD
QAAAVTWLKDGRELSLGPKEYMQVSAGRRALLVRDVAQDDAGLYECVSRGSR TAYQLLVQDITDGYRDWGPAG
PQKHMCKCAGAKIARYLGS SCYRFLQYDKGVWHLEAALDTRQKGKTS SCSLHEKPKLVFAKQQAHSEVKA E
AGNSATLSCEVTQAQTEVTWFKDGKLLSSSSKVRMEASGCSRRLVVQQAGKADAGEYSCEAGGQKLSFRLDVA
EPKLVFAKQQAHSEVKA EAGASATLSCEVAQAQTEVTWFKDGKLLSSSSKVRMEASGCSRRLVVQQAGKADA
GEYSCEAGGQKLSFRLDVAEPKMVFAKEQQARSEVKA EAGASATLSCEVAQAQTEVTWFKDGKLLSSSSKVRM
EASGCSRRLVVQQAGKADAGEYSCEAGGQKLSFRLDVTEPKLVFAKEQQARSEVKA EAVGNSATLSCEVAQAQ
EVTWFKDGKLLSSSSKVRMEASGCSRRLVVQQAGKADAGEYSCEAGGQKLSFRLDVAEPKLVFAKEQQARSEV
KAEAGNSATLSCEVAQAQTEVTWFKDGKLLSSSSKVRMEASGCSRRLVVQQAGKADAGEYSCEAGGQKLSFHL
DVTEPKLVFAKEQQAHSEVKA EAGASATLSCEVAQAQTEVTWFKDGKLLSSSSKVRMEASGCSRRLVVQQAGK
ADAGEYSCEAEGQKLSFRLDVAEPKLVFAKEQQARSEVKA EAGASATLSCEVAQAQTEVTWFKDGKLLSSSSK
VRVEASGCSRRLVVQQAGKADAGEYSCEAGGQKLSFRLDVAEPKLVFAKEQQANSEVKA EAGASATLSCEVAQ
AQTEVTWFKDGKLLSSSSKVRVEASGCSRRLVVQQAGKADAGEYSCEAGGQKLSFRLDVAEPKLVFAKEQQAH
SEVKA EAGASATLSCEVAQAQTEVTWFKDGKLLSSSSKVRVEASGCSRRLVVQQAGKADAGEYSCEAGGQKLS
FRLDVAEPKLVFAKEQQAHSEVKA EAGASATLSCEVAQAQTEVTWFKDGKLLSSSSKVRVEASGCSRRLVVQQ
AGKADAGEYSCEAGGQKLSFRLDVAEPKLVFAKEQQAHSEVKA EAGASATLSCEVAQAQTEVTWFKDGKLLSS
SSKVRVEASGCSRRLVVQQAGKADAGEYSCEAGGQKLFRLDVAEPKLVFAKEQQAHSEVKA EAGASATLSCE
VAQAQTEVTWFKDGKLLSSSSKVRVEASGCSRRLVVQQAGKADAGEYSCEAGGQKLSFRLDVAEPKLVFAKEQ
QAHSEVKA EAGASATLSCEVAQAQTEVTWFKDGKLLSSSSKVRVEASGCSRRLVVQQVQKADAGEYSCEARGQ

KLSFRLDVADTRLMFAKEQQARTEVKAEAGNSATLSCEVAQAQTEVTWFKDGKLLSSSSKVRVEASGCSRRLV  
 VQQAGKADAGEYSCEAGGQKLSFRLDVAEAEESQIPERPSRREPLVVKEHETIILTATIAAPSVAAVTLWKDGV  
 EIRRSKRHEATSLGDTHTLTVRGAQVLDIAIYSCRVGKEGQDFPVQVEEVAAKFSKPLEPVEGELGTVMLVC  
 ELSPEQAEVWRCGNTQLRPGKRFQMTSEGPRTTLTVSGLREDDAEYVCESTRDDRTSARLTVKVPVVKFSTS  
 GLSAMVAEEGQEATFQCIVVSPSDAGVTWYKDGMLQPSSEKFMVVEGASRSILTILGLTLEDAGQVTVAEAGAS  
 SSAALRVREAPVLFKKKLEPQTVVEERTSVTLEVELTRPWPEVKWTRNAAVLTPSENVEIRAEGARHCLVLRV  
 GFADRGGFFGCETPDDKTQAKLNVEMRQVRLVVRGLQVEVEAKEQGTASMDVELSHAEEVEGSWTRDGLRLQPGPKC  
 HLAVQGPVHILTLALSALQPQDSGLVAFRAEGVHTSARLIVTELPVSFTRVLQDVVATQKEKVTLECELSRPVDV  
 RWLKDGVLELRAGKAIQIVAQGTCSRSLVIYRCETGDQGVYVCDALDAQTSASLRVQGRTYTLIFRRLAEDAGE  
 VKFVAENAESRAHLRVKELPVTLLRPLRDKIAMEKHGRVLECCQVSRASQVRWFKGGVELQSGPKYEVVSDGL  
 YRKLVINVDQPEDEDTYTCDAGNVKTSAQFFVEEQSITIVRGLKDMTVMPPAWFECETSIPSVRPPKWLGL  
 KTVLQAGGNVGLQDGTVHRLTLHKTCSTMTGPVHFTIGKSRSSAQLVVS DIPVVLTRPLEPKAGRELQSVVL  
 SCDFRPAPKAVQWYKDDTPLSPSEKFKMALEGGQMAELRILRLTPADAGVYRCQAGSAQSSAEVTVAREVTVI  
 QPLQDAEAMEEGRVCFSCELSHKDEDIEWSLNGTPLYNDSFHEISHEGCLHTLVLSVSRQADTGTVCATSPKV  
 SVSARLVVKGKPVVFLKALDDVSAEERGTTLTQCEVSDPEARVWVRKDGVELGSPDKYDFLHKAGARGLTVHD  
 LSHEDAGLYTCQVGSKETQSKVSVHDLHVGITKRLKTVEVLEGESECSFECVLSHESPSDPAVWTVGGKTVGGS  
 GHFHAVRQGRKYTLTVKDAALSDAGEVVFVGLTSLKASLIIRERPVDTKPLEDQRTTELEDVMLSCELSRA  
 GTSVRWLKDGKAIRKSQKYDLLSEGTAVLVVRKASLKDSEGYTCETEASKSTAKLCEVEKANRTEELADLQ  
 VEEKGRAVFTCKTEHPASVVTWRKGLLELRASGKHVPSQEGTLKLTINALERTSDTYTCDIGQARTQARLL  
 VHQQKVRVIEDLEDTAVQEGSSAKFCRIAPADYGPVHWFLLDKTPLHSNELNEITVQPGGYHVLTLRQLALKD  
 SGTVYFEAGDQRTSAALRVTEKPSIFSRPLTDVTVTEGEDTLVCEVTTVDSSVRWTKDGKTLRPSARCQLSH  
 EGCQAQLLITATTPQDGGRYKCEIGGASSSSIVRVHALPVRFRRESLKDVEVPEGKAATLRCVLSVAAPVEWR  
 HGDDVLKSSNKYSRQEGAVLELVIRDLQPDQSGQYSCSFGDQTTSATLTVKTSQAQFVGLRKNKEATEGTTV  
 TLRCELTKEAPVEWKKGTETLRNGDKYSLKQDGA VCELQICSLLVADAGEYSCVCGQEKTSATLTVKALLVHF  
 VRRLSKEATEGDTTLQCELSKAAPVEWRKGTETLRDGDYSLKQDGA VCELQIRSLTIADAGEYLCTCGQE  
 KTSATLTVRALPAKFKDLSLKNEEATEGTTATLSCELSKAAPVTWKKGPKTLQSGDKYVLRQDGA VCGLIHGL  
 TMDAGEYSCVCGQEKTSATLTVRGLPAKFIEDLRSQEAETEGATAILRCELSKAAPVEWRKGETLKDGDYR  
 LRQDGA VCELQIRGLAVVDGTYSLSLPTKFTTEGLRNEEATEGTMATLRCQMSKAAPVEWRKGETLKDGDYR  
 LRQDGA MCELQIRGLTIEDSGEYTCVCGQEKTSATLSVKALPSRFIEDLRSQEAETEGTMATLRCQMSKTAPVE  
 WKKGSETLRDGGRYSLRQDGPVCELQICDLAVEDAGEYSCVCGQEKTSATLSIKALPPRFIEDLRSQEAETEGT  
 MATLRCQMSKAAPVEWRKGETLGDGGRYSLRQNGAVCELQIHDLAVEDTGEYSCVCGQEKTSATLNVKALPP  
 RFIEDLRSQEAETEGTMATLRCQMSKAAPVEWRKGETLRDGGRYSLRQDGA VCELQIHDLVEDAGQYSCVCG  
 QEKTSAVLTVDALPPKFTTEGLKKEEATEGTMVTLRCQMSKEATVEWRKGAKTSLDGGRYSLRQDGA MCELQIC  
 GLAVEDAGEYSCVCGQEKTSATLSVKALPPRFIEDLRSQEAETEGTMATLRCQMSKAAPVEWRKGETLRDGD  
 YSLRQDGA VCELQIRDLAVEDAGEYLCVCGQEKTSATLSVKALPPRFIEDLRSQEAETEGTMATLRCQMSKAAP  
 VEWRKGETLRDGDYSLRQDGA MCELQICDLAVEDTGEYSCVCGQEKTSATLSVKALPPRFIEDLRSQEA  
 GTVATLRCRMSKAAPVEWRKGETLKDGDYSLRQEGNLCELQIRDLAVEDTEEYSCVCGQEKTSATLSVKAL  
 PAKFIEDLRSQEAEPESSTVTLRCKLSKKASVVWKKGSETLRNGARYSLRQDGA VCELEIRDLTVEDTGEYSCT  
 CGQERTSATLSIMAPQVVFQQPLQNLQAEEGSMASLRCELSVNAAMVWSKGGLELQDGTREARQQGCVAEL  
 LLRDLRREDAGEYSCVCGQEKTSATLMVTAAPVRFLRELQAQDVDEGATARLRCELSREAVSVEWRKGLQLF  
 PCAKYQMVQEGTTAELLVHGVEQEDAGEYTC DAGHTQSIARLSVRAPKPKFKTDLQSTEQEAGGTARLCCQLS  
 EAEPTGPVQWLKEGVELHVGSKYEMRRQGA VCELLIHGLEAKDTGEYACLVGQKTLASLRVKEPEVTIVRGL  
 VDMEVQADEDEFTCKVQAGATDVQWHLQGLPLQSNVTEVAVLADGCTHVLQKGVTLLEDAGTVSFHVGGL  
 SSSAQLTVRVPEVTVLEPLKDVQLSEGQDAHFRCRLSRASGQEARWALGGVPLQCNEMNDITVEQGTLYLLTL  
 HKVTLEDAGTITLQVGSSEEAQLKVTAKNTVLRGLENVDALEGGALFECQLSQPEVAHAHTWLLDDEPVHTS  
 EKVEVVYFENGLRHLLLLKLNLPQDSCRVTFLAGDVVTS AFLTVRGWRLEVLPPHDASVKAGMQVRFCTILS  
 EAVPVGEATWYINGAAIQPDDTDWTVTTDGS HALTLSNAQPQHAGEVTF AARDAVASARLSVLALPDPPEDA  
 EVVGRSDHSVTLVSWAPMSDGGGGLCGYRVMKEASTGQWQLCHDLVPGPECVDDLVPGKTYRFRVAAVGPA  
 GAGEPVHLPQMVKIAPAPAPAPAPAPAPAPETRQAVVGEDICLELEVAADGGEVVWHKGTERRIQPGHFVLS  
 RGQRQMLVIKGFRTEDQGEYRCGPIQGLPSSGAATFNVMVMTSGSGDEVPAQPSLPPEAAQEGDLHLLWEALAR  
 KRRMSREPTLDSISELPEEDSRVQHLRQEAEEETAPDLSEGYSTADELARTGEADLSHTSSDDES RAGTPSLVT  
 YLKKAGGPGISPLASKHEAQVTTSVKPKQKQEPVVPTCPPPGDLSAADLMDPSLDKAAVKIQA AFKGYKVRKE  
 MKQQEGPVFSTRTSGRVSHSACVVVSGTESEAESSSGGELDDAFRAARRLHRLFRKSPAEELSEELFLSADE  
 GPGEPEEPADWQTYREDENFVCIRFESLAEARQAVTCFRNMFATMIGVEISLGEQGGPRGEMRIKGVAPTPT  
 PAVPLAKTPGLQTS DAAPVFLTELQNDQVQDGYPMSFDCVVTGQPVPSVRWFKDGKLEEDDHYMINDDQGGG  
 HQLIITAVVPADMGVYRCLAENSMGVSSTKAELRVELTSTDYDTAADATETSSYFSAQGYLSSREQEGTESDE  
 GQLPQVLEELKDLQVAPGTRLAKFQLKVKGYPAKLYWFKDGQPLTSDHIRMTDKKTLHTLEIVSVTREDSG



QYAAYSNAVGAAYSSARLLVRGPSEPEEKPASDVHERLVPPRI LEKFTPKKVKRGSSITFSVKVEGHPAPSV  
HWLKEEAKEKGV LWIGPDTPGYTMASSSKQHSLVLLDVGRQHOGTYTCIATNPAGQALCSASLHISGLAKEEEQ  
ERVKEALISSFLOGTSQAVSAQMSEASAGFADLVGQSKGESLVAEEAHSHLSLAEVGTTEEFLQKLTSTQITEMVS  
AKISQAKLQVPGGDSDEETKTPSASPRHGRSRPSSSVQESSSESEEDGDSRGEIFDIYVVTADYLP LGAEQDAI  
ILREGQYVEVLDSAHPLRWLVRTKPTKSSPSRQGWVSPAYLDKRLKLSPEWGPTEAPEFPGEAVSEDEYRTRL  
SSVIQELLSSEQAFV GELQFLES HHMKHLERSPRVPAAVASQKTVIFRNVQDISHFHSSFLKELQCGCTDDDV  
AMCFIKNQEAFAEKYLEFLVGRVQAESVVVSTPVQEFYKKYAEETLSAKDPTQPPPPLOHYLEQPVERVQKYQ  
ALLKELIRNKARNRQNCALLEQAYAVVSALPQRAENKLVHSLMENYPGTLEALGEPHPIRQGHFIVWEGAPGARM  
PWKGHNHRHVFLFRNYLVICKPRRDSRTDTFSYVFRNMKLLSSIDLNDQVEGD DRAFEVWHEREDSVRKYLLQA  
RTVI IKNSWVKEICGIQORLAQPVWRPPEFEEELADCTAELGETVKLACRVTGT PKPIVSWYKDGKPV EVDPH  
HILIEDPDG SCTLILDNLGTIDSGQYMCFAASAAGNASTLGKILVQVPPRFV NKVRATPFVEGEDAQITCTVE  
GAPYPQIRWYKDG TLLAPGNRYRMLNEPRSGVLV LVIQAASKEDLGHYECELVNRLGSTRGGGELYMQSPALR  
ARDQHHREQIVAAVEDTSVEGSAHSAQDQADQQAASVLWRLLGSEALGPS PGDLPNTRQSEPPAFEEAASQIP  
GAASGTPEVSPGTHKGLEQETSSSGSQGWTPVIRVEGTAWPGAGTGQLLLDVHSQVIMETTQRTYVQCAPDT  
GVTRAPSMQVTIEDVQVQVGDMAQF DAVIEGHPPPIV TWYKGSTQLTSSARLSQRQDGTYSLVLTDVAPHDA  
GVYTCVANNAGGQV LCKAELLVHGGDKLDAENQVYRRLKLSHFYDVQEEIGRGVFGFVKRVQHKGNMFCAAKF  
IPLRSKTRAQAYQERDILATLGHPLVTGLLDQFETRKTLLI LILELCSSEELLDRLFKKGVVTEAEVKNVYIQQL  
VEGLHYLHSHGILHLDIKPPNLLMVHPAREDIKICDFGFAQKITPSEPQYSKYGSPEFVSP EIEQNVPVSEGS  
DIWAMGVISYLSLTCSSPFAGESDRATLLNVLEGRVSWSSPTAAHLS EDAKDFIKATLQRTPRARPSTSQCLA  
HPWFLKSMPAEEAHFINTKQLKFL LARSRWQRSLMSYKSI LVMRSIPELLQGPPDSPSLGVARHLRGEASGAS  
SSSSSDNELAPFARAKSLPPSPVTHSPLLHPRGFLRPSASLPEETEASMTADAAVPAS PQSAGPPASPGCV  
PRHSVISSLFYQQAGEGAERGNKTS GAKRHPARRRHLLKGGYIARALPGLREPLMEYSLLEEEAAREEQASLM  
TKTPSFETALRLPSSSVREVPGRSHSLDNPPVT TGPSPEACKEQLLFPSTGLTHETTAKDRGHKEGFLQESV  
PFPMSGDSRPGKQEGSSQDSRCRGPASSCHSELGSGSQEGCGPPSSQSLGSLPPQSLKELSTSCGPLFSEQ  
PQAAPFPTQVSPLLGSEKEPQDGS LSEGPVVPVSSSPGASQVDASLDTEGLSEAGDTCDFTPPPQRPQEQAT  
TRKFSLESRGGYAGVAGYGTFAFGGDAGGMLGQPLWARMAWAVS QSSEEQDEAATESPQPLESLGPIAEASG  
VPLRTSPSLTPWEEVQVSLVQIRDLSGDAEAADTISLDISEVDPAYLNLSDLYDIKYL PFEFMI FRRVPKPI  
EQPESPGSETEAGQGLADFL EEAAWPWPGE LGLRAGLEIT EEP EEPGDLEALLGEAAVGRKRKWSPSRGLFQF  
PGRCLSGEEPVELGLRQRVKASMAHISRI LKGRPEGPERE GPPRKKAGLASFRLSGLKGRDQELSDEAVVLGQ  
SVTLACQVLAQPTAQATWSKDGVLLESSGHL LISTS LKNFQLLTI LVVKEEDLGTYTCCVSNPLGTAVTTGVL  
RKAERPSSSPRPEVGELYKDAVLLVWKPVE SCGPVTVIVQCCIEGGSWTTLASDISDCCYLTGKLSRGGMYIF  
RTACVSKAGMGPISSPSEQVLLGGPNHLASEEESRGRPAQLLPSTKTF AFQMQIRGRFVSVRQCREKASGR  
ALAAKIVPYQPEDKTA VLREYEA LKRLHHPHLAQLHAAYLS PRHLVLI LILELCSGPELLPSLAERESYSESDVK  
DYLWQMLSATQYLHAQHILHLDLRSENMMVTEYNLLKVIDLGN AQSLDQEKVPAPENFKDYLETMAPELLEGQ  
GAVPQTDIWAIGVTAFIMLSGEY PESSSEGT RDLQKRLKGLIRLSRCYAGLSGGAVAFLOSSLCAQPWGRPCA  
STCLQCGWLTEEGPTGSRPTPVTFPTVRLRAFVREKRRALLYKKNLAQVR\*

>ENSMUSP00000038264\_c.16220:g>T\_p.E5407D ENSMUST00000047441.14|Obscn-  
202|ENSMUSG00000061462|-|chr11:g.58928485:C>A

MDHSFSGAPRFLTRPKAFVSVGKDATLSCQIVGNPTPHVSWEKDRQPV EAGARFRLAQDGDVYRLTILDLAL  
GDSGQYVCRARNAIGEAFAAVGLRVDSEGTC AEQAPHLLRPTSIRVREGADATFRCRVGGSPQPAVSWSKDG  
RRLGPPDAPHVRVEEHGESSALRIRSARPRDGGTYEVRAENPLGSASAAAALVVDSDAEVAGPPGTSTATLLA  
HLQQRRREAMRAEGIPPSPPGAGTRTCTVTEGKHARLSCFVTGEPKPE TVWKKDQGLVTEGRRHVVEDEQENF  
VLKILFCKQSDRGLYTCTASNLVGQTYSSVLVVVREPTVPFKKRLQDLEVREKESATFQCEVAQ PATEAAWFK  
EETRLWASAKYDIEEGETERRLTVRNVSADDDAVYICETTEGSRVAELSVQGNLTKRLPRKTAVRTGDTAIF  
WVELAVPEGPVRWLRNQEEMVAGGRVAITAEGTCHTLTI FQCTLEDMGEVAFVSGGCRTTTTQFCV SAPRRPPL  
YPPADPVVKAKTESSVTL SWSAPPHGDRPVTIDGYVLEKRKLGA YAWSRCHEAGWLATTEFTITGVAAEGDFQ  
FRVSAINHFGQGPYLEFP GTMHLVPLAVKTP LKAVEAVEGGEVTFVSDLTVASSGEWFLDGEALKASSIYVI  
RCDRTRHMLTIREV PARLHGAQLKFVANGIETS IQMVVRAALGLPSSKLPAAAAREVLAQLHEEAQLLAELSD  
QAAAVTWLKDGRELSLGP KYEMQVSAGRRALLVRDVAQDDAGLYECVSRGSR TAYQLLVQDITDGYRDWGPAG  
PQKHMKCAGAKIARYLGSSCYRFLQYDKGVWHWEAALDTRQKGKTS SCSLHEKPKLVFAKGQQA HSEVKA  
AGASATLSCEVAQAQTEVTFWFKDGKLLSSSSKVRMEASGCSRRLVVQQAGKADAGEYSCEAGGQKLSFRLDVA  
EPKMVFAKEQQARSEVKA EAGASATLSCEVAQAQTEVTFWFKDGKLLSSSSKVRMEASGCSRRLVVQQAGKADA  
GEYSCEAGGQKLSFRLDVTEPKLVFAKEQQARSEVKA EAGVNSATLSCEVAQAQTEVTFWFKDGKLLSSSSKVRM  
EASGCSRRLVVQQAGKADAGEYSCEAGGQKLSFRLDVAE PKLVFAKEQQARSEVKA EAGNSATLSCEVAQAQ  
EVTWFKDGKLLSSSSKVRMEASGCSRRLVVQQAGKADAGEYSCEAGGQKLSFRLDVTEPKLVFAKEQQARSEV  
KAEAGASATLSCEVAQAQTEVTFWFKDGKLLSSSSKVRMEASGCSRRLVVQQAGKADAGEYSCEAGGQKLSFRL  
DVAE PKLVFAKEQQARSEVKA EAGASATLSCEVAQAQTEVTFWFKDGKLLSSSSKVRMEASGCSRRLVVQQAGK  
ADAGEYSCEAGGQKLSFRLDVAE PKLVFAKEQQANSEVKA EAGASATLSCEVAQAQTEVTFWFKDGKLLSSSSK

VRVEASGCSRRLVVQQAGKADAGEYSCEAGGQKLSFRLDVAEPKLAFAKEQQAHSEVKAEAGASATLSCEVAQ
AQTEVTFWKDGGKLSSSSSKVRVEASGCSRRLVVQQAGKADAGEYSCEAGGQKLSFRLDVAEPKLAFAKEQQAH
SEVKAEAGASATLSCEVAQAQTEVTFWKDGGKLSSSSSKVRVEASGCSRRLVVQQAGKADAGEYSCEAGGQKLS
FRLDVAEPKLAFAKEQQAHSEVKAEAGASATLSCEVAQAQTEVTFWKDGGKLSSSSSKVRVEASGCSRRLVVQQ
AGKADAGEYSCEAGGQKLSFRLDVAEPKLVFAKEQQAHSEVKAEAGASATLSCEVAQAQTEVTFWKDGGKLS
SSKVRVEASGCSRRLVVQQVQKADAGEYSCEARGQKLSFRLDVAEAEESQIPERPSRREPLVVEKHETIILTAT
IAAPSVAAVTWLKDGVETRRSKRHEATSLGDTHTLTVRGAQVLDIAIYSCRVGKEGQDFPVQVEEVAAKFSKP
LEPVGELGGTVMLVCELSPEQAEVWVRCGNTQLRPGKRFQMTSEGPRTTLTVSGLREDDAEYVCESRDDRT
SARLTVKVPVVKFTSGLSAMVAEEGQEAFTQCVCVSPSDAGVTWYKQDGMQLQPSSEKFMVMEVSGASRSLTILGL
TLEDAGQVTVAEAGASSAALRVREAPVLFKKKLEPQTVVEERTSVTLEVELTRPWPEVKWTRNAAVLTPSENV
EIRAEGARHCLVLRVSVGFADRGFFGCETPDDKTQAKLNVEMRQVRLVVRGLQEVEAKEQGTASMDVELSHAEVE
GSWTRDGLRQLQPGPKCHLAVQGPVHILTLTSLALQPQDSGLVAFRAEGVHTSARLIVTELTPVSTFRVLQDVVATQ
KEKVTLECELSRPVDVRLKDGVELRAGKAI GIVAQGTCSRSLVIYRCETGDQGVYVCDALDAQTSASLRVQGR
TYTLIFRRVLAEDAGEVKFVAENAESRAHLRVKELPVTLLRPLRDKIAMEKHRGVLEQCQVSRASQVRFWFKGG
VELQSGPKYEVVSDGLYRKLVINQVPEDEDTYTCDAGNVKTSAQFFVEEQSITIVRGLKDMTVMPEPAPAWFE
CETSIPSVRPPKWLKGTVLQAGGNVLEQDGTVHRLTLHKTCSTMTGPFVHFTIGKSRSSAQLVVSDIPVVLT
RPLEPKAGRELQSVLSSCDFRPAPKAVQWYKDDTPLSPSEKFKMALEGGQMAELRILRLTPADAGVYRCQAGSA
QSSAEVTVAEAEVTVIQPLQDAEAMEEGRVCFSELSHKDEIDIEWSLNGTPLYNDSFHEISHEGVLHRTLVLKS
VRQADTGTVCATSPKVSVSARLVVKGKPVVFLKALDDVSAEERGTTLQCEVSDPEARVWVRKDGVELGPSDK
YDFLHKAGARGLTVHDLSDHEDAGLYTCQVGSKETQSKVSVHDLHVGITKRLKTVEVLEGESECFEVLVSHESP
SDPAVWTVGGKTVGGSGHFHAVRQGRKYTLTVKDAALSDAGEVVFVGLTTSKASLIIRERPVDITKPLEDQR
TTLGEDVMLSCELSRAGTSVRWLKDGKAIKRSQKYDLLSEGTRAVLVVRKASLKDSGEYTCETEASKSTAKLC
VEEKANRFTEELADLQVEEKGRAVFTCKTEHPASVVTWRKGLLELRASGKHVPSQEGTLTKLTINALERTDSD
TYTCDIGQARTQARLLVHGQKVRVIEDLEDTAVQEGSSAKFCCRIPADYGPVHWFLLDKTPLHSNELNEITVQ
PGGYHVLTLRQLALKDSGTVYFEAGDQRTSAALRVTEKPSIFSRPLTDVTVTEGEDTLVCEVTTVDSSVRWT
KDGKTLRPSARPQLSEHGCAQLLITATTPQDGGRYKEIGGASSSSIVRVHALPVRFRESLKDVEVPEGKAA
TLRCVLSVAACPVHEHRGDDVLKSNKYSLRQEGAVLELIVIRDLQPDQSGQYSCSFGDQTTSATLTVKTSQAQ
FVGLKRNKEATEGTTVTLRCELTKEAPVEWKKGTETLRNGDKYSLKQDGAVCELQICSLLVADAGEYSCVCGQ
EKTSATLTVKALLVHFVRRRLRSKEATEGDTTTLQCELSKAAPVEWRKGTETLRDGDYSLKQDGAVCELQIRS
LTIADAGEYLCTCGQEKTSATLTVRALPAKFKDSLKNEEATEGTTATLSCELSKAAPVTWKKGPKTLQSGDKY
VLRQDGAVCGLQIHGLTMADAGEYSCVCGQEKTSATLTVRGLPAKFIEDLRSQEATEGATAILRCELSKAAPV
EWRKGETLTKDGDYTLRQDGAVCELQIRGLAVVDTGTYSPLPKFTEGLRNEEATEGTMATLRCQMSKAAPV
EWRKGETLTDGDYSLRQDGAMCELQIRGLTIEDSGEYTCVCGQEKTSATLSVKALPPRFIEDLRSQEATEG
TMATLRCQMSKAAPVEWRKGETLTDGGGRYSLRQNGAVCELQIHDLAVEDTGEYSCVCGQEKTSATLNVKALP
PRFIEDLRSQEATEGTMATLRCQMSKAAPVEWRKGETLTDGGGRYSLRQDGAVCELQIHDLVEDAGQYSCVC
GQEKTSAVLTVDALPPKFTTEGLKKEEATEGTMVTLRQMSKEATVEWRKGAKTLSGGGRYSLRQDGAMCELQI
CGLAVEDAGEYSCVCGQEKTSATLSVKALPPRFIEDLRSQEATEGTMATLRCQMSKAAPVEWRKGSKTLRDGD
RYSLRQDGAMCELQICDLAVEDTGDYSCVCGQEKTSATLSVKAPQVVFQQLQNLQAEEGSMASLRCELSVFN
AAMVWSKGGLELQGDTRREARQQGCVAELLLRDLRREDAGEYSCVCGQEKTSATLMVTAAPVRFRLRQADQV
DEGATARLRCELSREAVSVEWRKGSLLQFPKAKYQMVQEGTTAELLVHGVEQEDAGEYTC DAGHTQS IARLSV
RAPKPKFKTDLQSTEQEAGGTARLCCQLSEAEPTPVQWLKEGVELHVGSKYEMRRQGAVCELLIHGLEAKDT
GEYACLVGQKTLASLRVKEPEVTIVRGLVDMVEVQADEDFEFTCKVVSQAGATDVQWHLQGLPLQSNVTEVAV
LADGCTHVLQKGVTTLEDAGTVSFHVGGLSSSAQLTVRVPEVTVLEPLKDVQLSEGQDAHFRCRLSRASGQEA
RWALGGVPLQCNEMNDITVEQGTLYLLTLHKVTTLEDAGTITLQVGSSESAQLKVTAKNTVLRGLENVDALEG
GEALFECQLSQPEVAHAHTWLLDDEPVHTSEKVEVVYFENGLRHLRLLKLNKLPQDSCRVTFLAGDVVTS AFLTV
RALPDPPEDAEVVGRSDHSVTLVSWAPMSDGGGGLCGYRVMKEASTGQWQLCHDLVPGPECVDDLVPGKTY
RFRVAAVGPAGAGEPVHLPQMVKIAPAPAPAPAPAPAPAPETRQAVVGEDICLELEVAADGGVEVWHKGTERRI
QPGGHFEVLSRQGRQMLVIKGFRTEDQGEYRCGPIQGLPSSGAATFNVMVMTSGSGDEVPAQPSLPPEAAQEGD
LHLLWEALARKRRMSREPTLDSISELPEEDSRVQHLRQEAEEETAPDLSEGYSTADELARTGEADLSHTSSDDE
SRAGTPSLVTYLKKAGGPGISPLASKHEAQVTTSVKPKQKQEPVVPVTPCPPGDL SAADLMDPSLDKAAVKIQA
AFKGYKVRKEMKQOEGPVFSRTEFGDTEAQVGDVLRLECVLATKTDMRACWLKDGIELTDGRHYHIDQLKDGTC
SLLVTVGLAPTDSGRYTCQVSTKSGRVSHSACVVVSGTESEAESSSGGELDDAFRRAARLHRLFRTRKSPAELS
EEELFLSADEGPPEPEKPADWQTYREDENFVLCIRFESLAEARQAVTCFRNMFMATMIGIVEISLGEQGRGVEM
RIGKVAQTVTPAVPLAKT PGLQTS DAAPVFLTELQNDVQDGYPMSFDCVVVTGQPVSVRWFKDKGLLEEDDH
YMINDDQGGHQLIITAVVPADMGVYRCLAENSMGVSSTKAELRVELTSTDYDTAADATETSSYFSAQGYLSS
REQEGTESDEGQLPQVLEELKDLQVAPGTRLAKFQLKVKGYAPKLYWFKDGQPLTSDHIRMTDKKTLHTLE
IVSVTREDSGQYAAIYISNAVGAAYSARLLVVRGPEPEEKPASDVHERLVPPRILEKFTPKKVKRGSSTITFSV
KVEGHPAPSVHHLKEEAKEGVLWIGPDTPGYTMASSSKQHSVLVLDVGRQHOGTYTCIATNPAGQALCSASLH

ISGLAKEEEQERVKEALISSFLQGTSSQAVSAQMSEAGFADLVGQSKGESLVAAEEAHSHLSLAEVGTTEEFLOK
LTSQITEMVSAKISQAKLQVPGGDSDEETKTPSASPRHGRSRPSSSVQESSSEEDGDSRGEIFDIYVVTADY
LPLGAEQDAIILREGQYVEVLDSAHPLRVLVVRTKPTKSSPSRQGWVSPAYLDKRLKLSPEWGPTEAPEFPGEA
VSEDEYRTRLSSVIQELLSSEQAFVGGELQFLESHHMKHLERSPRVPAAVASQKTVI FRNVQDISHFHSSFLKE
LQCGCTDDDVAMCFIKNQEAFAEKYLEFLVGRVQAESVVVSTPVQEFYKKYAEETLSAKDPTQPPPPPLQHYLE
QPVERVQKYQALLKELIRNKARNRQNCALLEQAYAVVSALPQRAENKLVHSLMENYPGTLEALGEP IRQGHFI
VWEGAPGARMPWKGNHRHVFLFRNYLVICKPRRDSRTDTFSYVFRNMMKLSSIDLNDQVEGDRAFEVWHERE
DSVRKYLQARTVI IKNSWVKEICGIQORLAQPVWRPPEFEEELADCTAELGETVKLACRVTGT PKP IVSWYK
DGKPEVVDPHHILIEDPDGSC TLLILDNLTGIDSGQYMCFAASAAGNASTLGKILVQVPPRFRVNRATPFVVEG
EDAQITCTVEGAPYPQIRWYKDG TLLAPGNRYRMLNEPRSGVLV LVIQAASKEDLGHYECELVNRLGSTRGGG
ELYMQSPALRARDQHHREQIVAAVEGAPSMQVTIEDVQVQVGDMAQF DAVIEGHPPP IVTWYKGTQLTSSAR
LSQRQDGT TYSLVLT D VAPHDAGVYTCVANNAGGQVLCKAELLVHGDKLDAENQVYRRLKHSFYDVQEEIGR
GVFGFVKRVQHKGNMFC AAKFIPLRSKTRAQAYQERDILATLGHPLVTGLLDQFETRKTLLILILELCSSEEL
LDRLFKKG VVTEAEVKVYIQQLVEGLHYLHSHGILHLDIKPPN ILMVHPAREDIKICDFGFAQKI TPSEPQYS
KYGSPEFVSP EII EQNPVSEGS DIWAMGVI SYLSLTCSSPFAGESDRATLLNVLEGRVSWSSPTAAHLS EDAK
DFIKATLQRTPRARPST SQCLAH PWF LKSM PAAEEAHFINTKQLKFL LARSRWQRSLMSYKSI LVMRSI PELLQ
GPPDSPSLGVARHLRGEASGASSSSSSDNELAPFARAKSLPPSPVTHSPLLHPRGFRLRPSASLPEETEASMP
TADA AVPAS PQSAGPPASPGCVPRHSV ISSLFYQQAGEGAERGNKTS GAKRHPARRRHLLKGGYIARALPGLR
EPLMEYSLLEEEAAREEQASLMTKTPSFETALRLPSSSVREV PGRSHSLDNPPVTTG PSPEACKEQLLFPST
GLTHETAKDRGHKEGFLQESV PFPMSGDSRPGKQEGSSQDSCRGKPASSCHSELGSGSQEGCGPPSSQSLG
SLPPQSLKKE LSTSCG PLFSEQPQAAPFPTQVSP LLGSEKEPQDGS LSEGVPVPSSSPGSASQV DASLDTEG
LSEAGDTCDFTPPPQR PQEQATTRKFSLESRGGYAGVAGYGTFAFGGDAGGMLGQGPLWARM AWA VQSSEEQ
DEAATESPQP LESLGP IAEASGVPLRTSPSLTPWEEVEQVSLVQ IRDLSGDAEAADTISLDI SEVDPAYLNL S
DLYDIKYL PFEFMI FRRVKPIEQPESPGSETEAGQGLADFL EEA AWPWP GELGLRAGLEITEEPEEPGDLEA
LLGEAAVGRKRKWSPSRGLFQFPGRCLSGEEPVELGLRQRVKASMAHISRILKGRPEGPEREGPPRKKAGLAS
FRLSGLKGRDQELSDEAVVLGQSVTLACQVLAQPTAQATWSKDGVLLESSGHLLISSTLKNFQLLTI L VVKEE
DLGTYTCCVSNPLGTA VTTGVL RKAERPSSSPREVEGELYKDAVLLVWKPVE SCGPVTYIVQCCIEGGSWTTL
ASDISDCCYL TGKLSRGGMYIFRTACVSKAGMPYSSPSEQVLLGGPNHLASEEESSRGRPAQLLPSTKTF AF
QMQIRRGRFSVVRQCREKASGRALAAKIVPYQPEDKTAVLREYEALKRLHHPHLAQLHAAYLSPRHLV LILEL
CSGPELLPSLAERESYSESDVKDYLWQMLSATQYLHAQH IHLDLRSENMMVTEYNLLKVIDLGNASLDQEK
VPAPENFKDYLETMAPELLEGQAVPQTDIWAIGVTA FIMLSGEY P ESSEGETRDLQKGLRKLIRLSRCYAGL
SGGAVAF LQSSSLCAQPWGRPCASTCLQCGWLTEEGPTGSRPTPVTFTVRLRAFVREREKRRALLYKKNH LAQ
VR\*

>ENSMUSP00000049737\_c.18179:G>T\_p.E6060D ENSMUST00000052872.15|Obscn-
203|ENSMUSG00000061462|-|chr11:g.58928485:C>A
MDHSFSGAPRFLTRPKAFVSVGKDATLSCQIVGNPTPHVSWEKDRQPVEAGARFRLAQDGDVYRLTILDLAL
GDSGQYVCRARNAIGEAFAAVGLRVDSEGTCAEQAPHFLLRPTSIRVREGADATFRCRVGGSPQPAVSWSKDG
RRLGPPDAPHVRVEEHGESSALRIRSARPRDGGTYEVRAENPLGSASAAAALVVDSDAEVAGPPGTSTATLLA
HLQORREAMRAEGIPSPPGAGTRTCTVTEGKHARLSCFVTGEPKPEVWKKDGQLVTEGRRHVVEDEQENF
VLKILFCKQSDRGLYTCTASNLVGQTYSSVLVVVREPTVPFKKRLQDLEVREKESATFQCEVAQPAEAAWFK
EETRLWASAKYDIEEEGTERRLTVRNVSADDDAVYICETTEGSRVVAELSVQGNLTKLPRKTAVRTGDTAIF
WVELAVPEGPVRLRNQEEMVAGGRVAITAEGTCHTLTI FQCTLEDMGEVAFVSGGCRTTTQFCVSAPRRPPL
YPPADPVVKAKTESVTL SWSAPPHGDRPVTIDGYVLEKRRKLGAYAWSRCHEAGWLATTEFTITGVAAEGDFQ
FRVSAINHFGQGPYLEFPGTMHLVPM LAVKTP LKAVEAVEGGEVTFVSDLT VASSGEWFLDGEALKASSIYVI
RCDRTRHMLTIREV PARLHGAQLK FVANGIETS IQMVVRAALGLPSSKLPAAAAREVLAQLH EEAQLLAELSD
QAAAVTWLKDGRELSLGP KYEMQVSAGRRALLVRDVAQDDAGLYECVSRGSR TAYQLLVQEPKLVFAKGQQA H
SEVKAEAGNSATLSCEVTQAQTEVTWFKDGKLLSSSSKVRMEASGCSRRLVVQQAGKADAGEYSCEAGGQKLS
FRLDVAEPKLVFAKGQQA HSEVKAEAGASATLSCEVAQAQTEVTWFKDGKLLSSSSKVRMEASGCSRRLVVQQ
AGKADAGEYSCEAGGQKLSFRLDVAEPKMFVFAKEQQARSEVKAEAGASATLSCEVAQAQTEVTWFKDGKLLS
SSKVRMEASGCSRRLVVQQAGKADAGEYSCEAGGQKLSFRLDVTEPKLVFAKEQQARSEVKAEVNSATLSCE
VAQAQTEVTWFKDGKLLSSSSKVRMEASGCSRRLVVQQAGKADAGEYSCEAGGQKLSFRLDVAEPKLVFAKEQ
QARSEVKAEAGNSATLSCEVAQAQTEVTWFKDGKLLSSSSKVRMEASGCSRRLVVQQAGKADAGEYSCEAGGQ
KLSFHLDVTEPKLVFAKEQQAHSEVKAEAGASATLSCEVAQAQTEVTWFKDGKLLSSSSKVRMEASGCSRRLV
VQQAGKADAGEYSCEAGGQKLSFRLDVAEPKLVFAKEQQARSEVKAEAGASATLSCEVAQAQTEVTWFKDGK
LSSSSKVRVEASGCSRRLVVQQAGKADAGEYSCEAGGQKLSFRLDVAEPKLVFAKEQQANSEVKAEAGASATL
SCEVAQAQTEVTWFKDGKLLSSSSKVRVEASGCSRRLVVQQAGKADAGEYSCEAGGQKLSFRLDVAEPKLAFA
KEQQAHSEVKAEAGASATLSCEVAQAQTEVTWFKDGKLLSSSSKVRVEASGCSRRLVVQQAGKADAGEYSCEA
GGQKLSFRLDVAEPKLAFAKEQQAHSEVKAEAGASATLSCEVAQAQTEVTWFKDGKLLSSSSKVRVEASGCSR



FLSADEGPEPEPADWQTYREDENFVCIRFESLAEARQAVTTCFRNMFATMGIGVEISLGEQGPVEMRIGK  
VAPTVPFVPLAKTPGLQTSDAAPVFLTELQNDVQDGYPMSFDCVVTGQPVPSVRWFKDGLLEEDDHYMIN  
DDQQGGHQLIITAVVPADMGVYRCLAENSMGVSSTKAELRVELTSTDYDADAATETSSYFSAQGYLSSREQE  
GTESDEGQLPQVLEELKDLQVAPGTRLAKFQLKVKGYPAPKLYWFKDGOPLTTSDHIRMTDKKTLHLEIVSV  
TREDSDGQYAAYSNAVGAAYSSARLLVRGPSEPEEKPASDVHERLVPRILEKFTPKKVGRSSITFSVKVEG  
HPAPSVHWLKEEAKEGVLWIGPDTPGYTMASSSKQHSLVLLDVGRQHOGTYTCIATNPAGQALCSASLHISGL  
AKEEEQERVKEALISSFLQGTSAQVSAQMSSEAGFADLVGQSKGESLVAAEAHSHLSLAEVGTTEFLQKLTSSQ  
ITEMVSAKISQAKLQVPGGDSDEETKTPSASPRHGRSRPSSSVQESSSESEDGDSRGEIFDIYVVVTADYLPGL  
AEQDAIILREGQYVEVLDSSAHLRVLVTRTKPTKSSPSRQGWVSPAYLDKRLKLSPEWGPTEAPEFPGEAIVED  
EYRTRLSSVIQELLSSEQAFVGELOFLSHHMKHLERSPRVPAAVASQKTVI FRNVQDISHFHSSFLKELQGC  
GTDDDVAMCFIKNQEAFAKEYLEFLVGRVQAESVVVSTPVQEFYKYYAEETLSAKDPTQPPPPPLQHYLEQVVE  
RVQKYQALLKELIRNKARNRQNCALLEQAYAVVSALPQRAENKLVSLMENYPGTLEALGEP IRQGHFIVWEG  
APGARMFWKGNHRHVF LFRNYLVICKPRRDSRTDTFSYVFRNMMKLSIDLNDQVEGDRAFEVWHEREDSVR  
KYLQARTVI IKNSWVKEICGIQQLAQPVWRPPEFEELADCTAELGETVKLACRVTGTPKPIVSWYKDGKP  
VEVDPHHILIEDPDGSCCTLI LDNLGTIGDSGYMCFASAAGNASTLGKILVQVPPRFVNVKVRATPFVEGEDAQ  
ITCTVEGAPYPQIRWYKDGTLAPGNRYRMLNEPRSGVLVLIQAASKEDLGHYECELVNLGSTRGGGELYM  
QSPALRRADQHREQIVAAVEVTEQETKVPKKTVI IETITTVVKSPRGRRQSPGKSPSRSPRRSASPRRPG  
LLAPERLYPPGTSPSRRLEVEQGRKAPVPALYVTEAEVHAPASQSQPKWLEVEETIEVRVKKTGSRGASPVRE  
MSTRGEGILFTLPGGI PGRDPNANNNSNKS SVYQEARWGPVAVHVGEFFIFQVDSVGNVDWVAASPEPEQVRA  
SQKEENTERQEGCSDGDENTFLMEEPQDTSLQGRDPKILTHNGRVLTLADLEDYVPQEGETFSGCDSTPSTP  
DEPPCEVSVLQREI SEPTVGQPVLLNVGRPPGTGATPSFFRPGSQVHSPESVSFLLREAWSGPVSAAPWTSSF  
HTHVQSSVDGSHGSKTEVSTQTVSFGAVGETVTLHIDPDGGEAPGPSQ\*  
>ENSMUSP00000020732\_c.18380:G>T\_p.E6127D ENSMUST00000020732.13|Obscn-  
201|ENSMUSG00000061462|-|chr11:g.58928485:C>A  
MDHSFSGAPRFLTRPKAFVSVGKDATLSQCIVGNPTPHVSWEKDRQFVEAGARFRLAQDGDVYRLTILDLAL  
GDSGQYVCRARNAIGEAFAAVGLRVDSEGTCAEQYHFLLRPTS IRVREGADATFRCRVGGSPQPAVSWSKDG  
RRLGPPDAPHRVVEEHGESSALRIR SARPRDGGTYEVR AENPLGSASAAAALVVDSDAEVAGPPGTSTATLLA  
HLQORREAMRAEGIPPSPPGAGTRTCTVTEGKHARLSCFVTGEPKPEVWKKDGQLVTEGRRHVVEDEQENF  
VLKILFCKQSDRGLYTCTASNLVGQTYSSVLVVVREPTVPFKKRLQDLEVREKESATFQCEVAQPATEAAWFK  
EETRLWASAKYDIEEGTERRLTVRNVSADDDAVYICETTEGSRVVAELSVQGNLTKRKLPRKTAVRTGDTAIF  
WVELAVPEGPVRWLRNQEEMVAGGRVAITAEGTCHTLTI FQCTLEDMGVAFVSGGCRTTTQFCVSAAPRRPPL  
YPPADPVVKAKTSSVTLSSWAPPHGDRPVTIDGYVLEKRLGAYAWSRCHEAGWLATTEFTITGVAAEGDFQ  
FRVSAINHFGQGPYLEFPGTMHLVPLAVKTPKAVEAVEGGEVTFVSDLTVASSGEWFLDGEALKASSIYVI  
RCDRTRHMLTIREVPARLHGAQLKFVANGIETS IQMVVRAALGLPSSKLPAAAAREVLAQLHEEAQLLAE LSD  
QAAAATWLDKGRELSLGPKEYEMQVSAGRALLVRDVAQDDAGLYECVSRGSRRTAYQLLVQDITDGYRDWGPAG  
PQKHMCKCAGAKIARYLGSSEYRFLQYDKGVVHWLEAALDTRQKGTSSCSLHEKPKLVFAKGQAHEVKA  
AGNSATLSCEVTQAQTEVTWFKDGKLLSSSSKVRMEASGCSRRLVVQQAGKADAGEYSCEAGGQKLSFRLDVA  
EPKLVFAKQQAHEVKAEGASATLSCEVAQAQTEVTWFKDGKLLSSSSKVRMEASGCSRRLVVQQAGKADA  
GEYSCEAGGQKLSFRLDVAEPKLVFAKEQQARSEVKAEGASATLSCEVAQAQTEVTWFKDGKLLSSSSKVRM  
EASGCSRRLVVQQAGKADAGEYSCEAGGQKLSFRLDVTEPKLVFAKEQQARSEVKAEGVNSATLSCEVAQAQ  
EVTWFKDGKLLSSSSKVRMEASGCSRRLVVQQAGKADAGEYSCEAGGQKLSFRLDVAEPKLVFAKEQQARSEV  
KAEAGNSATLSCEVAQAQTEVTWFKDGKLLSSSSKVRMEASGCSRRLVVQQAGKADAGEYSCEAGGQKLSFHL  
DVTEPKLVFAKEQQAHSEVKAEGASATLSCEVAQAQTEVTWFKDGKLLSSSSKVRMEASGCSRRLVVQQAGK  
ADAGEYSCEAEGQKLSFRLDVAEPKLVFAKEQQARSEVKAEGASATLSCEVAQAQTEVTWFKDGKLLSSSSK  
VRVEASGCSRRLVVQQAGKADAGEYSCEAGGQKLSFRLDVAEPKLVFAKEQQANSEVKAEGASATLSCEVAQ  
AQTEVTWFKDGKLLSSSSKVRVEASGCSRRLVVQQAGKADAGEYSCEAGGQKLSFRLDVAEPKLVFAKEQQAH  
SEVKAEGASATLSCEVAQAQTEVTWFKDGKLLSSSSKVRVEASGCSRRLVVQQAGKADAGEYSCEAGGQKLS  
FRLDVAEPKLVFAKEQQAHSEVKAEGASATLSCEVAQAQTEVTWFKDGKLLSSSSKVRVEASGCSRRLVVQQ  
AGKADAGEYSCEAGGQKLSFRLDVAEPKLVFAKEQQAHSEVKAEGASATLSCEVAQAQTEVTWFKDGKLLSS  
SSKVRVEASGCSRRLVVQQAGKADAGEYSCEAGGQKLFRLDVAEPKLVFAKEQQAHSEVKAEGASATLSCE  
VAQAQTEVTWFKDGKLLSSSSKVRVEASGCSRRLVVQQAGKADAGEYSCEAGGQKLSFRLDVAEPKLVFAKEQ  
QAHEVKAEGASATLSCEVAQAQTEVTWFKDGKLLSSSSKVRVEASGCSRRLVVQQVQKADAGEYSCEARGQ  
KLSFRLDVADATRLMFAKEQQARTEVKAEGASATLSCEVAQAQTEVTWFKDGKLLSSSSKVRVEASGCSRRLV  
VQQAGKADAGEYSCEAGGQKLSFRLDVAEAESQIPERPSRREPLVVKHEHETIILTATIAAPSVAAVWTKLDGV  
EIRRSKRHEATSLGDHTLTVRGAQVLDLSAIYSCRVGKEGQDFPVQVEEVAAKFSKPLEPVEGELGTVMLVC  
ELSPQAEVWRCGNTQLRPGKRFQMTSEGPRRTLTVSGLREDDAEYVCESRDDRTSARLTVKVPVVKFTS  
GLSAMVAEEGQEAFTQCVVSPSDAGVTWYKDGMLQPSKFKVMVESGASRSLTILGLTLEDAGQVTVAEAGAS  
SSAALRVREAPVLFKKLEPQTVVEERTSVTLEVELTRPWPEVKWTRNAAVLTPSENVEIRAEGARHCLVLRVSV



GFADRGFFGCETPDDKTQAKLNVEMRQVRLVVRGLQVEVEAKEQGTASMDVELSHAEVEGSWTRDGLRLQPGPKC
HLAVQGPVHILTLALSALQPQDSGLVAFRAEGVHTSARLIVTELPSVSTRVLQDVVATQKEKVTLECELSRPVDV
RWLKDGVLELRAGKAIGIVAQGTCSRSLVIYRCETGDQGVYVCDALDAQTSASLRVQGRTYTLIFRRVLAEDAGE
VKFVAENAESRAHLRVKELPVTLLRPLRDKIAMEKHRGVLECCVSRASQVRWFKGGVELQSGPKYEVVSDGL
YRKLVINADVQPEDEDTYTCDAENVKTSAQFFVVEEQSITIVRGLKDMTVMPPAPAWFECETSIPSVRFPKWLLG
KTVLQAGGNVGLQDGTVHRLTLHKTCSTMTGPVHFTIGKSRSSAQLVVSDIPVVLTRPLEPKAGRELQSVVL
SCDFRPAPKAVQWYKDDTPLSPSEKFKMALEGQMAELRILRLTPADAGVYRCQAGSAQSSAEVTEAREVTVI
QPLQDAEAMEEGRVCFSELSHKDEDEIEWSLNGTPLYNDSFHEISHEGCLHTLVLKSVRQADTGTVCATSPKV
SVSARLVVKGKPVVFLKALDDVSAEERGTTLTQCEVSDPEARVVRKDGVELGSPDKYDFLHKAGARGLTVHD
LSHEDAGLYTCQVGSKETQSKVSVHDLHVGITKRLKTVEVLEGESECFEVLSSHESPDPAVWTVGGKTVGGS
GHFHAVRQGRKYTLTVKDAALSDAGEVVSFVGLTSLKASLIIRERPVDITKPLEDQRTTLGEDVMLSCELSRA
GTSVRWLKDGKAIRKSQKYDLLSEGTRAVLVVRKASLKDSGEYTCETEASKSTAKLCVEEKANRFTTELADLQ
VEEKGRAVFTCKTEHPASVVTWRKGLLELRASGKHVPSQEGTLTKLTINALERTDSDTYTCDIGQARTQARLL
VHGQKVRVIEDLEDTAVQEGSSAKFCCRIAPADYGPVHWFLDKTPLHSNELNEITVQPGGYHVLTLRQLALKD
SGTVYFEAGDQRTSAAALRVTEKPSIFSRPLTDVTVTEGEDTLVCEETTTVDSSVRWTKDGKTLRPSARCQLSH
EGCQAQLLITATTPQDGGRYKCEIGGASSSSIVRVHALPVRFRFRESLKDVEVPEGKAATLRCVLSVAAPVEWR
HGDDVLKSSNKYSLRQEGAVLELVIRDLQPDQSGQYSCSFGDQTTSATLTVKTSQAQFVGLKRNKEATEGTTV
TLRCELTKEAPVEWKKGTETLRNGDKYSLKQDGAUCELOICSLLVADAGEYSCVCGQEKTSATLTVKALLVHF
VRRLSKEATEGDTTTLQCELSKAAPVEWRKGTETLRDGDYSLKQDGAUCELOIRSLTIADAGEYLCTCGQE
KTSATLTVRALPAKFKDSLKNEEATEGTTATLSCELSKAAPVTWKKGPKTLQSGDKYVLRQDGAUCGLQIHGL
TMADAGEYSCVCGQEKTSATLTVRGLPAKFIEDLRSQEATEGATAILRCELSKAAPVEWRKGSSETLKDGDYR
LRQDGAUCELOIRGLAVVDGTYSLSPTKFTTEGLRNEEATEGTMATLRCQMSKAAPVEWRKGSSETLRDGDYR
LRQDGAUCELOIRGLTIEDSGEYTCVCGQEKTSATLSVKALPSPRFIEDLRSQEATEGTMATLRCQMSKTAPVE
WKKGSETLRDGGYSLRQDGPVCELOICDLAVEDAGEYSCVCGQEKTSATLSIKALPPRFIEDLRSQEATEG
MATLRCQMSKAAPVEWRKGSSETLGDGGYSLRQNGAVCELOIHDLAVEDTGEYSCVCGQEKTSATLNVKALPP
RFIEDLRSQEATEGTMATLRCQMSKAAPVEWRKGSSETLRDGGYSLRQDGAUCELOIHDLVEDAGQYSCVCG
QEKTSAVLTVDALPPKFTTEGLKKEEATEGTMVTLRQCMSKEATVEWRKGAKTLSDDGGYSLRQDGAUCELOIC
GLAVEDAGEYSCVCGQEKTSATLSVKALPPRFIEDLRSQEATEGTMATLRCQMSKAAPVEWRKGSSETLRDGD
YSLRQDGAUCELOIRDLAVEDAGEYLCVCGQEKTSATLSVKALPPRFIEDLRSQEATEGTMATLRCQMSKAAP
VEWRKGSKTLRDGDYSLRQDGAUCELOICDLAVEDTGDYSCVCGQEKTSATLSVKALPPRFIEDLRSQEARE
GTVATLRCRMSKAAPVEWRKGSSETLKDGDYSLRQEGNLCELOIRDLAVEDTEEYSCVCGQEKTSATLSVKAL
PAKFIEDLRSQEAPESSTVTLRCKLSKASVWKKGSETLRNGARYSLRQDGAUCELEIRDLTVEDTGEYSCT
CGQERTSATLSIMAPQVVFQQPLQNLQAEEGSMASLRCELSVPNAAMVWSKGGLELQGDTRREARQQGCVAEL
LLRDLRREDAGEYSCTCGSQTTSATLMVTAAPVRFLRELQAQDVEGATARLRCELSREAVSVEWRKGSLOLF
PCAKYQMVQEGTTAELLVHGVEQEDAGEYTCDAHTQSIARLSVRAPKPKFKTDLQSTEQEAGGTARLCCQLS
EABPGTPVQWLKEGVLEHVGSKYEMRRQGAUCELOIHGLEAKDTGEYACLVGQKTLASLRVKEPEVTIVRGL
VDMEVQADEDEVEFTCKVSAQATDVQWHLQGLPLQSNVTEVAVLADGCTHVLQKGVTLLEDAGTVSFHVGGL
SSSAQLTVRVPEVTVLEPLKDVQLSEGQDAHFRCLRSRASGQEARWALGGVPLQCNEMNDITVEQGTLYLLTL
HKVTLLEDAGTITLQVGSSEEAQLKVTAKNTVLRGLENVDALEGGEALFECQLSQPEVAHAHTWLLDDEPVHTS
EKVEVVYFENGLRHLLLLKLNKPKQDSCRVTFLAGDVVTSFAFLTVRGWRLEVLEPPHDASVKAGMQVRFTCILS
EAVPVGEATWYINGAAIQPDDTDWTVTTDGSHALTLNAQPPHAGEVTFFAARDAVASARLSVLALPDPPEDA
EVVGRSDHSVTLSSWVAPMSDGGGGLCGYRVMKEASTGQWQLCHDLVPGPECVVDLVPKTYRFRVAAVGPA
GAGEPVHLPQMVKIAPAPAPAPAPAPAPAPETRAVVGEDICLELEVAADGGEVVWHKGTERRIQPGGHFEVLS
RGQRQMLVIKGFRTEDQGEYRCGPIQGLPSSGAATFNVVMTSGSGDEVPAQPSLPPEAAQEGDLHLLWEALAR
KRRMSREPTLDSISELPEEDSRVQHLRQEAETAPDLSEGYSTADELARTGEADLSHTSSDDESRACTPSLVT
YLKKAAGPGISPLASKHEAQVTTSVKPKQKQEPVPTCPGGLSAAADLMDPSLDKAAVKIQAAFQYKVRKE
MKQQEGPVFSRTFGDTEAQVGDVLRLECVLATKTDMRACWLKDGIELTDGRHYHIDQLKDGTCSSLVTLGLAPT
DSGRYTCQVSTKSGRVSHSACVVVSGTESEAESSSGGELDDAFRRAARRLHRLFRTKSPAELSEELFLSADE
GPGEPEEPADWQTYREDENFVCIRFESLAEARQAVTCFRNMFMGIGVEISLGEQGPVGVEMRIGKVAPTVT
PAVPLAKTPGLQTSDAAPVFLTELQNDVQDGYPMSFDCVVTGQVPSVRWFKDGKLEEDDHYMINDDQGG
HQLIITAVVPADMGVYRCLAENSMGVSSTKAELRVELTSTDYDTAADATETSSYFSAQGYLSSREQEGTESDE
GQLPQVLEELKDLQVAPGTRLAKFQLKVKGYPAKLYWFKDGGQPLTSDHIRMTDKKTLHTLEIVSVTREDSG
QYAAYSNAVGAAYSSARLLVRGPSEPEEKPASDVHERLVPPRILEKFTPKKVKRGSSTISFSVKVEGHPAPSV
HWLKEEAEGVLLWIGPDTPGYTMASSSKQHSLLVLDVGRHQGTYTICATNPAGQALCSASLHISGLAKEEEQ
ERVKEALISSFLQGTSAQVSAQMSSEAGFADLVGQSKGESLVAAEAHSHLSLAEVGTSEFLQKLTSTQITMVS
AKISQAKLQVPGGDSDEETKTPSASPRHRSRSPSSSVQESSSESEDGDSRGEIFDIYVVTADYLPGLGAEQDAI
ILREGQYVEVLDSAHPLRWLVRTKPTKSSPSRQGWVSPAYLDRKRLKLSPEWGPTEAPEFPGEAVSEDEYRTRL
SSVIQELLSSEQAFVGLQFLESHHMKHLERSPRVPAVASQKTVIFRNVQDISHFHSSFLKELQCGCTDDDDV

AMCFIKNQEAFEKYLEFLVGRVQAESVSTPVQEFYKKYAEETLSAKDPTQPPPPPLQHYLEQPVERVQKYQ  
 ALLKELIRNKARNRQNCALLEQAYAVVSALPQRAENKLVSLMENYPGTLEALGEPHQGHFVWEGAPGARM  
 PWKGNHRHVFLFRNYLVICKPRRDSRTDTFSYVFRNMMKLSSIDLNDQVEGDDRAFEVWHEREDSVRKYLLQA  
 RTVIKNSWVKEICIGIQQLAQPVWRPPEFEEELADCTAELGETVKLACRVGTGTPKPIVSWYKDGKPVVEVDPH  
 HILIEDPDGSCTLILDNLGTIDSGQYMCFAASAAGNASTLGKILVQVPPRFVNVKVRATPFVEGEDAQITCTVE  
 GAPYPQIRWYKDGTLAPGNRYRMLNEPRSGVLVLIQAASKEDLGHYECELVNRLGSTRGGGELYMQSPALR  
 ARDQHHREQIVAAVEERRPSP\*  
 >ENSMUSP00000151217\_c.15674:G>T\_p.E5225D ENSMUST00000219084.3|Obscn-  
 207|ENSMUSG00000061462|-|chr11:g.58928485:C>A  
 MDHSFSGAPRFLTRPKAFVSVGKDATLSCQIVGNPTPHVSWEKDRQPVEAGARFLAQDGDVYRLTILDLAL  
 GDSGQYVCRARNAIGEFAAVGLRVDSEGTCAEQAPHFLLRPTSIRVREGADATFRCRVGGSPQPAVSWSKDG  
 RRLGPPDAPHVRVEEHGESSALRIRSARPRDGGTYEVRAENPLGSASAAAALVVDSDAEVAGPPGTSTATLLA  
 HLQORREAMRAEGIPSPPGAGTRTCTVTEGKHARLSCFVTGEPKPEVWKKDQGLVTEGRRHVVEDEQENF  
 VLKILFCKQSDRGLYTCTASNLVGQTYSSVLVVVREPTVPFKKRLQDLEVREKESATFQCEVAQPAEAAWFK  
 EETRLWASAKYDIEEGETERRLTVRNVSADDDAVYICETTEGSRVVAELSVQGNLTKLPRKTAVRTGDTAIF  
 WVVELAVPEGPVWRWRNQEEMVAGGRVAITAEGTCHTLTI FQCTLEDMGEVAFVSGGCRTTTQFCVSAPRRPPL  
 YPPADPVVAKATESSVTLWSAPPHGDRPVTIDGYVLEKRLKLGAYAWSRCHEAGWLATFTITGVAEEGDFQ  
 FRVSAINHFGQGPYLEFPGTMHLVPLAVKTPKAVEAVEGGEVTFVSDLTAVASSGEWFLDGEALKASSIYVI  
 RCDRTRHMLTIREVPARLHGAQLKFFVANGIETSIQMVVRAALGLPSSKLPAAAAAREVLAQLHEEAQLLAE  
 QAAAVTWLKDGRELSLGPKEYMQVSAGRRALLVRDVAQDDAGLYECVSRGSRTAYQLLVQDITDGYRDWGPAG  
 PQKHMCKCAGAKIARYLGSSCYRFLQYDKGVWHLEAALDTRQKGTSSCSLHEKPKLVFAKQQAHSVEKAE  
 AGNSATLSCEVTQAQTEVTWFKDGKLLSSSSKVRMEASGCSRRLVVQQAGKADAGEYSCEAGGQKLSFRLDVA  
 EPKLVFAKQQAHSVEKAEAGASATLSCEVAQAQTEVTWFKDGKLLSSSSKVRMEASGCSRRLVVQQAGKADA  
 GEYSCEAGGQKLSFRLDVAEPKMFVFAKEQQARSEVKAEGASATLSCEVAQAQTEVTWFKDGKLLSSSSKVRM  
 EASGCSRRLVVQQAGKADAGEYSCEAGGQKLSFRLDVTEPKLVFAKEQQARSEVKAEGASATLSCEVAQAQ  
 EVTWFKDGKLLSSSSKVRMEASGCSRRLVVQQAGKADAGEYSCEAGGQKLSFHLDVTEPKLVFAKEQQAHSEV  
 KAEAGASATLSCEVAQAQTEVTWFKDGKLLSSSSKVRMEASGCSRRLVVQQAGKADAGEYSCEAGGQKLSFR  
 LDVAEPKLVFAKEQQARSEVKAEGASATLSCEVAQAQTEVTWFKDGKLLSSSSKVRVEASGCSRRLVVQQAGK  
 ADAGEYSCEAGGQKLSFRLDVAEPKLVFAKEQQANSEVKAEGASATLSCEVAQAQTEVTWFKDGKLLSSSSK  
 VRVEASGCSRRLVVQQAGKADAGEYSCEAGGQKLSFRLDVAEPKLAFAKEQQAHSEVKAEGASATLSCEVAQ  
 AQTEVTWFKDGKLLSSSSKVRVEASGCSRRLVVQQAGKADAGEYSCEAGGQKLSFRLDVAEPKLVFAKEQQAH  
 SEVKAEGASATLSCEVAQAQTEVTWFKDGKLLSSSSKVRVEASGCSRRLVVQQVQKADAGEYSCEARGQKLS  
 FRLDVAEAESQIPERPSRREPLVVEKHETIILTATIAAPSVAAVTWLKDGVIEIRRSKRHEATSLGDTHTLTVR  
 GAQVLDIAIYSCRVGKEGQDFPVQVEEVAAKFSKPLEPVEGELGGTVMLVCELSPEQAEVWRCGNTQLRPGK  
 RFQMTSEGRRTLTVSGLEDDAEYVCESRDDRTSARLTVKVPVVKFTSGLSAMVAEEGQEAFTQCQVSPS  
 DAGVTWYKQGMQLPSEKFMVMEVSGASRSLTILGLTLEDAGQVTVAEAGASSAALRVREAPVLFKKKLEPQT  
 VEERTSVTLEVELTRPWPEVKWTRNAAVLTPSENVEIRAEGARHCLVLRVSGFADRGFFGCETPDDKTQAKLN  
 VEMRQVRLVRGLQEVEAKEQGTASMDVELSHAEVEGSWTRDGLRLQPGPKCHLAVQGPVHILTLALSALQPQDSG  
 LVAFRAEGVHTSARLIVTELPVSFTRVLQDVVATQKEKVTLECELSRPVDVRLKDGVELRAGKAIGIVAQGT  
 CRSLVIYRCETGDQGVYCDALDAQTSASLRVQGRYTLIFRRVLAEDAGEVKFVAENAESRAHLRVKELPVT  
 LLRPLRDKIAMEKHRGVLECVSRASAQVRWFKGGVELQSGPKYEVVSDGLYRKLVINQVPEDEDTYTC DAG  
 NVKTSAQFFVEEQSITIVRGLKDMTVMPEPAPAWFECETSIPSVRPPKWLKGTVLQAGGNVLEQDGTVHRLT  
 LHKTCSTMTGPVHFTIGKSRSSAQLVSDIPVVLTRPLEPKAGRELQSVVLSCDFRPAPKAVQWYKDDTPLSP  
 SEKFKMALEGQMAELRILRLTPADAGVYRCQAGSAQSSAEVTVAREVTVIQPLQDAEAMEEGRVCFSCELSH  
 KDEDIEWSLNGTPLYNDSFHEISHGCLHTLVLKSVRQADTGTVCATSPKVSVSARLVVKGKPVVFLKALDDV  
 SAEERGLTLTQCEVSDPEARVVWRKDGVELGPSDKYDFLHKAGARGLTVHDLSDHEDAGLYTCQVGSKETQSKV  
 SVHDLHVGITKRLKTVEVLEGESECFEVLSSHESPSDPAVWTVGGKTVGGSGHFHAVRQGRKYTLTVKDAALS  
 DAGEVVFVSVLGLTSKASLIIRERPVDITKPLEDQRTTLGEDVMLSCELSRAGTSVRWLKDGKAIRKSQKYDLL  
 SEGTRAVLVVRKASLKDSGEYTCETEASKSTAKLCVEEKANRFTBELADLQVEEKGRAVFTCKTEHPASVVTW  
 RKGLLELRASGKHVPSQEGTLKLTINALERTSDTYTCDIGQARTQARLLVHGQKVRVIEDLEDTAVQEGSS  
 AKFCCRIPADYGPVHWFLLDKTPLHSNELNEITVQPGGYHVLTLRQLALKDSGTVYFEAGDQRTSAAALRVTEK  
 PSIFSRPLTDVTVTEGEDTLVCETTTTVDSSVRWTKDGKTLRPSARCQLSHEGCAQLLITATTPQDGGRYKC  
 EIGGASSSIVRVHLPVRFRESLKDVEVPEGKAATLRCVLSVAAPVEWRHGDDVLKSSNKYSLRQEGAVLE  
 LVIRDLPQDSGQYSCSFGDQTTSATLTVKTTSSAQFVGLKRNKEATEGTTVTLRCELTKAPVEWKKGTETLR  
 NGDKYSLKQDGA VCELQICSLLVADAGEYSCVCGQEKTSATLTVKALLVHFVRRLRSKEATEGDTTTLQCELS  
 KAAPVEWRKGTETLRDGDYSLKQDGA VCELQIRSLTIADAGEYLCTCGQEKTSATLTVRGLPAKFIEDLRSQ  
 EATEGATAILRCELSKAAPVEWRKGSSETLKDGDYTLRQDGA VCELQIRGLAVVDTGTYSLPTKFTTEGLRNE  
 EATEGTMATLRCQMSKAAPVEWRKGSSETLRDGDYSLRQDGA MCELQIRGLTIEDSGEYTCVCGQEKTSATLS

VKALPPRFIEDLRSQEATEGTMATLRCQMSKAAPVEWRKGSSETLGDGGRYSLRQNGAVCELQIHDLAVEDTGE YSCVCGQEKTSATLNVKALPPKFTEGLKKEEATEGTMVTLRCQMSKEATVEWRKGAKTSLDGGGRYSLRQDGM CELQICGLAVEDAGEYSCVCGQEKTSATLSVKALPPRFIEDLRSQEATEGTMATLRCQMSKAAPVEWRKGSSET LRDGDRYSLRQDGA VCELQIRDLAVEDAGEYLCVCGQEKTSATLSVKALPPRFIEDLRSQEATEGTMATLRCQ MSKAAPVEWRKGSKTLLRDGDRYSLRQDGMCELQICDLAVEDTDYSCVCGQEKTSATLSVKAPQVVFQQPLQ NLQAEEGSMASLRCELSVPNAAMVWSKGGLELQGDTRREARQQGCVAELLLRDLRREDAGEYSCTCGSQTTSA TLMVTAAPVRFLELQAQDVDEGATARLRCELSREAVSVEWRKGS LQLFPCA K YQMVQEGTTAELLVHGVEQE DAGEYTC DAGHTQSIARLSVRAPKPKFKTDLQSTEQEAGGTARLCCQLSEAE PGTPVQWLKEGVELHVGS KYE MRRQYAVCELLIHGLEAKDTGEYACL VGGQKTLASLRVKEPEVTIVRGLVDMEVQADEDEVFTCKVSAQAGATD VQWHLQGLPLQSNEVTEVAVLADGCTHVLQKGVTLLEDAGTVSFHVGG LSSSAQLTVRVPVTVLEPLKDVQL SEGQDAHFRCLSRASGQEARWALGGVPLQCNEMNDITVEQGTLYLLTLHKVTLEDAGTITLQVGS CSSEAQL KVTAKNTVLRGLENDVALEGG EALFECQLSQPEVAHTWLLDDEPVHTSEKVEVVYFENGLRHL LLLKLNKLPQ DSCRVTFLAGDVVTS AFLTVRGWRLEVLEPPHDASVKAGMQVRFTCILSEAVPVGEATWYINGAAIQPDDTDW TVTDTDGSHHALTLSNAQPQHAGEVTF AARDAVASARLSVLALPDPEDA EVVGRSDHSVTL SWVAPMSDGGGG LCGYRVEMKEASTGQWQLCHDLVPGPECVVDLVP GKTYRFRVA AVGPAGAGEPVHLPQMVKIAPAPAPAPAP APAPETRAQAVVGEDICLELEVAADGGEVVWHKGTERRIQPGGHFEVLSRGRQMLVIKGFRTEDQGEYRCGPIQ GLPSSGAATFNVVMTSGSGDEVPAQPSLPPEAAQEGDLHLLEALARKRRMSREPTLDSISELPEEDSRVQHL RQEAETAPDLSEGYSTADELARTGEADLSHTSSDDES RAGT PSLVTYLKKAGGPGISPLASKHEAQVTTSVK PQKQQEPVVPPTCPPPGDLSAADLMDPSLDKAAVKIQAAF KGYKVRKEMKQQEGPVFSRTFGDTEAQVDVLRLE CVLATKTD MRACWLKDGIELTDGRHYHIDQLKDGTC SLLVTGLAPTDSGRYTCQVSTKSGRVSHSACVVVSG TESEAESSSGGELDDAFRRARRLHRLFRTKSPAELSEELFLSADEGPGEPEEPADWQTYREDEFVCI RFE SLAEARQAVTCFRNMFMATMGI GVEISLGEQGPGRVEMRIGKVAPVTPAVPLAKTPGLQTSDAAPVFLTELQN QVDQDGYPMSFDCVVTGQVPVSVRWFKDGKLL EEDDH YMINDDQGGHQLIITAVVPADMGVYRCLAENSMGV SSTKAELRVELTSTDYDTAADATETSSYFSAQGYLSSREQEGTESDEGQLPQVLEELKDLQVAPGTRLAKFQL KVKGY PAPKLYWFKDGOPLTSDHIRMTDKKTLHTLEIVSVTREDSGQYAA YISNAVGAAYSSARLLVRGPSE PEEKPASDVHERLWPPRILEKFTPKKVKRGSSITF SVKVEGHPAPSVHWLKEEA EKGVLWIGPDTPGYTMASS SKQHSVLVLLDVGRQHGYTYC IATNPAGQALCSASLHISGLAKEEEQERVKEALISSFLWGTSQAVSAQMSSES AGFADLVGQSKGESLVAAEEAHSHLSLAEVGT EEF LQKLT SQIT EMVSAKISQAKLQVPGGDSDEETKTPSASP RHGRSRPSSSVQESSSESEDGDSRGEIFDIYVVTADY LPLGAEQDAIILREGQYVEVLDSAHPLRVLVTRTKPT KSSPSRQGWVSPAYLDKRLKLSPEWGPTEAPEFPGEAVSEDEYRTRLS SVIQELLSSEQAFVGE LQFLESHM KHLERSPRVPAAVASQKT VIFRNVQDISHFHSSFLKELQCGCTDDDVAMCFIKNQEA FEKYLEFLVGRVQAES VVVSTPVQEFYKKYAEETLSAKDPTQPPPPPLQHYLEQPVERVQKYQALLKELIRNKARNRQNCALLEQAYAV VSALPQRAENKLVSLMENYPGTLEALGEP I RQGHFIVWEGAPGARM PWKGHNHRVFLFRNYLVI CKPRRDSR TDTFSYVFRNMMKLSSIDLNDQVEGDDRAFEVWHERE DSVRKYLLQARTV I IKNSWVKEICGIQORLAQPVWR PPEFEELADCTAELGETVKLACRVGTGPKPIVSWYKDGKPEVDPHILIEDPDG SCTLIDLNLGTIDSGQY MCFEASAAGNASTLGKILVQVPPRFV NKVRATPFVEGEDAQITCTVEGAPYPQIRWYKDGTL LAPGNRYMLN EPRSGVLV LVIQAASKEDLGHYECELVNR LGSTRGGGEL YMQSPALRARDQHHREQIVA AAVEVTEQETKVPKK TVIIEETITTVVKS PRGRRQSPGKSPSRPSRRSASPRRPGLLAPERLYPPGTSPSRRLEVEQGRKAPVPALY VTEAEVHAPASQSQPKWLEVEETIEVRVKKTGSRGASPVREMTSRGEGILFTLPGGIPGRDPNANN SNKSVY QEARTWGP AVVHVGEFFIFQVDSVGNVDWAASPEPEQVRASQKEENTERQEGCSDGDENTFLMEEPQD TDSL QGRDPKILTHNGRVLT LADLEDYVPQEGETF GCGDSTPSTPDEPPCEVSVLQREI SEPTVQPVLLNVGRPPG TGATPSFFRPGSQVHSPESVSFLLEAWSGPVSAAPWTSSFHTHVQSSVDGSHGFSFKTEVSTQTVSF GAVGET VTLHIDPDGGEAPGPSQG\*

>rs47135419\_ENSMUSP00000158795\_c.18354:G>A\_p.E6119K  
ENSMUST00000238536.2|Obscn-210|ENSMUSG00000061462|-|chr11:g.58928511:C>T MDHSFSGAPRFLTRPKAFVSVGKDATLSCQIVGNPTPHVSWEKDRQPVEAGARFLAQDGDVYRLTILDLAL GDSGQYVCRARNAIGEAFVAVGLRVDSEGTCAEQAPHLLRPTSIRVREGADATFRCRVGGSPQPAVSWSKDG RRLGPPDAPHVRVEEHGESSALRIRSARPRDGGTYEVRAENPLGSASAAAALVVDSDAEVAGPPGTSTATLLA HLLQRRREAMRAEGIPPSPPGAGTRTCTVTEGKHARLSCFVTGEPKPETVWKKDGLVTEGRRHVVEDEQENF VLKILFCKQSDRGLYTCTASNLVGTYSVVLVVVREPTVPFKKRLQDLEVREKESATFQCEVAQPA TEAAWFK EETRLWASAKYDIEEEGTERRLTVRNVSADDDAVYICETTEGSRVAELSVQGNLTKLPRKTAVRTGDTAIF WVVELAVPEGPVWRWRNQEEMVAGGRVAITAEGTCHTLTI FQCTLEDMGEVAFVSGGCRTTTQFCVSAPRRPPL YPPADPVVKAKTESVTLWSAPPHGDRPVTIDGYVLEAKRKL GAYAWSRCHEAGLWATEFTITGVAEEGDFQ FRVSAINHFQGGQPYLEFPGMTMLVPLAVKTPLKAVEAVEGGEVTFVSDLTVASSGEWFLDGEALKASSIYVI RCDRTRHMLTIREVMPARLHGAQLK FVANGIETS IQMVVRAALGLPS SKLPAAAAREVLAQLH EEAQLLAELSD QAAA VTWLKDGRELSLGP KYEMQVSAGRRALLVRDVAQDDAGLYECVSRGSRTAYQLLVQDITDGYRDWGPAG PQKHMCKCAGAKIARYLGSSCYRFLQYDKGVWHLEAALDTRQKGKTS SCSLHEKPKLVFAKQQAHSEVKA EAGNSATLSCEVTQAQTEVTWFKDGKLLSSSSKVRMEASGCSRRLV VQQAGKADAGEYSCEAGGQKLSFRLDVA

EPKLVFAKQQAHSEVKAEGASATLSCEVAQAQTEVTFWKDGKLLSSSSKVRMEASGCSRRLVVQQAGKADA  
GEYSCEAGGQKLSFRLDVAEPKMFVFAKEQQARSEVKAEGASATLSCEVAQAQTEVTFWKDGKLLSSSSKVRM  
EASGCSRRLVVQQAGKADAGEYSCEAGGQKLSFRLDVTEPKLVFAKEQQARSEVKAEVGN SATLSCEVAQAQ  
EVTWFKDGKLLSSSSKVRMEASGCSRRLVVQQAGKADAGEYSCEAGGQKLSFRLDVAEPKLVFAKEQQARSEV  
KAEAGNSATLSCEVAQAQTEVTFWKDGKLLSSSSKVRMEASGCSRRLVVQQAGKADAGEYSCEAGGQKLSFHL  
DVTEPKLVFAKEQQAHSEVKAEGASATLSCEVAQAQTEVTFWKDGKLLSSSSKVRMEASGCSRRLVVQQAGK  
ADAGEYSCEAGGQKLSFRLDVAEPKLVFAKEQQARSEVKAEGASATLSCEVAQAQTEVTFWKDGKLLSSSSK  
VRVEASGCSRRLVVQQAGKADAGEYSCEAGGQKLSFRLDVAEPKLVFAKEQQANSEVKAEGASATLSCEVAQA  
AQTEVTFWKDGKLLSSSSKVRVEASGCSRRLVVQQAGKADAGEYSCEAGGQKLSFRLDVAEPKLVFAKEQQAH  
SEVKAEGASATLSCEVAQAQTEVTFWKDGKLLSSSSKVRVEASGCSRRLVVQQAGKADAGEYSCEAGGQKLS  
FRLDVAEPKLVFAKEQQAHSEVKAEGASATLSCEVAQAQTEVTFWKDGKLLSSSSKVRVEASGCSRRLVVQQ  
AGKADAGEYSCEAGGQKLSFRLDVAEPKLVFAKEQQAHSEVKAEGASATLSCEVAQAQTEVTFWKDGKLLSS  
SSKVRVEASGCSRRLVVQQAGKADAGEYSCEAGGQKLFRLDVAEPKLVFAKEQQAHSEVKAEGASATLSCE  
VAQAQTEVTFWKDGKLLSSSSKVRVEASGCSRRLVVQQAGKADAGEYSCEAGGQKLSFRLDVAEPKLVFAKEQ  
QAHSEVKAEGASATLSCEVAQAQTEVTFWKDGKLLSSSSKVRVEASGCSRRLVVQQVQKADAGEYSCEARGQ  
KLSFRLDVADTRLMFAKEQQARTEVKAEGNSATLSCEVAQAQTEVTFWKDGKLLSSSSKVRVEASGCSRRLV  
VQQAGKADAGEYSCEAGGQKLSFRLDVAEAEASQIPERPSRREPLVVKHEHETIILTATIAAPSVAAVTWLKDG  
V EIRRSKRHEATSLGDHTLTVRGAQVLDLSAIYSCRVGKEQDFPVQVEEVAAKFSKPLEPVEGELGSTMVLC  
ELSPQAEVWRCGNTQLRPGKRFQMTSEGPRRTLTVSGLREDDAEYVCESRDDRTSARLTVKVPVVKFTS  
GLSAMVAEEGQEQATFQCVVSPSDAGVTWYKDGMLQPSKFMVVEGASRSILTILGLTLEDAGQVTEAEGAS  
SSAALRVREAPVLFKKLEPQTEVEERTSVTLEVELTRPWPEVKWTRNAAVLTPSENVEIRAEGARHCLVLRV  
GFADRGFFGCETPDDKTQAKLNVEMRQVRLVRLGQVEEAKQGTASMDVELSHAEEVGSWTRDGLRLQPGPKC  
HLAVQGPVHILTLALSALQPQDSGLVAFRAEGVHTSARLIVTEL PVSFTRVLQDVVATQKEKVTLECELSRPV  
RVLKDGVELRAGKAI GIVAQGTCSRSLVIYRCETGDQGVYVCDALDAQTSASLRVQGRTYTLIFRRLAEDAGE  
VKFVAENAESRAHLRVKELPVTLLRPLRDKIAMEKHRGVLEQCQVSRASQVRWFKGGVLELQSGPKYEVVSDGL  
YRKLIVINDVQPEDEDTYTC DAGNVKTSAQFFVVEEQSITIVRGLKDMTVMPEPAPAWFECETSIPSVRPPKWL  
KTVLQAGGNVLEQDGTYVHRLTLHKTCSTMTGPHFTIGKSRSSAQLVVSDIPVVLTRPLEPKAGRELQSVVL  
SCDFRPAPKAVQWYKDDTPLSPSEKFKMALEGMALRILRLTPADAGVYRCQAGSAQSSAEVTEAREVTVI  
QPLQDAEAMEEGRVCFSCELSHKDEDIEWLSLNGTPLYNDSFHEISHGCLHTLVLSVRQADTGTVCATSPKV  
SVSARLVVKGKPVVFLKALDDVSAEERGLTLTQCEVSDPEARVVRKDGVELGSPDKYDFLHKAGARGLTVHD  
LSHEDAGLYTCQVGSKETQSKVSVHDLHVGITKRLKTVEVLEGESECFEVLSHESPSDPAVWTVGKTVGGS  
GHFHAVRQGRKYTLTVKDAALSDAGEVVFVSLGLTSKASLIRERPVDTKPLEDQRTTLGEDVMLSCELSRA  
GTSVRWLKDGKAIRKSQKYDLLSEGTRAVLVVRKASLKDSDGEYTCETEASKSTAKLCVEEKANRFTTEELADLQ  
VEEKGRAVFTCKTEHPASVVTWRKGLLELRASGKHVPSQEGTLKLTINALERTDSDTYTCDIGQARTQARLL  
VHGQKVRVIDLEDLEDTAVQEGSSAKFCRIAPADYGPVHWF LDKTPLHSNELNEITVQPGGYHVLTLRQLALKD  
SGTVYFEAGDQRTSAALRVTEKPSIFSRPLTDVTVTEGEDLTLVCETTTVDSSVRWTKDGKTLRPSARCQLSH  
EGCQAQLLITATTPQDGGRYKCEIGGASSSSIVRVHALPVRFRRESLKDVEVPEGKAATLRCVLSVAAPVEWR  
HGDDVLKSSNKYSLRQEGAVLELVIRDLQPDQSGQYSCSFGDQTTSATLTVKTSQAQFVGLRKNKEATEGTTV  
TLRCELTKAEAPVEWKKGTETLRNGDKYSLKQDGAVCELQICSLLVADAGEYSCVCGQEKTSATLTVKALLVHF  
VRLRSKEATEGDTTTLQCELSKAAPVEWRKGTETLRDGDYSLKQDGAVCELQIRSLTIADAGEYLCTCGQE  
KTSATLTVRALPAKFKDSLKNEEATEGTTATLSCELSKAAPVTWKKGPKTLQSGDKYVLRQDGAVCGLQIHGL  
TMADAGEYSCVCGQEKTSATLTVRGLPAKFIEDLRSQEATEGATAILRCELSKAAPVEWRKGSSETLKDGDYR  
LRQDGAVCELQIRGLAVVDGTYSLSLPTKFTTEGLRNEEATEGTMATLRCQMSKAAPVEWRKGSSETLRDGDYR  
LRQDGAMCELQIRGLTIEDSGEYTCVCGQEKTSATLSVKALPSRFIEDLRSQEATEGTMATLRCQMSKTAPVE  
WKKGSETLRDGGYSLRQDGPVCELQICDLAVEDAGEYSCVCGQEKTSATLSIKALPPRFIEDLRSQEATEG  
MATLRCQMSKAAPVEWRKGSSETLGDGGYSLRQNGAVCELQIHDLAVEDTGEYSCVCGQEKTSATLNVKALPP  
RFIEDLRSQEATEGTMATLRCQMSKAAPVEWRKGSSETLRDGGYSLRQDGAVCELQIHDLVEDAGQYSCVCG  
QEKTSAVLTVDALPPKFTTEGLKKEEATEGTMVTLRCQMSKEATVEWRKGAKTSLDGGYSLRQDGAMCELQIC  
GLAVEDAGEYSCVCGQEKTSATLSVKALPPRFIEDLRSQEATEGTMATLRCQMSKAAPVEWRKGSSETLRDGD  
YSLRQDGAVCELQIRDLAVEDAGEYLCVCGQEKTSATLSVKALPPRFIEDLRSQEATEGTMATLRCQMSKAAP  
VEWRKGSSETLRDGDYSLRQDGAMCELQICDLAVEDTGDYSCVCGQEKTSATLSVKALPPRFIEDLRSQEARE  
GTVATLRCRMSKAAPVEWRKGSSETLKDGDYSLRQEGNLCELQIRDLAVEDTEEYSCVCGQEKTSATLSVKAL  
PAKFIEDLRSQEAPESSTVTLRCKLSKASVWKKGSETLRNGARYSLRQDGAVCELEIRDLTVEDTGEYSCT  
CGQERTSATLSIMAPQVVFQQLQNLQAEEGSMASLRCLELSPVNAAMVWSKGGLELQGDTRREARQQGCVAEL  
LLRDLRREDAGEYSCGQTSATLMVTAAPVRFLELQAQDVDEGATARLRCLELSREAVSVEWRKGSLLQFL  
PCAKYQMVQEGTTAELLVHGVEQEDAGEYTCDAHTQSIARLSVRAPKPKFKTDLQSTEQEAAGGTARLCCQLS  
EAEFGTPVQWLKEGVELHVGSKYEMRRQGAVCELLIHGLEAKDTGEYACLVGQKTLASLRVKEPEVTIVRGL  
VDMEVQADEDEFTCKVSAQATDVQWHLQGLPLQSNVTEVAVLADGCTHVLQKGVTLLEDAGTVSFHVGGL

SSSAQLTVRVPEVTVLEPLKDVQLSEGDQAHFRCLRSRASGQEARWALGGVPLQCNEMNDITVEQGTLYLLTL  
HKVTLEDAGTITLQVGSSEEAQLKVTAKNTVLRGLENVDALEGGEALFECQLSQPEVAHAHTWLLDDEPVHTS  
EKVEVVYFENGLRHLLLLKLNKPKQDSCRVTFLAGDVVTSFAFLTVRGWRLEVLEPPHDASVKAGMQVRFTCILS  
EAVPVGEATWYINGAAIQPDDTDWTVTTDGSHHALTLNSAQPHAGEVTFFAARDAVASARLSVLALPDPPEDA  
EYVGRSDHSVTLWSVAPMSDGGGGLCGYRVMKEASTGQWQLCHDLVPGPECVVDDLVPGKTYRFRVAAVGPA  
GAGEPVHLPQMVKIAPAPAPAPAPAPAPAPETRQAVVGEDICLELEVAADGGEVVWHKGTERRIQPGGHFEVLS  
RGQRQMLVIKGFRTEDQGEYRCGPIQGLPSSGAATFNVMVMTSGSGDEVPAQPSLPPEAAQEGDLHLLWEALAR  
KRRMSREPTLDSISELPEEDSRVQHLRQEAETAPDLSEGYSTADELARTGEADLSHTSSDDESRACTPSLVT  
YLKAGGPGISPLASKHEAQVTTSVKPKQKQEPVVPTCPPGDLAADMPSLDKAAVKIQAAAFKGYKVRKE  
MKQQEGPVFSRTFGDTEAQVGDVLRLECVLATKTDMRACWLKDGIELTDGRHYHIDQLKDGTCSSLVTLGLAPT  
DSGRYTCQVSTKSGRVSHSACVVVSGTESEAESSSGGELDDAFRAARRLHRLFRTKSPAELSEEELFLSADE  
GPGEPEPADWQTYREDENFVCIRFESLAEARQAVTCFRNMFATMIGVEISLGEQGRGVEMRIGKVAPTVT  
PAVPLAKTPGLQTSDAAPVFLTELQNDQVQDGYPMSFDCVVTGQPVPSVRWFKDGKLEKDDHYMINEDQGG  
HQLIITAVVPADMVYRCLAENSMGVSSTKAELRVELTSTDYDTAADATETSSYFSAQGYLSSREQEGTESDE  
GQLPQVLEELKDLQVAPGTRRLAKFQLKVKGYPAKLYWFKDGGQPLTSDHIRMTDKKTLHTLEIVSVTREDSG  
QYAAYSNAVGAAYSSARLLVRGPSEPEEKPASDVHERLVPPRILEKFTPKKVKRGSSTIFSVKVEGHPAPSV  
HWLKEEAKEKGVWIGPDTPGYTMASSSKQHSVLVLDVGRQHOGTYTCIATNPAGQALCSASLHISGLAKEEEQ  
ERVKEALISSFLQGTSAVSAQMSSESAGFADLVGQSKGESLVAEEAHSHLSLAEVGTFFLQKLTSTQITEMVS  
AKISQAKLQVPGGDSDEETKTPSASPRHRSRSPSSSVQESSSEEDGDSRGEIFDIYVVVTADYLPGLAEQDAI  
ILREGQYVEVLDSAHPLRWLVRTKPTKSSPSRQGWVSPAYLDRKRLKLSPEWGPTEAPEFPGEAVSEDEYRTRL  
SSVIQELLSSEQAFVQELQFLESHHMKHLERSPRVPAAVASQKTVIFRNVQDISHFHSSFLKELQCGCTDDDV  
AMCFIKNQEAFAKEYLEFLVGRVQAESVVVSTPVQEFYKKYAEETLSAKDPTQPPPPPLQHYLEQPVVERVQKYQ  
ALLKELIRNKARNRQNCALLEQAYAVVSALPQRAENKLVSLMENYPGTLEALGEPHQGHFIWEGAPGARM  
PWKGHNHRVFLFRNYLVICPRRDSRTDTFSYVFRNMMKLSSIDLNDQVEGDDRAFEVWHEREDSVRKYLLQA  
RTVIKNSWVKEICIGIQRLAQPVWRPPEFEEELNADCTAELGETVKLACRVTGTPKPIVSWYKDGKPVVEVDPH  
HILIEDPDGSCITLIDNLTGIDSGQYMCFAASAAGNASTLGIILVQVPPRFVNVKVRATPFVEGEDAQITCTVE  
GAPYPIRQWYKDGTLTLAGPNRYRMLNEPRSGVLVVLVIAQASKEDELGHYECELVNRLGTSRGGELQYMSPALR  
ARDQHHREQIVAAVEDTSVEGSAHSAQDQADQQAASVLWRLLGSEALGSPSPGDLNTRQSEPPAFEEAASQIP  
GAASGTPEVSPQPGTHKLEQETTSSGSQGWTPVIRVEGTAWPGAGTGQLLLDVHSQVIMETTQRTYVCQAPDT  
GVTRAPSMQVTIEDVQVQVGDMAQFDAVIEGHPPPVTWYKGSTQLTSSARLSQRQDGTYSVLVTDVAPHDA  
GVYTCVANNAGGQVLCKAELLVHGGDKLDAENQVYRRKLHSFYDVQEEIGRGVFGFVKRVQHKGNMFCAAKF  
IPLRSKTRAQAYQERDILATLGHPLVTGLLDQFETRKTLLIILELCSSEELLDRLFKKGVVTEAEVKVYIQQL  
VEGLHYLHSHGILHLDIKPPNIMVHPAREDIKICDFGFAQKITPSEPQYSKYGSPEFVSPETIEQNPVSEGS  
DIWAMGVISYLSLTCSSPFAGESDRATLLNVLEGRVSWSSPTAAHLSSEDAKDFIKATLQRTPRARPSTSQCLA  
HPWFLKSMPAEEAHFINTKQLKFLARSRWQRSLMSYKSILVMRSIPPELLQGGPPDSPSLGVARHLRGEASGAS  
SSSSSDNELAPFARAKSLPPSPVTHSPLLHPRGFLRPSASLPEETEASMPADAAVSPASQSGPPGCV  
PRHSVSISSLFYQQAGEGAERGNKTSGAKRHPARRRHLLKGGYIARALPGLREPLMEYSLLEEEAAREEQASLM  
TKTPSFETALRLPSSSVREVPGRSHSLDNPPVTGTPSPEACKEQLLFPSTGLTHETTAKDRGHKEGFLQESV  
PFPPMGSRSRPGKQEGSSQDSCRKPASSCHSELGSGSQEGCPSQSLGSLPPQSLKKEKELSTSCGPLFSEQ  
PQAAPFPTQVSPLLGSEKEPQDGLSEGPVVPSSSPGSASQVDASLDTEGLSEAGDTCDFTPPPQRPQEQAT  
TRKFSLESRGGYAGVAGYGTFAFGGDAGGMLGQGPLWARMWAVSQSSEEQDEAATESPQPLESGLPIAEASG  
VPLRTSPSLTPWEEVEQVSLVQIRDLSGDAEAADTISLDISEVDPAYLNLSLDYDIKYLPEFEMI FRRVPKPI  
EQPESPGSETEAGQGLADFLLEAAWPWPGELGLRAGLEITEEPEEPGDLEALLGEAAVGRKRKWSPSRGLFQF  
PGRCLSGEEPVELGLRQVRKASMAHISRIKGRPEGEREGPPRKKAGLASFRLSGLKGRDQELSDEAVVLGQ  
SVTLACQVLAQPTAATWASKDGVLESSGHLISSTLKNFQLLTIILVVKEEDLGTYTCCVSNPLGTAVTTGVL  
RKAERPSSSPREVEGELYKDAVLLVWKPVESCGPVTVIVQCCIEGGSWTTLASDISDCCYLTGKLSRGGMYIF  
RTACVSKAGMGPISSPSEQVLLGGPNHLASEEESRGRPAQLLPSTKTFQAFQMQIRRGFRFSVVRQCREKASGR  
ALAAKIVPYQPEDKTAVLREYEAALKRHLHPLHAQLHAAYLSPRHLVLIILELCSGPELLPSLAERESYSESDVK  
DYLWQMLSATQYLHAQHILHLDLRSENMMVTEYNLLKVIDLGNALDQEKVPAPENFKDYLETMAPELLEGG  
GAVPQTDIWAIGVTAIFIMLSGEYPESSSEGRDLQKGLRKLIRLSRCYAGLSGGAVAFQSSLCAQPWGRPCA  
STCLQCGLWTEEGPTGSRPTVPTVPTVRLRAVFREREKRRALLYKKNLAQVR\*  
>rs47135419\_ENSMUSP00000038264\_c.16194:G>A\_p.E5399K  
ENSMUST00000047441.14|Obscn-202|ENSMUSG00000061462|-|chr11:g.58928511:C>T  
MDHSFSGAPRFLTRPKAFVVSVGKDATLSCQIVGNPTPHVSWEKDRQFVEAGARFRLAQDGDVYRLTILDLAL  
GDSGQYVCRARNAIGEFAAVGLRVDSEGTCAEQAPHLLRPTSIRVREGADATFRCRVGGSPQPAVSWSKDG  
RRLGPPDAPHVRVEEHGESSALRIRSARPRDGGTYEVRAENPLGSASAAAALVVDSDAEVAGPPGTSTATLLA  
HLQORREAMRAEGIPSPPGAGTRTCTVTEGKHARLSCFVTGEPKPEVWKKDQGLVTEGRRHVVEDEQENF  
VLKILFCKQSDRGLYTCTASNLVGQTYSSVLVVVREPTVPFKKRLQDLEVREKESATFQCEVAQPAEAWFK



EETRLWASAKYDIEEEGTERRLTVRNVSADDDAVYICETTEGSRRTVAELSVQGNLTKLPRKTAVRTGDTAIF
WVELAVPEGPVRWLRNQEEMVAGGRVAITAEGTCHTLTI FQCTLEDMGEVAFVSGGCRTTTTQFCVSAPRRPPL
YPPADPVVKAKTESSVTLWSAPPHGDRPVTIDGYVLEKRKLGAYAWSRCHEAGWLATTEFTITGVAAEGDFQ
FRVSAINHFGQGPYLEFPGTMHLVPLAVKTPLKAVEAVEGGEVTFVSDTLTVASSGEWFLDGEALKASSIYVI
RCDRTRHMLTIREVPARLHGAQLKVFVANGIETS IQMVVRAALGLPS SKLPAAAAREVLAQLHHEAQLLAE LSD
QAAA VTWLKDGRELSLGPKEYMQVSAGRRALLVRDVAQDDAGLYECVSRGSRTAYQLLVQDITDGYRDWGPAG
PQKHMCKCAGAKIARYLGSSCYRFLQYDKGVWHWLEAALDTRQGKGTSSCSLHEKPKLVFAKQQAHSEVKA
AGASATLSCEVAQAQTEVTFWKDGKLLSSSSKVRMEASGCSRRLVVQQAGKADAGEYSCEAGGQKLSFRLDVA
EPKMVFAKEQQARSEVKAEGASATLSCEVAQAQTEVTFWKDGKLLSSSSKVRMEASGCSRRLVVQQAGKAD
GEYSCEAGGQKLSFRLDVTEPKLVFAKEQQARSEVKAEGVNSATLSCEVAQAQTEVTFWKDGKLLSSSSKVRM
EASGCSRRLVVQQAGKADAGEYSCEAGGQKLSFRLDVAE PKLVFAKEQQARSEVKAEGNSATLSCEVAQAQ
EVTWTFWKDGKLLSSSSKVRMEASGCSRRLVVQQAGKADAGEYSCEAGGQKLSFHLDVTEPKLVFAKEQQAHSEV
KAEAGASATLSCEVAQAQTEVTFWKDGKLLSSSSKVRMEASGCSRRLVVQQAGKADAGEYSCEAGGQKLSFRL
DVAE PKLVFAKEQQARSEVKAEGASATLSCEVAQAQTEVTFWKDGKLLSSSSKVRVEASGCSRRLVVQQAGK
ADAGEYSCEAGGQKLSFRLDVAE PKLVFAKEQQANSEVKAEGASATLSCEVAQAQTEVTFWKDGKLLSSSSK
VRVEASGCSRRLVVQQAGKADAGEYSCEAGGQKLSFRLDVAE PKLFAKEQQAHSEVKAEGASATLSCEVAQA
AQTEVTFWKDGKLLSSSSKVRVEASGCSRRLVVQQAGKADAGEYSCEAGGQKLSFRLDVAE PKLFAKEQQAH
SEVKAEGASATLSCEVAQAQTEVTFWKDGKLLSSSSKVRVEASGCSRRLVVQQAGKADAGEYSCEAGGQKLS
FRLDVAE PKLFAKEQQAHSEVKAEGASATLSCEVAQAQTEVTFWKDGKLLSSSSKVRVEASGCSRRLVVQQ
AGKADAGEYSCEAGGQKLFRLDVAE PKLVFAKEQQAHSEVKAEGASATLSCEVAQAQTEVTFWKDGKLLSS
SSKVRVEASGCSRRLVVQQVQKADAGEYSCEARGQKLSFRLDVAE AESQI PERPSRREPLVKEHETIILTAT
IAAPSVAAVTWLKDGV EIRRSKRHEATSLGDTHLTVRGAQVLD SAIYSCRVGKEGQDFPVQVEEVA AKFSKP
LEPVEGELGGTVMLVCELSPEQAEVWRCNGTQLRPGKRFQMTSEGPRRTLTVSGLREDDAE EYVCE SRDDRT
SARLTVKVPRVVKFTSGLSAMVAEEGQEATFQCVVSPSDAGVTWYKDGMLQ PSEKFMVMEVGASRSLTILGL
TLEDAGQVTVEAEGASSAALRVREAPVLFKKKLEPQTVEERTSVTLEVELTRPWPEVKWTRNAAVLTPSENV
EIRAEGARHCLVLRVSGFADRGRFFGCETPDDKTQAKLNVEMRQVRLV RGLQEVEAKEQTGASMDVLESHAEVE
GSWTRDGLRLQPGPKCHLAVQGPVHILTL SALQPQD SGLVAFRAEGVHTSARLIVTELPVSTFRVLQD VVATQ
KEKVTLECELSRPVDVRWLKDGVELRAGKAI GIVAQGTCSRSLVIYRCETGDQGVYVCDALDAQTSASLRVQGR
TYTLIFRRVLAEDAGEVKFVAENAESRAHLRVKELPVTLLRPLRDKIAMEKHRGVLECVSRASAQVRWFKGG
VELQSGPKYEVVSDGLYRKLVIN DVQPEDEDTYTCDAGNVKTS AQFFVEEQSITIVRGLKDMTVM EPAPAWFE
CETSIPSVRPPKWL LGKTVLQAGNVGLEQDGTVHRLTLHKTCSTMTGPHFTIGKSRSSAQLVSDI PVVLT
RPLEPKAGRELQSVVLSDFRPA PKAVQWYKDDTPLSPSEKFKMALEGQMAELRILRLTPADAGVYRCQAGSA
QSSAEVTVAREVTVIQPLQDAEAMEEGRVCFSCELSHKDEDIEWSLNGTPLYNDSFHEISHEGLHTLVLKS
VRQADTGTVCATSPKVSVSARLVVKGKPVVFLKALDDVSAEERGTLTLQCEVSDPEARVVRKDGVELGPSDK
YDFLHKAGARGLTVHDLSHEDAGLYTCQVGSKETQSKVSVHDLHVGITKRLKTVLEVLEGESCFECVLSHESP
SDPAVWTVGGKTVGSGHFAVRQGRKYTLTVKDAALSDAGEVVFVSVLGLTSKASLIIRERPVDITKPLEDQR
TTLGEDVMLSCELSRAGTSVRWLKDGKAI RKSQKYDLLSEGTRAVLVVRKASLKDSGEYTCETEASKSTAKLC
VEEKANRFTEELADLQVEEKGRAVFTCKTEHPASVVTWRKGLLELRASGKHVPSQEGTLTKLTINALERTDSD
TYTCDIGQARTQARLLVHGQKVRVIEDLEDTAVQEGSSAKFCCR IAPADYGPVHWFLDKTPLHSNELNEITVQ
PGGYHVLTLRQLALKDSGTVYFEAGDQRTS AALRVTEKPSIFSRPLTDVTVTEGEDLTLVCETTTVDSSVRWT
KDGKTLRPSARCQLSHEGCAQLLITATTPQDGGRYKCEIGGASSSIVRVHALPVRFRESLKDVEVPEGKAA
TLRCVLSSVAAPVEWRHGDDVLKSSNKYSLRQEGAVLELVIRDLQPQDSGQYSCSFGDQTTSATLTVKTS SAQ
FVGKLRNKEATEGTTVTLRCELTK EAPVEWKGTETLRNGDKYSLKQDGAVCELQICSLLVADAGEYSCVCGQ
EKTSATLTVKALLVHFVRR LRSKEATEGDTTTLQCELSKAAPVEWRKGTETLRDGD RYSLKQDGAVCELQIRS
LTIADAGEYLCTCGQEKTSATLTVRALPAKFKDSLKNEEATEGTTATLSCELSKAAPVTWKKGPKTLQSGDKY
VLRQDGAVCGLQIHGLTMADAGEYSCVCGQEKTSATLTVRGLPAKFIEDLRSQEATEGATAILRCELSKAAPV
EWRKGSETLKDGD RYTLRQDGAVCELQIRGLAVVDGTYS SLP TKFTEGLRNEEATEGTMATLRCQMSKAAPV
EWRKGSETLRDGD RYSLRQDGAMCELQIRGLTIEDSGEYTCVCGQEKTSATLSVKALPPRFIEDLRSQEATEG
TMATLRCQMSKAAPVEWRKGSETLRDGG RYSLRQDGAVCELQIHDLAVEDTGEYSCVCGQEKTSATLNVKALP
PRFIEDLRSQEATEGTMATLRCQMSKAAPVEWRKGSETLRDGG RYSLRQDGAVCELQIHDLVEDAGQYSCVC
GQEKTSAVLTVDALPPKFTEGLKKEEATEGTMVTLRCQMSKEATVEWRKGAKT LSDGG RYSLRQDGAMCELQI
CGLAVEDAGEYSCVCGQEKTSATLSVKALPPRFIEDLRSQEATEGTMATLRCQMSKAAPVEWRKGSKTLRDGD
RYSRLRQDGAMCELQICDLAVEDTGDYSCVCGQEKTSATLSVKAPQVVFQQPLQNLQAEEGSMASLRCELSV PN
AAMVWSKGGLELQGDTRREARQQGCVAELLRLDRLEDAGEYSCTCGSQTTSATLMTVAAPVRFRLRLQAQDV
DEGATARLRCELSREAVSVEWRKGS LQLFPKAKYQMVQEGTTAELLVHGVQEDEDAGEYTC DAGHTQS IARLSV
RAPKPKFKTDLQSTEQEAGGTARLCCQLSEAE PGTPVQWLKEGVELHVGSKYEMRRQGAVCELLIHGLEAKDT
GEYACLVGQKTLASLRVKEPEVTIVRGLVDMEVQADEDEVEFTCKV SQAGATDVQWHLQGLPQSNEVTEVAV
LADGCTHVLQLKGVTTLEDAGTVSFHVGG LSSSAQLTVRVPEVTVLEPLKDVQLSEGD DAHFRCRLSRASGQEA

RWALGGVPLQCNEMNDITVEQGTLYLLTLHKVTLEDAGTITLQVGSSESQAQLKVTAKNTVLRGLENVDALEG
GEALFECQLSQPEVAHAHTWLLDDEPVHTSEKVEVVYFENGLRHLLLLLNKLPQDSCRVTFLAGDVVTS AFLTV
RALPDPPEDAEVVGRSDHSVTLVSWVAPMSDGGGGLCGYRVMKEASTGQWQLCHDLVPGPECVDDLVPGKTY
RFRVAAVGPAGAGEPVHLPQMVKIAPAPAPAPAPAPAPAPAPETRAVVGEDICLELEVAADGGEVVWHKTERI
QPGGHFEVLSRGQRQMLVIKGFRTEDQGEYRCGPIQGLPSSGAATFNVMVMTSGSGDEVPAQPSLPEAAQEGD
LHLLWEALARKRRMSREPTLDSISELPEEDSRVQHLRQEAEEETAPDLSEGYSTADELARTGEADLSHTSSDDE
SRAGTPSLVTYLLKAGGPGISPLASKHEAQVTTSVKPKQKQPEVVPVTCPPPGDLSAADLMDPSLDKAAVKIQ
AFKGYKVRKEMKQQEGPVFSRTFGDTEAQVGDVLRLECVLATKTDMRACWLKDGIELTDGRHYHIDQLKDGTC
SLLVTLGLAPTDSGRYTCQVSTKSGRVSHSACVVVSGTESEAESSGGELDDAFRRAARRLHRLFRTKSPAEELS
EEELFLSADEGPEPEPADWQTYREDENFVCIRFESLAEARQAVTCFRNMFATMGIGVEISLGEQGPGRVEM
RIGKVAPTVTPAVPLAKTPGLQTSDAAPVFLTELQNDVQDGYPMSFDCVVTGQPVPSVRWFKDGKLEKDDH
YMINEDQQGGHQLIITAVVPADMGVYRCLAENSMGVSSTKAE LRVELTSTDYDTAADATETSSYFSAQGYLSS
REQEGTESDEGQLPQVLEELKDLQVAPGTRLAKFQLKVKGYPAKLYWFKDGOPLTSDHIRMTDKKTLHTLE
IVSVTREDSDGQYAAIYI SNAVGAAYSSARLLVRGPSEPEEKPASDVHERLVPPRILEKFTPKKVKRGSSTFSV
KVEGHPAPSVHWLKEEAEGVWLVIGPDTPGYTMASSSKQHSLVLLDVGQRHQGTYTCTIATNPAGQALCSASLH
ISGLAKEEEEQERVKEALISSFLQGTSAVSAQMSESAFADLVGQSKGESLVAAEEAHSHLSLAEVGTETEFLOK
LTSQITEMVSAKISQAKLQVPGGDSDEETKTPSASPRHGRSRPSSSVQESSSEEDGDSRGEIFDIYVVVTADY
LPLGAEQDAIILREGQYVEVLDSAHPLRWLVRTKPTKSSPSRQGWVSPAYLDKRLKLSPEWGPTEAPEFPGEA
VSEDEYRTRLSSVIQELLSSEQAFVQFLESHHMKHLERSPRVPAAVASQKTVIFRNVQDISHFHSSFLKE
LQCGCTDDDVAMCFIKNQEA FEKYLEFLVGRVQAESVVVSTPVQEFYKKYAEETLSAKDPTQPPPPPLQHYLE
QPVERVQKYQALLKELIRNKARNRQNCALLEQAYAVVSALPQRAENKLVSLMENYPGTLEALGEPTRQGHFI
VWEGAPGARMPPWKGNHRHVFLFRNYLVICKPRRDSRTDTFSYVFRNMMKLSSIDLNDQVEGDRAFEVWHERE
DSVRKYLQARTVI IKNSWVKEICGIQORLAQPVWRPPEFEEELADCTAELGETVKLACRVTGTPKPIVSWYK
DGKPVVEVDPHHILIEDPDGSC TLI LDNLTGIDSGQYMCFAASAAGNASTLGKILVQVPPRFVNKVRATPFVEG
EDAQITCTVEGAPYPQIRWYKDG TLLAPGNRYRMLNEPRSGVVLVLIQAASKEDLGHYECELVNR LGSTRGGG
ELYMQSPALRRYDQHHREQIVAAVEGAPSMQV TIEDVQVQGDMAQFDVAVIEGHPPPVTWYKGSTQLTSSAR
LSQRQDGLTDTYSLVLTDVAPHDAGVYTCVANNAGGVQCKAE LLVHGGDKLDAENQVYRRKLHSLFYDVQEEIGR
GVFGVFKRVQHKGNMFCAAKFIPLRSKTRAQAYQERDILATLGHPLVTGLLDQFETRKTLLIILELCSSEEL
LDRLFKKGVVTEAEVKVYIQQLVEGLHYLHSHGILHLDIKPPNIMVHPAREDIKICDFGFAQKITPSEPOYS
KYGSPFVVSPEIIEQNPNVSEGS DIWAMGVI SYLSLTCSSPFAGESDRATLLNVLEGRVSWSSPTAAHLS EDAK
DFIKATLQRTPRARPSTSQC LAHPWFLKSMPAAEAHFINTKQLKFLARSRWQRSLMSYKSI LVMRSIPELLQ
GPPDSPSLGVARHLRGEASGASSSSSSSDNELAPFARAKSLPPSPVTHSPLLHPRGFLRPSASLPEETEASMP
TADA AVPAS PQSAGPPASPGCVPRHSV ISSLFYQQAGEGAERGNKTS GAKRHPARRRHLKGGYIARALPGLR
EPLMEYSLLEEEAAREEQASLMTKT PSFETALRLPSSSVREVPGRSHSLDNPPVTTGSPPEACKEQLLFPST
GLTHETTAKKDRGHKEGFLQESV PFPMSGDSRPGKQEGSSQDSCRGPASSCHSELGSGSQEGCGPPSSQSLG
SLPPQSLKKE LSTSCGPLFSEQPQAAPFPTQVSPLLGSEKPEPQDGS LSEGVPVPSSSPGSASQVDSLDT EG
LSEAGDTCDFTPPPQRPQEQA TRKFSLESRGGYAGVAGYGTFAFGGDAGGMLGQGPLWARMWAVS QSSEEQ
DEAATESPQPLES LGPIAEASGVPLRTSPSLTPWEEVEQVSLVQIRDLSGDAEAADTISLDISEVDPAYLNL S
DLYDIKYL PPFEMIFRRVPKPIEQPESPGSETEAGQLADFL EEAAWPWPGE LGLRAGLEITEEPEEPGDLEA
LLGEAAVGRKRKWSPSRGLFQFPGRCLSGEEPVELGLRQRVKASMAHISRILKGRPEGPEREGPPRKKAGLAS
FRLSGLKGRDQELSDEAVVLGQSVTLACQVLAQPTAQATWSKDGVLLES SGHLLISSTLKNFQLLTI LLVVKEE
DLGTYTCCVSNPLGTA VTTGVLKRAERPSSSPRPEVGE LYKDAVLLVWKPVESCGPVTYIVQCCIEGGSWTTL
ASDISDCCYLTGKLSRGGMYIFRTACVSKAGMGPYSSPSEQVLLGGPNHLASEEESSRGRPAQLLPSTKTFAF
QMQIRRRGRF SVVRQCREKASGRALAAKIVPYQPEDKTAVLREYEA LKRLHHPHLAQLHAAYLSPRHLVLI LEL
CSGPELLPSLAERESYSESDVKDYLWQMLSATQYLHAQHILHLDLRSENMMVTEYNLLKVIDLGNAQSLDQEK
VPAPENFKDYLETMAPELLEGGAVPQTDIWAIGVTA FIMLSGEY PESSSEGRDLQKGLRKLGLIRLSRCYAGL
SGGAVAFLOSSLCAQPWGRPCASTCLQCGWLTEEGPTGSRPTVPTFPTVRLRAFVREKRRALLYKXHNLAQ
VR\*

>rs47135419\_ENSMUSP00000049737\_c.18153:G>A\_p.E6052K
ENSMUST00000052872.15|Obscn-203|ENSMUSG00000061462|-|chr11:g.58928511:C>T
MDHSFSGAPRFLTRPKAFVSVGKDATLSCQIVGNPTPHVSWEKDRQPVEAGARFLAQDGDVYRLTILDLAL
GDSGQYVCRARNAIGEAFAAVGLRVDSEGTCAEQAPHFLLRPTSIRVREGADATFRCRVGSGSPQPAVSWSKDG
RRLGPPADAMHVRVEEHGESSALRIR SARPRDGGTYEVRAENPLGSASAAAALVVDSDAEVAGPPGTSTATLLA
HLQQRREAMRAEIQIPSPGAGTRTCTVTTEGKHARLSCFVTGEPKPETVWKKDGLVTEGRHVVEYDEQENF
VLKILFCKQSDRGLYCTASNLVGTYSVSVLVVVREPTVPFKKRLQDLEVREKESATFQCEVAQVATEAAWFK
EETRLWASAKYDIEEGETERRLTVRNVSADDDAVYICETTEGSR TVAELSVQGNLTKLPRKTAVRTGDTAIF
WVELAVPEGPVRWLRNQEEMVAGGRVAITAEGTCHTLTIFQCTLEDMGEVAFVSGGCRTTTQFCVSAPRRPPL
YPPADPVVKA KTESVTL SWSAPPHGDRPVTIDGYVLEKRKLGAYAWSRCHEAGWLATTEFTITGVAAEEDGFQ

FRVSAINHFGQGPYLEFPGTMHLVPLAVKTPKAVEAVEGGEVTFVSDLTVASSGEWFLDGEALKASSIYVI  
RCDRTRHMLTIREVPARLHGAQLKVFANGIETSIQMVVRAALGLPSSKLPAAAAREVLQAQLHEEAQLLAELSD  
QAAAVTWLKDGRELSLGPYEMQVSAGRRALLVRDVAQDDAGLYECVSRGSRRTAYQLLVQEPKLVFAKGQQA  
SEVKAEAGNSATLSCEVTQAQTEVTFWKDGGKLSSSSKVRMEASGCSRRLLVVQQAGKADAGEYSCEAGGQKLS  
FRLDVAEPKLVFAKGQQAHESEVKAEAGASATLSCEVAQAQTEVTFWKDGGKLSSSSKVRMEASGCSRRLLVVQQ  
AGKADAGEYSCEAGGQKLSFRLDVAEPKLVFAKEQQARSEVKAEAGASATLSCEVAQAQTEVTFWKDGGKLS  
SSKVRMEASGCSRRLLVVQQAGKADAGEYSCEAGGQKLSFRLDVTEPKLVFAKEQQARSEVKAEVGNATLSCE  
VAQAQTEVTFWKDGGKLSSSSKVRMEASGCSRRLLVVQQAGKADAGEYSCEAGGQKLSFRLDVAEPKLVFAKEQ  
QARSEVKAEAGNSATLSCEVAQAQTEVTFWKDGGKLSSSSKVRMEASGCSRRLLVVQQAGKADAGEYSCEAGGQ  
KLSFHLDVTEPKLVFAKEQQAHSEVKAEAGASATLSCEVAQAQTEVTFWKDGGKLSSSSKVRMEASGCSRRLLV  
VQQAGKADAGEYSCEAGGQKLSFRLDVAEPKLVFAKEQQARSEVKAEAGASATLSCEVAQAQTEVTFWKDGGK  
LSSSKVRVEASGCSRRLLVVQQAGKADAGEYSCEAGGQKLSFRLDVAEPKLVFAKEQQANSEVKAEAGASATL  
SCEVAQAQTEVTFWKDGGKLSSSSKVRVEASGCSRRLLVVQQAGKADAGEYSCEAGGQKLSFRLDVAEPKLAFA  
KEQQAHSEVKAEAGASATLSCEVAQAQTEVTFWKDGGKLSSSSKVRVEASGCSRRLLVVQQAGKADAGEYSCEA  
GGQKLSFRLDVAEPKLAFAKEQQAHSEVKAEAGASATLSCEVAQAQTEVTFWKDGGKLSSSSKVRVEASGCSR  
RLVVQQAGKADAGEYSCEAGGQKLSFRLDVAEPKLAFAKEQQAHSEVKAEAGASATLSCEVAQAQTEVTFWKD  
GKLSSSSKVRVEASGCSRRLLVVQQAGKADAGEYSCEAGGQKLFRLDVAEPKLMFAKEQQAHSEVKAEAGAS  
ATLSCEVAQAQTEVTFWKDGGKLSSSSKVRVEASGCSRRLLVVQQAGKADAGEYSCEAGGQKLSFRLDVAEPK  
VFAKEQQAHSEVKAEAGASATLSCEVAQAQTEVTFWKDGGKLSSSSKVRVEASGCSRRLLVVQQVQKADAGEYS  
CEARGQKLSFRLDVADTRLMFAKEQQARTEVKAEAGNSATLSCEVAQAQTEVTFWKDGGKLSSSSKVRVEASG  
CSRRLLVVQQAGKADAGEYSCEAGGQKLSFRLDVAEAEESQIPERPSRREPLVVKEHETIILTATIAAPSVAAVT  
WLKDGVEIRRSKRHEATSLGDTHLTVRGAQVLDIAIYSCRVGKEGQDFPVQVEEVAAKFSKPLEPVEGELGG  
TVMLVCELSPEQAEVWRCGNTQLRPGKRFQMTSEGPRRTLTVSGLREDDAEYVCESRDDRTSARLTVKVPR  
VVKFTSGLSAMVAEEGQEATFQCVVSPSDAGVTWYKDGMLQPSSEKFMVESGASRSLTILGLTLEDAGQVTV  
EAEGASSAALRVREAPVLFKKKLEPQTVEERTSVTLEVELTRPWPVEVKWTRNAAVLTPSENVEIRAEGARHC  
LVLRSVGFADRGGFFGCETPDDKTQAKLVNEMRQVRLVGLQEVEAKEQGTASMDVELSHVAEVEGSWTRDGLRL  
QPGPKCHLAVRQGRKYTLTVKDAALSADAGEVVFVSLGLTSKASLIIRERPVDITKPLEDQRTTLGEDVMLS  
SRPVDVRWLKDGVELRAGKAI GIVAQGTCSRSLVIYRCETGDQGVYVCDALDAQTSASLRVQGRTYTLIFRRVL  
AEDAGEVKFVAENAESRAHLRVKELPVTLLRPLRDKIAMEKHRGVLECVSRASAQVRWFVGGVLEQSGPKYE  
VVSDGLYRKLVINVDVQPEDEDTYTCDAGNVKTSAQFFVEEQSITIVRGLKDMTVMPEPAPAWFECETSIPSVRP  
PKWLLGKTVLQAGGNVLEQDGTVHRLTLHKTCSTMTGPVHFTIGKSRSSAQLVVSIDI PVVLRPLPKAGRE  
LQSVVLSCDFRPAPKAVQWYKDDTPLSPSEKFKMALEGGMAELRILRLTPADAGVYRCQAGSAQSSAEVTVEA  
REVTVIQPLQDAEAMEEGRVCFSCELSHKDEDIEWLSLNGTPLYNDSFHEISHEGCLHTLVLSVRQADTGTVC  
ATSPKVSVSARLVVKGKPVVFLKALDDVSAEERGTTLTQCEVSDPEARVVWRKDGVELGPSDKYDFLHKAGAR  
GLTVHDLSDHEDAGLYTCQVGSKETQSKVSVHDLHVGITKRLKTEVELEGECSFECVLSHESPSDPAVWTVGG  
KTVGSGHFHAVRQGRKYTLTVKDAALSADAGEVVFVSLGLTSKASLIIRERPVDITKPLEDQRTTLGEDVMLS  
CELSRAGTSVRWLKDGKAIKRSQKYDLLSEGTRAVLVVRKASLKDSGEYTCETEASKSTAKLVCVEEKANRFT  
ELADLQVEEKGRAVFTCKTEHPASVVTWRKGLLELRASGKHVPSQEGTLKLTINALERTDSPTYTCDIGQAR  
TQARLLVHGQKVRVIEDLEDTAVQEGSSAKFCCRIAPADYGPVHWF LDKTPLHSNELNEITVQPGGYHVTLR  
QLALKDSGTVYFEAGDQRTSAAALRVTEKPSIFSRPLTDVTVTEGEDTLVCETTTVDSSVRWTKDGKTLRPSA  
RCQLSHEGCQAQLLITATTPQDGGRYKCEIGGASSSIVRVHALPVRFRRESLKDVEVPEGKAATLRCVLSVA  
APVEWRHGDDVLKSSNKYSLRQEGAVLELVIRDLQPDQSGQYSCSFGDQTTSATLTVKTSQAQFVGKLRNKEA  
TEGTTVTLRCELTKEAPVEWKKGTETLRNGDKYSLKQDGA VCELQICSLLVADAGEYSCVCGQEKTSATLTVK  
ALLVHFVRRRLRSKEATEGDTTTLQCELSKAAPVEWRKGTETLRDGDYSLKQDGA VCELQIRSLTIADAGEYL  
CTCQEKTSATLTVRALPAKFKDSLKNEEATEGTTATLSCELSKAAPVTWKKGPKTLQSGDKYVLRQDGA VCG  
LQIHGLTMADAGEYSCVCGQEKTSATLTVRGLPAKFIEDLRSQEATEGATAILRCELSKAAPVEWRKGS  
DGDYTLRQDGA VCELQIRGLAVVDGTYSLSLPTKFTTEGLRNEEATEGTMATLRCQMSKAAPVEWRKGS  
DGDYSLRQDGA MCELQIRGLTIEDSGEYTCVCGQEKTSATLSVKALPSRFIEDLRSQEATEGTMATLRCQMS  
KTAPVEWKKGSETLRDGGYSLRQDGPVCELQICDLAVEDAGEYSCVCGQEKTSATLSIKALPPRFIEDLRSQ  
EATEGTMATLRCQMSKAAPVEWRKGSSETLGDGGYSLRQNGAVCELQIHDLAVEDTGEYSCVCGQEKTSATLN  
VKALPPRFIEDLRSQEATEGTMATLRCQMSKAAPVEWRKGSSETLRDGGYSLRQDGA VCELQIHDLVEDAGQ  
YSCVCGQEKTSAVLTVDALPPKFTTEGLKKEEATEGTMVTLRQMSKEATVEWRKGAKTLSDDGGYSLRQDGA  
MCELQICGLAVEDAGEYSCVCGQEKTSATLSVKALPPRFIEDLRSQEATEGTMATLRCQMSKAAPVEWRKGS  
LRDGDYSLRQDGA VCELQIRDLAVEDAGEYLCVCGQEKTSATLSVKALPPRFIEDLRSQEATEGTMATLRCQ  
MSKAAPVEWRKGSSETLRDGDYSLRQDGA MCELQICDLAVEDTGDYSCVCGQEKTSATLSVKALPPRFIEDL  
SQEAREGTVATLRCMSKAAPVEWRKGSSETLKDGDYSLRQEGNLCELQIRDLAVEDTEEYSCVCGQEKTSAT  
LSVKALPAKFIEDLRSQEAPESSTVTLRCKLSKKASVVWKKGSETLRNGARYSLRQDGA VCELEIRDLTVEDT  
GEYSCTCGQERTSATLSIMAPQVVFQPLQNLQAEEGSMASLRCELSVPNAAMVWSKGGLELQDTRREARQQ

GCVAEALLLRDLRREDAGEYSCTCGSQTTSATLMVTAAPVRFLELQAQDVDEGATARLRCELSREAVSVEWRK  
GSLQLFPKAKYQMVQEGTTAELLVHGVEQEDAGEYTC DAGHTQS IARLSVRAPKPKFKTDLQSTEQEAGGTAR  
LCCQLSEAEPTPVQWLKEGVELHVGSKYEMRRQGAVCELLIHGLEAKDTGEYACLVGQKTLASLRVKEPEV  
TIVRGLVDMEVQADEDEVEFTCKVSQAGATDVQWHLQGLPLQSNEVTEVAVLADGCTHVLQKGVTLLEDAGTVS  
FHVGGSSSAQLTVRVPEVTVLEPLKDVQLSEGDHFRCLSRASGQEARWALGGVPLQCNEMNDITVEQGT  
LYLLTLHKVTLEDAGTITLQVGSSESQAQKVTAKNTVLRGLENVDALEGGALFECQLSQPEVAHAHTWLLDD  
EPVHTSEKVEVVYFENGLRHLLLLKLNKLPQDSCRVTFLAGDVVTS AFLTVRGWRLEVLEPPHDASVKAGMQVR  
FTCILSEAVPVGEATWYINGAAIQPDDTDWTVTTDGSHHALTLNAQFQHAGEVTF AARDAVASARLSVLALP  
DPEEDAEEVGRSDHSVTLRWSVAPMSDGGGLCGYRVEMKEASTGQWQLCHDLVPGPECVVDDLVPGKTYRFRV  
AAVGPAGAGEPVHLPQMVKIAPAPAPAPAPAPAPAPETROAVVGEDICLELEVAADGGEVVWHKGTERTIQPGG  
HFEVLSRGRQMLVIKGFRTEDQGEYRCGPIQGLPSSGAATFNVMVMTSGSGDEVPAQPSLPPEAAQEGDLHLL  
WEALARKRRMSREPTLDSISELPEEDSRVQHLRQEAETAPDLSEGYSTADELARTGEADLSHTSSDDES RAG  
TPSLVTYLKKAGGPGISPLASKHEAQVTTSVKPKQKQEPVPTCPPPGDLSAADLMDPSLDKAAVKIQAAFKG  
YKVRKEMKQOEGPVFSRTFGDTEAQVGDVLRLECVLATKTDMRACWLKDGIELTDGRHYHIDQLKDGTC SLLV  
TGLAPTDSGRYTCQVSTKSGRVSHSACVVVSGTESEAESSSGGELDDAFRRAARLHRLFRTKSPAELSEEEL  
FLSADEGPEPEEPADWQTYREDENFVICRFESLAEARQAVTCFRNMFATMGIGVEISLGEQGPGRVEMRIGK  
VAPTVTPAVPLAQLTGLQTSDAAPVFLTELQNDVQDGYPMSFDCVVTGQPVPSVRVFKDGKLEKDDHYMIN  
EDQQGGHQLIITAVVPADMGVYRCLAENSMGVSSTKAELRVLELTSTDYDTAADATETSSYFSAQYLS SREQE  
GTESDEGQLPQVLEELKDLQVAPGTRLAKFQKLVKGYPAKLYWFKDQGPLTSDHIRMTDKKTLHTLEIVSV  
TREDSGQYAAIYISNAVGAAYSSARLLVRGPSEPEEKPASDVHERLVPPRILEKFTPKKVKRGSSTFSVKVEG  
HPAPSVHWLKEEAKEGVLWIGPDTPGYTMASSSKQHSLLVLDVGRQHOGTYTCIATNPAGQALCSASLHISGL  
AKEEEQERVKEALISSFLQTSQAVSAQMSSESAGFADLVGQSKGESLVAEEAHSHLSLAEVGTTEFLQKLT SQ  
ITEMVSAKISQAKLQVPGGDSDEETKTPSASPRHGRSRPSSSVQESSSESEDGDSRGEIFDIYVVTADYLP LG  
AEQDAIILREGQYVEVLDSAHPLRWLVRTKPTKSSPSRQGWVSPAYLDKRLKLSPEWGPTEAPEFPGEAVSED  
EYRTRLSSVIQELLSSEQAFVGELOFLESHHMKHLERSPRVPAAVASQKTVIFRNVQDISHFHSSFLKELQGC  
GTDDDVAMCFIKNQEAFKEYLEFLVGRVQAEVSVVSTPVQEFYKKYAEETLSAKDTPQPPPPLOHYLEQVVE  
RVQKYQALLKELIRNKARNRQNCALLEQAYAVVVALPQRAENKLVSLMENYPTLEALGEPHQHFIVWEG  
APGARMPWKGNHRHVFVFRNYLVICKPRRDSRTDTFSYVFRNMMKLSSIDLNDQVEGDRAFEVWHEREDESVR  
KYLQARTVIKNSWVKEICGIQORLAQPVWRPPEFEEELADCTAELGETVKLACRVTGTPKPIVSWYKDGKP  
VEVDPHHILIEDPDGSC TLI LDNLTGIDSGOYMCFAASAAGNASTLGKILVQVPPRFVNVKVRATPFVEGEDAQ  
ITCTVEGAPYPQIRWYKDGTL LAPGNRYRMLNEPRSGVLV LVIQAASKEDLGHYECELVNRLGSTRGGGELYM  
QSPALRARDQHHREQIVAAVEVTEQETKVPKKTVIEETITTVVKS PRGRRQSPGKSPSRSPRRSASPRRPG  
LLAPERLYPPGTSPSRLEVEQGRKAPVPALYVTEAEVHAPASQSQPKWLEVEETIEVRVKKTGSRGASPVRE  
MTRSREGILFTLPGGIPGRDPNANNNSNKS SVYQEARWGPVAVHVGEPFIFQVDSVGNVDVVAASPEPEQVRA  
SQKEENTERQEGCSDGENTFLMEEPQD TDSLQGRDPKILTHNGRVLTADLEDYVQEGETF GCGDSTPSTP  
DEPPCEVSVLQREI SEPTVGQPVLLNVGRPPGTGATLPSFFRPGSQVHSPESVFLREAWSGPVSAAPWTSS F  
HTHVQSSVDGSHGSFKTEVSTQTVSFGAVGETVTLHIDPDGGEAPGPSQG\*  
>rs47135419\_ENSMUSP00000020732\_c.18354:g>A\_p.E6119K  
ENSMUST00000020732.13|Obscn-201|ENSMUSG00000061462|-|chr11:g.58928511:C>T  
MDHSFSGAPRFLTRPKAFVSVGKDATLSCQIVGNPTPHVSWEKDRQFVEAGARFRLAQDGDVYRLTILDLAL  
GDSGQYVCRARNAIGEAFVAVGLRVDSEGTCAEQAPHLLRPTSIRVREGADATFRCRVGGSPQPAVSWSKDG  
RRLGPPDAPHVRVEEHGESSALRIR SARPRDGGTYEVRAENPLGSASAAAALVVDSAEVAGPPGTSTATLLA  
HLQORREAMRAEGIPSPPPGAGTRTCTVTEGKHARLSCFVTGEPKPEVWKKDQGLVTEGRRHVVEDEQENF  
VLKILFCKQSDRGLYCTASNLVGGTYSSVLVVVREPTVPFKKRLQDLEVREKESATFQCEVAQAPATEAAWFK  
EETRLWASAKYDIEEKGTERRLTVRNVSADDDAVYICETTEGSRVVAELSVQGNLTKLPRKTAVRTGD TAI F  
WVELAVPEGPVRWLRNQEEMVAGGRVAITAEGTCHTLTI FQCTLEDMGEVAFVSGGCRTTTQFCVSAPRRPPL  
YPPADPVVKAKTESSVTLWSAPPHGDRPVTIDGYVLEKRKLGAYAWSRCHEAGWLATTEFTITGVAAEEGDFQ  
FRVSAINHFGQGPYLEFPGMTMLVPLAVKTPKAVEAVEGGEVTFVSDLTVASSGEWFLDGEALKASSIYVI  
RCDRTRHMLTIREV PARLHGAQLK FVANGIETS IQMVVRAALGLPSSKLPAAAAREVLAQLHEEAQLLAE LSD  
QAAAVTWLKDGRELSLGPKEYMQVSAGRRALLVRDVAQDDAGLYECVSRGSR TAYQLLVQDITDGYRDWGPAG  
PQKHMCKCAGAKIARYLGSSCYRFLQYDKGVWHLEAALDTRQKGTSSCSLHEKPKLVFAKQQAHSEVKA E  
AGNSATLSCEVTQAQTEVTFWKDGKLLSSSSKVRMEASGCSRRLVVQQAGKADAGEYSCEAGGQKLSFRLDVA  
EPKLVFAKQQAHSEVKA EAGASATLSCEVAQAQTEVTFWKDGKLLSSSSKVRMEASGCSRRLVVQQAGKADA  
GEYSCEAGGQKLSFRLDVAEPKMFVFAKEQQARSEVKA EAGASATLSCEVAQAQTEVTFWKDGKLLSSSSKVRM  
EASGCSRRLVVQQAGKADAGEYSCEAGGQKLSFRLDVTEPKLVFAKEQQARSEVKA EAGASATLSCEVAQAQ  
EVTWFKDGKLLSSSSKVRMEASGCSRRLVVQQAGKADAGEYSCEAGGQKLSFRLDVAEPKLVFAKEQQARSEV  
KAEAGNSATLSCEVAQAQTEVTFWKDGKLLSSSSKVRMEASGCSRRLVVQQAGKADAGEYSCEAGGQKLSFHL  
DVTEPKLVFAKEQQAHSEVKA EAGASATLSCEVAQAQTEVTFWKDGKLLSSSSKVRMEASGCSRRLVVQQAGK

ADAGEYSCEAEGQKLSFRLDVAEPKLVFAKEQQARSEVKAEAGASATLSCEVAQAQTEVTFWKDGGKLSSSSK
VRVEASGCSRRLVVQQAGKADAGEYSCEAGGQKLSFRLDVAEPKLVFAKEQQANSEVKAEAGASATLSCEVAQ
AQTEVTFWKDGGKLSSSSKVRVEASGCSRRLVVQQAGKADAGEYSCEAGGQKLSFRLDVAEPKLVFAKEQQAH
SEVKAEAGASATLSCEVAQAQTEVTFWKDGGKLSSSSKVRVEASGCSRRLVVQQAGKADAGEYSCEAGGQKLS
FRLDVAEPKLVFAKEQQAHSEVKAEAGASATLSCEVAQAQTEVTFWKDGGKLSSSSKVRVEASGCSRRLVVQQ
AGKADAGEYSCEAGGQKLSFRLDVAEPKLVFAKEQQAHSEVKAEAGASATLSCEVAQAQTEVTFWKDGGKLS
SSKVRVEASGCSRRLVVQQAGKADAGEYSCEAGGQKLFRLDVAEPKLMFAKEQQAHSEVKAEAGASATLSCE
VAQAQTEVTFWKDGGKLSSSSKVRVEASGCSRRLVVQQAGKADAGEYSCEAGGQKLSFRLDVAEPKLVFAKEQ
QAHSEVKAEAGASATLSCEVAQAQTEVTFWKDGGKLSSSSKVRVEASGCSRRLVVQQAGKADAGEYSCEARGQ
KLSFRLDVADTRLMFAKEQQARTEVKAEAGNSATLSCEVAQAQTEVTFWKDGGKLSSSSKVRVEASGCSRRLV
VQQAGKADAGEYSCEAGGQKLSFRLDVAEAEESQIPERPSRREPLVVKEHETIILTATIAAPSVAAVTWLKDGV
EIRRKRHEATSLGDTHTLTVRGAQVLDIAIYSCRVGKEGQDFPVQVEEVAAKFSKPLEPVEGELGGTVMLVC
ELSPQAEVWRCGNTQLRPGKRFQMTSEGPRRTLTVSGLREDDAEYVCESTRDDRTSARLTVKVPVVKFTS
GLSAMVAEEGQEATFQCVVSPSDAGVTWYKDGMLQPSSEKFMVVEGASRSILTILGLTLEDAGQVTEAEGAS
SSAALRVREAPVLFKKKLEPQTEVEERTSVTLEVELTRPWPEVKWTRNAAVLTPSENVEIRAEGARHCLVLRV
GFADRGGFFGCETPDDKTQAKLNVEMRQVRLVVRGLQVEEAKEQGTASMDVELSHAEEVEGSWTRDGLRQLQPGPK
HLAVQGPVHILTLALQPDGLVAFRAEGVHTSARLIVTELPVSFTRVLQDQVVTQKEKVTLECELSRFPVDV
RWLKDGVELRAGKAIQVVAQGTCSRSLVIYRCETGDQGVYVCDALDAQTSASLRVQGRTYTLIFRVLAEADAGE
VKFVAENAESRAHLRVKELPVTLLRPLRDKIAMEKHRGVLECCQVSRASAQVRWFKGGVELQSGPKYEVVSDGL
YRKLVINVDQPEDEDTYTCDAGNVKTSAQFFVEEQSITIVRGLKDMTVMPEPAPAWFECETSIPSVRPPKWL
KTVLQAGGNGLEQDGTVHRLTLHKTCSTMTGPHFTIGKSRSSAQLVSDIPVVLTRPLEPKAGRELQSVVL
SCDFRPAPKAVQWYKDDTPLSPSEKFKMALEGQMAELRILRLTPADAGVYRCQAGSAQSSAEVTEAREVTVI
QPLQDAEAMEEGRVCFSCELSHKDEDIEWSLNGTPLYNDSFHEISHGCLHTLVLSKVRQADTGTVCATSPKV
SVSARLVVKGKPVVFLKALDDVSAEERGTTLTQCEVSDPEARVWVRKDGVELGSPDKYDFLHKAGARGLTVHD
LSHEDAGLYTCQVGSKETQSKVSVHDLHVGITKRLKTVEVLEGESECSFECVLSHESPSDPAVWTVGGKTVGG
GHFHAVRQGRKYTLTKVDAALSDAGEVVFVSLVGLTSLKASLIIRERPVDITKPLEDQRTTELEDVMLSCELSRA
GTSVVRWLKAGASATLSCEVAQAQTEVTFWKDGGKLSSSSKVRVEASGCSRRLVVQQAGKADAGEYSCEARGQ
VEEKGRAVFTCKTEHPASVVTWRKGLLELRASGKHVPSQEGTLTKLTINALERTSDTYTCDIQQARTQARLL
VHGQKVRVIEDLEDTAVQEGSSAKFCRIAPADYGPVHWFLLDKTPLHSNELNEITVQPGGYHVLTLRQLALKD
SGTVYFEAGDQRTSAALRVTEKPSIFSRPLTDVTVTEGEDTLTVCETTTVDSVVRWTKDGKTLRPSARCQLSH
EGCQAQLLITATTPQDGGRYKCEIGGASSSSIVRVHALPVRFRESLKDVEVPEGKAATLRCVLSVAAPVEWR
HGDDVLKSSNKYSLRQEGAVLELVIRDLQPDQSGQYSCSFGDQTSATLTVKTSQAQFVQKLRNKEATEGTTV
TLRCELTKAEPVEWKKGTETLRNGDKYSLKQDGAVCCELQICSLLVADAGEYSCVCGQEKTSATLTVKALLVHF
VRLRSKEATEGDTTLQCELSKAAPVEWRKGTETLRDGDYSLKQDGAVCCELQIRSLTIADAGEYLCTCGQE
KTSATLTVRALPAKFKDSLKNEEATEGTTATLSCELSKAAPVWKKGPKTLQSGDKYVLRQDGAVCGLQIHGL
TMADAGEYSCVCGQEKTSATLTVRGLPAKFIEDLRSQEATEGATAILRCELSKAAPVEWRKGTETLRDGDYR
LRQDGAVCCELQIRGLAVVDGTGYSLSLPTKFTTEGLRNEEATEGTMATLRCQMSKAAPVEWRKGTETLRDGDYR
LRQDGAVCCELQIRGLTIEDSGEYTCVCGQEKTSATLSVKALPSRFIEDLRSQEATEGTMATLRCQMSKTAPVE
WKKGSETLRDGGRYSLRQDGPVCELQICDLAVEDAGEYSCVCGQEKTSATLSIKALPPRFIEDLRSQEATEGT
MATLRCQMSKAAPVEWRKGTETLRDGGRYSLRQNGAVCELQIHDLAVEDTGEYSCVCGQEKTSATLNVKALPP
RFIEDLRSQEATEGTMATLRCQMSKAAPVEWRKGTETLRDGGRYSLRQDGAVCCELQIHDLVEDAGQYSCVCG
QEKTSAVLTVDALPPKFTTEGLKKEEATEGTMVTLRCQMSKAEATVEWRKGAKTSLDGGRYSLRQDGAVCCELQI
GLAVEDAGEYSCVCGQEKTSATLSVKALPPRFIEDLRSQEATEGTMATLRCQMSKAAPVEWRKGTETLRDGD
YSLRQDGAVCCELQIRDLAVEDAGEYLCVCGQEKTSATLSVKALPPRFIEDLRSQEATEGTMATLRCQMSKAAP
VEWRKGTETLRDGDYSLRQDGAVCCELQICDLAVEDTGDYSCVCGQEKTSATLSVKALPPRFIEDLRSQEARE
GTVATLRCRMSKAAPVEWRKGTETLRDGDYSLRQEGNLCELQIRDLAVEDTEEYSCVCGQEKTSATLSVKAL
PAKFIEDLRSQEAPESSTVTLRCKLSKASVWKKGSETLRNGARYSLRQDGAVCLEIRDLTVEDTGEYSCT
CGQERTSATLSIMAPQVVFQQLQNLQAEEGSMASLRCELSVNAAMVWSKGGLELQGDTRREARQQGCVAEL
LLRDLRREDAGEYSCTCGSQTTSATLMVTAAPVRFLRELQAQDVDEGATARLRCELSREAVSVEWRKGSLLQF
PCAKYQMVQEGTTAELLVHGVEQEDAGEYTCDAHTQSIARLSVRAPKPKFKTDLQSTEQEAGGTARLCCQLS
EAEPTGTPVQWLKEGVELHVGSKYEMRRQGAVCCELLIHGLEAKDTGEYACLVGGQKTLASLRVKEPEVTIVRGL
VDMEVQADEDEFTCKVQAGATDVQWHLQGLPLQSNVTEVAVLADGCTHVLLQKGVTLLEDAGTVSFHVGGL
SSAQLTVRVEPTVLEPLKDVQLSEGQDAHFRCRLSRASDGEARWALGGVPLQCNEMNDITVEQGTLYLLTL
HKVTLVEDAGTITLQVGSCESEAQLKVTAKNTVLRGLNENVALEGGALFECQLSQVEAHTWLLDDEPVHTS
EKVEVVYFENGLRHLLLLKLNLPQDSCRVTFLAGDVVTSFAFLTVRGRLEVLPEPHDASVKAGMQVRFCTILS
EAVPVGEATWYINGAAIQPDDTDWTVTTDGSHHALTLSNAQPQHAGEVTFAAARDAVASARLSVLALPDPEDA
EAVGRSDHSVTLVSWAPMSDGGGGLCGYRVMKEASTGQWQLCHDLVPGPECVDDLVPGKTYRFRVAAVGPA
GAGEPVHLPQMVKIAPAPAPAPAPAPAPAPETRQAVVGEDICLELEVAADGGEVVWHKGTIERIQPGGHFEVLS



RGQRQMLVIKGFRTEDQGEYRCGPIQGLPSSGAATFNVMVMTSGSGDEVPAQPSPLPPEAAQEGDLHLLWEALAR  
 KRRMSREPTLDSISELPEEDSRVQHLRQEAEEETAPDLSEGYSTADELARTGEADLSHTSSDDESAGTGPLSVT  
 YLKKAGGPGISPLASKHEAQVTTSVKPKQKQEPVVPTCPPGDLAADLMDPSLDKAAVKIQAAFQYKVRKE  
 MKQQEGPVFSRTFGDTEAQVGDVLRLECVLATKTDMRACWLKDGIELTDGRHYHIDQLKDGTCSSLVTLGLAPT  
 DSGRYTCQVSTKSGRVSHSACVVVSGTESEAESSGGELDDAFRAARRLHRLFRTKSPAELSEEELFLSADE  
 GPGEPEEPADWQTYREDENFVCIRFESLAEARQAVTCFRNMFATMGIGVEISLGEQGGPRGVEMRIGKVAPTVT  
 PAVFLAKTPGLQTSDAAPVFLTELQNDVQDGYPMSFDCVVTGQVPVPSVRWFKDGKLEKDDHYMINEDQGG  
 HQLIITAVVPADMGVYRCLAENSMGVSSSTKAELRVELTSTDYDTAADATETSSYFSAQGYLSSREQEGTESDE  
 GQLPQVLEELKDLQVAPGTRLAKFQLKVKGYPAKPLYWFKDQPLTSDHIRMTDKKTLHTLEIVSVTREDSDG  
 QYAAYSNAVGAAYSSARLLVRGPSEPEEKPASDVHERLVPPRILEKFTPKKVKRGSSITFSVKVEGHPAPSV  
 HWLKEEAKEKGLWIGPDTPGYTMASSSKQHSVLVLDVGRQHQTGTYTCIATNPAGQALCSASLHISGLAKEEEQ  
 ERVKEALISSFLOGTSQAVSAQMSEAGFADLVGQSKGESLVAEEAHSHLSLAEVGTTEEFLQKLTSTQITEMVS  
 AKISQAKLQVPGGDSDEETKTPSASPRHGRSRPSSSVQESSSESEDGDSRGEIFDIYVVTADYLPGLAEQDAI  
 ILREGQYVEVLDSAHPLRWLVRTKPTKSSPSRQGWVSPAYLDKRLKLSPEWGPTEAPEFPGEAVSEDEYRTRL  
 SSVIQEELLSSEQAFVQELQFLESHHMKHLERSPRVPAAVASQKTVIFRNVQDISHFHSSFLKELQCGCTDDDV  
 AMCFIKNQEAFAKEYLEFLVGRVQAESVVVSTPVQEFYKKAEEETLSAKDPTQPPPPLOHYLEQPVERVQKYQ  
 ALLKELIRNKARNRQNCALLEQAYAVVSALPQRAENKLVSLMENYPGTLEALGEPHIRQGHFIVWEGAPGARM  
 PWKGHNHRHVFLFRNYLVICKPRRDSRTDTFSYVFRNMKLSIDLNDQVEGDRAFEVWHEREDSVRKYLLQA  
 RTVIKNSWVKEICGIQORLAQPVWRPPEFEEELADCTAELGETVKLACRVTGTPKPIVSWYKDGKPVVDPH  
 HILIEDPDGCTLILDNLTGIDSGQYMCFAASAAGNASTLGKILVQVPPRFVNVKVRATPFVEGEDAQITCTVE  
 GAPYPQIRWYKDGTLTLLAPGNRYRMLNEPRSGVLVVIQAASKEDLGHYECELVNRLGSTRGGGELYMOSPALR  
 ARDQHHREQIVAAVEERRPSP\*  
 >rs47135419\_ENSMUSP00000151217\_c.15648:G>A\_p.E5217K

ENSMUST00000219084.3|Obscn-207|ENSMUSG00000061462|-|chr11:g.58928511:C>T  
 MDHSFSGAPRFLTRPKAFVVSVGKDATLSCQIVGNPTPHVSWEKDRQFVEAGARFRLAQDGDVYRLTILDLAL  
 GDSGQYVPCRRARNAIGEFAAVGLRVDSEGTCAEQYHFLLRPTSIRVREGADATFRCRVGGSPQPAVSWSKDG  
 RRLGPPDAPHRVVEEHGESSALRIRRSARPRDGGTYEYVRAENPLGSASAAAALVVDSDRAEVAGPSTATLLA  
 HLQORREAMRAEGIPPSPPGAGTRTCTVTEGKHARLSCFVTGEPKPEVWKKDGQLVTEGRRHVVEDEQENF  
 VLKILFCKQSDRGLYTCTASNLVGQTYSSVLVVREPTVPFKKRLQDLEVREKESATFQCEVAQAPATEAAWFK  
 EETRLWASAKYDIEEGTERRLTVRNVSADDDAVYICETTEGSRVVAELSVQGNLTKLPRKTAVRTGDTAIF  
 WVAVLAVPEGPVWRWRNQEEMVAGGRVAITAEGTCHTLTI FQCTLEDMGEVAFVSGGCRTTTQFCVSAAPRRPPL  
 YPADPVVKAKTSSVTLWSAPPHGDRPVTIDGYVLEKRLGAYAWSRCHEAGWLATTEFTITGVAAEGDFQ  
 FRVSAINHFGQGPYLEFPGTMHMLVPLAVKTPKAVEAVEGGEVTFVSDLTVASSGGEWFLDGEALKASSIYVI  
 RCDRTRHMLTIREVPARLHGAQLKVFVANGIETSIQMVVRAALGLPSSKLPAAAAREVLAQLHEEAQLLAEALS  
 QAAAVTWLKDRELSLGPKEYEMQVSAGRRALLVRDVAQDDAGLYECVSRGSRRTAYQLLVQDITDGYRWDGPA  
 POKHMCCKAGAKIARIYLGSSCYRFLQYDKGVVHLEAALDTRQKGTSSCSLHEKPKLVFAKQQAHEVKA  
 AGNSATLSCEVTQAQTEVTFWFKDGKLLSSSSKVRMEASGCSRRLVVQQAGKADAGEYSCEAGGQKLSFRLDVA  
 EPKLVFAKQQAHEVKAEGASATLSCEVAQAQTEVTFWFKDGKLLSSSSKVRMEASGCSRRLVVQQAGKADA  
 GEYSCEAGGQKLSFRLDVAEPKMFVFAKEQQARSEVKAEGASATLSCEVAQAQTEVTFWFKDGKLLSSSSKVRM  
 EASGCSRRLVVQQAGKADAGEYSCEAGGQKLSFRLDVTEPKLVFAKEQQARSEVKAEGNSATLSCEVAQAQ  
 EVTFWFKDGKLLSSSSKVRMEASGCSRRLVVQQAGKADAGEYSCEAGGQKLSFRLDVTEPKLVFAKEQQAHSEV  
 KAEAGASATLSCEVAQAQTEVTFWFKDGKLLSSSSKVRMEASGCSRRLVVQQAGKADAGEYSCEAGGQKLSFRL  
 DVAEPKLVFAKEQQARSEVKAEGASATLSCEVAQAQTEVTFWFKDGKLLSSSSKVRVEASGCSRRLVVQQAGK  
 ADAGEYSCEAGGQKLSFRLDVAEPKLVFAKEQQANSEVKAEGASATLSCEVAQAQTEVTFWFKDGKLLSSSSK  
 VRVEASGCSRRLVVQQAGKADAGEYSCEAGGQKLSFRLDVAEPKLVFAKEQQAHSEVKAEGASATLSCEVAQ  
 AQTEVTFWFKDGKLLSSSSKVRVEASGCSRRLVVQQAGKADAGEYSCEAGGQKLSFRLDVAEPKLVFAKEQQAH  
 SEVKAEGASATLSCEVAQAQTEVTFWFKDGKLLSSSSKVRVEASGCSRRLVVQQVQKADAGEYSCEARGQKLS  
 FRLDVAEAESQIPERPSRREPLVVEKETIILTATIAAPSVAAVTWLKDGEVIRRSKRHEATSLGDTHLTVR  
 GAQVLDASAIYSCRVGKEGQDFPVQVEEVAAKFSKPLEPVEGELGGTVMLVCELSPEQAEVWRCGNTQLRPGK  
 RFQMTSEGPRRTLTVSGLREDDAEEYVCESRDDRTSARLTVKVPVVKFTSGLSAMVAEEGQEAFTQCQVSPS  
 DAGVTWYKDGMLQLPSEKFMVVEGASRSLTILGLTLEDAGQVTEAEGASSAALRVREAPVLFKFKLEPQT  
 VEERTSVTLEVELTRPWPEVKWTRNAAVLTPSENVEIRAEGARHCLVLRVSGFADRGFFGCETPDDKTQAKLN  
 VEMRQALVVRGLQVEVAEQGTASMDVELSHAETVEGWSVTRDGLRLQPGPKCHLAVQGPVHILTLALQFQDSG  
 LVAFRAGRVHTSARLIVTELPVSTFTRVLQDVVATQKEKVTLECELSRFPDVRWLKDGVELRAGKAIQIVAQGT  
 CRSLVIYRCETGQGVYVCDALDAQTSASLRVQGRTYTLIFRRLAEDAGEVKFVAENAESRAHLRVKELPVT  
 LLRPLRDKIAMEKHRGVLECVSRASAQVRFWFKGGVELQSGPKYEVVSDGLYRKLVIINDVQPEDEDTYTC  
 DAGNVKTSAQFFVEEQSITIVRGLKDMTVMEPAPAWFECETSIPSVRPPKWLKGTVLQAGGNVLEQDGTVHRLT  
 LHKTCTMTGPVHFTIGKSRSSAQLVVSIPVVLTRPLEPKAGRELQSVVLSCDFRPAPKAVQWYKDDTFLSP

SEKFKMALEGQMAELRILRLTPADAGVYRCQAGSAQSSAEVTVVEAREVTVIQPLQDAEAMEEGRVCFSCELSH  
 KDEDIEWSLNGTPLYNDSFHEISHEGCLHTLVLKSVRQADTGTVCATSPKVSVSARLVVKGPVVFVKALDDV  
 SAEERGTTLTQCEVSDPEARVVWRKDGVELGSPDKYDFLHKAGARGLTVHDLSHEDAGLYTCQVGSKETQSKV  
 SVHDLHVGITKRKLTVEVLEGECSFECVLSHESPSDPVAVWTVGGKTVGGSGHFHAVRQGRKYTLTVKDAALS  
 DAGEVVFVSVLGLTSKASLIIRERPVDITKPLEDQRTTLGEDVMLSCELSRAGTSVRWLKDGKAIKRSQKYDLL  
 SEGTRAVLVVRKASLKDSGEYTCETEASKSTAKLCVEEKANRFTEELADLQVEEKGRAVFTCKTEHPASVVTW  
 RKGLLELRASGKHVPSQEGTLKLTINALERTSDTYTCDIGQARTQARLLVHGQKVRVIEDLEDTAVQEGSS  
 AKFCCRIAPADYGPVHWFLLDKTPLHSNELNEITVQPGGYHVLTLRQLALKDSGTVYFEAGDQRTSAAALRVTEK  
 PSIFSRPLTDVTVTEGEDTLVCEFTTVDSVSRWTKDGKTLRPSARCQLSHEGCQAQLLITATTPQDGGRYKC  
 EIGGASSSSIVRVHALPVRFRESLKDVEVPEGKAATLRCVLSVAAPVEWRHGDDVLKSSNKYSLRQEGAVLE  
 LVIRDLQPDQSGQYSCSFGDQTTSATLTVKTSQAQFVKGKLNKEATEGTTVTLRCELTKPEAPVEWKKGTETLR  
 NGDKYSLKQDGAVCELQICSLVADAGEYSCVCGQEKTSATLTVKALLVHFVRRRLRSKEATEGDTTTLQCELS  
 KAAPVEWRKGTETLRDGDYSLKQDGAVCELQIRSLTIADAGEYLCTCGQEKTSATLTVRGLPAKFIEDLRSQ  
 EATEGATAILRCELSKAAPVEWRKGSSETLKDGDYTLRQDGAVCELQIRGLAVVDTGTYSLPTKFTTEGLRNE  
 EATEGTMATLRCQMSKAAPVEWRKGSSETLRDGDYSLRQDGAAMELQIRGLTIEDSGEYTCVCGQEKTSATLS  
 VKALPPRFIEDLRSQEATEGTMATLRCQMSKAAPVEWRKGSSETLGDGGYSLRQNGAVCELQIHDLAVEDTGE  
 YSCVCGQEKTSATLNVKALPPKFTEGLKKEEATEGTMVTLRQMSKEATVEWRKGAKTLSDDGGYSLRQDGA  
 CELQICGLAVEDAGEYSCVCGQEKTSATLSVKALPPRFIEDLRSQEATEGTMATLRCQMSKAAPVEWRKGS  
 LRDGDYSLRQDGAAMELQIRDLAVEDAGEYLCVCGQEKTSATLSVKALPPRFIEDLRSQEATEGTMATLRCQ  
 MSKAAPVEWRKGSKTLRDGDYSLRQDGAAMELQICDLAVEDTGDYSCVCGQEKTSATLSVKAPQVVFQQLQ  
 NLQAEEGSMASLRCELSVNAAMVWSKGGLELQGDTRREARQQGCVAELLLRDLRREDAGEYSCTCGSQTSA  
 TLMVTAAPVRFRLRELQAQDVDEGATARLRCELSREAVSVEWRKGSLLQFPKAKYQMVQEGTTAELLVHGVEQE  
 DAGEYTCDAAGHTQSIARLSVRAPKPKFKTDLQSTEQEAGGARLCCQLSEAPGTPVQWLKEGVELHVGSKYE  
 MRRQGAVALLEHGLEAKDTGEYACLVGQKTLASLRVKEPEVTIVRGLVDMEVQADEDEVEFTCKVSAQAGATD  
 VQWHLQGLPLQSNVTEVAVLADGCTHVLQKGVTLLEDAGTVSFHVGLSSSAQLTVRVPEVTVLEPLKDVQL  
 SEGQDAHFRCRLSRASGQEARWALGGVPLQCNEMNDITVEQGTLYLLTLHKVTLLEDAGTITLQVGSSESAQL  
 KVTAKNTVLRGLNSVADALEGGEALFECQLSQVEAAHTWLLDDEPVTSEKVEVYFENGLRHLRLLKLNKPKQ  
 DSCRVTFLAGDVVTSFALTVRGWRLEVLPPHDASVKAGMQVRFTCILSEAVPVGEATWYINGAAIQPDDTDW  
 TVTDDGSHHALTSLNAQPQHAGEVTFAAARDAVASARLSVLALPDPPEAEVGRSDHSVTLVSWVAPMSDGGGG  
 LCGYRVEMKEASTGQWQLCHDLVPGPECVVDDLVPKTYRFRVAAVGPAGAGEPVHLPQMVKIAPAPAPAPAP  
 APAPETRQAVVGEDICLELEVAADGGEVWWHKGTERIQPGGHFEVLSRQQRMLVIKGFRTEDQGEYRCGPIQ  
 GLPSSGAATFNVVMTSGSGDEVPAQPSLPPEAAQEGDLHLLWEALARKRRMSREPTLDSISELPEEDSRVQHL  
 RQEAETAPDLSEGYSTADELARTGEADLSHTSSDDESAGTPSLVTYLKKAGGPGISPLASKHEAQVTTSVK  
 PQKQQEPVVTCPPPGDLAADLMDPSLDKAAVKIQAFAFKGYKVRKEMKQEGPVFSRTFGDTEAQVGDVLR  
 ECVLATKTDMPRACWLKDGIELTDGRHYHIDQLKDGTCSELLVGLAPTDSGRYTCQVSTKSRVSHSACVVVSG  
 TESEAESSSGGELEDDAFRRAARLHRLFRFKSPAELSEEELFLSADEGPGPEEPADWQTYREDENFVCIRFE  
 SLAEARQAVTCFRNMFATMGIGVEISLGEQGPVEMRIGKVAPVTPAVPLAKTPGLQTSDAAPVFLTELQN  
 QDVQDGYPMSFDCVVTGQPVPSVRWFKDGKLEKDDHYMINEDQQGGHQLIITAVVPADMVYRCLAENSMGV  
 SSTKAELRVELTSTDYDTAADATETSSYFSAQGYLSSREQEGTESDEGQLPQVLEELKDLQVAPGTRLAKFQL  
 KVKGYPAKPLYWFKDGQPLTSDHIRMTDKKTLHTLEIVSVTREDSGQYAAIISNAVGAAYSSARLLVGRPSE  
 PEEKPASDVHERLVPPRILEKFTPKKVKRGSSITFSVKVEGHPAPSVHWLKEEAEGVLWIGPDPGYTMASS  
 SKQHSVLVLDVGRQHOGTYTCIATNPAGQALCSASLHISGLAKEEEQERVKEALISSFLQGTSSQAVSAQMS  
 AGFADLVGQSKGESLVAAEAHSHLSLAEVGTTEFLQKLTSSIEMVSAKISQAKLQVPGGDSDEETKTPSASP  
 RHGRSRPSSSVQESSSESEDGDSRGEIFDIYVVVTADYLPPLGAEQDAIILREGQYVEVLDLSDAHLRVLVTKPT  
 KSSPSRQGWVSPAYLDRKRLKLSPEWGPTEAPEFPEAVSEDEYRTRLSVVIQELLSSEQAFVGLQFLES  
 KHLERSPRVPAAVASQKTVIFRNVQDISHFHSSFLKELQCGCTDDVAMCFIKNQEAFAKEYLEFLVGRVQAES  
 VVSTPQVEFYKKAEEETLSAKDPTQPPPPPLQHYLEQPVVERVQKYQALLKELIRNKARNRQNCALLEQAYAV  
 VSALPQRAENKLVSLMENYPGTLEALGEPVIRQGHFVWEGAPGAMPWKGHNHRVFLFRNYLVICPRRDSR  
 TDTFSYVFRNMMKLSSIDLNDQVEGDDRAFEVWHHERDSVRKYLQARTVIKNSWVKEICGIQQRLAQPVWR  
 PEFEEELADCTAELGETVKLACRVGTGPKPIVSWYKDGKPEVDPHHILIEDPDGSCSLIDLNLGTIDSGQY  
 MCFAAASAAGNASTLGKILVQVPPRFVNVKVRATPFVEGEDAQITCTVEGAPYPQIRWYKDGTLAPGNRYRMLN  
 EPRSGVLVVLVIQAASKEDLGHYECLELVNRLGSTRGGGELYMQSPALRARDQHHREQIVAAVEVTEQETKVPKK  
 TVIIEETITTVVKSPPRRRQSPGKSPSRSPSRSPRPGLLAPERLYPPGTSPPRRLEVEQGRKAPVPALY  
 VTEAEVHAPASQSQPKWLEVEETIEVRVKKTSRGSASPVREMTSRGEGILFTLPGGIPGRDPNANNNSNNSVY  
 QEARTWGPVAVHVEPFIQVDSVGNVDWAASPEPEQVRASQKEENTERQEGCSDGDENTFLMEEPQDQDSDL  
 QGRDPKILTHNGRVLTADLEDYVPEGETFGCGDSTPSTPDEPPCEVSVLQREI SEPTVQPVLLNVGRPPG  
 TGATPSFFRPGSQVHSPESVSFLLREAWSGPVSAAPWTSSFHHTVQSSVDGSHGSFKTEVSTQTVSFGAVGET  
 VTLHIDPDGGEAPGPSQG\*

>rs243764830\_ENSMUSP00000158795\_c.18160:T>A\_p.V6054E  
ENSMUST00000238536.2|Obscn-210|ENSMUSG00000061462|-|chr11:g.58929213:A>T  
MDHSFSGAPRFLTRPKAFVSVGKDATLSCQIVGNPTPHVSWEKDRQFVEAGARFRLAQDGDVYRLTILDLAL  
GDSGQYVCRARNAIGEFAAVGLRVDSEGTCAEQAPHFLLRPTSIRVREGADATFRCRVGGSPPQPAVSWSKDG  
RRLGPPDAPHVRVEEHGESSALRIRSARPRDGGTYEVRAENPLGSASAAAALVVDSDAEVAGPPGTSTATLLA  
HLQQRREAMRAEGIPPSPPGAGTRTCTVTEGKHARLSCFVTGEPKPEVWKKDGLVTEGRRHVVEDEQENF  
VLKILFCKQSDRGLYTCTASNLVGQTYSSVLVVVREPTVPFKKRLQDLEVREKESATFQCEVAQAPATEAAWFK  
EETRLWASAKYDIEEEGETERRRLTVRNVASADDDAVYICETTEGSRVVAELSVQGNLTKLPRKTAVRTGDTAIF  
WVELAVPEGPVRWLRNQEEMVAGGRVAITAEGTCHTLTI FQCTLEDMGEVAFVSGGCRTTTFQCVSAPRRPPL  
YPPADPVVKAKTESSVTLWSAPPHGDRPVTIDGYVLEKRKLGAYAWSRCHEAGWLATTEFTITGVAAEEDGFQ  
FRVSAINHFGQGPYLEFPGTMHLVPLAVKTPKAVEAVEGGEVTFVSDLTVASSGEWFLDGEALKASSIYVI  
RCDRTRHMLTIREVPARLHGAQLKVFANGIETS IQMVVRAALGLPSSKLPAAAAREVLAQLHEEAQLLAE LSD  
QAAA VTWLKDGRELSLGP KYEMQVSAGRRALLVRDVAQDDAGLYECVSRGSR TAYQLLVQDITDGYRDWGPAG  
PQKHMCKCAGAKIARYLGSSCYRFLQYDKGVWHLEAALDTRQKGKTS SCSLHEKPKLVFAKQQAHSEVKA E  
AGNSATLSCEVTQAQTEVTFWKDGKLLSSSSKVRMEASGCSRRLVVQQAGKADAGEYSCEAGGQKLSFRLDVA  
EPKLVFAKQQAHSEVKA EAGASATLSCEVAQAQTEVTFWKDGKLLSSSSKVRMEASGCSRRLVVQQAGKAD  
GEYSCEAGGQKLSFRLDVAEPKMFVFAKEQQARSEVKA EAGASATLSCEVAQAQTEVTFWKDGKLLSSSSKVRM  
EASGCSRRLVVQQAGKADAGEYSCEAGGQKLSFRLDVTEPKLVFAKEQQARSEVKA EAGASATLSCEVAQAQ  
EVTWFKDGKLLSSSSKVRMEASGCSRRLVVQQAGKADAGEYSCEAGGQKLSFRLDVAEPKLVFAKEQQARSEV  
KAEAGNSATLSCEVAQAQTEVTFWKDGKLLSSSSKVRMEASGCSRRLVVQQAGKADAGEYSCEAGGQKLSFHL  
DVTEPKLVFAKEQQAHSEVKA EAGASATLSCEVAQAQTEVTFWKDGKLLSSSSKVRMEASGCSRRLVVQQAGK  
ADAGEYSCEAGGQKLSFRLDVAEPKLVFAKEQQARSEVKA EAGASATLSCEVAQAQTEVTFWKDGKLLSSSSK  
VRVEASGCSRRLVVQQAGKADAGEYSCEAGGQKLSFRLDVAEPKLVFAKEQQANSEVKA EAGASATLSCEVAQ  
AQTEVTFWKDGKLLSSSSKVRVEASGCSRRLVVQQAGKADAGEYSCEAGGQKLSFRLDVAEPKLAFAKEQQAH  
SEVKA EAGASATLSCEVAQAQTEVTFWKDGKLLSSSSKVRVEASGCSRRLVVQQAGKADAGEYSCEAGGQKLS  
FRLDVAEPKLAFAKEQQAHSEVKA EAGASATLSCEVAQAQTEVTFWKDGKLLSSSSKVRVEASGCSRRLVVQQ  
AGKADAGEYSCEAGGQKLSFRLDVAEPKLAFAKEQQAHSEVKA EAGASATLSCEVAQAQTEVTFWKDGKLLSS  
SSKVRVEASGCSRRLVVQQAGKADAGEYSCEAGGQKLFRLDVAEPKLMFAKEQQAHSEVKA EAGASATLSCE  
VAQAQTEVTFWKDGKLLSSSSKVRVEASGCSRRLVVQQAGKADAGEYSCEAGGQKLSFRLDVAEPKLVFAKEQ  
QAHSEVKA EAGASATLSCEVAQAQTEVTFWKDGKLLSSSSKVRVEASGCSRRLVVQQVQKADAGEYSCEARGQ  
KLSFRLDVADTRLMFAKEQQARTEVKA EAGNSATLSCEVAQAQTEVTFWKDGKLLSSSSKVRVEASGCSRRLV  
VQQAGKADAGEYSCEAGGQKLSFRLDVAEAE SQIPERPSRREPLVVKEHETIILTATIAAPSVAAV TWLKDGV  
EIRRSKRHEATSLGDTHTLTVRGAQVLD SAIYSCRVGKEGQDFPVQVEEVA AKFSKPLEPEVEGELGGTVMLVC  
ELSPQAEVWRCGN TQLRPGKRFQMTSEGPRTTLTVSGLREDDAE EYVCE SRDDRTSARLTVKVP RVV KFTS  
GLSAMVAEEGQEATFQCVVSPS DAGVTWYKDGMLQPSSEKFMVESGASRSLTILGLTLEDAGQVTEAEGAS  
SSAALRVREAPVLFKKLEPQTV EERTSVTLEVELTRPWPEVKWTRNAAVLTPSENVEIRAEGARHCLVLR SV  
GFADRGF FGCETPDDKTQAKLNVEMRQVRLVVRGLQEVEAKEQGTASMDVELSHAEVEG SWTRDGLRLQPGPKC  
HLAVQGPVHIL TLSALQPQDSGLVAFRAEGVHTSARLIVTELPVSFTRVLQDVVATQKEKVTLECELSRPVDV  
RWLKDGV ELRAGKAIGIVAQGTCSRSLVIYRCETGDQGVYCDALDAQTSASLRVQGRTYTLIFRRVLAEDAGE  
VKFVAENAESRAHLRVKELPVTLLRPLRDKIAMEKHGVLQCVSRASAQVRWFKGGVELQSGPKYEVVSDGL  
YRKLVIN DVQPEDEDTYTC DAGNVKTSAQFFVVEEQSITIVRGLKDMTVM EPAPAWFECETSIPSVRPPKWL LG  
KTVLQAGGNVGLQDGTVHRLTLHKTCSTMTGPVHFTIGKSRSSAQLVVSDIPVVLTRPLEPKAGRELQSVVL  
SCDFRPAPKAVQWYKDDTPLSPSEKFKMALEGQMAELRILRLTPADAGVYRCQAGSAQSSAEVTEAREVTVI  
QPLQDAEAMEEGRVCFSCELSHKDEDIEWLSLNGTPLYNDSFHEISHEGCLHTLVLSVRQADTGTVCATSPKV  
SVSARLVVVKGPVFLKALDDVSAEERGTLLQCEVSDPEARVVWRKDGVELGSPDKYDFLHKAGARGLTVHD  
LSHEDAGLYTCQVGSKETQSKVSVHDLHVGITKRLKTVEVLEGE SCSFECVLSHESPSDPAVWTVGGKTVGGS  
GHFHAVRQGRKYTLTVKDAALSDAGEVVSVLGLT SKASLIIRERPVDITKPLEDQRTTLGEDVMLSCELSRA  
GTSVRWLKDGKAIRKSQKYDLLSEGTRAVLVVRKASLKDSGEYTCETEASKSTAKLCVEEKANRFTEELADLQ  
VEEKGRAVFTCKTEHPASVVTWRKGLLELRASGKHVPSQEGTLKLTINALERTDSDTYTCDIGQARTQARLL  
VHGQKVRVIEDLEDTAVQEGSSAKFCRIAPADYGPVHWF LDKTPLHSNELNEITVQPGGYHVLTLRQLAL KD  
SGTVYFEAGDQRTS AALRVTEKPSIFSRPLTDVTVTEGEDTLVCE TTTVDSSVRWTKDGKTLRPSARCQLSH  
EGCQAQLLITATTPQDGGRYKCEIGGASSSSIVRVHALPVRVFRESLKDVEVPEGKAATLRCVLSSVAAPVEWR  
HGDDVLKSSNKYSLRQEGAVLELVIRDLQPDGSGQYSCSFGDQTSATLTVKTS SAQFVGLRKNKEATEGTTV  
TLRCELTKAEAPVEWKKGTETLRNGDKYSLKQDGA VCELQICSLLVADAGEYS CVCGQEKTSATLTVKALLVHF  
VRRLRSKEATEGDTTTLQCELSKAAPVEWRKGTETLRDGD RYS LKQDGA VCELQIRSLTIADAGEYLCTCGQE  
KTSATLTVRALPAKFKDSLKNEEATEGTTATLSCELSKAAPVTWKKGPKTLQSGDKYVLRQDGA VCGLQIHGL  
TMADAGEYS CVCGQEKTSATLTVRGLPAKFIEDLRSQEATEGATAILRCELSKAAPVEWRKGS ETLKDGDRYT  
LRQDGA VCELQIRGLAVVDGTYS LPTKFTEGLRNEEATEGTMATLRCQMSKAAPVEWRKGS ETLR DGRYS

LRQDGAMCELQIRGLTIEDSGEYTCVCGQEKTSATLSVKALPSRFIEDLRSQEATEGTMATLRCQMSKTAPVE  
WKKGSETLRDGGGRYSRQDGPVCELQICDLAVEDAGEYSCVCGQEKTSATLSIKALPPRFIEDLRSQEATEGT  
MATLRCQMSKAAPVEWRKGSSETLGDGGGRYSRQNGAVCELQIHDLAVEDTGEYSCVCGQEKTSATLNVKALPP  
RFIEDLRSQEATEGTMATLRCQMSKAAPVEWRKGSSETLRDGGGRYSRQDGAVALCELQIHDLVEDAGQYSCVCG  
QEKTSAVLTVDALPPKFTEGLKKEEATEGTMVTLRCQMSKEATVEWRKGAKTSLDGGGRYSRQDGAVALCELQIC  
GLAVEDAGEYSCVCGQEKTSATLSVKALPPRFIEDLRSQEATEGTMATLRCQMSKAAPVEWRKGSSETLRDGD  
YSRQDGAVALCELQIRDLAVEDAGEYLCVCGQEKTSATLSVKALPPRFIEDLRSQEATEGTMATLRCQMSKAAP  
VEWRKGSSETLRDGGDRYSRQDGAVALCELQICDLAVEDTGDYSCVCGQEKTSATLSVKALPPRFIEDLRSQEARE  
GTVATLRCRMSKAAPVEWRKGSSETLKDGDGRYSRQEGNLCELQIRDLAVEDTGEYSCVCGQEKTSATLSVKAL  
PAKFIEDLRSQEAPESSTVTLRCKLSKKASVVWKKGSETLRNGARYSRQDGAVALCELEIRDLTVEDTGEYSCT  
CGQERTSATLSIMAPQVVFQQPLQNLQAEEGSMASLRCELSVNAAMVWSKGGLELQGDTRREARQQGCVAEL  
LLRDLRREDAGEYSCTCGSQTTSATLMVTAAPVRFLELQAQDVDEGATARLRCELSREAVSVEWRKGSLLQF  
PCAKYQMVQEGTTAELLVHGVEQEDAGEYTCDAHTQSIARLSVRAPKPKFKTDLQSTEQEAGGTARLCCQLS  
EAEFGTVPVQWLKEGVELHVGSKYEMRRQGAVALCELLIHGLEAKDTGEYACLVGQKTASLRVKEPEVTIVRGL  
VDMEVQADEDEVEFTCKVSAQATDVQWHLQGLPLQSNVTEVAVLADGCTHVLQKGVTLDEAGTVSFHVGGL  
SSSAQLTVRPEVTVLEPLKDVQLSEGQDAHFRCRLSRASGQEARWALGGVPLQCNEMNDITVEQGTLYLLTL  
HKVTLDEAGTITLQVGSSEEAQLKVTAKNTVLRGLENVDALLEGGEALFECQLSQPEVAHAHTLLDDEPVHTS  
EKVEVVYFENGLRHLLLLKLNKLPQDSCRVTFLAGDVVTSFAFLTVRGWRLEVLEPPHDASVKAGMQGVEFTCILS  
EAVPVGEATWYINGAAIQPDDTDWTVTTDGSHHALTLSNAQPQHAGEVTFAAARDAVASARLSVLAALPDPEDA  
EUVGRSDHSVTLVSWVAPMSDGGGGLCGYRVMKEASTGQWQLCHDLVPGPECVDDLVPGKTYRFRVAAVGPA  
GAGEPVHLPQMVKIAPAPAPAPAPAPAPAPAPETRQAVVGEDICILEVAADGGEVVWHKGTERRIQPGGHFEVLS  
RGQRQMLVIKGFRTEDQGEYRCGPIQGLPSSGAATFNVMVMTSGSGDEVPAQPSLPPEAAQEGDLHLLWEALAR  
KRRMSREPTLDSISELPEEDSRVQHLRQEAETAPDLSEGYSTADELARTGEADLSHTSSDDESAGTPSLVT  
YLKKGAGGPGISPLASKHEAQVTTSVKPKQKQEPVVPTCPPPGDLSAADLMDPSLDKAAVKIQAAFKGYKVRKE  
MKQQEGPVFSRTFGDTEAQVGDVLRLECVLATKTDMRACWLKDGIELTDGRHYHIDQLKDGTCSSLVTVGLAPT  
DSGRYTCQVSTKSGYRSHSACVVVSGTESEAESSSGGELDDAFRAARRLHRLFRTKSPAELSEELFLSADE  
GPGEPEEPADWQTYREDENFVCIREFESLAEARQAVTCFRNMFATMIGVEISLGEQGPGRVEMRIKGAETVTV  
PAVPLAKTPGLQTSDAAPVFLTELQNDVQDGYPMSFDCVVTGQPVPSVRWFKDGKLEEDDHYMINEDQQGG  
HQLIITAVVPADMGVYRCLAENSMGVSSTKAELRVELTSTDYDTAADATETSSYFSAQGYLSSREQEGTESDE  
GQLPQVLEELKDLQVAPGTRLAKFQLKVKGYPAKLYWFKDGGPLTTSDHIRMTDKKTLHTLEIVSVTREDSG  
QYAAYSNAVGAAYSSARLLVRGPSEPEEKPASDVHERLVPPRILEKFTPKKVKRGSSITFSVKVEGHPAPSV  
HWLKEEAKEKGLWIGPDTPGYTMASSSKQHSVLVLDVGRQHGGTYTCIATNPAGQALCSASLHISGLAKEEEQ  
ERVKEALISSFLQGTSAVSAQMSSEAGFADLVGQSKGESLVAEEAHSLSLAEVGTTEFLQKLTSTQITEMVS  
AKISQAKLQVPGGDSDEETKTPSASPRHGRSRPSSSVQESSESEEDGDSRGEIFDIYVVTADYLPGLAEQDAI  
ILREGQYVEVLDSAHPLRWLVRTKPTKSSPSRQGWVSPAYLDRKRLKLSPEWGPTEAPEFPGEAVSEDEYRTRL  
SSVIQELLSSEQAFVGLQFLESHHMKHLERSPRVPAAVASQKTVIFRNVQDISHFHSSFLKELQCGCTDDDV  
AMCFIKNQEAFAKEYLEFLVGRVQAESVVVSTPVQEFYKKYAEETLSAKDPTQPPPPPLQHYLEQVPERVQKYQ  
ALLKELIRNKARNRQNCALLEQAYAVVSALPQRAENKLVSLMENYPGTLEALGEPHQGHFIVWEGAPGARM  
PWKGHNHRVFLFRNYLVICKPRRDSRTDTSYVFRNMMKLSSIDLNDQVEGDDRAFEVWHEREDSVRKYLLQA  
RTVVIKNSWVKEICGIQQLRAQPVWRPPEFEEELADCTAELGETVKLACRVTGTPKPIVSWYKDGKPVVDPH  
HILLIEDPDGSCTLILDNLTGIDSGQYMCFAASAAGNASTLGKILVQVPPRFVNVKVRATPFVEGEDAQITCTVE  
GAPYPQIRWYKDGTLAPGNRYRMLNEPRSGVLVVIQAASKEDLGHYECELVNLGSTRGGGELYMQSPALR  
ARDQHHREQIVAAVEDTSEVGSASHAQDQGAASVLRLLGSEALGPSPGDLPNTRQSEPPAFEEAASQIP  
GAASGTPPEVSQPGTHKGLEQETTSSGSQGWTVPIRVEGTAWPGACTGQLLLDVHSQVIMETTQRTYVCQAPDT  
GVTRAPSMQVTIEDVQVQVGDMAQFDAVIEGHPPPIVWTYKGSTQLTSSARLSQRQDGTYSVLVTDVAPHDA  
GVYTCVANNAGGQVLCKAELLVHGGDKLDAENQVYRRKLHSFYDVQEEIGRGVFGFVKRVQHKGNKMFCAAKF  
IPLRSKTRAQAYQERDILATLGHPLVTGLLDQFETRKTLLILILELCSSEELLDRLFKKGVVTEAEVKVYIQQL  
VEGLHLYLHSHGILHLDIKPPNIMVHPAREDIKICDFGFAQKITPSEPQYSKYGSPEFVSPEIIEQNPVSEGS  
DIWAMGVI SYLSLTCCSPFAGESDRATLLNVLEGRVSWSSPTAAHLSSEDAKDFIKATLQRTPRARPSTSQCLA  
HPWFLKSMPAEEAHFINTKQLKFLARSRWQRSLMSYKSI LVMRSIPPELLQGPPDPSPLGVARHLRGEASGAS  
SSSSSSDNELAPFARAKSLPPSPVTHSPLLHPRGFLRPSASLPEETEASMPATAAASPASQASAGPPASPGCV  
PRHSVISSLFYQQAGEGAERGNKTSGAKRHPARRRHLLKGGYIARALPGLREPLMEYSLLEEEAAREEQASLM  
TKTPSFETALRLPSSSVREVPRGRSHSLDNPPVLTGSPPEACKQLLFPSTGLTHETAKDRGHKEGFLQESV  
PFPMPGSDSRPGKQEGSSQDSCRGKPASSCHVELSGSGSQEGCGPPSSQSLGSLPQPQLKELSTSCGFLFSEQ  
PQAAPFPPTQVSPLLGSEKEPQDGSLSSEGPVPSLSSSPGASQVDASLDTEGLSEAGDTCDFTPPPQRPOEQAT  
TRKFSLESRGGYAGVAGYGTFAFGGDAGGMLGQGPLWARMAWAVS QSSEEQDEAATESPQPLES LGPIAEASG  
VPLRTSPSLTPWEEVEQVSLVQIRDLSGDAEAADTISLDISEVDPAYLNLSDLYDIKYLPEFEMI FRRVPKPI  
EQPESPGETEAGQGLADFLLEAAWFPWFGELGLRAGLEITTEPEEPGDLEALLGEEAVGRKRKWSPSRGLFQF

PGRCLSGEEPVELGLRQRVKASMAHISRILKGRPEGEREGPPRKKAGLASFRLSGLKGRDQELSDEAVVLGQ  
 SVTLACQVLAQPTAQATWSKDGVLLESSGHLIISSTLKNFQLLTIILVVKEEDLGTYTCCVSNPLGTAVTTGVL  
 RKAERPSSSPRPEVGEELYKDAVLLVWKPVESECGPVYIVQCCIEGGSWTTLASDISDCCYLTKGLSRGGMYIF  
 RTACVSKAGMGPISSPSEQVLLGGPNHLASEEESSRGRPAQLLPSTKTFQMQIRRRGRFSVVRQCREKASGR  
 ALAAKIVPYQPEDKTAVLREYEALKRHLHPLAQLHAAYLSRHLVLIILELCSGPELLPSLAERESYSESDVK  
 DYLWQMLSATQYLHAQHILHLDLRSENMMVTEYNLLKVIDLGNQSLDQEKVPAPENFKDYLETMAPELLEGG  
 GAVPQTDIWAIGVTAIFIMLSGEYPESSEGRDLQKGLRKLIRLSRCYAGLSGGAVAFLOSSLCAQPWGRPCA  
 STCLQCGLWTEEGPTGSRPTPVTFTVRLRAFVREKRRRALLYKKNLAQVR\*  
 >rs243764830\_ENSMUSP00000038264\_c.16000:T>A\_p.V5334E  
 ENSMUST00000047441.14|Obscn-202|ENSMUSG00000061462|-|chr11:g.58929213:A>T  
 MDHSFSGAPRFLTRPKAFVSVGKDATLSCQIVGNPTPHVSWEKDRQVPEAGARFRLAQDGDVYRLTILDLAL  
 GDSGQYVCRARNAIGEFAAVGLRVDSEGTCAEQAPHLLRPTSIRVREGADATFRCRVGGSPQPAVSWSKDG  
 RRLGPPDAPHVRVEEHGESSALRIRSARPRDGGTYEVRAENPLGSASAAAALVVDSDAEVAGPPGTSTATLLA  
 HLQQRREAMRAEGIPSPPGAGTRTCTVTEGKHARLSCFVTGEPKPKETVWKKDQGLVTEGRRHVVEDEQENF  
 VLKILFCKQSDRGLYTCTASNLVGQTYSSVLVVVREPTVPFKKRLQDLEVREKESATFQCEVAQPAATEAAWFK  
 EETRLWASAKYDIEEGTERRLTVRNVSADDDAVYICETTEGSRVVAELSVQGNLTKRKLPRKTAVRTGDTAIF  
 WVAVPEPVRWLRNQEEMVAGGRVAITAEGTCHTLTI FQCTLEDMGEVAFVSGGCRTTTTQCEVASAPRRPPL  
 YPPADPVVKAKTESSVTLSSWAPPHGDRPVTIDGYVLEKRLKLGAYAWSRCHAEAGWLATTEFTITGVAAEEGDFQ  
 FRVSAINHFGQGPYLEFPGTMHLVPLAVKTPKAVEAVEGGEVTFVSDLTVASSGEWFLDGEALKASSIYVI  
 RCDRTRHMLTIREVPARLHGAQLKVFANGIETSIQMVVRAALGLPSSKLPAAAAREVLAQLHEEAQLLAELSD  
 QAAAVTWLKDGRELSLGPYEMQVSAGRRALLVRDVAQDDAGLYECVSRGSRRTAYQLLVQDITDGYRDWGPAG  
 PQKHMCKCAGAKIARYLGSSCYRFLQYDKGVVHWEAALDTRQKGTSSCSLHEKPKLVFAKQQAHSVEKAE  
 AGASATLSCEVAQAQTEVTFWKDGKLLSSSSKVRMEASGCSRRLVVQQAGKADAGEYSCEAGGQKLSFRLDVA  
 EPKMFVFAKEQQARSEVKAEEAGASATLSCEVAQAQTEVTFWKDGKLLSSSSKVRMEASGCSRRLVVQQAGKADA  
 GEYSCEAGGQKLSFRLDVTEPKLVFAKEQQARSEVKAEEVGNATLSCEVAQAQTEVTFWKDGKLLSSSSKVRM  
 EASGCSRRLVVQQAGKADAGEYSCEAGGQKLSFRLDVAEPKLVFAKEQQARSEVKAEEAGNSATLSCEVAQAQ  
 EVTFWKDGKLLSSSSKVRMEASGCSRRLVVQQAGKADAGEYSCEAGGQKLSFHLVTEPKLVFAKEQQAHSEV  
 KAEAGASATLSCEVAQAQTEVTFWKDGKLLSSSSKVRMEASGCSRRLVVQQAGKADAGEYSCEAGGQKLSFR  
 DVAEPLVFAKEQQARSEVKAEEAGASATLSCEVAQAQTEVTFWKDGKLLSSSSKVRVEASGCSRRLVVQQAGK  
 ADAGEYSCEAGGQKLSFRLDVAEPLVFAKEQQANSEVKAEEAGASATLSCEVAQAQTEVTFWKDGKLLSSSSK  
 VRVEASGCSRRLVVQQAGKADAGEYSCEAGGQKLSFRLDVAEPLVFAKEQQAHSEVKAEEAGASATLSCEVAQ  
 AQTEVTFWKDGKLLSSSSKVRVEASGCSRRLVVQQAGKADAGEYSCEAGGQKLSFRLDVAEPLVFAKEQQAH  
 SEVKAEEAGASATLSCEVAQAQTEVTFWKDGKLLSSSSKVRVEASGCSRRLVVQQAGKADAGEYSCEAGGQKLS  
 FRLDVAEPLVFAKEQQAHSEVKAEEAGASATLSCEVAQAQTEVTFWKDGKLLSSSSKVRVEASGCSRRLVVQQ  
 AGKADAGEYSCEAGGQKLFRLDVAEPLVFAKEQQAHSEVKAEEAGASATLSCEVAQAQTEVTFWKDGKLLSS  
 SSKVRVEASGCSRRLVVQQAGKADAGEYSCEAGGQKLSFRLDVAEAEESQIPERPSRREPLVVEHETIILTAT  
 IAAPSVAAVTWLKDGVIEIRRSKRHEATSLGDHTLTVRGAQVLDSAIYSCRVGKEGQDFPVQVEEVAAKFSKP  
 LEPEVEGELGGTVMLVCELSPEQAEVWRCNGTQLRPGKRFQMTSEGPRRTLTVSGLREDDAEYVCESRDDRT  
 SARLTVKVPVVKFTSGLSAMVAEEGQEAFTQCVVSPSDAGVTWYKDGMLQPSSEKFMVVESEGASRSLTILGL  
 TLEDAGQVTVEAEGASSAALRVREAPVLFKKKLEPQTVEERTSVTLEVELTRPWPEVKWTRNAAVLTPSENV  
 EIRAEGARHCLVLRVSVGFADRGFFGCETPDDKTQAKLVNEMRQVRLVVRGLQEVEAKEQGTASMDVELSHA EVE  
 GSWTRDGLRLQPGPKCHLAVQGPVHILTLTALQPDQSGLVAFRAEGVHTSARLIVTELPVSVFTRVLQDQVATQ  
 KEKVTLECELSRPVDVRLKDGVELRAGKAI GIVAQGTCSRSLVIYRCETGDQGVVCDALDAQTSASLRVQGR  
 TYTLIFRRVLAEDAGEVKFVAENAESRAHLRVKELPVTLLRPLRDKIAMEKHRGVLECCQVSRASAQVRWFKGG  
 VELQSGPKYEVVSDGLYRKLVINLVQPEDEDTYTCDAGNVKTSAQFFVEEQSITIVRGLKDMTVMPEPAPAWFE  
 CETSI PSVRPPKWLKGTVLQAGGNVGLQDGTVHRLTLHKTCSTMTGVPVHFTIGKSRSSAQLVSDIPVVL  
 RPLEPKAGRELQSVVLSCDFRPAKAVQWYKDDTPLSPSEKFKMALEGQMAELRILRLTPADAGVYRCQAGSA  
 QSSAEVTVAREVTVIQPLQDAEAMEEGRVCFSCELSHKDEDI EWSLNGTPLYNDSFHEISHEGCLHTLVLKS  
 VRQADTGTVCATSPKVSVSARLVVKGKPVVFLKALDDVSAEERGTLTLQCEVSDPEARVVWRKDGVELGPSDK  
 YDFLHKAGARGLTVHDLSDHEDAGLYTCQVGSKETQSKVSVHDLHVGITKRLKTVEVLEGECSFCVLSHESP  
 SDPAVWTVGGKTVGGSGHFAVRQGRKYTLTVKDAALSDAGEVVFVSVLGLTFSKASLIIRERPVDTKPLEDQR  
 TTLGEDVMLSCELSRAGTSVRWLKDGKAIKRSQKYDLLSEGTRAVLVVRKASLKDSGEYTCETEASKSTAKLC  
 VEEKANRFTEELADLQVEEKGRAVFTCKTEHPASVVTWRKGLLELRASGKHVPSQEGTLTKLTINALERTSD  
 TYTCDIQQARTQARLLVHGQKVRVIEDLEDTAVQEGSSAKFFCCRIAPADYGPVHWFLLDKTPLHSNELNEITVQ  
 PGGYHVLTLRQLALKDSGTVYFEAGDQRTSAALRVTEKPSIFSRPLTDVTVTEGEDTLVCETTTTVDSSVVRWT  
 KDGKTLRPSARCQLSHEGCQAQLLITATTPQDGGRYKCEIGGASSSSIVRVHALPVRFRSLKDVVEVPEGKAA  
 TLRCVLSVAAPVEWRHGDDVLKSSNKYSLRQEGAVLELVIRDLQPDQSGQYSCSFGDQTTSATLTVKTSQAQ  
 FVGKLRNKEATEGTTVTLRCELTKAEAPVEWKKGTETLRNGDKYSLKQDGA VCELQICSLLVADAGEYSCVCGQ



EKTSATLTVKALLVHFVRRRLRSKEATEGDTTTLQCELSKAAPVEWRKGTETLRDGDYSLKQDGA VCELQIRS  
LTIADAGEYLCTCGQEKSATLTVRALPAKFKDSLKNEEATEGTTATLSCELSKAAPVTWKKGPKTLQSGDKY  
VLRQDGA VCGLQIHGLTMADAGEYSCVCGQEKSATLTVRGLPAKFIEDLRSQEATEGATAILRCELSKAAPV  
EWRKGETLTKDGDYTLRQDGA VCELQIRGLAVVDTGTYS SLP TKFTEGLRNEEATEGTMATLRCQMSKAAPV  
EWRKGETLTDGDYSLRQDGA MCELQIRGLTIEDSGEYTCVCGQEKSATLSVKALPPRFIEDLRSQEATEG  
TMATLRCQMSKAAPVEWRKGETLGDGGYSLRQNGAVCELQIHDLAVEDTGEYSCVCGQEKSATLNVKALP  
PRFIEDLRSQEATEGTMATLRCQMSKAAPVEWRKGETLTDGGYSLRQDGA VCELQIHDLVEDAGQYSCVC  
GQEKSATVLTVDALPPKFTEGLKKEEATEGTMVTLRCQMSKEATVEWRKGA KTLSDGGYSLRQDGA MCELQI  
CGLAVEDAGEYSCVCGQEKSATLSVKALPPRFIEDLRSQEATEGTMATLRCQMSKAAPVEWRKGSKTLRDGD  
RYSLRQDGA MCELQICDLAVEDTGDYSCVCGQEKSATLSVKAPQVVFQQLQNLQAEEGSMASLRCELSVPN  
AAMVWSKGGLELQGDTRREARQQGCVAELLLRDLRREDAGEYSC TCGSQTTSATLMVTAAPVRFRLQLAQDV  
DEGATARLRCELSREAVSVEWRKGS LQLFPCAKYQMVQEGTTAELLVHGVEQEDAGEYTC DAGHTQS IARLSV  
RAPKPKFKTDLQSTEQEAGGTARLCCQLSEAE PGTPVQWLKEGVELHVGS KYEMRRQGAVCELLIHGLEAKDT  
GEYACLVGQKTLASLRVKEPEVTIVRGLVDMEVQADEDFEFTCKV SQAGATDVQWHLQGLPLQSNVTEVAV  
LADGCTHV LQLKGV TLEDAGTVSFHVGG LSSSAQLTVRVPEVTVLEPLKDVQLSEGQDAHFRCRLSRASGQEA  
RWALGGVPLQCNEMNDITVEQGTLYLLTLHKVTLEDAGTITLQVGS CSSEAQLKVTAKNTVLRGLENVDALEG  
GEALFECQLSQPEVAHTWLLDDEPVHTSEKVEVVYFENGLRHLLLLKLNKLPQDS CRVTF LAGDVVTS AFLTV  
RALPDPPEDA EVVGRSDHSVTL SWVAPMSDGGGGLCGYRVMKEASTGQWQLCHDLVPGPECVLDLVP GKTY  
RFRVA AVGPAGAGEPVHLPQMVKIAPAPAPAPAPAPAPAPETRQAVVGEDICLELEVAADGGEVVWHKGTERRI  
QPGGHFEVLSRGRQMLVIKGFRTEDQGEYRCGPIQGLPSSGAATFNVMVMTSGSGDEVPAQPSLPPEAAQEGD  
LHLLWEALARKRRMSREPTLDSISELPEEDSRVQHLRQEAEETAPDLSEGYSTADELARTGEADLSHTSSDDE  
SRAGT PSLVTYLK KAGGPGISPLASKHEAQVTT SVKPKQKQEPVPTCPPPGDL SAADLMDPSLDKAAVKIQA  
AFKGYKVRKEMKQEGPVFSRTFGDTEAQVGDVLRLECVLATKTD MRACWLKDGIELTDGRHYHIDQLKDGTC  
SLLVTGLAPTDSGRYTCQVSTKSGRVSHSACVVVSGTESEAESSSGGELDDAFRRARRLHRLFRTRKSPAELS  
EELFLSADEGPEPEEPADWQTYREDENFVCIRFESLAEARQAVTCFRNMFMATMIGIVEISLGEQGPGRVEM  
RIGKEAPTPTPAVPLAKTGLQTS DAAPVFLTELQNDVQDGYPMSFDCVVTGQPVPSVRWFKDGKLLLEEDDH  
YMINEDQQGGHQLIITAVVPADMGVYRCLAENSMGVNSSTKAE LRVELTSTDYDTAADATETSSYFSAQGYLSS  
REQEGTESDEGQLPQVLEELKDLQVAPGTRLAKFQLKVKGY PAKLYWFKDQGPLTSDHIRMTDKTLHTLE  
IVSVTREDSGQYAAIISNAVGAAYSSARLLVRGPSEPEEK PASDVHERLVPPRI LEKFTPKVKRGSSITFSV  
KVEGHPAPSVHVLKEEA EKGV L WIGPDTPGYTMASSSKQHS LVLVLDVGRQHOGTYTCIATNPAGQALCSASLH  
ISGLAKEEEQERVKEALISSFLQGT SQAVSAQMSESAGFADLVGQSKGESLVAAEAHSHLSLAEVGT EEF LQK  
LTSQITEMVSAKISQAKLQVPGGDSDEETKTPSASPRHGRSRPSSSVQESSSESEDGDSRGEIFDIYVVTADY  
LPLGAEQDAIILREGQYVEVLDSAHPLRWLVRTKPTKSSPSRQGWVSPAYLDKRLKLSPEWGPTEAPEFPGEA  
VSEDEYRTRLSSVIQELLSSEQAFV GELQFLESHHMKHLERSPRVPAAVASQKTVIFRNVQDISHFHSSFLKE  
LQCGTDDDVMCFIKNQEA FEKYLEFLVGRVQAESVVVSTPVQEFYKKYAEETLSAKDPTQPPPPPLQHYLE  
QPVERVQKYQALLKELIRNKARNRQNCALLEQAYAVVSALPQRAENKLVSLMENYPGTLEALGEP I RQHGF I  
VWEGAPGARMPWKGNHRHVLF RNYLVICKPRRDSRTD TFSYVFRNMMLSSIDLNDQVEGDDRAFEVWHERE  
DSVRKYLQARTVIKNSWVKEICGIQQRLAQPVWRPPEFEELADCTAELGETVKLACRVTGTPKPIVSWYK  
DGKPV EVDPHHILIEDPDGSCTLILDNLTGIDSGQYMCFAASAAGNASTLGKILVQVPPRFVNKVRATPFVEG  
EDAQITCTVEGAPYPQIRWYKDGTL LAPGNRYRMLNEPRSGVLVLIQAASKEDLGHYECELVNR LGS TRGGG  
ELYMQSPALRARDQHHREQIVAAVEGAPSMQVTIEDVQVQVGDMAQF DAVIEGHPPPIVTWYKGTQLTSSAR  
LSQRQDGT TYSLVLT DVAPHDAGVYTCVANNAGQVLC KAE L LVHGDKLDAENQVYRRKLSFYDVQEEIGR  
GVFGV KRVQHKGKGMFCAAKFIP LRSKTRAQAYQERDILATLGHPLVTGLLDQFETRKTLLILILELCSSEEL  
LDRLF KKGVVTEAEVKVYIQQLVEGLHYLHSHGILHLDIKPNILMVHPAREDIKICDFGFAQKITPSEPOYS  
KYGSP E FVSPEIIEQNPVSEGS DIWAMGVISYLSLTCSSPFAGESDRATLLNVLEGRVSWSSPTAAHLS EDAK  
DFIKATLQRTPRARPSTSQCLAH PWF LKSMPAEAAHFINTKQLKFL LARSRWQRSLMSYKSI LVMRSIPELLQ  
GPPDSPSLGVARHLRGEASGASSSSSSSDNELAPFARAKSLPPSPVTHSPLLHPRGFLRPSASLPEETEASMP  
TADA AVPAS PQSAGPPASPGCVPRHSV ISSLFYQQAGEGA ERGNKTS GAKRHPARRRHLLKGGYIARALPGLR  
EPLMEYSLLEEEAAREEQASLMTKTPSFETALRLPSSSVREV PGRSHSLDNPPVTTGPSPEACKEQLLFPST  
GLTHE TTA KDRGHKEGFLQESVFPFPMMSGDSRPGKQEGSSQDS CRGKPASSCHSELGSGSQEGC PPSQS LG  
SLPPQSLKKE LSTSCGPLFSEQPQAAPFTQVSPLLGSEKEPQDGS LSEGVPVPSSSPGSASQVDASLDTEG  
LSEAGDTCDFTPPPQRPEQATTRKFSLESRGGYAGVAGYGTFAFGGDAGGMLGQGPLWARMWAVS QSSEEQ  
DEAATESPQLESFLGPIAEASGVPLRTSPSLTPWEEVEQVSLVQIRDLSGDAEAADTISLDISEVDPAYLNL S  
LDYDIKLYPFEFMI FRRVPKPIEQPESPGSETEAGQGLADFL EEAAWPWPGE LGLRAGLEITEEP EEPAGLLEA  
LLGEAAVGRKRKWSPSRGLFQFPGRCLSGEEPVELGRLQRVKASMAHISRILKGRPEGPEREGPPRKKAGLAS  
FRLSGLKGRDQELSDEAVVLGQSVTLACQVLAQPTAQATWSKDGVLLESSGHLLISSTLKNFQLLTLIVVKEE  
DLGTYTCCVSNPLGTAVTTGVLKKAERPSSSPRPEVGE LYKDAVLLVWKPVESCGPVTYIVQCCIEGGSWTTL  
ASDISDCCYL TGKLSRGGMYIFRTACVSKAGMPYSSPSEQVLLGGPNHLASEEESSRGRPAQLLPSTKTF AF

QMQIRRGFRSVVRQCREKASGRALAAKIVPYQPEDKTAVLREYEALKRHLHHPHLAQLHAAYLSPRHLVLILEL  
 CSGPELLPSLAERESYSESDVKDYLWQMSATQYLHAQHILHLDLRSNNMMVTEYNLLKVIDLGNASLDQEK  
 VPAPENFKDYLETMAPELLEGQAVPQTDIWAIGVTAIFIMLSGEYEPESSEGTDRDLQKGLRKLIRLSRCYAGL  
 SGGAVAFLLQSSSLCAQPWGRPCASTCLQCGWLTTEEGPTGSRPTPVTFTVRLRAFVREKRRALLYKKNLAQ  
 VR\*  
 >rs243764830\_ENSMUSP00000049737\_c.17959:T>A\_p.v5987E  
 ENSMUST00000052872.15|Obscn-203|ENSMUSG00000061462|-|chr11:g.58929213:A>T  
 MDHSFSGAPRFLTRPKAFVSVGKDATLSCQIVGNPTPHVSWEKDRQFVEAGARFRLAQDGDVYRLTILDLAL  
 GDSGQYVCRARNAIGEAFVAVGLRVDSEGTCAEQAPHFLLRPTSIRVREGADATFRCRVGGSPPAVSWSKDG  
 RRLGPPDAPHVRVEEHGESSALRIRSARPRDGGTYEVRAENPLGSASAAAAALVVDSAEVAGPPGTSTATLLA  
 HLQORREAMRAEGIPPSPPGAGTRTCTVTEGKHARLSCFVTGEPKPEVWKKDQGLVTEGRRHVVEDEQENF  
 VLKILFCKQSDRGLYTCTASNLVGQTYSSVLVVREPTVPFKKRLQDLEVREKESATFQCEVAQAPATEAAWFK  
 EETRLWASAKYDIEEEGETERRLTVRNVSADDDAVYICETTEGSRVVAELSVQGNLTKLPRKTAVRTGDTAIF  
 WVELAVPEGPVRWLRNQEEMVAGGRVAITAEGTCHTLTI FQCTLEDMGEVAFVSGGCRTTTTQFCVSAPRRPPL  
 YPPADPVVKAKTESSVTLSSWAPPHGDRPVTIDGYVLEKRLKLGAYAWSRCHEAGWLATTEFTITGVAAEEDGFQ  
 FRVSAINHFQGGPYLEFPGTMHLVPLAVKTPKAVEAVEGGEVTFVSDLTVASSGEWFLDGEALKASSIYVI  
 RCDRTRHMLTIREVPARLHGAQLKVFANGIETSIQMVVRAALGLPSSKLPAAAAREVLAQLHHEEAQLLAELS  
 QAAAATWLDKDGRELSLGPKYEMQVSAGRRALLVRDVAQDDAGLYECVSRGSRRTAYQLLVQEPHFAKQQAH  
 SEVKAEEAGNSATLSCEVTQAQTEVTFWKDGGKLSSSSKVRMEASGCSRRLVVQQAGKADAGEYSCEAGGQKLS  
 FRLDVAEPKLVFAKQQAHSEVKAEEAGASATLSCEVAQAQTEVTFWKDGGKLSSSSKVRMEASGCSRRLVVQQ  
 AGKADAGEYSCEAGGQKLSFRLDVAEPKMFVFAKEQQARSEVKAEEAGASATLSCEVAQAQTEVTFWKDGGKLS  
 SSKVRMEASGCSRRLVVQQAGKADAGEYSCEAGGQKLSFRLDVTEPKLVFAKEQQARSEVKAEEVGNATLSCE  
 VAQAQTEVTFWKDGGKLSSSSKVRMEASGCSRRLVVQQAGKADAGEYSCEAGGQKLSFRLDVAEPKLVFAKEQ  
 QARSEVKAEEAGNSATLSCEVAQAQTEVTFWKDGGKLSSSSKVRMEASGCSRRLVVQQAGKADAGEYSCEAGGQ  
 KLSFHLDVTEPKLVFAKEQQAHSEVKAEEAGASATLSCEVAQAQTEVTFWKDGGKLSSSSKVRMEASGCSRRLV  
 VQQAGKADAGEYSCEAGGQKLSFRLDVAEPKLVFAKEQQARSEVKAEEAGASATLSCEVAQAQTEVTFWKDGGK  
 LSSSKVRVEASGCSRRLVVQQAGKADAGEYSCEAGGQKLSFRLDVAEPKLVFAKEQQANSEVKAEEAGASATL  
 SCEVAQAQTEVTFWKDGGKLSSSSKVRVEASGCSRRLVVQQAGKADAGEYSCEAGGQKLSFRLDVAEPKLAFA  
 KEQQAHSEVKAEEAGASATLSCEVAQAQTEVTFWKDGGKLSSSSKVRVEASGCSRRLVVQQAGKADAGEYSCEA  
 GGQKLSFRLDVAEPKLAFAKEQQAHSEVKAEEAGASATLSCEVAQAQTEVTFWKDGGKLSSSSKVRVEASGCSR  
 RLVVQQAGKADAGEYSCEAGGQKLSFRLDVAEPKLAFAKEQQAHSEVKAEEAGASATLSCEVAQAQTEVTFWKD  
 GKKLSSSSSKVRVEASGCSRRLVVQQAGKADAGEYSCEAGGQKLFRLDVAEPKLMFAKEQQAHSEVKAEEAGAS  
 ATLSCEVAQAQTEVTFWKDGGKLSSSSKVRVEASGCSRRLVVQQAGKADAGEYSCEAGGQKLSFRLDVAEPK  
 VFAKEQQAHSEVKAEEAGASATLSCEVAQAQTEVTFWKDGGKLSSSSKVRVEASGCSRRLVVQQVQKADAGEYS  
 CEARGQKLSFRLDVADTRLMFAKEQQARTEVKAEEAGNSATLSCEVAQAQTEVTFWKDGGKLSSSSKVRVEASG  
 CSRRLVVQQAGKADAGEYSCEAGGQKLSFRLDVAEEAESQI PERPSRREPLVVKEHETIILTATIAAPSVAAVT  
 WLKDGVEIRRKRHEATS LGDTHLTVRGAQVLD SAIYSCRVGKEGQDFPVQVEEVAAKFSKPLEPVEGELGG  
 TVMLVCELSPEQAEVWRCGNTQLRPGKRFQMTSEGPRRTLVSGLREDDAEYVCESRDDRTSARLTVKVPR  
 VVKFTSGLSAMVAEEGQEA TFQCVVSPSDAGVTWYKDGMLQPSSEKFMVVEGASRSLTILGLTLEDAGQVTV  
 EAEGASSAALRVREAPVLFKKLEPQTVEERTSVTLEVELTRPWPVEVKWTRNAAVLTPSENVEIRAEGARHC  
 LVLSVGFADRGFFGCETPDDKTQAKLVNEMRQVRLVRLGQVEEAKEQGTASMDVELSHAEVEGSWTRDGLRL  
 QPGPKCHLAVQGPVHILTLALSALPQD SGLVAFRAEGVHTSARLIVTELPVSFTRVLQDVVATQKEKVTLECEL  
 SRPVDVRWLKDGVELRAGKAI GIVAQGTCSRSLVIYRCETGDQGVYVCDALDAQTSASLRVQGRTYTLIFRRVL  
 AEDAGEVVFVAENAESRAHLRVKELPVTLLRPLRDKIAMEKHRGVLECVSRASAVRWFVKGGLVLSGPKYE  
 VVSDGLYRKLVINVDVPEDEDTY TCDAGNVKTSAQFFVEEQSITIVRGLKDMTVMPEPAPAWFECE TSPSVRP  
 PKWLLGKTVLQAGGNVGLQDGTVHRLTLHKTCSTMTGPVHFTIGKSRSSAQLVVS DI PVVLTTRPLEPKAGRE  
 LQSVVLSCDFRPAPKAVQWYKDDTPLSPSEKFKMALEGQMAELRILRLTPADAGVYRCQAGSAQSSAEVTVEA  
 REVTVIQPLQDAEAMEEGRVCFSCELSHKDEDI EWSLNGTPLYNDSFHEISHEGCLHTLVLSVRQADTGTVC  
 ATSPKVSVSARLVVKGKPVVFLKALDDVSAEERGTLTLQCEVSDPEARVVWRKDGVELGPSDKYDFLHKAGAR  
 GLTVHDLSDHEDAGLYTCQVGSKETQSKVSVHDLHVGITKRLKTVEVLEGE SCSFECVLSHESPSDPAVWTVGG  
 KTVGGSGHFHAVRQGRKYTLTVKDAALSDAGEVVSVLGLTSKASLI IRERPVDITKPLEDQRTTLGEDVMLS  
 CELSRAGTSVRWLKDGKAI RKSQKYDLLSEGTRAVLVVRKASLKDSGEYTCETEASKSTAKLCVVEEKANRFT  
 ELADLQVEEKGRAVFTCKTEHPASVVTWRKGLLELRASGKHVPSQEGTLKLTINALERTSDTYTCDI GQAR  
 TQARLLVHGKVRVIEDLEDTAVQEGSSAKGCCRIAPADYGPVHWFLDKTPHLSNELN EITVQPGGYHVLTLR  
 QLALKDSGTVYFEAGDQRTS AALRVTEKPSIFSRPLTDVTVTEGEDLTLVCETTTVDSSVRWTKDGKTLRPSA  
 RCQLSHEGCAQLLITATTPQDGGRYKCEIGGASSSIVRVHALPVRFRESLKDVEVPEGKAATLRCVLSSVA  
 APVEWRHGDDVLKSSNKYSLRQEGAVLELVIDRLQPD SGOYSCSFGDQTTSATLTVKTSQAQVFGKLRNKEA  
 TEGTTVTLRCELTKAEAPVEWKKGTETLRNGDKYSLKQDGA VCELQICSLLVADAGEYSCVCGQEKTSATLTVK

ALLVHFVRRRLRSKEATEGDTTTLQCELSKAAPVEWRKGTETLRDGDYSLKQDGAUCELQIRSLTIADAGEYL  
 CTCGQEKTSATLTVRALPAKFKDSLKNEEATEGTTATLSCELSKAAPVTWKKGPKTLQSGDKYVLRQDGAUCG  
 LQIHGLTMADAGEYSCVCGQEKTSATLTVRGLPAKFIEDLRSQEATEGATAILRCLELSKAAPVEWRKGSSETLK  
 DGDYSLRQDGAUCELQIRGLAVVDGTYSLSLPTKFTTEGLRNEEATEGTMATLRCQMSKAAPVEWRKGSSETLR  
 DGDYSLRQDGAUCELQIRGLTIEDSGEYTCVCGQEKTSATLSVKALPSRFIEDLRSQEATEGTMATLRCQMS  
 KTAPVEWKKGSETLRDGGYSLRQDGPVCELQICDLAVEDAGEYSCVCGQEKTSATLSIKALPPRFIEDLRSQ  
 EATEGTMATLRCQMSKAAPVEWRKGSSETLGDGGYSLRQNGAVCELQIHDLAVEDTGEYSCVCGQEKTSATLN  
 VKALPPRFIEDLRSQEATEGTMATLRCQMSKAAPVEWRKGSSETLRDGGYSLRQDGAUCELQIHDLVEDAGQ  
 YSCVCGQEKTSAVLTVDALPPKFTTEGLKKEEATEGTMVTLRCQMSKEATVEWRKGAKTLSGGYSLRQDGAUC  
 CELQICGLAVEDAGEYSCVCGQEKTSATLSVKALPPRFIEDLRSQEATEGTMATLRCQMSKAAPVEWRKGSSET  
 LRDGDYSLRQDGAUCELQIRDLAVEDAGEYLCVCGQEKTSATLSVKALPPRFIEDLRSQEATEGTMATLRCQ  
 MSKAAPVEWRKGSSETLRDGDYSLRQDGAUCELQICDLAVEDTGDYSCVCGQEKTSATLSVKALPPRFIEDLR  
 SQEAREGTVATLRCRMSKAAPVEWRKGSSETLKDGDYSLRQEGNLCELQIRDLAVEDTEEYSCVCGQEKTSAT  
 LSVKALPAKFIEDLRSQEAPESSTVTLRCKLSKKASVWKKGSETLRNGARYSLRQDGAUCELEIRDLTVEEDT  
 GEYSCTCGQERTSATLSIMAPQVVFQQLQNLQAEEGSMASLRCELSVPAAMVWSKGGLELQGDTRREARQQ  
 GCVAELLLRDLRREDAGEYSCCTGSQTTATLMVTAAPVRFRELAQDQVDEGATARLRCLELSREAVSVEWRK  
 GSLQLFPCAKYQMVQEGTTAELLVHGVEQEDAGEYTCDAHTQSIARLSVRAPKPKFKTDLQSTEQEAGGTAR  
 LCCQLSEAEPTPVQWLKEGVELHVGSKYEMRRQGAUCELLIHGLEAKDTGEYACLVGQKTLASLRVKEPEV  
 TIVRGLVDMEVQADEDEFTCKVSQAGATDVQWHLQGLPLQSNVTEVAVLADGCTHVLQKGVTLLEDAGTVS  
 FHVGGSSSAQLTVRVPEVTVLEPLKDVQLSEGQDAHFRCRLSRASQGEARWALGGVPLQCNEMNDITVEQGT  
 LYLLTLHKVTLEDAGTITLQVGSSESAQLKVTAKNTVLRGLENVDALEGGALFECQLSQPEVAHTWLLDD  
 EPVHTSEKVEVVYFENGLRHLLLLKLNKPKQDSCRVTFLAGDVVTSAFLTVRGRWLEVLEPPHDASVKAGMQR  
 FTICILSEAVPVGEATWYINGAAIQPDDTWTVTDDGSHHALTLSNAQPQHAGEVTFAAARAVASARLSVLALP  
 DPPEDAEEVGRSDHSVTLSSWVAPMSDGGGGLCGYRVMKEASTGQWQLCHDLVPGPECVVDDLVPGKTYRFRV  
 AAVGPAGAGEPVHLPQMVKIAPAPAPAPAPAPAPETRAVVGEDICLELEVAADGGEVWVKGTERIQPGG  
 HFEVLSRGRQMLVIKGFRTEDQGEYRCGPIQGLPSSGAATFNVVMTSGSGDEVPAQPSLPEAAQEGDLHLHLL  
 WEALARKRRMSREPTLDSISELPEEDSRVQHLRQEAEETAPDLSEGYSTADELARTGEADLSHTSSDDESRA  
 TPSLVTYLKKAGGPGISPLASKHEAQVTTSVKPKQKQEPVVPTCPPPGDLSAADLMDPSLDKAAVKIQAAFKG  
 YKVRKEMKQOEGPVFSRTFGDTEAQVGDVLRLECVLATKTDMRACWLKDGIELTDGRHYHIDQLKDGTCSSLLV  
 TGLAPTDSGRYTCQVSTKSGRVSHSACVVVSGTESEAESSSGGELDDAFRRAARLHRLFRTKSPAELSEEEL  
 FLSADEGPGPEPEPADWQTYREDENFVCIRFESLAEARQAVTCFRNMFATMGIGVEISLGEQGRGVEMRIGK  
 EAPTVTPAVPLAKTPGLQTSDAAPVFLTELQNDVQDGYPMSFDCVVTGQPVPSVRWFKDKLLEEDDHYMIN  
 EDQGGHQLIITAVVPADMGVYRCLAENSMGVSSTKAELRVELTSTDYDTAADATETSSYFSAQGYLSSRQE  
 GTESDEGQLPQVLEELKDLQVAPGTRLAKFQKVKGYPAKLYWFKDQGLTTSDHIRMTDKKTLHTLEIVSV  
 TREDSGQYAAIYISNAVGAAYSSARLLVRGPSEPEEKSPASDVHERLVPPRIEKFTPKKVKRGSSTFVSVKVEG  
 HPAPSVHHLKEEAEGVLIWGPDPGYTMASSSKQHSVLVLDVGRQHOGTYTCIATNPAGQALCSALHISGL  
 AKEEEQERVKEALISSFLQGTSAQVSAQMSSEAGFADLVGQSKGESLVAEEAHSHLSLAEVGTTEFLQKLSQ  
 ITEMVSAKISQAKLQVPGGDSDEETKTPSASPRHGRSRPSSSVQESSSESEDGDSRGEIFDIYVVTADYLP  
 AEQDAIILREGQYVEVLDSAHPLRWLVRTKPTKSSPSRQGWVSPAYLDKRLKLSPEWGPTEAPEFPGEAVS  
 EYRTRLSSVIQELLSSEQAFVQELQFLESHHMKHLERSPRVPAAVASQKTVIFRNVQDISHFHSSFLKELQGC  
 GTDDVAMCFIKNQEAFEKYLEFLVGRVQAESVVVSTPVQEFYKKYAEETLSAKDPTQPPPPPLQHYLEQPV  
 RVQKYQALLKELIRNKARNRQNCALLEQAYAVVSALPQRAENKLVSLMENYPGTLEALGEPVIRQGHFVWEG  
 APGARMPWKGNHRHVFVFRNYLVICKPRRDSRTDTFSYVFRNMMKLSSIDLNDQVEGDDRAFEVWHEREDSVR  
 KYLLQARTVIKNSWVKEICGIQORLAQPVWRPPEFEELADCTAELGETVKLACRVTGTPKPIVSWYKDGK  
 VEVDPHHILIEDPDGSCTLILDNLTGIDSGYMCFAASAAGNASTLGKILVQVPPRFVNVKVRATPEFVEGEDAQ  
 ITCTVEGAPYPQIRWYKDGTLTLLAPGNRYRMLNEPRSGVLVLIQAASKEDLGHYECELVNRLGSTRGGGELYM  
 QSPALRARDQHHREQIVAAVEVTEQETKVPKKTVIEETITTVVKS PRGRRQSPGKSPSRSPRRSASPRRPG  
 LLAPERLYPPGTPSPRRLEVEQGRKAPVPALYVTEAEVHAPASQSPKWLEVEETIEVRVKKTGSRGASPVRE  
 MTSRGEGLIFLTPGGIPGRDPNANNNSNKS SVYQEARTWGPVAVHVGEFFIFQVDSVGNVDVWAASPEPEQVRA  
 SQKEENTERQEGCSGDENTFLMEEPQDTSLQGRDPKILTHNGRVLTLADLEDYVPQEGETFGCGDSTPSTP  
 DEPPCEVSVLQREISEPTVGQPVLLNVGRPPGTGATPSFFRPGSQVHSPESVSFLLREAWSGPVSAAPWTSS  
 HTHVQSSVDGSHGSFKTEVSTQTVSFGAVGETVTLHIDPDGGEAPGPSQG\*  
 >rs243764830.202MUSP0000020732\_c.18160:T>A\_p.V6054E  
 ENSMUST0000020732.13|Obscn-201|ENSMUSG00000061462|-|chr11:g.58929213:A>T  
 MDHSFSGAPRFLTRPKAFVSVGKDATLSQIVGNPTPHVSWEKDRQPVVEAGARFLAQDGDVYRLTILDLAL  
 GDSGQYVCRARNAIGEAFVAVGLRVDSEGTCAEQAPHLLRPTSIRVREGADATFRCRVGGSPPAVSWSKDG  
 RRLGPPDAPHVRVEEHGESSALRIRSARPRDGGTYEVRAENPLGSASAAAALVVDSDAEVAGPPGTSTATLLA  
 HLQQRREAMRAEGIPSPPGAGTRTCTVTEGKHARLSCFVTGEPKPETVWKKDGLVTEGRRHVVEDEQENF

VLKILFCKQSDRGLYTCTASNLVGQTYSSVLVVVREPTVPFKKRLQDLEVREKESATFQCEVAQPATEAAWFK  
EETRLWASAKYDIEEEGETERRLTVRNVSADDDAVYICETTEGSRVAELSVQGNLTKRKLPRKTAVRTGDTAIF  
WVELAVPEGPVWRWRNQEEMVAGGRVAITAEGTCHTLTI FQCTLEDMGEVAFVSGGCRTTTTQFCVSA PRRPPL  
YPPADPVVKAKTESSVTLWSAPPHGDRPVTIDGYVLEKRKLGAYAWSRCHEAGWLATTEFTITGVAEEGDFQ  
FRVSAINHFGQGPYLEFPGTMHLVPLAVKTPKAVEAVEGGEVTFVSDLTVASSGEWFLDGEALKASSIYVI  
RCDRTRHMLTIREVPARLHGAQLKFVANGIETSIQMVVRAALGLPSSKLPAAAAAREVLAQLHHEEAQLLAE LSD  
QAAAVTWLKDGRELSLGPKEYMQVSAGRRALLVRDVAQDDAGLYECVSRGSRRTAYQLLVQDITDGYRDWGPAG  
PQKHMCKCAGAKIARYLGSSCYRFLQYDKGVWHWLEAALDTRQGKGTSSCSLHEKPKLVFAKGGQQAHSSEVKAE  
AGNSATLSCEVTQAQTEVTWFKDGKLLSSSSKVRMEASGCSRRLVVQQAGKADAGEYSCEAGGQKLSFRLDVA  
EPKLVFAKGGQQAHSSEVKAEAGASATLSCEVAQAQTEVTWFKDGKLLSSSSKVRMEASGCSRRLVVQQAGKADA  
GEYSCEAGGQKLSFRLDVAEPKMFVFAKEQQARSEVKAEGASATLSCEVAQAQTEVTWFKDGKLLSSSSKVRM  
EASGCSRRLVVQQAGKADAGEYSCEAGGQKLSFRLDVTEPKLVFAKEQQARSEVKAEGVNSATLSCEVAQAQ  
EVTWFKDGKLLSSSSKVRMEASGCSRRLVVQQAGKADAGEYSCEAGGQKLSFRLDVAEPKLVFAKEQQARSEV  
KAEAGNSATLSCEVAQAQTEVTWFKDGKLLSSSSKVRMEASGCSRRLVVQQAGKADAGEYSCEAGGQKLSFHL  
DVTEPKLVFAKEQQAHSEVKAEGASATLSCEVAQAQTEVTWFKDGKLLSSSSKVRMEASGCSRRLVVQQAGK  
ADAGEYSCEAGGQKLSFRLDVAEPKLVFAKEQQARSEVKAEGASATLSCEVAQAQTEVTWFKDGKLLSSSSK  
VRVEASGCSRRLVVQQAGKADAGEYSCEAGGQKLSFRLDVAEPKLVFAKEQQANSEVKAEGASATLSCEVAQA  
AQTEVTWFKDGKLLSSSSKVRVEASGCSRRLVVQQAGKADAGEYSCEAGGQKLSFRLDVAEPKLVFAKEQQAH  
SEVKAEGASATLSCEVAQAQTEVTWFKDGKLLSSSSKVRVEASGCSRRLVVQQAGKADAGEYSCEAGGQKLS  
FRLDVAEPKLVFAKEQQAHSEVKAEGASATLSCEVAQAQTEVTWFKDGKLLSSSSKVRVEASGCSRRLVVQQ  
AGKADAGEYSCEAGGQKLSFRLDVAEPKLVFAKEQQAHSEVKAEGASATLSCEVAQAQTEVTWFKDGKLLSS  
SSKVRVEASGCSRRLVVQQAGKADAGEYSCEAGGQKLFRLDVAEPKLMFAKEQQAHSEVKAEGASATLSCE  
VAQAQTEVTWFKDGKLLSSSSKVRVEASGCSRRLVVQQAGKADAGEYSCEAGGQKLSFRLDVAEPKLVFAKEQ  
QAHSSEVKAEGASATLSCEVAQAQTEVTWFKDGKLLSSSSKVRVEASGCSRRLVVQQVQKADAGEYSCEARGQ  
KLSFRLDVADTRLMFAKEQQARTEVKAEGNSATLSCEVAQAQTEVTWFKDGKLLSSSSKVRVEASGCSRRLV  
VQQAGKADAGEYSCEAGGQKLSFRLDVAEAEISQI PERPSRREPLVVKHEHETIILTATIAAPVAAVTWLKDGV  
EIRRSKRHEATSLGDHTLTVRGAQVLDLSAISYSCRVGKQDFPVQVEEVAAKFSKPLEPVEGELGGTVMLVC  
ELSPQAEVWRCGNTQLRPGKRFQMTSEGPRRLTLTVSGLREDDAEYVCESRDDRTSARLTVKVPVVKFTS  
GLSAMVAEEGQEQATFQCVVSPSDAGVTWYKDGMLQPSKFMVVEGASRSILTILGLTLEDAGQVTVAEAGAS  
SSAALRVREAPVLFKFKLEPQTVVEERTSVTLEVELTRPWPEVKWTRNAAVLTPSENVEIRAEGARHCLVLRV  
GFADRGFFGCETPDDKTQAKLNVEMRQVRLVRLGLQEVEAKEQGTASMDVELSHAEEVGSWTRDGLRLQPGPKC  
HLAVQGPVHIILTLALQPQDSGLVAFRAEGVHTSARLIVTELPSFTRVLQDVVATQKEKVTLECELSRPVDV  
RWLKDGVLELRAGKAI GIVAQGTCSRSLVIYRCETGDQGVYVCDALDAQTSASLRVQGRTYTLIFRRLAEDAGE  
VKFVAENAESRAHLRVKELPVTLLRPLRDKIAMEKHRGVLEQCQVSRASAQVRWFKGGVELQSGPKYEVVSDGL  
YRKLVINVDQPEDEDTYTC DAGNVKTSAQFFVEEQSITIVRGLKDMTVMPEPAPAWFECETSIPSVRPPKWLGLG  
KTVLQAGGNVGLQDGTVHRLTLHKTCSTMTGPVHFTIGKSRSSAQLVVSDIPVVLTRPLEPKAGRELQSVVL  
SCDFRPAPKAVQWYKDDTPLSPSEKFKMALEGMALRILRLTPADAGVYRCQAGSAQSSAEVTVAEAREVTVI  
QPLQDAEAMEEGRVCFSCELSHKDEDEIWSLNGTPLYNDSFHEISHGCLHTLVLSVRQADTGTVCATSPKV  
SVSARLVVKGKPVVFLKALDDVSAEERGLTLQCEVSDPEARVVWRKDGVELGSPDKYDFLHKAGARGLTVHD  
LSHEDAGLYTCQVGSKETQSKVSVHDLHVGITKRLKTVEVLEGESECFEVLSHESPSDPAVWTVGGKTVGGS  
GHFHAVRQGRKYTLTVKDAALSDAGEVVFVSVLGLTSKASLI IRERPVDITKPLEDQRTTLGEDVMLSCELSRA  
GTSVRWLKDGKAIRKSQKYDLLSEGTRAVLVVRKASLKDSSGEYTCETEASKSTAKLCVEEKANRFTTEELADLQ  
VEEKGRAVFTCKTEHPASVVTWRKGLLELRASGKHVPSQEGTLKLTINALERTDSDTYTCDIGQARTQARLL  
VHGQKVRVIEDLEDTAVQEGSSAKFCCRIAPADYGPVHWF LDKTPLHSNELNEITVQPGGYHVLTLRQLALKD  
SGTVYFEAGDQRTSAAALRVTEKPSIFSRPLTDVTVTEGEDTLVCE TTTVDSSVRWTKDGKTLRPSARCQLSH  
EGCQAQLLITATTPQDGGRYKCEIGGASSSSIVRVHALPVRFRESLKDVEVPEGKAATLRCVLSVAAPVEWR  
HGDDVLKSSNKYSLRQEGAVLELVIRDLQPDQSGQYSCSFGDQTTSATLTVKTSQAQFVGLRKNKEATEGTTV  
TLRCELTKAEAPVEWKKGTETLRNGDKYSLKQDGAVCELQICSLLVADAGEYSCVCGQEKTSATLTVKALLVHF  
VRRLSKEATEGDTTTLQCELSKAAPVEWRKGTETLRDGDYSLKQDGAVCELQIRSLTIADAGEYLCTCGQE  
KTSATLTVRALPAKFKDSLKNEEATEGTTATLSCELSKAAPVWKKGPKTLQSGDKYVLRQDGA VCGLIHGL  
TMADAGEYSCVCGQEKTSATLTVRGLPAKFIEDLRSQEATEGATAILRCELSKAAPVEWRKGSSETLKDGDYR  
LRQDGA VCELQIRGLAVVDGTYSLSLPTKFTTEGLRNEEATEGTMATLRCQMSKAAPVEWRKGSSETLRDGDYR  
LRQDGA MCELQIRGLTIEDSGEYTCVCGQEKTSATLSVKALPSRFIEDLRSQEATEGTMATLRCQMSKTAPE  
WKKGSETLRDGGRYSLRQDGPVCELQICDLAVEDAGEYSCVCGQEKTSATLSIKALPPRFIEDLRSQEATEG  
MATLRCQMSKAAPVEWRKGSSETLGDGGRYSLRQNGAVCELQIHDLAVEDTGEYSVCGQEKTSATLNVKALPP  
RFIEDLRSQEATEGTMATLRCQMSKAAPVEWRKGSSETLRDGGRYSLRQDGA VCELQIHDLVEDAGQYSCVCG  
QEKTSAVLTVDALPPKFTTEGLKKEEATEGTMVTLRCQMSKEATVEWRKGAKTLS DGGRYSLRQDGA MCELQIC  
GLAVEDAGEYSCVCGQEKTSATLSVKALPPRFIEDLRSQEATEGTMATLRCQMSKAAPVEWRKGSSETLRDGD

YSLRQDGA VCE LQIRDLAVEDAGEYL CVCGQEKTSATLSVKALPPRFIEDLRSQEATEGTMATLRCQMSKAAP  
VEWRKGSKTLRDGDYSLRQDGAMCELQICDLAVEDTDYSCVCGQEKTSATLSVKALPPRFIEDLRSQEARE  
GTVATLRCRMSKAAPVEWRKGS ETLKGDYSLRQEGNLCELQIRDLAVEDTEEYSCVCGQEKTSATLSVKAL  
PAKFIEDLRSQEAPESSTVTLRCKLSKKASVWKKGSETLRNGARYSLRQDGA VCELEIRDLTVEDTGEYSCT  
CGQERTSATLSIMAPQVVFQQPLQNLQAEEGSMASLRCELSVPNAAMVWSKGGLELQGDTRREARQQGCVAEL  
LLRDLRREDAGEYSCTCGSQTTSATLMVTAAPVRFRLRELQAQDVDEGATARLRCELSREAVSVEWRKGS LQLF  
PCAKYQMVQEGTTAELLVHGVEQEDAGEYTC DAGHTQSIARLSVRAPKPKFKTDLQSTEQEAGGTARLCCQLS  
EAEPGTFVQWLKEGVELHVGSKYEMRRQGAVCELLIHGLEAKDTGEYACLVGGQKTLASLRVKEPEVTIVRGL  
VDMEVQADEDEFTCKVSQAGATDVQWHLQGLPLQSNKEVAVLADGCTHVLQKGVTL EDAGTVSFHVGG  
SSSAQLTVRVPEVTVLEPLKDVQLSEGDQAHFRCLRSRASGQEARWALGGVPLQCNEMNDITVEQGTLYLLTL  
HKVTLEDAGTITLQVGS CSSEAQLKVTAKNTVLRGLENVDALEGGEALFECQLSQPEVA AHTWLLDDEPVHTS  
EKVEVVYFENGLRHLLLLKNLKPQDSCRVTFLAGDVVTS AFLTVRGWRLEVLEPPHDASVKAGMQVRFTCILS  
EAVPVGEATWYINGAAIQPDDTDWTVTTDGS HHALTLSNAQPQHAGEVTF AARDAVASARLSVLALPDPPEDA  
EYVGRSDHSVTL SWVAPMSDGGG LCGYRVMKEASTGQWQLCHDLVPGPECVVDDLVP GKTYRFRVA AVGPA  
GAGEPVHLPQMVKIAPAPAPAPAPAPAPAPETRQAVVGEDIC LELEVAADGGEVVWHKGTERRIQPGHFVLS  
RGQRQMLVIKGFRTEDQGEYRCGPIQGLPSSGAATFNVVMTSGSGDEVPAQPSLPPEAAQEGDLHLLWEALAR  
KRMSREPTLDSISELPEEDSRVQHLRQEAEETAPDLSEGSTADELARTGEADLSHTSSDDES RAGT PSLVT  
YLK KAGGPGISPLASKHEAQVTT SVKPKQKQEPVVPTCPPPGDL SAADLMDPSLDKAAVKIQAAFKGYKVRKE  
MKQQEGPVFSRTFGDTEAQVGDVLRLECVLATKTD MRACWLKDGIELTDGRHYHIDQLKDGTC SLLVTGLAPT  
DSGRYTCQVSTKSGRVSHSACVVVSGTESEAESSGGELDDAFRRAARRLHRLFR TKSPAELSEELFLSADE  
GPGEPEPADWQTYREDEFV CIRFESLAEARQAVTCFRNMFATMIGVEISLGEQGRGVEMRIGKEAPT VT  
PAVPLAKTPGLQTS DAAPVFLTELQNDQVDQDGYPMSFDCVVTGQPVPSVRWFKDGKLEEDDH YMINEDQGG  
HQLLIITAVVPADMGVYRCLAENSMGVSSTKAELRVELTSTDYDTAADATETSSYFSAQGYLSSREQEGTESDE  
GQLPQVLEELKDLQVAPGTR LAKFQLKVKGYPA PKLYWFKDGGQPLTTSDHIRMTDKKTLHTLEIVSVTREDSG  
QYAAYSNAVGAAYSSARLLVRGPSEPEEK PASDVHERLVPPRI LEKFTPKKVKRGSSITFSVKVEGHPAPSV  
HWLKEEA EKGVFLWIGPDTPGYTMAS SSKQHSLLVLDVGRQH QGTYT CIATNPAGQALCSASLHISGLAKEEEQ  
ERVKEALISSFLQGTSAVSAQMS EASAGFADLVGQSKGESLVAEEAHSHLSLAEVQTEEF LQKLTQITMVVS  
AKISQAKLQVPGGDSDEETKTPSASPRHGRSRPSSSVQESSSESEDGDSRGEIFDIYVVTADY LPLGAEQDAI  
ILREGQYVEVLDSAHPLRWLVR TKPKSSPSRQGWVSPAYLDKRLKLSPEWGPTEAPEFPGEAVSEDEYRTRL  
SSVIQELLSSEQAFV GELQFLES HHMKHLERSPRVPA AVASQKTVI FRNVQDISHFHSSFLKELQCGCTDDDV  
AMCFIKNQEA FEKYLEFLVGRVQAESVVVSTPVQEFYKKYAEETLSAKDPTQPPPPPLQHYLEQPVERVQKYQ  
ALLKELIRNKARNRQNCALLEQAYAVVSALPQRAENKLVSLMENYPGTLEALGEP I RQGHFIVWEGAPGARM  
PWKGHNHRVFLFRNYLVIC PPRRDSRTDTFSYVFRNMMKLSSIDLNDQVEGD DRAFEVWHEREDSVRKYLLQA  
RTVI IKNSWVKEICGIQORLAQP VWRPPEFEEELADCTAE LGETVKLACRVTGT PKPIVSWYKDGKPV EVDPH  
HILIEDPDG SCTLILDNL TGIDSGQYMCFAASAAGNASTLGKILVQVPPRFVNVKVRATPFVEGEDAQITCTVE  
GAPYPQIRWYKDG TLLAPGNRYRMLNEPRSGVLV LVIQAASKEDLGHYECELVNRLGSTRGGGEL YMQSPALR  
ARDQHHREQIVAAVEERRPSP\*  
>rs243764830\_ENSMUSP00000151217\_c.15454:T>A\_p.V5152E  
ENSMUST00000219084.3|Obscn-207|ENSMUSG00000061462|-|chr11:g.58929213:A>T  
MDHSFSGAPRFLTRPKAFVSVGKDATLSCQIVGNPTPHVSWEKDRQFVEAGARFRLAQDGDVYRLTILDLAL  
GDSGQYVCRARNAIGEAFAAVGLRVDSEGTCAEQAPHLLRPTSIRVREGADATFRCRVGGSPQPAVSWSKDG  
RRLGPPDAPHVRVEEHGESSALRIRSARPRDGGTYEVRAENPLGSASAAAALVVDSDAEVAGPPGTSTATLLA  
HLQORREAMRAEGIPSPPGAGTRTCTVTEGKHARLSCFVTGEPKPE TVWKKDQGLVTEGRRHVVEDEQENF  
VLKILFCKQSDRGLYTC TASNLVGGTYSSVLVVVREPTVPFKKRLQDLEVREKESATFQCEVAQ PATEAAWFK  
EETRLWASAKYDIEEEGETERRLTVRNVSADDDAVYICETTEGSRVAELSVQGNLTKLPRKTAVRTGDTAIF  
WVELAVPEGPVRWLRNQEEMVAGGRVAITAEGTCHTLTI FQCTLEDMGEVAFVSGGCRTTTQFCVSAPRRPPL  
YPPADPVVKA KTESVTL SWSAPPHGDRPVTIDGYVLEKRKLGAYAWSRCHEAGWLATTEFTITGVAAEEGDFQ  
FRVSAINHFGQGPYLEFPGMTMLVPLAVKTP LKAVEAVEGGEVTFVSDLTVASSGEWFLDGEALKASSIYVI  
RCDRTRHMLTIREV PARLHGAQLK FVANGIETS IQMVVRAALGLPSSKLPAAAAREVLAQLHEEAQLLAELSD  
QAAAVTWLKDGRELSLGP KYEMQVSAGRRALLVRDVAQDDAGLYECVSRGSR TAYQLLVQDITDGYRDWGPAG  
PQKHMCKCAGAKIARYLGSSCYRFLQYDKGVWHLEAALDTRQKGKTS SCSLHEKPKLVFAKQQAHSEVKA E  
AGNSATLSCEVTQAQTEVTFWFKDGKLS SSSSKVRMEASGCSRRLVVQQAGKADAGEYSCEAGGQKLSFRLDVA  
EPKLVFAKGGQAHSEVKA EAGASATLSCEVAQAQTEVTFWFKDGKLS SSSSKVRMEASGCSRRLVVQQAGKADA  
GEYSCEAGGQKLSFRLDVAEPKMVFAKEQQARSEVKA EAGASATLSCEVAQAQTEVTFWFKDGKLS SSSSKVRM  
EASGCSRRLVVQQAGKADAGEYSCEAGGQKLSFRLDVTEPKLVFAKEQQARSEVKA EAGNSATLSCEVAQAQ  
EVTWFKDGKLS SSSSKVRMEASGCSRRLVVQQAGKADAGEYSCEAGGQKLSFRLDVTEPKLVFAKEQQAHSEV  
KAEAGASATLSCEVAQAQTEVTFWFKDGKLS SSSSKVRMEASGCSRRLVVQQAGKADAGEYSCEAGGQKLSFRL  
DVAEPKLVFAKEQQARSEVKA EAGASATLSCEVAQAQTEVTFWFKDGKLS SSSSKVRMEASGCSRRLVVQQAGK



ADAGEYSCEAGGQKLSFRLDVAEPKLVFAKEQQANSEVKAEAGASATLSCEVAQAQTEVTFWFKDGKLLSSSSK  
VRVEASGCSRRLVVQQAGKADAGEYSCEAGGQKLSFRLDVAEPKLAFAKEQQAHEVKAEGASATLSCEVAQ  
AQTEVTFWFKDGKLLSSSSKVRVEASGCSRRLVVQQAGKADAGEYSCEAGGQKLSFRLDVAEPKLVFAKEQQA  
SEVKAEGASATLSCEVAQAQTEVTFWFKDGKLLSSSSKVRVEASGCSRRLVVQQVKGADAGEYSCEARGQKLS  
FRLDVAEAESQIPERPSRREPLVVKHEHETIILTATIAAPSVAAVTWLKDGVEIRRSKRHEATSLGDTHTLTVR  
GAQVLDIAIYSCRVGKEGQDFPVQVEEVAAKFSKPLEPVEGELGGTVMLVCELSPEQAEVWRCGNTQLRPGK  
RFQMTSEGPRRTLTVSGLREDDAEYVCESRDDRTSARLTVKVPVVKFTSGLSAMVAEEGQEAFTQCVVSPS  
DAGVTWYKQDGMQLQPSSEKFMVESGASRSLTILGLTLEDAGQVTEAEGASSAALRVREAPVLFKKKLEPQT  
VEERTSVTLEVELTRPWPEVKWTRNAAVLTPSENVEIRAEGARHCLVLRVSGFADRGGFCETPDDKTQAKLN  
VEMRQVRLVVRGLQEVEAKEQGTASMDVELSHAEVEGSWTRDGLRLQPGPKCHLAVQGPVHILTLALSALQPQDSG  
LVAFRAEGVHTSARLIVTELPVSFTRVLQDVVATQKEKVTLECELSRPVDVRLKDGVELRAGKAIIGIVAQGT  
CRSLVIYRCETGDQGVYCDALDAQTSASLRVQGRYTLIFRRVLAEDAGEVKFVAENAESRAHLRVKELPVT  
LLRPLRDKIAMEKHRGVLECCVSRASAQVRWFKGGVELQSGPKYEVVSDGLYRKLVIINDVQPEDEDYTC DAG  
NVKTSAQFFVVEEQSITIVRGLKDMTVMPEPAPAWFECETSIPSVRPPKWLKGKTVLQAGGNVLEQDGTVHRLT  
LHKTCSTMTGPVHFTIGKSRSSAQLVVSDIPVVLTRPLEPKAGRELQSVVLSCDFRPAPKAVQWYKDDTPLSP  
SEKFKMALEGQMAELRILRLTPADAGVYRCQAGSAQSSAEVTVAREVTVIQPLQDAEAMEEGRVCFSCELSH  
KDEDIEWLNGLTPLYNDSFHEISHGCLHTLVLSKVRQADTGTVCATSPKVSVSARLVVKGKPVFLKALDDV  
SAEERGLTLTQCEVSDPEARVVWRKDGVELGSPDKYDFLHKAGARGLTVHDLSHEDAGLYTCQVVGSKETQSKV  
SVHDLHVGITKRLKTVLEVLEGESCSFECVLSHESPSDPAVWTVGGKTVGGSGHFHAVRQGRKYTLTVKDAALS  
DAGEVVSFVLGLTSKASLIIRERPVDITKPLEDQRTTLGEDVMLSCELSRAGTSVRWLKDGKAIKRSQKYDLL  
SEGTRAVLVVRKASLKDSGEYTCETEASKSTAKLCVEEKANRFTTELADLQVEEKGRAVFTCKTEHPASVVTW  
RKGLLELRASGKHVPSQEGTLKLTINALERTSDTYTCDIGQARTQARLLVHGQKVRVIEDLEDTAVQEGSS  
AKFCCRIAPADYGPVHFLDKTPLHSNELNEITVQPGGYHVLTLRQLALKDSGTVYFEAGDQRTSALRVTEK  
PSIFSRPLTDVTVTEGEDTLVCETTTTVDSSVRWTKDGKTLRPSARCQLSHEGCAQLLITATTPQDGGRYKC  
EIGGASSSSIVRVHALPVRFRFRESLKDVEVPEGKAATLRCVLSVAAPVEWRHGDDVLKSSNKYSLRQEGAVLE  
LVIRDLQPDQSGQYSCSFGDQTTSATLTVKTTSSAQVFGKLRNKEATEGTTVTLRCELTKEAPVEWKGKTETLR  
NGDKYSLKQDGAUCELVICSLLVADAGEYSCVCGQEKTSATLTVKALLVHFVRRRLRSKEATEGDTTTLQCELS  
KAAPVEWRKGTETLRDGDYSLKQDGAUCELQIRSLTIADAGEYLCTCGQEKTSATLTVRGLPAKFIEDLRSQ  
EATEGATAILRCELSKAAPVEWRKGTETLRDGDYSLRQDGAUCELQIRGLAVVDTGTYSLPTKFTTEGLRNE  
EATEGTMATLRCQMSKAAPVEWRKGTETLRDGDYSLRQDGAUCELQIRGLTIEDSGEYTCVCGQEKTSATLS  
VKALPPRFIEDLRSQEATEGTMATLRCQMSKAAPVEWRKGTETLRDGGGRYSLRQNGAVCELOIHLAVEDTGE  
YSCVCGQEKTSATLNVKALPPKFTTEGLKKEEATEGTMVTLRCQMSKEATVEWRKGAKTLSDGGRYSLRQDGA  
CELQICGLAVEDAGEYSCVCGQEKTSATLSVKALPPRFIEDLRSQEATEGTMATLRCQMSKAAPVEWRKGTET  
LRDGDYSLRQDGAUCELQIRDLAVEDAGEYLCVCGQEKTSATLSVKALPPRFIEDLRSQEATEGTMATLRCQ  
MSKAAPVEWRKGTETLRDGDYSLRQDGAUCELQICDLAVEDTGDYSCVCGQEKTSATLSVKAPQVVFQOPLQ  
NLQAEEGSMASLRCELSVPNAAMVWSKGGLELQDGTREARQQGCVAEILLRDLRREDAGEYSLCTGSGTTS  
TLMVTAAPVRFRLRELQAQDVDEGATARLRCELSREAVSVEWRKGSLLQFPKAKYQMVQEGTTAELLVHGVEQE  
DAGEYTC DAGHTQSIARLSVRAPKPKFKTDLQSTEQEAAGGTARLCCQLSEAEPGTPVQWLKEGVELHVGSKYE  
MRRQGAUCELLIHGLEAKDTGEYACLVGQKTLASLRVKEPEVTIVRGLVDMVEVQADEDEFTCKVSOAGATD  
VQWHLQGLPLQSNEVTEVAVLADGCTHVLQKGVTLLEDAGTVSFHVGGSSSAQLTVRVPEVTVLEPLKDVQL  
SEGQDAHFRCLSRASGQEARWALGGVPLQCNEMNITVEQGTLYLLTLHKVTLEDAGTITLQVGSSESAQL  
KVTAKNTVLRGLENVDALEGGELFECQLSQPEVAHTWLLDDEPVHTSEKVEVVYFENGLRHLLLLLKNLKPQ  
DSCRVTFLAGDVVTS AFLTVRGRWLEVLEPPHDASVKAGMQVRFTCILSEAVPVGEATWYINGAAIQPDDTDW  
TVTTDGGSHHALTLSNAQPQHAGEVTF AARDAVASARLSVLALPDPEDAEEVGRSDHSVTLWSVAPMSDGGGG  
LCGYRVEMKEASTGQWQLCHDLVPGPECVVDDLVPKTYRFRVAAVGPAGAGEPVHLPQMVKIAPAPAPAPAP  
APAPETRQAVVGEDICLELEVAADGGEVWHKGTERRIQPGGHFVLSRGRQMLVIKGFRTEDQGEYRCGP IQ  
GLPSSGAATFNVVMTSGSGDEVPAQPSLPPEAAQEGDLHLLWEALARKRRMSREPTLDSISELPEEDSRVQHL  
RQEAETAPDLSEGYSTADELARTGEADLSHTSSDDESRAGTPSLVTYLKKAGGPGISPLASKHEAQVTTSVK  
PQKQQEPVVPTCPPPGDLAADMPSLDKAAVKIQAFAFKGYKVRKEMKQOEGPVFSRTFGDTEAQVGDVLR  
ECVLATKTDMRACWLKDGIELTDGRHYHIDQLKDGTCSSLVTLGLAPTD SGRYTCQVSTKSGRVSHSACVVVSG  
TESEAESSSGELDDAFRRAARLRHLRFRTKSPAELSEELFLSADEGPGPEEPADWQTYREDEFVFCIRFE  
SLAEARQAVTCFRNMFATMGI GIVEISLGEQGRGVEMRIGKEAPTVPVAVPLAKTPGLQTSDAAPVFLTELQN  
QDVQDGYPMSFDCVVTGQVPVSVRWFKDGKLEEDDHYMINEQDQGGHQLIITAVVPADMGVYRCLAENSMGV  
SSTKAELRVELTSTDYDTAADATESTSYFSAQGYLSREYQEGTESDEGQLPQVLEELKDLQVAPGTRLAKFQL  
KVKGYPAKPLYWFKDQPLTSDHIRMTDKKTLTLEIRVSVTREDSGQYAAAYISNAVGAAYSSARLLVVRGPSE  
PEEKPASDVHERLVPVPRILEKFTPKKVKRGSSITFSVKVEGHPAPSVHVLKKEEAKEKGLWIGPDTPGYTMAS  
SKQHSVLVLDVGRQHOGTYTCIATNPAGQALCSASLHISGLAKEEEQERVKEALISSFLQGTSAVSAQMSSES  
AGFADLVGQSKGESLVAEEAHSHLSLAEVGT EEFLLQKLT SQITEMVSAKISQAKLQVPGGDSDEETKTPSASP

RHGRSRPSSSVQESSSESEDGDSRGEIFDIYVVTADYLPLGAEQDAIILREGQYVEVLDSAHPLRWLVRTKPT
KSSPSRQGWVSPAYLDKRLKLSPEWGPTEAPEFPGEAVSEDEYRTRLSSVIQELLSSEQAFVVELQFLESHHM
KHLERSPRVPAAVASQKTVI FRNVQDI SHFHSSFLKELQCGCTDDDVMAMCFIKNQEAFEKYLEFLVGRVQAES
VVVSTPVQEFYKKYAEETLSAKDPTQPPPPPLQHYLEQPVERVQKYQALLKELIRNKARNRQNCALLEQAYAV
VSALPQRAENKLVSLMENYPGTLEALGEP I RQGHFIVWEGAPGARMFWKGNHRHVFLFRNYLVI CKPRRDSR
TDTFSYVFRNMMKLSSIDLNDQVEGDDRAFEVWHEREDESVRKYLLQARTVI IKNSWVKEICGIQQRLAQPVWR
PPEFEEELADCTAELGETVKLACRVGTGPKPIVSWYKDGKPVVDPHILIEDPDGSCSTLI LDNLGTIDSGQY
MCFASAAGNASTLKGILVQVPPRFVNVKVRATPFVEGEDAQITCTVEGAPYPQIRWYKDGTL LAPGNRYRMLN
EPRSGVLVLIQAASKEDLGHYECELVNRIGSTRGGGELYMQSPALRARDQHHRREQIVAAVEVEEQETKVPKK
TVIIEETITTVVKS PRGRRQSPGKSPSRSPRRSASPRRPGLLAPERLYPPGTSPSRRLVEVEQGRKAPVPALY
VTEAEVHAPASQSQPKWLEVEETIEVRVKKTGSRGASPVREMTSRGEGILFTLPGGIPGRDPNANNNSNKS SVY
QEARTWGPVAVVHVGEPFI FQVDSVGNVDWVAASPEPEQVRASQKEENTERQEGCSDGDENTFLMEEPQD TDSL
QGRDPKILTHNGRVLTLADLEDYVPOEGETFGCGDSTPSTPDEPPCEVSVLQREI SEPTVQGPVLLNVGRPPG
TGATPSFFRPGSQVHSPESVSFLLREAWSGPVSAAPWTSSFHTHVQSSVDGSHGSFKTEVSTQTVSFGAVGET
VTLHIDPDGGEAPGPSQG\*

>rs46464091\_ENSMUSP00000158795\_c.17377:A>G\_p.K5793R
ENSMUST00000238536.2|Obscn-210|ENSMUSG00000061462|-|chr11:g.58929996:T>C
MDHSFSGAPRFLTRPKAFVSVGKDATLSCQIVGNPTPHVSWEKDRQPVEAGARFLAQDGDVYRLTILDLAL
GDSGQYVCRARNAIGEAFAAVGLRVDSEGTCAEQAPHFLLRPTSIRVREGADATFRCRVGGSPQPAVSWSKDG
RRLGPPDAPHVRVEEHGESSALRIRSARPRDGGTYEVRAENPLGSASAAAALVVDSDAEVAGPPGTSTATLLA
HLQORREAMRAEGIPPSPPGAGTRTCTVTEGKHARLSCFVTGEPKPEVWKKDGLVTEGRRHVVEDEQENF
VLKILFCKQSDRGLYTCTASNLVGQTYSSVLVVREPTVPFKKRLQDLEVREKESATFQCEVAQPAEAAWFK
EETRLWASAKYDIEEGETERRLTVRNVSADDDAVYICETTEGSRVVAELSVQGNLTKLPRKTAVRTGDTAIF
WVELAVPEGPVWRWRNQEEMVAGGRVAITAEGTCHTLTI FQCTLEDMGEVAFVSGGCRTTTQFCVSAPRRPPL
YPPADPVVKAKTESSVTLWSAPPHGDRPVTIDGYVLEKRRKLGAYAWSRCHEAGWLATTEFTITGVAEEGDFQ
FRVSAINHFGQGPYLEFPGTMHLVPLAVKTKPLKAEVAVEGGEVTFVSDLTVASSGEVFLDGEALKASSIYVI
RCDRTRHMLTIREVPARLHGAQLKFEVANGIETS IQMVVRAALGLPSSSKLPAAAAREVLAQLHHEEAQLLAE LSD
QAAA VTWLKDGRELSLGPKYEMQVSAGRRALLVRDVAQDDAGLYECVSRGSRRTAYQLLVQDITDGYRDWGPAG
PQKHMCKCAGAKIARYLGSSCYRFLQYDKGVWHLEAALDTRQKGKTS SCSLHEKPKLVFAKQQAHSEVKA E
AGNSATLSCEVTQAQTEVTWFKDGKLLSSSSKVRMEASGCSRRLVVQQAGKADAGEYSCEAGGQKLSFRLDVA
EPKLVFAKQQAHSEVKA EAGASATLSCEVAQAQTEVTWFKDGKLLSSSSKVRMEASGCSRRLVVQQAGKADA
GEYSCEAGGQKLSFRLDVAEPKMFVFAKEQQARSEVKA EAGASATLSCEVAQAQTEVTWFKDGKLLSSSSKVRM
EASGCSRRLVVQQAGKADAGEYSCEAGGQKLSFRLDVTEPKLVFAKEQQARSEVKA E VGN SATLSCEVAQAQ T
EVTWFKDGKLLSSSSKVRMEASGCSRRLVVQQAGKADAGEYSCEAGGQKLSFRLDVAEPKLVFAKEQQARSEV
KAEAGNSATLSCEVAQAQTEVTWFKDGKLLSSSSKVRMEASGCSRRLVVQQAGKADAGEYSCEAGGQKLSFHL
DVTEPKLVFAKEQQAHSEVKA EAGASATLSCEVAQAQTEVTWFKDGKLLSSSSKVRMEASGCSRRLVVQQAGK
ADAGEYSCEAEGQKLSFRLDVAEPKLVFAKEQQARSEVKA EAGASATLSCEVAQAQTEVTWFKDGKLLSSSSK
VRVEASGCSRRLVVQQAGKADAGEYSCEAGGQKLSFRLDVAEPKLVFAKEQQANSEVKA EAGASATLSCEVAQ
AQTEVTWFKDGKLLSSSSKVRVEASGCSRRLVVQQAGKADAGEYSCEAGGQKLSFRLDVAEPKLVFAKEQQAH
SEVKA EAGASATLSCEVAQAQTEVTWFKDGKLLSSSSKVRVEASGCSRRLVVQQAGKADAGEYSCEAGGQKLS
FRLDVAEPKLVFAKEQQAHSEVKA EAGASATLSCEVAQAQTEVTWFKDGKLLSSSSKVRVEASGCSRRLVVQQ
AGKADAGEYSCEAGGQKLSFRLDVAEPKLVFAKEQQAHSEVKA EAGASATLSCEVAQAQTEVTWFKDGKLLSS
SSKVRVEASGCSRRLVVQQAGKADAGEYSCEAGGQKLFRLDVAEPKLMFAKEQQAHSEVKA EAGASATLSCE
VAQAQTEVTWFKDGKLLSSSSKVRVEASGCSRRLVVQQAGKADAGEYSCEAGGQKLSFRLDVAEPKLVFAKEQ
QAHSEVKA EAGASATLSCEVAQAQTEVTWFKDGKLLSSSSKVRVEASGCSRRLVVQQVQKADAGEYSCEARGQ
KLSFRLDVADTRLMFAKEQQARTEVKA EAGNSATLSCEVAQAQTEVTWFKDGKLLSSSSKVRVEASGCSRRLV
VQQAGKADAGEYSCEAGGQKLSFRLDVAEAE SQIPERPSRREPLVVKEHETIILTATIAAPSVAAV TWLKDGV
EIRRSKRHEATSLGDTHTLTVRGAQVLD SAIYSCRVGKEGQDFPVQVEEVA AKFSKPLEPVEGELGGTVMLVC
ELSP EQAEVVWRCGNTQLRPGKRFQMTSEGPRRTLTVSGLREDDAEYVCE SRDDRTSARLTVKVP RVVKFTS
GLSAMVAEEGQEATFQCVVSPSDAGVTWYKDGMLQPSKFMVMEVSGASRSLTILGLTLEDAGQVTV EAGAS
SSAALRVREAPVLFKKLEPQTV EERTSVTLEVELTRPWPEVKWTRNAAVLTPSENVEIRAEGARHCLVLR SV
GFADRGF FGCETPDDKTQAKLNVEMRQVRLVVRGLQEVEAKEQGTASMDVELSHA EVEG SWTRDGLRLQPGPKC
HLAVQGPVHILTL SALSALQDSGLVAFRAEGVHTSARLIVTEL PVSFTRVLQDVVATQKEKVTLECELSRPVDV
RWLKDGENELRAGKAIGIVAQGTCSRSLVIYRCETGDLGVYVLECDALDAQTSASLRVQGRTYTLIFRVLAEADAGE
VKFVAENAESRAHLRVKELPVTLRLRDLRDKIAMEKHRGVLECCQVSRASAQVRWFKGGVELQSGPKYEVVSDGL
YRKLVIN DVQPEDEDTYTC DAGNVKTS AQFFVEEQSITIVRGLKDMTVMEPAPAWFECETSIPSVRPPK WLLG
KTVLQAGGNVGL EQDGTVHRLTLHKTCSTMTGPVHFTIGKSRSSAQLVSDI PVVLRPLEPKAGRELQSVVL
SCDFRPAPKAVQWYKDDTPLSPSEKFKMALEGGMAELRILRLTPADAGVYRCQAGSAQSSAEVTV EAREVTVI

QPLQDAEAMEEGRVCFSCELSHKDEDI EWSLNGTPLYNDSFHEISHEGCLHTLVLKSVRQADTGTVCATSPKV  
SVSARLVVKGKPVVFLKALDDVSAEERGLTLTQCEVSDPEARVVRKDGVELGSPDKYDFLHKAGARGLTVHD  
LSHEDAGLYTCQVGSKETQSKVSVHDLHVGITKRLKTVEVLEGESECSFECVLSHESPSDPAVWTVGGKTVGGS  
GHFHAVRQGRKYTLTVKDAALSDAGEVVFVSVLGLTSKASLIIRERPV DITKPLEDQRTTLGEDVMLSCELSRA  
GTSVRWLKDGKAIRKSQKYDLLSEGTRAVLVVRKASLKDSGEYTCETEASKSTAKLCVEEKANRFTEELADLQ  
VEEKGRAVFTCKTEHPASVVTWRKGLLELRASGKHVPSQEGLTLKLTINALERTDSDTYTCDIGQARTQARLL  
VHGQKVRVIEDLEDTAVQEGSSAKFCRIAPADYGPVHWFLDKTPLHSNELNEITVQPGGYHVLT LRQLALKD  
SGTVYFEAGDQRTSAALRVTEKPSIFSRPLTDVTVTEGEDTLVCETTTVDSSVRWTKDGKTLRPSARCQLSH  
EGCQAQLLITATTPQDGGRYKCEIGGASSSIVRVHALPVRFRESLKDVEVPEGKAATLRCVLSSVAAPVEWR  
HGDDVLKSSNKYSLRQEGAVLELVIRDLQPDQSGQYSCSFGDQTTSATLTVKTSQAQFVGKLRNKEATEGTTV  
TLRCELTKAPVEWKKGTETLRNGDKYSLKQDGAVCELQICSLLVADAGEYSCVCGQEKTSATLTVKALLVHF  
VRRLRSKEATEGDTTTLQCELSKAAPVEWRKGTETLRDGDYSLKQDGAVCELQIRSLTIADAGEYLCTCGQE  
KTSATLTVRALPAKFKDSLKNEEATEGTTATLSCELSKAAPVTWKKGPKTLQSGDKYVLRQDGAVCGLQIHGL  
TMADAGEYSCVCGQEKTSATLTVRGLPAKFIEDLRSQEATEGATAILRCELSKAAPVEWRKGTETLRDGDYSL  
LRQDGAVCELQIRGLAVVDGTGYSSLPKFTTEGLRNEEATEGTMATLRCQMSKAAPVEWRKGTETLRDGDYSL  
LRQDGAMCELQIRGLTIEDSGEYTCVCGQEKTSATLSVKALPSRFIEDLRSQEATEGTMATLRCQMSKTAPE  
WKKGSETLRDGGYSLRQDGPVCELQICDLAVEDAGEYSCVCGQEKTSATLSIKALPPRFIEDLRSQEATEG  
MATLRCQMSKAAPVEWRKGTETLRDGGYSLRQNGAVCELQIHDLAVEDTGEYSCVCGQEKTSATLNVKALPP  
RFIEDLRSQEATEGTMATLRCQMSKAAPVEWRKGTETLRDGGYSLRQDGAVCELQIHDLVEDAGQYSCVCG  
QEKTSAVLTVDALPPKFTTEGLKKEEATEGTMVTLRCQMSKEATVEWRKGAKTLS DGGYSLRQDGAMCELQIC  
GLAVEDAGEYSCVCGQEKTSATLSVKALPPRFIEDLRSQEATEGTMATLRCQMSKAAPVEWRKGTETLRDGD  
YSLRQDGAVCELQIRDLAVEDAGEYLCVCGQEKTSATLSVKALPPRFIEDLRSQEATEGTMATLRCQMSKAAP  
VEWRKGTETLRDGDYSLRQDGAMCELQICDLAVEDTGDYSCVCGQEKTSATLSVKALPPRFIEDLRSQEARE  
GTVATLRCRMSKAAPVEWRKGTETLRDGDYSLRQEGNLCELQIRDLAVEDTEEYSCVCGQEKTSATLSVKAL  
PAKFIEDLRSQEAPESSTVTLRCKLSKASVWKKGSETLRNGARYSLRQDGAVCELEIRDLTVEDETEYSC  
CGQERTSATLSIMAPQVVFQQPLQNLQAEEGSMASLRELSVPAAMVWSKGGLELQGDTRREARQQGCVAEL  
LLRDLRREDAGEYSCVCGQEKTSATLMTVTAAPVRLRELQAQDVDEGATARLRCELSREAVSVEWRKGSVLQF  
PCAKYQMVQEGTTAELLVHGVEQEDAGEYTC DAGHTQSIARLSVRAPKPKFKTDLQSTEQEAAGGTARLCCQLS  
EAEPGTPVQWLKEGVELHVGSKYEMRRQGA VCELLIHGLEAKDTGEYACLVGQKTLASLRVKEPEVTIVRGL  
VDMEVQADEDEFTCKVSOAGATDVQWHLQGLPLOSNEVTEVAVLADGCTHV LQLKGVTL EDAGTVSFHVGG  
SSSAQLTVRVPEVTVLEPLKDVQVLESEGQDAHFRCRLSRASGQEARWALGGVPLQCNEMNDITVEQGTLYLLTL  
HKVTLEDAGTITLQVGS CSSEAQLKVTAKNTVLRGLENVDALEGG EALFECQLSQPEVAHAHTWLLDDEPVHTS  
EKVEVVYFENGLRHLLLLKNLKPQDSCRVTFLAGDVVTSFAFLTVRGWRLEVL EPPHDASVKAGMQVRFTCILS  
EAVPVGEATWYINGAAIQPDDTDWTVTTDGS HHALTLSNAQPQHAGEVTF AARDAVASARLSVLALPDPPEDA  
EUVGRSDHSVTL SWVAPMSDGGGGLCGYRVMKEASTGQWQLCHDLVPGPECVVDDLVPKGTIRYRVAAVGPA  
GAGEPVHLPQMVKIIAPAPAPAPAPAPAPAPETRQAVVGEDICLELEVAADGGEVVWHKGTERTIQPGGHFEVLS  
RGQRQMLVIKGFRTEDQGEYRCGPIQGLPSSGAATFNVMVMTSGSGDEVPAQPSLPPEAAQEGDLHLLWEALAR  
KRRMSREPTLDSISELPEEDSRVQHLRQEAEEETAPDLSEGYSTADELARTGEADLSHTSSDDES RAGTPSLVT  
YLKAGGPGISPLASKHEAQVTTSVRPQKQEPVPTCPPPGDLSAADLMDPSLDKAAVKIQAAF KYKVRKE  
MKQQEGPVFSRTFGDTEAQVGDVLRLECVLATKTD MRACWLKDGIELTDGRHYHIDQLKDGTC SLLVTGLAPT  
DSGRYTCQVSTKSGRVSHSACVVVSGTESEAESSGGELDDAFRAARRLHRLFRTKSPAELSEELFLSADE  
GPGEPEEPADWQTYREDENFVCIRFESLAEARQAVTCFRNM FATMGIGVEISLGEQGPGRVEMRIKVAPTVT  
PAVPLAKTPGLQTS DAAPVFLTELQNDVQDGYPMSFDCVVTGQPVPSVRWFKDGKLEEDDHYMINEDQQGG  
HQLIITAVVPADMGVYRCLAENSMGVSSTKAELRVELTSTDYDTAADATETSSYFSAQGYLSSREQEGTESDE  
GQLPQVLEELKDLQVAPGTRLAKFQLKVKGYPA PKLYWFKDGQPLTSDHIRMTDKKTLHTLEIVSVTREDSG  
QYAAYSNAVGAAYSSARLLVRGPSEPEEK PASDVHERLVPPRILEKFTPKKVKRGSSITFSVKVEGHPAPSV  
HWLKEEAKEKGV LWIGPDTPGYTMASSSKQHSLVLLDVGRQHQT YTCIATNPAGQALCSASLHISGLAKEEEQ  
ERVKEALISSFLQGT SQAVSAQMSESAGFADLVGQSKGESLVAEEAHSHLSLAEVGTEEF LQKLT SQITEMVS  
AKISQAKLQVPGGDSDEETKTPSASPRHGRSRPSSSVQESSSESEDGDSRGEIFDIYVVTADYLP LGAEQDAI  
ILREGQYVEVLD SAHPLRWLVRTKPTKSSPSRQGWVSPAYLDKRLKLSPEWGPTEAPEFPGEAVSEDEYRTRL  
SSVIQELLSSEQAFV GELQFLES HHMKHLERSPRVPAAVASQKT VIFRNVQDISHFHSSFLKELQCGCTDDDV  
AMCFIKNQEA FEKYLEFLVGRVQAESVVVSTPVQEFYKKYAEETLSAKDPTQPPPPPLQHYLEQPVERVQKYQ  
ALLKELIRNKARNRNYNCALLEQAYAVVSALPQRAENKLVSLMENYPGTLEALGEP IRQGHFIVWEGAPGARM  
PWKGHNHVVFLFRNYL VICKPRRDSRTD TFSYVFRNMMLSSIDLNDQVEGDDRAFEVWHEREDSVRKYLLQA  
RTVVIKNSVVK EICGIQQLRAQPVWRPPEFEEELADCTAELGETV KLACRVTGTPKPIVSWYKDGKPV EVDPH  
HILIEDPDG SCTLILDNLGTIDSGQYMCFAASAAGNASTLGKILVQVPPRFVNVKVRATPFVEGEDAQITCTVE  
GAPYPQIRWYKDG TLLAPGNRYRMLNEPRSGVLV LVIQAASKEDLGHYECELVNR LGSTRGGGELYMQSPALR  
ARDQHHREQIVAAVEDTSVEGSAHSAQDGADQQAASVLWRLLGSEALGPS PGDLPNTRQSEPPAFEEAASQIP

GAASGTPEVSPQPGTHKGLEQETTSSGSQGWTPVIRVEGTAWPGAGTGQLLLDVHSQVIMETTQRTYVQCQAPDT  
GVTRAPSMQVTTIEDVQVQVGDMAQFDAVIEGHPPPIVWTYKGSTQLTSSARLSQRQDGTYSVLVTDVAPHDA  
GVYTCVANNAGGQVLCKAELLVHGGDKLDAENQVYRRKLHSFYDVQEEIGRGVFGFVKRVQHKGNKMFCAAKF  
IPLRSKTRAQAYQERDILATLGHPLVLTGLLDQFETRKTLLILILELCSSEELLDRFLFKKGVVTEAEVKVYIQQL  
VEGLHYLHSHGILHLDIKPPNILMVHPAREDIKICDFGFAQKITPSEFPQYSKYGSPEFVSPEIIEQNVPVSEGS  
DIWAMGVISYLSLTCSSPFAGESDRATLLNVLEGRVSWSSPTAAHLSSEDAKDFIKATLQRTPRARPSTSQCLA  
HPWFLKSMPEAAEHFINTKQKFLARSRWRSLMSYKSILVMRSIPPELLQGPPDSPSLGVARHRLRGEASGAS  
SSSSSSDNELAPFARAKSLPPSPVTHSPLLHPRGFRLRPSASLPEETEASMPPTADAAPVSPQASGPPASPGCV  
PRHSVSSSLFYQQAGEGAERGNKTSGAKRHPARRRHLKGGYIARALPGLREPLMEYSLLEEEAAREEQASLM  
TKTPSFETALRPLSSSVREVPGRSHSLDNPVTTGPSPEACKEQLLFPSTGLTHETHTAKDRGHKEGFLQESV  
PFPPMSGDSRPGKQEGSSQDSCRKPASSCHSELGSGSQEGCGPPSSQSLGSLPPQSLKKEKELSTSCGPLFSEQ  
PQAAPFPTQVSPLLGSEKEPQDGLSEGPVVPVSSSPGSASQVDASLDTEGLSEAGDTCDFTPPPQRPQEQAT  
TRKFSLESRGGYAGVAGYGTFAFGGDAGGMLGQGPLWARMAWAVSQSSEEQDEAATESPQPLESGLPIAEASG  
VPLRTSPSLTPWEEVEQVSLVQIRDLSGDAEAADTISLDISEVDPAYLNLSDLYDIKYLPEFEMI FRRVVKPI  
EQPESPGSETEAGQGLADFLLEAAWPWPGELGLRAGLEITTEPEEPGDLEALLGEAAVGRKRKWSPSRGLFQF  
PGRCLSGEEPVELGLRQVRKASMAHISRILKGRPEGPEREGPPRKKAGLASFRLSGLKGRDQELSDEAVVLGQ  
SVTLACQVLAQPTAQATWSKDGVLLESSGHLLISSTLKNFQLLTIILVVKEEDLGTYTCCVSNPLGTAVTTGVL  
RKAERPSSSPRPEVGEVLYKDAVLLVWKPVESCGPVYIVQCCIEGGSWTTLASDISDCCYLTGKLSRGGMYIF  
RTACVSKAGMGPYSSPSEQVLLGGPNHLASEEESRRGRPAQLLPSTKTFQAFQMQIRRRGRFSVVRQCREKASGR  
ALAAKIVPYQPEDKTAVLREYEAALKRLHHPHLAQLHAAYLSPRHLVLIILELCSGPELLPSLAERESYSESDVK  
DYLWQMLSATQYLHAQHIHLDLRSENMMVTEYNLLKVIDLGNASLDQEKVPAPENFKDYLETMAPELLEGGQ  
GAVPQTDIWAIGVTAIFIMLSGEYSESSEGTDLQKGLRKLIRLSRCYAGLSGGAVAFQSSLCAQPWGRPCA  
STCLQCGLWTEEGPTGSRPTPVTFPTVRLRAFAVREKRRALLYKKNLAQVR\*  
>rs46464091\_ENSMUSP00000038264\_c.15217:A>G\_p.K5073R  
ENSMUST00000047441.14|Obscn-202|ENSMUSP00000061462|-|chr11:g.58929996:T>C  
MDHSFGSAPRFLTRPKAFVSVGKDATLSCQIVGNPTPHVSWEKDRQFVEAGARFRLAQDGDVYRLTILDLAL  
GDSGQYVCRARNAIAGEAFAAVGLRVDSEGTCAEQAPHFLLRPTSIRVREGADATFRCRVGGSQPAAVSWSKDG  
RRLGPPDAPHVRVEEHGESSALRIRSARPRDGGTYEVRAENPLGSASAAAAALVVDSDAEVAGPPGTSTATLLA  
HLQORREAMRAEGIPPSPPGAGTRTCTVTEGKHARLSCFVTGEPKPKETVWKKDQGLVTEGRRHVVEDEQENF  
VLKILFCKQSDRGLYTCTASNLVGQTYSSVLVVVREPTVPFKKRLQDLEVREKESATFQCEVAQAPATEAAWFK  
EETRLWASAKYDIEEEGETERRLTVRNVSADDDAVYICETTEGSRVAELSVQGNLTKLPRKTAVRTGDTAIF  
WVELAVPEGPVRWLRNQEEMVAGGRVAITAEGTCHTLTI FQCTLEDMGEVAFVSGGCRTTTFQFCVSAPRRPPL  
YPPADPVVKAKTESSVTLWSAPPHGDRPVTIDGYVLEKRLKLGAYAWSRCHEAGWLATTEFTITGVAAEEDGFQ  
FRVSAINHFGQGPYLEFPGTMHLVPLAVKTPKAVEAVEGGEVTFVSDLTVASSGEWFLDGEALKASSIYVI  
RCDRTRHMLTIREVPARLHGAQLKVFANGIETS IQMVVRAALGLPSSKLPAAAAREVLAQLHHEAQLLAEKSD  
QAAAVTWLKDGRELSLGPKEYMQVSAGRRALLVRDVAQDDAGLYECVSRGSRRTAYQLLVQDITDGYRDWGPAG  
PQKHMCKCAGAKIARYLGSSCYRFLQYDKGVVHWEAALDTRQKGTSSCSLHEKPKLVFAKQQAHSEVKA  
AGASATLSCEVAQAQTEVTFKDGKLLSSSSKVRMEASGCSRRLVVQQAGKADAGEYSCEAGGQKLSFRLDVA  
EPKMFVFAKEQQARSEVKAEGASATLSCEVAQAQTEVTFKDGKLLSSSSKVRMEASGCSRRLVVQQAGKAD  
GEYSCEAGGQKLSFRLDVTEPKLVFAKEQQARSEVKAEGVNSATLSCEVAQAQTEVTFKDGKLLSSSSKVRM  
EASGCSRRLVVQQAGKADAGEYSCEAGGQKLSFRLDVAEPKLVFAKEQQARSEVKAEGNSATLSCEVAQAQ  
EVTWFKDGKLLSSSSKVRMEASGCSRRLVVQQAGKADAGEYSCEAGGQKLSFRLDVTEPKLVFAKEQQAHSEV  
KAEAGASATLSCEVAQAQTEVTFKDGKLLSSSSKVRMEASGCSRRLVVQQAGKADAGEYSCEAGGQKLSFR  
DVAEPKLVFAKEQQARSEVKAEGASATLSCEVAQAQTEVTFKDGKLLSSSSKVRVEASGCSRRLVVQQAGK  
ADAGEYSCEAGGQKLSFRLDVAEPKLVFAKEQQANSEVKAEGASATLSCEVAQAQTEVTFKDGKLLSSSSK  
VRVEASGCSRRLVVQQAGKADAGEYSCEAGGQKLSFRLDVAEPKLAFAKEQQAHSEVKAEGASATLSCEVAQ  
AQTEVTFKDGKLLSSSSKVRVEASGCSRRLVVQQAGKADAGEYSCEAGGQKLSFRLDVAEPKLAFAKEQQAH  
SEVKAEGASATLSCEVAQAQTEVTFKDGKLLSSSSKVRVEASGCSRRLVVQQAGKADAGEYSCEAGGQKLS  
FRLDVAEPKLAFAKEQQAHSEVKAEGASATLSCEVAQAQTEVTFKDGKLLSSSSKVRVEASGCSRRLVVQQ  
AGKADAGEYSCEAGGQKLFRLDVAEPKLVFAKEQQAHSEVKAEGASATLSCEVAQAQTEVTFKDGKLLSS  
SSKVRVEASGCSRRLVVQQVQKADAGEYSCEARGQKLSFRLDVAEAEESQIPERPSRREPLVVEKHETIILTAT  
IAAPSVAAVTWLKDGVIEIRRSKRHEATSLGDTHTLTVRGAQVLD SAIYSCRVGKEGQDFPVQVEEVAAKFSKP  
LEPVEGELGGTVMLVCELSPEQAEVWRCGNTOCLRVPGKRFQMTSEGPRRTLTVSGLREDDAEYVCESRDDRT  
SARLTAVKVPVVKFTSGLSAMVAEEGQEAFTQCVLPSDFAGVTWYKDMQLOPSEKFMVESGASRSLTILGL  
TLEDAGQVTVEAGASSAALRVREAPVLFKCKLEPQTVEERTSVTLEVELTRPWPEVVKWTRNAAVLTPSENV  
EIRAEGARHCLVLRVGFADRGFFGCETPDDKTQAKLNVEMRQVRLVVRGLQEVEAKEQGTASMDVELSHAEVE  
GSWTRDGLRQLQPGPKCHLAVQGPVHILTSLALQPDQSGLVAFRAEGVHTSARLIVTELTPVSTFTRVLQDVVATQ  
KEKVTLCELSRPPVDVRLKDGVELRAGKAI GIVAQGTCSRSLVIYRCETGDQGVYVCDALDAQTSASLRVQGR

TYTLIFRRVLAEDAGEVKFVAENAESRAHLRVKELPVTLLRPLRDKIAMEKHRGVLECVSRASQAQVRFKGG
VELQSGPKYEVVSDGLYRKLVINOVPEDEDTYTCDAENVKTSAQFFVEEQSITIVRGLKDMTVMPEPAPAWFE
CETSIPSVRPPKWLKGKTVLQAGNVGLEQDGTVHRLTLHKTCSTMTGPFVHFTIGKSRSSAQLVSDIPVVL
RPLEPKAGRELQSVVLSCDFRPAPKAVQWYKDDTPLSPSEKFKMALEGQMAELRILRLTPADAGVYRCQAGSA
QSSAEVTVAREVTVIQPLQDAEAMEEGRVCFSCELSHKDEDEIWSLNGTPLYNDSFHEISHEGCLHTLVLKS
VRQADTGTVCATSPKVSVSARLVVKGKPVVFLKALDDVSAEERGTLTLQCEVSDPEARVVRKDGVELGPSDK
YDFLHKAGARGLTVHDLSDHEDAGLYTCQVGSKETQSKVSVHDLHVGITKRLKTVEVLEGESECFVLSHESP
SDPAVWTVGGKTVGGSGHFHAVRQGRKYTLTVKDAALSDAGEVVFVSVLGLTSKASLIIRERPVDTKPLEDQR
TTLGEDVMLSCELSRAGTSVRWLKDGKAIKRSQKYDLLSEGTRAVLVVRKASLKDSEYTCETEASKSTAKLC
VEEKANRFTEELADLQVEEKGRAVFTCKTEHPASVVTWRKGLLELRASGKHVPSQEGTLTKLTINALERTDSD
TYTCDIGQARTQARLLVHGQKVRVIEDLEDTAVQEGSSAKFCCRIPADYGPVHWFLDKTPLHSNELNEITVQ
PGGYHVLTLRQLALKDSGTVYFEAGDQRTSAALRVTEKPSIFSRPLTDVTVTEGEDLTLVCETTTVDSSVRWT
KDGTLRPSARCQLSHEGCAQLLITATTPQDGGRYKCEIGGASSSIVRVHALPVRFRFRESLKDVEVPEGKAA
TLRCVLSVAAPVEWRHGDDVLKSSNKYSLRQEGAVLELVIRDLQPDQSGQYSCSFGDQTTSATLTVKTSQAQ
FVGLKRNKEATEGTTVTLRCELTKAEAPVEWKKGTETLRNGDKYSLKQDGAVCELQICSLLVADAGEYSCVCGQ
EKTSATLTVKALLVHFVRRRLSKEATEGDTTTLQCELSKAAPVEWRKGTETLRDGDYSLKQDGAVCELQIRS
LTIADAGEYLCTCGEKTSATLTVRALPAKFKDSLKNEEATEGTTATLSCELSKAAPVWKKGPKTLQSGDKY
VLRQDGAVCGLQIHGLTMADAGEYSCVCGQEKTSATLTVRGLPAKFIEDLRSQEATEGATAILRCELSKAAPV
EWRKGETLTKDGDYTLRQDGAVCLEQIRGLAVVDTGTYSLSLPTKFTTEGLRNEEATEGTMATLRCQMSKAAPV
EWRKGETLTDGDRYSLRQDGAVCLEQIRGLTIEDSGEYTCVCGQEKTSATLSVKALPPRFIEDLRSQEATEG
TMATLRCQMSKAAPVEWRKGETLTDGGRYSLRQNGAVCELQIHDLAVEDTGEYSCVCGQEKTSATLNVKALP
PRFIEDLRSQEATEGTMATLRCQMSKAAPVEWRKGETLTDGGRYSLRQDGAVCLEQIHDLVEDAGQYSCVC
GQEKTSAVLTVDALPPKFTTEGLKKEEATEGTMVTLRQMSKEATVEWRKGAKTLSGGGRYSLRQDGAVCLEQI
CGLAVEDAGEYSCVCGQEKTSATLSVKALPPRFIEDLRSQEATEGTMATLRCQMSKAAPVEWRKGSKTLRDGD
RYSLRQDGAVCLEQICDLAVEDTGDYSCVCGQEKTSATLSVKAPQVVFQQLQNLQAEEGSMASLRCELSVFN
AAMVWSKGGLELQDGTREARQQGCVAELLLDRREDAGEYSCVCGQEKTSATLMTVAAPVFLRELQAQDV
DEGATARLRCLELSREAVSVEWRKGSLLQFLPCAKYQMVQEGTTAELLVHGVVEQEDAGEYTCEDAGHTQSIARLSV
RAPKPKFKTDLQSTEQEAGGTARLCCQLSEAEPTPVQWLKEGVELHVGSKYEMRRQGAVCCELLIHGLEAKDT
GEYACLVGQKTLASLRVKEPEVTIVRGLVDMVQADEDEFTCKVVSQAGATDVQWHLQGLPLQSNVTEVAV
LADGCTHVLQKGVTLLEDAGTVSFHVGGLSSSAQLTVRVPEVTVLEPLKDVQLSEGQDAHFRCRLSRASGQEA
RWALGGVPLQCNEMNDITVEQGTLYLLTLHKVTLEDAGTIITLQVGSSESAQLKVTAKNTVLRGLENVDALEG
GEALFECQLSQPEVAHAHTWLLDDEPVHTSEKVEVVYFENGLRHLLLLKLNKLPQDSCRVTFLAGDVVTSAFITV
RALPDPPEDAEVVGRSDHSVTLVWVAPMSDGGGGLCGYRVEMKEASTGQWQLCHDLVPGPECVDDLVPGKTY
RFRVAAGVPAGAGEPVHLPQMVKIAPAPAPAPAPAPAPAPETRQAVVGEDICLELEVAADGGEVWHKGTERRI
QPGGHFEVLSRGQRQMLVIKGFRTEDQGEYRCGPIQGLPSSGAATFNVMVMTSGSGDEVPAQPSLPEAAQEGD
LHLLWEALARKRRMSREPTLDSISELPEEDSRVQHLRQEAETAPDLSEGYSTADELARTGEADLSHTSSDDE
SRAGTPSLVTYLKKAGGPGISPLASKHEAQVTTSVRPQKQEPVVPVTPCPPPGDLSAADLMDPSLDKAAVKIQA
AFKGYKVRKEMKQEGPVFSRTFGDTEAQVGDVLRLECVLATKTKDMRACWLKDGIELTDGRHYHIDQLKDGTC
SLLVTLGLAPTDSGRYTCQVSTKSGRVSHSACVVVSGTESEAESSSGGELDDAFRRAARRLHRLFRTKSPAELS
EELFLSADEGPEPEPADWQTYREDENFVCIRFESLAEARQAVTCFRNMFMATMGIGVEISLGEQGRGVEM
RIGKVAPTPTPAVPLAKTPGLQTSDAAPVFLTELQNDVQDGYPMSFDCVVTGQPVPSVRWFKDGKLEEDDH
YMINEDQGGHQLIITAVVPADMGVYRCLAENSMGVSSTKAE LRVELTSTDYDTAADATETSSYFSAQGYLSS
REQEGTESDEGQLPQVLEELKDLQVAPGTRLAKFQLKVKGYPAKLYWFKDGQPLTSDHIRMTDKKTLHTLE
IVSVTREDSGQYAAIYISNAVGAAYSSARLLVRGPSEPEEKPASDVHERLVPPRILEKFTPKKVKRGSITFSV
KVEGHPAPSVHHLKEEAKEKGVLWIGPDTPGYTMASSSKQHSLLVLLDVGRQHOGTYTCIATNPAGQALCSASLH
ISGLAKEEEQERVKEALISSFLQGTSAVSAQMSSESAGFADLVGQSKGESLVAAEEAHSHLSLAEVGTTEEFLQK
LTSQITEMVSAKISQAKLQVPGGDSDEETKTPSASPRHGRSRPSSSVQESSSESEDGDSRGEIFDIYVVTADY
LPLGAEQDAIILREGQYVEVLDLVAHPLRWLVRTKPTKSSPSRQGWVSPAYLDKRLKLSPEWGPTEAPEFPGEA
VSEDEYRTRLSSVIQELLSSEQAFVGELEQFLESHHMKHLERSPRVPAAVASQKTVIIRNVQDISHFHSSFLKE
LQCCGTDVDDVAMCFIKNQEAFFEKYLEFLVGRVQAESVVVSTPVQEFYKKYAEETLSAKDPTQPPPPPLQHYLE
QPVERVQKYQALLKELIRNKARNRQNCALLEQAYAVVSALPQRAENKLVSLMENYPGTLEALGEPVIRQGHFI
VWEGAPGARMPWKGHNHRVFLFRNYLVICKPRRDSRTDTFSYVFRNMMLSSIDLNDQVEGDRAFEVWHERE
DSVRKYLLQARTVIKNSWVKEICGIQORLAQPVWRPPEFEEELADCTAELGETVKLACRVNTGTPKPIVSWYK
DGKPEVEYDHHILIEDPDGSCSTLILDNLTGIDSGQYMCFAASAAGNASTLGKILVQVPPRVFNKVRATPFVVEG
EDAQITCTVEGAPYQIRWYKDGTLAPGNRYRMLNEPRSGVLVLIQAASKEDLGHYECELVNRLGSTRGGG
ELYMQSPALRARDQHREQIIVAAVEGAPSMQVTIEDVQVQVGDMAQFDAVIEGHPPPPIVTVWYKGTQLTSSAR
LSQRQDGTYSLVLTVDVAPHDAGVYTCVANNAGQVLCCKAELLVHGGDKLDAENQVYRRLKHSFYDVQEEIGR
GVFGFVKRVQHKGNMFCAAKFIPLRSKTRAQAYQERDILATLGHPLVTLGLLDQFETRKTLLIILELCSSEEL



LDRLFFKGGVTEAEVKVYIQQLVEGLHYLHSHGILHLDDIKPPNII LMVHPAREDIKICDFGFAQKITPSEPOYS  
KYGSPEFVSPETIEQNPVSEGSIDIWAMGVI SYLSLTCSSPFAGESDRATLLNVLEGRVSWSSPTAAHLSERDAK  
DFIKATLQRTPRARPSTSQCLAHFWFLKSMPAAEAHFINTKQLKFLARSRWQRSLMSYKSI LVMRSIPELLQ  
GPPDSPSLGVARHLRGEASGASSSSSSSDNELAPFARAKSLPPSPVTHSPLLHPRGFLRPSASLPEETEASMP  
TADAAVPASPQASAGPPASPGCVPRHSVSSLFYQQAGEGAERGNKTS GAKRHPARRRHLKGGYIARALPGLR  
EPLMEYSLLEEEAAREEQASLMTKTPSFETALRLPSSSVREVPGRSHSLDNPPVTTGSPPEACKEQLLFPST  
GLTHETAKDRGHKEGFLQESVFPFPMMSGDSRPGKQEGSSQDSCRGKPASSCHSELGSGSQEGCGPPSSQSLG  
SLPQQSLKKELSTSCGPLFSEQPQAAPFPTQVSPLLGSEKEPQDGSLSSEGVPVPSSSPGSASQVDASLDTEG  
LSEAGDTCDFTPPPQRPQEQATTRKFSLESRGGYAGVAGYGTFAFGGDAGGMLGQGPLWARMAWAVSQSSEEQ  
DEAATESPQPLESGLPIAEASGVPLRTSPSLTPWEEVEQVSLVQIRDLSGDAEAADTISLDISEVDPAYLNLS  
DLYDIKYLPPFEFMI FRRVPKPIEQPESPGSETEAGQGLADFLLEAAWPWPGEGLRAGLEITEEPEEPGDLEA  
LLGEAAVGRKRKWSPSRGLFQFPGRCLSGEEPVELGLRQRVKASMAHISRILKGRPEGPEREPPRKKAGLAS  
FRLSGLKGRDQELSDEAVVLGQSVTLACQVLAQPTAQATWSKDGVLLESSGHLLISSTLKNFQLLTI LVVKEE  
DLGTYTCCVSNPLGTAVTTGVLKKAERPSSSPRPEVGEYKDAVLLVWKPVE SCGPVTYIVQCCIEGGSWTTL  
ASDISDCCYLTKLSRGGMYIFRTACVSKAGMGPYSSPSEQVLLGGPNHLASEEESSRGRPAQLLPSTKTF  
QMQIRRRGRFSVVRQCREKASGRALAAKIVPYQPEDKTA VLREYEALKRLLHHPHLAQLHAAYLSPRHLVLI  
LELCSGPELLPSLAERESYSESDVKDYLWQMLSATQYLHAQHILHLDLRSNNMMVTEYNLLKVIDLGN  
AQSLDQEKVPAPENFKDYLETMAPELLEGGAVPQTDIWAIGVTA FIMLSGEYPESESETRDLQKGLR  
KGLRSLRCYAGLSGGAVAFLOSSLCAQPWGRPCASTCLQCGWLTEEGPTGSRPTVPTVTRLRAFVRE  
REKRRALLYKKNHNAQVR\*

>rs46464091\_ENSMUSP00000049737\_c.17176:A>G\_p.K5726R  
ENSMUST00000052872.15|Obscn-203|ENSMUSG00000061462|-|chr11:g.58929996:T>C  
MDHSFSGAPRFLTRPKAFVSVGKDATLSCQIVGNPTPHVSWEKDRQPVEAGARFRLAQDGDVYRLTILDLAL  
GDSGQYVCRARNAIGEAFAAVGLRVDSEGTCAEQAPHLLRPTSIRVREGADATFRCRVGGSPPAVSWSKDG  
RRLGPPDAPHVRVEEHGESSALRIR SARPRDDGGTYEVRANPLGSASAAAALVVDSDAEVAGPPGTSTATLLA  
HLQQRREAMRAEGIPSPPGAGTRTCTVTGKHARLSFCVTEGPKPETVWKKDGLVTEGRRHVVEDEQENF  
VLKILLFCKQSDRGLYCTASNLVGGQTYSSVLVVVREPTVPFKKRLQDLEVREKESATFQVAPATEAAWFK  
EETRLWASAKYDIEEGTERRLTVRNVSADDDAVYICETTEGSRTVAELSVQGNLTKLPRKTAVRTGDTAIF  
WVELAVPEGPVRWLRNQEEMVAGGRVAITAEGTCHTLTIFQCTLEDMGEVAFVSGGCRTTTQFCVSAPRRPPL  
YPPADPVVKAKTESSVTLWSAPPHGDRPVTIDGYVLEKRKLGAYAWSRCHEAGWLATTEFTITGVAAEGDFQ  
FRVSAINHFGQGPYLEFPGMTMLVPLAVKTPKAVEAVEGGEVTFVSDLTVASSGEWFLDGEALKASSIYVI  
RCDRTRHMLTIREV PARLHGAQLKFVANGIETS IQMVVRAALGLPSKLPAAAAREVLAQLHHEEAQLLAE  
LSDQAAA VTLKDGRELSLGPKEYMQVSAGRRALLVRDVAQDDAGLYECVSRGSR TAYQLLVQEPKLVFAK  
GQQAHSEVKAEAGNSATLSCEVTQAQTEVTWFKDGKLLSSSSKVRMEASGCSRRLVVQQAGKADAGEYS  
CEAGGQKLSFRLDVAEPKLVFAKQQAHSSEVKAEAGASATLSCEVAQAQTEVTWFKDGKLLSSSSKVR  
MEASGCSRRLVVQQAGKADAGEYSCEAGGQKLSFRLDVTEPKLVFAKEQQARSEVKAEVGN SATLSCE  
VAQAQTEVTWFKDGKLLSSSSKVRMEASGCSRRLVVQQAGKADAGEYSCEAGGQKLSFRLDVAEPKLV  
FAKEQQARSEVKAEAGNSATLSCEVAQAQTEVTWFKDGKLLSSSSKVRMEASGCSRRLVVQQAGKAD  
AGEYSCEAGGQKLSFRLDVAEPKLVFAKEQQANSEVKAEAGASATLSCEVAQAQTEVTWFKDGKLLSS  
SSKVRVEASGCSRRLVVQQAGKADAGEYSCEAGGQKLSFRLDVAEPKLVFAKEQQARSEVKAEAGAS  
ATLSCEVAQAQTEVTWFKDGKLLSSSSKVRVEASGCSRRLVVQQAGKADAGEYSCEAGGQKLSFRLD  
VAEPKLVFAKEQQAHSEVKAEAGASATLSCEVAQAQTEVTWFKDGKLLSSSSKVRVEASGCSRRLVV  
QQAGKADAGEYSCEAGGQKLSFRLDVAEPKLVFAKEQQARSEVKAEAGASATLSCEVAQAQTEVTWFK  
DGKLLSSSSKVRVEASGCSRRLVVQQAGKADAGEYSCEAGGQKLSFRLDVAEPKLVFAKEQQANSEV  
KAEAGASATLSCEVAQAQTEVTWFKDGKLLSSSSKVRVEASGCSRRLVVQQAGKADAGEYSCEAGG  
QKLSFRLDVAEPKLVFAKEQQAHSEVKAEAGASATLSCEVAQAQTEVTWFKDGKLLSSSSKVRVEAS  
GCSRRLVVQQAGKADAGEYSCEAGGQKLSFRLDVAEAEESQIPERPSRREPLVVKEHETIILTATIAAP  
SVAAVTWLKDGEIIRRSKRHEATS LGDTHLTVRGAQVLD SAIYSCRVGKEGQDFPVQVEEVAAKFSK  
PLEPVEGELGTVMLVCELSPEQAEVWRCNGNTQLRPGKRFQMTSEGPRRTLTVSGLREDDAEYVCSER  
DRDTR SARLTVKVPVVKFTSGLSAMVAEEGQEA TFQCVVSPSDAGVTWYKDGMLQLPSEKFMVMEV  
SGASRSLTILGLTLEDAGQVTV EAEGASSAALRVREAPVLFKKLEPQTVEERTSVKLEVELTRP  
WPEVKWTRNAAVLTPSENVEIRAEGARHCLVLR SVGFADRGFFGCETPDDKTQAKLNVEMRQV  
RLVRLGQEVEAKEQGTASMDVELSHAEVEGSWTRDGLRLQPGPKCHLAVQGPVHILTL  
LSALQPQDSGLVAFRAEGVHTSARLIVTEL PVSFTRVLQDVVATQKEKVTLECEL  
SRPVDVRWLKDGVELRAGKAIGIVAQGTCSRSLVIYRCETGDQGVVYCDALDAQTSASLRVQGR  
TYTLIFRRVL

AEDAGEVVFVAENAESRAHLRVKELPVTLRPLRDKIAMEKHRGVLECVSRASAQVRWFKGGVLELQSGPKYE
VVSDGLYRKLVINVDVQPEDEDYTC DAGNVKTS AQFFVVEEQSITIVRGLKDMTVM EPAPAWFECETSIPSVRP
PKWLLGKTVLQAGGNVLEQDGTVHRLTLHKTCSTMTGPVHFTIGKSRSSAQLVVSDIPVVLTRPLEPKAGRE
LQSVVLSCDFRPAPKAVQWYKDDTPLSPSEKFKMALEGQMAELRILRLTPADAGVYRCQAGSAQSSAEVTVEA
REVTVIQPLQDAEAMEEGRVCFSCELSHKDEDEI EWSLNGTPLYNDSFHEISHEGCLHTLVLKSVRQADTGTVC
ATS PKVSVSARLVVKGKPVVFLKALDDVSAEERGTLTLQCEVSDPEARVWVRKDGVELGPSDKYDFLHKAGAR
GLTVHDLSDHEDAGLYTCQVGSKETQSKVSVHDLHVGITRRLKTVLEVLEGESECSFECVLSHESPSDPAVWTVGG
KTVGGSGHFHAVRQRKYTLTVKDAALSDAGEVVFVSVLGLTSKASLIIRERPVDITKPLEDQRTTLGEDVMLS
CELSRAGTSVRWLKDGKAIRKSQKYDLLSEGTAVLVVRKASLKDSGEYTCETEASKSTAKLCVEEKANRFTE
ELADLQVEEKGRAVFTCKTEHPASVVTWRKGLLELRASGKHVPSQEGTLTKLTINALERTDSDTYTCDIGQAR
TQARLLVHGQKVRVIEDLEDTAVQEGSSAKFCCRIAPADYGPVHWF LDKTPLHSNELNEITVQPGGYHVLT LR
QLALKDSGTVYFEAGDQRTSAALRVTEKPSIFSRPLTDVTVTEGEDTLVCETTTTVDSSVRWTKDGKTLRPSA
RCQLSHEGCAQLLITATTPQDGGRYKCEIGGASSSSIVRVHALPVRFRRESLKDVEVPEGKAATLRCVLSVA
APVEWRHGDDVLKSSNKYSLRQEGAVLELVI RDLQPQDSGQYSCSFGDQTT SATLTVKTS SAQFVGLRNKEA
TEGTTVTLRCELTK EAPVEWKKGTETLRNGDKYSLKQDGAVCELQICSLLVADAGEYSCVCGQEKTSATLTVK
ALLVHFVRRRLRSKEATEGDTTTLQCELSKAAPVEWRKGTETLRDGDRLYSLKQDGAVCELQIRSLTIADAGEYL
CTCGQEKTSATLTVRALPAKFKDSLKNEEATEGTTATLSCELSKAAPVTWKKGPKTLQSGDKYVLRQDGAVCG
LQIHGLTMADAGEYSCVCGQEKTSATLTVRGLPAKFI EDLRSQEATEGATAILRCELSKAAPVEWRKGETL K
DGDRLYTLRQDGAVCELQIRGLAVVDGTYSLPTKFTTEGLRNEEATEGTMATLRCQMSKAAPVEWRKGETLR
DGDRLYSLRQDGAMCELQIRGLTIEDSGEYTCVCGQEKTSATLSVKALPSRFIEDLRSQEATEGTMATLRCQMS
KTAPVEWKKGSETLRDGGRYSLRQDGPVCELQICDLAVEDAGEYSCVCGQEKTSATLSIKALPPRFIEDLRSQ
EATEGTMATLRCQMSKAAPVEWRKGETLGDGGRYSLRQNGAVCELQIHDLAVEDTGEYSCVCGQEKTSATLN
VKALPPRFIEDLRSQEATEGTMATLRCQMSKAAPVEWRKGETLRDGGRYSLRQDGAVCELQIHDLVDVEDAGQ
YSCVCGQEKTSAVLTVDALPPKFTTEGLKKEEATEGTMVTLRCQMSKEATVEWRKGAKT LSDGGRYSLRQDGAM
CELQICGLAVEDAGEYSCVCGQEKTSATLSVKALPPRFIEDLRSQEATEGTMATLRCQMSKAAPVEWRKGET
LRDGDRLYSLRQDGAVCELQIRDLAVEDAGEYLCVCGQEKTSATLSVKALPPRFIEDLRSQEATEGTMATLRCQ
MSKAAPVEWRKGSKTLR DGDRLYSLRQDGAMCELQICDLAVEDTGDYSCVCGQEKTSATLSVKALPPRFIEDLR
SQEAREGTVATLRCMSKAAPVEWRKGETLKDGDRLYSLRQEGNLCELQIRDLAVEDTEEYSCVCGQEKTSAT
LSVKALPAKFIEDLRSQEAPESSTVTLRCKLSKKASVWKKGSETLRNGARYSLRQDGAVCELEIRDLTVEDT
GEYSCTCGQERTSATLSIMAPQVVFQOPLQNLQAEEGSMASLRCELSVPNAAMVWSKGGLELQGDTRREARQQ
GCVAELLLRDLRREDAGEYSCTCGSQTT SATLMVTAAPVRFLRELQAQDVDEGATARLRCELSREAVSVEWRK
GSLQLFPCAQYQMVQEGTTAELLVHGVEQEDAGEYTC DAGHTQS IARLSVRAPKPKFKTDLQSTEQEAGGTAR
LCCQLSEAEPTPVQWLKEGVELHVGSKYEMRRQGAVCELLIHGLEAKDTGEYACL VGGQKT LASLRVKEPEV
TIVRGLVDMVQADEDVEFTCKVSQAGATDVQWHLQGLPLQSNVETEVAVLADGCTHVLQ LKGVTL EDAGTVS
FHVGGSSSAQLTVRPEVTVLEPLKDVQLSEGQDAHFRCRLSRASGQEARWALGGVPLQCNEMNDITVEQGT
LYLLTLHKVTLEDAGTITLQVGSCSSEAQLKVTAKNTVLRGLENVDALLEGGEALFECQPEVAHTWLLDD
EPVHTSEKVEVVYFENGLRHLLLLKNLKPQDSCRVTFLAGDVVTSAF LTVRGWRLEVLEPPHDASVKAGMQVR
FTCILSEAVPVGEATWYINGAAIQPDDTDWTVTTDGS HALTLSNAQPQHAGEVTF AARDAVASARLSVLALP
DPPEDA EVVGRSDHSVTL SWVAPMSDGGGGLCGYRVMKEASTGQWQLCHDLVPGPECVDDLVPGKTYRFRV
AAVGPAGAGEPVHLPQMVKIAPAPAPAPAPAPAPAPETRQAVVGEDICLELEVAADGGEVVWHKGTERTIQPGG
HFEVLSRGRQMLVIKGFRTEDQGEYRCGPIQGLPSSGAATFNVVMTSGSGDEVPAQPSLPPEAAQEGDLHLL
WEALARKRRMSREPTLDSISELPEEDSRVQHLRQEAEEETAPDLSEGYSTADELARTGEADLSHTSSDDES RAG
TPSLVTYLKKAGGPGISPLASKHEAQVTTSVRPPKQQEPVVP TCPPPGDLSAADLMDPSLDKAAVKIQAAFKG
YKVRKEMKQOEGPVFSRTFGDTEAQVGDVLRLECVLATKTD MRACWLKDGIELTDGRHYHIDQLKDGTC SLLV
TGLAPTDSGRYTCQVSTKSGRVSHSACVVVSGTESEAESSSGGELDDAFRRAARRLHRLFRTKSPAELSEEEEL
FLSADEGPGEPEEPADWQTYREDENFVCIRFESLAEARQAVTCFRNMFATMGIGVEISLGEQGPVGVEMRIGK
VAPTVPAPVPLAKTPGLQTS DAAPVFLTELQNDVQDGYPMSFDCVVTGQPVPSVRWFKDGKLL EEDDHYMIN
EDQQGGHQLIITAVVPADMGVYRCLAENSMGVSSTKAELRVELTSTDYDTAADATETSSYFSAQGYLSSREQE
GTESDEGQLPQVLEELKDLQVAPGTR LAKFQLKVKGYPAPKLYWFKDGOPLTTS DHIRMTDKKTLHTLEIVSV
TREDSGQYAAYSNAVGAAYSARLLVRGPSEPEEK PASDVHERLVP PRILEKFTPKKV KRGSSTF SVKVEG
HPAPSVHWLKEEA EKGV LWIGPDTPGYTMASSSKQHSLVLLDVGRQH QGTYTCIATNPAGQALCSASLHISGL
AKEEEQERVKEALISSFLQGTSQAVSAQMSE SAGFADLVGQSKGESLVAEEAHSHLSLAEVGT EEFLOKLT SQ
ITEMVSAKISQAKLVPGGDSDEETKTPSPASPRHGRSRPSSSVQESSSESEDGDSRGEIFDIYVVTADYLP LG
AEQDAIILREGQYVEVLD SAHPLRWLVRTKPTKSSPSRQGVSPAYLDKRLKLSPEWGPTEAPEFPGEAVSED
EYRTRLSSVIQELLSSEQAFVGLQFLES HHMKHLERSPRVPAAVASQKTVI FRNVQDISHFHSSFLKELQGC
GTDDDVAMCFIKNQEA FEKYLEFLVGRVQAESVVVSTPVQEFYKKYAEETLSAKDPTQPPPPPLQHYLEQVPE
RVQKYQALLKELIRNKARNRQNCALLEQAYAVVSALPQRAENKLVSLMENYPGTLEALGEP IRQGHFIVWEG
APGARMFWKGNHRHVFLFRNYLVICKPRRDSRTDTFSYVFRNMMKLSSIDLNDQVEGDDRAFEVWHEREDSVR

KYLLQARTVI IKNSWVKEICGIQQRLAQPVWRPPEFEEELADCTAELGETVVKLACRVTGTPKPIVSWYKDGKP  
VEVDPHHILIEDPDGSCSTLILDNLTGIDSGQYMCFAASAAGNASTLGKILVQVPPRFVNVKVRATPFVEGEDAQ  
ITCTVEGAPYPQIRWYKDGTLAPGNRYRMLNEPRSGVLVLIQAASKEDLGHYECELVNRLGSTRGGGELYM  
QSPALRARDQHHREQIVAAVEVTEQETKVPKKTVIIIEETITTVVKS PRGRRQSPGKSPSRSPSRASPRRPG  
LLAPERLYPPGTSPSRLEVEQGRKAPVPALYVTEAEVHAPASQSQPKWLEVEETIEVRVKKTGSRGASPVRE  
MTRSREGILFTLPGGIPGRDPNANNNSNKS SVYQEARTWGPVAVHVGEFFIFQVDSVGNVDVVAASPEPEQVRA  
SQKEENTERQEGCSDGENTFLMEEPQDTSLQGRDPKILTHNGRVLTADLEDYVPQEGETFSGDSTPSTP  
DEPPCEVSVLQREI SEPTVGGQPVLLNVGRPPGTGATPSFFRPGSQVHSPESVSFLLREAWSGPVS AAPWTSSF  
HTHVQSSVDGSHGSFKTEVSTQTVSFGAVGETVTLHDIDPDGGEAPGPSQG\*  
>rs46464091\_ENSMUSP00000020732\_c.17377:A>G\_p.K5793R  
ENSMUST00000020732.13|Obscn-201|ENSMUSG00000061462|-|chr11:g.58929996:T>C  
MDHSFSGAPRFLTRPKAFVSVGKDATLSCQIVGNPTPHVSWEKDRQVEAGARFRLAQDGDVYRLTILDAL  
GDSGQYVCRARNAIGEAFVAVGLRVDSEGTCAEQAPHLLRPTSIRVREGADATFRRCRVGGSPQPAVSWSKDG  
RRLGPPDAPHVRVEEHGESSALRIRSARPRDGGTYEVRAENPLGSASAAAALVVDSDAEVAGPPGTSTATLLA  
HLQQRRREAMRAEGIPSPPPGAGTRTCTVTEGKHARLSCFVTGEPKPKETVWKKDGQLVTEGRRHVVEDEQENF  
VLKILFCKQSDRGLYCTASNLVGGTYSSVLVVVREPTVPFKKRLQDLEVREKESATFQCEVAQPAATEAAWFK  
EETRLWASAKYDIEEETERRRLTVRNVSAADDAVYICETTEGSRVAELSVQGNLTKRTPKTAVRTGDTAIF  
WVELAVPEGPVRWLRNQEEMVAGGRVAITAEGTCHTLTI FQCTLEDMGEVAFVSGGCRTTTFQCVSAPRRPPL  
YPPADPVVKAKTESSVTLWSAPPHGDRPVTIDGYVLEKRKLGAYAWSRCHEAGWLATTEFTITGVAAEEGDFQ  
FRVSAINHFGQGPYLEFPGTMHLVPLAVKTPKAVEAVEGGEVTFVSDLTVASSGEWFLDGEALKASSIYVI  
RCDRTRHMLTIREV PARLHGAQLKFVANGIETS IQMVVRAALGLPSSKLPAAAAREVLAQLHEEAQLLAE LSD  
QAAA VTWLKDGRELSLGPKYEMQVSAGRRALLVRDVAQDDAGLYECVSRGSR TAYQLLVQDITDGYRDWGPAG  
PQKHMCKCAGAKIARYLGSSCYRFLQYDKGVWHLEAALDTRQKGKTS SCSLHEKPKLVFAKQQAHSEVKA  
AGNSATLSCEVTQAQTEVTFWKDGKLLSSSSKVRMEASGCSRRLVVQQAGKADAGEYSCEAGGQKLSFRLDVA  
EPKLVFAKQQAHSEVKAEGASATLSCEVAQAQTEVTFWKDGKLLSSSSKVRMEASGCSRRLVVQQAGKADA  
GEYSCEAGGQKLSFRLDVAEPKMFVFAKEQQARSEVKAEGASATLSCEVAQAQTEVTFWKDGKLLSSSSKVR  
EASGCSRRLVVQQAGKADAGEYSCEAGGQKLSFRLDVAEPKLVFAKEQQARSEVKAEGVNSATLSCEVAQAQ  
EVTWFKDGKLLSSSSKVRMEASGCSRRLVVQQAGKADAGEYSCEAGGQKLSFRLDVAEPKLVFAKEQQARSEV  
KAEAGNSATLSCEVAQAQTEVTFWKDGKLLSSSSKVRMEASGCSRRLVVQQAGKADAGEYSCEAGGQKLSFHL  
DVTEPKLVFAKEQQAHSEVKAEGASATLSCEVAQAQTEVTFWKDGKLLSSSSKVRMEASGCSRRLVVQQAGK  
ADAGEYSCEAGGQKLSFRLDVAEPKLVFAKEQQARSEVKAEGASATLSCEVAQAQTEVTFWKDGKLLSSSSK  
VRVEASGCSRRLVVQQAGKADAGEYSCEAGGQKLSFRLDVAEPKLVFAKEQQANSEVKAEGASATLSCEVAQ  
AQTEVTFWKDGKLLSSSSKVRVEASGCSRRLVVQQAGKADAGEYSCEAGGQKLSFRLDVAEPKLVFAKEQQAH  
SEVKAEGASATLSCEVAQAQTEVTFWKDGKLLSSSSKVRVEASGCSRRLVVQQAGKADAGEYSCEAGGQKLS  
FRLDVAEPKLVFAKEQQAHSEVKAEGASATLSCEVAQAQTEVTFWKDGKLLSSSSKVRVEASGCSRRLVVQQ  
AGKADAGEYSCEAGGQKLSFRLDVAEPKLVFAKEQQAHSEVKAEGASATLSCEVAQAQTEVTFWKDGKLLSS  
SSKVRVEASGCSRRLVVQQAGKADAGEYSCEAGGQKLFRLDVAEPKLVFAKEQQAHSEVKAEGASATLSCE  
VAQAQTEVTFWKDGKLLSSSSKVRVEASGCSRRLVVQQAGKADAGEYSCEAGGQKLSFRLDVAEPKLVFAKEQ  
QAHSEVKAEGASATLSCEVAQAQTEVTFWKDGKLLSSSSKVRVEASGCSRRLVVQQVQKADAGEYSCEARGQ  
KLSFRLDVADTRLMFAKEQQARTEVKAEGNSATLSCEVAQAQTEVTFWKDGKLLSSSSKVRVEASGCSRRLV  
VQQAGKADAGEYSCEAGGQKLSFRLDVAEAE SQIPERPSRREPLVVKEHETIILTATIAAPSVAAVTWLDG  
EIRRSKRHEATSLGDTHTLTVRGAQVLD SAIYSCRVGKEGQDFPVQVEEVAAKFSKPLEPVEGELGGTVMLVC  
ELSPQAEVWRCGNTQLRPGKRFQMTSEGPRTTLTVSGLREDDAEYVCE SRDDRTSARLTVKVPVVKFTS  
GLSAMVAEEGQEA TFQCVVSPSDAGVTWYKDGMLQPSSEKFMVESGASRSLTILGLTLEDAGQVTEAEAGAS  
SSAALRVREAPVLFKKKLEPQTV EERTSVTLEVELTRPWPEVKWTRNAAVLTPSENVEIRAEGARHCLVLRVSV  
GFADRGGFFGCETPDDKTQAKLVNEMRQVRLVVRGLQEVEAKEQGTASMDVELSHA EVEG SWTRDGLRLQPGPKC  
HLAVQGPVHILTL SALQPQDSGLVAFRAEGVHTSARLIVTEL PVSFTRVLQDVVATQKEKVTLECELSRPVDV  
RWLKDGVLELRAGKAIGIVAQGTCSRSLVIYRCETGDQGVYVCDALDAQTSASLRVQGRTYTLIFRRVLAEDAGE  
VKFVAENAESRAHLRVKELPVTLLRPLRDKIAMEKHRGVLECCVSRASAQVRWFKGGVELQSGPKYEVVSDGL  
YRKLVIN DVQPEDEDTYTC DAGNVKTS AQFFVVEQSITIVRGLKDMTVMEPAPAWFECETSIPSVRPPKWL LG  
KTVLQAGGNVGLQDGTVHRLTLHKTCSTMTGPVHFTIGKSRSSAQLVVSDIPVVLTRPLEPKAGRELQSVVL  
SCDFRPAPKAVQWYKDDTPLSPSEKFKMALEGQMAELRILRLTPADAGVYRCQAGSAQSSAEVTEAREVTVI  
QPLQDAEEMVEGRVFCSELSHKDEDI EWSLNGTPLYNDSPEARVSVWRKDGVELGSPDKYDFLHKAGARGLTVHD  
SVSARLVVXGKPVVFLKALDDVSAEERGTLLTQCEVYDPEARVVWRKDGVELGSPDKYDFLHKAGARGLTVHD  
LSHEDAGLYTCQVGSKETQSKVSVHDLHVGITKRLKTVLEVLEGESECSFECVLSHESPSDPAVWTVGGKTVGGS  
GHFHAVRQGRKYTLTVKDAALSDAGEVVSVLGLT SKASLIIRERPV DITKPLEDQRTTLGEDVMLSCELSRA  
GTSVRWLKDGKAIRKSQKYDLLSEGTRAVLVVRKASLKDSGEYTCETEASKSTAKLCVEEKANRFTEELADLQ  
VEEKGRAVFTCKTEHPASVVTWRKGLLELRASGKHVPSQEGTLTKLTINALERTSDTYTCDIGQARTQARLL

VHGQKVRVIEDLEDTAVQEGSSAKFCCRIAPADYGPVHWFLLDKTPLHSNELNEITVQPGGYHVLTLRQLALKD  
 SGTVYFEAGDQRTSAALRVTEKPSIFSRPLTDVTVTEGEDTLTVCEFTTVVDSVVRWTKDGKTLRPSARCQLSH  
 EGCQAQLLITATTPQDGGRYKCEIGGASSSSIVRVHALPVRFRRESLKDVEVPEGKAATLRVLSVAAPVEWR  
 HGDDVLKSSNKYSLRQEGAVLELVIRDLQPQDSGQYSCSFGDQTTSATLTVKTSQAQFVKGKLRNKEATEGTTV  
 TLRCELTKAPVEWKKGTETLRNGDKYSLKQDGAVCELQICSLLVADAGEYSCVCGQEKTSAATLTKALLVHF  
 VRRLSKEATEGDTTTLQCELSKAAPVEWRKGTETLRDGDYSLKQDGAVCELQIRSLTIADAGEYLCTCGQE  
 KTSATLTVRALPAKFKDSLKNEEATEGTTATLSCELSKAAPVTWKKGPKTLQSGDKYVLRQDGAFCGLQIHGL  
 TMADAGEYSCVCGQEKTSAATLTVRGLPAKFIEDLRSQEATEGATAILRCELSKAAPVEWRKGTETLRDGDYR  
 LRQDGAVCELQIRGLAVVDGTYSLSPTKFTLEGLRNEEATEGTMATLRCQMSKAAPVEWRKGTETLRDGDYR  
 LRQDGAMCELQIRGLTIEDSGEYTCVCGQEKTSAATLSVKALPSRFIEDLRSQEATEGTMATLRCQMSKTAPVE  
 WKKGSETLRDGGYSLRQDGPVCELQICDLAVEDAGEYSCVCGQEKTSAATLSIKALPPRFIEDLRSQEATEG  
 MATLRCQMSKAAPVEWRKGTETLRDGGYSLRQNGAVCELQIHDLAVEDTGEYSCVCGQEKTSAATLNVKALPP  
 RFIEDLRSQEATEGTMATLRCQMSKAAPVEWRKGTETLRDGGYSLRQDGAFCGLQIHDLVEDAGQYSCVCG  
 QEKTSAVLTVDALPPKFTLEGLKKEEATEGTMVTLRCQMSKEATVEWRKGAKTLSDGGYSLRQDGAFCGLQIC  
 GLAVEDAGEYSCVCGQEKTSAATLSVKALPPRFIEDLRSQEATEGTMATLRCQMSKAAPVEWRKGTETLRDGD  
 YSLRQDGAFCGLQIRDLAVEDAGEYLCVCGQEKTSAATLSVKALPPRFIEDLRSQEATEGTMATLRCQMSKAAP  
 VEWRKGTETLRDGDYSLRQDGAFCGLQICDLAVEDTGDYSCVCGQEKTSAATLSVKALPPRFIEDLRSQEARE  
 GTVATLRCRMSKAAPVEWRKGTETLRDGDYSLRQEGNLCELQIRDLAVEDTGEYSCVCGQEKTSAATLSVKAL  
 PAKFIEDLRSQEAPESSTVTLRCKLSKASVWKKGSETLRNGARYSLRQDGAFCGLQIRDLVEDTGEYSCT  
 CGQERTSATLSIMAPQVVFQQLQNLQAEEGSMASLRCELSVNPAAWWSKGGLELQGDTRREARQQGCVAEL  
 LLRDLRREDAGEYSCVCGQEKTSAATLMVTAAPVRFLRELQAQDVDEGATARLRCELSREAVSVEWRKGSLLQF  
 PCAKYQMVQEGTTAELLVHGVEQEDAGEYTCDAHTQSIARLSVRAPKPKFKTDLQSTEQEAGGTARLCCQLS  
 EAEFGTVPVQWLKEGVELHVGSKYEMRRQGAFCGLQIHGLEAKDTGEYACLVGGQKTASLRVKEPEVTIVRGL  
 VDMEVQADEDFEFTCKVSAQATDVQWHLQGLPLQSNVTEVAVLADGCTHVLQKGVTLLEDAGTVSFHVGGL  
 SSSAQLTVRVPEVTVLEPLKDVQLSEGQDAHFRCRLSRASGQEARWALGGVPLQCNEMNDITVEQGTLYLLTL  
 HKVTLEDAGTITLQVGCSSSEAQLKVTAKNTVLRGLVNDVALEGGEALFECQLSQPEVAHAHTWLLDDEPVHTS  
 EKVEVVYFENGLRHLKLLKLPQDSCRVTFLAGDVTSAFLTVRGRLEVLPEPHDASVKAGMQRVFTCILS  
 EAVPVGEATWYINGAAIQPDDTDWTVTTDGSHEALTLNSAQQPHAGEVTFFAARDAVASARLSVLAALPDPEDA  
 EVVGRSDHSVTLVSWVAPMSDGGGGLCGYRVMKEASTGQWQLCHDLVPGPECVDDLVPGKTYRFRVAAVGPA  
 GAGEPVHLPQMVKIAPAPAPAPAPAPAPAPETROAVVEDICILEVAADGGEVVWHKGTERTIQPGHFVLS  
 RGQRQMLVIKGFRTEDQGEYRCGPIQGLPSSGAATFNVMVMTSGSGDEVPAQPSLPPEAAQEGDLHLLWEALAR  
 KRMSREPTLDSISELPEEDSRVQHLRQEAETAPDLSEGYSTADELARTGEADLSHTSSDDESAGTPSLVT  
 YLKKAGGPGISPLASKHEAQVTTSVRPQKQEPVPTCPPPGDLAADLMDPSLDKAAVKIQAQAFKGYKVRKE  
 MKQQEGPVFSRTFGDTEAQVGDVLRLECVLATKTDMRACWLKDGIELTDGRHYHIDQLKDGTCSSLVTLGLAPT  
 DSGRYTCQVSTKSGRVSHSACVVVSGTESEAESSSGGELDDAFRAARRLHRLFRTKSPAELSEELFLSADE  
 GPGEPEPADWQTYREDEFVCIREFESLAEARQAVTCFRNMFATMIGVEISLGEQGRGVEMRIKGVAPTVT  
 PAVPLAKTPGLQTSDAAPVFLTELQNDVQDGYPMSFDCVVTGQPVPSVRWFKDGKLEEDDHYMINEDQQGG  
 HQLIITAVVPADMGVYRCLAENSMGVSSTKAELRVELTSTDYDTAADATETSSYFSAQGYLSSREQEGTESDE  
 GQLPQVLEELKDLQVAPGTRLAKFQLKVKGYPAKLYWFKDGGQPLTSDHIRMTDKKTLHTLEIVSVTREDSG  
 QYAAYSNAVGAAYSSARLLVRGPSEPEEKPASDVHERLVPPRILEKFTPKKVKRGSSITFSVKVEGHPAPSV  
 HWLKEEAKEKGLWIGPDTPGYTMASSSKQHSVLVLDVGRQHGTYTICATNPAGQALCSASLHISGLAKEEEEQ  
 ERVKEALISSFLQGTSAQVSAQMSSEAGFADLVGQSKGESLVAAEAHSHLSLAEVGTTEFLQKLTSTQITEMVS  
 AKISQAKLQVPGGDSDEETKTPSASPRHGRSRPSSSVQESSSESEDGDSRGEIFDIYVVTADYLPGLAEQDAI  
 ILREGQYVEVLDSAHPLRWLVRTKPTKSSPSRQGWSPAYLDKRLKLSPEWGPTEAPEFPGEAVSEDEYRTRL  
 SSVIQELLSSSEQAFVGLLQFLESHHMKHLERSPRVPAAVASQKTVIFRNVDISHFHSSFLKELQCGCTDDDV  
 AMCFIKNQEAFAKYLEFLVGRVQAESVVVSTPVQEFYKKYAEETLSAKDPTQPPPPPLQHYLEQVPERVQKYQ  
 ALLKELIRNKARNRQNCALLEQAYAVVSALPQRAENKLVSLMENYPGTLEALGEPHQGHFIVWEGAPGARM  
 PWKGNHRHVFVFRNYLVICKPRRDSRTDFTSYVFRNMMKLSSIDLNDQVEGDDRAFEVWHEREDSVRKYLLQA  
 RTVVIKNSWVKEICGIQQLAQPVWRPPEFEEELADCTAELGETVKLACRVTGTPKPIVSWYKDGKPVVDPH  
 HILLIEDPDGCTLIILDNLTGIDSGQYMCFAASAAGNASTLGKILLVQVPPRFVNVKVRATPFVEGEDAQITCTVE  
 GAPYPQIRWYKDGTLAPGNRYRMLNEPRSGVLVVIQAASKEDLGHYECELVNLGSTRGGGELYMQSPALR  
 ARDQHHREQIVAAVEERRPSP\*  
 >rs46464091\_ENSMUSP00000151217\_c.14671:A>G\_p.K4891R  
 ENSMUST00000219084.3|Obscn-207|ENSMUSG00000061462|-|chr11:g.58929996:T>C  
 MDHSFSGAPRFLTRPKAFVSVGKDATLSCQIVGNPTPHVSEKDRQPVEAGARFLAQDGDVYRLTILDLAL  
 GDSGQYVCRARNAIGEAFVAVGLRVDSEGTCAEQAPHLLRPTSIRVREGADATFRCRVGSGPQPAVSWSKDG  
 RRLGPPDAPHVRVEEHGESSALRIRSARPRDGGTYEVRAENPLGSASAAAALVVDSDAEVAGPPGTSTATLLA  
 HLQQRREAMRAEGIPSPPGAGTRTCTVTEGKHARLSCFVTGEPKPEVWKKDGQLVTEGRRHVVEDEQENF

VLKILFCKQSDRGLYTCTASNLVGQTYSSVLVVVREPTVPFKKRLQDLEVREKESATFQCEVAQPATEAAWFK  
EETRLWASAKYDIEEEGETERRLTVRNVSADDDAVYICETTEGSRVAELSVQGNLTKRKLPRKTAVRTGDTAIF  
WVELAVPEGPVRWLRNQEEMVAGGRVAITAEGTCHTLTI FQCTLEDMGEVAFVSGGCRTTTTQFCVSAPRRPPL  
YPPADPVVKAKTESSVTLWSAPPHGDRPVTIDGYVLEKRKLGAYAWSRCHEAGWLATTEFTITGVAEEGDFQ  
FRVSAINHFGQGPYLEFPGTMHLVPMPLAVKTPKAVEAVEGGEVTFVSDLTVASSGEWFLDGEALKASSIYVI  
RCDRTRHMLTIREVPARLHGAQLKFVANGIETSIQMVVRAALGLPSSKLPAAAAAREVLAQLHHEEAQLLAE LSD  
QAAAVTWLKDGRELSLGPKEYMQVSAGRRALLVRDVAQDDAGLYECVSRGSRRTAYQLLVQDITDGYRDWGPAG  
PQKHMCKCAGAKIARYLGSscyRFLQYDKGVWHWLEAALDTRQGKGTSSCSLHEKPKLVFAKQQAHSEVKA  
AGNSATLSCEVTQAQTEVTFKDGKLLSSSSKVRMEASGCSRRLVVQQAGKADAGEYSCEAGGQKLSFRLDVA  
EPKLVFAKQQAHSEVKAEGASATLSCEVAQAQTEVTFKDGKLLSSSSKVRMEASGCSRRLVVQQAGKADA  
GEYSCEAGGQKLSFRLDVAEPKMFVFAKEQQARSEVKAEGASATLSCEVAQAQTEVTFKDGKLLSSSSKVRM  
EASGCSRRLVVQQAGKADAGEYSCEAGGQKLSFRLDVTEPKLVFAKEQQARSEVKAEGNSATLSCEVAQAQ  
EVTWFKDGKLLSSSSKVRMEASGCSRRLVVQQAGKADAGEYSCEAGGQKLSFHLDVTEPKLVFAKEQQAHSEV  
KAEAGASATLSCEVAQAQTEVTFKDGKLLSSSSKVRMEASGCSRRLVVQQAGKADAGEYSCEAGGQKLSFR  
LDVAEPKLVFAKEQQARSEVKAEGASATLSCEVAQAQTEVTFKDGKLLSSSSKVRVEASGCSRRLVVQQAGK  
ADAGEYSCEAGGQKLSFRLDVAEPKLVFAKEQQANSEVKAEGASATLSCEVAQAQTEVTFKDGKLLSSSSK  
VRVEASGCSRRLVVQQAGKADAGEYSCEAGGQKLSFRLDVAEPKLVFAKEQQAHSEVKAEGASATLSCEVAQ  
AQTEVTFKDGKLLSSSSKVRVEASGCSRRLVVQQAGKADAGEYSCEAGGQKLSFRLDVAEPKLVFAKEQQAH  
SEVKAEGASATLSCEVAQAQTEVTFKDGKLLSSSSKVRVEASGCSRRLVVQQVQKADAGEYSCEARGQKLS  
FRLDVAEAEQSIPERPSRREPLVVKEHETIILTATIAAPSVAAVTWLKDGVERRSKRHEATSLGDTHLTVR  
GAQVLDIAIYSCRVGKEGQDFPVQVEEVAKFSPLEPVEGELGGTVMLVCELSPEQAEVWRCGNTQLRPGK  
RFQMTSEGPRRTLTVSGLREDDAEYVCESRDDRTSARLTVKVRVVKFTSGLSAMVAEEGQEAFTQCVVSPS  
DAGVTWYKDGMLQPSKFMVSEGASRSLTILGLTLEDAGQVTVAEAGASSAALRVREAPVLFKKLEPQT  
VEERTSVTLEVELTRPWPEVKWTRNAAVLTPSENVEIRAEGARHCLVLRVSGFADRGFFGCETPDDKTQAKLN  
VEMRQVRLVRLQVEEAKQGTASMDVELSHAEEVGSWTRDGLRLQPGPKCHLAVQGPVHILTLALQPDQSG  
LVAFRAEGVHTSARLIVTELPVSTFRVLQDQVATQKEKVTLECELSRPVDVRLKDGVELRAGKAIQVAGGT  
CRSLVIYRCETGDQGVYVCDALDAQTSASLRVQGRTYTLIFRRVLAEDAGEVVFVAENAESRAHLRVLKELPVT  
LLRPLRDKIAMEKHRGVLECCQVSRASAQVRWFKGGVELQSGPKYEVVSDGLYRKLVIINDVQPEDEDTYTC DAG  
NVKTSAQFFVEEQSITIVRGLKDMTVMEPAPAWFECETSIPSVRPPKWLGLKTVLQAGGNVLEQDGTVHRLT  
LHKTCSTMTGPFVHTIGKSRSSAQLVSDIPVVLTRPLEPKAGRELQSVVLSCDFRPAPKAVQWYKDDTPLSP  
SEKFKMALEGQMAELRILRLTPADAGVYRCQAGSAQSSAEVTVAREVTVIQPLQDAEAMEEGRVCFSCELSH  
KDEDIEWSLNGTPLYNDSFHEISHGCLHTLVLKSVRQADTGTVCATSPKVSVSARLVVKGKPVVFLKALDDV  
SAEERGTTLTQCEVSDPEARVWRKDGVELGSPDKYDFLHKAGARGLTVHDLSDHEDAGLYTCQVGSKETQSKV  
SVHDLHVGITKRLKTVEVLEGECSFECVLSHESPSDPAVWTVGGKTVGGSGHFHAVRQGRKYTLTVKDAALS  
DAGEVVFVSLGLTSKASLIIRERPVDITKPLEDQRTTLGEDVMSCELSRAGTSVRWLKDGKAIKRSQKYDLL  
SEGTRAVLVVRKASLKDSGEYTCETEASKSTAKLCVEEKANRFTEELADLQVEEKGRAVFTCKTEHPASVVTW  
RKGLLELRASGKHVPSQEGTLTKLTINALERTSDTYTCDIGQARTQARLLVHGQKVRVIEDLEDTAVQEGSS  
AKFCCRIAPADYGPVHWFLLDKTPLHSNELNEITVQPGGYHVLTLRQLALKDSGTVYFEAGDQRTSAAALRVTEK  
PSIFSRPLTDVTVTEGEDTLVCETTTVDSVSRWTKDGKTLRPSARCQLSHEGCAQLLITATTPQDGGRYKC  
EIGGASSSSIVRVHALPVRFRFRESLKDVEVPEGKAATLRCVLSVAAPVEWRHGDDVLKSSNKYSRLQEGAVLE  
LVIRDLPQDQSGQYSCSFGDQTTSATLTVKTSQAQFVGKLRNKEATEGTTVTLRCELTKAPVEWKKGTETLR  
NGDKYSLKQDGAVCELQICSLLVADAGEYSCVCGQEKTSATLTVKALLVHFVRRRLRSKEATEGDTTTLQCELS  
KAAPVEWRKGTETLRDGDRLYSLKQDGAVCELQIRSLTIADAGEYLCTCGQEKTSATLTVRGLPAKFIEDLRSQ  
EATEGATAILRCELSKAAPVEWRKGSSETLKDGDRLYSLRQDGAVCELQIRGLAVVDTGTYSLSLPTKFTTEGLRNE  
EATEGTMATLRCQMSKAAPVEWRKGSSETLRDGDRLYSLRQDGAVCELQIRGLTIEDSGEYTCVCGQEKTSATLS  
VKALPPRFIEDLRSQEAEGTMATLRCQMSKAAPVEWRKGSSETLGDGGYSLRQNGAVCELQIHDLAVEDTGE  
YSCVCGQEKTSATLNVKALPPKFTTEGLKKEEATEGTMVTLRCQMSKEATVEWRKGAKTSLDGGYSLRQDGA  
MCELQICGLAVEDAGEYSCVCGQEKTSATLSVKALPPRFIEDLRSQEAEGTMATLRCQMSKAAPVEWRKGSSET  
LRDGDRLYSLRQDGAVCELQIRDLAVEDAGEYLCVCGQEKTSATLSVKALPPRFIEDLRSQEAEGTMATLRCQ  
MSKAAPVEWRKGSSETLRDGDRLYSLRQDGAVCELQICDLAVEDTGDYSCVCGQEKTSATLSVKAPVVFQQPLQ  
NLQAEEGSMASLRCELSVPNAAMVWSKGGLELQGDTRREARQQGCVAELLLRDLRREDAGEYSCTCGSQTTSA  
TLMVTAAPVRFRLRELQAQDVDEGATARLRCELSREAVSVEWRKGSILQFPCAQYQMVQEGTTAELLVHGVEQE  
DAGEYTCDAAGHTIQLSARLSVRAPKPKFKTDLQSTEQEAGGTARLCCQLSEAEPGTPVQVLKEGVELHVGSKYE  
MRQGAACCELLIHGLEAKDTGEYACLVGKQKTLASLRVLEKEPEVTIVRGLVDMVEVQADEVLEFTCKVQSAGATD  
VQWHLQGLPLQSNEVTEAVLADGCTHVLQKGVTLVEDAGTVSFHVGGSSSAQLTVRVPVTVLEPLKDVQL  
SEGQDAHFRCRLSRASQEARWALGGVPLQCNEMNDITVEQGTLYLLTLHKVTLLEDAGTITLQVGSCSSEAQL  
KVTAKNTVLRGLENDVALEGGALFECQLSQPEVAHTWLLDDEPVHTSEKVEVVYFENGLRHLLLLLKNLKPQ  
DSCRVTFLAGDVVTS AFLTVRGWRLEVLEPPHDASVKAGMQVRFTCILSEAVPVGEATWYINGAAIQPDDTDW



TVTTDGS HHAL T L S N A Q P Q H A G E V T F A A R D A V A S A R L S V L A L P D P P E D A E V V G R S D H S V T L S W V A P M S D G G G G  
L C G Y R V E M K E A S T G Q W Q L C H D L V P G P E C V V D D L V P G K T Y R F R V A A V G P A G A G E P V H L P Q M V K I A P A P A P A P A P  
A P A P E T R Q A V V G E D I C L E L E V A A D G G E V V W H K G T E R I Q P G G H F E V L S R G Q R Q M L V I K G F R T E D Q Q E Y R C G P I Q  
G L P S S G A A T F N V V M T S G S G D E V P A Q P S L P P E A A Q E G D L H L L W E A L A R K R R M S R E P T L D S I S E L P E E D S R V Q H L  
R Q E A E E T A P D L S E G Y S T A D E L A R T G E A D L S H T S S D D E S R A G T P S L V T Y L K K A G G P G I S P L A S K H E A Q V T T S V R  
P Q K Q Q E P V V P T C P P P G D L S A A D L M D P S L D K A A V K I Q A A F K G Y K V R K E M K Q Q E G P V F S R T F G D T E A Q V G D V L R L  
E C V L A T K T D M R A C W L K D G I E L T D G R H Y H I D Q L K D G T C S L L V T G L A P T D S G R Y T C Q V S T K S G R V S H S A C V V V S G  
T E S E A E S S S G G E L D D A F R R A A R L H R L F R T K S P A E L S E E E L F L S A D E G P G E P E E P A D W Q T Y R E D E N F V C I R F E  
S L A E A R Q A V T C F R N M F A T M G I G V E I S L G E Q Q P R G V E M R I G K V A P T V T P A V P L A K T P G L Q T S D A A P V F L T E L Q N  
Q D V Q D G Y P M S F D C V V T G Q P V P S V R W F K D G K L L E E D D H Y M I N E D Q Q G G H Q L I I T A V V P A D M G V Y R C L A E N S M G V  
S S T K A E L R V E L T S T D Y D T A A D A T E T S S Y F S A Q G Y L S S R E Q E G T E S D E G Q L P Q V L E E L K D L Q V A P G T R L A K F Q L  
K V K G Y P A P K L Y W F K D G Q P L T T S D H I R M T D K K T L H T L E I V S V T R E D S G Q Y A A Y I S N A V G A A Y S S A R L L V R G P S E  
P E E K P A S D V H E R L V P P R I L E K F T P K K V K R G S S I T F S V K V E G H P A P S V H W L K E E A E K G V L W I G P D T P G Y T M A S S  
S K Q H S L V L L D V G R Q H Q G T Y T C I A T N P A G Q A L C S A S L H I S G L A K E E E Q E R V K E A L I S S F L Q G T S Q A V S A Q M S E S  
A G F A D L V G Q S K G E S L V A E E A H S H L S L A E V G T E E F L Q K L T S Q I T E M V S A K I S Q A K L Q V P G G D S D E E T K T P S A S P  
R H G R S R P S S S V Q E S S E S E D G D S R G E I F D I Y V V T A D Y L P L G A E Q D A I I L R E G Q Y V E V L D S A H P L R W L V R T K P T  
K S S P S R Q G W V S P A Y L D K R L K L S P E W G P T E A P E F P G E A V S E D E Y R T R L S S V I Q E L L S Q E A F V G E L Q F L E S H H M  
K H L E R S P R V P A A V A S Q K T V I F R N V Q D I S H F H S S F L K E L Q C G T D D D V A M C F I K N Q E A F E K Y L E F L V G R V Q A E S  
V V V S T P V Q E F Y K K Y A E E T L S A K D P T Q P P P P L Q H Y L E Q P V E R V Q K Y Q A L L K E L I R N K A R N R Q N C A L L E Q A Y A V  
V S A L P Q R A E N K L H V S L M E N Y P G T L E A L G E P I R Q G H F I V W E G A P G A R M P W K G H N R H V F L F R N Y L V I C K P R R D S R  
T D T F S Y V F R N M M K L S S I D L N D Q V E G D D R A F E V W H E R E D S V R K Y L L Q A R T V I I K N S W V K E I C G I Q Q R L A Q P V W R  
P P E F E E E L A D C T A E L G E T V K L A C R V T G T P K P I V S W Y K D G K P V E V D P H H I L I E D P D G S C T L I L D N L T G I D S G Q Y  
M C F A A S A A G N A S T L G K I L V Q V P P R F V N K V R A T P F V E G E D A Q I T C T V E G A P Y P Q I R W Y K D G T L L A P G N R Y R M L N  
E P R S G V L V L V I Q A A S K E D L G H Y E C E L V N R L G S T R G G G E L Y M Q S P A L R A R D Q H H R E Q I V A A E V T E Q E T K V P K K  
T V I I E E T I T T V V K S P R G R R Q S P G K S P S R S P S R R S A S P R R P G L L A P E R L Y P P G T S P S R R L E V E Q G R K A P V P A L Y  
V T E A E V H A P A S Q S Q P K L E V E E T I E V R V K K T G S R G A S P V R E M T S R G E G I L F T L P G G I P G R D P N A N N S N N K S V Y  
Q E A R T W G P A V V H G E P F I F Q V D S V G N V D W V A A S P E P E Q V R A S Q K E E N T E R Q E G C S D G D E N T F L M E E P Q D T D S L  
Q G R D P K I L T H N G R V L T L A D L E D Y V P Q E G E T F G C G D S T P S T P D E P P C E V S V L Q R E I S E P T V G Q P V L L N V G R P P G  
T G A T P S F F R P G S Q V H S P E S V S F L L R E A W S G P V S A A P W T S S F H T H V Q S S V D G S H G S F K T E V S T Q T V S F G A V G E T  
V T L H I D P D G G E A P G P S Q G \*

>rs47381157\_ENSMUSP00000158795\_c.17290:C>G\_p.S5764C  
ENSMUST00000238536.2|Obscn-210|ENSMUSG00000061462|-|chr11:g.58931095:G>C  
MDHSFSGAPRFLTRPKAFVVSVGKDATLSCQIVGNPTPHVSWEKDRQPVEAGARFLAQDGDVYRLTILDLAL  
GDSGQYVCRARNAIGEFAAVGLRVDSEGTCAEQAPHFLLRPTSIRVREGADATFRCRVGGSPQPAVSWSKDG  
RRLGPPDAPHVRVEEHGESSALRIRSARPRDGGTYEVRANENPLGSASAAAALVVDSDAEVAGPPGTSTATLLA  
HLQQRREAMRAEGI PPSPPGAGTRTCTVTEGKHARLSECFVTGEPKPETVWKKDGQLVTEGRRHVVEDEQENF  
VLKILFCKQSDRGLYTCTASNLVGQTYSSVLVVVREPTVPFKKRLQDLEVREKESATFQCEVAQPATEAAWFK  
EETRLWASAKYDIEEEGTERRLTVRNVSADDDAVYICETTEGSRVVAELSVQGNLTKLPRKTAVRTGDTAIF  
WVELAVPEGPVRWLRNQEEMVAGGRVAITAEGTCHTLTI FQCTLEDMGEVAFVSGGCRTTTQFCVSAPRRPPL  
YPPADPVVKAKTESSVTL SWSAPPHGDRPVTIDGYVLEKRKLGAYAWSRCHEAGWLATTEFTITGVAAEGDFQ  
FRVSAINHFGQGPYLEFPGTMHLVPM LAVKTP LKAVEAVEGGEVTF SVDLTVASSGEWFLDGEALKASSIYVI  
RCDRTRHMLTIREV PARLHGAQLKFVANGIETS IQMVVRAALGLPSSKLPAAAAREVLAQLHEEAQLLAE LSD  
QAAA V T W L K D G R E L S L G P K Y E M Q V S A G R R A L L V R D V A Q D D A G L Y E C V S R G S R T A Y Q L L V Q D I T D G Y R D W G P A G  
P Q K H M C K C A G A K I A R Y L G S S C Y R F L Q Y D K G V W H W L E A A L D T R Q G K T S S C S L H E K P K L V F A K G Q Q A H S E V K A E  
A G N S A T L S C E V T Q A Q T E V T W F K D G K L S S S S K V R M E A S G C S R R L V V Q Q A G K A D A G E Y S C E A G G Q K L S F R L D V A  
E P K L V F A K G Q Q A H S E V K A E A G A S A T L S C E V A Q A Q T E V T W F K D G K L S S S S K V R M E A S G C S R R L V V Q Q A G K A D A  
G E Y S C E A G G Q K L S F R L D V A E P K M V F A K E Q Q A R S E V K A E A G A S A T L S C E V A Q A Q T E V T W F K D G K L S S S S K V R M  
E A S G C S R R L V V Q Q A G K A D A G E Y S C E A G G Q K L S F R L D V T E P K L V F A K E Q Q A R S E V K A E V G N S A T L S C E V A Q A Q T  
E V T W F K D G K L S S S S K V R M E A S G C S R R L V V Q Q A G K A D A G E Y S C E A G G Q K L S F R L D V A E P K L V F A K E Q Q A R S E V  
K A E A G N S A T L S C E V A Q A Q T E V T W F K D G K L S S S S K V R M E A S G C S R R L V V Q Q A G K A D A G E Y S C E A G G Q K L S F H L  
D V T E P K L V F A K E Q Q A H S E V K A E A G A S A T L S C E V A Q A Q T E V T W F K D G K L S S S S K V R M E A S G C S R R L V V Q Q A G K  
A D A G E Y S C E A G G Q K L S F R L D V A E P K L V F A K E Q Q A R S E V K A E A G A S A T L S C E V A Q A Q T E V T W F K D G K L S S S S K  
V R V E A T G C S R R L V V Q Q A G K A D A G E Y S C E A G G Q K L S F R L D V A E P K L V F A K E Q Q A N S E V K A E A G A S A T L S C E V A Q  
A Q T E V T W F K D G K L S S S S K V R M E A S G C S R R L V V Q Q A G K A D A G E Y S C E A G G Q K L S F R L D V A E P K L A F A K E Q Q A H  
S E V K A E A G A S A T L S C E V A Q A Q T E V T W F K D G K L S S S S K V R M E A S G C S R R L V V Q Q A G K A D A G E Y S C E A G G Q K L S  
F R L D V A E P K L A F A K E Q Q A H S E V K A E A G A S A T L S C E V A Q A Q T E V T W F K D G K L S S S S K V R M E A S G C S R R L V V Q Q  
A G K A D A G E Y S C E A G G Q K L S F R L D V A E P K L A F A K E Q Q A H S E V K A E A G A S A T L S C E V A Q A Q T E V T W F K D G K L S S  
S S K V R M E A S G C S R R L V V Q Q A G K A D A G E Y S C E A G G Q K L F R L D V A E P K L M F A K E Q Q A H S E V K A E A G A S A T L S C E

VAQAQTEVTFWFKDGKLLSSSSKVRVEASGCSRRLVVQQAGKADAGEYSCEAGGQKLSFRLDVAEPKLVFAKEQ  
 QAHSEVKAEAGASATLSCEVAQAQTEVTFWFKDGKLLSSSSKVRVEASGCSRRLVVQQVQKADAGEYSCEARGQ  
 KLSFRLDVADTRLMFAKEQQARTEVKAEAGNSATLSCEVAQAQTEVTFWFKDGKLLSSSSKVRVEASGCSRRLV  
 VQQAGKADAGEYSCEAGGQKLSFRLDVAEAEESQIPERPSRREPLVVKEHETIILTATIAAPSVAAVTVLKDGV  
 EIRRSKRHEATSLGDTHTLTVRGAQVLDIAIYSCRVGKEGQDFPVQVEEVAAKFSKPLEPVEGELGGTVMLVC  
 ELSPEQAEVWRCGNTQLRPGKRFQMTSEGPRRTLTVSGLREDDAEYVCESTRDRTSARLTVKVPVVKFTS  
 GLSAMVAEEGQEAFTQCVVSPSDAGVTWYKQGMQLPSEKFMVESGASRSLTILGLTLEDAGQVTEAEGAS  
 SSAALRVREAPVLFKFKLEPQTVERTSVTLEVELTRPWEVKWTRNAAVLTPSENVEIRAEGARHCLVLRVSV  
 GFADRGFFGCETPDDKTQAKLNVEMRQVRLVRLGQVEVAKEQGTASMDVELSHAEEVGSWTRDGLRLQPGPKC  
 HLAVQGPVHILTLALSALQPQDSGLVAFRAEGVHTSARLIVTELPVSFTRVLQDQVAVTQKEKVTLECELSRPVDV  
 RWLKDGVLELRAGKAIGIVAQGTCSRSLVIYRCETGDQGVYVCDALDAQTSASLRVQGRYTLIFRRLAEDAGE  
 VKFVAENAESRAHLRVKELPVTLLRPLRDKIAMEKHGVLCEQVSRASAQVRWFKGGVELQSGPKYEVVSDGL  
 YRKLVINVDVQPEDEDTYTCDAENVKTSAQFFVVEEQSITIVRGLKDMTVMPEPAPAWFECETSIPSVRPPKWLGL  
 KTVLQAGGNVGLQDGTVHRLTLHKTCSTMTGPVHFTIGKSRSSAQLVVSDIPVVLTRPLEPKAGRELQSVVL  
 SCDFRPAPKAVQWYKDDTPLSPSEKFKMALEGQMAELRILRLTPADAGVYRCQAGSAQSSAEVTEAREVTVI  
 QPLQDAEAMEEGRVCFSCSELSHKDEDIEWSLNGTPLYNDSFHEISHEGCLHTLVLSVQRADTGTVCATSPKV  
 SVSARLVVKGKPVVFLKALDDVSAEERGTLLTQCEVSDPEARVVWRKDGVELGSPDKYDFLHKAGARGLTVHD  
 LSHEDAGLYTCVQSGKETQSKVSVHDLHVGITKRLKTVLEVLEGECSFECVLSHESPSDPAVTVGGKTVGGS  
 GHFHAVRQGRKYTLTVKDAALSDAGEVVSFVGLTSLKASLIIRERPVDTKPLEDQRTTLGEDVMLSCELSRA  
 GTSVRWLKDGKAIRKSQKYDLLSEGTRAVLVVRKASLKDSGEYTCETEASKSTAKLCVEEKANRFTTELADLQ  
 VEEKGRAVFTCKTEHPASVVTWRKGLLELRASGKHVPSQEGTLKLTINALERTSDTYTCDIGQARTQARLL  
 VHGGKVRVIEDLEDTAVQEGSSAKFCRIAPADYGPVHWFLLDKTPLHSNELNEITVQPGGYHVLTLRQLALKD  
 SGTVYFEAGDQRTSALRVTEKPSIFSRPLTDVTVTEGEDLTVCETTTTVDSVVRWTKDGKTLRPSARCQLSH  
 EGCQAQLLITATTPQDGGRYKCEIGGASSSSIVRVHALPVRFRRESLKDVEVPEGKAATLRCVLSVAAPVEWR  
 HGDDVLKSSNKYSLRQEGAVLELVIRDLQPDQSGQYSCSFGDQTTSATLTVKTSQAQFVGLKRNKEATEGTTV  
 TLRCELSTKEAPVEWKKGTETLRNGDKYSLKQDGAVALCELQICSLLVADAGEYSCVCGQEKTSATLTVKALLVHF  
 VRRLRSKEATEGDTTTLQCELSKAAPVEWRKGTETLRDGDYSLKQDGAVALCELQIRSLTIADAGEYLCTCGQE  
 KTSATLTVRALPAKFKDSLKNEEATEGTTATLSCELSKAAPVTWKKGPKTLQSGDKYVLRQDGAVALCELQIHGL  
 TMADAGEYSCVCGQEKTSATLTVRGLPAKFIEDLRSQEATEGATAILRCELSKAAPVEWRKGSSETLKDGDYR  
 LRQDGAVALCELQIRGLAVVDGTYSLLPTKFTTEGLRNEEATEGTMATLRCQMSKAAPVEWRKGSSETLRDGDYR  
 LRQDGAVALCELQIRGLTIEDSGEYTCVCGQEKTSATLSVKALPSRFIEDLRSQEATEGTMATLRCQMSKTA  
 PVEWKKGSETLRDGGYSLRQDGPVCELQICDLAVEDAGEYSCVCGQEKTSATLSIKALPPRFIEDLRSQEATEG  
 MATLRCQMSKAAPVEWRKGSSETLGDGGYSLRQNGAVCELQIHDLAVEDTGEYSCVCGQEKTSATLNVKALPP  
 RFIEDLRSQEATEGTMATLRCQMSKAAPVEWRKGSSETLRDGGYSLRQDGAVALCELQIHDLVEDAGQYSCVCG  
 QEKTSAVLTVDALPKPFTEGLKKEEATEGTMVTLRQMSKEATVEWRKGAKTLSDDGGYSLRQDGAVALCELQI  
 GLAVEDAGEYSCVCGQEKTSATLSVKALPPRFIEDLRSQEATEGTMATLRCQMSKAAPVEWRKGSSETLRDGD  
 YSLRQDGAVALCELQIRDLAVEDAGEYLCVCGQEKTSATLSVKALPPRFIEDLRSQEATEGTMATLRCQMSKA  
 APVEWRKGSSETLRDGDYSLRQDGAVALCELQICDLAVEDTGDYSCVCGQEKTSATLSVKALPPRFIEDLRSQ  
 EAREGTVALRRCMSKAAPVEWRKGSSETLKDGDYSLRQEGNLCELQIRDLAVEDTEEYSCVCGQEKTSATLSV  
 KALPAKFIEDLRSQEAPESSTVTLRCKLSKKASVVWKKGSETLRNGARYSLRQDGAVALCELEIRDLTVEDTGEY  
 SCTCGQERTSATLSIMAPQVVFQQPLQNLQAEEGSMASLRCELSVNAAMVWSKGGLELQGDTRREARQQGCVAEL  
 LLRDLRREDAGEYSCTCGSQTTSATLMVTAAPVRFRLRELQAQDVDEGATARLRCELSREAVSVEWRKGSLLQF  
 PCAKYQMVQEGTTAELLVHGVEQEDAGEYTCDAHTQSIARLSVRAPKPKFKTDLQSTEQEAGGTARLCCQLS  
 EAEPGTPVQWLKEGVELHVGSKYEMRRQGAVALCELLIHGLEAKDTGEYACLVGQKTLASLRVKEPEVTIVRGL  
 VDMEVQADEDVEFTCKVSQAGATDVQWHLQGLPLQSNVTEVAVLADGCTHVLQKGVTLLEDAGTVSFHVGGL  
 SSSAQLTVRVPEVTVLEPLKDVQLSEGQDAHFRCRLSRASGQEARWALGGVPLQCNEMNDITVEQGTLYLLTL  
 HKVTLEDAGTITLQVGSSESQAQLKVTAKNTVLRGLENVDALLEGGEALFECQLSQPEVAHAHTWLLDDEPVHTS  
 EKVEVVYFENGLRHLLLLKLNKPKQDSCRVTFLAGDVVTSFAFLTVRGRLEVLLEPPHDASVKAGMQVRFCTILS  
 EAVPVGEATWYINGAAIQPDDTDWTVTTDGSHHALTLNAQPHAGEVTFFAARDAVASARLSVLALPDPPEDA  
 EVVGRSDHSVTLVSWAPMSDGGGLCGYRVMKEASTGQWQLCHDLVPGPECVDDLVPGKTYRFRVAAVGPA  
 GAGEPVHLPQMVKIAPAPAPAPAPAPAPAPETRQAVVGEDICLELEVAADGGEVVWHKGTERRIQPGGHFEVLS  
 RGQRQMLVIKGFRTEDQGEYRCGPIQGLPSSGAATFNVVMTSGSGDEVPAQPSLPPEAAQEGDLHLLWEALAR  
 KRRMSREPTLDSISELPEEDSRVQHLRQEAETAPDLSEGYSTADELARTGEADLSSTDDSESRAGTFCPLVT  
 YLKKAGGPGISPLASKHEAQVTTSVKPKQKQEPVPTCPGGDLAADMPSLDKAAVKIQAAFQKGYKVRKE  
 MKQQEGPVFSRTFGDTEAQVGLRLECVLTKTCDMRACWLKDGIELTDGRHYHIDQLKDGTCSSLVTVGLAPT  
 DSGRYTCQVSTKSGRVSHSACVVVSGTESEAESSSGGELDDAFRRAARRLHRLFRTKSPAELSEELFLSADE  
 GPGEPEPADWQTYREDENFVCIRFESLAEARQAVTCFRNMFATMGIGVEISLGEQGPVEMRIGKVAPTVT  
 PAVPLAKTPGLQTSDAAPVFLTELQNDQVQDGYPMSFDCVVTGQPVPSVRWFKDGKLLLEDDHYMINEDQGG

HQLIITAVVPADMGVYRCLAENSMGVSSSTKAELRVELTSTDYDTAADATETSSYFSAQGYLSSREQEGTESDE  
GQLPQVLEELKDLQVAPGTRLAKFQLKVKGYPAKLYWFKDGGPLTTS DHIRMTDKKTLHTLEIVSVTREDSG  
QYAAIISNAVGAAYSSARLLVRGPSEPEEKPASDVHERLVPPRI LEKFTPKKVKRGSSITFSVKVEGHPAPSV  
HWLKEEAKEKGV LWIGPDTPGYTMASSSKQHSLVLLDVGRQHQTTCIATNPAGQALCSASLHISGLAKEEEQ  
ERVKEALISSFLQGTSAQVSAQMSSEAGFADLVGQSKGESLVAEEAHSHLSLAEVGTEEFLLQKLT SQITEMVS  
AKISQAKLQVPGGDSDEETKTPSASPRHGRSRPSSSVQESSSESEDGDSRGEIFDIYVVTADYLP LGAEQDAI  
ILREGQYVEVLD SAHPLRWLVRTKPTKSSPSRQGWVSPAYLDKRLKLSPEWGPTEAPEFPGEAVSEDEYRTRL  
SSVIQELLSSEQAFVGGELQFLESHHMKHLERSPRVPAAVASQKTVI FRNVQDISHFHSSFLKELQCGCTDDDV  
AMCFIKNQEAFEKYLEFLVGRVQAESV VVSTPVQEFYKKYAEETLSAKDPTQPPPPPLQHYLEQPVVERVQKYQ  
ALLKELIRNKARNRQNCALLEQAYAVVSALPQRAENKLVSLMENYPGTLEALGEP I RQGHFIVWEGAPGARM  
PWKGHNHRVFLFRNYLVICKPRRDSRTDTFSYVFRNMMKLSSIDLNDQVEGDDRAFEVWHEREDSVRKYLLQA  
RTVIKNSWVKEICGIQORLAQPVWRPPEFEEELADCTAELGETVKLACRVTGT PKPIVSWYKDGKPV EVDPH  
HILIEDPDG SCTLILDNLTGIDSGQYMCFAASAAGNASTLGKILVQVPPRFVNVKVRATPFVEGEDAQITCTVE  
GAPYQIRWYKDGTL LAGPNRYRMLNEPRSGVLV LVIQAASKEDLGHYECELVNRLGSTRGGGELYMQSPALR  
ARDQHHREQIVA AVEDTSVEGSAHSAQDQGAASVLRLLGSEALGPS PGDLPNTRQSEPPAFEEAASQIP  
GAASGTPEVSPQPGTHKGLEQETTSSGSQGWTPVIRVEGTAWPGAGTGQLL LDVHSQVIMETTQRTYVCQAPDT  
GVTRAPMQVTIEDVQVQGDMAQF DAVIEGHPPP I V TWYKGSTQLTSSARLSQRQDGTYSVLVTDVAPHDA  
GYVTCVANNAGQV LCKAELLVHGGDKLDAENQVYRRLKLSFYDVQEEI GRGVFGFVKRVQHKGNKMFCAAKF  
IPLRSKTRAQAYQERDILATLGHPLVTGLLDQFETRKTLLI LILELCSSEELLDR LFKKGVVTEAEVKVYIQQL  
VEGLHYLHSHGILHLDIKPPNIMLVHPAREDIKICDFGFAQKITPSEPQY SKYGSPEFVSPEIIEQNPVSEGS  
DIWAMGVISYLSLTCSSPFAGESDRATLLNVLEGRVSWSSPTAAHLS EDAKDFIKATLQRTPRARPSTSQCLA  
HPWFLKSMPAEEAHFINTKQLKFL LARSRWQRSLMSYKSI LVMRSIPELLQGPDPSPSLGVARHLRGEASGAS  
SSSSSSDNELAPFARAKSLPPSPVTHSPLLHPRGFLRPSASLPEETEASMTADAAVPAS PQSAGPPASPGCV  
PRHSVISSLFYQQAGEGAERGNKTS GAKRHPARRRHLKGGYIARALPGLREPLMEYSLLEEEAAREEQASLM  
TKTPSFETALRLPSSSVREVPGRSHSLDNPPVT TGPSPEACKEQLLFPSTGLTHET TAKDRGHKEGFLQESV  
PFPMPGSDSRPGKQEGSSQDSCRGPASSCHSELGSGSQEGCGPPSSQSLGSLPPQSLKELSTSCGFLFSEQ  
PQAAPFPTQVSPLLGSEKEPQDGSLSSEGPVVPSSSPGSASQVDASLDTEGLSEAGDTCDFTPPPQRPQEQAT  
TRKFSLESRGGYAGVAGYGTFAFGGDAGGMLGQGPLWARMAWAVS QSSEEQDEAATESPQPLES LGPIAEASG  
VPLRTSPSLTPWEEVEQVSLVQIRDLSGDAEAADTISLDISEVDPAYLNLSDLYDIKYL PFEFMI FRRVPKPI  
EQPESPGSETEAGQGLADFL EEAAWPWP GELGLRAGLEITEEPEEPGDLEALLGEAAVGRKRKWSPSRGLFQF  
PGRCLSGEEPVELGLRQRVKASMAHISRI LKGRPEGPEREPPRKKAGLASFRLSGLKGRDQELSDEAVVLGQ  
SVTLACQVLAQPTAQATWSKDGVLLESSGHLLI SSSLKNFQLLTI LVVKEEDLGTYTCCVSNPLGTAVTTGVL  
RKAERPSSSPRPEVGELYKDAVLLVWKPVE SCGPVTVYIVQCCIEGGSWTTLASDISDCCYLTGKLSRGGMYIF  
RTACVSKAGMGPYSSPSEQVLLGGPNHLASEEESSRGRPAQLLPSTKTFAFQMQIRRRGRFSVVRQCREKASGR  
ALAAKIVPYQPEDKTA VLREYEA LKRLHHPHLAQLHAAYLSPRHLVLI LELCSGPELLPSLAERESYSESDVK  
DYLWQMLSATQYLHAQHILHLDLRSENMMVTEYNLLKVIDLGN AQSLDQEKVPAPENFKDYLETMAPELLEGQ  
GAVPQTDIWAIGVTA FIMLSGEY P ESSEGRDLQKGLRKLGLIRLSRCYAGLSGGAVAF LQSSSLCAQPWGRPCA  
STCLQCGLWTEEGPTGSRPTVTFPTVRLRA FVREKRRRALLYKKNLAQVR\*  
>rs47381157\_ENSMUSP00000038264\_c.15130:C>G\_p.s5044C  
ENSMUST00000047441.14|Obscn-202|ENSMUSG00000061462|-|chr11:g.58931095:G>C  
MDHSFSGAPRFLTRPKAFVVS VGKDATLSCQIVGNPTPHVSWEKDRQPV EAGARFRLAQDGDVYRLTILDLIAL  
GDSGQYVCRARNAIGEAFAAVGLRVDSEGTC AEQAPHLLRPTSIRVREGADATFR CRVGGSPQPAVSWSKDG  
RRLGPPDAPHVRVEEHGESSALRIR SARPRDGGTYEVRAENPLGSASAAAAALVVDSDAEVAGPPGTSTATLLA  
HLQORREAMRAEGIPSPPGAGTRTCTVTEGKHARLSCFVTGEPKPE TVWKKDQGLVTEGRRHV VYEDEQENF  
VLKILFCKQSDRGLYTCASNLVGQTYSSVLVVREPTVPFKKRLQDLEVREKESATFQCEVAQPATEAAWFK  
EETRLWASAKYDIEEEGTERRLTVRNVSADDDAVYICETTEGSR TVAELSVQGNLTRKLPKRTAVRTGDTAIF  
WVELAVPEGPVRWLRNQEEMVAGGRVAITAEGTCHTLTIFQCTLEDMGEVAFVSGGCRTTTQFCVSAPRRPPL  
YPPADPVVKAKTESSVTL SWSAPPHGDRPVTIDGYVLEKRKLGAYAWSRCHEAGWLATTEFTITGVAAEGDFQ  
FRVSAINHFGQGPYLEFPGTMHLVPLAVKTP LKAVEAVEGGEVTFVSDLTVASSGEWFLDGEALKASSIYVI  
RCDRTRHMLTIREV PARLHGAQLKFVANGIETS IQMVVRAALGLPS SKLPAAAAAREVLAQLHEEAQLLAE LSD  
QAAA VTWLKDGRELSLGPKEYMQVSAGRRALLVRDVAQDDAGLYECVSRGSR TAYQLLVQDITDGYRDWGPAG  
PQKHMCKCAGAKIARYLGS SCYRFLQYDKGVWHWLEAALDTRQKGKTS SCSLHEKPKLVFAKQQQAHSEVKA E  
AGASATLSCEVAQAQTEVTWFKDGKLLSSSSKVRMEASGCSRRLLVQQAGKADAGEYSCEAGGQKLSFRLDVA  
EPKMVFAKEQQARSEVKAEGASATLSCEVAQAQTEVTWFKDGKLLSSSSKVRMEASGCSRRLLVQQAGKADA  
GEYSCEAGGQKLSFRLDVTEPKLVFAKEQQARSEVKAEGVNSATLSCEVAQAQTEVTWFKDGKLLSSSSKVRM  
EASGCSRRLLVQQAGKADAGEYSCEAGGQKLSFRLDVAEPKLVFAKEQQARSEVKAEGNSATLSCEVAQAQ T  
EVTWFKDGKLLSSSSKVRMEASGCSRRLLVQQAGKADAGEYSCEAGGQKLSFRLDVTEPKLVFAKEQQAHSEV  
KAEAGASATLSCEVAQAQTEVTWFKDGKLLSSSSKVRMEASGCSRRLLVQQAGKADAGEYSCEAGGQKLSFRL

DVAEPKLVFAKEQQARSEVKAEAGASATLSCEVAQAQTEVTFWKDGGKLSSSSKVRVEASGCSRRLVVQQAGK  
ADAGEYSCEAGGQKLSFRLDVAEPKLVFAKEQQANSEVKAEAGASATLSCEVAQAQTEVTFWKDGGKLSSSSK  
VRVEASGCSRRLVVQQAGKADAGEYSCEAGGQKLSFRLDVAEPKLAFAKEQQAHSEVKAEAGASATLSCEVAQ  
AQTEVTFWKDGGKLSSSSKVRVEASGCSRRLVVQQAGKADAGEYSCEAGGQKLSFRLDVAEPKLAFAKEQQAH  
SEVKAEAGASATLSCEVAQAQTEVTFWKDGGKLSSSSKVRVEASGCSRRLVVQQAGKADAGEYSCEAGGQKLS  
FRLDVAEPKLAFAKEQQAHSEVKAEAGASATLSCEVAQAQTEVTFWKDGGKLSSSSKVRVEASGCSRRLVVQQ  
AGKADAGEYSCEAGGQKLSFRLDVAEPKLVFAKEQQAHSEVKAEAGASATLSCEVAQAQTEVTFWKDGGKLS  
SSKVRVEASGCSRRLVVQQAGKADAGEYSCEAGGQKLSFRLDVAEAEBSQI PERPSRREPLVKEHETIILTAT  
IAAPSVAAVTWLKDGEIIRRSKRHEATSLGDTHLTVRGAQVLDLSAIYSCRVGKEGQDFPVQVEVAAKFSKP  
LEPVEGELGGTVMLVCELSPEQAEVWRCNGTQLRPGKRFQMTSEGPRRTLTVSGLREDDAEYVCESRDDRT  
SARLTVKVPVVKFTSGLSAMVAEEGQEAFTQCVVSPSDAGVTWYKDGMLQPSSEKFMVMEVSGASRSLTILGL  
TLEDAGQVTVAEAGASSAALRVREAPVLFKKKLEPQTVEERTSVTLEVELTRPWPEVKWTRNAAVLTPSENV  
EIRAEGARHCLVLRVSGFADRGFFGCETPDDKTQAKLNVEMRQVRLVRLGLQEVEAKEQGTASMDVELSHAEVE  
GSWTRDGLRQLQPGPKHLAVQGPVHILTLTALQPDQSGLVAFRAEGVHTSARLIVTELPVSTFTRVLQDVVATQ  
KEKVTLECELSRPVDVRLKDGVELRAGKAI GIVAQGTCSRSLVIYRCETGDQGVYVCDALDAQTSASLRVQGR  
TYTLIFRRVLAEDAGEVVFVAENAESRAHLRVKELPVTLLRPLRDKIAMEKHRGVLECVSRASQAQRWFKGG  
VELQSGPKYEVVSDGLYRKLVINQVPEDEDTYTCADAGNVKTSAQFFVVEEQSITIVRGLKDMTVMFPAPAFWFE  
CETSI PSVRPPKWLGLKTVLQAGGNVLEQDGTVHRLTLHKTCTMTGVPVHFTIGKSRSSAQLVSDIPVVL  
RPLEPKAGRELQSVVLSCDFRPAKAVQWYKDDTPLSPSEKFKMALEGQMAELRILRLTPADAGVYRCQAGSA  
QSSAEVTVAEAREVTVIQPLQDAEAMEEGRVCFSCELSHKDEDEIWSLNGTPLYNDSFHEISHEGCLHTLVLS  
VRQADTGTVCATSPKVSVSARLVVKGKPVVFLKALDDVSAEERGTTLQCEVSDPEARVVWRKDGVELGSPDK  
YDFLHKAGARGLTVHDLSDHEDAGLYTCQVGSKETQSKVSVHDLHVGITKRLKTVEVLEGESECSFECVLSHESP  
SDPAVWTVGGKTVGGSGHFHAVRQGRKYTLTVKDAALSDAGEVVFVSVLGLTSKASLIIRERPVDTKPLEDQR  
TTLGEDVMSCELSRAGTSVRWLKDGKAIKRSQKYDLLSEGTRAVLVVRKASLKDSGEYTCETEASKSTAKLC  
VEEKANRFTTEELADLQVEEKGRAVFTCKTEHPASVVTWRKGLLELRASGKHVPSQEGTLTKLTINALERTDSD  
TYTCDIGQARTQARLLVHGQKVRVIEDLEDTAVQEGSSAKFCRIPADYGPVHWFLLDKTPLHSNELNEITVQ  
PGYHVLTLRQLALKDSGTVYFEAGDQRTSAALVRETEKPSIFSRPLTDVTVTEGEDTLVCEVSDVSSVRWT  
KDGKTLRPSARCQLSHEGCAQLLITATTPQDGGRYKCEIGGASSSSIVRVHALPVRFRESLKDVEVPEGKAA  
TLRCVLSVAAPVEWRHGDDVLKSSNKYSLRQEGAVLELVIRDLQPDQSGQYSCSFGDQTTSATLTVKTSQAQ  
FVGKLRNKEATEGTTVTLRCELTKEAPVWKKGTETLRNGDKYSLKQDGAVCCELQICSLLVADAGEYSCVCGQ  
EKTSATLTVKALLVHFVRRRLRSKEATEGDTTTLQCELSKAAPVEWRKGTETLRDGDYSLKQDGAVCCELQIRS  
LTADAGEYLCCTCGQEKTSATLTVRALPAKFKDSLKNEEATEGTATLSCELSKAAPVTWKKGPKTLQSGDKY  
VLRQDGAVCGLQIHGLTMADAGEYSCVCGQEKTSATLTVRGLPAKFIEDLRSQEATEGATAILRCELSKAAPV  
EWRKGSSETLKDGDYTLRQDGAVCCELQIRGLAVVDTGTYSLSLPTKFTTEGLRNEEATEGTMATLRCQMSKAAPV  
EWRKGSSETLRDGDYSLRQDGAVCCELQIRGLTIEDSGEYTCVCGQEKTSATLSVKALPFRFIEDLRSQEATEG  
TMATLRCQMSKAAPVEWRKGSSETLGDGGYSLRQNGAVCELQIHDLAVEDTGEYSCVCGQEKTSATLNVKALP  
PRFIEDLRSQEATEGTMATLRCQMSKAAPVEWRKGSSETLRDGGYSLRQDGAVCCELQIHDLVDVADAGYSCVC  
GQEKTSAVLTVDALPPKFTTEGLKKEEATEGTMVTLRQMSKEATVEWRKGAKTLSGGYSLRQDGAVCCELQI  
CGLAVEDAGEYSCVCGQEKTSATLSVKALPFRFIEDLRSQEATEGTMATLRCQMSKAAPVEWRKGSKTLRDGD  
RYSRQDGAVCCELQICDLAVEDTGDYSCVCGQEKTSATLSVKAPQVVFQPLQNLQAEEGSMASLRCELSVNP  
AAMVWSKGGLELQGDTRREARQQGCVAELLLRDLRREDAGEYSCTCGSQTTSATLMVTAAPVRFRLRLQAQDV  
DEGATARLRCELSREAVSVEWRKGSLLQFPKAKYQMVQEGTTAELLVHGVEQEDAGEYTCDAHTQSARLSV  
RAPKPKFKTDLQSTEQEAGGTARLCCQLSEAEPTPVQWLKEGVELHVGSKYEMRRQGAVCCELLIHGLEAKDT  
GEYACLVGQKTLASLRVKEPEVTIVRGLVDMVEQADEVFEFTCKVSOAGATDVQWHLQGLPLQSNVTEVAV  
LADGCTHVLQLKGVTLLEDAGTVSFHVGGLSAQLTVRVPEVTVLEPLKDVQLSEGQDAHFRCLRSRASGQEA  
RWALGGVPLQCNEMNDITVEQGTLYLLTLHKVTLLEDAGTITLQVGCSSSEAQLKVTAKNTVLRGLENDVALEG  
GEALFECQLSQPEVAHAHTWLLDDEPVHTSEKVEVVYFENGLRHLLLLKNLKPQDSCRVTFLAGDVVTSAFITV  
RALPDPPEDAEVVGRSDHSVTLVSWVAPMSDGGGGLCGYRVMKEASTGQWQLCHDLVPGPECVDDLVPGKTY  
RFRVAAVGPAGAGEPVHLPQMVKIAPAPAPAPAPAPAPAPETRAVVGEDICLELEVAADGGEVWVHKGTERI  
QPGGHFEVLSRGRQMLVIKGFRTEDQGEYRCGPIQGLPSSGAATFNVMVMTSGSGDEVPAQPSLPPEAAQEGD  
LHLLWEALARKRRMSREPTLDSISELPEEDSRVQHLRQEAETAPDLSEGYSTADELARTGEADLSHTSSDDE  
SRAGTPCLVTYLKKAGGPGISPLASKHEAQVTTSVKPKQKQEPVVPPTCPPPGDLSAADLMDPSLDKAAVKIQA  
AFKGYKVRKEMKQEGPVSRTFGDTEAQVGDVLRLECVLATKTDMRACWLKDGIELTDGRHYHIDQLKDGTC  
SLLVTLGLAPTDGGRYTCQVSTKSGRVSHSACVIVVSGTESEAESSGGELDDAFRRAARRLHRLFRTPKSPALS  
EELFLSADEGPEEPADWQTYREDENFVCFERFSLAEARQAVTCFRNMFMATMGIGVEISLGEQGPVGVEM  
RIGKVAPTPTPAVPLAKTPGLQTSDAAPVFLTELQNDVQDGYPMSFDCVVTGQPVPSVRWFKDGLLEEDDH  
YMINEDQQGGHQLIITAVVPADMGVYRCLAENSMGVSSTKAEALRVELTSTDYDTAADATETSSYFSAQGYLSS  
REQEGTESDEGQLPQVLEELKDLQVAPGTRLAKFQLKVKGYAPKLYWFKDGOPLTSDHIRMTDKKTLHTLE

IVSVTREDSDGQYAAIYISNAVGAAYSARLLVVRGPEPEEKPASDVHERLVPVPRILEKFTPKKVKRGSSITFSV
KVEGHPAPSVHVLKEEAKEGVLWIGPDTPGYTMASSSKQHSLLVLDVGRHQGTYTCTIATNPAGQALCSASLH
ISGLAKEEEEQERVKEALISSFLQGTSAQVSAQMSEASAGFADLVGQSKGESLVAAEEAHSHLSLAEVGTTEFLQK
LTSQITEMVSAKISQAKLQVPGGDSDEETKTPSASPRHGRSRPSSSVQESSSESEDGDSRGEIFDIYVVTADY
LPLGAEQDAIILREGQYVEVLDSAHPLRWLVRTKPTKSSPSRQGWVSPAYLDRKRLKLSPEWGPTEAPEFPGEA
VSEDEYRTRLSSVIQELLSSEQAFVQFLESHHMKHLERSPRVPAAVASQKTVIFRNVQDISHFHSSFLKE
LQCGCTDDDVAMCFIKNQEAFKEYLEFLVGRVQAESVVVSTPVQEFYKKYAEETLSAKDPTQPPPPPLQHYLE
QPVERVQKYQALLKELIRNKARNRQNCALLEQAYAVVSALPQRAENKLVSLMENYPGTLEALGEPVIRQGHFI
VWEGAPGARMPWKGNHRHVFVFRNYLVICKPRRDSRTDTFSYVFRNMMKLSSIDLNDQVEGDRAFEVWHERE
DSVRKYLQARTVIKNSWVKEICGIQORLAQPVWRPPEFEEELADCTAELGETVKLACRVTGTPKPIVSWYK
DGKPVVDPHHLIEDPDGSCCTLIIDNLTGIDSGQYMCFAASAAGNASTLGKILVQVPPRFVNVKVRATPFVEG
EDAQITCTVEGAPYPQIRWYKDGTLAPGNRYRMLNEPRSGVLVLIQAASKEDLGHYECELVNRLGSTRGGG
ELYMQSPALRARDQHHREQIVAAVEGAPSMQVTIEDVQVQVGDMAQFDAVIEGHPPPPIVTWYKGSTQLTSSAR
LSQRQDGTYSVLVTDVAPHDAGVYTCVANNAGQVLCCKAELLVHGGDKLDAENQVYRRLKHSFYDVQEEIGR
GVFGFVKRVQHKGNMFCFAAKFIPLRSKTRAQAYQERDILATLGHPLVTGLLDQFETRKTLLILILELCSSEEL
LDRLFKKGVVTEAEVKVYIQQLVEGLHYLHSHGILHLDIKPPNIMVHPAREDIKICDFGFAQKITPSEPOYS
KYGSPEFVSPVIEQNPVSEGSDIWAMGVISYLSLTCSSPFAGESDRATLLNVLEGRVSWSSPTAAHLSSEDAK
DFIKATLQRTPRARPSTSQCLAHWPFLKSMPEAAEHFINTKQLKFLLRARSRWRQSLMSYKSLVMRSIPPELLQ
GPPDPSLGVARHLRGEASGASSSSSSSDNELAPFARAKSLPPSPVTHSPLLHPRGFLRPSASLPEETEASMP
TADAAVPASPQASAGPPASPGCVPRHSVIVSSLFYQQAGEGAERGNKTSKAKRHPARRRHLKGGYIARALPGLR
EPLMEYSLLEEEAAREEQASLMTKTPSFETALRLPSSSVREVPGRSHSLDNPPVTTGSPPEACKEQLLFPST
GLTHETTAKDRGHKEGFLQESVPPFPMMSGDSRPGKQEGSSQDSCRKGPASSCHSELGSGSQEGCGPPSSQSLG
SLPPQSLKKELESTSCGPLFSEQQAAPFTQVSPLLGSEKEPQDGLSEGVPVPSSSPGSASQVDASLDTEG
LSEAGDTCDFTPPPQRPQEQATTRKFSLESRGGYAGVAGYGTFAFGGDAGGMLGQGPLWARMWAVSQSSEEQ
DEAATESPQPLESLGPIAEASGVPLRTSPSLTPWEEVEQVSLVQIRDLSGDAEAADTISLDISEVDPAYLNL
DLYDIKYLPEFEMI FRRVPKPIEQPESPGSETEAGQLADFLLEAAWFPWPGELGLRAGLEITEEPEEPGDLEA
LGEAAVGRMPWKGNHRHVFVFRNYLVICKPRRDSRTDTFSYVFRNMMKLSSIDLNDQVEGDRAFEVWHERE
FRLSGLKGRDQELSDEAVVLGQSVTLACQVLAQPTAQTATWSKDGVLLESSGHLLISSTLKNFQLLTIIVVKEE
DLGTYTCCVSNPLGTAVTTGVLKRAERPSSSPRPEVGEYKDAVLLVWKPVESECGPVTYIVQCCIEGGSWTTL
ASDISDCCYLTKLSRGGMYIFRTACVSKAGMGPYSSPSEQVLLGGPNHLASEEESSRGRPAQLLPSTKTF
QMQIRRRGRFVVRQCREKASGRALAAKIVPYQPEDKTAVLREYEALKRLLHHPHLAQLHAAYLSPRHLVLI
CSGPELLPSLAERESYSESDVKDYLWQMSLQYLHAQHILHLDLRSENMMVTEYNLLKVIDLGNASLDQEK
VPAPENFKDYLETMAPELLEGQAVPQTDIWAIGVTAIFIMLSGEYPESEGETRDLQKGLRKLIRLSRCYAGL
SGGAVAFLOSSLCAQPWGRPCASTCLQCGWLTEEGPTGSRPTPVTFTVRLRAFVREEREKRRALLYKKNLQ
VR\*

>rs47381157\_ENSMUSP00000049737\_c.17089:C>G\_p.S5697C

ENSMUST00000052872.15|Obscn-203|ENSMUSG00000061462|-|chr11:g.58931095:G>C
MDHSFSGAPRFLTRPKAFVSVGKDATLSCQIVGNPTPHVSWEKDRQVPEAGARFRLAQDGDVYRLTILDLAL
GDSGQYVCRARNAIGEAFVAVGLRVDSEGTCAEQAPHFLLRPTSIRVREGADATFRCRVGGSPQPAVSWSKDG
RRLGPPDAPHVRVEEHGESSALRIRSARPRDGGTYEVRAENPLGSASAAAALVVDSDAEVAGPPGTSTATLLA
HLQQRREAMRAEGIPPSPPGAGTRTCTVTEGKHARLSCFVTGEPKPKETVWKKDQQLVTEGRRHVYDEQENF
VLKILFCKQSDRGLYTCTASNLVGQTYSSVLVVVREPTVPFKKRLQDLEVREKESATFQCEVAQPATEAAWFK
EETRLWASAKYDIEEGETERRLTVRNVSADDDAVYICETTEGSRVVAELSVQGNLTKLPRKTAVRTGDTAIF
WVELAVPEGPVWRVLRNQEEMVAGGRVAITAEGTCHTLTI FQCTLEDMGVAFVSGGCRTTTFQCVSAPRRPPL
YPPADPVVKAKTESSVTLSSWAPPHGDRPVTIDGYVLEKRKLGAAYASRCHEAGWLATTEFTITGVAAEEGDFQ
FRVSAINHFGQGPYLEFPGMTMLVPLAVKTPKAVEAVEGGEVTFVSDLTVASSGEWFLDGEALKASSIYVI
RCDRTRHMLTIREVPARLHGAQLKVFANGIETSIQMVVRAALGLPSSKLPAAAAREVLAQLHEEAQLLAELSD
QAAAVTWLKDGRELSLGPKEYMQVSAGRRALLVRDVAQDDAGLYECVSRGSRRTAYQLLVQEPKLVFAKGQQA
SEVKAEGNSATLSCEVTQAQTEVTFWFKDGKLLSSSSKVRMEASGCSRRLVVQQAGKADAGEYSCEAGGQKLS
FRLDVAEPKLVFAKGQQAHEVKAEGASATLSCEVAQAQTEVTFWFKDGKLLSSSSKVRMEASGCSRRLVVQQ
AGKADAGEYSCEAGGQKLSFRLDVAEPMVFAKEQQARSEVKAEGASATLSCEVAQAQTEVTFWFKDGKLLS
SSKVRMEASGCSRRLVVQQAGKADAGEYSCEAGGQKLSFRLDVTEPKLVFAKEQQARSEVKAEGNSATLSCE
VAQAQTEVTFWFKDGKLLSSSSKVRMEASGCSRRLVVQQAGKADAGEYSCEAGGQKLSFRLDVAEPMVFAKEQ
QARSEVKAEGNSATLSCEVAQAQTEVTFWFKDGKLLSSSSKVRMEASGCSRRLVVQQAGKADAGEYSCEAGGQ
KLSFHLDVTEPKLVFAKEQQAHSEVKAEGASATLSCEVAQAQTEVTFWFKDGKLLSSSSKVRMEASGCSRRLV
VQQAGKADAGEYSCEAGGQKLSFRLDVAEPMVFAKEQQARSEVKAEGASATLSCEVAQAQTEVTFWFKDGK
LSSSSKVRVEASGCSRRLVVQQAGKADAGEYSCEAGGQKLSFRLDVAEPMVFAKEQQANSEVKAEGASATL
SCEVAQAQTEVTFWFKDGKLLSSSSKVRVEASGCSRRLVVQQAGKADAGEYSCEAGGQKLSFRLDVAEPMVFA



KEQQAHSEVKAEEAGASATLSCEVAQAQTEVTFWFKDGKKLSSSSKVRVEASGCSRRLVVQQAGKADAGEYSCEA  
GGQKLSFRLDVAEPKLAFAKEQQAHSEVKAEEAGASATLSCEVAQAQTEVTFWFKDGKKLSSSSKVRVEASGCSR  
RLVVQQAGKADAGEYSCEAGGQKLSFRLDVAEPKLAFAKEQQAHSEVKAEEAGASATLSCEVAQAQTEVTFWFKD  
GKKLSSSSKVRVEASGCSRRLVVQQAGKADAGEYSCEAGGQKLFRLDVAEPKLMFAKEQQAHSEVKAEEAGAS  
ATLSCEVAQAQTEVTFWFKDGKKLSSSSKVRVEASGCSRRLVVQQAGKADAGEYSCEAGGQKLSFRLDVAEPK  
VFAKEQQAHSEVKAEEAGASATLSCEVAQAQTEVTFWFKDGKKLSSSSKVRVEASGCSRRLVVQQVQKADAGEYS  
CEARGQKLSFRLDVADTRLMFAKEQQARTEVKAEEAGNSATLSCEVAQAQTEVTFWFKDGKKLSSSSKVRVEASG  
CSRRLVVQQAGKADAGEYSCEAGGQKLSFRLDVAEEAESQI PERPSRREPLVVKEHETIILTATIAAPSVAAVT  
WLKDGVEIRRSKRHEATSLGDTHLTVRGAQVLDLSDAIYSCRVGKEGQDFPVQVEEVAAKFSKPLEPVELEGG  
TVMLVCELSPEQAEVWRCGNTQLRPGKRFQMTSEGPRRTLVSGLREDDAEEYVCESTRDDRTSARLTVKVPR  
VVKFTSGLSAMVAEEGQEAFTQCVVSPSDAGVTWYKDGMLQPSSEKFMVVEGASRSLTILGLTLEDAGQVTV  
EAEGASSAALRVREAPVLFKKKLEPQTVVEERTSVTLEVELTRPWPVEVKWTRNAAVLTPSENVEIRAEGARHC  
LVLSVGFADRGFFGCETPDDKTQAKLNVEMRQVRLVRLQVEVAKEQGTASMDVELSHAEEVGSWTRDGLRL  
QPGPKCHLAVQGPVHILTLALQPDQSLVAFRAEGVHTSARLIVTELPVSTFTRVLQDVVATQKEKVTLECEL  
SRPVDVRWLKDGVELRAGKAI GIVAQGTCSRSLVIYRCETGDQGVYVCDALDAQTSASLRVQGRTYTLIFRRVL  
AEDAGEVVFVAENAESAHLRVKELPVTLRPLRDKIAMEKHRGVLECVSRASQAQVRFWFKGGVLEQSGPKYE  
VVSDGLYRKLVLQAGNVLEQDGTVHRLTLHKTCSTMTGPVHFTIGKSRSSAQLVVSDIPVVLTRPLEPKAGRE  
LQSVVLSCDFRPAKAVQWYKDDTPLSPSEKFKMALEGQMAELRILRLTPADAGVYRCQAGSAQSSAEVTVEA  
REVTVIQPLQDAEAMEEGRVCFSCELSHKDEDI EWSLNGTPLYNDSFHEISHEGCLHTLVLSVRQADTGTVC  
ATSPKVSVSARLVVKGKPVVFLKALDDVSAEERGTLTLQCEVSDPEARVVRKDGVELGPSDKYDFLHKAGAR  
GLTVHDLSHEDAGLYTCQVGSKETQSKVSVHDLHVGITRRLKTVEVLEGESECSFECVLSHESPSDPAVWTVGG  
KTVGGSGHFHAVRQGRKYTLTVKDAALSDAGEVFSVLGLTSKASLIIRERPVDITKPLEDQRTTLGEDVMLS  
CELSRAGTSVRWLKDGKAIKRSQKYDLLSEGTRAVLVVRKASLKDSGEYTCETEASKSTAKLCVEEKANRFTE  
ELADLQVEEKGRAVFTCKTEHPASVVTRKGLLELRASGKHVPSQEGTLKLTINALERTDSPTYCDIGQAR  
TQARLLVHGQKVRVIEDLEDTAVQEGSSAKFCCRIAPADYGPVHWFLDKTPHLSHNEITVQPGGYHVLTLR  
QLALKDSGTVYFEAGDQRTSAAALRVTEKPSIFSRPLTDVTVTEGEDTLVCETTTTVDSVVRWTKDGTLLRPSA  
RCQLSHEGCAQQLLITATTPQDGGRYKCEIGGASSSSIVRVHALPVRFRRESLKDVEVPEGKAATLRCVLSSVA  
APVEWRHGDDVLKSSNKYSLRQEGAVLELVIRDLQPDQSGQYSCSFGDQTSATLTVKTSQAQVFGKLRNKEA  
TEGTTVTLRCELTKAEAPVEWKKGTETLRNGDKYSLKQDGA VCELQICSLLVADAGEYSCVCGQEKTSATLTVK  
ALLVHFVRRRLRSKEATEGDTTLQCELSKAAPVEWRKGTETLRDGDYSLKQDGA VCELQIRSLTIADAGEYL  
CTCGQEKTSATLTVRALPAKFKDSLKNEEATEGTTATLSCELSKAAPVTWKKGPKTLQSGDKYVLRQDGA VCG  
LQIHGLTMADAGEYSCVCGQEKTSATLTVRGLPAKFIEDLRSQEATEGATAILRCELSKAAPVEWRKGSSETLK  
DGDYTLRQDGA VCELQIRGLAVVDTGTYSSLPKFTTEGLRNEEATEGTMATLRCQMSKAAPVEWRKGSSETLR  
DGDYSLRQDGA VCELQIRGLTIEDSGEYTCVCGQEKTSATLSVKALPPRFIEDLRSQEATEGTMATLRCQMS  
KTAPVEWKKGSETLRDGGYSLRQDGPVCELQICDLAVEDAGEYSCVCGQEKTSATLSIKALPPRFIEDLRSQ  
EATEGTMATLRCQMSKAAPVEWRKGSSETLGDGGYSLRQNGAVCELQIHDLAVEDTGEYSCVCGQEKTSATLN  
VKALPPRFIEDLRSQEATEGTMATLRCQMSKAAPVEWRKGSSETLRDGGYSLRQDGA VCELQIHDLVEDAGQ  
YSCVCGQEKTSAVLTVDALPPKFTEGLKKEEATEGTMVTLRQMSKEATVEWRKGAKTLSDDGGYSLRQDGA M  
CELQICGLAVEDAGEYSCVCGQEKTSATLSVKALPPRFIEDLRSQEATEGTMATLRCQMSKAAPVEWRKGSSET  
LRDGDYSLRQDGA VCELQIRDLAVEDAGEYLCVCGQEKTSATLSVKALPPRFIEDLRSQEATEGTMATLRCQ  
MSKAAPVEWRKGSKTLRQDGGYSLRQDGA VCELQICDLAVEDTGDYSCVCGQEKTSATLSVKALPPRFIEDLR  
SQEAREGTVALRRCMSKAAPVEWRKGSSETLKDGDYSLRQEGNLCELQIRDLAVEDTEEYSCVCGQEKTSAT  
LSVKALPAKFIEDLRSQEAPESSTVTLRCKLSKKASVVWKKGSETLRNGARYSLRQDGA VCELEIRDLTVEDT  
GEYSCVCGQEKTSATLSIMAPQVVFQQLQNLQAEEGSMASLRCELSVNPNAAMVWSKGGLELQGDTRREARQO  
GCVAELLLRDLRREDAGEYSCVCGQEKTSATLMVTAAPVRFRLRQADVDGATARLRCELSREAVSVEWRK  
GSLQLFPKAKYQMVQEGTTAELLVHGVEQEDAGEYTCDAHTQS IARLSVRAPKPKFKTDLQSTEQEAAGGTAR  
LCCQLSEAEPTPVQWLKEGVELHVGSKYEMRRQGA VCELLIHGLEAKDTGEYACLVGGQKTLASLRVKEPEV  
TIVRGLVDMVEQADEDEFTCKVSQAGATDVQWHLQGLPLQSNVTEVAVLADGCTHVLQKGVTLLEDAGTVS  
FHVGGSSSAQLTVRVPEVTVLEPLKDVQLSEGQDAHFRCRLSRASGQEARWALGGVPLQCNEMNDITVEQGT  
LYLLTLHKVTLEDAGTITLQVGSSESQAQLKVTAKNVTVLRGLENVDALEGGEALFECQLSQPEVAHAHTWLLDD  
EPVHTSEKVEVVYFENGLRHLLLLKLNKLPQDSCRVTFLAGDVVTS AFLTVRGWRLEVLEPPHDASVKAGMQVR  
FTCILSEAVPVGEATSVYINGAAIQPDDTDWTVTGDSHHALTSNAQFQHAGEVTF AARDAVASARLSVLALP  
DPPEDAEVVGRSDHSTVLSWVAPMSDGGGLCVGRVEMKEASTGQWQLCHDLVPGPEACVVDLVPKTYRFRV  
AAVGPAGAGEPVHLPQMVKIAPAPAPAPAPAPAPETRAVVGEDICLELEVAADGGEVWVKGTERTIQPGG  
HFEVLSRGRQMLVIKGFRTEDQGEYRCGPIQGLPSSGAATFNVMVTS GSGDEVPAQPSLPPEAAQEGDLHLL  
WEALARKRRMSREPTLDSISELPEEDSRVQHLRQEAEEETAPDLSEGYSTADELARTGEADLSHTSSDDESRA  
TPCLVTVYLLKAGGPGISPLASKHEAQVTTSVKPKQKQEPVVPTCPPPGDLSAADLMDPSLDKAAVKIQAAFKG

YKVRKEMKQQEGPVFSRTFGDTEAQVGDVLRLECVLATKTDMRACWLKDGIELTDGRHYHIDQLKDGTCSSLLV  
TGLAPTDSGRYTCQVSTKSGRVSHSACVVVSGTESEAESSSGGELDDAFRRAARLHRLFRTKSPAELSEEEL  
FLSADEGPGPEEPADWQTYREDENFVCIRFESLAEARQAVTCFRNMFATMGIGVEISLGEQGPGRVEMRIGK  
VAPTVPVAVPLAKTPGLQTSDAAPVFLTELQNDQVDQDGYPMSFDCVVTGQPVPSVRWFKDGKLEEDDHYMIN  
EDQQGGHQLIITAVVPADMGVYRCLAENSMGVSSSTKAELRVELTSTDYDTAADATETSSYFSAQGYLSSREQE  
GTESDEGQLPQVLEELKDLQVAPGTRLAKFQKLVKGYPAKLYWFKDQGPLTSDHIRMTDKKTLHTLEIVSV  
TREDSGQYAAIISNAVGAAYSARLLVRGPSEPEEKPASDVHERLVPRILEKFTPKKVKRGSSTFVSVKVEG  
HPAPSVHWLKEEAKEGVLWIGPDTPGYTMASSSKQHSVLVLDVGRQHOGTYTICIATNPAGQALCSASLHISGL  
AKEEEQERVKEALISSFLQGTSAQVSAQMSSEAGFADLVGQSKGESLVAEEAHSHLSLAEVGTTEFLQKLT SQ  
ITEMVSAKISQAKLQVPGGDSDEETKTPSASPRHGRSRPSSSVQESSSESEDGDSRGEIFDIYVVTADYLP LG  
AEQDAIILREGQYVEVLDSAHPLRWLVRTKPTKSSPSRQGWVSPAYLDKRLKLSPEWGPTEAPEFPGEAVSED  
EYRTRLSSVIQELLSSEQAFVGELOFLESHHMKHLERSPRVPAAVASQKTVI FRNVQDISHFHSSFLKELQGC  
GTDDDVAMCFIKNQEA FEKYLEFVLVGRVQAESVVVSTPVQEFYKKYAEBETLSAKDPTQPPPPPLQHYLEQ PVE  
RVQKYQALLKELIRNKARNRQNCALLEQAYAVVSALPQRAENKLVSLMENYPGTLEALGEP IRQGHFIVWEG  
APGARMPWKGNHRHVF LFRNYLVICKPRRDSRTDTFSYVFRNMMKLSSIDLNDQVEGDRAFEVWHEREDSVR  
KYLQARTVI IKNSWVKEICGIQORLAQPVWRPPEFEELADCTAELGETVKLACRVTGTPKPIVSWYKDGKP  
VEVDPHHILIEDPDGSC TLI LDNLTGIDSGQYMCFAASAAGNASTLGKILVQVPPRFVNKVRATPFVEGEDAQ  
ITCTVEGAPYPQIRWYKDGTL LAPGNRYRMLNEPRSGVLVLIQAA SKEDLGHYECELVNLRLSTRGGGELYM  
QSPALRARDQHHREQIVA AVEVTEQETKVPKKTVI I EETITTVVKS PRGRRQSPGKSPSRSPRRSASPRRPG  
LLAPERLYPPGTSPRRLEVEQGRKAPVPALYVTEAEVHAPASQSPKWLEVEETIEVRVKKTGSRGASPVRE  
MTRSREGILFTLPGGI PGRDPNANNNSNKS SVYQEA RTWGPVAVHVGEFFIFQVDSVGNVDVWAASPEPEQVRA  
SQKEENTERQEGCSDG DENTFLMEEPQD TDSLQGRDPKIL THNGRVLTLADLEDYVPQEGETFGCGDSTPSTP  
DEPPCEVSVLQREI SEPTVGQPVLLNVGRPPGTGATPSFFRPGSQVHSPESVSFLLREAWSGPVSAPWTSSF  
HTHVQSSVDGSHGSFKTEVSTQTVSFGAVGETVTLHIDPDGGEAPGPSQG\*  
>rs47381157\_ENSMUSP00000020732\_c.17290:C>G\_p.55764C  
ENSMUST00000020732.13|Obscn-201|ENSMUSG00000061462|-|chr11:g.58931095:G>C  
MDHSFSGAPRFLTRPKAFVVS VGKDATLSCQIVGNPTPHVSWEKDRQPVEAGARFLAQDGDVYRLTILDLAL  
GDSGQYVCRARNAIGEAFAAVGLRVDSEGTCAEQAPHFLLRPTSIRVREGADATFRRCRVGGSPQPAVSWSKDG  
RRLGPPDAPHVRVEEHGESSALRIRSARPRDGGTYEVRAENPLGSASAAAALVVDSDAEVAGPPGTSTATLLA  
HLQORREAMRAEGIPPSPPGAGTRTCTVTEGKHARLSCFVTGEPKPETVWKKDGQLVTEGRRHVVEDEQENF  
VLKILFCKQSDRGLYTCTASNLVGQTYSSVLVVVREPTVPFKKRLQDLEVREKESATFQCEVAQPAEAAWFK  
EETRLWASAKYDIEEEGTERRLTVRNVSADDDAVYICETTEGSRVVAELSVQGNLTKLPRKTAVRTGDTAIF  
WVELAVPEGPVWRWRNQEEMVAGGRVAITAEGTCHTLTI FQCTLEDMGEVAFVSGGCRTTTTQFCVSAPRRPPL  
YPPADPVVKAKTESSVTL SWSAPPHGDRPVTIDGYVLEKRRKLGAYAWSRCHEAGWLATTEFTITGVAEEGDFQ  
FRVSAINHFGQGPYLEFPGTMHLVPLAVKTPLKVAEAVEGGEVTFVSDLTVASSGEWFLDGEALKASSIYVI  
RCDRTRHMLTIREVPARLHGAQLK FVANGIETS IQMVVRAALGLPSSKLPAAAAREVLAQLHEEAQLLAE LSD  
QAAA VTLWKDGRELSLGP KYEMQVSAGRRALLVRDVAQDDAGLYECVSRGSR TAYQLLVQDITDGYRDWGPAG  
PQKHMCKCAGAKIARYLGS SCYRFLQYDKGVWHWLEAALDTRQKGKTS SCSLHEKPKLVFAKQQAHSEVKA E  
AGNSATLSCEVTQAQTEVTWFKDGKLLSSSSKVRMEASGCSRRLVVQQAGKADAGEYSCEAGGQKLSFRLDVA  
EPKLVFAKQQAHSEVKA EAGASATLSCEVAQAQTEVTWFKDGKLLSSSSKVRMEASGCSRRLVVQQAGKADA  
GEYSCEAGGQKLSFRLDVAEPKMVFAKEQQARSEVKA EAGASATLSCEVAQAQTEVTWFKDGKLLSSSSKVRM  
EASGCSRRLVVQQAGKADAGEYSCEAGGQKLSFRLDVTEPKLVFAKEQQARSEVKA EVGN SATLSCEVAQAQ T  
EVTWFKDGKLLSSSSKVRMEASGCSRRLVVQQAGKADAGEYSCEAGGQKLSFRLDVAEPKLVFAKEQQARSEV  
KAEAGNSATLSCEVAQAQTEVTWFKDGKLLSSSSKVRMEASGCSRRLVVQQAGKADAGEYSCEAGGQKLSFHL  
DVTEPKLVFAKEQQAHSEVKA EAGASATLSCEVAQAQTEVTWFKDGKLLSSSSKVRMEASGCSRRLVVQQAGK  
ADAGEYSCEAEGQKLSFRLDVAEPKLVFAKEQQARSEVKA EAGASATLSCEVAQAQTEVTWFKDGKLLSSSSK  
VRVEASGCSRRLVVQQAGKADAGEYSCEAGGQKLSFRLDVAEPKLVFAKEQQANSEVKA EAGASATLSCEVAQ  
AQTEVTWFKDGKLLSSSSKVRVEASGCSRRLVVQQAGKADAGEYSCEAGGQKLSFRLDVAEPKLAFAKEQQAH  
SEVKA EAGASATLSCEVAQAQTEVTWFKDGKLLSSSSKVRVEASGCSRRLVVQQAGKADAGEYSCEAGGQKLS  
FRLDVAEPKLAFAKEQQAHSEVKA EAGASATLSCEVAQAQTEVTWFKDGKLLSSSSKVRVEASGCSRRLVVQQ  
AGKADAGEYSCEAGGQKLSFRLDVAEPKLAFAKEQQAHSEVKA EAGASATLSCEVAQAQTEVTWFKDGKLLSS  
SSKVRVEASGCSRRLVVQQAGKADAGEYSCEAGGQKLFRLDVAEPKLMFAKEQQAHSEVKA EAGASATLSCE  
VAQAQTEVTWFKDGKLLSSSSKVRVEASGCSRRLVVQQAGKADAGEYSCEAGGQKLSFRLDVAEPKLVFAKEQ  
QAHSEVKA EAGASATLSCEVAQAQTEVTWFKDGKLLSSSSKVRVEASGCSRRLVVQQVQVQKADAGEYSCEARGQ  
KLSFRLDVADTRLMFAKEQQARTEVKA EAGNSATLSCEVAQAQTEVTWFKDGKLLSSSSKVRVEASGCSRRLV  
VQQAGKADAGEYSCEAGGQKLSFRLDVAEAE SQIPERPSRREPLVVKEHETIILTATIAAPSVAAVTWLKDG V  
EIRRSKRHEATSLGDHTLTVRGAQVLD SAIYSCRVGKEGQDFPVQVEEVA AKFSKPLEPVEGELGGTVMLVC  
ELSPQAEVWVRGNTQLRPGKRFQMTSEGPRRTLTVSGLREDDAEYVCE SRDDRTSARLTVKVP RVVKFTS

GLSAMVAEEGQEQATFQCVVSPSDAGVTWYKDGMLQOPSEKFMVVEGASRSILTILGLTLEDAGQVTVAEAGAS  
SSAALRVREAPVLFKKKLEPQTVEERTSVTLEVELTRPWPEVKWTRNAAVLTPSENVEIRAEGARHCLVLRV  
GFADRGFFGCETPDDKTQAKLNVEMRQVRLVRLQVEVEAKEQGTASMDVELSHAEEVGSWTRDGLRLQPGPKC  
HLAVQGPVHILTLALSALQPQDSGLVAFRAEGVHTSARLIVTELVSFTRVLQDVVATQKEKVTLECELSRPVDV  
RWLKDGVLELRAGKAIIGIVAQGTCSRSLVIYRCETGDQGVYVCDALDAQTSASLRVQGRITYTLIFRVLAEADAGE  
VKFVAENAESRAHLRVKELPVTLLRPLRDKIAMEKHRGVLECCQVSRASAQVRWFKGGVELQSGPKYEVVSDGL  
YRKLVINDVQPEDEDTYTCAGNVKTSAQFFVVEEQSITIVRGLKDMTVMPEPAPAWFECETSIPSVRPPKWL  
KTVLQAGGNVGLQDGTVHRLTLHKTCSTMTGPVHFTIGKSRSSAQLVVSDI PVVLRPLEPKAGRELQSVVL  
SCDFRPAPKAVQWYKDDT PLSPEKFKMALEGQMAELRILRLTPADAGVYRCQAGSAQSSAEVTVAREVTVI  
QPLQDAEAMEEGRVCFSCELSHKDEDEIWSLNGTPLYNDSFHEISHGCLHTLVLKSVRQADTGTVCATSPKV  
SVSARLVVKGKPVVFLKALDDVSAEERGLTLTQCEVSDPEARVVRKDGVELGSPDKYDFLHKAGARGLTVHD  
LSHEDAGLYTCQVGSKETQSKSVVHDLHVGITKRLKTVVEVLEGESECFEVLSSHESPSDPAVWTVGGKTVGGS  
GHFHAVRQGRKYTLTVKDAALSDAGEVVSVLGLTSSKASLIIRERPVDIKPLEDQRTTLGEDVMLSCELSRA  
GTSVRWLKDGKAIRKSQKYDLLSEGTRAVLVVRKASLKDSGEYTCETEASKSTAKLCVEEKANRFTTEELADLQ  
VEEKGRAVFTCKTEHPASVVTWRKGLLELRASGKHVPSQEGTLTKLTINALERTDSDTYTCDIGQARTQARLL  
VHGQKVRVIEDLEDTAVQEGSSAKFCRIAPADYGPVHWFLLDKTPLHSNELNEITVQPGGYHVLTLRQLALKD  
SGTVYFEAGDQRTSAALRVTEKPSIFSRPLTDVTVTEGEDLTLVCETTTVDSVVRWTKDGKTLRPSARCQLSH  
EGCQAQLLITATTPQDGGRYKCEIGGASSSIVRVHALPVRFRFRESLKDVEVPEGKAATLRVLSVAAPVEWR  
HGDDVLKSSNKYSLRQEGAVLELVIRDLPQDSGQYSCSFGDQTTSATLTVKTSQAQFVGLKRNKEATEGTTV  
TLRCELKEAPVEWKKGTETLRNGDKYSLKQDGA VCELQICSLLVADAGEYSCVCGQEKTSATLTVKALLVHF  
VRLRSKEATEGDTTTLQCELSKAAPVEWRKGTETLRDGDYSLKQDGA VCELQIRSLTIADAGEYLCTCGQE  
KTSATLTVRALPAKFKDSLKNEEATEGTTATLSCELSKAAPVTWKKGPKTLQSGDKYVLRQDGA VCELQIHGL  
TMADAGEYSCVCGQEKTSATLTVRGLPAKFIEDLRSQEATEGATAILRCELSKAAPVEWRKGETLKDGDYR  
LRQDGA VCELQIRGLAVVDGTGYSSLPKTFTEGLRNEEATEGTMATLRCQMSKAAPVEWRKGETLRDGDYR  
LRQDGA MCELQIRGLTIEDSGEYTCVCGQEKTSATLSVKALPSRFIEDLRSQEATEGTMATLRCQMSKTA  
PVEWKKGETLRSKAGPVEWRKGETLQDGA VCELQICDLAVEDAGEYSCVCGQEKTSATLSIKALPRFIEDLRS  
QEATEGTMATLRCQMSKAAPVEWRKGETLQDGA VCELQIHDLAVEDTGEYSCVCGQEKTSATLNVKALPP  
RFIEDLRSQEATEGTMATLRCQMSKAAPVEWRKGETLQDGA VCELQIHDLVEDAGQYSCVCG  
QEKTSAVLTVDALPPKFTTEGLKKEEATEGTMVTLRCQMSKEATVEWRKGAKTLSDGGRYSLRQDGA MCELQI  
GLAVEDAGEYSCVCGQEKTSATLSVKALPPRFIEDLRSQEATEGTMATLRCQMSKAAPVEWRKGETLQDGD  
YSLRQDGA VCELQIRDLAVEDAGEYLCVCGQEKTSATLSVKALPPRFIEDLRSQEATEGTMATLRCQMSKA  
APVEWRKGETLQDGDYSLRQDGA MCELQICDLAVEDTGDYSCVCGQEKTSATLSVKALPPRFIEDLRSQEA  
RE GTVATLRCRMSKAAPVEWRKGETLKDGDYSLRQEGNLCELQIRDLAVEDTEEYSCVCGQEKTSATLSVKAL  
PAKFIEDLRSQEAPESSTVTLRCKLSKASVWKKGSETLRNGARYSLRQDGA VCELEIRDLTVEDETEYSC  
CGQERTSATLSIMAPVFFQQPLQNLQAEEGSMASLRCELSVPNAAMVWSKGGLELQGDTRREARQQGCVAEL  
LLRDLRREDAGEYSCVCGQEKTSATLMVTAAPVRFRLRELQAQDVDEGATARLRCELSREAVSVEWRKGS  
LQLFPCAKYQMVQEGTTAELLVHGVEQEDAGEYTCDAHTQSIARLSVRAPKPKFKTDLQSTEQEAGGTARLCC  
QLSEAEPTPVQWLKEGVELHVGSKYEMRRQGA VCELLIHGLEAKDTGEYACLVGGQKTLASLRVKEPEVTI  
VRGLVDMEVQADEDEFTCKVSQAGATDVQWHLQGLPLQSNVTEVAVLADGCTHVLQKGVTLLEDAGTVSFH  
VGGSSSAQLTVRVPEVTVLEPLKDVQVLESEGQDAHFRCRLSRASGQEARWALGGVPLQCNEMNDITVEQ  
TLYLLTLHKVTLEDAGTITLQVGSSESAQLKVTAKNTVLRGLENVDALLEGGEALFECQLSQPEVA  
AHTWLLDDEPVHTSEKVEVVYFENGLRHLLLLKNLKPQDSCRVTFLAGDVVTSFAFLT  
VRGWRLEVLPEPHDASVKAGMQVRFCTILSEAVPVGEATWYINGAAIQPDDTDWTVTTDGS  
SHALTLNSAQPHAGEVTFAAARDAVASARLSVLALPDPPEDAE VVGRSDHSVTL  
SWVAPMSDGGGGLCGYRVEMKEASTGQWQLCHDLVPGPECVVDDLVPGKTYRFRVA  
AVGPA GEPVHLPMVKIAPAPAPAPAPAPAPAPETRQAVVGEDICLELEVAADGGEV  
VWHKGTERRIQPGGHFEVLSRGQRQMLVIKGFRTEDQGEYRCGPIQGLPSSGAATFN  
VMTSGSGDEVPAQPSLPPEAAQEGDLHLLWEALAR KRRMSREPTLDSISELPE  
EDSRVQHLRQEAEEETAPDLSEGYSTADELARTGEADLSHTSSDDESRA  
GTPCLVTYLKAGGPGISPLASKHEAQVTTSVKPKQEQEPVPTCPPPGDLSAADLMD  
PSLDKAAVKIQAAFKGYKVRKEMKQEQGPVFSRTFGDTEAQVGDVLRLECVL  
ATKTDMRACWLKDGIELTDGRHYHIDQLKDGTCSSLVVTGLAPTD SGRYTCQV  
STKSGRVSHSACVVVSGTESEAESSSGGELDDAFRAARRLHRLFRTKSPA  
ELSEELFLSADEGPGEPEEPADWQTYREDFVFCIRFESLAEARQAVTCFRNMF  
ATMGIGVEISLGEQGPGRVEMRIGKVAPTVPVAVPLAKTPGLQTS  
DAAPVFLTELQNDVQDGYPMSFDCVVTGQVPVPSVRWFKDGKLEEDDHY  
MINEDQQGGHQLIITAVVPADMGVYRCLAENSMGVSSTKAE  
LRVELTSTDYDTAADATETSSYFSAQKGLSSREQEGTES  
DEGQLPQVLEELKDLQVAPGTRLAKFQLKVKGYAPKLYWFKD  
GQPLTSDHIRMTDKKTLHTLEIVSVTREDSGQYAA  
YISNAVGAAYSSARLLVRGSEPEEKPASDVHERLVPPRI  
LEKFTPKKVKRGSSITFSVKVEGHPAPSVHWLKEEA  
EKGVLWIGPDTPGYTMASSSKQHSVLVLDVGRQH  
QGTYTCIATNPAGQALCSASLHISGLAKEEEQ  
ERVKEALISSFLQGTSAQVSAQMSSESAGFADLVGQ  
SKGESLVAEEAHSHLSLAEVGTTEFLQKLT  
SQITEMVSAKISQAKLQVPGGDSDEETKTPSASPRHGR  
SRPSSSVQESSSESEDGDSRGEIFDIYVVTADY  
LPLGAEQDAI

ILREGQYVEVLDSAHPLRWLVRTKPTKSSPSRQGWVSPAYLDRKRLKLSPEWGPTEAPEFPGEAVSEDEYRTRL  
SSVIQELLSSEQAFVGLQFLESHHMKHLERSPRVPAAVASQKTVI FRNVQDISHFHSSFLKELQGCCTDDDDV  
AMCFIKNQEAFEKYLEFLVGRVQAESVVVSTPVQEFYKKYAEETLSAKDPTQPPPPPLQHYLEQPVERVQKYQ  
ALLKELIRNKARNRQNCALLEQAYAVVSALPQRAENKLVSLMENYPGTLEALGEPPIRQGHFIVWEGAPGARM  
PWKGHNHRVFLFRNYLVICKPRRDSRTDTFSYVFRNMMKLSSIDLNDQVEGDDRAFEVWHEREDSVRKYLLQA  
RTVI IKNSWVKEICGIQQLAQPVWRPPEFEEELADCTAELGETVKLACRVTGTGPKPIVSWYKDGKPVVEVDPH  
HILIEDPDGSCCTLILDNLTGIDSGQYMCFAASAAGNASTLGKILVQVPPRFVNVKVRATPFVEGEDAQITCTVE  
GAPYPQIRWYKDGTLAPGNRYRMLNEPRSGVLVVIQAASKEDLGHYECELVNRLGSTRGGGELYMQSPALR  
ARDQHHREQIVAAVEERRPSP\*  
>rs47381157\_ENSMUSP00000151217\_c.14584:C>G\_p.S4862C  
ENSMUST00000219084.3|Obscn-207|ENSMUSG00000061462|-|chr11:g.58931095:G>C  
MDHSFSGAPRFLTRPKAFVSVGKDATLSCQIVGNPTPHVSWEKDRQVEAGARFRLAQDGDVYRLTILDIAL  
GDSGQYVCRARNAIGEFAAVGLRVDSEGTCAEQAPHLLRPTSIRVREGADATFRCRVGGSPPAVSWSKDG  
RRLGPPDAPHVRVEEHGESSALRIRSARPRDGGTYEVRAENPLGSASAAAALVVDSDAEVAGPPGTSTATLLA  
HLQORREAMRAEGIPSPPPGAGTRTCTVTEGKHARLSCFVTGEPKPKETVWKKDQGLVTEGRRHVVEDEQENF  
VLKILFCQKSDRGLYCTASNLVGGTYSSVLVVVREPTVFFKKRLQDLEVREKESATFQCEVAQPAATEAAWFK  
EETRLWASAKYDIEEETERRRLTVRNVSAADDADAVYICETTEGSRVAELSVQGNLTKLPRKTVARTGDTAIF  
WVELAVPEGPVWRVLRNQEEMVAGGRVAITAEGTCHTLTI FQCTLEDMGEVAFVSGGCRTTTFQCVSAPRRPPL  
YPPADPVVKAKTESSVTLWSAPPHGDRPVTIDGYVLEKRKLGAYAWSRCHEAGWLATTEFTITGVAAEEDGFQ  
FRVSAINHFGQGPYLEFPGTMHLVPLAVKTPKAVEAVEGGEVTFVSDLTVASSGEWFLDGEALKASSIYVI  
RCDRTRHMLTIREVPARLHGAQLKVFANGIETS IQMVVRAALGLPSSKLPAAAAREVLAQLHEEAQLLAE LSD  
QAAA VTWLKDGRELSLGPYEMQVSAGRRALLVRDVAQDDAGLYECVSRGSRRTAYQLLVQDITDGYRDWGPAG  
PQKHMCKCAGAKIARYLGSSCYRFLQYDKGVVHWEAALDTRQKGTSSCSLHEKPKLVFAKQQAHSVEKAE  
AGNSATLSCEVTQAQTEVTFWKDGKLLSSSSKVRMEASGCSRRLVVQQAGKADAGEYSCEAGGQKLSFRLDVA  
EPKLVFAKQQAHSVEKAEAGASATLSCEVAQAQTEVTFWKDGKLLSSSSKVRMEASGCSRRLVVQQAGKADA  
GEYSCEAGGQKLSFRLDVAEPKLVFAKEQQARSEVKAEGASATLSCEVAQAQTEVTFWKDGKLLSSSSKVRM  
EASGCSRRLVVQQAGKADAGEYSCEAGGQKLSFRLDVTEPKLVFAKEQQARSEVKAEGNSATLSCEVAQAQ  
EVTWFKDGKLLSSSSKVRMEASGCSRRLVVQQAGKADAGEYSCEAGGQKLSFRLDVTEPKLVFAKEQQAHSEV  
KAEAGASATLSCEVAQAQTEVTFWKDGKLLSSSSKVRMEASGCSRRLVVQQAGKADAGEYSCEAGGQKLSFR  
LDVAEPKLVFAKEQQARSEVKAEGASATLSCEVAQAQTEVTFWKDGKLLSSSSKVRMEASGCSRRLVVQQAG  
ADAGEYSCEAGGQKLSFRLDVAEPKLVFAKEQQANSEVKAEGASATLSCEVAQAQTEVTFWKDGKLLSSSSK  
VRVEASGCSRRLVVQQAGKADAGEYSCEAGGQKLSFRLDVAEPKLVFAKEQQAHSEVKAEGASATLSCEVAQ  
AQTEVTFWKDGKLLSSSSKVRMEASGCSRRLVVQQAGKADAGEYSCEAGGQKLSFRLDVAEPKLVFAKEQQAH  
SEVKAEGASATLSCEVAQAQTEVTFWKDGKLLSSSSKVRMEASGCSRRLVVQQVKGADAGEYSCEARGQKLS  
FRLDVAEASQI PERPSRREPLVVKHEHETIILTATIAAPSVAAVTWLKDGV EIRRSKRHEATS LGDHTLTVR  
GAQVLD SAIYSCRVKEGQDFPVQVEEVAAKFSKPLEPVEGELGGTVMLVCELSPEQAEVWVRCGNVQLRPGK  
RFQMTSEGPRRTLTVSGLREDDAEYVCESRDDRTSARLTVKVPVVKFTSGLSAMVAEEGQEAFTQCQVSPS  
DAGVTWYKDGMLQPSSEKFMVVEGASRSLTILGLTLEDAGQVTVAEAGASSAALRVREAPVLFKKKLEPQT  
VEERTSVTLEVELTRPWPEVKWTRNAAVLTPSENVEIRAEGARHCLVLRVSGFADRGFFGCETPDDKTQAKLN  
VEMRQVRLVVRGLQEVEAKEQGTASMDVELSHAEEVGSWTRDGLRLQPGPKCHLAVQGPVHILTALSALQPDG  
LVAFRAEGVHTSARLIVTELPVSFTRVLQDVVATQKEKVTLECELSRPVDVRWLKDGVELRAGKAI GIVAQGT  
CRSLVIYRCETGDQGVYVCDALDAQTSASLRVQGRYTLIFRRVLAEDAGEVKFVAENAESRAHLRVKELPVT  
LLRPLRDKIAMEKHRGVLECVSRASAQVRWFKGGVLEQSGPKYEVVSDGLYRKLVIINDVQPEDEDTYTC DAG  
NVKTSAQFFVEEQSITIVRGLKDMTVMEPAPAWFECETSIPSVRPPKWLGLGKTVLQAGGNVGLQDGTVHRLT  
LHKTCSTMTGPVHFTIGKSRSSAQLVVS DIPVVLTRPLEPKAGRELQSVVLSCDFRPAPKAVQWYKDDTPLSP  
SEKFKMALEGQMAELRILRLTPADAGVYRCQAGSAQSSAEVTVAEAREVTVIQPLQDAEAMEEGRVCFSCELSH  
KDEDIEWSLNGTPLYNDSFHEISHEGCLHTLVLKSVRQADTGTVCATSPKVS SARLVVKGKPVVFLKALDDV  
SAEERGLTLTQCEVSDPEARVVWRKDGVELGPSDKYDFLHKAGARGLTVHDL SHEDAGLYTCQVGSKETQSKV  
SVHDLHVGITKRLKTVEVLEGESECFEVLVSHESPSDPAVWTVGGKTVGGSGHFHAVRQGRKYTLTVKDAALS  
DAGEVVFVSVLGLT SKASLIIRERPVDITKPLEDQRTTLGEDVMLSCELSRAGTSVRWLKDGKAI RKSQKYDLL  
SEGTRAVLVVRKASLKDSGEYTCETEASKSTAKLCVEEKANRFTEELADLQVEEKGRAVFTCKTEHPASVVTW  
RKGLLELRASGKHVPSQEGLTLKLTINALERTDSDTYTCDIGQARTQARLLVHGQKVRVIEDLEDTAVQEGSS  
AKFCCR IAPADYGPVHWF LDKTPLHSNELNETIVQPGGYHVLTLRQLALKDSGTVYFEAGDQRTS AALRVTEK  
PSIFSRPLTDVTVTEGEDTLTVCE TTVVDSVSRWTKDGKTLRPSARCQLSHEGCAQLLITATTPQDGGRYKC  
ETCGASSSIVRVHGLPVRFRFRESLKDVEVPEGKAATLRCVLSVAAPVEWRHGDV LKSSNKYSLRQEGAVLE  
LVIRDLPQDQSGQYSCSFGDQTTSATLTVKTSQAQFVGLKRNKEATEGTTVTLRCELTK EAPVEWKKGTETLR  
NGDKYSLKQDGA VCELQICSLLVADAGEYSCVCGQEKTSATLTVKALLVHFVRRLRSKEATEGDTTTLQCELS  
KAAPVEWRKGTETLRDGD RYSLKQDGA VCELQIRSLTIADAGEYLCTCGQEKTSATLTVRGLPAKFIEDLRSQ

EATEGATAILRCELSKAAPVEWRKGSETLKDGDYRTRLDGAVCELQIRGLAVVDTGTYSSSLPTKFEGLRNE
EATEGTMATLRCQMSKAAPVEWRKGSETLRDGDYRSLRQDGMCELQIRGLTIEDSGEYTCVCGQEKTSATLS
VKALPPRFIEDLRSQEATEGTMATLRCQMSKAAPVEWRKGSETLGDGGYRSLRQNGAVCELQIHDLAVEDTGE
YSCVCGQEKTSATLNVKALPPKFTTEGLKKEEATEGTMVTLRCQMSKEATVEWRKGAKTSLSDGGYRSLRQDGM
CELQICGLAVEDAGEYSCVCGQEKTSATLSVKALPPRFIEDLRSQEATEGTMATLRCQMSKAAPVEWRKGSET
LRDGDYRSLRQDGMCELQIRDLAVEDAGEYLCVCGQEKTSATLSVKALPPRFIEDLRSQEATEGTMATLRCQ
MSKAAPVEWRKGSKTLRDGDYRSLRQDGMCELQICDLAVEDTGDYSCVCGQEKTSATLSVKAPQVVFQQPLQ
NLQAEEGSMASLRCELSVNAAMVWSKGGLELQGDTRREARQQGCVAELLLRDLRREDAGEYSCVCGQEKTSAT
TLMVTAAPVRFRLRELQAQDVDEGATARLRCLEASVSEWRKGLQLFPCAQYQMVQEGTTAELLVHGVEQE
DAGEYTC DAGHTQSIARLSVRAPKPKFKTDLQSTEQEAGGTARLCCQLSEAEPTPVQWLKEGVELHVGSKYE
MRRQGA VCELLIHGLEAKDTGEYACL VGGQKT LASLRVKEPEVTIVRGLVDMEVQADEDEVEFTCKVSOAGATD
VQWHLQGLPLQSNEVTEVAVLADGCTHVLQKGVTLLEDAGTVSFHVGGSSSAQLTVRVPEVTVLEPLKDVQL
SEGQDAHFRCRLSRASGQEARWALGGVPLQCNEMNDITVEQGTLYLLTLHKVTLLEDAGTITLQVGSSEAQL
KVTAKNTVLRGLENVDALEGGEALFECQLSQPEVAHTWLLDDEPVHTSEKVEVVYFENGLRHLLLLKLNKPKQ
DSCRVTFLAGDVVTS AFLTVRGWRLEVLEPPHDASVKAGMQVRFTCILSEAVPVGEATWYINGAAIQPDDTDW
TVTTD GSHHALTLSNAQPQHAGEVTF AARDAVASARLSVLALPDPPEDAEVVGRSDHSVTLWSVAPMSDGGGG
LCGYRVMKEASTGQWQLCHDLVPGPECVVDDLVPKTYRFRVAAVGPAGAGEPVHLPQMVKIAPAPAPAPAP
APAPETRQAVVGEDICLELEVAADGGEVWVHKGTERIQPGGHFVLSRGRQMLVIKGFRTEDQGEYRCGPIQ
GLPSSGAATFNVMVMTSGSGDEVPAQPSLPPEAAQEGDLHLLWEALARKRRMSREPTLDSISELPEEDSRVQHL
RQEAETAPDLSEGYSTADELARTGEADLSHTSSDDESRAGT PCLV TYLKKAGGPGISPLASKHEAQVTTSVK
PQKQQEPVVPPTCPPPGDLSAADLMDPSLDKAAVKIQAAFQKGYKVRKEMKQQEGPVFSRTFGDTEAQVGDVLR
ECVLATKTKDMRACWLKDGIELTDGRHYHIDQLKDGTC SLLVTGLAPTDSGRYTCQVSTKSGRVSHSACVVVSG
TESEAESSSGGELDDAFRRAARLHRLFRTKSPAELSEEELFLSADEGPGPEEPADWQTYREDEFNVCIRFE
SLAEARQAVTCFRNMFATMGI GVEISLGEQGPGRVEMRIGKVAPTVTPAVPLAKTPGLQTSDAAPVFLTELQN
QDVQDGYPMSFDCVVVTGQVPVSVRWFKDGKLEEDDHYMINEDQQGGHQLIITAVVPADMVYRCLAENSMGV
SSTKAELRVELTSTDYDTAADATETSSYFSAQGYLSSREGETSEDEGQLPQVLEELKDLQVAPGTRLAKFQL
KVKGYPAKPLYWFKDGGPLTSDHIRMTDKKTLHTLEIVSVTREDSGQYAAAYISNAVGAAYSSARLLVVRGPE
PEEKPASDVHERLVPVPRILEKFTPKKVKRGS SITFSVKVEGHPAPSVHWLKEEAKEKGLWIGPDP TPGYTMAS
SKQHSVLVLLDVG RQHQT YTCIATNPAGQALCSASLHISGLAKEEEQERVKEALISSFLQGT SQAVSAQMS
AGFADLVGQSKGESLVAAEAHSHLSLAEVGT EEFLOKLT SQI TEMVSAKISQAKLQVPGGDSDEETKTPSASP
RHGRSRPSSSVQESSSESEDGDSRGEIFDIYVVTADYLP LGAEQDAIILREGQYVEVLDSAHPLRVLVTRTKPT
KSSPSRQGWVSPAYLDKRLKLSPEWGPTEAPEFPGEAVSEDEYRTRLSSVIQELLSSEQAFVGLQFLESHHM
KHLERSPRVPAAVASQKTVIFRNVQDISHFHSSFLKELQCGCTDDDVMCFIKNQEAFAFEKYLEFLVGRVQAES
VVVSTPVQEFYKKYAEETLSAKDPTQPPPPPLQHYLEQPVERVQKYQALLKELIRNKARNRQNCALLEQAYAV
VSALPQRAENKHLVSLMENYPTLEALGEP I RQGHFIVWEGAPGARM PWKGHNHVF LFRNYLVICKPRRDSR
TDTFSYVFRNMMKLSSIDLNDQVEGD DRAFEVWHEREDSVRKYLLQARTVI IKNSWVKEICG IQORLAQPVWR
PPEFEEELADCTAELGETVKLACRVGTGPKPIVSWYKDGKPVVEVDPHHILIEDPDG SCTLILDNLTGIDSGQY
MCF AASAAGNASTLGKILVQVPPRFVNVKVRATPFVEGEDAQITCTVEGAPYPQIRWYKDG TLLAPGNRYRMLN
EPRSGVLV LVIQAASKEDLGHYEC ELVNR LGSTRGGGEL YMQSPALRARDQHHREQIVA AVEVTEQETKVPKK
TVIIEETITTVVKS PRGRRQSPGKSPSRSPRRSASPRRPGLLAPERLYPPGTS PSRRLEVEQGRKAPVPALY
VTEAEVHAPASQS QPKWLEVEETIEVRVKKTGSRGASPVREMTSRGEGILFTLPGGIPGRDPNANN SNNKSVY
QEARTWGP AVVHVGE PFI FQVDSVGNVDWVAASPEPEQVRASQKEENTERQEGCSDG DENTFLMEEPQD TDSL
QGRDPKILTHNGRVLT LADLEDYVPQEGETF GCGDSTPSTPDEPPCEVSVLQREI SEPTVGGPVLLNVGRPPG
TGATPSFFRPGSQVHSPESVFL LREAWSGPVSAAPWTSSFHTHVQSSVDGSHG SFKTEVSTQTVSFGAVGET
VTLHIDPDGGEAPGPSQ\*

>rs48899298\_ENSMUSP00000158795\_c.16720:C>T\_p.P5574L
ENSMUST00000238536.2|Obscn-210|ENSMUSG00000061462|-|chr11:g.58932645:G>A
MDHSFSGAPRFLTRPKAFVSVGKDATLSCQIVGNPTPHVSWEKDRQPV EAGARFRLAQDGDVYRLTILDLAL
GDSGQYVCRARNAIGEAFAAVGLRVDSEGTC AEQAPHLLRPTSIRVREGADATFRCRVGGSPQPAVSWSKDG
RRLGPPDAPHVRVEEHGESSALRIRSARPRDGGTYEVRAENPLGSASAAAALVVDSAEVAGPPGTSTATLLA
HLQORREAMRAEGIPSPPGAGTRTCTVTEGKHARLSCFVTGEPKPEVWKKDGQLVTEGRRHVVEDEQENF
VLKILFCKQSDRGLYTCTASNLVGQTYSSVLVVVREPTVPFKKRLQDLEVREKESATFQCEVAQPATEAAWFK
EETRLWASAKYDIEEGETERRLTVRNVSADDAVYICETTEGSRVAELSVQGNLTKRLPRKTAVRTGDTAIF
WVELAVPEGPVRLNRNQEEMVAGGRVAITAEGTCHTLTIFQCTLEDMG EFAVSVGGCRITTTQFCVSAPRRPPL
YPPADPVVKAKTESVTLSSAPPHGDRPVTIDGYVLEKRLKLGAYAWSRCHEAGWLATTEFTITGVAAEEGDFQ
FRVSAINHFGQGPYLEFPGMTMHLVPM LAVKTP LKAVEAVEGGEVTFVSDLTVASSGEWFLDGEALKASSIYVI
RCDRTRHMLTIREV PARLHGAQLK FVANGIETS IQMVVRAALGLPSSKLPAAAAREVLAQLHEEAQLLAE LSD
QAAA VTWLKDGRELSLGP KYEMQVSAGRRALLVRDVAQDDAGLYECVSRGSR TAYQLLVQDITDGYRDWGPAG



PQKHMCKCAGAKIARYLGSSCYRFLQYDKGVWHLEAALDTRQGKGTSSCSLHEKPKLVFAKGQQAHSVEKAE  
 AGNSATLSCEVTQAQTEVTFWKDGKLLSSSSKVRMEASGCSRRLVVQQAGKADAGEYSCEAGGQKLSFRLDVA  
 EPKLVFAKGQQAHSVEKAEAGASATLSCEVAQAQTEVTFWKDGKLLSSSSKVRMEASGCSRRLVVQQAGKADA  
 GEYSCEAGGQKLSFRLDVAEPKMFVFAKEQQARSEVKAEGASATLSCEVAQAQTEVTFWKDGKLLSSSSKVRM  
 EASGCSRRLVVQQAGKADAGEYSCEAGGQKLSFRLDVTEPKLVFAKEQQARSEVKAEVGNSATLSCEVAQAQT  
 EVTFWKDGKLLSSSSKVRMEASGCSRRLVVQQAGKADAGEYSCEAGGQKLSFRLDVAEPKLVFAKEQQARSEV  
 KAEAGNSATLSCEVAQAQTEVTFWKDGKLLSSSSKVRMEASGCSRRLVVQQAGKADAGEYSCEAGGQKLSFHL  
 DVTEPKLVFAKEQQAHSEVKAEGASATLSCEVAQAQTEVTFWKDGKLLSSSSKVRMEASGCSRRLVVQQAGK  
 ADAGEYSCEAGGQKLSFRLDVAEPKLVFAKEQQARSEVKAEGASATLSCEVAQAQTEVTFWKDGKLLSSSSK  
 VRVEASGCSRRLVVQQAGKADAGEYSCEAGGQKLSFRLDVAEPKLVFAKEQQANSEVKAEGASATLSCEVAQ  
 AQTEVTFWKDGKLLSSSSKVRVEASGCSRRLVVQQAGKADAGEYSCEAGGQKLSFRLDVAEPKLAFAKEQQA  
 SEVKAEGASATLSCEVAQAQTEVTFWKDGKLLSSSSKVRVEASGCSRRLVVQQAGKADAGEYSCEAGGQKLS  
 FRLDVAEPKLAFAKEQQAHSVEKAEAGASATLSCEVAQAQTEVTFWKDGKLLSSSSKVRVEASGCSRRLVVQ  
 AGKADAGEYSCEAGGQKLSFRLDVAEPKLAFAKEQQAHSVEKAEAGASATLSCEVAQAQTEVTFWKDGKLLS  
 SSKVRVEASGCSRRLVVQQAGKADAGEYSCEAGGQKLFRLDVAEPKLMFAKEQQAHSVEKAEAGASATLSCE  
 VAQAQTEVTFWKDGKLLSSSSKVRVEASGCSRRLVVQQAGKADAGEYSCEAGGQKLSFRLDVAEPKLVFAKEQ  
 QAHSVEKAEAGASATLSCEVAQAQTEVTFWKDGKLLSSSSKVRVEASGCSRRLVVQQAGKADAGEYSCEARGQ  
 KLSFRLDVADTRLMFAKEQQAHSVEKAEAGNSATLSCEVAQAQTEVTFWKDGKLLSSSSKVRVEASGCSRRLV  
 VQQAGKADAGEYSCEAGGQKLSFRLDVAEAEESQIPERPSRREPLVVKEHETIILTATIAAPSVAAVTWLKDG  
 EIRRSKRHEATSLGDTHTLTVRGAQVLDIAIYSCRVGKEGQDFPVQVEEVAAKFSKPLEPVEGELGGTVMLVC  
 ELSPEQAEVWRCGNTQLRPGKRFQMTSEGPRTTLTVSGLREDDAEYVCESRDDRTSARLTVKVPVVKFTS  
 GLSAMVAEEGQEQATFQCVVSPSDAGVTWYKDGMLQPSKFKVMVESGASRSLTILGLTLEDAGQVTVAEAGAS  
 SSAALRVREAPVLFKKLEPQTVERTSVTLEVELTRPWPEVKWTRNAAVLTPSENVEIRAEGARHCLVLRV  
 GFADRGGFFGCETPDDKTQAKLNVEMRQVRLVRLGQVEVEAKEQGTASMDVLSHAEVEGSWTRDGLRLQPGPKC  
 HLAVQGPVHILTLALSALQPDQSGLVAFRAEGVHTSARLIVTELPVSFTRVLQDVVATQKEKVTLECELSRPV  
 RVLKDGVELRAGKAIGIVAQGTCSRSLVIYRCETGDKQGVYVCDALDAQTSASLRVQGRVYTLIFRVLAEADAGE  
 VKFVAENAESRAHLRKLPTVLLRPLRDKIAMEKHRGVLEQVSRASAQVRWFKGVTYELQSGPKYEVVSDGL  
 YRKLVINVDQPEDEDTYTCDAENVKTSAQFFVEEQSITIVRGLKDMTVMPEPAPAWFECETSIPSVRPPKWL  
 LGKTVLQAGGNVLEQDGTVHRLTLHKTCSTMTGPVHFTIGKSRSSAQLVSDIPVVLTRPLEPKAGRELQSVV  
 LSCDFRPAKAVQWYKDDTPLSPSEKFKMALEGQMAELRILRLTPADAGVYRCQAGSAQSSAEVTVAREVTVI  
 QPLQDAEAMEEGRVCFSCELSHKDEDIEWSLNGTPLYNDSFHEISHEGCLHTLVLSVRQADTGTVCATSPKV  
 SVSARLVVKGKPVVFLKALDDVSAEERGTTLTQCEVSDPEARVVWRKDGVELGPSDKYDFLHKAGARGLTVH  
 DLSHEDAGLYTCQVGSKETQSKVSVHDLHVGITKRLKTVEVLEGESECSFECVLSHESPSDPAVWTVGGKTV  
 GGS GHFHAVRQGRKYTLTVKDAALSDAGEVVFVGLTSLKASLIIRERPVDITKPLEDQRTTLGEDVMLSCELS  
 RAGTSVRWLKDGKAIKRSKYDLSSEGTRAVLVVRKASLKDSEYTCETEASKSTAKLCEVEKANRFTBELADLQ  
 VEEKGRAVFTCKTEHPASVVTWRKGLLELRASGKHVPSQGLTLKLTINALERTSDSTYTCDIGQARTQARLL  
 VHGGKVRVIEDLEDTAVQEGSSAKFCCRIAPADYGPVHWFLLDKTPLHSNELNEITVQPGGYHVLTRQLAL  
 KDSGTVYFEAGDQRTSALRVTEKPSIFSRPLTDVTVTEGEDTLVCEETTVDSSVRWTKDGKTLRPSARCQL  
 SHEGCQAQLLITATTPQDGGRYKCEIGGASSSSIVRVHALPVRFRRESLKDVEVPEGKAATLRCVLSVAAPV  
 EWHRGDDVLKSSNKYSLRQEGAVLELVIRDLQPDQSGQYSCSFGDQTTSATLTVKTSQAQFVGLKRNKEATE  
 GTTVTLRCELTKAEAPVEWKKGTETLRNGDKYSLKQDGAVCELQICSLLVADAGEYSCVCGQEKTSA  
 TLTVKALLVHVRRLRSKEATEGDTTLQCELSKAAPVEWRKGTETLRDGDYSLKQDGAVCELQIRSLTIA  
 DAGEYLCTCGQEKTSATLTVRALPAKFKDSLKNEEATEGTTATLSCELSKAAPVWKKGPKTLQSGDKYV  
 LRDQGAVCELQIRGLAVVDGTYSLSLPTKFTTEGLRNEEATEGTMATLRCQMSKAAPVEWRKGS  
 ETLRDGDYSLRQDGAMCELQIRGLTIEDSGEYTCVCGQEKTSAVSKALPSRFIEDLRSQEATEG  
 TMATLRCQMSKTAPVEWKKGSETLRDGGRYSLRQDGPVCELQICDLAVEDAGEYSCVCGQEKTSA  
 TLSIKALPPRFIEDLRSQEATEGTMATLRCQMSKAAPVEWRKGSSETLRDGDYSLRQDGA  
 VCELQIRDLAVEDAGEYLCVCGQEKTSAVSKALPPRFIEDLRSQEATEGTMATLRCQMSKAAP  
 VEWRKGSKTLRDGDYSLRQDGAMCELQICDLAVEDTGDYSCVCGQEKTSAVSKALPPRFIEDLRS  
 QEAAREGTATLRCRMSKAAPVEWRKGSSETLRDGDYSLRQEGNLCELQIRDLAVEDTEEYSCVCG  
 QEKTSATLSVSKALPPRFIEDLRSQEATEGTMATLRCQMSKAAPVEWRKGSSETLRDGDYSLRQ  
 DGAVCELEIRDLTVEEDTGEYSCTCGQERTSATLSIMAPQVVFQQLQNLQAEEGSMASLRCELS  
 VPNAAMVWSKGGLELQGDTRREARQQGCVAELLLRDLRREDAGEYSCTCGSQTTSATLMVTA  
 APVRFLELQAQDVDEGATARLRCELSREAVSVEWRKGSLLQPCAKYQMVQEGTTAELLVHGVEQ  
 EDAGEYTCDAHTQSIARLSVRAPKPKFKTDLQSTEQEAGGTARLCCQLS

EAEPGTPVQWLKEGVELHVGSKYEMRRQGAUCELLIHGLEAKDTGEYACLVGGQKTLASLRVKEPEVTIVRGL  
VDMEVQADEDEVEFTCKVSOAGATDVQWHLQGLPLQSNVTEVAVLADGCTHVLQKGVTLLEDAGTVSFHVGGL  
SSSAQLTVRVPEVTVLEPLKDVQLSEGDQAHFRCRLSRASGQEARWALGGVPLQCNEMNDITVEQGTLYLLTL  
HKVTLEDAGTITLQVGSCSSEAQLKVTAKNTVLRGLENVDALLEGGEALFECQLSQPEVAHAHTWLLDDEPVHTS  
EKVEVVYFENGLRHLLLLKLNKLPQDSCRVTFLAGDVVTS AFLTVRGWRLEVLEPPHDASVKAGMQVRFCTILS  
EAVPVGEATWYINGAAIQPDDTDWTVTTDGS HHALTLSNAQPQHAGEVTF AARDAVASARLSVLALPDPPEDA  
EUVGRSDHSVTL SWVAPMSDGGGGLCGYRVEMKEASTGQWQLCHDLVPGPECVDDLVPGKTYRFRVAAVGPA  
GAGEPVHL PQMVKIAPAPAPAPALAPAPETRQAVVGMEDICLELEVAADGGEVVWHKGTERRIQPGGHFEVLS  
RGQRMLVIKGFRTEDQGEYRCGPIQGLPSSGAATFNVMVMTSGSGDEVPAQPSLPPEAAQEGDLHLLWEALAR  
KRRMSREPTLDSISELPEEDSRVQHLRQEAEEETAPDLSEGYSTADELARTGEADLSHTSSDDES RAGT PSLVT  
YLK KAGGPGI SPLASKHEAQVTT SVKPQKQEPVVPTCPPPGDLSAADLMDPSLDKAAVKIQA AFKGYKVRKE  
MKQQEGPVFSRTFGDTEAQVGDVLRLECVLATKTD MRACWLKDGIELTDGRHYHIDQLKDGTC SLVVTGLAPT  
DSGRYTCQVSTKSGRVSHSACVVVSGTESEAESSSGGELDDAFRAARRLHRLFRTKSPAELSEEELFLSADE  
GPGEPEEPADWQTYREDENFVCIRFESLAEARQAVTCFRNMFATMGIGVEISLGEQGPGRVEMRI GKVAPTVT  
PAVPLAKTPGLQTS DAAPVFLTELQNDVQDGYPMSFDCVVTGQPVPVSVRWFKDGKLEEDDHYMINEDQQGG  
HQLIITAVVPADMGVYRCLAENSMGVSSTKAELRVELTSTDYDTAADATETSSYFSAQGYLSSREQEGTESDE  
GQLPQVLEELKDLQVAPGTRLAKFQLKVKGYPAKLYWFKDGGQPLTSDHIRMTDKKTLHTLEIVSVTREDSG  
QYAAIISNAVGAAYSSARLLVRGPSEPEEKPASDVHERLVPPRILEKFTPKKVKRGSSITFSVKVEGHPAPSV  
HWLKEEAKEKGV LWIGPDTPGYTMASSSKQHSLVLLDVGRQHQTGTYTCIATNPAGQALCSASLHISGLAKEEEQ  
ERVKEALISSFLQGTSAVSAQMSSESAGFADLVGQSKGESLVAEEAHSHLSLAEVGT EEF LQKLT S QIT E MVS  
AKISQAKLQVPGGDSDEETKTPSASPRHGRSRPSSSVQESSSEEDGDSRGEIFDIYVVTADYLP LGAEQDAI  
ILREGQYVEVLD SAHPLRVLVTRKPTKSSPSRQGWVSPAYLDRKRLKLSPEWGPTEAPEFPGEAVSEDEYRTRL  
SSVIQELLSSEQAFVQELQFLESHHMKHLERSPRVPAAVASQKTVIFRNVQDISHFHSSFLKELQCGCTDDDDV  
AMCFIKNQEA FEKYLEFLVGRVQAESVVVSTPVQEFYKKYAEETLSAKDPTQPPPPPLQHYLEQPVERVQKYQ  
ALLKELIRNKARNRNCALLEQAYAVVSALPQRAENKLVSLMENYPGTLEALGEP I RQGHFIVWEGAPGARM  
PWKGHNHVLFRNYLVICKPRRDSRTDFTFSYVFRNMKLLSIDLNDQVEGD DRAFEVWHEREDSVRKYLLQA  
RTVILKNSWVKEICGIIQGLAQPVWRPPEFEELADCTAELGETVKLACRVTGTPKPIVSWYKDGKPEVEVDPH  
HILIEDPDG SCTLILDNLTGIDSGQYMCFAASAAGNASTLGKILVQVPPRFVNVKVRATPFVEGEDAQITCTVE  
GAPYPQIRWYKDGTL LAPGNRYRMLNEPRSGVLV LVIQAASKEDLGHYECELVNRLGSTRGGGELYMQSPALR  
ARDQHHREQIVAAVEDT SVEGSAHSAQDQADQQAASVLWRLLGSEALGPS PGDLPNTRQSEPPAFEEAASQIP  
GAASGTPEVSQPGTHKLEQETTSSGSQGWTVPIRVEGTAWPGAGTGQLLDDVHSQVIMETTQRTYVQAPDT  
GVTRAPSMQVTIEDVQVQVGDMAQF DAVIEGHPPPIV TWYKGSTQLTSSARLSQRQDGTYSLVLTDVAPHDA  
GVYTCVANNAGGQV LCKAELLVHGGDKLDAENQVYRRKLHSFYDVQEEIGRGVFGFVKRVQHKGNKMFCAAKF  
IPLRSKTRAQAYQERDILATLGHPLVTGLLDQFETRKTLLI LILELCSSEELLDRLFKKGVVTEAEVKVYIQQL  
VEGLHYLHSHGILHLDIKPPNIMVHPAREDIKICDFGFAQKITPSEPQYSKYGSP E FVSPEIIEQN PVS EGS  
DIWAMGVI SYLSLTCS SPFAGESDRATLLNVLEGRVSWSSPFLTAHLSEDAKDFIKATLQRTPRARVSTSQCLA  
HPWFLKSMPAEEAHFINTKQLKFL LARSRWRSLMSYKSI LVMRSIPELLQGPPDPSPLGVARHLRGEASGAS  
SSSSSSDNELAPFARAKSLPPSPVTHSPLLHPRGFLRPSASLPEETEASMP TADA AVPASPQSAGPPASPGCV  
PRHSVISSLFYQQAGEGAERGKNTSGAKRHPARRRHLLKGGYIARALPGLREPLMEYSLLEEEAAREEQASLM  
TKTPSFETALRLPSSSVREVPGRSHSLDNPPVTTGPSPEACKEQLLFPSTGLTHETTAKDRGHKEGFLQESV  
PFPMSGDSRPGKQEGSSQDSCRGKPASSCHSELGSGSQEGCGPPSSQSLGSLPPQSLKKE LSTSCGPLFSEQ  
PQAAPFPTQVSPLLGSEKEPQDGS LSEGPVPVPS SSPGSASQVDASLDTEGLSEAGDTCDFTPPPQRPQEQAT  
TRKFSLESRGGYAGVAGYGTFAFGGDAGGMLQGGLWARMAWAVS QSSEEQDEAATESPQPLES LGPIAEASG  
VPLRTSPSLTPWEEVEQVSLVQIRDLSGDAEAADTISLDISEVDPAYLNLSLDYDIKYL PFEFMI FRRVPKPI  
EQPESPGSETEAGQLADFL EEAAPWPGE LGLRAGLEITEEPEEPGDLEALLGEEAVGRKRKWSPSRGLFQF  
PGRCLSGEEPVELGLRQRVKASMAHISRILKGRPEGPEREGPPRKKAGLASFRLSGLKGRDQELSDEAVVLGQ  
SVTLACQVLAQPTAQATWSKDGVLLESSGHLLISSTLKNFQLLTI LVVKEEDLGTYTCCVSNPLGTAVTTGVL  
RKAERPSSSPRPEVGELYKDAVLLVWKPVE SCGPVTVYIVQCCIEGGSWTTLASDISDCCYLTGKLSRGGMYIF  
RTACVSKAGMGPYSSPSEQVLLGGPNHLASEEESRRGRPAQLLPSTKTF AFQM QIRRGFRFSVVRQCREKASGR  
ALAAKIVPYQPEDKTAVLREYEALKRLHHPHLAQLHAAYLSPRHLVLI LILELCSGPELLPSLAERESYSES DVK  
DYLWQMLSATQYLHAQHILHLDLRSENMMVTEYNLLKVIDLGN AQSLDQEKVPAPENFKDYLETMAPELLEGG  
GAVPQTDIWAIGVTA FIMLSGEY P ESSEGTRDLQKGLRKLIRLSRCYAGLSGGAVAF LQSSSLCAQPWGRPCA  
STCLQCGWLTEEGTSGSRPTPVTFPTVRLRAFVREKRRRALLYKKNLAQVR\*

>rs48899298\_ENSMUSP00000038264\_c.14560:C>T\_p.P4854L  
ENSMUST00000047441.14|Obscn-202|ENSMUSG00000061462|-|chr11:g.58932645:G>A  
MDHSFSGAPRFLTRPKAFVSVGKDATLSCQIVGNPTPHVSWEKDRQPVEAGARFRLAQDGDVYRLTILDLAL  
GDSGQYVCRARNAIGEAFAAVGLRVDSEGTCAEQAPHLLRPTSIRVREGADATFRCRVGGSPQPAVSWSKDG  
RRLGPPDAPHVRVEEHGESSALRIRSARPRDGGTYEVRAENPLGSASAAAALVVDSDAEVAGPPGTSTATLLA

HLQQRREAMRAEGIPPSPPGAGTRTCTVTEGKHARLSCFVTGEPKPEVWKKDGLVTEGRRHVVEDEQENF
VLKILFCKQSDRGLYTCTASNLVGQTYSSVLVVVREPTVPFKKRLQDLEVREKESATFQCEVAQPATEAAWFK
EETRLWASAKYDIEEEGETERRLTVRNVSADDDAVYICETTEGSRVVAELSVQGNLTKRKLPRKTAVRTGDTAIF
WVELAVPEGPVWRWRNQEEMVAGGRVAITAEGTCHTLTI FQCTLEDMGEVAFVSGGCRTTTQFCVSAPRRPPL
YPPADPVVKAKTESVTLWSAPPHGDRPVTIDGYVLEKRKLGAYAWSRCHEAGWLATTEFTITGVAAEEDGFQ
FRVSAINHFGQGPYLEFPGTMHLVPLAVKTPKAVEAVEGGEVTFVSDLTVASSGEWFLDGEALKASSIYVI
RCDRTRHMLTIREVPARLHGAQLKVFANGIETSIQMVVRAALGLPSSKLPAAAAREVLAQLHHEEAQLLAE LSD
QAAAVTWLKDGRELSLGPKYEMQVSAGRRALLVRDVAQDDAGLYECVSRGSRRTAYQLLVQDITDGYRDWGPAG
PQKHMCKCAGAKIARYLGSSCYRFLQYDKGVVHWEAALDTRQGKGTSSCSLHEKPKLVFAKQQAHSVKA
AGASATLSCEVAQAQTEVTFWKDGKLLSSSSKVRMEASGCSRRLVVQQAGKADAGEYSCEAGGQKLSFRLDVA
EPKMFVFAKEQQARSEVKAEGASATLSCEVAQAQTEVTFWKDGKLLSSSSKVRMEASGCSRRLVVQQAGKADA
GEYSCEAGGQKLSFRLDVTEPKLVFAKEQQARSEVKAEGVNSATLSCEVAQAQTEVTFWKDGKLLSSSSKVRM
EASGCSRRLVVQQAGKADAGEYSCEAGGQKLSFRLDVAEPKLVFAKEQQARSEVKAEGVNSATLSCEVAQAQ
EVTWTFWKDGKLLSSSSKVRMEASGCSRRLVVQQAGKADAGEYSCEAGGQKLSFRLDVTEPKLVFAKEQQAHSEV
KAEAGASATLSCEVAQAQTEVTFWKDGKLLSSSSKVRMEASGCSRRLVVQQAGKADAGEYSCEAGGQKLSFR
DVAEPKLVFAKEQQARSEVKAEGASATLSCEVAQAQTEVTFWKDGKLLSSSSKVRVEASGCSRRLVVQQAGK
ADAGEYSCEAGGQKLSFRLDVAEPKLVFAKEQQANSEVKAEGASATLSCEVAQAQTEVTFWKDGKLLSSSSK
VRVEASGCSRRLVVQQAGKADAGEYSCEAGGQKLSFRLDVAEPKLVFAKEQQAHSEVKAEGASATLSCEVAQ
AQTEVTFWKDGKLLSSSSKVRVEASGCSRRLVVQQAGKADAGEYSCEAGGQKLSFRLDVAEPKLVFAKEQQAH
SEVKAEGASATLSCEVAQAQTEVTFWKDGKLLSSSSKVRVEASGCSRRLVVQQAGKADAGEYSCEAGGQKLS
FRLDVAEPKLVFAKEQQAHSEVKAEGASATLSCEVAQAQTEVTFWKDGKLLSSSSKVRVEASGCSRRLVVQQ
AGKADAGEYSCEAGGQKLSFRLDVAEPKLVFAKEQQAHSEVKAEGASATLSCEVAQAQTEVTFWKDGKLLSS
SSKVRVEASGCSRRLVVQQVQKADAGEYSCEARGQKLSFRLDVAEAE SQI PERPSRREPLVVKHEHTI I LTAT
IAAPSVAAVTWLKDGV EIRRSKRHEATSLGDTHTLTVRGAQVLD SAIYSCRVGKEGQDFPVQVEEVAAKFSKP
LEPVEGELGGTVMLVCELSPEQAEVWRCNGTQLRPGKRFQMTSEGPRRTLTVSGLREDDAEYVCE SRDDRT
SARLTVKVPRVVKFTSGLSAMVAEEGQEA TFQCVVSPDAGVTWYKDMQLQ PSEKFMVWESGASRSLTILGL
TLEDAGQVTVEAEGASSAALRVREAPVLFKKKLEPQTVEERTSVTLEVELTRPWPVEKVRNAAVLTPSENV
EIRAEGARHCLVLRVSVGFADRGFFGCETPDDKTQAKLNVEMRQVRLVVRGLQEVEAKEQGTASMDVELSHAEVE
GSWTRDGLRLQPGPKCHLAVQGPVHILTL SALQPQDSGLVAFRAEGVHTSARLIVTELPVSFTRVLQDVVATQ
KEKVTLECELSRPVDVRWLKDGVELRAGKAI GIVAQGTCSRSLVIYRCETGDQGVYVCDALDAQTSASLRVQGR
TYTLIFRRVLAEDAGEVKFVAENAESRAHLRVKELPVTLLRPLRDKIAMEKHRGVLECCQVSRASAQVRWFKGG
VELQSGPKYEVVSDGLYRKLVIN DVQPEDEDTYTCDAGNVKTSAQFFVEEQSITIVRGLKDMTVMPEPAPAWFE
CETSIPSVRPPKWL LGKTVLQAGGNVGLQDGTVHRLTLHKTCSTMTGPVHFHTIGKSRSSAQLVVS DIPVVL
RPLEPKAGRELQSVVLSCDFRPAPKAVQWYKDDTPLSPSEKFKMALEGQMAELRILRLTPADAGVYRCQAGSA
QSSAEVTVAEAREVTVIQPLQDAEAMEEGRVCFSCELSHKDEDIEWSLNGTPLYNDSFHEISHEGCLHTLV LKS
VRQADTGTVCATSPKVSARL VVKGKPVVFLKALDDVSAEERGLTLQCEVSDPEARVVRKDGVELGSPDK
YDFLHKAGARGLTVHDLSDHEDAGLYTCQVGSKETQSKVSVHDLHVGITKRLKTVEVLEGE SCSFECVLSHESP
SDPAVWTVGGKTVGGSGHFHAVRQGRKYTLTVKDAALSDAGEVVFVSVLGLTSKASLIIRERPV DITKPLEDQR
TTLGEDVMLSCELSRAGTSVRWLKDGKAI RKSQKYDLLSEGTRAVLVVRKASLKDSGEYTCETEASKSTAKLC
VEEKANRFTEELADLQVEEKGRAVFTCKTEHPASVVTWRKGLLELRASGKHVPSQEGTLTKLTINALERTDSD
TYTCDIGQARTQARLLVHGQKVRVIEDLED TAVQEGSSAKFCCR IAPADYGPVHWFLDKTPLHSNELNEITVQ
PGGYHVLT LRQLALKDSGTVYFEAGDQRTSAALRVTEKPSIFSRPLTDVTVTEGEDLTLVCETTTVDSSVRWT
KDGKTLRPSARCQLSHEGCQAQLLITATTPQDGGRYKCEIGGASSSSIVRVHALPVRFRESLKDVEVPEGKAA
TLRCVLSVAAPVEWRHGDDVLKSSNKYSLRQEGAVLELVIRDLQPDGQYSCSFGDQTT SATLTVKTS SAQ
FVGLKRNKEATEGTTVTLRCEL TKEAPVEWKKGTETLRNGDKYSLKQDGAVCELQICSLLVADAGEYSCVCGQ
EKTSATLTVKALLVHFVRRRLRSKEATEGDTTTLQCELSKAAPVEWRKGTETLRDGD RYSLKQDGAVCELQIRS
LT IADAGEYLCTCGQEKTSATLTVRALPAKFKDSLKNEEATEGTATLSCELSKAAPVTWKKGPKTLQSGDKY
VLRQDGAVCGLQIHGLTMADAGEYSCVCGQEKTSATLTVRGLPAKFIEDLRSQEATEGATAILRCELSKAAPV
EWRKGSETLTKDGD RYTLRQDGAVCELQIRGLAVVDTGTYS SLPKFTTEGLRNEEATEGTMATLRCQMSKAAPV
EWRKGSETLRDGD RYSLRQDGAMCELQIRGLTIEDSGEYTCVCGQEKTSATLSVKALPPRFIEDLRSQEATEG
TMATLRCQMSKAAPVEWRKGSETLGDGGRYSLRQNGAVCELQIHDLAVEDTGEYSCVCGQEKTSATLNVKALP
PRFIEDLRSQEATEGTMATLRCQMSKAAPVEWRKGSETLRDGGRYSLRQDGAVCELQIHDL DVEDAGQYSCVC
GQEKTSAVLTVDALPPKFTTEGLKKEEATEGTMATLRCQMSKEATVEWRKGAKT LSDGGRYSLRQDGAMCELQI
CGLAVEDAGEYSCVCGQEKTSATLSVKALPPRFIEDLRSQEATEGTMATLRCQMSKAAPVEWRKGSKTLR DGD
RYSLRQDGAMCELQICDLAVEDTGDYSCVCGQEKTSATLSVKAPQVVFQQPLQNLQAEEGSMASLRCELSVPN
AAMVWSKGGLELQGDTRREARQQGCVAELLLRDLRREDAGEYSCTCGSQTT SATLMVTAAPVRFRLRLQAQDV
DEGATARLRCELSREAVSVEWRKGS LQLFPCA KYQMVQEGTTAE LLVHGVEQEDAGEYTC DAGHTQS IARLSV
RAPKPKFKTDLQSTEQEAGGTARLCCQLSEAE PGTPVQWLKEGVELHVGS KYEMRRQGAVCELLIHGLEAKDT

GEYACLVGGQKTLASLRVKEPEVTIVRGLVDMEVQADEDEVEFTCKVVSQAGATDVQWHLQGLPLQSNVTEVAV
LADGCTHVLQKGVTLLEDAGTVSFHVGGSSSAQLTVRVPEVTVLEPLKDVQLSEGQDAHFRCRLSRASGQEA
RWALGGVPLQCNEMNDITVEQGTLYLLTLHKVTLLEDAGTITLQVGCSSSEQLKVTAKNTVLRGLENVDALEG
GEALFECQLSQPEVAHAHTWLLDDEPVHTSEKVEVVYFENGLRHLLLLLKNLKPQDSCRVTFLAGDVVTS AFLTV
RALPDPPEDAEVVGRSDHSVTLVWVAPMSDGGGGGLCGYRVMKEASTGQWQLCHDLVPGPECVVDLVP GKTY
RFRVAAVGPAGAGEPVHLPQMVKIAPAPAPAPALAPAPETRQAVVGEDICLELEVAADGGVEVWHKGTERRI
QPGGHFEVLSRGQRQMLVIKGFRTEDQGEYRCGPIQGLPSSGAATFNVMVMTSGSGDEVPAQPSLPPEAAQEGD
LHLLWEALARKRRMSREPTLDSISELPEEDSRVQHLRQEAEEETAPDLSEGYSTADELARTGEADLSHTSSDDE
SRAGTPSLVTYLLKAGGPGISPLASKHEAQVTTSVKPKQKQEPVVPTCPPGDL SAADLMDPSLDKAAVKIQA
AFKGYKVRKEMKQOEGPVFSRTFGDTEAQVGDVLRLECVLATKTKDMRACWLKDGIELTDGRHYHIDQLKDGTC
SLLVTGLAPTDSGRYTCQVSTKSGRVSHSACVVVSGTESEAESSSGGELDDAFRRAARRLHRLFRTKSPAELS
EELFLSADEGPEPEPADWQTYREDENFVCIRFESLAEARQAVTCFRNMFATMGIGVEISLGEQGRGVEM
RIGKVAPTPTPAVPLAKTPGLQTSDAAPVFLTELQNDQVDQGYPMSFDCVVTGQPVPSVRWFKDGKLL EEDDH
YMINEDQQGGHQLIITAVVPADMGVYRCLAENSMGVSSTKAELRVELTSTDYDTAADATETSSYFSAQGYLSS
REQEGTESDEGQLPQVLEELKDLQVAPGTRLAKFQLKVKGYPAKLYWFKDGQPLTSSDHIRM TDKKT LH TLE
IVSVTREDSGQYAAIYI SNAVGAAYSSARLLVVRGPEPEEK PASDVHERLVPPRI LEKFTPKVKRGS S ITFSV
KVEGHPAPSVHHLKEEA EKGV LWIGPDTPGYTMASSSKQHS LVLVDVGRQHOGTYTCIATNPAGQALCSASLH
ISGLAKEEEEQERVKEALISSFLQGT SQAVSAQMSSESAGFADLVGQSKGSLVAEEAHSHLSLAEVGT EEF LQK
LTSQITEMVSAKISQAKLQVPGGDSDEETKTPSASPRHGRSRPSSSVQESSSESEEDGDSRGEIFDIYVVTADY
LPLGAEQDAIILREGQYVEVLD SAHPLRWLVRTKPTKSSPSRQGWVSPAYLDKRLKLSPEWGPTEAPEFPGEA
VSEDEYRTRLSSVIQELLSSEQAFVGE LQFLESHHMKHLERSPRVPAAVASQKTVI FRNVQDISHFHSFLKE
LQCGGTDDDVAMCFIKNQEA FEKYLEFLVGRVQAESVVVSTPVQEFYKKYAEETLSAKDPTQPPPP LQHYLE
QPV E RVQKYQALLKELIRNKARNRQNCALLEQAYAVVSALPQRAENKLVHSLMENYPGTLEALGEP I RQGHFI
VWEGAPGARMPWKGNHRHVFLFRNYLVICKPRRDSRTDTFSYVFRNMMKLSSIDLNDQVEGDDRAFEVWHERE
DSVRKYLQARTVI IKNWVKEICGIQORLAQPVWRPPEFEELADCTAELGETVKLACRVGTGPKPIVSWYK
DGKPVVEVDPHHILIEDPDGSC TLI LDNLTGIDSGYMCFAASAAGNASTLGKILVQVPRFVNKVRATPFVEG
EDAQITCTVEGAPYQPIRWYKDGTL LAPGNRYRMLNE PRSGV LVLVIQAASKEDLGHYECELVNRLGSTRGGG
ELYMQSPALRARDQHREQI VAAVEGAPSMQVTIEDVQVQVGDMAQF DAVIEGHPPP I V TWYKGTQLTSSAR
LSQRQDGTYSLVLT DVAPHDAGVYTCVANNAGQV LCKAELLVHGDKLDAENQVYRRKLHSFYDVQEE IGR
GVFGFVKRVQHKGNMFC AAKFIPLRSKTRAQAYQERDILATLGHP LV TGLLDQFETRKT L I L I L E L C S S E E L
LDRLFKKGVVTEAEVKVYIQQLVEGLHYLHSHGILHLDIKPPNI LMVHPAREDIKICDFGFAQKI TPSEPOYS
KYGSP E FV S P E I I E Q N P V S E G S D I W A M G V I S Y L S L T C S S P F A G E S D R A T L L N V L E G R V S W S S P T A A H L S E D A K
DFIKATLQRTPRARPSTSQC LAHPWFLKSMPAEEAHFINTKQLKFL LARSRWQRSLMSYKSI LVMRSIPELLQ
GPPDSPSLGVARHLRGEASGASSSSSSSDNELAPFARAKSLPPSPVTHSPLLHPRGFLRPSASLP EETEASMP
TADAAVPASPQASAGPPASPGCVPRHSV ISSLFYQQAGEGAERGNKTS GAKRHPARRRHLLKGGYIARALPGLR
EPLMEYSLLEEEAAREEQASLMTKTPSFETALR L P S S S V R E V P G R S H S L D N P P V T T G P S P E A C K E Q L L F P P S T
GLTHETTA KDRGHKEGFLQESVFPFPMMSGDSRPGKQEGSSQDSCRGKPASSCHSELGSGSQEGCGPPSSQSLG
SLPPQSLKKE LSTSCGPLFSEQPQAAPFPTQVSPLLGSEKEPQDGSLSSEGVPVPSSSPGSASQVDASLDTEG
LSEAGDTCDFTPPPQRPEQATTRKFSLESRGGYAGVAGYGTFAFGGDAGGMLGQGPLWARMWAVS QSSEEQ
DEAATESPQPLESGLPIAEASGVPLRTSPSLTPWEEVEQVSLVQIRDLSGDAEAADTISLDISEVDPAYLNLS
DLYDIKYL PFEFMI FRRV PKPIEQPESPGSETEAGQGLADFL EEA AWPWP GELGLRAGLEITEEPEEPGDLEA
LLGEAAVGRKRKWSPSRGLFQFPGRCLSGEEPVELGLRQRVKASMAHISRILKGRPEGPEREGPPRKKAGLAS
FRLSGLKGRDQELSDEAVVLGQSVTLACQVLAQPTAQTATWSKDGVLLES SGHLLISSTLKNFQLL T I L V V K E E
DLGTYTCCVSNPLGTAVTTGVLKKAERPSSSPRPEVVELGYKDAVLLVWKPVESCGPVTYIVQCCIEGGSWTTL
ASDISDCCYLTGKLSRGGMYIFRTACVSKAGMPYSSPSEQVLLGGPNHLASEEESSRGRPAQLL PSTKTFFAF
QMQIRRGRFSVVRQCREKASGRALAAKIVPYQPEDKTA VLREYEALKRLHHPHLAQLHAAYLS PRHLV L I L E L
CSGPELLPSLAERESYSES DVKDYLWQMSATQYLHAQHILHLDLRSENMMVTEYNLLKVIDLGNAQSLDQEK
VPAPENFKDYLETMAPELLEGQAVPQTDIWAIGVTA FIMLSGEY P E S S E G T R D L Q K L R K G L I R L S R C Y A G L
SGGAVAF LQSS LCAQPWGRPCASTCLQCGWLTEEGPTGSRPTPVTFTVRLRAFVREKRRALLYKKNHLAQ
VR\*

>rs48899298\_ENSMUSP00000049737\_c.16519:C>T\_p.P5507L
ENSMUST00000052872.15|Obscn-203|ENSMUSG00000061462|-|chr11:g.58932645:G>A
MDHSFSGAPRFLTRPKAFVVSVGKDATLSCQIVGNPTPHVSWEKDRQFVEAGARFRLAQDGDVYRLTILDAL
GDSGQYVCRARNAIKEAFAAVGLRVDSEGTCAEQAPHFLLRPTSIRVREGADATFRCRVGGSPQPAVSWSKDG
RRLGPPDAPHVRVEEHGESSALRIRSARPRDGGTYEVRAENPLGSASAAAALVVDSDAEVAGPPGTSTATLLA
HLQORREAMRAEGIPSPPPGAGTRTCTVTEGKHARLSCFVTGEPKPEVWKKDGQLVTEGRRHVVEDEQENF
VLKILFCKQSDRGLYTCTASNLVGQTYSSVLVVVREPTVPFKKRLQDLEVREKESATFQCEVAQPA TEAAWFK
EETRLWASAKYDIEEGETERRLTVRNVSADDDAVYICETTEGSRVVAELSVQGNLTRKLPKRTAVRTGDTAIF

WVELAVPEGPVRWLRNQEEMVAGGRVAITAEGTCHTLTI FQCTLEDMGEVAFVSGGCRTTTQFCVSA PRRPPL  
YPPADPVVKAKTESSVTLWSAPPHGDRPVTIDGYVLEKRKLGAYAWSRCHEAGWLATTEFTITGVAAEEGDFQ  
FRVSAINHFQGGPYLEFPGTMHLVPLAVKTPKAVEAVEGGEVTFVSDLTVASSGEWFLDGEALKASSIYVI  
RCDRTRHMLTIREV PARLHGAQLK FVANGIETSIQMVVRAALGLPSSKLPAAAAREVLAQLHEEAQLLAE LSD  
QAAAVTWLKDGRELSLGPKEYMQVSAGRRALLVRDVAQDDAGLYECVSRGSRRTAYQLLVQEPKLVFAKQQAH  
SEVKAEAGNSATLSCEVTQAQTEVTWFKDGKLLSSSSKVRMEASGCSRRLVVQQAGKADAGEYSCEAGGQKLS  
FRLDVAEPKLVFAKQQAHSEVKAEAGASATLSCEVAQAQTEVTWFKDGKLLSSSSKVRMEASGCSRRLVVQQ  
AGKADAGEYSCEAGGQKLSFRLDVAEPKMFVFAKEQQARSEVKAEAGASATLSCEVAQAQTEVTWFKDGKLLSS  
SSKVRMEASGCSRRLVVQQAGKADAGEYSCEAGGQKLSFRLDVTEPKLVFAKEQQARSEVKAEVGN SATLSCE  
VAQAQTEVTWFKDGKLLSSSSKVRMEASGCSRRLVVQQAGKADAGEYSCEAGGQKLSFRLDVAEPKLVFAKEQ  
QARSEVKAEAGNSATLSCEVAQAQTEVTWFKDGKLLSSSSKVRMEASGCSRRLVVQQAGKADAGEYSCEAGGQ  
KLSFHLDVTEPKLVFAKEQQAHSEVKAEAGASATLSCEVAQAQTEVTWFKDGKLLSSSSKVRMEASGCSRRLV  
VQQAGKADAGEYSCEAGGQKLSFRLDVAEPKLVFAKEQQARSEVKAEAGASATLSCEVAQAQTEVTWFKDGK  
LSSSSKVRVEASGCSRRLVVQQAGKADAGEYSCEAGGQKLSFRLDVAEPKLVFAKEQQANSEVKAEAGASATL  
SCEVAQAQTEVTWFKDGKLLSSSSKVRVEASGCSRRLVVQQAGKADAGEYSCEAGGQKLSFRLDVAEPKLAFA  
KEQQAHSEVKAEAGASATLSCEVAQAQTEVTWFKDGKLLSSSSKVRVEASGCSRRLVVQQAGKADAGEYSCEA  
GGQKLSFRLDVAEPKLAFAKEQQAHSEVKAEAGASATLSCEVAQAQTEVTWFKDGKLLSSSSKVRVEASGCSR  
RLVVQQAGKADAGEYSCEAGGQKLSFRLDVAEPKLAFAKEQQAHSEVKAEAGASATLSCEVAQAQTEVTWFKD  
GKLLSSSSKVRVEASGCSRRLVVQQAGKADAGEYSCEAGGQKLFRLDVAEPKLMFAKEQQAHSEVKAEAGAS  
ATLSCEVAQAQTEVTWFKDGKLLSSSSKVRVEASGCSRRLVVQQAGKADAGEYSCEAGGQKLSFRLDVAEPK  
VFAKEQQAHSEVKAEAGASATLSCEVAQAQTEVTWFKDGKLLSSSSKVRVEASGCSRRLVVQQV GKADAGEYS  
CEARGQKLSFRLDVADTRLMFAKEQQARTEVKAEAGNSATLSCEVAQAQTEVTWFKDGKLLSSSSKVRVEASG  
CSRRLVVQQAGKADAGEYSCEAGGQKLSFRLDVAEAE SQI PERPSRREPLVVKEHETIILTATIAAPSVAAVT  
WLKDGVEIRRSKRHEATS LGDTHLTVRGAQVLD SAIYSCRVGKEGQDFPVQVEEVAAKFSKPLEPVEGELGG  
TVMLVCELSPEQAEVWRCGNTQLRPGKRFQMTSEGPRRTLTVSGLREDDAEYVCESRDDRTSARLTVKVPR  
VVKFTSGLSAMVAEEGQEATFQCVVSPSDAGVTSYKDKMQLPSEKFMVMVESGASRSLTILGLTLEDAGQVTV  
EAEGASSAALRVREAPVLFKFKLEPQTVEERTSVTLLEVELTRPWEVVKWTRNAAVLTPSENVEIRAEAGRHC  
LVLRVGFADRGFFGCETPDDKTQAKLNVEMRQVRLVVRGLQEVEAKEQGTASMDVELSHAEVEGSWTRDGLRL  
QPGPKCHLAVQGPVHILTLALSALQPQDSGLVAFRAEGVHTSARLIVTELPVSFTRVLQDVVATQKEKVTLECEL  
SRPVDVRWLKDGVELRAGKAIGIVAQGTCSRSLVIYRCETGDQGVYVCDALDAQTSASLRVQGRTYTLIFRRLV  
AEDAGEVKFVAENAESRAHLRVKELPVTLLRPLRDKIAMEKHRGVLECVSRASAQVRWFVKGVELQSGPKYE  
VVS DGLYRKLVIN DVQPEDEDTYTC DAGNVKTS AQFFVVEQSITIVRGLKDMTVME PAPA WFE CETSIPSVRP  
PKWLLGKTVLQAGGNVGLQDGTVHRLTLHKTCSTMTGPVHFTIGKSRSSAQLVVSDIPVVLTRPLEPKAGRE  
LQSVVLSCDFRPAPKAVQWYKDDTPLSPSEKFKMALEGQMAELRILRLTPADAGVYRCQAGSAQSSAEVTVEA  
REVTVIQPLQDAEAMEEGRVCFSCELSHKDEI EWSLNGTPLYNDSFHEISHEGCLHTLVLKSVRQADTGTVC  
ATSPKVS SARLVVKGKPVVFLKALDDVSAEERGLTLTQCEVSDPEARVVWRKDGVELGPSDKYDFLHKAGAR  
GLTVHDLSDHEDAGLYTCQVGSKETQSKVSVHDLHVGITKRLKTVEVLEGE SCSFECVLSHESPSDPAVWTVGG  
KTVGGSGHFHAVRQGRKYTLTVKDAALSDAGEVVSVLGLTSKASLIIRERPVDITKPLEDQRTTLGEDVMLS  
CELSRAGTSVRWLKDGKAIRKSQKYDLLSEGTRAVLVVRKASLKDSGEYTCETEASKSTAKLCVEEKANRFT  
ELADLQVEEKGRAVFTCKTEHPASVVTWRKGLLELRASGKHVPSQEGTLKLTINALERTDSDTYTCDIGQAR  
TQARLLVHGQKVRVIEDLED TAVQEGSSAKFCCRIAPADYGPVHWF LDKTPLHSNELNEITVQPGGYHVLT LR  
QLALKDSGTVYFEAGDQRTS AALRVTEKPSIFSRPLTDVTVTEGEDLTLVCETTTVDSSVRWTKDGKTLRPSA  
RCQLSHEGCQAQLLITATTPQDGGRYKCEIGGASSSSIVRVHALPVRFRFRESLKDVEVPEGKAATLRVLSVA  
APVEWRHGDDVLKSSNKYSLRQEGAVLELVIRDLQPDQSGQYSCSFGDQTTSATLTVKTSQAQFVGLKRNKEA  
TEGTTVTLRCELTK EAPVEWKKGTETLRNGDKYSLKQDGAVCELQICSLLVADAGEYSCVCGQEKTSATLTVK  
ALLVHFVRRLRSKEATEGDTTTLQCELSKAAPVEWRKGTETLRDGD RYSLKQDGAVCELQIRSLTIADAGEYL  
CTCGQEKTSATLTVRALPAKFKDSLKNEEATEGTTATLSCELSKAAPVTWKKGPKTLQSGDKYVLRQDGAVCG  
LQIHGLTMADAGEYSCVCGQEKTSATLTVRGLPAKFIEDLRSQEATEGATAILRCELSKAAPVEWRKGETL  
DGD RYTLRQDGAVCELQIRGLAVVDTGTYS SLPKFTTEGLRNEEATEGTMATLRCQMSKAAPVEWRKGETLR  
DGD RYSLRQDGAMCELQIRGLTIEDSGEYTCVCGQEKTSATLSVKALPSRFIEDLRSQEATEGTMATLRCQMS  
KTAPVEWKKGSETLRDGGRYSLRQDGPVCELQICDLAVEDAGEYSCVCGQEKTSATLSIKALPPRFIEDLRSQ  
EATEGTMATLRCQMSKAAPVEWRKGETLGDGGRYSLRQNGAVCELQIHDLAVEDTGEYSCVCGQEKTSATLN  
VKALPPRFIEDLRSQEATEGTMATLRCQMSKAAPVEWRKGETLRDGGRYSLRQDGAVCELQIHDL DVEDAGQ  
YSCVCGQEKTSATLTVDALPPKFTTEGLKKEEATEGTMVTLRQMSKEATVEWRKGAKTLS DGGRYSLRQDGAM  
CELQICGLAVEDAGEYSCVCGQEKTSATLSVKALPPRFIEDLRSQEATEGTMATLRCQMSKAAPVEWRKGET  
LRDGD RYSLRQDGAVCELQIRDLAVEDAGEYLCVCGQEKTSATLSVKALPPRFIEDLRSQEATEGTMATLRCQ  
MSKAAPVEWRKGSKTLR DGD RYSLRQDGAMCELQICDLAVEDTGDYSCVCGQEKTSATLSVKALPPRFIEDLR  
SQEAREGTVATLRCRMSKAAPVEWRKGETLKDGD RYSLRQEGNLCELQIRDLAVEDTEEYSCVCGQEKTSAT



LSVKALPAKFIEDLRSQEAPESSTVTLRCKLSKKASVVWKKGSETLRNGARYSLRQDGAUCELEIRDLTVEDT  
GEYSCTCGQERTSATLSIMAPQVVFQOPLQNLQAEEGSMASLRCELSVPNAAMVWSKGGLELQGDTRREARQQ  
GCVAELLLRDLRREDAGEYSCTCGSQTTSATLMVTAAPVRFRELAQQDVDEGATARLRCELSREAVSVEWRK  
GSLQLFPCAKYQMVQEGTTAELLVHGVEQEDAGEYTC DAGHTQS IARLSVRAPKPKFKTDLQSTEQEAGGTAR  
LCCQLSEAEPTPVQWLKEGVELHVGSKYEMRRQGAVCELLIHGLEAKDTGEYACLGGQKTLASLRVKEPEV  
TIVRGLVDMEVQADEDEFTCKVSQAGATDVQWHLQGLPLQSNVEVAVLADGCTHVLQKGVTLLEDAGTVS  
FHVGGSSSAQLTVRVPEVTVLEPLKDVQLSEGQDAHFRCRLSRASGQEARWALGGVPLQCNEMNDITVEQGT  
LYLLTLHKVTLLEDAGTITLQVGSSEAEQLKVTAKNTVLRGLENVDALEGGALFECQLSQPEVAHAHTWLLDD  
EPVHTSEKVEVVYFENGLRHLLLLKLNKLPQDSCRVTFLAGDVVTSAFVTVRGWRLEVEPPHDASVKAGMQVR  
FTCII LSEAVPVGEATWYINGAAIQPDDTDWTVTTDGSHHALTLSNAQPQHAGEVTF AARDAVASARLSVLALP  
DPPEDAEEVGRSDHSVTLVWVAPMSDGGGGLCGYRVMKEASTGQWQLCHDLVPGPECVDDLVPGKTYRFRV  
AAVGPAGAGEPVHLPQMVKIAPAPAPAPALAPAPETRQAVVGEDICLELEVAADGGEVVWHKGTERTIQPGG  
HFEVLSRGRQMLVIKGFRTEDQGEYRCGPIQGLPSSGAATFNVVMTSGSGDEVPAQPSLPPEAAQEGDLHLL  
WEALARKRRMSREPTLDSISELPEEDSRVQHLRQEAETAPDLSEGYSTADELARTGEADLSHTSSDDESRAG  
TPSLVTVLKKAGGPGISPLASKHEAQVTTSVKPKQKQPEVVPVTCPPPGDLSAADLMDPSLDKAAVKIQAAFKG  
YKVRKEMKQOEGPVFSRTFGDTEAQVGDVLRLECVLATKTDMRACWLKDGIELTDGRHYHIDQLKDGTCSSLLV  
TGLAPTDSGRYTCQVAFKSGRVSHSACVVVSGTESEAESSSGGELDDAFRRAARRLHRLFRTKSPAELSEEEL  
FLSADEGPEPEEPADWQTYREDEFVFCIRFESLAEARQAVTCFRNMFATMGIGVEISLGEQGRGVEMRIGK  
VAPTVPAPVPLAKTPGLQTSDAAPVFLTELQNDVQDGYPMSFDCVVTGQPVPSVRWFKDGKLEEDDHYMIN  
EDQQGGHQLIITAVVPADMGVYRCLAENSMGVSSTKAELRVELTSTDYDTAADATETSSYFSAQGYLSSREQE  
GTESDEGQLPQVLEELKDLQVAPGTRLAKFQLKVKGYPAKLYWFKDQGPLTTSDHIRMTDKKTLHTLEIVSV  
TREDSGQYAAIYISNAVGAAYSSARLLVRGPSEPEEKPASDVHERLVPRILEKFTPKKVKRGSSTFSVKVEG  
HPAPSVHWLKEEAKEKGLVWIGPDTPGYTMASSSKQHSVLVDVGRQHOGTYTCIATNPAGQALCSASLHISGL  
AKEEEQERVKEALISSFLQGTSAQVSAQMSSEAGFADLVGQSKGESLVAEEAHSHLSLAEVGTTEEFLQKLTSSQ  
ITEMVSAKISQAKLQVPGGDSDEETKTPSASPRHGRSRPSSSVQESSSESEDGDSRGEIFDIYVVTADYLPLG  
AEQDAIILREGQYVEVLDSAHPLRWLVRTKPTKSSPSRQGWVSPAYLDKRLKLSPEWGPTEAPEFPGEAVSED  
EYRTRLSSVIGQELLSSEQAFVGLQFLESHHMKHLERSPRVPAAVASQKTVIFRNVQDISHFHSSFLKELQGC  
GTDDDVAMCFIKNQEA FEKYLEFLVGRVQAESVVVSTPVQEFYKKYAEETLSAKDPTQPPPPPLQHYLEQVPE  
RVQKYQALLKELIRNKARNRQNCALLEQAYAVVSALPQRAENKLVSLMENYPGTLEALGEPHQGHFVWEG  
APGARMPWKGNHRHVF LFRNYLVICKPRRDSRTDTFSYVFRNMMKLSIDLNDQVEGDDRAFEVWHEREDESVR  
KYLQARTVI IKNSWVKEICGIQQRLAQPVWRPPEFEELADCTAELGETVKKLACRVTGTPKPIVSWYKDGKP  
VEVDPHHILIEDPDGSCTLI LDNLTGIDSGQYMCFAASAAGNASTLGKILVQVPPRFVNVKVRATPFVEGEDAQ  
ITCTVEGAPYPQIRWYKDGTLAPGNRYRMLNEPRSGVLVLIQAASKEDLGHYECELVNLRLGSTRGGGELYM  
QSPALRARDQHHREQIVAAVEVTEQETKVPKKTVIIEETITTVVKS PRGRRQSPGKSPSRSPRRSASPRRPG  
LLAPERLYPPGTSPRRLEVEQGRKAPVPALYVTEAEVHAPASQSQPKWLEVEETIEVRVKKTGSRGASPVRE  
MTRSREGILFTLPGGI PGRDPNANNNSNKS SVYQEARTWGPVAVVHVGEPFIFQVDSVGNVDWVAASPEPEQVRA  
SQKEENTERQEGCSDGDENTFLMEEPQDQDSDLQGRDPKILTHNGRVLTLADLEDYVPQEGETFQCGDSTPSTP  
DEPPCEVSVLQREISEPTVGGQPVLLNVGRPPGTGATPSFFRPGSQVHSPESVSFLLREAWSGPVSAAAPWTSSF  
HTHVQSSVDGSHGSFKTEVSTQTVSFGAVGETVTLHIDPDGGEAPGPSQG\*  
>rs48899298\_ENSMUSP00000020732\_c.16720:C>T\_p. P5574L  
ENSMUST00000020732.13|Obscn-201|ENSMUSG00000061462|-|chr11:g.58932645:G>A  
MDHSFSGAPRFLTRPKAFVSVGKDATLSCQIVGNPTPHVSWEKDRQVPEAGARFRLAQDGDVYRLTILDLAL  
GDSGQYVCRARNAIGEAFAAVGLRVDSEGTCAEQAPHFLLRPTSIRVREGADATFRCRVGGSPQPAVSWSKDG  
RRLGPPDAPHVRVEEHGESSALRIR SARPRDGGTYEVRAENPLGSASAAAALVVDSDAEVAGPPGTSTATLLA  
HLQQRREAMRAEGIPSPPPGAGTRTCTVTEGKHARLSCFVTGEPKPEVTVWKKDGLVTEGRRHVVEDEQENF  
VLKILFCKQSDRGLYTCTASNLVGQTYSSVLVVREPTVPFKKRLQDLEVREKESATFQCEVAQPATEAAWFK  
EETRLWASAKYDIEEEGTERRLTVRNVSADDDAVYICETTEGSRVVAELSVQGNLTKLPRKTAVRTGDTAIF  
WVELAVPEGPVRWRNQEEMVAGGRVAITAEGTCHTLTIFQCTLEDMGEVAFVSGGCRTTTQFCVSA PRRPPL  
YPPADPVVKAKTESSVTLVSWAPPHGDRPVTIDGYVLEKRKLGAYAWSRCHEAGWLATTEFTITGVAAEGDFQ  
FRVSAINHFGQGPYLEFPGTMHLVPLAVKTPKAVEAVEGGEVTFVSDLTVASSGEWFLDGEALKASSIYVI  
RCDRTRHMLTIREV PARLHGAQLKFVANGIETSIQMVVRAALGLPSSKLPAAAAAREVLAQLHEEAQLLAE LSD  
QAAA VTWLKDGRELSLGPKEYMQVSAGRRALLVRDVAQDDAGLYECVSRGSR TAYQLLVQDITDGYRDWGPAG  
PQKHMCKCAGAKIARYLGS SCYRFLQYDKGVVHWLEAALDRQKGTSSCSLHEKPKLVFAKQQAHSEVKA E  
AGNSATLSCEVTAQTEVTFWKDGGKLSSSSKVRMEASGCSRRLVVQQAGKADAGEYSCEAGGQKLSFRLDVA  
EPKLVFAKQQAHSEVKA EAGASATLSCEVAQAQTEVTFWKDGGKLSSSSKVRMEASGCSRRLVVQQAGKADA  
GEYSCEAGGQKLSFRLDVAEPKMFVFAKEQQARSEVKA EAGASATLSCEVAQAQTEVTFWKDGGKLSSSSKVRM  
EASGCSRRLVVQQAGKADAGEYSCEAGGQKLSFRLDVTEPKLVFAKEQQARSEVKA EAGASATLSCEVAQAQ  
EVTWTFKDGKLSSSSKVRMEASGCSRRLVVQQAGKADAGEYSCEAGGQKLSFRLDVAEPKLVFAKEQQARSEV

KAEAGNSATLSCEVAQAQTEVTFWKDGKLLSSSSKVRMEASGCSRRLVVQQAGKADAGEYSCEAGGQKLSFHL  
DVTEPKLVFAKEQQAHSEVKAEAGASATLSCEVAQAQTEVTFWKDGKLLSSSSKVRMEASGCSRRLVVQQAGK  
ADAGEYSCEAEGQKLSFRLDVAEPKLVFAKEQQARSEVKAEAGASATLSCEVAQAQTEVTFWKDGKLLSSSSK  
VRVEASGCSRRLVVQQAGKADAGEYSCEAGGQKLSFRLDVAEPKLVFAKEQQANSEVKAEAGASATLSCEVAQ  
AQTEVTFWKDGKLLSSSSKVRVEASGCSRRLVVQQAGKADAGEYSCEAGGQKLSFRLDVAEPKLAFAKEQQAH  
SEVKAEAGASATLSCEVAQAQTEVTFWKDGKLLSSSSKVRVEASGCSRRLVVQQAGKADAGEYSCEAGGQKLS  
FRLDVAEPKLAFAKEQQAHSEVKAEAGASATLSCEVAQAQTEVTFWKDGKLLSSSSKVRVEASGCSRRLVVQQ  
AGKADAGEYSCEAGGQKLSFRLDVAEPKLAFAKEQQAHSEVKAEAGASATLSCEVAQAQTEVTFWKDGKLLSS  
SSKVRVEASGCSRRLVVQQAGKADAGEYSCEAGGQKLSFRLDVAEPKLMFAKEQQAHSEVKAEAGASATLSCE  
VAQAQTEVTFWKDGKLLSSSSKVRVEASGCSRRLVVQQAGKADAGEYSCEAGGQKLSFRLDVAEPKLVFAKEQ  
QAHSEVKAEAGASATLSCEVAQAQTEVTFWKDGKLLSSSSKVRVEASGCSRRLVVQQVQKADAGEYSCEARGQ  
KLSFRLDVADTRLMFAKEQQARTEVKAEAGNSATLSCEVAQAQTEVTFWKDGKLLSSSSKVRVEASGCSRRLV  
VQQAGKADAGEYSCEAGGQKLSFRLDVAEAEESQIPERPSRREPLVVKEHETIILTATIAAPSVAAVTWLKDG  
VEIRRSKRHEATSLGDTHTLTVRGAQVLDIAIYSCRVGKEGQDFPVQVEEVAAKFSKPLEPVEGELGGTVMLVC  
ELSPQAEVWRCGNTQLRPGKRFQMTSEGPRRTLTVSGLREDDAEYVCESRDDRTSARLTVKVPVVKFTS  
GLSAMVAEEGQEAATFQCVVSPDAGVTWYKDGMLQPSKFKVMVESGASRSLTILGLTLEDAGQVTEAEGAS  
SSAALRVREAPVLFKCKLEPQTVERTSVTLEVELTRPWPEVKWTRNAAVLTPSENVEIRAEGARHCLVLRVSV  
GFADRGFFGCETPDDKTQAKLNVEMRQVRLVRLVGLQEVEAKEQGTASMDVELSHAEEVGSVTRDGLRLQPGPKC  
HLAVQGPVHILTLALSALQPQDSGLVAFRAEGVHTSARLIVTELPSFTRVLQDQVATQKEKVTLECELSRPVDV  
RWLKDGVLELRAGKAIIGIVAQGTCSRSLVIYRCETGDQGVYVCDALDAQTSASLRVQGRTYTLIFRRLAEDAGE  
VKFVAENAESRAHLRVKELPVTLLRPLRDKIAMEKHRGVLECCQVSRASQVRWFKGGVELQSGPKYEVVSDGL  
YRKLVINVDQPEDEDTYTCDAENVKTSAQFFVVEQSITIVRGLKDMTVMPEPAPAWFECETSIPSVRPPKWL  
LGTVLQAGGNVGLQDGTVHRLTLHKTCSTMTGPVHFTIGKSRSSAQLVVSDIPVVLTRPLEPKAGRELQSVVL  
SCDFRPAPKAVQWYKDDTPLSPSEKFKMALEGQMAELRILRLTPADAGVYRCQAGSAQSSAEVTEAREVTVI  
QPLQDAEAMEEGRVCFSCELSHKDEDIEWSLNGTPLYNDSFHEISHGCLHTLVLSKSVRQADTGTVCATSPKV  
SVSARLVVKGKPVVFLKALDDVSAEERGTLLTQCEVSDPEARVVWRKDGVELGSPDQYDFLHKAGARGLTVHD  
LSHEDAGLYTCQVSKTQSKVSVHDLHVGITKRLKTVEVLEGECSFECVLSHESPSDPAVMTVGGKTVGGS  
GHFHAVRQGRKYTLTVKDAALSDAGEVVSVLGLTSLKASLIIRERPVDTKPLEDQRTTLGEDVMLSCELSRA  
GTSVRWLKDGKAIRKSQKYDLLSEGTRAVLVVRKASLKDSEYTCETEASKSTAKLCVEEKANRFTTEELADLQ  
VEEKGRAVFTCKTEHPASVVTWRKGLLELRASGKHVPSQEGTLTKLTINALERTSDTYTCDIGQARTQARLL  
VHGQKVRVIEDLEDTAVQEGSSAKFCRIAPADYGPVHWFLLDKTPLHSNELNEITVQPGGYHVLTLRQLALKD  
SGTVYFEAGDQRTSAALRVTEKPSIFSRPLTDVTVTEGEDTLVCETTTVDSVSRWTKDGKTLRPSARCQLSH  
EGCQAQLLITATTPQDGGRYKCEIGGASSSSIVRVHALPVRFRRESLKDVEVPEGKAATLRCVLSVAAPVEWR  
HGDDVLKSSNKYSLRQEGAVLELVIRDLQPDQSGQYSCSFGDQTTSATLTVKTSQAQFVGLKRNKEATEGTTV  
TLRCELTKAEAPVEWKKGTETLRNGDKYSLKQDGAVCELQICSLLVADAGEYSCVCGQEKTSATLTVKALLVHF  
VRRLRSKEATEGDTTTLQCELSKAAPVEWRKGTETLRDGDYSLKQDGAVCELQIRSLTIADAGEYLCTCGQE  
KTSATLTVRALPAKFKDSLKNEEATEGTTATLSCELSKAAPVTWKKGPKTLQSGDKYVLRQDGAVCGLQIHGL  
TMADAGEYSCVCGQEKTSATLTVRGLPAKFIEDLRSQEATEGATAILRCELSKAAPVEWRKGSSETLKDGDYR  
LRQDGAVCELQIRGLAVVDGTYSLSLPTKFTTEGLRNEEATEGTMATLRCQMSKAAPVEWRKGSSETLRDGDYR  
LRQDGAVCELQIRGLTIEDSGEYTCVCGQEKTSATLSVKALPSRFIEDLRSQEATEGTMATLRCQMSKTAPVE  
WKKGSETLRDGGYSLRQDGPVCELQICDLAVEDAGEYSCVCGQEKTSATLSIKALPPRFIEDLRSQEATEGT  
MATLRCQMSKAAPVEWRKGSSETLGDGGYSLRQNGAVCELQIHDLAVEDTGEYSCVCGQEKTSATLNVKALPP  
RFIEDLRSQEATEGTMATLRCQMSKAAPVEWRKGSSETLRDGGYSLRQDGAVCELQIHDLVEDAGQYSCVCG  
QEKTSAVLTVDALPPKFTTEGLKKEEATEGTMVTLRCQMSKEATVEWRKGAKTSLDGGYSLRQDGAVCELQIC  
GLAVEDAGEYSCVCGQEKTSATLSVKALPPRFIEDLRSQEATEGTMATLRCQMSKAAPVEWRKGSSETLRDGD  
YSLRQDGAVCELQIRDLAVEDAGEYLCVCGQEKTSATLSVKALPPRFIEDLRSQEATEGTMATLRCQMSKAAP  
VEWRKGSSETLRDGDYSLRQDGAVCELQICDLAVEDTGDYSCVCGQEKTSATLSVKALPPRFIEDLRSQEARE  
GTVATLRCMSKAAPVEWRKGSSETLKDGDYSLRQEGNLCELQIRDLAVEDTEEYSCVCGQEKTSATLSVKAL  
PAKFIEDLRSQEAPESSTVTLRCKLSKKASVVWKKGSETLRNGARYSLRQDGAVCELEIRDLTVEDTGEYSCT  
CGQERTSATLSIMAPQVVFQQPLQNLQAEEGSMASLRCELSVNAAMVWSKGGLELQGDTRREARQQGCVAEL  
LLRDLRREDAGEYSCTCGSQTTSATLMVTAAPVRFRLRELQAQDVEGATARLRCELSREAVSVEWRKGSLLQF  
PCAKYQMVQEGTTAELLVHGVEQEDAGEYTCDAHTQSIARLSVRAPKPKFKTDLQSTEQEAGGTARLCCQLS  
EAEFGTPVQWLKEFTLVHVGSKYEMRRQGAPELLIHGLEAKDTGEYACLVGGQKTLASLRVKEPEVTIVRGL  
VDMEVQADEVEFTCKVSOAGATDVQWHLQGLLQSLNEVTEVAVLADGCTHVLQKGVTLLEDAGTVSFHVGGL  
SSAQLTVRVPEVTVLEPLKDVQLSEGQDAHFRCRLSRASGQEARWALGGVPLQCNEMNNDITVEQGTLYLLTL  
HKVTLLEDAGTITLQVGSSESQAQLKVTAKNTVLRGLENVDALLEGGEALFECQLSQPEVAHAHTWLLDDEPVHTS  
EKVEVVYFENGLRHLLLLKLNKPKQDSCRVTFLAGDVVTSFAFLTVRGRWLEVLPPHDASVKAGMQVRFCTILS  
EAVPVGEATWYINGAAIQPDDTDWTVTTDGSHHALTLNAQPPQHAGEVTFAAARDAVASARLSVLALPDPEDA

EVVGRSDHSVTLWSVAPMSDGGGGLCGYRVMKEASTGQWQLCHDLVPGPECVVDLVPVKTYRFRVAAVGPA  
 GAGEPVHLPQMVKIAPAPAPAPALAPAPETRQAVVGEDICLELEVAADGGEVVWHKGTERTIQPGGHFEVLS  
 RGQRQMLVIKGFRTEDQGEYRCGPIQGLPSSGAATFNVMVMTSGSGDEVPAQPSLPPEAAQEGDLHLLWEALAR  
 KRRMSREPTLDSISELPEEDSRVQHLRQEAETAPDLSEGYSTADELARTGEADLSHTSSDDESAGTSPSLVT  
 YLKKAGGPGISPLASKHEAQVTTSVKPKQKQEPVPTCP PGDL SAADLMDPSLDKAAVKIQAAFQYKVRKE  
 MKQQEGPVFSRTFGDTEAQVGDVLRLECVLATKTD MRACWLKDGIELTDGRHYHIDQLKDGTC SLLVTGLAPT  
 DSGRYTCQVSTKSGRVSHSACVVVSGTESEAESSSGGELDDAFRAARRLHRLFRTKSPAELSEELFLSADE  
 GPGEPEEPADWQTYREDEFVFCIRFESLAEARQAVTCFRNMFATMIGVEISLGEQGRGVEMRIGKVAPTVT  
 PAVPLAKTPGLQTSDAAPVFLTELQNDVQDGYPMSFDCVVTGQVPVSVRWFKDGKLEEDDHVMINEDQQGG  
 HQLIITAVVPADMGVYRCLAENSMGVSSTKAELRVELTSTDYDTAADATETSSYFSAQGYLSSREQEGTESDE  
 GQLPQVLEELKDLQVAPGTR LAKFQLKVKGYPAKLYWFKDGGPLTSDHIRMTDKKTLHTLEIVSVTREDSG  
 QYAAIY SNAVGAAYSSARLLVRGPSEPEEK PASDVHERLVPPRI LEKFTPKKVKRGSSITFSVKVEGHPAPSV  
 HWLKEEAKEKGV LWIGPDTPGYTMASSSKQHSLLVLDVGRQHQTTCIATNPAGQALCSASLHISGLAKEEEEQ  
 ERVKEALISSFLQGTSAQVSAQMSSEAGFADLVGQSKGESLVAEEAHSHLSLAEVGT EEF LQKLT SQITMV S  
 AKISQAKLQVPGGDSDEETKTPSASPRHGRSRPSSSVQESSSESEDGDSRGEIFDIYVVTADYLP LGAEQDAI  
 ILREGQYVEVLDSAHPLRWLVRTKPTKSSPSRQGWVSPAYLDRKRLKLSPEWGPTEAPEFPGEAVSEDEYRTRL  
 SSVIQELLSSEQAFVGE LQFLESHHMKHLERSPRVPAAVASQKTVIFRNVQDISHFHSSFLKELQCGCTDDD  
 AMCFIKNQEAFAEKYLEFLVGRVQAESVWVSTPVQEFYKKYAEETLSAKDPTQPPPPPLQHYLEQPVVERVQKYQ  
 ALLKELIRNKARNRQNCALLEQAYAVVSALPQRAENKLVSLMENYPGTLEALGEP I RQGHFIVWEGAPGARM  
 PWKGHNHRVFLFRNYLVICKPRRDSRTDTFSYVFRNMMKLSIDLNDQVEGDDRAFEVWHEREDESVRKYLLQA  
 RTVIKNSWVKEICGIQQLAQPVWRPPEFEEELADCTAELGETVKLACRVTGT PKPIVSWYKDGKPV EVDPH  
 HILIEDPDG SCTLILDNLTGIDSGQYMCFAASAAGNASTLGKILVQVPPRFVNVKVRATPFVEGEDAQITCTVE  
 GAPYQIRWYKDGTL LAGPNRYRMLNEPRSGVLV LVIQAASKEDLGHYECELVNRLGSTRGGGELYMQSPALR  
 ARDQHHREQIVAAVEERRPSP\*

>rs48899298\_ENSMUSP00000151217\_c.14014:C>T\_p.P4672L

ENSMUST00000219084.3|Obscn-207|ENSMUSG00000061462|-|chr11:g.58932645:G>A  
 MDHSFSGAPRFLTRPKAFVVSVGKDATLSCQIVGNPTPHVSWEKDRQPVEAGARFLAQDGDVYRLTILDLAL  
 GDSGQYVCRARNAIGEAFAAVGLRVDSEGTCAEQAPHFLLRPTSIRVREGADATFRCRVGGSPQPAVSWSKDG  
 RRLGPPDAPHVRVEEHGESSALRIRSARPRDGGTYEVRAENPLGSASAAAALVVDSDAEVAGPPGTSTATLLA  
 HLQORREAMRAEGIPPSPPGAGTRTCTVTEGKHARLSCFVTGEPKPETVWKKDQGLVTEGRRHVVEDEQENF  
 VLKILFCKQSDRGLYTCTASNLVGQTYSSVLVVVREPTVPFKKRLQDLEVREKESATFQCEVAQPAEAAWFK  
 EETRLWASAKYDIEEEGTERRLTVRNVSADDDAVYICETTEGSRVAELSVQGNLTKLPRKTAVRTGDTAIF  
 WVELAVPEGPVRLRNQEE MVAGGRVAITAEGTCHTLTI FQCTLEDMGEVAFVSGGCRTTTQFCVSAPRRPPL  
 YPPADPVVKAKTESVTLWSAPPHGDRPVTIDGYVLEKRLKLGAYAWSRCHEAGWLATTEFTITGVAEEGDFQ  
 FRVSAINHFGQGPYLEFPGTMHLVPLAVKTLKVAEAVEGGEVTFVSDLTVASSGEWFLDGEALKASSIYVI  
 RCDRTRHMLTIREVPARLHGAQLKFEVANGIETSIQMVVRAALGLPSSKLPAAAAREVLAQLHEEAQLLASLSD  
 QAAAVTWLKDGRELSLGPKYEMQVSAGRRALLVRDVAQDDAGLYECVSRGSRRTAYQLLVQDITDGYRDWGPAG  
 PQKHMCKCAGAKIARYLGSSCYRFLQYDKGVWHLEAALDTRQKGTSSCSLHEKPKLVFAKQQAHSEVKA  
 AGNSATLSCEVTQAQTEVTWFKDGKLLSSSSKVRMEASGCSRRLVVQQAGKADAGEYSCEAGGQKLSFRLDVA  
 EPKLVFAKQQAHSEVKAEGASATLSCEVAQAQTEVTWFKDGKLLSSSSKVRMEASGCSRRLVVQQAGKADA  
 GEYSCEAGGQKLSFRLDVAEPKMVFAKEQQARSEVKAEGASATLSCEVAQAQTEVTWFKDGKLLSSSSKVRM  
 EASGCSRRLVVQQAGKADAGEYSCEAGGQKLSFRLDVTEPKLVFAKEQQARSEVKAEGASATLSCEVAQAQ  
 EVTWFKDGKLLSSSSKVRMEASGCSRRLVVQQAGKADAGEYSCEAGGQKLSFRLDVTEPKLVFAKEQQAHSEV  
 KAEAGASATLSCEVAQAQTEVTWFKDGKLLSSSSKVRMEASGCSRRLVVQQAGKADAGEYSCEAGGQKLSFRL  
 DVAEPKLVFAKEQQARSEVKAEGASATLSCEVAQAQTEVTWFKDGKLLSSSSKVRMEASGCSRRLVVQQAGK  
 ADAGEYSCEAGGQKLSFRLDVAEPKLVFAKEQQANSEVKAEGASATLSCEVAQAQTEVTWFKDGKLLSSSSK  
 VRVEASGCSRRLVVQQAGKADAGEYSCEAGGQKLSFRLDVAEPKLVFAKEQQAHSEVKAEGASATLSCEVAQ  
 AQTEVTWFKDGKLLSSSSKVRVEASGCSRRLVVQQAGKADAGEYSCEAGGQKLSFRLDVAEPKLVFAKEQQAH  
 SEVKAEGASATLSCEVAQAQTEVTWFKDGKLLSSSSKVRVEASGCSRRLVVQQAGKADAGEYSCEAGGQKLS  
 FRLDVAEAESQIPERPSRREPLVVKHEHETIILTATIAAPSVAAVTWLKDGVEIRRSKRHEATSLGDTHTLTVR  
 GAQVLD SAIYSCRVGKEGQDFPVQVEEVAAKFSKPLEPVEGELGGTVMLVCELSPEQAEVWRCGNTQLRPGK  
 RFQMTSEGPRRTLTVSGLREDDAEYVCESRDDRTSARLTVKVPRVVKFTSGLSAMVAEEGQEAFTQCVVSPS  
 DAGVTWYKDMGLQLPSEKFMVVEGASRSILTILGLTLEDAGQVTEAEGASSAALRVREAPVLFKPKKLEPQT  
 VEERTSVTLEVELETRPWPVEVKWTRNAAVLTPSENVEIRAEGARHCLVLRVSVGFADRGVFRECETPDDKTQAKLN  
 VEMRQVRLVLRGLQEVEAKEQGTASMDVELSHAEEGVSWTRDGLRLQPGPKCHLAVQGGPVHILTL SALQPQDSG  
 LVAFRAEGVHTSARLIVTELPVSFTRVLQDVVATQKEKVTLECELSRPVDVRWLKDGVELRAGKAI GIVAQGT  
 CRSLVIYRCETGDQGVYCDALDAQTSASLRVQGRTYTLIFRRVLAEDAGEVKFVAENAESRAHLRVKELPVT  
 LLRPLRDKIAMEKHRGVLECCQVSRASAQVRWFKGGVELQSGPKYEVVSDGLYRKLVIINDVQPEDEDYTC DAG

NVKTSAQFFVVEEQSITIVRGLKDMTVMPEPAPAWFECETSIPSVRPPKWLLGKTVLQAGGNVBLEQDGTVHRLT
LHKTCSTMTGVPVHFTIGKSRSSAQLVVSIDI PVVLRTRPLEPKAGRELQSVVLSCDFRPAPKAVQWYKDDTPLSP
SEKFKMALEGQMAELRILRLTPADAGVYRCQAGSAQSSAEVTVEAREVTVIQPLQDAEAMEEGRVCFSCELSH
KDEDIEWSLNGTPLYNDSFHEISHEGCLHTLVLKSVRQADTGTVCATSPKVSVSARLVVKGKPVVFLKALDDV
SAEERGTTLTQCEVSDPEARVVWRKDGVELGPSDKYDFLHKAGARGLTVHDLSHEDAGLYTCQVGSKETQSKV
SVHDLHVGITKRLKTVEVLEGESECSFECVLSHESPSDPAVWTVGGKTVGGSGHFHAVRQGRKYTLTVKDAALS
DAGEVVFVSVLGLTSSKASLIIRERPVDTIKPLEDQRTTLGEDVMLSCELSRAGTSVRWLKDGKAIKRSQKYDLL
SEGTRAVLVVRKASLKDSGEYTCETEASKSTAKLVCVEEKANRFTTELADLQVEEKGRAVFTCKTEHPASVVWTW
RKGLLELRASGKHVPSQEGLTLKLTINALERTSDSTYTCDIGQARTQARLLVHGQKVRVIEDLEDTAVQEGSS
AKFCCRIPADYGPVHWFLDKTPHLSNELNEITVQPGGYHVLTLRQLALKDSGTVYFEAGDQRTSAAALRVTEK
PSIFSRPLTDVTVTEGEDTLTVCEFTTVDSSVRWTKDGKTLRPSARCQLSHEGCAQLLITATTPQDGGRYKC
EIGGASSSSIVRVHALPVRFRFRESLKDVEVPEGKAATLRCVLSVAAPVEWRHGDDVLKSSNKYSLRQEGAVLE
LVIRDLQPDQSGQYSCSFGDQTTSATLTVKTSQAQFVGLRNKEATEGTTVTLRCELTKEAPVEWKKGTETLR
NGDKYSLKQDGA VCELQICSLLVADAGEYSCVCGQEKTSATLTVKALLVHFVRRRLRSKEATEGDTTTLQCELS
KAAPVEWRKGTETLRDGDYSLKQDGA VCELQIRSLTIADAGEYLCTCGQEKTSATLTVRGLPAKFIEDLRSQ
EATEGATAILRCELSKAAPVEWRKGSSETLKDGDYTLRQDGA VCELQIRGLAVVDTGTYSLSLPTKFTTEGLRNE
EATEGTMATLRQMSKAAPVEWRKGSSETLRDGDYSLRQDGA VCELQIRGLTIEDSGEYTCVCGQEKTSATLS
VKALPPRFIEDLRSQEATEGTMATLRQMSKAAPVEWRKGSSETLRDGDYSLRQDGA VCELQIHDLAVEDTGE
YSCVCGQEKTSATLNVKALPPKFTTEGLKKEEATEGTMVTLRQMSKEATVEWRKGAKTSLDGGRYSLRQDGA
CELQICGLAVEDAGEYSCVCGQEKTSATLSVKALPPRFIEDLRSQEATEGTMATLRQMSKAAPVEWRKGSSET
LRDGDYSLRQDGA VCELQIRDLAVEDAGEYLCVCGQEKTSATLSVKALPPRFIEDLRSQEATEGTMATLRQ
MSKAAPVEWRKGSKTLRQDGDYSLRQDGA VCELQICDLAVEDTGDYSCVCGQEKTSATLSVKAPQVVFQOPLQ
NLQAEEGSMASLRCELSVFNAAAMVWSKGGLELQGDTRREARQQGCVAELLRLDLRREDAGEYSCTCGSQTTSA
TLMVTAAPVRFRLRELQAQDVDEGATARLRCELSREAVSVEWRKGSLLQFPKAKYQMVQEGTTAELLVHGVEQE
DAGEYTCDAAGHTQSIARLSVRAPKPKFKTDLQSTEQEAGGTARLCCQLSEAEPGTPVQWLKEGVELHVGSKYE
MRRQGA VCELLIHGLEAKDTGEYACLVGQKTLASLRVKEPEVTIVRGLVDMVEVQADEVVEFTCKVVSQAGATD
VQWHLQGLPLQSNVEVAVLADGCTHVLQKGVTLVEDAGTVSFHVGGLSSSAQTLTVRVEVTVLEPLKDVQL
SEGQDAHFRCRLSRASGQEARWALGGVPLQCNEEMNDITVEQGTLYLLTLHKVTLLEDAGTITLQVGSSESQAQL
KVTAKNTVLRGLENVDALEGGALFECQLSQPEVAHTWLLDDEPVHTSEKVEVVYFENGLRHLLLLKLNKLPQ
DSCRVTFLAGDVVTSFALTVRGWRLEVLEPPHDASVKAGMQVRFCTILSEAVPVGEATWYINGAAIQPDDTDW
TVTTDGGSHALTLNAQPPHAGEVTF AARDAVASARLSVLALPDPPEDAEVVGRSDHSVTLSSWVAPMSDGGGG
LCGYRVEMKEASTGQWQLCHDLVPGPECVVDLVPKTYRFRVAAVGPAGAGEPVHLPQMVKIAPAPAPAPAL
APAPETRQAVVGEDICLELEVAADGGEVVWHKGTERRIQPGGHFEVLSRGRQMLVIKGFRTEDQGEYRCGPIQ
GLPSSGAATFNVVMTSGSGDEVPAPQPSLPPEAAQEGDLHLLEALARKRRMSREPTLDSISELPEEDSRVQHL
RQEAETAPDLSEGTSTADELARTGEADLSHTSSDDESAGTPSLVTYLKKAGGPGISPLASKHEAQVTTSVK
PQKQQEPVVPTCPPPGDLSAADLMDPSLDKAAVKIQAAFKGYKVRKEMKQEQEGPVFSRTFGDTEAQVGDVLR
ECVLAATKTDMRACWLKDGIELTDGRHYHIDQLKDGTCSLLVTLGLAPTDSGRYTCQVSTKSGRVSHSACVVVSG
TESEAESSSGGELDDAFRRARRLHRLFRTKSPAELSEELFSLADEGPGEPEEPADWQTYREDEFVFCIRFE
SLAEARQAVTCFRNMFMATMGIGVEISLGEQGRGVEMRIGKVAPTVTPAVPLAKTPGLQTSDAAPVFLTELQN
QDVQDGYPMSFDCVVTGQPVPSVRWFKDGKLLLEEDDHMINEDQQGGHQLIITAVVPADMGVYRCLAENSMGV
SSTKAELRVELTSTDYDTAADATETSSYFSAQGYLSSREQEGTESDEGQLPQVLEELKDLQVAPGTRLAKFQL
KVKGYAPAPKLYWFKDGOPLTSDHIRMTDKKTLHTLEIVSVTREDSGQYAAAYISNAVGAAYSSARLLVGRPSE
PEEKPASDVHERLVPPRILEKFTPKKVKRGSSTIFSVMVEGHPAPSVHVLKKEEAKEGVLWIGPDPGTYTMASS
SKQHSVLVLDVGRQHGTQYTCIATNPAGQALCSASLHISGLAKEEEQERVKEALISSFLQGTSAQVSAQMSSES
AGFADLVGQSKGESLVAEEAHSHLSLAEVGTEEFLLKLTSTQITEMVSAKISQAKLQVPGGDSDEETKTPSASP
RHGRSRPSSSVQESSSESEDGDSRGEIFDIYVVTADYLPGLAEQDAIILREGQYVEVLDSAHPLRWLVRTKPT
KSSPSRQGWVSPAYLDKRLKLSPEWGPTEAPEFPGEAVSEDEYRTRLSSVIOELLSSEQAFVGVLELQFLESHM
KHLERSPRVPAAVASQKTVI FRNVQDISHFHSSFLKELQCGCTDDDVAMCFIKNQEAFEKYLEFLVGRVQAES
VVVSTPVQEFYKKYAETLSAKDPTQPPPPPLQHYLEQPVVERVQKYQALLKELIRNKARNRQNCALLEQAYAV
VSALPQRAENKLVSLMENYPGTLEALGEPRIQGHFIVWEGAPGARMPWKGNHRVFLFRNYLVICPKRRDSR
TDTFSYVFRNMMKLSSIDLNDQVEGDDRAFEVWHEREDSVRKYLQARTVVIKNSWVKEICGIQQRLAQPVWR
PPEFEEELADCTAELGETVKLACRVGTGPKPIVSWYKDGKPEVDPHHILIEDPDGSCTLIDLNLGTIDSGQY
MCFASAAGNASTLKGILVQVPPRFVNVKVRATPFVEGEDAQITCTVEGAPYQIRWYKDLGTLLAPGNRYRMLN
EPRSGVLVVLVIAASKEDLGHYECELVNRLGSTRGGELLYMQSPALRARDQHHREQIVAAVEVTEQETKVPKK
TVIIEETITTVVKS PRGRRQSPGKSPSRSPSRSSPRLPGLLAPERLYPPGTSPPSRLEVEQGRKAPVPALY
VTEAEVHAPASQSQPKWLEVEETIEVRVKKTGSRGASPVREMTSRGEGILFTLPGGIPGRDPNANNSNNKSVY
QEARTWGPVAVHVGEPFIFQVDSVGNVDVVAASPEPEQVRASQKEENTERQEGCSDGDENTFLMEEPQDTS
LQGRDPKILTHNGRVLTLADLEDYVPOEGETFQCGDSTPSTPDEPPCEVSVLQREI SEPTVQGPVLLNVGRPPG

TGATPSFFRPGSQVHSPESVSFLLREAWSGPVSAAPWTSSFHTHVQSSVDGSHGSFKTEVSTQTVSFGAVGET  
 VTLHIDPDGGEAPGPSQG\*  
 >rs217506487\_ENSMUSP00000158795\_c.16070:A>GAGA\_p.R5357R-ins  
 ENSMUST00000238536.2|Obscn-210|ENSMUSG00000061462|-  
 |chr11:g.58934759:T>TCTC  
 MDHSFSGAPRFLTRPKAFVSVGKDATLSCQIVGNPTPHVSWEKDRQPVEAGARFRLAQDGDVYRLTILDLAL  
 GDSGQYVCRARNAIGEFAAVGLRVDSEGTCAEQAPHFLLRPTSIRVREGADATFRCRVGSGPQPAVSWSKDG  
 RRLGPPDAPHVRVEEHGESSALRIRSARPRDGGTYEVRAENPLGSASAAAALVVDSDAEVAGPPGTSTATLLA  
 HLQQRRREAMRAEGIPSPPGAGTRTCTVTEGKHARLSCFVTGEPKPEVWKKDQQLVTEGRRHVVEDEQENF  
 VLKILFCKQSDRGLYTCTASNLVGQTYSSVLVVVREPTVPFKKRLQDLEVREKESATFQCEVAQPATEAAWFK  
 EETRLWASAKYDIEEEGETERRLTVRNVSADDDAVYICETTEGSRVAELSVQGNLTKRKLPRKTAVRTGDTAIF  
 WVVELAVPEGPVWRWRNQEEMVAGGRVAITAEGTCHTLTI FQCTLEDMGEVAFVSGGCRTTTQFCVSAARRPPL  
 YPPADPVVKAKTESSVTLWSAPPHGDRPVTIDGYVLEKRKLGAYAWSRCHEAGWLATTEFTITGVAAEGDFQ  
 FRVSAINHFGQGPYLEFPGMTMLVPLAVKTPKAVEAVEGGEVTFVSVDLTVASSGEWFLDGEALKASSIYVI  
 RCDRTRHMLTIREVPARLHGAQLKFVANGIETSIQMVVRAALGLPSSKLPAAAAREVLAQLHEEAQLLAE LSD  
 QAAA VTWLKDGRELSLGPKEYMQVSAGRRALLVRDVAQDDAGLYECVSRGSRRTAYQLLVQDITDGYRDWGPAG  
 PQKHMCKCAGAKIARYLGSSCYRFLQYDKGVWHWLEAALDRQKGTSSCSLHEKPKLVFAKQQAHSEVKA  
 AGNSATLSCEVTQAQTEVTFWKDGKLLSSSSKVRMEASGCSRRLVVQQAGKADAGEYSCEAGGQKLSFRLDVA  
 EPKLVFAKQQAHSEVKAEGASATLSCEVAQAQTEVTFWKDGKLLSSSSKVRMEASGCSRRLVVQQAGKADA  
 GEYSCEAGGQKLSFRLDVAEPKMFVFAKEQQARSEVKAEGASATLSCEVAQAQTEVTFWKDGKLLSSSSKVRM  
 EASGCSRRLVVQQAGKADAGEYSCEAGGQKLSFRLDVTEPKLVFAKEQQARSEVKAEVGNSATLSCEVAQAQ  
 EVTWFKDGKLLSSSSKVRMEASGCSRRLVVQQAGKADAGEYSCEAGGQKLSFRLDVAEPKLVFAKEQQARSEV  
 KAEAGNSATLSCEVAQAQTEVTFWKDGKLLSSSSKVRMEASGCSRRLVVQQAGKADAGEYSCEAGGQKLSFHL  
 DVTEPKLVFAKEQQAHSEVKAEGASATLSCEVAQAQTEVTFWKDGKLLSSSSKVRMEASGCSRRLVVQQAGK  
 ADAGEYSCEAGGQKLSFRLDVAEPKLVFAKEQQARSEVKAEGASATLSCEVAQAQTEVTFWKDGKLLSSSSK  
 VRVEASGCSRRLVVQQAGKADAGEYSCEAGGQKLSFRLDVAEPKLVFAKEQQANSEVKAEGASATLSCEVAQ  
 AQTEVTFWKDGKLLSSSSKVRVEASGCSRRLVVQQAGKADAGEYSCEAGGQKLSFRLDVAEPKLVFAKEQQAH  
 SEVKAEGASATLSCEVAQAQTEVTFWKDGKLLSSSSKVRVEASGCSRRLVVQQAGKADAGEYSCEAGGQKLS  
 FRLDVAEPKLVFAKEQQAHSEVKAEGASATLSCEVAQAQTEVTFWKDGKLLSSSSKVRVEASGCSRRLVVQQ  
 AGKADAGEYSCEAGGQKLSFRLDVAEPKLVFAKEQQAHSEVKAEGASATLSCEVAQAQTEVTFWKDGKLLSS  
 SSKVRVEASGCSRRLVVQQAGKADAGEYSCEAGGQKLFRLDVAEPKLMFAKEQQAHSEVKAEGASATLSCE  
 VAQAQTEVTFWKDGKLLSSSSKVRVEASGCSRRLVVQQAGKADAGEYSCEAGGQKLSFRLDVAEPKLVFAKEQ  
 QAHSEVKAEGASATLSCEVAQAQTEVTFWKDGKLLSSSSKVRVEASGCSRRLVVQQVQKADAGEYSCEARGQ  
 KLSFRLDVADTRLMFAKEQQARTEVKAEGNSATLSCEVAQAQTEVTFWKDGKLLSSSSKVRVEASGCSRRLV  
 VQQAGKADAGEYSCEAGGQKLSFRLDVAEAEQSIPERPSRREPLVVKEHETIILTATIAAPVAAVTWLKDG  
 VEIRRSKRHEATSLGDHTTLTVRGAQVLDLSAIYSCRVGKEGQDFPVQVEEVAAKFSKPLEPVEGELGGTVMLVC  
 ELSPEQAEVWRCGNTQLRPGKRFQMTSEGPRTTLTVSGLREDDAEYVCESRDDRTSARLTVKVPVVKFTS  
 GLSAMVAEEGQEQATFQCVVSPSDAGVTWYKDGMLQPSKFMVVEGASRSILTILGLTLEDAGQVTEAEGAS  
 SSAALRVREAPVLFKKLEPQTEERTSVTLEVELTRPWPEVKWTRNAAVLTPSENVEIRAEGARHCLVLRV  
 GFADRGFFGCETPDDKTQAKLNVEMRQVRLVRLGLQEVEAKEQGTASMDVELSHAEEVGSWTRDGLRLQPGPKC  
 HLAVQGPVHILTLALQPQDSGLVAFRAEGVHTSARLIVTELPVSFTRVLQDQVATQKEKVTLECELSRPVDV  
 RWLKDGVLELRAGKAIIGIVAQGTCSRSLVIYRCETGDQGVYVCDALDAQTSASLRVQGRTYTLIFRRLAEDAGE  
 VKFVAENAESRAHLRVKELPVTLLRPLRDKIAMEKHRGVLECCQVSRASAQVRWFKGGVELQSGPKYEVVSDGL  
 YRKLVINVDVQPEDEDTYTCDAENVKTSAQFFVEEQSITIVRGLKDMTVMPEPAPAWFECETSIPSVRPPKWL  
 LGKTIVLQAGGNVGLQDGTVHRLTLHKTCSTMTGPVHFTIGKSRSSAQLVVSIPVVLTRPLEPKAGRELQSVVL  
 SCDFRPAPKAVQWYKDDTPLSPSEKFKMALEGMALRILRLTPADAGVYRCQAGSAQSSAEVTVAREVTVI  
 QPLQDAEAMEEGRVCFSCELSHKDEDEIWSLNGTPLYNDSFHEISHEGCLHTLVLSVRQADTGTVCATSPKV  
 SVSARLVVKGKPVVFLKALDDVSAEERGLTLTQCEVSDPEARVVRKDGVELGSPDKYDFLHKAGARGLTVHD  
 LSHEDAGLYTCQVGSKETQSKVSVHDLHVGITKRLKTVEVLEGESECFEVLVSHESPSDPAVWTVGGKTVGGS  
 GHFHAVRQGRKYTLTVKDAALSDAGEVVFVSVLGLTSKASLI IRERPVDITKPLEDQRTTLGEDVMLSCELSRA  
 GTSVRWLKDGKAIRKSQKYDLLSEGTRAVLVVRKASLKDSSGEYTCETEASKSTAKLCVEEKANRFTTEELADLQ  
 VEEKGRAVFTCKTEHPASVVTWRKGLLELRASGKHVPSQEGTLTKLTINALERTDSDTYTCDIGQARTQARLL  
 VHGGQKVRVIEDLEDTAVQEGSSAKFCRIAIPADYVGPVHWFLDKTPHLSNELNEITVQPGGYHVLTLRQLALKD  
 SGTVYFEAGDQRTSAALRVTEKPSIFSRPLTDVTVEGEDTLTVCETTTTVDSSVRWTKDGGYKDLRPSARCQLSH  
 EGCQAQLLITATTPQDGGRYKCEIGGASSSIVRVHALPVRFRESLKDVEVPEGKAATLRCVLSVAAPVEWR  
 HGDDVLKSSNKYSLRQEGAVLELVIRDLQPDQSGQYSCSFGDQTTSATLTVKTSQAQFVGLKRNKEATEGTTV  
 TLRCELTKAPVEWKKGTETLRNGDKYSLKQDGA VCELQICSLLVADAGEYSCVCGQEKTSATLTVKALLVHF  
 VRRLSKEATEGDTTTLQCELSKAAPVEWRKGTETLRDGDYSLKQDGA VCELQIRSLTIADAGEYLCTCGQE



KTSATLTVRALPAKFKDSLKNEEATEGTTATLSCELSKAAPVTWKKGPKTLQSGDKYVLRQDGAUCGLQIHGL
TMADAGEYSCVCGQEKTSATLTVRGLPAKFIEDLRSQEATEGATAILRCELSKAAPVEWRKGSSETLKDGDRTY
LRQDGAUCGLQIRGLAVVDGTYSLSPTKFTTEGLRNEEATEGTMATLRCQMSKAAPVEWRKGSSETLRDGDRTY
LRQDGAUCGLQIRGLTIEDSGEYTCVCGQEKTSATLSVKALPSRFIEDLRSQEATEGTMATLRCQMSKTAPVE
WKKGSETLRDGGRYSLRQDGPVCELQICDLAVEDAGEYSCVCGQEKTSATLSIKALPPRFIEDLRSQEATEGT
MATLRCQMSKAAPVEWRKGSSETLGDGGRYSLRQNGAVCELQIHDLAVEDTGEYSCVCGQEKTSATLNVKALPP
RFIEDLRSQEATEGTMATLRCQMSKAAPVEWRKGSSETLRDGGRYSLRQDGAUCGLQIHDLVEDAGQYSCVCG
QEKTSAVLTVDALPPKFTEGLKKEATEGTMVTLRCQMSKEATVEWRKGAKTLSDDGGRYSLRQDGAUCGLQIC
GLAVEDAGEYSCVCGQEKTSATLSVKALPPRFIEDLRSQEATEGTMATLRCQMSKAAPVEWRKGSSETLRDGD
YSLRQDGAUCGLQIRDLAVEDAGEYLCVCGQEKTSATLSVKALPPRFIEDLRSQEATEGTMATLRCQMSKAAP
VEWRKGSSETLRDGDRTYSLRQDGAUCGLQICDLAVEDTGDYSCVCGQEKTSATLSVKALPPRFIEDLRSQEARE
GTVATLRCRMSKAAPVEWRKGSSETLKDGDRTYSLRQEGNLCELQIRDLAVEDTEEYSCVCGQEKTSATLSVKAL
PAKFIEDLRSQEAPESSTVTLRCKLSKKASVVWKKGSETLRNGARYSLRQDGAUCLEIRDLTVEDTGEYSCT
CGQERTSATLSIMAPQVVFQQPLQNLQAEEGSMASLRCELSVNAAMVWSKGGLELQGDTRREARQQGCVAEL
LLRDLRREDAGEYSCTCGSQTTSATLMVTAAPVRFLELQAQDVDEGATARLRCELSREAVSVEWRKGSLLQF
PCAKYQMVQEGTTAELLVHGVEQEDAGEYTCDAHTQSIARLSVRAPKPKFKTDLQSTEQEAAGTARLCCQLS
EAEPGTPVQWLKEGVLHVGSKYEMRRQGAUCCELLIHGLEAKDTGEYACLVGGQKTLASLRVKEPEVTIVRGL
VDMEVQADEDEVEFTCKVQAGATDVQWHLQGLPLQSNVTEVAVLADGCTHVLQKGVTEFLQKLTSTVHFVGG
SSSAQLTVRVPEVTVLEPLKDVQLSEGDQAHFRCLRSRSGQEARWALGGVPLQCNEMNNDITVEQGTLYLLTL
HKVTVLEAGTITLQVGSSESQAQLKVTAKNTVLRGLENVDALEGGEALFECQLSQPEVAHAHTWLLDDEPVHTS
EKVEVVYFENGLRHLLLLKLNKLPQDSCRRTVFLAGDVVTSFALTIVRGRLEVLPPHDASVKAGMQRVFTCIL
SEAVPVGEATWYINGAAIQPDDTWTVTDDGSHHALTLSNAQPQHAGEVTFAARDAVASARLSVLALPDPED
AEVVGSRSDHSVTLVSWAPMSDGGGGLCGYRVEMKEASTGQWQLCHDLVPGPECVVDDLVPKTYRFRVAAVGP
AGAGEPVHLPQMVKIAPAPAPAPAPAPAPAPETRAVVGEDICLELEVAADGGEVWVHKGTERIQPGGHFEVL
SRGQRQMLVIKGFRTEDQGEYRCGPIQGLPSSGAATFNVMVMTSGSGDEVPAPQPSLPPEAAQEGDLHLLWEALA
RKRMSREPTLDSISELPEEDSRVQHLRQEAETAPDLSEGYSTADELARTGEADLSHTSSDDESAGTPSLV
TYLKKAGGPGISPLASKHEAQVTTSVKPKQKQEPVVPVPTCPGGDLAADLMDPSLDKAAVKIQAAFKGYKVRK
EMKQQEGPVFSRTFGDTEAQVGDVLRLECVLATKTDMRACWLKDGIELTDGRHYHIDQLKDGTCSSLVTGLAP
TDSGRYTCQVSTKSGRVSHSACVVVSGTESEAESSSGGELDDAFRRAARLHRLFRTKSPAELSEELFLSAD
EGPGEPEEPADWQTYREDEFVFCIRFESLAEARQAVTCFRNMFATMGIGVEISLGEQGPGRVEMRIGKVAPTV
TPAVPLAKTPGLQTSDAAPVFLTELQNDQVDQGYPMSFDCVVTGQVPSVRWFKDGKLEEDDHVMINEDQQG
GHQLIITAVVPADMGVYRCLAENSMGVSSTKAELRVELTSTDYDTAADATETSSYFSAQGYLSSREQEGTESD
EGQLPQVLEELKDLQVAPGTRLAKFQLKVKGYPAKPLYWFKDGGPLTTSDHIRMTDKKTLHTLEIVSVTRES
GQYAAAYISNAVGAAAYSSARLLVRGPSEPEEKPASDVHERLVPPRILEKFTPKKVKRGSSTIFSVKVEGHPAPS
VHVLKEEAESGLVWIGPDPGYTMASSSKQHSLLVLDVGRHQHTYTCIATNPAGQALCSASLHISGLAKEEEE
QERVKEALISSFLQGTSAVSAQMSSESAGFADLVGQSKGESLVAAEAHSHLSLAEVGTTEFLQKLTSTQITEMV
SAKISQAKLQVPGGDSDEETKTPSASPRHGRSRPSSSVQESSSESEDGDSRGEIFDIYVVTADYLPGLAEQDA
IILREGQYVEVLDSAHPLRWLVRTKPTKSSPSRQGWVSPAYLDKRLKLSPEWGPTEAPEFPGEAVSEDEYRTR
LSSVIQELLSSEQAFVQELQFLESHMKHLERSPRVPAAVASQKTVIFRNVQDISHFHSSFLKELQCGTDDD
VAMCFIKNQEAFAEKYLEFLVGRVQAESVVVSTPVQEFYKKYAETLSAKDPTQPPPPPLQHYLEQVPERVQKY
QALLKELIRNKARNRQNCALLEQAYAVVSALPQRAENKLHVSLMENYPGTLEALGEPRIQGHFIVWEGAPGAR
MPWKGHNRHVFLFRNYLVICKPRRDSRTDTFSYVFRNMMKLSIIDLNDQVEGDDRAFEVWHEREDSVRKYLLQ
ARTVIKNSWVKEICGIQQRLAQPVWRPPEFEEELADCTAELGETVKLACRVGTGPKPIVSWYKDGKPEVDF
HHILIEDPDGSCTLILDNLGTIDSGQYMCFAASAAGNASTLGKILVQVPPRFVNVKVRATPFVEGEDAQITCTV
EGAPYPQIRYKDGTLAPGNRYRMLNPRSGVVLVLIQAASKEDLGHYECELVNLRLGSTRGGELYMQSPAL
RARQDHHREQIVAAVEDTSVEGSAHSAQDQQAASVLRWLLGSEALGPPGDLPNTRQSEPPAFEEAASQI
PGAASGTPEVSPQPGTHKLEQETTSQSGQWTVPIRVEGTAWPGAGTGQLLQVHVSQVIMETTQRTYVCQAPD
TGVTTRAPSMQVTIEDVQVQVGDMAQFDAVIEGHPPPITVWYKGSTQLTSSARLSQRQDGTYSVLVTDVAPHD
AGVYTCVANNAGQVLCCKAELLVHGGDKLDAENQVYRRLKHSFYDVQEEIIRGVFVGFVQVHKGNKMFCAAK
FIPLRSKTRAQAYQERDILATLGHPLVTGLLDQFETRKTLLILELCSSEELLDRLFKKGVVTEAEVVKYIQQ
LVEGLHYLHSHGILHLDIKPPNIIIMVHPAREDIKICDFGFAQKITPSEPQYSKYGSPEFVSPETIEQNPVSEG
SDIWAMGVISYLSLTCSSPFAGESDRATLLNVLEGRVSWSSPTAAHLSADAKDFIKATLQRTPRARPSTSQCL
AHPWFLKSDMPAAEAHFINTKQLKFLARSRWLRLMSLYKSIIVMRSIPPELLQGPDPSPSLGARVHLRGEASGA
SSSSSSDNEELAPFARAKSLPPSPVTHSPLHLPRGLFRPSASLPEETEASMPPTADAAPVSPASQAGPPASPGC
VPRHSVISLQYQAGAGEAERGNKTSGAKRHPARRRHLKGGYIARALPGLREPLMEYSLLEEEAAREEQASL
MTKTPSFETALRLPSSSVREVPGRSHSLDNPPVTTGSPPEACKEQLLFPSTGLTHETAKDRGHKEGFLQES
VFPFPMMSGDSRPGKQEGSSQDSCRGKPASSCHSELGSGSQEGCGPPSSQSLGSLPPQSLKKELESTSCGPLFSE
QPQAAPFPTQVSPLLGSEKEPQDGSLESGVPPVPSPPSASQVDAASLDTEGLSEAGDTCDFTPPPQRPQEQA

TTRKFSLESRRGGYAGVAGYGTFAFGGDAGGMLGQGPLWARMWAVSQSSEEQDEAATESPQPLESIGPIAEAS  
 GVPLRTSPSLTPWEEVEQVSLVQIRDLSDGAEAAADTISLDISEVDPAYLNLSDLYDIKYLPFEFMI FRRV PKP  
 IEQPESPGSETEAGQGLADFL EEAAPWP GELGLRAGLEITEEPEEPGDLEALLGEEAVGRKRKWSPSRGLFQ  
 FPGRCLSGEEPVELGLRQRVKASMAHISRILKGRPEGPEREGPPRKKAGLASFRLSGLKGRDQELSDEAVVLG  
 QSVTLACQVLAQPTAQATWSKDGVLLESSGHLLISSTLKNFQLLTI LVVKEEDLGTYTCCVSNPLGTAVTTGV  
 LRKAERPSSSPRPEVGEYKDAVLLVWKPVESCGPVTYIVQCCIEGGSWTTLASDISDCCYLTKLSRGGMYI  
 FRTACVSKAGMGPYSSPSEQVLLGGPNHLASEEESSRGRPAQLLPSTKTF AFQM QIRRRGRFSVVRQCREKASG  
 RALAAKIVPYQPEDKTA VLREYEAL KRLHHPHLAQLHAAYLS PRHLV LILELCSGPELLPSLAERESYSESDV  
 KDYLWQMLSATQYLHAQHILHLDLRS ENMMVTEYNLLKVIDLGNAQSLDQEKVPAPENFKDYLETMAPELLEG  
 QGAVPQTDIWAIGVTA FIMLSGEY PESSGTRDLQKGLRKLIRLSRCYAGLSGGAVAF LQSSSLCAQPWGRPC  
 ASTCLQCGWLTEEGPTGSRPTVTFPTVRLRAFVREKRRRALLYKKNLAQVR\*  
 >rs217506487\_ENSMUSP00000038264\_c.14186:A>GAGA\_p.R4729R-ins  
 ENSMUST00000047441.14|Obscn-202|ENSMUSG00000061462|-  
 |chr11:g.58934759:T>TCTC  
 MDHSFSGAPRFLTRPKAFVSVGKDATLSQIVGNPTPHVSWEKDRQPVEAGARFRLAQDGDVYRLTILDLAL  
 GDSGQYVCRARNAIGEAFAAVGLRVDSEGTCAEQAPHFLLRPTSIRVREGADATFRCRVGSGSPQPAVSWSKDG  
 RRLGPPDAPHVRVEEHGESSALRIRSARPRDGGTYEVRAENPLGSASAAAALVVDSDAEVAGPPGTSTADLLA  
 HLQQRREAMRAEGIPSPPGAGTRTCTVTEGKHARLSCFVTGEPKPEVWKKDGLVTEGRRHVVEDEQENF  
 VLKILFCKQSDRGLYTCTASNLVGQTYSSVLVVREPTVPFKKRLQDLEVREKESATFQCEVAQPAEEAAWFK  
 EETRLWASAKYDIEEEGTERRLTVRNVSADDDAVYICETTEGSRVVAELSVQGNLTKLPRKTAVRTGDTAIF  
 WVAVPEGPVVRWRNQEEMVAGGRVAITAEGTCHTLTI FQCTLEDMGEVAFVSGGCRTTTQFCVSAPRRPPL  
 YPPADPVVKAKTESSVTL SWSAPPHGDRPVTIDGYVLEKRKLGAYAWSRCHEAGWLATTEFTITGVAAEGDFQ  
 FRVSAINHFGQGPYLEFPGMTMLVPLAVKTPKAVEAVEGGEVTFVSVDLTVASSGEWFLDGEALKASSIYVI  
 RCDRTRHMLTIREV PARLHGAQLKFVANGIETS IQMVVRAALGLPSSSKLPAAAAREVLAQLHEEAQLLAE LSD  
 QAAA VTWLKDGRELSLGPKEYMQVSAGRRALLVRDVAQDDAGLYECVSRGSR TAYQLLVQDITDGYRDWGPAG  
 PQKHMCKCAGAKIARYLGS SCYRFLQYDKGVWHWLEAALDTRQKGTSSCSLHEKPKLVFAKQQAHSEVKA  
 AGASATLSCEVAQAQTEVTFWKDGKLLSSSSKVRMEASGCSRRLLVVQQAGKADAGEYSCEAGGQKLSFRLDVA  
 EPKMVFAKEQQARSEVKAEGASATLSCEVAQAQTEVTFWKDGKLLSSSSKVRMEASGCSRRLLVVQQAGKADA  
 GEYSCEAGGQKLSFRLDVTEPKLVFAKEQQARSEVKAEGNSATLSCEVAQAQTEVTFWKDGKLLSSSSKVRM  
 EASGCSRRLLVVQQAGKADAGEYSCEAGGQKLSFRLDVAEPKLVFAKEQQARSEVKAEGNSATLSCEVAQAQ  
 EVTWTFKDGKLLSSSSKVRMEASGCSRRLLVVQQAGKADAGEYSCEAGGQKLSFHLDVTEPKLVFAKEQQAHSEV  
 KAEAGASATLSCEVAQAQTEVTFWKDGKLLSSSSKVRMEASGCSRRLLVVQQAGKADAGEYSCEAGGQKLSFR  
 LDVAEPKLVFAKEQQARSEVKAEGASATLSCEVAQAQTEVTFWKDGKLLSSSSKVRVEASGCSRRLLVVQQAGK  
 ADAGEYSCEAGGQKLSFRLDVAEPKLVFAKEQQANSEVKAEGASATLSCEVAQAQTEVTFWKDGKLLSSSSK  
 VRVEASGCSRRLLVVQQAGKADAGEYSCEAGGQKLSFRLDVAEPKLVFAKEQQAHSEVKAEGASATLSCEVAQA  
 AQTEVTFWKDGKLLSSSSKVRVEASGCSRRLLVVQQAGKADAGEYSCEAGGQKLSFRLDVAEPKLVFAKEQQAH  
 SEVKAEGASATLSCEVAQAQTEVTFWKDGKLLSSSSKVRVEASGCSRRLLVVQQAGKADAGEYSCEAGGQKLS  
 FRLDVAEPKLVFAKEQQAHSEVKAEGASATLSCEVAQAQTEVTFWKDGKLLSSSSKVRVEASGCSRRLLVVQQ  
 AGKADAGEYSCEAGGQKLSFRLDVAEPKLVFAKEQQAHSEVKAEGASATLSCEVAQAQTEVTFWKDGKLLSS  
 SSKVRVEASGCSRRLLVVQQAGKADAGEYSCEAGGQKLSFRLDVAEAEBSQI PERPSRREPLVVEKHETIILTAT  
 IAAPSVAAVTWLKDGV EIRRSKRHEATSLGDTHLTVRGAQVLDSAIYSCRVGKEGQDFPVQVEEVA AKFSKP  
 LEVVEGELGGTVMLVCELSPEQA EVVWRCNGTQLRPGKRFQMTSEGPRRTLTVSGLREDDAE EYVCE SRDDRT  
 SARLTVKVPVVKFTSGLSAMVAEEGQEATFQCVVSPSDAGVTWYKDGMLQLPSEKFMVMEVSGASRSLTILGL  
 TLEDAGQVTVEAEGASSAALRVREAPVLFKKKLEPQTVEERTSVTLEVELTRPWPEVKWTRNAAVLTPSENV  
 EIRAEGARHCLVLRVSVGFADRGFFGCETPDDKTQAKLNVEMRQVRLVRLGLQEVEAKEQGTASMDVELSHAEVE  
 GSWTRDGLRLQPGPKCHLAVQGPVHILTSLALQPQDSGLVAFRAEGVHTSARLIVTEL PVSFTRVLQDVVATQ  
 KEKVTLECELSRPVDVRWLKDGVELRAGKAI GIVAQGTCSRSLVIYRCETGDQGVVCDALDAQTSASLRVQGR  
 TYTLIFRRVLAEDAGEVKFVAENAESRAHLRVKELPVTLLRPLRDKIAMEKHRGVLECVSRASAVRWFKGG  
 VELQSGPKYEVVSDGLYRKLVIN DVQPEDEDTYTCDAGNVKTS AQFFVEEQSITIVRGLKDMTVMEPAPAWFE  
 CETSI PSVRPPKWL LKGTVLQAGNVGLEQDGTVHRLTLHKTCSTMTGPVHFTIGKSRSSAQLVSDIPVVL T  
 RPLEPKAGRELQSVVLSCDFRPAPKAVQWYKDDTPLSPSEKFKMALEGQMAELRILRLTPADAGVYRCQAGSA  
 QSSAEVTVAREVTVIQPLQDAEAMEEGRVCFSCELSHKDEDI EWSLNGTPLYNDSFHEISHEGLHTLVLKS  
 VRQADTGTVCATLSPVSVSARLVVKGKPVVFLKALDDKSVSAEHERGTLTLQCEVSDPEARVWRKDGVELGSPDK  
 YDFLHKAGARGLTVHDSLHEDAGLYTCQVGSKETQKSVSABHDLHVGITKRLKTVLEVLEGESCSFECVLSHESP  
 SDPAVWTVGGKTVGGSGHFHAVRQGRKYTLTKVDAALSDAGEVVFVSVLGLTSKASLIIRERPVDITKPLEDQR  
 TTLGEDVMLSCELSRAGTSVRWLKDGKAI RKSQKYDLLSEGTRAVLVVRKASLKDSGEYTCETEASKSTAKLC  
 VEEKANRFTEELADLQVEEKGRAVFTCKTEHPASVVTWRKGLLELRASGKHVPSQEGTLTKLTINALERTDSD  
 TYTCDIGQARTQARLLVHGQKVRVIEDLEDTAVQEGSSAKFCCR IAPADYGPVHWF LDKTPLHSNELNEITVQ

PGGYHVLTLRQLALKDSGTVYFEAGDQRTSAALRVTEKPSIFSRPLTDVTVTEGEDLTLVCETTTVDSSVRWT
KDGKTLRPSARCQLSHEGCQAQLLI TATTPQDGGRYKCEIGGASSSSIVRVHALPVRFRESLKDVEVPEGKAA
TLRCVLSVAAPVEWRHGDDVLKSSNKYSLRQEGAVLELVIRDLQPDQSGQYSCSFGDQTT SATLTVKTSQAQ
FVGKLRNKEATEGTTVTLRCELTKAPVEWKKGTTETLRNGDKYSLKQDGAVCELQICSLLVADAGEYSCVCGQ
EKT SATLTVKALLVHFVRLRSKEATEGDTTTLQCELSKAAPVEWRKGTETLRDGDYSLKQDGAVCELQIRS
LT IADAGEYLCTCGQEKT SATLTVRALPAKFKDSLKNEEATEGTTATLSCELSKAAPVTWKKGPKTLQSGDKY
VLRQDGAVCGLQIHGLTMADAGEYSCVCGQEKT SATLTVRGLPAKFIEDLRSQEATEGATAILRCELSKAAPV
EWRKGTETLRDGDYSLRQDGAVCELQIRGLAVVDTGTYSLLPTKFTTEGLRNEEATEGTMATLRCQMSKAAPV
EWRKGTETLRDGDYSLRQDGAVCELQIRGLTIEDSGEYTCVCGQEKT SATLSVKALPPRFIEDLRSQEATEG
TMATLRCQMSKAAPVEWRKGTETLRDGDYSLRQDGAVCELQIHDLAVEDTGEYSCVCGQEKT SATLNVKALP
PRFIEDLRSQEATEGTMATLRCQMSKAAPVEWRKGTETLRDGGYSLRQDGAVCELQIHDLVDEDAGQYSCVC
GQEKTSAVLTVDALPPKFTTEGLKKEEATEGTMVTLRCQMSKEATVEWRKGAKTLSGGYSLRQDGAMCELQI
CGLAVEDAGEYSCVCGQEKT SATLSVKALPPRFIEDLRSQEATEGTMATLRCQMSKAAPVEWRKGSKTLRDGD
RYSLRQDGAMCELQICDLAVEDTGDYSCVCGQEKT SATLSVKAPQVVFQQPLQNLQAEEGSMASLRCELSVPN
AAMVWSKGGLELQGDTRREARQQGCVAELELLRDLRREDAGEYSCCTCGSQTTSATLMVTAAPVRFRLRLQAQDV
DEGATARLRCELSREAVSVEWRKGSLLQFPKAKYQMVQEGTTAEELLVHGVEQEDAGEYTC DAGHTQS IARLSV
RAPKPKFKTDLQSTEQEAGGTARLCCQLSEAEPTPVQWLKEGVELHVGSKYEMRRQGA VCELLIHGLEAKDT
GEYACLVGGQKTLASLRVKEPEVTI VRGLVDMEVQADEVFEFTCKV SQAGATDVQWHLQGLPLQSNVEVAV
LADGCTHVLQKGVTL EDAGTVSFHVGGLSSSAQLTVRVPEVTVLEPLKDVQLSEGQDAHFRCRLSRASGQEA
RWALGGVPLQCNEMNDITVEQGTLYLLTLHKVTLEDAGTITLQVGCSSAEQLKVTAKNTVLRGLENVDALEG
GEALFECQLSQPEVA AHTWLLDDEPVHTSEKVEVVYFENGLRHLLLLKNLKPQDSCRRTVFLAGDVVTS AFLT
VRALPDPPEDAEVVGRSDHSVTL SWVAPMSDGGGGLCGYRVMKEASTGQWQLCHDLVPGPECVVDLVPKGT
YRFRVAAVGPAGAGEPVHLPQMVKIAPAPAPAPAPAPAPAPETRQAVVGEDICLELEVAADGGEV VWHKGTET
IQPGGHFEVLSRGRQMLVIKGFRTEDQGEYRCGP IQGLPSSGAATFNVMVMTSGSGDEVPAQPSLPPEAAQEG
DLHLLWEALARKRRMSREPTLDSISELPEEDSRVQHLRQEAETAPDLSEGYSTADELARTGEADLSHTSSDD
ESRAGT PSLVYTKKAGGPGISPLASKHEAQVTT SVKQPQEPVPTCP PPGDLSAADLMDP SLDKAAVKIQ
AAFYKGVKVRKMGEGPVFSRTFGDTEAQVGDVLRLECVLTKTDMRACWLKDGIELTDGRHYHIDQLKDG
CSLLVTGLAPTDSGRYTCQVSTKSGRVSHSACVVVSGTESEAESSSGGELDDAFRRAARRLHRLFRTKSPAEL
SEELFLSADEGPGEPEEPADWQTYREDEFVFCIRFESLAEARQAVTCFRNMFMATMIGIVEISLGEQGRGVE
MRIGKVAPT VTPAVPLAKTPGLQTS DAAPVFLTELQNDVQDGYPMSFDCVVTGQPVPSVRWFKDGKLEEDD
HYMINEDQQGGHQLIITAVVPADMGVYRCLAENSMGVSSTKAELRVELTSTDYDTAADATETSSYFSAQGYLS
SREQEGTESDEGQLPQVLEELKDLQVAPGTRLAKFQLKVKGYPA PKLYWFKDQPLTTS DHIRMTDKKTLHTL
EIVSVTREDSGQYAAAYISNAVGAA YSSARLLVRGPSEPEEKPASDVHERLVPPRILEKFTPKKVKRGSSITFS
VKVEGHPAPSVHVLKKEAEKGVLWIGPDTPGYTMASSSKQHSVLVLLDVGRQHOGTYTCIATNPAGQALCSASL
HISGLAKEEEEQERVKEALISSFLQGTSAQVSAQMSSEAGFADLVGQSKGESLVAEEAHSHLSLAEVGT EEFLO
KLTSTQITEMVSAKISQAKLQVPGGDSDEETKTPSASPRHGRSRPSSSVQESSSESEDGSRGEIFDIYVVTAD
YLP LGAEQDAIILREGQYVEVLDSAHPLRVLRTKPTKSSPSRQGWSPAYLDRKRLKLSPEWGPTEAPEFPGE
AVSEDEYRTRLSSVIQELLSSEQAFV GELQFLESHMKHLERSPRVPAAVASQKTVI FRNVQDISHFHSSFLK
ELQCGTDDDVMCFIKNQEAFEKYLEFLVGRVQAE SVVSTPVQEFYKKYAEETLSAKDPTQPPPPLOHYL
EQPVERVQKYQALLKELIRNKARNRQNCALLEQAYAVVSALPQRAENKLVSLMENYPGTLEALGEP IRQGHF
IVWEGAPGARMPWKGNRHVFLFRNYLVI CKPRRDSRTD TFSYVFRNMMKLS SIDLNDQVEGDDRAFEVWHER
EDSVRKYLLQARTV I IKN SWVKEICGIQORLAQPVWRPPEFEELADCTAELGETVKLACRVGTGPKPIVSWY
KDGKPV EVDPHHILIEDPDG SCTLILDNLTGIDSGQYMCFAASAAGNASTLGKILVQVPPRFVNVKVRATPFVE
GEDAQITCTVEGAPYPQIRWYKDG TLLAPGNRYRMLNEPRSGV LVLVIQAASKEDLGHYECELVNRLGSTRGG
GELYMQSPALRARDQHREQI VAAVEGAPSMQVTIEDVQVGDMAQF DAVIEGHPPP I V TWYKGS TQLTSSA
RLSQRQDGT TYSLVLT DVAPHDAGVYTCVANNAGGQVLCKAE LLVHGGDKLDAENQVYRRKLSHFYDQEEIG
RGVFGFVKRVQHKGNMFC AAKFIPLRSKTRAQAYQERDILATLGHPLVTGLLDQFETRKTLLILILELCSSEE
LLDRLFKKGVVTEAEVKVYIQQLVEGLHYLHSHGILHLDIKPPNIMVHPAREDIKICDFGFAQKITPSEPQY
SKYGSPEFVSP EII EQNPVSEGS DIWAMGVI SYLSLTCSSPFAGESDRATLLNVLEGRVSWSSPTAAHLSEDA
KDFIKATLQRTPRARPSTSQC LAHPWFLKSMPAEEAHFINTKQLK FLLARSRWRQSLMSYKSI LVMRSIPELL
QGPDPSPSLGVARHLRGEASGASSSSSSSDNELAPFARAKSLPSPVTHSPLLHPRGFLRPSASLPEETEASM
PTADAAVPASPQASGPPASPGCVPRHSV ISSLFYQQAGEGAERGNKTS GAKRHPARRRHLLKGGYIARALPGL
REPLMEYSLLEEEAAREEQASLMTKTPSFETALRLPSSSREV PGRSHSLDNPPVLTG P SPEACKEQLLFPSP
TGLTHETTAKDRGHKEGFLQESVFPFPM SGGDSRPGKQEGSSQDS CRGKPASSCHSELSESGSGS QEGCGPSSQL
GSLPHQTS LKELSTKCGPLFSEQQAAPFPTQVSP LLGSEKEPQDGS LSEGPVPV PSSSPGSASQV DASLDTE
GLSEAGDTCDFTPPPQRPQEQA TTRKFSLESRGGYAGVAGYGTFAFGGDAGGMLGQGPLWARMAWAVS QSSEE
QDEAATESPQPLES LGPIAEASGVPLRTSPSLTPWEEVEQVSLVQIRDLSGDAEAA DTISLDISEVDPAYLNL
SDLYDIKYL PFEFMI FRRV PKPIEQPESPGSETEAGQGLADFL EEAAWPWP GELGLRAGLEITEEPEEPGDLE

ALLGEEAVGRKRKWSRGLFQFPGRCLSGEEPVELGLRQVRKASMAHISRILKGRPEGPEREPPRKKAGLA  
SFRLSGLKGRDQELSDEAVVLGQSVTLACQVLAQPTAQATWSKDGVLLESSGHLISSTLKNFQLLTIILVVKE  
EDLGTYTCCVSNPLGTAVTTGVLKKAERPSSSPRPEVGEYKDAVLLVWKPVESECGPVTYIVQCCIEGGSWTT  
LASDISDCCYLTGKLSRGGMYIFRTACVSKAGMGPISSPSEQVLLGGPNHLASEEESSRGRPAQLLPSTKTFA  
FQMQIRRRGRFSVVRQCREKASGRALAAKIVPYQPEDKTAVLREYEALKRLLHHPHLAQLHAAYLSPRHLVLI  
LCSGPELLPSLAERESYSESVDVKDYLWQMLSATQYLHAQHILHLDLRSNNMMVTEYNLLKVIDLNAQSLDQE  
KVPAPENFKDYLETMAPELLEGQAVPQTDIWAIGVTAIFIMLSGEYPESESETRDLQKGLRKLIRLSRCYAG  
LSGGAVALFQSSSLCAQPWGRPCASTCLQCGLWTEEGPTGSRPTPVTFFPTVRLRAFVREKRRALLYKKNHNA  
QVR\*

>rs217506487\_ENSMUSP00000049737\_c.15869:A>GAGA\_p.R5290R-ins  
ENSMUST00000052872.15|Obscn-203|ENSMUSG00000061462|-  
|chr11:g.58934759:T>TCTC

MDHSFSGAPRFLTRPKAFVSVGKDATLSCQIVGNPTPHVSWEKDRQPVVEAGARFRLAQDGDVYRLTILDLAL  
GDSGQYVCRARNAIGEFAAVGLRVDSEGTCAEQAPHLLRPTSIRVREGADATFRCRVGGSPQPAVSWSKDG  
RRLGPPDAPHVVEEHGESSALRIRRSARPRDGGTYEVRAENPLGSASAAAAALVVDSAEVAGPPGTSTATLLA  
HLQORREAMRAEGIPSPPGAGTRTCTVTEGKHARLSCFVTGEPKPEVWKKDGQLVTEGRRHVVEDEQENF  
VLKILFCKQSDRGLYTCTASNLVGQTYSSVLLVVVREPTVPFKKRLQDLEVRKESATFQCEVAQPAATEAAWFK  
EETRLWASAKYDIEEEGTERLLTVRNVSADDDAVYICETTEGSRVVAELSVQGNLTKLPRKTAVRTGDTAIF  
WVELAVPEGPVWRWRNQEEMVAGGRVAITAEGTCHTLTI FQCTLEDMGEVAFVSGGCRTTTQFCVSAPRRPPL  
YPPADPVVKAKTESVTLWSAPPHGDRPVTIDGYVLEKRLKAYAWSRCHEAGWLATTEFTITGVAAEGDFQ  
FRVSAINHFQGGPYLEFPGTMHLVPLAVKTPKAVEAVEGGEVTFVSDLTVASSGEWFLDGEALKASSIYVI  
RCDRTRHMLTIREVPARLHGAQLKVFANGIETSIQMVVRAALGLPSSKLPAAAAAREVLAQLHEEAQLLAELSD  
QAAAVTWLKDGRELSLGPKEYMQVSAGRRALLVRDVAQDDAGLYECVSRGSRRTAYQLLVQEPKLVFAKQQAH  
SEVKAEAGNSATLSCEVTQAQTEVTFWFKDGKLLSSSSKVRMEASGCSRRLVVQQAGKADAGEYSCEAGGQKLS  
FRLDVAEPKLVFAKQQAHSEVKAEAGASATLSCEVAQAQTEVTFWFKDGKLLSSSSKVRMEASGCSRRLVVQQ  
AGKADAGEYSCEAGGQKLSFRLDVAEPKLVFAKEQQARSEVKAEAGASATLSCEVAQAQTEVTFWFKDGKLLS  
SSKVRMEASGCSRRLVVQQAGKADAGEYSCEAGGQKLSFRLDVTEPKLVFAKEQQARSEVKAEVGN SATLSCE  
VAQAQTEVTFWFKDGKLLSSSSKVRMEASGCSRRLVVQQAGKADAGEYSCEAGGQKLSFRLDVAEPKLVFAKEQ  
QARSEVKAEAGNSATLSCEVAQAQTEVTFWFKDGKLLSSSSKVRMEASGCSRRLVVQQAGKADAGEYSCEAGGQ  
KLSFHLDVTEPKLVFAKEQQAHSEVKAEAGASATLSCEVAQAQTEVTFWFKDGKLLSSSSKVRMEASGCSRRLV  
VQQAGKADAGEYSCEAGGQKLSFRLDVAEPKLVFAKEQQARSEVKAEAGASATLSCEVAQAQTEVTFWFKDGK  
LSSSSKVRVEASGCSRRLVVQQAGKADAGEYSCEAGGQKLSFRLDVAEPKLVFAKEQQANSEVKAEAGASATL  
SCEVAQAQTEVTFWFKDGKLLSSSSKVRVEASGCSRRLVVQQAGKADAGEYSCEAGGQKLSFRLDVAEPKLAFA  
KEQQAHSEVKAEAGASATLSCEVAQAQTEVTFWFKDGKLLSSSSKVRVEASGCSRRLVVQQAGKADAGEYSCEA  
GGQKLSFRLDVAEPKLAFAKEQQAHSEVKAEAGASATLSCEVAQAQTEVTFWFKDGKLLSSSSKVRVEASGCSR  
RLVVQQAGKADAGEYSCEAGGQKLSFRLDVAEPKLAFAKEQQAHSEVKAEAGASATLSCEVAQAQTEVTFWFKD  
GKLLSSSSKVRVEASGCSRRLVVQQAGKADAGEYSCEAGGQKLFRLDVAEPKLMFAKEQQAHSEVKAEAGAS  
ATLSCEVAQAQTEVTFWFKDGKLLSSSSKVRVEASGCSRRLVVQQAGKADAGEYSCEAGGQKLSFRLDVAEPK  
VFAKEQQAHSEVKAEAGASATLSCEVAQAQTEVTFWFKDGKLLSSSSKVRVEASGCSRRLVVQQV GKADAGEYS  
CEARGQKLSFRLDVADTRLMFAKEQQARTEVKAEAGNSATLSCEVAQAQTEVTFWFKDGKLLSSSSKVRVEASG  
CSRRLVVQQAGKADAGEYSCEAGGQKLSFRLDVAEAEESQIPERPSRREPLVVKEHETIILTATIAAPSVAAVT  
WLKDGEVIRRSKRHEATSLGDTHLTVRGAQVLDIAIYSCRVGKEGQDFPVQVEEVAAKFSKPLEPVEGELGG  
TVMLVCELSPEQAEVWRCGNQTLRPGKRFQMTSEGPRRTLTVSGLREDDAEYVCESRDDRTSARLTVKVP  
VVKFTSGLSAMVAEEGQEATFQCVCVSPSDAGVTWYKDGMLQPSSEKFMVMEVSGASRSLTILGLTLEDAGQVTV  
EAEGASSAALRVREAPVLFKFKLEPQTVEERTSVTLELTRPWPPEVKWTRNAAVLTPSENVEIRAEGARHC  
LVLRSVGFADRGFFGCETPDDKTQAKLNEMRQVRLVRLVGLQVEEAKEQGTASMDVELSHAEVEGSWTRDGLRL  
QPGPKCHLAVQGPVHILTLALQPQDSGLVAFRAEGVHTSARLIVTELVPVSTRVLQDQVATQKEKVTLECEL  
SRPVDVRLWKDGVLELRAGKAIGIVAQGTCSRSLVIYRCETGDQGVYVCDALDAQTSASLRVQGRTYTLIFRRL  
AEDAGEVVFVAENAESRAHLRVKELPVTLLRPLRDKIAMEKHRGVLECVSRASAQVRWFKGGVELQSGPKYE  
VVS DGLYRKLVIN DVQPEDEDTYTC DAGNVKTS AQFFVVEQSITIVRGLKDMTVMEPAPAWFECETSIPSVRP  
PKWLLGKTVLQAGGNVGLQDGTVHRLTLHKTCSTMTGPVHFTIGKSRSSAQLVVS D I PVVLRTRPLEPKAGRE  
LQSVVLSCDFRPAPKAVQWYKDDTPLSPSEKFKMALEGQMAELRILRLTPADAGVYRCQAGSAQSSAEVTV  
ATSPKVS SARLVVKGKPVVFLKALDDVSAEERGLTLTQCEVSDPEARVVWRKDGVELGPSDKYDFLHKAGAR  
GLTVHDLSDARLGLYTCQVGSKETQSKVSVHDLHGVTIKRLKTVEVLEGESECSFECVLSHESPSDPAVWTVGG  
KTVGGSGHFHAVRQGRKYTLTVKDAALSDAGEVVSVLGLTSSKASLIIRERPVDITKPLEDQRTTLGEDVMLS  
CELSRAGTSVRWLKDGKAIRKSQKYDLLSEGTRAVLVVRKASLKDSEYTCETEASKSTAKLCVEEKANRFTE  
ELADLQVEEKGRAVFTCKTEHPASVVTWRKGLLELRASGKHVPSQEGTLKLTINALERTDSDTYTCDIGAR

TQARLLVHGQKVRVIEDLEDTAVQEGSSAKFCCRIAPADYGPVHWFLDKTPHLSNELNEITVQPGGYHVLTLR
QLALKDSGTVYFEAGDQRTSAAALRVTEKPSIFSRPLTDVTVTEGEDTLVCETTTTVDSSVRWTKDGKTLRPSA
RCQLSHEGCQAQLLITATTPQDGGRYKCEIGGASSSSIVRVHALPVRFRFRESLKDVEVEPEGKAATLRCVLSVA
APVEWRHGDDVLKSSNKYSLRQEGAVLELVIRDLPQDQSGQYSCSFGDQTTSATLTVKTSQAQFVGLRNKEA
TEGTTVTLRCELTKKEAPVEWKKGTETLRNGDKYSLKQDQAVCELQICSLLVADAGEYSCVCGQEKTSATLTVK
ALLVHFVRRRLRSKEATEGDTTTLQCELSKAAPVEWRKGTETLRDGDRLSLKQDQAVCELQIRSLTIADAGEYL
CTCGQEKTSATLTVRALPAKFKDSLKNEEATEGTTATLSCELSKAAPVTWKKGPKTLQSGDKYVLRQDQAVCG
LQIHGLTMADAGEYSCVCGQEKTSATLTVRGLPAKFIEDLRSQEATEGATAILRCELSKAAPVEWRKGTETLR
DGDRLTVRQDQAVCELQIRGLAVVDGTYSLSLPTKFTTEGLRNEEATEGTMATLRCQMSKAAPVEWRKGTETLR
DGDRLSLRQDQAVCELQIRGLTIEDSGEYTCVCGQEKTSATLSVKALPSRFIEDLRSQEATEGTMATLRCQMS
KTAPVEWKKGSETLRDGGRYSLRQDQAVCELQICDLAVEDAGEYSCVCGQEKTSATLSIKALPPRFIEDLRSQ
EATEGTMATLRCQMSKAAPVEWRKGTETLRDGGRYSLRQNGAVCELQIHDLAVEDTGEYSCVCGQEKTSATLN
VKALPPRFIEDLRSQEATEGTMATLRCQMSKAAPVEWRKGTETLRDGGRYSLRQDQAVCELQIHDLVEDAGQ
YSCVCGQEKTSAVLTVDALPPKFTTEGLKKEEATEGTMVTLRCQMSKEATVEWRKGAKTLSDGGRYSLRQDQAV
CELQICGLAVEDAGEYSCVCGQEKTSATLSVKALPPRFIEDLRSQEATEGTMATLRCQMSKAAPVEWRKGTET
LRDGDRLSLRQDQAVCELQIRDLAVEDAGEYLCVCGQEKTSATLSVKALPPRFIEDLRSQEATEGTMATLRCQ
MSKAAPVEWRKGTETLRDGDRLSLRQDQAVCELQICDLAVEDTGDYSCVCGQEKTSATLSVKALPPRFIEDLR
SQEAREGTVATLRCRMSKAAPVEWRKGTETLRDGDRLSLRQEGNLCELQIRDLAVEDTEEYSCVCGQEKTSAT
LSVKALPAKFIEDLRSQEAPESSTVTLRCKLSKASVVKKGTETLRNGARYSLRQDQAVCELEIRDLTVEDT
GEYSCTCGQERTSATLSIMAPQVVFQQLQNLQAEEGSMASLRCELSVPNAAMVWSKGGLELQGDTRREARQQ
GCVAELLLRDLRREDAGEYSCVCGQEKTSATLMVTAAPVRFLELQAQDVDEGATARLRCELSREAVSVEWRK
GSLQLFPCAKYQMVQEGTTAELLVHGVEQEDAGEYTC DAGHTQS IARLSVRAPKPKFKTDLQSTEQEAGGTAR
LCCQLSEAEPTPVQWLKEGVELHVGSKYEMRRQAVCELLIHGLEAKDTGEYACLVGQKTLASLRVKEPEV
TIVRGLVDMEVQADEDEFTCKVSQAGATDVQWHLQGLPLQSNVETEVAVLADGCTHVLQKGVTLLEDAGTVS
FHVGGSSSAQLTIVRVPEVTVLEPLKDVQLSEGQDAHFRCRLSRASGQEARWALGGVPLQCNEMNDITVEQGT
LYLLTLHKVTELEDAGTITLQVGSSEAEQLKVTAKNTVLRGLENVDALEGGALFECQLSQPEVAHAHTWLLDD
EPVHTSEKVEVVYFENGLRHLHLLKLNKLPQDSCRRTVFLAGDVVTSFAFLTVRGRWRLVLEPPHDSVVKAGMV
RFTCILSEAVPVGEATWYINGAAIQPDDTDWTVTTDGSHHALTLNSAQPQHAGEVTF AARDAVASARLSVLAL
PDPPEDAEAVVGRSDHSVTLVWVAPMSDGGGLCGYRVEMKEASTGQWQLCHDLVPGPECVVDDLVPKTYRFR
VAAVGPAGAGEPVHLPQMVKIAPAPAPAPAPAPAPAPETRQAVVGEDICLELEVAADGGEVWVKGTERTIQPG
GHFEVLSRGRQMLVIKGFRTEDQGEYRCGPIQGLPSSGAATFNVVMTSGSGDEVPAQPSLPPEAAQEGDLHL
LWEALARKRRMSREPTLDSISELPEEDSRVQHLRQEAETAPDLSEGYSTADELARTGEADLSHTSSDDESRA
GTPSLVTVYLLKAGGPGISPLASKHEAQVTTSVKPKQKQEPVVPVTCPPPGDLSAADLMDPSLDKAAVKIQAAFK
GYKVRKEMKQEGEPVFSRTFGDTEAQVGDVLRLECVLATKTDMRACWLKDGIELTDGRHYHIDQLKDGTCSSL
VTGLAPTDSSGRYTCQVSTKSGRVSHSACVVVSGTESEAESSGGELDDAFRRAARRLHRLFRTKSPAELSEEE
LFLSADEGPGEPEEPADWQTYREDEFVFCIRFESLAEARQAVTCFRNMFMATMGIGVEISLGEQGPGRVEMRIG
KVAPTVPVAVPLAKTPGLQTSDAAPVFLTELQNDVDQDGYPMSFDCVVTGQPVPVSVRWFKDGLLEEDDHYMI
NEDQQGGHQLIITAVVPADMVYRCLAENSMGVSSTKAELRVELTSTDYDTAADATETSSYFSAQGYLSSREQ
EGTESDEGQLPQVLEELKDLQVAPGTRLAKFQLKVKGYPAKLYWFKDQPLTSDHIRMTDKKTLHTLEIVS
VTREDSGQYAAAYISNAVGAAYSARLLVGRGPSEPEEKPASDVHERLVPPRILEKFTPKKVKRGSITFSVKVE
GHPAPSVHHLKKEEAEGVLWIGPDPGYTMASSSKQHSVLVLDVGRQHOGTYTCIATNPAGQALCSASLHISG
LAKEEEQERVKEALISSFLQGTSQAVSAQMSSESAGFADLVGQSKGESLVAEEAHSHLSLAEVGTTEEFLQKLS
QITEMVSAKISQAKLQVPGGDSDEETKTPSASPRHGRSRPSSSVQESSSESEDGDSRGEIFDIYVVTADYLPL
GAEQDAIILREGQYVEVLDSAHPLRWLVRTKPTKSSPSRQGWVSPAYLDKRLKLSPEWGPTEAPEFPGEAVSE
DEYRTRLSSVIQELLSSEQAFVGELEQFLESHHMKHLERSPRVPAAVASQKTVIFRNVQDISHFHSSFLKELQG
CGTDDDVMCFIKNQEAFAFEKYLEFLVGRVQAESVVVSTPVQEFYKKYAEETLSAKDPTQPPPPPLQHYLEQPV
ERVQKYQALLKELIRNKARNRQNCALLEQAYAVVSALPQRAENKLVSLMENYPGTLEALGEPVIRQGHFVWE
GAPGARMPWKGNHRHVFLFRNYLVICKPRRDSRTDTFSYVFRNMMLSSIDLNDQVEGDDRAFEVWHEREDSV
RKYLLQARTVVIKNSWVKEICGIQQRQAQPVWRPPEFEELADCTAELGETVKKLACRVGTGPKPIVSWYKDGK
PVEVDPHHILIEDPDGSCTLILDNLTGIDSGQYMCFAASAAGNASTLGKILVQVPPRFVNKVRATPFVEGEDA
QITCTVEGAPYPQIRWYKDGTLAPGNRYRMLNEPRSGVLVVLVVIQAASKEDLGHYECELVNRLGSTRGGELY
MQSPALRARDQHREQIVAAVEVTEQETKVPKKTVIEETITTVVKSPPRGRRQSPGKSPSRSPSRRSASPRRP
GLLAPERLYPPGTSPPRRLEVEQGRKAPVPALYVTEAETHVAPASQSQPKWLEVEETIEVRVKKTSRGSAPVR
EMTSRGEILFTLPGGIPGRDPNANNNSNNKSIVYQEARTWGPVAVHVGEFFIFQVDSVGNVDVVAASPEPEQVR
ASQKEENTERQEGCSDGDENTFLMEEPQDSDSLQGRDPKILTHNGRVLTLADLEDYVPQEGETFCCGDPSTPST
PDEPPCEVSVLQREISEPTVGGQPVLLNVGRPPGTGATPSFFRPGSQVHSPESVSVLLREAWSGPVSAAAPWTSS
FHTHVQSSVDGSHGSFKTEVSTQTVSFGAVGETVTLHIDPDGGEAPGPSQG\*



```

>rs217506487_ENSMUSP00000020732_c.16070:A>GAGA_p.R5357R-ins
ENSMUST00000020732.13|Obscn-201|ENSMUSG00000061462|-
|chr11:g.58934759:T>TCTC
MDHSFSGAPRFLTRPKAFVSVGKDATLSCQIVGNPTPHVSWEKDRQPVEAGARFRLAQDGDVYRLTILDLAL
GDSGQYVCRARNAIGEAFVAVGLRVDSEGTCAEQAPHFLLRPTSIRVREGADATFRCRVGGSPQPAVSWSKDG
RRLGPPDAPHVRVEEHGESSALRIRRSARPRDGGTYEVRAENPLGSASAAAALVVDSDAEVAGPPGTSTATLLA
HLQQRREAMRAEGIPSPPGAGTRTCTVTEGKHARLSCFVTGEPKPEVWKKDGLVTEGRRHVVEDEQENF
VLKILFCKQSDRGLYTCTASNLVGQTYSSVLVVVREPTVPFKKRLQDLEVREKESATFQCEVAQPAEAAWFK
EETRLWASAKYDIEEEGTERRLTVRNVASADDDAVYICETTEGSRVVAELSVQGNLTKLPRKTAVRTGDTAIF
WVELAVPEGPVWRWRNQEEMVAGGRVAITAEGTCHTLTI FQCTLEDMGEVAFVSGGCRTTTQFCVSAPRRPPL
YPPADPVVKAKTESSVTLWSAPPHGDRPVTIDGYVLEKRKLGAYAWSRCHEAGWLATTEFTITGVAAEGDFQ
FRVSAINHFGQGPYLEFPGTMHLVPLAVKTPKAVEAVEGGEVTFVSDLTVASSGEWFLDGEALKASSIYVI
RCDRTRHMLTIREVPARLHGAQLKRVANGIETS IQMVVRAALGLPSSKLPAAAAAREVLAQLHEEAQLLAE LSD
QAAAVTWLKDGRELSLGPKEYMQVSAGRRALLVRDVAQDDAGLYECVSRGSRRTAYQLLVQDITDGYRDWGPAG
PQKHMCKCAGAKIARYLGS SCYRFLQYDKGVWHWLEAALDTRQKGKTS SCSLHEKPKLVFAKQQAHSEVKA E
AGNSATLSCEVTQAQTEVTWFKDGKLLSSSSSKVRMEASGCSRRLVVQQAGKADAGEYSCEAGGQKLSFRLDVA
EPKLVFAKQQAHSEVKA EAGASATLSCEVAQAQTEVTWFKDGKLLSSSSSKVRMEASGCSRRLVVQQAGKADA
GEYSCEAGGQKLSFRLDVAEPKLVFAKEQQARSEVKA EAGASATLSCEVAQAQTEVTWFKDGKLLSSSSSKVRM
EASGCSRRLVVQQAGKADAGEYSCEAGGQKLSFRLDVTEPKLVFAKEQQARSEVKA EAGASATLSCEVAQAQ T
EVTWFKDGKLLSSSSSKVRMEASGCSRRLVVQQAGKADAGEYSCEAGGQKLSFRLDVAEPKLVFAKEQQARSEV
KAEAGNSATLSCEVAQAQTEVTWFKDGKLLSSSSSKVRMEASGCSRRLVVQQAGKADAGEYSCEAGGQKLSFHL
DVTEPKLVFAKEQQAHSEVKA EAGASATLSCEVAQAQTEVTWFKDGKLLSSSSSKVRMEASGCSRRLVVQQAGK
ADAGEYSCEAGGQKLSFRLDVAEPKLVFAKEQQARSEVKA EAGASATLSCEVAQAQTEVTWFKDGKLLSSSSK
VRVEASGCSRRLVVQQAGKADAGEYSCEAGGQKLSFRLDVAEPKLVFAKEQQANSEVKA EAGASATLSCEVAQ
AQTEVTWFKDGKLLSSSSSKVRVEASGCSRRLVVQQAGKADAGEYSCEAGGQKLSFRLDVAEPKLVFAKEQQAH
SEVKA EAGASATLSCEVAQAQTEVTWFKDGKLLSSSSSKVRVEASGCSRRLVVQQAGKADAGEYSCEAGGQKLS
FRLDVAEPKLVFAKEQQAHSEVKA EAGASATLSCEVAQAQTEVTWFKDGKLLSSSSSKVRVEASGCSRRLVVQ
AGKADAGEYSCEAGGQKLSFRLDVAEPKLVFAKEQQAHSEVKA EAGASATLSCEVAQAQTEVTWFKDGKLLSS
SSKVRVEASGCSRRLVVQQAGKADAGEYSCEAGGQKLFRLDVAEPKLVFAKEQQAHSEVKA EAGASATLSCE
VAQAQTEVTWFKDGKLLSSSSSKVRVEASGCSRRLVVQQAGKADAGEYSCEAGGQKLSFRLDVAEPKLVFAKEQ
QAHSEVKA EAGASATLSCEVAQAQTEVTWFKDGKLLSSSSSKVRVEASGCSRRLVVQQVQKADAGEYSCEARGQ
KLSFRLDVADTRLMFAKEQQARTEVKA EAGNSATLSCEVAQAQTEVTWFKDGKLLSSSSSKVRVEASGCSRRLV
VQQAGKADAGEYSCEAGGQKLSFRLDVAEAE SQIPERPSRREPLVVKEHETIILTATIAAPSVAAVTWLKDG V
EIRRSKRHEATSLGDTHTLTVRGAQVLD SAIYSCRVGKEGQDFPVQVEEVA AKFSKPLEPVEGELGGTVMLVC
ELSPQAEVWRCNGT LRPGRFQMTSEGPRRTLTVSGLREDDAEYVCE SRDDRTSARLTVKVPVVKFTS
GLSAMVAEEGQEA TFQC VVSPSDAGVTWYKDGMLQPEK FVMVESGASRSLTILGLTLEDAGQVTV EAE GAS
SSAALRVREAPVLFKKLEPQTVEERTSVTLEVELTRPWPEVKWTRNAAVLTPSENVEIRAEGARHCLVLR SV
GFADRGF FGCETPDDKTQAKLNVEMRQVRLVVRGLQEVEAKEQGTASMDVELSHA EVEGSWTRDGLRLQPGPKC
HLAVQGPVHIL TLSALQPQDSGLVAFRAEGVHTSARLIVTEL PVSFTRVLQDVVATQKEKVTLECELSRPVDV
RWLKDGVELRAGKAIGIVAQGTCSRSLVIYRCETGDQGVYVCDALDAQTSASLRVQGRTYTLIFRVLAE DAGE
VKFVAENAESRAHLRVKELPVTLLRPLRDKIAMEKHGVL ECVSRASAQVRWFKGGVELQSGPKYEVVSDGL
YRKLVIN DVQPEDEDTYTC DAGNVKTS AQFFVEEQSITIVRGLKDMTVM EPAPAWFECETSIPSVRPPKWL LG
KTVLQAGGNVGL EQDGTVHRLTLHKTCSTMTGPVHFTIGKSRSSAQLVVDI PVVLRPLEPKAGRELQSVVL
SCDFRPAPKAVQWYKDDT PLS PSEKFKMALEGM AELRILRLTPADAGVYRCQAGSAQSSAEVTV EAREVTVI
QPLQDAEAMEEGRVCFSC ELSHKDEDI EWSLNGTPLYNDSFHEI SHEGLHTLVLKSVRQADTGTVCATSPKV
SVSARLVVKGKPVVFLKALDDVSAEERGLTLTQCEVSDPEARVVWRKDGVELGPSDKYDFLHKAGARGLTVHD
LSHEDAGLYTCQVGSKETQSKVSVHDLHVGITKRLKTV E VLEGE SCSFECVLSHESPSDPAVWTVGGKTVGGS
GHFHAVRQGRKYTLTVKDAALSDAGEV VSVLGLT SKASLIIRERPVDITKPLEDQRTTLGEDVMLSCELSRA
GTSVRWLKDGKAIRKSQKYDLLSEGTRAVLVVRKASLKD SGEYTCETEASKSTAKLCVEEKANRFTBELADLQ
VEEKGRAVFTCKTEHPASVVTWRKGLLELRASGKHVPSQ EGLTKLTINALERTSDTYTCDIGQARTQARLL
VHGQKVRVIEDLED TAVQEGSSAKFCCRIAPADYGPVHWFLDKTPLHSNELNEITVQPGGYHVLTLRQLALKD
SGTVYFEAGDQRTS AALRVTEKPSIFSRPLTDVTVTEGEDTLVCE TTTVDSSVRWTKDGKTLRPSARCQLSH
EGCQALLITATTPQDGGRYKCEIGGASSSSIVRVHALPVRFRFRESLKDVEVPEGKAATLRCVLSVVAAPVEWR
HGDDVLKSSNKYSLRQEGAVLELVIRDLQPQDSGQYSCSFVDGQTT SATLTVKTS SAQFVWGLRKNKEATEGTTV
TLRCELTK EAPVEWKGTETLRNGDKYSLKQDGA VCELQICSLLVADAGEYS CVCGQEKTSATLTVKALLVHF
VRRLSKEATEGDTTLTQCELSKAAPVEWRKGTETLRDGD RYSLKQDGA VCELQIRSLTIADAGEY LCTCGQE
KTSATLTVRALPAKFKDSLKNEEATEGTTATLSCELSKAAPVTWKKGPKTLQSGDKYVLRQDGA VCGLQIHGL
TMADAGEYSCVCGQEKTSATLTVRGLPAKFIEDLR SQEATEGATAILRCELSKAAPVEWRKGS ETLKDGDRYT

```

LRQDGAVCELQIRGLAVVDVTGTYSSLPKTFTEGLRNEEATEGTMATLRCQMSKAAPVEWRKGETLRDGDYSLRQDGAMCELQIRGLTIEDSGEYTCVCGQEKTSATLSVKALPSRFIEDLRSQEATEGTMATLRCQMSKTAPVEWKKGSETLRDGGYSLRQDGPVCELQICDLAVEDAGEYSCVCGQEKTSATLSIKALPPRFIEDLRSQEATEGTMATLRCQMSKAAPVEWRKGETLRDGGYSLRQNGAVCELQIHDLAVEDTGEYSCVCGQEKTSATLNVKALPPRFIEDLRSQEATEGTMATLRCQMSKAAPVEWRKGETLRDGGYSLRQDGAVCELQIHDLAVEDAGQYSCVCGQEKTSAVLTVDALPPKTFTEGLKKEEATEGTMVTLRCQMSKEATVEWRKGAKTSLDGGYSLRQDGAMCELQICGLAVEDAGEYSCVCGQEKTSATLSVKALPPRFIEDLRSQEATEGTMATLRCQMSKAAPVEWRKGETLRDGDYSLRQDGAVCELQIRDLAVEDAGEYLCVCGQEKTSATLSVKALPPRFIEDLRSQEATEGTMATLRCQMSKAAPVEWRKGETLRDGDYSLRQDGAMCELQICDLAVEDTGDYSCVCGQEKTSATLSVKALPPRFIEDLRSQEAREGTVATLRCRMSKAAPVEWRKGETLRDGDYSLRQEGNLCELQIRDLAVEDTEEYSCVCGQEKTSATLSVKALPAKFIEDLRSQEAPESSTVTLRCKLSKKASVVWKKGSETLRNGARYSLRQDGAVCELEIRDLTVEDETEYSCCGQERTSATLSIMAPQVVFQQPLQNLQAEEGSMASLRCELSVPNAAMVWSKGGLELQGDTRREARQQGCVAELLLRDLRREDAGEYSCGQTSATLMVTAAPVRFRELQAQDVDEGATARLRCELSREAVSVEWRKGSLLQFPCAKYQMVQEGTTAELLVHGVEQEDAGEYTCDAHTQSIARLSVRAPKPKFKTDLQSTEQEAGGTARLCCQLSEAEPTGTPVQWLKEGVELHVGSKYEMRRQAVCELLIHGLEAKDTGEYACLVGGQKTLASLRVKEPEVTIVRGLVDMEVQADEDVEFTCKVQAGATDVQWHLQGLPLQSNVTEVAVLADGCTHVLQKGVTLLEDAGTVSFHVGGLSSSAQLTVRVPVTVLEPLKDVQLESEGQDAHFRCRLSRASGQEARWALGGVPLQCNEMNDITVEQGTLYLLTLHKVTLEDAGTITLQVGSSEEAQLKVTAKNTVLRGLENVDALLEGGEALFECQLSQPEVAHTWLLDDEPVTSEKVEVVYFENGLRHLLLLKLNKLPQDSCRRTVFLAGDVVTSAFITVRGWRLEVLPPHDASVKAGMQVRFITCILSEAVPVGEATWYINGAAIQPDDTDWTVTTDGSHHALTLSNAQPQHAGEVTFAAARDAVASARLSVLALPDPPEDAEAVVGRSDHSVTLVSWAPMSDGGGGLCGYRVMKEASTGQWQLCHDLVPGPECVDDLVPGKTYRFRVAAVGPAAGAGEPVHLPQMVKIAPAPAPAPAPAPAPAPETRQAVVGEDICLELEVAADGGEVVWHKGTERRIQPGHFVLSRQGRQMLVIKGFRTEDQGEYRCGPIQGLPSSGAATFNVMVMTSGSGDEVPAQPSLPPEAAQEGDLHLLWEALARKRRMSREPTLDSISELPEEDSRVQHLRQEAETAPDLSEGYSTADELARTGEADLSHTSSDDESRACTPSLVTYLKKAGGPGISPLASKHEAQVTTSVKPKQKQEPVVPTCPGGDLAADLMDPSLDKAAVKIQAAFQKGYKVRKEMKQYEGPVFVSRFTFGDTEAQVGDVLRLECEVLATKTDMMRACELDKGIELTDGRHYHIDQLKDGTCSSLVTLGLAPTDSGRYTCQVSTKTSGRVSHSACVVVSGTESEAESSSGRAGLDDAFRAARRLHRLFRTKSPAELSEELFLSADEGPGEPEEPADWQTYREDENFVCIRFESLAEARQAVTCFRNMFATMGIGVEISLGEQGPGRVEMRIGKVAPTVTPAVPLAKTPGLQTSDAAPVFLTELQNDVQDGYPMSFDCVVTGQPVPSVRWFKDGKLLLEDDHYMINEDQQGGHQLIITAVVPADMGVYRCLAENSMGVSSSTKAELRVELTSTDYDTAADATETSSYFSAQGYLSSREQEGTESDEGQLPQVLEELKDLQVAPGTRLAKFQLKVKGYPAKPLYWFKDQPLTSDHIRMTDKKTLHTLEIVSVTREDSGQYAAAYISNAVGAAYSSARLLVGRPSEPEEKPASDVHERLVPPRILEKFTPKKVKRGSITFSVKVEGHPAPSVHHLKEEAEKGVWIGPDPGTYTMASSSKQHSVLVLDVGRQHQQTYTCIATNPAGQALCSASLHISGLAKEEEQERVKEALISSFLQGTSAVSAQMSSESAGFADLVGQSKGESLVAEEAHSHLSLAEVGTTEFLQKLTSSQITEMVSAKISQAKLQVPGGDSDEETKTPSAPRHRGRSRPSSSVQESSSESEDGDSRGEIFDIYVVTADYLPGLAEQDAIILREGQYVEVLDSAHPLRWLVTRKPTKSSPSRQGVSPAYLDRKRLKLSPEWGPTEAPEFPGEAVSEDEYRTRLSSVIQELLSSEQAFVQELQFLESHMKHLERSPRVPAAVASQKTVIFRNVQDISHFHSSFLKELQCGCTDDDAMCFIKNQEAFAFEKYLEFLVGRVQAESVVVSTPVQEFYKKYAETLSAKDPTQPPPPPLQHYLEQPVERVQKYQALLKELIRNKARNRQNCALLEQAYAVVSALPQRAENKLHVSIMENYPGTLEALGEPTRQGHFIVWEGAPGARMPWKGNHRHVFLFRNYLVICKPRRDSRTDFTSYVFRNMMKLSIDLNDQVEGDDRAFEVWHEREDSVRKYLLQARTVILKNSWVKEICGIQQRLAQPVWRPPEFEEELADCTAELGETVKLACRVTGTPKPIVSWYKDGKPVVDPHHILIEDPDGSCTLILDNLGTIDSGQYMCFAASAAGNASTLGKILVQVPPRFVNVKVRATPFVEGEDAQITCTVEGAPYPQIRWYKDGTLAPGNRYRMLNEPRSGVLVQVIAASKEDLGHYECVLNRLGSTRGGGELYMQSPALRARDQHHREQIIVAAVEERRPSP\*

>rs217506487\_ENSMUSP00000151217\_c.13370:A>GAGA\_p.R4457R-ins  
ENSMUST00000219084.3|Obscn-207|ENSMUSG00000061462|-  
|chr11:g.58934759:T>TCTC

MDHSFSGAPRFLTRPKAFVSVGKDATLSCQIVGNPTPHVSWEKDRQPVVEAGARFRLAQDGDVYRLTILDLALGDSGQYVCRARNAIGEAFVAVGLRVDSEGTCAEQAPHLLRPTSIRVREGADATFRCRVGGSPQPAVSWSKDGRRLGPPDAPHVVEEHGESSALRIRSARPRDGGTYEVRAENPLGSASAAAALVVDSAEVAGPPGTSTATLLAHLQQRREAMRAEGIPSPPPGAGTRTCTVTEGKHARLSCFVTGEPKPEVWKKDQGLVTEGRRHVVEDEQENFVLKILFCKQSDRGLYTCTASNLVGQTYSSVLVVVREPTVPFKKRLQDLEVREKESATFQCEVAQPATEAAWFKEETRLWASAKYDIEEGETERRLTVRNVSADDDAVYICETTEGSRVAVELSVQGNLTKRKLPRKTAVRTGDTAIFWVELAVPEGPVWRWLRNQEEMVAGGRVAITAEGTCHTLTIFQCTLEDMGEEVAVFVSGGCRITTTQFCVSAAPRRPPLYPPADPVVKAKTSSVTLSSWAPPHGDRPVTIDGYVLEKRLKLGAYAWSRCHEAGWLATTEFTITGVAAEEDGFQFRVSAINHFGQGPYLEFPGMTMHLVPLAVKTPKAVEAVEGGEVTFVSDLTVASSGEWFLDGEALKASSIYVIRCDRTRHMLTIREVPARLHGAQLKVFANGIETSIQMVVRAALGLPSSKLPAAAAREVLAQLHEEAQLLAEALSQAAAAVTWLKDGRELSLGPKEYMQVSAGRRALLVRDVAQDDAGLYECVSRGSRRTAYQLLVQDITDGYRDWGPAG

PQKHMCKCAGAKIARYLGSSCYRFLQYDKGVWHLEAALDTRQKGKTS SCSLHEKPKLVFAKGQQAHSVEKAE
AGNSATLSCEVTQAQTEVTFWKDGKLLSSSSKVRMEASGCSRRLVVQQAGKADAGEYSCEAGGQKLSFRLDVA
EPKLVFAKGQQAHSVEKAEAGASATLSCEVAQAQTEVTFWKDGKLLSSSSKVRMEASGCSRRLVVQQAGKADA
GEYSCEAGGQKLSFRLDVAEPKLVFAKEQQARSEVKAEGASATLSCEVAQAQTEVTFWKDGKLLSSSSKVRM
EASGCSRRLVVQQAGKADAGEYSCEAGGQKLSFRLDVTEPKLVFAKEQQARSEVKAEGNSATLSCEVAQAQT
EVTWFKDGKLLSSSSKVRMEASGCSRRLVVQQAGKADAGEYSCEAGGQKLSFHLDVTEPKLVFAKEQQAHSEV
KAEAGASATLSCEVAQAQTEVTFWKDGKLLSSSSKVRMEASGCSRRLVVQQAGKADAGEYSCEAGGQKLSFRL
DVAEPKLVFAKEQQARSEVKAEGASATLSCEVAQAQTEVTFWKDGKLLSSSSKVRVEASGCSRRLVVQQAGK
ADAGEYSCEAGGQKLSFRLDVAEPKLVFAKEQQANSEVKAEGASATLSCEVAQAQTEVTFWKDGKLLSSSSK
VRVEASGCSRRLVVQQAGKADAGEYSCEAGGQKLSFRLDVAEPKLAFAKEQQAHSEVKAEGASATLSCEVAQ
AQTEVTFWKDGKLLSSSSKVRVEASGCSRRLVVQQAGKADAGEYSCEAGGQKLSFRLDVAEPKLVFAKEQQAH
SEVKAEGASATLSCEVAQAQTEVTFWKDGKLLSSSSKVRVEASGCSRRLVVQQVKGADAGEYSCEARGQKLS
FRLDVAEAEESQIPERPSRREPLVVKHEHETIILTATIAAPSVAAVTWLKDGVERRSKRHEATSLGDTHTLTVR
GAQVLD SAIYSCRVGKEGQDFPVQVEEVAAKFSKPLEPVEGELGGTVMLVCELSPEQAEVVRWCNTQLRPGK
RFQMTSEGPRRTLTVSGLREDDAEYVCESRDDRTSARLTVKVRVVKFTSGLSAMVAEEGQEAFTQCVVSPS
DAGVTWYKDGMLQVPESEKFMVVESEGASRSLTILGLTLEDAGQVTEAEGASSAALRVREAPVLFKFKLEPQT
VEERTSVTLEVELTRPWPVEVKWTRNAAVLTPSENVEIRAEGARHCLVLRVSVGFADRGFFGCEPDDKTQAKLN
VEMRQVRLVRLQVEVAKEQGTASMDVELSHAEEVGSWTRDGLRLQPGPKCHLAVQGGPVHILTLTSLALQPDG
LVAFRAEGVHTSARLIVTELPVSFTRVLQDVVATQKEKVTLECELSRPVDVRLWKDGVLELRAGKAIGIVAQGT
CRSLVIYRCETGDQGVYVCDALDAQTSASLRVQGRYTLIFRRVLAEDAGEVKFVAENAESRAHLRVKELPVT
LLRPLRDKIAMEKHRGVLECVSRASAQVRWFKGGVELQSGPKYEVVSDGLYRKLVINVDVQPEDEDTYCDAG
NVKTSAQFFVEEQSITIVRGLKDMTVMEPAPAWFECETSIPSVRPPKWLGLKTVLQAGGNVLEQDGTVHRLT
LHKTCSTMTGPVHFTIGKSRSSAQLVVSDIPVVLTRPLEPKAGRELQSVVLSCDFRPAPKAVQWYKDDTPLSP
SEKFKMALEGQMAELRILRLTPADAGVYRCQAGSAQSSAEVTVAEAREVTVIQPLQDAEAMEEGRVCFSCELSH
KDEDIEWSLNGTPLYNDSFHEISHGCLHTLVLKSVRQADHTGTVCATSPKVSVSARLVVKGKPVVFLKALDDV
SAEERGLTLTQCEVSDPEARVVWRKDGVELGSPDQYDFLHKAGARGLTVHDLSHEDAGLTYCQVGSKETQSKV
SVHDLHVGITKRLKTVEVEKESCFEVLSSHESPSDPAVWTVGGKTVGGSGHFHAVRQGRKYTLTVKDAALS
DAGEVVFVSVLGLTSKASLIIRERPVDITKPLEDQRTTLGEDVMLSCELSRAGTSVRWLKDGKAIKRSQKYDLL
SEGTRAVLVVRKASLKDSGEYTCETEASKSTAKLCVEEKANRFTEELADLQVEEKGRAVFTCKTEHPASVVTW
RKGLLELRASGKHVPSQEGTLTKLTINALERTSDTYTCDIGQARTQARLLVHGQKVRVIEDLEDTAVQEGSS
AKFCCRIPADYGPVHWFLLDKTPLHSNELNEITVQPGYHVLTLRQLALKDSGTVYFEAGDQRTSAAALRVTEK
PSIFSRPLTDVTVTEGEDTLVCETTTVDSVSRWTKDGKTLRPSARCQLSHEGCAQLLITATTPQDGGRYKC
EIGGASSSSIVRVHALPVRFRESLKDVEVPEGKAATLRCVLSVAAPVEWRHGDDVLKSSNKYSLRQEGAVLE
LVIRDLPQDQSGQYSCSFGDQTTSATLTVKTSQAQFVGLKRNKEATEGTTVTLRCELTKAPVEWKKGTETLR
NGDKYSLKQDGA VCELQICSLLVADAGEYSCVCGQEKTSATLTVKALLVHFVRRRLRSKEATEGDTTLQCELS
KAAPVEWRKGTETLRDGDYSLKQDGA VCELQIRSLTIADAGEYLCTCGQEKTSATLTVRGLPAKFIEDLRSQ
EATEGATAILRCELSKAAPVEWRKGSSETLKDGDYTLRQDGA VCELQIRGLAVVDTGTYSLPTKFTTEGLRNE
EATEGTMATLRCQMSKAAPVEWRKGSSETLRDGDYSLRQDGA MCELQIRGLTIEDSGEYTCVCGQEKTSATLS
VKALPPRFIEDLRSQEATEGTMATLRCQMSKAAPVEWRKGSSETLGDGGYSLRQNGAVCELQIHDLAVEDTGE
YSCVCGQEKTSATLNVKALPPKFTTEGLKKEEATEGTMVTLRQMSKEATVEWRKGAKTSLDGGYSLRQDGA
MCELQICGLAVEDAGEYSCVCGQEKTSATLSVKALPPRFIEDLRSQEATEGTMATLRCQMSKAAPVEWRKGS
SETLRDGDYSLRQDGA VCELQIRDLAVEDAGEYLCVCGQEKTSATLSVKALPPRFIEDLRSQEATEGTMATLRC
QMSKAAPVEWRKGSKTLRQDGDYSLRQDGA MCELQICDLAVEDTGDYSCVCGQEKTSATLSVKAPQVVFQQLP
NLQAEEGSMASLRCELSVPNAAMVWSKGGLELQGDTRREARQQGCVAELLLRDLRREDAGEYSCTCGSQTTS
ATLMVTAAPVRFRLRELQAQDVDEGATARLRCELSREAVSVEWRKGSLLQFPKAKYQMVQEGTTAELLVHGVEQE
DAGEYTC DAGHTQSIARLSVRAPKPKFKTDLQSTEQEAGGTARLCCQLSEAEPTPVQWLKEGVELHVGSKYE
MRRQGA VCELLIHGLEAKDTGEYACL VGGQKTLASLRVKEPEVTIVRGLVDMVEVQADEDEFTCKVSOAGATD
VQWHLQGLPLQSNEVTEVAVLADGCTHVLQKGVTLLEDAGTVSFHVGLSSSAQLTVRVPEVTVLEPLKDVQL
SEGQDAHFRCRLSRASGQEARWALGGVPLQCNEMNDITVEQGTLYLLTLHKVTLEDAGTITLQVGSSEAQL
KVTAKNTVLRGLENDVALEGGAEALFECQLSQPEVAHTWLLDDEPVHTSEKVEVVYFENGLRHLLLLKLNKPQ
DSCRRTVFLAGDVVTSFAFLTVRGWRLVLEPPHDASVKAGMQVRFTCILSEAVPVGEATWYINGAAIQPDDTD
WTVT TDGSHHALTLSNAQPQHAGEVTF AARDAVASARLSVLALPDPPEAEVVGSRSDHSVTLVSWAPMSDGGG
GLCGYRVMKEASTGQWQLCHDLVPGPECVVDDLVPKGTIRYFRVAAVGPAGAGEPVHLQPMVKIAPAPAPAPA
PAPAPETRQAVVEDICLELEVAADGGEVVHDKGTERTIQPGHFEVLRSRQRQMLVILKFRTEDEQGEYRCGPI
QGLPSSGAATFNVMVMTSGSGDEVPAQPSLPPEAAQEGEDLHLLWEALARKRRMSREPTLDSISELPEEDSRVQH
LRQEAEEETAPDLSEGYSTADELARTGEADLSHTSSDDES RAGTPSLVTYLKKAGGPGISPLASKHEAQVTTSV
KPQKQOEPVVPTCPPPGDLSAADLMDPSLDKAAVKIQAAFKGYKVRKEMKQOEGPVFSRTFGDTEAQVGDVLR
LECVLATKTD MRACWLKDGIELTDGRHYHIDQLKDGTC SLLVTGLAPTDSGRYTCQVSTKSGRVSHSACVVVS

GTESEAESSGGELDDAFRRAARRLHRLFRKTPAELSEELFLSADEGPGPEEPADWQTYREDENFVCIRF  
 ESLAEARQAVTFCFRNMFATMGIGVEISLGEQGRGEMRIGKVAPTVTPAVPLAKTPGLQTSDAAPVFLTELQ  
 NQDVQDGYPMFSFDCVVTGQPVPVSRWFKDGKLLLEEDDHYMINEDQQGGHQLIITAVVPADMGVYRCLAENSMG  
 VSSTKAELRVELTSTDYDTAADATETSSYFSAQGYLSSREQEGTESDEGQLPQVLEELKDLQVAPGTRLAKFQ  
 LKVKGYPAKLYWFKDQPLTSDHIRMTDKKTLHTLEIVSVTREDSGQYAAIYISNAVGAAYSSARLLVRGSP  
 EPEEKASDVHERLVPPRILEKFTPKKVKRGSSITFSVKVEGHPAPSVHVLKEEAKEGVLWIGPDTPGYTMAS  
 SSKQHSLVLLDVGRQHOGTYTCIATNPAGQALCSASLHISGLAKEEEQERVKEALISSFLQGTSQAVSAQMSE  
 SAGFADLVGQSKGESLVAEEAHSHLSLAEVGTEEFQKLTSSQITEMVSAKISQAKLQVPGGDSDEETKTPSAS  
 PRHGRSRPSSVQESSSEEDGDSRGEIFDIYVVVTADYLPGLAEQDAIILREGQYVEVLDSAHPLRVLVTRTKP  
 TKSSPSRQGWVSPAYLDRKRLKLSPEWGPTEAPEFPGEAVSEDEYRTRLSVVIQELLSSEQAFVGELEQFLESHH  
 MKHLERSPRVPAAVASQKTVIFRNVQDISHFHSSFLKELQCGCTDDVAMCFIKNQEAFAKEYLEFLVGRVQAE  
 SVVVSTPVQEFYKKAEEETLSAKDPTQPPPPPLQHYLEQPVVERVQKYQALLKELIRNKARNRQNCALLEQAYA  
 VVSALPQRAENKLVSLMENYPGTLEALGEPHQGHFIVWEGAPGARMPWKGNHRHVFLFRNYLVICPKPRRDS  
 RTDFTSYVFRNMMKLSIDLNDQVEGDDRAFEVWHEREDSVRYLLQARTVIKNSWVKEICGIQORLAQPVW  
 RPPEFEEELADCTAELGETVKLACRVGTGPKPIVSWYKDGKPVVEVDPHHILIEDPDGSCCTLIDLNLTGIDSGQ  
 YMCFAASAAGNASTLGKILVQVPPRFVNVKVRATPFVEGEDAQITCTVEGAPYPQIRWYKDGTLAPGNRYRML  
 NEPRSGVLVLIQAASKEDLGHYECELVNRGLGSTRGGGELYMQSALRARDQHHRREQIVAAVEVTEQETKVPK  
 KTVIIEETITTVVKSPPRGRQSPGKSPSRSSRSASPRRPGLLAPERLYPPGTSPSRLEVEQGRKAPVPAL  
 YVTEAEVHAPASQSQPKWLEVEETIEVRVKKTGSRGASPVREMTSRGEGILFTLPGGI PGRDPNANNNSNNSV  
 YQEARTWGPVAVHVGEFFIFQVDSVGNVDWVAASPEPEQVRASQKEENTERQEGCSDGIDENTFLMEEPQDTS  
 LQGRDPKILTHNGRVLTLADLEDYVQEGETFGCGDSTPSTPDEPPCEVSVLQREI SEPTVQGPVLLNVGRPP  
 GTGATPSFFRPGSQVHSPESVFLREAWSGPVSAAPWTSSFHTHVQSSVDGSHGSFKTEVSTQTVSFGAVGE  
 TVTLHIDPDGGEAPGPSQ\*

>rs217506487\_ENSMUSP00000158662\_c.836:A>GAGA\_p.R279R-ins  
 ENSMUST00000238202.2|Obscn-208|ENSMUSG00000061462|-  
 |chr11:g.58934759:T>TCTC

VTLEDAGTITLQVGSSEEAQLKVTEAALCLVRGLQNVDFVAGEVATFSCVSRAGGPEARWLDGTLQNSP  
 ESAITVQEGIVHSLTSLGLGVADSGTITFRGTPLVSTAKLLVKDPTVEVVSAMQDLVVEEGGSAELLCQYSRP  
 VQATWKMNEREVCADGHRVIEQDWTVARLTLRPAALPCDSGIYSCEAAGTRVVALQVQAKNTVLRGLENVDA  
 LEGGEALFECQLSQPEVAHTWLLDDEPVHTSEKVEVVYFENGLRHLLLLKLNKPKQDSCRRTVFLAGDVVTS  
 FLTVR

>rs51583444\_ENSMUSP00000158795\_c.15894:G>C\_p.E5299Q

ENSMUST00000238536.2|Obscn-210|ENSMUSG00000061462|-|chr11:g.58934935:C>G  
 MDHSFSGAPRFLTRPKAFVSVGKDATLSCQIVGNPTPHVSWEKDRQPVVEAGARFRLAQDGDVYRLTILDLAL  
 GDSGQYVCRARNAIGEFAAVGLRVDSEGTCAEQAPHFLLRPTSIRVREGADATFCRCRVGGSPQPAVSWSKDG  
 RRLGPPDAPHVRVEEHGESSALRIR SARPRDGGTYEVRAENPLGSASAAAALVVDSDAEVAGPPGTSTATLLA  
 HLQQRREAMRAEGIPPSPPGAGTRTCTVTEGKHARLSCFVTGEPKPEVWKKDGQLVTEGRRHVVEDEQENF  
 VLKILFCKQSDRGLYTCTASNLVGQTYSSVLVVVREPTVPFKKRLQDLEVREKESATFQCEVAQPAEAAWFK  
 EETRLWASAKYDIEEGTERRLTVRNVSADDDAVYICETTEGSRVAELSVQGNLTKRKLPRKTAVRTGDTAIF  
 WVAVLAVPEGPVRWLRNQEEMVAGGRVAITAEGTCHTLTI FQCTLEDMGEVAFVSGGCRTTTQFCVSAAPRRPPL  
 YPPADPVVAKATESVTLWSAPPHGDRPVTIDGYVLEKRLKLGAYAWSRCHEAGWLATTEFTITGVAAEGDFQ  
 FRVSAINHFGQGPYLEFPGTMHLVPLAVKTPKAVEAVEGGEVTFVSDLTVASSGEWFLDGEALKASSIYVI  
 RCDRTRHMLTIREVPARLHGAQLKVFVANGIETSIQMVVRAALGLPSSKLPAAAAREVLAQLHHEEAQLLAE  
 QAAAVTWLKDGRELSLGPKYEMQVSAGRRALLVRDVAQDDAGLYECVSRGSRRTAYQLLVQDITDGYRDWGPAG  
 PQKHMCKCAGAKIARYLGS CYRFLQYDKGVVHWEAALDTRQKGTSSCSLHEKPKLVFAKQQAHEVKA  
 AGNSATLSCEVTQAQTEVTWFKDGKLLSSSSKVRMEASGCSRRLVVQQAGKADAGEYSCEAGGQKLSFR  
 LDVAEPKLVFAKQQAHEVKAEGASATLSCEVAQAQTEVTWFKDGKLLSSSSKVRMEASGCSRRLVVQQAG  
 KADAGEYSCEAGGQKLSFRLDVAEPKLVFAKEQQARSEVKAEGASATLSCEVAQAQTEVTWFKDGKLLSS  
 SSKVRMEASGCSRRLVVQQAGKADAGEYSCEAGGQKLSFRLDVTEPKLVFAKEQQARSEVKAEGVNSATLS  
 CEVAQAQTEVTWFKDGKLLSSSSKVRMEASGCSRRLVVQQAGKADAGEYSCEAGGQKLSFHL  
 DVTEPKLVFAKEQQAHSEVKAEGASATLSCEVAQAQTEVTWFKDGKLLSSSSKVRMEASGCSRRLVVQQAG  
 KADAGEYSCEAEGQKLSFRLDVAEPKLVFAKEQQARSEVKAEGASATLSCEVAQAQTEVTWFKDGKLLSS  
 SSKVRMEASGCSRRLVVQQAGKADAGEYSCEAGGQKLSFRLDVAEPKLVFAKEQQANSEVKAEGASATLS  
 CEVAQAQTEVTWFKDGKLLSSSSKVRVEASGCSRRLVVQQAGKADAGEYSCEAGGQKLSFRLDVAEPKLV  
 FAKEQQAHSEVKAEGASATLSCEVAQAQTEVTWFKDGKLLSSSSKVRVEASGCSRRLVVQQAGKADAGE  
 YSCEAGGQKLSFRLDVAEPKLVFAKEQQAHSEVKAEGASATLSCEVAQAQTEVTWFKDGKLLSSSSKVR  
 VEASGCSRRLVVQQAGKADAGEYSCEAGGQKLSFRLDVAEPKLVFAKEQQAHSEVKAEGASATLSCEVAQA  
 QTEVTWFKDGKLLSSSSKVRVEASGCSRRLVVQQAGKADAGEYSCEAGGQKLSFRLDVAEPKLVFAKEQQ  
 AHSEVKAEGASATLSCEVAQAQTEVTWFKDGKLLSSSSKVRVEASGCSRRLVVQQAGKADAGEYSCEAG  
 GQKLSFRLDVAEPKLVFAKEQQAHSEVKAEGASATLSCEVAQAQTEVTWFKDGKLLSSSSKVRVEASGCS  
 RRLVVQQAGKADAGEYSCEAGGQKLSFRLDVAEPKLVFAKEQQAHSEVKAEGASATLSCEVAQAQTEVTW  
 FFKDGKLLSS

SSKVRVEASGCSRRLVVQQAGKADAGEYSCEAGGQKLFRLDVAEPKLMFAKEQQAHSEVKAEAGASATLSCE  
VAQAQTEVTFWFKDGKLLSSSSKVRVEASGCSRRLVVQQAGKADAGEYSCEAGGQKLSFRLDVAEPKLVFAKEQ  
QAHSEVKAEAGASATLSCEVAQAQTEVTFWFKDGKLLSSSSKVRVEASGCSRRLVVQQVQKADAGEYSCEARGQ  
KLSFRLDVADTRLMFAKEQQARTEVKAEAGNSATLSCEVAQAQTEVTFWFKDGKLLSSSSKVRVEASGCSRRLV  
VQQAGKADAGEYSCEAGGQKLSFRLDVAEAEESQIPERPSRREPLVVKEHETIILTATIAAPSVAAVTWLKDGV  
EIRRSKRHEATSLGDTHTLTVRGAQVLDIAIYSCRVGKEGQDFPVQVEEVAAKFSKPLEPEVEGELGGTVMLVC  
ELSPQAEVWRCGNTQLRPGKRFQMTSEGPRTTLTVSGLREDDAEYVCESRDDRTSARLTVKVPVVKFTS  
GLSAMVAEEGQEAFTQCQVSPSDAGVTWYKQDGMQLQPSSEKFMVESGASRSLTILGLTLEDAGQVTEAEGAS  
SSAALRVREAPVLFKKKLEPQTVVEERTSVTLEVALTRPWPEVKWTRNAAVLTPSENVEIRAEGARHCLVLRV  
GFADRGGFFGCETPDDKTQAKLNVEMRQVRLVLRGLQVEEVAKEQGTASMDVELSHAEVEGWSWTRDGLRLQPGPKC  
HLAVQGPVHILTLALSALQPDGSLVAFRAEGVHTSARLIVTELPVSFTRVLQDVVATQKEKVTLECELSRPVDV  
RWLKDGVLELRAGKAIGIVAQGTCSLVIYRCETGDQGVYVCDALDAQTSASLRVQGRTYTLIFRRVLAEDAGE  
VKFVAENAESRAHLRVKELPVTLLRPLRDKIAMEKHRGVLECCQVSRASQVRWFVKGVELQSGPKYEVVSDGL  
YRKLVINVDVQPEDEDTYTCDAAGNVKTSAQFFVVEEQSITIVRGLKDMTVMEPAPAWFECETSIPSVRPPKWL  
KTVLQAGGNVGLQDGTVHRLTLHKTCSTMTGPVHFTIGKSRSSAQLVVSDIPVVLTRPLEPKAGRELQSVVL  
SCDFRPAPKAVQWYKDDTPLSPSEKFKMALEGQMAELRILRLTPADAGVYRCQAGSAQSSAEVTEAREVTVI  
QPLQDAEAMEEGRVCFSCELSHKDEDIEWSLNGTPLYNDSFHEISHEGCLHTLVLSKSVRQADTGTVCATSPKV  
SVSARLVVKGKPVVFLKALDDVSAEERGTTLTQCEVSDPEARVVWRKDGVELGSDKYDFLHKAGARGLTVHD  
LSHEDAGLYTCQVGSKETQSKVSVHDLHVGITKRLKTVEVLEGESECSFECVLSHESPSDPAVWTVGGKTVGGS  
GHFHAVRQGRKYTLTVKDAALSDAGEVVSFVGLTSLKASLIIRERPVDTKPLEDQRTTLGEDVMLSCELSRA  
GTSVRWLKDGKAIRKSQKYDLLSEGTRAVLVVRKASLKDSEYTCETEASKSTAKLCEVEKANRFTTELADLQ  
VEEKGRAVFTCKTEHPASVVTWRKGLLELRASGKHVPSQEGTLKLTINALERTDSDTYTCDIGQARTQARLL  
VHGQKVRVIEDLEDTAVQEGSSAKFCCRIAPADYGPVHWFLDKTPLHSNELNEITVQPGGYHVLTLRQLALKD  
SGTVYFEAGDQRTSALRVTEKPSIFSRPLTDVTVTEGEDTLVCETTTTVDSVVRWTKDGKTLRPSARCQLSH  
EGCQAQLLITATTPQDGGRYKCEIGGASSSSIVRVHALPVRFRFRESLKDVEVPEGKAATLRCVLSVAAPVEWR  
HGDDVLKSSNKYSLRKEGAVLELVIRDLQPDGSGQYSCSFGDQTTSATLTVKTSQAQFVGLRKNKEATEGTTV  
TLRCELTKREAPVLFKKKLEPQTVVEERTSVTLEVALTRPWPEVKWTRNAAVLTPSENVEIRAEGARHCLVLRV  
VRRLSKEATEGDTTTLQCELSKAAPVEWRKGTETLRDGDYSLKQDQAVCELQIRSLTIADAGEYLCTCGQE  
KTSATLTVRALPAKFKDSLKNEEATEGTTATLSCELSKAAPVTKKGPKTLQSGDKYVLRQDQAVCGLQIHGL  
TMADAGEYSCVCGQEKTSATLTVRGLPAKFIEDLRSQEATEGATAILRCELSKAAPVEWRKGSSETLKDGDYR  
LRQDQAVCELQIRGLAVVDGTYSLSLPTKFTTEGLRNEEATEGTMATLRCQMSKAAPVEWRKGSSETLRDGDYR  
LRQDQAVCELQIRGLTIEDSGEYTCVCGQEKTSATLSVKALPSRFIEDLRSQEATEGTMATLRCQMSKTAPVE  
WKKGSETLRDGGYSLRQDGPVCELQICDLAVEDAGEYSCVCGQEKTSATLSIKALPPRFIEDLRSQEATEG  
MATLRCQMSKAAPVEWRKGSSETLGDGGYSLRQNGAVCELQIHDLAVEDTGEYSCVCGQEKTSATLNVKALPP  
RFIEDLRSQEATEGTMATLRCQMSKAAPVEWRKGSSETLRDGGYSLRQDQAVCELQIHDLVEDAGQYSCVCG  
QEKTSAVLTVDALPPKFTTEGLKKEEATEGTMVTLRQMSKEATVEWRKGAKTLSDGGYSLRQDQAVCELQIC  
GLAVEDAGEYSCVCGQEKTSATLSVKALPPRFIEDLRSQEATEGTMATLRCQMSKAAPVEWRKGSSETLRDGD  
YSLRQDQAVCELQIRDLAVEDAGEYLCVCGQEKTSATLSVKALPPRFIEDLRSQEATEGTMATLRCQMSKAAP  
VEWRKGSSETLRDGDYSLRQDQAVCELQICDLAVEDTGDYSCVCGQEKTSATLSVKALPPRFIEDLRSQEARE  
GTVATLRCRMSKAAPVEWRKGSSETLKDGDYSLRQEGNLCELQIRDLAVEDTEEYSCVCGQEKTSATLSVKAL  
PAKFIEDLRSQEAPESSTVTLRCKLSKKASVVWKKGSETLRNGARYSLRQDQAVCELEIRDLTVEDTGEYSCT  
CGQERTSATLSIMAPQVVFQQPLQNLQAEEGSMASLRCELSVPAAMVWSKGGLELQGDTRREARQQGCVAEL  
LLRDLRREDAGEYSCTCGSQTTSATLMVTAAPVRFLRELQAQDVDEGATARLRCELSREAVSVEWRKGSQQLF  
PCAKYQMVQEGTTAELLVHGVEQEDAGEYTCDAHTQSIARLSVRAPKPKFKTDLQSTEQEAGGTARLCCQLS  
EAEFGTPVQWLKEGVELHVGSKYEMRRQAVCELLIHGLEAKDTGEYACLVGGQKTLASLRVKEPEVTVRGL  
VDMEVQADEDEFTCKVQAGATDVQWHLQGLPLQSNVTEVAVLADGCTHVLQKGLVLEAGTVSFHVGGL  
SSSAQLTVRVPEVTVLEPLKDVQLSEGQDAHFRCLRSRASGQEARWALGGVPLQCNEMNDITVEQGTLYLLTL  
HKVTVLEAGTITLQVGSSEEAQLKVTAKNTVLRGLENVDALQGGALFECQLSQPEVAHAHTWLLDDEPVHTS  
EKVEVVYFENGLRHLLLLKLNKPKQDSCRVTFLAGDVVTSFAFLTVRGRLEVLPEPPHDA SVKAGMQVRFTCILS  
EAVPVGEATWYINGAAIQPDDTDWTVTTDGSHHALTLSNAQPQHAGEVTFFAARDAVASARLSVLALPDPPEDA  
EAVGRSDHSVTLVSWAPMSDGGGGLCGYRVMKEASTGQWQLCHDLVPGPECVDDLVPGKTYRFRVAAVGPA  
GAGEPVHLPQMVKIAPAPAPAPAPAPAPAPETRAVVGEDICLELEVAADGGEVVWHKGTERRIQPGGHFEVLS  
RGQRQMLVIKGFRTEDQGEYRCGPIQGLPSSGAATFNVVMTSGSGDEVPAQPSLPPEAAQEGDLHLLWEALAR  
KRMSREPTLDSISELPEEDSRVQHLRQEAETAPDLSEGYSTADELARTGEADLSHTSSDDESRACTPSLVT  
YLKKAAGPGISPLASKHEAQVTSVKPQKQEPVVPTCP PPGDLSAADLMDPSLDKAAVKIQAAFQKGYKVRKE  
MKQQEGPVFSRTFGDTEAQVGDVLRLECVLATKTDMRACWLKDGIELTDGRHYHIDQLKDGTCSSLVVTGLAPT  
DSGRYTCQVSTKSGRVSHSACVVVSGTESEAESSSGGELDDAFRRAARLHRLFRKTPAELSEEELFLSADE  
GPGEPEEPADWQTYREDENFVCIRFESLAEARQAVTCFRNMFMATMIGVEISLGEQGPVEMRIGKVAPTVT



PAVPLAKTPGLQTSDAAPVFLTELQNDVQDGYPMSFDCVVTGQPVPSVRWFKDGLLEEDDHYMINEDQGGG  
HQLIITAVVPADMGVYRCLAENSMGVSSTKAELRVELTSTDYDTAADATETSSYFSAQGYLSSREQEGTESDE  
GQLPQVLEELKDLQVAPGTRLAKFQLKVKGYPAKLYWFKDGPPLTSDHIRMTDKKTLHTLEIVSVTREDSDG  
QYAAIYISNAVGAAYSSARLLVRGPSEPEEKPPASDVHERLVPPRILEKFTPKKVKRGSSITFSVKVEGHPAPSV  
HWLKEEAKEKGLWIGPDTPGYTMASSSKQHSVLVLDVGRQHGTYTTCIATNPAGQALCSASLHISGLAKEEEQ  
ERVKEALISSFLQGTSAVSAQMSSEAGFADLVGQSKGESLVAEEAHSLSLAEVGTTEEFLQKLTSTQITEMVS  
AKISQAKLQVPGGDSDEETKTPSASPRHGRSRPSSSVQESSESESDGDSRGEIFDIYVVTADYDPLGAEQDAI  
ILREGQYVEVLDSAHPLRWLVRTKPTKSSPSRQGWVSPAYLDRKRLKLSPEWGPTEAPEFPGEAVSEDEYRTRL  
SSVIQELLSSEQAFVQELQFLESHHMKHLERSPRVPAAVASQKTVIFRNVQDISHFHSSFLKELQCGCTDDDV  
AMCFIKNQEAFAKEYLEFLVGRVQAESVVVSTPVQEFYKKYAEETLSAKDPTQPPPPPLQHYLEQPVVERVQKYQ  
ALLKELIRNKARNRQNCALLEQAYAVVSALPQRAENKLVSLMENYPGTLEALGEPTRQGHFIVWEGAPGARM  
PWKGHNHRVFLFRNYLVICKPRRDSRTDFTSYVFRNMMKLSSIDLNDQVEGDDRAFEVWHEREDSVRKYLLQA  
RTVLIKNSWVKEICGIQQLAQPVWRPPEFEEELADCTAELGETVKLACRVTGTTPKPIVSWYKDGKPVVEVDPH  
HILIEDPDGSLTILDLNLTGIDSGQYMCFAASAAGNASTLGKILVQVPPRFVNVKVRATPFVEGEDAQITCTVE  
GAPYPQIRWYKDGTLAPGNRYRMLNEPRSGVLVVIQAASKEDLGHYECELVNRGLGSTRGGGELYMQSPALR  
ARDQHHREQIVAAVEDTSEVGSASHAQDQAAASVWLRLGSEALGSPSGDLPNTRQSEPPAFEEAASQIP  
GAASGTPEVSQPGTHKLEQETTSSGSQGWTPVIRVEGTAWPGAGTQQLLDVHSQVIMETTQRTYVQAPDT  
GVTRAPSMQVTIEDVQVQVGDMAQFDAVIEGHPPPIVITWYKGSTQLTSSARLSQRQDGTITYSLVLTDVAPHDA  
GVYTCVANNAGGQVLCKAELLVHGGDKLDAENQVYRRKLHSFYDVQEEIGRGVFGFVKRVQHKGNKMFCAAKF  
IPLRSKTRAQAYQERDILATLGHPLVTGLLDQFETRKTLLILILELCSSEELLDRLFKKGVVTEAEVKVYIQQL  
VEGLHLYLHSHGILHLDIKPPNIMLVHPAREDIKICDFGFAQKITPSEPQYSKYGSPEFVSPEIIEQNPFVSEGS  
DIWAMGVI SYLSLTCSSPFAGESDRATLLNVLEGRVSWSSPTAAHLSSEDAKDFIKATLQRTPRARPSTSQCLA  
HPWFLKSMPEAAEHFINTKQLKFLARSRWQRSLMSYKSI LVMRSIPELLQGPDPSPSLGVARHLRGEASGAS  
SSSSSSDNELAPFARAKSLPPSPVTHSPLLHPRGFLRPSASLPEETEASMTADAAVPASPQASAGPPASPGCV  
PRHSVSISSLFYQQAGEGAERGNKTSGAKRHPARRRHLKGGYIARALPGLREPLMEYSLLEEEAAREEQASLM  
TKTPSFETALRPLSSSVREVPRGRSHLDNPPVLTGSPPEACKQLLFPSTGLTHETAKDRGHKEGFLQESV  
FFPMSGDSRPGKQEGSSQDSRCKPSSCHSELGSGSGEGCGPPSSQSLGSLPPQSLKKELESTSCGGLFSEQ  
PQAAPFPTQVSPLLGSEKEPQDGSLSSEGPVVPVSSSPGSASQVDASLDTEGLSEAGDTCDFTPPPQRPQEQAT  
TRKFSLESRGGYAGVAGYGTFAFGGDAGGMLGQGPLWARMMAVVSQSSEEQDEAATESPQPLESIGPIAEASG  
VPLRTPSLTPWEEVEQVSLVQIRDLSGDAEAADTISLDISEVDPAYLNLSDLYDIKYLPEFEMI FRRVPKPI  
EQPESPGSETEAGQGLADFLLEAAWPPWPGELGLRAGLEITEEPEEPGDLEALLGEEAVGRKRKWSPSRGLFQF  
PGRCLSGEEPVELGLRQVRKASMAHISRI LKGRPEGPEREPPRKKAGLASFRLSGLKGRDQELSDEAVVLGQ  
SVTLACQVLAQPTAQATWSKDGVLLESSGHLLISSTLKNFQLLTI LVVKEEDLGTYTCCVSNPLGTAVTTGVL  
RKAERPSSSRPEVGELEKYDAVLLVWKPVESECGPVYIVQCCIEGGSWTTLASDISDCCYLTGKLSRGGMYIF  
RTACVSKAGMGPIYSSPSEQVLLGGPNHLASEEESRRGRPAQLLPSTKTFQMQIRRRGRFSVVRQCREKASGR  
ALAAKIVPYQPEDKTAVLEREYALKRHLHHPHLAQLHAAYLSRPHLVLI LELCSGPELLPSLAERESYSESDVK  
DYLWQMLSATQYLHAQHILHLDLRSENMMVTEYNLLKVIDLGNQSLDQEKVPAPENFKDYLETMAPELLEGQ  
GAVPQTDIWAIGVTAIFIMLSGEYPESESETRDLQKGLRKLIRLSRCYAGLSGGAVAFQLSSLCAQPWGRPCA  
STCLQCGWLTEEGPTGSRPTVPTVPTVRLRAVFREREKRRALLYKKNLAQVR\*  
>rs51583444\_ENSMUSP00000038264\_c.14010:G>C\_p.E4671Q  
ENSMUST00000047441.14|Obscn-202|ENSMUSG00000061462|-|chr11:g.58934935:C>G  
MDHSFSGAPRFLTRPKAFVSVGKDATLSCQIVGNPTPHVSWEKDRQVPEAGARFRLAQDGDVYRLTILDLAL  
GDSGQYVCRARNAIGEAFAAVGLRVDSEGTCAEQAPHFLLRPTSIRVREGADATFRCRVGSGSPQPAVSWSKDG  
RRLGPPDAPHVRVEEHGESSALRIR SARPRDGGTYEVRAENPLGSASAAAALVVDSDAEVAGPPGTSTATLLA  
HLQQRREAMRAEGIPPSPPGAGTRTCTVTEGKHARLSCFVTGEPKPEVWKKDGQLVTEGRRHVVEDEQENF  
VLKILFCKQSDRGLYTCTASNLVGQTYSSVLVVREPTVPFKKRLQDLEVREKESATFQCEVAQPATEAAWFK  
EETRLWASAKYDIEEEGTERRLTVRNVSADDDAVYICETTEGSRVVAELSVQGNLTKLPRKTAVRTGDTAIF  
WVELAVPEGPVRWRNQEEMVAGGRVAITAEGTCHTLTI FQCTLEDMGEVAFVSGGCRTTTQFCVSA PRRPPL  
YPPADPVVKAKTESSVTLSSWAPPHGDRPVTIDGYVLEKRKLGA YAWSRCHEAGWLATTEFTITGVAAEGDFQ  
FRVSAINHFGQGPYLEFPGTMHLVPLAVKTPKAVEAVEGGEVTFVSDLTVASSGEWFLDGEALKASSIYVI  
RCDRTRHMLTIREV PARLHGAQLKFVANGIETSIQMVVRAALGLPSSKLPAAAAAREVLAQLHEEAQLLAE LSD  
QAAA VTWLKDGRELSLGPKEYMQVSAGRRALLVRDVAQDDAGLYECVSRGSR TAYQLLVQDITDGYRDWGPAG  
PQKHMCKCAGAKIARYLGSSCYRFLQYDKGVWHWLEAALDTRQKGTSSCSLHEKPKLVFAKQQAHSEVKA  
AGASATLSCEVAQAQTEVTFWKDGGKLSSSSKVRMEASGCSRRLLVVQQAGKADAGEYSCEAGGQKLSFRLDVA  
EPKMVFAKEQQARSEVKAEGASATLSCEVAQAQTEVTFWKDGGKLSSSSKVRMEASGCSRRLLVVQQAGKADA  
GEYSCEAGGQKLSFRLDVTEPKLVFAKEQQARSEVKA EVGNSATLSCEVAQAQTEVTFWKDGGKLSSSSKVRM  
EASGCSRRLLVVQQAGKADAGEYSCEAGGQKLSFRLDVAEPKLVFAKEQQARSEVKAEGNSATLSCEVAQAQ  
EVTWTFKDGKLSSSSKVRMEASGCSRRLLVVQQAGKADAGEYSCEAGGQKLSFRLDVTEPKLVFAKEQQAHSEV

KAEAGASATLSCEVAQAQTEVTFWKDGKLLSSSSKVRMEASGCSRRLVVQQAGKADAGEYSCEAEGQKLSFRL  
 DVAEPKLVFAKEQQARSEVKAEAGASATLSCEVAQAQTEVTFWKDGKLLSSSSKVRVEASGCSRRLVVQQAGK  
 ADAGEYSCEAGGQKLSFRLDVAEPKLVFAKEQQANSEVKAEAGASATLSCEVAQAQTEVTFWKDGKLLSSSSK  
 VRVEASGCSRRLVVQQAGKADAGEYSCEAGGQKLSFRLDVAEPKLVFAKEQQAHSEVKAEAGASATLSCEVAQ  
 AQTEVTFWKDGKLLSSSSKVRVEASGCSRRLVVQQAGKADAGEYSCEAGGQKLSFRLDVAEPKLVFAKEQQAH  
 SEVKAEAGASATLSCEVAQAQTEVTFWKDGKLLSSSSKVRVEASGCSRRLVVQQAGKADAGEYSCEAGGQKLS  
 FRLDVAEPKLVFAKEQQAHSEVKAEAGASATLSCEVAQAQTEVTFWKDGKLLSSSSKVRVEASGCSRRLVVQQ  
 AGKADAGEYSCEAGGQKLSFRLDVAEPKLVFAKEQQAHSEVKAEAGASATLSCEVAQAQTEVTFWKDGKLLSS  
 SSKVRVEASGCSRRLVVQQAGKADAGEYSCEAGGQKLSFRLDVAEAEESQI PERPSRREPLVVKHEHTIILTAT  
 IAAPSVAAVTWLKDGV EIRRSKRHEATSLGDHTLTVRGAQVLD SAIYSCRVGKEGQDFPVQVEEVAAKFSKP  
 LEPEVEGELGGTVMLVCELSPEQAEVWRCGNTQLRPGKRFQMTSEGPRRTLTVSGLREDDAEYVCESRDDRT  
 SARLTVKVPVVKFTSGLSAMVAEEGQEA TFQCVVSPSDAGVTWYKDMQLQ PSEKFVMVESGASRSLTILGL  
 TLEDAGQVTVEAEGASSAALRVREAPVLFKKKLEPQTVEERTSVTLEVELTRPWPVEVKWTRNAAVLTPSENV  
 EIRAEGARHCLVLRVSVGFADRGFPGCETPDDKTQAKLNVEMRQVRLVVRGLQEVEAKEQGTASMDVELSHA EVE  
 GSWTRDGLRLQPGPKCHLAVQGPVHIL TLSALQPQDSGLVAFRAEGVHTSARLIVTELPVSFTRVLQDQVATQ  
 KEKVTLECELSRPVDVRLWKDGV E L RAGKAI GIVAQGTCSRSLVIYRCETGDQGVYVCDALDAQTSASLRVQGR  
 TYTLIFRRVLAEDAGEV KFVAENAESRAHLRVKELPVTLLRPLRDKIAMEKHRGVLECCQVSRASAVRWFKGG  
 VELQSGPKYEVVSDGLYRKLVIN DVQPEDEDTYTCDAGNVKTSAQFVVEEQSITIVRGLKDMTVMPEPAPAWFE  
 CETSIPSVRPPKWL LGKTVLQAGGNVGLQDGT VHR LTLHKTCSTMTGPVHFTIGKSRSSAQLVVS DIPVVL T  
 RPLEPKAGRELQSVVLSCDFRPAPKAVQWYKDDTPLSPSEKFKMALEGQMAELRILRLTPADAGVYRCQAGSA  
 QSSAEVTVAREVTVIQPLQDAEAMEEGRVCFSCELSHKDEDIEWSLNGTPLYNDSFHEISHEGLHTLVLKS  
 VRQADTGTVCATSPKVSVSARLVVKGKPVVFLKALDDVSAEERGTTLQCEVSDPEARVVWRKDGVELGPSDK  
 YDFLHKAGARGLTVHDL SHEDAGLYTCQVGSKETQSKVSVHDLHVGITKRLKTVEVLEGE SCSFECVLSHESP  
 SDPAVWTVGGKTVGGSGHFHAVRQGRKYTLTVKDAALSDAGEV VFSVLGLT SKASLIIRERPVDITKPLEDQR  
 TTLGEDVMSCELSRAGTSVRWLKDGKAI RKSQKYDLLSEGTRAVLVVRKASLKDSGEYTCETEASKSTAKLC  
 VEEKANRFTTEELADLQVEEKGRAVFTCKTEHPASVVTWRKGLLELRASGKHVPSQEGTLTKLTINALERTSD  
 TYTCDIGQARTARLLVHGQKVRVIEDLED TAVQEGSSAKFCCR IAPADYGPVHWFLDKTPLHSNELNEITVQ  
 PGGYHVLT LRQLALKDSGTVYFEAGDQRTSAALRVTEKPSIFSRPLTDVTVTEGEDLTLVCE TTTVDSSVRWT  
 KDGKTLRPSARCQLSHEGCAQLLI TATTPQDGGRYKCEIGGASSSSIVRVHALPVRFRSLKDVVEVPEGKAA  
 TLRCVLSVAAPVEWRHGDDVLKSSNKYSLRQEGAVLELVIRDLQPDGSGQYSCSFGDQTT SATLTVKTS SAQ  
 FVGKLRNKEATEGTTVTLRCELTK EAPV EWKKG TETLRNGDKYSLKQDGAVCELQICSLLVADAGEYSCVCGQ  
 EKT SATLTVKALLVHFVRR LRSKEATEGDTTTLQCELSKAAPVEWRKGTETLRDGD RYSLKQDGAVCELQIRS  
 LT IADAGEYLCTCGQEKT SATLTVRALPAKFKDSLKNEEATEGTTATLSCELSKAAPVTWKKGPKTLQSGDKY  
 VLRQDGAVCGLQIHGLTMADAGEYSCVCGQEKT SATLTVRGLPAKFIEDLRSQEATEGATAILRCELSKAAPV  
 EWRKGETLKDGD RYTLRQDGAVCELQIRGLAVVD TGYTSSLP TKFTEGLRNEEATEGTMATLRCQMSKAAPV  
 EWRKGETLRDGD RYSLRQDGAMCELQIRGLTIEDSGEYTCVCGQEKT SATLSVKALPPRFIEDLRSQEATEG  
 TMATLRCQMSKAAPVEWRKGETLGDGGRYSLRQNGAVCELQIHDLAVEDTGEYSCVCGQEKT SATLNVKALP  
 PRFIEDLRSQEATEGTMATLRCQMSKAAPVEWRKGETLRDGGRYSLRQDGAVCELQIHDL DVEDAGQYSCVC  
 GQEKTSAVLTVDALPPKFTEGLKKEEATEGTMVTLRQMSKEATVEWRKGAKTLS DGGRYSLRQDGAMCELQI  
 CGLAVEDAGEYSCVCGQEKT SATLSVKALPPRFIEDLRSQEATEGTMATLRCQMSKAAPVEWRKGSKTLRDGD  
 RYSLRQDGAMCELQICDLAVEDTGDYSCVCGQEKT SATLSVKAPQVVFQQPLQNLQAEEGSMASLRCELSV PN  
 AAMVWSKGGLELQGDTRREARQQCVAELLLRDLRREDAGEYSC TCGSQTTSATLMVTAAPVRFRLRELQAQDV  
 DEGATARLRCELSREAVSVEWRKGS LQLFPCA K YQMVQEGTTAE LLVHGVEQEDAGEYTC DAGHTQS IARLSV  
 RAPKPKFKTDLQSTEQEAGGTARLCCQLSEAE PGTPVQWLKEGVELHVGSKYEMRRQGA VCELLIHGLEAKDT  
 GEYACL VGGQKTLASLRVKEPEVTIVRGLVDMEVQADEDEFTCKVSQAGATDVQWHLQGLPLQSN E VTEVAV  
 LADGCTHVLQ LKGV TLEDAGTVSFHVGG LSSSAQLTVRVP E VTVLEPLKDVQLSE GQDAHFRCRLSRASGQEA  
 RWALGGVPLQCNEMNDITVEQGTLYLLTLHKVTLEDAGTITLQVGS CSSEAQLKVTAKNTVLRGLENVDALQG  
 GEALFECQLSQPEVA AHTWLLDDEPVHTSEKVEVVYFENGLRHLLLLLKNLKPQDSCRVTFLAGDVVTS AFLTV  
 RALPDPPEDA EVVGRSDHSVTL SWVAPMSDGGGGLCGYR VEMKEASTGQWQLCHDLVPGPECVDDLVPGKTY  
 RFRVAAVGPAGAGEPVHLPQMVKIAPAPAPAPAPAPAPAPETRAVVGEDI CLELEVAADGGEVVWHKGTERRI  
 QPGGHFEVLSRGRQMLVIKGFRTEDQGEYRCGPIQGLPSSGAATFNVMVTS GSGDEVPAQPSLPPEAAQEGD  
 LHLLWEALARKRRMSREPTLDSISELPEEDSRVQHLRQEAEETAPDLSEGYSTADELARTGEADLSHTSSDDE  
 SRAGTYPVLTYLKKGAGPGISPLASKHEAQVTT SVKPKQKQVEPVVPTCPPPGDLSAADLMDPSLDKAAVKIQA  
 AFKGYKVRKEMKQEGPVFSRTFGDTEAQVGDVLRLECEVQATKTD MRACWLKDGIELTDGRHYHIDQLKDGTC  
 SLLV TGLAPTD SGRYTCQVSTKSGRVSHSACVVVSGTESEAESSGGELDDAFRAARRLHRLFRTKSPAELS  
 EEELFLSADEGPGEPEEPADWQTYREDEFV CIRFESLAEARQAVTCFRNM FATMGIGVEISLGEQGPGRVEM  
 RIGKVAPTVTPAVPLAKTPGLQTS DAAPVFLTELQNDVQDGYPMSFDCVVTGQPVPSVRWFKDGKLL EEDDH  
 YMINEDQQGGHQLIITAVVPADMGVYRCLAENSMGVSSTKAE LRVELTSTDYDTA ADATETSSYFSAQGYLSS

REQEGTESDEGQLPQVLEELKDLQVAPGTRLAKFQKLVKGYAPKLYWFKDQPLTSDHIRMTDKKTLHTLE
IVSVTREDSGQYAAIYISNAVGAAYSARLLVVRGPEPEEKPASDVHERLVPPRILEKFTPKVKRGSSTITSV
KVEGHPAPSVHHLKEEAKEKGLVWIGPDTPGYTMASSSKQHSVLVLDVGRQHOGTYTCIATNPAGQALCSASLH
ISGLAKEEEEQERVKEALISSFLQGTSAQVSAQMSSESAGFADLVGQSKGESLVAEEAHSHLSLAEVGTTEEFLOK
LTSQITEMVSAKISQAKLQVPGGDSDEETKTPSASPRHGRSRPSSSVQESSSESEDGDSRGEIFDIYVVTADY
LPLGAEQDAIILREGQYVEVLDLSDAHLRVLVVRTKPTKSSPSRQGWVSPAYLDKRLKLSPEWGPTEAPEFPGEA
VSEDEYRTRLSSVIQELLSSEQAFVGELOFLESHHMKHLERSPRVPAAVASQKTVIFRNVQDISHFHSSFLKE
LQCGGTDDDDVAMCFIKNQEAFAFEKYLEFLVGRVQAESVVVSTPVQEFYKKYAEETLSAKDPTQPPPPPLQHYLE
QPVERVQKYQALLKELIRNKARNRQNCALLEQAYAVVSALPQRAENKLVSLMENYPGTLEALGEPVIRQGHFI
VWEGAPGARMPWKGNHRHVFVFRNYLVICKPRRDSRTDTFSYVFRNMMKLSSIDLNDQVEGDDRAFEVWHERE
DSVRKYLQARTVIKNSWVKEICGIQQRLAQPVWRPPEFEELADCTAELGETVKLACRVTGTPKPIVSWYK
DGKPVVEVDPHHILIEDPDGSCCTLIIDNLTGIDSGQYMCFAASAAGNASTLGKILVQVPPRFVNVKVRATPFVEG
EDAQITCTVEGAPYPQIRWYKDGTLAPGNRYRMLNEPRSGVLVLIQAASKEDLGHYECELVNLGSTRGGG
ELYMQSPALRARDQHHREQIVAAVEGAPSMQVTIEDVQVQVGDMAQFDAVIEGHPPPVTWYKGSQTLS SAR
LSQRQDGTYSLVLTVDVAPHDAGVYTCVANNAGGQVLCKAELLVHGDKLDAENQVYRRLKHSFYDVQEEIGR
GVFGFVKRVQHKGNKMFCAAKFIPLRSKTRAQAYQERDILATLGHPLVLTGLLDQFETRKTLLILILELCSSEEL
LDRLFKKGVVTEAEVKVYIQQLVEGLHYLHSHGILHLDIKPPNIMVHPAREDIKICDFGFAQKIPSEFPQYS
KYGSPFVSPFIIEQNPVSEGSDIWAMGVISYLSLTCSSPFLAGESDRATLLNVLEGRVSWSSPTAAHLSSEDAK
DFIKATLQRTPRARPSTSQC LAHPWFLKSMPEAAEHAHFINTKQLKFLLRARSRWRSLMSYKSI LVMRSIPELLQ
GPPDPSPLGVARHLRGEASGASSSSSSDNE LAPFARAKSLPPSPVTHSPLLHPRGFLRPSASLPEETEASMP
TADAAPAS PQSAGPPASPGCVPRHSV ISSLFYQQAGEGAERGNKTS GAKRHPARRRHLLKGGYIARALPGLR
EPLMEYSLLEEEAAREEQASLMTKTPSFETALRLPSSSVREVPRGRSHSLDNPPVTTGSPPEACKELLPST
GLTHETAKDRGHKEGFLQESVFPFPMMSGDSRPGKQEGSSQDSCRGKPASSCHSELGSGSQEGCGPPSSQSLG
SLPPQSLKKELESTSCGPLFSEQPQAAPFPTQVSPLLGSEKEPQDGSLSSEGPVVPVSSSPGSASQVDASLDETEG
LSEAGDTCDFTPPPQRPQEATTRKFSLESRRGGYAGVAGYGTFAFGGDAGGMLGQGPLWARMWAVS QSSEEQ
DEAATESPQPLESLGPIAEASGVPLRTSPSLTPWEEVEQVSLVQIRDLSGDAEAADTISLDISEVDPAYLNS
DLYDIKYLPEFEMI FRRVPKPIEQPESPGSETEAGQGLADFLLEAAWPPWPGELGLRAGLEITEEPEEPGLLEA
LLGEAAVGRKRKWSPSRGLFQFPGRCLSGEELVGLRQRVKASMAHISRILKGRPEGPEREGPPRKKAGLAS
FRLSGLKGRDQELSDEAVVLGQSVTLACQVLAQPTAQATWSKDGVLLESGHLLISSTLKNFQLLTLIVVKEE
DLGTYTCCVSNPLGTAVTTGVLKRAERPSSSPRPEVGEYKDAVLLVWKPVESECGPVTYIVQCCIEGGSWTTL
ASDISDCCYLTKLSRGGMYIFRTACVSKAGMPYSSPSEQVLLGGPNHLASEEESSRGRPAQLLPSTKTF AF
QMQIRRRGRFSVVRQCREKASGRALAAKIVPYQPEDKTA VLREYEALKRLHHPHLAQLHAAYLSPRHLVLI LEL
CSGPELLPSLAERESYSESVDKDYLWQMSLQYLHAQHILHLDLRSENMMVTEYNLLKVIDLGNASLDQEK
VPAPENFKDYLETMAPELLEGQAVPQTDIWAIGVTA FIMLSGEY PESSSEGETRDLQKGLRKLIRLSRCYAGL
SGGAVAFLOSSLCAQPWGRPCASTCLQCGWLTEEGPTGSRPTPVTFTVRLRAFVREKRRRALLYKKNH LAQ
VR\*

>rs51583444\_ENSMUSP00000049737\_c.15693:G>C\_p.E5232Q
ENSMUST00000052872.15|Obscn-203|ENSMUSG00000061462|-|chr11:g.58934935:C>G
MDHSFSGAPRFLTRPKAFVSVGKDATLSCQIVGNPTPHVSWEKDRQPV EAGARFRLAQDGDVYRLTILDLAL
GDSGQYVCRARNAIGEAFVAVGLRVDSEGTCAEQAPHLLRPTSIRVREGADATFRCRVGGSPQPAVSWSKDG
RRLGPPDAPHVRVEEHGESSALRIRSARPRDGGTYEVRAENPLGSASAAAALVVDSDAEVAGPPGTSTATLLA
HLQQRRREAMRAEGIPPSPPGAGTRTCTVTEGKHARLSCFVTGEPKPEPVWKKDQGLVTEGRRHVVEDEQENF
VLKILFCKQSDRGLYTCTASNLVGQTYSSVLVVVREPTVPFKKRLQDLEVREKESATFQCEVAQPA TEAAWFK
EETRLWASAKYDIEEGETERRLTVRNVSADDDAVYICETTEGSRVAELSVQGNLTKRKLPRKTAVRTGDTAIF
WVELAVPEGPVWRWRNQEEMVAGGRVAITAEGTCHTLTIFQCTLEDMGEVAFVSGGCRTTTTFCVSA PRRPPL
YPPADPVVKAKTESVTLWSAPPHGDRPVTIDGYVLEKRLKLGAYAWSRCHEAGWLATTEFTITGVAEEGDFQ
FRVSAINHFGQGPYLEFPGMTMLVPLAVKTPLKAVEAVEGGEVTFVSDLTVASSGEWFLDGEALKASSIYVI
RCDRTRHMLTIREV PARLHGAQLK FVANGIETS IQMVVRAALGLPSSKLPAAAAREVLAQLHEEAQLLAE LSD
QAAA VTWLKDGRELSLGPYEMQVSAGRRALLVRDVAQDDAGLYECVSRGSR TAYQLLVQEPKLVFAKQQA H
SEVKAEAGNSATLSCEVTQAQTEVTWFKDGKLLSSSSKVRMEASGCSRRLVVQQAGKADAGEYSCEAGGQKLS
FRLDVAEPKLVFAKQQA HSEVKAEAGASATLSCEVAQAQTEVTWFKDGKLLSSSSKVRMEASGCSRRLVVQQ
AGKADAGEYSCEAGGQKLSFRLDVAEPKLVFAKEQQARSEVKAEAGASATLSCEVAQAQTEVTWFKDGKLLSS
SSKVRMEASGCSRRLVVQQAGKADAGEYSCEAGGQKLSFRLDVTEPKLVFAKEQQARSEVKAEVGN SATLSCE
VAQAQTEVTWFKDGKLLSSSSKVRMEASGCSRRLVVQQAGKADAGEYSCEAGGQKLSFRLDVAEPKLVFAKEQ
QARSEVKAEAGNSATLSCEVAQAQTEVTWFKDGKLLSSSSKVRMEASGCSRRLVVQQAGKADAGEYSCEAGGQ
KLSFHLDVTEPKLVFAKEQQAHSEVKAEAGASATLSCEVAQAQTEVTWFKDGKLLSSSSKVRMEASGCSRRLV
VQQAGKADAGEYSCEAGGQKLSFRLDVAEPKLVFAKEQQARSEVKAEAGASATLSCEVAQAQTEVTWFKDGK
LSSSSKVRVEASGCSRRLVVQQAGKADAGEYSCEAGGQKLSFRLDVAEPKLVFAKEQQANSEVKAEAGASATL

SCEVAQAQTEVTFWFKDGKKLSSSSKVRVEASGCSRRLVVQQAGKADAGEYSCEAGGQKLSFRLDVAEPKLAFA  
KEQQAHSEVKAEEAGASATLSCEVAQAQTEVTFWFKDGKKLSSSSKVRVEASGCSRRLVVQQAGKADAGEYSCEA  
GGQKLSFRLDVAEPKLAFAKEQQAHSEVKAEEAGASATLSCEVAQAQTEVTFWFKDGKKLSSSSKVRVEASGCSR  
RLVVQQAGKADAGEYSCEAGGQKLSFRLDVAEPKLAFAKEQQAHSEVKAEEAGASATLSCEVAQAQTEVTFWFKD  
GKKLSSSSKVRVEASGCSRRLVVQQAGKADAGEYSCEAGGQKLFRLDVAEPKLMFAKEQQAHSEVKAEEAGAS  
ATLSCEVAQAQTEVTFWFKDGKKLSSSSKVRVEASGCSRRLVVQQAGKADAGEYSCEAGGQKLSFRLDVAEPKL  
VFAKEQQAHSEVKAEEAGASATLSCEVAQAQTEVTFWFKDGKKLSSSSKVRVEASGCSRRLVVQVQKADAGEYS  
CEARGQKLSFRLDVADTRLMFAKEQQARTEVKAEEAGASATLSCEVAQAQTEVTFWFKDGKKLSSSSKVRVEASG  
CSRRLVVQQAGKADAGEYSCEAGGQKLSFRLDVAEAEESQI PERPSRREPLVVKEHETIILTATIAAPSVAAVT  
WLKDGVEIRRSKRHEATS LGDTHLTVRGAQVLD SAIYSCRVGKEGQDFPVQVEEVAAKFSKPLEPVEGELGG  
TVMLVCELSPEQAEVWRCGNTQLRPGKRFQMTSEGPRRTLT VSGLREDDAEYVCESRDDRTSARLTVKVPR  
VVKFTSGLSAMVAEEGQEATFQCVVSPSDAGVTWYKDGMLQLPSEKFMVVEGASRSLTILGLTLEDAGQVTV  
EAEGASSAALRVREAPVLFKFKLEPQTVEERTSVTLEVELTRPWPEVKWTRNAAVLTPSENVEIRAEGARHC  
LVLRVGFADRGFFGCETPDDKTQAKLVNEMRQVRLVRLQVEEAEQGTASMDVELSHAEVEGSWTRDGLRL  
QPGPKCHLAVQGPVHILTLALSALQPDQSGLVAFRAEGVHTSARLIVTEL PVSFTRVLQDVVATQKEKVTLECEL  
SRPVDVRLKDGVELRAGKAI GIVAQGTCSRSLVIYRCETGDQGVYVCDALDAQTSASLRVQGRTYTLIFRRLV  
AEDAGEVGFVAENAESRAHLRVKELPVTLLRPLRDKIAMEKHRGVLECGVSRASAVRWFVKGVELQSGPKYE  
VVS DGLYRKLVINDDVQPEDEDTYTC DAGNVKTSAQFFVEEQSITIVRGLKDMTVMPEPAPAFWECETSIPSVRP  
PKWLLGKTVLQAGGNVLEQDGT VHRLLHKTCTMTGPVHFTIGKSRSSAQLVVS DI PVVLRPLEPKAGRE  
LQSVVLSCDFRPAPKAVQWYKDDTPLSPSEKFKMALEGQMAELRILRLTPADAGVYRCQAGSAQSSAEVTVEA  
REVTVIQPLQDAEAMEEGRVCFSCELSHKDEDI EWSLNGTPLYNDSFHEISHEGCLHTLVLSVRQADTGTVC  
ATSPKVSVSARLVVKGKPVVFLKALDDVSAEERGTTLTQCEVSDPEARVVWRKDGVELGPSDKYDFLHKAGAR  
GLTVHDLSHEDAGLYTCQVGSKETQSKVSVHDLHVGITKRLKTVLEVLEGE SCSFECVLSHESPSDPAVWTVGG  
KTVGGSGHFHAVRQGRKYTLTVKDAALSDAGEVVSVLGLTSKASLIRERPV DITKPLEDQRTTLGEDVMLS  
CELSRAGTSVRWLKDGKAI RKSQKYDLLSEGTRAVLVRKASLKDSGEYTCETEASKSTAKLVCVEEKANRFTE  
ELADLQVEEKGRAVFTCKTEHPASVVTWRKGLLELRASGKHVPSQEGTLTKLTINALERTSDTYTCDI GQAR  
TQARLLVHGQKAVIEDLEDTA VQEGSSAKFCCLRIAPADYGPVHWF LDKTPLHLSNELNEITVQPGGYHVLTLR  
QLALKDSGTVYFEAGDQRTS AALRVTEKPSIFSRPLTDVTVTEGEDTLVCE TTTVDSSVRWTKDGKTLRPSA  
RCQLSHEGCAQLLITATTPQDGGRYKCEIGGASSSSIVRVHALPVRFRFRESLKDVEVPEGKAATLRCVLSVA  
APVEWRHGDDVLKSSNKYSLRQEGAVLELVIDRLQPDQSGQYSCSFGDQTT SATLTVKTSSAQFVGKLRNKEA  
TEGTVTLRCELTKEAPVEWKKGTETLRNGDKYSLKQDGAVCELQICSLLVADAGEYSCVCGQEKT SATLTVK  
ALLVHFVRRRLRSKEATEGDTTLQCELSKAAPVEWRKGTETLRDGD RYSLKQDGAVCELQIRSLT IADAGEYL  
CTCGQEKT SATLTVRALPAKFKDSLKNEEATEGTTATLSCELSKAAPVTWKKGPKTLQSGDKYVLRQDGAVCG  
LQIHGLTMADAGEYSCVCGQEKT SATLTVRGLPAKFIEDLRSQEATEGATAILRCELS KAAPVEWRKGETL K  
DGD RYTLRQDGAVCELQIRGLAVDGTYS LPTKFTETGLRNEEATEGTMATLRCQMSKAAPVEWRKGETLR  
DGD RYSLRQDGAMCELQIRGLTIEDSGEYTCVCGQEKT SATLSVKALPSRFIEDLRSQEATEGTMATLRCQMS  
KTAPVEWKKGSETLRDGGRYSLRQDGPVCELQICDLAVEDAGEYSCVCGQEKT SATLSIKALPPRFIEDLRSQ  
EATEGTMATLRCQMSKAAPVEWRKGETLGDGGRYSLRQNGAVCELQIHDLAVEDTGEYSCVCGQEKT SATLN  
VKALPPRFIEDLRSQEATEGTMATLRCQMSKAAPVEWRKGETLRDGGRYSLRQDGAVCELQIHDLVEDAGQ  
YSCVCGQEKTSAVLTVDALPPKFTETGLKKEEATEGTMVTLRCQMSKEATVEWRKGAKT LSDGGRYSLRQDGAM  
CELQICGLAVEDAGEYSCVCGQEKT SATLSVKALPPRFIEDLRSQEATEGTMATLRCQMSKAAPVEWRKGET  
LRDGD RYSLRQDGAVCELQIRDLAVEDAGEYLCVCGQEKT SATLSVKALPPRFIEDLRSQEATEGTMATLRCQ  
MSKAAPVEWRKGSKTLR DGD RYSLRQDGAMCELQICDLAVEDTGDYSCVCGQEKT SATLSVKALPPRFIEDLR  
SQEAREGTVATLRCRMSKAAPVEWRKGETLKDGD RYSLRQEGNLCELQIRDLAVEDTEEYSCVCGQEKT SAT  
LSVKALPAKFIEDLRSQEAPESSTVTLRCKLSKKASVVKKGETLRNGARYSLRQDGAVCELEIRDLTVEDT  
GEYSCTCGQERTSATLSIMAPQVVFQQPLQNLQAEEGSMASLRCELSVPNAAMVWSKGGLELQGDTRREARQQ  
GCVAELLLRDLRREDAGEYSCCTCGSQTT SATLMVTAAPVRFLRELQAQDVDEGATARLRCELSREAVSVEWRK  
GSLQLFPKAKYQMVQEGTTAELLVHGVEQEDAGEYTC DAGHTQS IARLSVRAPKPKFKTDLQSTEQEAGGTAR  
LCCQLSEAEPTPVQWLKEGVELHVGSKYEMRRQGAVCELLIHGLEAKDTGEYACLVGGQKTLASLRVKEPEV  
TIVRGLVDMEVQADEDEFTCKVSQAGATDVQWHLQGLPLQSNVEVAVLADGCTHVLQKGVTLLEDAGTVS  
FHVGG LSSSAQLTVRVPEVTVLEPLKDVQLSEGQDAHFRCLSRASGQEARWALGGVPLQCNE MNDITVEQGT  
LYLLTLHKVTLEDAGTITLQVGS CSSEAQLKVTAKNTVLRGLENVDALQGG EALFECQLSQPEVA AHTWLLDD  
EPVHTSEKVEVVYFENGLRHLLLLKLNKLPQDSRVTF LAGDVVTS AFLTVRGWRLEVP PHDASVRLKAGMQVR  
FTCILSEAVPVGEATYINGAAIQPDDTDWTVTTDGSHHALTSNAQPQHAGEVTF AARDVASARLSVLALP  
DPEDAEVVGRSDHSVTLSSWVAPMSDGGGLCGYRVE MKEASTGQWQLCHDLVPGPECVVDLVP GKTYRFRV  
AAVGPAGAGEPVHLPQMVKIAPAPAPAPAPAPAPAPETRQAVVGEDICLELEVAADGGEVVWHKGTERRIQPGG  
HFEVLSRGRQMLVIKGFRTEDQGEYRCGPIQGLPSSGAATFNVM TSGSGDEVPAQPSLPPEAAQEGDLHLL  
WEALARKRRMSREPTLDSISELPEEDSRVQHLRQEAEEETAPDLSEGYSTADELARTGEADLSHTSSDDES RAG

TPSLVITYLKKAGGPGISPLASKHEAQVTTSVKPKQKQEPVVPTCPPPGDLSAADLMDPSLDKAAVKIQAAFVK  
YKVRKEMKQOEGPVFSRTFGDTEAQVGDVLRLECVLATKTDMRACWLKDGIELTDGRHYHIDQLKDGTCSSLLV  
TGLAPTDSGRYTCQVSTKSGRVSHSACVVVSGTESEAESSSGGELDDAFRRAARRLHRLFRTKSPAELSEEEL  
FLSADEGPGEPEEPADWQTYREDENFVCIRFESLAEARQAVTCFRNMFATMGIGVEISLGEQGPVEMRIGK  
VAPTPTPAVPLAKTPGLQTSDAAPVFLTELQNDVDQDGYPMSFDCVVTGQPVPSVRWFKDGKLEEDDHYMIN  
EDQQGGHQLIITAVVPADMGVYRCLAENSMGVSSTKAELRVELTSTDYDTAADATETSSYFSAQGYLSSREQE  
GTESDEGQLPQVLEELKDLQVAPGTRLAKFQKLVKGYPAKLYWFKDGQPLTSTDHIRMTDKKTLHTLEIVSV  
TREDSGQYAAIYISNAVGAAYSSARLLVRGPEPEEKPASDVHERLVPFRILEKFTPKKVKRGSSTFVSVKVEG  
HPAPSVHKLKEEAEGVLWIGPDTPGYTMASSSKQHSVLVLDVGRQHOGTYTICIATNPAGQALCSASLHISGL  
AKEEEQERVKEALISSFLQGTSQAVSAQMSESAGFADLVGQSKGESLVAEEAHSHLSLAEVGTTEFLQKLSQ  
ITEMVSAKISQAKLQVPGGDSDEETKTPSASPRHGRSRPSSSVQESSSESEDGDSRGEIFDIYVVTADYLP  
AEQDAIILREGQYVEVLDSAHPLRWLVRTKPTKSSPSRQGWVSPAYLDKRLKLSPEWGPTEAPEFPGEAVS  
EYRTRLSSVIQELLSSEQAFVGEQFLESHHMKHLERSPRVPAAVASQKTVI FRNVQDISHFHSSFLKELQGC  
GTDDDVAMCFIKNQEA FEKYLEFLVGRVQAESVVVSTPVQEFYKKYAEETLSAKDPTQPPPPPLQHYLEQPV  
RVQKYQALLKELIRNKARNRQNCALLEQAYAVVSALPQRAENKLVSLMENYPGTLEALGEP  
IRQGHFIVWEGAPGARMFWKGNHRHVFVLFNRNYLVICKPRRDSRTDFTSYVFRNMMKLSSIDLNDQVEGDDRAFEV  
WHEREDSVRKYLLQARTVI IKNSWVKEICIGIQORLAQPVWRPPEFEELADCTAELGETVKLACRVTGTPKPIV  
SVYKDGKPVVDPHHILIEDPDGSCITLIDNLTGIDSGQYMCFAASAAGNASTLGKILVQVPPRFVKNKVRATPFV  
VEGEDAQITCTVEGAPYPQIRWYKDGTLAPGNRYRMLNEPRSGVLVLIQAASKEDLGHYECELVNRLGSTRG  
GGELYM QSPALRARDQHHREQIVAAVEVTEQETKVPKKTVI IETITTVVKS PRGRRQSPGKSPSRSPRRSAS  
PRRPG LLAPERLYPPGTSPSRRLVEVEQGRKAPVPALYVTEAEVHAPASQSPKWLEVEETIEVRVKKTG  
SRGASPVRE MTSRGEGLIFTLPGGI PGRDPNANNNSNKS SVYQEA RTWGPVAVHVGEFFIFQVDSVGNVD  
WVAASPEPEQVRA SQKEENTERQEGCSGDENTFLMEEPQD TDSLQGRDKPILTHNGRVLTLADLE  
DYVPQEGETFGCGDSTPSTPDEPPCEVSVLQREISEPTVGPVLLNVGRPPGTGATPSFFRPGSQVHSPESV  
SFLLEAWSGPVSAAPWTSSFHVQSSVDGSHGSFKTEVSTQTVSFGAVGETVTLHIDPDGGEAPGPSQG\*  
>rs51583444\_ENSMUSP00000020732\_c.15894:G>C\_p.E5299Q  
ENSMUST00000020732.13|Obscn-201|ENSMUSG000000061462|-|chr11:g.58934935:C>G  
MDHSFSGAPRFLTRPKAFVSVGKDATLSCQIVGNPTPHVSWEKDRQVPEAGARFLAQDGDVYRLTILDLAL  
GDSGQYVCRARNAIGEAFVAVGLRVDSEGTCAEQAPHFLLRPTSIRVREGADATFRCRVGGSPQPAVSWSKDG  
RRLGPPDAPHVRVEEHGESSALRIR SARPRDGGTYEVRAENPLGSASAAAALVVDSDAEVAGPPGTSTATLLA  
HLQORREAMRAEGIPPSPPGAGTRTCTVTEGKHARLSCFVTGEPKPEVWKKDGQLVTEGRRHVVEDEQENF  
VLKILFCKQSDRGLYTCTASNLVGTYSVSVLVVREPTVPFKKRLQDLEVREKESATFQCEVAQPA  
TEAAWFK EETRLWASAKYDIEEGETERRLTVRNVSADDDAVYICETTEGSRVVAELSVQGNLTKLPRKTA  
VRTGDTAIFWVELAVPEGPVWRWRNQEEMVAGGRVAITAEGTCHTLTI FQCTLEDMGEVAFVSGGCRTTTQ  
FCVSAPRRPPL YPPADPVVKAKTESVTLWSAPPHGDRPVTIDGYVLEKRLKGLAYAWSRCHEAGW  
LATTEFTITGVAEEGDFQFRVSAINHFGQGPYLEFPGTMHLVPLAVKTPLKAVEAVEGGEVTF  
SVDLTVASSGEWFLDGEALKASSIYVIRCDRTRHMLTIREV PARLHGAQLKFVANGIETS IQMVVRAALGL  
PSSKLPAAAAAREVLAQLHEEAQLLAE LSDQAAA VTLKDGRELSLGPKEYMQVSAGRRALLVRDVAQ  
DDAGLYECVSRGSR TAYQLLVQDITDGYRDWGPAGPQKHMCKCAGAKIARYLGSSCYRFLQYDKG  
VWHWLEAALDTRQKGKTS SCSLHEKPKLVFAKQQAHSEVKA EAGNSATLSCEVTQAQTEVTWFKD  
GKKLSSSSSKVRMEASGCSRRLVVQQAGKADAGEYSCEAGGQKLSFRLDVAEPKLVFAKQQAHSEV  
KAEAGASATLSCEVAQAQTEVTWFKDGKKLSSSSSKVRMEASGCSRRLVVQQAGKADAGEYSCEAGG  
QKLSFRLDVAEPKLVFAKQQAHSEVKA EAGASATLSCEVAQAQTEVTWFKDGKKLSSSSSKVRMEAS  
GCSRRLVVQQAGKADAGEYSCEAGGQKLSFRLDVTEPKLVFAKQQARSEVKA EAGASATLSCEVAQAQ  
TEVTWFKDGKKLSSSSSKVRMEASGCSRRLVVQQAGKADAGEYSCEAGGQKLSFRLDVAEPKLVFAK  
QQARSEVKA EAGNSATLSCEVAQAQTEVTWFKDGKKLSSSSSKVRMEASGCSRRLVVQQAGKADAGE  
YSCEAGGQKLSFRLDVAEPKLVFAKQQARSEVKA EAGASATLSCEVAQAQTEVTWFKDGKKLSSSSSK  
VRMEASGCSRRLVVQQAGKADAGEYSCEAGGQKLSFRLDVAEPKLVFAKQQANSEVKA EAGASATLSCE  
VAQAQTEVTWFKDGKKLSSSSSKVRMEASGCSRRLVVQQAGKADAGEYSCEAGGQKLSFRLDVAEPK  
LAFKQQAHSEVKA EAGASATLSCEVAQAQTEVTWFKDGKKLSSSSSKVRMEASGCSRRLVVQQAGK  
ADAGEYSCEAGGQKLSFRLDVAEPKLVFAKQQAHSEVKA EAGASATLSCEVAQAQTEVTWFKDGKKL  
SSSSSKVRMEASGCSRRLVVQQAGKADAGEYSCEAGGQKLSFRLDVAEPKLVFAKQQAHSEVKA  
EAGASATLSCEVAQAQTEVTWFKDGKKLSSSSSKVRMEASGCSRRLVVQQAGKADAGEYSCEAGGQKLS  
FRLDVAEPKLVFAKQQAHSEVKA EAGASATLSCEVAQAQTEVTWFKDGKKLSSSSSKVRMEASGCS  
RRLVVQQAGKADAGEYSCEAGGQKLSFRLDVAEPKLVFAKQQAHSEVKA EAGASATLSCEVAQAQTEVT  
WFKDGKKLSSSSSKVRMEASGCSRRLVVQQAGKADAGEYSCEAGGQKLSFRLDVAEPKLVFAKQQAH  
SEVKA EAGASATLSCEVAQAQTEVTWFKDGKKLSSSSSKVRMEASGCSRRLVVQQAGKADAGEYSCE  
AGGQKLSFRLDVAEPKLVFAKQQAHSEVKA EAGASATLSCEVAQAQTEVTWFKDGKKLSSSSSKVR  
MEASGCSRRLVVQQAGKADAGEYSCEAGGQKLSFRLDVAEPKLVFAKQQAHSEVKA EAGASATLSCEVA  
QAQTEVTWFKDGKKLSSSSSKVRMEASGCSRRLVVQQAGKADAGEYSCEAGGQKLSFRLDVAEPKLVFA  
KQQAHSEVKA EAGASATLSCEVAQAQTEVTWFKDGKKLSSSSSKVRMEASGCSRRLVVQQAGKADAGE  
YSCEARGQKLSFRLDVADTRLMFAKQQARTEVKAEAGNSATLSCEVAQAQTEVTWFKDGKKLSSSSSK  
VRMEASGCSRRLVVQQAGKADAGEYSCEAGGQKLSFRLDVAEAEESQIPERPSRREPLVVKEHETIIL  
TATIAAPSVAAVTWLDGVEIRRSKRHEATSLGDTHTLTVRGAQVLD SAIYSCRVGKEGQDFPVQVEEVA  
AKFSKPLEPVEGELGGTVMLVC



ELSPEQAEVWRCGNTQLRPGKRFQMTSEGPRTTLTVSGLREDDAEYVCESTRDDRTSARLTVKVPVVKFSTS  
GLSAMVAEEGQEQATFQCVVSPSDAGVTWYKDGMLQOPSEKFMVVEGASRSLTILGLTLEDAGQVTEAEGAS  
SSAALRVREAPVLFKKKLEPQTVVEERTSVTLEVELTRPWPEVKWTRNAAVLTPSENVEIRAEGARHCLVLRVSV  
GFADRGFFGCETPDDKTQAKLNVEMRQVRLVVRGLQEVEAKEQGTASMDVELSHAEEVGSWTRDGLRLQPGPKC  
HLAVQGPVHILTLALSALQPQDSGLVAFRAEGVHTSARLIVTELPVSFTRVLQDVVATQKEKVTLECELSRPVDV  
RWLKDGVLELRAGKAIGIVAQGTCSRSLVIYRCETGDQGVYVCDALDAQTSASLRVQGRTYTLIFRRVLAEDAGE  
VKFVAENAESRAHLRVKELPVTLLRPLRDKIAMEKHRGVLECCQVSRASAQVRWFKGGVELQSGPKYEVVSDGL  
YRKLVINVDVQPEDEDTYTCDAENVKTSAQFFVVEEQSITIVRGLKDMTVMPEPAPAWFECETSIPSVRPPKWLGLG  
KTVLQAGGNVGLREQDGTVHRLTLHKTCSTMTGPVHFTIGKSRSSAQLVVSIDI PVVLRPLPEPKAGRELQSVVL  
SCDFRPAPKAVQWYKDDTPLSPSEKFKMALEGQMAELRILRLTPADAGVYRCQAGSAQSSAEVTEAREVTVI  
QPLQDAEAMEEGRVCFSCELSHKDEDEIWSLNGTPLYNDSFHEISHGCLHTLVLSVRQADTGTVCATSPKV  
SVSARLVVKGKPVVFLKALDDVSAEERGTTLTQCEVSDPEARVVRKDGVELGSPDKYDFLHKAGARGLTVHD  
LSHEDAGLYTCQVGSKETQSKVSVHDLHVGITKRLKTVEVLEGESECSFECVLSHESPSDPAVWTVGGKTVGGS  
GHFHAVRQGRKYTLTVKDAALSDAGEVVFVSVLGLTSKASLI IRERPVDITKPLEDQRTTLGEDVMLSCELSRA  
GTSVRWLKDGKAIRKSKYDILLSEGTRAVLVVRKASLKDSEYTCETEASKSTAKLCVEEKANRFTEELADLQ  
VEEKGRAVFTCKTEHPASVVTWRKGLLELRASGKHVPSQEGTLTKLTINALERTDSDTYTCDIGQARTQARLL  
VHGQKVRVIEDLEDTAVQEGSSAKFCRIAPADYGPVHWFLDKTPHLSNELNEITVQPGGYHVLTLRQLALKD  
SGTVYFEAGDQRTSAALRVTEKPSIFSRPLTDVTVTEGEDLTVLVCETTTVDSSVRWTKDGTGKTLRPSARCLSH  
EGCQAQLLITATTPQDGGRYKCEIGGASSSSIVRVHALPVRFRESLKDVEVPEGKAATLRCVLSVVAAPVEWR  
HGDDVLKSSNKYSLRQEGAVLELVIRDLQPDQSGQYSCSFGDQTTSATLTVKTSQAQFVGLKRNKEATEGTTV  
TLRCELTKAPVEWKKGTETLRNGDKYSLKQDGAVCELQICSLLVADAGEYSCVCGQEKTSATLTVKALLVHF  
VRLRSKEATEGDTTTLQCELSKAAPVEWRKGTETLRDGDYSLKQDGAVCELQIRSLTIADAGEYLCTCGQE  
KTSATLTVRALPAKFKDSLKNEEATEGTTATLSCELSKAAPVWKKGPKTLQSGDKYVLRQDGAFCGLQIHGL  
TMADAGEYSCVCGQEKTSATLTVRGLPAKFIEDLRSQEATEGATAILRCELSKAAPVEWRKGSSETLKDGDYR  
LRQDGAVCELQIRGLAVVDGTYSLSLPTKFTTEGLRNEEATEGTMATLRCQMSKAAPVEWRKGSSETLRDGDYR  
LRQDGAFCGLQIRGLTIEDSGEYTCVCGQEKTSATLSVKALPSRFIEDLRSQEATEGTMATLRCQMSKATAPVE  
WKKGSETLRDGGYSLRQDGPVCELQICDLAVEDAGEYSCVCGQEKTSATLSIKALPPRFIEDLRSQEATEG  
MATLRCQMSKAAPVEWRKGSSETLGDGGYSLRQNGAVCELQIHDLAVEDTGEYSCVCGQEKTSATLNVKALPP  
RFIEDLRSQEATEGTMATLRCQMSKAAPVEWRKGSSETLRDGGYSLRQDGAFCGLQIHDLVEDAGQYSCVCG  
QEKTSAVLTVDALPPKFTTEGLKKEEATEGTMVTLRCQMSKEATVEWRKGAKTLSDDGGYSLRQDGAFCGLQIC  
GLAVEDAGEYSCVCGQEKTSATLSVKALPPRFIEDLRSQEATEGTMATLRCQMSKAAPVEWRKGSSETLRDGD  
YSLRQDGAFCGLQIRDLAVEDAGEYLCVCGQEKTSATLSVKALPPRFIEDLRSQEATEGTMATLRCQMSKAAP  
VEWRKGSSETLRDGDYSLRQDGAFCGLQICDLAVEDTGDYSCVCGQEKTSATLSVKALPPRFIEDLRSQEARE  
GTVATLRCRMSKAAPVEWRKGSSETLKDGDYSLRQEGNLCELQIRDLAVEDTEEYSCVCGQEKTSATLSVKAL  
PAKFIEDLRSQEAPESSTVTLRCKLSKASVWKKGSETLRNGARYSLRQDGAFCGLQIRDLVEDTGEYSCT  
CGQERTSATLSIMAPQVVVQQLQNLQAEEGSMASLRCELSVNAAMVWSKGGLELQGDTRREARQQGCVAEL  
LLRDLRREDAGEYSCTCGSQTTSATLMVTAAPVRFLRELQAQDVDEGATARLRCELSREAVSVEWRKGSGLQF  
PCAKYQMVQEGTTAELLVHGVEQEDAGEYTCDAHTQSIARLSVRAPKPKFKTDLQSTEQEAGGTARLCCQLS  
EAEPGTPVQWLKEGVELHVGSKYEMRRQGAFCGLQIHGLEAKDTGEYACLVGGQKTLASLRVKEPEVTIVRGL  
VDMEVQADEDEFTCKVQAGATDVQWHLQGLPLQSNVTEVAVLADGCTHVLQKGVTLLEDAGTVSFHVGGL  
SSSAQLTVRVPEVTVLEPLKDVQLSEGQDAHFRCRLSRASGQEARWALGGVPLQCNEMNDITVEQGTLYLLTL  
HKVTLLEDAGTITLQVGSSESQAQLKVTAKNTVLRGLENVDALQGGALFECQLSQPEVAHAHTWLLDDEPVHTS  
EKVEVVYFENGLRHLLLLLKNLKPQDSCRVTFLAGDVVTSFAFLTVRGWRLEVLPEPHDASVKAGMQVRFCTILS  
EAVPVGEATWYINGAAIQPDDTDWTVTTDGSHHALTLNAQPPHAGEVTFFAARDAVASARLSVLALPDPPEDA  
EVRGRSDHSVTLSSWVAPMSDGGGLCGYRVEMKEASTGQWQLCHDLVPGPECVVDDLVPKTYRFRVAAVGP  
GAGEPVHLPQMVKIAPAPAPAPAPAPAPAPAPETRAVVGEDICLELEVAADGGEVWVHKGTERIQPGGHFEVLS  
RGQRQMLVIKGFRTEDQGEYRCGPIQGLPSSGAATFNVMVMTSGSGDEVPAQPSLPPEAAQEGDLHLLWEALAR  
KRRMSREPTLDSISELPEEDSRVQHLRQEAEEETAPDLSEGYSTADELARTGEADLSHTSSDDESRACTPSLVT  
YLKAGGPGISPLASKHEAQVTSVKPQKQEPVPTCPPPGDLSAADLMDPSLDKAAVKIQAQAFKGYKVRKE  
MKQQEGPVFSRTFGDTEAQVGDVLRLECVLATKTDMRACWLKDGIELTDGRHYHIDQLKDGTCSSLVTVGLAPT  
DSGRYTCQVSTKSGRVSHSACVVVSGTESEAESSSGGELDDAFRAARRLHRLFRTKSPAELSEELFLSADE  
GPGEPEPADWQTYREDENFVCIRFESLAEARQAVTCFRNMFATMGIGVEISLGEQGPGRVEMRIGKVAPT  
PAVPLAKTPGLQTSDAAPVFLTELQNDQVQDGYPMSFDCVSTYDQVPSVVRWFKDGKLEEDDHVMINEDQQGG  
HQLIITAVVPADMVGYRCLAEENSMTKAEYRVELTSTDYDTAADATETSSYFSAQGYLSSREQEGTESDE  
GQLPQVLEELKDLQVAPGTRLAKFQLKVKYAPKLYWFKDGGQPLTTSDHIRMTDKKTLHTLEIVSVTREDSG  
QYAAYSNAVGAAYSSARLLVRGPSEPEEKPASDVHERLVPPRILEKFTPKKVKRGSSTIFSVEGHPAPSV  
HWLKEEAKEKGLWIGPDTPGYTMASSSKQHSVLVLDVGRQHGTQYTCIATNPAGQALCSASLHISGLAKEEEQ  
ERVKEALISSFLQGTSAQVSAQMSSEAGFADLVGQSKGESLVAEEAHSHLSLAEVGTTEFLQKLTSTQITEMVS

AKISQAKLQVPGGDSDEETKTPSASPRHGRSRPSSSVQESSSESEDGDSRGEIFDIYVVTADYLPLGAEQDAI  
 ILREGQYVEVLDSAHPLRWLVRTKPTKSSPSRQGWVSPAYLDRKRLKLSPEWGPTEAPEFPGEAVSEDEYRTRL  
 SSVIQELLSSEQAFVGLQFLESHHMKHLERSPRVPAAVASQKTVIFRNVQDISHFHSSFLKELQCGTDDDDV  
 AMCFIKNQEAFAKEYLEFLVGRVQAESVWVSTPVQEFYKKYAEETLSAKDPTQPPPPPLQHYLEQPVVERVQKYQ  
 ALLKELIRNKARNRQNCALLEQAYAVVSALPQRAENKLHVSLMENYPGTLEALGEPTRQGHFIVWEGAPGARM  
 PWKGNHRHVFLFRNYLVICKPRRDSRTDTFSYVFRNMMKLSSIDLNDQVEGDDRAFEVWHEREDSVRKYLLQA  
 RTVIKNSWVKEICGIQORLAQPVWRPPEFEEELADCTAELGETVKLACRVTGTPKPIVSWYKDGKPVVEVDPH  
 HILIEDPDGSCCTLILDNLGTIDSGQYMCFAASAAGNASTLTKILVQVPPRFVNVKVRATPFVEGEDAQITCTVE  
 GAPYPQIRWYKDGTLAPGNRYRMLNEPRSGVLVVIQAASKEDLGHYECELVNLGSTRGGGELYMQSPALR  
 ARDQHHREQIVAAVEERRPSP\*  
 >rs51583444\_ENSMUSP00000151217\_c.13194:G>C\_p.E4399Q  
 ENSMUST00000219084.3|Obscn-207|ENSMUSG00000061462|-|chr11:g.58934935:C>G  
 MDHSFSGAPRFLTRPKAFVSVGKDATLSCQIVGNPTPHVSWEKDRQVEAGARFRLAQDGDVYRLTILDLAL  
 GDSGQYVCRARNAIGEFAAVGLRVDSEGTCAEQAPHLLRPTSIRVREGADATFRCRVGGSPQPAVSWSKDG  
 RRLGPPDAPHVRVEEHGESSALRIRSARPRDGGTYEVRAENPLGSASAAAAALVVDSDAEVAGPPGTSTATLLA  
 HLQORREAMRAEGIPSPPGAGTRTCTVTEGKHARLSCFVTGEPKPEVWKKDGQLVTEGRRHVVEDEQENF  
 VLKILFCKQSDRGLYCTASNLVGTYSVVLVVVREPTVPFKKRLQDLEVRKESATFQCEVAQPAATEAAWFK  
 EETRLWASAKYDIEEGTERLLTVRNVSADDDAVYICETTEGSRVLAELSVQGNLTKLPRKTAVRTGDTAIF  
 WVELAVPEGPVRWLRNQEEMVAGGRVAITAEGTCHTLTI FQCTLEDMGEVAFVSGGCRTTTQFCVSAPRRPPL  
 YPPADPVVKAKTESSVTLWSAPPHGDRPVTIDGYVLEKRKLGAYAWSRCHEAGWLATTEFTITGVAAEGDFQ  
 FRVSAINHFGQGPYLEFPGTMHLVPLAVKTPKAVEAVEGGEVTFVSDLTVASSGEWFLDGEALKASSIYVI  
 RCDRTRHMLTIREVPARLHGAQLKRVANGIETS IQMVVRAALGLPSSKLPAAAAAREVLAQLHEEAQLLAE LSD  
 QAAAVTWLKDGRELSLGPKEYMQVSAGRRALLVRDVAQDDAGLYECVSRGSRRTAYQLLVQDITDGYRDWGPAG  
 PQKHMCKCAGAKIARYLGSSCYRFLQYDKGVWHLEAALDTRQKGTSSCSLHEKPKLVFAKQQAHSEVKA  
 AGNSATLSCEVTQAQTEVTFWFKDGKLLSSSSKVRMEASGCSRRLVVQQAGKADAGEYSCEAGGQKLSFRLDVA  
 EPKLVFAKQQAHSEVKAEGASATLSCEVAQAQTEVTFWFKDGKLLSSSSKVRMEASGCSRRLVVQQAGKADA  
 GEYSCEAGGQKLSFRLDVAEPKLVFAKEQQARSEVKAEGASATLSCEVAQAQTEVTFWFKDGKLLSSSSKVRM  
 EASGCSRRLVVQQAGKADAGEYSCEAGGQKLSFRLDVTEPKLVFAKEQQARSEVKAEGASATLSCEVAQAQ  
 EVTWFKDGKLLSSSSKVRMEASGCSRRLVVQQAGKADAGEYSCEAGGQKLSFRLDVTEPKLVFAKEQQAHSEV  
 KAEAGASATLSCEVAQAQTEVTFWFKDGKLLSSSSKVRMEASGCSRRLVVQQAGKADAGEYSCEAGGQKLSFRL  
 DVAEPKLVFAKEQQARSEVKAEGASATLSCEVAQAQTEVTFWFKDGKLLSSSSKVRVEASGCSRRLVVQQAGK  
 ADAGEYSCEAGGQKLSFRLDVAEPKLVFAKEQQANSEVKAEGASATLSCEVAQAQTEVTFWFKDGKLLSSSSK  
 VRVEASGCSRRLVVQQAGKADAGEYSCEAGGQKLSFRLDVAEPKLVFAKEQQAHSEVKAEGASATLSCEVAQ  
 AQTEVTFWFKDGKLLSSSSKVRVEASGCSRRLVVQQAGKADAGEYSCEAGGQKLSFRLDVAEPKLVFAKEQQAH  
 SEVKAEGASATLSCEVAQAQTEVTFWFKDGKLLSSSSKVRVEASGCSRRLVVQQVKGADAGEYSCEARGQKLS  
 FRLDVAEAESQIPEPSPRREPLVVEKHETIILTATIAAPSVAAVWTKDGVERRSKRHEATSLGDTHTLTVR  
 GAQVLD SAIYSCRVGKEGQDFPVQVEEVAAKFSKPLEPVEGELGGTVMLVCELSPEQAEVWRCGNTQLRPGK  
 RFQMTSEGPRRTLTVSGLREDDAEYVCESRDDRTSARLTVKVRVVKFTSGLSAMVAEEGQEAFTQCVVSPS  
 DAGVTWYKDGMLQPPSEKFMVVEGASRSILTILGLTLEDAGQVTEAEGASSAALRVREAPVLFKKKLEPQT  
 VEERTSVTLEVELTRPWPEVKWTRNAAVLTPSENVEIRAEGARHCLVLRVSGFADRGFFGCETPDDKTQAKLN  
 VEMRQVRLVRLQVEEAKEQGTASMDVELSHAEEVGSWTRDGLRLQPGPKCHLAVQGPVHILTLALQPDQSG  
 LVAFRAEGVHTSARLIVTELPVSTFTRVLQDVVATQKEKVTLECELSRPVDVRLKDGVELRAGKAI GIVAQGT  
 CRSLVIYRCETGDQGVYVCDALDAQTSASLRVQGRYTLIFRRVLAEDAGEVKFVAENAESRAHLRVKELPVT  
 LLRPLRDKIAMEKHRGVLECVSRASAQVRWFKGGVELQSGPKYEVVSDGLYRKLVINVDQPEDEDYTC DAG  
 NVKTSAQFFVEEQSITIVRGLKDMTVMPEPAPAWFECETSIPSVRPPKWL LGKTVLQAGGNVGLQDGTVHRLT  
 LHKTCSTMTGPVHFTIGKSRSSAQLVSDIPVVLTRPLEPKAGRELQSVVLSCDFRPAPKAVQWYKDDTPLSP  
 SEKFKMALEGQMAELRILRLTPADAGVYRCQAGSAQSSAEVTVAEAREVTVIQPLQDAEAMEEGRVCFSCELSH  
 KDEDIEWSLNGTPLYNDSFHEISHEGCLHTLVLKSVRQADTGTVCATSPKVSVSARLVVKGKPVVFLKALDDV  
 SAEERGTTLTQCEVSDPEARVVWRKDGVELGPSDKYDFLHKAGARGLTVHDLSHEDAGLYTCQVGSKETQSKV  
 SVHDLHVGITKRLKTVLEVLEGESCFECVLSHESPSDPAVWTVGGKTVGGSGHFHAVRQGRKYTLTVKDAALS  
 DAGEVVFVSVLGLTSKASLIRERPVDITKPLEDQRTTLGEDVMLSCELSRAGTSVRWLKDGKAIKRSQKYDLL  
 SEGTRAVLVVRKASLKDSGEYTCETEASKSTAKLCVEEKANRFTTELADLQVEEKGRAVFTCKTEHPASVVTW  
 RKGLLELRASGKHVPWHQEGLETLKLTINALERTDSDTYTCDIGQARTQARLLVHGQKVRVIEDLEDTAVQEGSS  
 AKFCRIIRADYPADYQPVHFLDKTPLHSNELNETVDPGGYHVLTLRQLALKDSGTVYFEAGDQRTSAAALRTEK  
 PSIFSRPLTDVTVTEGEDTLVCETTTVDSSVRWTKDGKTLRPSARCQLSHEGCQAQLLITATTPQDGGRYKC  
 EIGGASSSSIVRVHALPVRFRFRESLKDVEVPEGKAATLRCVLSVAAPVEWRHGDDVLKSSNKYS LRQEGAVLE  
 LVIRDLQPDQSGQYSCSFGDQTTSATLTVKTSQAQFVGLRNKEATEGTTVTLRCELTKEAPVEWKKGTETLR  
 NGDKYSLKQDGA VCELQICSLLVADAGEYSCVCGQEKTSATLTVKALLVHFVRRRLRSKEATEGDTTTLQCELS

KAAPVEWRKGTETLRDGDYSLKQDGA VCE LQIRSLTIADAGEYLCTCGQEKTSATLTVRGLPAKFIEDLRSQ
EATEGATAILRCELSKAAPVEWRKGSETLKDGDYTLRQDGA VCE LQIRGLAVVDTGTYS SLP TKFTEGLRNE
EATEGTMATLRCQMSKAAPVEWRKGSETLRDGDYSLRQDGA MCE LQIRGLTIEDSGEYTCVCGQEKTSATLS
VKALPPRFIEDLRSQEATEGTMATLRCQMSKAAPVEWRKGSETLGDGGYSLRQNGAVCE LQI HDLAVEDTGE
YSCVCGQEKTSATLNVKALPPKFTEGLKKEEATEGTMVTLRCQMSKEATVEWRKGAKT L SDGGYSLRQDGA M
CE LQICGLAVEDAGEYSCVCGQEKTSATLSVKALPPRFIEDLRSQEATEGTMATLRCQMSKAAPVEWRKGSET
LRDGDYSLRQDGA VCE LQIRDLAVEDAGEYLCVCGQEKTSATLSVKALPPRFIEDLRSQEATEGTMATLRCQ
MSKAAPVEWRKGSKTLRDGDYSLRQDGA MCE LQICDLAVEDTGDYSCVCGQEKTSATLSVKAPQVVFQQPLQ
NLQAEEGSMASLRCELSVPNAAMVWSKGGLELQGDTRREARQQGCVAELLLRDLRREDAGEYSC TCGSQTSA
TLMVTAAPVRFLRELQAQDVDEGATARLRCELSREAVSVEWRKGS LQ LFP CAKYQMVQEGTTAELLVHGVEQE
DAGEYTC DAGHTQSIARLSVRAPKPKFKTDLQSTEQEAGGTARLCCQLSEAE PGTPVQWLKEGVELHVGS KYE
MRRQGA VCELLIHGLEAKDTGEYACL VGGQKT LASLRVKEPEVTIVRGLVDMEVQADEDEFTCKV SQAGATD
VQWHLQGLPLQSNEVTEVAVLADGCTHVLQ LKGV TLEDAGTVSFHVGG LSSSAQLTVRVPEVTVLEPLKDVQL
SEGQDAHFRCRLSRASGQEARWALGGVPLQC NEMNDITVEQGTLYLLTLHKVTLEDAGTITLQVGS CSSEAQL
KVTAKNTVLRGLE NVDALQGG EALFECQLSQPEVAHTWLLDDEPVHTSEKVEVVYFENGLRHLL LKLNKLPQ
DSCRVTFLAGDVVTS AFLTVRGRWLEVLEPPHDASVKAGMQVRFTCILSEAVPVGEATWYINGAAIQPDDTDW
TVTTDGSHHALT LSNAPQHAGEVTF AARDAVASARLSV LALPDPPEDAE VVGRSDHSVTLSWVAPMS DGGGG
LCGYRVEMKEASTGQWQLCHDLVPGPECVVDDLVP GKTYRFRVA AVGPAGAGEPVHLPQMVKIAPAPAPAPAP
APAPETRQAVVGEDICLELEVAADGGEVVWHKGTERRIQPGGHFEVLSRGRQMLVIKGFRTEDQGEYRCGPIQ
GLPSSGAATFNVVMTSGSGDEVPAQPSLPPEAAQEGDLHLLWEALARKRRMSREPTLDSISELPEEDSRVQHL
RQEAETAPDLSEGYSTADELARTGEADLSHTSSDDESRAGT PSLV TYLKKAGGPGISPLASKHEAQVTT SVK
PQKQQEPVVPTCPPPGDLSAADLMDPSLDKAAVKIQAAF KGYKVRKEMKQQEGPVFSRTFGDTEAQVGDVLR L
ECVLATKTD MRACWLKDGIELTDGRHYHIDQLKDGTC SLV TGLAPTDSGRYTCQVSTKSGRVSHSACVVVSG
TESEAESSSGGELDDAFRRARRLHRLFRTKSPAELSEEEFLSADEGPGEPEEPADWQTYREDENFVCIRFE
SLAEARQAVTCFRNMFATMGIGVEISLGEQGRGVEMRIGKVAPTVTPAVPLAKTPGLQTSDAAPVFLTELQN
QDVQDGYPMSFDCVVTGQVPVSVRWFKDGKLL EEDDHYMINEDQQGGHQLIITAVVPADMGVYRCLAENSMGV
SSTKAELRVELTSTDYDTAADATETSSYFSAQGYLS SREQEGTESDEGQLPQVLEELKDLQVAPGTRLAKFQL
KVKGYPA PKLYWFKDGOPLTTS DHIRMTDKKTLHTLEIVSVTREDSGQYAA YISNAVGAAYSSARLLV RGPSE
PEEKPASDVHERLVP PPRILEKFTPKKVKRGSSITFSVKVEGHPAPSVHWLKEEA EKGLWIGPDP TPGYTMAS S
SKQHS LVLLDVGRQHOGTYTCIATNPAGQALCSASLHISGLAKEEEQERVKEALISSFLOGTSQAVSAQMS ES
AGFADLVGQSKGESLVAEEAHSHLSLAEVGT EEF LQKLTSQITEMVSAKISQAKLQVPGGDSDEETKTPSASP
RHGRSRPSSSVQESSSEEDGDSRGEIFDIYVVTADYLP LGAEQDAIILREGQYVEVLDSAHPLRWLVRTKPT
KSSPSRQGWVSPAYLDKRLKLSPEWGPTEAPEFPGEAVSEDEYRTRLSSVIQELLSSEQAFV GELQFLESHM
KHLERSPRVPAAVASQKT VIFRNVDISHFHSSFLKELQCGCTDDDVAMCFIKNQEA FEKYLEFLVGRVQAES
VVVSTPVQEFYKKYAETLSAKDPTQPPPPPLQHYLEQGVVERVQKYQALLKELIRNKARNRQNCALLEQAYAV
VSALPQRAENKLHVSLMENYPGTLEALGEP I RQHGFIVWEGAPGARMPWKGNHRHVFLFRNYLVICKPRRDSR
TDTFSYVFRNMMKLSSIDLNDQVEGDDRAFEVWHERE DSVRKYLLQARTVIKNSWKEICGIQQRLAQPVWR
PPEFEEELADCTAELGETVKLACRVGTGPKPIVSWYKDGK PVEVDPHHILIEDPDG SCTLILDNLTGIDSGQY
MCFAASAAGNASTLGKILVQVPPRFVNKVRATPFVEGEDAQITCTVEGAPYPQIRWYKDGTL LAPGNRYRMLN
EPRSGVLV LVIQAASKEDLGHYEC ELVNRLGSTRGGGELYMQSPALRARDQHHRREQIVA AAVEVTEQETKVPKK
TVIIEETITTVVKS PRGRRQSPGKSPSRSPRRSASPRR PGLLAPERLYPPGTSPSRRLEVEQGRKAPVPALY
VTEAEVHAPASQS QPKWLEVEETIEVRVKKTGSRGASPVREMTSRGEGILFTLPGGIPGRDPNANN SNKSVY
QEARTWGP AVVHVGEFFIFQVDSVGNVDWVAASPEPEQVRASQKEENTERQEGCSDGDENTFLMEEPQD TDSL
QGRDPKILTHNGRVLTLADLEDYVPOEGETF GCGDSTPSTPDEPPCEVSVLQREI SEPTVGGQPVLLNVGRPPG
TGATPSFFRPGSQVHSPESVFLREAWSGPVS AAPWTSSFHTHVQSSVDGSHG SFKTEVSTQTVSFGAVGET
VTLHIDPDGGEAPGPSQG\*

>rs51583444\_ENSMUSP00000158662\_c.660:G>C\_p.E221Q
ENSMUST00000238202.2|Obscn-208|ENSMUSG00000061462|-|chr11:g.58934935:C>G
VTLEDAGTITLQVGS CSSEAQLKVTEAALCLVRGLQNVDFAGEVATFSCEVSRAGGPEARWWLDGTL LQNSP
ESAITVQEGIVHSLT LSGLVADSGTITFR TGPLVSTAKLLVKDPTVEVVSAMQDLVVEEGGSAELLCQYSRP
VQATWKMNEREVCADGHRVIEQDWTVARLTLR PALPCDSGIYSCEAAGTRVVAL LQVQAKNTVLRGLE NVDA
LQGG EALFECQLSQPEVAHTWLLDDEPVHTSEKVEVVYFENGLRHLL LKLNKLPQDSCRVTFLAGDVVTSAF
LTVR

>rs46013744\_ENSMUSP00000158662\_c.609:G>A\_p.V204M
ENSMUST00000238202.2|Obscn-208|ENSMUSG00000061462|-|chr11:g.58935646:C>T
VTLEDAGTITLQVGS CSSEAQLKVTEAALCLVRGLQNVDFAGEVATFSCEVSRAGGPEARWWLDGTL LQNSP
ESAITVQEGIVHSLT LSGLVADSGTITFR TGPLVSTAKLLVKDPTVEVVSAMQDLVVEEGGSAELLCQYSRP
VQATWKMNEREVCADGHRVIEQDWTVARLTLR PALPCDSGIYSCEAAGTRVVAL LQMQAKNTVLRGLE NVDA

LEGGEALFECQLSQPEVAHAHTWLLDDEPVHTSEKVEVVYFENGLRHLLLLLKNLKPQDSCRVTFLAGDVVTSAF  
LTVR  
>rs29421098\_ENSMUSP00000158662\_c.466:G>A\_p.R156Q  
ENSMUST00000238202.2|Obscn-208|ENSMUSG00000061462|-|chr11:g.58935789:C>T  
VTLEDAGTITLQVGSSEEAQLKVTEAALCLVRGLQNVDFAGEVATFSCVSRAGGPEARWWLDGTLQNSP  
ESAITVQEGIVHSLTSLGLGVADSGTITFRTGPLVSTAKLLVKDPTVEVVSAMQDLVVEEGGSSELLCQYSRP  
VQATWKMNEQEVCADGHRVIEEQDWTVARLTLRPAALPCDSGIYSCEAAGTRVVALLOVQAKNTVLRGLENVDA  
LEGGEALFECQLSQPEVAHAHTWLLDDEPVHTSEKVEVVYFENGLRHLLLLLKNLKPQDSCRVTFLAGDVVTSAF  
LTVR  
>rs51724502\_ENSMUSP00000158795\_c.14664:G>A\_p.A4889T  
ENSMUST00000238536.2|Obscn-210|ENSMUSG00000061462|-|chr11:g.58943367:C>T  
MDHSFSGAPRFLTRPKAFVSVGKDATLSCQIVGNPTPHVSWEKDRQFVEAGARFRLAQDGDVYRLTILDLAL  
GDSGQYVCRARNAIGEFAAVGLRVDSEGTCAEQAPHFLLRPTSIRVREGADATFRCRVGGSPQPAVSWSKDG  
RRLGPPDAPHVRVEEHGESSALRIRSARPRDGGTYEVRAENPLGSASAAAALVVDSDAEVAGPPGTSTATLLA  
HLQQRRREAMRAEGIPPSPPGAGTRTCTVTEGKHARLSCFVTGEPKPKETVWKKDGLVTEGRRHVVEDEQENF  
VLKILFCKQSDRGLYCTASNLVGGTYSSVLVVVREPTVPFKKRLQDLEVREKESATFQCEVAQPAATEAAWFK  
EETRLWASAKYDIEEETERRRLTVRNVSADDDAVYICETTEGSRVAELSVQGNLTKLPRKTAVRTGDTAIF  
WVELAVPEGPVRWLRNQEEMVAGGRVAITAEGTCHTLTI FQCTLEDMGEVAFVSGGCRTTTFQCVSAPRRPPL  
YPPADPVVKAKTESSVTLWSAPPHGDRPVTIDGYVLEKRKLGAYAWSRCHEAGWLATTEFTITGVAAEEDGFQ  
FRVSAINHFGQGPYLEFPGMTMLVPLAVKTPKAVEAVEGGEVTFVSDLTVASSGEWFLDGEALKASSIYVI  
RCDRTRHMLTIREVPARLHGAQLKVFANGIETS IQMVVRAALGLPSSKLPAAAAREVLAQLHEEAQLLAE LSD  
QAAA VTWLKDGRELSLGPYEMQVSAGRRALLVRDVAQDDAGLYECVSRGSRRTAYQLLVQDITDGYRDWGPAG  
PQKHMCKCAGAKIARYLGSSCYRFLQYDKGVWHLEAALDTRQGKGTSSCSLHEKPKLVFAKQQAHSEVKA  
AGNSATLSCEVTQAQTEVTFWKDGKLLSSSSKVRMEASGCSRRLVVQQAGKADAGEYSCEAGGQKLSFRLDVA  
EPKLVFAKQQAHSEVKAEGASATLSCEVAQAQTEVTFWKDGKLLSSSSKVRMEASGCSRRLVVQQAGKAD  
GEYSCEAGGQKLSFRLDVAEPKMFVFAKEQQARSEVKAEGASATLSCEVAQAQTEVTFWKDGKLLSSSSKVR  
EASGCSRRLVVQQAGKADAGEYSCEAGGQKLSFRLDVTEPKLVFAKEQQARSEVKAEGVNSATLSCEVAQAQ  
EVTWFKDGKLLSSSSKVRMEASGCSRRLVVQQAGKADAGEYSCEAGGQKLSFRLDVAEPKLVFAKEQQARSEV  
KAEAGNSATLSCEVAQAQTEVTFWKDGKLLSSSSKVRMEASGCSRRLVVQQAGKADAGEYSCEAGGQKLSFHL  
DVTEPKLVFAKEQQAHSEVKAEGASATLSCEVAQAQTEVTFWKDGKLLSSSSKVRMEASGCSRRLVVQQAGK  
ADAGEYSCEAGGQKLSFRLDVAEPKLVFAKEQQARSEVKAEGASATLSCEVAQAQTEVTFWKDGKLLSSSSK  
VRVEASGCSRRLVVQQAGKADAGEYSCEAGGQKLSFRLDVAEPKLVFAKEQQANSEVKAEGASATLSCEVAQ  
AQTEVTFWKDGKLLSSSSKVRVEASGCSRRLVVQQAGKADAGEYSCEAGGQKLSFRLDVAEPKLVFAKEQQAH  
SEVKAEGASATLSCEVAQAQTEVTFWKDGKLLSSSSKVRVEASGCSRRLVVQQAGKADAGEYSCEAGGQKLS  
FRLDVAEPKLVFAKEQQAHSEVKAEGASATLSCEVAQAQTEVTFWKDGKLLSSSSKVRVEASGCSRRLVVQQ  
AGKADAGEYSCEAGGQKLSFRLDVAEPKLVFAKEQQAHSEVKAEGASATLSCEVAQAQTEVTFWKDGKLLSS  
SSKVRVEASGCSRRLVVQQAGKADAGEYSCEAGGQKLFRLDVAEPKLVFAKEQQAHSEVKAEGASATLSCE  
VAQAQTEVTFWKDGKLLSSSSKVRVEASGCSRRLVVQQAGKADAGEYSCEAGGQKLSFRLDVAEPKLVFAKEQ  
QAHSEVKAEGASATLSCEVAQAQTEVTFWKDGKLLSSSSKVRVEASGCSRRLVVQQVQKADAGEYSCEARGQ  
KLSFRLDVADTRLMFAKEQQARTEVKAEGNSATLSCEVAQAQTEVTFWKDGKLLSSSSKVRVEASGCSRRLV  
VQQAGKADAGEYSCEAGGQKLSFRLDVAEAE SQIPERPSRREPLVVKEHETIILTATIAAPSVAAVTWLDG  
EIRRSKRHEATSLGDTHTLTVRGAQVLD SAIYSCRVGKEGQDFPVQVEEVAAKFSKPLEPVEGELGGTVMLVC  
ELSPQAEVWRCGNTQLRPGKRFQMTSEGPRTTLTVSGLREDDAEYVCESRDDRTSARLTVKVPVVKFTS  
GLSAMVAEEGQEAATFQCVVSPSDAGVTWYKDGMLQPSSEKFMVESGASRSLTILGLTLEDAGQVTEAEGAS  
SSAALRVREAPVLFKKLEPQTVVEERTSVTLEVELTRPPEVKWTRNAAVLTPSENVEIRAEGARHCLVLRVSV  
GFADRGGFFGCETPDDKTQAKLVEMRQVRLVRGLQEVEAKEQGTASMDVELSHAEEGVSWTRDGLRLQPGPKC  
HLAVQGPVHILTLALSALQPQDSGLVAFRAEGVHTSARLIVTELPSVSTRVLQDVVATQKEKVTLECELSRPV  
RVLKDGVELRAGKAIGIVAQGTCSRSLVIYRCETGDQGVYCDALDAQTSASLRVQGRTYTLIFRRVLAEDAGE  
VKFVAENAESRAHLRVKELPVTLLRPLRDKIAMEKHGVLCEQVSRASAVRWFKGGVELQSGPKYEVVSDGL  
YRKLVINLVQPEDEDTYTC DAGNVKTSAQFFVVEEQSITIVRGLKDMTVMEPAPAWFECETSIPSVRPPKWL  
KTVLQAGGNVGLQDGTVHRLTLHKTCSTMTGPVHFTIGKSRSSAQLVVS DIPVVLTRPLEPKAGRELQSVVL  
SCDFRPAPKAVQWYKDDTPLSPSEKFKMALEGQMAELRILRLTPADAGVYRCQAGSAQSSAEVTEAREVTVI  
QPLQDAEEMEGRVCFSCELSHKDEDEIWSLNGTPLYNDSPEARVIVRWRKDGVELGSPDKYDFLHKAGARGLTV  
HDSARLVVKGKPVVFLKALDDVSAEERGTLLTQCEVYDSEARVVRKDGVELGSPDKYDFLHKAGARGLTVH  
LSHEDAGLYTCQVGSKETQSKVSVHDLHVGITKRLKTVLEVLEGECSFECVLSHESPSDPAVWTVGKTVGGS  
GHFHAVRQGRKYTLTVKDAALSDAGEVVSVLGLTSKASLIIRERPV DITKPLEDQRTTLGEDVMLSCELSRA  
GTSVRWLKDGKAIRKSQKYDLLSEGTRAVLVVRKASLKDSGEYTCETEASKSTAKLCVEEKANRFTEELADLQ  
VEEKGRAVFTCKTEHPASVVTWRKGLLELRASGKHVPSQEGTLTKLTINALERTSDTYTCDIGQARTQARLL

VHGQKVRVIEDLEDTAVQEGSSAKFCCRIAPADYGPVHWFLLDKTPLHSNELNEITVQPGGYHVLTLRQLALKD  
SGTVYFEAGDQRTSAAALRVTEKPSIFSRPLTDVTVTEGEDLTLVCEFTTVVDSVVRWTKDGKTLRPSARCQLSH  
EGCQAQLLITATTPQDGGRYKCEIGGASSSSIVRVHALPVRFRRESLKDVEVPEGKAATLRCVLSVAAPVEWR  
HGDDVLKSSNKYSRQEGAVLELVIRDLQPQDSGQYSCSFGDQTTSATLTVKTSQAQFVGLRNKEATEGTTV  
TLRCELTKAPVEWKKGTETLRNGDKYSLKQDGAVCELQICSLLVADAGEYSCVCGQEKTSAATLTKALLVHF  
VRLRSKEATEGDTTTLQCELSKAAPVEWRKGTETLRDGDYSLKQDGAVCELQIRSLTIADAGEYLCTCGQE  
KTSATLTVRALPAKFKDSLKNEEATEGTTATLSCELSKAAPVWKKGPKTLQSGDKYVLRQDGAFCGLQIHGL  
TMADAGEYSCVCGQEKTSAATLTVRGLPAKFIEDLRSQEATEGATAILRCELSKAAPVEWRKGTETLRDGDYR  
LRQDGAFCGLQIRGLAVDVTGTYSPLTKFTEGLRNEEATEGTMATLRCQMSKAAPVEWRKGTETLRDGDYR  
LRQDGAFCGLQIRGLTIEDSGEYTCVCGQEKTSAATLSVKALPSRFIEDLRSQEATEGTMATLRCQMSKTAPVE  
WKKGSETLRDGGYSLRQDGPVCELQICDLAVEDAGEYSCVCGQEKTSAATLSIKALPPRFIEDLRSQEATEG  
MATLRCQMSKAAPVEWRKGTETLRDGGYSLRQNGAVCELQIHDLAVEDTGEYSCVCGQEKTSAATLNVKALPP  
RFIEDLRSQEATEGTMATLRCQMSKAAPVEWRKGTETLRDGGYSLRQDGAFCGLQIHDLVEDAGQYSCVCG  
QEKTSAVLTVDALPPKFTEGLKKEEATEGTMVTLRCQMSKEATVEWRKGAKTLSDGGYSLRQDGAFCGLQIC  
GLAVEDAGEYSCVCGQEKTSAATLSVKALPPRFIEDLRSQEATEGTMATLRCQMSKAAPVEWRKGTETLRDGD  
YSLRQDGAFCGLQIRDLAVEDAGEYLCVCGQEKTSAATLSVKALPPRFIEDLRSQEATEGTMATLRCQMSKAAP  
VEWRKGTETLRDGGYSLRQDGAFCGLQICDLAVEDTGDYSCVCGQEKTSAATLSVKALPPRFIEDLRSQEARE  
GTVATLRCRMSKAAPVEWRKGTETLRDGDYSLRQEGNLCELQIRDLAVEDTGEYSCVCGQEKTSAATLSVKAL  
PAKFIEDLRSQEAPESSTVTLRCKLSKKASVVWKKGSETLRNGARYSLRQDGAFCGLQIRDLVEDTGEYSCT  
CGQERTSATSIMAPQVVFQQLQNLQAEEGSMASLRCELSVPAAMVWSKGGLELQGDTRREARQQGCVTEL  
LLRDLRREDAGEYSCVCGQEKTSAATLMVTAAPVRFLRELQAQDVDEGATARLRCELSREAVSVEWRKGSLLQF  
PCAKYQMVQEGTTAELLVHGVEQEDAGEYTCDAHTQSIARLSVRAPKPKFKTDLQSTEQEAGGTARLCCQLS  
EAEFGTVPVQWLKEGVELHVGSKYEMRRQGAFCGLQIHGLEAKDTGEYACLVGGQKTASLRVKEPEVTIVRGL  
VDMEVQADEDEFTCKVSAQATDVQWHLQGLPLQSNVTEVAVLADGCTHVVLQKGVTLLEDAGTVSFHVGGL  
SSSAQLTVRVPEVTVLEPLKDVQLSEGQDAHFRCRLSRASGQEARWALGGVPLQCNEMNDITVEQGTLYLLTL  
HKVTLLEDAGTITLQVGCSSSEAQLKVTAKNTVLRGLVNDVALEGGEALFECQLSQPEVAHAHTWLLDDEPVHTS  
EKVEVVYFENGLRHLKLLKLPQDSCRVTFLAGDVVTSFAFLTVRGRLEVLPEPHDASVKAGMQRVFTCILS  
EAVPVGEATWYINGAAIQPDDTDWTVTTDGSHEALTLNSAQPQHAGEVTFFAARDAVASARLSVLAALPDPEDA  
EAVGRSDHSVTLVSWAPMSDGGGLCGYRVMKEASTGQWQLCHDLVPGPECVDDLVPGKTYRFRVAAVGPA  
GAGEPVHLPQMVKIAPAPAPAPAPAPAPAPAPETROAVVGEDICLELEVAADGGEVVWHKGTERTIQPGHFVLS  
RGQRQMLVIKGFRTEDQGEYRCGPIQGLPSSGAATFNVMVMTSGSGDEVPAQPSLPPEAAQEGDLHLWEALAR  
KRRMSREPTLDSISELPEEDSRVQHLRQEAETAPDLSEGYSTADELARTGEADLSHTSSDDESAGTPSLVT  
YLKAGGPGISPLASKHEAQVTTSVKPKQKQEPVPTCPPPGDLSAADLMDPSLDKAAVKIQAQAFKGYKVRKE  
MKQEGPVFSRTFGDTEAQVGDVLRLECVLATKTDMRACWLKDGIELTDGRHYHIDQLKDGTCSSLVTLGLAPT  
DSGRYTCQVSTKSGRVSHSACVVVSGTESEAESSSGGELDDAFRAARRLHRLFRTKSPAELSEELFLSADE  
GPEPEPADWQTYREDENFVCIREFESLAEARQAVTCFRNMFATMIGIVEISLGEQGRGVEMRIKGVAPTVT  
PAVPLAKTPGLQTSDAAPVFLTELQNDVQDGYPMSFDCVVTGQPVPSVRWFKDGKLEEDDHYMINEDQQGG  
HQLIITAVVPADMGVYRCLAENSMGVSSTKAELRVELTSTDYDTAADATETSSYFSAQGYLSSREQEGTESDE  
GQLPQVLEELKDLQVAPGTRLAKFQLKVKGYPAKLYWFKDGGQPLTSDHIRMTDKKTLHTLEIVSVTREDSG  
QYAAYSNAVGAAYSSARLLVRGPSEPEEKPASDVHERLVPPRILEKFTPKKVKRGSSITFSVKVEGHPAPSV  
HWLKEEAKEKGLWIGPDTPGYTMASSSKQHSVLVLDVGRQHGTYTICATNPAGQALCSASLHISGLAKEEEEQ  
ERVKEALISSFLQGTSAQVSAQMSSEAGFADLVGQSKGESLVAAEAHSHLSLAEVGTTEFLQKLTLSQITEMVS  
AKISQAKLQVPGGDSDEETKTPSASPRHGRSRPSSSVQESSSESEDGDSRGEIFDIYVVTADYLPGLAEQDAI  
ILREGQYVEVLDSAHPLRWLVRTKPTKSSPSRQGWVSPAYLDKRLKLSPEWGPTEAPEFPGEAVSEDEYRTRL  
SSVIQELLSSSEQAFVGLLQFLESHHMKHLERSPRVPAAVASQKTVIFRNVQDISHFSSFLKELQCGGTDDDV  
AMCFIKNQEAFEKYLEFLVGRVQAESVVVSTPVQEFYKKYAEETLSAKDPTQPPPPPLQHYLEQPVVERVQKYQ  
ALLKELIRNKARNRQNCALLEQAYAVVSALPQRAENKLVSLMENYPGTLEALGEPHQGHFIVWEGAPGARM  
PWKGHNHRVFLFRNYLVICKPRRDSRTDFTSYVFRNMMKLSSIDLNDQVEGDDRAFEVWHEREDSVRKYLLQA  
RTVVIKNSWVKEICGIQQLAQPVWRPPEFEEELADCTAELGETVKLACRVTGTPKPIVSWYKDGKPVVDPH  
HILLIEDPDGCTLIILDNLTGIDSGQYMCFAASAAGNASTLGKILLVQVPPRFVNVKVRATPFVEGEDAQITCTVE  
GAPYPQIRWYKDGTLAPGNRYRMLNEPRSGVLVVIQAASKEDLGHYECELVNRLGSTRGGGELYMQSPALR  
ARDQHHREQIVAAVEDTSVEGSAHSAQDQADQAAVSLWRLLGSEALGPSPGDLPNTRQSEPPAFEEAASQIP  
GAASGTPEVSPQPGTHKLEQETSSSGSQGWTVIRVEGTAWPGAGTQQLLDVHSQVIMETTQRTYVCQAPDT  
GVTRAMPQVTEIDVQVQVGDMAQFDAVIEGHPPPIVTVYKGSTQLTSSARLSQRQDGTTYSLVLTVDVAPHDA  
GVYTCVANNAGGVLCKAELLVHGDKLDAENQVYRRKLHSFYDVQEEIGRGVFGVVKRQHKGNKMFCAAKF  
IPLRSKTRAQAYQERDILATLGHPLVTGLLDQFETRKTLLILILELCSSEELLDRLFKKGVVTEAEVKVYIQQL  
VEGLHYLHSHGILHLDIKPPNIMVHPAREDIKICDFGFAQKITPSEPQYSKYGSPEFVSPEIIEQNPVSEGS  
DIWAMGVI SYLSLTCCSPFAGESDRATLLNVLEGRVSWSSPTAAHLSSEDAKDFIKATLQRTPRARPSTSQCLA



HPWFLKSMPEAAEHFINTKQLKFLLRASRWRQSLMSYKSIILVMRSIPELLQGPPDPSPLGVARHLRGEASGAS  
SSSSSSDNELAPFARAKSLPPSPVTHSPLLHPRGFLRPSASLPEETEASMPPTADAAVPASPQASGPPASPGCV  
PRHSVISSLFYQQAGEGAERGNKTSGAKRHPARRRHLLKGGYIARALPGLREPLMEYSLLEEEAAREEQASLM  
TKTPSFETALRLPSSSVREVPGRSHSLDNPPVTTGPSPEACEQLLFPSTGLTHETTAKDRGHKEGFLQESV  
PFPMSGDSRPGKQEGSSQDSCRGKPASSCHSELGSGSQEGCPSQSLGSLPPQSLKKELESTSCGPLFSEQ  
PQAAPFPTQVSPLLGSEKEPQDGSLEGPVVPSSSPGSASQVDASLDTEGLSEAGDTCDFTPPPQRPQEQAT  
TRKFSLESRGGYAGVAGYGTFAFGGDAGGMLGQGPLWARMAWAVSOSSEEQDEAATESPQPLESIGPIAEASG  
VPLRTPSPSLTPWEEVEQVSLVQIRDLSDGDAEAADTISLDISEVDPAYLNLSDLYDIKYLPEFEMI FRRVPKPI  
EQPESPGSETEAGQLADFLLEAAWPWPGEGLRAGLEITEEPEEPGDLEALLGEEAVGRKRKWSPSRGLFQF  
PGRCLSGEEPVELGLRQRVKASMAHISRILKGRPEGPEREPPRKKAGLASFRLSGLKGRDQELSDEAVVLGQ  
SVTLACQVLAQPTAQATWSKDGVLLESSGHLISSTLKNFQLLTIILVVKEEDLGTYTCCVSNPLGTAVTTGVL  
RKAERPSSSPRPEVGELYKDAVLLVWKPVESECGPVYIVQCCIEGGSWTTLASDISDCCYLTKGLSRGGMYIF  
RTACVSKAGMGPYSSPSEQVLLGGPNHLASEEESSRGRPAQLLPSTKTFAFQMQRIRGRFVSVRQCREKASGR  
ALAAKIVPYQPEDKTAVLREYEAALKRHLHHPHLAQLHAAYLSPRHLVLIILELCSGPELLPSLAERESYSESDVK  
DYLWQMLSATQYLHAQHILHLDLRSENMMVTEYNLLKVIDLGNQSLDQEKVPAPENFKDYLETMAPELLEGQ  
GAVPQTDIWAIGVTAIFIMLSGEYPESSEGRDLQKGLRKLIRLSRCYAGLSGGAVAFLOSSLCAQPWGRPCA  
STCLQCGLWTEEGPTGSRPTPVTFTVRLRAFVREKRRALLYKHNLAQVR\*  
>rs51724502\_ENSMUSP00000038264\_c.12780:G>A\_p.A4261T  
ENSMUST00000047441.14|Obscn-202|ENSMUSG00000061462|-|chr11:g.58943367:C>T  
MDHSFSGAPRFLTRPKAFVSVGKDATLSCQIVGNPTPHVSWEKDRQPVEAGARFRLAQDGDVYRLTILDLAL  
GDSGQYVCRARNAIGEFAAVGLRVDSEGTCAEQAPHFLLRPTSIRVREGADATFRCRVGGSPQPAVSWSKDG  
RRLGPPDAPHVRVEEHGESSALRIRSARPRDGGTYEVRAENPLGSASAAAALVVDSDAEVAGPPGTSTATLLA  
HLQQRREAMRAEGIPSPPGAGTRTCTVTEGKHARLSCFVTGEPKPKETVWKKDQQLVTEGRRHVYVEDEQENF  
VLKILFCKQSDRGLYTCTASNLVGQTYSSVLVVVREPTVPFKKRLQDLEVREKESATFQCEVAQPAATEAAWFK  
EETRLWASAKYDIEEGTERRLTVRNVSADDDAVYICETTEGSRVAELSVQGNLTKRKLPRKTAVRTGDTAIF  
WVELAVPEGPVWRLLRNQEMVAGGRVAITAEGTCHTLTI FQCTLEDMGVAVFVSGGCRTTTFVCSVAPRRPPL  
YPPADPVVKAKTSSVTLSSWAPPHGDRPVTIDGYVLEKRLKLGAYAWSRCHEAGWLATTEFTITGVAAEEGDFQ  
FRVSAINHFGQGPYLEFPGMTMLVPLAVKTPKAVEAVEGGEVTFVSDLTVASSGEWFLDGEALKASSIYVI  
RCDRTRHMLTIREVPARLHGAQLKFVANGIETSIQMVVRAALGLPSSKLPAAAAREVLAQLHEEAQLLAELSD  
QAAAVTWLKDGRELSLGPKYEMQVSAGRRALLVRDVAQDDAGLYECVSRGSRRTAYQLLVQDITDGYRDWGPAG  
PQKHMCKCAGAKIARYLGSSCYRFLQYDKGVWHWLEAALDTRQKGTSSCSLHEKPKLVFAKQQAHSEVKA  
AGASATLSCEVAQAQTEVTFWKDGGKLSSSSKVRMEASGCSRRLVVQQAGKADAGEYSCEAGGQKLSFRLDVA  
EPKMVFAKEQQARSEVKAEGASATLSCEVAQAQTEVTFWKDGGKLSSSSKVRMEASGCSRRLVVQQAGKADA  
GEYSCEAGGQKLSFRLDVTEPKLVFAKEQQARSEVKAEGVNSATLSCEVAQAQTEVTFWKDGGKLSSSSKVRM  
EASGCSRRLVVQQAGKADAGEYSCEAGGQKLSFRLDVAEPKLVFAKEQQARSEVKAEGVNSATLSCEVAQAQ  
EVTWFKDGGKLSSSSKVRMEASGCSRRLVVQQAGKADAGEYSCEAGGQKLSFHLDVTEPKLVFAKEQQAHSEV  
KAEAGASATLSCEVAQAQTEVTFWKDGGKLSSSSKVRMEASGCSRRLVVQQAGKADAGEYSCEAGGQKLSFRL  
DVAEPKLVFAKEQQARSEVKAEGASATLSCEVAQAQTEVTFWKDGGKLSSSSKVRVEASGCSRRLVVQQAGK  
ADAGEYSCEAGGQKLSFRLDVAEPKLVFAKEQQANSEVKAEGASATLSCEVAQAQTEVTFWKDGGKLSSSSK  
VRVEASGCSRRLVVQQAGKADAGEYSCEAGGQKLSFRLDVAEPKLAFAKEQQAHSEVKAEGASATLSCEVAQ  
AQTEVTFWKDGGKLSSSSKVRVEASGCSRRLVVQQAGKADAGEYSCEAGGQKLSFRLDVAEPKLAFAKEQQAH  
SEVKAEGASATLSCEVAQAQTEVTFWKDGGKLSSSSKVRVEASGCSRRLVVQQAGKADAGEYSCEAGGQKLS  
FRLDVAEPKLAFAKEQQAHSEVKAEGASATLSCEVAQAQTEVTFWKDGGKLSSSSKVRVEASGCSRRLVVQQ  
AGKADAGEYSCEAGGQKLFRLDVAEPKLVFAKEQQAHSEVKAEGASATLSCEVAQAQTEVTFWKDGGKLS  
SSKVRVEASGCSRRLVVQQVQKADAGEYSCEARGQKLSFRLDVAEAEESQI PERPSRREPLVKEHETIILTAT  
IAAPSVAAVTWLKDGV EIRRSKRHEATSLGDHTLTVRGAQVLD SAIYSCRVGKEGQDFPVQVEEVAAKFSKP  
LEPVEGELGGTVMLVCELSPEQAEVVWRCNGTQLRPGKRFQMTSEGPRRTLTVSGLREDDAEYVCESRDDRT  
SARLTVKVPRVVKFTSGLSAMVAEEGQEATFQCVVSPSDAGVTWYKDGMLQPSSEKFMVVESEGASRSLTILGL  
TLEDAGQVTVAEAGASSAALRVREAPVLFKKKLEPQTVEERTSVTLEVELTRPWPEVKWTRNAAVLTPSENV  
EIRAEGARHCLVLRVGFADRGGFCETPDDKTQAKLNVEMRQVRLVRLVGLQEVEAKEQGTASMDVELSHA EVE  
GSWTRDGLRLQPGPKCHLAVQGPVHILTSLALQPQDSGLVAFRAEGVHTSARLIVTEL PVSFTRVLQDQVATQ  
KEKVTLECELSRPVDVRLKDGVELRAGKAI GIVAQGTCSRSLVIYRCETGDQGVYVCDALDAQTSASLRVQGR  
TYTLIFRRVLAEDDAGEVVFVAENAESRAHLRDKLPTVLLRPLRDKIAMEKHRGVLECCQVSRASAVQWRWFKGG  
VELQSGPKYEVVSDGLYRKLVINVDVQPEDEDTYKTELDTAGNVKTSAQFFVEEQSITIVRGLKDMTVMEPAPAFWE  
CETSI PSVRPPKWLGLKTVLQAGGNVGLQDGTVHRLTLHKTCSTMTGPVHFTIGKSRSSAQLVVS DIPVVL  
RPLEPKAGRELQSVVLSCDFRPAPKAVQWYKDDTPLSPSEKFKMALEGQMAELRILRLTPADAGVYRCQAGSA  
QSSAEVTVAREVTVIQPLQDAEAMEEGRVCFSCELSHKDEDI EWSLNGTPLYNDSFHEISHEGCLHTLVLKS  
VRQADTGTVCATSPKVSVSARLVVKGKPVVFLKALDDVSAEERGTLTLQCEVSDPEARVVWRKDGVELGSPDK

YDFLHKAGARGLTVHDLSDHEDAGLYTCQVGSKETQSKVSVHDLHVGI TKRLKTVEVLEGESECSFECVLSHESP  
SDPAVWTVGGKTVGGSGHFHAVRQGRKYTLTVKDAALSDAGEVVFVSVLGLTSKASLIIRERPVDITKPLEDQR  
TTLGEDVMLSCLESRAGTSVRWLKDGKAIKRSQKYDLLSEGTRAVLVVRKASLKDSGEYTCETEASKSTAKLC  
VEEKANRFTEELADLQVEEKGRAVFTCKTEHPASVVTWRKGLLELRASGKHVPSQEGTLTKLTINALERTDSD  
TYTCDIGQARTQARLLVHGQKVRVIEDLEDTAVQEGSSAKFCCRIAPADYGPVHWFLDKTPLHSNELNEITVQ  
PGGYHVLTLRQLALKDSGTVYFEAGDQRTSAALRVTEKPSIFSRPLTDVTVTEGEDLTLVCETTTVDSSVRWT  
KDGKTLRPSARCQLSHEGCQAQLLITATTPQDGGRYKCEIGGASSSSIVRVHALPVRFRESLKDVEVPEGKAA  
TLRCVLSVAAPVEWRHGDDVLKSSNKYSLRQEGAVLELVIRDLQPDQSGQYSCSFGDQTTSATLTVKTSAAQ  
FVGKLRNKEATEGTTVTLRCELTKAPVEWKKGTETLRNGDKYSLKQDGA VCELQICSLLVADAGEYSCVCGQ  
EKTSATLTVKALLVHFVRRRLRSKEATEGDTTTLQCELSKAAPVEWRKGTETLRDGDYSLKQDGA VCELQIRS  
LTIADAGEYLCTCGQEKTSATLTVRALPAKFKDSLKNEEATEGTTATLSCELSKAAPVTWKKGPKTLQSGDKY  
VLRQDGA VCGLQIHGLTMADAGEYSCVCGQEKTSATLTVRGLPAKFIEDLRSQEATEGATAILRCELSKAAPV  
EWRKGETLTKDGDYTLRQDGA VCELQIRGLAVVDTGTYSPLPTKFTTEGLRNEEATEGTMATLRCQMSKAAPV  
EWRKGETLTDGDYSLRQDGA MCELQIRGLTIEDSGEYTCVCGQEKTSATLSVKALPPRFIEDLRSQEATEG  
TMATLRCQMSKAAPVEWRKGETLTDGGYSLRQNGAVCELQIHDLAVEDTGEYSCVCGQEKTSATLNVKALP  
PRFIEDLRSQEATEGTMATLRCQMSKAAPVEWRKGETLTDGGYSLRQDGA VCELQIHDLVDEDAGQYSCVC  
GQEKTSAVLTVDALPKFTEGLKKEEATEGTMVTLRQMSKEATVEWRKGA KTLSDGGYSLRQDGA MCELQI  
CGLAVEDAGEYSCVCGQEKTSATLSVKALPPRFIEDLRSQEATEGTMATLRCQMSKAAPVEWRKGETLTDGD  
RYSLRQDGA MCELQICDLAVEDTGDYSCVCGQEKTSATLSVKAPQVVFQQLQNLQAEEGSMASLRCELSVPN  
AAMVWSKGGLELQGDTRREARQQGCVTELLLRDLRREDAGEYSCVCGQEKTSATLMVTAAPVRFRELQAQDV  
DEGATARLRCELSREAVSVEWRKGS LQLFPCAKYQMVQEGTTAELLVHGVEQEDAGEYTC DAGHTQS IARLSV  
RAPKPKFKTDLQSTEQEAGGTARLCCQLSEAEPTPVQWLKEGVELHVGSKYEMRRQGAVCELLIHGLEAKDT  
GEYACLVGQKTLASLRVKEPEVTIVRGLVDMEVQADEDFEFTCKVSOAGATDVQWHLQGLPLQSNVTEVAV  
LADGCTHVQLKGVTLLEDAGTVSFHVGGLSSSAQLTVRVPEVTVLEPLKDVQLSEGQDAHFRCRLSRASGQEA  
RWALGGVPLQCNEMNDITVEQGTLYLLTLHKVTLLEDAGTITLQVGSSEAEQLKVTA KNTVLRGLENVDAL  
GEALFECQLSQVEVAASHTWLDDPEVHTSEKVEVVYFENGLRHLLLLKLNKLPQDSRVTF LAGDVVTSFAFLT  
RALPDPPEDAEVVGRSDHSVTLVWVAPMSDGGGLCGYRVMKEASTGQWQLCHDLVPGCEVVDLVPGKTY  
RFRVAAVGPAGAGEPVHLPQMVKIAPAPAPAPAPAPAPAPETRQAVVGEDICLELEVAADGGVEVWHKGT  
RERQGGHFEVLSRQGRQMLVIKGFRTEDQGEYRCGPIQGLPSSGAATFNVMVMTSGSGDEVPAQPSLPPEAAQEGD  
LHLLWEALARKRRMSREPTLDSISELPEEDSRVQHLRQEAETAPDLSEGYSTADELARTGEADLSHTSSDDE  
SRAGTPSLVTYLKKAGGPGISPLASKHEAQVTTSVKPKQKQEPVVPPTCPPPGDLSAADLMDPSLDKAAVKIQA  
AFKGYKVRKEMKQEGPVFSRTFGDTEAQVGDVLRLECVLATKTKDMRACWLKDGIELTDGRHYHIDQLKDGTC  
SLLVTGLAPTDSGRYTCQVSTKSGRVSHSACVVVSGTSEAESSSGGELDDAFRRARRLHRLFRTRKSPAELS  
EELFLSADEGPGEPEPADWQTYREDENFVCIRFESLAEARQAVTCFRNMFMATMGIGVEISLGEQGPGRVEM  
RIGKVAPTVTAVPLAKTGLQTSDAAPVFLTELQNDVQDGYPMSFDCVVTGQPVPSVRWFKDGKLLLEDDH  
YMINEDQQGGHQLIITAVVPADMGVYRCLAENSMGVSTKAELELVELTSTDYDTAADATETSSYFAQGYLSS  
REQEGTESDEGQLPQVLEELKDLQVAPGTRLAKFQLKVKGYPA PKLYWFKDQGPLTSDHIRMTPDKTLHTLE  
IVSVTREDSGQYAAIISNAVGAAYSSARLLVRGPSEPEEKPASDVHERLVPPRILEKFTPKKVKRGSSTFSV  
KVEGHPAPSVHVLKEEAKEGVLWIGPDTPGYTMASSSKQHSVLVLDVGRQHOGTYTCIATNPAGQALCSASLH  
ISGLAKEEEQERVKEALISSFLQGTSAVSAQMSSESAGFADLVGQSKGESLVAAEEAHSHLSLAEVGTTEFLQK  
LTSQITMVSAKISQAKLQVPGGDSDEETKTPSASPRHGRSRPSSSVQESSSESEDGDSRGEIFDIYVVTADY  
LPLGAEQDAIILREGQYVEVLD SAHPLRWLVRTKPTKSSPSRQGWVSPAYLDKRLKLSPEWGPTEAPEFPGEA  
VSEDEYRTRLSSVIQELLSSEQAFVGE LQFLESHHMKHLERSPRVPAAVASQKTVIFRNVQDISHFHSSFLKE  
LQCGCTDDDAMCFIKNQEA FEKYLEFLVGRVQAESVVVSTPVQEFYKKYAEETLSAKDPTQPPPPPLQHYLE  
QPVERVQKYQALLKELIRNKARNRQNCALLEQAYAVVSALPQRAENKLVSLMENYPTGLEALGEP IRQGHFI  
VWEGAPGARMPWKGNHRHVFLFRNYLVICKPRRDSRTDTFSYVFRNMMKLSSIDLNDQVEGDDRAFEVWHERE  
DSVRKYLQARTVIKNSWVKEICGIQORLAQPVWRPPEFEELADCTAELGETVKLACRVGTGPKPIVSWYK  
DGKPEVDPHHILIEDPDGSC TLI LDNLTGIDSGQYMCFAASAAGNASTLGKILVQVPPRFVNKVRATPFVEG  
EDAQITCTVEGAPYPQIRWYKDGTL LAPGNRYRMLNEPRSGVLVLIQAASKEDLGHYECELVNR LGSTRGGG  
ELYMQSPALRARDQHREQIVAAVEGAPSMQVTIEDVQVQVGDMAQF DAVIEGHPPPIVTWYKGTQLTSSAR  
LSQRQDGTYSLVLTVDVAPHDAGVYTCVANNAGGQVLCKAELLVHGGDKLDAENQVYRRKLSHFYDVQEEIGR  
GVFGFVKRVQHKGNMFCAAKFIP LRSKTRAQYQERDILATLGHPLVTGLLDQFETRKTLLILILELCSSEEL  
LDRLFGLKGVVTEAEVKVIQQLVEGLHLYLHSHGILHLDIKPNILMVHPAREDIKICDFGFAQKITPSEFPQYS  
KYGSEPFVSPETIEQNPVSEGS DIWAMGVI SYLSLTCSSP FAGESDRATLLNVLEGRVSWSSPTAAHLSEDAK  
DFIKATLQRTPRARPSTSQCLAHPWFLKSMPEAAEHAHINTKQLKFL LARSRWQRSLMSYKSI LVMRSIPELLQ  
GPPDPSPLGVARHLRGEASGASSSSSSSDNELAPFARAKSLPPSPVTHSPLLHPRGFLRPSASLPEETEASMP  
TADA AVPAS PQSAGPPASPGCVPRHSV ISSLFYQQAGEGA ERGNKTS GAKRHPARRRHLLKGGYIARALPGLR  
EPLMEYSLLEEEAAREEQASLMTKTPSFETALRLPSSSVREV PGRSHSLDNPVTTGSPPEACKEQLLFPST

GLTHETAKDRGHKEGFLQESVFPFPPMSGDSRPGKQEGSSQDSRCRGKPASSCHSELGSGSQEGCGPPSSQSLG  
SLPPQSLKKELESTSCGPLFSEQPQAAPFPTQVSPLLGSEKEPQDGLSEGPVVPVSSSPGSASQVDAASLDTEG  
LSEAGDTCDFTPPPQRPQEQATTRKFSLESRRGGYAGVAGYGTFAFGGDAGGMLGQGPLWARMWAVSOSSEEQ  
DEAATESPQPLESGLPIAEASGVPLRTSPSLTPWEEVEQVSLVQIRDLSGDAEAADTISLDISEVDPAYLNLS  
DLYDIKYLPEFEMI FRRVPKPIEQPESPGSETEAGQGLADFL EEAAWPWPGEGLGLRAGLEIT EEPPEEPGDLEA  
LLGEAAVGRKRKWSPSRGLFQFPGRCLSGEEPVELGLRQRVKASMAHISRILKGRPEGP EREGPPRKKAGLAS  
FRLSGLKGRDQELSDEAVVLGQSVTLACQVLAQPTAQATWSKDGVLLESSGHLLISSTLKNFQLLTI LVVKEE  
DLGTYTCCVSNPLGTAVTTGVLKKAERPSSSPRPEVGEYKDAVLLVWKPVESCGPVTYIVQCCIEGGSWTTL  
ASDISDCCYLTGKLSRGGMYIFRTACVSKAGMGPYSSPSEQVLLGGPNHLASEEESSRRRPAQLLPLSTKTFAF  
QMQIRRGRFSVVRQCREKASGRALAAKIVPYQPEDKTA VLREYEALKRLLHHPHLAQLHAAYLSPRHLVLI LEL  
CSGPELLPSLAERESYSESDVKDYLWQMSATQYLHAQHILHLDLRSENMMVTEYNLLKVIDLGNASLDQEK  
VPAPENFKDYLETMAPELLEGQAVPQTDIWAIGVTA FIMLSGEY P ESSEGETRDLQKGLRKLIRLSRCYAGL  
SGGAVAFLOSSLCAQPWGRPCASTCLQCGWLTEEGPTGSRPTPVTFPTVRLRAFVREKRRRALLYKKNHQAQ  
VR\*

>rs51724502\_ENSMUSP00000049737\_c.14463:G>A\_p.A4822T  
ENSMUST000000052872.15|Obscn-203|ENSMUSG00000061462|-|chr11:g.58943367:C>T  
MDHSFSGAPRFLTRPKAFVSVGKDATLSCQIVGNPTPHVSWEKDRQVEAGARFRLAQDGDVYRLTILDLAL  
GDSGQYVCRARNAIGEAFVAVGLRVDSEGTCAEQAPHFLLRPTSIRVREGADATFRCRVGGSQPAVSWSKDG  
RRLGPPDAPHVRVEEHGESSALRIRSARPRDGGTYEVRAENPLGSASAAAAALVVDSDAEVAGPPGTSTATLLA  
HLQORREAMRAEGIPPSPPGAGTRTCTVTEGKHARLSCFVTGEPKPEVWKKDGQLVTEGRRHVVEDEQENF  
VLKILFCKQSDRGLYTCTASNLVGQTYSSVLVVREPTVPFKKRLQDLEVREKESATFQCEVAQPAEAAWFK  
EETRLWASAKYDIEEEGETERRLTVRNVSADDDAVYICETTEGSRVVAELSVQGNLTKLPRKTAVRTGDTAIF  
WVELAVPEGPVWRNRNQEEMVAGGRVAITAEGTCHTLTI FQCTLEDMGEVAFVSGGCRTTTTQFCVSAPRRPPL  
YPPADPVVKAKTESSVTLWSAPPHGDRPVTIDGYVLEKRLKLGAYAWSRCHEAGWLATTEFTITGVAAEEDGFQ  
FRVSAINHFGQGPYLEFPGTMHLVPLAVKTPKAVEAVEGGEVTFVSDLTVASSGEWFLDGEALKASSIYVI  
RCDRTRHMLTIREVPARLHGAQLKVFANGIETSIQMVVRAALGLPSKLPAAAAAREVLLAQHHEEAQLLAELSD  
QAAAATVWLKDGRELSLGPKYEMQVSAGRRALLVRDVAQDDAGLYECVSRGSRRTAYQLLVQEPKLVFAKQQA  
SEVKAEEAGNSATLSCEVTQAQTEVTWFKDGKLLSSSSKVRMEASGCSRRLVVQQAGKADAGEYSCEAGGQKLS  
FRLDVAEPKLVFAKQQAHSSEVKAEEAGASATLSCEVAQAQTEVTWFKDGKLLSSSSKVRMEASGCSRRLVVQQ  
AGKADAGEYSCEAGGQKLSFRLDVAEPKMFVFAKEQQARSEVKAEEAGASATLSCEVAQAQTEVTWFKDGKLLSS  
SSKVRMEASGCSRRLVVQQAGKADAGEYSCEAGGQKLSFRLDVTEPKLVFAKEQQARSEVKAEEVGN SATLSCE  
VAQAQTEVTWFKDGKLLSSSSKVRMEASGCSRRLVVQQAGKADAGEYSCEAGGQKLSFRLDVAEPKLVFAKEQ  
QARSEVKAEEAGNSATLSCEVAQAQTEVTWFKDGKLLSSSSKVRMEASGCSRRLVVQQAGKADAGEYSCEAGGQ  
KLSFHLDVTEPKLVFAKEQQAHSEVKAEEAGASATLSCEVAQAQTEVTWFKDGKLLSSSSKVRMEASGCSRRLV  
VQQAGKADAGEYSCEAGGQKLSFRLDVAEPKLVFAKEQQARSEVKAEEAGASATLSCEVAQAQTEVTWFKDGKLL  
SSSSKVRMEASGCSRRLVVQQAGKADAGEYSCEAGGQKLSFRLDVAEPKLVFAKEQQANSEVKAEEAGASATL  
SCEVAQAQTEVTWFKDGKLLSSSSKVRMEASGCSRRLVVQQAGKADAGEYSCEAGGQKLSFRLDVAEPKLAFA  
KEQQAHSEVKAEEAGASATLSCEVAQAQTEVTWFKDGKLLSSSSKVRMEASGCSRRLVVQQAGKADAGEYSCEA  
GGQKLSFRLDVAEPKLAFAKEQQAHSEVKAEEAGASATLSCEVAQAQTEVTWFKDGKLLSSSSKVRMEASGCSR  
RLVVQQAGKADAGEYSCEAGGQKLSFRLDVAEPKLAFAKEQQAHSEVKAEEAGASATLSCEVAQAQTEVTWFKD  
GKLLSSSSKVRMEASGCSRRLVVQQAGKADAGEYSCEAGGQKLFRLDVAEPKLMFAKEQQAHSEVKAEEAGAS  
ATLSCEVAQAQTEVTWFKDGKLLSSSSKVRMEASGCSRRLVVQQAGKADAGEYSCEAGGQKLSFRLDVAEPKL  
VFAKEQQAHSEVKAEEAGASATLSCEVAQAQTEVTWFKDGKLLSSSSKVRMEASGCSRRLVVQQVQKADAGEYS  
CEARGQKLSFRLDVADTRLMFAKEQQARTEVKAEEAGNSATLSCEVAQAQTEVTWFKDGKLLSSSSKVRMEASG  
CSRRLVVQQAGKADAGEYSCEAGGQKLSFRLDVAEEAESQI PERPSRREPLVVKEHETIILTATIAAPSVAAVT  
WLKDGVEIRRKRHEATS LGDTHLTVRGAQVLD SAIYSCRVGKEGQDFPVQVEEVAAKFSKPLEPVEGELGG  
TVMLVCELSPEQAEVWRCGNTQLRPGKRFQMTSEGPRRTLVSGLREDDAEYVCESRDDRTSARLTVKVP  
VVKFTSGLSAMVAEEGQEA TFQCVVSPSDAGVTWYKDGMLQPSSEKFMVVEGASRSLTILGLTLEDAGQVTV  
EAEGASSAALRVREAPVLFKFKLEPQTVEERTSVTLEVELTRPWPVEVKWTRNAAVLTPSENVEIRAEGARHC  
LVLRVGFADRGFFGCETPDDKTQAKLVNEMRQVRLVRGLQVEVAKEQGTASMDVELSHAEEVGSWTRDGLRL  
QPGPKCHLAVQGPVHILTLALSALQPDQSGLVAFRAEGVHTSARLIVTELPVSFTRVLQDVVATQKEKVTLECEL  
SRPVDVRWLKDGVELRAGKAI GIVAQGTCSRSLVIYRCETGDQGVYVCDALDAQTSASLRVQGRTYTLIFRRVL  
AEDAGEVVKFAENAESRAHLRVKELPVTLLRPLRDKIAMEKHRGVLECVSRASQAQVRFKGGVLELQSGPKYE  
VVDGLYRKLVINDDVQPEDEDTYTCDAGNVKTSQMTFVEEQSITIVRGLKDMTVMPEPAPWFECETSIPSVRP  
PKWLLGKTVLQAGGNVLEQDGTVHRLTLHKTCSTMTGPVHFTIGKSRSSAQLVSDI PVVLRPLEPKAGRE  
LQSVVLSCDFRPAPKAVQWYKDDTPLSPSEKFKMALEGMALRILRLTPADAGVYRCQAGSAQSSAEVTVEA  
REVTVIQPLQDAEAMEEGRVCFSCLELHKDEDI EWSLNGTPLYNDSFHEISHEGCLHTLVLKSVRQADTGTVC  
ATSPKVSVSARLVVKGKPVVFLKALDDVSAEERGTLLTQCEVSDPEARVVWRKDGVELGPSDKYDFLHKAGAR

GLTVHDLSDHEDAGLYTCQVGSKETQSKVSVHDLHVGITKRLKTVEVLEGESECSFECVLSHESPSDPAVTVVGG
KTVGGSGHFHAVRQGRKYTLTVKDAALSDAGEVVFVSVLGLTSKASLIIRERPVDITKPLEDQRTTLGEDVMLS
CELSRAGTSVRWLKDGKAIKRSQKYDLLSEGTRAVLVVRKASLKDSGEYTCETEASKSTAKLCVEEKANRFTE
ELADLQVEEKGRAVFTCKTEHPASVVTWRKGLLELRASGKHVPSQEGTLKLTINALERTDSDTYTCDIGAR
TQARLLVHGQKVRVIEDLEDTAVQEGSSAKFCCRIAPADYGPVHWFIDKTPHLSNELNEITVQPGGYHVLTLR
QLALKDSGTVYFEAGDQRTSAALRVTEKPSIFSRPLTDVTVTEGEDLTLVCETTTVDSSVVRWTKDGKTLRPSA
RCQLSHEGCAQLLITATTPQDGGRYKCEIGGASSSSIVRVHALPVRFRFRESLKDVEVPEGKAATLRCVLSVA
APVEWRHGGDDVLKSSNKYSLRQEGAVLELVIRDLPQDQSGQYSCSFGDQTTSATLTVKTTSSAQFVGLRNKEA
TEGTTVTLRCELTKAPVEWKKGTETLRNGDKYSLKQDGAVCELQICSLLVADAGEYSCVCGQEKTSATLTVK
ALLVHFVRRLSKEATEGDTTTLQCELSKAAPVEWRKGTETLRDGDYSLKQDGAVCELQIRSLTIADAGEYL
CTCGQEKTSATLTVRALPAKFKDSLKNEEATEGTTATLSCELSKAAPVTWKKGPKTLQSGDKYVLRQDGAVCG
LQIHGLTMADAGEYSCVCGQEKTSATLTVRGLPAKFIEDLRSQEATEGATAILRCELSKAAPVEWRKGETL
DGDYRDLRQDGAVCELQIRGLAVVDGTYSLSLPTKFTTEGLRNEEATEGTMATLRCQMSKAAPVEWRKGETL
DGDYRDLRQDGAMCELQIRGLTIEDSGEYTCVCGQEKTSATLSVKALPSRFIEDLRSQEATEGTMATLRCQMS
KTAPVEWKKGSETLRDGGYSLRQDGPVCELQICDLAVEDAGEYSCVCGQEKTSATLSIKALPPRFIEDLRSQ
EATEGTMATLRCQMSKAAPVEWRKGETLGDGGYSLRQNGAVCELQIHDLAVEDTGEYSCVCGQEKTSATLN
VKALPPRFIEDLRSQEATEGTMATLRCQMSKAAPVEWRKGETLDRDGGYSLRQDQAVCELQIHDLVEDAGQ
YSCVCGQEKTSAVLTVDALPPKFTTEGLKKEEATEGTMATLRCQMSKEATVEWRKGAKTLSDGGYSLRQDQAV
CELQICGLAVEDAGEYSCVCGQEKTSATLSVKALPPRFIEDLRSQEATEGTMATLRCQMSKAAPVEWRKGET
LRDGDYSLRQDGAVCELQIRDLAVEDAGEYLCVCGQEKTSATLSVKALPPRFIEDLRSQEATEGTMATLRCQ
MSKAAPVEWRKGSKTLRQDGDYSLRQDQAVCELQICDLAVEDTGDYSCVCGQEKTSATLSVKALPPRFIEDL
RQDQAVCELQIRDLAVEDAGEYLCVCGQEKTSATLSVKALPPRFIEDLRSQEATEGTMATLRCQMSKAAP
VEWRKGSKTLRQDGDYSLRQDQAVCELQIRDLAVEDAGEYLCVCGQEKTSATLSVKALPPRFIEDLRSQ
EAREGTVATLRCRMSKAAPVEWRKGETLKDGDYSLRQEGNLCCELQIRDLAVEDTEEYSCVCGQEKTSAT
LSVKALPAKFIEDLRSQEAPESSTVTLRCKLSKKASVWKKGSETLRNGARYSLRQDQAVCELEIRDLTVE
DTEGYSCTCGQERTSATLSIMAPQVVFQQLQNLQAEEGSMASLRCELSVPAAMVWSKGGLELQGDTRREARQ
GCVTELLLRDLRREDAGEYSCVCGQEKTSATLMTAAPVRFRELAQDQVDEGATARLCELSREAVSVEWRK
GSLQLFPCAKYQMVQEGTAEALLVHGVQEEDAGEYTCDAHTQSIARLSVRAPKPKFKDLQSTEQEAGGTAR
LCCQLSEAEPTPVQWLKEGVELHVGSKYEMRQYQAVCELQIHGLEAKDTGEYACLVGQKTLASLRVKEPEV
TIVRGLVDMEVQADEDEFTCKVVSQAGATDVQWHLQGLPLQSNVTEVAVLADGCTHVLQKGVTLQEDAGTVS
FHVGGSSSAQLTVRVPEVTVLEPLKDVQLSEGQDAHFRCRLSRASGQEARWALGGVPLQCNEMNDITVEQGT
LYLLTLHKVTLQEDAGTITLQVGSSESAQLKVTAKNTVLRGLENVDALEGGALFECQLSQPEVAHTWLLDD
EPVHTSEKVEVVYFENGLRHLLLLKLNKPKQDSCRVTFLAGDVVTSVFLTVRGRWRLEVPHPHDAVSKAGMQR
FTCILLSEAVPVGEATWYINGAAIQPDDTDWTVTTDGSHHALTLSNAQPQHAGEVTFFAARDAVASARLSVLALP
DPPEDAEEVGRSDHSVTLVWVAPMSDGGGGLCGYRVMKEASTGQWQLCHDLVPGPECVVDDLVPGKTYRFRV
AAVGPAGAGEPVHLPQMVKIAPAPAPAPAPAPAPAPETRAVVGEDIACLEVAADGGVEVWHKGTERRIQPGG
HFEVLSRGRQMLVIKGFRTEDQGEYRCGPIQGLPSSGAATFNVVMTSGSGDEVPAQPSLPEAAQEGDLHL
WEALARKRRMSREPTLDSISELPEEDSRVQHRLRQEAETAPDLSEGYSTADELARTGEADLSHTSSDDESRAG
TPSLVTVLTKKAGGPGISPLASKHEAQVTVSVKPKQKQEPVVPTCPPPGDLSAADLMDPSLDKAAVKIQAAF
YKVRKEMKQQEGPVFSRFTFGDTEAQVGDVLRLECVLATKTDMRACWLKDGIELTDGRHYHIDQLKDGTC
TGLAPTDSGRYTCQVSTKSGRVSHSACVVVSGTESEAESSSGGELDDAFRRAARLHRLFRKTPSAPLSEEL
FLSADEGPGPEEPADWQTYREDENFVCIRFESLAEARQAVTCFRNMFATMIGVEISLGEQGRGVEMRIGK
VAPTVPAPVPLAKTPGLQTSDAAPVFLTELQNDQVQDGYPMSFDCVVTGQPVPSVRWFKDGKLEDDHYMIN
EDQQGGHQLIITAVVPADMGVYRCLAENSMGVSSTKAELRVELTSTDYDTAADATETSSYFSAQGYLSSRQE
GTESDEGQLPQVLEELKDLQVAPGTRLAKFQKLVKGYPAKLYWFKDQGPLTSDHIRMTDKKTLHTLEIVSV
TREDSGQYAAIISNAVGAAYSSARLLVRGPSEPEEKPASDVHERLVPPRIEKFTPKKVKRGSSTFVSVKVEG
HPAPSVHHLKEEAEGVLWIGPDTPGYTMASSSKQHSVLVLDVGRQHOGTYTCIATNPAGQALCASLHISGL
AKEEEQERVKEALISSFLQGTSAQVSAQMSEAGFADLVGQSKGESLVAEEAHSHLSLAEVGTTEFLQKLSQ
ITEMVSAKISQAKLQVPGGDSDEETKTPSASPRHGRSRPSSSVQESSSESEDGDSRGEIFDIYVVTADYLP
AEQDAIILREGQYVEVLDSAHPLRWLVRTKPTKSSPSRQGWVSPAYLDKRLKLSPEWGPTEAPEFPGEAVS
EYRTRLSSVIQELLSSEQAFVGEQFLESHHMKHLERSPRVPAAVASQKTVIFRNVQDISHFHSSFLKELQGC
GTDDVAMCFIKNQEAKEYLEFLVGRVQAESVVVSTPVQEFYKKAETLSAKDPTQPPPPPLQHYLEQVPE
RVQKYQALLKELIRNKARNRQNCALLEQAYAVVSALPQRAENKLVSLMENYPGTLEALGEPHIFVWEG
APGARMPPWKGNHRVFLFRNYLVICKPRRDSRTDFTSYVFRNMMKLSSIDLNDQVEGDDRAFEVWHEREDSV
KYLQARTHIVIKNSWVKEICGIQORLAQPVWRPPEFEELADCTAELGETVKLACRVTGTPKPIVSWYKDGK
VEVDQPHALVIEDPDGSKETLILDNLTGIDSGQYMCFAASAAGNASTLGLVQVPPRFVNVKVRATPFVEGEDAQ
ITCTVEGAPYPQIRWYKDGTLTLLAPGNRYRMLNEPRSGVLVLIQAAASKEDLGHYECELVNRGLSTRGGEL
YMQSPALRARDQHHREQIIVAAVEVTEQETKVPKKTVIIEETITTVVKSPPRGRRQSPGKSPSRSPRRSASPRR
PGLLAPERLYPPGTSPPRRLEVEQGRKAPVPALYVTEAEVHAPASQSPKWLEVEETIEVRVKKTGSRGASPVRE
MTRSGEGILFTLPGGI PGRDPNANNNSNNKSVYQEAARTWGPVAVHVGEFFIFQVDSVGNVDWVAASPEPEQVRA

SQKEENTERQEGCSGDENTFLMEEPQDTSLSQGRDPKILTHNGRVLTADLEDYVPOEGETFGCGDSTPSTP  
DEPPCEVSVLQREISEPTVGQPVLNVGRPPGTGATPSFFRPGSQVHSPESVSFLLREAWSGPVSAAAPWTSSSF  
HTHVQSSVDGSHGSFKTEVSTQTVSFGAVGETVTLHIDPDGGEAPGPSQG\*

>rs51724502\_ENSMUSP00000020732\_c.14664:G>A\_p.A4889T  
ENSMUST00000020732.13|Obscn-201|ENSMUSG00000061462|-|chr11:g.58943367:C>T  
MDHSFSGAPRFLTRPKAFVSVGKDATLSCQIVGNPTPHVSWEKDRQPVEAGARFRLAQDGDVYRLTILDLAL  
GDSGQYVCRARNAIGEFAAVGLRVDSEGTCAEQAPHFLLRPTSIRVREGADATFRCRVGSGPQPAVSWSKDG  
RRLGPPDAPHVRVEEHGESSALRIRSARPRDGGTYEVRAENPLGSASAAAALVVDSDAEVAGPPGTSTATLLA  
HLQQRRREAMRAEGIPSPPGAGTRTCTVTTEGKHARLSCFVTGEPKPEVWKKDQQLVTEGRRHVVEDEQENF  
VLKILFCKQSDRGLYTCTASNLVGQTYSSVLVVVREPTVPFKKRLQDLEVREKESATFQCEVAQAPATEAAWFK  
EETRLWASAKYDIEEEGTERRLTVRNVSADDDAVYICETTEGSRVVAELSVQGNLTKLPRKTAVRTGDTAIF  
WVELAVPEGPVWRWRNQEEMVAGGRVAITAEGTCHTLTI FQCTLEDMGEVAFVSGGCRTTTQFCVSAPRRPPL  
YPPADPVVKAKTESSVTLWSAPPHGDRPVTIDGYVLEKRKLGAYAWSRCHEAGWLATTEFTITGVAEEGDFQ  
FRVSAINHFGQGPYLEFPGMTMLVPLAVKTPKAVEAVEGGEVTFVSVDLTVASSGEWFLDGEALKASSIYVI  
RCDRTRHMLTIREVPARLHGAQLKFVANGIETSIQMVVRAALGLPSSKLPAAAAREVLAQLHEEAQLLAE LSD  
QAAA VTWLKDGRELSLGPKEYMQVSAGRRALLVRDVAQDDAGLYECVSRGSRRTAYQLLVQDITDGYRDWGPAG  
PQKHMCKCAGAKIARYLGSscyRFLQYDKGVWHWLEAALDRQKGTSSCSLHEKPKLVFAKQQAHSEVKA  
AGNSATLSCEVTQAQTEVTWFKDGKLLSSSSKVRMEASGCSRRLVVQQAGKADAGEYSCEAGGQKLSFRLDVA  
EPKLVFAKQQAHSEVKAEGASATLSCEVAQAQTEVTWFKDGKLLSSSSKVRMEASGCSRRLVVQQAGKADA  
GEYSCEAGGQKLSFRLDVAEPKMFVFAKEQQARSEVKAEGASATLSCEVAQAQTEVTWFKDGKLLSSSSKVRM  
EASGCSRRLVVQQAGKADAGEYSCEAGGQKLSFRLDVTEPKLVFAKEQQARSEVKAEGVNSATLSCEVAQAQ  
EVTWFKDGKLLSSSSKVRMEASGCSRRLVVQQAGKADAGEYSCEAGGQKLSFRLDVAEPKLVFAKEQQARSEV  
KAEAGNSATLSCEVAQAQTEVTWFKDGKLLSSSSKVRMEASGCSRRLVVQQAGKADAGEYSCEAGGQKLSFHL  
DVTEPKLVFAKEQQAHSEVKAEGASATLSCEVAQAQTEVTWFKDGKLLSSSSKVRMEASGCSRRLVVQQAGK  
ADAGEYSCEAGGQKLSFRLDVAEPKLVFAKEQQARSEVKAEGASATLSCEVAQAQTEVTWFKDGKLLSSSSK  
VRVEASGCSRRLVVQQAGKADAGEYSCEAGGQKLSFRLDVAEPKLVFAKEQQANSEVKAEGASATLSCEVAQA  
AQTEVTWFKDGKLLSSSSKVRVEASGCSRRLVVQQAGKADAGEYSCEAGGQKLSFRLDVAEPKLVFAKEQQAH  
SEVKAEGASATLSCEVAQAQTEVTWFKDGKLLSSSSKVRVEASGCSRRLVVQQAGKADAGEYSCEAGGQKLS  
FRLDVAEPKLVFAKEQQAHSEVKAEGASATLSCEVAQAQTEVTWFKDGKLLSSSSKVRVEASGCSRRLVVQQ  
AGKADAGEYSCEAGGQKLSFRLDVAEPKLVFAKEQQAHSEVKAEGASATLSCEVAQAQTEVTWFKDGKLLSS  
SSKVRVEASGCSRRLVVQQAGKADAGEYSCEAGGQKLFRLDVAEPKLMFAKEQQAHSEVKAEGASATLSCE  
VAQAQTEVTWFKDGKLLSSSSKVRVEASGCSRRLVVQQAGKADAGEYSCEAGGQKLSFRLDVAEPKLVFAKEQ  
QAHSEVKAEGASATLSCEVAQAQTEVTWFKDGKLLSSSSKVRVEASGCSRRLVVQQVQKADAGEYSCEARGQ  
KLSFRLDVADTRLMFAKEQQARTEVKAEGNSATLSCEVAQAQTEVTWFKDGKLLSSSSKVRVEASGCSRRLV  
VQQAGKADAGEYSCEAGGQKLSFRLDVAEAEISQIIPERPSRREPLVVKHEHETIILTATIAAPVAAVTWLKDGV  
EIRRSKRHEATSLGDTHTLTVRGAQVLDLSAIYSCRVKEGQDFPVQVEEVAAKFSKPLEPVEGELGGTVMLVC  
ELSPQAEVWRCGNTQLRPGKRFQMTSEGPRRLTLTVSGLREDDAEEYVCESRDDRTSARLTVKVPVVKFTS  
GLSAMVAEEGQEQATFQCVVSPSDAGVTWYKDGMLQPSKFMVVEGASRSLTILGLTLEDAGQVTEAEGAS  
SSAALRVREAPVLFKKLEPQTEERTSVTLEVELTRPWPEVKWTRNAAVLTPSENVEIRAEGARHCLVLRV  
GFADRGFFGCETPDDKTQAKLNVEMRQVRLVRLGLQEVEAKEQGTASMDVELSHAEEVGSWTRDGLRLQPGPKC  
HLAVQGPVHIILTLALQPQDSGLVAFRAEGVHTSARLIVTELPVSFTRVLQDVVATQKEKVTLECELSRPVDV  
RWLKDGVLELRAGKAIIGIVAQGTCSRSLVIYRCETGDQGVYVCDALDAQTSASLRVQGRTYTLIFRRLAEDAGE  
VKFVAENAESRAHLRVKELPVTLLRPLRDKIAMEKHRGVLECCQVSRASAQVRWFKGGVELQSGPKYEVVSDGL  
YRKLVINVDVQPEDEDTYTCDAENVKTSAQFFVEEQSITIVRGLKDMTVMEPAPAWFECETSIPSVRPPKWL  
KTVLQAGGNVGLQDGTVHRLTLHKTCSTMTGPVHFTIGKSRSSAQLVVSDIPVVLTRPLEPKAGRELQSVVL  
SCDFRPAPKAVQWYKDDTPLSPSEKFKMALEGMALRILRLTPADAGVYRCQAGSAQSSAEVTVAREVTVI  
QPLQDAEAMEEGRVCFSCELSHKDEDEIWSLNGTPLYNDSFHEISHGCLHTLVLSVRQADTGTVCATSPKV  
SVSARLVVKGKPVVFLKALDDVSAEERGLTLQCEVSDPEARVVRKDGVELGSPDKYDFLHKAGARGLTVHD  
LSHEDAGLYTCQVGSKETQSKVSVHDLHVGITKRLKTVEVLEGESECSFECVLSHESPSDPAVWTVGKTVGGS  
GHFHAVRQGRKYTLTVKDAALSDAGEVVFVSVLGLTSKASLI IRERPVDITKPLEDQRTTLGEDVMLSCELSRA  
GTSVRWLKDGKAIRKSQKYDLLSEGTRAVLVVRKASLKDSSGEYTCETEASKSTAKLCVEEKANRFTTEELADLQ  
VEEKGRAVFTCKTEHPASVVTWRKGLLELRASGKHVPSQEGTLKLTINALERTDSDTYTCDIGQARTQARLL  
VHGQKVRVIEDLEDTAQVEGSSAKFCRIAIPADYVGPVHWFLDKTPHLSNELNEITVQPGGYHVLTLRQLALKD  
SGTVYFEAGDQRTSAAALRVTEKPSIFSRPLTDVTVEGEDTLTVCETTTTVDSSVRWTKDGGTLRPSARCQLSH  
EGCQAQLLITATTPQDGGRYKCEIGGASSSSIVRVHALPVRFRESLKDVEVPEGKAATLRCVLSVAAPVEWR  
HGDDVLKSSNKYSLRQEGAVLELVIRDLQPDQSGQYSCSFGDQTTSATLTVKTSQAQFVGLKRNKEATEGTTV  
TLRCELTKAPVEWKKGTETLRNGDKYSLKQDGA VCELQICSLLVADAGEYSCVCGQEKTSATLTVKALLVHF  
VRLRSKEATEGDTTTLQCELSKAAPVEWRKGTETLRDGDYSLKQDGA VCELQIRSLTIADAGEYLC TCGQE



KTSATLTVRALPAKFKDSLKNEEATEGTTATLSCELSKAAPVTWKKGPKTLQSGDKYVLRQDGAVCGLQIHGL
TMADAGEYSCVCGQEKTSATLTVRGLPAKFIEDLRSQEATEGATAILRCELSKAAPVEWRKGSSETLKDGDRTY
LRQDGAVCCELQIRGLAVVDGTYSLSPTKFTTEGLRNEEATEGTMATLRCQMSKAAPVEWRKGSSETLRDGDRTYS
LRQDGAVCCELQIRGLTIEDSGEYTCVCGQEKTSATLSVKALPSRFIEDLRSQEATEGTMATLRCQMSKTAPVE
WKKGSETLRDGGRYSLRQDGPVCELQICDLAVEDAGEYSCVCGQEKTSATLSIKALPPRFIEDLRSQEATEGT
MATLRCQMSKAAPVEWRKGSSETLGDGGRYSLRQNGAVCELQIHDLAVEDTGEYSCVCGQEKTSATLNVKALPP
RFIEDLRSQEATEGTMATLRCQMSKAAPVEWRKGSSETLRDGGRYSLRQDGAVCCELQIHDLVEDAGQYSCVCG
QEKTSAVLTVDALPPKFTEGLKKEEATEGTMVTLRCQMSKEATVEWRKGAKTSLSDGGRYSLRQDGAVCCELQIC
GLAVEDAGEYSCVCGQEKTSATLSVKALPPRFIEDLRSQEATEGTMATLRCQMSKAAPVEWRKGSSETLRDGD
YSLRQDGAVCCELQIRDLAVEDAGEYLCVCGQEKTSATLSVKALPPRFIEDLRSQEATEGTMATLRCQMSKAAP
VEWRKGSKTLRDGDRTYSLRQDGAVCCELQICDLAVEDTGDYSCVCGQEKTSATLSVKALPPRFIEDLRSQEARE
GTVATLRCRMSKAAPVEWRKGSSETLKDGDRTYSLRQEGNLCELQIRDLAVEDTEEYSCVCGQEKTSATLSVKAL
PAKFIEDLRSQEAPESSTVTLRCKLSKKASVVWKKGSETLRNGARYSLRQDGAVCLEIRDLTVEDTGEYSCT
CGQERTSATLSIMAPQVVFQQPLQNLQAEEGSMASLRCELSVNAAMVWSKGGLELQGDTRREARQQGCVTEL
LLRDLRREDAGEYSCTCGSQTTSATLMVTAAPVRFRLRELQAQDVDEGATARLRCELSREAVSVEWRKGSLLQF
PCAKYQMVQEGTTAELLVHGVEQEDAGEYTCDAHTQSIARLSVRAPKPKFKTDLQSTEQEAGGTARLCCQLS
EAEPGTPVQWLKEGVLHVGSKYEMRRQGAVCCELLIHGLEAKDTGEYACLVGGQKTLASLRVKEPEVTIVRGL
VDMEVQADEDEVEFTCKVQAGATDVQWHLQGLPLQSNVTEVAVLADGCTHVLQKGVTFLEDAGTVSFHVGG
SSSAQLTVRVPEVTVLEPLKDVQLSEGDQAHFRCLRSRASGQEARWALGGVPLQCNEMNNDITVEQGTLYLLTL
HKVTLLEDAGTITLQVGSSESQAQLKVTAKNTVLRGLENVDALLEGGEALFECQLSQPEVAHAHTWLLDDEPVHTS
EKVEVVYFENGLRHLLLLLKNLKPQDSCRVTFLAGDVVTSFAFLTVRGRLEVLLEPPHDASVKAGMQVRFCTILS
EAVPVGEATWYINGAAIQPDDTDWTVTTDGSHHALTLNAQPPHAGEVTFFAARDAVASARLSVLALPDPPEDA
EAVGRSDHSVTLVSWVAPMSDGGGGLCGYRVMKEASTGQWQLCHDLVPGPECVDDLVPGKTYRFRVAAVGPA
GAGEPVHLPQMVKIAPAPAPAPAPAPAPAPETRQAVVGEDICLELEVAADGGEVVWHKGTERRIQPGGHFEVLS
RGQRQMLVIKGFRTEDQGEYRCGPIQGLPSSGAATFNVVMTSGSGDEVPAQPSLPPEAAQEGDLHLLWEALAR
KRRMSREPTLDSISELPEEDSRVQHLRQEAETAPDLSEGYSTADELARTGEADLSHTSSDDESRACTPSLVT
YLKAGGPGISPLAQTSQAVSAQMSQSEAGFADLVGQSKGESLVAAEAHSHLSLAEVGTEEFQKLTSTQITMVS
AKISQAKLQVPGGDSDEETKTPSASPRHGRSRPSSSVQESSSESEDGDSRGEIFDIYVVTADYLPGLAEQDAI
ILREGQYVEVLDSAHPLRWLVRTKPTKSSPSRQGWVSPAYLDRKRLKLSPEWGPTEAPEFPGEAVSEDEYRTRL
SSVIQELLSSEQAFVQELQFLESHHMKHLERSPRVPAVASQKTVI FRNVQDISHFHSSFLKELQCGCTDDDV
AMCFIKNQEAFAKEYLEFLVGRVQAESVVVSTPVQEFYKKAETLSAKDPTQPPPPPLQHYLEQPVERVQKYQ
ALLKELIRNKARNRQNCALLEQAYAVVSALPQRAENKLHVSLMENYPGTLEALGEPPIRQGHFIVWEGAPGARM
PWKGHNHRVFLFRNYLVICPPRRDSRTDTFSYVFRNMMKLSSIDLNDQVEGDRAFEVWHEREDSVRKYLLQA
RTVI IKNSWVKEICGIQQLAQPVWRPPEFEEELADCTAELGETVKLACRVTGTPKPIVSWYKDGKPEVDPH
HILIEDPDGSCCTLILDNLGTIDSGQYMCFAASAAGNASTLGIILVQVPPRFVNVKVRATPFVEGEDAQITCTVE
GAPYPQIRWYKDGTLTLLAPGNRYRMLNEPRSGVLVLIQAASKEDLGHYECELVNRLGSTRGGGELYMQSPALR
ARDQHHREQIIVAAVEERRPSP\*

>rs51724502\_ENSMUSP00000151217\_c.11964:G>A\_p.A3989T
ENSMUST00000219084.3|Obscn-207|ENSMUSG00000061462|-|chr11:g.58943367:C>T
MDHSFSGAPRFLTRPKAFVSVGKDATLSCQIVGNPTPHVSWEKDRQFVEAGARFRLAQDGDVYRLTILDLAL
GDSGQYVCRARNAIGEAFAAVGLRVDSEGTCAEQAPHLLRPTSIRVREGADATFRCRVGGSPQPAVSWSKDG
RRLGPPDAPHVVEEHGESSALRIRSARPRDGGTYEVRAENPLGSASAAAAALVVDSAEVAGPPGTSTATLLA
HLQORREAMRAEGIPPSPPGAGTRTCTVTEGKHARLSCFVTGEPKPEVWKKDQGLVTEGRRHVVEDEQENF
VLKILFCKQSDRGLYECTASNLVGQTYSSVLDVVVREIPTVFFKKRLQDLEVREKESATFQCEVAQAPATEAAWFK
EETRLWASAKYDIEEECTERRLTVRNVSADDDAVYICETVTEGSRVAELSVQGNLTKRLKPRKTAVRTGDTAIF
WVELAVPEGPVRWLRNQEEMVAGGRVAITAEGTCHTLTI FQCTLEDMGEVAFVSGGCRTTTTQFCVSAAPRRPPL
YPPADPVVKAKTESSVTLWSAPPHGDRPVTIDGYVLEKRLKLGAYAWSRCHEAGWLATTEFTITGVAAEEGDFQ
FRVSAINHFGQGPYLEFPGMTMHLVPLAVKTPKAVEAVEGGEVTFVSDLTVASSGEWFLDGEALKASSIYVI
RCDRTRHMLTIREVPARLHGAQLKVFVANGIETS IQMVVRAALGLPSSKLPAAAAREVLAQLHEEAQLLAE LSD

QAAA V TWLKD GREL S L G P K Y E M Q V S A G R R A L L V R D V A Q D D A G L Y E C V S R G S R T A Y Q L L V Q D I T D G Y R D W G P A G  
P Q K H M C K C A G A K I A R Y L G S S C Y R F L Q Y D K G V W H W L E A A L D T R Q G K G T S S C S L H E K P K L V F A K Q Q A H S E V K A E  
A G N S A T L S C E V T Q A Q T E V T W F K D G K K L S S S S K V R M E A S G C S R R L V V Q Q A G K A D A G E Y S C E A G G Q K L S F R L D V A  
E P K L V F A K Q Q A H S E V K A E A G A S A T L S C E V A Q A Q T E V T W F K D G K K L S S S S K V R M E A S G C S R R L V V Q Q A G K A D A  
G E Y S C E A G G Q K L S F R L D V A E P K M V F A K E Q Q A R S E V K A E A G A S A T L S C E V A Q A Q T E V T W F K D G K K L S S S S K V R M  
E A S G C S R R L V V Q Q A G K A D A G E Y S C E A G G Q K L S F R L D V T E P K L V F A K E Q Q A R S E V K A E A G N S A T L S C E V A Q A Q T  
E V T W F K D G K K L S S S S K V R M E A S G C S R R L V V Q Q A G K A D A G E Y S C E A G G Q K L S F H L D V T E P K L V F A K E Q Q A H S E V  
K A E A G A S A T L S C E V A Q A Q T E V T W F K D G K K L S S S S K V R M E A S G C S R R L V V Q Q A G K A D A G E Y S C E A G G Q K L S F R L  
D V A E P K L V F A K E Q Q A R S E V K A E A G A S A T L S C E V A Q A Q T E V T W F K D G K K L S S S S K V R V E A S G C S R R L V V Q Q A G K  
A D A G E Y S C E A G G Q K L S F R L D V A E P K L V F A K E Q Q A N S E V K A E A G A S A T L S C E V A Q A Q T E V T W F K D G K K L S S S S K  
V R V E A S G C S R R L V V Q Q A G K A D A G E Y S C E A G G Q K L S F R L D V A E P K L A F A K E Q Q A H S E V K A E A G A S A T L S C E V A Q  
A Q T E V T W F K D G K K L S S S S K V R V E A S G C S R R L V V Q Q A G K A D A G E Y S C E A G G Q K L S F R L D V A E P K L V F A K E Q Q A H  
S E V K A E A G A S A T L S C E V A Q A Q T E V T W F K D G K K L S S S S K V R V E A S G C S R R L V V Q Q V G K A D A G E Y S C E A R G Q K L S  
F R L D V A E A E S Q I P E R P S R R E P L V V K E H E T I I L T A T I A A P S V A A V T W L K D G V E I R R S K R H E A T S L G D T H T L T V R  
G A Q V L D S A I Y S C R V G K E G Q D F P V Q V E E V A A K F S K P L E P V E G E L G G T V M L V C E L S P E Q A E V V W R C G N T Q L R P G K  
R F Q M T S E G P R R T L T V S G L R E D D A E E Y V C E S R D D R T S A R L T V K V P R V V K F T S G L S A M V A E E G Q E A T F Q C V V S P S  
D A G V T W Y K D G M Q L Q P S E K F V M V E S G A S R S L T I L G L T L E D A G Q V T V E A E G A S S A A L R V E A P V L F K K K L E P Q T  
V E E R T S V T L E V E L T R P W P E V K W T R N A A V L T P S E N V E I R A E G A R H C L V L R S V G F A D R G F G C E T P D D K T Q A K L N  
V E M R Q V R L V R G L Q E V E A K E Q G T A S M D V E L S H A E V E G S W T R D G L R L Q P G P K C H L A V Q G P V H I L T L S A L Q P Q D S G  
L V A F R A E G V H T S A R L I V T E L P V S F T R V L Q D V V A T Q K E K V T L E C E L S R P V D V R W L K D G V E L R A G K A I G I V A Q G T  
C R S L V I Y R C E T G D Q G V Y C D A L D A Q T S A S L R V Q G R T Y T L I F R R V L A E D A G E V K F V A E N A E S R A H L R V K E L P V T  
L L R P L R D K I A M E K H R G V L E C Q V S R A S A Q V R W F K G G V E L Q S G P K Y E V V S D G L Y R K L V I N D V Q P E D E T Y T C D A G  
N V K T S A Q F F V E E Q S I T I V R G L K D M T V M E P A P A W F E C E T S I P S V R P P K W L L G K T V L Q A G G N V G L E Q D G T V H R L T  
L H K T C S T M T G P V H F T I G K S R S S A Q L V V S D I P V V L T R P L E P K A G R E L Q S V V L S C D F R P A P K A V Q W Y K D D T P L S P  
S E K F K M A L E G Q M A E L R I L R L T P A D A G V Y R C Q A G S A Q S S A E V T V E A R E V T V I Q P L Q D A E A M E E G R V C F S C E L S H  
K D E D I E W S L N G T P L Y N D S F H E I S H E G L H T L V L K S V R Q A D T G T V C A T S P K V S V S A R L V V K G K P V V F L K A L D D V  
S A E E R G T L T L Q C E V L D P E A R V V W R K D G V E L G P S D K Y D F L H K A G A R G L T V H D L S H E D A G L V T C Q V G S K E T Q S K V  
S V H D L H V G I T K R L K T V E V L E G E S C S F E C V L S H E S P S D P A V W T V G G K T V G G S G H F H A V R Q G R K Y T L T V K D A A L S  
D A G E V V F S V L G L T S K A S L I I R E R P V D I T K P L E D Q R T T L G E D V M L S C E L S R A G T S V R W L K D G K A I R K S Q K Y D L L  
S E G T R A V L V V R K A S L K D S G E Y T C E T E A S K S T A K L C V E E K A N R F T E E L A D L Q V E E K G R A V F T C K T E H P A S V V T W  
R K G L L E L R A S G K H V P S Q E G L T L K L T I N A L E R T D S D T Y T C D I G Q A R T Q A R L L V H G Q K V R V I E D L E D T A V Q E G S S  
A K F C C R I A P A D Y G P V H W F L D K T P L H S N E L N E I T V Q P G G Y H V L T L R Q L A L K D S G T V Y F E A G D Q R T S A A L R V T E K  
P S I F S R P L T D V T V T E G E D L T L V C E T T T V D S S V R W T K D G K T L R P S A R C Q L S H E G C Q A Q L L I T A T P Q D G G R Y K C  
E I G G A S S S S I V R V H A L P V R F R E S L K D V E V P E G K A A T L R C V L S S V A A P V E W R H G D D V L K S N K Y S L R Q E G A V L E  
L V I R D L Q P Q D S G Q Y S C S F G D Q T T S A T L T V K T S S A Q F V G K L R N K E A T E G T T V T L R C E L T K E A P V E W K K G T E T L R  
N G D K Y S L K Q D G A V C E L Q I C S L L V A D A G E Y S C V C G Q E K T S A T L T V K A L L V H F V R R L R S K E A T E G D T T T L Q C E L S  
K A A P V E W R K G T E T L R D G D R Y S L K Q D G A V C E L Q I R S L T I A D A G E Y L C T C G Q E K T S A T L T V R G L P A K F I E D L R S Q  
E A T E G A T A I L R C E L S K A A P V E W R K G S E T L K D G D R Y T L R Q D G A V C E L Q I R G L A V V D T G T Y S S L P T K F T E G L R N E  
E A T E G T M A T L R C Q M S K A A P V E W R K G S E T L R D G D R Y S L R Q D G A M C E L Q I R G L T I E D S G E Y T C V C G Q E K T S A T L S  
V K A L P P R F I E D L R S Q E A T E G T M A T L R C Q M S K A A P V E W R K G S E T L G D G G R Y S L R Q N G A V C E L Q I H D L A V E D T G E  
Y S C V C G Q E K T S A T L N V K A L P P K F T E G L K K E E A T E G T M V T L R C Q M S K E A T V E W R K G A K T L S D G G R Y S L R Q D G A M  
C E L Q I C G L A V E D A G E Y S C V C G Q E K T S A T L S V K A L P P R F I E D L R S Q E A T E G T M A T L R C Q M S K A A P V E W R K G S E T  
L R D G D R Y S L R Q D G A V C E L Q I R D L A V E D A G E Y L C V C G Q E K T S A T L S V K A L P P R F I E D L R S Q E A T E G T M A T L R C Q  
M S K A A P V E W R K G S K T L R D G D R Y S L R Q D G A M C E L Q I C L A V E D T G D Y S C V C G Q E K T S A T L S V K A P Q V V F Q Q P L Q  
N L Q A E E G S M A S L R C E L S V P N A A M V W S K G G L E L Q G D T R R E A R Q Q G C V T E L L L R D L R R E D A G E Y S C T C G S Q T T S A  
T L M V T A A P V R F L R E L Q A Q D V D E G A T A R L R C E L S R E A V S V E W R K G S L Q L F P C A K Y Q M V Q E G T T A E L L V H G V E Q E  
D A G E Y T C D A G H T Q S I A R L S V R A P K P K F K T D L Q S T E Q E A G G T A R L C C Q L S E A E P G T P V Q W L K E G V E L H V G S K Y E  
M R R Q G A V C E L L I H G L E A K D T G E Y A C L V G G Q K T L A S L R V K E P E V T I V R G L V D M E V Q A D E D V E F T C K V S Q A G A T D  
V Q W H L Q G L P L Q S N E V T E V A V L A D G C T H V L Q L K G V T L E D A G T V S F H V G G L S S S A Q L T V R V P E V T V L E P L K D V Q L  
S E G Q D A H F R C R L S R A S G Q E A R W A L G G V P L Q C N E M N D I T V E Q G T L Y L L T L H K V T L E D A G T I T L Q V G S C S S E A Q L  
K V T A K N T V L R G L E N V D A L E G G E A L F E C Q L S Q P E V A A H T W L L D D E P V H T S E K V E V V Y F E N G L R H L L L L K N L K P Q  
D S C R V T F L A G D V V T S A F L T V R G W R L E V L E P P H D A S V K A G M Q V R F T C I L S E A V P V G E A T W Y I N G A A I Q P D D T D W  
T V T T D G S H H A L T L S N A Q P Q H A G E V T F A A R D A V A S A R L S V L A L P D P P E D A E V V G R S D H S V T L S W A P M S D G G G  
L C G Y R V E M K E A S T G Q W Q L C H D L V P G P E C V D D L V P G K T Y R F R V A A V G P A G A G E P V H L P Q M V K I A P A P A P A P A P  
A P A P E T R Q A V V G E D I C L E L E V A A D G G E V V W H K G T E R I Q P G G H F E V L S R G Q R Q M L V I K G F R T E D Q G E Y R C G P I Q  
G L P S S G A A T F N V M T S G S G D E V P A Q P S L P P E A A Q E G D L H L L W E A L A R K R R M S R E P T L D S I S E L P E E D S R V Q H L  
R Q E A E E T A P D L S E G Y S T A D E L A R T G E A D L S H T S S D D E S R A G T P S L V T Y L K K A G G P G I S P L A S K H E A Q V T T S V K  
P Q K Q Q E P V V P T C P P P G D L S A A D L M D P S L D K A A V K I Q A A F K G Y K V R K E M K Q Q E G P V F S R T F G D T E A Q V G D V L R L

ECVLATKTDMRACWLKDGIELTDGRHYHIDQLKDGTCSSLVTLGLAPTDSGRYTCQVSTKSGRVSHSACVVVSG  
 TESEAESSSGGELDDAFRRARRLHRLFRTRKSPAELSEEELFLSADEGPGEPEEPADWQTYREDEFVFCIRFE  
 SLAEARQAVTCFRNMFATMGIGVEISLGEQGRVEMRIGKVAPTVTPAVPLAKTPGLQTSDAAPVFLTELQN  
 QDVQDGYPMFDCVVTGQPVPSVRWFKDGLLEEDDHMINEDQQGGHQLIITAVVPADMGVYRCLAENSMGV  
 SSTKAELRVELTSTDYDTAADATETSSYFSAQGYLSSREQEGTESDEGQLPQVLEELKDLQVAPGTRLAKFQL  
 KVKGYPAKLYWFKDQPLTSDHIRMTDKKTLHTLEIVSVTREDSGQYAAAYISNAVGAAYSSARLLVGRPSE  
 PEEKPASDVHERLVPFRILEKFTPKKVKRGSSTFVSVKVEGHPAPSVHWLKEEAKEKGLWIGPDPGTYTMASS  
 SKQHSVLVLDVGRQHGTCTIATNPAGQALCSASLHISGLAKEEEQERVKEALISSFLOGTSQAVSAQMSSES  
 AGFADLVGQSKGESLVAEEHSHLSLAEVGTEEFLLQKLTSTQITEMVSAKISQAKLQVPGGDSDEETKTPSASP  
 RHGRSRPSSSVQESSSESEDGDSRGEIFDIYVVTADYLPLGAEQDAIILREGQYVEVLDSAPLRLVTRTKPT  
 KSSPSRQGWVSPAYLDKRLKLSPEWGPTEAPEFPGEAVSEDEYRTRLSSVIQELLSSEQAFVQFLESHHM  
 KHLERSPRVPAAVASQKTVI FRNVQDISHFHSSFLKELQCGCTDDDVAMCFIKNQEAFEKYLEFLVGRVQAES  
 VVVSTPVQEFYKKYAETLSAKDPTQPPPPPLQHYLEQPVVERVQKYQALLKELIRNKARNRQNCALLEQAYAV  
 VSALPQRAENKLVSLMENYPGTLEALGEPTRQGHFIVWEGAPGARMFWKGNHRHVFLFRNYLVI CKPRRDSR  
 TDTFSYVFRNMMKLSSIDLNDQVEGDDRAFEVWHEREDESVRKYLLQARTVI IKNSWVKEICGIQQRLAQPVWR  
 PPEFEEELADCTAELGETVKLACRVGTGPKPIVSWYKDGKPEVDPHILIEDPDGSCSTLI LDNLGTIDSGQY  
 MCFASAAGNASTLGKILVQVPPRFVNVKVRATPFVEGEDAQITCTVEGAPYPIRIRWYKDGTLAPGNRYRMLN  
 EPRSGVLVLIQAASKEDLGHYECELVNLRLGSTRGGGELYMQSPALRARDQHHRQIIVAAVEVTEQETKVPKK  
 TVIIETITTVVKS PRGRRQSPGKSPSRSPRRSASPRRGLLAPERLYPPGTSPSRRLVEVEQGRKAPVPALY  
 VTEAEVHAPASQSQPKWLEVEETIEVRVKKTGSRGASPVREMTSRGEGILFTLPGGIPGRDPNANNNSNKSQY  
 QEARTWGPVVHVGEFFIFQVDSVGNVDWAASPEPEQVRASQKEENTERQEGCSDGDENTFLMEEPQDTSLS  
 QGRDPKILTHNGRVLTLADLEDYVQEGETFQCGDSTPSTPDEPPCEVSVLQREI SEPTVQGPVLLNVGRPPG  
 TGATPSFFRPGSQVHSPESVFLREAWSGPVSAAPWTSSFHTHVQSSVDGSHGSKFEVSTQTVSFGAVGET  
 VTLHIDPDGGEAPGPSQG\*

>rs50048074\_ENSMUSP00000158795\_c.14572:T>C\_p.L4858S  
 ENSMUST00000238536.2|Obscn-210|ENSMUSG00000061462|-|chr11:g.58943459:A>G  
 MDHSFSGAPRFLTRPKAFVSVGKDATALSCQIVGNPTPHVSWEKDRQPVEAGARFLAQDGDVYRLTILDLAL  
 GDSGQYVCRARNAIGEAFAAVGLRVDSEGTCAEQAPHFLLRPTSIRVREGADATFRCRVGGSPQPAVSWSKDG  
 RRLGPPDAPHVRVEEHGESSALRIRSARPRDGGTYEVRAENPLGSASAAAALVVDSDAEVAGPPGTSTATLLA  
 HLQORREAMRAEGIPSPPGAGTRTCTVTEGKHARLSCFVTGEPKPEVWKKDQGLVTEGRRHVVEDEQENF  
 VLKILFCKQSDRGLYTCTASNLVQTYSSVLVVREPTVPFKKRLQDLEVREKESATFQCEVAQPAEAAWFK  
 EETRLWASAKYDIEEEGTERRLTVRNVSADDDAVYICETTEGSRVVAELSVQGNLTKLPRKTAVRTGDTAIF  
 WVELAVPEGPVRLRNQEEVAGGRVAITAEGTCHTLTI FQCTLEDMGEVAFVSGGCRTTTTQFCVSAPRRPPL  
 YPPADPVVKAKTESVTLWSAPPHGDRPVTIDGYVLEKRLKLGAYAWSRCHEAGWLATTEFTITGVAEEGDFQ  
 FRVSAINHFGQGPYLEFPGTMHLVPLAVKTLKVAEAVEGGEVTFVSDLTVAASSGEWFLDGEALKASSIYVI  
 RCDRTRHMLTIREVPARLHGAQLKFEVANGIETS IQMVVRAALGLPSSKLPAAAAAREVLAQLHHEAQLLAE LSD  
 QAAAVTWLKDGRELSLGPKEYMQVSAGRRALLVRDVAQDDAGLYECVSRGSRRTAYQLLVQDITDGYRDWGPAG  
 PQKHMCKCAGAKIARYLGS SCYRFLQYDKGVWHLEAALDTRQKGTSSCSLHEKPKLVFAKQQAHSEVKA  
 AGNSATLSCEVTQAQTEVTWFKDGKLLSSSSKVRMEASGCSRRLVVQQAGKADAGEYSCEAGGQKLSFRLDVA  
 EPKLVFAKQQAHSEVKAEGASATLSCEVAQAQTEVTWFKDGKLLSSSSKVRMEASGCSRRLVVQQAGKADA  
 GEYSCEAGGQKLSFRLDVAEPKMVFAKEQQARSEVKAEGASATLSCEVAQAQTEVTWFKDGKLLSSSSKVRM  
 EASGCSRRLVVQQAGKADAGEYSCEAGGQKLSFRLDVTEPKLVFAKEQQARSEVKAEVGNSATLSCEVAQAQ  
 EVTWFKDGKLLSSSSKVRMEASGCSRRLVVQQAGKADAGEYSCEAGGQKLSFRLDVAEPKLVFAKEQQARSEV  
 KAEAGNSATLSCEVAQAQTEVTWFKDGKLLSSSSKVRMEASGCSRRLVVQQAGKADAGEYSCEAGGQKLSFHL  
 DVTEPKLVFAKEQQAHSEVKAEGASATLSCEVAQAQTEVTWFKDGKLLSSSSKVRMEASGCSRRLVVQQAGK  
 ADAGEYSCEAEGQKLSFRLDVAEPKLVFAKEQQARSEVKAEGASATLSCEVAQAQTEVTWFKDGKLLSSSSK  
 VRVEASGCSRRLVVQQAGKADAGEYSCEAGGQKLSFRLDVAEPKLVFAKEQQANSEVKAEGASATLSCEVAQ  
 AQTEVTWFKDGKLLSSSSKVRVEASGCSRRLVVQQAGKADAGEYSCEAGGQKLSFRLDVAEPKLVFAKEQQAH  
 SEVKAEGASATLSCEVAQAQTEVTWFKDGKLLSSSSKVRVEASGCSRRLVVQQAGKADAGEYSCEAGGQKLS  
 FRLDVAEPKLVFAKEQQAHSEVKAEGASATLSCEVAQAQTEVTWFKDGKLLSSSSKVRVEASGCSRRLVVQQ  
 AGKADAGEYSCEAGGQKLSFRLDVAEPKLVFAKEQQAHSEVKAEGASATLSCEVAQAQTEVTWFKDGKLLSS  
 SSKVRVEASGCSRRLVVQQAGKADAGEYSCEAGGQKLFRLDVAEPKLMFAKEQQAHSEVKAEGASATLSCE  
 VAQAQTEVTWFKDGKLLSSSSKVRVEASGCSRRLVVQQAGKADAGEYSCEAGGQKLSFRLDVAEPKLVFAKEQ  
 QAHSEVKAEGASATLSCEVAQAQTEVTWFKDGKLLSSSSKVRVEASGCSRRLVVQQVQVQKADAGEYSCEARGQ  
 KLSFRLDVADATRLMFAKEQQARTEVKAEGASATLSCEVAQAQTEVTWFKDGKLLSSSSKVRVEASGCSRRLV  
 VQQAGKADAGEYSCEAGGQKLSFRLDVAEAEQSIPERPSRREPLVVKEHETIILTATIAAPSVAAVTWLKDG  
 EIRRSKRHEATSLGDHTLTVRGAQVLDIAIYSCRVGKEGQDFPVQVEEVAAKFSKPLEPVEGELGGTVMLVC  
 ELSPEQAEVWRCGNTQLRPGKRFQMTSEGPRRTLTVSGLREDDAEYVCESRDDRTSARLTVKVPVVKFTS

GLSAMVAEEGQEQATFQCVVSPSDAGVTWYKDGMLQOPSEKFMVESGASRSLTILGLTLEDAGQVTVAEAGAS  
 SSAALRVREAPVLFKKKLEPQTVEERTSVTLEVELTRPWPEVKWTRNAAVLTPSENVEIRAEGARHCLVLRV  
 GFADRGFFGCETPDDKTQAKLNVEMRQVRLVRLGLQVEVEAKEQGTASMDVELSHAEEVGSWTRDGLRLQPGPKC  
 HLAVQGPVHILTLALSALQPQDSGLVAFRAEGVHTSARLIVTELPVSFTRVLQDVVATQKEKVTLECELSRPVDV  
 RWLKDGVLELRAGKAIIGIVAQGTCSRSLVIYRCETGDQGVYVCDALDAQTSASLRVQGRTYTLIFRVLAEADAGE  
 VKFVAENAESRAHLRVKELPVTLLRPLRDKIAMEKHRGVLECCQVSRASAQVRWFKGGVELQSGPKYEVVSDGL  
 YRKLVINDVQPEDEDTYTCDAENVKTSAQFFVVEEQSITIVRGLKDMTVMPPAWFECETSIPSVRPPKWLGL  
 KTVLQAGGNVGLQDGTVHRLTLHKTCSTMTGPHVHTIGKSRSSAQLVVSDIPVVLTRPLEPKAGRELQSVVL  
 SCDFRPAPKAVQWYKDDTPLSPSEKFKMALEGQMAELRILRLTPADAGVYRCQAGSAQSSAEVTVAREVTVI  
 QPLQDAEAMEEGRVCFSCELSHKDEDEIWSLNGTPLYNDSFHEISHGCLHTLVLKSVRQADTGTVCATSPKV  
 SVSARLVVKGKPVVFLKALDDVSAEERGLTLTQCEVSDPEARVVRKDGVELGSPDKYDFLHKAGARGLTVHD  
 LSHEDAGLYTCQVGSKETQSKSVVHDLHVGITKRLKTVEVLEGESECFEVLSSHESPSDPAVWTVGGKTVGGS  
 GHFHAVRQGRKYTLTVKDAALSDAGEVVSVLGLTSSKASLIIRERPVDIKPLEDQRTTLGEDVMLSCELSRA  
 GTSVRWLKDGKAIRKSQKYDLLSEGTRAVLVVRKASLKDSEYTCETEASKSTAKLCVEEKANRFTHEELADLQ  
 VEEKGRAVFTCKTEHPASVVTWRKGLLELRASGKHVPSQEGTLTKLTINALERTDSDTYTCDIGQARTQARLL  
 VHGGKVRVIEDLEDTAVQEGSSAKFCRIAPADYGPVHWFLDKTPLHSNELNEITVQPGGYHVLTLRQLALKD  
 SGTVYFEAGDQRTSAALRVTEKPSIFSRPLTDVTVTEGEDTLVCEVTVVDSVVRWTKDGKTLRPSARCQLSH  
 EGCAQQLLITATTPQDGGRYKCEIGGASSSIVRVHALPVRFRFRESLKDVEVPEGKAATLRCVLSVAAPVEWR  
 HGDDVLKSSNKYSLRQEGAVLELVIRDLPQDSGQYSCSFGDQTTSATLTVKTSQAQFVGLKRNKEATEGTTV  
 TLRCELTKAPVEWKKGTETLRNGDKYSLKQDGAVCELQICSLLVADAGEYSCVCGQEKTSATLTVKALLVHF  
 VRRLSKEATEGDTTLTQCELSKAAPVEWRKGTETLRDGDYSLKQDGAVCELQIRSLTIADAGEYLCTCGQE  
 KTSATLTVRALPAKFKDSLKNEEATEGTTATLSCELSKAAPVTWKKGPKTLQSGDKYVLRQDGAVCELQIHGL  
 TMADAGEYSCVCGQEKTSATLTVRGLPAKFIEDLRSQEATEGATAILRCELSKAAPVEWRKGETLKDGDYR  
 LRQDGAVCELQIRGLAVVDGTGYSLSLPTKFTTEGLRNEEATEGTMATLRCQMSKAAPVEWRKGETLRDGDYR  
 LRQDGAVCELQIRGLTIEDSGEYTCVCGQEKTSATLSVKALPSRFIEDLRSQEATEGTMATLRCQMSKAPVE  
 WKKGETLRCQMSKAAPVEWRKGETLGDGGYSLRQDGAVCELQIHDLAVEDTGEYSCVCGQEKTSATLNVKALPP  
 RFIEDLRSQEATEGTMATLRCQMSKAAPVEWRKGETLRDGGYSLRQDGAVCELQIHDLVEDAGQYSCVCG  
 QEKTSAVLTVDALPPKFTTEGLKKEEATEGTMATLRCQMSKATVEWRKGAKTLSDDGGYSLRQDGAVCELQIC  
 GLAVEDAGEYSCVCGQEKTSATLSVKALPPRFIEDLRSQEATEGTMATLRCQMSKAAPVEWRKGETLRDGD  
 YSLRQDGAVCELQIRDLAVEDAGEYLCVCGQEKTSATLSVKALPPRFIEDLRSQEATEGTMATLRCQMSKAAP  
 VEWRKGETLRDGDYSLRQDGAVCELQICDLAVEDTGDYSCVCGQEKTSATLSVKALPPRFIEDLRSQEARE  
 GTVATLRCRMSKAAPVEWRKGETLKDGDYSLRQEGNLCELQIRDLAVEDTEEYSCVCGQEKTSATLSVKAL  
 PAKFIEDLRSQEAPESSTVTLRCKLSKASVWKKGSETLRNGARYSLRQDGAVCELEIRDLTVEDETEYSC  
 CGQERTSATLSIMAPVVFQQPLQNLQAEEGSMASLRCESSVPNAAMVWSKGGLELQGDTRREARQQGCVAEL  
 LLRDLRREDAGEYSCVCGQEKTSATLMVTAAPVRFRLRELQAQDVDEGATARLRCELSREAVSVEWRKGSLLQF  
 PCAKYQMVQEGTTAELLVHGVEQEDAGEYTCDAHTQSIARLSVRAPKPKFKTDLQSTEQEAGGTARLCCQLS  
 EAEPGTPVQWLKEGVELHVGSKYEMRRQGAVCELLIHGLEAKDTGEYACLVGQKTLASLRVKEPEVTIVRGL  
 VDMEVQADEDEFTCKVQAGATDVQWHLQGLPLQSNVTEVAVLADGCTHVLQKGVTLLEDAGTVSFHVGGL  
 SSSAQLTVRVPEVTVLEPLKDVQLESEGQDAHFRCRLSRASGQEARWALGGVPLQCNEMNDITVEQGTLYLLTL  
 HKVTLEDAGTITLQVGSSESAQLKVTAKNTVLRGLENVDALLEGGEALFECQLSQPEVAHAHTWLLDDEPVHTS  
 EKVEVVYFENGLRHLLLLKNLKPQDSCRVTFLAGDVVTSFAFLTVRGWRLEVLPPHDA SVKAGMQVRFCTILS  
 EAVPVGEATWYINGAAIQPDDTDWTVTTDGSHHALTL SNAQPQHAGEVTF AARDAVASARLSVLALPDPPEDA  
 GEPVHLPLQMVKIA PAPA  
 RGQRQMLVIKGFRTEDQGEYRCGPIQGLPSSGAATFNVMVMTSGSGDEVPAQPSLPPEAAQEGDLHLLWEALAR  
 KRRMSREPTLDSISELPEEDSRVQHLRQEAEEETAPDLSEGYSTADELARTGEADLSHTSSDDESRACTPSLVT  
 YLKKAGGPGISPLASKHEAQVTTSVKPKQKQEPVPTCPPPGDLSAADLMDPSLDKAAVKIQAAFKYKVRKE  
 MKQQEGPVFSRTFGDTEAQVGDVLRLECVLATKTD MRACWLKDGIELTDGRHYHIDQLKDGTCSSLVVTGLAPT  
 DSGRYTCQVSTKSGRVSHSACVVVSGTESEAESSSGGELDDAFRAARRLHRLFRTKSPAELSEELFLSADE  
 GPGEPEEPADWQTYREDENFVCIRFESLAEARQAVTCFRNMFMATMGIGVEISLGEQGPGRVEMRIGKVAPTVT  
 PAVPLAKTPGLQTSDAAPVFLTELQNDVQDGYPMSFDCVVTGQPVPSVRWFKDGKLEEDDHYMINEDQQGG  
 HQLIITAVVPADMGVYRCLAENSMGVSSTKALREVELTSTDYDTAADATETSSYFSAQKGLYSSREQEGTESDE  
 GQLPQVLEELKDLQVAPGTRLAKFQLKVKGYAPKLYWFKDQGLPSTSDHIRMDDKTLHTLEIVSVTREDSG  
 QYAAIISNAVGAAYSSARLLVRGSEPEEKPASDVHERLVPPRILEKFTPKKVKRGSSITFSVKVEGHPAPSV  
 HWLKEEAKEGVLWIGPDTPGYTMASSSKQHSLLVLDVGRQHGTQYTCIATNPAGQALCSASLHISGLAKEEEQ  
 ERVKEALISSFLQGTSAQVSAQMSSESAGFADLVGQSKGESLVAEEAHSHLSLAEVGTEEFLQKLTSTQITEMVS  
 AKISQAKLQVPGGDSDEETKTPSASPRHGRSRPSSSVQESSSESEDGDSRGEIFDIYVVTADYLPGLAEQDAI

ILREGQYVEVLDSAHPLRWLVRTKPTKSSPSRQGWVSPAYLDRKRLKLSPEWGPTEAPEFPGEAVSEDEYRTRL  
 SSVIQEELLSSEQAFVQELQFLESHHMKHLERSPRVPAAVASQKTVI FRNVQDISHFHSSFLKELQGCCTDDDDV  
 AMCFIKNQEAFEKYLEFLVGRVQAESVVVSTPVQEFYKKYAEETLSAKDPTQPPPPPLQHYLEQPVVERVQKYQ  
 ALLKELIRNKARNRQNCALLEQAYAVVSALPQRAENKLVSLMENYPGTLEALGEPHQGHFIVWEGAPGARM  
 PWKGNHRHVFLFRNYLVICKPRRDSRTDTFSYVFRNMMKLS SIDLNDQVEGDDRAFEVWHEREDSVRKYLLQA  
 RTVI IKNSWVKEICGIQQLAQPVWRPPEFEEELADCTAELGETVKLACRVTGTPKPIVSWYKDGKPVVEVDPH  
 HILIEDPDGSCCTLILDNLTGIDSGQYMCFAASAAGNASTLGKILVQVPPRFVNVKVRATPFVEGEDAQITCTVE  
 GAPYQQIRWYKDGTTLLAPGNRYRMLNEPRSGVLVVIQAASKEDLGHYECELNVNRLGSTRGGGELYMOSPALR  
 ARDQHHREQIVAAVEDTSEVGSASHSAQDQADQQAASVLWRLLGSEALGPS PGDLNTRQSEPPAFEEAASQIP  
 GAASGTPEVSPQPGTHKGLEQETTSSGSQGWTPVIRVEGTAWPGAGTGQLLLDVHSQVIMETTQRTYVCQAPDT  
 GVTRAPSMQVTIEDVQVQVGDMAQF DAVIEGHPPP IVTWYKGSTQLTSSARLSQRQDGTYSLVLTDVAPHDA  
 GVYTCVANNAGGQVLCKAELLVHGGDKLDAENQVYRRKLHSFYDVQEE IGRGVFGFVKRVQHKGNMFCAAKF  
 IPLRSKTRAQAYQERDILATLGHPLVTGLLDQFETRKTLLI LILELCSSEELLDRLFKKGVVTEAEVKVYIQQL  
 VEGHLHLHSHGILHLDIKPPNILMVHPAREDIKICDFGFAQKI TPSEPQYSKYGSPEFVSPEI IEQNPVSEGS  
 DIWAMGVI SYLSLTCSSPFAGESDRATLLNVLEGRVSWSSPTAAHLSSEDAKDFIKATLQRTPRARPSTSQCLA  
 HPWFLKSMPAEAAHFINTKQLKFLARSRWQRSLMSYKSILVMRSIPELLOQPPDPSPLGVARHLRGEASGAS  
 SSSSSDNELAPFARAKSLPPSPVTHSPLLHPRGFLRPSASLPEETEASMP TADA AVPASQAGPPASPGCV  
 PRHSVLSLQYQAGEGAERGNKTS GAKRHPARRRHLLKGGYIARALPGLREPLMEYSLLEEEAAREEQASLM  
 TKTPSFETALRLPSSSVREVPGRSHSLDNPVTTGPSPEACKEQLLFPSTGLTHEHTAKDRGHKEGFLQESV  
 PFPMSGDSRPGKQEGSSQDSCRKGPASSCHSELGSGSQEGCGPPSSQSLGSLPPQSLKELSTSCGPLFSEQ  
 PQAAPFPPTQVSPLLGSEKEPQDGS LSEGPVVPVSSSPGSASQVDASLDTEGLSEAGDTCDFTPPPQRPQEQAT  
 TRKFSLESRGGYAGVAGYGTFAFGGDAGGMLGQGPLWARMAWAVSQSSEEQDEAATESPQPLES LGPIAEASG  
 VPLRTSPSLTPWEEVEQVSLVQIRDLSGDAEAADTISLDISEVDPAYLNLSLDLYDIKYL PFEFMI FRRVFKPI  
 EQPESPGSETEAGQGLADFL EEAAPWPPELGLRAGLEITEEPEEPGDLEALLGEEAVGRKRKWSPSRGLFQF  
 PGRCLSGEEPVELGLRQVRKASMAHISRILKGRPEGEREGPPRKKAGLASFRLSGLKGRDQELSDEAVVLGQ  
 SVTLACQVLAQPTAQATWSKDGVLLESSEGHLLISSTLKNVQFLLTILVVKEEDLGTITCCVSNPLGTAVTGVL  
 RKAERPSSSRARNAIGEAFAAVGLRVDSEGTCAEQAPHFLLRPTSIRVREGADATFRCRVGGSPQPAVSWSKDG  
 RRLGPPDAPHVRVEEHGESSALRIRSARPRDGGTYEVRAENPLGSASAAAAALVVDSDAEVAGPPGTSTATLLA  
 HLQORREAMRAEGIPPSPPGAGTRTCTVTEGKHARLSCFVTGEPKPEVWKKDGQLVTEGRRHVVEDEQENF  
 VLKILFCKQSDRGLYTCTASNLVGQTYSSVLVVVREPTVPFKKRLQDLEVREKESATFQCEVAQPAEAAWFK  
 EETRLWASAKYDIEEEGETERRLTVRNVSADDDAVYICETTEGSRVVAELSVQGNLTKLPRKTAVRTGDTAIF  
 WVELAVPEGPVRWLRNQEEMVAGGRVAITAEGTCHTLTI FQCTLEDMGEVAFVSGGCRTTTQFCVSAPRRPPL  
 YPPADPVVKAKTESSVTLWSAPPHGDRPVTIDGYVLEKRLKLGAYAWSRCHEAGWLATTEFTITGVAAEEDGFQ  
 FRVSAINHFGQGPYLEFPGTMHLVPLAVKTPKAVEAVEGGEVTFVSDLTVASSGEWFLDGEALKASSIYVI  
 RCDRTRHMLTIREVPARLHGAQLKFVANGIETS IQMVVRAALGLPSSKLPAAAAREVLAQLHHEEAQLLAE LSD  
 QAAAVTWLKDGRELSLGPKYEMQVSAGRRALLVRDVAQDDAGLYECVSRGSR TAYQLLVQDITDGYRDWGPAG  
 PQKHMCKCAGAKIARYLGSSCYRFLQYDKGVWHLEAALDTRQKGKTS SCSLHEKPKLVFAKQQAHSEVKA  
 AGASATLSCEVAQAQTEVTFWKDGKLLSSSSKVRMEASGCSRRLVVQQAGKADAGEYSCEAGGQKLSFRLDVA  
 EPKMFVFAKEQQARSEVKAEGASATLSCEVAQAQTEVTFWKDGKLLSSSSKVRMEASGCSRRLVVQQAGKADA  
 GEYSCEAGGQKLSFRLDVTEPKLVFAKEQQARSEVKAEGVNSATLSCEVAQAQTEVTFWKDGKLLSSSSKVRM  
 EASGCSRRLVVQQAGKADAGEYSCEAGGQKLSFRLDVAEPKLVFAKEQQARSEVKAEGNSATLSCEVAQAQ  
 EVTWFKDGKLLSSSSKVRMEASGCSRRLVVQQAGKADAGEYSCEAGGQKLSFRLDVTEPKLVFAKEQQAHSEV  
 KAEAGASATLSCEVAQAQTEVTFWKDGKLLSSSSKVRMEASGCSRRLVVQQAGKADAGEYSCEAGGQKLSFR  
 DVAEPKLVFAKEQQARSEVKAEGASATLSCEVAQAQTEVTFWKDGKLLSSSSKVRVEASGCSRRLVVQQAGK  
 ADAGEYSCEAGGQKLSFRLDVAEPKLVFAKEQQANSEVKAEGASATLSCEVAQAQTEVTFWKDGKLLSSSSK  
 VRVEASGCSRRLVVQQAGKADAGEYSCEAGGQKLSFRLDVAEPKLVFAKEQQAHSEVKAEGASATLSCEVAQ  
 AQTEVTFWKDGKLLSSSSKVRVEASGCSRRLVVQQAGKADAGEYSCEAGGQKLSFRLDVAEPKLVFAKEQQAH  
 SEVKAEGASATLSCEVAQAQTEVTFWKDGKLLSSSSKVRVEASGCSRRLVVQQAGKADAGEYSCEAGGQKLS  
 FRLDVAEPKLVFAKEQQAHSEVKAEGASATLSCEVAQAQTEVTFWKDGKLLSSSSKVRVEASGCSRRLVVQQ



AGKADAGEYSCEAGGQKLFRLDVAEPKLVFAKEQQAHSSEVKAEGASATLSCEVAQAQTEVTFWKDGKLLSS  
SSKVRVEASGCSRRLVVQVQVKADAGEYSCEARGQKLSFRLDVAEAEESQIPERPSRREPLVVEKHETIILTAT  
IAAPSVAAVTWLDGVEIRRSKRHEATSLGDTHLTVRGAQVLDIAIYSCRVGKEGQDFPVQVEEVAKFVSKP  
LEPVEGELGGTVMLVCELSPEQAEVVWRCGNTQLRPGKRFQMTSEGPRTTLTVSGLREDDAEYVCESRDDRT  
SARLTVKVPVVKFTSGLSAMVAEEGQEATFQCVVSPSDAGVTWYKDGMLQPSSEKFMVVEGASRSILTILGL  
TLEDAGQVTVAEAGASSAALRVREAPVLFKKKLEPQTVEERTSVTLEVELTRPWPVEVKWTRNAAVLTPSENV  
EIRAEGARHCLVLRVGFADRGFFGCETPDDKTQAKLNVEMRQVRLVVRGLQEVEAKEQGTASMDVELSHAEVE  
GSWTRDGLRLQPGPKCHLAVQGPVHILTLALSALQPQDSGLVAFRAEGVHTSARLIVTELPVVFTRVLQDQVATQ  
KEKVTLECELSRPVDRWLKDGVELRAGKAIGIVAQGTCSRSLVIYRCETGDQGVYVCDALDAIIRCELSLRVQGR  
TYTLIFRRVLAEDAGEVKFVAENAESRAHLRVKELPVTLLRPLRDKIAMEKHRGVLECCQVSRASAQVRFVKGK  
VELQSGPKYEVVSDGLYRKLVINQVPEDEDTYTCDAGNVKTSAQFFVEEQSITIVRGLKDMTVMEPAPAWFE  
CETSIPSVRPPKWLKGKTVLQAGNVGLEQDGTVHRLTLHKTCSTMTGPFVHFTIGKSRSSAQLVSDIPVVL  
RPLEPKAGRELQSVVLSCDFRPAPKAVQWYKDDTPLSPSEKFKMALEGQMAELRILRLTPADAGVYRCQAGSA  
QSSAEVTVAREVTVIQPLQDAEAMEEGRVCFSCELSHKDEDEIWSLNGTPLYNDSFHEISHEGCLHTLVLKS  
VRQADTGTVCATSPKVSVSARLVVKGKPVVFLKALDDVSAEERGTTLQCEVSDPEARVVWRKDGVELGPSDK  
YDFLHKAGARGLTVHDLSDHEDAGLYTCQVGSKETQSKVSVHDLHVGITKRLKTVEVLEGESECFVLSHESP  
SDPAVWTVGGKTVGGSGHFHAVRQGRKYTLTVKDAALSDAGEVVFVGLTSLKASLIIRERPVDTKPLEDQR  
TTLGEDVMLSCELSRAGTSVRWLKDGKAIKRSQKYDLSSEGTRAVLVVRKASLKDSEYTCETEASKSTAKLC  
VEEKANRFTEELADLQVEEKGRAVFTCKTEHPASVVTWRKGLLELRASGKHVPSQEGTLKLTINALERTDSD  
TYTCDIGQARTQARLLVHGQKVRVIEDLEDTAVQEGSSAKFCCRIPADYGPVHWFLDKTPLHSNELNEITVQ  
PGGYHVLTLRQLALKDSGTVYFEAGDQRTSALRVTEKPSIFSRPLTDVTVTEGEDTLVLCETTTVDSSVRWT  
KDGTLRPSARCQLSHEGCAQLLITATTPQDGGRYKCEIGGASSSIVRVHALPVRFRESLKDVEVPEGKAA  
TLRCVLSVAAPVEWRHGDDVLKSSNKYSLRQEGAVLELVIDRLQPDQSGQYSCSFGDQTTSATLTVKTSQAQ  
FVGLKRNKEATEGTTVTLRCELTKEAPVEWKKGTETLRNGDKYSLKQDGAVCELQICSLLVADAGEYSCVCGQ  
EKTSATLTVKALLVHFVRRRLRSEKATEGDTTTLQCELSKAAPVEWRKGTETLRDGDRLYSLKQDGAVCELQIRS  
LTIADAGEYLCTCGEKTSATLTVRALPAKFKDSLKNEEATEGTATLSCELSKAAPVTWKKGPKTLQSGDKY  
VLRQDGAVCGLQIHGLTMADAGEYSCVCGQEKTSATLTVRGLPAKFIEDLRSQEATEGATAILRCELSKAAPV  
EWRKGETLTKDGDRTYTLRQDGAVCELQIRGLAVVDTGTYSLSLPTKFTTEGLRNEEATEGTMATLRCQMSKAAPV  
EWRKGETLTDGDRYSLRQDGAMCELQIRGLTIEDSGEYTCVCGQEKTSATLSVKALPPRFIEDLRSQEATEG  
TMATLRCQMSKAAPVEWRKGETLTDGGRYSLRQNGAVCELQIHDLAVEDTGEYSCVCGQEKTSATLNVKALP  
PRFIEDLRSQEATEGTMATLRCQMSKAAPVEWRKGETLTDGGRYSLRQDGAVCELQIHDLVEDAGQYSCVC  
GQEKTSAVLTVDALPPKFTEGLKKEEATEGTMVTLRQMSKEATVEWRKGAKTLDGGRYSLRQDGAMCELQI  
CGLAVEDAGEYSCVCGQEKTSATLSVKALPPRFIEDLRSQEATEGTMATLRCQMSKAAPVEWRKGSKTLRDG  
RYSRLQDGAMCELQICDLAVEDTGDYSCVCGQEKTSATLSVKAPQVVFQQLQNLQAEEGSMASLRCESSVFN  
AAMVWSKGGLELQGDTRREARQQCVAEALLRLDRLEDAGEYSCVCGQEKTSATLMTVAAPVRFRLQAOQDV  
DEGATARLRCELSREAVSVWRKGSGLQFLPFCAKYQMVQEGTTAELLVHGVEQEDAGEYSCVCGQEKTSATLRSV  
RAPKPKFKTDLQSTEQEAAGGTARLCCQLSEAEPTPVQWLKEGVELVHVGSKYEMRRQGAUCELLIHGLEAKDT  
GEYACLVGQKTLASLRVKEPEVTIVRGLVDMVEQADEDEFTCKVVSQAGATDVQWHLQGLPLQSNVTEVAV  
LADGCTHVLQKGVTLLEDAGTVSFHVGGLSSSAQLTVRVPEVTVLEPLKDVQLSEGQDAHFRCLSRASGQEA  
RWALGGVPLQCNEMNDITVEQGTLYLLTLHKVTLLEDAGTITLQVGSSESAQLKVTAKNTVLRGLENVDALEG  
GEALFECQLSQPEVAHTWLLDDEPVHTSEKVEVVYFENGLRHLLLLKLNKLPQDSCRVTFLAGDVVTSFAFLT  
RALPDPPEDAEVVGRSDHSVTLVWVAPMSDGGGGLCGYRVEMKEASTGQWQLCHDLVPGPECVDDLVPGKTY  
RFRVAAVGPAGAGEPVHLPQMVKIAPAPAPAPAPAPAPAPETRQAVVGEDICLELEVAADGGVEVWHKGTERRI  
QPGGHFEVLSRGQRQMLVIKGFRTEDQGEYRCGPIQGLPSSGAATFNVVMTSGSGDEVPAQPSLPPAAQEGD  
LHLLWEALARKRRMSREPTLDSISELPEEDSRVQHLRQEAETAPDLSEGYSTADELARTGEADLSHTSSDDE  
SRAGTPSLVTYLKKAGGPGISPLASKHEAQVTTSVKPKQKQEPVVPVTPCPPGDLSAADLMDPSLDKAAVKIQA  
AFKGYKVRKEMKQOEGPVFSRTFGDTEAQVGDVLRLECVLATKTDMRACWLKDGIELTDGRHYHIDQLKDGTC  
SLLVTLGLAPTDSGRYTCQVSTKSGRVSHSACVVVSGTESEAESSSGGELDDAFRRAARRLHRLFRTKSPAELS  
EELFLSADEGPEPEPADWQTYREDENFVCIRFESLAEARQAVTCFRNMFMATMGIGVEISLGEQGPVGVEM  
RIGKVAPTPTPAVPLAKTPGLQTSDAAPVFLTELQNDVQDGYPMSFDCVVTGQPVPSVRWFKDKLLEEDDH  
YMINEDQGGHQLIITAVVPADMGVYRCLAENSMGVSSTKAELRVELTSTDYDTAADATETSSYFSAQGYLSS  
REQEGTESDEGQLPQVLEELKDLQVAPGTRLAKFQLKVKGYAPKLYWFKDGQPLTSDHIRMTDKKTLHTLE  
IVSVTRESDSGVYAAYISNAVGAAYSSARLLVRGVPSEPEEKPASDVHERLVPPRILEKFTPKKVKRGSITFSV  
KVEGHPAPSVHHLKKEEAEGVLIWIGPDTPGYTMASSSQHSLVLLLDVGRQHOGQTYTCIATNPAGQALCSASLH  
ISGLAKEEEQERVKEALISSFLQGTSAQVSAQMSSESAGFADLVGQSKGSLVAEEAHSHLSLAEVGTTEEFLQK  
LTSQITEMVSAKISQAKLQVPGGDSDEETKTPSASPRHGRSRPSSSVQESSSESESDGDSRGEIFDIYVVTADY  
LPLGAEQDAIILREGQYVEVLDLVAHPLRVLVVRTKPTKSSPSRQGWVSPAYLDKRLKLSPEWGPTEAPEFPGEA  
VSEDEYRTRLSSVIQELLSSEQAFVGELOFLESHHMKHLERSPRVPAAVASQKTVIFRNVQDISHFHSSFLKE

LQCGCTDDDVAMCFIKNQEAFAEKYLEFLVGRVQAESVVVSTPVQEFYKKYAEETLSAKDPTQPPPPPLQHYLE
QPVERVQKYQALLKELIRNKARNRQNCALLEQAYAVVSALPQRAENKLVHSLMENYPGTLEALGEPVIRQGHFI
VWEGAPGARMPPWKGNHRHVFVFRNYLVICKPRRDSRTDTFSYVFRNMMKLSSIDLNDQVEGDRAFEVWHERE
DSVRKYLQARTVIKNSWVKEICGIQQRLAQPVWRPPEFEELADCTAELGETVKLACRVTGTGPKPIVSWYK
DGKPVVEVDPHHILIEDPDGSCTLIIDNLTGIDSGQYMCFAASAAGNASTLGKILVQVPPRFVNVKVRATPFVEG
EDAQITCTVEGAPYPQIRWYKDGTLAPGNRYRMLNEPRSGVVLVLIQAASKEDLGHYECELVNRLGSTRGGG
ELYMOSPALRARDQHHREQIVAAVEGAPSMQVTIEDVQVQVGDMAQFDAVIEGHPPPVTWYKGSTQLTSSAR
LSQRQDGTYSLVLTVDVAPHDAGVYTCVANNAGGQVLCCKAELLVHGGDKLDAENQVYRRKLSHFYDVQEEIGR
GVFGFVKRVQHKGNMFCAAKFIPLRSKTRAQAYQERDILATLGHPLVTGLLDQFETRKTLLILELCSSEEL
LDRLFKKGVVTEAEVKVYIQQLVEGLHYLHSHGILHLDIKPPNIIIMVHPAREDIKICDFGFAQKITPSEPQYS
KYGSPFVVSPEIIEQNPNVSEGSIDIWAMGVISYLSLTCSSPFAGESDRATLLNVLEGRVSWSSPTAAHLSEDA
DFIKATLQRTPRARPSTSQCLAHPWFLKSMPAAEAHFINTKQLKFLARSRWQRSLMSYKSIIVMRSIPPELLQ
GPPDSPSLGVARHLRGEASGASSSSSSDNEAPFARAKSLPPSPVTHSPLLHPRGFLRPSASLPEETEASMP
TADAAPVSPASQAGPPASPGCVPRHSVSSLFYQQAGEGAERGNKTSKAKRHPARRRHLKGGYIARALPGLR
EPLMEYSLLEEEAAREEQASLMTKTPSFETALRLPSSSVREVPGRSHSLDNPPVTTGSPPEACKEQLLFPST
GLTHETAKDRGHKEGFLQESVFPFPMMSGDSRPGKQEGSSQDSCRGKPASSCHSELGSGSQEGCGPPSSQSLG
SLPFPQSLKKELSTSCGPLFSEQPQAAPFPTQVSPLLGSEKPEPQDGSLSSEGPVVPVSSSPGSASQVDAASLDTEG
LSEAGDTCDFTPPPQRPQEQATRKFSLSRGGYAGVAGYGTFAFGGDAGGMLGQGPLWARMVAWSQSSEEQ
DEAATESPQPLESGLPIAEASGVPLRTSPSLTPWEEVEQVSLVQIRDLSDGAEAAADTISLDISEVDPAYLNLS
DLYDIKYLPPFEFMIFRVVPKPIEQPESPGSETEAGQGLADFLLEAAWPWPGLGLRAGLEITEEPEEPDLEA
LLGEAAVGRKRKWSPSRGLFQFPGRCLSGEEPVELGLRQRVKASMAHISRIKGRPEGPPEREGPPRKKAGLAS
FRLSGLKGRDQELSDEAVVLGQSVTLACQVLAQPTAQATWSKDGVLLESSGHLLISSTLKNFQLLTIIVVKEE
DLGTYTCCVSNPLGTAVTTGVLKKAERPSSSPRPEVGEYKDAVLLVWKPVE SCGPVTYIVQCCIEGGSWTTL
ASDISDCCYLTKLSRGGMYIFRTACVSKAGMGPYSSPSEQVLLGGPNHLASEEESSRGRPAQLLPSTKTFAF
QMQIRGRFRSVVRQCREKASGRALAAKIVPYQPEDKTAVREYEAALKRLLHHPHLAQLHAAYLSRHLVLI LEL
CSGPELLPSLAERESYSESDVKDYLWQMLSATQYLHAQHIHLDLRSENMMVTEYNLLKVIDLGNASQLDQEK
VPAPENFKDYLETREMAPELLEGQAVPQTDIWAIGVTAIFIMLSGEYPESESEGTDLQGLRKLIRLSRCYAGL
SGGAVAFVQLSSLCAQPWGRPCASTCLQCGWLTEEGPTGSRPTVPTVPTVRLRAFVREKRRRALLYKKNHNAQ
VR\*

>rs50048074\_ENSMUSP00000049737\_c.14371:T>C\_p.L4791S
ENSMUST00000052872.15|Obscn-203|ENSMUSG00000061462|-|chr11:g.58943459:A>G
MDHSFSGAPRFLTRPKAFVSVGKDATLSCQIVGNPTPHVSWEKDRQPVEAGARFRLAQDGDVYRLTILDLAL
GDSGQYVCRARNAIGEAFAAVGLRVDSEGTCAEQAPHFLLRPTSIRVREGADATFRCRVGGSPQPAVSWSKDG
RRLGPPDAPHVRVEEHGESSALRIRARSARPRDGGTYEVRAENPLGSASAAAALVVDSDAEVAGPPGTSTATLLA
HLQORREAMRAEGIPSPPGAGTRTCTVTTEGKHARLSFCVTEGPKPETVWKKDGLVTEGRRHVVEDEQENF
VLKILFCKQSDRGLYCTASNLVGGTYSSVVLVVVREPTVFPFKRLQDLEVREKESATFPCEVAQPATEAAWFK
EETRLWASAKYDIEEEGTERRLTVRNVSADDDAVYICETTEGSRVVAELSVQGNLTKLPRKTAVRTGDTAIF
WVELAVPEGPVWRWRNQEEMVAGGRVAITAEGTCHTLTIFQCTLEDMGEVAFVSGGCRTTTQFCVSAPRRPPL
YPPADPVVAKATESVTLWSAPPHGDRPVTIDGYVLEKRLKLGAYAWSRCHEAGWLATTEFTITGVAAEGDFQ
FRVSAINHFQGGPYLEFPGTMHLVPLAVKTPKAVEAVEGGEVTFVSDLTVASSGEVFLDGEALKASSIYVI
RCDRTRHMLTIREVPARLHGAQLKFVANGIETS IQMVVRAALGLPSKLPAAAAREVLAQLHHEEAQLLAELSD
QAAAVTWLKDGRELSLGPKEYMQVSAGRRALLVRDVAQDDAGLYECVSRGSRRTAYQLLVQEPKLVFAKQQAH
SEVKAEAGNSATLSCEVTAQTEVTWFKDGKLLSSSSKVRMEASGCSRRLVVQQAGKADAGEYSCEAGGQKLS
FRLDVAEPKLVFAKQQAHSEVKAEAGASATLSCEVAQAQTEVTWFKDGKLLSSSSKVRMEASGCSRRLVVQQ
AGKADAGEYSCEAGGQKLSFRLDVAEPKLVFAKEQQARSEVKAEAGASATLSCEVAQAQTEVTWFKDGKLLSS
SSKVRMEASGCSRRLVVQQAGKADAGEYSCEAGGQKLSFRLDVTEPKLVFAKEQQARSEVKAEVGN SATLSCE
VAQAQTEVTWFKDGKLLSSSSKVRMEASGCSRRLVVQQAGKADAGEYSCEAGGQKLSFRLDVAEPKLVFAKEQ
QARSEVKAEAGNSATLSCEVAQAQTEVTWFKDGKLLSSSSKVRMEASGCSRRLVVQQAGKADAGEYSCEAGGQ
KLSFHLDVTEPKLVFAKEQQAHSEVKAEAGASATLSCEVAQAQTEVTWFKDGKLLSSSSKVRMEASGCSRRLV
VQQAGKADAGEYSCEAGGQKLSFRLDVAEPKLVFAKEQQARSEVKAEAGASATLSCEVAQAQTEVTWFKDGK
LSSSSKVRVEASGCSRRLVVQQAGKADAGEYSCEAGGQKLSFRLDVAEPKLVFAKEQQANSEVKAEAGASATL
SCEVAQAQTEVTWFKDGKLLSSSSKVRVEASGCSRRLVVQQAGKADAGEYSCEAGGQKLSFRLDVAEPKLAFA
KEQQAHSEVKAEAGASATLSCEVAQAQTEVTWFKDGKLLSSSSKVRVEASGCSRRLVVQQAGKADAGEYSCEA
GGQKLSFRLDVAEPKLAFAKEQQAHSEVKAEAGASATLSCEVAQAQTEVTWFKDGKLLSSSSKVRVEASGCSR
RLVVQQAGKADAGEYSCEAGGQKLSFRLDVAEPKLAFAKEQQAHSEVKAEAGASATLSCEVAQAQTEVTWFKD
GKLLSSSSKVRVEASGCSRRLVVQQAGKADAGEYSCEAGGQKLFRLDVAEPKLMFAKEQQAHSEVKAEAGAS
ATLSCEVAQAQTEVTWFKDGKLLSSSSKVRVEASGCSRRLVVQQAGKADAGEYSCEAGGQKLSFRLDVAEPK
LVFAKEQQAHSEVKAEAGASATLSCEVAQAQTEVTWFKDGKLLSSSSKVRVEASGCSRRLVVQQVQKADAGEYS

CEARGQKLSFRLDVADTRLMFAKEQQARTEVKA EAGNSATLSCEVAQAQTEVTWFKDGGKLSSSSKVRVEASG
CSRRLVVQQAGKADAGEYSCEAGGQKLSFRLDVAEAE SQIPERPSRREPLVVKEHETI IILTATIAAPSVAAVT
WLKDGVEIRRSKRHEATS LGDHTLTVRGAQVLDSAIYSCRVGKEGQDFPVQVEEVAAKFSKPLEPVEGELGG
TVMLVCELSPEQA E VVWRCGNTQLRPGKRFQMTSEGPRTTLTVSGLREDDAEYVCE SRDDRTSARLTVKVPR
VVKFTSGLSAMVAEEGQEATFQCVVSPSDAGVTWYKDGMLQPSSEKFMVMSGASRSLTILGLTLEDAGQVTV
EAE GASSAALRVREAPVLFKKKLEPQTVEERTSVTLEVELTRPWPEVKWTRNAAVLTPSENVEIRAEGARHC
LVLRSVGFADRGFFGCETPDDKTQAKLNVEMRQVRLVRGLQEVEAKEQGTASMDVELSHAEVEGSWTRDGLRL
QPGPKCHLAVQGPVHILTL SALQPQDSGLVAFRAEGVHTSARLIVTELPVVSFTRVLQDVVATQKEKVTLECEL
SRPVDVRWLKDGVELRAGKAIGIVAQGTCSRSLVIYRCETGDQGVYVCDALDAQTSASLRVQGRTYTLIFRRVL
AEDAGEVKFVAENAESRAHLRVKELPVTLLRPLRDKIAMEKHRGVLE CQVSRASAQVRWFKGGVLEQSGPKYE
VVSDGLYRKLVIN DVQPEDEDTYTCDAGNVKTSAQFFVVEEQSITIVRGLKDMTVM EPAPAWFECETSIPSVRP
PKWLLGKTVLQAGGNVGL EQDGT VHRLTLHKTCSTMTGPVHFTIGKSRSSAQLVVSDIPVVLTRPLEPKAGRE
LQSVVLSCDFRPAPKAVQWYKDDTPLSPSEKFKMALEGQMAELRILRLTPADAGVYRCQAGSAQSSAEVTVEA
REVTVIQPLQDAEAMEEGRVCFSCELSHKDEDI EWSLNGTPLYNDSFHEISHEGCLHTLVLSVRQADTGTVC
ATSPKVSVSARLVVKGKPVVFLKALDDVSAEERGTTLTQCEVSDPEARVVWRKDGVELGPSDKYDFLHKAGAR
GLTVHDLSDHEDAGLYTCQVGSKETQSKVSVHDLHVGITKRLKTVEVLEGE SCSFECVLSHESPSDPAVWTVGG
KTVGGSGHFHAWRQRKYTLTVKDAALSDAGEVVSGLGTSKASLIIRERPVDITKPLEDQRTTLGEDVMLS
CELSRAGTSVRWLKDGKAI RKSQKYDLLSEGTRAVLVVRKASLKDSGEYTCETEASKSTAKLCVBEKANRFTTE
ELADLQVEEKGRAVFTCKTEHPASVVTWRKGLLELRASGKHVPSQEGTLKLTINALERTDSDTYTCDIGQAR
TQARLLVHGQKVRVIEDLED TAVQEGSSAKFCCRIAPADYGPVHWF LDKTPLHSNELNEITVQPGGYHVTLR
QLALKDSGTVYFEAGDQRTS AALRVTEKPSIFSRPLTDVTVTEGEDTLVCE TTTVDSSVRWTKDGKTLRPSA
RCQLSHEGCAQLLITATTPQDGGRYKCEIGGASSSSIVRVHALPVRFRESLKDVEVPEGKAATLRCVLS SVA
APVEWRHGDDVLKSSNKYSLRQEGAVLELVI RDLQPDQSGQYSCSFGDQTT SATLTVKTS SAQFVGKLRNKEA
TEGTTVTLRCELTK EAPVEWKKGTETLRNGDKYSLKQDGAVCELQIC SLLVADAGEYSCVCGQE KTSATLTVK
ALLVHFVRRRLRSKEATEGDTTTLQCELSKAAPVEWRKGTETLRDGD RYSLKQDGAVCELQIRSLTIADAGEYL
CTCGQKTSATLTVRALPAKFKDSLKNEEATEGTTATLSCELSKAAPVTWKKGPKTLQSGDKYVLRQDGAVCG
LQIHGLTMADAGEYSCVCGQE KTSATLTVRGLPAKFIEDLRSQEATEGATAILRCELSKAAPVEWRKGETL K
DGD RYTLRQDGAVCELQIRGLAVVDGTYS SLPKFTTEGLRNEEATEGTMATLRCQMSKAAPVEWRKGETLR
DGD RYSLRQDGAMCELQIRGLTIEDSGEYTCVCGQE KTSATLSVKALPSRFIEDLRSQEATEGTMATLRCQMS
KTAPVEWKKGSETLRDGG RYSLRQDGPVCELQICDLAVEDAGEYSCVCGQE KTSATLSIKALPPRFIEDLRSQ
EATEGTMATLRCQMSKAAPVEWRKGETLGDGG RYSLRQNGAVCELQIHDLAVEDTGEYSCVCGQE KTSATLN
VKALPPRFIEDLRSQEATEGTMATLRCQMSKAAPVEWRKGETLRDGG RYSLRQDGAVCELQIHDL DVEDAGQ
YSCVCGQE KTSAVLTVDALPPKFTEGLKKEEATEGTMVTLRCQMSKEATVEWRKGAKT LSDGG RYSLRQDGAM
CELQICGLAVEDAGEYSCVCGQE KTSATLSVKALPPRFIEDLRSQEATEGTMATLRCQMSKAAPVEWRKGET
LRDGD RYSLRQDGAVCELQIRDLAVEDAGEYLCVCGQE KTSATLSVKALPPRFIEDLRSQEATEGTMATLRCQ
MSKAAPVEWRKGETLRDGD RYSLRQDGAMCELQICDLAVEDTGDYSCVCGQE KTSATLSVKALPPRFIEDLR
SQEAREGTVATLRCRMSKAAPVEWRKGETLKDGD RYSLRQEGNLCELQIRDLAVEDTEEYSCVCGQE KTSAT
LSVKALPAKFIEDLRSQEAPESSTVTLRCKLSKKASVWKKGSETLRNGARYSLRQDGAVCELEIRDLTVEDT
GEYSCTCGQERTSATLSIMAPQVVFQQPLQNLQAEEGSMASLRCESSVPNAAMVWSKGGLELQGDTRREARQQ
GCVAELLLRDLRREDAGEYSC TCGSQTT SATLMVTAAPVRFLRELQAQDVDEGATARLRCELSREAVSVEWRK
GSLQLFPCA KYQMVQEGTTAELLVHGVEQEDAGEYTC DAGHTQS IARLSVRAPKPKFKTDLQSTEQEAGGTAR
LCCQLSEAE PGTPVQWLKEGVELHVGSKYEMRRQGAVCELLIHGLEAKDTGEYACL VGGQKTLASLRVKEPEV
TIVRGLVDMEVQADE DVEFTCKVSQAGATDVQWHLQGLPLQSN E VTEVAVLADGCTHV LQLKGVTL EDAGTVS
FHVGG LSSSAQLTVRVPEVTVLEPLKDVQLSEGQDAHFRCRLSRASGQEARWALGGVPLQC NEMNDITVEQGT
LYLLTLHKVTLEDAGTITLQVGS CSSEAQLKVTAKNTVLRGLENVDALEGG EALFECQLSQPEVAHTWLLDD
EPVHTSEKVEVVYFENGLRHLL LLLKLNKLPQDSCRVTFLAGDVVTS AFLTVRGRLEVLEPPHDASVKAGMQVR
FTCILSEAVPVGEATWYINGAAIQPDDTDWTVTTDGS HHALTLSNAQPQHAGEVTF AARDAVASARLSVLALP
DPPEDA EVVGRSDHSVTL SWVAPMSDGGG LCGYRVMKEASTGQWQLCHDLVPGPECVDDLVPGKTYRFRV
AAVGPAGAGEPVHLPQMVKIAPAPAPAPAPAPAPAPETRQAVVGEDIC LELEVAADGGEVVWHKGTERTIQPGG
HFEVLSRGRQMLVIKGRFTE DQGEYRCGPIQGLPSSGAATFNVMVMTSGSGDEVPAQPSLPPEAAQEGDLHLL
WEALARKRRMSREPTLDSISELPEEDSRVQHLRQEA EETAPDLSEGYSTADELARTGEADLSHTSSDDES RAG
TPSLV TYLKKAGGPGI S PLASKHEAQVTT SVKPKQKQEPVVP TCPPPGDLSAADLMDPSLDKAAVKIQAAF KG
YKVRKEMKQYEGPVSRTFGDTEAQVGDVLRLECVLATAKTTDMRACWLKDGIELTDGRHYHI DQLKDGTC SLV
TGLAPTDSGRYTCQVSTKSGRVSHSACVVVSGTESAEAES SGGELDDAFRRAARRLHRLFRKSPAE LSEEL
FLSADEGPEEPPADWQTYRE DENFVCIRFESLAEARQAVTCFRNMFATMIGVEISLGEQGP RGVEMRIGK
VAPT VTPAVPLAKTPGLQTS DAAPVFLTELQNQDVQDGYPMSFDCVVTGQPVPSVRWFKDGLLEEDDHYMIN
EDQQGGHQLIITAVVPADMGVYRCLAENSMGVSSTKAELRVELTSTDYDTAADATETSSYFSAQGYLSSREQE
GTESDEGQLPQVLEELKDLQVAPGTR LAKFQLKVKGYPAPKLYWFKDGOPLTTS DHIRMTDKKTLHTLEIVSV

TREDSGQYAAAYISNAVGAAYSSARLLVVRGPSEPEEKPASDVHERLVPRIILEKFTPKKVKRGSSITFSVKVEG  
HPAPSVHWLKEEAKEKGVWLGPDTPGYTMASSSKQHSLLVLDVGRHQHGTYTCTIATNPAGQALCSASLHISGL  
AKEEEQERVKEALISSFLQGTSAVSAQMSEASAGFADLVGQSKGESLVAAEEAHSHLSLAEVGTTEEFLQKLTSSQ  
ITEMVSAKISQAKLQVPGGDSDEETKTPSASPRHGRSRPSSSVQESSSESEDGDSRGEIFDIYVVTADYLPGLG  
AEQDAIILREGQYVEVLDSAHPLRWLVRTKPTKSSPSRQGWVSPAYLDKRLKLSPEWGPTEAPEFPGEAVSED  
EYRTRLSSVIQELLSSEQAFVGELEQFLESHHMKHLERSPRVPAAVASQKTVI FRNVQDISHFSSFLKELQGC  
GTDDDVAMCFIKNQEAFAFEKYLEFLVGRVQAESVVVSTPVQEFYKKYAEETLSAKDPTQPPPPPLQHYLEQPV  
RVQKYQALLKELIRNKARNRQNCALLEQAYAVVSALPQRAENKLHVSLMENYPGTLEALGEPIRQGHFIVWEG  
APGARMPWKGNHRHVFLFRNYLVICKPRRDSRTDTFSYVFRNMMKLSSIDLNDQVEGDDRAFEVWHEREDSVR  
KYLQARTVI IKNSWVKEICGIQQRLAQPVWRPPEFEEELADCTAELGETVVKLACRVTGTPKPIVSWYKDGKP  
VEVDPHHILIEDPDGSCTLILDNLTGIDSGQYMCFAASAAGNASTLGKILVQVPPRFVNVKVRATPFVEGEDAQ  
ITCTVEGAPYPQIRWYKDGTLAPGNRYRMLNEPRSGVLVVIQAASKEDLGHYECELVNRLGSTRGGGELYM  
QSPALRARDQHHREQIVAAVEVTEQETKVPKKTVIEETITTVVKS PRGRRQSPGKSPSRSPSRSSASPRRPG  
LLAPERLYPPGTSPSRLEVEQGRKAPVPALYVTEAEVHAPASQSQPKWLEVEETIEVRVKKTGSRGASPVRE  
MTRSREGILFTLPGGIPGRDPNANNNSNNSVYQEARWGPVAVHVGEFFIFQVDSVGNVDVVAASPEPEQVRA  
SQKEENTERQEGCSDGDENTFLMEEPQDTSLQGRDPKILTHNGRVLTADLEDYVPQEGETFQCGDSTPSTP  
DEPPCEVSVLQREI SEPTVGGQPVLLNVGRPPGTGATPSFFRPGSQVHSPESVSFLLREAWSGPVSAAPWTSSP  
HTHVQSSVDGSHGSFKTEVSTQTVSFGAVGETVTLHIDDPDGGEAPGPSQG\*

>rs50048074\_ENSMUSP00000020732\_c.14572:T>C\_p.L4858S

ENSMUST00000020732.13|Obscn-201|ENSMUSG00000061462|-|chr11:g.58943459:A>G  
MDHSFSGAPRFLTRPKAFVSVGKDATLSCQIVGNPTPHVSWEKDRQVEAGARFRLAQDGDVYRLTILDLAL  
GDSGQYVCRARNAIGEFAAVGLRVDSEGTCAEQAPHLLRPTSIRVREGADATFRRCRVGGSQPAPVSWSKDG  
RRLGPPDAPHVRVEEHGESSALRIRSARPRDGGTYEVRAENPLGASAAAALVVDSDAEVAGPPGTSTATLLA  
HLQQRRREAMRAEGIPSPPPGAGTRTCTVTEGKHARLSCFVTGEPKPKETVWKKDQGLVTEGRRHVVEDEQENF  
VLKILFCCKQSDRGLYTCTASNLVGQTYSSVLVVVREPTVFFKKRLQDLEVREKESATFQCEVAQAPATEAAWFK  
EETRLWASAKYDIEEETERRLTVRNVSAADDAVYICETTEGSRVAVELSVQGNLPRKTAVRTGDTAIF  
WVELAVPEGPVRWLRNQEEMVAGGRVAITAEGDCHTLTITFQCTLEDMGEVAVFVSGGCRTTTTQFCVSAAPRRPPL  
YPPADPVVKAKTESSVTLSSWAPPHGDRPVTIDGYVLEKRLKLGAYAWSRCHEAGWLATTEFTITGVAAEGDFQ  
FRVSAINHFGQGPYLEFPGMTMLVPLAVKTPKAVEAVEGGEVTFVSDLTVASSGEWFLDGEALKASSIYVI  
RCDRTRHMLTIREVPARLHGAQLKVFANGIETS IQMVVRAALGLPSSKLPAAAAREVLAQLHEEAQLLAE LSD  
QAAA VTWLKDGRELSLGPYEMQVSAGRRALLVRDVAQDDAGLYECVSRGSRRTAYQLLVQDITDGYRDWGPAG  
PQKHMCKCAGAKIARYLGSSCYRFLQYDKGVWHWLEAALDTRQKGKTS SCSLHEKPKLVFAKQQAHSEVKA  
AGNSATLSCEVTQAQTEVTWFKDGKLLSSSSKVRMEASGCSRRLVVQQAGKADAGEYSCEAGGQKLSFRLDVA  
EPKLVFAKQQAHSEVKAEGASATLSCEVAQAQTEVTWFKDGKLLSSSSKVRMEASGCSRRLVVQQAGKAD  
GEYSCEAGGQKLSFRLDVAEPKLVFAKEQQARSEVKAEGASATLSCEVAQAQTEVTWFKDGKLLSSSSKVR  
EASGCSRRLVVQQAGKADAGEYSCEAGGQKLSFRLDVTEPKLVFAKEQQARSEVKAEGVNSATLSCEVAQAQ  
EVTWFKDGKLLSSSSKVRMEASGCSRRLVVQQAGKADAGEYSCEAGGQKLSFRLDVAEPKLVFAKEQQARSEV  
KAEAGNSATLSCEVAQAQTEVTWFKDGKLLSSSSKVRMEASGCSRRLVVQQAGKADAGEYSCEAGGQKLSFHL  
DVTEPKLVFAKEQQAHSEVKAEGASATLSCEVAQAQTEVTWFKDGKLLSSSSKVRMEASGCSRRLVVQQAG  
ADAGEYSCEAGGQKLSFRLDVAEPKLVFAKEQQARSEVKAEGASATLSCEVAQAQTEVTWFKDGKLLSSSSK  
VRVEASGCSRRLVVQQAGKADAGEYSCEAGGQKLSFRLDVAEPKLVFAKEQQANSEVKAEGASATLSCEVAQ  
AQTEVTWFKDGKLLSSSSKVRVEASGCSRRLVVQQAGKADAGEYSCEAGGQKLSFRLDVAEPKLVFAKEQQAH  
SEVKAEGASATLSCEVAQAQTEVTWFKDGKLLSSSSKVRVEASGCSRRLVVQQAGKADAGEYSCEAGGQKLS  
FRLDVAEPKLVFAKEQQAHSEVKAEGASATLSCEVAQAQTEVTWFKDGKLLSSSSKVRVEASGCSRRLVVQQ  
AGKADAGEYSCEAGGQKLSFRLDVAEPKLVFAKEQQAHSEVKAEGASATLSCEVAQAQTEVTWFKDGKLLSS  
SSKVRVEASGCSRRLVVQQAGKADAGEYSCEAGGQKLFRLDVAEPKLVFAKEQQAHSEVKAEGASATLSCE  
VAQAQTEVTWFKDGKLLSSSSKVRVEASGCSRRLVVQQAGKADAGEYSCEAGGQKLSFRLDVAEPKLVFAKEQ  
QAHSEVKAEGASATLSCEVAQAQTEVTWFKDGKLLSSSSKVRVEASGCSRRLVVQQVQKADAGEYSCEARGQ  
KLSFRLDVADTRLMFAKEQQARTEVKAEGNSATLSCEVAQAQTEVTWFKDGKLLSSSSKVRVEASGCSRRLV  
VQQAGKADAGEYSCEAGGQKLSFRLDVAEASQIPERPSRREPLVVKEHETIILTATIAAPSVAAVWTKDGV  
EIRRSKRHEATSLGDTHTLTVRGAQVLDIAIYSCRVGKEGQDFPVQVEEVAAKFSKPLEPVEGELGGTVMLVC  
ELSPQAEVWRCGNTQLRPGKRFQMTSEGPRTTLTVSGLREDDAEYVCESRDDRTSARLTVKVPVVKFTS  
GLSAMVAEAGEQATFQCVVSPSDAGVTWYKDMQELQPSKFKVMVESGASRSLTILGLTLEDAGQVTVAEAGAS  
SSAALRVREAPVLEFKKLEPQTVERTSVTLEMLTRPWPVEKVTRNAAVLTPSENVEIRAEGARHCLVLRVSV  
GFADRGFFGCETPDDKTQAKLVNEMRQVRLVVRGLQEVEAKEQGTASMDVELSHAEEGVSWTRDGLRLQPGPKC  
HLAVQGPVHILTLALQPDQSGLVAFRAEGVHTSARLIVTELPSVSTRVLQDVVATQKEKVTLECELSRPVDV  
RWLKDGVLELRAGKAIGIVAQGTCSRSLVIYRCETGDQGVYVCDALDAQTSASLRVQGRTYTLIFRRVLAEDAGE  
VKFVAENAESRAHLRVKELPVTLLRPLRDKIAMEKHGVLQVSRASAQVRFKGGVLELQSGPKYEVVSDGL

YRKLVINVDQPEDEDTYTCDAAGNVKTSAQFFVEEQSITIVRGLKDMTVMPEPAPAWFECETSIPSVRPPKWLIG  
 KTVLQAGGNVLEQDGTVHRLTLHKTCSTMTGPVHFTIGKSRSSAQLVVSDIPVVLTRPLEPKAGRELQSVVL  
 SCDFRPAPKAVQWYKDDTPLSPSEKFKMALEGGMAELRILRLTPADAGVYRCQAGSAQSSAEVTVAREVTVI  
 QPLQDAEAMEEGRVCFSCELSHKDEDEIWSLNGTPLYNDSFHEISHEGCLHTLVLSVSRQADTGTVCATSPKV  
 SVSARLVVKGKPVVFLKALDDVSAEERGTTLTQCEVSDPEARVVWRKDGVELGPSDKYDFLHKAGARGLTVHD  
 LSHEDAGLYTCQVGSKETQSKVSVHDLHVGITKRLKTVEVLEGESECSFECVLSHESPSDPAVWTVGGKTVGGS  
 GHFHAVRQGRKYTLTVKDAALSDAGEVVFVSLGLTSKASLIIRERPVDITKPLEDQRTTLGEDVMLSCELSRA  
 GTSVRWLKDGKAIKRSQKYDLLSEGTAVLVVRKASLKDSEYTCETEASKSTAKLCEVEKANRFTTELADLQ  
 VEEKGRAVFTCKTEHPASVVTWRKGLLELRASGKHVPSQEGELTKLKTINALERTSDTYTCDIGQARTQARLL  
 VHQQKRVVIEDLEDTAVQEGSSAKFCCRIAPADYGPVHWFLLDKTPLHSNELNEITVQPGGYHVLTLRQLAKD  
 SGTVYFEAGDQRTSAAALRVTEKPSIFSRPLTDVTVTEGEDTLVCETTTTVDSSVRWTKDGKTLRPSARCQLSH  
 EGCQAQLLITATTPQDGGRYKCEIGGASSSSIVRVHALPVRFRSLKDVVEVPEGKAATLRCVLSVAAPVEWR  
 HGDDVLKSSNKYSRQEGAVLELVRDLQPDQSGQYSCSFGDQTTSATLTVKTSQAQFVQKLRNKEATEGTTV  
 TLRCELTKAEAPVEWKKGTETLRNGDKYSLKQDGAVALQICSLLVADAGEYSCVCGQEKTSAITLVKALLVHF  
 VRRLSKEATEGDTTLQCELSKAAPVEWRKGTETLRDGDYSLKQDGAVALQIRSLTIADAGEYLCTCGQE  
 KTSATLTVRALPAKFKDLSKNEEATEGTTATLSCELSKAAPVTKKGPKTQSGDKYVLRQDGAVALQIHL  
 TMADAGEYSCVCGQEKTSAITLTVRGLPAKFIEDLRSQEATEGATAILRCELSKAAPVEWRKGSSETLRDGDYR  
 LRQDGAVALQIRGLAVVDGTYSLSLPTKFTTEGLRNEEATEGTMATLRCQMSKAAPVEWRKGSSETLRDGDYR  
 LRQDGAVALQIRGLTIEDSGEYTCVCGQEKTSAITLSVKALPSRFIEDLRSQEATEGTMATLRCQMSKTAPVE  
 WKKGSETLRDGGYSLRQDGPVCELQICDLAVEDAGEYSCVCGQEKTSAITLSIKALPPRFIEDLRSQEATEG  
 MATLRCQMSKAAPVEWRKGSSETLRDGGYSLRQNGAVCELQIHDLAVEDTGEYSCVCGQEKTSAITLVKALPP  
 RFIEDLRSQEATEGTMATLRCQMSKAAPVEWRKGSSETLRDGGYSLRQDGAVALQIHDLDVEDAGQYSCVCG  
 QEKTSAVLTVDALPPKFTTEGLKKEEATEGTMVTLRCQMSKEATVEWRKGAKTLSDGGRYSLRQDGAVALQIC  
 GLAVEDAGEYSCVCGQEKTSAITLSVKALPPRFIEDLRSQEATEGTMATLRCQMSKAAPVEWRKGSSETLRDGD  
 YSLRQDGAVALQIRDLAVEDAGEYLCVCGQEKTSAITLSVKALPPRFIEDLRSQEATEGTMATLRCQMSKAAP  
 VEWRKGSSETLRDGGYSLRQDGAVALQICDLAVEDTGDYSCVCGQEKTSAITLSVKALPPRFIEDLRSQEARE  
 GTVATLRCRMSKAAPVEWRKGSSETLRDGGYSLRQEGNCELQIRDLAVEDTEEYSCVCGQEKTSAITLSVKAL  
 PAKFIEDLRSQEAPESSTVTLRCKLSKASVWVWKKGSETLRNGARYSLRQDGAVALQIRDLVEDTGEYSCT  
 CGQERTSATLSIMAPQVVFQQLQNLQAEEGSMASLRCESSVNPAAWWSKGGLELQGDTRREARQQGCVAEL  
 LLRDLRREDAGEYSCVCGQEKTSAITLMVTAAPVRFLELQAQDVDEGATARLRCELSREAVSVEWRKGSQQLF  
 PCAKYQMVQEGTTAELLVHGVEQEDAGEYTCDAAGTQSIARLSVRAPKPKFKTDLQSTEQEAAGTARLCCQLS  
 EAEFGTVPVQWLKEGVELHVGSKYEMRRQGAVALQIHLGLEAKDTGEYACLVGGQKTASLRVKEPEVTIVRGL  
 VDMEVQADEDEFTCKVSAQATDVQWHLQGLPLQSNVTEVAVLADGCTHVLQKGVTLLEDAGTVSFHVGGL  
 SSSAQLTVRVPEVTVLEPLKDVQLSEGQDAHFRCLRSRAGQEARWALGGVPLQCNEMNDITVEQGTLYLLTL  
 HKVTLEDAGTITLQVGSSEEAQLKVTAKNTVLRGLENVDALEGGEALFECQLSQPEVAHAHTLLDDEPVHTS  
 EKVEVVYFENGLRHLLLLKLPQDSCRVTFLAGDVVTSAFITVRGWRLEVLEPPHDASVFKAGMQRVFTCILS  
 EAVPVGEATWYINGAAIQPDDTDWTVTTDGSHEALTLNSAQPHAGEVTFFAARDAVASARLSVLALPDPEDA  
 EVVGRSDHSVTLVSWAPMSDGGGLCGYRVMKEASTGQWQLCHDLVPGPECVDDLVPGKTYRFRVAAVGPA  
 GAGEPVHLPQMVKIAPAPAPAPAPAPAPAPETROAVVEDICLELEVAADGGEVVWHKGTERTIQPGHFVLS  
 RGQRQMLVIKGFRTEDQGEYRCGPIQGLPSSGAATFNVMVMTSGSGDEVPAQPSLPPEAAQEGDLHLLWEALAR  
 KRRMSREPTLDSISELPEEDSRVQHLRQEAETAPDLSEGYSTADELARTGEADLSHTSSDDESAGTPSLVT  
 YLKKAGGPGISPLASKHEAQVTTSVKPKQKQEPVVPTCPPPGDLSAADLMDPSLDKAAVKIQAAFKGYKVRKE  
 MKQQEGPVFSRTFGDTEAQVGDVLRLECVLATKTDMRACWLKDGIELTDGRHYHIDQLKDGTCSLLVTLGLAPT  
 DSGRYTCQVSTKSGRVSHSACVVVSGTESEAESSSGGELDDAFRRAARRLHRLFRTKSPAELSEELFLSADE  
 GPGEPEEPADWQTYREDEFVCIREFESLAEARQAVTCFRNMFATMIGVEISLGEQGRGVEMRIGKVAPTVT  
 PAVPLAKTPGLQTSDAAPVFLTELQNDVQDGYPMSFDCVVTGQPVPSVRWFKDGKLEEDDHYMINEDQGGG  
 HQLIITAVVPADMGVYRCLAENSMGVSSTKAELRVELTSTDYDTAADATETSSYFSAQGYLSSREQEGTESDE  
 GQLPQVLEELKDLQVAPGTRLAKFQLKVKGYPAKLYWFKDQGPLTSDHIRMTDKKTLHTLEIVSVTREDSG  
 QYAAYSNAVGAAYSSARLLVRGPSEPEEKPASDVHERLVPPRILEKFTPKKVKRGSSITFSVKVEGHPAPSV  
 HWLKEEAKEGVLWIGPDTPGYTMASSSKQHSVLVLDVGRQHQTTCIATNPAGQALCSASLHISGLAKEEEQ  
 ERVKEALISSFLQGTSAQVSAQMSSEAGFADLVGQSKGESLVAEEAHSHLSLAEVGTTEFLQKLTSSQITEMVS  
 AKISQAKLQVPGGDSDEETKTPSASPRHGRSRPSSSVQESSESEEDGDSRGEIFDIYVVTADYLPGLAEQDAI  
 ILREGQVLESLDSAHPLRWLVRKTPKSSPSRQGWVSPAYLDRKRLKLSPEWGPTEAPEFPGEAVSEDEYRTRL  
 SSVIQEYLLSEQAFYVLEFLVGRVQAESVWVSTPVQEFYKKYAEETLSAKDPTQPPPPPLQHYLEQPVVERVQKYQ  
 ALLKELIRNKARNRQNCALLEQAYAVVSALPQRAENKLVSLMENYPGTLEALGEPVIRQGHFVWEGAPGARM  
 PWKGHNHRVFLFRNYLVICKPRRDSRTDTFSYVFRNMMKLSSIDLNDQVEGDDRAFEVWHEREDSVRKYLLQA  
 RTVVIKNSWVKEICGIQQLAQPVWRPPEFEEELADCTAELGETVKLACRVTGTPKPIVSWYKDGKPVVEVDPH



HILIEDPDGSC TLLDNLGTGIDSGQYMCFAASAAGNASTLGKILVQVPPRFVNVKVRATPFVEGEDAQITCTVE  
GAPYPQIRWYKDG TLLAPGNRYRMLNEPRSGVLV LVIQAASKEDLGHYECELVNRLGSTRGGGELYMQSPALR  
ARDQHHREQI VAAVEERRPSP\*  
>rs50048074\_ENSMUSP00000151217\_c.11872:T>C\_p.L3958S  
ENSMUST00000219084.3|Obscn-207|ENSMUSG00000061462|-|chr11:g.58943459:A>G  
MDHSFSGAPRFLTRPKAFVVSVGKDATLSCQIVGNPTPHVSWEKDRQFVEAGARFRLAQDGDVYRLTILDLAL  
GDSGQYVCRARNAIGEAFVAVGLRVDSEGTCAEQAPHFLLRPTSIRVREGADATFRCRVGGSPPAVSWSKDG  
RRLGPPDAPHVRVEEHGESSALRIRSARPRDGGTYEVRAENPLGSASAAAALVVDSDAEVAGPPGTSTATLLA  
HLQQRRREAMRAEGIPSPPGAGTRTCTVTTEGKHARLSCFVTGEPKPEVTWKKDGLVTEGRRHVVEDEQENF  
VLKILFCKQSDRGLYTCTASNLVGQTYSSVLVVVREPTVPFKKRLQDLEVREKESATFQCEVAQAPATEAAWFK  
EETRLWASAKYDIEEEGTERRLTVRNVSADDDAVYICETTEGSRVAELSVQGNLTKLPRKTAVRTGDTAIF  
WVELAVPEGPVWRWRNQEEMVAGGRVAITAEGTCHTLTI FQCTLEDMGEVAFVSGGCRTTTQFCVSAPRRPPL  
YPPADPVVKAKTESSVTL SWSAPPHGDRPVTIDGYVLEKRKLGAYAWSRCHEAGWLATTEFTITGVAEEGDFQ  
FRVSAINHFGQGPYLEFPGMTMLVPLAVKTPKAVEAVEGGEVTFVSDLTVASSGEWFLDGEALKASSIYVI  
RCDRTRHMLTIREVPARLHGAQLKFVANGIETSIQMVVRAALGLPSSKLPAAAAREVLAQLHEEAQLLAE LSD  
QAAA VTWLKDGRELSLGPKEYMQVSAGRRALLVRDVAQDDAGLYECVSRGSR TAYQLLVQDITDGYRDWGPAG  
PQKHMCKCAGAKIARYLGSSCYRFLQYDKGVWHWLEAALDTRQKGTSSCSLHEKPKLVFAKQQAHSEVKA  
AGNSATLSCEVTQAQTEVTWFKDGKLLSSSSKVRMEASGCSRRLLVVQQAGKADAGEYSCEAGGQKLSFRLDVA  
EPKLVFAKQQAHSEVKAEGASATLSCEVAQAQTEVTWFKDGKLLSSSSKVRMEASGCSRRLLVVQQAGKADA  
GEYSCEAGGQKLSFRLDVAEPKMFVFAKEQQARSEVKAEGASATLSCEVAQAQTEVTWFKDGKLLSSSSKVRM  
EASGCSRRLLVVQQAGKADAGEYSCEAGGQKLSFRLDVTEPKLVFAKEQQARSEVKAEGNSATLSCEVAQAQ  
EVTWFKDGKLLSSSSKVRMEASGCSRRLLVVQQAGKADAGEYSCEAGGQKLSFHLDVTEPKLVFAKEQQAHSEV  
KAEAGASATLSCEVAQAQTEVTWFKDGKLLSSSSKVRMEASGCSRRLLVVQQAGKADAGEYSCEAGGQKLSFR  
LDVAEPKLVFAKEQQARSEVKAEGASATLSCEVAQAQTEVTWFKDGKLLSSSSKVRVEASGCSRRLLVVQQAGK  
ADAGEYSCEAGGQKLSFRLDVAEPKLVFAKEQQANSEVKAEGASATLSCEVAQAQTEVTWFKDGKLLSSSSK  
VRVEASGCSRRLLVVQQAGKADAGEYSCEAGGQKLSFRLDVAEPKLVFAKEQQAHSEVKAEGASATLSCEVAQ  
AQTEVTWFKDGKLLSSSSKVRVEASGCSRRLLVVQQAGKADAGEYSCEAGGQKLSFRLDVAEPKLVFAKEQQAH  
SEVKAEGASATLSCEVAQAQTEVTWFKDGKLLSSSSKVRVEASGCSRRLLVVQQVKGADAGEYSCEARGQKLS  
FRLDVAEAEQSIPERPSRREPLVVKHEHETIILTATIAAPSVAAVTWLKDGV EIRRSKRHEATSLGDTHTLTVR  
GAQVLD SAIYSCRVGKEGQDFPVQVEEVAAKFSKPLEPVEGELGGTVMLVCELSPEQAEVWRCGNTQLRPGK  
RFQMTSEGPRRTLTVSGLREDDAEYVCESRDDRTSARLTVKVPVVKFTSGLSAMVAEEGQEA TFQCVVSPS  
DAGVTWYKDGMLQPSKFMVMEGASRSLTILGLTLEDAGQVTVAEAGASSAALRVREAPVLFKPKLEPQT  
VEERTSVTLEVELTRPWPEVKWTRNAAVLTPSENVEIRAEGARHCLVLRVSGFADRGFFGCETPDDKTQAKLN  
VEMRQVRLVRGLQEVEAKEQGTASMDVELSHAEEVGSWTRDGLRLQPGPKCHLAVQGPVHILTL SALQPQDSG  
LVAFRAEGVHTSARLIVTELPVSFTRVLQDVVATQKEKVTLECELSRPVDVRLKDGVELRAGKAI GIVAQGT  
CRSLVIYRCETGDQGVYVCDALDAQTSASLRVQGRTYTLIFRRVLAEDAGEV KFVAENAESRAHLRVKELPVT  
LLRPLRDKIAMEKHRGVLECCVSRASAQVRWFVKGVELQSGPKYEVVSDGLYRKLVIINDVQPEDEDTYTC DAG  
NVKTSAQFFVEEQSITIVRGLKDMTVMEPAPAWFECETSIPSVRPPKWL LGKTVLQAGGNVLEQDGTVHRLT  
LHKTCSTMTGVPVHFTIGKSRSSAQLVSDIPVVLTRPLEPKAGRELQSVVLSCDFRPAPKAVQWYKDDTPLSP  
SEKFKMALEGQMAELRI LR LTPADAGVYRCQAGSAQSSAEVTVEAREVTVIQPLQDAEAMEEGRVCFSCELSH  
KDEDIEWSLNGTPLYNDSFHEISH EGCLHTLVLKSVRQADTGTVCATSPKVSVSARLVVKGKPVVFLKALDDV  
SAEERGTTLTQCEVSDPEARVVRKDGVELGSPDKYDFLHKAGARGLTVHDL SHEDAGLYTCQVGSKETQSKV  
SVHDLHVGITKRLKTVEVLEGECSFECVLSHESPSDPAVWTVGGKTVGGSGHFHAVRQGRKYTLTVKDAALS  
DAGEVVFVSVLGLT SKASLIIRERPVDITKPLEDQRTTLGEDVMLSCELSRAGTSVRWLKDGKAIRKSQKYDLL  
SEGTRAVLVVRKASL KDSGEYTCETEASKSTAKLQVEEKANRFT EELADLQVEEKGRAVFTCKL TEHPASVVTV  
RGLLELRASGKHVPSQEGTLKLTINALERTSDTYTCDIGQARTQARLLVHGQKVRVIEDLED TAVQEGSS  
AKFCRIAPADYGPVHWF LDKTPLHSNELNEITVQPGYHVLTLRQLALKDSGTVYFEAGDQRTSAAALRVTEK  
PSIFSRPLTDVTVTEGEDLTLVCETTTVDSSVRWTKDGKTLRPSARCQLSHEGCAQLLITATTPQDGGRYKC  
EIGGASSSSIVRVHALPVRFRESLKDVEVPEGKAATLRCVLSVAAPVEWRHGDDVLKSSNKYSLRQEGAVLE  
LVIRDLPQDQSGQYSCSFGDQTT SATLTVKTSQAQFVGLKRNKEATEGTTVTLRCELTK EAPVEWKKGTETLR  
NGDKYSLKQDGAVCELQICSLLVADAGEYSCVCGQEKTSATLTVKALLVHFVRRRLRSKEATEGDTTTLQCELS  
KAAPVEWRKGTETLRDGD RYSLKQDGAVCELQIRSLTIADAGEYLCTCGQEKTSATLTVRGLPAKFIEDLRSQ  
EATEGATAILRCELSKAAPVEWRK GSETLKDGD RYTLRQDGAVCELQIRGLTIEDSGEYTCVCGQEKTSATLS  
VKALPPRFIEDLRSQEATEGTMATLRCQMSKAAPVEWRK GSETLGDGGRYSLRQNGAVCELQI HDLAVEDTGE  
YSCVCGQEKTSATLNVKALPPKFT EGLKKEEATEGTMVTLRQMSKEATVEWRKGAKT LSDGGRYSLRQDGAM  
CELQICGLAVEDAGEYSCVCGQEKTSATLSVKALPPRFIEDLRSQEATEGTMATLRCQMSKAAPVEWRK GSET  
LRDGD RYSLRQDGAVCELQIRDLAVEDAGEYLCVCGQEKTSATLSVKALPPRFIEDLRSQEATEGTMATLRCQ

MSKAAPVEWRKGSKTLRDGDYSLRQDGMCELQICDLAVEDTGDYSCVCGQEKTSATLSVKAPQVVFQOPLQ
NLQAEEGSMASLRCESSVPAAMVWSKGGLELQGDTRREARQQGCVAELLLRDLRREDAGEYSCTCGSQTTSA
TLMVTAAPVRFRLRELQAQDVDEGATARLRCELSREAVSVEWRKGSLLQFPCKAYQMVQEGTTAELLVHGVEQE
DAGEYTC DAGHTQSIARLSVRAPKPKFKTDLQSTEQEAGGTARLCCQLSEAEPTPVQWLKEGVELHVGSKYE
MRRQGAVCELLIHGLEAKDTGEYACLVGGQKTLASLRVKEPEVTIVRGLVDMEVQADEDFEFTCKVVSQAGATD
VQWHLQGLPLQSNEVTEVAVLADGCTHVLQKGVTLLEDAGTVSFHVGGSSSAQLTVRVPEVTVLEPLKDVQL
SEGQDAHFRCRLSRASGQEARWALGGVPLQCNEMNDITVEQGTLYLLTLHKVTLLEDAGTITLVGSCSSEAQL
KVTAKNTVLRGLNVDALLEGGEALFECQLSQPEVAHAHTWLLDDEPVHTSEKVEVVYFENGLRHLLELLKLNKLPQ
DSCRVTFLAGDVVTS AFLTVRGWRLEVLPPHDASVKAGMQVRFTCILSEAVPVGEATWYINGAAIQPDDTDW
TVTTDGSHHALTLSNAQPQHAGEVTF AARDAVASARLSVLALPDPPEDAEVVGRSDHSVTLVSWVAPMSDGGGG
LCGYRVEMKEASTGQWQLCHDLVPGPECVVDDLVPKTYRFRVAAVGPAGAGEPVHLPQMVKIAPAPAPAPAP
APAPETRQAVVGEDICLELEVAADGGEVWVHKGTERIQPGGHFEVLSRGQRQMLVIKGFRTEDQGEYRCGPIQ
GLPSSGAATFNVVMTSGSGDEVPAQPSLPPEAAQEGDLHLLWEALARKRRMSREPTLDSISELPEEDSRVQHL
RQEAETAPDLSEGYSTADELARTGEADLSHTSSDDESRAGTPSLVTYLKKAGGPGISPLASKHEAQVTTSVK
PQKQQEPVVPPTCPPPGDLSAADLMDPSLDKAAVKIQAAFQKGYKVRKEMKQQEGPVFSRTFGDTEAQVGDVLR
ECVLATKTDMRACWLKDGIELTDGRHYHIDQLKDGTC SLVLTGLAPTDSGRYTCQVSTKSGRVSHSACVVVSG
TESEAESSSGGELDDAFRAARLRHLRFRTKSPAELSEELFLSADEGPGPEPEPADWQTYREDENFVCIRFE
SLAEARQAVTCFRNMFMATMGIVELSLGEGPRGPEMIRIGKVAPTVTPAVPLAKTPGLQTSDAAPVFLTELQN
QDVQDGYPMSFDCVVTGQPVPSVRWFKDGKLLLEEDDHMINEDQQGGHQLIITAVVPADMGVYRCLAENSMGV
SSTKAELRVELTSTDYDTAADATETSSYFSAQGYLSSREQEGTESDEGQLPVLEELKDLQVAPGTRLAKFQL
KVKGYPAKLYWFKDQPLTSDHIRMTDKKTLHTLEIVSVTREDSGQYAAIISNAVGAAYSSARLLVRGPSE
PEEKPASDVHERLVPVPRILEKFTPKKVKRGSSITFSVKVEGHPAPSVHWLKEEAEGVLWIGPDTPGYTMAS
SKQHSVLVLDVGRQHOGTYTICATNPAGQALCSASLHISGLAKEEEQERVKEALISSFLQGTSQAVSAQMS
AGFADLVGQSKGESLVAEEAHSHLSLAEVGT EEFLOKLTSTIEMVSAKISQAKLQVPGGDSDEETKTPSASP
RHGRSRPSSSVQESSSEEDGDSRGEIFDIYVVTADYLP LGAEQDAIILREGQYVEVLDSAHPLRWLVRTKPT
KSSPSRQGWVSPAYLQDKRKLKLSPEWGPTEAPEFPEAVSEDEYRTRLSVVIQELLSSEQAFVQELQFLSHHM
KHLERSPRVPAAVVHQDVI FRNVQDISHFHSSFLKELQVCEQVRSQKEENTERQEGCSDGDENTFLMEEPQD
VVDSTVPQEFYKQYAEETLSAKDPTQPPPPPLQHYLEQPVVERVQKYQALLKELIRNKARNRQNCALLEQAYAV
VSALPQRAENKLVSLMENYPGTLEALGEP I RQGHFIVWEGAPGARMPWKGNHRHVFLFRNYLVICPRRDSR
TDTFSYVFRNMMKLSSIDLNDQVEGDDRAFEVWHERE DSVRKYLQARTVVIKNSWVKEICGIQORLAQPVWR
PPEFEEELADCTAELGETVKLACRVGTGPKPIVSWYKDGKPEVDPHILIEDPDGSC TLI LDNLGTIDSGQY
MCF AASAAGNASTLGKILVQVPPRFVNVKVRATPFVEGEDAQITCTVEGAPYPQIRWYKDGTL LAPGNRYRMLN
EPRSGVLV LVIQAASKEDLGHYECELVNR LGSTRGGGELYMQS PALRARDQHHREQIVA AAVEVTEQETKVPKK
TVIIETITTVVKS PRGRRQSPGKSPSRPSRRSASPRRPGLLAPERLYPPGTSPSRRLEVEQGRKAPVPALY
VTEAEVHAPASQSQVQKLEVEETIEVRVKKTGSRGASPVREMTSRGEGILFTLPGGIPGRDPNANNNSNKS
VEARTWGPVAVVHVGEFFIFQVDSVGNVDWVAASPEPEQVRASQKEENTERQEGCSDGDENTFLMEEPQD
QGRDPKILTHNGRVLTLADLEDYVPQEGETF GCGDSTPSTPDEPPCEVSVLQREI SEPTVQGPVLLNVGRPPG
TGATPSFFRPGSQVHSPESVSFLLREAWSGPVSAAPWTSSFHTHVQSSVDGSHGSFKTEVSTQTVSFGAVGET
VTLHIDPDGGEAPGPSQG\*

>ENSMUSP00000158795\_c.14010:A>T\_p.R4671W ENSMUST00000238536.2|Obscn-
210|ENSMUSG00000061462|-|chr11:g.58945207:T>A
MDHSFSGAPRFLTRPKAFVSVGKDATLSCQIVGNPTPHVSWEKDRQPVEAGARFRLAQDGDVYRLTILDLAL
GDSGQYVCRARNAIGEAFAAVGLRVDSEGTCAEQAPHFLLRPTSIRVREGADATFRCRVGGSPQPAVSWSKDG
RRLGPPDAPHVRVEEHGESSALRIR SARPRDGGTYEVR AENPLGSASAAAALVVDSDAEVAGPPGTSTATLLA
HLQQRREAMRAEGIPSPPGAGTRTCTVTEGKHARLSCFVTGEPKPETVWKKDGQLVTEGRRHVVEYEDQENF
VLKILFCKQSDRGLYTCTASNLVGQTYSSVLVVREPTVPFKKRLQDLEVREKESATFQCEVAQPATEAAWFK
EETRLWASAKYDIEEGETERRLTVRNVSADDDAVYICETTEGSR TVAELSVQGNLTRKLRKTAVRTGDTAIF
WVELAVPEGPVRWRNQEEMVAGGRVAITAEGTCHTLTIFQCTLEDMGEVAFVSGGCRTTTQFCVSA PRRPPL
YPPADPVVKAKTESSVTL SWSAPPHGDRPVTIDGYVLEKRKLGAYAWSRCHEAGWLATTEFTITGV AEEGDFQ
FRVSAINHFGQGPYLEFPGMTMLVPLAVKTPKAVEAVEGGEVTF SVDLTVASSGEWFLDGEALKASSIYVI
RCDRTRHMLTIREV PARLHGAQLKFVANGIETSIQMVVRAALGLPSSKLPAAAAAREVLAQLHEEAQLLAE LSD
QAAA VTWLKDGRELSLGPKEYMQVSAGRRALLVRDVAQDDAGLYECVSRGSR TAYQLLVQDITDGYRDWGPAG
PQKHMCKCAGAKIARYLGSSCYRFLQYDKGVWHWLEAALDTRQKGKTS SCSLHEKPKLVFAKQQAHSEVKA
AGNSATLSCEVTAQTEVTWFKDGKLLSSSSKVRMEASGCSRRLLVVQQAGKADAGEYSCEAGGQKLSFRLDVA
EPKLVFAKQQAHSEVKA EAGASATLSCEVAQAQTEVTWFKDGKLLSSSSKVRMEASGCSRRLLVVQQAGKADA
GEYSCEAGGQKLSFRLDVAEPKMFVFAKEQQARSEVKA EAGASATLSCEVAQAQTEVTWFKDGKLLSSSSKVRM
EASGCSRRLLVVQQAGKADAGEYSCEAGGQKLSFRLDVTEPKLVFAKEQQARSEVKA EAGASATLSCEVAQAQ
EVTWFKDGKLLSSSSKVRMEASGCSRRLLVVQQAGKADAGEYSCEAGGQKLSFRLDVAEPKLVFAKEQQARSEV

KAEAGNSATLSCEVAQAQTEVTFWFKDGKKLSSSSKVRMEASGCSRRLVVQQAGKADAGEYSCEAGGQKLSFHL  
DVTEPKLVFAKEQQAHSEVKAEAGASATLSCEVAQAQTEVTFWFKDGKKLSSSSKVRMEASGCSRRLVVQQAGK  
ADAGEYSCEAEGQKLSFRLDVAEPKLVFAKEQQARSEVKAEAGASATLSCEVAQAQTEVTFWFKDGKKLSSSSK  
VRVEASGCSRRLVVQQAGKADAGEYSCEAGGQKLSFRLDVAEPKLVFAKEQQANSEVKAEAGASATLSCEVAQ  
AQTEVTFWFKDGKKLSSSSKVRVEASGCSRRLVVQQAGKADAGEYSCEAGGQKLSFRLDVAEPKLAFAKEQQAH  
SEVKAEAGASATLSCEVAQAQTEVTFWFKDGKKLSSSSKVRVEASGCSRRLVVQQAGKADAGEYSCEAGGQKLS  
FRLDVAEPKLAFAKEQQAHSEVKAEAGASATLSCEVAQAQTEVTFWFKDGKKLSSSSKVRVEASGCSRRLVVQQ  
AGKADAGEYSCEAGGQKLSFRLDVAEPKLAFAKEQQAHSEVKAEAGASATLSCEVAQAQTEVTFWFKDGKKLSS  
SSKVRVEASGCSRRLVVQQAGKADAGEYSCEAGGQKLSFRLDVAEPKLMFAKEQQAHSEVKAEAGASATLSCE  
VAQAQTEVTFWFKDGKKLSSSSKVRVEASGCSRRLVVQQAGKADAGEYSCEAGGQKLSFRLDVAEPKLVFAKEQ  
QAHSEVKAEAGASATLSCEVAQAQTEVTFWFKDGKKLSSSSKVRVEASGCSRRLVVQQVQKADAGEYSCEARGQ  
KLSFRLDVADTRLMFAKEQQARTEVKAEAGNSATLSCEVAQAQTEVTFWFKDGKKLSSSSKVRVEASGCSRRLV  
VQQAGKADAGEYSCEAGGQKLSFRLDVAEAEESQIPERPSRREPLVVKEHETIILTATIAAPSVAAVTVLKDGV  
EIRRSKRHEATSLGDTHTLTVRGAQVLDSAIYSCRVGKEGQDFPVQVEEVAAKFSKPLEPVEGELGGTVMLVC  
ELSPQAEVWRCGNTQLRPGKRFQMTSEGPRRTLTVSGLREDDAEYVCESRDDRTSARLTVKVPVVKFTS  
GLSAMVAEEGQEQATFQCVVSPDAGVTWYKDGMLQPSKFKVMVESGASRSLTILGLTLEDAGQVTEAEGAS  
SSAALRVREAPVLFKCKLEPQTEVEERTSVTLEVELTRPWPEVKWTRNAAVLTPSENVEIRAEGARHCLVLRVSV  
GFADRGFFGCETPDDKTQAKLNVEMRQVRLVRLVGLQVEVAEQGTASMDVELSHAEEVGSVTRDGLRLQPGPKC  
HLAVQGPVHILTLALSALQPQDSGLVAFRAEGVHTSARLIVTELPVSFTRVLQDVVATQKEKVTLECELSRPVDV  
RWLKDGVLELRAGKAIIGIVAQGTCSRSLVIYRCETGDQGVYVCDALDAQTSASLRVQGRTYTLIFRRLAEDAGE  
VKFVAENAESRAHLRVKELPVTLLRPLRDKIAMEKHRGVLECCQVSRASAQVRWFKGGVELQSGPKYEVVSDGL  
YRKLVINVDVQPEDEDTYTCDAENVKTSAQFFVVEEQSITIVRGLKDMTVMEPAPAWFECETSIPSVRPPKWLGL  
KTVLQAGGNVGLQDGTVHRLTLHKTCSTMTGPVHFTIGKSRSSAQLVVSDIPVVLTRPLEPKAGRELQSVVL  
SCDFRPAPKAVQWYKDDTPLSPSEKFKMALEGQMAELRILRLTPADAGVYRCQAGSAQSSAEVTEAREVTVI  
QPLQDAEAMEEGRVCFSCELSHKDEDIEWSLNGTPLYNDSFHEISHGCLHTLVLSKSVRQADTGTVCATSPKV  
SVSARLVVKGKPVVFLKALDDVSAEERGTLLTQCEVSDPEARVVWRKDGVELGSPDQYDFLHKAGARGLTVHD  
LSHEDAGLYTCQVSKTQSKVSVHDLHVGITKRLKTVEVLEGECSFECVLSHESPSDPAVMTVGGKTVGGS  
GHFHAVRQGRKYTLTVKDAALSDAGEVVSVLGLTSKASLIIRERPVDTKPLEDQRTTLGEDVMLSCELSRA  
GTSVRWLKDGKAIRKSQKYDLLSEGTRAVLVVRKASLKDSGEYTCETEASKSTAKLCVEEKANRFTTELADLQ  
VEEKGRAVFTCKTEHPASVVTWRKGLLELRASGKHVPSQEGTLTKLTINALERTSDTYTCDIGQARTQARLL  
VHGQKVRVIEDLEDTAVQEGSSAKFCRIAPADYGPVHWFLLDKTPLHSNELNEITVQPGGYHVLTLRQLALKD  
SGTVYFEAGDQRTSALRVTEKPSIFSRPLTDVTVTEGEDTLVCETTTVDSVVRWTKDGKTLRPSARCQLSH  
EGCQAQLLITATTPQDGGRYKCEIGGASSSSIVRVHALPVRFRESLKDVEVPEGKAATLRCVLSVAAPVEWR  
HGDDVLKSSNKYSLRQEGAVLELVIRDLQPDQSGQYSCSFGDQTTSATLTVKTSQAQFVGLRKNKEATEGTTV  
TLRCELTKAEAPVEWKKGTETLRNGDKYSLKQDGAVCELQICSLLVADAGEYSCVCGQEKTSATLTVKALLVHF  
VRRLRSKEATEGDTTTLQCELSKAAPVEWRKGTETLRDGDYSLKQDGAVCELQIRSLTIADAGEYLCTCGQE  
KTSATLTVRALPAKFKDSLKNEEATEGTTATLSCELSKAAPVTWKKGPKTLQSGDKYVLRQDGAVCGLQIHGL  
TMADAGEYSCVCGQEKTSATLTVRGLPAKFIEDLRSQEATEGATAILRCELSKAAPVEWRKGSSETLKDGDYR  
LRQDGAVCELQIRGLAVVDTGTYSSLPTKFTTEGLRNEEATEGTMATLRCQMSKAAPVEWRKGSSETLRDGDYR  
LRQDGAVCELQIRGLTIEDSGEYTCVCGQEKTSATLSVKALPSRFIEDLRSQEATEGTMATLRCQMSKTAPVE  
WKKGSETLRDGGYSLRQDGPVCELQICDLAVEDAGEYSCVCGQEKTSATLSIKALPPRFIEDLRSQEATEGT  
MATLRCQMSKAAPVEWRKGSSETLGDGGYSLRQNGAVCELQIHDLAVEDTGEYSCVCGQEKTSATLNVKALPP  
RFIEDLRSQEATEGTMATLRCQMSKAAPVEWRKGSSETLRDGGYSLRQDGAVCELQIHDLVEDAGQYSCVCG  
QEKTSAVLTVDALPPKFTTEGLKKEEATEGTMVTLRCQMSKEATVEWRKGAKTSLDGGYSLRQDGAVCELQIC  
GLAVEDAGEYSCVCGQEKTSATLSVKALPPRFIEDLRSQEATEGTMATLRCQMSKAAPVEWRKGSSETLRDGD  
YSLRQDGAVCELQIRDLAVEDAGEYLCVCGQEKTSATLSVKALPPRFIEDLRSQEATEGTMATLRCQMSKAAP  
VEWRKGSSETLRDGDYSLRQDGAVCELQICDLAVEDTGDYSCVCGQEKTSATLSVKALPPRFIEDLRSQEAW  
GTVATLRCMSKAAPVEWRKGSSETLKDGDYSLRQEGNLCELQIRDLAVEDTEEYSCVCGQEKTSATLSVKAL  
PAKFIEDLRSQEAPESSTVTLRCKLSKKASVVWKKGSETLRNGARYSLRQDGAVCELEIRDLTVEDTGEYSCT  
CGQERTSATLSIMAPQVVFQQPLQNLQAEEGSMASLRCELSVNAAMVWSKGGLELQGDTRREARQQGCVAEL  
LLRDLRREDAGEYSCTCGSQTTSATLMVTAAPVRFRLRELQAQDVDEGATARLRCELSREAVSVEWRKGSLLQF  
PCAKYQMVQEGTTAELLVHGVEQEDAGEYTCDAHTQSIARLSVRAPKPKFKTDLQSTEQEAGGTARLCCQLS  
EAEPGTPVQWLKEGTEVLHVGSKYEMRRQGAPELLIHGLEAKDTGEYACLVGGQKTLASLRVKEPEVTIVRGL  
VDMEVQADEVEFTCKVSOAGATDVQWHLQGLLQSLNEVTEVAVLADGCTHVLQLKGVTLLEDAGTVSFHVGGL  
SSSAQLTVRVPEVTVLEPLKDVQLSEGQDAHFRCRLSRASGQEARWALGGVPLQCNEMNNDITVEQGTLYLLTL  
HKVTLLEDAGTITLQVGSSESQAQLKVTAKNTVLRGLENVDALLEGGEALFECQLSQPEVAHAHTWLLDDEPVHTS  
EKVEVVYFENGLRHLLLLKNLKPQDSCRVTFLAGDVVTSFAFLTVRGRWLEVLPPHDASVKAGMQVRFCTILS  
EAVPVGEATWYINGAAIQPDDTDWTVTTDGSHHALTLNSAQPQHAGEVTFAAARDAVASARLSVLALPDPEDA

EVVGRSDHSVTLWSVAPMSDGGGGLCGYRVMKEASTGQWQLCHDLVPGPECVVDDLVPKGTYRFRVAAVGPA
GAGEPVHLPQMVKIAPAPAPAPAPAPAPAPETRQAVVGEDICLELEVAADGGEVVWHKGTERRIQPGGHFEVLS
RGQRQMLVIKGFRTEDQGEYRCGPIQGLPSSGAATFNVMVMTSGSGDEVPAQPSLPPEAAQEGDLHLLWEALAR
KRRMSREPTLDSISELPEEDSRVQHLRQEAETAPDLSEGYSTADELARTGEADLSHTSSDDESRACTPSLVT
YLKAGGPGISPLASKHEAQVTTSVKPKQKQEPVPTCP PGDLAADLMDPSLDKAAVKIQAAFQYKVRKE
MKQQEGPVFSRTFGDTEAQVGDVLRLECVLATKTD MRACWLKDGIELTDGRHYHIDQLKDGTCSSLVVTGLAPT
DSGRYTCQVSTKSGRVSHSACVVVSGTESEAESSSGGELDDAFRAARRLHRLFRTKSPAELSEELFLSADE
GPGEPEEPADWQTYREDENFVCIRFESLAEARQAVTCFRNMFATMIGVEISLGEQGPGRVEMRIGKVAPTVT
PAVPLAKTPGLQTSDAAPVFLTELQNDVQDGYPMSFDCVVTGQVPVSVRWFKDGKLEEDDHVMINEDQQGG
HQLIITAVVPADMGVYRCLAENSMGVSSSTKAELRVELTSTDYDTAADATETSSYFSAQGYLSSREQEGTESDE
GQLPQVLEELKDLQVAPGTRLAKFQLKVKGYPAKLYWFKDGGPLTSDHIRMTDKKTLHTLEIVSVTREDSG
QYAAIISNAVGAAYSSARLLVRGPSEPEEKPASDVHERLVPPRILEKFTPKKVKRGSSTIFSVKVEGHPAPSV
HWLKEEAKEKGVLWIGPDTPGYTMASSSKQHSVLVLDVGRQHQTTCIATNPAGQALCSASLHISGLAKEEEEQ
ERVKEALISSFLQGTSAQVSAQMSSEAGFADLVGQSKGESLVAEEAHSHLSLAEVGTTEFLQKLTSTQITEMVS
AKISQAKLQVPGGDSDEETKTPSASPRHGRSRPSSSVQESSESESDGDSRGEIFDIYVVTADYLPGLAEQDAI
ILREGQYVEVLDSAHPLRWLVRTKPTKSSPSRQGWVSPAYLDRKRLKLSPEWGPTEAPEFPGEAVSEDEYRTRL
SSVIQELLSSEQAFVGELEFLSHHMKHLERSPRVPAVASQKTVIFRNVQDISHFHSSFLKELQCGCTDDDV
AMCFIKNQEAFAKEYLEFLVGRVQAESVVVSTPVQEFYKKYAEETLSAKDPTQPPPPPLQHYLEQPVFRVQKYQ
ALLKELIRNKARNRQNCALLEQAYAVVSALPQRAENKLVSLMENYPGTLEALGEPHQGHFIVWEGAPGARM
PWKGHNHRVFLFRNYLVICKPRRDSRTDTSYVFRNMMKLSSIDLNDQVEGDDRAFEVWHEREDSVRKYLLQA
RTVIKNSWVKEICGIQQLAQPVWRPPEFEEELADCTAELGETVKLACRVTGTPKPIVSWYKDGKPVVDPH
HILIEDPDGSLTILDLNLTGIDSGQYMCFAASAAGNASTLGKILVQVPPRFVNVKVRATPFVEGEDAQITCTVE
GAPYQIRWYKDGTLTLLAPGNRYRMLNEPRSGVLVVIQAASKEDLGHYECELVNRLGSTRGGGELYMQSPALR
ARDQHHREQIVAAVEDTSEVGSASHAQDQGAASVLWRLLGSEALGPSPGDLPNTRQSEPPAFEEAASQIP
GAASGTPPEVSPQPGTHKGLEQETTSSGSQGWTVPIRVEGTAWPGAGTGQLLDVHVSQVIMETTQRTYVCQAPDT
GVTRAPSMQVTEIDVQVQVGDMAQFDAVIEGHPPPPIVETWYKGSTQLTSSARLSQRQDGTTYSLVLTVDVAPHA
GVYTCVANNAGGQVLCQAEELLVHGDKLDAENQVYRRLKHSFYDVQEEIGRGVGFVQRVQHKGNMFCAAKF
IPLRSKTRAQAYQERDILATLGHPLVTGLLDQFETRKTLLIILELCSSEELLDRFLKKGVVTEAEVKVYIQQL
VEGLHYLHSHGILHLDIKPPNILMVHPAREDIKICDFGFAQKITPSEPQYSKYGSPEFVSPEIEQNPVSEGS
DIWAMGVISYLSLTCSSPFAGESDRATLLNVLEGRVSWSSPTAAHLSSEDAKDFIKATLQRTPRARPSTSQCLA
HPWFLKSMPAEEAHFINTKQLKFLARSRWQRSLMSYKSI LVMRSIPPELLQGPPDPSPLGVARHLRGEASGAS
SSSSSSDNELAPFARAKSLPPSPVTHSPLLHPRGFLRPSASLPEETEASMTADAAVPAS PQSAGPPASPGCV
PRHSVISSLFYQQAGEGAERGNKTSGAKRHPARRRHLKGGYIARALPGLREPLMEYSLLEEEAAREEQASLM
TKTPSFETALRLPSSSVREVPGRSHSLDNPPVTGTPSPEACKEQLLFPSTGLTHETAKDRGHKEGFLQESV
PFPMSGDSRPGKQEGSSQDSCRKPASSCHSELGSGSGEGCGPPSSQSLGSLPPQSLKKELTSCGFLQSEQ
PQAAPFPTQVSPLLGSEKEPQDGSLSSEGPVVPVSSSPGSASQVDASLDTEGLSEAGDCTDFTPPPQRPFQAT
TRKFSLESRGGYAGVAGYGTFAFGGDAGGMLGQGPLWARMAWAVSQSSEEQDEAATESQPPLSLGPIAEASG
VPLRTSPSLTPWEEVEQVSLVQIRDLSGDAEAADTISLDISEVDPAYLNLSDLYDIKYLPEFEMI FRRVPKPI
EQPESPGSETEAGQGLADFLLEAAWPWPGELGLRAGLEITEEPEEPGDLEALLGEAAVGRKRKWSPSRGLFQF
PGRCLSGEEPVELGLRQRVKASMAHISRIKGRPEGPREGPPRKKAGLASFRLSGLKGRDQELSDEAVVLGQ
SVTLACQVLAQPTAQATWSKDGVLLESSEGHLLISSTLKNFQLLTILVVKEEDLGTYTCCVSNPLGTAVTTGVL
RKAERPSSSPRPEVGEYKDAVLLVWKPVESECGPVTVIVQCCIEGGSWTTLASDISDCCYLTGKLSRGGMYIF
RTACVSKAGMGPIYSSPSEQVLLGGPNHLASEEESRRGRPAQLLPSTKTFAFQMQIRRRGRFSVVRQCREKASGR
ALAAKIVPYQPEDKTAVLREYEAALKRHLHHPHLAQLHAAYLSRHLVLIILELCSGPELLPSLAERESYSESDVK
DYLWQMSLQYLHAQHIHLHLDRSENMMVTEYNLLKVIDLGNAQSLDQEKVPAPENFKDYLETMAPELLEGGQ
GAVPQTDIWAIGVTAIFIMLSGEYPESESETRDLQKGLRKLGLIRLSRCYAGLSGGAVAFLOSSLCAQPWGRPCA
STCLQCGWLTEEGPTGSRPTVPTVPTVRLRAVFREREKRRRALLYKKNLAQVR\*

>ENSMUSP00000049737\_c.13809:A>T\_p.R4604W ENSMUST00000052872.15|Obscn-
203|ENSMUSG00000061462|-|chr11:g.58945207:T>A

MDHSFSGAPRFLTRPKAFVVSVGKDATLSCQIVGNPTPHVSWEKDRQVEAGARFRLAQDGDVYRLTILDLAL
GDSGQYVCRARNAIGEFAAVGLRVDSEGTCAEQAPHLLRPTSIRVREGADATFCRCRVGGSPQPAVSWSKDG
RRLGPPDAPHVRVEEHGESSALRIRSARPRDGGTYEVRAENPLGSASAAAAALVVDSDAEVAGPPGTSTATLLA
HLQORREAMRAEGIPPSPPGAGTRTCTVTEGKHARLSCFVTEGPKPETVWKKDGLVTEGRRHVVEDEQENF
VLKILFCKQSDRGLTYTASNLVGQTYSSVLVVVREPTVFPKRLQDLEVRKEKESATFQCEVAQAPATEAAWFK
EETRLWASAKYDIEEGTERRLTVRNVSADDDAVICETTEGSRVAELSVQGNLTKLPRKTAVRTGDTAIF
WVELAVPEGPVWRWRNQEEMVAGGRVAITAEGTCHTLTIFQCTLEDMGEVAFVSGGCRTTTQFCVSAPRRPPL
YPPADPVVKAKTESVTLWSAPPHGDRPVTIDGYVLEKRKLGAYAWSRCHEAGWLATTEFTITGVAAEEDGFQ
FRVSAINHFGQGPYLEFPGMTMLVPLAVKTPKAVEAVEGGEVTFVSDLTVASSGEWFLDGEALKASSIYVI

RCDRTRHMLTIREV PARLHGAQLK FVANGIETS IQMVVRAALGLPSSKLPAAAAREVLAQLHEEAQLLAELSD
QAAA V TWLKD GRELSLGP KYEMQVSAGRRALLVRDVAQDDAGLYECVSRGSR TAYQLLVQEPKLVFAKQQAH
SEVKAEAGNSATLSCEVTQAQTEVTWFKDGKLLSSSSKVRMEASGCSRRLVVQQAGKADAGEYSCEAGGQKLS
FRLDVAEPKLVFAKQQAHSEVKAEAGASATLSCEVAQAQTEVTWFKDGKLLSSSSKVRMEASGCSRRLVVQQ
AGKADAGEYSCEAGGQKLSFRLDVAE PKMVFAKEQQARSEVKAEAGASATLSCEVAQAQTEVTWFKDGKLLSS
SSKVRMEASGCSRRLVVQQAGKADAGEYSCEAGGQKLSFRLDVTEPKLVFAKEQQARSEVKAEVGN SATLSCE
VAQAQTEVTWFKDGKLLSSSSKVRMEASGCSRRLVVQQAGKADAGEYSCEAGGQKLSFRLDVAE PKLVFAKEQ
QARSEVKAEAGNSATLSCEVAQAQTEVTWFKDGKLLSSSSKVRMEASGCSRRLVVQQAGKADAGEYSCEAGGQ
KLSFHLDVTEPKLVFAKEQQAHSEVKAEAGASATLSCEVAQAQTEVTWFKDGKLLSSSSKVRMEASGCSRRLV
VQQAGKADAGEYSCEAEGQKLSFRLDVAE PKLVFAKEQQARSEVKAEAGASATLSCEVAQAQTEVTWFKDGK
LSSSSKVRVEASGCSRRLVVQQAGKADAGEYSCEAGGQKLSFRLDVAE PKLVFAKEQQANSEVKAEAGASATL
SCEVAQAQTEVTWFKDGKLLSSSSKVRVEASGCSRRLVVQQAGKADAGEYSCEAGGQKLSFRLDVAE PKLAF
KEQQAHSEVKAEAGASATLSCEVAQAQTEVTWFKDGKLLSSSSKVRVEASGCSRRLVVQQAGKADAGEYSCEA
GGQKLSFRLDVAE PKLAF AKEQQAHSEVKAEAGASATLSCEVAQAQTEVTWFKDGKLLSSSSKVRVEASGCSR
RLVVQQAGKADAGEYSCEAGGQKLSFRLDVAE PKLAF AKEQQAHSEVKAEAGASATLSCEVAQAQTEVTWFKD
GKLLSSSSKVRVEASGCSRRLVVQQAGKADAGEYSCEAGGQKLFRLDVAE PKLMFAKEQQAHSEVKAEAGAS
ATLSCEVAQAQTEVTWFKDGKLLSSSSKVRVEASGCSRRLVVQQAGKADAGEYSCEAGGQKLSFRLDVAE PKL
VFAKEQQAHSEVKAEAGASATLSCEVAQAQTEVTWFKDGKLLSSSSKVRVEASGCSRRLVVQQAGKADAGEYS
CEARGQKLSFRLDVADTRLMFAKEQQARTEVKAEAGNSATLSCEVAQAQTEVTWFKDGKLLSSSSKVRVEASG
CSRRLVVQQAGKADAGEYSCEAGGQKLSFRLDVAE AESQI PERPSRREPLVVKEHETIILTATIAAPSVAAVT
WLKDGVEIRRSKRHEATS LGDTHLTVRGAQVLD SAIYSCRVGKEGQDFPVQVEEVA AKFSKPLEPVEGELGG
TVMLVCELSPEQA EVVWRCGNTQLRPGKRFQMTSEGPRRTLTVSGLREDDAEYV CESRDDRTSARLTVKVPR
VVKFTSGLSAMVAEEGQEATFQC VVSPSDAGVTWYKDGMLQPSEK FVMVESGASRSLTILGLTLEDAGQVTV
EAE GASSAALRVREAPVLFKKKLEPQTVEERTSVTLEVELTRPWPEVKWTRNAAVLTPSENVEIRAEGARHC
LVLRSVGFADRGFFGCETPDDKTQAKLNVEMRQVRLVRLGLEVEAKEQGTASMDVELSHAEVEGSWTRDGLRL
QPGPKCHLAVQGPVHILTL S ALQPQDSGLVAFRAIEGVHTSARLIVTELPVSFTRVLQDVVATQKEKVTLCECEL
SRPVDVRLWKDGVLELRAGKAI GIVAQGTCSRSLVIYRCETGDQGVYVCDALDAQTSASLRVQGRTYTLIFRRVL
AEDAGEVKFVAENAESRAHLRVKELPVTLLRPLRDKIAMEKHRGVLE CQVSRASAQVRWFKGGVLELQSGPKYE
VVSDGLYRKLVIN DVQPEDEDTYTCDAGNVKTS AQFFVVEQSITIVRGLKDMTVM EPAPAWFECETSIPSVRP
PKWLLGKTVLQAGGNVGL EQDGT VHRLTLHKTCSTMTGPVHFTIGKSRSSAQLVVS D I PVVLRTRPLEPKAGRE
LQSVVLSCDFRPA PKAVQWYKDDT PLSPEKFKMALEGQMAELRILRLTPADAGVYRCQAGSAQSSAEV TVEA
REVTVIQPLQDAEAMEEGRVCFSC ELSHKDEDIEW SLNGTPLYNDSFHEI SHEGCLHTLVLSV RQADTGTVC
ATSPKVSVSARLVVKGKPVVFLKALDDVSAEERGTLLTQCEVSDPEARVVWRKDGVELGPSDKYDFLHKAGAR
GLTVHDL SHEDAGLYTCQVGSKETQSKVSVHDLHVGI TKRLKTVEVLEGE SCSEFCVLSHESPSDPAVWTVGG
KTVGSGGHFHAVRQRKYTLTVKDAALSDAGEV VSVLGLT SKASLIIRERPVDITKPLEDQRTTLGEDVMLS
CELSRAGTSVRWLKDGKAIRKSQYD LLS EGTTRAVLVVRKASL KDSGEYTCETEASKSTAKLCVEKANRFTE
ELADLQVEEKGRAVFTCKTEHPASVVTWRKGLLELRASGKHVPSQEG LTKLKTINALERTDSDTYTCDIGQAR
TQARLLVHGQKVRVIEDLED TAVQEGSSAKFCCRIAPADYGPVHWF LDKTPLHSNELNEITVQPGGYHVLT LR
QLALKDSGTVYFEAGDQRTS AALRVTEKPSIFSRPLTDVTVTEGEDLTLVCETTTVDSSVRWTKDGKTLRPSA
RCQLSHEGCAQLLITATTPQDGGRYKCEIGGASSSSIVRVHALPVRFRFRESLKDVEVPEGKAATLRCVLS SVA
APVEWRHGDDVLKSSNKYSLRQEGAVLELVIDLQPDQSGQYSCSFGDQTT SATLTVKTS SAQFVGKLRNKEA
TEGTTVTLRCELTK EAPVEWKKGTETLRNGDKYSLKQDGAVCELQICSLLVADAGEYSCVCGQE KTSATLTVK
ALLVHFVRRRLRSKEATEGDTTTLQCELSKAAPVEWRKGTETLRDGD RYSLKQDGAVCELQIRSLTIADAGEYL
CTCGQE KTSATLTVRALPAKFKDSLKNEEATEGTTATLSCELSKAAPVTWKKGPKTLQSGDKYVLRQDGAVCG
LQIHGLTMADAGEYSCVCGQE KTSATLTVRGLPAKFIEDLRSQEATEGATAILRCELSKAAPVEWRKGS ETLK
DGD RYTLRQDGAVCELQIRGLAVVDGTYS SLPTKFTEGLRNEEATEGTMATLRCQMSKAAPVEWRKGS ETLR
DGD RYSLRQDGAMCELQIRGLTIEDSGEYTCVCGQE KTSATLSVKALPSRFIEDLRSQEATEGTMATLRCQMS
KTAPVEWKKGSETLRDGG RYSLRQDGPVCELQICDLAVEDAGEYSCVCGQE KTSATLSIKALPPRFIEDLRSQ
EATEGTMATLRCQMSKAAPVEWRKGS ETLGDGG RYSLRQNGAVCELQIHDLAVEDTGEYSCVCGQE KTSATLN
VKALPPRFIEDLRSQEATEGTMATLRCQMSKAAPVEWRKGS ETLRDGG RYSLRQDGAVCELQIHDL DVEDAGQ
YSCVCGQE KTSAVLTVDALPPKFTEGLKKEEATEGTMVTLRCQMSKEATVEWRKGAKT LSDGG RYSLRQDGAM
CELQICGLAVEDAGEYSCVCGQE KTSATLSVKALPPRFIEDLRSQEATEGTMATLRCQMSKAAPVEWRKGS ETLR
DGD RYSLRQDGAVCELQIRDLAVEDAGEYLCVCGQE KTSATLSVKALPPRFIEDLRSQEATEGTMATLRCQ
MSKAAPVEWRKGS ETLR DGD RYSLRQDGAMCELQICDLAVEDTGDYSCVCGQE KTSATLSVKALPPRFIEDLR
SQEAWEGTVATLRCRMSKAAPVEWRKGS ETLKDGDRYSLRQEGNLCELQIRDLAVEDTEEYSCVCGQE KTSAT
LSVKALPAKFIEDLRSQEAPESSTVTLRCKLSKKASVWKKGSETLRNGARYSLRQDGAVCELEIRDLTVEDT
GEYSCTCGQERTSATLSIMAPQVVFQQPLQNLQAEEGSMASLRCELSVPNAAMVWSKGGLELQGDTRREARQQ
GCVAELLLRDLRREDAGEYSC TCGSQTT SATLMVTAAPVRFLRELQAQDVDEGATARLRCELSREAVSVEWRK



GSLQLFPKAKYQMVQEGTAEELLVHGVEQEDAGEYTC DAGHTQS IARLSVRAPKPKFKTDLQSTEQEAGGTAR  
LCCQLSEAEPTGTPVQWLKEGVELHVGSKYEMRRQGA VCELLIHGLEAKDTGEYACL VGGQKT LASLRVKEPEV  
TIVRGLVDMEVQADEDEFTCKV SQAGATDVQWHLQGLPLQSN E VTEVA VLADGCTHVLQ LKGV TLEDAGTVS  
FHVGLSSSAQLTVRVPEVTVLEPLKDVQLSEGD A HFRCRLSRASGQEARWALGGVPLQCNEMNDITVEQGT  
LYLLTLHKVTLEDAGTITLQVGS CSSEAQLKVTAKNTVLRGLENVDALEGG EALFECQLSQPEVA AHTWLLDD  
EPVHTSEKVEVVYFENGLRHLLLLKNLKPQDSCRVTFLAGDVVTS AFLTVRGWRLEVLEPPHDASVKAGMQVR  
FTCILSEAVPVG EATWYINGAAIQPDDTDWTVTTD GSHHALTLSNAQPQHAGEVTF AARDAVASARLSVLALP  
DPPEDAE VVGRSDHSVTL SWVAPMSDGGGGLCGYR VEMKEASTGQWQLCHDLVPGPECVVDDLVP GKTYRFRV  
AAVGPAGAGEPVHLPQMVKIAPAPAPAPAPAPAPAPETRQAVVGEDICLELEVAADGGEV VVHKGTERRIQPGG  
HFEVLSRGRQMLVIKGFRTEDQGEYRCGPIQGLPSSGAATFNVVMTSGSGDEVPAQPSLPPEAAQEGDLHLL  
WEALARKRRMSREPTLDSISELPEEDSRVQHLRQEA EETAPDLSEGYSTADELARTGEADLSHTSSDDES RAG  
TPSLVTYLKKAGGPGISPLASKHEAQVTT SVKPKQKQEPVPTCPPPGDLSAADLMDPSLDKAAVKIQAAFKG  
YKVRKEMKQQEGPVFSRTFGDTEAQVGDVLRLECVLATKTD MRACWLKDGIELTDGRHYHIDQLKDGTC SLIV  
TGLAPTDSGRYTCQVSTKSGRVSHSACVVVSGTESEAE SSSGGELDDAFRRAARRLHRLFRTKSPAELSEEEL  
FLSADEGPEPEEPADWQTYREDENFVCIRFESLAEARQAVTCFRNMFATMGIGVEISLGEQGPGRVEMRIGK  
VAPTVTPAVPLAKTPGLQTS DAAPVFLTELQNDVQDGYPMSFDCVVTGQPVPSVRWFKDGKLEEDDHYMIN  
EDQQGGHQLIITAVVPADMGVYRCLAENSMGVSSTKAELRVELTSTDYDTAADATETSSYFSAQGYLSSREQE  
GTESDEGQLPQVLEELKDLQVAPGTRLAKFQLKVKGY PAKKLYWFKDQPLTTS DHIRMTDKKTLHTLEIVSV  
TREDSGQYAAIYISNAVGAAYSSARLLVRGPSEPEEK PASDVHERLVP PRILEKFTPKKVKRGSSTIFS VKVEG  
HPAPSVHWLKEEA EKGV LWIGPDTPGYTMAS SSKQHSLVLLDVG RQHGTYTCIATNPAGQALCSASLHISGL  
AKEEEQERVKEALISSFLQTSQAVSAQMS ESAGFADLVGQSKGESLVAE EAHSHLSLAEVGT EEFLOKLT SQ  
ITEMVSAKISQAKLQVPGGDSDEETKTPSASPRHGRSRPSSSVQESSSESEDGDSRGEIFDIYVVTADYLPLG  
AEQDAIILREGQYVEVLDSAHPLRWLVRTKPTKSSPSRQGWVSPAYLDKRLKLSPEWGPTEAPEFPGEAVSED  
EYRTRLSSVIQELLSSEQAFVGE LQFLESHHMKHLERSPRVPAVASQKTVIFRNVQDISHFHSSFLKELQGC  
GTDDDVAMCFIKNQEA FEKYLEFLVGRVQAESVVVSTPVQEFYK KYAEETLSAKDPTQPPPPLOHYLEQFVE  
RVQKYQALLKELIRNKARNRQNCALLEQAYAVVSALPQRAENKLVSLMENYPGTLEALGEP IRQGHFIVWEG  
APGARMPWKGNHRHVF LFRNYLVICKPRRDSRTDTSFYFRNMMKLS SIDLNDQVEGDDRAFVWHEREDSVR  
KYLQARTVI IKNSWVKEICGIQQR LAQPVWRPPEFEELADCTAELGETVKLACRVTGTPKPIVSWYKDGKP  
VEVDPHHILIEDPDG SCTLILDNLTGIDSGQYMCFAASAAGNASTLGKILVQVPPRFVNVKVRATPFVEGEDAQ  
ITCTVEGAPYPQIRWYKDGTL LAPGNRYRMLNEPRSGVLV LVIQAASKEDLGHYEC ELVNR LGSTRGGGELYM  
QSPALRARDQHHREQIVAAVEVTEQETKVPKKTVI I EETITTVVKS PRGRRQSPGKSPSRSPRRSASPRRPG  
LLAPERLYPPGTSPSRRLVEVEQGRKAPVPALYVTEAEVHAPASQSPKWLEVEETIEVRVKKTGSRGASPVRE  
MTRSREGILFTLPGGIPGRDPNANNSNNSVYQEAR TWGPAVVHVGEFFIFQVDSVGNVDVWAASPEPEQVRA  
SQKEENTERQEGCSDG DENTFLMEEPQD TDSLQGRDPKILTHNGRVLTLADLEDYVPQEGETF GCGDSTPSTP  
DEPPCEVSVLQREI SEPTVGGQPVLLNVGRPPGTGATPSDFRPGSQVHSPESV SFLLEAWSGPVSAAPWTSSF  
HTHVQSSVDGSHSGFKTEVSTQTVSFGAVGETVTLHIDPDGGEAPGPSQG\*

>ENSMUSP00000020732\_c.14010:A>T\_p.R4671W ENSMUST00000020732.13|Obscn-  
201|ENSMUSG00000061462|-|chr11:g.58945207:T>A

MDHSFSGAPRFLTRPKAFVSVGKDATLSCQIVGNPTPHVSWEKDRQFVEAGARFRLAQDGDVYRLTILDLAL  
GDSGQYVCRARNAIGEAFAAVGLRVDSEGTCAEQAPHLLRPTSIRVREGADATFRCRVGGSPQPAVSWSKDG  
RRLGPPDAPHVRVEEHGESSALRIRSARPRDGGTYEVRAENPLGSASAAAALVVDSAEVAGPPGTSTATLLA  
HLQQRREAMRAEGIPPSPPGAGTRTCTVTEGKHARLSCFVTGEPKPEVWKKDGQLVTEGRRHVVEDEQENF  
VLKILFCKQSDRGLYTCTASNLVGQTYSSVLVVVREPTVPFKKRLQDLEVREKESATFQCEVAQPA TEAAWFK  
EETRLWASAKYDIEEGETERRLTVRNVSADDDAVYICETTEGSRVAELSVQGNLTKRKLPRKTAVRTGDTAIF  
WVELAVPEGPVRWLRNQEEMVAGGRVAITAEGTCHTLTIFQCTLEDMGEVAFVSGGCRTTTQFCVSA PRRPPL  
YPPADPVVKAKTESVTL SWSAPPHGDRPVTIDGYVLEKRKLGA YAWSRCHEAGWLATTEFTITGVAAEGDFQ  
FRVSAINHFGQGPYLEFPGTMHLVPLAVKTP LKAVEAVEGGEVTFVSDLTVASSGEWFLDGEALKASSIYVI  
RCDRTRHMLTIREV PARLHGAQLKFVANGIETS IQMVVRAALGLPSSKLPAAAAREVLAQLHEEAQLLAE LSD  
QAAA VTWLKDGRELSLGP KYEMQVSAGRRALLVRDVAQDDAGLYECVSRGSR TAYQLLVQDITDGYRDWGPAG  
PQKHMCKCAGAKIARYLGSSCYRFLQYDKGVWHWLEAALDTRQKGKTS SCSLHEKPKLVFAKQQAHSEVKA E  
AGNSATLSCEVTAQTEVTFWFKDGKLLSSSSKVRMEASGCSRRLVVQQAGKADAGEYSCEAGGQKLSFRLDVA  
EPKLVFAKQQAHSEVKA EAGASATLSCEVAQAQTEVTFWFKDGKLLSSSSKVRMEASGCSRRLVVQQAGKADA  
GEYSCEAGGQKLSFRLDVAEPKMVFAKEQQARSEVKA EAGASATLSCEVAQAQTEVTFWFKDGKLLSSSSKVRM  
EASGCSRRLVVQQAGKADAGEYSCEAGGQKLSFRLDVATEPKLVFAKEQQARSEVKA EAGNSATLSCEVAQAQ  
EVTWFKDGKLLSSSSKVRMEASGCSRRLVVQQAGKADAGEYSCEAGGQKLSFRLDVAEPKLVFAKEQQARSEV  
KAEAGNSATLSCEVAQAQTEVTFWFKDGKLLSSSSKVRMEASGCSRRLVVQQAGKADAGEYSCEAGGQKLSFHL  
DVTEPKLVFAKEQQAHSEVKA EAGASATLSCEVAQAQTEVTFWFKDGKLLSSSSKVRMEASGCSRRLVVQQAGK  
ADAGEYSCEAGGQKLSFRLDVAEPKLVFAKEQQARSEVKA EAGASATLSCEVAQAQTEVTFWFKDGKLLSSSSK

VRVEASGCSRRLVVQQAGKADAGEYSCEAGGQKLSFRLDVAEPKLVFAKEQQANSEVKAEEAGASATLSCEVAQ  
AQTEVTFWKDGGKLSSSSSKVRVEASGCSRRLVVQQAGKADAGEYSCEAGGQKLSFRLDVAEPKLAFAKEQQAH  
SEVKAEEAGASATLSCEVAQAQTEVTFWKDGGKLSSSSSKVRVEASGCSRRLVVQQAGKADAGEYSCEAGGQKLS  
FRLDVAEPKLAFAKEQQAHSEVKAEEAGASATLSCEVAQAQTEVTFWKDGGKLSSSSSKVRVEASGCSRRLVVQQ  
AGKADAGEYSCEAGGQKLSFRLDVAEPKLAFAKEQQAHSEVKAEEAGASATLSCEVAQAQTEVTFWKDGGKLS  
SSKVRVEASGCSRRLVVQQAGKADAGEYSCEAGGQKLFRLDVAEPKLMFAKEQQAHSEVKAEEAGASATLSCE  
VAQAQTEVTFWKDGGKLSSSSSKVRVEASGCSRRLVVQQAGKADAGEYSCEAGGQKLSFRLDVAEPKLVFAKEQ  
QAHSEVKAEEAGASATLSCEVAQAQTEVTFWKDGGKLSSSSSKVRVEASGCSRRLVVQQAGKADAGEYSCEARGQ  
KLSFRLDVADTRLMFAKEQQARTEVKAEAGNSATLSCEVAQAQTEVTFWKDGGKLSSSSSKVRVEASGCSRRLV  
VQQAGKADAGEYSCEAGGQKLSFRLDVAEAEESQIPERPSRREPLVVKEHETIILTATIAAPSVAAVTWLKDG  
EIRRSKRHEATSLGDTHTLTVRGAQVLDIAIYSCRVGKEGQDFPVQVEEVAAKFSKPLEPVEGELGGTVMLVC  
ELSPQAEVWRCGNTQLRPGKRFQMTSEGPRTTLTVSGLREDDAEYVCESRDDRTSARLTVKVPVVKFTS  
GLSAMVAEEGQEQATFQCVVSPSDAGVTWYKDGMLQPSKFKVMVESGASRSLTILGLTLEDAGQVTVAEAGAS  
SSAALRVREAPVLFKFKLEPQTVVEERTSVTLEVELTRPWPEVKWTRNAAVLTPSENVEIRAEGARHCLVLRV  
GFADRGGFFGCETPDDKTQAKLNVEMRQVRLVVRGLQVEVEAKEQGTASMDVELSHAEVEGSWTRDGLRQLQPGPK  
HLAVQGPVHILTLALSALQPDQSGLVAFRAEGVHTSARLIVTELPVSFTRVLQDVVATQKEKVTLECELSRPVDV  
RWLKDGVLELRAGKAIIGIVAQGTCSRSLVIYRCETGDQGVYCDALDAQTSASLRVQGRTYTLIFRVLAEADAGE  
VKFVAENAESRAHLRVKLEPVTLLRPLRDKIAMEKHRGVLEKQVSRASAQVRWFKGGVELQSGPKYEVVSDGL  
YRKLVINVDQPEDEDTYTCDAENVKTSAQFFVEEQSITIVRGLKDMTVMPEPAPAWFECETSIPSVRPPKWL  
KTVLQAGGNVLEQDGTVHRLTLHKTCSTMTGPVHFTIGKSRSSAQLVSDIPVVLTRPLEPKAGRELQSVVL  
SCDFRPAPKAVQWYKDDTPLSPSEKFKMALEGQMAELRILRLTPADAGVYRCQAGSAQSSAEVTVAREVTVI  
QPLQDAEAMEEGRVCFSCELSHKDEDIEWSLNGTPLYNDSFHEISHGCLHTLVLSVRQADTGTVCATSPKV  
SVSARLVVKGKPVVFLKALDDVSAEERGTTLTQCEVSDPEARVVWRKDGVELGPSDKYDFLHKAGARGLTVHD  
LSHEDAGLYTCQVGSKETQSKVSVHDLHVGITKRLKTVLEVLEGESECSFECVLSHESPSDPAVWTVGGKTVGGS  
GHFHAVRQGRKYTLTVKDAALSDAGEVVFVGLGLTSKASLIIRERPVDITKPLEDQRTTLGEDVMLSCELSRA  
GTSVRWLKDGKAIKRSQYDLSSEGTRAVLVRKASLKDSGEYTCETEASKSTAKLVCVEEKANRFTBELADLQ  
VEEKGRAVFTCKTEHPASVVTWRKGLLELRASGKLVSPQEGLETLKLTINALERTSDTYTCDIQARTLQARLL  
VHGQKVRVIEDLEDTAVQEGSSAKFCCRIPADYGPVHWFLLDKTPLHSNELNEITVQPGGYHVLTLRQLALKD  
SGTVYFEAGDQRTSALRVTEKPSIFSRPLTDVTVTEGEDTLVCEETTVDSSVRWTKDGKTLRPSARCQLSH  
EGCQALLITATTPQDGGRYKCEIGGASSSSIVRVHALPVRFRRESLKDVEVPEGKAATLRCVLSVAAPVEWR  
HGDDVLKSSNKYSLRQEGAVLELVIRDLQPDQSGQYSCSFGDQTTSATLTVKTSQAQFVGLKRNKEATEGTTV  
TLRCELTKAEAPVEWKKGTETLRNGDKYSLKQDGA VCELQICSLLVADAGEYSCVCGQEKT SATLTVKALLVHF  
VRRLSKEATEGDTTLQCELSKAAPVEWRKGTETLRDGDYSLKQDGA VCELQIRSLTIADAGEYLCTCGQE  
KTSATLTVRALPAKFKDSLKNEEATEGTTATLSCELSKAAPVWKKGPKTLQSGDKYVLRQDGA VCGLIHGL  
TMADAGEYSCVCGQEKT SATLTVRGLPAKFIEDLRSQEATEGATAILRCELSKAAPVEWRKGSSETLKDGDYR  
LRQDGA VCELQIRGLAVVDGTYSLSLPTKFTTEGLRNEEATEGTMATLRCQMSKAAPVEWRKGSSETLRDGDYR  
LRQDGA MCELQIRGLTIEDSGEYTCVCGQEKT SATLSVKALPSRFIEDLRSQEATEGTMATLRCQMSKTAPVE  
WKKGSETLRDGGYSLRQDGPVCELQICDLAVEDAGEYSCVCGQEKT SATLSIKALPPRFIEDLRSQEATEG  
MATLRCQMSKAAPVEWRKGSSETLGDGGYSLRQNGAVCELQIHDLAVEDTGEYSCVCGQEKT SATLNVKALPP  
RFIEDLRSQEATEGTMATLRCQMSKAAPVEWRKGSSETLRDGGYSLRQDGA VCELQIHDLDVEDAGQYSCVCG  
QEKTSAVLTVDALPPKFTEGLKKEEATEGTMVTLRCQMSKEATVEWRKGAKTLDGGYSLRQDGA MCELQIC  
GLAVEDAGEYSCVCGQEKT SATLSVKALPPRFIEDLRSQEATEGTMATLRCQMSKAAPVEWRKGSSETLRDGD  
YSLRQDGA VCELQIRDLAVEDAGEYLCVCGQEKT SATLSVKALPPRFIEDLRSQEATEGTMATLRCQMSKAAP  
VEWRKGSSETLRDGDYSLRQDGA MCELQICDLAVEDTGDYSCVCGQEKT SATLSVKALPPRFIEDLRSQEAVE  
GTVATLRCRMSKAAPVEWRKGSSETLKDGDYSLRQEGNCELQIRDLAVEDTGEYSCVCGQEKT SATLSVKAL  
PAKFIEDLRSQEAPESSTVTLRCKLSKKASVVWKKGSETLRNGARYSLRQDGA VCELEIRDLTVEDTGEYSCT  
CGQERTSATLSIMAPQVVFQQPLQNLQAEEGSMASLRCELSVPNAAMVWSKGGLELQGDTRREARQQGCVAEL  
LLRDLRREDAGEYSCTCGSQTT SATLMVTAAPVRFLRELQAQDVDEGATARLRCELSREAVSVEWRKGS LQLF  
PCAKYQMVQEGTTAELLVHGVEQEDAGEYTCDAHTQSIARLSVRAPKPKFKTDLQSTEQEAAGGTARLCCQLS  
EABPGTPVQWLKEGVELHVGSKYEMRRQGA VCELLIHGLEAKDTGEYACLVGGQKTASLRVKEPEVTIVRGL  
VDMEVQADEDEFTCKVSAQATDVQWHLQGLPLQSNVTEVAVLADGCTHVLQKGVTLLEDAGTVSFHVGGL  
SSSAQLTVRVPEVTVLEPLKDVQLSEGQDAHFRCLSRASGQEARWALGGVPLQCNEMNDITVEQGTLYLLTL  
HKVTLEDAGTITLHQVSSSEALQKVTAKNTVLRLGLNVDLEGGALFECQLSQPEVAVAHTWLLDDEPVHTS  
EKVEVVYFENGLRHLKLLKLPQDSCRVTFLAGDVVTSFAFLTVRGRWLELVPPHDASVAKAGMQRVFTCILS  
EAVPVGEATWYINGAAIQPDDTDWTVTTDGS SHALTL SNAQPQHAGEVTF AARDAVASARLSVLLALPDPEDA  
EVVGRSDHSVTL SWVAPMSDGGGGLCGYRVMKEASTGQWQLCHDLVPGPECVDDLVPGKTYRFRVAAVGPA  
GAGEPVHLPQMVKIAPAPAPAPAPAPAPAPETRQAVVGEDICLELEVAADGGEVVWHKGTERRIQPGHFVLS  
RGQRQMLVIKGFRTEDQGEYRCGPIQGLPSSGAATFNVMVMTSGSGDEVPAQPSLPPEAAQEGDLHLLWEALAR

KRRMSREPTLDSISELPEEDSRVQHLRQEAETAPDLSEGYSTADELARTGEADLSHTSSDDESFRAGTPSLVT  
YLKKGAGPGISPLASKHEAQVTTSVKPKQKQEPVVPTCPPPGDLSAADLMDPSLDKAAVKIQAAFQKGYKVRKE  
MKQQEGPVFSRTFGDTEAQVGDVLRLECVLATKTDMRACWLKDGIELTDGRHYHIDQLKDGTCSSLVTLGLAPT  
DSGRYTCQVSTKSGRVSHSACVVVSGTESEAESSSSGGELDDAFRAARRLHRLFRTKSPAELSEEELFLSADE  
GPGEPEEPADWQTYREDENFVCIRFESLAEARQAVTCFRNMFATMGIGVEISLGEQGPRGVEMRIGKVAPTVT  
PAVPLAKTPGLQTSDAAPVFLTELQNDVQDGYPMSFDCVVTGQPVPSVRWFKDGKLEEDDHYMINEDQQGG  
HQLIITAVVPADMGVYRCLAENSMGVSSTKAELRVELTSTDYDTAADATETSSYFSAQGYLSSREQEGTESDE  
GQLPQVLEELKDLQVAPGTRLAKFQLKVKGYPAKPLYWFKDQGPLTSDHIRMTDKKTLHTLEIVSVTREDSDG  
QYAAAYISNAVGAAYSSARLLVRGPSEPEEKPASDVHERLVPPRILEKFTPKKVKRGSSITFSVKVEGHPAPSV  
HWLKEEAKEKGVLWIGPDTPGYTMASSSKQHSVLVLDVGRQHOGTYTCIATNPAGQALCSASLHISGLAKEEEQ  
ERVKEALISSFLQGTSAQVSAQMSSEAGFADLVGQSKGESLVAEEAHSHLSLAEVGTTEFLQKLTSTQITEMVS  
AKISQAKLQVPGGDSDEETKTPSASPRHGRSRPSSSVQESSSESEDGDSRGEIFDIYVVTADYLPGLAEQDAI  
ILREGQYVEVLDLSDAHLRVLVTRKPTKSSPSRQGWVSPAYLDRKRLKLSPEWGPTEAPEFPGEAVSEDEYRTRL  
SSVIQELLSSEQAFVQELQFLESHHMKHLERSPRVPAAVASQKTVIFRNVQDISHFHSSFLKELQCGCTDDDDV  
AMCFIKNQEAFAKEYLEFLVGRVQAESVVVSTPVQEFYKKYAEETLSAKDPTQPPPPPLQHYLEQPVERVQKYQ  
ALLKELIRNKARNRQNCALLEQAYAVVSALPQRAENKLVSLMENYPGTLEALGEPTRQGHFIVWEGAPGARM  
PWKGNRHRVFLFRNYLVICKPRRDSRTDTFSYVFRNMMLKSSIDLNDQVEGDDRAFVWHEREDSVRKYLLQA  
RTVLIKNSWVKEICGIQQLRAQPVWRPPEFEEELADCTAELGETVKLACRVTGTPKPIVSWYKDGKPEVVDPH  
HILIEDPDGSCTLILDNLTGIDSGQYMCFAASAAGNASTLGKILVQVPPRFVNVKVRATPFVEGEDAQITCTVE  
GAPYPQIRWYKDGTLTLLAPGNRYRMLNEPRSGVLVLIQAASKEDLGHYECELVNRLGSTRGGGELYMQSPALR  
ARDQHHREQIVAAVEERRPSP\*  
>rs217953617\_ENSMUSP00000158795\_c.13009:A>C\_p.E4337A  
ENSMUST00000238536.2|Obscn-210|ENSMUSG00000061462|-|chr11:g.58951834:T>G  
MDHSFSGAPRFLTRPKAFVVSVGKDATLSCQIVGNPTPHVSWEKDRQFVEAGARFLAQDGDVYRLTILDLAL  
GDSGQYVCRARNAIGEFAAVGLRVDSEGTCAEQAPHFLLRPTSIRVREGADATFRCRVGGSPPAVSWSKDG  
RRLGPPDAPHRVEEHGESSALRIRSARPRDGGTYEVRAENPLGSASAAAALVVDSDAEVAGPPGTSTATLLA  
HLQQRREAMRAEIGIPSPPGAGTRTCTVTTEGKHARLSCFVTEGPKPETVWKKDQGLVTEGRRHVVYDEQENF  
VLKILFCKQSDRGLYTCTASNLVGQTYSSVLVVVREPTVPFKKRLQDLEVREKESATFQCEVAQPATEAAWFK  
EETRLWASAKYDIEEEGTERRLTVRNVSADDDAVYICETTEGSRVVAELSVQGNLTKLPRKTAVRTGDTAIF  
WVELAVPEGPVRWLRNQEEMVAGGRVAITAEGTCHTLTI FQCTLEDMGEVAFVSGGCRTTTQFCVSAPRRPPL  
YPPADPVVAKAKTESVTLSSWAPPHGDRPVTIDGYVLEKRKLGAYAWSRCHEAGWLATTEFTITGVABEGDFQ  
FRVSAINHFGQGPYLEFPGMTMLVPLAVKTPKAVEAVEGGEVTFVSDLTVASSGEWFLDGEALKASSIYVI  
RCDRTRHMLTIREVPARLHGAQLKFVANGIETSIQMVVRAALGLPSSKLPAAAAAREVLAQLHEEAQLLAE LSD  
QAAA VTLWKDGRELSLGPYEMQVSAGRRALLVRDVAQDDAGLYECVSRGSRRTAYQLLVQDITDGYRDWGPAG  
PQKHMCKCAGAKIARYLGSSCYRFLQYDKGVWHWLEAALDTRQKGTSSCSLHEKPKLVFAKQQAHSEVKA  
AGNSATLSCEVTQAQTEVTWFKDGKLLSSSSKVRMEASGCSRRLVVQQAGKADAGEYSCEAGGQKLSFRLDVA  
EPKLVFAKQQAHSEVKAEGASATLSCEVAQAQTEVTWFKDGKLLSSSSKVRMEASGCSRRLVVQQAGKADA  
GEYSCEAGGQKLSFRLDVAEPKLVFAKEQQARSEVKAEGASATLSCEVAQAQTEVTWFKDGKLLSSSSKVRM  
EASGCSRRLVVQQAGKADAGEYSCEAGGQKLSFRLDVTEPKLVFAKEQQARSEVKAEGVNSATLSCEVAQAQ  
EVTWFKDGKLLSSSSKVRMEASGCSRRLVVQQAGKADAGEYSCEAGGQKLSFRLDVAEPKLVFAKEQQARSEV  
KAEAGNSATLSCEVAQAQTEVTWFKDGKLLSSSSKVRMEASGCSRRLVVQQAGKADAGEYSCEAGGQKLSFHL  
DVTEPKLVFAKEQQAHSEVKAEGASATLSCEVAQAQTEVTWFKDGKLLSSSSKVRMEASGCSRRLVVQQAGK  
ADAGEYSCEAGGQKLSFRLDVAEPKLVFAKEQQARSEVKAEGASATLSCEVAQAQTEVTWFKDGKLLSSSSK  
VRVEASGCSRRLVVQQAGKADAGEYSCEAGGQKLSFRLDVAEPKLVFAKEQQANSEVKAEGASATLSCEVAQ  
AQTEVTWFKDGKLLSSSSKVRVEASGCSRRLVVQQAGKADAGEYSCEAGGQKLSFRLDVAEPKLVFAKEQQAH  
SEVKAEGASATLSCEVAQAQTEVTWFKDGKLLSSSSKVRVEASGCSRRLVVQQAGKADAGEYSCEAGGQKLS  
FRLDVAEPKLVFAKEQQAHSEVKAEGASATLSCEVAQAQTEVTWFKDGKLLSSSSKVRVEASGCSRRLVVQQ  
AGKADAGEYSCEAGGQKLSFRLDVAEPKLVFAKEQQAHSEVKAEGASATLSCEVAQAQTEVTWFKDGKLLSS  
SSKVRVEASGCSRRLVVQQAGKADAGEYSCEAGGQKLFRLDVAEPKLVFAKEQQAHSEVKAEGASATLSCE  
VAQAQTEVTWFKDGKLLSSSSKVRVEASGCSRRLVVQQAGKADAGEYSCEAGGQKLSFRLDVAEPKLVFAKEQ  
QAHSEVKAEGASATLSCEVAQAQTEVTWFKDGKLLSSSSKVRVEASGCSRRLVVQQVQKADAGEYSCEARGQ  
KLSFRLDVADTRLMFAKEQQARTEVKAEGNSATLSCEVAQAQTEVTWFKDGKLLSSSSKVRVEASGCSRRLV  
VQQAGKADAGEYSCEAGGQKLSFRLDVAEASISQI PERPSTRREPLVVKEHETIILTATIAAPVAAVTLWKDGV  
EIRRSKRHEATSLDHTLTVRGAQVLDLSAIVSCRVKEGQDFPVQVEEVAAKFSKPLEPVEGELGGTVMLVLC  
ELSPQAEVWRCGNTQLRPGKRFQMTSEGPRTLTVSGLREDDAEYVCSRDRTSARLTVKVPRVVKFTS  
GLSAMVAEEGQEAFTQCVVSPSDAGVTWYKDGMLQPSKFKVMVESGASRSLTILGLTLEDAGQVTVAEAGAS  
SSAALRVREAPVLFKKKLEPQTVVEERTSVTLEVELTRPWPEVKWTRNAAVLTPSENVEIRAEGARHCLVLRV  
GFADRGFFGCETPDDKTQAKLNVEMRQVRLVVRGLQVEVEAKEQGTASMDVELSHAEEVGSWTRDGLRLQPGPKC

HLAVQGPVHILTLALSALQPQDSGLVAFRAEGVHTSARLIVTELPSVSTRVLQDVVATQKEKVTLECELSRPVDV
RWLKDGVLELRAGKAIGIVAQGTCSRSLVIYRCETGDQGVYVCDALDAQTSASLRVQGRTYTLIFRRVLAEDAGE
VKFVAENAESRAHLRVKELPVTLLRPLRDKIAMEKHRGVLECCQVSRASAQVRWFKGGVELQSGPKYEVVSDGL
YRKLVINADVQPEDEDTYTCDAGNVKTSAQFFVVEEQSITIVRGLKDMTVMEPAPAWFECETSIPSVRPPKWLGLG
KTVLQAGGNVQLEQDGTVHRLTLHKTCSTMTGPVHFTIGKSRSSAQLVVSDIPVVLTRPLEPKAGRELQSVVL
SCDFRPAPKAVQWYKDDTPLSPSEKFKMALEGQMAELRILRLTPADAGVYRCQAGSAQSSAEVTVAREVTVI
QPLQDAEAMEEGRVCFSCSELCHKDEDIEWSLNGTPLYNDSFHEISHEGCLHTLVLSVSRQADTGTVCATSPKV
SVSARLVVKGKPVVFLKALDDVSAEERGTLLTQCEVSDPEARVVRKDGVELGSPDKYDFLHKAGARGLTVHD
LSHEDAGLYTCQVGSKETQSKVSVHDLHVGITKRLKTVEVELEGESCFECVLSHESPSDPAVWTVGGKTVGGS
GHFHAVRQGRKYTLTVKDAALS DAGEVVSVLGLTSKASLIIRERPVDTKPLEDQRTTLGEDVMLSCELSRA
GTSVRWLKDGKAIRKSQKYDLLSEGTRAVLVVRKASLKDSGEYTCETEASKSTAKLCVEEKANRFTEELADLQ
VEEKGRAVFTCKTEHPASVVTWRKGLLELRASGKHVPSQEGTLKLTINALERTSDTYTCDIGQARTQARLL
VHGQKVRVIEDLEDTAVQEGSSAKFCRIAPADYGPVHWFLDKTPLHSNELNEITVQPGGYHVLTLRQLALKD
SGTVYFEAGDQRTSALRVTEKPSIFSRPLTDVTVTEGEDTLVCETTTVDSSVRWTKDGKTLRPSARCQLSH
EGCQAQLLITATTPQDGGRYKCEIGGASSSSIVRVHALPVRFRRESLKDVEVPEGKAATLRCVLSVAAPVEWR
HGDDVLKSSNKYSLRQEGAVLELVIRDLQPDQSGQYSCSFGDQTTSATLTVKTSQAQFVGLKRNKEATEGTTV
TLRCELTKEAPVEWKKGTETLRNGDKYSLKQDGAVALCELQICSLLVADAGEYSCVCGQEKTSATLTVKALLVHF
VRRLRSKEATEGDTTTLQCELSKAAPVEWRKGTETLRDGDVRYSLKQDGAVALCELQIRSLTIADAGEYLCGQEQE
KTSATLTVRALPAKFKDSLKNEEATEGTTATLSCELSKAAPVTWKKGPKTLQSGDKYVLRQDGAVALCELQIHGL
TMADAGEYSCVCGQEKTSATLTVRGLPAKFIEDLRSQEAETEGATAILRCELSKAAPVEWRKGSSETLKDGDVRY
LRQDGAVALCELQIRGLAVVDGTYSLSPTKFTTEGLRNEEATEGTMATLRCQMSKAAPVEWRKGSSETLRDGDVRY
LRQDGAVALCELQIRGLTIEDSGEYTCVCGQEKTSATLSVKALPSRFIEDLRSQEAETEGTMATLRCQMSKTAPE
WKKGSETLRDGGRYSLRQDGPVCELQICDLAVEDAGEYSCVCGQEKTSATLSIKALPPRFIEDLRSQEAETEGT
MATLRCQMSKAAPVEWRKGSSETLGDGGRYSLRQNGAVCELQIHDLAVEDTGEYSCVCGQEKTSATLNVKALPP
RFIEDLRSQEAETEGTMATLRCQMSKAAPVAWRKGSSETLRDGGRYSLRQDGAVALCELQIHDLVEDAGQYSCVCG
QEKTSAVLTVDALPPKFTTEGLKKEEATEGTMVTLRQMSKEATEVWRKGAKTLSDGGRYSLRQDGAVALCELQIC
GLAVEDAGEYSCVCGQEKTSATLSVKALPPRFIEDLRSQEAETEGTMATLRCQMSKAAPVEWRKGSSETLRDGD
YSLRQDGAVALCELQIRDLAVEDAGEYLCVCGQEKTSATLSVKALPPRFIEDLRSQEAETEGTMATLRCQMSKAAP
VEWRKGSSETLRDGDVRYSLRQDGAVALCELQICDLAVEDTGDYSCVCGQEKTSATLSVKALPPRFIEDLRSQEA
GTVALRRCMSKAAPVEWRKGSSETLKDGDVRYSLRQEGNLCELQIRDLAVEDTEEYSCVCGQEKTSATLSVKAL
PAKFIEDLRSQEAPESSVTLRCKLSKKASVVWKKGSETLRNGARYSLRQDGAVALCELQIRDLTVEDTGEYSCT
CGQERTSATLSIMAPQVVFQQLQNLQAEEGSMASLRCELSVNAAMVWSKGGLELQGDTRREARQQGCVAEL
LLRDLRREDAGEYSCTCGSQTTSATLMVTAAPVRFRLRELQAQDVDEGATARLRCELSREAVSVEWRKGSQQLF
PCAKYQMVQEGTTAELLVHGVEQEDAGEYTCDAHTQSIARLSVRAPKPKFKTDLQSTEQEAAGTARLCCQLS
EAEPGTPVQWLKEGVELHVGSKYEMRRQGAVALCELLIHGLEAKDTGEYACLVGGQKTLASLRVKEPEVTIVRGL
VDMEVQADEDEVEFTCKVVSQAGATDVQWHLQGLPLQSNVEVAVLADGCHVLQKGLVLEADGTVSFHVGGL
SSSAQLTVRVPEVTVLEPLKDVQLSEGQDAHFRCRLSRASGQEARWALGGVPLQCNEMNDITVEQGTLYLLTL
HKVTLLEDAGTITLQVGSSESQAQLKVTAKNTVLRGLENVDALLEGGEALFECQLSQPEVAHAHTWLLDDEPVHTS
EKVEVVYFENGLRHLLLLKLNKLPQDSCRVTFLAGDVVTS AFLTVRGRVLELVLEPPHDASVKAGMQVRFCTILS
EAVPVGEATWYINGAAIQPDDTDWTVTTDGSHHALTL SNAQPQHAGEVTF AARDAVASARLSVLALPDPPEDA
EYVGRSDHSVTL SWVAPMSDGGGGLCGYRVEMKEASTGQWQLCHDLVPGPECVDDLVPGKTYRFRVAAVGPA
GAGEPVHLPQMVKIAPAPAPAPAPAPAPAPETRQAVVGEDICLELEVAADGGEVVWHKGTERRIQPGGHFEVLS
RGQRQMLVIKGFRTEDQGEYRCGPIQGLPSSGAATFNVMVMTSGSGDEVPAQPSLPPEAAQEGDLHLLWEALAR
KRRMSREPTLDSISELPEEDSRVQHLRQEAETAPDLSEGYSTADELARTGEADLSHTSSDDESRACTPSLVT
YLKKAAGPGISPLASKHEAQVTSVKPQKQEPVVPVTPCPPGDLAADLMDPSLDKAARKIQAFAFKYKVRKE
MKQQEGPVFSRTFGDTEAQVGDVLRLECVLATKTD MRACWLKDGIELTDGRHYHIDQLKDGTCSSLVVTGLAPT
DSGRYTCQVSTKSGRVSHSACVVVSGTESEAESSGGELDDAFRRAARRLHRLFRTKSPAELSEEELFLSADE
GPGEPEPADWQTYREDENFVCIRFESLAEARQAVTCFRNMFMATMGIGVEISLGEQGPGRVEMRIGKVAPTVT
PAVPLAKTPGLQTSDAAPVFLTELQNDQVQDGYPMSFDCVVTGQPVPSVRWFKDGKLEEDDHVMINEDQGG
HQLIITAVVPADMGVYRCLAENSMGVSSKAELRVELTSTDYDTAADATETS SYFSAQGYLSSREQEGTESDE
GQLPQVLEELKDLQVAPGTRLAKFQLKVKGYPAKLYWFKDGPPLTSDHIRMTDKKTLHTLEIVSVTREDSG
QYAAYSNAVGAAYSSARLLVRGPSEPEEKPASDVHERLVPPRILEKFTPKKVKRGSSITFSVKVEGHPAPSV
HWLKEEAEBKGLVIGPDTPGYTMASSSKQHSLLVLDVGRQHGTYTIC IATNPAGQALCSASLHISGLAKEEBEQ
ERVKEALISSFLQGTSAVSAQMSASAGFADLVGQSGESLVAEEAHSHLSLAEVGTETEFLOKLTSTQITEMVS
AKISQAKLQVPPGGDSDEETKTPSASPRHGRSRPSSSVQESSSESEDGDSRGEIFDIYVVTADYPLGAEQDAI
ILREGQYVEVLDSAHPLRWLVRTKPTKSSPSRQGWVSPAYLDKRLKLSPEWGPTEAPEFPGEAVSEDEYRTRL
SSVIQELLSSEQAFVQELQFLESHHMKHLERSPRVPAAVASQKTVI FRNVQDISHFHSSFLKELQCGCTDDDV
AMCFIKNQEAFAKEYLEFLVGRVQAESVVVSTPVQEFYKKYAEETLSAKDPTQPPPPPLQHYLEQPVERVQKYQ

ALLKELIRNKARNRQNCALLEQAYAVVSALPQRAENKLVSLMENYPGTLEALGEPiRQGHFIVWEGAPGARM  
 PWKGHNHRVFLFRNYLVICKPRRDSRTDTFSYVFRNMMKLSSIDLNDQVEGDDRAFEVWHEREDSVRKYLLQA  
 RTVI IKNSWVKEICIGIQORLAQPVWRPPEFEEELADCTAELGETVKLACRVTGTPKPIVSWYKDGKPVVEVDPH  
 HILIEDPDGSLTILDLNLTGIDSGQYMCFAASAAGNASTLGKILVQVPPRFVNVKVRATPFVEGEDAQITCTVE  
 GAPYQPIRKYKDGTLTLLAPGNRYRMLNEPRSGVLVVIQAASKEDLGHYECELVNRLGSTRGGGELYMQSPALR  
 ARDQHHREQIVAAVEDTSEVGSASQAQDQQAASVLWRLGSEALGPSPGDLPNTRQSEPPAFEEAASQIP  
 GAASGTPEVSPQPGTHKGLEQETTSSGSQGWTVPIRVEGTAWPGAGTGQLLDVHVSQVIMETTQRTYVCQAPDT  
 GVTRAPSMQVTIEDVQVQVGDMAQFDAVIEGHPPPIVTVWYKGSTQLTSSARLSQRQDGTYSVLVTDVAFPHDA  
 GYTCVANNAGGQVLCKAELLVHGDKLDAENQVYRRKLHSFYDVQEEIGRGVFGFVKRVQHKGNMFCAAKF  
 IPLRSKTRAQAYQERDILATLGHPLVTGLLDQFETRKTLLILELCSSEELLDRFLFKKGVVTEAEVKVYIQQL  
 VEGHLHLHSHGILHLDIKPPNIMVHPAREDIKICDFGFAQKITPSEPQYSKYGSPEFVSPEIEQNVPVSEGS  
 DIWAMGVISYLSLTCCSPFAGESDRATLLNVLEGRVSWSSPTAAHLESDAKDFIKATLQRTPRARPSTSQCLA  
 HPWFLKSMPAEEAHFINTKQLKFLARSRWQRSLMSYKSILVMRSIPPELLQGPPDSPSLGVARHLRGEASGAS  
 SSSSSSDNELAPFARAKSLPPSPVTHSPLLHPRGFLRPSASLPEETEASMTADAAVPASPQASGPPASPGCV  
 PRHSVSISSLFYQQAGEGAERGNKTSGAKRHPARRRHLKGGYIARALPGLREPLMEYSLLEEEAAREEQASLM  
 TKTPSFETALRLPSSSVREVPGRSHSLDNPPVTTGPSPEACKEQLLFPSTGLTHETAKDRGHKEGFLQESV  
 PFPMPGDSRPGKQEGSSQDSCRKPASSCHSELGSGSQEGCGPPSSQSLGSLPPQSLKKELESTSCGFLFSEQ  
 PQAAPFPTQVSPLLGSEKEPQDGSLEGPVVPSSSPGSASQVDASLDTEGLSEAGDTCDFTPPPQRPQEQAT  
 TRKFSLESRGGYAGVAGYGTFAFGGDAGGMLGQGPLWARMAWAVSQSSEEQDEAATESQPPLSLGPIAEASG  
 VPLRTSPSLTPWEEVEQVSLVQIRDLSGDAEAADTISLDISEVDPAYLNLSDLYDIKYLPEFEMI FRRVPKPI  
 EQPESPGSETEAGQGLADFLLEAAWPWPGELGLRAGLEITEEPEEPGDLEALLGEAAVGRKRKWSPSRGLFQF  
 PGRCLSGEEPVELGLRQRVKASMAHISRIKGRPEGPREGPPRKKAGLASFRLSGLKGRDQELSDEAVVLGQ  
 SVTLACQVLAQPTAQATWSKDGVLLESSGHLLISSTLKNFQLLTILVVKEEDLGTYTCCVSNPLGTAVTTGVL  
 RKAERPSSSPREVEGELYKDAVLLVWPKVESCVPVTVIVQCCIEGGSWTTLASDISDCCYLTGKLSRGGMYIF  
 RTACVSKAGMGPYSSPSEQVLLGGPNHLASEEESRRGRPAQLLPSTKTFAFQMQRIRGRFVSVRQCREKASGR  
 ALAAKIVPYQPEDKTAHLREYEAALKRHLHHPHLAHLAAHYLSPRHLVLI LELCSGPELLPSLAERESYSESDVK  
 DYLVQMLSATQYLHAQHIHLDLRSENMMVTYENLLKVIDLGNQSLDQEKVPAPENLDKDYLETMAPELLEGGQ  
 GAVPQTDIWAIGVTAIFIMLSGEYPESSEGRDRLQKGLRKLIRLSRCYAGLSGGAVAFVLSLCAQPPWRPCA  
 STCLCQGWLTEEGPTGSRPTVPTFPTVRLRAFVREERERKRRALLYKKNLAQVR\*  
 >rs217953617\_ENSMUSP00000038264\_c.11917:A>C\_p.E3973A  
 ENSMUST00000047441.14|Obscn-202|ENSMUSG00000061462|-|chr11:g.58951834:T>G  
 MDHSFSGAPRFLTRPKAFVSVGKDATLSCQIVGNPTPHVSWEKDRQPVEAGARFRLAQDGDVYRLTILDLAL  
 GDSGQYVCRARNAIGEFAAVGLRVDSEGTCAEQAPHFLLRPTSIRVREGADATFRCRVGGSPQPAVSWSKDG  
 RRLGPPDAPHVRVEEHGESSALRIRARSARPRDGGTYEVRAENPLGSASAAAAALVVDSDAEVAGPPGTSTATLLA  
 HLQORREAMRAEGIPSPPGAGTRTCTVTEGKHARLSCFVTGEPKPEVWKKDGLVTEGRRHVVEDEQENF  
 VLKILFCQSDRGLYCTASNLVGGQTYSSVLVVVREPTVFFKKRLQDLEVREKESATFQCEVAQPATEAAWFK  
 EETRLWASAKYDIEEGTERRLTVRNVSADDDAVYICETTEGSRVVAELSVQGNLTKLPRKTAVRTGDTAIF  
 WVAVLAVPEGPVWRWRNQEEMVAGGRVAITAEGTCHTLTIFQCTLEDMGEVAFVSGGCRTTTQFCVSAPRRPPL  
 YPPADPVVKAKTESSVTLWSAPPHGDRPVTIDGYVLEKRLKLGAYAWSRCHEAGWLATTEFTITGVAAEGDFQ  
 FRVSAINHFGQGPYLEFPGTMHLVPLAVKTPKAVEAVEGGEVTFVSDLTVASSGEWFLDGEALKASSIYVI  
 RCDRTRHMLTIREVPARLHGAQLKVFVANGIETS IQMVVRAALGLPSKLPAAAAAREVLAQLHEEAQLLAELSD  
 QAAAVTWLKDGRELSLGPKEYMQVSAGRRALLVRDVAQDDAGLYECVSRGSRTAYQLLVQDITDGYRDWGPAG  
 PQKHMCKCAGAKIARYLGSscyRFLQYDKGVWHWLEAALDTRQKGTSSCSLHEKPKLVFAKQQAHSEVKAE  
 AGASATLSCEVAQAQTEVTFWFKDGKLLSSSSKVRMEASGCSRRLVVQQAGKADAGEYSCEAGGQKLSFRLDVA  
 EPKMVFAKEQQARSEVKAEGASATLSCEVAQAQTEVTFWFKDGKLLSSSSKVRMEASGCSRRLVVQQAGKADA  
 GEYSCEAGGQKLSFRLDVTEPKLVFAKEQQARSEVKAEGVNSATLSCEVAQAQTEVTFWFKDGKLLSSSSKVRM  
 EASGCSRRLVVQQAGKADAGEYSCEAGGQKLSFRLDVAEPKLVFAKEQQARSEVKAEGVNSATLSCEVAQAQ  
 EVTFWFKDGKLLSSSSKVRMEASGCSRRLVVQQAGKADAGEYSCEAGGQKLSFRLDVTEPKLVFAKEQQAHSEV  
 KAEAGASATLSCEVAQAQTEVTFWFKDGKLLSSSSKVRMEASGCSRRLVVQQAGKADAGEYSCEAGGQKLSFRL  
 DVAEPKLVFAKEQQARSEVKAEGASATLSCEVAQAQTEVTFWFKDGKLLSSSSKVRVEASGCSRRLVVQQAGK  
 ADAGEYSCEAGGQKLSFRLDVAEPKLVFAKEQQANSEVKAEGASATLSCEVAQAQTEVTFWFKDGKLLSSSSK  
 VRVEASGCSRRLVVQQAGKADAGEYSCEAGGQKLSFRLDVAEPKLAFAKEQQAHSEVKAEGASATLSCEVAQ  
 AQTEVTFWFKDGKLLSSSSKVRVEASGCSRRLVVQQAGKADAGEYSCEAGGQKLSFRLDVAEPKLAFAKEQQAH  
 SEVKAEGASATLSCEVAQAQTEVTFWFKDGKLLSSSSKVRVEASGCSRRLVVQQAGKADAGEYSCEAGGQKLS  
 FRLDVAEPKLAFAKEQQAHSEVKAEGASATLSCEVAQAQTEVTFWFKDGKLLSSSSKVRVEASGCSRRLVVQQ  
 AGKADAGEYSCEAGGQKLFRLDVAEPKLVFAKEQQAHSEVKAEGASATLSCEVAQAQTEVTFWFKDGKLLSS  
 SSKVRVEASGCSRRLVVQQVQKADAGEYSCEARGQKLSFRLDVAEAEESQIPERPSRREPLVKEHETIILTAT  
 IAAPSVAAVTWLKDGVEIRRSKRHEATSLGDTHLTVRGAQVLDIAIYSCRVGKEGQDFPVQVEEVAKFSPK



LEPVEGELGGTVMLVCELSPEQAEVWRCGNTQLRPGKRFQMTSEGPRRTLTVSGLREDDAEYVCESRDDRT
SARLTVKVPRVVKFTSGLSAMVAEEGQEATFQCVVSPSDAGVTWYKDGMLQOPSEKFMVMEVSGASRSLTILGL
TLEDAGQVTVEAEGASSAALRVREAPVLFKKKLEPQTVEERTSVTLEVELTRPWPEVKWTRNAAVLTPSENV
EIRAEGARHCLVLRVSVGFADRGFFGCETPDDKTQAKLNVEMRQVRLVVRGLQEVEAKEQGTASMDVELSHAEVE
GSWTRDGLRLQPGPKCHLAVQGPVHILTLTSLALQPQDSGLVAFRAEGVHTSARLIVTELPVSVFTRVLQDQVATQ
KEKVTLECELSRPVDVRLKDGVELRAGKAI GIVAQGTCSRSLVIYRCETGDQGVYVCDALDAQTSASLRVQGR
TYTLIFRRVLAEDAGEVKFVAENAESRAHLRVKELPVTLLRPLRDKIAMEKHRGVLECVSRASQAQRWFKGG
VELQSGPKYEVVSDGLYRKLVINOVQPEDEDTYTCDAENVKTSAQFFVEEQSITIVRGLKDMTVMFPAPAWFE
CETSI PSVRPPKWL LGKTVLQAGGNVGLQDGTVHRLTLHKTCSTMTGPVHFTIGKSRSSAQLVVS D I PVVLT
RPLEPKAGRELQSVVLSCDFRPAPKAVQWYKDDTPLSPSEKFKMALEGQMAELRILRLTPADAGVYRCQAGSA
QSSAEVTVAREVTVIQPLQDAEAMEEGRVCFSCELSHKDEDI EWSLNGTPLYNDSFHEISHEGCLHTLVLKS
VRQADTGTVCATSPKVSVSARLVVKGKPVVFLKALDDVSAEERGTTLQCEVSDPEARVVWRKDGVELGPSDK
YDFLHKAGARGLTVHDLSDHEDAGLYTCQVGSKETQSKVSVHDLHVGITKRLKTVEVLEGESECSFECVLSHESP
SDPAVWTVGGKTVGGSGHFHAVRQGRKYTLTVKDAALSDAGEVVFVSVLGLTSKASLIIRERPVDITKPLEDQR
TTLGEDVMLSCELSRAGTSVRWLKDGKAIKRSQKYDLLSEGTRAVLVVRKASLKDSGEYTCETEASKSTAKLC
VEEKANRFTEELADLQVEEKGRAVFTCKTEHPASVVTWRKGLLELRASGKHVPSQEGTLTKLTINALERTDSD
TYTCDIGQARTQARLLVHGQKVRVIEDLEDTAVQEGSSAKFCRIA PADYGPVHWFLDKTPHLSNELNEITVQ
PGYHVLTLRQLALKDSGTVYFEAGDQRTSAALRVTEKPSIFSRPLTDVTVTEGEDTLVCEITTVDSVSRWT
KDGKTLRPSARCQLSHEGCAQLLITATTPQDGGRYKCEIGGASSSSIVRVHALPVRFRESLKDVEVPEGKAA
TLRCVLSVAAPVEWRHGDDVLKSSNKYSLRQEGAVLELVIRDLQPDQSGQYSCSFGDQTTSATLTVKTSQAQ
FVGKLRNKEATEGTTVTLRCELTKEAPVEWKKGTETLRNGDKYSLKQDGA VCELQICSLLVADAGEYSCVCGQ
EKTSATLTVKALLVHFVRRRLRSKEATEGDTTTLQCELSKAAPVEWRKGTETLRDGD RYSLKQDGA VCELQIRS
LTIADAGEYLCCTCGQEKTSATLTVRALPAKFKDSLKNEEATEGTATLSCELSKAAPVTWKKGPKTLQSGDKY
VLRQDGA VCGLQIHGLTMADAGEYSCVCGQEKTSATLTVRGLPAKFIEDLRSQEATEGATAILRCELSKAAPV
EWRKGSSETLKDGD RYTLRQDGA VCELQIRGLAVVDGTYS SLP TKFTEGLRNEEATEGTMATLRCQMSKAAPV
EWRKGSSETLRDGD RYSLRQDGA MCELQIRGLTIEDSGEYTCVCGQEKTSATLSVKALPRFIEDLRSQEATEG
TMATLRCQMSKAAPVEWRKGSSETLGDGGRYSLRQDGA VCELQIHDLAVEDTGEYSCVCGQEKTSATLNVKALP
PRFIEDLRSQEATEGTMATLRCQMSKAAPVAWRKGSSETLRDGGRYSLRQDGA VCELQIHDLVDV EDAGQYSCVC
GQEKTSAVLTVDALPPKFTEGLKKEEATEGTMVTLRCQMSKEATVEWRKGA KTLSDGGRYSLRQDGA MCELQI
CGLAVEDAGEYSCVCGQEKTSATLSVKALPRFIEDLRSQEATEGTMATLRCQMSKAAPVEWRKGS KTLRDGD
RYSLRQDGA MCELQICDLAVEDTGDYSCVCGQEKTSATLSVKAPQVVFQOPLQNLQAEEGSMASLRCELSVPN
AAMVWSKGGLELQGDTRREARQQCVAELLLRDLRRE DAGEYSC TCGSQTT SATLMVTAAPVRFRLQLQAQDV
DEGATARLRCELSREAVSVEWRKGS LQLFPCA KYQMVQEGTTAELLVHGVEQEDAGEYTC DAGHTQS IARLSV
RAPKPKFKTDLQSTEQEAGGTARLCCQLSEAE PGT PVQWLKEGVELHVGS KYEMRRQGA VCELLIHGLEAKDT
GEYA CLVGGQKTLASLRVKEPEVTIVRGLVDMVEVQADEVFEFTCKVSQAGATDVQWHLQGLPLQSNVTEVAV
LADGCTHVLQLKGVLTLEDAGTVSFHVGG LSSAQLTVRVPEVTLEPLKDVQLSEGQDAHFRCRLSRASGQEA
RWALGGVPLQCNEMNDITVEQGTLYLLTLHKVTLEDAGTITLQVGS CSSEAQLKVTAKNTVLRGLENDVALEG
GEALFECQLSQPEVA AHTWLLDDEPVHTSEKVEV VYFENGLRHLLLLLKNLKPQDSCRVTFLAGDVVTS AFLTV
RALPDPPEDAEVVGRSDHSVTL SWVAPMSDGGGGLCGYRVMKEASTGQWQLCHDLVPGPECVDDLVPGKTY
RFRVA AVGPAGAGEPVHLPQMVKIAPAPAPAPAPAPAPAPETRQAVVGEDIC LELEVAADGGEVVWHKGTERRI
QPGGHFEVLSRGQRQMLVIKGFRTEDQGEYRCGPIQGLPSSGAATFNVMVMTSGSGDEVPAQPSLPPEAAQEGD
LHLLWEALARKRRMSREPTLDSISELPEEDSRVQHLRQEA EETAPDLSEGYSTADELARTGEADLSHTSSDDE
SRAGT PSLV TYLKKAGGPGISPLASKHEAQVTT SVKPKQKQEPVVP TCPPPGDLSAADLMDPSLDKAAVKIQA
AFKGYKVRKEMKQQEGPVFSRTFGDTEAQVGDVLRLECVLATKTD MRACWLKDGIELTDGRHYHIDQLKDGTC
SLLVTGLAPTDSGRYTCQVSTKSGRVSHSACVVVSGTESEAESSSGELDDAFRRAARRLHRLFRTKSPAELS
EEELFLSADEGPGEPEEPADWQTYREDENFVCIRFESLAEARQAVTCFRNM FATMGIGVEISLGEQGRGVEM
RIGKVAPT VTPAVPLAKTPGLQTS DAAPVFLTELQNDVQDGYPMSFDCVVTGQPVPSVRWFKDGKLL EEDDH
YMINEDQGGHQLIITAVVPADMGVYRCLAENSMGVSSTKAELRVELTSTDYDTAADATETSSYFSAQGYLSS
REQEGTESDEGQLPQVLEELKDLQVAPGTRLAKFQLKVKGY PAPKLYWFKDGQPLTSDHIRMTDKKTLHTLE
IVSVTREDSGQYAAIY SNAVGAAYS SARLLVRGPSEPEEK PASDVHERLVPPRI LEKFTPKKVGRGSSITFSV
KVEGHPAPSVHWLKEEAEGVLWIGPDTPGYTMASSSKQHSLVLLDVGRQHOGTYT CIATNPAGQALCSASLH
ISGLAKEEEQERVKEALISSFLQGT SQAVSAQMSE SAGFADLVGQSKGESLVAAEEAHSHLSLAEVGT EEFLOK
LTSQITEMVSAKISQAKLQVPGGDSDEETKTPSASPRHGRSRPSSSVQESSSESEDDGDSRGEIFDIYVVVTADY
LPLGAEQDAI IREGQYVEVLD SAHPLRWLVRTKPTKSSPSRQGWVSPAYLDKRLKLSPEWGPTEAPEFPGEA
VSEDEYRTRLSSVIQELLSSEQAFV GELQFLES HMKHLERSPRVPAAVASQKT VIFRNVDI SHFSSFLKE
LQCGCTDDDVAMCFIKNQEA FEKYLEFLVGRVQAESVVVSTPVQEFYKKYAEETLSAKDPTQPPPPPLQHYLE
QPVERVQKYQALLKELIRNKARNRQNCALLEQAYAVVSALPQRAENKLVHSLMENYPGTLEALGEP I RQGHFI
VWEGAPGARM PWKGHN RVFLFRNYLVICKPRRDSRTDTFSYVFRNMMKLSSIDLNDQVEGD DRAFEVWHERE

DSVRKYLQARTVI IKNSWVKEICGIQQRLAQPVWRPPEFEEELADCTAELGETVKLACRVGTGPKPIVSWYK  
 DGKPEVEVDPHHILIEDPDGSCSTLILDNLTGIDSGQYMCFAASAAGNASTLGKILVQVPPRFVNVKVRATPFVEG  
 EDQITCTVEGAPYPQIRWYKDGTLAPGNRYRMLNEPRSGVLVLIQAASKEDLGHYECELVNRLGSTRGGG  
 ELYMQSPALRARDQHHREQIVAAVEGAPSMQVTIEDVQVQVGDMAQFDAVIEGHPPPIVTWYKGSTQLTSSAR  
 LSQRQDGTYSLVLTVDVPHDAGVYTCVANNAGGQVLCKAELLVHGDKLDAENQVYRRLKHSFYDVQEEIGR  
 GVFGFVKRVQHKGNMFCFAKFIPLRSKTRAQAYQERDILATLGHPLVTGLLDQFETRKTLLILLELCSSEEL  
 LDRLFKKGVVTEAEVKVYIQQLVEGLHYLHSHGILHLDIKPPNIMVHPAREDIKICDFGFAQKITPSEPOYS  
 KYGSPFVSPFIEIQNPVSEGSDIWAMGVISYLSLTCSSPFAGESDRATLLNVLEGRVSWSSPTAAHLESEDAK  
 DFIKATLQRTPRARPSTSQCLAHWPFLKSMPEAAEHFINTKQLKFLLRARSRWQRSLMSYKSIILVMRSIPELLQ  
 GPPDPSPLGVARHLRGEASGASSSSSSSDNELAPFARAKSLPPSPVTHSPLLHPRGFLRPSASLPEETEASMP  
 TADAAVPASPQASAGPPASPGCVPRHSVIVSSLFYQQAGEGAERGNKTSKAKRHPARRRHLKGGYIARALPGLR  
 EPLMEYSLLEEEAAREEQASLMTKTPSFETALRLPSSSVREVPGRSHSLDNPVTTGSPPEACKEQLLFPST  
 GLTHETTAKDRGHKEGFLQESVPPFPMMSGDSRPGKQEGSSQDSCRGKPASSCHSELGSGSQEGCGPPSSQSLG  
 SLPPQSLKKELESTSCGPLFSEQQAAPFTQVSPLLGSEKEPQDGLSEGVPVPSSSPGSASQVDASLDTEG  
 LSEAGDTCDFTPPPQRPEQATTRKFSLESRGGYAGVAGYGTFAFGGDAGGMLGQGPLWARMWAVSQSSEEQ  
 DEAAATESPQPLESLGPIAEASGVPLRTSPSLTPWEEVEQVSLVQIRDLSGDAEAADTISLDISEVDPAYLNLS  
 DLYDIKYLPEFEMI FRRVPKPIEQPESPGSETEAGQLADFLLEAAWFPWPGELGLRAGLEITEEPEEPGDLEA  
 LLGEAAVGRKRKWSRGLFQFPGRCLSGEEPVELGLRQRVKASMAHISRILKGRPEGPEREGPRKKAGLAS  
 FRLSGLKGRDQELSDEAVVLGQSVTLACQVLAQPTAQATWSKDGVLLESSGHLLISSTLKNFQLLTLIVVKEE  
 DLGTYTCCVSNPLGTAVTTGVLKRAERPSSSPRPEVGEYKDAVLLVWKPVESECGPVTYIVQCCIEGGSWTTL  
 ASDISDCCYLTGKLSRGGMYIFRTACVSKAGMGPYSSPSEQVLLGGPNHLASEEESSRGRPAQLLPSTKTFAF  
 QMQIRRGFRSVVRQCREKASGRALAAKIVPYQPEDKTAVLREYEALKRLLHHPHLAQLHAAYLSRHLVLI LEL  
 CSGPELLPSLAERESYSESDVKDYLWQMSLQYLAQHILHLDLRSENMMVTEYNLLKVIDLGNASLDQEK  
 VPAPENFKDYLETMAPELLEGQAVPQTDIWAIGVTAIFIMLSGEYPESEGETRDLQKGLRKLIRLSRCYAGL  
 SGGAVAFLOSSLCAQPWGRPCASTCLQCGWLTEEGPTGSRPTPVTFPTVRLRAFVREKRRRALLYKKNLQ  
 VR\*

>rs217953617\_ENSMUSP00000049737\_c.12808:A>C\_p.E4270A  
 ENSMUST00000052872.15|Obscn-203|ENSMUSG00000061462|-|chr11:g.58951834:T>G  
 MDHSFSGAPRFLTRPKAFVSVGKDATLSCQIVGNPTPHVSWEKDRQPVVEAGARFRLAQDGDVYRLTILDLAL  
 GDSGQYVCRARNAIGEFAAVGLRVDSEGTCAEQAPHLLRPTSIRVREGADATFRCRVGGSPQPAVSWSKDG  
 RRLGPPDAPHVRVEEHGESSALRIRSARPRDGGTYEVRAENPLGSASAAAALVVDSDAEVAGPPGTSTATLLA  
 HLQQRREAMRAEGIPPSPPGAGTRTCTVTEGKHARLSCFVTGEPKPKETVWKKDQGLVTEGRRHVYVEDEQENF  
 VLKILFCKQSDRGLYTCTASNLVGQTYSSVLVVVREPTVPFKKRLQDLEVREKESATFQCEVAQPATEAAWFK  
 EETRLWASAKYDIEEGTERRLTVRNVSADDDAVYICETTEGSRVVAELSVQGNLTKLPRKTAVRTGDTAIF  
 WVLEAVPEGPVWRWLRNQEEMVAGGRVAITAEGTCHTLTI FQCTLEDMGEVAFVSGGCRTTTTQFCVSAPRRPPL  
 YPPADPVVKAKTSSVTLWSAPPHGDRPVTIDGYVLEKRLKLGAYAWSRCHAEAGWLATTEFTITGVAAEEDFQ  
 FRVSAINHFGQGPYLEFPGMTMLVPLAVKTPKAVEAVEGGEVTFVSDLTVASSGEWFLDGEALKASSIYVI  
 RCDRTRHMLTIREVPARLHGAQLKFVANGIETSIQMVVRAALGLPSSKLPAAAAREVLAQLHEEAQLLAELSD  
 QAAAVTWLKDGRELSLGPYEMQVSAGRRALLVRDVAQDDAGLYECVSRGSRRTAYQLLVQEPKLVFAKQQA  
 SEVKAEAGNSATLSCEVTQAQTEVTFWFKDGKLLSSSSKVRMEASGCSRRLVVQQAGKADAGEYSCEAGGQKLS  
 FRLDVAEPKLVFAKQQAHSSEVKAEAGASATLSCEVAQAQTEVTFWFKDGKLLSSSSKVRMEASGCSRRLVVQQ  
 AGKADAGEYSCEAGGQKLSFRLDVAEPMVFAKEQQARSEVKAEAGASATLSCEVAQAQTEVTFWFKDGKLLSS  
 SSKVRMEASGCSRRLVVQQAGKADAGEYSCEAGGQKLSFRLDVTEPKLVFAKEQQARSEVKAEVGNATLSCE  
 VAQAQTEVTFWFKDGKLLSSSSKVRMEASGCSRRLVVQQAGKADAGEYSCEAGGQKLSFRLDVAEPKLVFAKEQ  
 QARSEVKAEAGNSATLSCEVAQAQTEVTFWFKDGKLLSSSSKVRMEASGCSRRLVVQQAGKADAGEYSCEAGGQ  
 KLSFHLDVTEPKLVFAKEQQAHSEVKAEAGASATLSCEVAQAQTEVTFWFKDGKLLSSSSKVRMEASGCSRRLV  
 VQQAGKADAGEYSCEAEGQKLSFRLDVAEPKLVFAKEQQARSEVKAEAGASATLSCEVAQAQTEVTFWFKDGK  
 LSSSSKVRVEASGCSRRLVVQQAGKADAGEYSCEAGGQKLSFRLDVAEPKLVFAKEQQANSEVKAEAGASATL  
 SCEVAQAQTEVTFWFKDGKLLSSSSKVRVEASGCSRRLVVQQAGKADAGEYSCEAGGQKLSFRLDVAEPKLAFA  
 KEQQAHSEVKAEAGASATLSCEVAQAQTEVTFWFKDGKLLSSSSKVRVEASGCSRRLVVQQAGKADAGEYSCEA  
 GGQKLSFRLDVAEPKLAFAKEQQAHSEVKAEAGASATLSCEVAQAQTEVTFWFKDGKLLSSSSKVRVEASGCSR  
 RLVVQQAGKADAGEYSCEAGGQKLSFRLDVAEPKLAFAKEQQAHSEVKAEAGASATLSCEVAQAQTEVTFWFKD  
 GKLLSSSSKVRVEASGCSRRLVVQQAGKADAGEYSCEAGGQKLFRLDVAEPKLMFAKEQQAHSEVKAEAGAS  
 ATLSCEVAQAQTEVTFWFKDGKLLSSSSKVRVEASGCSRRLVVQQAGKADAGEYSCEAGGQKLSFRLDVAEPK  
 VFAKEQQAHSEVKAEAGASATLSCEVAQAQTEVTFWFKDGKLLSSSSKVRVEASGCSRRLVVQQVQKADAGEYS  
 CEARGQKLSFRLDVADTRLMFAKEQQARTEVKAEAGNSATLSCEVAQAQTEVTFWFKDGKLLSSSSKVRVEASG  
 CSRRLVVQQAGKADAGEYSCEAGGQKLSFRLDVAEAEASQIPERPSRREPLVVKEHETIILTATIAAPSVAAVT  
 WLKDGVEIRRSKRHEATSLGDTHTLTVRGAQVLDSAIYSCRVGKEGQDFPVQVEEVAAKFSKPLEPVEGELGG

TVMLVCELSPEQAEVWRCGNTQLRPGKRFQMTSEGPRRTLTVSGLREDDAEYVCESTRDDRTSARLTVKVPR
VVKFTSGLSAMVAEEGQEATFQCVVSPSDAGVTWYKDGMLQPSSEKFMVVEGASRSLTILGLTLEDAGQVTV
EAEGASSAALRVREAPVLFKKKLEPQTVEERTSVTLEVELTRPWEVVKWTRNAAVLTPSENVEIRAEGARHC
LVLRVGFADRGFFGCETPDDKTQAKLNVEMRQVRLVRLVGLQEVEAKEQGTASMDVELSHAEVEGSWTRDGLRL
QPGPKCHLAVQGPVHILTLALSALQPQDSGLVAFRAEGVHTSARLIVTELPVSFTRVLQDVVATQKEKVTLECEL
SRPVDVRWLKDGVELRAGKAI GIVAQGTCSRSLVIYRCETGDQGVVCDALDAQTSASLRVQGRTYTLIFRRVL
AEDAGEVKFVAENAESRAHLRVKELPVTLRPLRDKIAMEKHRGVLECVSRASAVRWFVFKGGVLELQSGPKYE
VVSDDLGRKLVINDVQPEDEDTYTCDAGNVKTSAQFFVEEQSITIVRGLKDMTVMPEPAPAWFECETSIPSVRP
PKWLLGKTVLQAGGNVLEQDGTVHRLTLHKTCSTMTGPVHFTIGKSRSSAQLVSDIPVVLTRPLEPKAGRE
LQSVVLSCDFRPAPKAVQWYKDDTPLSPSEKFKMALEGQMAELRILRLTPADAGVYRCQAGSAQSSAEVTVEA
REVTVIQPLQDAEAMEEGRVCFSCLESHKDEDI EWSLNGTPLYNDSFHEISHEGCLHTLVLKSVRQADTGTVC
ATSPKVSVSARLVVKGKPVVFLKALDDVSAEERGTLLTQCEVSDPEARVVWRKDGVELGPSDKYDFLHKAGAR
GLTVHDLSDHEDAGLYTCQVGSKETQSKVSVHDLHVGITKRLKTVLEVLEGESECSFECVLSHESPSDPAVWTVGG
KTVGGSGHFHAVRQGRKYTLTVKDAALSDAGEVFSVLGLTSKASLIIRERPVDITKPLEDQRTTLGEDVMLS
CELSRAGTSVRWLKDGKAIKRSQKYDLLSEGTRAVLVVRKASLKDSGEYTCETEASKSTAKLCVVEEKANRFTE
ELADLQVEEKGRAVFTCKTEHPASVVTWRKGLLELRASGKHVPSQEGTLKLTINALERTDSDTYTCDIGQAR
TQARLLVHGQKVRVIEDLEDTA VQEGSSAKFCCRIAPADYGPVHWF LDKTPLHSNELNEITVQPGGYHVLTLR
QLALKDSGTVYFEAGDQRTSAAALRVTEKPSIFSRPLTDVTVTEGEDTLVCE TTTVDSSVRWTKDGKTLRPSA
RCQLSHEGCAQLLITATTPQDGGRYKCEIGGASSSSIVRVHALPVRFRFRESLKDVEVPEGKAATLRCVLSVA
APVEWRHGDDVLKSSNKYSLRQEGAVLELVIRDLQPDQSGQYSCSFGDQTTSATLTVKTSQAQVFGKLRNKEA
TEGTTVTLRCELTKEAPVEWKKGTETLRNGDKYSLKQDGAVCELQICSLLVADAGEYSCVCGQEKTSATLTVK
ALLVHFVRRRLRSKEATEGDTTLTQCELSKAAPVEWRKGTETLRDGDYSLKQDGAVCELQIRSLTIADAGEYL
CTCGQEKTSATLTVRALPAKFKDSLKNEEATEGTTATLSCLESKAAPVTWKKGPKTLQSGDKYVLRQDGAVCG
LQIHGLTMADAGEYSCVCGQEKTSATLTVRGLPAKFIEDLRSQEATEGATAILRCLELSKAAPVEWRKGETLK
DGDYTLRQDGAVCELQIRGLAVVDGTYSLSLPTKFTTEGLRNEEATEGTMATLRCQMSKAAPVEWRKGETLR
DGDYSLRQDGAVCELQIRGLTIEDSGEYTCVCGQEKTSATLSVKALPSRFIEDLRSQEATEGTMATLRCQMS
KTAPVEWKKGSETLRDGGRYSLRQDGAVCELQICDLAVEDAGEYSCVCGQEKTSATLSIKALPPRFIEDLRSQ
EATEGTMATLRCQMSKAAPVEWRKGETLGDGGRYSLRQNGAVCELQIHDLAVEDTGEYSCVCGQEKTSATLN
VKALPPRFIEDLRSQEATEGTMATLRCQMSKAAPVAWRKGETLRDGGRYSLRQDGAVCELQIHDLVDVEDAGQ
YSCVCGQEKTSAVLTVDALPPKFTTEGLKKEEATEGTMVTLRCQMSKEATVEWRKGAKTLSDDGGRYSLRQDGAM
CELQICGLAVEDAGEYSCVCGQEKTSATLSVKALPPRFIEDLRSQEATEGTMATLRCQMSKAAPVEWRKGET
LRDGDYSLRQDGAVCELQIRDLAVEDAGEYLCVCGQEKTSATLSVKALPPRFIEDLRSQEATEGTMATLRCQ
MSKAAPVEWRKGSKTLRQDGAVCELQICDLAVEDTGDYSCVCGQEKTSATLSVKALPPRFIEDLR
SQEAREGTVA TLRCMSKAAPVEWRKGETLKDGDYSLRQEGNLCELQIRDLAVEDTEEYSCVCGQEKTSAT
LSVKALPAKFIEDLRSQEAPESSTVTLRCKLSKASVWKKGSETLRNGARYSLRQDGAVCELEIRDLTVEDT
GEYSCTCGQERTSATLSIMAPQVVFQQLQNLQAEEGSMASLRCELSVPNAAMVWSKGGLELQGDTRREARQQ
GCVAELLLRDLRREDAGEYSCVCGQTTSATLMVTAAPVRFLRELQAQDVDEGATARLRCLELSREAVSVEWRK
GSLQLFPKAKYQMVQEGTTAELLVHGVEQEDAGEYTCDAHTQS IARLSVRAPKPKFKTDLQSTEQEAGGTAR
LCCQLSEAEPTPVQWLKEGVELHVGSKYEMRRQGAVCELLIHGLEAKDTGEYACLVGQKTLASLRVKEPEV
TIVRGLVDMEVQADEDEFTCKVSAQATDVQWHLQGLPLQSNVTEVAVLADGCTHVLQKGVTLLEDAGTVS
FHVGGSSSAQLTVRVPEVTVLEPLKDVQLSEGQDAHFRCRLSRASGQEARWALGGVPLQCNEMNDITVEQGT
LYLLTLHKVTLEDAGTITLQVGSSEAEQLKVTAKNTVLRGLENVDALEGGEALFECQLSQPEVAHAHTWLLDD
EPVHTSEKVEVVYFENGLRHLLLLLNKLPQDSCRVTFLAGDVVTS AFLTVRGWRLEVLEPPHDASVKAGMQVR
FTCILSEAVPVGEATWYINGAAIQPDDTDWTVTTDGSHHALTL SNAQFQHAGEVTF AARDAVASARLSVLALP
DPPEDAEVVGRSDHSVTL SWVAPMSDGGGLCGYRVEKKEASTGQWQLCHDLVPGPECVDDLVPGKTYRFRV
AAVGPAGAGEPVHLPQMVKIAPAPAPAPAPAPAPAPETRAVVGEDI CLELEVAADGGEVWVHKGTERIQPGG
HFEVLSRGRQMLVIKGFRTEDQGEYRCGPIQGLPSSGAATFNVMTSGSGDEVPAQPSLPPEAAQEGDLHLL
WEALARKRRMSREPTLDSISELPEEDSRVQHLRQEAETAPDLSEGYSTADELARTGEADLSHTSSDDES RAG
TPSLVTYLKKAGGPGI SPLASKHEAQVTT SVKPKQKQEPVPTCPPPGDLSAADLMDPSLDKAAVKIQAAFKG
YKVRKEMKQQEGPVFSRTFGDTEAQVGDVLRLECVLATKTD MRACWLKDGIELTDGRHYHIDQLKDGTC SLLV
TGLAPTDSGRYTCQVSTKSGRVSHSACVVVSGTESEAESSSGGELDDAFRRRAARLHRLFRTKSPAELSEEEL
FLSADEGPGEPEEPADWQTYREDENFVCIRFESLAEARQAVTCFRNM FATMGIGVEISLGEQGPGRVEMRIGK
VAPTVTAPVPLAKT PGLQTS DAAPVFLTELQNVQSDVQDGYPMSFDCVVTGQPVPSVRWFKDGKLEEDDHYMIN
EDQQGGHQLI IATAVVPADMGVYRCLAENSMGVSSTKAELRVELTSTDYDTAADATETSSYFSAQGYLSSREQE
GTESEGGQLPQVLEELKDLQVAPGTRLAKFQLKVKGY PAKLYWFKDGOPLTSSDHIRMTDKKTLHTLEIVSV
TREDSGQYAAYSNAVGAAYSSARLLVRGPSEPEEK PASDVHERLVPPRI LEKFTPKKVKRGSSTIFS VKVEG
HPAPSVHWLKEEAKEGVLWIGPDTPGYTMASSSKQHSLLVLLDVGRRHQGTYT CIATNPAGQALCSASLHISGL
AKEEEQERVKEALISSFLQTSQAVSAQMSE SAGFADLVGQSKGESLVAEEAHSHLSLAEVGT EEFQLKTSQ

ITEMVSAKISQAKLQVPGGDSDEETKTPSASPRHGRSRPSSSVQESSSESEDGDSRGEIFDIYVVTADYLPGLG  
AEQDAIILREGQYVEVLDSAHPLRWLVRTKPTKSSPSRQGWVSPAYLDKRLKLSPEWGPTEAPEFPGEAVSED  
EYRTRLSSVIQELLSSEQAFVGELOFLESHHMKHLERSPRVPAAVASQKTVI FRNVQDISHFHSSFLKELQGC  
GTDDDVAMCFIKNQEAFAKEYLEFLVGRVQAESVVVSTPVQEFYKKYAEETLSAKDPTQPPPPPLQHYLEQPV  
RVQKYQALLKELIRNKARNRQNCALLEQAYAVVSALPQRAENKLVSLMENYPGTLEALGEPTRQGHFIVWEG  
APGARMFPWKGNHRVFLFRNYLVICKPRRDSRTDTFSYVFRNMMKLSSIDLNDQVEGDRAFEVWHEREDSVR  
KYLQARTVI IKNSWVKEICGIQORLAQPVWRPPEFEELADCTAELGETVKLACRVTGTPKPIVSWYKDGK  
VEVDPHHILIEDPDGSCITLIDNLTGIDSGQYMCFAASAAGNASTLGKILVQVPPRFVNVKVRATPFVEGEDAQ  
ITCTVEGAPYPQIRWYKDGTLTLLAPGNRYRMLNEPRSGVLVLIQAASKEDLGHYECELVNRLGSTRGGELYM  
QSPALRARDQHHREQIVA AVEVTEQETKVPKKTVI I EETITTVVKS PRGRRQSPGKSPSRSPRRSASPRRPG  
LLAPERLYPPGTSPRRLEVEQGRKAPVPALYVTEAEVHAPASQSPKWLEVEETIEVRVKKTGSRGASPVRE  
MTRGEGILFTLPGGIPGRDPNANNNSNKSQVYQEAARTWGPVAVHVGEFFIFQVDSVGNVDVWAASPEPEQVRA  
SQKEENTERQEGCSDGIDENTFLMEEPQDTSLQGRDPKILTHNGRVLTLADLEDYVPQEGETFGCGDSTPSTP  
DEPPCEVSVLQREI SEPTVGQPVLLNVGRPPGTGATPSFFRPGSQVHSPESVSFLLREAWSGPVSAAPWTSSF  
HTHVQSSVDGSHGSFKTEVSTQTVSFGAVGETVTLHIDPDGGEAPGPSQG\*  
>rs217953617\_ENSMUSP0000020732\_c.13009:A>C\_p.E4337A  
ENSMUST0000020732.13|Obscn-201|ENSMUSG0000061462|-|chr11:g.58951834:T>G  
MDHSFSGAPRFLTRPKAFVSVGKDATLSCQIVGNPTPHVSWEKDRQPV EAGARFLAQDGDVYRLTILDLAL  
GDSGQYVCRARNAIGEAFVAVGLRVDSEGTCAEQAPHFLLRPTSIRVREGADATFRCRVGGSPQPAVSWSKDG  
RRLGPPDAPHVRVEEHGESSALRIRSARPRDGGTYEVRAENPLGSASAAAALVVDSDAEVAGPPGTSTATLLA  
HLQORREAMRAEGIPSPPGAGTRTCTVTEGKHARLSCFVTGEPKPEVWKKDQGLVTEGRRHVVEDEQENF  
VLKILFCKQSDRGLYCTASNLVQTYSSVLVVREPTVPFKKRLQDLEVREKESATFQCEVAQPAEAAWFK  
EETRLWASAKYDIEEGTERRLTVRNVSADDDAVYICETTEGSRVAELSVQGNLTKLPRKTAVRTGDTAIF  
WVELAVPEGPVWRWRNQEEMVAGGRVAITAEGTCHTLTI FQCTLEDMGEVAFVSGGCRTTTTQFCVSAPRRPPL  
YPPADPVVKAKTESVTLWSAPPHGDRPVTIDGYVLEKRRKLGAYAWSRCHEAGWLATTEFTITGVAEEGDFQ  
FRVSAINHFGQGPYLEFPGTMHLVPLAVKTKPLKAEVAVEGGEVTFVSDLTVASSGEVFLDGEALKASSIYVI  
RCDRTRHMLTIREVPARLHGAQLKVFVANGIETS IQMVRAALGLPSSKLPAAAAAREVLAQLHHEEAQLLAE  
QAAA VTLWKDGRELSLGPKEYM QVSAGRRALLVRDVAQDDAGLYECVSRGSRRTAYQLLVQDITDGYRDWGPAG  
PQKHMCKCAGAKIARYLGSSCYRFLQYDKGVWHLEAALDTRQGGKTS SCSLHEKPKLVFAKQQAHSEVKA  
AGNSATLSCEVTQAQTEVTWFKDGKLLSSSSKVRMEASGCSRRLVVQQAGKADAGEYSCEAGGQKLSFRLDVA  
EPKLVFAKQQAHSEVKA EAGASATLSCEVAQAQTEVTWFKDGKLLSSSSKVRMEASGCSRRLVVQQAGKA  
GEYSCEAGGQKLSFRLDVAEPKMVFAKEQQARSEVKA EAGASATLSCEVAQAQTEVTWFKDGKLLSSSSKVR  
EASGCSRRLVVQQAGKADAGEYSCEAGGQKLSFRLDVTEPKLVFAKEQQARSEVKA EVGNSATLSCEVAQAQ  
EVTWFKDGKLLSSSSKVRMEASGCSRRLVVQQAGKADAGEYSCEAGGQKLSFRLDVAEPKLVFAKEQQARSE  
KAEAGNSATLSCEVAQAQTEVTWFKDGKLLSSSSKVRMEASGCSRRLVVQQAGKADAGEYSCEAGGQKLSFHL  
DVTEPKLVFAKEQQAHSEVKA EAGASATLSCEVAQAQTEVTWFKDGKLLSSSSKVRMEASGCSRRLVVQQAG  
ADAGEYSCEAEGQKLSFRLDVAEPKLVFAKEQQARSEVKA EAGASATLSCEVAQAQTEVTWFKDGKLLSSSSK  
VRVEASGCSRRLVVQQAGKADAGEYSCEAGGQKLSFRLDVAEPKLVFAKEQQANSEVKA EAGASATLSCEVAQ  
AQTEVTWFKDGKLLSSSSKVRVEASGCSRRLVVQQAGKADAGEYSCEAGGQKLSFRLDVAEPKLVFAKEQQAH  
SEVKA EAGASATLSCEVAQAQTEVTWFKDGKLLSSSSKVRVEASGCSRRLVVQQAGKADAGEYSCEAGGQKLS  
FRLDVAEPKLVFAKEQQAHSEVKA EAGASATLSCEVAQAQTEVTWFKDGKLLSSSSKVRVEASGCSRRLVVQQ  
AGKADAGEYSCEAGGQKLSFRLDVAEPKLVFAKEQQAHSEVKA EAGASATLSCEVAQAQTEVTWFKDGKLLSS  
SSKVRVEASGCSRRLVVQQAGKADAGEYSCEAGGQKLFRLDVAEPKLMFAKEQQAHSEVKA EAGASATLSCE  
VAQAQTEVTWFKDGKLLSSSSKVRVEASGCSRRLVVQQAGKADAGEYSCEAGGQKLSFRLDVAEPKLVFAKEQ  
QAHSEVKA EAGASATLSCEVAQAQTEVTWFKDGKLLSSSSKVRVEASGCSRRLVVQQVQKADAGEYSCEARGQ  
KLSFRLDVADTRLMFAKEQQARTEVKA EAGNSATLSCEVAQAQTEVTWFKDGKLLSSSSKVRVEASGCSRRLV  
VQQAGKADAGEYSCEAGGQKLSFRLDVAEAE SQIPERPSRREPLVVKEHETIILTATIAAPSVAAVTWLKDG  
EIRRSKRHEATSLGDTHTLTVRGAQVLD SAIYSCRVGKEGQDFPVQVEEVA AKFSKPLEPVEGELGGTVMLVC  
ELSP EQAEVWRCGNTQLRPGKRFQMTSEGPRRTLTVSGLREDDAEYVCE SRDDRTSARLTVKVPVVKFTS  
GLSAMVAEEGQEATFQCVVSPSDAGVTWYKDGMLQPSKFMVMEVSGASRSLTILGLTLEDAGQVTV EAGAS  
SSAALRVREAPVLFKKLEPQTV EERTSVTLEVELTRPWPEVKWTRNAAVLTPSENVEIRAEGARHCLVLRV  
GFADRGGFFGCETPDDKTQAKLNVEMRQVRLVVRGLQVEEAK EQGTASMDVELSHA EVEG SWTRDGLRLQPGPKC  
HLAVQGPVHILTLALSALQD SGLVAFRAEGVHTSARLIVTEL PVSFTRVLQDVVATQKEKVTLECELSRPVDV  
RWLKDGVNELRAGKAIGIVAQGTCSRSLVIYRCETG DGVYVCDALDAQTSASLRVQGRTYTLIFRVLAEADAGE  
VKFVAENAESRAHLRVKELPVTLRLRDKIAMEKHRGVLECCQVSRASAQVRWFKGGV ELQSGPKYEVVSDGL  
YRKLVIN DVQPEDEDTYTC DAGNVKTS AQFFVEEQSITIVRGLKDMTVMEPAPAWFECETSIPSVRPPKWL  
KTVLQAGGNVGL EQDGTVHRLTLHKTCSTMTGPVHFTIGKSRSSAQLVSDI PVVLRPLEPKAGRELQSVVL  
SCDFRPAPKAVQWYKDDTPLSPSEKFKMALEGGMAELRILRLTPADAGVYRCQAGSAQSSAEVTV EAREVTVI

QPLQDAEAMEEGRVCFSCELSHKDEDEIWSLNGTPLYNDSFHEISHGCLHTLVLKSVRQADTGTVCATSPKV
SVSARLVVKGKPVVFLKALDDVSAEERGLTLTQCEVSDPEARVVRKDGVELGSPDKYDFLHKAGARGLTVHD
LSHEDAGLYTCQVGSKETQSKVSVHDLHVGITKRLKTVEVLEGESECSFECVLSHESPSDPAVWTVGGKTVGGS
GHFHAVRQGRKYTLTVKDAALSDAGEVVFVSVLGLTSKASLIIRERPV DITKPLEDQRTTLGEDVMLSCELSRA
GTSVRWLKDGKAIRKSQKYDLLSEGTRAVLVVRKASLKDSGEYTCETEASKSTAKLCVEEKANRFTTELADLQ
VEEKGRAVFTCKTEHPASVVTWRKGLLELRASGKHVPSQEGLTLKLTINALERTDSDTYTCDIGQARTQARLL
VHGQKVRVIEDLEDTAVQEGSSAKFCRIAPADYGPVHWFLDKTPLHSNELNEITVQPGGYHVLT LRQLALKD
SGTVYFEAGDQRTSAALRVTEKPSIFSRPLTDVTVTEGEDTLVCETTTVDSSVRWTKDGKTLRPSARCQLSH
EGCQAQLLITATTPQDGGRYKCEIGGASSSIVRVHALPVRFRESLKDVEVPEGKAATLRVLSVAAPVEWR
HGDDVLKSSNKYSLRQEGAVLELVIRDLQPDQSGQYSCSFGDQTTSATLTVKTSQAQFVGKLRNKEATEGTTV
TLRCELTKAPVEWKKGTETLRNGDKYSLKQDGAVCELQICSLLVADAGEYSCVCGQEKTSATLTVKALLVHF
VRLRSKEATEGDTTTLQCELSKAAPVEWRKGTETLRDGDYSLKQDGAVCELQIRSLTIADAGEYLCTCGQE
KTSATLTVRALPAKFKDSLKNEEATEGTTATLSCELSKAAPVTWKKGPKTLQSGDKYVLRQDGAVCGLQIHGL
TMADAGEYSCVCGQEKTSATLTVRGLPAKFIEDLRSQEATEGATAILRCELSKAAPVEWRKGTETLRDGDYSL
LRQDGAVCELQIRGLAVVDGTGYSLSLPTKFTTEGLRNEEATEGTMATLRCQMSKAAPVEWRKGTETLRDGDYSL
LRQDGAMCELQIRGLTIEDSGEYTCVCGQEKTSATLSVKALPSRFIEDLRSQEATEGTMATLRCQMSKTAPEVE
WKKGSETLRDGGYSLRQDGPVCELQICDLAVEDAGEYSCVCGQEKTSATLSIKALPPRFIEDLRSQEATEG
MATLRCQMSKAAPVEWRKGTETLRDGGYSLRQNGAVCELQIHDLAVEDTGEYSCVCGQEKTSATLNVKALPP
RFIEDLRSQEATEGTMATLRCQMSKAAPVAWRKGTETLRDGGYSLRQDGAVCELQIHDLVEDAGQYSCVCG
QEKTSAVLTVDALPPKFTTEGLKKEEATEGTMVTLRCQMSKEATVEWRKGAKTLSDGGYSLRQDGAMCELQIC
GLAVEDAGEYSCVCGQEKTSATLSVKALPPRFIEDLRSQEATEGTMATLRCQMSKAAPVEWRKGTETLRDGD
YSLRQDGAVCELQIRDLAVEDAGEYLCVCGQEKTSATLSVKALPPRFIEDLRSQEATEGTMATLRCQMSKAAP
VEWRKGTETLRDGDYSLRQDGAMCELQICDLAVEDTGDYSCVCGQEKTSATLSVKALPPRFIEDLRSQEARE
GTVATLRCRMSKAAPVEWRKGTETLRDGDYSLRQEGNLCELQIRDLAVEDTEEYSCVCGQEKTSATLSVKAL
PAKFIEDLRSQEAPESSTVTLRCKLSKASVWKKGSETLRNGARYSLRQDGAVCELEIRDLTVEDTGEYSCT
CGQERTSATLSIMAPQVVFQQPLQNLQAEEGSMASLRELSVPAAMVWSKGGLELQGDTRREARQQGCVAEL
LLRDLRREDAGEYSCVCGQEKTSATLQVTAAPVRLRELQAQDVDEGATARLRCELSREAVSVEWRKGSVQLF
PCAKYQMVQEGTTAELLVHGVEQEDAGEYTCDAHTQSIARLSVRAPKPKFKTDLQSTEQEAGGTARLCCQLS
EAEPGTPVQWLKEGVELHVGSKYEMRRQGA VCELLIHGLEAKDTGEYACLVGQKTLASLRVKEPEVTIVRGL
VDMEVQADEDEFTCKVQAGATDVQWHLQGLPLQSNVTEVAVLADGCTHVQLKGVTLLEDAGTVSFHVGG
SSSAQLTVRVPEVTVLEPLKDVQVLESEGQDAHFRCRLSRASGQEARWALGGVPLQCNEMNDITVEQGTLYLLTL
HKVTLEDAGTITLQVGSSEEAQLKVTAKNTVLRGLENVDALLEGGEALFECQLSQPEVAHAHTWLLDDEPVHTS
EKVEVVYFENGLRHLLKLNKLPQDSCRVTFLAGDVVTSFAFLTVRGWRLEVLPPHDASVKAGMQVRFCTILS
EAVPVGEATWYINGAAIQPDDTDWTVTTDGS HALTSLNAQPQHAGEVTF AARDAVASARLSVLALPDPPEDA
EUVGRSDHSVTLVSWAPMSDGGGLCGYRVMKEASTGQWQLCHDLVPGPECVVDDLVPKGYRFRVAAVGPA
GAGEPVHLPQMVKIIAPAPAPAPAPAPAPAPAPETRQAVVGEDICLELEVAADGGEVWVKGTERIQPGGHFEVLS
RGQRQMLVIKGFRTEDQGEYRCGPIQGLPSSGAATFNVMVMTSGSGDEVPAQPSLPPEAAQEGDLHLWEALAR
KRRMSREPTLDSISELPEEDSRVQHLRQEAEEETAPDLSEGYSTADELARTGEADLSHTSSDDES RAGTPSLVT
YLKAGGPGISPLASKHEAQVTTSVKPKQKQEPVPTCPPPGDLSAADLMDPSLDKAAVKIQA AFKGYKVRKE
MKQQEGPVFSRTFGDTEAQVGDVLRLECVLATKTD MRACWLKDGIELTDGRHYHIDQLKDGTCSLLVTLGLAPT
DSGRYTCQVSTKSGRVSHSACVVVSGTESEAESSGGELDDAFRAARRLHRLFRTKSPAELSEEELFLSADE
GPGEPEEPADWQTYREDEFVFCIRFESLAEARQAVTCFRNM FATMGIGVEISLGEQGPGRVEMRIGKVAPTVT
PAVPLAKTPGLQTSDAAPVFLTELQNDVQDGYPMSFDCVVTGQPVPSVRWFKDGKLEEDDHYMINEDQQGG
HQLIITAVVPADMGVYRCLAENSMGVSSTKAELRVELTSTDYDTAADATETSSYFSAQGYLSSREQEGTESDE
GQLPQVLEELKDLQVAPGTRLAKFQLKVKGYPA PKLYWFKDGQPLTTS DHIRMTDKKTLHTLEIVSVTREDSG
QYAAYSNAVGAAYSSARLLVRGPSEPEEK PASDVHERLVPPRILEKFTPKKVKRGSSITFSVKVEGHPAPSV
HWLKEEAKEKGVLWIGPDTPGYTMASSSKQHSLVLLDVGRQHGTYTTCIATNPAGQALCSASLHISGLAKEEEQ
ERVKEALISSFLQGTSAQVSAQMSE SAGFADLVGQSKGESLVAEEAHSHLSLAEVGTEEF LQKLTSTQITEMVS
AKISQAKLQVPGGDSDEETKTPSASPRHGRSRPSSSVQESSSESEDGDSRGEIFDIYVVTADYLP LGAEQDAI
ILREGQYVEVLD SAHPLRVLVTKPTKSSPSRQGWVSPAYLDKRLKLSPEWGPTEAPEFPGEAVSEDEYRTRL
SSVIQELLSSEQAFV GELQFLESHHMKHLERSPRVPAAVASQKT VIFRNVQDISHFHSSFLKELQCGCTDDDV
AMCFIKNQEA FEKYLEFLVGRVQAESVVVSTPVQEFYKKYAEETLSAKDPTQPPPPPLQHYLEQPVERVQKYQ
ALLKELIRNKARNRNCALLEQAYAVVSALPQRAENKLVSLMENYPGTLEALGEP IRQGHFIVWEGAPGARM
PWKGHNHVFLFRNYL VICKPRRDSRTD TFSYFRNMMLKSSIDLNDQVEGD DRAFEVWHEREDS VRKYLLQA
RTVVIKNSVVK EICGIQQLRAQPVWRPPEFEEELADCTAELGETV KVLACRVTGTPKPIVSWYKDGKPV EVDPH
HILIEDPDGSCTLILDNLTGIDSGQYMCFAASAAGNASTLGKILVQVPPRFVNVKVRATPFVEGEDAQITCTVE
GAPYPQIRWYKDG TLLAPGNRYRMLNEPRSGVLV LVIQAASKEDLGHYECELVNRLGSTRGGGELYMOSPALR
ARDQHHREQIVAAVEERRPSP\*



```

>rs46320494_ENSMUSP00000158795_c.12924:T>C_p.F4309L
ENSMUST00000238536.2|Obscn-210|ENSMUSG00000061462|-|chr11:g.58951919:A>G
MDHSFSGAPRFLTRPKAFVSVGKDATLSCQIVGNPTPHVSWEKDRQFVEAGARFRLAQDGDVYRLTILDLAL
GDSGQYVCRARNAIGEFAAVGLRVDSEGTCAEQAPHFLLRPTSIRVREGADATFRCRVGGSPPQAVSWSKDG
RRLGPPDAPHVRVEEHGESSALRIRSARPRDGGTYEVRAENPLGSASAAAALVVDSDAEVAGPPGTSTATLLA
HLQQRREAMRAEGIPSPPPGAGTRTCTVTEGKHARLSCFVTGEPKPEVWKKDGLVTEGRRHVVEDEQENF
VLKILFCKQSDRGLYTCTASNLVGQTYSSVLVVVREPTVPFKKRLQDLEVREKESATFQCEVAQAPATEAAWFK
EETRLWASAKYDIEEEGETERRRLTVRNVASADDDAVYICETTEGSRVAELSVQGNLTKLPRKTAVRTGDTAIF
WVELAVPEGPVWRWRNQEEMVAGGRVAITAEGTCHTLTI FQCTLEDMGEVAFVSGGCRTTTTQFCVSAAPRRPPL
YPPADPVVKAKTESSVTLWSAPPHGDRPVTIDGYVLEKRLKLGAYAWSRCHEAGWLATTEFTITGVAAEGDFQ
FRVSAINHFGQGPYLEFPGMTMLVPLAVKTPKAVEAVEGGEVTFVSDLTVASSGEWFLDGEALKASSIYVI
RCDRTRHMLTIREVPARLHGAQLKVFANGIETS IQMVVRAALGLPSSKLPAAAAREVLAQLHEEAQLLAE LSD
QAAA VTWLKDGRELSLGPKYEMQVSAGRRALLVRDVAQDDAGLYECVSRGSRRTAYQLLVQDITDGYRDWGPAG
PQKHMCKCAGAKIARYLGSSCYRFLQYDKGVWHLEAALDTRQGKGTSSCSLHEKPKLVFAKQQAHSEVKAE
AGNSATLSCEVTQAQTEVTFWKDGKLLSSSSKVRMEASGCSRRLVVQQAGKADAGEYSCEAGGQKLSFRLDVA
EPKLVFAKQQAHSEVKAEAGASATLSCEVAQAQTEVTFWKDGKLLSSSSKVRMEASGCSRRLVVQQAGKADA
GEYSCEAGGQKLSFRLDVAEPKLVFAKEQQARSEVKAEGASATLSCEVAQAQTEVTFWKDGKLLSSSSKVRM
EASGCSRRLVVQQAGKADAGEYSCEAGGQKLSFRLDVTEPKLVFAKEQQARSEVKAEGVNSATLSCEVAQAQ
EVTWFKDGKLLSSSSKVRMEASGCSRRLVVQQAGKADAGEYSCEAGGQKLSFRLDVAEPKLVFAKEQQARSEV
KAEAGNSATLSCEVAQAQTEVTFWKDGKLLSSSSKVRMEASGCSRRLVVQQAGKADAGEYSCEAGGQKLSFHL
DVTEPKLVFAKEQQAHSEVKAEAGASATLSCEVAQAQTEVTFWKDGKLLSSSSKVRMEASGCSRRLVVQQAGK
ADAGEYSCEAGGQKLSFRLDVAEPKLVFAKEQQARSEVKAEGASATLSCEVAQAQTEVTFWKDGKLLSSSSK
VRVEASGCSRRLVVQQAGKADAGEYSCEAGGQKLSFRLDVAEPKLVFAKEQQANSEVKAEGASATLSCEVAQ
AQTEVTFWKDGKLLSSSSKVRVEASGCSRRLVVQQAGKADAGEYSCEAGGQKLSFRLDVAEPKLVFAKEQQAH
SEVKAEGASATLSCEVAQAQTEVTFWKDGKLLSSSSKVRVEASGCSRRLVVQQAGKADAGEYSCEAGGQKLS
FRLDVAEPKLVFAKEQQAHSEVKAEGASATLSCEVAQAQTEVTFWKDGKLLSSSSKVRVEASGCSRRLVVQQ
AGKADAGEYSCEAGGQKLSFRLDVAEPKLVFAKEQQAHSEVKAEGASATLSCEVAQAQTEVTFWKDGKLLSS
SSKVRVEASGCSRRLVVQQAGKADAGEYSCEAGGQKLFRLDVAEPKLVFAKEQQAHSEVKAEGASATLSCE
VAQAQTEVTFWKDGKLLSSSSKVRVEASGCSRRLVVQQAGKADAGEYSCEAGGQKLSFRLDVAEPKLVFAKEQ
QAHSEVKAEGASATLSCEVAQAQTEVTFWKDGKLLSSSSKVRVEASGCSRRLVVQQVQKADAGEYSCEARGQ
KLSFRLDVADTRLMFAKEQQARTEVKAEGNSATLSCEVAQAQTEVTFWKDGKLLSSSSKVRVEASGCSRRLV
VQQAGKADAGEYSCEAGGQKLSFRLDVAEAESQIPERPSRREPLVVKEHETIILTATIAAPSVAAVWTKDGV
EIRRSKRHEATSLGDTHTLTVRGAQVLDIAIYSCRVGKEGQDFPVQVEEVAAKFSKPLEPEVEGELGGTVMLVC
ELSPQAEVWRCGNQTLRPGKRFQMTSEGPRTTLTVSGLREDDAEYVCESRDDRTSARLTVKVPVVKFTS
GLSAMVAEEGQEAATFQCVVSPDAGVTWYKDGMLQPSSEKFMVESGASRSLTILGLTLEDAGQVTEAEGAS
SSAALRVREAPVLFKKKLEPQTVBEERTSVTLEVELTRPWPPEVKWTRNAAVLTPSENVEIRAEGARHCLVLRV
GFADRGGFFGCETPDDKTQAKLVNEMRQVRLVVRGLQEVEAKEQGTASMDVELSHAEVEGSWTRDGLRLQPGPKC
HLAVQGPVHILTLALSALQPQDGLVAFRAEGVHTSARLIVTELPSVTRVLQDVVATQKEKVTLECELSRPVDV
RWLKDGVLELRAGKAIGIVAQGTCSRSLVIYRCETGDQGVYCDALDAQTSASLRVQGRTYTLIFRRVLAEDAGE
VKFVAENAESRAHLRVKELPVTLLRPLRDKIAMEKHGVLQVSRASAQVRWFKGGVELQSGPKYEVVSDGL
YRKLVINVDQPEDEDTYTCDAGNVKTSAQFFVVEEQSITIVRGLKDMTVMEPAPAWFECETSIPSVRPPKWL
KTVLQAGGNVGLQDGTVHRLTLHKTCSTMTGPVHFTIGKSRSSAQLVVS D I PVVLRPLEPKAGRELQSVVL
SCDFRPAPKAVQWYKDDTPLSPSEKFKMALEGQMAELRILRLTPADAGVYRCQAGSAQSSAEVTEAREVTVI
QPLQDAEAMEEGRVCFSCELSHKDEDIEWSLNGTPLYNDSFHEISHEGCLHTLVLSVRQADTGTVCATSPKV
SVSARLVVVKGPVFLKALDDVSAEERGTTLTQCEVSDPEARVVWRKDGVELGSPDKYDFLHKAGARGLTVHD
LSHEDAGLYTCQVGSKETQSKVSVHDLHVGITKRLKTVLEVLEGECSFECVLSHESPSDPAVWTVGGKTVGGS
GHFHAVRQGRKYTLTVKDAALSDAGEVVSVLGLTSKASLIIRERPVDITKPLEDQRTTLGEDVMLSCELSRA
GTSVRWLKDGKAIRKSQKYDLLSEGTRAVLVVRKASLKDSGEYTCETEASKSTAKLCVEEKANRFTEELADLQ
VEEKGRAVFTCKTEHPASVVTWRKGLLELRASGKHVPSQEGTLKLTINALERTSDTYTCDIGQARTQARLL
VHGQKVRVIEDLEDTAVQEGSSAKFCRIAPADYGPVHWFLLDKTPLHSNELNEITVQPGGYHVLTLRQLALKD
SGTVYFEAGDQRTSAAALRVTEKPSIFSRPLTDVTVTEGEDTLVCETTTTVDSVVRWTKDGKTLRPSARCQLSH
EGCQAQLLITATTPQDGGRYKCEIGGASSSSIVRVHALPVRVFRESLKDVEVPEGKAATLRCVLSSVAAPVEWR
HGDDVLKSSNKYSLRQEGAVLELVIRDLQPDGSGVYSCSFGDQTSATLTVKTSQAQFVGLKRNKEATEGTTV
TLRCELTKKEAPVEWKKGTETLRNGDKYSLKQDQDGA VCELQICSLLVADAGEYSCVCGQEKTSATLTVKALLVHF
VRLRLSKEATEGDTTTLQCELSKAAPVEWRKGTETLRDGDYSLKQDGA VCELQIRSLTIADAGEYLCTCGQE
KTSATLTVRALPAKFKDSLKNEEATEGTTATLSCELSKAAPVTWKKGPKTLQSGDKYVLRQDGA VCELQIHGL
TMADAGEYSCVCGQEKTSATLTVRGLPAKFIEDLRSQEATEGATAILRCELSKAAPVEWRKGSSETLKDGDYR
LRQDGA VCELQIRGLAVVDGTYSLSPTKFTTEGLRNEEATEGTMATLRCQMSKAAPVEWRKGSSETLRDGDYR

```

LRQDGAMCELQIRGLTIEDSGEYTCVCGQEKTSATLSVKALPSRFIEDLRSQEATEGTMATLRCQMSKTAPVE  
WKKGSETLRDGGGRYSLRQDGPVCELQICDLAVEDAGEYSCVCGQEKTSATLSIKALPPRFIEDLRSQEATEGT  
MATLRCQMSKAAPVEWRKGSSETLGDGGGRYSLRQNGAVCELQIHDLAVEDTGEYSCVCGQEKTSATLNVKALPP  
RLIEDLRSQEATEGTMATLRCQMSKAAPVEWRKGSSETLRDGGGRYSLRQDGAVALCELQIHDLVEDAGQYSCVCG  
QEKTSAVLTVDALPPKFTEGLKKEEATEGTMVTLRCQMSKEATVEWRKGAKTSLSDGGGRYSLRQDGAMCELQIC  
GLAVEDAGEYSCVCGQEKTSATLSVKALPPRFIEDLRSQEATEGTMATLRCQMSKAAPVEWRKGSSETLRDGD  
YSLRQDGAVALCELQIRDLAVEDAGEYLCVCGQEKTSATLSVKALPPRFIEDLRSQEATEGTMATLRCQMSKAAP  
VEWRKGSSETLRDGGDRYSLRQDGAMCELQICDLAVEDTGDYSCVCGQEKTSATLSVKALPPRFIEDLRSQEARE  
GTVATLRCRMSKAAPVEWRKGSSETLKDGDYSLRQEGNLCELQIRDLAVEDTGEYSCVCGQEKTSATLSVKAL  
PAKFIEDLRSQEAPESSTVTLRCKLSKKASVVWKKGSETLRNGARYSLRQDGAVALCELQIRDLVEDTGEYSCT  
CGQERTSATLSIMAPQVVFQQPLQNLQAEEGSMASLRCELSVNAAMVWSKGGLELQGDTRREARQQGCVAEL  
LLRDLRREDAGEYSCVCGQEKTSATLMVTAAPVRFLELQAQDVDEGATARLRCELSREAVSVEWRKGSLLQF  
PCAKYQMVQEGTTAELLVHGVEQEDAGEYTCDAHTQSIARLSVRAPKPKFKTDLQSTEQEAGGTARLCCQLS  
EAEFGTVPVQWLKEGVELHVGSKYEMRRQGAVALCELLIHGLEAKDTGEYACLVGQKTLASLRVKEPEVTIVRGL  
VDMEVQADEDEVEFTCKVSAQATDVQWHLQGLPLQSNVTEVAVLADGCTHVLQKGVTLDEAGTVSFHVGGL  
SSSAQLTVRPEVTVLEPLKDVQLSEGQDAHFRCLSRASGQEARWALGGVPLQCNEMNDITVEQGTLYLLTL  
HKVTLDEAGTITLQVGSSEEAQLKVTAKNTVLRGLENVDALLEGGEALFECQLSQPEVAHAHTLLDDEPVHTS  
EKVEVVYFENGLRHLLLLKLNKLPQDSCRVTFLAGDVVTSFAFLTVRGWRLEVPVPHDASVKAGMQGQVFTCILS  
EAVPVGEATWYINGAAIQPDDTDWTVTTDGSHHALTLSNAQPQHAGEVTFFAARDAVASARLSVLAALPDPEDA  
EAVGRSDHSVTLVSWVAPMSDGGGGLCGYRVMKEASTGQWQLCHDLVPGPECVDDLVPGKTYRFRVAAVGPA  
GAGEPVHLPQMVKIAPAPAPAPAPAPAPAPAPETRQAVVGEDICILEVAADGGEVVWHKGTERRIQPGGHFEVLS  
RGQRQMLVIKGFRTEDQGEYRCGPIQGLPSSGAATFNVMVMTSGSGDEVPAQPSLPPEAAQEGDLHLLWEALAR  
KRRMSREPTLDSISELPEEDSRVQHLRQEAETAPDLSEGYSTADELARTGEADLSHTSSDDESAGTPSLVT  
YLKKGAGGPGISPLASKHEAQVTSVKPQKQEPVPTCPGGDLAADLMDPSLDKAAVKIQAAPFKYKVRKE  
MKQEGPVFSRTFGDTEAQVGDVLRLECVLATKTDMRACWLKDGIELTDGRHYHIDQLKDGTCSSLVTLGLAPT  
DSGRYTCQVSTKSGYRSHSACVVVSGTESEAESSSGGELDDAFRAARRLHRLFRTKSPAELSEELFLSADAE  
GPEPEEPADWQTYREDENFVCIREFESLAEARQAVTCFRNMFATMIGVEISLGEQGPVEMRIGKVAPTVT  
PAVPLAKTPGLQTSDAAPVFLTELQNDVQDGYPMSFDCVVTGQPVPSVRWFKDGKLEEDDHYMINEDQQGG  
HQLIITAVVPADMGVYRCLAENSMGVSSTKAELRVELTSTDYDTAADATETSSYFSAQGYLSSREQEGTESDE  
GQLPQVLEELKDLQVAPGTRLAKFQLKVKGYPAKLYWFKDGGQPLTSDHIRMTDKKTLHTLEIVSVTREDSG  
QYAAYSNAVGAAYSSARLLVRGPSEPEEKPASDVHERLVPPRILEKFTPKKVKRGSSITFSVKVEGHPAPSV  
HWLKEEAKEKGLWIGPDTPGYTMASSSKQHSVLVLDVGRQHGGTYTCIATNPAGQALCSASLHISGLAKEEEQ  
ERVKEALISSFLQGTSAVSAQMSSEAGFADLVGQSKGESLVAEEAHSLSLAEVGTTEFLQKLTSSQITEMVS  
AKISQAKLQVPGGDSDEETKTPSASPRHGRSRPSSSVQESSESEEDGDSRGEIFDIYVVTADYLPGLAEQDAI  
ILREGQYVEVLDSAHPLRWLVRTKPTKSSPSRQGWVSPAYLDRKRLKLSPEWGPTEAPEFPGEAVSEDEYRTRL  
SSVIQELLSSEQAFVGLQFLESHHMKHLERSPRVPAAVASQKTVIFRNVQDISHFHSSFLKELQCGCTDDDV  
AMCFIKNQEAFAKEYLEFLVGRVQAESVVVSTPVQEFYKKYAEETLSAKDPTQPPPPPLQHYLEQVPERVQKYQ  
ALLKELIRNKARNRQNCALLEQAYAVVSALPQRAENKLVSLMENYPGTLEALGEPHQGHFIVWEGAPGARM  
PWKGHNHRVFLFRNYLVICKPRRDSRTDTSYVFRNMMKLSSIDLNDQVEGDDRAFEVWHEREDSVRKYLLQA  
RTVVIKNSWVKEICGIQQLRAQPVWRPPEFEEELADCTAELGETVKLACRVTGTPKPIVSWYKDGKPVVDPH  
HILLIEDPDGSCTLILDNLTGIDSGQYMCFAASAAGNASTLGKILVQVPPRFVNVKVRATPFVEGEDAQITCTVE  
GAPYPQIRWYKDGTLAPGNRYRMLNEPRSGVLVVIQAASKEDLGHYECELVNLGSTRGGGELYMQSPALR  
ARDQHHREQIVAAVEDTSEVGSASHAQDQAAASVLWRLGSEALGPSPGDLPNTRQSEPPAFEEAASQIP  
GAASGTPPEVSQPGTHKGLEQETTSSGSQGWTVPIRVEGTAWPGACTGQLLLDVHSQVIMETTQRTYVCQAPDT  
GVTRAPSMQVTIEDVQVQVGDMAQFDAVIEGHPPPIVWTYKGSTQLTSSARLSQRQDGTYSVLVTDVAPHDA  
GVYTCVANNAGGQVLCKAELLVHGGDKLDAENQVYRRKLHSFYDVQEEIGRGVFGFVKRVQHKGNMFCAAKF  
IPLRSKTRAQAYQERDILATLGHPLVTGLLDQFETRKTLLILILELCSSEELLDRLFKKGVVTEAEVKVYIQQL  
VEGLHLYLHSHGILHLDIKPPNIMVHPAREDIKICDFGFAQKITPSEPQYSKYGSPEFVSPEIIEQNPVSEGS  
DIWAMGVI SYLSLTCCSPFAGESDRATLLNVLEGRVSWSSPTAAHLSSEDAKDFIKATLQRTPRARPSTSQCLA  
HPWFLKSMPAEEAHFINTKQLKFLARSRWQRSLMSYKSLVMRSIPPELLQGGPDSPLGVARHLRGEASGAS  
SSSSSSDNELAPFARAKSLPPSPVTHSPLHPRGFLRPSASLPEETEASMPATAAASPASQASAGPPASPGCV  
PRHSVISSLFYQQAGEGAERGNKTSGAKRHPARRRHLKGGYIARALPGLREPLMEYSLLEEEAAREEQASLM  
TKTPSFETALRLPSSSVREVPRGRSHSLDNPPVLTGSPPEACKQLLFPSTGLTHETTAKDRGHKEGFLQESV  
PFPMPGSDSRPGKQEGSSQDSCRKGPASSCHVELSGSGSQEGCGPPSSQSLGSLPQSLKCELSTSCGFLFSEQ  
PQAAPFPTQVSPLLGSEKEPQDGSLSSEGVPVPLSSSPGASQVDASLDTEGLSEAGDTCDFTPPPQRPQEQAT  
TRKFSLESRGGYAGVAGYGTFAFGGDAGGMLGQGPLWARMAWAVSQQSSEEQDEAATESPQPLESGLPIAEASG  
VPLRTSPSLTPWEEVEQVSLVQIRDLSGDAEAADTISLDISEVDPAYLNLSDLYDIKYLPEFEMI FRRVPKPI  
EQPESPGETEAGQGLADFLLEAAWFPWFGELGLRAGLEITTEPEEPGDLEALLGEEAVGRKRKWSPSRGLFQF

PGRCLSGEEPVELGLRQRVKASMAHISRILKGRPEGEREGPPRKKAGLASFRLSGLKGRDQELSDEAVVLGQ  
 SVTLACQVLAQPTAQATWSKDGVLLESSGHLISSTLKNFQLLTIILVVKEEDLGTYTCCVSNPLGTAVTGVL  
 RKAERPSSSPRPEVGEYKDAVLLVWKPVESECGPVYIVQCCIEGGSWTTLASDISDCCYLTKGLSRGGMYIF  
 RTACVSKAGMGPISSPSEQVLLGGPNHLASEEESSRGRPAQLLPSTKTFAFQMQRIRGRFVSVRQCREKASGR  
 ALAAKIVPYQPEDKTAVLREYEALKRLHHPHLAQLHAAYLSRHLVLIILELCSGPELLPSLAERESYSESDVK  
 DYLWQMLSATQYLHAQHILHLDLRSENMMVTEYNLLKVIDLGNQSLDQEKVPAPENFKDYLETMAPELLEGG  
 GAVPQTDIWAIGVTAIFIMLSGEYPESESETRDLQKGLRKLIRLSRCYAGLSGGAVAFLOSSLCAQPWGRPCA  
 STCLQCGWLTEEGPTGSRPTPVTFTVRLRAFVREKRRRALLYKKNLAQVR\*  
 >rs46320494\_ENSMUSP00000038264\_c.11832:T>C\_p.F3945L  
 ENSMUST00000047441.14|Obscn-202|ENSMUSG00000061462|-|chr11:g.58951919:A>G  
 MDHSFSGAPRFLTRPKAFVSVGKDATLSCQIVGNPTPHVSWEKDRQVPEAGARFRLAQDGDVYRLTILDLAL  
 GDSGQYVCRARNAIGEFAAVGLRVDSEGTCAEQAPHLLRPTSIRVREGADATFRCRVGGSPQPAVSWSKDG  
 RRLGPPDAPHVRVEEHGESSALRIRSARPRDGGTYEVRAENPLGSASAAAALVVDSDAEVAGPPGTSTATLLA  
 HLQQRREAMRAEGIPSPPGAGTRTCTVTEGKHARLSCFVTGEPKPKETVWKKDQGLVTEGRRHVVEDEQENF  
 VLKILFCKQSDRGLYTCTASNLVGQTYSSVLVVVREPTVPFKKRLQDLEVREKESATFQCEVAQPAATEAAWFK  
 EETRLWASAKYDIEEGTERRLTVRNVSADDDAVYICETTEGSRVAELSVQGNLTKRKLPRKTAVRTGDTAIF  
 WVAVPEPVRWLRNQEEMVAGGRVAITAEGTCHTLTI FQCTLEDMGVAFVSGGCRTTTTQCFVSAPRRPPL  
 YPPADPVVKAKTESSVTLSSWAPPHGDRPVTIDGYVLEKRKLGAAYASRCHEAGWLATTEFTITGVAAEEGDFQ  
 FRVSAINHFGQGPYLEFPGTMHLVPLAVKTPKAVEAVEGGEVTFVSDLTVASSGEWFLDGEALKASSIYVI  
 RCDRTRHMLTIREVPARLHGAQLKVFANGIETSIQMVVRAALGLPSSKLPAAAAREVLAQLHEEAQLLAELSD  
 QAAAVTWLKDGRELSLGPYEMQVSAGRRALLVRDVAQDDAGLYECVSRGSRRTAYQLLVQDITDGYRDWGPAG  
 PQKHMCKCAGAKIARYLGSSCYRFLQYDKGVVHWEAALDTRQKGTSSCSLHEKPKLVFAKQQAHSVEKAE  
 AGASATLSCEVAQAQTEVTFWKDGKLLSSSSKVRMEASGCSRRLVVQQAGKADAGEYSCEAGGQKLSFRLDVA  
 EPKMFVFAKEQQARSEVKAEEAGASATLSCEVAQAQTEVTFWKDGKLLSSSSKVRMEASGCSRRLVVQQAGKADA  
 GEYSCEAGGQKLSFRLDVTEPKLVFAKEQQARSEVKAEEVGNATLSCEVAQAQTEVTFWKDGKLLSSSSKVRM  
 EASGCSRRLVVQQAGKADAGEYSCEAGGQKLSFRLDVAEPKLVFAKEQQARSEVKAEEAGNSATLSCEVAQAQ  
 EVTFWKDGKLLSSSSKVRMEASGCSRRLVVQQAGKADAGEYSCEAGGQKLSFHLDVTEPKLVFAKEQQAHSEV  
 KAEAGASATLSCEVAQAQTEVTFWKDGKLLSSSSKVRMEASGCSRRLVVQQAGKADAGEYSCEAGGQKLSFR  
 LDVAEPKLVFAKEQQARSEVKAEEAGASATLSCEVAQAQTEVTFWKDGKLLSSSSKVRVEASGCSRRLVVQQAGK  
 ADAGEYSCEAGGQKLSFRLDVAEPKLVFAKEQQANSEVKAEEAGASATLSCEVAQAQTEVTFWKDGKLLSSSSK  
 VRVEASGCSRRLVVQQAGKADAGEYSCEAGGQKLSFRLDVAEPKLVFAKEQQAHSEVKAEEAGASATLSCEVAQ  
 AQTEVTFWKDGKLLSSSSKVRVEASGCSRRLVVQQAGKADAGEYSCEAGGQKLSFRLDVAEPKLVFAKEQQAH  
 SEVKAEEAGASATLSCEVAQAQTEVTFWKDGKLLSSSSKVRVEASGCSRRLVVQQAGKADAGEYSCEAGGQKLS  
 FRLDVAEPKLVFAKEQQAHSEVKAEEAGASATLSCEVAQAQTEVTFWKDGKLLSSSSKVRVEASGCSRRLVVQQ  
 AGKADAGEYSCEAGGQKLFRLDVAEPKLVFAKEQQAHSEVKAEEAGASATLSCEVAQAQTEVTFWKDGKLLSS  
 SSKVRVEASGCSRRLVVQQAGKADAGEYSCEAGGQKLSFRLDVAEAEESQIPERPSRREPLVVEHETIILTAT  
 IAAPSVAAVTWLKDGVIEIRRSKRHEATSLGDTHLTVRGAQVLDLDAIYSCRVGKEGQDFPVQVEEVAAKFSKP  
 LEVPEGELGGTVMLVCELSPEQAEVWRCNGTQLRPGKRFQMTSEGPRRTLTVSGLREDDAEYVCESRDDRT  
 SARLTVKVPVVKFTSGLSAMVAEEGQEAFTQCVVSPSDAGVTWYKDGMLQPSSEKFMVVESEGASRSLTILGL  
 TLEDAGQVTVAEAGASSAALRVREAPVLFKKKLEPQTVTEERTSVTLEVELTRPWPEVKWTRNAAVLTPSENV  
 EIRAEGARHCLVLRVSVGFADRGFFGCETPDDKTQAKLVNEMRQVRLVRLQVEVEAKEQGTASMDVELSHA EVE  
 GSWTRDGLRLQPGPKCHLAVQGPVHILTLTALQPDGSLVAFRAEGVHTSARLIVTELPVSVFTRVLQDQVATQ  
 KEKVTLECELSRPVDVRLKDGVELRAGKAI GIVAQGTCSRSLVIYRCETGDQGVVCDALDAQTSASLRVQGR  
 TYTLIFRRVLAEDAGEVKFVAENAE SRAHLRVKELPVTLLRPLRDKIAMEKHRGVLECVSRASAQVRWFKGG  
 VELQSGPKYEVVSDGLYRKLVINVDQPEDEDTYTCADAGNVKTSAQFFVEEQSITIVRGLKDMTMEPAPAWFE  
 CETSI PSVRPPKWLKGKTVLQAGGNVGLQDGTVHRLTLHKTCSTMTGPFVHFTIGKSRSSAQLVSDIPVVL  
 RPLEPKAGRELQSVVLSCDFRPAPKAVQWYKDDTPLSPSEKFKMALEGQMAELRILRLTPADAGVYRCQAGSA  
 QSSAEVTVAEAREVTVIQPLQDAEAMEEGRVCFSCELSHKDEDIEWSLNGTPLYNDSFHEISHEGCLHTLVLS  
 VRQADTGTVCATSPKVSVSARLVVKGKPVVFLKALDDVSAEERGTLTLQCEVSDPEARVVWRKDGVELGPSDK  
 YDFLHKAGARGLTVHDLSDHEDAGLYTCQVGSKETQSKVSVHDLHVGITKRLKTVEVLEGECSFCVLSHESP  
 SDPAVWTVGGKTVGGSGHFHAVRQGRKYTLTVKDAALSDAGEVVFVSVLGLTFSKASLIIRERPVDTKPLEDQR  
 TTLGEDVMSCELSRAGTSVRWLKDGKAIKRSQKYDLLSEGTRAVLVVRKASLKDSGEYTCETEASKSTAKLC  
 VEEKANRFTTEELADLQVEEKGRAVFTCKTEHPASVVTWRKGLLELRASGKHVPSQEGTLTKLTINALERTSD  
 TYTCDIQQARTQARLLVHGQKVRVIEDLEDTAVQEGSSAKFFCCRIAPADYGPVHWFLLDKTPLHSNELNEITVQ  
 PGGYHVLTLRQLALKDSGTVYFEAGDQRTSAALRVTEKPSIFSRPLTDVTVTEGEDTLVCETTTTVDSVSRWT  
 KDGKTLRPSARCQLSHEGCQAQLLITATTPQDGGRYKCEIGGASSSSIVRVHALPVRFRSLKDVVEVPEGKAA  
 TLRVLSVVAAPVEWRHGDDVLKSSNKYSLRQEGAVLELVIRDLQPDGSGQYSCSFGDQTTSATLTVKTSQAQ  
 FVGKLRNKEATEGTTVTLRCELTKAEAPVEWKKGTETLRNGDKYSLKQDGA VCELQICSLLVADAGEYSCVCGQ

EKTSATLTVKALLVHFVRRRLRSKEATEGDTTTLQCELSKAAPVEWRKGTETLRDGDYSLKQDGA VCELOIRS  
LTIADAGEYLCTCGQEKSATLTVRALPAKFKDSLKNEEATEGTTATLSCELSKAAPVTWKKGPKTLQSGDKY  
VLRQDGA VCGLQIHGLTMADAGEYSCVCGQEKSATLTVRGLPAKFIEDLRSQEATEGATAILRCELSKAAPV  
EWRKGETLTKDGDYSLRQDGA VCELOIRGLAVVDTGTYSLPTKFTTEGLRNEEATEGTMATLRCQMSKAAPV  
EWRKGETLTDGDYSLRQDGA MCELOIRGLTIEDSGEYTCVCGQEKSATLSVKALPPRFIEDLRSQEATEG  
TMATLRCQMSKAAPVEWRKGETLGDGGYSLRQNGAVCELOIHDLAVEDTGEYSCVCGQEKSATLNVKALP  
PRLIEDLRSQEATEGTMATLRCQMSKAAPVEWRKGETLTDGGYSLRQDGA VCELOIHDLDVEDAGQYSCVC  
GQEKSATLTVDALPPKFTTEGLKKEEATEGTMVTLRCQMSKEATVEWRKGA KTLSDGGYSLRQDGA MCELOI  
CGLAVEDAGEYSCVCGQEKSATLSVKALPPRFIEDLRSQEATEGTMATLRCQMSKAAPVEWRKGSKTLRDGD  
RYSLRQDGA MCELOICDLAVEDTGDYSCVCGQEKSATLSVKAPQVVFQQLQNLQAEEGSMASLRCELSVPN  
AAMVWSKGGLELQGDTRREARQQGCVAELLLRDLRREDAGEYSCVCGSQTTSATLMVTAAPVRFRLQADV  
DEGATARLRCELSREAVSVEWRKGS LQLFPCAKYQMVQEGTTAELLVHGVEQEDAGEYTC DAGHTQS IARLSV  
RAPKPKFKTDLQSTEQEAGGTARLCCQLSEAEPTPVQWLKEGVELHVGSKYEMRRQGAVCELLIHGLEAKDT  
GEYACLVGQKTLASLRVKEPEVTIVRGLVDMEVQADEDFEFTCKVSOAGATDVQWHLQGLPLQSNVTEVAV  
LADGCTHVLQKGVTLLEDAGTVSFHVGGLSSAQLTVRVPEVTVLEPLKDVQLSEGQDAHFRCRLSRASGQEA  
RWALGGVPLQCNEMNDITVEQGTLYLLTLHKVTLEDAGTITLQVGCSSSEAKLVTAKNVTLRGLENVDALEG  
GEALFECQLSQPEVAHTWLLDDEPVHTSEKVEVVYFENGLRHLLLLKLNKLPQDSRVTFLAGDVVTS AFLTV  
RALPDPPEDA EVVGRSDHSVTLVWVAPMSDGGGGLCGYRVMKEASTGQWQLCHDLVPGCEVLDLVP GKTY  
RFRVAAVGPAGAGEPVHLPQMVKIAPAPAPAPAPAPAPAPETRQAVVGEDICLELEVAADGGEVVWHKGTERRI  
QPGGHFEVLSRQGRQMLVIKGFRTEDQGEYRCGPIQGLPSSGAATFNVMVMTSGSGDEVPAQPSLPPEAAQEGD  
LHLLWEALARKRRMSREPTLDSISELPEEDSRVQHLRQEAETAPDLSEGYSTADELARTGEADLSHTSSDDE  
SRAGTPSLVTYLKKAGGPGISPLASKHEAQVTTSVKPKQKQEPVVPPTCPPPGDL SAADLMDPSLDKAAVKIQA  
AFKGYKVRKEMKQEGPVFSRTFGDTEAQVGDVLRLECVLATKTD MRACWLKDGIELTDGRHYHIDQLKDGTC  
SLLVTGLAPTDSGRYTCQVSTKSGRVSHSACVVVSGTESEAESSSGGELDDAFRRARRLHRLFRTRKSPAELS  
EELFLSADEGPEPEPADWQTYREDENFVCIRFESLAEARQAVTCFRNMFMATMIGIVEISLGEQGRGVEM  
RIGKVAPTVTPAVPLAKTGLQTS DAAPVFLTELQNDVQDGYPMSFDCVVTGQPVPSVRWFKDGKLLLEEDDH  
YMINEDQQGGHQLIITAVVPADMGVYRCLAENSMGVNSSTKAEELRVELTSTDYDTAADATETSSYFSAQGLSS  
REQEGTESDEGQLPQVLEELKDLQVAPGTRLAKFQLKVKGYPA PKLYWFKDQGPLTSDHIRMTPDKTLHTLE  
IVSVTREDSGQYAAIISNAVGAAYSSARLLVRGPSEPEEKPASDVHERLVPPRILEKFTPKVKRGSSITFSV  
KVEGHPAPSVHHLKEEAKEGVLWIGPDTPGYTMASSSKQHSLVLLDVG RQHOGTYTCIATNPAGQALCSASLH  
ISGLAKEEEQERVKEALISSFLQGTSAVSAQMSESAGFADLVGQSKGESLVAAEAHSHLSLAEVGT EEFLOK  
LTSQITEMVSAKISQAKLQVPGGDSDEETKTPSASPRHGRSRPSSSVQESSSESEDGDSRGEIFDIYVVTADY  
LPLGAEQDAIILREGQYVEVLDSAHPLRWLVRTKPTKSSPSRQGWVSPAYLDKRLKLSPEWGPTEAPEFPGEA  
VSEDEYRTRLSSVIQELLSSEQAFVGELOFLESHHMKHLERSPRVPAAVASQKTVIFRNVQDISHFHSSFLKE  
LQCGTDDDDVAMCFIKNQEA FEKYLEFLVGRVQAESVVVSTPVQEFYKKYAEETLSAKDPTQPPPPPLQHYLE  
QPVVERVQYQALLKELIRNKARNRQNCALLEQAYAVVSALPQRAENKLVSLMENYPGTLEALGEP IIRGHFI  
VWEGAPGARMPWKGNHRHVLFNRNYLVICKPRRDSRTDFTSYVFRNMMLSSIDLNDQVEGDDRAFEVWHERE  
DSVRKYLQARTVIKNSWVKEICGIQQRLAQPVWRPPEFEELADCTAELGETVKLACRVTGTPKPIVSWYK  
DGKPVVEVDPHHILIEDPDGSCTLILDNLTGIDSGQYMCFAASAAGNASTLGKILVQVPPRFVNKVRATPFVEG  
EDAQITCTVEGAPYPQIRWYKDGTL LAPGNRYRMLNEPRSGVLVLIQAASKEDLGHYECELVNR LGS TRGGG  
ELYMQSPALRARDQHHREQIVAAVEGAPSMQVTIEDVQVQVGDMAQF DAVIEGHPPPIVTWYKGTQLTSSAR  
LSQRQDGTYSLVLT DVAPHDAGVYTCVANNAGQVLC KAEELLVHGGDKLDAENQVYRRKLSFYDVQEEIGR  
GVFGFVKRVQHKGNMFC AAKFIP LRSKTRAQAYQERDILATLGHPLVTGLLDQFETRKTLLILILELCSSEEL  
LDRLFKKGVVTEAEVKVYIQQLVEGLHYLHSHGILHLDIKPNILMVHPAREDIKICDFGFAQKITPSEPOYS  
KYGSPFVSP EIIIEQNPVSEGS DIWAMGVISYLSLTCSSPFAGESDRATLLNVLEGRVSWSSPTAAHLS EDAK  
DFIKATLQRTPRARPSTSQC LAHPWFLKSMPAAEAHFINTKQLKFL LARSRWQRSLMSYKSI LVMRSIP ELLQ  
GPPDSPSLGVARHLRGEASGASSSSSSDNE LAPFARAKSLPPSPVTHSPLLHPRGFLRPSASLPEETEASMP  
TADA AVPAS PQSAGPPASPGCVPRHSV ISSLFYQQAGEGA ERGNKTS GAKRHPARRRHLLKGGYIARALPGLR  
EPLMEYSLLEEEAAREEQASLMTKTPSFETALRLPSSSVREV PGRSHSLDNPPVTTG PSPEACKEQLLFPST  
GLTHETTAKDRGHKEGFLQESVFPFPMMSGDSRPGKQEGSSQDS CRGKPASSCHSELGSGSQEGC PPSQS LG  
SLPPQSLKKELESTSCGPLFSEQPQAAPFTQVSPLLGSEKEPQDGS LSEGVPVPSSSPGSASQVDASLDTEG  
LSEAGDTCDFTPPPQRPQEATTRKFSLESRGGYAGVAGYGTFAFGGDAGGMLGQGPLWARMWAVS QSSEEQ  
DEAATESPQFLESMLGIAEASGVPLRTSPSLTPWEEVEQVSLVQIRDLSGDAEAADTISLDISEVDPAYLNS  
DLYDIKYLPEFEMI FRRVPKPIEQPESPGSETEAGQGLADFL EEAAWPWPGEGLGLRAGLEITEEPPEPDLLEA  
LLGEAAVGRKRKWSPSRGLFQFPGRCLSGEEPVELGLRQRVKASMAHISRILKGRPEGPERE GPPRKKAGLAS  
FRLSGLKGRDQELSDEAVVLGQSVTLACQVLAQPTAQATWSKDGVLLESSGHLLISSTLKNFQLLTLIVVKEE  
DLGTYTCCVSNPLGTAVTTGVLKKAERPSSSPRPEVGE LYKDAVLLVWKPVESCGPVTYIVQCCIEGGSWTTL  
ASDISDCCYLTKLSRGGMYIFRTACVSKAGMPYSSPSEQVLLGGPNHLASEEESSRGRPAQLLPSTKTF AF

QMQIRRGFRSVVRQCREKASGRALAAKIVPYQPEDKTAVLREYEALKRLHHPHLAQLHAAYLSPRHLVLILEL  
 CSGPELLPSLAERESYSESDVKDYLWQMSATQYLHAQHILHLDLRSNNMMVTEYNLLKVIDLGNASLDQEK  
 VPAPENFKDYLETMAPELLEGQAVPQTDIWAIGVTAIFIMLSGEYEPESSEGRDLQKGLRKLIRLSRCYAGL  
 SGGAVAFLLQSSSLCAQPWGRPCASTCLQCGWLTTEEGPTGSRPTPVTFTVRLRAFVREKRRALLYKKNLAQ  
 VR\*  
 >rs46320494\_ENSMUSP00000049737\_c.12723:T>C\_p.F4242L  
 ENSMUST00000052872.15|Obscn-203|ENSMUSG00000061462|-|chr11:g.58951919:A>G  
 MDHSFSGAPRFLTRPKAFVSVGKDATLSCQIVGNPTPHVSWEKDRQFVEAGARFRLAQDGDVYRLTILDLAL  
 GDSGQYVCRARNAIGEAFVAVGLRVDSEGTCAEQAPHFLLRPTSIRVREGADATFRCRVGGSPPAVWSKDG  
 RRLGPPDAPHVRVEEHGESSALRIRSARPRDGGTYEVRAENPLGSASAAAAALVVDSAEVAGPPGTSTATLLA  
 HLQORREAMRAEGIPPSPPGAGTRTCTVTEGKHARLSCFVTGEPKPEVWKKDQGLVTEGRRHVVEDEQENF  
 VLKILFCKQSDRGLYTCTASNLVGQTYSSVLVVREPTVPFKKRLQDLEVREKESATFQCEVAQAPATEAAWFK  
 EETRLWASAKYDIEEEGETERRLTVRNVSADDDAVYICETTEGSRVVAELSVQGNLTKLPRKTAVRTGDTAIF  
 WVVELAVPEGPVRWLRNQEEMVAGGRVAITAEGTCHTLTI FQCTLEDMGEVAFVSGGCRTTTTQFCVSAPRRPPL  
 YPPADPVVKAKTESSVTLWSWAPPHGDRPVTIDGYVLEKRLKLGAYAWSRCHEAGWLATTEFTITGVAAEEDGFQ  
 FRVSAINHFQGGPYLEFPGTMHLVPLAVKTPKAVEAVEGGEVTFVSDLTVASSGEWFLDGEALKASSIYVI  
 RCDRTRHMLTIREVPARLHGAQLKVFANGIETS IQMVVRAALGLPSSKLPAAAAREVLAQLHHEEAQLLAELS  
 QAAAATWLDKDGRELSLGPKYEMQVSAGRRALLVRDVAQDDAGLYECVSRGSRRTAYQLLVQEPKLVFAKQQA  
 SEVKAEEAGNSATLSCEVTQAQTEVTFWKDGGKLSSSSKVRMEASGCSRRLVVQQAGKADAGEYSCEAGGQKLS  
 FRLDVAEPKLVFAKQQAHEVKAEEAGASATLSCEVAQAQTEVTFWKDGGKLSSSSKVRMEASGCSRRLVVQQ  
 AGKADAGEYSCEAGGQKLSFRLDVAEPKMFVFAKEQQARSEVKAEEAGASATLSCEVAQAQTEVTFWKDGGKLS  
 SSKVRMEASGCSRRLVVQQAGKADAGEYSCEAGGQKLSFRLDVTEPKLVFAKEQQARSEVKAEEVNSATLSCE  
 VAQAQTEVTFWKDGGKLSSSSKVRMEASGCSRRLVVQQAGKADAGEYSCEAGGQKLSFRLDVAEPKLVFAKEQ  
 QARSEVKAEEAGNSATLSCEVAQAQTEVTFWKDGGKLSSSSKVRMEASGCSRRLVVQQAGKADAGEYSCEAGGQ  
 KLSFHLDVTEPKLVFAKEQQAHSEVKAEEAGASATLSCEVAQAQTEVTFWKDGGKLSSSSKVRMEASGCSRRLV  
 VQQAGKADAGEYSCEAGGQKLSFRLDVAEPKLVFAKEQQARSEVKAEEAGASATLSCEVAQAQTEVTFWKDGGK  
 LSSSKVRVEASGCSRRLVVQQAGKADAGEYSCEAGGQKLSFRLDVAEPKLVFAKEQQANSEVKAEEAGASATL  
 SCEVAQAQTEVTFWKDGGKLSSSSKVRVEASGCSRRLVVQQAGKADAGEYSCEAGGQKLSFRLDVAEPKLAFA  
 KEQQAHSEVKAEEAGASATLSCEVAQAQTEVTFWKDGGKLSSSSKVRVEASGCSRRLVVQQAGKADAGEYSCEA  
 GGQKLSFRLDVAEPKLAFAKEQQAHSEVKAEEAGASATLSCEVAQAQTEVTFWKDGGKLSSSSKVRVEASGCSR  
 RLVVQQAGKADAGEYSCEAGGQKLSFRLDVAEPKLAFAKEQQAHSEVKAEEAGASATLSCEVAQAQTEVTFWKD  
 GKKLSSSSKVRVEASGCSRRLVVQQAGKADAGEYSCEAGGQKLFRLDVAEPKLMFAKEQQAHSEVKAEEAGAS  
 ATLSCEVAQAQTEVTFWKDGGKLSSSSKVRVEASGCSRRLVVQQAGKADAGEYSCEAGGQKLSFRLDVAEPK  
 VFAKEQQAHSEVKAEEAGASATLSCEVAQAQTEVTFWKDGGKLSSSSKVRVEASGCSRRLVVQQVQKADAGEYS  
 CEARGQKLSFRLDVADTRLMFAKEQQARTEVKAEEAGNSATLSCEVAQAQTEVTFWKDGGKLSSSSKVRVEASG  
 CSRRLVVQQAGKADAGEYSCEAGGQKLSFRLDVAEAEESQI PERPSRREPLVVKEHETIILTATIAAPSVAAVT  
 WLKDGEVIRRKRHEATS LGDTHLTVRGAQVLD SAIYSCRVGKEGQDFPVQVEEVAAKFSKPLEPVEGELGG  
 TVMLVCELSPEQAEVWRCGNTQLRPGKRFQMTSEGPRRTLT VSGLREDDAEYVCE SRDDRTSARLTVKVPR  
 VVKFTSGLSAMVAEEGQEA TFQCVVSPSDAGVTWYKDGMLQLPSEKFMVVEGASRSLTILGLTLEDAGQVTV  
 EAEGASSAALRVREAPVLFKFKLEPQTVEERTSVTLEVELTRPWPVEVKWTRNAAVLTPSENVEIRAEGARHC  
 LVLSVGFADRGFFGCETPDDKTQAKLVNEMRQVRLVRLGQVEVAKEQGTASMDVELSHAEVEGSWTRDGLRL  
 QPGPKCHLAVQGPVHILTLALSALPQD SGLVAFRAEGVHTSARLIVTELPVSFTRVLQDVVATQKEKVTLECEL  
 SRPVDVRWLKDGVELRAGKAI GIVAQGTCSRSLVIYRCETGDQGVVCDALDAQTSASLRVQGRTYTLIFRRVL  
 AEDAGEVVFVAENAESAHLRVKELPVTLLRPLRDKIAMEKHRGVLECVSRASAVRWFVKGVELQSGPKYE  
 VVSDGLYRKLVINVDVPEDEDTY TCDAGNVKTSAQFFVEEQSITIVRGLKDMTVMPEPAPAWFECE TIPSVRP  
 PKWLLGKTVLQAGGNVGLQDGTVHRLTLHKTCSTMTGPVHFTIGKSRSSAQLVSDI PVVLRPLEPKAGRE  
 LQSVVLSCDFRPAPKAVQWYKDDTPLSPSEKFKMALEGQMAELRILRLTPADAGVYRCQAGSAQSSAEVTVEA  
 REVTVIQPLQDAEAMEEGRVCFSCELSHKDEDI EWSLNGTPLYNDSFHEISHEGCLHTLVLSVRQADTGTVC  
 ATSPKVSVSARLVVKGKPVVFLKALDDVSAEERGTLLTQCEVSDPEARVVWRKDGVELGPSDKYDFLHKAGAR  
 GLTVHDLSDHEDAGLYTCQVGSKETQSKVSVHDLHVGITKRLKTVEVLEGE SCSFECVLSHESPSDPVAVTVGG  
 KTVGGSGHFHAVRQGRKYTLTVKDAALSDAGEVVSVLGLTSKASLI IRERPVDITKPLEDQRTTLGEDVMLS  
 CELSRAGTSVRWLKDGKAI RKSQKYDLLSEGTRAVLVVRKASLKDSGEYTCETEASKSTAKLCVVEEKANRFT  
 ELADLQVEEKGRAVFTCKTEHPASVVTWRKGLLELRASGKHPVPSQEGTLKLTINALERTSDTYTCDI GQAR  
 TQARLLVHGKVRVIEDLEDTAVQEGSSAKGCCRIAPADYGPVHWFLDKTPHLSNELNETITVQPGGYHVLTLR  
 QLALKDSGTVYFEAGDQRTSAAALRVTEKPSIFSRPLTDVTVTEGEDLTLVCETTTVDSSVRWTKDGKTLRPSA  
 RCQLSHEGCAQLLITATTPQDGGRYKCEIGGASSSIVRVHALPVRFRESLKDVEVPEGKAATLRCVLSVA  
 APVEWRHGDDVLKSSNKYSLRQEGAVLELVIRDLQPDQSGQYSCSFGDQTTSATLTVKTSQAQVFGKLRNKEA  
 TEGTTVTLRCELTKAEVWKKGTETLRNGDKYSLKQDGA VCELQICSLLVADAGEYSCVCGQEKTSATLTVK



ALLVHFVRRRLRSKEATEGDTTTLQCELSKAAPVEWRKGTETLRDGDYSLKQDGAUCELQIRSLTIADAGEYL  
 CTCGQEKTSATLTVRALPAKFKDSLKNEEATEGTTATLSCELSKAAPVTWKKGPKTLQSGDKYVLRQDGAUCG  
 LQIHGLTMADAGEYSCVCGQEKTSATLTVRGLPAKFIEDLRSQEATEGATAILRCLELSKAAPVEWRKGSSETLK  
 DGDYSLRQDGAUCELQIRGLAVVDGTYSSTLPTKFTTEGLRNEEATEGTMATLRCQMSKAAPVEWRKGSSETLR  
 DGDYSLRQDGAUCELQIRGLTIEDSGEYTCVCGQEKTSATLSVKALPSRFIEDLRSQEATEGTMATLRCQMS  
 KTAPVEWKKGSETLRDGGYSLRQDGPVCELQICDLAVEDAGEYSCVCGQEKTSATLSIKALPPRFIEDLRSQ  
 EATEGTMATLRCQMSKAAPVEWRKGSSETLGDGGYSLRQNGAVCELQIHDLAVEDTGEYSCVCGQEKTSATLN  
 VKALPPRLIEDLRSQEATEGTMATLRCQMSKAAPVEWRKGSSETLRDGGYSLRQDGAUCELQIHDLVEDAGQ  
 YSCVCGQEKTSAVLTVDALPPKFTTEGLKKEEATEGTMVTLRCQMSKEATVEWRKGAKTLSDGGRYSLRQDGA  
 CELQICGLAVEDAGEYSCVCGQEKTSATLSVKALPPRFIEDLRSQEATEGTMATLRCQMSKAAPVEWRKGSSET  
 LRDGDYSLRQDGAUCELQIRDLAVEDAGEYLCVCGQEKTSATLSVKALPPRFIEDLRSQEATEGTMATLRCQ  
 MSKAAPVEWRKGSSETLRDGDYSLRQDGAUCELQICDLAVEDTGDYSCVCGQEKTSATLSVKALPPRFIEDLR  
 SQEAREGTVATLRCRMSKAAPVEWRKGSSETLKDGDYSLRQEGNLCELQIRDLAVEDTEEYSCVCGQEKTSAT  
 LSVKALPAKFIEDLRSQEAPESSTVTLRCKLSKKASVWKKGSETLRNGARYSLRQDGAUCELEIRDLTVEDT  
 GEYSCTCGQERTSATLSIMAPQVVFQQLQNLQAEEGSMASLRCELSVPAAMVWSKGGLELQGDTRREARQQ  
 GCVAELLLRDLRREDAGEYSCCTGSQTTSATLMVTAAPVRFRELAQDQVDEGATARLRCLELSREAVSVEWRK  
 GSLQLFPCAKYQMVQEGTTAELLVHGVEQEDAGEYTCDAHTQSIARLSVRAPKPKFKTDLQSTEQEAGGTAR  
 LCCQLSEAEPTPVQWLKEGVELHVGSKYEMRRQGAUCELLEIHLGAEKDTGEYACLVGQKTLASLRVKEPEV  
 TIVRGLVDMEVQADEDEFTCKVSQAGATDVQWHLQGLPLQSNVETEVAVLADGCTHVLQKGVTLLEDAGTVS  
 FHVGGSSSAQLTVRVPEVTVLEPLKDVQLSEGQDAHFRCRLSRASQGEARWALGGVPLQCNEMNDITVEQGT  
 LYLLTLHKVTLEDAGTITLQVGSSESAQLKVTAKNTVLRGLENVDALEGGALFECQLSQPEVAHTWLLDD  
 EPVHTSEKVEVVYFENGLRHLLLLKLNKPKQDSCRVTFLAGDVVTSAFLTVRGRWRLEVLPEPHDASVKAGMQR  
 FTICILSEAVPVGEATWYINGAATQPDWVTDDGSHHALTLSNAQPQHAGEVTFAAARDAVASARLSVLALP  
 DPPEDAEEVGRSDHSVTLSSWVAPMSDGGGGLCGYRVMKEASTGQWQLCHDLVPGPECVVDDLVPGKTYRFRV  
 AAVGPAGAGEPVHLPQMVKIAPAPAPAPAPAPAPETRAVVGEDICLELEVAADGGVEVWHKGTERTIQPGG  
 HFEVLSRGRQMLVIKGFRTEDQGEYRCGPIQGLPSSGAATFNVVMTSGSGDEVPAQPSLPEAAQEGDLHL  
 WEALARKRRMSREPTLDSISELPEEDSRVQHLRQEAEETAPDLSEGYSTADELARTGEADLSHTSSDDESRAG  
 TPSLVTYLKKAGGPGISPLASKHEAQVTTSVKPKQKQEPVPTCPPPGDLSAADLMDPSLDKAAVKIQAAPFKG  
 YKVRKEMKQOEGPVFSRTFGDTEAQVGDVLRLECVLATKTDMRACWLKDGIELTDGRHYHIDQLKDGTCSSLLV  
 TGLAPTDSGRYTCQVSTKSGRVSHSACVVVSGTESEAESSSGGELDDAFRRAARLHRLFRTKSPAELSEEEL  
 FLSADEGPGPEEPADWQTYREDENFVCIRFESLAEARQAVTCFRNMFATMGIGVEISLGEQGRGVEMRIGK  
 VAPTPTPAVPLAKTPGLQTSDAAPVFLTELQNDVQDGYPMSFDCVVTGQPVPSVRWFKDKLLEEDDHMIN  
 EDQGGHQLIITAVVPADMGVYRCLAENSMGVSSTKAELRVELTSTDYDTAADATETSSYFSAQGYLSSREQE  
 GTESDEGQLPQVLEELKDLQVAPGTRLAKFQKLVKGYPAKLYWFKDQGLTTSDHIRMTDKKTLHTLEIVSV  
 TREDSGQYAAIYISNAVGAAYSSARLLVRGPEPEEKSPASDVHERLVPPRIEKFTPKKVKRGSSTFVSVKVEG  
 HPAPSVHHLKEEAEGVLIWGPDPGYTMASSSKQHSVLVLDVGRQHGTQYTCIATNPAGQALCSASLHISGL  
 AKEEEQERVKEALISSFLQGTSAQVSAQMSSEAGFADLVGQSKGESLVAEEAHSHLSLAEVGTTEFLQKLTQ  
 ITEMVSAKISQAKLQVPGGDSDEETKTPSASPRHGRSRPSSSVQESSSESEDGDSRGEIFDIYVVTADYLP  
 AEQDAIILREGQYVEVLDSAHPLRWLVRTKPTKSSPSRQGWVSPAYLDKRLKLSPEWGPTEAPEFPGEAVSED  
 EYRTRLSSVIQELLSSEQAFVQELQFLESHHMKHLERSPRVPAAVASQKTVI FRNVQDI SHFHSSFLKELQGC  
 GTDDVAMCFIKNQEA FEKYLEFLVGRVQAESVVVSTPVQEFYKKAETLSAKDPTQPPPPPLQHYLEQPV  
 RVQKYQALLKELIRNKARNRQNCALLEQAYAVVSALPQRAENKLVSLMENYPGTLEALGEPVIRQGHFVWEG  
 APGARMPWKGNHRHVFVFRNYLVICKPRRDSRTDFTSYVFRNMMKLSSIDLNDQVEGDDRAFEVWHEREDSVR  
 KYLLQARTVI IKNSWVKEICGIQORLAQPVWRPPEFEELADCTAELGETVKLACRVTGTPKPIVSWYKDGK  
 VEVDPHHILIEDPDGSCTLILDNLTGIDSGYMCFAASAAGNASTLGKILVQVPPRFVNVKVRATPEFVEGEDAQ  
 ITCTVEGAPYPQIRWYKDGTLAPGNRYRMLNEPRSGVLVLIQAASKEDLGHYECELVNRLGSTRGGGELYM  
 QSPALRARDQHHREQIVA AVEVTEQETKVPKKTVI IETITTVVKS PRGRRQSPGKSPSRSPRRSASPRRPG  
 LLAPERLYPPGTSPSRRLEVEQGRKAPVPALYVTEAEVHAPASQSPKWLEVEETIEVRVKKTGSRGASPVRE  
 MTSRGEGLIFLTPGGI PGRDPNANNNSNKS SVYQEA RTWGPVAVHVGEFFIFQVDSVGNVDWVAASPEPEQVRA  
 SQKEENTERQEGCSGDENTFLMEEPQDTS LQGRDPKILTHNGRVLTLADLEDYVPQEGETFGCGDSTPSTP  
 DEPPCEVSVLQREISEPTVGGQVLLNVGRPPGTGATPSFFRPGSQVHSPESVSVFLLREAWSGPVSAAPWTSS  
 HTHVQSSVDGSHGSFKTEVSTQTVSFGAVGETVTLHIDPDGGEAPGPSQG\*  
 >rs46320494\_ENSMUSP00000020732\_c.12924:T>C\_p.F4309L  
 ENSMUST00000020732.13|Obscn-201|ENSMUSG00000061462|-|chr11:g.58951919:A>G  
 MDHSFSGAPRFLTRPKAFVSVGKDATLSQIVGNPTPHVSWEKDRQPV EAGARFLAQDGDVYRLTILDLAL  
 GDSGQYVCRARNAIGEAFVAVGLRVDSEGTCAEQAPHLLRPTSIRVREGADATFRCRVGGSPQPAVSWSKDG  
 RRLGPPDAPHVRVEEHGESSALRIRSARPRDGGTYEVRAENPLGSASAAAALVVDSDAEVAGPPGTSTATLLA  
 HLQQRREAMRAEGIPSPPGAGTRTCTVTEGKHARLSCFVTGEPKPETVWKKDGLVTEGRRHVVEDEQENF

VLKILFCKQSDRGLYTCTASNLVGQTYSSVLVVVREPTVPFKKRLQDLEVREKESATFQCEVAQPATEAAWFK  
EETRLWASAKYDIEEEGETERRLTVRNVSADDDAVYICETTEGSRVAELSVQGNLTKRKLPRKTAVRTGDTAIF  
WVELAVPEGPVWRWRNQEEMVAGGRVAITAEGTCHTLTI FQCTLEDMGEVAFVSGGCRTTTTQFCVSA PRRPPL  
YPPADPVVKAKTESSVTLWSWAPPHGDRPVTIDGYVLEKRKLGAYAWSRCHEAGWLATTEFTITGVAAEGDFQ  
FRVSAINHFGQGPYLEFPGTMHLVPLAVKTPKAVEAVEGGEVTFVSDLTVASSGEWFLDGEALKASSIYVI  
RCDRTRHMLTIREVPARLHGAQLKFVANGIETSIQMVVRAALGLPSSKLPAAAAAREVLAQLHHEEAQLLAE LSD  
QAAAVTWLKDGRELSLGPKEYMQVSAGRRALLVRDVAQDDAGLYECVSRGSRRTAYQLLVQDITDGYRDWGPAG  
PQKHMCKCAGAKIARYLGSscyRFLQYDKGVWHWLEAALDTRQKGKTS SCSLHEKPKLVFAKGGQQA HSEVKAE  
AGNSATLSCEVTQAQTEVTWFKDGKLLSSSSKVRMEASGCSRRLVVQQAGKADAGEYSCEAGGQKLSFRLDVA  
EPKLVFAKGGQQA HSEVKAEAGASATLSCEVAQAQTEVTWFKDGKLLSSSSKVRMEASGCSRRLVVQQAGKADA  
GEYSCEAGGQKLSFRLDVAEPKMFVFAKEQQARSEVKAEAGASATLSCEVAQAQTEVTWFKDGKLLSSSSKVRM  
EASGCSRRLVVQQAGKADAGEYSCEAGGQKLSFRLDVTEPKLVFAKEQQARSEVKAEVGN SATLSCEVAQAQT  
EVTWFKDGKLLSSSSKVRMEASGCSRRLVVQQAGKADAGEYSCEAGGQKLSFRLDVAEPKLVFAKEQQARSEV  
KAEAGNSATLSCEVAQAQTEVTWFKDGKLLSSSSKVRMEASGCSRRLVVQQAGKADAGEYSCEAGGQKLSFHL  
DVTEPKLVFAKEQQAHSEVKAEAGASATLSCEVAQAQTEVTWFKDGKLLSSSSKVRMEASGCSRRLVVQQAGK  
ADAGEYSCEAEGQKLSFRLDVAEPKLVFAKEQQARSEVKAEAGASATLSCEVAQAQTEVTWFKDGKLLSSSSK  
VRVEASGCSRRLVVQQAGKADAGEYSCEAGGQKLSFRLDVAEPKLVFAKEQQANSEVKAEAGASATLSCEVAQA  
AQTEVTWFKDGKLLSSSSKVRVEASGCSRRLVVQQAGKADAGEYSCEAGGQKLSFRLDVAEPKLVFAKEQQAH  
SEVKAEAGASATLSCEVAQAQTEVTWFKDGKLLSSSSKVRVEASGCSRRLVVQQAGKADAGEYSCEAGGQKLS  
FRLDVAEPKLVFAKEQQAHSEVKAEAGASATLSCEVAQAQTEVTWFKDGKLLSSSSKVRVEASGCSRRLVVQQ  
AGKADAGEYSCEAGGQKLSFRLDVAEPKLVFAKEQQAHSEVKAEAGASATLSCEVAQAQTEVTWFKDGKLLSS  
SSKVRVEASGCSRRLVVQQAGKADAGEYSCEAGGQKLFRLDVAEPKLMFAKEQQAHSEVKAEAGASATLSCE  
VAQAQTEVTWFKDGKLLSSSSKVRVEASGCSRRLVVQQAGKADAGEYSCEAGGQKLSFRLDVAEPKLVFAKEQ  
QA HSEVKAEAGASATLSCEVAQAQTEVTWFKDGKLLSSSSKVRVEASGCSRRLVVQQV GKADAGEYSCEARGQ  
KLSFRLDVADTRLMFAKEQQARTEVKAEAGNSATLSCEVAQAQTEVTWFKDGKLLSSSSKVRVEASGCSRRLV  
VQQAGKADAGEYSCEAGGQKLSFRLDVAEAEISYIPERPSRREPLVVKHEHETIILTATIAAPVA AVTWLKDGV  
EIRRSKRHEATSLGDHTLTVRGAQVLDLSAISYICRVGKEGQDFPVQVEEVAAKF SKPLEPVEGELGGTVMLVC  
ELSPQAEVWRCGNTQLRPGKRFQMTSEGPRRTLTVSGLREDDAEYVCE SRDDRTSARLTVKVPVVKFTS  
GLSAMVAEEGQEA TFQCVVSPSDAGVTWYKDGMLQPSK FVMVESGASRSLTILGLTLEDAGQVTEVAEGAS  
SSAALRVREAPVLFKKKLEPQTV EERTSVTLEVELTRPWPEVKWTRNAAVLTPSENVEIRAEGARHCLVLR SV  
GFADRGFFGCETPDDKTQAKLNVEMRQVRLVRLGLQEVEAKEQGTASMDVELSHA EVEGSWTRDGLRLQPGPKC  
HLAVQGPVHILTL SALQPQDSGLVA FRAEGVHTSARLIVTEL PVSFTRVLQDVVATQKEKVTLECELSRPVDV  
RWLKDGV ELRAGKAIGIVAQGTCSRSLVIYRCETGDQGVYVCDALDAQTSASLRVQGRTYTLIFRRLAEDAGE  
VKFVAENAESRAHLRVKELPVTLLRPLRDKIAMEKHRGVLEQCQVSRASAQVRWFKGGVELQSGPKYEVVSDGL  
YRKLVIN DVQPEDEDTYTC DAGNVKTSAQFFVEEQSITIVRGLKDMTVMEPAPAWFECETSIPSVRPPKWL LG  
KTVLQAGGNVGLQDGTVHRLTLHKTCSTMTGPVHFTIGKSRSSAQLVVSDIPVVLTRPLEPKAGRELQSVVL  
SCDFRPAPKAVQWYKDDTPLSPSEKFKMALEGM AELRILRLTPADAGVYRCQAGSAQSSAEVTEVAREVTVI  
QPLQDAEAMEEGRVCFSCELSHKDEDIEW SLNGTPLYNDSFHEISHEGCLHTLVLSVRQADTGTVCATSPKV  
SVSARLVVKGKPVVFLKALDDVSAEERGLTLQCEVSDPEARVVWRKDGVELG PSDKYDFLHKAGARGLTVHD  
LSHEDAGLYTCQVGSKETQSKVSVHDLHVGITKRLKTVEVLEGE SCFECVLSHESPSDPAVWTVGGKTVGGS  
GHFHAVRQGRKYTLTVKDAALSDAGEVVF SVLGLTSKASLI IRE RPVDITKPLEDQRTTLGEDVMLSCELSRA  
GTSVRWLKDGKAIRKSQKYDLLSEGTRAVLVVRKASLKD SGEYTCETEASKSTAKLCV EEKANRFTEELADLQ  
VEEKGRAVFTCKTEHPASVVTWRKGLLELRASGKHVPSQEGLTLKLTINALERTDSDTYTCDIGQARTQARLL  
VHGQKVRVIEDLEDTAVQEGSSAKFCCRIAPADYGPVHWF LDKTPLHSNELNEITVQPGGYHVLTLRQLALKD  
SGTVYFEAGDQRTSAAALRVTEKPSIFSRPLTDVTVTEGEDTLVCE TTTVDSSVRWTKDGKTLRPSARCQLSH  
EGCQAQLLITATTPQDGGRYKCEIGGASSSSIVRVHALPVRFRESLKDVEVPEGKAATLRCVLSVAAPVEWR  
HGDDVLKSSNKYSLRQEGAVLELVIRDLQPDQSGQYSCSFGDQTT SATLTVKTS SAQFVGLRNKEATEGTTV  
TLRCELTK EAPVEWKKGTETLRNGDKYSLKQDGAVCELQICSLLVADAGEYSCVCGQEKTSATLTVKALLVHF  
VRRLSKEATEGDTTTLQCELSKAAPVEWRKGTETLRDGD RYSLKQDGAVCELQIRSLTIADAGEYLCTCGQE  
KTSATLTVRALPAKFKDSLKNEEATEGTTATLSCELSKAAPVWKKGPKTLQSGDKYVLRQDGAVCGLQIHGL  
TMADAGEYSCVCGQEKTSATLTVRGLPAKFIEDLRSQEATEGATAILRCELSKAAPVEWRKGS ETLKDGDRYT  
LRQDGAVCELQIRGLAVVDGTYSLSLPTKFTEGLRNEEATEGTMATLRCQMSKAAPVEWRKGS ETLR DGRYS  
LRQDGAMCELQIRGLTIEDSGEYTCVCGQEKTSATLSVKALPSRFIEDLRSQEATEGTMATLRCQMSK TAPVE  
WKKGSETLRDGGRYSLRQDGAVCELQICDLAVEDAGEYSCVCGQEKTSATLSIKALPPRFIEDLRSQEATEGT  
MATLRCQMSKAAPVEWRKGS ETLGDGGRYSLRQNGAVCELQIHDLAVEDTGEYS CVCGQEKTSATLNVKALPP  
RLIEDLRSQEATEGTMATLRCQMSKAAPVEWRKGS ETLR DGGRYSLRQDGAVCELQIHDL DVEDAGQYSCVCG  
QEKTS AVLTVDALPPKFTEGLKKEEATEGTMVTLRCQMSKEATVEWRKGAKT LSDGGRYSLRQDGAMCELQIC  
GLAVEDAGEYSCVCGQEKTSATLSVKALPPRFIEDLRSQEATEGTMATLRCQMSKAAPVEWRKGS ETLR DGR

YSLRQDGA VCELQIRDLAVEDAGEYLCVCGQEKTSATLSVKALPPRFIEDLRSQEATEGTMATLRCQMSKAAP  
VEWRKGSKTLRDGDYSLRQDGAMCELQICDLAVEDTDYSCVCGQEKTSATLSVKALPPRFIEDLRSQEARE  
GTVATLRCRMSKAAPVEWRKGSSETLKDGDYSLRQEGNLCELQIRDLAVEDTEEYSCVCGQEKTSATLSVKAL  
PAKFIEDLRSQEAPESSTVTLRCKLSKKASVWKKGSETLRNGARYSLRQDGA VCELEIRDLTVEDTGEYSCT  
CGQERTSATLSIMAPQVVFQQPLQNLQAEEGSMASLRCELSVPNAAMVWSKGGLELQGDTRREARQQGCVAEL  
LLRDLRREDAGEYSCTCGSQTTSATLMVTAAPVRFRLRELQAQDVDEGATARLRCELSREAVSVEWRKGS LQLF  
PCAKYQMVQEGTTAELLVHGVEQEDAGEYTC DAGHTQSIARLSVRAPKPKFKTDLQSTEQEAGGTARLCCQLS  
EAEPGTFVQWLKEGVELHVGSKYEMRRQGAVCELLIHGLEAKDTGEYACLVGGQKTLASLRVKEPEVTIVRGL  
VDMEVQADEDEFTCKVSQAGATDVQWHLQGLPLQSNKEVAVLADGCTHVLQKGVTLLEDAGTVSFHVGGL  
SSSAQLTVRVPEVTVLEPLKDVQLSEGDQAHFRCLRSRASGQEARWALGGVPLQCNEMNDITVEQGTLYLLTL  
HKVTLEDAGTITLQVGS CSSEAQLKVTAKNTVLRGLENVDALEGGEALFECQLSQPEVA AHTWLLDDEPVHTS  
EKVEVVYFENGLRHLLLLKLNKLPQDSCRVTFLAGDVVTS AFLTVRGWRLEVLEPPHDASVKAGMQVRFTCILS  
EAVPVGEATWYINGAAIQPDDTDWTVTTDGS HHALTLSNAQPQHAGEVTF AARDAVASARLSVLALPDPPEDA  
EYVGRSDHSVTL SWVAPMSDGGGGLCGYRVMKEASTGQWQLCHDLVPGPECVVDDLVP GKTYRFRVA AVGPA  
GAGEPVHLPQMVKIAPAPAPAPAPAPAPAPETRQAVVGEDIC LELEVAADGGEVVWHKGTERRIQPGHFVLS  
RGQRQMLVIKGFRTEDQGEYRCGPIQGLPSSGAATFNVVMTSGSGDEVPAQPSLPPEAAQEGDLHLLWEALAR  
KRMSREPTLDSISELPEEDSRVQHLRQEAETAPDLSEGSTADELARTGEADLSHTSSDDES RAGT PSLVT  
YLK KAGGPGISPLASKHEAQVTT SVKPKQKQEPVVPTCPPGDL SAADLMDPSLDKAAVKIQAAFKGYKVRKE  
MKQQEGPVFSRTFGDTEAQVGDVLRLECVLATKTD MRACWLKDGIELTDGRHYHIDQLKDGTC SLLVTGLAPT  
DSGRYTCQVSTKSGRVSHSACVVVSGTESEAESSGGELDDAFRRAARLHRLFR TKSPAELSEELFLSADE  
GPGEPEPADWQTYREDEFVFCIRFESLAEARQAVTCFRNMFATMIGVEISLGEQGRGVEMRIGKVAPTVT  
PAVPLAKTPGLQTS DAAPVFLTELQNDQVDQDGYPMSFDCVVTGQPVPSVRWFKDGKLEEDDH YMINEDQGG  
HQLIITAVVPADMGVYRCLAENSMGVSSTKAELRVELTSTDYDTAADATETSSYFSAQGYLSSREQEGTESDE  
GQLPQVLEELKDLQVAPGTR LAKFQLKVKGYPA PKLYWFKDGGQPLTTSDHIRMTDKKTLHTLEIVSVTREDSG  
QYAAYSNAVGAAYSSARLLVRGPSEPEEK PASDVHERLVPRRI LEKFTPKKVKRGSSITFSVKVEGHPAPSV  
HWLKEEA EKGVFLWIGPDTPGYTMAS SSKQHSLVLLDVGRQH QGTYT CIATNPAGQALCSASLHISGLAKEEEQ  
ERVKEALISSFLQGTSAVSAQMS EASAGFADLVGQSKGESLVAEEAHSHLSLAEVGTEEF LQKLTQITMVVS  
AKISQAKLQVPGGDSDEETKTPSASPRHGRSRPSSSVQESSSESEDGDSRGEIFDIYVVTADY LPLGAEQDAI  
ILREGQYVEVLDSAHPLRWLVR TKPTKSSPSRQGWVSPAYLDKRLKLSPEWGPTEAPEFPGEAVSEDEYRTRL  
SSVIQELLSSEQAFV GELQFLES HHMKHLERSPRVPA AVASQKTVI FRNVQDISHFHSSFLKELQCGCTDDDV  
AMCFIKNQEA FEKYLEFLVGRVQAESVVVSTPVQEFYKKYAEETLSAKDPTQPPPPPLQHYLEQPVERVQKYQ  
ALLKELIRNKARNRQNCALLEQAYAVVSALPQRAENKLVSLMENYPGTLEALGEP IRQGHFIVWEGAPGARM  
PWKGHNHRVFLFRNYLVIC PPRRDSRTDTFSYVFRNMMKLSSIDLNDQVEGD DRAFEVWHEREDSVRKYLLQA  
RTVI IKNSWVKEICGIQORLAQP VWRPPEFEEELADCTAE LGETVKLACRV TGTGPKPIVSWYKDGKPV EVDPH  
HILIEDPDG SCTLILDNL TGIDSGQYMCFAASAAGNASTLGKILVQVPPRFVNVKVRATPFVEGEDAQITCTVE  
GAPYPQIRWYKDG TLLAPGNRYRMLNEPRSGVLV LVIQAASKEDLGHYECELVNRLGSTRGGGEL YMQSPALR  
ARDQHHREQIVAAVEERRPSP\*  
>rs50739555\_ENSMUSP00000158795\_c.12868:T>G\_p.V4290G  
ENSMUST00000238536.2|Obscn-210|ENSMUSG00000061462|-|chr11:g.58952291:A>C  
MDHSFSGAPRFLTRPKAFVSVGKDATLSCQIVGNPTPHVSWEKDRQFVEAGARFRLAQDGDVYRLTILDLAL  
GDSGQYVCRARNAIGEAFAAVGLRVDSEGTCAEQAPHLLRPTSIRVREGADATFRCRVGGSPQPAVSWSKDG  
RRLGPPDAPHVRVEEHGESSALRIRSARPRDGGTYEVRAENPLGSASAAAALVVDSDAEVAGPPGTSTATLLA  
HLQORREAMRAEGIPSPPGAGTRTCTVTEGKHARLSCFVTGEPKPETVWKKDQGLVTEGRRHVVEDEQENF  
VLKILFCKQSDRGLYTCASNLVGQTYSSVLVVVREPTVPFKKRLQDLEVREKESATFQCEVAQPA TEAAWFK  
EETRLWASAKYDIEEEGTERRLTVRNVSADDDAVYICETTEGSRVAELSVQGNLTKLPRKTAVRTGDTAIF  
WVELAVPEGPVRWLRNQEEMVAGGRVAITAEGTCHTLTI FQCTLEDMGEVAFVSGGCRTTTQFCVSAPRRPPL  
YPPADPVVKA KTESVTL SWSAPPHGDRPVTIDGYVLEKRKLGAYAWSRCHEAGWLATTEFTITGVAAEEGDFQ  
FRVSAINHFGQGPYLEFPGMTMLVPLAVKTP LKAVEAVEGGEVTFVSDLTVASSGEWFLDGEALKASSIYVI  
RCDRTRHMLTIREV PARLHGAQLKFVANGIETS IQMVVRAALGLPSSKLPAAAAREVLAQLHEEAQLLAELSD  
QAAAVTWLKDGRELSLGPKEYMQVSAGRRALLVRDVAQDDAGLYECVSRGSR TAYQLLVQDITDGYRDWGPAG  
PQKHMCKCAGAKIARYLGSSCYRFLQYDKGVWHLEAALDTRQKGKTS SCSLHEKPKLVFAKQQAHSEVKA E  
AGNSATLSCEVTQAQTEVTFWKDGKLLSSSSKVRMEASGCSRRLVVQQAGKADAGEYSCEAGGQKLSFRLDVA  
EPKLVFAKQQAHSEVKA EAGASATLSCEVAQAQTEVTFWKDGKLLSSSSKVRMEASGCSRRLVVQQAGKADA  
GEYSCEAGGQKLSFRLDVAEPKMFVFAKEQQARSEVKA EAGASATLSCEVAQAQTEVTFWKDGKLLSSSSKVRM  
EASGCSRRLVVQQAGKADAGEYSCEAGGQKLSFRLDVTFKLVFAKEQQARSEVKA EAGASATLSCEVAQAQ  
EVTWFKDGKLLSSSSKVRMEASGCSRRLVVQQAGKADAGEYSCEAGGQKLSFRLDVAEPKLVFAKEQQARSEV  
KAEAGNSATLSCEVAQAQTEVTFWKDGKLLSSSSKVRMEASGCSRRLVVQQAGKADAGEYSCEAGGQKLSFHL  
DVTEPKLVFAKEQQAHSEVKA EAGASATLSCEVAQAQTEVTFWKDGKLLSSSSKVRMEASGCSRRLVVQQAGK



RGQRQMLVIKGFRTEDQGEYRCGPIQGLPSSGAATFNVMVMTSGSGDEVPAQPSLPPEAAQEGDLHLLWEALAR  
 KRMSREPTLDSISELPEEDSRVQHLRQEAETAPDLSEGYSTADELARTGEADLSHTSSDDESAGTGPLSVT  
 YLKKAGGPGISPLASKHEAQVTSVKPQKQOQEPVVPTCPPGDLAADLMDPSLDKAAVKIQAAFQKQYKVRKE  
 MKQOQEGPVFSRTFGDTEAQVGDVLRLECVLATKTDMRACWLKDGIELTDGRHYHIDQLKDGTCSSLVVTGLAPT  
 DSGRYTCQVSTKSGRVSHSACVVVSGTESEAESSGGELDDAFRAARRLHRLFRTKSPAELSEEELFLSADE  
 GPGEPEEPADWQTYREDENFVCIRFESLAEARQAVTCFRNMFATMGIGVEISLGEQGGPRGVEMRIGKVAPTVT  
 PAVFLAKTPGLQTSDAAPVFLTELQNDVQDGYPMSFDCVVTGQVPVPSVRWFKDGKLEEDDHYMINEDQOQG  
 HQLIITAVVPADMVGYRCLAENSMGVSSSTKAELRVELTSTDYDTAADATETSSYFSAQGYLSSREQEGTESDE  
 GQLPQVLEELKDLQVAPGTRLAKFQLKVKGYPAKPLYWFKDQGPLTSDHIRMTDKKTLHTLEIVSVTRESG  
 QYAAYSNAVGAAYSSARLLVRGPSEPEEKPASDVHERLVPPRILEKFTPKKVKRGSSITFSVKVEGHPAPSV  
 HWLKEEAKEKGVLWIGPDTPGYTMASSSKQHSVLVLDVGRQHQTCTCIATNPAGQALCSASLHISGLAKEEEQ  
 ERVKEALISSFLOGTSQAVSAQMSESAFADLVGQSKGESLVAEEAHSHLSLAEVGTTEEFLQKLTSTQITEMVS  
 AKISQAKLQVPGGDSDEETKTPSASPRHGRSRPSSSVQESSSESEDGDSRGEIFDIYVVTADYLPGLAEQDAI  
 ILREGQYVEVLDSAHPLRWLVRTKPTKSSPSRQGWVSPAYLDKRLKLSPEWGPTEAPEFPGEAVSEDEYRTRL  
 SSVIQEELLSSEQAFVQELQFLESHHMKHLERSPRVPAAVASQKTVIFRNVQDISHFHSSFLKELQCGCTDDDV  
 AMCFIKNQEAFAKEYLEFLVGRVQAESVVVSTPVQEFYKQYAEETLSAKDPTQPPPPPLQHYLEQPVVERVQKYQ  
 ALLKELIRNKARNRNCALLEQAYAVVSALPQRAENKLVSLMENYPGTLEALGEPHQGHFIWEGAPGARM  
 PWKGHNHRHVFLFRNYLVICKPRRDSRTDTFSYVFRNMMKLLSIDLNDQVEGDRAFEVWHEREDSVRKYLLQA  
 RTVIKNSWVKEICGIQORLAQPVWRPPEFEEELADCTAELGETVKLACRVTGTPKPIVSWYKDGKPVVDPH  
 HILIEDPDGCTLILDNLTGIDSGQYMCFAASAAGNASTLGKILVQVPPRFVNVKVRATPFVEGEDAQITCTVE  
 GAPYPQIRWYKDGTLAPGNRYRMLNEPRSGVLVVIQAASKEDLGHYECELVNRLGSTRGGELYMOSPALR  
 ARDQHHREQIVAAVEDTSVEGSAHSAQDQGAASVLWRLGSEALGPSPGDLPNTRQSEPPAFEEAASQIP  
 GAASGTPEVSPGTHKGLEQETSSSGSQGWTVPIRVEGTAWPGAGTGQLLLDVHSQVIMETTQRTYVQCAPDT  
 GVTRAPSMQVTIEDVQVQVGDMAQFDAVIEGHPPPIVTVWYKGSTQLTSSARLSQRQDGTYSVLVTDVAPHDA  
 GVYTCVANNAGGQVLCKAELLVHGGDKLDAENQVYRRKLSHFYDVQEEIGRGVFGFVKRVQHKGNKMFCAAKF  
 IPLRSKTRAQAYKEDILATLGHPLVTGLLDQFETKRTLILILELCSSEELLDRLFKKGVVTEAEVKVYIQQL  
 VEGHLHSHGILHLDIKPPNIIIMVHPAREDDIKICDFGFAQKIPSEEPQYSKYGSPEFVSPETIEQNPVSEGS  
 DIWAMGVISYLSLTCSSPFAGESDRATLLNVLEGRVSWSSPTAAHLSSEDAKDFIKATLQRTPRARSTSQCLA  
 HPWFLKSMPEAAHFINTKQKFLARSRWQRSLMSYKSIIVMRSIPELLQGPPDPSPLGVARHLRGEASGAS  
 SSSSSDNELAPFARAKSLPPSPVTHSPLLHPRGFLRPSASLPEETEASMPPTADAAPASPOSAGPPASPGCV  
 PRHSVISSLFYQQAGEGAERGNKTSGAKRHPARRRHLLKGGYIARALPGLREPLMEYSLLEEEAAREEQASLM  
 TKTPSFETALRLPSSSVREVPGRSHSLDNPPVTTGPSPEACEKQLLFPSTGLTHETTAKDRGHKEGFLQESV  
 PFPMSGDSRPGKQEGSSQDSRCRGPASSCHSELGSGSQEGCGPPSSQSLGSLPPQSLKKEKELSTSCGPLFSEQ  
 PQAAPFPTQVSPLLGSEKEPQDGSLEGPVVPVSSSPGSASQVDASLDTEGLSEAGDTCDFTPPPQRPQEQAT  
 TRKFSLESRGGYAGVAGYGTFAFGGDAGGMLGQGPLWARMWAVSOSSEEQDEAATESQPPELESGLPIAEASG  
 VPLRTSPSLTPWEEVEQVSLVQIRDLSGDAEAADTISLDISEVDPAYLNLSDLYDIKYLPEFEMIFRRVPKPI  
 EQPESPGSETEAGQGLADFLLEAAWPWPGELGLRAGLEITTEPEEPGDLEALLGEAAVGRKRKWSPSRGLFQF  
 PGRCLSGEEPVELGLRQVRKASMAHISRIKGRPEGPEREPPRKKAGLASFRLSGLKGRDQELSDEAVVLGQ  
 SVTLACQVLAQPTAQATWSKDGVLLESSGHLIISSTLKNFQLLTIILVVKEEDLGTYTCCVSNPLGTAVTTGVL  
 RKAERPSSSPRPEVGELYKDAVLLVWKPVESECGPVTVIVQCCIEGGSWTTLASDISDCCYLTGKLSRGGMYIF  
 RTACVSKAGMPYSSPSEQVLLGGPNHLASEEESRGRPAQLLPSTKTFQAFQMQIRRRFVSVVRQCREKASGR  
 ALAAKIVPYQPEDKTAVLREYEALKRHLHPLHAQLHAAYLSPRHLVLIILELCSGPELLPSLAERESYSESDVK  
 DYLWQMLSATQYLHAQHILHLDLRSNMMVTEYNLLKVIDLGNQSLDQEKVPAPENFKDYLETMAPELLEGG  
 GAVPQTDIWAIGVTAIFIMLSGEYPESESETRDLQKGLRKLIRLSRCYAGLSGGAVAFVLSLCAQWPGRPCA  
 STCLQCGWLTEEGPTGSRPTPVTFPTVRLRAFVREKRRALLYKHNLAQVR\*  
 >rs50739555\_ENSMUSP00000038264\_c.11776:T>G\_p.V3926G  
 ENSMUST00000047441.14|Obscn-202|ENSMUSG00000061462|-|chr11:g.58952291:A>C  
 MDHSFSGAPRFLTRPKAFVSVGKDATLSCQIVGNPTPHVSWEKDRQVEAGARFRLAQDGDVYRLTILDLAL  
 GDSGQYVCRARNAIGEFAAVGLRVDSEGTCAEQAPHLLRPTSIRVREGADATFRCRVGGSPQPAVSWSKDG  
 RRLGPPDAPHVRVEEHGESSALRIRSARPRDGGTYEVRAENPLGSASAAAALVVDSAEVAGPPGTSTATLLA  
 HLQORREAMRAEGIPSPPGAGTRTCTVTEGKHARLSCFVTGEPKPEVWKKDQGLVTEGRRHVVEDEQENF  
 VLKILFCKQSDRGLYTCTASNLVGQTYSSVLVVVREPTVPFKKRLQDLEVREKESATFQCEVAQPAATEAAWFK  
 EETRLWASAKYDIEEGETERRLTVRNVSADDDAVYICETTEGSRVAELSVQGNLTKRKLPRKTAVRTGDTAIF  
 WVLEAVPEGPVRLRNQEMVAGGRVAITAEGTCHTLTIIFQCTLEDMGEEVAVFVSGGCRITTTQFCVSAPRRPPL  
 YPADPVVKAKTESSVTLSSAPPHGDRPVTIDGYLKEKRLGAYAWSRCHEAGWLATTEFTITGVAAEEDFQ  
 FRVSAINHFGQGPYLEFPGTMHLVPLAVKTPKAVEAVEGGEVTFVSDLTVASSGEWFLDGEALKASSIYVI  
 RCDRTRHMLTIREVPARLHGAQLKVFANGIETSIQMVVRAALGLPSSKLPAAAAREVLAQLHEEAQLLAELSD  
 QAAAVTWLKDGRELSLGPKEYMQVSAGRRALLVRDVAQDDAGLYECVSRGSRRTAYQLLVQDITDGYRDWGPAG



PQKHMCKCAGAKIARYLGSSCYRFLQYDKGVWHLEAALDTRQGKGTSSCSLHEKPKLVFAKQQAHSEVKAE
AGASATLSCEVAQAQTEVTWFKDGKLLSSSSKVRMEASGCSRRLVVQQAGKADAGEYSCEAGGQKLSFRLDVA
EPKMFVFAKEQQARSEVKAEGASATLSCEVAQAQTEVTWFKDGKLLSSSSKVRMEASGCSRRLVVQQAGKADA
GEYSCEAGGQKLSFRLDVTEPKLVFAKEQQARSEVKAEVGNSATLSCEVAQAQTEVTWFKDGKLLSSSSKVRM
EASGCSRRLVVQQAGKADAGEYSCEAGGQKLSFRLDVAEPKLVFAKEQQARSEVKAEGNSATLSCEVAQAQT
EVTWFKDGKLLSSSSKVRMEASGCSRRLVVQQAGKADAGEYSCEAGGQKLSFHLDVTEPKLVFAKEQQAHSEV
KAEAGASATLSCEVAQAQTEVTWFKDGKLLSSSSKVRMEASGCSRRLVVQQAGKADAGEYSCEAGGQKLSFRL
DVAEPKLVFAKEQQARSEVKAEGASATLSCEVAQAQTEVTWFKDGKLLSSSSKVRVEASGCSRRLVVQQAGK
ADAGEYSCEAGGQKLSFRLDVAEPKLVFAKEQQANSEVKAEGASATLSCEVAQAQTEVTWFKDGKLLSSSSK
VRVEASGCSRRLVVQQAGKADAGEYSCEAGGQKLSFRLDVAEPKLAFAKEQQAHSEVKAEGASATLSCEVAQ
AQTEVTWFKDGKLLSSSSKVRVEASGCSRRLVVQQAGKADAGEYSCEAGGQKLSFRLDVAEPKLAFAKEQQAH
SEVKAEGASATLSCEVAQAQTEVTWFKDGKLLSSSSKVRVEASGCSRRLVVQQAGKADAGEYSCEAGGQKLS
FRLDVAEPKLAFAKEQQAHSEVKAEGASATLSCEVAQAQTEVTWFKDGKLLSSSSKVRVEASGCSRRLVVQQ
AGKADAGEYSCEAGGQKLFRLDVAEPKLVFAKEQQAHSEVKAEGASATLSCEVAQAQTEVTWFKDGKLLSS
SSKVRVEASGCSRRLVVQQVQKADAGEYSCEARGQKLSFRLDVAEAEESQIPERPSRREPLVVEKHETIILTAT
IAAPSVAAVTWLKDGVEIRRSKRHEATSLGDTHTLTVRGAQVLDIAIYSCRVGKEGQDFPVQVEEVAAKFSKP
LEPVGELGGTVMLVCELSPEQAEVWRCGNTQLRPGKRFQMTSEGPRTLTVSGLREDDAEYVCSRDDRT
SARLTVKVPVVKFTSGLSAMVAEEGQEAFTQCIVVSPSDAGVTWYKDKGMQLQPSEKFMVMEGASRSLTILGL
TLEDAGQVTVAEAGASSAALRVREAPVLFKKKLEPQTVTEERTSVTLEVELTRPWPEVKWTRNAAVLTPSENV
EIRAEGARHCLVLRVGFADRGFFGCETPDDKTQAKLNVEMRQVRLVRLVGLQEVEAKEQGTASMDVELSHAEVE
GSWTRDGLRLQPGPKCHLAVQGPVHILTLALQPDQSGLVAFRAEGVHTSARLIVTELPSFTRVLQDVVATQ
KEKVTLECELSRPVDVRLKDGVELRAGKAI GIVAQGTCSRSLVIYRCETGDQGVYVCDALDAQTSASLRVQGR
TYTLIFRRVLAEDAGEVKFVAENAESRAHLRVKELPVTLLRPLRDKIAMEKHRGVLECVSRASAVRWFKGG
VELQSGPKYEVVSDGLYRKLVINQVPEDEDTYTCDAGNVKTSAQFFVEEQSITIVRGLKDMTVMEPAPAWFE
CETSIPSVRPPKWLKGTVLQAGGNVLEQDGTVHRLTLHKTCSTMTGPFVHFTIGKSRSSAQLVVS DIPVVL
RPLEPKAGRELQSVLSCDFRPAPKAVQWYKDDTPLSPSEKFKMALEGQMAELRILRLTPADAGVYRCQAGSA
QSSAEVTVAEAREVTVIQPLQDAEAMEEGRVCSFCELSHKDDEI EWSLNGTPLYNDSFHEISHEGCLHTLVLKS
VRQADTGTVCATSPKVSVSARLVVKGKPVVFLKALDDVSAEERGTTLQCEVSDPEARVVWRKDGVELGPSDK
YDFLHKAGARGLTVHDLSDHEDAGLYTCQVGSKETQSKVSVHDLHVGITKRLKTVEVLEGESECSFECVLSHESP
SDPAVWTVGGKTVGGSGHFHAVRQGRKYTLTVKDAALSDAGEVVFVSVLGLTSKASLIIRERPVDI TKPLEDQR
TTLGEDVMLSCELSRAGTSVRWLKDGKAIKRSQKYDLLSEGTRAVLVVRKASLKDSGEYTCETEASKSTAKLC
VEEKANRFTEELADLQVEEKGRAVFTCKTEHPASVVTWRKGLLELRASGKHVPSQEGTLTKLTINALERTDSD
TYTCDIGQARTQARLLVHGQKVRVIEDLEDTAVQEGSSAKFCCRIPADYGPVHWFVLDKTPHLSNELNEITVQ
PGGYHVLTLRQLALKDSGTVYFEAGDQRTSAALRVTEKPSIFSRPLTDVTVTEGEDTLVCEITTTVDSSVRWT
KDGKTLRPSARCQLSHEGCGAQLLITATTPODGGRYKCEIGGASSSIVRVHALPVRFRESLKDVEVPEGKAA
TLRCVLSVAAPVEWRHGDVLSNKYSLRQEGAVLELVIDRLQPDQSGQYSCSFGDQTTSATLTVKTSQAQ
FVGLKRNKEATEGTTVTLRCELTKAEAPVEWKKGTETLRNGDKYSLKQDGAVCELQICSLLVADAGEYSCVCGQ
EKTSATLTVKALLVHFVRRRLRSKEATEGDTTTLQCELSKAAPVEWRKGTETLRDGDYSLKQDGAVCELQIRS
LTIADAGEYLCTCGQEKTSATLTVRALPAKFKDSLKNEEATEGTTATLSCELSKAAPVTWKKGPKTLQSGDKY
VLRQDGAVCGLQIHGLTMADAGEYSCVCGQEKTSATLTVRGLPAKFIEDLRSQEATEGATAILRCELSKAAPV
EWRKGETLTKDGDYTLRQDGAVCELQIRGLAVVDTGTYSLSLPTKFTGLRNEEATEGTMATLRCQMSKAAPV
EWRKGETLTDGDYSLRQDGAMCELQIRGLTIEDSGEYTCVCGQEKTSATLSVKALPPRFIEDLRSQEATEG
TMATLRCQMSKAAPVEWRKGETLGDGGYSLRQNGAVCELQIHDLAVEDTGEYSCGCGQEKTSATLNVKALP
PRFIEDLRSQEATEGTMATLRCQMSKAAPVEWRKGETLTDGGYSLRQDGAVCELQIHDLVEDAGQYSCVC
GQEKTSAVLTVDALPPKFTEGLKKEEATEGTMVTLRQMSKEATEVWRKGAKTLDGGRYSLRQDGAMCELQI
CGLAVEDAGEYSCVCGQEKTSATLSVKALPPRFIEDLRSQEATEGTMATLRCQMSKAAPVEWRKGSKTLRDGD
RYSLRQDGAMCELQICDLAVEDTGDYSCVCGQEKTSATLSVKAPQVVFQQLQNLQAEEGSMASLRCELSVPN
AAMVWSKGGLELQGDTRREARQQGCVAELLLRDLRREDAGEYSCTCGSQTTSATLMVTAAPVRFRLRLQAQDV
DEGATARLRCELSREAVSVEWRKGSLLQFPKAKYQMVQEGTTAELLVHGVEQEDAGEYTC DAGHTQS IARLSV
RAPKPKFKTDLQSTEQEAGGTARLCCQLSEAEPTPVQWLKEGVELHVGSKYEMRRQGAVCELLIHGLEAKDT
GEYACLVGQKTLASLRVKEPEVTIVRGLVDMVEQADEDEFTCKVVSQAGATDVQWHLQGLPLQSNVTEVAV
LADGCTHVLLQKGVTLLEDAGTVSFHVGGLSSSAQLTTRVPEVTVLEPLKDVQLSEGQDAHFRCRLSRASGQEA
RWALGGVPLQCNEMNDITVEQGTLYLLTLHKVTLLEDAGTITLQVGSSESAQLKVTAKNTVLRGLNENVDAL
GEALFECVLSQPEVAANTWLLDDEPVHTSEKVEVYVFNGLRHLHLLKLNKLPQDSCRVTFLAGDVVTSFAFLTV
RALPDPPEDAEVVGRSDHSVTLVWVAPMSDGGGGLCGYRVMKEASTGQWQLCHDLVPGPECVVDDLVPGKTY
RFRVAAVGPAGAGEPVHLPQMVKIAAPAPAPAPAPAPAPAPETRQAVVGEDICLELEVAADGGVEVWHKGT
RIPGGHFEVLSRGRQMLVIKGFRTEDQGEYRCGPIQGLPSSGAATFNVMVMTSGSGDEVPAQPSLPPEAAQEGD
LHLLWEALARKRRMSREPTLDSISELPEEDSRVQHLRQEAEEETAPDLSEGYSTADELARTGEADLSHTSSDDE

SRAGTPSLVTYLKKAGGPGISPLASKHEAQVTTSVKPKQKQEPVVPVTCPPPGDLAADLMDPSLDKAAVKIQAFKGYKVRKEMKQOEGPVFSRTFGDTEAQVGDVLRLECVLATKTKDMRACWLKDGIELTDGRHYHIDQLKDGTC  
SLLVTGLAPTDSGRYTCQVSTKSGRVSHSACVVVSGTESEAESSSGGELDDAFRRAARRLHRLFRTKSPAELS  
EELFLSADEGPEPEEPADWQTYREDENFVCIRFESLAEARQAVTCFRNMFATMGIGVEISLGEQGRGVEM  
RIGKVAPTPTPAVPLAKTPGLQTSDAAPVFLTELQNQDVQDGYPMSFDCVVTGQPVPSVRWFKDGKLLLEEDDH  
YMINEDQQGGHQLIITAVVPADMGVYRCLAENSMGVSSTKAELRVELTSTDYDTAADATETSSYFSAQGYLSS  
REQEGTESDEGQLPQVLEELKDLQVAPGTRLAKFQLKVKGYPAKLYWFKDGOPLTSDHIRMTDKKTLHTLE  
IVSVTREDSGQYAAIYI SNAVGAAYSSARLLVVRGPEPEEKPASDVHERLVPPRILEKFTPKKVKRGSITFSV  
KVEGHPAPSVHWLKEEAKEKGVLWIGPDTPGYTMASSSKQHSVLVLDVGRQHOGTYTTCIATNPAGQALCSASLH  
ISGLAKEEEQERVKEALISSFLQGTSAQVSAQMSEAGFADLVGQSKGESLVAAEEAHSHLSLAEVGTETEEFLQK  
LTSQITEMVSAKISQAKLQVPGGDSDEETKTPSASPRHGRSRPSSSVQESSSESEGDGSRGEIFDIYVVTADY  
LPLGAEQDAIILREGQYVEVLDSAHPLRWLVRTKPTKSSPSRQGWVSPAYLDKRLKLSPEWGPTEAPEFPGEA  
VSEDEYRTRLSSVIQELLSSEQAFVGELOFLESHHMKHLERSPRVPAAVASQKTVIFRNVQDISHFHSSFLKE  
LQCGCTDDDVAMCFIKNQEAFAKYLEFLVGRVQAESVVVSTPVQEFYKKYAEETLSAKDPTQPPPPPLQHYLE  
QPVERVQKYQALLKELIRNKARNRQNCALLEQAYAVVSALPQRAENKLVSLMENYPGTLEALGEPVIRQGHFI  
VWEGAPGARMPWKGHNRHVFLFRNYLVICKPRRDSRTDTFSYVFRNMMKLSSIDLNDQVEGDDRAFEVWHERE  
DSVRKYLQARTVVIKNSWVKEICGIQORLAQPVWRPFEFEEELADCTAELGETVKLACRVTGTPTKPIVSWYK  
DGKPEVEVDPHHILIEDPDGSCTLILDNLGTIDSGYMCFAASAAGNASTLGKILVQVPPRVFNKRPATPFVEG  
EDAQITCTVEGAPYPQIRWYKDGTLAPGNRYRMLNEPRSGVVLVLIQAASKEDLGHYECELVNRLGSTRGGG  
ELYMQSPALRARDQHHREQIVAAVEGAPSMQVTIEDVQVQVGDMAQFDAVIEGHPPPVTWYKGTQLTSSAR  
LSQRQDGTYSLVLTVDVAPHDAGVYTCVANNAGQVLCCKAELLVHGGDKLDAENQVYRRLKLSFYDVQEEIGR  
GVFGFVKRVQHKGNMFCAAKFIPLRSKTRAQAYQERDILATLGHPLVTGLLDQFETRKTLLIILELCSSEEL  
LDRLFCKGVVTEAEVKVYIQQLVEGLHYLHSHGILHLDIKPPNIIIMVHPAREDIKICDFGFAQKITPSEFQYS  
KYGSPEFVSPETIEQNPVSEGSIDIWAMGVISYLSLTCSSPFAGESDRATLLNVLEGRVSWSSPTAAHLSDAK  
DFIKATLQRTPRARPSTQCLAHWPFLKSMPEAAEHFINTKQLKFLARSRWQRSLMSYKSIIVMRSIPELLQ  
GPPDSPSLGVARHLRGEASGASSSSSSDNLAPFARAKALPPSPVTHSPLLHPRGFLRPSASLPEETEASMP  
TADAAPVSPQSAAGPPASPGCVPRHSVSSSLFYQAGAGEAERGNKTSGAKRHPARRRHLKGGYIARALPGLR  
EPLMEYSLLEEEAAREEQASLMTKTPSFETALRLPSSSVREVPGRSHSLDNPPVTTGPSPEACKEQLLFPST  
GLTHETAKDRGHKEGFLQESVPPFPMMSGDSRPGKQEGSSQDSCRGKPASSCHSELGSGSQEGCGPPSSQSLG  
SLPPQSLKKELESTSCGPLFSEQPQAAPFPTQVSPLLGSEKEPQDGLSEGPVVPVSSSPGSASQVDAASLDTEG  
LSEAGDTCDFTPPPQRPQEQATTRKFSLESRGGYAGVAGYGTFAFGGDAGGMLGQGPLWARMWAVSQSSEEQ  
DEAATESPQPLESGLPIAEASGVPLRTSPSLTPWEEVEQVSLVQIRDLSGDAEAADTISLDISEVDPAYLNL  
DLYDIKYLPEFEMI FRRVPKPIEQPESPGSETEAGQGLADFLLEAAWPWPGEGLGLRAGLEITEEPEEPGDLEA  
LLGEAAVGRKRKWSPSRGLFQFPGRCLSGEEPVELGLRQRVKASMAHISRIKGRPEGPEREPPRKKAGLAS  
FRLSGLKGRDQELSDEAVVLGQSVTLACQVLAQPTAQATWSKDGVLLESSGHLLISSTLKNFQLLTIIVVKEE  
DLGTYTCCVSNPLGTAVTTGVLKRAERPSSSPREVELYKDAVLLVWKPVESECGPVTVIVQCCIEGGSWTTL  
ASDISDCCYLTGKLSRGGMYIFRTACVSKAGMPYSSPSEQVLLGGPNHLASEEESSRGRPAQLLPSTKTFAF  
QMQIRRGRFSVVRQCREKASGRALAAKIVPYQPEDKTAVREYEALKRLHHPHLAQLHAAYLSPRHLVLI  
CSGPELLPSLAERESYSESDVKDYLWQMSATQYLHAQHILHLDRSENMMVTEYNLLKVIDLGNASLDQEK  
VPAPENFKDYLETMAPELLEGQAVPQTDIWAIGVTAIFIMLSGEYPESEGETRDLQKGLRKLIRLSRCYAGL  
SGGAVAFLOSSLCAQPWGRPCASTLQCGWLTEEGPTGSRPTPVTFTVRLRAFVREKRRALLYKKNHQA  
VR\*

>rs50739555\_ENSMUSP00000049737\_c.12667:T>G\_p.V4223G  
ENSMUST00000052872.15|Obscn-203|ENSMUSG00000061462|-|chr11:g.58952291:A>C  
MDHSFSGAPRFLTRPKAFVVSVGKDATALSCQIVGNPTPHVSWEKDRQPVEAGARFLAQDGDVYRLTILDLAL  
GDSGQYVCRARNAIGEFAAVGLRVDSEGTCAEQAPHLLRPTSIRVREGADATFRCRVGGSPQPAVSWSKDG  
RRLGPPDAPHVRVEEHGESSALRIRSARPRDGGTYEVRAENPLGSASAAAALVVDSDAEVAGPPGTSTATLLA  
HLQORREAMRAEGIPPSPPGAGTRTCTVTEGKHARLSCFVTGEPKPEVWKKDGLVTEGRRHVVEDEQENF  
VLKILFCKQSDRGLYTCTASNLVGTYSVSVLVVREPTVPFKKRLQDLEVREKESATFQCEVAQPAEAAWFK  
EETRLWASAKYDIEEEGTERRLTVRNVSADDDAVYICETTEGSRVVAELSVQGNLTKLPRKTAVRTGDTAIF  
WVELAVPEGPVRLRNQEEMVAGGRVAITAEGTCHTLTI FQCTLEDMGEVAFVSGGCRTTTQFCVSAPRRPPL  
YPPADPVVKAKTESVTLWSAPPHGDRPVTIDGYVLEKRLKLAGAYAWSRCHEAGWLATTEFTITGVAEEGDFQ  
FRVSAINHFGQIPEYLEFPGTMHLVPLAVKTPKAVEAVEAGGEVTFVSDLTVAASSGEWFLDGEALKASSIYVI  
RCDRTRHMLTIREVPARLHGAQLKVFVANGIETSIQMVVAAAGLPLSSKLPAAAAREVLAQLHHEAQLLAELSD  
QAAAVTWLKDRELSLGPKEYMQVSAGRRALLVRDVAQDDAGLYECVSRGSRRTAYQLLVQEPKLVFAKQQAH  
SEVKAEAGNSATLSCEVTQAQTEVTFWFKDGKLLSSSSKVRMEASGCSRRLVVQQAGKADAGEYSCEAGGQKLS  
FRLDVAEPKLVFAKQQAHSEVKAEAGASATLSCEVAQAQTEVTFWFKDGKLLSSSSKVRMEASGCSRRLVVQQ  
AGKADAGEYSCEAGGQKLSFRLDVAEPKLVFAKEQQARSEVKAEAGASATLSCEVAQAQTEVTFWFKDGKLLSS

SSKVRMEASGCSRRLVVQQAGKADAGEYSCEAGGQKLSFRLDVTEPKLVFAKEQQARSEVKAIEVGN SATLSCE  
VAQAQTEVTFWKDGKLLSSSSKVRMEASGCSRRLVVQQAGKADAGEYSCEAGGQKLSFRLDVAEPKLVFAKEQ  
QARSEVKAIEAGNSATLSCEVAQAQTEVTFWKDGKLLSSSSKVRMEASGCSRRLVVQQAGKADAGEYSCEAGGQ  
KLSFHLDVTEPKLVFAKEQQAHSEVKAIEAGASATLSCEVAQAQTEVTFWKDGKLLSSSSKVRMEASGCSRRLV  
VQQAGKADAGEYSCEAGGQKLSFRLDVAEPKLVFAKEQQARSEVKAIEAGASATLSCEVAQAQTEVTFWKDGK  
LSSSSKVRVEASGCSRRLVVQQAGKADAGEYSCEAGGQKLSFRLDVAEPKLVFAKEQQANSEVKAIEAGASATL  
SCEVAQAQTEVTFWKDGKLLSSSSKVRVEASGCSRRLVVQQAGKADAGEYSCEAGGQKLSFRLDVAEPKLAFA  
KEQQAHSEVKAIEAGASATLSCEVAQAQTEVTFWKDGKLLSSSSKVRVEASGCSRRLVVQQAGKADAGEYSCEA  
GGQKLSFRLDVAEPKLAFAKEQQAHSEVKAIEAGASATLSCEVAQAQTEVTFWKDGKLLSSSSKVRVEASGCSR  
RLVVQQAGKADAGEYSCEAGGQKLSFRLDVAEPKLAFAKEQQAHSEVKAIEAGASATLSCEVAQAQTEVTFWKD  
GKLLSSSSKVRVEASGCSRRLVVQQAGKADAGEYSCEAGGQKLFRLDVAEPKLMFAKEQQAHSEVKAIEAGAS  
ATLSCEVAQAQTEVTFWKDGKLLSSSSKVRVEASGCSRRLVVQQAGKADAGEYSCEAGGQKLSFRLDVAEPK  
VFAKEQQAHSEVKAIEAGASATLSCEVAQAQTEVTFWKDGKLLSSSSKVRVEASGCSRRLVVQQVQKADAGEYS  
CEARGQKLSFRLDVADTRLMFAKEQQARTEVKAIEAGNSATLSCEVAQAQTEVTFWKDGKLLSSSSKVRVEASG  
CSRRLVVQQAGKADAGEYSCEAGGQKLSFRLDVAEAEESQIPERPSRREPLVVKEHETIILTATIAAPSVAAVT  
WLKDGVEIRRSKRHEATSLGDHTLTVRGAQVLD SAIYSCRVGKEGQDFPVQVEEVAAKFSKPLEPVEGELGG  
TVMLVCELSPEQAIEVWRCGNTQLRPGKRFQMTSEGRRTLT VSGLEDDAEIYVCESTRDRRTSARLTVKVP  
VVKFTSGLSAMVAEEGQEAFTQC VVSPSDAGVTWYKDGMLQPSSEKFMVMSGASRSLTILGLTLEDAGQVTV  
EAEGASSAALRVREAPVLFKFKLEPQTV EERTSVTLEVELTRPWEVKWTRNAAVLTPSENVEIRAEGARHC  
LVLRSVGFADRGFFGCETPDDKTQAKLNVEMRQVRLVRLGQVEEAKQGTASMDVELSHAEVEGSWTRDGLRL  
QPGPKCHLAVQGPVHILTL S ALQPQDSGLVAFRAEGVHTSARLIVTEL PVSFTRVLQDVVATQKEKVTLECEL  
SRPVDVRWLKDGVELRAGKAIGIVAQGTCSRSLVIYRCETGDQGVVCDALDAQTSASLRVQGRTYTLIFRRVL  
AEDAGEVVFVAENAESRAHLRVKELPVTLLRPLRDKIAMEKHRGVLECVSRASAVRWFVKGVELQSGPKYE  
VVSDGLYRKLVIN DVQPEDEDTYTC DAGNVKTSAQFFVVEEQSITIVRGLKDMTVMEPAPAWFECETSIPSVRP  
PKWLLGKTVLQAGGNVLEQDGT VHRLTLHKTCSTMTGPVHFTIGKSRSSAQLVVS D I PVVLRTRPLEPKAGRE  
LQSVVLSCDFRPAKPAKAVQYKDDTPLSPSEKFKMALESLNGMAELRILRLTPADAGVYRCQAGSAQSSAEVTV  
REVTVIQPLQDAEAMEEGRVCFSC ELSHKDEDIEWSLNGMPLYNDSFHEI SHEGCLHTLVLSKVRQADTGTVC  
ATSPKVS SARLVVKGKPVVFLKALDDVSAEERGTLTQCEVSDPEARVVWRKDGVELGPSDKYDFLHKAGAR  
GLTVHDLSDHEDAGLYTCQVGSKETQSKVSVHDLHVGITRRLKTV E VLEGE SCSFECVLSHESPSDPAVWTVGG  
KTVGGSGHFHAVRQGRKYTLTVKDAALSDAGEVVSVLGLTSKASLIIRERPVDITKPLEDQRTTLGEDVMLS  
CELSRAGTSVRWLKDGKAIRKSQKYDLLSEGTRAVLVVRKASLKDSEYTCETEASKSTAKLCVEEKANRFTE  
ELADLQVEEKGRAVFTCKTEHPASVVWTRKGLLELRASGKHVPSQEGTLKLTINALERTDSDTYTCDIGQAR  
TQARLLVHGQKVRVIEDLED TAVQEGSSAKFCCRIAPADYGPVHWF LDKTPLHSNELNEITVQPGGYHVLT  
QLALKDSGTVYFEAGDQRTS AALRVTEKPSIFSRPLTDVTVTEGEDLTLCETT TVDSSVRWTKDGKTLRPSA  
RCQLSHEGCAQLLITATTPQDGGRYKCEIGGASSSSIVRVHALPVRFRFRESLKDVEVPEGKAATLRCVLSVA  
APVEWRHGDDVLKSSNKYSLRQEGAVLELVIRDLQPDQSGQYSCSFGDQTTSATLTVKTSQAQFVGLRNLKEA  
TEGTTVTLRCELTK EAPVEWKKGTETLRNGDKYSLKQDGAVCELQICSLLVADAGEYSCVCGQEKT SATLTVK  
ALLVHFVRRRLRSKEATEGDTTTLQCELSKAAPVEWRKGTETLRDGDYSLKQDGAVCELQIRSLTIADAGEYL  
CTCGQEKT SATLTVRALPAKFKDSLKNEEATEGTTATLSCELSKAAPVTWKKGPKTLQSGDKYVLRQDGAVCG  
LQIHGLTMADAGEYSCVCGQEKT SATLTVRGLPAKFIEDLRSQEATEGATAILRCELSKAAPVEWRKGETL  
DGDRYTLRQDGAVCELQIRGLAVVDGTYS LPTKFT E GLRNEEATEGTMATLRCQMSKAAPVEWRKGETL  
DGDRYSLRQDGAMCELQIRGLTIEDSGEYTCVCGQEKT SATLSVKALPSRFIEDLRSQEATEGTMATLRCQMS  
KTAPVEWKKGSETLRDGGRYSLRQDGPVCELQICDLAVEDAGEYSCVCGQEKT SATLSIKALPPRFIEDLRSQ  
EATEGTMATLRCQMSKAAPVEWRKGETLGDGGRYSLRQNGAVCELQIHDLAVEDTGEYSCGCGQEKT SATLN  
VKALPPRFIEDLRSQEATEGTMATLRCQMSKAAPVEWRKGETL RDGGRYSLRQDGAVCELQIHDLVEDDAGQ  
YSCVCGQEKTSAVLTVDALPPKFT E GLKKEEATEGTMVTLRQMSKEATVEWRKGAKTLS DGGRYSLRQDGAM  
CELQICGLAVEDAGEYSCVCGQEKT SATLSVKALPPRFIEDLRSQEATEGTMATLRCQMSKAAPVEWRKGET  
LRDGDYSLRQDGAVCELQIRDLAVEDAGEYLCVCGQEKT SATLSVKALPPRFIEDLRSQEATEGTMATLRCQ  
MSKAAPVEWRKGSKTLRDGDYSLRQDGAMCELQICDLAVEDTGDYSCVCGQEKT SATLSVKALPPRFIEDLR  
SQEAREGTVATLRCRMSKAAPVEWRKGETLKDGDYSLRQEGNLCELQIRDLAVEDTEEYSCVCGQEKT SAT  
LSVKALPAKFIEDLRSQEAPESSTVTLRCKLSKKASVVWKKGSETLRNGARYSLRQDGAVCELEIRDLTVEDT  
GEYSCTCGQERTSATLSIMAPQVVFQQLQNLQAEEGSMASLRCELSVPNAAMVWSKGGLELQGDTRREARQQ  
GCVAELLLRDLRREDAGEYSC TCGSQTTSATLDMVTAAPVRFLELQAQDVDEGATARLCELSREAVSVEWRK  
GSLQLFPACKRYQMVQEGTTAELLVHGVEQEDAGEYTC DAGHTQS IARLSVRAPKPKFKTDLQSTEQEAGGTAR  
LCCQLSEAEPGTPVQWLKEGVELHVGSKYEMRRQGAVCELLIHGLEAKDTGEYACL VGGQKTLASLRVKEPEV  
TIVRGLVDMEVQADEDEVEFTCKVVSQAGATDVQWHLQGLPLQSNVTEVAVLADGCTHVLQKGVTL E D AGTVS  
FHVGGSSSAQLTVRVPEVTVLEPLKDVQLSEGQDAHFRCLRSRASGQEARWALGGVPLQCNEMNDITVEQGT  
LYLLTLHKVTL E D AGTITLQVGS SSEAQLKVTAKNTVLRGLENVDALEGGEALFECQLSQPEVAHAHTWLLDD

EPVHTSEKVEVVYFENGLRHLLLLLKNLKPQDSCRVTFLAGDVVTS AFLTVRGWRLEVL EPPHDASVKAGMQVR  
FTCILSEAVPVGEATWYINGAAIQPDDTDWTVTTDGS SHAL TLSNAQPQHAGEVTF AARDAVASARLSVLALP  
DPPEDAE VVGRSDHSVTL SWVAPMS DGGGGLCGYR VEMKEASTGQWQLCHDLVPGPECVDDLVPGKTYRFRV  
AAVGPAGAGEPVHLPQMVKIAPAPAPAPAPAPAPAPETRQAVVGEDICLELEVAADGGEVVWHKGTERTIQPGG  
HFEVLSRGRQMLVIKGFRTEDQGEYRCGPIQGLPSSGAATFNVMVMTSGSGDEVPAQPSLPPEAAQEGDLHLL  
WEALARKRRMSREPTLDSISELPEEDSRVQHLRQEAEEETAPDLSEGYSTADELARTGEADLSHTSSDDES RAG  
TPSLVTYLLK KAGGPGI SPLASKHEAQVTT SVKPKQKQEPVVP TCPPPGDLSAADLMDPSLDKAAVKIQAAF KG  
YKVRKEMKQQEGPVFSRTFGDTEAQVGDVLRLECVLATK TIDMRACWLKDGIELTDGRHYHIDQLKDGTC SLLV  
TGLAPTDSGRYTCQVSTKSGRVSHSACVVVSGTESEAESSGGE LDDAFRRAARRLHRLFRKTS PAELSEEL  
FLSADEGPGEPEEPADWQTYREDENFVCIRFESLAEARQAVT CFRNMFATMGIGVEISLGEQGP RGVEMRIGK  
VAPT VTPAVPLAKTPGLQTS DAAPVFLTELQNDVQDGY PMSFDCVVTGQPVPSVRWFKDGKLL EEDDHYMIN  
EDQQGGHQLIITAVVPADMGVYRCLAENSMGVSSTKAELRVELTSTDYDTAADATETSSYFSAQGYLSSREQE  
GTESDEGQLPQVLEELKDLQVAPGTR LAKFQLKVKGYPAPKLYWFKDGOPLTTS DHIRMTDKKTLHTLEIVSV  
TREDSGQYAAYSNAVGAAYSARLLVRGPSEPEEK PASDVHERLVPPRI LEKFTPKKVKRGSSTF SVKVEG  
HPAPSVHWLKEEA EKGV LWIGPDTPGYTMAS SSKQHSLVLLDVG RQHOGTYTCIATNPAGQALCSASLHISGL  
AKEEEQERVKEALISSFLQGT SQAVSAQMSESAGFADLVGQSKGESLVAEEAHSHLSLAEVGT EEF LQKLT SQ  
ITEMVSAKISQAKLQVPGGDSDEETKTPSAPRHRGRSRPSSSVQESSSESEDGDSRGEIFDIYVVTADYLP LG  
AEQDAIILREGQYVEVLDSAHPLRWLVRTKPTKSSPSRQGWVSPAYLDKRLKLSPEWGPTEAPEFPEGEAVSED  
EYRTRLSSVIQELLSSEQAFV GELQFLESHHMKHLERSPRVPAAVASQKT VIFRNVQDISHFHSSFLKELQGC  
GTDDDVAMCFIKNQEA FEKYLEFLVGRVQAESVVVSTPVQEFYKKYAEETLSAKDPTQPPPPPLQHYLEQ PVE  
RVQKYQALLKELIRNKARNRQNCALLEQAYAVVSALPQRAENKLVSLMENY PGTLEALGEP IRQGHFIVWEG  
APGARM PWKGNHRHVF LFRNYLVICKPRRDSRTDTFSYVFRNMMKLS SIDLNDQVEGD DRAFEVWHERE DSVR  
KYLQARTVI IKNSWVKEICGIQQLAQPVWRPPEFEELADCTAELGETV KKLACRVTGT PKPIVSWYKDGKP  
VEVDPHHILIEDPDG SCTLILDNLTGIDSGQYMCFAASAAGNASTLGKILVQVPPRFVNVKVRATPFVEGEDAQ  
ITCTVEGAPYPQIRWYKDGTL LAPGNRYRMLNEPRSGVLVLIQAASKEDLGHYECELVNRLGSTRGGGELYM  
QSPALRARDQHHREQIVAAVEVTEQETKVPKKT VIT EETITTVVKS PRGRRQSPGKSPSRSPRRSASP RRPGL  
LLAPERLYPPGTSPRLEVEQGRKAPVPALYVTEAIEVHAPASQSQPKWLEVEETIEVRVKKTSRGASPVRE  
MTRSGEGILFTLPGGI PGRDPNANN SNKSVYQEAR TWGPAVVHVGE PFI FQVDSVGNVDWVAASPEPEQVRA  
SQKEENTERQEGCSDG DENTFLMEEPQD TDSLQGRDPKILTHNGRVLTLADLEDYVPQEGETFGCGDSTPSTP  
DEPPCEVSVLQREI SEPTVGQP VLLNVGRPPGTGATPSFFRPGSQVHSPESVSFLLREAWSGPVSAAPWTSS F  
HTHVQSSVDGSHGSFKTEVSTQTVSFGAVGETVTLHIDPDGGEAPGPSQ\*

>rs50739555\_ENSMUSP00000020732\_c.12868:T>G\_p.v4290G  
ENSMUST00000020732.13|Obscn-201|ENSMUSG00000061462|-|chr11:g.58952291:A>C  
MDHSFSGAPRFLTRPKAFVSVGKDATLSCQIVGNPTPHVSWEKDRQPV EAGARFRLAQDGDVYRLTILDLAL  
GDSGQYVCRARNAIGEAFAAVGLRVDSEGTCAEQAPHFLLRPTSIRVREGADATFRCRVGGSPPQAVSWSKDG  
RRLGPPDAPHVRVEEHGESSALRIRSARPRDGGTYEVRAENPLGSASAAAALVVDSDAEVAGPPGTSTATLLA  
HLQQRREAMRAEGIPPSPPGAGTRTCTVTEGKHARLSCFVTGEPKPEVWKKDGQLVTEGRRHVVEDEQENF  
VLKILFCKQSDRGLYTCTASNLVGQTYSSVLVVVREPTVPFKKRLQDLEVREKESATFQCEVAQPATEAAWFK  
EETRLWASAKYDIEEGTERRLTVRNVSADDDAVYICETTEGSRVVAELSVQGNLTKRKLPRKTAVRTGDTAIF  
WVELAVPEGPVRWLRNQEEMVAGGRVAITAEGTCHTLTI FQCTLEDMGEVAFVSGGCRTTTQFCV SAPRRPPL  
YPPADPVVKAKTESSVTL SWSAPPHGDRPVTIDGYVLEKRLGAYAWSRCHEAGWLATTEFTITGVAEEGDFQ  
FRVSAINHFGQGPYLEFPGTMHLVPM LAVKTP LKAVEAVEGGEVTF SVDLTVASSGEWFLDGEALKASSIYVI  
RCDRTRHMLTIREV PARLHGAQLKFVANGIETS IQMVVRAALGLPSSKLPAAAAREVLAQLH EEAQLLAE LSD  
QAAAVTWLKDGRELSLGP KYEMQVSAGRRALLVRDVAQDDAGLYECVSRGSR TAYQLLVQDITDGYRDWGPAG  
PQKHMCKCAGAKIARYLGSSCYRFLQYDKGVVWHLEAALDTRQKGTSSCSLHEKPKLVFAKQQAHSEVKA E  
AGNSATLSCEVTQAQTEVTFWKDGKLLSSSSKVRMEASGCSRRLVVQQAGKADAGEYSCEAGGQKLSFRLDVA  
EPKLVFAKQQAHS EVKAEAGASATLSCEVAQAQTEVTFWKDGKLLSSSSKVRMEASGCSRRLVVQQAGKADA  
GEYSCEAGGQKLSFRLDVAEPKMFVFAKEQQARSEVKA EAGASATLSCEVAQAQTEVTFWKDGKLLSSSSKVRM  
EASGCSRRLVVQQAGKADAGEYSCEAGGQKLSFRLDVTEPKLVFAKEQQARSEVKA EVGNSATLSCEVAQAQT  
EVTWFKDGKLLSSSSKVRMEASGCSRRLVVQQAGKADAGEYSCEAGGQKLSFRLDVAEPKLVFAKEQQARSEV  
KAEAGNSATLSCEVAQAQTEVTFWKDGKLLSSSSKVRMEASGCSRRLVVQQAGKADAGEYSCEAGGQKLSFHL  
DVTEPKLVFAKEQQAHSEVKA EAGASATLSCEVAQAQTEVTFWKDGKLLSSSSKVRMEASGCSRRLVVQQAGK  
ADAGEYSCEAEGQKLSFRLDVAEPKLVFAKEQQARSEVKA EAGASATLSCEVAQAQTEVTFWKDGKLLSSSSK  
VRVEASGCSRRLVVQQAGKADAGEYSCEAGGQKLSFRLDVAEPKLVFAKEQQANSEVKA EAGASATLSCEVAQ  
AQTEVTFWKDGKLLSSSSKVRVEASGCSRRLVVQQAGKADAGEYSCEAGGQKLSFRLDVAEPKLVFAKEQQAH  
SEVKA EAGASATLSCEVAQAQTEVTFWKDGKLLSSSSKVRVEASGCSRRLVVQQAGKADAGEYSCEAGGQKLS  
FRLDVAEPKLVFAKEQQAHSEVKA EAGASATLSCEVAQAQTEVTFWKDGKLLSSSSKVRVEASGCSRRLVVQQ  
AGKADAGEYSCEAGGQKLSFRLDVAEPKLVFAKEQQAHSEVKA EAGASATLSCEVAQAQTEVTFWKDGKLLSS





PAVPLAKTPGLQTSDAAPVFLTELQNDVQDGYPMSFDCVVTGQPVPSVRWFKDGLLEEDDHYMINEDQQGG  
HQLIITAVVPADMGVYRCLAENSMGVSSSTKAELRVELTSTDYDTAADATETSSYFSAQGYLSSREQEGTESDE  
GQLPQVLEELKDLQVAPGTRLAKFQLKVKGYPAKLYWFKDGPPLTSDHIRMTDKKTLHTLEIVSVTREDSDG  
QYAAYSNAVGAAYSSARLLVRGPSEPEEKPPASDVHERLVPPRILEKFTPKKVKRGSSITFSVKVEGHPAPSV  
HWLKEEAKEKGLWIGPDTPGYTMASSSKQHSVLVLDVGRQHGTYTCTIATNPAGQALCSASLHISGLAKEEEQ  
ERVKEALISSFLQGTSAVSAQMSESAFADLVGQSKGESLVAEEAHSLSLAEVGTTEEFLQKLTSSQITEMVS  
AKISQAKLQVPGGDSDEETKTPSASPRHGRSRPSSSVQESSESESDGDSRGEIFDIYVVTADYLPGLAEQDAI  
ILREGQYVEVLDSAHPLRWLVRTKPTKSSPSRQGWVSPAYLDKRLKLSPEWGPTEAPEFPGEAVSEDEYRTRL  
SSVIQELLSSEQAFVGEFQFLESHHMKHLERSPRVPAAVASQKTVIFRNVDI SHFHSSFLKELQCGCTDDDDV  
AMCFIKNQEAFAKEYLEFLVGRVQAESVVVSTPVQEFYKKYAEETLSAKDPTQPPPPPLQHYLEQPVERVQKYQ  
ALLKELIRNKARNRQNCALLEQAYAVVSALPQRAENKLVSLMENYPGTLEALGEPTRQGHFIVWEGAPGARM  
PWKGHNHRVFLFRNYLVICKPRRDSRTDFTSYVFRNMMKLSSIDLNDQVEGDDRAFEVWHEREDSVRKYLLQA  
RTVLIKNSWVKEICGIQQLAQPVWRPPEFEEELADCTAELGETVKLACRVTGTTPKPIVSWYKDGKPVVEVDPH  
HILIEDPDGSLTILDLNLTGIDSGQYMCFAASAAGNASTLGKILVQVPPRFVNVKVRATPFVEGEDAQITCTVE  
GAPYPQIRWYKDGTLTLLAPGNRYRMLNEPRSGVLVLIQAASKEDLGHYECELVNRLGSTRGGGELYMQSPALR  
ARDQHHREQIVAAVEERRPSP\*  
>rs50739555\_ENSMUSP00000151217\_c.10960:T>G\_p.V3654G  
ENSMUST00000219084.3|Obscn-207|ENSMUSG00000061462|-|chr11:g.58952291:A>C  
MDHSFSGAPRFLTRPKAFVSVGKDATLSCQIVGNPTPHVSWEKDRQPVEAGARFRLAQDGDVYRLTILDLAL  
GDSGQYVCRARNAIGEAFVAVGLRVDSEGTCAEQAPHFLLRPTSIRVREGADATFRCRVGGSPQPAVSWSKDG  
RRLGPPDAPHVRVEEHGESSALRIRSARPRDGGTYEVRAENPLGSASAAAALVVDSDAEVAGPPGTSTATLLA  
HLQORREAMRAEGIPPSPPGAGTRTCTVTEGKHARLSCFVTGEPKPETVWKKDGLVTEGRRHVVEDEQENF  
VLKILFCKQSDRGLYTCTASNLVGQTYSSVLVVREPTVPFKKRLQDLEVREKESATFQCEVAQPAEEAAWFK  
EETRLWASAKYDIEEEGTERRLTVRNVSADDDAVYICETTEGSRVAELSVQGNLTKLPRKTAVRTGDTAIF  
WVELAVPEGPRWLRNQEEMVAGGRVAITAEGTCHTLTI FQCTLEDMGEVAFVSGGCRTTTQFCVSAPRRPPL  
YPPADPVVKAKTESVTLWSAPPHGDRPVTIDGYVLEKRKLGAYAWSRCHEAGWLATFTITGVAEEGDFQ  
FRVSAINHFQGTPELFPFGTMLHVLVPLAVKTPKAVEAVEGGEVTFVSDLTVASSGEWFLDGEALCASSIYVI  
RCDRTRHMLTIREVPARLHGAQLKFVANGIETSIQMVVRAALGLPSSKLPAAAAAREVLAQLHEEAQLLAE LSD  
QAAA VTLKDGRELSLGPKEYMQVSAGRRALLVRDVAQDDAGLYECVSRGSRRTAYQLLVQDITDGYRDWGPAG  
PQKHMCKCAGAKIARYLGSSCYRFLQYDKGVWHLEAALDTRQKGTSSCSLHEKPKLVFAKQQAHSEVKA  
AGNSATLSCEVTQAQTEVTWFKDGKLLSSSSKVRMEASGCSRRLVVQQAGKADAGEYSCEAGGQKLSFRLDVA  
EPKLVFAKQQAHSEVKAEGASATLSCEVAQAQTEVTWFKDGKLLSSSSKVRMEASGCSRRLVVQQAGKADA  
GEYSCEAGGQKLSFRLDVAEPKMFVFAKEQQARSEVKAEGASATLSCEVAQAQTEVTWFKDGKLLSSSSKVRM  
EASGCSRRLVVQQAGKADAGEYSCEAGGQKLSFRLDVTEPKLVFAKEQQARSEVKAEGNSATLSCEVAQAQ  
EVTWFKDGKLLSSSSKVRMEASGCSRRLVVQQAGKADAGEYSCEAGGQKLSFHLDVTEPKLVFAKEQQAHSEV  
KAEAGASATLSCEVAQAQTEVTWFKDGKLLSSSSKVRMEASGCSRRLVVQQAGKADAGEYSCEAGGQKLSFR  
DVAEPKLVFAKEQQARSEVKAEGASATLSCEVAQAQTEVTWFKDGKLLSSSSKVRVEASGCSRRLVVQQAGK  
ADAGEYSCEAGGQKLSFRLDVAEPKLVFAKEQQANSEVKAEGASATLSCEVAQAQTEVTWFKDGKLLSSSSK  
VRVEASGCSRRLVVQQAGKADAGEYSCEAGGQKLSFRLDVAEPKLAFAKEQQAHSEVKAEGASATLSCEVAQ  
AQTEVTWFKDGKLLSSSSKVRVEASGCSRRLVVQQAGKADAGEYSCEAGGQKLSFRLDVAEPKLVFAKEQQAH  
SEVKAEGASATLSCEVAQAQTEVTWFKDGKLLSSSSKVRVEASGCSRRLVVQQVQKADAGEYSCEARGQKLS  
FRLDVAEAEQSIPERPSRREPLVVEKHETIILTATIAAPSVAAVTWLKDGVERRSKRHEATSLGDHTLTVR  
GAQVLD SAIYSCRVGKEGQDFPVQVEEVAAKFSKPLEPVEGELGGTVMLVCELSPEQAEVWRCGNTQLRPGK  
RFQMTSEGPRTTLTVSGLREDDAEYVCESRDDRTSARLTVKVPVVKFTSGLSAMVAEEGQEAFTQCQVSPS  
DAGVTWYKDMQLQPSEKFMVESGASRSLTILGLTLEDAGQVTVAEAGASSAALRVREAPVLFKCKLEPQT  
VEERTSVTLEVELTRPWPEVKWTRNAAVLTPSENVEIRAEGARHCLVLRVSGFADRGFFGCETPD DKTQAKLN  
VEMRQVRLVRGLQEVEAKEQGTASMDVELSHAEVEGSWTRDGLRLQPGPKCHLAVQGPVHILTLALSALQPQDSG  
LVAFRAEGVHTSARLIVTELPVSFTRVLQDVVATQKEKVTLECELSRPVDVRWLKDGVELRAGKAI GIVAQGT  
CRSLVIYRCETGDQGVYCDALDAQTSASLRVQGRYTLIFRVLAEADAGEVKFVAENAESRAHLRVKELPVT  
LLRPLRDKIAMEKHRGVLECVSRASAQVRWFKGGVELQSGPKYEVVSDGLYRKLVIINDVQPEDEDYTC DAG  
NVKTSAQFFVEEQSITIVRGLKDMTVMEMPAPAWFECETSIPSVRPPKWLKGTVLQAGGNVGLEQDGTVHRLT  
LHKTCSTMTGPVHFTIGKSRSSAQLVSDIPVVLTRPLEPKAGRELQSVVLSCDFRPAPKAVQWYKDDTPLSP  
SEKFKMALEGQMAYELRILRLTPADAGVYRCQAGSAQSVADTVEAREVTVIQPLQDAEAMEEGRVCFSEL SH  
KDEDIEWLNGTPLYNDSFHEISHEGCLHTLVLSKVRQADGTVCATSPKVS SARLVVKGKPVVFLKALDDV  
SAEERGLTLTQCEVSDPEARVVWRKDGVELGSPDKYDFLHKAGARGLTVHDLSHEDAGLYTCQVGSKETQSKV  
SVHDLHVGITKRLKTVEVLEGECSFECVLSHESPSDPAVWTVGGKTVGGSGHFHAVRQGRKYTLTVKDAALS  
DAGEVVFVSVLGLT SKASLIIRERPVDITKPLEDQRTTLGEDVMLSCELSRAGTSVRWLKDGKAIKRSQKYDLL  
SEGTRAVLVVRKASLKDSGEYTCETEASKSTAKLCVEEKANRFTTELADLQVEEKGRAVFTCKTEHPASVVTW

RKGLLELRASGKHVPSQEGTLTKLTINALERTSDTYTCDIGQARTQARLLVHGQKVRVIEDLEDTAVQEGSS  
AKFCRIAPADYGPVHWFLLDKTPLHSNELNEITVQPGGYHVLTLRQLALKDSGTVYFEAGDQRTSAAALRVTEK  
PSIFSRPLTDVTVTEGEDLTLVCETTTVDSSVRWTKDGKTLRPSARCQLSHEGCAQQLLITATTPQDGGRYKC  
EIGGASSSSIVRVHALPVRFRESLKDVEVPEGKAATLRCVLSVAAPVEWRHGDDVLKSSNKYSRLRQEGAVLE  
LVIRDLQPQDSGQYSCSFGDQTTSATLTVKTSQAQFVGLKRNKEATEGTTVTLRCELTKKEAPVEWKKGTETLR  
NGDKYSLKQDGAVCELQICSLLVADAGEYSCVCGQEKTSATLTVKALLVHFVRRRLRSKEATEGDTTTLQCELS  
KAAPVEWRKGTETLRDGDYSLKQDGAVCELQIRSLTIADAGEYLCTCGQEKTSATLTVRGLPAKFIEDLRSQ  
EATEGTMATLRCESKAAPVEWRKGSSETLKDGDYTLRQDGAVCELQIRGLAVVDTGTYSLPTKFTTEGLRNE  
EATEGTMATLRCESKAAPVEWRKGSSETLKDGDYTLRQDGAVCELQIRGLAVVDTGTYSLPTKFTTEGLRNE  
VKALPPRFIEDLRSQEATEGTMATLRCQMSKAAPVEWRKGSSETLGDGGYSLRQNGAVCELQIHDLAVEDTGE  
YSCGCGQEKTSATLNVKALPPKFTTEGLKKEEATEGTMVTLRQMSKEATVEWRKGAKTLSGGYSLRQDGAM  
CELQICGLAVEDAGEYSCVCGQEKTSATLSVKALPPRFIEDLRSQEATEGTMATLRCQMSKAAPVEWRKGSSET  
LRDGDYSLRQDGAVCELQIRDLAVEDAGEYLCVCGQEKTSATLSVKALPPRFIEDLRSQEATEGTMATLRCQ  
MSKAAPVEWRKGSSETLKDGDYSLRQDGAVCELQICDLAVEDTGDYSCVCGQEKTSATLSVKAPQVVFQQPLQ  
NLQAEEGSMASLRCELSVPAAMVWSKGGLELQGDTRREARQQGCVAELLLRDLRREDAGEYSCTCGSQTTSA  
TLMVTAAPVRFRLRELQAQDVDEGATARLRCELSREAVSVEWRKGSLLQFPKAYQMVQEGTTAELLVHGVEQE  
DAGEYTCDAHTQSIARLSVRAPKPKFKTDLQSTEQEAGGTARLCCQLSEAEPTPVQWLKEGVELHVQSKYE  
MRQGAQCELLIHGLEAKDTGEYACLVGQKTLASLRVKEPEVTIVRGLVDMEVQADEVFEFTCKVSOQAGATD  
VQWHLQGLPLQSNEVTEVAVLADGCTHVLQKGVTLDEAGTVSFHVGGSSSAQLTVRVEVTVLEPLKDVQL  
SEGQDAHFRCRLSRASQEARWALGGVPLQCNEMNDITVEQGTLYLLTLHKVTLDEAGTITLVQVGSSEAQL  
KVTAKNTVLRGLENVDALEGGALFECQLSQPEVAHTWLLDDEPVHTSEKVEVVYFENGLRHLKLNKLPQ  
DSCRVTFLAGDVVTSFALTVRGWRLEVLPPHDASVKAGMQRFTCILSEAVPVGEATWYINGAAIQPDDTDW  
TVTTDGSHHALTLSNAQPQHAGEVTFFAARDAVASARLSVLALPDPEDAEEVGRSDHVSVLSVWVAPMSDGGGG  
LCGYRVEMKEASTGQWQLCHDLVPGPECVVDDLVPKTYRFRVAAVGPAGAGEPVHLPQMVKIAPAPAPAPAP  
APAPETRAQAVVGEDICLELEVAADGGEVVWHKGTERRIQPGGHFEVLSRGRQMLVIKGFRTEDQGEYRCGPIQ  
GLPSSGAATFNVMTSGSGDEVPAQPSLPPPEAAQEGDLHLLEALARKRRMSREPTLDSISELPEEDSRVQHL  
RQEAEEETAPDLSEGYSTADELARTGEADLSHTSDDESFRAGTPSLVTYLKKAGGPGISPLASKHEAQVTTSVK  
PQKQQEPVVPPTCPPPGDLAADMPSLDKAAVKIQAFAKGYKVRKEMKQOQEGPVFSRTFGDTEAQVGDVLR  
ECVLATKTDMRACWLKDGIELTDGRHYHIDQLKDGTCSLLVTLGLAPTDGGRYTCQVSTKSGRVSHSACVVVSG  
TESEAESSSGGELDDAFRRARRLHRLFRTKSPAELSEELFLSADEGPGEPEEPADWQTYREDEFVFCIRFE  
SLAEARQAVTCFRNMFMATMGIGVEISLGEQGPGRVEMRIGKVAPTVTPAVPLAKTPGLQTSDAAPVFLTELQN  
QVDQDGYPMDFCVVTGQVPSVRWFKDGKLLLEDDHYMINEDQQGGHQLIITAVVPADMGVYRCLAENSMGV  
SSTKAELRVELTSTDYDTAADATETSSYFSAQGYLSSREQEGTESDEGQLPQVLEELKDLQVAPGTRLAKFQL  
KVKGYPAKLYWFKDQPLTSDHIRMTDKKTLHTLEIVSVTREDSGQYAAAYISNAVGAAYSSARLLVGRPSE  
PEEKASDVHRLVPPRILEKFTPKKVKRGSSITFSVKVEGHPAPSVHVLKKEAEKGVLLWIGPDTPGYTMAS  
SKQHSVLVLDVGRQHGTYTCIATNPAGQALCSASLHISGLAKEEEQERVKEALISSFLQGSTQAVSAQMSSES  
AGFADLVGQSKGESLVAEEAHSHLSLAEVGTTEFLQKLTSTIEMVSAKISQAKLQVPGGDSDEETKTPSASP  
RHGRSRPSSSVQESSSESEDGDSRGEIFDIYVVTADYLPGLAEQDAIILREGQYVEVLDSAPHLRVLVTRKPT  
KSSPSRQGWVSPAYLDKRLKLSPEWGPTEAPEFPGEAVSEDEYRTRLSVVIQELLSSEQAFVGELOFLESHM  
KHLERSPRVPAAVASQKTVIFRNVQDISHFHSSFLKELQCGCTDDDVAMCFIKNQEAFAFEKYLEFLVGRVQAES  
VVVSTPVQEFYKKYAETLSAKDPTQPPPPPLQHYLEQPVERVQKYQALLKELIRNKARNRQNCALLEQAYAV  
VSALPQRAENKLVSLMENYPGTLEALGEPTRQGHFIVWEGAPGARMPWKGNHRVFLFRNYLVI CKPRRDSR  
TDTFSYVFRNMMKLSSIDLNDQVEGDDRAFEVWHEREVSRKYLQARTVVIKNSWVKEICGIQQRQAQPVWR  
PPEFEEELADCTAELGETVKLACRVGTGPKPIVSWYKDGKPEVDPHILIEDPDGSCTLIDLNLGTIDSGQY  
MCFASAAGNASTLTKILVQVPPRFVNVKVRATPFVEGEDAQITCTVEGAPYPQIRWYKDGTLAPGNRYRMLN  
EPRSGVLVLIQAASKEDLGHYECELVNRGSTRGGGELYMQSPALRARDQHHREQIVAAVEVTEQETKVPKK  
TVIIEETITTVVKSPPRRRQSPGKSPSRPSRRSASPRRGLLAPERLYPPGTSPSRRLVEVEQGRKAPVPALY  
VTEAEVHAPASQSQPKWLEVEETIEVRVKKTGSRGASPVREMTSRGEGILFTLPGGIPGRDPNANNNSNKS  
QVYQEARWGPVVHVGEPFIHQVDSVGNVDVVAASPEPEQVRASQKEENTERQEGCSDGDENTFLMEEPQD  
TDSLQGRDPKILTHNGRVLTLADLEDYVPQEGEFTFGCGDSTPSTPDEPPEVSVLQREI SEPTVQPVLLNVGRPPG  
TGATPSFFRPGSQVHSPESVSFLLEAWSGPVSAAPWTSSFHHTVQSSVDGSHGFSFKTEVSTQTVSFGAVGET  
VTLHIDPDGGEAPGPSQG\*

>ENSMUSP00000158795\_c.12828:C>AGGCCCTTGTGGGTGGGAC\_p.H4277RPLWVGH-ins  
ENSMUST00000238536.2|Obscn-210|ENSMUSG00000061462|-  
|chr11:g.58952331:g>GTCCACCCACAAGGCCCT  
MDHSFSGAPRFLTRPKAFVSVGKDATLSCQIVGNPTPHVSWEKDRQPVEAGARFLAQDGDVYRLTILDLAL  
GDSGQYVCRARNAIGEAFVAVGLRVDSEGTCAEQAPHLLRPTSIRVREGADATFRCRVGGSPQPAVSWSKDG  
RRLGPPDAPHVRVEEHGESSALRIRSARPRDGGTYEVRAENPLGSASAAAALVVDSDAEVAGPPGTSTATLLA

HLQQRREAMRAEGIPPSPPGAGTRTCTVTEGKHARLSCFVTGEPKPEVWKKDQGLVTEGRRHVVEDEQENF
VLKILFCQSDRGLYTCTASNLVGQTYSSVLVVVREPTVPFKKRLQDLEVREKESATFQCEVAQPATEAAWFK
EETRLWASAKYDIEEEGETERRLTVRNVSADDDAVYICETTEGSRVVAELSVQGNLTKRKLPRKTAVRTGDTAIF
WVELAVPEGPVRWLRNQEEMVAGGRVAITAEGTCHTLTI FQCTLEDMGEVAFVSGGCRTTTQFCVSAPRRPPL
YPPADPVVKAKTESSVTLWSAPPHGDRPVTIDGYVLEKRKLGA YAWSRCHEAGWLATTEFTITGVAAEEDGFQ
FRVSAINHFGQGPYLEFPGTMHLVPLAVKTPKAVEAVEGGEVTFVSDLTVASSGGEWFLDGEALKASSIYVI
RCDRTRHMLTIREVPARLHGAQLKFVANGIETS IQMVVRAALGLPSSKLPAAAAREVLAQLHHEEAQLLAE LSD
QAAAFTWLKDGRELSLGPKYEMQVSAGRRALLVRDVAQQDDAGLYECVSRGSRRTAYQLLVQDITDGYRDWGPAG
PQKHMCKCAGAKIARYLGSSCYRFLQYDKGVVHWHLEAALDTRQGKGTSSCSLHEKPKLVFAKGOQAHSEVKA E
AGNSATLSCEVTQAQTEVTFWKDGKLLSSSSKVRMEASGCSRRLVVQQAGKADAGEYSCEAGGQKLSFRLDVA
EPKLVFAKGOQAHSEVKA EAGASATLSCEVAQAQTEVTFWKDGKLLSSSSKVRMEASGCSRRLVVQQAGKADA
GEYSCEAGGQKLSFRLDVAEPKMFVFAKEQQARSEVKA EAGASATLSCEVAQAQTEVTFWKDGKLLSSSSKVRM
EASGCSRRLVVQQAGKADAGEYSCEAGGQKLSFRLDVTEPKLVFAKEQQARSEVKA E VGN SATLSCEVAQAQT
EVTWFKDGKLLSSSSKVRMEASGCSRRLVVQQAGKADAGEYSCEAGGQKLSFRLDVAEPKLVFAKEQQARSEV
KAEAGNSATLSCEVAQAQTEVTFWKDGKLLSSSSKVRMEASGCSRRLVVQQAGKADAGEYSCEAGGQKLSFHL
DVTEPKLVFAKEQQAHSEVKA EAGASATLSCEVAQAQTEVTFWKDGKLLSSSSKVRMEASGCSRRLVVQQAGK
ADAGEYSCEAGGQKLSFRLDVAEPKLVFAKEQQARSEVKA EAGASATLSCEVAQAQTEVTFWKDGKLLSSSSK
VRVEASGCSRRLVVQQAGKADAGEYSCEAGGQKLSFRLDVAEPKLVFAKEQQANSEVKA EAGASATLSCEVAQ
AQTEVTFWKDGKLLSSSSKVRVEASGCSRRLVVQQAGKADAGEYSCEAGGQKLSFRLDVAEPKLAFAKEQQAH
SEVKA EAGASATLSCEVAQAQTEVTFWKDGKLLSSSSKVRVEASGCSRRLVVQQAGKADAGEYSCEAGGQKLS
FRLDVAEPKLAFAKEQQAHSEVKA EAGASATLSCEVAQAQTEVTFWKDGKLLSSSSKVRVEASGCSRRLVVQQ
AGKADAGEYSCEAGGQKLSFRLDVAEPKLAFAKEQQAHSEVKA EAGASATLSCEVAQAQTEVTFWKDGKLLSS
SSKVRVEASGCSRRLVVQQAGKADAGEYSCEAGGQKLFRLDVAEPKLMFAKEQQAHSEVKA EAGASATLSCE
VAQAQTEVTFWKDGKLLSSSSKVRVEASGCSRRLVVQQAGKADAGEYSCEAGGQKLSFRLDVAEPKLVFAKEQ
QAHSEVKA EAGASATLSCEVAQAQTEVTFWKDGKLLSSSSKVRVEASGCSRRLVVQQVKGADAGEYSCEARGQ
KLSFRLDVADATRLMFAKEQQARTEVKA EAGNSATLSCEVAQAQTEVTFWKDGKLLSSSSKVRVEASGCSRRLV
VQQAGKADAGEYSCEAGGQKLSFRLDVAEAEASQIPERPSRREPLVVKHEHETIILTATIAAPSAAVTWLKDG V
EIRRSKRHEATSLGDHTLTVRGAQVLD SAIYSCRVGKEGQDFPVQVEEVAAKFSKPLEPVEGELGGTVMLVC
ELSPQAEVWRCGNTQLRPGKRFQMTSEGPRRTLTVSGLREDDAE EYVCESRDDRTSARLTVKVPVVKFTS
GLSAMVAEEGQ EATFQCVVSPSDAGVTWYKDGMLQ PSEKFMVESGASRSLTILGLTLEDAGQVTEAEGAS
SSAALRVREAPVFLFKKLEPQTV EERTSVTLEVELTRPWPEVKWTRNAAVLTPSENVEIRAEGARHCLVLR SV
GFADRGFFGCETPDDKTQAKLNVEMRQVRLVRGLQEVEAKEQGTASMDVELSHA E VEGSWTRDGLRQLPGPKC
HLAVQGPVHILTL SALQPQDSGLVAFRAEGVHTSARLIVTEL PVSFTRVLQDVVATQKEKVTLECELSRPVDV
RWLKDGVELRAGKAIGIVAQGTCSRSLVIYRCETGDQGVYVCDALDAQTSASLRVQGRTYTLIFRRVLAEDAGE
VKFVAENAESRAHLRVELPVTLLRPLRDKIAMEKHRGVLECCQVSRASAQVRWFKGGVELQSGPKYEVVSDGL
YRKLVIN DVQPEDEDTYTC DAGNVKTSAQFFVEEQSITIVRGLKDMTVM EPAPAWFECETSIPSVRPPKWL LG
KTVLQAGGNVGL EQDGTVHRLTLHKTCSTMTGPVHFTIGKSRSSAQLVVSDIPVVLTRPLEPKAGRELQSVVL
SCDFRPAPKAVQWYKDDTPLSPSEKFKMALEGQMAELRILRLTPADAGVYRCQAGSAQSSAEVTEAREVTVI
QPLQDAEAMEEGRVCFSCELSHKDEDIEWSLNGTPLYNDSFHEI SHEGCLHTLVLSVRQADTGTVCATSPKV
SVSARLVVKGKPVVFLKALDDVSAEERGTLTLQCEVSDPEARVVWRKDGVELGSPDKYDFLHKAGARGLTVHD
LSHEDAGLYTCQVGSKETQSKVSVHDLHVGITKRLKTVEVLEGE SCSEFCVLSHESPSDPAVWTVGGKTVGGS
GHFHAVRQGRKYTLTVKDAALSDAGEVVSVLGLTSKASLIIRERPVDITKPLEDQRTTLGEDVMLSCELSRA
GTSVRWLKDGKAIRKSQKYDLLSEGTRAVLVVRKASLKDSGEYTCETEASKSTAKLCVEEKANRFTEELADLQ
VEEKGRAVFTCKTEHPASVVTWRKGLLELRASGKHVPSQEGTLTKLTINALERTDSDTYTCDIGQARTQARLL
VHGQKVRVIEDLEDTAVQEGSSAKFCRIAPADYGPVHWF LDKTPLHSNELNEITVQPGYHVLTLRQLALKD
SGTVYFEAGDQRTSAAALRVTEKPSIFSRPLTDVTVTEGEDLTLVCETTTVDSSVRWTKDGKTLRPSARCQLSH
EGCQAQLLITATTPQDGGRYKCEIGGASSSSIVRVHALPVRFRRESLKDVEVPEGKAATLRCVLSVAAPVEWR
HGDDVLKSSNKYSLRQEGAVLELVIRDLQPDQSGQYSCSFGDQTTSATLTVKTSQAQFVGLKRNKEATEGTTV
TLRCELTK EAPVEWKKGTETLRNGDKYSLKQDGAVCELQICSLLVADAGEYSCVCGQEKTSATLTVKALLVHF
VRLRSKEATEGDTTTLQCELSKAAPVEWRKGTETLRDGDYSLKQDGAVCELQIRSLTIADAGEYLCTCGQE
KTSATLTVRALPAKFKDSLKNEEATEGTTATLSCELSKAAPVWKKGPKTLQSGDKYVLRQDGAVCGLQIHGL
TMADAGEYSCVCGQEKTSATLTVRGLPAKFIEDLRSQEATEGATAILRCELSKAAPVEWRKGSSETLKDGDYR T
LRQDGAVCELQIRGLAVDTGTYS LPTKFTEGLRNEEATEGTMATLRCQMSKAAPVEWRKGSSETLRDGDYR S
LRQDGAVCELQIRGLTIEDSGEYTCVCGQEKTSATLSVKALPSRFIEDLRSQEATEGTMATLRCQMSKATAPVE
WKKGSETLRDGGYSLRQDGPVCELQICDLAVEDAGEYSCVCGQEKTSATLSIKALPPRFIEDLRSQEATEGT
MATLRCQMSKAAPVEWRKGSSETLGDGGYSLRQNGAVCELQIRPLWVGHDLAVEDTGEYSCVCGQEKTSATLN
VKALPPRFIEDLRSQEATEGTMATLRCQMSKAAPVEWRKGSSETLRDGGYSLRQDGAVCELQIHDLDVEDAGQ
YSCVCGQEKTSAVLTVDALPPKFT EGLKKEEATEGTMVTLRCQMSKEATVEWRKGAKT LSDGGYSLRQDGAM

CELQICGLAVEDAGEYSCVCGQEKTSATLSVKALPPRFIEDLRSQEATEGTMATLRCQMSKAAPVEWRKGET  
 LRDGDRYSLRQDGAUCELQIRDLAVEDAGEYLCVCGQEKTSATLSVKALPPRFIEDLRSQEATEGTMATLRCQ  
 MSKAAPVEWRKGSKTLRDGDRYSLRQDGAUCELQICDLAVEDTGDYSCVCGQEKTSATLSVKALPPRFIEDLR  
 SQEAREGTVATLRCRMSKAAPVEWRKGETLKDGDYSLRQEGNLCQLQIRDLAVEDTEEYSCVCGQEKTSAT  
 LSVKALPAKFIEDLRSQEAPESSTVTLRCKLSKKASVVWKKGETLRNGARYSLRQDGAUCELEIRDLTVEEDT  
 GEYSCTCGQERTSATLSIMAPQVVFQOPLQNLQAEEGSMASLRCELSVPNAAMVWSKGGLELQGDTRREARQQ  
 GCVAELLLRDLRREDAGEYSCCTGSQTTSATLMVTAAPVRFRELAQDQVDEGATARLRCELSREAVSVEWRK  
 GSLQLFPCAQYQMVQEGTTAELLVHGVQEEDAGEYTC DAGHTQS IARLSVRAPKPKFKTDLQSTEQEAGGTAR  
 LCCQLSEAEPTPVQWLKEGVELHVGSKYEMRRQGAUCELLIHGLEAKDTGEYACLVGQKTLASLRVKEPEV  
 TIVRGLVDMEVQADEDEFTCKVSQAGATDVQWHLQGLPLQSNVETEVAVLADGCTHVLQKGVTLLEDAGTVS  
 FHVGGSSSAQLTVRVPEVTVLEPLKDVQLSEGQDAHFRCRLSRASQGEARWALGGVPLQCNEMNDITVEQGT  
 LYLLTLHKVTLEDAGTITLQVGSSESAQLKVTAKNTVLRGLENVDALEGGEALFECQLSQPEVAATWLLDD  
 EPVHTSEKVEVVYFENGLRHLLLLKNLKPQDSCRVTFLAGDVVTS AFLTVRGRWLEVLPPHDASVKAGMQVR  
 FTCLLSEAVPVGEATWYINGAAIQPDDTDWTVTTDGSHHALTLSNAQPQHAGEVTF AARDAVASARLSVLALP  
 DPPEDAEEVGRSDHSVTLSSWVAPMSDGGGGLCGYRVMKEASTGQWQLCHDLVPGPECVDDLVPGKTYRFRV  
 AAVGPAGAGEPVHLPQMVKIAPAPAPAPAPAPAPETRAVVGEDICLELEVAADGGVEVWHKGTERRIQPGG  
 HFEVLSRGQMLVIKGFRTEDQGEYRCGPIQGLPSSGAATFNVMVMTSGSGDEVPAQPSLPPEAAQEGDLHLL  
 WEALARKRRMSREPTLDSISELPEEDSRVQHRLRQEAETAPDLSEGYSTADELARTGEADLSHTSSDDESFRAG  
 TPSLVTYLKKAGGPGISPLASKHEAQVTTSVKPKQKQEPVVPVTPCPPPGDLSAADLMDPSLDKAAVKIQAAFKG  
 YKVRKEMKQOEGPVFSRTFGDTEAQVGDVLRLECVLATKTDMRACWLKDGIELTDGRHYHIDQLKDGTCSSLLV  
 TGLAPTDSGRYTCQVSTKSGRVSHSACVVVSGTESEAESSSGGELDDAFRRAARRLHRLFRTKSPAELSEEEL  
 FLSADEGPGPEEPADWQTYREDENFVCIRFESLAEARQAVTCFRNMFMATMIGVEISLGEQGRGVEMRIGK  
 VAPTPTPAVPLAKTPGLQTSDAAPVFLTELQNDVQDGYPMSFDCVVTGQPVPSVRWFKDGKLEEDDHYMIN  
 EDQGGHQLIITAVVPADMGVYRCLAENSMGVSSTKAELRVELTSTDYDTAADATETSSYFSAQGYLSSREQE  
 GTESDEGQLPQVLEELKDLQVAPGTRLAKFQLKVKGYPAKLYWFKDQGLTTS DHIRMTDKKTLHTLEIVSV  
 TREDSGQYAAIYISNAVGAAYSARLLVRGVPSEPEEKSPASDHERLVPRILEKFTPKKVKRGSSTIFS VKVEG  
 HPAPSVHHLKEEAEGVLIWIGPDTPGYTMASSSKQHSVLVLDVGRQHOGTYTIC IATNPAGQALCSASLHISGL  
 AKEEEQERVKEALISSFLQGTSAQVSAQMSEAGFADLVGQSKGESLVAEEAHSHLSLAEVGTTEFLQKLT SQ  
 ITEMVSAKISQAKLQVPGGDSDEETKTPSASPRHGRSRPSSSVQESSSESEDGDSRGEIFDIYVVTADYLP LG  
 AEQDAIILREGQYVEVLDSAHPLRWLVRTKPTKSSPSRQGWSPAYLDKRLKLSPEWGPTEAPEFPGEAVSED  
 EYRTRLSSVIQELLSSEQAFVGELOFLESHHMKHLERSPRVPAAVASQKTVI FRNVQDISHFHSSFLKELQGC  
 GTDDVAMCFIKNQEA FEKYLEFLVGRVQAESVVVSTPVQEFYKKAETLSAKDPTQPPPPPLQHYLEQPVE  
 RVQKYQALLKELIRNKARNRQNCALLEQAYAVVSALPQRAENKLVSLMENYPGTLEALGEP IRQGHFIVWEG  
 APGARMPWKGNHRHVF LFRNYLVICKPRRDSRTDTFSYVFRNMMLSSIDLNDQVEGDRAFEVWHEREDSVR  
 KYLLQARTVI IKNSWVKEICGIQORLAQPVWRPPEFEELADCTAELGETVKLACRVGTGPKPIVSWYKDGKP  
 VEVDPHHILIEDPDGSC TLI LDNLTGIDSGQYMCFAASAAGNASTLGKILVQVPPRFVNKVRATPFVEGEDAQ  
 ITCTVEGAPYPQIRWYKDGTL L LAPGNRYRMLNEPRSGVLV LVIQAASKEDLGHYECELVNRLGSTRGGGELYM  
 QSPALRARDQHHREQIVAAVEDTSVEGSAHSAQDGDADQQAASVLWRLGSEALGSPSGDLNTRQSEPPAFEE  
 AASQIPGAASGTPEVSQPGTHKGLEQETTSSGSQGWTVPIRVEGTAWPGAGTGQLLLDVHSQVIMETTORTYV  
 CQAPDGTGVTTRAPSMQVTIEDVQVQVGDMAQF DAVIEGHPPPIV TWYKGSTQLTSSARLSQRQDGTYSLVLTD  
 VAPHDAGVYTCVANNAGGQVLCKAELLVHGGDKLDAENQVYRRKLHSFYDVQEEIGRGVFGFVKRVQHKGNKM  
 FCAAKFIPLRSKTRAQAYQERDILATLGHPLVTGLLDQFETRKTLLI LILELCSSEELLDRLFKKGVVTEAEVK  
 VYIQQLVEGLHLYLHSHGILHLDIKPPNIMLVHPAREDIKICDFGFAQKITPSEPQYSKYGSPFVVSPEIIEQN  
 TVSEGSDIWMAGVISYLSLTCSSPFAGESDRATLLNVLEGRVSWSSPTAAHLS EDAKDFIKATLQRTPRARPS  
 TSQCLAHPWFLKSMPEAAEHFINTKQLKFL LARSWRSLMSYKSILVMRSIPELLQGPDPSPSLGVARHLRG  
 EASGASSSSSSSDNELAPFARAKSLPSPVTHSPLLHPRGFLRPSASLPEETEASMTADAAVPASPQSAGPP  
 ASPGCVPRHSVSISSLFYQQAGEGAERGNKTS GAKRHPARRRHLLKGGYIARALPGLREPLMEYSLLEEEAARE  
 EQASLMTKTPSFETALRLPSSSVREVPGRSHSLDNPPVTTGPSPEACKEQLLFPSTGLTHETTAKDRGHKEG  
 FLQESVFPFPMSGDSRPGKQEGSSQDSCRGKPASSCHSELGSGSQEGCGPPSSQSLGSLPPQSLKKEKELSTSCG  
 PLFSEQPQAAPFPTQVSPLLGSEKEPQDGS LSEGVPVVPSSPGSASQVDASLDTEGLSEAGDTCDFTPPPQR  
 PQEQATTRKFSLESRGGYAGVAGYGTFAFGGDAGGMLGQGPLWARMWAVS QSSEEQDEAATESPQPLES LGP  
 IAEASGVPLRTSPSLTPWEEVEQVSLVQIRDLSGDAEAADTISLDISEVDPAYLNLSDLYDIKYLPEFEMI FR  
 RVPKPIEQESPSGSETEAGQGLADFL EEAAWPWPGEGLGRAGLEITEEPPEPGDLEALLGEAAVGRKRKWSPS  
 RGLVQFPGRCLSGSEEPVGLRQRVKASMAHISRILKGRPEGEREPGRKKAGLASFRLSGLKGRDQELSDSE  
 AVVLGQSVTLACQVLAQPTAQATWSKDGVLLESSGHLLI SSSLKNFQLLTLVVKKEEDLGTYTCCVSNPLGTA  
 VTTGVLRAERPSSSPRPEVGELYKDAVLLVWKPVE SCGPVTVYIVQCCIEGGSWTTLASDISDCCYLTGKLSR  
 GGMYIFRTACVSKAGMGYSSPSEQVLLGGPNHLASEEESRGRPAQLLPSTKTFAFQMQIRRGFRSVVRQCR  
 EKASGRALAAKIVPYQPEDKTAVLREYEALKRLHHPHLAQLHAAYSRHLVLI LILELCSGPELLPSLAERESY

SESDVKDYLDWQMLSATQYLHAQHILHLDLRSENMMVTEYNLLKVIDLGNAQSLDQEKVPAPENFKDYLETMAP  
 ELLEGQAVPQTDIWAIGVTAFLMSGEYPESSEGRDLQKGLRKLIRLSRCYAGLSGGAVAFLOSSLCAQP  
 WGRPCASTCLOCGWLTEEGPTGSRPTPVTFPTVRLRAFVREERERALLYKKHNLQAVR\*  
 >ENSMUSP00000038264\_c.11736:C>AGGCCCTTGTGGGTGGGAC\_p.H3913RPLWVGH-ins  
 ENSMUST00000047441.14 | Obscn-202 | ENSMUSG00000061462 | -  
 | chr11:g.58952331:g>GTCCCACCCACAAGGGCCT  
 MDHSFSGAPRFLTRPKAFVSVGKDATLSCQIVGNPTPHVSWEKDRQPVVEAGARFRLAQDGDVYRLTILDLAL  
 RDLGPPDAPHVRVEEHGESSALRIR SARPRDGGTYEVRAENPLGSASAAAALVVDSDAEVAGPPGTSTATLLA  
 HLQORREAMRAEGIPPSPPGAGTRTCTVTEGKHARLSCFVTGEPKPEVWKKDGQLVTEGRRHVVEDEQENF  
 VLKILFCKQSDRGLYTCTASNLVGQTYSSVLVVVREPTVPFKKRLQDLEVREKESATFQCEVAQPAEAAWFK  
 EETRLWASAKYDIEEEGETERRLTVRNVSADDDAVYICETTEGSRVVAELSVQGNLTKLPRKTAVRTGDTAIF  
 WVVELAVPEGPVRWLRNQEEMVAGGRVAITAEGTCHTLTI FQCTLEDMGEVAFVSGGCRTTTQFCVSAAPRRPPL  
 YPADPVVKAKTESVTLWSAPPHGDRPVTIDGYVLEKRKLGA YAWSRCHEAGWLATTEFTITGVAAEEGDFQ  
 FRVSAINHFGQGPYLEFPGTMHLVPLAVKTPKAVEAVEGGEVTFVSDLTVASSGEWFLDGEALKASSIYVI  
 RCDRTRHMLTIREVPARLHGAQLKVFANGIETSIQMVVRAALGLPSSKLPAAAAREVLAQLHHEEAQLLAE LSD  
 QAAA VTWLKDGRELSLGPKYEMQVSAGRRALLVRDVAQDDAGLYECVSRGSR TAYQLLVQDITDGYRDWGPAG  
 PQKHMCKCAGAKIARYLGSSCYRFLQYDKGVVHWEAALDTRQKGTSSCSLHEKPKLVFAKGQQAHSEVKA  
 AGASATLSCEVAQAQTEVTFWKDGKLLSSSSKVRMEASGCSRRLVVQQAGKADAGEYSCEAGGQKLSFRLDVA  
 EPKMFVFAKEQQARSEVKA EAGASATLSCEVAQAQTEVTFWKDGKLLSSSSKVRMEASGCSRRLVVQQAGKAD  
 GEYSCEAGGQKLSFRLDVTEPKLVFAKEQQARSEVKA EGVNSATLSCEVAQAQTEVTFWKDGKLLSSSSKVRM  
 EASGCSRRLVVQQAGKADAGEYSCEAGGQKLSFRLDVAEPKLVFAKEQQARSEVKA EAGNSATLSCEVAQAQ  
 ETVTFWKDGKLLSSSSKVRMEASGCSRRLVVQQAGKADAGEYSCEAGGQKLSFHLDVTEPKLVFAKEQQAHSEV  
 KAEAGASATLSCEVAQAQTEVTFWKDGKLLSSSSKVRMEASGCSRRLVVQQAGKADAGEYSCEAGGQKLSFR  
 DVAEPKLVFAKEQQARSEVKA EAGASATLSCEVAQAQTEVTFWKDGKLLSSSSKVRVEASGCSRRLVVQQAGK  
 ADAGEYSCEAGGQKLSFRLDVAEPKLVFAKEQQANSEVKA EAGASATLSCEVAQAQTEVTFWKDGKLLSSSSK  
 VRVEASGCSRRLVVQQAGKADAGEYSCEAGGQKLSFRLDVAEPKLVFAKEQQAHSEVKA EAGASATLSCEVAQ  
 AQTEVTFWKDGKLLSSSSKVRVEASGCSRRLVVQQAGKADAGEYSCEAGGQKLSFRLDVAEPKLVFAKEQQAH  
 SEVKA EAGASATLSCEVAQAQTEVTFWKDGKLLSSSSKVRVEASGCSRRLVVQQAGKADAGEYSCEAGGQKLS  
 FRLDVAEPKLVFAKEQQAHSEVKA EAGASATLSCEVAQAQTEVTFWKDGKLLSSSSKVRVEASGCSRRLVVQQ  
 AGKADAGEYSCEAGGQKLFRLDVAEPKLVFAKEQQAHSEVKA EAGASATLSCEVAQAQTEVTFWKDGKLLSS  
 SSKVRVEASGCSRRLVVQQVQKADAGEYSCEARGQKLSFRLDVAEAE SQI PERPSRREPLVVKHEHTI I LTAT  
 IAAPSVAAVTWLKDGV EIRRSKRHEATSLGDTHLTVRGAQVLD SA IYSCRVGKEGQDFPVQVEEVA AKFSKP  
 LEPVEGELGGTVMLVCELSPEQAEVWRCNGTQLRPGKRFQMTSEGPRRTLTVSGLREDDAEYVCE SRDDRT  
 SARLTVKVPRVVKFTSGLSAMVAEEGQEATFQC VVSPSDAGVTWYKDMQLQ PSEKFMVMEVSGASRSLTILGL  
 TLEDAGQVTVAEAGASSAALRVREAPVLFK KLEPQTV EERTSVTLEVELTRPWPEVKWTRNAAVLTPSENV  
 EIRAEGARHCLVLRVSGFADRGFFGCETPDDKTQAKLNVEMRQVRLVVRGLQEVEAKEQGTASMDVELSHAEVE  
 GSWTRDGLRLQPGPKCHLAVQGPVHIL TLSALQPQDSGLVAFRAEGVHTSARLIVTEL PVSFTRVLQDVVATQ  
 KEKVTLECELSRPVDVRWLKDGVELRAGKAI GIVAQGTCSRSLVIYRCETGDQGVYVCDALDAQTSASLRVQGR  
 TYTLIFRRVLAEDAGEVKFVAENAESRAHLRVKELPVTLLRPLRDKIAMEKHRGVLECCQVSRASAQVRWFKGG  
 VELQSGPKYEVVSDGLYRKLVIN DVQPEDEDTYTCDAGNVKTS AQFFVEEQSITIVRGLKDMTVM EPAPAWFE  
 CETSIPSVRPPKWL LGKTVLQAGGNVGL EQDGTVHRLTLHKTCSTMTGPVHFHTIGKSRSSAQLVVS DIPVVL T  
 RPLEPKAGRELQSVVLSCDFRPAPKAVQWYKDDTPLSPSEKFKMALEGO MAELRILRLTPADAGVYRCQAGSA  
 QSSAEVTV EAREVTVIQPLQDAEAMEEGRVCFSCELSHKDEDIEWSLNGTPLYNDSFHEI SHEGLHTLV LKS  
 VRQADTGTVCATSPKVS SARLVVKGKPVVFLKALDDVSAEERGLTLQCEVSDPEARVWVRKDGVELGPSDK  
 YDFLHKAGARGLTVHDL SHEDAGLYTCQVGSKETQSKVSVHDLHVGITKRLKTVEVLEGE SCSFECVLSHESP  
 SDPAVWTVGGKTVGGSGHFHAVRQGRKYTLTVKDAALSDAGEV VFSVLGLTSKASLIIRERPV DITKPLEDQR  
 TTLGEDVMLSCELSRAGTSVRWLKDGKAI RKSQKYDLLSEGTRAVLVVRKASLKDSGEYTCETEASKSTAKLC  
 VEEKANRFTEELADLQVEEKGRAVFTCKTEHPASVVTWRKGLLELRASGKHVPSQEGTLTKLTINALERTDSD  
 TYTCDIGQARTQARLLVHGQKVRVIEDLED TAVQEGSSAKFCCR IAPADYGPVHWF LDKTPLHSHNELNEITVQ  
 PGGYHVLT LRQLALKDSGTVYFEAGDQRTSAALRVTEKPSIFSRPLTDVTVTEGEDLTLVCETTTVDSSVRWT  
 KDGKTLRPSARCQLSHEGCQAQLLITATTPQDGGRYKCEIGGASSSSIVRVHALPVRFRESLKDVEVPEGKAA  
 TLRVLSVAAPVEVTRHGDDVLKSSNKYSLRQEGAVLELVIRDLQPDQSGQYSCSFGDQTT SATLTVKTTSSAQ  
 FVGKLRNKEATEGTTVLRCELTK EAPVEWKKGTELRNGDKYSLKQDGA VCELQICSLLVADAGEYSCVCGQ  
 EKTSATLTVKALLVHFVRRLRSKEATEGDTTTLQCELSKAAPVEWRKGTETLRDGD RYSLKQDGA VCELQIRS  
 LT IADAGEYLCTCGQEKTSATLTVRALPAKFKDSLKNEEATEGTTATLSCELSKAAPV TWKKGPKTLQSGDKY  
 VLRQDGA VCGLQIHGLTMADAGEYSCVCGQEKTSATLTVRGLPAKFIEDLRSQEATEGATAILRCELSKAAPV  
 EWRKGETLKDGD RYTLRQDGA VCELQIRGLAVVDTGTYS SLP TKFTEGLRNEEATEGTMATLRCQMSKAAPV



EWRKGETLRDGDYSLRQDGMACELOIRGLTIEDSGEYTCVCGQEKTSATLSVKALPPRFIEDLRSQEATEG
TMATLRCQMSKAAPVEWRKGETLRDGGYSLRQNGAVCELQIRPLWVGHDLAVEDTGEYSCVCGQEKTSATL
NVKALPPRFIEDLRSQEATEGTMATLRCQMSKAAPVEWRKGETLRDGGYSLRQDGMACELOIHDLVEDDAG
QYSCVCGQEKTSAVLTVDALPPKFTEGLKKEEATEGTMVTLRCQMSKEATVEWRKGAKTSLDGGYSLRQDGA
MCELQICGLAVEDAGEYSCVCGQEKTSATLSVKALPPRFIEDLRSQEATEGTMATLRCQMSKAAPVEWRKGSK
TLRDGDYSLRQDGMACELOICDLAVEDTGDYSCVCGQEKTSATLSVKAPQVVFQQLQNLQAEEGSMASLRC
ELSVPNAMVWSKGGLELQGDTRREARQQGCVAELLLRDLRREDAGEYSCTCGSQTTSATLMVTAAPVRFRE
LQAQDVDEGATARLRCELSREAVSVEWRKGSLLQFPACAKYQMVQEGTTAELLVHGVEQEDAGEYTCDAAGTQS
IARLSVRAPKPKFKTDLQSTEQEAGGTARLCCQLSEAEPTPVQWLKEGVELHVGSKYEMRRQGAUCELLIHG
LEAKDTGEYAACLVGQKTLASLRVKEPEVTIVRGLVDMEVQADEDFEFTCKVSQAGATDVQWHLQGLPLQSNE
VTEVAVLADGCTHVLQKGVTLLEDAGTVSFHVGGLSSSAQLTVRVEVTVLEPLKDVQLSEGQDAHFRCRLSR
ASGQEARWALGGVPLQCNEMNDITVEQGTLYLLTLHKVTLLEDAGTITLQVGSSESAQLKVTAKNTVLRGLEN
VDALEGGEALFECQLSQPEVAHAHTWLLDDEPVHTSEKVEVVYFENGLRHLLLLLNKLPQDSCRVTFLAGDVVT
SAFLTVRALPDPPEAEVVGSRDHSVTLSSWVAPMSDGGGGLCGYRVMKEASTGQWQLCHDLVPGPECVVDL
VPGKTYRFRVAAVGPAGAGEPVHLPQMVKIAPAPAPAPAPAPAPAPETRQAVVGEDICLELEVAADGGEVVWH
KGTERRIQPGGHFEVLSRGQRQMLVIKGFRTEDQGEYRCGPIQGLPSSGAATFNVMVMTSGSGDEVPAQPSLPPE
AAQEGDLHLLWEALARKRRMSREPTLDSISELPEEDSRVQHLRQEAEEETAPDLSEGYSTADELARTGEADLSH
TSSDDESRAAGTTPSLVTYLKKAGGPGISPLASKHEAQVTSVKPQKQEPVVPTCPPPGDLSAADLMDPSLDKA
AVKIQAAFKGYKVRKEMKQEGPVFSRTFGDTEAQVGDVLRLECVLATKTDMRACWLKDGIELTDGRHYHIDQ
LKDGTCSSLVTLGLAPTDSGRYTCQVSTKSGRVSHSACVVVSGTSEAESSSGGELDDAFRRAARRLHRLFRTK
SPAELSEEELFLSADEGPEPEEPADWQTYREDENFVCIRFESLAEARQAVTCFRNMFATMGIGVEISLGEQG
PRGVEMRIGKVAPTPTPAVPLAKTPTGLQTSDAAPVFLTELQNDVQDGYPMSEFDCVVTGQPVPSVRVFKDGKL
LEEDDHYMINEDQGGHQLIITAVVPADMGVYRCLAENSMGVSSTKAELRVELTSTDYDTAADATETSSYFSA
QGYLSSREQEGTESDEGQLPQVLEELKDLQVAPGTRLAKFQLKVKGYPAKLYWFKDQGPLTSSDHIRMTDKK
TLHTLEIVSVTREDSDGQYAAYSNAVGAAYSSARLLVRGPSEPEEKPASDVHERLVPRIREFKFTPKVKRGS
SITFSVKVEGHPAPSVHLLKKEEAEGVLIWIGPDTPGYTMASSSKQHSVLVLDVGRQHGTQYTCIATNPAGQAL
CSASLHISGLAKEEEQERVKEALISSFLQGTSAQVSAQMSSESAGFADLVGQSKGELVAEEAHSLSLAEEVGT
EEFLQKLTSTQITEMVSAKISQAKLQVPGGDSDEETKTPSASPRHGRSRPSSSVQESSSESEDGDSRGEIFDIY
VVTADYLPLGAEQDAIILREGQYVEVLDSAHPLRWLVRTKPKSSSRQGWVSPAYLDKRLKLSPEWGPTEAP
EFPGEAVSEDEYRTRLSSVIEQLLSSEQAFVQELQFLESHMKHLERSPRVPAAVASQKTVIIFRNVQDISHFH
SSFLKELQCGCTDDDDVAMCFIKNQEAFAFEKYLEFLVGRVQAESVVVSTPVQEFYKKYAEETLSAKDPTQPPPPP
LQHYLEQPVERVQKYQALLKELIRNKARNRQNCALLEQAYAVVSALPQRAENKLVSLMENYPTLEALGEPPI
RQGHFIVWEGAPGARMPPWKGNHRHVFLFRNYLVICKPRRDSRTDTFSYVFRNMMKLSSIDLNDQVEGDDRAFE
VWHEREDSVRKYLQARTVIKNSWVKEICGIQORLAQPVWRPPEFEEELADCTAELGETVKLACRVGTGPKP
IVSWYKDGKPVVEVDPHHILIEDPDGSCTLILDNLTGIDSGQYMCFAASAAGNASTLGKILVQVPPRFVNVKRA
TFPVEGEDAQITCTVEGAPYPQIRWYKDGTLAPGNRYRMLNEPRSGVLVVLVQAASKEDLGHYCELVNRLG
STRGGGELYMQSPALRARDQHHRQIVAAVEGAPSMQVTIEDVQVQVGDMAQFQDAVIEGHPPPITWTYKGSTQ
LTSSARLSQRQDGTYSLVLTVDVAPHDAGVYTCVANNAGQVLCKAELLVHGDKLDAENQVYRRKLSHFYDV
QEEIGRGVFGFVQKRVQHKGNMFCAAKFIPLRSKTRAQAYQERDILATLGHPLVTGLLDQFETRKTLLILEL
CSSEELLDRFLKKGVVTEAEVKVYIQQLVEGLHYLHSHGILHLDIKPPNIMLVHPAREDIKICDFGFAQKITP
SEPQYSKYGSPFVSPPEIEQNPVSEGSDIWAMGVISYLSLTCSSPFAGESDRATLLNVLEGRVSWSSPTAAH
LSEDAKDFIKATLQRTPRARPSTSQCLAHPWFLKSMPEAAHFINTKQLKFLLRARSRWQSRMSYKSIIVMRS
IPELLQGPDPSPSLGVARHLRGEASGASSSSSSSDNELAPFARAKSLPPSPVTHSPLLHPRGFLRPSASLPEE
TEASMPATAAVPASPQASGPPASPVCVPRHSVSISSLFYQQAGEGAERGNKTSKAKRHPARRRHLLKGGYIAR
ALPGLREPLMEYSLLEEEAAREEQASLMTKTPSFETALRLPSSSVREVPGRSHSLDNPPVTTGSPPEACKEQL
LFPSTGLTHEHTAKDRGHKEGFLQESVFPFPMMSGDSRPGKQEGSSQDSCRGKPASSCHSELGSGSQEGCGPP
SSQSLGSLPPLQSLKKELESTSCGPLFSEQPQAAPFPTQVSPLLGSEKEPQDGLSEGPVVPVSSSPGSASQVDA
SLDTEGLSEAGDTCDFTPPPQRPQEQATTRKFSLESRGGYAGVAGYGTFAFGGDAGGMLGQGPLWARMWAVS
QSSEEQDEAATESPQPLESGLPIAEASGVPLRTSPSLTPWEEVEQVSLVQIRDLSGDAEAADTISLIDISEVDP
AYLNLSDLYDIKYLPFEFMIFRRVKPIEQPESPGSETEAGQGLADFLEEAAWPWPGLGLRAGLEITTEEPPEE
PGDLEALLGEEAVGRKRKWSPSRGLFQFPGRCLSGEEPVELGLRQRVKASMAHISRIKGRPEGPEREGPFRK
KAGLASFRLSGLKGRDQELSDEAVVLGQSVTLACQVLAQPTAQTATWSKDGVLLESSGHLLISSTLKNFOLLTI
LVVKEEDLGTITCCVNLGLTAVTTGVLKKAERSSSRPEVGEVLYKDAVLLVVKPVESCGPVTYIVQCCIEG
GSWTTLASDIDSCCYLTKLSRGGMYIFRTACVSKAGMGYSSPSEQVLLGGPNHLASEEESRRGPAQLLPS
TKTFAFQMQIRRRGRFSVVRQCREKASGRALAAKIVPYQPEDKTAVLRREYEAALKRHLHHPHLAQLHAAYLSRHL
VLILELCSGPELLPSLAERESYSESDVKDYLWQMLSATQYLHAQHIHLDLRSENMMVTEYNLLKVIDLGNQAQ
SLDQEKVPAPENFKDYLETMAPELLEGQAVPQTDIWAIGVTAFTIMLSGEYPESEGETRDLQKGLRGLIRLS

RCYAGLSGGAVAFLOSSLCAQPWGRPCASTCLQCGWLTEEGPTGSRPTPVTFPTVRLRAFVREKERRALLYK  
KHNLAQVR\*  
>ENSMUSP00000049737\_c.12627:C>AGGCCCTTGTGGGTGGAC\_p.H4210RPLWVGH-ins  
ENSMUST00000052872.15|Obscn-203|ENSMUSG00000061462|-  
|chr11:g.58952331:G>GTCCACCCACAAGGGCCT  
MDHSFSGAPRFLTRPKAFVSVGKDATLSQCIVGNPTPHVSWEKDRQPVEAGARFRLAQDGDVYRLTILDLAL  
GDSGQYVCRARNAIGEFAAVGLRVDSEGTCAEQAPHFLLRPTSIRVREGADATFRCRVGGSPPAVSWSKDG  
RRLGPPDAPHVRVEEHGESSALRIRSARPRDGGTYEVRAENPLGSASAAAALVVDSDAEVAGPPGTSTATLLA  
HLQQRRREAMRAEGI PPSPPGAGTRTCTVTEGKHARLSCFVTGEPKPEVWKKDQQLVTEGRRHVVEDEQENF  
VLKILFCKQSDRGLYTCTASNLVGQTYSSVLVVVREPTVPFKKRLQDLEVREKESATFQCEVAQPATEAAWFK  
EETRLWASAKYDIEEEGTERRLTVRNVSADDDAVYICETTEGSRVVAELSVQGNLTKLPRKTAVRTGDTAIF  
WVELAVPEGPVWRWRNQEEMVAGGRVAITAEGTCHTLTI FQCTLEDMGVAFVSGGCRTTTQFCVSAPRRPPL  
YPPADPVVKAKTESSVTLWSAPPHGDRPVTIDGYVLEKRKLGAYAWSRCHEAGWLATTEFTITGVAAEGDFQ  
FRVSAINHFGQGPYLEFPGMTMLVPLAVKTPKAVEAVEGGEVTFVSVDLTVASSGEWFLDGEALKASSIYVI  
RCDRTRHMLTIREVPARLHGAQLKFVANGIETSIQMVVRAALGLPSSKLPAAAAREVLAQLHEEAQLLAE LSD  
QAAA VTLWKDGRELSLGPYEMQVSAGRRALLVRDVAQDDAGLYECVSRGSRRTAYQLLVQEPKLVFAKQQAH  
SEVKAEGNSATLSCEVTAQTEVTWFKDGKLLSSSSKVRMEASGCSRRLLVVQQAGKADAGEYSCEAGGQKLS  
FRLDVAEPKLVFAKQQAHSEVKAEGASATLSCEVAQAQTEVTWFKDGKLLSSSSKVRMEASGCSRRLLVVQQ  
AGKADAGEYSCEAGGQKLSFRLDVAEPKLVFAKEQQARSEVKAEGASATLSCEVAQAQTEVTWFKDGKLLSS  
SSKVRMEASGCSRRLLVVQQAGKADAGEYSCEAGGQKLSFRLDVTEPKLVFAKEQQARSEVKAEGNSATLSCE  
VAQAQTEVTWFKDGKLLSSSSKVRMEASGCSRRLLVVQQAGKADAGEYSCEAGGQKLSFRLDVAEPKLVFAKEQ  
QARSEVKAEGNSATLSCEVAQAQTEVTWFKDGKLLSSSSKVRMEASGCSRRLLVVQQAGKADAGEYSCEAGGQ  
KLSFHLDVTEPKLVFAKEQQAHSEVKAEGASATLSCEVAQAQTEVTWFKDGKLLSSSSKVRMEASGCSRRLLV  
VQQAGKADAGEYSCEAGGQKLSFRLDVAEPKLVFAKEQQARSEVKAEGASATLSCEVAQAQTEVTWFKDGK  
LSSSSKVRVEASGCSRRLLVVQQAGKADAGEYSCEAGGQKLSFRLDVAEPKLVFAKEQQANSEVKAEGASATL  
SCEVAQAQTEVTWFKDGKLLSSSSKVRVEASGCSRRLLVVQQAGKADAGEYSCEAGGQKLSFRLDVAEPKLAFA  
KEQQAHEVKAEGASATLSCEVAQAQTEVTWFKDGKLLSSSSKVRVEASGCSRRLLVVQQAGKADAGEYSCEA  
GGQKLSFRLDVAEPKLAFAKEQQAHSEVKAEGASATLSCEVAQAQTEVTWFKDGKLLSSSSKVRVEASGCSR  
RLVVQQAGKADAGEYSCEAGGQKLSFRLDVAEPKLAFAKEQQAHSEVKAEGASATLSCEVAQAQTEVTWFKD  
GKLLSSSSKVRVEASGCSRRLLVVQQAGKADAGEYSCEAGGQKLFRLDVAEPKLMFAKEQQAHSEVKAEGAS  
ATLSCEVAQAQTEVTWFKDGKLLSSSSKVRVEASGCSRRLLVVQQAGKADAGEYSCEAGGQKLSFRLDVAEPK  
VFAKEQQAHSEVKAEGASATLSCEVAQAQTEVTWFKDGKLLSSSSKVRVEASGCSRRLLVVQQVQKADAGEYS  
CEARGQKLSFRLDVADTRLMFAKEQQARTEVKAEGNSATLSCEVAQAQTEVTWFKDGKLLSSSSKVRVEASG  
CSRRLLVVQQAGKADAGEYSCEAGGQKLSFRLDVAEAEESQI PERPSRREPLVVKEHETIILTATIAAPSVAAVT  
WLKDGEVIRRSKRHEATSLGDHTLTVRGAQVLDLSAIYSCRVGKEGQDFPVQVEEVAAKFSKPLEPVEGELGG  
TVMLVCELSPEQAEEVVRWRCGNTQLRPGKRFQMTSEGPRRTLTVSGLREDDAEYVCESTRDDRTSARLTVKVP  
VVKFTSGLSAMVAEEGQEQATFQCVVSPSDAGVTWYKDGMLQLPSEKFMVVEGASRSILTILGLTLEDAGQVTV  
EAEGASSAALRVREAPVLFKKLEPQTEERTSVTLEVELTRPWPEVKWTRNAAVLTPSENVEIRAEGARHC  
LVLRSVGFADRGFFGCETPDDKTQAKLNVEMRQVRLVRLQVEEAKQGTASMDVELSHAEVEGSWTRDGLRL  
QPGPKCHLAVQGPVHILTLALSALQPQDSGLVAFRAEGVHTSARLIVTELPSVFTTRVLQDVVATQKEKVTLECEL  
SRPVDVRLKDGVELRAGKAI GIVAQGTCSRSLVIYRCETGDQGVYVCDALDAQTSASLRVQGRYTLIFRRVL  
AEDAGEVKFVAENAESRAHLRVKELPVTLLRPLRDKIAMEKHRGVLECVSRASAQVRWFKGGVLELQSGPKYE  
VVS DGLYRKLVIN DVQPEDEDYTC DAGNVKTS AQFFVEEQSITIVRGLKDMTVMPEPAPAWFECETSIPSVRP  
PKWLLGKTVLQAGGNVLEQDGTVHRLTLHKTCSTMTGPVHFTIGKSRSSAQLVVS D I PVVLRPLEPKAGRE  
LQSVVLSCDFRPAKAVQWYKDDTPLSPSEKFKMALEGQMAELRILRLTPADAGVYRCQAGSAQSSAEVTVEA  
REVTVIQPLQDAEAMEEGRVCFSCELSHKDEDI EWSLNGTPLYNDSFHEISHEGCLHTLVLSVRQADTGTVC  
ATSPKVSVSARLVVKGKPVVFLKALDDVSAEERGTLLTQCEVSDPEARVVWRKDGVELGPSDKYDFLHKAGAR  
GLTVHDLSDHEDAGLYTCQVGSKETQSKVSVHDLHVGITKRLKTVLEVLEGECSFCVLSHESPSDPVAVTVGG  
KTVGGSGHFHAVRQGRKYTLTVKDAALSDAGEVVSVLGLTSKASLIIRERPVDITKPLEDQRTTLGEDVMLS  
CELSRAGTSVRWLKDGKAIKSKYDILLSEGTRAVLVVRKASLKDSGEYTCETEASKSTAKLCVEEKANRFT  
ELADLQVEEKGRAVFTCKTEHPASVVTWRKGLLELRASGKHVPSQEGTLKLTINALERTDSDTYTCDIGQAR  
TQARLLVHGQKVRVIEDLEDTAVQEGSSAKFCRIAPADYGPVHWF LDKTPLHSNELNEITVQPGGYHVLT  
QLALKSHGCTVYFEAGDRTS AALRVTEKPSIFSRPLTDVTVTEGEDTLVCE TTTVDSSVRWTKDGKTLRPSA  
RCQLSHEGQAQLLITATTPQDGGRYKCEIGGASSSIVRVHALPVRFRSLKDVVEPEGKAATLRCVLSVA  
APVEWRHGDDVLKSSNKYSLRQEGAVLELVIRDLQPQDSGQYSCSFGDQTTSATLTVKTSQAQVFGKLRNKEA  
TEGTTVTLRCELTKAEVWKKGTETLRNGDKYSLKQDGA VCELQICSLLVADAGEYSCVCGQEKTSATLTVK  
ALLVHFVRRRLRSKEATEGDTTTLQCELSKAAPVEWRKGTETLRDGDYSLKQDGA VCELQIRSLTIADAGEYL  
CTCGQEKTSATLTVRALPAKFKDSLKNEEATEGTTATLSCELSKAAPVWKKGPKTLQSGDKYVLRQDGA VCG

LQIHGLTMADAGEYSCVCGQEKTSATLTVRGLPAKFIEDLRSQEATEGATAILRCELSKAAPVEWRKGETLK  
 DGDRYTLRQDGA VCELQIRGLAVVDGTYSLSLPTKFTTEGLRNEEATEGTMATLRCQMSKAAPVEWRKGETLR  
 DGDRYSLRQDGA MCELQIRGLTIEDSGEYTCVCGQEKTSATLSVKALPSRFIEDLRSQEATEGTMATLRCQMS  
 KTAPVEWKKGSETLRDGGRYSLRQDGPVCELQICDLAVEDAGEYSCVCGQEKTSATLSIKALPPRFIEDLRSQ  
 EATEGTMATLRCQMSKAAPVEWRKGETLGDGGRYSLRQNGAVCELQIRPLWVGHDLAVEDTGEYSCVCGQEK  
 TSATLNVKALPPRFIEDLRSQEATEGTMATLRCQMSKAAPVEWRKGETLRDGGRYSLRQDGA VCELQIHDLD  
 VEDAGQYSCVCGQEKTSAVLTVDALPPKFTTEGLKKEEATEGTMVTLRCQMSKEATVEWRKGA KTLSDGGRYSL  
 RQDGA MCELQICGLAVEDAGEYSCVCGQEKTSATLSVKALPPRFIEDLRSQEATEGTMATLRCQMSKAAPVE  
 RKGETLRDGGRYSLRQDGA VCELQIRDLAVEDAGEYLCVCGQEKTSATLSVKALPPRFIEDLRSQEATEGTM  
 ATLRCQMSKAAPVEWRKGSKTLRQDGGRYSLRQDGA MCELQICDLAVEDTGDYSCVCGQEKTSATLSVKALPP  
 FIEDLRSQEAREGTVATLRCRMSKAAPVEWRKGETLKDGGRYSLRQEGNLCELQIRDLAVEDTGEYSCVCGQ  
 EKTSATLSVKALPAKFIEDLRSQEAPESSTVTLRCKLSKKASVWKKGSETLRNGARYSLRQDGA VCELEIRD  
 LTVEDTGEYSCTCGQERTSATLSIMAPQVVFQQLQNLQAEEGSMASLRCELSVPNAAMVWSKGGLELQGDTR  
 REARQQGCVAELLLRDLRREDAGEYSCVCGQEKTSATLSVKA LPPRFIEDLRSQEATEGTMATLRCQMSKAAP  
 SVEWRKGS LQFLPCKAKYQMVQEGTAE LLVHGVQE DAGEYTC DAGHTQS IARLSVRAPKPKFKTDLQSTEQE  
 AGGTARLCCQLSEAEPTPVQWLKEGVELHVGSKYEMRRQGA VCELLIHGLEAKDTGEYACLVGGQKTLASLR  
 VKEPEVTIVRGLVDMVEQADEDFEFTCKVSOAGATDVQWHLQGLPLQSNVTEVAVLADGCTHVLQKGVTLLE  
 DAGTVSFHVGGLSSSAQLTVRVEVTVLEPLKDVQLSEGQDAHFRCRLSRASGQEARWALGGVPLQCNEMNDI  
 TVEQGTLYLLTLHKVTLLEDAGTITLQVGCSSSEAQLKVTAKNTVLRGLENDVALEGGALFECQLSQPEVA AH  
 TWLLDDEPVHTSEKVEVVYFENGLRHLLLLKLNKPKQDSCRVTFLAGDVVTS AFLTVRGRWLEVLPPHDASVK  
 AGMQVRFTCILSEAVPVGEATWYINGAAIQPDDTDWTVTDTGSHHALTLSNAQPQHAGEVTF AARDAVASARL  
 SVLALPDPPEDAEVVGRSDHSVTLSWVAPMSDGGGGLCGYRVMKEASTGQWQLCHDLVPGPECVDDLVPGK  
 TYRFRVAAVGPAGAGEPVHLPQMVKIAPAPAPAPAPAPAPAPETRQAVVGEDICLELEVAADGGEV VWHKGT  
 RIQPGGHFEVLSRQQRMLVIKGFRTEDQGEYRCGPIQGLPSSGAATFNVMVMTSGSGDEVPAQPSLPPEAAQE  
 GDLHLLWEALARKRRMSREPTLDSISELPEEDSRVQHLRQEAEETAPDLSEGYSTADELARTGEADLSHTSSD  
 DESRAGTPSLVTYLLKAGGPGISPLASKHEAQVTTSVKALPQQEPPVPTCP PPPGDL SAADLMDPSLDKA AVKI  
 QAAFYKGVKRVQEGEPVFSRFTFGDTEAQVGDVLRLEKCVLATAKTD MRACWLKDGIELTDGRHYHIDQLKDG  
 TCSLLVTGLAPTDSGRYTCQVSTKSGRVSHSACVVVSGTSEAESSSGGELDDAFRRARRLHRLFRTKSPA E  
 LSEELFLSADEGPGEPEPADWQTYREDENFVCIRFESLAEARQAVTCFRNMFATMGIGVEISLGEQGPRGV  
 EMRIGKVAPTPTPAVPLAKTPGLQTS DAAPVFLTELQNDVQDGYPMSFDCVVTGQPVPSVRWFKDGLLEED  
 DHYMINEDQGGHQLIITAVVPADMGVYRCLAENSMGVSSTKAELRVELTSTDYDTAADATETSSYFSAQGYL  
 SSREQEGTESDEGQLPQVLEELKDLQVAPGTRLAKFQLKVKGYPA PKLYWFKDQPLTSDHIRM TDKKT LHT  
 LEIVSVTREDSGQYAAIY SNAVGAAYSSARLLVRGPSEPEEKPASDVHERLVPPRILEKFTPKKVKRGSSITF  
 SVKVEGHPAPSVHWLKEEA EKGLVWIGPDTPGYTMASSSKQHSLVLLDVGRQHQTGTYTCIATNPAGQALCSAS  
 LHI SGLAKEEEQERVKEALISSFLQGT SQAVSAQMSESAGFADLVGQSKGESLVAAEEAHSHLSLAEVGT EEF  
 QKLT SQI TEMVSAKISQAKLQVPGGDSDEETKTPSASPRHGRSRPSSSVQESSESEDEGDSRGEIFDIYVVTA  
 DYLP LGAEQDAIILREGQYVEVLDSAHPLRWLVRTKPTKSSPSRQGWVSPAYLDKRLKLSPEWGPTEAPEFPG  
 EAVSEDEYRTRLSSVIQELLSSEQAFV GELQFLESHHMKHLERSPRVPAAVASQKTVIFRNVQDISHFHSSFL  
 KELQCGTDDD VAMCFIKNQEAFEKYLEFLVGRVQAESVVVSTPVQEFYKKYAEETLSAKDPTQPPPPLOHY  
 LEQPVERVQKYQALLKELIRNKARNRQNCALLEQAYAVVSALPQRAENKLVSLMENYPGTLEALGEP I RQGH  
 FIVWEGAPGARMPWKGNHRHVFLFRNYLVICKPRRDSRTDFTSYVFRNMMKLSIDLNDQVEGDRAFEVWHE  
 REDSVRKYLLQARTVIKNSWVKEICGIQORLAQPVWRPPEFEELADCTAELGETVKLACRVGTGPKPIVSW  
 YKDGKPVVEVDPHHILIEDPDGSC TLI LDNLTGIDSGQYMCFAASAAGNASTLGKILVQVPPRFV NKVRATPFV  
 EGEDAQITCTVEGAPYPQIRWYKDG TLLAPGNRYRMLNEPRSGVLV LVIQAASKEDLGHYECELVNR LGSTRG  
 GGEDAQITCTVEGAPYPQIRWYKDG TLLAPGNRYRMLNEPRSGVLV LVIQAASKEDLGHYECELVNR LGSTRG  
 SRRRPGLLAPERLYPPGTSRRLEVEQGRKAPVPALYVTEAEVHAPASQSQPKWLEVEETIEVRVKKTGSRG  
 ASPVREMTSRGEGILFTLPGGIPGRDPNANNNSNNSVYQEARWGPVAVHVGEPIFQVDSVGNVDVVAASPE  
 PEQVRASQKEENTERQEGCSGDENTFLMEEPQD TDSLQGRDPKILTHNGRVLT LADLEDYVPQEGETF GCGD  
 STPSTPDEPPCEVSVLQREISEPTVGPVLLNVGRPPGTGATPSFRPGSQVHSPESVSFLLREAWSGFVSAA  
 PWTSSFHTHVQSSVDGSHGSFKTEVSTQTVSFGAVGETVTLHIDPDGGEAPGPSQG\*  
 >ENSMUSP00000020732\_c.12828:C>AGGCCCTGTGGGTGGGAC\_p.H4277RPLWVGH-ins  
 ENSMUST00000020732.13|Obscn-201|ENSMUSG00000061462|-  
 |chr11:g.58952331:g>GTCCCACCCACAGGCCT  
 MDHSFSGAPRFLTRPKAFVVSVGKDATLSCQIVGNPTPHVSWEKDRQVPEAGARFRLAQDGDVYRLTILDLAL  
 GDSGQYVCRARNAIGEFAAVGLRVDSEGTCAEQAPHLLRPTSIRVREGADATFCRVRGGSQPAVSWSKDG  
 RRLGPPDAPHVRVEEHGESSALRIRSARPRDGGTYEVRAENPLGSASAAAALVVDSDAEVAGPPGTSTATLLA  
 HLQORREAMRAEGIPSPPGAGTRTCTVTEGKHARLSCFVTGEPKPETVWKKDGLVTEGRRHVVEDEQENF  
 VLKILFCKQSDRGLYTCTASNLVGQTYSSVLVVVREPTVPFKKRLQDLEVREKESATFQCEVAQPA TEAAWFK

EETRLWASAKYDIEEEGETERRLTVRNVSADDDAVYICETTEGSRRTVAELSVQGNLTKLPRKTAVRTGDTAIF
WVELAVPEGPVRWLRNQEEMVAGGRVAITAEGTCHTLTI FQCTLEDMGEVAFVSGGCRTTTFQCVSAPRRPPL
YPPADFPVVKAKTESSVTLWSAPPHGDRPVTIDGYVLEKRKLGAYAWSRCHEAGWLATTEFTITGVAAEGDFQ
FRVSAINHFGQGPYLEFPGTMHLVPLAVKTPKAVEAVEGGEVTFVSDTLTVASSGEWFLDGEALKASSIYVI
RCDRTRHMLTIREVPARLHGAQLKFVANGIETS IQMVVRAALGLPS SKLPAAAAREVLAQLHHEAQLLAE LSD
QAAA VTWLKDGRELSLGPYEMQVSAGRRALLVRDVAQDDAGLYECVSRGSRTAYQLLVQDITDGYRDWGPAG
PQKHMCKCAGAKIARYLGS SCYRFLQYDKGVWHLEAALDTRQGKGTSSCSLHEKPKLVFAKQQAHSEVKA E
AGNSATLSCEVTQAQTEVTFWKDGKLLSSSSKVRMEASGCSRRLVVQQAGKADAGEYSCEAGGQKLSFRLDVA
EPKLVFAKQQAHSEVKA EAGASATLSCEVAQAQTEVTFWKDGKLLSSSSKVRMEASGCSRRLVVQQAGKADA
GEYSCEAGGQKLSFRLDVAEPKLVFAKEQQARSEVKA EAGASATLSCEVAQAQTEVTFWKDGKLLSSSSKVRM
EASGCSRRLVVQQAGKADAGEYSCEAGGQKLSFRLDVTEPKLVFAKEQQARSEVKA EVGNSATLSCEVAQAQ T
EVTWTFWKDGKLLSSSSKVRMEASGCSRRLVVQQAGKADAGEYSCEAGGQKLSFRLDVAEPKLVFAKEQQARSEV
KAEAGNSATLSCEVAQAQTEVTFWKDGKLLSSSSKVRMEASGCSRRLVVQQAGKADAGEYSCEAGGQKLSFHL
DVTEPKLVFAKEQQAHSEVKA EAGASATLSCEVAQAQTEVTFWKDGKLLSSSSKVRMEASGCSRRLVVQQAGK
ADAGEYSCEAEGQKLSFRLDVAEPKLVFAKEQQARSEVKA EAGASATLSCEVAQAQTEVTFWKDGKLLSSSSK
VRVEASGCSRRLVVQQAGKADAGEYSCEAGGQKLSFRLDVAEPKLVFAKEQQANSEVKA EAGASATLSCEVAQA
AQTEVTFWKDGKLLSSSSKVRVEASGCSRRLVVQQAGKADAGEYSCEAGGQKLSFRLDVAEPKLVFAKEQQAH
SEVKA EAGASATLSCEVAQAQTEVTFWKDGKLLSSSSKVRVEASGCSRRLVVQQAGKADAGEYSCEAGGQKLS
FRLDVAEPKLVFAKEQQAHSEVKA EAGASATLSCEVAQAQTEVTFWKDGKLLSSSSKVRVEASGCSRRLVVQQ
AGKADAGEYSCEAGGQKLSFRLDVAEPKLVFAKEQQAHSEVKA EAGASATLSCEVAQAQTEVTFWKDGKLLSS
SSKVRVEASGCSRRLVVQQAGKADAGEYSCEAGGQKLFRLDVAEPKLVFAKEQQAHSEVKA EAGASATLSCE
VAQAQTEVTFWKDGKLLSSSSKVRVEASGCSRRLVVQQAGKADAGEYSCEAGGQKLSFRLDVAEPKLVFAKEQ
QAHSEVKA EAGASATLSCEVAQAQTEVTFWKDGKLLSSSSKVRVEASGCSRRLVVQQVQKADAGEYSCEARGQ
KLSFRLDVADTRLMFAKEQQARTEVKA EAGNSATLSCEVAQAQTEVTFWKDGKLLSSSSKVRVEASGCSRRLV
VQQAGKADAGEYSCEAGGQKLSFRLDVAEAE SQI PERPSRREPLVVKEHETI ILTATIAAPSVAAVTWLKDG V
EIRRSKRHEATS LGDTHLTVRGAQVLD SAIYSCRVGKQDFPVQVEEVA AKFSKPLEPVEGELGGTVMLVC
ELSP EQAEVWRCGNTQLRPGKRFQMTSEGPRTTLTVSGLREDDAEYVVCESRDDRTSARLTVKVRPVVKFTS
GLSAMVAEEGQEATFQCVVSPSDAGVTWYKDGMLQPSKFKVMVESGASRSLTILGLTLEDAGQVTEAEGAS
SSAALRVREAPVLFKKKLEPQTEVEERTSVTLEVELTRPWPEVKWTRNAAVLTPSENVEIRAEGARHCLVLR SV
GFADRGF FGCETPDDKTQAKLNVEMRQVRLV RGLQEV EAKEQGTASMDVELSHA EVEGSWTRDGLRLQPGPKC
HLAVQGPVHILTL SALQPQDSGLVAFRAEGVHTSARLIVTEL PVSFTRVLQDVVATQKEKVTLECELSRPVDV
RWLKDGV ELRAGKAIGIVAQGT CRSLVIYRCETGDQGVYVCDALDAQTSASLRVQGRTYTLIFRRLAEDAGE
VKFVAENAESRAHLRVKELPVTLLRPLRDKIAMEKHRGVLECCQVSRASAQVRWFKGGVELQSGPKYEVVSDGL
YRKLVIN DVQPEDEDTYTC DAGNVKTS AQFFVEEQSITIVRGLKDMTVM EPAPAWFECETSIPSVRPPKWL LG
KTVLQAGGNVGL EQDGTVHRLTLHKTCSTMTGPVHFTIGKSRSSAQLVVSDIPVVLTRPLEPKAGRELQSVVL
SCDFRPAPKAVQYKDDT PLSPEKFKMALEGQMAELRILRLTPADAGVYRCQAGSAQSSAEVAREVTVI
QPLQDAEAMEEGRVCFSCELSHKDEDIEWLSLNGTPLYNDSFHEI SHEGCLHTLVLKSVRQADTGTVCATSPKV
SVSARLVVKGKPVVFLKALDDVSAEERGLTLTQCEVSDPEARVVWRKDGVELG PSDKYDFLHKAGARGLTVHD
LSHEDAGLYTCQVGSKETQSKVSVHDLHVGITKRLKTV E VLEGE SCFECVLSHESPSDPAVWTVGGKT VGG S
GHFHAVRQGRKYTLTVKDAALSDAGEV VFSVLGLT SKASLIIRERPV DITKPLEDQRTTLGEDVMLSCELSRA
GTSVRWLKDGKAIRKSQKYDLLSEGTRAVLVVRKASL KDSGEYTCETEASKSTAKLCV EEKANRFT EELADLQ
VEEKGRAVFTCKTEHPASVVTWRKGLLELRASGKHVPSQ EGLTLKLTINALERTDSDTYTCDIGQARTQARLL
VHGQKVRVIEDLEDTAVQEGSSAKFCRIAPADYGPVHWF LDKTPLHSNELNEITVQPGGYHVLT LRQLALKD
SGTVYFEAGDQRTS AALRVTEKPSIFSRPLTDVTVTEGEDLTLVCETTVDSSVRWTKDGKTLRPSARCQLSH
EGCQAQLLITATTPQDGGRYKCEIGGASSSSIVRVHALPVRFRESLKDVEVPEGKAATLRCVLSVAAPVEWR
HGDDVLKSSNKYSLRQEGAVLELVIRDLQPQDSGQYSCSFGDQTT SATLTVKTS SAQFVGLKRNKEATEGTTV
TLRCELTK EAPVEWKKGTETLRNGDKYSLKQDGAVCELQICSLLVADAGEYSCVCGQEKTSATLTVKALLVHF
VRRLSKEATEGDTTTLQCELSKAAPVEWRKGTETLRDGD RYSLKQDGAVCELQIRSLTIADAGEYLCTCGQE
KTSATLTVRALPAKFKDSLKNEEATEGTTATLSCELSKAAPVTWKKGPKTLQSGDKYVLRQDGAVCGLQIHGL
TMADAGEYSCVCGQEKTSATLTVRGLPAKFIEDLRSQEATEGATAILRCELSKAAPVEWRKGS ETLKDGDRYT
LRQDGAVCELQIRGLAVVDGTGYSSLPKFTTEGLRNEEATEGTMATLRCQMSKAAPVEWRKGS ETLR DGD RYS
LRQDGAMCELQIRGLTIEDSGEYTCVCGQEKTSATLSVKALPSRFIEDLRSQEATEGTMATLRCQMSKTAPVE
WKKGSETLRSKAGRYSLRQDGPVCELQICDLAVEDAGEYSCVCGQEKTSATLSIKALPPRFIEDLRSQEATEGT
MATLRCQMSKAAPVEWRKGS ETLGDGGRYSLRQNGAVCELQIRPLWVGHDLAVEDTGEYSCVCGQEKTSATLN
VKALPPRFIEDLRSQEATEGTMATLRCQMSKAAPVEWRKGS ETLR DGGRYSLRQDGAVCELQIHDL DVEDAGQ
YSCVCGQEKTSAVLTVDALPPKFT EGLKKEEATEGTMVTLRCQMSKEATVEWRKGAKT LSGGRYSLRQDGAM
CELQICGLAVEDAGEYSCVCGQEKTSATLSVKALPPRFIEDLRSQEATEGTMATLRCQMSKAAPVEWRKGS ETL
LRDGD RYSLRQDGAVCELQIRDLAVEDAGEYLCVCGQEKTSATLSVKALPPRFIEDLRSQEATEGTMATLRCQ

MSKAAPVEWRKSGSKTLRDGDYSLRQDGMCELQICDLAVEDTGDYSCVCGQEKTSATLSVKALPPRFIEDLR  
SQEAREGTVATLRCRMSKAAPVEWRKGETLKDGDYSLRQEGNLCELQIRDLAVEDTEEYSCVCGQEKTSAT  
LSVKALPAKFIEDLRSQEAPESSTVTLRCKLSKKASVVKKGETLRNGARYSLRQDGAUCELEIRDLTVEDT  
GEYSCTCGQERTSATLSIMAPQVVFQQPLQNLQAEEGSMASLRCELSVPNAAMVWSKGGLELQGDTRREARQQ  
GCVAEALLRDLRREDAGEYSCTCGSQTTSATLMVTAAPVRFLRELQAQDVDEGATARLRCELSREAVSVEWRK  
GSLQLFPCAQYQMVQEGTAEALLVHGVEQEDAGEYTC DAGHTQS IARLSVRAPKPKFKTDLQSTEQEAGGTAR  
LCCQLSEAEPTPVQWLKEGVELHVGSKYEMRRQGA VCELLIHGLEAKDTGEYACLVGQKTLASLRVKEPEV  
TIVRGLVDMVEVADEDEVEFTCKVSQAGATDVQWHLQGLPLQSNVTEVAVLADGCTHVLQKGVTLLEDAGTVS  
FHVGGSSSAQLTTRVPEVTVLEPLKDVQLSEGDQDAHFRCLSRASGQEARWALGGVPLQCENMNDITVEQGT  
LYLLTLHKVTLEDAGTITLQVGSSEAEQLKVTAKNTVLRGLENVDALEGGEALFECQLSQPEVAATWLLDD  
EPVHTSEKVEVVYFENGLRHLLLNKLPQDSCRVTFLAGDVVTS AFLTVRGWRLEVLEPPHDASVKAGMQVR  
FTCILSEAVPVGEATWYINGAAIQPDDTDWTVTTDGS HHALTLSNAQPHAGEVTF AARDAVASARLSVLALP  
DPPEDAEVVGRSDHSVTLSSWVAPMSDGGGGLCGYRVMKEASTGQWQLCHDLVPGPECVDDLVPGKTYRFRV  
AAVGPAGAGEPVHLPQMVKIAPAPAPAPAPAPAPAPETRAVVGEDICLELEVAADGGEVWVKGTERIQPGG  
HFEVLSRGRQMLVIKGFRTEDQGEYRCGPIQGLPSSGAATFNVMVTS GSGDEVPAQPSLPPEAAQEGDLHLL  
WEALARKRRMSREPTLDSISELPEEDSRVQHLRQEAETAPDLSEGYSTADELARTGEADLSHTSSDDESRA  
TPSLVTLKKGAGPGI SPLASKHEAQVTT SVKPKQKQEPVVPPTCPPGDL SAADLMDPSLDKAAVKIQAQFKG  
YKVRKEMKQEGPVFSRTFGDTEAQVGDVLRLECVLATKTD MRACWLKDGIELTDGRHYHIDQLKDKTCSLLV  
TGLAPTDSGRYTCQVSTKSGRVSHSACVVVSGTESEAESSSGGELDDAFRRAARRLHRLFRTKSPAELSEEEL  
FLSADEGPGEPEEPADWQTYREDENFVCIRFESLAEARQAVTCFRNMFATMGIGVEISLGEQGPGRVEMRIGK  
VAPTVPAPVPLAKTPGLQTS DAAPVFLTELQNDVQDGYPMSFDCVVTGQPVPSVRWFKDGKLEEDDHYMIN  
EDQQGGHQLIITAVVPADMGVYRCLAENSMGVSSTKAELRVELTSTDYDTAADATETSSYFSAQGYLSSREQE  
GTESDEGQLPQVLEELKDLQVAPGTRLAQKQKLVKGY PAKLYWFKDQGPLTSDHIRMTDKKTLHTLEIVSV  
TREDSGQYAAIYISNAVGAAYSSARLLVRGPSEPEEK PASDVHERLVPRI LEKFTPKKVKRGSSTIFS VKVEG  
HPAPSVHWLKEEAKEGVLWIGPDTPGYTMASSSKQHS LVLVDVGRHQGTYTCIATNPAGQALCSASLHISGL  
AKEEEQERVKEALISSFLQGTSAVSAQMSESAFADLVGQSKGESLVAAEAAHSHLSLAEVQTEEFLOKLTSSQ  
ITEMVSAKISSQAKLVVPGGDSDEETKTPSASPRHGRSRPSSSVQESSSESEDGDSRGEI FDIYVVTADYLP LG  
AEQDAIILREGQYVEVLDSAHPLRWLVRTKPTKSSPSRQGWVSPAYLDKRLKLSPEWGPTEAPEFPGEAVSED  
EYRTRLSSVIQELLSSEQAFVGELEFLVGRVQAESVVVSTPVQEFYKKYAEETLSAKDPTQPPPPLOHYLEQVVE  
GTDDDVAMCFIKNQEA FEKYLEFLVGRVQAESVVVSTPVQEFYKKYAEETLSAKDPTQPPPPLOHYLEQVVE  
RVQKYQALLKELIRNKARNRQNCALLEQAYAVVSALPQRAENKLVSLMENYPGTLEALGEP IRQGHFIVWEG  
APGARM PWKGNHRHVF LFRNYLVICKPRRDSRTDTFSYVFRNMMKLSSIDLNDQVEGDRAFEVWHEREDSVR  
KYLQARTVI IKNSWVKEICGIQQRLAQPVWRPPEFEEELADCTAELGETVKLACRVTGT PKPIVSWYKDGKP  
VEVDPHHILIEDPDGSC TLI LDNL TGIDSGQYMCFAASAAGNASTLGKILVQVPPRFVNVKVRATPFVEGEDAQ  
ITCTVEGAPYPQIRWYKDG TLLAPGNRYRMLNEPRSGVLVVIQAASKEDLGHYECELVNR LRGSTRGGGELYM  
QSPALRARDDHREQI VAAVEERRPSP\*  
>ENSMUSP00000151217\_c.10920:c>AGGCCCTTGTGGGTGGGAC\_p.H3641RPLWVGH-ins  
ENSMUST00000219084.3|Obscn-207|ENSMUSG00000061462|-  
|chr11:g.58952331:g>GTCCCACCCACAAGGGCCT

MDHSFSGAPRFLTRPKAFVVS VGKDATLSCQIVGNPTPHVSWEKDRQPV EAGARFRLAQDGDVYRLTILDLAL  
GDSGQYVCRARNAIGEAFVAVGLRVDSEGTCAEQAPHLLRPTSIRVREGADATFRCRVGGSPQPAVSWSKDG  
RRLGPPDAPHVRVEEHGESSALRIR SARPRDGGTYEVRAENPLGSASAAAALVVDSDAEVAGPPGTSTATLLA  
HLQORREAMRAEGIPSPPPGAGTRTCTVTEGKHARLSCFVTGEPKPEVWKKDGQLVTEGRRHVVEDEQENF  
VLKILFCKQSDRGLYTC TASNLVGQTYSSVLVVVREPTVPFKKRLQDLEVREKESATFQCEVAQPA TEAAWFK  
EETRLWASAKYDIEEEGTERRLTVRNVSADDDAVYICETTEGSRVVAELSVQGNLTKLPRKTAVRTGDTAIF  
WVELAVPEGPVRWLRNQEEMVAGGRVAITAEGTCHTLTI FQCTLEDMGEVAFVSGGCRTTTQFCVSAPRRPPL  
YPPADPVVKAKTESSVTLSSW SAPPHGDRPVTIDGYVLEKRLKLGAYAWSRCHEAGWLATTEFTITGVAAEEDFQ  
FRVSAINHFGQGPYLEFPGMTMLVPLAVKTPKAVEAVEGGEVTFVSDLTVASSGEWFLDGEALKASSIYVI  
RCDRTRHMLTIREV PARLHGAQLK FVANGIETS IQMVVRAALGLPSSKLPAAAAREVLAQLHEEAQLLAELSD  
QAAAVTWLKDGRELSLGPKEYMQVSAGRRALLVRDVAQDDAGLYECVSRGSR TAYQLLVQDITDGYRDWGPAG  
PQKHMCKCAGAKIARYLGSSCYRFLQYDKGVWHLEAALDTRQKGTSSCSLHEKPKLVFAKQQA HSEVKA  
AGNSATLSCEVTQAQTEVTFWFKDGKLS SSSSKVRMEASGCSRRLVVQQAGKADAGEYSCEAGGQKLSFRLDVA  
EPKLVFAKQQA HSEVKA EAGASATLSCEVAQAQTEVTFWFKDGKLS SSSSKVRMEASGCSRRLVVQQAGKAD  
GEYSCEAGGQKLSFRLDVAEPKMFVFAKEQQARSEVKA EAGASATLSCEVAQAQTEVTFWFKDGKLS SSSSKVRM  
EASGCSRRLVVQQAGKADAGEYSCEAGGQKLSFRLDVTEPKLVFAKEQQARSEVKA EAGNSATLSCEVAQAQ  
EVTWFKDGKLS SSSSKVRMEASGCSRRLVVQQAGKADAGEYSCEAGGQKLSFRLDVTEPKLVFAKEQQAHSEV  
KAEAGASATLSCEVAQAQTEVTFWFKDGKLS SSSSKVRMEASGCSRRLVVQQAGKADAGEYSCEAGGQKLSFRL  
DVAEPKLVFAKEQQARSEVKA EAGASATLSCEVAQAQTEVTFWFKDGKLS SSSSKVRMEASGCSRRLVVQQAGK



ADAGEYSCEAGGQKLSFRLDVAEPKLVFAKEQQANSEVKAEAGASATLSCEVAQAQTEVTFWKDGGKLLSSSSK
VRVEASGCSRRLVVQQAGKADAGEYSCEAGGQKLSFRLDVAEPKLAFAKEQQAHSEVKAEAGASATLSCEVAQ
AQTEVTFWKDGGKLLSSSSKVRVEASGCSRRLVVQQAGKADAGEYSCEAGGQKLSFRLDVAEPKLVFAKEQQAH
SEVKAEAGASATLSCEVAQAQTEVTFWKDGGKLLSSSSKVRVEASGCSRRLVVQQVKGADAGEYSCEARGQKLS
FRLDVAEAESQIPERPSRREPLVVKEHETIILTATIAAPSVAAVTWLKDGVEIRRSKRHEATSLGDTHTLTVR
GAQVLDIAIYSCRVGKEGQDFPVQVEEVAAKFSKPLEPVEGELGGTVMLVCELSPEQAEVWRCGNTQLRPGK
RFQMTSEGPRRTLTVSGLREDDAEYVCESRDDRTSARLTVKVPVVKFTSGLSAMVAEEGQEAFTQCVVSPS
DAGVTWYKDGMLQLPSEKFMVESGASRSLTILGLTLEDAGQVTEAEGASSAALRVREAPVLFKKKLEPQT
VEERTSVTLEVELTRPWPEVKWTRNAAVLTPSENVEIRAEGARHCLVLRVSVGFADRGFFGCETPDDKTQAKLN
VEMRQVRLVVRGLQEVEAKEQGTASMDVELSHAEVEGSWTRDGLRLQPGPKCHLAVQGPVHILTLALSALQPQDSG
LVAFRAEGVHTSARLIVTELPVSFTRVLQDVVATQKEKVTLECELSRPVDVRWLKDGVELRAGKAIIGIVAQGT
CRSLVIYRCETGDQGVYVCDALDAQTSASLRVQGRYTLIFRRVLAEDAGEVKFVAENAESRAHLRVKELPVT
LLRPLRDKIAMEKHRGVLECCVSRASAQVRWFKGGVELQSGPKYEVVSDGLYRKLVIINDVQPEDEDYTC DAG
NVKTSAQFFVVEEQSITIVRGLKDMTVMEPAPAWFECETSIPSVRPPKWLKGKTVLQAGGNVLEQDGTVHRLT
LHKTCSTMTGPVHFTIGKSRSSAQLVVS DIPVVLTRPLEPKAGRELQSVVLSCDFRPAPKAVQWYKDDTPLSP
SEKFKMALEGQMAELRILRLTPADAGVYRCQAGSAQSSAEVTVAREVTVIQPLQDAEAMEEGRVCFSCELSH
KDEDIEWSLNGTPLYNDSFHEISHGCLHTLVLKSVRQADTGTVCATSPKVSVSARLVVKGKPVVFLKALDDV
SAEERGTLLTQCEVSDPEARVWVRKDGVELGSPDKYDFLHKAGARGLTVHDLSHEDAGLYTCQVVGSKETQSKV
SVHDLHVGITKRLKTVEVLEGESECFVLSHESPSDPAVWTVGGKTVGGSGHFHAVRQGRKYTLTVKDAALS
DAGEVVSFVLGLTSKASLIIRERPVDITKPLEDQRTTLGEDVMLSCELSRAGTSVRWLKDGKAIKRSQKYDLL
SEGTRAVLVVRKASLKDSGEYTCETEASKSTAKLCVEEKANRFTTELADLQVEEKGRAVFTCKTEHPASVVTW
RKGLLELRASGKHVPSQEGTLKLTINALERTSDTYTCDIGQARTQARLLVHGQKVRVIEDLEDTAVQEGSS
AKFCCRIPADYGPVHWFLLDKTPLHSNELNEITVQPGGYHVLTLRQLALKDSGTVYFEAGDQRTSALRVTEK
PSIFSRPLTDVTVTEGEDTLVCETTTVDSSVRWTKDGKTLRPSARCQLSHEGCAQLLITATTPQDGGRYKC
EIGGASSSSIVRVHALPVRFRFRESLKDVEVPEGKAATLRCVLSVAAPVEWRHGDDVLKSSNKYSLRQEGAVLE
LVIRDLQPDQSGQYSCSFGDQTTSATLTVKTSQAQVFGKLRNKEATEGTTVTLRCELTKEAPVEWKGKGTETLR
NGDKYSLKQDGAUCELVICSLLVADAGEYSCVCGQEKTSATLTVKALLVHFVRRRLRSEATEGDTTTLQCELS
KAAPVEWRKGTETLRDGDYSLKQDGAUCELVICSLLVADAGEYLCCTCGQEKTSATLTVRGLPAKFIEDLRSQ
EATEGATAILRCELSKAAPVEWRKGTETLRDGDYSLRQDGAUCELVICIRGLAVVDTGTYSLPTKFTTEGLRNE
EATEGTMATLRCQMSKAAPVEWRKGTETLRDGDYSLRQDGAUCELVICIRGLTIEDSGEYTCVCGQEKTSATLS
VKALPPRFIEDLRSQEATEGTMATLRCQMSKAAPVEWRKGTETLRDGGGRYSLRQNGAVCELVICIRPLVWGHDLA
VEDTGEYSCVCGQEKTSATLNVKALPPKFTTEGLKKEEATEGTMATLRCQMSKEATVEWRKGAKTLSDGGRYSL
RQDGAUCELVICGLAVEDAGEYSCVCGQEKTSATLSVKALPPRFIEDLRSQEATEGTMATLRCQMSKAAPVEW
RKGSETLRDGDYSLRQDGAUCELVICIRDLAVEDAGEYLCVCGQEKTSATLSVKALPPRFIEDLRSQEATEGTM
ATLRCQMSKAAPVEWRKGTETLRDGDYSLRQDGAUCELVICDLAVEDTGDYSCVCGQEKTSATLSVKAPQV
FQPLQNLQAEEGSMASLRCELSVPNAAMVWSKGGLELQGDTRREARQQGCVAELLRLDRREDAGEYSCVCG
SQTTSATLMVTAAPVRFRLRELQAQDVDEGATARLRCELSREAVSVEWRKGSLLQFLPCAKYQMVQEGTTAELLV
HGVEQEDAGEYTC DAGHTQSIARLSVRAPKPKFKTDLQSTEQEAGGTARLCCQLSEAEPTPVQWLKEGVELH
VGSKYEMRRQGAUCELLIHGLEAKDTGEYACLVGGQKTLASLRVKEPEVTIVRGLVDMEVQADEDEVEFTCKVS
QAGATDVQWHLQGLPLQSNEVTEVAVLADGCTHVLQLKGVTLLEDAGTVSFHVGLSSSAQLTVRVPEVTVLEP
LKDVQLSEGQDAHFRCRLSRASQEARWALGGVPLQCNEMNITVEQGTLYLLTLHKVTLEDAGTITLQVGS
SSEAQLKVTAKNTVLRGLENVDALEGGALFECQLSQPEVAHTWLLDDEPVHTSEKVEVVYFENGLRHLLLL
KNLKPQDSCRVTFLAGDVVTSFAFLTVRGRWLEVLEPPHDASVKAGMQVRFTCILSEAVPVGEATWYINGAAIQ
PDDTDWTVTTDGSHHALTLNSAQPQHAGEVTFAARDAVASARLSVLALPDPPEDAEVVGRSDHSVTLSSWVAPM
SDGGGLCGYRVEMKEASTGQWQLCHDLVPGPECVVDDLVPKTYRFRVAAVGPAGAGEPVHLPQMVKIAPAP
APAPAPAPAPETRAVVGEDICLELEVAADGGEVWVKGTERIQPGGHFEVLSRGRQMLVIKGFRTEDQGEY
RCGPIQGLPSSGAATFNVVMTSGSGDEVPAQPSLPPEAAQEGDLHLLWEALARKRRMSREPTLDSISELPEED
SRVQHLRQEAETAPDLSEGYSTADELARTGEADLSHTSSDDES RAGTPSLVTYLKKAGGPGISPLASKHEAQ
VTTSVKPKQKQEPVVPPTCPPPGDLSAADLMDPSLDKAAVKIQAAFQKGVKVRKEMKQQEGPVFSRTFGDTEAQV
GDVLRLECVLATKTDMRACWLKDGIELTDGRHYHIDQLKDGTCSSLVTVGLAPTDSGRYTCQVSTKSGRVSHA
CVVVSGETESEAESSSGELDDAFRRAARRLHRLFRTKSPAELSEEEFLSADEGPGPEPEPADWQTYREDEF
VCIRFESLAEARQAVTCFRNMFATMGIGVEISLGEQGRGVMEMRIGKVAPTVPVAVPLAKT PGLQTSDAAPVF
LTELQNVSDQDGYPMSFDCVVTGQPVPSVRWFKSLDGKLLLEDHMYMINEDQQGGHQLIITAVVPADMGVYRCLA
ENSMGVSSDKAELRVELTSTDYDTAADATETSSYFSAQGYLSSREQEGTESDEGQLPQVLEELKDLQVAPGTR
LAKFQLKVKYGPAPKLYWFKDQPLTTSDHIRMTDKKTLHTLEIVSVTREDSGQYAAIYI SNAVGAAYSSARLL
VRGPSEPEEKPASDVHERLVPPRILEKFTPKVKRGSITFSVKVEGHPAPSVHWLKEEAEGVLIWGPDPG
YTMASSSKQHSVLVLDVGRQHGTQYTCIATNPAGQALCSASLHISGLAKEEEQERVKEALISSFLQGTSQAVS
AQMSESAGFADLVGQSKGESLVAAEAHSHLSLAEVGT EEFLOKLT SQITEMVSAKISQAKLQVPGGDSDEETK

TPSASPRHGRSRPSSSVQESSSESEEDGDSRGEIFDIYVVTADYLP LGAEQDAIILREGQYVEVLDSAHPLRWL  
VRTKPTKSSPSRQGWVSPAYLDKRLKLSPEWGPTEAPEFPGEAVSEDEYRTRLSSSVIQEELLSSEQAFV GELQF  
LESHHMKHLERSPRVPAAVASQKTVIFRNVQDISHFHSSFLKELQCGTDDDVMCFIKNQEAFEKYLEFLVG  
RVQAESVVVSTPVQEFYKKYAEETLSAKDPTQPPPPPLQHYLEQPVVERVQKYQALLKELIRNKARNRQNCALL  
EQAYAVVSALPQRAENKLHVSLMENYPGTLEALGEPTRQGHFIVWEGAPGARMPPWKGNHRHVFLFRNYLVICK  
PRRDSRTDTFSYVFRNMMKLSSIDLNDQVEGDDRAFEVWHEREDSVRKYLLQARTVIIKNSWVKEICGIQQRL  
AQPVWRPPEFEEELADCTAELGETVKLACRVGTGPKPIVSWYKDGKPVVDPHHILIEDPDGSCCTLI LDNLTG  
IDSGQYMCFAASAAGNASTLGKILVQVPPRFVNVKVRATPFVEGEDAQITCTVEGAPYPQIRWYKDGTL LAPGN  
RYRMLNEPRSGVLVLIQAASKEDLGHYECELVNR LGSTRGGELYMQS PALRARDQHREQI VAAVEVTEQE  
TKVPKKTVIIIEETITTVVKS PRGRRQSPGKSPSRSPRRSAS PRRPGLLAPERLYPPGTSPSRRELEVEQGRKA  
PVPALYVTEAEVHAPASQS QPKWLEVEETIEVRVKKTGSRGASPVREMTSRGEGILFTLPGGIPGRDPNANNS  
NNKSVYQEARTWGPVAVHVGEPIFQVDSVGNVDWAASPEPEQVRASQKEENTERQEGCSDG DENTFLMEEP  
QD TDSLQGRDPKILTHNGRVLTLADLEDYVPQEGETFGCGDSTPSTPDEPPCEVSVLQREI SEPTVGGQVLLN  
VGRPPGTGATPSFFRPGSQVHSPESVSFLLREAWSGPVSAAPWTS SFHTHVQSSVDGSHGSKFTEVSTQTVSF  
GAVGETVTLHIDPDGGEAPGPSQG\*

>rs45824303\_ENSMUSP00000158795\_c.12685:A>G\_p.E4229G

ENSMUST00000238536.2|Obscn-210|ENSMUSG00000061462|-|chr11:g.58952474:T>C  
MDHSFSGAPRFLTRPKAFVSVGKDATLSCQIVGNPTPHVSWEKDRQPVEAGARFLAQDGDVYRLTILDLAL  
GDSGQYVCRARNAIGEAFAAVGLRVDSEGTCAEQAPHFLLRPTSIRVREGADATFRCRVGGSPQPAVSWSKDG  
RRLGPPDAPHVRVEEHGESSALRIRSARPRDGGTYEVRAENPLGSASAAAALVVDSDAEVAGPPGTSTATLLA  
HLQORREAMRAEGIPPSPPGAGTRTCTVTEGKHARLSCFVTGEPKPEVWKKDGQLVTEGRRHVVEDEQENF  
VLKILFCKQSDRGLYTCTASNLVGQTYSSVLVVREPTVPFKKRLQDLEVREKESATFQCEVAQPA TEAAWFK  
EETRLWASAKYDIEEEGTERRLTVRNVSADDDAVYICETTEGSRVVAELSVQGNLTKLPRKTA VRTGDTAIF  
WVELAVPEGPVWRWRNQEEMVAGGRVAITAEGTCHTLTI FQCTLEDMGEVAFVSGGCRTTTTQFCVSAPRRPPL  
YPPADPVVKAKTESSVTLWSAPPHGDRPVTIDGYVLEKRRKLGAYAWSRCHEAGWLATTEFTITGVAEEGDFQ  
FRVSAINHFGQGPYLEFPGTMHLVPLAVKTKPLKAEVAVEGGEVTFVSDLTVASSGEVFLDGEALKASSIYVI  
RCDRTRHMLTIREVPARLHGAQLKFVANGIETS IQMVVRAALGLPSSSKLPAAAAREVLAQLHEEAQLLAE LSD  
QAAA VTLWKDGRELSLGPKEYMQVSAGRRALLVRDVAQDDAGLYECVSRGSRTAYQLLVQDITDGYRDWGPAG  
PQKHMCKCAGAKIARYLGSSCYRFLQYDKGVWHLEAALDTRQGGKTS SCSLHEKPKLVFAKQQAHSEVKA E  
AGNSATLSCEVTQAQTEVTWFKDGKLLSSSSKVRMEASGCSRRLVVQQAGKADAGEYSCEAGGQKLSFR LDVA  
EPKLVFAKQQAHSEVKA EAGASATLSCEVAQAQTEVTWFKDGKLLSSSSKVRMEASGCSRRLVVQQAGKAD A  
GEYSCEAGGQKLSFRLDVAEPKMVFAKEQQARSEVKA EAGASATLSCEVAQAQTEVTWFKDGKLLSSSSKVRM  
EASGCSRRLVVQQAGKADAGEYSCEAGGQKLSFRLDVTEPKLVFAKEQQARSEVKA EVGN SATLSCEVAQAQ T  
EVTWFKDGKLLSSSSKVRMEASGCSRRLVVQQAGKADAGEYSCEAGGQKLSFRLDVAEPKLVFAKEQQARSE V  
KAEAGNSATLSCEVAQAQTEVTWFKDGKLLSSSSKVRMEASGCSRRLVVQQAGKADAGEYSCEAGGQKLSFHL  
DVTEPKLVFAKEQQAHSEVKA EAGASATLSCEVAQAQTEVTWFKDGKLLSSSSKVRMEASGCSRRLVVQQAGK  
ADAGEYSCEAEGQKLSFRLDVAEPKLVFAKEQQARSEVKA EAGASATLSCEVAQAQTEVTWFKDGKLLSSSSK  
VRVEASGCSRRLVVQQAGKADAGEYSCEAGGQKLSFRLDVAEPKLVFAKEQQANSEVKA EAGASATLSCEVAQ  
AQTEVTWFKDGKLLSSSSKVRVEASGCSRRLVVQQAGKADAGEYSCEAGGQKLSFRLDVAEPKLVFAKEQQAH  
SEVKA EAGASATLSCEVAQAQTEVTWFKDGKLLSSSSKVRVEASGCSRRLVVQQAGKADAGEYSCEAGGQKLS  
FRLDVAEPKLVFAKEQQAHSEVKA EAGASATLSCEVAQAQTEVTWFKDGKLLSSSSKVRVEASGCSRRLVVQQ  
AGKADAGEYSCEAGGQKLSFRLDVAEPKLVFAKEQQAHSEVKA EAGASATLSCEVAQAQTEVTWFKDGKLLSS  
SSKVRVEASGCSRRLVVQQAGKADAGEYSCEAGGQKLFRLDVAEPKLMFAKEQQAHSEVKA EAGASATLSCE  
VAQAQTEVTWFKDGKLLSSSSKVRVEASGCSRRLVVQQAGKADAGEYSCEAGGQKLSFRLDVAEPKLVFAKEQ  
QAHSEVKA EAGASATLSCEVAQAQTEVTWFKDGKLLSSSSKVRVEASGCSRRLVVQQV GKADAGEYSCEARGQ  
KLSFRLDVADTRLMFAKEQQARTEVKA EAGNSATLSCEVAQAQTEVTWFKDGKLLSSSSKVRVEASGCSRRLV  
VQQAGKADAGEYSCEAGGQKLSFRLDVAEAE SQIPERPSRREPLVVKEHETIILTATIAAPSVAAVTLWKDGV  
EIRRSKRHEATSLGDTHTLTVRGAQVLD SAIYSCRVGKEGQDFPVQVEEVA AKFSKPLEPVEGELGGTVMLVC  
ELSPQEAEVWRCGNTQLRPGKRFQMTSEGPRRTLTVSGLREDDAEYVCE SRDDRTSARLTVKVP RVVKFTS  
GLSAMVAEEGQEATFQCVVSPSDAGVTWYKDGMLQPSKFMVMEVSGASRSLTILGLTLEDAGQVTV EAGAS  
SSAALRVREAPVLFKKLEPQTV EERTSVTLEVELTRPWPEVKWTRNAAVLTPSENVEIRAEGARHCLVLR SV  
GFADRGGFFGCETPDDKTQAKLNVEMRQVRLVRGLQEVEAKEQGTASMDVELSHA EVEGSWTRDGLRLQPGPKC  
HLAVQGPVHILTLALSALPQDSGLVAFRAEGVHTSARLIVTEL PVSFTRVLQDVVATQKEKVTLECELSRPVDV  
RWLKDGENELRAGKAIGIVAQGTCSRSLVIYRCETGDLGVYEC DALDAQTSASLRVQGRTYTLIFRVLAEADAGE  
VKFVAENAESRAHLRVKELPVTLLRPLRDKIAMEKHRGVLECCQVSRASAQVRWFKGGVELQSGPKYEVVSDGL  
YRKLVIN DVQPEDEDTYTC DAGNVKTS AQFFVEEQSITIVRGLKDMTVMEPAPAWFECETSIPSVRPPK WLLG  
KTVLQAGGNVGLQDGTVHRLTLHKTCSTMTGPVHFTIGKSRSSAQLVSDI PVVLRPLEPKAGRELQSVVL  
SCDFRPAPKAVQWYKDDTPLSPSEKFKMALEGGQMAELRILRLTPADAGVYRCQAGSAQSSAEVTV EAREVTVI

QPLQDAEAMEEGRVCFSCELSHKDEDEIWSLNGTPLYNDSFHEISHEGCLHTLVLKSVRQADTGTVCATSPKV  
 SVSARLVVKGKPVVFLKALDDVSAEERGLTLTQCEVSDPEARVVRKDGVELGSPDKYDFLHKAGARGLTVHD  
 LSHEDAGLYTCQVGSKETQSKVSVHDLHVGITKRLKTVEVLEGESECSFECVLSHESPSDPAVWTVGGKTVGGS  
 GHFHAVRQGRKYTLTVKDAALSDAGEVVFVSVLGLTSKASLIIRERPVDIITKPLEDQRTTLGEDVMLSCELSRA  
 GTSVRWLKDGKAIRKSQKYDLLSEGTRAVLVVRKASLKDSGEYTCETEASKSTAKLCVEEKANRFTTELADLQ  
 VEEKGRAVFTCKTEHPASVVTWRKGLLELRASGKHVPSQEGTLTKLTINALERTDSDTYTCDIGQARTQARLL  
 VHQQKVRVIEDLEDTAVQEGSSAKFCRIAPADYGPVHWFLDKTPLHSNELNEITVQPGGYHVLTLRQLALKD  
 SGTVYFEAGDQRTSAALRVTEKPSIFSRPLTDVTVTEGEDTLVCEETTTVDSSVRWTKDGKTLRPSARCQLSH  
 EGCQAQLLITATTPQDGGRYKCEIGGASSSIVRVHALPVRFRESLKDVEVPEGKAATLRVLSVAAPVEWR  
 HGDDVLKSSNKYSRQEGAVLELVIRDLQPDQSGQYSCSFGDQTTSATLTVKTSQAQFVGKLRNKEATEGTTV  
 TLRCELTKAPVEWKKGTETLRNGDKYSLKQDGAVCELQICSLLVADAGEYSCVCGQEKTSATLTVKALLVHF  
 VRRLRSKEATEGDTTTLQCELSKAAPVEWRKGTETLRDGDYSLKQDGAVCELQIRSLTIADAGEYLCTCGQE  
 KTSATLTVRALPAKFKDSLKNEEATEGTTATLSCELSKAAPVTWKKGPKTLQSGDKYVLRQDGAVCGLQIHGL  
 TMADAGEYSCVCGQEKTSATLTVRGLPAKFIEDLRSQEATEGATAILRCELSKAAPVEWRKGTETLRDGDYSL  
 LRQDGAVCELQIRGLAVVDGTYSLSLPTKFTTEGLRNEEATEGTMATLRCQMSKAAPVEWRKGTETLRDGDYSL  
 LRQDGAVCELQIRGLTIEDSGEYTCVCGQEKTSATLSVKALPSRFIEDLRSQEATEGTMATLRCQMSKATAPVE  
 WKKGSETLRDGGYSLRQDGPVCELQICDLAVEDAGEYSCVCGQEKTSATLSIKALPPRFIEDLRSQVATEG  
 MATLRCQMSKAAPVEWRKGTETLRDGGYSLRQNGAVCELQIHDLAVEDTGEYSCVCGQEKTSATLNVKALPP  
 RFIEDLRSQEATEGTMATLRCQMSKAAPVEWRKGTETLRDGGYSLRQDGAVCELQIHDLDVEDAGQYSCVCG  
 QEKTSAVLTVDALPPKFTTEGLKKEEATEGTMVTLRCQMSKEATVEWRKGAKTLSDGGYSLRQDGAVCELQIC  
 GLAVEDAGEYSCVCGQEKTSATLSVKALPPRFIEDLRSQEATEGTMATLRCQMSKAAPVEWRKGTETLRDGD  
 YSLRQDGAVCELQIRDLAVEDAGEYLCVCGQEKTSATLSVKALPPRFIEDLRSQEATEGTMATLRCQMSKAAP  
 VEWRKGTETLRDGDYSLRQDGAVCELQICDLAVEDTGDYSCVCGQEKTSATLSVKALPPRFIEDLRSQEARE  
 GTVATLRCRMSKAAPVEWRKGTETLRDGDYSLRQEGNLCELQIRDLAVEDTEEYSCVCGQEKTSATLSVKAL  
 PAKFIEDLRSQEAPESSTVTLRCKLSKASVWKKGSETLRNGARYSLRQDGAVCELEIRDLTVEDTGEYSCT  
 CGQERTSATLSIMAPQVVFQQPLQNLQAEEGSMASLRELSVPAAMVWSKGGLELQGDTRREARQQGCVAEL  
 LLRDLRREDAGEYSCVCGQEKTSATLMTVAAPVFLRELQAQDVDEGATARLRCELSREAVSVEWRKGSVQLF  
 PCAKYQMVQEGTTAELLVHGVEQEDAGEYTCDAHTQSIARLSVRAPKPKFKTDLQSTEQEAGGTARLCCQLS  
 EAEPGTPVQWLKEGVELHVGSKYEMRRQGAVCELLIHGLEAKDTGEYACLVGQKTLASLRVKEPEVTIVRGL  
 VDMEVQADEDEFTCKVSQAGATDVQWHLQGLPLQSNEVTEVAVLADGCTHVQLKGVTLLEDAGTVSFHVGGL  
 SSSAQLTVRVPEVTVLEPLKDVQVLESEGQDAHFRCRLSRASGQEARWALGGVPLQCNEMNDITVEQGTLYLLTL  
 HKVTLEDAGTITLQVGSSESQAQLKVTAKNTVLRGLENVDALEGGELFCQLSQPEVAHAHTWLLDDEPVHTS  
 EKVEVVYFENGLRHLLLLKLNKLPQDSCRVTFLAGDVVTSFAFLTVRGWRLEVLPPHDASVKAGMQVRFCTILS  
 EAVPVGATWYINGAAIQPDDTDWTVTTDGSHHALTLNAQPHAGEVTFAAARAVASARLSVLALPDPPEDA  
 EVVGRSDHSVTLVSWAPMSDGGGLCGYRVMKEASTGQWQLCHDLVPGPECVVDDLVPKGTIRYRFAAVGPA  
 GAGEPVHLPQMVKIIAPAPAPAPAPAPAPAPETRQAVVGEDICLELEVAADGGEVVWHKGTERTIQPGGHFEVLS  
 RGQRQMLVIKGFRTEDQGEYRCGPIQGLPSSGAATFNVMVMTSGSGDEVPAQPSLPPEAAQEGDLHLLEALAR  
 KRRMSREPTLDSISELPEEDSRVQHLRQEAETAPDLSEGYSTADELARTGEADLSHTSSDDESRACTPSLVT  
 YLKKAGGPGISPLASKHEAQVTSVKPKQKQEPVPTCPGGDLAADMPSLDKAAVKIQAQAFKGYKVRKE  
 MKQQEGPVFSRTFGDTEAQVGDVLRLECVLATKTDMRACWLKDGIELTDGRHYHIDQLKDGTCSSLVTLGLAPT  
 DSGRYTCQVSTKSGRVSHSACVVVSGTESEAESSGGELDDAFRAARRLHRLFRTKSPAELSEELFLSADE  
 GPGEPEEPADWQTYREDENFVCIRFESLAEARQAVTCFRNMFMATMGIGVEISLGEQGPGRVEMRIKVAPTVT  
 PAVPLAKTPGLQTSDAAPVFLTELQNDVQDGYPMSFDCVVTGQPVPSVRWFKDGKLEEDDHYMINEDQQGG  
 HQLIITAVVPADMVYRCLAENSMGVSSTKAELRVELTSTDYDTAADATETSSYFSAQGYLSSREQEGTESDE  
 GQLPQVLEELKDLQVAPGTRLAKFQLKVKGYPAKPLYWFKDGQPLTSDHIRMTDKKTLHTLEIVSVTREDSDG  
 QYAAAYSNAVGAAYSSARLLVRGPSEPEEKPASDVHERLVPPRILEKFTPKKVKRGSSTIFSVKVEGHPAPSV  
 HWLKEEAKEKGLVWIGPDTPGYTMASSSKQHSVLVLDVGRQHGTQYTCIATNPAGQALCSASLHISGLAKEEEQ  
 ERVKEALISSFLQGTSAQVSAQMSSESAGFADLVGQSKGESLVAEEAHSHLSLAEVGTTEFLQKLTSTQITEMVS  
 AKISQAKLQVPGGDSDEETKTPSASPRHGRSRPSSSVQESSSESEDGDSRGEIFDIYVVTADYLPGLAEQDAI  
 ILREGQYVEVLDLSDAHLRVLVTKPTKSSPSRQGWVSPAYLDKRLKLSPEWGPTEAPEFPGEAVSEDEYRTRL  
 SSVIQEELLSSEQAFVQELQFLESHHMKHLERSPRVPAAVASQKTVIFRNVQDISHFHSSFLKELQCGCTDDDV  
 AMCFIKNQEAFAKEYLEFLVGRVQAESVVVSTPVQEFYKKAEEETLSAKDPTQPPPPPLQHYLEQPVVERVQKYQ  
 ALLKELIRNKARNRNCALLEQAYAVVSALPQRAENKHLVSLMENYPGTLEALGEPRIQGHFIVWEGAPGARM  
 PWKGHNHVVFLFRNYLICKPRRDSRTDFTFSYFRNMMLKSSIDLNDQVEGDRAFEVWHEREDSVRKYLLQA  
 RTVVIKNSVVKKEICGIQQLRAQPVWRPPEFEEELADCTAELGETVVKLACRVTGTPKPIVSWYKDGKPVVEVDPH  
 HILIEDPDGSLTILDLNLTGIDSGQYMCFAASAAGNASTLGKILVQVPPRFVNVKVRATPFVEGEDAQITCTVE  
 GAPYPQIRWYKDGTLAPGNRYRMLNEPRSGVLVLIQAASKEDLGHYECELVNRLGSTRGGGELYMQSPALR  
 ARDQHHREQIVAAVEDTSVEGSAHSAQDQGAASVLRLLGSEALGSPSPGDLNTRQSEPPAFEEAASQIP

GAASGTPEVSPQPGTHKGLEQETTSSGSQGWTPVIRVEGTAWPGAGTGQLLLDVHSQVIMETTQRTYVQCQAPDT  
GVTRAPSMQVTTIEDVQVQVGDMAQFDAVIEGHPPPIVWTYKGSTQLTSSARLSQRQDGTYSVLVTDVAPHDA  
GVYTCVANNAGGQVLCKAELLVHGGDKLDAENQVYRRKLSHFYDVQEEIGRGVFGFVKRVQHKGNKMFCAAKF  
IPLRSKTRAQAYQERDILATLGHPLVLTGLLDQFETRKTLLILILELCSSEELLDRFLFKKGVVTEAEVKVYIQQL  
VEGLHYLHSHGILHLDIKPPNILMVHPAREDIKICDFGFAQKITPSEFPQYSKYGSPEFVSPEIIEQNPNVSEGS  
DIWAMGVISYLSLTCSSPFAGESDRATLLNVLEGRVSWSSPTAAHLSSEDAKDFIKATLQRTPRARPSTSQCLA  
HPWFLKSMPEAAEHFINTKQLKFLARSRWQRSLMSYKSILVMRSIPELLQGPDPSPSLGVARHRLRGEASGAS  
SSSSSSDNELAPFARAKSLPPSPVTHSPLLHPRGFRLRPSASLPEETEASMPATAAASPQASGPPASPGCV  
PRHSVSSLFYQQAGEGAERGNKTSGAKRHPARRRHLKGGYIARALPGLREPLMEYSLLEEEAAREEQASLM  
TKTPSFETALRPLSSSVREVPGRSHSLDNPPVTTGPSPEACKEQLLFPSTGLTHETHTAKDRGHKEGFLQESV  
PFPPMSGDSRPGKQEGSSQDSCRKPASSCHSELGSGSQEGCGPPSSQSLGSLPPQSLKKEKELSTSCGPLFSEQ  
PQAAPFPTQVSPLLGSEKEPQDGLSEGPVVPVSSSPGSASQVDASLDTEGLSEAGDTCDFTPPPQRPQEQAT  
TRKFSLESRGGYAGVAGYGTFAFGGDAGGMLGQGPLWARMAWAVSQSSEEQDEAATESPQPLESGLPIAEASG  
VPLRTSPSLTPWEEVEQVSLVQIRDLSDGAEAAADTISLDISEVDPAYLNLSDLYDIKYLPEFEMI FRRVVKPI  
EQPESPGSETEAGQGLADFLLEEAAWPWPGELGLRAGLEITEEPEEPGDLEALLGEAAVGRKRKWSPSRGLFQF  
PGRCLSGEEPVELGLRQVRKASMAHISRILKGRPEGPEREGPPRKKAGLASFRLSGLKGRDQELSDEAVVLGQ  
SVTLACQVLAQPTAQATWSKDGVLLESSGHLLISSTLKNFQLLTIILVVKEEDLGTYTCCVSNPLGTAVTTGVL  
RKAERPSSSPRPEVGEVLYKDAVLLVWKPVESCGPVYIVQCCIEGGSWTTLASDISDCCYLTGKLSRGGMYIF  
RTACVSKAGMGPIYSSPSEQVLLGGPNHLASEEESSRGRPAQLLPSTKTFQAFQMQIRRRGRFSVVRQCREKASGR  
ALAAKIVPYQPEDKTAVALREYEAALKRLHHPHLAQLHAAYLSPRHLVLIILELCSGPELLPSLAERESYSESDVK  
DYLWQMLSATQYLHAQHIHLDLRSENMMVTEYNLLKVIDLGNALDQEKVPAPENFKDYLETMAPELLEGGQ  
GAVPQTDIWAIGVTAIFIMLSGEYSESSEGTDLQKGLRKLIRLSRCYAGLSGGAVAFLOSSLCAQPWGRPCA  
STCLQCGLWTEEGPTGSRPTPVTFPTVRLRAFVREKRRALLYKKNLAQVR\*  
>rs45824303\_ENSMUSP00000038264\_c.11593:A>G\_p.E3865G  
ENSMUST00000047441.14|Obscn-202|ENSMUSP00000061462|-|chr11:g.58952474:T>C  
MDHSFGSAPRFLTRPKAFVSVGKDATLSCQIVGNPTPHVSWEKDRQFVEAGARFRLAQDGDVYRLTILDLAL  
GDSGQYVCRARNAIGEFAAAGLVRVDSGTCAEQAPHFLLRPTSIRVREGADATFRCRVGGSQPAAVSWSKDG  
RRLGPPDAPHVRVEEHGESSALRIRSARPRDGGTYEVRAENPLGSASAAAAALVVDSDAEVAGPPGTSTATLLA  
HLQORREAMRAEGIPPSPPGAGTRTCTVTEGKHARLSCFVTGEPKPKETVWKKDGQLVTEGRRHVVEDEQENF  
VLKILFCKQSDRGLYTCTASNLVGQTYSSVLVVREPTVPFKKRLQDLEVREKESATFQCEVAQAPATEAAWFK  
EETRLWASAKYDIEEEGTERRLTVRNVSADDDAVYICETTEGSRVAELSVQGNLTKLPRKTAVRTGDTAIF  
WVELAVPEGPVRWLRNQEEMVAGGRVAITAEGTCHTLTI FQCTLEDMGEVAFVSGGCRTTTQFCVSAPRRPPL  
YPPADPVVKAKTESSVTLWSAPPHGDRPVTIDGYVLEKRLKLGAYAWSRCHEAGWLATTEFTITGVAAEEDGFQ  
FRVSAINHFGQGPYLEFPGTMHLVPLAVKTPKAVEAVEGGEVTFVSDLTVASSGEWFLDGEALKASSIYVI  
RCDRTRHMLTIREVPARLHGAQLKVFANGIETSIQMVVRAALGLPSSKLPAAAAREVLAQLHEEAQLLAELSD  
QAAAVTWLKDGRELSLGPKEYMQVSAGRRALLVRDVAQDDAGLYECVSRGSRRTAYQLLVQDITDGYRDWGPAG  
PQKHMCKCAGAKIARYLGSSCYRFLQYDKGVVHWEAALDTRQKGKTS SCSLHEKPKLVFAKQQAHSEVKA  
AGASATLSCEVAQAQTEVTFKDGKLLSSSSKVRMEASGCSRRLVVQQAGKADAGEYSCEAGGQKLSFRLDVA  
EPKMFVFAKEQQARSEVKAEGASATLSCEVAQAQTEVTFKDGKLLSSSSKVRMEASGCSRRLVVQQAGKADA  
GEYSCEAGGQKLSFRLDVTEPKLVFAKEQQARSEVKAEGVNSATLSCEVAQAQTEVTFKDGKLLSSSSKVRM  
EASGCSRRLVVQQAGKADAGEYSCEAGGQKLSFRLDVAEPKLVFAKEQQARSEVKAEGNSATLSCEVAQAQ  
EVTWFKDGKLLSSSSKVRMEASGCSRRLVVQQAGKADAGEYSCEAGGQKLSFRLDVTEPKLVFAKEQQAHSEV  
KAEAGASATLSCEVAQAQTEVTFKDGKLLSSSSKVRMEASGCSRRLVVQQAGKADAGEYSCEAGGQKLSFR  
DVAEPKLVFAKEQQARSEVKAEGASATLSCEVAQAQTEVTFKDGKLLSSSSKVRVEASGCSRRLVVQQAGK  
ADAGEYSCEAGGQKLSFRLDVAEPKLVFAKEQQANSEVKAEGASATLSCEVAQAQTEVTFKDGKLLSSSSK  
VRVEASGCSRRLVVQQAGKADAGEYSCEAGGQKLSFRLDVAEPKLAFAKEQQAHSEVKAEGASATLSCEVAQ  
AQTEVTFKDGKLLSSSSKVRVEASGCSRRLVVQQAGKADAGEYSCEAGGQKLSFRLDVAEPKLAFAKEQQAH  
SEVKAEGASATLSCEVAQAQTEVTFKDGKLLSSSSKVRVEASGCSRRLVVQQAGKADAGEYSCEAGGQKLS  
FRLDVAEPKLAFAKEQQAHSEVKAEGASATLSCEVAQAQTEVTFKDGKLLSSSSKVRVEASGCSRRLVVQQ  
AGKADAGEYSCEAGGQKLFRLDVAEPKLVFAKEQQAHSEVKAEGASATLSCEVAQAQTEVTFKDGKLLSS  
SSKVRVEASGCSRRLVVQQVQKADAGEYSCEARGQKLSFRLDVAEAEESQIPERPSRREPLVVEKHETIILTAT  
IAAPSVAAVTWLKDGVIEIRRSKRHEATSLGDTHTLTVRGAQVLD SAIYSCRVGKEGQDFPQVVEEVAAKFSKP  
LEPVEGELGGTVMLVCELSPEQAEVWRCGNTOVLRPGKRFQMTSEGPRTLTVQLGREDDAEYVCESRDDRT  
SARLTVKVRVVKFTSGLSAMVAEEGQEAFTQCVVSPSDAGVTWYKDMQLOPSEKFMVESGASRSLTILGL  
TLEDAGQVTVAEAGASSAALRVREAPVLFKKKLEPQTVEERTSVTLEVELTRPWPEVVKWTRNAAVLTPSENV  
EIRAEGARHCLVLRVGFADRGFFGCETPDDKTQAKLNVEMRQVRLVVRGLQEVEAKEQGTASMDVELSHAEVE  
GSWTRDGLRQLQPGPKCHLAVQGPVHILTSLALQPD SGLVAFRAEGVHTSARLIVTELTPVSTFTRVLQDVVATQ  
KEKVTLCELSRPPVDVRLKDGVELRAGKAI GIVAQGTCSRSLVIYRCETGDQGVYVCDALDAQTSASLRVQGR

TYTLIFRRVLAEDAGEVKFVAENAESRAHLRVKELPVTLLRPLRDKIAMEKHRGVLECVSRASQAQVRFKGG  
VELQSGPKYEVVSDGLYRKLVINOVPEDEDYTCAGNVKTSAQFFVEEQSITIVRGLKDMTVMEPAPAWFE  
CETSIPSVRPPKWLKGTVLQAGNVGLEQDGTVHRLTLHKTCSTMTGPFVHFTIGKSRSSAQLVSDIPVVL  
RPLEPKAGRELQSVVLSCDFRPAPKAVQWYKDDTPLSPSEKFKMALEGQMAELRILRLTPADAGVYRCQAGSA  
QSSAEVTVAREVTVIQLQDAEAMEEGRVCFSCELSHKDEDEIWSLNGTPLYNDSFHEISHEGCLHTLVLKS  
VRQADTGTVCATSPKVSVSARLVVKGKPVVFLKALDDVSAEERGTLTLQCEVSDPEARVVWRKDGVELGPSDK  
YDFLHKAGARGLTVHDLSDHEDAGLYTCQVGSKETQSKVSVHDLHVGITKRLKTVEVLEGESECFVLSHESP  
SDPAVWTVGGKTVGGSGHFHAVRQGRKYTLTVKDAALSDAGEVVFVSLGLTSKASLIIRERPVDTKPLEDQR  
TTLGEDVMLSCELSRAGTSVRWLKDGKAIKRSQKYDLLSEGTRAVLVVRKASLKDSEYTCETEASKSTAKLC  
VEEKANRFTEELADLQVEEKGRAVFTCKTEHPASVVTWRKGLLELRASGKHVPSQEGTLTKLTINALERTDSD  
TYTCDIGQARTQARLLVHGQKVRVIEDLEDTAVQEGSSAKFCCRIPADYGPVHWFLDKTPLHSNELNEITVQ  
PGGYHVLTLRQLALKDSGTVYFEAGDQRTSAALRVTEKPSIFSRPLTDVTVTEGEDTLTV CETTTVDSSVRWT  
KDGTLRPSARCQLSHEGCAQLLITATTPQDGGRYKCEIGGASSSIVRVHALPVRFRFRESLKDVEVPEGKAA  
TLRCVLSVAAPVEWRHGDDVLKSSNKYSLRQEGAVLELVIRDLQPDQSGQYSCSFGDQTTSATLTVKTSQAQ  
FVGKLRNKEATEGTTVTLRCELTKAEAPVEWKKGTETLRNGDKYSLKQDGAVCELQICSLLVADAGEYSCVCGQ  
EKTSATLTVKALLVHFVRRLSKEATEGDTTTLQCELSKAAPVEWRKGTETLRDGDYSLKQDGAVCELQIRS  
LTIADAGEYLCTCGEKTSATLTVRALPAKFKDSLKNEEATEGTTATLSCELSKAAPVWKKGPKTLQSGDKY  
VLRQDGAVCGLQIHGLTMADAGEYSCVCGQEKTSATLTVRGLPAKFIEDLRSQEATEGATAILRCELSKAAPV  
EWRKGETLTKDGDYTLRQDGAVCELQIRGLAVVDTGTYSLSLPTKFTTEGLRNEEATEGTMATLRCQMSKAAPV  
EWRKGETLRDGDYSLRQDGAVCELQIRGLTIEDSGEYTCVCGQEKTSATLSVKALPPRFIEDLRSQGATEG  
TMATLRCQMSKAAPVEWRKGETLGDGGYSLRQNGAVCELQIHDLAVEDTGEYSCVCGQEKTSATLNVKALP  
PRFIEDLRSQEATEGTMATLRCQMSKAAPVEWRKGETLRDGGYSLRQDGAVCELQIHDLVEDAGQYSCVC  
GQEKTSAVLTVDALPPKFTTEGLKKEEATEGTMVTLRQMSKEATVEWRKGAKTLSGGYSLRQDGAVCELQI  
CGLAVEDAGEYSCVCGQEKTSATLSVKALPPRFIEDLRSQEATEGTMATLRCQMSKAAPVEWRKGSKTLRDGD  
RYSLRQDGAVCELQICDLAVEDTGDYSCVCGQEKTSATLSVKAPQVVFQQLQNLQAEEGSMASLRCELSVFN  
AAMVWSKGGLELQDGTREARQQGCVAELLLDRREDAEYSCVCGQEKTSATLMTVAAPVFLRLELQAQDV  
DEGATARLRCLELSREAVSVEWRKGSLLQFLPCAKYQMVQEGTTAEILLVHGVVEQEDAGEYTCEDAGHTQS IARLSV  
RAPKPKFKTDLQSTEQEAGGTARLCCQLSEAEPTPVQWLKEGVELHVGSKYEMRRQGAVCELLIHGLEAKDT  
GEYACLVGQKTLASLRVKEPEVTIVRGLVDMVEQADEDEFTCKVVSQAGATDVQWHLQGLPLQSNVTEVAV  
LADGCTHVLQKGVTLLEDAGTVSFHVGGLSSSAQLTVRVPEVTVLEPLKDVQLSEGQDAHFRCLSRASGQEA  
RWALGGVPLQCNEMNDITVEQGTLYLLTLHKVTLEDAGTIITLQVGSSESAQLKVTAKNTVLRGLENVDALEG  
GEALFECQLSQPEVAHAHTWLLDDEPVHTSEKVEVVYFENGLRHLLLLKLNKLPQDSCRVTFLAGDVVTSAFITV  
RALPDPPEDAEVVGRSDHSVTLVWVAPMSDGGGGLCGYRVEMKEASTGQWQLCHDLVPGPECVDDLVPGKTY  
RFRVAAGVPAGAGEPVHLPQMVKIAPAPAPAPAPAPAPAPETRQAVVGEDICLELEVAADGGEVWHKGTERRI  
QPGGHFEVLSRGQRQMLVIKGFRTEDQGEYRCGPIQGLPSSGAATFNVMVMTSGSGDEVPAQPSLPEAAQEGD  
LHLLWEALARKRRMSREPTLDSISELPEEDSRVQHLRQEAETAPDLSEGYSTADELARTGEADLSHTSSDDE  
SRAGTPSLVTYLKKAGGPGISPLASKHEAQVTTSVKPKQKQEPVPTCPPPGDLSAADLMDPSLDKAAVKIQA  
AFKGYKVRKEMKQEGPVFSRTFGDTEAQVGDVLRLECVLATKTKDMRACWLKDGIELTDGRHYHIDQLKDGTC  
SLLVTLGLAPTDSGRYTCQVSTKSGRVSHSACVVVSGTESEAESSSGGELDDAFRRAARLHRLFRTKSPAELS  
EELFLSADEGPEPEPADWQTYREDENFVCIRFESLAEARQAVTCFRNMFMATMGIGVEISLGEQGRGVEM  
RIGKVAPTPTPAVPLAKTPGLQTSDAAPVFLTELQNDVQDGYPMSFDCVVTGQPVPSVRWFKDGKLEEDDH  
YMINEDQGGHQLIITAVVPADMGVYRCLAENSMGVSSTKAE LRVELTSTDYDTAADATETSSYFSAQGYLSS  
REQEGTESDEGQLPQVLEELKDLQVAPGTRLAKFQLKVKGYPAKLYWFKDGQPLTSDHIRMTDKKTLHTLE  
IVSVTREDSGQYAAIYISNAVGAAYSSARLLVRGPSEPEEKPASDVHERLVPPRILEKFTPKKVKRGSITFSV  
KVEGHPAPSVHHLKEEAKEGVLWIGPDTPGYTMASSSKQHSLLVLLDVGRQHOGQTYTCIATNPAGQALCSASLH  
ISGLAKEEEQERVKEALISSFLQGTSAVSAQMSSESAGFADLVGQSKGESLVAAEEAHSHLSLAEVGTTEEFLOK  
LTSQITEMVSAKISQAKLQVPGGDSDEETKTPSASPRHGRSRPSSSVQESSSESEDGDSRGEIFDIYVVTADY  
LPLGAEQDAIILREGQYVEVLDLVAHPLRVLVVRTKPTKSSPSRQGWVSPAYLDKRLKLSPEWGPTEAPEFPGEA  
VSEDEYRTRLSSVIQELLSSEQAFVGELOFLESHHMKHLERSPRVPAAVASQKTVIIRNVQDISHFSSFLKE  
LQCCGTDVDDVAMCFIKNQEAFFEKYLEFLVGRVQAESVVVSTPVQEFYKKYAEETLSAKDPTQPPPPPLQHYLE  
QPVERVQKYQALLKELIRNKARNRQNCALLEQAYAVVSALPQRAENKLVSLMENYPGTLEALGEPVIRQGHFI  
VWEGAPGARMPWKGNHRHVFLEFRNYLVICKPRRDSRTDTFSYVFRNMMLSSIDLNDQVEGDRAFEVWHERE  
DSVRKYLLQARTVIKNSWVKEICGIQORLAQPVWRPPEFEEELADCTAELGETVKLACRVNTGTPKPIVSWYK  
DGKPVVEYDHHILIEDPDGSCTLILDNLTGIDSGQYMCFAASAAGNASTLGKILVQVPPRVFNKVRATPFVVEG  
EDAQITCTVEGAPYQAIRWYKDGTLAPGNRYRMLNEPRSGVLVLIQAASKEDLGHYECELVNRLGSTRGGG  
ELYMQSPALRARDQHHREQIVAAVEGAPSMQVTIEDVQVQVGDMAQFDAVIEGHPPPPIVTVWYKGTQLTSSAR  
LSQRQDGTYSVLVTDVAPHDAGVYTCVANNAGQVLCCKAELLVHGGDKLDAENQVYRRKLSHFYDVQEEIGR  
GVVGFVQVQHKGNMFCFAAKFIPLRSKTRAQAYQERDILATLGHPLVTVGLLDQFETRKTLLIILELCSSEEL



LDRLFKKGVVTEAEVKVYIQQLVEGLHYLHSHGILHLDDIKPPNII LMVHPAREDIKICDFGFAQKITPSEPOYS  
KYGSPEFVSPETIEQNPVSEGSIDIWAMGVI SYLSLTCSSPFAGESDRATLLNVLEGRVSWSSPTAAHLSSEDAK  
DFIKATLQRTPRARPSTSQCLAHFWFLKSMPAAEAHFINTKQLKFLLRARSRWQRSLMSYKSI LVMRSIPELLQ  
GPPDSPSLGVARHLRGEASGASSSSSSSDNELAPFARAKSLPPSPVTHSPLLHPRGFLRPSASLPEETEASMP  
TADAAVPASPQASAGPPASPGCVPRHSVSSLFYQQAGEGAERGNKTS GAKRHPARRRHLLKGGYIARALPGLR  
EPLMEYSLLEEEAAREEQASLMTKTPSFETALRLPSSSVREVPGRSHSLDNPPVTTGSPPEACKEQLLFPST  
GLTHETAKDRGHKEGFLQESVFPFPMMSGDSRPGKQEGSSQDSCRGKPASSCHSELGSGSQEGCGPPSSQSLG  
SLPQQSLKKELSTSCGPLFSEQPQAAPFPTQVSPLLGSEKEPQDGSLSSEGPVVPVSSSPGSASQVDAASLDTEG  
LSEAGDTCDFTPPPQRPQEQATTRKFSLESRGGYAGVAGYGTFAFGGDAGGMLGQGPLWARMAWAVSQSSEEQ  
DEAATESPQPLESGLPIAEASGVPLRTSPSLTPWEEVEQVSLVQIRDLSGDAEAADTISLDISEVDPAYLNLS  
DLYDIKYLPPFEFMI FRRVPKPIEQPESPGSETEAGQGLADFLLEAAWPWPGEGLRAGLEITEEPEEPGDLEA  
LLGEAAVGRKRKWSPSRGLFQFPGRCLSGEEPVELGLRQRVKASMAHISRILKGRPEGPEREPPRRKAGLAS  
FRLSGLKGRDQELSDEAVVLGQSVTLACQVLAQPTAQATWSKDGVLLESSGHLLISSTLKNFQLLTI LVVKEE  
DLGTYTCCVSNPLGTAVTTGVLKKAERPSSSPRPEVGEYKDAVLLVWKPVE SCGPVTYIVQCCIEGGSWTTL  
ASDISDCCYLTKLSRGGMYIFRTACVSKAGMGPYSSPSEQVLLGGPNHLASEEESSRGRPAQLLPSTKTF  
QMQIRRRGRFSVVRQCREKASGRALAAKIVPYQPEDKTA VLREYEALKRLLHHPHLAQLHAAYLSPRHLVLI  
LELCSGPELLPSLAERESYSESDVKDYLWQMLSATQYLHAQHILHLDLRSNNMMVTEYNLLKVIDLGN  
AQSLDQEKVPAPENFKDYLETMAPELLEGGAVPQTDIWAIGVTA FIMLSGEY PESSSEGRDLQKGLR  
KGLRSLRKYAGL SGGAVAF LQSSSLCAQPWGRPCASTCLQCGWLTEEGPTGSRPTVPTVTRLRA  
FVREKRRALLYKKNHNAQVR\*

>rs45824303\_ENSMUSP00000049737\_c.12484:A>G\_p.E4162G  
ENSMUST00000052872.15|Obscn-203|ENSMUSG00000061462|-|chr11:g.58952474:T>C  
MDHSFSGAPRFLTRPKAFVSVGKDATLSCQIVGNPTPHVSWEKDRQPVEAGARFRLAQDGDVYRLTILDLAL  
GDSGQYVCRARNAIGEAFAAVGLRVDSEGTCAEQAPHLLRPTSIRVREGADATFRCRVGGSPPAVSWSKDG  
RRLGPPDAPHVRVEEHGESSALRIR SARPRDGGTYEVRANPLGSASAAAAALVVDSDAEVAGPPGTSTATLLA  
HLQQRREAMRAEGIPSPPGAGTRTCTVTEGKHARLSFCVTEGPKPETVWKKDGQLVTEGRRHVVEDEQENF  
VLKILLFCKQSDRGLYCTASNLVGGTYSSVLVVVREPTVPFKKRLQDLEVREKESATFVCEAAQPA  
TEAAWFK EETRLWASAKYDIEEEGTERRLTVRNVSADDDAVYICETTEGSRTVAE LSVQGNLTKLPRKTA  
VRTGDTAIFWVELAVPEGPVRWLRNQEEMVAGGRVAITAEGTCHTLTIFQCTLEDMGEVAFVSGGCRTT  
TQFCVSAPRRPPLYPPADPVVKAKTSSVTLWSAPPHGDRPVTIDGYVLEKRKLGAYAWSRCHEAGW  
LATTEFTITGVAAEGDFQFRVSAINHFGQGPYLEFPGMTMLVPLAVKTPLKAVEAVEGGEVTF  
SVDLTVASSGEWFLDGEALKASSIYVIRCDRTRHMLTIREV PARLHGAQLKFVANGIETS  
IQMVVRAALGLPSKLPAAAAAREVLAQLHEEAQLLAE LSDQAAA VTWLKDGRELSLGP  
KYEMQVSAGRRALLVRDVAQDDAGLYECVSRGSR TAYQLLVQEPKLVFAKQQAHSEV  
KAEAGNSATLSCEVTAQTEVTWFKDGKLLSSSSKVRMEASGCSRRLVVQQAGKADAGEYS  
CEAGGQKLSFRLDVAEPKLVFAKQQAHSEVKA EAGASATLSCEVAQAQTEVTWFKDGKLL  
SSSSKVRMEASGCSRRLVVQQAGKADAGEYSCEAGGQKLSFRLDVTEPKLVFAKEQQAR  
SEVKA EAVGNSATLSCEVAQAQTEVTWFKDGKLLSSSSKVRMEASGCSRRLVVQQAGK  
ADAGEYSCEAGGQKLSFRLDVAEPKLVFAKEQQARSEVKA EAGASATLSCEVAQAQTEVT  
WFKDGKLLSSSSKVRMEASGCSRRLVVQQAGKADAGEYSCEAGGQKLSFRLDVAEPKLV  
FAKEQQARSEVKA EAGASATLSCEVAQAQTEVTWFKDGKLLSSSSKVRMEASGCSRRL  
VVQQAGKADAGEYSCEAGGQKLSFRLDVAEPKLVFAKEQQANSEVKA EAGASATLSCE  
VAQAQTEVTWFKDGKLLSSSSKVRMEASGCSRRLVVQQAGKADAGEYSCEAGGQKLS  
FRLDVAEPKLVFAKEQQAHSEVKA EAGASATLSCEVAQAQTEVTWFKDGKLLSSSSK  
VRMEASGCSRRLVVQQAGKADAGEYSCEAGGQKLSFRLDVAEPKLVFAKEQQAHSEV  
KA EAGASATLSCEVAQAQTEVTWFKDGKLLSSSSKVRMEASGCSRRLVVQQAGKADAGE  
YSCEAGGQKLSFRLDVADTRLMFAKEQQARTEVKA EAGNSATLSCEVAQAQTEVTWFK  
DGKLLSSSSKVRMEASGCSRRLVVQQAGKADAGEYSCEAGGQKLSFRLDVAEAE  
SQIPERPSRREPLVVKEHETIILTATIAAPSVAAVTWLKDGEIRR SKRHEATS  
LGDHTLTVRGAQVLD SAIYSCRVGKEGQDFPVQVEEVA AFKSKPLEPVEGELGG  
TVMLVCELSPEQAEVWRCGNTQLRPGKRFQMTSEGPRRTLTVSGLREDDAEYVCS  
ERDDRTSARLTVKVPVVKFTSGLSAMVAEEGQEATFQC VVSPSDAGVTWYKDMQLQ  
PSEKFMVMEVSGASRSLTILGLTLEDAGQVTV EAEGASSAALRVREAPVLFK  
KLEPQTV EERTSVHTLEVELTRWPPEVKWTRNAAVLTPSENVEIRAEGARHC  
LVLR SVGFADRGFFGCETPDDKTQAKLNVEMRQVRLV RGLQEVEAKEQGTASMD  
VELSHAEVEGSWTRDGLRLQPGPKCHLAVQGPVHILTL SALQPQDSGLVAFRAE  
GVHTSARLIVTEL PVSFTRVLQDVVATQKEKVTLECEL SRPVDVRWLKDG  
VELRAGKAIGIVAQGTCSRSLVIYRCETGDQGVVYCDALDAQTSASLRVQGR  
TYTLIFRRVL

AEDAGEVVFVAENAESRAHLRVKELPVTLLRPLRDKIAMEKHRGVLECVSRASAQVRWFKGGVLELQSGPKYE
VVSDGLYRKLVINVDVQPEDEDTYTC DAGNVKTS AQFFVVEEQSITIVRGLKDMTVM EPAPAWFECETSIPSVRP
PKWLLGKTVLQAGGNVLEQDGTVHRLTLHKTCSTMTGPVHFTIGKSRSSAQLVVSDIPVVLTRPLEPKAGRE
LQSVVLSCDFRPAPKAVQWYKDDTPLSPSEKFKMALEGQMAELRILRLTPADAGVYRCQAGSAQSSAEVTVEA
REVTVIQPLQDAEAMEEGRVCFSCELSHKDEDEI EWSLNGTPLYNDSFHEISHEGCLHTLVLKSVRQADTGTVC
ATS PKVSVSARLVVKGKPVVFLKALDDVSAEERGTTLTQCEVSDPEARVWVRKDGVELGPSDKYDFLHKAGAR
GLTVHDLSDHEDAGLYTCQVGSKETQSKVSVHDLHVGITRRLKTVLEVLEGECSFCFECVLSHESPSDPAVWTVGG
KTVGGSGHFHAVRQRGRKYTLTVKDAALSDAGEVVFVSVLGLTSKASLIIRERPVDITKPLEDQRTTLGEDVMLS
CELSRAGTSVRWLKDGKAIRKSQKYDLLSEGTRAVLVVRKASLKDSGEYTCETEASKSTAKLCEVEKANRFTE
ELADLQVEEKGRAVFTCKTEHPASVVTWRKGLLELRASGKHVPSQEGTLTKLTINALERTDSDTYTCDIGQAR
TQARLLVHGQKVRVIEDLEDTAVQEGSSAKFCCRIAPADYGPVHWF LDKTPLHSNELNEITVQPGGYHVLT LR
QLALKDSGTVYFEAGDQRTSAALRVTEKPSIFSRPLTDVTVTEGEDTLVCETTTTVDSSVRWTKDGKTLRPSA
RCQLSHEGCQAQLLITATTPQDGGRYKCEIGGASSSSIVRVHALPVRFRRESLKDVEVPEGKAATLRCVLSVA
APVEWRHGDDVLKSSNKYSLRQEGAVLELVI RDLQPQDSGQYSCSFGDQTT SATLTVKTS SAQFVGKLRNKEA
TEGTTVTLRCELTK EAPVEWKKGTETLRNGDKYSLKQDGAVCELQICSLLVADAGEYSCVCGQEKTSATLTVK
ALLVHFVRRRLRSKEATEGDTTTLQCELSKAAPVEWRKGTETLRDGDRLYSLKQDGAVCELQIRSLTIADAGEYL
CTCGQEKTSATLTVRALPAKFKDSLKNEEATEGTTATLSCELSKAAPVTWKKGPKTLQSGDKYVLRQDGAVCG
LQIHGLTMADAGEYSCVCGQEKTSATLTVRGLPAKFI EDLRSQEATEGATAILRCELSKAAPVEWRKGETL K
DGDRLYTLRQDGAVCELQIRGLAVVDGTYSLPTKFTTEGLRNEEATEGTMATLRCQMSKAAPVEWRKGETLR
DGDRLYSLRQDGAMCELQIRGLTIEDSGEYTCVCGQEKTSATLSVKALPSRFIEDLRSQEATEGTMATLRCQMS
KTAPVEWKKGSETLRDGGRYSLRQDGPVCELQICDLAVEDAGEYSCVCGQEKTSATLSIKALPPRFIEDLRSQ
GATEGTMATLRCQMSKAAPVEWRKGETLGDGGRYSLRQNGAVCELQIHDLAVEDTGEYSCVCGQEKTSATLN
VKALPPRFIEDLRSQEATEGTMATLRCQMSKAAPVEWRKGETLRDGGRYSLRQDGAVCELQIHDLVEDAGQ
YSCVCGQEKTSAVLTVDALPPKFTTEGLKKEEATEGTMVTLRCQMSKEATVEWRKGAKT LSDGGRYSLRQDGAM
CELQICGLAVEDAGEYSCVCGQEKTSATLSVKALPPRFIEDLRSQEATEGTMATLRCQMSKAAPVEWRKGET
LRDGDRLYSLRQDGAVCELQIRDLAVEDAGEYLCVCGQEKTSATLSVKALPPRFIEDLRSQEATEGTMATLRCQ
MSKAAPVEWRKGSKTLR DGDRLYSLRQDGAMCELQICDLAVEDTGDYSCVCGQEKTSATLSVKALPPRFIEDLR
SQEAREGTVATLRCRMSKAAPVEWRKGETLKDGDRLYSLRQEGNLCELQIRDLAVEDTEEYSCVCGQEKTSAT
LSVKALPAKFIEDLRSQEAPESSTVTLRCKLSKKASVWKKGSETLRNGARYSLRQDGAVCELEIRDLTVEDT
GEYSCTCGQERTSATLSIMAPQVVFQOPLQNLQAEEGSMASLRCELSVPNAAMVWSKGGLELQGDTRREARQQ
GCVAELLLRDLRREDAGEYSCTCGSQTT SATLMVTAAPVRFLRELQAQDVDEGATARLRCELSREAVSVEWRK
GSLQLFPCAQYQMVQEGTTAELLVHGVEQEDAGEYTC DAGHTQS IARLSVRAPKPKFKTDLQSTEQEAGGTAR
LCCQLSEAEPTPVQWLKEGVELHVGSKYEMRRQGAVCELLIHGLEAKDTGEYACL VGGQKT LASLRVKEPEV
TIVRGLVDMEVQADEDFEFTCKVSOAGATDVQWHLQGLPLQSNVETEVAVLADGCTHVLQ LKGVTL EDAGTVS
FHVGGSSSAQLTVRPEVTVLEPLKDVQLSEGQDAHFRCRLSRASGQEARWALGGVPLQCNE MNDITVEQGT
LYLLTLHKVTLEDAGTITLQVGSCSSEAQLKVTAKNTVLRGLENVDALLEGGEALFECQPEVAHTWLLDD
EPVHTSEKVEVVYFENGLRHLLLLLKNLKPQDSCRVTFLAGDVVTS AFLTVRGWRLEVLEPPHDASVKAGMQVR
FTCILSEAVPVGEATWYINGAAIQPDDTDWTVTTDGS HALTLSNAQPQHAGEVTF AARDAVASARLSVLALP
DPPEDA EVVGRSDHSVTL SWVAPMSDGGGGLCGYRVMKEASTGQWQLCHDLVPGPECVDDLVPGKTYRFRV
AAVGPAGAGEPVHLPQMVKIAPAPAPAPAPAPAPAPETRQAVVGEDICLELEVAADGGEVVWHKGTERTIQPGG
HFEVLSRGRQMLVIKGFRTEDQGEYRCGPIQGLPSSGAATFNVVMTSGSGDEVPAQPSLPPEAAQEGDLHLL
WEALARKRRMSREPTLDSISELPEEDSRVQHLRQEAEEETAPDLSEGYSTADELARTGEADLSHTSSDDES RAG
TPSLVTYLKKAGGPGISPLASKHEAQVTT SVKPKQKQPEVVPVTPCPPGDL SAADLMDPSLDKAAVKIQAAFKG
YKVRKEMKQOEGPVFSRTFGDTEAQVGDVLRLECVLATKTD MRACWLKDGIELTDGRHYHIDQLKDGTC SLV
TGLAPTDSGRYTCQVSTKSGRVSHSACVVVSGTESEAESSSGGELDDAFRRAARRLHRLFRTKSPAELSEEEL
FLSADEGPGEPEEPADWQTYREDENFVCIRFESLAEARQAVTCFRNMFATMGIGVEISLGEQGPGRVEMRIGK
VAPTVPAPVPLAKTPGLQTS DAAPVFLTELQNDVQDGYPMSFDCVVTGQPVPSVRWFKDGKLL EEDDHYMIN
EDQQGGHQLIITAVVPADMGVYRCLAENSMGVSSTKAELRVELTSTDYDTAADATETSSYFSAQGYLSSREQE
GTESDEGQLPQVLEELKDLQVAPGTR LAKFQLKVKGY PAPKLYWFKDGOPLTTS DHIRMTDKKTLHTLEIVSV
TREDSGQYAAYSNAVGAAYSARLLVRGPSEPEEK PASDVHERLVP PRILEKFTPKKVKRGSSTF SVKVEG
HPAPSVHWLKEEA EKGV LWIGPDTPGYTMASSSKQHSLVLLDVGRQH QGTYTCIATNPAGQALCSASLHISGL
AKEEEQERVKEALISSFLQGTSQAVSAQMSESAGFADLVGQSKGESLVAEEAHSHLSLAEVGT EEFLOKLT SQ
ITEMVSAKISQAKLVPPGGDSDEETKTPSPASPRHGRSRPSSSVQESSSESEDGDSRGEIFDIYVVTADYLP LG
AEQDAIILREGQYVEVLD SAHPLRWLVRTKPTKSSPSRQGVSPAYLDKRLKLSPEWGPTEAPEFPGEAVSED
EYRTRLSSVIQELLSSEQAFVGLQFLESHMKHLERSPRVPAAVASQKTVI FRNVQDISHFHSSFLKELQGC
GTDDDVAMCFIKNQEA FEKYLEFLVGRVQAESVVVSTPVQEFYKKYAEETLSAKDPTQPPPPPLQHYLEQ PVE
RVQKYQALLKELIRNKARNRQNCALLEQAYAVVSALPQRAENKLVSLMENYPGTLEALGEP IRQGHFIVWEG
APGARMFWKGNHRHVFLFRNYLVICKPRRDSRTDTFSYVFRNMMKLSSIDLNDQVEGDDRAFEVWHEREDSVR

KYLLQARTVI IKNSWVKEICGIQQRLAQPVWRPPEFEELADCTAELGETVVKLACRVTGTPKPIVSVYKDGKP  
 VEVDPHHILIEDPDGSCCTLILDNLTGIDSGQYMCFAASAAGNASTLGKILVQVPPRFVNVKVRATPFVEGEDAQ  
 ITCTVEGAPYPQIRWYKDGTLAPGNRYRMLNEPRSGVLVLIQAASKEDLGHYECELVNRLGSTRGGGELYM  
 QSPALRARDQHHREQIVAAVEVTEQETKVPKKTVIIEETITTVVKS PRGRRQSPGKSPSRSPSRASPRRPG  
 LLAPERLYPPGTSPSRLEVEQGRKAPVPALYVTEAEVHAPASQSQPKWLEVEETIEVRVKKTGSRGASPVRE  
 MTSRGEGLFTLPGGIPGRDPNANNNSNNSVYQEARWGPVAVHVGEFFIFQVDSVGNVDVVAASPEPEQVRA  
 SQKEENTERQEGCSDGENTFLMEEPQDTSLQGRDPKILTHNGRVLTADLEDYVPOEGETFGCGDSTPSTP  
 DEPPCEVSVLQREI SEPTVGGQPVLLNVGRPPGTGATPSFFRPGSQVHSPESVSFLLREAWSGPVSAPWTSSF  
 HTHVQSSVDGSHGSKFADAVSTQTVSFGAVGETVTLHDIDPDGGEAPGPSQG\*  
 >rs45824303\_ENSMUSP00000020732\_c.12685:A>G\_p.E4229G  
 ENSMUST00000020732.13|Obscn-201|ENSMUSG00000061462|-|chr11:g.58952474:T>C  
 MDHSFSGAPRFLTRPKAFVSVGKDATLSCQIVGNPTPHVSWEKDRQVEAGARFRLAQDGDVYRLTILDLAL  
 GDSGQYVCRARNAIGEAFVAVGLRVDSEGTCAEQAPHFLLRPTSIRVREGADATFRCRVGGSQPAPVSWSKDG  
 RRLGPPDAPHVRVEEHGESSALRIRSARPRDGGTYEVRAENPLGSASAAAALVVDSDAEVAGPPGTSTATLLA  
 HLQQRREAMRAEGIPSPPPGAGTRTCTVTEGKHARLSCFVTGEPKPKETVWKKDQGLVTEGRRHVVEDEQENF  
 VLKILFCKQSDRGLYCTASNLVGGTYSSVLVVVREPTVPFKKRLQDLEVREKESATFQCEVAQAPATEAAWFK  
 EETRLWASAKYDIEEETERRRLTVRNVSAADDVAVYICETTEGSRVAELSVQGNLTKRTPKTAVRTGDTAIF  
 WVLEAVPEGPVRWLRNQEEMVAGGRVAITAEGTCHTLTI FQCTLEDMGEVAVFVSGGCRTTTFQCVSAPRRPPL  
 YPPADPVVKAKTESSVTLWSAPPHGDRPVTIDGYVLEKRKLGAYAWSRCHEAGWLATTEFTITGVAAEEDGFQ  
 FRVSAINHFGQGPYLEFPGMTMLVPLAVKTPKAVEAVEGGEVTFVSDLTVASSGEWFLDGEALKASSIYVI  
 RCDRTRHMLTIREVPARLHGAQLKVFANGIETS IQMVVRAALGLPSSKLPAAAAREVLAQLHEEAQLLAE LSD  
 QAAA VTWLKDGRELSLGPKYEMQVSAGRRALLVRDVAQDDAGLYECVSRGSR TAYQLLVQDITDGYRDWGPAG  
 PQKHMCKCAGAKIARYLGSSCYRFLQYDKGVVHWEAALDTRQKGKTS SCSLHEKPKLVFAKGQQAHSVEKAE  
 AGNSATLSCEVTQAQTEVTWFKDGKLLSSSSKVRMEASGCSRRLVVQQAGKADAGEYSCEAGGQKLSFRLDVA  
 EPKLVFAKGQQAHSVEKAEAGASATLSCEVAQAQTEVTWFKDGKLLSSSSKVRMEASGCSRRLVVQQAGKADA  
 GEYSCEAGGQKLSFRLDVAEPKMFVFAKEQQARSEVKAEGASATLSCEVAQAQTEVTWFKDGKLLSSSSKVRM  
 EASGCSRRLVVQQAGKADAGEYSCEAGGQKLSFRLDVAEPKLVFAKEQQARSEVKAEGVNSATLSCEVAQAQ  
 EVTWFKDGKLLSSSSKVRMEASGCSRRLVVQQAGKADAGEYSCEAGGQKLSFRLDVAEPKLVFAKEQQARSEV  
 KAEAGNSATLSCEVAQAQTEVTWFKDGKLLSSSSKVRMEASGCSRRLVVQQAGKADAGEYSCEAGGQKLSFHL  
 DVTEPKLVFAKEQQAHSEVKAEGASATLSCEVAQAQTEVTWFKDGKLLSSSSKVRMEASGCSRRLVVQQAGK  
 ADAGEYSCEAGGQKLSFRLDVAEPKLVFAKEQQARSEVKAEGASATLSCEVAQAQTEVTWFKDGKLLSSSSK  
 VRVEASGCSRRLVVQQAGKADAGEYSCEAGGQKLSFRLDVAEPKLVFAKEQQANSEVKAEGASATLSCEVAQ  
 AQTEVTWFKDGKLLSSSSKVRVEASGCSRRLVVQQAGKADAGEYSCEAGGQKLSFRLDVAEPKLVFAKEQQAH  
 SEVKAEGASATLSCEVAQAQTEVTWFKDGKLLSSSSKVRVEASGCSRRLVVQQAGKADAGEYSCEAGGQKLS  
 FRLDVAEPKLVFAKEQQAHSEVKAEGASATLSCEVAQAQTEVTWFKDGKLLSSSSKVRVEASGCSRRLVVQQ  
 AGKADAGEYSCEAGGQKLSFRLDVAEPKLVFAKEQQAHSEVKAEGASATLSCEVAQAQTEVTWFKDGKLLSS  
 SSKVRVEASGCSRRLVVQQAGKADAGEYSCEAGGQKLFRLDVAEPKLVFAKEQQAHSEVKAEGASATLSCE  
 VAQAQTEVTWFKDGKLLSSSSKVRVEASGCSRRLVVQQAGKADAGEYSCEAGGQKLSFRLDVAEPKLVFAKEQ  
 QAHSEVKAEGASATLSCEVAQAQTEVTWFKDGKLLSSSSKVRVEASGCSRRLVVQQVQKADAGEYSCEARGQ  
 KLSFRLDVADTRLMFAKEQQARTEVKAEGNSATLSCEVAQAQTEVTWFKDGKLLSSSSKVRVEASGCSRRLV  
 VQQAGKADAGEYSCEAGGQKLSFRLDVAEAE SQIPERPSRREPLVVKEHETIILTATIAAPSVAAVWTKDGV  
 EIRRSKRHEATSLGDTHTLTVRGAQVLD SAIYSCRVGKEGQDFPVQVEEVAAKFSKPLEPVEGELGGTVMLVC  
 ELSPEQAEVWRCGNTQLRPGKRFQMTSEGPRTTLTVSGLREDDAEYVCE SRDDRTSARLTVKVPVVKFTS  
 GLSAMVAEEGQEA TFQCVVSPSDAGVTWYKDGMLQLPSEKFMVVEGASRSRLTILGLTLEDAGQVTEVAEGAS  
 SSAALRVREAPVLFKKKLEPQTV EERTSVTLEVELTRPWPEVKWTRNAAVLTPSENVEIRAEGARHCLVLRVSV  
 GFADRGGFFGCETPDDKTQAKLVNEMRQVRLVVRGLQEVEAKEQGTASMDVELSHAEEGVSWTRDGLRLQPGPKC  
 HLAVQGPVHILTL SALQPQDSGLVAFRAEGVHTSARLIVTELPSVSTRVLQDVVATQKEKVTLECELSRPVDV  
 RWLKDGVLELRAGKAIGIVAQGTCSRSLVIYRCETGDQGVYVCDALDAQTSASLRVQGRTYTLIFRRVLAEDAGE  
 VKFVAENAESRAHLRVKELPVTLLRPLRDKIAMEKHRGVLECCQVSRASAQVRWFKGGVELQSGPKYEVVSDGL  
 YRKLVIN DVQPEDEDTYTC DAGNVKTSAQFFVVEQSITIVRGLKDMTVMEPAPAWFECETSIPSVRPPKWL LG  
 KTVLQAGGNVGLQDGTVHRLTLHKTCSTMTGPVHFTIGKSRSSAQLVVS DIPVVLTRPLEPKAGRELQSVVL  
 SCDFRPAPKAVQWYKDDTPLSPSEKFKMALEGQMAELRILRLTPADAGVYRCQAGSAQSSAEVTEAREVTVI  
 QPLQDAEEMVEGRVCFSCELSHKDEDIEWLSLNGTPLYNDSFHEISHGCLHTLVLKSVRQADTGTVCATSPKV  
 SVSARLVVVKGPVVFLKALDDVSAEERGTLLTQCEVSDPEARVVWRKDGVELGSPSDKYDFLHKAGARGLTVHD  
 LSHEDAGLYTCQVGSKETQSKVSVHDLHVGITKRLKTVLEVLEGECSFCVLSHESPSDPAVWTVGCGKTVGGS  
 GHFHAVRQGRKYTLTVKDAALSDAGEVVSVLGLT SKASLIIRERPV DITKPLEDQRTTLGEDVMLSCELSRA  
 GTSVRWLKDGKAIRKSQKYDLLSEGTRAVLVVRKASLKDSGEYTCETEASKSTAKLCVEEKANRFTEELADLQ  
 VEEKGRAVFTCKTEHPASVVTWRKGLLELRASGKHVPSQEGTLTKLTINALERTSDTYTCDIGQARTQARLL

VHGQKVRVIEDLEDTAVQEGSSAKFCCRIAPADYGPVHWFLLDKTPLHSNELNEITVQPGGYHVLTLRQLALKD  
 SGTVYFEAGDQRTSAALRVTEKPSIFSRPLTDVTVTEGEDTLTVCEFTTVVDSVVRWTKDGKTLRPSARCQLSH  
 EGCQAQLLITATTPQDGGRYKCEIGGASSSSIVRVHALPVRFRRESLKDVEVPEGKAATLRCVLSVAAPVEWR  
 HGDDVLKSSNKYSRQEGAVLELVIRDLQPQDSGQYSCSFGDQTSATLTVKTSQAQFVGLRNKEATEGTTV  
 TLRCELTKAPVEWKKGTETLRNGDKYSLKQDGAVCELQICSLLVADAGEYSCVCGQEKTSAATLTKALLVHF  
 VRRLSKEATEGDTTTLQCELSKAAPVEWRKGTETLRDGDYSLKQDGAVCELQIRSLTIADAGEYLCTCGQE  
 KTSATLTVRALPAKFKDSLKNEEATEGTTATLSCELSKAAPVWKKGPKTLQSGDKYVLRQDGAFCGLQIHGL  
 TMADAGEYSCVCGQEKTSAATLTVRGLPAKFIEDLRSQEATEGATAILRCELSKAAPVEWRKGSSETLRDGDYR  
 LRQDGAFCGLQIRGLAVVDGTYSLSPTKFTLEGLRNEEATEGTMATLRCQMSKAAPVEWRKGSSETLRDGDYR  
 LRQDGAFCGLQIRGLTIEDSGEYTCVCGQEKTSAATLSVKALPSRFIEDLRSQEATEGTMATLRCQMSKTAPVE  
 WKKGSETLRDGGYSLRQDGPVCELQICDLAVEDAGEYSCVCGQEKTSAATLSIKALPPRFIEDLRSQATEGT  
 MATLRCQMSKAAPVEWRKGSSETLRDGGYSLRQNGAVCELQIHDLAVEDTGEYSCVCGQEKTSAATLNVKALPP  
 RFIEDLRSQEATEGTMATLRCQMSKAAPVEWRKGSSETLRDGGYSLRQDGAFCGLQIHDLVEDAGQYSCVCG  
 QEKTSAVLTVDALPPKFTLEGLKKEEATEGTMVTLRCQMSKEATVEWRKGAKTLSDGGYSLRQDGAFCGLQIC  
 GLAVEDAGEYSCVCGQEKTSAATLSVKALPPRFIEDLRSQEATEGTMATLRCQMSKAAPVEWRKGSSETLRDGD  
 YSLRQDGAFCGLQIRDLAVEDAGEYLCVCGQEKTSAATLSVKALPPRFIEDLRSQEATEGTMATLRCQMSKAAP  
 VEWRKGSSETLRDGDYSLRQDGAFCGLQICDLAVEDTGDYSCVCGQEKTSAATLSVKALPPRFIEDLRSQEARE  
 GTVATLRCRMSKAAPVEWRKGSSETLRDGDYSLRQEGNLCELQIRDLAVEDTGEYSCVCGQEKTSAATLSVKAL  
 PAKFIEDLRSQEAPESSTVTLRCKLSKASVWKKGSETLRNGARYSLRQDGAFCGLQIRDLVEDTGEYSCT  
 CGQERTSAATLSIMAPQVVFQQLQNLQAEEGSMASLRCELSVNPAAWWSKGGLELQGDTRREARQQGCVAEL  
 LLRDLRREDAGEYSCVCGQEKTSAATLMVTAAPVRFLELQAQDVDEGATARLRCELSREAVSVEWRKGSLLQF  
 PCAKYQMVQEGTTAELLVHGVEQEDAGEYTCDAHTQSIARLSVRAPKPKFKTDLQSTEQEAAGTARLCCQLS  
 EAEFGTVPVQWLKEGVELHVGSKYEMRRQGAFCGLQIHGLEAKDTGEYACLVGGQKTASLRVKEPEVTIVRGL  
 VDMEVQADEDFEFTCKVSAQATDVQWHLQGLPLQSNVTEVAVLADGCTHVLQKGVTLDEAGTVSFHVGGL  
 SSSAQLTVRVPEVTVLEPLKDVQLSEGQDAHFRCRLSRASGQEARWALGGVPLQCNEMNDITVEQGTLYLLTL  
 HKVTLEDAGTITLQVGCSSSEAQLKVTAKNTVLRGLVNDVALEGGEALFECQLSQPEVAHAHTWLLDDEPVHTS  
 EKVEVVYFENGLRHLKLLKLPQDSCRVTFLAGDVTSAFTLTVRGRLEVLPPHDASVKAGMQRVFTCILS  
 EAVPVGEATWYINGAAIQPDDTDWTVTTDGSHEALTLNSAQPQHAGEVTFFAARDAVASARLSVLAALPDPEDA  
 EVVGRSDHSVTLVSWVAPMSDGGGGLCGYRVMKEASTGQWQLCHDLVPGPECVDDLVPGKTYRFRVAAVGPA  
 GAGEPVHLPQMVKIAPAPAPAPAPAPAPAPETROAVVGEDICLELEVAADGGEVVWHKGTERTIQPGHFVLS  
 RGQRQMLVIKGFRTEDQGEYRCGPIQGLPSSGAATFNVMVMTSGSGDEVPAQPSLPPEAAQEGDLHLLWEALAR  
 KRMSREPTLDSISELPEEDSRVQHLRQEAETAPDLSEGYSTADELARTGEADLSHTSSDDESAGTPSLVT  
 YLKKAGGPGISPLASKHEAQVTTSVKPKQKQEPVPTCPPPGDLAADLMDPSLDKAAVKIQAAFKGYKVRKE  
 MKQQEGPVFSRTFGDTEAQVGDVLRLECVLATKTDMRACWLKDGIELTDGRHYHIDQLKDGTCSSLVTLGLAPT  
 DSGRYTCQVSTKSGRVSHSACVVVSGTESEAESSSGGELDDAFRAARRLHRLFRTKSPAELSEELFLSADE  
 GPGEPEPADWQTYREDEFVCIREFESLAEARQAVTCFRNMFATMIGVEISLGEQGRGVEMRIGKVAPTVT  
 PAVPLAKTPGLQTSDAAPVFLTELQNDVQDGYPMSFDCVVTGQPVPSVRWFKDGKLEEDDHYMINEDQQGG  
 HQLIITAVVPADMGVYRCLAENSMGVSSTKAELRVELTSTDYDTAADATETSSYFSAQGYLSSREQEGTESDE  
 GQLPQVLEELKDLQVAPGTRLAKFQLKVKGYPAKLYWFKDGGQPLTSDHIRMTDKKTLHTLEIVSVTREDSG  
 QYAAYSNAVGAAYSSARLLVRGPSEPEEKPASDVHERLVPPRILEKFTPKKVKRGSSITFSVKVEGHPAPSV  
 HWLKEEAKEKGLWIGPDTPGYTMASSSKQHSVLVLDVGRQHGTYTICATNPAGQALCSASLHISGLAKEEEEQ  
 ERVKEALISSFLQGTSAQVSAQMSSEAGFADLVGQSKGESLVAAEAHSHLSLAEVGTTEFLQKLTSSQITEMVS  
 AKISQAKLQVPGGDSDEETKTPSASPRHGRSRPSSSVQESSSESEDGDSRGEIFDIYVVTADYLPGLAEQDAI  
 ILREGQYVEVLDSAHPLRWLVRTKPTKSSPSRQGWVSPAYLDKRLKLSPEWGPTEAPEFPGEAVSEDEYRTRL  
 SSVIQELLSSSEQAFVGLLQFLESHHMKHLERSPRVPAAVASQKTVIFRNVDISHFHSSFLKELQCGCTDDDV  
 AMCFIKNQEAFAKYLEFLVGRVQAESVVVSTPVQEFYKKYAEETLSAKDPTQPPPPPLQHYLEQPVERVQKYQ  
 ALLKELIRNKARNRQNCALLEQAYAVVSALPQRAENKLVSLMENYPGTLEALGEPHQGHFIVWEGAPGARM  
 PWKGNHRHVFVFRNYLVICKPRRDSRTDFTSYVFRNMMKLSSIDLNDQVEGDDRAFEVWHEREDSVRKYLLQA  
 RTVVIKNSWVKEICGIQQLAQPVWRPPEFEEELADCTAELGETVKLACRVTGTPKPIVSWYKDGKPVVDPH  
 HILLIEDPDGCTLIILDNLTGIDSGQYMCFAASAAGNASTLGKILLVQVPPRFVNVKVRATPFVEGEDAQITCTVE  
 GAPYPQIRWYKDGTLAPGNRYRMLNEPRSGVLVVIQAASKEDLGHYECELVNLGSTRGGGELYMQSPALR  
 ARDQHHREQIVAAVEERRPSP\*  
 >rs45824303\_ENSMUSP00000151217\_c.10777:A>G\_p.E3593G

ENSMUST00000219084.3|Obscn-207|ENSMUSG00000061462|-|chr11:g.58952474:T>C  
 MDHSFSGAPRFLTRPKAFVSVGKDATLSCQIVGNPTPHVSEKDRQPVEAGARFLAQDGDVYRLTILDLAL  
 GDSGQYVCRARNAIGEAFVAVGLRVDSEGTCAEQAPHLLRPTSIRVREGADATFRCRVGGSPQPAVSWSKDG  
 RRLGPPDAPHVRVEEHGESSALRIRSARPRDGGTYEVRAENPLGSASAAAALVVDSDAEVAGPPGTSTATLLA  
 HLQQRREAMRAEGIPSPPGAGTRTCTVTEGKHARLSCFVTGEPKPETVWKKDGLVTEGRRHVVEDEQENF

VLKILFCKQSDRGLYTCTASNLVGQTYSSVLVVVREPTVPFKKRLQDLEVREKESATFQCEVAQPATEAAWFK  
EETRLWASAKYDIEEEGETERRLTVRNVSADDDAVYICETTEGSRVAELSVQGNLTKLPRKTAVRTGDTAIF  
WVELAVPEGPVWRWRNQEEMVAGGRVAITAEGTCHTLTI FQCTLEDMGVAFVSGGCRTTTTQFCVSA PRRPPL  
YPPADPVVKAKTESSVTLWSAPPHGDRPVTIDGYVLEKRKLGAYAWSRCHEAGWLATTEFTITGVAEEGDFQ  
FRVSAINHFGQGPYLEFPGMTMLVPMPLAVKTPKAVEAVEGGEVTFVSDLTVASSGEWFLDGEALKASSIYVI  
RCDRTRHMLTIREVPARLHGAQLKFVANGIETSIQMVVRAALGLPSSKLPAAAAAREVLAQLHHEEAQLLAE LSD  
QAAAVTWLKDGRELSLGPKEYMQVSAGRRALLVRDVAQDDAGLYECVSRGSRRTAYQLLVQDITDGYRDWGPAG  
PQKHMCKCAGAKIARYLGSscyRFLQYDKGVWHWLEAALDTRQKGKTS SCSLHEKPKLVFAKQQAHSEVKA E  
AGNSATLSCEVTQAQTEVTFKDGKLLSSSSKVRMEASGCSRRLLVVQQAGKADAGEYSCEAGGQKLSFRLDVA  
EPKLVFAKQQAHSEVKA EAGASATLSCEVAQAQTEVTFKDGKLLSSSSKVRMEASGCSRRLLVVQQAGKADA  
GEYSCEAGGQKLSFRLDVAEPKMFVFAKEQQARSEVKA EAGASATLSCEVAQAQTEVTFKDGKLLSSSSKVRM  
EASGCSRRLLVVQQAGKADAGEYSCEAGGQKLSFRLDVTEPKLVFAKEQQARSEVKA EAGNSATLSCEVAQAQ T  
EVTWFKDGKLLSSSSKVRMEASGCSRRLLVVQQAGKADAGEYSCEAGGQKLSFHLDVTEPKLVFAKEQQAHSEV  
KA EAGASATLSCEVAQAQTEVTFKDGKLLSSSSKVRMEASGCSRRLLVVQQAGKADAGEYSCEAGGQKLSFR L  
DVAEPKLVFAKEQQARSEVKA EAGASATLSCEVAQAQTEVTFKDGKLLSSSSKVRVEASGCSRRLLVVQQAGK  
ADAGEYSCEAGGQKLSFRLDVAEPKLVFAKEQQANSEVKA EAGASATLSCEVAQAQTEVTFKDGKLLSSSSK  
VRVEASGCSRRLLVVQQAGKADAGEYSCEAGGQKLSFRLDVAEPKLAFAKEQQAHSEVKA EAGASATLSCEVAQ  
AQTEVTFKDGKLLSSSSKVRVEASGCSRRLLVVQQAGKADAGEYSCEAGGQKLSFRLDVAEPKLVFAKEQQAH  
SEVKA EAGASATLSCEVAQAQTEVTFKDGKLLSSSSKVRVEASGCSRRLLVVQQVQKADAGEYSCEARGQKLS  
FRLDVAEAE SQIPERPSRREPLVVKHEHETIILTATIAAPSVAAVTWLKDGV EIRRSKRHEATSLGDTHLTVR  
GAQVLD SAIYSCRVGKEGQDFPVQVEEVA AKFSKPLEPVEGELGGTVMLVCELSPEQAEVWRCGNTQLRPGK  
RFQMTSEGPRRTLTVSGLREDDAEYVCE SRDDRTSARLTVKVPVVKFTSGLSAMVAEEGQEATFQCVVSPS  
DAGVTWYKDGMLQ PSEKFMVME SGASRLTILGLTLEDAGQVTV EAEAGASSAALRVREAPVLFKKLEPQT  
VEERTSVTLEVELTRPWPEVKWTRNAAVLTPSENVEIRAEGARHCLVLR SVGFADRGFFGCETPDDKTQAKLN  
VEMRQVRLV RGLQEVEAKEQGTASMDVELSHA EVEG SWTRDGLRLQPGPKCHLAVQGPVHILTL SALQPQDSG  
LVA FRAEGVHTSARLIVTELPVSFTRVLQDVVATQKEKVTLECELSRFPVDVRWLKDGVELRAGKAIGIVAQGT  
CRSLVIYRCETGDQGVYVCDALDAQTSASLRVQGRTYTLIFRRVLAEDAGEVKFVAENAESRAHLRVKELPVT  
LLRPLRDKIAMEKHRGVLE CQVSRASAQVRWFKGGVELQSGPKYEVVSDGLYRKLVI NDVQPEDEDTYTC DAG  
NVKTSAQFFVEEQSITIVRGLKDMTVM EPAPAWFECETSIPSVRPPKWL LGKTVLQAGGNVLEQDGTVHRLT  
LHKTCSTMTG PVHFTIGKSRSSAQLV VSDIPVVLTRPLEPKAGRELQSVVLSCDFRPAPKAVQWYKDDTPLSP  
SEKFKMALEGGQMAELRI LR LTPADAGVYRCQAGSAQSSAEVTV EAREVTVIQPLQDAEAMEEGRVCFSCELSH  
KDEDIEWSLNGTPLYNDSFHEI SHEGCLHTLV LKSVRQADTGTVCATSPKVS SARLVVKGKPVVFLKALDDV  
SAEERGTTLTQCEVSDPEARV VWRKDGVELG PSDKYDFLHKAGARGLTVHDL SHEDAGLYTCVQVGSKETQSKV  
SVHDLHVGITKRLKTVEVLEGE SCSEFCVLSHESPSDPAVWTVGGKTVGGSGHFHAVRQGRKYTLTVKDAALS  
DAGEVVF SVLGLT SKASLIIRERPVDITKPLEDQRTTLGEDVMLSCELSRAGTSVRWLKDGKAIRKSQKYDLL  
SEGTRAVLVVRKASL KDSGEYTCETEASKSTAKLCVEEKANRFTEELADLQVEEKGRAVFTCKTHEP ASVVW  
RKGLLELRASGKHVPSQEG LTLKLTINALERTSDTYTCDIGQARTQARLLVHGQKVRVIEDLEDTAVQEGSS  
AKFCCR IAPADYGPVHWF LDKTPLHSNELNEITVQPGGYHVLTLRQLALKDSGTVYFEAGDQRTSAA LRVTEK  
PSIFSRPLTDVTVTEGEDLTLVCETTTVDSSVRWTKDGKTLRPSARCQLSHEGCAQLLITATTPQDGGRYKC  
EIGGASSSSIVRVHALPVRFRESLKDVEVPEGKAATLRCVLSVAAPVEWRHGDDVLKSSNKYSLRQEGAVLE  
LVIRDLPQDQSGQYSCSFGDQTT SATLTVKTS SAQFVGKLRNKEATEGTTVTLRCELTK EAPVEWKKGTETLR  
NGDKYSLKQDGAVCELQICSLLVADAGEYSCVCGQEKTSATLTVKALLVHFVRRLRSKEATEGDTTTLQCELS  
KAAPVEWRKGTETLRDGD RYSLKQDGAVCELQIRSLTIADAGEYLCTCGQEKTSATLTVRGLPAKFIEDLRSQ  
EATEGATAILRCELSKAAPVEWRK GSETLKDGD RYTLRQDGAVCELQIRGLAVVDTGTYS SLPKFTTEGLRNE  
EATEGTMATLRCQMSKAAPVEWRK GSETLRDGD RYSLRQDGAMCELQIRGLTIEDSGEYTCVCGQEKTSATLS  
VKALPPRFIEDLRSQ GATEGTMATLRCQMSKAAPVEWRK GSETLGDGGYSLRQNGAVCELQIHDLAVEDTGE  
YSCVCGQEKTSATLNVKALPPKFTEGLKKEEATEGTMVTLRCQMSKEATVEWRKGAKT LSDGGYSLRQDGAM  
CELQICGLAVEDAGEYSCVCGQEKTSATLSVKALPPRFIEDLRSQEATEGTMATLRCQMSKAAPVEWRK GSET  
LRDGD RYSLRQDGAVCELQIRDLAVEDAGEYLCVCGQEKTSATLSVKALPPRFIEDLRSQEATEGTMATLRCQ  
MSKAAPVEWRK GSKTLR DGD RYSLRQDGAMCELQICDLAVEDTGDYSCVCGQEKTSATLSVKAPVVFQQPLQ  
NLQAEEGSMASLRCELSVPNAAMVWSKGGLELQGDTRREARQQGCVAELLLRDLRREDAGEYSCTCGSQTTSA  
TLMVTAAPVRFLRELQAQDVDEGATARLRCELSREAVSVEWRK GSIQLFPKAYQMVQEGTTAELLVHGVEQE  
DAGEYTC DAGHTTQSIARLSVRAPKPKFKTDLQSTEQEAGGTARLCCQLSEAEPGTPVQVLLKEGVELHVGSKYE  
MRQGA VCELLIHGLEAKDTGEYACL VGGKTLASLRVLEKEPEVTIVRGLVDMVEVQADEVLEFTCKV SQAGATD  
VQWHLQGLPLQSNEVTEAVLADGCTHVLQKGVTLDEAGTVSFHVGG LSSSAQLTVRVPVTVLEPLKDVQL  
SEGQDAHFRCRLSRASGQEARWALGGVPLQCNEMNDITVEQGTLYLLTLHKVTLTEDAGTITLQVGS CSSEAQL  
KVTAKNTVLRGLE NVDALEGG EALFECQLSQPEVAHTWLLDDEPVHTSEKVEVVYFENGLRHLLLLKLNLPQ  
DSCRVTFLAGDVVTS AFLTVRGWRLEVLEPPHDASVKAGMQVRFTCILSEAVPVGEATWYINGAAIQPDDTDW



TVTTDGSHHALTLSNAQPQHAGEVTF AARD AVASARLSVLALPDPPEDA EVVGRSDHSVTL SVWVAPMSDGGGG  
LCGYR VEMKEASTGQWQLCHDLVPGPECVVDDLVP GKTYRFRVA AVGPAGAGEPVHLPQMVKIAPAPAPAPAP  
APAPETRQAVVGEDICLELEVAADGGEVVVWHKGTERRIQPGGHFEVLSRGQRQMLVIKGFRTEDQGEYRCGPIQ  
GLPSSGAATFNVVMTSGSGDEVPAQPSLPPEAAQEGDLHLLWEALARKRRMSREPTLDSISELPEEDSRVQHL  
RQEAEETAPDLSEGYSTADELARTGEADLSHTSSDDESRAGTPSLVTYLKKAGGGPISPLASKHEAQVTTSVK  
PQKQQEPVVPTCPPPGDLSAADLMDPSLDKAAVKIQAAFKGYKVRKEMKQQEGPVFSRTFGDTEAQVGDVLR  
ECVLATKTD MRACWLKDGIELTDGRHYHIDQLKDGTC SLLVTGLAPTDSGRYTCQVSTKSGRVSHSACVVVSG  
TESEAESSSGGELDDAFRRAARLHRLFRTKSPAELSEEEFLSADEGPGPEEPADWQTYREDENFVCIRFE  
SLAEARQAVTCFRNMFATMGI GVEISLGEQGP RGVEMRIGKVAPT VTPAVPLAKTPGLQTS DAAPVFLTELQN  
QDVQDGYPMSFDCVVTGQPVPSVRWFKDGKLL EEDDH YMINEDQQGGHQLIITAVVPADMGVYRCLAENSMGV  
SSTKAELRVELTSTDYDTAADATETSSYFSAQGYLSSREQEGTESDEGQLPQVLEELKDLQVAPGTRLAKFQL  
KVKGY PAKPLYWFKDGOPLTSDHIRMTDKKTLHTLEIVSVTREDSGQYAA YISNAVGAAYSSARLLVRGPSE  
PEEKPASDVHERLVP PRILEKFTPKKVKGSSITFSVKVEGHPAPSVHWLKEEA EKGLWIGPDTPGYTMASS  
SKQHSVLVLLDVGRQHOGTYTCTIATNPAGQALCSASLHISGLAKEEEQERVKEALISSFLQGTSQAVSAQMSSES  
AGFADLVGQSKGESLVAAEASHLSLAEVGT EEFLOKLT SQI TEMVSAKISQAKLQVPGGDSDEETKTPSASP  
RHGRSRPSSSVQESSSESEDGDSRGEIFDIYVV TADYLP LGAEQDAIILREGQYVEVLDSAHPLRVLVTRTKPT  
KSSPSRQGWVSPAYL DKRLKLSPEWGPTEAEPFPEAVSEDEYRTRLS SVIQELLSEQAFV GELQFLSHHM  
KHLERSPRVPAAVASQKTVIFRNVQDISHFHSSFLKELQCGCTDDVAMCFIKNQEA FEKYLEFLVGRVQAES  
VVVSTPVQEFYKKYAEETLSAKDPTQPPPPPLQHYLEQPVERVQKYQALLKELIRNKARNRQNCALLEQAYAV  
VSALPQRAENKLVSLMENYPGTLEALGEP I RQGHFIVWEGAPGARMPWKGNHRHVFLFRNYLVICP RRDSR  
TDTFSYVFRNMMKLSSIDLNDQVEGDDRAFEVWHERE DSVRKYLQARTV I IKN SWVKEICGIQORLAQPVWR  
PPEFEEELADCTAELGETVKLACRVTGT PKPIVSWYKDGK PVEVDPHHILIEDPDG SCTLILDNLGTIDSGQY  
MCF AASAAGNASTLGKILVQVPPRFV NKVRATPFVEGEDAQITCTVEGAPYPQIRWYKDGTL LAPGNRYRMLN  
EPRSGVLV LVIQAASKEDLGHYECELVNR LGSTRGGGEL YMQSPALRARDQH HREQIVA AAVEVTEQETKVPKK  
TVIIEETITTVVKS PRGRRQSPGKSPSRSPRRSASPRR PGLLAPERLYPPGTSPSRRLVEVEQGRKAPV PALY  
VTEAEVHAPASQSQPKLEVEETIEVRVKKTGSRGASPRVREMTSRGEGILFTLPGGIPGRDPNANNNSNNKSVY  
QEARTWGP AVVHVEPFIFQVDSVGNVDWVAASPEPEQVRASQKEENTERQEGCSGDGENTFLMEEPQD TDSL  
QGRDPKILTHNGRVLTLADLEDYVPQEGETF GCGDSTPSTPDEPPCEVSVLQREI SEPTVGGQPVLLNVGRPPG  
TGATPSFFRPGSQVHSPESVSFLLREAWSGPVSAAPWTSSFH THVQSSVDGSHGSFKTEVSTQTVSFGAVGET  
VTLHIDPDGGEAPGPSQG\*

>rs51177498\_ENSMUSP00000158795\_c.12346:G>C\_p.G4116A  
ENSMUST00000238536.2|Obscn-210|ENSMUSG00000061462|-|chr11:g.58953508:C>G  
MDHSFSGAPRFLTRPKAFVVSVGKDATLSCQIVGNPTPHVSWEKDRQPV EAGARFLAQDGDVYRLTILDLAL  
GDSGQYVCRARNAIGEFAAVGLRVDSEGTC AEQAPHFLLRPTSIRVREGADATFRCRVGGSPQPAVSWSKDG  
RRLGPPDAPHVRVEEHGESSALRIR SARPRDGGTYEVR AENPLGSASAAAALVVDSDAEVAGPPGTSTATLLA  
HLQQRREAMRAEGIPSPPGAGTRTCTVTEGHARLSCEVFTGEPKPE TVWKKDQGLVTEGRRHVVYEDENF  
VLKILFCQSDRGLYTCTASNLVGQTYSSVLVVREPTVPFKKRLQDLEVREKESATFQCEVAQPATEAAWFK  
EETRLWASAKYDIEEGTERRLTVRNVSADDDAVYICETTEGSR TVAELSVQGNLTRKLPKRTAVRTGDTAIF  
WVELAVPEGPVRWLRNQEEMVAGGRVAITAEGTCHTLTIFQCTLEDMGEVAFVSGGCRTTTQFCVSAPRRPPL  
YPPADPVVKAKTESSVTL SWSAPPHGDRPVTIDGYVLEKRKLGAYAWSRCHEAGWLATTEFTITGVAAEGDFQ  
FRVSAINHFGQGPYLEFPGTMHLVPM LAVKTPLKAVEAVEGGEVTF SVDLTVASSGEWFLDGEALKASSIYVI  
RCDRTRHMLTIREV PARLHGAQLKFVANGIETS IQMVVRAALGLPSSKLPAAAAREVLAQLHEEAQLLAE LSD  
QAAA VTWLKDGRELSLGP KYEMQVSAGRRALLVRDVAQDDAGLYECVSRGSR TAYQLLVQDITDGYRDWGPAG  
PQKHMCKCAGAKIARYLGSSCYRFLQYDKGVWHWLEAALDTRQ GKGTSSCSLHEKPKLVFAKQQAHSEVKA E  
AGNSATLSCEVTQAQTEVTWFKDGKLLSSSSKVRMEASGCSRRLLVVQQAGKADAGEYSCEAGGQKLSFRLDVA  
EPKLVFAKQQAHSEVKA EAGASATLSCEVAQAQTEVTWFKDGKLLSSSSKVRMEASGCSRRLLVVQQAGKADA  
GEYSCEAGGQKLSFRLDVAEPKMF AKEQQARSEVKA EAGASATLSCEVAQAQTEVTWFKDGKLLSSSSKVRM  
EASGCSRRLLVVQQAGKADAGEYSCEAGGQKLSFRLDVTEPKLVFAKEQQARSEVKA EVGNSATLSCEVAQAQ  
EVTWFKDGKLLSSSSKVRMEASGCSRRLLVVQQAGKADAGEYSCEAGGQKLSFRLDVAEPKLVFAKEQQARSEV  
KAEAGNSATLSCEVAQAQTEVTWFKDGKLLSSSSKVRMEASGCSRRLLVVQQAGKADAGEYSCEAGGQKLSFHL  
DVTEPKLVFAKEQQAHSEVKA EAGASATLSCEVAQAQTEVTWFKDGKLLSSSSKVRMEASGCSRRLLVVQQAGK  
ADAGEYSCEAGGQKLSFRLDVAEPKLVFAKEQQARSEVKA EAGASATLSCEVAQAQTEVTWFKDGKLLSSSSK  
VRVEASGCSRRLLVVQQAGKADAGEYSCEAGGQKLSFRLDVAEPKLVFAKEQQANSEVKA EAGASATLSCEVAQA  
AQTEVTWFKDGKLLSSSSKVRMEASGCSRRLLVVQQAGKADAGEYSCEAGGQKLSFRLDVAEPKLVFAKEQQAH  
SEVKA EAGASATLSCEVAQAQTEVTWFKDGKLLSSSSKVRMEASGCSRRLLVVQQAGKADAGEYSCEAGGQKLS  
FRLDVAEPKLVFAKEQQAHSEVKA EAGASATLSCEVAQAQTEVTWFKDGKLLSSSSKVRMEASGCSRRLLVVQQ  
AGKADAGEYSCEAGGQKLSFRLDVAEPKLVFAKEQQAHSEVKA EAGASATLSCEVAQAQTEVTWFKDGKLLSS  
SSKVRMEASGCSRRLLVVQQAGKADAGEYSCEAGGQKLFRLDVAEPKLMFAKEQQAHSEVKA EAGASATLSCE

VAQAQTEVTFWFKDGKLLSSSSKVRVEASGCSRRLVVQQAGKADAGEYSCEAGGQKLSFRLDVAEPKLVFAKEQ  
QAHSEVKAEAGASATLSCEVAQAQTEVTFWFKDGKLLSSSSKVRVEASGCSRRLVVQQVQKADAGEYSCEARGQ  
KLSFRLDVADTRLMFAKEQQARTEVKAEAGNSATLSCEVAQAQTEVTFWFKDGKLLSSSSKVRVEASGCSRRLV  
VQQAGKADAGEYSCEAGGQKLSFRLDVAEAEESQIPERPSRREPLVVKEHETIILTATIAAPSVAAVTVLKDGV  
EIRRSKRHEATSLGDTHTLTVRGAQVLDIAIYSCRVGKEGQDFPVQVEEVAAKFSKPLEPVEGELGGTVMLVC  
ELSPQAEVWRCGNTQLRPGKRFQMTSEGPRTTLTVSGLREDDAEYVCESTRDRTSARLTVKVPVVKFTS  
GLSAMVAEEGQEAFTQCVVSPSDAGVTWYKDGMLQPSKFKVMVESGASRSLTILGLTLEDAGQVTEAEGAS  
SSAALRVREAPVLFKKKLEPQTVERTSVTLEVELTRPWPEVKWTRNAAVLTPSENVEIRAEGARHCLVLRVSV  
GFADRGFFGCETPDDKTQAKLNVEMRQVRLVRLGQVEVAKEQGTASMDVELSHAEEVGSWTRDGLRLQPGPKC  
HLAVQGPVHILTLALSALQPDQSGLVAFRAEGVHTSARLIVTELPSFTRVLQDQVATQKEKVTLECELSRPVDV  
RWLKDGVLELRAGKAIGIVAQGTCSRSLVIYRCETGDQGVYVCDALDAQTSASLRVQGRTYTLIFRRLAEDAGE  
VKFVAENAESRAHLRVKELPVTLLRPLRDKIAMEKHRGVLECCQVSRASQVRWFKGGVELQSGPKYEVVSDGL  
YRKLVINVDVQPEDEDTYTCDAENVKTSAQFFVVEEQSITIVRGLKDMTVMPEPAPAWFECETSIPSVRPPKWL  
KTVLQAGGNVGLQDGTVHRLTLHKTCSTMTGPVHFTIGKSRSSAQLVVSDIPVVLTRPLEPKAGRELQSVVL  
SCDFRPAPKAVQWYKDDTPLSPSEKFKMALEGQMAELRILRLTPADAGVYRCQAGSAQSSAEVTEAREVTVI  
QPLQDAEAMEEGRVCFSCSELSHKDEDIEWLSLNGTPLYNDSFHEISHEGCLHTLVLSKSVRQADTGTVCATSPKV  
SVSARLVVKGKPVVFLKALDDVSAEERGTLLTQCEVSDPEARVVWRKDGVELGPSDKYDFLHKAGARGLTVHD  
LSHEDAGLYTCVQSGKETQSKVSVHDLHVGITKRLKTVLEVLEGECSFECVLSHESPSDPAVTVGGKTVGGS  
GHFHAVRQGRKYTLTVKDAALSADAGEVVSFVGLTSLKASLIIRERPVDTKPLEDQRTTLGEDVMLSCELSRA  
GTSVRWLKDGKAIRKSQKYDLLSEGTRAVLVVRKASLKDSEYTCETEASKSTAKLCVEEKANRFTTELADLQ  
VEEKGRAVFTCKTEHPASVVTWRKGLLELRASGKHVPSQEGTLKLTINALERTSDTYTCDIGQARTQARLL  
VHGQKVRVIEDLEDTAVQEGSSAKFCRIAPADYGPVHWFLLDKTPLHSNELNEITVQPGGYHVLTLRQLALKD  
SGTVYFEAGDQRTSALRVTEKPSIFSRPLTDVTVTEGEDLTLVCETTTVDSVVRWTKDGKTLRPSARCQLSH  
EGCQAQLLITATTPQDGGRYKCEIGGASSSSIVRVHALPVRFRRESLKDVEVPEGKAATLRCVLSVAAPVEWR  
HGDDVLKSSNKYSLRQEGAVLELVIRDLQPDQSGQYSCSFGDQTTSATLTVKTSQAQFVGLKRNKEAETGTV  
TLRCELSTKEAPVEWKKGTETLRNGDKYSLKQDGAVALCELQICSLLVADAGEYSCVCGQEKTSATLTVKALLVH  
VRLRSKEATEGDTTTLQCELSKAAPVEWRKGTETLRDGDYSLKQDGAVALCELQIRSLTIADAGEYLCTCGQE  
KTSATLTVRALPAKFKDSLKNEEATEGTTATLSCELSKAAPVTWKKGPKTLQSGDKYVLRQDGAVALCELQIHGL  
TMADAGEYSCVCGQEKTSATLTVRGLPAKFIEDLRSQEATEGATAILRCELSKAAPVEWRKGSSETLKDGDYR  
LRQDGAVALCELQIRGLAVVDGTYSLLPTKFTTEGLRNEEATEGTMATLRCQMSKAAPVEWRKGSSETLRDGD  
LRQDGAVALCELQIRGLTIEDSGEYTCVCAQEKTSATLSVKALPSRFIEDLRSQEATEGTMATLRCQMSKTA  
PVEWKKGSETLRDGGYSLRQDGPVCELQICDLAVEDAGEYSCVCGQEKTSATLSIKALPPRFIEDLRSQEATE  
GTMATLRCQMSKAAPVEWRKGSSETLGDGGYSLRQNGAVCELQIHDLAVEDTGEYSCVCGQEKTSATLNVK  
ALPPRFIEDLRSQEATEGTMATLRCQMSKAAPVEWRKGSSETLRDGGYSLRQDGAVALCELQIHDLVEDAG  
QYSCVCGQEKTSATLTVDALVDPKFTTEGLKKEEATEGTMVTLRQMSKEATVEWRKGAKTLSDDGGYSLRQD  
GAMCELQICGLAVEDAGEYSCVCGQEKTSATLSVKALPPRFIEDLRSQEATEGTMATLRCQMSKAAPVEWR  
KGSSETLRDGDYSLRQDGAVALCELQICDLAVEDAGEYLCVCGQEKTSATLSVKALPPRFIEDLRSQEATE  
GTMATLRCQMSKAAPVEWRKGSSETLKDGDYSLRQEGNLCELQIRDLAVEDTEEYSCVCGQEKTSATLSV  
KALPAKFIEDLRSQEAPESSTVTLRCKLSKKASVVWKKGSETLRNGARYSLRQDGAVALCELQIRDLTVE  
DTEGEYSCTCGQERTSATLSIMAPQVVFQQPLQNLQAEEGSMASLRCELSVNAAMVWSKGGLELQGDTRR  
EARQQGCVAELLLRDLRREDAGEYSCTCGSQTTSATLMVTAAPVRFRLRELQAQDVDEGATARLRCELSR  
EAVSVEWRKGSLLQFPCAKYQMVQEGTTAELLVHGVEQEDAGEYTCDAHTQSIARLSVRAPKPKFKTDLQ  
STEQEAGGTARLCCQLSEAEFGTPVQWLKEGVELHVGSKYEMRRQGAVALCELLIHGLEAKDTGEYACL  
VGGQKTLASLRVKEPEVTIVRGLVDMEVQADEDEFTCKVSQAGATDVQWHLQGLPLQSNVTEVA  
VLADGCTHVLQLKGVTTLEDAGTVSFHVGGLSSSAQLTVRVPEVTVLEPLKDVQLSEGQDAHFR  
CRLSRASGQEARWALGGVPLQCNEMNDITVEQGTLYLLTLHKVTTLEDAGTITLQVGS  
CSSEALQKVTAKNTVLRGLENVDALLEGGEALFECQLSQPEVAHAHTWLLDDEPVHTSEK  
VEVVYFENGLRHLLLLLKNLKPQDSCRVTFLAGDVVTSFAFLTVRGRLEVLLEPPHDASV  
KAGMQVRFCTILSEAVPVGEATWYINGAAIQPDDTDWTVTTDGSHHALTLNAQPHAGEV  
TFAARDAVASARLSVLALPDPPEAEVVGSRDHSVTLVSWAPMSDGGGLCGYR  
VEMKEASTGQWQLCHDLVPGPECVDDLVPGKTYRFRVAAVGPA GAGEPVHLPQMV  
KIAPAPAPAPAPAPAPAPETRQAVVGEDICLELEVAADGGEVVWHKGT  
ERIQPGGHFEVLSRGQRQMLVIKGFRTEDQGEYRCGPIQGLPSSGAATFN  
VMYTSVSGSDEVPAQPSLPPEAAQEGDLHLLWEALAR KRRMSREPTLDS  
ISELPEEDSRVQHLRQEAETAPDLSEGYSTADELARTGEADLS  
SSDDESRACTPSLVTYLKAGGPGISPLASKHEAQVTTSVKPKQKQEP  
VPTCPGGDLAADMPSLDKAAVKIQAQAFKGYKVRKEMKQQEGPVF  
SRTFGDTEAQVGLRLECVLTKTDMRACWLKDGIELTDGRHYHIDQL  
KDGTCSLLVTLGLAPDSGRYTCQVSTKSGRVSHSACVVVSGTESEAE  
SSSGGELDDAFRRAARRLHRLFRTKSPAELSEELFLSADEGPGEPE  
PADWQTYREDENFVCIRFESLAEARQAVTCFRNMFATMGIGVEISL  
GEQGRGVEMRIGKVAPTPTPAVPLAKTPGLQTSDAAPVFLTELQ  
NQDQVQDGYPMSFDCVVTGQPVPSVRWFKDGKLLLEDDHYMINEDQ  
QGG

HQLIITAVVPADMGVYRCLAENSMGVSSSTKAELRVELTSTDYDTAADATETSSYFSAQGYLSSREQEGTESDE  
GQLPQVLEELKDLQVAPGTRLAKFQLKVKGYPAKLYWFKDGGPLTTS DHIRMTDKKTLHTLEIVSVTREDSG  
QYAAIISNAVGAAYSSARLLVRGPSEPEEKPASDVHERLVPPRILEKFTPKKVKRGSSITFSVKVEGHPAPSV  
HWLKEEAKEKGVLWIGPDTPGYTMASSSKQHSVLVLLDVGRQHQTTCIATNPAGQALCSASLHISGLAKEEEQ  
ERVKEALISSFLQGTSAQVSAQMSSEAGFADLVGQSKGESLVAEEAHSHLSLAEVGTTEFLQKLTSTQITEMVS  
AKISQAKLQVPGGDSDEETKTPSASPRHGRSRPSSSVQESSESESDGDSRGEIFDIYVVTADYLPGLAEQDAI  
ILREGQYVEVLDSAHPLRWLVRTKPTKSSPSRQGWVSPAYLDKRLKLSPEWGPTEAPEFPGEAVSEDEYRTRL  
SSVIQELLSSEQAFVGGELQFLESHHMKHLERSPRVPAAVASQKTVI FRNVQDISHFHSSFLKELQCGCTDDDV  
AMCFIKNQEAFEKYLEFLVGRVQAESVWVSTPVQEFYKKYAEETLSAKDPTQPPPPPLQHYLEQPVVERVQKYQ  
ALLKELIRNKARNRQNCALLEQAYAVVSALPQRAENKLVSLMENYPGTLEALGEPHQGHFIVWEGAPGARM  
PWKGHNHRVFLFRNYLVICKPRRDSRTDTFSYVFRNMMKLSSIDLNDQVEGDDRAFEVWHEREDESVRKYLLQA  
RTVIKNSWVKEICGIQORLAQPVWRPPEFEEELADCTAELGETVKLACRVTGTPKPIVSWYKDGKPVVEVDPH  
HILIEDPDGSLTILDLNLTGIDSGQYMCFAASAAGNASTLGKILVQVPPRFVNVKVRATPFVEGEDAQITCTVE  
GAPYQIRWYKDGTLTLLAPGNRYRMLNEPRSGVLVVIQAASKEDLGHYECELVNRLGSTRGGGELYMQSPALR  
ARDQHHREQIVAAVEDTSEVGSASQAQDQQAASVLWRLLGSEALGPS PGDLPNTRQSEPPAFEEAASQIP  
GAASGTPEVSQPGTHKGLEQETTSSGSQGWTVPIRVEGTAWPGAGTGQLLDDVHSQVIMETTQRTYVCQAPDT  
GVTRAPSMQVTIEDVQVQGDMAQFDAVIEGHPPPVTWYKGSTQLTSSARLSQRQDGTTYSLVLTDPVPHDA  
GYVTCVANNAGQVLCKAELLVHGGDKLDAENQVYRRLKLSFYDVQEEIGRGVFGFVKRVQHKGNKMFCAAKF  
IPLRSKTRAQAYQERDILATLGHPLVTGLLDQFETRKTLLILILELCSSEELLDRFLFKKGVVTEAEVKVYIQQL  
VEGLHYLHSHGILHLDIKPPNIMLVHPAREDIKICDFGFAQKITPSEPQYSKYGSPEFVSPEIIEQNPVSEGS  
DIWAMGVISYLSLTCSPPFAGESDRATLLNVLEGRVSWSSPTAAHLSSEDAKDFIKATLQRTPRARPSTSQCLA  
HPWFLKSMPAEEAHFINTKQLKFLARSRWQRSLMSYKSI LVMRSIPPELLQGPPDSPSLGVARHLRGEASGAS  
SSSSSSDNELAPFARAKSLPPSPVTHSPLLHPRGFLRPSASLPEETEASMTADAAVPAS PQSAGPPASPGCV  
PRHSVSISSLFYQQAGEGAERGNKTS GAKRHPARRRHLKGGYIARALPGLREPLMEYSLLEEEAAREEQASLM  
TKTPSFETALRLPSSSVREVPGRSHSLDNPPVTGTGPSPEACKEQLLFPSTGLTHETAKDRGHKEGFLQESV  
PFPMPGSDSRPGKQEGSSQDSCRKPASSCHSELGSGSQEGCGPPSSQSLGSLPPQSLKELSTSCGFLFSEQ  
PQAAPFPTQVSPLLGSEKEPQDGSLSSEGPVPPSSSPGSASQVDASLDTEGLSEAGDTCDFTPPPQRPQEQAT  
TRKFSLESRGGYAGVAGYGTFAFGGDAGGMLGQGPLWARMAWAVS QSSEEQDEAATESPQPLES LGPIAEASG  
VPLRTSPSLTPWEEVEQVSLVQIRDLSGDAEAADTISLDISEVDPAYLNLSDLDYDIKYLPEFEMI FRRVPKPI  
EQPESPGSETEAGQGLADFL EEAAWPWP GELGLRAGLEITEEPEEPGDLEALLGEAAVGRKRKWSPSRGLFQF  
PGRCLSGEEPVELGLRQRVKASMAHISRI LKGRPEGPREGPPRKKAGLASFRLSGLKGRDQELSDEAVVLGQ  
SVTLACQVLAQPTAQATWSKDGVLLESSGHLLISSTLKNFQLLTI LVVKEEDLGTYTCCVSNPLGTAVTTGVL  
RKAERPSSSPRPEVGELYKDAVLLVWKPVESECGPVTYIVQCCIEGGSWTTLASDISDCCYLTGKLSRGGMYIF  
RTACVSKAGMGPYSSPSEQVLLGGPNHLASEEESRRGRPAQLLPSTKTFAFQMQIRRRGRFSVVRQCREKASGR  
ALAAKIVPYQPEDKTAVLEREYALKRHLHPLHAQLLHAAYLSPRHLVLI LELCSGPELLPSLAERESYSESDVK  
DYLWQMLSATQYLHAQHIHLHLDRSENMMVTEYNLLKVIDLGN AQSLDQEKVPAPENFKDYLETMAPELLEGGQ  
GAVPQTDIWAIGVTA FIMLSGEY P ESSEGTRDLQKGLRKLIRLSRCYAGLSGGAVAFVLSLCAQWPWRPCA  
STCLQCGLWTEEGPTGSRPTVTFPTVRLRA FVREERKRALLYKKNLAQVR\*  
>rs51177498\_ENSMUSP00000038264\_c.11518:G>C\_p.G3840A  
ENSMUST00000047441.14|Obscn-202|ENSMUSG00000061462|-|chr11:g.58953508:C>G  
MDHSFSGAPRFLTRPKAFVVS VGKDATLSCQIVGNPTPHVSWEKDRQPVEAGARFRLAQDGDVYRLTILDLIAL  
GDSGQYVCRARNAIGEAFAAVGLRVDSEGTCAEQAPHLLRPTSIRVREGADATFRCRVGGSPQPAVSWSKDG  
RRLGPPDAPHVRVEEHGESSALRIR SARPRDGGTYEVRAENPLGSASAAAAALVVDSDAEVAGPPGTSTATLLA  
HLQORREAMRAEGIPSPPGAGTRTCTVTEGKHARLSCFVTGEPKPETVWKKDGQLVTEGRRHVVEDEQENF  
VLKILFCKQSDRGLYTCASNLVGQTYSSVLVVREPTVPFKKRLQDLEVREKESATFQCEVAQAPATEAAWFK  
EETRLWASAKYDIEEEGTERRLTVRNVSADDDAVYICETTEGSRVAELSVQGNLTKLPRKTAVRTGDTAIF  
WVELAVPEGPVRWLRNQEEMVAGGRVAITAEGTCHTLTIFQCTLEDMGEVAFVSGGCRTTTQFCVSAPRRPPL  
YPPADPVVKAKTESVTLWSAPPHGDRPVTIDGYVLEKRKLGAYAWSRCHEAGWLATTEFTITGVAAEGDFQ  
FRVSAINHFGQGPYLEFPGTMHLVPLAVKTPLKAVEAVEGGEVTFVSDLTVASSGEWFLDGEALKASSIYVI  
RCDRTRHMLTIREV PARLHGAQLKFVANGIETS IQMVVRAALGLPS SKLPAAAAAREVLAQLHEEAQLLAE LSD  
QAAA VTWLKDGRELSLGPKEYMQVSAGRRALLVRDVAQDDAGLYECVSRGSR TAYQLLVQDITDGYRDWGPAG  
PQKHMCKCAGAKIARYLGSSCYRFLQYDKGVWHLEAALDTRQGGKTS SCSLHEKPKLVFAKQQQAHSEVKA  
AGASATLSCEVAQAQTEVTWFKDGKLLSSSSKVRMEASGCSRRLVVQQAGKADAGEYSCEAGGQKLSFRLDVA  
EPKMVFAKEQQARSEVKAEGASATLSCEVAQAQTEVTWFKDGKLLSSSSKVRMEASGCSRRLVVQQAGKAD  
GEYSCEAGGQKLSFRLDVTEPKLVFAKEQQARSEVKAEGVNSATLSCEVAQAQTEVTWFKDGKLLSSSSKVRM  
EASGCSRRLVVQQAGKADAGEYSCEAGGQKLSFRLDVAEPKLVFAKEQQARSEVKAEGNSATLSCEVAQAQ  
EVTWFKDGKLLSSSSKVRMEASGCSRRLVVQQAGKADAGEYSCEAGGQKLSFRLDVTEPKLVFAKEQQAHSEV  
KAEAGASATLSCEVAQAQTEVTWFKDGKLLSSSSKVRMEASGCSRRLVVQQAGKADAGEYSCEAGGQKLSFRL

DVAEPKLVFAKEQQARSEVKAEAGASATLSCEVAQAQTEVTFWKDGGKLSSSSKVRVEASGCSRRLVVQQAGK
ADAGEYSCEAGGQKLSFRLDVAEPKLVFAKEQQANSEVKAEAGASATLSCEVAQAQTEVTFWKDGGKLSSSSK
VRVEASGCSRRLVVQQAGKADAGEYSCEAGGQKLSFRLDVAEPKLAFAKEQQAHSEVKAEAGASATLSCEVAQ
AQTEVTFWKDGGKLSSSSKVRVEASGCSRRLVVQQAGKADAGEYSCEAGGQKLSFRLDVAEPKLAFAKEQQAH
SEVKAEAGASATLSCEVAQAQTEVTFWKDGGKLSSSSKVRVEASGCSRRLVVQQAGKADAGEYSCEAGGQKLS
FRLDVAEPKLAFAKEQQAHSEVKAEAGASATLSCEVAQAQTEVTFWKDGGKLSSSSKVRVEASGCSRRLVVQQ
AGKADAGEYSCEAGGQKLFRLDVAEPKLVFAKEQQAHSEVKAEAGASATLSCEVAQAQTEVTFWKDGGKLS
SSKVRVEASGCSRRLVVQQGKADAGEYSCEARGQKLSFRLDVAEAEBSQI PERPSRREPLVVKHEHETIILTAT
IAAPSVAAVTTLKDGVEIRRSKRHEATSLGDTHLTVRGAQVLDLSAIYSCRVGKEGQDFPVQVEVAAKFSKP
LEPVEGELGGTVMLVCELSPEQAEVVWRCNGTQLRPGKRFQMTSEGPRRTLTVSGLREDDAEYVCESRDDRT
SARLTVKVPVVKFTSGLSAMVAEEGQEA TFQCVVSPSDAGVTWYKDGMLQPSSEKFMVMEVSGASRSLTILGL
TLEDAGQVTVAEAGASSAALRVREAPVLFKKKLEPQTVEERTSVTLEVELTRPWPEVKWTRNAAVLTPSENV
EIRAEGARHCLVLRVSGFADRGFFGCETPDDKTQAKLNVEMRQVRLVRLGLQEVEAKEQGTASMDVELSHAEVE
GSWTRDGLRLQPGPKHLAVQGPVHILTLTALQPDQSGLVAFRAEGVHTSARLIVTELPVSTFTRVLQDVVATQ
KEKVTLECELSRPVDVRLKDGVELRAGKAI GIVAQGTCSRSLVIYRCETGDQGVYVCDALDAQTSASLRVQGR
TYTLIFRRVLAEDAGEVVFVAENAESRAHLRVKELPVTLLRPLRDKIAMEKHRGVLECVSRASQAQRWFKGG
VELQSGPKYEVVSDGLYRKLVINOVPEDEDTYTCADAGNVKTSAQFFVVEEQSITIVRGLKDMTVMPEPAPAWFE
CETSI PSVRPPKWLGLKTVLQAGGNVLEQDGTVHRLTLHKTCSTMTGVPVHFTIGKSRSSAQLVSDIPVVL
RPLEPKAGRELQSVVLSCDFRPAKAVQWYKDDTPLSPSEKFKMALEGMALRILRLTPADAGVYRCQAGSA
QSSAEVTVAREVTVIQPLQDAEAMEEGRVCFSCELSHKDEDI EWSLNGTPLYNDSFHEISHEGCLHTLVLS
VRQADTGTVCATSPKVSVSARLVVKGKPVVFLKALDDVSAEERGTTLQCEVSDPEARVVRKDGVELGSPDK
YDFLHKAGARGLTVHDLSDHEDAGLYTCQVGSKETQSKVSVHDLHVGITKRLKTVEVLEGESECSFCVLSHESP
SDPAVWTVGGKTVGGSGHFHAVRQGRKYTLTVKDAALSDAGEVVFVSVLGLTSKASLIIRERPVDTKPLEDQR
TTLGEDVMLSCELSRAGTSVRWLKDGKAIKRSQKYDLLSEGTRAVLVVRKASLKDSGEYTCETEASKSTAKLC
VEEKANRFTTEELADLQVEEKGRAVFTCKTEHPASVVTWRKGLLELRASGKHVPSQEGTLTKLTINALERTDSD
TYTCDIGQARTQARLLVHGQKVRVIEDLEDTAVQEGSSAKFCRIA PADYGPVHWFLLDKTPLHSNELNEITVQ
PGYHVLTLRQLALKDSGTVYFEAGDQRTSAALVRETEKPSIFSRPLTDVTVTEGEDTLVCEVSDVSSVRWT
KDGKTLRPSARCQLSHEGCAQLLITATTPQDGGRYKCEIGGASSSSIVRVHALPVRFRESLKDVEVPEGKAA
TLRCVLSVAAPVEWRHGDDVLKSSNKYSLRQEGAVLELVIRDLQPDQSGQYSCSFGDQTTSATLTVKTSQAQ
FVGKLRNKEATEGTTVTLRCELTKEAPVWKKGTETLRNGDKYSLKQDGA VCELOICSLLVADAGEYSCVCGQ
EKTSATLTVKALLVHFVRRRLRSKEATEGDTTTLQCELSKAAPVEWRKGTETLRDGD RYSLKQDGA VCELOIRS
LTIADAGEYLCCTCGQEKTSATLTVRALPAKFKDSLKNEEATEGTATLSCELSKAAPVTWKKGPKTLQSGDKY
VLRQDGA VCELOIHLTMADAGEYSCVCGQEKTSATLTVRGLPAKFIEDLRSQEATEGATAILRCELSKAAPV
EWRKGSSETLKDGD RYTLRQDGA VCELOIRGLAVVDGTYS SLPKTFTEGLRNEEATEGTMATLRCQMSKAAPV
EWRKGSSETLRDGD RYSLRQDGA MCELQIRGLTIEDSGEYTCVCAQEKT SATLSVKALP PRFIEDLRSQEATEG
TMATLRCQMSKAAPVEWRKGSSETLGDGGRYSLRQNGAVCELOIHDLAVEDTGEYSCVCGQEKTSATLNVKALP
PRFIEDLRSQEATEGTMATLRCQMSKAAPVEWRKGSSETLRDGGRYSLRQDGA VCELOIHDLDVEDAGQYSCVC
GQEKTSAVLTVDALPPKTFTEGLKKEEATEGTMVTLRQMSKEATVEWRKGAKTLS DGGRYSLRQDGA MCELQI
CGLAVEDAGEYSCVCGQEKTSATLSVKALP PRFIEDLRSQEATEGTMATLRCQMSKAAPVEWRKGSKT LR DGD
RYS LRQDGA MCELQICDLAVEDTGDYSCVCGQEKTSATLSVKAPQVVFQQPLQNLQAEEGSMASLRCELSVPN
AAMVWSKGGLELQGDTRREARQQGCVAELLLRDLRREDAGEYSC TCGSQTT SATLMVTAAPVRFRLRLQAQDV
DEGATARLRCELSREAVSVEWRKGS LQLFPCA KYQMVQEGTTAE LLVHGVEQEDAGEYTC DAGHTQS IARLSV
RAPKPKFKTDLQSTEQEAGGTARLCCQLSEAE PGTPVQWLKEGVELHVGSKYEMRRQGA VCELLIHGLEAKDT
GEYA CLVGGQKT LASLRVKEPEVTIVRGLVDMVEVQADEVFEFTCKV SQAGATDVQWHLQGLPLQSNVTEVAV
LADGCTHVLQLKGVTL EDAGTVSFHVGG LSSSAQLTVRVPEVTVLEPLKDVQLSEGQDAHFRCLSRASGQEA
RWALGGVPLQCNEMNDITVEQGTLYLLTLHKVTLEDAGTITLQVGCSSSEAQLKV TAKNTVLRGLENDVALEG
GEALFECQLSQPEVA AHTWLLDDEPVHTSEKVEV VYFENGLRHLLLLKNLKPQDSCRVTFLAGDVVTS AFLTV
RALPDPPEDA EVVGRSDHSVTL SWVAPMSDGGGGLCGYRVMKEASTGQWQLCHDLVPGPECVDDLVPGKTY
RFRVA AVGPAGAGEPVHLPQMVKIAPAPAPAPAPAPAPAPETRQAVVGEDIC LELEVAADGGEVVWHKGTERRI
QPGGHFEVLSRGRQMLVIKGFRTEDQGEYRCGPIQGLPSSGAATFNVMVMTSGSGDEVPAQPSLPPEAAQEGD
LHLLWEALARKRRMSREPTLDSISELPEEDSRVQHLRQEA EETAPDLSEGYSTADELARTGEADLSHTSSDDE
SRAGT PSLV TYLKKAGGPGISPLASKHEAQVTT SVKPKQKQEPVVP TCPPPGDLSAADLMDPSLDKAAVKIQA
AFKGYKVRKEMKQEGPVSRTFGDTEAQVGDVLRLECVLATKTD MRACWLKDGIELTDGRHYHIDQLKDGTC
SLLVTLGLAPTDSGRYTCQVSTKSGRVSHSACVVVSGTSEAESSGGELDDAFRRAARRLHRLFRTPKSPAE LS
EELFLSADEGPPEPADWQTYREDENFVCIRFESLAEARQAVTCFRNMFMATMIGIGVEISLGEQGP RGVEM
RIGKVAPT VTPAVPLAKTPGLQTS DAAPVFLTELQNDVQDGYPMSFDCVVTGQPVPSVRWFKDGLLEEDDH
YMINEDQQGGHQLIITAVVPADMGVYRCLAENSMGVSSTKAE LRVELTSTDYD TAADATETSSYFSAQGYLSS
REQEGTESDEGQLPQVLEELKDLQVAPGTR LAKFQLKVKGY PAKLYWFKDGOPLTSDHIRMTDKKTLHTLE

IVSVTREDSGQYAAIYISNAVGAAYSARLLVVRGPEPEEKPASDVHERLVPPRILEKFTPKKVKRGSSITFSV
KVEGHPAPSVHVLKEEAKEGVLWIGPDTPGYTMASSSKQHSLLVLDVGRQHOGTYTTCIATNPAGQALCSASLH
ISGLAKEEEEQERVKEALISSFLQGTSAQVSAQMSEASAGFADLVGQSKGESLVAAEEAHSLSLAEVGTTEFLQK
LTSQITEMVSAKISQAKLQVPGGDSDEETKTPSASPRHGRSRPSSSVQESSSESEDGDSRGEIFDIYVVTADY
LPLGAEQDAIILREGQYVEVLDSAHPLRWLVRTKPTKSSPSRQGWVSPAYLDRKRLKLSPEWGPTEAPEFPGEA
VSEDEYRTRLSSVIQELLSSEQAFVQFLESHHMKHLERSPRVPAAVASQKTVIFRNVQDISHFHSSFLKE
LQCGGTDDDVAMCFIKNQEAFKYLEFLVGRVQAESVVVSTPVQEFYKKYAEETLSAKDPTQPPPPPLQHYLE
QPVERVQKYQALLKELIRNKARNRQNCALLEQAYAVVSALPQRAENKLVSLMENYPGTLEALGEPVIRQGHFI
VWEGAPGARMPWKGNHRHVFVFRNYLVICPKRRDSRTDTFSYVFRNMMKLSSIDLNDQVEGDDRAFVWHERE
DSVRKYLQARTVIKNSWVKEICGIQORLAQPVWRPPEFEEELADCTAELGETVKLACRVTGTPKPIVSWYK
DGKPVVDPHHLIEDPDGSCCTLIIDNLTGIDSGQYMCFAASAAGNASTLGKILVQVPPRFVNVKVRATPFVEG
EDAQITCTVEGAPYPQIRWYKDGTLAPGNRYRMLNEPRSGVLVLIQAASKEDLGHYECELVNRLGSTRGGG
ELYMQSPALRARDQHHREQIVAAVEGAPSMQVTIEDVQVQVGDMAQFDAVIEGHPPPPIVTWYKGSTQLTSSAR
LSQRQDGTYSVLVTDVAPHDAGVYTCVANNAGQVLCCKAELLVHGGDKLDAENQVYRRLKHSFYDVQEEIGR
GVFGFVKRVQHKGNMFCFAAKFIPLRSKTRAQAYQERDILATLGHPLVTGLLDQFETRKTLLILILELCSSEEL
LDRLFKKGVVTEAEVKVYIQQLVEGLHYLHSHGILHLDIKPPNIMVHPAREDIKICDFGFAQKITPSEPOYS
KYGSPFVSPVPEIIEQNPVSEGSIDIWAMGVISYLSLTCSSPFAGESDRATLLNVLEGRVSWSSPTAAHLSSEDAK
DFIKATLQRTPRARPSTSQCLAHWPFLKSMPEAAEHFINTKQLKFLLRASRWRQRSLMSYKSLVMRSIPPELLQ
GPPDPSLGVARHLRGEASGASSSSSSSDNELAPFARAKSLPPSPVTHSPLLHPRGFLRPSASLPEETEASMP
TADAAVPASPQASAGPPASPGCVPRHSVIVSSLFYQQAGEGAERGNKTSGAKRHPARRRHLKGGYIARALPGLR
EPLMEYSLLEEEAAREEQASLMTKTPSFETALRLPSSSVREVPGRSHSLDNPPVTTGSPPEACKEQLLFPST
GLTHETTAKDRGHKEGFLQESVPPFPMMSGDSRPGKQEGSSQDSCRKGPASSCHSELGSGSQEGCGPPSSQSLG
SLPPQSLKKELESTSCGPLFSEQQAAPFTQVSPLLGSEKEPQDGLSEGVPVPSSSPGSASQVDASLDTEG
LSEAGDTCDFTPPPQRPQEQATTRKFSLESRGGYAGVAGYGTFAFGGDAGGMLGQGPLWARMWAVSQSSEEQ
DEAATESPQPLESLGPIAEASGVPLRTSPSLTPWEEVEQVSLVQIRDLSGDAEAADTISLDISEVDPAYLNL
LLYDIKYLPPFEFMI FRRVPKPIEQPESPGSETEAGQLADFLLEAAWFPWPGELGLRAGLEITEEPEEPGDLEA
LLEAAVGRMPWKGNHRHVFVFRNYLVICPKRRDSRTDTFSYVFRNMMKLSSIDLNDQVEGDDRAFVWHERE
FRLSGLKGRDQELSDEAVVLGQSVTLACQVLAQPTAQTATWSKDGVLLESSGHLLISSTLKNFQLLTIIVVKEE
DLGTYTCCVSNPLGTAVTTGVLKRAERPSSSPRPEVGEYKDAVLLVWKPVESECGPVTYIVQCCIEGGSWTTL
ASDISDCCYLTKLSRGGMYIFRTACVSKAGMPYSSPSEQVLLGGPNHLASEEESSRGRPAQLLPSTKTFAF
QMQIRRRGRFSVVRQCREKASGRALAAKIVPYQPEDKTAVLREYEALKRLLHHPHLAQLHAAYLSPRHLVLI
CSGPELLPSLAERESYSESDVKDYLWQMLSATQYLHAQHILHLDLRSENMMVTEYNLLKVIDLGNQSLDQEK
VPAPENFKDYLETMAPELLEGQAVPQTDIWAIGVTAIFIMLSGEYPESEGETRDLQKGLRKLIRLSRCYAGL
SGGAVAFLOSSLCAQPWGRPCASTCLQCGWLTEEGPTGSRPTPVTFTVRLRAFVREEREKRRALLYKKNLQ
VR\*

>rs51177498\_ENSMUSP00000049737\_c.12145:G>C\_p.G4049A
ENSMUST00000052872.15|Obscn-203|ENSMUSG00000061462|-|chr11:g.58953508:C>G
MDHSFSGAPRFLTRPKAFVSVGKDATLSCQIVGNPTPHVSWEKDRQVPEAGARFRLAQDGDVYRLTILDLAL
GDSGQYVCRARNAIGEAFVAVGLRVDSEGTCAEQAPHFLLRPTSIRVREGADATFRCRVGGSPQPAVSWSKDG
RRLGPPDAPHVRVEEHGESSALRIR SARPRDGGTYEVRAENPLGSASAAAALVVDSDAEVAGPPGTSTATLLA
HLQQRREAMRAEGIPPSPPGAGTRTCTVTEGKHARLSCFVTGEPKPKETVWKKDQQLVTEGRRHVYDEQENF
VLKILFCKQSDRGLYTCTASNLVGQTYSSVLVVVREPTVPFKKRLQDLEVREKESATFQCEVAQPATEAAWFK
EETRLWASAKYDIEEGETERRLTVRNVSADDDAVYICETTEGSRVVAELSVQGNLTKLPRKTAVRTGDTAIF
WVELAVPEGPVWRVLRNQEEMVAGGRVAITAEGTCHTLTI FQCTLEDMGVAFVSGGCRTTTFQFCVSAPRRPPL
YPPADPVVKAKTESSVTLSSWAPPHGDRPVTIDGYVLEKRLKLGAYAWSRCHAEAGWLATTEFTITGVAAEGDFQ
FRVSAINHFGQGPYLEFPGMTMLVPLAVKTPKAVEAVEGGEVTFVSDLTVASSGEWFLDGEALKASSIYVI
RCDRTRHMLTIREVPARLHGAQLKVFANGIETSIQMVVRAALGLPSSKLPAAAAREVLAQLHEEAQLLAELSD
QAAAAVTWLKDGRELSLGPKEYMQVSAGRRALLVRDVAQDDAGLYECVSRGSRRTAYQLLVQEPKLVFAKQQA
SEVKAEGNSATLSCEVTQAQTEVTFWKDGGKLSSSSKVRMEASGCSRRLVVQQAGKADAGEYSCEAGGQKLS
FRLDVAEPKLVFAKQQAHEVKAEGASATLSCEVAQAQTEVTFWKDGGKLSSSSKVRMEASGCSRRLVVQQ
AGKADAGEYSCEAGGQKLSFRLDVAEPMVFAKEQQARSEVKAEGASATLSCEVAQAQTEVTFWKDGGKLS
SSKVRMEASGCSRRLVVQQAGKADAGEYSCEAGGQKLSFRLDVTEPKLVFAKEQQARSEVKAEGNSATLSCE
VAQAQTEVTFWKDGGKLSSSSKVRMEASGCSRRLVVQQAGKADAGEYSCEAGGQKLSFRLDVAEPMVFAKEQ
QARSEVKAEGNSATLSCEVAQAQTEVTFWKDGGKLSSSSKVRMEASGCSRRLVVQQAGKADAGEYSCEAGGQ
KLSFHLDVTEPKLVFAKEQQAHSEVKAEGASATLSCEVAQAQTEVTFWKDGGKLSSSSKVRMEASGCSRRLV
VQQAGKADAGEYSCEAGGQKLSFRLDVAEPMVFAKEQQARSEVKAEGASATLSCEVAQAQTEVTFWKDGGK
LSSSKVRVEASGCSRRLVVQQAGKADAGEYSCEAGGQKLSFRLDVAEPMVFAKEQQANSEVKAEGASATL
SCEVAQAQTEVTFWKDGGKLSSSSKVRVEASGCSRRLVVQQAGKADAGEYSCEAGGQKLSFRLDVAEPMVFA



KEQQAHSEVKAEGASATLSCEVAQAQTEVTFWFKDGKKLSSSSKVRVEASGCSRRLVVQQAGKADAGEYSCEA
GGQKLSFRLDVAEPKLAFAKEQQAHSEVKAEGASATLSCEVAQAQTEVTFWFKDGKKLSSSSKVRVEASGCSR
RLVVQQAGKADAGEYSCEAGGQKLSFRLDVAEPKLAFAKEQQAHSEVKAEGASATLSCEVAQAQTEVTFWFKD
GKKLSSSSKVRVEASGCSRRLVVQQAGKADAGEYSCEAGGQKLFRLDVAEPKLMFAKEQQAHSEVKAEGAS
ATLSCEVAQAQTEVTFWFKDGKKLSSSSKVRVEASGCSRRLVVQQAGKADAGEYSCEAGGQKLSFRLDVAEPKL
VFAKEQQAHSEVKAEGASATLSCEVAQAQTEVTFWFKDGKKLSSSSKVRVEASGCSRRLVVQQVQKADAGEYS
CEARGQKLSFRLDVADTRLMFAKEQQARTEVKAEGASATLSCEVAQAQTEVTFWFKDGKKLSSSSKVRVEASG
CSRRLVVQQAGKADAGEYSCEAGGQKLSFRLDVAEAEESQI PERPSRREPLVVKEHETI IILTATIAAPSVAAVT
WLKDGVEIRRSKRHEATSLGDTHLTVRGAQVLD SAIYSCRVGKEGQDFPVQVEEVAAKFSKPLEPVEVLEGG
TVMLVCELSPEQAEVWRCGNTQLRPGKRFQMTSEGPRRTLT VSGLREDDAEYVCESRDDRTSARLTVKVPR
VVKFTSGLSAMVAEEGQEA TFQCVVSPSDAGVTWYKDGMLQPSSEKFMVESGASRSLTILGLTLEDAGQVTV
EAEGASSAALRVREAPVLFKKKLEPQTV EERTSVTLEVELTRPWPEVKWTRNAAVLTPSENVEIRAEGARHC
LVLSVGFADRGFFGCETPDDKTQAKLNVEMRQVRLV RGLQEVEAKEQGTASMDVELSHAEEVGSWTRDGLRL
QPGPKCHLAVQGPVHILTSALQPQDSGLVAFRAEGVHTSARLIVTELPVSFTRVLQDVVATQKEKVTLECEL
SRPVDVRWLKDGVELRAGKAI GIVAQGTCSRSLVIYRCETGDQGVVCDALDAQTSASLRVQGRTYTLIFRRVL
AEDAGEVKFVAENAESAHLRVKELPVTLRLPLRDKIAMEKHRGVLECVSRASAQVRWFVKGGLVQSGPKYE
VVDGGLYRKLQAGNVLEQDGTVHRLTLHKTCSTMTGPVHFTIGKSRSSAQLVVS DI PVVLTRELPKAGRE
LQSVVLSCDFRPAPKAVQWYKDDTPLSPSEKFKMALEGQMAELRILRLTPADAGVYRCQAGSAQSSAEVTEA
REVTVIQPLQDAEAMEEGRVCFSC ELSHKDEDI EWSLNGTPLYNDSFHEISHEGCLHTLVLSVRQADTGTVC
ATSPKVSVSARLVVKGKPVVFLKALDDVSAEERGTLLTQCEVSDPEARVVRKDGVELGPSDKYDFLHKAGAR
GLTVHDLSDHEDAGLYTCQVGSKETQSKVSVHDLHVGITKRLKTEVLEGE SCSFECVLSHESPSDPAVWTVGG
KTVGGSGHFHAVRQGRKYTLTVKDAALSDAGEVFSVLGLT SKASLIIRERPVDITKPLEDQRTTLGEDVMLS
CELSRAGTSVRWLKDGKAIKRSQKYDLLSEGTRAVLVVRKASLKDSGEYTCETEASKSTAKLCVEEKANRFTE
ELADLQVEEKGRAVFTCKTEHPASVVTWRKGLLELRASGKHVPSQEGTLKLTINALERTDSDTYTCDI GQAR
TQARLLVHGQKVRVIEDLED TAVQEGSSAKFCCRIAPADYGPVHWF LDKTPLHSALNEITVQPGGYHVLT LR
QLALKDSGTVYFEAGDQRTS AALRVTEKPSIFSRPLTDVTVTEGEDLTLVCETTTVDSSVRWTKDGKTLRPSA
RCQLSHEGCAQQLLITATTPQDGGRYKCEIGGASSSSIVRVHALPVRFR ES LKDVVEPEGKAATLRCVLSVA
APVEWRHGDDVLKSSNKYSLRQEGAVLELVIRDLQPDGSGQYSCSFGDQTT SATLTVTKTSQAQFVGKLRNKEA
TEGTTVTLRCELTKEAPVEWKKGTETLRNGDKYSLKQDGAVCELQICSLLVADAGEYSCVCGQEKT SATLTVK
ALLVHFVRRRLRSKEATEGDTTTLQCELSKAAPVEWRKGTETLRDGD RYSLKQDGAVCELQIRSLTIADAGEYL
CTCGQEKT SATLTVRALPAKFKDSLKNEEATEGTTATLSCELSKAAPVTWKKGPKTLQSGDKYVLRQDGAVCG
LQIHGLTMADAGEYSCVCGQEKT SATLTVRGLPAKFIEDLRSQEATEGATAILRC ELSKAAPVEWRKGETL K
DGDRTYLRQDGAVCELQIRGLAVVDGTYS LPTKFTTEGLRNEEATEGTMATLRCQMSKAAPVEWRKGETLR
DGDRTYSLRQDGAVCELQIRGLTIEDSGEYTCVCAQEKT SATLSVKALPSRFIEDLRSQEATEGTMATLRCQMS
KTAPVEWKKGSETLRDGGRYSLRQDGPVCELQICDLAVEDAGEYSCVCGQEKT SATLSIKALPPRFIEDLRSQ
EATEGTMATLRCQMSKAAPVEWRKGETLGDGGRYSLRQNGAVCELQIHDLAVEDTGEYSCVCGQEKT SATLN
VKALPPRFIEDLRSQEATEGTMATLRCQMSKAAPVEWRKGETLRDGGRYSLRQDGAVCELQIHDL DVEDAGQ
YSCVCGQEKTSAVLTVDALPPKFTEGLKKEEATEGTMVTLRCQMSKEATVEWRKGAKT LSDGGRYSLRQDGAM
CELQICGLAVEDAGEYSCVCGQEKT SATLSVKALPPRFIEDLRSQEATEGTMATLRCQMSKAAPVEWRKGET
LRDGDRTYSLRQDGAVCELQIRDLAVEDAGEYLCVCGQEKT SATLSVKALPPRFIEDLRSQEATEGTMATLRCQ
MSKAAPVEWRKGSKTLRDGDRTYSLRQDGAVCELQICDLAVEDTGDYSCVCGQEKT SATLSVKALPPRFIEDLR
SQEAREGTVATLRCRMSKAAPVEWRKGETLKDGDRTYSLRQEGNLCELQIRDLAVEDTEEYSCVCGQEKT SAT
LSVKALPAKFIEDLRSQEAPESSTVTLRCKLSKKASVWKKGSETLRNGARYSLRQDGAVCELEIRDLTVEDT
GEYSCTCGQVYTSATLSIMAPQVVFQQPLQNLQAEEGSMASLRCELSVPNAAMVWSKGGLELQGDTRREARQQ
GCVAELLLRDLRREDAGEYSCTCGSQTTSATLMVTAAPVRFLRELQAQDVDEGATARLRCELSREAVSVEWRK
GSLQLFPKAKYQMVQEGTTAELLVHGVEQEDAGEYTC DAGHTQS IARLSVRAPKPKFKTDLQSTEQEAGGTAR
LCCQLSEAEPGTPVQWLKEGVELHVGSKYEMRRQGAVCELLIHGLEAKDTGEYACLVGGQKT LASLRVKEPEV
TIVRGLVDMEVQADEDEFTCKV SQAGATDVQWHLQGLPLQSNVTEVAVLADGCTHVLQKGVTL EDAGTVS
FHVGGSSSAQLTVRVPEVTVLEPLKDVQLSEGQDAHFRCRLSRASGQEARWALGGVPLQCNEMNDITVEQGT
LYLLTLHKVTLEDAGTITLQVGS CSSEAQLKVTAKNTVLRGLENVDALEGGEALFECQLSQPEVAHAHTWLLDD
EPVHTSEKVEVVYFENGLRHLLLLKNLKPQDSCRVTFLAGDVVTS AFLTVRGWRLEVLEPPHDASVKAGMQVR
FTCILSEAVPVGEATSVYINGAAIQPDDTDWVTITDGS HHALTSNAQFQHAGEVTF AARDAVASARLSVLALP
DPPEDAEVVGRSDHSVTLSWVAPMSDGGGGLCVGRVEMKEASTGQWQLCHDLVPGPEACVVDLVP GKTYRFRV
AAVGFPAGAGEPVHLPQMVK IAPAPAPAPAPAPAPAPETRAVVGEDICLELEVAADGGEV VWHKGTERTIQPGG
HFEVLSRGRQMLVIKGFRTEDQGEYRCGPIQGLPSSGAATFNVMVTS GSGDEVPAQPSLPPEAAQEGDLHLL
WEALARKRRMSREPTLDSISELPEEDSRVQHLRQEA EETAPDLSEGYSTADELARTGEADLSHTSSDDES RAG
TPSLVTYLKKAGGPGI SPLASKHEAQVTT SVKPKQKQEPVVPTCPPPGDLSAADLMDPSLDKAAVKIQAAFKG

YKVRKEMKQQEGPVFSRTFGDTEAQVGDVLRLECVLATKTDMRACWLKDGIELTDGRHYHIDQLKDGTCSSLLV  
TGLAPTDSGRYTCQVSTKSGRVSHSACVVVSGTESEAESSSSGGELDDAFRRAARLHRLFRTKSPAELSEEEL  
FLSADEGPGPEEPADWQTYREDENFVCIRFESLAEARQAVTCFRNMFATMGIGVEISLGEQGPGRVEMRIGK  
VAPTVPVAVPLAKTPGLQTSDAAPVFLTELQNDQVQDGYPMSFDCVVTGQPVPSVRWFKDGKLEEDDHYMIN  
EDQQGGHQLIITAVVPADMGVYRCLAENSMGVSSSTKAELRVELTSTDYDTAADATETSSYFSAQGYLSSREQE  
GTESDEGQLPQVLEELKDLQVAPGTRLAKFQKLVKGYPAKLYWFKDGOPLTSDHIRMTDKKTLHTLEIVSV  
TREDSGQYAAIISNAVGAAYSARLLVRGPSEPEEKPASDVHERLVPRILEKFTPKKVKRGSSTFVSVKVEG  
HPAPSVHWLKEEAKEGVLWIGPDTFGYTMASSSKQHSVLVLDVGRQHOGTYTICIATNPAGQALCSASLHISGL  
AKEEEQERVKEALISSFLQGTSAQVSAQMSSEAGFADLVGQSKGESLVAEEAHSHLSLAEVGTSEEFLOKLTSSQ  
ITEMVSAKISQAKLQVPGGDSDEETKTPSASPRHGRSRPSSSVQESSSESEDGDSRGEIFDIYVVTADYLPGLG  
AEQDAIILREGQYVEVLDSAHPLRWLVRTKPTKSSPSRQGWVSPAYLDKRLKLSPEWGPTEAPEFPGEAVSED  
EYRTRLSVVIQELLSSEQAFVGELOFLESHHMKHLERSPRVPAAVASQKTVI FRNVQDISHFHSSFLKELQGC  
GTDDDVAMCFIKNQEAFAKEYLEFLVGRVQAESVVVSTPVQEFYKKYAEBETLSAKDPTQPPPPPLQHYLEQVVE  
RVQKYQALLKELIRNKARNRQNCALLEQAYAVVSALPQRAENKLVSLMENYPGTLEALGEP IRQGHFIVWEG  
APGARMPWKGNHRVFLFRNYLVICKPRRDSRTDTFSYVFRNMMKLSSIDLNDQVEGDRAFEVWHEREDESVR  
KYLQARTVI IKNSWVKEICGIQQRLAQPVWRPPEFEELADCTAELGETVKLACRVTGTPKPIVSWYKDGKP  
VEVDPHHILIEDPDGSCITLIDNLTGIDSGQYMCFAASAAGNASTLGKILVQVPPRFVNVKVRATPFVEGEDAQ  
ITCTVEGAPYPQIRWYKDGTLAPGNRYRMLNEPRSGVLVLIQAAKEDLGHYECELVNLRLGTRGGGELYM  
QSPALRARDQHHREQIVAAVEVTEQETKVPKKTVI IEEITITTVVKS PRGRRQSPGKSPSRSPRRSASPRRPG  
LLAPERLYPPGTSPRRLEVEQGRKAPVPALYVTEAEVHAPASQSPKWLEVEETIEVRVKKTGSRGASPVRE  
MTRGEGILFTLPGGI PGRDPNANNNSNKS SVYQEAARTWGPVAVHVGEFFIFQVDSVGNVDVVAASPEPEQVRA  
SQKEENTERQEGCSDGIDENTFLMEEPQDTSLQGRDPKILTHNGRVLTLADLEDYVPQEGETFGCGDSTPSTP  
DEPPCEVSVLQREISEPTVGQPVLLNVGRPPGTGATPSFFRPGSQVHSPESVSFLLREAWSGPVSAPWTSSF  
HTHVQSSVDGSHGSFKTEVSTQTVSFGAVGETVTLHIDPDGGEAPGPSQG\*  
>rs51177498\_ENSMUSP00000020732\_c.12346:G>C\_p.G4116A  
ENSMUST00000020732.13|Obscn-201|ENSMUSG00000061462|-|chr11:g.58953508:C>G  
MDHSFSGAPRFLTRPKAFVVSVGKDATLSCQIVGNPTPHVSWEKDRQPVEAGARFLAQDGDVYRLTILDLAL  
GDSGQYVCRARNAIGEAFAAVGLRVDSEGTCAEQAPHFLLRPTSIRVREGADATFRRCRVGGSPQPAVSWSKDG  
RRLGPPDAPHVRVEEHGESSALRIRSARPRDGGTYEVRAENPLGSASAAAALVVDSDAEVAGPPGTSTATLLA  
HLQORREAMRAEGIPSPPGAGTRTCTVTEGKHARLSCFVTGEPKPEVWKKDGQLVTEGRRHVVEDEQENF  
VLKILFCKQSDRGLYCTASNLVGQTYSSVLVVVREPTVPFKKRLQDLEVREKESATFQCEVAQPAEAWFK  
EETRLWASAKYDIEEEGTERRLTVRNVSADDDAVYICETTEGSRVVAELSVQGNLTKLPRKTAVRTGDTAIF  
WVELAVPEGPVRLRNQEEVAGGRVAITAEGTCHTLTI FQCTLEDMGEVAFVSGGCRTTTTQFCVSAPRRPPL  
YPPADPVVKAKTESSVTLWSAPPHGDRPVTIDGYVLEKRLKLGAYAWSRCHEAGWLATTEFTITGVAEEGDFQ  
FRVSAINHFGQGPYLEFPGTMHLVPLAVKTPLKAEVAEVEGGEVTFVSDLTVAASSGEWFLDGEALKASSIYVI  
RCDRTRHMLTIREVPARLHGAQLKVFVANGIETS IQMVVRAALGLPSSKLPAAAAREVLAQLHEEAQLLAELSD  
QAAAVTWLKDGRELSLGPKEYMQVSAGRRALLVRDVAQDDAGLYECVSRGSRRTAYQLLVQDITDGYRDWGPAG  
PQKHMCKCAGAKIARYLGS SCYRFLQYDKGVWHLEAALDTRQKGTSSCSLHEKPKLVFAKQQAHSEVKA  
AGNSATLSCEVTQAQTEVTFWKDGGKLS SSSKVRMEASGCSRRLVVQQAGKADAGEYSCEAGGQKLSFRLDVA  
EPKLVFAKQQAHSEVKAEGASATLSCEVAQAQTEVTFWKDGGKLS SSSKVRMEASGCSRRLVVQQAGKADA  
GEYSCEAGGQKLSFRLDVAEPKMVFAKEQQARSEVKAEGASATLSCEVAQAQTEVTFWKDGGKLS SSSKVRM  
EASGCSRRLVVQQAGKADAGEYSCEAGGQKLSFRLDVTEPKLVFAKEQQARSEVKAEVGNSATLSCEVAQAQ  
EVTWFKDGGKLS SSSKVRMEASGCSRRLVVQQAGKADAGEYSCEAGGQKLSFRLDVAEPKLVFAKEQQARSEV  
KAEAGNSATLSCEVAQAQTEVTFWKDGGKLS SSSKVRMEASGCSRRLVVQQAGKADAGEYSCEAGGQKLSFHL  
DVTEPKLVFAKEQQAHSEVKAEGASATLSCEVAQAQTEVTFWKDGGKLS SSSKVRMEASGCSRRLVVQQAGK  
ADAGEYSCEAEGQKLSFRLDVAEPKLVFAKEQQARSEVKAEGASATLSCEVAQAQTEVTFWKDGGKLS SSSK  
VRVEASGCSRRLVVQQAGKADAGEYSCEAGGQKLSFRLDVAEPKLVFAKEQQANSEVKAEGASATLSCEVAQ  
AQTEVTFWKDGGKLS SSSKVRVEASGCSRRLVVQQAGKADAGEYSCEAGGQKLSFRLDVAEPKLVFAKEQQAH  
SEVKAEGASATLSCEVAQAQTEVTFWKDGGKLS SSSKVRVEASGCSRRLVVQQAGKADAGEYSCEAGGQKLS  
FRLDVAEPKLVFAKEQQAHSEVKAEGASATLSCEVAQAQTEVTFWKDGGKLS SSSKVRVEASGCSRRLVVQQ  
AGKADAGEYSCEAGGQKLSFRLDVAEPKLVFAKEQQAHSEVKAEGASATLSCEVAQAQTEVTFWKDGGKLS  
SSKVRVEASGCSRRLVVQQAGKADAGEYSCEAGGQKLFRLDVAEPKLMFAKEQQAHSEVKAEGASATLSCE  
VAQAQTEVTFWKDGGKLS SSSKVRVEASGCSRRLVVQQAGKADAGEYSCEAGGQKLSFRLDVAEPKLVFAKEQ  
QAHSEVKAEGASATLSCEVAQAQTEVTFWKDGGKLS SSSKVRVEASGCSRRLVVQQVQVQKADAGEYSCEARGQ  
KLSFRLDVADTRLMFAKEQQARTEVKAEGASATLSCEVAQAQTEVTFWKDGGKLS SSSKVRVEASGCSRRLV  
VQQAGKADAGEYSCEAGGQKLSFRLDVAEAE SQIPERPSRREPLVVKEHETIILTATIAAPSVAAVTWLKDG  
EIRRSKRHEATSLGDHTLTVRGAQVLD SAIYSCRVGKEGQDFPVQVEEVAAKFSKPLEPVEGELGGTVMLVC  
ELSPQAEVWRCGNTQLRPGKRFQMTSEGPRRTLTVSGLREDDAEYVCESRDDRTSARLTVKVPVVKFTS

GLSAMVAEEGQEQATFQCVVSPSDAGVTWYKDGMLQOPSEKFMVVEGASRSRLTILGLTLEDAGQVTVAEAGAS  
 SSSAALRVREAPVLFKKKLEPQTVEERTSVTLEVELTRPWPEVKWTRNAAVLTPSENVEIRAEGARHCLVLRV  
 GFADRGFFGCETPDDKTQAKLNVEMRQVRLVRLGLQVEEAKEQGTASMDVELSHAEEVGSWTRDGLRLQPGPKC  
 HLAVQGPVHILTLALSALQPQDSGLVAFRAEGVHTSARLIVTELPSVFTRVLQDVVATQKEKVTLECELSRPVDV  
 RWLKDGVLELRAGKAIIGIVAQGTCSRSLVIYRCETGDQGVYVCDALDAQTSASLRVQGRTYTLIFRVLAEADAGE  
 VKFVAENAESRAHLRVKELPVTLLRPLRDKIAMEKHRGVLECCQVSRASAQVRWFKGGVELQSGPKYEVVSDGL  
 YRKLVINDVQPEDEDTYTCDAENVKTSAQFFVVEEQSITIVRGLKDMTVMEPAPAWFECETSIPSVRPPKWL  
 KTVLQAGGNVGLQDGTVHRLTLHKTCSTMTGPVHFTIGKSRSSAQLVVSDIPVVLTRPLEPKAGRELQSVVL  
 SCDFRPAPKAVQWYKDDTPLSPSEKFKMALEGQMAELRILRLTPADAGVYRCQAGSAQSSAEVTVAREVTVI  
 QPLQDAEAMEEGRVCFSCELSHKDEDEIWSLNGTPLYNDSFHEISHGCLHTLVLKSVRQADTGTVCATSPKV  
 SVSARLVVKGKPVVFLKALDDVSAEERGLTLTQCEVSDPEARVVRKDGVELGPDSDKYDFLHKAGARGLTVHD  
 LSHEDAGLYTCQVGSKETQSKVSVHDLHVGITKRLKTVEVLEGESECFEVLSSHESPSDPAVWTVGGKTVGGS  
 GHFHAVRQGRKYTLTVKDAALSDAGEVVSVLGLTSSKASLIIRERPVDITKPLEDQRTTLGEDVMLSCELSRA  
 GTSVRWLKDGKAIRKSQKYDLLSEGTRAVLVVRKASLKDSGEYTCETEASKSTAKLCVEEKANRFTHEELADLQ  
 VEEKGRAVFTCKTEHPASVVTWRKGLLELRASGKHVPSQEGTLTKLTINALERTDSDTYTCDIGQARTQARLL  
 VHGGKVRVIEDLEDTAVQEGSSAKFCRIAPADYGPVHWFLLDKTPLHSNELNEITVQPGGYHVLTLRQLALKD  
 SGTVYFEAGDQRTSAAALRVTEKPSIFSRPLTDVTVTEGEDLTLVCETTVDSSVRWTKDGKTLRPSARCQLSH  
 EGCAQQLLITATTPQDGGRYKCEIGGASSSIVRVHALPVRFRFRESLKDVEVPEGKAATLRVLSVAAPVEWR  
 HGDDVLKSSNKYSLRQEGAVLELVIRDLPQDQSGQYSCSFGDQTTSATLTVKTSQAQFVGLKRNKEATEGTTV  
 TLRCELTKAPVEWKKGTETLRNGDKYSLKQDGAVCELQICSLLVADAGEYSCVCGQEKTSATLTVKALLVHF  
 VRRLSKEATEGDTTTLQCELSKAAPVEWRKGTETLRDGDYSLKQDGAVCELQIRSLTIADAGEYLCTCGQE  
 KTSATLTVRALPAKFKDSLKNEEATEGTTATLSCELSKAAPVTWKKGPKTLQSGDKYVLRQDGAVCELQIHGL  
 TMADAGEYSCVCGQEKTSATLTVRGLPAKFIEDLRSQEATEGATAILRCELSKAAPVEWRKGSSETLKDGDYR  
 LRQDGAVCELQIRGLAVVDGTGYSLSLPTKFTTEGLRNEEATEGTMATLRCQMSKAAPVEWRKGSSETLRDGDYR  
 LRQDGAVCELQIRGLTIEDSGEYTCVCAQEKTSATLSVKALPSRFIEDLRSQEATEGTMATLRCQMSKTAPE  
 WKKGSETLRSKAGPVYSLRQDGPVCELQICDLAVEDAGEYSCVCGQEKTSATLSIKALPRFIEDLRSQEATEG  
 MATLRCQMSKAAPVEWRKGSSETLGDGGYSLRQNGAVCELQIHDLAVEDTGEYSCVCGQEKTSATLNVKALPP  
 RFIEDLRSQEATEGTMATLRCQMSKAAPVEWRKGSSETLRDGGYSLRQDGAVCELQIHDLVEDAGQYSCVCG  
 QEKTSAVLTVDALPPKFTTEGLKKEEATEGTMATLRCQMSKATVEWRKGAKTLSDDGGYSLRQDGAVCELQIC  
 GLAVEDAGEYSCVCGQEKTSATLSVKALPPRFIEDLRSQEATEGTMATLRCQMSKAAPVEWRKGSSETLRDGD  
 YSLRQDGAVCELQIRDLAVEDAGEYLCVCGQEKTSATLSVKALPPRFIEDLRSQEATEGTMATLRCQMSKAAP  
 VEWRKGSSETLRDGDYSLRQDGAVCELQICDLAVEDTGDYSCVCGQEKTSATLSVKALPPRFIEDLRSQEARE  
 GTVATLRCRMSKAAPVEWRKGSSETLKDGDYSLRQEGNLCELQIRDLAVEDTEEYSCVCGQEKTSATLSVKAL  
 PAKFIEDLRSQEAPESSTVTLRCKLSKASVWKKGSETLRNGARYSLRQDGAVCELEIRDLTVEDETEYSC  
 CGQERTSATLSIMAPVFFQQPLQNLQAEEGSMASLRCELSVPNAAMVWSKGGLELQGDTRREARQQGCVAEL  
 LLRDLRREDAGEYSCVCGQEKTSATLMVTAAPVRFRLRELQAQDVDEGATARLRCELSREAVSVEWRKGS  
 LQFPCAKYQMVQEGTTAELLVHGVEQEDAGEYTCDAQHTQSIARLSVRAPKPKFKTDLQSTEQEAGGTARLCCQLS  
 EAEPGTPVQWLKEGVELHVGSKYEMRRQGAVCELLIHGLEAKDTGEYACLVGQKTLASLRVKEPEVTIVRGL  
 VDMEVQADEDEFTCKVSQAGATDVQWHLQGLPLQSNVTEVAVLADGCTHVLQKGVTLLEDAGTVSFHVGGL  
 SSSAQLTVRVPEVTVLEPLKDVQVLESEGQDAHFRCRLSRASGQEARWALGGVPLQCNEMNDITVEQGTLYLLTL  
 HKVTLEDAGTITLQVGSSESAQLKVTAKNTVLRGLENVDALLEGGEALFECQLSQPEVAHAHTWLLDDEPVHTS  
 EKVEVVYFENGLRHLLLLKLNKLPQDSCRVTFLAGDVVTSFAFLTVRGWRLEVLPEPHDASVKAGMQVRFTCILS  
 EAVPVGEATWYINGAAIQPDDTDWTVTTDGSHHALTLNSAQPHAGEVTFAAARDAVASARLSVLALPDPPEDA  
 GAGEPVHLPQMVKIAAPAPAPAPAPAPAPAPAPAPAPAPAPAPAPAPAPAPAPAPAPAPAPAPAPAPAPAPAP  
 RGQRQMLVIKGFRTEDQGEYRCGPIQGLPSSGAATFNVMVMTSGSGDEVPAQPSLPPEAAQEGDLHLLWEALAR  
 KRRMSREPTLDSISELPEEDSRVQHLRQEAEEETAPDLSEGYSTADELARTGEADLSHTSSDDESRACTPSLVT  
 YLKKAGGPGISPLASKHEAQVTTSVKPKQKQEPVPTCPGGDLAADLMDPSLDKAAVKIQAAFKYKVRKE  
 MKQQEGPVFSRTFGDTEAQVGDVLRLECVLATKTDMRACWLKDGIELTDGRHYHIDQLKDGTCSSLVVTGLAPT  
 DSGRYTCQVSTKSGRVSHSACVVVSGTESEAESSSGGELDDAFRAARRLHRLFRTKSPAELSEELFLSADE  
 GPGEPEEPADWQTYREDENFVCIRFESLAEARQAVTCFRNMFMATMGIGVEISLGEQGPGRVEMRIGKVAPTVT  
 PAVPLAKTPGLQTSDAAPVFLTELQNDVQDGYPMSFDCVVTGQPVPSVRWFKDGKLEEDDHYMINEDQQGG  
 HQLIITAVVPADMGVYRCLAENSMGVSSTKAELRVELTSTDYDAAATETSSYFSAQKGLYSSREQEGTESDE  
 GQLPQVLEELKDLQYVAPGTRLAKFQLKVKGYAPKLYWFKDQGLPSTSDHIRMDDKTLHTLEIVSVTREDSG  
 QYAAIYISNAVGAAYSSARLLVRGSEPEEKPASDVHERLVPPRILEKFTPKKVKRGSSITFSVKVEGHPAPSV  
 HWLKEEAKEKGLVWIGPDTPGYTMASSSKQHSLLVLDVGRQHGTQYTCIATNPAGQALCSASLHISGLAKEEEQ  
 ERVKEALISSFLQGTSAQVSAQMSSESAGFADLVGQSKGESLVAEEAHSHLSLAEVGTTEFLQKLTSTQITEMVS  
 AKISQAKLQVPGGDSDEETKTPSASPRHGRSRPSSSVQESSSESEDGDSRGEIFDIYVVTADYLPGLAEQDAI

ILREGQYVEVLDSAHPLRWLVRTKPTKSSPSRQGWVSPAYLDKRLKLSPEWGPTEAPEFPGEAVSEDEYRTRL  
SSVIQELLSSEQAFVQELQFLESHHMKHLERSPRVPAAVASQKTVI FRNVQDISHFHSSFLKELQGCCTDDDV  
AMCFIKNQEAFEKYLEFLVGRVQAESVVVSTPVQEFYKKYAEETLSAKDPTQPPPPPLQHYLEQPVERVQKYQ  
ALLKELIRNKARNRQNCALLEQAYAVVSALPQRAENKLVSLMENYPTLEALGEPHQGHFVWEGAPGARM  
PWKGHNHRVFLFRNYLVICKPRRDSRTDTFSYVFRNMMKLSSIDLNDQVEGDDRAFEVWHEREDSVRKYLLQA  
RTVI IKNSWVKEICIGIQQLAQPVWRPPEFEEELADCTAELGETVKLACRVTGTGPKPIVSWYKDGKPVVEVDPH  
HILIEDPDGSCCTLILDNLTGIDSGQYMCFAASAAGNASTLGKILVQVPPRFVNVKVRATPFVEGEDAQITCTVE  
GAPYPQIRWYKDGTLTLLAPGNRYRMLNEPRSGVLVVIQAASKEDLGHYECELVNRLGSTRGGGELYMQSPALR  
ARDQHREQIVAAVEERRPSP\*  
>rs51177498\_ENSMUSP00000151217\_c.10702:G>C\_p.G3568A  
ENSMUST00000219084.3|Obscn-207|ENSMUSG00000061462|-|chr11:g.58953508:C>G  
MDHSFSGAPRFLTRPKAFVSVGKDATLSCQIVGNPTPHVSWEKDRQVEAGARFRLAQDGDVYRLTILDIAL  
GDSGQYVCRARNAIGEAFVAVGLRVDSEGTCAEQAPHFLLRPTSIRVREGADATFRCRVGGSPPQPAVSWSKDG  
RRLGPPDAPHVRVEEHGESSALRIRSARPRDGGTYEVRAENPLGSASAAAALVVDSDAEVAGPPGTSTATLLA  
HLQORREAMRAEGIPPSPPGAGTRTCTVTEGKHARLSCFVTGEPKPKETVWKKDQGLVTEGRRHVVEDEQENF  
VLKILFCQKSDRGLYCTASNLVGGTYSSVLVVVREPTVPFKKRLQDLEVREKESATFQCEVAQPAATEAAWFK  
EETRLWASAKYDIEEETERRRLTVRNVSAADDVAVICETTEGSRVAELSVQGNLTKLPRKTAVRTGDTAIF  
WVELAVPEGPVWRVLRNQEEMVAGGRVAITAEGTCHTLTI FQCTLEDMGEVAFVSGGCRTTTFQCVSAPRRPPL  
YPPADPVVKAKTESSVTLWSAPPHGDRPVTIDGYVLEKRLKLGAYAWSRCHEAGWLATTEFTITGVAAEEDGFQ  
FRVSAINHFGQGPYLEFPGTMHLVPLAVKTPKAVEAVEGGEVTFVSDLTVASSGEWFLDGEALKASSIYVI  
RCDRTRHMLTIREVPARLHGAQLKVFANGIETS IQMVVRAALGLPSSKLPAAAAREVLAQLHEEAQLLAE LSD  
QAAA VTWLKDGRELSLGPYEMQVSAGRRALLVRDVAQDDAGLYECVSRGSRRTAYQLLVQDITDGYRDWGPAG  
PQKHMCKCAGAKIARYLGSSCYRFLQYDKGVVHWEAALDTRQKGTSSCSLHEKPKLVFAKQQAHSVEKAE  
AGNSATLSCEVTQAQTEVTFWKDGKLLSSSSKVRMEASGCSRRLVVQQAGKADAGEYSCEAGGQKLSFRLDVA  
EPKLVFAKQQAHSVEKAEAGASATLSCEVAQAQTEVTFWKDGKLLSSSSKVRMEASGCSRRLVVQQAGKADA  
GEYSCEAGGQKLSFRLDVAEPKMFVFAKEQQARSEVKAEGASATLSCEVAQAQTEVTFWKDGKLLSSSSKVRM  
EASGCSRRLVVQQAGKADAGEYSCEAGGQKLSFRLDVTEPKLVFAKEQQARSEVKAEGNSATLSCEVAQAQ  
EVTWFKDGKLLSSSSKVRMEASGCSRRLVVQQAGKADAGEYSCEAGGQKLSFHLVDVTEPKLVFAKEQQAHSEV  
KAEAGASATLSCEVAQAQTEVTFWKDGKLLSSSSKVRMEASGCSRRLVVQQAGKADAGEYSCEAGGQKLSFR  
LDVAEPKLVFAKEQQARSEVKAEGASATLSCEVAQAQTEVTFWKDGKLLSSSSKVRMEASGCSRRLVVQQAG  
ADAGEYSCEAGGQKLSFRLDVAEPKLVFAKEQQANSEVKAEGASATLSCEVAQAQTEVTFWKDGKLLSSSSK  
VRVEASGCSRRLVVQQAGKADAGEYSCEAGGQKLSFRLDVAEPKLVFAKEQQAHSEVKAEGASATLSCEVAQ  
AQTEVTFWKDGKLLSSSSKVRMEASGCSRRLVVQQAGKADAGEYSCEAGGQKLSFRLDVAEPKLVFAKEQQAH  
SEVKAEGASATLSCEVAQAQTEVTFWKDGKLLSSSSKVRMEASGCSRRLVVQQVQKADAGEYSCEARGQKLS  
FRLDVAEASQI PERPSRREPLVVKHEHETIILTATIAAPSVAAVTWLKDGVVEIRRSKRHEATS LGDHTLTVR  
GAQVLDLSAIYSCRVKEGQDFPVQVEEVAAKFSKPLEPVEGELGGTVMLVCELSPEQAEVWRCGNVQLRPGK  
RFQMTSEGPRRTLTVSGLREDDAEYVCESRDDRTSARLTVKVRVVKFTSGLSAMVAEEGQEAFTQCVVSPS  
DAGVTWYKDGMLQPSSEKFMVVESEGASRSLTILGLTLEDAGQVTVAEAGASSAALRVREAPVLFKKKLEPQT  
VEERTSVTLEVELTRPWPEVKWTRNAAVLTPSENVEIRAEGARHCLVLRVSGFADRGFFGCETPDDKTQAKLN  
VEMRQVRLVVRGLQEVEAKEQGTASMDVELSHAEEVGSWTRDGLRLQPGPKCHLAVQGPVHILTALSALQPDG  
LVAFRAEGVHTSARLIVTELPVSFTRVLQDVVATQKEKVTLECELSRPVDVRWLKDGVELRAGKAI GIVAQGT  
CRSLVIYRCETGDQGVYVCDALDAQTSASLRVQGRYTLIFRVLAEADAGEVKFVAENAESRAHLRVKELPVT  
LLRPLRDKIAMEKHRGVLECVSRASAQVRWFVGGVLELQSGPKYEVVSDGLYRKLVIINDVQPEDEDTYTC DAG  
NVKTSAQFFVVEEQSITIVRGLKDMTVMEPAPAWFECETSIPSVRPPKWLGLGKTVLQAGGNVGLQDGTVHRLT  
LHKTCSTMTGPVHFTIGKSRSSAQLVVS DIPVVLTRPLEPKAGRELQSVVLSCDFRPAPKAVQWYKDDTPLSP  
SEKFKMALEGQMAELRILRLTPADAGVYRCQAGSAQSSAEVTVAEAREVTVIQPLQDAEAMEEGRVCFSCELSH  
KDEDIEWSLNGTPLYNDSFHEISHEGCLHTLVLKSVRQADTGTVCATSPKVS SARLVVKGPVVFLLKALDDV  
SAEERGLTLTQCEVSDPEARVVWRKDGVELGPSDKYDFLHKAGARGLTVHDLSHEDAGLYTCQVGSKETQSKV  
SVHDLHVGITKRLKTVEVLEGESECFEVLVSHESPSDPAVWTVGGKTVGGSGHFHAVRQGRKYTLTVKDAALS  
DAGEVVFVSVLGLT SKASLIIRERPVDITKPLEDQRTTLGEDVMLSCELSRAGTSVRWLKDGKAI RKSQKYDLL  
SEGTRAVLVVRKASLKDSEYTCETEASKSTAKLCVEEKANRFTTEELADLQVEEKGRAVFTCKTEHPASVVTW  
RKGLLELRASGKHVPSQEGTLTKLTINALERTDSDTYTCDIGQARTQARLLVHGQKVRVIEDLEDTAVQEGSS  
AKFCCR IAPADYGPVHWF LDKTPLHSNELNETIVQPGGYHVLTLRQLALKDSGTVYFEAGDQRTS AALRVTEK  
PSIFSRPLTDVTVTEGEDLTLVCETTTVDSSVRWTKDGKTLRPSARCQLSHEGCAQLLITATTPQDGGRYKC  
ETGASSSSIVRVHALPVRFRFRESLKDVEVPEGKAATLRCVLSVAAPVEWRHGDVLLKSSNKYSLRQEGAVLE  
LVIRDLQPDGSGQYSCSFGDQTTSATLTVKTSQAQFVGLKRNKEATEGTTVTLRCELTKPEVWKKGTETLR  
NGDKYSLKQDGA VCELQICSLLVADAGEYSCVCGQEKTSATLTVKALLVHFVRRLRSKEATEGDTTTLQCELS  
KAAPVEWRKGTETLRDGDYSLKQDGA VCELQIRSLTIADAGEYLCTCGQEKTSATLTVRGLPAKFIEDLRSQ

EATEGATAILRCELSKAAPVEWRKGSETLKDGDYTLRQDGA VCELQIRGLAVVDTGTYS SLP TKFTEGLRNE
EATEGTMATLRCQMSKAAPVEWRKGSETLRDGDYSLRQDGA MCELQIRGLTIEDSGEYTCVCAQEKTSATLS
VKALPPRFIEDLRSQEATEGTMATLRCQMSKAAPVEWRKGSETLGDGGYSLRQNGAVCELQI HDLAVEDTGE
YSCVCGQEKTSATLNVKALPPKFTTEGLKKEEATEGTMVTLRCQMSKEATVEWRKGAKT LSDGGYSLRQDGA
MCELQICGLAVEDAGEYSCVCGQEKTSATLSVKALPPRFIEDLRSQEATEGTMATLRCQMSKAAPVEWRKGSET
LRDGDYSLRQDGA VCELQIRDLAVEDAGEYLCVCGQEKTSATLSVKALPPRFIEDLRSQEATEGTMATLRCQ
MSKAAPVEWRKGSKTLRDGDYSLRQDGA MCELQICDLAVEDTGDYSCVCGQEKTSATLSVKAPQVVFQQPLQ
NLQAEEGSMASLRCELSVNAAMVWSKGGLELQGDTRREARQQGCVAELLLRDLRREDAGEY SCTCGSQTTSA
TLMVTAAPVRFRLRELQAQDVDEGATARLRCELSREAVSVEWRKGS LQLFPCA KYQMVQEGTTAELLVHGVEQE
DAGEYTC DAGHTQSIARLSVRAPKPKFKTDLQSTEQEAGGTARLCCQLSEAE PGTPVQWLKEGVELHVGSKYE
MRRQGA VCELLIHGLEAKDTGEYACL VGGQKT LASLRVKEPEVTIVRGLVDMEVQAEDVEFTCKV SQAGATD
VQWHLQGLPLQSNEVTEVA VLADGCTHVLQLKGV TLEDAGTVSFHVGG LSSSAQLTVRVPEVTVLEPLKDVQL
SEGQDAHFRCRLSRASGQEARWALGGVPLQC NEMNDITVEQGTLYLLTLHKVTLEDAGTITLQVGS CSSEAQL
KVTAKNTVLRGLE NVDALEGG EALFECQLSQPEVA AHTWLLDDEPVHTSEKVEV VYFENGLRH LLLLK NLPKQ
DSCRVTFLAGDVVTS AFLTVRGWRLEVLEPPHDASVKAGMQVRF TCILSEAVPVGEATWYINGAAIQPDDTDW
TVTTD GSHHALT LSNAPQHAGEVTF AARDAVASARLSVLALPDPPEDAEVVGRSDHSV TLSWVAPMSDGGGG
LCGYRVMKEASTGQWQLCHDLVPGPECVVDDLVP GKTYRFRVA AVGPAGAGEPVHLPQMVKIAPAPAPAP
APAPETRQAVVGEDICLELEVAADGGEV VVWHKGT ERIQPGGHFEVLSRGRQMLVIKGFRTEDAGEYRCGPIQ
GLPSSGAATFNVMVMTSGSGDEVPAQPSLPPEAAQEGDLHLLWEALARKRRMSREPTLDSISELPEEDSRVQHL
RQEAETAPDLSEGYSTADELARTGEADLSHTSSDDESRAGT PSLV TYLKKAGGPGISPLASKHEAQVTT SVK
PQKQQEPVVPTCPPPGDL SAADLMDPSLDKAAVKIQAAF KGYKVRKEMKQQEGPVFSRTFGDTEAQVGDVLR
ECVLATKTKDMRACWLKDGIELTDGRHYHIDQLKDG TCSLLVTGLAPTDSGRYTCQVSTKSGRVSHSACVVVSG
TESEAE SSSGGELDDAFRRAARLHRLFR TKSPAELSEEEFLSADEGPGEP EEPADWQTYRE DENFVCIRFE
SLAEARQAVTCFRNMFATMGI GVEISLGEQGP RGVEMRIGKVAPTVTPAVPLAKTPGLQTS DAAPVFLTELQN
QDVQDGYPMSFDCVVGTGQVPVSVRWFKDGK LLEEDDHYMINEDQQGGHQLIITAVVPADMGVYRCLAENSMGV
SSTKAELRVELTSTDYDTAADATETSSYFSAQGYLSSREGETSEDEGQLPQVLEELKDLQVAPGTR LAKFQL
KVKGYPA PKLYWFKDGQPLTSDHIRMTDKKTLHTLEIVSVTREDSGQYAA YISNAVGAAYSSARLLVVRGPSE
PEEKPASDVHERLVP PPRILEKFTPKKVKRGS SITFSVKVEGHPAPSVH WLKEEA EKGV LWIGPDP TPGYTMAS
SKQHSVLVLLDVG RQHQT YTCIATNPAGQALCSASLHISGLAKEEEQERVKEALISSFLQGT SQAVSAQMSES
AGFADLVGQSKGESLVAAEAHSHLSLAEVGT EEFLOKLT SQITEMVSAKISQAKLQVPGGDSDEETKTPSASP
RHGRSRPSSSVQESSSESEDGDSRGEIFDIYVVTADYLP LGAEQDAIILREGQYVEVLDSAHPLR LVR TKPT
KSSPSRQGWVSPAYLDKRLKLSPEWGPTEAPEFPGEAVSEDEYRTR LSSVIQELLSSEQAFV GELQFLESHM
KHLERSPRVPAAVASQKTVIFRNVQDISHFHSSFLKELQCGCTDDDVAMCFIKNQEA FEKYLEFLVGRVQAES
VVVSTPVQEFYKKYAEETLSAKDPTQPPPPPLQHYLEQPVERVQKYQALLKELIRNKARNRQNCALLEQAYAV
VSALPQRAENKHLVSLMENYPGTLEALGEP I RQGHFIVWEGAPGARMPWKGHNRHVFLFRNYLVIC KPRRDSR
TDTFSYVFRNMMK LSSIDLNDQVEGD DRAFEVWHEREDSVRKYLLQARTVI IKNSWVKEICGIQQRLAQPVWR
PPEFEEELADCTAELGETVKLACRV TGT PKPIVSWYKDGK PVEVDPHHILIEDPDG SCTLILDNL TGIDSGQY
MCF AASAAGNASTLGKILVQVPPRFV NKVRATPFVEGEDAQITCTVEGAPYPQIRWYKDG TLLAPGNRYRMLN
EPRSGVLV LVIQAASKEDLGHYEC ELVNR LGSTRGGGEL YMQSPALRARDQHHREQIVA AVEVTEQETKVPKK
TVIEETITTVVKSPRGRRQSPGKSPSRSPRRSASPRRPGLLAPERLYPPGTSPSRRLEVEQGRKAPVPALY
VTEAEVHAPASQS QPKWLEVEETIEVRVKKTGSRGASPVREMTSRGEGILFTLPGGIPGRDPNANN SNNKSVY
QEARTWGP AVVHVGE PFI FQVDSVGNVDWVAASPEPEQVRASQKEENTERQEGCSDG DENTFLMEEPQD TDSL
QGRDPKILTHNGRVLT LADLEDYVPQEGETF GCGDSTPSTPDEPPCEVSVLQREI SEPTV GQPVLLNVGRPPG
TGATPSFFRPGSQVHSPESV SFLLEAWSGPVS AAPWTSSFH THVQSSVDGSHG SFKTEVSTQTVSFGAVGET
VTLHIDPDGGEAPGPSQ\*

>rs49663840\_ENSMUSP00000158795\_c.12262:G>T\_p.S4088I
ENSMUST00000238536.2|Obscn-210|ENSMUSG00000061462|-|chr11:g.58953592:C>A
MDHSFSGAPRFLTRPKAFVSVGKDATLSCQIVGNPTPHVSWEKDRQPV EAGARFRLAQDGDVYRLTILDLAL
GDSGQYVCRARNAIGEAFAAVGLRVDSEGTC AEQAPHLLRPTSIRVREGADATFRCRVGGSPQPAVSWSKDG
RRLGPPDAPHVRVEEHGESSALRIRSARPRDGGTYEVRAENPLGSASAAAALVVDSDAEVAGPPGTSTATLLA
HLQQRRREAMRAEGIPPSPPGAGTRTCTVTEGKHARLSCFVTGEPKPE TVWKKDGQLVTEGRRHVVEDEQENF
VLKILFCKQSDRGLYTCTASNLVGQTYSSVLVVVREPTVPFKKRLQDLEVREKESATFQCEVAQ PATEAAWFK
EETRLWASAKYDIEEGETERRLTVRNVSADDAVYICETTEGSR TVALSVQGNLTKRLPRKTAVRTGD TAI F
WVELAVPEGPVRWLRNQEEMVAGGRVAITAEGTCHTLTIFQCTLED MGEVAFVSGGCRTTTFQCVSAPRRPPL
YPPADPVVKAKTESVTL SWSAPPHGDRPVTIDGYVLEK RKLGA YAWSRCHEAGWLATTEFTITGV AEEGDFQ
FRVSAINHFGQGPYLEFP GTMHLVPM LAVKTP LKAVEAVEGGEVTF SVDLTVASSGEWFLDGEALKASSIYVI
RCDRTRHMLTIREV PARLHGAQLK FVANGIETS IQMVVRAALGLPSSKLPAAAAREVLAQLHEEAQLLAE LSD
QAAAVTWLKDGRELSLGP KYEMQVSAGRRALLVRDVAQDDAGLYECVSRGSR TAYQLLVQDITDGYRDWGPAG



PQKHMCKCAGAKIARYLGSSCYRFLQYDKGVWHLEAALDTRQGKGTSSCSLHEKPKLVFAKGQQAHSVEKAE  
 AGNSATLSCEVTQAQTEVTFWKDGKLLSSSSKVRMEASGCSRRLVVQQAGKADAGEYSCEAGGQKLSFRLDVA  
 EPKLVFAKGQQAHSVEKAEAGASATLSCEVAQAQTEVTFWKDGKLLSSSSKVRMEASGCSRRLVVQQAGKADA  
 GEYSCEAGGQKLSFRLDVAEPKMFVFAKEQQARSEVKAEGASATLSCEVAQAQTEVTFWKDGKLLSSSSKVRM  
 EASGCSRRLVVQQAGKADAGEYSCEAGGQKLSFRLDVTEPKLVFAKEQQARSEVKAEVGNSATLSCEVAQAQ  
 EVTFWKDGKLLSSSSKVRMEASGCSRRLVVQQAGKADAGEYSCEAGGQKLSFRLDVAEPKLVFAKEQQARSEV  
 KAEAGNSATLSCEVAQAQTEVTFWKDGKLLSSSSKVRMEASGCSRRLVVQQAGKADAGEYSCEAGGQKLSFHL  
 DVTEPKLVFAKEQQAHSEVKAEGASATLSCEVAQAQTEVTFWKDGKLLSSSSKVRMEASGCSRRLVVQQAGK  
 ADAGEYSCEAGGQKLSFRLDVAEPKLVFAKEQQARSEVKAEGASATLSCEVAQAQTEVTFWKDGKLLSSSSK  
 VRVEASGCSRRLVVQQAGKADAGEYSCEAGGQKLSFRLDVAEPKLVFAKEQQANSEVKAEGASATLSCEVAQ  
 AQTEVTFWKDGKLLSSSSKVRVEASGCSRRLVVQQAGKADAGEYSCEAGGQKLSFRLDVAEPKLAFAKEQQA  
 SEVKAEGASATLSCEVAQAQTEVTFWKDGKLLSSSSKVRVEASGCSRRLVVQQAGKADAGEYSCEAGGQKLS  
 FRLDVAEPKLAFAKEQQAHSVEKAEAGASATLSCEVAQAQTEVTFWKDGKLLSSSSKVRVEASGCSRRLVVQ  
 AGKADAGEYSCEAGGQKLSFRLDVAEPKLAFAKEQQAHSVEKAEAGASATLSCEVAQAQTEVTFWKDGKLLSS  
 SSKVRVEASGCSRRLVVQQAGKADAGEYSCEAGGQKLFRLDVAEPKLMFAKEQQAHSVEKAEAGASATLSCE  
 VAQAQTEVTFWKDGKLLSSSSKVRVEASGCSRRLVVQQAGKADAGEYSCEAGGQKLSFRLDVAEPKLVFAKEQ  
 QAHSVEKAEAGASATLSCEVAQAQTEVTFWKDGKLLSSSSKVRVEASGCSRRLVVQQAGKADAGEYSCEARGQ  
 KLSFRLDVADTRLMFAKEQQAHSVEKAEAGNSATLSCEVAQAQTEVTFWKDGKLLSSSSKVRVEASGCSRRLV  
 VQQAGKADAGEYSCEAGGQKLSFRLDVAEAEESQIPERPSRREPLVVKEHETIILTATIAAPSVAAVTWLKDG  
 EIRRSKRHEATSLGDTHTLTVRGAQVLDIAIYSCRVGKEGQDFPVQVEEVAAKFSKPLEPVEGELGGTVMLVC  
 ELSPEQAEVWRCGNTQLRPGKRFQMTSEGRRTTLVSGLEDDAEYVCESTRDDRTSARLTVKVPVVKFTS  
 GLSAMVAEEGQEQATFQCVVSPSDAGVTWYKDGMLQPSKFKVMVESGASRSLTILGLTLEDAGQVTVAEAGAS  
 SSAALRVREAPVFLFKKLEPQTVERTSVTLEVELTRPWPEVKWTRNAAVLTPSENVEIRAEGARHCLVLRV  
 GFADRGGFFGCETPDDKTQAKLNVEMRQVRLVVRGLQVEVEAKEQGTASMDVELSHAEVEGSWTRDGLRQLQPGPK  
 HLAVQGPVHILTLALSALQPDQSGLVAFRAEGVHTSARLIVTELPVSTFRVLQDVVATQKEKVTLECELSRPV  
 RVLKDGVELRAGKAIGIVAQGTCSRSLVIYRCETGDKQGVVCDALDAQTSASLRVQGRVYTLIFRVLAEADAGE  
 VKFVAENAESRAHLRKLPTVLLRPLRDKIAMEKHRGVLEQVSRASAQVRWFKGGVELQSGPKYEVVSDGL  
 YRKLVINVDQPEDEDTYTCDAENVKTSAQFFVEEQSITIVRGLKDMTVMPEPAPAWFECETSIPSVRPPKWL  
 LKTVLQAGGNVGLQDGTVHRLTLHKTCSTMTGPVHFTIGKSRSSAQLVSDIPVVLTRPLEPKAGRELQSVVL  
 SCDFRPAPKAVQWYKDDTPLSPSEKFKMALEGQMAELRILRLTPADAGVYRCQAGSAQSSAEVTVAREVTVI  
 QPLQDAEAMEEGRVCFSCELSHKDEDIEWSLNGTPLYNDSFHEISHEGCLHTLVLSVRQADTGTVCATSPKV  
 SVSARLVVKGKPVVFLKALDDVSAEERGTTLTQCEVSDPEARVVWRKDGVELGPSDKYDFLHKAGARGLTVHD  
 LSHEDAGLYTCQVGSKETQSKVSVHDLHVGITKRLKTVEVLEGESECSFECVLSHESPSDPAVWTVGGKTVGGS  
 GHFHAVRQGRKYTLTVKDAALSDAGEVVFVGLTSLKASLIIRERPVDITKPLEDQRTTLGEDVMLSCELSRA  
 GTSVRWLKDGKAIKRSKYDLSSEGTRAVLVVRKASLKDSEYTCETEASKSTAKLCEVEKANRFTBELADLQ  
 VEEKGRAVFTCKTEHPASVVTWRKGLLELRASGKHVPSQEGTLTKLTINALERTSDSTYTCDIGQARTQARLL  
 VHGGKVRVIEDLEDTAVQEGSSAKFCCRIAPADYGPVHWFLLDKTPLHSNELNEITVQPGGYHVLTRQLALKD  
 SGTVYFEAGDQRTSAAALRVTEKPSIFSRPLTDVTVTEGEDTLVCEETTVDSSVRWTKDGKTLRPSARCQLSH  
 EGCQAQLLITATTPQDGGRYKCEIGGASSSSIVRVHALPVRFRESLKDVEVPEGKAATLRCVLSVAAPVEWR  
 HGDDVLKSSNKYSLRQEGAVLELVIRDLQPDQSGQYSCSFGDQTTSATLTVKTSQAQFVGLKRNKEATEGTTV  
 TLRCELTKEAPVEWKKGTETLRNGDKYSLKQDGAVCELQICSLLVADAGEYSCVCGQEKT SATLTVKALLVHF  
 VRRLSKEATEGDTTLQCELSKAAPVEWRKGTETLRDGDYSLKQDGAVCELQIRSLTIADAGEYLCTCGQE  
 KTSATLTVRALPAKFKDSLKNEEATEGTTATLSCELSKAAPVWKKGPKTLQSGDKYVLRQDGAVCGLQIHGL  
 TMADAGEYSCVCGQEKT SATLTVRGLPAKFIEDLRSQEATEGATAILRCELSKAAPVEWRKGSSETLKDGDYR  
 LRQDGAVCELQIRGLAVVDGTYSLSLPTKFTTEGLRNEEATEGTMATLRCQMSKAAPVEWRKGSSETLRDGDYR  
 LRQDGAMCELQIRGLTIEDSGEYTCVCGQEKT SATLSVKALPSRFIEDLRSQEATEGTMATLRCQMSKTAPVE  
 WKKGSETLRDGGYSLRQDGPVCELQICDLAVEDAGEYSCVCGQEKT SATLSIKALPPRFIEDLRSQEATEG  
 MATLRCQMSKAAPVEWRKGSSETLGDGGYSLRQNGAVCELQIHDLAVEDTGEYSCVCGQEKT SATLNVKALPP  
 RFIEDLRSQEATEGTMATLRCQMSKAAPVEWRKGSSETLRDGGYSLRQDGAVCELQIHDLVEDAGQYSCVCG  
 QEKTSAVLTVDALPPKFTTEGLKKEEATEGTMVTLRCQMSKEATVEWRKGAKTLSDGGRYSLRQDGAMCELQIC  
 GLAVEDAGEYSCVCGQEKT SATLSVKALPPRFIEDLRSQEATEGTMATLRCQMSKAAPVEWRKGSSETLRDGD  
 YSLRQDGAVCELQIRDLAVEDAGEYLCVCGQEKT SATLSVKALPPRFIEDLRSQEATEGTMATLRCQMSKAAP  
 VEWRKGSSETLRDGDYSLRQDGAMCELQICDLAVEDTGDYSCVCGQEKT SATLSVKALPPRFIEDLRSQEARE  
 GTVATLRCRMSKAAPVEWRKGSSETLKDGDYSLRQEGNLCELQIRDLAVEDTEEYSCVCGQEKT SATLSVKAL  
 PAKFIEDLRSQEAPESSTVTLRCKLSKASVWVWKKGSETLRNGARYSLRQDGAVCELEIRDLTVEEDTGEYSCT  
 CGQERTSATLSIMAPQVVFQQLQNLQAEEGSMASLRCELSVPNAAMVWSKGGLELQGDTRREARQQGCVAEL  
 LLRDLRREDAGEYSCVCGQTTSATLMVTAAPVRFLELQAQDVDEGATARLRCELSREAVSVEWRKGSLLQF  
 PCAKYQMVQEGTTAELLVHGVEQEDAGEYTCDAHTQSIARLSVRAPKPKFKTDLQSTEQEAAGGTARLCCQLS

EAEPGTPVQWLKEGVELHVGSKYEMRRQGAUCELLIHGLEAKDTGEYACLVGGQKTLASLRVKEPEVTIVRGL  
VDMEVQADEDEFTCKVSOAGATDVQWHLQGLPLQSNVTEVAVLADGCTHVLQKGVTLLEDAGTVSFHVGGL  
SSSAQLTVRVPEVTVLEPLKDVQLESEGQDAHFRCRLSRASGQEARWALGGVPLQCNEMNDITVEQGTLYLLTL  
HKVTLEDAGTITLQVGSCSSEAQLKVTAKNTVLRGLENVDALLEGGEALFECQLSQPEVAHAHTWLLDDEPVHTS  
EKVEVVYFENGLRHLLLLKNLKPQDSCRVTFLAGDVVTS AFLTVRGWRLEVLEPPHDASVKAGMQVRFCTILS  
EAVPVGEATWYINGAAIQPDDTDWTVTTDGSHHALTLSNAQPQHAGEVTF AARDAVASARLSVLALPDPPEDA  
EUVGRSDHSVTLSSWVAPMSDGGGGLCGYRVEMKEASTGQWQLCHDLVPGPECVDDLVPGKTYRFRVAAVGPA  
GAGEPVHLPMVKIAPAPAPAPAPAPAPAPAPETRQAVVMGEDICILELEVAADGGGEVVWHKGTERRIQPGGHFEVLS  
RGQRMLVIKGFRTEDQGEYRCGPIQGLPSSGAATFNVMVMTSGSGDEVPAQPSLPPEAAQEGDLHLLWEALAR  
KRRMSREPTLDSISELPEEDSRVQHLRQEAEEETAPDLSEGYSTADELARTGEADLSHTSSDDESAGTPSLVT  
YLKAGGPGISPLASKHEAQVTTSVKPKQKQEPVVPTCPPPGDLSAADLMDPSLDKAAVKIQAAPFKYKVRKE  
MKQQEGPVFSRTFGDTEAQVGDVLRLECVLATKTD MRACWLKDGIELTDGRHYHIDQLKDGTCSSLVTLGLAPT  
DSGRYTCQVSTKSGRVSHSACVVVSGTESEAESSSGGELDDAFRAARRLHRLFRTKSPAELSEEELFLSADE  
GPGEPEEPADWQTYREDENFVCIRFESLAEARQAVTCFRNMFATMGIGVEISLGEQGGPRGVEMRIKGVAPTVT  
PAVPLAKTPGLQTSDAAPVFLTELQNDVQDGYPMSFDCVVTGQPVPVSVRWFKDGKLEEDDHYMINEDQQGG  
HQLIITAVVPADMGVYRCLAENSMGVSSTKAELRVELTSTDYDTAADATETSSYFSAQGYLSSREQEGTESDE  
GQLPQVLEELKDLQVAPGTRLAKFQKLVKGYPAKLYWFKDGGQPLTSDHIRMTDKKTLHTLEIVSVTREDSG  
QYAAIISNAVGAAYSSARLLVRGPSEPEEKPASDVHERLVPPRILEKFTPKKVKRGSSITFSVKVEGHPAPSV  
HWLKEEAKEKGVLWIGPDTPGYTMASSSKQHSVLVLDVGRQHOGTYTCIATNPAGQALCSASLHISGLAKEEEQ  
ERVKEALISSFLQGTSAVSAQMSSESAGFADLVGQSKGESLVAEEAHSHLSLAEVGTTEFLQKLTSTITEMVS  
AKISQAKLQVPGGDSDEETKTPSASPRHGRSRPSSSVQESSSEEDGDSRGEIFDIYVVTADYLP LGAEQDAI  
ILREGQYVEVLD SAHPLRVLVTRKTKSSPSRQGWVSPAYLDRKRLKLSPEWGPTEAPEFPGEAVSEDEYRTRL  
SSVIQELLSSEQAFVQELQFLESHHMKHLERSPRVPAAVASQKTVIFRNVQDISHFHSSFLKELQCGCTDDDDV  
AMCFIKNQEAFAKEYLEFLVGRVQAESVVVSTPVQEFYKKAEEETLSAKDPTQPPPPPLQHYLEQPVERVQKYQ  
ALLKELIRNKARNRNCALLEQAYAVVSALPQRAENKLVSLMENYPGTLEALGEP IROGHFIVWEGAPGARM  
PWKGNHRHVLFRNYLVICKPRRDSRTDFTFSYVFRNMKLLSIDLNDQVEGDDRAFEVWHEREDSVRKYLLQA  
RTVILKNSWVKEICGIIQGLADFLQVWRPPEFEFEEELADCTAELGETVKLACRVTGTPKPIVSWRYKDGKPEVEVDPH  
HILIEDPDGSLTILDLNLTGIDSGQYMCFAASAAGNASTLGKILVQVPPRFVNVKVRATPFVEGEDAQITCTVE  
GAPYPQIRWYKDGTL LLAGPNRYRMLNEPRSGVLV LVIQAASKEDLGHYECELVNRLGSTRGGGELYMQSPALR  
ARDQHHREQIVAAVEDT SVEGSAHSAQDQADQQAASVLWRLLGSEALGSPGDLPNTRQSEPPAFEEAASQIP  
GAASGTPEVSQPGTHKLEQETTSSGSQGWTVPIRVEGTAWPGAGTGQLLLDVHSQVIMETTQRTYVQAPDT  
GVTRAPSMQVTIEDVQVQVGDMAQF DAVIEGHPPPIV TWYKGSTQLTSSARLSQRQDGTYSLVLTDVAPHDA  
GVYTCVANNAGGQV LCKAELLVHGGDKLDAENQVYRRKLSHFYDVQEEIGRGVFGFVKRVQHKGNKMFCAAKF  
IPLRSKTRAQAYQERDILATLGHPLVTGLLDQFETRKTLLI LILELCSSEELLDRLFKKGVVTEAEVKVYIQQL  
VEGLHYLHSHGILHLDIKPPNIMVHPAREDIKICDFGFAQKITPSEPQYSKYGSPFVSP EII EQNPVSEGS  
DIWAMGVI SYLSLTCSPPFAGESDRATLLNVLEGRVSWSSPFLTAHLS EDAKDFIKATLQRTPRARSTSQCLA  
HPWFLKSMPAEEAHFINTKQLKFL LARSRWRSLMSYKSI LVMRSIPELLQGPPDPSPLGVARHLRGEASGAS  
SSSSSSDNELAPFARAKSLPPSPVTHSPLLHPRGFLRPSASLPEETEASMP TADA AVPASQASAGPPASPGCV  
PRHSVISSLFYQQAGEGAERGNTSGAKRHPARRRHLLKGGYIARALPGLREPLMEYSLLEEEAAREEQASLM  
TKTPSFETALRLPSSSVREVPGRSHSLDNPPVTTGPSPEACKEQLLFPSTGLTHETTAKDRGHKEGFLQESV  
PFPMSGDSRPGKQEGSSQDSCRGKPASSCHSELGSGSQEGCGPPSSQSLGSLPPQSLKKE LSTSCGPLFSEQ  
PQAAPFPTQVSPLLGSEKEPQDGS LSEGPVPVPSSSPGSASQVDASLDTEGLSEAGDTCDFTPPPQRPQEQAT  
TRKFSLESRGGYAGVAGYGTFAFGGDAGGMLGQGPLWARMAWAVS QSSEEQDEAATESPQPLES LGPIAEASG  
VPLRTSPSLTPWEEVEQVSLVQIRDLSGDAEAADTISLDISEVDPAYLNLSLDYDIKYL PFEFMI FRRVPKPI  
EQPESPGSETEAGQLADFL EEAAWPWPGE LGLRAGLEITEEPEEPGDLEALLGEEAVGRKRKWSPSRGLFQF  
PGRCLSGEEPVELGLRQRVKASMAHISRILKGRPEGPEREGPPRKKAGLASFRLSGLKGRDQELSDEAVVLGQ  
SVTLACQVLAQPTAQATWSKDGVLLESSGHLLISSTLKNFQLLTI LVVKEEDLGTYTCCVSNPLGTAVTTGVL  
RKAERPSSSPRPEVGE LYKDAVLLVWKPVE SCGPVTVYIVQCCIEGGSWTTLASDISDCCYLTGKLSRGGMYIF  
RTACVSKAGMGPYSSPSEQVLLGGPNHLASEEESRRGRPAQLLPSTKTF AFQMQIRRGFRFSVVRQCREKASGR  
ALAAKIVPYQPEDKTAVLREYEALRHLHHLAQLHAAYLSPRHLVLI LILELCSGPELLPSLAERESYSESDVK  
DYLWQMLSATQYLHAQHILHLDLRSENMMVTEYNLLKVIDLGN AQSLDQEKVPAPENFKDYLETMAPELLEGQ  
GAVPQTDIWAIGVTA FIMLSGEY PESSSEGTRDLQKGLRKLIRLSRCYAGLSGGAVAF LQSSSLCAQPWGRPCA  
STCLQCGWLTEEGTSGSRPTVPTVPTVRLRAFVREKRRALLYKKNLAQVR\*  
>rs49663840\_ENSMUSTP00000038264\_c.11434:G>T\_p.S3812I  
ENSMUST00000047441.14|Obscn-202|ENSMUSG00000061462|-|chr11:g.58953592:c>A  
MDHSFSGAPRFLTRPKAFVSVGKDATLSCQIVGNPTPHVSWEKDRQPV EAGARFRLAQDGDVYRLTILDLAL  
GDSGQYVCRARNAIGEAFAAVGLRVDSEGTCAEQAPHLLRPTSIRVREGADATFRCRVGGSPQPAVSWSKDG  
RRLGPPDAPHVRVEEHGESSALRIRSARPRDGGTYEVRAENPLGSASAAAALVVDSDAEVAGPPGTSTATLLA

HLQQRREAMRAEGIPPSPPGAGTRTCTVTEGKHARLSCFVTGEPKPEVWKKDQGLVTEGRRHVVEDEQENF
VLKILFCKQSDRGLYTCTASNLVGQTYSSVLVVVREPTVPFKKRLQDLEVREKESATFQCEVAQPATEAAWFK
EETRLWASAKYDIEEEGETERRLTVRNVSADDDAVYICETTEGSRVVAELSVQGNLTKRKLPRKTAVRTGDTAIF
WVELAVPEGPVWRWRNQEEMVAGGRVAITAEGTCHTLTI FQCTLEDMGEVAFVSGGCRTTTQFCVSAPRRPPL
YPPADPVVKAKTESVTLWSAPPHGDRPVTIDGYVLEKRLKLGAYAWSRCHEAGWLATTEFTITGVAAEEDGFQ
FRVSAINHFGQGPYLEFPGTMHLVPLAVKTPKAVEAVEGGEVTFVSDLTVASSGEWFLDGEALKASSIYVI
RCDRTRHMLTIREVPARLHGAQLKVFANGIETSIQMVVRAALGLPSSKLPAAAAREVLAQLHHEAQLLAE LSD
QAAAVTWLKDGRELSLGPKYEMQVSAGRRALLVRDVAQDDAGLYECVSRGSRRTAYQLLVQDITDGYRDWGPAG
PQKHMCKCAGAKIARYLGSSCYRFLQYDKGVVHLEAALDTRQGKGTSSCSLHEKPKLVFAKQQAHSSEVKA
AGASATLSCEVAQAQTEVTFWKDGKLLSSSSKVRMEASGCSRRLVVQQAGKADAGEYSCEAGGQKLSFRLDVA
EPKMFVFAKEQQARSEVKAEGASATLSCEVAQAQTEVTFWKDGKLLSSSSKVRMEASGCSRRLVVQQAGKADA
GEYSCEAGGQKLSFRLDVTEPKLVFAKEQQARSEVKAEGVNSATLSCEVAQAQTEVTFWKDGKLLSSSSKVRM
EASGCSRRLVVQQAGKADAGEYSCEAGGQKLSFRLDVAEPKLVFAKEQQARSEVKAEGVNSATLSCEVAQAQ
EVTWTFWKDGKLLSSSSKVRMEASGCSRRLVVQQAGKADAGEYSCEAGGQKLSFHLDVTEPKLVFAKEQQAHSEV
KAEAGASATLSCEVAQAQTEVTFWKDGKLLSSSSKVRMEASGCSRRLVVQQAGKADAGEYSCEAEQKLSFRL
DVAEPKLVFAKEQQARSEVKAEGASATLSCEVAQAQTEVTFWKDGKLLSSSSKVRVEASGCSRRLVVQQAGK
ADAGEYSCEAGGQKLSFRLDVAEPKLVFAKEQQANSEVKAEGASATLSCEVAQAQTEVTFWKDGKLLSSSSK
VRVEASGCSRRLVVQQAGKADAGEYSCEAGGQKLSFRLDVAEPKLAFAKEQQAHSEVKAEGASATLSCEVAQ
AQTEVTFWKDGKLLSSSSKVRVEASGCSRRLVVQQAGKADAGEYSCEAGGQKLSFRLDVAEPKLAFAKEQQAH
SEVKAEGASATLSCEVAQAQTEVTFWKDGKLLSSSSKVRVEASGCSRRLVVQQAGKADAGEYSCEAGGQKLS
FRLDVAEPKLAFAKEQQAHSEVKAEGASATLSCEVAQAQTEVTFWKDGKLLSSSSKVRVEASGCSRRLVVQQ
AGKADAGEYSCEAGGQKLSFRLDVAEPKLVFAKEQQAHSEVKAEGASATLSCEVAQAQTEVTFWKDGKLLSS
SSKVRVEASGCSRRLVVQQVQKADAGEYSCEARGQKLSFRLDVAEAE SQI PERPSRREPLVVKHEHTI I LTAT
IAAPSVAAVTWLKDGV EIRRSKRHEATSLGDTHTLTVRGAQVLD SA IYSCRVGKEGQDFPVQVEEVAAKFSKP
LEPVEGELGGTVMLVCELSPEQAEVWRCNGTQLRPGKRFQMTSEGPRRTLTVSGLREDDAEYVCE SRDDRT
SARLTVKVPVPRVVFSTGLSAMVAEEGQEA TFQCVVSPDAGVTWYKDMQLQ PSEKFMVWESGASRSLTILGL
TLEDAGQVTVEAEGASSAALRVREAPVLFKKKLEPQTVEERTSVTLEVELTRPWPPEVWRKDVLELGPSEN
EIRAEGARHCLVLRVSVGFADRGFFGCETPDDKTQAKLNVEMRQVRLVVRGLQEVEAKEQGTASMDVELSHAEVE
GSWTRDGLRLQPGPKCHLAVQGPVHIL TLSALQPQDSGLVAFRAEGVHTSARLIVTELPVSFTRVLQDVVATQ
KEKVTLECELSRPVDVRWLKDGVELRAGKAI GIVAQGTCSRSLVI YRCETGDQGVYVCDALDAQTSASLRVQGR
TYTLIFRRVLAEDAGEVKFVAENAESRAHLRVKELPVTLLRPLRDKIAMEKHRGVLEQCQVSRASAQVRWFKGG
VELQSGPKYEVVSDGLYRKLVIN DVQPEDEDTYTCDAGNVKTSAQFFVEEQSITIVRGLKDMTVMFPAPAWFE
CETSIPSVRPPKWL LGKTVLQAGGNVGLQDGTVHRLTLHKTCSTMTGPVHFHTIGKSRSSAQLVVS DIPVVL
RPLEPKAGRELQSVVLSCDFRPAKAVQWYKDDTPLSPSEKFKMALEGQMAELRILRLTPADAGVYRCQAGSA
QSSAEVTVAEAREVTVIQPLQDAEAMEEGRVCFSCELSHKDEDIEWSLNGTPLYNDSFHEI SHEGLHTLVLKS
VRQADTGTVCATSPKVSARL VVKGKPVVFLKALDDVSAEERGLTLQCEVSDPEARVWVRKDVLELGP SDK
YDFLHKAGARGLTVHDLSDHEDAGLYTCQVGSKETQSKVSVHDLHVGITKRLKTVEVLEGE SCSFECVLSHESP
SDPAVWTVGGKTVGGSGHFHAVRQGRKYTLTVKDAALSDAGEVVF SVLGLTSKASLIIRERPVDI TKPLEDQR
TTLGEDVMLSCELSRAGTSVRWLKDGKAI RKSQKYDLLSEGTRAVLVVRKASLKDSGEYTCETEASKSTAKLC
VEEKANRFTEELADLQVEEKGRAVFTCKTEHPASVVTWRKGLLELRASGKHVPSQEGTLTKLTINALERTDSD
TYTCDIGQARTQARLLVHGQKVRVIEDLED TAVQEGSSAKFCCR IAPADYGPVHWFLDKTPLHSNELNEITVQ
PGGYHVLT LRQLALKDSGTVYFEAGDQRTSAALRVTEKPSIFSRPLTDVTVTEGEDLTLVCETTTVDSSVRWT
KDGKTLRPSARCQLSHEGCQAQLLITATTPQDGGRYKCEIGGASSSSIVRVHALPVRFRFRESLKDVEVPEGKAA
TLRCVLSVAAPVEWRHGDDVLKSSNKYSLRQEGAVLELVIRDLQPDQSGQYSCSFQDQTT SATLTVKTS SAQ
FVQKLRNKEATEGTTVTLRCEL TKEAPVEWKKGTETLRNGDKYSLKQDGAVCELQICSLLVADAGEYS CVCGQ
EKTSATLTVKALLVHFVRRRLRSKEATEGDTTTLQCELSKAAPVEWRKGTETLRDGD RYSLKQDGAVCELQIRS
LT IADAGEYLCTCGQEKTSATLTVRALPAKFKDSLKNEEATEGTATLSCELSKAAPVTWKKGPKTLQSGDKY
VLRQDGAVCGLQIHGLTMADAGEYSCVCGQEKTSATLTVRGLPAKFIEDLRSQEATEGATAILRCELSKAAPV
EWRKGSETLTKDGD RYTLRQDGAVCELQIRGLAVVDTGTYS SLPTKFT EGLRNEEATEGTMATLRCQMSKAAPV
EWRKGSETLRDGD RYILRQDGAMCELQIRGLTIEDSGEYTCVCGQEKTSATLSVKALPPRFIEDLRSQEATEG
TMATLRCQMSKAAPVEWRKGSETLGDGGRYSLRQNGAVCELQIHDLAVEDTGEYSCVCGQEKTSATLNVKALP
PRFIEDLRSQEATEGTMATLRCQMSKAAPVEWRKGSETLRDGGRYSLRQDGAVCELQIHDL DVEDAGQYSCVC
GQEKTSAVLTVDALPPKFT EGLKKEEATEGTMATLRCQMSKEATVEWRKGAKT LSDGGRYSLRQDGAMCELQI
CGLAVEDAGEYSCVCGQEKTSATLSVKALPPRFIEDLRSQEATEGTMATLRCQMSKAAPVEWRKGSKTLR DGD
RYSLRQDGAMCELQICDLAVEDTGDYSCVCGQEKTSATLSVKAPQVVFQQPLQNLQAEEGSMASLRCELSVPN
AAMVWSKGGLELQGDTRREARQQGCVAELLLRDLRREDAGEYSCTCGSQTT SATLMVTAAPVRFRLRLQAQDV
DEGATARLRCELSREAVSVEWRKGS LQLFPCA KQMVQEGTTAE LLVHGVEQEDAGEYTC DAGHTQS IARLSV
RAPKPKFKTDLQSTEQEAGGTARLCCQLSEAE PGTPVQWLKEGVELHVGSKYEMRRQGAVCELLIHGLEAKDT

GEYACLVGGQKTLASLRVKEPEVTIVRGLVDMEVQADEDEVEFTCKVVSQAGATDVQWHLQGLPLQSNVTEVAV
LADGCTHVLQKGVTLLEDAGTVSFHVGGSSSAQLTVRVPEVTVLEPLKDVQLSEGQDAHFRCRLSRASGQEA
RWALGGVPLQCNEMNDITVEQGTLYLLTLHKVTLLEDAGTITLQVGCSSSEQLKVTAKNVTLRGLNVDALEG
GEALFECQLSQPEVAHAHTWLLDDEPVHTSEKVEVVYFENGLRHLLLLLKNLKPQDSCRVTFLAGDVVTS AFLTV
RALPDPPEDAEVVGRSDHSVTLVWVAPMSDGGGGLCGYRVMKEASTGQWQLCHDLVPGPECVVDLVP GKTY
RFRVAAVGPAGAGEPVHLPQMVKIAPAPAPAPAPAPAPAPETRQAVVGEDICLELEVAADGGVEVWHKGTERRI
QPGGHFEVLSRGQRQMLVIKGFRTEDQGEYRCGPIQGLPSSGAATFNVMVMTSGSGDEVPAQPSLPPEAAQEGD
LHLLWEALARKRRMSREPTLDSISELPEEDSRVQHLRQEAEETAPDLSEGYSTADELARTGEADLSHTSSDDE
SRAGTPSLVTYLLKAGGPGISPLASKHEAQVTTSVKPKQKQEPVVPTCPPGDL SAADLMDPSLDKAAVKIQA
AFKGYKVRKEMKQOEGPVFSRTFGDTEAQVGDVLRLECVLATKTKDMRACWLKDGIELTDGRHYHIDQLKDGTC
SLLVTGLAPTDSGRYTCQVSTKSGRVSHSACVVVSGTESEAESSSGGELDDAFRRAARRLHRLFRTKSPAELS
EEELFLSADEGPEPEPADWQTYREDENFVCIRFESLAEARQAVTCFRNMFATMGIGVEISLGEQGRGVEM
RIGKVAPTVT PAVPLAKT PGLQTS DAAPVFLTELQNDVQDGYPMSFDCVVTGQPVPSVRWFKDGKLL EEDDH
YMINEDQQGGHQLIITAVVPADMGVYRCLAENSMGVSSTKAELRVELTSTDYDTAADATETSSYFSAQGYLSS
REQEGTESDEGQLPQVLEELKDLQVAPGTRLAKFQLKVKGYPAPKLYWFKDGOPLTSSDHIRM TDKKT LH TLE
IVSVTREDSGQYAAIYI SNAVGAAYSSARLLVVRGPEPEEK PASDVHERLVPPRI LEKFTPKKVKRGS S ITFSV
KVEGHPAPSVHWLKEEA EKQVLWIGPDTPGYTMASSSKQHS LVLVDVGRQHOGTYTCIATNPAGQALCSASLH
ISGLAKEEEEQERVKEALISSFLQGT SQAVSAQMSSESAGFADLVGQSKGESLVAAEEAHSHLSLAEVGT EEF LQK
LTSQITEMVSAKISQAKLQVPGGDSDEETKTPSASPRHGRSRPSSSVQESSSESEDEGDSRGEIFDIYVVTADY
LPLGAEQDAIILREGQYVEVLD SAHPLRWLVRTKPTKSSPSRQGWVSPAYLDKRLKLSPEWGPTEAPEFPGEA
VSEDEYRTRLSSVIQELLSSEQAFVGE LQFLESHHMKHLERSPRVPAAVASQKTVI FRNVQDISHFHSFLKE
LQCGGTDDDVAMCFIKNQEA FEKYLEFLVGRVQAESVVVSTPVQEFYKKYAEETLSAKDPTQPPPP LQHYLE
QPVERVQKYQALLKELIRNKARNRQNCALLEQAYAVVSALPQRAENKLHVSLMENYPGTLEALGEP I RQGHFI
VWEGAPGARM PWKGNHRHVF LFRNYLVICKPRRDSRTDTFSYVFRNMMKLSSIDLNDQVEGDDRAFEVWHERE
DSVRKYLLOARTVI IKNWVKEICGIQORLAQPVWRPPEFEELADCTAELGETVKLACRVTGT PKPIVSWYK
DGKPVVEVDPHHILIEDPDGSC TLIIDLNLTGIDSGYMCFAASAAGNASTLGKILVQVPRFVNKVRATPFVEG
EDAQITCTVEGAPYQPIRWYKDGTL LAPGNRYRMLNEPRSGV LVLVIQAASKEDLGHYECELVNRLGSTRGGG
ELYMQSPALRARDQHREQIIVA AVEGAPSMQVTIEDVQVQVGDMAQF DAVIEGHPPP I V TWYKGTQLTSSAR
LSQRQDGT TYSLVLT DVAPHDAGVYTCVANNAGQV LCKAELLVHGGDKLDAENQVYRRKLHSFYDVQEEIGR
GVFGFVKRVQHKGNMFC AAKFIPLRSKTRAQAYQERDILATLGHP LV TGLLDQFETRKT LILILELCSSEEL
LDRLFKKGVVTEAEVKVYIQQLVEGLHYLHSHGILHLDIKPPNI LMVHPAREDIKICDFGFAQKI TPSEPOYS
KYGSPFVVSPEIIEQNPVSEGS DIWAMGVI SYLSLTCSSPFAGESDRATLLNVLEGRVSWSSPTAAHLS EDAK
DFIKATLQRTPRARPSTSQC LAHPWFLKSMPAEEAHFINTKQLKFL LARSRWQRSLMSYKSI LVMRSIPELLQ
GPPDSPSLGVARHLRGEASGASSSSSSSDNELAPFARAKSLPPSPVTHSPLLHPRGFLRPSASLP EETEASMP
TADAAVPASPQASAGPPASPGCVPRHSV ISSLFYQQAGEGAERGNKTS GAKRHPARRRHLLKGGYIARALPGLR
EPLMEYSLLEEEAAREEQASLMTKTPSFETALR LPPSSSVREVPGRSHSLDNPPVTTGPGSPEACKQLLFPST
GLTHETTAADRKHKEGFLQESVFPFPMMSGDSRPGKQEGSSQDSCRGKPASSCHSELGSGSQEGCGPSSQSLG
SLPPQSLKKELESTSCGPLFSEQPQAAPFPTQVSPLLGSEKEPQDGSLSSEGVPVPSSSPGSASQVDASLDTEG
LSEAGDTCDFTPPPQRPEQATTRKFSLESRGGYAGVAGYGTFAFGGDAGGMLGQGPLWARMWAVS QSSEEQ
DEAATESPQPLESGLPIAEASGVPLRTSPSLTPWEEVEQVSLVQIRDLSGDAEAADTISLDISEVDPAYLNL S
DLYDIKYL PFEFMI FRRVPKPIEQPESPGSETEAGQGLADFL EEAAPWPWGPGLGLRAGLEITEEPEEPGDLEA
LLGEAAVGRKRKWSPSRGLFQFPGRCLSGEEPVELGLRQRVKASMAHISRILKGRPEGPEREGPPRKKAGLAS
FRLSGLKGRDQELSDEAVVLGQSVTLACQVLAQPTAQTATWSKDGVLLES SGHLLISSTLKNFQLL TILVVKEE
DLGTYTCCVSNPLGTAVTTGVLKRAERPSSSPRPEVVELGYKDAVLLVWKPVESCGPVTYIVQCCIEGGSWTTL
ASDISDCCYLTKLSRGGMYIFRTACVSKAGMPYSSPSEQVLLGGPNHLASEEESSRGRPAQLL PSTKTFFAF
QMQIRRGRFVSVRQCREKASGRALAAKIVPYQPEDKTA VLREYEALKRLLHHPHLAQLHAAYLS PRHLV LILEL
CSGPELLPSLAERESYSES DVKDYLWQMSATQYLHAQHILHLDLRSENMMVTEYNLLKVIDLGNAQSLDQEK
VPAPENFKDYLETMAPELLEGQAVPQTDIWAIGVTA FIMLSGEY PESSSEGTRDLQKGLRKLIRLSRCYAGL
SGGAVAFLLQSSSLCAQPWGRPCASTCLQCGWLTEEGPTGSRPTPVTFTVRLRAFVREKRRALLYKKNH LAQ
VR\*

>rs49663840\_ENSMUSP00000049737\_c.12061:G>T\_p.S4021I
ENSMUST00000052872.15|Obscn-203|ENSMUSP00000061462|-|chr11:g.58953592:C>A
MDHSFSGAPRFLTRPKAFVVSVGKDATLSCQIVGNPTPHVSWEKDRQPV EAGARFRLAQDGDVYRLTILDAL
GDSGQYVCRARNAIKEAFAAVGLRVDSEGTCAGEQAPHFLLRPTSIRVREGADATFRCRVGGSPPAVSWSKDG
RRLGPPDAPHVRVEEHGESSALRIRSARPRDGGTYEVRAENPLGSASAAAALVVDSAEVAGPPGTSTATLLA
HLQORREAMRAEGIPPSPPGAGTRTCTVTEGKHARLSCFVTGEPKPEVWKKDGQLVTEGRRHVVEDEQENF
VLKILFCKQSDRGLYTCTASNLVGQTYSSVLVVVREPTVPFKKRLQDLEVREKESATFQCEVAQPA TEAAWFK
EETRLWASAKYDIEEGETERRLTVRNVSADDDAVYICETTEGSRVVAELSVQGNLTRKLPKRTAVRTGDTAIF

WVELAVPEGPVRWLRNQEEMVAGGRVAITAEGTCHTLTI FQCTLEDMGEVAFVSGGCRTTTQFCVSA PRRPPL  
YPPADPVVKAKTESSVTL SWSAPPHGDRPVTIDGYVLEKRKLGAYAWSRCHEAGWLATTEFTITGVAAEEGDFQ  
FRVSA INHFGQGPYLEFPGTMHLVPLAVKTPKAVEAVEGGEVTFVSDLTVASSGEWFLDGEALKASSIYVI  
RCDRTRHMLTIREV PARLHGAQLKFVANGIETSIQMVVRAALGLPSSKLPAAAAREVLAQLHEEAQLLAE LSD  
QAAAVTWLKDGRELSLGPKEYMQVSAGRRALLVRDVAQDDAGLYECVSRGSR TAYQLLVQEPKLVFAKGOQAH  
SEVKAEAGNSATLSCEVTQAQTEVTWFKDGKLLSSSSKVRMEASGCSRRLVVQQAGKADAGEYSCEAGGQKLS  
FRLDVAEPKLVFAKGOQAHSEVKAEAGASATLSCEVAQAQTEVTWFKDGKLLSSSSKVRMEASGCSRRLVVQQ  
AGKADAGEYSCEAGGQKLSFRLDVAEPKMFVFAKEQQARSEVKAEAGASATLSCEVAQAQTEVTWFKDGKLLSS  
SSKVRMEASGCSRRLVVQQAGKADAGEYSCEAGGQKLSFRLDVTEPKLVFAKEQQARSEVKAEVGN SATLSCE  
VAQAQTEVTWFKDGKLLSSSSKVRMEASGCSRRLVVQQAGKADAGEYSCEAGGQKLSFRLDVAEPKLVFAKEQ  
QARSEVKAEAGNSATLSCEVAQAQTEVTWFKDGKLLSSSSKVRMEASGCSRRLVVQQAGKADAGEYSCEAGGQ  
KLSFHLDVTEPKLVFAKEQQAHSEVKAEAGASATLSCEVAQAQTEVTWFKDGKLLSSSSKVRMEASGCSRRLV  
VQQAGKADAGEYSCEAGGQKLSFRLDVAEPKLVFAKEQQARSEVKAEAGASATLSCEVAQAQTEVTWFKDGK  
LSSSSKVRVEASGCSRRLVVQQAGKADAGEYSCEAGGQKLSFRLDVAEPKLVFAKEQQANSEVKAEAGASATL  
SCEVAQAQTEVTWFKDGKLLSSSSKVRVEASGCSRRLVVQQAGKADAGEYSCEAGGQKLSFRLDVAEPKLAFA  
KEQQAHSEVKAEAGASATLSCEVAQAQTEVTWFKDGKLLSSSSKVRVEASGCSRRLVVQQAGKADAGEYSCEA  
GGQKLSFRLDVAEPKLAFAKEQQAHSEVKAEAGASATLSCEVAQAQTEVTWFKDGKLLSSSSKVRVEASGCSR  
RLVVQQAGKADAGEYSCEAGGQKLSFRLDVAEPKLAFAKEQQAHSEVKAEAGASATLSCEVAQAQTEVTWFKD  
GKLLSSSSKVRVEASGCSRRLVVQQAGKADAGEYSCEAGGQKLFRLDVAEPKLMFAKEQQAHSEVKAEAGAS  
ATLSCEVAQAQTEVTWFKDGKLLSSSSKVRVEASGCSRRLVVQQAGKADAGEYSCEAGGQKLSFRLDVAEPK  
VFAKEQQAHSEVKAEAGASATLSCEVAQAQTEVTWFKDGKLLSSSSKVRVEASGCSRRLVVQQV GKADAGEYS  
CEARGQKLSFRLDVADTRLMFAKEQQARTEVKAEAGNSATLSCEVAQAQTEVTWFKDGKLLSSSSKVRVEASG  
CSRRLVVQQAGKADAGEYSCEAGGQKLSFRLDVAEAE SQI PERPSRREPLVVKEHETIILTATIAAPSVAAVT  
WLKDGVEIRRSKRHEATS LGDTHLTVRGAQVLD SAIYSCRVGKEGQDFPVQVEEVA AKFSKPLEPVEGELGG  
TVMLVCELSPEQAEVWRCGNTQLRPGKRFQMTSEGPRTLT VSGLREDDAE EYVCE SRDDRTSARLTVKVPR  
VVKFTSGLSAMVAEEGQEATFQC VVSPSDAGVTSYKDGMLQPSEK FVMVESGASRSLTILGLTLEDAGQVTV  
EAE GASSAALRVREAPVLFK KLEPQTVEERTSVTLLEVELTRPWEVVKWTRNAAVLTPSENVEIRAEAGRHC  
LVLR SVGFADR GFFGCETPDDKTQAKLNVEMRQVRLV RGLQEVEAKEQGTASMDVELSHAEVEG SWTRDGLRL  
QPGPKCHLAVQGPVHIL TLSALQPQDSGLVAFRAEGVHTSARLIVTELPVSFTRVLQDVVATQKEKVTLECEL  
SRPVDVRWLKDGVELRAGKAIGIVAQGTCSRSLVIYRCETGDQGVYVCDALDAQTSASLRVQGRTYTLIFRRL  
AEDAGEV KFVAENAESRAHLRVKELPVTLLRPLRDKIAMEKH RGVLE CQVSRASAQVRWFKGGVELQSGPKYE  
VVS DGLYRKLVIN DVQPEDEDTYTC DAGNVKTS AQFFV EEQSITIVRGLKDMTVME PAPA WFE CETSIPSVRP  
PKWLLGKTVLQAGGNV GLEQDGT VHRLTLHKTCSTMTGPVHFTI GKSRS SAQLVVS DI PVVLRPLEPKAGRE  
LQSVVLSCDFRPA PKAVQWYKDDTPLSPSEKFKMALEGQMAELRILRLTPADAGVYRCQAGSAQSSAEVTV EA  
REVTVIQPLQDAEAMEEGRVCFSC ELSHKDEI EWSLNGTPLYNDSFHEI SHEGLHTLVLKSVRQADTGTVC  
ATSPKVS SARLVVKGKPVVFLKALDDVSAEERGLTLTQCEVSDPEARVVWRKDGVELGPSDKYDFLHKAGAR  
GLTVHDL SHEDAGLYTCQVGSKETQSKVSVHDLHVGITKRLKTVEVLEGE SCSFECVLSHESPSDPAVWTVGG  
KTVGGSGHFHAVRQGRKYTLTVKDAALSDAGEV VFSVLGLTSKASLIIRERPVDITKPLEDQRTTLGEDVMLS  
CELSRAGTSVRWLKDGKAIRKSQKYDLLSEGTRAVLVVRKASLKDSGEYTCETEASKSTAKLCVEEKANR FTE  
ELADLQVEEKGRAVFTCKTEHPASVVTWRKGLLELRASGKHVPSQEGTLKLTINALERTDSDTYTCDIGQAR  
TQARLLVHGQKVRVIEDLED TAVQEGSSAKFCCRIAPADYGPVHWF LDKTPLHSNELNEITVQPGGYHVLT LR  
QLALKDSGTVYFEAGDQRTS AALRVTEKPSIFSRPLTDVTVTEGEDLTLVCETTTVDSSVRWTKDGKTLRPSA  
RCQLSHEGCAQLLITATTPQDGGRYKCEIGGASSSSIVRVHALPVRFRFRESLKDVEVPEGKAATLR CVLSSVA  
APVEWRHGDDVLKSSNKYSLRQEGAVLELVIRDLQPDQSGQYSCSFGDQTT SATLTVKTS SAQFVGKLRNKEA  
TEGTTVTLRCELTK EAPVEWKKGTETLRNGDKYSLKQDGAVCELQICSLLVADAGEYSCVCGQEKTSATLTVK  
ALLVHFVRRLRSKEATEGDTTTLQCELSKAAPVEWRKGTETLRDGD RYSLKQDGAVCELQIRSLTIADAGEYL  
CTCGQEKTSATLTVRALPAKFKDSLKNEEATEGTTATLSCELSKAAPVTWKKGPKTLQSGDKYVLRQDGAVCG  
LQIHGLTMADAGEYSCVCGQEKTSATLTVRGLPAKFIEDLRSQEATEGATAILRCELSKAAPVEWRK GSETLK  
DGD RYTLRQDGAVCELQIRGLAVDGTYS SLPKTFTEGLRNEEATEGTMATLRCQMSKAAPVEWRK GSETLR  
DGD RYILRQDGAMCELQIRGLTIEDSGEYTCVCGQEKTSATLSVKALPSRFIEDLRSQEATEGTMATLRCQMS  
KTAPVEWKKGSETLRDGG RYSLRQDGPVCELQICDLAVEDAGEYSCVCGQEKTSATLSIKALPPRFIEDLRSQ  
EATEGTMATLRCQMSKAAPVEWRK GSETLGDGG RYSLRQNGAVCELQIHDLAVEDTGEYSCVCGQEKTSATLN  
VKALPPRFIEDLRSQEATEGTMATLRCQMSKAAPVEWRK GSETLRDGG RYSLRQDGAVCELQIHDL DVEDAGQ  
YSCVCGQEKTSATLTVDALPPKFT EGLKKEEATEGTMVTLR CQMSKEATVEWRKGAKTLS DGG RYSLRQDGAM  
CELQICGLAVEDAGEYSCVCGQEKTSATLSVKALPPRFIEDLRSQEATEGTMATLRCQMSKAAPVEWRK GSET  
LRDGD RYSLRQDGAVCELQIRDLAVEDAGEYLCVCGQEKTSATLSVKALPPRFIEDLRSQEATEGTMATLRCQ  
MSKAAPVEWRK GSKTLR DGD RYSLRQDGAMCELQICDLAVEDTGDYSCVCGQEKTSATLSVKALPPRFIEDLR  
SQEAREGTVATLRCRMSKAAPVEWRK GSETLKDGD RYSLRQEGNLCELQIRDLAVEDTEEYSCVCGQEKTSAT



LSVKALPAKFIEDLRSQEAPESSTVTLRCKLSKKASVVWKKGSETLRNGARYSLRQDGAUCELEIRDLTVEEDT  
GEYSCTCGQERTSATLSIMAPQVVFQQPLQNLQAEEGSMASLRCELSVPNAAMVWSKGGLELQGDTRREARQQ  
GCVAELLLRDLRREDAGEYSCTCGSQTTSATLMVTAAPVRFRELQAQDVDEGATARLRCELSREAVSVEWRK  
GSLQLFPCAKYQMVQEGTTAELLVHGVEQEDAGEYTC DAGHTQS IARLSVRAPKPKFKTDLQSTEQEAGGTAR  
LCCQLSEAEPTPVQWLKEGVELHVGSKYEMRRQGAVCELLIHGLEAKDTGEYACLGGQKTLASLRVKEPEV  
TIVRGLVDMEVQADEDEFTCKVSQAGATDVQWHLQGLPLQSNVEVAVLADGCTHVLQKGVTLLEDAGTVS  
FHVGGSSSAQLTVRVPEVTVLEPLKDVQLSEGQDAHFRCRLSRASGQEARWALGGVPLQCNEMNDITVEQGT  
LYLLTLHKVTLLEDAGTITLQVGSSEAEQLKVTAKNTVLRGLENVDALEGGALFECQLSQPEVAHAHTWLLDD  
EPVHTSEKVEVVYFENGLRHLLLLKLNKPKQDSCRVTFLAGDVVTSAFVTVRGWRLEVEPPHDASVKAGMQVR  
FTCII LSEAVPVGEATWYINGAAIQPDDTDWTVTTDGSHHALTLSNAQPQHAGEVTF AARDAVASARLSVLALP  
DPPEDAEEVGRSDHSVTLVSWVAPMSDGGGGLCGYRVMKEASTGQWQLCHDLVPGPECVDDLVPGKTYRFRV  
AAVGPAGAGEPVHLPQMVKIAPAPAPAPAPAPAPAPETRQAVVGEDICLELEVAADGGEVVWHKGTERTIQPGG  
HFEVLSRGRQRLVIKGFRTEDQGEYRCGPIQGLPSSGAATFNVVMTSGSGDEVPAQPSLPPEAAQEGDLHLL  
WEALARKRRMSREPTLDSISELPEEDSRVQHLRQEAETAPDLSEGYSTADELARTGEADLSHTSSDDESRAG  
TPSLVTYLLKAGGPGISPLASKHEAQVTTSVKPKQKQEPVVPVTCPPPGDLSAADLMDPSLDKAAVKIQAAFKG  
YKVRKEMKQOEGPVFSRTFGDTEAQVGDVLRLECVLATKTDMRACWLKDGIELTDGRHYHIDQLKDGTCSSLLV  
TGLAPTDSGRYTCQVAFKSGRVSHSACVVVSGTESEAESSSGGELDDAFRRAARRLHRLFRTKSPAELSEEEEL  
FLSADEGPEPEEPADWQTYREDEFVFCIRFESLAEARQAVTCFRNMFATMGIGVEISLGEQGRPVEMRIGK  
VAPTVPAPVPLAKTPGLQTSDAAPVFLTELQNDVQDGYPMSFDCVVTGQPVPSVRWFKDGKLLLEDDHYMIN  
EDQQGGHQLIITAVVPADMGVYRCLAENSMGVSSTKAELRVELTSTDYDTAADATETSSYFSAQGYLSSREQE  
GTESDEGQLPQVLEELKDLQVAPGTRLAKFQLKVKGYPAKLYWFKDQGPLTTSDHIRMTDKKTLHTLEIVSV  
TREDSGQYAAIYISNAVGAAYSSARLLVRGPSEPEEKPASDVHERLVPRILEKFTPKKVKRGSSTFSVKVEG  
HPAPSVHWLKEEAKEKGLVWIGPDTPGYTMASSSKQHSVLVLDVGRQHOGTYTCIATNPAGQALCSASLHISGL  
AKEEEQERVKEALISSFLQGTSAQVSAQMSSEAGFADLVGQSKGESLVAEEAHSHLSLAEVGTTEEFLQKLTSSQ  
ITEMVSAKISQAKLQVPGGDSDEETKTPSASPRHGRSRPSSSVQESSSESEDGDSRGEIFDIYVVTADYLPLG  
AEQDAIILREGQYVEVLDSAHPLRWLVRTKTKSSPSRQGWVSPAYLDKRLKLSPEWGPTEAPEFPGEAVSED  
EYRTRLSSVIGQELLSSEQAFVGLQFLESHHMKHLERSPRVPAAVASQKTVIFRNVQDISHFHSSFLKELQGC  
GTDDDVAMCFIKNQEA FEKYLEFLVGRVQAESVVVSTPVQEFYKKYAEETLSAKDPTQPPPPPLQHYLEQVVE  
RVQKYQALLKELIRNKARNRQNCALLEQAYAVVSALPQRAENKLVSLMENYPGTLEALGEPHQGHFVWEG  
APGARMPWKGNHRHVF LFRNYLVICKPRRDSRTDTFSYVFRNMMKLSSIDLNDQVEGDDRAFEVWHERE SVR  
KYLQARTVI IKNSWVKEICGIQQRQAQPVWRPPEFEELADCTAELGETVKKLACRVTGTPKPIVSWYKDGKP  
VEVDPHHILIEDPDGSC TLI LDNLTGIDSGQYMCFAASAAGNASTLGKILVQVPPRFVNVKVRATPFVEGEDAQ  
ITCTVEGAPYPQIRWYKDGTL LLAGPNRYRMLNEPRSGVLVLIQAASKEDLGHYECELVNLRGSTRGGGELYM  
QSPALRARDQHHREQIVAAVEVTEQETKVPKKTVI I EETITTVVKS PRGRRQSPGKSPSRSPRRSASPRRPG  
LLAPERLYPPGTSPRRLEVEQGRKAPVPALYVTEAEVHAPASQSOPKWLEVEETIEVRVKKTGSRGASPVRE  
MTRSREGILFTLPGGI PGRDPNANNNSNKS SVYQEARTWGPVAVVHVGEPFIFQVDSVGNVDWVAASPEPEQVRA  
SQKEENTERQEGCSDGDENTFLMEEPQD TDSLQGRDPKILTHNGRVLTLADLEDYVPQEGETFQCGDSTPSTP  
DEPPCEVSVLQREISEPTVGGQPVLLNVGRPPGTGATPSFFRPGSQVHSPESVSFLLREAWSGPVSAAPWTSSF  
HTHVQSSVDGSHGSFKTEVSTQTVSFGAVGETVTLHIDPDGGEAPGPSQ\*

>rs49663840\_ENSMUSP00000020732\_c.12262:G>T\_p.S4088I  
ENSMUST00000020732.13|Obscn-201|ENSMUSG00000061462|-|chr11:g.58953592:C>A  
MDHSFSGAPRFLTRPKAFVSVGKDATLSCQIVGNPTPHVSWEKDRQVPEAGARFRLAQDGDVYRLTILDLAL  
GDSGQYVCRARNAIGEAFAAVGLRVDSEGTCAEQAPHFLLRPTSIRVREGADATFRCRVGGSPQPAVSWSKDG  
RRLGPPDAPHVRVEEHGESSALRIR SARPRDGGTYEVRAENPLGSASAAAALVVDSDAEVAGPPGTSTATLLA  
HLQQRREAMRAEGIPSPPPGAGTRTCTVTEGKHARLSCFVTGEPKPEVTVWKKDGLVTEGRRHVVEDEQENF  
VLKILFCKQSDRGLYTCTASNLVGQTYSSVLVVREPTVPFKKRLQDLEVREKESATFQCEVAQPATEAAWFK  
EETRLWASAKYDIEEEGETERRLTVRNVSADDDAVYICETTEGSRVVAELSVQGNLTKLPRKTAVRTGDTAIF  
WVELAVPEGPVRWRNQEEMVAGGRVAITAEGTCHTLTIFQCTLEDMGEVAFVSGGCRTTTQFCVSAAPRRPPL  
YPPADPVVKAKTESSVTL SWSAPPHGDRPVTIDGYVLEKRKLGAYAWSRCHEAGWLATTEFTITGVAAEGDFQ  
FRVSAINHFGQGPYLEFPGTMHLVPM LAVKTPKAVEAVEGGEVTFVSDLTVASSGEWFLDGEALKASSIYVI  
RCDRTRHMLTIREV PARLHGAQLKFVANGIETSIQMVVRAALGLPSSKLPAAAAAREVLAQLHEEAQLLAE LSD  
QAAA VTWLKDGRELSLGPKEYMQVSAGRRALLVRDVAQDDAGLYECVSRGSR TAYQLLVQDITDGYRDWGPAG  
PQKHMCKCAGAKIARYLGS SCYRFLQYDKGVVHWLEAALDTRQKGKTS SCSLHEKPKLVFAKQQAHSEVKA E  
AGNSATLSCEVTAQTEVTFWKDGKLLSSSSKVRMEASGCSRRLLVVQQAGKADAGEYSCEAGGQKLSFRLDVA  
EPKLVFAKQQAHSEVKA EAGASATLSCEVAQAQTEVTFWKDGKLLSSSSKVRMEASGCSRRLLVVQQAGKADA  
GEYSCEAGGQKLSFRLDVAEPKMFVFAKEQQARSEVKA EAGASATLSCEVAQAQTEVTFWKDGKLLSSSSKVRM  
EASGCSRRLLVVQQAGKADAGEYSCEAGGQKLSFRLDVTEPKLVFAKEQQARSEVKA EAGASATLSCEVAQAQ  
EVTWTFKDGKLLSSSSKVRMEASGCSRRLLVVQQAGKADAGEYSCEAGGQKLSFRLDVAEPKLVFAKEQQARSEV

KAEAGNSATLSCEVAQAQTEVTFWKDGKKLSSSSKVRMEASGCSRRLVVQQAGKADAGEYSCEAGGQKLSFHL
DVTEPKLVFAKEQQAHSEVKAEAGASATLSCEVAQAQTEVTFWKDGKKLSSSSKVRMEASGCSRRLVVQQAGK
ADAGEYSCEAEGQKLSFRLDVAEPKLVFAKEQQARSEVKAEAGASATLSCEVAQAQTEVTFWKDGKKLSSSSK
VRVEASGCSRRLVVQQAGKADAGEYSCEAGGQKLSFRLDVAEPKLVFAKEQQANSEVKAEAGASATLSCEVAQ
AQTEVTFWKDGKKLSSSSKVRVEASGCSRRLVVQQAGKADAGEYSCEAGGQKLSFRLDVAEPKLAFAKEQQAH
SEVKAEAGASATLSCEVAQAQTEVTFWKDGKKLSSSSKVRVEASGCSRRLVVQQAGKADAGEYSCEAGGQKLS
FRLDVAEPKLAFAKEQQAHSEVKAEAGASATLSCEVAQAQTEVTFWKDGKKLSSSSKVRVEASGCSRRLVVQQ
AGKADAGEYSCEAGGQKLSFRLDVAEPKLAFAKEQQAHSEVKAEAGASATLSCEVAQAQTEVTFWKDGKKLSS
SSKVRVEASGCSRRLVVQQAGKADAGEYSCEAGGQKLFRLDVAEPKLMFAKEQQAHSEVKAEAGASATLSCE
VAQAQTEVTFWKDGKKLSSSSKVRVEASGCSRRLVVQQAGKADAGEYSCEAGGQKLSFRLDVAEPKLVFAKEQ
QAHSEVKAEAGASATLSCEVAQAQTEVTFWKDGKKLSSSSKVRVEASGCSRRLVVQQVQKADAGEYSCEARGQ
KLSFRLDVADTRLMFAKEQQARTEVKAEAGNSATLSCEVAQAQTEVTFWKDGKKLSSSSKVRVEASGCSRRLV
VQQAGKADAGEYSCEAGGQKLSFRLDVAEAEESQIPERPSRREPLVVKEHETIILTATIAAPSVAAVTWLKDG
V EIRRSKRHEATSLGDTHTLTVRGAQVLDSAIYSCRVGKEGQDFPVQVEEVAAKFSKPLEPVEGELGGTVMLVC
ELSPQAEVWRCGNTQLRPGKRFQMTSEGPRRTLTVSGLREDDAEYVCESRDDRTSARLTVKVPVVKFTS
GLSAMVAEEGQEAATFQCVVSPDAGVTWYKDGMLQPSKFKVMVESGASRSLTILGLTLEDAGQVTEAEAGAS
SSAALRVREAPVLFKKKLEPQTVERTSVTLEVELTRPWPEVKWTRNAAVLTPSENVEIRAEGARHCLVLRVSV
GFADRGFFGCETPDDKTQAKLNVEMRQVRLVRLVGLQEVEAKEQGTASMDVELSHAEEVGSVTRDGLRLQPGPKC
HLAVQGPVHILTLALSALQPQDSGLVAFRAEGVHTSARLIVTELPSVSTRVLQDQVATQKEKVTLECELSRPVDV
RWLKDGVLELRAGKAIIGIVAQGTCSRSLVIYRCETGDQGVYVCDALDAQTSASLRVQGRYTLIFRRLAEDAGE
VKFVAENAESRAHLRVKELPVTLLRPLRDKIAMEKHRGVLECCQVSRASAQVRWFKGGVELQSGPKYEVVSDGL
YRKLVINVDVQPEDEDTYTCDAGNVKTSAQFFVVEQSITIVRGLKDMTVMEPAPAWFECETSIPSVRPPKWL
LGTVQLQAGGNVGLQDGTVHRLTLHKTCSTMTGPVHFTIGKSRSSAQLVVSDIPVVLTRPLEPKAGRELQSV
VLSDFRPAKAVQWYKDDTPLSPSEKFKMALEGQMAELRILRLTPADAGVYRCQAGSAQSSAEVTEAREVTVI
QPLQDAEAMEEGRVCFSCELSHKDEDIEWSLNGTPLYNDSFHEISHGCLHTLVLSKVRQADTGTVCATSPKV
SVSARLVVKGKPVVFLKALDDVSAEERGTLLTQCEVSDPEARVVWRKDGVELGSPDQYDFLHKAGARGLTVHD
LSHEDAGLYTCQVSKVSVHDLHVGITKRLKTVEVLEGECSFECVLSHESPSDPAVMTVGGKTVGGS
GHFHAVRQGRKYTLTVKDAALSDAGEVVSVLGLTSKASLIIRERPVDTKPLEDQRTTLGEDVMLSCELSRA
GTSVRWLKDGKAIRKSQKYDLLSEGTRAVLVVRKASLKDSGEYTCETEASKSTAKLCVEEKANRFTTEELADLQ
VEEKGRAVFTCKTEHPASVVTWRKGLLELRASGKHVPSQEGTLTKLTINALERTSDTYTCDIGQARTQARLL
VHGQKVRVIEDLEDTAVQEGSSAKFCRIAPADYGPVHWFLLDKTPLHSNELNEITVQPGGYHVLTLRQLAL
KDSGTVYFEAGDQRTSAALRVTEKPSIFSRPLTDVTVTEGEDTLVCETTTVDSVSRWTKDGKTLRPSARCQL
SHEGCQAQLLITATTPQDGGRYKCEIGGASSSSIVRVHALPVRFRESLKDVEVPEGKAATLRCVLSVVAAPVE
WRHGDVVLKSSNKYSLRQEGAVLELVIRDLQPDQSGQYSCSFGDQTTSATLTVKTSQAQFVGLRKNKEATEG
TTVTLRCELTKAEAPVEWKKGTETLRNGDKYSLKQDGAVCELQICSLLVADAGEYSCVCGQEKTSATLTVK
ALLVHFVRLRSKEATEGDTTTLQCELSKAAPVEWRKGTETLRDGDYSLKQDGAVCELQIRSLTIADAGEYLCT
GQEKTSATLTVRALPAKFKDSLKNEEATEGTTATLSCELSKAAPVTWKKGPKTLQSGDKYVLRQDGA
VCGLQIHGLTMADAGEYSCVCGQEKTSATLTVRGLPAKFIEDLRSQEATEGATAILRCELSKAAPVEWRK
GSETLKDGDYTLRQDGA
VCELQIRGLAVVDGTYSLSLPTKFTTEGLRNEEATEGTMATLRCQMSKAAPVEWRK
GSETLRDGDYTLRQDGA
MCELQIRGLTIEDSGEYTCVCGQEKTSATLSVKALPSRFIEDLRSQEATEGTMATLRCQMSK
TAPVEWKKGSETLRDGGYSLRQDGPVCELQICDLAVEDAGEYSCVCGQEKTSATLSIKALPPRFIEDLRS
QEATEGTMATLRCQMSKAAPVEWRK
GSETLGDGGYSLRQNGAVCELQIHDLAVEDTGEYSCVCGQEKTSATLNVKALPPRFIEDLRSQEATEG
TMATLRCQMSKAAPVEWRK
GSETLRDGGYSLRQDGA
VCELQIHDLVEDAGQYSCVCGQEKTSAVLTVDALPPKFTTEGLKKEEATEGTMVTLRCQMSKEATVEWRK
GAKTLDGGYSLRQDGA
MCELQICGLAVEDAGEYSCVCGQEKTSATLSVKALPPRFIEDLRSQEATEGTMATLRCQMSKAAPVEWRK
GSETLRDGDYSLRQDGA
VCELQIRDLAVEDAGEYLCVCGQEKTSATLSVKALPPRFIEDLRSQEATEGTMATLRCQMSKAAPVEWRK
GSKTLR
DGDYSLRQDGA
MCELQICDLAVEDTGDYSCVCGQEKTSATLSVKALPPRFIEDLRSQEAREGTVATLRCRMSKAAPVEWRK
GSETLKDGDYSLRQEGNLCELQIRDLAVEDTEEYSCVCGQEKTSATLSVKALPAKFIEDLRSQEAPESSTV
TLRCKLSKKASVVWKKGSETLRNGARYSLRQDGA
VCELEIRDLTVEDTGEYSCTCGQERTSATLSIMAPQV
VFPQPLQNLQAEEGSMASLRCELSVPNAAMVWSKGGLELQGDTRREARQQGCVAELLLRDLRREDAGEYSCT
CGSQTTSATLMVTAAPVRFRLRELQAQDVDEGATARLRCELSREAVSVEWRK
GSLQLFPCAKYQMVQEGTTAELLVHGVEQEDAGEYTCDAHTQSIARLSVRAPKPKFKTDLQSTEQEAGGTARLCC
QLSEAEFGTPVQWLKEFTLHVHGSKYEMRRQGA
VCELLIHGLEAKDTGEYACLVGGQKTLASLRVKEPEVTIVRGLV
DMEVQADEDEVEFTCKVSOAGATDVQWHLQGLPLLISNEVTEVAVLADGCTHVLQLKGVTLLEDAGTVSFH
VGGSSSAQLTVRVPEVTVLEPLKDVQLSEGQDAHFRCRLSRASGQEARWALGGVPLQCNE
MNDITVEQGTLYLLTLHKVTLLEDAGTITLQV
GSCSSEAQLKVTAKNVTLRGLNVDVALEGG
EALFECQLSQPEVA
AHTWLLDDEPVHTSEKVEV
VYFENGLRHLLLLKNLKPQDSCRVTFLAGDVVTS
AFLTVR
GWRLEVLPPHDASVKAGMQVRF
TCILSEAVPVGEATWYINGAAIQPDDTDWTVTTD
GSHHALTLSNAQPQHAGEVTF
AARDAVASARLSVLALPDPEDA

EVVGRSDHSVTLWSVAPMSDGGGGLCGYRVMKEASTGQWQLCHDLVPGPECVVDDLVPGKTYFRVAAVGPA  
 GAGEPVHLPQMVKIAPAPAPAPAPAPAPAPAPETRQAVVGEDICLELEVAADGGEVVWHKGTERTIQPGGHFEVLS  
 RGQRQMLVIKGFRTEDQGEYRCGPIQGLPSSGAATFNVMVMTSGSGDEVPAQPSLPPEAAQEGDLHLLWEALAR  
 KRRMSREPTLDSISELPEEDSRVQHLRQEAEEETAPDLSEGYSTADELARTGEADLSHTSSDDESAGTSPSLVT  
 YLKKAGGPGISPLASKHEAQVTTSVKPKQKQEPVPTCP PGDL SAADLMDPSLDKAAVKIQAAFQYKVRKE  
 MKQQEGPVFSRTFGDTEAQVGDVLRLECVLATKTDMRACWLKDGIELTDGRHYHIDQLKDGTCSSLVVTGLAPT  
 DSGRYTCQVSTKSGRVSHSACVVVSGTESEAESSSGGELDDAFRAARRLHRLFRTKSPAELSEELFLSADE  
 GPGEPEEPADWQTYREDEFVFCIRFESLAEARQAVTFCFRNMFATMIGVEISLGEQGRGVEMRIGKVAPTVT  
 PAVPLAKTPGLQTSDAAPVFLTELQNDVQDGYPMSFDCVVTGQVPVSVRWFKDGKLEEDDHVMINEDQQGG  
 HQLIITAVVPADMGVYRCLAENSMGVSSSTKAELRVELTSTDYDTAADATETSSYFSAQGYLSSREQEGTESDE  
 GQLPQVLEELKDLQVAPGTRLAKFQLKVKGYPAKLYWFKDGGPLTSDHIRMTDKKTLHTLEIVSVTREDSG  
 QYAAYSNAVGAAYSSARLLVRGPSEPEEKPASDVHERLVPPRILEKFTPKKVKRGSSTIFSVKVEGHPAPSV  
 HWLKEEAKEKGVLWIGPDTPGYTMASSSKQHSLLVLDVGRQHQTTCIATNPAGQALCSASLHISGLAKEEEEQ  
 ERVKEALISSFLQGTSAQVSAQMSSEAGFADLVGQSKGESLVAEEAHSHLSLAEVGTTEFLQKLTSTQITEMVS  
 AKISQAKLQVPGGDSDEETKTPSASPRHGRSRPSSSVQESSSESEDGDSRGEIFDIYVVTADYLPGLAEQDAI  
 ILREGQYVEVLDSAHPLRWLVRTKPTKSSPSRQGWVSPAYLDRKRLKLSPEWGPTEAPEFPGEAVSEDEYRTRL  
 SSVIQELLSSEQAFVGEFLQFLESHHMKHLERSPRVPAVASQKTVIFRNVQDISHFHSSFLKELQCGCTDDD  
 AMCFIKNQEAFAKEYLEFLVGRVQAESVVVSTPVQEFYKKYAEETLSAKDPTQPPPPPLQHYLEQPVVERVQKYQ  
 ALLKELIRNKARNRQNCALLEQAYAVVSALPQRAENKLVSLMENYPGTLEALGEPHQGHFIVWEGAPGARM  
 PWKGHNHRVFLFRNYLVICKPRRDSRTDTFSYVFRNMMKLSSIDLNDQVEGDDRAFEVWHEREDSVRKYLLQA  
 RTVIKNSWVKEICGIQQLAQPVWRPPEFEEELADCTAELGETVKLACRVTGTGPKPIVSWYKDGKPVVDPH  
 HILIEDPDGSLTILDLNLTGIDSGQYMCFAASAAGNASTLGKILVQVPPRFVNVKVRATPFVEGEDAQITCTVE  
 GAPYQIRWYKDGTLTLLAPGNRYRMLNEPRSGVLVVIQAASKEDLGHYECELVNRLGSTRGGGELYMQSPALR  
 ARDQHHREQIVAAVEERRPSP\*

>rs49663840\_ENSMUSP00000151217\_c.10618:g>T\_p.S3540I  
 ENSMUST00000219084.3|Obscn-207|ENSMUSG00000061462|-|chr11:g.58953592:C>A  
 MDHSFSGAPRFLTRPKAFVVSVGKDATLSCQIVGNPTPHVSWEKDRQPVEAGARFLAQDGDVYRLTILDLAL  
 GDSGQYVCRARNAIGEAFAAVGLRVDSEGTCAEQAPHFLLRPTSIRVREGADATFRCRVGGSPQPAVSWSKDG  
 RRLGPPDAPHVRVEEHGESSALRIRSARPRDGGTYEVRAENPLGSASAAAALVVDSDAEVAGPPGTSTATLLA  
 HLQORREAMRAEGIPPSPPGAGTRTCTVTEGKHARLSCFVTGEPKPEVWKKDQGLVTEGRRHVVEDEQENF  
 VLKILFCKQSDRGLYTCTASNLVGQTYSSVLVVVREPTVPFKKRLQDLEVREKESATFQCEVAQAPATEAAWFK  
 EETRLWASAKYDIEEEGTERRLTVRNVSADDDAVYICETTEGSRVVAELSVQGNLTKLPRKTAVRTGDTAIF  
 WVELAVPEGPVRLRNQEEMVAGGRVAITAEGTCHTLTI FQCTLEDMGEVAFVSGGCRTTTQFCVSAPRRPPL  
 YPPADPVVKAKTESVTLWSVAPPHGDRPVTIDGYVLEKRLKLGAYAWSRCHEAGWLATTEFTITGVAEEGDFQ  
 FRVSAINHFGQGPYLEFPGTMHLVPLAVKTLKVAEAVEGGEVTFVSDLTVAASSGEWFLDGEALKASSIYVI  
 RCDRTRHMLTIREVPARLHGAQLKFFVANGIETSIQMVVRAALGLPSSKLPAAAAAREVLAQLHEEAQLLALS  
 QAAAVTWLKDGRELSLGPKEYMQVSAGRRALLVRDVAQDDAGLYECVSRGSRRTAYQLLVQDITDGYRDWGPAG  
 PQKHMCKCAGAKIARYLGSscyRFLQYDKGVWHLEAALDTRQKGTSSCSLHEKPKLVFAKQQAHSEVKA  
 AGNSATLSCEVTQAQTEVTFWFKDGKLLSSSSKVRMEASGCSRRLVVQQAGKADAGEYSCEAGGQKLSFRLDVA  
 EPKLVFAKQQAHSEVKAEGASATLSCEVAQAQTEVTFWFKDGKLLSSSSKVRMEASGCSRRLVVQQAGKADA  
 GEYSCEAGGQKLSFRLDVAEPKMVFAKEQQARSEVKAEGASATLSCEVAQAQTEVTFWFKDGKLLSSSSKVRM  
 EASGCSRRLVVQQAGKADAGEYSCEAGGQKLSFRLDVTEPKLVFAKEQQARSEVKAEGASATLSCEVAQAQ  
 EVTWFKDGKLLSSSSKVRMEASGCSRRLVVQQAGKADAGEYSCEAGGQKLSFRLDVTEPKLVFAKEQQAHSEV  
 KAEAGASATLSCEVAQAQTEVTFWFKDGKLLSSSSKVRMEASGCSRRLVVQQAGKADAGEYSCEAGGQKLSFRL  
 DVAEPKLVFAKEQQARSEVKAEGASATLSCEVAQAQTEVTFWFKDGKLLSSSSKVRMEASGCSRRLVVQQAGK  
 ADAGEYSCEAGGQKLSFRLDVAEPKLVFAKEQQANSEVKAEGASATLSCEVAQAQTEVTFWFKDGKLLSSSSK  
 VRVEASGCSRRLVVQQAGKADAGEYSCEAGGQKLSFRLDVAEPKLVFAKEQQAHSEVKAEGASATLSCEVAQ  
 AQTEVTFWFKDGKLLSSSSKVRVEASGCSRRLVVQQAGKADAGEYSCEAGGQKLSFRLDVAEPKLVFAKEQQAH  
 SEVKAEGASATLSCEVAQAQTEVTFWFKDGKLLSSSSKVRVEASGCSRRLVVQQVQKADAGEYSCEARGQKLS  
 FRLDVAEAESQIPERPSRREPLVVKHEHETIILTATIAAPSVAAVTWLKDGVEIRRSKRHEATSLGDTHTLTVR  
 GAQVLDIAIYSCRVGKEGQDFPVQVEEVAAKFSKPLEPVEGELGGTVMLVCELSPEQAEVWRCGNTQLRPGK  
 RFQMTSEGPRRTLTVSGLREDDAEYVCESRDDRTSARLTVKVPRVVKFTSGLSAMVAEEGQEAFTQCVVSPS  
 DAGVTWYKDMGLQLPSEKFMVVEGASRSILTILGLTLEDAGQVTEAEGASSAALRVREAPVLFKPKLEPQT  
 VEERTSVTLEVELTRPWEVVKWTRNAAVLTPSENVEIRAEGARHCLVLRVSVGFADRGVFRECETPDDKTQAKLN  
 VEMRQVTLVRGLQVEVAKEQGTASMDVELSHAEEGVSWTRDGLRLQPGPKCHLAVQGGPVHILTLALQPDQSG  
 LVAFRAEGVHTSARLIVTELPVSFTRVLQDVVATQKEKVTLECELSRPVDVRWLKDGVELRAGKAI GIVAQGT  
 CRSLVIYRCETGDQGVYCDALDAQTSASLRVQGRTYTLIFRRVLAEDAGEVKFVAENAESRAHLRVKELPVT  
 LLRPLRDKIAMEKHRGVLECCQVSRASAQVRWFKGGVELQSGPKYEVVSDGLYRKLVIINDVQPEDEDYTC DAG



TGATPSFFRPGSQVHSPESVSFLLREAWSGPVSAAPWTSSFHTHVQSSVDGSHGSFKTEVSTQTVSFGAVGET  
 VTLHIDPDGGEAPGPSQG\*  
 >rs26971817\_ENSMUSP00000158795\_c.11967:A>G\_p.R3990G  
 ENSMUST00000238536.2|Obscn-210|ENSMUSG00000061462|-|chr11:g.58954441:T>C  
 MDHSFSGAPRFLTRPKAFVSVGKDATLSCQIVGNPTPHVSWEKDRQPVEAGARFRLAQDGDVYRLTILDLAL  
 GDSGQYVCRARNAIGEAFVAVGLRVDSEGTCAEQAPHFLLRPTSIRVREGADATFRCRVGGSPQPAVSWSKDG  
 RRLGPPDAPHVRVEEHGESSALRIRARPRDGGTYEVRAENPLGSASAAAAALVVDSDAEVAGPPGTSTATLLA  
 HLQQRREAMRAEGIPSPPPGAGTRTCTVTTEGKHARLSCFVTGEPKPEVWKKDGLVTEGRRHVVEDEQENF  
 VLKILFCKQSDRGLYCTASNLVGQTYSSVLVVREPTVPFKKRLQDLEVREKESATFQCEVAQPAATEAAWFK  
 EETRLWASAKYDIEEEGTERRLTVRNVSADDDAVYICETTEGSRVVAELSVQGNLTKLPRKTAVRTGDTAIF  
 WVAVLAVPEGPVWRWRNQEEMVAGGRVAITAEGTCHTLTI FQCTLEDMGEVAFVSGGCRTTTQFCVSAPRRPPL  
 YPPADPVVKAKTESSVTLWSAPPHGDRPVTIDGYVLEKRKLGAYAWSRCHEAGWLATTEFTITGVAAEGDFQ  
 FRVSAINHFGQGPYLEFPGMTMLVPLAVKTPKAVEAVEGGEVTFVSDTLTVASSGEWFLDGEALKASSIYVI  
 RCDRTTRHMLTIREVPARLHGAQLKVFVANGIETS IQMVVRAALGLPSSKLPAAAAAREVLAQLHEEAQLLAE LSD  
 QAAA VTWLKDGRELSLGPYEMQVSAGRRALLVRDVAQDDAGLYECVSRGSRTAYQLLVQDITDGYRDWGPAG  
 PQKHMCKCAGAKIARYLGS SCYRFLQYDKGVWHLEAALDTRQKGTSSCSLHEKPKLVFAKQQAHSEVKA  
 AGNSATLSCEVTQAQTEVTWFKDGKLLSSSSKVRMEASGCSRRLVVQQAGKADAGEYSCEAGGQKLSFRLDVA  
 EPKLVFAKQQAHSEVKAEGASATLSCEVAQAQTEVTWFKDGKLLSSSSKVRMEASGCSRRLVVQQAGKADA  
 GEYSCEAGGQKLSFRLDVAEPKMFVFAKEQQARSEVKAEGASATLSCEVAQAQTEVTWFKDGKLLSSSSKVRM  
 EASGCSRRLVVQQAGKADAGEYSCEAGGQKLSFRLDVTEPKLVFAKEQQARSEVKAEGVNSATLSCEVAQAQ  
 EVTWFKDGKLLSSSSKVRMEASGCSRRLVVQQAGKADAGEYSCEAGGQKLSFRLDVAEPKLVFAKEQQARSEV  
 KAEAGNSATLSCEVAQAQTEVTWFKDGKLLSSSSKVRMEASGCSRRLVVQQAGKADAGEYSCEAGGQKLSFHL  
 DVTEPKLVFAKEQQAHSEVKAEGASATLSCEVAQAQTEVTWFKDGKLLSSSSKVRMEASGCSRRLVVQQAGK  
 ADAGEYSCEAEGQKLSFRLDVAEPKLVFAKEQQARSEVKAEGASATLSCEVAQAQTEVTWFKDGKLLSSSSK  
 VRVEASGCSRRLVVQQAGKADAGEYSCEAGGQKLSFRLDVAEPKLVFAKEQQANSEVKAEGASATLSCEVAQ  
 AQTEVTWFKDGKLLSSSSKVRVEASGCSRRLVVQQAGKADAGEYSCEAGGQKLSFRLDVAEPKLVFAKEQQAH  
 SEVKAEGASATLSCEVAQAQTEVTWFKDGKLLSSSSKVRVEASGCSRRLVVQQAGKADAGEYSCEAGGQKLS  
 FRLDVAEPKLVFAKEQQAHSEVKAEGASATLSCEVAQAQTEVTWFKDGKLLSSSSKVRVEASGCSRRLVVQQ  
 AGKADAGEYSCEAGGQKLSFRLDVAEPKLVFAKEQQAHSEVKAEGASATLSCEVAQAQTEVTWFKDGKLLSS  
 SSKVRVEASGCSRRLVVQQAGKADAGEYSCEAGGQKLFRLDVAEPKLMFAKEQQAHSEVKAEGASATLSCE  
 VAQAQTEVTWFKDGKLLSSSSKVRVEASGCSRRLVVQQAGKADAGEYSCEAGGQKLSFRLDVAEPKLVFAKEQ  
 QAHSEVKAEGASATLSCEVAQAQTEVTWFKDGKLLSSSSKVRVEASGCSRRLVVQQVQKADAGEYSCEARGQ  
 KLSFRLDVADTRLMFAKEQQARTEVKAEGNSATLSCEVAQAQTEVTWFKDGKLLSSSSKVRVEASGCSRRLV  
 VQQAGKADAGEYSCEAGGQKLSFRLDVAEAE SQI PERPSRREPLVVKEHETIILTATIAAPSVAAVTWLKDV  
 EIRRSKRHEATSLDTHLTVRGAQVLD SAIYSCRVGKEGQDFPVQVEEVAAKFSKPLEPVEGELGGTVMLVC  
 ELSPEQAEVWRCGNTQLRPGKRFQMTSEGPRTTLVSGLREDDAEYVCE SRDDRTSARLTVKVPVVKFTS  
 GLSAMVAEEGQEATFQCVVSPSDAGVTWYKDGMLQLPSEKFMVVEGASRSILTILGLTLEDAGQVTEAEGAS  
 SSAALRVREAPVLFKKKLEPQTEVEERTSVTLEVELTRPWPEVKWTRNAAVLTPSENVEIRAEGARHCLVRSV  
 GFADRGFVFCETPDDKTQAKLNVEMRQVRLVVRGLQVEVEAKEQGTASMDVELSHA EVEG SWTRDGLRLQPGPKC  
 HLAVQGPVHILTL SALQPQD SGLVAFRAEGVHTSARLIVTEL PVSFTRVLQDVVATQKEKVTLECELSRPVDV  
 RWLKDGVLELRAGKAIGIVAQGT CRSLVIYRCETGDQGVYVCDALDAQTSASLRVQGRTYTLIFRRVLAEDAGE  
 VKFVAENAESRAHLRVKELPVTLLRPLRDKIAMEKHRGVLECCVSRASAQVRWFKGGVELQSGPKYEVVSDGL  
 YRKLVIN DVQPEDEDTYTC DAGNVKTS AQFFVEEQSITIVRGLKDMTVM EPAPAWFECETSIPSVRPPKWL  
 LGKTVLQAGGNVGLQDGTVHRLTLHKTCSTMTGPVHFTIGKSRSSAQLVVSDIPVVLTRPLEPKAGRELQSVVL  
 SCDFRPAKAVQYKDDTPLSPSEKFKMALEGQMAELRILRLTPADAGVYRCQAGSAQSSAEVTVAREVTVI  
 QPLQDAEAMEEGRVCFSCELSHKDEDIEWSLNGTPLYNDSFHEISHEGCLHTLVLSVSRQADTGTVCATSPKV  
 SVSARLVVKGKPVVFLKALDDVSAEERGLTLTQCEVSDPEARVVRKDGVELGSPDKYDFLHKAGARGLTVHD  
 LSHEDAGLYTCQVGSKETQSKVSVHDLHVGITKRLKTVEVLEGE SCFECVLSHESPSDPAVWTVGGKTVGGS  
 GHFHAVRQGRKYTLTVKDAALSDAGEVVFVSVLGLT SKASLIIRERPVDITKPLEDQRTTLGEDVMLSCELSRA  
 GTSVRWLKDGKAIRKSQKYDLLSEGTRAVLVVRKASLKDSGEYTCETEASKSTAKLCVEEKANRTEELADLQ  
 VEEKGRAVFTCKTEHPASVVTWRKGLLELRASGKHVPSQEGLTLKLTINALERTSDTYTCDIGQARTQARLL  
 VHGQKVRVIEDLEDTAVQEGSSAKFCRIAPADYGPVHWF LDKTPLHSNELNEITVQPGGYHVLTLRQLALKD  
 SGTVYFEAGDQRTSAAALRVTEKPSIFSRPLTDVTVTEGEDTLVLCETTTVDSSVRWTKDGKTLRPSARCQLSH  
 EGCAQLLITATTPQDGGRYKCEIGGASSSIVRVHALPVRFRRESLKDVEVPEGKAATLRCVLSVAAPVEWR  
 HGDVVLKSNKYSRLRQEGAVLELVIRDLQPQD SGQYSCSFGDQTTSATLTVKTS SAQFVGLRNKEATEGTTV  
 TLRCELTKAEAPVEWKKGTETLRNGDKYSLKQDGA VCELQICSLLVADAGEYSCVCGQEKTSATLTVKALLVHF  
 VRRLSKEATEGDTTTLQCELSKAAPVEWRKGTETLRDGD RYSLKQDGA VCELQIRSLTIADAGEYLCTCGQE  
 KTSATLTVRALPAKFKDSLKNEEATEGTTATLSCELSKAAPVTWKKGPKTLQSGDKYVLRQDGA VCGLQIHGL



TMADAGEYSCVCGQEKTSATLTVRGLPAKFIEDLRSQEATEGATAILGCELSKAAPVEWRKGETLKDGDRTY  
 LRQDGA VCELQIRGLAVVDGTGYSLSPTKFTTEGLRNEEATEGTMATLRCQMSKAAPVEWRKGETLDRDGRYS  
 LRQDGA MCELQIRGLTIEDSGEYTCVCGQEKTSATLSVKALPSRFIEDLRSQEATEGTMATLRCQMSKTAPVE  
 WKKGSETLRDGGRYSLRQDGPVCELQICDLAVEDAGEYSCVCGQEKTSATLSIKALPPRFIEDLRSQEATEGT  
 MATLRCQMSKAAPVEWRKGETLGDGGRYSLRQNGAVCELQIHDLAVEDTGEYSCVCGQEKTSATLNVKALPP  
 RFIEDLRSQEATEGTMATLRCQMSKAAPVEWRKGETLRDGGRYSLRQDGA VCELQIHDLVDVEDAGQYSCVCG  
 QEKTSAVLTVDALPPKFTTEGLKKEEATEGTMVTLRCQMSKEATVEWRKGA KTLSDGGRYSLRQDGA MCELQIC  
 GLAVEDAGEYSCVCGQEKTSATLSVKALPPRFIEDLRSQEATEGTMATLRCQMSKAAPVEWRKGETLDRDGR  
 YSLRQDGA VCELQIRDLAVEDAGEYLCVCGQEKTSATLSVKALPPRFIEDLRSQEATEGTMATLRCQMSKAAP  
 VEWRKGSKTLRDGDRTYSLRQDGA MCELQICDLAVEDTGDYSCVCGQEKTSATLSVKALPPRFIEDLRSQEARE  
 GTVATLRCRMSKAAPVEWRKGETLKDGDRTYSLRQEGNLCELQIRDLAVEDTEEYSCVCGQEKTSATLSVKAL  
 PAKFIEDLRSQEAPESSTVTLRCKLSKASVWKKGSETLRNGARYSLRQDGA VCELEIRDLTVEDTGEYSCT  
 CGQERTSATLSIMAPQVVFQQPLQNLQAEEGSMASLRCELSVPNAAMVWSKGGLELQGDTRREARQQCVAAEL  
 LLRDLRREDAGEYSCTCGSQTTATLMVTAAPVRFLRELQAQDVDEGATARLRCELSREAVSVEWRKGS LQLF  
 PCAKYQMVQEGTTAELLVHGVEQEDAGEYTCDAHGHTQSIARLSVRAPKPKFKTDLQSTEQEAGGTARLCCQLS  
 EAEPGTPVQWLKEGVELHVGSKYEMRRQGA VCELLIHGLEAKDTGEYACL VGGQKTLASLRVKEPEVTIVRGL  
 VDMEVQADEDEFTCKVSAQAGATDVQWHLQGLPLQSNVEVAVLADGCTHVLQ LKGVTLDEAGTVSFVGGGL  
 SSSAQLTVRVPEVTVLEPLKDVQLSEGQDAHFRCRLSRASGQEARWALGGVPLQCNEMNDITVEQVTFLYLLTL  
 HKVTLEDA GTITLQVGS CSSEAQLKVTA KNTVLRGLENVDALEGG EALFECQLSQPEVA AHTWLLDDEPVHTS  
 EKVEVVFENGLRHLLLLLKNLKPQDSCRVTFLAGDVVTS AFLTVRGRLEVLLEPPHDASVKAGMQVRFTCILS  
 EAVPVGEATWYINGAAIQPDDTDWTVTTDGS HHAL TLSNAQPQHAGEVTF AARDAVASARLSVLALPDPEDA  
 EVVGRSDHSVTL SWVAPMSDGGGGLCGYRVMKEASTGQWQLCHDLVPGPECVDDLVPGKTYFRVA AVGPA  
 GAGEPVHLPQMVKIAPAPAPAPAPAPAPAPETRQAVVGEDICLELEVAADGGEVVWHKGTERRIQPGHFVLS  
 RGQRQMLVIKGFRTEDQGEYRCGPIQGLPSSGAATFNVMVMTSGSGDEVPAQPSLPPEAAQEGDLHLLWEALAR  
 KRRMSREPTLDSISELPEEDSRVQHLRQEA EETAPDLSEGYSTADELARTGEADLSHTSSDDES RAGT PSLVT  
 YLKKAGPGISPLASKHEAQVTT SVKPKQKQEPVPTCP PPGDLSAADLMDPSLDKAAVKIQAAF KGYKVRKE  
 MKSQEGPVFSRTFGDTEAQVGVDLRLECVLAKTKTDMRACVWLKDGIELTDGRHYHIDQLKDGKTSLLVTLGLAPT  
 DSGRYTCQVSTKSGRVSHSACVVVSGTESEAESSGGELDDAFRRAARRLHRLFRTKSPAELSEELFLSADE  
 GPGEPEEPADWQTYREDENFVCIRFESLAEARQAVTCFRNMFATMGIGVEISLGEQGPGRVEMRIGKVAPTVT  
 PAVPLAKTPGLQTS DAAPVFLTELQNDVQDGYPMSFDCVVTGQPVPSVRWFKDGKLEEDDHVMINEDQGG  
 HQLIITAVVPADMGVYRCLAENSMGVSSTKAELRVELTSTDYDTAADATETSSYFSAQGYLSSREQEGTESDE  
 GQLPQVLEELKDLQVAPGTRLAKFQLKVKGYPA PKLYWFKDQGPLTTSDHIRMTDKKTLHTLEIVSVTREDSG  
 QYAAYSNAVGAAYSSARLLVRGPSEPEEK PASDVHERLVPPRI LEKFTPKVKVRGSSITFSVKVEGHPAPSV  
 HWLKEEA EKGV LWIGPDTPGYTMASSSKQHSVLVLDVGRQHOGTYTCIATNPAGQALCSASLHISGLAKEEQ  
 ERVKEALISSFLQGTSAVSAQMSESA GFADLVGQSKGESLVAEEAHSHLSLAEVGT EEFLOKLTSSQITEMVS  
 AKISQAKLQVPGGDSDEETKTPSASPRHGRSRPSSSVQESSSEEDGDSRGEIFDIYVVTADYLP LGAEQDAI  
 ILREGQYVEVLDSAHPLRWLVRTPKTKSSPSRQGWVSPAYLDRKRLKLSPEWGPTEAPEFPGEAVSEDEYRTRL  
 SSVIQE LLSSEQAFV GELQFLES HHMKHLERSPRVPA AVASQKTVIFRNVQDISHFHSSFLKELQCGCTDDDV  
 AMCFIKNQEA FEKYLEFLVGRVQAESVVVSTPVQEFYKKYAEETLSAKDPTQPPPPPLQHYLEQPVERVQKYQ  
 ALLKELIRNKARNRQNCALLEQAYAVVSALPQRAENKLVSLMENYPGTLEALGEP IRQGHFIVWEGAPGARM  
 PWKGHNHRVFLFRNYLVICP PRDRTDFTSYVFRNMMKLSIDLNDQVEGD DRAFEVWHEREDSVRKYLLQA  
 RTVI IKNSWVKEICGIQQLAQPVWRPPEFEEELADCTAELGETVKLACRVTGT PKPIVSWYKDGKPV EVDPH  
 HILIEDPDG SCTLILDNLTGIDSGQYMCFAASAAGNASTLGKILVQVPPRFVNVKVRATPFVEGEDAQITCTVE  
 GAPYPQIRWYKDG TLLAPGNRYRMLNEPRSGVLV LVIQAASKEDLGHYECELVNRLGSTRGGGELYMQSPALR  
 ARDQHHREQIVAAVEDTSVEGSAHSAQDQADQAA SVLWRLLGSEALGPS PGDLPNTRQSEPPAFEEAASQIP  
 GAASGTPEVSPGTHKLEQETSSSGSQGWTVPIRVEGTAWPGAGTGQLLLDVHSQVIMETTQRTYVCQAPDT  
 GVTRAPSMQVTIEDVQVQVGDMAQF DAVIEGHPPPIV TWYKGSTQLTSSARLSQRQDGT TYSLVLT DVAPHDA  
 GVYTCVANNAGGQV LCKAELLVHGDKLDAENQVYRRKLSHFYDVQEEIGRGVFGFVKRVQHKGNMFC AAKF  
 IPLRSKTRAQAYQERDILATLGHPLVTGLLDQFETRKT LILILELCSSEELLDR LFKKGVVTEAEVKVYIQQL  
 VEG LHYLHSHGILHLDIKPPNILMVHPAREDIKICDFGFAQKITPSEPQYSKYGSPEFVSPEIIEQN PVSEGS  
 DIWAMGVISYLSLTCSSPFAGESDRATLLNVLEGRVSWSSPTAAHLS EDAKDFIKATLQRTPRARPSTSQCLA  
 HPWFLKSMPAEAAHFINTKQLKFL LARSRWRSLMSYKSI LVMRSIPELLQGPPDPSPLGVARHLRGEASGAS  
 SSSSSNDLAPFARAKELPPSPVTHSPLLHPRGFLRPSASLPEETEASMP TADA AVPAS PQSAGPPASPGCV  
 PRHSVSSLFYQQAGEAERGNKTS GAKRHPARRRHL LKGGYIARALPGLREPLMEYSLLEEEAAREEQASLM  
 TKT P SFETALRLPSSSVREVPGRSHSLDNPPVTTGSP EACEKQLLFPSTGLTHETTAKDRGHKEGFLOESV  
 PFPMSGDSRPGKQEGSSQDSCRGKPASSCHSELGSGSQEGC PPSQSLGSLPPQSLKELSTSCGPLFSEQ  
 PQAAPFPPTQVSPLLGSEKEPQDGS LSEGPVVPVSSSPGSASQVDASLDTEGLSEAGDTCDFTPPPQR PQEQAT  
 TRKFSLESRGGYAGVAGYGTFAFGGDAGGMLGQGPLWARMAWAVS QSSEEQDEAATESPQPLES LGPIAEASG

VPLRTPSPSLTPWEEVEQVSLVQIRDLSDGDAEAADTISLDISEVDPAYLNLSLDLYDIKYLPFEFMI FRRVPKPI  
EQPESPGSETEAGQGLADFL EEAAWPWP GELGLRAGLEITEEPEEPGDLEALLGEAAVGRKRKWSPSRGLFQF  
PGRCLSGEEPVELGLRQRVKASMAHISRILKGRPEGP EREGPPRKKAGLASFRLSGLKGRDQELSDEAVVLGQ  
SVTLACQVLAQPTAQATWSKDGVLLESSGHL L I S S T L K N F Q L L T I L V V K E E D L G T Y T C C V S N P L G T A V T T G V L  
RKAERPSSSPRPEVGELYKDAVLLVWKPVESCGPVTYIVQCCIEGGSWTTLASDISDCCYLTGKLSRGGMYIF  
RTACVSKAGMGPISSPSEQVLLGGPNHLASEEESRRGRPAQLLPSTKTFFAFQMQIRRRGRFSVVRQCREKASGR  
ALAAKIVPYQPEDKTAVLREYEALKRLHHPHLAQLHAAYLSRHLVLI L E L C S G P E L L P S L A E R E S Y S E S D V K  
DYLWQMSATQYLHAQHILHLDLRS ENMMVTEYNLLKVIDLGN AQSLDQEKVPAPENFKDYLETMAPELLEGGQ  
GAVPQTDIWAIGVTA FIMLSGEY P E S S E G T R D L Q K G L R K G L I R L S R C Y A G L S G G A V A F L Q S S L C A Q P W G R P C A  
STCLQCGLWTEEGPTGSRPTVTFPTVRLRA FVREREKRRALLYK KHNLAQVR\*  
>rs26971817\_ENSMUSP00000038264\_c.11139:A>G\_p.R3714G  
ENSMUST00000047441.14|Obscn-202|ENSMUSG00000061462|-|chr11:g.58954441:T>C  
MDHSFSGAPRFLTRPKAFVSVGKDATLSCQIVGNPTPHVSWEKDRQPVEAGARFRLAQDGDVYRLTILDLAL  
GDSGQYVCRARNAIGEFAAVGLRVDSEGTCAEQAPHLLRPTSIRVREGADATFRCRVGGSPPAVSWSKDG  
RRLGPPDAPHVRVEEHGESSALRIRSARPRDGGTYEVRAENPLGSASAAAALVVDSDAEVAGPPGTSTATLLA  
HLQQRREAMRAEGIPSPPGAGTRTCTVTEGKHARLSCFVTGEPKPEPVWKKDGQLVTEGRRHVVEDEQENF  
VLKILFCKQSDRGLYCTASNLVGTYSVSVLVVREPTVPFKRLQDLEVREKESATFQCEVAQPAATEAAWFK  
EETRLWASAKYDIEEGTERRLTVRNVSADDDAVYICETTEGSRVVAELSVQGNLTKLPRKTAVRTGDTAIF  
WVELAVPEGPVRWLRNQEEMVAGGRVAITAEGTCHTLTI FQCTLEDMGEVAFVSGGCRTTTQFCVSAPRRPPL  
YPPADPVVKAKTESSVTL SWSAPPHGDRPVTIDGYVLEKRKLGAYAWSRCHEAGWLATTEFTITGVAAEGDFQ  
FRVSAINHFGQGPYLEFPGMTMLVPLAVKTPKAVEAVEGGEVTFVSDLTVASSGEWFLDGEALKASSIYVI  
RCDRTRHMLTIREV PARLHGAQLKFVANGIETS IQMVVRAALGLPSSKLPAAAAREVLAQLHEEAQLLAELSD  
QAAAVTWLKDGRELSLGPKEYMQVSAGRRALLVRDVAQDDAGLYECVSRGSR TAYQLLVQDITDGYRDWGPAG  
PQKHMCKCAGAKIARYLGSSCYRFLQYDKGVWHWLEAALDTRQKGKTS SCSLHEKPKLVFAKQQAHSEVKA  
AGASATLSCEVAQAQTEVTFWKDGKLLSSSSKVRMEASGCSRRLVVQQAGKADAGEYSCEAGGQKLSFRLDVA  
EPKMVFAKEQQARSEVKA EAGASATLSCEVAQAQTEVTFWKDGKLLSSSSKVRMEASGCSRRLVVQQAGKAD  
GEYSCEAGGQKLSFRLDVTEPKLVFAKEQQARSEVKA EAGASATLSCEVAQAQTEVTFWKDGKLLSSSSKVRM  
EASGCSRRLVVQQAGKADAGEYSCEAGGQKLSFRLDVAEPKLVFAKEQQARSEVKA EAGASATLSCEVAQAQ  
EVTWFKDGKLLSSSSKVRMEASGCSRRLVVQQAGKADAGEYSCEAGGQKLSFRLDVTEPKLVFAKEQQAHSEV  
KAEAGASATLSCEVAQAQTEVTFWKDGKLLSSSSKVRMEASGCSRRLVVQQAGKADAGEYSCEAGGQKLSFRL  
DVAEPKLVFAKEQQARSEVKA EAGASATLSCEVAQAQTEVTFWKDGKLLSSSSKVRMEASGCSRRLVVQQAGK  
ADAGEYSCEAGGQKLSFRLDVAEPKLVFAKEQQANSEVKA EAGASATLSCEVAQAQTEVTFWKDGKLLSSSSK  
VRVEASGCSRRLVVQQAGKADAGEYSCEAGGQKLSFRLDVAEPKLVFAKEQQAHSEVKA EAGASATLSCEVAQ  
AQTEVTFWKDGKLLSSSSKVRMEASGCSRRLVVQQAGKADAGEYSCEAGGQKLSFRLDVAEPKLVFAKEQQAH  
SEVKA EAGASATLSCEVAQAQTEVTFWKDGKLLSSSSKVRMEASGCSRRLVVQQAGKADAGEYSCEAGGQKLS  
FRLDVAEPKLVFAKEQQAHSEVKA EAGASATLSCEVAQAQTEVTFWKDGKLLSSSSKVRMEASGCSRRLVVQQ  
AGKADAGEYSCEAGGQKLFRLDVAEPKLVFAKEQQAHSEVKA EAGASATLSCEVAQAQTEVTFWKDGKLLSS  
SSKVRMEASGCSRRLVVQQVQKADAGEYSCEARGQKLSFRLDVAEAE S Q I P E R P S R R E P L V V K E H E T I I L T A T  
IAAPSVAAVTWLKDGV E I R R S K R H E A T S L G D T H T L T V R G A Q V L D S A I Y S C R V G K E G Q D F P V Q V E E V A A K F S K P  
LEPVEGELGGTVMLVCELSPEQAEVWRCGNTQLRPGKRFQMTSEGPRRTLTVSGLREDDAEYVCE SRDDRT  
SARLTVKVPVVKFTSGLSAMVAEEGQEATFQCVVSPSDAGVTWYKDGMLQPSSEKFMVME SGASRSLTILGL  
TLEDAGQVTVAEAGASSAALRVREAPVLFKKKLEPQTVEERTSVTLEVELTRPWPEVKWTRNAAVLTPSENV  
EIRAEGARHCLVLRVSGFADRGGFFGCETPDDKTQAKLNVEMRQVRLVVRGLQEVEAKEQGTASMDVELSHAEVE  
GSWTRDGLRLQPGPKCHLAVQGPVHILTL SALQPQDSGLVAFRAEGVHTSARLIVTELPV SFTRVLQDVVATQ  
KEKVTLECELSRPVDVRLKDGVELRAGKAIGIVAQGTCSRSLVIYRCETGDQGVVCDALDAQTSASLRVQGR  
TYTLIFRRVLAEDAGEVKFVAENAESRAHLRVKELPVTLLRPLRDKIAMEKHRGVLECCQVSRASAQVRWFKGG  
VELQSGPKYEVVSDGLYRKLVIN DVQPEDEDTYTC D A G N V K T S A Q F F V E E Q S I T I V R G L K D M T V M E P A P A W F E  
CETSIPSVRPPKWL LGKTVLQAGGNVLEQDGTVHRLTLHKTCSTMTGPVHFTIGKSRSSAQLVSDIPVVL T  
RPLEPKAGRELQSVVLSCDFRPAPKAVQWYKDDTPLSPSEKFKMALEGQMAELRILRLTPADAGVYRCQAGSA  
QSSAEVTVAEAREVTVIQPLQDAEAMEEGRVCFSCELSHKDEDIEWSLNGTPLYNDSFHEISHEGCLHTLVLKS  
VRQADTGTVCATSPKVSVSARLVVKGPVVF L K A L D D V S A E E R G T L T L Q C E V S D P E A R V V W R K D G V E L G P S D K  
YDFLHKAGARGLTVHDL SHEDAGLYTCQVGSKETQSKVSVHDLHVGITKRLKTVEVLEGE SCSFECVLSHESP  
SDPAVWTVGGKT V G G S G H F H A V R Q R K Y T L T V K D A A L S D A G E V V F S V L G L T S K A S L I I R E R P V D I T K P L E D Q R  
TTLGEDVMLSCELSRAGTSVRWLKDGKAI R K S Q Y D L L S E G T R A V L V V R K A S L K D S G E Y T C E T E A S K S T A K L C  
VEEKANRFTTEELADLQVEEKGRAVFTCKTEHPASVVTWRKGLLELRASGKHVPSQEGLTLKLTINALERTDSD  
TYTCDIGQARTQARLLVHGQKVRVIEDLED TAVQEGSSAKFCCR IAPADYGPVHWFLDKTPLHSNELNEITVQ  
PGGYHVLT LRQLALKDSGTVYFEAGDQRTS AALRVTEKPSIFSRPLTDVTVTEGEDLTLVCETTTVDSSVRWT  
KDGTKLRPSARCQLSHEGCAQLLITATTPQDGGRYKCEIGGASSSIVRVHALPVRFRESLKDVEVPEGKAA



DLGTYTCCVSNPLGTAVTTGVLKRAERPSSSPRPEVGEYKDAVLLVWKPVEESCGPVTYIVQCCIEGGSWTTL  
ASDISDCCYLTKGLSRGGMYIFRTACVSKAGMPYSSPSEQVLLGGPNHLASEEESSRGRPAQLLPSTKTF  
QMQIRRRGRFVSVRQCREKASGRALAAKIVPYQPEDKTAVLREYEALKRLLHHPHLAQLHAAYLSRHLVLI  
LELCSGPELLPSLAERESYSESDVKDYLWQMLSATQYLHAQHILHLDLRSNNMMVTEYNLLKVIDLGN  
AQSLDQEKVPAPENFKDYLETMAPELLEGQAVPQTDIWAIGVTAIFIMLSGEYPESEGETRDLQKGLR  
KGLIRLSRCYAGLSGGAVAFLLQSSSLCAQPWGRPCASTCLQCGWLTEEGPTGSRPTVPTVPTVRLRA  
FVREEREKRRALLYKXKHNLAQVR\*

>rs26971817\_ENSMUSP00000049737\_c.11766:A>G\_p.R3923G

ENSMUST00000052872.15|Obscn-203|ENSMUSG00000061462|-|chr11:g.58954441:T>C  
MDHSFSGAPRFLTRPKAFVSVGKDATLSCQIVGNPTPHVSWEKDRQPVEAGARFRLAQDGDVYRLTILDLAL  
GDSGQYVCRARNAIGEFAAVGLRVDSEGTCAEQAPHFLLRPTSIRVREGADATFRCRVGGSPQPAVSWSKDG  
RRLGPPDAPHVRVEEHGESSALRIRSARPRDGGTYEVRAENPLGSASAAAALVVDSDAEVAGPPGTSTATLLA  
HLQORREAMRAEGIPPSPPGAGTRTCTVTEGKHARLSCFVTGEPKPEVWKKDQGLVTEGRRHVVEDEQENF  
VLKILFCKQSDRGLYTCTASNLVQTYSSVLVVVREPTVPPFKRLQDLEVREKESATFQCEVAQAPATEAAWFK  
EETRLWASAKYDIEEEGETERRLTVRNVSADDDAVYICETTEGSRVVAELSVQGNLTKLPRKTAVRTGDTAIF  
WVELAVPEGPVWRNRNQEEMVAGGRVAITAEGTCHTLTI FQCTLEDMGEVAFVSGGCRTTTQFCVSAPRRPPL  
YPPADFPVVKAKTESSVTLWSAPPHGDRPVTIDGYVLEKRKLGAYAWSRCHEAGWLATTEFTITGVAEEGDFQ  
FRVSAINHFGQGPYLEFPGTMHLVPLAVKTPKAVEAVEGGEVTFVSDLTVAASSGELWFLDGEALKASSIYVI  
RCDRTRHMLTIREVPARLHGAQLKFVANGIETSIQMVVRAALGLPSSKLPAAAAAREVLAQLHEEAQLLAE  
LSDQAAAVTWLKDGRELSLGPYEMQVSAGRRALLVRDVAQDDAGLYECVSRGSRATAYQLLVQEPKLVFAK  
GQQAHEVKAEGNSATLSCEVTQAQTEVTWFKDGKLLSSSSKVRMEASGCSRRLVVQQAGKADAGEYS  
CEAGGQKLSFRLDVAEPKLVFAKQQAHEVKAEGASATLSCEVAQAQTEVTWFKDGKLLSSSSKVRMEAS  
GCSRRLVVQQAGKADAGEYSCEAGGQKLSFRLDVAEPKLVFAKEQQARSEVKAEGASATLSCEVAQAQ  
TEVTWFKDGKLLSSSSKVRMEASGCSRRLVVQQAGKADAGEYSCEAGGQKLSFRLDVAEPKLVFAKEQ  
QARSEVKAEGNSATLSCEVAQAQTEVTWFKDGKLLSSSSKVRMEASGCSRRLVVQQAGKADAGEYS  
CEAGGQKLSFRLDVAEPKLVFAKEQQARSEVKAEGASATLSCEVAQAQTEVTWFKDGKLLSSSSKVR  
MEASGCSRRLVVQQAGKADAGEYSCEAGGQKLSFRLDVTEPKLVFAKEQQARSEVKAEGNSATLSCE  
VAQAQTEVTWFKDGKLLSSSSKVRMEASGCSRRLVVQQAGKADAGEYSCEAGGQKLSFRLDVAEPKLV  
FAKEQQARSEVKAEGNSATLSCEVAQAQTEVTWFKDGKLLSSSSKVRMEASGCSRRLVVQQAGKADAGE  
YSCEAGGQKLSFRLDVAEPKLVFAKEQQARSEVKAEGASATLSCEVAQAQTEVTWFKDGKLLSSSSK  
VRMEASGCSRRLVVQQAGKADAGEYSCEAGGQKLSFRLDVAEPKLVFAKEQQANSEVKAEGASATL  
SCEVAQAQTEVTWFKDGKLLSSSSKVRMEASGCSRRLVVQQAGKADAGEYSCEAGGQKLSFRLDVAE  
PKLAFAKEQQAHSEVKAEGASATLSCEVAQAQTEVTWFKDGKLLSSSSKVRMEASGCSRRLVVQQAG  
KADAGEYSCEAGGQKLSFRLDVAEPKLVFAKEQQAHSEVKAEGASATLSCEVAQAQTEVTWFKDGK  
LLSSSSKVRMEASGCSRRLVVQQAGKADAGEYSCEAGGQKLFRLDVAEPKLMFAKEQQAHSEVKAEGAS  
ATLSCEVAQAQTEVTWFKDGKLLSSSSKVRMEASGCSRRLVVQQAGKADAGEYSCEAGGQKLSFRLD  
VAEPKLVFAKEQQAHSEVKAEGASATLSCEVAQAQTEVTWFKDGKLLSSSSKVRMEASGCSRRLVV  
QQAGKADAGEYSCEAGGQKLSFRLDVAEPKLVFAKEQQARSEVKAEGASATLSCEVAQAQTEVTWFKD  
GKLLSSSSKVRMEASGCSRRLVVQQAGKADAGEYSCEAGGQKLFRLDVAEPKLMFAKEQQAHSEVKAEGAS  
ATLSCEVAQAQTEVTWFKDGKLLSSSSKVRMEASGCSRRLVVQQAGKADAGEYSCEAGGQKLSFRLD  
VAEPKLVFAKEQQAHSEVKAEGASATLSCEVAQAQTEVTWFKDGKLLSSSSKVRMEASGCSRRLVV  
QQAGKADAGEYSCEAGGQKLSFRLDVAEAEESQIPERPSRREPLVVKEHETIILTATIAAPSVAAVT  
WLKDGVEIRRSKRHEATSLGDHTLTVRGAQVLDIAIYSCRVGKEGQDFPVQVEEVAAKFSKPLEPVEGELGG  
TVMLVCELSPEQAEVWRCGNTQLRPGKRFQMTSEGPRRTLTVSGLREDDAEYVCESRDDRTSARLTVKVP  
RVLVVFVTSGLSAMVAEEGQEAFTQC VVSPSDAGVTWYKDGMLQPSSEKFMVMSGASRSLTILGLTLE  
DAGQVTV EAEGASSAALRVREAPVFLFKKLEPQTVEERTSVTLEVELTRPWPVEVKWTRNAAVLTPSEN  
VEIRAEGARHCLVLRVSGFADRGFFGCETPDDKTQAKLNVEMRQVRLVVRGLQVEVAKEQGTASMDVEL  
SHAEVEGSWTRDGLRLQPGPKCHLAVQGPVHILTLALQPDQSGLVAFRAEGVHTSARLIVTELPVSVFTR  
VLQDQVATQKEKVTLECEL SRPVDVRWLKDGVELRAGKAIIGIVAQGTCSRSLVIYRCETGDQGVYVCDAL  
DAQTSASLRVQGRTYTLIFRRVLAEDAGEVKFVAENAESRAHLRVKELPVTLLRPLRDKIAMEKHRGVLE  
CQVSRASQVRWFKGGVLELQSGPKYEVVSDGLYRKLVINVDVQPEDEDTYTCDAAGNVKTSAQFFV  
EEQSITIVRGLKDMTVMPEPAPAWFECETSIPSVRPKWL LGKTVLQAGGNVGLQDGTVHRLTLHKT  
CSTMTGPVHFTIGKSRSSAQLVVSDIPVVLTRPLEPKAGRELQSVVLSCDFRPAPKAVQWYKDDT  
PLSPSEKFKMALEGQMAELRILRLTPADAGVYRCQAGSAQSSAEVTVEARVTVIQPLQDAEAMEE  
GRVCFSCELSHKDEDIEWLSLNGTPLYNDSFHEISHEGCLHTLVLSVRQADTGTVCATSPKVS  
VSARLVVKGKPVVFLKALDDVSAEERGTLLTQCEVSDPEARVVWRKDGVELGPSDKYDFLHKAGAR  
GLTVHDLSDHEDAGLYTCQVGSKETQSKVSVHDLHVGITKRLKTVEVLEGESECSFECVLSHES  
PSDPVAVTVGGKTVGSGHFHAVRQGRKYTLTVKDAALSDAGEVVSGLVGLTSKASLIRERPV  
DITKPLEDQRTTLGEDVMLSCELSRAGTSVRWLKDGKAIKRSQKYDLLSEGTRAVLVVRKASLKD  
SGEYTCETEASKSTAKLCEVEKANRFTEELADLQVEEKGRAVFTCKTEHPASVVTWRKGLLE  
LRASGKHVPSQEGTLKLTINALERTDSDTYTCDIGQAR TQARLLVHGQKVRVIEDLED  
TAVQEGSSAKFCCRIAPADYGPVHWFLLDKTPLHSNELNEITVQPGGYHVLTLRQLAL  
KDSGTVYFEAGDQRTSAAALRVTEKPSIFSRPLTDVTVTEGEDTLVCETTTTVDSSVRWTK  
DGKTLRPSARCQLSHEGCQAQLLITATTPQDGGRYKCEIGGASSSSIVRVHALPVRFRESLKD  
VEVPEGKAATLRCVLSVA

APVEWRHGDDVLKSSNKYSLRQEGAVLELVIRDLQPQDSGQYSCSFGDQTTSATLTVKTSQAQFVGLRNKEA  
 TEGTTVTLRCELTKAPVEWKKGTETLRNGDKYSLKQDQAVCELQICSLLVADAGEYSCVCGQEKTSATLTVK  
 ALLVHFVRRRLRSKEATEGDTTTLQCELSKAAPVEWRKGTETLRDGDYSLKQDQAVCELQIRSLTIADAGEYL  
 CTCGQEKTSATLTVRALPAKFKDSLKNEEATEGTTATLSCELSKAAPVTWKKGPKTLQSGDKYVLRQDQAVCG  
 LQIHGLTMADAGEYSCVCGQEKTSATLTVRGLPAKFIEDLRSQEATEGATAILGCELSKAAPVEWRKGTETL  
 DGDYTLRQDQAVCELQIRGLAVVDTGTYSLPTKFTTEGLRNEEATEGTMATLRCQMSKAAPVEWRKGTETL  
 DGDYSLRQDQAVCELQIRGLTIEDSGEYTCVCGQEKTSATLSVKALPSRFIEDLRSQEATEGTMATLRCQMS  
 KTAPVEWKKGSETLRDGGYSLRQDQAVCELQICDLAVEDAGEYSCVCGQEKTSATLSIKALPPRFIEDLRSQ  
 EATEGTMATLRCQMSKAAPVEWRKGTETLRDGGYSLRQDQAVCELQIHDLAVEDTGEYSCVCGQEKTSATLN  
 VKALPPRFIEDLRSQEATEGTMATLRCQMSKAAPVEWRKGTETLRDGGYSLRQDQAVCELQIHDLVEDAGQ  
 YSCVCGQEKTSAVLTVDALPPKFTTEGLKKEEATEGTMVTLRCQMSKEATVEWRKGAKTLSGGYSLRQDQAV  
 CELQICGLAVEDAGEYSCVCGQEKTSATLSVKALPPRFIEDLRSQEATEGTMATLRCQMSKAAPVEWRKGT  
 LRDGDYSLRQDQAVCELQIRDLAVEDAGEYLCVCGQEKTSATLSVKALPPRFIEDLRSQEATEGTMATLRCQ  
 MSKAAPVEWRKGTETLRDGGYSLRQDQAVCELQICDLAVEDTGDYSCVCGQEKTSATLSVKALPPRFIEDLR  
 SQEAREGTVATLRCRMSKAAPVEWRKGTETLRDGGYSLRQDQAVCELQIRDLAVEDTEEYSCVCGQEKTSAT  
 LSVKALPAKFIEDLRSQEAPESSTVTLRCKLSKASVWKKGSETLRNGARYSLRQDQAVCELEIRDLTVEDT  
 GEYSCVCGQEKTSATLSIMAPQVVFQQLQNLQAEEGSMASLRCELSVPNAAMVWSKGGLELQDTRREARQQ  
 GCVAEALLRDLRREDAGEYSCVCGQEKTSATLMVTAAPVRFRLRLQAQDVDEGATARLRCLELSREAVSVEWRK  
 GSLQLFPCAQYQMVQEGTAEALLVHGVQEDAGEYTCDAHGHTQS IARLSVRAPKPKFKTDLQSTEQEAGGTAR  
 LCCQLSEAEPTPVQWLKEGVELHVGSKYEMRRQAVCELLIHGLEAKDTGEYACLVGQKTLASLRVKEPEV  
 TIVRGLVDMVQADEDEFTCKVSAQATDVQWHLQGLPLQSNVTEVAVLADGCTHVLQKGVTLQDAGTVS  
 FHVGLSSSAQLTVRVPEVTVLEPLKDVQLSEGQDAHFRCRLSRASQEARWALGGVPLQCNEMNDITVEQGT  
 LYLLTLHKVTLQDAGTITLQVGSSEEAQLKVTAKNTVLRGLENVDALEGGALFECQLSQPEVAHTWLLDD  
 EPVHTSEKVEVVYFENGLRHLLLLKLNKLPQDSCRVTFLAGDVVTS AFLTVRGRWLEVLEPPHDASVKAGMQR  
 FTCILSEAVPVGEATWYINGAAIQPDDTWTVTDDGSHHALTSLNAQPHAGEVTF AARDAVASARLSVLALP  
 DPEDAEVGSRDHSVTLWSVAPMSDGGGLCGYRVEKMEASTGQWQLCHDLVPGPECVVDDLVPGKTYRFRV  
 AAVGPAGAGEPVHLQPMVKIAPAPAPAPAPAPAPAPAPETRQAVVGEDICLELEVAADGGEVWVKGTERIQPGG  
 HFEVLSRGRQMLVIKGFRTEDQGEYRCGPIQGLPSSGAATFNVMVMTSGSGDEVPAQPSLPPPEAAQEGDLHLL  
 WEALARKRRMSREPTLDSISELPEEDSRVQHLRQEAEEETAPDLSEGYSTADELARTGEADLSHTSSDDESRA  
 TPSLVTYLKKAGGPGISPLASKHEAQVTTSVKPKQKQEPVPTCPPPGDLSAADLMDPSLDKAAVKIQAAFQK  
 YKVRKEMKQQEGPVFSRTFGDTEAQVGDVLRLECVLATKTDMRACWLKDGIELTDGRHYHIDQLKDGTCSSLLV  
 TGLAPTDSGRYTCQVSTKSGRVSHSACVVVSGTESEAESSSGGELDDAFRRAARLHRLFRTKSPAELSEEEL  
 FLSADEGPEPEEPADWQTYREDENFVICIRFESLAEARQAVTCFRNMFATMGIGVEISLGEQGPGRVEMRIGK  
 VAPTVTAVPLAKTPGLQTSDAAPVFLTELQNDQVQDGYPMSFDCVVTGQPVPSVRWFKDGKLEEDDHMIN  
 EDQGGHQLIITAVVPADMGVYRCLAENSMGVSSTKAELRVELTSTDYDTAADATETSSYFSAQGYLSSREQE  
 GTESDEGLPQVLEELKDLQVAPGTRLAKFQLKVKGYPAKLYWFKDQPLTSDHIRMTDKKTLHTLEIVSV  
 TREDSGQYAAIYISNAVGAAYSSARLLVRGPSEPEEKPASDVHERLVPRILEKFTPKKVKRGSSTIFSVEG  
 HPAPSVHVLKEEAKEGVLWIGPDTPGYTMASSSKQHSVLVLDVGRQHGTYTCIATNPAGQALCSASLHISGL  
 AKEEQERVKEALISSFLQTSQAVSAQMSSEAGFADLVGQSKGESLVAEEAHSHLSLAEVGTTEFLQKLTSSQ  
 ITEMPSAKISQAKLQVPGGDSDEETKTPSASPRHGRSRPSSSVQESSSESEDGDSRGEIFDIYVVTADYLPGL  
 AEQDAIILREGQYVEVLDSAHPLRWLVRTKPTKSSPSRQGWVSPAYLDKRLKLSPEWGPTEAPEFPGEAVSED  
 EYRTRLSSVIQELLSSEQAFVGELEQFLESHHMKHLERSPRVPAVASQKTVIFRNVQDISHFHSSFLKELQGC  
 GTDDDVAMCFIKNQEAFFEKYLEFLVGRVQAESVVVSTPVQEFYKKYAEETLSAKDPTQPPPPLOHYLEQVVE  
 RVQKYQALLKELIRNKARNRQNCALLEQAYAVVSALPQRAENKLVHSLMENYPGTLEALGEPVIRQGHFVWEG  
 APGARMFWKGNHRHVFVLFVFRNYLVICKPRRDSRTDTSYVFRNMMKLSSIDLNDQVEGDDRAFEVWHEREDESVR  
 KYLLQARTVIKNSWVKEICGIQQLAQPVWRPPEFEELADCTAELGETVKLACRVTGTPKPIVSWYKDGKP  
 VEVDPHHILIEDPDGSCCTLILDNLTGIDSGQYMCFAASAAGNASTLGKILVQVPPRFVNVKVRATPFVEGEDAQ  
 ITCTVEGAPYPQIRWYKDGTLAPGNRYRMLNEPRSGVLVVIQAASKEDLGHYECELVNRLGSTRGGGELYM  
 QSPALRARDQHHREQIVAAVEVTEQETKVPKKTVIIIEETITTVVKS PRGRRQSPGKSPSRSPSRASPRRPG  
 LLAPERLYPPGTSPSRRLEVEQGRKAPVPALYVTEAEVHAPASQSPKWLEVEETIEVRVKKTGSRGASPVRE  
 MTSRGEGLIFTLPGGIPGRDPNANNSNNSVYQEARWGPVAVHVGEPFIFQVDSVGNVDWVAASPEPEQVRA  
 SQKEENTERQEGCSDGENTFLMEEPQDQDLSQGRDPKILTHNGRVLTLADLEDYVPQEGETFGCGDSTPSTP  
 DEPPCEVSVLQREI SEPTVGGQPVLLNVGRPPGTGATPSFFRPGSQVHSPESVSLFLREAWSGPVSAAPWTSSF  
 HTHVQSSVDGSHGSKTEVSTQTVSFGAVGETVTLHIDPDGGEAPGPSQG\*  
 >rs26971817 ENSMUSP00000020732\_c.11967:A>G\_p.R3990G  
 ENSMUST00000020732.13|Obscn-201|ENSMUSG00000061462|-|chr11:g.58954441:T>C  
 MDHSFSGAPRFLTRPKAFVSVGKDATLSCQIVGNPTPHVSWEKDRQVPEAGARFRLAQDGDVYRLTILDLAL  
 GDSGQYVCRARNAIGEAFAAVGLRVDSEGTCAEQAPHLLRPTSIRVREGADATFRCRVGGSPQPAVSWSKDG



RRLGPPDAPHVRVEEHGESSALRIRRSARPRDGGTYEVRAENPLGSASAAAAALVVDSDAEVAGPPGTSTATLLA
HLQORREAMRAEGIPPSPPGAGTRTCTVTEGKHARLSCFVTGEPKPEVWKKDGLVTEGRRHVVEDEQENF
VLKILFCKQSDRGLYTCTASNLVGGQTYSSVLVVVREPTVPFKKRLQDLEVREKESATFQCEVAQPATEAAWFK
EETRLWASAKYDIEEEGETERRLTVRNVSADDDAVYICETTEGSRVVAELSVQGNLTKRKLPRKTAVRTGDTAIF
WVELAVPEGPVRWLRNQEEMVAGGRVAITAEGTCHTLTI FQCTLEDMGEVAFVSGGCRTTTTQFCVSAPRRPPL
YPPADPVVKAKTESSVTLWSAPPHGDRPVTIDGYVLEKRKLGAYAWSRCHEAGWLATTEFTITGVAAEEDGFQ
FRVSAINHFGQGPYLEFPGTMHLVPLAVKTPKAVEAVEGGEVTFVSDLTVASSGEWFLDGEALKASSIYVI
RCDRTRHMLTIREVPARLHGAQLKVFVANGIETS IQMVVRAALGLPSSKLPAAAAREVLAQLHEEAQLLAELSD
QAAAVTWLKDGRELSLGPKYEMQVSAGRRALLVRDVAQDDAGLYECVSRGSRRTAYQLLVQDITDGYRDWGPAG
PQKHMCKCAGAKIARYLGS SCYRFLQYDKGVWHLEAALDTRQGKGTSSCSLHEKPKLVFAKQQAHSEVKA
AGNSATLSCEVTQAQTEVTFKDGKLLSSSSKVRMEASGCSRRLVVQQAGKADAGEYSCEAGGQKLSFRLDVA
EPKLVFAKQQAHSEVKAEGASATLSCEVAQAQTEVTFKDGKLLSSSSKVRMEASGCSRRLVVQQAGKADA
GEYSCEAGGQKLSFRLDVAEPKMFVFAKEQQARSEVKAEGASATLSCEVAQAQTEVTFKDGKLLSSSSKVRM
EASGCSRRLVVQQAGKADAGEYSCEAGGQKLSFRLDVTEPKLVFAKEQQARSEVKAEVGNSATLSCEVAQAQ
EVTWFKDGKLLSSSSKVRMEASGCSRRLVVQQAGKADAGEYSCEAGGQKLSFRLDVAEPKLVFAKEQQARSE
KAEAGNSATLSCEVAQAQTEVTFKDGKLLSSSSKVRMEASGCSRRLVVQQAGKADAGEYSCEAGGQKLSFHL
DVTEPKLVFAKEQQAHSEVKAEGASATLSCEVAQAQTEVTFKDGKLLSSSSKVRMEASGCSRRLVVQQAGK
ADAGEYSCEAGGQKLSFRLDVAEPKLVFAKEQQARSEVKAEGASATLSCEVAQAQTEVTFKDGKLLSSSSK
VRVEASGCSRRLVVQQAGKADAGEYSCEAGGQKLSFRLDVAEPKLVFAKEQQANSEVKAEGASATLSCEVAQ
AQTEVTFKDGKLLSSSSKVRVEASGCSRRLVVQQAGKADAGEYSCEAGGQKLSFRLDVAEPKLAFAKEQQAH
SEVKAEGASATLSCEVAQAQTEVTFKDGKLLSSSSKVRVEASGCSRRLVVQQAGKADAGEYSCEAGGQKLS
FRLDVAEPKLAFAKEQQAHSEVKAEGASATLSCEVAQAQTEVTFKDGKLLSSSSKVRVEASGCSRRLVVQQ
AGKADAGEYSCEAGGQKLSFRLDVAEPKLAFAKEQQAHSEVKAEGASATLSCEVAQAQTEVTFKDGKLLSS
SSKVRVEASGCSRRLVVQQAGKADAGEYSCEAGGQKLFRLDVAEPKLMFAKEQQAHSEVKAEGASATLSCE
VAQAQTEVTFKDGKLLSSSSKVRVEASGCSRRLVVQQAGKADAGEYSCEAGGQKLSFRLDVAEPKLVFAKEQ
QAHSEVKAEGASATLSCEVAQAQTEVTFKDGKLLSSSSKVRVEASGCSRRLVVQQAGKADAGEYSCEARGQ
KLSFRLDVADTRLFAKEQQARTEVKAEGASATLSCEVAQAQTEVTFKDGKLLSSSSKVRVEASGCSRRLV
VQQAGKADAGEYSCEAGGQKLSFRLDVAEAEESQIPERPSRREPLVVKEHETIILTATIAAPSVAAVTWLKDG
EIRRSKRHEATSLGDTHTLTVRGAQVLDSAIYSCRVGKEGQDFPVQVEEVAAKFSKPLEPVEGELGGTVMLVC
ELSPQAEVWRCGNTQLRPGKRFQMTSEGPRTTLTVSGLREDDAEYVCESRDDRTSARLTVKVPVVKFTS
GLSAMVAEEGQEQATFQCVVSPSDAGVTWYKDGMLQPSKFKVMVESGASRSLTILGLTLEDAGQVTVAEAGS
SSAALRVREAPVLFKKLEPQTVERTSVTLEVELTRPWPEVKWTRNAAVLTPSENVEIRAEGARHCLVLRV
GFADRGGFFGCETPDDKTQAKLNVEMRQVRLVVRGLQVEVEAKEQGTASMDVELSHAEVEGSWTRDGLRQLQ
HLAVQGPVHILTLALSALQPDQSLVAFRAEGVHTSARLIVTELPVSFTRVLQDVVATQKEKVTLECELSRPVD
RWLKDGVLELRAGKAIGIVAQGTCSRSLVIYRCETGDQGVYCDALDAQTSASLRVQGRTYTLIFRVLAEADAGE
VKEVAENAESRAHLRVKELPVTLLRPLRDKIAMEKHRGVLECGVSRASAVRWFKGGVLELQSGPKYEVVSDGL
YRKLVINVDQPEDEDTYTC DAGNVKTSAQFFVVEEQSITIVRGLKDMTVMPEPAPAWFECETSIPSVRPPK
KTLVQLQAGNGVLEQDGTVHRLTLHKTCSTMTGPVHFTIGKSRSSAQLVSDIPVVLTRPLEPKAGRELQSV
SCDFRPAPKAVQWYKDDTPLSPSEKFKMALEGQMAELRILRLTPADAGVYRCQAGSAQSSAEVTVAREVTVI
QPLQDAEAMEEGRVCFSCELSHKDEDEIWSLNGTPLYNDSFHEISHGCLHTLVLSVRQADTGTVCATSPKV
SVSARLVVKGKPVVFLKALDDVSAEERGTTLTQCEVSDPEARVVWRKDGVELGSPDKYDFLHKAGARGLTV
LHSHEDAGLYTCQVGSKETQSKVSVHDLHVGITKRLKTVEVLEGESECSFECVLSHESPSDPAVWTVGGKTV
GHFHAVRQGRKYTLTVKDAALSDAGEVVFVGLTSLKASLIIRERPVDITKPLEDQRTTLGEDVMLSCELSRA
GTSVRWLKDGKAIKRSQKYDLLSEGTRAVLVVRKASLKDSEYTCETEASKSTAKLCEVEKANRFTBELADLQ
VEEKGRAVFTCKTEHPASVVTWRKGLLELRASGKHVPSQEGTLTKLTINALERTDSDTYTCDIGQARTQARLL
VHGQKVRVIEDLEDTAVQEGSSAKFCRIAPADYGPVHWFLLDKTPLHSNELNEITVQPGGYHVLTLRQLAL
SGTVYFEAGDQRTSAALRVTEKPSIFSRPLTDVTVTEGEDTLVCEETTVDSSVRWTKDGKTLRPSARCQLSH
EGCQALLITATTPQDGGRYKCEIGGASSSSIVRVHALPVRFRESLKDVEVPEGKAATLRCVLSVAAPVEWR
HGDDVLKSSNKYSLRQEGAVLELVIRDLQPDQSGQYSCSFGDQTTSATLTVKTSQAQFVGLRNKEATEGTTV
TLRCELTKAEAPVEWKKGTETLRNGDKYSLKQDQAVCELQICSLLVADAGEYSCVCGQEKTSATLTVKALLV
VRLRSKEATEGDTTLQCELSKAAPVEWRKGTETLRDGDYSLKQDQAVCELQIRSLTIADAGEYLCTCGQE
KTSATLTVRALPAKFKDSLKNEEATEGTTATLSCELSKAAPVWKKGPKTLQSGDKYVLRQDQAVCGLQIHGL
TMADAGEYSCVCGQEKTSATLTVRGLPAKFIEDLRSQEATEGATAILGCELSKAAPVEWRKGSSETLKDGRY
LRQDQAVCELQIRGLAVVDGTYSLSLPTKFTTEGLRNEEATEGTMATLRCQMSKAAPVEWRKGSSETLRDGRY
LRQDQAVCELQIRGLTIEDSGEYTCVCGQEKTSATLSVKALPSRFIEDLRSQEATEGTMATLRCQMSKTPA
VVEWRKGSSETLRDGGRYSLRQDQAVCELQICDLAVEDAGEYSCVCGQEKTSATLSIKALPPRFIEDLRSQE
ATEGTMATLRCQMSKAAPVEWRKGSSETLGDGGRYSLRQNGAVCELQIHDLAVEDTGEYSCVCGQEKTSAT
LNVKALPPRFIEDLRSQEATEGTMATLRCQMSKAAPVEWRKGSSETLRDGGRYSLRQDQAVCELQIHDLDVED
AGQYSCVCG

QEKTSAVLTVDALPPKFTEGLKKEEATEGTMVTLRCQMSKEATVEWRKGAKTSLSDGGRYSLRQDGMCELQIC  
GLAVEDAGEYSCVCGQEKTSATLSVKALPPRFIEDLRSQEATEGTMATLRCQMSKAAPVEWRKGETLRDGD  
YSLRQDGAVCELQIRDLAVEDAGEYLCVCGQEKTSATLSVKALPPRFIEDLRSQEATEGTMATLRCQMSKAAP  
VEWRKGSKTLRDGDYSLRQDGMCELQICDLAVEDTDYSCVCGQEKTSATLSVKALPPRFIEDLRSQEARE  
GTVATLRCRMSKAAPVEWRKGETLKDGDYSLRQEGNLCELQIRDLAVEDTEEYSCVCGQEKTSATLSVKAL  
PAKFIEDLRSQEAPESSTVTLRCKLSKKASVVVKKGSETLRNGARYSLRQDGAVCELEIRDLTVEEDTGEYSCT  
CGQERTSATLSIMAPQVVFQQLQNLQAEEGSMASLRCELSVPNAAMVWSKGGLELQGDTRREARQQGCVAEL  
LLRDLRREEDAGEYSTCGSQTTSATLMVTAAPVRFLELQAQDVDEGATARLRCELSREAVSVEWRKGSLLQF  
PCAKYQMVQEGTTAELLVHGVEQEDAGEYTCDAAGHTQSIARLSVRAPKPKFKTDLQSTEQEAGGTARLCCQLS  
EAEPTGTPVQWLKEGVELHVGSKYEMRRQGAUCELLIHGLEAKDTGEYACLVGGQKTLASLRVKEPEVTIVRGL  
VDMEVQADEDEFTCKVSOAGATDVQWHLQGLPLQSNVTEVAVLADGCTHVLQKGVTLLEDAGTVSFHVGGL  
SSSAQLTVRVPEVTVLEPLKDVQLSEGQDAHFRCRLSRASGQEARWALGGVPLQCNEMNDITVEQGTLYLLTL  
HKVTLEDAGTITLQVGSSESQAQLKVTAKNTVLRGLENDVALEGGEALFECQLSQPEVAHAHTWLLDDEPVHTS  
EKVEVVYFENGLRHLLKLNKLPQDSCRVTFLAGDVVTSAFLTVRGWRLEVLPEPHDASVKAGMQVRFCTILS  
EAVPVGEATWYINGAAIQPDDTDWTVTTDGSHHALTLSNAQPQHAGEVTFAAARDAVASARLSVLALPDPEDA  
EAVGRSDHVSVTLVSWVAPMSDGGGGLCGYRVMKEASTGQWQLCHDLVPGPECVVDDLVPKTYRFRVAAVGPA  
GAGEPVHLQMVVLIAPAPAPAPAPAPAPAPAPAPETRAVVGEDICILEVAADGGEVWHKGTERRIQPGHFVLS  
RQQRQMLVIKGFRTEDQGEYRCGPIQGLPSSGAATFNVMVTSGSQDEVPAQPSLPPEAAQGLRDLHLLWEALAR  
KRRMSREPTLDSISELPEEDSRVQHLRQEAEEETAPDLSEGYSTADELARTGEADLSHTSSDDESAGTPSLVT  
YLKAGGPGISPLASKHEAQVTTSVKPKQKQEPVVPTCPPPGDLSAADLMDPSLDKAAVKIQAAPFKYKVRKE  
MKQQEGPVFSRTFGDTEAQVGDVLRLECVLATKTDMRACWLKDGIELTDGRHYHIDQLKDGTCSLVLTGLAPT  
DSGRYTCQVSTKSGRVSHSACVVVSGTESEAESSGGELDDAFRAARRLHRLFRTKSPAELSEELFLSADE  
GPGPEEPADWQTYREDENFVCIRFESLAEARQAVTCFRNMFATMGIGVEISLGEQGPGRVEMRIKGVAPTVT  
PAVPLAKTPGLQTSDAAPVFLTELQNDVQDGYPMSFDCVVTGQPVPSVRWFKDGKLEEDDHYMINEDQQGG  
HQLIITAVVPADMVYRCLAENSMGVSSTKAELRVELTSTDYDTAADATETSSYFSAQGYLSSREQEGTESDE  
GQLPQVLEELKDLQVAPGTRLAKFQLKVKGYPAKLYWFKDQGLTTSDHIRMTDKKTLHTEIVSVTREDPSG  
QYAAIYLSNAVWKEICGIQQLRAQPVWRPPEFEELADCTAELGETVVKLACRVGTGPKPIVSWYKDGKPEVDPH  
HWLKEEAKEKGLVWIGPDTPGYTMASSSKQHSVLVLDVGRQHQTGTYTCIATNPAGQALCSASLHISGLAKEEQ  
ERVKEALISSFLQGTSAVSAQMSSESAGFADLVGQSKGESLVAEEAHSLSLAEVGTTEFLQKLSQITEMVS  
AKISQAKLQVPGGDSDEETKTPSASPRHGRSRPSSSVQESSESESDGDSRGEIFDIYVVTADYLPGLAEQDAI  
ILREGQYVEVLDSAHPLRVLVTRTKSPSRQGWVSPAYLDRKRLKLSPEWGPTEAPEFPGEAVSEDEYRTRL  
SSVIQELLSSEQAFVQELQFLESHHMKHLERSPRVPAAVASQKTVIFRNVQDISHFHSSFLKELQCGCTDDDDV  
AMCFIKNQEAFAKEYLEFLVGRVQAESVVVSTPVQEFYKKAEEETLSAKDPTQPPPPPLQHYLEQPVERVQKYQ  
ALLKELIRNKARNRQNCALLEQAYAVVSALPQRAENKLVSLMENYPGTLEALGEPHQGHFVWEGAPGARM  
PWKGNHRHVFLFRNYLVICKPRRDSRTDTFSYVFRNMMKLSSIDLNDQVEGDDRAFEVWHEREDSRKYLQ  
RTVILKNSWVKEICGIQQLRAQPVWRPPEFEELADCTAELGETVVKLACRVGTGPKPIVSWYKDGKPEVDPH  
HILIEDPDGCTLILDNLGTIDSGQYMCFAASAAGNASTLGKILVQVPPRFVNVKVRATPFVEGEDAQITCTVE  
GAPYPQIRWYKDGTLAPGNRYRMLNEPRSGVLVVIQAASKEDLGHYECELVNRLGSTRGGGELYMQSPALR  
ARDQHHREQIVAAVEERRPSP\*  
>rs26971817\_ENSMUSP00000151217\_c.10323:A>G\_p.R3442G

ENSMUST00000219084.3|Obscn-207|ENSMUSG00000061462|-|chr11:g.58954441:T>C  
MDHSFSGAPRFLTRPKAFVSVGKDATLSCQIVGNPTPHVSWEKDRQVPEAGARFLAQDGDVYRLTILDLAL  
GDSGQYVCRARNAIGEAFAAVGLRVDSEGTCAEQAPHFLLRPTSIRVREGADATFRCRVGGSPQPAVSWSKDG  
RRLGPPDAPHVRVEEHGESSALRIR SARPRDGGTYEVR AENPLGSASAAAALVVDSDAEVAGPPGTSTATLLA  
HLQQRREAMRAEGIPSPPGAGTRTCTVTEGKHARLSCFVTGEPKPETVWKKDGLVTEGRRHVYDEQENF  
VLKILFCKQSDRGLYTCTASNLVQGTYSVVLVVREPTVPFKKRLQDLEVREKESATFQCEVAQPATEAAWFK  
EETRLWASAKYDIEEGTERRLTVRNVSADDDAVYICETTEGSRVVAELSVQGNLTKLPRKTAVRTGDTAIF  
WVELAVPEGPVRWLRNQEEMVAGGRVAITAEGTCHTLTIFQCTLEDMGEVAFVSGGCRTTTQFCVSAAPRRPPL  
YPPADPVVKAKTESSVTLVSWAPPHGDRPVTIDGYVLEKRKLGAYAWSRCHEAGWLATTEFTITGVAAEEDGFQ  
FRVSAINHFGQGPYLEFPGTMHLVPLAVKTPKAVEAVEGGEVTFVSDLTVASSGEWFLDGEALKASSIYVI  
RCDRTRHMLTIREVPARLHGAQLKFVANGIETSIQMVVRAALGLPSSKLPAAAAAREVLAQLHEEAQLLAEALS  
QAAAATWLKDGRELSLGPKEYMQVSAGRRALLVRDVAQDDAGLYECVSRGSRRTAYQLLVQDITDGYRDWGPAG  
PQKHMCKCAGAKIARYLGSSCYRFLQYDKGVWHWLEAALDTRQKGTSSCSLHEKPKLVFAKQQAHSEVKA  
AGNSATLSCEVTAQTEVTFWKDGKLLSSSSKVRMEASGCSRRLLVVQQAGKADAGEYSCEAGGQKLSFRLDVA  
EPKLVFAKQQAHSEVKAAGASATLSCEVAQAQTEVTFWKDGKLLSSSSKVRMEASGCSRRLLVVQQAGKADA  
GEYSCEAGGQKLSFRLDVAEPKMFVFAKEQQARSEVKAAGASATLSCEVAQAQTEVTFWKDGKLLSSSSKVRM  
EASGCSRRLLVVQQAGKADAGEYSCEAGGQKLSFRLDVTEPKLVFAKEQQARSEVKAAGNSATLSCEVAQAQ  
EVTWTFKDGKLLSSSSKVRMEASGCSRRLLVVQQAGKADAGEYSCEAGGQKLSFRLDVTEPKLVFAKEQQAHSEV

KAEAGASATLSCEVAQAQTEVTWFKDGKLLSSSSKVRMEASGCSRRLVVQQAGKADAGEYSCEAEGQKLSFRL
DVAEPKLVFAKEQQARSEVKAEAGASATLSCEVAQAQTEVTWFKDGKLLSSSSKVRVEASGCSRRLVVQQAGK
ADAGEYSCEAGGQKLSFRLDVAEPKLVFAKEQQANSEVKAEAGASATLSCEVAQAQTEVTWFKDGKLLSSSSK
VRVEASGCSRRLVVQQAGKADAGEYSCEAGGQKLSFRLDVAEPKLAFAKEQQAHSEVKAEAGASATLSCEVAQ
AQTEVTWFKDGKLLSSSSKVRVEASGCSRRLVVQQAGKADAGEYSCEAGGQKLSFRLDVAEPKLVFAKEQQAH
SEVKAEAGASATLSCEVAQAQTEVTWFKDGKLLSSSSKVRVEASGCSRRLVVQQVKGADAGEYSCEARGQKLS
FRLDVAEAEESQIPERPSRREPLVVKEHETIILTATIAAPSVAAVTWLKDGVETIRRSKRHEATSLGDHTLTVR
GAQVLDIAIYSCRVGKEGQDFPVQVEEVAAKFSKPLEPVEGELGGTVMLVCELSPEQAEVWRCGNTQLRPGK
RFQMTSEGPRTLTVSGLREDDAEYVCESRDDRTSARLTVKVPRVVKFTSGLSAMVAEEGQEATFQCIVVSPS
DAGVTWYKDGMLQPSSEKFMVSESGASRSLTILGLTLEDAGQVTVAEAGASSAALRVREAPVLFKKKLEPQT
VEERTSVTLEVELTRPWPEVKWTRNAAVLTPSENVEIRAEGARHCLVLRVSGFADRGFFGCETPDDKTQAKLN
VEMRQVRLVVRGLQVEEAKQGTASMDVELSHAEVEGSWTRDGLRLQPGPKCHLAVQGPVHILTLALSALQPDQSG
LVAFRAEGVHTSARLIVTELPVSFTRVLQDVVATQKEKVTLECELSRPVDVRLKDGVELRAGKAI GIVAQGT
CRSLVIYRCETGDQGVYCDALDAQTSASLRVQGRYTLIFRRVLAEDAGEVKFVAENAESRAHLRVKELPVT
LLRPLRDKIAMEKHRGVLECVSRASAQVRWFKGGVELQSGPKYEVVSDGLYRKLVINDDVQPEDEDTYTC DAG
NVKTSAQFFVEEQSITIVRGLKDMTVMEPAPAWFECETSIPSVRPPKWLKGKTVLQAGGNVLEQDGTVHRLT
LHKTCSTMTGPHVFTIGKSRSSAQLVSDIPVVLTRPLEPKAGRELQSVVLSCDFRPAPKAVQWYKDDTFLSP
SEKFKMALEGQMAELRILRLTPADAGVYRCQAGSAQSSAEVTVAREVTVIQPLQDAEAMEEGRCVCFSCELSH
KDEDIEWSLNGTPLYNDSFHEISHEGCLHTLVLKSVRQADTGTVCATSPKVSVSARLVVKGKPVVFLKALDDV
SAEERGTTLTQCEVSDPEARVVWRKDGVELGSPDKYDFLHKAGARGLTVHDLSHEDAGLYTCQVGSKETQSKV
SVHDLHVGITKRLKTVEVLEGESECFEVLSEHSPDPAVWTVGGKTVGGSGHFHAVRQGRKYTLTVKDAALS
DAGEVVSFVGLGLTSKASLIIRERPVDTITKPLEDQRTTLGEDVMLSCELSRAGTSVRWLKDGKAIKRSQKYDLL
SEGTRAVLVVRKASLKDSGEYTCETEASKSTAKLCVEEKANRFTEELADLQVEEKGRAVFTCKTEHPASVVTW
RKGLLELRASGKHVPSQEGTLTKLTINALERTSDSYTCDIGQARTQARLLVHGQKVRVIEDLEDTAVQEGSS
AKFCCRIAPADYGPVHWFLDKTPHLSNELNEITVQPGGYHVLTLRQLALKDSGTVYFEAGDQRTSAAALRVTEK
PSIFSRPLTDVTVTEGEDTLVCETTTVDSSVRWTKDKGKTLRPSARCQLSHEGCAQLLITATTPQDGGRYKC
EIGGASSSSIVRVHALPVRFRESLKDVEVPEGKAATLRCLVLSVAAPVVEWRHGDVLLKSSNKYSLRQEGAVLE
LVIRDLQPDQSGQYSCSFGDQTSATLTVKTSQAQFVGLKRNKEATEGTTVTLRCELTKEAPVEWKKGTETLR
NGDKYSLKQDGA VCELQICSLLVADAGEYSCVCGQEKTSATLTVKALLVHFVRRLRSKEATEGDTTTLQCELS
KAAPVEWRKGTETLRDGDYSLKQDGA VCELQIRSLTIADAGEYLCTCGQEKTSATLTVRGLPAKFIEDLRSQ
EATEGATAILGCELSKAAPVEWRKGSSETLKDGDYTLRQDGA VCELQIRGLAVVDTGTYSLPTKFTGLRNE
EATEGTMATLRCQMSKAAPVEWRKGSSETLRDGDYSLRQDGA MCELQIRGLTIEDSGEYTCVCGQEKTSATLS
VKALPPRFIEDLRSQEATEGTMATLRCQMSKAAPVEWRKGSSETLGDGGYSLRQNGAVCELQIHDLAVEDTGE
YSCVCGQEKTSATLNVKALPPKFTGLKKEEATEGTMVTLRCQMSKEATVEWRKGAKTLSDDGGYSLRQDGA M
CELQICGLAVEDAGEYSCVCGQEKTSATLSVKALPPRFIEDLRSQEATEGTMATLRCQMSKAAPVEWRKGSSET
LRDGDYSLRQDGA VCELQIRDLAVEDAGEYLCVCGQEKTSATLSVKALPPRFIEDLRSQEATEGTMATLRCQ
MSKAAPVEWRKGSKTLR DGDYSLRQDGA MCELQICDLAVEDTGDYSCVCGQEKTSATLSVKAPQVVFQQPLQ
NLQAEEGSMASLRCELSVPNAAMVWSKGGLELQGDTRREARQQGCVAELLLRDLRREDAGEYSCTCGSQTTSA
TLMVTAAPVRFRLRELQAQDVDEGATARLRCELSREAVSVEWRKGS LQFLPCKAKYQMVQEGTTAELLVHGVEQE
DAGEYTC DAGHTQSIARLSVRAPKPKFKTDLQSTEQEAGGTARLCCQLSEAEPTPVQWLKEGVELHVGSKYE
MRRQGA VCELLIHGLEAKDTGEYACL VGGQKTLASLRVKEPEVTIVRGLVDMEVQADEDFEFTCKV SQAGATD
VQWHLQGLPLQSNEVTEVAVLADGCTHVLQLKGVTL EDAGTVSFHVGGSSSAQLTVRVPEVTVLEPLKDVQL
SEGQDAHFRCLSRASGQEARWALGGVPLQCNEMNDITVEQGTLYLLTLHKVTLEDAGTITLQVGS CSSEAQL
KVTAKNTVLRGLENVDALLEGGEALFECQLSQPEVAHTWLLDDEPVHTSEKVEVVYFENGLRHLLLLKLNKLPQ
DSCRVTFLAGDVVTS AFLTVRGWRLEVLEPPHDASVKAGMQVRFTCILSEAVPVGEATWYINGAAIQPDDTDW
TVTTDGS HHALTLSNAQPQHAGEVTF AARDAVASARLSVLALPDPPEDAEVVGRSDHSVTL SVWAPMSDGGGG
LCGYR VEMKEASTGQWQLCHDLVPGPECVVDDLVP GKTYRFRVAAVGPAGAGEPVHLPQMVKIAPAPAPAPAP
APAPETROAVVGEDICLELEVAADGGEV VWHKGTERRIQPGGHFEVLSRGQRQMLVIKGFRTEDQGEYRCGPIQ
GLPSSGAATFNVVMTSGSGDEVPAQPSLPPEAAQEGDLHLLWEALARKRRMSREPTLDSISELPEEDSRVQHL
RQEAETAPDLSEGYSTADELARTGEADLSHTSSDDESRAGTPSLVTYLKKAGGPGISPLASKHEAQVTTSVK
PQKQQEPVVP TCPPPGDLSAADLMDPSLDKAAVKIQAAFKGYKVRKEMKQQEGPVFSRTFGDTEAQVGDVLR
ECVLATKTD MRACWLKDGIELTDGRHYHIDQLKDGTC SLLVTGLAPTD SGRYTCQVSTKSGRVSHSACVVVSG
TESEAESSAGTELDLDAFRRAARRLHRLFRTKSPAELSEELFLSADEGPGEPEEPADWQTYREDENFVCIRFE
SLAEARQAVTFCFRNMFATMIGVEISLGEQGPGRVEMRIGKVAPTVTPAVPLAKT PGLQTS DAAPVFLTELQN
QDVQDGYPMSFDCVVTGQPVPSVRWFKDGKLLLEEDDHYMINEDQQGGHQLIITAVVPADMGVYRCLAENSMGV
SSTKAELRVELTSTDYD TAADATETSSYFSAQGYLSSREQEGTESDEGQLPVLEELKDLQVAPGTRLAKFQL
KVKGY PAPKLYWFKDGQPLTSDHIRMTDKKTLHTLEIVSVTREDSGQYAAYSNAVGAAYSSARLLVRGPSE
PEEKPASDVHERLVPVPRILEKFTPKKVKRGSSITFSVKVEGHPAPSVHWLKEEAEGVLWIGPDTPGYTMASS

SKQHSLVLLDVGRRHQGTTCIATNPAGQALCSASLHISGLAKEEEEQERVKEALISSFLQGTSSQAVSAQMSES  
AGFADLVGQSKGESLVAEEAHSHLSLAEVGTTEFLQKLTSTIEMVSAKISQAKLQVPGGDSDEETKTPSASP  
RHGRSRPSSSVQESSSESEDGDSRGEIFDIYVVVTADYLPGLAEQDAIILREGQYVEVLDSAHPLRWLVRTKPT  
KSSPSRQGWVSPAYLDKRLKLSPEWGPTEAPEFPGEAVSEDEYRTRLSSVIQELLSSEQAFVVELQFLESHHM  
KHLERSPRVPAAVASQKTVI FRNVQDI SHFHSSFLKELQGCCTDDVAMCFIKNQEAFAEKYLEFLVGRVQAES  
VVVSTPVQEFYKKYAEETLSAKDPTQPPPPPLQHYLEQPVERVQKYQALLKELIRNKARNRQNCALLEQAYAV  
VSALPQRAENKLVSLMENYPGTLEALGEP I RQGHFIVWEGAPGARMPPWKGNHRHVFLFRNYLVI CKPRRDSR  
TDTFSYVFRNMMKLSSIDLNDQVEGDDRAFEVWHEREDSVRKYLLQARTVI IKNSWVKEICIGIQQRLAQPVWR  
PEFEELADCTAELGETVKLACRVGTGPKPIVSWYKDGKPVVEVDPHHILIEDPDGSCSTLIIDNLTGIDSGQY  
MCFASAAGNASTLGKILVQVPPRFVNVKVRATPFVEGEDAQITCTVEGAPYPQIRWYKDGTL LAPGNRYRMLN  
EPRSGVLVLIQAASKEDLGHYECELVNRLGSTRGGGELYMQS PALRARDQHHREQIVA AVEVTEQETKVPKK  
TVIIEETITTVVKS PRGRRQSPGKSPSRSPRRSASPRRPGLLAPERLYPPGTS PSRRLEVEQGRKAPVPALY  
VTEAEVHAPASQS QPKWLEVEETIEVRVKKTGSRGASPVREMTSRGEGILFTLPGGIPGRDPNANNNSNKS SVY  
QEARTWGP AVVHVGEFFIFQVDSVGNVDWAASPEPEQVRASQKEENTERQEGCSDGDENTFLMEEPQD TDSL  
QGRDPKILTHNGRVLT LADLEDYVPEGETFGCGDSTPSTPDEPPCEVSVLQREI SEPTVGGPVLLNVGRPPG  
TGATPSFFRPGSQVHSPESVFLREAWSGPVSAAPWTSSFHHTVQSSVDGSHGFSFKTEVSTQTVSFGAVGET  
VTLHIDPDGGEAPGPSQG\*

>rs51034442\_ENSMUSP00000158795\_c.11684:A>T\_p.E3895D

ENSMUST00000238536.2|Obscn-210|ENSMUSG00000061462|-|chr11:g.58955227:T>A  
MDHSFSGAPRFLTRPKAFVSVGKDATLSCQIVGNPTPHVSWEKDRQPVEAGARFLAQDGDVYRLTILDLAL  
GDSGQYVCRARNAIGEAFVAVGLRVDSEGTCAEQAPHLLRPTSIRVREGADATFRCRVGGSPQPAVSWSKDG  
RRLGPPDAPHVRVEEHGESSALRIR SARPRDGGTYEVRAENPLGSASAAAALVVDSDAEVAGPPGTSTATLLA  
HLQQRREAMRAEGIPSPPGAGTRTCTVTEGKHARLSCFVTGEPKPKETVWKKDQQLVTEGRRHVYVEDEQENF  
VLKILFCKQSDRGLYTCTASNLVGQTYSSVLVVVREPTVPFKKRLQDLEVREKESATFQCEVAQPAEAAWFK  
EETRLWASAKYDIEEGTERRLTVRNVSADDDAVYICETTEGSRVVAELSVQGNLTKRKLPRKTAVRTGDTAIF  
WVELAVPEGPVRWLRNQEEMVAGGRVAITAEGTCHTLTI FQCTLEDMGVAFVSGGCRATTTTCVCSAPRRPPL  
YPPADPVVAKTETSLSVAPPHGDRPVTIDGYVLEKRLKLGAYAWSRCHEAGWLATTEFTITGVAAEEGDFQ  
FRVSAINHFGQGPYLEFPGMTMLVPLAVKTPKAVEAVEGGEVTFVSDLTVA SSGEWFLDGEALKASSIYVI  
RCDRTRHMLTIREV PARLHGAQLKFVANGIETS IQMVVRAALGLPSSKLPAAAAREVLAQLHEEAQLLAE LSD  
QAAA VTWLKDGRELSLGPKYEMQVSAGRRALLVRDVAQDDAGLYECVSRGSR TAYQLLVQDITDGYRDWGPAG  
PQKHMCKCAGAKIARYLGSSCYRFLQYDKGVWHWLEAALDTRQKGTSSCSLHEKPKLVFAKQQAHSEVKA E  
AGNSATLSCEVTQAQTEVTWFKDGKLLSSSSKVRMEASGCSRRLVVQQAGKADAGEYSCEAGGQKLSFR LDVA  
EPKLVFAKQQAHSEVKA EAGASATLSCEVAQAQTEVTWFKDGKLLSSSSKVRMEASGCSRRLVVQQAGKADA  
GEYSCEAGGQKLSFR LDVAEPKMFVFAKEQQARSEVKA EAGASATLSCEVAQAQTEVTWFKDGKLLSSSSKVRM  
EASGCSRRLVVQQAGKADAGEYSCEAGGQKLSFR LDVTEPKLVFAKEQQARSEVKA EAGNSATLSCEVAQAQ  
EVTWFKDGKLLSSSSKVRMEASGCSRRLVVQQAGKADAGEYSCEAGGQKLSFR LDVAEPKLVFAKEQQARSEV  
KAEAGNSATLSCEVAQAQTEVTWFKDGKLLSSSSKVRMEASGCSRRLVVQQAGKADAGEYSCEAGGQKLSFHL  
DVTEPKLVFAKEQQAHSEVKA EAGASATLSCEVAQAQTEVTWFKDGKLLSSSSKVRMEASGCSRRLVVQQAGK  
ADAGEYSCEAGGQKLSFR LDVAEPKLVFAKEQQARSEVKA EAGASATLSCEVAQAQTEVTWFKDGKLLSSSSK  
VRVEASGCSRRLVVQQAGKADAGEYSCEAGGQKLSFR LDVAEPKLVFAKEQQANSEVKA EAGASATLSCEVAQ  
AQTEVTWFKDGKLLSSSSKVRVEASGCSRRLVVQQAGKADAGEYSCEAGGQKLSFR LDVAEPKLVFAKEQQAH  
SEVKA EAGASATLSCEVAQAQTEVTWFKDGKLLSSSSKVRVEASGCSRRLVVQQAGKADAGEYSCEAGGQKLS  
FR LDVAEPKLVFAKEQQAHSEVKA EAGASATLSCEVAQAQTEVTWFKDGKLLSSSSKVRVEASGCSRRLVVQQ  
AGKADAGEYSCEAGGQKLSFR LDVAEPKLVFAKEQQAHSEVKA EAGASATLSCEVAQAQTEVTWFKDGKLLSS  
SSKVRVEASGCSRRLVVQQAGKADAGEYSCEAGGQKLFRLDVAEPKLMFAKEQQAHSEVKA EAGASATLSCE  
VAQAQTEVTWFKDGKLLSSSSKVRVEASGCSRRLVVQQAGKADAGEYSCEAGGQKLSFR LDVAEPKLVFAKEQ  
QAHSEVKA EAGASATLSCEVAQAQTEVTWFKDGKLLSSSSKVRVEASGCSRRLVVQQVQKADAGEYSCEARGQ  
KLSFR LDVADTRLMFAKEQQARTEVKA EAGNSATLSCEVAQAQTEVTWFKDGKLLSSSSKVRVEASGCSRRLV  
VQQAGKADAGEYSCEAGGQKLSFR LDVAEAE SQIPERPSRREPLVVKEHETIILTATIAAPSVAAV TWLKDGV  
EIRRSKRHEATSLGDHTLTVRGAQVLDSAIYSCRVGKEGQDFPVQVEEVA AKFSKPLEPVEGELGGTVMLVC  
ELSPQAEVWRCGNTQLRPGKRFQMTSEGPRRTLTVSGLREDDAE EYVCESRDDRTSARLTVKVPVVKFTS  
GLSAMVAEEGQEATFQCVVSPSDAGVTWYKDGMLQLPSEKFMVMEVSGASRSLTILGLTLEDAGQVTEAEGAS  
SSAALRVREAPVLFKKKLEPQTVERTSVTLVEVLVRLVLELQVEVEAQQGTASMDVELSHAEVEGSWTRDGLRLQPGPKC  
HLAVQGPVHILTL SALQPDSGLVA FRAEGVHTSARLIVTELPVSFTRVLQDVVATQKEKVTLECELSRPPVDV  
RWLKDGVLELRAGKAI GIVAQGTCSRSLVIYRCETGDQGVYVCDALDAQT SASLRVQGRTYTLIFRRVLAEDAGE  
VKFVAENAESRAHLRVKELPVTLLRPLRDKIAMEKHRGVLECCQVSRASAVRWFKGGVELQSGPKYEVVSDGL  
YRKLVIN DVQPEDEDTYTC DAGNVKTS AQFFVVEEQSITIVRGLKDMTVMEPAPAWFECETSIPSVRPPKWL LG

KTVLQAGGNVGLQDGTVHRLTLHKTCSTMTGPVHFTIGKSRSSAQLVVSIPVVLTRPLEPKAGRELQSVVL  
SCDFRPAPKAVQWYKDDTPLSPSEKFKMALEGQMAELRILRLTPADAGVYRCQAGSAQSSAEVTVAREVTVI  
QPLQDAEAMEEGRVCFSCELSHKDEDEIWSLNGTPLYNDSFHEISHEGCLHTLVLSVRQADTGTVCATSPKV  
SVSARLVVKGKPVVFLKALDDVSAEERGTTLQCEVSDPEARVVWRKDGVELGSPDKYDFLHKAGARGLTVHD  
LSHEDAGLYTCQVGSKETQSKVSVHDLHVGITKRLKTVEVLEGECSFECVLSHESPSDPAVWTVGGKTVGGS  
GHFHAVRQGRKYTLTVKDAALSDAGEVVSFVLGLTSKASLIIRERPVDITKPLEDQRTTLGEDVMLSCELSRA  
GTSVRWLKDGKAIKRSQKYDLLSEGTRAVLVVRKASLKDSGEYTCETEASKSTAKLCVEEKANRFTEELADLQ  
VEEKGRAVFTCKTEHPASVVTWRKGLLELRASGKHVPSQEGELTKLTINALERTDSDTYTCDIGQARTQARLL  
VHGQKVRVIEDLEDTAVQEGSSAKFCRIAPADYGPVHWFLDKTPLHSNELNEITVQPGGYHVLTLRQLALKD  
SGTVYFEAGDQRTSAALRVTEKPSIFSRPLTDVTVTEGEDTLVCETTTVDSVVRWTKDGKTLRPSARCQLSH  
EGCQAQLLITATTPQDGGRYKCEIGGASSSSIVRVHALPVRFRRESLKDVEVPEGKAATLRCVLSVAAPVEWR  
HGDDVLKSSNKYSLRQEGAVLELVIRDLQPDQSGQYSCSFGDQTTSATLTVKTSQAQFVGLRNKEATEGTTV  
TLRCELTKAPVEWKKGTETLRNGDKYSLKQDGAVCELQICSLLVADAGEYSCVCGQEKTSATLTVKALLVHF  
VRLRSKEATEGDTTLQCELSKAAPVEWRKGTETLRDGDYSLKQDGAVCELQIRSLTIADAGEYLCTCGQE  
KTSATLTVRALPAKFKDSLKNEEATDGTATLSCELSKAAPVWKKGPKTLQSGDKYVLRQDGAVCGLQIHGL  
TMADAGEYSCVCGQEKTSATLTVRGLPAKFIEDLRSQEATEGATAIIRCELSKAAPVEWRKGSSETLKDGDYR  
LRQDGAVCELQIRGLAVVDGTYSPLTKFTEGLRNEEATEGTMATLRCQMSKAAPVEWRKGSSETLRDGDYR  
LRQDGAVCELQIRGLTIEDSGEYTCVCGQEKTSATLSVKALPSRFIEDLRSQEATEGTMATLRCQMSKTAPVE  
WKKGSETLRDGGYSLRQDGPVCELQICDLAVEDAGEYSCVCGQEKTSATLSIKALPPRFIEDLRSQEATEG  
MATLRCQMSKAAPVEWRKGSSETLGDGGYSLRQNGAVCELQIHDLAVEDTGEYSCVCGQEKTSATLNVKALPP  
RFIEDLRSQEATEGTMATLRCQMSKAAPVEWRKGSSETLRDGGYSLRQDGAVCELQIHDLVEDAGQYSCVCG  
QEKTSAVLTVDALPPKFTEGLKKEEATEGTMVTLRCQMSKEATVEWRKGAKTLSDGGRYSLRQDGAMCELQIC  
GLAVEDAGEYSCVCGQEKTSATLSVKALPPRFIEDLRSQEATEGTMATLRCQMSKAAPVEWRKGSSETLRDGD  
YSLRQDGAVCELQIRDLAVEDAGEYLCVCGQEKTSATLSVKALPPRFIEDLRSQEATEGTMATLRCQMSKAAP  
VEWRKGSSETLRDGDYSLRQDGAMCELQICDLAVEDTGDYSCVCGQEKTSATLSVKALPPRFIEDLRSQEARE  
GTVATLRCMSKAAPVEWRKGSSETLKDGDYSLRQEGNLCELQIRDLAVEDTEEYSCVCGQEKTSATLSVKAL  
PAKFIEDLRSQEAPESSTVTLRCKLSKKASVWKKGSETLRNGARYSLRQDGAVCELEIRDLTVEDTGEYSCT  
CGQERTSATLSIMAPQVVFQQLQNLQAEEGSMASLRCELSVNAAMVWSKGGLELQGDTRREARQQGCVAEL  
LLRDLRREDAGEYSCTCGSQTTSATLMVTAAPVRFRLRELQAQDVDEGATARLRCELSREAVSVEWRKGSQQLF  
PCAKYQMVQEGTTAELLVHGVEQEDAGEYTCDAHTQSIARLSVRAPKPKFKTDLQSTEQEAGGTARLCCQLS  
EAEPGTPVQWLKEGVELHVGSKYEMRRQAVCELLIHGLEAKDTGEYACLVGGQKTLASLRVKEPEVTIVRGL  
VDMEVQADEDVEFTCKVQAGATDVQWHLQGLPLQSNVTEVAVLADGCTHVLQKGVTLLEDAGTVSFHVGGL  
SSSAQLTVRVPEVTVLEPLKDVQLSEGQDAHFRCRLSRASGQEARWALGGVPLQCNEMNDITVEQGTLYLLTL  
HKVTLLEDAGTITLQVGSSESQAQLKVTAKNTVLRGLENVDALEGGEALFECQLSQPEVAHAHTWLLDDEPVHTS  
EKVEVVYFENGLRHLLLLKLNLPQDSCRVTFLAGDVVTSFAFLTVRGWRLEVLEPPHDASVKAGMQVRFTCILS  
EAVPVGEATWYINGAAIQPDDTDWTVTTDGSHHALTLNSAQLPQHAGEVTFAAARDAVASARLSVLALPDPEDA  
EVVGRSDHSVTLVSWVAPMSDGGGGLCGYRVMKEASTGQWQLCHDLVPGPECVDDLVPGKTYRFRVAAVGPA  
GAGEPVHLPQMVKIAPAPAPAPAPAPAPAPAPETRAVVGEDICLELEVAADGGEVVWHKGTERRIQPGGHFEVLS  
RGQRQMLVIKGFRTEDQGEYRCGPIQGLPSSGAATFNVVMTSGSGDEVPAQPSLPPEAAQEGDLHLLWEALAR  
KRRMSREPTLDSISELPEEDSRVQHLRQEAETAPDLSEGYSTADELARTGEADLSHTSSDDESAGTPSLVT  
YLKAGGPGISPLASKHEAQVTTSVKPKQKQEPVPTCP PPGDLAADMPSLDKAAVKIQAAFQYKVRKE  
MKQQEGPVFSRTFGDTEAQVGDVLRLECVLATKTDMRACWLKDGIELTDGRHYHIDQLKDGTCSSLVVTGLAPT  
DSGRYTCQVSTKSGRVSHSACVVVSGTESEAESSSGGELDDAFRAARRLHRLFRTKSPAELSEELFLSADE  
GPGEPEPADWQTYREDENFVCIRFESLAEARQAVTCFRNMFATMGI GVEISLGEQGRGVEMRIGKVAPTVT  
PAVPLAKTPGLQTSDAAPVFLTELQNQDVQDGYPMSFDCVVTGQVPVSVRWFKDGKLEEDDHYMINEDQGG  
HQLIITAVVPADMVYRCLAENSMGVSTKAELRVELTSTDYDTAADATETSSYFSAQGYLSSREQEGTESDE  
GQLPQVLEELKDLQVAPGTRLAKFQLKVKGYPAKLYWFKDGGPLTSDHIRMTDKKTLHTLEIVSVTREDSG  
QYAAYSNAVGAAYSSARLLVRGPSEPEEKPASDVHERLVPPRILEKFTPKKVKRGSSITFSVKVEGHPAPSV  
HWLKEEAKEKGVLWIGPDTPGYTMASSSKQHSLLVLDVGRQHGTYYTCIATNPAGQALCSASLHISGLAKEEEQ  
ERVKEALISSFLQGTSAQVSAQMSSEAGFADLVGQSKGESLVAEEAHSHLSLAEVGTTEEFLQKLTSTQITMVS  
AKISQAKLQVPGGDSDEETKTPSASPRHGRSRPSSSVQESSSESEDGDSRGEIFDIYVVVTADYLPGLAEQDAI  
ILREGQYVEVLDLSDAHLRVLVTRKTPKSSPSRQGWVSPAYLDKRLKLSPEWGPTEAPEFPGEAVSEDEYRTRL  
SSVIQELLSSQAFVGLQFLESHEHMKHLERSPRVPAVASQKTVIFRNVQDISHFHSSFLKELQCGCTDDDV  
AMCFIKNQAEFAFEKYLEFLVGRVQAESVVVSTPVQEFYKKAEEETLSAKDPTQPPPPPLQHYLEQVVERVQKYQ  
ALLKELIRNKARNRQNCALLEQAYAVVSALPQRAENKLVSLMENYPGTLEALGEPYRQGHFIWEGAPGARM  
PWKGHNHRVFLFRNYLVICKPRRDSRTDFTSYVFRNMMKLSSIDLNDQVEGDDRAFEVWHEREDESVRKYLLQA  
RTVVIKNSWVKEICGIQORLAQPVWRPPEFEEELADCTAELGETVKLACRVGTGPKPIVSWYKDGKPEVDPH  
HILIEDPDGSCTLILDNLTGIDSGQYMCFAASAAGNASTLGKILVQVPPRFVNVKVRATPFVEGEDAQITCTVE



GAPYPQIRWYKDGTLAPGNRYRMLNEPRSGVLVVIQAASKEDLGHYECELVNRLGSTRGGGELYMQSPALR  
ARDQHHREQIVAAVEDTSVEGSAHSAQDQADQQAASVLWRLGSEALGSPSGDLNTRQSEPPAFEEAASQIP  
GAASGTPEVSPQPGTHKLEQETTSSGSQGWTVPIRVEGTAWPGAGTGQLLLDVHSQVIMETTQRTYVCQAPDT  
GVTRAPSMQVTIEDVQVQVGDMAQFDAVIEGHPPPIVTVWYKGSTQLTSSARLSQRQDGTYSVLVTDVAPHDA  
GVYTCVANNAGGQVLCKAELLVHGGDKLDAENQVYRRKLHSFYDVQEEIGRGVFGFVKRVQHKGNMFCAAKF  
IPLRSKTRAQAYQERDILATLGHPLVLTGLLDQFETRKTLLILILELCSSEELLDRFLKKGVVTEAEVKVYIQQL  
VEGLHYLHSHGILHLDIKPPNIMLVHPAREDIKICDFGFAQKITPSEPQYSKYGSPEFVSPETIEQNPVSEGS  
DIWAMGVI SYLSLTCCSSPFAGESDRATLLNVLEGRVSWSSPTAAHSEDAKDFIKATLQRTPRARPSTSQCLA  
HPWFLKSMPEAAEHFINTKQLKFLLRARSRWQRSLMSYKSIILVMRSIPELLQGPPDSPSLGVARHLRGEASGAS  
SSSSSSDNELAPFARAKSLPPSPVTHSPLHPRGFLRPSASLPEETEASMTADAAVPASPQASAGPPASPGCV  
PRHSVISSLFYQQAGEGAERGNKTSGAKRHPARRRHLLKGGYIARALPGLREPLMEYSLLEEEAAREEQASLM  
TKTPSFETALRLPSSSVREVPGRSHSLDNPPVTTGPSPEACKEQLLFPSTGLTHETTAKDRGHKEGFLQESV  
PFPMSGDSRPGKQEGSSQDSCRKPASSCHSELGSGSQEGCGPSSQSLGSLPPQSLKELSTSCGPLFSEQ  
PQAAPFPPTQVSPLLGEKEPQDGSLSSEGPVVPSSSPGSASQVDASLDTEGLSEAGDTCDFTPPPQRPQEQAT  
TRKFSLESRGGYAGVAGYGTFAFGGDAGGMLGQGPLWARMAWAVSQQSSEEQDEAATESPQPLESGLPIAEASG  
VPLRTSPSLTPWEEVEQVSLVQIRDLSDGDAEAADTISLDISEVDPAYLNLSLDYDIKYLPEFEMI FRRVPKPI  
EQPESPGSETEAGQLADFLLEAAWPFPGELGLRAGLEITTEPEEPGDLEALLGEAAVGRKRKWSPSRGLFQF  
PGRCLSGEEPVELGLRQVRKASMAHISRIKGRPEGEREGPPRKKAGLASFRLSGLKGRDQELSDAEVVLGQ  
SVTLACQVLAQPTAQATWSKDGVLLESSGHLISSTLKNFQLLTIILVVKEEDLGTYTCCVSNPLGTAVTTGVL  
RKAERPSSSPREVEGELYKDAVLLVWKPVESECGPVTVYIVQCCIEGGSWTTLASDISDCCYLTGKLSRGGMYIF  
RTACVSKAGMGPISSPSEQVLLGGPNHLASEEESRRGRPAQLLPSTKTFAFQMQIRRGFRFSVVRQCREKASGR  
ALAAKIVPYQPEDKTAVLREYEALKRHLHHPHLAQLHAAYLSPRHLVLI LELCSGPELLPSLAERESYSESDVK  
DYLWQMLSATQYLHAQHI LHLDLRSENMMVTEYNLLKVIDLGNALQSLDQEKVPAPENFKDYLETMAPELLEGG  
GAVPQTDIWAIGVTAIFIMLSGEY PESSSEGRDLQKGLRKLIRLSRCYAGLSGGAVAFQSSSLCAQPWGRPCA  
STCLQCGLWTEEGPTGSRPTVTFPTVRLRAFVREKERRRALLYKKNLAQVR\*  
>rs51034442\_ENSMUSP00000038264\_c.10856:A>T\_p.E3619D  
ENSMUST00000047441.14|Obscn-202|ENSMUSG000000061462|-|chr11:g.58955227:T>A  
MDHSFSGAPRFLTRPKAFVSVGKDATLSCQIVGNPTPHVSWEKDRQPEAGARFLAQDGDVYRLTILDLAL  
GDSGQYVCRARNAIGEAFVAVGLRVDSEGTCAEQAPHFLLRPTSIRVREGADATFRCRVGGSPQPAVSWSKDG  
RRLGPPDAPHVRVEEHGESSALRIRSARPRDGGTYEVRAENPLGSASAAAALVVDSDAEVAGPPGTSTATLLA  
HLQORREAMRAEGIPPSPPGAGTRTCTVTEGKHARLSCFVTGEPKPEVWKKDQGLVTEGRRHVVEDEQENF  
VLKILFCKQSDRGLYTCTASNLVGQTYSSVLVVVREPTVPFKKRLQDLEVREKESATFQCEVAQPAEEAAWFK  
EETRLWASAKYDIEEEGTERRLTVRNVSADDDAVYICETTEGSRVAELSVQGNLTKLPRKTAVRTGDTAIF  
WVELAVPEGPVWRWRNQEEMVAGGRVAITAEGTCHTLTI FQCTLEDMGEVAFVSGGCRTTTQFCVSAPRRPPL  
YPPADPVVKAKTESSVTLWSAPPHGDRPVTIDGYVLEKRKLGAYAWSRCHEAGWLATEFTITGVAEEGDFQ  
FRVSAINHFQGGPYLEFPGTMHLVPLAVKTPKAVEAVEGGEVTFVSDLTVAWSGEWFLDGEALKASSIYVI  
RCDRTRHMLTIREVPARLHGAQLKFVANGIETSIQMVVRAALGLPSSKLPAAAAREVLAQLHEEAQLLAELSD  
QAAAAVTWLKDGRELSLGPKEYMQVSAGRRALLVRDVAQDDAGLYECVSRGSRRTAYQLLVQDITDGYRDWGPAG  
PQKHMCKCAGAKIARYLGSSCYRFLQYDKGVWHLEAALDTRQKGTSSCSLHEKPKLVFAKQQAHSEVKA  
AGASATLSCEVAQAQTEVTFWKDGKLLSSSSKVRMEASGCSRRLVVQQAGKADAGEYSCEAGGQKLSFRLDVA  
EPKMFVFAKEQQARSEVKAEEAGASATLSCEVAQAQTEVTFWKDGKLLSSSSKVRMEASGCSRRLVVQQAGKADA  
GEYSCEAGGQKLSFRLDVTEPKLVFAKEQQARSEVKAEEVGNASATLSCEVAQAQTEVTFWKDGKLLSSSSKVRM  
EASGCSRRLVVQQAGKADAGEYSCEAGGQKLSFRLDVAEPKLVFAKEQQARSEVKAEEAGNSATLSCEVAQAQ  
EVTWFKDGKLLSSSSKVRMEASGCSRRLVVQQAGKADAGEYSCEAGGQKLSFHLDVTEPKLVFAKEQQAHSEV  
KAEAGASATLSCEVAQAQTEVTFWKDGKLLSSSSKVRMEASGCSRRLVVQQAGKADAGEYSCEAGGQKLSFRLD  
DVAEPKLVFAKEQQARSEVKAEEAGASATLSCEVAQAQTEVTFWKDGKLLSSSSKVRVEASGCSRRLVVQQAGK  
ADAGEYSCEAGGQKLSFRLDVAEPKLVFAKEQQANSEVKAEEAGASATLSCEVAQAQTEVTFWKDGKLLSSSSK  
VRVEASGCSRRLVVQQAGKADAGEYSCEAGGQKLSFRLDVAEPKLVFAKEQQAHSEVKAEEAGASATLSCEVAQ  
AQTEVTFWKDGKLLSSSSKVRVEASGCSRRLVVQQAGKADAGEYSCEAGGQKLSFRLDVAEPKLVFAKEQQAH  
SEVKAEEAGASATLSCEVAQAQTEVTFWKDGKLLSSSSKVRVEASGCSRRLVVQQAGKADAGEYSCEAGGQKLS  
FRLDVAEPKLVFAKEQQAHSEVKAEEAGASATLSCEVAQAQTEVTFWKDGKLLSSSSKVRVEASGCSRRLVVQQ  
AGKADAGEYSCEAGGQKLFRLDVAEPKLVFAKEQQAHSEVKAEEAGASATLSCEVAQAQTEVTFWKDGKLLSS  
SSKVRVEASGCSRRLVVQQGKADAGEYSCEAGGQKLSFRLDVAEAEBSQI PERPSRREPLVVKHEHETIILTAT  
IAAPSAAVTWLKDGEVIRRSKRHEATSLGDHTTLTKVSRGLDVAEAEBSQI SCRVRGKEGDFPVQVEEVAAKFSK  
LEPVEGELGGTVMLVCELSPEQAEVWVRCGNTQLRPGKRFQMTSEGPRRTLTVSGLREDDAEFYVCESRDRT  
SARLTVKVPVVKFTSGLSAMVAEEGQEAATFQCVVSPSDAGVTWYKDGMLQPSSEKFMVMEVSGASRSLTILGL  
TLEDAGQVTEAEGASSAALRVREAPVLFKKKLEPQTVTEERTSVTLEVELTRPWPEVKWTRNAAVLTPSENV  
EIRAEGARHCLVLRVSVGFADRGFFGCETPDDKTQAKLVNEMRQVRLVRLGQVEEAKQGTASMDVELSHAEVE

GSWTRDGLRLQPGPKCHLAVQGPVHILTLSALQPQDSGLVAFRAEGVHTSARLIVTELPVVSFTRVLQDQVATQ  
KEKVTLECELSRPVDVRLKDGVELRAGKAI GIVAQGTCSRSLVIYRCETGDQGVYVCDALDAQTSASLRVQGR  
TYTTLIFRRVLAEDAGEVKFVAENAESRAHLRVKELPVTLLRPLRDKIAMEKHRGVLECCQVSRASAVRWFKGG  
VELQSGPKYEVVSDGLYRKLVINQVPEDEDTYTCDAGNVKTSAQFFVEEQSITIVRGLKDMTVMPEPAPAWFE  
CETSI PSVRPPKWLGLKTVLQAGGNVGLQDGTVHRLTLHKTCSTMTGPFVHTIGKSRSSAQLVVS DIPVVL  
RPLEPKAGRELQSVVLSCDFRPAPKAVQWYKDDTPLSPSEKFKMALEGQMAELRILRLTPADAGVYRCQAGSA  
QSSAEVTVEAREVTVIQPLQDAEAMEEGRVCFSCELSHKDEDIEWSLNGTPLYNDSFHEISHEGCLHTLVLSK  
VRQADTGTVCATSPKVSVSARLVVKGKPVVFLKALDDVSAEERGTTLQCEVSDPEARVVRKDGVELGSPDK  
YDFLHKAGARGLTVHDLSHEDAGLYTCQVGSKETQSKVSVHDLHVGITKRLKTVEVLEGESCSFCEVLSHESP  
SDPAVWTVGGKTVGGSGHFHAVRQGRKYTLTVKDAALSDAGEVVSFVGLGTSKASLIIRERPVDTKPLEDQR  
TTLGEDVMLSCELSRAGTSVRWLKDGKAIKRSQKYDLLSEGTRAVLVVRKASLKDSGEYTCETEASKSTAKLC  
VEEKANRFTEELADLQVEEKGRAVFTCKTEHPASVVTWRKGLLELRASGKHVPSQEGTLKLTINALERTDSD  
TYTCDIGQARTQARLLVHGQKVRVIEDLEDTAVQEGSSAKFCCRIPADYGPVHWFLLDKTPLHSNELNEITVQ  
PGGYHVLTLRQLALKDSGTVYFEAGDQRTSAALRVTEKPSIFSRPLTDVTVTEGEDTLVCETTTVDSSVRWT  
KDGTLRPSARCQLSHEGCAQLLITATTPQDGGRYKCEIGGASSSSIVRVHALPVRFRESLKDVEVPEGKAA  
TLRCVLSVAAPVEWRHGDDVLKSSNKYSLRQEGAVLELVIRDLQPDQSGQYSCSFGDQTTSATLTVKTSQAQ  
FVGKLRNKEATEGTTVTLRCELTKAPVEWKKGTETLRNGDKYSLKQDGAVCELQICSLLVADAGEYSCVCGQ  
EKTSAATLTVKALLVHFVRLRSKEATEGDTTTLQCELSKAAPVEWRKGTETLRDGDYSLKQDGAVCELQIRS  
LTIADAGEYLCTCGQEKTSATLTVRALPAKFKDSLKNEEATDGTATLSCELSKAAPVTWKKGPKTLQSGDKY  
VLRQDGAVCGLQIHGLTMADAGEYSCVCGQEKTSATLTVRGLPAKFIEDLRSQEATEGATAILRCELSKAAPV  
EWRKGETLKDGDYTLRQDGAVCELQIRGLAVVDTGTYSLSLPTKFTTEGLRNEEATEGTMATLRCQMSKAAPV  
EWRKGETLRDGDYSLRQDGAVCELQIRGLTIEDSGEYTCVCGQEKTSATLSVKALPPRFIEDLRSQEATEG  
TMATLRCQMSKAAPVEWRKGETLGDGGYSLRQNGAVCELQIHDLAVEDTGEYSCVCGQEKTSATLNVKALP  
PRFIEDLRSQEATEGTMATLRCQMSKAAPVEWRKGETLRDGGYSLRQDGAVCELQIHDLVEDAGQYSCVC  
GQEKTSAVLTVDALPPKFTTEGLKKEEATEGTMVTLRQMSKEATVEWRKGAKTLSGGYSLRQDGAVCELQI  
CGLAVEDAGEYSCVCGQEKTSATLSVKALPPRFIEDLRSQEATEGTMATLRCQMSKAAPVEWRKGSKTLRDGD  
RYSLRQDGAVCELQICDLAVEDTGDYSCVCGQEKTSATLSVKAPQVVFQQLQNLQAEEGSMASLRCELSVFN  
AAMVWSKGGLELQGDTRREARQQGCVAELLLRDLRREDAGEYSCVCGQEKTSATLNMVTAAPVRFRLQADQV  
DEGATARLRCELSREAVSVEWRKGSLLQFPKAKYQMVQEGTAEELLVHGVQEEDAGEYTCDAHTQSARLSV  
RAPKPKFKTDLQSTEQEAGGTARLCCQLSEAEPTPVQWLKEGVELHVGSKYEMRRQGAVCELLIHGLEAKDT  
GEYACLVGQKTLASLRVKEPEVTIVRGLVDMEVQADEDEFTCKVSOAGATDVQWHLQGLPLQSNVEVAV  
LADGCTHVLQKGVTLLEDAGTVSFHVGGLSSAQLTVRVPEVTLEPLKDVQLSEGQDAHFRCRLSRASGQEA  
RWALGGVPLQCNEMNDITVEQGTLYLLTLHKVTLLEDAGTITLQVGSSESQAQLKVTAKNTVLRGLENVDALEG  
GEALFECQLSQPEVAHAHTWLLDDEPVHTSEKVEVVYFENGLRHLLLLKLNKLPQDSCRVTFLAGDVVTSAPLTV  
RALPDPPEAEVVGSRSDHSVTLVWVAPMSDGGGLCGYRVEMKEASTGQWQLCHDLVPGPEVCVDDLVPGKTY  
RFVVAAVGPGAGGEPVHLPQMVKIAPAPAPAPAPAPAPAPAPAPAPAPAPAPAPAPAPAPAPAPAPAPAPAP  
QPGGHFEVLSRQQRMLVIKGFRTEDQGEYRCGPIQGLPSSGAATFNVMVTSVSGSDEVPAPQPSLPPEAAQEGD  
LHLLWEALARKRRMSREPTLDSISELPEEDSRVQHLRQEAEEETAPDLSEGYSTADELARTGEADLSHTSSDDE  
SRAGTPSLVTYLKKAGGPGISPLASKHEAQVTTSVKPKQKQEPVVPVTPPPGDLAADLMDPSLDKAAVKIQ  
AFKGYKVRKEMKQEGPVFSRTFGDTEAQVGDVLRLECVLATKTDMRACWLKDGIELTDGRHYHIDQLKDGTC  
SLLVTGLAPTDSGRYTCQVSTKSGRVSHSACVVVSGTESEAESSSGGELDDAFRRAARLHRLFRTKSPAELS  
EEELFLSADEGPEPEPADWQTYREDENFVICRFESLAEARQAVTCFRNMFMATMGIGVEISLGEQGPVGVEM  
RIGKVAPTPTPAVPLAKTPGLQTSDAAPVFLTELQNDVQDGYPMSFDCVVTGQPVVPSVRWFKDGKLEEDDH  
YMINEDQGGHQLIITAVVPADMGVYRCLAENSMGVSSTKAE LRVELTSTDYDTAADATETSSYFSAQGYLSS  
REQEGTESDEGQLPVLEELKDLQVAPGTRLAKFQLKVKGYPAKLYWFKDQGPLTTSDHIRMTDKKTLHTLE  
IVSVTREDSGQYAAIISNAVGAAYSARLLVRGPSEPEEKPASDVHERLVPPRILEKFTPKKVKRGSSITFSV  
KVEGHPAPSVHWLKEEAEGVLIWIGPDTPGYTMASSKQHSVLVLDVGRQHGGTYTCIATNPAGQALCSASLH  
ISGLAKEEEQERVKEALISSFLQGTSAVSAQMSSESAGFADLVGQSKGESLVAAEAAHSHLSLAEVGTTEFLQK  
LTSQITEMVSAKISQAKLQVPGGDSDEETKTPSASPRHGRSRPSSSVQESSSESEDGDSRGEIFDIYVVTDADY  
LPLGAEQDAIILREGQYVEVLDSAHPLRWLVRTKPTKSSPSRQGWVSPAYLDKRLKLSPEWGPTEAPEFPGEA  
VSEDEYRTRLSSVIQELLSSEQAFVGEQFLESHHMKHLERSPRVPAAVASQKTVIFRNVQDISHFHSSFLKE  
LQCGCTDDDVAMCFIKNQEAFAKEYLEFLVGRVQAESVVVSTPVQEFYKKAEEETLSAKDPTQPPPPPLQHYLE  
QPVERVQKRYQALLKELIRNKARNRQNCALLEQAYAVSDALPQRAENKLVSLMENYPGTLEALGEPVIRQGHFI  
VWEGAPGARMPKXGHNHVFVFRNYLVICPKRRDRSDTFSYVFRNMMLKSSIDLNDQVEGDDRAFEVWHERE  
DSVRKYLQARTVVIKNSWVKEICGIQORLAQPVWRPPEFEELADCTAELGETVKLACRVGTGPKPIVSWYK  
DGKPVVDPHHLIEDPDGSCSTLILDNLGTIGDSQYMCFAASAAGNASTLGKILVQVPPRFVNVKVRATPFVVEG  
EDAQITCTVEGAPYPQIRWYKDGTLAPGNRYRMLNEPRSGVLVLIQAASKEDLGHYECELVNRGLSTRGGG  
ELYMOSPALRARDQHHREQIVAAVEGAPSMQVTTIEDVQVQVGDMAQFDAVIEGHPPPPIVTWYKGSTQLTSSAR

LSQRQDGTYSVLVTDVAPHDAGVYTCVANNAGQVLCKAELLVHGGDKLDAENQVYRRKLHSFYDVQEEIGR
GVFGFVKRVQHKGNMFCAAKFIPLRSKTRAQAYQERDILATLGHPLVTGLLDQFETRKTLLILILELCSSEEL
LDRLFKKGVVTEAEVKVYIQQLVEGLHYLHSHGILHLDIKPPNIMVHPAREDIKICDFGFAQKITPSEPOYS
KYGSPFVVSPEIIEQNPVSEGSDIWAMGVISYLSLTCSSPFAGESDRATLLNVLEGRVSWSSPTAAHLSEDAK
DFIKATLQRTPRARPSTSQC LAHPWFLKSMPAEEAHFINTKQLKFL LARSRWQRSLMSYKSI LVMRSIPELLQ
GPPDSPSLGVARHLRGEASGASSSSSSSDNELAPFARAKSLPPSPVTHSPLLHPRGFLRPSASLPEETEASMP
TADAAVPASPQASAGPPASPGCVPRHSVSISSLFYQQAGEGAERGNKTS GAKRHPARRRHLLKGGYIARALPGLR
EPLMEYSLLEEEAAREEQASLMTKTPSFETALRLPSSSVREVPGRSHSLDNPPVTTGSPPEACKEQLLFPST
GLTHEFTAKDRGHKEGFLQESVFPFMSGDSRPGKQEGSSQDSCRGKPASSCHSELGSGSQEGCGPPSSQSLG
SLPPQSLKKELESTSCGPLFSEQPQAAPFPQTQVSPLLGSEKEPQDGSLSSEGVPVPSSSPGSASQVDASLDTEG
LSEAGDTCDFTPPPQRPQEQATTRKFSLESRGGYAGVAGYGTFAFGGDAGGMLGQGPLWARMWAVSQSSEEQ
DEAATESPQPLESLGPIAEASGVPLRTPSLTPWEEVEQVSLVQIRDLSGDAEAADTISLDISEVDPAYLNLS
DLYDIKYLPFEFMI FRRVPKPIEQPESPGSETEAGQGLADFL EEAAPWPWGPGLGLRAGLEITEEPEEPGDLEA
LLGEAAVGRKRKWSPSRGLFQFGRCLSGEEPVELGLRQRVKASMAHISRILKGRPEGPEREGPPRKKAGLAS
FRLSGLKGRDQELSDEAVVLGQSVTLACQVLAQPTAQTWSKDGVLLESSGHLLISSTLKNFQLLTLIVVKEE
DLGTYTCCVSNPLGTAVTTGVLKRAERPSSSPRPEVGEYKDAVLLVWKPVESCGPVTYIVQCCIEGGSWTTL
ASDISDCCYLTVGKLSRGGMYIFRTACVSKAGMGPYSSPSEQVLLGGPNHLASEEESRRGRPAQLLPSTKTFAF
QMQIRRGFRFSVVRQCREKASGRALAAKIVPYQPEDKTAVLREYEALKRHLHHPHLAQLHAAYLSPRHLVILEL
CSGPELLPSLAERESYSESVDKDYLWQMSATQYLHAQHILHLDLRSENMMVTEYNLLKVIDLGNASLDQEK
VPAPENFKDYLETMAPELLEGQAVPQTDIWAIGVTAIFIMLSGEY P ESSEGETRDLQKGLRKLIRLSRCYAGL
SGGAVAFLOSSLCAQPWGRPCASTCLOCGWLTEEGPTGSRPTPVTFTVRLRAFVREKRRALLYKXHNLAQ
VR\*

>rs51034442\_ENSMUSP00000049737\_c.11483:A>T\_p.E3828D
ENSMUST00000052872.15|Obscn-203|ENSMUSG00000061462|-|chr11:g.58955227:T>A
MDHSFSGAPRFLTRPKAFVVSVGKDATLSCQIVGNPTPHVSWEKDRQFVEAGARFRLAQDGDVYRLTILDLAL
GDSGQYVCRARNAIEGFAAVGLRVDSEGTCAEQAPHFLLRPTSIRVREGADATFRCRVGGSPQPAVSWSKDG
RRLGPPDAPHRVVEHEGESSALRIR SARPRDGGTYEVRAENPLGSASAAAALVVDSAEVAGPPTSTATLLA
HLQQRRREAMRAEGIPPSPPGAGTRTCTVTEGKHARLSCFVTGEPKPEVWKKDGQLVTEGRRHVVEDEQENF
VLKILFCKQSDRGLYTCTASNLVGQTYSSVLVVREPTVPFKKRLQDLEVREKESATFQCEVAQPATEAAWFK
EETRLWASAKYDIEEGTERRLTVRNVSADDDAVYICETTEGSRVVAELSVQGNLTKLPRKTAVRTGDTAIF
WVELAVPEGPVRWLRNQEEMVAGGRVAITAEGTCHTLTI FQCTLEDMGEVAFVSGGCRTTTQFCVSAAPRRPPL
YPPADPVVKAKTESVTLWSAPPHGDRPVTIDGYVLEKRLGAYAWSRCHEAGWLATTEFTITGVAAEGDFQ
FRVSAINHFGQGPYLEFPGTMHLPMLAVKTPKAVEAVEGGEVTFVSDLTVASSGEWFLDGEALKASSIYVI
RCDRTRHMLTIREV PARLHGAQLKFVANGIETS IQMVVRAALGLPSSKLPAAAAREVLAQLHEEAQLLAE LSD
QAAA VTLWKGDRLESLGPKYEMQVSAGRRALLVRDVAQDDAGLYECVSRGSR TAYQLLVQEPKLVFAKQQAH
SEVKAEAGNSATLSCEVTAQTEVTFWKDGKLLSSSSKVRMEASGCSRRLLVVQQAGKADAGEYSCEAGGQKLS
FRLDVAEPKLVFAKQQAHSEVKAEAGASATLSCEVAQAQTEVTFWKDGKLLSSSSKVRMEASGCSRRLLVVQQ
AGKADAGEYSCEAGGQKLSFRLDVAEPMVFAKEQQARSEVKAEAGASATLSCEVAQAQTEVTFWKDGKLLSS
SSKVRMEASGCSRRLLVVQQAGKADAGEYSCEAGGQKLSFRLDVTEPKLVFAKEQQARSEVKAEVGN SATLSCE
VAQAQTEVTFWKDGKLLSSSSKVRMEASGCSRRLLVVQQAGKADAGEYSCEAGGQKLSFRLDVAEPKLVFAKEQ
QARSEVKAEAGNSATLSCEVAQAQTEVTFWKDGKLLSSSSKVRMEASGCSRRLLVVQQAGKADAGEYSCEAGGQ
KLSFHLDVTEPKLVFAKEQQAHSEVKAEAGASATLSCEVAQAQTEVTFWKDGKLLSSSSKVRMEASGCSRRLV
VQQAGKADAGEYSCEAEGQKLSFRLDVAEPKLVFAKEQQARSEVKAEAGASATLSCEVAQAQTEVTFWKDGK
LSSSSKVRVEASGCSRRLLVVQQAGKADAGEYSCEAGGQKLSFRLDVAEPKLVFAKEQQANSEVKAEAGASATL
SCEVAQAQTEVTFWKDGKLLSSSSKVRVEASGCSRRLLVVQQAGKADAGEYSCEAGGQKLSFRLDVAEPKLAFA
KEQQAHSEVKAEAGASATLSCEVAQAQTEVTFWKDGKLLSSSSKVRVEASGCSRRLLVVQQAGKADAGEYSCEA
GGQKLSFRLDVAEPKLAFAKEQQAHSEVKAEAGASATLSCEVAQAQTEVTFWKDGKLLSSSSKVRVEASGCSR
RLVVQQAGKADAGEYSCEAGGQKLSFRLDVAEPKLAFAKEQQAHSEVKAEAGASATLSCEVAQAQTEVTFWKD
GKLLSSSSKVRVEASGCSRRLLVVQQAGKADAGEYSCEAGGQKLFRLDVAEPKLMFAKEQQAHSEVKAEAGAS
ATLSCEVAQAQTEVTFWKDGKLLSSSSKVRVEASGCSRRLLVVQQAGKADAGEYSCEAGGQKLSFRLDVAEPK
LVFAKEQQAHSEVKAEAGASATLSCEVAQAQTEVTFWKDGKLLSSSSKVRVEASGCSRRLLVVQQVQKADAGEYS
CEARGQKLSFRLDVADTRLMFAKEQQARTEVKAEAGNSATLSCEVAQAQTEVTFWKDGKLLSSSSKVRVEASG
CSRRLLVVQQAGKADAGEYSCEAGGQKLSFRLDVAEASIQI PERPSRREPLVVKEHETIILTATIAAPSVAAVT
WLKDGVEIRRSKRHEATSLGDTHLTVRGAQVLDASAIYSICRVGKEGQDFPVQVEEVAAKFSKPLEPVEGELGG
TVMLVCELSPEQAEVWRCGNTQLRPGKRFQMTSEGPRRTLTVSLREDDAEEYVCEASRDDRTSARLTVKVP
VVKFTSGLSAMVAEEGQEA TFQCVVSPSDAGVTWYKDGMLQPSSEKFMVVEGASRSLTILGLTLEDAGQVTV
EAEGASSAALRVREAPVLFKKKLEPQTV EERTSVTLEVELTRPWPEVKWTRNAAVLTPSENVEIRAEGARHC
LVLSRVGFADRGFFGCETPDDKTQAKLNVEMRQVRLVRLGQVEVEAKEQGTASMDVELSHAEVEGSWTRDGLRL

QPGPKCHLAVQGPVHILTLALSALQPQDSGLVAFRAEGVHTSARLIVTELPVSFTRVLQDQVAVATQKEKVTLECEL  
 SRPVDVRLKDGVELRAGKAI GIVAQGTCSRSLVIYRCETGDQGVYVCDALDAQTSASLRVQGRTYTLIFRRVL  
 AEDAGEVVFVAENAESRAHLRVKELPVTLLRPLRDKIAMEKHRGVLECVSRASAVRWFVKGVELQSGPKYE  
 VVSDGLYRKLVINVDVQPEDEDYTC DAGNVKTSAQFFVVEEQSITIVRGLKDMTVMPEPAPAWFECETSIPSVRP  
 PKWLLGKTVLQAGGNVLEQDGTVHRLTLHKTCSTMTGPVHFTIGKSRSSAQLVVSIPVVLTRPLEPKAGRE  
 LQSVVLSCDFRPAPKAVQWYKDDTPLSPSEKFKMALEGQMAELRILRLTPADAGVYRCQAGSAQSSAEVTVEA  
 REVTVIQPLQDAEAMEEGRVCFSCLESHKDEDI EWLSLNGTPLYNDSFHEISHEGCLHTLVLKSVRQADTGTVC  
 ATSPKVSVSARLVVKGKPVVFLKALDDVSAEERGTLLTQCEVSDPEARVVWRKDGVELGPSDKYDFLHKAGAR  
 GLTVHDLSHEDAGLYTCVGSKETQSKVSVHDLHVGITKRLKTVEVLEGE SCSFECVLSHESPSDPAVWTVGG  
 KTVGGSGHFHAVRQGRKYTLTVKDAALSDAGEVVSFVLGLTSKASLIIRERPVDITKPLEDQRTTLGEDVMLS  
 CELSRAGTSVRWLKDGKAIKRSQKYDLLSEGTRAVLVVRKASLKDSGEYTCETEASKSTAKLCVEEKANRFT  
 ELADLQVEEKGRAVFTCKTEHPASVVTWRKGLLELRASGKHVPSQEGTLKLTINALERTDSDTYTCDIGQAR  
 TQARLLVHGQKVRVIEDLEDTA VQEGSSAKFCCRIAPADYGPVHWF LDKTPLHSNELNEITVQPGGYHVLTLR  
 QLALKDSGTVYFEAGDQRTS AALRVTEKPSIFSRPLTDVTVTEGEDTLVCE TTTVDSSVRWTKDGKTLRPSA  
 RCQLSHEGCAQLLITATTPQDGGRYKCEIGGASSSSIVRVHALPVRFRESLKDVEVPEGKAATLRCVLSVA  
 APVEWRHGDDVLKSSNKYSLRQEGAVLELVIDRLQPDQSGQYSCSFGDQTTSATLTVKTSQAQVFGKLRNKEA  
 TEGTVTRRCELTKKEAPVEWKKGTETLRNGDKYSLKQDGAVCELQICSLLVADAGEYSCVCGQEKTSATLTVK  
 ALLVHFVRRLRKEATEGDTTLQCELSKAAPVEWRKGTETLRDGDYSLKQDGAVCELQIRSLTADAGEYL  
 CTCGQEKTSATLTVRALPAKFKDSLKNEEATDGTATLSCLELSKAAPVTWKKGPKTLQSGDKYVLRQDGAVCG  
 LQIHGLTMADAGEYSCVCGQEKTSATLTVRGLPAKFIEDLRSQEATEGATAILRCELSKAAPVEWRKGSSETL  
 DGDRYTLRQDGAVCELQIRGLAVDGTYSLSLPTKFTTEGLRNEEATEGTMATLRCQMSKAAPVEWRKGSSETL  
 DGDRYSLRQDGAMCELQIRGLTIEDSGEYTCVCGQEKTSATLSVKALPSRFIEDLRSQEATEGTMATLRCQMS  
 KTAPVEWKKGSETLRDGGYSLRQDGPVCELQICDLAVEDAGEYSCVCGQEKTSATLSIKALPPRFIEDLRSQ  
 EATEGTMATLRCQMSKAAPVEWRKGSSETLGDGGYSLRQNGAVCELQIHDLAVEDTGEYSCVCGQEKTSATLN  
 VKALPPRFIEDLRSQEATEGTMATLRCQMSKAAPVEWRKGSSETLRDGGYSLRQDGAVCELQIHDLVDEDAG  
 YSCVCGQEKTSATLTVDALPPKFTTEGLKKEEATEGTMVTLRQMSKEATVEWRKGAKTLSDGGYSLRQDGAM  
 CELQICGLAVEDAGEYSCVCGQEKTSATLSVKALPPRFIEDLRSQEATEGTMATLRCQMSKAAPVEWRKGSSET  
 LRDGDYSLRQDGAVCELQIRDLAVEDAGEYLCVCGQEKTSATLSVKALPPRFIEDLRSQEATEGTMATLRCQ  
 MSKAAPVEWRKGSSETLRDGDYSLRQDGAMCELQICDLAVEDTGDYSCVCGQEKTSATLSVKALPPRFIEDL  
 SQEAREGTVATLRCMSKAAPVEWRKGSSETLKDGDYSLRQEGNLCELQIRDLAVEDTEEYSCVCGQEKTSAT  
 LSVKALPAKFIEDLRSQEAPESSTVTLRCKLSKKASVVWKKGSETLRNGARYSLRQDGAVCELEIRDLTVEDT  
 GEYSCTCGQERTSATLSIMAPQVVFQQPLQNLQAEEGSMASLRCELSVPNAAMVWSKGGLELQGDTRREARQQ  
 GCVAELLLRDLRREDAGEYSCCTCGSQTTSATLMVTAAPVRFRELAQDQVDEGATARLRCELSREAVSVEWRK  
 GSIQLFPKAKYQMVQEGTTAELLVHGVEQEDAGEYTC DAGHTQS IARLSVRAPKPKFKTDLQSTEQEAGGTAR  
 LCCQLSEAEPTPVQWLKEGVELHVGSKYEMRRQAVCELLIHGLEAKDTGEYACLVGQKTLASLRVKEPEV  
 TIVRGLVDMEVQADEDEFTCKVQAGATDVQWHLQGLPLQSNNEVTEVAVLADGCTHVLQKGVTLLEDAGTVS  
 FHVGGLSSSAQLTVRVPEVTVLEPLKDVQLSEGDQDAHFRCRLSRASGQEARWALGGVPLQCNEMNDITVEQGT  
 LYLLTLHKVTLEDAGTITLQVGS SQAQLKVTAKNTVLRGLENVDALEGGEALFECQLSQPEVAHAWLLDD  
 EPVHTSEKVEVVYFENGLRHLLLLKLNKLPQDSCRVTFLAGDVVTS AFLTVRGWRLEVLPPHDASVKAGMQVR  
 FTCILSEAVPVGEATWYINGAAIQPDDTDWTVTTDGS HALTLSNAQPHAGEVTF AARDAVASARLSVLALP  
 DPEDA EVVGRSDHSVTL SWVAPMSDGGGGLCGYRVMKEASTGQWQLCHDLVPGPECVVDLVP GKTYRFRV  
 AAVGPAGAGEPVHLPQMVKIAPAPAPAPAPAPAPAPETRQAVVGEDICLELEVAADGGEVVWHKGTERRIQPGG  
 HFEVLSRGRQMLVIKGFRTEDQGEYRCGPIQGLPSSGAATFNVMVTS GSGDEVPAQPSLPPEAAQEGDLHLL  
 WEALARKRRMSREPTLDSISELPEEDSRVQHLRQEAETAPDLSEGYSTADELARTGEADLSHTSSDDES RAG  
 TPSLVTYLKKAGGPGISPLASKHEAQVTT SVKPQKQEPVVP TCPPPGDL SAADLMDPSLDKAAVKIQAAFKG  
 YKVRKEMKQQEGPVFSRTFGDTEAQVGDVLRLECVLATKTD MRACWLKDGIELTDGRHYHIDQLKDGTC SLIV  
 TGLAPTDSGRYTCQVSTKSGRVSHSACVVVSGTESEAE SSSGGELDDAFRAARRLHRLFRTKSPAELSEEEL  
 FLSADEGPGPEEPADWQTYREDENFVCIRFESLAEARQAVTCFRNMFATMGIGVEISLGEQGPGRVEMRIGK  
 VAPTVPAPVPLAKTPGLQTS DAAPVFLTELQNDQVQDGYPMSFDCVVTGQPVPSVRWFKDGKLEEDDHYMIN  
 EDQQGGHQLIITAVVPADMGVYRCLAENSMGVSTKAELRVELTSTDYDTAADATETSSYFSAQGYLSSREQE  
 GTESDEGQLPQVLEELKDLQVAPGTR LAKFQLKVKGYPAPKLYWFKDQGPLTTS DHIRMTDKKTLHTLEIVSV  
 TREDSGQYAAYSNAVGAAYSSARLLVRGPSEPEEK PASDVHERLVP PPRILEKFTPKKVKRGSSTF SVKVEG  
 HPAPSVHWLKEEA EKFLWIGPDTPGYTMASSSKQHSADLVLLDVG RQHOGTYTCIATNPAGVALCSASLHISGL  
 AKEEEQERVKEALISSFLQGTSQAVSAQMSE SAGFADLVGSKGESLVAEEAHSHLSLAEVGTEEF LQKLTSSQ  
 ITEMVSAKISQAKLQVPGGDSDEETKTPSASPRHGRSRPSSSVQESSSESEDGDSRGEIFDIYVVTADYLP LG  
 AEQDAIILREGQYVEVLDSAHPLRWLVRTKPTKSSPSRQGWVSPAYLDKRLKLSPEWGPTEAPEFPGEAVSED  
 EYRTRLSSVIQELLSSEQAFVGE LQFLESHHMKHLERSPRVPAAVASQKTVIFRNVQDISHFHSSFLKELQGC  
 GTDDDVAMCFIKNQEA FEKYLEFLVGRVQAESVVVSTPVQEFYKKYAEETLSAKDPTQPPPPPLQHYLEQ PVE

RVQKYQALLKELIRNKARNRQNCALLEQAYAVVSALPQRAENKLVSLMENYPGTLEALGEPiRQGHFIVWEG  
 APGARMPWKGHNHRVFLFRNYLVICKPRRDSRTDTFSYVFRNMMKLSSIDLNDQVEGDDRAFEVWHEREDESVR  
 KYLLQARTVVIKNSWVKEICGIQORLAQPVWRPPEFEELADCTAELGETVKKLACRVTGTPKPIVSWYKDGKP  
 VEVDPHHILIEDPDGSCSTLILDNLTGIDSGQYMCFAASAAGNASTLGKILVQVPPRFVNVKVRATPFVEGEDAQ  
 ITCTVEGAPYPQIRWYKDGTLTLLAPGNRYRMLNEPRSGVLVLIQAASKEDLGHYECELVNRLGSTRGGGELYM  
 QSPALRARDQHHREQIVAAVEVTEQETKVPKKTVIEETITTVVKSPRGRRQSPGKSPSRSPRRSASPRRPG  
 LLAPERLYPPGTSPRRLEVEQGRKAPVPALYVTEAEVHAPASQSQPKWLEVEETIEVRVKKTGSRGASPVRE  
 MTSRGEGLFTLPGGI PGRDPNANNNSNKS SVYQEARTWGPVAVHVGEFFIFQVDSVGNVDWVAASPEPEQVRA  
 SQKEENTERQEGCSDGDENTFLMEEPQDTSLQGRDPKILTHNGRVLTLADLEDYVPQEGEFTFGCGDSTPSTP  
 DEPPCEVSVLQREISEPTVGQPVLLNVGRPPGTGATPSFFRPGSQVHSPESVSFLLREAWSGPVSAAPWTSSSF  
 HTHVQSSVDGSHGSFKTEVSTQTVSFGAVGETVTLHIDPDGGEAPGPSQG\*  
 >rs51034442\_ENSMUSP00000020732\_c.11684:A>T\_p.E3895D  
 ENSMUST00000020732.13|Obscn-201|ENSMUSG00000061462|-|chr11:g.58955227:T>A  
 MDHSFSGAPRFLTRPKAFVSVGKDATLSCQIVGNPTPHVSWEKDRQPVEAGARFRLAQDGDVYRLTILDLAL  
 GDSGQYVCRARNAIGEAFAAVGLRVDSEGTCAEQAPHFLLRPTSIRVREGADATFRCRVGSGSPQPAVSWSKDG  
 RRLGPPDAPHVRVEEHGESSALRIRSARPRDGGTYEVRAENPLGSASAAAAALVVDSDAEVAGPPGTSTATLLA  
 HLQORREAMRAEGIPSPPGAGTRTCTVTEGKHARLSCFVTGEPKPEVTVWKKDGLVLEGRRHVVYEDEQENF  
 VLKILFCKQSDRGLYCTASNLVGQTYSSVLVVREPTVPFKKRLQDLEVREKESATFQCEVAQATEAAWFK  
 EETRLWASAKYDIEEEGTERRLTVRNVSADDDAVYICETTEGSRRTVAELSVQGNLTKLPRKTAVRTGDTAIF  
 WVAVLAVPEGPVWRWRNQEEMVAGGRVAITAEGTCHTLTI FQCTLEDMGEVAFVSGGCRTTTQFCVSAPRRPPL  
 YPPADPVVKAKTESSVTLWSAPPHGDRPVTIDGYVLEKRKLGAYAWSRCHEAGWLATTEFTITGVAAEGDFQ  
 FRVSAINHFGQGPYLEFPGMTMLVPLAVKTPKAVEAVEGGEVTFVSDLTVASSGEWFLDGEALKASSIYVI  
 RCDRTRHMLTIREVPARLHGAQLKFVANGIETS IQMVVRAALGLPSKLPAAAAEVLAQLHHEAQLLAE LSD  
 QAAA VTWLKDGRELSLGPKEYMQVSAGRRALLVRDVAQDDAGLYECVSRGSRTAYQLLVQDITDGYRDWGPAG  
 PQKHMCKCAGAKIARYLGS SCYRFLQYDKGVWHLEAALDTRQGKGTSSCSLHEKPKLVFAKQQAHSEVKA  
 AGNSATLSCEVTAQTEVTWFKDGKLLSSSSKVRMEASGCSRRLVVQQAGKADAGEYSCEAGGQKLSFRLDVA  
 EPKLVFAKQSDRGLYCTASNLVGQTYSSVLVVREPTVPFKKRLQDLEVREKESATFQCEVAQATEAAWFK  
 GEYSCEAGGQKLSFRLDVAEPKMFVFAKEQQARSEVKAEGASATLSCEVAQAQTEVTWFKDGKLLSSSSKVRM  
 EASGCSRRLVVQQAGKADAGEYSCEAGGQKLSFRLDVTEPKLVFAKEQQARSEVKAEGNSATLSCEVAQAQ  
 EVTWFKDGKLLSSSSKVRMEASGCSRRLVVQQAGKADAGEYSCEAGGQKLSFRLDVAEPKLVFAKEQQARSEV  
 KAEAGNSATLSCEVAQAQTEVTWFKDGKLLSSSSKVRMEASGCSRRLVVQQAGKADAGEYSCEAGGQKLSFHL  
 DVTEPKLVFAKEQQAHSEVKAEGASATLSCEVAQAQTEVTWFKDGKLLSSSSKVRMEASGCSRRLVVQQAGK  
 ADAGEYSCEAEGQKLSFRLDVAEPKLVFAKEQQARSEVKAEGASATLSCEVAQAQTEVTWFKDGKLLSSSSK  
 VRVEASGCSRRLVVQQAGKADAGEYSCEAGGQKLSFRLDVAEPKLVFAKEQQANSEVKAEGASATLSCEVAQ  
 AQTEVTWFKDGKLLSSSSKVRVEASGCSRRLVVQQAGKADAGEYSCEAGGQKLSFRLDVAEPKLVFAKEQQAH  
 SEVKAEGASATLSCEVAQAQTEVTWFKDGKLLSSSSKVRVEASGCSRRLVVQQAGKADAGEYSCEAGGQKLS  
 FRLDVAEPKLVFAKEQQAHSEVKAEGASATLSCEVAQAQTEVTWFKDGKLLSSSSKVRVEASGCSRRLVVQQ  
 AGKADAGEYSCEAGGQKLSFRLDVAEPKLVFAKEQQAHSEVKAEGASATLSCEVAQAQTEVTWFKDGKLLSS  
 SSKVRVEASGCSRRLVVQQAGKADAGEYSCEAGGQKLFRLDVAEPKLMFAKEQQAHSEVKAEGASATLSCE  
 VAQAQTEVTWFKDGKLLSSSSKVRVEASGCSRRLVVQQAGKADAGEYSCEAGGQKLSFRLDVAEPKLVFAKEQ  
 QAHSEVKAEGASATLSCEVAQAQTEVTWFKDGKLLSSSSKVRVEASGCSRRLVVQQVQKADAGEYSCEARGQ  
 KLSFRLDVADTRLMFAKEQQARTEVKAEGNSATLSCEVAQAQTEVTWFKDGKLLSSSSKVRVEASGCSRRLV  
 VQQAGKADAGEYSCEAGGQKLSFRLDVAEAE SQIPERPSRREPLVVKEHETIILTATIAAPSVAAVTWLKDG  
 VEIIRSKRHEATSLGDTHTLTVRGAQVLD SAIYSCRVGKEGQDFPVQVEEVAAKFSKPLEPVEGELGCTVMLVC  
 ELSPEQAEVWRCGNTQLRPGKRFQMTSEGPRTTLTVSGLREDDAEYVVCESRDDRTSARLTVKVPVVKFTS  
 GLSAMVAEEGQEAFTQCVVSPSDAGVTWYKDGMLQPSKFKVMVESGASRSLTILGLTLEDAGQVTEAEGAS  
 SSAALRVREAPVFLFKKLEPQTEVEERTSVTLEVELTRPWPEVKWTRNAAVLTPSENVEIRAEGARHCLVRSV  
 GFADRGGFFGCETPDDKTQAKLNVEMRQVRLVVRGLQVEVEAKEQGTASMDVELSHAEEVGSWTRDGLRLQPGPKC  
 HLAVQGPVHILTLTSLALQPQD SGLVAFRAEGVHTSARLIVTEL PVSFTRVLQDVVATQKEKVTLECELSRPVDV  
 RWLKDGVLELRAGKAIGIVAQGTCSLVIYRCETGDQGVYVCDALDAQTSASLRVQGRTYTLIFRRLAEDAGE  
 VKFVAENAESRAHLRVKELPVTLLRPLRDKIAMEKHRGVLECCQVSRASAQVRWFKGGVELQSGPKYEVVSDGL  
 YRKLVIN DVQPEDEDTYTC DAGNVKTSAQFFVEEQSITIVRGLKDMTVMEPAPAWFECETSIPSVRPPKWL LG  
 KTVLQAGGNVGLQDQDVT HRLTLHKTCSTMTGQVHFTIGKSRSSAQLVVS DI PVVLT RPLEPKAGRELQSVVL  
 SCDFRPAPKAVQWYKDDT PLS PSEKFKMALEGGMALRILRLTPADAGVYRCQAGSAQSSAEVTVAREVTVI  
 QPLQDAEAMEEGRVCFSELSHKDEDI EWSLNGTPLYNDSFHEI SHEGCLHTLVLSVRQADTGTVCATSPKV  
 SVSARLVVKGKPVVFLKALDDVSAEERGLTLTQCEVSDPEARVVWRKDGVELGSPDKYDFLHKAGARGLTVHD  
 LSHEDAGLYTCQVGSKETQSKVSVHDLHVGITKRLKTVEVLEGE SCFECVLSHESPSDPAVWTVGGKTVGGS  
 GHFHAVRQGRKYTLTVKDAALSDAGEVVSVLGLT SKASLIIRERPV DITKPLEDQRTTLGEDVMLSCELSRA



GTSVRWLKDGKAIRKSQKYDLLSEGTRAVLVVRKASLKDSGEYTCETEASKSTAKLCVEEKANRFTEELADLQ  
VEEKGRAVFTCKTEHPASVVTWRKGLLELRASGKHVPSQEGLTLKLTINALERTDSDTYTCDIGQARTQARLL  
VHGQKVRVIEDLEDTAVQEGSSAKFCCRIAPADYGPVHWFLLDKTPLHSNELNEITVQPGGYHVLTLRQLALKD  
SGTVYFEAGDQRTSAAALRVTEKPSIFSRPLTDVTVTEGEDTLVLCETTTVDSSVRWTKDGKTLRPSARCQLSH  
EGCQAQLLITATTPQDGGRYKCEIGGASSSSIVRVHALPVRFRESLKDVEVPEGKAATLRCVLSVAAPVEWR  
HGDDVLKSSNKYSLRQEGAVLELVIRDLQPQDSGQYSCSFGDQTTSATLTVKTSQAQFVGLRKNKEATEGTTV  
TLRCELTKEAPVEWKKGTETLRNGDKYSLKQDGAVCELQICSLLVADAGEYSCVCGQEKTSAITLVKALLVHF  
VRRLSKEATEGDTTTLQCELSKAAPVEWRKGTETLRDGDYSLKQDGAVCELQIRSLTIADAGEYLCTCGQE  
KTSATLTVRALPAKFKDSLKNEEATDGTATLSCELSKAAPVTWKKGPKTLQSGDKYVLRQDGAVCGLQIHGL  
TMADAGEYSCVCGQEKTSAITLTVRGLPAKFIEDLRSQEATEGATAILRCELSKAAPVEWRKGSSETLKDGDYR  
LRQDGAVCELQIRGLAVVDGTGYSSLPKFTTEGLRNEEATEGTMATLRCQMSKAAPVEWRKGSSETLRDGDYR  
LRQDGAVCELQIRGLTIEDSGEYTCVCGQEKTSAITLSVKALPSRFIEDLRSQEATEGTMATLRCQMSKTA  
PVEWKKGSSETLRDGGYSLRQDGPVCELQICDLAVEDAGEYSCVCGQEKTSAITLSIKALPPRFIEDLRSQE  
ATEGTMATLRCQMSKAAPVEWRKGSSETLRDGGYSLRQDGAVCELQIHDLVDVADAGYSCVCG  
QEKTSAVLTVDALPPKFTTEGLKKEEATEGTMVTLRCQMSKEATVEWRKGAKTLSDDGGYSLRQDGA  
VCELQICGLAVEDAGEYSCVCGQEKTSAITLSVKALPPRFIEDLRSQEATEGTMATLRCQMSKAAPVEWR  
KGSSETLRDGDYSLRQDGAVCELQICDLAVEDAGEYLCVCGQEKTSAITLSVKALPPRFIEDLRSQEATE  
GTMATLRCQMSKAAPVEWRKGSSETLRDGDYSLRQDGAVCELQICDLAVEDAGEYSCVCGQEKTSAITLS  
VKALPPRFIEDLRSQEAREGTVA TLRCMSKAAPVEWRKGSSETLKDGDYSLRQEGNLCELQIRDLAVEDTE  
EYSCVCGQEKTSAITLSVKALPAKFIEDLRSQEAPESSTVTLRCKLSKASVWKKGSSETLRNGARYSLRQ  
DGAVCELEIRDLTVEDTGEYSCTCGQERTSATLSIMAPQVVFQQPLQNLQAEEGSMASLRCELSVNAAMV  
WSKGGLELQGDTRREARQQCVAELLLRDLRREDAGEYSCTCGSQTTATLMVTAAPVRFRELQAQD  
VDEGATARLRCELSREAVSVEWRKGS LQFPCAKYQMVQEGTTAELLVHGVEQEDAGEYTCDA  
GHTQSIARLSVRAPKPKFKTDLQSTEQEAGGTARLCCQLSEAEFGTVPVQWLKEGTEFLVHVGSKY  
EMRRQGA VCELLIHGLEAKDTGEYACLVGGQKTLASLRVKEPEVTIVRGLVDMVQADEVVEFTCKV  
SQAGATDVQWHLQGLPLQSNVEVAVLADGCTHVLQKGVTLQEDAGTYSFHVGGSSAQLTVRVPEV  
TVLEPLKDVQLSEGQDAHFRCRLSRASGQEARWALGGVPLQCNEMNNDITVEQGTLYLLTLHKVTL  
EDAGTITLQVGS CSSEAQLKVTAKN TVLRGLENVDALEGG EALFECQLSQPEVA AHTWLLDDEPVHTS  
EKVEVVYFENGLRHLLLLLKNLKPQDSCRVTFLAGDVVTS AFLTVRGRLEVLLEPPHDASVKAGMQR  
VFTCILSEAVPVGEATWYINGAAIQPDDTDWTVTTDGS SHAL TLSNAQPQHAGEVTF AARDAVASAR  
LSVLALPDPPEDAE VVGRSDHSVTL SWVAPMSDGGG LCGYR VEMKEASTGQWQLCHDLVPGPECV  
VDDLVPGKTYRFRVA AVGPA GAGEPVHLPQMVKIAPAPAPAPAPAPAPETRAVVGEDICLELEVAAD  
GGEVVWHKGTERRIQPGHFVLSRGQRQMLVIKGFRTEDQGEYRCGPIQGLPSSGAATFNVVMTSGS  
GDEVPAQPSLPPEAAQEGDLHLLWEALAR KRRMSREPTLDSISELPEEDSRVQHLRQEA  
EETAPDLSEGYSTADELARTGEADLSHTSSDDES RAGT PSLVTY LKKAAGPGISPLASKHEA  
QVTTSVKPKQKQEPVPTCP PPGDLSAADLMDPSLDKAAVKIQAAF KYKVRKEMKQQEGPVF  
SRFTFGDLEAQVGVDLRLECVLATKTD MRACWLKDGIELTDGRHYHIDQLKDGCTSLVVTGLA  
PDTDSGRYTCQVSTKSGRVSHSACVVVSGTESEAESSGGELDDAFRRAARRLHRLFRTKSPA  
ELSEEELFLSADEGPGPEEPADWQTYRE DENFVCIRFESLAEARQAVTCFRNMFATMGIGVEIS  
LGEQGPGRGEMRIGKVAPT VTPAVPLAKTPGLQTS DAAPVFLTELQNDVQDGYPMSFDCVVTG  
QVPVPSVRWFKDGKLEEDDHYMINEDQGGHQLIITAVVPADMGVYRCLAENSMGVSSTKA  
ELRVELTSTDYDTAADATETSSYFSAQGYLSSREQEGTESDEGQLPQVLEELKDLQVAPG  
TRLAKFQLKVKGYPAPKLYWFKDGP LTTSDHIRMTDKKTLHTLEIVSVTREDSGQYAA  
YISNAVGAAYSSARLLVRGPSEPEEK PASDVHERLVPPRI LEKFTPKKV KRGSSITFSVK  
VEGHPAPSVH WLKEEA EKGV LWIGPDTPGYTMASSSKQHS LVLLDVGRHQHTYTCIATNPAG  
QALCSASLHISGLAKEEEQERVKEALISSFLQGTSQAVSAQMSE SAGFADLVGQSKGESLVA  
EEAHSHLSLAEVGT EEFLOKLTSSQITEMVSAKISQAKLQVPGGDSDEETKTPSASPRHGR  
SRPSSSVQESSSESEEDGDSRGEIFDIYVVTADYLP LGAEQDAIILREGQYVEVLD SAH  
PLRWLVRTKPTKSSPSRQGWVSPAYLDRKRLKLSPEWGPTEAPEFPGEAVSEDEYRTRL  
SSVIQELLSSEQAFV GELQFLESHHMKHLERSPRVPAAVASQKT VIFRNVQDISHFHSSFL  
KELQCGCTDDDVAMCFIKNQEA FEKYLEFLVGRVQAESVVVSTPVQEFYKKYAEETLSAK  
DPTQPPPPPLQHYLEQPVERVQKYQALLKELIRNKARNRQNCALLEQAYAVVSALPQRAEN  
KLHVS LMENYPGTLEALGEP IRQGHFIVWEGAPGARM PWKGHNHRVFLFRNYLVI  
CKPRRDSRTDTFSYVFRNMMKLSSIDLNDQVEGDDRAFEVWHEREDSVRKYLLQARTVI  
IKNSWVKEICGIQQLAQPVWRPPEFEEELADCTAELGETVKLACRVTGT PKPIVSWYK  
DGKPV EVDPHHILIEDPDG SCTLILDNLTGIDSGYMCFAASAAGNASTLGKILVQVPP  
RFVNVKVRATPFVEGEDAQITCTVEGAPYPQIRWYKDGTL LLAGNRYRLMNEPRSGV  
LVLVIQAASKEDLGHYECELVNRLGSTRGGGELYMQSPALRARQDHHREQIVA  
AVEERRPSP\*  
>rs257062692\_ENSMUSP00000158795\_c.11466:G>T\_p.V3823L  
ENSMUST00000238536.2|Obscn-210|ENSMUSG00000061462|-|chr11:g.58958060:C>A  
MDHSFSGAPRFLTRPKAFVSVGKDATLSCQIVGNPTPHVSWEKDRQPV EAGARFRLAQDGDVYR  
LTILD LALGDSGQYVCRARNAIGEAFAAVGLRVDSEGTCAEQAPHLLRPTSIRVREGADATFR  
CRVGGSPQPAVSWSKDG

RRLGPPDAPHVRVEEHGESSALRIRRSARPRDGGTYEVRAENPLGSASAAAAALVVDSDAEVAGPPGTSTATLLA
HLQORREAMRAEGIPSPPGAGTRTCTVTEGKHARLSCFVTGEPKPETVWKKDGLVTEGRRHVVEDEQENF
VLKILFCKQSDRGLYTCTASNLVQTYSSVLVVREPTVPFKKRLQDLEVREKESATFQCEVAQPATEAAWFK
EETRLWASAKYDIEEEGETERRLTVRNVSADDDAVYICETTEGSRVVAELSVQGNLTKRKLPRKTAVRTGDTAIF
WVELAVPEGPVRWLRNQEEMVAGGRVAITAEGTCHTLTI FQCTLEDMGEVAFVSGGCRTTTTQFCVSAPRRPPL
YPPADPVVKAKTESSVTLWSAPPHGDRPVTIDGYVLEKRKLGAYAWSRCHEAGWLATTEFTITGVAAEEDGFQ
FRVSAINHFGQGPYLEFPGTMHLVPLAVKTPKAVEAVEGGEVTFVSVDLTVASSGEWFLDGEALKASSIYVI
RCDRTRHMLTIREVPARLHGAQLKVFANGIETS IQMVVRAALGLPSSKLPAAAAAREVLAQLHEEAQLLAELSD
QAAAVTWLKDGRELSLGPKYEMQVSAGRRALLVRDVAQDDAGLYECVSRGSRRTAYQLLVQDITDGYRDWGPAG
PQKHMCKCAGAKIARYLGS SCYRFLQYDKGVWHLEAALDTRQGKGTSSCSLHEKPKLVFAKQQAHSEVKA
AGNSATLSCEVTQAQTEVTFKDGKLLSSSSKVRMEASGCSRRLVVQQAGKADAGEYSCEAGGQKLSFRLDVA
EPKLVFAKQQAHSEVKAEGASATLSCEVAQAQTEVTFKDGKLLSSSSKVRMEASGCSRRLVVQQAGKADA
GEYSCEAGGQKLSFRLDVAEPKLVFAKEQQARSEVKAEGASATLSCEVAQAQTEVTFKDGKLLSSSSKVRM
EASGCSRRLVVQQAGKADAGEYSCEAGGQKLSFRLDVTEPKLVFAKEQQARSEVKAEVGNSATLSCEVAQAQ
EVTWFKDGKLLSSSSKVRMEASGCSRRLVVQQAGKADAGEYSCEAGGQKLSFRLDVAEPKLVFAKEQQARSE
KAEAGNSATLSCEVAQAQTEVTFKDGKLLSSSSKVRMEASGCSRRLVVQQAGKADAGEYSCEAGGQKLSFHL
DVTEPKLVFAKEQQAHSEVKAEGASATLSCEVAQAQTEVTFKDGKLLSSSSKVRMEASGCSRRLVVQQAG
ADAGEYSCEAGGQKLSFRLDVAEPKLVFAKEQQARSEVKAEGASATLSCEVAQAQTEVTFKDGKLLSSSSK
VRVEASGCSRRLVVQQAGKADAGEYSCEAGGQKLSFRLDVAEPKLVFAKEQQANSEVKAEGASATLSCEVAQ
AQTEVTFKDGKLLSSSSKVRVEASGCSRRLVVQQAGKADAGEYSCEAGGQKLSFRLDVAEPKLAFAKEQQAH
SEVKAEGASATLSCEVAQAQTEVTFKDGKLLSSSSKVRVEASGCSRRLVVQQAGKADAGEYSCEAGGQKLS
FRLDVAEPKLAFAKEQQAHSEVKAEGASATLSCEVAQAQTEVTFKDGKLLSSSSKVRVEASGCSRRLVVQQ
AGKADAGEYSCEAGGQKLSFRLDVAEPKLAFAKEQQAHSEVKAEGASATLSCEVAQAQTEVTFKDGKLLSS
SSKVRVEASGCSRRLVVQQAGKADAGEYSCEAGGQKLFRLDVAEPKLMFAKEQQAHSEVKAEGASATLSCE
VAQAQTEVTFKDGKLLSSSSKVRVEASGCSRRLVVQQAGKADAGEYSCEAGGQKLSFRLDVAEPKLVFAKEQ
QAHSEVKAEGASATLSCEVAQAQTEVTFKDGKLLSSSSKVRVEASGCSRRLVVQQAGKADAGEYSCEAGGQ
KLSFRLDVADTRFAKEQQARTEVKAEGASATLSCEVAQAQTEVTFKDGKLLSSSSKVRVEASGCSRRLV
VQQAGKADAGEYSCEAGGQKLSFRLDVAEAEESQIPERPSRREPLVVKEHETIILTATIAAPSVAAVTWLKDG
EIRRSKRHEATSLGDTHTLTVRGAQVLDSAIYSCRVGKEGQDFPVQVEEVAAKFSKPLEPVEGELGGTVMLVC
ELSPQAEVWRCGNTQLRPGKRFQMTSEGPRTTLTVSGLREDDAEYVCESRDDRTSARLTVKVPVVKFTS
GLSAMVAEEGQEQATFQCVVSPSDAGVTWYKDGMLQPSKFKVMVESGASRSLTILGLTLEDAGQVTVAEAGS
SSAALRVREAPVLFKKLEPQTVERTSVTLEVELTRPWPEVKWTRNAAVLTPSENVEIRAEGARHCLVLRV
GFADRGGFFGCETPDDKTQAKLNVEMRQVRLVVRGLQVEVEAKEQGTASMDVELSHAEVEGSWTRDGLRLQF
HLAVQGPVHILTLALSALQPDQSGLVAFRAEGVHTSARLIVTELPVSVFTRVLQDQVATQKEKVTLECELSRP
RVLKDGVELRAGKAIGIVAQGTCSRSLVIYRCETGDQGVYCDALDAQTSASLRVQGRTYTLIFRVLAEADAGE
VKEVAENAESRAHLRVKELPVTLLRPLRDKIAMEKHGKRVLECGVSRASQVRWFKGGVLELQSGPKYEVVSD
YRKLVINVDQPEDEDTYTCDAENVKTSAQFFVVEEQSITIVRGLKDMTVMPEPAPAWFECETSIPSVRPPK
KWLKTVLQAGGNVLEQDGTVHRLTLHKTCSTMTGPVHFTIGKSRSSAQLVSDIPVVLTRPLEPKAGRELQSV
SCDFRPAPKAVQWYKDDTPLSPSEKFKMALEGQMAELRILRLTPADAGVYRCQAGSAQSSAEVTVAREVTVI
QPLQDAEAMEEGRVCFSCELSHKDEDEIWSLNGTPLYNDSFHEISHEGCLHTLVLSVRQADTGTVCATSPKV
SVSARLVVKGKPVVFLKALDDVSAEERGTTLTQCEVSDPEARVVWRKDGVELGSPDKYDFLHKAGARGLTV
HDLSHEDAGLYTCQVGSKETQSKVSVHDLHVGITKRLKTVEVLEGESECSFECVLSHESPSDPAVWTVGGK
TGVGGS GHFHAVRQGRKYTLTVKDAALSDAGEVVFVSVLGLTSKASLIIRERPVDITKPLEDQRTTLGEDV
MLSCELSRA GTSVRWLKDGKAIKRSQKYDLLSEGTRAVLVVRKASLKDSEYTCETEASKSTAKLCVEEKANR
FTEELADLQ VEEKGRAVFTCKTEHPASVVTWRKGLLELRASGKHVPSQEGTLTKLTINALERTDSDTYTC
DIGQARTQARLL VHQQKRVVIEDLEDTAVQEGSSAKFCRIAPADYGPVHWFLDKTPLHSNELNEITVQ
PGGYHVLTLRQLALKD SGTVYFEAGDQRTSAALRVTEKPSIFSRPLTDVTVTEGEDTLVCETTTVD
SRSVRWTKDGKTLRPSARCQLSH EGCQAQLLITATTPQDGGRYKCEIGGASSSSIVRVHALPVR
FRESLKDVEVPEGKAATLRCVLSVAAPVEWR HGDDVLKSSNKYSLRQEGAVLELVIRDLQPD
SGQYSCSFGDQTTSATLTVKTSQAQFVGLKRNKEATEGTTV TLRCELTKAEAPVEWKKGTET
LRNGDKYSLKQDGAVCELQICSLLVADAGEYSCVCGQEKTSATLTVKALLVHF VRRLSKEATEG
DTTLQCELSKAAPLEWRKGTETLRDGDYSLKQDGAVCELQIRSLTIADAGEYLCTCGQE KTSAT
LTVRALPAKFKDSLKNEEATEGTTATLSCELSKAAPVWKKGPKTLQSGDKYVLRQDGAVCGLQI
HGLTMADAGEYSCVCGQEKTSATLTVRGLPAKFIEDLRSQEATEGATAILRCELSKAAPVEWRK
GSETLKDGDYRTRQDGAVCELQIRGLAVVDGTYSLSPTKFTTEGLRNEEATEGTMATLRCQMSKA
APVEWRKGSSETLRDGDYRSLRQDGAMCELQIRGLTIEDSGEYTCVCGQEKTSATLSVKALPSR
FIEDLRSQEATEGTMATLRCQMSKAAPVEWRKGSSETLRDGGRYSLRQDGAVCELQIHDLDVEDAG
QYSCVCG

QEKTSAVLTVDALPPKFTEGLKKEEATEGTMVTLRCQMSKEATVEWRKGAKTSLSDGGRYSLRQDGAMCELQIC
GLAVEDAGEYSCVCGQEKTSATLSVKALPPRFIEDLRSQEATEGTMATLRCQMSKAAPVEWRKGSETLRDGD
YSLRQDGAVCELQIRDLAVEDAGEYLCVCGQEKTSATLSVKALPPRFIEDLRSQEATEGTMATLRCQMSKAAP
VEWRKSGKTLRDGDYSLRQDGAMCELQICDLAVEDTDYSCVCGQEKTSATLSVKALPPRFIEDLRSQEARE
GTVATLRCRMSKAAPVEWRKGSETLKDGDYSLRQEGNLCELQIRDLAVEDTEEYSCVCGQEKTSATLSVKAL
PAKFIEDLRSQEAPESSTVTLRCKLSKKASVVWKKGSETLRNGARYSLRQDGAVCELEIRDLTVEEDTGEYSCT
CGQERTSATLSIMAPQVVFQQPLQNLQAEEGSMASLRCELSVPNAAMVWSKGGLELQGDTRREARQQGCVAE
LLRDLRREEDAGEYSTCGSQTTSATLMVTAAPVRFLELQADVDEGATARLRCELSREAVSVEWRKGSLLQF
PCAKYQMVQEGTTAELLVHGVEQEDAGEYTCDAAGHTQSIARLSVRAPKPKFKTDLQSTEQEAGGTARLCCQLS
EAEPTGTPVQWLKEGVELHVGSKYEMRRQGAUCELLIHGLEAKDTGEYACLVGGQKTLASLRVKEPEVTIVRGL
VDMEVQADEDEFTCKVSOAGATDVQWHLQGLPLQSNVTEVAVLADGCTHVLQKGVTLLEDAGTVSFHVGGL
SSSAQLTVRVPEVTVLEPLKDVQLSEGQDAHFRCRLSRASGQEARWALGGVPLQCNEMNDITVEQGTLYLLTL
HKVTLLEDAGTITLQVGSSESQAQLKVTAKNTVLRGLENVDALEGGEALFECQLSQPEVAHAHTWLLDDEPVHTS
EKVEVVYFENGLRHLLKLNKLPQDSCRVTFLAGDVVTSFAFLTVRGWRLEVLPEPHDASVKAGMQVRFCTILS
EAVPVGEATWYINGAAIQPDDTDWTVTTDGSHHALTLSNAQPQHAGEVTFAAARDAVASARLSVLALPDPPEDA
EUVGRSDHSVTLWSVAPMSDGGGGLCGYRVEMKEASTGQWQLCHDLVPGPECVDDLVPGKTYRFRVAAVGPA
GAGEPVHLPQMVKIAPAPAPAPAPAPAPAPAPETRAVAVGEMDICLELEVAADGGEVWHKGTERRIQPGHFEVLS
RGQRQMLVIKGFRTEDQGEYRCGPIQGLPSSGAATFNVMVMTSGSGDEVPAQPSLPPEAAQGTSLHLLWEALAR
KRRMSREPTLDSISELPEEDSRVQHLRQEAEEETAPDLSEGYSTADELARTGEADLSHTSSDDESAGTPSLVT
YLKKAAGPGISPLASKHEAQVTTSVKPKQEQEPVVPTCPPPGDLSAADLMDPSLDKAAVKIQAAPFKYKVRKE
MKQEQEPVFSRFTFGDTEAQVGDVLRLECVLATKTDMRACWLKDGIELTDGRHYHIDQLKDGTCSSLVTLGLAPT
DSGRYTCQVSTKSGRVSHSACVVVSGTESEAESSSGGELDDAFRAARRLHRLFRTKSPAELSEELFLSADE
GPGEPEEPADWQTYREDENFVCIRFESLAEARQAVTCFRNMFATMGIGVEISLGEQGPGRVEMRIKGVAPTVT
PAVPLAKTPGLQTSDAAPVFLTELQNDVQDGYPMSFDCVVTGQPVPSVRWFKDGLLEEDDHYMINEDQQGG
HQLIITAVVPADMGVYRCLAENSMGVSSTKAELRVELTSTDYDTAADATETSSYFSAQGYLSSREQEGTESDE
GQLPQVLEELKDALQVAPGTRLAKFQLKVKGYPAKPLYWFKDQGPLTSDHIRMTDKKTLHTEIVSVTREDSG
QYAAIYISNAVWKEICGIIQQLRAQPVWRPPEFEEELADCTAELGETVKLACRVTGTPKPIVSWYKDGKPEVDPH
HLLIEPDPGCTLILDNLTGIDSGQYMCFAASAAGNASTLGKILVQVPPRFVNVKVRATPFVEGEDAQITCTVE
GAPYPQIRWYKDGTLAPGNRYRMLNEPRSGVLVLIQAASKEDLGHYECELVNRLGSTRGGGELYMQSPALR
ARDQHHREQIVAAVEDTSVEGSAHSAQDQAAASVLRLLGSEALGSPGDLNTRQSEPPAFEEAASQIP
GAASGTPEVSQPGTHKLEQETTSSGSQGWTVPIRVEGTAWPGAGTQQLLDVHSQVIMETTQRTYVQAPDT
GVTRAPSMQVTIEDVQVQVGDMAQFDAVIEGHPPPIVTVWYKGSTQLTSSARLSQRQDGTYSVLVTDVAPHDA
GVYTCVANNAGGQVLCKAELLVHGGDKLDAENQVYRRKLHSFYDVQEEIGRGVFGFVKRVQHKGNKMFCAAKF
IPLRSKTRAQAYQERDILATLGHPLVTLGLDQFETRKTLLILILELCSSEELLDRLFKKGVVTEAEVKVYIQQL
VEGLHYLHSHGILHLDIKPPNILMVHPAREDIKICDFGFAQKITPSEPQYSKYGSPEFVSPETIEQNPVSEGS
DIWAMGVI SYLSLTSSPFAGESDRATLLNVLEGRVSWSSPTAAHLEDAKDFIKATLQRTPRARPSTSQCLA
HPWFLKSMPAEEAHFINTKQLKFLARSRWQRSLMSYKSI LVMRSIPELLQGPDPSPSLGVARHLRGEASGAS
SSSSSSDNELAPFARAKSLPPSPVTHSPLLHPRGFLRPSASLPEETEASMPATAAASPASQASAGPPASPGCV
PRHSVISSLFYQQAGEGAERGNKTSGAKRHPARRRHLLKGGYIARALPGLREPLMEYSLLEEEAAREEQASLM
TKTSPFETALRLPSSSVREVPGRSHSLDNPPVTTGPSPEACKEQLLFPSTGLTHETTAKDRGHKEGFLQESV
PFPMPGSDSRPGKQEGSSQDSCRGPASSCHSELGSGSQEGCPPSSQSLGSLPPQSLKKESTSCGPLFSEQ
PQAAPFPTQVSPLLGSEKEPQDGSLSSEGPVVPVSSSPGSASQVDASLDTEGLSEAGDTCDFTPPPQRPQEQAT
TRKFSLESRGGYAGVAGYGTFAFGGDAGGMLQGGLWARMMAVVSQSSEEQDEAATESPQPLES LGPIAEASG
VPLRTPSPSETPEWEEQVSLVQIRDLSDGAEAAATISLDISEVDPAYLNLSDLYDIKYLPEFEMI FRRVFKPI
EQPEPSPGSETEAGQLADFLLEAAWPWPGELGLRAGLEITEEPEEPGDLEALLGEAAVGRKRKWSPSRGLFQF
PGRCLSGEEPVELGLRQRVKASMAHISRILKGRPEPEREGPPRKKAGLASFRLSGLKGRDQELSDEAVVLGQ
SVTLACQVLAQPTAQATWSKDGVLLESSGHLLISSTLKNFQLLTI LVVKEEDLGTYTCCVSNPLGTAVTTGVL
RKAERPSSSRPEVGEYKDAVLLVWKPVESCGPVTVYIVQCCIEGGSWTTLASDISDCCYLTGKLSRGGMYIF
RTACVSKAGMGPYSSPSEQVLLGGPNHLASEEESRRGRPAQLLPSTKTFAFQMQIRRGFRFSVVRQCREKASGR

ALAAKIVPYQPEDKTA VLREYEALKRLHHPHLAQLHAAAYLSPRHLVLI LELCSGPELLPSLAERESYSESDVK  
DYLWQMLSATQYLHAQHILHLDLRSENMMVTEYNLLKVIDLGNALDQEKVPAPENFKDYLETMAPELLEGG  
GAVPQTDIWAIGVTA FIMLSGEY PESSSEGTRDLQKGLRKLIRLSRCYAGLSGGAVAFLOSSLCAQPWGRPCA  
STCLQCGWLTEEGPTGSRPTPVTFPTVRLRAFVREKRRALLYKKNLAQVR\*

>rs257062692\_ENSMUSP00000038264\_c.10638:G>T\_p.V3547L  
ENSMUST00000047441.14|Obscn-202|ENSMUSG00000061462|-|chr11:g.58958060:C>A  
MDHSFSGAPRFLTRPKAFVSVGKDATLSCQIVGNPTPHVSWEKDRQFVEAGARFRLAQDGDVYRLTILDLAL  
GDSGQYVCRARNAIGEFAAVGLRVDSEGTCAEQAPHFLLRPTSIRVREGADATFRCRVGGSPQPAVSWSKDG  
RRLGPPDAPHVRVEEHGESSALRIRSARPRDGGTYEVRAENPLGSASAAAALVVDSDAEVAGPPGTSTATLLA  
HLQQRRREAMRAEGIPPSPPGAGTRTCTVTEGKHARLSCFVTGEPKPEVWKKDGQLVTEGRRHVVEDEQENF  
VLKILFCKQSDRGLYTCTASNLVGQTYSSVLVVVREPTVPFKKRLQDLEVREKESATFQCEVAQPAEAAWFK  
EETRLWASAKYDIEEEGTERRLTVRNVSADDDAVYICETTEGSRVVAELSVQGNLTKLPRKTAVRTGDTAIF  
WVELAVPEGPVRWLRNQEEMVAGGRVAITAEGTCHTLTI FQCTLEDMGEVAFVSGGCRTTTQFCVSAAPRRPPL  
YYPADPVVKAKTSSVTLWSAPPHGDRPVTIDGYVLEKRKLGA YAWSRCHEAGWLATTEFTITGVAAEEDGFQ  
FRVSAINHFGQGPYLEFPGTMHLVPLAVKTPKAVEAVEGGEVTFVSDLTVASSGGEWFLDGEALKASSIYVI  
RCDRTRHMLTIREVPARLHGAQLKVFANGIETSIQMVVRAALGLPSSKLPAAAAREVLAQLHHEEAQLLAE LSD  
QAAA VTWLKDGRELSLGPKYEMQVSAGRRALLVRDVAQDDAGLYECVSRGSR TAYQLLVQDITDGYRDWGPAG  
PQKHMCKCAGAKIARYLGSSCYRFLQYDKGVVHWEAALDTRQKGTSSCSLHEKPKLVFAKGQQAHSVEKAE  
AGASATLSCEVAQAQTEVTFWFKDGKLLSSSSKVRMEASGCSRRLVVQQAGKADAGEYSCEAGGQKLSFRLDVA  
EPKMFVFAKEQQARSEVKA EAGASATLSCEVAQAQTEVTFWFKDGKLLSSSSKVRMEASGCSRRLVVQQAGKADA  
GEYSCEAGGQKLSFRLDVTEPKLVFAKEQQARSEVKA EGVNSATLSCEVAQAQTEVTFWFKDGKLLSSSSKVRM  
EASGCSRRLVVQQAGKADAGEYSCEAGGQKLSFRLDVAEPKLVFAKEQQARSEVKA EAGNSATLSCEVAQAQ T  
EVTWFKDGKLLSSSSKVRMEASGCSRRLVVQQAGKADAGEYSCEAGGQKLSFHLDVTEPKLVFAKEQQAHSEV  
KAEAGASATLSCEVAQAQTEVTFWFKDGKLLSSSSKVRMEASGCSRRLVVQQAGKADAGEYSCEAE GQKLSFRL  
DVAEPKLVFAKEQQARSEVKA EAGASATLSCEVAQAQTEVTFWFKDGKLLSSSSKVRVEASGCSRRLVVQQAGK  
ADAGEYSCEAGGQKLSFRLDVAEPKLVFAKEQQANSEVKA EAGASATLSCEVAQAQTEVTFWFKDGKLLSSSSK  
VRVEASGCSRRLVVQQAGKADAGEYSCEAGGQKLSFRLDVAEPKLVFAKEQQAHSEVKA EAGASATLSCEVAQ  
AQTEVTFWFKDGKLLSSSSKVRVEASGCSRRLVVQQAGKADAGEYSCEAGGQKLSFRLDVAEPKLVFAKEQQAH  
SEVKA EAGASATLSCEVAQAQTEVTFWFKDGKLLSSSSKVRVEASGCSRRLVVQQAGKADAGEYSCEAGGQKLS  
FRLDVAEPKLVFAKEQQAHSEVKA EAGASATLSCEVAQAQTEVTFWFKDGKLLSSSSKVRVEASGCSRRLVVQQ  
AGKADAGEYSCEAGGQKLFRLDVAEPKLVFAKEQQAHSEVKA EAGASATLSCEVAQAQTEVTFWFKDGKLLSS  
SSKVRVEASGCSRRLVVQQVQKADAGEYSCEARGQKLSFRLDVAEAE SQI PERPSRREPLVVKHEHTIILTAT  
IAAPSVAAVTWLKDGV EIRRSKRHEATSLGDTHLTVRGAQVLD SA IYSCRVGKEGQDFPVQVEEVA AKFSKP  
LEPVEGELGGTVMLVCELSPEQAEVWRCNGTQLRPGKRFQMTSEGPRRTLTVSGLREDDAEYVCE SRDDRT  
SARLTAVKVPVVKFTSGLSAMVAEEGQEA TFQCVVSPDAGVTWYKDMQLQ PSEKFMVMEVSGASRSLTILGL  
TLEDAGQVTVEAEGASSAALRVREAPVLFKKKLEPQTVDEERTSVTLEVELTRPWEVKWTRNAAVLTPSENV  
EIRAEGARHCLVLRVSGFADRGFFGCETPDDKTQAKLNVEMRQVRLVRGLQEVEAKEQGTASMDVELSHAEVE  
GSWTRDGLRLQPGPKCHLAVQGPVHILTLSALQPQDSGLVAFRAEGVHTSARLIVTEL PVSFTRVLQDVVATQ  
KEKVTLECELSRPVDVRWLKDGVELRAGKAI GIVAQGTCSRSLVIYRCETGDQGVYVCDALDAQTSASLRVQGR  
TYTLIFRRVLAEDAGEV KFVAENAESRAHLRVKELPVTLLRPLRDKIAMEKHRGVLECCQVSRASAQVRWFKGG  
VELQSGPKYEVVSDGLYRKLVIN DVQPEDEDTYTCDAGNVKTSAQFFVEEQSITIVRGLKDMTVM EPAPAWFE  
CETSIPSVRPPKWL LGKTVLQAGGNVGLQDGTVHRLTLHKTCSTMTGPVHFHTIGKSRSSAQLVVS DIPVVL T  
RPLEPKAGRELQSVVLSCDFRPAPKAVQWYKDDTPLSPSEKFKMALEGO MAELRILRLTPADAGVYRCQAGSA  
QSSAEVTVEAREVTVIQPLQDAEAMEEGRVCFSCELSHKDEDIEWSLNGTPLYNDSFHEI SHEGLHTLVLSK  
VRQADTGTVCATSPKVS SARLVVKGKPVVFLKALDDVSAEERGTLTLQCEVSDPEARVVWRKDGVELG PSDK  
YDFLHKAGARGLTVHDL SHEDAGLYTCQVGSKETQSKVSVHDLHVGITKRLKTVEVLEGE SCSFECVLSHESP  
SDPAVWTVGGKTVGGSGHFHAVRQGRKYTLTVKDAALSDAGEV VFSVLGLTSKASLIIRERPV DITKPLEDQR  
TTLGEDVMLSCELSRAGTSVRWLKDGKAI RKSQKYDLLSEGTRAVLVVRKASLKDSGEYTCETEASKSTAKLC  
VEEKANRFTEELADLQVEEKGRAVFTCKTEHPASVVTWRKGLLELRASGKHVPSQEGTLTKLTINALERTDSD  
TYTCDIGQARTQARLLVHGQKVRVIEDLED TAVQEGSSAKFCCR IAPADYGPVHWF LDKTPLHSNELNEITVQ  
PGGYHVLT LRQLALKDSGTVYFEAGDQRTSAALRVTEKPSIFSRPLTDVTVTEGEDLTLVCETTTVDSSVRWT  
KDGTLRPSARCQLSHEGCAQLLITATTPQDGGRYKCEIGGASSSSIVRVHALPVRFRESLKDVEVPEGKAA  
TLRCVLSVAAPVWRHGDV LKSSNKYS LRQEGAVLELVIRDLQPDQSGQYSCSFGDQTT SATLTVKTTSSAQ  
FVGKLRNKEATEGTTVLRCEL TKEAPVEWKKGTETLRNGDKYSLKQDGA VCELQICSLLVADAGEYSCVCGQ  
EKTSATLTVKALLVHFVRRLRSKEATEGDTTTLQCELSKAAPLEWRKGTETLRDGD RYSLKQDGA VCELQIRS  
LTIA DAGEYLCTCGQEKTSATLTVRALPAKFKDSLKNEEATEGTTATLSCELSKAAPV TWKKGPKTLQSGDKY  
VLRQDGA VCGLQIHGLTMADAGEYSCVCGQEKTSATLTVRGLPAKFIEDLRSQEATEGATAILRCELSKAAPV  
EWRKGETLKDGD RYTLRQDGA VCELQIRGLAVVDTGTYS SLP TKFTEGLRNEEATEGTMATLRCQMSKAAPV

EWRKGETLRDGDYSLRQDGAMCELQIRGLTIEDSGEYTCVCGQEKTSATLSVKALPPRFIEDLRSQEATEG
TMATLRCQMSKAAPVEWRKGETLGDGGYSLRQNGAVCELQIHDLAVEDTGEYSCVCGQEKTSATLNVKALP
PRFIEDLRSQEATEGTMATLRCQMSKAAPVEWRKGETLRDGGYSLRQDGAVCELQIHDLVEDAGQYSCVC
GQEKTSAVLTVDALPPKFTEGLKKEEATEGTMVTLRCQMSKEATVEWRKGAKTLDGGRYSLRQDGAMCELQI
CGLAVEDAGEYSCVCGQEKTSATLSVKALPPRFIEDLRSQEATEGTMATLRCQMSKAAPVEWRKGSKTLRDGD
RYSLRQDGAMCELQICDLAVEDTGDYSCVCGQEKTSATLSVKAPQVVFQQLQNLQAEEGSMASLRCELSVFN
AAMVWSKGGLELQGDTRREARQQGCVAELLLRDLRREDAGEYSCVCGSQTTSATLMVTAAPVRFRELQAQDV
DEGATARLRCELSREAVSEWRKGSLLQFPKAKYQMVQEGTTAELLVHGVEQEDAGEYTC DAGHTQSIARLSV
RAPKPKFKTDLQSTEQEAGGTARLCCQLSEAEPTPVQWLKEGVELHVGSKYEMRRQGAVALLELHGLEAKDT
GEYACLVGQKTLASLRVKEPEVTIVRGLVDMEVQADEDEFTCKVSQAGATDVQWHLQGLPLQSNVTEVAV
LADGCTHVLQKGVTLLEDAGTVSFHVGGLSSSAQLTVRVPEVTVLEPLKDVQLSEGQDAHFRCRLSRASGQEA
RWALGGVPLQCNEMNDITVEQGTLYLLTLHKVTLLEDAGTITLQVGCSSSEALQKVTAKNTVLRGLENVDALEG
GEALFECQLSQPEVAHAHTWLLDDEPVHTSEKVEVVYFENGLRHLLLLKNLKPQDSCRVTFLAGDVVTS AFLTV
RALPDPPEDAEVVGRSDHSVTLVWVAPMSDGGGGLCGYRVMKEASTGQWQLCHDLVPGPECVVDLVP GKTY
RFRVAAVGPAGAGEPVHLPQMVKIAPAPAPAPAPAPAPAPETRQAVVGEDICLELEVAADGGVEVWHKGTERRI
QPGGHFEVLSRGQRQMLVIKGFRTEDQGEYRCGPIQGLPSSGAATFNVMVMTSGSGDEVPAQPSLPPEAAQEGD
LHLLWEALARKRRMSREPTLDSISELPEEDSRVQHLRQEAETAPDLSEGYSTADELGEADLSHTSSDDE
SRAGTPSLVTYLKKAGGPGISPLASKHEAQVTTSVKPKQKQEPVVPVTCPPPGDLAADLMDPSLDKAAVKIQA
AFKGYKVRKEMKQOEGPVFSRTFGDTEAQVGDVLRLECVLATKTKDMRACWLKDGIELTDGRHYHIDQLKDGTC
SLLVTVGLAPTDSGRYTCQVSTKSGRVSHSACVVVSGTESEAESSSGGELDDAFRRAARLHRLFRFKSPAELS
EELFLSADEGPEPEPADWQTYREDENFVCIRFESLAEARQAVTCFRNMFATMGIGVEISLGEQGRGVEM
RIGKVAPTPTPAVPLAKTPGLQTSDAAPVFLTELQNDQVQDGYPMSFDCVVTGQPVPSVRWFKDGKLL EEDDH
YMNEDQQGGHQLIITAVVPADMGVYRCLAENSMGVSSTKAELRVELTSTDYDTAADATETSSYFSAQGYLSS
REQEGTESDEGQLPQVLEELKDLQVAPGTRLAKFQLKVKGYPAKLYWFKDGOPLTSSDHIRM TDKKT LH TLE
IVSVTREDSGQYAAIYI SNAVGAAYSSARLLVGRGPSEPEEKPASDVHERLVPPRILEKFTPKKVKRGSSI TFSV
KVEGHPAPSVHWLKEEAKEGVLWIGPDTPGYTMASSSQHSLVLLDVGQRHQGTYTICATNPAGQALCSASLH
ISGLAKEEEEQERVKALISSFLQGTSAQVSAQMSSEAGFADLVGQSKGESLVAAEEAHSHLSLAEVGTTEFLQK
LTSQITEMVSAKISQAKLQVPGGDSDEETKTPSASPRHGRSRPSSSVQESSSESEDGDSRGEI FDIYVVTADY
LPLGAEQDAIILREGQYVEVLDSAHPLRWLVRTKPTKSSPSRQGWVSPAYLDKRLKLSPEWGPTEAPEFPGEA
VSEDEYRTRLSSVIQELLSSEQAFVGELOFLESHHMKHLERSPRVPAAVASQKTVI FRNVQDISHFHSSFLKE
LQCGGTDDDDVAMCFIKNQEA FEKYLEFLVGRVQAESVVVSTPVQEFYKKYAEETLSAKDPTQPPPPLOHYLE
QPVERVQKYQALLKELIRNKARNRQNCALLEQAYAVVSALPQRAENKLVHSLMENYPGTLEALGEP I RQGHFI
VWEGAPGARMPWKGNHRHVFLFRNYLVICKPRRDSRTDTFSYVFRNMMKLSSIDLNDQVEGDDRAFEVWHERE
DSVRKYLQARTVI IKNWVKEICGIQORLAQPVWRPPEFEELADCTAELGETVKLACRVTGTPKPIVSWYK
DGKPVVEVDPHHILIEDPDGSC TLI LDNLTGIDSGYMCFAASAAGNASTLGKILVQVPPRFVNKVRATPFVVEG
EDAQITCTVEGAPYPQIRWYKDGTL LAPGNRYRMLNEPRSGVLLVVIQAASKEDLGHYPELNVRLGSTRGGG
ELYMQSPALRARDQHHRQIIVA AVEGAPSMQVTIEDVQVQVGDMAQF DAVIEGHPPP I V TWYKGTQLTSSAR
LSQRQDGTYSLVLT DVAPHDAGVYTCVANNAGQVLCKAELLVHGGDKLDAENQVYRRKLHSFYDVQEEIGR
GVFGFVKRVQHKGNMFC AAKF I PLRSKTRAQAYQERDILATLGHPLVTGLLDQFETRKTLLIILELCSSEEL
LDRLFKKGVVTEAEVKVYIQQLVEGLHYLHSHGILHLDIKPPNIMVHPAREDIKICDFGFAQKITPSEPOYS
KYGSPFVSP EII EQNPVSEGS DIWAMGVI SYLSLTCSSPFAGESDRATLLNVLEGRVSWSSPTAAHLS EDAK
DFIKATLQRTPRARPSTSQC LAHPWFLKSMPAEAAHFINTKQLKFL LARSRWQRSLMSYKSI LVMRSIPELLQ
GPPDSPSLGVARHLRGEASGASSSSSSSDNELAPFARAKSLPPSPVTHSPLLHPRGFLRPSASLPEETEASMP
TADAAVPASPQASAGPPASPGCVPRHSVISSLFYQQAGEGAERGNKTS GAKRHPARRRHLLKGGYIARALPGLR
EPLMEYSLLEEEAAREEQASLMTKTPSFETALRPLSSSVREVPGRSHSLDNPPVTGSPPEACKEQLLFPST
GLTHETTAKDRGHKEGFLQESVFPFMSGDSRPGKQEGSSQDSCRGKPASSCHSELGSGSQEGCGPSSQSLG
SLPPQSLKKELESTSCGPLFSEQPQAAPFPTQVSPLLGSEKEPQDGSLSSEGVPVPSSSPGSASQVDASLDTEG
LSEAGDTCDFTPPPQRPQEQATTRKFSLESRGGYAGVAGYGTFAFGGDAGGMLGQGPLWARMWAVSOSSEEQ
DEAATESPQPLESGLPIAEASGVPLRTSPSLTPWEEVEQVSLVQIRDLSGDAEAADTISLDISEVDPAYLNL S
DLYDIKYL PFEFMI FRRV PKPIEQPESPGSETEAGQGLADFL EEAAPWPWGPGLGLRAGLEITEEP EEPGDLEA
LLGEAAVGRKRKWSPSRGLFQFPGRCLSGEEPVELGLRQRVKASMAHISRILKGRPEGPEREGPPRKKAGLAS
FRLSGLKGRDQELSDEAVVLGQSVTLACQVLAQPTAQTATWSKDGVLLES SGHLLISSTLKNFQLLTI LVVKEE
DLGTYTCCVSNLTGLTAVTTGVLKAEERPSSSRPEVVELGYKDAVLLVWKPVESCGPVTYIVQCCLIEGGSWTTL
ASDISDRGRFSLTKLRSRGGMYIFRTACVSKAGMGPYSSPSEQVLLGGPNHLASEEESRRRPAQLLPSTKTFAF
QMQIRRGFRVSVRQCREKASGRALAAKIVPYQPEDKTAVLREYEAALKRLLHHPHLAQLHAAYLSPRHLVLI LEL
CSGPELLPSLAERESYSES DVKDYLWQMSATQYLHAQHILHLDLRSENMMVTEYNLLKVIDLGNASLDQEK
VPAPENFKDYLETMAPELLEGQAVPQTDIWAIGVTA FIMLSGEY P ESSEGETRDLQKGLRKLIRLSRCYAGL



SGGAVAFLOSSLCAQPWGRPCASTCLQCGWLTEEGPTGSRPTPVTFTVRLRAFVREKRRALLYKKNHNAQ  
 VR\*  
 >rs257062692\_ENSMUSP00000049737\_c.11265:G>T\_p.V3756L  
 ENSMUST00000052872.15|Obscn-203|ENSMUSG00000061462|-|chr11:g.58958060:C>A  
 MDHSFSGAPRFLTRPKAFVSVGKDATLSCQIVGNPTPHVSWEKDRQPVEAGARFRLAQDGDVYRLTILDLAL  
 GDSGQYVCRARNAIGEAFAAVGLRVDSEGTCAEQAPHFLLRPTSIRVREGADATFRCRVGGSPQPAVSWSKDG  
 RRLGPPDAPHVRVEEHGESSALRIRRSARPRDGGTYEVRAENPLGSASAAAAALVVDSDAEVAGPPGTSTATLLA  
 HLQQRREAMRAEGIPSPGGAGTRTCTVTTEGKHARLSCFVTGEPKPEVWKKDGLVTEGRRHVVEDEQENF  
 VLKILFCKQSDRGLYCTASNLVQTYSSVLVVREPTVPFKKRLQDLEVREKESATFQCEVAQPAEAAWFK  
 EETRLWASAKYDIEEGTERRLTVRNVSADDDAVYICETTEGSRVVAELSVQGNLTKLPRKTAVRTGDTAIF  
 WVAVLAVPEGPVWRWRNQEEMVAGGRVAITAEGTCHTLTI FQCTLEDMGEVAFVSGGCRTTTFQFCVAPRRPPL  
 YPPADPVVKAKTESSVTLWSAPPHGDRPVTIDGYVLEKRKLGAYAWSRCHEAGWLATTEFTITGVAAEGDFQ  
 FRVSAINHFGQGPYLEFPGMTMLVPLAVKTPKAVEAVEGGEVTFVSDTLTVASSGEWFLDGEALKASSIYVI  
 RCDRTTRHMLTIREVPARLHGAQLKVFVANGIETS IQMVVRAALGLPSSKLPAAAAAREVLAQLHEEAQLLAE LSD  
 QAAA VTWLKDGRELSLGPYEMQVSAGRRALLVRDVAQDDAGLYECVSRGSRRTAYQLLVQEPKLVFAKQQA  
 SEVKAEAGNSATLSCEVTQAQTEVTWFKDGKLLSSSSKVRMEASGCSRRLVVQQAGKADAGEYSCEAGGQKLS  
 FRLDVAEPKLVFAKQQAHEVKAEGASATLSCEVAQAQTEVTWFKDGKLLSSSSKVRMEASGCSRRLVVQQ  
 AGKADAGEYSCEAGGQKLSFRLDVAEPKLVFAKEQQARSEVKAEGASATLSCEVAQAQTEVTWFKDGKLLSS  
 SSKVRMEASGCSRRLVVQQAGKADAGEYSCEAGGQKLSFRLDVTEPKLVFAKEQQARSEVKAEGNSATLSCE  
 VAQAQTEVTWFKDGKLLSSSSKVRMEASGCSRRLVVQQAGKADAGEYSCEAGGQKLSFRLDVAEPKLVFAKEQ  
 QARSEVKAEGNSATLSCEVAQAQTEVTWFKDGKLLSSSSKVRMEASGCSRRLVVQQAGKADAGEYSCEAGGQ  
 KLSFHLDVTEPKLVFAKEQQAHSEVKAEGASATLSCEVAQAQTEVTWFKDGKLLSSSSKVRMEASGCSRRLV  
 VQQAGKADAGEYSCEAGGQKLSFRLDVAEPKLVFAKEQQARSEVKAEGASATLSCEVAQAQTEVTWFKDGK  
 LSSSSKVRVEASGCSRRLVVQQAGKADAGEYSCEAGGQKLSFRLDVAEPKLVFAKEQQANSEVKAEGASATL  
 SCEVAQAQTEVTWFKDGKLLSSSSKVRVEASGCSRRLVVQQAGKADAGEYSCEAGGQKLSFRLDVAEPKLAFA  
 KEQQAHSEVKAEGASATLSCEVAQAQTEVTWFKDGKLLSSSSKVRVEASGCSRRLVVQQAGKADAGEYSCEA  
 GGQKLSFRLDVAEPKLAFAKEQQAHSEVKAEGASATLSCEVAQAQTEVTWFKDGKLLSSSSKVRVEASGCSR  
 RLVVQQAGKADAGEYSCEAGGQKLSFRLDVAEPKLAFAKEQQAHSEVKAEGASATLSCEVAQAQTEVTWFKD  
 GKLLSSSSKVRVEASGCSRRLVVQQAGKADAGEYSCEAGGQKLFRLDVAEPKLMFAKEQQAHSEVKAEGAS  
 ATLSCEVAQAQTEVTWFKDGKLLSSSSKVRVEASGCSRRLVVQQAGKADAGEYSCEAGGQKLSFRLDVAEPK  
 VFAKEQQAHSEVKAEGASATLSCEVAQAQTEVTWFKDGKLLSSSSKVRVEASGCSRRLVVQQVQKADAGEYS  
 CEARGQKLSFRLDVADTRLMFAKEQQARTEVKAEGNSATLSCEVAQAQTEVTWFKDGKLLSSSSKVRVEASG  
 CSRRLVVQQAGKADAGEYSCEAGGQKLSFRLDVAEAEESQIPERPSRREPLVVKEHETIILTATIAAPSVAAVT  
 WLKDGVEIRRSKRHEATSLGDTHLTVRGAQVLDIAIYSCRVGKEGQDFPVQVEEVAAKFSKPLEPVEGELGG  
 TVMLVCELSPEQAEVWRCGNTQLRPGKRFQMTSEGPRRTLTVSGLREDDAEYVCSRDDRTSARLTVKVPR  
 VVKFTSGLSAMVAEEGQEAETFCVVS PSDAGVTWYKDGMLQPSSEKFMVMSGASRSLTILGLTLEDAGQVTV  
 EAEGASSAALRVREAPVLFKFKLEPQTEVERTSVTLEVELTRPWEVKWTRNAAVLTPSENVEIRAEGARHC  
 LVLRSVGFADRGFFGCETPDDKTQAKLNVEMRQVRLVRLQVEEAKQGTASMDVELSHAEVEGSWTRDGLRL  
 QPGPKCHLAVQGPVHILTLALSALQPQDSGLVAFRAEGVHTSARLIVTELPVSFTRVLQDVVATQKEKVTLECEL  
 SRPVDVRWLKDGVELRAGKAIGIVAQGTCSRSLVIYRCETGDQGVVCDALDAQTSASLRVQGRTYTLIFRRVL  
 AEDAGEVVKFVAENAESRAHLRVKELPVTLLRPLRDKIAMEKHRGVLECVSRASAVRWFKGGVELQSGPKYE  
 VVSDGLYRKLVINVDVQPEDEDYTCDA GNVKTSAQFFVVEEQSITIVRGLKDMTVMEPAPAWFECETSIPSVRP  
 PKWLLGKTVLQAGGNVLEQDGTVHRLTLHKTCSTMTGPVHFTIGKSRSSAQLVVSDIPVVLTRPLEPKAGRE  
 LQSVVLSCDFRPAPKAVQWYKDDTPLSPSEKFKMALEGQMAELRILRLTPADAGVYRCQAGSAQSSAEVTV  
 REVTVIQPLQDAEAMEEGRVCFSCELSHKDEIDWLSLNGTPLYNDSFHEISHGCLHTLVLSKVRQADTGTVC  
 ATSPKVSVSARLVVKGKPVVFLKALDDVSAEERGTLLTQCEVSDPEARVVWRKDGVELGPSDKYDFLHKAGAR  
 GLTVHDLSDHEDAGLYTCQVGSKETQSKVSVHDLHVGITKRLKTVEVLEGESECFEVLSSHESPSDPVAVTVGG  
 KTVGGSGHFHAVRQGRKYTLTVKDAALSDAGEVVSVLGLTSKASLIIRERPVDITKPLEDQRTTLGEDVMLS  
 CELSRAGTSVRWLKDGKAIRKSQKYDLLSEGTRAVLVVRKASLKDSGEYTCETEASKSTAKLCVEEKANRFTE  
 ELADLQVEEKGRAVFTCKTEHPASVVTWRKGLLELRASGKHVPSQEGTLKLTINALERTDSDTYTCDIGQAR  
 TQARLLVHGQKVRVIEDLEDTAVQEGSSAKFCCRIAPADYGPVHWFVLDKTPHLSNELNEITVQPGGYHVLT  
 QLALKDSGTVYFEAGDQRTSAAALRVTEKPSIFSRPLTDVTVTEGEDLTLVCETTTVDSSVRWTKDGKTLRPSA  
 RCQLSHEGCAQLLITATTPQDGGRYKCEIGGASSSSIVRVHALPVRFRFRESLKDVEVPEGKAATLRCVLSVA  
 APVEWRHGGDVLKSSNKYSLRQEGAVLELVIRDLQPDQSGYSCSFGDQTTSATLTVKTTSSAQFVGLKRNKEA  
 TEGTTVTLRCELTKAPVEWKKGTETLRNGDKYSLKQDGA VCELQICSLLVADAGEYSCVCGQEKTSATLTVK  
 ALLVHFVRRRLRSKEATEGDTTTLQCELSKAAPLEWRKGTETLRDGDYSLKQDGA VCELQIRSLTIADAGEYL  
 CTCGQEKTSATLTVRALPAKFKDSLKNEEATEGTTATLSCELSKAAPVWKKGPKTLQSGDKYVLRQDGA VCG  
 LQIHGLTMADAGEYSCVCGQEKTSATLTVRGLPAKFIEDLRSQEATEGATAILRCELSKAAPVEWRKGETLK

DGDRYTLRQDGA VCELQIRGLAVVD TGTYS SLP TKFTEGLRNEEATEGTMATLRCQMSKAAPVEWRK GSETLR
DGDRYSLRQDGA MCELQIRGLTIEDSGEYTCVCGQEKTSATLSVKALPSRFIEDLRSQEATEGTMATLRCQMS
KTAPVEWKKGSETLRDGGRYSLRQDGPVCELQICDLAVEDAGEYSCVCGQEKTSATLSIKALPPRFIEDLRSQ
EATEGTMATLRCQMSKAAPVEWRK GSETLGDGGRYSLRQNGAVCELQIHD LAVEDTGEYS CVCGQEKTSATLN
VKALPPRFIEDLRSQEATEGTMATLRCQMSKAAPVEWRK GSETLRDGGRYSLRQDGA VCELQIHD LVEDAGQ
YSCVCGQEKTSAVLTVDALPPKFTEGLKKEEATEGTMVTLRCQMSKEATVEWRKGAKT LSDGGRYSLRQDGA M
CELQICGLAVEDAGEYSCVCGQEKTSATLSVKALPPRFIEDLRSQEATEGTMATLRCQMSKAAPVEWRK GSET
LRDGGRYSLRQDGA VCELQIRDLAVEDAGEYLCVCGQEKTSATLSVKALPPRFIEDLRSQEATEGTMATLRCQ
MSKAAPVEWRK GSKTLRQDGGRYSLRQDGA MCELQICDLAVEDTGDYSCVCGQEKTSATLSVKALPPRFIEDLR
SQEAREGT VATLRCRMSKAAPVEWRK GSETLKDGGRYSLRQEGNLCELQIRDLAVEDTEEYSCVCGQEKTSAT
LSVKALPAKFIEDLRSQEAPESSTVTLRCKLSKKASV VWKKGSETLRNGARYSLRQDGA VCELEIRDLTVEDT
GEYSCTCGQERTSATLSIMAPQVVFQQPLQNLQAEEGSMASLRCELSVPNAAMVWSKGGLELQGDTRREARQQ
GCVAELLLRDLRREDAGEYSC TCGSQTT SATLMVTAAPVRFLRELQAQDVDEGATARLRCELSREAVSVEWRK
GSLQLFPCA KYQMVQEGTTAELLVHGVEQEDAGEYTC DAGHTQS IARLSVRAPKPKFKTDLQSTEQEAGGTAR
LCCQLSEAE PGTPVQWLKEGVELHVGSKYEMRRQGA VCELLIHGLEAKDTGEYACL VGGQKT LASLRVKEPEV
TIVRGLVDMEVQADEDFEFTCKVSQAGATDVQWHLQGLPLOSNEVTEVAVLADGCTHVLQ LKGVTL EDAGTVS
FHVGG LSSSAQLTVRVP ETVLEPLKDVQLSEGQDAHFRCRLSRASGQEARWALGGVPLQCNEMNDITVEQGT
LYLLTLHKVTLEDAGTITLQVGS CSSEAQLKVTAKNTVLRGLENVDAL EGG EALFECQLSQNEVAHTWLLDD
EPVHTSEKVEVVYFENGLRHLLLLKNLKPQDSCRVTFLAGDVVTS AFLTVRGRWRLEVLEPPHDASVKAGMQVR
FTCILSEAVPVGEATWYINGAAIQPDDTDWTVTTDGS HALTLSNAQPQHAGEVTF AARDAVASARLSVLALP
DPPEDA EVVGRSDHSVTL SWVAPMSDGGG LCGYRVMKEASTGQWQLCHDLVPGPECVDDLVPGKTYRFRV
AAVGPAGAGEPVHLPQMVKIAPAPAPAPAPAPAPAPETRQAVVGEDIC LELEVAADGGEVVWHKGTERRIQPGG
HFVLSRGRQRLVIKGFRTEDQGEYRCGPIQGLPSSGAATFNVVMTSGSGDEVPAQPSLPPEAAQEGDLHLL
WEALARKRRMSREPTLDSISELPEEDSRVQHLRQEAEEETAPDLSEGYSTADELARTGEADLSHTSSDDES RAG
TPSLVTYLKKAGGPGISPLASKHEAQVTT SVKPKQKQEPVVP TCPPPGDLSAADLMDPSLDKAAVKIQAAFKG
YKVRKEMKQYEGPVSRTFGDTEAQVGDVLRLECEVLAETKDMRACWLKDGIELTDGRHYHIDQLKDGTC SLLV
TGLAAPTDSGRYTCQVSTKSGRVSHSACVVVSGTESEAESSSGGELDDAFRRAARRLHRLFRTKSPAELSEEEL
FLSADEGPGEPEEPADWQTYREDENFVCIRFESLAEARQAVTCFRNMFATMGIGVEISLGEQGP RGVEMRIGK
VAPT VTPAVPLAKTPGLQTS DAAPVFLTELQNDVQDGYPMSFDCVVTGQPVPSVRWFKDGKLL EEDDHYMIN
EDQQGGHQLIITAVVPADMGVYRCLAENSMGVSSTKAELRVELTSTDYDTAADATETSSYFSAQGYLSSREQE
GTESDEGQLPQVLEELKDLQVAPGTR LAKFQLKVKGYPAPKLYWFKDGOPLTSDHIRMTDKKTLHTLEIVSV
TREDSGQYAAYSNAVGAAYSARLLVRGPSEPEEK PASDVHERLVPPRILEKFTPKKVKRGSSTF SVKVEG
HPAPSVHWLKEEA EKGVLWIGPDTPGYTMASSSKQHSLVLLDVGRQH QGTYTCIATNPAGQALCSASLHISGL
AKEEEQERVKEALISSFLQGTSQAVSAQMSE SAGFADLVGQSKGESLVAAEAHSHLSLAEVGT EEFLOKLT SQ
ITEMVSAKISQAKLQVPGGDSDEETKTPSASPRHGRSRPSSSVQESSSESEDGDSRGEIFDIYVVTADYLP LG
AEQDAIILREGQYVEVLD SAHPLRWLVRTKPTKSSPSRQGWVSPAYLDKRLKLSPEWGPTEAPEFGEAVSED
EYRTRLSSVIQELLSSEQAFV GELQFLESHHMKHLERSPRVPAAVASQKT VIFRNVQDISHFHSSFLKELQGC
GTDDDVAMCFIKNQEA FEKYLEFLVGRVQAESVVVSTPVQEFYKKYAEETLSAKDPTQPPPPPLQHYLEQ PVE
RVQKYQALLKELIRNKARNRQNCALLEQAYAVVSALPQRAENKLVSLMENYPGTLEALGEP IRQGHFIVWEG
APGARM PWKGNHRHVFLFRNYLVICKPRRDSRTDTFSYVFRNMMKLSSIDLNDQVEGD DRAFEVWHERE SVR
KYLQARTVIKNSWVKEICGIQQRLAQPVWRPPEFEELADCTAELGETV KKLACRVTGT PKPIVSWYKDGKP
VEVDPHHILIEDPDG SCTLILDNLTGIDSGQYMCFAASAAGNASTLGKILVQVPPRFVNVKVRATPFVEGEDAQ
ITCTVEGAPYPQIRWYKDGTL LAPGNRYRMLNEPRSGVLVLVIQAASKEDLGHYECELVNLRGSTRGGGELYM
QSPALRARDQHHREQIVAAVEVTEQETKVPKKT VIEETITTVVKS PRGRRQSPGKSPSRSPRRSASPRRPG
LLAPERLYPPGTSPSRRLVEEQGRKAPVPALYVTEAEVHAPASQS QPKWLEVEETIEVRVKKTGSRGASPVRE
MTRSGEGILFTLPGGI PGRDPNANN SNKSVYQEA RTWGPVAVHVGE PFI FQVDSVGNVDWVAASPEPEQVRA
SQKEENTERQEGCSDG DENTFLMEEPQD TDSLQGRDPKILTHNGRVLTLADLE DYVPQEGETFGCGDSTPSTP
DEPPCEVSVLQREI SEPTVGQP VLLNVGRPPGTGATPSFFRPGSQVHSPESVSFLLREAWSGPVSAAPWTSS F
HTHVQSSVDGSHGSFKTEVSTQTVSFGAVGETVTLHIDPDGGEAPGPSQ\*

>rs257062692\_ENSMUSP00000020732\_c.11466:G>T\_p.V3823L
ENSMUST00000020732.13|Obscn-201|ENSMUSG00000061462|-|chr11:g.58958060:C>A
MDHSFSGAPRFLTRPKAFVSVGKDATLSCQIVGNPTPHVSWEKDRQPV EAGARFRLAQDGDVYRLTILDLAL
GDSGQYVDARNAI GEFAAVGLRVDSEGTCAGEQAPHFLLRPTSIRVREGADATFRCRVGGSQPQAVSWSKDG
RRLGPPDPAPHRVVEEHGESSALRIRSARPRDGGTYEVRAENPLGSASAAAALVVDSDAEVAGPPGTSTATLLA
HLQQRREAMRAEYIPSPPGAGTRTCTVTEGKHARLSCFVTGEPKPETVVWKKDQGLVTEGRRHVVEDEQENF
VLKILFCKQSDRGLYTCTASNLVGQTYSSVLVVVREPTVPFKKRLQDLEVREKESATFQCEVAQPATEAAWFK
EETRLWASAKYDIEEGTERRLTVRNVSADDDAVYICETTEGSRVAELSVQGNLTKRLPRKTAVRTGDTAIF
WVELAVPEGPVRWLRNQEEMVAGGRVAITAEGTCHTLTI FQCTLEDMGEVAFVSGGCRTTTQFCVSA PRRPPL

YPPADPVVKAKTESSVTLWSAPPHGDRPVTTIDGYVLEKRKLGAYAWSRCHEAGWLATTEFTITGVAAEEGDFQ  
FRVSAINHFGQGPYLEFPGTMHLVPLAVKTPKAVEAVEGGEVTFVSDLTVASSGEWFLDGEALKASSIYVI  
RCDRTRHMLTIREVPARLHGAQLKVFVANGIETS IQMVVRAALGLPSSKLPAAAAREVLAQLHEEAQLLAE LSD  
QAAA VTWLKDGRELSLGPYEMQVSAGRRALLVRDVAQDDAGLYECVSRGSRRTAYQLLVQDITDGYRDWGPAG  
PQKHMCKCAGAKIARYLGSSCYRFLQYDKGVWHWLEAALDTRQGKGTSSCSLHEKPKLVFAKGOQAHSEVKAE  
AGNSATLSCEVTQAQTEVTFWKDGKLLSSSSKVRMEASGCSRRLVVQQAGKADAGEYSCEAGGQKLSFRLDVA  
EPKLVFAKGOQAHSEVKAEAGASATLSCEVAQAQTEVTFWKDGKLLSSSSKVRMEASGCSRRLVVQQAGKADA  
GEYSCEAGGQKLSFRLDVAEPKMFVFAKEQQARSEVKAEAGASATLSCEVAQAQTEVTFWKDGKLLSSSSKVRM  
EASGCSRRLVVQQAGKADAGEYSCEAGGQKLSFRLDVTEPKLVFAKEQQARSEVKAEVGN SATLSCEVAQAQ  
EVTWFKDGKLLSSSSKVRMEASGCSRRLVVQQAGKADAGEYSCEAGGQKLSFRLDVAEPKLVFAKEQQARSEV  
KAEAGNSATLSCEVAQAQTEVTFWKDGKLLSSSSKVRMEASGCSRRLVVQQAGKADAGEYSCEAGGQKLSFHL  
DVTEPKLVFAKEQQAHSEVKAEAGASATLSCEVAQAQTEVTFWKDGKLLSSSSKVRMEASGCSRRLVVQQAGK  
ADAGEYSCEAGGQKLSFRLDVAEPKLVFAKEQQARSEVKAEAGASATLSCEVAQAQTEVTFWKDGKLLSSSSK  
VRVEASGCSRRLVVQQAGKADAGEYSCEAGGQKLSFRLDVAEPKLVFAKEQQANSEVKAEAGASATLSCEVAQ  
AQTEVTFWKDGKLLSSSSKVRVEASGCSRRLVVQQAGKADAGEYSCEAGGQKLSFRLDVAEPKLVFAKEQQAH  
SEVKAEAGASATLSCEVAQAQTEVTFWKDGKLLSSSSKVRVEASGCSRRLVVQQAGKADAGEYSCEAGGQKLS  
FRLDVAEPKLVFAKEQQAHSEVKAEAGASATLSCEVAQAQTEVTFWKDGKLLSSSSKVRVEASGCSRRLVVQQ  
AGKADAGEYSCEAGGQKLSFRLDVAEPKLVFAKEQQAHSEVKAEAGASATLSCEVAQAQTEVTFWKDGKLLSS  
SSKVRVEASGCSRRLVVQQAGKADAGEYSCEAGGQKLFRLDVAEPKLMFAKEQQAHSEVKAEAGASATLSCE  
VAQAQTEVTFWKDGKLLSSSSKVRVEASGCSRRLVVQQAGKADAGEYSCEAGGQKLSFRLDVAEPKLVFAKEQ  
QAHSEVKAEAGASATLSCEVAQAQTEVTFWKDGKLLSSSSKVRVEASGCSRRLVVQQVQKADAGEYSCEARGQ  
KLSFRLDVADTRLMFAKEQQARTEVKAEAGNSATLSCEVAQAQTEVTFWKDGKLLSSSSKVRVEASGCSRRLV  
VQQAGKADAGEYSCEAGGQKLSFRLDVAEAE SQI PERPSRREPLVVKEHETI ILTATIAAPSVAAV TWLKDGV  
EIRRSKRHEATSLGDTHTLTVRGAQVLD SAIYSCRVGKEGQDFPVQVEEVAAKFSKPLEPEVEGELGGTVMLVC  
ELSPQAEVWRCNGTQLRPGKRFQMTSEGPRTTLTVSGLREDDAEYVCE SRDDRTSARLTVKVPVVKFTS  
GLSAMVAEEGQEA TFCVSPSDAGVTWYKDGMLQPSKFMVVEGASRSLTILGLTLEDAGQVTVAEAGAS  
SSAALRVREAPVFLFKKLEPQTVVEERTSVTLEVLTRPWEVWTRNAAVLTPSENVE I RAEGARHCLVLRV  
GFADRGF FGCETPDDKTQAKLVNEMRQVRLVRLGLQEVEAKEQGTASMDVELSHAEVEG SWTRDGLRLQPGPKC  
HLAVQGPVHILTL SALQPQDSGLVAFRAEGVHTSARLIVTEL PVSFTRVLQDVVATQKEKVTLECELSRPVDV  
RWLKDGVLELRAGKAIGIVAQGTCSRSLVIYRCETGDQGVYVCDALDAQTSASLRVQGRTYTLIFRRVLAEDAGE  
VKFVAENAESRAHLRVKELPVTLLRPLRDKIAMEKHRGVLECCQVSRASAQVRWFKGGVELQSGPKYEVVSDGL  
YRKLVIN DVQPEDEDTYTC DAGNVKTSAQFFVVEQSITIVRGLKDMTVMEPAPAWFECETSIPSVRPPKWL LG  
KTVLQAGGNVGLQDGTVHRLTLHKTCSTMTGPVHFTIGKSRSSAQLVVSDI PVVLRTRPLEPKAGRELQSVVL  
SCDFRPAPKAVQWYKDDTPLSPSEKFKMALEGQMAELRILRLTPADAGVYRCQAGSAQSSAEVTVAREVTVI  
QPLQDAEAMEEGRVCFSCELSHKDEDIEWLSLNGTPLYNDSFHEI SHEGLHTLVLKSVRQADTGTVCATSPKV  
SVSARLVVKGKPVVFLKALDDVSAEERGTTLTQCEVSDPEARVVWRKDGVELGSPDKYDFLHKAGARGLTVHD  
LSHEDAGLYTCQVGSKETQSKVSVHDLHVGITKRLKTVEVLEGE SCSFECVLSHESPSDPAVWTVGGKTVGGS  
GHFHAVRQGRKYTLTVKDAALSDAGEVVSVLGLTSKASLIIRERPV DITKPLEDQRTTLGEDVMLSCELSRA  
GTSVRWLKDGKAIRKSQKYDLLSEGTRAVLVVRKASLKDSGEYTCETEASKSTAKLCVEEKANRFTEELADLQ  
VEEKGRAVFTCKTEHPASVVTWRKGLLELRASGKHVPSQEGTLKLTINALERTDSDTYTCDIGQARTQARLL  
VHGQKVRVIEDLED TAVQEGSSAKFCCRIAPADYGPVHWFLDKTPLHSNELNEITVQPGGYHVLTLRQLALKD  
SGTVYFEAGDQRTS AALRVTEKPSIFSRPLTDVTVTEGEDTLVCE TTTVDSSVRWTKDGKTLRPSARCQLSH  
EGCQAQLLITATTPQDGGRYKCEIGGASSSSIVRVHALPVRFRFRESLKDVEVPEGKAATLRCVLSVAAPVEWR  
HGDDVLKSSNKYSLRQEGAVLELVIRDLQPDQSGQYSCSFGDQTT SATLTVKTS SAQFVFKLRNKEATEGTTV  
TLRCELTK EAPVEWKKGTETLRNGDKYSLKQDGAVCELQICSLLVADAGEYS CVCGQEKTSATLTVKALLVHF  
VRLRSKEATEGDTTTLQCELSKAAPLEWRKGTETLRDGD RYSLKQDGAVCELQIRSLTIADAGEYLCTCGQE  
KTSATLTVRALPAKFKDSLKNEEATEGTTATLSCELSKAAPVTWKKGPKTLQSGDKYVLRQDGAVCGLQIHGL  
TMADAGEYSCVCGQEKTSATLTVRGLPAKFIEDLRSQEATEGATAILRCELSKAAPVEWRKGS ETLKDGDRYT  
LRQDGAVCELQIRGLAVVDGTYS LPTKFTTEGLRNEEATEGTMATLRCQMSKAAPVEWRKGS ETLR DGRYS  
LRQDGAMCELQIRGLTIEDSGEYTCVCGQEKTSATLSVKALPSRFIEDLRSQEATEGTMATLRCQMSKTAPVE  
WKKGSETLRDGGRYSLRQDGPVCELQICDLAVEDAGEYSCVCGQEKTSATLSIKALPPRFIEDLRSQEATEGT  
MATLRCQMSKAAPVEWRKGS ETLGDGGRYSLRQNGAVCELQIHDLAVEDTGEYSCVCGQEKTSATLNVKALPP  
RFIEDLRSQEATEGTMATLRCQMSKAAPVEWRKGS ETLR DGGRYSLRQDGAVCELQIHDLVEDAGQYSCVCG  
QEKTSAVLTVDALETPPKFTEGLKKEEATEGTMVTLRQCMSKEATVEWRKGAKT LSDGGRYSLRQDGAMCELQIC  
GLAVEDAGEYSCVCGQEKTSATLSVKALPPRFIEDLRSQEATEGTMATLRCQMSKAAPVEWRKGS ETLR DGR  
YSLRQDGAVCELQIRDLAVEDAGEYLCVCGQEKTSATLSVKALPPRFIEDLRSQEATEGTMATLRCQMSKAAP  
VEWRKGS KTLR DGRYSLRQDGAMCELQICDLAVEDTGDYSCVCGQEKTSATLSVKALPPRFIEDLRSQEARE  
GTVATLRCRMSKAAPVEWRKGS ETLKDGDRYSLRQEGNLCELQIRDLAVEDTEEYSCVCGQEKTSATLSVKAL

PAKFIEDLRSQEAPESSTVTLRCKLSKKASVVWKKGSETLRNGARYSLRQDGAUCELEIRDLTVEEDTGEYSCT  
CGQERTSATLSIMAPQVVFQQPLQNLQAEEGSMASLRCELSVNPAAAMVWSKGGLELQGDTRREARQQGCVAEL  
LLRDLRREDAGEYSCTCGSQTTSATLMVTAAPVRFRLRELQAQDVDEGATARLRCELSREAVSVEWRKGLQLF  
PCAKYQMVQEGTTAELLVHGVEQEDAGEYTCDAHGHTQSIARLSVRAPKPKFKTDLQSTEQEAGGTARLCCQLS  
EAEPGTPVQWLKEGVELHVGSKYEMRRQGAUCELLIHGLEAKDTGEYACLVGGQKTLASLRVKEPEVTIVRGL  
VDMEVQADEDEVEFTCKVVSQAGATDVQWHLQGLPLQSNVTEVAVLADGCTHVLQKGVTLDEAGTVSFHVGGL  
SSSAQLTVRVPEVTVLEPLKDVQLSEGQDAHFRCRLSRASGQEARWALGGVPLQCNEMNDITVEQGTLYLLTL  
HKVTLEDAGTITLQVGSCESEAQLKVTAKNTVLRGLENVDLEGGALFECQLSQPEVAHAHTWLLDDEFPVHTS  
EKVEVVYFENGLRHLLLLKNLKPQDSCRVTFLAGDVVTSFAFLTVRGRLEVLPPHDASVKAGMQVRFCTILS  
EAVPVGEATWYINGAAIQPDDTDWTVTTDGSHHALTLSNAQPQHAGEVTFFAARDAVASARLSVLAALPDPPEDA  
EUVGRSDHSVTLVSWVAPMSDGGGGLCGYRVMKEASTGQWQLCHDLVPGPECVDDLVPGKTYRFRVAAVGPA  
GAGEPVHLPQMVKIAPAPAPAPAPAPAPAPAPAPAPAPAPAPAPAPAPAPAPAPAPAPAPAPAPAPAPAPAPAP  
RGQRQMLVIKGFRTEDQGEYRCGPIQGLPSSGAATFNVMVMTSGSGDEVPAQPSLPPEAAQEGDLHLLWEALAR  
KRRMSREPTLDSISELPEEDSRVQHLRQEAETAPDLSEGYSTADELARTGEADLSHTSSDDESAGTPSLVT  
YLKKGAGGPGISPLASKHEAQVTTSVKPKQKQEPVVPTCPPPGDLSAADLMDPSLDKAAVKIQAAFKGYKVRKE  
MKQQEGPVFSRTFGDTEAQVGDVLRLECVLATKTDMRACWLKDGIELTDGRHYHIDQLKDGTCSSLVTLGLAPT  
DSGRYTCQVSTKSGRVSHSACVVVSGTESEAESSSGGELDDAFRAARRLHRLFRTKSPAELSEELFLSADE  
GPGEPEEPADWQTYREDEFVCIREFESLAEARQAVTCFRNMFAFMGIGVEISLGEQGPGRVEMRIKGVAPTVT  
PAVPLAKTPGLQTSDAAPVFLTELQNDQVQDGYPMSFDCVVTGQPVPSVRWFKDGKLEEDDHYMINEDQQGG  
HQLIITAVVPADMGVYRCLAENSMGVSSTKAELRVELTSTDYDTAADATETSSYFSAQGYLSSREQEGTESDE  
GQLPQVLEELKDLQVAPGTRLAKFQLKVKGYPAKLYWFKDGPPLTSDHIRMTDKKTLHTLEIVSVTREDSG  
QYAAYSNAVGAAYSSARLLVRGPSEPEEKPASDVHERLVPPRILEKFTPKKVKRGSSITFSVKVEGHPAPSV  
HWLKEEAKEKGLWIGPDTPGYTMASSSKQHSVLVLDVGRQHGGTYTCIATNPAGQALCSASLHISGLAKEEEQ  
ERVKEALISSFLQGTSAVSAQMSSEAGFADLVGQSKGESLVAAEAHSHLSLAEVGTTEFLQKLTSSQITEMVS  
AKISQAKLQVPGGDSDEETKTPSASPRHGRSRPSSSVQESSESESDGDSRGEIFDIYVVTADYPLGAEQDAI  
ILREGQYVELLDSAHPLRWLVRTPKTKSSPSRQWVSPAYLDRKRLKLSPEWGPTEAPEFPEGEAVSEDEYRTRL  
SSVIEQLLSEVSEGLQFLESHHMKHLERSPRVPAVASQKTVIFRNVQDISHFHSSFLKELQCGCTDDDV  
AMCFIKNQEAFAKEYLEFLVGRVQAESVVVSTPVQEFYKKYAEETLSAKDPTQPPPPPLQHYLEQPVVERVQKYQ  
ALLKELIRNKARNRQNCALLEQAYAVVSALPQRAENKLVSLMENYPGTLEALGEPTRQGHFIVWEGAPGARM  
PWKGHNHRVFLFRNYLVICKPRRDSRTDTSYVFRNMMKLSSIDLNDQVEGDDRAFEVWHEREDSVRKYLLQA  
RTVVIKNSWVKEICGIQQLAQPVWRPPEFEEELADCTAELGETVKLACRVTGTTPKPIVSWYKDGKPVVEVDPH  
HILLIEDPDGSLTILDLNLGTIDSGQYMCFAASAAGNASTLGKILVQVPPRFVNVKVRATPFVEGEDAQITCTVE  
GAPYPQIRWYKDGTLAPGNRYRMLNEPRSGVLVVIQAASKEDLGHYECELVNRGLGSTRGGGELYMQSPALR  
ARDQHHREQIVAAVEERRPSP\*  
>rs257062692\_ENSMUSP00000151217\_c.10086:G>T\_p.V3363L  
ENSMUST00000219084.3|Obscn-207|ENSMUSG00000061462|-|chr11:g.58958060:C>A  
MDHSFSGAPRFLTRPKAFVSVGKDATLSCQIVGNPTPHVSWEKDRQPVEAGARFRLAQDGDVYRLTILDLAL  
GDSGQYVCRARNAIGEAFVAVGLRVDSEGTCAEQAPHFLLRPTSIRVREGADATFRCRVGGSPQPAVSWSKDG  
RRLGPPDAPHVRVEEHGESSALRIRSARPRDGGTYEVRAENPLGSASAAAALVVDSDAEVAGPPGTSTATLLA  
HLQORREAMRAEGIPPSPPGAGTRTCTVTEGKHARLSCFVTGEPKPEVWKKDQGLVTEGRRHVVEDEQENF  
VLKILFCKQSDRGLYTCTASNLVGTYSVVLVVREPTVPFKKRLQDLEVREKESATFQCEVAQPAEAAWFK  
EETRLWASAKYDIEEGTERRLTVRNVSADDDAVYICETTEGSRVVAELSVQGNLTKLPRKTAVRTGDTAIF  
WVELAVPEGPVWRWRNQEEMVAGGRVAITAEGTCHTLTIFQCTLEDMGVAFVSGGCRTTTQFCVSAPRRPPL  
YPPADPVVKAKTESSVTLVSWAPPHGDRPVTIDGYVLEKRLKLAGAYAWSRCHEAGWLATTEFTITGVAEEGDFQ  
FRVSAINHFGQGPYLEFPGTMHLVPLMAVKTPLKAVEAVEGGEVTFVSDLTVASSGEWFLDGEALKASSIYVI  
RCDRTRHMLTIREVPARLHGAQLKVFVANGIETSIQMVVRAALGLPSSKLPAAAAREVLAQLHHEAQLLAELSD  
QAAAAVTWLKDGRELSLGPKEYMQVSAGRRALLVRDVAQDDAGLYECVSRGSRTAYQLLVQDITDGYRDWGPAG  
PQKHMCKCAGAKIARYLGSSCYRFLQYDKGVWHLEAALDTRQKGTSSCSLHEKPKLVFAKQQAHSEVKA  
AGNSATLSCEVTQAQTEVTWFKDGKLLSSSSKVRMEASGCSRRLVVQQAGKADAGEYSCEAGGQKLSFRLDVA  
EPKLVFAKQQAHSEVKAEGASATLSCEVAQAQTEVTWFKDGKLLSSSSKVRMEASGCSRRLVVQQAGKADA  
GEYSCEAGGQKLSFRLDVAEPKLVFAKEQQARSEVKAEGASATLSCEVAQAQTEVTWFKDGKLLSSSSKVRM  
EASGCSRRLVVQQAGKADAGEYSCEAGGQKLSFRLDVTEPKLVFAKEQQARSEVKAEGASATLSCEVAQAQ  
EVTWFKDGKLLSSSSKVRMEASGCSRRLVVQQAGKADAGEYSCEAGGQKLSFHLDVTEPKLVFAKEQQAHSE  
KAEAGASATLSCEVAQAQTEVTWFKDGKLLSSSSKVRMEASGCSRRLVVQQAGKADAGEYSCEAGGQKLSFR  
DVAEPKLVFAKEQQARSEVKAEGASATLSCEVAQAQTEVTWFKDGKLLSSSSKVRMEASGCSRRLVVQQAGK  
ADAGEYSCEAGGQKLSFRLDVAEPKLVFAKEQQANSEVKAEGASATLSCEVAQAQTEVTWFKDGKLLSSSSK  
VRVEASGCSRRLVVQQAGKADAGEYSCEAGGQKLSFRLDVAEPKLVFAKEQQAHSEVKAEGASATLSCEVAQ  
AQTEVTWFKDGKLLSSSSKVRVEASGCSRRLVVQQAGKADAGEYSCEAGGQKLSFRLDVAEPKLVFAKEQQAH

SEVKAEAGASATLSCEVAQAQTEVTFWFKDGKLLSSSSKVRVEASGCSRRLLVVQQVKGADAGEYSCEARGQKLS  
FRLDVAEAEESQIPERPSRREPLVVKEHETIILTATIAAPSVAAVTWLKDGEIRRSKRHEATSLGDTHLTIVR  
GAQVLDIAIYSCRVGKEGQDFPVQVEEVAAKFSKPLEPVEGELGGTVMLVCELSPEQAEVWRCGNTQLRPGK  
RFQMTSEGPRRTLTVSGLREDDAEYVCESRDDRTSARLTVKVPVVKFTSGLSAMVAEEGQEAFTQCVVSPS  
DAGVTWYKDGMLQPSSEKFMVVESEGASRSLTILGLTLEDAGQVTVAEAGASSAALRVREAPVLFKPKLEPQT  
VEERTSVTLEVELTRPWPEVKWTRNAAVLTPSENVEIRAEGARHCLVLRVSGFADRGFFGCETPDDKTQAKLN  
VEMRQVRLVVRGLQEVEAKEQGTASMDVELSHAEEVGSWTRDGLRLQPGPKCHLAVQGPVHILTLALQPDQSG  
LVAFRAEGVHTSARLIVTELPVSTFRVLQDVVATQKEKVTLECELSRFPVDVRLKDGVELRAGKAIGIVAQGT  
CRSLVIYRCETGDQGVYCDALDAQTSASLRVQGRYTLIFRRVLAEDAGEVKFVAENAESRAHLRVKELPVT  
LLRPLRDKIAMEKHRGVLECVSRASQAQRWFKGGVELQSGPKYEVVSDGLYRKLVIINDVQPEDEDTYTC DAG  
NVKTSAQFFVEEQSITIVRGLKDMTVMEPAPAWFECETSIPSVRPPKWLKGKTVLQAGGNVLEQDGTVHRLT  
LHKTCSTMTGPVHFTIGKSRSSAQLVVS DIPVVLTRPLEPKAGRELQSVVLSCDFRPAPKAVQWYKDDTFLSP  
SEKFKMALEGQMAELRILRLTPADAGVYRCQAGSAQSSAEVTVAREVTVIQPLQDAEAMEEGRCVCFSELSSH  
KDEDIEWSLNGTPLYNDSFHEISHEGCLHTLVLKSVRQADTGTVCATSPKVSVSARLVVKGKPVVFLKALDDV  
SAEERGTTLTQCEVSDPEARVWVRKDGVELGSPDKYDFLHKAGARGLTVHDLSHEDAGLYTCQVGSKETQSKV  
SVHDLHVGITKRLKTVEVLEGESECFEVLSSHESPSDPAVWTVGGKTVGGSGHFHAVRQGRKYTLTVKDAALS  
DAGEVSVLGLTSLKASLIIRERPVDTIKPLEDQRTTLGEDVMLSCELSRAGTSVRWLKDGKAIKRSQKYDLL  
SEGTTRAVLVVRKASLKDSEYTCETEASKSTAKLCVEEKANRFEELADLQVEEKGRAVFTCKTEHPASVVTW  
RKGLLELRASGKHVPSQEGTLTKLTINALERTSDTYTCDIGQARTQARLLVHGQKVRVIEDLEDTAVQEGSS  
AKFCCRIAPADYGPVHWFLDKTPHLSNELNEITVQPGYHVLTLRQLALKDSGTVYFEAGDQRTSAAALRVTEK  
PSIFSRPLTDVTVTEGEDTLTVCETTTVDSSVRWTKDGKTLRPSARCQLSHEGCAQLLITATTPQDGGRYKC  
EIGGASSSSIVRVHALPVRFRESLKDVEVPEGKAATLRCVLSVAAPVEWRHGDDVLKSSNKYSRLQREGAVLE  
LVIRDLPQDQSGQYSCSFGDQTTSATLTVKTSQAQFVGLKRNKEATEGTTVTLRCELTKAPVWKKGTETLR  
NGDKYSLKQDGA VCELQICSLLVADAGEYSCVCGQEKTSATLTVKALLVHFVRRRLRSKEATEGDTTTLQCELS  
KAAPLEWRKGTETLRDGDRLYSLKQDGA VCELQIRSLTIADAGEYLCTCGQEKTSATLTVRGLPAKFIEDLRSQ  
EATEGATAILRCELSKAAPVEWRKGSSETLKDGDRLYTLRQDGA VCELQIRGLAVVDTGTYSYSLPTKFTTEGLRNE  
EATEGTMATLRCQMSKAAPVEWRKGSSETLRDGDRLYSLRQDGA MCELQIRGLTIEDSGEYTCVCGQEKTSATLS  
VKALPPRFIEDLRSQEATEGTMATLRCQMSKAAPVEWRKGSSETLGDGGRYSLRQNGAVCELQIHDLAVEDTGE  
YSCVCGQEKTSATLNVKALPPKFTEGLKKEEATEGTMVTLRCQMSKEATVEWRKGAKTLSDDGGRYSLRQDGA  
MCELQICGLAVEDAGEYSCVCGQEKTSATLSVKALPPRFIEDLRSQEATEGTMATLRCQMSKAAPVEWRKGSSET  
LRDGDRLYSLRQDGA VCELQIRDLAVEDAGEYLCVCGQEKTSATLSVKALPPRFIEDLRSQEATEGTMATLRCQ  
MSKAAPVEWRKGSKTLRQDGDRLYSLRQDGA MCELQICDLAVEDTGDYSCVCGQEKTSATLSVKAPQVVFQQLQ  
NLQAEEGSMASLRCELSVPNAAMVWSKGGLELQGDTRREARQQGCVAELLLRDLRREDAGEYSCTCGSQTTSA  
TLMVTAAPVRFRLRELQAQDVDEGATARLRCLESLREAVSVEWRKGSILQFPKAYQMVQEGTAE LLVHGVEQE  
DAGEYTC DAGHTQSIARLSVRAPKPKFKTDLQSTEQEAGGTARLCCQLSEAEPTPVQWLKEGVELHVHGSKYE  
MRQGA VCELLIHGLEAKDTGEYACLVGQKTLASLRVKEPEVTVIRGLVDMVEVQADEDEFTCKVVSQAGATD  
VQWHLQGLPLQSNEVTEVAVLADGCTHVLQLKGVTLLEDAGTVSFHVGGSSSAQLTVRVPVTVLEPLKDVQL  
SEGQDAHFRCRLSRASGQEARWALGGVPLQCNE MNDI TVEQGTLYLLTLHKVTLEDAGTITLVGSCSSEAQL  
KVTAKNTVLRGLENVDALEGGALFECQLSQPEVAHTWLLDDEPVHTSEKVEVVYFENGLRHLLLLLKNLKPQ  
DSCRVTFLAGDVVTS AFLTVRGWRLEVLEPPHDASVKAGMQRFTCILSEAVPVGEATWYINGAAIQPDDTDW  
TVTDTDGSHHALTLSNAQPQHAGEVTF AARDAVASARLSVLALPDPPEDAEVVGRSDHSVTLSSWVAPMSDGGG  
LCGYRVEMKEASTGQWQLCHDLVPGPECVVDDLVPKGTYRFRVAAVGPAGAGEPVHLPQMVKIAPAPAPAPAP  
APAPETRQAVVGEDICLELEVAADGGEVVWHKGTERRIQPGGHFEVLSRGRQMLVIKGFRTEDQGEYRCGPIQ  
GLPSSGAATFNVVMTSGSGDEVPAQPSLPPPEAAQEGDLHLLEALARKRRMSREPTLDSISELPEEDSRVQHL  
RQEAEETAPDLSEGYSTADELARTGEADLSHTSSDDES RAGTPSLVTYLKKAGGPGISPLASKHEAQVTTSVK  
PQKQGEFVVPTCPPPGDLSAADLMDPSLDKAAVKIQAAFKGYKVRKEMKQQEGPVFSRTFGDTEAQVDVLR  
ECVLATKTDMRACWLKDGIELTDGRHYHIDQLKDGTC SLLVTGLAPTD SGRYTCQVSTKSGRVSHSACVVVSG  
TESEAESSSGGELDDAFRRARRLHRLFRTKSPAELSEELFLSADEGPGEPEEPADWQTYREDEFV CIRFE  
SLAEARQAVTCFRNMFMATMGIGVEISLGEQGRGVEMRIGKVAPVTPAVPLAKTPGLQTS DAAPVFLTELQN  
QDVQDGYPMSFDCVVTGQVPVSVRWFKDGKLL EEDDH YMINEDQQGGHQLIITAVVPADMGVYRCLAENSMGV  
SSTKAELRVELTSTDYDTAADATETSSYFSAQGYLSSREQEGTESDEGQLPVLEELKDLQVAPGTRLAKFQL  
KVKGY PAPKLYWFKDGQPLTTS DHIRMTDKKTLHTLEIVSVTREDSGQYAAAYISNAVGAAYSSARLLVGRPSE  
PEEKPASDVHERLVPPRILEKFTPKKVKRGSSITFSVKVEGHPAPSVHVLKKEAEKGVLLWIGPDTPGYTMAS  
SKQHSVLVLLDVRQHGTYTCIATNPAGQALCSASLHISGLAKEEEQERVKEALISSFLQGTSSQAVSAQMSSES  
AGFADLVGQSKGESLVAEEAHSLSLAEVGTEEFLLQKLTSTQITEMVSAKISQAKLQVPGGDSDEETKTPSASP  
RHGRSRPSSSVQESSSESEDGDSRGEIFDIYVVTADYLP LGAEQDAIILREGQYVEVLDSAPHLRVLVTRTKPT  
KSSPSRQGWVSPAYLDKRLKLSPEWGPTEAPEFPGEAVSEDEYRTRLSSVIQELLSSEQAFVGVLEQLFLESHHM  
KHLERSPRVPAAVASQKTVIFRNVQDISHFHSSFLKELQCGCTDDDVAMCFIKNQEAFAFEKYLEFLVGRVQAES



VVSTPVEQEFYKKYAEETLSAKDPTQPPPPPLQHYLEQPVERVQKYQALLKELIRNKARNRQNCALLEQAYAV  
VSALPQRAENKLVSLMENYPGTLEALGEP I RQGHFIVWEGAPGARM PWKGHNHRHVFLFRNYLVI CKPRRDSR  
TDTFSYVFRNMMKLSSIDLNDQVEGDDRAFEVWHERE SDSVRKYLLQARTV I I KNSWVKEICIGIQORLAQPVWR  
PPEFEEELADCTAELGETVKLACRVGTGPKPIVSWYKDGKPV EVDPHHILIEDPDGSCSTLI LDNLGTIDSGQY  
MCF AASAAGNASTLGKILVQVPPRFVNKVRATPFVEGEDAQITCTVEGAPYPQIRWYKDGTL LAPGNRYRMLN  
EPRSGVLVLVIQAASKEDLGHYECELVNRLGSTRGGGELYMQSPALRARDQHHRQI VA AAVEVTEQETKVPKK  
TVIIEETITTVVKS PRGRRQSPGKSPSRSPRRSASPRRPGLLAPERLYPPGTS PSRRLEVEQGRKAPVPALY  
VTEAEVHAPASQSQPKWLEVEETIEVRVKKTGSRGASPVREMTSRGEGILFTLPGGIPGRDPNANN SNKSVY  
QEARTWGPVAVHVGEFFIFQVDSVGNVDVVAASPEPEQVRASQKEENTERQEGCSDGDENTFLMEEPQD TDSL  
QGRDPKILTHNGRVLT LADLEDYVPQEGETF GCGDSTPSTPDEPPCEVSVLQREI SEPTVGGQPVLLNVGRPPG  
TGATPSFFRPGSQVHSPESVSFLLREAWSGPVSAAPWTSSFH THVQSSVDGSHGSFKTEVSTQTVSFGAVGET  
VTLHIDPDGGEAPGPSQG\*

>ENSMUSP00000158795\_c.11404:G>T\_p.S3802I ENSMUST00000238536.2|Obscn-  
210|ENSMUSG00000061462|-|chr11:g.58958122:C>A

MDHSFSGAPRFLTRPKAFVSVGKDATLSCQIVGNPTPHVSWEKDRQPV EAGARFRLAQDGDVYRLT I LD LAL  
GDSGQYVCRARNAIGEAF AAVGLRVDSEGTC AEQAPHFLLRPTS IRVREGADATFRCRVGSGSPQPAVSWSKDG  
RRLGPPDAPHVRVEEHGESSALRIR SARPRDGGTYEVRAENPLGSASAAAALVVDSDAEVAGPPGTSTATLLA  
HLQQRREAMRAEGIPPSPPGAGTRTCTVTEGKHARLS CFVTGEPKPE TVWKKDGLVTEGRRHVVEDEQENF  
VLKILFCKQSDRGLYTCTASNLVGGQTYSSVLVVVREPTVPFKKRLQDLEVREKESATFQCEVAQ PATEAAWFK  
EETRLWASAKYDIEEEGTERRLTVRNVSADDDAVYICETTEGSR TVAELSVQGNLTRKLRKTAVRTGDTAIF  
WVELAVPEGPVRWLRNQEEMVAGGRVAITAEGTCHTLTI FQCTLEDMGEVAFVSGGCRTTTQFCVSA PRRPPL  
YPPADPVVKAKTESSVTL SWSAPPHGDRPVTIDGYVLEKRKLGAYAWSRCHEAGWLATTEFTITGV AEEGDFQ  
FRVSAINHFGQGPYLEFP GTMHLVPM LAVKTP LKAVEAVEGGEVTF SVDLTVASSGEWFLDGEAL KASSIYVI  
RCDRTRHMLTIREV PARLHGAQLKFVANGIETS IQMVVRAALGLPSSKLPAAAAREVLAQLHEEAQLLAE LSD  
QAAA VTLWKDGRELSLGP KYEMQVSAGRRALLVRDVAQDDAGLYECVSRGSR TAYQLLVQDITDGYRDWGPAG  
PQKHMCKCAGAKTIARYL GSSCYRFLQYDKGVWHWLEAALDTRQKGKTS SCSLHEKPKLVFAKQQAHSEVKAE  
AGNSATLSCEVAQAQTEVTWFKDGKLLSSSSKVRMEASGCSRRLLVVQQAGKADAGEYSCEAGGQKLSFR LDVA  
EPKLVFAKQQA HSEVKAEAGASATLSCEVAQAQTEVTWFKDGKLLSSSSKVRMEASGCSRRLLVVQQAGKADA  
GEYSCEAGGQKLSFR LDVAEPKLVFAKEQQARSEVKAEAGASATLSCEVAQAQTEVTWFKDGKLLSSSSKVRM  
EASGCSRRLLVVQQAGKADAGEYSCEAGGQKLSFR LDVTEPKLVFAKEQQARSEVKAEVGN SATLSCEVAQAQT  
EVTWFKDGKLLSSSSKVRMEASGCSRRLLVVQQAGKADAGEYSCEAGGQKLSFR LDVAEPKLVFAKEQQARSEV  
KAEAGNSATLSCEVAQAQTEVTWFKDGKLLSSSSKVRMEASGCSRRLLVVQQAGKADAGEYSCEAGGQKLSFHL  
DVTEPKLVFAKEQQAHSEVKAEAGASATLSCEVAQAQTEVTWFKDGKLLSSSSKVRMEASGCSRRLLVVQQAGK  
ADAGEYSCEAGGQKLSFR LDVAEPKLVFAKEQQARSEVKAEAGASATLSCEVAQAQTEVTWFKDGKLLSSSSK  
VRVEASGCSRRLLVVQQAGKADAGEYSCEAGGQKLSFR LDVAEPKLVFAKEQQANSEVKAEAGASATLSCEVAQA  
AQTEVTWFKDGKLLSSSSKVRVEASGCSRRLLVVQQAGKADAGEYSCEAGGQKLSFR LDVAEPKLVFAKEQQAH  
SEVKAEAGASATLSCEVAQAQTEVTWFKDGKLLSSSSKVRVEASGCSRRLLVVQQAGKADAGEYSCEAGGQKLS  
FR LDVAEPKLVFAKEQQAHSEVKAEAGASATLSCEVAQAQTEVTWFKDGKLLSSSSKVRVEASGCSRRLLVVQQ  
AGKADAGEYSCEAGGQKLSFR LDVAEPKLVFAKEQQAHSEVKAEAGASATLSCEVAQAQTEVTWFKDGKLLSS  
SSKVRVEASGCSRRLLVVQQAGKADAGEYSCEAGGQKLFRLDVAEPKLMFAKEQQAHSEVKAEAGASATLSCE  
VAQAQTEVTWFKDGKLLSSSSKVRVEASGCSRRLLVVQQAGKADAGEYSCEAGGQKLSFR LDVAEPKLVFAKEQ  
QA HSEVKAEAGASATLSCEVAQAQTEVTWFKDGKLLSSSSKVRVEASGCSRRLLVVQQV GKADAGEYSCEARGQ  
KLSFR LDVADTRLMFAKEQQARTEVKAEAGNSATLSCEVAQAQTEVTWFKDGKLLSSSSKVRVEASGCSRRLV  
VQQAGKADAGEYSCEAGGQKLSFR LDVAEAE SQI PERPSRREPLVVKHEHETI ILTATIAAPSVAAVTWLKDG V  
EIRRSKRHEATSLGDHTHTLTVRGAQVLD SAIYSCRVGKEGQDFPVQVEEVA AKF SKPLEPVEGELGGTVMLVC  
ELSP EQAEVVWRCGNTQLRPGKRFQMTSEGPRRTLT VSGLREDDAE EYVCE SRDRTSARLTVKVP RVV KFTS  
GLSAMVAEEGQEATFQCVVSPSDAGVTWYKDG MQLPSEKFMVESGASRSLTILGLTLEDAGQVTV EAE GAS  
SSAALRVREAPVLFKKKLEPQTV EERTSVTLEVELTRPWPEVKWTRNAAVLTPSENVEIRAEGARHCLVLR SV  
GFADRGFFGCETPDDKTQAKLNVEMRQVRLVRGLQEVEAKEQGTASMDVELSHA EVEG SWTRDGLRLQPGPKC  
HLAVQGPVHIL TLSALQPQDSGLVAFRAEGVHTSARLIVTEL PVSFTRVLQDVVATQKEKVTLECELSRPVDV  
RWLKDGV ELRAGKAIGIVAQGTCSRSLVIYRCETGDQGVYVCDALDAQT SASLRVQGRTYTLIFRRLAEDAGE  
VKFVAENAESRAHLRVKELPV TLLRPLRDKIAMEKHRGVLECCQVSRASAQVRWFKGGVELQSGPKYEVVSDGL  
YRKLVINDDQPEDEDTYTC DAGNVKTS AQFFVEEQSITIVRGLKDMTVMEPAPAWFECETSIPSVRPPKWL LG  
KTVLQAGGNVGLQEDGTVHRLTLHKTCSTMTGVPVHFTIGKSRSSAQLVVSDI PVVLT RPLEPKAGRELQSVVL  
SCDFRPA PKAVQYKDDT PLS PSEKFKMALEGGMAELRILRLTPADAGVYRCQAGSAQSSAEVTV EAREVTVI  
QPLQDAEAMEEGRVCFSC ELSHKDEDI EWSLNGTPLYNDSFHEI SHEGCLHTLV LKSVRQADTGTVCATSPKV  
SVSARLVVKGKPVVFLKALDDVSAEERGLTLTQCEVSDPEARVVWRKDGVELG PSDKYDFLHKAGARGLTVHD  
LSHEDAGLYTCQVGSKETQSKVSVHDLHVGITKRLKTVEVLEGE SCFECVLSHESPSDPAVWTVGGKTVGGS

GHFHAVRQGRKYTLTVKDAALSDAGEVVSVLGLTSKASLIIRERPVDI TKPLEDQRTTLGEDVMLSCELSRA
GTSVRWLKDGKAIRKSQKYDLLSEGTRAVLVVRKASLKDSGEYTCETEASKSTAKLCVEEKANRFTEELADLQ
VEEKGRAVFTCKTEHPASVVTWRKGLLELRASGKHVPSQEGTLTKLTINALERTSDTYTCDIGQARTQARLL
VHGQKVRVIEDLEDTAVQEGSSAKFCCRIAPADYGPVHWFLDKTPLHSNELNEITVQPGGYHVLTLRQLALKD
SGTVYFEAGDQRTSAALRVTEKPSIFSRPLTDVTVTEGEDTLVCETTTVDSSVRWTKDGKTLRPSARCQLSH
EGCQAQLLITATTPQDGGRYKCEIGGASSSSIVRVHALPVRFRESLKDVEVPEGKAATLRCVLSVAAPVEWR
HGDDVLKSSNKYSRLQEGAVLELVIRDLQPDQSDGQYSCSFGDQTTSATLTVKTSQAQFVFKLRNKEATEGTTV
TLRCELTKEAPVEWKKGTETLRNGDKYSLKQDGA VCELQICSLLVADAGEYSCVCGQEKTSATLTVKALLVHF
VRLRLIKEATEGDTTTLQCELSKAAPVEWRKGTETLRDGDYSLKQDGA VCELQIRSLTIADAGEYLCTCGQE
KTSATLTVRALPAKFKDSLKNEEATEGTTATLSCELSKAAPVTWKKGPKTLQSGDKYVLRQDGA VCGLIHGL
TMADAGEYSCVCGQEKTSATLTVRGLPAKFIEDLRSQEATEGATAILRCELSKAAPVEWRKGSSETLKDGDYR
LRQDGA VCELQIRGLAVVDGTYSLSPTKFTEGLRNEEATEGTMATLRCQMSKAAPVEWRKGSSETLRDGDYR
LRQDGA MCELQIRGLTIEDSGEYTCVCGQEKTSATLSVKALPSRFIEDLRSQEATEGTMATLRCQMSKTAPVE
WKKGSETLRDGGYSLRQDGPVCELQICDLAVEDAGEYSCVCGQEKTSATLSIKALPPRFIEDLRSQEATEG
MATLRCQMSKAAPVEWRKGSSETLGDGGYSLRQNGAVCELQIHDLAVEDTGEYSCVCGQEKTSATLNVKALPP
RFIEDLRSQEATEGTMATLRCQMSKAAPVEWRKGSSETLRDGGYSLRQDGA VCELQIHDLVEDAGQYSCVCG
QEKTSAVLTVDALPKPKFTEGLKKEEATEGTMVTLRCSKEATVEWRKGA KTLSDGGYSLRQDGA MCELQIC
GLAVEDAGEYSCVCGQEKTSATLSVKALPPRFIEDLRSQEATEGTMATLRCQMSKAAPVEWRKGSSETLRDGD
YSLRQDGA VCELQIRDLAVEDAGEYLCVCGQEKTSATLSVKALPPRFIEDLRSQEATEGTMATLRCQMSKAAP
VEWRKGSKTLRQDGDYSLRQDGA MCELQICDLAVEDTGDYSCVCGQEKTSATLSVKALPPRFIEDLRSQEARE
GTVATLRCRMSKAAPVEWRKGSSETLKDGDYSLRQEGNLCELQIRDLAVEDTEEYSCVCGQEKTSATLSVKAL
PAKFIEDLRSQEAPESSTVTLRCKLSKKASVVWKKGSETLRNGARYSLRQDGA VCELEIRDLTVEDTGEYSCT
CGQERTSATLSIMAPQVVFQQPLQNLQAEEGSMASLRCELSVNAAMVWSKGGLELQGDTRREARQQGCVAEL
LLRDLRREDAGEYSCTCGSQTTSATLMVTAAPVRFLELQAQDVDEGATARLRCELSREAVSVEWRKGS LQLF
PCAKYQMVQEGTTEALLVHGVEQEDAGEYTCDAHTQSIARLSVRAPKPKFKTDLQSTEQEAGGTARLCCQLS
EAEPGTPVQWLKEGVELHVGSKYEMRRQGA VCELLIHGLEAKDTGEYACLVGGQKTLASLRVKEPEVTIVRGL
VDMEVQADDEVEFTCKVSAQAGATDVQWHLQGLPLQSNHEVAVLADGCHVQLKGVTLLEDAGTVSFHVGG
SSSAQLTVRVPEVTVLEPLKDVQLSEGQDAHFRCLRSRASGQEARWALGGVPLQCNEMNDITVEQGTLYLLTL
HKVTLEDAGTITLQVGS SSEAQLKVTAKNVLRGLENDVALEGGEALFECQLSQPEVA AHTWLLDDEPVHTS
EKVEVVYFENGLRHLLLLKNLKPQDSCRVTFLAGDVVTS AFLTVRGRLEVLLEPPHDASVKAGMQVRFTCILS
EAVPVGEATWYINGAAIQPDDTDWTVTTDGS HHALTLSNAQPQHAGEVTF AARDAVASARLSVLALPDPPEDA
EYVGRSDHSVTL SWVAPMSDGGG LCGYRVMKEASTGQWQLCHDLVPGPECVDDLVPGKTYRFRVA AVGPA
GAGEPVHLPQMVKIAPAPAPAPAPAPAPAPETRQAVVGEDICLELEVAADGGEVVWHKGTERRIQPGGHFEVLS
RGQRQMLVIKGFRTEDQGEYRCGPIQGLPSSGAATFNVVMTSGSGDEVPAQPSLPPEAAQEGDLHLLWEALAR
KRRMSREPTLDSISELPEEDSRVQHLRQEAEETAPDLSEGYSTADELARTGEADLSHTSSDDESRACTPSLVT
YLKAGGPGISPLASKHEAQVTTSVKPKQKQEPVVPTCPPGDL SAADLMDPSLDKAAVKIQAAFQYKVRKE
MKQQEGPVFSRTFGDTEAQVGDVLRLECVLATKTD MRACWLKDGIELTDGRHYHIDQLKDGTCSSLVTVGLAPT
DSGRYTCQVSTKSGRVSHSACVVVSGTESEAESSGGELDDAFRRAARRLHRLFRTKSPAELSEELFLSADE
GPGEPEEPADWQTYREDFVCIRFESLAEARQAVTCFRNMFATMGIGVEISLGEQGPRGVEMRIGKVAPTVT
PAVPLAKTPGLQTSDAAPVFLTELQNDQVDQDGYPMSFDCVVTGQPVPSVRWFKDGKLEEDDH YMINEDQGG
HQLIITAVVPADMGVYRCLAENSMGVSSKAELRVELTSTDYDTAADATETSSYFSAQGYLSSREQEGTESDE
GQLPQVLEELKDLQVAPGTR LAKFQLKVKGYPA PKLYWFKDGPPLTTSDHIRMTDKKTLHTLEIVSVTREDSG
QYAAYSNAVGAAYSSARLLVRGPSEPEEK PASDVHERLVPPRI LEKFTPKKVKRGSSITFSVKVEGHPAPSV
HWLKEEA EKGVLWIGPDTPGYTMASSSKQHSLVLLDVGRQHQT YTCIATNPAGQALCSASLHISGLAKEEEQ
ERVKEALISSFLQGTSAVSAQMS EAGFADLVGQSKGESLVAAEASHLSLAEVGTEEF LQKLT SQITEMVS
AKISQAKLQVPGGDSDEETKTPSASPRHGRSRPSSSVQESSSESDGDSRGEIFDIYVVTADYLP LGAEQDAI
ILREGQYVEVLDSAHPLRWLVRTPKTKSSPSRQGWVSPAYLDKRLKLSPEWGPTEAPEFPGEAVSEDEYRTRL
SSVIQELLSSEQAFV GELQFLESHHMKHLERSPRVPAAVASQKTVI FRNVQDISHFHSSFLKELQCGCTDDDV
AMCFIKNQEA FEKYLEFLVGRVQAESVVVSTPVQEFYKKYAEETLSAKDPTQPPPPPLQHYLEQPVERVQKYQ
ALLKELIRNKARNRQNCALLEQAYAVVSALPQRAENKLHVSLMENY PGTLEALGEP I RQGHFI VWEGAPGARM
PWKGHNHRVFLFRNYLVIC PPRDRSRTDTFSYVFRNMMKLSSIDLNDQVEGDDRAFEVWHEREDSVRKYLLQA
RTVI IKNSWVKEICGIQORLAQPVWRPPEFEEELADCTAELGETVKLACRVTGT PKPIVSWYKDGKPV EVDPH
HILIEDPDG SCTLILDNLTGIDSGQYMCFAASAAGNASTLGK IILVQVPPRFVNVKVRATPFVEGEDAQITCTVE
GAPYQIRWYKDLGTLLAPGNRYRMLNEPRSGVLVLIQAASKEDLGHYEC ECLVNLRLGSTRGGGELYMQSPALR
ARDQHREQIVAAVEDTSVEGSAHSAQDGA DQQAASVLRLLGSEALGPS PGDLPNTRQSEPPAFEEAASQIP
GAASGTPEVSQPGTHKGLEQETTSSGSQGWTP IRVEGTAWPGAGTGQLLLDVHSQVIMETTQRTYVCQAPDT
GVTRAPSMQVTIEDVQVQVGDMAQF DAVIEGHPPP IVTWYKGSTQLTSSARLSQRQDGT TYSLVLT DVAPHDA
GVYTCVANNAGGQVLC KAELLVHGDKLDAENQVYRRKLHSFYDVQEE IGRGVFGFVKRVQHKGNMFC AAKF

IPLRSKTRAQAYQERDILATLGHPLVTGLLDQFETRKTLLILILELCSSEELLDRLFKKGVVTEAEVKVYIQQL  
VEGLHYLHSHGILHLDDIKPPNIMLVHPAREDIKICDFGFAQKITPSEPQYSKYGSPEFVSPEIIEQNPVSEGS  
DIWAMGVISYLSLTCSSPFAGESDRATLLNVLEGRVSWSSPTAAHLEDAKDFIKATLQRTPRARPSTSQCLA  
HPWFLKSMPAAEEAHFINTKQLKFLARSRWQRSLMSYKSIILVMRSIPPELLQGPPDSPSLGVARHLRGEASGAS  
SSSSSSDNELAPFARAKSLPPSPVTHSPLLHPRGFLRPSASLPEETEASMTADAAVPASPQASGPPASPGCV  
PRHSVSISSLFYQQAGEGAERGNKTSGAKRHPARRRHLLKGGYIARALPGLREPLMEYSLLEEEAAREEQASLM  
TKTPSFETALRLPSSSVREVPGRSHSLDNPPVTTGPSPEACKEQLLFPSTGLTHETTAKDRGHKEGFLQESV  
PFPMPSGDSRPGKQEGSSQDSCRGKPASSCHSELGSGSQEGCGPPSSQSLGSLPPQSLKKEKELSTSCGFLFSEQ  
PQAAPFPPTQVSPLLGSEKEPQDGSLSSEGPVVPVSSSPGSASQVDASLDTEGLSEAGDTCDFTPPPQRPQEQAT  
TRKFSLESRGGYAGVAGYGTFAFGGDAGGMLGQGPLWARMAWAVSQSSEEQDEAATESPQPLESIGPIAEASG  
VPLRTSPSLTPWEEVEQVSLVQIRDLSDGAEAAADTISLDISEVDPAYLNLSDLYDIKYLPEFEMI FRRVPKPI  
EQPESPGSETEAGQGLADFLLEAAWPWPGELGLRAGLEITEEPEEPGDLEALLGEAAVGRKRKWSPSRGLFQF  
PGRCLSGEEPVELGLRQRVKASMAHISRIKGRPEGPEREPPRKKAGLASFRLSGLKGRDQELSDEAVVLGQ  
SVTLACQVLAQPTAQATWSKDGVLLESSGHLLISSTLKNFQLLTIILVVKEEDLGTYTCCVSNPLGTAVTTGVL  
RKAERPSSSPRPEVGEYKDAVLLVWPKVPEVSCGPVTVIVQCCIEGGSWTTLASDISDCCYLTGKLSRGGMYIF  
RTACVSKAGMGPISSPSEQVLLGGPNHLASEEESRRGRPAQLLPSTKTFAFQMQRIRGRFVSVRQCREKASGR  
ALAAKIVPYQPEDKTAVLEREYALKRHLHPLHAQLHAAYLSPRHLVLIILELCSGPELLPSLAERESYSESDVK  
DYLWQMLSATQYLHAQHILHLDLRSENMMVTEYNLLKVIDLGNQSLDQEKVPAPENFKDYLEMAPELLLEGQ  
GAVPQTDIWAIGVTAIFIMLSGEYPESESETRDLQKGLRKLRLSRYAGLSGGAVAFVLSLCAQPWGRPCA  
STCLQCGLWTEEGPTGSRPTVPTVPTVRLRAVFREREKRRALLYKKNLAQVR\*  
>ENSMUSP00000038264\_c.10576:G>T\_p.S3526I ENSMUST00000047441.14|Obscn-  
202|ENSMUSG00000061462|-|chr11:g.58958122:C>A  
MDHSFSGAPRFLTRPKAFVVSVGKDATLSCQIVGNPTPHVSWEKDRQPVEAGARFRLAQDGDVYRLTILDLAL  
GDSGQYVCRARNAIGEAFVAVGLRVDSEGTCAEQAPHFLLRPTSIRVREGADATFRCRVGSGSPQPAVSWSKDG  
RRLGPPDAPHVRVEEHGESSALRIRSARPRDGGTYEVRAENPLGSASAAAALVVDSDAEVAGPPGTSTATLLA  
HLQQRREAMRAEGIPSPPGAGTRTCTVTEGKHARLSCTVTEGPKPETVWKKDGQLVTEGRRHVVEDEQENF  
VLKILLECKQSDRGLYCTASNLVGGQTYSSVLVVVREPTVFPKRLQDLEVREKESATVQCEVAQPAEAAWFK  
EETRLWASAKYDIEEEGTERRLTVRNVSADDDAVYICETTEGSRVVAELSVQGNLTKLPRKTAVRTGDTAIF  
WVELAVPEGPVRWLRNQEEMVAGGRVAITAEGTCHTLTIFQCTLEDMGEVAFVSGGCRTTTQFCVSAPRRPPL  
YPPADPVVKAKTESSVTLWSAPPHGDRPVTIDGYVLEKRKLGAYAWSRCHEAGWLATTEFTITGVAAEGDFQ  
FRVSAINHFGQGPYLEFPGTMHLVPLAVKTPKAVEAVEGGEVTFVSDLTVASSGEWFLDGEALKASSIYVI  
RCDRTRHMLTIREVPARLHGAQLKVFVANGIETSIQMVVRAALGLPSKLPAAAAREVLAQLHEEAQLLAEALSD  
QAAAVTWLKDGRELSLGPKEYMQVSAGRRALLVRDVAQDDAGLYECVSRGSRRTAYQLLVQDITDGYRDWGPAG  
PQKHMCKCAGAKIARYLGSscyRFLQYDKGVWHLEAALDTRQGKGTSSCSLHEKPKLVFAKQQAHSEVKA  
AGASATLSCEVAQAQTEVTWFKDGKLSSSSKVRMEASGCSRRLVVQQAGKADAGEYSCEAGGQKLSFRLDVA  
EPKMVFAKEQQARSEVKAEGASATLSCEVAQAQTEVTWFKDGKLSSSSKVRMEASGCSRRLVVQQAGKADA  
GEYSCEAGGQKLSFRLDVTEPKLVFAKEQQARSEVKAEGVNSATLSCEVAQAQTEVTWFKDGKLSSSSKVRM  
EASGCSRRLVVQQAGKADAGEYSCEAGGQKLSFRLDVAEPKLVFAKEQQARSEVKAEGVNSATLSCEVAQAQ  
EVTWFKDGKLSSSSKVRMEASGCSRRLVVQQAGKADAGEYSCEAGGQKLSFHLDVTEPKLVFAKEQQAHSEV  
KAEAGASATLSCEVAQAQTEVTWFKDGKLSSSSKVRMEASGCSRRLVVQQAGKADAGEYSCEAGGQKLSFR  
LDVAEPKLVFAKEQQARSEVKAEGASATLSCEVAQAQTEVTWFKDGKLSSSSKVRVEASGCSRRLVVQQAG  
ADAGEYSCEAGGQKLSFRLDVAEPKLVFAKEQQANSEVKAEGASATLSCEVAQAQTEVTWFKDGKLSSSSK  
VRVEASGCSRRLVVQQAGKADAGEYSCEAGGQKLSFRLDVAEPKLVFAKEQQAHSEVKAEGASATLSCEVAQ  
AQTEVTWFKDGKLSSSSKVRVEASGCSRRLVVQQAGKADAGEYSCEAGGQKLSFRLDVAEPKLVFAKEQQAH  
SEVKAEGASATLSCEVAQAQTEVTWFKDGKLSSSSKVRVEASGCSRRLVVQQAGKADAGEYSCEAGGQKLS  
FRLDVAEPKLVFAKEQQAHSEVKAEGASATLSCEVAQAQTEVTWFKDGKLSSSSKVRVEASGCSRRLVVQQ  
AGKADAGEYSCEAGGQKLSFRLDVAEPKLVFAKEQQAHSEVKAEGASATLSCEVAQAQTEVTWFKDGKLS  
SSSKVRVEASGCSRRLVVQQAGKADAGEYSCEARGQKLSFRLDVAEAEESQI PERPSRREPLVKEHETIILTAT  
IAAPSVAAVTWLKDGEIIRSKRHEATSLGDTHLTVRGAQVLDIAIYSCRVGKEGQDFPVQVEEVAKFVSKP  
LEPVEGELGGTVMLVCELSPEQAEVWRCGNTQLRPGKRFQMTSEGPRRTLTVSGLREDDAEYVCESRDDRT  
SARLTVKVPVVKFTSGLSAMVAEEGQEAFTQCVVSPSDAGVTWYKDGMLQPSSEKFMVMEVGASRSLTILGL  
TLEDAGQVTVAEAGSSAALRVREAPVLFKKKLEPQTVEERTSVTLEVELTRPWPEVKWTRNAAVLTPSENV  
EIRAEGARHCLVLRVSGFADRGRFGCETPDDKTQAKLNVEMRQVRLVVRGLQEVEAKEQTASMDVELSHA  
EVEGSWTRDGLRLQPGKCHLAVQGPVHILTLTSLALQPDQDGLVAFRAEGVHTSARLIVTEKLPVSTRVLQDVVATQ  
KEKVTLECELTRPVDRWLDKGVLELRAGKAI GIVAQDGTCSRSLVIYRCETGDDQGVYVCDALDAQTSASLRVQGR  
TYTLIFRRLVLAEDAGEVKFVAENAESRAHLRVKELPVTLLRPLRDKIAMEKHARGVLECVSRASAQVRWFKGG  
VELQSGPKYEVVSDGLYRKLVINQVPEDEDTYTC DAGNVKTSAQFFVEEQSITIVRGLKDMTVMEPAPAWFE  
CETSI PSVRPPKWLKGKTVLQAGNVGLEQDGTVHRLTLHKTCSTMTGPHFTIIGKSRSSAQLVVSIDI PVVLT

RPLEPKAGRELQSVVLSCDFRPAKAVQWYKDDTPLSPSEKFKMALEGQMAELRILRLTPADAGVYRCQAGSA
QSSAEVTVAREVTVIQPLQDAEAMEEGRVCFSCELSHKDEDIWLSNGTPLYNDSFHEISHEGCLHTLVLKS
VRQADTGTVCATSPKVSVSARLVVKGKPVVFLKALDDVSAEERGTTLQCEVSDPEARVVWRKDGVELGSPDK
YDFLHKAGARGLTVHDLSDHEDAGLYTCQVGSKETQSKVSVHDLHVGI TKRLKTVEVLEGESECSFECVLSHESP
SDPAVWTVGGKTVGGSGHFHAVRQGRKYTLTVKDAALSDAGEVVFVVLGLTSKASLIIRERPVDITKPLEDQR
TTLGEDVMLSCELSRAGTSVRWLKDGKAIKRSQKYDLLSEGTRAVLVVRKASLKDSGEYTCETEASKSTAKLC
VEEKANRFTEELADLQVEEKGRAVFTCKTEHPASVVTWRKGLLELRASGKHVPSQEGTLTKLTINALERTDSD
TYTCDIGQARTQARLLVHGQKVRVIEDLEDTAVQEGSSAKFCCRIAPADYGPVHWFLDKTPLHSNELNEITVQ
PGYHVLTLRQLALKDSGTVYFEAGDQRTSAALRVTEKPSIFSRPLTDVTVTEGEDLTLVCETTTVDSSVRWT
KDGKTLRPSARCQLSHEGCAQLLITATTPQDGGRYKCEIGGASSSSIVRVHALPVRFRESLKDVEVPEGKAA
TLRCVLSVAAPVEWRHGDDVLKSSNKYSLRQEGAVLELVIRDLQPQDSGQYSCSFGDQTTSATLTVKTSQAQ
FVGKLRNKEATEGTTVTLRCELTKEAPVEWKKGTETLRNGDKYSLKQDGAVCELQICSLLVADAGEYSCVCGQ
EKTSATLTVKALLVHFVRRRLRIKEATEGDTTTLQCELSKAAPVEWRKGTETLRDGDYSLKQDGAVCELQIRS
LTADAGEYLCTCGQEKTSATLTVRALPAKFKDSLKNEEATEGTATLSCELSKAAPVTWKKGPKTLQSGDKY
VLRQDGAVCGLQIHGLTMADAGEYSCVCGQEKTSATLTVRGLPAKFIEDLRSQEATEGATAILRCELSKAAPV
EWRKGETLTKDGDYTLRQDGAVCELQIRGLAVVDTGTYSLSLPTKFTTEGLRNEEATEGTMATLRCQMSKAAPV
EWRKGETLRDGDYSLRQDGAMCELQIRGLTIEDSGEYTCVCGQEKTSATLSVKALPPRFIEDLRSQEATEG
TMATLRCQMSKAAPVEWRKGETLGDGGYSLRQNGAVCELQIHDLAVEDTGEYSCVCGQEKTSATLNVKALP
PRFIEDLRSQEATEGTMATLRCQMSKAAPVEWRKGETLRDGGYSLRQDGAVCELQIHDLVEDAGQYSCVC
GQEKTSAVLTVDALPPKFTTEGLKKEEATEGTMVTLRCQMSKEATVEWRKGAKTLSGGYSLRQDGAMCELQI
CGLAVEDAGEYSCVCGQEKTSATLSVKALPPRFIEDLRSQEATEGTMATLRCQMSKAAPVEWRKGSKTLRDGD
RYSLRQDGAMCELQICDLAVEDTGDYSCVCGQEKTSATLSVKAPQVVFQOPLQNLQAEEGSMASLRCELSVPN
AAMVWSKGGLELQGDTRREARQQCVAELLLRDLRREDAGEYSCTCGSQTTSATLMVTAAPVRFRELQAQDV
DEGATARLRCELSREAVSVEWRKGSLLQFPCAKYQMVQEGTTAELLVHGVEQEDAGEYTC DAGHTQS IARLSV
RAPKPKFKTDLQSTEQEAGGTARLCCQLSEAEPGTPVQWLKEGVELHVGSKYEMRRQGA VCELLIHGLEAKDT
GEYACLVGQKTLASLRVKEPEVTIVRGLVDMVEVADEVEFTCKVSQAGATDVQWHLQGLPLQSNVTEVAV
LADGCTHVLRLQKGVTLQDAGTVSFHVGLSSAQLTVRVEVTVLEPLKDVQLSEGDHAFRRARLRLFRKSPAELE
RWALGGVPLQCNEMNDITVEQGTLYLLTLHKVTLQDAGTITLQVGCSSSEAQLKVTAKNTVLRGLENDVALEG
GEALFECQLSQPEVA AHTWLLDDEPVHTSEKVEVVYFENGLRHLLLLKNLKPQDSCRVTFLAGDVVTS AFLTV
RALPDPPEDAEVVGRSDHSVTLVSWVAPMSDGGGGLCGYRVMKEASTGQWQLCHDLVPGPECVDDLVPGKTY
RFRVAAVGPAGAGEPVHLPQMVKIAPAPAPAPAPAPAPAPETRAVVGEDICLELEVAADGGVEVWHKGTERRI
QPGGHFEVLSRGRQMLVIKGFRTEDQGEYRCGPIQGLPSSGAATFNVVMTSGSGDEVPAQPSLPEAAQEGD
LHLLWEALARKRRMSREPTLDSISELPEEDSRVQHLRQEAETAPDLSEGYSTADELARTGEADLSHTSSDDE
SRAGTPSLVTYLKKAGGPGISPLASKHEAQVTTSVKPKQKQEPVVPPTCPPPGDLSAADLMDPSLDKAAVKIQ
AFKGYKVRKEMKQEGPVFSRTFGDTEAQVGDVLRLECEVLATKTD MRACWLKDGIELTDGRHYHIDQLKDGTC
SLLVTVGLAPTDSGRYTCQVSTKSGRVSHSACVVVSGTESEAESSSGELDDAFRRAARRLHRLFRKSPAELE
EEELFLSADEGPGEPEEPADWQTYREDENFVCIRFESLAEARQAVTCFRNMFATMGIGVEISLGEQGRGVEM
RIGKVAPTPTPAVPLAKTPGLQTSDAAPVFLTELQNDVQDGYPMSFDCVVTGQPVPSVRWFKDGKLL EEDDH
YMINEDQGGHQLIITAVVPADMGVYRCLAENSMGVSSTKAELRVELTSTDYDTAADATETSSYFSAQGYLSS
REQEGTESDEGQLPQVLEELKDLQVAPGTRLAKFQLKVKGYPAKLYWFKDGOPLTSDHIRMTDKKTLHTLE
IVSVTREDSGQYAAIISNAVGAAYSSARLLVRGPSEPEEKPASDVHERLVPPRILEKFTPKKVKRGS S ITFSV
KVEGHPAPSVHWLKEEAEGVWLWIGPDTPGYTMASSSKQHSLVLLDVGQRHQGTYT CIATNPAGQALCSASLH
ISGLAKEEEQERVKEALISSFLQGT SQAVSAQMSE SAGFADLVGQSKGESLVAAEASHLSLAEVGT EEFLOK
LTSQITEMVSAKISQAKLQVPGGDSDEETKTPSASPRHGRSRPSSSVQESSSESEDGDSRGEIFDIYVVTADY
LPLGAEQDAIILREGQYVEVLDSAHPLRWLVRTKPTKSSPSRQGWVSPAYLDKRLKLSPEWGPTEAPEFPGEA
VSEDEYRTRLSSVIQELLSSEQAFV GELQFLESHMKHLERSPRVPAAVASQKTVIFRNVQDISHFHSSFLKE
LQCGCTDDDVAMCFIKNQEA FEKYLEFLVGRVQAESVVVSTPVQEFYKKYAEETLSAKDPTQPPPPPLQHYLE
QPVERVQKYQALLKELIRNKARNRQNCALLEQAYAVVSALPQRAENKLVHSLMENYPGTLEALGEP IROGHFI
VWEGAPGARMPPWKGNHRHVFLFRNYLVICKPRRDSRTDTFSYVFRNMMKLSSIDLNDQVEGD DRAFEVWHERE
DSVRKYLQARTVI IKNSWVKEICGIQORLAQPVWRPPEFEEELADCTAELGETVKLACRVTGT PKPIVSWYK
DGKPV EVDPHHILIEDPDGSC TLLIDNLTGIDSGQYMCFAASAAGNASTLGKILVQVPPRFV NKVRATPFVEG
EDAQITCTVEGAPYPQIRWYKDG TLLAPGNRYRMLNEPRSGVLVLIQAASKEDLGHYECELVNRLGSTRGGG
ELYMQSPALRARDQHHREQIVAAVEGAPSMQVTI EDVQVQVGDMAQF DAVIEGHPPP IVTWYKGSTQLTSSAR
LSQRQDGTTYSLVLT DVAPHDAGVYTCVANNAGGQVLC KAE LLVHGGDKLDAENQVYRRKLSHFYDVQEEIGR
GVFGRVYRQYHKGNMFCAAKFIP LRSKTRAQAYQERDI L ATLGHPLVTGLLDQFETRKTLLIILELCSSEEL
LDRLFKKGVVTEAEVKVYIQQLVEGLHYLHSHGILHLDIKPPN ILMVHPAREDIKICDFGFAQKITPSE PQYS
KYGSP E FVSP E IIEQN PVSEGS DIWAMGVI SYLSLTCSSPFAGESDRATLLNVLEGRVSWSSPTAAHLSEDAK
DFIKATLQRTPRARPSTSQC LAHPWFLKSMPAEAAHFINTKQLKFL LARSRWQRSLMSYKSI LVMRSIPELLQ

GPPDPSPLGVARHLRGEASGASSSSSSSDNELAPFARAKSLPPSPVTHSPLLHPRGFLRPSASLPEETEASMP  
TADAAVPASPQASAGPPASPGCVPRHSVSSSLFYQQAGEGAERGNKTSKAKRHPARRRHLKGGYIARALPGLR  
EPLMEYSLLEEEAAREEQASLMTKTPSFETALRLPSSSVREVPGRSHSLDNPVTTGPSPEACKEQLLFFPST  
GLTHETTAKDRGHKEGFLQESVFPFPMMSGDSRPGKQEGSSQDSCRGKPASSCHSELGSGSQEGCGPPSSQSLG  
SLPQQSLKKELESTSCGPLFSEQPQAAPFPTQVSPLLGSEKEPQDGLSEGPVVPVSSSPGSASQVDASLDTEG  
LSEAGDTCDFTPPPQRPQEATTRKFSLESRRGGYAGVAGYGTFAFGGDAGGMLGGQPLWARMWAVSQSSEEQ  
DEAATESPQPLESGLPIAEASGVPLRTSPSLTPWEEVEQVSLVQIRDLSGDAEAADTISLDISEVDPAYLNLS  
DLYDIKYLPEFEMI FRRVPKPIEQPESPGSETEAGQGLADFLLEAAWFPWPGELGLRAGLEITEEPEEPGDLEA  
LLGEAAVGRKRKWSPSRGLFQFPGRCLSGEEPVELGLRQRVKASMAHISRILKGRPEGPEREQPPRKKAGLAS  
FRLSGLKGRDQELSDEAVVLGQSVTLACQVLAQPTAQATWSKDGVLLESSGHLLISSTLKNFQLLTIILVVKEE  
DLGTYTCCVSNPLGTAVTTGVLKRAERPSSSPRPEVGEYKDAVLLVWKPVESECGPVTYIVQCCIEGGSWTTL  
ASDISDCCYLTKLSRGGMYIFRTACVSKAGMGPYSSPSEQVLLGGPNHLASEEESSRGRPAQLLPSTKTFAF  
QMQIRRRGRFSVVRQCREKASGRALAAKIVPYQPEDKTAVLREYEALKRLLHHPHLAQLHAAYLSRHLVLIILEL  
CSGPELLPSLAERESYSESDVKDYLWQMSLQYLHAQHILHLDLRSENMMVTEYNLLKVIDLGNASLDQEK  
VPAPENFKDYLETMAPELLEGQAVPQTDIWAIGVTAIFIMLSGEYPESEGETRDLQKGLRKLIRLSRCYAGL  
SGGAVAFLOSSLCAQPWGRPCASTCLQCGWLTEEGPTGSRPTPVTFPTVRLRAFVREEREKRRALLYKKNHNAQ  
VR\*

>ENSMUSP00000049737\_c.11203:G>T\_p.S3735I ENSMUST00000052872.15|Obscn-  
203|ENSMUSG00000061462|-|chr11:g.58958122:C>A

MDHSFSGAPRFLTRPKAFVSVGKDATLSCQIVGNPTPHVSWEKDRQVPEAGARFRLAQDGDVYRLTILDLAL  
GDSGQYVCRARNAIGEFAAVGLRVDSEGTCAEQAPHFLLRPTSIRVREGADATFRRCRVGGSPQPAVSWSKDG  
RRLGPPDAPHVRVEEHGESSALRIR SARPRDGGTYEVRAENPLGSASAAAALVVDSDAEVAGPPGTSTATLLA  
HLQQRRREAMRAEGIPPSPPGAGTRTCTVTEGKHARLSCFVTGEPKPKETVWKKDQQLVTEGRRHVYVEDEQENF  
VLKILFCKQSDRGLYTCTASNLVGQTYSSVLVVVREPTVPFKKRLQDLEVREKESATFQCEVAQPATEAAWFK  
EETRLWASAKYDIEEGETERRLTVRNVSADDDAVYICETTEGSRVVAELSVQGNLTKRKLPRKTAVRTGDTAIF  
WVELAVPEGPVWRWLRNQEEMVAGGRVAITAEGTCHTLTI FQCTLEDMGVAVFVSGGCRATTEFTFCVSA PRRPPL  
YPPADPVVKAKTSLWSAPPHGDRPVTIDGYVLEKRLKLGAYAWSRCHEAGWLATTEFTITGVAAEGDFQ  
FRVSAINHFGQGPYLEFPGMTMLVPLAVKTPKAVEAVEGGEVTFVVDLTVASSGEWFLDGEALKASSIYVI  
RCDRTRHMLTIREV PARLHGAQLKFVANGIETS IQMVVRAALGLPSSKLPAAAAREVLAQLHEEAQLLAELSD  
QAAA VTWLKDGRELSLGPYEMQVSAGRRALLVRDVAQDDAGLYECVSRGSR TAYQLLVQEPKLVFAKQQAH  
SEVKAEAGNSATLSCEVTQAQTEVTWFKDGKLLSSSSKVRMEASGCSRRLVVQQAGKADAGEYSCEAGGQKLS  
FRLDVAEPKLVFAKQQAHSEVKAEAGASATLSCEVAQAQTEVTWFKDGKLLSSSSKVRMEASGCSRRLVVQQ  
AGKADAGEYSCEAGGQKLSFRLDVAEPMVFQARSEVKAEAGASATLSCEVAQAQTEVTWFKDGKLLSS  
SSKVRMEASGCSRRLVVQQAGKADAGEYSCEAGGQKLSFRLDVTEPKLVFAKEQQARSEVKAEVNSATLSCE  
VAQAQTEVTWFKDGKLLSSSSKVRMEASGCSRRLVVQQAGKADAGEYSCEAGGQKLSFRLDVAEPKLVFAKEQ  
QARSEVKAEAGNSATLSCEVAQAQTEVTWFKDGKLLSSSSKVRMEASGCSRRLVVQQAGKADAGEYSCEAGGQ  
KLSFHLDVTEPKLVFAKEQQAHSEVKAEAGASATLSCEVAQAQTEVTWFKDGKLLSSSSKVRMEASGCSRRLV  
VQQAGKADAGEYSCEAGGQKLSFRLDVAEPKLVFAKEQQARSEVKAEAGASATLSCEVAQAQTEVTWFKDGK  
LSSSSKVRVEASGCSRRLVVQQAGKADAGEYSCEAGGQKLSFRLDVAEPKLVFAKEQQANSEVKAEAGASATL  
SCEVAQAQTEVTWFKDGKLLSSSSKVRVEASGCSRRLVVQQAGKADAGEYSCEAGGQKLSFRLDVAEPKLAFA  
KEQQAHSEVKAEAGASATLSCEVAQAQTEVTWFKDGKLLSSSSKVRVEASGCSRRLVVQQAGKADAGEYSCEA  
GGQKLSFRLDVAEPKLAFAKEQQAHSEVKAEAGASATLSCEVAQAQTEVTWFKDGKLLSSSSKVRVEASGCSR  
RLVVQQAGKADAGEYSCEAGGQKLSFRLDVAEPKLAFAKEQQAHSEVKAEAGASATLSCEVAQAQTEVTWFKD  
GKLLSSSSKVRVEASGCSRRLVVQQAGKADAGEYSCEAGGQKLFRLDVAEPKLMFAKEQQAHSEVKAEAGAS  
ATLSCEVAQAQTEVTWFKDGKLLSSSSKVRVEASGCSRRLVVQQAGKADAGEYSCEAGGQKLSFRLDVAEPKLV  
VFAKEQQAHSEVKAEAGASATLSCEVAQAQTEVTWFKDGKLLSSSSKVRVEASGCSRRLVVQQVQKADAGEYS  
CEARGQKLSFRLDVADTRLMFAKEQQARTEVKAEAGNSATLSCEVAQAQTEVTWFKDGKLLSSSSKVRVEASG  
CSRRLVVQQAGKADAGEYSCEAGGQKLSFRLDVAEAEESQIPERPSRREPLVVKEHETIILTATIAAPSVAAVT  
WLKDGEVIRRSKRHEATSLGDTHLTVRGAQVLDSAIYSCRVGKEGQDFPVQVEEVAAKFSKPLEPVEGELGG  
TVMLVCELSPEQAEVWRCGNTQLRPGKRFQMTSEGPRRTLVSGLREDDAEYVCESRDDRTSARLTVKVP  
VVKFTSGLSAMVAEEGQEAFTQC VVSPSDAGVTWYKDGMLQPSSEKFMVESGASRSLTILGLTLEDAGQVTV  
EAEGASSSAALRVREAPVLFKKKLEPQTVTEERTSVTLEVELTRPWPEVKWTRNAAVLTPSENVEIRAEGARHC  
LVLRSVGLADRGFFGCETPDDKTQAKLNVEMRQVRLVRLGVEVEAKEQGTASMDVELSHAEVEGSWTRDGLRL  
QPGPKCHLAVQGPVHILTSALQPQDSGLVAFRAEGVHTSARLIVTEL PVSFTRVLQDVVATQKEKVTLECEL  
SRPVDVRLKDGVELRAGKAIGIVAQGTCSRSLVIYRCETGQGVYVCDALDAQTSASLRVQGRYTLIFRRVL  
AEDAGEVKFVAENAESRAHLRVKELPVTLLRPLRDKIAMEKHRGVLECVSRASAVRWFVGGVLEQSGPKYE  
VVSDGLYRKLVIN DVQPEDEDTYTC DAGNVKTS AQFFVVEQSITIVRGLKDMTVMEPAPAWFECETSIPSVRP  
PKWLLGKTVLQAGGNVGLQDGTVHRLTLHKTCSTMTGPVHFTIGKSRSSAQLVVS DI PVVLRPLPKAGRE



LQSVVLSCDFRPAPKAVQWYKDDTPLSPSEKFKMALEGQMAELRILRLTPADAGVYRCQAGSAQSSAEVTVEA  
REVTVIQPLQDAEAMEEGRVCFSCLESHKDEDI EWSLNGTPLYNDSFHEISHEGCLHTLVLKSVRQADTGTVC  
ATSPKVSVSARLVVKGKPVVFLKALDDVSAEERGTLLTQCEVSDPEARVVWRKDGVELGPSDKYDFLHKAGAR  
GLTVHDLSDHEDAGLYTCQVGSKETQSKVSVHDLHVGITKRLKTVEVLEGESECSFECVLSHESPSDPAVWTVGG  
KTVGGSGHFHAVRQGRKYTLTVKDAALSDAGEVVSFLGLTSKASLIIRERPVDITKPLEDQRTTLGEDVMLS  
CELSRAGTSVRWLKDGKAIKRSQKYDLLSEGTRAVLVVRKASLKDSGEYTCETEASKSTAKLCVEEKANRFTE  
ELADLQVEEKGRAVFTCKTEHPASVVTWRKGLLELRASGKHVPSQEGTLKLTINALERTDSDTYTCDIGQAR  
TQARLLVHGQKVRVIEDLEDTAVQEGSSAKFCCRIAPADYGPVHWFLDKTPHLSNELNEITVQPGGYHVLTLR  
QLALKDSGTVYFEAGDQRTSAALRVTEKPSIFSRPLTDVTVTEGEDTLVCETTTVDSSVRWTKDGKTLRPSA  
RCQLSHEGCAQLLITATTPQDGGRYKCEIGGASSSSIVRVHALPVRFRFRESLKDVEVPEGKAATLRCVLSSVA  
APVEWRHGDDVLKSSNKYSLRQEGAVLELVIRDLQPDQSGQYSCSFGDQTTSATLTVKTSQAQVFGKLRNKEA  
TEGTTVTLRCELTKAPVEWKKGTETLRNGDKYSLKQDGAVCELQICSLLVADAGEYSCVCGQEKT SATLTVK  
ALLVHFVRRRLRIKEATEGDTTTLQCELSKAAPVEWRKGTETLRDGDYSLKQDGAVCELQIRSLTIADAGEYL  
CTCGQEKT SATLTVRALPAKFKDSLKNEEATEGTTATLSCLELSKAAPVTWKKGPKTLQSGDKYVLRQDGAVCG  
LQIHGLTMADAGEYSCVCGQEKT SATLTVRGLPAKFIEDLRSQEATEGATAILRCELSKAAPVEWRKGSSETLK  
DGDYTLRQDGAVCELQIRGLAVVDGTYSLSLPTKFTTEGLRNEEATEGTMATLRCQMSKAAPVEWRKGSSETLR  
DGDYSLRQDGAVCELQIRGLTIEDSGEYTCVCGQEKT SATLSVKALPSRFIEDLRSQEATEGTMATLRCQMS  
KTAPVEWKKGSETLRDGGYSLRQDGPVCELQICDLAVEDAGEYSCVCGQEKT SATLSIKALPPRFIEDLRSQ  
EATEGTMATLRCQMSKAAPVEWRKGSSETLGDGGYSLRQNGAVCELQIHDLAVEDTGEYSCVCGQEKT SATLN  
VKALPPRFIEDLRSQEATEGTMATLRCQMSKAAPVEWRKGSSETLRDGGYSLRQDGAVCELQIHDLVEDAGQ  
YSCVCGQEKTSAVLTVDALPPKFTTEGLKKEEATEGTMVTLRCQMSKEATVEWRKGAKTLSDGGRYSLRQDGAM  
CELQICGLAVEDAGEYSCVCGQEKT SATLSVKALPPRFIEDLRSQEATEGTMATLRCQMSKAAPVEWRKGSSET  
LRDGDYSLRQDGAVCELQIRDLAVEDAGEYLCVCGQEKT SATLSVKALPPRFIEDLRSQEATEGTMATLRCQ  
MSKAAPVEWRKGSSETLRDGDYSLRQDGAVCELQICDLAVEDTGDYSCVCGQEKT SATLSVKALPPRFIEDLR  
SQEAREGTVAFLRCRMSKAAPVEWRKGSSETLKDGDYSLRQEGNLCELQIRDLAVEDTEEYSCVCGQEKT SAT  
LSVKALPAKFIEDLRSQEAPESSTVTLRCKLSKASVWVKGSETLRNGARYSLRQDGAVCELEIRDLTVEDT  
GEYSCTCGQERTSATLSIMAPQVVFQQLQNLQAEEGSMASLRCLELSPNAAMVWSKGGLELQGDTRREARQQ  
GCVAELLLRDLRREDAGEYSCVCGQEKT SATLMTAAPVRFLELQAQDVDEGATARLRCELSREAVSVEWRK  
GSLQLFPKAKYQMVQEGTTAELLVHGVEQEDAGEYTCDAHTQS IARLSVRAPKPKFKTDLQSTEQEAGGTAR  
LCCQLSEAEPTPVQWLKEGVELHVGSKYEMRRQAVCELLIHGLEAKDTGEYACLGGQKTLASLRVKEPEV  
TIVRGLVDMEVQADEDEFTCKVSAQATDVQWHLQGLPLQSNVTEVAVLADGCTHVLQKGVTLLEDAGTVS  
FHVGGSSSAQLTVRVPVETVLEPLKDVQLSEGQDAHFRCRLSRASGQEARWALGGVPLQCNEMNDITVEQGT  
LYLLTLHKVTLEDAGTITLQVGSSEAEQKVTAKNTVLRGLENVDALEGGEALFECQLSQPEVAHAHTWLLDD  
EPVHTSEKVEVVYFENGLRHLLLNKLPQDSCRVTFLAGDVVTS AFLTVRGWRLEVLPPHDASVKAGMQVR  
FTCILSEAVPVEATWYINGAAIQPDDTDWTVTDDGSHHALTSLNAQPHAGEVTF AARDASARLSVLALP  
DPEDAEYVGRSDHVSVTLWSVAPMSDGGGLCGYRVEKASTGQWQLCHDLVPGPECVDDLVPGKTYRFRV  
AAVGPAGAGEPVHLPQMVKIAPAPAPAPAPAPAPAPETRAVVGEDICLELEVAADGGEVWHKGTERRIQPGG  
HFEVLSRGRQMLVIKGFRTEDQGEYRCGPIQGLPSSGAATFNVMVTS GSGDEVPAQPSLPPEAAQEGDLHLL  
WEALARKRMSREPTLDSISELPEEDSRVQHLRQEAETAPDLSEGYSTADELARTGEADLSHTSSDDES RAG  
TPSLVTYLKKAGGPGI SPLASKHEAQVTT SVKPKQKQEPVPTCPPPGDLSAADLMDPSLDKAAVKIQAAFKG  
YKVRKEMKQQEGPVFSRTFGDTEAQVGDVLRLECVLATKTD MRACWLKDGIELTDGRHYHIDQLKDGTC SLLV  
TGLAPTDSGRYTCQVSTKSGRVSHSACVVVSGTESEAESSSGGELDDAFRRARLHRLFRTKSPAELSEEEL  
FLSADEGPGEPEEPADWQTYREDENFVICRFESLAEARQAVTCFRNMFMATMGIGVEISLGEQGPGRVEMRIGK  
VAPTVPVAVPLAKTPGLQTS DAAPVFLTELQNDVQDGYPMSFDCVVTGQPVPSVRWFKDGKLEEDDHYMIN  
EDQQGGHQLIITAVVPADMGVYRCLAENSMGVSSTKAELRVELTSTDYDTAADATETSSYFSAQGYLSSREQE  
GTESDEGQLPQVLEELKDLQVAPGTRLAKFQLKVKGYPAKLYWFKDQGPLTTSDHIRMTDKKTLHTLEIVSV  
TREDSGQYAAYSNAVGAAYSSARLLVRGPSEPEEKPASDVHERLVPPRILEKFTPKKVKRGSSTIFS VKVEG  
HPAPSVHWLKEEAKEGVLWIGPDTPGYTMASSSKQHSVLVLDVGRQHOGTYTCIATNPAGQALCSASLHISGL  
AKEEEQERVKEALISSFLQTSQAVSAQMSESAGFADLVGQSKGESLVAEEAHSHLSLAEVGT EEFQLKTSQ  
ITEMVSAKISQAKLQVPGGDSDEETKTPSASPRHGRSRPSSSVQESSSESEDGDSRGEIFDIYVVTADYLP LG  
AEQDAIILREGQYVEVLDSAHPLRWLVRTKPTKSSPSRQGWVSPAYLDKRLKLSPEWGPTEAPEFPGEAVSED  
EYRTRLSSVIQELLSSEQAFVGELEQFLESHHMKHLERSPRVPAVASQKTVIFRNVQDISHFHSSFLKELQGC  
GTDDDVAMCFIKNQEAFAKEYLEFLVGRVQAESVVSALPQAEFYKKYAEETLSAKDPTQPPPPLOHYLEQVVE  
RVQKYQALLKELIRNKARNRQNCALLEQAYAVSALPQAEFNKLHVS LMENYPGTLEALGEP IRQGHFIVWEG  
APGARMWKGHNHRVFLFRNYLVICPPRRDSRTDTFSYVFRNMMKLSIDLNDQVEGDDRAFEVWHEREDSVR  
KYLQARTVIKNSWVKEICGIQQRLAQPVWRPPEFEEELADCTAELGETVKLACRVTGTPKPIVSWYKDGKP  
VEVDPHHILIEDPDG SCTLILDNLTGIDSGQYMCFAASAAGNASTLGKILVQVPPRFVNVKVRATPFVEGEDAQ  
ITCTVEGAPYPQIRWYKDGTL LAPGNRYRMLNEPRSGVLVLIQAASKEDLGHYECELVNRLGSTRGGGELYM

QSPALRARDQHHREQIIVA AVEVTEQETKVPKKTVIIEETITTVVKS PRGRRQSPGKSPSRSPSRRSASPRRPG  
 LLAPERLYPPGTSPSRRLVEVEQGRKAPVPALYVTEAEVHAPASQSPKWLEVEETIEVRVKKTGSRGASPVRE  
 MTSRGEGLFTLPGGI PGRDPNANNNSNKS SVYQEARTWGPVAVHVGEFFIFQVDSVGNVDVWAASPEPEQVRA  
 SQKEENTERQEGCSDG DENTFLMEEPQD TDSLQGRDPKILTHNGRVLTLADLEDYVPQEGETF GCGDSTPSTP  
 DEPPCEVSVLQREI SEPTVGQPVLLNVGRPPGTGATPSFFRPGSQVHSPESVSFLLREAWSGPVS AAPWTSS F  
 HTHVQSSVDGSHGSFKTEVSTQTVSFGAVGETVTLHIDPDGGEAPGPSQG\*  
 >ENSMUSP00000020732\_c.11404:G>T\_p.S3802I ENSMUST00000020732.13|Obscn-  
 201|ENSMUSG00000061462|-|chr11:g.58958122:C>A  
 MDHSFSGAPRFLTRPKAFVSVGKDATLSCQIVGNPTPHVSWEKDRQPVEAGARFRLAQDGDVYRLTILDLAL  
 GDSGQYVCRARNAIGEAFAAVGLRVDSEGTCAEQAPHFLLRPTSIRVREGADATFRCRVGGSPQPAVSWSKDG  
 RRLGPPDAPHVRVEEHGESSALRIRSARPRDGGTYEVRAENPLGSASAAAALVVDSDAEVAGPPGTSTATLLA  
 HLQORREAMRAEGIPPSPPGAGTRTCTVTEGKHARLSCFVTGEPKPEVWKKDGLVTEGRRHVVEDEQENF  
 VLKILFCKQSDRGLYTCTASNLVGQTYSSVLVVVREPTVPFKKRLQDLEVREKESATFQCEVAQPA TEAAWFK  
 EETRLWASAKYDIEEGETERRLTVRNVSADDDAVYICETTEGSRVVAELSVQGNLTKLPRKTAVRTGDTAIF  
 WVELAVPEGPVRLRNQEE MVAGGRVAITAEGTCHTLTI FQCTLEDMGEVAFVSGGCRTTTQFCVSAPRRPPL  
 YPPADPVVKAKTESSVTLWSAPPHGDRPVTIDGYVLEKRRKLGAYAWSRCHEAGWLATTEFTITGVAEEGDFQ  
 FRVSAINHFGQGPYLEFPGTMHLVPLAVKTPLKAVEAVEGGEVTFVSDLTVAASSGVEFLDGEALKASSIYVI  
 RCDRTRHMLTIREVPARLHGAQLK FVANGIETS IQMVVRAALGLPSSKLPAAAAREVLAQLHEEAQLLAE LSD  
 QAAA VTLWKDGRELSLGP KYEMQVSAGRRALLVRDVAQDDAGLYECVSRGSR TAYQLLVQDITDGYRDWGPAG  
 PQKHMCKCAGAKIARYLGSSCYRFLQYDKGVWHLEAALDTRQKGKTS SCSLHEKPKLVFAKQQAHSEVKA E  
 AGNSATLSCEVTQAQTEVTWFKDGKLLSSSSKVRMEASGCSRRLVVQQAGKADAGEYSCEAGGQKLSFRLDVA  
 EPKLVFAKQQAHSEVKA EAGASATLSCEVAQAQTEVTWFKDGKLLSSSSKVRMEASGCSRRLVVQQAGKAD A  
 GEYSCEAGGQKLSFRLDVAEPKMFVFAKEQQARSEVKA EAGASATLSCEVAQAQTEVTWFKDGKLLSSSSKVRM  
 EASGCSRRLVVQQAGKADAGEYSCEAGGQKLSFRLDVTEPKLVFAKEQQARSEVKA EVGNSATLSCEVAQAQ T  
 EVTWFKDGKLLSSSSKVRMEASGCSRRLVVQQAGKADAGEYSCEAGGQKLSFRLDVAEPKLVFAKEQQARSEV  
 KAEAGNSATLSCEVAQAQTEVTWFKDGKLLSSSSKVRMEASGCSRRLVVQQAGKADAGEYSCEAGGQKLSFHL  
 DVTEPKLVFAKEQQAHSEVKA EAGASATLSCEVAQAQTEVTWFKDGKLLSSSSKVRMEASGCSRRLVVQQAGK  
 ADAGEYSCEAEGQKLSFRLDVAEPKLVFAKEQQARSEVKA EAGASATLSCEVAQAQTEVTWFKDGKLLSSSSK  
 VRVEASGCSRRLVVQQAGKADAGEYSCEAGGQKLSFRLDVAEPKLVFAKEQQANSEVKA EAGASATLSCEVAQ  
 AQTEVTWFKDGKLLSSSSKVRVEASGCSRRLVVQQAGKADAGEYSCEAGGQKLSFRLDVAEPKLAFAKEQQAH  
 SEVKA EAGASATLSCEVAQAQTEVTWFKDGKLLSSSSKVRVEASGCSRRLVVQQAGKADAGEYSCEAGGQKLS  
 FRLDVAEPKLAFAKEQQAHSEVKA EAGASATLSCEVAQAQTEVTWFKDGKLLSSSSKVRVEASGCSRRLVVQQ  
 AGKADAGEYSCEAGGQKLSFRLDVAEPKLAFAKEQQAHSEVKA EAGASATLSCEVAQAQTEVTWFKDGKLLSS  
 SSKVRVEASGCSRRLVVQQAGKADAGEYSCEAGGQKLFRLDVAEPKLMFAKEQQAHSEVKA EAGASATLSCE  
 VAQAQTEVTWFKDGKLLSSSSKVRVEASGCSRRLVVQQAGKADAGEYSCEAGGQKLSFRLDVAEPKLVFAKEQ  
 QAHSEVKA EAGASATLSCEVAQAQTEVTWFKDGKLLSSSSKVRVEASGCSRRLVVQQV GADAGEYSCEARGQ  
 KLSFRLDVADTRLMFAKEQQARTEVKAEAGNSATLSCEVAQAQTEVTWFKDGKLLSSSSKVRVEASGCSRRLV  
 VQQAGKADAGEYSCEAGGQKLSFRLDVAEAE SQIPERPSRREPLVVKEHETIILTATIAAPSVAAVTLWKDGV  
 EIRRSKRHEATSLGDTHTLTVRGAQVLD SAIYSCRVGKEGQDFPVQVEEVA AKFSKPLEPVEGELGGTVMLVC  
 ELSPEQAEVWRCGNTQLRPGKRFQMTSEGPRRTLTVSGLREDDAEYVCE SRDDRTSARLTVKVP RVVKFTS  
 GLSAMVAEEGQEATFQCVVSPSDAGVTWYKDGMLQPSK FVMVESGASRSLTILGLTLEDAGQVTV EAGAS  
 SSAALRVREAPVFLFKKLEPQTV EERTSVTLEVELTRPWPEVKWTRNAAVLTPSENVEIRAEGARHCLVLR SV  
 GFADRGF FGCETPDDKTQAKLNVEMRQVRLVVRGLQVEVEAKEQGTASMDVELSHA EVEG SWTRDGLRLQPGPKC  
 HLAVQGPVHILTLALSALQPQDSGLVAFRAEGVHTSARLIVTELPVSFTRVLQDVVATQKEKVTLECELSRPVDV  
 RWLKDGVELRAGKAI GIVAQGTCSRSLVIYRCETGDQGVYVCDALDAQTSASLRVQGRTYTLIFRRLAEDAGE  
 VKFVAENAESRAHLRVKELPVTLLRPLRDKIAMEKHRGVLECCQVSRASAQVRWFKGGVELQSGPKYEVVSDGL  
 YRKLVIN DVQPEDEDTYTC DAGNVKTS AQFFVEEQSITIVRGLKDMTVMEPAPAWFECETSIPSVRPPK WLLG  
 KTVLQAGGNVGL EQDGTVHRLTLHKTCSTMTGPVHFTIGKSRSSAQLVSDI PVVLRPLEPKAGRELQSVVL  
 SCDFRPAPKAVQWYKDDTPLSPSEKFKMALEGGMAELRILRLTPADAGVYRCQAGSAQSSAEVTVEAREVTVI  
 QPLQDAEAMEEGRVCFSCELSHKDEDIEWLSNGTPLYNDSFHEI SHEGCLHTLVLSVRQADTGTVCATSPKV  
 SVSARLVVKGKPVVFLKALDDVSAEERGLTLTQCEVSDPEARVVWRKDGVELGPSDKYDFLHKAGARGLTVHD  
 LSHEDAGLYTCQVGSKETQSKVSVHDLHVGITKRLKTVEVLEGE SCFSFECVLSHESPSDPAVWTVGGKTVGGS  
 GHFHAVRQRGRKAITLTKVDAALSDAGEV VSVLGLT SKASLIIRERPVDITKPLEDQRTTLEDVMLSCELSRA  
 GTSVRWLKDGKAYAIRKSQKYDLLSEGTRAVLVVRKASLKDSGEYTCETEASKSTAKLCTVEEKANRFTEELADLQ  
 VEEKGRAVFTCKTEHPASVVTWRKGLLELRASGKHVPSQEGTLTKLTINALERTSDTYTCDIGQARTQARLL  
 VHGQKVRVIEDLEDTAVQEGSSAKFCRIAPADYGPVHWF LDKTPLHSNELNEITVQPGGYHVLTLRQLALKD  
 SGTVYFEAGDQRTS AALRVTEKPSIFSRPLTDVTVTEGEDTLTVCE TTTVDSSVRWTKDGKTLRPSARCQLSH  
 EGCQAQLLITATTPQDGGRYKCEIGGASSSSIVRVHALPVRFRESLKDVEVPEGKAATLRCVLSVAAFPVEWR

HGDDVLKSSNKYSLRQEGAVLELVIRDLQPQDSGQYSCSFGDQTTSATLTVKTSQAQFVGLKRNKEATEGTTV
TLRCELKEAPVEWKKGTETLRNGDKYSLKQDGAVCELQICSLLVADAGEYSCVCGQEKTSATLTVKALLVHF
VRLRLRIKATEGDTTTLQCELSKAAPVEWRKGTETLRDGDYSLKQDGAVCELQIRSLTIADAGEYLCTCGQE
KTSATLTVRALPAKFKDSLKNEEATEGTTATLSCELSKAAPVTWKKGPKTLQSGDKYVLRQDGAVCGLQIHGL
TMADAGEYSCVCGQEKTSATLTVRGLPAKFIEDLRSQEATEGATAILRCELSKAAPVEWRKGTETLRDGDYSL
LRQDGAVCELQIRGLAVVDGTGYSLSLPTKFTTEGLRNEEATEGTMATLRCQMSKAAPVEWRKGTETLRDGDYSL
LRQDGAMCELQIRGLTIEDSGEYTCVCGQEKTSATLSVKALPSRFIEDLRSQEATEGTMATLRCQMSKATAPVE
WKKGSETLRDGGYSLRQDGPVCELQICDLAVEDAGEYSCVCGQEKTSATLSIKALPPRFIEDLRSQEATEGTM
MATLRCQMSKAAPVEWRKGTETLRDGGYSLRQNGAVCELQIHDLAVEDTGEYSCVCGQEKTSATLNVKALPP
RFIEDLRSQEATEGTMATLRCQMSKAAPVEWRKGTETLRDGGYSLRQDGAVCELQIHDLVEDAGQYSCVCG
QEKTSAVLTVDALPPKFTTEGLKKEEATEGTMVTLRCQMSKEATVEWRKGAKTLSDDGGYSLRQDGAMCELQIC
GLAVEDAGEYSCVCGQEKTSATLSVKALPPRFIEDLRSQEATEGTMATLRCQMSKAAPVEWRKGTETLRDGD
YSLRQDGAVCELQIRDLAVEDAGEYLCVCGQEKTSATLSVKALPPRFIEDLRSQEATEGTMATLRCQMSKAAP
VEWRKGTETLRDGDYSLRQDGAMCELQICDLAVEDTGDYSCVCGQEKTSATLSVKALPPRFIEDLRSQEARE
GTVATLRCRMSKAAPVEWRKGTETLRDGDYSLRQEGNLCELQIRDLAVEDTEEYSCVCGQEKTSATLSVKAL
PAKFIEDLRSQEAPESSTVTLRCKLSKASVWKKGSETLRNGARYSLRQDGAVCELEIRDLTVEDTGEYSCT
CGQERTSATLSIMAPQVVFQQPLQNLQAEEGSMASLRCELSVNAAMVWSKGGLELQGDTRREARQQGCVAEL
LLRDLRREDAGEYSCVCGQEKTSATLMTAAPVRFRLRELQADVDDEGATARLRCELSREAVSVEWRKGSQQLF
PCAKYQMVQEGTTAELLVHGVEQEDAGEYTCDAHGHTQSIARLSVRAPKPKFKTDLQSTEQEAGGTARLCCQLS
EAEPGTPVQWLKEGVELHVGSKYEMRRQGAVALLEHGLEAKDTGEYACLVGGQKTASLRVKEPEVTIVRGL
VDMEVQADEDEFTCKVQAGATDVQWHLQGLPLQSNVTEVAVLADGCTHVLQKGVTLLEDAGTVSFHVGGL
SSSAQLTVRVPEVTVLEPLKDVQVLESEGQDAHFRCRLSRASGQEARWALGGVPLQCNEMNDITVEQGTLYLLTL
HKVTLLEDAGTITLQVGSSEEAQLKVTAKNTVLRGLENDVALEGGALFECQLSQPEVAHAHTWLLDDEPVHTS
EKVEVVYFENGLRHLLLLKLNKLPQDSCRVTFLAGDVVTSFAFLTVRGWRLEVLPEPHDASVKAGMQVRFCTILS
EAVPVGAEATWYINGAAIQPDDTDWTVTTDGSHHALTLNAQPPHAGEVTFAAARDAVASARLSVLALPDPEDA
EAVVGRSDHSVTLVSWVAPMSDGGGLCGYRVMKEASTGQWQLCHDLVPGPECVDDLVHPGKTYRFRVAAVGPA
GAGEPVHLPQMVKIAAPAPAPAPAPAPAPAPAPAPAPAPAPAPAPAPAPAPAPAPAPAPAPAPAPAPAPAPAP
RGQRQMLVIKGFRTEDQGEYRCGPIQGLPSSGAATFNVMVMTSGSGDEVPAQPSLPPEAAQEGDLHLLWEALAR
KRRMSREPTLDSISELPEEDSRVQHLRQEAEEETAPDLSEGYSTADELARTGEADLSHTSSDDESRAAGTSLVT
YLKAGGPGISPLASKHEAQVTTSVKPKQKQEPVPTCPPPGDLSAADLMDPSLDKAAVKIQAAFQYKVRKE
MKQQEGPVFSRTFGDTEAQVGDVLRLECVLATKTDMRACWLKDGIELTDGRHYHIDQLKDGTCSLVLTGLAPT
DSGRYTCQVSTKSGRVSHSACVVVSGTESEAESSSGGELDDAFRAARRLHRLFRTKSPAELSEELFLSADE
GPGEPEEPADWQTYREDENFVCIRFESLAEARQAVTCFRNMFMATMIGIVEISLGEQGPGRVEMRIGKVAPTVT
PAVPLAKTPGLQTSDAAPVFLTELQNDVQDGYPMSFDCVVTGQPVPSVRWFKDGKLEEDDHYMINEDQGG
HQLITAVVPADMGVYRCLAENSMGVSSTKAELRVELTSTDYDTAADATETSSYFSAQGYLLSREQEGTESDE
GQLPQVLEELKDLQVAPGTRLAKFQLKVKGYPAKPLYWFKDQGPLTTSDHIRMTDKKTLHTLEIVSVTREDSG
QYAAYSNAVGAAYSSARLLVRGPSEPEEKPASDVHERLVPPRILEKFTPKKVKRGSSITFSVKVEGHPAPSV
HWLKEEAKEKGLVWIGPDTPGYTMASSSKQHSVLVLDVGRQHQTGTYTCIATNPAGQALCSASLHISGLAKEEEQ
ERVKEALISSFLOGTSQAVSAQMSSEAGFADLVGQSKGESLVAEEAHSHLSLAEVGTTEFLQKLTSTQITEMVS
AKISQAKLQVPGGDSDEETKTPSASPRHGRSRPSSSVQESSSESEDGDSRGEIFDIYVVTADYLPGLAEQDAI
LLREGQYVEVLDSAHPLRWLVRTKPTKSSPSRQGWVSPAYLDKRLKLSPEWGPTEAPEFPGEAVSEDEYRTRL
SSVIQELLSSEQAFVGLQFLESHHMKHLERSPRVPAAVASQKTVIFRNVQDISHFHSSFLKELQCGCTDDDV
AMCFIKNQEAFAKEYLEFLVGRVQAESVVVSTPVQEFYKKAEEETLSAKDPTQPPPPPLQHYLEQPVERVQKYQ
ALLKELIRNKARNRQNCALLEQAYAVVSALPQRAENKLVSLMENYPGTLEALGEPVIRQGHFVWEGAPGARM
PWKGHNHRHVFLFRNYLVICKPRRDSRTDTFSYVFRNMMLSSIDLNDQVEGDDRAFEVWHEREDSVRKYLLQA
RTVIKNSWVKEICGIQQLAQPVWRPPEFEEELADCTAELGETVKLACRVTGTPKPIVSWYKDGKPVVEVDPH
HILIEDPDGSCTLILDNLTGIDSGQYMCFAASAAGNASTLGKILVQVPPRFVNVKVRATPFVEGEDAQITCTVE
GAPYPQIRWYKDGTLTLLAPGNRYRMLNEPRSGVLVLIQAASKEDLGHYECELVNRGLGSTRGGGELYMQSPALR
ARDQHHREQIVAAVEERRPSP\*
>ENSMUSP00000151217\_c.10024:G>T\_p.S3342I ENSMUST00000219084.3|Obscn-
207|ENSMUSG00000061462|-|chr11:g.58958122:C>A

MDHSFSGAPRFLTRPKAFVSVGKDATLSCQIVGNPTPHVSWEKDRQPVVEAGARFRLAQDGDVYRLTILDLAL
GDSGQYVCDARNAIGEFAAVGLRVDSEGTCAEQAPHFLLRPTSIRVREGADATFCRVRGGSPQPAVSWSKDG
RRLGPPDAPHVRVEEHGESSALRIRSARPRDGGTYEVRAENPLGSASAAAALVVDSAEVAGPPGTSTATLLA
HLQQRREAMRAEGIPSPPGAGTRTCTVTTEGKHARLSCFVTGEPKPEVWKKDQGLVTEGRRHVVEDEQENF
VLKILFCKQSDRGLYTCTASNLVGQTYSSVLVVVREPTVPFKKRLQDLEVREKESATFQCEVAQPATEAAWFK
EETRLWASAKYDIEEGTERRLTVRNVSADDDAVYICETTEGSRVAELSVQGNLTKLPRKTAVRTGDTAIF
WVELAVPEGPVWRWRNQEEMVAGGRVAITAEGTCHTLTI FQCTLEDMGEVAFVSGGCRTTTQFCVSAPRRPL

YPPADPVVKAKTESSVTLSSWSAPPHGDRPVTIDGYVLEKRKLGAYAWSRCHEAGWLATTEFTITGVAAEEGDFQ
FRVSAINHFGQGPYLEFPGTMHLVPLAVKTPKAVEAVEGGEVTFVSDLTVASSGEWFLDGEALKASSIYVI
RCDRTRHMLTIREVPARLHGAQLKVFVANGIETS IQMVVRAALGLPSSKLPAAAAREVLAQLHEEAQLLAE LSD
QAAA VTWLKDGRELSLGP KYEMQVSAGRRALLVRDVAQDDAGLYECVSRGSR TAYQLLVQDITDGYRDWGPAG
PQKHMCKCAGAKIARYLGSSCYRFLQYDKGVVHWEAALDTRQGKGTSSCSLHEKPKLVFAKGOAHSEVKA E
AGNSATLSCEVTQAQTEVTFWKDGKLLSSSSKVRMEASGCSRRLLVVQQAGKADAGEYSCEAGGQKLSFR LDVA
EPKLVFAKGOAHSEVKA EAGASATLSCEVAQAQTEVTFWKDGKLLSSSSKVRMEASGCSRRLLVVQQAGKAD
GEYSCEAGGQKLSFR LDVAEPKMFVFAKEQQARSEVKA EAGASATLSCEVAQAQTEVTFWKDGKLLSSSSKVRM
EASGCSRRLLVVQQAGKADAGEYSCEAGGQKLSFR LDVTEPKLVFAKEQQARSEVKA EAGNSATLSCEVAQAQ
EVTWFKDGKLLSSSSKVRMEASGCSRRLLVVQQAGKADAGEYSCEAGGQKLSFR LDVTEPKLVFAKEQQAHSEV
KAEAGASATLSCEVAQAQTEVTFWKDGKLLSSSSKVRMEASGCSRRLLVVQQAGKADAGEYSCEAE GQKLSFR
LDVAEPKLVFAKEQQARSEVKA EAGASATLSCEVAQAQTEVTFWKDGKLLSSSSKVRVEASGCSRRLLVVQQAG
ADAGEYSCEAGGQKLSFR LDVAEPKLVFAKEQQANSEVKA EAGASATLSCEVAQAQTEVTFWKDGKLLSSSSK
VRVEASGCSRRLLVVQQAGKADAGEYSCEAGGQKLSFR LDVAEPKLAFAKEQQAHSEVKA EAGASATLSCEVAQ
AQTEVTFWKDGKLLSSSSKVRVEASGCSRRLLVVQQAGKADAGEYSCEAGGQKLSFR LDVAEPKLVFAKEQQAH
SEVKA EAGASATLSCEVAQAQTEVTFWKDGKLLSSSSKVRVEASGCSRRLLVVQQVKGADAGEYSCEARGQKLS
FR LDVAEAEASQIPERPSRREPLVVKHEHETIILTATIAAPSVAAVTLWKDGV EIRRSKRHEATSLGDTHTLTVR
GAQVLD SAIYSCR VQKEGQDFPVQVEEVA AKFSKPLEPVEGELGTVMLVCELSPEQA EVVWR CGNTQLRPGK
RFQMTSEGPRTLT VSG LREDDAE EYVCE SRDDRTSARLTVKVP RVVKFTSGLS AMVAEEGQEATFQC VVSPS
DAGVTWYKDGMLQ PSEK FVMVESGASRSLTILGLTLEDAGQVTVEAEGASSAALRVREAPVLFKKKLEPQT
VEERTSVTLEVELTRPWPVEVKWTRNAAVLTPSENVEIRAEGARHCLVLR SVGFADRGFFGCETPDDKTQAKLN
VEMRQVRLV RGLQEVEAKEQGTASMDVELSHA EVEG SWTRDGLRLQPGPKCHLAVQGPVHI L T L S A L Q P Q D S G
LVA FRAEGVHTSARLIVTELPVSFTRVLQDVVATQKEKVTLECELSRPVDVRWLKDGVELRAGKAI G I V A Q G T
CRSLVIYRCETGDQGVYVCDALDAQTSASLRVQGRYTLIFRRVLAEDAGEVKFVAENAESRAHLRVKELPVT
LLRPLRDKIAMEKHRGVLEQCQVSRASAQVRWFKGGVELQSGPKYEVVSDGLYRKLVIN DVQPEDEDTYTC DAG
NVKTSAQTFVVEEQSITIVRGLKDMTVM EPAPAFECETSIPSVRPPKWL L G K T V L Q A G N V G L E Q D G T V H R L T
LHKTCSMTTGVPVFTIGKSRSSAQLVVSDIPVVLTRPLEPKAGRELQSVVLSCDFRPAPKAVGQWYKDDTPLSP
SEKFKMALEGQMAELRILRLTPADAGVYRCQAGSAQSSAEVTV EAREVTVIQPLQDAEAMEEGRVCFSCELSH
KDEDIEWSLNGTPLYNDSFHEISHEGCLHTLV LKSVRQADTGTVCATSPKVSVSARLVVKGPVVF LKALDDV
SAEERGTLTLOCEVSDPEARVVWRKDGVELG PSDKYDFLHKAGARGLTVHDL SHEDAGLYTCQVGSKETQSKV
SVHDLHVGITKRLKTVEVLEGE SCFECVLSHESPSDPAVWTVGGKTVGGSGHFHAVRQGRKYTLTVKDAALS
DAGEVVF SVLGLT SKASLIIRERPVDITKPLEDQRTTLGEDVMLSCELSRAGTSVRWLKDGKAI RKSQKYDLL
SEGTRAVLVVRKASLKDSGEYTCETEASKSTAKLCVEEKANRFTEELADLQVEEKGRAVFTCKTEHPASVVTW
RKGLLELRASGKHVPSQEG LTLKLTINALERTDSDTYTCDIGQARTQARLLVHGQKVRVIEDLEDTAVQEGSS
AKFCRIAPADYGPVHWF LDKTPLHSNELNETIVQPGGYHVLTLRQLALKDSGTVYFEAGDQRTS AALRVTEK
PSIFSRPLTDVTVTEGEDLTLVCETTTVDSSVRWTKDGKTLRPSARCQLSHEGQAQLLITATTPQDGGRYKC
EIGGASSSSIVRVHALPVRFRESLKDVEVPEGKAATLRCVLSVAAPVEWRHGDDVLKSSNKYSLRQEGAVLE
LVIRDLQPDGSGQYSCSFGDQTTSATLTVKTSQAQFVGLRNKEATEGTTVTLRCELTK EAPVEWKKGTETLR
NGDKYSLKQDGAVCELQICSLLVADAGEYSCVCGQEKTSATLTVKALLVHFVRRLRIKEATEGDTTTLQCELS
KAAPVEWRKGTETLRDGD RYSLKQDGAVCELQIRSLTIADAGEYLCTCGQEKTSATLTVRGLPAKFIEDLRSQ
EATEGATAILRCELSKAAPVEWRK GSETLKDGD RYTLRQDGAVCELQIRGLAVVDTGTYS SLP TKFTEGLRNE
EATEGTMATLRCQMSKAAPVEWRK GSETLRDGD RYSLRQDGAMCELQIRGLTIEDSGEYTCVCGQEKTSATLS
VKALPPRFIEDLRSQEATEGTMATLRCQMSKAAPVEWRK GSETLGDGGRYSLRQNGAVCELQIHDLAVEDTGE
YSCVCGQEKTSATLNVKALPPKFTEGLKKEEATEGTMVTLRCQMSKEATVEWRK GAKT L S D G G R Y S L R Q D G A M
CELQICGLAVEDAGEYSCVCGQEKTSATLSVKALPPRFIEDLRSQEATEGTMATLRCQMSKAAPVEWRK GSET
LRDGD RYSLRQDGAVCELQIRDLAVEDAGEYLCVCGQEKTSATLSVKALPPRFIEDLRSQEATEGTMATLRCQ
MSKAAPVEWRK GSKTLR DGD RYSLRQDGAMCELQICDLAVEDTGDYSCVCGQEKTSATLSVKAPQVVFQQPLQ
NLQAEEGSMASLRCELSVPNAAMVWSKGGLELQGDTRREARQQGCVAELLLRDLRREDAGEYSCTCGSQT TSA
TLMVTAAPVRFLRELQAQDVDEGATARLRCELSREAVSVEWRK GSLQLFPKAKYQMVQEGTTAELLVHGVEQE
DAGEYTC DAGHTQS IARLSVRAPKPKFKTDLQSTEQEAGGTARLCCQLSEAPGTPVQWLKEGVELHVGS KYE
MRRQGAVCELLIHGLEAKDTGEYACL VGGQKTLASLRVKEPEVTIVRGLVDMEVQADEDV EFTCKV SQAGATD
VQWHLQGLPLQSNEVTEVAVLADGCTHV LQLKGV TLEDAGTVSFHVGG LSSSAQLTVRVPEVTVLEPLKDVQL
SEGQDAHFRCRLSRASGQEARWALGGVPLQCNEPMNDITVEQGTLYLLTLHKV TLEDAGTITLQVGS CSSEAQL
KVTAKNTVLRGLLENVDALEGG EALFECQLSQNEVAHAHTWLLDDEPVHTSEKVEVVYFENGLRHLL L L K N L K P Q
DSCRVTFLAGDVVTS AFLTVRGWRLEVLEPPHDA SVKAGMQVRF TCILSEAVPVGEATWYINGAAIQPDDTDW
TVTTD GSHHALT L S N A Q P Q H A G E V T F A A R D A V A S A R L S V L A L P D P P E D A E V V G R S D H S V T L S W V A P M S D G G G G
LCGYRVEMKEASTGQWQLCHDLVPGPECVVDDLVP GKTYRFRVA AVGPAGAGEPVHLPQMVKIAPAPAPAPAP
APAPETRQAVVGEDICLELEVAADGGEVVWHKGTERRIQPGGHFEVLSRGQRQMLVIKGFRTEDQGEYRCGPIQ

GLPSSGAATFNVVMTSGSGDEVPAQPSPPEAAQEGDLHLLWEALARKRRMSREPTLDSISELPEEDSRVQHL  
RQEAETAPDLSEGYSTADELARTGEADLSHTSSDDESRAGTPSLVTVLKKAGGPGISPLASKHEAQVTTSVK  
PQKQQEPVVPTCPPPGDLSAADLMDPSLDKAAVKIQAAFQKGYKVRKEMKQQEGPVFSRTFGDTEAQVGDVLR  
ECVLATKTKDMRACWLKDGIELTDGRHYHIDQLKDGTCSSLVTGLAPTDSGRYTCQVSTKSGRVSHSACVVVSG  
TESEAESSSGGELDDAFRRARLHRLFRTKSPAELSEEELFLSADEGPGPEEPADWQTYREDEFVCIRFE  
SLAEARQAVTCFRNMFATMGIGVEISLGEQGPGRVEMRIGKVAPVTPAVPLAKTPGLQTSDAAPVFLTELQN  
QDVQDGYPMSFDCVVTGQPVPSVRWFKDGKLEEDDHYMINEDQQGGHQLIITAVVPADMVYRCLAENSMGV  
SSTKAELRVELTSTDYDTAADATETSSYFSAQGYLSSREQEGTESDEGQLPQVLEELKDLQVAPGTRLAKFQL  
KVKGYPAKLYWFKDQPLTSDHIRMTDKKTLHTLEIVSVTREDSGQYAAIISNAVGAAYSSARLLVVRGPSE  
PEEKPASDVHERLVPPRILEKFTPKKVKRGSITFSVKVEGHPAPSVHVLKKEEAKEGVLWIGPDTPGYTMAS  
SKQHSVLVLDVGRQHOGTYTCIATNPAGQALCSASLHISGLAKEEEQERVKEALISSFLOGTSQAVSAQMS  
AGFADLVGQSKGESLVAEEAHSHLSLAEVGTTEFLQKLTSTIEMVSAKISQAKLQVPGGDSDEETKTPSASP  
RHGRSRPSSSVQESSSESEDGDSRGEIFDIYVVTADYLPGLAEQDAIILREGQYVEVLDSAPHLRVLVTRTKPT  
KSSPSRQGWVSPAYLDRKLSPEWGPTEAPEFPGEAVSEDEYRTRLSVVIQELLSSEQAFVQELQFLESHHM  
KHLERSRVPAAVASQKTVIFRNVQDISHFHSSFLKELQCGCTDDDVAMCFIKNQEAFEFKYLEFVGRVQAES  
VVVSTPVQEFYKKYAETLSAKDPTQPPPPPLQHYLEQPVVERVQKYQALLKELIRNKARNRQNCALLEQAYAV  
VSALPQRAENKHLVSLMENYPTLEALGEPVIRQGHFVWEGAPGARMFWKGNRHFVFLFRNYLVICKPRRDSR  
TDTFSYVFRNMMKLSSIDLNDQVEGDDRAFEVWHEREDSVRKYLLQARTVIKNSWVKEICGIQQRLAQPVWR  
PPEFEEELADCTAELGETVKLACRVGTGPKPIVSWYKDGKPEVVDPHHILIEDPDGSCSTLILDNLGTIDSGQY  
MCFASAAGNASTLGKILVQVPPRFVNVKVRATPFVEGEDAQITCTVEGAPYQPIRWYKDGTLAPGNRYRMLN  
EPRSGVLVLIQAASKEDLGHYECELVNRGSTRGGGELYMQSPALRARDQHHREQIVAAVEVTEQETKVPKK  
TVIEETITTVVKS PRGRRQSPGKSPSRSPSRSSASPRRGLLAPERLYPPGTSPSRRLEVEQGRKAPVPALY  
VTEAEVHAPASQSQPKWLEVEETIEVVRVKKTGSRGASPVREMTSRGEGILFTLPGGIPGRDPNANNNSNKSVY  
QEARTWGPVAVHVGEPFIQVDSVGNVDWAASPEPEQVRASQKEENTERQEGCSDGDENTFLMEEPQDTS  
QGRDPKILTHNGRVLTLADLEDYVPEGETFGCGDSTPSTPDEPPCEVSVLQREI SEPTVQPVLLNVGRPPG  
TGATPSFFRPGSQVHSPESVFLREAWSGPVSAAPWTSSFHTHVQSSVDGSHGFSFKTEVSTQTVSFGAVGET  
VTLHIDPDGGEAPGPSQG\*

>rs47117923\_ENSMUSP00000158795\_c.10146:G>A\_p.G3383S  
ENSMUST00000238536.2|Obscn-210|ENSMUSG00000061462|-|chr11:g.58964086:C>T  
MDHSFSGAPRFLTRPKAFVSVGKDATLSCQIVGNPTPHVSWEKDRQPVVEAGARFRLAQDGDVYRLTILDLAL  
GDSGQYVCRARNAIGEFAAVGLRVDSEGTCAEQAPHLLRPTSIRVREGADATFRCRVGGSPQPAVSWSKDG  
RRLGPPDAPHVRVEEHGESSALRIRSARPRDGGTYEVRAENPLGSASAAAALVVDSAEVAGPPGTSTATLLA  
HLQQRRREAMRAEGIPPSPPGAGTRTCTVTEGKHARLSCFVTGEPKPEVWKKDGQLVTEGRRHVVEDEQENF  
VLKILFCCKQSDRGLYTCTASNLVGQTYSSVLVVVREPTVPFKKRLQDLEVREKESATFQCEVAQPAEAAWFK  
EETRLWASAKYDIEEGETERRLTVRNVSADDDAVYICETTEGSRVAVELSVQGNLTKRLPRKTAVRTGDTAIF  
WVELAVPEGPVRWLRNQEEMVAGGRVAITAEGTCHTLTI FQCTLEDMGEVAFVSGGCRTTTTFCVSAAPRRPPL  
YPPADPVVKAKTESSVTLWSAPPHGDRPVTIDGYVLEKRLKLGAYAWSRCHEAGWLATTEFTITGVAEEGDFQ  
FRVSAINHFGQGPYLEFPGMTMLVPLAVKTPKAVEAVEGGEVTFVSDLTVASSGEWFLDGEALKASSIYVI  
RCDRTRHMLTIREVPARLHGAQLKVFANGIETS IQMVVRAALGLPSSKLPAAAAREVLAQLHEEAQLLAE  
QAAAVTWLKDGRELSLGPYEMQVSAGRRALLVRDVAQDDAGLYECVSRGSRRTAYQLLVQDITDGYRDWGPAG  
PQKHMCKCAGAKIARYLGSSCYRFLQYDKGVVHWEAALDTRQKGTSSCSLHEKPKLVFAKQQAHSEVKA  
AGNSATLSCEVTQAQTEVTFWFKDGKLLSSSSKVRMEASGCSRRLVVQQAGKADAGEYSCEAGGQKLSFR  
LDVAEPKLVFAKQQAHSEVKAEGASATLSCEVAQAQTEVTFWFKDGKLLSSSSKVRMEASGCSRRLVVQQ  
AGKADAGEYSCEAGGQKLSFRLDVAEPKLVFAKEQQARSEVKAEGASATLSCEVAQAQTEVTFWFKDGKLL  
SSSSKVRMEASGCSRRLVVQQAGKADAGEYSCEAGGQKLSFRLDVAEPKLVFAKEQQARSEVKAEGASAT  
LSCEVAQAQTEVTFWFKDGKLLSSSSKVRMEASGCSRRLVVQQAGKADAGEYSCEAGGQKLSFRLDVAEP  
KLVFAKEQQARSEVKAEGASATLSCEVAQAQTEVTFWFKDGKLLSSSSKVRMEASGCSRRLVVQQAGKAD  
AGEYSCEAGGQKLSFRLDVAEPKLVFAKEQQARSEVKAEGASATLSCEVAQAQTEVTFWFKDGKLLSSSSK  
VRVEASGCSRRLVVQQAGKADAGEYSCEAGGQKLSFRLDVAEPKLVFAKEQQANSEVKAEGASATLSCEVA  
QAQTEVTFWFKDGKLLSSSSKVRVEASGCSRRLVVQQAGKADAGEYSCEAGGQKLSFRLDVAEPKLVFAKE  
QQAHSEVKAEGASATLSCEVAQAQTEVTFWFKDGKLLSSSSKVRVEASGCSRRLVVQQAGKADAGEYSCE  
AGGQKLSFRLDVAEPKLVFAKEQQAHSEVKAEGASATLSCEVAQAQTEVTFWFKDGKLLSSSSKVRVEAS  
GCSRRLVVQQAGKADAGEYSCEAGGQKLSFRLDVAEPKLVFAKEQQAHSEVKAEGASATLSCEVAQAQTE  
VTFWFKDGKLLSSSSKVRVEASGCSRRLVVQQAGKADAGEYSCEAGGQKLSFRLDVAEPKLVFAKEQ  
QAHSEVKAEGASATLSCEVAQAQTEVTFWFKDGKLLSSSSKVRVEASGCSRRLVVQQVQKADAGEYSCE  
ARGQKLSFRLDVADTRLMFAKEQQARTEVKAEGNSATLSCEVAQAQTEVTFWFKDGKLLSSSSKVRVEAS  
GCSRRLV



VQQAGKADAGEYSCEAGGQKLSFRLLDVAEAEESQIPERPSRREPLVVKEHETIILTATIAAPSVAAVTWLKDGVE  
EIRRSKRHEATSLGDTHTLTVRGAQVLDSAIYSCRVGKEGQDFPVQVEEVAAKFSKPLEPVEGELGGTVMLVC  
ELSPQAEVWRCGNTQLRPGKRFQMTSEGPRTTLTVSGLREDDAEYVCESTRDDRTSARLTVKVPVVKFTS  
GLSAMVAEEGQEATFQCVVSPSDAGVTWYKDGMLQPSSEKFMVESGASRSLTILGLTLEDAGQVTVAEAGAS  
SSAALRVREAPVLFKKKLEPQTVEERTSVTLEVELTRPWPEVKWTRNAAVLTPSENVEIRAEGARHCLVLRV  
GFADRGGFFGCETPDDKTQAKLNVEMRQVRLVVRGLQVEVEAKEQGTASMDVELSHAEVEGWSWTRDGLRLQPGPKC  
HLAVQGPVHILTLALSALQPDQSGLVAFRAEGVHTSARLIVTELPVSFTRVLQDVVATQKEKVTLECELSRPVDV  
RWLKDGVLELRAGKAIGIVAQGTCSRSLVIYRCETGDQGVYVCDALDAQTSASLRVQGRTYTLIFRVLAEADAGE  
VKFVAENAESRAHLRVKELPVTLLRPLRDKIAMEKHRGVLECVSRASQAQVRWFKGGVELQSGPKYEVVSDGL  
YRKLVINVDQPEDEDTYTCDAAGNVKTSAQFFVEEQSITIVRGLKDMTVMPEPAPAWFECETSIPSVRPPKWL  
KTVLQAGGNVLEQDGTVHRLTLHKTCSTMTGPVHFTIGKSRSSAQLVVSDIPVVLTRPLEPKAGRELQSVVL  
SCDFRPAPKAVQWYKDDTPLSPSEKFKMALEGGMAELRILRLTPADAGVYRCQAGSAQSSAEVTVAREVTVI  
QPLQDAEAMEEGRVCFSCELSHKDEDIEWSLNGTPLYNDSFHEISHEGCLHTLVLSVRQADTGTVCATSPKV  
SVSARLVVKGKPVVFLKALDDVSAEERGTTLTQCEVSDPEARVVWRKDGVELGPSDKYDFLHKAGARGLTVHD  
LSHEDAGLYTCQVGSKETQSKVSVHDLHVGITKRLKTVEVLEGESECSFECVLSHESPSDPAVWTVGGKTVGGS  
GHFHAVRQGRKYTLTVKDAALSDAGEVVSVLGLTSKASLIIRERPVDITKPLEDQRTTLGEDVMLSCELSRA  
GTSVRWLKDGKAIRKSKQYDLSSEGTRAVLVVRKASLKDSEYTCETEASKSTAKLCVEEKANRFTEELADLQ  
VEEKGRAVFTCKTEHPASVVTWRKSLELRASGKHVPSQEGTLKLTINALERTSDSTYTCDIGQARTQARLL  
VHGQKVRVIEDLEDTAVQEGSSAKFCCRIAPADYGPVHWFLDKTPLHSNELNEITVQPGGYHVLTLRQLALKD  
SGTVYFEAGDQRTSALRVTEKPSIFSRPLTDVTVTEGEDTLVCEETTTVDSSVRWTKDGKTLRPSARCQLSH  
EGCQALLITATTPQDGGRYKCEIGGASSSSIVRVHALPVRFRSLKDVEVPEGKAATLRCVLSVAAPVEWR  
HGDDVLKSSNKYSLRQEGAVLELVIRDLQPDQSGQYSCSFGDQTTSATLTVKTSQAQFVGLKRNKEATEGTTV  
TLRCELTKEAPVEWKKGTETLRNGDKYSLKQDGAVCELQICSLLVADAGEYSCVCGQEKTSAATLTVKALLVHF  
VRLRSKEATEGDTTTLQCELSKAAPVEWRKGTETLRDGDYSLKQDGAVCELQIRSLTIADAGEYLCTCGQE  
KTSATLTVRALPAKFKDLSKNEEATEGTTATLSCELSKAAPVWKKGPKTLQSGDKYVLRQDGAVCGLIHGL  
TMADAGEYSCVCGQEKTSAATLTVRGLPAKFIEDLRSQATEGATAILRCELSKAAPVEWRKGSSETLKDGDYR  
LRQDGAVCELQIRGLAVVDGTYSLPTKFTTEGLRNEEATEGTMATLRCQMSKAAPVEWRKGSSETLRDGDYR  
LRQDGAMCELQIRGLTIEDSGEYTCVCGQEKTSAATLSVKALPSRFIEDLRSQATEGTMATLRCQMSKTAPVE  
WKKGSETLRDGGYSLRQDGPVCELQICDLAVEDAGEYSCVCGQEKTSAATLSIKALPPRFIEDLRSQATEG  
MATLRCQMSKAAPVEWRKGSSETLGDGGYSLRQNGAVCELQIHDLAVEDTGEYSCVCGQEKTSAATLNKALPP  
RFIEDLRSQATEGTMATLRCQMSKAAPVEWRKGSSETLRDGGYSLRQDGAVCELQIHDLVEDAGQYSCVCG  
QEKTSAVLTVDALPPKFTTEGLKKEEATEGTMVTLRCQMSKEATVEWRKGAKTLSDGGRYSLRQDGAMCELQIC  
GLAVEDAGEYSCVCGQEKTSAATLSVKALPPRFIEDLRSQATEGTMATLRCQMSKAAPVEWRKGSSETLRDGD  
YSLRQDGAVCELQIRDLAVEDAGEYLCVCGQEKTSAATLSVKALPPRFIEDLRSQATEGTMATLRCQMSKAAP  
VEWRKGSSETLRDGDYSLRQDGAMCELQICDLAVEDTGDYSCVCGQEKTSAATLSVKALPPRFIEDLRSQEA  
RGTVALTRCRMSKAAPVEWRKGSSETLKDGDYSLRQEGNCELQIRDLAVEDTGEYSCVCGQEKTSAATLSVKAL  
PAKFIEDLRSQEAPESSVTTLRCKLSKASVWKKGSETLRNGARYSLRQDGAVCELEIRDLTVEDTGEYSCT  
CGQERTSATLSIMAPQVVFQQPLQNLQAEEGSMASLRCELSVNPAAWWSKGGLELQGDTRREARQQGCVAEL  
LLRDLRREDAGEYSCVCGQEKTSAATLMVTAAPVRFRLRELQAQDVDEGATARLRCELSREAVSVEWRKGS  
PCAKYQMVQEGTTAELLVHGVEQEDAGEYTCDAHTQSIARLSVRAPKPKFKTDLQSTEQEAAGGTARLCCQLS  
EAEFGTPVQWLKEGVELHVGSKYEMRRQGAVCELLIHGLEAKDTGEYACLVGGQKTLASLRVKEPEVTIVRGL  
VDMEVQADEDEFTCKVQAGATDVQWHLQGLPLQSNVTEVAVLADGCTHVLQKGVTLLEDAGTVSFHVGGL  
SSSAQLTVRVPEVTVLEPLKDVQLSEGQDAHFRCLSRASGQEARWALGGVPLQCNEMNDITVEQGTLYLLTL  
HKVTLLEDAGTITLQVGSSESQAQLKVTAKNTVLRGLENVDALEGGEALFECQLSQPEVAHAHTWLLDDEPVHTS  
EKVEVVYFENGLRHLLLLKNLKPQDSCRVTFLAGDVVTS AFLTVRGWRLEVLEPPHDASVKAGMQRVFTCILS  
EAVPVGEATWYINGAAIQPDDTDWTVTTDGSHALTLSNAQPQHAGEVTF AARDAVASARLSVLALPDPEDA  
EAVGRSDHSVTLVSWAPMSDGGGGLCGYRVMKEASTGQWQLCHDLVPGPECVDDLVPGKTYRFRVAAVGPA  
GAGEPVHLPQMVKIAPAPAPAPAPAPAPAPETRQAVVGEDICLELEVAADGGEVVWHKGTERRIQPGHFVLS  
RGQRQMLVIKGFRTEDQGEYRCGPIQGLPSSGAATFNVMVMTSGSGDEVPAQPSLPPEAAQEGDLHLLWEALAR  
KRRMSREPTLDSISELPEEDSRVQHLRQEAETAPDLSEGYSTADELARTGEADLSHTSSDDESAGTPSLVT  
YLKAGGPGISPLASKHEAQVTTSVKPKQKQEPVPTCPPPGDLSAADLMDPSLDKAAVKIQAAFKGYKVRKE  
MKQQEGPVFSRTFGDTEAQVGDVLRLECVLATKTDMRACWLKDGIELTDGRHYHIDQLKDGTCSSLVTVGLAPT  
DSGRYTCQVSTKSGRVSHSACVVVSGTESEAEASSGGELDDAFRAARRLHRLFRTKSPAELSEELFLSADE  
GPGEPEEPADWQTYREDENFVCIREFESLAEARQAVTCFRNMFATMGI GVEISLGEQGRGVEMRIGKVAPT  
PAVPLAKTPGLQTSDAAPVFLTELQNDVQDGYPMSFDCVVTGQVPSVRWFKDGKLEEDDHYMINEDQGG  
HQLIITAVVPADMGVYRCLAENSMGVSSTKAELRVELTSTDYDTAADATETSSYFSAQGYLSSREQEGTESDE  
GQLPQVLEELKDLQVAPGTRLAKFQLKVKGYPAKLYWFKDGPPLTTS DHIRMTDKKTLHTLEIVSVTREDSG  
QYAAIY SNAVGAAYSSARLLVRGPSEPEEKPASDVHERLVPPRI LEKFTPKKVKRGSSITFSVKVEGHPAPSV

HWLKEEAKEKGLVLIWIGPDTPGYTMASSSKQHSLVLLDVGRQHOGTYTTCIATNPAGQALCSASLHISGLAKEEEQ  
ERVKEALISSFLOGTSQAVSAQMSESAFADLVGQSKGESLVAEEAHSHLSLAEVGTTEFLQKLTSTQITEMVS  
AKISQAKLQVPGGDSDEETKTPSASPRHGRSRPSSSVQESSSEEDGDSRGEIFDIYVVTADYLPGLAEQDAI  
ILREGQYVEVLDLSDAHLRVLVTRKPTKSSPSRQGWVSPAYLDKRLKLSPEWGPTEAPEFPGEAVSEDEYRTRL  
SSVIQELLSSEQAFVQELQFLESHHMKHLERSPRVPAAVASQKTVI FRNVQDISHFHSSFLKELQCGCTDDDDV  
AMCFIKNQEAFAKEYLEFLVGRVQAESVVVSTPVQEFYKKYAEETLSAKDPTQPPPPPLQHYLEQPVERVQKYQ  
ALLKELIRNKARNRNCALLEQAYAVVSALPQRAENKLVSLMENYPGTLEALGEPTRQGHFIVWEGAPGARM  
PWKGHNHRVFLFRNYLVICKPRRDSRTDTFSYVFRNMMKLSSIDLNDQVEGDDRAFEVWHEREDSVRKYLLQA  
RTVLIKNSWVKEICGIQQLAQPVWRPPEFEEELADCTAELGETVKLACRVTGTPKPIVSWYKDGKPEVDPH  
HILIEDPDGSCITLILDNLTGIDSGQYMCFAASAAGNASTLGKILVQVPPRFVNVKVRATPFVEGEDAQITCTVE  
GAPYPQIRWYKDGTLAPGNRYRMLNEPRSGVLVLIQAASKEDLGHYECELVNRGSTRGGGELYMQSPALR  
ARDQHHREQIVAAVEDTSVEGSAHSAQDQAAASVLWRLGSEALGSPGDLNTRQSEPPAFEEAASQIP  
GAASGTPEVSQPGTHKGLEQETSSSGSQGWTPVIRVEGTAWPGAGTGQLLLDVHSQVIMETTQRTYVQCQAPDT  
GVTRAPSMQVTIEDVQVQVGDMAQFDAVIEGHPPPIVTVYKGSTQLTSSARLSQRQDGTYSVLVTDVAPHDA  
GVYTCVANNAGGQVLCKAELLVHGGDKLDAENQVYRRKLSHFYDVQEEIGRGVFGFVKRVQHKGNKMFCAAKF  
IPLRSKTRAQAYQERDILATLGHPLVLTGLLDQFETRKTLLILILELCSSEELLDRLFKKGVVTEAEVKVYIQQL  
VEGLHYLHSHGILHLDIKPPNIMVHPAREDIKICDFGFAQKITPSEFPQYSKYGSPFVSPPEIEQNPVSEGS  
DIWAMGVI SYLSLTCSPPFAGESDRATLLNVLEGRVSWSSPTAAHLSSEDAKDFIKATLQRTPRARSTSQCLA  
HPWFLKSMPAEEAHFINTKQKFLARSRWRSLMSYKSI LVMRSIPELLQGPPDPSPLGVARHLRGEASGAS  
SSSSSSDNELAPFARAKSLPPSPVTHSPLLHPRGFLRPSASLPEETEASMTADAAVPASPQASAGPPASPGCV  
PRHSVSISSLFYQQAGEGAERGNKTSGAKRHPARRRHLKGGYIARALPGLREPLMEYSLLEEEAAREEQASLM  
TKTPSFETALRLPSSSVREVPGRSHSLDNPPVTTGPSPEACKEQLLFPSTGLTHETTAKDRGHKEGFLQESV  
PFPMSGDSRPGKQEGSSQDSCRKPASSCHSELGSGSQEGCPSQSLGSLPPQSLKKELTSCGPLFSEQ  
PQAAPFPTQVSPLLGSEKEPQDGSLSSEGPVVPSSSPGSASQVDASLDTEGLSEAGDTCDFTPPPQRPQEQAT  
TRKFSLESRRGGYAGVAGYGTFAFGGDAGGMLGQGPLWARMAWAVSOSSEEQDEAATESPQPLESIGPIAEASG  
VPLRTPSLTPWEEVEQVSLVQIRDLSDGDAEAADTISLDISEVDPAYLNLSDLYDIKYLPEFEMI FRVRPKPI  
EQPESPGSETEAGLEADFLLEAAWPWPGELGLRAGLEITEEPEEPGDLEALLGEAAVTRKRKWSRGLFQF  
PGRCLSGEEPVELGLRQVRKASMAHISRILKGRPEGPEREGPPRKKAGLASFRLSGLKGRDQELSDEAVVLGQ  
SVTLACQVLAQPTAQATWSKDGVLLESSGHLISSTLKNFQLLTI LVVKEEDLGTYTCCVSNPLGTAVTTGVL  
RKAERPSSSPRPEVGEYKDAVLLVWKPVESECGPVTVIVQCCIEGGSWTTLASDISDCCYLTGKLSRGGMYIF  
RTACVSKAGMGPYSSPSEQVLLGGPNHLASEEESSRGRPAQLLPSTKTFAFQMQIRRRGRFSVVRQCREKASGR  
ALAAKIVPYQPEDKTAVLREYEAALKRHLHHLAQLHAAYLSPRHLVLI LELCSGPELLPSLAERESYSESDVK  
DYLWQMLSATQYLHAQHILHLDLRSNNMMVTEYNLLKVIDLGNAAQSLDQEKVPAPENFKDYLETMAPELLEGQ  
GAVPQTDIWAIGVTAFIMLSGEYPESESETRDLQKGLRKLIRLSRCYAGLSGGAVAFLOSSLCAQPWGRPCA  
STCLQCGWLTEEGPTGSRPTPVTFVRLRAVFREREKRRALLYKKNLAQVR\*

>rs47117923\_ENSMUSP00000038264\_c.9318:G>A\_p.G3107S  
ENSMUST00000047441.14|Obscn-202|ENSMUSG00000061462|-|chr11:g.58964086:C>T  
MDHSFSGAPRFLTRPKAFVSVGKDATLSCQIVGNPTPHVSWEKDRQPVEAGARFRLAQDGDVYRLTILDLAL  
GDSGQYVCRARNAIGEAFVAVGLRVDSEGTCAEQAPHFLLRPTSIRVREGADATFRCRVGGSPPAVSWSKDG  
RRLGPPDAPHVRVEEHGESSALRIRSARPRDGGTYEVRAENPLGSASAAAALVVDSDAEVAGPPGTSTATLLA  
HLQQRREAMRAEGIPSPPGAGTRTCTVTEGKHARLSCFVTGEPKPKETVWKKDQQLVTEGRRHVYDEQENF  
VLKILFCKQSDRGLYTCTASNLVGQTYSSVLVVVREPTVPFKKRLQDLEVREKESATFQCEVAQPATEAAWFK  
EETRLWASAKYDIEEGETERRLTVRNVSADDDAVYICETTEGSRVAELSVQGNLTKLPRKTAVRTGDTAIF  
WVELAVPEGPVRLRNQEEVMVAGGRVAITAEGTCHTLTI FQCTLEDMGEVAFVSGGCRTTTFQCVSAPRRPPL  
YPPADPVVKAKTESSVTLSSWAPPHGDRPVTIDGYVLEKRLKLGAYAWSRCHEAGWLAATTEFTITGVAAEEDGFQ  
FRVSAINHFGQGPYLEFPGMTMLVPLAVKTPKAVEAVEGGEVTFVSDLTVASSGEWFLDGEALKASSIYVI  
RCDRTRHMLTIREVPARLHGAQLKLVANGIETSIQMVVRAALGLPSSKLPAAAAREVLAQLHEEAQLLAELSD  
QAAAVTWLKDGRELSLGPKEYMQVSAGRRALLVRDVAQDDAGLYECVSRGSRRTAYQLLVQDITDGYRDWGPAG  
PQKHMCKCAGAKIARYLGSSCYRFLQYDKGVVHLEAALDTRQKGTSSCSLHEKPKLVFAKQQAHSEVKA  
AGASATLSCEVAQAQTEVTFWFKDGKLLSSSSKVRMEASGCSRRLVVQQAGKADAGEYSCEAGGQKLSFRLDVA  
EPKMFVFAKEQQARSEVKAEGASATLSCEVAQAQTEVTFWFKDGKLLSSSSKVRMEASGCSRRLVVQQAGKADA  
GEYSCEAGGQKLSFRLDVTEPKLVFAKEQQARSEVKAEGVNSATLSCEVAQAQTEVTFWFKDGKLLSSSSKVRM  
EASGCSRRLVVQQAGKADAGEYSCEAGGQKLSFRLDVAEPKLVFAKEQQARSEVKAEGVNSATLSCEVAQAQTE  
EVTWFKDGLKLLSSSSKVRMEASGCSRRLVVQQAGKADAGEYSCEAGGQKLSFHLVDVTEPKLVFAKEQQAHSEV  
KAEAGASATLSCEVAQAQTEVTFWFKDGKLLSSSSKVRMEASGCSRRLVVQQAGKADAGEYSCEAGGQKLSFR  
DVAEPKLVFAKEQQARSEVKAEGASATLSCEVAQAQTEVTFWFKDGKLLSSSSKVRMEASGCSRRLVVQQAGK  
ADAGEYSCEAGGQKLSFRLDVAEPKLVFAKEQQANSEVKAEGASATLSCEVAQAQTEVTFWFKDGKLLSSSSK  
VRVEASGCSRRLVVQQAGKADAGEYSCEAGGQKLSFRLDVAEPKLVFAKEQQAHSEVKAEGASATLSCEVAQ

AQTEVTFWFKDGKLLSSSSKVRVEASGCSRRLVVQQAGKADAGEYSCEAGGQKLSFRLDVAEPKLAFAKEQQA  
SEVKAEAGASATLSCEVAQAQTEVTFWFKDGKLLSSSSKVRVEASGCSRRLVVQQAGKADAGEYSCEAGGQKLS  
FRLDVAEPKLAFAKEQQAHEVKAEGASATLSCEVAQAQTEVTFWFKDGKLLSSSSKVRVEASGCSRRLVVQQ  
AGKADAGEYSCEAGGQKLFRLDVAEPKLVFAKEQQAHEVKAEGASATLSCEVAQAQTEVTFWFKDGKLLSS  
SSKVRVEASGCSRRLVVQQVQKADAGEYSCEARGQKLSFRLDVAEAEESQIPERPSRREPLVVKHEHETIILTAT  
IAAPSVAAVTWLKDGVIEIRRSKRHEATSLGDTHLTVRGAQVLDIAIYSCRVGKEGQDFPVQVEEVAAKFSKP  
LEPVEGELGGTVMLVCELSPEQAEVVRWCNGTQLRPGKRFQMTSEGPRRTLTVSGLREDDAEYVCESRDDRT  
SARLTVKVPVVKFTSGLSAMVAEEGQEAFTQCVVSPSDAGVTWYKDGMLQPSSEKFMVVEGASRSALTILGL  
TLEDAGQVTVEAEGASSAALRVREAPVLFKFKLEPQTVEERTSVTLEVELTRPWPEVKWTRNAAVLTPSENV  
EIRAEGARHCLVLRVGFADRGFFGCETPDDKTQAKLNVEMRQVRLVVRGLQEVEAKEQGTASMDVELSHAEVE  
GSWTRDGLRQLQPGPKCHLAVQGPVHILTLALQPDQSGLVAFRAEGVHTSARLIVTELPVSFTRVLQDVVATQ  
KEKVTLECELSRPVDVRLWLDGVELRAGKAI GIVAQGTCSRSLVIYRCETGDQGVYVCDALDAQTSASLRVQGR  
TYTLIFRRVLAEDAGEVVFVAENAESRAHLRVKELPVTLLRPLRDKIAMEKHRGVLECCQVSRASAVRWFKGG  
VELQSGPKYEVVSDGLYRKLVINVDVQPEDEDTYTCDAGNVKTSAQFFVEEQSITIVRGLKDMTVMPEPAPAWFE  
CETSIPSVRPPKWLKGTVLQAGNVGLEQDGTVHRLTLHKTCSTMTGPVHFTIGKSRSSAQLVVS DIPVVL  
RPLEPKAGRELQSVVLSCDFRPAPKAVQWYKDDTPLSPSEKFKMALEGQMAELRILRLTPADAGVYRCQAGSA  
QSSAEDTVEAREVTVIQLQDAEAMEEGRVCFSELSHKDEIEWSLNGTPLYNDSFHEISHGCLHTLVLSKS  
VRQADTGTVCATSPKVSARLNVKGPVFLKALDDVSAEERGLTLQCEVSDPEARVVRWKDGLVGLGSPDK  
YDFLHKAGARGLTVHDLSDHEDAGLYTCQVGSKETQSKVSVHDLHVGITKRLKTVEVLEGESECFVLSHESP  
SDPAVWTVGGKTVGGSGHFHAVRQGRKYTLTKDAALSDAGEVVSGLGLTSKASLIIRERPVIDITKPLEDQR  
TTLGEDVMLSCELSRAGTSVRWLKDGKAIKRSQKYDLLSEGTRAVLVVRKASLKDSGEYTCETEASKSTAKLC  
VEEKANRFTEELADLQVEEKGRAVFTCKTEHPASVVTWRKSLLELRASGKHVPSQEGTLTKLTINALERTDSD  
TYTCDIGQARTQARLLVHGQKVRVIEDLEDTAVQEGSSAKFCRIPADYGPVHWFLDKTPLHNSNELNEITVQ  
PGGYHVLTLRQLALKDSGTVYFEAGDQRTSAALRVTEKPSIFSRPLTDVTVTEGEDTLVCETTTTVDSSVRWT  
KDGKTLRPSARCQLSHEGCAQLLITATTPQDGGRYKCEIGGASSSSIVRVHALPVRFRESLKDVEVPEGKAA  
TLRCLVSSVAAPVHTRHGDVLSKSNKYSLRQEGAVLELVIDRLQPDQSGQYSCSFGDQTTSATLTKVTSQAQ  
FVGLKLRNKEATEGTTVLRCELTKAPVEWKEGTETLRNGDKYSLKQDQAVCELQICSLLVADAGEYSCVCGQ  
EKTSATLTVKALLVHFVRRRLRSKEATEGDTTTLQCELSKAAPVEWRKGTETLRDGDYSLKQDQAVCELQIRS  
LTIADAGEYLCTCGQEKTSATLTVRALPAKFKDSLKNEEATEGTTATLSCELSKAAPVTWKKGPKTLQSGDKY  
VLRQDQAVCGLQIHGLTMADAGEYSCVCGQEKTSATLTVRGLPAKFIEDLRSQEATEGATAILRCELSKAAPV  
EWRKGSETLTKDGDYTLRQDQAVCELQIRGLAVVDGTYSLSLPTKFTTEGLRNEEATEGTMATLRCQMSKAAPV  
EWRKGSETLRDGDYSLRQDQAVCELQIRGLTIEDSGEYTCVCGQEKTSATLSVKALPPRFIEDLRSQEATEG  
TMATLRCQMSKAAPVEWRKGSETLGDGGYSLRQNGAVCELQIHDLAVEDTGEYSCVCGQEKTSATLNVKALP  
PRFIEDLRSQEATEGTMATLRCQMSKAAPVEWRKGSETLRDGGYSLRQDQAVCELQIHDLVEDAGQYSCVC  
GQEKTSAVLTVDALPVPKFTTEGLKKEEATEGTMVTLRQMSKEATVEWRKGAKTSLDGGYSLRQDQAVCELQI  
CGLAVEDAGEYSCVCGQEKTSATLSVKALPPRFIEDLRSQEATEGTMATLRCQMSKAAPVEWRKGSKTLRDGD  
RYSRLRQDQAVCELQICDLAVEDTGDYSCVCGQEKTSATLSVKAPQVVFQQLQNLQAEEGSMASLRCELSV  
AAMVWSKGGLELQGDTRREARQQGCVAELLLRDLRREDAGEYSCVCGQEKTSATLMVTAAPVRFRLRQAVD  
DEGATARLRCELSREAVSVEWRKGSLLQFPKAKYQMVQEGTTAELLVHGVEQEDAGEYTC DAGHTQSIARLSV  
RAPKPKFKTDLQSTEQEAGGTARLCCQLSEAEPTPVQWLKEGVELHVGSKYEMRRQAVCELLIHGLEAKDT  
GEYACLVGQKTLASLRVKEPEVTIVRGLVDMEVQADEDFEFTCKVVSQAGATDVQWHLQGLPLQSNVEVAV  
LADGCTHVQLKGVTLLEDAGTVSFHVGGLSSSAQLTVRVPEVTVLEPLKDVQLSEGQDAHFRCRLSRASGQEA  
RWALGGVPLQCNEMNDITVEQGTLYLLTLHKVTLEDAGTITLQVGCSSSEALKVTAKNTVLRGLENVDALEG  
GEALFECQLSQPEVAHAHTWLLDDEPVHTSEKVEVVYFENGLRHLLLLKLNKLPQDSCRVTFLAGDVVTSAPFLT  
RALPDPPEDAEVVGRSDHSVTLVWVAPMSDGGGLCGYRVMKEASTGQWQLCHDLVPGPECVVDLVPVKTY  
RFRVAAVGPAGAGEPVHLPQMVKIAPAPAPAPAPAPAPAPETRAVVGEDICLELEVAADGGVEVWHKGT  
RQPGGHFEVLSRQQRQMLVIKGFRTEDQGEYRCGPIQGLPSSGAATFNVMVTSVSGSDEVPAPQPSLPPEAAQEGD  
LHLLWEALARKRRMSREPTLDSISELPEEDSRVQHLRQEAEEAPDLSEGYSTADELARTGEADLSHTSSDDE  
SRAGTPSLVTYLKKAGGPGISPLASKHEAQVTTSVKPKQKQEPVVPVTPCPPGDLAADLMDPSLDKAAVKIQA  
AFKGYKVRKEMKQEGPVFSRFTFGDTEAQVGDVLRLECVLATKTDMRACWLKDGIELTDGRHYHIDQLKDGTC  
SLLVTGLAPTDSGRYTCQVSTKSGRVSHSACVVVSGTESEAESSSGGELDDAFRRARRLHRLFRTRKSPAELS  
EELFLSADEGPEPEPADWQTYREDENFVCIRFESLAEARQAVTCFRNMFMATMGIGVEISLGEQGPGRVEM  
RIGKVAPTVTPAVPLAKTGLQTSDAAPVFLTELQNDVQDGYPMSFDCVVTGQVPVSVRWFKDKGLLEEDDH  
YMINEDQQGGHQLIITAVVPADMGVYRCLAENSMGVSSTKAELRVELTSTDYDTAADATETSSYFSAQGYLSS  
REQEGTSEDEGQLPVLEELKDLQVAPGTRAKFQLKVKGYPAKPLYWFKDQGPLTSSDHIRMTDKTLHTLE  
IVSVTREDSGQYAAIYISNAVGAAYSARLLVRGPSEPEEKPASDVHERLVPPRIEKFTPKKVKRGSSITFSV  
KVEGHPAPSVHVLKEEAKEKGLVIGPDTPGYTMASSSKQHSVLVLDVGRQHOGTYTCIATNPAGQALCSASLH  
ISGLAKEEEQERVKEALISSFLQGTSAVSAQMSSESAGFADLVGQSKGESLVAAEAHSHLSLAEVGTTEEFLOK

LTSQITEMVSAKISQAKLQVPGGDSDEETKTPSASPRHGRSRPSSSVQESSSESEEDGDSRGEIFDIYVVTADY  
 LPLGAEQDAIILREGQYVEVLDSAHPLRWLVRTKPTKSSPSRQGWVSPAYLDKRLKLSPEWGPTEAPEFPGEA  
 VSEDEYRTRLSSVIQELLSSEQAFVGELOFLESHHMKHLERSPRVPAAVASQKTVI FRNVQDISHFHSSFLKE  
 LQCGGTDDDDVAMCFIKNQEA FEKYLEFLVGRVQAESVVVSTPVQEFYKKYAEETLSAKDPTQPPPPPLQHYLE  
 QPVERVQKYQALLKELIRNKARNRQNCALLEQAYAVVSALPQRAENKLVSLMENYPGTLEALGEP I RQGHFI  
 VWEGAPGARMPWKGNHRHVFLFRNYLVICKPRRDSRTDTFSYVFRNMMKLSIDLNDQVEGDRAFEVWHERE  
 DSVRKYLLQARTVI IKNSWVKEICGIQQRLAQPVWRPPEFEEELADCTAELGETVKLACRVGTGPKPIVSWYK  
 DGKPVVEVDPHHILIEDPDGSCSTLILDNLTGIDSGQYMCFAASAAGNASTLGKILVQVPPRFVNKVRATPFVEG  
 EDAQITCTVEGAPYPQIRWYKDGTL LAPGNRYRMLNEPRSGVLLVLIQAASKEDLGHYCELVNRLGSTRGGG  
 ELYMQSPALRARDQHREQIVAAVEGAPSMQVTIEDVQVQVGDMAQF DAVIEGHPPP I V TWYKGTQLTSSAR  
 LSQRQDGTYSLVLT D V A P H D A G V Y T C V A N N A G G Q V L C K A E L L V H G G D K L D A E N Q V Y R R K L H S F Y D V Q E E I G R  
 GVFGFVKRVQHKGNMFCAAKFIPLRSKTRAQAYQERDILATLGHPLVLTGLLDQFETRKTLLILILELCSSEEL  
 LDRLFKKGVVTEAEVKVYIQQLVEGLHYLHSHGILHLDIKPPNIMVHPAREDIKICDFGFAQKITPSEPOYS  
 KYGSEPFVSP E I I E Q N P V S E G S D I W A M G V I S Y L S L T C S S P F A G E S D R A T L L N V L E G R V S W S S P T A A H L S E D A K  
 DFIKATLQRTPRARPSTSQC LAHPWFLKSMPAEEAHFINTKQLKFLARSRWQRSLMSYKSI LVMRSIPELLQ  
 GPPDSPSLGVARHLRGEASGASSSSSSSDNELAPFARAKSLPPSPVTHSPLLHPRGFLRPSASLPEETEASMP  
 TADA AV P A S P Q S A G P P A S P G C V P R H S V I S S L F Y Q Q A G E G A E R G N K T S G A K R H P A R R R H L L K G G Y I A R A L P G L R  
 EPLMEYSLLEEEAAREEQASLMTKTPSFETALRLPSSSVREVPGRSHSLDNPPVTTGSPPEACKQLLFPST  
 GLTHEHTAKDRGHKEGFLQESVFPFPMMSGDSRPGKQEGSSQDSCRGKPASSCHSELGSGSQEGCGPPSSQSLG  
 SLPPQSLKKELESTSCGPLFSEQPQAAPFPTQVSPLLGSEKEPQDGSLSSEGPVFPVSSSPGSASQVDASLDTEG  
 LSEAGDTCDFTPPPQRPQEQATTRKFSLESRRGGYAGVAGYGTFAFGGDAGGMLGQGPLWARMWAVSQSSEEQ  
 DEAAATESPQPLESLGPIAEASGVPLRTSPSLTPWEEVEQVSLVQIRDLSGDAEAADTISLDISEVDPAYLNLS  
 DLYDIKYL P F E F M I F R R V P K P I E Q P E S P G S E T E A G Q G L A D F L E E A A W P W P G E L G L R A G L E I T E E P E E P G D L E A  
 LLGEAAVGRKRKWSPSRGLFQFPGRCLSGEEPVELGLRQRVKASMAHISRI LKGRPEGPEREPPRKKAGLAS  
 FRLSGLKGRDQELSDEAVVLGQSVTLACQVLAQPTAQTWSKDGVLLES SGHLLISSTLKNFQLLTI L V V K E E  
 DLGTYTCCVSNPLGTAVTTGVLKAERPSSSRPEVSEYKDAVLLVWKPVESCGPVTYIQVCCIEGGSWTTL  
 ASDISDCCYLTKGLSRGGMYIFRTACVSKAGMGPYSSPSEYVLLGGPNHLASEEESRRGRPAQLL PSTKTFAF  
 QMQIRRGRFVVRQCREKASGRALAAKIVPYQPEDKTA VLREYEALKRLHHPHLAQLHAAYLSPRHLVLI L E L  
 CSGPELLPSLAERESYSESDVKDYLWQMSATQYLHAQHILHLDLRSENMMVTEYNLLKVIDLGNASLDQEK  
 VPAPENFKDYLETMAPELLEGQAVPQTDIWAIGVTA F I M L S G E Y P E S S E G T R D L Q K G L R K G L I R L S R C Y A G L  
 SGGAVAFLLQSSSLCAQPWGRPCASTCLQCGWLTEEGPTGSRPTPVTFTVRLRAFVREKRRALLYKKNLAQ  
 VR\*

>rs47117923\_ENSMUSP00000049737\_c.9945:G>A\_p.G3316S

ENSMUST00000052872.15|Obscn-203|ENSMUSG00000061462|-|chr11:g.58964086:C>T  
 MDHSFSGARFLTRPKAFVSVGKDATLSCQIVGNPTPHVSWEKDRQVVEAGARFRLAQDGDVYRLTILDLAL  
 GDSGQYVCRARNAIEEFAAVGLRVDSEGTCAEQAPHFLLRPTSIRVREGADATFRRCRVGGSPPAVWSKDG  
 RRLGPPDAPHVRVEEHGESSALRIRSARPRDGGTYEVRAENPLGSASAAAAALVVDSDAEVAGPPGTSTATLLA  
 HLQORREAMRAEGIPPSPPGAGTRTCTVTEGKHARLSCFVTGEPKPEVWKKDGQLVTEGRRHVVEDEQENF  
 VLKILFCKQSDRGLYTCTASNLVGQTYSSVLVVVREPTVPFKKRLQDLEVREKESATFQCEVAQPAEAAWFK  
 EETRLWASAKYDIEEEGTERRLTVRNVSADDDAVYICETTEGSRVVAELSVQGNLTKLPRKTAVRTGDTAIF  
 WVELAVPEGPVRWLRNQEEMVAGGRVAITAEGTCHTLTI FQCTLEDMGEVAFVSGGCRTTTQFCVSAPRRPPL  
 YPPADPVVKAKTESSVTLWSAPPHGDRPVTIDGYVLEKRKLGA YAWSRCHEAGWLATTEFTITGVAAEEDFDQ  
 FRVSAINHFGQGPYLEFPGTMHLVPLAVKTPKAVEAVEGGEVTFVSDLTVASSGEWFLDGEALKASSIYVI  
 RCDRTRHMLTIREVPARLHGAQLKVFANGIETSIQMVVRAALGLPSSKLPAAAAREVLAQLHHEAQLLAE L S D  
 QAAAVTWLKDGRELSLGPKYEMQVSAGRRALLVRDVAQDDAGLYECVSRGSR TAYQLLVQEPKLVFAKQQAH  
 SEVKA EAGNSATLSCEVTQAQTEVTWFKDGKLLSSSSKVRMEASGCSRRLVVQQAGKADAGEYSCEAGGQKLS  
 FRLDVAEPKLVFAKQQAHSEVKA EAGASATLSCEVAQAQTEVTWFKDGKLLSSSSKVRMEASGCSRRLVVQQ  
 AGKADAGEYSCEAGGQKLSFRLDVAEPKMFVFAKEQQARSEVKA EAGASATLSCEVAQAQTEVTWFKDGKLLSS  
 SSKVRMEASGCSRRLVVQQAGKADAGEYSCEAGGQKLSFRLDVTEPKLVFAKEQQARSEVKA EAGNSATLSCE  
 VAQAQTEVTWFKDGKLLSSSSKVRMEASGCSRRLVVQQAGKADAGEYSCEAGGQKLSFRLDVAEPKLVFAKEQ  
 QARSEVKA EAGNSATLSCEVAQAQTEVTWFKDGKLLSSSSKVRMEASGCSRRLVVQQAGKADAGEYSCEAGGQ  
 KLSFHLDVTEPKLVFAKEQQAHSEVKA EAGASATLSCEVAQAQTEVTWFKDGKLLSSSSKVRMEASGCSRRLV  
 VQQAGKADAGEYSCEAGGQKLSFRLDVAEPKLVFAKEQQARSEVKA EAGASATLSCEVAQAQTEVTWFKDGKLL  
 LSSSKVRMEASGCSRRLVVQQAGKADAGEYSCEAGGQKLSFRLDVAEPKLVFAKEQQANSEVKA EAGASATL  
 SCEVAQAQTEVTWFKDGKLLSSSSKVRMEASGCSRRLVVQQAGKADAGEYSCEAGGQKLSFRLDVAEPKLAFA  
 KEQQAHSEVKA EAGASATLSCEVAQAQTEVTWFKDGKLLSSSSKVRMEASGCSRRLVVQQAGKADAGEYSCEA  
 GGQKLSFRLDVAEPKLAFAKEQQAHSEVKA EAGASATLSCEVAQAQTEVTWFKDGKLLSSSSKVRMEASGCSR  
 RLVVQQAGKADAGEYSCEAGGQKLSFRLDVAEPKLAFAKEQQAHSEVKA EAGASATLSCEVAQAQTEVTWFKD

GKKLSSSSKVRVEASGCSRRLLVVQQAGKADAGEYSCEAGGQKLFRRLDVAEPKLMFAKEQQAHSEVKAEEAGAS
ATLSCEVAQAQTEVTFWFKDGKKLSSSSKVRVEASGCSRRLLVVQQAGKADAGEYSCEAGGQKLSFRLDVAEPKL
VFAKEQQAHSEVKAEEAGASATLSCEVAQAQTEVTFWFKDGKKLSSSSKVRVEASGCSRRLLVVQQVQKADAGEYS
CEARGQKLSFRLDVADTRLMFAKEQQARTEVKAEEAGNSATLSCEVAQAQTEVTFWFKDGKKLSSSSKVRVEASG
CSRRLLVVQQAGKADAGEYSCEAGGQKLSFRLDVAEEAESQIPERPSRREPLVVKEHETIILTATIAAPSVAAVT
WLKDGVEIRRSKRHEATS LGDTHLTVRGAQVLD SAIYSCRVGKEGQDFPVQVEEVAAKFSKPLEPVEGELGG
TVMLVCELSPEQAEVWRCGNTQLRPGKRFQMTSEGPRRTLTVSGLREDDAEYVCESRDDRTSARLTVKVPR
VVKFTSGLSAMVAEEGQEAFTQC VVSPSDAGVTWYKDGMLQPSSEKFMVVEGASRSRLTILGLTLEDAGQVTV
EAEGASSAALRVREAPVLFKFKLEPQTVEERTSVTLEVELTRPWEVVKWTRNAAVLTPSENVEIRAEGARHC
LVLRSVGFADRGGFFGCETPDDKTQAKLNVEMRQVRLVVRGLQEVEAKEQGTASMDVELSHAEVEGSWTRDGLRL
QPGPKCHLAVQGPVHILTLALSALQPQDSGLVAFRAEGVHTSARLIVTELPVSFTRVLQDVVATQKEKVTLECEL
SRPVDVRWLKDGVELRAGKAIGIVAQGTCSRSLVIYRCETGDQGVVCDALDAQTSASLRVQGRTYTLIFRRVL
AEDAGEVVFVAENAESRAHLRVKELPVTLLRPLRDKIAMEKHRGVLECCQVSRASAQVRWFKGGVLEQSGPKYE
VVSDGLYRKLVINVDQPEDEDTYTCDAGNVKTSAQFFVVEEQSIITIVRGLKDMTVMPEPAPAWFECETSIPSVRP
PKWLLGKTVLQAGGNVGLQDGTVHRLTLHKTCSTMTGPVHFTIGKSRSSAQLVVSDIPVVLTRPLEPKAGRE
LQSVVLSCDFRPAPKAVQWYKDDTPLSPSEKFKMALEGQMAELRILRLTPADAGVYRCQAGSAQSSAEVTVEA
REVTVIQPLQDAEAMEEGRVCFSCELSHKDEDEIWSLNGTPLYNDSFHEISHEGCLHTLVLSKVRQADTGTVC
ATSPKVSVSARLVVKGKPVVFLKALDDVSAEERGTLLTQCEVSDPEARVVWRKDGVELGKPSDKYDFLHKAGAR
GLTVHDLSDHEDAGLYTCQVGSKETQSKVSVHDLHVGITKRLKTVEVLEGESECSFECVLSHESPSDPAVWTVGG
KTVGGSGHFHAVRQGRKYTLTVKDAALSDAGEVVSVLGLTSKASLIIRERPVDITKPLEDQRTTLGEDVMLS
CELSRAGTSVRWLKDGKAIRKSQKYDLLSEGTRAVLVVRKASLKDSGEYTCETEASKSTAKLCVEEKANRFTTE
ELADLQVEEKGRAVFTCKTEHPASVVTWRKSLLELRASGKHVPSQEGTLKLTINALERTDSDTYTCDIGQAR
TQARLLVHGQKVRVIEDLEDTAVQEGSSAKFCCRIAPADYGPVHWF LDKTPLHSNELNEITVQPGGYHVLTLR
QLALKDSGTVYFEAGDQRTS AALRVTEKPSIFSRPLTDVTVTEGEDLTLVCETTTVDSSVRWTKDGKTLRPSA
RCQLSHEGCAQLLITATTPQDGGRYKCEIGGASSSSIVRVHALPVRFRESLKDVEVPEGKAATLRCVLSVA
APVEWRHGDDVLKSSNKYSLRQEGAVLELVIRDLQPDQSGQVSCSFGDQTTSATLTVKTSQVQVFKLRNKEA
TEGTVTLRCELTSAVLTVDALPPKFTTEGLKKEEATEGTMVTLRQCMSKEATVVEWRKGAKTLS DGGRYSLRQDGAM
CELLQICGLAVEDAGEYSCVCGQEKTSATLSVKALPPRFIEDLRSQEATEGTMATLRCQMSKAAPVEWRKGS
LQIHGLTMADAGEYSCVCGQEKTSATLTVRGLPAKFIEDLRSQEATEGATAILRCELSKAAPVEWRKGS
DGDYTLRQDGAVCELQIRGLAVVDTGTYSLPTKFTTEGLRNEEATEGTMATLRCQMSKAAPVEWRKGS
DGDYSLRQDGAMCELQIRGLTIEDSGEYTCVCGQEKTSATLSVKALPSRFIEDLRSQEATEGTMATLRCQMS
KTAPVEWKKGSETLRDGGRYSLRQDGPVCELQICDLAVEDAGEYSCVCGQEKTSATLSIKALPPRFIEDLRSQ
EATEGTMATLRCQMSKAAPVEWRKGSSETLGDGGRYSLRQNGAVCELQIHDLAVEDTGEYSCVCGQEKTSATLN
VKALPPRFIEDLRSQEATEGTMATLRCQMSKAAPVEWRKGSSETLRDGGRYSLRQDGAVCELQIHDLVEDAGQ
YSCVCGQEKTSAVLTVDALPPKFTTEGLKKEEATEGTMVTLRQCMSKEATVVEWRKGAKTLS DGGRYSLRQDGAM
CELQICGLAVEDAGEYSCVCGQEKTSATLSVKALPPRFIEDLRSQEATEGTMATLRCQMSKAAPVEWRKGS
LRDGDYSLRQDGAVCELQIRDLAVEDAGEYLCVCGQEKTSATLSVKALPPRFIEDLRSQEATEGTMATLRCQ
MSKAAPVEWRKGSKTLR DGDYSLRQDGAMCELQICDLAVEDTGDYSCVCGQEKTSATLSVKALPPRFIEDLR
SQEAREGTVATLRCRMSKAAPVEWRKGSSETLKDGDYSLRQEGNLCCELQIRDLAVEDTEEYSCVCGQEKTSAT
LSVKALPAKFIEDLRSQEAPESSTVTLRCKLSKKASVVWKKGSETLRNGARYSLRQDGAVCELEIRDLTVEDT
GEYSCTCGQERTSATLSIMAPQVVFQQPLQNLQAEEGSMASLRCELSVPNAAMVWSKGGLELQGDTRREARQQ
GCVAELLLRDLRREDAGEYSCCTGSQTTSATLMVTAAPVRFRELEQAQDVDEGATARLRCELSREAVSVEWRK
GSLQLFPKAKYQMVQEGTAEALLVHGVEQEDAGEYTC DAGHTQS IARLSVRAPKPKFKTDLQSTEQEAGGTAR
LCCQLSEAEPTPVQWLKEGVELHVGSKYEMRRQGA VCELLIHGLEAKDTGEYA CLVGGQKTLASLRVKEPEV
TIVRGLVDMVEQADEDEFTCKVSQAGATDVQWHLQGLPLQSNEVTEVAVLADGCTHVQLKGVTLLEDAGTVS
FHVGGSSSAQLTVRVPEVTVLEPLKDVQLSEGQDAHFRCRLSRASGQEARWALGGVPLQCNE MNDITVEQGT
LYLLTLHKVTLEDAGTITLQVGS CSSEAKLVTAKNVTLRGLENVDALEGG EALFECQLSQPEVA AHTWLLDD
EPVHTSEKVEVVYFENGLRHLLLLKNLKPQDSCRVTFLAGDVVTS AFLTVRGRWRLEVLEPPHDASVKAGMQVR
FTCILLSEAVPVGEATWYINGAAIQPDDTDWTVTTDGS HHALTLSNAQPQHAGEVTF AARDAVASARLSVLALP
DPPEDA EVVGRSDHSVTL SWVAPMSDGGGGLCGYR VEMKEASTGQWQLCHDLVPGPECVVDDLVPGKTYRFRV
AAVGPAGAGEPVHLPQMVKIAPAPAPAPAPAPAPAPETRQAVVGEDICLELEVAADGGVEVWHKGTERRIQPGG
HFEVLSRGRQMLVIKGFRTEDQGEYRCGPIQGLPSSGAATFNVMVMTSGSGDEVPAQP SLPPEAAQEGDLHL
WEALARKRRMSREPTLDSISELPEEDSRVQHLRQEAEETAPDLSEGYSTADELARTGEADLSHTSSDDESRAG
TPSLVTYLKAGGPGI SPLASKHEAQVTT SVKPKQKQEPVVPTCPPPGDL SAADLMDPSLDKAAVKIQAAFKG
YKVRKEMKQOEGPVFSRTFGDTEAQVGDVLRLECVLATKTD MRACWLKDGIELTDGRHYHIDQLKDGTC SLLV
TGLAPTDSGRYTCQVSTKSGRVSHSACVVVSGTESEAE SSSGGELDDAFRRAARLHRLFRTKSPAELSEEEL
FLSADEGPGPEEPADWQTYREDENFVCIRFESLAEARQAVTCFRNMFATMIGIVEISLGEQGPGRVEMRIGK



VAPTVPAPVPLAKTPGLQTSDAAPVFLTELQNDVDQDGYPMSFDCVVTGQPVPSVRWFKDGLLEEDDHYMIN  
EDQQGGHQLIITAVVPADMGVYRCLAENSMGVSSTKAELRVELTSTDYDTAADATETSSYFSAQGYLSSREQE  
GTESDEGQLPQVLEELKDLQVAPGTRLAKFQLKVKGYPAKLYWFKDQPLTTSDDHIRMTDKKTLHTLEIVSV  
TREDSGQYAAIYISNAVGAAYSSARLLVRGPSEPEEKPASDVHERLVPRILEKFTPKKVKRGSSTIFSVMVEG  
HPAPSVHWLKEEAKEKGLVWIGPDTPGYTMASSSKQHSVLVDVGRQHGGTYTCIATNPAGQALCSASLHISGL  
AKEEEQERVKEALISSFLQGTSAQVSAQMSEAGFADLVGQSKGESLVAEEAHSHLSLAEVGTEEFLLQKLTSSQ  
ITEMVSAKISQAKLQVPGGDSDEETKTPSASPRHGRSRPSSSVQESSSESEDGDSRGEIFDIYVVTADYLPLG  
AEQDAIILREGQYVEEHLDSAHPLRVLVTRTKTPKSSPSRQGWVSPAYLDKRLKLSPEWGPTEAPEFPGEAVSED  
EYRTRLSSVIQELLSSSEQAFVGLQFLESHHMKHLERSPRVPAAVASQKTVIFRNVQDI SHFHSSFLKELQGC  
GTDDDVAMCFIKNQEAFAKEYLEFLVGRVQAESVVVSTPVQEFYKKYAEETLSAKDPTQPPPPPLQHYLEQVVE  
RVQKYQALLKELIRNKARNRQNCALLEQAYAVVSALPQRAENKLVSLMENYPGTLEALGEPHQGHFVWEG  
APGARMPWKGHNHRVFLFRNYLVICKPRRDSRTDTFSYVFRNMMKLSIDLNDQVEGDRAFEVWHEREDESVR  
KYLQARTVI IKNSWVKEICGIQQRLAQPVWRPPEFEELADCTAELGETVKKLACRVTGTPKPIVSWYKDGKP  
VEVDPHHILIEDPDGSCTLIDLNLTGIDSGQYMCFAASAAGNASTLGKILVQVPPRFVNVKVRATPFVEGEDAQ  
ITCTVEGAPYPQIRWYKDGTLAPGNRYRMLNEPRSGVLVLIQAASKEDLGHYECELVNLGSTRGGGELYM  
QSPALRARDQHHREQIVAAVEVTEQETKVPKKTVIIEETITTVVKS PRGRRQSPGKSPSRSPRRSASPRRPG  
LLAPERLYPPGTSPSRRLVEVEQGRKAPVPALYVTEAEVHAPASQSOPKWLEVEETIEVRVKKTGSRGASPVRE  
MTRSGEGILFTLPGGI PGRDPNANNNSNKS SVYQEARTWGPVAVHVGEPIFQVDSVGNVDWVAASPEPEQVRA  
SQKEENTERQEGCSDGIDENTFLMEEPQDQDLSQGRDPKILTHNGRVLTLADLEDYVPEGETFGCGDSTPSTP  
DEPPCEVSVLQREI SEPTVGQPVLLNVGRPPGTGATPSFFRPGSQVHSPESVSFLLREAWSGPVSAAWPTSSSF  
HTHVQSSVDGSHGSFKTEVSTQTVSFGAVGETVTLHIDPDGGEAPGPSQG\*  
>rs47117923\_ENSMUSP00000020732\_c.10146:G>A\_p.G3383S  
ENSMUST00000020732.13|Obscn-201|ENSMUSG00000061462|-|chr11:g.58964086:C>T  
MDHSFSGAPRFLTRPKAFVVSVGKDATLSCQIVGNPTPHVSWEKDRQFVEAGARFRLAQDGDVYRLTILDLAL  
GDSGQYVCRARNAIGEFAAVGLRVDSEGTCAEQAPHFLLRPTSIRVREGADATFRCRVGGSPPAVSWSKDG  
RRLGPPDAPHVRVEIGESSALRIR SARPRDGGTYEVRAENPLGSASAAAALVVDSDAEVAGPPGTSTATLLA  
HLQRRREAMRAEGIPSPPGAGTRTCTVTTEGKHARLSCFVTGEPKPEVTWVKKDGQLVTEGRHVVEDEQENF  
VLKILFCKQSDRGLYTCTASNLVGQTYSSVLVVVREPTVPFKKRLQDLEVREKESATFQCEVAQPAEAAWFK  
EETRLWASAKYDIEEEGTERRLTVRNVSADDDAVYICETTEGSRVVAELSVQGNLTKLPRKTAVRTGDTAIF  
WVELAVPEGPVRWLRNQEEMVAGGRVAITAEGTCHTLTI FQCTLEDMGEVAFVSGGCRTTTQFCVSAPRRPPL  
YPPADPVVKAKTESSVTLSSWAPPHGDRPVTIDGYVLEKRKLGAYAWSRCHEAGWLATTEFTITGVAAEGDFQ  
FRVSAINHFGQGPYLEFPGMTMLVPLAVKTPKAVEAVEGGEVTFVSDTLTVASSGEWFLDGEALKASSIYVI  
RCDRTRHMLTIREVPARLHGAQLKFVANGIETSIQMVVRAALGLPSSKLPAAAAREVLAQLHEEAQLLAE LSD  
QAAA VTLWKDGRELSLGPKEYMQVSAGRRALLVRDVAQDDAGLYECVSRGSRRTAYQLLVQDITDGYRDWGPAG  
PQKHMCKCAGAKIARYLGSSCYRFLQYDKGVWHWLEAALDRQKGTSSCSLHEKPKLVFAKQQAHSEVKAE  
AGNSATLSCEVTQAQTEVTWFKDGKLLSSSSKVRMEASGCSRRLVVQQAGKADAGEYSCEAGGQKLSFRLDVA  
EPKLVFAKQQAHSEVKAEGASATLSCEVAQAQTEVTWFKDGKLLSSSSKVRMEASGCSRRLVVQQAGKADA  
GEYSCEAGGQKLSFRLDVAEPKLVFAKEQQARSEVKAEGASATLSCEVAQAQTEVTWFKDGKLLSSSSKVRM  
EASGCSRRLVVQQAGKADAGEYSCEAGGQKLSFRLDVTEPKLVFAKEQQARSEVKAEGVNSATLSCEVAQAQ  
EVTWFKDGKLLSSSSKVRMEASGCSRRLVVQQAGKADAGEYSCEAGGQKLSFRLDVAEPKLVFAKEQQARSEV  
KAEAGNSATLSCEVAQAQTEVTWFKDGKLLSSSSKVRMEASGCSRRLVVQQAGKADAGEYSCEAGGQKLSFHL  
DVTEPKLVFAKEQQAHSEVKAEGASATLSCEVAQAQTEVTWFKDGKLLSSSSKVRMEASGCSRRLVVQQAGK  
ADAGEYSCEAGGQKLSFRLDVAEPKLVFAKEQQARSEVKAEGASATLSCEVAQAQTEVTWFKDGKLLSSSSK  
VRVEASGCSRRLVVQQAGKADAGEYSCEAGGQKLSFRLDVAEPKLVFAKEQQANSEVKAEGASATLSCEVAQ  
AQTEVTWFKDGKLLSSSSKVRVEASGCSRRLVVQQAGKADAGEYSCEAGGQKLSFRLDVAEPKLVFAKEQQAH  
SEVKAEGASATLSCEVAQAQTEVTWFKDGKLLSSSSKVRVEASGCSRRLVVQQAGKADAGEYSCEAGGQKLS  
FRLDVAEPKLVFAKEQQAHSEVKAEGASATLSCEVAQAQTEVTWFKDGKLLSSSSKVRVEASGCSRRLVVQQ  
AGKADAGEYSCEAGGQKLSFRLDVAEPKLVFAKEQQAHSEVKAEGASATLSCEVAQAQTEVTWFKDGKLLSS  
SSKVRVEASGCSRRLVVQQAGKADAGEYSCEAGGQKLFRLDVAEPKLVFAKEQQAHSEVKAEGASATLSCE  
VAQAQTEVTWFKDGKLLSSSSKVRVEASGCSRRLVVQQAGKADAGEYSCEAGGQKLSFRLDVAEPKLVFAKEQ  
QAHSEVKAEGASATLSCEVAQAQTEVTWFKDGKLLSSSSKVRVEASGCSRRLVVQQVQKADAGEYSCEARGQ  
KLSFRLDVADTRLMFAKEQQARTEVKAEGNSATLSCEVAQAQTEVTWFKDGKLLSSSSKVRVEASGCSRRLV  
VQQAGKADAGEYSCEAGGQKLSFRLDVAEASISQI PERPRTREPLVVKEHETIILTATIAAPVAAVTLWKDGV  
EIRRSKRHEATSLGDTHTLTVRGAQVLDLSAIYSCRVKEGQDFPVQVEEVAAKFSKPLEPVEGELGGTVMLVC  
ELSPQAEVWRCGNTQLRPGKRFQMTSEGPRTLTVSGLREDDAEYVCESRDDRTSARLTIVKVRVPRVVKFTS  
GLSAMVAEEGQEAFTQCVVSPSDAGVTWYKDGMLQPSKFKVMVESGASRSLTILGLTLEDAGQVTEAEGAS  
SSAALRVREAPVLFKKLEPQTEVEERTSVTLEVELTRPWPEVKWTRNAAVLTPSENVEIRAEGARHCLVLRV  
GFADRGFFGCETPDDKTQAKLNVEMRQVRLVVRGLQEVEAKEQGTASMDVELSHAEEVGSWTRDGLRLQPGPKC

HLAVQGPHVHILTLALSALQPQDSGLVAFRAEGVHTSARLIVTELPSVSTRVLQDQVATQKEKVTLECELSRPVDV
RWLKDGVLELRAGKAIGIVAQGTCSRSLVIYRCETGDQGVYVCDALDAQTSASLRVQGRTYTLIFRRVLAEDAGE
VKFVAENAESRAHLRVKELPVTLLRPLRDKIAMEKHRGVLECCQVSRASAQVRWFKGGVELQSGPKYEVVSDGL
YRKLVINADVQPEDEDTYTCDAGNVKTSAQFFVVEEQSITIVRGLKDMTVMEPAPAWFECETSIPSVRPPKWLGL
KTVLQAGGNVGLQDGTVHRLTLHKTCSTMTGPVHFTIGKSRSSAQLVVSDIPVVLTRPLEPKAGRELQSVVL
SCDFRPAPKAVQWYKDDTPLSPSEKFKMALEGQMAELRILRLTPADAGVYRCQAGSAQSSAEVTVAREVTVI
QPLQDAEAMEEGRVCFSCELSHKDEDIEWSLNGTPLYNDSFHEISHEGCLHTLVLSVSRQADTGTVCATSPKV
SVSARLVVKGKPVVFLKALDDVSAEERGTLLTQCEVSDPEARVWVRKDGVELGSPDKYDFLHKAGARGLTVHD
LSHEDAGLYTCQVGSKETQSKVSVHDLHVGITKRLKTVEVELEGESCFECVLSHESPSDPAVWTVGGKTVGGS
GHFHAVRQGRKYTLTVKDAALSDAGEVVSVLGLTSKASLIIRERPVDTKPLEDQRTTLGEDVMLSCELSRA
GTSVRWLKDGKAIRKSQKYDLLSEGTRAVLVVRKASLKDSGEYTCETEASKSTAKLCVEEKANRFTTELADLQ
VEEKGRAVFTCKTEHPASVVTWRKSLLELRASGKHVPSQEGTLKLTINALERTDSDTYTCDIGQARTQARLL
VHGQKVRVIEDLEDTAVQEGSSAKFCRIAPADYGPVHWFLLDKTPLHSNELNEITVQPGGYHVLTLRQLALKD
SGTVYFEAGDQRTSALRVTEKPSIFSRPLTDVTVTEGEDTLVCETTTVDSSVRWTKDGKTLRPSARCQLSH
EGCQAQLLITATTPQDGGRYKCEIGGASSSSIVRVHALPVRFRRESLKDVEVPEGKAATLRCVLSVAAPVEWR
HGDDVLKSSNKYSLRQEGAVLELVIRDLQPDQSGQYSCSFGDQTTSATLTVKTSQAQFVGLKRNKEATEGTTV
TLRCELTKEAPVEWKKGTETLRNGDKYSLKQDGAVALQICSLLVADAGEYSCVCGQEKTSATLTVKALLVHF
VRLRSKEATEGDTTTLQCELSKAAPVEWRKGTETLRDGDVRYSLKQDGAVALQIRSLTIADAGEYLCGCGQE
KTSATLTVRALPAKFKDSLKNEEATEGTTATLSCELSKAAPVWKKGPKTLQSGDKYVLRQDGAVALQIHGL
TMADAGEYSCVCGQEKTSATLTVRGLPAKFIEDLRSQEATEGATAILRCELSKAAPVEWRKGSSETLKDGDVRY
LRQDGAVALQIRGLAVVDGTYSLSLPTKFTTEGLRNEEATEGTMATLRCQMSKAAPVEWRKGSSETLRDGDVRY
LRQDGAVALQIRGLTIEDSGEYTCVCGQEKTSATLSVKALPSRFIEDLRSQEATEGTMATLRCQMSKTAPVE
WKKGSETLRDGGRYSLRQDGPVCELQICDLAVEDAGEYSCVCGQEKTSATLSIKALPPRFIEDLRSQEATEGT
MATLRCQMSKAAPVEWRKGSSETLGDGGRYSLRQNGAVCELQIHDLAVEDTGEYSCVCGQEKTSATLNVKALPP
RFIEDLRSQEATEGTMATLRCQMSKAAPVEWRKGSSETLRDGGRYSLRQDGAVALQIHDLVEDAGQYSCVCG
QEKTSAVLTVDALPPKFTTEGLKKEEATEGTMVTLRQMSKEATEVWRKGAKTLSDGGRYSLRQDGAVALQIC
GLAVEDAGEYSCVCGQEKTSATLSVKALPPRFIEDLRSQEATEGTMATLRCQMSKAAPVEWRKGSSETLRDGD
YSLRQDGAVALQIRDLAVEDAGEYLCVCGQEKTSATLSVKALPPRFIEDLRSQEATEGTMATLRCQMSKAAP
VEWRKGSSETLRDGDVRYSLRQDGAVALQICDLAVEDTGDYSCVCGQEKTSATLSVKALPPRFIEDLRSQEARE
GTVATLRCRMSKAAPVEWRKGSSETLKDGDVRYSLRQEGNLCELQIRDLAVEDTEEYSCVCGQEKTSATLSVKAL
PAKFIEDLRSQEAPESSTVTLRCKLSKKASVVWKKGSETLRNGARYSLRQDGAVALQIRDLTVEDTGEYSCT
CGQERTSATLSIMAPQVVFQQLQNLQAEEGSMASLRCELSVNAAMVWSKGGLELQGDTRREARQQGCVAEL
LLRDLRREDAGEYSCTCGSQTTSATLMVTAAPVRFRLRELQAQDVDEGATARLRCELSREAVSVEWRKGSLLQF
PCAKYQMVQEGTTAELLVHGVEQEDAGEYTCDAHTQSIARLSVRAPKPKFKTDLQSTEQEAAGTARLCCQLS
EAEFGTPVQWLKEGVELHVGSKYEMRRQGAVALQIHGLEAKDTGEYACLVGGQKTLASLRVKEPEVTIVRGL
VDMEVQADEDEVEFTCKVVSQAGATDVQWHLQGLPLQSNVEVAVLADGCHVLQKGLVLEADAGTVSFHVGGL
SSSAQLTVRVPEVTVLEPLKDVQLSEGQDAHFRCRLSRASGQEARWALGGVPLQCNEMNDITVEQGTLYLLTL
HKVTLLEDAGTITLQVGSSESQAQLKVTAKNTVLRGLENVDALEGGEALFECQLSQPEVAHAHTWLLDDEPVHTS
EKVEVVYFENGLRHLLLLKLNKPKQDSCRVTFLAGDVVTSFAFLTVRGWRLEVLPEPHDASVKAGMQVRFCTILS
EAVPVGEATWYINGAAIQPDDTDWTVTTDGSHHALTLNAQPPHAGEVTFFAARDAVASARLSVLALPDPPEDA
EYVGRSDHSVTLVSWVAPMSDGGGGLCGYRVEMKEASTGQWQLCHDLVPGPECVDDLVPGKTYRFRVAAVGPA
GAGEPVHLPQMVKIAPAPAPAPAPAPAPAPETRQAVVGEDICLELEVAADGGEVVWHKGTERRIQPGGHFEVLS
RGQRQMLVIKGFRTEDQGEYRCGPIQGLPSSGAATFNVMVMTSGSGDEVPAQPSLPPEAAQEGDLHLLWEALAR
KRRMSREPTLDSISELPEEDSRVQHLRQEAETAPDLSEGYSTADELARTGEADLSHTSSDDESRACTPSLVT
YLKKAAGPGISPLASKHEAQVTSVKPQKQEPVVPVTPCPPGDLAADLMDPSLDKAAVKIQAAFKGYKVRKE
MKQQEGPVFSRTFGDTEAQVGDVLRLECVLATKTDMRACWLKDGIELTDGRHYHIDQLKDGTCSSLVVTGLAPT
DSGRYTCQVSTKSGRVSHSACVVVSGTESEAESSSGGELDDAFRRAARRLHRLFRTKSPAELSEELFLSADE
GPGEPEPADWQTYREDENFVCIRFESLAEARQAVTCFRNMFATMGIGVEISLGEQGPVEMRIGKVAPTVT
PAVPLAKTPGLQTSDAAPVFLTELQNDQVQDGYPMSFDCVVTGQPVPSVRWFKDGKLEEDDHVMINEDQGG
HQLIITAVVPADMGVYRCLAENSMGVSSKAELRVELTSTDYDTAADATETSYSFSAQGYLSSREQEGTESDE
GQLPQVLEELKDLQVAPGTRLAKFQLKVKGYPAKLYWFKDGGPLTTSDHIRMTDKKTLHTLEIVSVTREDSG
QYAAYSNAVGAAYSSARLLVRGPSEPEEKPASDVHERLVPPRILEKFTPKKVKRGSSITFSVKVEGHPAPSV
HWLKEEAEEKVFLWIGPDTPGYTMASSSKQHSLLVLDVGRQHGTYTICATNPAGQALCSASLHISGLAKEEEEQ
ERVKEALISSFLQGTSAVSAQMSSEAGFADLVGQSGVESLVAEEAHSHLSLAEVGTETEFLOKLTSTQITEMVS
AKISQAKLQVPPGGDSDEETKTPSASPRHGRSRPSSSVQESSSESEDGDSRGEIFDIYVVVTADYPLGAEQDAI
ILREGQYVEVLDSAHPLRWLVRTKPTKSSPSRQGWVSPAYLDKRLKLSPEWGPTEAPEFPGEAVSEDEYRTRL
SSVIQELLSSEQAFVGLQFLESHHMKHLERSPRVPAAVASQKTVIFRNVQDISHFHSSFLKELQCGCTDDDV
AMCFIKNQEAFAKEYLEFLVGRVQAESVVVSTPVQEFYKKYAEETLSAKDPTQPPPPPLQHYLEQPVERVQKYQ

ALLKELIRNKARNRQNCALLEQAYAVVSALPQRAENKLVSLMENYPGTLEALGEPHQHFIWVEGAPGARM  
PWKGHNHRVFLFRNYLVICKPRRDSRTDTFSYVFRNMMKLSSIDLNDQVEGDDRAFEVWHEREDSVRKYLLQA  
RTVI IKNSWVKEICIGIQORLAQPVWRPPEFEEELADCTAELGETVKLACRVTGTPKPIVSWYKDGKPVVEVDPH  
HILIEDPDGSCITLILDNLGTIDSGQYMCFAASAAGNASTLGKILVQVPPRFVNVKVRATPFVEGEDAQITCTVE  
GAPYQIRWYKDGITLLAPGNRYRMLNEPRSGVLVVIQAASKEDELGHYECELVNRLGSTRGGGELYMQSPALR  
ARDQHHREQIVAAVEERRPSP\*  
>rs47117923\_ENSMUSP00000151217\_c.8766:G>A\_p.G2923S  
ENSMUST00000219084.3|Obscn-207|ENSMUSG00000061462|-|chr11:g.58964086:C>T  
MDHSFSGAPRFLTRPKAFVSVGKDATLSCQIVGNTPHVSWEKDRQPVEAGARFRLAQDGDVYRLTILDLAL  
GDSGQYVCRARNAIGEAFAAVGLRVDSEGTCAEQAPHFLLRPTSIRVREGADATFRCRVGGSPQPAVSWSKDG  
RRLGPPDAPHVRVEEHGESSALRIRSARPRDGGTYEVRAENPLGSASAAAALVVDSDAEVAGPPGTSTATLLA  
HLQORREAMRAEGIPSPPGAGTRTCTVTEGKHARLSCFVTGEPKPEVWKKDQGLVTEGRRHVVEDEQENF  
VLKILFCKQSDRGLYTCTASNLVGQTYSSVLVVVREPTVPFKKRLQDLEVREKESATFQCEVAQAPATEAAWFK  
EETRLWASAKYDIEEGTERRLTVRNVSADDDAVYICETTEGSRVVAELSVQGNLTKLPRKTAVRTGDTAIF  
WVELAVPEGPVRLRNQEEVAGGRVAITAEGTCHTLTI FQCTLEDMGEVAFVSGGCRTTTQFCVSAPRRPPL  
YPPADPVVAKTESVTLWSAPPHGDRPVTIDGYVLEKRLKLGAYAWSRCHEAGWLATTEFTITGVAEEGDFQ  
FRVSAINHFQGPYLEFPGTMHLVPLAVKTPKAVEAVEGGEVTFVSDLTVAASSGEVFLDGEALKASSIYVI  
RCDRTRHMLTIREVPARLHGAQLKVFVANGIETS IQMVVRAALGLPSSKLPAAAAREVLAQLHEEAQLLAE LSD  
QAAA VTLWKDGRELSLGPKEYMQVSAGRRALLVRDVAQDDAGLYECVSRGSRRTAYQLLVQDITDGYRDWGPAG  
PQKHMCKCAGAKIARYLGSSCYRFLQYDKGVWHLEAALDTRQKGTSSCSLHEKPKLVFAKQQAHSVEKAE  
AGNSATLSCEVTQAQTEVTWFKDGKLLSSSSKVRMEASGCSRRLVVQQAGKADAGEYSCEAGGQKLSFRLDVA  
EPKLVFAKQQAHSVEKAEAGASATLSCEVAQAQTEVTWFKDGKLLSSSSKVRMEASGCSRRLVVQQAGKADA  
GEYSCEAGGQKLSFRLDVAEPKMFVFAKEQQARSEVKAEGASATLSCEVAQAQTEVTWFKDGKLLSSSSKVRM  
EASGCSRRLVVQQAGKADAGEYSCEAGGQKLSFRLDVTEPKLVFAKEQQARSEVKAEGNSATLSCEVAQAQ  
EVTWFKDGKLLSSSSKVRMEASGCSRRLVVQQAGKADAGEYSCEAGGQKLSFHLDVTEPKLVFAKEQQAHSE  
KAEAGASATLSCEVAQAQTEVTWFKDGKLLSSSSKVRMEASGCSRRLVVQQAGKADAGEYSCEAGGQKLSFRL  
DVAEPKLVFAKEQQARSEVKAEGASATLSCEVAQAQTEVTWFKDGKLLSSSSKVRMEASGCSRRLVVQQAGK  
ADAGEYSCEAGGQKLSFRLDVAEPKLVFAKEQQANSEVKAEGASATLSCEVAQAQTEVTWFKDGKLLSSSSK  
VRVEASGCSRRLVVQQAGKADAGEYSCEAGGQKLSFRLDVAEPKLVFAKEQQAHSEVKAEGASATLSCEVAQ  
AQTEVTWFKDGKLLSSSSKVRVEASGCSRRLVVQQAGKADAGEYSCEAGGQKLSFRLDVAEPKLVFAKEQQAH  
SEVKAEGASATLSCEVAQAQTEVTWFKDGKLLSSSSKVRVEASGCSRRLVVQQVQKADAGEYSCEARGQKLS  
FRLDVAEAESQIPERPSRREPLVVKHEHETIILTATIAAPSVAAVTWLDGVEIRRSKRHEATSLGDTHTLTVR  
GAQVLD SAIYSCRVGKEGQDFPVQVEEVAAKFSKPLEPVEGELGGTVMLVCELSPEQAEVWRCGNTQLRPGK  
RFQMTSEGPRRTLTVSGLEDDAEYVCESRDDRTSARLTVKVPVVKFTSGLSAMVAEEGQEAFTQCVVSPS  
DAGVTWYKDGMLQPSKPFVMEVSGASRSLTILGLTLEDAGQVTEAEGASSAALRVREAPVLFKPKLEPQT  
VEERTSVTLEVELTRPWPEVKWTRNAAVLTPSENVEIRAEGARHCLVLRVSGFADRGFFGCETPDDKTQAKLN  
VEMRQVRLVLRGLQEVEAKEQGTASMDVELSHAEVEGSWTRDGLRLQPGPKCHLAVQGPVHILTLALSALQPQDSG  
LVAFRAEGVHTSARLIVTELPVSFTRVLQDVVATQKEKVTLECELSRPVDVRWLKDGVELRAGKAIGIVAQGT  
CRSLVIYRCETGDQGVYCDALDAQTSASLRVQGRYTLIFRRVLAEDAGEVKFVAENAESRAHLRVKELPVT  
LLRPLRDKIAMEKHRGVLECVSRASAQVRWFKGGVELQSGPKYEVVSDGLYRKLVIINDVQPEDEDYTC DAG  
NVKTSAQFFVEEQSITIVRGLKDMTVMEPAPAWFECETSIPSVRPPKWLKGKTVLQAGGNVLEQDGTVHRLT  
LHKTCSTMTGVPVHFTIGKSRSSAQLVVS DIPVVLTRPLEPKAGRELQSVVLSCDFRPAPKAVQWYKDDTPLSP  
SEKFKMALEGQMAELRILRLTPADAGVYRCQAGSAQSSAEVTVAREVTVIQPLQDAEAMEEGRVCFSCELSH  
KDEDIEWSLNGTPLYNDSFHEISHEGLHTLVLSKVRQADTGTVCATSPKVSVSARLVVKGKPVVFLKALDDV  
SAEERGLTLQCEVSDPEARVVWRKDGVELGSPDKYDFLHKAGARGLTVHDLSHEDAGLYTCQVGSKETQSKV  
SVHDLHVGITKRLKTVEVLEGESECSFECVLSHESPSDPAVWTVGGKTVGGSGHFHAVRQGRKYTLTVKDAALS  
DAGEVVSFVGLTSTKASLIIRERPVDITKPLEDQRTTLGEDVMLSCELSRAGTSVRWLKDGKAIRKSQKYDLL  
SEGTRAVLVVRKASLKDSGEYTCETEASKSTAKLCVEEKANRFTTELADLQVEEKGRAVFTCKTEHPASVVTW  
RKSLELRASGKHVPSQEGTLKLTINALERTSDTYTCDIGQARTQARLLVHGQKVRVIEDLEDTAVQEGSS  
AKFCCRIPADYGPVHFLDKTPLHSNELNEITVQPGGYHVLTLRQLALKDSGTVYFEAGDQRTSALRVTEK  
PSIFSRPLTDVTVTEGEDLTLVCETTTVDSSVRWTKDGKTLRPSARCQLSHEGCAQLLITATTPQDGGRYKC  
EIGGASSSSIVRVHALPVRFRFRESLKDVEVPEGKAATLRCVLSVAAPVEWRHGDDVLKSSNKYSLRQEGAVLE  
LVIRDLPQDSGQYSCSFGDQTTSATLTVKTSQAQFVGLKRNKEATEGTTVTLRCELTKAPVEWKKGTETLR  
NGDKYSLKQDGA VCELQICSLLVADAGEYSCVCGQEKTSATLTVKALLVHFVRRRLRSKEATEGDTTLQCELS  
KAAPVEWRKGTETLRDGDYSLKQDGA VCELQIRSLTIADAGEYLCTCGQEKTSATLTVRGLPAKFIEDLRSQ  
EATEGATAILRCELSKAAPVEWRKGSSETLKDGDYTLRQDGA VCELQIRGLAVVDTGTYSLSLPTKFTTEGLRNE  
EATEGTMATLRCQMSKAAPVEWRKGSSETLRDGDYSLRQDGA MCELQIRGLTIEDSGEYTCVCGQEKTSATLS  
VKALPPRFIEDLRSQEAETEGTMATLRCQMSKAAPVEWRKGSSETLGDGGYSLRQNGAVCELQIHDLAEDTGE

YSCVCGQEKTSATLNVKALPPKFTEGLKKEEATEGTMVTLRCQMSKEATVEWRKGAKTLSDGGRYSLRQDGM  
CELQICGLAVEDAGEYSCVCGQEKTSATLSVKALPPRFIEDLRSQEATEGTMATLRCQMSKAAPVEWRKGET  
LRDGDYSLRQDGAVCELQIRDLAVEDAGEYLCVCGQEKTSATLSVKALPPRFIEDLRSQEATEGTMATLRCQ  
MSKAAPVEWRKGSKTLRDGDYSLRQDGMCELQICDLAVEDTDYSCVCGQEKTSATLSVKAPQVVFQOPLQ  
NLQAEEGSMASLRCELSVPNAAMVWSKGGLELQGDTRREARQQGCVAELLLRDLRREDAGEYSCTCGSQTTSA  
TLMVTAAPVRFRLRELQAQDVDEGATARLRCELSREAVSVEWRKGSLLQFPKAKYQMVQEGTTAELLVHGVEQE  
DAGEYTCDAHTQSIARLSVRAPKPKFKTDLQSTEQEAGGTARLCCQLSEAEPTPVQWLKEGVELHVGSKEYE  
MRRQGAVCELLIHGLEAKDTGEYACLVGGQKTLASLRVKEPEVTIVRGLVDMEVQADEDEVEFTCKVSOAGATD  
VQWHLQGLPLQSNEVTEAVLADGCTHVLQKGVTLLEDAGTVSFHVGGLSSSAQLTVRVPEVTVLEPLKDVQL  
SEGQDAHFRCRLSRASGQEARWALGGVPLQCNEMNDI TVEQGTLYLLTLHKVTLEDAGTITLQVGSSESQAQL  
KVTAKNTVLRGLENVDALEGGEALFECQLSQPEVAHTWLLDDEPVHTSEKVEVVYFENGLRHLKLNKLPQ  
DSCRVTFLAGDVVTSFALTVRGWRLEVLEPPHDASVKAGMQVRFTCILSEAVPVGEATWYINGAAIQPDDTDW  
TVTDTGSHHALTLSNAQPQHAGEVTF AARDAVASARLSVLALPDPPEDAEVVGRSDHSVTLSSWVAPMSDGGGG  
LCGYRVEMKEASTGQWQLCHDLVPGPECVVDDLVPKTYRFRVAAVGPAGAGEPVHLPQMVKIAPAPAPAPAP  
APAPETRAQAVVGEDICLELEVAADGGVEVWHKGTERRIQPGGHFEVLSRGRQMLVIKGFRTEDQGEYRCGPIQ  
GLPSSGAATFNVMVMTSGSGDEVPAQPSLPPPEAAQEGDLHLLEALARKRRMSREPTLDSISELPEEDSRVQHL  
RQEAEBETAPDLSEGYSTADELARTGEADLSHTSSDDESRAQTPSLVTYLKKAGGPGISPLASKHEAQVTTSVK  
PQKQEPVVPTCPPPGDLSAADLMDPSLDKAAVKIQAAFQKGYKVRKEMKQOEGPVFSRTFGDTEQVGDVLR  
ECVLATKTDMRACWLKDGIELTDGRHYHIDQLKDGTC SLLVTGLAPTD SGRYTCQVSTKSGRVSHSACVVVSG  
TESEAESSSGGELDDAFRRAARLHRLFRTKSPAELSEELFLSADEGPGEPEEPADWQTYREDEFVCI RFE  
SLAEARQAVTCFRNMFATMGIGVEISLGEQGRGVEMRIGKVAPTVTPAVPLAKTPGLQTSDAAPVFLTELQN  
QDVQDGYPMSFDCVVTGQPVPSVRWFKDGKLLLEDDHYMINEDQQGGHQLIITAVVPADMVYRCLAENSMGV  
SSTKAELRVELTSTDYDTAADATETSSYFSAQGYLSSREQEGTESDEGQLPVLEELKDLQVAPGTRLAKFQL  
KVKGYPAKLYWFKDQGLTTS DHIRMTDKKTLHTLEIVSVTREDSGQYAAAYISNAVGAAYSSARLLVGRPSE  
PEEKPADVHERLVPVPRILEKFTPKKVKRGSSITFSVKVEGHPAPSVHVLKKEEAKEGVLWIGPDP TPGYTMAS  
SKQHSVLVLDVGRQHGTYTIC IATNPAGQALCSASLHISGLAKEEEQERVKEALISSFLQDTSQAVSAQMSSES  
AGFADLVGQSKNEVLAEEAHSLSLAEVGTEEFLLKLTSTQITMVSAKISQAKLQVPGGDSDEETKPTKPSASP  
RHGRSRPSSSVQESSSESEDGDSRGEIFDIYVVVTADYLP LGAEQDAIILREGQYVEVLDSAHPLRVLVTRTKPT  
KSSPSRQGWVSPAYLDKRLKLSPEWGPTEAPEFPGEAVSEDEYRTRLSSVIQELLSSEQAFVGVGELQFLESHH  
KHLERSPRVPAAVASQKTVI FRNVQDISHFHSSFLKELQCGCTDDDVAMCFIKNQEAFEKYLEFLVGRVQAES  
VVVSTPVQEFYKKYAEETLSAKDPTQPPPPPLQHYLEQPVERVQKYQALLKELIRNKARNRQNCALLEQAYAV  
VSALPQRAENKLVSLMENYPGTLEALGEP I RQGHFIVWEGAPGARMPWKGNHRHVFLFRNYLVICKPRRDSR  
TDTFSYVFRNMMKLSSIDLNDQVEGDDRAFEVWHERE DSVRKYLLQARTVI IKNSWVKEICGIQQRLAQPVWR  
PPEFEEELADCTAELGETVKLACRVGTGPKPIVSWYKDGKPEVDPHHLIEDPDGSC TLI LDNLTGIDSGQY  
MCFASAAGNASTLGKILVQVPPRFVNVKVRATPFVEGEDAQITCTVEGAPYPQIRWYKDGTL LAPGNRYRMLN  
EPRSGLVVLVLIQAASKEDLGHYCELVNRLGSTRGGGELYMQSPALRARDQHHREQI VAAVEVTEQETKVPKK  
TVIIEETITTVVKS PRGRRQSPGKSPSRSPRRSASPRRPGLLAPERLYPPGTSPSRRLVEVEQGRKAPVPALY  
VTEAEVHAPASQSQPKWLEVEETIEVRVKKTGSRGASPVREMTSRGEGILFTLPGGIPGRDPNANNNSNKS VY  
QEARTWGPVAVHVGEPFIFQVDSVGNVDWAASPEPEQVRASQKEENTERQEGCSDGDENTFLMEEPQD TDSL  
QGRDPKILTHNGRVLTLADLEDYVQEGETF GCGDSTPSTPDEPPCEVSVLQREI SEPTVQGPVLLNVGRPPG  
TGATPSFFRPGSQVHSPESVS FLLREAWSGPVSAAPWTSSFHTHVQSSVDGSHGSFKTEVSTQT VSF GAVGET  
VTLHIDPDGGEAPGPSQG\*

>rs47117923\_ENSMUSP00000122181\_c.2394:G>A\_p.G799S  
ENSMUST00000133040.4|Obscn-205|ENSMUSG00000061462|-|chr11:g.58964086:C>T  
AGKAI GIVAQGTCSRSLVIYRCETGDQGVYVCDALDAQTSASLRVQGRSVQITKPLEDVEVMEKEGATF SCEVS  
HDEVPLWFRSSKLRPSDNVRI RQEGRTYTLIFRRVLAEDAGEVKFVAENAESRAHLRVKELPVTLLRPLRD  
KIAMEKHGRVLEQCQVSRASAQVRWFKGGVELQSGPKYEVVSDGLYRKLVIN DVQPEDEDTYTC DAGNVK TSAQ  
FFVEEQSITIVRGLKDMTVM EPAPAWFECETSIPSVRPPKWL LKGTVLQAGGNVGL EQDGTVHRTLHKT CST  
MTGVPVHFTIGKSRSSAQLVSDI PVVLT RPLEPKAGRELQSVVLSCDFRPAKAVQWYKDDT PLSPEKFKMA  
LEGQMAELRILRLTPADAGVYRCQAGSAQSSAEVTVEAREVTVIQPLQDAEAMEEGRVCF SCEL SHKDEDIEW  
SLNGTPLYNDSFHEISHEGCLHTLVLSVRQADTGTVCATSPKVSVSARLVVKGKPVVFLKALDDVSAEERGT  
LTLQCEVSDPEARVVWRKDGVELGPSDKYDFLHKAGARGLTVHDL SHEDAGLYTCQVGSKETQSKVSVHDLHV  
GITKRLKTVLEVELEGESCFECVLSHESPSDPAVVTVGKTVGGSGHFHAVRQGRKYTLTVKDAALSDAGEVVF  
SVLGLT SKASLIIRERPV DITKPLEDQRTTLGEDVMLSELSRAGTSVRWLKDGKAIKRSQKYDLLSEGTRAV  
LVVRKASLKSGETCETEASKSTAKLCVEEKANRFT EELADLQVEEKGRAVFTCKTEHPASVVTWRKSLLEL  
RASGKHVPSQEGTLKLTINALERTDSDTYTCDIGQARTQARLLVH  
>rs48441780\_ENSMUSP00000158795\_c.9999:G>C\_p.A3334P  
ENSMUST00000238536.2|Obscn-210|ENSMUSG00000061462|-|chr11:g.58964369:C>G

MDHSFSGAPRFLTRPKAFVSVGKDATLSCQIVGNPTPHVSWEKDRQPVEAGARFRLAQDGDVYRLTILDLAL
GDSGQYVCRARNAIGEFAAVGLRVDSEGTCAEQAPHFLLRPTSIRVREGADATFRCRVGGSPQPAVSWSKDG
RRLGPPDAPHVRVEEHGESSALRIR SARPRDGGTYEVRAENPLGSASAAAALVVDSDAEVAGPPGTSTATLLA
HLQQRREAMRAEGIPSPPGAGTRTCTVTEGKHARLSCFVTGEPKPEVWKKDQGLVTEGRRHVVEDEQENF
VLKILFCKQSDRGLYTCTASNLVGTYSVVLVVVREPTVPFKKRLQDLEVREKESATFQCEVAQPAEAAWFK
EETRLWASAKYDIEEEGETERRLTVRNVSADDDAVYICETTEGSRVVAELSVQGNLTKLPRKTAVRTGDTAIF
WVELAVPEGPVWRWRNQEEMVAGGRVAITAEGTCHTLTI FQCTLEDMGEVAFVSGGCRTTTQFCVSAPRRPPL
YPPADPVVKAKTESSVTLWSAPPHGDRPVITDGYVLEKRLGAYAWSRCHEAGWLATTEFTITGVAEEGDFQ
FRVSAINHFGQGPYLEFPGMTMLVPLAVKTPKAVEAVEGGEVTFVSDLTVASSGEWFLDGEALKASSIYVI
RCDRTRHMLTIREV PARLHGAQLKFVANGIETSIQMVVRAALGLPSSKLPAAAAAREVLAQLHEEAQLLAE LSD
QAAA VTWLKDGRELSLGPKEYMQVSAGRRALLVRDVAQDDAGLYECVSRGSR TAYQLLVQDITDGYRDWGPAG
PQKHMCKCAGAKIARYLGSSCYRFLQYDKGVWHLEAALDTRQKGKTS SCSLHEKPKLVFAKQQAHSEVKA E
AGNSATLSCEVTQAQTEVTWFKDGKLLSSSSKVRMEASGCSRRLVVQQAGKADAGEYSCEAGGQKLSFRLDVA
EPKLVFAKQQAHSEVKA EAGASATLSCEVAQAQTEVTWFKDGKLLSSSSKVRMEASGCSRRLVVQQAGKADA
GEYSCEAGGQKLSFRLDVAEPKMFVFAKEQQARSEVKA EAGASATLSCEVAQAQTEVTWFKDGKLLSSSSKVRM
EASGCSRRLVVQQAGKADAGEYSCEAGGQKLSFRLDVTEPKLVFAKEQQARSEVKA EAGASATLSCEVAQAQ T
EVTWFKDGKLLSSSSKVRMEASGCSRRLVVQQAGKADAGEYSCEAGGQKLSFRLDVAEPKLVFAKEQQARSEV
KAEAGNSATLSCEVAQAQTEVTWFKDGKLLSSSSKVRMEASGCSRRLVVQQAGKADAGEYSCEAGGQKLSFHL
DVTEPKLVFAKEQQAHSEVKA EAGASATLSCEVAQAQTEVTWFKDGKLLSSSSKVRMEASGCSRRLVVQQAGK
ADAGEYSCEAGGQKLSFRLDVAEPKLVFAKEQQARSEVKA EAGASATLSCEVAQAQTEVTWFKDGKLLSSSSK
VRVEASGCSRRLVVQQAGKADAGEYSCEAGGQKLSFRLDVAEPKLVFAKEQQANSEVKA EAGASATLSCEVAQ
AQTEVTWFKDGKLLSSSSKVRVEASGCSRRLVVQQAGKADAGEYSCEAGGQKLSFRLDVAEPKLAFAKEQQAH
SEVKA EAGASATLSCEVAQAQTEVTWFKDGKLLSSSSKVRVEASGCSRRLVVQQAGKADAGEYSCEAGGQKLS
FRLDVAEPKLAFAKEQQAHSEVKA EAGASATLSCEVAQAQTEVTWFKDGKLLSSSSKVRVEASGCSRRLVVQQ
AGKADAGEYSCEAGGQKLSFRLDVAEPKLAFAKEQQAHSEVKA EAGASATLSCEVAQAQTEVTWFKDGKLLSS
SSKVRVEASGCSRRLVVQQAGKADAGEYSCEAGGQKLFRLDVAEPKLMFAKEQQAHSEVKA EAGASATLSCE
VAQAQTEVTWFKDGKLLSSSSKVRVEASGCSRRLVVQQAGKADAGEYSCEAGGQKLSFRLDVAEPKLVFAKEQ
QAHSEVKA EAGASATLSCEVAQAQTEVTWFKDGKLLSSSSKVRVEASGCSRRLVVQQVQKADAGEYSCEARGQ
KLSFRLDVADTRLMFAKEQQARTEVKA EAGNSATLSCEVAQAQTEVTWFKDGKLLSSSSKVRVEASGCSRRLV
VQQAGKADAGEYSCEAGGQKLSFRLDVAEAE SQIPERPSRREPLVVKEHETIILTATIAAPSVAAV TWLKDGV
EIRRSKRHEATSLGDTHTLTVRGAQVLD SAIYSCRVGKEGQDFPVQVEEVA AKFSKPLEPVEGELGGTVMLVC
ELSP EQAEVWRCGNTQLRPGKRFQMTSEGPRRTLTVSGLREDDAE EYVCE SRDDRTSARLTVKVRVVKFTS
GLSAMVAEEGQEATFQCVVSPSDAGVTWYKDGMLQLPSEKFMVVEGASRS LTI LGLTLEDAGQVTVAEAGAS
SSAALRVREAPVLFKKKLEPQTV EERTSVTLEVELTRPWPEVKWTRNAAVLTPSENVEIRAEGARHCLVLR SV
GFADRGGFFGCETPDDKTQAKLNVEMRQVRLV RGLQEVEAKEQGTASMDVELSHAEVEGSWTRDGLRQLQPGPKC
HLAVQGPVHILTL SALQPQDSGLVAFRAEGVHTSARLIVTELPVSFTRVLQDQVATQKEKVTLECELSRFPVDV
RWLKDGVELRAGKAIGIVAQGTCSRSLVIYRCETGDQGVYVCDALDAQTSASLRVQGRTYTLIFRRLAEDAGE
VKFVAENAESRAHLRVKELPVTLLRPLRDKIAMEKHRGVLECCQVSRASAQVRWFKGGVELQSGPKYEVVSDGL
YRKLVIN DVQPEDEDTYTC DAGNVKTS AQFFVEEQSITIVRGLKDMTVM EPAPAWFECETSIPSVRPPKWL LG
KTVLQAGGNVGL EQDGTVHRLTLHKTCSTMTGPVHFTIGKSRSSAQLVVS DI PVVLRPLEPKAGRELQSVVL
SCDFRPAPKAVQWYKDDT PLSPEKFKMALEGM AELRILRLTPADAGVYRCQAGSAQSSAEVTV EAREVTVI
QPLQDAEAMEEGRVCFSC ELSHKDEDI EWSLNGTPLYNDSFHEI SHEGCLHTLV LKSVRQADTGTVCATSPKV
SVSARLVVKGKPVVFLKALDDVSAEERGTLTLQCEVSDPEARV VWRKDGVELGSPDKYDFLHKAGARGLTVHD
LSHEDAGLYTCQVGSKETQSKVSVHDLHVGITKRLKTVEVLEGE SCSFECVLSHESPSDPAVWTVGGKTVGGS
GHFHAVRQGRKYTLTVKDAALSDAGEV VFSVLGLT SKASLI IRE RPVDITKPLEDQRTTLGEDVMLSC ELSRA
GTSVRWLKDGKAIRKSQKYDLLSEGTRAVLVVRKASLKDSGEYTCETEPSKSTAKLCVEEKANRFTEELADLQ
VEEKGRAVFTCKTEHPASVVTWRKGLLELRASGKHVPSQEGTLTKLTINALERTSDTYTCDIGQARTQARLL
VHGQKVRVIEDLEDTAVQEGSSAKFCCRIAPADYGPVHWFLDKTPLHSNELNEITVQPGGYHVLTLRQLAL KD
SGTVYFEAGDQRTSAALRVTEKPSIFSRPLTDVTVTEGEDLTLVCETTTVDSSVRWTKDGKTLRPSARCQLSH
EGCQAQLLITATTPQDGGRYKCEIGGASSSIVRVHALPVRFRESLKDVEVPEGKAATLRCVLSVAAPVEWR
HGDDVLKSSNKYSLRQEGAVLELVIRDLQPDQSGQYSCSFGDQTTSATLTVKTS SAQFVGLRKNKEATEGTTV
TLRCELTK EAPVEWKKGTETLRNGDKYSLKQDGAVCELQICSLLVADAGEYSCVCGQEKTSATLTVKALLVHF
VRRLSRKEATEGDTTTLQCELSKAAPVEWRKGTETLRDGD RYSLKQDGAVCELQIRSLTIADAGEYLC TCGQE
KTSATLTVRALPAKFKDSLKNEEATEGTTATLSCELSKAAPVTWKKGPKTLQSGDVKVLRQDGAVCGLQIHGL
TMADAGEYSCVCGQEKTSATLTVRGLPAKFIEDLRSQEATEGATAILRCELSKAAPVEWRKGS ETLKDGDRYT
LRQDGAVCELQIRGLAVVDGTGYS LPTKFTEGLRNEEATEGTMATLRCQMSKAAPVEWRKGS ETLR DGD RYS
LRQDGAMCELQIRGLTIEDSGEYTCVCGQEKTSATLSVKALPSRFIEDLRSQEATEGTMATLRCQMSKTAPVE
WKKGSETLRDGGRYSLRQDGPVCELQICDLAVEDAGEYSCVCGQEKTSATLSIKALPPRFIEDLRSQEATEGT



MATLRCQMSKAAPVEWRKGSSETLGDGGRYSLRQNGAVCELQIHDLAVEDTGEYSCVCGQEKTSATLNVKALPP
RFIEDLRSQEATEGTMATLRCQMSKAAPVEWRKGSSETLRDGGRYSLRQDGA VCELQIHDLVDV EDAGQYSCVCG
QEKTSAVLTVDALPPKFTEGLKKEEATEGTMVTLRCQMSKEATVEWRKGAKTSLSDGGRYSLRQDGA MCELQIC
GLAVEDAGEYSCVCGQEKTSATLSVKALPPRFIEDLRSQEATEGTMATLRCQMSKAAPVEWRKGSSETLRDGD
YSLRQDGA VCELQIRDLAVEDAGEYLCVCGQEKTSATLSVKALPPRFIEDLRSQEATEGTMATLRCQMSKAAP
VEWRKGSKTLRDGDYSLRQDGA MCELQICDLAVEDTGDYSCVCGQEKTSATLSVKALPPRFIEDLRSQEARE
GTVATLRCRMSKAAPVEWRKGSSETLKDGDYSLRQEGNLCELQIRDLAVEDTEEYSCVCGQEKTSATLSVKAL
PAKFIEDLRSQEAPESSTVTLRCKLSKKASVWKKGSETLRNGARYSLRQDGA VCELEIRDLTVEDTGEYSCT
CGQERTSATLSIMAPQVVFLQNLQAEEGSMASLRCELSVNAAMVWSKGGLELQGDTRREARQQGCVAEL
LLRDLRREDAGEYSCTCGSQTTSATLMVTAAPVRFRELQAQDVDEGATARLRCELSREAVSVEWRKGS LQLF
PCAKYQMVQEGTTAELLVHGVEQEDAGEYTC DAGHTQSIARLSVRAPKPKFKTDLQSTEQEAGGTARLCCQLS
EAEFGTPVQWLKEGVELHVGSKYEMRRQGA VCELLIHGLEAKDTGEYACL VGGQKTLASLRVKEPEVTIVRGL
VDMEVQADEDEFTCKVSQAGATDVQWHLQGLPLQSNVTEVAVLADGCTHVLQ LKGVTLEDAGTVSFHVGG
SSSAQLTVRVPEVTVLEPLKDVQLSEGQDAHFRCRLSRASGQEARWALGGVPLQCNEMNDITVEQGTLYLLTL
HKVTLEDAGTITLQVGS CSSEALQKVTAKN TVLRGLENVDALEGG EALFECQLSQPEVA AHTWLLDDEPVHTS
EKVEVVYFENGLRHLLLLKNLKPQDSCRVTFLAGDVVTS AFLTVRGWRLEVLEPPHDASVKAGMQVRF TCILS
EAVPVGEATWYINGAAIQPDDTDWTVTTDGS HHALTLSNAQPQHAGEVTF AARDAVASARLSVLALPDPPEDA
EVVGRSDHSVTL SWVAPMSDGGGLCGYRVEMKEASTGQWQLCHDLVPGPECVVDDLVP GKTYFRFVAAVGA
GAGEPVHLPQMVKIAPAPAPAPAPAPAPAPETRQAVVGEDIC LELEVAADGGEVVWHKGTERRIQPGGHFEVLS
RGQRQMLVIKGFRTEDQGEYRCGPIQGLPSSGAATFNVMVMTSGSGDEVPAQPSLPPEAAQEGDLHLLWEALAR
KRRMSREPTLDSISELPEEDSRVQHLRQEA EETAPDLSEGYSTADELARTGEADLSHTSSDDES RAGT PSLVT
YLK KAGGPGISPLASKHEAQVTSVKPQKQEPVPTCPPPGDLSAADLMDPSLDKAAVKIQAAF KGYKVRKE
MKQQEGPVFSRTFGDTEAQVGVLRLECVLATKTD MRACWLKDGIELTDGRHYHIDQLKDGTC SLLVTGLAPT
DSGRYTCQVSTKSGRVSHSACVVVSGTESEAESSSGGELDDAFRAARRLHRLFR TKSPAELSEELFLSADE
GPGEPEEPADWQTYREDENFVCIRFESLAEARQAVTCFRNMFATMGIGVEISLGEQGPGRVEMRIGKVAPTVT
PAVPLAKTPGLQTS DAAPVFLTELQNDVQDGYPMSFDCVVTGQVPVPSVRWFKDGLLEEDDHYMINEDQQGG
HQLLIITAVVPADMGVYRCLAE NSMGVSSSTKAELRVELTSTDYDTAADATETSSYFSAQGDYHSSREQEGTESDE
GQLPQVLEELKDLQVAPGTR LAKFQLKVKGYPA PKLYWFKDGGQPLTSDHIRMTDKKTLHTLEIVSVTREDSG
QYAAYSNAVGAAYSSARLLVRGPSEPEEK PASDVHERLVPPRI LEKFTPKKVKRGSSITFSVKVEGHPAPSV
HWLKEEA EKGV LWIGPDTPGYTMASSSKQHS LVL LDVGRQHOGTYTCIATNPAGQALCSASLHISGLAKEEEQ
ERVKEALISSFLQGTSAVSAQMSESAGFADLVGQSKGESLVAEEAHSHLSLAEVGT EEF LQKLT SQI TEMVS
AKISQAKLQVPGGDSDEETKTPSASPRHGRSRPSSSVQESSSEEDGDSRGEIFDIYVVTADYLP LGAEQDAI
ILREGQYVEVLD SAHPLRWLVR TKPKSSPSRQGWVSPAYLDKRLKLSPEWGPTEAPEFPGEAVSEDEYRTRL
SSVIQELLSSEQAFV GELQFLESHHMKHLERSPRVPAAVASQKTVIFRNVQDISHFHSSFLKELQCGCTDDD
AMCFIKNQEAFAKEYLELVLGRVQAESVVVSTPVQEFYKKYAEETLSAKDPTQPPPPPLQHYLEQPV ERVQKYQ
ALLKELIRNKARNRNCALLEQAYAVVSALPQRAENKLVSLMENYPGTLEALGEP I RQGHFIWEGAPGARM
PWKGHNHRHVF LFRNYLVIC KPRRDSRTD TFSYVFRNMMKLSSIDLNDQVEGD DRAFEVWHEREDSVRKYLLQA
RTVI IKNSWVKEICGIQORLAQP VWRPPEFEEELADCTAELGETVKLACRVTGT PKPIVSWYKDGKPV EVDPH
HILIEDPDG SCTLILDNLTGIDSGQYMCFAASAAGNASTLGKILVQVPPRFVNVKVRATPFVEGEDAQITCTVE
GAPYQIRWYKDG TLLAPGNRYRMLNEPRSGVLV LVIQAASKEDLGHYECELVNRLGSTRGGGELYMQSPALR
ARDQHHREQIVAAVEDTSVEGSAHSAQDGA DQQAASVLWRLLGSEALGPS PGDLPNTRQSEPPAFEEAASQIP
GAASGTPEVSPQPGTHKGLEQETTSSGSQGWTVPIRVEGTAWPGAGTGQLLLDVHSQVIMETTQRTYVCQAPDT
GVTRAPSMQVTIEDVQVQVGDMAQF DAVIEGHPPP I V TWYKGSTQLTSSARLSQRQDGT TYSLVLTDVAPHDA
GVYTCVANNAGGQV LCKAELLVHGDKLDAENQVYRRKLSHSFYDVQEE IGRGVFGFVKRVQHKGNMFC AAKF
IPLRSKTRAQAYQYR DILATLGHPLVTGLLDQFETRKTLLIILELCSSEELLDRLFKKGVVTEAEVKVYIQQL
VEGLHYLHSHGILHLDIKPPN ILMVHPAREDIKICDFGFAQKITPSEPQYSKYGSPEFVSPEIIEQNPVSEGS
DIWAMGVI SYLSLTCSSPFAGESDRATLLNVLEGRVSWSSPTAAHLS EDAKDFIKATLQRTPRARPSTSQCLA
HPWFLKSMPAEEAHFINTKQLKFL LARSRWQRSLMSYKSI LVMRSIPELLQGPPDSPSLGVARHLRGEASGAS
SSSSSSDNELAPFARAKSLPPSPVTHSPLLHPRGFLRPSASLPEETEASMP TADA AVPAS PQSAGPPASPGCV
PRHSV ISSLFYQQAGEGA ERGNKTS GAKRHPARRRHLLKGGYIARALPGLREPLMEYS LLEEEAAREEQASIM
TKTPSFETALRLPSSSVREVPGRSHSLDNPPVT TGPSPEACKEQLLFPSTGLTHE TTAKDRGHKEGFLQESV
PFPMSGDSRPGKQEGSSQDSRCRGKPASSCHSELGSGS QEGCGPPSSQSLGSLPPQSLKKE LSTSCGPLFSEQ
PQAAPFPTQVSPLLGKEPEQDGS LSEGPVPVSSSPGASQVDASLDTEGLSEAGDTCDFTPPPQRPEQAT
TRKFSLESRGGYAGVAGYGTFAFGDAGGMLGQGLPLARMAWAVS QSSEEQDEAATESQPLES LGPIAEASG
VPLRTSPSLTPWEEVEQVSLVQIRDLSGDAEAADTISLDISEVDPAYLNLSDLYDIKYL PFEFMI FRRVPKPI
EQPESPGSETEAGQGLADFL EEAAWPWP GELGLRAGLEITEEPEEPGDLEALLGEAAVGRKRKWSPSRGLFQF
PGRCLSGEEPVELGLRQRVKASMAHISRILKGRPEGPEREPPRKKAGLASFRLSGLKGRDQELSDEAVVLGQ
SVTLACQVLAQPTAQATWSKDGVLLESSGHLLISSTLKNFQLLTI LVVKEEDLGTYTCCVSNPLGTA VTTGVL

RKAERPSSSPRPEVGEYKDAVLLVWKPVESECGPVTVYIVQCCIEGGSWTTLASDISDCCYLTGKLSRGGMYIF  
RTACVSKAGMGPYSSPSEQVLLGGPNHLASEEESSRRGPAQLLPSTKTFAFQMQIRRRGRFSVVRQCREKASGR  
ALAAKIVPYQPEDKTAVLREYEALRHLHHPHLAQLHAAYLSRHLVLI LELCSGPELLPSLAERESYSESDVK  
DYLWQMLSATQYLHAQHILHLDLRSNNMMVTEYNLLKVIDLGNALDQEKVPAPENFKDYLETMAPELLEGG  
GAVPQTDIWAIGVTAIFIMLSGEY PESSSEGTRDLQKGLRKLIRLSRCYAGLSGGAVAFLOSSLCAQPWGRPCA  
STCLQCGLWTEEGPTGSRPTPVTFPTVRLRAVFREREKRRALLYKKNLAQVR\*  
>rs48441780\_ENSMUSP00000038264\_c.9171:G>C\_p.A3058P  
ENSMUST00000047441.14|Obscn-202|ENSMUSG00000061462|-|chr11:g.58964369:C>G  
MDHSFSGAPRFLTRPKAFVVSVGKDATLSCQIVGNPTPHVSWEKDRQPVEAGARFRLAQDGDVYRLTILDLAL  
GDSGQYVCRARNAIGEAFAAVGLRVDSEGTCAEQAPHFLLRPTSIRVREGADATFRCRVGGSPQPAVSWSKDG  
RRLGPPDAPHVRVEEHGESSALRIRSARPRDGGTYEVRAENPLGSASAAAALVVDSDAEVAGPPGTSTATLLA  
HLQORREAMRAEGIPSPPGAGTRTCTVTEGKHARLSCFVTGEPKPEVWKKDQGLVTEGRRHVVEDEQENF  
VLKILFCKQSDRGLYTCTASNLVGQTYSSVLVVVREPTVPFKKRLQDLEVREKESATFQCEVAQPAEAWFK  
EETRLWASAKYDIEEGETERRLTVRNVSADDDAVYICETTEGSRVVAELSVQGNLTKLPRKTAVRTGDTAIF  
WVELAVPEGPVRLRNQEEVAGGRVAITAEGTCHTLTI FQCTLEDMGEVAFVSGGCRTTTQFCVSAPRRPPL  
YPPADPVVAKTESVTLWSAPPHGDRPVTIDGYVLEKRLKLGAYAWSRCHEAGWLATTEFTITGVAEEGDFQ  
FRVSAINHFGQGPYLEFPGTMHLVPLAVKTPKAVEAVEGGEVTFVSDLTVAASSGEVFLDGEALKASSIYVI  
RCDRTRHMLTIREVPARLHGAQLKFEVANGIETS IQMVVRAALGLPSSKLPAAAAREVLAQLHEEAQLLAE LSD  
QAAA VTLWKDGRELSLGPKEYMQVSAGRRALLVRDVAQDDAGLYECVSRGSRRTAYQLLVQDITDGYRDWGPAG  
PQKHMCKCAGAKIARYLGSSCYRFLQYDKGVWHLEAALDTRQKGTSSCSLHEKPKLVFAKQQAHSEVKA  
AGASATLSCEVAQAQTEVTFWFKDGKLSSSSKVRMEASGCSRRLVVQQAGKADAGEYSCEAGGQKLSFRLDVA  
EPKMFVFAKEQQARSEVKAEGASATLSCEVAQAQTEVTFWFKDGKLSSSSKVRMEASGCSRRLVVQQAGKAD  
GEYSCEAGGQKLSFRLDVTEPKLVFAKEQQARSEVKAEGVNSATLSCEVAQAQTEVTFWFKDGKLSSSSKVRM  
EASGCSRRLVVQQAGKADAGEYSCEAGGQKLSFRLDVAEPKLVFAKEQQARSEVKAEGNSATLSCEVAQAQ  
EVTWFKDGKLSSSSKVRMEASGCSRRLVVQQAGKADAGEYSCEAGGQKLSFHLDVTEPKLVFAKEQQAHSE  
KAEAGASATLSCEVAQAQTEVTFWFKDGKLSSSSKVRMEASGCSRRLVVQQAGKADAGEYSCEAGGQKLSFRL  
DVAEPKLVFAKEQQARSEVKAEGASATLSCEVAQAQTEVTFWFKDGKLSSSSKVRMEASGCSRRLVVQQAGK  
ADAGEYSCEAGGQKLSFRLDVAEPKLVFAKEQQANSEVKAEGASATLSCEVAQAQTEVTFWFKDGKLSSSSK  
VRVEASGCSRRLVVQQAGKADAGEYSCEAGGQKLSFRLDVAEPKLVFAKEQQAHSEVKAEGASATLSCEVAQ  
AQTEVTFWFKDGKLSSSSKVRVEASGCSRRLVVQQAGKADAGEYSCEAGGQKLSFRLDVAEPKLVFAKEQQAH  
SEVKAEGASATLSCEVAQAQTEVTFWFKDGKLSSSSKVRVEASGCSRRLVVQQAGKADAGEYSCEAGGQKLS  
FRLDVAEPKLVFAKEQQAHSEVKAEGASATLSCEVAQAQTEVTFWFKDGKLSSSSKVRVEASGCSRRLVVQQ  
AGKADAGEYSCEAGGQKLFRLDVAEPKLVFAKEQQAHSEVKAEGASATLSCEVAQAQTEVTFWFKDGKLS  
SSKVRVEASGCSRRLVVQQVQKADAGEYSCEARGQKLSFRLDVAEAEESQIPERPSRREPLVKEHETIILTAT  
IAAPSVAAVTWLKDGVEIRRSKRHEATSLGDTHLTVRGAQVLD SAIYSCRVGKEGQDFPVQVEEVAKF SKP  
LEPVEGELGGTVMLVCELSPEQAEEVWRCGNTQLRPGKRFQMTSEGPRTLT VSGLREDDAEYVCE SRDDRT  
SARLTVKVPVVKFTSGLSAMVAEEGQEATFQCVVSPSDAGVTWYKDGMLQPSSEKFMVMEVSGASRSLTILGL  
TLEDAGQVTVAEAGASSAALRVREAPVLFKKKLEPQTVERTSVTLEVELTRPWPVEVKWTRNAAVLTPSENV  
EIRAEGARHCLVLRVGFADRGFFGCETPDDKTQAKLNVEMRQVRLVRLQVEVEAKEQGTASMDVELSHAEVE  
GSWTRDGLRLQPGPKCHLAVQGPVHILTL SALQPQDSGLVAFRAEGVHTSARLIVTEL PVSFTRVLQDVVATQ  
KEKVTLECELSRPVDVRLKDGVELRAGKAIGIVAQGTCSRSLVIYRCETGDQGVYCDALDAQTSASLRVQGR  
TYTLIFRRVLAEDAGEVKFVAENAESRAHLRVKELPVTLLRPLRDKIAMEKHRGVLECVSRSASAQVRWFKGG  
VELQSGPKYEVVSDGLYRKLVIN DVQPEDEDTYTC DAGNVKTSAQFFVEEQSITIVRGLKDMTVM EPAPAWFE  
CETSIPSVRPPKWL LKTVLQAGGNVLEQDGTVHRLTLHKTCSTMTGVPVHFTIGKSRSSAQLVVS DI PVVLT  
RPLEPKAGRELQSVVLSCDFRPAPKAVQWYKDDTPLSPSEKFKMALEGGQMAELRILRLTPADAGVYRCQAGSA  
QSSAEVTVAREVTVIQPLQDAEAMEEGRVCFSCELSHKDEDI EWSLNGTPLYNDSFHEISHEGLHTLVLKS  
VRQADTGTVCATSPKVSVSARLVVKGKPVVFLKALDDVSAEERGTLTLQCEVSDPEARVVWRKDGVELGPSDK  
YDFLHKAGARGLTVHDLSDHEDAGLYTCQVGSKETQSKVSVHDLHVGITKRLKTVEVLEGESECSFECVLSHESP  
SDPAVWTVGGKTVGGSGHFHAVRQGRKYTLTVKDAALSDAGEVVFVSLGLTSKASLIIRERPVDI TKPLEDQR  
TTLGEDVMLSCELSRAGTSVRWLKDGKAIKRSQKYDLLSEGTRAVLVVRKASLKDSGEYTCETEPSKSTAKLC  
VEEKANRFTTEELADLQVEEKGRAVFTCKTEHPASVVTWRKGLLELRASGKHVPSQEGTLTKLTINALERTDSD  
TYTCDIQARTQARLLVHGQKVRVIEDLEDTAVQEGSSAKFCCRIPADYGPVHWF LDKTPLHSNELNEITVQ  
PGGYHVLTLRQLALKDSGTVYFEAGDQRTSAALRVTEKPIFSRPLTDVTVTEGEDTLVCE TTTVDSSVRWT  
KDGTTLRPSARQLSHEGCAQLLITATTPQDGGRYKECIGGASSSIVRVHALPVRFRESLTKDVEVPEGKAA  
TLRCVLSVAAPVWEHRGDDVLKSSNKYSLRQEGAVLELVIRDLQPDQSGYSCSFGDQTTSATLTVKTS SAQ  
FVGKLRNKEATEGTTVTLRCELTK EAPVEWKKGTETLRNGDKYSLKQDGA VCELQICSLLVADAGEYSCVCGQ  
EKTSATLTVKALLVHFVRRRLRSKEATEGDTTTLQCELSKAAPVEWRKGTETLRDGD RYSLKQDGA VCELQIRS  
LTIADAGEYLCTCGQEKTSATLTVRALPAKFKDSLKNEEATEGTTATLSCELSKAAPVTWKKGPKTLQSGDKY

VLRQDGA VCGLQIHGLTMADAGEYSCVCGQEKTSATLTVRGLPAKFIEDLRSQEATEGATAILRCELSKAAPV  
EWRKGETLKDGD RYTLRQDGA VCELQIRGLAVVDGTYS SLP TKFTEGLRNEEATEGTMATLRCQMSKAAPV  
EWRKGETLRDGD RYSLRQDGA MCELQIRGLTIEDSGEYTCVCGQEKTSATLSVKALPPRFIEDLRSQEATEG  
TMATLRCQMSKAAPVEWRKGETLGDGG RYSLRQNGAVCELQIHDLAVEDTGEYSCVCGQEKTSATLNVKALP  
PRFIEDLRSQEATEGTMATLRCQMSKAAPVEWRKGETLRDGG RYSLRQDGA VCELQIHDLVDVEDAGQYSCVC  
GQEKTSAVLTVDALPPKFTEGLKKEEATEGTMVTLRQMSKEATVEWRKGAKT LSDGG RYSLRQDGA MCELQI  
CGLAVEDAGEYSCVCGQEKTSATLSVKALPPRFIEDLRSQEATEGTMATLRCQMSKAAPVEWRKGSKT LRDGD  
RYSRLRQDGA MCELQICDLAVEDTGDYSCVCGQEKTSATLSVKAPQVVFQQPLQNLQAEEGSMASLRCELSVPN  
AAMVWSKGGLELQGDTRREARQQGCVAELLLRDLRREDAGEYSC TCGSQTTSATLMVTAAPVRFLELQAQDV  
DEGATARLRCELSREAVSVEWRKGS LQLFPCA K YQMVQEGTTAELLVHGVEQEDAGEYTC DAGHTQS IARLSV  
RAPKPKFKTDLQSTEQEAGGTARLCCQLSEAE PGTPVQWLKEGVELHVGS KYEMRRQGA VCELLIHGLEAKDT  
GEYA CLVGGQKT LASLRVKEPEVTIVRGLVDMEVQADE DVEFTCKVSQAGATDVQWHLQGLPLQSNVTEVAV  
LADGCTHVLQ LKGV TLEDAGTVSFHVGG LSSSAQLTVRVPEVTVLEPLKDVQLSEGD A HFRCRLSRASGQEA  
RWALGGVPLQCNEMNDITVEQGTLYLLTLHKVTLEDAGTITLQVGCSSQAQLKVTAKNTVLRGLENDVALEGE  
GEALFECQLSQPEVA AHTWLLDDEPVHTSEKVEVVYFENGLRHLLLLLNKLPQDSCRVTFLAGDVVTS AFLTV  
RALPDPPEDAEVVGRSDHSVTLVSWAPMSDGGGGLCGYRVMKEASTGQWQLCHDLVPGPECVDDLVPGKTY  
RFRVA AVGPAGAGEPVHLPQMVKIAPAPAPAPAPAPAPAPETRAVVGEDICLELEVAADGGEVVWHKGTERTI  
QPGHFVEVLSRGQRQMLVIKGFRTEDQGEYRCGPIQGLPSSGAATFNVMVTSGSGDEVPAPQPSLPEAAQEGD  
LHLLWEALARKRRMSREPTLDSISELPEEDSRVQHRLRQEAEEETAPDLSEGYSTADELARTGEADLSHTSSDDE  
SRAGT PSLV TYLKKAGGPGISPLASKHEAQVTTSVKPKQKQEPVPTCPPPGDL SAADLMDPSLDKAAVKIQA  
AFKGYKVRKEMKQQEGPVFSRTFGDTEAQVGDVLRLECVLATKTKDMRACWLKDGIELTDGRHYHIDQLKDGTC  
SLLVTGLAPTDSGRYTCQVSTKSGRVSHSACVVVSGTESEAESSSGGELDDAFRRAARRLHRLFRTKSPAELS  
EELFLSADEGPGEPEPADWQTYREDENFVICRFESLAEARQAVTCFRNMFATMGIGVEISLGEQGRGVEM  
RIGKVAPT VTPAVPLAKTPGLQTSDAAPVFLTELQNDVQDGYPMSFDCVVTGQPVPSVRWFKDGKLEEDDH  
YMINEDQQGGHQLIITAVVPADMGVYRCLAENSMGVSTKAE LRVELTSTDYDTAADATETSSYFSAQGYLSS  
REQEGTESDEGQLPVLEELKDLQVAPGTRLAKFVKVYPA PKLYWFKDQGPLTSDHIRMTDKKTLHTLE  
IVSVTREDSGVYAAIYI SNAVGAAYS SARLLVRGPEPEEK PASDVHERLVPPRILEKFTPKVKRGSSTIFS  
KVEGHPAPSVHWLKEEA EKGV LWIGPDTPGYTMASSSKQHSLVLLDVG RQH QGTYTCIATNPAGQALCSASLH  
ISGLAKEEEQERVKEALISSFLQGTSQAVSAQMSE SAGFADLVGQSKGESLVAAEEAHSHLSLAEVGT EEF LQK  
LTSQITEMVSAKISQAKLQVPGGDSDEETKTPSASPRHGRSRPSSSVQESSSESEDGDSRGEIFDIYVVTADY  
LPLGAEQDAIILREGQYVEVLDSAHPLRWLVRTKPTKSSPSRQGWVSPAYLDKRLKLSPEWGPTEAEPFGEA  
VSEDEYRTRLSSVIQELLSSEQAFV GELQFLESHHMKHLERSPRVPAAVASQKTVIFRNVQDI SHFHS SFLKE  
LQCGCTDDDVAMCFIKNQEA FEKYLEFLVGRVQAESVVVSTPVQEFYKKYAEETLSAKDPTQPPPPPLQHYLE  
QPVERVQKYQALLKELIRNKARNRQNCALLEQAYAVVSALPQRAENKLVHSLMENYPGTLEALGEP IRQGHFI  
VWEGAPGARMPPKGNHRHVF LFRNYLVICKPRRDSRTDTFSYVFRNMMKLS SIDLNDQVEGDDRAFEVWHERE  
DSVRKYL LQARTVI IKNSWVKEICGIQORLAQPVWRPPEFEELADCTAELGETVKLACRVTGT PKPIVSWYK  
DGKPV EVDPHHILIEDPDG SCTLILDNLTGIDSGQYMCFAASAAGNASTLGKILVQVPPRFVNVKVRATPFVEG  
EDAQITCTVEGAPYPQIRWYKDGTL LAPGNRYRMLNEPRSGVLV LVIQAASKEDLGHYECELVNR LGSTRGGG  
ELYMQSPALRARDQH HREQIVAAVEGAPSMQVTIEDVQVQVGDMAQF DAVIEGHPPP IVTWYKGTQLTSSAR  
LSQRQDGT TYSLVLT DVA PHDAGVYTCVANNAGGQVLCKAELLVHGGDKLDAENQVYRRKLSHFYDVQEEIGR  
GVFGFVKRVQHKG NKMFC AAKFIP LRSKTRAQAYQERDILATLGHPLVTGLLDQFETRKTLLIILELCSSEEL  
LDRLFKKGVVTEAEVKVYIQQLVEGLHYLHSHGILHLDIKPPNIMVHPAREDIKICDFGFAQKITPSEPQYS  
KYGSP E FVSP EIEQN PVSEGS DIWAMGVI SYLSLTCSSPFAGESDRATLLNVLEGRVSWSSPTAAHLS EDAK  
DFIKATLQRTPRARPSTSQC LAHPWFLKSMPAAE AHFINTKQLKFL LARSRWQRSLMSYK SILVMRSIP ELLQ  
GPPDSPSLGVARHLRGEASGASSSSSSDNELAPFARAKSLPPSPVTHSPLLHPRGFLRPSASLPEETEASMP  
TADA AVPAS PQSAGPPASPGCVPRHSV ISSLFYQQAGEGA ERGNKTS GAKRHPARRRHLKGGYIARALPGLR  
EPLMEYSLLEEEAAREEQASLMTKT P SFETALRLPSSSVREV PGRSHSLDNPPVTTG PSPEACKEQLLFPST  
GLTHETAKDRGHKEGFLQESVFPFPPMSGDSRPGKQEGSSQDSCRGKPASSCHSELGSGSQEGCGPPSSQSLG  
SLPPQSLKKE LSTSCGPLFSEQPQAAPFTQVSPLLGSEKEPQDGS LSEGVPVPSSSPGSASQVDA SLDTEG  
LSEAGDTCDFTPPPQRPEQATTRKFSLESRGGYAGVAGYGTFAFGGDAGGMLGQGPLWARMWAVSQSSEEQ  
DEAATESPQPLESGLPIAEASGVPLRTSPSLTPWEEVEQVSLVQIRDLSGDAEAAADTISLDISEVDPAYLNL  
DLYDIKYL PFEFMI FRRVPKPIEQPESPGSETEAGQLADFL EEA AWPWP GELGLRAGLEITEEPEEPGDLEA  
LLGEAAKGRKRKWSPSRGLFQFPGRCLSGEEPVELGLRQRVKASMAHISRILKGRPEGPEREGPPRKKAGLAS  
FRLSGLKGRDQELSDEAVVLGQSVTLACQVLAQPTAQATWSKDGVLLESSGHLLISSTLKNFQLLTI LVVKEE  
DLGTYTCCVSNPLGTA VTTGVL RKAERPSSSPRPVEGELYKDAVLLVWKPVE SCGPVTYIVQCCIEGGSWTTL  
ASDISDCCYL TGKLSRGGMYIFRTACVSKAGMPYSSPSEQVLLGGPNHLASEEESSRGRPAQLLPSTKTF AF  
QMQIRGRF SVVRQCREKASGRALAAKIVPYQPEDKTA VLREYEALKRLHHPHLAQLHAAYLSPRHLV LILEL  
CSGPELLPSLAERESYSESDVKDYLWQMLSATQYLHAQHILHLDLRSENMMVTEYNLLKVIDLIGNAQSLDQEK



LQIHGLTMADAGEYSCVCGQEKTSATLTVRGLPAKFIEDLRSQEATEGATAILRCELSKAAPVEWRKGETLKD  
 DGDRYTLRQDGA VCELQIRGLAVVDGTYSLSLPTKFTTEGLRNEEATEGTMATLRCQMSKAAPVEWRKGETLKD  
 DGDRYSLRQDGA MCELQIRGLTIEDSGEYTCVCGQEKTSATLSVKALPSRFIEDLRSQEATEGTMATLRCQMS  
 KTAPVVEWKKGSETLRDGGRYSLRQDGPVCELQICDLAVEDAGEYSCVCGQEKTSATLSIKALPPRFIEDLRSQ  
 EATEGTMATLRCQMSKAAPVEWRKGETLGDGGRYSLRQNGAVCELQIHDLAVEDTGEYSCVCGQEKTSATLN  
 VKALPPRFIEDLRSQEATEGTMATLRCQMSKAAPVEWRKGETLRDGGRYSLRQDGA VCELQIHDLVEDAGQ  
 YSCVCGQEKTSAVLTVDALPPKFTEGLKKEEATEGTMVTLRCQMSKEATVEWRKGA KTLSDGGRYSLRQDGA M  
 CELQICGLAVEDAGEYSCVCGQEKTSATLSVKALPPRFIEDLRSQEATEGTMATLRCQMSKAAPVEWRKGET  
 LRDGGRYSLRQDGA VCELQIRDLAVEDAGEYLCVCGQEKTSATLSVKALPPRFIEDLRSQEATEGTMATLRCQ  
 MSKAAPVEWRKGSKTLR DGGRYSLRQDGA MCELQICDLAVEDTGDYSCVCGQEKTSATLSVKALPPRFIEDLR  
 SQEAREGTVATLRCRMSKAAPVEWRKGETLKDGGRYSLRQEGNLCELQIRDLAVEDTEEYSCVCGQEKTSAT  
 LSVKALPAKFIEDLRSQEAPESSTVTLRCKLSKKASVVWKKGSETLRNGARYSLRQDGA VCELEIRDLTVEDT  
 GEYSCTCGQERTSATLSIMAPQVVFQQPLQNLQAEEGSMASLRCELSVPNAAMVWSKGGLELQGDTRREARQQ  
 GCVAE LLLRDLRREDAGEYSC TCGSQTT SATLMVTAAPVRFLRELQAQDVDEGATARLRCELSREAVSVEWRK  
 GSIQLFPKAKYQMVQEGTAE LLLVHGVEQEDAGEYTC DAGHTQS IARLSVRAPKPKFKTDLQSTEQEAGGTAR  
 LCCQLSEAE PGTPVQWLKEGVELHVGSKYEMRRQGA VCELLIHGLEAKDTGEYACL VGGQKTLASLRVKEPEV  
 TIVRGLVDMVEVQADEVFTECKV SQAGATDVQWHLQGLPLQSNVTEVA VLADGCTHVLQKGVTL EDAGTVS  
 FHVGLSSSAQLTVRVPEVTVLEPLKDVQLSEGDHFRCLRSRSGQEARWALGGVPLQCNEMNDITVEQGT  
 LYLLTLHKVTLEDAGTITLQVGS CSSEAQLKVTAKNTVLRGLENVDALEGGEALFECQLSQPEVA AHTWLLDD  
 EPVHTSEKVEVVYFENGLRHLLLLKNLKPQDSCRVTFLAGDVVTS AFLTVRGRWLEVL EPPHDASVKAGMQVR  
 FTCILSEAVPVGEATWYINGAAIQPDDTDWTVTTDGS HHALTLSNAQPHAGEVTF AARDAVASARLSVLALP  
 DPPEDAEVVGRSDHSVTL SWVAPMSDGGGGLCGYRVMKEASTGQWQLCHDLVPGPECVDDLVPGKTYRFRV  
 AAVGPAGAGEPVHLPQMVKIAPAPAPAPAPAPAPETRAVVGEDICLELEVAADGGEV VWHKGTERRIQPGG  
 HFEVLSRGRQMLVIKGFRTEDQGEYRCGPIQGLPSSGAATFNVMVTS GSGDEVPAQPSLPPEAAQEGDLHLL  
 WEALARKRRMSREPTLDSISELPEEDSRVQHLRQEA EETAPDLSEGYSTADELARTGEADLSHTSSDDES RAG  
 TPSLVTYLKKAGGPGFISPLASKHEAQVTT SVKPKQKVEFPVPTCPPPGDL SAADLMDPSLKDAAVKIQAAFKG  
 YKVRKEMKQEGEVSRTFGDTEAQVGDVLRLECKV LQATKTD MRACWLKDGIELTDGRHYHIDQLKDGTCSSLV  
 TGLAPTDSGRYTCQVSTKSGRVSHSACVVVSGTESEAE SSSGGELDDAFRRAARRLHRLFRTKSPAELSEEEL  
 FLSADEGPGEPEEPADWQTYREDENFVCIRFESLAEARQAVTCFRNMFATMGIGVEISLGEQGPGRVEMRIGK  
 VAPTVPAPVPLAKTPGLQTS DAAPVFLTELQNDVQDGYPMSFDCVVTGQPVPSVRWFKDGKLEEDDHYMIN  
 EDQQGGHQLIITAVVPADMGVYRCLAENSMGVSSTKAELRVELTSTDYDTA ADATETSSYFSAQGYLSSREQE  
 GTESDEGQLPQVLEELKDLQVAPGTRLAKFQLKVKGY PAKLYWFKDGOPLTSDHIRMTDKKTLHTLEIVSV  
 TREDSGQYAAYSNAVGAAYSSARLLVRGPSEPEEK PASDVHERLVPRI LEKFTPKKVKRGS SITFSVKVEG  
 HPAPSVHWLKEEA EKGV LWIGPDTPGYTMAS SSKQHS LVLVDVGRQH QGTYT CIATNPAGQALCSASLHISGL  
 AKEEEQERVKEALISSFLQGTSQAVSAQMSE SAGFADLVGQSKGESLV AEEAHSHLSLAEVGETEFLQKLT SQ  
 ITEMVSAKISQAKLQVPGGDSDEETKTPSASPRHGRSRPSSSVQESSSESDGDSRGEI FDIYVVTADYLP LG  
 AEQDAIILREGQYVEVLDSAHPLRWLVRTKPTKSSPSRQGWVSPAYLDKRLKLSPEWGPTEAPEFPGEAVSED  
 EYRTRLSSVIQELLSSEQAFV GELQFLESHHMKHLERSPRVPA AVASQKTVI FRNVQDISHFHSSFLKELQGC  
 GTDDDVAMCFIKNQEA FEKYLEFLVGRVQAESVVVSTPVQEFYKKYAEETLSAKDPTQPPPPPLQHYLEQVVE  
 RVQKYQALLKELIRNKARNRQNCALLEQAYAVVSALPQRAENKLVSLMENYPGTLEALGEP IRQGHFIVWEG  
 APGARMPWKGNHRHVFLFRNYLVICKPRRDSRTDTFSYVFRNMMKLSSIDLNDQVEGD DRAFEVWHEREDSVR  
 KYLLQARTVI IKNSWVKEICGIQQRLAQPVWRPPEFEELADCTAELGETVKLACRVTGTPKPIVSWYKDGKP  
 VEVDPHHILIEDPDG SCTLILDNLGTGIDSGQYMCFAASAAGNASTLGKILVQVPPRFVNVKVRATPFVEGEDAQ  
 ITCTVEGAPYPQIRWYKDGTL LLAGPNRYRMLNEPRSGVLVLV IQAASKEDLGHYECELVNLRLGSTRGGGELYM  
 QSPALRARDQHREQIVAAVEVTEQETKVPKKTVI I EETITTVVKS PRGRRQSPGKSPSRSPRRSASPRRPG  
 LLAPERLYPPGTSPSRLEVEQGRKAPVPALYVTEAEVHAPASQSQPKWLEVEETIEVRVKKTGSRGASPVRE  
 MTSRGE GILFTLPGGIPGRDPNANNNSNNSVYQEA RTWGP AVVHVGE PFI FQVDSVGNVDVVAASPEPEQVRA  
 SQKEENTERQEGCS DG DENTFLMEEPQD TDSLQGRDPKIL THNGRVLTLADLEDYVPQEGETFGCGDSTPSTP  
 DEPPCEVSVLQREI SEPTVGQPVL LNVRPPGTGATPSFFRPGSQVHSPESVSFLLREAWSGPVS AAPWTSS F  
 HTHVQSSVDGSHGSFKTEVSTQTVSFGAVGETVTLHIDPDGGEAPGPSQG\*  
 >rs48441780\_ENSMUSP00000020732\_c.9999:G>C\_p.A3334P  
 ENSMUST00000020732.13|Obscn-201|ENSMUSP00000061462|-|chr11:g.58964369:C>G  
 MDHSFSGAPRFLTRPKAFVSVGKDATLSCQIVGNPTPHVSWEKDRQFVEAGARFRLAQDGDVYRLTILDAL  
 GDSGQYVCRARNAIEGAFAAVGLRVDSEGTCAEQAPHFLLRPTSIRVREGADATFRCRVGGSPPAVSWSKDG  
 RRLGPPDAPHVRVEEHGESSALRIRSARPRDGGTYEVRAENPLGSASAAAALVVDSDAEVAGPPGTSTATLLA  
 HLQORREAMRAEGIPSPPPGAGTRTCTVTEGKHARLSCFVTGEPKPE TVWKKDGQLVTEGRRHVVEDEQENF  
 VLKILFCKQSDRGLYTCTASNLVGQTYSSVLVVVREPTVPFKKRLQDLEVREKESATFQCEVAQPA TEAAWFK  
 EETRLWASAKYDIEEGETERRLTVRNVSADDDAVYICETTEGSRVVAELSVQGNLTKLPRKTAVRTGDTAIF



WVELAVPEGPVWRWRNQEEMVAGGRVAITAEGTCHTLTI FQCTLEDMGEVAFVSGGCRTTTQFCVSAPRRPPL
YPPADPVVKAKTESSVTLWSAPPHGDRPVTIDGYVLEKRKLGAYAWSRCHEAGWLATTEFTITGVAAEEGDFQ
FRVSAINHFGQGPYLEFPGTMHLVPLAVKTPKAVEAVEGGEVTFVSDLTVASSGEWFLDGEALKASSIYVI
RCDRTRHMLTIREVPARLHGAQLKVFVANGIETSIQMVVRAALGLPSSKLPAAAAAREVLAQLHEEAQLLAE LSD
QAAAVTWLKDGRELSLGPKEYMQVSAGRRALLVRDVAQDDAGLYECVSRGSRRTAYQLLVQDITDGYRDWGPAG
PQKHMCKCAGAKIARYLGS SCYRFLQYDKGVWHWLEAALDTRQGKTSSCSLHEKPKLVFAKQQAHSEVKA E
AGNSATLSCEVTQAQTEVTFWKDGKLLSSSSKVRMEASGCSRRLVVQQAGKADAGEYSCEAGGQKLSFRLDVA
EPKLVFAKQQAHSEVKA EAGASATLSCEVAQAQTEVTFWKDGKLLSSSSKVRMEASGCSRRLVVQQAGKADA
GEYSCEAGGQKLSFRLDVAEPKLVFAKEQQARSEVKA EAGASATLSCEVAQAQTEVTFWKDGKLLSSSSKVRM
EASGCSRRLVVQQAGKADAGEYSCEAGGQKLSFRLDVTEPKLVFAKEQQARSEVKA EAGASATLSCEVAQAQ
EVTWFKDGKLLSSSSKVRMEASGCSRRLVVQQAGKADAGEYSCEAGGQKLSFRLDVAEPKLVFAKEQQARSEV
KAEAGNSATLSCEVAQAQTEVTFWKDGKLLSSSSKVRMEASGCSRRLVVQQAGKADAGEYSCEAGGQKLSFHL
DVTEPKLVFAKEQQAHSEVKA EAGASATLSCEVAQAQTEVTFWKDGKLLSSSSKVRMEASGCSRRLVVQQAGK
ADAGEYSCEAGGQKLSFRLDVAEPKLVFAKEQQARSEVKA EAGASATLSCEVAQAQTEVTFWKDGKLLSSSSK
VRVEASGCSRRLVVQQAGKADAGEYSCEAGGQKLSFRLDVAEPKLVFAKEQQANSEVKA EAGASATLSCEVAQ
AQTEVTFWKDGKLLSSSSKVRVEASGCSRRLVVQQAGKADAGEYSCEAGGQKLSFRLDVAEPKLVFAKEQQAH
SEVKA EAGASATLSCEVAQAQTEVTFWKDGKLLSSSSKVRVEASGCSRRLVVQQAGKADAGEYSCEAGGQKLS
FRLDVAEPKLVFAKEQQAHSEVKA EAGASATLSCEVAQAQTEVTFWKDGKLLSSSSKVRVEASGCSRRLVVQQ
AGKADAGEYSCEAGGQKLSFRLDVAEPKLVFAKEQQAHSEVKA EAGASATLSCEVAQAQTEVTFWKDGKLLSS
SSKVRVEASGCSRRLVVQQAGKADAGEYSCEAGGQKLFRLDVAEPKLVFAKEQQAHSEVKA EAGASATLSCE
VAQAQTEVTFWKDGKLLSSSSKVRVEASGCSRRLVVQQAGKADAGEYSCEAGGQKLSFRLDVAEPKLVFAKEQ
QAHSEVKA EAGASATLSCEVAQAQTEVTFWKDGKLLSSSSKVRVEASGCSRRLVVQQVQKADAGEYSCEARGQ
KLSFRLDVADTRLMFAKEQQARTEVKA EAGNSATLSCEVAQAQTEVTFWKDGKLLSSSSKVRVEASGCSRRLV
VQQAGKADAGEYSCEAGGQKLSFRLDVAEAE SQIPERPSRREPLVVKEHETIILTATIAAPSVAAVTWLKDG V
EIRRSKRHEATSLGDTHTLTVRGAQVLD SAIYSCRVGKEGQDFPVQVEEVA AKFSKPLEPVEGELGGTVMLVC
ELSPAEAEVWRCNTQLRPGKRFQMTSEGPRTLTVSGLEDDAEYVCE SRDDRTSARLTVKVRVVKFTS
GLSAMVAEEGQVFCFQVSPDAGVTWYKDGMLQPSEKFMVMEVSGASRSLTILGLTLEDAGQVTVAEAGAS
SSAALRVREAPVFLFKKLEPQTV EERTSVTLEVELTRPWPEVKWTRNAAVLTPSENVEIRAEGARHCLVLR SV
GFADRGF FGCETPDDKTQAKLNVEMRQVRLVVRGLQVEVEAKEQGTASMDVELSHA EVEG SWTRDGLRLQPGPKC
HLAVQGPVHILTL SALQPQDSGLVAFRAEGVHTSARLIVTEL PVSFTRVLQDVVATQKEKVTLECELSRPVDV
RWLKDGVELRAGKAIGIVAQGTCSRSLVIYRCETGDQGVYVCDALDAQTSASLRVQGRTYTLIFRVLAE DAGE
VKFVAENAESRAHLRVKELPVTLRPLRDKIAMEKHRGVLECCQVSRASAQVRWFKGGVELQSGPKYEVVSDGL
YRKLVIN DVQPEDEDTYTC DAGNVKTS AQFFVEEQSITIVRGLKDMTVM EPAPAWFECETSIPSVRPPKWL LG
KTVLQAGNVGLEQDGTVHRLTLHKTCSTMTGPVHFTIGKSRSSAQLVVSDIPVVLTRPLEPKAGRELQSVVL
SCDFRPAPKAVGWYKDDTPLSPSEKFKMALEGMALRILRLTPADAGVYRCQAGSAQSSAEVTV EAREVTVI
QPLQDAEAMEEGRVCFSCELSHKDEDI EWSLNGTPLYNDSFHEI SHEGLHTLVLKSVRQADTGTVCATSPKV
SVSARLVVKGKPVVFLKALDDVSAEERGLTLTQCEVSDPEARVVWRKDGVELGPSDKYDFLHKAGARGLTVHD
LSHEDAGLYTCQVGSKETQSKVSVHDLHVGITKRLKTV E VLEGE SCFECVLSHESPSDPAVWTVGGKTVGGS
GHFHAVRQGRKYTLTVKDAALSDAGEV VFSVLGLT SKASLIIRERPV DITKPLEDQRTTLGEDVMLSCELSRA
GTSVRWLKDGKAIRKSQKYDLLSEGTRAVLVVRKASLKD SGEYTCETEPSKSTAKLCVEEKANRFTBELADLQ
VEEKGRAVFTCKTEHPASVVTWRKGLLELRASGKHVPSQEGTLKLTINALERTSDTYTCDIGQARTQARLL
VHGQKVRVIEDLEDTAVQEGSSAKFCRIAPADYGPVHWF LDKTPLHSNELNEITVQPGGYHVLTLRQLALKD
SGTVYFEAGDQRTS AALRVTEKPSIFSRPLTDVTVTEGEDLTLVCE TTTVDSSVRWTKDGKTLRPSARCQLSH
EGCQAQLLITATTPQDGGRYKCEIGGASSSSIVRVHALPVRFRFRESLKDVEVPEGKAATLRCVLSVAAPVEWR
HGDDVLKSSNKYSLRQEGAVLELVIRDLQPQDSGQYSCSFGDQTSATLTVKTS SAQFVGLKRNKEATEGTTV
TLRCELTK EAPVEWKKGTETLRNGDKYSLKQDGAVCELQICSLLVADAGEYSCVCGQEKTSATLTVKALLVHF
VRRLSKEATEGDTTLTQCELSKAAPVEWRKGTETLRDGD RYSLKQDGAVCELQIRSLTIADAGEYLCTCGQE
KTSATLTVRALPAKFKDSLKNEEATEGTTATLSCELSKAAPVTWKKGPKTLQSGDKYVLRQDGAVCGLQIHGL
TMADAGEYSCVCGQEKTSATLTVRGLPAKFIEDLRSQEATEGATAILRCELSKAAPVEWRKGS ETLKDGD RYT
LRQDGAVCELQIRGLAVVDGTYS SLPTKFT EGLRNEEATEGTMATLRCQMSKAAPVEWRKGS ETLRDGD RYS
LRQDGAMCELQIRGLTIEDSGEYTCVCGQEKTSATLSVKALPSRFIEDLRSQEATEGTMATLRCQMSKTAPVE
WKKGSETLRDGGRYSLRQDGPVCELQICDLAVEDAGEYSCVCGQEKTSATLSIKALPPRFIEDLRSQEATEGT
MATLRCQMSKAAPVEWRKGS ETLGDGGYSLRQNGAVCELQIHDLAVEDTGEYSCVCGQEKTSATLNVKALPP
RFIEDLRSQEATEGTMATLRCQMSKAAPVEWRKGS ETLRDGGRYSLRQDGA VCELQIHDLVEDAGQYSCVCG
QEKTSAVLTVDALPPKFTEGLKKEEATEGTMVTLRQMSKEATVEWRKGAKTSLSDGGYSLRQDGAMCELQIC
GLAVEDAGEYSCVCGQEKTSATLSVKALPPRFIEDLRSQEATEGTMATLRCQMSKAAPVEWRKGS ETLRDGD R
YSLRQDGAVCELQIRDLAVEDAGEYLCVCGQEKTSATLSVKALPPRFIEDLRSQEATEGTMATLRCQMSKAAP
VEWRKGSKTLRDGD RYSLRQDGAMCELQICDLAVEDTGDYSCVCGQEKTSATLSVKALPPRFIEDLRSQEARE

GTVATLRCRMSKAAPVEWRKGSSETLKDGDYSLRQEGNLCELQIRDLAVEDTEEYSCVCGQEKTSATLSVKAL  
PAKFIEDLRSQEAPESSTVTLRCKLSKKASVVWKKGSETLRNGARYSLRQDGAVCELEIRDLTVEEDTGEYSCT  
CGQERTSATLSIMAPQVVFQQPLQNLQAEEGSMASLRCELSVFNAMVWSKGGLELQGDTRREARQQGCVAEL  
LLRDLRREDAGEYSCTCGSQTTSATLMVTAAPVRFLRELQAQDVDEGATARLRCELSREAVSVEWRKGSQQLF  
PCAKYQMVQEGTTAELLVHGVEQEDAGEYTCDAAGHTQSIARLSVRAPKPKFKTDLQSTEQEAGGTARLCCQLS  
EAEPTGTPVQWLKEGVELHVGSKYEMRRQGAUCELLIHGLEAKDTGEYACLVGGQKTLASLRVKEPEVTIVRGL  
VDMEVQADEDEFTCKVSOAGATDVQWHLQGLPLQSNVTEVAVLADGCTHVLQKGVTLLEDAGTVSFHVGGGL  
SSSAQLTVRVPEVTVLEPLKDVQLSEGDHAHFRCLSRASGQEARWALGGVPLQCNEMNDITVEQGTLYLLTL  
HKVTLEDAGTITLQVGSSEEAQLKVTAKNTVLRGLENVDALEGGALFECQLSQPEVAHAHTWLLDDEPVHTS  
EKVEVVYFENGLRHLLLLKNLKPQDSCRVTFLAGDVVTSFAFLTVRGWRLEVLPPHDASVKAGMQVRFCTILS  
EAVPVGEATWYINGAAIQPDDTDWTVTTDGSHHALTLSNAQPQHAGEVTFAAARDAVASARLSVLALPDPEDA  
EAVGRSDHSVTLSSWVAPMSDGGGGLCGYRVMKEASTGQWQLCHDLVPGPECVDDDLVPGKTYRFRVAAVGPA  
GAGEPVHLPQMVKIAPAPAPAPAPAPAPAPAPETRQAVVGEDICLELEVAADGGEVVWHKGTERRIQPGHFVLS  
RGQRQMLVIKGFRTEDQGEYRCGPIQGLPSSGAATFNVMVMTSGSGDEVPAQPSLPPEAAQEGDLHLLWEALAR  
KRRMSREPTLDSISELPEEDSRVQHLRQEAEEETAPDLSEGYSTADELARTGEADLSHTSSDDESAGTPSLVT  
YLKKAAGGPGISPLASKHEAQVTTSVKPKQKQEPVVPTCPPPGDLSAADLMDPSLDKAAVKIQAAFKGYKVRKE  
MKQQEGPVFSRTFGDTEAQVGDVLRLECVLATKTDMRACWLKDGIELTDGRHYHIDQLKDGTCSSLVTLGLAPT  
DSGRYTCQVSTKSGRVSHSACVVVSGTESEAESSSGGELDDAFRRAARRLHRLFRTKSPAELSEEELFLSADE  
GPGEPEEPADWQTYREDENFVCIRFESLAEARQAVTCFRNMFMATMGIGVEISLGEQGPGRVEMRIGKVAPTVT  
PAVPLAKTPGLQTSDAAPVFLTELQNDVQDGYPMSFDCVVTGQPVPSVRWFKDGKLEEDDHYMINEDQQGG  
HQLIITAVVPADMGVYRCLAENSMGVSSTKAELRVELTSTDYDTAADATETSSYFSAQGYLSSREQEGTESDE  
GQLPQVLEELKDLQVAPGTRLAKFQLKVKGYPAKLYWFKDGGPLTSDHIRMTDKKTLHTLEIVSVTREDSG  
QYAAIYISNAVGAAYSSARLLVRGPSEPEEKPASDVHERLVPPRILEKFTPKKVKRGSSITFSVKVEGHPAPSV  
HWLKEEAKEKGVLWIGPDTPGYTMASSSKQHSLLVLDVGRQHGGTYTCIATNPAGQALCSASLHISGLAKEEEQ  
ERVKEALISSFLOGTSQAVSAQMSSESAGFADLVGQSKGESLVAEEAHSHLSLAEVGTFFLQKLTSTQITEMVS  
AKISQAKLVQVGGDSDEETKTPSASPRHGRSRPSSSVQSESSSESEDGDSRGEIFDIYVVVTADYLPGLAEQDAI  
LLREGQYVEVLDLSDAHLRVLVTKPTKSSPSRQVSVSPAYLDRKRLKLSPEWGPTEAPEFPGAEVSEDEPVTRTL  
SSVIQELLSSEQAFVQELQFLESHHMKHLERSPRVPAAVASQKTVIFRNVQDISHFHSSFLKELQCGCTDDDV  
AMCFIKNQEAFAEKYLEFLVGRVQAESVVVSTPVQEFYKKAEEETLSAKDPTQPPPPPLQHYLEQPVVERVQKYQ  
ALLKELIRNKARNRQNCALLEQAYAVVSALPQRAENKLVSLMENYPGTLEALGEPHQGHFIVWEGAPGARM  
PWKGHNHRVFLFRNYLVICKPRRDSRTDFTSYVFRNMMKLSIDLNDQVEGDDRAFEVWHEREDSVRKYLLQA  
RTVILKNSWVKEICGIQQLAQPVWRPPEFEEELADCTAELGETVKLACRVTGTPKPIVSWYKDGKPVVEVDPH  
HILIEDPDGSCTLILDNLGTIDSGQYMCFAASAAGNASTLGKILVQVPPRFVNVKVRATPFVEGEDAQITCTVE  
GAPYPQIRWYKDGTLTLLAPGNRYRMLNEPRSGVLVLIQAASKEDLGHYECELVNRLGSTRGGGELYMQSPALR  
ARDQHHREQIVAAVEERRPSP\*  
>rs48441780\_ENSMUSP00000151217\_c.8619:G>C\_p.A2874P  
ENSMUST00000219084.3|Obscn-207|ENSMUSG00000061462|-|chr11:g.58964369:C>G  
MDHSFSGAPRFLTRPKAFVSVGKDATLSCQIVGNPTPHVSWEKDRQVPEAGARFRLAQDGDVYRLTILDLAL  
GDSGQYVCRARNAIGEAFVAVGLRVDSEGTCAEQAPHFLLRPTSIRVREGADATFRCRVGGSPPAVSWSKDG  
RRLGPPDAPHVRVEEHGESSALRIRSARPRDGGTYEVRAENPLGSASAAAALVVDSDAEVAGPPGTSTATLLA  
HLQQRREAMRAEGIPPSPPGAGTRTCTVTEGKHARLSCFVTGEPKPKETVWKKDQGLVTEGRRHVYEDQENF  
VLKILFCKQSDRGLYTCTASNLVGQTYSSVLVVVREPTVPFKKRLQDLEVREKESATFQCEVAQAPATEAAWFK  
EETRLWASAKYDIEEETERRLTVRNVSADDDAVYICETTEGSRVVAELSVQGNLTKLPRKTAVRTGDTAIF  
WVELAVPEGPPVRLRNQEMVAGGRVAITAEGTCHTLTIQCTLEDMGVAVFVSGGCRTTTTQFCVSAPRRPPL  
YPPADPVVAKTESVTLSSWAPPHGDRPVTIDGYVLEKRLKLGAYAWSRCHEAGWLATTEFTITGVAAEGDFQ  
FRVSAINHFGQGPYLEFPGMTMLVPLAVKTPKAVEAVEGGEVTFVSDTLTVASSGEWFLDGEALKASSIYVI  
RCDRTRHMLTIREVPARLHGAQLKVFVANGIETSIQMVVRAALGLPSSKLPAAAAAREVLAQLHEEAQLLAELSD  
QAAAVTWLKDGRELSLGPKEYMQVSAGRRALLVRDVAQDDAGLYECVSRGSRRTAYQLLVQDITDGYRDWGPAG  
PQKHMCKCAGAKIARYLGSSCYRFLQYDKGVVHLEAALDTRQKGTSSCSLHEKPKLVFAKQQAHSEVKA  
AGNSATLSCEVTQAQTEVTFWFKDGKLLSSSSKVRMEASGCSRRLVVQQAGKADAGEYSCEAGGQKLSFRLDVA  
EPKLVFAKQQAHSEVKAEEAGASATLSCEVAQAQTEVTFWFKDGKLLSSSSKVRMEASGCSRRLVVQQAGKADA  
GEYSCEAGGQKLSFRLDVAEPKMFVFAKEQQARSEVKAEEAGASATLSCEVAQAQTEVTFWFKDGKLLSSSSKVRM  
EASGCSRRLVVQQAGKADAGEYSCEAGGQKLSFRLDVTEPKLVFAKEQQARSEVKAEEAGNSATLSCEVAQAQ  
EVTWFKDGLKLLSSSSKVRMEASGCSRRLVVQQAGKADAGEYSCEAGGQKLSFHLVDVTEPKLVFAKEQQAHSEV  
KAEAGASATLSCEVAQAQTEVTFWFKDGKLLSSSSKVRMEASGCSRRLVVQQAGKADAGEYSCEAGGQKLSFR  
LDVAEPKLVFAKEQQARSEVKAEEAGASATLSCEVAQAQTEVTFWFKDGKLLSSSSKVRMEASGCSRRLVVQQAGK  
ADAGEYSCEAGGQKLSFRLDVAEPKLVFAKEQQANSEVKAEEAGASATLSCEVAQAQTEVTFWFKDGKLLSSSSK  
VRVEASGCSRRLVVQQAGKADAGEYSCEAGGQKLSFRLDVAEPKLVFAKEQQAHSEVKAEEAGASATLSCEVAQ

AQTEVTFWFKDGKLLSSSSKVRVEASGCSRRLVVQQAGKADAGEYSCEAGGQKLSFRLDVAEPKLVFAKEQQAH  
SEVKAEGASATLSCEVAQAQTEVTFWFKDGKLLSSSSKVRVEASGCSRRLVVQQVKGADAGEYSCEARGQKLS  
FRLDVAEAEESQIPERPSRREPLVVKEHETIILTATIAAPSVAAVTWLKDGVERRSKRHEATSLGDTHTLTVR  
GAQVLDASAIYSCRVGKEGQDFPVQVEEVAAKFSKPLEPVEGELGGTVMLVCELSPEQAEVWVRCGNTQLRPGK  
RFQMTSEGPRTTLTVSGLREDDAEYVCESRDDRTSARLTVKVPVVKFTSGLSAMVAEEGQEAFTQCQVVS  
DAGVTWYKDGMLQVSEKFMVVEGASRSLTILGLTLEDAGQVTVAEAGASSAALRVREAPVLFKFKLEPQT  
VEERTSVTLEVELTRPWPEVKWTRNAAVLTPSENVEIRAEGARHCLVLRVSGFADRGFFGCETPDDKTQAKLN  
VEMRQVRLVRGLQEVEAKEQGTASMDVELSHAEEVGSWTRDGLRLQPGPKCHLAVQGPVHILTLALSALQFQDSG  
LVAEFAEGVHTSARLIVTELPVSFTRVLQDVVATQKEKVTLECELSRPVDVRLWKDGVLRAGKAIIGIVAQGT  
CRSLVIYRCETGDQGVYVCDALDAQTSASLRVQGRYTLIFRRVLAEDAGEVKFVAENAESRAHLRVKELPVT  
LLRPLRDKIAMEKHRGVLECVSRASAQVRWFKGGVELQSGPKYEVVSDGLYRKLVIINDVQPEDEDTYTC  
NVKTSAQFFVEEQSITIVRGLKDMTVMPEPAPAWFECETSIPSVRPPKWLGLKTVLQAGGNVLEQDGT  
LHKTCSTMTGVPVHFTIGKSRSSAQLVVSIPVVLTRPLEPKAGRELQSVVLSCDFRPAPKAVQWYKDDT  
SEKFKMALEGOAELRILRLTPADAGVYRCQAGSAQSSAEVTVAEAREVTVIQPLQDAEAMEEGRVCF  
KDEDIEWSLNGTPLYNDSFHEISHEGCLHTLVLKSVRQADTGTVCATSPKVSARSARLVVKGKPVVFLKALDDV  
SAEERGLTLTQCEVSDPEARVWVRKDGVELGSPDKYDFLHKAGARGLTVHDLSDHEDAGLYTCQVGSKETQSKV  
SVHDLHVGITKRLKTVELEGESECFEVLSHESPSDPVAVTVGGKTVGGSGHFHAVRQGRKYTLTVKDAALS  
DAGEVVFVSVLGLTSKASLIIRERPVDTIKPLEDQRTTLGEDVMLSCELSRAGTSVRWLKDGKAIKRSQKYDLL  
SEGTRAVLVVRKASLKDSGEYTCETEPSKSTAKLCVEEKANRFTTEELADLQVEEKGRAVFTCKTEHPASVVTW  
RKGLLELRASGKHVPSQEGTLTKLTINALERTSDTYTCDIGQARTQARLLVHGQKVRVIEDLEDTAVQEGSS  
AKFCCRIPADYGPVHWFLLDKTPLHSNELNEITVQPGYHVLTLRQLALKDSGTVYFEAGDQRTSALRVTEK  
PSIFSRPLTDVTVTEGEDTLTVCETTTVDSVSRWTKDGKTLRPSARCQLSHEGCAQQLLITATTPQDGGRYKC  
EIGGASSSSIVRVHALPVRFRFRESLKDVEVPEGKAATLRCVLSVAAPVEWRHGDDVLKSSNKYSLRFQEGAVLE  
LVIRDLQFQDSGQYSCSFGDQTTSATLTVKTSQAQFVGLKRNKEATEGTTVTLRCELTKPEVWKKGTETLR  
NGDKYSLKQDGAVALQICSLLVADAGEYSCVCGQEKTSATLTVKALLVHFVRRRLRSKEATEGDTTTLQCELS  
KAAPVEWRKGTETLRDGDYSLKQDGAVALQIRSLTIADAGEYLCTCGQEKTSATLTVRGLPAKFIEDLRSQ  
EATEGATAILRCELSKAAPVEWRKGETLKDGDYSLRQDGAVALQIRGLAVVDGTGYSSTLPTKFTTEGLRNE  
EATEGTMATLRCQMSKAAPVEWRKGETLKDGDYSLRQDGAVALQIRGLTIEDSGEYTCVCGQEKTSATLS  
VKALPPRFIEDLRSQEAEGTMATLRCQMSKAAPVEWRKGETLGDGGYSLRQNGAVCELQIHDLAVEDTGE  
YSCVCGQEKTSATLNVKALPPKFTTEGLKKEEATEGTMVTLRCQMSKEATVEWRKGAKTLSDDGGYSLRQDGA  
VALQICGLAVEDAGEYSCVCGQEKTSATLSVKALPPRFIEDLRSQEAEGTMATLRCQMSKAAPVEWRKGET  
LRDGDYSLRQDGAVALQIRDLAVEDAGEYLCVCGQEKTSATLSVKALPPRFIEDLRSQEAEGTMATLRCQ  
MSKAAPVEWRKGSKTLRDGDYSLRQDGAVALQICDLAVEDTGDYSCVCGQEKTSATLSVKAPQVVFQQLQ  
NLQAEEGSMASLRCELSVNPAAVMSKGGLELQGDTRREARQQGCVAELLLRDLRREDAGEYSCTCGSQTTSA  
TLMVTAAPVRFLELQADVDEGATARLRCLESAEAVSVEWRKGSQVLPFCQAKYQMVQEGTAEELLVHGVEQE  
DAGEYTCADAGTQSIARLSVRAPKPKFKTDLQSTEGAGGTARLCCQLSEAEPTPVQWLKEGVELHVGSKYE  
MRRQGAVALCELLIHGLEAKDTGEYACLVGGQKTLASLRVKEPEVTIVRGLVDMEVQADEDEFTCKVVSQAGATD  
VQWHLQGLPLQSNEVTEVAVLADGCTHVLQKGVTLLEDAGTVSFHVGLSSSAQLTVRVPVTVLEPLKDVQL  
SEGQDAHFRCLSRASGQEARWALGGVPLQCNEMNDITVEQGTLYLLTLHKVTLLEDAGTITLVGSCSSEAQL  
KVTAKNTVLRGLENDVALEGGALFECQLSQPEVAHTWLLDDEPVHTSEKVEVVYFENGLRHLLLLKLNKPKQ  
DSRVTFFLAGDVVTSFVTVRGRLEVLEPPHDASVKAGMQRFTCILSEAVPVGEATWYINGAAIQPDDTDW  
TVTTDGSHHALTLNSAQPQHAGEVTFFAARDAVASARLSVLALPDPPEDAEAVVGRSDHSVTLVSWVAPMSDGGG  
LCGYRVEMKEASTGQWQLCHDLVPGPECVVDDLVPKTYRFRVAAVGPAGAGEPVHLPQMVKIAPAPAPAPAP  
APAPETRAQAVVEDICILEVAADGGEVWVHKGTERIQPGGHFEVLSRGRQMLVIKGFRTEDQGEYRCGPIQ  
GLPSSGAATFNVMVMTSGSGDEVPAQPSLPPEAAQEGDLHLLWEALARKRRMSREPTLDSISELPEEDSRVQHL  
RQEAETAPDLSEGYSTADELARTGEADLSHTSSDDESRAGTPSLVTYLKKAGGPGISPLASKHEAQVTTSVK  
PQKQQEPVPTCPPPGDLSAADLMDPSLDKAAVKIQAAFKGYKVRKEMKQEGPVFSRTFGDTEAQVGDVLR  
ECVLATKTDMRACWLKDGIELTDGRHYHIDQLKDGTCSLLVTLGLAPTDSGRYTCQVSTKSGRVSHSACVVVSG  
TESEAESSSGELDDAFRRARRLHRLFRTKSPAELSEELFLSADEGPGEPEEPADWQTYREDENFVCIRFE  
SLAEARQAVTCFRNMFATMGI GVEISLGEQGPVEMRIGKVAPTVTPAVPLAKTPGLQTSDAAPVFLTELQN  
QDVQDGYPMFDCVVTGQPVPSVRWFKDGKLLLEDDHYMINEDQQGGHQLIITAVVPADMVYRCLAENSMGV  
SSTKAELRVELTSTDYDTAADATETSSYFSAQGYLSSREQEGTESDEGQLPQVLEELKDLQVAPGTRLAKFQL  
KVKGYAPAKLVYFKDGQPLTSDHIRMTDKKTLTLEIVSVTREDSGQYAAIISNAVGAAYSSARLLVVRGPE  
PEEKPSADVHERLVPRILEKFTPKKVKRGSSITFVSVKVEGHPAPSVHWLKEEAKEKGVLWIGPDTPGYTMAS  
SKQHSVLVLDVGRQHGYTCIATNPAGQALCSASLHISGLAKEEEQERVKEALISSFLQGTSSQAVSAQMS  
AGFADLVGQSKGESLVAEEAHSHLSLAEVGTVEFLQKLTSTIEMVSAKISQAKLQVPGGDSDEETKTPSASP  
RHGRSRPSSSVQESSSESEDGDSRGEIFDIYVVTADYLPGLAEQDAIILREGQYVEVLDSAPHLRVLVTRTKPT  
KSSPSRQGWVSPAYLDKRLKLSPEWGPTEAPEFPGEAVSEDEYRTRLSVVIQELLSSEQAFVQVLESHHM

KHLERSPRVPAAVASQKTVIFRNVQDISHFHSSFLKELQCGCTDDDDVAMCFIKNQEAFEKYLEFLVGRVQAES  
VVVSTPVQEFYKKYAEETLSAKDPTQPPPPPLQHYLEQPVERVQKYQALLKELIRNKARNRQNCALLEQAYAV  
VSALPQRAENKLVSLMENYPGTLEALGEPRIQGHFIVWEGAPGARMFPGHNRHVFLFRNYLVICKPRRDSR  
TDTFSYVFRNMMKLSSIDLNDQVEGDDRAFEVWHEREDESVRKYLLQARTVIKNSWVKEICGIQQRLAQPVWR  
PEFEHEELADCTAELGETVKLACRVGTGPKPIVSWYKDGKPVVDPHHILIEDPDGSCSTLIDLNLTGIDSGQY  
MCFAASAAGNASTLGKILVQVPPRFVNKVRATPFVEGEDAQITCTVEGAPYPQIRWYKDGTLTLLAPGNRYRMLN  
EPRSGVLVLIQAASKEDLGHYECELVNRLGSTRGGGELYMQSPALRARDQHHREQIVAAVEVTEQETKVPKK  
TVIIEETITTVVKS PRGRRQSPGKSPSRSPSRASPRRGLLAPERLYPPGTSPSRREVEQGRKAPVPALY  
VTEAEVHAPASQSQPKWLEVEETIEVRVKKTGSRGASPVREMTSRGEGILFTLPGGIPGRDPNANNNSNKS  
QEARWGPVAVHVGEPFIQVDSVGNVDVAASPEPEQVRASQKEENTERQEGCSDGDENTFLMEEPQD  
QGRDPKILTHNGRVLTADLEDYVPOEGETFGCGDSTPSTPDEPPCEVSVLQREI SEPTVQPVLLNVGRPPG  
TGATPSFFRPGSQVHSPESVSFLLREAWSGPVSAAPWTSSFHTHVQSSVDGSHGSFKTEVSTQTVSFGAVGET  
VTLHIDPDGGEAPGPSQG\*

>rs48441780\_ENSMUSP00000122181\_c.2247:G>C\_p.A750P

ENSMUST00000133040.4|Obscn-205|ENSMUSG00000061462|-|chr11:g.58964369:C>G  
AGKAI GIVAQGTCSRSLVIYRCETGDQGVYVCDALDAQTSASLRVQGRSVQITKPLEDVEVMEKEGATFSC  
HDEVPGLWFRESSKLRPSDNVRI RQEGRTYTLIFRRVLAEDAGEVKFVAENAESRAHLRVKELPVTLLRPLRD  
KIAMEKHRGVLECVSRASQVRWFKGGVELQSGPKYEVSDGLYRKLVINQVPEDEDTYTCDA GNVKTSAQ  
FFVEEQSITIVRGLKDMTVMEPAPAWFECETSI PSVRPPKWL LKGTVLQAGGNVGLQDGTVHRLTLHKTCST  
MTGVPVHFTIGKSRSSAQLVSDIPVVLTRPLEPKAGRELQSVVLSCDFRPAPKAVQWYKDDTPLSPSEKFKMA  
LEGQMAELRILRLTPADAGVYRCQAGSAQSSAEVTVEAREVTVIQPLQDAEAMEEGRVCFSCELSHKDE  
SLNGTPLYNDSFHEISHEGCLHTLVLSVRQADTGTVCATSPKVSVSARLVVKGKPVVFLKALDDVSA  
EERTLTLQCEVSDPEARVVRKDGVELGSPDKYDFLHKAGARGLTVHDLSHEDAGLYTCQVGSKETQSKVSV  
HDLHVGITKRLKTVEVLEGESCSFECVLSHESPSDPAVWTVGGKTVGGSGHFHAVRQGRKYTLTVKDAALSD  
AGEVVF SVLGLTSKASLIRIRPVDITKPLEDQRTTLGEDVMLSCELSRAGTSVRWLKDGKAIRKSQKYD  
LLESEGTRAVLVVRKASLKDSGEYTCETEPSKSTAKLCVEEKANFTEELADLQVEEKGRAVFTCKTEHPASV  
VTVWRKGLLELRASGKHVPSQEGTLTKLTINALERTSDTYTCIDIGQARTQARLLVH

>rs47146051\_ENSMUSP00000158795\_c.9528:G>C\_p.V3177L

ENSMUST00000238536.2|Obscn-210|ENSMUSG00000061462|-|chr11:g.58965954:C>G  
MDHSFSGAPRFLTRPKAFVSVGKDATLSCQIVGNPTPHVSWEKDRQPV EAGARFRLAQDGDVYRLTILDLAL  
GDSGQYVCRARNAIGEFAAVGLRVDSEGTCAEQAPHLLRPTSIRVREGADATFRCRVGGSPQPAVSWSKDG  
RRLGPPDAPHVRVEEHGESSALRIRSARPRDGGTYEVRAENPLGSASAAAALVVDSDAEVAGPPGTSTATLLA  
HLQQRRREAMRAEGIPPSPPGAGTRTCTVTEGKHARLSCFVTGEPKPEVWKKDQGLVTEGRRHVVEDEQENF  
VLKILFCCKQSDRGLYTCTASNLVGQTYSSVLVVVREPTVPFKKRLQDLEVREKESATFQCEVAQPA  
TEAAWFK EETRLWASAKYDIEEGTERRLTVRNVSA DDAVYICETTEGSRV AELSVQGNLTKRLPRKTA  
VTDGTAIF WVELAVPEGPVRWLRNQEEMVAGGRVAITAEGTCHTLTIFQCTLEDMGEVAFVSGGCRTT  
TQCVSAPRRPPL YPPADPVVKAKTESSVTLWSAPPHGDRPVTIDGYVLEKRLKLGAYAWSRCHEAGW  
LATTEFTITGVAAEGDFQ FRVSAINHFGQGPYLEFPGTMHLVPLAVKTPKAVEAVEGGEVTFVSDLT  
VASSGEWFLDGEALKASSIYVIRCDRTRHMLTIREV PARLHGAQLKFVANGIETS IQMVVRAALGLP  
SSKLPAAAAREVLAQLHEEAQLLAE LSDQAAA VTWLKDGRELSLGPYEMQVSAGRRALLVRDVAQ  
DDAGLYECVSRGSR TAYQLLVQDITDGYRDWGPAG P QKHMKCAGAKIARYLGSSCYRFLQYD  
KGVVHWEAALDTRQKGKTS SCSLHEKPKLVFAKGQQA HSEVKA EAGNSATLSCEVTQAQTEV  
TWFKDGKLLSSSSKVRMEASGCSRRLVVQQAGKADAGEYSCEAGGQKLSFRLDVAEPKLVFAK  
GQQA HSEVKA EAGASATLSCEVAQAQTEVTWFKDGKLLSSSSKVRMEASGCSRRLVVQQAGK  
ADAGEYSCEAGGQKLSFRLDVAEPKLVFAKEQQARSEVKA EAGASATLSCEVAQAQTEVTWFKD  
GKLLSSSSKVRMEASGCSRRLVVQQAGKADAGEYSCEAGGQKLSFRLDVAEPKLVFAKEQQARSEV  
KAEAGNSATLSCEVAQAQTEVTWFKDGKLLSSSSKVRMEASGCSRRLVVQQAGKADAGEYSCEAG  
GQKLSFHL DVTEPKLVFAKEQQAHSEVKA EAGASATLSCEVAQAQTEVTWFKDGKLLSSSSKVR  
MEASGCSRRLVVQQAGKADAGEYSCEAGGQKLSFRLDVAEPKLVFAKEQQARSEVKA EAGASATLS  
CEVAQAQTEVTWFKDGKLLSSSSKVRMEASGCSRRLVVQQAGKADAGEYSCEAGGQKLSFRLDVA  
EPKLVFAKEQQAHSEVKA EAGASATLSCEVAQAQTEVTWFKDGKLLSSSSKVRMEASGCSRRLVV  
QQAGKADAGEYSCEAGGQKLSFRLDVAEPKLVFAKEQQANSEVKA EAGASATLSCEVAQAQTEV  
TWFKDGKLLSSSSKVRMEASGCSRRLVVQQAGKADAGEYSCEAGGQKLSFRLDVAEPKLVFAKEQ  
QA HSEVKA EAGASATLSCEVAQAQTEVTWFKDGKLLSSSSKVRMEASGCSRRLVVQQAGKADAGE  
YSCEARGQ KLSFRLDVADTRLMFAKEQQARTEVKA EAGNSATLSCEVAQAQTEVTWFKDGKLLSS  
SSKVRMEASGCSRRLV

VQQAGKADAGEYSCEAGGQKLSFRLLDVAEAEESQIPERPSRREPLVVKEHETIILTATIAAPSVAAVTWLKDGVE  
EIRRSKRHEATSLGDTHTLTVRGAQVLDSAIYSCRVGKEGQDFPVQVEEVAAKFSKPLEPVEGELGGTVMLVC  
ELSPQAEVWRCGNTQLRPGKRFQMTSEGPRTTLTVSGLREDDAEYVCESTRDDRTSARLTVKVPVVKFTS  
GLSAMVAEEGQEATFQCVVSPSDAGVTWYKDGMLQPSSEKFMVVEGASRSLTILGLTLEDAGQVTVAEAGAS  
SSAALRVREAPVLFKKKLEPQTVEERTSVTLEVELTRPWPEVKWTRNAAVLTPSENVEIRAEGARHCLVLRV  
GFADRGGFFGCETPDDKTQAKLNVEMRQVRLVVRGLQVEVEAKEQGTASMDVELSHAEVEGWSWTRDGLRLQPGPKC  
HLAVQGPVHILTLALSALQPDQSGLVAFRAEGVHTSARLIVTELPVSFTRVLQDVVATQKEKVTLECELSRPVDV  
RWLKDGVLELRAGKAIGIVAQGTCSRSLVIYRCETGDQGVYVCDALDAQTSASLRVQGRTYTLIFRVLAEADAGE  
VKFVAENAESRAHLRVKELPVTLLRPLRDKIAMEKHRGVLECVSRASAQVRWFKGGVELQSGPKYEVVSDGL  
YRKLVINVDQPEDEDTYTCDAAGNVKTSAQFFVEEQSITIVRGLKDMTVMPEPAPAWFECETSIPSVRPPKWL  
KTVLQAGGNVLEQDGTVHRLTLHKTCSTMTGPVHFTIGKSRSSAQLVVSDIPVVLTRPLEPKAGRELQSVVL  
SCDFRPAPKAVQWYKDDTPLSPSEKFKMALEGGMAELRILRLTPADAGVYRCQAGSAQSSAEVTVAREVTVI  
QPLQDAEAMEEGRVCFSCELSHKDEDIEWSLNGTPLYNDSFHEISHEGCLHTLVLSVRQADTGTVCATSPKV  
SVSARLVVKGKPVVFLKALDDVSAEERGTTLQCEVSDPEARVVRKDGVELGPSDKYDFLHKAGARGLTVHD  
LSHEDAGLYTCQVGSKETQSKVSVHDLHVGITKRLKTLLEVLEGECSFECVLSHESPSDPAVWTVGGKTVGGS  
GHFHAVRQGRKYTLTVKDAALSDAGEVVSVLGLTSKASLIIRERPVDITKPLEDQRTTLGEDVMLSCELSRA  
GTSVRWLKDGKAIRKSKQYDLSSEGTRAVLVVRKASLKDSEGYTCETEASKSTAKLCVEEKANRFTEELADLQ  
VEEKGRAVFTCKTEHPASVVTWRKGLLELRASGKHVPSQEGTLKLTINALERTSDSTYTCDIGQARTQARLL  
VHGQKVRVIEDLEDTAVQEGSSAKFCCRIAPADYGPVHWFLLDKTPLHSNELNEITVQPGGYHVLTLRQLALKD  
SGTVYFEAGDQRTSALRVTEKPSIFSRPLTDVTVTEGEDTLVCEETTTVDSSVRWTKDGKTLRPSARCQLSH  
EGCQALLITATTPQDGGRYKCEIGGASSSSIVRVHALPVRFRSLKDVEVPEGKAATLRCVLSVAAPVEWR  
HGDDVLKSSNKYSRQEGAVLELVIRDLQPDQSGQYSCSFGDQTTSATLTVKTSQAQFVGLKRNKEATEGTTV  
TLRCELTKEAPVEWKKGTETLRNGDKYSLKQDGAVCELQICSLLVADAGEYSCVCGQEKTSAATLTKALLVHF  
VRRLSKEATEGDTTLQCELSKAAPVEWRKGTETLRDGDYSLKQDGAVCELQIRSLTIADAGEYLCTCGQE  
KTSATLTVRALPAKFKDSLKNEEATEGTTATLSCELSKAAPVWKKGPKTLQSGDKYVLRQDGAVCGLIHGL  
TMADAGEYSCVCGQEKTSAATLTVRGLPAKFIEDLRSQEATEGATAILRCELSKAAPVEWRKGSSETLKDGDYR  
LRQDGAVCELQIRGLAVVDGTYSLSLPTKFTTEGLRNEEATEGTMATLRCQMSKAAPVEWRKGSSETLRDGRYS  
LRQDGAMCELQIRGLTIEDSGEYTCVCGQEKTSAATLSVKALPSRFIEDLRSQEATEGTMATLRCQMSKTAPVE  
WKKGSETLRDGGYSLRQDGPVCELQICDLAVEDAGEYSCVCGQEKTSAATLSIKALPPRFIEDLRSQEATEGT  
MATLRCQMSKAAPVEWRKGSSETLGDGGYSLRQNGAVCELQIHDLAVEDTGEYSCVCGQEKTSAATLNKALPP  
RFIEDLRSQEATEGTMATLRCQMSKAAPVEWRKGSSETLRDGGYSLRQDGAVCELQIHDLDVEDAGQYSCVCG  
QEKTSAVLTVDALPPKFTTEGLKKEEATEGTMVTLRCQMSKEATVEWRKGAKTLSDGGRYSLRQDGAMCELQIC  
GLAVEDAGEYSCVCGQEKTSAATLSVKALPPRFIEDLRSQEATEGTMATLRCQMSKAAPVEWRKGSSETLRDGR  
YSLRQDGAVCELQIRDLAVEDAGEYLCVCGQEKTSAATLSVKALPPRFIEDLRSQEATEGTMATLRCQMSKAAP  
VEWRKGSSETLRDGGYSLRQDGAMCELQICDLAVEDTGDYSCVCGQEKTSAATLSVKALPPRFIEDLRSQEARE  
GTVATLRCRMSKAAPVEWRKGSSETLKDGDYSLRQEGNLCELQIRDLAVEDTGEYSCVCGQEKTSAATLSVKAL  
PAKFIEDLRSQEAPESSTVTLRCKLSKKASVVWKKGSETLRNGARYSLRQDGAVCELEIRDLTVEDTGEYSCT  
CGQERTSATLSIMAPQVVFQQPLQNLQAEEGSMASLRCELSVNPAAWWSKGGLELQGDTRREARQQGCVAEL  
LLRDLRREDAGEYSCVCGQTTSATLMVTAAPVRFLRELQAQDVDEGATARLRCELSREAVSVEWRKGSLLQF  
PCAKYQMVQEGTTAELLVHGVEQEDAGEYTCDAHTQSIARLSVRAPKPKFKTDLQSTEQEAAGGTARLCCQLS  
EAEFGTPVQWLKEGVELHVGSKYEMRRQGAVCELLIHGLEAKDTGEYACLVGQKTASLRVKEPEVTIVRGL  
VDMEVQADEDEFTCKVQAGATDVQWHLQGLPLQSNVTEVAVLADGCTHVLQKGVTLLEDAGTVSFHVGGL  
SSSAQLTVRVPEVTVLEPLKDVQLSEGQDAHFRCLSRASGQEARWALGGVPLQCNEMNDITVEQGTLYLLTL  
HKVTLLEDAGTITLQVGSSESQAQLKVTAKNTVLRGLENVDALEGGEALFECQLSQPEVAHAHTWLLDDEPVHTS  
EKVEVVYFENGLRHLKLLKLNKLPQDSCRVTFLAGDVVTS AFLTVRGWRLEVLEPPHDASVKAGMQVRFTCILS  
EAVPVGEATWYINGAAIQPDDTDWTVTTDGSHALTLSNAQPQHAGEVTF AARDAVASARLSVLALPDPEDA  
EAVGRSDHSVTLVSWVAPMSDGGGGLCGYRVMKEASTGQWQLCHDLVPGPECVDDLVPGKTYRFRVAAVGPA  
GAGEPVHLPQMVKIAPAPAPAPAPAPAPAPAPETRQAVVGEDICLELEVAADGGEVVWHKGTERRIQPGHFVLS  
RGQRQMLVIKGFRTEDQGEYRCGPIQGLPSSGAATFNVMVMTSGSGDEVPAQPSLPPEAAQEGDLHLLWEALAR  
KRRMSREPTLDSISELPEEDSRVQHLRQEAETAPDLSEGYSTADELARTGEADLSHTSSDDESAGTPSLVT  
YLKKGPGISPLASKHEAQVTTSVKPKQKQEPVPTCPPPGDLSAADLMDPSLDKAAVKIQAAFKGYKVRKE  
MKQQEGPVFSRTFGDTEAQVGDVLRLECVLATKTDMRACWLKDGIELTDGRHYHIDQLKDGTCSSLVTLGLAPT  
DSGRYTCQVSTKSGRVSHSACVVVSGTESEAEASSGGELDDAFRAARRLHRLFRTKSPAELSEELFLSADE  
GPGEPEEPADQTYREDENFVCIREFESLAEARQAVTCFRNMFATMGI GVEISLGEQKPRGVEMRIGKVAPTVT  
PAVPLAKTPGLQTSDAAPVFLTELQNDVQDGYPMSFDCVVTGQVPVPSVRWFKDGKLEEDDHYMINEDQGG  
HQLIITAVVPADMGVYRCLAENSMGVSSTKAELRVELTSTDYDTAADATETSSYFSAQGYLSSREQEGTESDE  
GQLPQVLEELKDLQVAPGTRLAKFQLKVKGYPAKLYWFKDGPPLTTS DHIRMTDKKTLHTLEIVSVTREDSG  
QYAAYSNAVGAAYSSARLLVRGPSEPEEKPASDVHERLVPPRILEKFTPKKVKRGSSITFSVKVEGHPAPSV



HWLKEEAKEGVLWIGPDTPGYTMASSSKQHSLLVLLDVGRQHOGTYTTCIATNPAGQALCSASLHISGLAKEEEQ  
ERVKEALISSFLOGTSQAVSAQMSESAFADLVGQSKGESLVAEEAHSHLSLAEVGTTEFLQKLSQITEMVS  
AKISQAKLQVPGGDSDEETKTPSASPRHGRSRPSSSVQESSSEEDGDSRGEIFDIYVVTADYLPGLAEQDAI  
ILREGQYVEVLDLSDAHLRVLVTRKPTKSSPSRQGWVSPAYLDKRLKLSPEWGPTEAPEFPGEAVSEDEYRTRL  
SSVIQELLSSEQAFVQELQFLESHHMKHLERSPRVPAAVASQKTVI FRNVQDISHFHSSFLKELQCGTDDDDV  
AMCFIKNQEAFAKEYLEFLVGRVQAESVVVSTPVQEFYKKYAEETLSAKDPTQPPPPPLQHYLEQPVERVQKYQ  
ALLKELIRNKARNRNCALLEQAYAVVSALPQRAENKLVSLMENYPGTLEALGEPTRQGHFIVWEGAPGARM  
PWKGHNHRHVFLFRNYLVICKPRRDSRTDTFSYVFRNMMKLSSIDLNDQVEGDDRAFEVWHEREDSVRKYLLQA  
RTVLIKNSWVKEICGIQQLAQPVWRPPEFEELADCTAELGETVKLACRVGTGPKPIVSWYKDGKPEVDPH  
HILIEDPDGSLTILDLNLTGIDSGQYMCFAASAAGNASTLGKILVQVPPRFVNVKVRATPFVEGEDAQITCTVE  
GAPYPQIRWYKDGTLAPGNRYRMLNEPRSGVLVVIQAASKEDLGHYECELVNRLGSTRGGGELYMOSPALR  
ARDQHHREQIVAAVEDTSVEGSAHSAQDQAAASVLWRLGSEALGSPSGDLNTRQSEPPAFEEAASQIP  
GAASGTPEVSQPGTHKLEQETSSSGSQGWTPVIRVEGTAWPGAGTGQLLLDVHSQVIMETTQRTYVQAPDT  
GVTRAPSMQVTIEDVQVQVGDMAQFDAVIEGHPPPIVWTYKGSTQLTSSARLSQRQDGTYSVLVTDVAPHDA  
GVYTCVANNAGGQVLCKAELLVHGGDKLDAENQVYRRKLSHFYDVQEEIGRGVFGFVKRVQHKGNKMFCAAKF  
IPLRSKTRAQAYQERDILATLGHPLVLTGLLDQFETRKTLLILILELCSSEELLDRLFKKGVVTEAEVKVYIQQL  
VEGLHYLHSHGILHLDIKPPNIMVHPAREDIKICDFGFAQKITPSEFPQYSKYGSPPEFVSPPEIEQNPVSEGS  
DIWAMGVI SYLSLTCSPPFAGESDRATLLNVLEGRVSWSSPTAAHLSSEDAKDFIKATLQRTPRARPSTSQCLA  
HPWFLKSMPAEEAHFINTKQLKFLARSRWQRSLMSYKSI LVMRSIPELLQGPPDPSPLGVARHLRGEASGAS  
SSSSSSDNELAPFARAKSLPPSPVTHSPLLHPRGFLRPSASLPEETEASMPATAAASPASQAGPPASPGCV  
PRHSVSISSLFYQQAGEGAERGNKTSGAKRHPARRRHLKGGYIARALPGLREPLMEYSLLEEEAAREEQASLM  
TKTPSFETALRLPSSSVREVPGRSHSLDNPPVTTGPSPEACKEQLLFPSTGLTHETTAKDRGHKEGFLQESV  
PFPMSGDSRPGKQEGSSQDSCRKPASSCHSELGSGSQEGCPSQSLGSLPPQSLKKEKLSSTCGPLFSEQ  
PQAAPFPTQVSPLLGSEKEPQDGSLSSEGPVVPSSSPGSASQVDASLDTEGLSEAGDTCDFTPPPQRPQEQAT  
TRKFSLESRRGGYAGVAGYGTFAFGGDAGGMLGQGPLWARMAWAVSQSSEEQDEAATESPQPLESIGPIAEASG  
VPLRTPSLTPWEEVEQVSLVQIRDLSDGDAEAADTISLDISEVDPAYLNLSDLYDIKYLPEFEMI FRVFPKPI  
EQPESPGSETEAGLEADFLLEAAWPWPGELGLRAGLEITEEPEEPGDLEALLGDEAAVGRKRKWSPSRGLFQF  
PGRCLSGEEPVELGLRQVRKASMAHISRILKGRPEGPEREGPPRKKAGLASFRLSGLKGRDQELSDEAVVLGQ  
SVTLACQVLAQPTAQATWSKDGVLLESSGHLISSTLKNFQLLTI LVVKEEDLGTYTCCVSNPLGTAVTTGVL  
RKAERPSSSPRPEVGEYKDAVLLVWKPVESECGPVTYIVQCCIEGGSWTTLASDISDCCYLTGKLSRGGMYIF  
RTACVSKAGMGPYSSPSEQVLLGGPNHLASEEESSRGRPAQLLPSTKTFAFQMQIRRRGRFSVVRQCREKASGR  
ALAAKIVPYQPEDKTAVLRREYEAALKRHLHPLHAQLHAAYLSPRHLVLI LELCSGPELLPSLAERESYSESDVK  
DYLWQMLSATQYLHAQHILHLDLRSNNMMVTEYNLLKVIDLGNAAQSLDQEKVPAPENFKDYLETMAPELLEGQ  
GAVPQTDIWAIGVTAIFIMLSGEYPESESETRDLQKGLRKLIRLSRCYAGLSGGAVAFLOSSLCAQPWGRPCA  
STCLQCGWLTEEGPTGSRPTPVTFPTVRLRAFVREKRRRALLYKKNLAQVR\*  
>rs47146051\_ENSMUSP00000038264\_c.8700:G>C\_p.V2901L  
ENSMUST00000047441.14|Obscn-202|ENSMUSG00000061462|-|chr11:g.58965954:C>G  
MDHSFSGAPRFLTRPKAFVSVGKDATLSCQIVGNPTPHVSWEKDRQVPEAGARFRLAQDGDVYRLTILDLAL  
GDSGQYVCRARNAIGEAFVAVGLRVDSEGTCAEQAPHFLLRPTSIRVREGADATFRCRVGGSPQPAVSWSKDG  
RRLGPPDAPHVRVEEHGESSALRIRSARPRDGGTYEVRAENPLGSASAAAALVVDSDAEVAGPPGTSTATLLA  
HLQQRREAMRAEGIPPSPPGAGTRTCTVTEGKHARLSCFVTGEPKPKETVWKKDQQLVTEGRRHVYDEQENF  
VLKILFCKQSDRGLYTCTASNLVGQTYSSVLVVVREPTVPFKKRLQDLEVREKESATFQCEVAQPATEAAWFK  
EETRLWASAKYDIEEGTERRLTVRNVSADDDAVYICETTEGSRVVAELSVQGNLTKLPRKTAVRTGDTAIF  
WVELAVPEGPVWRWRNQEEMVAGGRVAITAEGTCHTLTI FQCTLEDMGVAFVSGGCRTTTFQCVSAPRRPPL  
YPPADPVVKAKTESSVTLSSWAPPHGDRPVTIDGYVLEKRKLGA YAWSRCHEAGWALTEFTITGVAAEEDGFQ  
FRVSAINHFGQGPYLEFPGMTMLVPLAVKTPKAVEAVEGGEVTFVSDLTVASSGEWFLDGEALKASSIYVI  
RCDRTRHMLTIREVPARLHGAQLKLVANGIETSIQMVVRAALGLPSSKLPAAAAAREVLAQLHEEAQLLAE LSD  
QAAA VTWLKDGRELSLGPKEYMQVSAGRRALLVRDVAQDDAGLYECVSRGSR TAYQLLVQDITDGYRDWGPAG  
PQKHMCKCAGAKIARYLGSSCYRFLQYDKGVVHWEALDTRQKGTSSCSLHEKPKLVFAKQQAHSVEKAE  
AGASATLSCEVAQAQTEVTWFKDGKLLSSSSKVRMEASGCSRRLVVQQAGKADAGEYSCEAGGQKLSFRLDVA  
EPKMFVFAKEQQARSEVKAEEAGASATLSCEVAQAQTEVTWFKDGKLLSSSSKVRMEASGCSRRLVVQQAGKADA  
GEYSCEAGGQKLSFRLDVTEPKLVFAKEQQARSEVKAEEVGN SATLSCEVAQAQTEVTWFKDGKLLSSSSKVRM  
EASGCSRRLVVQQAGKADAGEYSCEAGGQKLSFRLDVAEPKLVFAKEQQARSEVKAEEAGNSATLSCEVAQAQ  
EVTWFKDGLKLLSSSSKVRMEASGCSRRLVVQQAGKADAGEYSCEAGGQKLSFHLVDVTEPKLVFAKEQQAHSEV  
KAEAGASATLSCEVAQAQTEVTWFKDGKLLSSSSKVRMEASGCSRRLVVQQAGKADAGEYSCEAGGQKLSFR  
DVAEPKLVFAKEQQARSEVKAEEAGASATLSCEVAQAQTEVTWFKDGKLLSSSSKVRMEASGCSRRLVVQQAGK  
ADAGEYSCEAGGQKLSFRLDVAEPKLVFAKEQQANSEVKAEEAGASATLSCEVAQAQTEVTWFKDGKLLSSSSK  
VRVEASGCSRRLVVQQAGKADAGEYSCEAGGQKLSFRLDVAEPKLVFAKEQQAHSEVKAEEAGASATLSCEVAQ

AQTEVTWFKDGGKLSSSSSKVRVEASGCSRRLVVQQAGKADAGEYSCEAGGQKLSFRLDVAEPKLAFAKEQQA  
SEVKAEAGASATLSCEVAQAQTEVTWFKDGGKLSSSSSKVRVEASGCSRRLVVQQAGKADAGEYSCEAGGQKLS  
FRLDVAEPKLAFAKEQQAHESEVKAEAGASATLSCEVAQAQTEVTWFKDGGKLSSSSSKVRVEASGCSRRLVVQQ  
AGKADAGEYSCEAGGQKLSFRLDVAEPKLVFAKEQQAHESEVKAEAGASATLSCEVAQAQTEVTWFKDGGKLS  
SSKVRVEASGCSRRLVVQQVQKADAGEYSCEARGQKLSFRLDVAEAEESQIPERPSRREPLVVKHEHETIILTAT  
IAAPSVAAVTWLKDGVETRRSKRHEATSLGDHTLTVRGAQVLDIAIYSCRVGKEGQDFPVQVEEVAAKFSKP  
LEPVEGELGGTVMLVCELSPEQAEVWRCNGTQLRPGKRFQMTSEGPRRTLTVSGLREDDAEYVCESRDDRT  
SARLTVKVPVVKFTSGLSAMVAEEGQEAFTQCVVSPSDAGVTWYKDMQLOPSEKFMVVEGASRSRLTILGL  
TLEDAGQVTVEAEGASSAALRVREAPVLFKKKLEPQTVEERTSVTLEVELTRPWPEVKWTRNAAVLTPSENV  
EIRAEGARHCLVLRVGFADRGFFGCETPDDKTQAKLNVEMRQVRLVVRGLQEVEAKEQGTASMDVELSHAEVE  
GSWTRDGLRQLQPGPKCHLAVQGPVHILTLALQPDQSGLVAFRAEGVHTSARLIVTELPVSFTRVLQDVVATQ  
KEKVTLECELSRPVDVRLWLDGVELRAGKAI GIVAQGTCSRSLVIYRCETGDQGVYCDALDAQTSASLRVQGR  
TYTLIFRRVLAEDAGEVKFVAENAESRAHLRVKELPVTLLRPLRDKIAMEKHRGVLEQCQVSRASAVRWFKGG  
VELQSGPKYEVVSDGLYRKLVINVDVQPEDEDTYTCDAGNVKTSAQFFVEEQSITIVRGLKDMTVMPEPAPAWFE  
CETSIPSVRPPKWLGLKTVLQAGNVGLEQDGTVHRLTLHKTCSTMTGPVHFTIGKSRSSAQLVVS DIPVVL  
RPLEPKAGRELQSVVLSCDFRPAPKAVQWYKDDTPLSPSEKFKMALEGQMAELRILRLTPADAGVYRCQAGSA  
QSSAEDTVEAREVTVIQLQDAEAMEEGRVCFSELSHKDEIEWSLNGTPLYNDSFHEISHGCLHTLVLSKS  
VRQADTGTVCATSPKVSARSARLVVKGKPVVFLKALDDVSAEERGTTLQCEVSDPEARVWVRKDGVELGSPDK  
YDFLHKAGARGLTVHDLSDHEDAGLYTCQVGSKETQSKVSVHDLHVGITKRLKTLLEVLEGESECFVLSHESP  
SDPAVWTVGGKTVGGSGHFHAVRQGRKYTLTVKDAALSDAGEVVSVLGLTSKASLIIRERPVDITKPLEDQR  
TTLGEDVMLSCELSRAGTSVRWLKDGKAIKRSQKYDLLSEGTRAVLVVRKASLKDSGEYTCETEASKSTAKLC  
VEEKANRFTEELADLQVEEKGRAVFTCKTEHPASVVTWRKGLLELRASGKHVPSQEGTLKLTINALERTDSD  
TYTCDIGQARTQARLLVHGQKVRVIEDLEDTAVQEGSSAKFCRRIAPADYGPVHWFLDKTPLHNSNELNEITVQ  
PGGYHVLTLRQLALKDSGTVYFEAGDQRTSAALRVTEKPSIFSRPLTDVTVTEGEDTLVCESTTTVDSSVRWT  
KDGKTLRPSARCQLSHEGCAQLLITATTPQDGGRYKCEIGGASSSSIVRVHALPVRFRESLKDVEVPEGKAA  
TLRCLVSSVAAPVWHRGDDVLKSSNKYSLRQEGAVLELVIRDLQPDQSGQYSCSFGDQTTSATLTVKTTSSAQ  
FVGLKLRNKEATEGTTVLRCELTKAEAPVEWKEGTETLRNGDKYSLKQDQAVCELQICSLLVADAGEYSCVCGQ  
EKTSATLTVKALLVHFVRRRLRSKEATEGDTTTLQCELSKAAPVEWRKGTETLRDGDYSLKQDQAVCELQIRS  
LTIADAGEYLCTCGQEKTSATLTVRALPAKFKDSLKNEEATEGTTATLSCELSKAAPVTWKKGPKTLQSGDKY  
VLRQDQAVCGLQIHGLTMADAGEYSCVCGQEKTSATLTVRGLPAKFIEDLRSQEATEGATAILRCELSKAAPV  
EWRKGETLTKDGDYTLRQDQAVCELQIRGLAVVDGTYSLSLPTKFTTEGLRNEEATEGTMATLRCQMSKAAPV  
EWRKGETLTDGDYSLRQDQAVCELQIRGLTIEDSGEYTCVCGQEKTSATLSVKALPPRFIEDLRSQEATEG  
TMATLRCQMSKAAPVEWRKGETLTDGGYSLRQNGAVCELQIHDLAVEDTGEYSCVCGQEKTSATLNVKALP  
PRFIEDLRSQEATEGTMATLRCQMSKAAPVEWRKGETLTDGGYSLRQDQAVCELQIHDLVEDAGQYSCVC  
GQEKTSAVLTVDALPVPKFTTEGLKKEEATEGTMVTLRQMSKEATVEWRKGAKTLSDDGGYSLRQDQAVCELQI  
CGLAVEDAGEYSCVCGQEKTSATLSVKALPPRFIEDLRSQEATEGTMATLRCQMSKAAPVEWRKGETLTDGD  
RYSRLRQDQAVCELQICDLAVEDTGDYSCVCGQEKTSATLSVKAPQVVFQQLQNLQAEEGSMASLRCELSVPN  
AAMVWSKGGLELQGDTRREARQQGCVAELLLRDLRREDAGEYSCVCGQEKTSATLMVTAAPVRFRLRQAVD  
DEGATARLRCELSREAVSVEWRKGSLLQFPKAKYQMVQEGTTAELLVHGVEQEDAGEYTC DAGHTQSIARLSV  
RAPKPKFKTDLQSTEQEAGGTARLCCQLSEAEPTPVQWLKEGVELHVGSKYEMRRQAVCELLIHGLEAKDT  
GEYACLVGQKTLASLRVKEPEVTIVRGLVDMEVQADEDFEFTCKVVSQAGATDVQWHLQGLPLQSNVTEVAV  
LADGCTHVQLKGVTLLEDAGTVSFHVGGLSSSAQLTVRVPEVTVLEPLKDVQLSEGQDAHFRCRLSRASGQEA  
RWALGGVPLQCNEMNDITVEQGTLYLLTLHKVTLLEDAGTITLQVGSSEAEQLKVTAKNTVLRGLENVDALEG  
GEALFECQLSQPEVAHAHTWLLDDEPVHTSEKVEVVYFENGLRHLLLLKLNKLPQDSCRVTFLAGDVVTSAPFLT  
RALPDPPEDAEVVGRSDHSVTLVWVAPMSDGGGLCGYRVMKEASTGQWQLCHDLVPGPECVVDLVPVKTY  
RFRVAAVGPAGAGEPVHLPQMVKIAPAPAPAPAPAPAPAPETRAVVGEDICLELEVAADGGVEVWHKGTERRI  
QPGGHFEVLSRQQRQMLVIKGFRTEDQGEYRCGPIQGLPSSGAATFNVMVMTSGSGDEVPAQPSLPPEAAQEGD  
LHLLWEALARKRRMSREPTLDSISELPEEDSRVQHLRQEAEEETAPDLSEGYSTADELARTGEADLSHTSSDDE  
SRAGTPSLVTYLKKAGGPGISPLASKHEAQVTTSVKPKQKQEPVVPPTCPPPGDLSAADLMDPSLDKAAVKIQA  
AFKGYKVRKEMKQEGPVFSRFTFGDTEAQVGDVLRLECVLATKTDMRACWLKDGIELTDGRHYHIDQLKDGTC  
SLLVTGLAPTDSGRYTCQVSTKSGRVSHSACVVVSGTESEAESSSGGELDDAFRRRAARLHRLFRTRKSPAELS  
EELFLSADEGPEPEPADWQTYREDENFVCIRFESLAEARQAVTCFRNMFMATMGIGVEISLGEQGPGRVEM  
RIGKVAPTVTPAVPLAKTGLQTSDAAPVFLTELQNSDQVQDGYPMSFDCVVTGQVPVSVRWFKDKGLLEEDDH  
YMINEDQQGGHQLIITAVVPADMGVYRCLAENSMGVSSTKAELRVELTSTDYDTAADATETSSYFSAQGYLSS  
REQEGTSEDEGQLPVLEELKDLQVAPGTRAKFQLKVKGYPAKPLYWFKDQGPLTSSDHIRMTDKKTLHTLE  
IVSVTREDSGQYAAIYISNAVGAAYSARLLVRGPSEPEEKPASDVHERLVPPRILEKFTPKKVKRGSSITFSV  
KVEGHPAPSVHVLKEEAKEKGLVWIGPDTPGYTMASSSKQHSVLVLDVGRQHQGTYTICATNPAGQALCSASLH  
ISGLAKEEEQERVKEALISSFLQGTSAVSAQMSSESAGFADLVGQSKGESLVAAEEAHSLSLAEVGTTEEFLOK

LTSQITEMVSAKISQAKLQVPGGDSDEETKTPSASPRHGRSRPSSSVQESSSESEDGDSRGEIFDIYVVTADY
LPLGAEQDAIILREGQYVEVLDSAHPLRVLVVRTKPTKSSPSRQGWVSPAYLDKRLKLSPEWGPTEAPEFPGEA
VSEDEYRTRLSSVIQELLSSEQAFVGELOFLESHHMKHLERSPRVPAAVASQKTVI FRNVQDISHFSSFLKE
LQCGGTDDDDVAMCFIKNQEA FEKYLEFLVGRVQAESVVVSTPVQEFYKKYAEETLSAKDPTQPPPPLOHYLE
QPVERVQKYQALLKELIRNKARNRQNCALLEQAYAVVSALPQRAENKLVSLMENYPGTLEALGEP I RQGHFI
VWEGAPGARMPWKGNHRHVFLFRNYLVICKPRRDSRTDTFSYVFRNMMKLS SIDLNDQVEGDRAFEVWHERE
DSVRKYLLQARTVI IKNSWVKEICGIQQRLAQPVWRPPEFEEELADCTAELGETVKLACRVGTGPKPIVSWYK
DGKPVVEVDPHHILIEDPDGSCSTLILDNLGTGIDSGQYMCFAASAAGNASTLGKILVQVPPRFVNKVRATPFVEG
EDAQITCTVEGAPYPQIRWYKDGTL LAPGNRYRMLNEPRSGVLV LVIQAASKEDLGHYECELVNRLGSTRGGG
ELYMQSPALRARDQHREQIVAAVEGAPSMQVTIEDVQVQVGDMAQF DAVIEGHPPP I V TWYKGTQLTSSAR
LSQRQDGT TYSLVLT D V A P H D A G V Y T C V A N N A G G Q V L C K A E L L V H G G D K L D A E N Q V Y R R K L H S F Y D V Q E E I G R
GVFGFVKRVQHKGNMFC AAKFIPLRSKTRAQAYQERDILATLGHPLV TGLLDQFETRKTLLILILELCSSEEL
LDRLFKKGVVTEAEVKVYIQQLVEGLHYLHSHGILHLDIKPPNIMVHPAREDIKICDFGFAQKITPSEPOYS
KYGSEPFVSP E I I E Q N P V S E G S D I W A M G V I S Y L S L T C S S P F A G E S D R A T L L N V L E G R V S W S S P T A A H L S E D A K
DFIKATLQRTPRARPSTSQC LAHPWFLKSM P A E E A H F I N T K Q L K F L L A R S R W Q R S L M S Y K S I L V M R S I P E L L Q
GPPDSPSLGVARHLRGEASGASSSSSSSDNELAPFARAKSLPPSPVTHSPLLHPRGFLRPSASLPEETEASMP
TADA AV P A S P Q S A G P P A S P G C V P R H S V I S S L F Y Q Q A G E G A E R G N K T S G A K R H P A R R R H L L K G G Y I A R A L P G L R
EPLMEYSLLEEEAAREEQASLMTKTPSFETALRLPSSSVREVPGRSHSLDNPPVTTPSPPEACKQLLFPST
GLTHEHTAKDRGHEGFLQESVFPFPMMSGDSRPGKQEGSSQDSRCRGKPASSCHSELGSGSQEGCGPPSSQSLG
SLPPQSLKKELESTSCGPLFSEQPQAAPFPTQVSPLLGSEKEPQDGSLSSEGPVFPVSSSPGSASQVDASLDTEG
LSEAGDTCDFTPPPQRPQEQATTRKFSLESRRGGYAGVAGYGTFAFGGDAGGMLGQGPLWARMAWAVSQSSEEQ
DEAATESPQPLESGLPIAEASGVPLRTSPSLTPWEEVEQVSLVQIRDLSGDAEAADTISLDISEVDPAYLNLS
DLYDIKYL P F E F M I F R R V P K P I E Q P E S P G S E T E A G Q G L A D F L E E A A W P W P G E L G L R A G L E I T E E P E E P G D L E A
LLGEAAVGRKRKWSPSRGLFQFPGRCLSGEEPVELGLRQRVKASMAHISRI LKGRPEGPEREGPPRKKAGLAS
FRLSGLKGRDQELSDEAVVLGQSVTLACQVLAQPTAQTATWSKDGVLLES S G H L L I S S T L K N F Q L L T I L V V K E E
DLGTYTCCVSNLGTAVTGVLRKAERPSSSRPEVSEYKDAVLLVWKPVESCGPVTYIQVCCIEGGSWTTL
ASDISDCCYLTKGLSRGGMYIFRTACVSKAGMGPYSSPSEYVLLGGPNHLASEEESRRGRPAQLL PSTKTFAF
QMQUIRRGRFVVRQCREKASGRALAAKIVPYQPEDKTA VLREYEALKRLHHPHLAQLHAAYLSPRHLV L I L E L
CSGPELLPSLAERESYSESDVKDYLWQMSATQYLHAQHILHLDLRSENMMVTEYNLLKVIDLGNASLDQEK
VPAPENFKDYLETMAPELLEGQAVPQTDIWAIGVTA F I M L S G E Y P E S S E G T R D L Q K G L R K G L I R L S R C Y A G L
SGGAVAFLLQSSSLCAQPWGRPCASTCLQCGWLTEEGPTGSRPTPVTFTVRLRAFVREREKRRALLYKKNLAQ
VR\*

>rs47146051\_ENSMUSP00000049737\_c.9327:G>C\_p.V3110L
ENSMUST00000052872.15|Obscn-203|ENSMUSG0000061462|-|chr11:g.58965954:C>G
MDHSFSGARFLTRPKAFVSVGKDATLSCQIVGNPTPHVSWEKDRQVVEAGARFRLAQDGDVYRLTILDLAL
GDSGQYVCRARNAIEEFAAVGLRVDSEGTCAEQAPHFLLRPTSIRVREGADATFRCRVGGSPQPAVSWSKDG
RRLGPPDAPHVRVEEHGESSALRIRSARPRDGGTYEVRAENPLGSASAAAALVVDSDAEVAGPPGTSTATLLA
HLQORREAMRAEGIPPSPPGAGTRTCTVTEGKHARLSCFVTGEPKPEVWKKDGQLVTEGRRHVVEDEQENF
VLKILFCKQSDRGLYTCTASNLVGQTYSSVLVVREPTVPFKKRLQDLEVREKESATFQCEVAQPAEAAWFK
EETRLWASAKYDIEEGETERRLTVRNVSADDDAVYICETTEGSRVVAELSVQGNLTRKLPKRTAVRTGDTAIF
WVELAVPEGPVRWLRNQEEMVAGGRVAITAEGTCHTLTI FQCTLEDMGEVAFVSGGCRTTTQFCVSAPRRPPL
YPPADPVVKAKTESSVTL SWSAPPHGDRPVTIDGYVLEKRKL GAYAWSRCHEAGWLATTEFTITGVAAEEDFQ
FRVSAINHFGQGPYLEFPGTMHLVPLAVKTPKAVEAVEGGEVTFVSDLTVASSGEWFLDGEALKASSIYVI
RCDRTRHMLTIREVPARLHGAQLKVFANGIETSIQMVVRAALGLPSSKLPAAAAREVLAQLHHEAQLLAE L S D
QAAAVTWLKDGRELSLGPKYEMQVSAGRRALLVRDVAQDDAGLYECVSRGSR TAYQLLVQEPKLVFAKGQQA H
SEVKA EAGNSATLSCEVTQAQTEVTFWKDGKLLSSSSKVRMEASGCSRRLVVQQAGKADAGEYSCEAGGQKLS
FRLDVAEPKLVFAKQQA HSEVKA EAGASATLSCEVAQAQTEVTFWKDGKLLSSSSKVRMEASGCSRRLVVQQ
AGKADAGEYSCEAGGQKLSFRLDVAEPKMFVFAKEQQARSEVKA EAGASATLSCEVAQAQTEVTFWKDGKLLSS
SSKVRMEASGCSRRLVVQQAGKADAGEYSCEAGGQKLSFRLDVTEPKLVFAKEQQARSEVKA EAGNSATLSCE
VAQAQTEVTFWKDGKLLSSSSKVRMEASGCSRRLVVQQAGKADAGEYSCEAGGQKLSFRLDVAEPKLVFAKEQ
QARSEVKA EAGNSATLSCEVAQAQTEVTFWKDGKLLSSSSKVRMEASGCSRRLVVQQAGKADAGEYSCEAGGQ
KLSFHLDVTEPKLVFAKEQQAHSEVKA EAGASATLSCEVAQAQTEVTFWKDGKLLSSSSKVRMEASGCSRRLV
VQQAGKADAGEYSCEAEGQKLSFRLDVAEPKLVFAKEQQARSEVKA EAGASATLSCEVAQAQTEVTFWKDGK
LSSSKVRVEASGCSRRLVVQQAGKADAGEYSCEAGGQKLSFRLDVAEPKLVFAKEQQANSEVKA EAGASATL
SCEVAQAQTEVTFWKDGKLLSSSSKVRVEASGCSRRLVVQQAGKADAGEYSCEAGGQKLSFRLDVAEPKLAFA
KEQQAHSEVKA EAGASATLSCEVAQAQTEVTFWKDGKLLSSSSKVRVEASGCSRRLVVQQAGKADAGEYSCEA
GGQKLSFRLDVAEPKLAFAKEQQAHSEVKA EAGASATLSCEVAQAQTEVTFWKDGKLLSSSSKVRVEASGCSR
RLVVQQAGKADAGEYSCEAGGQKLSFRLDVAEPKLAFAKEQQAHSEVKA EAGASATLSCEVAQAQTEVTFWKD



VAPTVPAPVPLAKTPGLQTSDAAPVFLTELQNDVDQDGYPMSFDCVVTGQPVPSVRWFKDGLLEEDDHYMIN  
EDQQGGHQLIITAVVPADMGVYRCLAENSMGVSSTKAELRVELTSTDYDTAADATETSSYFSAQGYLSSREQE  
GTESDEGQLPQVLEELKDLQVAPGTRLAKFQLKVKGYAPKLYWFKDQPLTTSDHIRMTDKKTLHTLEIVSV  
TREDSGQYAAIYISNAVGAAYSSARLLVRGPSEPEEKPASDVHERLVPRILEKFTPKKVKRGSSTIFSVMVEG  
HPAPSVHWLKEEAKEKGLVWIGPDTPGYTMASSSKQHSVLVLDVGRQHGGTYTCIATNPAGQALCSASLHISGL  
AKEEEQERVKEALISSFLQGTSAQVSAQMSSEAGFADLVGQSKGESLVAAEEAHSHLSLAEVGTTEFLQKLTSSQ  
ITEMVSAKISQAKLQVPGGDSDEETKTPSASPRHGRSRPSSSVQESSSESEDGDSRGEIFDIYVVTADYLPLG  
AEQDAIILREGQYVEEHLDSAHPLRWLVRTKTKSSPSRQGWVSPAYLDKRLKLSPEWGPTEAPEFPGEAVSED  
EYRTRLSSVIQELLSSSEQAFVGLQFLESHHMKHLERSPRVPAAVASQKTVIFRNVQDI SHFHSSFLKELQGC  
GTDDDVAMCFIKNQEAFAKEYLEFLVGRVQAESVVVSTPVQEFYKKYAEETLSAKDPTQPPPPPLQHYLEQVVE  
RVQKYQALLKELIRNKARNRQNCALLEQAYAVVSALPQRAENKLVSLMENYPGTLEALGEPVIRQGHFVWEG  
APGARMPWKGHNHRVFLFRNYLVICKPRRDSRTDTFSYVFRNMMKLSIDLNDQVEGDRAFEVWHEREDESVR  
KYLQARTVI IKNSWVKEICGIQQRLAQPVWRPPEFEELADCTAELGETVKKLACRVTGTPKPIVSWYKDGKP  
VEVDPHHILIEDPDGSCTLIDLNLTGIDSGQYMCFAASAAGNASTLGKILVQVPPRFVNVKVRATPEVEGEDAQ  
ITCTVEGAPYPQIRWYKDGTLAPGNRYRMLNEPRSGVLVLIQAASKEDLGHYECELVNLGSTRGGGELYM  
QSPALRARDQHHREQIVAAVEVTEQETKVPKKTVIIEETITTVVKS PRGRRQSPGKSPSRSPRRSASPRRPG  
LLAPERLYPPGTSPSRRLVEVEQGRKAPVPALYVTEAEVHAPASQSOPKWLEVEETIEVRVKKTVSRGASPVRE  
MTRSGEGILFTLPGGI PGRDPNANNNSNKS SVYQEARTWGPVAVHVGEPPFIQVDSVGNVDWVAASPEPEQVRA  
SQKEENTERQEGCSDGIDENTFLMEEPQDQDLSQGRDPKILTHNGRVLTLADLEDYVPEGETFGCGDSTPSTP  
DEPPCEVSVLQREISEPTVGGQPVLLNVGRPPGTGATPSFFRPGSQVHSPESVSFLLREAWSGPVSAAPTSSSF  
HTHVQSSVDGSHGSFKTEVSTQTVSFGAVGETVTLHIDPDGGEAPGPSQG\*

>rs47146051\_ENSMUSP00000020732\_c.9528:G>C\_p.V3177L  
ENSMUST00000020732.13|Obscn-201|ENSMUSG00000061462|-|chr11:g.58965954:C>G  
MDHSFSGAPRFLTRPKAFVVSVGKDATLSCQIVGNPTPHVSWEKDRQVVEAGARFRLAQDGDVYRLTILDLAL  
GDSGQYVCRARNAIGEFAAVGLRVDSEGTCAEQAPHFLLRPTSIRVREGADATFRCRVGSGPQPAVSWSKDG  
RRLGPPDAPHVRVEIGESSALRIR SARPRDGGTYEVRANENPLGSASAAAALVVDSDAEVAGPPGTSTATLLA  
HLQRRREAMRAEIGIPSPPGAGTRTCTVTTEGKHARLSCFVTGEPKPEVTVWKKDQGLVTEGRHVVEDEQENF  
VLKILFCKQSDRGLYTCTASNLVGQTYSSVLVVVREPTVPFKKRLQDLEVREKESATFQCEVAQPAEAAWFK  
EETRLWASAKYDIEEEGTERRLTVRNVSADDDAVYICETTEGSRVVAELSVQGNLTKRKLPRKTAVRTGDTAIF  
WVELAVPEGPVRWLRNQEEMVAGGRVAITAEGTCHTLTI FQCTLEDMGEVAFVSGGCRTTTTQFCVSAPRRPPL  
YPPADPVVKAKTESSVTLSSWAPPHGDRPVTIDGYVLEKRKLGAYAWSRCHEAGWLATTEFTITGVAAEGDFQ  
FRVSAINHFGQGPYLEFPGTMHLVPLAVKTPLKAVEAVEGGEVTFVSDLTVASSGEWFLDGEALKASSIYVI  
RCDRTRHMLTIREVPARLHGAQLKFVANGIETS IQMVVRAALGLPSSKLPAAAAREVLAQLHEEAQLLAE LSD  
QAAA VTLWKDGRELSLGPKEYMQVSAGRRALLVRDVAQDDAGLYECVSRGSRRTAYQLLVQDITDGYRDWGPAG  
PQKHMCKCAGAKIARYLGSSCYRFLQYDKGVWHWLEAALDRQKGTSSCSLHEKPKLVFAKQQAHSEVKA  
AGNSATLSCEVTQAQTEVTWFKDGKLLSSSSKVRMEASGCSRRLVVQQAGKADAGEYSCEAGGQKLSFRLDVA  
EPKLVFAKQQAHSEVKAEGASATLSCEVAQAQTEVTWFKDGKLLSSSSKVRMEASGCSRRLVVQQAGKADA  
GEYSCEAGGQKLSFRLDVAEPKLVFAKEQQARSEVKAEGASATLSCEVAQAQTEVTWFKDGKLLSSSSKVRM  
EASGCSRRLVVQQAGKADAGEYSCEAGGQKLSFRLDVTEPKLVFAKEQQARSEVKAEGVNSATLSCEVAQAQ  
EVTWFKDGKLLSSSSKVRMEASGCSRRLVVQQAGKADAGEYSCEAGGQKLSFRLDVAEPKLVFAKEQQARSEV  
KAEAGNSATLSCEVAQAQTEVTWFKDGKLLSSSSKVRMEASGCSRRLVVQQAGKADAGEYSCEAGGQKLSFHL  
DVTEPKLVFAKEQQAHSEVKAEGASATLSCEVAQAQTEVTWFKDGKLLSSSSKVRMEASGCSRRLVVQQAGK  
ADAGEYSCEAGGQKLSFRLDVAEPKLVFAKEQQARSEVKAEGASATLSCEVAQAQTEVTWFKDGKLLSSSSK  
VRVEASGCSRRLVVQQAGKADAGEYSCEAGGQKLSFRLDVAEPKLVFAKEQQANSEVKAEGASATLSCEVAQ  
AQTEVTWFKDGKLLSSSSKVRVEASGCSRRLVVQQAGKADAGEYSCEAGGQKLSFRLDVAEPKLVFAKEQQAH  
SEVKAEGASATLSCEVAQAQTEVTWFKDGKLLSSSSKVRVEASGCSRRLVVQQAGKADAGEYSCEAGGQKLS  
FRLDVAEPKLVFAKEQQAHSEVKAEGASATLSCEVAQAQTEVTWFKDGKLLSSSSKVRVEASGCSRRLVVQQ  
AGKADAGEYSCEAGGQKLSFRLDVAEPKLVFAKEQQAHSEVKAEGASATLSCEVAQAQTEVTWFKDGKLLSS  
SSKVRVEASGCSRRLVVQQAGKADAGEYSCEAGGQKLFRLDVAEPKLVFAKEQQAHSEVKAEGASATLSCE  
VAQAQTEVTWFKDGKLLSSSSKVRVEASGCSRRLVVQQAGKADAGEYSCEAGGQKLSFRLDVAEPKLVFAKEQ  
QAHSEVKAEGASATLSCEVAQAQTEVTWFKDGKLLSSSSKVRVEASGCSRRLVVQQVQKADAGEYSCEARGQ  
KLSFRLDVADTRLMFAKEQQARTEVKAEGNSATLSCEVAQAQTEVTWFKDGKLLSSSSKVRVEASGCSRRLV  
VQQAGKADAGEYSCEAGGQKLSFRLDVAEASISQI PERPSTRREPLVVKEHETIILTATIAAPVAAVTLWKDGV  
EIRRSKRHEATSLDHTLTVRGAQVLDLSAIYSCRVKEGQDFPVQVEEVAAKFSKPLEPVEGELGGTVMLVC  
ELSPQAEVWRCGNTQLRPGKRFQMTSEGPRTLTVSGLREDDAEYVCSRDDRTSARLTIVKVPVPRVVKFTS  
GLSAMVAEEGQEAFTQCVVSPSDAGVTWYKDGMLQVPESEKFMVESGASRSLTILGLTLEDAGQVTEAEGAS  
SSAALRVREAPVLFKKLEPQTEVEERTSVTLEVELTRPWPEVKWTRNAAVLTPSENVEIRAEGARHCLVLRV  
GFADRGFFGCETPDDKTQAKLNVEMRQVRLVVRGLQEVEAKEQGTASMDVELSHAEEVGSWTRDGLRLQPGPKC



HLAVQGPVHILTLALSALQPQDSGLVAFRAEGVHTSARLIVTELPSVSTRVLQDVVATQKEKVTLECELSRPVDV
RWLKDGVLELRAGKAIGIVAQGTCSRSLVIYRCETGDQGVYVCDALDAQTSASLRVQGRTYTLIFRRVLAEDAGE
VKFVAENAESRAHLRVKELPVTLLRPLRDKIAMEKHRGVLECCQVSRASAQVRWFKGGVELQSGPKYEVVSDGL
YRKLVINADVQPEDEDTYTCDAGNVKTSAQFFVVEEQSITIVRGLKDMTVMEPAPAWFECETSIPSVRPPKWLGLG
KTVLQAGGNVQLEQDGTVHRLTLHKTCSTMTGPVHFTIGKSRSSAQLVVSDIPVVLTRPLEPKAGRELQSVVL
SCDFRPAPKAVQWYKDDTPLSPSEKFKMALEGQMAELRILRLTPADAGVYRCQAGSAQSSAEVTVAREVTVI
QPLQDAEAMEEGRVCFSCSELCHKDEDIEWSLNGTPLYNDSFHEISHEGCLHTLVLSVSRQADTGTVCATSPKV
SVSARLVVKGKPVVFLKALDDVSAEERGTLLTQCEVSDPEARVVRKDGVELGSPDKYDFLHKAGARGLTVHD
LSHEDAGLYTCQVGSKETQSKVSVHDLHVGITKRLKTLVLEGECSFECVLSHESPSDPAVWTVGGKTVGGS
GHFHAVRQGRKYTLTVKDAALSDAGEVVSVLGLTSKASLIIRERPVDTKPLEDQRTTLGEDVMLSCELSRA
GTSVRWLKDGKAIRKSQKYDLLSEGTRAVLVVRKASLKDSGEYTCETEASKSTAKLCVEEKANRFTTELADLQ
VEEKGRAVFTCKTEHPASVVTWRKGLLELRASGKHVPSQEGTLKLTINALERTDSDTYTCDIGQARTQARLL
VHGQKVRVIEDLEDTAVQEGSSAKFCRIAPADYGPVHWFLLDKTPLHSNELNEITVQPGGYHVLTLRQLALKD
SGTVYFEAGDQRTSALRVTEKPSIFSRPLTDVTVTEGEDTLVCETTTVDSSVRWTKDGKTLRPSARCQLSH
EGCQAQLLITATTPQDGGRYKCEIGGASSSSIVRVHALPVRFRRESLKDVEVPEGKAATLRCVLSVAAPVEWR
HGDDVLKSSNKYSLRQEGAVLELVIRDLQPDQSGQYSCSFGDQTTSATLTVKTSQAQFVGLKRNKEATEGTTV
TLRCELTKEAPVEWKKGTETLRNGDKYSLKQDGAVALCQICSLLVADAGEYSCVCGQEKTSATLTVKALLVHF
VRRLRSKEATEGDTTTLQCELSKAAPVEWRKGTETLRDGDVRYSLKQDGAVALCQIRSLTIADAGEYLCGCGQE
KTSATLTVRALPAKFKDSLKNEEATEGTTATLSCELSKAAPVTWKKGPKTLQSGDKYVLRQDGAVALCQIHLG
TMADAGEYSCVCGQEKTSATLTVRGLPAKFIEDLRSQEATEGATAILRCELSKAAPVEWRKGSSETLKDGDRTY
LRQDGAVALCQIRGLAVVDGTYSLSPTKFTTEGLRNEEATEGTMATLRCQMSKAAPVEWRKGSSETLRDGDRTY
LRQDGAVALCQIRGLTIEDSGEYTCVCGQEKTSATLSVKALPSRFIEDLRSQEATEGTMATLRCQMSKTAPVE
WKKGSETLRDGGRYSLRQDGPVCELQICDLAVEDAGEYSCVCGQEKTSATLSIKALPPRFIEDLRSQEATEGT
MATLRCQMSKAAPVEWRKGSSETLGDGGRYSLRQNGAVCELQIHDLAVEDTGEYSCVCGQEKTSATLNVKALPP
RFIEDLRSQEATEGTMATLRCQMSKAAPVEWRKGSSETLRDGGRYSLRQDGAVALCQIHDLDVEDAGQYSCVCG
QEKTSAVLTVDALPPKFTTEGLKKEEATEGTMVTLRQMSKEATEVWRKGAKTLSDGGRYSLRQDGAVALCQI
GLAVEDAGEYSCVCGQEKTSATLSVKALPPRFIEDLRSQEATEGTMATLRCQMSKAAPVEWRKGSSETLRDGD
YSLRQDGAVALCQIRDLAVEDAGEYLCVCGQEKTSATLSVKALPPRFIEDLRSQEATEGTMATLRCQMSKAAP
VEWRKGSSETLRDGDRTYSLRQDGAVALCQICDLAVEDTGDYSCVCGQEKTSATLSVKALPPRFIEDLRSQEARE
GTVATLRCMSKAAPVEWRKGSSETLKDGDRTYSLRQEGNLCELQIRDLAVEDTEEYSCVCGQEKTSATLSVKAL
PAKFIEDLRSQEAPESSTVTLRCKLSKKASVVWKKGSETLRNGARYSLRQDGAVALCQIIRDLTVEDTGEYSCT
CGQERTSATLSIMAPQVVFQQLQNLQAEEGSMASLRCELSVNAAMVWSKGGLELQGDTRREARQQGCVAEL
LLRDLRREDAGEYSCTCGSQTTSATLMVTAAPVRFRLRELQAQDVDEGATARLRCELSREAVSVEWRKGSQQLF
PCAKYQMVQEGTTAELLVHGVEQEDAGEYTCDAHTQSIARLSVRAPKPKFKTDLQSTEQEAAGTARLCCQLS
EAEPGTPVQWLKEGVELHVGSKYEMRRQGAVALCQIHLGLEAKDTGEYACLVGGQKTLASLRVKEPEVTIVRGL
VDMEVQADEDEVEFTCKVVSQAGATDVQWHLQGLPLQSNVEVAVLADGCHVQLKGVTFLEDAGTVSFHVGG
SSSAQLTVRVPEVTVLEPLKDVQLSEGQDAHFRCRLSRASGQEARWALGGVPLQCENMNDITVEQGTLYLLTL
HKVTLLEDAGTITLQVGSSESQAQLKVTAKNTVLRGLENVDALLEGGEALFECQLSQPEVAHAHTWLLDDEPVHTS
EKVEVVYFENGLRHLLLLLKNLKPQDSCRVTFLAGDVVTS AFLTVRGRLEVLLEPPHDASVKAGMQVRFCTILS
EAVPVGEATWYINGAAIQPDDTDWTVTTDGSHHALTL SNAQPQHAGEVTF AARDAVASARLSVLALPDPPEDA
EAVGRSDHSVTL SWVAPMSDGGGGLCGYRVEMKEASTGQWQLCHDLVPGPECVDDLVPGKTYRFRVAAVGPA
GAGEPVHLPQMVKIAPAPAPAPAPAPAPAPETRQAVVGEDICLELEVAADGGEVVWHKGTERRIQPGGHFEVLS
RGQRQMLVIKGFRTEDQGEYRCGPIQGLPSSGAATFNVMVMTSGSGDEVPAQPSLPPEAAQEGDLHLLWEALAR
KRRMSREPTLDSISELPEEDSRVQHLRQEAEETAPDLSEGYSTADELARTGEADLSHTSSDDESRACTPSLVT
YLKKAAGPGISPLASKHEAQVTSVKPQKQEPVVPVTPCPPGDLAADLMDPSLDKAAVKIQAAFKGYKVRKE
MKQQEGPVFSRTFGDTEAQVGDVLRLECVLATKTD MRACWLKDGIELTDGRHYHIDQLKDGTCSSLVVTGLAPT
DSGRYTCQVSTKSGRVSHSACVVVSGTESEAESSGGELDDAFRRAARRLHRLFRTKSPAELSEELFLSADE
GPGEPEPADWQTYREDENFVCIRFESLAEARQAVTCFRNMFATMGIGVEISLGEQGPGRVEMRIGKVAPTVT
PAVPLAKTPGLQTSDAAPVFLTELQNDQVQDGYPMSFDCVVTGQPVPSVRWFKDGKLEEDDHVMINEDQGG
HQLIITAVVPADMGVYRCLAENSMGVSSKAELRVELTSTDYDTAADATETS SYFSAQGYLSSREQEGTESDE
GQLPQVLEELKDLQVAPGTRTLAKFQLKVKGYPAKLYWFKDGGPLTTSDHIRMTDKKTLHTLEIVSVTREDSG
QYAAYSNAVGAAYSSARLLVRGPSEPEEKPASDVHERLVPPRILEKFTPKKVKRGSSITFSVKVEGHPAPSV
HWLKEEAEBKGLVWIGPDTPGYTMASSSKQHSLLVLDVGRQHGTYTTCIATNPAGQALCSASLHISGLAKEEBEQ
ERVKEALISSFLQGTSAVSAQMSASAGFADLVGQSKGESLVAAEEHSHLSLAEVGTETEFLOKLTSTQITEMVS
AKISQAKLQVPPGGDSDEETKTPSASPRHGRSRPSSSVQESSSESEDGDSRGEIFDIYVVVTADYPLGAEQDAI
ILREGQYVEVLDSAHPLRWLVRTKPTKSSPSRQGWVSPAYLDRKRLKLSPEWGPTEAPEFPGEAVSEDEYRTRL
SSVIQELLSSEQAFVQELQFLESHHMKHLERSPRVPAAVASQKTVI FRNVQDISHFHSSFLKELQCGCTDDDV
AMCFIKNQEAFAKEYLEFLVGRVQAESVVVSTPVQEFYKKYAEETLSAKDPTQPPPPPLQHYLEQPVERVQKYQ

ALLKELIRNKARNRQNCALLEQAYAVVSALPQRAENKLVSLMENYPGTLEALGEPHQHFIWVEGAPGARM  
PWKGHNHRVFLFRNYLVICKPRRDSRTDTFSYVFRNMMKLSSIDLNDQVEGDDRAFEVWHEREDSVRKYLLQA  
RTVI IKNSWVKEICIGIQORLAQPVWRPPEFEEELADCTAELGETVKLACRVTGTGPKPIVSWYKDGKPVVEVDPH  
HILIEDPDGSCITLILDNLGTIDSGQYMCFAASAAGNASTLGKILVQVPPRFVNVKVRATPFVEGEDAQITCTVE  
GAPYQPIRWDGTLTLLAPGNRYRMLNEPRSGVLVVIQAASKEDELGHYECELVNRLGSTRGGGELYMQSPALR  
ARDQHHREQIVAAVEERRPSP\*  
>rs47146051\_ENSMUSP00000151217\_c.8148:G>C\_p.V2717L  
ENSMUST00000219084.3|Obscn-207|ENSMUSG00000061462|-|chr11:g.58965954:C>G  
MDHSFSGAPRFLTRPKAFVSVGKDATLSCQIVGNTPHVSWEKDRQPVEAGARFRLAQDGDVYRLTILDLAL  
GDSGQYVCRARNAIGEFAAVGLRVDSEGTCAEQAPHFLLRPTSIRVREGADATFRCRVGGSPQPAVSWSKDG  
RRLGPPDAPHVRVEEHGESSALRIRSARPRDGGTYEVRAENPLGSASAAAALVVDSDAEVAGPPGTSTATLLA  
HLQORREAMRAEGIPSPPGAGTRTCTVTEGKHARLSCFVTGEPKPEVWKKDQGLVTEGRRHVVEDEQENF  
VLKILFCKQSDRGLYTCTASNLVGQTYSSVLVVREPTVPFKKRLQDLEVREKESATFQCEVAQAPATEAAWFK  
EETRLWASAKYDIEEGETERRLTVRNVSADDDAVYICETTEGSRVVAELSVQGNLTKLPRKTAVRTGDTAIF  
WVELAVPEGPVRLRNQEEVAGGRVAITAEGTCHTLTI FQCTLEDMGEVAFVSGGCRTTTQFCVSAPRRPPL  
YPPADPVVAKTESVTLWSAPPHGDRPVTIDGYVLEKRLKLGAYAWSRCHEAGWLATTEFTITGVAEEGDFQ  
FRVSAINHFGQPYLEFPGTMHLVPLAVKTPKAVEAVEGGEVTFVSDLTVAASSGEVFLDGEALKASSIYVI  
RCDRTRHMLTIREVPARLHGAQLKVFVANGIETS IQMVVRAALGLPSSKLPAAAAREVLAQLHEEAQLLAE LSD  
QAAA VTLWKDGRELSLGPKEYMQVSAGRRALLVRDVAQDDAGLYECVSRGSRRTAYQLLVQDITDGYRDWGPAG  
PQKHMCKCAGAKIARYLGSSCYRFLQYDKGVWHLEAALDTRQKGTSSCSLHEKPKLVFAKQQAHSEVKA  
AGNSATLSCEVTQAQTEVTFWKDGKLLSSSSKVRMEASGCSRRLVVQQAGKADAGEYSCEAGGQKLSFRLDVA  
EPKLVFAKQQAHSEVKAEGASATLSCEVAQAQTEVTFWKDGKLLSSSSKVRMEASGCSRRLVVQQAGKAD  
GEYSCEAGGQKLSFRLDVAEPKMFVFAKEQQARSEVKAEGASATLSCEVAQAQTEVTFWKDGKLLSSSSKVRM  
EASGCSRRLVVQQAGKADAGEYSCEAGGQKLSFRLDVTEPKLVFAKEQQARSEVKAEGNSATLSCEVAQAQ  
EVTWFKDGKLLSSSSKVRMEASGCSRRLVVQQAGKADAGEYSCEAGGQKLSFHLDVTEPKLVFAKEQQAHSE  
KAEAGASATLSCEVAQAQTEVTFWKDGKLLSSSSKVRMEASGCSRRLVVQQAGKADAGEYSCEAGGQKLSFRL  
DVAEPKLVFAKEQQARSEVKAEGASATLSCEVAQAQTEVTFWKDGKLLSSSSKVRMEASGCSRRLVVQQAGK  
ADAGEYSCEAGGQKLSFRLDVAEPKLVFAKEQQANSEVKAEGASATLSCEVAQAQTEVTFWKDGKLLSSSSK  
VRVEASGCSRRLVVQQAGKADAGEYSCEAGGQKLSFRLDVAEPKLVFAKEQQAHSEVKAEGASATLSCEVAQ  
AQTEVTFWKDGKLLSSSSKVRVEASGCSRRLVVQQAGKADAGEYSCEAGGQKLSFRLDVAEPKLVFAKEQQAH  
SEVKAEGASATLSCEVAQAQTEVTFWKDGKLLSSSSKVRVEASGCSRRLVVQQVQKADAGEYSCEARGQKLS  
FRLDVAEAESQIPERPSRREPLVVKHEHETIILTATIAAPSVAAVTLWKDGVERRSKRHEATSLGDTHTLTVR  
GAQVLD SAIYSCRVGKEGQDFPVQVEEVAAKFSKPLEPVEGELGGTVMLVCELSPEQAEVWRCGNTQLRPGK  
RFQMTSEGPRRTLTVSGLREDDAEYVCESRDDRTSARLTVKVPVVKFTSGLSAMVAEEGQEAFTQCVVSPS  
DAGVTWYKDGMLQPSKFMVVEGASRSILTILGLTLEDAGQVTEAEGASSAALRVREAPVLFKPKLEPQT  
VEERTSVTLEVELTRPWPEVKWTRNAAVLTPSENVEIRAEGARHCLVLRVSVGFADRGFFGCETPDDKTQAKLN  
VEMRQVRLVLRGLQEVEAKEQGTASMDVELSHAEVEGSWTRDGLRLQPGPKCHLAVQGPVHILTLALSALQPQDSG  
LVAFRAEGVHTSARLIVTELPVSFTRVLQDVVATQKEKVTLECELSRPVDVRWLKDGVELRAGKAI GIVAQGT  
CRSLVIYRCETGDQGVYCDALDAQTSASLRVQGRYTLIFRRVLAEDAGEVKFVAENAESRAHLRVKELPVT  
LLRPLRDKIAMKHRGVLECVSRASAQVRWFKGGVELQSGPKYEVVSDGLYRKLVIINDVQPEDEDYTC DAG  
NVKTSAQFFVEEQSITIVRGLKDMTVMEPAPAWFECETSIPSVRPPKWLKGKTVLQAGGNVLEQDGTVHRLT  
LHKTCSTMTGPVHFTIGKSRSSAQLVVS DIPVVLTRPLEPKAGRELQSVVLSCDFRPAPKAVQWYKDDTPLSP  
SEKFKMALEGQMAELRILRLTPADAGVYRCQAGSAQSSAEVTVAREVTVIQPLQDAEAMEEGRVCFSCELSH  
KDEDIEWSLNGTPLYNDSFHEISHEGCLHTLVLSKVRQADTGTVCATSPKVSVSARLVVKGKPVVFLKALDDV  
SAEERGLTLQCEVSDPEARVVWRKDGVELGSPDKYDFLHKAGARGLTVHDLSHEDAGLYTCQVGSKETQSKV  
SVHDLHVGITKRLKTLLEVLEGESECSFECVLSHESPSDPAVWTVGGKTVGGSGHFHAVRQGRKYTLTVKDAALS  
DAGEVVSFVGLTSTKASLIIRERPVDTKPLEDQRTTLGEDVMLSCELSRAGTSVRWLKDGKAIRKSQKYDLL  
SEGTRAVLVVRKASLKDSGEYTCETEASKSTAKLCVEEKANRFTTELADLQVEEKGRAVFTCKTEHPASVVTW  
RKGLLELRASGKHVPSQEGTLKLTINALERTSDTYTCDIGQARTQARLLVHGQKVRVIEDLEDTAVQEGSS  
AKFCCRIPADYGPVHFLDKTPLHSNELNEITVQPGYHVLTLRQLALKDSGTVYFEAGDQRTSALRVTEK  
PSIFSRPLTDVTVTEGEDLTLVCETTTVDSSVRWTKDGKTLRPSARCQLSHEGCAQLLITATTPQDGGRYKC  
EIGGASSSSIVRVHALPVRFRFRESLKDVEVPEGKAATLRCVLSVAAPVEWRHGDDVLKSSNKYSRLRQEGAVLE  
LVIRDLPQDSGQYSCSFGDQTTSATLTVKTSQAQFVGLKRNKEATEGTTVTLRCELTKAPVEWKKGTETLR  
NGDKYSLKQDGA VCELQICSLLVADAGEYSCVCGQEKTSATLTVKALLVHFVRRRLRSKEATEGDTTLQCELS  
KAAPVEWRKGTETLRDGDYSLKQDGA VCELQIRSLTIADAGEYLCTCGQEKTSATLTVRGLPAKFIEDLRSQ  
EATEGATAILRCELSKAAPVEWRKGSSETLKDGDYTLRQDGA VCELQIRGLAVVDGTGYSLSLPTKFTTEGLRNE  
EATEGTMATLRCQMSKAAPVEWRKGSSETLRDGDYSLRQDGA MCELQIRGLTIEDSGEYTCVCGQEKTSATLS  
VKALPPRFIEDLRSQEATEGTMATLRCQMSKAAPVEWRKGSSETLGDGGYSLRQNGAVCELQIHDLAVEDTGE

YSCVCGQEKTSATLNVKALPPKFTEGLKKEEATEGTMVTLRCQMSKEATVEWRKGAKTLSDGGRYSLRQDGM  
CELQICGLAVEDAGEYSCVCGQEKTSATLSVKALPPRFIEDLRSQEATEGTMATLRCQMSKAAPVEWRKGET  
LRDGDYSLRQDGAVCELQIRDLAVEDAGEYLCVCGQEKTSATLSVKALPPRFIEDLRSQEATEGTMATLRCQ  
MSKAAPVEWRKGSKTLRDGDYSLRQDGMCELQICDLAVEDTDYSCVCGQEKTSATLSVKAPQVVFQOPLQ  
NLQAEEGSMASLRCELSVPNAAMVWSKGGLELQGDTRREARQQGCVAELLLRDLRREDAGEYSCTCGSQTTSA  
TLMVTAAPVRFRLRELQAQDVDEGATARLRCELSREAVSVEWRKGSLLQFPKAKYQMVQEGTTAELLVHGVEQE  
DAGEYTCDAHTQSIARLSVRAPKPKFKTDLQSTEQEAGGTARLCCQLSEAEPTVQWLKEGVELHVGSKEYE  
MRRQGAVCELLIHGLEAKDTGEYACLVGGQKTLASLRVKEPEVTIVRGLVDMEVQADEDEFTCKVSOAGATD  
VQWHLQGLPLQSNEVTEAVLADGCTHVLQKGVTLLEDAGTVSFHVGGSSSAQLTVRVPEVTVLEPLKDVQL  
SEGQDAHFRCRLSRASGQEARWALGGVPLQCNEMNDI TVEQGTLYLLTLHKVTLLEDAGTITLQVGSSESQAQL  
KVTAKNTVLRGLENVDALEGGEALFECQLSQPEVAHTWLLDDEPVHTSEKVEVVYFENGLRHLKLNKLPQ  
DSCRVTFLAGDVVTSFALTVRGWRLEVLEPPHDASVKAGMQVRFCTILSEAVPVGEATWYINGAAIQPDDTDW  
TVTDTGSHHALTLSNAQPQHAGEVTF AARDAVASARLSVLALPDPPEDAE VVGRSDHSVTL SWVAPMSDGGGG  
LCGYRVEMKEASTGQWQLCHDLVPGPECVVDDLVPKTYRFRVAAVGPAGAGEPVHLPQMVKIAPAPAPAPAP  
APAPETRQAVVGEDICLELEVAADGGEVVWHKGTERRIQPGGHFEVLSRGRQMLVIKGFRTEDQGEYRCGPIQ  
GLPSSGAATFNVMVMTSGSGDEVPAQPSLPPEAAQEGDLHLLEALARKRRMSREPTLDSISELPEEDSRVQHL  
RQEAEETAPDLSEGYSTADELARTGEADLSHTSSDDESRAQTSLVLYLKKAGGPGISPLASKHEAQVTTSVK  
PQKQEPVVPTCPPPGDLSAADLMDPSLDKAAVKIQAAFQKGYKVRKEMKQOEGPVFSRTFGDTEQVGDVLR  
ECVLATKTDMRACWLKDGIELTDGRHYHIDQLKDGTC SLLVTGLAPTDSGRYTCQVSTKSGRVSHSACVVVSG  
TESEAESSSGGELDDAFRRAARLHRLFRTKSPAELSEELFLSADEGPGEPEEPADWQTYREDEFV CIRFE  
SLAEARQAVTCFRNMFATMGIGVEISLGEQGRGVEMRIGKVAPTVTPAVPLAKTPGLQTSDAAPVFLTELQN  
QDVQDGYPMSFDCVVTGQPVPSVRWFKDGKLLLEDDHYMINEDQQGGHQLIITAVVPADMGVYRCLAENSMGV  
SSTKAELRVELTSTDYDTAADATETSSYFSAQGYLSSREQEGTESDEGQLPQVLEELKDLQVAPGTRLAKFQL  
KVKGYPAKLYWFKDQGLTTS DHIRMTDKKTLHTLEIVSVTREDSGQYAAAYISNAVGAAYSSARLLVGRPSE  
PEEKPADVHERLVPVPRILEKFTPKKVKRGSSITFSVKVEGHPAPSVHVLKKEEAKEGVLWIGPDPGTYTMASS  
SKQHSVLVLDVGRQHGTYTIC IATNPAGQALCSASLHISGLAKEEEQERVKEALISSFLQDTSQAVSAQMSSES  
AGFADLVGQSKNEVLAEEAHSHLSLAEVGTEEFLLKLTSTQITMVSAKISQAKLQVPGGDSDEETKPTKPSASP  
RHGRSRPSSSVQESSSESEDGDSRGEIFDIYVVVTADYLP LGAEQDAIILREGQYVEVLDSAHPLRVLVTRTKPT  
KSSPSRQGWVSPAYLDKRLKLSPEWGPTEAPEFPGEAVSEDEYRTRLSSVIQELLSSEQAFVGVLEQLFLESHHM  
KHLERSPRVPAAVASQKTVI FRNVQDISHFHSSFLKELQCGCTDDDVAMCFIKNQEAFEKYLEFLVGRVQAES  
VVVSTPVQEFYKKYAEETLSAKDPTQPPPPPLQHYLEQPVVERVQKYQALLKELIRNKARNRQNCALLEQAYAV  
VSALPQRAENKLVSLMENYPGTLEALGEP I RQGHFI V WEGAPGARMPWKGNHRHVFLFRNYLVICKPRRDSR  
TDTFSYVFRNMMKLSSIDLNDQVEGDDRAFEVWHERE DSVRKYLLQARTVI IKNSWVKEICGIQQRLAQPVWR  
PPEFEEELADCTAELGETVKLACRVGTGPKPIVSWYKDGKPEVDPHHLIEDPDGSC TLI LDNLTGIDSGQY  
MCFASAAGNASTLGKILVQVPPRFVNKVRATPFVEGEDAQITCTVEGAPYPQIRWYKDGTL LAPGNRYRMLN  
EPRSGVLVLIQAASKEDLGHYCELVNRLGSTRGGGELYMQSPALRARDQHHREQI VAAVEVTEQETKVPKK  
TVIIEETITTVVKS PRGRRQSPGKSPSRSPRRSASPRRPGLLAPERLYPPGTSPSRRLVEVEQGRKAPVPALY  
VTEAEVHAPASQSQPKWLEVEETIEVRVKKTGSRGASPVREMTSRGEGILFTLPGGIPGRDPNANNNSNKS VY  
QEARTWGPVAVHVGEPFIFQVDSVGNVDWAASPEPEQVRASQKEENTERQEGCSDGDENTFLMEEPQD TDSL  
QGRDPKILTHNGRVLTLADLEDYVQEGETF GCGDSTPSTPDEPPCEVSVLQREI SEPTVQGPVLLNVGRPPG  
TGATPSFFRPGSQVHSPESVS FLLREAWSGPVSAAPWTSSFHTHVQSSVDGSHGSFKTEVSTQT VSF GAVGET  
VTLHIDPDGGEAPGPSQG\*

>rs47146051\_ENSMUSP00000122181\_c.1776:G>C\_p.V593L  
ENSMUST00000133040.4|Obscn-205|ENSMUSG00000061462|-|chr11:g.58965954:C>G  
AGKAI GIVAQGTCSRSLVIYRCETGDQGVYVCDALDAQTSASLRVQGRSVQITKPLEDVEVMEKEGATFSCVVS  
HDEVPLWFRSSKLRPSDNVRI RQEGRTYTLIFRRVLAEDAGEVKFVAENAESRAHLRVKELPVTLLRPLRD  
KIAMEKHRGVLEQCQVSRASAQVRWFKGGVELQSGPKYEVVSDGLYRKLVIN DVQPEDEDTYTC DAGNVK TSAQ  
FFVEEQSITIVRGLKDMTVM EPAPAWFECETSIPSVRPPKWL LGKTVLQAGGNVGL EQDGTVHRTLHKT CST  
MTGVPVHFTIGKSRSSAQLVSDIPVVLTRPLEPKAGRELQSVVLSCDFRPAPKAVQWYKDDTPLSPSEKFKMA  
LEGQMAELRILRLTPADAGVYRCQAGSAQSSAEVTVEAREVTVIQPLQDAEAMEEGRVCFSCELSHKDEDIEW  
SLNGTPLYNDSFHEISHEGCLHTLVLSVRQADTGTVCATSPKVSVSARLVVKGKPVVFLKALDDVSAEERGT  
LTLQCEVSDPEARVVWRKDGVELGPSDKYDFLHKAGARGLTVHDL SHEDAGLYTCQVGSKETQSKVSVHDLHV  
GITKRLKTLLEVLEGESCFECVLSHESPSDPAVDVTGGKTVGGSGHFHAVRQGRKYTLTVKDAALSDAGEVVF  
SVLGLTSKASLIIRERPV DITKPLEDQRTTLGADWMLSELSRAGTSVRWLKDGKAIKRSQKYDLLSEGTRAV  
LVVRKASLKDSEYTCETEASKSTAKLCVEEKANRFT EELADLQVEEKGRAVFTCKTEHPASVVTWRKGLLEL  
RASGKHVPSQEGTLTKLTINALERTDSDTYTCDIGQARTQARLLVH  
>rs29481309\_ENSMUSP00000158795\_c.7159:G>T\_p.S2387I  
ENSMUST00000238536.2|Obscn-210|ENSMUSG00000061462|-|chr11:g.58972713:C>A

MDHSFSGAPRFLTRPKAFVSVGKDATLSCQIVGNPTPHVSWEKDRQPVEAGARFRLAQDGDVYRLTILDLAL
GDSGQYVCRARNAIGEFAAVGLRVDSEGTCAEQAPHFLLRPTSIRVREGADATFRCRVGGSPQPAVSWSKDG
RRLGPPDAPHVRVEEHGESSALRIR SARPRDGGTYEVRAENPLGSASAAAALVVDSDAEVAGPPGTSTATLLA
HLQQRREAMRAEGIPSPPGAGTRTCTVTEGKHARLSCFVTGEPKPEVWKKDQGLVTEGRRHVVEDEQENF
VLKILFCKQSDRGLYTCTASNLVGQTYSSVLVVVREPTVPFKKRLQDLEVREKESATFQCEVAQPAEAAWFK
EETRLWASAKYDIEEEGETERRLTVRNVSADDDAVYICETTEGSRVVAELSVQGNLTKLPRKTAVRTGDTAIF
WVELAVPEGPVWRWRNQEEMVAGGRVAITAEGTCHTLTI FQCTLEDMGEVAFVSGGCRTTTQFCVSAPRRPPL
YPPADPVVKAKTESSVTLWSAPPHGDRPVITIDGYVLEKRLGAYAWSRCHEAGWLATTEFTITGVAEEGDFQ
FRVSAINHFGQGPYLEFPGTMHLVPLAVKTPLKAVEAVEGGEVTFVSDLTVASSGEWFLDGEALKASSIYVI
RCDRTRHMLTIREV PARLHGAQLKFVANGIETSIQMVVRAALGLPSSKLPAAAAAREVLAQLHEEAQLLAE LSD
QAAA VTWLKDGRELSLGPYEMQVSAGRRALLVRDVAQDDAGLYECVSRGSR TAYQLLVQDITDGYRDWGPAG
PQKHMCKCAGAKIARYLGSSCYRFLQYDKGVWHLEAALDTRQKGKTS SCSLHEKPKLVFAKQQAHSEVKA E
AGNSATLSCEVTQAQTEVTWFKDGKLLSSSSKVRMEASGCSRRLVVQQAGKADAGEYSCEAGGQKLSFRLDVA
EPKLVFAKQQAHSEVKA EAGASATLSCEVAQAQTEVTWFKDGKLLSSSSKVRMEASGCSRRLVVQQAGKADA
GEYSCEAGGQKLSFRLDVAEPKMFVFAKEQQARSEVKA EAGASATLSCEVAQAQTEVTWFKDGKLLSSSSKVRM
EASGCSRRLVVQQAGKADAGEYSCEAGGQKLSFRLDVTEPKLVFAKEQQARSEVKA EAGASATLSCEVAQAQ T
EVTWFKDGKLLSSSSKVRMEASGCSRRLVVQQAGKADAGEYSCEAGGQKLSFRLDVAEPKLVFAKEQQARSEV
KAEAGNSATLSCEVAQAQTEVTWFKDGKLLSSSSKVRMEASGCSRRLVVQQAGKADAGEYSCEAGGQKLSFHL
DVTEPKLVFAKEQQAHSEVKA EAGASATLSCEVAQAQTEVTWFKDGKLLSSSSKVRMEASGCSRRLVVQQAGK
ADAGEYSCEAGGQKLSFRLDVAEPKLVFAKEQQARSEVKA EAGASATLSCEVAQAQTEVTWFKDGKLLSSSSK
VRVEASGCSRRLVVQQAGKADAGEYSCEAGGQKLSFRLDVAEPKLVFAKEQQANSEVKA EAGASATLSCEVAQ
AQTEVTWFKDGKLLSSSSKVRVEASGCSRRLVVQQAGKADAGEYSCEAGGQKLSFRLDVAEPKLAFAKEQQAH
SEVKA EAGASATLSCEVAQAQTEVTWFKDGKLLSSSSKVRVEASGCSRRLVVQQAGKADAGEYSCEAGGQKLS
FRLDVAEPKLAFAKEQQAHSEVKA EAGASATLSCEVAQAQTEVTWFKDGKLLSSSSKVRVEASGCSRRLVVQQ
AGKADAGEYSCEAGGQKLSFRLDVAEPKLAFAKEQQAHSEVKA EAGASATLSCEVAQAQTEVTWFKDGKLLSS
SSKVRVEASGCSRRLVVQQAGKADAGEYSCEAGGQKLFRLDVAEPKLMFAKEQQAHSEVKA EAGASATLSCE
VAQAQTEVTWFKDGKLLSSSSKVRVEASGCSRRLVVQQAGKADAGEYSCEAGGQKLSFRLDVAEPKLVFAKEQ
QAHSEVKA EAGASATLSCEVAQAQTEVTWFKDGKLLSSSSKVRVEASGCSRRLVVQQVQKADAGEYSCEARGQ
KLSFRLDVADTRLMFAKEQQARTEVKA EAGNSATLSCEVAQAQTEVTWFKDGKLLSSSSKVRVEASGCSRRLV
VQQAGKADAGEYSCEAGGQKLSFRLDVAEAE SQIPERPSRREPLVVKEHETIILTATIAAPSVAAVTWLKDG V
EIRRSKRHEATSLGDTHTLTVRGAQVLD SAIYSCRVGKEGQDFPVQVEEVA AKFSKPLEPVEGELGGTVMLVC
ELSP EQAEVWRCGNTQLRPGKRFQMTSEGPRRTLTVSGLREDDAE EYVCE SRDDRTSARLT VKVPRVVKFTS
GLSAMVAEEGQEATFQCVVSPSDAGVTWYKDGMLQLPSEKFMVVEGASRILTLGLTLEDAGQVTEAEGAS
SSAALRVREAPVLFKKLEPQTEVERTSVTLEVELTRPWPEVKWTRNAAVLTPSENVEIRAEGARHCLVLR SV
GFADRGGFFGCETPDDKTQAKLNVEMRQVRLVRLGQVEVEAKEQGTASMDVELSHA EVEGSWTRDGLRLQPGPKC
HLAVQGPVHILTL SALQPQDSGLVAFRAEGVHTSARLIVTELPVSFTRVLQDQVATQKEKVTLECELSRFPVDV
RWLKDGVELRAGKAIGIVAQGTCSRSLVIYRCETGDQGVYVCDALDAQTSASLRVQGRTYTLIFRRLAEDAGE
VKFVAENAESRAHLRVKELPVTLLRPLRDKIAMEKHRGVLECCQVSRASAVRWFKGGVELQSGPKYEVVSDGL
YRKLVIN DVQPEDEDTYTC DAGNVKTS AQFFVEEQSITIVRGLKDMTVM EPAPAWFECETSIPSVRPPK WLLG
KTVLQAGGNVGL EQDGTVHRLTLHKTCSTMTGPVHFTIGKSRSSAQLVSDIPVVLTRPLEPKAGRELQSVVL
SCDFRPAPKAVQWYKDDT PLSPEKFKMALEGM AELRILRLTPADAGVYRCQAGSAQSSAEVTV EAREVTVI
QPLQDAEAMEEGRVCFSCELSHKDEDIEWLSLNGTPLYNDSFHEISHEGCLHTLVLSVSRQADTGTVCATSPKV
SVSARLVVKGKPVVFLKALDDVSAEERGTLT LQCEVSDPEARVWVRKDGVELGSPDKYDFLHKAGARGLTVHD
LSHEDAGLYTCQVGSKETQSKVSVHDLHVGITKRLKTVEVLEGE SCSFECVLSHESPSDPAVWTVGGKTVGGS
GHFHAVRQGRKYTLTVKDAALSDAGEVVF SVLGLT SKASLI IRE RPVDITKPLEDQRTTLGEDVMLSCELSRA
GTSVRWLKDGKAIRKSQKYDLLSEGTRAVLVVRKASLKDSGEYTCETEASKSTAKLCVEEKANRFT EELADLQ
VEEKGRAVFTCKTEHPASVVTWRKGLLELRASGKHVPSQEGLTLKLTINALERTSDTYTCDIGQARTQARLL
VHGQKVRVIEDLED TAVQEGSSAKFCRIAPADYGPVHWFLDKTPLHSNELNEITVQPGGYHVLTLRQLALKD
SGTVYFEAGDQRTS AALRVTEKPSIFSRPLTDVTVTEGEDLTLVCETTTVDSSVRWTKDGKTLRPSARCQLSH
EGCQAQLLITATTPQDGGRYKCEIGGASSSIVRVHALPVRFRSLKDVVEPEGKAATLRCVLSVAAPVEWR
HGDDVLKSSNKYSLRQEGAVLELVIRDLQPDQSGQYSCSFGDQTT SATLTVKTS SAQFVFGKLRNKEATEGTTV
TLRCELTK EAPVEWKKGTETLRNGDKYSLKQDGAVCELQICSLLVADAGEYSCVCGQEKTSATLTVKALLVHF
VRRLRSK EATEGDTTTLQCELSKAAPVEWRKGTETLRDGD RYSLKQDGAVCELQIRSLT IADAGEYLCTCGQE
KTSATLTVRALPAKFKDSLKNEEATEGTTATLSCELSKAAPVTWKKGPKTLQSGDVKVLRQDGAVCGLQIHGL
TMADAGEYSCVCGQEKTSATLTVRGLPAKFIEDLRSQEATEGATAILRCELSKAAPVEWRKGS ETLKDGDRYT
LRQDGAVCELQIRGLAVVDGTGYSSLPKFT EGLRNEEATEGTMATLRCQMSKAAPVEWRKGS ETLR DGD RYS
LRQDGAMCELQIRGLTIEDSGEYTCVCGQEKTSATLSVKALPSRFIEDLRSQEATEGTMATLRCQMSKTAPVE
WKKGSETLRDGGRYSLRQDGPVCELQICDLAVEDAGEYSCVCGQEKTSATLSIKALPPRFIEDLRSQEATEGT

MATLRCQMSKAAPVEWRKGSSETLGDGGRYSLRQNGAVCELQIHDLAVEDTGEYSCVCGQEKTSATLNVKALPP
RFIEDLRSQEATEGTMATLRCQMSKAAPVEWRKGSSETLRDGGRYSLRQDGA VCELQIHDLVDV EDAGQYSCVCG
QEKTSAVLTVDALPPKFTEGLKKEEATEGTMVTLRCQMSKEATVEWRKGAKTSLSDGGRYSLRQDGA MCELQIC
GLAVEDAGEYSCVCGQEKTSATLSVKALPPRFIEDLRSQEATEGTMATLRCQMSKAAPVEWRKGSSETLRDGD
YSLRQDGA VCELQIRDLAVEDAGEYLCVCGQEKTSATLSVKALPPRFIEDLRSQEATEGTMATLRCQMSKAAP
VEWRKGSKTLRDGDYSLRQDGA MCELQICDLAVEDTGDYSCVCGQEKTSATLSVKALPPRFIEDLRSQEARE
GTVATLRCRMSKAAPVEWRKGSSETLKDGDYSLRQEGNLCELQIRDLAVEDTEEYSCVCGQEKTSATLSVKAL
PAKFIEDLRSQEAPESSTVTLRCKLSKKASVWKKGSETLRNGARYSLRQDGA VCELEIRDLTVEDTGEYSCT
CGQERTSATLSIMAPQVVFLQNLQAEEGSMASLRCELSVNAAMVWSKGGLELQGDTRREARQQGCVAEL
LLRDLRREDAGEYSCTCGSQTTSATLMVTAAPVRFRELQAQDVDEGATARLRCELSREAVSVEWRKGS LQLF
PCAKYQMVQEGTTAELLVHGVEQEDAGEYTC DAGHTQSIARLSVRAPKPKFKTDLQSTEQEAGGTARLCCQLS
EAEPGTPVQWLKEGVELHVGSKYEMRRQGA VCELLIHGLEAKDTGEYACL VGGQKTLASLRVKEPEVTIVRGL
VDMEVQADEDEFTCKVSQAGATDVQWHLQGLPLQSNVTEVAVLADGCTHVLQ LKGVTL EDAGTVSFHVGGL
SSSAQLTVRVPEVTVLEPLKDVQLSEGQDAHFRCRLSRASGQEARWALGGVPLQCNEMNDITVEQGTLYLLTL
HKVTLEDAGTITLQVGS CSSEAQLKVTAKN TVLRGLENDVALEGG EALFECQLSQPEVA AHTWLLDDEPVHTS
EKVEVVYFENGLRHLLLLKNLKPQDSCRVTFLAGDVVTS AFLTVRGWRLEVLEPPHDASVKAGMQVRF TCILS
EAVPVGEATWYINGAAIQPDDTDWTVTTDGS HHAL TLSNAQPQHAGEVTF AARDAVASARLSVLALPDPPEDA
EUVGRSDHSVTLSWVAPMSDGGGLCGYRVEMKEASTGQWQLCHDLVPGPECVVDDLVP GKTYFRFVAAVGA
GAGEPVHLPQMVKIAPAPAPAPAPAPAPAPETRQAVVGEDIC LELEVAADGGEVVWHKGTERRIQPGGHFEVLS
RGQRQMLVIKGFRTEDQGEYRCGPIQGLPSSGAATFNVMVMTSGSGDEVPAQPSLPPEAAQEGDLHLLWEALAR
KRRMSREPTLDSISELPEEDSRVQHLRQEA EETAPDLSEGYSTADELARTGEADLSHTSSDDES RAGT PSLVT
YLK KAGGPGISPLASKHEAQV TTSVKPQKQEPVPTCPPPGDLSAADLMDPSLDKAAVKIQAAF KGYKVRKE
MKQQEGPVFSRTFGDTEAQVGVLRLECVLATKTD MRACWLKDGIELTDGRHYHIDQLKDGTC SLLVTGLAPT
DSGRYTCQVSTKSGRVSHSACVVVSGTESEAESSSGGELDDAFRAARRLHRLFR TKSPAELSEEELFLSADE
GPGEPEEPADWQTYREDENFV CIRFESLAEARQAVTCFRNMFATMGIGVEISLGEQGRGVEMRIGKVAPTVT
PAVPLAKTPGLQTS DAAPVFLTELQNDVQDGYPMSFDCVVTGQPVPSVRWFKDGKLEEDDHYMINEDQQGG
HQLLIITAVVPADMGVYRCLAE NSMGVSSSTKAELRVELTSTDYDTAADATETSSYFSAQYDSSREQEGTESDE
GQLPQVLEELKDLQVAPGTR LAKFQLKVKGYPAPKLYWFKDGGQPLTSDHIRMTDKKTLHTLEIVSVTRED SG
QYAAYSNAVGAAYSSARLLVRGPSEPEEK PASDVHERLVPPRI LEKFTPKKVKRGSSITFSVKVEGHPAPSV
HWLKEEA EKGV LWIGPDTPGYTMASSSKQHS LVL LDVGRQH QGT YTCIATNPAGQALCSASLHISGLAKEEEQ
ERVKEALISSFLQGT SQAVSAQMSESAGFADLVGQSKGESLVAEEAHSHLSLAEVGT EEF LQKLT SQI TEMVS
AKISQAKLQVPGGDSDEETKTPSASPRHGRSRPSSSVQESSSEEDGDSRGEIFDIYVVTADYLP LGAEQDAI
ILREGQYVEVLDSAHPLRWLVR TKPKSSPSRQGWVSPAYLDKRLKLSPEWGPTEAPEFPGEAVSEDEYRTRL
SSVIQELLSSEQAFV GELQFLES HHMKHLERSPRVPAAVASQKTVIFRNVQDISHFHSSFLKELQCGCTDDD V
AMCFIKNQEA FEKYLELFLVGRVQAESVVVSTPVQEFYKKYAEETLSAKDPTQPPPP LQHYLEQ PVERVQKYQ
ALLKELIRNKARNRNCALLEQAYAVVSALPQRAENKLVSLMENYPGTLEALGEP I RQGHFIWEGAPGARM
PWKGHNHRHVF LFRNYLVIC KPRRDSRTD TFSYVFRNMMKLSSIDLNDQVEGD DRAFEVWHEREDSVRKYLLQA
RTVI IKNSWVKEICGIQORLAQPVWRPPEFEEELADCTAELGETVKLACRVTGT PKPIVSWYKDGK PVEVDPH
HILIEDPDG SCTLILDNLTGIDSGQYMCFAASAAGNASTLGKILVQVPPRFVNVKVRATPFVEGEDAQITCTVE
GAPYQIRWYKDG TLLAPGNRYRMLNEPRSGVLV LVIQAASKEDLGHYEC ELVNRLGSTRGGGELYMQSPALR
ARDQHHREQIVAAVEDTSVEGSAHSAQD GADQQAASVLWRLLGSEALGPS PGDLPNTRQSEPPAFEEAASQIP
GAASGTPEVSPQPGTHKGLEQETTSSGSQGWTPIRVEGTAWPGAGTGQLLLDVHSQVIMETTQRTYVCQAPDT
GVTRAPSMQVTIEDVQVQVGDMAQF DAVIEGHPPP I V TWYKGSTQLTSSARLSQRQDGT TYSLVLTDVAPHDA
GVYTCVANNAGGQV LCKAELLVHGDKLDAENQVYRRKLSHSFYDVQEE IGRGVFGFVKRVQHKGNMFCAAKF
IPLRSKTRAQAYQYR DILATLGHPLVTGLLDQFETRKTLLIILELCSSEELLDRLFKKGVVTEAEVKVYIQQL
VEGLHYLHSHGILHLDIKPPN ILMVHPAREDIKICDFGFAQKITPSEPQYSKYGSPEFVSPEIIEQNPVSEGS
DIWAMGVI SYLSLTCSSPFAGESDRATLLNVLEGRVSWSSPTAAHLS EDAKDFIKATLQRTPRARPSTSQCLA
HPWFLKSMPAEEAHFINTKQLKFL LARSRWQRSLMSYKSI LVMRSIPELLQGPPDSPSLGVARHLRGEASGAS
SSSSSSDNELAPFARAKSLPPSPVTHSPLLHPRGFLRPSASLPEETEASMP TADA AVPAS PQSAGPPASPGCV
PRHSV ISSLFYQQAGEGA ERGNKTS GAKRHPARRRHLLKGGYIARALPGLREPLMEYS LLEEEAAREEQASIM
TKTPSFETALRLPSSSVREVPGRSHSLDNPPVT TGPSPEACKEQLLFPSTGLTHETTAKDRGHKEGFLQESV
PFPMSGDSRPGKQEGSSQDSCRGKPASSCHSELGSGSQEGC GPPSSQSLGSLPPQSLKKE LSTSCGPLFSEQ
PQAAPFPTQVSP LLLGKEPEQDGS LSEGPVPVSSSPGASQVDASLDTEGLESEAGTDCDFTPPPQRPEQAT
TRKFSLESRGGYAGVAGYGTFAFGDAGGMLGQGLPLWARMAVAVS QSSEEQDEAATESQPLES LGPIAEASG
VPLRTSPSLTPWEEVEQVSLVQIRDLSGDAEAADTISLDI SEVDPAYLNLSDLYDIKYL PFEFMI FRRVPKPI
EQPESPGSETEAGQGLADFL EEAAWPWP GELGLRAGLEITEEPEEPGDLEALLGEAAVGRKRKWSPSRGLFQF
PGRCLSGEEPVELGLRQRVKASMAHISRILKGRPEGPERE GPPRKKAGLASFRLSGLKGRDQELSDEAVVLGQ
SVTLACQVLAQPTAQATWSKDGVLLESSGHLLI SSSLKNFQLLTI LVVKEEDLGTYTCCVSNPLGTAVTTGVL



RKAERPSSSPRPEVGEELYKDAVLLVWKPVESECGPVTYIVQCCIEGGSWTTLASDISDCCYLTGKLSRGGMYIF  
RTACVSKAGMGPYSSPSEQVLLGGPNHLASEEESSRRGPAQLLPSTKTFQFQMQIRRRGRFSVVRQCREKASGR  
ALAAKIVPYQPEDKTAVLREYEALRHLHHPHLAQLHAAYLSPRHLVLI LELCSGPELLPSLAERESYSESDVK  
DYLWQMLSATQYLHAQHILHLDLRSNNMMVTEYNLLKVIDLGNALDQEKVPAPENFKDYLETMAPELLEGGQ  
GAVPQTDIWAIGVTAIFIMLSGEY PESSSEGTRDLQKGLRKLIRLSRCYAGLSGGAVAFLOSSLCAQPWGRPCA  
STCLQCGLWTEEGPTGSRPTPVTFPTVRLRAVFREREKRRALLYKKNLAQVR\*  
>rs29481309\_ENSMUSP00000038264\_c.6331:G>T\_p.S2111I  
ENSMUST00000047441.14|Obscn-202|ENSMUSG00000061462|-|chr11:g.58972713:C>A  
MDHSFSGAPRFLTRPKAFVVSVGKDATLSCQIVGNPTPHVSWEKDRQPVEAGARFRLAQDGDVYRLTILDLAL  
GDSGQYVCRARNAIGEAFAAVGLRVDSEGTCAEQAPHFLLRPTSIRVREGADATFRCRVGGSPQPAVSWSKDG  
RRLGPPDAPHVRVEEHGESSALRIRSARPRDGGTYEVRAENPLGSASAAAALVVDSDAEVAGPPGTSTATLLA  
HLQORREAMRAEGIPSPPGAGTRTCTVTEGKHARLSCFVTGEPKPEVWKKDQGLVTEGRRHVVEDEQENF  
VLKILFCKQSDRGLYTCTASNLVGQTYSSVLVVREPTVPFKKRLQDLEVREKESATFQCEVAQPAEAAWFK  
EETRLWASAKYDIEEGETERRLTVRNVSADDDAVYICETTEGSRVVAELSVQGNLTKLPRKTAVRTGDTAIF  
WVELAVPEGPVRLRNQEEVAGGRVAITAEGTCHTLTI FQCTLEDMGEVAFVSGGCRTTTQFCVSAPRRPPL  
YPPADPVVAKTESVTLWSAPPHGDRPVTIDGYVLEKRLKLGAYAWSRCHEAGWLATTEFTITGVAEEGDFQ  
FRVSAINHFGQGPYLEFPGTMHLVPLAVKTPKAVEAVEGGEVTFVSDLTVAASSGEWFLDGEALKASSIYVI  
RCDRTRHMLTIREVPARLHGAQLKFEVANGIETS IQMVVRAALGLPSSKLPAAAAREVLAQLHEEAQLLAE LSD  
QAAAVTWLKDGRELSLGPKEYMQVSAGRRALLVRDVAQDDAGLYECVSRGSRRTAYQLLVQDITDGYRDWGPAG  
PQKHMCKCAGAKIARYLGSSCYRFLQYDKGVWHLEAALDTRQKGTSSCSLHEKPKLVFAKQQAHSEVKA  
AGASATLSCEVAQAQTEVTFWKDGGKLSSSSKVRMEASGCSRRLVVQQAGKADAGEYSCEAGGQKLSFRLDVA  
EPKMFVFAKEQQARSEVKAEGASATLSCEVAQAQTEVTFWKDGGKLSSSSKVRMEASGCSRRLVVQQAGKAD  
GEYSCEAGGQKLSFRLDVTEPKLVFAKEQQARSEVKAEGVNSATLSCEVAQAQTEVTFWKDGGKLSSSSKVRM  
EASGCSRRLVVQQAGKADAGEYSCEAGGQKLSFRLDVAEPKLVFAKEQQARSEVKAEGNSATLSCEVAQAQ  
EVTWFKDGGKLSSSSKVRMEASGCSRRLVVQQAGKADAGEYSCEAGGQKLSFHLDVTEPKLVFAKEQQAHSE  
KAEAGASATLSCEVAQAQTEVTFWKDGGKLSSSSKVRMEASGCSRRLVVQQAGKADAGEYSCEAGGQKLSFRL  
DVAEPKLVFAKEQQARSEVKAEGASATLSCEVAQAQTEVTFWKDGGKLSSSSKVRVEASGCSRRLVVQQAGK  
ADAGEYSCEAGGQKLSFRLDVAEPKLVFAKEQQANSEVKAEGASATLSCEVAQAQTEVTFWKDGGKLSSSSK  
VRVEASGCSRRLVVQQAGKADAGEYSCEAGGQKLSFRLDVAEPKLVFAKEQQAHSEVKAEGASATLSCEVAQ  
AQTEVTFWKDGGKLSSSSKVRVEASGCSRRLVVQQAGKADAGEYSCEAGGQKLSFRLDVAEPKLVFAKEQQAH  
SEVKAEGASATLSCEVAQAQTEVTFWKDGGKLSSSSKVRVEASGCSRRLVVQQAGKADAGEYSCEAGGQKLS  
FRLDVAEPKLVFAKEQQAHSEVKAEGASATLSCEVAQAQTEVTFWKDGGKLSSSSKVRVEASGCSRRLVVQQ  
AGKADAGEYSCEAGGQKLFRLDVAEPKLVFAKEQQAHSEVKAEGASATLSCEVAQAQTEVTFWKDGGKLS  
SSKVRVEASGCSRRLVVQQVQKADAGEYSCEARGQKLSFRLDVAEAEESQI PERPSRREPLVKEHETIILTAT  
IAAPSVAAVTWLKDGVEIRRSKRHEATSLGDTHLTVRGAQVLD SAIYSCRVGKEGQDFPVQVEEVAKF SKP  
LEPVEGELGGTVMLVCELSPEQAEEVWRCGNTQLRPGKRFQMTSEGPRTTLTVSGLREDDAE EYVCE SRDDRT  
SARLTVKVPVVKFTSGLSAMVAEEGQEATFQCVVSPSDAGVTWYKDGMLQPSSEKFMVMEVSGASRIILTILGL  
TLEDAGQVTVEAEGASSAALRVREAPVLFKKKLEPQTVERTSVTLEVELTRPWPVEVKWTRNAAVLTPSENV  
EIRAEGARHCLVLRVGFADRGFFGCETPDDKTQAKLVEMRQVRLVRLGQVEVEAKEQGTASMDVELSHAEVE  
GSWTRDGLRLQPGPKCHLAVQGPVHILTL SALQPQDSGLVAFRAEGVHTSARLIVTEL PVSFTRVLQDVVATQ  
KEKVTLECELSRPVDVRLKDGVELRAGKAIGIVAQGTCSRSLVIYRCETGDQGVYVCDALDAQTSASLRVQGR  
TYTLIFRRVLAEDAGEVKFVAENAESRAHLRVKELPVTLLRPLRDKIAMEKHRGVLEQCQVSRASAQVRWFKGG  
VELQSGPKYEVVSDGLYRKLVIINDVQPEDEDTYTC DAGNVKTSAQFFVEEQSITIVRGLKDMTVMEPAPAWFE  
CETSIPSVRPPKWL LKGTVLQAGGNVLEQDGTVHRLTLHKTCSTMTGVPVHFTIGKSRSSAQLVVS DIPVVL  
RPLEPKAGRELQSVVLSCDFRPAPKAVQWYKDDTPLSPSEKFKMALEGQMAELRILRLTPADAGVYRCQAGSA  
QSSAEVTVAREVTVIQPLQDAEAMEEGRVCFSCELSHKDEDI EWSLNGTPLYNDSFHEISHEGLHTLVLKS  
VRQADTGTVCATSPKVSVSARLVVKGKPVVFLKALDDVSAEERGTLTLQCEVSDPEARVVWRKDGVELGPSDK  
YDFLHKAGARGLTVHDLSDHEDAGLYTCQVGSKETQSKVSVHDLHVGITKRLKTVEVLEGESECFEVLSP  
SDPAVWTVGGKTVGGSGHFHAVRQGRKYTLTVKDAALSDAGEVVFVSLGLTSKASLIIRERPVDI TKPLEDQR  
TTLGEDVMLSCELSRAGTSVRWLKDGKAIKRSQKYDLLSEGTRAVLVVRKASLKDSGEYTCETEASKSTAKLC  
VEEKANRFTTEELADLQVEEKGRAVFTCKTEHPASVVTWRKGLLELRASGKHVPSQEGTLTKLTINALERTDSD  
TYTCDIGQARTQARLLVHGQKVRVIEDLEDTAVQEGSSAKFCCRIPADYGPVHWF LDKTPLHSNELNEITVQ  
PGGYHVLTLRQLALKDSGTVYFEAGDQRTSAALRVTEKPIFSRPLTDVTVTEGEDTLVCE TTTVDSSVRWT  
KDGTTLRPSARQLSHEGCAQLLITATTPQDGGRYKECIGGASSSIVRVHALPVRFRESLTKDVEVPEGKAA  
TLRCVLSSVAAPVEWRHGDDVLKSSNKYSLRQEGAVLELVIRDLQPDQSGYSCSFGDQTTSATLTVKTSQAQ  
FVGKLRNKEATEGTTVTLRCELTKEAPVEWKKGTETLRNGDKYSLKQDGA VCELQICSLLVADAGEYSCVCGQ  
EKTSATLTVKALLVHFVRRRLRSKEATEGDTTTLQCELSKAAPVEWRKGTETLRDGD RYSLKQDGA VCELQIRS  
LTIADAGEYLCTCGQEKTSATLTVRALPAKFKDSLKNEEATEGTTATLSCELSKAAPVTWKKGPKTLQSGDKY

VLRQDGA VCGLQIHGLTMADAGEYSCVCGQEKTSATLTVRGLPAKFIEDLRSQEATEGATAILRCELSKAAAPV  
EWRKGS ETLKDGDRYTLRQDGA VCELQIRGLAVVDTGTYS SLP TKFTEGLRNEEATEGTMATLRCQMSKAAAPV  
EWRKGS ETLRQDGRYS LRQDGA MCELQIRGLTIEDS GEYTCVCGQEKTSATLSVKALPPRFIEDLRSQEATEG  
TMATLRCQMSKAAAPVEWRKGS ETLRQDGRYS LRQDGA VCELQIHDLAVEDTGEYSCVCGQEKTSATLNVKALP  
PRFIEDLRSQEATEGTMATLRCQMSKAAAPVEWRKGS ETLRQDGRYS LRQDGA VCELQIHDLVDV DAGQYSCVC  
GQEKTS AVLTVDALPPKFTEGLKKEEATEGTMVTLRCQMSKEATVEWRKGAKT LSDGG RYS LRQDGA MCELQI  
CGLAVEDAGEYSCVCGQEKTSATLSVKALPPRFIEDLRSQEATEGTMATLRCQMSKAAAPVEWRKGS KTLRQD  
RYS LRQDGA MCELQICDLAVEDTGDYSCVCGQEKTSATLSVKAPQVVFQQPLQNLQAEEGSMASLRCELSVPN  
AAMVWSKGGLELQGDTRREARQQGCVAELLLRDLRREDAGEYSC TCGSQTT SATLMVTAAPVRFRLRLQAQDV  
DEGATARLRCELSREAVSVEWRKGS LQLFPCA KYQMVQEGTTAE LLVHGVEQEDAGEYTC DAGHTQS IARLSV  
RAPKPKFKTDLQSTEQEAGGTARLCCQLSEAE PGTPVQWLKEGVELHVGS KYEMRRQGA VCELLIHGLEAKDT  
GEYA CLVGGQKT LASLRVKEPEVTIVRGLVDMEVQADE DVEFTCKV SQAGATDVQWHLQGLPLQSNVTEVAV  
LADGCTHVLQ LKGV TLEDAGTVSFHVGG LSSSAQLTVRVPEVTVLEPLKDVQLSEGD ADFRCRLSRASGQEA  
RWALGGVPLQCNEMNDITVEQGTLYLLTLHKVTLEDAGTITLQVGCSS EAQLKVTAKNTVLRGLE NVDALEGE  
GEALFECQLSQPEVA AHTWLLDDEPVHTSEKVEVVYFENGLRHLLLLKNLKPQDSCRVTFLAGDVVTS AFLTV  
RALPDPPEDAEVVGRSDHSVTL SVWAPMSDGGGGLCGYRVMKEASTGQWQLCHDLVPGPECVDDLVPGKTY  
RFRVA AVGPAGAGEP VHLPQMVKIAPAPAPAPAPAPAPAPETRAVVGEDICLELEVAADGGEVVWHKGTERTI  
QPGHF FEVLSRGRQMLVIKGFRTEDQGEYRCGPIQGLPSSGAATFNVMVMTSGSGDEVPAPQSPLEAAQEGD  
LHLLWEALARKRRMSREPTLDSISELPEEDSRVQHRLRQEAEEETAPDLSEGYSTADELARTGEADLSHTSSDDE  
SRAGT PSLV TYLKKAGGPGISPLASKHEAQV TTSVKPQKQQEPVPTCPPPGDL SAADLMDPSLDKAAVKIQA  
AFKGYKVRKEMKQQEGPVFSRTFGDTEAQVGDVLRLECVLATKTKDMRACWLKDGIELTDGRHYHIDQLKDGTC  
SLLVTGLAPTDSGRYTCQVSTKSGRVSHSACVVVSGTESEAESSSGGELDDAFRRAARRLHRLFRTKSPAELS  
EELFLSADEGPGEPEPADWQTYREDENFVICRFESLAEARQAVTCFRNMFATMGIGVEISLGEQGRGVEM  
RIGKVAPT VTPAVPLAKTPGLQTS DAAPVFLTELQNDVQDGYPMSFDCVVTGQPVPSVRWFKDGKLEEDDH  
YMINEDQQGGHQLIITAVVPADMGVYRCLAENSMGVSTKAE LRVELTSTDYD TAADATETSSYFSAQGYLSS  
REQEGTESDEGQLPVQLEELKDLQVAPGTRLAKFVKVYPA PKLYWFKDGOPLTSDHIRMTDKKTLHTLE  
IVSVTREDSGYAAAYISNAVGAAYS SARLLVRGPSEPEEK PASDVHERLVPPRILEKFTPKVKRGSSTFSV  
KVEGHPAPSVHWLKEEA EKGV LWIGPDTPGYTMAS SSKQHSLVLLDVG RQHOGTYTCIATNPAGQALCSASLH  
ISGLAKEEEQERVKEALISSFLQGTSQAVSAQMSE SAGFADLVGQSKGESLVAAEEAHSHLSLAEVGT EEFLOK  
LTSQITEMVSAKISQAKLQVPGGDSDEETKTPSASPRHGRSRPSSSVQESSSESEDGDSRGEIFDIYVVTADY  
LPLGAEQDAIILREGQYVEVLD SAHPLRVLVVRTKPTKSSPSRQGWVSPAYLDKRLKLSPEWGPTEAEPFGEA  
VSEDEYRTRLSSVIQELLSSEQA FVGELQFLESHHMKHLERSPRVPAAVASQKTVIFRNVQDI SHFHS SFLKE  
LQCGCTDDDVAMCFIKNQEA FEKYLEFLVGRVQAESVVVSTPVQEFYKKYAEETLSAKDPTQPPPPPLQHYLE  
QPVERVQKYQALLKELIRNKARNRQNCALLEQAYAVVSALPQRAENKLVHSLMENYPGTLEALGEP IROGHFI  
VWEGAPGARMPKWHNRHVFLFRNYLVICKPRRDSRTDTFSYVFRNMMKLS SIDLNDQVEGDDRAFEVWHERE  
DSVRKYL LQARTVI IKNSWVKEICGIQORLAQPVWRPPEFEELADCTAELGETVKLACRVTGTPKPIVSWYK  
DGKPV EVDPHHILIEDPDG SCTLILDNLTGIDSGQYMCFAASAAGNASTLGKILVQVPPRFVNVKVRATPFVEG  
EDAQITCTVEGAPYPQIRWYKDG TLLAPGNRYRMLNEPRSGVLV LVIQAASKEDLGHYECELVNR LGSTRGGG  
ELYMQSPALRARDQH HREQIVAAVEGAPSMQVTIEDVQVQVGDMAQF DAVIEGHPPP IVTWYKGTQLTSSAR  
LSQRQDGT TYSLVLT DVA PHDAGVYTCVANNAGGQVLCKAELLVHGDKLDAENQVYRRKLSHFYDVQEEIGR  
GVFGFVKRVQHKG NMFCAAKFIP LRSKTRAQAYQERDILATLGHPLVTGLLDQFETRKTLLIILELCSSEEL  
LDRLFKKGVVTEAEVKVYIQQLVEGLHYLHSHGILHLDIKPPNIMVHPAREDIKICDFGFAQKITPSEPQYS  
KYGSP E FVSP EIEQNPVSEGS DIWAMGVISYLSLTCSSPFAGESDRATLLNVLEGRVSWSSPTAAHLS EDAK  
DFIKATLQRTPRARPSTSQC LAHPWFLKSMPAAE AHFINTKQLKFL LARSRWQRSLMSYK SILVMRSIP ELLQ  
GPPDSPSLGVARHLRGEASGASSSSSSDNELAPFARAKSLPPSPVTHSPLLHPRGF LRPSASLPEETEASMP  
TADA AVPAS PQSAGPPASPGCVPRHSV ISSLFYQQAGEGA ERGNKTS GAKRHPARRRHLKGGYIARALPGLR  
EPLMEYSLLEEEAAREEQASLMTKT PSETALRLPSSSVREV PGRSHSLDNPPVTTG PSPEACKEQLLFPST  
GLTHE TTA KDRGHKEGFLQESVFPFPPMSGDSRPGKQEGSSQDSCRGKPASSCHSELGSGSQEGCGPPSSQSLG  
SLPPQSLKKE LSTSCGPLFSEQPQA AAFPQTQVSPLLGSEKEPQDGS LSEGVPVPSSSPGSASQVDA SLDTEG  
LSEAGDTCDFTPPPQRPEQATTRKFSLESRGGYAGVAGYGTFAFGGDAGGMLGQGPLWARMAWAVSQSSEEQ  
DEAATESPQPLES LGPIAEASGVPLRTSPSLTPWEEVEQVSLVQIRDLSGDAEAADTISLDISEVDPAYLNL S  
DLYDIKYL PFEFMI FRRVPKPIEQPESPGSETEAGQLADFL EEAAWPWPGE LGLRAGLEITEEPEEPGDLEA  
LLGEAAKGRKRKWSPSRGLFQFPGRCLSGEEPVELGLRQRVKASMAHISRILKGRPEGPERE GP RRKAGLAS  
FRLSGLKGRDQELSDEAVVLGQSVTLACQVLAQPTAQATWSKDGVLLESSGHLLISSTLKNFQLLTI LVVKEE  
DLGTYTCCVSNPLGTA VTTGVL RKAERPSSSPRPVEGELYKDAVLLVWKPVE SCGPVTYIVQCCIEGGSWTTL  
ASDISDCCYLTGKLSRGGMYIFRTACVSKAGMPYSSPSEQVLLGGPNHLASEEESSRGRPAQLLPSTKTF AF  
QMQIRGRF SVVRQCREKASGRALAAKIVPYQPEDKTAVLREYEALKRLHHPHLAQLHAAYLSPRHLVLI LEL  
CSGPELLPSLAERESYSESDVKDYLWQMLSATQYLHAQHILHLDLRSENMMVTEYNLLKVIDLGNASLDQEK

VPAPENFKDYLETMAPELLEGQGAVPQTDIWAIGVTAIFIMLSGEYPESSEGETRDLQKGLRKLIRLSRCYAGL  
SGGAVAFLOSSLCAQPWGRPCASTCLOCGWLTEEGPTGSRPTPVTFTVRLRAFVREKRRALLYKKNHNAQ  
VR\*

>rs29481309\_ENSMUSP00000049737\_c.6958:G>T\_p.S2320I

ENSMUST00000052872.15|Obscn-203|ENSMUSG00000061462|-|chr11:g.58972713:C>A  
MDHSFSGAPRFLTRPKAFVSVGKDATLSCQIVGNPTPHVSWEKDRQPVEAGARFRLAQDGDVYRLTILDLAL  
GDSGQYVCRARNAIGEFAAVGLRVDSEGTCAEQAPHFLLRPTSIRVREGADATFRCRVGSGPQPAVSWSKDG  
RRLGPPDAPHVRVEEHGESSALRIRSARPRDGGTYEVRAENPLGSASAAAALVVDSDAEVAGPPGTSTATLLA  
HLQQRRREAMAEGI PPSPPGAGTRTCTVTEGKHARLSCFVTGEPKPEVWKKDQQLVTEGRRHVVEDEQENF  
VLKILFCKQSDRGLYTCTASNLVGQTYSSVLVVVREPTVPFKKRLQDLEVREKESATFQCEVAQPATEAAWFK  
EETRLWASAKYDIEEEGETERRLTVRNVSADDDAVYICETTEGSRVVAELSVQGNLTKLPRKTAVRTGDTAIF  
WVELAVPEGPVWRWRNQEEMVAGGRVAITAEGTCHTLTI FQCTLEDMGVAFVSGGCRTTTFQFCVSAPRRPPL  
YPPADPVVKAKTESSVTLWSAPPHGDRPVTIDGYVLEKRKLGAYAWSRCHEAGWLATTEFTITGVAAEGDFQ  
FRVSAINHFGQGPYLEFPGMTMLVPLAVKTPKAVEAVEGGEVTFVSVDLTVASSGEWFLDGEALKASSIYVI  
RCDRTRHMLTIREVPARLHGAQLKFVANGIETSIQMVVRAALGLPSSKLPAAAAREVLAQLHEEAQLLAE LSD  
QAAA VTLKDGRELSLGPKEYMQVSAGRRALLVRDVAQDDAGLYECVSRGSRRTAYQLLVQEPKLVFAKQQAH  
SEVKAEGNSATLSCEVTAQTEVTWFKDGKLLSSSSKVRMEASGCSRRLLVVQQAGKADAGEYSCEAGGQKLS  
FRLDVAEPKLVFAKQQAHSEVKAEGASATLSCEVAQAQTEVTWFKDGKLLSSSSKVRMEASGCSRRLLVVQQ  
AGKADAGEYSCEAGGQKLSFRLDVAEPKLVFAKEQQARSEVKAEGASATLSCEVAQAQTEVTWFKDGKLLSS  
SSKVRMEASGCSRRLLVVQQAGKADAGEYSCEAGGQKLSFRLDVTEPKLVFAKEQQARSEVKAEGNSATLSCE  
VAQAQTEVTWFKDGKLLSSSSKVRMEASGCSRRLLVVQQAGKADAGEYSCEAGGQKLSFRLDVAEPKLVFAKEQ  
QARSEVKAEGNSATLSCEVAQAQTEVTWFKDGKLLSSSSKVRMEASGCSRRLLVVQQAGKADAGEYSCEAGGQ  
KLSFHLDVTEPKLVFAKEQQAHSEVKAEGASATLSCEVAQAQTEVTWFKDGKLLSSSSKVRMEASGCSRRLLV  
VQQAGKADAGEYSCEAGGQKLSFRLDVAEPKLVFAKEQQARSEVKAEGASATLSCEVAQAQTEVTWFKDGK  
LSSSSKVRVEASGCSRRLLVVQQAGKADAGEYSCEAGGQKLSFRLDVAEPKLVFAKEQQANSEVKAEGASATL  
SCEVAQAQTEVTWFKDGKLLSSSSKVRVEASGCSRRLLVVQQAGKADAGEYSCEAGGQKLSFRLDVAEPKLAFA  
KEQQAHSEVKAEGASATLSCEVAQAQTEVTWFKDGKLLSSSSKVRVEASGCSRRLLVVQQAGKADAGEYSCEA  
GGQKLSFRLDVAEPKLAFAKEQQAHSEVKAEGASATLSCEVAQAQTEVTWFKDGKLLSSSSKVRVEASGCSR  
RLVVQQAGKADAGEYSCEAGGQKLSFRLDVAEPKLAFAKEQQAHSEVKAEGASATLSCEVAQAQTEVTWFKD  
GKLLSSSSKVRVEASGCSRRLLVVQQAGKADAGEYSCEAGGQKLFRLDVAEPKLMFAKEQQAHSEVKAEGAS  
ATLSCEVAQAQTEVTWFKDGKLLSSSSKVRVEASGCSRRLLVVQQAGKADAGEYSCEAGGQKLSFRLDVAEPK  
VFAKEQQAHSEVKAEGASATLSCEVAQAQTEVTWFKDGKLLSSSSKVRVEASGCSRRLLVVQQVQKADAGEYS  
CEARGQKLSFRLDVADTRLMFAKEQQARTEVKAEGNSATLSCEVAQAQTEVTWFKDGKLLSSSSKVRVEASG  
CSRRLLVVQQAGKADAGEYSCEAGGQKLSFRLDVAEAEESQI PERPSRREPLVVKEHETIILTATIAAPSVAAVT  
WLKDGEVIRRSKRHEATSLGDHTLTVRGAQVLDLSAIYSCRVGKEGQDFPVQVEEVAAKFSKPLEPVEGELGG  
TVMLVCELSPEQAQEVVWRCGNTQLRPGKRFQMTSEGRPRRTLTVSGLREDDAEYVCEASRRDRTSARLTVKVPR  
VVKFTSGLSAMVAEEGQEQATFQCVVSPSDAGVTWYKDGMLQLPSEKFMVMEVSGASRILTLGLTLEDAGQVTV  
EAEGASSAALRVREAPVLFKKLEPQTEERTSVTLEVELTRPWPEVKWTRNAAVLTPSENVEIRAEGARHC  
LVLRSVGFADRGFFGCETPDDKTQAKLNVEMRQVRLVRGLQVEAKEQGTASMDVELSHAEVEGSWTRDGLRL  
QPGPKCHLAVQGPVHILTLALSALQPQDSGLVAFRAEGVHTSARLIVTEL PVSFTRVLQDVVATQKEKVTLECEL  
SRPVDVRLKDGVELRAGKAI GIVAQGTCSRSLVIYRCETGDQGVYVCDALDAQTSASLRVQGRYTLIFRRVL  
AEDAGEVKFVAENAESRAHLRVKELPVTLLRPLRDKIAMEKHRGVLECVSRASAQVRWFKGGVLEQSGPKYE  
VVSDGLYRKLVIN DVQPEDEDYTC DAGNVKTSAQFFVEEQSITIVRGLKDMTVMPEPAPAWFECETSIPSVRP  
PKWLLGKTVLQAGGNVLEQDGTVHRLTLHKTCSTMTGPVHFTIGKSRSSAQLVVS DIPPVLRPLEPKAGRE  
LQSVVLSCDFRPAKAVQWYKDDTPLSPSEKFKMALEGQMAELRILRLTPADAGVYRCQAGSAQSSAEVTVEA  
REVTVIQPLQDAEAMEEGRVCFSCELSHKDEDIEWLSNGTPLYNDSFHEISHEGCLHTLVLSVRQADTGTVC  
ATSPKVSVSARLVVKGKPVVFLKALDDVSAEERGTLLTQCEVSDPEARVVWRKDGVELGPSDKYDFLHKAGAR  
GLTVHDLSDHEDAGLYTCQVGSKETQSKVSVHDLHVGITRRLKTVLEVLEGECSFCVLSHESPSDPVAVTVGG  
KTVGGSGHFHAVRQGRKYTLTVKDAALSDAGEVVSVLGLTSKASLIIRERPVDITKPLEDQRTTLGEDVMLS  
CELSRAGTSVRWLKDGKAIRKSKYDLLSEGTRAVLVVRKASLKDSGEYTCETEASKSTAKLCVEEKANRFT  
ELADLQVEEKGRAVFTCKTEHPASVVTWRKGLLELRASGKHVPSQEGTLTKLTINALERTDSDTYTCDIGQAR  
TQARLLVHGQKVRVIEDLEDTAVQEGSSAKFCRIAPADYGPVHWF LDKTPLHSNELNEITVQPGGYHVLT  
QLALKSHGCTVYFEAGDRTSAAALRVTEKPSIFSRPLTDVTVTEGEDTLVCEETTVDSSVRWTKDGKTLRPSA  
RCQLSHEGQAQLLITATTPQDGGRYKCEIGGASSSIVRVHALPVRFRSLKDVPEVPEGKAATLRCVLSVA  
APVEWRHGDDVLKSSNKYSLRQEGAVLELVIRDLQPQDSGQYSCSFGDQTTSATLTVKTSQAQFVGLRNKEA  
TEGTTVTLRCELTKAPVEWKKGTETLRNGDKYSLKQDGA VCELQICSLLVADAGEYSCVCGQEKTSATLTVK  
ALLVHFVRRLSKEATEGDTTTLQCELSKAAPVEWRKGTETLRDGDYSLKQDGA VCELQIRSLTIADAGEYL  
CTCGQEKTSATLTVRALPAKFKDSLKNEEATEGTTATLSCELSKAAPVWKKGPKTLQSGDKYVLRQDGA VCG

LQIHGLTMADAGEYSCVCGQEKTSATLTVRGLPAKFIEDLRSQEATEGATAILRCELSKAAPVEWRKGETLKD  
 DGDRYTLRQDGA VCELQIRGLAVVDGTYSLSLPTKFTTEGLRNEEATEGTMATLRCQMSKAAPVEWRKGETLKD  
 DGDRYSLRQDGA MCELQIRGLTIEDSGEYTCVCGQEKTSATLSVKALPSRFIEDLRSQEATEGTMATLRCQMS  
 KTAPVVEWKKGSETLRDGGRYSLRQDGPVCELQICDLAVEDAGEYSCVCGQEKTSATLSIKALPPRFIEDLRSQ  
 EATEGTMATLRCQMSKAAPVEWRKGETLGDGGRYSLRQNGAVCELQIHDLAVEDTGEYSCVCGQEKTSATLN  
 VKALPPRFIEDLRSQEATEGTMATLRCQMSKAAPVEWRKGETLRDGGRYSLRQDGA VCELQIHDLVDVEDAGQ  
 YSCVCGQEKTSAVLTVDALPPKFTEGLKKEEATEGTMVTLRCQMSKEATVEWRKGA KTLSDGGRYSLRQDGA M  
 CELQICGLAVEDAGEYSCVCGQEKTSATLSVKALPPRFIEDLRSQEATEGTMATLRCQMSKAAPVEWRKGET  
 LRDGGRYSLRQDGA VCELQIRDLAVEDAGEYLCVCGQEKTSATLSVKALPPRFIEDLRSQEATEGTMATLRCQ  
 MSKAAPVEWRKGSKTLR DGGRYSLRQDGA MCELQICDLAVEDTGDYSCVCGQEKTSATLSVKALPPRFIEDLR  
 SQEAREGTVATLRCRMSKAAPVEWRKGETLKDGGRYSLRQEGNLCELQIRDLAVEDTEEYSCVCGQEKTSAT  
 LSVKALPAKFIEDLRSQEAPESSTVTLRCKLSKKASVVWKKGSETLRNGARYSLRQDGA VCELEIRDLTVEDT  
 GEYSCTCGQERTSATLSIMAPQVVFQQPLQNLQAEEGSMASLRCELSVPNAAMVWSKGGLELQGDTRREARQQ  
 GCVAE LLLRDLRREDAGEYSC TCGSQTTSATLMVTAAPVRFLRELQAQDVDEGATARLRCELSREAVSVEWRK  
 GSIQLFPKAKYQMVQEGTAE LLLVHGVEQEDAGEYTC DAGHTQS IARLSVRAPKPKFKTDLQSTEQEAGGTAR  
 LCCQLSEAE PGTPVQWLKEGVELHVGSKYEMRRQGA VCELLIHGLEAKDTGEYACL VGGQKTLASLRVKEPEV  
 TIVRGLVDMVEVQADEVFTECKVSAQAGATDVQWHLQGLPLQSNVTEVA VLADGCTHVLQKGVTL EDAGTVS  
 FHVGG LSSSAQLTVRVPEVTVLEPLKDVQLSEGDHAFRCRLSRASGQEARWALGGVPLQCNEMNDITVEQGT  
 LYLLTLHKVTL EDAGTITLQVGS CSSEAQLKVTAKNTVLRGLENVDALEGG EALFECQLSQPEVA AHTWLLDD  
 EPVHTSEKVEVVYFENGLRH LLLLKNLKPQDSCRVTFLAGDVVTS AFLTVRGRWLEVLEPPHDASVKAGMQVR  
 FTCILSEAVPVGEATWYINGAAIQPDDTDWTVTTDGS HHALTLSNAQPHAGEVTF AARDAVASARLSVLALP  
 DPPEDAEVVGRSDHSVTL SWVAPMSDGGGGLCGYRVMKEASTGQWQLCHDLVPGPECVVDLVPKTYRFRV  
 AAVGPAGAGEPVHL PQMVKIAPAPAPAPAPAPAPAPETRAVVGEDIC LELEVAADGGEVVWHKGTERRIQPGG  
 HFEVLSRGRQMLVIKGFRTEDQGEYRCGPIQGLPSSGAATFNVMVTS GSGDEVPAQPSLPPEAAQEGDLHLL  
 WEALARKRRMSREPTLDSISELPEEDSRVQHLRQEA EETAPDLSEGYSTADELARTGEADLSHTSSDDES RAG  
 TPSLVTYLKKAGGPGISPLASKHEAQVTT SVKPKQKLVQEPVVPVTCPPPGDL SAADLMDPSLKDAAVKIQAAFKG  
 YKVRKEMKQEGEFGSRTFGDTEAQVGDVLRLECEQLATKTD MRACWLKDGIELTDGRHYHIDQLKDGTCSSLV  
 TGLAPTDSGRYTCQVSTKSGRVSHSACVVVSGTESEAE SSSGGELDDAFRRAARRLHRLFRTKSPAELSEEEL  
 FLSADEGPEPEEPADWQTYREDENFVCIRFESLAEARQAVTCFRNMFATMGIGVEISLGEQGPGRVEMRIGK  
 VAPTVPAPVPLAKTPGLQTS DAAPVFLTELQNDVQDGYPMSFDCVVTGQPVPSVRWFKDGKLEEDDHYMIN  
 EDQGGHQLIITAVVPADMGVYRCLAENSMGVSSTKAELRVELTSTDYDTAADATETSSYFSAQGYLSSREQE  
 GTESDEGQLPQVLEELKDLQVAPGTRLAKFQLKVKGY PAKLYWFKDGOPLTSDHIRMTDKKTLHTLEIVSV  
 TREDSGQYAAYSNAVGAAYSSARLLVRGPSEPEEK PASDVHERLVPRI LEKFTPKKVKRGSSTIFS VKVEG  
 HPAPSVHWLKEEA EKGV LWIGPDTPGYTMAS SSKQHSLVLLDVG RQHOGTYTCIATNPAGQALCSASLHISGL  
 AKEEEQERVKEALISSFLQGTSAVSAQMSESA GADLVGQSKGESLVAAEEAHSHLSLAEVGT EEFLOKLT SQ  
 ITEMVSAKISQAKLQVPGGDSDEETKTPSASPRHGRSRPSSSVQESSSESDGDSRGEIFDIYVVTADYLP LG  
 AEQDAIILREGQYVEVLDSAHPLRWLVRTKPTKSSPSRQGWVSPAYLDKRLKLSPEWGPTEAPEFPGEAVSED  
 EYRTRLSSVIQELLSSEQAFV GELQFLESHHMKHLERSPRVPAAVASQKTVI FRNVQDISHFHSSFLKELQGC  
 GTDDDVAMCFIKNQEA FEKYLEFLVGRVQAESVVVSTPVQEFYKKYAEETLSAKDPTQPPPPLOHYLEQVVE  
 RVQKYQALLKELIRNKARNRQNCALLEQAYAVVSALPQRAENKLVSLMENYPGTLEALGEP IRQGHFIVWEG  
 APGARMPWKGHNRHVFLFRNYLVICKPRRDSRTDTFSYVFRNMMKLSSIDLNDQVEGD DRAFEVWHEREDSVR  
 KYLLQARTVI IKNSWVKEICGIQQRLAQPVWRPPEFEELADCTAELGETVKLACRVTGTPKPIVSWYKDGKP  
 VEVDPHHILIEDPDG SCTLILDNLGTGIDSGQYMCFAASAAGNASTLGKILVQVPPRFVNKVRATPFVEGEDAQ  
 ITCTVEGAPYPQIRWYKDGTL LLAGPNRYRMLNEPRSGVLVLV IQAASKEDLGHYECELVNLRLGSTRGGGELYM  
 QSPALRARDQHHREQIVA AVEVTEQETKVPKKTVI I EETITTVVKS PRGRRQSPGKSPSRSPRRSASPRRPG  
 LLAPERLYPPGTSPSRLEVEQGRKAPVPALYVTEAEVHAPASQSQPKWLEVEETIEVRVKKTGSRGASPVRE  
 MTSRGEGLIFTLPGGIPGRDPNANNNSNNSVYQEA RTWGPVAVHVGEFFIFQVDSVGNVDVVAASPEPEQVRA  
 SQKEENTERQEGCS DG DENTFLMEEPQD TDSLQGRDPKILTHNGRVLTLADLE DYVPQEGETFGCGDSTPSTP  
 DEPPCEVSVLQREI SEPTVGQPVLLNVGRPPGTGATPSFFRPGSQVHSPESVSFLLREAWSGPVSAPWTSSF  
 HTHVQSSVDGSHGSFKTEVSTQTVSFGAVGETVTLHIDPDGGEAPGPSQG\*  
 >rs29481309\_ENSMUSP00000020732\_c.7159:G>T\_p.S2387I  
 ENSMUST00000020732.13|Obscn-201|ENSMUSP00000061462|-|chr11:g.58972713:C>A  
 MDHSFSGAPRFLTRPKAFVSVGKDATLSCQIVGNPTPHVSWEKDRQFVEAGARFRLAQDGDVYRLTILDLAL  
 GDSGQYVCRARNAIEGAFAAVGLRVDSEGTCAEQAPHFLLRPTSIRVREGADATFRCRVGGSPPAVSWSKDG  
 RRLGPPDAPHVRVEEHGESSALRIRSARPRDGGTYEVRAENPLGSASAAAALVVDSAEVAGPPGTSTATLLA  
 HLQORREAMRAEGIPSPPGAGTRTCTVTEGKHARLSCFVTGEPKPEVWKKDGQLVTEGRRHVVEDEQENF  
 VLKILFCKQSDRGLYTCTASNLVGQTYSSVLVVVREPTVPFKKRLQDLEVREKESATFQCEVAQPA TEAAWFK  
 EETRLWASAKYDIEEGETERRLTVRNVSADDDAVYICETTEGSRVVAELSVQGNLTKLPRKTAVRTGDTAIF





GTVATLRCRMSKAAPVEWRKGSSETLKDGDYSLRQEGNLCELQIRDLAVEDTEEYSCVCGQEKTSATLSVKAL
PAKFIEDLRSQEAPESSTVTLRCKLSKASVVKKGSSETLRNGARYSLRQDGAVCELEIRDLTVEDEDTGEYSCT
CGQERTSATLSIMAPQVVFQQPLQNLQAEEGSMASLRCELSVPNAAMVWSKGGLELQGDTRREARQQGCVAEL
LLRDLRREDAGEYSCTCGSQTTSATLMVTAAPVRFLRELQAQDVDEGATARLRCELSREAVSVEWRKGSQQLF
PCAKYQMVQEGTTAELLVHGVEQEDAGEYTCDAHGHTQSIARLSVRAPKPKFKTDLQSTEQEAGGTARLCCQLS
EAEFGPTVQWLKEGVELHVGSKYEMRRQGAUCELLIHGLEAKDTGEYACLVGGQKTLASLRVKEPEVTIVRGL
VDMEVQADEDEVEFTCKVSOAGATDVQWHLQGLPLQSNVTEVAVLADGCTHVLQKGVTLLEDAGTVSFHVGG
SSSAQLTVRVPEVTVLEPLKDVQLSEGDQAHFRCLSRASGQEARWALGGVPLQCNEMNDITVEQGTLYLLTL
HKVTLEDAGTITLQVGSSEEAQLKVTAKNTVLRGLENVDALLEGGEALFECQLSQPEVAHAHTWLLDDEPVHTS
EKVEVVYFENGLRHLLLLKNLKPQDSCRVTFLAGDVVTSFAFLTVRGWRLEVLPEPHDASVKAGMQVRFCTILS
EAVPVGEATWYINGAAIQPDDTDWTVTTDGSHHALTLSNAQPQHAGEVTFAAARDAVASARLSVLALPDPPEDA
EAVGRSDHSVTLSSWVAPMSDGGGGLCGYRVMKEASTGQWQLCHDLVPGPECVDDDLVPGKTYRFRVAAVGPA
GAGEFVHLPQMVKIAPAPAPAPAPAPAPAPAPETRQAVVGEDICLELEVAADGGEVVWHKGTERRIQPGHFVLS
RGQRQMLVIKGFRTEDQGEYRCGPIQGLPSSGAATFNVMVMTSGSGDEVPAQPSLPEAAQEGDLHLLWEALAR
KRRMSREPTLDSISELPEEDSRVQHLRQEAEEETAPDLSEGYSTADELARTGEADLSHTSSDDESAGTPSLVT
YLKAGGPGISPLASKHEAQVTTSVKPKQKQEPVPTCPGGDLAADMPLDKAARKIQAQAFKGYKVRKE
MKQEGPVSRTFGDTEAQVGDVLRLECVLATKTDMRACWLKDGIELTDGRHYHIDQLKDGTCSSLLVTLGLAPT
DSGRYTCQVSTKSGRVSHSACVVVSGTESEAESSSGGELDDAFRRAARRLHRLFRTKSPAELSEELFLSADE
GPGEPEEPADWQTYREDENFVCIRFESLAEARQAVTCFRNMFMATMGIGVEISLGEQGPGRVEMRIGKVAPTVT
PAVPLAKTPGLQTSDAAPVFLTELQNDVQDGYPMSFDCVVTGQPVPSVRWFKDGKLEEDDHYMINEDQQGG
HQLIITAVVPADMGVYRCLAENSMGVSSTKAELRVELTSTDYDTAADATETSSYFSAQGYLSSREQEGTESDE
GQLPQVLEELKDLQVAPGTRLAKFQLKVKGYPAKLYWFKDGGPLTSDHIRMTDKKTLHTLEIVSVTREDSG
QYAAIYISNAVGAAYSSARLLVRGPSEPEEKPASDVHERLVPPRILEKFTPKKVKRGSSITFSVKVEGHPAPSV
HWLKEEAKEKGLVWIGPDTPGYTMASSSKQHSLLVLDVGRQHGGTYTCIATNPAGQALCSASLHISGLAKEEEQ
ERVKEALISSFLOGTSQAVSAQMSSESAGFADLVGQSKGESLVAEEAHSHLSLAEVGTTEFLQKLTSTQITEMVS
AKISQAKLQVPGGDSDEETKTPSASPRHGRSRPSSSVQSESSSESEDGDSRGEIFDIYVVTADYLPGLAEQDAI
LLREGQYVEVLDLQVSAHPLRVLVTKPTKSSPSRQVSVSPAYLDRKRLKLSPEWGPTEAPEFPGEAUVSEDEPVRTL
SSVIQELLSSEQAFVQELQFLESHHMKHLERSPRVPAAVASQKTVIFRNVQDISHFHSSFLKELQCGCTDDDV
AMCFIKNQEAFAEKYLEFLVGRVQAESVVVSTPVQEFYKKAEEETLSAKDPTQPPPPPLQHYLEQPVERVQKYQ
ALLKELIRNKARNRQNCALLEQAYAVVSALPQRAENKLVSLMENYPGTLEALGEPHQGHFIVWEGAPGARM
PWKGHNHRVFLFRNYLVICKPRRDSRTDFTSYVFRNMMLSSIDLNDQVEGDDRAFEVWHEREDSVRKYLLQA
RTVILKNSWVKEICGIQQLAQPVWRPPEFEEELADCTAELGETVKLACRVTGTPKPIVSWYKDGKPVVEVDPH
HILIEDPDGSCTLILDNLGTIDSGQYMCFAASAAGNASTLGKILVQVPPRFVNVKVRATPFVEGEDAQITCTVE
GAPYPQIRWYKDGTLTLLAPGNRYRMLNEPRSGVLVLIQAASKEDLGHYECELVNRLGSTRGGGELYMQSPALR
ARDQHHREQIVAAVEERRPSP\*
>rs29481309\_ENSMUSP00000151217\_c.5779:G>T\_p.S1927I
ENSMUST00000219084.3|Obscn-207|ENSMUSG00000061462|-|chr11:g.58972713:C>A
MDHSFSGAPRFLTRPKAFVSVGKDATLSCQIVGNPTPHVSWEKDRQVPEAGARFLAQDGDVYRLTILDLAL
GDSGQYVCRARNAIGEAFVAVGLRVDSEGTCAEQAPHFLLRPTSIRVREGADATFRCRVGGSPPAVSWSKDG
RRLGPPDAPHVRVEEHGESSALRIRSARPRDGGTYEVRAENPLGSASAAAALVVDSDAEVAGPPGTSTATLLA
HLQQRREAMRAEGIPPSPPGAGTRTCTVTEGKHARLSCFVTGEPKPKETVWKKDQQLVTEGRRHVYEDQENF
VLKILFCKQSDRGLYTCTASNLVGQTYSSVLVVVREPTVPFKKRLQDLEVREKESATFQCEVAQAPATEAAWFK
EETRLWASAKYDIEEGETERRLTVRNVSADDDAVYICETTEGSRVVAELSVQGNLTKLPRKTAVRTGDTAIF
WVELAVPEGPPVRLRNQEMVAGGRVAITAEGTCHTLTI FQCTLEDMGVAFVSGGCRTTTTQFCVSAPRRPPL
YPPADPVVAKTESSVTLSSWAPPHGDRPVTIDGYVLEKRLKLGAYAWSRCEAGWLATTEFTITGVAAEGDFQ
FRVSAINHFGQGPYLEFPGMTMLVPLAVKTPKAVEAVEGGEVTFVSDLTVASSGEWFLDGEALKASSIYVI
RCDRTRHMLTIREVPARLHGAQLKVFVANGIETSIQMVVRAALGLPSSKLPAAAAAREVLAQLHEEAQLLAELSD
QAAAVTWLKDGRELSLGPKYEMQVSAGRRALLVRDVAQDDAGLYECVSRGSRRTAYQLLVQDITDGYRDWGPAG
PQKHMCKCAGAKIARYLGSSCYRFLQYDKGVVHLEAALDTRQKGTSSCSLHEKPKLVFAKQQAHSVEKAE
AGNSATLSCEVTQAQTEVTWFKDGKLLSSSSKVRMEASGCSRRLVVQQAGKADAGEYSCEAGGQKLSFRLDVA
EPKLVFAKQQAHSVEKAEAGASATLSCEVAQAQTEVTWFKDGKLLSSSSKVRMEASGCSRRLVVQQAGKADA
GEYSCEAGGQKLSFRLDVAEPMVFAKEQQARSEVKAEEAGASATLSCEVAQAQTEVTWFKDGKLLSSSSKVRM
EASGCSRRLVVQQAGKADAGEYSCEAGGQKLSFRLDVTEPKLVFAKEQQARSEVKAEEAGNSATLSCEVAQAQ
EVTWFKDGLKLLSSSSKVRMEASGCSRRLVVQQAGKADAGEYSCEAGGQKLSFHLVDVTEPKLVFAKEQQAHSE
KAEAGASATLSCEVAQAQTEVTWFKDGKLLSSSSKVRMEASGCSRRLVVQQAGKADAGEYSCEAGGQKLSFR
DVAEPMVFAKEQQARSEVKAEEAGASATLSCEVAQAQTEVTWFKDGKLLSSSSKVRMEASGCSRRLVVQQAG
ADAGEYSCEAGGQKLSFRLDVAEPMVFAKEQQANSEVKAEEAGASATLSCEVAQAQTEVTWFKDGKLLSSSSK
VRVEASGCSRRLVVQQAGKADAGEYSCEAGGQKLSFRLDVAEPMVFAKEQQAHSEVKAEEAGASATLSCEVAQ

AQTEVTFWFKDGKLLSSSSKVRVEASGCSRRLVVQQAGKADAGEYSCEAGGQKLSFRLDVAEPKLVFAKEQQAH  
SEVKAEGASATLSCEVAQAQTEVTFWFKDGKLLSSSSKVRVEASGCSRRLVVQQVKGADAGEYSCEARGQKLS  
FRLDVAEAEESQIPERPSRREPLVVKEHETIILTATIAAPSVAAVTWLKDGVERRSKRHEATSLGDTHTLTVR  
GAQVLDASAIYSCRVGKEGQDFPVQVEEVAAKFSKPLEPVEGELGGTVMLVCELSPEQAEVWRCGNTQLRPGK  
RFQMTSEGPRTTLTVSGLREDDAEYVCESRDDRTSARLTVKVPVVKFTSGLSAMVAEEGQEAFTQCVVSPS  
DAGVTWYKDGMLQVSEKFMVVEGASRIILTILGLTLEDAGQVTVAEAGASSAALRVREAPVLFKFKLEPQT  
VEERTSVTLEVELTRPWPEVKWTRNAAVLTPSENVEIRAEGARHCLVLRVSGFADRGFFGCETPDDKTQAKLN  
VEMRQVRLVRGLQEVEAKEQGTASMDVELSHAEEVGSWTRDGLRLQPGPKCHLAVQGPVHILTLALSALQFQDSG  
LVAEFAEGVHTSARLIVTELPVSFTRVLQDVVATQKEKVTLECELSRPVDVRLWKDGVLELRAGKAIIGIVAQGT  
CRSLVIYRCETGDQGVYVCDALDAQTSASLRVQGRYTLIFRRVLAEDAGEVKFVAENAESRAHLRVKELPVT  
LLRPLRDKIAMEKHRGVLECVSRASAQVRWFKGGVELQSGPKYEVVSDGLYRKLVIINDVQPEDEDTYTC DAG  
NVKTSAQFFVEEQSITIVRGLKDMTVMEPAPAWFECETSIPSVRPPKWLKGKTVLQAGGNVLEQDGTVHRLT  
LHKTCSTMTGVPVHFTIGKSRSSAQLVVS DIPVVLTRPLEPKAGRELQSVVLSCDFRPAPKAVQWYKDDTPLSP  
SEKFKMALEGQMAELRILRLTPADAGVYRCQAGSAQSSAEVTVAEAREVTVIQPLQDAEAMEEGRVCFSCELSH  
KDEDIEWSLNGTPLYNDSFHEISHEGCLHTLVLKSVRQADTGTVCATSPKVS SARLVVKGKPVVFLKALDDV  
SAEERGLTLTQCEVSDPEARVWVRKDGVELGSPDKYDFLHKAGARGLTVHDLSHEDAGLYTCQVGSKETQSKV  
SVHDLHVGITKRLKTVELEGESECFEVLSHESPSDPVAVTVGGKTVGGSGHFHAVRQGRKYTLTVKDAALS  
DAGEVVFVSVLGLTSKASLIIRERPV DITKPLEDQRTTLGEDVMLSCELSRAGTSVRWLKDGKAIKRSQKYDLL  
SEGTRAVLVVRKASLKDSGEYTCETEASKSTAKLCVEEKANRFTTEELADLQVEEKGRAVFTCKTEHPASVVTW  
RKGLLELRASGKHVPSQEGTLTKLTINALERTSDTYTCDIGQARTQARLLVHGQKVRVIEDLEDTAVQEGSS  
AKFCCRIPADYGPVHWF LDKTPLHSNELNEITVQPGYHVLTLRQLALKDSGTVYFEAGDQRTSALRVTEK  
PSIFSRPLTDVTVTEGEDTLTVCE TTTVDSSVRWTKDGKTLRPSARCQLSHEGCAQQLLITATTPQDGGRYKC  
EIGGASSSSIVRVHALPVRFRESLKDVEVPEGKAATLRCVLSVAAPVEWRHGDDVLKSSNKYS LRQEGAVLE  
LVIRDLQFQDSGQYSCSFGDQTTSATLTVKTSQAQFVGKLRNKEATEGTTVTLRCELTKPEVWKKGTETLR  
NGDKYSLKQDGA VCELQICSLLVADAGEYSCVCGQEKTSATLTVKALLVHFVRRRLRSKEATEGDTTTLQCELS  
KAAPVEWRKGTETLRDGD RYSLKQDGA VCELQIRSLTIADAGEYLCTCGQEKTSATLTVRGLPAKFIEDLRSQ  
EATEGATAILRCELSKAAPVEWRKGETLKDGD RYTLRQDGA VCELQIRGLAVVDGTGYS SLPKFTEGLRNE  
EATEGTMATLRCQMSKAAPVEWRKGETL RDGD RYSLRQDGA MCELQIRGLTIEDSGEYTCVCGQEKTSATLS  
VKALPPRFIEDLRSQEATEGTMATLRCQMSKAAPVEWRKGETLGDGGRYSLRQNGAVCELQIHDLAVEDTGE  
YSCVCGQEKTSATLNVKALPPKFTEGLKKEEATEGTMVTLRCQMSKEATVEWRKGAKTLS DGGRYSLRQDGA  
MCELQICGLAVEDAGEYSCVCGQEKTSATLSVKALPPRFIEDLRSQEATEGTMATLRCQMSKAAPVEWRKGET  
LRDGD RYSLRQDGA VCELQIRDLAVEDAGEYLCVCGQEKTSATLSVKALPPRFIEDLRSQEATEGTMATLRCQ  
MSKAAPVEWRKGSKTLRDGD RYSLRQDGA MCELQICDLAVEDTDYSCVCGQEKTSATLSVKAPQVVFQQPLQ  
NLQAEEGMSALRCELSVPNAAMVWSKGGLELQGDTRREARQQGCVAELLLRDLRREDAGEYSC TCGSQT TSA  
TLMVTAAPVRFLRELQAQDVDEGATARLRCELSREAVSVEWRKGS LQFPKAKYQMVQEGTTAELLVHGVEQE  
DAGEYTC DAGTYSIARLSVRAPKPKFKTDLQSTEQEAGGTARLCCQLSEAE PGTPVQWLKEGVELHVGSKYE  
MRRQGA VCELLIHGLEAKDTGEYACL VGGQKTLASLRVKEPEVTIVRGLVDMEVQADE DVEFTCKV SQAGATD  
VQWHLQGLPLQSNEVTEVAVLADGCTHV LQLKGVTL EDAGTVSFHVGLSSSAQLTVRVPEVTVLEPLKDVQL  
SEGQDAHFRCRLSRASGQEARWALGGVPLQCNE MNDITVEQGTLYLLTLHKVTLEDAGTITLQVGS CSSEAQL  
KVTAKNTVLRGLE NVDALEGG EALFECQLSQPEVAHTWLLDDEPVHTSEKVEVVYFENGLRHLLLLKNLKPQ  
DS CRVTF LAGDVVTS AFLTVRGWRLEVLEPPHDASVKAGMQVRFTCILSEAVPVGEATWYINGAAIQPDDTDW  
TVTTD GSHHALTLSNAQPQHAGEVTF AARDAVASARLSVLALPDPPEDAEVVGRSDHSVTL S WVA PMSDGGGG  
LCGYRVEMKEASTGQWQLCHDLVPGPECVVDDLVP GKTYRFRVA AVGPAGAGEPVHLPQMVKIAPAPAPAPAP  
APAPETRQAVVGEDICLELEVAADGGEV VWHKGTERRIQPGGHFEVLSRGQRQMLVIKGFRTEDQGEYRCGP IQ  
GLPSSGAATFNVM TSGSGDEVPAQPSLPPEAAQEGDLHLLWEALARKRRMSREPTLDSISELPEEDSRVQHL  
RQEAEETAPDLSEGYSTADELARTGEADLSHTSSDDESRAGT PSLVTYLKKAGGPGISPLASKHEAQVTT SVK  
PQKQQEPVVP TCPPPGDLSAADLMDPSLDKAAVKIQAAF KGYKVRKEMKQQEGPVFSRTFGDTEAQVGDVLR  
ECVLATKTD MRACWLKDGIELTDGRHYHIDQLKDGTC SLLVTGLAPTDSGRYTCQVSTKSGRVSHSACVVVSG  
TESEAE SSSGELDDAFRRARRLHRLFR TKSPAELSEELFLSADEGPGEPEEPADWQTYRE DENFVCIRFE  
SLAEARQAVTCFRNMFATMGI GVEISLGEQGP RGVEMRIGKVAPVTPAVPLAKTPGLQTS DAA PVFLTELQN  
QDVQDGY PMSFDCVVTGQPVPSVRWFKDGKLL EEDDH YMINEDQQGGHQLIITAVVPADMGVYRCLAENSMGV  
SSTKAELRVELTSTDYDTAADATETSSYFSAQGYLSSREQEGTESDEGQLPQVLEELKDLQVAPGTRLAKFQL  
KVKGY PAPKLVYFKDGQPLTTS DHIRMTDKKTLTLEIVSVTREDSGQYAAIISNAVGAAYSSARLLV RGPSE  
PEEK PASDVHERLVPRI LEKFTPKKVKRGSSITF SVKVEGHPAPSVHWLKEEA EKGVLWIGPDTPGYTMAS S  
SKQHS LVLLDVGRQHGT YTCIATNPAGQALCSASLHISGLAKEEEQERVKEALISSFLQGT SQAVSAQMSSES  
AGFADLVGQSKGESLVAEEAHSHLSLAEVGT EEF LQKLT SQI TEMVSAKISQAKLQVPGGDSDEETKTPSASP  
RHGRSRPSSSVQESSSESEDGDSRGEIFDIYVVTADYLP LGAEQDAIILREGQYVEVLDSAHPLRWLVRTKPT  
KSSPSRQGWVSPAYLDKRLKLSPEWGPTEAPEFPGEAVSEDEYRTRLSSVIQELLSSEQAFV GELQFLSHHM

KHLERSPRVPAAVASQKTVIFRNVQDISHFHSSFLKELQCGCTDDDDVAMCFIKNQEAFKYLEFLVGRVQAES  
VVVSTPVQEFYKKYAEEETLSAKDPTQPPPPPLQHYLEQPVERVQKYQALLKELIRNKARNRQNCALLEQAYAV  
VSALPQRAENKLVSLMENYPGTLEALGEPRIQGHFIVWEGAPGARMFWKGNHRHVFLFRNYLVICKPRRDSR  
TDTFSYVFRNMMKLSSIDLNDQVEGDDRAFEVWHEREEDSVRKYLLQARTVIKNSWVKEICGIQQRLAQPVWR  
PEFEHEELADCTAELGETVKLACRVGTGPKPIVSWYKDGKPEVDPHHILIEDPDGSCSTLI LDNLGTIDSGQY  
MCFAASAAGNASTLGKILVQVPPRFVNKVRATPFVEGEDAQITCTVEGAPYPQIRWYKDGTLTLLAPGNRYRMLN  
EPRSGVLVLIQAASKEDLGHYECELVNRLGSTRGGGELYMQSPALRARDQHHREQIVA AAVEVTEQETKVPKK  
TVIIEETITTVVKS PRGRRQSPGKSPSRSPSRSSASPRRPGGLLAPERLYPPGTSPSRRLVEVEQGRKAPVPALY  
VTEAEVHAPASQSPKWLEVEETIEVVRVKKTGSRGASPVREMTSRGEGILFTLPGGIPGRDPPNANSNNKSVY  
QEARTWGPVAVHVGEPFI FQVDSVGNVDWAASPEPEQVRASQKEENTERQEGCSDGDENTFLMEEPQD TDSL  
QGRDPKILTHNGRVLT LADLEDYVPQEGETF GCGDSTPSTPDEPPCEVSVLQREI SEPTVQPVLLNVGRPPG  
TGATPSFFRPGSQVHSPESVSFLLREAWSGPVSAAPWTSSFHTHVQSSVDGSHGSFKTEVSTQTVSFGAVGET  
VTLHIDPDGGEAPGPSQG\*

>rs29425205\_ENSMUSP00000158795\_c.6720:G>A\_p.A2241T

ENSMUST00000238536.2|Obscn-210|ENSMUSG00000061462|-|chr11:g.58973279:C>T  
MDHSFSGAPRFLTRPKAFVSVGKDATLSCQIVGNPTPHVSWEKDRQFVEAGARFRLAQDGDVYRLTILDLAL  
GDSGQYVCRARNAIGEAFAAVGLRVDSEGTCAEQAPHFLLRPTSIRVREGADATFRCRVGSGPPQAVSWSKDG  
RRLGPPDAPHVRVEEHGESSALRIRSARPRDGGTYEVRVAENPLGSASAAAALVVDSDAEVGAGPPTSTATLLA  
HLQQRRREAMRAEGIPPSPPGAGTRTCTVTEGKHARLSCFVTGEPKPEVWKKDGQLVTEGRRHVVEDEQENF  
VLKILFCKQSDRGLYTCTASNLVGQTYSSVLVVVREPTVPFKKRLQDLEVREKESATFQCEVAQAPATEAAWFK  
EETRLWASAKYDIEEGTERRLTVRNVSADDDAVYICETTEGSRVVAELSVQGNLTKLPRKTAVRTGDTAIF  
WVELAVPEGPVRWLRNQEEMVAGGRVAITAEGTCHTLTI FQCTLEDMGEVAFVSGGCRTTTQFCVSA PRRPPL  
YYPADPVVKAKTESVTLWSAPPHGDRPVTIDGYVLEKRLKLGAYAWSRCHEAGWLATTEFTITGVAAEEDGFQ  
FRVSAINHFGQGPYLEFPGTMHLVPLAVKTPKAVEAVEGGEVTFVSDLTVASSGEWFLDGEALKASSIYVI  
RCDRTRHMLTIREV PARLHGAQLKFVANGIETSIQMVVRAALGLPSSKLPAAAAREVLAQLHEEAQLLAE LSD  
QAAAVTWLKDGRELSLGPKEYEMQVSAGRRALLVRDVAQDAGLYECVSRGSRRTAYQLLVQDITDGYRWDGVPAG  
PQKHMCKCAGAKIARYLQSSCYRFLQYDKGVVHWLEAALDTRQKGTSSCSLHEKPKLVFAKQQAHSSEVKA  
AGNSATLSCEVTQAQTEVTWFKDGKLLSSSSKVRMEASGCSRRLVVQQAGKADAGEYSCEAGGQKLSFRLDVA  
EPKLVFAKQQAHSSEVKAEGASATLSCEVAQAQTEVTWFKDGKLLSSSSKVRMEASGCSRRLVVQQAGKADA  
GEYSCEAGGQKLSFRLDVAEPKMFVFAKEQQARSEVKAEGASATLSCEVAQAQTEVTWFKDGKLLSSSSKVRM  
EASGCSRRLVVQQAGKADAGEYSCEAGGQKLSFRLDVTEPKLVFAKEQQARSEVKAEGVNSATLSCEVAQAQ  
EVTWFKDGKLLSSSSKVRMEASGCSRRLVVQQAGKADAGEYSCEAGGQKLSFRLDVAEPKLVFAKEQQARSEV  
KAEAGNSATLSCEVAQAQTEVTWFKDGKLLSSSSKVRMEASGCSRRLVVQQAGKADAGEYSCEAGGQKLSFHL  
DVTEPKLVFAKEQQAHSEVKAEGASATLSCEVAQAQTEVTWFKDGKLLSSSSKVRMEASGCSRRLVVQQAGK  
ADAGEYSCEAGGQKLSFRLDVAEPKLVFAKEQQARSEVKAEGASATLSCEVAQAQTEVTWFKDGKLLSSSSK  
VRVEASGCSRRLVVQQAGKADAGEYSCEAGGQKLSFRLDVAEPKLVFAKEQQANSEVKAEGASATLSCEVAQ  
AQTEVTWFKDGKLLSSSSKVRVEASGCSRRLVVQQAGKADAGEYSCEAGGQKLSFRLDVAEPKLVFAKEQQAH  
SEVKAEGASATLSCEVAQAQTEVTWFKDGKLLSSSSKVRVEASGCSRRLVVQQAGKADAGEYSCEAGGQKLS  
FRLDVAEPKLVFAKEQQAHSEVKAEGASATLSCEVAQAQTEVTWFKDGKLLSSSSKVRVEASGCSRRLVVQQ  
AGKADAGEYSCEAGGQKLSFRLDVAEPKLVFAKEQQAHSEVKAEGASATLSCEVAQAQTEVTWFKDGKLLSS  
SSKVRVEASGCSRRLVVQQAGKADAGEYSCEAGGQKLFRLDVAEPKLVFAKEQQAHSEVKAEGASATLSCE  
VAQAQTEVTWFKDGKLLSSSSKVRVEASGCSRRLVVQQAGKADAGEYSCEAGGQKLSFRLDVAEPKLVFAKEQ  
QAHSSEVKAEGASATLSCEVAQAQTEVTWFKDGKLLSSSSKVRVEASGCSRRLVVQQVQKADAGEYSCEARGQ  
KLSFRLDVADTRLMFAKEQQARTEVKAEGNSATLSCEVAQAQTEVTWFKDGKLLSSSSKVRVEASGCSRRLV  
VQQAGKADAGEYSCEAGGQKLSFRLDVAEAESQIPEPSPRREPLVVKEHETIILTATIAAPSVAAVTWLKDGV  
EIRRSKRHEATSLGDHTLTVRGAQVLDSAIYSCRVGKEGQDFPVQVEEVTAKFSKPLEPVEGELGGTVMLVC  
ELSPQAEVWRCGNTQLRPGKRFQMTSEGPRRTLTVSGLREDDAEYVCESRDDRTSARLTVKVPVVKFTS  
GLSAMVAEEGQEAFTQCVVSPSDAGVTWYKDGMLQLPSEKFMVESGASRSLTILGLTLEDAGQVTEAEGAS  
SSAALRVREAPVLFKKLEPQTVERTSVTLEVELTRPWPEVKWTRNAAVLTPSENVEIRAEGARHCLVLRVSV  
GFADRGFFGCETPDDKTQAKLVNEMRQVRLVRGLQEVEAKEQGTASMDVELSHAEEVGSWTRDGLRQLQPGPKC  
HLAVQGPVHILTLALSALQPQDSGLVAFRAEGVHTSARLIVTELPVSFTRVLQDVVATQKEKVTLECELSRPVDV  
RWLKDGVLELRAGKAI GIVAQGTCSRSLVIYRCETGDQGVYVCDALDAQTSASLRVQGRTYTLIFRRVLAEDAGE  
VKFVAENAESRAHLRVKELPVTLLRPLRDKIAMEKHRGIVLECCQVSRASAQVRWFKGGVETLQSGPKYEVVSDGL  
YRKLVINQVQPEDEDTYCTDAGNVKTSAQFFVVEEQSITIVRGLKDMTVMPEPAPAFWECETSIPSVRPPKWLGLG  
KTVLQAGGNVLEQDGTVHRLTLHKTCSTMTGPVHFTIGKSRSSAQLVVSDIPVVLTRPLEPKAGRELQSVVL  
SCDFRPAPKAVQWYKDDTPLSPSEKFKMALEGMALRILRLTPADAGVYRCQAGSAQSSAEVTEAREVTVI  
QPLQDAEAMEEGRVCFSCELSHKDEDIEWSLNGTPLYNDSFHEISHEGCLHTLVLSVRQADTGTVCATSPKV  
SVSARLVVKGKPVVFLKALDDVSAEERGTLLQCEVSDPEARVVWRKDGVELGSPDKYDFLHKAGARGLTVHD

LSHEDAGLYTCQVGSKETQSKVSVHDLHVGITKRLKTVEVLEGESECSFECVLSHESPSDPAVWTVGGKTVGGS
GHFHAVRQGRKYTLTVKDAALSDAGEVVFVSVLGLTSKASLIIRERPVDIKPLEDQRTTLGEDVMLSCELSRA
GTSVRWLKDGKAIRKSQKYDLLSEGTRAVLVVRKASLKDSGEYTCETEASKSTAKLCVEEKANRFTTELADLQ
VEEKGRAVFTCKTEHPASVVTWRKGLLELRASGKHVPSQEGTLTKLTINALERTDSDTYTCDIGQARTQARLL
VHGQKVRVIEDLEDTAVQEGSSAKFCRIAPADYGPVHWFLDKTPLHSNELNEITVQPGGYHVLTLRQLALKD
SGTVYFEAGDQRTSAALRVTEKPSIFSRPLTDVTVTEGEDTLVCETTTVDSSVRWTKDGKTLRPSARCQLSH
EGCQAQLLITATTPQDGGRYKCEIGGASSSSIVRVHALPVRFRFRESLKDVEVPEGKAATLRCVLSVAAPVEWR
HGDDVLKSSNKYSLRQEGAVLELVIRDLQPDQSGQYSCSFGDQTTSATLTVKTTSSAQFVQKLRNKEATEGTTV
TLRCELTKAPVEWKKGTETLRNGDKYSLKQDGA VCELQICSLLVADAGEYSCVCGQEKTSATLTVKALLVHF
VRRLSKEATEGDTTTLQCELSKAAPVEWRKGTETLRDGDYSLKQDGA VCELQIRSLTIADAGEYLCTCGQE
KTSATLTVRALPAKFKDSLKNEEATEGTTATLSCELSKAAPVTWKKGPKTLQSGDKYVLRQDGA VCGLIHGL
TMADAGEYSCVCGQEKTSATLTVRGLPAKFIEDLRSQEATEGATAILRCELSKAAPVEWRKGSSETLKDGDYR
LRQDGA VCELQIRGLAVVDGTYSLSPTKFTTEGLRNEEATEGTMATLRCQMSKAAPVEWRKGSSETLRDGDYR
LRQDGA MCELQIRGLTIEDSGEYTCVCGQEKTSATLSVKALPSRFIEDLRSQEATEGTMATLRCQMSKTAPVE
WKKGSETLRDGGYSLRQDGPVCELQICDLAVEDAGEYSCVCGQEKTSATLSIKALPPRFIEDLRSQEATEG
MATLRCQMSKAAPVEWRKGSSETLGDGGYSLRQNGAVCELQIHDLAVEDTGEYSCVCGQEKTSATLNVKALPP
RFIEDLRSQEATEGTMATLRCQMSKAAPVEWRKGSSETLRDGGYSLRQDGA VCELQIHDLVEDAGQYSCVCG
QEKTSAVLTVDALPPKFTTEGLKKEEATEGTMVTLRCQMSKEATVEWRKGA KTLSDGGYSLRQDGA MCELQIC
GLAVEDAGEYSCVCGQEKTSATLSVKALPPRFIEDLRSQEATEGTMATLRCQMSKAAPVEWRKGSSETLRDGD
YSLRQDGA VCELQIRDLAVEDAGEYLCVCGQEKTSATLSVKALPPRFIEDLRSQEATEGTMATLRCQMSKAAP
VEWRKGSKTLRDGDYSLRQDGA MCELQICDLAVEDTGDYSCVCGQEKTSATLSVKALPPRFIEDLRSQEARE
GTVATLRCRMSKAAPVEWRKGSSETLKDGDYSLRQEGNLCELQIRDLAVEDTEEYSCVCGQEKTSATLSVKAL
PAKFIEDLRSQEAPESSTVTLRCKLSKKASVVWKKGSETLRNGARYSLRQDGA VCELEIRDLTVEDTGEYSCT
CGQERTSATLSIMAPQVVFQQLQNLQAEEGSMASLRCELSVPNAAMVWSKGGLELQGDTRREARQQGCV AEL
LLRDLRREDAGEYSCTCGSQTTSATLMVTAAPVRFLELQAOVDDEGATARLRCELSREAVSVEWRKGS LQLF
PCAKYQMVQEGTTAELLVHGVEQEDAGEYTCDAHELLIARLSVRAPKPKFKTDLQSTASQEAGGTARLCCQLS
EABPGTPVQWLKEGVELHVGSKYEMRRQGA VCELQIHGLEAKDTEYACLVGGQKTLRCELSRVEPEVTVIRGL
VDMEVQADEDEFTCKVSAQATDVQWHLQGLPLQSNVTEVAVLADGCTHVLQKGVTLLEDAGTVSFHVGGL
SSSAQLTVRVPEVTVLEPLKDVQLSEGQDAHFRCLRSRASGQEARWALGGVPLQCNEMNDITVEQGTLYLLTL
HKVTLLEDAGTITLQVGSSEEAQLKVTAKNTVLRGLENVDALEGGEALFECQLSQPEVA AHTWLLDDEPVHTS
EKVEVVYFENGLRHLLLLKNLKPQDSCRVTFLAGDVVTS AFLTVRGWRLEVLEPPHDASVKAGMQVRFTCILS
EAVPVGEATWYINGAAIQPDDTWTVTTDGSHHALTLSNAQPQHAGEVTF AARDAVASARLSVLALPDPEDA
EUVGRSDHSVTLSSWVAPMSDGGGGLCGYRVMKEASTGQWQLCHDLVPGPECVVDLVP GKTYRFRVA AVGPA
GAGEPVHLPQMVKIAPAPAPAPAPAPAPAPETRAVVGEDICLELEVAADGGEVVWHKGTERRIQPGGHFEVLS
RGQRQMLVIKGFRTEDQGEYRCGPIQGLPSSGAATFNVVMTSGSGDEVPAQPSLPPEAAQEGDLHLLWEALAR
KRRMSREPTLDSISELPEEDSRVQHLRQEAETAPDLSEGYSTADELARTGEADLSHTSSDDES RAGTPSLVT
YLKKA GGPGISPLASKHEAQVTTSVKPKQKQEPVPTCPPPGDLSAADLMDPSLDKAAVKIQA AFKGYKVRKE
MKQQEGPVFSRTFGDTEAQVGDVLRLECVLATKTD MRACWLKDGIELTDGRHYHIDQLKDGTC SLLVTGLAPT
DSGRYTCQVSTKSGRVSHSACVVVSGTESEAESSSGGELDDAFRRAARRLHRLFRTKSPAELSEELFLSADE
GPGEPEEPADWQTYREDENFVCIRFESLAEARQAVTCFRNM FATMIGVEISLGEQGPGRVEMRIGKVAPTVT
PAVPLAKTPGLQTS DAAPVFLTELQNQDVQDGYPMSFDCVVTGQVPVSVRWFKDGKLEEDDH YMINEDQQGG
HQLIITAVVPADMGVYRCLAENSMGVSSTKAELRVELTSTDYDTA ADATETSSYFSAQGYLSSREQEGTESDE
GQLPQVLEELKDLQVAPGTR LAKFQLKVKGYPA PKLYWFKDGP LTTSDHIRMTDKKTLHTLEIVSVTREDSG
QYAAYSNAVGAAYSSARLLVRGPSEPEEK PASDVHERLVPPRI LEKFTPKKVKRGS S ITFSVKVEGHPAPS
HWLKEEA EKGVLWIGPDTPGYTMASSSKQHSVLVLLDVGRQH QGTYTCIATNPAGQALCSASLHISGLAKEEEQ
ERVKEALISSFLQGTSQAVSAQMSE SAGFADLVGQSKGESLVAAEASHLSLA EVGTEEF LQKLT SQI TEMVS
AKISQAKLQVPGGDSDEETKTPSASPRHRSRSPSSSVQESSSESEDGDSRGEIFDIYVVTADYLP LGAEQDAI
ILREGQYVEVLD SAHPLRWLVRTKPTKSSPSRQGWVSPAYL DKRLKLSPEWGPTEAPEFPGEAVSEDEYRTRL
SSVIQELLSSEQAFV GELQFLESHHMKHLERSPRVPA AVASQKTVI FRNVQDISHFHSSFLKELQCGTDDD
AMCFIKNQEA FEKYLEFLVGRVQAESVVVSTPVQEFYKKYAEETLSAKDPTQPPPP LQHYLEQPV ERVQKYQ
ALLKELIRNKARNRQNCALLEQAYAVVSALPQRAENK LHVSLMENYPGTLEALGEP I RQGHFIVWEGAPGARM
PWKGHNHRVFLFRNYLVICKPRRDSRTD TFSYVFRNMMKLSSIDLNDQVEGDDRAFEVWHEREDSVRKYLLQA
RTVI IKNSWVGEICIGIQRLAQPVWRPPEFEEELNACSTAE LGETVKLACRVTGT PKPIVSWYKDGKPEVVDPH
HILIEDPDG SCTLILDNLTGIDSGQYMCFAASAAGNASTL GKILVQVPPRFV NKVRATPFVEGEDAQITCTVE
GAPY PQIRWYKDG TLLAPGNRYRMLNEPRSGVLV LVIQAASKEDLGHYEC ELVNR LGSTRGGGEL YMQSPALR
ARDQHHREQIVA AVEDTSVEGSAHSAQDGA DQQAASVLRLLGSEALGPS PGDLPNTRQSEPPAFEEAASQIP
GAASGTPEV SQPGTHKGLEQETTSSGSQGWTVPIRVEGTAWPGAGTGQLLLDVHSQVIMETTQRTYVCQAPDT
GVTRAPSMQVTIEDVQVQVGDMAQF DAVIEGHPPP I V TWYKGSTQLTSSARLSQRQDGT TYSVLVTDVAPHDA

GVYTCVANNAGGQVLCKAELLVHGGDKLDAENQVYRRKLHSFYDVQEEIGRGVFGFVKRVQHKGNKMFCAAKF  
IPLRSKTRAQAYQERDILATLGHPLVTGLLDQFETRKTLLILILELCSSEELLDRLFKKGVVTEAEVKVYIQQL  
VEGLHYLHSHGILHLDIKPPNIMVHPAREDIKICDFGFAQKITPSEPOYSKYGSPEFVSPEIIEQNPFVSEGS  
DIWAMGVI SYLSLTCSSPFAGESDRATLLNVLEGRVSWSSPTAAHLESDAKDFIKATLQRTPRARPSTSQCLA  
HPWFLKSMPAEEAHFINTKQLKFLARSRWQRSLMSYKSIIVMRSIPELLQGPPDSPSLGVARHLRGEASGAS  
SSSSSSDNELAPFARAKSLPPSPVTHSPLLHPRGFLRPSASLPEETEASMTADAAVPASPQASAGPPASPGCV  
PRHSVISSLFYQQAGEGAERGNKTSGAKRHPARRRHLLKGGYIARALPGLREPLMEYSLLEEEAAREEQASLM  
TKTPSFETALRLPSSSVREVPGRSHSLDNPPVTTGSPPEACKQLLFPSTGLTHETTAKDRGHKEGFLQESV  
FFPMSGDSRPGKQEGSSQDSCRGKPASSCHSELGSGSQEGCGPPSSQSLGSLPPQSLKKEKELSTSCGPLFSEQ  
PQAAPFPTQVSPLLGSEKEPQDGSLESGPVPVSPSSPGSASQVDASLDTEGLSEAGDTCDFTPPPQRPQEQAT  
TRKFSLESRGGYAGVAGYGTFAFGGDAGGMLGQGPLWARMAWAVSQSSEEQDEAATESPQPLESIGPIAEASG  
VPLRTPSPSLTPWEEVEQVSLVQIRDLSGDAEAADTISLDISEVDPAYLNLSLDYDIKYLPEFEMI FRRVFKPI  
EQPESPGSETEAGQGLADFLLEAAWPWPGELGLRAGLEITEEPEEPGDLEALLGEEAVGRKRKWSPSRGLFQF  
PGRCLSGEEPVELGLRQRVKASMAHISRILKGRPEGPEREGPPRKKAGLASFRLSGLKGRDQELSDEAVVLGQ  
SVTLACQVLAQPTAQATWSKDGVLLESSGHLLISSTLKNFQLLTIILVVKEEDLGTYTCCVSNPLGTAVTTGVL  
RKAERPSSSPRPEVGEELYKDAVLLVWKPVESECGPVYIVQCCIEGGSWTTLASDISDCCYLTGKLSRGGMYIF  
RTACVSKAGMGPYSSPSEQVLLGGPNHLASEEISSRGRPAQLLPSTKTFQMQIRRGFRFVVRQCREKASGR  
ALAAKIVPYQPEDKTAVLRREYEAALKRHLHHPHLAQLHAAYLSPRHLVLIILELCSGPELLPSLAERESYSESDVK  
DYLWQMLSATQYLHAQHILHLDLRSENMMVTEYNLLKVIDLGNQSLDQEKVPAPENFKDYLETMAPELLEGGQ  
GAVPQTDIWAIGVTAIFIMLSGEYPESEGTDLQKGLRKLIRLSRCYAGLSGGAVAFLOSSLCAQPWGRPCA  
STCLQCGLWTEEGPTGSRPTPVTFTVRLRAFVREKRRALLYKKNLAQVR\*  
>rs29425205\_ENSMUSP00000038264\_c.5892:G>A\_p.A1965T  
ENSMUST00000047441.14|Obscn-202|ENSMUSG00000061462|-|chr11:g.58973279:C>T  
MDHSFSGAPRFLTRPKAFVSVGKDATLSCQIVGNPTPHVSWEKDRQFVEAGARFLAQDGDVYRLTILDLAL  
GDSGQYVCRARNAIGEAFAAVGLRVDSEGTCAEQAPHFLLRPTSIRVREGADATFRCRVGGSPQPAVSWSKDG  
RRLGPPDAPHVRVEEHGESSALRIR SARPRDGGTYEVRANPLGSASAAAALVVDSDAEVAPPGTSTATLLA  
HLQRRREAMRAEGIPSPPGAGTRTCTVTTEGKHARLSCFVTEGPKPETVWKKDQGLVTEGRRHVVEDEQENF  
VLKILFCKQSDRGLYTCTASNLVGQTYSSVLVVVREPTVPFKKRLQDLEVREKESATFQCEVAQPATEAAWFK  
EETRLWASAKYDIEEEGTERRLTVRNVSADDDAVYICETTEGSRVAELSVQGNLTKLPRKTAVRTGDTAIF  
WVELAVPEGPVRWLRNQEEMVAGGRVAITAEGTCHTLTI FQCTLEDMGEVAFVSGGCRTTTQFCVSAPRRPPL  
YPPADPVVKAKTESSVTLWSAPPHGDRPVTIDGYVLEKRKLGAYAWSRCHEAGWLATTEFTITGVABEGDFQ  
FRVSAINHFGQGPYLEFPGTMHLVPLAVKTPKAVEAVEGGEVTFVSDLTVASSGEWFLDGEALKASSIYVI  
RCDRTRHMLTIREVPARLHGAQLKFVANGIETSIQMVVRAALGLPSSKLPAAAAREVLAQLHEEAQLLAE LSD  
QAAA VTLKDGRELSLGPYEMQVSAGRALLVRDVAQDDAGLYECVSRGSRRTAYQLLVQDITDGYRDWGPAG  
PQKHMCKCAGAKIARYLGSSCYRFLQYDKGVWHWLEAALDTRQGKGTSSCSLHEKPKLVFAKQQAHSEVKA  
AGASATLSCEVAQAQTEVTWFKDGKLLSSSSKVRMEASGCSRRLVVQQAGKADAGEYSCEAGGQKLSFRLDVA  
EPKMFVFAKEQQARSEVKAEGASATLSCEVAQAQTEVTWFKDGKLLSSSSKVRMEASGCSRRLVVQQAGKADA  
GEYSCEAGGQKLSFRLDVTEPKLVFAKEQQARSEVKAEGVNSATLSCEVAQAQTEVTWFKDGKLLSSSSKVRM  
EASGCSRRLVVQQAGKADAGEYSCEAGGQKLSFRLDVAEPKLVFAKEQQARSEVKAEGNSATLSCEVAQAQ  
EVTWFKDGKLLSSSSKVRMEASGCSRRLVVQQAGKADAGEYSCEAGGQKLSFHLDVTEPKLVFAKEQQAHSEV  
KAEAGASATLSCEVAQAQTEVTWFKDGKLLSSSSKVRMEASGCSRRLVVQQAGKADAGEYSCEAGGQKLSFR  
LDVAEPKLVFAKEQQARSEVKAEGASATLSCEVAQAQTEVTWFKDGKLLSSSSKVRVEASGCSRRLVVQQAGK  
ADAGEYSCEAGGQKLSFRLDVAEPKLVFAKEQQANSEVKAEGASATLSCEVAQAQTEVTWFKDGKLLSSSSK  
VRVEASGCSRRLVVQQAGKADAGEYSCEAGGQKLSFRLDVAEPKLVFAKEQQAHSEVKAEGASATLSCEVAQA  
QTEVTWFKDGKLLSSSSKVRVEASGCSRRLVVQQAGKADAGEYSCEAGGQKLSFRLDVAEPKLVFAKEQQAH  
SEVKAEGASATLSCEVAQAQTEVTWFKDGKLLSSSSKVRVEASGCSRRLVVQQAGKADAGEYSCEAGGQKLS  
FRLDVAEPKLVFAKEQQAHSEVKAEGASATLSCEVAQAQTEVTWFKDGKLLSSSSKVRVEASGCSRRLVVQQ  
AGKADAGEYSCEAGGQKLSFRLDVAEPKLVFAKEQQAHSEVKAEGASATLSCEVAQAQTEVTWFKDGKLLSS  
SSKVRVEASGCSRRLVVQQVQKADAGEYSCEARGQKLSFRLDVAEAEBSQI PERPSRREPLVVEKHETIILTAT  
IAAPSVAAVTWLKDGVEIRRSKRHEATSLGDTHLTVRGAQVLD SAIYSCRVGKEGQDFPVQVEEVTAKFSKP  
LEPVEGELGGTVMLVCELSPEQAEVVWRCNGTQLRPGKRFQMTSEGPRRTLTVSGLREDDAEYVCESRDDRT  
SARLTVKVPVVKFTSGLSAMVAEEGQEQATFQCVVSPSDAGVTWYKDGMLQLPSEKFMVMEVGASRSLTILGL  
TLEDAGQVHVEAEGSSAALRVREAPVLFKKKLEPQTVEERTSVTLEVELTRPWEVVKWTRNAAVLTPSENV  
EIRAEGARTCLVLRSGVFADRGGFCETPDDKTQAKLVNEMRQVRLVVRGLQEVEAKEQTASMDVLSHA EVE  
GSWTRDGLRLQPGPKCHLAVQGPVHILTL SALQPQDSGLVAFRAEGVHTSARLIVTELPVSFTRVLQDVVATQ  
KEKVTLECELSRPVDVRWLKDGVELRAGKAI GIVAQGTCSLVIYRCETGDQGVVCDALDAQTSASLRVQGR  
TYTLIFRRVLAEDAGEVKFVAENAESRAHLRVKELPVTLLRPLRDKIAMEKHRGVLECCQVSRASAVRWFKGG  
VELQSGPKYEVVSDGLYRKLVIN DVQPEDEDYTC DAGNVKTSAQFFVEEQSITIVRGLKDMTVMFPAPAWFE



CETSIPSVRPPKWLKGTVLQAGGNVLEQDGTVHRLTLHKTCSTMTGPHFTIGKSRSSAQLVVS DIPVVLTRPLEPKAGRELQSVVLSCDFRPAPKAVQWYKDDTPLSPSEKFKMALEGQMAELRILRLTPADAGVYRCQAGSAQSSAEVTVAREVTVIQPLQDAEAMEEGRVCFSCELSHKDEDIEWSLNGTPLYNDSFHEISHEGCLHTLVLKSVRQADTGTVCATSPKVSVSARLVVKGKPVVFLKALDDVSAEERGTTLQCEVSDPEARVVWRKDGVELGSPDKYDFLHKAGARGLTVHDLSDHEDAGLYTCQVGSKETQSKVSVHDLHVGITKRLKTVEVLEGESCSFECVLSHESP SDPAVWTVGGKTVGGSGHFHAVRQGRKYTLTVKDAALSDAGEVVFVSVLGLTSSKASLIIRERPVDTKPLEDQRTTLGEDVMSCELSRAGTSVRWLKDGKAIKRSQKYDLLSEGTRAVLVVRKASLKDSGEYTCETEASKSTAKLCVEEKANRFTTEELADLQVEEKGRAVFTCKTEHPASVVTWRKGLLELRASGKHVPSQEGTLTKLTINALERTDSDTYTCDIGQARTQARLLVHGQKVRVIEDLEDTAVQEGSSAKFCCRIAPADYGPVHWFLDKTPLHSNELNEITVQPGGYHVLTLRQLALKDSGTVYFEAGDQRTSAALRVTEKPSIFSRPLTDVTVTEGEDLTLVCETTTVDSSVRWTKDGKTLRPSARCQLSHEGCQAQLLITATTPQDGGRYKCEIGGASSSSIVRVHALPVRFRESLKDVEVPEGKAA TLRCVLSVAAPVEWRHGDDVLKSSNKYSLRQEGAVLELVIRDLQPDQSGQYSCSFGDQTTSATLTVKTSAAQFVGKLRNKEATEGTTVTLRCELTKEAPVEWKGTETLRNGDKYSLKQDGAVCELQICSLLVADAGEYSCVCGQEKTSATLTVKALLVHFVRRLSKEATEGDTTTLQCELSKAAPVEWRKGTETLRDGDYSLKQDGAVCELQIRSLTIADAGEYLCTCGQEKTSATLTVRALPAKFKDSLKNEEATEGTTATLSCELSKAAPVTWKKGPKTLQSGDKYVLRQDGAVCGLQIHGLTMADAGEYSCVCGQEKTSATLTVRGLPAKFIEDLRSQEATEGATAILRCELSKAAPVEWRKGETLRDGDYSLRQDGAVCELQIRGLAVVDGTYSLSLPTKFTTEGLRNEEATEGTMATLRQMSKAAPVEWRKGETLRDGDYSLRQDGAMCELQIRGLTIEDSGEYTCVCGQEKTSATLSVKALPPRFIEDLRSQEATEGTMATLRQMSKAAPVEWRKGETLRDGDYSLRQNGAVCELQIHDLAVEDTGEYSCVCGQEKTSATLNVKALPPRFIEDLRSQEATEGTMATLRQMSKAAPVEWRKGETLRDGGYSLRQDGAVCELQIHDLVEDAGQYSCVCGQEKTSAVLTVDALPPKFTTEGLKKEEATEGTMVTLRQMSKEATVEWRKGAKTSLDGGYSLRQDGAMCELQICGLAVEDAGEYSCVCGQEKTSATLSVKALPPRFIEDLRSQEATEGTMATLRQMSKAAPVEWRKGSKTLRDGDRYSLRQDGAMCELQICDLAVEDTGDYSCVCGQEKTSATLSVKAPQVVFQQPLQNLQAEEGSMASLRCELSVPNAAMVWSKGGLELQGDTRREARQQCVAELLLRDLRREDAGEYSCCTCGSQTTSATLMVTAAPVRFRLRLQAQDVDEGATARLRCELSREAVSVEWRKGSLLQFPKAKYQMVQEGTTAELLVHGVEQEDAGEYTC DAGHTQS IARLSV RAKPKFKTDLQSTAEAGGTARLCCQLSEAEPTQVWLKEGVELHVGSKYEMRRQAVCELLIHGLEAKDTEYACLVGGQKTLASLRVKEPEVTVIRGLVDMVEQVADVEDVEFTCKVVSQAGATDVQVHGLQVPLQSNNEVTEVAVLADGCTHVLQKGVTLLEDAGTVSFHVGGLSSAQLTVRVPEVTVLEPLKDVQLSEGQDAHFRCRLSRASGQEARWALGGVPLQCNEMNDITVEQGTLYLLTLHKVTLLEDAGTITLQVGSCSSEAQLKVTAKNTVLRGLENDVALEGEALFECQLSQPEVAHAHTWLLDDEPVHTSEKVEVVYFENGLRHLLLLKLNKPKQDSCRVTFLAGDVVTS AFLTVRALPDPPEDAEVVGRSDHSVTLVSWVAPMSDGGGGLCGYRVMKEASTGQWQLCHDLVPGPECVDDLVPGKTYRFRVAAVGPAGAGEPVHLPQMVKIAPAPAPAPAPAPAPAPETRAVVGEDICLELEVAADGGVEVWHKGTERRIQPGGHFEVLSRQQRQMLVIKGFRTEDQGEYRCGPIQGLPSSGAATFNVMVMTSGSGDEVPAQPSLPPEAAQEGDLHLLWEALARKRRMSREPTLDSISELPEEDSRVQHLRQEAETAPDLSEGYSTADELARTGEADLSHTSSDDES RAGTTPSLVTYLKKAGGPGISPLASKHEAQVTTSVKPKQKQEPVVPVTPCPPPGDLSAADLMDPSLDKAAVKIQAFKGYKVRKEMKQEGPVFSRTFGDTEAQVGDVLRLECVLATKTDMRACWLKDGIELTDGRHYHIDQLKDGTC SLLVTGLAPTDSGRYTCQVSTKSGRVSHSACVVVSGTESEAESSSGGELDDAFRRAARRLHRLFRTKSPAELS EEELFLSADEGPGEPEEPADWQTYREDENFVCIRFESLAEARQAVTCFRNMFMATMGIGVEISLGEQGPRGVEMRIGKVAPTPTPAVPLAKTPGLQTSDAAPVFLTELQNDVQDGYPMSFDCVVTGQPVPSVRWFKDGKLLLEDDHYMINEDQQGGHQLIITAVVPADMGVYRCLAENSMGVSSTKAEALRVELTSTDYDTAADATETSSYFSAQGYLSSREQEGTESDEGQLPQVLEELKDLQVAPGTRLAKFQLKVKGYPAKLYWFKDGQPLTSDHIRMTDKKTLHTLEIVSVTREDSGQYAAIISNAVGAAYSSARLLVRGPSEPEEKPASDVHERLVPPRILEKFTPKKVKRGSSITFSVKVEGHPAPSVHWLKEEAKEGVLWIGPDTPGYTMASSKQHSVLVLDVGRQHOGTYTCIATNPAGQALCSASLHISGLAKEEEEQERVKEALISSFLQGTSAQVSAQMSSESAGFADLVGQSKGESLVAAEEAHSHLSLAEVGTETEFLOKLT SQITEMVSAKISQAKLQVPGGDSDEETKTPSASPRHGRSRPSSSVQESSSESEDGDSRGEIFDIYVVTADYLPLGAEQDAIILREGQYVEVLDSAHPLRWLVRTKPTKSSPSRQGWVSPAYLDKRLKLSPEWGPTEAPEFPGEAVSEDEYRTRLSSVIQELLSSEQAFVQFVLESHHMKHLERSPRVPAAVASQKTVIFRNVQDISHFHSSFLKEIQCGCTDDDVAMCFIKNQEA FEKYLEFLVGRVQAESVVVSTPVQEFYKKYAEETLSAKDPTQPPPPLOHYLEQPVERVQKYQALLKELIRNKARNRQNCALLEQAYAVVSALPQRAENKLVSLMENYPGTLEALGEP IROGHFIVWEGAPGARMPPWKGNHRHVFVFRNYLVICPKRRDSRTDTFSYVFRNMMKLSSIDLNDQVEGDDRAFEVWHERE DSVRKYLLQARTVIKNSWVKEICGIQORLAQPVWRPPEFEEELADCTAELGETVKLACRVGTGPKPIVSWYKD GKPVEVDPHHILIEDPDGSCSTLILDNLGTIGDSGQYMCFAASAAGNASTLGKILVQVPPRFVNKVRATPFVEGEDAQITCTVEGAPYPIRIRYKDGTLAPGNRYRMLNEPRSGVVLVLIQAASKEDLGHYECELVNRNLGSTRGGG ELYMQSPALRARDQHHREQIVAAVEGAPSMQVTEIDVQVQVGDMAQFDAVIEGHPPPIVTVYKGSTQLTSSARLSQRQDGTYSLVLTVDVAPHDAVYTCVANNAGGVLCQAEELLVHGGDKLDAENQVYRRKLSHFYDVQEEIGR GVFVGFVQVHKGNMFCAAKFIPLRSKTRAQAYQERDILATLGHPLVTGLLDQFETRKTLLILILELCSSEELDLRFLFKGVVTEAEVKVYIQQLVEGLHYLHSHGILHLDIKPPNIMVHPAREDIKICDFGFAQKITPSEPOYSKYGSPFVVSPEIIEQNPVSEGSDIWAMGVISYLSLTCSSPFAGESDRATLLNVLEGRVSWSSPTAAHLSEDA

DFIKATLQRTPRARPSTSQC LAHPWFLKSM PAEEAHFINTKQLKFL LARSRWQRSLMSYKSI LVMRSIPELLO  
 GPPDPSLGVARHLRGEASGASSSSSSSDNELAPFARAKSLPPSPVTHSPLLHPRGFLRPSASLPEETEASMP  
 TADAAVPASPQASAGPPASPGCVPRHSV ISSLFYQQAGEGAERGNKTS GAKRHPARRRHLLKGGYIARALPGLR  
 EPLMEYSLLEEEAAREEQASLMTKTPSFETALRLPSSSVREVPGRSHSLDNPPVTTGSPPEACKEQLLFPST  
 GLTHETTAKDRGHKEGFLQESVFPFPMMSGDSRPGKQEGSSQDSCRGKPASSCHSELGSGSQEGCGPPSSQSLG  
 SLPPQSLKKELESTSCGPLFSEQPQAAPFPTQVSPLLGSEKEPQDGSLSSEGPVVPVSSSPGSASQVDASLDT  
 LSEAGDTCDFTPPPQRPQEQATTRKFSLESRRGGYAGVAGYGTFAFGGDAGGMLGQGPLWARMAWAVSOSSEEQ  
 DEATEESPQPLESLGPIAEASGVPLRTSPSLTPWEEVEQVSLVQIRDLSGDAEAADTISLDISEVDPAYLNLS  
 DLYDIKYLPPFEFMI FRRVPKPIEQPESPGSETEAGQGLADFL EEAAPWPWPGELGLRAGLEIT EEPPEPGDLEA  
 LLGEAAVGRKRKWSPSRGLFQFPGRCLSGEEPVELGLRQRVKASMAHISRILKGRPEGPEREGPPRKKAGLAS  
 FRLSGLKGRDQELSDEAVVLGQSVTLACQVLAQPTAQATWSKDGVLLESSGHLLISSTLKNFQLLTI LVVKEE  
 DLGTYTCCVSNPLGTAVTTGVLKRAERPSSSPRPEVGEYKDAVLLVWKPVE SCGPVTYIVQCCIEGGSWTTL  
 ASDISDCCYLTKLSRGGMYIFRTACVSKAGMGPYSSPSEQVLLGGPNHLASEEESSRGRPAQLLPSTKTF  
 QMQIRRRGRFSVVRQCREKASGRALAAKIVPYQPEDKTAVLREYEALKRLHHPHLAQLHAAYLSPRHLVLI  
 LELCSGPELLPSLAERESYSESDVKDYLWQMSATQYLHAQHILHLDLRSENMMVTEYNLLKVIDLGNASLDQEK  
 VPAPENFKDYLETMAPELLEGQGAVPQTDIWAIGVTA FIMLSGEY PESSSEGETRDLQKGLRKLIRLSRCYAGL  
 SGGAVAFLOSSLCAQPWGRPCASTCLQCGWLTEEGPTGSRPTPVTFTVRLRAFVREKRRRALLYKKNLAQ  
 VR\*

>rs29425205\_ENSMUSP00000049737\_c.6519:G>A\_p.A2174T  
 ENSMUST00000052872.15|Obscn-203|ENSMUSG00000061462|-|chr11:g.58973279:C>T  
 MDHSFSGAPRFLTRPKAFVSVGKDATLSCQIVGNPTPHVSWEKDRQVEAGARFRLAQDGDVYRLTILDLAL  
 GDSGQYVCRARNAIGEAFVAVGLRVDSEGTCAEQAPHLLRPTSIRVREGADATFRCRVGGSQPAPVSWSKDG  
 RRLGPPDAPHVRVEEHGESSALRIRSARPRDGGTYEVRAENPLGASAAAAALVVDSDAEVAGPPGTSTATLLA  
 HLQQRREAMRAEGIPPSPPGAGTRTCTVTEGKHARLSCFVTGEPKPKETVWKKDQGLVTEGRRHVVEDEQENF  
 VLKILFCCKQSDRGLYTCTASNVLVGGTYSSVLVVVREPTVPFKKRLQDLEVREKESATFQCEVAQAPATEAAWFK  
 EETRLWASAKYDIEEETERRLTVRNVSAADDAVYICETTEGSRVAELSVQGNLPRKTAVRTGDTAIF  
 WVLELAVPEGPVVRVLRVAITAEQDCHYTLTI FQCTLEDMGEVAFVSGGCRTTTTQFCVSAAPRRPPL  
 YPPADPVVKAKTESSVTLWSAPPHGDRPVTIDGYVLEKRLKLGAYAWSRCHEAGWLATTEFTITGVAAEEDGFQ  
 FRVSAINHFGQGPYLEFPGMTMLVPLAVKTPKAVEAVEGGEVTFVSDLTVASSGEWFLDGEALKASSIYVI  
 RCDRTRHMLTIREV PARLHGAQLK FVANGIETS IQMVVRAALGLPSSKLPAAAAAREVLAQLHEEAQLLAE LSD  
 QAAA VTWLKDGRELSLGPYEMQVSAGRRALLVRDVAQDDAGLYECVSRGSR TAYQLLVQEPKLVFAKQQA  
 SEVKAEAGNSATLSCEVTQAQTEVTWFKDGKLLSSSSKVRMEASGCSRRLVVQQAGKADAGEYSCEAGGQKLS  
 FRLDVAEPKLVFAKQQAHSSEVKAEAGASATLSCEVAQAQTEVTWFKDGKLLSSSSKVRMEASGCSRRLVVQQ  
 AGKADAGEYSCEAGGQKLSFRLDVAEPKMFVFAKEQQARSEVKAEAGASATLSCEVAQAQTEVTWFKDGKLLS  
 SSKVRMEASGCSRRLVVQQAGKADAGEYSCEAGGQKLSFRLDVTEPKLVFAKEQQARSEVKAEVGN SATLSCE  
 VAQAQTEVTWFKDGKLLSSSSKVRMEASGCSRRLVVQQAGKADAGEYSCEAGGQKLSFRLDVAEPKLVFAKEQ  
 QARSEVKAEAGNSATLSCEVAQAQTEVTWFKDGKLLSSSSKVRMEASGCSRRLVVQQAGKADAGEYSCEAGGQ  
 KLSFHLDVTEPKLVFAKEQQAHSEVKAEAGASATLSCEVAQAQTEVTWFKDGKLLSSSSKVRMEASGCSRRLV  
 VQQAGKADAGEYSCEAGGQKLSFRLDVAEPKLVFAKEQQARSEVKAEAGASATLSCEVAQAQTEVTWFKDGK  
 LSSSSKVRVEASGCSRRLVVQQAGKADAGEYSCEAGGQKLSFRLDVAEPKLVFAKEQQANSEVKAEAGASATL  
 SCEVAQAQTEVTWFKDGKLLSSSSKVRVEASGCSRRLVVQQAGKADAGEYSCEAGGQKLSFRLDVAEPKLAFA  
 KEQQAHSEVKAEAGASATLSCEVAQAQTEVTWFKDGKLLSSSSKVRVEASGCSRRLVVQQAGKADAGEYSCEA  
 GGQKLSFRLDVAEPKLAFAKEQQAHSEVKAEAGASATLSCEVAQAQTEVTWFKDGKLLSSSSKVRVEASGCSR  
 RLVVQQAGKADAGEYSCEAGGQKLSFRLDVAEPKLAFAKEQQAHSEVKAEAGASATLSCEVAQAQTEVTWFKD  
 GKLLSSSSKVRVEASGCSRRLVVQQAGKADAGEYSCEAGGQKLFRLDVAEPKLMFAKEQQAHSEVKAEAGAS  
 ATLSCEVAQAQTEVTWFKDGKLLSSSSKVRVEASGCSRRLVVQQAGKADAGEYSCEAGGQKLSFRLDVAEPK  
 VFAKEQQAHSEVKAEAGASATLSCEVAQAQTEVTWFKDGKLLSSSSKVRVEASGCSRRLVVQQV GKADAGEYS  
 CEARGQKLSFRLDVADTRLMFAKEQQARTEVKAEAGNSATLSCEVAQAQTEVTWFKDGKLLSSSSKVRVEASG  
 CSRRLVVQQAGKADAGEYSCEAGGQKLSFRLDVAEAEESQIPERPSRREPLVVKEHETIILTATIAAPSVAAVT  
 WLKDGVEIRRKRHEATSLGDTHLTVRGAQVLDSAIYSCRVGKEGQDFPVQVEEVTAKFSKPLEPVEGELGG  
 TVMLVCELSPEQAEVWRCGNTQLRPGKRFQMTSEGPRRTLT VSGLREDDAE EYVCESRDDRTSARLTVKVP  
 VVKFTSGLSAMVAEEGQEA TFCVSPSDAGVTWYKDGMLQPSSEKFMVMEVGASRSLTILGLTLEDAGQVTV  
 EAEGASSAALRVREAPVLFKKKLEPQTVEERTSVTLEVELTRPWPPEVKWTRNAAVLTPSENVEIRAEGARHC  
 LVLRVSGFADRGFFGCETPDDKTQAKLNVEMRQVRLVRLGVEVEAKEQGTASMDVELSHA EVEGSWTRDGLRL  
 QPGPKCHLAVQGPVHILTL SALQPD SGLVAFRAEGVHTSARLIVTELPVSFTRVLQDVVATQKEKVTLECEL  
 SRPVDVRWLKDGVELRAGKAIGIVAQGTCSRSLVIYRCETGDQGVVCDALDAQTSASLRVQGRTYTLIFRRVL  
 AEDAGEVKFVAENAESRAHLRVKELPVTLLRPLRDKIAMEKHRGVLECVSRASAQVRWFVKGGLVLSGPKYE  
 VVSDGLYRKLVIN DVQPEDEDTYTC DAGNVKTS AQFFVVEQSITIVRGLKDMTVM EPAPAWFECETSIPSVRP

PKWLLGKTVLQAGGNVGLQDGTVHRLTLHKTCSTMTGPVHFTIGKSRSSAQLVVSDDIPVVLTRPLEPKAGRE
LQSVVLSCDFRPAPKAVQWYKDDTPLSPSEKFKMALEGQMAELRILRLTPADAGVYRCQAGSAQSSAEVTVEA
REVTVIQPLQDAEAMEEGRVCFSCELSHKDEDEIWSLNGTPLYNDSFHEISHEGCLHTLVLSVVRQADTGTVC
ATSPKVSVSARLVVKGKPVVFLKALDDVSAEERGTLTLQCEVSDPEARVVWRKDGVELGPSDKYDFLHKAGAR
GLTVHDLSDHEDAGLYTCQVGSKETQSKVSVHDLHVGITKRLKTVEVLEGESECSFECVLSHESPSDPAVWTVGG
KTVGGSGHFHAVRQGRKYTLTVKDAALSDAGEVVSFLGLTSKASLIIRERPVDITKPLEDQRTTLGEDVMLS
CELSRAGTSVRWLKDGKAIKRSQKYDLLSEGTRAVLVVRKASLKDSGEYTCETEASKSTAKLCVEEKANRFTE
ELADLQVEEKGRAVFTCKTEHPASVVWTRKGLLELRASGKHVPSQEGTLKLTINALERTDSDTYTCDIGQAR
TQARLLVHGQKVRVIEDLEDTAVQEGSSAKFCCRIAPADYGPVHWFLDKTPHLSNELNEITVQPGGYHVLTLR
QLALKDSGTVYFEAGDQRTSAALRVTEKPSIFSRPLTDVTVTEGEDTLVCETTTTVDSSVRWTKDGKTLRPSA
RCQLSHEGCAQQLLITATTPQDGGRYKCEIGGASSSSIVRVHALPVRFRESLKDVEVPEGKAATLRCVLSVA
APVEWRHGDDVLKSSNKYSLRQEGAVLELVIDRLQPDQSGQYSCSFGDQTTSATLTVKTSQAQVFGKLRNKEA
TEGTVTVLRCCLTKEAPVEWKKGTETLRNGDKYSLKQDGAVCELQICSLLVADAGEYSCVCGQEKTSATLTVK
ALLVHFVRRRLRSKEATEGDTTTLQCELSKAAPVEWRKGTETLRDGDYSLKQDGAVCELQIRSLTIADAGEYL
CTCGQEKTSATLTVRALPAKFKDSLKNEEATEGTTATLSCELSKAAPVTWKKGPKTLQSGDKYVLRQDGAVCG
LQIHGLTMADAGEYSCVCGQEKTSATLTVRGLPAKFIEDLRSQEATEGATAILRCELSKAAPVEWRKGETLQ
DGDYSLRQDGAVCELQIRGLAVVDGTYSLSLPTKFTTEGLRNEEATEGTMATLRCQMSKAAPVEWRKGETLR
DGDYSLRQDGAVCELQIRGLTIEDSGEYTCVCGQEKTSATLSVKALPSRFIEDLRSQEATEGTMATLRCQMS
KTAPVEWKKGSETLRDGGYSLRQDGPVCELQICDLAVEDAGEYSCVCGQEKTSATLSIKALPPRFIEDLRSQ
EATEGTMATLRCQMSKAAPVEWRKGETLGDGGYSLRQNGAVCELQIHDLAVEDTGEYSCVCGQEKTSATLN
VKALPPRFIEDLRSQEATEGTMATLRCQMSKAAPVEWRKGETLRDGGYSLRQDGAVCELQIHDLVEDAGQ
YSCVCGQEKTSAVLTVDALPPKFTTEGLKKEEATEGTMVTLRCQMSKEATVEWRKGAKTLSDGGRYSLRQDGAM
CELQICGLAVEDAGEYSCVCGQEKTSATLSVKALPPRFIEDLRSQEATEGTMATLRCQMSKAAPVEWRKGET
LRDGDYSLRQDGAVCELQIRDLAVEDAGEYLCVCGQEKTSATLSVKALPPRFIEDLRSQEATEGTMATLRCQ
MSKAAPVEWRKGSKTLRQDGDYSLRQDGAVCELQICDLAVEDTGDYSCVCGQEKTSATLSVKALPPRFIEDLR
SQEAREGTVATLRCRMSKAAPVEWRKGETLKDGDYSLRQEGNLCELQIRDLAVEDTEEYSCVCGQEKTSAT
LSVKALPAKFIEDLRSQEAPESSTVTLRCKLSKASVWKKGSETLRNGARYSLRQDGAVCELEIRDLTVEDT
GEYSCTCGQERTSATLSIMAPQVVFQQLQNLQAEEGSMASLRCELSVPNAAMVWSKGGLELQGDTRREARQQ
GCVAELLLRDLRREDAGEYSCCTGSQTTSATLMVTAAPVRFLRELQAQDVDEGATARLRCELSREAVSVEWRK
GSLQLFPCAKYQMVQEGTTAELLVHGVEQEDAGEYTCDAHTQS IARLSVRAPKPKFKTDLQSTEQEAGGTAR
LCCQLSEAEPTPVQWLKEGVELHVGSKYEMRRQGAVCELLIHGLEAKDTGEYACLVGQKTLASLRVKEPEV
TIVRGLVDMEVQADEDEFTCKVSAQAGATDVQWHLQGLPLQSNVEVAVLADGCTHVLQKGVTLQEDAGTVS
FHVGGSSSAQLTVRVPEVTVLEPLKDVQLSEGQDAHFRCRLSRASGQEARWALGGVPLQCNEEMNDITVEQGT
LYLLTLHKVTLEDAGTITLQVGSSEAEQLKVTAKNTVLRGLENVDALEGGALFECQLSQPEVAHTWLLDD
EPVHTSEKVEVVYFENGLRHLHLLKLNKPKQDSCRVTFLAGDVVTSAFITVVRGWRLEVLPPHDASVKAGMQVR
FTCILLSEAVPVGEATWYINGAAIQPDDTDWTVTTDGSHHALTLNAQPQHAGEVTFAAARDAVASARLSVLALP
DPPEDAEEVGRSDHSVTLVWVAPMSDGGGGLCGYRVMKEASTGQWQLCHDLVPGPECVDDLVPGKTYRFRV
AAVGPAGAGEPVHLPQMVKIAPAPAPAPAPAPAPAPETRQAVVGEDICLELEVAADGGEVVWHKGTERRIQPGG
HFEVLSRQORQMLVIKGFRTEDQGEYRCGPIQGLPSSGAATFNVVMTSGSGDEVPAQPSLPPEAAQEGDLHLL
WEALARKRRMSREPTLDSISELPEEDSRVQHLRQEAETAAPDLSEGYSTADELARTGEADLSHTSSDDESRAG
TPSLVTYLKAGGPGI SPLASKHEAQVTTSVKPKQKQEPVVPTCPPPGDLSAADLMDPSLDKAAVKIQAAFKG
YKVRKEMKQOEGPVFSRTFGDTEAQVGDVLRLECVLATKTDMRACWLKDGIELTDGRHYHIDQLKDGTCSSLLV
TGLAPTDSGRYTCQVSTKSGRVSHSACVVVSGTESEAESSSGGELDDAFRRRAARLHRLFRTKSPAELSEEEL
FLSADEGPGPEPEPADWQTYREDENFVCIRFESLAEARQAVTCFRNMFATMGIGVEISLGEQGPGRVEMRIGK
VAPTPTPAVPLAKTPGLQTSDAAPVFLTELQNDVQDGYPMSFDCVVTGQPVPSVRWFKDGKLLLEDDHYMIN
EDQQGGHQLIITAVVPADMGVYRCLAENSMGVSSTKAELRVELTSTDYDTAADATETSSYFSAQGYLSSREQE
GTESDEGQLPQVLEELKDLQVAPGTRLAKFQKLVKGYAPKLYWFKDQGPLTSDHIRMTDKKTLHTLEIVSV
TREDSGQYAAYSNAVGAAYSSARLLVRGPSEPEEKPASDVHERLVPPRILEKFTPKKVKRGSSTIFSVKVEG
HPAPSVHWLKEEAKEKGLVWIGPDTPGYTMASSSKQHSVLVDVGRQHOGTYTCIATNPAGQALCSASLHISGL
AKEEEQERVKEALISSFLQGTSAVSAQMSEAGFADLVGQSKGESLVAEEAHSHLSLAEVGTTEFLQKLTSSQ
ITEMVSAKISQAKLQVPGGDSDEETKTPSASPRHGRSRPSSSVQESSSESEDGDSRGEIFDIYVVTADYLPGLG
AEQDAIILREGQYVEVLDSAHPLRWLVRTKPTKSSPSRQGWVSPAYLDKRLKLSPEWGPTEAPEFPGEAVSED
EYRTRLSSVICHELLSSEQAFVGELOFLESHHMKHLVSRPVAASQKTVIFRNVQDISHFHSSFLKELQGC
GTDDDVAMVICIKNQEAFKEYLEFLVGRVQAESVLLSTPVQEFYKKYAEBETLSAKDTPQPPPPPLQHYLEQVPE
RVQKYQALLKELIRNKARNRQNCALLEQAYAVVSALPQRAENKLVHSLMENYPGTLEALGEP IRQGHFIVWEG
APGARMPWKGHNHRVFLFRNYLVICKPRRDSRTDFTSYVFRNMMKLSIDLNDQVEGDDRAFEVWHEREDSVR
KYLQARTVI IKNSWVKEICGIQORLAQPVWRPPEFEELADCTAELGETVKLACRVTGTPKPIVSWYKDGKP
VEVDPHHILIEDPDGSCTLIIDNLTGIDSGQYMCFAASAAGNASTLTKILVQVPPRFVNVKVRATPFVEGEDAQ

ITCTVEGAPYPQIRWYKDGTLTLLAPGNRYRMLNEPRSGVLVVLVIQAASKEDLGHYECELVNRLGSTRGGGELYM  
QSPALRARDQHHREQIVAAVEVTEQETKVPKKTVIIEETITTTVVKSPRGRRQSPGKSPSRSPRRSASPRRPG  
LLAPERLYPPGTSPSRRLEVEQGRKAPVPALYVTEAEVHAPASQSQPKWLEVEETIEVRVKKTGSRGASPVRE  
MTRSGEGILFTLPGGI PGRDPNANNNSNKS SVYQEARTWGPVAVHVGEFFIFQVDSVGNVDVWAASPEPEQVRA  
SQKEENTERQEGCSDGIDENTFLMEEPQDTSLQGRDPKILTHNGRVLTLADLEDYVPQEGETFQCGDSTPSTP  
DEPPCEVSVLQREISEPTVGQPVLNNGRPPGTGATPSFFRPGSQVHSPESVSFLLREAWSGPVSAAPWTSSSF  
HTHVQSSVDGSHGSFKTEVSTQTVSFGAVGETVTLHIDPDGGEAPGPSQG\*  
>rs29425205\_ENSMUSP00000020732\_c.6720:G>A\_p.A2241T  
ENSMUST00000020732.13|Obscn-201|ENSMUSG00000061462|-|chr11:g.58973279:C>T  
MDHSFSGAPRFLTRPKAFVSVGKDATLSCQIVGNPTPHVSWEKDRQPVEAGARFRLAQDGDVYRLTILDLAL  
GDSGQYVCRARNAIGEFAAVGLRVDSEGTCAEQAPHFLLRPTSIRVREGADATFRCRVGGSPQPAVSWSKDG  
RRLGPPDAPHVRVEEHGESSALRIRSARPRDGGTYEVRAENPLGSASAAAALVVDSDAEVAGPPGTSTATLLA  
HLQQRREAMRAEGIPPSPPGAGTRTCTVTEGKHARLSCFVTGEPKPEVWKKDQGLVTEGRRHVVEDEQENF  
VLKILFCQKQSDRGLYTCTASNLVQTYSSVLVVVREPTVPFKKRLQDLEVREKESATFQCEVAQPAEAAWFK  
EETRLWASAKYDIEEEGETERRLTVRNVSADDDAVYICETTEGSRVVAELSVQGNLTKLPRKTAVRTGDTAIF  
WVELAVPEGPVWRWRNQEEMVAGGRVAITAEGTCHTLTI FQCTLEDMGEVAFVSGGCRTTTTQFCVSAPRRPPL  
YPPADFPVVKAKTESSVTLWSAPPHGDRPVTIDGYVLEKRLGAYAWSRCHEAGWLATFTTITGVAEEGDFQ  
FRVSAINHFGQGPYLEFPGTMHLVPLAVKTPKLAVEAVEGGEVTFVSDLTVAASGEWFLDGEALKASSIYVI  
RCDRTRHMLTIREVPARLHGAQLKFVANGIETSIQMVVRAALGLPSSKLPAAAAAREVLAQLHEEAQLLAE LSD  
QAAA VTLKDGRELSLGPKEYMQVSAGRRALLVRDVAQDDAGLYECVSRGSRRTAYQLLVQDITDGYRDWGPAG  
PQKHMCKCAGAKIARYLGSSCYRFLQYDKGVWHWLEAALDTRQKGTSSCSLHEKPKLVFAKQQAHSEVKA  
AGNSATLSCEVTQAQTEVTFWKDGKLLSSSSKVRMEASGCSRRLVVQQAGKADAGEYSCEAGGQKLSFRLDVA  
EPKLVFAKQQAHSEVKAEGASATLSCEVAQAQTEVTFWKDGKLLSSSSKVRMEASGCSRRLVVQQAGKADA  
GEYSCEAGGQKLSFRLDVAEPKMFVFAKEQQARSEVKAEGASATLSCEVAQAQTEVTFWKDGKLLSSSSKVRM  
EASGCSRRLVVQQAGKADAGEYSCEAGGQKLSFRLDVTEPKLVFAKEQQARSEVKAEGVNSATLSCEVAQAQ  
EVTWFKDGKLLSSSSKVRMEASGCSRRLVVQQAGKADAGEYSCEAGGQKLSFRLDVAEPKLVFAKEQQARSEV  
KAEAGNSATLSCEVAQAQTEVTFWKDGKLLSSSSKVRMEASGCSRRLVVQQAGKADAGEYSCEAGGQKLSFHL  
DVTEPKLVFAKEQQAHSEVKAEGASATLSCEVAQAQTEVTFWKDGKLLSSSSKVRMEASGCSRRLVVQQAGK  
ADAGEYSCEAGGQKLSFRLDVAEPKLVFAKEQQARSEVKAEGASATLSCEVAQAQTEVTFWKDGKLLSSSSK  
VRVEASGCSRRLVVQQAGKADAGEYSCEAGGQKLSFRLDVAEPKLVFAKEQQANSEVKAEGASATLSCEVAQ  
AQTEVTFWKDGKLLSSSSKVRVEASGCSRRLVVQQAGKADAGEYSCEAGGQKLSFRLDVAEPKLAFAKEQQAH  
SEVKAEGASATLSCEVAQAQTEVTFWKDGKLLSSSSKVRVEASGCSRRLVVQQAGKADAGEYSCEAGGQKLS  
FRLDVAEPKLAFAKEQQAHSEVKAEGASATLSCEVAQAQTEVTFWKDGKLLSSSSKVRVEASGCSRRLVVQQ  
AGKADAGEYSCEAGGQKLSFRLDVAEPKLAFAKEQQAHSEVKAEGASATLSCEVAQAQTEVTFWKDGKLLSS  
SSKVRVEASGCSRRLVVQQAGKADAGEYSCEAGGQKLFRLDVAEPKLMFAKEQQAHSEVKAEGASATLSCE  
VAQAQTEVTFWKDGKLLSSSSKVRVEASGCSRRLVVQQAGKADAGEYSCEAGGQKLSFRLDVAEPKLVFAKEQ  
QAHSEVKAEGASATLSCEVAQAQTEVTFWKDGKLLSSSSKVRVEASGCSRRLVVQQVQKADAGEYSCEARGQ  
KLSFRLDVADTRLMFAKEQQARTEVKAEGNSATLSCEVAQAQTEVTFWKDGKLLSSSSKVRVEASGCSRRLV  
VQQAGKADAGEYSCEAGGQKLSFRLDVAEAEESQIPERPSRREPLVVKEHETIILTATIAAPSAAVTWLKDG  
EIRRSKRHEATSLGDTHTLTVRGAQVLDIAIYSCRVGKEGQDFPVQVEEVTAKFSKPLEPVEGELGGTVMLVC  
ELSPQAEVWRCGNTQLRPGKRFQMTSEGPRRTLTVSGLREDDAEYVCE SRDDRTSARLTVKVPVVKFTS  
GLSAMVAEEGQEATFQCVVSPSDAGVTWYKDGMLQLPSEKFMVVEGASRSRLTILGLTLEDAGQVTEAEGAS  
SSAALRVREAPVLFKKLEPQTEERTSVTLEVELTRPWPEVKWTRNAAVLTPSENVEIRAEGARHCLVLRV  
GFADRGGFFGCETPDDKTQAKLNVEMRQVRLVVRGLQEVEAKEQGTASMDVELSHAEEVGSWTRDGLRLQPGPKC  
HLAVQGPVHILTLALQPDQSLVAFRAEGVHTSARLIVTELPVSFTRVLQDVVATQKEKVTLECELSRPVDV  
RWLKDGVLELRAGKAIGIVAQGTCSRSLVIYRCETGDQGVYVCDALDAQTSASLRVQGRTYTLIFRRLAEDAGE  
VKFVAENAESRAHLRVKELPVTLLRPLRDKIAMEKHGRVLECCQVSRASQVRWFKGGVELQSGPKYEVVSDGL  
YRKLVINVDQPEDEDTYTC DAGNVKTSAQFFVEEQSITIVRGLKDMTVMPEPAPAWFECETSIPSVRPPKWL  
KTVLQAGGNVGLQDGTVHRLTLHKTCSTMTGPVHFTIGKSRSSAQLVSDIPVVLTRPLEPKAGRELQSVVL  
SCDFRPAPKAVQWYKDDTPLSPSEKFKMALEGMALRLRLTPADAGVYRCQAGSAQSSAEVTVAREVTVI  
QPLQDAEAMEEGRVCFSCELSHKDEDIEWLSLNGTPLYNDSFHEISHEGCLHTLVLSVSRQADTGTVCATSPKV  
SVSARLVVKGKPVVFLKALDDVSAEERGLTLTQCEVSDPEARVWVRKDGVELGSPDKYDFLHKAGARGLTVHD  
LSHEDAGLTYKQVTSKETQSKVSVHDLHVGITKRLKTVEVLEGESECSFECVLSHESPSDPAVWTVGGKTVGGS  
GHFHAVRQRKTYTLTKVDAALSDAGEVVSGLVLTASKASLIIRERPVDTIKPLEDQRTTLGEDVMLSCELSRA  
GTSVRWLKDGKAIRKSQYDLLESEGTRAVLVVRKASLKDSGEYTCETEASKSTAKLCEVEKANRFEELADLQ  
VEEKGRAVFTCKTEHPASVVTWRKGLLELRASGKHVPSQEGTLTKLTINALERTSDTYTCDIGQARTQARLL  
VHGQKVRVIEDLEDTAVQEGSSAKFCRIAPADYGPVHWFLDKTPLHSNELNEITVQPGGYHVLTLRQLALKD  
SGTVYFEAGDQRTSALRVTEKPSIFSRPLTDVTVTEGEDLTLVCETTTVDSSVRWTKDGKTLRPSARCQLSH

EGCQAQLLITATTPQDGGRYKCEIGGASSSSIVRVHALPVRFRRESLKDVEVPEGKAATLRCVLSVAAPVEWR  
 HGDDVLKSSNKYSLRQEGAVLELVIRDLQPDQSGQYSCSFGDQTTSATLTVKTSQAQFVGLKRNKEATEGTTV  
 TLRCELTKAPVEWKKGTETLRNGDKYSLKQDGAVCELQICSLLVADAGEYSCVCGQEKTSATLTVKALLVHF  
 VRRLSKEATEGDTTTLQCELSKAAPVEWRKGTETLRDGDYSLKQDGAVCELQIRSLTIADAGEYLCTCGQE  
 KTSATLTVRALPAKFKDSLKNEEATEGTTATLSCELSKAAPVTWKKGPKTLQSGDKYVLRQDGAFCGLQIHGL  
 TMADAGEYSCVCGQEKTSATLTVRGLPAKFIEDLRSQEATEGATAILRCELSKAAPVEWRKGSSETLKDGDYR  
 LRQDGAFCGLQIRGLAVVDGTYSLSLPTKFTTEGLRNEEATEGTMATLRCQMSKAAPVEWRKGSSETLRDGDYR  
 LRQDGAFCGLQIRGLTIEDSGEYTCVCGQEKTSATLSVKALPSRFIEDLRSQEATEGTMATLRCQMSKTA  
 PVEWKKGSETLRDGGYSLRQDGPVCELQICDLAVEDAGEYSCVCGQEKTSATLSIKALPPRFIEDLRSQEATEG  
 MATLRCQMSKAAPVEWRKGSSETLGDGGYSLRQNGAVCELQIHDLAVEDTGEYSCVCGQEKTSATLNVKALPP  
 RFIEDLRSQEATEGTMATLRCQMSKAAPVEWRKGSSETLRDGGYSLRQDGAFCGLQIHDLVEDAGQYSCVCG  
 QEKTSAVLTVDALPPKFTTEGLKKEEATEGTMVTLRCQMSKEATVEWRKGAKTLSDDGGYSLRQDGAFCGLQ  
 ICDLAVEDAGEYSCVCGQEKTSATLSVKALPPRFIEDLRSQEATEGTMATLRCQMSKAAPVEWRKGSSETLRDGD  
 YSLRQDGAFCGLQIRDLAVEDAGEYLCVCGQEKTSATLSVKALPPRFIEDLRSQEATEGTMATLRCQMSKAAP  
 VEWRKGSSETLRDGGYSLRQDGAFCGLQICDLAVEDTGDYSCVCGQEKTSATLSVKALPPRFIEDLRSQEARE  
 GTVATLRCRMSKAAPVEWRKGSSETLKDGDYSLRQEGNLCELQIRDLAVEDTEEYSCVCGQEKTSATLSVKAL  
 PAKFIEDLRSQEATEGTMATLRCQMSKAAPVEWRKGSSETLRDGGYSLRQDGAFCGLQIRDLVEDTGEYSC  
 CGQERTSATLSIMAPQVVFQQPLQNLQAEEGSMASLRCELSVNAAMVWSKGGLELQGDTRREARQQCGVAEL  
 LLRDLRREDAGEYSCVCGQEKTSATLMVTAAPVRFRLRELQAQDQVDEGATARLRCELSREAVSVEWRKGS  
 LQFPCAKYQMVQEGTTAELLVHGVEQEDAGEYTCDAHTQSIARLSVRAPKPKFKTDLQSTEQEAAGTARLCC  
 QLSAEAPGTPVQWLKEGVELHVGSKYEMRRQGAFCGLQIHGLEAKDTGEYACLVGGQKTLASLRVKEPEVT  
 IVRGLVDMEVQADEDEFTCKVQAGATDVQWHLQGLPLQSNVTEVAVLADGCTHVLQKGVTLQDAGTVSFH  
 VGGSSSAQLTVRVPEVTVLEPLKDVQLSEGQDAHFRCLRSRAGQEARWALGGVPLQCNEMNDITVEQGT  
 LYLTLHKVTLQDAGTITLQVGSSESQAQLKVTAKNTVLRGLENVDALLEGGEALFECQLSQPEVAHAHT  
 WLLDDEPVHTSEKVEVVYFENGLRHLLLLKNLKPQDSCRVTFLAGDVVTSFAFLTVRGRLEVLPEPHDAS  
 VKAGMQVRFTCILSEAVPVGEATSWYINGAAIQPDDTDWTVTTDGSHHALTLSNAQPHAGEVTFAAARDA  
 VASARLSVLALEPDPEDA EYVGRSDHSVTLSWVAIPMSDGGGLCGYRVEMKEASTGQWQLCHDLVPGPE  
 CVVDDLVPGKTYRFRVAAVGPA GAGEPVHLPQMVKIAPAPAPAPAPAPAPAPETRQAVVGEDICLELE  
 VAADGGEVVWHKGTERRIQPGGHFEVLSRGQRQMLVIKGFRTEDQGEYRCGPIQGLPSSGAATFNV  
 VMTSGSGDEVPAQPSLPPEAAQEGDLHLLWEALAR KRRMSREPTLDSISELPEEDSRVQHLRQEA  
 EETAPDLSEGYSTADELARTGEADLSHTSSDDESRAGTPSLVTYLKKAGGPGISPLASKHEAQV  
 TTSVKPQKQEPVPTCPGGDLAADLMDPSLDKAAVKIQAAFQYKVRKEMKQQEGPVFSRTFGDTEA  
 QVGDVLRLECVLATKTDMRACWLKDGIELTDGRHYHIDQLKDGTCSLLVTLGLAPTDSGRYTCQ  
 VSTKSGRVSHSACVVVSGTESEAESSGGELDDAFRAARRLHRLFRTKSPAELSEELFLSADE  
 GPGEPEPADWQTYREDENFVCIRFESLAEARQAVTCFRNMFATMGIGVEISLGEQGRGVEMRIGK  
 VAPTVP PAVPLAKT PGLQTS DAAPVFLTELQNDVQDGYPMSFDCVVTGQVPVSVRWFKDGKLL  
 EDDHYMINEDQQGHQLLITAVVPADMGVYRCLAENSMGVSSTKAELRVELTSTDYDTAADATETSSY  
 FSAQGYLSSREQEGTESDEGQLPQVLEELKDLQVAPGTRLAKFQLKVKGYPAKLYWFKDGGQPLT  
 TSDHIRMTDKKTLHTLEIVSVTREDSGQYAAYSNAVGAAYSSARLLVRGPSEPEEKPASDVHERL  
 VPPRILEKFTPKKVKRGSSITFSVKVEGHPAPSVHWLKEEAKEKGLWIGPDTPGYTMASSSKQ  
 HSLVLLDVGRHQHTYTCIATNPAGQALCSASLHISGLAKEEEQERVKEALISSFLQGTSAVSA  
 QMSAGFADLVGQSKGESLVAEEAHSHLSLAEVGTTEEFLQKLTSTQITMVSAKISQAKLQV  
 PGGDSDEETKTPSASPRHGRSRPSSSVQESSSEEDGDSRGEIFDIYVVTADYPLGAEQDAI  
 ILREGQYVEVLDSAHPLRWLVRTPKTKSSPSRQGWVSPAYLDKRLKLSPEWGPTEAPEFPGEAV  
 SEDEYRTRLS SSVIQEELLSSEQAFVGLQFLESHHMKHLERSPRVPAAVASQKTVIFRNVQDI  
 SHFHSSFLKELQCGTDDDVAMCFIKNQEAFAFEKYLEFLVGRVQAESVVVSTPVQEFYKKA  
 YEETLSAKDPTQPPPPLOHYLEQPVERVQKYQALLKELIRNKARNRQNCALLEQAYAVV  
 SALPQRAENKLVSLMENYPTLEALGEPHPIRQGHFIWVWEGAPGAMPWKGHNRHVFLFRNYL  
 VICPRRDSRTDTFSYVFRNMMKLSSIDLNDQVEGDDRAFEVWHEREDSVRKYLLQARTVI  
 IKNSWVKEICGIQQLAQPVWRPPEFEEELADCTAELGETVKLACRVTGTPKPIVSWYKDGK  
 PVEVDPHHILIEDPDGCTLILDNLTGIDSGQYMCFAASAAGNASTLGKILVQVPPRFVNVK  
 VRATPFVEGEDAQITCTVEGAPYQIRWYKDGTLTLLAPGNRYRMLNEPRSGVLV  
 LVIQAASKEDLGHYECELVNRLGSTRGGGELYMQSPALRARDQHHREQIVAAVEERRP  
 SPP\*

>rs29425205\_ENSMUSP00000151217\_c.5340:G>A\_p.A1781T  
 ENSMUST00000219084.3|Obscn-207|ENSMUSG00000061462|-|chr11:g.58973279:C>T  
 MDHSFSGAPRFLTRPKAFVVSVGKDATLSCQIVGNPTPHVSWEKDRQFVEAGARFRLAQDGDVYRLT  
 ILDLALGDSGQYVCRARNAIEGAFAAVGLRVDSEGTCAEQAPHFLLRPTSIRVREGADATFRCR  
 VGGSPQPAVSWSKDGRRLGPPDAPHVRVEEHGESSALRIRSARPRDGGTYEVRAENPLGSASAAAAL  
 VVDSDAEVAGPPGTSTATLLAHLQORREAMRAEGIPPSPPGAGTRTCTVTEGKHARLSCFVTGEP  
 KPEVWKKDGQLVTEGRRHVVEDEQENFVLKILFCKQSDRGLYTCTASNLVGQTYSSV  
 LVVVREPTVPFKKRLQDLEVREKESATFQCEVAQPAEAAWFK EETRLWASAKYDIEE  
 EGTEERRLTVRNVSADDDAVYICETTEGSRVVAELSVQGNLTKLPRKTAVRTGDTAIF



WVELAVPEGPVWRWRNQEEMVAGGRVAITAEGTCHTLTI FQCTLEDMGEVAFVSGGCRTTTTQFCVSAPRRPPL  
YPPADPVVKAKTESSVTLWSAPPHGDRPVTIDGYVLEKRKLGAYAWSRCHEAGWLATTEFTITGVAAEGDFQ  
FRVSAINHFGQGPYLEFPGTMHLVPLAVKTPKAVEAVEGGEVTFVSDLTVASSGEWFLDGEALKASSIYVI  
RCDRTRHMLTIREVPARLHGAQLKVFVANGIETSIQMVVRAALGLPSSKLPAAAAAREVLAQLHEEAQLLAE LSD  
QAAAVTWLKDGRELSLGPKEYMQVSAGRRALLVRDVAQDDAGLYECVSRGSRRTAYQLLVQDITDGYRDWGPAG  
PQKHMCKCAGAKIARYLGSSCYRFLQYDKGVWHWEAALDTRQKGKTS SCSLHEKPKLVFAKQQAHSEVKA  
AGNSATLSCEVTQAQTEVTFWKDGKLS SSSSKVRMEASGCSRRLVVQQAGKADAGEYSCEAGGQKLSFRLDVA  
EPKLVFAKQQAHSEVKAEGASATLSCEVAQAQTEVTFWKDGKLS SSSSKVRMEASGCSRRLVVQQAGKADA  
GEYSCEAGGQKLSFRLDVAEPKLVFAKEQQARSEVKAEGASATLSCEVAQAQTEVTFWKDGKLS SSSSKVRM  
EASGCSRRLVVQQAGKADAGEYSCEAGGQKLSFRLDVTEPKLVFAKEQQARSEVKAEGNSATLSCEVAQAQ  
EVTWFKDGKLS SSSSKVRMEASGCSRRLVVQQAGKADAGEYSCEAGGQKLSFHLDVTEPKLVFAKEQQAHSEV  
KAEAGASATLSCEVAQAQTEVTFWKDGKLS SSSSKVRMEASGCSRRLVVQQAGKADAGEYSCEAGGQKLSFRL  
DVAEPKLVFAKEQQARSEVKAEGASATLSCEVAQAQTEVTFWKDGKLS SSSSKVRVEASGCSRRLVVQQAGK  
ADAGEYSCEAGGQKLSFRLDVAEPKLVFAKEQQANSEVKAEGASATLSCEVAQAQTEVTFWKDGKLS SSSSK  
VRVEASGCSRRLVVQQAGKADAGEYSCEAGGQKLSFRLDVAEPKLVFAKEQQAHSEVKAEGASATLSCEVAQ  
AQTEVTFWKDGKLS SSSSKVRVEASGCSRRLVVQQAGKADAGEYSCEAGGQKLSFRLDVAEPKLVFAKEQQAH  
SEVKAEGASATLSCEVAQAQTEVTFWKDGKLS SSSSKVRVEASGCSRRLVVQQVQKADAGEYSCEARGQKLS  
FRLDVAEAESQI PERPSRREPLVVKHEHETIILTATIAAPSVAAVWTLKDGVEIRRSKRHEATSLGDTHTLTVR  
GAQVLD SAIYSCRVGKEGQDFPVQVEEVTAKFSKPLEPVEGELGGTVMLVCELSPEQAEVWRCGNTQLRPGK  
RFQMTSEGPRTTLTVSGLREDDAEYVCE SRDDRTSARLTVKVRVVKFTSGLSAMVAEEGQEA TFQCVVSPS  
DAGVTWYKDGMLQ PSEKFMVESGASRSLTILGLTLEDAGQVTEAEGASSAALRVREAPVLFK KLEPQT  
VEERTSVTLEVELTRPWPEVKWTRNAAVLTPSENVEIRAEGARHCLVLRVSGFADRGFFGCETPDDKTQAKLN  
VEMRQVRLVRGLQEVEAKEQGTASMDVELSHAEEVGSWTRDGLRLQPGPKCHLAVQGPVHILTL SALQPQDSG  
LVAFRAEGVHTSARLIVTELPVSFTRVLQDVVATQKEKVTLECELSRPVDVRWLKDGVELRAGKAI GIVAQGT  
CRSLVIYRCIEMTDGQGVYVCDALDAQTSASLRVQGRYTLIFRRVLAEDAGEVKFVAENAESRAHLRVKELPVT  
LLRPLRDKIAMEKRVLECCQVSRASAQVRWFKGGVELQSGPKYEVVSDGLYRKLVLINDVQPEDEDTYTC DAG  
NVKTSAGQFFVEEQSITIVRGLKDMTVMPEPAPAWFECETSIPSVRPPKWL LGKTVLQAGGNVGLQDGTVHRLT  
LHKTCSTMTGPVHFTIGKSRSSAQLVVS DIPVVLTRPLEPKAGRELQSVVLSCDFRPAPKAVQWYKDDTPLSP  
SEKFKMALEGQMAELRILRLTPADAGVYRCQAGSAQSSAEVTVAREVTVIQPLQDAEAMEEGRVCFSCELSH  
KDEDIEWSLNGTPLYNDSFHEISHEGCLHTLVLKSVRQADTGTVCATSPKVSVSARLVVKGKPVVFLKALDDV  
SAEERGTTLTQCEVSDPEARVVWRKDGVELGPSDKYDFLHKAGARGLTVHDL SHEDAGLYTCQVGSKETQSKV  
SVHDLHVGITKRLKTVLEVLEGESCSFECVLSHESPSDPAVWTVGGKTVGGSGHFHAVRQGRKYTLTVKDAALS  
DAGEVVSFVLGLT SKASLIIRERPVDITKPLEDQRTTLGEDVMLSCELSRAGTSVRWLKDGKAIKRSQKYDLL  
SEGTRAVLVRKASLKDSGEYTCETEASKSTAKLCVEEKANRFTTEELADLQVEEKGRAVFTCKTEHPASVVTW  
RKGLLELRASGKHPVSEGLTLKLTINALERTSDTYTCDIGQARTQARLLVHGQKVRVIEDLEDTAVQEGSS  
AKFFCRIAPADYGPVHWF LDKTPLHSNELNETITVQPGYHVLT LRQLALKDSGTVYFEAGDQRTS AALRVTEK  
PSIFSRPLTDVTVTEGEDTLTVCE TTTVDSSVRWTKDGKTLRPSARCQLSHEGCAQLLITATTPQDGGRYKC  
EIGGASSSSIVRVHALPVRFRESLKDVEVPEGKAATLRCVLSVAAPVEWRHGDDVLKSSNKYSLRQEGAVLE  
LVIRDLPQDSGQYSCSFGDQTT SATLTVKTSQAQFVQKLNKEATEGTTVTLRCELTKEAPVEWKKGTETLR  
NGDKYSLKQDGAVCELQICSLLVADAGEYSCVCGQEKTSATLTVKALLVHFVRRRLRSKEATEGDTTLQCELS  
KAAPVEWRKGTETLRDGD RYSLKQDGAVCELQIRSLTIADAGEYLCTCGQEKTSATLTVRGLPAKFIEDLRSQ  
EATEGATAILRCELSKAAPVEWRK GSETLKDGD RYTLRQDGAVCELQIRGLAVVDGTGYSSLP TKFTEGLRNE  
EATEGTMATLRCQMSKAAPVEWRK GSETLRDGD RYSLRQDGAMCELQIRGLTIEDSGEYTCVCGQEKTSATLS  
VKALPPRFIEDLRSQEATEGTMATLRCQMSKAAPVEWRK GSETLGDGGRYSLRQNGAVCELQIHDLAVEDTGE  
YSCVCGQEKTSATLNVKALPPKFTEGLKKEEATEGTMVTLRCQMSKEATVEWRKGAKTLS DGGYSLRQDGAM  
CELQICGLAVEDAGEYSCVCGQEKTSATLSVKALPPRFIEDLRSQEATEGTMATLRCQMSKAAPVEWRK GSET  
LRDGD RYSLRQDGAVCELQIRDLAVEDAGEYLCVCGQEKTSATLSVKALPPRFIEDLRSQEATEGTMATLRCQ  
MSKAAPVEWRK GSKTLR DGD RYSLRQDGAMCELQICDLAVEDTGDYSCVCGQEKTSATLSVKAPQVVFQOPLQ  
NLQAEEGSMASLRCELSVPNAAMVWSKGGLELQGDTRREARQQGCVAELLLRDLRREDAGEYSCTCGSQTTSA  
TLMVTAAPVRFRLRELQAQDVDEGATARLRCELSREAVSVEWRKGS LQFLPCAQYQMVQEGTTAELLVHGVEQE  
DAGEYTC DAGHTQSIARLSVRAPKPKFKTDLQSTEQEAGGTARLCCQLSEAE PGTPVQWLKEGVELHVGSKYE  
MRRQGA VCELLIHGLEAKDTGEYACL VGGQKTLASLRVKEPEVTIVRGLVDMEVQADEDEVEFTCKV SQAGATD  
VQWHLQGLPLOSNEVTEVAVLADGCTHV LQLKGVTLLEDAGTVSFHVGGLS SQAQLTVRVPVETVLEPLKDVQL  
SEGQDAHFRCRLSRASGQEARWALGGVPLQC NEMNDITVEQGTLYLLTLHKVTLLEDAGTITLQVGS CSSEAAQL  
KVTAKNTVLRGL ENVDAL EGGEALFECQLSQPEVAHTWLLDDEPVHTSEKVEVYFENGLRHLLLLKLNKLPQ  
DSCRVTFLAGDVVTS AFLTVRGWRLEVLEPPHDASVKAGMQVRF TCILSEAVPVGEATWYINGAAIQPDDTDW  
TVTTD GSHHALTLSNAQPQHAGEVTF AARDAVASARLSVLALPDPPEDAEVVGRSDHSVTLWSVAPMSDGGGG  
LCGYRVEMKEASTGQWQLCHDLVPGPECVVDDLVP GKTYRFRVAAVGPAGAGEPVHLPQMVKIAPAPAPAP

APAPETRQAVVGEDICLELEVAADGGEVVWHKGTERRIQPGGHFEVLSRGRQMLVIKGFRTEDQGEYRCGPIQ
GLPSSGAATFNVVMTSGSGDEVPAQPSLPPEAAQEGDLHLLWEALARKRRMSREPTLDSISELPEEDSRVQHL
RQEAETAPDLSEGYSTADELARTGEADLSHTSSDDESRAGTPSLVTYLKKAGGPGISPLASKHEAQVTTSVK
PQKQQEPVVPTCPPPGDLSAADLMDPSLDKAAVKIQAAFKGYKVRKEMKQQEGPVFSRTFGDTEAQVGDVLR
ECVLATKTKDMRACWLKDGIELTDGRHYHIDQLKDGTCSSLVTGLAPTDSGRYTCQVSTKSGRVSHSACVVVSG
TESEAESSSGGELDDAFRRARRLHRLFRTKSPAELSEELFSLADEGPGPEEPADWQTYREDENFVCIRFE
SLAEARQAVTCFRNMFATMGIGVEISLGEQGRGVEMRIGKVAPTVTPAVPLAKTPGLQTSDAAPVFLTELQN
QDVQDGYPMSFDCVVTGQPVPVSRWFKDGKLLLEEDDHYMINEDQQGGHQLIITAVVPADMGVYRCLAENSMGV
SSTKAELRVELTSTDYDTAADATETSSYFSAQGYLSSREQEGTESDEGQLPQVLEELKDLQVAPGTRLAKFQL
KVKGYPAKLYWFKDGQPLTTSDHIRMTDKKTLHTLEIVSVTREDSGQYAAAYISNAVGAAYSSARLLVGRPSE
PEEKPASDVHERLVPVPRILEKFTPKKVKRGSSITFSVKVEGHPAPSVHWLKEEAKEGVLWIGPDPGTYTMAS
SKQHSVLVLDVGRQHOGTYTCIATNPAGQALCSASLHISGLAKEEEQERVKEALISSFLOGTSQAVSAQMSSES
AGFADLVGQSKGESLVAEEAHSHLSLAEVGTTEFLQKLTSTQITEMVSAKISQAKLQVPGGDSDEETKTPSASP
RHGRSRPSSSVQESSSESEDGDSRGEIFDIYVVTADYLP LGAEQDAIILREGQYVEVLDSAHPLRWLVRTKPT
KSSPSRQGWVSPAYLDKRLKLSPEWGPTEAPEFPGEAVSEDEYRTRLSSVIQELLSSEQAFVGGELQFLESHM
KHLERSPRVPAAVASQKTVI FRNVQDISHFHSSFLKELQCGCTDDVAMCFIKNQEAFAFEKYLEFLVGRVQAES
VVVSTFPVQEFYKKYAEETLSAKDPTQPPPPPLQHYLEQPVERVQKYQALLKELIRNKARNRNCALLEQAYAV
VSLPQRAENKLVHSLMENYPGTLEALGEP IRQGHFIVWEGAPGARMWPKGHNRHVFLFRNYLVICKPRRDSR
TDTFSYVFRNMMKLSSIDLNDQVEGDDRAFEVWHEREDESVRKYLLQARTVIKNSWVKEICGIQQRLAQPVWR
PPEFEEELADCTAELGETVKLACRVGTGPKPIVSWYKDGKPVVEVDPHHILIEDPDGSCSTLIDLNLTGIDSGQY
MCFASAAGNASTLGKILVQVPPRFVNKVRATPFVEGEDAQITCTVEGAPYPQIRWYKDGTLAPGNRYRMLN
EPRSGVLVQVIAASKEDLGHYECLELVNRLGSTRGGGELYMQSPALRARDQHHREQIVAAVEVTEQETKVPKK
TVIIEETITTVVKS PRGRRQSPGKSPSRSPRRSASPRRPGLLAPERLYPPGTS PSRRLEVEQGRKAPVPALY
VTEAEVHAPASQSQPKWLEVEETIEVRVKKTGSRGASPVREMTSRGEGILFTLPGGIPGRDPNANNSNKS SVY
QEARTWGPVAVHVGEFFIFQVDSVGNVDWVAASPEPEQVRASQKEENTERQEGCSDGDENTFLMEEPQD TDSL
QGRDPKILTHNGRVLTLADLEDYVPOEGETF GCGDSTPSTPDEPPCEVSVLQREI SEPTVGGQVLLNVGRPPG
TGATPSFFRPGSQVHSPESVFLFREAWSGPVSAAPWTSSFHTHVQSSVDGSHGFSFKTEVSTQTVSFGAVGET
VTLHIDPDGGEAPGPSQG\*

>rs48519378\_ENSMUSP00000158795\_c.5122:G>A\_p.S1708N
ENSMUST00000238536.2|Obscn-210|ENSMUSG00000061462|-|chr11:g.58990725:C>T
MDHSFSGAPRFLTRPKAFVSVGKDATLSCQIVGNPTPHVSWEKDRQFVEAGARFRLAQDGDVYRLTILDLAL
GDSGQYVCRARNAIGEAFAAVGLRVDSEGTCAEQAPHLLRPTSIRVREGADATFRCRVGGSPPAVSWSKDG
RRLGPPDAPHVRVEEHGESSALRIR SARPRDGGTYEVRAENPLGSASAAAAALVVDSDAEVAGPPGTSTATLLA
HLQORREAMRAEGIPPSPPGAGTRTCTVTEGKHARLSCFVTGEPKPEVWKKDGQLVTEGRRHVVEDEQENF
VLKILFCKQSDRGLYTCTASNLVGQTYSSVLVVVREPTVFPKKRLQDLEVREKESATFQCEVAQPAEAAWFK
EETRLWASAKYDIEEEGTERRLTVRNVSADDDAVYICETTEGSRVVAELSVQGNLTKLPRKTAVRTGDTAIF
WVELAVPEGPVRWLRNQEEMVAGGRVAITAEGTCHTLTI FQCTLEDMGEVAFVSGGCRTTTQFCVSAPRRPPL
YPPADPVVKAKTESSVTLWSAPPHGDRPVTIDGYVLEKRKLGAYAWSRCHEAGWLATTEFTITGVAAEEDFQ
FRVSAINHFGQGPYLEFPGMTMLVPLAVKTPKAVEAVEGGEVTFVSDLTVASSGEWFLDGEALKASSIYVI
RCDRTRHMLTIREV PARLHGAQLK FVANGIETS IQMVVRAALGLPSSKLPAAAAREVLAQLHEEAQLLAE LSD
QAAAVTWLKDGRELSLGPKEYMQVSAGRRALLVRDVAQDDAGLYECVSRGSR TAYQLLVQDITDGYRDWGPAG
PQKHMCKCAGAKIARYLGS SCYRFLQYDKGVWHLEAALDTRQKGKTS SCSLHEKPKLVFAKQQAHSEVKA E
AGNSATLSCEVTQAQTEVTWFKDGKLLSSSSKVRMEASGCSRRLVVQQAGKADAGEYSCEAGGQKLSFR LDVA
EPKLVFAKQQAHSEVKA EAGASATLSCEVAQAQTEVTWFKDGKLLSSSSKVRMEASGCSRRLVVQQAGKADA
GEYSCEAGGQKLSFR LDVAEPKLVFAKEQQARSEVKA EAGASATLSCEVAQAQTEVTWFKDGKLLSSSSKVRM
EASGCSRRLVVQQAGKADAGEYSCEAGGQKLSFR LDVTEPKLVFAKEQQARSEVKA EAVGNSATLSCEVAQAQ
EVTWFKDGKLLSSSSKVRMEASGCSRRLVVQQAGKADAGEYSCEAGGQKLSFR LDVAEPKLVFAKEQQARSEV
KAEAGNSATLSCEVAQAQTEVTWFKDGKLLSSSSKVRMEASGCSRRLVVQQAGKADAGEYSCEAGGQKLSFHL
DVTEPKLVFAKEQQAHSEVKA EAGASATLSCEVAQAQTEVTWFKDGKLLSSSSKVRMEASGCSRRLVVQQAGK
ADAGEYSCEAEGQKLSFR LDVAEPKLVFAKEQQARSEVKA EAGASATLSCEVAQAQTEVTWFKDGKLLSSSSK
VRVEASGCSRRLVVQQAGKADAGEYSCEAGGQKLSFR LDVAEPKLVFAKEQQANSEVKA EAGASATLSCEVAQ
AQTEVTWFKDGKLLSSSSKVRVEASGCSRRLVVQQAGKADAGEYSCEAGGQKLSFR LDVAEPKLVFAKEQQAH
SEVKA EAGASATLSCEVAQAQTEVTWFKDGKLLSSSSKVRVEASGCSRRLVVQQAGKADAGEYSCEAGGQKLS
FR LDVAEPKLVFAKEQQAHSEVKA EAGANATLSCEVAQAQTEVTWFKDGKLLSSSSKVRVEASGCSRRLVVQQ
AGKADAGEYSCEAGGQKLSFR LDVAEPKLVFAKEQQAHSEVKA EAGASATLSCEVAQAQTEVTWFKDGKLLSS
SSKVRVEASGCSRRLVVQQAGKADAGEYSCEAGGQKLFRLDVAEPKLVFAKEQQAHSEVKA EAGASATLSCE
VAQAQTEVTWFKDGKLLSSSSKVRVEASGCSRRLVVQQAGKADAGEYSCEAGGQKLSFR LDVAEPKLVFAKEQ
QAHSEVKA EAGASATLSCEVAQAQTEVTWFKDGKLLSSSSKVRVEASGCSRRLVVQQVQKADAGEYSCEARGQ

KLSFRLDVADTRLMFAKEQQARTEVKAEAGNSATLSCEVAQAQTEVTWFKDGKLLSSSSKVRVEASGCSRRLV  
VQQAGKADAGEYSCEAGGQKLSFRLDVAEAEESQIPERPSRREPLVVKEHETIILTATIAAPSVAAVTLKDG  
EIRRKRHEATSLGDTHTLTVRGAQVLDIAIYSCRVGKEGQDFPVQVEEVAAKFSKPLEPVEGELGTVMLVC  
ELSPQAEVWRCGNTQLRPGKRFQMTSEGPRRTLTVSGLREDDAEYVCESTRDDRTSARLTVKVPVVKFTS  
GLSAMVAEEGQEATFQC VVSPSDAGVTWYKDGMLQPSKFKVMVESGASRSLTILGLTLEDAGQVTVAEAGAS  
SSAALRVREAPVLFKKKLEPQTVEERTSVTLEVELTRPWPEVKWTRNAAVLTPSENVEIRAEGARHCLVLRV  
GFADRGGFFGCETPDDKTQAKLNVEMRQVRLVVRGLQVEEAKQGTASMDVELSHAEEVEGSWTRDGLRLQPGPKC  
HLAVQGPVHILTLALQPDQSLVAFRAEGVHTSARLIVTELPVSFTRVLQDVVATQKEKVTLECELSRPVDV  
RWLKDGVELRAGKAIQIVAQGTCRSLVIYRCETGDQGVYVCDALDAQTSASLRVQGRTYTLIFRRVLAEDAGE  
VKFVAENAESRAHLRVKELPVTLLRPLRDKIAMEKHRGVLECCQVSRASQVRWFKGGVELQSGPKYEVVSDGL  
YRKLVINVDQPEDEDTYTC DAGNVKTSAQFFVEEQSITIVRGLKDMTVMEPAPAWFECETSIPSVRPPKWL  
KTVLQAGGNVGLQDGTVHRLTLHKTCSTMTGPVHFTIGKSRSSAQLVSDIPVVLTRPLEPKAGRELQSVVL  
SCDFRPAPKAVQWYKDDTPLSPSEKFKMALEGGQMAELRILRLTPADAGVYRCQAGSAQSSAEVTVAREVTVI  
QPLQDAEAMEEGRVCFSCELSHKDEDIEWSLNGTPLYNDSFHEISHEGCLHTLVLSVRQADTGTVCATSPKV  
SVSARLVVKGKPVVFLKALDDVSAEERGTTLTQCEVSDPEARVWVRKDGVELGPSDKYDFLHKAGARGLTVHD  
LSHEDAGLYTCQVGSKETQSKVSVHDLHVGITKRLKTVEVLEGESECSFECVLSHESPSDPAVWTVGGKTVGGS  
GHFHAVRQGRKYTLTVKDAALSDAGEVVFVGLTSLKASLIIRERPVDTITKPLEDQRTTELEDVMLSCELSRA  
GTSVRWLKDGKAIRKSQKYDLLSEGTAVLVVRKASLKDSEYTCETEASKSTAKLCEVEKANRTEELADLQ  
VEEKGRAVFTCKTEHPASVVTWRKGLLELRASGKHVPSQEGTLTKLTINALERTSDTYTCDIGQARTQARLL  
VHGQKVRVIEDLEDTAVQEGSSAKFCRIAPADYGPVHWFLLDKTPLHSNELNEITVQPGGYHVLTLRQLALKD  
SGTVYFEAGDQRTSAALRVTEKPSIFSRPLTDVTVTEGEDTLVCE TTTVDSSVRWTKDGKTLRPSARCQLSH  
EGCQAQLLITATTPQDGGRYKCEIGGASSSSIVRVHALPVRFRESLKDVEVPEGKAATLRCVLSVAAPVEWR  
HGDDVLKSSNKYSRQEGAVLELVIRDLQPDQSGQYSCSFGDQTTSATLTVKTSQAQFVGLRNKEATEGTTV  
TLRCELTKAPVEWKKGTETLRNGDKYSLKQDGA VCELQICSLLVADAGEYSCVCGQEKTSATLTVKALLVHF  
VRLRSKEATEGDTTLQCELSKAAPVEWRKGTETLRDGDYSLKQDGA VCELQIRSLTIADAGEYLCTCGQE  
KTSATLTVRALPAKFKDLSLKNEEATEGTTATLSCELSKAAPVTWKKGPKTLQSGDKYVLRQDGA VCGLIHGL  
TMADAGEYSCVCGQEKTSATLTVRGLPAKFIEDLRSQEAETEGATAILRCELSKAAPVEWRKGETLKDGDYR  
LRQDGA VCELQIRGLAVVDGTYSLSLPTKFTTEGLRNEEATEGTMATLRCQMSKAAPVEWRKGETLKDGDYR  
LRQDGA MCELQIRGLTIEDSGEYTCVCGQEKTSATLSVKALPSRFIEDLRSQEAETEGTMATLRCQMSKTAPVE  
WKKGSETLRDGGRYSLRQDGPVCELQICDLAVEDAGEYSCVCGQEKTSATLSIKALPPRFIEDLRSQEAETEGT  
MATLRCQMSKAAPVEWRKGETLGDGGRYSLRQNGAVCELQIHDLAVEDTGEYSCVCGQEKTSATLNVKALPP  
RFIEDLRSQEAETEGTMATLRCQMSKAAPVEWRKGETLRDGGRYSLRQDGA VCELQIHDLVEDAGQYSCVCG  
QEKTSAVLTVDALPPKFTTEGLKKEEATEGTMVTLRCQMSKEATVEWRKGAKTSLDGGRYSLRQDGA MCELQIC  
GLAVEDAGEYSCVCGQEKTSATLSVKALPPRFIEDLRSQEAETEGTMATLRCQMSKAAPVEWRKGETLRDGD  
YSLRQDGA VCELQIRDLAVEDAGEYLCVCGQEKTSATLSVKALPPRFIEDLRSQEAETEGTMATLRCQMSKAAP  
VEWRKGETLRDGDYSLRQDGA MCELQICDLAVEDTGDYSCVCGQEKTSATLSVKALPPRFIEDLRSQEA  
GTVATLRCRMSKAAPVEWRKGETLKDGDYSLRQEGNLCELQIRDLAVEDTEEYSCVCGQEKTSATLSVKAL  
PAKFIEDLRSQEAEPESSTVTLRCKLSKKASVVWKKGSETLRNGARYSLRQDGA VCELEIRDLTVEDTGEYSCT  
CGQERTSATLSIMAPQVVFQQPLQNLQAEEGSMASLRCELSVNAAMVWSKGGLELQGDTRREARQQGCVAEL  
LLRDLRREDAGEYSCVCGQEKTSATLMVTAAPVRFLRELQAQDVDEGATARLRCELSREAVSVEWRKGLQLF  
PCAKYQMVQEGTTAELLVHGVEQEDAGEYTC DAGHTQSIARLSVRAPKPKFKTDLQSTEQEAAGGTARLCCQLS  
EAEPTGPVQWLKEGVELHVGSKYEMRRQGA VCELLIHGLEAKDTGEYACLVGQKTLASLRVKEPEVTIVRGL  
VDMEVQADEDEFTCKVQAGATDVQWHLQGLPLQSNVTEVAVLADGCTHVLLQKGVTLLEDAGTVSFHVGGL  
SSSAQLTVRVPEVTVLEPLKDVQLSEGQDAHFRCRLSRASGQEARWALGGVPLQCNEMNDITVEQGTLYLLTL  
HKVTLEDAGTITLQVGSSEEAQLKVTAKNTVLRGLENVDALEGGALFECQLSQPEVAHAHTWLLDDEPVHTS  
EKVEVVYFENGLRHLLLLKLNLPQDSCRVTFLAGDVVTS AFLTVRGWRLEVLPEPHDASVKAGMQVRFCTILS  
EAVPVGEATWYINGAAIQPDDTDWTVTTDGS HALTLSNAQPQHAGEVTF AARDAVASARLSVLALPDPEDA  
EAVGRSDHSVTLSSWVAPMSDGGGGLCGYRVMKEASTGQWQLCHDLVPGPECVDDLVPGKTYRFRVAAVGPA  
GAGEPVHLPQMVKIAPAPAPAPAPAPAPAPETRQAVVGEDICLELEVAADGGEVWVKGTERIQPGHFVLS  
RGQRQMLVIKGFRTEDQGEYRCGPIQGLPSSGAATFNVMVMTSGSGDEVPAQPSLPPEAAQEGDLHLLWEALAR  
KRRMSREPTLDSISELPEEDSRVQHLRQEAEEETAPDLSEGYSTADELARTGEADLSHTSSDDES RAGTPSLVT  
YLKAGGPGISPLASKHEAQVTTSVKPKQKQEPVPTCPPPGDLSAADLMDPSLDKAAVKIQA AFKGYKVRKE  
MKQQEGPVFSTRTFGDTEAQVGDVLRLECVLATKTD MRACVLDKGIELTDGRHYHIDQLKDGTCSSLVTVGLAPT  
DSGRYTCQVSTKSGRVSHSACVVVSGTESEAESSSGGELDDAFRAARRLHRLFRKSPAEELSEELFLSADE  
GPGPEEPADWQTYREDENFVCIRFESLAEARQAVTCFRNMFATMIGVEISLGEQGGPRVEMRIKGVAPT  
PAVPLAKTPGLQTS DAAPVFLTELQNDQVQDGYPMSFDCVVTGQPVPSVRWFKDGKLEEDDHYMINEDQGGG  
HQLIITAVVPADMGVYRCLAENSMGVSSTKAELRVELTSTDYDTAADATETSSYFSAQGYLSSREQEGTESDE  
GQLPQVLEELKDLQVAPGTRLAKFQLKVKGYPAKLYWFKDGQPLTSDHIRMTDKKTLHTLEIVSVTREDSG

QYAAYSNAVGAAYSSARLLVRGPSEPEEKPASDVHERLVPPRI LEKFTPKKVKRGSSITFSVKVEGHPAPSV  
HWLKEEAKEKGLVLIWGPDTPGYTMASSSKQHSVLVLDVGRQHOGTYTTCIATNPAGQALCSASLHISGLAKEEEQ  
ERVKEALISSFLOGTSQAVSAQMSEASAGFADLVGQSKGESLVAEEAHSHLSLAEVGTTEEFLQKLTSTQITEMVS  
AKISQAKLQVPGGDSDEETKTPSASPRHGRSRPSSSVQESSSESEEDGDSRGEIFDIYVVTADYLLPLGAEQDAI  
ILREGQYVEVLDSAHPLRWLVRTKPTKSSPSRQGWVSPAYLDKRLKLSPEWGPTEAPEFPGEAVSEDEYRTRL  
SSVIQELLSSEQAFVQELQFLESHHMKHLERSPRVPAAVASQKTVIFRNVQDISHFHSSFLKELQCGCTDDDDV  
AMCFIKNQEAFAKEYLEFLVGRVQAESVVVSTPVQEFYKKAEEETLSAKDPTQPPPPPLQHYLEQPVVERVQKYQ  
ALLKELIRNKARNRQNCALLEQAYAVVSALPQRAENKLVHSLMENYPGTLEALGEPTRQGHFIVWEGAPGARM  
PWKGHNHRHVFLFRNYLVICKPRRDSRTDTFSYVFRNMKLS SIDLNDQVEGDRAFEVWHEREDSVRKYLLQA  
RTVI IKNSWVKEICGIQORLAQPVWRPPEFEEELADCTAELGETVKLACRVTGTPKPIVSWYKDGKPVVDPH  
HILIEDPDGSCCTLILDNLTGIDSGQYMCFAASAAGNASTLGKILVQVPPRFVNVKVRATPFVEGEDAQITCTVE  
GAPYPQIRWYKDGTLAPGNRYRMLNEPRSGVLVLIQAASKEDLGHYECELVNRLGSTRGGGELYMQSPALR  
ARDQHHREQIVAAVEDTSVEGSAHSAQDQADQQAASVLWRLLGSEALGPS PGDLPNTRQSEPPAFEEAASQIP  
GAASGTPEVSPGTHKLEQETSSSGSQGWTPVIRVEGTAWPGAGTGQLLLDVHSQVIMETTQRTYVCOQAPDT  
GVTRAPSMQVTIEDVQVQVGDMAQFDAVIEGHPPPIVTVWYKGSTQLTSSARLSQRQDGTYSVLVTDVAPHDA  
GVYTCVANNAGGQVLCKAELLVHGGDKLDAENQVYRRLKLSHFYDVQEEIGRGVFGFVKRVQHKGNKMFCAAKF  
IPLRSKTRAQAYQERDILATLGHPLVTGLLDQFETRKTLLIILELCSSEELLDRLFKKGVVTEAEVNVYIQQL  
VEGLHYLHSHGILHLHDIKPPNLLMVHPAREDIKICDFGFAQKITPSEFPQYSKYGSPEFVSPETIEQNPVSEGS  
DIWAMGVISYLSLTCSSPFAGESDRATLLNVLEGRVSWSSPTAAHLSSEDAKDFIKATLQRTPRARPSTSQCLA  
HPWFLKSMFAEEAHFINTKQLKFLARSRWQRSLMSYKSI LVMRSIPELLQGPPDPSPLGVARHLRGEASGAS  
SSSSSDNELAPFARAKSLPPSPVTHSPLLHPRGFLRPSASLPEETEASMP TADA AVPAS PQSAGPPASPGCV  
PRHSVISSLFYQQAGEGAERGNKTS GAKRHPARRRHLLKGGYIARALPGLREPLMEYSLLEEEAAREEQASLM  
TKTPSFETALRLPSSSVREVPGRSHSLDNPPVTTGPSPEACKEQLLFPSTGLTHETTAKDRGHKEGFLQESV  
PFPPMSGDSRPGKQEGSSQDSCRGKPASSCHSELGSGSQEGCGPPSSQSLGSLPPQSLKELSTSCGPLFSEQ  
PQAAPFPTQVSPLLGSEKEPQDGSLEGPVVPVSSSPGASQVDASLDTEGLSEAGDTCDFTPPPQRPQEQAT  
TRKFSLESRGGYAGVAGYGTFAFGGDAGGMLGQPLWARMWAVS QSSEEQDEAATESPQPLESLGPIAEASG  
VPLRTSPSLTPWEEVEQVSLVQIRDLSGDAEAADTISLDISEVDPAYLNLSDLYDIKYLPEFEMIFRRVPKPI  
EQPESPGSETEAGQGLADFLLEAAWPWPGELGLRAGLEITEEPEEPGDLEALLGEAAVGRKRKWSPSRGLFQF  
PGRCLS GEEPVELGLRQRVKASMAHISRI LKGRPEGPEREPPRKKAGLASFRLSGLKGRDQELSDEAVVLGQ  
SVTLACQVLAQPTAQATWSKDGVLLESSGHLIISSTLKNFQLLTI LVVKEEDLGTYTCCVSNPLGTAVTTGVL  
RKAERPSSSPRPEVGELYKDAVLLVWKPVESECGPVTVIVQCCIEGGSWTTLASDISDCCYLTGKLSRGGMYIF  
RTACVSKAGMGPYSSPSEQVLLGGPNHLASEEESRGRPAQLLPSTKTFAFQMQIRRRGFSVVRQCREKASGR  
ALAAKIVPYQPEDKTA VLREYEAALKRHLHPLHAQLHAAYLSPRHLVLI LELCSGPELLPSLAERESYSESDVK  
DYLWQMSATQYLVHAQHILHLDLRSENMMVTEYNLLKVIDLGNALDQEKVPAPENFKDYLETMAPELLEGQ  
GAVPQTDIWAIGVTAIFIMLSGEY PESSSEGRDLQKGLRKLGLIRLSRCYAGLSGGAVAFLOSSLCAQPWGRPCA  
STCLQCGWLTTEEGTGSRPTPVTFPTVRLRAFVREKRRALLYKHNLAQVR\*

>rs48519378\_ENSMUSP00000038264\_c.4846:G>A\_p.S1616N  
ENSMUST00000047441.14|Obscn-202|ENSMUSG00000061462|-|chr11:g.58990725:C>T  
MDHSFSGAPRFLTRPKAFVSVGKDATLSCQIVGNPTPHVSWEKDRQPV EAGARFRLAQDGDVYRLTILDLAL  
GDSGQYVCRARNAIGEAFAAVGLRVDSEGTCAEQAPHLLRPTSIRVREGADATFRCRVGGSPPAVSWSKDG  
RRLGPPDAPHVRVEEHGESSALRIRSARPRDGGTYEVRAENPLGSASAAAALVVDSDAEVAGPPGTSTATLLA  
HLQORREAMRAEGIPPSPPGAGTRTCTVTEGKHARLSCFVTGEPKPEVWKKDGQLVTEGRRHVVEDEQENF  
VLKILFCKQSDRGLYTCTASNLVGQTYSSVLVVVREPTVPFKKRLQDLEVREKESATFQCEVAQPA TEAAWFK  
EETRLWASAKYDIEEGETERRLTVRNVSADDDAVYICETTEGSRVAELSVQGNLTKRLPRKTAVRTGDTAIF  
WVELAVPEGPVRWLRNQEEMVAGGRVAITAEGTCHTLTI FQCTLEDMGEVAFVSGGCRTTTQFCVSA PRRPPL  
YPPADPVVKAKTESSVTL SWSAPPHGDRPVTIDGYVLEKRKLGA YAWSRCHEAGWLATTEFTITGVAAEEDFQ  
FRVSAINHFGQGPYLEFPGMTMLVPLAVKTPKAVEAVEGGEVTFVSDLTVASSGEWFLDGEALKASSIYVI  
RCDRTRHMLTIREV PARLHGAQLK FVANGIETS IQMVVRAALGLPSSKLPAAAAREVLAQLHEEAQLLAE LSD  
QAAA VTWLKDGRELSLGP KYEMQVSAGRRALLVRDVAQDDAGLYECVSRGSR TAYQLLVQDITDGYRDWGPAG  
PQKHMCKCAGAKIARYLGSSCYRFLQYDKGVWHWLEAALDTRQKGKTS SCSLHEKPKLVFAKQQAHSEVKA E  
AGASATLSCEVAQAQTEVTFWKDGKLLSSSSKVRMEASGCSRRLVVQQAGKADAGEYSCEAGGQKLSFRLDVA  
EPKMVFAKEQQARSEVKA EAGASATLSCEVAQAQTEVTFWKDGKLLSSSSKVRMEASGCSRRLVVQQAGKADA  
GEYSCEAGGQKLSFRLDVTEPKLVFAKEQQARSEVKA EAGVNSATLSCEVAQAQTEVTFWKDGKLLSSSSKVRM  
EASGCSRRLVVQQAGKADAGEYSCEAGGQKLSFRLDVAE PKLVFAKEQQARSEVKA EAGNSATLSCEVAQAQ  
EVTWFKDGKLLSSSSKVRMEASGCSRRLVVQQAGKADAGEYSCEAGGQKLSFRLDVTEPKLVFAKEQQARSEV  
KAEAGASATLSCEVAQAQTEVTFWKDGKLLSSSSKVRMEASGCSRRLVVQQAGKADAGEYSCEAGGQKLSFRL  
DVAE PKLVFAKEQQARSEVKA EAGASATLSCEVAQAQTEVTFWKDGKLLSSSSKVRMEASGCSRRLVVQQAGK  
ADAGEYSCEAGGQKLSFRLDVAE PKLVFAKEQQANSEVKA EAGASATLSCEVAQAQTEVTFWKDGKLLSSSSK

VRVEASGCSRRLVVQQAGKADAGEYSCEAGGQKLSFRLDVAEPKLAFAKEQQAHSEVKAEAGASATLSCEVAQ
AQTEVTFWKDGGKLSSSSSKVRVEASGCSRRLVVQQAGKADAGEYSCEAGGQKLSFRLDVAEPKLAFAKEQQAH
SEVKAEAGANATLSCEVAQAQTEVTFWKDGGKLSSSSSKVRVEASGCSRRLVVQQAGKADAGEYSCEAGGQKLS
FRLDVAEPKLAFAKEQQAHSEVKAEAGASATLSCEVAQAQTEVTFWKDGGKLSSSSSKVRVEASGCSRRLVVQQ
AGKADAGEYSCEAGGQKLSFRLDVAEPKLVFAKEQQAHSEVKAEAGASATLSCEVAQAQTEVTFWKDGGKLS
SSKVRVEASGCSRRLVVQQVQKADAGEYSCEARGQKLSFRLDVAEAEESQIPERPSRREPLVVEKHETIILTAT
IAAPSVAAVTWLKDGVIEIRRSKRHEATSLGDTHLTVRGAQVLDIAIYSCRVGKEGQDFPVQVEEVAAKFSKP
LEPVGELGGTVMLVCELSPEQAEVWVRCGNTQLRPGKRFQMTSEGPRTTLTVSGLREDDAEYVCESRDDRT
SARLTVKVPVVKFTSGLSAMVAEEGQEAFTQCVCVSPSDAGVTWYKQDGMQLQPSSEKFMVMEVSGASRSLTILGL
TLEDAGQVTVAEAGASSAALRVREAPVLFKKKLEPQTVVEERTSVTLEVELTRPWPEVKWTRNAAVLTPSENV
EIRAEGARHCLVLRVSGFADRGFFGCETPDDKTQAKLNVEMRQVRLVLRGLQEVEAKEQGTASMDVELSHAEVE
GSWTRDGLRQLQPGPKCHLAVQGPVHILTLTSLALQPQDSGLVAFRAEGVHTSARLIVTELTPVSTFRVLQDVVATQ
KEKVTLECELSRPVDVRLKDGVELRAGKAI GIVAQGTCSRSLVIYRCETGDQGVYCDALDAQTSASLRVQGR
TYTLIFRRVLAEDAGEVKFVAENAESRAHLRVKELPVTLLRPLRDKIAMEKHRGVLEQCQVSRASQVRFWFKGG
VELQSGPKYEVVSDGLYRKLVINQVPEDEDTYTCDAGNVKTSAQFFVEEQSITIVRGLKDMTVMEPAPAWFE
CETSIPSVRPPKWLKKTVLQAGGNVLEQDGTVHRLTLHKTCSTMTGPFVHFTIGKSRSSAQLVVSDIPVVLT
RPLEPKAGRELQSVVLSCDFRPAPKAVQWYKDDTPLSPSEKFKMALEGQMAELRILRLTPADAGVYRCQAGSA
QSSAEVTVAEAEVTVIQPLQDAEAMEEGRVCFSELSHKDEIDIEWSLNGTPLYNDSFHEISHEGHLRHLVLS
VRQADTGTVCATSPKVSVSARLVVKGKPVVFLKALDDVSAEERGTTLQCEVSDPEARVVWRKDGVELGPSDK
YDFLHKAGARGLTVHDLSDHEDAGLYTCQVGSKETQSKVSVHDLHVGITKRLKTVEVLEGESECFEVLVSHESP
SDPAVWTVGGKTVGGSGHFHAVRQGRKYTLTVKDAALSDAGEVVFVGLTTSKASLIIRERPVDITKPLEDQR
TTLGEDVMLSCELSRAGTSVRWLKDGKAIKRSQKYDLLSEGTRAVLVVRKASLKDSGEYTCETEASKSTAKLC
VEEKANRFTEELADLQVEEKGRAVFTCKTEHPASVVTWRKGLLELRASGKHVPSQEGTLTKLTINALERTDSD
TYTCDIGQARTQARLLVHGQKVRVIEDLEDTAVQEGSSAKFCCRIPADYGPVHWFLDKTPHLSNELNEITVQ
PGGYHVLTLRQLALKDSGTVYFEAGDQRTSAALRVTEKPSIFSRPLTDVTVTEGEDTLVCEVTTVDSSVRWT
KDGKTLRPSARCPQLESHGCAQLLITATTPQDGGRYKEIGGASSSSIVRVHALPVRFRESLTKDVEVPEGKAA
TLRCVLSVVAAPVLRHGDVLSKSNKYSLRQEGAVLELVIIRDQLQPDQSGQYSCSFGDQTTSATLTVKTSQAQ
FVGLKRNKEATEGTTVTLRCELTKEAPVEWKKGTETLRNGDKYSLKQDGAVCELQICSLLVADAGEYSCVCGQ
EKTSATLTVKALLVHFVRRRLRSKEATEGDTTTLQCELSKAAPVEWRKGTETLRDGDYSLKQDGAVCELQIRS
LTIADAGEYLCTCGQEKTSATLTVRALPAKFKDSLKNEEATEGTTATLSCELSKAAPVTWKKGPKTLQSGDKY
VLRQDGAVCGLQIHGLTMADAGEYSCVCGQEKTSATLTVRGLPAKFIEDLRSQEATEGATAILRCELSKAAPV
EWRKGSETLTKDGDYTLRQDGAVCELQIRGLAVVDTGTYSPLTKFTEGLRNEEATEGTMATLRCQMSKAAPV
EWRKGSETLRDGDYSLRQDGAMCELQIRGLTIEDSGEYTCVCGQEKTSATLSVKALPPRFIEDLRSQEATEG
TMATLRCQMSKAAPVEWRKGSETLGDGGYSLRQNGAVCELQIHDLAVEDTGEYSCVCGQEKTSATLNVKALP
PRFIEDLRSQEATEGTMATLRCQMSKAAPVEWRKGSETLRDGGYSLRQDGAVCELQIHDLVEDAGYSCVC
GQEKTSAVLTVDALPPKFTEGLKKEEATEGTMVTLRCELSKMSKEATVEWRKGAKTLDGGYSLRQDGAMCELQI
CGLAVEDAGEYSCVCGQEKTSATLSVKALPPRFIEDLRSQEATEGTMATLRCQMSKAAPVEWRKGSKTLRDGD
RYSLRQDGAMCELQICDLAVEDTGDYSCVCGQEKTSATLSVKAPQVVFQQLQNLQAEEGSMASLRCELSVFN
AAMVWSKGGLELQGDTRREARQQGCVAELLLRDLRREDAGEYSCVCGQEKTSATLMVTAAPVRFRLRQADV
DEGATARLRCELSREAVSVEWRKGSLLQFPKAKYQMVQEGTTAELLVHGVEQEDAGEYTC DAGHTQS IARLSV
RAPKPKFKTDLQSTEQEAGGTARLCCQLSEAEPTPVQWLKEGVELHVGSKYEMRRQGAVCELLIHGLEAKDT
GEYACLVGQKTLASLRVKEPEVTIVRGLVDMVEVQADEDFEFTCKVVSQAGATDVQWHLQGLPLQSNVTEVAV
LADGCTHVLQKGVTTLEDAGTVSFHVGGLSSSAQLTVRVPEVTVLEPLKDVQLSEGQDAHFRCRLSRASGQEA
RWALGGVPLQCNEMNDITVEQGTLYLLTLHKVTTLEDAGTITLQVGSSESAQLKVTAKNTVLRGLENVDALEG
GEALFECQLSQPEVAHAHTWLLDDEPVHTSEKVEVVYFENGLRHLRLLKLNKLPQDSCRVTFLAGDVVTS AFLTV
RALPDPPEDAEVVGRSDHSVTLVSWAPMSDGGGGLCGYRVMKEASTGQWQLCHDLVPGPECVDDLVPGKTY
RFRVAAVGPAGAGEPVHLPQMVKIAPAPAPAPAPAPAPAPETRQAVVGEDICLELEVAADGGEVWHKGTERRI
QPGGHFEVLSRGRQMLVIKGFRTEDQGEYRCGPIQGLPSSGAATFNVMVMTSGSGDEVPAQPSLPPEAAQEGD
LHLLWEALARKRRMSREPTLDSISELPEEDSRVQHLRQEAEEETAPDLSEGYSTADELARTGEADLSHTSSDDE
SRAGTPSLVTYLKKAGGPGISPLASKHEAQVTTSVKPKQKQEPVVPPTCPPPGDL SAADLMDPSLDKAAVKIQA
AFKGYKVRKEMKQOEGPVFSRTEFGDTEAQVGDVLRLECVLATKTDMRACWLKDGIELTDGRHYHIDQLKDGTC
SLLVTVGLAPTDSGRYTCQVSTKSGRVSHSACVVVSGTESEAESSSGGELDDAFRRAARLHRLFRTRKSPAELS
EEELFLSADEGPPEPEKPADWQTYREDENFVLCIRFESLAEARQAVTCFRNMFMATMIGVEISLGEQGRGVEM
RIGKVAPTVTPAVPLAKT PGLQTS DAAPVFLTELQNDVQDGYPMSFDCVVVTGQPVSVRWFVKDKLLEEDDH
YMINEDQQGGHQLIITAVVPADMGVYRCLAENSMGVSSTKAE LRVELTSTDYDTAADATETSSYFSAQGYLSS
REQEGTESDEGQLPQVLEELKDLQVAPGTRAKFQLKVKGYAPKLYWFKDGQPLTSDHIRMTRDKTLHTLE
IVSVTREDSGQYAAIYI SNAVGAAYSSARLLVRGPSEPEEKPASDVHERLVPPRILEKFTPKKVKRGSITFSV
KVEGHPAPSVHHLKEEAKEGVLWIGPDTPGYTMASSSKQHSVLVLDVGRQHOGTYTCIATNPAGQALCSASLH



ISGLAKEEEQERVKEALISSFLQGTSSQAVSAQMSEAGFADLVGQSKGESLVAAEEAHSHLSLAEVGTTEEFLOK
LTSQITEMVSAKISQAKLQVPGGDSDEETKTPSASPRHGRSRPSSSVQESSSESEDGDSRGEIFDIYVVTADY
LPLGAEQDAIILREGQYVEVLDSAHPLRVLVVRTKPTKSSPSRQGWVSPAYLDKRLKLSPEWGPTEAPEFPGEA
VSEDEYRTRLSSVIQELLSSEQAFVGGELQFLESHHMKHLERSPRVPAAVASQKTVIFRNVQDISHFHSSFLKE
LQCGCTDDDVAMCFIKNQEAFAEKYLEFLVGRVQAESVVVSTPVQEFYKKYAEETLSAKDPTQPPPPPLQHYLE
QPVERVQKYQALLKELIRNKARNRQNCALLEQAYAVVSALPQRAENKLVHSLMENYPGTLEALGEPPIRQGHFI
VWEGAPGARMPWKGNHRHVFLFRNYLVICKPRRDSRTDTFSYVFRNMMKLSSIDLNDQVEGDRAFEVWHERE
DSVRKYLQARTVIKNSWVKEICGIQORLAQPVWRPPEFEEELADCTAELGETVKLACRVTGTGPKPIVSWYK
DGKPEVVDPHHILIEDPDGCTLLILDNLGTIDSGQYMCFAASAAGNASTLGKILVQVPPRFRVNRKVRATPFVEG
EDAQITCTVEGAPYPQIRWYKDGTLAPGNRYRMLNEPRSGVLVLIQAAASKEDLGHYECELVNRLGSTRGGG
ELYMQSPALRARDQHHREQIVAAVEGAPSMQVTIEDVQVQVGDMAQFDAVIEGHPPPPIVTWYKGTQLTSSAR
LSQRQDGTYSLVLTVDVAPHDAGVYTCVANNAGQVLCCKAELLVHGGDKLDAENQVYRRLKLSFYDVQEEIGR
GVFGFVKRVQHKGNMFCAAKFIPLRSKTRAQAYQERDILATLGHPLVTGLLDQFETRKTLLILELCSSEEL
LDRLFKKGVVTEAEVKVYIQQLVEGLHYLHSHGILHLDIKPPNIIIMVHPAREDIKICDFGFAQKI TPSE PQYS
KYGSPEFVSPETIEQNPVSEGSIDIWAMGVISYLSLTCSSPFAGESDRATLLNVLEGRVSWSSPTAAHLSEDA
DFIKATLQRTPRARPSTSQCLAHPWFLKSMPEAAEHFINTKQLKFLARSRWQRSLMSYKSI LVMRSIPELLQ
GPPDSPSLGVARHLRGEASGASSSSSSDNELAPFARAKSLPPSPVTHSPLLHPRGFLRPSASLPEETEASMP
TADAAVPASPQSAGPPASPGCVPRHSVSSLFYQQAGEGAERGNKTSGAKRHPARRRHLLKGGYIARALPGLR
EPLMEYSLLEEEAAREEQASLMTKTPSFETALRLPSSSVREVPGRSHSLDNPPVTTGSPPEACKEQLLFPST
GLTHETAKDRGHKEGFLQESVPPFMSGDSRPGKQEGSSQDSCRGKPASSCHSELGSGSQEGCGPPSSQSLG
SLPPQSLKKELESTSCGPLFSEQPQAAPFPTQVSPLLGSEKEPQDGLSEGPVVPVSSSPGSASQVDAASLDEG
LSEAGDTCDFTPPPQRPQEQATTRKFSLESRGGYAGVAGYGTFAFGGDAGGMLGQGPLWARMWAVSQSSEEQ
DEAATESPQPLESGLPIAEASGVPLRTSPSLTPWEEVEQVSLVQIRDLSGDAEAADTISLDISEVDPAYLNL
DLYDIKYLPEFEMI FRRVKPIEQPESPGSETEAGQGLADFLLEAAWPWPGEGLGLRAGLEITEEPEEPGDLEA
LLGEAAVGRKRKWSPSRGLFQFPGRCLSGEEPVELGLRQRVKASMAHISRI LKGRPEGPEREPPRKKAGLAS
FRLSGLKGRDQELSDAEAVLGGQSVTLACQVLAQPTAQATWSKDGVLLESSGHLLISSTLKNFQLLTI LVVKEE
DLGTYTCCVSNPLGTAVTGTGVLKRAERPSSSPREVEGELYKDAVLLVWKPVE SCGPVTVIVQCCIEGGSWTTL
ASDISDCCYLTKLSRGGMYIFRTACVSKAGMPYSSPSEQVLLGGPNHLASEEESSRGRPAQLLPSTKTF
QMQIRGRFVSVRQCREKASGRALAAKIVPYQPEDKTA VLREYEALKRLHHPHLAQLHAAYLSPRHLVLI
CSGPELLPSLAERESYSESDVKDYLWQMSATQYLHAQHILHLDLRSENMMVTEYNLLKVIDLGNASLDQEK
VPAPENFKDYLETMAPELLEGQAVPQTDIWAIGVTA FIMLSGEY PESSSETRDLQKGLRKLIRLSRCYAGL
SGGAVAFLOSSLCAQPWGRPCASTLQCGWLTEEGPTGSRPTPVTFTVRLRAFVREKRRALLYKKNHQAQ
VR\*

>rs48519378\_ENSMUSP00000049737\_c.4921:g>A\_p.S1641N
ENSMUST00000052872.15|Obscn-203|ENSMUSG00000061462|-|chr11:g.58990725:C>T
MDHSFSGAPRFLTRPKAFVSVGKDATLSCQIVGNPTPHVSWEKDRQPEAGARFRLAQDGDVYRLTILDLAL
GDSGQYVCRARNAIGEAFAAVGLRVDSEGTCAEQAPHFLLRPTSIRVREGADATFRRCRVGGSPQPAVSWSKDG
RRLGPPDAPHVRVEEHGESSALRIRSARPRDGGTYEVRAENPLGSASAAAALVVDSDAEVAGPPGTSTATLLA
HLQORREAMRAEGIPSPPGAGTRTCTVTEGKHARLSCFVTGEPKPEVWKKDGQLVTEGRRHVVEDEQENF
VLKILFCKQSDRGLYTCTASNLVGQTYSSVLVVVREPTVPFKKRLQDLEVREKESATFQCEVAQPAEAWFK
EETRLWASAKYDIEEEGTERRLTVRNVSADDDAVYICETTEGSRVVAELSVQGNLTKLPRKTAVRTGDTAIF
WVELAVPEGPVRLRNQEE MVAGGRVAITAEGTCHTLTI FQCTLEDMGEVAFVSGGCRTTTQFCVSAPRRPPL
YPPADPVVKAKTESVTLWSAPPHGDRPVTIDGYVLEKRRKLGAYAWSRCHEAGWLATTEFTITGVAEEGDFQ
FRVSAINHFGQGPYLEFPGTMHLVPM LAVKTPLKAVEAVEGGEVTFVSDLTVASSGEWFLDGEALKASSIYVI
RCDRTRHMLTIREVPARLHGAQLKFEVANGIETS IQMVVRAALGLPSSKLPAAAAREVLAQLHHEEAQLLAELSD
QAAAVTWLKDGRELSLGPKEYMQVSAGRRALLVRDVAQDDAGLYECVSRGSRRTAYQLLVQEPKLVFAKGQQA
SEVKAEAGNSATLSCEVTQAQTEVTWFKDGKLLSSSSKVRMEASGCSRRLVVQQAGKADAGEYSCEAGGQKLS
FRLDVAEPKLVFAKGQQAHEVKAEEAGASATLSCEVAQAQTEVTWFKDGKLLSSSSKVRMEASGCSRRLVVQQ
AGKADAGEYSCEAGGQKLSFRLDVAEPKMFVFAKEQQARSEVKAEEAGASATLSCEVAQAQTEVTWFKDGKLLS
SSKVRMEASGCSRRLVVQQAGKADAGEYSCEAGGQKLSFRLDVTEPKLVFAKEQQARSEVKAEEVNSATLSCE
VAQAQTEVTWFKDGKLLSSSSKVRMEASGCSRRLVVQQAGKADAGEYSCEAGGQKLSFRLDVAEPKLVFAKEQ
QARSEVKAEEAGNSATLSCEVAQAQTEVTWFKDGKLLSSSSKVRMEASGCSRRLVVQQAGKADAGEYSCEAGGQ
KLSFHLDVTEPKLVFAKEQQAHSEVKAEEAGASATLSCEVAQAQTEVTWFKDGKLLSSSSKVRMEASGCSRRLV
VQQAGKADAGEYSCEAGGQKLSFRLDVAEPKLVFAKEQQARSEVKAEEAGASATLSCEVAQAQTEVTWFKDGK
LSSSSKVRVEASGCSRRLVVQQAGKADAGEYSCEAGGQKLSFRLDVAEPKLVFAKEQQANSEVKAEEAGASATL
SCEVAQAQTEVTWFKDGKLLSSSSKVRVEASGCSRRLVVQQAGKADAGEYSCEAGGQKLSFRLDVAEPKLAFA
KEQQAHSEVKAEEAGASATLSCEVAQAQTEVTWFKDGKLLSSSSKVRVEASGCSRRLVVQQAGKADAGEYSCEA
GGQKLSFRLDVAEPKLAFAKEQQAHSEVKAEEAGANATLSCEVAQAQTEVTWFKDGKLLSSSSKVRVEASGCSR

RLVVQQAGKADAGEYSCEAGGQKLSFRLDVAEPKLAFAKEQQAHSEVKAEGASATLSCEVAQAQTEVTFWFKD
GKKLSSSSKVRVEASGCSRRLLVVQQAGKADAGEYSCEAGGQKLFRLDVAEPKLMFAKEQQAHSEVKAEGAS
ATLSCEVAQAQTEVTFWFKDGKKLSSSSKVRVEASGCSRRLLVVQQAGKADAGEYSCEAGGQKLSFRLDVAEPK
VFAKEQQAHSEVKAEGASATLSCEVAQAQTEVTFWFKDGKKLSSSSKVRVEASGCSRRLLVVQQVQKADAGEYS
CEARGQKLSFRLDVADTRLMFAKEQQARTEVKAEAGNSATLSCEVAQAQTEVTFWFKDGKKLSSSSKVRVEASG
CSRRLLVVQQAGKADAGEYSCEAGGQKLSFRLDVAEAEESQIPERPSRREPLVVKEHETIILTATIAAPSVAAVT
WLKDGVEIRRSKRHEATSLGDHTLTVRGAQVLDIAIYSCRVGKEGQDFPVQVEEVAAKFSKPLEPVEGELGG
TVMLVCELSPEQAEEVWRCGNTQLRPGKRFQMTSEGRRTTLTVSGLREDDAEYVCESTRDDRTSARLTVKVPR
VVKFTSGLSAMVAEEGQEATFQCVVSPSDAGVTWYKDGMLQPSSEKFMVVESSGASRSLTILGLTLEDAGQVTV
EAEGASSAALRVREAPVLFKKKLEPQTVTEERTSVTLEVELTRPWEVKWTRNAAVLTPSENVEIRAEGARHC
LVLRSVGFADRGFFGCETPDDKTQAKLNVEMRQVRLVLRGLQVEEAKQGTASMDVELSHAEVEGSWTRDGLRL
QPGPKCHLAVQGPVHILTLALSALQPQDSGLVAFRAEGVHTSARLIVTELPSFTRVLQDVVATQKEKVTLECEL
SRPVDVRWLKDGVELRAGKAI GIVAQGTCSRSLVIYRCETGDQGVVCDALDAQTSASLRVQGRTYTLIFRRVL
AEDAGEVVKFAENAESRAHLRVKELPVTLRPLRDKIAMEKHGVLQVSRASQVRWFKGGVLEQSGPKYE
VVSDGLYRKLVINDDVQPEDEDYTCDAENVKTSAQFFVVEEQSITIVRGLKDMTVMPEPAPAWFECETSIPSVRP
PKWLLGKTVLQAGGNVLEQDGTVHRLTLHKTCSTMTGPVHFTIGKSRSSAQLVVSDIPVVLTRPLEPKAGRE
LQSVVLSCDFRPAPKAVQWYKDDTFLSPSEKFKMALESLGMAELRILRLTPADAGVYRCQAGSAQSSAEVTVEA
REVTVIQPLQDAEAMEEGRVCFCELSHKDEIDIEWSLNGTPLYNDSFHEISHEGCLHTLVLSKVRQADTGTVC
ATSPKVSVSARLVVKGKPVVFLKALDDVSAEERGTTLTQCEVSDPEARVWVRKDGVELGPSDKYDFLHKAGAR
GLTVHDLSDHEDAGLYTCQVGSKETQSKVSVHDLHVGITKRLKTEVEVLEGESECFEVLSSHESPSDPVAVTVGG
KTVGGSGHFHAVRQGRKYTLTVKDAALSDAGEVVSFLGLTSKASLIIRERPVDITKPLEDQRTTLGEDVMLS
CELSRAGTSVRWLKDGKAIKRSQKYDLLSEGTRAVLVVRKASLKDSGEYTCETEASKSTAKLCVEEKANRFTE
ELADLQVEEKGRAVFTCKTEHPASVVTWRKGLLELRASGKHVPSQEGTLKLTINALERTDSDTYTCDIGQAR
TQARLLVHGQKVRVIEDLEDTAVQEGSSAKFCCRIAPADYGPVHWFLDKTPHLSNELNEITVQPGGYHVLTLR
QLALKDSGTVYFEAGDQRTSAAALRVTEKPSIFSRPLTDVTVTEGEDTLVLCETTTVDSSVRWTKDGKTLRPSA
RCQLSHEGQQAQLLITATTPQDGGRYKCEIGGASSSSIVRHALPVRFRFRESLKDVEVPESKAATLRCVLSVA
APVEWRHGDVLLKSSNKSLRQEGAVLELVIRDLQPDQSGVSLRQVSCSFGDQTTSATLTVTKTSSAQFVGLKLRNKEA
TEGTTVTLRCELTKAEPVEWKKGTETLRNGDKYSLKQDGA VCELQICSLLVADAGEYSCVCGQEKT SATLTVK
ALLVHFVRRRLRSKEATEGDTTTLQCELSKAAPVEWRKGTETLRDGDYSLKQDGA VCELQIRSLTIADAGEYL
CTCGQEKT SATLTVRALPAKFKDSLKNEEATEGTTATLSCELSKAAPVTWKKGPKTLQSGDKYVLRQDGA VCG
LQIHGLTMADAGEYSCVCGQEKT SATLTVRGLPAKFIEDLRSQEATEGATAILRCELSKAAPVEWRKGETLK
DGDYRDLRQDGA VCELQIRGLAVVDGTYSLSLPTKFTTEGLRNEEATEGTMATLRCQMSKAAPVEWRKGETLR
DGDYRDLRQDGA MCELQIRGLTIEDSGEYTCVCGQEKT SATLSVKALPSRFIEDLRSQEATEGTMATLRCQMS
KTAPVEWKKGSETLRDGGYSLRQDGPVCELQICDLAVEDAGEYSCVCGQEKT SATLSIKALPPRFIEDLRSQ
EATEGTMATLRCQMSKAAPVEWRKGETLGDGGYSLRQNGAVCELQIHDLAVEDTGEYSCVCGQEKT SATLN
VKALPPRFIEDLRSQEATEGTMATLRCQMSKAAPVEWRKGETLRDGGYSLRQDGA VCELQIHDLVEDAGQ
YSCVCGQEKTSAVLTVDALPPKFTTEGLKKEEATEGTMVTLRQMSKEATVEWRKGAKTLSDGGYSLRQDGA M
CELQICGLAVEDAGEYSCVCGQEKT SATLSVKALPPRFIEDLRSQEATEGTMATLRCQMSKAAPVEWRKGET
LRDGDYSLRQDGA VCELQIRDLAVEDAGEYLCVCGQEKT SATLSVKALPPRFIEDLRSQEATEGTMATLRCQ
MSKAAPVEWRKGSKTLRQDGDYSLRQDGA MCELQICDLAVEDTGDYSCVCGQEKT SATLSVKALPPRFIEDLR
SQEAREGTVATLRCRMSKAAPVEWRKGETLKDGDYSLRQEGNLCELQIRDLAVEDTEEYSCVCGQEKT SAT
LSVKALPAKFIEDLRSQEAPESSTVTLRCKLSKKASVVWKKGSETLRNGARYSLRQDGA VCELEIRDLTVEDT
GEYSCTCGQERTSATLSIMAPQVVFQQLQNLQAEESMASLRCELSVPNAAMVWSKGGLELQGDTRREARQQ
GCVAELLLRDLRREDAGEYSCTCGSQTTSATLMVTAAPVRFRLRELQAQDVDEGATARLRCCELSREAVSVEWRK
GSLQLFPKAYQMVQEGTTAELLVHGVEQEDAGEYTCDAHTQS IARLSVRAPKPKFKTDLQSTEQEAGGTAR
LCCQLSEAEPGTPVQWLKEGVELHVGSKYEMRRQGA VCELLIHGLEAKDTGEYAACLVGQKTLASLRVKEPEV
TIVRGLVDMEVQADEDEFTCKVSQAGATDVQWHLQGLPLQSNVTEVAVLADGCTHVLQKGVTLLEDAGTVS
FHVGGSSSAQLTVRVPEVTVLEPLKDVQLSEGQDAHFRCLRSRASQGEARWALGGVPLQCNEMNDITVEQGT
LYLLTLHKVTLEDAGTITLQVGSSESAQLKVTAKNTVLRGLENVDALEGGEALFECQLSQPEVAHTWLLDD
EPVHTSEKVEVVYFENGLRHLLLLKLNKLPQDSCRVTFLAGDVVTS AFLTVRGWRLEVLEPPHDASVKAGMQR
FTCILSEAVPVGEATWYINGAAIQPDDTDWTVTTDGSHHALTLSNAQPQHAGEVTF AARDAVASARLSVLALP
DPPEDAEEVGRSDHSVTLSSWVAPMSDGGGGLCGYRVEKMAESTGQWQLCHDLVPGPECVVDDLVPGKTYRFRV
AAVGPAGAGEPVHLPIQMVKIA PAPA PAPA
HFEVLSRGQRQMLVIKGFRTEDQGEYRCGPIQGLPSSGAATFNVVMTSGSGDEVPAQPSLPPEAAQEGDLHLL
WEALARKRRMSREPTLDSISELPEEDSRVQHLRQEAEEATPDLSEGYSTADELARTGEADLSHTSSDDESRA
TPSLVTVLKKAGGPGISPLASKHEAQVTTSVKPKQKQEPVPTCPPPGDLSAADLMDPSLDKAAVKIQAAFKG
YKVRKEMKQOEGPVFSRTFGDTEAQVGDVLRLECVLATKTDMRACWLKDGIELTDGRHYHIDQLKDGTCSSLLV
TGLAPTDSGRYTCQVSTKSGRVSHSACVVVSGTESEAESSSGGELDDAFRRAARLHRLFRTKSPAELSEEL

FLSADEGPEPEPADWQTYREDENFVCIRFESLAEARQAVTTCFRNMFATMGIGVEISLGEQGPRGVEMRIGK  
VAPTVPFVPLAKTPGLQTSDAAPVFLTELQNDVQDGYPMSFDCVVTGQPVPSVRWFKDGKLLLEDDHYMIN  
EDQQGGHQLIITAVVPADMGVYRCLAENSMGVSSTKAELRVELTSTDYDTAADATETSSYFSAQGYLSSREQE  
GTESDEGQLPQVLEELKDLQVAPGTRLAKFQLKVKGYPAKLYWFKDGOPLTSSDHIRMTDKKTLHTLEIVSV  
TREDSGQYAAYSNAVGAAYSSARLLVRGPSEPEEKPASDVHERLVPRIILEKFTPKKVKRGSSI TFSVKVEG  
HPAPSVHWLKEEAKEGVLWIGPDTPGYTMASSSKQHSLLVLDVGRQHOGTYTCIATNPAGQALCSASLHISGL  
AKEEEQERVKEALISSFLOGTSQAVSAQMSSEAGFADLVGQSKGESLVAEEAHSHLSLAEVGTTEEFLOKLTSSQ  
ITEMVSAKISQAKLQVPGGDSDEETKTPSASPRHGRSRPSSSVQESSSESEDGDSRGEIFDIYVVTADYLP  
AEQDAIILREGQYVEVLD SAHPLRVLVTRKPTKSSPSRQGWVSPAYLDKRLKLSPEWGPTEAPEFPGEAVSED  
EYRTRLSSVIQELLSSEQAFVGELOFLESHHMKHLERSPRVPAAVASQKTVI FRNVQDISHFHSSFLKELQGC  
GTDDDVAMCFIKNQEA FEKYLEFLVGRVQAESVVVSTPVQEFYKYYAEETLSAKDPTQPPPPPLQHYLEQVVE  
RVQKYQALLKELIRNKARNRQNCALLEQAYAVVSALPQRAENKLVSLMENYPGTLEALGEP IRQGHFIVWEG  
APGARMFWKGNHRHVF LFRNYLVICKPRRDSRTDTFSYVFRNMMKLSSIDLNDQVEGDRAFEVWHEREDSVR  
KYLQARTVI IKNSWVKEICGIQQLAQPVWRPPEFEELADCTAELGETVKLACRVTGTPKPIVSWYKDGKP  
VEVDPHHILIEDPDGSC TLLIDLNLTGIDSGQYMCFAASAAGNASTLGKILVQVPPRFVNVKVRATPFVEGEDAQ  
ITCTVEGAPYPQIRWYKDGTL LLAGPNRYRMLNEPRSGVLVLIQAASKEDLGHYECELVNLGSTRGGGELYM  
QSPALRRADQHHREQIVA AVEVTEQETKVPKKTVI IETITTVVKS PRGRRQSPGKSPSRSPRRSASPRRPG  
LLAPERLYPPGTSPSRRLEVEQGRKAPVPALYVTEAEVHAPASQSQPKWLEVEETIEVRVKKTSRGASPVRE  
MTRSREGILFTLPGGI PGRDPNANNNSNNSVYQEARWGPVAVHVGEPFIFQVDSVGNVDWVAASPEPEQVRA  
SQKEENTERQEGCSDG DENTFLMEEPQD TDSLQGRDPKILTHNGRVLTLADLEDYVPQEGETFGCGDSTPSTP  
DEPPCEVSVLQREI SEPTVGQPVLLNVGRPPGTGATPSFFRPGSQVHSPESVSFLLREAWSGPVSAAPWTSSF  
HTHVQSSVDGSHGSFKTEVSTQTVSFGAVGETVTLHIDPDGGEAPGPSQ\*

>rs48519378\_ENSMUSP00000020732\_c.5122:G>A\_p.S1708N  
ENSMUST00000020732.13|Obscn-201|ENSMUSG00000061462|-|chr11:g.58990725:C>T  
MDHSFSGAPRFLTRPKAFVVS VGKDATLSCQIVGNPTPHVSWEKDRQFVEAGARFRLAQDGDVYRLTILDLAL  
GDSGQYVCRARNAIGEAFAAVGLRVDSEGTCAEQYHFLLRPTSIRVREGADATFRCRVGGSPQPAVSWSKDG  
RRLGPPDAPHRVVEEHGESSALRIR SARPRDGGTYEVR AENPLGSASAAAALVVDSDAEVAGPPTSTATLLA  
HLQORREAMRAEGIPPSPPGAGTRTCTVTEGKHARLSCFVTGEPKPEVWKKDGQLVTEGRRHVVEDEQENF  
VLKILFCKQSDRGLYTCTASNLVGQTYSSVLVVVREPTVPFKKRLQDLEVREKESATFQCEVAQPATEAAWFK  
EETRLWASAKYDIEEGTERRLTVRNVSADDDAVYICETTEGSRVVAELSVQGNLTKLPRKTAVRTGDTAIF  
WVELAVPEGPVRWLRNQEEMVAGGRVAITAEGTCHTLTI FQCTLEDMGEVAFVSGGCRTTTQFCVSA PRRPPL  
YPPADPVVKAKTSSVTL SWSAPPHGDRPVTIDGYVLEKRLGAYAWSRCHEAGWLATTEFTITGVAAEGDFQ  
FRVSAINHFGQGPYLEFPGTMHLVPLAVKTPKAVEAVEGGEVTFVSDLTVASSGEWFLDGEALKASSIYVI  
RCDRTRHMLTIREV PARLHGAQLKFVANGIETS IQMVVRAALGLPSSKLPAAAAREVLAQLHEEAQLLAE LSD  
QAAAVTWLKDGRELSLGPKEYEMQVSAGRRALLVRDVAQDDAGLYECVSRGSR TAYQLLVQDITDGYRDWGPAG  
PQKHMCKCAGAKIARYLGS SCYRFLQYDKGVVHWLEAALDTRQKGTSSCSLHEKPKLVFAKGQQA HSEVKAE  
AGNSATLSCEVTQAQTEV TWFKDGKLLSSSSKVRMEASGCSRRLVVQQAGKADAGEYSCEAGGQKLSFR LDVA  
EPKLVFAKGQQA HSEVKAEAGASATLSCEVAQAQTEV TWFKDGKLLSSSSKVRMEASGCSRRLVVQQAGKADA  
GEYSCEAGGQKLSFR LDVAEPKMFVFAKEQQARSEVKA EAGASATLSCEVAQAQTEV TWFKDGKLLSSSSKVRM  
EASGCSRRLVVQQAGKADAGEYSCEAGGQKLSFR LDVTEPKLVFAKEQQARSEVKA EVGNSATLSCEVAQAQT  
EVTWFKDGKLLSSSSKVRMEASGCSRRLVVQQAGKADAGEYSCEAGGQKLSFR LDVAEPKLVFAKEQQARSEV  
KAEAGNSATLSCEVAQAQTEV TWFKDGKLLSSSSKVRMEASGCSRRLVVQQAGKADAGEYSCEAGGQKLSFHL  
DVTEPKLVFAKEQQAHSEVKA EAGASATLSCEVAQAQTEV TWFKDGKLLSSSSKVRMEASGCSRRLVVQQAGK  
ADAGEYSCEAEGQKLSFR LDVAEPKLVFAKEQQARSEVKA EAGASATLSCEVAQAQTEV TWFKDGKLLSSSSK  
VRVEASGCSRRLVVQQAGKADAGEYSCEAGGQKLSFR LDVAEPKLVFAKEQQANSEVKA EAGASATLSCEVAQ  
AQTEV TWFKDGKLLSSSSKVRVEASGCSRRLVVQQAGKADAGEYSCEAGGQKLSFR LDVAEPKLVFAKEQQAH  
SEVKA EAGASATLSCEVAQAQTEV TWFKDGKLLSSSSKVRVEASGCSRRLVVQQAGKADAGEYSCEAGGQKLS  
FR LDVAEPKLVFAKEQQAHSEVKA EAGANATLSCEVAQAQTEV TWFKDGKLLSSSSKVRVEASGCSRRLVVQQ  
AGKADAGEYSCEAGGQKLSFR LDVAEPKLVFAKEQQAHSEVKA EAGASATLSCEVAQAQTEV TWFKDGKLLSS  
SSKVRVEASGCSRRLVVQQAGKADAGEYSCEAGGQKLFRLDVAEPKLMFAKEQQAHSEVKA EAGASATLSCE  
VAQAQTEV TWFKDGKLLSSSSKVRVEASGCSRRLVVQQAGKADAGEYSCEAGGQKLSFR LDVAEPKLVFAKEQ  
QA HSEVKA EAGASATLSCEVAQAQTEV TWFKDGKLLSSSSKVRVEASGCSRRLVVQQV GKADAGEYSCEARGQ  
KLSFR LDVADATRLMFAKEQQARTEVKA EAGNSATLSCEVAQAQTEV TWFKDGKLLSSSSKVRVEASGCSRRLV  
VQQAGKADAGEYSCEAGGQKLSFR LDVAEAEASQI PERPSRREPLVVKHEHETIILTATIAAPSVAAVWTKLDGV  
EIRRSKRHEATS LGDHTLT V RGAQVLD SAIYSCRVGKEGQDFPVQVEEVA AKFSKPLEPVEGELGCTVMLVC  
ELSPQAEVWRCGNTQLRPGKRFQMTSEGPRRTLTVSGLREDDAE EYVCE SRDDRTSARLTVKVP RVVKFTS  
GLSAMVAEEGQ EATFQCVVSPSDAGVTWYKDGMLQLPSEK FVMVESGASRSLTILGLTLEDAGQV TVEAEGAS  
SSAALRVREAPVLFKKKLEPQTVEERTSVTLEVELTRPWPEVKWTRNAAVLTPSENVEIRAEGARHCLVLR SV

GFADRGFFGCETPDDKTQAKLNVEMRQVRLVVRGLQVEVEAKEQGTASMDVELSHAEVEGSWTRDGLRLQPGPKC  
HLAVQGPVHILTLALSALQPQDSGLVAFRAEGVHTSARLIVTELPSVSTRVLQDVVATQKEKVTLECELSRPVDV  
RWLKDGVLELRAGKAIGIVAQGTCSRSLVIYRCETGDQGVYVCDALDAQTSASLRVQGRTYTLIFRRVLAEDAGE  
VKFVAENAESRAHLRVKELPVTLLRPLRDKIAMEKHRGVLECCVSRASQVRWFKGGVELQSGPKYEVVSDGL  
YRKLVINADVQPEDEDTYTCDAENVKTSAQFFVEEQSITIVRGLKDMTVMPPAPAWFECETSIPSVRPPKWLGL  
KTVLQAGGNVGLQDGTVHRLTLHKTCSTMTGPVHFTIGKSRSSAQLVVS DIPVVLTRPLEPKAGRELQSVVL  
SCDFRPAPKAVQWYKDDTPLSPSEKFKMALEGQMAELRILRLTPADAGVYRCQAGSAQSSAEVTEAREVTVI  
QPLQDAEAMEEGRVCFSELSHKDEDEIEWSLNGTPLYNDSFHEISHEGCLHTLVLKSVRQADTGTVCATSPKV  
SVSARLVVKGKPVVFLKALDDVSAEERGTTLTQCEVSDPEARVVWRKDGVELGSPDKYDFLHKAGARGLTVHD  
LSHEDAGLYTCQVGSKETQSKVSVHDLHVGITKRLKTVEVLEGESECSFECVLSHESPSDPAVWTVGGKTVGGS  
GHFHAVRQGRKYTLTVKDAALSDAGEVVSVLGLTSKASLIIRERPVDITKPLEDQRTTLGEDVMLSCELSRA  
GTSVRWLKDGKAIRKSQKYDLLSEGTRAVLVVRKASLKDSGEYTCETEASKSTAKLCVEEKANRFTTELADLQ  
VEEKGRAVFTCKTEHPASVVTWRKGLLELRASGKHVPSQEGTLTKLTINALERTDSDTYTCDIGQARTQARLL  
VHGQKVRVIEDLEDTAVQEGSSAKFCCRIAPADYGPVHWFLDKTPLHSNELNEITVQPGGYHVLTLRQLALKD  
SGTVYFEAGDQRTSAAALRVTEKPSIFSRPLTDVTVTEGEDTLVCETTTTVDSVVRWTKDGKTLRPSARCQLSH  
EGCQAQLLITATTPQDGGRYKCEIGGASSSSIVRVHALPVRFRFRESLKDVEVPEGKAATLRCVLSVAAPVEWR  
HGDDVLKSSNKYSLRQEGAVLELVIRDLQPDQSGQYSCSFGDQTTSATLTVKTSQAQFVGLRKNKEATEGTTV  
TLRCELTKAEPVEWKKGTETLRNGDKYSLKQDGAVCELQICSLLVADAGEYSCVCGQEKTSATLTVKALLVHF  
VRRLSKEATEGDTTTLQCELSKAAPVEWRKGTETLRDGDYSLKQDGAVCELQIRSLTIADAGEYLCTCGQE  
KTSATLTVRALPAKFKDSLKNEEATEGTTATLSCELSKAAPVTWKKGPKTLQSGDKYVLRQDGAVCGLQIHGL  
TMADAGEYSCVCGQEKTSATLTVRGLPAKFIEDLRSQEATEGATAILRCELSKAAPVEWRKGSSETLKDGDYR  
LRQDGAVCELQIRGLAVVDGTYSLSPTKFTTEGLRNEEATEGTMATLRCQMSKAAPVEWRKGSSETLRDGDYR  
LRQDGAMCELQIRGLTIEDSGEYTCVCGQEKTSATLSVKALPSRFIEDLRSQEATEGTMATLRCQMSKTAPVE  
WKKGSETLRDGGYSLRQDGPVCELQICDLAVEDAGEYSCVCGQEKTSATLSIKALPPRFIEDLRSQEATEG  
MATLRCQMSKAAPVEWRKGSSETLGDGGYSLRQNGAVCELQIHDLAVEDTGEYSCVCGQEKTSATLNVKALPP  
RFIEDLRSQEATEGTMATLRCQMSKAAPVEWRKGSSETLRDGGYSLRQDGAVCELQIHDLVEDAGQYSCVCG  
QEKTSAVLTVDALPPKFTTEGLKKEEATEGTMVTLRQCMSKEATVEWRKGAKTLSDDGGYSLRQDGAMCELQIC  
GLAVEDAGEYSCVCGQEKTSATLSVKALPPRFIEDLRSQEATEGTMATLRCQMSKAAPVEWRKGSSETLRDGD  
YSLRQDGAVCELQIRDLAVEDAGEYLCVCGQEKTSATLSVKALPPRFIEDLRSQEATEGTMATLRCQMSKAAP  
VEWRKGSKTLRDGDYSLRQDGAMCELQICDLAVEDTGDYSCVCGQEKTSATLSVKALPPRFIEDLRSQEARE  
GTVATLRCRMSKAAPVEWRKGSSETLKDGDYSLRQEGNLCELQIRDLAVEDTEEYSCVCGQEKTSATLSVKAL  
PAKFIEDLRSQEAPESSTVTLRCKLSKASVVWKKGSETLRNGARYSLRQDGAVCELEIRDLTVEDTGEYSCT  
CGQERTSATLSIMAPQVVFQQLQNLQAEEGSMASLRCELSVPNAAMVWSKGGLELQGDTRREARQQGCVAEL  
LLRDLRREDAGEYSCTCGSQTTSATLMVTAAPVRFLELQADQVDEGATARLRCELSREAVSVEWRKGSQQLF  
PCAKYQMVQEGTTAELLVHGVEQEDAGEYTCDAHTQSIARLSVRAPKPKFKTDLQSTEQEAGGTARLCCQLS  
EABPGTPVQWLKEGVLEHVGSKYEMRRQGA VCELLIHGLEAKDTGEYACLVGQKTLASLRVKEPEVTIVRGL  
VDMEVQADEDEVEFTCKVSAQATDVQWHLQGLPLQSNVTEVAVLADGCTHVLQKGVTLLEDAGTVSFHVGGL  
SSSAQLTVRVPEVTVLEPLKDVQLSEGQDAHFRCLRSRASGQEARWALGGVPLQCNEMNDITVEQGTLYLLTL  
HKVTLLEDAGTITLQVGSSEEAQLKVTAKNTVLRGLENVDALEGGEALFECQLSQPEVAHAHTWLLDDEPVHTS  
EKVEVVYFENGLRHLLLLKLNKPKQDSCRVTFLAGDVVTS AFLTVRGRWLEVLPPHDASVKAGMQVRFTCILS  
EAVPVGEATWYINGAAIQPDDTDWTVTTDGS HALTLSNAQPQHAGEVTF AARDAVASARLSVLALPDPPEDA  
EVVGRSDHSVTLSSWVAPMSDGGGGLCGYRVMKEASTGQWQLCHDLVPGPECVVDLVP GKTYRFRVAAVGPA  
GAGEPVHLPQMVKIAPAPAPAPAPAPAPAPETRQAVVGEDICLELEVAADGGEVVWHKGTERRIQPGGHFEVLS  
RGQRQMLVIKGFRTEDQGEYRCGPIQGLPSSGAATFNVVMTSGSGDEVPAQPSLPPEAAQEGDLHLLWEALAR  
KRMSREPTLDSISELPEEDSRVQHLRQEAETAPDLSEGYSTADELARTGEADLSHTSSDDESRAGTPSLVT  
YLKKAAGPGISPLASKHEAQVTTSVKPKQKQEPVPTCP PPGDLSAADLMDPSLDKAAVKIQAAFQYKVRKE  
MKQQEGPVFSRTFGDTEAQVGDVLRLECVLATKTD MRACWLKDGIELTDGRHYHIDQLKDGTCSSLVVTGLAPT  
DSGRYTCQVSTKSGRVSHSACVVVSGTESEAESSSGGELDDAFRRAARRLHRLFRTKSPAELSEELFLSADE  
GPGEPEEPADWQTYREDENFVCIRFESLAEARQAVTCFRNM FATMIGVEISLGEQGPGRVEMRIGKVAPTVT  
PAVPLAKTPGLQTS DAAPVFLTELQNQDVQDGYPMSFDCVVTGQVPVPSVRWFKDGKLEEDDH YMINEDQQGG  
HQLIITAVVPADMGVYRCLAENSMGVSSTKAELRVELTSTDYDTAADATETSSYFSAQGYLSSREQEGTESDE  
GQLPQVLEELKDLQVAPGTR LAKFQLKVKGYPAKLYWFKDGGQPLTSDHIRMTDKKTLHTLEIVSVTREDSG  
QYAAYSNAVGAAYSSARLLVRGPSEPEEK PASDVHERLVPPRILEKFTPKKVKRGSITSFVSKVEGHPAPSV  
HWLKEEAEGVLLWIGPDTPGYTMASSSKQHSLLVLLDVGRRHQGTYTIC IATNPAGQALCSASLHISGLAKEEEQ  
ERVKEALISSFLQGTSAQVSAQMSSEAGFADLVGQSKGESLVAAEAHSHLSLAEVGT EEFLLQKLT SQIITEMVS  
AKISQAKLQVPGGDSDEETKTPSASPRHRSRSPSSSVQESSSESEDGDSRGEIFDIYVVTADYLP LGAEQDAI  
ILREGQYVEVLDSAHPLRWLVRTKPTKSSPSRQGWVSPAYLDRKRLKLSPEWGPTEAPEFPGEAVSEDEYRTRL  
SSVIQELLSSEQAFV GELQFLESHHMKHLERSPRVPAAVASQKTVIFRNVQDISHFHSSFLKELQCGCTDDDDV

AMCFIKNQEAFEKYLEFLVGRVQAESVSTPVQEFYKKYAEETLSAKDPTQPPPPPLQHYLEQPVERVQKYQ  
 ALLKELIRNKARNRQNCALLEQAYAVVSALPQRAENKLVSLMENYPGTLEALGEPHQGHFIVWEGAPGARM  
 PWKGNHRHVFLFRNYLVICKPRRDSRTDTFSYVFRNMMKLSSIDLNDQVEGDDRAFEVWHEREDSVRKYLLQA  
 RTVLIKNSWVKEICIGIQQLAQPVWRPPEFEEELADCTAELGETVKLACRVGTGTPKPIVSWYKDGKPVVEVDPH  
 HILIEDPDGSCTLILDNLGTIDSGQYMCFAASAAGNASTLGKILVQVPPRFVNVKVRATPFVEGEDAQITCTVE  
 GAPYPQIRWYKDGTLAPGNRYRMLNEPRSGVLVVIQAASKEDLGHYECELVNRGLGSTRGGGELYMQSPALR  
 ARDQHHREQIVAAVEERRPSP\*  
 >rs48519378\_ENSMUSP00000151217\_c.4570:G>A\_p.S1524N  
 ENSMUST00000219084.3|Obscn-207|ENSMUSG00000061462|-|chr11:g.58990725:C>T  
 MDHSFSGAPRFLTRPKAFVSVGKDATLSCQIVGNPTPHVSWEKDRQPVVEAGARFRLAQDGDVYRLTILDLAL  
 GDSGQYVCRARNAIGEFAAVGLRVDSEGTCAEQAPHFLLRPTSIRVREGADATFRCRVGGSPQPAVSWSKDG  
 RRLGPPDAPHVRVEEHGESSALRIRSARPRDGGTYEVRAENPLGSASAAAALVVDSDAEVAGPPGTSTATLLA  
 HLQORREAMRAEGIPSPPGAGTRTCTVTEGKHARLSCFVTGEPKPEVWKKDQGLVTEGRRHVVEDEQENF  
 VLKILFCQKSDRGLYTCTASNLVGQTYSSVLVVVREPTVPFKKRLQDLEVREKESATFQCEVAQPAEAAWFK  
 EETRLWASAKYDIEEEGETERRLTVRNVSADDDAVYICETTEGSRVVAELSVQGNLTKLPRKTAVRTGDTAIF  
 WVVELAVPEGPVWRWRNQEEMVAGGRVAITAEGTCHTLTI FQCTLEDMGEVAFVSGGCRTTTQFCVSAPRRPPL  
 YPPADPVVAKTESSVTLWSAPPHGDRPVTIDGYVLEKRLKLGAYAWSRCHEAGWLATFTITGVAEEGDFQ  
 FRVSAINHFGQGPYLEFPGTMHLVPLAVKTPKAVEAVEGGEVTFVSDLTVAASSGEWFLDGEALKAASSIYVI  
 RCDRTRHMLTIREVPARLHGAQLKFVANGIETSIQMVVRAALGLPSSKLPAAAAAREVLAQLHEEAQLLAE LSD  
 QAAA VTLKDGRELSLGPKEYMQVSAGRRALLVRDVAQDDAGLYECVSRGSRRTAYQLLVQDITDGYRDWGPAG  
 PQKHMCKCAGAKIARYLGSSCYRFLQYDKGVWHLEAALDTRQKGTSSCSLHEKPKLVFAKQQAHSVEKAE  
 AGNSATLSCEVTQAQTEVTWFKDGKLLSSSSKVRMEASGCSRRLVVQQAGKADAGEYSCEAGGQKLSFRLDVA  
 EPKLVFAKQQAHSVEKAEAGASATLSCEVAQAQTEVTWFKDGKLLSSSSKVRMEASGCSRRLVVQQAGKADA  
 GEYSCEAGGQKLSFRLDVAEPKMFVFAKEQQARSEVKAEGASATLSCEVAQAQTEVTWFKDGKLLSSSSKVRM  
 EASGCSRRLVVQQAGKADAGEYSCEAGGQKLSFRLDVTEPKLVFAKEQQARSEVKAEGASATLSCEVAQAQ  
 EVTWFKDGKLLSSSSKVRMEASGCSRRLVVQQAGKADAGEYSCEAGGQKLSFHLDVTEPKLVFAKEQQAHSEV  
 KAEAGASATLSCEVAQAQTEVTWFKDGKLLSSSSKVRMEASGCSRRLVVQQAGKADAGEYSCEAGGQKLSFR  
 LDVAEPKLVFAKEQQARSEVKAEGASATLSCEVAQAQTEVTWFKDGKLLSSSSKVRVEASGCSRRLVVQQAGK  
 ADAGEYSCEAGGQKLSFRLDVAEPKLVFAKEQQANSEVKAEGASATLSCEVAQAQTEVTWFKDGKLLSSSSK  
 VRVEASGCSRRLVVQQAGKADAGEYSCEAGGQKLSFRLDVAEPKLAFAKEQQAHSEVKAEGANATLSCEVAQ  
 AQTEVTWFKDGKLLSSSSKVRVEASGCSRRLVVQQAGKADAGEYSCEAGGQKLSFRLDVAEPKLVFAKEQQAH  
 SEVKAEGASATLSCEVAQAQTEVTWFKDGKLLSSSSKVRVEASGCSRRLVVQQVQKADAGEYSCEARGQKLS  
 FRLDVAEAEQSIPERPSRREPLVVEKHETIILTATIAAPSVAAVTWLKDGVIEIRRSKRHEATSLGDHTLTVR  
 GAQVLD SAIYSCRVGKEGQDFPVQVEEVAAKFSKPLEPVEGELGGTVMLVCELSPEQAEVWRCGNTQLRPGK  
 RFQMTSEGRRTLTVSGLEDDAEYVCESRDDRTSARLTVKVPVVKFTSGLSAMVAEEGQEAFTQCQVSPS  
 DAGVTWYKQGMQLPSEKFMVMEVGASRSLTILGLTLEDAGQVTVAEAGASSAALRVREAPVLFKCKLEPQT  
 VEERTSVTLEVELTRPWPEVKWTRNAAVLTPSENVEIRAEGARHCLVLRVSGFADRGFFGCETPDDKTQAKLN  
 VEMRQVRLVRGLQEVEAKEQGTASMDVELSHAEVEGSWTRDGLRLQPGPKCHLAVQGPVHILTLALSALQPQDSG  
 LVAFAREGVHTSARLIVTELPVSFTRVLQDVVATQKEKVTLECELSRPVDVRLKDGVELRAGKAIGIVAQGT  
 CRSLVIYRCETGDQGVYCDALDAQTSASLRVQGRYTLIFRRVLAEDAGEVKFVAENAESRAHLRVKELPVT  
 LLRPLRDKIAMEKHRGVLEQCQVSRASAQVRWFKGGVELQSGPKYEVVSDGLYRKLVIINDVQPEDEDTYTCDAG  
 NVKTSAQFFVEEQSITIVRGLKDMTVMEMPAPAWFECETSIPSVRPPKWLKGKTVLQAGGNVLEQDGTVHRLT  
 LHKTCSTMTGPVHFTIGKSRSSAQLVSDIPVVLTRPLEPKAGRELQSVVLSCDFRPAPKAVQWYKDDTPLSP  
 SEKFKMALEGQMAELRILRLTPADAGVYRCQAGSAQSSAEVTVAEAREVTVIQPLQDAEAMEEGRVCFSCELSH  
 KDEDIEWSLNGTPLYNDSFHEISHGCLHTLVLKSVRQADTGTVCATSPKVSVSARLVVKGKPVVFLKALDDV  
 SAEERGLTLTQCEVSDPEARVVWRKDGVELGPSDKYDFLHKAGARGLTVHDLSDHEDAGLYTCQVGSKETQSKV  
 SVHDLHVGITKRLKTVLEVLEGESCSFECVLSHESPSDPAVWTVGGKTVGGSGHFHAVRQGRKYTLTVKDAALS  
 DAGEVVSFVLGLTSKASLIIRERPVDITKPLEDQRTTLGEDVMLSCELSRAGTSVRWLKDGKAIRKSQKYDLL  
 SEGTRAVLVVRKASLKDSGEYTCETEASKSTAKLCVEEKANRFTBELADLQVEEKGRAVFTCKTEHPASVVTW  
 RKGLLELRASGKHVPSQEGTLKLTINALERTSDTYTCDIGQARTQARLLVHGQKVRVIEDLEDTAVQEGSS  
 AKFCCRIPADYGPVHWFLLDKTPLHSNELNEITVQPGGYHVLTLRQLALKDSGTVYFEAGDQRTSAAALRVTEK  
 PSIFSRPLTDVTVTEGEDTLVCETTTTVDSSVRWTKDGKTLRPSARCQLSHEGCAQQLLITATTPQDGGRYKC  
 EIGGASSSSIVRVHALPVRFRRESLKDVEVPEGKAATLRCVLSVAAPVEWRHGDDVLKSSNKYSLRQEGAVLE  
 LVIRDLQPDGSGQYSCSFGDQTTSATLTVKTTSSAQFVGLKRNKEATEGTTVTLRCELTKAPVEWKKGTETLR  
 NGDKYSLKQDGAVCELQICSLLVADAGEYSCVCGEKTSATLTVKALLVHFVRRLSKEATEGDTTTLQCELS  
 KAAPVEWRKGTETLRDGDYSLKQDGAVCELQIRSLTIADAGEYLCTCGQEKTSATLTVRGLPAKFIEDLRSQ  
 EATEGATAILRCELSKAAPVEWRKGSSETLKDGDYTLRQDGAVCELQIRGLAVVDTGTYSLPTKFTTEGLRNE  
 EATEGTMATLRCQMSKAAPVEWRKGSSETLRDGDYSLRQDGAMCELQIRGLTIEDSGEYTCVCGQEKTSATLS



VKALPPRFIEDLRSQEATEGTMATLRCQMSKAAPVEWRKGSSETLGDGGRYSLRQNGAVCELQIHDLAVEDTGE  
YSCVCGQEKTSATLNVKALPPKFTTEGLKKEEATEGTMVTLRCQMSKEATVEWRKGAKTLSDDGGRYSLRQDGM  
CELQICGLAVEDAGEYSCVCGQEKTSATLSVKALPPRFIEDLRSQEATEGTMATLRCQMSKAAPVEWRKGSSET  
LRDGDYSLRQDGA VCELQIRDLAVEDAGEYLCVCGQEKTSATLSVKALPPRFIEDLRSQEATEGTMATLRCQ  
MSKAAPVEWRKGSKTLRDGDYSLRQDGMCELQICDLAVEDTGDYSCVCGQEKTSATLSVKAPQVVFQQPLQ  
NLQAEEGSMASLRCELSVPNAAMVWSKGGLELQGDTRREARQQGCVAELLRLDLREDAGEYSCTCGSQTTSA  
TLMVTAAPVRFRLRELQAQDVDEGATARLRCELSREAVSVEWRKGSLLQFPKAKYQMVQEGTTAELLVHGVEQE  
DAGEYTCDAAGHTQSIARLSVRAPKPKFKTDLQSTEQEAGGTARLCCQLSEAEPTPVQWLKEGVELHVGSKYE  
MRRQYAVCELLIHGLEAKDTGEYACLVGQKTLASLRVKEPEVTIVRGLVDMEVQADEDEVFTCKVSAQAGATD  
VQWHLQGLPLQSNEVTEVAVLADGCTHVLQLKGVTLLEDAGTVSFHVGGSSSAQLTVRVPVTVLEPLKDVQL  
SEGQDAHFRCRLSRASQEARWALGGVPLQCNEMNDITVEQGTLYLLTLHKVTLLEDAGTITLQVGSSESQAQL  
KVTAKNTVLRGLENVDALEGGALFECQLSQPEVAHTWLLDDEPVHTSEKVEVVYFENGLRHLHLLKLNKLPQ  
DSCRVTFLAGDVVTSFALTVRGWRLEVLPEPHDASVKAGMQRVFTCILSEAVPVGEATWYINGAAIQPDDTDW  
TVTTDGSHHALTLSNAQPQHAGEVTF AARDAVASARLSVLALPDPEDA EVVGRSDH SVTLSWVA PMSDGGGG  
LCGYRVEMKEASTGQWQLCHDLVPGPECVDDLVPGKTYRFRVA AVGPAGAGEPVHLPQMVKIAPAPAPAPAP  
APAPETRAQAVVGEDICLELEVAADGGEVVWHKGTERRIQPGGHFEVLSRGRQMLVIKGFRTEDQGEYRCGPIQ  
GLPSSGAATFNVMTSGSGDEVPAQPSLPPEAAQGLDLHLWEALARKRRMSREPTLDSISELPEEDSRVQHL  
RQEAETAPDLSEGYSTADELARTGEADLSHTSSDDES RAGT PSLVTYLKKAGGPGISPLASKHAEQVTTSVK  
PQKQQEPVVPPTCPPPGDLSAADLMDPSLDKAAVKIQAAFQKGYKVRKEMKQQEGPVFSRTFGDTEAQVDVLR  
ECVLATKTDMRACWLKDGIELTDGRHYHIDQLKDGTC SLLVTGLAPTDSGRYTCQVSTKSGRVSHSACVVVSG  
TESEAESSSGGELDDAFRRARRLHRLFRTKSPAELSEELFLSADEGPGEPEEPADWQTYREDENFVCIRFE  
SLAEARQAVTCFRNMFATMGI GVEISLGEQGPGRVEMRIGKVA PTVTPAVPLAKTPGLQTSDAAPVFLTELQN  
QVDQDGYPMSFDCVVTGQVPVSVRWFKDGKLL EEDDH YMINEDQ QGGHQLIITAVVPADMGVYRCLAENSMGV  
SSTKAELRVELTSTDYDTAADATETSSYFSAQGYLSSREQEGTESDEGQLPQVLEELKDLQVAPGTRLAKFQL  
KVKGYPAKPLYWFKDQGPLTSDHIRMTDKKTLHTLEIVSVTREDSGQYAAIISNAVGAAYS SARLLVGRPSE  
PEEKASDVHRLVPPRILEKFTPKKVKRGSSITF SVKVEGHPAPSVHWLKEEA EKGVLWIGPDTPGYTMAS  
SKQHSVLVLLDVGRRHQGTYTCIATNPAGQALCSASLHISGLAKEEEQERVKEALISSFLQGTSSQAVSQMSSES  
AGFADLVGQSKGESLVAEEAHSHLSLAEVGT EEF LQKLT SQITEMVSAKISQAKLQVPGGDSDEETKTPSASP  
RHGRSRPSSSVQESSSESEDGDSRGEIFDIYVVTADY LPLGAEQDAIILREGQYVEVLDSAHPLRVLVTRTKPT  
KSSPSRQGWVSPAYLDKRLKLSPEWGPTEAPEFPGEAVSEDEYRTRLSVVIQELLSSEQAFVGELOFLSHHM  
KHLERSPRVPAAVASQKTVI FRNVQDISHFHSSFLKELQCGCTDDDVAMCFIKNQEAF EKYLEFLVGRVQAES  
VVVSTPVQEFYKKYAEETLSAKDPTQPPPPPLQHYLEQPVERVQKYQALLKELIRNKARNRQNCALLEQAYAV  
VSALPQRAENKLVSLMENYPGTLEALGEP I RQGHFIVWEGAPGARM PWKGNHRHVFLFRNYLVI CKPRRDSR  
TDTFSYVFRNMMKLSSIDLNDQVEGDDRAFEVWHERE DSVRKYLLQARTV I IKNSWVKEICGIQQR LAQPVWR  
PPEFEELADCTAELGETVKLACRVGTGPKPIVSWYKDGKPEVDPHILIEDPDGSC TLI LDNLTGIDSGQY  
MCFEASAAGNASTLGKILVQVPPRFVNVKVRATPFVEGEDAQITCTVEGAPYPQIRWYKDGTL LAPGNRYRMLN  
EPRSGVLV LVIQAASKEDLGHYECELVNR LGSTRGGGELYMQSPALRARDQHHREQIVA AAVEVTEQETKVPKK  
TVIIEETITTVVKS PRGRRQSPGKSPSRPSRRSASPRRPGLLAPERLYPPGTSPSRRLEVEQGRKAPVPALY  
VTEAEVHAPASQSQPKWLEVEETIEVRVKKTGSRGASPVREMTSRGEGILFTLPGGIPGRDPNANNNSNKS VY  
QEARTWGPVVHVGEPFIFQVDSVGNVDWAASPEPEQVRASQKEENTERQEGCSDGDENTFLMEEPQD TDSL  
QGRDPKILTHNGRVLT LADLEDYVPQEGETF GCGDSTPSTPDEPPCEVSVLQREI SEPTVQPVLLNVGRPPG  
TGATPSFFRPGSQVHSPESVSFLLEAWSGPVSAAPWTSSFHHTHVQSSVDGSHGFSFKTEVSTQTVSF GAVGET  
VTLHIDPDGGEAPGPSQG\*

>rs50041364\_ENSMUSP00000158795\_c.4895:G>A\_p.W1632\*  
ENSMUST00000238536.2|Obscn-210|ENSMUSG00000061462|-|chr11:g.58994261:C>T  
MDHSFSGAPRFLTRPKAFVSVGKDATLSCQIVGNPTPHVSWEKDRQPVEAGARFLAQDGDVYRLTILDLAL  
GDSGQYVCRARNAIGEAFAAVGLRVDSEGTCAEQAPHLLRPTSIRVREGADATFRCRVGGSPQPAVSWSKDG  
RRLGPPDAPHVRVEEHGESSALRIRSARPRDGGTYEVRAENPLGSASAAAALVVDSDAEVAGPPGTSTATLLA  
HLQORREAMRAEGIPPSPPGAGTRTCTVTEGKHARLSCFVTGEPKPETVWKKDQGLVTEGRRHVVEDEQENF  
VLKILFCKQSDRGLYCTASNLVGTYSVSVLVVREPTVPFKKRLQDLEVREKESATFQCEVAQPA TEAAWFK  
EETRLWASAKYDIEEEGTERRLTVRNVSADDDAVYICETTEGSRVAELSVQGNLTKLPRKTAVRTGDTAIF  
WVELAVPEGPVWRNRNQEEMVAGGRVAITAEGTCHTLTI FQCTLEDMGEVAFVSGGCRTTTQFCVSAPRRPPL  
YPPADPVVKAKTESVTLWSAPPHGDRPVTIDGYVLEAKRKL GAYAWSRCHEAGLWATEFTITGVAEEDGFQ  
FRVSAINHFQGGQPYLEFPGMTMLVPLAVKTPLKAVEAVEGGEVTFVSDLTVASSGELWFLDGEALKASSIYVI  
RCDRTRHMLTIREVMPARLHGAQLKFFVANGIETS IQMVVRAALGLPS SKLPAAAAREVLAQLHHEAQLLAELSD  
QAAA VTWLKDGRELSLGPKYEMQVSAGRRALLVRDVAQDDAGLYECVSRGSRTAYQLLVQDITDGYRDWGPAG  
PQKHMCKCAGAKIARYLGSSCYRFLQYDKGVWHLEAALDTRQKGTSSCSLHEKPKLVFAKQQAHSEVKA E  
AGNSATLSCEVTQAQTEVTWFKDGKLLSSSSKVRMEASGCSRRLVQQAGKADAGEYSCEAGGQKLSFRLDVA

EPKLVFAKQQAHSEVKAEGASATLSCEVAQAQTEVTFWKDGKLLSSSSKVRMEASGCSRRLVVQQAGKADA
GEYSCEAGGQKLSFRLDVAEPKMFVFAKEQQARSEVKAEGASATLSCEVAQAQTEVTFWKDGKLLSSSSKVRM
EASGCSRRLVVQQAGKADAGEYSCEAGGQKLSFRLDVTEPKLVFAKEQQARSEVKAEVGN SATLSCEVAQAQT
EVTWFKDGKLLSSSSKVRMEASGCSRRLVVQQAGKADAGEYSCEAGGQKLSFRLDVAEPKLVFAKEQQARSEV
KAEAGNSATLSCEVAQAQTEVTFWKDGKLLSSSSKVRMEASGCSRRLVVQQAGKADAGEYSCEAGGQKLSFHL
DVTEPKLVFAKEQQAHSEVKAEGASATLSCEVAQAQTEVTFWKDGKLLSSSSKVRMEASGCSRRLVVQQAGK
ADAGEYSCEAGGQKLSFRLDVAEPKLVFAKEQQARSEVKAEGASATLSCEVAQAQTEVTFWKDGKLLSSSSK
VRVEASGCSRRLVVQQAGKADAGEYSCEAGGQKLSFRLDVAEPKLVFAKEQQANSEVKAEGASATLSCEVAQA
AQTEVTFWKDGKLLSSSSKVRVEASGCSRRLVVQQAGKADAGEYSCEAGGQKLSFRLDVAEPKLVFAKEQQAH
SEVKAEGASATLSCEVAQAQTEVT\*FKDGKLLSSSSKVRVEASGCSRRLVVQQAGKADAGEYSCEAGGQKLS
FRLDVAEPKLAFAKEQQAHSEVKAEGASATLSCEVAQAQTEVTFWKDGKLLSSSSKVRVEASGCSRRLVVQQ
AGKADAGEYSCEAGGQKLSFRLDVAEPKLAFAKEQQAHSEVKAEGASATLSCEVAQAQTEVTFWKDGKLLSS
SSKVRVEASGCSRRLVVQQAGKADAGEYSCEAGGQKLFRLDVAEPKLMFAKEQQAHSEVKAEGASATLSCE
VAQAQTEVTFWKDGKLLSSSSKVRVEASGCSRRLVVQQAGKADAGEYSCEAGGQKLSFRLDVAEPKLVFAKEQ
QAHSEVKAEGASATLSCEVAQAQTEVTFWKDGKLLSSSSKVRVEASGCSRRLVVQQVQKADAGEYSCEARGQ
KLSFRLDVADTRLMFAKEQQARTEVKAEGNSATLSCEVAQAQTEVTFWKDGKLLSSSSKVRVEASGCSRRLV
VQQAGKADAGEYSCEAGGQKLSFRLDVAEAEASQI PERPSRREPLVVKHEHETIILTATIAAPSVAAVTWLKDG
V EIRRSKRHEATSLGDHTLTLVRGAQVLDLSAIYSCRVGKEQDFPVQVEEVAAKFSKPLEPVEGELGSTMVLC
ELSPQAEVWRCGNTQLRPGKRFQMTSEGPRRLTLTVSGLREDDAEYVCESRDDRTSARLTVKVPVVKFTS
GLSAMVAEEGQEQATFQCVVSPSDAGVTWYKDGMLQPSKFMVESGASRSLTILGLTLEDAGQVTEAEGAS
SSAALRVREAPVLFKKLEPQTEVEERTSVTLEVELTRPWPEVKWTRNAAVLTPSENVEIRAEGARHCLVLRV
GFADRGFFGCETPDDKTQAKLNVEMRQVRLVRLGLQEVEAKEQGTASMDVELSHAEEVGSWTRDGLRLQPGPKC
HLAVQGPVHILTLALSALQPQDSGLVAFRAEGVHTSARLIVTEL PVSFTRVLQDVVATQKEKVTLECELSRPVDV
RWLKDGVLELRAGKAI GIVAQGTCSRSLVIYRCETGDQGVYVCDALDAQTSASLRVQGRTYTLIFRRLAEDAGE
VKFVAENAESRAHLRVKELPVTLLRPLRDKIAMEKHRGVLEQCQVSRASQVRWFKGGVLELQSGPKYEVVSDGL
YRKLVINDDPEDEDTYTC DAGNVKTSAQFFVEEQSITIVRGLKDMTVMEPAPAWFECETSIPSVRPPKWLGLG
KTVLQAGGNVLEQDGTYVHRLTLHKTCSTMTGPHFTIGKSRSSAQLVVSDI PVVLRTRPLEPKAGRELQSVVL
SCDFRPAPKAVQWYKDDTPLSPSEKFKMALEGMALRILRLTPADAGVYRCQAGSAQSSAEVTEAREVTVI
QPLQDAEAMEEGRVCFSCELSHKDEDIEWLSLNGTPLYNDSFHEISHGCLHTLVLSVRQADTGTVCATSPKV
SVSARLVVKGKPVVFLKALDDVSAEERGLTLTQCEVSDPEARVVRKDGVELGSPDKYDFLHKAGARGLTVHD
LSHEDAGLYTCQVGSKETQSKVSVHDLHVGITKRLKTVEVLEGESECFEVLSHESPSDPAVWTVGGKTVGGS
GHFHAVRQGRKYTLTVKDAALSDAGEVVFVSVLGLTSKASLI IRERPVDITKPLEDQRTTLGEDVMLSCELSRA
GTSVRWLKDGKAIRKSQKYDLLSEGTRAVLVVRKASLKDSGEYTCETEASKSTAKLCVEEKANRFTTEELADLQ
VEEKGRAVFTCKTEHPASVVTWRKGLLELRASGKHVPSQEGTLKLTINALERTDSDTYTCDIGQARTQARLL
VHGQKVRVIEDLEDTAVQEGSSAKFCRIAPADYGPVHWFLDKTPHLSNELNEITVQPGGYHVLTLRQLALKD
SGTVYFEAGDQRTSAALRVTEKPSIFSRPLTDVTVTEGEDLTLVCETTTVDSSVRWTKDGKTLRPSARCQLSH
EGCQAQLLITATTPQDGGRYKCEIGGASSSSIVRVHALPVRFRESLKDVEVPEGKAATLRCVLSVAAPVEWR
HGDDVLKSSNKYSLRQEGAVLELVIRDLQPDQSGQYSCSFGDQTTSATLTVKTSQAQFVGLRKNKEATEGTTV
TLRCELTKAEAPVEWKKGTETLRNGDKYSLKQDGAVCELQICSLLVADAGEYSCVCGQEKTSATLTVKALLVHF
VRLRSKEATEGDTTTLQCELSKAAPVEWRKGTETLRDGDYSLKQDGAVCELQIRSLTIADAGEYLCTCGQE
KTSATLTVRALPAKFKDSLKNEEATEGTTATLSCELSKAAPVTWKKGPKTLQSGDKYVLRQDGAVCGLQIHGL
TMADAGEYSCVCGQEKTSATLTVRGLPAKFIEDLRSQEATEGATAILRCELSKAAPVEWRKGSSETLKDGDYR
LRQDGAVCELQIRGLAVVDGTYSLSLPTKFTTEGLRNEEATEGTMATLRCQMSKAAPVEWRKGSSETLRDGDYR
LRQDGAMCELQIRGLTIEDSGEYTCVCGQEKTSATLSVKALPSRFIEDLRSQEATEGTMATLRCQMSKTAPVE
WKKGSETLRDGGYSLRQDGPVCELQICDLAVEDAGEYSCVCGQEKTSATLSIKALPPRFIEDLRSQEATEGT
MATLRCQMSKAAPVEWRKGSSETLGDGGYSLRQNGAVCELQIHDLAVEDTGEYSCVCGQEKTSATLNVKALPP
RFIEDLRSQEATEGTMATLRCQMSKAAPVEWRKGSSETLRDGGYSLRQDGAVCELQIHDLVEDAGQYSCVCG
QEKTSAVLTVDALPPKFTTEGLKKEEATEGTMVTLRCQMSKEATVEWRKGAKTSLDGGYSLRQDGAMCELQIC
GLAVEDAGEYSCVCGQEKTSATLSVKALPPRFIEDLRSQEATEGTMATLRCQMSKAAPVEWRKGSSETLRDGD
YSLRQDGAVCELQIRDLAVEDAGEYLCVCGQEKTSATLSVKALPPRFIEDLRSQEATEGTMATLRCQMSKAAP
VEWRKGSSETLRDGDYSLRQDGAMCELQICDLAVEDTGDYSCVCGQEKTSATLSVKALPPRFIEDLRSQEARE
GTVATLRCRMSKAAPVEWRKGSSETLKDGDYSLRQEGNLCELQIRDLAVEDTEEYSCVCGQEKTSATLSVKAL
PAKFIEDLRSQEAPESSTVTLRCKLSKASVWKKGSETLRNGARYSLRQDGAVCELEIRDLTVEDTGEYSCT
CGQERTSATLSIMAPQVVFQQPLQNLQAEEGSMASLRCELSVNPAMVWSKGGLELQGDTRREARQQGCVAEL
LLRDLRREDAGEYSCGQTSATLMVTAAPVRFLELQAQDVDEGATARLRCELSREAVSVEWRKGLQLF
PCAKYQMVQEGTTAELLVHGVEQEDAGEYTCDAHTQSIARLSVRAPKPKFKTDLQSTEQEAGGTARLCCQLS
EAEFGTPVQWLKEGVELHVGSKYEMRRQGAVCELLIHGLEAKDTGEYACLVGGQKTLASLRVKEPEVTIVRGL
VDMEVQADEDEFTCKVSAQATDVQWHLQGLPLQSNVTEVAVLADGCTHVLQKGVTLLEDAGTVSFHVGGL

SSSAQLTVRVPEVTVLEPLKDVQLSEGDQAHFRCLRSRASGQEARWALGGVPLQCNEMNDITVEQGTLYLLTL  
HKVTLEDAGTITLQVGSSEEAQLKVTAKNTVLRGLENVDALEGGEALFECQLSQPEVAHAHTWLLDDEPVHTS  
EKVEVVYFENGLRHLLLLKLNKPKQDSCRVTFLAGDVVTSFAFLTVRGWRLEVLEPPHDASVKAGMQVRFTCILS  
EAVPVGEATWYINGAAIQPDDTDWTVTTDGSHHALTLNSAQPQHAGEVTFFAARDAVASARLSVLALPDPPEDA  
EYVGRSDHSVTLWSVAPMSDGGGGLCGYRVMKEASTGQWQLCHDLVPGPECVVDDLVPGKTYRFRVAAVGPA  
GAGEPVHLPQMVKIAPAPAPAPAPAPAPAPETRQAVVGEDICLELEVAADGGEVVWHKGTERRIQPGGHFEVLS  
RGQRQMLVIKGFRTEDQGEYRCGPIQGLPSSGAATFNVMVMTSGSGDEVPAQPSLPPEAAQEGDLHLLWEALAR  
KRRMSREPTLDSISELPEEDSRVQHLRQEAETAPDLSEGYSTADELARTGEADLSHTSSDDESRACTPSLVT  
YLKAGGPGISPLASKHEAQVTTSVKPKQKQEPVVPTCPPGDLAADMPSLDKAAVKIQAAAFKGYKVRKE  
MKQQEGPVFSRTFGDTEAQVGDVLRLECVLATKTDMRACWLKDGIELTDGRHYHIDQLKDGTCSSLVVTGLAPT  
DSGRYTCQVSTKSGRVSHSACVVVSGTESEAESSSGGELDDAFRAARRLHRLFRTKSPAELSEELFLSADE  
GPGEPEPADWQTYREDENFVCIRFESLAEARQAVTCFRNMFATMIGVEISLGEQGRGVEMRIGKVAPTVT  
PAVPLAKTPGLQTSDAAPVFLTELQNDQVDQDGYPMSFDCVVTGQPVPSVRWFKDGKLEEDDHVMINEDQGG  
HQLIITAVVPADMVYRCLAENSMGVSSTKAELRVELTSTDYDTAADATETSSYFSAQGYLSSREQEGTESDE  
GQLPQVLEELKDLQVAPGTRRLAKFQLKVKGYPAKLYWFKDGGQPLTSDHIRMTDKKTLHTLEIVSVTREDSG  
QYAAYSNAVGAAYSSARLLVRGPSEPEEKPASDVHERLVPPRILEKFTPKKVKRGSSTIFSVKVEGHPAPSV  
HWLKEEAKEKGVWIGPDTPGYTMASSSKQHSVLVLDVGRQHOGTYTCIATNPAGQALCSASLHISGLAKEEEEQ  
ERVKEALISSFLQGTSAVSAQMSSESAGFADLVGQSKGESLVAEEAHSHLSLAEVGTEEFFLQKLTQSIEMVS  
AKISQAKLQVPGGDSDEETKTPSASPRHGRSRPSSSVQESSSEEDGDSRGEIFDIYVVTADYLPLGAEQDAI  
ILREGQYVEVLDSAHPLRWLVRTKPTKSSPSRQGWVSPAYLDRKRLKLSPEWGPTEAPEFPGEAVSEDEYRTRL  
SSVIQELLSSEQAFVQELQFLESHHMKHLERSPRVPAAVASQKTVIFRNVQDISHFHSSFLKELQCGCTDDDV  
AMCFIKNQEAFAKEYLEFLVGRVQAESVVVSTPVQEFYKKYAEETLSAKDPTQPPPPPLQHYLEQPVERVQKYQ  
ALLKELIRNKARNRQNCALLEQAYAVVSALPQRAENKLVSLMENYPGTLEALGEPHQGHFIWEGAPGARM  
PWKGHNHRVFLFRNYLVICPRRDSRTDTFSYVFRNMMKLSSIDLNDQVEGDDRAFEVWHEREDSVRKYLLQA  
RTVIKNSWVKEICIGIQRLAQPVWRPPEFEEELADCTAELGETVKLACRVTGTPKPIVSWYKDGKPVVEVDPH  
HILIEDPDGSCITLIDNLTGIDSGQYMCFAASAAGNASTLGIILVQVPPRFVNVKVRATPFVEGEDAQITCTVE  
GAPYPIRQWYKDGTLTLAGPNRYRMLNEPRSGVLVVIQAASKEDLGHYECELVNRLGATSPGGEDLYMQSPALR  
ARDQHHREQIVAAVEDTSVEGSAHSAQDQADQQAASVLWRLLGSEALGSPSPGDLNTRQSEPPAFEEAASQIP  
GAASGTPEVSPQPGTHKLEQETTSSGSQGWTPVIRVEGTAWPGAGTGQLLLDVHSQVIMETTQRTYVCQAPDT  
GVTRAPSMQVTIEDVQVQVGDMAQFDAVIEGHPPPVTWYKGSTQLTSSARLSQRQDGTTYSLVLTVDVAPHDA  
GVYTCVANNAGGQVLCKAELLVHGGDKLDAENQVYRRKLHSFYDVQEEIGRGVFGFVKRVQHKGNMFCAAKF  
IPLRSKTRAQAYQERDILATLGHPLVTGLLDQFETRKTLLIILELCSSEELLDRLFKKGVVTEAEVKVYIQQL  
VEGLHYLHSHGILHLDIKPPNIMVHPAREDIKICDFGFAQKITPSEPQYSKYGSPEFVSPETIEQNPVSEGS  
DIWAMGVISYLSLTCSSPFAGESDRATLLNVLEGRVSWSSPTAAHLSSEDAKDFIKATLQRTPRARPSTSQCLA  
HPWFLKSMPAAEEAHFINTKQLKFLARSRWQRSLMSYKSILVMRSIPPELLQGPDPSPSLGVARHLRGEASGAS  
SSSSSDNELAPFARAKSLPPSPVTHSPLLHPRGFLRPSASLPEETEASMPADAAVSPASQSGAPPSPGCV  
PRHSVSISSLFYQQAGEGAERGNKTSGAKRHPARRRHLLKGGYIARALPGLREPLMEYSLLEEEAAREEQASLM  
TKTPSFETALRLPSSSVREVPGRSHSLDNPPVTTGSPPEACKEQLLFPSTGLTHETTAKDRGHKEGFLQESV  
PFPPMGSRSRPGKQEGSSQDSCRGPASSCHSELGSGSQEGCPSQSLGSLPPQSLKKEKELSTSCGPLFSEQ  
PQAAPFPTQVSPLLGSEKEPQDGLSEGPVVPSSSPGSASQVDASLDTEGLSEAGDTCDFTPPPQRQEQAT  
TRKFSLESRGGYAGVAGYGTFAFGDAGGMLGQGPLWARMWAVSQSSEEQDEAATESPQPLESGLPIAEASG  
VPLRTSPSLTPWEEVEQVSLVQIRDLSGDAEAADTISLDISEVDPAYLNLSLDYDIKYLPEFEMI FRRVPKPI  
EQPESPGSETEAGQGLADFLLEAAWPWPGELGLRAGLEITEEPEEPGDLEALLGEEAAVGRKRKWSPSRGLFQF  
PGRCLSGEEPVELGLRQVRKASMAHISRIKGRPEGEREGPPRKKAGLASFRLSGLKGRDQELSDEAVVLGQ  
SVTLACQVLAQPTAQTATWSKDGVLLESSGHLIISSTLKNFQLLTIILVVKEEDLGTYTCCVSNPLGTAVTTGVL  
RKAERPSSSPREVEGELYKDAVLLVWKPVESCGPVTVIVQCCIEGGSWTTLASDISDCCYLTGKLSRGGMYIF  
RTACVSKAGMGPISSPSEQVLLGGPNHLASEEESRGRPAQLLPSTKTFAFQMQIRRRGRFSVVRQCREKASGR  
ALAAKIVPYQPEDKTAVLREYEALKRLLHHPHLAQLHAAYLSPRHLVLIILELCSGPELLPSLAERESYSESDVK  
DYLWQMLSATQYLHAQHILHLDLRSENMMVTEYNLLKVIDLGNALDQEKVPAPENFKDYLETMAPELLEGG  
GAVPQTDIWAIGVTAIFIMLSGEYPESSSEGRDLQKGLRKLIRLSRCYAGLSGGAVAFQSSLCAQPWGRPCA  
STCLQCGLWTEEGPTGSRPTVTFPTVRLRAVFREREKRRALLYKKNLAQVR\*

>rs50041364\_ENSMUSP00000038264\_c.4619:G>A\_p.W1540\*

ENSMUST00000047441.14|Obscn-202|ENSMUSP00000061462|-|chr11:g.58994261:C>T  
MDHSFSGAPRFLTRPKAFVVSVGKDATLSCQIVGNMTPHVSWEKDRQFVEAGARFRLAQDGDVYRLTILDLAL  
GDSGQYVCRARNAIGEFAAVGLRVDSEGTCAEQAPHLLRPTSIRVREGADATFRCRVGGSPQPAVSWSKDG  
RRLGPPDAPHVRVEEHGESSALRIRSARPRDGGTYEVRAENPLGSASAAAALVVDSAEVAGPPGTSTATLLA  
HLQORREAMRAEGIPSPPGAGTRTCTVTEGKHARLSCFVTGEPKPEVWKKDQGLVTEGRRHVVEDEQENF  
VLKILFCKQSDRGLYTCTASNLVGQTYSSVLVVVREPTVPFKKRLQDLEVREKESATFQCEVAQPAEAAWFK

EETRLWASAKYDIEEEGETERRLTVRNVSADDDAVYICETTEGSRRTVAELSVQGNLTKLPRKTAVRTGDTAIF  
WVELAVPEGPVRWLRNQEEMVAGGRVAITAEGTCHTLTI FQCTLEDMGEVAFVSGGCRTTTTQFCVSAPRRPPL  
YPPADPVVKAKTESSVTLWSAPPHGDRPVTIDGYVLEKRKLGAYAWSRCHEAGWLATTEFTITGVAAEGDFQ  
FRVSAINHFGQGPYLEFPGTMHLVPLAVKTPLKAVEAVEGGEVTFVSDTLTVASSGEWFLDGEALKASSIYVI  
RCDRTRHMLTIREVPARLHGAQLKVFVANGIETS IQMVVRAALGLPS SKLPAAAAREVLAQLHHEAQLLAE LSD  
QAAA VTWLKDGRELSLGPKEYMQVSAGRRALLVRDVAQDDAGLYECVSRGSRTAYQLLVQDITDGYRDWGPAG  
PQKHMCKCAGAKIARYLGSSCYRFLQYDKGVWHWLEAALDTRQGKGTSSCSLHEKPKLVFAKQQAHSEVKA  
AGASATLSCEVAQAQTEVTFWKDGKLLSSSSKVRMEASGCSRRLVVQQAGKADAGEYSCEAGGQKLSFRLDVA  
EPKMVFAKEQQARSEVKAEGASATLSCEVAQAQTEVTFWKDGKLLSSSSKVRMEASGCSRRLVVQQAGKAD  
GEYSCEAGGQKLSFRLDVTEPKLVFAKEQQARSEVKAEGVNSATLSCEVAQAQTEVTFWKDGKLLSSSSKVRM  
EASGCSRRLVVQQAGKADAGEYSCEAGGQKLSFRLDVAE PKLVFAKEQQARSEVKAEGNSATLSCEVAQAQ  
EVTWTFWKDGKLLSSSSKVRMEASGCSRRLVVQQAGKADAGEYSCEAGGQKLSFHLDVTEPKLVFAKEQQAHSEV  
KAEAGASATLSCEVAQAQTEVTFWKDGKLLSSSSKVRMEASGCSRRLVVQQAGKADAGEYSCEAGGQKLSFR  
LDVAE PKLVFAKEQQARSEVKAEGASATLSCEVAQAQTEVTFWKDGKLLSSSSKVRVEASGCSRRLVVQQAGK  
ADAGEYSCEAGGQKLSFRLDVAE PKLVFAKEQQANSEVKAEGASATLSCEVAQAQTEVTFWKDGKLLSSSSK  
VRVEASGCSRRLVVQQAGKADAGEYSCEAGGQKLSFRLDVAE PKLFAKEQQAHSEVKAEGASATLSCEVAQA  
AQTEVT\*FKDGKLLSSSSKVRVEASGCSRRLVVQQAGKADAGEYSCEAGGQKLSFRLDVAE PKLFAKEQQAH  
SEVKAEGASATLSCEVAQAQTEVTFWKDGKLLSSSSKVRVEASGCSRRLVVQQAGKADAGEYSCEAGGQKLS  
FRLDVAE PKLFAKEQQAHSEVKAEGASATLSCEVAQAQTEVTFWKDGKLLSSSSKVRVEASGCSRRLVVQQ  
AGKADAGEYSCEAGGQKLSFRLDVAE PKLVFAKEQQAHSEVKAEGASATLSCEVAQAQTEVTFWKDGKLLSS  
SSKVRVEASGCSRRLVVQQV GKADAGEYSCEARGQKLSFRLDVAE AESQI PERPSRREPLVKEHETIILTAT  
IAAPSVAAVTWLKDGV EIRRSKRHEATSLGDTHLTVRGAQVLD SAIYSCRVGKEGQDFPVQVEEVA AKFSKP  
LEPVEGELGGTVMLVCELSPEQAEVWRCNGTQLRPGKRFQMTSEGPRRTLTVSGLREDDAE EYVCE SRDDRT  
SARLTVKVPRVVKFTSGLSAMVAEEGQEATFQCVVSPSDAGVTWYKDGMLQ PSEKFMVMEVGASRSLTILGL  
TLEDAGQVTVEAEGASSAALRVREAPVLFKKKLEPQTVEERTSVTLEVELTRPWPEVKWTRNAAVLTPSENV  
EIRAEGARHCLVLRVSGFADRGRFFGCETPDDKTQAKLNVEMRQVRLV RGLQEVEAKEQTGASMDVLESHAEVE  
GSWTRDGLRLQPGPKCHLAVQGPVHILTL SALQPQD SGLVAFRAEGVHTSARLIVTELPVSTFRVLVQD VVATQ  
KEKVTLECELSRPVDVRWLKDGVELRAGKAI GIVAQGTCSRSLVIYRCETGDQGVYVCDALDAQTSASLRVQGR  
TYTLIFRRVLAEDAGEVKFVAENAESRAHLRVKELPVTLLRPLRDKIAMEKHRGVLECVSRASAQVRWFKGG  
VELQSGPKYEVVSDGLYRKLVIN DVQPEDEDTYTC DAGNVKTSAQFFVEEQSITIVRGLKDMTVMEPAPAWFE  
CETSI PSVRPPKWL LGKTVLQAGNVGLEQDGTVHRLTLHKTCSTMTGPFVHFTIGKSRSSAQLVSDI PVVLT  
RPLEPKAGRELQSVVLSDFRPA PKAVQWYKDDTPLSPSEKFKMALEGQMAELRILRLTPADAGVYRCQAGSA  
QSSAEVTVAREVTVIQPLQDAEAMEEGRVCFSCELSHKDEDIEWSLNGTPLYNDSFHEISHEGLHTLVLKS  
VRQADTGTVCATSPKVSVSARLVVKGKPVVFLKALDDVSAEERGTLTLQCEVSDPEARVVRKDGVELGPSDK  
YDFLHKAGARGLTVHDLSHEDAGLYTCQVGSKETQSKVSVHDLHVGITKRLKTVEVLEGESCFECVLSHES  
SDPAVWTVGGKTVGSGHFAVRQGRKYTLTVKDAALSDAGEVVFVSVLGLTSKASLIIRERPVDITKPLEDQR  
TTLGEDVMLSCELSRAGTSVRWLKDGKAI RKSQKYDLLSEGTRAVLVVRKASLKDSGEYTCETEASKSTAKLC  
VEEKANRFTEELADLQVEEKGRAVFTCKTEHPASVVTWRKGLLELRASGKHVPSQEGTLTKLTINALERTDSD  
TYTCDIGQARTQARLLVHGQKVRVIEDLEDTAVQEGSSAKFCCRIPADYGPVHWFLDKTPLHSNELNEITVQ  
PGGYHVLTLRQLALKDSGTVYFEAGDQRTSALRVTEKPSIFSRPLTDVTVTEGEDLTLVCETTTVDSSVRWT  
KDGTLRPSARCQLSHEGCAQLLITATTPQDGGRYKCEIGGASSSIVRVHALPVRFRESLKDVEVPEGKAA  
TLRCVLSVAAPVEWRHGDDVLKSSNKYSLRQEGAVLELVIRDLQPQDSGQYSCSFGDQTTSATLTVKTS SAQ  
FVGKLRNKEATEGTTVTLRCELTK EAPVEWKGTETLRNGDKYSLKQDGAVCELQICSLLVADAGEYSCVCGQ  
EKTSATLTVKALLVHFVRRRLRSKEATEGDTTTLQCELSKAAPVEWRKGTETLRDGD RYSLKQDGAVCELQIRS  
LTIADAGEYLCTCGQEKTSATLTVRALPAKFKDSLKNEEATEGTTATLSCELSKAAPVTWKKGPKTLQSGDKY  
VLRQDGAVCGLQIHGLTMADAGEYSCVCGQEKTSATLTVRGLPAKFIEDLRSQEATEGATAILRCELSKAAPV  
EWRKGSETLKDGD RYTLRQDGAVCELQIRGLAVVDGTYS SLPTKFTTEGLRNEEATEGTMATLRCQMSKAAPV  
EWRKGSETLRDGD RYSLRQDGAMCELQIRGLTIEDSGEYTCVCGQEKTSATLSVKALPPRFIEDLRSQEATEG  
TMATLRCQMSKAAPVEWRKGSETLRDGGRYSLRQNGAVCELQIHDLAVEDTGEYSCVCGQEKTSATLNVKALP  
PRFIEDLRSQEATEGTMATLRCQMSKAAPVEWRKGSETLRDGGRYSLRQDGAVCELQIHDLVEDAGQYSCVC  
GQEKTSAVLTVDALPPKFTTEGLKKEEATEGTMVTLRCQMSKEATVEWRKGAKTSLDGGRYSLRQDGAMCELQI  
CGLAVEDAGEYSCVCGQEKTSATLSVKALPPRFIEDLRSQEATEGTMATLRCQMSKAAPVEWRKGSKTLRDGD  
RYSRLQDGAMCELQICDLAVEDTGDYSCVCGQEKTSATLSVKAPQVVFQQPLQNLQAEEGSMASLRCELSV PN  
AAMVWSKGGLELQGDTRREARQQGCVAELLRLDRLEDAGEYSCTCGSQTTSATLMTVAAPVRFRLRLQAQDV  
DEGATARLCELSREAVSVEWRKGS LQLFPKAKYQMVQEGTTAELLVHGVQEDEDAGEYTC DAGHTQS IARLSV  
RAPKPKFKTDLQSTEQEAGGTARLCCQLSEAE PGTPVQWLKEGVELHVGSKYEMRRQGAVCELLIHGLEAKDT  
GEYACLVGQKTLASLRVKEPEVTIVRGLVDMEVQADEDEVEFTCKVVSQAGATDVQWHLQGLPLQSNVTEVAV  
LADGCTHVLQLKGVTTLEDAGTVSFHVGG LSSSAQLTVRVPEVTVLEPLKDVQLSEGD DAHFRCLSRASGQEA

RWALGGVPLQCNEMNDITVEQGTLYLLTLHKVTLEDAGTITLQVGSSESQAQLKVTAKNTVLRGLENVDALEG  
GEALFECQLSQPEVAHAHTWLLDDEPVHTSEKVEVVYFENGLRHLLLLLNKLPQDSCRVTFLAGDVVTS AFLTV  
RALPDPPEDAEVVGRSDHSVTLVSWVAPMSDGGGGLCGYRVMKEASTGQWQLCHDLVPGPECVDDLVPGKTY  
RFRVAAVGPAGAGEPVHLPQMVKIAPAPAPAPAPAPAPAPAPETRAVVGEDICLELEVAADGGEVVWHKTERI  
QPGGHFEVLSRGQRQMLVIKGFRTEDQGEYRCGPIQGLPSSGAATFNVMVMTSGSGDEVPAQPSLPEAAQEGD  
LHLLWEALARKRRMSREPTLDSISELPEEDSRVQHLRQEAETAPDLSEGYSTADELARTGEADLSHTSSDDE  
SRAGTPSLVTYLLKAGGPGISPLASKHEAQVTTSVKPKQKQPEVVPVTCPPPGDLSAADLMDPSLDKAAVKIQA  
AFKGYKVRKEMKQQEGPVFSRTFGDTEAQVGDVLRLECVLATKTDMRACWLKDGIELTDGRHYHIDQLKDGTC  
SLLVTLGLAPTDSGRYTCQVSTKSGRVSHSACVVVSGTESEAESSGGELDDAFRRAARRLHRLFRTKSPAELS  
EEELFLSADEGPEPEPADWQTYREDENFVCIRFESLAEARQAVTCFRNMFATMGIGVEISLGEQGPGRVEM  
RIGKVAPTVTPAVPLAKTPGLQTSDAAPVFLTELQNDVQDGYPMSFDCVVTGQPVPSVRWFKDGKLLLEDDH  
YMINEDQQGGHQLIITAVVPADMGVYRCLAENSMGVSSTKAE LRVELTSTDYDTAADATETSSYFSAQGYLSS  
REQEGTESDEGQLPQVLEELKDLQVAPGTRLAKFQLKVKGYPAKLYWFKDGQPLTSDHIRMTDKKTLHTLE  
IVSVTREDSDGQYAAIISNAVGAAYSSARLLVRGPSEPEEKPASDVHERLVPRILEKFTPKKVKRGSSTFSV  
KVEGHPAPSVHWLKEEAEGVWLVIGPDTPGYTMASSSKQHSLVLLDVGQRHQGTYTCTIATNPAGQALCSASLH  
ISGLAKEEEQERVKEALISSFLQGTSAVSAQMSESAFADLVGQSKGESLVAEEAHSHLSLAEVGTTEEFLOK  
LTSQITEMVSAKISQAKLQVPGGDSDEETKTPSASPRHGRSRPSSSVQESSSEDEGDSRGEIFDIYVVVTADY  
LPLGAEQDAIILREGQYVEVLDSAHPLRWLVRTKPTKSSPSRQGWVSPAYLDKRLKLSPEWGPTEAPEFPGEA  
VSEDEYRTRLSSVIQELLSSEQAFVGEQFLESHHMKHLERSPRVPAAVASQKTVIFRNVQDISHFHSSFLKE  
LQCGCTDDDVAMCFIKNQEAFAEKYLEFLVGRVQAESVVVSTPVQEFYKKYAEETLSAKDPTQPPPPPLQHYLE  
QPVERVQKYQALLKELIRNKARNRQNCALLEQAYAVVSALPQRAENKLVSLMENYPGTLEALGEPTRQGHFI  
VWEGAPGARMPPWKGNHRHVFLFRNYLVICKPRRDSRTDTFSYVFRNMMKLSSIDLNDQVEGDRAFEVWHERE  
DSVRKYLQARTVIKNSWVKEICGIQORLAQPVWRPPEFEEELADCTAELGETVKLACRVTGTPKPIVSWYK  
DGKPVVEVDPHHILIEDPDGSCSTLILDNLGTIGDSQYMCFAASAAGNASTLGKILVQVPPRFVNVKVRATPFVEG  
EDAQITCTVEGAPYPQIRWYKDGTLAPGNRYRMLNEPRSGVVLVLIQAASKEDLGHYCELVNRLGSTRGGG  
ELYMQSPALRRYDQHHREQIVAAVEGAPSMQVTEIDVQVQVGDMAQFDAVIEGHPPPVTWYKGSTQLTSSAR  
LSQRQDGLTDTYSLVLTVDVAPHDAGVYTCVANNAGGVCLCAEELLVHGGDKLDAENQVYRRKLHSLFYDVQEEIGR  
GVFGVVKRVQHKGNMFCAAKFIPLRSKTRAQAYQERDILATLGHPLVTGLLDQFETRKTLLILELCSSEEL  
LDRLFKKGVVTEAEVKVYIQQLVEGLHYLHSHGILHLDIKPPNIMVHPAREDIKICDFGFAQKITPSEPOYS  
KYGSPFVVSPEIIEQNPNVSEGSDIWAMGVI SYLSLTCSSPFAGESDRATLLNVLEGRVSWSSPTAAHLSERDAK  
DFIKATLQRTPRARPSTSQC LAHPWFLKSMPAAEAHFINTKQLKFLARSRWQRSLMSYKSI LVMRSIPPELLQ  
GPPDSPSLGVARHLRGEASGASSSSSSSDNELAPFARAKSLPPSPVTHSPLLHPRGFLRPSASLPEETEASMP  
TADAAPVAPSPQASAGPPASPGCVPRHSVSISSLFYQQAGEGAERGNKTS GAKRHPARRRHLKGGYIARALPGLR  
EPLMEYSLLEEEAAREEQASLMTKTPSFETALRLPSSSVREVPGRSHSLDNPVTTGSPPEACKEQLLFPST  
GLTHEHTAKDRGHKEGFLQESVFPFPMGDSRPGKQEGSSQDSCRGPASSCHSELGSGSQEGCGPPSSQSLG  
SLPPQSLKKEKELSTSCGPLFSEQQAAPFPTQVSPLLGSEKPEPQDGSLSSEGVPVPSPPSSPGSASQVDSLDTGEG  
LSEAGDTCDFTPPPQRPQEQATRKFSLERSGGYAGVAGYGTFAFGGDAGGMLGQGPLWARMWAVS QSSEEQ  
DEAATESPQPLESLGPIAEASGVPLRTSPSLTPWEEVEQVSLVQIRDLSDGAEAAADTISLDISEVDPAYLNL  
DLYDIKYLPPFEFMI FRRVPKPIEQPESPGSETEAGQGLADFLLEAAWPWPGEGLGLRAGLEITEPEEPGDLEA  
LLGAAVGRKRKWSPSRGLFQFPGRCLSGEEPVELGLRQRVKASMAHISRILKGRPEGPREGPPRKKAGLAS  
FRLSGLKGRDQELSDEAVVLGQSVTLACQVLAQPTAQATWSKDGVLLES SGHLLISSTLKNFQLLTI LVVKEE  
DLGTYTCCVSNPLGTAVTGVLKRAERPSSSPRPEVGEYKDAVLLVWKPVESECGPVTYIVQCCIEGGSWTTL  
ASDISDCCYLTKLSRGGMYIFRTACVSKAGMGPYSSPSEQVLLGGPNHLASEEESSRGRPAQLLPSTKTFAF  
QMQIRRRGRFVVRQCREKASGRALAAKIVPYQPEDKTAVREYEAALKRHLHHPHLAQLHAAYLSPRHLVLI LEL  
CSGPELLPSLAERESYSESDVKDYLWQMLSATQYLAHQHILHLDLRSENMMVTEYNLLKVIDLGNAQSLDQEK  
VPAPENFKDYLETMAPELLEGGQAVPQTDIWAIGVTAIFIMLSGEY PESSSEGTDLQKGLRKLIRLSRCYAGL  
SGGAVAFLOSSLCAQPWGRPCASTCLQCGWLTEEGPTGSRPTVPTVPTVRLRAFVREKRRALLYKXHNLAQ  
VR\*

>rs50041364\_ENSMUSP00000049737\_c.4694:G>A\_p.W1565\*  
ENSMUST00000052872.15|Obscn-203|ENSMUSG00000061462|-|chr11:g.58994261:C>T  
MDHSFSGAPRFLTRPKAFVSVGKDATLSCQIVGNPTPHVSWEKDRQPVEAGARFLAQDGDVYRLTILDLAL  
GDSGQYVCRARNAIGEFAAVGLRVDSEGTCAEQAPHFLLRPTSIRVREGADATFRCRVGGSPQPAVSWSKDG  
RRLGPPADAMHVRVEEHGESSALRIR SARPRDGGTYEVRAENPLGSASAAAALVVDSDAEVAGPPGTSTATLLA  
HLQRRREAMRAEIQIPSPGAGTRTCTVTTEGKHARLSCFVTGEPKPETVWKKDGLVTEGRHVYVEDEQENF  
VLKILFCKQSDRGLYCTASNLVQTYSSVLVVVREPTVPFKKRLQDLEVREKESATFQCEVAQVATEAAWFK  
EETRLWASAKYDIEEGTERRLTVRNVSADDDAVYICETTEGSRVAELSVQGNLTKLPRKTAVRTGDTAIF  
WVELAVPEGPVRWRNQEEMVAGGRVAITAEGTCHTLTIFQCTLEDMGEVAFVSGGCRTTTQFCVSAPRRPPL  
YPPADPVVKAKTESSVTLWSAPPHGDRPVTIDGYVLEKRKLGAYAWSRCHEAGWLATTEFTITGVAAEEDGFQ



FRVSAINHFGQGPYLEFPGTMHLVPLAVKTPKAVEAVEGGEVTFVSDLTVASSGEWFLDGEALKASSIYVI  
 RCDRTRHMLTIREVPARLHGAQLKVFVANGIETSIQMVVRAALGLPSSKLPAAAAREVLALQHEEAQLLAELSD  
 QAAAVTWLKDGRELSLGPYEMQVSAGRRALLVRDVAQDDAGLYECVSRGSRRTAYQLLVQEPKLVFAKQQA  
 SEVKAEAGNSATLSCEVTQAQTEVTFWKDGGKLSSSSKVRMEASGCSRRLLVVQQAGKADAGEYSCEAGGQKLS  
 FRLDVAEPKLVFAKQQAHESEVKAEAGASATLSCEVAQAQTEVTFWKDGGKLSSSSKVRMEASGCSRRLLVVQQ  
 AGKADAGEYSCEAGGQKLSFRLDVAEPMVFQAEQQARSEVKAEAGASATLSCEVAQAQTEVTFWKDGGKLS  
 SSKVRMEASGCSRRLLVVQQAGKADAGEYSCEAGGQKLSFRLDVTEPKLVFAKEQQARSEVKAEVGNATLSCE  
 VAQAQTEVTFWKDGGKLSSSSKVRMEASGCSRRLLVVQQAGKADAGEYSCEAGGQKLSFRLDVAEPKLVFAKEQ  
 QARSEVKAEAGNSATLSCEVAQAQTEVTFWKDGGKLSSSSKVRMEASGCSRRLLVVQQAGKADAGEYSCEAGGQ  
 KLSFHLDVTEPKLVFAKEQQAHSEVKAEAGASATLSCEVAQAQTEVTFWKDGGKLSSSSKVRMEASGCSRRLLV  
 VQQAGKADAGEYSCEAGGQKLSFRLDVAEPMVFQAEQQARSEVKAEAGASATLSCEVAQAQTEVTFWKDGGK  
 LSSSKVRVEASGCSRRLLVVQQAGKADAGEYSCEAGGQKLSFRLDVAEPMVFQAEQQANSEVKAEAGASATL  
 SCEVAQAQTEVTFWKDGGKLSSSSKVRVEASGCSRRLLVVQQAGKADAGEYSCEAGGQKLSFRLDVAEPKLAFA  
 KEQQAHSEVKAEAGASATLSCEVAQAQTEVT\*FKDGGKLSSSSKVRVEASGCSRRLLVVQQAGKADAGEYSCEA  
 GGQKLSFRLDVAEPKLAFAKEQQAHSEVKAEAGASATLSCEVAQAQTEVTFWKDGGKLSSSSKVRVEASGCSR  
 RLVVQQAGKADAGEYSCEAGGQKLSFRLDVAEPMVFQAEQQAHSEVKAEAGASATLSCEVAQAQTEVTFWKD  
 GKLSSSSKVRVEASGCSRRLLVVQQAGKADAGEYSCEAGGQKLFRLDVAEPMVFQAEQQAHSEVKAEAGAS  
 ATLSCEVAQAQTEVTFWKDGGKLSSSSKVRVEASGCSRRLLVVQQAGKADAGEYSCEAGGQKLSFRLDVAEPK  
 LFAKEQQAHSEVKAEAGASATLSCEVAQAQTEVTFWKDGGKLSSSSKVRVEASGCSRRLLVVQQVQKADAGEYS  
 CEARGQKLSFRLDVADTRLMFAKEQQARTEVKAEAGNSATLSCEVAQAQTEVTFWKDGGKLSSSSKVRVEASG  
 CSRRLLVVQQAGKADAGEYSCEAGGQKLSFRLDVAEAEESQIPERPSRREPLVVKEHETIILTATIAAPSVAAVT  
 WLKDGVEIRRSKRHEATSLGDTHLTVRGAQVLDIAIYSCRVGKEGQDFPVQVEEVAAKFSKPLEPVEGELGG  
 TVMLVCELSPEQAEVWRCGNTQLRPGKRFQMTSEGPRRTLTVSGLREDDAEYVCESTRDDRTSARLTVKVP  
 VVKFTSGLSAMVAEEGQEAFTQCVCVSPSDAGVTWYKDGMLQPSSEKFMVESGASRSLTILGLTLEDAGQVTV  
 EAEAGASSAALRVREAPVLFKFKLEPQTVEERTSVTLEVELTRPWPVEVKWTRNAAVLTPSENVEIRAEGARHC  
 LVLRSVGFADRGFFGCEPDDKTQAKLNVEMRQVRLVGLQVEAKEQGTASMDVELSHVAEVEGSWTRDGLRL  
 QPGPKCHLAVRQGRKYTLTVKDAALSADAGEVVFVSLGLTSKASLIIRERPDITKPLEDQRTTLGEDVMLS  
 SRPVDVRWLKDGVELRAGKAIIGIVAQGTCSRSLVIYRCETGDQGVYVCDALDAQTSASLRVQGRTYTLIFRRVL  
 AEDAGEVKFVAENAESRAHLRVKELPVTLLRPLRDKIAMEKHRGVLECVSRASAVRWFVGGVLEQSGPKYE  
 VVSDGLYRKLVINVDVQPEDEDTYTCDAGNVKTSAQFFVEEQSITIVRGLKDMTVMPEPAPAWFECETSIPSVRP  
 PKWLLGKTVLQAGGNVLEQDGTVHRLTLHKTCSTMTGPVHFTIGKSRSSAQLVVSDIPVVLTRPLEPKAGRE  
 LQSVVLSCDFRPAPKAVQWYKDDTPLSPSEKFKMALEGGMAELRILRLTPADAGVYRCQAGSAQSSAEVTVEA  
 REVTVIQPLQDAEAMEEGRVCFSCELSHKDEDIEWLSLNGTPLYNDSFHEISHEGCLHTLVLSVRQADTGTVC  
 ATSPKVSVSARLVVKGKPVVFLKALDDVSAEERGTLLTQCEVSDPEARVVWRKDGVELGPSDKYDFLHKAGAR  
 GLTVHDLSDHEDAGLYTCQVGSKETQSKVSVHDLHVGITKRLKTEVELEGECSFECVLSHESPSDPAVWTVGG  
 KTVGGSGHFHAVRQGRKYTLTVKDAALSADAGEVVFVSLGLTSKASLIIRERPDITKPLEDQRTTLGEDVMLS  
 CELSRAGTSVRWLKDGKAIKRSQKYDLLSEGTRAVLVVRKASLKDSGEYTCETEASKSTAKLCVVEEKANRFT  
 ELADLQVEEKGRAVFTCKTEHPASVVTWRKGLLELRASGKHVPSQEGTLKLTINALERTDSDTYTCDIGQAR  
 TQARLLVHGQKVRVIEDLEDTAVQEGSSAKFCCRIAPADYGPVHWFVLDKTPHLSNELNEITVQPGGYHVTLR  
 QLALKDSGTVYFEAGDQRTSAAALRVTEKPSIFSRPLTDVTVTEGEDTLVCETTTVDSSVRWTKDGKTLRPSA  
 RCQLSHEGCQAQLLITATTPQDGGRYKCEIGGASSSIVRVHALPVRFRESLKDVEVPEGKAATLRCVLSVA  
 APVEWRHGDDVLKSSNKYSLRQEGAVLELVIRDLQPDQSGQYSCSFGDQTTSATLTVKTSQAQFVGLKRNKEA  
 TEGTTVTLRCELTKAEVWKKGTETLRNGDKYSLKQDGAVALCELQICSLLVADAGEYSCVCGQEKTSATLTVK  
 ALLVHFVRRRLRSKEATEGDTTTLQCELSKAAPVEWRKGTETLRDGDYSLKQDGAVALCELQIRSLTIADAGEYL  
 CTCGQEKTSATLTVRALPAKFKDSLKNEEATEGTTATLSCELSKAAPVTWKKGPKTLQSGDKYVLRQDGAVAL  
 LQIHGLTMADAGEYSCVCGQEKTSATLTVRGLPAKFIEDLRSQEATEGATAILRCELSKAAPVEWRKGSSETL  
 DGDRYTLRQDGAVALCELQIRGLAVVDGTYSLSLPTKFTTEGLRNEEATEGTMATLRCQMSKAAPVEWRKGS  
 SETLRDGDRYSLRQDGAVALCELQIRGLTIEDSGEYTCVCGQEKTSATLSVKALPSRFIEDLRSQEATEGTMATLRCQMS  
 KTAPVEWKKGSETLRDGGRYSLRQDGPVCELQICDLAVEDAGEYSCVCGQEKTSATLSIKALPPRFIEDLRSQ  
 EATEGTMATLRCQMSKAAPVEWRKGSSETLGDGGRYSLRQNGAVCELQIHDLAVEDTGEYSCVCGQEKTSATLN  
 VKALPPRFIEDLRSQEATEGTMATLRCQMSKAAPVEWRKGSSETLRDGGRYSLRQDGAVALCELQIHDLVEDAGQ  
 YSCVCGQEKTSAVLTVDALPPKFTTEGLKKEEATEGTMVTLRCQMSKEATVEWRKGAKTLSDDGGRYSLRQDGA  
 VALCELQICGLAVEDAGEYSCVCGQEKTSATLSVKALPPRFIEDLRSQEATEGTMATLRCQMSKAAPVEWRKGS  
 SETLRDGDYSLRQDGAVALCELQIRDLAVEDAGEYLCVCGQEKTSATLSVKALPPRFIEDLRSQEATEGTMATLRCQ  
 MSKAAPVEWRKGSSETLRDGDYSLRQDGAVALCELQICDLAVEDTGDYSCVCGQEKTSATLSVKALPPRFIEDL  
 RSQEAREGTVATLRCMSKAAPVEWRKGSSETLKDGDYSLRQEGNLCELQIRDLAVEDTEEYSCVCGQEKTSAT  
 LSVKALPAKFIEDLRSQEAPESSTVTLRCKLSKKASVVWKKGSETLRNGARYSLRQDGAVALCELQIRDLTVEDT  
 GEYSCTCGQERTSATLSIMAPQVVFQPLQNLQAEEGSMASLRCELSVPNAAMVWSKGGLELQDTRREARQQ

GCVAEALLRLDLRREDAGEYSCTCGSQTTSATLMVTAAPVRFLELQAQDVDEGATARLRCELSREAVSVEWRK  
GSLQLFPCAQYQMVQEGTTAELLVHGVEQEDAGEYTC DAGHTQS IARLSVRAPKPKFKTDLQSTEQEAGGTAR  
LCCQLSEAEPTPVQWLKEGVELHVGSKYEMRRQGA VCELLIHGLEAKDTGEYACL VGGQKT LASLRVKEPEV  
TIVRGLVDMEVQADEDEVEFTCKVSQAGATDVQWHLQGLPLQSNEVTEVAVLADGCTHVLQKGVTL EDAGTVS  
FHVGGSSSAQLTVRVPEVTVLEPLKDVQLSEGD AHFRCRLSRASGQEARWALGGVPLQCNEMNDITVEQGT  
LYLLTLHKVTLEDAGTITLQVGS CSSEALKVTAKNTVLRGLENVDAL EGG EALFECQLSQPEVA AHTWLLDD  
EPVHTSEKVEVVYFENGLRHLLLLKNLKPQDSCRVTFLAGDVVTS AFLTVRGWRLEVLEPPHDASVKAGMQVR  
FTCILSEAVPVGEATWYINGAAIQPDDTDWTVTTD GSHHALTLSNAQFQHAGEVTF AARDAVASARLSVLALP  
DPEDAEVVGRSDHSVTL SWVAPMSDGGGLCGYRVEMKEASTGQWQLCHDLVPGPECVVDDLVPGKTYRFRV  
AAVGPAGAGEPVHLPQMVKIAPAPAPAPAPAPAPAPETRQAVVGEDIC LELEVAADGGEVVWHKGTERTIQPGG  
HFEVLSRGRQMLVIKGFRTEDQGEYRCGPIQGLPSSGAATFNVMVMTSGSGDEVPAQPSLPPEAAQEGDLHLL  
WEALARKRRMSREPTLDSISELPEEDSRVQHLRQEAEETAPDLSEGYSTADELARTGEADLSHTSSDDES RAG  
TPSLVTYLKKAGGPGISPLASKHEAQVTT SVKPKQKQEPVPTCPPPGDLSAADLMDPSLDKAAVKIQAAFKG  
YKVRKEMKQQEGPVFSRTFGDTEAQVGDVLRLECVLATKTD MRACWLKDGIELTDGRHYHIDQLKDGTC SLLV  
TGLAPTDSGRYTCQVSTKSGRVSHSACVVVSGTESEAE SSSGGELDDAFRRARLHRLFRTKSPAELSEEEL  
FLSADEGPEPEEPADWQTYREDENFVICRFESLAEARQAVTCFRNMFATMGIGVEISLGEQGPGRVEMRIGK  
VAPTVPFAVPLAQTGLQTS DAAPVFLTELQNDVQDGYPMSFDCVVTGQPVPSVRVFKDGLLEEDDHYMIN  
EDQQGGHQLIITAVVPADMGVYRCLAENSMGVSSTKAELRVELTSTDYDTAADATETSSYFSAQGLSSSREQE  
GTESDEGQLPQVLEELKDLQVAPGTRLAKFQ LKVKGY PAKLYWFKDGQPLTSDHIRMTDKKTLHTLEIVSV  
TREDSGQYAAIYISNAVGAAYSSARLLVRGPSEPEEK PASDVHERLVPRI LEKFTPKKVKRGSSTIFSVKVEG  
HPAPSVHWLKEEA EKGV LWIGPDTPGYTMAS SSKQHS LVLVDVGRHQGT YTCIATNPAGQALCSASLHISGL  
AKEEEQERVKEALISSFLQGTSQAVSAQMS ESAGFADLVGQSKGESLVAEEAHSHLSLAEVGT EEF LQKLT SQ  
ITEMVSAKISQAKLQVPGGDSDEETKTPSASPRHGRSRPSSSVQESSSESEDGDSRGEI FDIYVVTADYLP LG  
AEQDAIILREGQYVEVLD SAHPLRWLVRTKPTKSSPSRQGWVSPAYLDKRLKLSPEWGPTEAPEFPGEAVSED  
EYRTRLSSVIQELLSSEQAFVGE LQFLSHHMKHLERSPRVPAAVASQKT VIFRNVQDISHFHSSFLKELQGC  
GTDDDVAMCFIKNQAEFAFEKYLEFLVGRVQAEVSVVSTPVQEFYKKYAEETLSAKDPTQPPPPLOHYLEQVVE  
RVQKYQALLKELIRNKARNRQNCALLEQAYAVV SALPQRAENKLVSLMENYPGTLEALGEP I RQGHFVWEG  
APGARMPWKGNHRHVF LFRNYLVICKPRRDSRTD TFSYVFRNMMKLSSIDLNDQVEGD DRAFEVWHERE SVR  
KYLQARTVI IKNSWVKEICGIQQR LAQPVWRPPEFEELADCTAELGETVKLACRVTGTPKPIVSWYKDGKP  
VEVDPHHILIEDPDG SCTLIDLNLTGIDSGOYMCFAASAAGNASTLGKILVQVPPRFVNVKVRATPFVEGEDAQ  
ITCTVEGAPYPQIRWYKDGTL LAPGNRYRMLNEPRSGVLV LVIQAASKEDLGHYECELVNRLGSTRGGELYM  
QSPALRARDQHHREQIVAAVEVTEQETKVPKKT VIEETITTVVKS PRGRRQSPGKSPSRSPRRSASPRRPG  
LLAPERLYPPGTSPSRLEVEQGRKAPVPALYVTEAEVHAPASQSQPKWLEVEETIEVRVKKTGSRGASPVRE  
MTRSREGILFTLPGGIPGRDPNANNNSNKS SVYQEA RTWGP AVVHVGEFFI FQVDSVGNVDVVAASPEPEQVRA  
SQKEENTERQEGCSDG DENTFLMEEPQD TDSLQGRDPKILTHNGRVLTADLEDYVPQEGETF GCGDSTPSTP  
DEPPCEVSVLQREI SEPTVGQPVLLNVGRPPGTGATPSFFRPGSQVHSPESV SFLLEAWSGPVSAAPWTSS F  
HTHVQSSVDGSHGSFKTEVSTQTVSFGAVGETVTLHIDPDGGEAPGPSQG\*  
>rs50041364\_ENSMUSP00000020732\_c.4895:G>A\_p.W1632\*  
ENSMUST00000020732.13|Obscn-201|ENSMUSG00000061462|-|chr11:g.58994261:C>T  
MDHSFSGAPRFLTRPKAFVSVGKDATLSCQIVGNPTPHVSWEKDRQFVEAGARFRLAQDGDVYRLTILDLAL  
GDSGQYVCRARNAIGEAFAAVGLRVDSEGTCAEQAPHLLRPTSIRVREGADATFRCRVGGSPQPAVSWSKDG  
RRLGPPDAPHVRVEEHGESSALRIRSARPRDGGTYEVRAENPLGSASAAAALVVDSAEVAGPPGTSTATLLA  
HLQORREAMRAEGIPSPPPGAGTRTCTVTEGKHARLSCFVTGEPKPEVWKKDGQLVTEGRRHVVEDEQENF  
VLKILFCKQSDRGLYCTASNLVGGTYSSVLVVVREPTVPFKKRLQDLEVREKESATFQCEVAQPA TEAAWFK  
EETRLWASAKYDIEEEGTERRLTVRNVSADDDAVYICETTEGSRVVAELSVQGNLTKLPRKTAVRTGD TAI F  
WVELAVPEGPVRWLRNQEEMVAGGRVAITAEGTCHTLTI FQCTLEDMGEVAFVSGGCR TTTQFCVSAPRRPPL  
YPPADPVVKAKTESSVTL SWSAPPHGDRPVTIDGYVLEKRKLGAYAWSRCHEAGWLATTEFTITGVAAEEDFQ  
FRVSAINHFGQGPYLEFPGMTMLVPLAVKTP LKAVEAVEGGEVTFVSDLTVASSGEWFLDGEALKASSIYVI  
RCDRTRHMLTIREV PARLHGAQLK FVANGIETS IQMVVRAALGLPSSKLPAAAAREVLAQLHEEAQLLAE LSD  
QAAAVTWLKDGRELSLGPKEYMQVSAGRRALLVRDVAQDDAGLYECVSRGSR TAYQLLVQDITDGYRDWGPAG  
PQKHMCKCAGAKIARYLGS SCYRFLQYDKGVWHLEAALDTRQKGKTS SCSLHEKPKLVFAKQQAHSEVKA E  
AGNSATLSCEVTQAQTEVTFWKDGKLLSSSSKVRMEASGCSRRLVVQQAGKADAGEYSCEAGGQKLSFRLDVA  
EPKLVFAKQQAHSEVKA EAGASATLSCEVAQAQTEVTFWKDGKLLSSSSKVRMEASGCSRRLVVQQAGKADA  
GEYSCEAGGQKLSFRLDVAEPKMFVFAKEQQARSEVKA EAGASATLSCEVAQAQTEVTFWKDGKLLSSSSKVRM  
EASGCSRRLVVQQAGKADAGEYSCEAGGQKLSFRLDVTEPKLVFAKEQQARSEVKA EAGASATLSCEVAQAQ  
EVTWFKDGKLLSSSSKVRMEASGCSRRLVVQQAGKADAGEYSCEAGGQKLSFRLDVAEPKLVFAKEQQARSEV  
KAEAGNSATLSCEVAQAQTEVTFWKDGKLLSSSSKVRMEASGCSRRLVVQQAGKADAGEYSCEAGGQKLSFHL  
DVTEPKLVFAKEQQAHSEVKA EAGASATLSCEVAQAQTEVTFWKDGKLLSSSSKVRMEASGCSRRLVVQQAGK

ADAGEYSCEAEGQKLSFRLDVAEPKLVFAKEQQARSEVKAEAGASATLSCEVAQAQTEVTFWKDGGKLSSSSK
VRVEASGCSRRLVVQQAGKADAGEYSCEAGGQKLSFRLDVAEPKLVFAKEQQANSEVKAEAGASATLSCEVAQ
AQTEVTFWKDGGKLSSSSKVRVEASGCSRRLVVQQAGKADAGEYSCEAGGQKLSFRLDVAEPKLAFAKEQQAH
SEVKAEAGASATLSCEVAQAQTEVT\*FKDGGKLSSSSKVRVEASGCSRRLVVQQAGKADAGEYSCEAGGQKLS
FRLDVAEPKLAFAKEQQAHSEVKAEAGASATLSCEVAQAQTEVTFWKDGGKLSSSSKVRVEASGCSRRLVVQQ
AGKADAGEYSCEAGGQKLSFRLDVAEPKLAFAKEQQAHSEVKAEAGASATLSCEVAQAQTEVTFWKDGGKLS
SSKVRVEASGCSRRLVVQQAGKADAGEYSCEAGGQKLFRLDVAEPKLMFAKEQQAHSEVKAEAGASATLSCE
VAQAQTEVTFWKDGGKLSSSSKVRVEASGCSRRLVVQQAGKADAGEYSCEAGGQKLSFRLDVAEPKLVFAKEQ
QAHSEVKAEAGASATLSCEVAQAQTEVTFWKDGGKLSSSSKVRVEASGCSRRLVVQQVQKADAGEYSCEARGQ
KLSFRLDVADTRLMFAKEQQARTEVKAEAGNSATLSCEVAQAQTEVTFWKDGGKLSSSSKVRVEASGCSRRLV
VQQAGKADAGEYSCEAGGQKLSFRLDVAEAEESQIPERPSRREPLVVKEHETIILTATIAAPSVAAVTWLKDGV
EIRRSKRHEATSLGDTHTLTVRGAQVLDIAIYSCRVGKEGQDFPVQVEEVAAKFSKPLEPVEGELGGTVMLVC
ELSPQAEVWRCGNTQLRPGKRFQMTSEGPRRTLTVSGLREDDAEYVCESTRDDRTSARLTVKVPVVKFTS
GLSAMVAEEGQEATFQCVVSPSDAGVTWYKDGMLQPSSEKFMVVEGASRSILTILGLTLEDAGQVTEAEGAS
SSAALRVREAPVLFKKKLEPQTEERTSVTLEVELTRPWPEVKWTRNAAVLTPSENVEIRAEGARHCLVLRV
GFADRGGFFGCETPDDKTQAKLNVEMRQVRLVRLGQVEEAKQGTASMDVELSHAEEVEGSWTRDGLRQLQPGPK
HLAVQGPVHILTLALSALQPDGLVAFRAEGVHTSARLIVTELPVSFTRVLQDQVVTQKEKVTLECELSRFPDV
RWLKDGVLELRAGKAIGIVAQGTCSRSLVIYRCETGDQGVYVCDALDAQTSASLRVQGRTYTLIFRRLAEDAGE
VKFVAENAESRAHLRVKELPVTLLRPLRDKIAMEKHRGVLECCQVSRASAQVRWFKGGVELQSGPKYEVVSDGL
YRKLVINVDQPEDEDTYTCDAGNVKTSAQFFVEEQSITIVRGLKDMTVMPPAWFECETSIPSVRPPKWLGL
KTVLQAGGNVGLQDGTVHRLTLHKTCSTMTGPVHFTIGKSRSSAQLVVSDIPVVLTRPLEPKAGRELQSVVL
SCDFRPAPKAVQWYKDDTPLSPSEKFKMALEGGMAELRILRLTPADAGVYRCQAGSAQSSAEVTEAREVTVI
QPLQDAEAMEEGRVCFSCELSHKDEDEIWSLNGTPLYNDSFHEISHGCLHTLVLSKVRQADTGTVCATSPKV
SVSARLVVKGKPVVFLKALDDVSAEERGLTLQCEVSDPEARVWVRKDGVELGSPDKYDFLHKAGARGLTVHD
LSHEDAGLYTCQVGSKETQSKVSVHDLHVGITKRLKTVEVLEGESECSFECVLSHESPSDPAVWTVGGKTVGG
GHFHAVRQGRKYTLTKVDAALSDAGEVVFVSLVGLTKSKASLIIRERPVDITKPLEDQRTTELEDVMLSCELSRA
GTSVRWLKDGVELRAGKAIGIVAQGTCSRSLVIYRCETGDQGVYVCDALDAQTSASLRVQGRTYTLIFRRLAEDAGE
VEEKGRAVFTCKTEHPASVVTWRKGLLELRASGKHVPSQEGTLTKLTINALERTDSDTYTCDIGQARTQARLL
VHGQKVRVIEDLEDTAVQEGSSAKFCRIAPADYGPVHWFLLDKTPLHSNELNEITVQPGGYHVLTLRQLALKD
SGTVYFEAGDQRTSAALRVTEKPSIFSRPLTDVTVTEGEDTLTVCETTTVDSVVRWTKDGKTLRPSARCQLSH
EGCQAQLLITATTPQDGGRYKCEIGGASSSSIVRVHALPVRFRESLKDVEVPEGKAATLRCVLSVAAPVEWR
HGDDVLKSSNKYSLRQEGAVLELVIRDLQPDQSGQYSCSFGDQTSATLTVKTSQAQFVQKLRNKEATEGTTV
TLRCELTKAEAPVEWKKGTETLRNGDKYSLKQDGAVCCELQICSLLVADAGEYSCVCGQEKTSATLTVKALLVHF
VRLRSKEATEGDTTLQCELSKAAPVEWRKGTETLRDGDYSLKQDGAVCCELQIRSLTIADAGEYLCTCGQE
KTSATLTVRALPAKFKDSLKNEEATEGTTATLSCELSKAAPVTWKKGPKTLQSGDKYVLRQDGAVCGLQIHGL
TMADAGEYSCVCGQEKTSATLTVRGLPAKFIEDLRSQEATEGATAILRCELSKAAPVEWRKGTETLRDGDYR
LRQDGAVCCELQIRGLAVVDGTGYSLSLPTKFTTEGLRNEEATEGTMATLRCQMSKAAPVEWRKGTETLRDGDYR
LRQDGAVCCELQIRGLTIEDSGEYTCVCGQEKTSATLSVKALPSRFIEDLRSQEATEGTMATLRCQMSKTAPVE
WKKGSETLRDGGRYSLRQDGPVCELQICDLAVEDAGEYSCVCGQEKTSATLSIKALPPRFIEDLRSQEATEGT
MATLRCQMSKAAPVEWRKGTETLRDGGRYSLRQNGAVCELQIHDLAVEDTGEYSCVCGQEKTSATLNVKALPP
RFIEDLRSQEATEGTMATLRCQMSKAAPVEWRKGTETLRDGGRYSLRQDGAVCCELQIHDLVEDAGQYSCVCG
QEKTSAVLTVDALPPKFTTEGLKKEEATEGTMVTLRCQMSKAEATVEWRKGAKTSLDGGRYSLRQDGAVCCELQI
GLAVEDAGEYSCVCGQEKTSATLSVKALPPRFIEDLRSQEATEGTMATLRCQMSKAAPVEWRKGTETLRDGD
YSLRQDGAVCCELQIRDLAVEDAGEYLCVCGQEKTSATLSVKALPPRFIEDLRSQEATEGTMATLRCQMSKAAP
VEWRKGTETLRDGDYSLRQDGAVCCELQICDLAVEDTGDYSCVCGQEKTSATLSVKALPPRFIEDLRSQEARE
GTVATLRCRMSKAAPVEWRKGTETLRDGDYSLRQEGNLCELQIRDLAVEDTGEYSCVCGQEKTSATLSVKAL
PAKFIEDLRSQEAPESSTVTLRCKLSKKASVVWKKGSETLRNGARYSLRQDGAVCLEIRDLTVEDTGEYSCT
CGQERTSATLSIMAPQVVFQQLQNLQAEEGSMASLRCELSVNAAMVWSKGGLELQDGTREARQQGCVAEL
LLRDLRREDAGEYSCTCGSQTTSATLMVTAAPVRFLRELQAQDVDEGATARLRCELSREAVSVEWRKGSLLQF
PCAKYQMVQEGTTAELLVHGVEQEDAGEYTCDAHTQSIARLSVRAPKPKFKTDLQSTEQEAGGTARLCCQLS
EAEPTGTPVQWLKEGVELHVGSKYEMRRQGAVCCELLIHGLEAKDTGEYACLVGGQKTLASLRVKEPEVTIVRGL
VDMEVQADEDEFTCKVQAGATDVQWHLQGLPLQSNVTEVAVLADGCTHVLLQKGVTLQDAGTVSFHVGGL
SSAQLTVRVEPVTVLEPLKDVQLSEGQDAHFRCRLSRASGQEARWALGGVPLQCNEMNDITVEQGTLYLLTL
HKVTELEDAGTITLQVGSSEEAQLKVTAKNTVLRGLSREAVDELEGGEALFECQLSQPEVAHTWLLDDEPVHTS
EKVEVVYFENGLRHLLLLKLNLPQDSCRVTFLAGDVVTSFAFLTVRGRLEVLPPHDASVKAGMQVRFCTILS
EAVPVGEATWYINGAAIQPDDTDWTVTTDGSHALTLSNAQPQHAGEVTFAAARDAVASARLSVLALPDPPEDA
EAVGRSDHSVTLVSWAPMSDGGGGLCGYRVMKEASTGQWQLCHDLVPGPECVDDLVPGKTYRFRVAAVGPA
GAGEPVHLPQMVKIAPAPAPAPAPAPAPAPETRQAVVGEDICILELEVAADGGEVVWHKGTERRIQPGHFVLS

RGQRQMLVIKGFRTEDQGEYRCGPIQGLPSSGAATFNVMVMTSGSGDEVPAQPSPLPPEAAQEGDLHLLWEALAR  
KRRMSREPTLDSISELPEEDSRVQHLRQEAEEETAPDLSEGYSTADELARTGEADLSHTSSDDES RAGT PSLVT  
YLKKAGGPGISPLASKHEAQVTTSVKPKQKQEPVVPTCPPGDLAADLMDPSLDKAAVKIQAAFQYKVRKE  
MKQQEGPVFSRTFGDTEAQVGDVLRLECVLATKTD MRACWLKDGIELTDGRHYHIDQLKDGTCSSLVVTGLAPT  
DSGRYTCQVSTKSGRVSHSACVVVSGTESEAESSSGGELDDAFRAARRLHRLFRTKSPAELSEEELFLSADE  
GPGEPEEPADWQTYREDENFVCIRFESLAEARQAVTCFRNMFATMGIGVEISLGEQGGPRGVEMRIGKVAPT  
PAVFLAKTPGLQTSDAAPVFLTELQNDVQDGYPMSFDCVVTGQVPVPSVRWFKDGKLEEDDHYMINEDQGG  
HQLIITAVVPADMGVYRCLAENSMGVSSSTKAELRVELTSTDYDTAADATETSSYFSAQGYLSSREQEGTESDE  
GQLPQVLEELKDLQVAPGTRLAKFQLKVKGYPAKLYWFKDGLTTS DHIRMTDKKTLHTLEIVSVTREDSG  
QYAAYSNAVGAAAYSSARLLVRGPSEPEEK PASDVHERLVPPRILEKFTPKKVKRGSSITFSVKVEGHPAPSV  
HWLKEEAKEGVLWIGPDTPGYTMASSSKQHSVLVLDVGRQHQTCTCIATNPAGQALCSASLHISGLAKEEEQ  
ERVKEALISSFLQGTSAQVSAQMSSEAGFADLVGQSKGESLVAEEAHSHLSLAEVGTTEEFLQKLTSTQITMVS  
AKISQAKLQVPGGDSDEETKTPSASPRHGRSRPSSSVQESSSESEDGDSRGEIFDIYVVTADYLP LGAEQDAI  
ILREGQYVEVLDSAHPLRVLVTKPTKSSPSRQGWVSPAYLDKRLKLSPEWGPTEAPEFPGEAVSEDEYRTRL  
SSVIQELLSSEQAFVQELQFLESHHMKHLERSPRVPAAVASQKTVIFRNVQDISHFHSSFLKELQCGCTDDDV  
AMCFIKNQEA FEKYLEFLVGRVQAESVVVSTPVQEFYKKYAEETLSAKDPTQPPPPLOHYLEQ PVERVQKYQ  
ALLKELIRNKARNRNCALLEQAYAVVSALPQRAENKLVSLMENYPGTLEALGEPFIRQGHFIWEGAPGARM  
PWKGHNHRHVFLFRNYLVICKPRRDSRTDTFSYVFRNMKLSIDLNDQVEGD DRAFEVWHEREDSVRKYLLQA  
RTVI IKNSWVKEICGIQORLAQPVWRPPEFEEELADCTAELGETVKLACRVTGT PKPIVSWYKDGKPV EVDPH  
HILIEDPDG SCTLILDNLTGIDSGQYMCFAASAAGNASTLGKILVQVPPRFVNVKVRATPFVEGEDAQITCTVE  
GAPYPQIRWYKDGTL LAPGNRYRMLNEPRSGVLV LVIQAASKEDLGHYECELVNRLGSTRGGGELYMOSPALR  
ARDQHHREQIVAAVEERRPSP\*

>rs26971697\_ENSMUSP00000158795\_c.4806:C>T\_p.Q1603\*  
ENSMUST00000238536.2|Obscn-210|ENSMUSG00000061462|-|chr11:g.58994350:G>A  
MDHSFSGAPRFLTRPKAFVVSVGKDATLSCQIVGNPTPHVSWEKDRQFVEAGARFRLAQDGDVYRLTILDLAL  
GDSGQYVDCRARNAIIEGFAAVGLRVDSEGTCAEQAPHFLLRPTSIRVREGADATFRCRVGGSPQPAVSWSKDG  
RRLGPPDACHRVVEEHGESSALRIR SARPRDGGTYEVYWAENPLGSASAAAALVVDSDAEVAGPVDSTATLLA  
HLQORREAMRAEGIPPSPPGAGTRTCTVTEGKHARLSCFVTGEPKPEVWKKDGQLVTEGRRHVVEDEQENF  
VLKILFCKQSDRGLYTCTASNLVGQTYSSVLVVVREPTVPFKKRLQDLEVREKESATFQCEVAQ PATEAAWFK  
EETRLWASAKYDIEEGTERRLTVRNVSADDDAVYICETTEGSRVVAELSVQGNLTKLPRKTAVRTGDTAIF  
WVELAVPEGPVRWLRNQEEMVAGGRVAITAEGTCHTLTI FQCTLEDMGEVAFVSGGCRTTTQFCV SAPRRPPL  
YPPADPVVKAKTSSVTL SWSAPPHGDRPVTIDGYVLEKRLGAYAWSRCHEAGWLATTEFTITGVAAEGDFQ  
FRVSAINHFGQGPYLEFPGTMHLVPLAVKTPKAVEAVEGGEVTFVSDLTVASSGGEWFLDGEALKASSIYVI  
RCDRTRHMLTIREV PARLHGAQLKFVANGIETS IQMVVRAALGLPSSKLPAAAAREVLAQLHEEAQLLAE LSD  
QAAAVTWLKDRELSLGPKYEMQVSAGRRALLVRDVAQDDAGLYECVSRGSR TAYQLLVQDITDGYRDWGPAG  
PQKHMCKCAGAKIARYLGSSCYRFLQYDKGVVHWLEAALDTRQKGTSSCSLHEKPKLVFAKQQAHEVKA  
AGNSATLSCEVTQAQTEVTFWKDGKLLSSSSKVRMEASGCSRRLVVQQAGKADAGEYSCEAGGQKLSFR LDVA  
EPKLVFAKQQAHEVKA EAGASATLSCEVAQAQTEVTFWKDGKLLSSSSKVRMEASGCSRRLVVQQAGKADA  
GEYSCEAGGQKLSFR LDVAEPKLVFAKEQQARSEVKA EAGASATLSCEVAQAQTEVTFWKDGKLLSSSSKVRM  
EASGCSRRLVVQQAGKADAGEYSCEAGGQKLSFR LDVTEPKLVFAKEQQARSEVKA EVGNSATLSCEVAQAQ  
EVTWFKDGKLLSSSSKVRMEASGCSRRLVVQQAGKADAGEYSCEAGGQKLSFR LDVAEPKLVFAKEQQARSEV  
KAEAGNSATLSCEVAQAQTEVTFWKDGKLLSSSSKVRMEASGCSRRLVVQQAGKADAGEYSCEAGGQKLSFHL  
DVTEPKLVFAKEQQAHSEVKA EAGASATLSCEVAQAQTEVTFWKDGKLLSSSSKVRMEASGCSRRLVVQQAGK  
ADAGEYSCEAEAGQKLSFR LDVAEPKLVFAKEQQARSEVKA EAGASATLSCEVAQAQTEVTFWKDGKLLSSSSK  
VRVEASGCSRRLVVQQAGKADAGEYSCEAGGQKLSFR LDVAEPKLVFAKEQQANSEVKA EAGASATLSCEVAQ  
AQTEVTFWKDGKLLSSSSKVRVEASGCSRRLVVQQAGKADAGEYSCEAGGQKLSFR LDVAEPKLVFAKE\*QA  
SEVKA EAGASATLSCEVAQAQTEVTFWKDGKLLSSSSKVRVEASGCSRRLVVQQAGKADAGEYSCEAGGQKLS  
FR LDVAEPKLVFAKEQQAHSEVKA EAGASATLSCEVAQAQTEVTFWKDGKLLSSSSKVRVEASGCSRRLVVQQ  
AGKADAGEYSCEAGGQKLSFR LDVAEPKLVFAKEQQAHSEVKA EAGASATLSCEVAQAQTEVTFWKDGKLLSS  
SSKVRVEASGCSRRLVVQQAGKADAGEYSCEAGGQKLFRLDVAEPKLVFAKEQQAHSEVKA EAGASATLSCE  
VAQAQTEVTFWKDGKLLSSSSKVRVEASGCSRRLVVQQAGKADAGEYSCEAGGQKLSFR LDVAEPKLVFAKEQ  
QAHEVKA EAGASATLSCEVAQAQTEVTFWKDGKLLSSSSKVRVEASGCSRRLVVQQVQKADAGEYSCEARGQ  
KLSFR LDVADATRLMFAEQQARTEVKA EAGNSATLSCEVAQAQTEVTFWKDGKLLSSSSKVRVEASGCSRRLV  
VQQAGKADAGEYSCEAGGQKLSFR LDVAEAEASQI PERPSRREPLVVEKEHETIILTATIAAPSVAAVWTKLDGV  
EIRRSKRHEATS LGDHTLTVRGAQVLD SAIYSCRVGKEGQDFPVQVEEVA AKFSKPLEPVEGELGTVMLVC  
ELSPQAEVWRCGNTQLRPGKRFQMTSEGPRRTLTVSGLREDDAE EYVCE SRDDRTSARLTVKVP RVVKFTS  
GLSAMVAEEGQ EATFQCVVSPSDAGVTWYKDGMLQ PSEK FVMVESGASRSLTILGLTLEDAGQVTVAEAGAS  
SSAALRVREAPVLFKKKLEPQTV EERTSVTLEVELTRPWPEVKWTRNAAVLTPSENVEIRAEGARHCLVLR SV

GFADRGFFGCETPDDKTQAKLNVEMRQVRLVVRGLQVEVEAKEQGTASMDVELSHAEVEGSWTRDGLRLQPGPKC
HLAVQGPVHILTLALSALQPQDSGLVAFRAEGVHTSARLIVTELVPVSFTRVLQDVVATQKEKVTLECELSRPVDV
RWLKDGVLELRAGKAIGIVAQGTCSRSLVIYRCETGDQGVYVCDALDAQTSASLRVQGRTYTLIFRRVLAEDAGE
VKFVAENAESRAHLRVKELPVTLLRPLRDKIAMEKHRGVLECCQVSRASQVRWFKGGVELQSGPKYEVVSDGL
YRKLVINADVQPEDEDTYTCDAENVKTSAQFFVVEEQSITIVRGLKDMTVMEPAPAWFECETSIPSVRFPKWLLG
KTVLQAGGNVGLQDGTVHRLTLHKTCSTMTGPVHFTIGKSRSSAQLVVSDIPVVLTRPLEPKAGRELQSVVL
SCDFRPAPKAVQWYKDDTPLSPSEKFKMALEGQMAELRILRLTPADAGVYRCQAGSAQSSAEVTEAREVTVI
QPLQDAEAMEEGRVCFSELSHKDEDEIEWSLNGTPLYNDSFHEISHEGCLHTLVLKSVRQADTGTVCATSPKV
SVSARLVVKGKPVVFLKALDDVSAEERGTTLTQCEVSDPEARVVWRKDGVELGSPDKYDFLHKAGARGELTVHD
LSHEDAGLYTCQVGSKETQSKVSVHDLHVGITKRLKTVEVLEGESECSFECVLSHESPSDPAVWTVGGKTVGGS
GHFHAVRQGRKYTLTVKDAALSDAGEVVSVLGLTSKASLIIRERPVDTKPLEDQRTTLGEDVMLSCELSRA
GTSVRWLKDGKAIRKSQKYDLLSEGTRAVLVVRKASLKDSGEYTCETEASKSTAKLCVEEKANRFTTELADLQ
VEEKGRAVFTCKTEHPASVVTWRKGLLELRASGKHVPSQEGTLTKLTINALERTDSDTYTCDIGQARTQARLL
VHGQKVRVIEDLEDTAVQEGSSAKFCCRIAPADYGPVHWFLDKTPLHSNELNEITVQPGGYHVLTLRQLALKD
SGTVYFEAGDQRTSAAALRVTEKPSIFSRPLTDVTVTEGEDTLVCETTTVDSSVRWTKDGKTLRPSARCQLSH
EGCQAQLLITATTPQDGGRYKCEIGGASSSSIVRVHALPVRFRESLKDVEVPEGKAATLRCVLSVAAPVEWR
HGDDVLKSSNKYSLRQEGAVLELVIRDLQPDQSGQYSCSFGDQTTSATLTVKTSQAQFVGLRKNKEATEGTTV
TLRCELTKAEPVEWKKGTETLRNGDKYSLKQDGAVCELQICSLLVADAGEYSCVCGQEKTSATLTVKALLVHF
VRRLSKEATEGDTTTLQCELSKAAPVEWRKGTETLRDGDYSLKQDGAVCELQIRSLTIADAGEYLCTCGQE
KTSATLTVRALPAKFKDSLKNEEATEGTTATLSCELSKAAPVTWKKGPKTLQSGDKYVLRQDGAVCGLQIHGL
TMADAGEYSCVCGQEKTSATLTVRGLPAKFIEDLRSQEATEGATAILRCELSKAAPVEWRKGSSETLKDGDYR
LRQDGAVCELQIRGLAVVDGTYSLSPTKFTTEGLRNEEATEGTMATLRCQMSKAAPVEWRKGSSETLRDGDYR
LRQDGAMCELQIRGLTIEDSGEYTCVCGQEKTSATLSVKALPSRFIEDLRSQEATEGTMATLRCQMSKTAPVE
WKKGSETLRDGGYSLRQDGPVCELQICDLAVEDAGEYSCVCGQEKTSATLSIKALPPRFIEDLRSQEATEG
MATLRCQMSKAAPVEWRKGSSETLGDGGYSLRQNGAVCELQIHDLAVEDTGEYSCVCGQEKTSATLNVKALPP
RFIEDLRSQEATEGTMATLRCQMSKAAPVEWRKGSSETLRDGGYSLRQDGAVCELQIHDLVEDAGQYSCVCG
QEKTSAVLTVDALPPKFTTEGLKKEEATEGTMVTLRQCMSKEATVEWRKGAKTLSDDGGYSLRQDGAMCELQIC
GLAVEDAGEYSCVCGQEKTSATLSVKALPPRFIEDLRSQEATEGTMATLRCQMSKAAPVEWRKGSSETLRDGD
YSLRQDGAVCELQIRDLAVEDAGEYLCVCGQEKTSATLSVKALPPRFIEDLRSQEATEGTMATLRCQMSKAAP
VEWRKGSKTLRDGDYSLRQDGAMCELQICDLAVEDTGDYSCVCGQEKTSATLSVKALPPRFIEDLRSQEARE
GTVATLRCRMSKAAPVEWRKGSSETLKDGDYSLRQEGNLCELQIRDLAVEDTEEYSCVCGQEKTSATLSVKAL
PAKFIEDLRSQEAPESSTVTLRCKLSKASVVWKKGSETLRNGARYSLRQDGAVCELEIRDLTVEDTGEYSCT
CGQERTSATLSIMAPQVVFQQLQNLQAEEGSMASLRCELSVPNAAMVWSKGGLELQGDTRREARQQGCVAEL
LLRDLRREDAGEYSCTCGSQTTSATLMVTAAPVRFLRELQAQDVEGATARLRCELSREAVSVEWRKGSQQLF
PCAKYQMVQEGTTAELLVHGVEQEDAGEYTCDAHTQSIARLSVRAPKPKFKTDLQSTEQEAGGTARLCCQLS
EABPGTPVQWLKEGVLEHVGSKYEMRRQGAVCCELLIHGLEAKDTGEYACLVGQKTLASLRVKEPEVTIVRGL
VDMEVQADEDVEFTCKVQAGATDVQWHLQGLPLQSNVTEVAVLADGCTHVLQKGVTLLEDAGTVSFHVGGL
SSSAQLTVRVPEVTVLEPLKDVQLSEGQDAHFRCLRSRASGQEARWALGGVPLQCNEMNDITVEQGTLYLLTL
HKVTLLEDAGTITLQVGSSEEAQLKVTAKNTVLRGLENVDALEGGEALFECQLSQPEVAHAHTWLLDDEPVHTS
EKVEVVYFENGLRHLLLLKLNKPKQDSCRVTFLAGDVVTSFAFLTVRGWRLEVLEPPHDASVKAGMQVRFTCILS
EAVPVGEATWYINGAAIQPDDTDWTVTTDGSHHALTLNAQPPHAGEVTFFAARDAVASARLSVLALPDPEDA
EVVGRSDHSVTLSSWVAPMSDGGGGLCGYRVMKEASTGQWQLCHDLVPGPECVVDLVPVKTYRFRVAAVGPA
GAGEPVHLPQMVKIAPAPAPAPAPAPAPAPETRAVVGEDICLELEVAADGGEVVWHKGTERRIQPGGHFEVLS
RGQRQMLVIKGFRTEDQGEYRCGPIQGLPSSGAATFNVVMTSGSGDEVPAQPSLPPEAAQEGDLHLLWEALAR
KRRMSREPTLDSISELPEEDSRVQHLRQEAETAPDLSEGYSTADELARTGEADLSHTSSDDESRACTPSLVT
YLKKAAGPGISPLASKHEAQVTTSVKPKQKQEPVPTCPPPGDLSAADLMDPSLDKAAVKIQAAFQYKVRKE
MKQQEGPVFSRTFGDTEAQVGDVLRLECVLATKTDMRACWLKDGIELTDGRHYHIDQLKDGTCSSLVTLGLAPT
DSGRYTCQVSTKSGRVSHSACVVVSGTESEAESSSGGELDDAFRRAARRLHRLFRTKSPAELSEELFLSADE
GPGEPEEPADWQTYREDENFVCIRFESLAEARQAVTCFRNMFMATMIGVEISLGEQGPVGVEMRIGKVAPTVT
PAVPLAKTPGLQTSDAAPVFLTELQNDVQDGYPMSFDCVVTGQVPSVRWFKDGKLEEDDHVMINEDQQGG
HQLIITAVVPADMGVYRCLAENSMGVSSTKAELRVELTSTDYDTAADATETSSYFSAQGYLSSREQEGTESDE
GQLPQVLEELKDLQVAPGTRLAKFQLKVKGYPAKLYWFKDQGPLTSDHIRMTDKKTLHLEIVSVTREDSG
QYAAIYISNAVGAAYSSARLLVRGPSEPEEKPASDVHERLVPPRILEKFTPKKVKRGSITSFVSKVEGHPAPSV
HWLKEEAEGVFLWIGPDTPGYTMASSSKQHSLLVLDVGRHQGTYTICATNPAGQALCSASLHISGLAKEEEQ
ERVKEALISSFLQGTSAQVSAQMSSEAGFADLVGQSKGESLVAAEAHSHLSLAEVGTSEFLQKLTSTQITMVS
AKISQAKLQVPGGDSDEETKTPSASPRHRSRSPSSSVQESSSESEDGDSRGEIFDIYVVTADYLPPLGAEQDAI
ILREGQYVEVLDSAHPLRWLVRTKPTKSSPSRQGWVSPAYLDRKRLKLSPEWGPTEAPEFPGEAVSEDEYRTRL
SSVIQELLSSEQAFVQELQFLESHHMKHLERSPRVPAVASQKTVIFRNVQDISHFHSSFLKELQCGCTDDDDV



AMCFIKNQEAFEKYLEFLVGRVQAESVWVSTPVQEFYKKYAEETLSAKDPTQPPPPPLQHYLEQPVERVQKYQ  
 ALLKELIRNKARNRQNCALLEQAYAVVSALPQRAENKLVSLMENYPGTLEALGEPTRQGHFIVWEGAPGARM  
 FWKGNHRHVFLFRNYLVICKPRRDSRTDTFSYVFRNMMKLSSIDLNDQVEGDDRAFEVWHEREDSVRKYLLQA  
 RTVLIKNSWVKEICGIQQLAQPVWRPPEFEEELADCTAELGETVKLACRVTGTPKPIVSWYKDGKPVVEVDPH  
 HILIEDPDGSCTLILDNLTGIDSGQYMCFAASAAGNASTLGKILVQVPPRFVNVKVRATPFVEGEDAQITCTVE  
 GAPYPQIRWYKDGTLAPGNRYRMLNEPRSGVLVVIQAASKEDLGHYECELVNRGLSTRGGGELYMQSPALR  
 ARDQHHREQIVAAVEDTSEVGSASHAQDQQAASVLRLLGSEALGSPGDLPNTRQSEPPAFEEAASQIP  
 GAASGTPEVSPQPGTHKLEQETTSSGSQGWTVPIRVEGTAWPGAGTGQLLLDVHSQVIMETTQRTYVCOAPDT  
 GVTTRAPSMQVTIEDVQVQVGDMAQFDAVIEGHPPPPIVWYKGSTQLTSSARLSQRQDGGTTYSLVLTVDVAPDA  
 GVYTCVANNAGGQVLCKAELLVHGGDKLDAENQVYRRKLHSFYDVQEEIGRGVFGFVKRVQHKGNKMFCAAKF  
 IPLRSKTRAQAYQERDILATLGHPLVTGLLDQFETRKTLLILILELCSSEELLDRLFKKGVVTEAEVKVYIQQL  
 VEGHLHLHSHGILHLDIKPPNIMLVHPAREDIKICDFGFAQKITPSEPQYSKYGSPEFVSPEIIEQNPFVSEGS  
 DIWAMGVI SYLSLTCSSPFAGESDRATLLNVLEGRVSWSSPTAAHLSSEDAKDFIKATLQRTPRARPSTSQCLA  
 HPWFLLKSMPEAAHFINTKQLKFLARSRWQRSLMSYKSIIVMRSIPELLQGPPDSPSLGVARHLRGEASGAS  
 SSSSSSDNELAPFARAKSLPPSPVTHSPLLHPRGFLRPSASLPEETEASMTADA AVPAS PQSAGPPASPGCV  
 PRHSVSISSLFYQQAGEGAERGNKTS GAKRHPARRRHLKGGYIARALPGLREPLMEYSLLEEEAAREEQASLM  
 TKTPSFETALRLPSSSVREVPGRSHSLDNPPVTTGSPPEACKQLLFPSTGLTHETTAKDRGHKEGFLQESV  
 PFPMSGDSRPGKQEGSSQDSCRGKPASSCHSELGSGSEGCPPSSQSLGSLPPQSLKKELESTSCGPLFSEQ  
 PQAAPFPTQVSPLLGSEKEPQDGSLSSEGPVVPVSSSPGSASQVDASLDTEGLSEAGDTCDFTPPPQRPQEQAT  
 TRKFSLESRGGYAGVAGYGTFAFGGDAGGMLGQGPLWARMAWAVS QSSEEQDEAATESPQPLES LGPIAEASG  
 VPLRTPSPLTPWEEVEQVSLVQIRDLSGDAEAADTISLDISEVDPAYLNLSLDYDIKYLPEFEMI FRRVPKPI  
 EQPESPGSETEAGQGLADFL EEAAWPWP GELGLRAGLEIT EEP EEPGDLEALLGEAAVGRKRKWSPSRGLFQF  
 PGRCLSGEEPVELGLRQRVKASMAHISRILKGRPEGP EREGPPRKKAGLASFRLSGLKGRDQELSDEAVVLGQ  
 SVTLACQVLAQPTAQATWSKDGVLLESSGHLLISSTLKNFQLLTIILVVKEEDLGTYTCCVSNPLGTAVTTGVL  
 RKAERPSSSRPEVGEELYKDAVLLVWKPVESECGPVYIVQCCIEGGSWTTLASDISDCCYLTGKLSRGGMYIF  
 RTACVSKAGMGPYSSPSEQVLLGGPNHLASEEISSRGRPAQLLPSTKTFAFQMQIRRRGRFSVVRQCREKASGR  
 ALAAKIVPYQPEDKTAVLREYEAALKRHLHPLHAQLHAAYLSPRHLVLIILELCSGPELTPSLAERESYSES DVK  
 DYLWQMLSATQYLHAQHILHLDLRSENMMVTEYNLLKVIDLGN AQSLDQEKVPAPENFKDYLETMAPELLEGGQ  
 GAVPQTDIWAIGVTA FIMLSGEY P ESSEGTRDLQKGLRKLIRLSRCYAGLSGGAVAF LQSSSLCAQPWGRPCA  
 STCLQCGLWTEEGPTGSRPTVPTFPTVRLRA FVREERKRRALLYKKNHNAQVR\*  
 >rs26971697\_ENSMUSP00000038264\_c.4530:C>T\_p.Q1511\*  
 ENSMUST00000047441.14|Obscn-202|ENSMUSG00000061462|-|chr11:g.58994350:G>A  
 MDHSFSGAPRFLTRPKAFVSVGKDATLSCQIVGNPTPHVSWEKDRQPV EAGARFLAQDGDVYRLTILDLAL  
 GDSGQYVCRARNAIGEFAAVGLRVDSEGTCAEQAPHFLLRPTSIRVREGADATFRCRVGSGSPQPAVSWSKDG  
 RRLGPPDAPHVRVEEHGESSALRIR SARPRDGGTYEVRAENPLGSASAAAALVVDSDAEVAGPPGTSTATLLA  
 HLQQRREAMRAEGIPPSPPGAGTRTCTVTEGKHARLSCEFTVTEPKPETVWKKDQGLVTEGRRHVVEDEQENF  
 VLKILFCQSDRGLYTCTASNLVGQTYSSVLVVVREPTVPFKKRLQDLEVREKESATFQCEVAQPATEAAWFK  
 EETRLWASAKYDIEEEGTERRLTVRNVSADDDAVYICETTEGSRVVAELSVQGNLTKLPRKTAVRTGDTAIF  
 WV ELAVPEGPVRWLRNQEEMVAGGRVAITAEGTCHTLTI FQCTLEDMGEVAFVSGGCRTTTQFCVSAPRRPPL  
 YPPADPVVKAKTESSVTL SWSAPPHGDRPVTIDGYVLEKRKLGAYAWSRCHEAGWLATTEFTITGV AEEGDFQ  
 FRVSAINHFGQGPYLEFPGTMHLVPLAVKTPLKAVEAVEGGEVTF SVDLTVASSGEWFLDGEALKASSIYVI  
 RCDRTRHMLTIREV PARLHGAQLKFVANGIETS IQMVVRAALGLPSSKLPAAAAREVLAQLHEEAQLLAE LSD  
 QAAA VTWLKDGRELSLGP KYEMQVSAGRRALLVRDVAQDDAGLYECVSRGSR TAYQLLVQDITDGYRDWGPAG  
 PQKHMCKCAGAKIARYLGSSCYRFLQYDKGVWHWLEAALDTRQKGKTS SCSLHEKPKLVFAKQQAHSEVKAE  
 AGASATLSCEVAQAQTEVTWFKDGKLLSSSSSKVRMEASGCSRRLVVQQAGKADAGEYSCEAGGQKLSFRLDVA  
 EPKMVFAKEQQARSEVKA EAGASATLSCEVAQAQTEVTWFKDGKLLSSSSSKVRMEASGCSRRLVVQQAGKADA  
 GEYSCEAGGQKLSFRLDVTEPKLVFAKEQQARSEVKA EGVNSATLSCEVAQAQTEVTWFKDGKLLSSSSSKVRM  
 EASGCSRRLVVQQAGKADAGEYSCEAGGQKLSFRLDVAEPKLVFAKEQQARSEVKA EAGNSATLSCEVAQAQ  
 EVTWFKDGKLLSSSSSKVRMEASGCSRRLVVQQAGKADAGEYSCEAGGQKLSFHLDVTEPKLVFAKEQQAHSEV  
 KAEAGASATLSCEVAQAQTEVTWFKDGKLLSSSSSKVRMEASGCSRRLVVQQAGKADAGEYSCEAGGQKLSFR  
 LDVAEPKLVFAKEQQARSEVKA EAGASATLSCEVAQAQTEVTWFKDGKLLSSSSSKVRMEASGCSRRLVVQQAGK  
 ADAGEYSCEAGGQKLSFRLDVAEPKLVFAKEQQANSEVKA EAGASATLSCEVAQAQTEVTWFKDGKLLSSSSK  
 VRVEASGCSRRLVVQQAGKADAGEYSCEAGGQKLSFRLDVAEPKLAFAKE\*QAHSEVKA EAGASATLSCEVAQA  
 QTEVTWFKDGKLLSSSSSKVRMEASGCSRRLVVQQAGKADAGEYSCEAGGQKLSFRLDVAEPKLAFAKEQQAH  
 SEVKA EAGASATLSCEVAQAQTEVTWFKDGKLLSSSSSKVRMEASGCSRRLVVQQAGKADAGEYSCEAGGQKLS  
 FRLDVAEPKLAFAKEQQAHSEVKA EAGASATLSCEVAQAQTEVTWFKDGKLLSSSSSKVRMEASGCSRRLVVQQ  
 AGKADAGEYSCEAGGQKLSFRLDVAEPKLVFAKEQQAHSEVKA EAGASATLSCEVAQAQTEVTWFKDGKLLSS  
 SSKVRMEASGCSRRLVVQQVQKADAGEYSCEARGQKLSFRLDVAEAEBSQIPERPSRREPLVVEKHETIILTAT

IAAPSVAAVTWLKDGV EIRRSKRHEATSLGDTHTLTVRGAQVLD SA IYSCRVGKEGQDFPVQVEEVA AKFSKP  
LEPVEGELGGTVMLVCELSPEQAEVWRCGNTQLRPGKRFQMTSEGPRTTLTVSGLREDDAEYVCE SRDDRT  
SARLTVKVPRVVKFTSGLSAMVAEEGQ EATFQCVVSPSDAGVTWYKDMQLQPSEKFMVME S GASRSLTILGL  
TLEDAGQVTVEAEGASSAALRVREAPVLFKKKLEPQTVEERTSVTLEVELTRPWPEVKWTRNAAVLTPSENV  
EIRAEGARHCLVLRVSGFADRGGFCETPDDKTQAKLNVEMRQVRLVVRGLQEVEAKEQGTASMDVELSHA EVE  
GSWTRDGLRLQPGPKCHLAVQGPVHILTLSALQPQDSGLVAFRAEGVHTSARLIVTELPVSFTRVLQDVVATQ  
KEKVTLECELSRPVDVRWLKDGVELRAGKAI GIVAQGTCSRSLVIYRCETGDQGVVCDALDAQTSASLRVQGR  
TYTLIFRRVLAEDAGEV KFVAENAESRAHLRVKELPVTLLRPLRDKIAMEKHRGVLECCQVSRASAQVRWFKGG  
VELQSGPKYEVVSDGLYRKLVIN DVQPEDEDTYTCDAGNVKTSAQFFVEEQSITIVRGLKDMTVM EPAPAWFE  
CETSIPSVRPPKWL LGKTVLQAGGNVGL EQDGTVHRLTLHKTCSTMTGPVHFTIGKSRSSAQLVVS DIPVVL T  
RPLEPKAGRELQSVVLSCDFRPAPKAVQWYKDDTPLSPSEKFKMALEGQMAELRILRLTPADAGVYRCQAGSA  
QSSAEVTV EAREVTVIQPLQDAEAMEEGRVCFSCELSHKDEDIEWSLNGTPLYNDSFHEISHEGCLHTLV LKS  
VRQADTGTVCATSPKVSVSARLVVKGKPVVFLKALDDVSAEERGTTLQCEVSDPEARVVWRKDGVELGPS DK  
YDFLHKAGARGLTVHDL SHEDAGLYTCQVGSKETQSKVSVHDLHVGITKRLKTVEVLEGE SC SFECVLSHESP  
SDPAVWTVGGKTVGGSGHFHAVRQGRKYTLTVKDAALSDAGEV VFSVLGLT SKASLIIRERPVDITKPLEDQR  
TTLGEDVMLSCELSRAGTSVRWLKDGKAI RKSQKYDLLSEGTRAVLVVRKASLKDSGEYTCETEASKSTAKLC  
VEEKANRFTEELADLQVEEKGRAVFTCKTEHPASVVTWRKGLLELRASGKHVPSQEGTLKLTINALERTDSD  
TYTCDIGQARTQARLLVHGQKVRVIEDLED TAVQEGSSAKFCCR IAPADYGPVHWF LDKTPLHSNELNEITVQ  
PGGYHVLT LRQLALKDSGTVYFEAGDQRTSAALRVTEKPSIFSRPLTDVTVTEGEDLTLVCETTTVDSSVRWT  
KDGKTLRPSARCQLSHEGCQAQLLI TATTPQDGGRYKCEIGGASSSSIVRVHALPVRFRESLKDVEVPEGKAA  
TLRCVLSSVAAPVEWRHGDDVLKSSNKYSLRQEGAVLELVIRDLQPDGSGQYSCSFGDQTT SATLTVKTS SAQ  
FVGKLRNKEATEGTTVTLRCEL TKEAPVWKKGTETLRNGDKYSLKQDGAVCELQICSLLVADAGEYSCVCGQ  
EKTSATLTVKALLVHFVRR LRSKEATEGDTTTLQCELSKAAPVEWRKGTETLRDGD RYSLKQDGAVCELQIRS  
LT IADAGEYLCTCGQEKT SATLTVRALPAKFKDSLKNEEATEGTTATLSCELSKAAPVTWKKGPKTLQSGDKY  
VLRQDGAVCGLQIHGLTMADAGEYSCVCGQEKT SATLTVRGLPAKFIEDLRSQEATEGATAILRCELSKAAPV  
EWRKGETLKDGD RYTLRQDGAVCELQIRGLAVVDVTGTYS SLPKFT EGLRNEEATEGTMATLRQMSKAAPV  
EWRKGETL RDGD RYTLRQDGAMCELQIRGLTIEDSGEYTCVCGQEKT SATLSVKALPPRFIEDLRSQEATEG  
TMATLRQMSKAAPVEWRKGETLGDGGRYSLRQNGAVCELQIHDLAVEDTGEYSCVCGQEKT SATLNVKALP  
PRFIEDLRSQEATEGTMATLRQMSKAAPVEWRKGETLRDGGRYSLRQDGAVCELQIHDL DVEDAGQYSCVC  
GQEKTSAVLTVDALPPKFTEGLKKEEATEGTMVTLRQMSKEATVEWRKGAKT LSDGGRYSLRQDGAMCELQI  
CGLAVEDAGEYSCVCGQEKT SATLSVKALPPRFIEDLRSQEATEGTMATLRQMSKAAPVEWRKGSKTLRDGD  
RYSLRQDGAMCELQICDLAVEDTGDYSCVCGQEKT SATLSVKAPQVVFQQPLQNLQAEEGSMASLRCELSVPN  
AAMVWSKGGLELQGDTRREARQQCVAELLLRDLRREDAGEYSC TCGSQTT SATLMVTAAPVRFRLRQLQAQDV  
DEGATARLRCELSREAVSVEWRKGS LQLFPCA KYQMVQEGTTAE LLVHGVEQEDAGEYTC DAGHTQS IARLSV  
RAPKPKFKTDLQSTEQEAGGTARLCCQLSEAE PGTPVQWLKEGVELHVGS KYEMRRQGAVCELLIHGLEAKDT  
GEYACLVGQKTLASLRVKEPEVTIVRGLVDMEVQADEVEFTCKVVSQAGATDVQWHLQGLPLQSN E VTEVAV  
LADGCTHV LQLKGV TLEDAGTVSFHVGG LSSAQLTVRVPEVTVLEPLKDVQLSEGD DAHFRCLRSRASGQEA  
RWALGGVPLQCNEMNDITVEQGTLYLLTLHKVTLEDAGTITLQVGS CSSEAQLKVTAKNTVLRGLENVDALEG  
GEALFECQLSQPEVA AHTWLLDDEPVHTSEKVEVVYFENGLRHLL LKLNKLPQDSCRVTFLAGDVVTS AFLTV  
RALPDPPEDAEVVGRSDHSVTL SWVAPMSDGGGGLCGYRVMKEASTGQWQLCHDLVPGPECVDDLVPGKTY  
RFRVAAVGPAGAGEPVHLPQMVKIAPAPAPAPAPAPAPAPETRQAVVGEDICLELEVAADGGEVVWHKGTERRI  
QPGGHFEVLSRGRQMLVIKGFRTEDQGEYRCGPIQGLPSSGAATFNVMVTS GSGDEVPAQPSP LPEAAQEGD  
LHLLWEALARKRRMSREPTLDSISELPEEDSRVQHLRQEAEETAPDLSEGYSTADELARTGEADLSHTSSDDE  
SRAGT PSLVTYLLKAGGPGISPLASKHEAQVTT SVKPKQKQEPVVP TCPPPGDLSAADLMDPSLDKAAVKIQ A  
AFKGYKVRKEMKQEGPVFSRTFGDTEAQVGDVLRLECVLATKTD MRACWLKDGIELTDGRHYHI DQLKDGTC  
SLLVTGLAPTDSGRYTCQVSTKSGRVSHSACVVVSGTESEAESSSGGELDDAFRRAARRLHRLFRTKSPAELS  
EEELFLSADEGPGEPEEPADWQTYREDEFV CIRFESLAEARQAVTCFRNM FATMGIGVEISLGEQGP RVEM  
RIGKVAPT VTPAVPLAKTPGLQTS DAAPVFLTELQNDVQDGYPMSFDCVVTGQPVPSVRWFKDGKLL EDDH  
YMINEDQQGGHQLIITAVVPADMGVYRCLAENSMGVSSTKAE LRVELTSTDYDTAADATETSSYFSAQGYLSS  
REQEGTESDEGQLPQVLEELKDLQVAPGTRLAKFQLKVKGYPAPKLYWFKDGQPLTSDHIRMTDKKTLHTLE  
IVSVTREDSGQYAAYSNAVGAAYSSARLLVRGPSEPEEK PASDVHERLVPPRI LEKFTPKKVKRGSSITFSV  
KVEGHPAPSVHWLKEEA EKGV LWIGPDTPGYTMASSSKQHSLVLLDVGRQHOGTYTCIATNPAGQALCSASLH  
ISGLAKEEEQERVKEALISSFLQGT SQAVSAQMSASAGFADLVGQSKGESLV AEEAHSHLSLAEVGT EEFLOK  
LTSQITEMVSAKISQAKLQVPGGDSDEETKTPSASPRHGRSRPSSSVQESSSESDGSRGEIFDIYVVVTADY  
LPLGAEQDAIILREGQYEVVLD SAHPLRWLVR TKPTKSSPSRQGWVSPAYLDKRLKLSPEWGPTEAPEFPGEA  
VSEDEYRTRLSSVIQELLSSEQAFV GELQFLESHHMKHLERSPRVPAAVASQKTVIFRNVQDISHFHSSFLKE  
LQCGCTDDD VAMCFIKNQEAFEKYLEFLVGRVQAESVVVSTPVQEFYKKYAEETLSAKDPTQPPPPLOHYLE  
QPVERVQKYQALLKELIRNKARNRQNCALLEQAYAVVSALPQRAENKLVSLMENYPGTLEALGEP IROGHFI

VWEGAPGARM PWKGNHRHVF LFRNYLV ICKPRRDSRTDTFSYVFRNMMKLSSIDLNDQVEGDRAFEVWHERE
DSVRKYLQARTVI IKNSWVKEICGIQQRLAQPVWRPPEFEELADCTAELGETVKLACRVTGTPKPIVSWYK
DGKPVVEVDPHHILIEDPDGSC TLI LDNLTGIDSGQYMCFAASAAGNASTLGKILVQVPPRFVNKVRATPFVEG
EDAQITCTVEGAPYPQIRWYKDGTL LAPGNRYRMLNEPRSGVLV LVIQAASKEDLGHYECELVNRLGSTRGGG
ELYMQSPALRARDQHHREQIVAAVEGAPSMQVTIEDVQVQVGDMAQF DAVIEGHPPPIVTWYKSTQLTSSAR
LSQRQDGTYSLVLT D VAPHDAGVYTCVANNAGGQVLC KAELLVHGGDKLDAENQVYRRKLSFYDVQEEIGR
GVFGFVKRVQHKGKGMFCAAKF I PLRSKTRAQAYQERDILATLGHP LVTGLLDQFETRKTLLI LILELCSSEEL
LDRLFKKGVVTEAEVKVYIQQLVEGLHYLHSHGILHLDIKPPN ILMVHPAREDIKICDFGFAQKI TPSEPQYS
KYGSPFVSP E I IEQNPVSEGS DIWAMGVI SYLSLTCSSPFAGESDRATLLNVLEGRVSWSSPTAAHLS EDAK
DFIKATLQRTPRARPSTSQC LAHPWFLKSMPAEAAHFINTKQLKFL LARSRWQRSLMSYKSI LVMRSIPELLQ
GPPDSPSLGVARHLRGEASGASSSSSSSDNELAPFARAKSLPPSPVTHSPLLHPRGFLRPSASLP EETEASMP
TADA AVPAS PQSAGPPASPGCVPRHSV ISSLFYQQAGEGAERGNKTS GAKRHPARRRHLLKGGYIARALPGLR
EPLMEYSLLEEEAAREEQASLMTKTPSFETALRLPSSSVREVPGRSHSLDNPPVTTGSP EACKEQLLFPST
GLTHETTAKDRGHKEGFLQESVFPFPMSGDSRPGKQEGSSQDSCRGKPASSCHSELGSGSQEGCGPPSSQSLG
SLPPQSLKKELESTSCGPLFSEQPQAAPFPTQVSPLLGSEKEPQDGS LSEGVPVPSSSPGSASQVDASLDTEG
LSEAGDTCDFTPPPQRPQEATTRKFSLESRGGYAGVAGYGTFAFGGDAGGMLGQGPLWARMAWAVSQSSEEQ
DEAATESPQPLESLGPIAEASGVPLRTSPSLTPWEEVEQVSLVQ I RDLSGDAEAADTISLDISEVDPAYLNL S
DLYDIKYL PFEFMI FRRVPKPIEQPESPGSETEAGQGLADFL EEAAWPWPGE LGLRAGLEITEEP EEPGDLEA
LLGEAAVGRKRKWSPSRGLFQFGRCLSGEEPVELGLRQRVKASMAH I SRILKGRPEGPEREGPPRKKAGLAS
FRLSGLKGRDQELSDEAVVLGQSVTLACQVLAQPTAQATWSKDGVLLESSGHLLISSTLKNFQLLTI L VVKEE
DLGTYTCCVSNPLGTAVTTGVLKKAERPSSSPRPEVGELYKDAVLLVWKPVESCGPVTYIVQCCIEGGSWTTL
ASDISDCCYL TGKLSRGGMYIFRTACVSKAGMPYSSPSEQVLLGGPNHLASEEESSRGRPAQLLPSTKTF AF
QMQIRRRGRFSVVRQCREKASGRALAAKIVPYQPEDKTAVLREYEALKRLHHPHLAQLHAAYLSPRHLV L ILEL
CSGPELLPSLAERESYSES DVKDYLWQMSATQYLHAQH I LHLDLRSENMMVTEYNLLKVIDLGNASLDQEK
VPAPENFKDYLETMAPELLEGQAVPQTDIWAIGVTA FIMLSGEY P ESSEGETRDLQKGLRKLIRLSRCYAGL
SGGAVAF LQSSSLCAQPWGRPCASTCLQCGWLTEEGPTGSRPTPVTFTVRLRAFVREKRRRALLYKKNH LAQ
VR\*

>rs26971697\_ENSMUSP00000049737\_c.4605:C>T\_p.Q1536\*
ENSMUST00000052872.15|Obscn-203|ENSMUSG00000061462|-|chr11:g.58994350:G>A
MDHSFSGAPRFLTRPKAFVSVGKDATLSCQIVGNPTPHVSWEKDRQPV EAGARFRLAQDGDVYRLTILDLAL
GDSGQYVCRARNAIGEAF AAVGLRVDSEGTC AEQAPHLLRPTSIRVREGADATFRCRVGGSPQPAVSWSKDG
RRLGPPDAPHVRVEEHGESSALRIRSARPRDGGTYEVRAENPLGSASAAAALVVDSDAEVAGPPTSTATILLA
HLQQRRREAMRAEGIPPSPPGAGTRTCTVTEGKHARLSCFVTGEPK PETVWKKDQGLVTEGRRHVVEDEQENF
VLKILFCCKQSDRGLYTCTASNLVGQTYSSVLVVVREPTVPFKKRLQDLEVREKESATFQCEVAQ PATEAAWFK
EETRLWASAKYDIEEGETERRLTVRNVSADDDAVYICETTEGSRVAELSVQGNLTKRLPRKTAVRTGDTAIF
WVELAVPEGPVRWLRNQEEMVAGGRVAITAEGTCHTLTI FQCTLEDMGEVAFVSGGCRTTTQFCVSA PRRPPL
YPPADPVVKAKTESSVTL SWSAPPHGDRPVTIDGYVLEKRKLGAYAWSRCHEAGWLATTEFTITGVAAEGDFQ
FRVSAINHFGQGPYLEFPGMTMLVPLAVKTP LKAVEAVEGGEVTFVSDLTVASSGEWFLDGEALKASSIYVI
RCDRTRHMLTIREV PARLHGAQLK FVANGIETS IQMVVRAALGLPSSKLPAAAAREVLAQLHEEAQLLAE LSD
QAAA VTWLKDGRELSLGP KYEMQVSAGRRALLVRDVAQDDAGLYECVSRGSR TAYQLLVQEPKLVFAKQQA H
SEVKA EAGNSATLSCEVTQAQTEVTWFKDGK KLS SSSSKVRMEASGC SRRLVVQQAGKADAGEYSCEAGGQKLS
FRLDVAEPKLVFAKQQA HSEVKA EAGASATLSCEVAQAQTEVTWFKDGK KLS SSSSKVRMEASGC SRRLVVQQ
AGKADAGEYSCEAGGQKLSFRLDVAEPKMF AKEQQARSEVKA EAGASATLSCEVAQAQTEVTWFKDGK KLS
SSSKVRMEASGC SRRLVVQQAGKADAGEYSCEAGGQKLSFRLDVTEPKLVFAKEQQARSEVKA EAGNSATLSCE
VAQAQTEVTWFKDGK KLS SSSSKVRMEASGC SRRLVVQQAGKADAGEYSCEAGGQKLSFRLDVAEPKLVFAKEQ
QARSEVKA EAGNSATLSCEVAQAQTEVTWFKDGK KLS SSSSKVRMEASGC SRRLVVQQAGKADAGEYSCEAGGQ
KLSFHLDVTEPKLVFAKEQQAHSEVKA EAGASATLSCEVAQAQTEVTWFKDGK KLS SSSSKVRMEASGC SRRLV
VQQAGKADAGEYSCEAGGQKLSFRLDVAEPKLVFAKEQQARSEVKA EAGASATLSCEVAQAQTEVTWFKDGK K
LSSSSKVRVEASGC SRRLVVQQAGKADAGEYSCEAGGQKLSFRLDVAEPKLVFAKEQQANSEVKA EAGASATL
SCEVAQAQTEVTWFKDGK KLS SSSSKVRVEASGC SRRLVVQQAGKADAGEYSCEAGGQKLSFRLDVAEPKLAFA
KE\*QAHSEVKA EAGASATLSCEVAQAQTEVTWFKDGK KLS SSSSKVRVEASGC SRRLVVQQAGKADAGEYSCEA
GGQKLSFRLDVAEPKLAFAKEQQAHSEVKA EAGASATLSCEVAQAQTEVTWFKDGK KLS SSSSKVRVEASGC SR
RLVVQQAGKADAGEYSCEAGGQKLSFRLDVAEPKLAFAKEQQAHSEVKA EAGASATLSCEVAQAQTEVTWFKD
GKLS SSSSKVRVEASGC SRRLVVQQAGKADAGEYSCEAGGQKLFRLDVAEPKLMFAKEQQAHSEVKA EAGAS
ATLSCEVAQAQTEVTWFKDGK KLS SSSSKVRVEASGC SRRLVVQQAGKADAGEYSCEAGGQKLSFRLDVAEPK
L VFAKEQQAHSEVKA EAGASATLSCEVAQAQTEVTWFKDGK KLS SSSSKVRVEASGC SRRLVVQQV GKADAGEYS
CEARGQKLSFRLDVADTRLMFAKEQQARTEVKA EAGNSATLSCEVAQAQTEVTWFKDGK KLS SSSSKVRVEASG
CSRRLVVQQAGKADAGEYSCEAGGQKLSFRLDVAEAE SQI PERPSRREPLVVKEHETI I LTATIAAP SVAAVT

WLKDGVEIRRSKRHEATS LGDTHTLTVRGAQVLD SAIYSCRVGKEGQDFPVQVEEVA AKFSKPLEPVEGELGG  
TVMLVCELSPEQAEVWRCGNTQLRPGKRFQMTSEGPRTTLTVSGLREDDAEYVCE SRDDRTSARLTVKVPR  
VVKFTSGLSAMVAEEGQEATFQCVVSPSDAGVTWYKDGMLQLPSEKFMVVE S GASRSLTILGLTLEDAGQVTV  
EAEGASSAALRVREAPVLFKKKLEPQTVEERTSVTLEVELTRPWPEVKWTRNAAVLTPSENVEIRAEGARHC  
LVLRVSVGFADRGFFGCETPDDKTQAKLNVEMRQVRLVRGLQVEVAKEQGTASMDVELSHAEVEGSWTRDGLRL  
QPGPKCHLAVQGPVHILTLALSALQPQDSGLVAFRAEGVHTSARLIVTELPVSFTRVLQDVVATQKEKVTLECEL  
SRPVDVRWLKDGVELRAGKAIGIVAQGTCSRSLVIYRCETGDQGVYVCDALDAQTSASLRVQGRTYTLIFRRVL  
AEDAGEVVKFVAENAESRAHLRVKELPVTLLRPLRDKIAMEKHRGVLECCQVSRASAQVRWFKGGVLEQSGPKYE  
VVSDGLYRKLVIDVQPEDEDTYTC DAGNVKTSAQFFVEEQSITIVRGLKDMTVMEPAPAWFECETSIPSVRP  
PKWLLGKTVLQAGGNVLEQDGTVHRLTLHKTCSTMTGPVHFTIGKSRSSAQLVVS D I PVVLRTRPLEPKAGRE  
LQSVVLSCDFRPAPKAVQWYKDDTPLSPSEKFKMALEGQMAELRILRLTPADAGVYRCQAGSAQSSAEVTVEA  
REVTVIQPLQDAEAMEEGRVCFSCELSHKDEDI EWSLNGTPLYNDSFHEISHEGCLHTLVLSVRQADTGTVC  
ATSPKVSVSARLVVKGKPVVFLKALDDVSAEERGTLTLQCEVSDPEARVVWRKDGVELGPSDKYDFLHKAGAR  
GLTVHDLSDHEDAGLYTCQVGSKETQSKVSVHDLHVGITKRLKTVEVLEGE SCSFECVLSHESPSDPAVWTVGG  
KTVGGSGHFHAVRQGRKYTLTVKDAALSDAGEVVSFLGLTSKASLIRERPVDITKPLEDQRTTLGEDVMLS  
CELSRAGTSVRWLKDGKAIKRSQKYDLLSEGTRAVLVRKASLKDSGEYTCETEASKSTAKLVEEKANRFTE  
ELADLQVEEKGRAVFTKTEHPASVVTWRKGLLELRASGKHVPSQEGTLKLTINALERTSDSTYTCDIGAR  
TQARLLVHGQKVRVIEDLEDTA VQEGSSAKFCCRIAPADYGPVHWF LDKTPLHSNELNEITVQPGGYHVLT LR  
QLALKDSGTVYFEAGDQRTS AALRVTEKPSIFSRPLTDVTVTEGEDLTLVCETTTVDSSVRWTKDGKTLRPSA  
RCQLSHEGCAQLLITATTPQDGGRYKCEIGGASSSSIVRVHALPVRFRESLKDVEVPEGKAATLRCVLSSVA  
APVEWRHGDDVLKSSNKYSLRQEGAVLELVIRDLQPDGSGQYSCSFGDQTT SATLT VKTSSAQFVGKLRNKEA  
TEGTVTVLRCELTKEAPVEWKKGTETLRNGDKYSLKQDGAVCELQICSLLVADAGEYSCVCGQEKT SATLTVK  
ALLVHFVRRRLRSKEATEGDTTLQCELSKAAPVEWRKGTETLRDGD RYSLKQDGAVCELQIRSLT IADAGEYL  
CTCGQEKT SATLTVRALPAKFKDSLKNEEATEGTTATLSCELSKAAPVTWKKGPKTLQSGDKYVLRQDGAVCG  
LQIHGLTMADAGEYSCVCGQEKT SATLTVRGLPAKFIEDLRSQEATEGATAILRCELSKAAPVEWRKGETL K  
DGD RYTLRQDGAVCELQIRGLAVVDGTYS SLPKTFTEGLRNEEATEGTMATLRCQMSKAAPVEWRKGETLR  
DGD RYTLRQDGAVCELQIRGLTIEDSGEYTCVCGQEKT SATLSVKALPSRFIEDLRSQEATEGTMATLRCQMS  
KTAPVEWKKGSETLRDGG RYSLRQDGPVCELQICDLAVEDAGEYSCVCGQEKT SATLSIKALPPRFIEDLRSQ  
EATEGTMATLRCQMSKAAPVEWRKGETLGDGG RYSLRQNGAVCELQIHDLAVEDTGEYSCVCGQEKT SATLN  
VKALPPRFIEDLRSQEATEGTMATLRCQMSKAAPVEWRKGETLRDGG RYSLRQDGAVCELQIHDL DVEDAGQ  
YSCVCGQEKTSAVLTVDALPPKFTTEGLKKEEATEGTMVTLRCQMSKEATVEWRKGAKT LSDGG RYSLRQDGAM  
CELQICGLAVEDAGEYSCVCGQEKT SATLSVKALPPRFIEDLRSQEATEGTMATLRCQMSKAAPVEWRKGET  
LRDGD RYSLRQDGAVCELQIRDLAVEDAGEYLCVCGQEKT SATLSVKALPPRFIEDLRSQEATEGTMATLRCQ  
MSKAAPVEWRKGSKTLRDGD RYSLRQDGAMCELQICDLAVEDTGDYSCVCGQEKT SATLSVKALPPRFIEDLR  
SQEAREGTVATLRCRMSKAAPVEWRKGETLKDGD RYSLRQEGNLCELQIRDLAVEDTEEYSCVCGQEKT SAT  
LSVKALPAKFIEDLRSQEAPESSTVTLRCKLSKKASVVWKKGSETLRNGARYSLRQDGAVCELEIRDLTVEDT  
GEYSCTCGQERTSATLSIMAPQVVFQQPLQNLQAEEGSMASLRCELSVPNAAMVWSKGGLELQGDTRREARQQ  
GCVAELLLRDLRREDAGEYSCCTCGSQTT SATLMVTAAPVRFLRELQAQDVDEGATARLRCELSREAVSVEWRK  
GSLQLFPCAKYQMVQEGTTAELLVHGVEQEDAGEYTC DAGHTQS IARLSVRAPKPKFKTDLQSTEQEAGGTAR  
LCCQLSEAEPTPVQWLKEGVELHV GSKYEMRRQGAVCELLIHGLEAKDTGEYACL VGGQKT LASLRVKEPEV  
TIVRGLVDMEVQADEDFEFTCKV SQAGATDVQWHLQGLPLQSNEVTEVAVLADGCTHVLQKGVTL EDAGTVS  
FHVGG LSSSAQLTVRVPEVTVLEPLKDVQLSEGQDAHFRCRLSRASGQEARWALGGVPLQCNE MNDITVEQGT  
LYLLTLHKVTLEDAGTITLQVGS CSSEAQLKVTAKNTVLRGLENVDALEGG EALFECQLSQPEVA AHTWLLDD  
EPVHTSEKVEVVYFENGLRHLLLLKLNKLPQDSCRVTFLAGDVVTS AFLTVRGRWRLEVLEPPHDASVKAGMQVR  
FTCILSEAVPVGEATWYINGAAIQPDDTDWTVTTDGS SHAL TLSNAQPQHAGEVTF AARDAVASARLSVLALP  
DPPEDAEVVGRSDHSVTLSSWVAPMSDGGGGLCGYRVMKEASTGQWQLCHDLVPGPECVDDLVPGKTYRFRV  
AAVGPAGAGEPVHLPQMVKIAPAPAPAPAPAPAPAPETRQAVVGEDI CLELEVAADGGEVVWHKGTERRIQPGG  
HFEVLSRGRQMLVIKGFRTEDQGEYRCGPIQGLPSSGAATFNVVMTSGSGDEVPAQPSLPPEAAQEGDLHLL  
WEALARKRRMSREPTLDSISELPEEDSRVQHLRQEAEETAPDLSEGYSTADELARTGEADLSHTSSDDES RAG  
TPSLVTYLKAGGPGI SPLASKHEAQVTT SVKPKQKQEPVPTCPPPGDLSAADLMDPSLDKAAVKIQAAFKG  
YKVRKEMKQOEGPVFSRTFGDTEAQVGDVLRLECVLATKTKDMRACWLKDGIELTDGRHYHIDQLKDGTC SLLV  
TGLAPTDSGRYTCQVSTKSGRVSHSACVVVSGTESEAE SSSGGE LDDAFRRRAARLHRLFRTKSPAELSEEEL  
FLSADEGPEPEEPADWQTYREDENFVCIRFESLAEARQAVTCFRNMFATMIGVEISLGEQGP RGVEMRIGK  
VAPTPTPAVPLAKT PGLQTS DAA PVFLTELQNDQDVQDGY PMSFDCVVVTGQVPVSRWFKDGLLEEDDHYMIN  
EDQGGHQLIITAVVPADMGVYRCLAENSMGVSTKAELRVELTSTDYDTAADATETSSYFSAQGYLSSREQE  
GTESDEGQLPQVLEELKDLQVAPGTR LAKFQLKVKGY PAPKLYWFKDQPLTSDHIRMTDKKTLHTLEIVSV  
TREDSGQYAAYSNAVGAAYSSARLLVRGPSEPEEK PASDVHERLVPPRI LEKFTPKKVKRGS S ITFSVKVEG  
HPAPSVHWLKEEA EKGV LWIGPDTPGYTMAS SSKQHS LVLDDVGRQHOGTYTCIATNPAGQALCSASLHISGL

AKEEEQERVKEALISSFLQGTSAQVSAQMSEASAGFADLVGQSKGESLVAEEAHSHLSLAIEVGTTEEFLOKLTSSQ  
 ITEMVSAKISQAKLQVPGGDSDEETKTPSASPRHGRSRPSSSVQESSSESEDGDSRGEIFDIYVVTADYLPLG  
 AEQDAIILREGQYVEVLDSAHPLRWLVRTKPTKSSPSRQGWVSPAYLDKRLKLSPEWGPTEAPEFPGEAVSED  
 EYRTRLSSVIQELLSSEQAFVGLQFLESHHMKHLERSPRVPAAVASQKTVIFRNVQDISHFHSSFLKELQGC  
 GTDDDVAMCFIKNQEAFEKYLEFLVGRVQAESVVVSTPVQEFYKKYAEETLSAKDPTQPPPPPLQHYLEQPVE  
 RVQKYQALLKELIRNKARNRQNCALLEQAYAVVSALPQRAENKLVSLMENYPGTLEALGEPVIRQGHFVWEG  
 APGARMPWKGNHRHVFLFRNYLVICKPRRDSRTDTFSYVFRNMMKLSIDLNDQVEGDRAFEVWHEREDSVR  
 KYLLQARTVI IKNSWVKEICGIQQRLAQPVWRPPEFEELADCTAELGETVKLACRVTGTPKPIVSWYKDGKP  
 VEVDPHHILIEDPDGCTLI LDNLTGIDSGQYMCFAASAAGNASTLGKILVQVPPRFVNKVRATPFVEGEDAQ  
 ITCTVEGAPYPQIRWYKDGTL LAPGNRYRMLNEPRSGVLV LVIQAASKEDLGHYECELVNRLGSTRGGGELYM  
 QSPALRARDQHHREQIVA AVEVTEQETKVPKKTVI I EETITTVVKS PRGRRQSPGKSPSRSPRRSASPRRPG  
 LLAPERLYPPGTSPSRRLVEVEQGRKAPVPALYVTEAEVHAPASQSPKWLEVEETIEVRVKKTGSRGASPVRE  
 MTSRGEGLIFTLPGGI PGRDPNANNNSNKS SVYQEARTWGPVAVHVGEFFIFQVDSVGNVDVWAASPEPEQVRA  
 SQKEENTERQEGCSGDENTFLMEEPQD TDSLQGRDKI LTHNGRVLTLADLEDYVPQEGETFCGCDSTPSTP  
 DEPPCEVSVLQREISEPTVGPVLLNVGRPPGTGATPSFFRPGSQVHSPESVSFLLREAWSGPVSAAPWTSSS  
 HTHVQSSVDGSHGSFKTEVSTQTVSFGAVGETVTLHIDPDGGEAPGPSQG\*  
 >rs26971697\_ENSMUSP0000020732\_c.4806:C>T\_p.Q1603\*  
 ENSMUST0000020732.13|Obscn-201|ENSMUSG00000061462|-|chr11:g.58994350:G>A  
 MDHSFSGAPRFLTRPKAFVSVGKDATLSCQIVGNPTPHVSWEKDRQPVEAGARFRLAQDGDVYRLTILDLAL  
 GDSGQYVCRARNAIGEAFVAVGLRVDSEGTCAEQAPHFLLRPTSIRVREGADATFRCRVGGSPQPAVSWSKDG  
 RRLGPPDAPHVRVEEHGESSALRIRSARPRDGGTYEVRAENPLGSASAAAALVVDSDAEVAGPPGTSTATLLA  
 HLQQRREAMRAEGIPPSPPGAGTRTCTVTEGKHARLSCFVTGEPKPEVWKKDGLVTEGRRHVVEDEQENF  
 VLKILFCKQSDRGLYTCTASNLVGQTYSSVLVVVREPTVPFKKRLQDLEVREKESATFQCEVAQPAEAAWFK  
 EETRLWASAKYDIEEEGETERRLTVRNVSADDDAVYICETTEGSRVAELSVQGNLTKLPRKTAVRTGDTAIF  
 WVVELAVPEGPVWRWRNQEEMVAGGRVAITAEGTCHTLTI FQCTLEDMGEVAFVSGGCRTTTTQFCVSAPRRPPL  
 YPADPVVKAKTESVTLWSAPPHGDRPVTIDGYVLEKRLGAYAWSRCHEAGLATTEFTITGVAEEGDFQ  
 FRVSAINHKTGQPYLEFPGTMHLVPLAVKTPLKAVEAVEGGEVTFVSDLTVASGSEWFLDGEALKASSIYVI  
 RCDRTRHMLTIREVPARLHGAQLKFVANGIETSIQMVVRAALGLPSSKLPAAAAAREVLAQLHEEAQLLAE LSD  
 QAAA VTWLKDGRELSLGPKEYMQVSAGRRALLVRDVAQDDAGLYECVSRGSR TAYQLLVQDITDGYRDWGPAG  
 PQKHMCKCAGAKIARYLGSSCYRFLQYDKGVWHLEAALDTRQKGKTS SCSLHEKPKLVFAKQQAHSEVKA E  
 AGNSATLSCEVTQAQTEVTWFKDGKLLSSSSKVRMEASGCSRRLVVQQAGKADAGEYSCEAGGQKLSFRLDVA  
 EPKLVFAKQQAHSEVKA EAGASATLSCEVAQAQTEVTWFKDGKLLSSSSKVRMEASGCSRRLVVQQAGKADA  
 GEYSCEAGGQKLSFRLDVAEPKMFVFAKEQQARSEVKA EAGASATLSCEVAQAQTEVTWFKDGKLLSSSSKVRM  
 EASGCSRRLVVQQAGKADAGEYSCEAGGQKLSFRLDVTEPKLVFAKEQQARSEVKA EVGNSATLSCEVAQAQ T  
 EVTWFKDGKLLSSSSKVRMEASGCSRRLVVQQAGKADAGEYSCEAGGQKLSFRLDVAEPKLVFAKEQQARSEV  
 KAEAGNSATLSCEVAQAQTEVTWFKDGKLLSSSSKVRMEASGCSRRLVVQQAGKADAGEYSCEAGGQKLSFHL  
 DVTEPKLVFAKEQQAHSEVKA EAGASATLSCEVAQAQTEVTWFKDGKLLSSSSKVRMEASGCSRRLVVQQAGK  
 ADAGEYSCEAEGQKLSFRLDVAEPKLVFAKEQQARSEVKA EAGASATLSCEVAQAQTEVTWFKDGKLLSSSSK  
 VRVEASGCSRRLVVQQAGKADAGEYSCEAGGQKLSFRLDVAEPKLVFAKEQQANSEVKA EAGASATLSCEVAQ  
 AQTEVTWFKDGKLLSSSSKVRVEASGCSRRLVVQQAGKADAGEYSCEAGGQKLSFRLDVAEPKLAFAKE\*QAH  
 SEVKA EAGASATLSCEVAQAQTEVTWFKDGKLLSSSSKVRVEASGCSRRLVVQQAGKADAGEYSCEAGGQKLS  
 FRLDVAEPKLAFAKEQQAHSEVKA EAGASATLSCEVAQAQTEVTWFKDGKLLSSSSKVRVEASGCSRRLVVQQ  
 AGKADAGEYSCEAGGQKLSFRLDVAEPKLAFAKEQQAHSEVKA EAGASATLSCEVAQAQTEVTWFKDGKLLSS  
 SSKVRVEASGCSRRLVVQQAGKADAGEYSCEAGGQKLFRLDVAEPKLMFAKEQQAHSEVKA EAGASATLSCE  
 VAQAQTEVTWFKDGKLLSSSSKVRVEASGCSRRLVVQQAGKADAGEYSCEAGGQKLSFRLDVAEPKLVFAKEQ  
 QAHSEVKA EAGASATLSCEVAQAQTEVTWFKDGKLLSSSSKVRVEASGCSRRLVVQQVQKADAGEYSCEARGQ  
 KLSFRLDVADTRLMFAKEQQARTEVKA EAGNSATLSCEVAQAQTEVTWFKDGKLLSSSSKVRVEASGCSRRLV  
 VQQAGKADAGEYSCEAGGQKLSFRLDVAEAE SQIPERPSRREPLVVKEHETIILTATIAAPSVAAV TWLKDGV  
 EIRRSKRHEATSLGDHTLTVRGAQVLD SAIYSCRVGKEGQDFPVQVEEVA AKFSKPLEPVEGELGGTVMLVC  
 ELSPEQA EVVWRCGNTQLRPGKRFQMTSEGPRRTLTVSGLREDDAE EYVCE SRDDRTSARLTVKVPVVKFTS  
 GLSAMVAEEGQEATFQCVVSPSDAGVTWYKDGMLQLPSEKFMV VESGASRSLTILGLTLEDAGQVTEAEGAS  
 SSAALRVREAPVLFKKKLEPQTEVERTSVTLEVELTRPWPEVKWTRNAAVLTPSENVEIRAEGARHCLVLRV  
 GFADRGGFFGCETPDDKTQAKLNVEMRQVRLVRLGHTVEAVEAQQGTASMDVELSHA EVEGSWTRDGLRLQPGPKC  
 HLAVQGPVHILTL S ALQPDQSGLVA FRAEGLVHTSARLIVTELPVSFTRVLQDVVATQKEKVTLCELSRFPDV  
 RWLKDGVELRAGKAIGIVAQGTCSRSLVIYRCETGDQGVYVCDALDAQTSASLRVQGRTYTLIFRRVLAEDAGE  
 VKFVAENAESRAHLRVKELPVTLLRPLRDKIAMEKHRGVLECCQVSRASAVRWFKGGVELQSGPKYEVVSDGL  
 YRKLVINVDQPEDEDTYTC DAGNVKTS AQFFVEEQSITIVRGLKDMTVM EPAPAWFECETSIPSVRPPKWL LG  
 KTVLQAGGNVGL EQDGTVHRLTLHKTCSTMTGPVHFTIGKSRSSAQLVVSDIPVVLTRPLEPKAGRELQSVVL



SCDFRPAPKAVQWYKDDTPLSPSEKFKMALEGQMAELRILRLTPADAGVYRCQAGSAQSSAEVTVAREVTVI  
QPLQDAEAMEEGRVCFSCELSHKDEDEIWSLNGTPLYNDSFHEISHEGCLHTLVLKSVRQADTGTVCATSPKV  
SVSARLVVVKGKPVVFLKALDDVSAEERGTTLTQCEVSDPEARVVWRKDGVELGSPDKYDFLHKAGARGLTVHD  
LSHEDAGLYTCQVGSKETQSKVSVHDLHVGITKRLKTVEVLEGESECSFECVLSHESPSDPAVWTVGGKTVGGS  
GHFHAVRQGRKYTLTVKDAALSDAGEVVFVSVLGLTSKASLI IRERPVDITKPLEDQRTTLGEDVMLSCELSRA  
GTSVRWLKDGKAIRKSQKYDLLSEGTRAVLVVRKASLKDSGEYTCETEASKSTAKLCVEEKANRFTEELADLQ  
VEEKGRAVFTCKTEHPASVVTWRKGLLELRASGKHVPSQEGTLKLTINALERTDSDTYTCDIGQARTQARLL  
VHGQKVRVIEDLEDTAVQEGSSAKFCRIAPADYGPVHWFLLDKTPLHSNELNEITVQPGGYHVLTLRQLALKD  
SGTVYFEAGDQRTSAALRVTEKPSIFSRPLTDVTVTEGEDLTLVCETTTVDSSVRWTKDGKTLRPSARCQLSH  
EGCQAQLLITATTPQDGGRYKCEIGGASSSSIVRVHALPVRFRRESLKDVEVPEGKAATLRCVLSVAAPVEWR  
HGDDVLKSSNKYSLRQEGAVLELVIRDLQPDQSGQYSCSFGDQTTSATLTVKTSQAQFVGLRKNKEATEGTTV  
TLRCELTKAPVEWKKGTETLRNGDKYSLKQDGAVCELQICSLLVADAGEYSCVCGQEKTSATLTVKALLVHF  
VRLRSKEATEGDTTTLQCELSKAAPVEWRKGTETLRDGDYSLKQDGAVCELQIRSLTIADAGEYLCTCGQE  
KTSATLTVRALPAKFKDSLKNEEATEGTTATLSCELSKAAPVWKKGPKTLQSGDKYVLRQDGAFCGLQIHGL  
TMADAGEYSCVCGQEKTSATLTVRGLPAKFIEDLRSQEATEGATAILRCELSKAAPVEWRKGSSETLKDGDYR  
LRQDGAVCELQIRGLAVVDGTYSLSLPTKFTTEGLRNEEATEGTMATLRCQMSKAAPVEWRKGSSETLRDGDYR  
LRQDGAFCGLQIRGLTIEDSGEYTCVCGQEKTSATLSVKALPSRFIEDLRSQEATEGTMATLRCQMSKTAVE  
WKKGSETLRDGGYSLRQDGPVCELQICDLAVEDAGEYSCVCGQEKTSATLSIKALPPRFIEDLRSQEATEG  
MATLRCQMSKAAPVEWRKGSSETLGDGGYSLRQNGAVCELQIHDLAVEDTGEYSCVCGQEKTSATLNVKALPP  
RFIEDLRSQEATEGTMATLRCQMSKAAPVEWRKGSSETLRDGGYSLRQDGAFCGLQIHDLVEDAGQYSCVCG  
QEKTSAVLTVDALPPKFTTEGLKKEEATEGTMVTLRCQMSKEATVEWRKGAKTLSDDGGYSLRQDGAFCGLQIC  
GLAVEDAGEYSCVCGQEKTSATLSVKALPPRFIEDLRSQEATEGTMATLRCQMSKAAPVEWRKGSSETLRDGD  
YSLRQDGAFCGLQIRDLAVEDAGEYLCVCGQEKTSATLSVKALPPRFIEDLRSQEATEGTMATLRCQMSKAAP  
VEWRKGSSETLRDGDYSLRQDGAFCGLQICDLAVEDTGDYSCVCGQEKTSATLSVKALPPRFIEDLRSQEARE  
GTVATLRCRMSKAAPVEWRKGSSETLKDGDYSLRQEGNLCELQIRDLAVEDTEEYSCVCGQEKTSATLSVKAL  
PAKFIEDLRSQEATEGTMVTLRCKLSKASVWKKGSETLRNGARYSLRQDGAFCGLQIRDLVEDTGEYSCT  
CGQERTSATLSIMAPQVVVQQLQNLQAEEGSMKRELSVNAAMVWSKGGLELQGDTRREARQQGCVAEL  
LLRDLRREDAGEYSCVCGQEKTSATLMVTAAPVRFRLRELQAQDQVDEGATARLRCELSREAVSVEWRKGSQQLF  
PCAKYQMVQEGTTAELLVHGVEQEDAGEYTCDAHTQSIARLSVRAPKPKFKTDLQSTEQEAGGTARLCCQLS  
EAEPGTPVQWLKEGVELHVGSKYEMRRQGAFCGLQIHGLEAKDTGEYACLVGGQKTLASLRVKEPEVTIVRGL  
VDMEVQADEDEFTCKVQAGATDVQWHLQGLPLQSNVTEVAVLADGCTHVLQKGVTLLEDAGTVSFHVGGL  
SSSAQLTVRVPEVTVLEPLKDVQLSEGQDAHFRCRLSRASGQEARWALGGVPLQCNEMNDITVEQGTLYLLTL  
HKVTLLEDAGTITLQVGSSESSEALQKVTAKNTVLRGLENVDALEGGEALFECQLSQPEVAHAHTWLLDDEPVHTS  
EKVEVVYFENGLRHLLLLKLNKLPQDSCRVTFLAGDVVTSFAFLTVRGWRLEVLPEPHDASVKAGMQVRFCTILS  
EAVPVGEATWYINGAAIQPDDTDWTVTTDGSHHALTLNAQPHAGEVTFFAARDAVASARLSVLAALPDPPEDA  
EYVGRSDHSVTLSWVAPMSDGGGLCGYRVEKAEASTGQWQLCHDLVPGPECVDDLVPGKTYRFRVAAVGPA  
GAGEPVHLPQMVKIAPAPAPAPAPAPAPAPAPETRAVVGEDICLELEVAADGGEVVWHKGTERRIQGGHFEVLS  
RGQRQMLVIKGFRTEDQGEYRCGPIQGLPSSGAATFNVMVMTSGSGDEVPAQPSLPPEAAQEGDLHLLWEALAR  
KRRMSREPTLDSISELPEEDSRVQHLRQEAEEETAPDLSEGYSTADELARTGEADLSHTSSDDESRACTPSLVT  
YLKAGGPGISPLASKHEAQVTSVKPQKQEPVPTCPPPGDLAADLMDPSLDKAAVKIQAAFQYKVRKE  
MKQQEGPVFSRTFGDTEAQVGDVLRLECVLATKTDMRACWLDKGIELTDGRHYHIDQLKDGTCSLLVTLGLAPT  
DSGRYTCQVSTKSGRVSHSACVVVSGTESEAESSGGELDDAFRAARRLHRLFRTKSPAELSEELFLSADE  
GPGEPEPADWQTYREDENFVCIRFESLAEARQAVTCFRNMFATMGIGVEISLGEQGRGVEMRIGKVAPTVT  
PAVPLAKTPGLQTSDAAPVFLTELQNDVQDGYPMSFDCVVTGQVPVSVRWFKDGKLEEDDHVMINEDQQGG  
HQLIITAVVPADMGVYRCLAENSMGVSSTKAELRVELTSTDYDTAADATETSSYFSAQGYLSSREQEGETESDE  
GQLPQVLEELKDLQVAPGTRLAKFQLKVKGYPAKLYWFKDGGPLTSDHIRMTDKKTLHTLEIVSVTREDSG  
QYAAYSNAVGAAYSSARLLVRGPSEPEEKPASDVHERLVPPRILEKFTPKKVKRGSSITFSVKVEGHPAPSV  
HWLKEEAKEKGLVLIWGPDTPGYTMASSSKQHSVLVLDVGRQHGTYTICATNPAGQALCSASLHISGLAKEEEQ  
ERVKEALISSFLQGTSAQVSAQMSSESAGFADLVGQSKGESLVAEEAHSHLSLAEVGTTEEFLQKLTSTQITEMVS  
AKISQAKLQVPGGDSDEETKTPSASPRHGRSRPSSSVQESSSEEDGDSRGEIFDIYVVTADYLPGLAEQDAI  
ILREGQYVEVLDSAHPLRWLVRTKPTKSSPSRQGWVSPAYLDKRLKLSPEWGPTEAPEFPGEAVSEDEYRTRL  
SSVIQELLSSEQAFVGLQFLESHEHMKHLERSPRVPAAVASQKTVIFRNVQDISHFHSSFLKELQCGCTDDDV  
AMCFIKNQEAFAKEYLEFLVGRVQAESVVVSTPVQEFYKKYAEETLSAKDPTQPPPPPLQHYLEQPVVERQKYQ  
ALLKELIRNKARNRQNCALLEQAYAVVSALPQRAENKHLVSLMENYPTLEALGEPPIRQGHFIVWEGAPGARM  
PWKGHNHRVFLFRNYLVI CKPRRDSRTDTFSYVFRNMMKLSIDLNDQVEGDDRAFEVWHEREDSVRKYLLQA  
RTVI IKNSWVKEICGIQQLAQPVWRPPEFEEELADCTAELGETVKLACRVGTGPKPIVSWYKDGKPVVDPH  
HILIEDPDGSCTLILDNLGTIDSGQYMCFAASAAGNASTLGKILVQVPPRFVNVKVRATPFVEGEDAQITCTVE

GAPYPQIRWYKDGTLAPGNRYRMLNEPRSGVLVLIQAASKEDLGHYECELVNRLGSTRGGGELYMQSPALR  
ARDQHHREQIIVAAVEERRPSP\*  
>rs45807983\_ENSMUSP00000158795\_c.4536:G>T\_p.A1513S  
ENSMUST00000238536.2|Obscn-210|ENSMUSG00000061462|-|chr11:g.58997364:C>A  
MDHSFSGAPRFLTRPKAFVSVGKDATLSCQIVGNPTPHVSWEKDRQPVEAGARFRLAQDGDVYRLTILDLAL  
GDSGQYVCRARNAIGEAFVAVGLRVDSEGTCAEQAPHFLLRPTSIRVREGADATFRCRVGSGPQPAVSWSKDG  
RRLGPPDAPHVRVEEHGESSALRIRRSARPRDGGTYEVRAENPLGSASAAAAALVVDSDAEVAGPPGTSTATLLA  
HLQQRREAMRAEGIPSPPPGAGTRTCTVTTEGKHARLSCFVTGEPKPEVWKKDGLVTEGRRHVVEDEQENF  
VLKILFCKQSDRGLYTCTASNLVQTYSSVLVVREPTVPFKKRLQDLEVREKESATFQCEVAQPAATEAAWFK  
EETRLWASAKYDIEEGTERRLTVRNVSADDDAVYICETTEGSRVAELSVQGNLTKLPRKTAVRTGDTAIF  
WVELAVPEGPVWRWRNQEEMVAGGRVAITAEGTCHTLTI FQCTLEDMGEVAFVSGGCRTTTFQFCVSAPRRPPL  
YPPADPVVKAKTESSVTLWSAPPHGDRPVTIDGYVLEKRKLGAYAWSRCHEAGWLATTEFTITGVAAEGDFQ  
FRVSAINHFGQGPYLEFPGMTMLVPLAVKTPKAVEAVEGGEVTFVSDTLTVASSGEWFLDGEALKASSIYVI  
RCDRTTRHMLTIREVPARLHGAQLKFFVANGIETS IQMVVRAALGLPSSKLPAAAAAREVLAQLHEEAQLLAE LSD  
QAAA VTWLKDGRELSLGPKEYMQVSAGRRALLVRDVAQDDAGLYECVSRGSRTAYQLLVQDITDGYRDWGPAG  
PQKHMCKCAGAKIARYLGS SCYRFLQYDKGVWHLEAALDTRQKGTSSCSLHEKPKLVFAKQQAHSEVKA  
AGNSATLSCEVTQAQTEVTWFKDGKLS SSSSKVRMEASGCSRRLVVQQAGKADAGEYSCEAGGQKLSFRLDVA  
EPKLVFAKQQAHSEVKAEGASATLSCEVAQAQTEVTWFKDGKLS SSSSKVRMEASGCSRRLVVQQAGKADA  
GEYSCEAGGQKLSFRLDVAEPKMFVFAKEQQARSEVKAEGASATLSCEVAQAQTEVTWFKDGKLS SSSSKVRM  
EASGCSRRLVVQQAGKADAGEYSCEAGGQKLSFRLDVTEPKLVFAKEQQARSEVKAEGVNSATLSCEVAQAQ  
EVTWFKDGKLS SSSSKVRMEASGCSRRLVVQQAGKADAGEYSCEAGGQKLSFRLDVAEPKLVFAKEQQARSEV  
KAEAGNSATLSCEVAQAQTEVTWFKDGKLS SSSSKVRMEASGCSRRLVVQQAGKADAGEYSCEAGGQKLSFHL  
DVTEPKLVFAKEQQAHSEVKAEGASATLSCEVAQAQTEVTWFKDGKLS SSSSKVRMEASGCSRRLVVQQAGK  
ADAGEYSCEAGGQKLSFRLDVAEPKLVFAKEQQARSEVKAEGASATLSCEVAQAQTEVTWFKDGKLS SSSK  
VRVEASGCSRRLVVQQAGKADAGEYSCEAGGQKLSFRLDVAEPKLVFAKEQQSNSEVKAEGASATLSCEVAQ  
AQTEVTWFKDGKLS SSSSKVRVEASGCSRRLVVQQAGKADAGEYSCEAGGQKLSFRLDVAEPKLVFAKEQQAH  
SEVKAEGASATLSCEVAQAQTEVTWFKDGKLS SSSSKVRVEASGCSRRLVVQQAGKADAGEYSCEAGGQKLS  
FRLDVAEPKLVFAKEQQAHSEVKAEGASATLSCEVAQAQTEVTWFKDGKLS SSSSKVRVEASGCSRRLVVQQ  
AGKADAGEYSCEAGGQKLSFRLDVAEPKLVFAKEQQAHSEVKAEGASATLSCEVAQAQTEVTWFKDGKLS S  
SSSKVRVEASGCSRRLVVQQAGKADAGEYSCEAGGQKLFRLDVAEPKLMFAKEQQAHSEVKAEGASATLSCE  
VAQAQTEVTWFKDGKLS SSSSKVRVEASGCSRRLVVQQAGKADAGEYSCEAGGQKLSFRLDVAEPKLVFAKEQ  
QAHSEVKAEGASATLSCEVAQAQTEVTWFKDGKLS SSSSKVRVEASGCSRRLVVQQVQKADAGEYSCEARGQ  
KLSFRLDVADTRLMFAKEQQARTEVKAEGNSATLSCEVAQAQTEVTWFKDGKLS SSSSKVRVEASGCSRRLV  
VQQAGKADAGEYSCEAGGQKLSFRLDVAEAE SQIPERPSRREPLVVKEHETIILTATIAAPSVAAVTWLKDG  
VEIRRSKRHEATSLDTHLTVRGAQVLD SAIYSRCVKGEGQDFPVQVEEVAAKFSKPLEPVEGELGGTVMLVC  
ELSPQAEVWVRCGNTQLRPGKRFQMTSEGPRTTLTVSGLREDDAEYVCE SRDDRTSARLTVKVPVVKFTS  
GLSAMVAEEGQEATFQCVVSPSDAGVTWYKDGMLQLPSEKFMVSVESGASRSLTILGLTLEDAGQVTEAEGAS  
SSAALRVREAPVLFKKLEPQTEVEERTSVTLEVELTRPWPEVKWTRNAAVLTPSENVEIRAEGARHCLVRSV  
GFADRGFVFCETPDDKTQAKLNVEMRQVRLVVRGLQVEVEAKEQGTASMDVELSHAEEVGSWTRDGLRLQPGPKC  
HLAVQGPVHILTL SALQPQDSGLVAFRAEGVHTSARLIVTEL PVSFTRVLQDVVATQKEKVTLECELSRPVDV  
RWLKDGVLELRAGKAIGIVAQGT CRSLVIYRCETGDQGVYVCDALDAQTSASLRVQGRTYTLIFRRLAEDAGE  
VKFVAENAESRAHLRVKELPVTLLRPLRDKIAMEKHRGVLECCVSRASAQVRWFKGGVELQSGPKYEVVSDGL  
YRKLVIN DVQPEDEDTYTC DAGNVKTS AQFFVEEQSITIVRGLKDMTVMEPAPAWFECETSIPSVRPPKWL  
LGGKTVLQAGGNVGLQDGTVHRLTLHKTCSTMTGPVHFTIGKSRSSAQLVVSDIPVVLTRPLEPKAGRELQSVV  
LSCDFRPAKAVQWYKDDTPLSPSEKFKMALEGQMAELRILRLTPADAGVYRCQAGSAQSSAEVTVAREVTVI  
QPLQDAEAMEEGRVCFSCELSHKDEDI EWSLNGTPLYNDSFHEI SHEGCLHTLVLSVRQADTGTVCATSPKV  
SVSARLVVKGKPVVFLKALDDVSAEERGLTLTQCEVSDPEARVVRKDGVELGSPDKYDFLHKAGARGLTVHD  
LSHEDAGLYTCQVGSKETQSKVSVHDLHVGITKRLKTVEVLEGE SCFECVLSHESPSDPAVWTVGGKTVGGS  
GHFHAVRQGRKYTLTVKDAALSDAGEVVFVSVLGLT SKASLIIRERPVDITKPLEDQRTTLGEDVMLSCELSRA  
GTSVRWLKDGKAIRKSQKYDLLSEGTRAVLVVRKASLKD SGEYTCETEASKSTAKLCVEEKANRTEELADLQ  
VEEKGRAVFTCKTEHPASVVTWRKGLLELRASGKHVPSQEGLTLKLTINALERTSDTYTCDIGQARTQARLL  
VHGQKVRVIEDLEDTAVQEGSSAKFCRIAPADYGPVHWF LDKTPLHSNELNEITVQPGGYHVLT LRQLALKD  
SGTVYFEAGDQRTSAAALRVTEKPSIFSRPLTDVTVTEGEDTLTVCE TTTVDSSVRWTKDGKTLRPSARCQLSH  
EGCQAQLLITATTPQDGGRYKCEIGGASSSIVRVHALPVRFRRESLKDVEVPEGKAATLRCVLSVAAPVEWR  
HGDDVLKSNKYSRLRQEGAVLELVIRDLQPQDSGQYSCSFGDQTT SATLTVKTS SAQFVGLRNKEATEGTTV  
TLRCELTKAEVWKKGTETLRNGDKYSLKQDGA VCELQICSLLVADAGEYSCVCGQEKTSATLTVKALLVHF  
VRRLSKEATEGDTTTLQCELSKAAPVEWRKGTETLRDGD RYSLKQDGA VCELQIRSLTIADAGEYLCTCGQE  
KTSATLTVRALPAKFKDSLKNEEATEGTTATLSCELS KAAPVTWKKGPKTLQSGDKYVLRQDGA VCGLQIHGL

TMADAGEYSCVCGQEKTSATLTVRGLPAKFIEDLRSQEATEGATAILRCELSKAAPVEWRKGETLKDGDRTY  
LRQDGAVCELQIRGLAVVDGTYSLSLPTKFTEGLRNEEATEGTMATLRCQMSKAAPVEWRKGETLDRDGRYS  
LRQDGAMCELQIRGLTIEDSGEYTCVCGQEKTSATLSVKALPSRFIEDLRSQEATEGTMATLRCQMSKTAPVE  
WKKGSETLRDGGRYSLRQDGPVCELQICDLAVEDAGEYSCVCGQEKTSATLSIKALPPRFIEDLRSQEATEGT  
MATLRCQMSKAAPVEWRKGETLGDGGRYSLRQNGAVCELQIHDLAVEDTGEYSCVCGQEKTSATLNVKALPP  
RFIEDLRSQEATEGTMATLRCQMSKAAPVEWRKGETLRDGGRYSLRQDGAVCELQIHDLVDVEDAGQYSCVCG  
QEKTSAVLTVDALPPKFTEGLKKEEATEGTMVTLRCQMSKEATVEWRKGAKTLSDDGGRYSLRQDGAMCELQIC  
GLAVEDAGEYSCVCGQEKTSATLSVKALPPRFIEDLRSQEATEGTMATLRCQMSKAAPVEWRKGETLRDGD  
YSLRQDGAVCELQIRDLAVEDAGEYLCVCGQEKTSATLSVKALPPRFIEDLRSQEATEGTMATLRCQMSKAAP  
VEWRKGSKTLRDGDYSLRQDGAMCELQICDLAVEDTGDYSCVCGQEKTSATLSVKALPPRFIEDLRSQEARE  
GTVATLRCRMSKAAPVEWRKGETLKDGDYSLRQEGNLCELQIRDLAVEDTEEYSCVCGQEKTSATLSVKAL  
PAKFIEDLRSQEAPESSTVTLRCKLSKASVWKKGSETLRNGARYSLRQDGAVCELEIRDLTVEDTGEYSCT  
CGQERTSATLSIMAPQVVFQQPLQNLQAEEGSMASLRCELSVFNAMVWSKGGLELQGDTRREARQQGCVAEL  
LLRDLRREDAGEYSCTCGSQTTSATLMVTAAPVRFLRELQAQDVEGATARLRCELSREAVSVEWRKGSLLQF  
PCAKYQMVQEGTTAELLVHGVEQEDAGEYTCDAHTQSIARLSVRAPKPKFKTDLQSTEQEAGGTARLCCQLS  
EAEFGTVPVQWLKEGVELHVGSKYEMRRQGAVCELLIHGLEAKDTGEYACLVGGQKTASLRVKEPEVTIVRGL  
VDMEVQADEDFEFTCKVSQAGATDVQWHLQGLPLQSNVEVAVLADGCTHVLQKGVTLDEAGTVSFVGGGL  
SSSAQLTVRVPEVTVLEPLKDVQLSEGQDAHFRCRLSRASGQEARWALGGVPLQCNEMNDITVEQFTLYLLTL  
HKVTLEDAGTITLQVGSSESQAQLKVTAKNTVLRGLENVDALEGGALFECQLSQPEVAHAHTWLLDDEPVHTS  
EKVEVVFENGLRHLLLNKLPQDSCRVTFLAGDVVTSFAFLTVRGRLEVLLEPPHDASVKAGMQVRFTCILS  
EAVPVGEATWYINGAAIQPDDTDWTVTTDGSHHALTLSNAQPQHAGEVTFAAARDAVASARLSVLALPDPEDA  
EVRGRSDHSVTLVSWVAPMSDGGGGLCGYRVMKEASTGQWQLCHDLVPGPECVDDLVPGKTYRFRVAAVGPA  
GAGEPVHLPQMVKIAPAPAPAPAPAPAPAPETRAVAVGEDIQLELEVAADGGEVVWHKGTERRIQPGHFVLS  
RGQRQMLVIKGFRTEDQGEYRCGPIQGLPSSGAATFNVMVMTSGSGDEVPAQPSLPPEAAQEGDLHLLWEALAR  
KRRMSREPTLDSISELPEEDSRVQHLRQEAEBETAPDLSEGYSTADELARTGEADLSHTSSDDESAGTPSLVT  
YLKAGGPGISPLASKHEAQVTTSVKPKQKQEPVPTCPPPGDLAADMPLDKAQVAVKIQAQAFKGYKVRKE  
MKQEGGPVSRFTFGDTEAQVGVDLRLECVLAKTKTDMRACVWLKDGIELTDGRHYHIDQLKDGCTSLLVTLGLAPT  
DSGRYTCQVSTKSGRVSHSACVVVSGTESEAESSGGELDDAFRAARRLHRLFRTKSPAELSEEELFLSADE  
GPGPEEPADWQTYREDFVFCIRFESLAEARQAVTCFRNMFATMGIGVEISLGEQGRGVEMRIGKVAPTVT  
PAVPLAKTPGLQTSDAAPVFLTELQNDVQDGYPMSFDCVVTGQPVPSVRWFKDGKLEEDDHVMINEDQGG  
HQLIITAVVPADMGVYRCLAENSMGVSSTKAELRVELTSTDYDTAADATETSSYFSAQGYLSSREQEGTESDE  
GQLPQVLEELKDLQVAPGTRLAKFQLKVKGYPAKLYWFKDQGPLTTSDHIRMTDKKTLHTLEIVSVTREDSG  
QYAAYSNAVGAAYSSARLLVRGPSEPEEKPASDVHERLVPPRILEKFTPKKVKRGSSITFSVKVEGHPAPSV  
HWLKEEAKEKGLVWIGPDTPGYTMASSSKQHSVLVLDVGRQHOGTYTCIATNPAGQALCSASLHISGLAKEEQ  
ERVKEALISSFLQGTSAVSAQMSESAFADLVGQSKGESLVAEEAHSHLSLAEVGTTEFLQKLTSTQITEMVS  
AKISQAKLQVPGGDSDEETKTPSASPRHGRSRPSSSVQESSSEEDGDSRGEIFDIYVVTADYLPGLGAEQDAI  
ILREGQYVEVLDSAHPLRVLVTRTKPTKSSPSRQGWVSPAYLDRKRLKLSPEWGPTEAPEFPGEAVSEDEYRTRL  
SSVIQELLSSEQAFVGLQFLESHHMKHLERSPRVPAVASQKTVIFRNVQDISHFHSSFLKELQCGCTDDDV  
AMCFIKNQEAFAKEYLEFLVGRVQAESVVVSTPVQEFYKKAETLSAKDPTQPPPPPLQHYLEQPVERVQKYQ  
ALLKELIRNKARNRQNCALLEQAYAVVSALPQRAENKLVSLMENYPGTLEALGEPHQGHFIVWEGAPGARM  
PWKGHNHRVFLFRNYLVICKPRRDSRTDFTSYVFRNMMKLSIDLNDQVEGDDRAFEVWHEREDSVRKYLLQA  
RTVIKNSWVKEICGIQQLAQPVWRPPEFEEELADCTAELGETVKLACRVTGTPKPIVSWYKDGKPVVDPH  
HILIEDPDGCTLIIDLNLTGIDSGQYMCFAASAAGNASTLGKILVQVPPRFVNVKVRATPFVEGEDAQITCTVE  
GAPYPQIRWYKDGTLAPGNRYRMLNEPRSGVLVLIQAASKEDLGHYECELVNLRLGSTRGGGELYMOSPALR  
ARDQHHREQIVAAVEDTSVEGSAHSAQDQADQAAASVLRLLGSEALGPSPGDLPNTRQSEPPAFEEAASQIP  
GAASGTPEVSPQPGTHKLEQETSSSGSQGWTVPIRVEGTAWPGAGTGQLLLDVHSQVIMETTQRTYVCQAPDT  
GVTRAPSMQVTIEDVQVQVGDMAQFDAVIEGHPPPIVTVYKGSTQLTSSARLSQRQDGTTYSLVLTVDVAPHA  
GVYTCVANNAGGQVLCKAELLVHGGDKLDAENQVYRRKLSHFYDVQEEIGRGVFGFVKRVQHKGNMFCAAKF  
IPLRSKTRAQAYQERDILATLGHPLVTGLLDQFETRKTILILILELCSSEELLDRLFKKGVTAEVVKVYIQQL  
VEGLHYLHSHGILHLDIKPPNILMVHPAREDIKICDFGFAQKITPSEPQYSKYGSPEFVSPEIIEQNVPVSEGS  
DIWAMGVISYLSLTCSSPFAGESDRATLLNVLEGRVSWSSPTAAHLSSEDAKDFIKATLQRTPRARPSTSQCLA  
HPWFLKSMPAEEAHFINTKQLKFLARSRWQRSLMSYKSIIVMRSIPELLQGPPDPSPLGVARHLRGEASGAS  
SSSSSSNDLAPFARAKELPPSPVTHSPLLHPRGFLRPSASLPEETEASMPATAAASPASQAGPPASPGCV  
PRHSVSNLQYQAGAGEAERGNKTSKAKRHPARRRHLKGGYIARALPGLREPLMEYSLLEEEAAREEQASLM  
TKTPSFETALRLPSSSVREVPGRSHSLDNPPVTTGSPPEACKQLLFPSTGLTHTTAKDRGHKEGFLOESV  
PFPPMSGDSRPGKQEGSSQDSCRGKPASSCHSELGSGSQEGCPSQSLGSLPPQSLKELSTSCGPLFSEQ  
PQAAPFPTQVSPLLGSEKEPQDGSLSSEGPVVPVSSSPGSASQVDASLDTEGLSEAGDTCDFTPPPQRPQEQAT  
TRKFSLESRGGYAGVAGYGTFAFGGDAGGMLGQGPLWARMAWAVSQSSEEQDEAATESQPPLSGLPIAEASG

VPLRTPSPSLTPWEEVEQVSLVQIRDLSDGDAEAADTISLSDISEVDPAYLNLSLDYDIKYLPFEFMI FRRVPKPI  
EQPESPGSETEAGQGLADFLLEAAWPWPGLGLRAGLEITEEPEEPGDLEALLGEAAVGRKRKWSPSRGLFQF  
PGRCLSGEEPVELGLRQRVKASMAHISRILKGRPEGPPEPRKKAGLASFRLSGLKGRDQELSDEAVVLGQ  
SVTLACQVLAQPTAQATWSKDGVLLESSGHLIISSTLKNFQLLTILVVKEEDLGTYTCCVSNPLGTAVTGVL  
RKAERPSSSPRPEVGELYKDAVLLVWKPVESCGPVTYIVQCCIEGGSWTTLASDISDCCYLTGKLSRGGMYIF  
RTACVSKAGMGPISSPSEQVLLGGPNHLASEEESRRGRPAQLLPSTKTFAFQMQIRRRGRFSVVRQCREKASGR  
ALAAKIVPYQPEDKTAVLREYEALKRLHHPHLAQLHAAYLSRHLVLIILELCSGPELLPSLAERESYSESDVK  
DYLWQMLSATQYLHAQHILHLDLRSNNMMVTEYNLLKVIDLGNQSLDQEKVPAPENFKDYLETMAPELLEGGQ  
GAVPQTDIWAIGVTAIFIMLSGEYPESESEGRDLQKGLRKLIRLSRCYAGLSGGAVAFVLSQSSCAQWPWRPCA  
STCLQCGLWTEEGPTGSRPTVTFPTVRLRAVFREREKRRALLYKKNLAQVR\*  
>rs45807983\_ENSMUSP00000038264\_c.4260:g>T\_p.A1421S  
ENSMUST00000047441.14|Obscn-202|ENSMUSG00000061462|-|chr11:g.58997364:C>A  
MDHSFSGAPRFLTRPKAFVSVGKDATLSCQIVGNPTPHVSWEKDRQVEAGARFRLAQDGDVYRLTILDLAL  
GDSGQYVCRARNAIGEFAAVGLRVDSEGTCAEQAPHLLRPTSIRVREGADATFRCRVGGSPPAVSWSKDG  
RRLGPPDAPHVRVEEHGESSALRIRSARPRDGGTYEVRAENPLGSASAAAALVVDSDAEVAGPPGTSTATLLA  
HLQORREAMRAEGIPSPGGAGTRTCTVTEGKHARLSCFVTGEPKPKETVWKKDGQLVTEGRRHVVEDEQENF  
VLKILFCKQSDRGLYTCTASNLVGQTYSSVLVVVREPTVPFKRRLQDLEVREKESATFQCEVAQPAATEAAWFK  
EETRLWASAKYDIEEGTERRLTVRNVSADDDAVYICETTEGSRVAVELSVQGNLTKLPRKTAVRTGDTAIF  
WVELAVPEGPVWRWRNQEEMVAGGRVAITAEGTCHTLTI FQCTLEDMGEVAFVSGGCRTTTQFCVSAPRRPPL  
YPPADPVVKAKTESSVTLWSAPPHGDRPVTIDGYVLEKRKLGAYAWSRCHEAGWLATTEFTITGVAAEGDFQ  
FRVSAINHFGQGPYLEFPGMTMLVPLAVKTPKAVEAVEGGEVTFVSDLTVASSGEWFLDGEALKASSIYVI  
RCDRTRHMLTIREVPARLHGAQLKRVANGIETS IQMVVRAALGLPSSKLPAAAAREVLAQLHEEAQLLAE LSD  
QAAAVTWLKDGRELSLGPKEYMQVSAGRRALLVRDVAQDDAGLYECVSRGSRRTAYQLLVQDITDGYRDWGPAG  
PQKHMCKCAGAKIARYLGS SCYRFLQYDKGVWHWLEAALDTRQKGKTS SCSLHEKPKLVFAKQQAHSEVKA  
AGASATLSCEVAQAQTEVTFWKDGKLLSSSSKVRMEASGCSRRLVVQQAGKADAGEYSCEAGGQKLSFRLDVA  
EPKMVFAKEQQARSEVKAEGASATLSCEVAQAQTEVTFWKDGKLLSSSSKVRMEASGCSRRLVVQQAGKAD  
GEYSCEAGGQKLSFRLDVTEPKLVFAKEQQARSEVKAEGVNSATLSCEVAQAQTEVTFWKDGKLLSSSSKVRM  
EASGCSRRLVVQQAGKADAGEYSCEAGGQKLSFRLDVAEPKLVFAKEQQARSEVKAEGNSATLSCEVAQAQ  
EVTWFKDGKLLSSSSKVRMEASGCSRRLVVQQAGKADAGEYSCEAGGQKLSFRLDVTEPKLVFAKEQQAHSEV  
KAEAGASATLSCEVAQAQTEVTFWKDGKLLSSSSKVRMEASGCSRRLVVQQAGKADAGEYSCEAGGQKLSFRL  
DVAEPKLVFAKEQQARSEVKAEGASATLSCEVAQAQTEVTFWKDGKLLSSSSKVRVEASGCSRRLVVQQAGK  
ADAGEYSCEAGGQKLSFRLDVAEPKLVFAKEQQSNSEVKAEGASATLSCEVAQAQTEVTFWKDGKLLSSSSK  
VRVEASGCSRRLVVQQAGKADAGEYSCEAGGQKLSFRLDVAEPKLVFAKEQQAHSEVKAEGASATLSCEVAQ  
AQTEVTFWKDGKLLSSSSKVRVEASGCSRRLVVQQAGKADAGEYSCEAGGQKLSFRLDVAEPKLVFAKEQQAH  
SEVKAEGASATLSCEVAQAQTEVTFWKDGKLLSSSSKVRVEASGCSRRLVVQQAGKADAGEYSCEAGGQKLS  
FRLDVAEPKLVFAKEQQAHSEVKAEGASATLSCEVAQAQTEVTFWKDGKLLSSSSKVRVEASGCSRRLVVQQ  
AGKADAGEYSCEAGGQKLFRLDVAEPKLVFAKEQQAHSEVKAEGASATLSCEVAQAQTEVTFWKDGKLLSS  
SSKVRVEASGCSRRLVVQQVQKADAGEYSCEARGQKLSFRLDVAEAEESQIPERPSRREPLVKEHETIILTAT  
IAAPSVAAVTWLKDGV EIRRSKRHEATSLGDHTLTVRGAQVLD SAIYSCRVGKEGQDFPVQVEEVAAKFSKP  
LEPVEGELGGTVMLVCELSPEQAEVWRCGNTQLRPGKRFQMTSEGPRTTLTVSGLREDDAEYVCESRDDRT  
SARLTVKVPVVKFTSGLSAMVAEEGQEATFQCVVSPSDAGVTWYKDGMLQPSSEKFMVMEVGASRSLTILGL  
TLEDAGQVTVAEAGASSAALRVREAPVLFKKKLEPQTVEERTSVTLEVELTRPWPEVKWTRNAAVLTPSENV  
EIRAEGARHCLVLRVSGFADRGGFFGCETPDDKTQAKLNVEMRQVRLVVRGLQEVEAKEQGTASMDVELSHA EVE  
GSWTRDGLRLQPGPKCHLAVQGPVHILTL SALQPQDSGLVAFRAEGVHTSARLIVTELPVSFTRVLQDVVATQ  
KEKVTLECELSRPVDVRLKDGVELRAGKAIGIVAQGTCSRSLVIYRCETGDQGVVCDALDAQTSASLRVQGR  
TYTLIFRRVLAEDAGEVKFVAENAESRAHLRVKELPVTLLRPLRDKIAMEKHRGVLECCVSRASQVRWFKGG  
VELQSGPKYEVVSDGLYRKLVIN DVQPEDEDTYTC DAGNVKTS AQFFVEEQSITIVRGLKDMTVM EPAPAWFE  
CETSIPSVRPPKWL LGKTVLQAGNVGLEQDGTVHRLTLHKTCSTMTGPHFTIGKSRSSAQLVSDIPVVL T  
RPLEPKAGRELQSVVLSCDFRPAPKAVQWYKDDTPLSPSEKFKMALEGQMAELRILRLTPADAGVYRCQAGSA  
QSSAEVTVAEAREVTVIQPLQDAEAMEEGRVCFSCELSHKDEDIEWSLNGTPLYNDSFHEISHEGCLHTLVLKS  
VRQADTGTVCATSPKVSVSARLVVKGPVVF LKALDDVSAEERGTLTLCQEVSDPEARVVWRKDGVELGPS DK  
YDFLHKAGARGLTVHDLSDHEDAGLYTCQVGSKETQSKVSVHDLHVGITKRLKTVEVLEGESECSFECVLSHESP  
SDPAVWTVGGKTVGGSGHFHAVRQGRKYTLTVKDAALSDAGEVVFVSVLGLT SKASLIRERPVDTKPLEDQR  
TTLGEDVMLSCELSRAGTSVRWLKDGKAIKRSQKYDLSSEGTRAVLVVRKASLSDSGETCETEASKSTAKLC  
VEEKANRFTTEELADLQVEEKGRAVFTCKTEHPASVYTWKGLLELRASGKHVPSQEGLTLKLTINALERTDSD  
TYTCDIGQARTQARLLVHGQKVRVIEDLEDTAVQEGSSAKFCCRIPADYGPVHWFLDKTPLHSNELNEITVQ  
PGGYHVLT LRQLALKDSGTVYFEAGDQRTS AALRVTEKPSIFSRPLTDVTVTEGEDLTLVCETTTVDSSVRWT  
KDGTKLRPSARCQLSHEGCQAQLLITATTPQDGGRYKCEIGGASSSSIVRVHALPVRFRESLKDVEVPEGKAA

TLRCVLSVAAPVEWRHGDDVLKSSNKYSLRQEGAVLELVIRDLQPQDSGQYSCSFGDQTTSATLTVKTSQAQ
FVGKLRNKEATEGTTVTLRCELTKKEAPVEWKKGTETLRNGDKYSLKQDGAVCELQICSLLVADAGEYSCVCGQ
EKTSATLTVKALLVHFVRRRLRSKEATEGDTTTLQCELSKAAPVEWRKGTETLRDGDYSLKQDGAVCELQIRS
LTADAGEYLCTCGQEKSATLTVRALPAKFKDSLKNEEATEGTATLSCELSKAAPVTWKKGPKTLQSGDKY
VLRQDGAVCGLQIHGLTMADAGEYSCVCGQEKSATLTVRGLPAKFIEDLRSQEATEGATAILRCELSKAAPV
EWRKGTETLRDGDYSLRQDGAVCELQIRGLAVVDTGTYSLSLPTKFTTEGLRNEEATEGTMATLRCQMSKAAPV
EWRKGTETLRDGDYSLRQDGAMCELQIRGLTIEDSGEYTCVCGQEKSATLSVKALPPRFIEDLRSQEATEG
TMATLRCQMSKAAPVEWRKGTETLRDGGGRYSLRQNGAVCELQIHDLAVEDTGEYSCVCGQEKSATLNVKALP
PRFIEDLRSQEATEGTMATLRCQMSKAAPVEWRKGTETLRDGGGRYSLRQDGAVCELQIHDLVEDAGQYSCVC
GQEKSATLTVDALPPKFTTEGLKKEEATEGTMVTLRCQMSKEATVEWRKGAKTLSDGGGRYSLRQDGAMCELQI
CGLAVEDAGEYSCVCGQEKSATLSVKALPPRFIEDLRSQEATEGTMATLRCQMSKAAPVEWRKGSKTLRDGD
RYSLRQDGAMCELQICDLAVEDTGDYSCVCGQEKSATLSVKAPQVVFQQLQNLQAEEGSMASLRCELSVFN
AAMVWSKGGLELQGDTRREARQQGCVAELLLRDLRREDAGEYSCVCGSQTTSATLMVTAAPVRFRLRLQAQDV
DEGATARLRCELSREAVSVEWRKGSLLQFPKAKYQMVQEGTTAELLVHGVEQEDAGEYTC DAGHTQSIARLSV
RAPKPKFKTDLQSTEQEAGGTARLCCQLSEAEPTPVQWLKEGVELHVGSKYEMRRQGA VCELLIHGLEAKDT
GEYACLVGQKTLASLRVKEPEVTIVRGLVDMVEQADEDEVEFTCKVSQAGATDVQWHLQGLPLQSNVTEVAV
LADGCTHVLQKGLVLEDAAGTVSFHVGLSSSAQLTVRVPEVTVLEPLKDVQLSEGQDAHFRCRLSRASGQEA
RWALGGVPLQCNEMNDITVEQGTLYLLTLHKVTLEDAGTITLQVGCSSSEAQLKVTAKNTVLRGLLENVDALLEG
GEALFECQLSQPEVAHAHTWLLDDEPVHTSEKVEVVYFENGLRHLLLLLNKLPQDSCRVTFLAGDVVTSAFITV
RALPDPPEDAEVVGRSDHSVTLVSWAPMSDGGGGLCGYRVMKEASTGQWQLCHDLVPGPECVDDLVPGKTY
RFRVAAVGPAGAGEPVHLPQMVKIAPAPAPAPAPAPAPAPETRQAVVGEDICLELEVAADGGEVWHKGTERRI
QPGHFVLSRGRQMLVIKGFRTEDQGEYRCGPIQGLPSSGAATFNVMVTS GSGSDEVPAQPSLPEAAQEGD
LHLLWEALARKRRMSREPTLDSISELPEEDSRVQHLRQEAEEETAPDLSEGYSSTADELARTGEADLSHTSSDDE
SRAGTPSLVTYLKKAGGPGISPLASKHEAQVTTSVKPKQKQPEVVPVTPCPPPGDLSAADLMDPSLDKAAVKIQA
AFKGYKVRKEMKQEGPVFSRTFGDTEAQVGDVLRLECVLATKTDMRACWLKDGIELTDGRHYHIDQLKDGTC
SLLVTGLAPTDSGRYTCQVSTKSGRVSHSACVVVSGTSEAESSSGGELDDAFRRAARRLHRLFRTKSPAELS
EEELFLSADEGPGEPEEPADWQTYREDENFVCIRFESLAEARQAVTCFRNMFATMGIVGIEISLGEQGRGVEM
RIGKVAPTVPVAVPLAKTPGLQTSDAAPVFLTELQNDVQDGYPMSFDCVVTGQPVPSVRWFKDGKLLLEEDDH
YMINEDQQGGHQLIITAVVPADMGVYRCLAENSMGVSSTKAELRVELTSTDYDTAADATETSSYFSAQGYLSS
REQEGTESDEGQLPQVLEELKDLQVAPGTRLAKFQLKVKGYPAKLYWFKDGOPLTSDHIRMTDKKTLHTLE
IVSVTREDSGQYAAIYI SNAVGAAYSSARLLVGRGPSEPEEKPASDVHERLVPPRILEKFTPKKVKRGSITFSV
KVEGHPAPSVHVLKEEAKEGVLWIGPDTPGYTMASSSKQHSVLVLDVGRQHOGTYTCIATNPAGQALCSASLH
ISGLAKEEEQERVKEALISSFLQGTSAQVSAQMSEAGFADLVGQSKGESLVAAEEAHSHLSLAEVGTETEEFLQK
LTSQITEMVSAKISQAKLVPPGGDSDEETKTPSASPRHGRSRPSSSVQESSSESEDGDSRGEIFDIYVVTADY
LPLGAEQDAIILREGQYVEVLD SAHPLRWLVRTKTKSSPSRQGWVSPAYLDKRLKLSPEWGPTEAEFPFGEA
VSEDEYRTRLSSVIQELLSSEQAFVGELOFLES SHMKHLERSPRVPAAVASQKTVI FRNVQDI SHFHSSFLKE
LQCGCTDDDVAMCFIKNQEA FEKYLEFLVGRVQAESVVVSTPVQEFYKKYAEETLSAKDPTQPPPPPLQHYLE
QPVERVQKYQALLKELIRNKARNRQNCALLEQAYAVVSALPQRAENKLVSLMENYPGTLEALGEP IRQGHFI
VWEGAPGARMPPWKGNHRHVFLFRNYLVICKPRRDSRTDTFSYVFRNMMKLSSIDLNDQVEGDRAFEVWHERE
DSVRKYLQARTVI IKNSWVKEICGIQORLAQPVWRPPEFEELADCTAELGETVKLACRVTGTPKPIVSWYK
DGKPVVEVDPHHILIEDPDGSC TLLDNLTGIDSGQYMCFAASAAGNASTLGKILVQVPPRFVNVKRATPFVEG
EDAQITCTVEGAPYPQIRWYKDGTL LAPGNRYRMLNEPRSGVLVVIQAASKEDLGHYECELVNRLGSTRGGG
ELYMQSPALRARDQHHRQI VAAVEGAPSMQVTIEDVQVQVGDMAQF DAVIEGHPPP IVTWYKGSTQLTSSAR
LSQRQDGTYSVLVTDVAPHDAGVYTCVANNAGQVLCKAELLVHGGDKLDAENQVYRRLKHSFYDVQEEIGR
GVFGFVKRVQHKGKMFCAAKFIPLRSKTRAQAYQERDILATLGHPLVTGLLDQFETRKTLLIILELCSSEEL
LDRLFKKGVVTEAEVKVYIQQLVEGLHYLHSHGILHLDIKPPNII MVHPAREDIKICDFGFAQKI TPSEPQYS
KYGSPFVSP EII EQNPVSEGS DIWAMGVISYLSLTCSSPFAGESDRATLLNVLEGRVSWSSPTAAHLS EDAK
DFIKATLQRTPRARPSTSQC LAHPWFLKSMPAAEAHFINTKQLKFL LARSRWQRSLMSYKSI LVMRSIPELLQ
GPPDSPSLGVARHLRGEASGASSSSSSSDNELAPFARAKSLPPSPVTHSPLLHPRGFLRPSASLPEETEASMP
TADA AVPAS PQSAGPPASPGCVPRHSV ISSLFYQQAGEGA ERGNKTS GAKRHPARRRHLLKGGYIARALPGLR
EPLMEYSLLEEEAAREEQASLMTKTPSFETALRLPSSSVREV PGRSHSLDNPVTTGPSPEACKEQLLFPST
GLTHETAKDRGHKEGFLQESVFPFPMMSGDSRPGKQEGSSQDSCRGKPASSCHSELGSGSQEGCGPPSSQSLG
SLPPQSLKKELTSTCGPLFSEQPQAAPFPTQVSPLLGSEKEPQDGSLSSEGVPVPSSPGSASQVDA SLDTEG
LSEAGDTCDFLTPPPQRPQEATTRKFSLESRGGYAGVAGYGTFAFGDAGGMVLGQGPLWARMAWAVSQSSEEQ
DEAATESPQPLESGLPIAEASGVPLRTSPSLTPWEEVEQVSLVQIRDLSGDAEAADTISLDISEVDPAYLNL S
DLYDIKYL PFEFMI FRRVPKPIEQPESPGSETEAGQLADFL EEAAWPWPGEGLGLRAGLEITEEPEEPGDLEA
LLGEAAVGRKRKWSPSRGLFQFPGRCLSGEEPVELGLRQRVKASMAHISRILKGRPEGPERE GP RRKAGLAS
FRLSGLKGRDQELSDEAVVLGQSVTLACQVLAQPTAQATWSKDGVLLESSGHLLISSTLKNFQLLTI LVVKEE



DLGTYTCCVSNPLGTAVTTGVLKRAERPSSSPRPEVGEYKDAVLLVWKPVESECGPVTYIVQCCIEGGSWTTL  
ASDISDCCYLTKGLSRGGMYIFRTACVSKAGMPYSSPSEQVLLGGPNHLASEEESSRGRPAQLLPSTKTF  
QMQIRRRGRFVSVRQCREKASGRALAAKIVPYQPEDKTAVLREYEALKRLLHHPHLAQLHAAYLSRHLVLI  
LELCSGPELLPSLAERESYSESDVKDYLWQMLSATQYLHAQHILHLDLRSNNMMVTEYNLLKVIDLGN  
AQSLDQEKVPAPENFKDYLETMAPELLEGQAVPQTDIWAIGVTAIFIMLSGEYPESEGETRDLQKGLR  
KGLIRLSRCYAGLSGGAVAFLOSSLCAQPWGRPCASTCLQCGWLTEEGPTGSRPTVPTVPTVRLRA  
FVREEREKRRALLYKXKHNLAQVR\*

>rs45807983\_ENSMUSP00000049737\_c.4335:G>T\_p.A1446S

ENSMUST00000052872.15|Obscn-203|ENSMUSG00000061462|-|chr11:g.58997364:C>A  
MDHSFSGAPRFLTRPKAFVSVGKDATLSCQIVGNPTPHVSWEKDRQPVEAGARFRLAQDGDVYRLTILDLAL  
GDSGQYVCRARNAIGEFAAVGLRVDSEGTCAEQAPHFLLRPTSIRVREGADATFRCRVGGSPQPAVSWSKDG  
RRLGPPDAPHVRVEEHGESSALRIRSARPRDGGTYEVRAENPLGSASAAAALVVDSDAEVAGPPGTSTATLLA  
HLQQRREAMRAEGIPSPPGAGTRTCTVTEGKHARLSCFVTGEPKPEVWKKDQGLVTEGRRHVVEDEQENF  
VLKILFCKQSDRGLYCTASNLVQTYSSVLVVVREPTVPPFKKRLQDLEVREKESATFQCEVAQAPATEAAWFK  
EETRLWASAKYDIEEEGETERRLTVRNVSADDDAVYICETTEGSRVVAELSVQGNLTKLPRKTAVRTGDTAIF  
WVELAVPEGPVWRWRNQEEMVAGGRVAITAEGTCHTLTI FQCTLEDMGEVAFVSGGCRTTTQFCVSAPRRPPL  
YPPADFPVVKAKTESSVTLWSAPPHGDRPVTIDGYVLEKRRKLGAYAWSRCHEAGWLATTEFTITGVAEEGDFQ  
FRVSAINHFGQGPYLEFPGTMHLVPMPLAVKTPKAVEAVEGGEVTFVSDLTVAASSGFLDGEALKASSIYVI  
RCDRTRHMLTIREVPARLHGAQLKFVANGIETSIQMVVRAALGLPSSKLPAAAAAREVLAQLHEEAQLLAE  
LSDQAAAVTWLKDGRELSLGPYEMQVSAGRRALLVRDVAQDDAGLYECVSRGSRATAYQLLVQEPKLVFAK  
GQQAHEVKAEGNSATLSCEVTQAQTEVTWFKDGKLLSSSSKVRMEASGCSRRLVVQQAGKADAGEYS  
CEAGGQKLSFRLDVAEPKLVFAKQQAHEVKAEGASATLSCEVAQAQTEVTWFKDGKLLSSSSKVRMEAS  
GCSRRLVVQQAGKADAGEYSCEAGGQKLSFRLDVAEPKLVFAKEQQARSEVKAEGASATLSCEVAQAQ  
TEVTWFKDGKLLSSSSKVRMEASGCSRRLVVQQAGKADAGEYSCEAGGQKLSFRLDVTEPKLVFAKE  
QQARSEVKAEGNSATLSCEVAQAQTEVTWFKDGKLLSSSSKVRMEASGCSRRLVVQQAGKADAGEYS  
CEAGGQKLSFRLDVAEPKLVFAKEQQARSEVKAEGNSATLSCEVAQAQTEVTWFKDGKLLSSSSKVR  
MEASGCSRRLVVQQAGKADAGEYSCEAGGQKLSFRLDVTEPKLVFAKEQQARSEVKAEGNSATLSCE  
VAQAQTEVTWFKDGKLLSSSSKVRMEASGCSRRLVVQQAGKADAGEYSCEAGGQKLSFRLDVAEPKLV  
FAKEQQARSEVKAEGNSATLSCEVAQAQTEVTWFKDGKLLSSSSKVRMEASGCSRRLVVQQAGKADAGE  
YSCEAGGQKLSFRLDVAEPKLVFAKEQQARSEVKAEGASATLSCEVAQAQTEVTWFKDGKLLSSSSK  
VRMEASGCSRRLVVQQAGKADAGEYSCEAGGQKLSFRLDVAEPKLVFAKEQQARSEVKAEGASATLS  
CEVAQAQTEVTWFKDGKLLSSSSKVRMEASGCSRRLVVQQAGKADAGEYSCEAGGQKLSFRLDVAEP  
KLVFAKEQQARSEVKAEGASATLSCEVAQAQTEVTWFKDGKLLSSSSKVRMEASGCSRRLVVQQAGK  
ADAGEYSCEAGGQKLSFRLDVAEPKLVFAKEQQARSEVKAEGASATLSCEVAQAQTEVTWFKDGKLL  
SSSSKVRMEASGCSRRLVVQQAGKADAGEYSCEAGGQKLSFRLDVAEPKLVFAKEQQARSEVKAEGAS  
ATLSCEVAQAQTEVTWFKDGKLLSSSSKVRMEASGCSRRLVVQQAGKADAGEYSCEAGGQKLSFRLD  
VAEPKLVFAKEQQARSEVKAEGASATLSCEVAQAQTEVTWFKDGKLLSSSSKVRMEASGCSRRLVV  
QQAGKADAGEYSCEAGGQKLSFRLDVAEPKLVFAKEQQARSEVKAEGASATLSCEVAQAQTEVTWFKD  
GKLLSSSSKVRMEASGCSRRLVVQQAGKADAGEYSCEAGGQKLFRLDVAEPKLVFAKEQQARSEV  
KAEGASATLSCEVAQAQTEVTWFKDGKLLSSSSKVRMEASGCSRRLVVQQAGKADAGEYSCEAGGQ  
KLSFRLDVAEPKLVFAKEQQARSEVKAEGASATLSCEVAQAQTEVTWFKDGKLLSSSSKVRMEASG  
CSRRLVVQQAGKADAGEYSCEAGGQKLSFRLDVAEPKLVFAKEQQARSEVKAEGASATLSCEVAQAQ  
TEVTWFKDGKLLSSSSKVRMEASGCSRRLVVQQAGKADAGEYSCEAGGQKLSFRLDVAEPKLVFAKE  
QQARSEVKAEGASATLSCEVAQAQTEVTWFKDGKLLSSSSKVRMEASGCSRRLVVQQAGKADAGEYS  
CEAGGQKLSFRLDVADTRLMFAKEQQARTEVKAEGNSATLSCEVAQAQTEVTWFKDGKLLSSSSKVR  
MEASGCSRRLVVQQAGKADAGEYSCEAGGQKLSFRLDVAEAEESQIPERPSRREPLVVKEHETIILT  
TATIAAPSVAAVTWLKDGVEIRRSKRHEATSLGDHTLTVRGAQVLDIAIYSCRVGKEGQDFPVQVEE  
VAAKFSKPLEPVEGELGGTVMLVCELSPEQAEVWRCGNTQLRPGKRFQMTSEGPRRTLTVSGLREDDAE  
EYVCESRDDRTSARLTVKVPVVKFTSGLSAMVAEEGQEATFQCVVSPSDAGVTWYKDGMLQPSSEK  
FVMVESGASRSLTILGLTLEDAGQVTV EAEGASSAALRVREAPVFLFKKLEPQTVTEERTSVTLE  
VELTRPWPEVKWTRNAAVLTPSENVEIRAEGARHCLVLRVSGFADRGFFGCETPDDKTQAKLNV  
EMRQVRLVVRGLQVEVAKEQGTASMDVELSHAEVEGSWTRDGLRLQPGPKCHLAVQGPVHIL  
TLSALQPQDSGLVAFRAEGVHTSARLIVTELPVSFTRVLQDQVATQKEKVTLECEL SRPVDV  
RWLKDGVLELRAGKAIIGIVAQGTCSRSLVIYRCETGDQGVYVCDALDAQTSASLRVQGRYTLI  
FRRLVLAEDAGEVKFVAENAESRAHLRVKELPVTLLRPLRDKIAMEKHRGVLECCQVSRASAQVR  
WFKGGVLELQSGPKYEVVSDGLYRKLVINOVQPEDEDYTCDAAGNVKTSAQFFVEEQSITIVRGL  
KDMTVMEPAPAWFECETSIPSVRPKWLLGKTVLQAGGNVLEQDGTVHRLTLHKTCSTMTGPVH  
FTIGKSRSSAQLVVSDIPVVLTRPLEPKAGRELQSVVLSCDFRPAPKAVQWYKDDTPLSPSEK  
FKMALEGQMAELRILRLTPADAGVYRCQAGSAQSSAEVTVEARVTVIQPLQDAEAMEEGRVCF  
SCELSHKDEDI EWSLNGTPLYNDSFHEISHEGCLHTLVLSKVRQADTGTVCATSPKVSVSAR  
LVVKGKPVVFLKALDDVSAEERGTLLTQCEVSDPEARVVWRKDGVELGPSDKYDFLHKAGAR  
GLTVHDLSDHEDAGLYTCQVGSKETQSKVSVHDLHVGTIKRLLKTVLEVLEGESECFEVL  
SHESPSDPVAVTVGGKTVGSGHFHAVRQGRKYTLTVKDAALSDAGEVVVSVLGLTSKASLI  
IRERPVDITKPLEDQRTTLGEDVMLSCELSRAGTSVRWLKDGKAIKRSQKYDLLSEGTRAVL  
VVRKASLKDSEGYTCETEASKLCTEAKLVEEKANRFTEELADLQVEEKGRAVFTCKTEHPAS  
VVWTRKGLLELRASGKHVPSQEGTLTKLTINALERTSDTYTCDIGQARTQARLLVHGQKVRV  
IEDLEDTA VQEGSSAKFCCRIAPADYGPVHWFLLDKTPLHSNELNEITVQPGGYHVLT  
LRLQLALKDSGTVYFEAGDQRTSAAALRVTEKPSIFSRPLTDVTVTEGEDTLVCE  
TTTTVDSVVRWTKDGKTLRPSARCQLSHEGCQAQLLITATTPQDGGRYKCEIGGASSSSIVR  
VHALPVRFRRESLKDVEVPEGKAATLRCVLSVA

APVEWRHGDDVLKSSNKYSLRQEGAVLELVIRDLQPQDSGQYSCSFGDQTTSATLTVKTSQAQFVGLRNKEA  
 TEGTTVTLRCELTKAPVEWKKGTETLRNGDKYSLKQDGAVCCELQICSLLVADAGEYSCVCGQEKTSATLTVK  
 ALLVHFVRRRLRSKEATEGDTTTLQCELSKAAPVEWRKGTETLRDGDYSLKQDGAVCCELQIRSLTIADAGEYL  
 CTCGQEKTSATLTVRALPAKFKDSLKNEEATEGTTATLSCELSKAAPVTWKKGPKTLQSGDKYVLRQDGAFCG  
 LQIHGLTMADAGEYSCVCGQEKTSATLTVRGLPAKFIEDLRSQEATEGATAILRCELSKAAPVEWRKGSSETLK  
 DGDYRDLRQDGAVCCELQIRGLAVVDGTYSLPTKFTTEGLRNEEATEGTMATLRCQMSKAAPVEWRKGSSETLR  
 DGDYRDLRQDGAFCMCELQIRGLTIEDSGEYTCVCGQEKTSATLSVKALPSRFIEDLRSQEATEGTMATLRCQMS  
 KTAPVEWKKGSETLRDGGYSLRQDGFVCELQICDLAVEDAGEYSCVCGQEKTSATLSIKALPPRFIEDLRSQ  
 EATEGTMATLRCQMSKAAPVEWRKGSSETLRDGGYSLRQNGAVCELQIHDLAVEDTGEYSCVCGQEKTSATLN  
 VKALPPRFIEDLRSQEATEGTMATLRCQMSKAAPVEWRKGSSETLRDGGYSLRQDGAFCMCELQIHDLVEDAGQ  
 YSCVCGQEKTSAVLTVDALPPKFTTEGLKKEEATEGTMVTLRCQMSKEATVEWRKGAKTLSDDGGYSLRQDGAFCM  
 CELQICGLAVEDAGEYSCVCGQEKTSATLSVKALPPRFIEDLRSQEATEGTMATLRCQMSKAAPVEWRKGSSET  
 LRDGGYSLRQDGAFCMCELQIRDLAVEDAGEYLCVCGQEKTSATLSVKALPPRFIEDLRSQEATEGTMATLRCQ  
 MSKAAPVEWRKGSSETLRDGGYSLRQDGAFCMCELQICDLAVEDTGDYSCVCGQEKTSATLSVKALPPRFIEDLR  
 SQEAREGTVATLRCRMSKAAPVEWRKGSSETLRDGGYSLRQEGNLCELQIRDLAVEDTEEYSCVCGQEKTSAT  
 LSVKALPAKFIEDLRSQEAPESSTVTLRCKLSKASVWKKGSETLRNGARYSLRQDGAFCMCELQIRDLTVEDT  
 GEYSCVCGQEKTSATLSIMAPQVVFQQLQNLQAEEGSMASLRCELSVPNAAMVWSKGGLELQDTRREARQQ  
 GCVAEALLRDLRREDAGEYSCVCGQEKTSATLMVTAAPVRFRLRLQAQDQVDEGATARLRCLEASREAVSVEWRK  
 GSLQLFPCAQYQMVQEGTAEALLVHGVQEDAGEYTCDAHGHTQS IARLSVRAPKPKFKTDLQSTEQEAGGTAR  
 LCCQLSEAEFGTPVQWLKEGVELHVGSKYEMRRQGAFCMCELLIHGLEAKDTGEYACLVGGQKTLASLRVKEPEV  
 TIVRGLVDMVQADEDEFTCKVSAQATDVQWHLQGLPLQSNVTEVAVLADGCTHVLQKGVTLLEDAGTVS  
 FHVGLSSSAQLTVRVPEVTVLEPLKDVQLSEGQDAHFRCRLSRASQEARWALGGVPLQCNEMNDITVEQGT  
 LYLLTLHKVTLLEDAGTITLQVGSSESAQLKVTAKNTVLRGLENVDALEGGEALFECQLSQPEVAHTWLLDD  
 EPVHTSEKVEVVYFENGLRHLLLLLNKLPQDSCRVTFLAGDVVTSAFLTVRGWRLEVLPEPHDASVKAGMQVR  
 FTCILSEAVPVEGATWYINGAAIQPDDTWTVTDDGSHHALTSLNAQFQHAGEVTFAAARDAVASARLSVLALP  
 DPEDAEVGSRDHSVTLWSVAPMSDGGGGLCGYRVEKMEASTGQWQLCHDLVPGPECVDDLVPGKTYRFRV  
 AAVGPAGAGEPVHLQPMVKIAPAPAPAPAPAPAPAPETRQAVVGEDICLELEVAADGGEVWVKGTERIQPGG  
 HFEVLSRQQRQMLVIKGFRTEDQGEYRCGPIQGLPSSGAATFNVMVMTSGSGDEVPAQPSLPPEAAQEGDLHLL  
 WEALARKRRMSREPTLDSISELPEEDSRVQHLRQEAEEETAPDLSEGYSTADELARTGEADLSHTSSDDESRA  
 TPSLVTYLKKAGGPGISPLASKHEAQVTTSVKPKQKQEPVPTCPPPGDLSAADLMDPSLDKAAVKIQAAFQK  
 YKVRKEMKQQEGPVFSRTFGDTEAQVGDVLRLECVLATKTDMRACWLKDGIELTDGRHYHIDQLKDGTCSLLV  
 TGLAPTDSGRYTCQVSTKSGRVSHSACVVVSGTESEAESSSGGELDDAFRRAARLHRLFRTKSPAELSEEEL  
 FLSADEGPEPEEPADWQTYREDENFVICIRFESLAEARQAVTCFRNMFATMGIGVEISLGEQGPGRVEMRIGK  
 VAPTVTAVPLAKTPGLQTSDAAPVFLTELQNDVQDGYPMSFDCVVTGQPVPSVRWFKDGKLEEDDHMIN  
 EDQQGGHQLIITAVVPADMGVYRCLAENSMGVSSTKAELRVELTSTDYDTAADATETSSYFSAQGYLSSREQE  
 GTESDEGLPQVLEELKDLQVAPGTRLAKFQLKVKGYPAKLYWFKDQGPLTSDHIRMTDKKTLHTLEIVSV  
 TREDSGQYAAIYISNAVGAAYSSARLLVRGPSEPEEKPASDVHERLVPRILEKFTPKKVKRGSSTIFSVMVEG  
 HPAPSVHVLKEEAKEKGVWLGPDTPGYTMASSSKQHSVLVLDVGRQHGGTYTCIATNPAGQALCSASLHISGL  
 AKEEEQERVKEALISSFLQTSQAVSAQMSSEAGFADLVGQSKGESLVAEEAHSHLSLAEVGTTEFLQKLTSSQ  
 ITEMVSAKISQAKLQVPGGDSDEETKTPSASPRHGRSRPSSSVQESSSESEDGDSRGEIFDIYVVTADYLPGL  
 AEQDAIILREGQYVEVLDSAHPLRWLVRTKPTKSSPSRQGWVSPAYLDKRLKLSPEWGPTEAPEFPEGEAVSED  
 EYRTRLSSVIQELLSSEQAFVGELEQFLESHHMKHLERSPRVPAVASQKTVIFRNVQDISHFHSSFLKELQGC  
 GTDDDVAMCFIKNQEAFAKEYLEFLVGRVQAESVVVSTPVQEFYKKYAEETLSAKDPTQPPPPPLQHYLEQVVE  
 RVQKYQALLKELIRNKARNRQNCALLEQAYAVVSALPQRAENKLVHSLMENYPGTLEALGEPVIRQGHFVWEG  
 APGARMFWKGNHRHVFVLFVFRNYLVICKPRRDSRTDTFSYVFRNMMKLSSIDLNDQVEGDDRAFEVWHEREDSVR  
 KYLLQARTVIKNSWVKEICGIQQLRQAPVWRPPEFEELADCTAELGETVKLACRVTGTPKPIVSWYKDGK  
 VEVDPHHILIEDPDGSCCTLILDNLTGIDSGQYMCFAASAAGNASTLGKILVQVPPRFVNVKVRATPFVEGEDAQ  
 ITCTVEGAPYPQIRWYKDGTLTLLAPGNRYRMLNEPRSGVLVVIQAASKEDLGHYECELVNRGLSTRGGGELYM  
 QSPALRARDQHHREQIVAAVEVTEQETKVPKKTVIEETITTVVKSFRGRRQSPGKSPSRSPSRASPRRPG  
 LLAPERLYPPGTSPSRRLEVEQGRKAPVPALYVTEAEVHAPASQSPKWLEVEETIEVRVKKTGSRGASPVRE  
 MTSRREGILFTLPGGIPGRDPNANNSNNSVYQEARWGPVAVHVGEPFIFQVDSVGNVDWVAASPEPEQVRA  
 SQKEENTERQEGCSDGDENTFLMEEPQDTSLQGRDPKILTHNGRVLTLADLEDYVPQEGETFSGCDSTPSTP  
 DEPPCEVSVLQREI SEPTVGGQPVLLNVGRPPGTGATPSFFRPGSQVHSPESVSVFLLREAWSGPVSAAPWTSSF  
 HTHVQSSVDGSHGSKFTEVSTQTVSFGAVGETVTLHIDPDGGEAPGPSQG\*  
 >rs45807983 ENSMUSP00000020732\_c.4536:G>T\_p.A1513S  
 ENSMUST00000020732.13|Obscn-201|ENSMUSG00000061462|-|chr11:g.58997364:C>A  
 MDHSFSGAPRFLTRPKAFVSVGKDATLSCQIVGNPTPHVSWEKDRQVPEAGARFRLAQDGDVYRLTILDLAL  
 GDSGQYVCRARNAIGEAFVAVGLRVDSEGTCAEQAPHLLRPTSIRVREGADATFRCRVGGSPQPAVSWSKDG

RRLGPPDAPHVRVEEHGESSALRIRRSARPRDGGTYEVRAENPLGSASAAAAALVVDSDAEVAGPPGTSTATLLA
HLQORREAMRAEGIPSPPPGAGTRTCTVTEGKHARLSCFVTGEPKPETVWKKDGLVTEGRRHVVEDEQENF
VLKILFCKQSDRGLYTCTASNLVGGQTYSSVLVVVREPTVPFKKRLQDLEVREKESATFQCEVAQPATEAAWFK
EETRLWASAKYDIEEEGETERRLTVRNVSADDDAVYICETTEGSRVVAELSVQGNLTKRKLPRKTAVRTGDTAIF
WVELAVPEGPVRWLRNQEEMVAGGRVAITAEGTCHTLTI FQCTLEDMGEVAFVSGGCRTTTFQFCVSAPRRPPL
YPPADPVVKAKTESSVTLWSAPPHGDRPVTIDGYVLEKRKL GAYAWSRCHEAGWLATTEFTITGVAAEEDGFQ
FRVSAINHFGQGPYLEFPGTMHLVPLAVKTPKAVEAVEGGEVTFVSVDLTVASSGEWFLDGEALKASSIYVI
RCDRTRHMLTIREVPARLHGAQLKVFVANGIETS IQMVVRAALGLPSSKLPAAAAREVLAQLHEEAQLLAELSD
QAAAVTWLKDGRELSLGPKYEMQVSAGRRALLVRDVAQDDAGLYECVSRGSRRTAYQLLVQDITDGYRDWGPAG
PQKHMCKCAGAKIARYLGSSCYRFLQYDKGVWHLEAALDTRQGKGTSSCSLHEKPKLVFAKQQAHSEVKA
AGNSATLSCEVTQAQTEVTFWKDGKLLSSSSKVRMEASGCSRRLVVQQAGKADAGEYSCEAGGQKLSFRLDVA
EPKLVFAKQQAHSEVKAEGASATLSCEVAQAQTEVTFWKDGKLLSSSSKVRMEASGCSRRLVVQQAGKADA
GEYSCEAGGQKLSFRLDVAEPKLVFAKEQQARSEVKAEGASATLSCEVAQAQTEVTFWKDGKLLSSSSKVRM
EASGCSRRLVVQQAGKADAGEYSCEAGGQKLSFRLDVTEPKLVFAKEQQARSEVKAEVGNSATLSCEVAQAQ
EVTWFKDGKLLSSSSKVRMEASGCSRRLVVQQAGKADAGEYSCEAGGQKLSFRLDVAEPKLVFAKEQQARSE
KAEAGNSATLSCEVAQAQTEVTFWKDGKLLSSSSKVRMEASGCSRRLVVQQAGKADAGEYSCEAGGQKLSFHL
DVTEPKLVFAKEQQAHSEVKAEGASATLSCEVAQAQTEVTFWKDGKLLSSSSKVRMEASGCSRRLVVQQAG
ADAGEYSCEAGGQKLSFRLDVAEPKLVFAKEQQARSEVKAEGASATLSCEVAQAQTEVTFWKDGKLLSSSS
VRVEASGCSRRLVVQQAGKADAGEYSCEAGGQKLSFRLDVAEPKLVFAKEQQSNSEVKAEGASATLSCEVAQ
AQTEVTFWKDGKLLSSSSKVRVEASGCSRRLVVQQAGKADAGEYSCEAGGQKLSFRLDVAEPKLAFAKEQQA
SEVKAEGASATLSCEVAQAQTEVTFWKDGKLLSSSSKVRVEASGCSRRLVVQQAGKADAGEYSCEAGGQKLS
FRLDVAEPKLAFAKEQQAHEVKAEGASATLSCEVAQAQTEVTFWKDGKLLSSSSKVRVEASGCSRRLVVQQ
AGKADAGEYSCEAGGQKLSFRLDVAEPKLAFAKEQQAHEVKAEGASATLSCEVAQAQTEVTFWKDGKLLSS
SSKVRVEASGCSRRLVVQQAGKADAGEYSCEAGGQKLFRLDVAEPKLMFAKEQQAHEVKAEGASATLSCE
VAQAQTEVTFWKDGKLLSSSSKVRVEASGCSRRLVVQQAGKADAGEYSCEAGGQKLSFRLDVAEPKLVFAKEQ
QAHEVKAEGASATLSCEVAQAQTEVTFWKDGKLLSSSSKVRVEASGCSRRLVVQQAGKADAGEYSCEAGGQ
KLSFRLDVADTRLFAKEQQARTEVKAEGASATLSCEVAQAQTEVTFWKDGKLLSSSSKVRVEASGCSRRLV
VQQAGKADAGEYSCEAGGQKLSFRLDVAEAEESQIPERPSRREPLVVKEHETIILTATIAAPSVAAVTWLKDG
EIRRSKRHEATSLGDTHTLTVRGAQVLDSAIYSCRVGKEGQDFPVQVEEVAAKFSKPLEPVEGELGGTVMLVC
ELSPQAEVWRCGNTQLRPGKRFQMTSEGPRTTLTVSGLREDDAEYVCESRDDRTSARLTVKVPVVKFTS
GLSAMVAEEGQEAFTQCVVSPSDAGVTWYKDGMLQPSKFKVMVESGASRSLTILGLTLEDAGQVTVAEAGAS
SSAALRVREAPVLFKKLEPQTVERTSVTLEVELTRPWPEVKWTRNAAVLTPSENVEIRAEGARHCLVLRV
GFADRGGFFGCETPDDKTQAKLVNEMRQVRLVVRGLQVEVEAKEQGTASMDVELSHAEVEGSWTRDGLRQLQ
HLAVQGPVHILTLALSALQPQDSGLVAFRAEGVHTSARLIVTELPVSFTRVLQDVVATQKEKVTLECELSRPV
RWLKDGVLELRAGKAIGIVAQGTCSRSLVIYRCETGDQGVYCDALDAQTSASLRVQGRYTYLIFRVLAEADAGE
VKEVAENAESRAHLRVKELPVTLLRPLRDKIAMEKHRGVLECGVSRASQVRWFKGGVLELQSGPKYEVVSDGL
YRKLVINVDQPEDEDTYTCDAENVKTSAQFFVVEEQSITIVRGLKDMTVMPEPAPAWFECETSIPSVRPPK
KTLVQLQAGNGVLEQDGTVHRLTLHKTCSTMTGPVHFTIGKSRSSAQLVSDIPVVLTRPLEPKAGRELQSV
SCDFRPAPKAVQWYKDDTPLSPSEKFKMALEGQMAELRILRLTPADAGVYRCQAGSAQSSAEVTVAREVTVI
QPLQDAEAMEEGRVCFSCELSHKDEDIEWLSLNGTPLYNDSFHEISHEGCLHTLVLSVRQADTGTVCATSPKV
SVSARLVVKGKPVVFLKALDDVSAEERGTTLTQCEVSDPEARVVWRKDGVELGSPDKYDFLHKAGARGLTV
LHSHEDAGLYTCQVGSKETQSKVSVHDLHVGITKRLKTVEVLEGESECSFECVLSHESPSDPAVWTVGGKTV
GHFHAVRQGRKYTLTVKDAALSDAGEVVSVLGLTSKASLIIRERPVDITKPLEDQRTTLGEDVMLSCELSRA
GTSVRWLKDGKAIKRSQKYDLLSEGTRAVLVVRKASLKDSGEYTCETEASKSTAKLCEVEKANRFTBELADLQ
VEEKGRAVFTCKTEHPASVVTWRKGLLELRASGKHVPSQEGTLTKLTINALERTDSDTYTCDIGQARTQARLL
VHGQKVRVIEDLEDTAVQEGSSAKFCRIAPADYGPVHWFLLDKTPLHSNELNEITVQPGGYHVLTLRQLAL
SGTVYFEAGDQRTSAALRVTEKPSIFSRPLTDVTVTEGEDTLVCETTTVDSSVRWTKDGKTLRPSARCQLSH
EGCQALLITATTPQDGGRYKCEIGGASSSSIVRVHALPVRFRFRESLKDVEVPEGKAATLRCVLSVAAPVEWR
HGDDVLKSSNKYSLRQEGAVLELVIRDLQPDQSGQYSCSFGDQTTSATLTVKTSQAQFVGLKRNKEATEGTT
TLRCELTKAEAPVEWKKGTETLRNGDKYSLKQDGAVCELQICSLLVADAGEYSCVCGQEKTSATLTVKALLV
VRLRSKEATEGDTTLQCELSKAAPVEWRKGTETLRDGDYSLKQDGAVCELQIRSLTIADAGEYLCTCGQE
KTSATLTVRALPAKFKDSLKNEEATEGTTATLSCELSKAAPVWKKGPKTLQSGDKYVLRQDGAVCGLQIHGL
TMADAGEYSCVCGQEKTSATLTVRGLPAKFIEDLRSQEATEGATAILRCELSKAAPVEWRKGSSETLKDGRY
LRQDGAVCELQIRGLAVVDGTYSLSLPTKFTTEGLRNEEATEGTMATLRCQMSKAAPVEWRKGSSETLRDGRY
LRQDGAMCELQIRGLTIEDSGEYTCVCGQEKTSATLSVKALPSRFIEDLRSQEATEGTMATLRCQMSKTPA
WKKGSETLRDGGRYSLRQDGPVCELQICDLAVEDAGEYSCVCGQEKTSATLSIKALPPRFIEDLRSQEATEG
MATLRCQMSKAAPVEWRKGSSETLGDGGRYSLRQNGAVCELQIHDLAVEDTGEYSCVCGQEKTSATLNVKAL
RFIEDLRSQEATEGTMATLRCQMSKAAPVEWRKGSSETLRDGGRYSLRQDGAVCELQIHDLVEDAGQYSCVCG

QEKTSAVLTVDALPPKFTEGLKKEEATEGTMVTLRCQMSKEATVEWRKGAKTSLSDGGRYSLRQDGAMCELQIC  
GLAVEDAGEYSCVCGQEKTSATLSVKALPPRFIEDLRSQEATEGTMATLRCQMSKAAPVEWRKGETLRDGD  
YSLRQDGAVCELQIRDLAVEDAGEYLCVCGQEKTSATLSVKALPPRFIEDLRSQEATEGTMATLRCQMSKAAP  
VEWRKGSKTLRDGDYSLRQDGAMCELQICDLAVEDTDYSCVCGQEKTSATLSVKALPPRFIEDLRSQEARE  
GTVATLRCRMSKAAPVEWRKGETLKDGDYSLRQEGNLCELQIRDLAVEDTEEYSCVCGQEKTSATLSVKAL  
PAKFIEDLRSQEAPESSTVTLRCKLSKKASVVVKKGSETLRNGARYSLRQDGAVCELEIRDLTVEEDTGEYSCT  
CGQERTSATLSIMAPQVVFQQPLQNLQAEEGSMASLRCELSVPNAAMVWSKGGLELQGDTRREARQQGCVAEL  
LLRDLRREDAGEYSTCGSQTTSATLMVTAAPVRFLELQAQDVDEGATARLRCELSREAVSVEWRKGSLLQFL  
PCAKYQMVQEGTTAELLVHGVQEEDAGEYTCDAAGHTQSIARLSVRAPKPKFKTDLQSTEQEAGGTARLCCQLS  
EAEPTGTPVQWLKEGVELHVGSKYEMRRQGAUCELLIHGLEAKDTGEYACLVGGQKTLASLRVKEPEVTIVRGL  
VDMEVQADEDEFTCKVSOAGATDVQWHLQGLPLQSNVTEVAVLADGCTHVLQKGVTLLEDAGTVSFHVGGL  
SSSAQLTVRVPEVTVLEPLKDVQLSEGQDAHFRCRLSRASGQEARWALGGVPLQCNEMNDITVEQGTLYLLTL  
HKVTLLEDAGTITLQVGSSESQAQLKVTAKNTVLRGLENDVALEGGEALFECQLSQPEVAHAHTWLLDDEPVHTS  
EKVEVVYFENGLRHLLKLNKLPQDSCRVTFLAGDVVTSAFLTVRGWRLEVLEPPHDASVKAGMQVRFCTILS  
EAVPVGEATWYINGAAIQPDDTDWTVTTDGSHHALTLSNAQPQHAGEVTFAAARDAVASARLSVLALPDPPEDA  
EUVGRSDHSVTLWSVAPMSDGGGGLCGYRVMKEASTGQWQLCHDLVPGPECVVDDLVPKTYRFRVAAVGPA  
GAGEPVHLPMVKIAPAPAPAPAPAPAPAPAPAPETRAVVGEDICILEVAADGGEVWHKGTERRIQPGHFVLS  
RGQRQMLVIKGFRTEDQGEYRCGPIQGLPSSGAATFNVMVMTSGSGDEVPAQPSLPPEAAQGLHLLWEALAR  
KRRMSREPTLDSISELPEEDSRVQHLRQEAEEETAPDLSEGYSTADELARTGEADLSHTSSDDESAGTPSLVT  
YLKAGGPGISPLASKHEAQVTTSVKPKQKQEPVVPTCPPPGDLSAADLMDPSLDKAAVKIQAAPFKYKVRKE  
MKQQEGPVFSRTFGDTEAQVGDVLRLECVLATKTDMRACWLKDGIELTDGRHYHIDQLKDGTCSLLVTLGLAPT  
DSGRYTCQVSTKSGRVSHSACVVVSGTESEAESSSGGELDDAFRAARRLHRLFRTKSPAELSEELFLSADE  
GPGEPEEPADWQTYREDENFVCIRFESLAEARQAVTCFRNMFATMGIGVEISLGEQGPGRVEMRIKGVAPTVT  
PAVPLAKTPGLQTSDAAPVFLTELQNDVQDGYPMSFDCVVTGQPVPSVRWFKDGKLEEDDHYMINEDQQGG  
HQLIITAVVPADMVYRCLAENSMGVSSTKAELRVELTSTDYDTAADATETSSYFSAQGYLSSREQEGTESDE  
GQLPQVLEELKDLQVAPGTRLAKFQLKVKGYPAKLYWFKDQGLTTSDHIRMTDKKTLHTEIVSVTREDPSG  
QYAAIYLSNAVWKEICGIQQRLAQPVWRPPEFEELADCTAELGETVVKLACRVGTGPKPIVSWYKDGKPEVDPH  
HWLKEEAKEKGLVWIGPDTPGYTMASSSKQHSVLVLDVGRQHQTGTYTCIATNPAGQALCSASLHISGLAKEEEQ  
ERVKEALISSFLQGTSAVSAQMSSESAGFADLVGQSKGESLVAEEAHSLSLAEVGTTEFLQKLTSTITEMVS  
AKISQAKLQVPGGDSDEETKTPSASPRHGRSRPSSSVQESSESESDGDSRGEIFDIYVVTADYLPGLAEQDAI  
ILREGQYVEVLDSAHPLRWLVRTKPTKSSPSRQGWVSPAYLDRKRLKLSPEWGPTEAPEFPGEAVSEDEYRTRL  
SSVIQELLSSEQAFVQELQFLESHHMKHLERSPRVPAAVASQKTVIFRNVQDISHFHSSFLKELQCGCTDDDDV  
AMCFIKNQEAFAKEYLEFLVGRVQAESVVVSTPVQEFYKKAEEETLSAKDPTQPPPPPLQHYLEQPVERVQKYQ  
ALLKELIRNKARNRQNCALLEQAYAVVSALPQRAENKLVSLMENYPGTLEALGEPHQGHFVWEGAPGARM  
PWKGHNHRHVLFRNYLVICKPRRDSRTDTFSYVFRNMMKLSSIDLNDQVEGDDRAFEVWHEREDSVRKYLLQA  
RTVILKNSWVKEICGIQQRLAQPVWRPPEFEELADCTAELGETVVKLACRVGTGPKPIVSWYKDGKPEVDPH  
HILIEDPDGCTLILDNLGTIDSGQYMCFAASAAGNASTLGKILVQVPPRFVNVKVRATPFVEGEDAQITCTVE  
GAPYPQIRWYKDGTLAPGNRYRMLNEPRSGVLVVIQAASKEDLGHYECELVNRLGSTRGGGELYMQSPALR  
ARDQHHREQIVAAVEERRPSP\*  
>rs45807983\_ENSMUSP00000151217\_c.4260:G>T\_p.A1421S  
ENSMUST00000219084.3|Obscn-207|ENSMUSG00000061462|-|chr11:g.58997364:C>A  
MDHSFSGAPRFLTRPKAFVSVGKDATLSCQIVGNPTPHVSWEKDRQPVEAGARFLAQDGDVYRLTILDLAL  
GDSGQYVCRARNAIGEFAAVGLRVDSEGTCAEQAPHFLLRPTSIRVREGADATFRCRVGSGPQPAVSWSKDG  
RRLGPPDAPHVRVEEHGESSALRIR SARPRDGGTYEVRAENPLGSASAAAALVVDSDAEVAGPPGTSTATLLA  
HLQQRREAMRAEGIPSPPGAGTRTCTVTEGKHARLSCFVTGEPKPEVTVWKKDGLVTEGRRHVVEDEQENF  
VLKILFCKQSDRGLYTCTASNLVGQTYSSVLVVREPTVPFKKRLQDLEVREKESATFQCEVAQPATEAAWFK  
EETRLWASAKYDIEEGTERRLTVRNVSADDDAVYICETTEGSRVVAELSVQGNLTKLPRKTAVRTGDTAIF  
WVELAVPEGPVRWLRNQEEMVAGGRVAITAEGTCHTLTIFQCTLEDMGEVAFVSGGCRTTTQFCVSAAPRRPPL  
YPPADPVVKAKTESSVTLWSAPPHGDRPVTIDGYVLEKRKLGAYAWSRCHEAGWLATTEFTITGVAAEEDGFQ  
FRVSAINHFGQGPYLEFPGTMHLVPLAVKTPKAVEAVEGGEVTFVSDLTVASSGEWFLDGEALKASSIYVI  
RCDRTRHMLTIREVPARLHGAQLKFVANGIETSIQMVVRAALGLPSSKLPAAAAAREVLAQLHEEAQLLAEALS  
QAAAATWLKDGRELSLGPKEYMQVSAGRRALLVRDVAQDDAGLYECVSRGSRRTAYQLLVQDITDGYRDWGPAG  
PQKHMCKCAGAKIARYLGSSCYRFLQYDKGVWHWLEAALDTRQKGTSSCSLHEKPKLVFAKQQAHSEVKA  
AGNSATLSCEVTAQTEVTFWFKDGKLLSSSSKVRMEASGCSRRLLVVQQAGKADAGEYSCEAGGQKLSFRLDVA  
EPKLVFAKQQAHSEVKAAGASATLSCEVAQAQTEVTFWFKDGKLLSSSSKVRMEASGCSRRLLVVQQAGKADA  
GEYSCEAGGQKLSFRLDVAEPKMFVFAKEQQARSEVKAAGASATLSCEVAQAQTEVTFWFKDGKLLSSSSKVRM  
EASGCSRRLLVVQQAGKADAGEYSCEAGGQKLSFRLDVTEPKLVFAKEQQARSEVKAAGNSATLSCEVAQAQ  
EVTWFKDGKLLSSSSKVRMEASGCSRRLLVVQQAGKADAGEYSCEAGGQKLSFRLDVTEPKLVFAKEQQAHSEV

KAEAGASATLSCEVAQAQTEVTFWFKDGKLLSSSSKVRMEASGCSRRLVVQQAGKADAGEYSCEAEGQKLSFRL  
 DVAEPKLVFAKEQQARSEVKAEGASATLSCEVAQAQTEVTFWFKDGKLLSSSSKVRVEASGCSRRLVVQQAGK  
 ADAGEYSCEAGGQKLSFRLDVAEPKLVFAKEQQSNSEVKAEGASATLSCEVAQAQTEVTFWFKDGKLLSSSSK  
 VRVEASGCSRRLVVQQAGKADAGEYSCEAGGQKLSFRLDVAEPKLVFAKEQQAHSEVKAEGASATLSCEVAQ  
 AQTEVTFWFKDGKLLSSSSKVRVEASGCSRRLVVQQAGKADAGEYSCEAGGQKLSFRLDVAEPKLVFAKEQQAH  
 SEVKAEGASATLSCEVAQAQTEVTFWFKDGKLLSSSSKVRVEASGCSRRLVVQQVKGADAGEYSCEARGQKLS  
 FRLDVAEAEESQIPERPSRREPLVVKEHETIILTATIAAPSVAAVTWLKDGVETIRRSKRHEATSLGDHTLTVR  
 GAQVLDIAIYSCRVGKEGQDFPVQVEEVAAKFSKPLEPVEGELGGTVMLVCELSPEQAEVWRCGNTQLRPGK  
 RFQMTSEGPRTLTVSGLREDDAEYVCESRDDRTSARLTVKVPVVKFTSGLSAMVAEEGQEATFQCVVSPS  
 DAGVTWYKDGMLQPSSEKFMVSESGASRSLTILGLTLEDAGQVTVAEAGASSAALRVREAPVLFKFKLEPQT  
 VEERTSVTLEVELTRPWPEVKWTRNAAVLTPSENVEIRAEGARHCLVLRVSGFADRGFFGCETPDDKTQAKLN  
 VEMRQVRLVVRGLQVEEAKQGTASMDVELSHAEVEGSWTRDGLRLQPGPKCHLAVQGPVHILTLALSALQPDQSG  
 LVAFRAEGVHTSARLIVTELPVSFTRVLQDVVATQKEKVTLECELSRPVDVRLKDGVELRAGKAI GIVAQGT  
 CRSLVIYRCETGDQGVYCDALDAQTSASLRVQGRYTLIFRRVLAEDAGEVKFVAENAESRAHLRVKELPVT  
 LLRPLRDKIAMEKHRGVLECVSRASAQVRWFKGGVELQSGPKYEVVSDGLYRKLVINDDVQPEDEDTYTC DAG  
 NVKTSAQFFVEEQSITIVRGLKDMTVMEPAPAWFECETSIPSVRPPKWLKGKTVLQAGGNVLEQDGTVHRLT  
 LHKTCSTMTGPHVFTIGKSRSSAQLVSDIPVVLTRPLEPKAGRELQSVVLSCDFRPAPKAVQWYKDDTPLSP  
 SEKFKMALEGQMAELRILRLTPADAGVYRCQAGSAQSSAEVTVAREVTVIQPLQDAEAMEEGRCVCFKLSH  
 KDEDIEWSLNGTPLYNDSFHEISHEGCLHTLVLKSVRQADTGTVCATSPKVSVSARLVVKGKPVVFLKALDDV  
 SAEERGTTLTQCEVSDPEARVVWRKDGVELGPSDKYDFLHKAGARGLTVHDLSHEDAGLYTCQVGSKETQSKV  
 SVHDLHVGITKRLKTVEVLEGESECFEVLSEHSPSPAVVTVGGKTVGGSGHFHAVRQGRKYTLTVKDAALS  
 DAGEVVSFVGLTSLKASLIIRERPVDTIKPLEDQRTTLGEDVMLSCELSRAGTSVRWLKDGKAIKRSQKYDLL  
 SEGTRAVLVVRKASLKDSGEYTCETEASKSTAKLCVEEKANRFTEELADLQVEEKGRAVFTCKTEHPASVVTW  
 RKGLLELRASGKHVPSQEGTLTKLTINALERTSDSYTCDIGQARTQARLLVHGQKVRVIEDLEDTAVQEGSS  
 AKFCCRIAPADYGPVHWFLDKTPHLSNELNEITVQPGGYHVLTLRQLALKDSGTVYFEAGDQRTSAAALRVTEK  
 PSIFSRPLTDVTVTEGEDTLVCETTTVDSSVRWTKDGKTLRPSARCQLSHEGCAQLLITATTPQDGGRYKC  
 EIGGASSSSIVRVHALPVRFRESLKDVEVPKGAATLRCLVLSVAAPVVEWRHGDVLLKSSNKYSLRQCVGAVLE  
 LVIRDLQPDQSGQYSCSFGDQTTSATLTVKTSQAQFVGLKRNKEATEGTTVTLRCELTKEAPVEWKKGTETLR  
 NGDKYSLKQDGA VCELQICSLLVADAGEYSCVCGQEKTSATLTVKALLVHFVRRLRSKEATEGDTTTLQCELS  
 KAAPVEWRKGTETLRDGDYSLKQDGA VCELQIRSLTIADAGEYLCTCGQEKTSATLTVRGLPAKFIEDLRSQ  
 EATEGATAILRCELSKAAPVEWRKGSSETLKDGDYTLRQDGA VCELQIRGLAVVDTGTYSLPTKFTTEGLRNE  
 EATEGTMATLRCQMSKAAPVEWRKGSSETLRDGDYSLRQDGA MCELQIRGLTIEDSGEYTCVCGQEKTSATLS  
 VKALPPRFIEDLRSQEATEGTMATLRCQMSKAAPVEWRKGSSETLGDGGYSLRQNGAVCELQIHDLAVEDTGE  
 YSCVCGQEKTSATLNVKALPPKFTTEGLKKEEATEGTMVTLRCQMSKEATVEWRKGAKTLSDDGGYSLRQDGA  
 MCELQICGLAVEDAGEYSCVCGQEKTSATLSVKALPPRFIEDLRSQEATEGTMATLRCQMSKAAPVEWRKGS  
 SETLRDGDYSLRQDGA VCELQIRDLAVEDAGEYLCVCGQEKTSATLSVKALPPRFIEDLRSQEATEGTMATLRCQ  
 MSKAAPVEWRKGSKTLRQDGDYSLRQDGA MCELQICDLAVEDTGDYSCVCGQEKTSATLSVKAPQVVFQQLQ  
 NLQAEEGSMASLRCELSVPNAAMVWSKGGLELQGDTRREARQQGCVAELLLRDLRREDAGEYSCTCGSQTTSA  
 TLMVTAAPVRFRLRELQAQDVDEGATARLRCELSREAVSVEWRKGSQVLPCKAKYQMVQEGTTAELLVHGVEQE  
 DAGEYTC DAGHTQSIARLSVRAPKPKFKTDLQSTEQEAGGTARLCCQLSEAEPTPVQWLKEGVELHVGSKYE  
 MRQGA VCELLIHGLEAKDTGEYACL VGGQKTLASLRVKEPEVTIVRGLVDMEVQADEDFEFTCKV SQAGATD  
 VQWHLQGLPLQSNEVTEVAVLADGCTHVLQLKGVTLLEDAGTVSFHVGGSSSAQLTVRVPEVTVLEPLKDVQL  
 SEGQDAHFRCLSRASGQEARWALGGVPLQCNEMNDITVEQGTLYLLTLHKVTLLEDAGTITLQVGSSESAQL  
 KVTAKNTVLRGLENVDALEGGALFECQLSQPEVAHTWLLDDEPVHTSEKVEVVYFENGLRHLLLLKLNKLPQ  
 DSCRVTFLAGDVVTS AFLTVRGWRLEVLEPPHDASVKAGMQVRFTCILSEAVPVGEATWYINGAAIQPDDTDW  
 TVTDTDGSHHALTLSNAQPQHAGEVTF AARDAVASARLSVLALPDPPEDAEVVGRSDHSVTLSSVWAPMSDGGGG  
 LCGYR VEMKEASTGQWQLCHDLVPGPECVVDDLVPKTYRFRVAAVGPAGAGEPVHLPQMVKIAPAPAPAPAP  
 APAPETROAVVGEDICLELEVAADGGEVWHKGTERRIQPGGHFEVLSRGQRQMLVIKGFRTEDQGEYRCGPIQ  
 GLPSSGAATFNVVMTSGSGDEVPAQPSLPPEAAQEGDLHLLWEALARKRRMSREPTLDSISELPEEDSRVQHL  
 RQEAETAPDLSEGYSTADELARTGEADLSHTSSDDESRAGTPSLVTYLKKAGGPGISPLASKHEAQVTTSVK  
 PQKQQEPVVPPTCPPPGDLSAADLMDPSLDKAAVKIQAAFQKGYKVRKEMKQQEGPVFSRTFGDTEAQVGDVLR  
 ECVLATKTD MRACWLKDGIELTDGRHYHIDQLKDGTC SLLVTGLAPTD SGRYTCQVSTKSGRVSHSACVVVSG  
 TESEAESSAGTELDLDAFRRAARRLHRLFRTKSPAELSEELFLSADEGPGEPEEPADWQTYREDENFVCIRFE  
 SLAEARQAVTCFRNMAFTMIGVEISLGEQGPGRVEMRIGKVAPTVPAVPLAKT PGLQTS DAAPVFLTELQN  
 QDVQDGYPMSFDCVVTGQPVPSVRWFKDGKLLLEEDDHYMINEDQQGGHQLIITAVVPADMGVYRCLAENSMGV  
 SSTKAELRVELTSTDYD TAADATETSSYFSAQGYLSSREQEGTESDEGQLPVLEELKDLQVAPGTRLAKFQL  
 KVKGY PAPKLYWFKDGQPLTSDHIRMTDKKTLHTLEIVSVTREDSGQYAAIISNAVGAAYSSARLLVRGPSE  
 PEEKPASDVHERLVPVPRILEKFTPKKVKRGSSITFSVKVEGHPAPSVHWLKEEAEGVLWIGPDTPGYTMASS



SKQHSLVLLDVGROHQGYTTCIATNPAGQALCSASLHISGLAKEEEQERVKEALISSFLQGTSSQAVSAQMSES  
AGFADLVGQSKGESLVAEEAHSHLSLAEVGT EEFLOKLT SQI TEMVSAKISQAKLQVPGGDSDEETKTPSASP  
RHGRSRPSSSVQESSSESEDGDSRGEIFDIYVVVTADYLPGLAEQDAIILREGQYVEVLDSAHPLRWLVRTKPT  
KSSPSRQGWVSPAYLDKRLKLSPEWGPTEAPEFPGEAVSEDEYRTRLSSVIQELLSSEQAFVQELQFLESHHM  
KHLERSPRVPAAVASQKTVI FRNVQDI SHFHSSFLKELQGCCTDDVAMCFIKNQEA FEKYLEFVLVGRVQAES  
VVVSTPVQEFYKKYAEETLSAKDPTQPPPPPLQHYLEQPVERVQKYQALLKELIRNKARNRQNCALLEQAYAV  
VSALPQRAENKLVSLMENYPGTLEALGEP I RQGHFIVWEGAPGARM PWKGHNHRVFLFRNYLVI CKPRRDSR  
TDTFSYVFRNMMKLSSIDLNDQVEGDDRAFEVWHEREDSVRKYLLQARTVI IKNSWVKEICIGIQQRLAQPVWR  
PEFEELADCTAELGETVKLACRVGTGPKPIVSWYKDGKPVVEDPHHILIEDPDGSC TLI LDNLTGIDSGQY  
MCF AASAAGNASTLGKILVQVPPRFVNKVRATPFVEGEDAQITCTVEGAPYPQIRWYKDG TLLAPGNRYRMLN  
EPRSGVLVLIQAASKEDLGHYECELVNR LGSTRGGGELYMQS PALRARDQHHREQIVA AVEVTEQETKVPKK  
TVIIEETITTVVKS PRGRRQSPGKSPSRSPRRSASPRR PGLLAPERLYPPGTS PSRRLEVEQGRKAPVPALY  
VTEAEVHAPASQS QPKWLEVEETIEVRVKKTGSRGASPVREMTSRGEGILFTLPGGIPGRDPNANNNSNKS VY  
QEARTWGP AVVHVGE PFI FQVDSVGNVDWAASPEPEQVRASQKEENTERQEGCSDGDENTFLMEEPQD TDSL  
QGRDPKILTHNGRVLT LADLEDYV PQEGETFGCGDSTPSTPDEPPCEVSVLQREI SEPTVGGPVL LNVRPPG  
TGATPSFFRPGSQVHSPESVFL LREAWSGPVSAAPWTSSFH THVQSSVDGSHG SFKTEVSTQTVSFGAVGET  
VTLHIDPDGGEAPGPSQ\*

>rs26955766\_ENSMUSP00000158795\_c.3961:T>C\_p.L1321P

ENSMUST00000238536.2|Obscn-210|ENSMUSG00000061462|-|chr11:g.59003611:A>G  
MDHSFSGAPRFLTRPKAFVSVGKDATLSCQIVGNPTPHVSWEKDRQPV EAGARFLAQDGDVYRLTILDLAL  
GDSGQYVCRARNAIGEAFAAVGLRVDSEGTCAEQAPHLLRPTSIRVREGADATFRCRVGGSPQPAVSWSKDG  
RRLGPPDAPHVRVEEHGESSALRIR SARPRDGGTYEVRAENPLGSASAAAALVVDSDAEVAGPPGTSTATLLA  
HLQQRREAMRAEGIPSPPGAGTRTCTVTEGKHARLSCFVTGEPK PETVWKKDQQLVTEGRRHVYVEDEQENF  
VLKILFCKQSDRGLYTCTASNLVGQTYSSVLVVVREPTVPFKKRLQDLEVREKESATFQCEVAQ PATEAAWFK  
EETRLWASAKYDIEEGTERRLTVRNVSADDDAVYICETTEGSR TVAELSVQGNLTRKLRKTAVRTGD TAI F  
WVELAVPEGPVRWLRNQEEMVAGGRVAITAEGTCHTLTI FQCTLEDMGEVAFVSGGCRTTTFVCSAPRRPPL  
YPPADPVVKAKTSEVTLSSW SAPPHGDRPVTIDGYVLEKRLKLGAYAWSRCHEAGWLATTEFTITGVAE EGD FQ  
FRVSAINHFGQGPYLEFP GTMHLVPLAVKTP LKAVEAVEGGEVTF SVDLTVASSGEWFLDGEALKASSIYVI  
RCDRTRHMLTIREV PARLHGAQLKFVANGIETS IQMVVRAALGLPSSKLPAAAAREVLAQLHEEAQLLAE LSD  
QAAA VTWLKDGRELSLGP KYEMQVSAGRRALLVRDVAQDDAGLYECVSRGSR TAYQLLVQDITDGYRDWGPAG  
PQKHMCKCAGAKIARYLGSSCYRFLQYDKGVWHWLEAALDTRQKGTSSCSLHEKPKLVFAKQQAHSEV KAE  
AGNSATLSCEVTQAQTEVTWFKDGKLLSSSSKVRMEASGCSRRLVVQQAGKADAGEYSCEAGGQKLSFR LDVA  
EPKLVFAKQQAHSEV KAEAGASATLSCEVAQAQTEVTWFKDGKLLSSSSKVRMEASGCSRRLVVQQAGKADA  
GEYSCEAGGQKLSFR LDVAEPKMF AKEQQARSEV KAEAGASATLSCEVAQAQTEVTWFKDGKLLSSSSKVRM  
EASGCSRRLVVQQAGKADAGEYSCEAGGQKLSFR LDVTEPKLVFAKEQQARSEV KAEVGN SATLSCEVAQAQ T  
EVTWFKDGKLLSSSSKVRMEASGCSRRLVVQQAGKADAGEYSCEAGGQKLSFR LDVAEPKLVFAKEQQARSEV  
KAEAGNSATLSCEVAQAQTEVTWFKDGKLLSSSSKVRMEASGCSRRLVVQQAGKADAGEYSCEAGGQKLSFHL  
DVTEPKPVFAKEQQAHSEV KAEAGASATLSCEVAQAQTEVTWFKDGKLLSSSSKVRMEASGCSRRLVVQQAGK  
ADAGEYSCEAGGQKLSFR LDVAEPKLVFAKEQQARSEV KAEAGASATLSCEVAQAQTEVTWFKDGKLLSSSSK  
VRVEASGCSRRLVVQQAGKADAGEYSCEAGGQKLSFR LDVAEPKLVFAKEQQANSEV KAEAGASATLSCEVAQ  
AQTEVTWFKDGKLLSSSSKVRVEASGCSRRLVVQQAGKADAGEYSCEAGGQKLSFR LDVAEPKLVFAKEQQAH  
SEV KAEAGASATLSCEVAQAQTEVTWFKDGKLLSSSSKVRVEASGCSRRLVVQQAGKADAGEYSCEAGGQKLS  
FR LDVAEPKLVFAKEQQAHSEV KAEAGASATLSCEVAQAQTEVTWFKDGKLLSSSSKVRVEASGCSRRLVVQQ  
AGKADAGEYSCEAGGQKLSFR LDVAEPKLVFAKEQQAHSEV KAEAGASATLSCEVAQAQTEVTWFKDGKLLSS  
SSKVRVEASGCSRRLVVQQAGKADAGEYSCEAGGQKLFRLDVAEPKLMFAKEQQAHSEV KAEAGASATLSCE  
VAQAQTEVTWFKDGKLLSSSSKVRVEASGCSRRLVVQQAGKADAGEYSCEAGGQKLSFR LDVAEPKLVFAKEQ  
QAHS EVKAEAGASATLSCEVAQAQTEVTWFKDGKLLSSSSKVRVEASGCSRRLVVQQV GKADAGEYSCEARGQ  
KLSFR LDVADTRLMFAKEQQARTEV KAEAGNSATLSCEVAQAQTEVTWFKDGKLLSSSSKVRVEASGCSRRLV  
VQQAGKADAGEYSCEAGGQKLSFR LDVAEAE SQIPERPSRREPLVVKEHETIILTATI AAPSVAAV TWLKDGV  
EIRRSKRHEATSLGDTHTLTVRGAQVLDSAIYSCRVGKEGQDFPVQVEEVA AKFSKPLEPVEGELGGTVMLVC  
ELSP EQAEVWRCGNTQLRPGKRFQMTSEGPRRTLTVSGLREDDAE EYV CESRDDRTSARLTVKVP RVV KFTS  
GLSAMVAEEGQEATFQCVVSPSDAGVTWYKDGMLQLPSEKFMVMEVSGASRSLTILGLTLEDAGQVTEAEAGS  
SSAALRVREAPVLFKKKLEPQTV EERTSVTLEVELVRLTRPWPEVKWTRNAAVLTPSENVEIRAEGARHCLVLRVSV  
GFADRGGFEACETPDDKTQAKLNVEMRQVRLVRGLQEVEAKEQGTASMDVELSHAEVEGSWTRDGLRLQPGPKC  
HLAVQGPVHILTL SALQPDSGLVA FRAEGVHTSARLIVTELPVSFTRVLQDVVATQKEKVTLECELSR PVDV  
RWLKDGV ELRAGKAI GIVAQGTCSRSLVIYRCETGDQGVYVCDALDAQT SASLRVQGRTYTLIFRRVLAEDAGE  
VKFVAENAESRAHLRVKELPVTLLRPLRDKIAMEKHRGVLECCQVSRASAQVRWFKGGVELQSGPKYEVVSDGL  
YRKLVIN DVQPEDEDTYTC DAGNVK TSAQFFVVEEQSITIVRGLKDMT VMEPAPAWFECETSIPSVRPPKWL LG

KTVLQAGGNVGLQDGTVHRLTLHKTCSTMTGPVHFTIGKSRSSAQLVVSIPVVLTRPLEPKAGRELQSVVL  
SCDFRPAPKAVQWYKDDTPLSPSEKFKMALEGQMAELRILRLTPADAGVYRCQAGSAQSSAEVTVAREVTVI  
QPLQDAEAMEEGRVCFSCELSHKDEDEIWSLNGTPLYNDSFHEISHEGCLHTLVLSVRQADTGTVCATSPKV  
SVSARLVVKGKPVVFLKALDDVSAEERGTTLQCEVSDPEARVVRKDGVELGSPDKYDFLHKAGARGLTVHD  
LSHEDAGLYTCQVGSKETQSKVSVHDLHVGITKRLKTVEVLEGECSFECVLSHESPSDPAVWTVGGKTVGGS  
GHFHAVRQGRKYTLTVKDAALSDAGEVVSFVLGLTSKASLIIRERPVDITKPLEDQRTTLGEDVMLSCELSRA  
GTSVRWLKDGKAIKRSQKYDLLSEGTRAVLVVRKASLKDSGEYTCETEASKSTAKLCVEEKANRFTEELADLQ  
VEEKGRAVFTCKTEHPASVVTWRKGLLELRASGKHVPSQEGTLTKLTINALERTDSDTYTCDIGQARTQARLL  
VHGQKVRVIEDLEDTAVQEGSSAKFCRIAPADYGPVHWFLDKTPLHSNELNEITVQPGGYHVLTLRQLAKD  
SGTVYFEAGDQRTSAAALRVTEKPSIFSRPLTDVTVTEGEDTLVCETTTVDSVVRWTKDGKTLRPSARCQLSH  
EGCQAQLLITATTPQDGGRYKCEIGGASSSSIVRVHALPVRFRRESLKDVEVPEGKAATLRCVLSVAAPVEWR  
HGDDVLKSSNKYSLRQEGAVLELVIRDLQPDQSGQYSCSFGDQTTSATLTVKTSQAQFVGLKRNKEATEGTTV  
TLRCELTKAPVEWKKGTETLRNGDKYSLKQDGAVCELQICSLLVADAGEYSCVCGQEKTSATLTVKALLVHF  
VRLRSKEATEGDTTLQCELSKAAPVEWRKGTETLRDGDYSLKQDGAVCELQIRSLTIADAGEYLCTCGQE  
KTSATLTVRALPAKFKDSLKNEEATEGTTATLSCELSKAAPVWKKGPKTLQSGDKYVLRQDGAVCGLQIHGL  
TMADAGEYSCVCGQEKTSATLTVRGLPAKFIEDLRSQEATEGATAIIRCELSKAAPVEWRKGSSETLKDGDYR  
LRQDGAVCELQIRGLAVVDGTYSPLTKFTEGLRNEEATEGTMATLRCQMSKAAPVEWRKGSSETLRDGDYR  
LRQDGAVCELQIRGLTIEDSGEYTCVCGQEKTSATLSVKALPSRFIEDLRSQEATEGTMATLRCQMSKTAPVE  
WKKGSETLRDGGYSLRQDGPVCELQICDLAVEDAGEYSCVCGQEKTSATLSIKALPPRFIEDLRSQEATEG  
MATLRCQMSKAAPVEWRKGSSETLGDGGYSLRQNGAVCELQIHDLAVEDTGEYSCVCGQEKTSATLNVKALPP  
RFIEDLRSQEATEGTMATLRCQMSKAAPVEWRKGSSETLRDGGYSLRQDGAVCELQIHDLVEDAGQYSCVCG  
QEKTSAVLTVDALPPKFTEGLKKEEATEGTMVTLRCQMSKEATVEWRKGAKTLSDGGRYSLRQDGAMCELQIC  
GLAVEDAGEYSCVCGQEKTSATLSVKALPPRFIEDLRSQEATEGTMATLRCQMSKAAPVEWRKGSSETLRDGD  
YSLRQDGAVCELQIRDLAVEDAGEYLCVCGQEKTSATLSVKALPPRFIEDLRSQEATEGTMATLRCQMSKAAP  
VEWRKGSSETLRDGDYSLRQDGAMCELQICDLAVEDTGDYSCVCGQEKTSATLSVKALPPRFIEDLRSQEARE  
GTVATLRCMSKAAPVEWRKGSSETLKDGDYSLRQEGNLCELQIRDLAVEDTEEYSCVCGQEKTSATLSVKAL  
PAKFIEDLRSQEAPESSTVTLRCKLSKASVWKKGSETLRNGARYSLRQDGAVCELEIRDLTVEDTGEYSCT  
CGQERTSATLSIMAPQVVFQQLQNLQAEEGSMASLRCELSVNAAMVWSKGGLELQGDTRREARQQGCVAEL  
LLRDLRREDAGEYSCTCGSQTTSATLMVTAAPVRFRLRELQAQDVDEGATARLRCELSREAVSVEWRKGSQQLF  
PCAKYQMVQEGTTAELLVHGVEQEDAGEYTCDAHTQSIARLSVRAPKPKFKTDLQSTEQEAGGTARLCCQLS  
EAEPGTPVQWLKEGVELHVGSKYEMRRQAVCELLIHGLEAKDTGEYACLVGGQKTLASLRVKEPEVTVRGL  
VDMEVQADEDEVEFTCKVQAGATDVQWHLQGLPLQSNVTEVAVLADGCTHVLQKGVTLLEDAGTVSFHVGGL  
SSSAQLTVRVPEVTVLEPLKDVQLSEGQDAHFRCRLSRASGQEARWALGGVPLQCNEMNDITVEQGTLYLLTL  
HKVTLLEDAGTITLQVGSSESQAQLKVTAKNTVLRGLENVDALEGGEALFECQLSQPEVAHAHTWLLDDEPVHTS  
EKVEVVYFENGLRHLLLLKLNKLPQDSCRVTFLAGDVVTSFAFLTVRGWRLEVLEPPHDASVKAGMQVRFTCILS  
EAVPVGEATWYINGAAIQPDDTDWTVTTDGSHHALTLNSAQLPQHAGEVTFAAARDAVASARLSVLAALPDPEDA  
EVVGRSDHSVTLVSWAPMSDGGGGLCGYRVMKEASTGQWQLCHDLVPGPECVDDLVPGKTYRFRVAAVGPA  
GAGEPVHLPQMVKIAPAPAPAPAPAPAPAPAPETRAVVGEDICLELEVAADGGEVVWHKGTERRIQPGHFVLS  
RGQRQMLVIKGFRTEDQGEYRCGPIQGLPSSGAATFNVVMTSGSGDEVPAQPSLPPEAAQEGDLHLLWEALAR  
KRRMSREPTLDSISELPEEDSRVQHLRQEAETAPDLSEGYSTADELARTGEADLSHTSSDDESAGTPSLVT  
YLKAGGPGISPLASKHEAQVTTSVKPKQKQEPVPTCP PPGDLAADLMPSLDKAAVKIQAAFQYKVRKE  
MKQQEGPVFSRTFGDTEAQVGDVLRLECVLATKTDMRACWLKDGIELTDGRHYHIDQLKDGTCSSLVTVGLAPT  
DSGRYTCQVSTKSGRVSHSACVVVSGTESEAESSSGGELDDAFRAARRLHRLFRTKSPAELSEELFLSADE  
GPGEPEPADWQTYREDENFVCIRFESLAEARQAVTCFRNMFATMGI GVEISLGEQGRGVEMRIGKVAPTVT  
PAVPLAKTPGLQTSDAAPVFLTELQNDVDQDGYPMSFDCVVTGQVPVSVRWFKDGKLEEDDHYMINEDQQGG  
HQLIITAVVPADMGVYRCLAENSMGVSTKAELRVELTSTDYDTAADATETSSYFSAQGYLSSREQEGTESDE  
GQLPQVLEELKDLQVAPGTRLAKFQLKVKGYPAKLYWFKDGGPLTSDHIRMTDKKTLHTLEIVSVTREDSG  
QYAAYSNAVGAAYSSARLLVRGPSEPEEKPASDVHERLVPPRILEKFTPKKVKRGSSITFSVKVEGHPAPSV  
HWLKEEAKEKGVLLWIGPDTPGYTMASSSKQHSLVLLDVGRHQGTYTICATNPAGQALCSASLHISGLAKEEEQ  
ERVKEALISSFLQGTSAQVSAQMSSEAGFADLVGQSKGESLVAEEAHSHLSLAEVGTEEFQKLTLSQITEMVS  
AKISQAKLQVPGGDSDEETKTPSASPRHGRSRPSSSVQESSSESEDGDSRGEIFDIYVVVTADYLPGLAEQDAI  
ILREGQYVEVLD SAHPLRWLVRTKPTKSSPSRQGWVSPAYLDKRLKLSPEWGPTEAPEFPGEAVSEDEYRTRL  
SSVIQELLSSEQAFVGLQFLESHEHMKHLERSPRVPAVASQKTVIFRNVQDISHFHSSFLKELQCGCTDDD  
AMCFIKNQAEFAFEKYLEFLVGRVQAESVVVSTPVQEFYKKAEEETLSAKDPTQPPPPPLQHYLEQVVERVQKYQ  
ALLKELIRNKARNRQNCALLEQAYAVVSALPQRAENKLVSLMENYPGTLEALGEPYRQGHFIWEGAPGARM  
PWKGHNHRVFLFRNYLVICKPRRDSRTDFTSYVFRNMMKLSSIDLNDQVEGDDRAFEVWHEREDESVRKYLLQA  
RTVVIKNSWVKEICGIQORLAQPVWRPPEFEEELADCTAELGETVKLACRVTGTPKPIVSWYKDGKPEVDPH  
HILIEDPDGSCTLILDNLTGIDSGQYMCFAASAAGNASTLGKILVQVPPRFVNVKVRATPFVEGEDAQITCTVE

GAPYPQIRWYKDGTLAPGNRYRMLNEPRSGVLVVIQAASKEDLGHYECELVNRLGSTRGGGELYMQSPALR  
ARDQHHREQIVAAVEDTSVEGSAHSAQDQADQQAASVLWRLGSEALGSPSGDLNTRQSEPPAFEEAASQIP  
GAASGTPEVSPQPGTHKLEQETTSSGSQGWTVPIRVEGTAWPGAGTGQLLLDVHSQVIMETTQRTYVCQAPDT  
GVTRAPSMQVTIEDVQVQVGDMAQFDAVIEGHPPPIVTVWYKGSTQLTSSARLSQRQDGTYSVLVTDVAPHDA  
GVYTCVANNAGGQVLCKAELLVHGGDKLDAENQVYRRKLHSHFYDVQEEIGRQVFGFVKRVQHKGNKMFCAAKF  
IPLRSKTRAQAYQERDILATLGHPLVLTGLLDQFETRKTLLILILELCSSEELLDRFLKKGVVTEAEVKVYIQQ  
VEGLHLYHSHGILHLDIKPPNIMLVHPAREDIKICDFGFAQKITPSEPQYSKYGSPEFVSPETIEQNPVSEGS  
DIWAMGVI SYLSLTCCSSPFAGESDRATLLNVLEGRVSWSSPTAAHLEDAKDFIKATLQRTPRARPSTSQCLA  
HPWFLKSMPEAAEHFINTKQLKFLARSRWQRSLMSYKSIILVMRSIPELLQGPPDSPSLGVARHLRGEASGAS  
SSSSSSDNELAPFARAKSLPPSPVTHSPLHPRGFLRPSASLPEETEASMPATAAASPASQASAGPPASPGCV  
PRHSVISSLFYQQAGEGAERGNKTSGAKRHPARRRHLKGGYIARALPGLREPLMEYSLLEEEAAREEQASLM  
TKTPSFETALRPLSSSVREVPRGRSHSLDNPPVTTGPSPEACKEQLLFPSTGLTHETTAKDRGHKEGFLQESV  
PFPMSGDSRPGKQEGSSQDSCRKPASSCHSELGSGSQEGCGPPSSQSLGSLPPQSLKELSTSCGPLFSEQ  
PQAAPFPPTQVSPLLGEKEPQDGSLSGEPVVPVSSSPGSASQVDASLDTEGLSEAGDTCDFTPPPQRPQEQAT  
TRKFSLESRGGYAGVAGYGTFAFGGDAGGMLGQGPLWARMAWAVSQQSSEEQDEAATESPQPLESGLPIAEASG  
VPLRTSPSLTPWEEVEQVSLVQIRDLSDGAEAAADTISLDISEVDPAYLNLSLDYDIKYLPEFEMI FRRVPKPI  
EQPESPGSETEAGQLADFLLEAAWFPWPGELGLRAGLEITTEPEEPGDLEALLGEAAVGRKRKWSPSRGLFQF  
PGRCLSGEEPVELGLRQVRKASMAHISRIKGRPEGEREGPPRKKAGLASFRLSGLKGRDQELSDAEVVLGQ  
SVTLACQVLAQPTAQATWSKDGVLLESSGHLISSTLKNFQLLTIILVVKEEDLGTYTCCVSNPLGTAVTTGVL  
RKAERPSSSPREVEGELYKDAVLLVWKPVESECGPVTVYIVQCCIEGGSWTTLASDISDCCYLTGKLSRGGMYIF  
RTACVSKAGMGPISSPSEQVLLGGPNHLASEEESRRGRPAQLLPSTKTFAFQMQIRRRGRFSVVRQCREKASGR  
ALAAKIVPYQPEDKTAVLREYEAALKRHLHHPHLAQLHAAYLSPRHLVLI LELCSGPELLPSLAERESYSESDVK  
DYLWQMLSATQYLHAQHI LHLDLRSENMMVTEYNLLKVIDLGNALQSLDQEKVPAPENFKDYLETMAPELLEGG  
GAVPQTDIWAIGVTAIFIMLSGEY PESSSEGTRDLQKGLRKLIRLSRCYAGLSGGAVAFQSSSLCAQPWGRPCA  
STCLQCGLWTEEGPTGSRPTVTFPTVRLRAVFREREKRRRALLYKKNLAQVR\*  
>rs26955766\_ENSMUSP00000038264\_c.3685:T>C\_p.L1229P  
ENSMUST00000047441.14|Obscn-202|ENSMUSG000000061462|-|chr11:g.59003611:A>G  
MDHSFSGAPRFLTRPKAFVSVGKDATLSCQIVGNPTPHVSWEKDRQPVEAGARFLAQDGDVYRLTILDLAL  
GDSGQYVCRARNAIGEAFVAVGLRVDSEGTCAEQAPHFLLRPTSIRVREGADATFRCRVGGSPQPAVSWSKDG  
RRLGPPDAPHVRVEEHGESSALRIRSARPRDGGTYEVRAENPLGSASAAAALVVDSDAEVAGPPGTSTATLLA  
HLQORREAMRAEGIPPSPPGAGTRTCTVTEGKHARLSCFVTGEPKPEVWKKDQGLVTEGRRHVVEDEQENF  
VLKILFCKQSDRGLYTCTASNLVGQTYSSVLVVVREPTVPFKKRLQDLEVREKESATFQCEVAQPAEAAWFK  
EETRLWASAKYDIEEEGTERRLTVRNVSADDDAVYICETTEGSRVVAELSVQGNLTKLPRKTAVRTGDTAIF  
WVELAVPEGPVWRWRNQEEMVAGGRVAITAEGTCHTLTI FQCTLEDMGEVAFVSGGCRTTTQFCVSAPRRPPL  
YPPADPVVKAKTESVTLWSAPPHGDRPVTIDGYVLEKRKLGAYAWSRCHEAGWLATEFTITGVAEEGDFQ  
FRVSAINHFQGPYLEFPFGTMHLVPLAVKTPLKAVEAVEGGEVTFVSDLTVAWSGEWFLDGEALKASSIYVI  
RCDRTRHMLTIREVPARLHGAQLKFVANGIETSIQMVVRAALGLPSSKLPAAAAAREVLAQLHEEAQLLAELSD  
QAAAAVTWLKDGRELSLGPKEYMQVSAGRRALLVRDVAQDDAGLYECVSRGSRRTAYQLLVQDITDGYRDWGPAG  
PQKHMCKCAGAKIARYLGSSCYRFLQYDKGVWHLEAALDTRQKGTSSCSLHEKPKLVFAKQQAHSEVKA  
AGASATLSCEVAQAQTEVTFWFKDGKLLSSSSKVRMEASGCSRRLVVQQAGKADAGEYSCEAGGQKLSFRLDVA  
EPKMFVFAKEQQARSEVKAEGASATLSCEVAQAQTEVTFWFKDGKLLSSSSKVRMEASGCSRRLVVQQAGKADA  
GEYSCEAGGQKLSFRLDVTEPKLVFAKEQQARSEVKAEGVNSATLSCEVAQAQTEVTFWFKDGKLLSSSSKVRM  
EASGCSRRLVVQQAGKADAGEYSCEAGGQKLSFRLDVAEPKLVFAKEQQARSEVKAEGNSATLSCEVAQAQ  
EVTWFKDGKLLSSSSKVRMEASGCSRRLVVQQAGKADAGEYSCEAGGQKLSFHLDVTEPKPVFAKEQQAHSEV  
KAEAGASATLSCEVAQAQTEVTFWFKDGKLLSSSSKVRMEASGCSRRLVVQQAGKADAGEYSCEAGGQKLSFR  
DVAEPKLVFAKEQQARSEVKAEGASATLSCEVAQAQTEVTFWFKDGKLLSSSSKVRVEASGCSRRLVVQQAGK  
ADAGEYSCEAGGQKLSFRLDVAEPKLVFAKEQQANSEVKAEGASATLSCEVAQAQTEVTFWFKDGKLLSSSSK  
VRVEASGCSRRLVVQQAGKADAGEYSCEAGGQKLSFRLDVAEPKLVFAKEQQAHSEVKAEGASATLSCEVAQ  
AQTEVTFWFKDGKLLSSSSKVRVEASGCSRRLVVQQAGKADAGEYSCEAGGQKLSFRLDVAEPKLVFAKEQQAH  
SEVKAEGASATLSCEVAQAQTEVTFWFKDGKLLSSSSKVRVEASGCSRRLVVQQAGKADAGEYSCEAGGQKLS  
FRLDVAEPKLVFAKEQQAHSEVKAEGASATLSCEVAQAQTEVTFWFKDGKLLSSSSKVRVEASGCSRRLVVQQ  
AGKADAGEYSCEAGGQKLFRLDVAEPKLVFAKEQQAHSEVKAEGASATLSCEVAQAQTEVTFWFKDGKLLSS  
SSKVRVEASGCSRRLVVQQGKADAGEYSCEAGGQKLSFRLDVAEAEBSQI PERPSRREPLVVKHEHTIILTAT  
IAAPSAAVTWLKDGEVIRRSKRHEATSLGDHTTLTKVSRGLDVAEAEBSQI SCRVRGKEGDFPVQVEEVAAKFSK  
LEPVEGELGTTVMVLVCELSPEQAEVWVRCGNTQLRPGKRFQMTSEGPRRTLTVSGLREDDAEFYVCESRDRT  
SARLTVKVPVVKFTSGLSAMVAEEGQEAATFQCVVSPSDAGVTWYKDGMLQPSSEKFMVMEVSGASRSLTILGL  
TLEDAGQVTVAEAGASSAALRVREAPVLFKKKLEPQTVTEERTSVTLEVELTRPWPEVKWTRNAAVLTPSENV  
EIRAEGARHCLVLRVSVGFADRGFFGCETPDDKTQAKLVNEMRQVRLVRLVGLQEVEAKEQGTASMDVELSHAEVE

GSWTRDGLRLQPGPKCHLAVQGPVHILTLSALQPQDSGLVAFRAEGVHTSARLIVTELPVVSFTRVLQDQVATQ  
KEKVTLECELSRPVDVRLWKDGVLELRAGKAI GIVAQGTCSRSLVIYRCETGDQGVYVCDALDAQTSASLRVQGR  
TYTTLIFRRVLAEDAGEVKFVAENAESRAHLRVKELPVTLLRPLRDKIAMEKHRGVLECCQVSRASAVRWFKGG  
VELQSGPKYEVVSDGLYRKLVINQVPEDEDTYTCDAGNVKTSAQFFVEEQSITIVRGLKDMTVMPEPAPAWFE  
CETSI PSVRPPKWLGLKTVLQAGGNVGLQDGTVHRLTLHKTCSTMTGPFVHTIIGKSRSSAQLVVS DIPVVL  
RPLEPKAGRELQSVVLSCDFRPAPKAVQWYKDDTPLSPSEKFKMALEGQMAELRILRLTPADAGVYRCQAGSA  
QSSAEVTVEAREVTVIQPLQDAEAMEEGRVCFSCELSHKDEDIEWSLNGTPLYNDSFHEISHEGCLHTLVLSK  
VRQADTGTVCATSPKVS SARLVVKGKPVVFLKALDDVSAEERGTTLQCEVSDPEARVVRKDGVELGSPDK  
YDFLHKAGARGLTVHDLSHEDAGLYTCQVGSKETQSKVSVHDLHVGITKRLKTVEVLEGESCSFCEVLSHESP  
SDPAVWTVGGKTVGGSGHFHAVRQGRKYTLTVKDAALSDAGEVVSFVGLGTSKASLIIRERPVDTKPLEDQR  
TTLGEDVMLSCELSRAGTSVRWLKDGKAIKRSQKYDLLSEGTRAVLVVRKASLKDSGEYTCETEASKSTAKLC  
VEEKANRFTEELADLQVEEKGRAVFTCKTEHPASVVTWRKGLLELRASGKHVPSQEGTLTKLTINALERTDSD  
TYTCDIGQARTQARLLVHGQKVRVIEDLEDTAVQEGSSAKFCCRIPADYGPVHWFLLDKTPLHSNELNEITVQ  
PGGYHVLTLRQLALKDSGTVYFEAGDQRTSAALRVTEKPSIFSRPLTDVTVTEGEDTLVCETTTVDSSVRWT  
KDGTLRPSARCQLSHEGCAQLLITATTPQDGGRYKCEIGGASSSSIVRVHALPVRFRESLKDVEVPEGKAA  
TLRCVLSVAAPVEWRHGDDVLKSSNKYSLRQEGAVLELVIRDLQPDQSGQYSCSFGDQTTSATLTVKTSQAQ  
FVGKLRNKEATEGTTVTLRCELTKAPVEWKKGTETLRNGDKYSLKQDGA VCELQICSLLVADAGEYSCVCGQ  
EKTSA TLTVKALLVHFVRLRSKEATEGDTTTLQCELSKAAPVEWRKGTETLRDGDYSLKQDGA VCELQIRS  
LTIADAGEYLCTCGQEKTSA TLTVRALPAKFKDSLKNEEATEGTTATLSCELSKAAPVTWKKGPKTLQSGDKY  
VLRQDGA VCGLQIHGLTMADAGEYSCVCGQEKTSA TLTVRGLPAKFIEDLRSQEATEGATAILRCELSKAAPV  
EWRKGETLKDGDYTLRQDGA VCELQIRGLAVVDTGTYSLSLPTKFTTEGLRNEEATEGTMATLRCQMSKAAPV  
EWRKGETLRDGDYSLRQDGA MCELQIRGLTIEDSGEYTCVCGQEKTSA TLSVKALPPRFIEDLRSQEATEG  
TMATLRCQMSKAAPVEWRKGETLGDGGYSLRQNGAVCELQIHDLAVEDTGEYSCVCGQEKTSA TLNVKALP  
PRFIEDLRSQEATEGTMATLRCQMSKAAPVEWRKGETLRDGGYSLRQDGA VCELQIHDLVEDAGQYSCVC  
GQEKTSAVLTVDALPPKFTTEGLKKEEATEGTMVTLRQMSKEATVEWRKGAKTLSGGYSLRQDGA MCELQI  
CGLAVEDAGEYSCVCGQEKTSA TLSVKALPPRFIEDLRSQEATEGTMATLRCQMSKAAPVEWRKGAKTLSRQD  
RYSLRQDGA MCELQICDLAVEDTGDYSCVCGQEKTSA TLSVKAPQVVFQQLQNLQAEEGMSASLRCVLSVFN  
AAMVWSKGGLELQGDTRREARQQGCVAELLLRDLRREDAGEYSCVCGSQTTSATLMVTAAPVRFRLRQAQDV  
DEGATARLRCELSREAVSVEWRKGSLLQFPKAKYQMVQEGTTAE LLVHGVEQEDAGEYTC DAGHTQSIARLSV  
RAPKPKFKTDLQSTEQEAGGTARLCCQLSEAEPTPVQWLKEGVELHVGSKYEMRRQGA VCELLIHGLEAKDT  
GEYA CLVGGQKTLASLRVKEPEVTIVRGLVDMEVQADEDEFTCKVSOAGATDVQWHLQGLPLQSNEVTEVAV  
LADGCTHVLQKGVTLLEDAGTVSFHVGGSSAQLTVRVPEVTLEPLKDVQLSEGQDAHFRCRLSRASGQEA  
RWALGGVPLQCNEMNDITVEQGTLYLLTLHKVTLEDAGTITLQVGS CSSEAQLKVTA KNTVLRGLENDVALEG  
GEALFECQLSQPEVA AHTWLLDDEPVHTSEKVEVVYFENGLRHLLLLKLNKLPQDSCRVTFLAGDVVTS AFLTV  
RALPDPPEDAE VVGRSDHSVTL SWVAPMSDGGGLCGYRVEMKEASTGQWQLCHDLVPGPECVDDLVPGKTY  
RFVVA AVGPAGAGEPVHLPQMVKIAPAPAPAPAPAPAPAPAPAPETRQAVVGEDICLELEVAADGGEVVWHKGT  
QPGGHFEVLSRGRQMLVIKGFRTEDQGEYRCGPIQGLPSSGAATFNVMVTS GSGDEVPAQPSLPPEAAQEGD  
LHLLWEALARKRRMSREPTLDSISELPEEDSRVQHLRQEA EETAPDLSEGYSTADELARTGEADLSHTSSDDE  
SRAGT PSLVTYLKKAGGPGISPLASKHEAQVTT SVKPQKQEPVVP TCPPPGDL SAADLMDPSLDKAAVKIQ  
AFKGYKVRKEMKQEGPVFSRTFGDTEAQVGDVLRLECVLATKTD MRACWLKDGIELTDGRHYHIDQLKDGTC  
SLLVTGLAPTDSGRYTCQVSTKSGRVSHSACVVVSGTESEAESSGGELDDAFRAARRLHRLFRTKSPAELS  
EEELFLSADEGPGEPEPADWQTYREDENFVICRFESLAEARQAVTCFRNM FATMGIGVEISLGEQGPGRVEM  
RIGKVAPT VTPAVPLAKTPGLQTS DAAPVFLTELQNDVQDGYPMSFDCVVTGQPVVPSVRWFKDGKLEEDDH  
YMINEDQGGHQLIITAVVPADMGVYRCLAENSMGVSSTKAE LRVELTSTDYDTAADATETSSYFSAQGYLSS  
REQEGTESDEGQLPVLEELKDLQVAPGTRLAKFQLKVKGYPAKLYWFKDQGPLTTSDHIRMTDKKTLHTLE  
IVSVTREDSGQYAAI SNAVGAAYSSARLLVRGPSEPEEK PASDVHERLVPPRI LEKFTPKKVKRGSSITFSV  
KVEGHPAPSVHWLKEEA EKGVLIWIGPDTPGYTMASSSKQHSLVLLDVGRQHGGTYTCIATNPAGQALCSASLH  
ISGLAKEEEQERVKEALISSFLQGT SQAVSAQMSSESAGFADLVGQSKGESLVAAEAAHSHLSLAEVGT EEFLOK  
LTSQITEMVSAKISQAKLQVPGGDSDEETKTPSASPRHGRSRPSSSVQESSSESEDGDSRGEIFDIYVVTADY  
LPLGAEQDAIILREGQYVEVLDSAHPLRWLVRTKPTKSSPSRQGWVSPAYLDKRLKLSPEWGPTEAPEFPGEA  
VSEDEYRTRLSSVIQELLSSEQAFV GELQFLESHHMKHLERSPRVPAAVASQKTVIFRNVQDISHFHSSFLKE  
LQCGCTDDDVAMCFIKNQEA FEKYLEFLVGRVQAESVVVSTPVQEFYKKYAEETLSAKDPTQPPPPPLQHYLE  
QPVERVQKRYQALLKELIRNKARNRQNCALLEQAYAVS DALPQRAENKLVSLMENYPGTLEALGEP I RQGHFI  
VWEGAPGARMPPKGNHRVFLFRNYLVICKPRRDSRPTDFSYVFRNMMLKSSIDLNDQVEGDDRAFEVWHERE  
DSVRKYL LQARTVI IKNSWVKEICGIQORLAQPVWRPPEFEELADCTAELGETVKLACRVGTGTPKPIVSWYK  
DGKPV EVDPHHILIEDPDGSC TLI LDNLTGIDSGQYMCFAASAAGNASTLGKILVQVPPRFVNVKVRATPFVEG  
EDAQITCTVEGAPYPQIRWYKDG TLLAPGNRYRMLNEPRSGVLVLIQAASKEDLGHYECELVNR LGSTRGGG  
ELYMQSPALRARDQHREQIVAAVEGAPSMQVTIEDVQVQVGDMAQF DAVIEGHPPP I V TWYKGSTQLTSSAR

LSQRQDGTYSVLVTDVAPHDAGVYTCVANNAGQVLCKAELLVHGGDKLDAENQVYRRKLHSFYDVQEEIGR
GVFGFVKRVQHKGNMFCAAKFIPLRSKTRAQAYQERDILATLGHPLVTGLLDQFETRKTLLILILELCSSEEL
LDRLFKKGVVTEAEVKVYIQQLVEGLHYLHSHGILHLDIKPPNIMVHPAREDIKICDFGFAQKITPSEPOYS
KYGSPFVVSPEIIEQNPVSEGSDIWAMGVISYLSLTCSSPFAGESDRATLLNVLEGRVSWSSPTAAHLSEDAK
DFIKATLQRTPRARPSTSQC LAHPWFLKSMPAEEAHFINTKQLKFL LARSRWQRSLMSYKSI LVMRSIPELLQ
GPPDSPSLGVARHLRGEASGASSSSSSSDNELAPFARAKSLPPSPVTHSPLLHPRGFLRPSASLPEETEASMP
TADAAVPASPQASAGPPASPGCVPRHSVSISSLFYQQAGEGAERGNKTS GAKRHPARRRHLLKGGYIARALPGLR
EPLMEYSLLEEEAAREEQASLMTKTPSFETALRLPSSSVREVPGRSHSLDNPPVTTGSPPEACKEQLLFPST
GLTHEFTAKDRGHKEGFLQESVFPFMSGDSRPGKQEGSSQDSCRGKPASSCHSELGSGSQEGCGPPSSQSLG
SLPPQSLKKELESTSCGPLFSEQPQAAPFPQTQVSPLLGSEKEPQDGSLSSEGVPVPSSSPGSASQVDASLDTEG
LSEAGDTCDFTPPPQRPQEQATTRKFSLESRGGYAGVAGYGTFAFGGDAGGMLGQGPLWARMWAVSQSSEEQ
DEAATESPQPLESGLPIAEASGVPLRTPSLTPWEEVEQVSLVQIRDLSGDAEAADTISLDISEVDPAYLNLS
DLYDIKYLPPFEFMI FRRVPKPIEQPESPGSETEAGQGLADFL EEAAPWPWGPGLGLRAGLEITEEPEEPGDLEA
LLGEAAVGRKRKWSPSRGLFQFGRCLSGEEPVELGLRQRVKASMAHISRILKGRPEGPEREPPRKKAGLAS
FRLSGLKGRDQELSDEAVVLGQSVTLACQVLAQPTAQATWSKDGVLLESSGHLLISSTLKNFQLLTLILVVKEE
DLGTYTCCVSNPLGTAVTTGVLKRAERPSSSPRPEVGEYKDAVLLVWKPVESCGPVTYIVQCCIEGGSWTTL
ASDISDCCYLTGKLSRGGMYIFRTACVSKAGMGPYSSPSEQVLLGGPNHLASEEESSRRGRPAQLLPSTKTFAF
QMQIRRGFRFSVVRQCREKASGRALAAKIVPYQPEDKTAVLREYEAALKRHLHHPHLAQLHAAYLSPRHLVILEL
CSGPELLPSLAERESYSESVDKDYLWQMSATQYLHAQHILHLDLRSENMMVTEYNLLKVIDLGNASLDQEK
VPAPENFKDYLETMAPELLEGQAVPQTDIWAIGVTA FIMLSGEY P ESSEGETRDLQKGLRKLIRLSRCYAGL
SGGAVAFLOSSLCAQPWGRPCASTCLOCGWLTEEGPTGSRPTPVTFTVRLRAFVREKRRALLYKXHNLAQ
VR\*

>rs26955766\_ENSMUSP00000049737\_c.3760:T>C\_p.L1254P
ENSMUST00000052872.15|Obscn-203|ENSMUSG00000061462|-|chr11:g.59003611:A>G
MDHSFSGAPRFLTRPKAFVSVGKDATLSCQIVGNPTPHVSWEKDRQFVEAGARFRLAQDGDVYRLTILDLAL
GDSGQYVCRARNAIEGAFAAVGLRVDSEGTCAEQAPHFLLRPTSIRVREGADATFRCRVGGSPQPAVSWSKDG
RRLGPPDAPHRVVEHEGESSALRIR SARPRDGGTYEVRAENPLGSASAAAALVVDSAEVAGPPTSTATLLA
HLQORREAMRAEGIPPSPPGAGTRTCTVTEGKHARLSCFVTGEPKPEVWKKDGQLVTEGRRHVVEDEQENF
VLKILFCKQSDRGLYTCTASNLVGQTYSSVLVVREPTVPFKKRLQDLEVREKESATFQCEVAQPATEAAWFK
EETRLWASAKYDIEEGTERRLTVRNVSADDDAVYICETTEGSRVVAELSVQGNLTKLPRKTAVRTGDTAIF
WVELAVPEGPVRWLRNQEEMVAGGRVAITAEGTCHTLTI FQCTLEDMGEVAFVSGGCRTTTQFCVSA PRRPPL
YPPADPVVKAKTESVTLWSAPPHGDRPVTIDGYVLEKRLGAYAWSRCHEAGWLATTEFTITGVAEEGDFQ
FRVSAINHFGQGPYLEFPGTMHLVPLAVKTPKAVEAVEGGEVTFVSDLTVASSGEWFLDGEALKASSIYVI
RCDRTRHMLTIREV PARLHGAQLKFVANGIETS IQMVVRAALGLPSSKLPAAAAREVLAQLHEEAQLLAE LSD
QAAA VTLWKGDRLESLGPKYEMQVSAGRRALLVRDVAQDDAGLYECVSRGSR TAYQLLVQEPKLVFAKQQAH
SEVKAEAGNSATLSCEVTAQTEVTFWFKDGKLLSSSSKVRMEASGCSRRLLVVQQAGKADAGEYSCEAGGKLS
FRLDVAEPKLVFAKQQAHSEVKAEAGASATLSCEVAQAQTEVTFWFKDGKLLSSSSKVRMEASGCSRRLLVVQQ
AGKADAGEYSCEAGGQKLSFRLDVAEPMVFAKEQQARSEVKAEAGASATLSCEVAQAQTEVTFWFKDGKLLSS
SSKVRMEASGCSRRLLVVQQAGKADAGEYSCEAGGQKLSFRLDVTEPKLVFAKEQQARSEVKAEVGN SATLSCE
VAQAQTEVTFWFKDGKLLSSSSKVRMEASGCSRRLLVVQQAGKADAGEYSCEAGGQKLSFRLDVAEPKLVFAKEQ
QARSEVKAEAGNSATLSCEVAQAQTEVTFWFKDGKLLSSSSKVRMEASGCSRRLLVVQQAGKADAGEYSCEAGGQ
KLSFHLDVTEPKPVFAKEQQAHSEVKAEAGASATLSCEVAQAQTEVTFWFKDGKLLSSSSKVRMEASGCSRRLV
VQQAGKADAGEYSCEAEGQKLSFRLDVAEPKLVFAKEQQARSEVKAEAGASATLSCEVAQAQTEVTFWFKDGK
LSSSSKVRVEASGCSRRLLVVQQAGKADAGEYSCEAGGQKLSFRLDVAEPKLVFAKEQQANSEVKAEAGASATL
SCEVAQAQTEVTFWFKDGKLLSSSSKVRVEASGCSRRLLVVQQAGKADAGEYSCEAGGQKLSFRLDVAEPKLAFA
KEQQAHSEVKAEAGASATLSCEVAQAQTEVTFWFKDGKLLSSSSKVRVEASGCSRRLLVVQQAGKADAGEYSCEA
GGQKLSFRLDVAEPKLAFAKEQQAHSEVKAEAGASATLSCEVAQAQTEVTFWFKDGKLLSSSSKVRVEASGCSR
RLVVQQAGKADAGEYSCEAGGQKLSFRLDVAEPKLAFAKEQQAHSEVKAEAGASATLSCEVAQAQTEVTFWFKD
GKLLSSSSKVRVEASGCSRRLLVVQQAGKADAGEYSCEAGGQKLFRLDVAEPKLMFAKEQQAHSEVKAEAGAS
ATLSCEVAQAQTEVTFWFKDGKLLSSSSKVRVEASGCSRRLLVVQQAGKADAGEYSCEAGGQKLSFRLDVAEPK
LFAKEQQAHSEVKAEAGASATLSCEVAQAQTEVTFWFKDGKLLSSSSKVRVEASGCSRRLLVVQQVQKADAGEYS
CEARGQKLSFRLDVADTRLMFAKEQQARTEVKAEAGNSATLSCEVAQAQTEVTFWFKDGKLLSSSSKVRVEASG
CSRRLLVVQQAGKADAGEYSCEAGGQKLSFRLDVAEASISQI PERPSRREPLVVKEHETIILTATIAAPSVAAVT
WLKDGVEIRRSKRHEATSLGDTHLTVRGAQVLDASAIYSICRVGKEGQDFPVQVEEVAAKFSKPLEPVEGELGG
TVMLVCELSPEQAEVWRCGNTQLRPGKRFQMTSEGPRRTLTVSLGREDDAEEYVCEASRDDRTSARLTVKVP
VVKFTSGLSAMVAEEGQEA TFQCVVSPSDAGVTWYKDGMLQPSSEKFMVVEGASRSLTILGLTLEDAGQVTV
EAEGASSAALRVREAPVLFKKKLEPQTV EERTSVTLEVELTRPWPEVKWTRNAAVLTPSENVEIRAEGARHC
LVLSRVGFADRGFFGCETPDDKTQAKLNVEMRQVRLVRLGQVEVEAKEQGTASMDVELSHAEVEGSWTRDGLRL



QPGPKCHLAVQGPVHILTLALSALQPQDSGLVAFRAEGVHTSARLIVTELPVSFTRVLQDVVATQKEKVTLECEL
SRPVDVRWLKDGVELRAGKAI GIVAQGTCSRSLVIYRCETGDQGVYVCDALDAQTSASLRVQGRTYTLIFRRVL
AEDAGEVVKFVAENAESRAHLRVKELPVTLLRPLRDKIAMEKHRGVLECVSRASAQVRWFKGGVLEQSGPKYE
VVDGLYRKLVLINDVQPEDEDTYTCDAGNVKTSAQFFVVEEQSITIVRGLKDMTVMPEPAPAWFECETSIPSVRP
PKWLLGKTVLQAGGNVLEQDGTVHRLTLHKTCSTMTGPVHFTIGKSRSSAQLVVSIPVVLTRPLEPKAGRE
LQSVVLSCDFRPAPKAVQWYKDDTPLSPSEKFKMALEGQMAELRILRLTPADAGVYRCQAGSAQSSAEVTVEA
REVTVIQPLQDAEAMEEGRVCFSCELSHKDEDI EWSLNGTPLYNDSFHEISHEGCLHTLVLKSVRQADTGTVC
ATSPKVSVSARLVVKGKPVVFLKALDDVSAEERGTTLTQCEVSDPEARVVWRKDGVELGPSDKYDFLHKAGAR
GLTVHDLSHEDAGLYTCVGSKETQSKVSVHDLHVGITKRLKTVEVLEGE SCSFECVLSHESPSDPAVWTVGG
KTVGGSGHFHAVRQGRKYTLTVKDAALSDAGEVVSVLGLTSKASLIIRERPVDITKPLEDQRTTLGEDVMLS
CELSRAGTSVRWLKDGKAIKRSQKYDLLSEGTRAVLVVRKASLKDSGEYTCETEASKSTAKLCVEEKANRFTTE
ELADLQVEEKGRAVFTCKTEHPASVVTWRKGLLELRASGKHVPSQEGTLKLTINALERTDSDTYTCDIGQAR
TQARLLVHGQKVRVIEDLEDTAVQEGSSAKFCCRIAPADYGPVHWFLDKTPHLSNELNEITVQPGGYHVLTLR
QLALKDSGTVYFEAGDQRTSAAALRVTEKPSIFSRPLTDVTVTEGEDTLVCETTTVDSSVRWTKDGKTLRPSA
RCQLSHEGCAQLLITATTPQDGGRYKCEIGGASSSSIVRVHALPVRFRESLKDVEVPEGKAATLRCVLSVA
APVEWRHGDDVLKSSNKYSLRQEGAVLELVIDLQPDQSGQYSCSFGDQTTSATLTVKTSQAQVFGKLRNKEA
TEGTVTLRCELTKKEAPVEWKKGTETLRNGDKYSLKQDGAVCELQICSLLVADAGEYSCVCGQEKTSATLTVK
ALLVHFVRRLRKEATEEGDTTTLQCELSKAAPVEWRKGTETLRDGDYSLKQDGAVCELQIRSLTADAGEYL
CTCGQEKTSATLTVRALPAKFKDSLKNEEATEGTTATLSCELSKAAPVTWKKGPKTLQSGDKYVLRQDGAVCG
LQIHGLTMADAGEYSCVCGQEKTSATLTVRGLPAKFIEDLRSQEATEGATAILRCLELSKAAPVEWRKGSSETLK
DGDRYTLRQDGAVCELQIRGLAVDGTYSLSLPTKFTTEGLRNEEATEGTMATLRCQMSKAAPVEWRKGSSETLR
DGDRYSLRQDGAMCELQIRGLTIEDSGEYTCVCGQEKTSATLSVKALPSRFIEDLRSQEATEGTMATLRCQMS
KTAPVEWKKGSETLRDGGYSLRQDGPVCELQICDLAVEDAGEYSCVCGQEKTSATLSIKALPPRFIEDLRSQ
EATEGTMATLRCQMSKAAPVEWRKGSSETLGDGGYSLRQNGAVCELQIHDLAVEDTGEYSCVCGQEKTSATLN
VKALPPRFIEDLRSQEATEGTMATLRCQMSKAAPVEWRKGSSETLRDGGYSLRQDGAVCELQIHDLVEDAGAM
YSCVCGQEKTSATLTVDALPPKFTTEGLKKEEATEGTMVTLRQMSKEATVEWRKGAKTLSDDGGYSLRQDGAM
CELQICGLAVEDAGEYSCVCGQEKTSATLSVKALPPRFIEDLRSQEATEGTMATLRCQMSKAAPVEWRKGSSET
LRDGDYSLRQDGAVCELQIRDLAVEDAGEYLCVCGQEKTSATLSVKALPPRFIEDLRSQEATEGTMATLRCQ
MSKAAPVEWRKGSSETLRDGDYSLRQDGAMCELQICDLAVEDTGDYSCVCGQEKTSATLSVKALPPRFIEDLR
SQEAREGTVATLRCMSKAAPVEWRKGSSETLKDGDYSLRQEGNLCELQIRDLAVEDTEEYSCVCGQEKTSAT
LSVKALPAKFIEDLRSQEAPESSTVTLRCKLSKKASVVWKKGSETLRNGARYSLRQDGAVCELEIRDLTVEDT
GEYSCTCGQERTSATLSIMAPQVVFQQPLQNLQAEEGSMASLRCEL SVPNAAMVWSKGGLELQGDTRREARQQ
GCVAELLLRDLRREDAGEYSCCTCGSQTTSATLMVTAAPVRFLRELQAQDVDEGATARLRCELSREAVSVEWRK
GSLQLFPAKAYQMVQEGTTAELLVHGVEQEDAGEYTC DAGHTQS IARLSVRAPKPKFKTDLQSTEQEAGGTAR
LCCQLSEAEPTPVQWLKEGVELHVGSKYEMRRQAVCELLIHGLEAKDTGEYACL VGGQKTLASLRVKEPEV
TIVRGLVDMEVQADEDEFTCKVQAGATDVQWHLQGLPLQSNNEVTEVAVLADGCTHVLQKGVTL EDAGTVS
FHVGGLSSSAQLTVRVPEVTVLEPLKDVQLSEGQDAHFRCRLSRASGQEARWALGGVPLQCNEMNDITVEQGT
LYLLTLHKVTLEDAGTITLQVGS SQAQLKVTAKNTVLRGLENVDALEGGEALFECQLSQPEVAHWTLLDD
EPVHTSEKVEVVYFENGLRHLLLLKNLKPQDSCRVTFLAGDVVTS AFLTVRGWRLEVL EPPHDASVKAGMQVR
FTCILSEAVPVGEATWYINGAAIQPDDTDWTVTTDGS HHALTLSNAQPQHAGEVTF AARDAVASARLSVLALP
DPEDAEVVGRSDHSVTL SWVAPMSDGGGGLCGYRVMKEASTGQWQLCHDLVPGPECVVDLVP GKTYRFRV
AAVGPAGAGEPVHLPQMVKIAPAPAPAPAPAPAPAPETRQAVVGEDICLELEVAADGGEVVWHKGTERRIQPGG
HFEVLSRGRQMLVIKGFRTEDQGEYRCGPIQGLPSSGAATFNVVMTSGSGDEVPAQPSLPPEAAQEGDLHLL
WEALARKRRMSREPTLDSISELPEEDSRVQHLRQEAETAPDLSEGYSTADELARTGEADLSHTSSDDES RAG
TPSLVTYLKKAGGPGISPLASKHEAQVTT SVKPQKQEPVVP TCPPPGDL SAADLMDPSLDKAAVKIQAAFKG
YKVRKEMKQQEGPVFSRTFGDTEAQVGDVLRLECVLATKTD MRACWLKDGIELTDGRHYHIDQLKDGTCSLLV
TGLAPTDSGRYTCQVSTKSGRVSHSACVVVSGTESEAESSSGGELDDAFRRAARRLHRLFRTKSPAELSEEEL
FLSADEGPGEPEEPADWQTYREDENFVCIRFESLAEARQAVTCFRNMFATMGIGVEISLGEQGPRGVEMRIGK
VAPTVPAPVPLAKTPGLQTS DAAPVFLTELQNDVQDGYPMSFDCVVTGQPVPSVRWFKDGKLEEDDHYMIN
EDQQGGHQLIITAVVPADMGVYRCLAENSMGVSTKAELRVELTSTDYDTAADATETSSYFSAQGYLSSRQE
GTESDEGQLPQVLEELKDLQVAPGTRLAKFQLKVKGYPAPKLYWFKDGQPLTTS DHIRMTDKKTLHTLEIVSV
TREDSGQYAAYSNAVGAAYSSARLLVRGPSEPEEK PASDVHERLVP PPRILEKFTPKKV KRGSSITFSVKVEG
HPAPSVHWLKEEA EKFLWIGPDTPGYTMASSSKQFADLVLDVGRQHOGTYTCIATNPAGALCSASLHISGL
AKEEEQERVKREALISSFLQGTSQAVSAQMSESAAGHSLVQSGKESLVAEEAHSHLSLAEVGT EEFQLKLT SQ
ITEMVSAKISQAKLQVPGGDSDEETKTPSASPRHGRSRPSSSVQESSSESEDGDSRGEIFDIYVVTADYLP LG
AEQDAIILREGQYVEVLDSAHPLRWLVRTKPTKSSPSRQGWVSPAYLDKRLKLSPEWGPTEAPEFPGEAVSED
EYRTRLSSVIQELLSSEQAFVGE LQFLESHHMKHLERSPRVPAAVASQKTVIFRNVQDISHFHSSFLKELQGC
GTDDDVAMCFIKNQEA FEKYLEFLVGRVQAESVVVSTPVQEFYKKYAEETLSAKDPTQPPPPPLQHYLEQ PVE

RVQKYQALLKELIRNKARNRQNCALLEQAYAVVSALPQRAENKLVSLMENYPGTLEALGEPIRQGHFIVWEG  
 APGARMPWKGHNHRVFLFRNYLVICKPRRDSRTDTFSYVFRNMMKLSSIDLNDQVEGDDRAFEVWHEREDSVR  
 KYLLQARTVVIKNSWVKEICGIQORLAQPVWRPPEFEELADCTAELGETVKKLACRVGTGPKPIVSWYKDGKP  
 VEVDPHHILIEDPDGSCSTLILDNLTGIDSGQYMCFAASAAGNASTLGKILVQVPPRFVNVKVRATPFVEGEDAQ  
 ITCTVEGAPYPQIRWYKDGTLTLLAPGNRYRMLNEPRSGVLVLIQAASKEDLGHYECELVNRLGSTRGGGELYM  
 QSPALRARDQHHREQIVAAVEVTEQETKVPKKTVIEETITITTVKSPRGRRQSPGKSPSRSPSRRSASPRRPG  
 LLAPERLYPPGTSPSRRLEVEQGRKAPVPALYVTEAEVHAPASQSQPKWLEVEETIEVRVKKTGSRGASPVRE  
 MTSRGEGLFTLPGGI PGRDPNANNNSNKS SVYQEARTWGPVAVHVGEFFIFQVDSVGNVDWVAASPEPEQVRA  
 SQKEENTERQEGCSDGDENTFLMEEPQDTSLQGRDPKILTHNGRVLTLADLEDYVPQEGEFTFGCGDSTPSTP  
 DEPPCEVSVLQREISEPTVGQPVLLNVGRPPGTGATPSFFRPGSQVHSPESVSFLLREAWSGPVSAAPWTSSF  
 HTHVQSSVDGSHGSFKTEVSTQTVSFGAVGETVTLHIDPDGGEAPGPSQG\*  
 >rs26955766\_ENSMUSP00000020732\_c.3961:T>C\_p.L1321P  
 ENSMUST00000020732.13|Obscn-201|ENSMUSG00000061462|-|chr11:g.59003611:A>G  
 MDHSFSGAPRFLTRPKAFVSVGKDATLSCQIVGNPTPHVSWEKDRQPVEAGARFRLAQDGDVYRLTILDLAL  
 GDSGQYVCRARNAIGEAFAAVGLRVDSEGTCAEQAPHFLLRPTSIRVREGADATFRCRVGSGSPQPAVSWSKDG  
 RRLGPPDAPHVRVEEHGESSALRIR SARPRDGGTYEVRAENPLGSASAAAAALVVDSDAEVAGPPGTSTATLLA  
 HLQORREAMRAEGIPSPPGAGTRTCTVTEGKHARLSCFVTGEPKPEVTVWKKDGLVLEVRREKESATFQCEVAQATEAAWFK  
 VLKILFCKQSDRGLYTCTASNLVGQTYSSVLVVREPTVPFKKRLQDLEVRREKESATFQCEVAQATEAAWFK  
 EETRLWASAKYDIEEEGETERRLTVRNVSADDDAVYICETTEGSRRTVAELSVQGNLTKLPRKTAVRTGDTAIF  
 WVAVLAVPEGPVWRWRNQEEMVAGGRVAITAEGTCHTLTI FQCTLEDMGEVAFVSGGCRTTTQFCVSAPRRPPL  
 YPPADPVVKAKTESSVTLWSAPPHGDRPVTIDGYVLEKRKLGAYAWSRCHEAGWLATTEFTITGVAAEGDFQ  
 FRVSAINHFGQGPYLEFPGTMHLVPLAVKTPKAVEAVEGGEVTFVSDTLTVASSGEWFLDGEALKASSIYVI  
 RCDRTRHMLTIREV PARLHGAQLKFVANGIETS IQMVVRAALGLPSKLPAAAAREVLQALHHEAQLLAE LSD  
 QAAA VTWLKDGRELSLGPKEYMQVSAGRRALLVRDVAQDDAGLYECVSRGSRRTAYQLLVQDITDGYRDWGPAG  
 PQKHMCKCAGAKIARYLGS SCYRFLQYDKGVWHLEAALDTRQKGTSSCSLHEKPKLVFAKQQAHSEVKA  
 AGNSATLSCEVTAQTEVTWFKDGKLLSSSSKVRMEASGCSRRLVVQQAGKADAGEYSCEAGGQKLSFRLDVA  
 EPKLVFAKQSAHSEVKAEGASATLSCEVAQAQTEVTWFKDGKLLSSSSKVRMEASGCSRRLVVQQAGKADA  
 GEYSCEAGGQKLSFRLDVAEPKLVFAKEQQARSEVKAEGASATLSCEVAQAQTEVTWFKDGKLLSSSSKVRM  
 EASGCSRRLVVQQAGKADAGEYSCEAGGQKLSFRLDVTEPKLVFAKEQQARSEVKAEGVNSATLSCEVAQAQ  
 EVTWFKDGKLLSSSSKVRMEASGCSRRLVVQQAGKADAGEYSCEAGGQKLSFRLDVAEPKLVFAKEQQARSEV  
 KAEAGNSATLSCEVAQAQTEVTWFKDGKLLSSSSKVRMEASGCSRRLVVQQAGKADAGEYSCEAGGQKLSFHL  
 DVTEPKLVFAKEQQAHSEVKAEGASATLSCEVAQAQTEVTWFKDGKLLSSSSKVRMEASGCSRRLVVQQAGK  
 ADAGEYSCEAEGQKLSFRLDVAEPKLVFAKEQQARSEVKAEGASATLSCEVAQAQTEVTWFKDGKLLSSSSK  
 VRVEASGCSRRLVVQQAGKADAGEYSCEAGGQKLSFRLDVAEPKLVFAKEQQANSEVKAEGASATLSCEVAQ  
 AQTEVTWFKDGKLLSSSSKVRVEASGCSRRLVVQQAGKADAGEYSCEAGGQKLSFRLDVAEPKLVFAKEQQAH  
 SEVKAEGASATLSCEVAQAQTEVTWFKDGKLLSSSSKVRVEASGCSRRLVVQQAGKADAGEYSCEAGGQKLS  
 FRLDVAEPKLVFAKEQQAHSEVKAEGASATLSCEVAQAQTEVTWFKDGKLLSSSSKVRVEASGCSRRLVVQQ  
 AGKADAGEYSCEAGGQKLSFRLDVAEPKLVFAKEQQAHSEVKAEGASATLSCEVAQAQTEVTWFKDGKLLSS  
 SSKVRVEASGCSRRLVVQQAGKADAGEYSCEAGGQKLFRLDVAEPKLVFAKEQQAHSEVKAEGASATLSCE  
 VAQAQTEVTWFKDGKLLSSSSKVRVEASGCSRRLVVQQAGKADAGEYSCEAGGQKLSFRLDVAEPKLVFAKEQ  
 QAHSEVKAEGASATLSCEVAQAQTEVTWFKDGKLLSSSSKVRVEASGCSRRLVVQQVQKADAGEYSCEARGQ  
 KLSFRLDVADTRLMFAKEQQARTEVKAEGNSATLSCEVAQAQTEVTWFKDGKLLSSSSKVRVEASGCSRRLV  
 VQQAGKADAGEYSCEAGGQKLSFRLDVAEAE SQI PERPSRREPLVVKEHETIILTATIAAPSVAAVTWLKDG  
 VEIIRRSKRHEATSLGDTHTLTVRGAQVLD SAIYSCRVGKEGQDFPVQVEEVAAKFSKPLEPVEGELGCTVMLVC  
 ELSPEQAEVWVRGNTQLRPGKRFQMTSEGPRRTLTVSGLREDDAEYVCE SRDDRTSARLTVKVPVVKFTS  
 GLSAMVAEEGQEA TFQCVVSPSDAGVTWYKDGMLQPSKFKVMVESGASRSLTILGLTLEDAGQVTEAEGAS  
 SSAALRVREAPVLFKKKLEPQTEVEERTSVTLEVELTRPWPEVKWTRNAAVLTPSENVEIRAEGARHCLVLRV  
 GFADRGFVGCETPDDKTQAKLNVEMRQVRLVVRGLQVEVEAKEQGTASMDVELSHAEEVGSWTRDGLRQLQPGPKC  
 HLAVQGPVHILTL SALQPQDSGLVAFRAEGVHTSARLIVTELPVSFTRVLQDVVATQKEKVTLECELSRPVDV  
 RWLKDGVLELRAGKAIGIVAQGTCSLVIYRCETGDQGVYVCDALDAQTSASLRVQGRTYTLIFRRLAEDAGE  
 VKFVAENAESRAHLRVKELPVTLLRPLRDKIAMEKHRGVLECCQVSRASAQVRWFKGGVELQSGPKYEVVSDGL  
 YRKLVIN DVQPEDEDTYTC DAGNVKTS AQFFVEEQSITIVRGLKDMTVMPEPAPAWFECETSIPSVRPPKWL  
 LKTVLQAGGNVGLQDQDVT HRLTLHKTCSTMTGPVHFTIGKSRSSAQLVVS DI PVVLT RPLEPKAGRELQSVV  
 LSCDFRPAPKAVQWYKDDTPLSPSEKFKMALEGGMAELRILRLTPADAGVYRCQAGSAQSSAEVTVAREVTVI  
 QPLQDAEAMEEGRVCFSELSHKDEDEI EWSLNGTPLYNDSFHEI SHEGCLHTLVLSVRQADTGTVCATSPKV  
 SVSARLVVKGKPVVFLKALDDVSAEERGLTLTQCEVSDPEARVVWRKDGVELGSPDKYDFLHKAGARGLTVHD  
 LSHEDAGLYTCQVGSKETQSKVSVHDLHVGITKRLKTVEVLEGE SCFECVLSHESPSDPAVWTVGGKTVGGS  
 GHFHAVRQGRKYTLTVKDAALSDAGEVVSVLGLT SKASLIIRERPV DITKPLEDQRTTLGEDVMLSCELSRA

GTSVRWLKDGKAIRKSQKYDLLSEGTRAVLVVRKASLKDSGEYTCETEASKSTAKLCVEEKANRFTEELADLQ  
VEEKGRAVFTCKTEHPASVVTWRKGLLELRASGKHVPSQEGLTLKLTINALERTDSDTYTCDIGQARTQARLL  
VHGQKVRVIEDLEDTAVQEGSSAKFCCRIAPADYGPVHWFLLDKTPLHSNELNEITVQPGGYHVLTLRQLALKD  
SGTVYFEAGDQRTSAAALRVTEKPSIFSRPLTDVTVTEGEDTLVCETTTTVDSSVRWTKDGKTLRPSARCQLSH  
EGCQAQLLITATTPQDGGRYKCEIGGASSSSIVRVHALPVRFRESLKDVEVPEGKAATLRCVLSVAAPVEWR  
HGDDVLKSSNKYSRQEGAVLELVIRDLQPQDSGQYSCSFGDQTTSATLTVKTSQAQFVGLRKNKEATEGTTV  
TLRCELTKEAPVEWKKGTETLRNGDKYSLKQDGAVCELQICSLLVADAGEYSCVCGQEKTSATLTVKALLVHF  
VRRLSKEATEGDTTTLQCELSKAAPVEWRKGTETLRDGRYSKQDGAVCELQIRSLTIADAGEYLCTCGQE  
KTSATLTVRALPAKFKDSLKNEEATEGTTATLSCELSKAAPVTWKKGPKTLQSGDKYVLRQDGA VCGLQIHGL  
TMADAGEYSCVCGQEKTSATLTVRGLPAKFIEDLRSQEATEGATAILRCELSKAAPVEWRKGSSETLKDGRYT  
LRQDGA VCELQIRGLAVVDGTGYSLSLPTKFTTEGLRNEEATEGTMATLRCQMSKAAPVEWRKGSSETLRDGRYS  
LRQDGA MCELQIRGLTIEDSGEYTCVCGQEKTSATLSVKALPSRFIEDLRSQEATEGTMATLRCQMSKTAPVE  
WKKGSETLRDGGRYSLRQDGPVCELQICDLAVEDAGEYSCVCGQEKTSATLSIKALPPRFIEDLRSQEATEGT  
MATLRCQMSKAAPVEWRKGSSETLGDGGRYSLRQNGAVCELQIHDLAVEDTGEYSCVCGQEKTSATLNVKALPP  
RFIEDLRSQEATEGTMATLRCQMSKAAPVEWRKGSSETLRDGGRYSLRQDGA VCELQIHDLVDVEDAGQYSCVCG  
QEKTSAVLTVDALPPKFTTEGLKKEEATEGTMVTLRCQMSKEATVEWRKGAKTLSDDGGRYSLRQDGA MCELQIC  
GLAVEDAGEYSCVCGQEKTSATLSVKALPPRFIEDLRSQEATEGTMATLRCQMSKAAPVEWRKGSSETLRDGR  
YSLRQDGA VCELQIRDLAVEDAGEYLCVCGQEKTSATLSVKALPPRFIEDLRSQEATEGTMATLRCQMSKAAP  
VEWRKGSSETLRDGRYSRQDGA MCELQICDLAVEDTGDYSCVCGQEKTSATLSVKALPPRFIEDLRSQEARE  
GTVATLRCRMSKAAPVEWRKGSSETLKDGRYSRQEGNLCELQIRDLAVEDTEEYSCVCGQEKTSATLSVKAL  
PAKFIEDLRSQEAPESSTVTLRCKLSKASVWKKGSETLRNGARYSLRQDGA VCELEIRDLTVEDTGEYSCT  
CGQERTSATLSIMAPQVVFQQPLQNLQAEEGSMASLRCELSVNAAMVWSKGGLELQGDTRREARQQCVAEL  
LLRDLRREDAGEYSCTCGSQTTATLMVTAAPVRFRELQAQDVDEGATARLRCELSREAVSVEWRKGS LQLF  
PCAKYQMVQEGTTAELLVHGVEQEDAGEYTC DAGHTQSIARLSVRAPKPKFKTDLQSTEQEAGGTARLCCQLS  
EAEFGTPVQWLKEGTEFLHVGSKYEMRRQGA VCELLIHGLEAKDTGEYACL VGGQKTLASLRVKEPEVTIVRGL  
VDMEVQADEVEFTCKVLSQAGATDVQWHLQGLPLQSNVEVAVLADGCTHVLQKGVTLQKGTIVSFHVGG  
SSAQLTVRVPEVTVLEPLKDVQLSEGQDAHFRCRLSRASGQEARWALGGVPLQCNE MNDITVEQGTLYLLTL  
HKVTL EDAGTITLQVGS CSSEAQLKV TAKNTVLRGLENVDALEGG EALFECQLSQPEVA AHTWLLDDEPVHTS  
EKVEVVYFENGLRHLLLLLKNLKPQDSCRVTFLAGDVVTS AFLTVRGRLEVLLEPPHDASVKAGMQVRFTCILS  
EAVPVGEATWYINGAAIQPDDTDWTVTTDGS HHALTLSNAQPQHAGEVTF AARDAVASARLSVLALPDPPEDA  
E VVGRSDHSVTL SWVAPMSDGGGGLCGYR VEMKEASTGQWQLCHDLVPGPECVDDDLVPGKTYRFRVA AVGPA  
GAGEPVHLPQMVKIAPAPAPAPAPAPAPAPETRAVVGEDICLELEVAADGGEVVWHKGTERRIQPGGHFEVLS  
RGQRQMLVIKGFRTEDQGEYRCGPIQGLPSSGAATFNVVMTSGSGDEVPAQPSLPPEAAQEGDLHLLWEALAR  
KRRMSREPTLDSISELPEEDSRVQHLRQEA EETAPDLSEGYSTADELARTGEADLSHTSSDDES RAGT PSLVT  
Y LK KAGPGI S PLASKHEAQV TTSVKPQKQPEVPVTPC PPGDLSAADLMDPSLDKAAVKIQAAF KYKVRKE  
MKQQEGPVFSRTFGDTEAQVGLRLECVLATKTD MRACWLKDGIELTDGRHYHIDQLKDGCTSLLV TGLAPT  
DSGRYTCQVSTKSGRVSHSACVVVSGTESEAESSGGELDDAFRRAARRLHRLFRTKSPAELSEELFLSADE  
GPGEPEEPADWQTYRE DENFVCIRFESLAEARQAVTCFRNMFATMGIGVEISLGEQGP RGVEMRIGKVAPT V T  
PAVPLAKTPGLQTS DAAPVFLTELQNDVQDGYPMSFDCVVTGQPVPSVRWFKDGKLEEDDH YMINEDQGG  
HQLIITAVVPADMGVYRCLAENSMGVSSTKAELRVELTSTDYDTAADATETSSYFSAQGYLSSREQEGTESDE  
GQLPQVLEELKDLQVAPGTR LAKFQLKVKGYPAPKLYWFKDGP LTTSDHIRMTDKKTLHTLEIVSVTREDSG  
QYAAYSNAVGAAYSSARLLVRGPSEPEEK PASDVHERLVPPRI LEKFTPKKVKRGSSITFSVKVEGHPAPSV  
HWLKEEA EKGV LWIGPDTPGYTMASSSKQHSLVLLDVGRQH QGTYTCIATNPAGQALCSASLHISGLAKEEQ  
ERVKEALISSFLQGTSQAVSAQMSE SAGFADLVGQSKGESLVAEEAHSHLSLAEVGT EEFLOKLTSSQITEMVS  
AKISQAKLQVPGGDSDEETKTPSASPRHGRSRPSSSVQESSSESE DGSERGEIFDIYVVTADYLP LGAEQDAI  
ILREGQYVEVLDSAHPLRWLVRTKPTKSSPSRQGWVSPAYLDRKRLKLSPEWGPTEAPEFPGEAVSEDEYRTRL  
SSVIQELLSSEQAFV GELQFLESHHMKHLERSPRVPAAVASQKTVIFRNVQDISHFHSSFLKELQCGCTDDDV  
AMCFIKNQEA FEKYLEFLVGRVQAESVVVSTPVQEFYKKYAEETLSAKDPTQPPPPPLQHYLEQPVERVQKYQ  
ALLKELIRNKARNRQNCALLEQAYAVVSALPQRAENKLVSLMENYPGTLEALGEP I RQGHFIVWEGAPGARM  
PWKGHNHRVFLFRNYLVICKPRRDSRTDTFSYVFRNMMKLSIDLNDQVEGDDRAFEVWHEREDSVRKYLLQA  
RTVI IKNSWVKEICGIQQLAQPVWRPPEFEEELADCTAELGETVKLACRVTGT PKPIVSWYKDGKPV EVDPH  
HILIEDPDGSCTLILDNLTGIDSGYMCFAASAAGNASTLGKILVQVPPRFVNVKVRATPFVEGEDAQITCTVE  
GAPYPQIRWYKDGTL LLAGNRYRMLNEPRSGVLV LVIQAASKEDLGHYECELVNLRLGSTRGGGEL YMQSPALR  
ARDQHHREQIVA AVEERRPSP\*  
>rs26955766\_ENSMUSP00000151217\_c.3685:T>C\_p.L1229P  
ENSMUST00000219084.3|Obscn-207|ENSMUSG00000061462|-|chr11:g.59003611:A>G  
MDHSFSGAPRFLTRPKAFVSVGKDATLSCQIVGNPTPHVSWEKDRQPV EAGARFRLAQDGDVYRLTILDLAL  
GDSGQYVCRARNAIGEAF AAVGLRVDSEGTCAEQAPHLLRPTSIRVREGADATFRCRVGGSPQPAVSWSKDG

RRLLGPPDAPHVRVEEHGESSALRIRRSARPRDGGTYEVRAENPLGSASAAAAALVVDSDAEVAGPPGTSTATLLA
HLQORREAMRAEGIPPSPPGAGTRTCTVTEGKHARLSCFVTGEPKPEVWKKDGLVTEGRRHVVEDEQENF
VLKILFCKQSDRGLYTCTASNLVGGQTYSSVLVVREPTVPFKKRLQDLEVREKESATFQCEVAQPATEAAWFK
EETRLWASAKYDIEEEGETERRLTVRNVSADDDAVYICETTEGSRVVAELSVQGNLTKRKLPRKTAVRTGDTAIF
WVELAVPEGPVRWLRNQEEMVAGGRVAITAEGTCHTLTI FQCTLEDMGEVAFVSGGCRTTTFQFCVSAPRRPPL
YPPADPVVKAKTESSVTLWSWAPPHGDRPVTIDGYVLEKRKLGAYAWSRCHEAGWLATTEFTITGVAAEEDGFQ
FRVSAINHFGQGPYLEFPGTMHLVPLAVKTPKAVEAVEGGEVTFVSDLTVASSGEWFLDGEALKASSIYVI
RCDRTRHMLTIREVPARLHGAQLKVFVANGIETS IQMVVRAALGLPSSKLPAAAAAREVLAQLHHEEAQLLAELSD
QAAAVTWLKDGRELSLGPKEYMQVSAGRRALLVRDVAQDDAGLYECVSRGSRRTAYQLLVQDITDGYRDWGPAG
PQKHMCKCAGAKIARYLGSscyRFLQYDKGVWHLEAALDTRQGKGTSSCSLHEKPKLVFAKQQAHSEVKA
AGNSATLSCEVTQAQTEVTWFKDGKLLSSSSKVRMEASGCSRRLVVQQAGKADAGEYSCEAGGQKLSFRLDVA
EPKLVFAKQQAHSEVKAEGASATLSCEVAQAQTEVTWFKDGKLLSSSSKVRMEASGCSRRLVVQQAGKADA
GEYSCEAGGQKLSFRLDVAEPKMFVFAKEQQARSEVKAEGASATLSCEVAQAQTEVTWFKDGKLLSSSSKVRM
EASGCSRRLVVQQAGKADAGEYSCEAGGQKLSFRLDVTEPKLVFAKEQQARSEVKAEGNSATLSCEVAQAQ
EVTWFKDGKLLSSSSKVRMEASGCSRRLVVQQAGKADAGEYSCEAGGQKLSFHLDVTEPKPVFAKEQQAHSEV
KAEAGASATLSCEVAQAQTEVTWFKDGKLLSSSSKVRMEASGCSRRLVVQQAGKADAGEYSCEAGGQKLSFR
DVAEPKLVFAKEQQARSEVKAEGASATLSCEVAQAQTEVTWFKDGKLLSSSSKVRMEASGCSRRLVVQQAG
ADAGEYSCEAGGQKLSFRLDVAEPKLVFAKEQQANSEVKAEGASATLSCEVAQAQTEVTWFKDGKLLSSSSK
VRVEASGCSRRLVVQQAGKADAGEYSCEAGGQKLSFRLDVAEPKLVFAKEQQAHSEVKAEGASATLSCEVAQ
AQTEVTWFKDGKLLSSSSKVRVEASGCSRRLVVQQAGKADAGEYSCEAGGQKLSFRLDVAEPKLVFAKEQQAH
SEVKAEGASATLSCEVAQAQTEVTWFKDGKLLSSSSKVRVEASGCSRRLVVQQVKGADAGEYSCEARGQKLS
FRLDVAEAEESQIPERPSRREPLVVKHEHETIILTATIAAPSVAAVTWLKDGEIRRSKRHEATSLGDTHTLTVR
GAQVLD SAIYSCRVGKEGQDFPVQVEEVAAKFSKPLEPVEGELGGTVMLVCELSPEQAEVVRWCNTQLRPGK
RFQMTSEGPRRTLTVSGLREDDAEYVCESRDDRTSARLTVKVRVVKFTSGLSAMVAEEGQEAFTQCVVSPS
DAGVTWYKDGMLQLPSEKFMVVEGASRSLTILGLTLEDAGQVTEAEGASSAALRVREAPVLFKFKLEPQT
VEERTSVTLEQLETRPWEVVKWTRNAAVLTPSENVEIRAEGARHCLVLRVSVGFADRGFCETPDDKTQAKLN
VEMRQVRLVRLGQVEEAKQGTASMDVELSHAEEVSGSWTRDGLRLQPGPKCHLAVRQGPVHILTL SALQPD
LVAFRAEGVHTSARLIVTELPVSVFTRVLQDVVATQKEKVTLECELSRPVDVRWLKDGVELRAGKAI GIVAQGT
CRSLVIYRCETGDQGVYVCDALDAQTSASLRVQGRYTLIFRRVLAEDAGEVKFVAENAESRAHLRVKELPVT
LLRPLRDKIAMEKHRGVLECCQVSRASAQVRWFKGGVELQSGPKYEVVSDGLYRKLVINDDVQPEDEDTYTC
DAGNVKTSAQFFVEEQSITIVRGLKDMTVMEPAPAWFECETSIPSVRPPKWLKGKTVLQAGGNVLEQDGT
VHRLTLHKTCTMTGVPVHFTIGKSRSSAQLVVSDIPVVLTRPLEPKAGRELQSVVLSCDFRPAPKAVQWYK
DDTPLSPSEKFKMALEGQMAELRILRLTPADAGVYRCQAGSAQSSAEVTVAEAREVTVIQPLQDAEAMEE
GRVCFSCELSHKDEDIEWSLNGTPLYNDSFHEISHEGCLHTLVLKSVRQADTGTVCATSPKVSVSARLV
VKGPVVFLLKALDDVSAEERGTTLTQCEVSDPEARVVWRKDGVELGSPDKYDFLHKAGARGLTVHDL
SHEDAGLYTCQVGSKETQSKVSVHDLHVGITKRLKTVELEGECSFECVLSHESPSDPVAVWTVGGKTVGG
SGHFHAVRQGRKYTLTVKDAALS DAGEVVFVSVLGLTSKASLIIRERPVDITKPLEDQRTTLGED
VMLSCELSRAGTSVRWLKDGKAIKRSQKYDLLSEGTRAVLVVRKASLKDSGEYTCETEASKSTAKLC
VEEKANRFTTEELADLQVEEKGRAVFTCKTEHPASVVTWRKGLLELRASGKHVPSQEGTLKLT
INALERTSDTYTCDIGQARTQARLLVHGQKVRVIEDLEDTAVQEGSSAKFCCRIPADYGPVHWF
LTKPLHSNELNEITVQPGYHVLTLRQLALKDSGTVYFEAGDQRTSALRVTEKPSIFSRPLTDV
TVTEGEDTLVCETTTTVDSSVRWTKDGKTLRPSARCQLSHEGCQAQLLITATTPQDGGRYKC
EIGGASSSSIVRVHALPVRFRESLKDVEVPEGKAATLRCVLSVVAAPVEWRHGDDVLKSSNKYSLR
QEGAVLELVIRDLPQDQSGQYSCSFGDQTTSATLTVKTSQAQFVGKLRNKEATEGTTVTLRCEL
TKEAPVEWKKGTETLRNGDKYSLKQDGAVCELQICSLLVADAGEYSCVCGQEKTSATLTVKALLV
HFVRRRLRSKEATEGDTTTLQCELSKAAPVEWRKGTETLRDGDYSLKQDGAVCELQIRSLTIADAGE
YLCTCGQEKTSATLTVRGLPAKFIEDLRSQEATEGATAILRCELSKAAPVEWRKGSSETLKDGDY
TLRQDGAVCELQIRGLAVVDTGTYSLPTKFTGLRNEEATEGTMATLRCQMSKAAPVEWRKGS
SETLRDGDYSLRQDGAMCELQIRGLTIEDSGEYTCVCGQEKTSATLSVKALPPRFIEDLRSQEATE
GTMATLRCQMSKAAPVEWRKGSSETLGDGGYSLRQNGAVCELQIHDLAVEDTGEYSCVCGQEK
TSATLNVKALPPKFTTEGLKKEEATEGTMVTLRCQMSKEATVEWRKGAKTSLDGGYSLRQDGAM
CELQICGLAVEDAGEYSCVCGQEKTSATLSVKALPPRFIEDLRSQEATEGTMATLRCQMSKAAP
VEWRKGSSETLRDGDYSLRQDGAVCELQIRDLAVEDAGEYLCVCGQEKTSATLSVKALPPRFIE
DLRSQEATEGTMATLRCQMSKAAPVEWRKGSKTLRQDGAMCELQICDLAVEDTGDYSCVCGQEK
TSATLSVKAPQVVFQQLQNLQAEEGSMARLRELSVPNAAMVWSKGGLELQGDTRREARQQGCVAEL
LLRDLRREDAGEYSCTCGSQTTSATLMVTAAPVFLRLEQAQDVDEGATARLRCLELSREAVSWR
KGSLLQFPCKAYQMVQEGTTAELLVHGVEQE DAGEYTC DAGHTQSIARLSVRAPKPKFKTDLQ
STEQEAGGTARLCCQLSEAEPTPVQWLKEGVELHVGSKYEMRRQGAVCELLIHGLEAKDTGEYAC
LVGGQKTLASLRVKEPEVTIVRGLVDMEVQADEDEVEFTCKVVSQAGATDVQWHLQGLPLQSNE
VTEVAVLADGCTHVQLKGVTLLEDAGTVSFHVGGSSSAQLTVRVPEVTVLEPLKDVQLSEGQDA
HFRCLSRASGQEARWALGGVPLQCNE MNDI TVEQGTLYLLTLHKVTLEDAGTITLQVGS
SSEAQL

KVTAKNTVLRGLENVDALLEGGEALFECQLSQPEVAHAHTWLLDDEPVHTSEKVEVVYFENGLRHLLELKNLKPQ
DSCRVTFLAGDVVTS AFLTVRGWRLEVLEPPHDASVKAGMQVRFTCILSEAVPVGEATWYINGAAIQPDDTDW
TVTTDGSHHALTLSNAQPQHAGEVTF AARDAVASARLSVLALPDPPEDAE VVGRSDHSVTLWSVAPMSDGGGG
LCGYRVEMKEASTGQWQLCHDLVPGPECVVDDLVP GKTYRFRVA AVGPAGAGEPVHLPQMVKIAPAPAPAPAP
APAPETRQAVVGEDICLELEVAADGGEV VWHKGTERRIQGGHFVLSRGRQMLVIKGFRTEDQGEYRCGP IQ
GLPSSGAATFNVMVMTSGSGDEVP AQPSLPPEAAQEGDLHLLEALARKRRMSREPTLDSISELPEEDSRVQHL
RQEAETAPDLSEGYSTADELARTGEADLSHTSSDDESRAGTPSLVTYLK KAGGPGISPLASKHEAQVTTSVK
PQKQQEPVVPPTCPPPGDL SAADLMDPSLDKA AVKIQA AFKGYKVRKEMKQQEGPVFSRTFGDTEAQVGDVLR
ECVLATKTD MRACWLKDGIELTDGRHYHIDQLKDGTC SLVTLGLAPTDSGRYTCQVSTKSGRVSHSACVVVSG
TESEAESSSGGELDDAFRRARRLHRLFRTKSPAELSEEEFLSADEGPGPEEPADWQTYREDEFVCIRFE
SLAEARQAVTCFRNMFMATMGI GVEISLGEQGPGRVEMRIGK VAPTVP PAVPLAKTPGLQTS DAAPVFLTELQN
QDVQDGYPMSFDCVVTGQPVPSVRWFKDGK LLEEDDH YMINEDQQGGHQLIITAVVPADMGVYRCLAENSMGV
SSTKAELRVELTSTDYDTA ADATETSSYFSAQGYLSSREQEGTESDEGQLPQVLEELKDLQVAPGTRLAKFQL
KVKGYPAPKLYWFKDGQPLTTS DHIRMTDKKTLHTLEIVSVTREDSGQYAA YISNAVGAA YSSARLLV RGPSE
PEEKPASDVHERLVPPRI LEKFTPKKVKRGSSITFSVKVEGHPAPSVH WLKEEA EKGV LWIGPDTPGYTM ASS
SKQHSVLVLDVGRQHOGTYTCIATNPAGQALCSASLHISGLAKEEEQERVKEALISSFLOGTSQAVSAQMSES
AGFADLVGQSKGESLVAEEAHSHLSLAEVGT EEF LQKLT SQITEMVSAKISQAKLQVPGGDSDEETKTPSASP
RHGRSRPSSSVQESSSEEDGSRGEIFDIYVV TADYLP LGAEQDAIILREGQYVEVLD SAHPLRVLV RTKPT
KSSPSRQGWVSPAYLDKRLKLSPEWGPTEAPEFPGEAVSEDEYRTRLSSVIQELLSSEQAFV GELQFLESHHM
KHLERSPRVPAAVASQKT VIFRNVQDISHFHSSFLKELQGC GTDDDVAMCFIKNQEA FEKYLEFLVGRVQAES
VVVSTPVQEFYKKYA EETLSAKDPTQPPPP LQHYLEQPV ERVQKYQALLKELIRNKARNRQNCALLEQAYAV
VSALPQRAENKLVSLMENYPGTLEALGEP I RQGHFIVWEGAPGARMPWKGNRHRVFLFRNYLVIC PRRDSR
TDTFSYVFRNMMKLSIDLNDQVEGD DRAFEVWHERE DSVRKYLLQARTVI IKNSWVKEICGIQQRLAQPVWR
PPEFEEELADCTAELGETVKLACRV TGT PKPIVSWYKDGK PVEVDPHHILIEDPDG SCTLIDLNLTGIDSGQY
MCFAASAAGNASTLGKILVQVPPRFVNKVRATPFVEGEDAQITCTVEGAPYPQIRWYKDG TLLAPGNRYRMLN
EPRISGVLVLVIQAASKEDLGHYEC ELVNLRGSTRGGEL YMLQSPALRARDQHHREQIVAAVEVTEQETKVPKK
TVII EETITTVVKS PRGRRQSPGKSPSRSPRRSARPRRPGLLAPERLYPPGTSPSRRLVEVQGRKAPVALY
VTEAEVHAPASQS QPKWLEVEETIEVRVKKTGSRGASPVREMTSRGEGILFTLPGGIPGRDPNANN SNKSVY
QEARTWGP AVVHVGE PFI FQVDSVGNVDWVAASPEPEQVRASQKEENTERQEGCSDG DENTFLMEEPQD TDSL
QGRDPKILTHNGRVLTLADLE DYVPQEGE TFGCGDSTPSTPDEPPCEVSVLQREI SEPTV GQPVLLNVGRPPG
TGATPSFFRPGSQVHSPESVSFL LREAWSGPVSAAPWTSSFH THVQSSVDGSHG SFKTEVSTQTVSFGAVGET
VTLHIDPDGGEAPGPSQG\*

>rs50800163\_ENSMUSP00000158795\_c.3008:G>A\_p.M1003I
ENSMUST00000238536.2|Obscn-210|ENSMUSP00000061462|-|chr11:g.59019004:c>T
MDHSFSGARFLTRPKAFVSVGKDATLSCQIVGNPTPHVSWEKDRQPV EAGARFRLAQDGDVYRLTILDLAL
GDSGQYVCRARNAIGEAFAAVGLRVDSEGTC AEQAPHLLRPTSIRVREGADATFR CRVGGSPQPAVSWSKDG
RRLGPPDAPHVRVEEHGESSALRIR SARPRDGGTYEVRAENPLGSASAAAALVVDSDAEVAGPPGTSTATLLA
HLQORREAMRAEGIPPSPPGAGTRTCTVTEGKHARLSCFVTGEPK PETVWKKDGQLVTEGRRHVVYEDEQENF
VLKILFCKQSDRGLYTCTASNLV GQTYSSV LVVVREPTVPFKKRLQDLEVREKESATFQCEVAQ PATEAAWFK
EETRLWASAKYDIEEGETERRLTVRNV SADD DAVYICETTEGSR T VAE LSVQGNLTRKLPKRTAVRTGDTAIF
WVELAVPEGPVRWLRNQEEMVAGGRVAITAEGTCHTLTI FQCTLEDMGEVAFVSGGCRTTTQFCVSAPRRPPL
YPPADPVVKAKTESVTL SWSAPPHGDRPVTIDGYVLEKRKLGAYAWSRCHEAGWLATTEFTITGVAAEEDGFQ
FRVSAINHFGQGPYLEFPGT MHLVPM LAVKTP LKAVEAVEGGEVTF SVDLTVASSGEWFLDGEALKASSIYVI
RCDRTRHMLTIREV PARLHGAQLKFVANGIETS IQMVVRAALGLPSSKLPAAAAREVLAQLH EEAQLLAE LSD
QAAAVTWLKDGRELSLGP KYEMQVSAGRRALLVRDVAQDDAGLYECVSRGSR TAYQLLVQDITDGYR DWGPAG
PQKHMCKCAGAKIARYLGSSCYRFLQYDKGVWHLEAALDTRQGKGTSSCSLHEKPKLVFAKQQAHSEVKA E
AGNSATLSCEVTQAQTEVTWFKDGK KLSSSSKVRMEASGCSRRLV VQQAGKADAGEYSCEAGGQKLSFR LDVA
EPKLVFAKQQAHSEVKA EAGASATLSCEVAQAQTEVTWFKDGK KLSSSSKVRIEASGCSRRLV VQQAGKADA
GEYSCEAGGQKLSFR LDVAEPKMVFAKEQQARSEVKA EAGASATLSCEVAQAQTEVTWFKDGK KLSSSSKVRM
EASGCSRRLV VQQAGKADAGEYSCEAGGQKLSFR LDVTEPKLVFAKEQQARSEVKA EVGNSATLSCEVAQAQT
EVTWFKDGK KLSSSSKVRMEASGCSRRLV VQQAGKADAGEYSCEAGGQKLSFR LDVAEPKLVFAKEQQARSEV
KAEAGNSATLSCEVAQAQTEVTWFKDGK KLSSSSKVRMEASGCSRRLV VQQAGKADAGEYSCEAGGQKLSFHL
DVTEPKLVFAKEQQAHSEVKA EAGASATLSCEVAQAQTEVTWFKDGK KLSSSSKVRMEASGCSRRLV VQQAGK
ADAGEYSCEAGGQKLSFR LDVAEPKLVFAKEQQARSEVKA EAGASATLSCEVAQAQTEVTWFKDGK KLSSSSK
VRVEASGCSRRLV VQQAGKADAGEYSCEAGGQKLSFR LDVAEPKLVFAKEQQANSEVKA EAGASATLSCEVAQ
AQTEVTWFKDGK KLSSSSKVRVEASGCSRRLV VQQAGKADAGEYSCEAGGQKLSFR LDVAEPKLVFAKEQQAH
SEVKA EAGASATLSCEVAQAQTEVTWFKDGK KLSSSSKVRVEASGCSRRLV VQQAGKADAGEYSCEAGGQKLS
FR LDVAEPKLVFAKEQQAHSEVKA EAGASATLSCEVAQAQTEVTWFKDGK KLSSSSKVRVEASGCSRRLV VQQ





GPGEPEEPADWQTYREDENFVCIRFESLAEARQAVTCFRNMFATMGIGVEISLGEQGPGRVEMRIKGVAPTVT  
PAVPLAKTPGLQTSDAAPVFLTELQNDVQDGYPMSFDCVVTGQPVPSVRWFKDGKLEEDDHYMINEDQGGG  
HQLIITAVVPADMGVYRCLAENSMGVSSTKAELRVELTSTDYDTAADATETSSYFSAQGYLSSREQEGTESDE  
GQLPQVLEELKDLQVAPGTRLAKFQLKVKGYPAKLYWFKDQGPLTTSDHIRMTDKKTLHTLEIVSVTREDSDG  
QYAAYSNAVGAAYSSARLLVRGPSEPEEKPPASDVHERLVPPRILEKFTPKKVKRGSSITFSVKEGHPAPSV  
HWLKEEAKEKGLVWIGPDTPGYTMASSSKQHSVLVLDVGRQHOGTYTCIATNPAGQALCSASLHISGLAKEEEQ  
ERVKEALISSFLOQTSQAVSAQMSSEAGFADLVGQSKGESLVAEEAHSHLSLAEVGTTEFLQKLTSTITEMVS  
AKISQAKLQVPGGDSDEETKTPSASPRHGRSRPSSSVQESSSESEDGDSRGEIFDIYVVVTADYPLGAEQDAI  
LLREGQYVEVLDLSDAHLRVLVTKPTKSSPSRQGWVSPAYLDKRLKLSPEWGPTEAPEFPGAEVSEDEYRTRL  
SSVIQELLSSEQAFVQELQFLESHHMKHLERSPRVPAAVASQKTVIFRNVQDISHFHSSFLKELQCGCTDDDV  
AMCFIKNQEAFAKEYLEFLVGRVQAESVVVSTPVQEFYKKAEEETLSAKDPTQPPPPPLQHYLEQPVVERVQKYQ  
ALLKELIRNKARNRQNCALLEQAYAVVSALPQRAENKLVSLMENYPGTLEALGEPIRQGHFIVWEGAPGARM  
PWKGHNHRVFLFRNYLVICKPRRDSRTDTFSYVFRNMMKLSSIDLNDQVEGDDRAFEVWHEREDSVRKYLLQA  
RTVIKNSWVKEICGIQQLAQVWRPPEFEEELADCTAELGETVKLACRVTGTPKPIVSWYKDGKPVVEVDPH  
HILIEDPDGSLTILDLNLTGIDSGQYMCFAASAAGNASTLGKILVQVPPRFVNVKVRATPFVEGEDAQITCTVE  
GAPYPQIRWYKDGTELLAPGNRYRMLNEPRSGVLVLIQAASKEDLGHYECELVNRLGSTRGGGELYMQSPALR  
ARDQHHREQIVAAVEDTVEGSAHSAQDQAAASVLWRLLGSEALGPSPGDLPNTRQSEPPAFEEAASQIP  
GAASGTPEVSPGTHKGLEQETSSSGSQGWTVPIRVEGTAWPGAGTGQLLLDVHSQVIMETTQRTYVVCQAPDT  
GVTRAPSMQVTIEDVQVQVGDMAQFDAVIEGHPPPIVTVWYKGSTQLTSSARLSQRQDGTYSVLVTDVAPHDA  
GVYTCVANNAGGQVLCKAELLVHGGDKLDAENQVYRRKLHSFYDVQEEIGRGVFGFVKRVQHKGNKMFCAAKF  
IPLRSKTRAQAYQERDILATLGHPLVTGLLDQFETRKTLLILILELCSSEELLDRLFKKGVVTEAEVKVYIQQL  
VEGLHYLHSHGILHLDIKPPNILMVHPAREDIKICDFGFAQKITPSEPQYSKYGSPEFVSPEIEQNFVSEGS  
DIWAMGVI SYLSLTCSPPFAGESDRATLLNVLEGRVSWSSPTAAHLSSEDAKDFIKATLQRTPRARPSTSQCLA  
HPWFLKSMPEAAHFINTKQLKFLARSRWQRSLMSYKSILVMRSIPELLQGPPDPSPLGVARHLRGEASGAS  
SSSSSSDNELAPFARAKSLPPSPVTHSPLLHPRGFLRPSALPEETEASMTADAAVPASPQASAGPPASPGCV  
PRHSVSSFLFYQQAGEAERGNKTSKAKRHPARRRHLLKGGYIARALPGLREPLMEYSLLEEEAAREEQASLM  
TKTPSFETALRLPSSSVREVPGRSHSLDNPPVTGPGSEACKEQLLFPSTGLTHETTAKDRGHEGFLQESV  
PFPMSGDSRPGKQEGSSQDSCRKPASSCHSELGSGSQEGCQPPSSQSLGSLPPQSLKELSTSCGPLFSEQ  
PQAAPFPTQVSPLLGSEKEPQDGSLSSEGPVVPSSSPGSASQVDASLDTEGLSEAGDTCDFTPPPQRPQEQAT  
TRKFSLESRGGYAGVAGYGTFAFGGDAGGMLGQGPLWARMAWAVSOSSEEQDEAATESPQPLESIGPIAEASG  
VPLRTSPSLTPWEEVEQVSLVQIRDLSDGDAEAADTISLDISEVDPAYLNLSLDYDIKYLPEFEMI FRRVPKPI  
EQPESPGSETEAGQGLADFLLEAAWPWPGEGLGLRAGLEITEEPEEPGDLEALLGEEAVGRKRKWSPSRGLFQF  
PGRCLSGEEPVELGLRQVRKASMAHISRI LKGRPEGPEREGPPRKKAGLASFRLSGLKGRDQELSDEAVVLGQ  
SVTLACQVLAQPTAQATWSKDGVLLESSGHLIISSTLKNFQLLTILVVKEEDLGTYTCCVSNPLGTAVTTGVL  
RKAERPSSSRPEVGGELYKDAVLLVWKPVESECGPVTVIVQCCIEGGSWTTLASDISDCCYLTKLSRGGMYIF  
RTACVSKAGMPYSEQVLLGGPNHLASEEESRGRPAQLLPSTKTFAFQMQIRRRGRFVVRQCREKASGR  
ALAAKIVPYQPEDKTAVLREYEALKRHLHPLHAQLHAAYLSPRHLVLIILELCSGPELLPSLAERESYSESDVK  
DYLWQMLSATQYLHAQHILHLDLRSENMMVTEYNLLKVIDLGNASLDQEKVPAPENFKDYLETMAPELLEGQ  
GAVPQTDIWAIGVTAIFIMLSGEYPESESETRDLQKGLRGLIRLSRCYAGLSGGAVAFLOSSLCAQPWGRPCA  
STCLQCGWLTEEGPTGSRPTPVTFTVRLRAFVREKRRALLYKKNLAQVR\*

>rs50800163\_ENSMUSP00000038264\_c.2732:G>A\_p.M911I  
ENSMUST00000047441.14|Obscn-202|ENSMUSG00000061462|-|chr11:g.59019004:C>T  
MDHSFSGAPRFLTRPKAFVSVGKDATLSCQIVGNPTPHVSWEKDRQPVVEAGARFRLAQDGDVYRLTILDLAL  
GDSGQYVCRARNAIGEAFAAVGLRVDSEGTCAEQAPHFLLRPTSIRVREGADATFRCRVGGSPQPAVSWSKDG  
RRLGPPDAPHVRVEEHGESSALRIRSARPRDGGTYEVRAENPLGSASAAAALVVDSDAEVAGPPGTSTATLLA  
HLQQRRREAMRAEGIPSPPGAGTRTCTVTEGKHARLSCFVTGEPKPEVWKKDQQLVTEGRRHVVEDEQENF  
VLKILFCKQSDRGLYTCTASNLVGQTYSSVLVVVREPTVPFKKRLQDLEVREKESATFQCEVAQPATEAAWFK  
EETRLWASAKYDIEEGTERRLTVRNVSADDDAVYICETTEGSRVVAELSVQGNLTKLPRKTAVRTGDTAIF  
WVELAVPEGPVRWLRNQEEMVAGGRVAITAEGTCHTLTI FQCTLEDMGEVAFVSGGCRTTTQFCVSAAPRRPPL  
YPPADPVVKAKTESVTLWSAPPHGDRPVTIDGYVLEKRKLGAAYAWSRCHEAGWLATTEFTITGVAAEGDFQ  
FRVSAINHFGQGPYLEFPGTMHLVPLAVKTPKAVEAVEGGEVTFVSDLTVASSGEWFLDGEALKASSIYVI  
RCDRTRHMLTIREVPARLHGAQLKVFANGIETSIQMVVRAALGLPSSKLPAAAAREVLAQLHEEAQLLAE LSD  
QAAAVTWLKDGRELSLGPKEYMQVSAGRALLVRDVAQDDAGLYECVSRGSRRTAYQLLVQDITDGYRDWGPAG  
PQKHMCKCAGAKIARYLGSscyRFLQYDKGVVWHLEAALDTRQKGTSSCSLHEKPKLVFAKQQQAHSEVKA  
AGASATLSCEVAQAQTEVTFWKDGKLLSSSSKVRIEASGCSRRLVQVQAGKADAGEYSCEAGGQKLSFRLDVA  
EPKMFVFAKEQQARSEVKAEGASATLSCEVAQAQTEVTFWKDGKLLSSSSKVRMEASGCSRRLVQVQAGKADA  
GEYSCEAGGQKLSFRLDVTEPKLVFAKEQQARSEVKAEGVNSATLSCEVAQAQTEVTFWKDGKLLSSSSKVRM  
EASGCSRRLVQVQAGKADAGEYSCEAGGQKLSFRLDVAEPKLVFAKEQQARSEVKAEGNSATLSCEVAQAQT

EVTWFKDGKLLSSSSKVRMEASGCSRRLLVVQQAGKADAGEYSCEAGGQKLSFHLDVTEPKLVFAKEQQAHSEV
KAEAGASATLSCEVAQAQTEVTWFKDGKLLSSSSKVRMEASGCSRRLLVVQQAGKADAGEYSCEAEGQKLSFRL
DVAEPKLVFAKEQQARSEVKAEAGASATLSCEVAQAQTEVTWFKDGKLLSSSSKVRVEASGCSRRLLVVQQAGK
ADAGEYSCEAGGQKLSFRLDVAEPKLVFAKEQQANSEVKAEAGASATLSCEVAQAQTEVTWFKDGKLLSSSSK
VRVEASGCSRRLLVVQQAGKADAGEYSCEAGGQKLSFRLDVAEPKLAFAKEQQAHSEVKAEAGASATLSCEVAQ
AQTEVTWFKDGKLLSSSSKVRVEASGCSRRLLVVQQAGKADAGEYSCEAGGQKLSFRLDVAEPKLAFAKEQQAH
SEVKAEAGASATLSCEVAQAQTEVTWFKDGKLLSSSSKVRVEASGCSRRLLVVQQAGKADAGEYSCEAGGQKLS
FRLDVAEPKLAFAKEQQAHSEVKAEAGASATLSCEVAQAQTEVTWFKDGKLLSSSSKVRVEASGCSRRLLVVQQ
AGKADAGEYSCEAGGQKLFRLDVAEPKLVFAKEQQAHSEVKAEAGASATLSCEVAQAQTEVTWFKDGKLLSS
SSKVRVEASGCSRRLLVVQQVQKADAGEYSCEARGQKLSFRLDVAEAEESQIPERPSRREPLVVEKHETIILTAT
IAAPSVAAVTWLKDGVEIRRSKRHEATSLGDHTLTVRGAQVLDSAIYSCRVGKEGQDFPVQVEEVAAKFSKP
LEPVEGELGGTVMLVCELSPEQAEVWRCGNTQLRPGKRFQMTSEGPRTTLTVSGLREDDAEYVCESRDDRT
SARLTVKVPVVKFTSGLSAMVAEEGQEQATFQCVVSPSDAGVTWYKDGMLQPSSEKFMVMEVSGASRSLTILGL
TLEDAGQVTVAEAGASSAALRVREAPVLFKKKLEPQTVEERTSVTLEVELTRPWPEVKWTRNAAVLTPSENV
EIRAEGARHCLVLRVSGFADRGGFFGCETPDDKTQAKLNVEMRQVRLVVRGLQEVEAKEQGTASMDVELSHA EVE
GSWTRDGLRQLQPGPKCHLAVQGPVHILTLALQPDQSGLVAFRAEGVHTSARLIVTELPVSVFTRVLQDVVATQ
KEKVTLECELSRPVDVRLKDGVELRAGKAIQVAGQTCRSLVIYRCETGDQGVYVCDALDAQTSASLRVQGR
TYTLIFRRVLAEDAGEVVFVAENAESRAHLRVKLEPVTLLRPLRDKIAMEKHARGVLECCVSRASQAQVRFKGG
VELQSGPKYEVVSDGLYRKLVINQVPEDEDTYTCDAGNVKTSAQFFVEEQSITIVRGLKDMTVMEPAPAWFE
CETSIPSVRPPKWLKGKTVLQAGGNVLEQDGTVHRLTLHKTCSTMTGPVHFTIGKSRSSAQLVVS DIPVVL
RPLEPKAGRELQSVVLSCDFRPAPKAVQWYKDDTPLSPSEKFKMALEGQMAELRILRLTPADAGVYRCQAGSA
QSSAEVTVAREVTVIQPLQDAEAMEEGRVCFSCELSHKDEDIEWSLNGTPLYNDSFHEISHEGLHTLVLSK
VRQADTGTVCATSPKVSVSARLVVKGKPVVFLKALDDVSAEERGTTLQCEVSDPEARVVWRKDGVELGSPDK
YDFLHKAGARGLTVHDLSDHEDAGLYTCQVGSKETQSKVSVHDLHVGITKRLKTVEVLEGESECSFECVLSHESP
SDPAVWTVGGKTVGGSGHFHAVRQGRKYTLTVKDAALSDAGEVVFVSVLGLTSSKASLIRERPVDTKPLEDQR
TTLGEDVMSCELSRAGTSVRWLKDGKAIKRSQKYDLLSEKTRAVLVRKASLKDSEGYTCETEASKSTAKLC
VEEKANRFTTEELADLQVEEKGRAVFTCKTEHPASVVTWRKGLLELRASGKHVPSQEGTLTKLTINALERTDSD
TYTCDIGQARTQARLLVHGQKVRVIEDLEDTAVQEGSSAKFCCRIPADYGPVHWFLDKTPLHSNELNEITVQ
PGGYHVLTLRQLALKDSGTVYFEAGDQRTSAALRVTEKPSIFSRPLTDVTVTEGEDTLTVCETTTTVDSSVRWT
KDGKTLRPSARCQLSHEGCAQLLITATTPQDGGRYKCEIGGASSSSIVRVHALPVRFRESLKDVEVPEGKAA
TLRCVLSVAAPVEWRHGDDVLKSSNKYSLRQEGAVLELVIRDLQPDQSGQYSCSFGDQTTSATLTVKTSQAQ
FVGKLRNKEATEGTTVTLRCELTKAPVEWKKGTETLRNGDKYSLKQDGAVCELQICSLLVADAGEYSCVCGQ
EKTSATLTVKALLVHFVRRRLRSKEATEGDTTTLQCELSKAAPVEWRKGTETLRDGDYSLKQDGAVCELQIRS
LTADAGEYLCTCGQEKTSATLTVRALPAKFKDSLKNEEATEGTTATLSCELSKAAPVTWKKGPKTLQSGDKY
VLRQDGAVCGQLIHLTMADAGEYSCVCGQEKTSATLTVRGLPAKFIEDLRSQEATEGATAILRCELSKAAPV
EWRKGETLKDGDYTLRQDGAVCELQIRGLAVVDGTLYSSLPTKFTGLRNEEATEGTMATLRCQMSKAAPV
EWRKGETLDRDGYSLRQDGAMCELQIRGLTIEDSGEYTCVCGQEKTSATLSVKALPPRFIEDLRSQEATEG
TMATLRCQMSKAAPVEWRKGETLGDGGYSLRQNGAVCELQIHDLAVEDTGEYSCVCGQEKTSATLNVKALP
PRFIEDLRSQEATEGTMATLRCQMSKAAPVEWRKGETLDRGGYSLRQDGAVCELQIHDLDVEDAGQYSCVC
GQEKTSAVLTVDALPPKFTGLKKEEATEGTMVTLRQMSKEATVEWRKGAKTSLDGGYSLRQDGAMCELQI
CGLAVEDAGEYSCVCGQEKTSATLSVKALPPRFIEDLRSQEATEGTMATLRCQMSKAAPVEWRKGSKTLRDG
RYSRQDGAMCELQICDLAVEDTGDYSCVCGQEKTSATLSVKAPQVVFQQLQNLQAEEGSMASLRCELSVFN
AAMVWSKGGLELQGDTRREARQQGCVAEALLRDLRREDAGEYSCTCGSQTTSATLMVTAAPVRFRLQLAQDV
DEGATARLRCELSREAVSVEWRKGSLLQFPKAKYQMVQEGTTAELLVHGVEQEDAGEYTCDAHTQS IARLSV
RAPKPKFKTDLQSTEQAEAGGTARLCCQLSEAPGTPVQWLKEGVELHVGSKYEMRRQGA VCELLIHGLEAKDT
GEYACLVGQKTLASLRVKEPEVTIVRGLVDMEVQADEDEFTCKVQAGATDVQWHLQGLPLQSNVEVAV
LADGCTHVQLKGVTLLEDAGTVSFHVGGLSSSAQLTVRVPEVTVLEPLKDVQLSEGQDAHFRCLRSRSGQEA
RWALGGVPLQCNEMNDITVEQGTLYLLTLHKVTLLEDAGTITLQVGSSESAQLKVTAKNTVLRGLENVDALEG
GEALFECQLSQPEVA AHTWLLDDEPVHTSEKVEVVYFENGLRHLLLLKLNKPKQDSCRVTFLAGDVVTS AFLTV
RALPDPPEDAEVVGRSDHSVTLVWVAPMSDGGGGLCGYRVMKEASTGQWQLCHDLVPGPECVVDDLVP GKTY
RFRVAAVGPAGAGEPVHLPQMVK IAPAPAPAPAPAPAPAPETRQAVVGEDICLELEVAADGGEV VWHKGTERRI
QPGGHFEVLSRGQRQMLVIKGFRTEDQGEYRCGPIQGLPSSGAATFNVMVMTSGSGDEVPAQPSLPPEAAQEGD
LHLLWEALARKRRMSREPTLDSISELPEEDSRVQLHRQEAEETAPDLSEGYSTADELARTGDEADLSHTSSDDE
SRAGTPSLVTYLKKAGGPGISPLASKHEAQVTVSVKPKQEQPEVVPVTPCPPPGDLMSAADLMDPSLDKAAVKIQA
AFKGYKVRKEMQQEGPVFSRTFGDTEAQVGDVLRLECVLATKTDMRACWLKDGIELTDGRHYHIDQLKDGTC
SLLVTVGLAPTDSGRYTCQVSTKSGRVSHSACVVVSGTESEAESSSGGELDDAFRRAARLHRLFRTKSPAELS
EEELFLSADEGPGEPEPADWQTYREDEFVFCIRFESLAEARQAVTCFRNMFMATMGIGVEISLGEQGPGRVEM
RIGKVAPTPTPAVPLAKTPGLQTSDAAPVFLTELQNDQVQDGYPMSFDCVVVTGQPVPSVRWFKDGKLL EEDDH

YMINEDQQGGHQLIITAVVPADMGVYRCLAENSMGVSSTKAEALRVELTSTDYDTAADATETSSYFSAQGYLSS  
 REQEGTESDEGQLPQVLEELKDLQVAPGTRLAKFQKLVKGYAPKLYWFKDQPLTSDHIRMTDKKTLHTLE  
 IVSVTREDSGQYAAIISNAVGAAYSARLLVVRGPEPEEKPASDVHERLVPPRILEKFTPKKVKRGSITFSV  
 KVEGHPAPSVHHLKEEAKEKGVLVIGPDTPGYTMASSSKQHSVLVLDVGRQHOGTYTCIATNPAGQALCSASLH  
 ISGLAKEEEQERVKEALISSFLQGTSAQVSAQMSESAGFADLVGQSKGESLVAAEEAHSHLSLAEVGTEEFLOK  
 LTSQITEMVSAKISQAKLQVPGGDSDEETKTPSASPRHGRSRPSSSVQESSSESEEDGDSRGEIFDIYVVTADY  
 LPLGAEQDAIILREGQYVEVLDSAHPLRWLVRTKPTKSSPSRQGWVSPAYLDKRLKLSPEWGPTEAPEFPGEA  
 VSEDEYRTRLSSVIQELLSSEQAFVGELOFLESHHMKHLERSPRVPAAVASQKTVI FRNVQDISHFHSSFLKE  
 LQCGTDDDDVAMCFIKNQEAFEKYLEFLVGRVQAESVVVSTPVQEFYKKYAEETLSAKDPTQPPPPPLQHYLE  
 QPVERVQKYQALLKELIRNKARNRQNCALLEQAYAVVSALPQRAENKLVSLMENYPGTLEALGEP IRQGHFI  
 VWEGAPGARMPPWKGNHRHVFVFRNYLVICKPRRDSRTDTFSYVFRNMMKLSSIDLNDQVEGDRAFEVWHERE  
 DSVRKYLLQARTVI IKNSWVKEICGIQQRLAQPVWRPPEFEEELADCTAELGETVKLACRVTGTPKPIVSWYK  
 DGKPVVEVDPHHILIEDPDGSC TLI LDNLTGIDSGQYMCFAASAAGNASTLGKILVQVPPRFVNKVRATPFVEG  
 EDAQITCTVEGAPYPQIRWYKDGTL LAPGNRYRMLNEPRSGVLVVIQAASKEDLGHYECELVNRLGSTRGGG  
 ELYMQSPALRARDQHHREQIVAAVEGAPSMQVTIEDVQVQVGDMAQF DAVIEGHPPP I V TWYKGTQLTSSAR  
 LSQRQDGTYSVLVTDVAPHDAGVYTCVANNAGGQVLCKAELLVHGGDKLDAENQVYRRLKHSFYDVQEEIGR  
 GVFGFVKRVQHKGNMFCAAKFIPLRSKTRAQAYQERDILATLGHPLVTGLLDQFETRKLILILELCSSEEL  
 LDRLFKKGVVTEAEVKVYIQQLVEGLHYLHSHGILHLDIKPPNII LMVHPAREDIKICDFGFAQKITPSEFPQYS  
 KYGSPEFVSPEIIEQNPNVSEGSDIWAMGVISYLSLTCSSPFAGESDRATLLNVLEGRVSWSSPTAAHLSEDA  
 DFIKATLQRTPRARPSTSQC LAHPWFLKSMPAAEAHFINTKQLKFL LARSRWQRSLMSYKSI LVMRSIPELLQ  
 GPPDPSLGVARHLRGEASGASSSSSSDNELAPFARAKSLPSPVTHSPLLHPRGFLRPSASLPEETEASMP  
 TADA AVPAS PQSAGPPASPGCVPRHSV ISSLFYQQAGEGAERGNKTS GAKRHPARRRHLLKGGYIARALPGLR  
 EPLMEYSLLEEEAAREEQASLMTKTPSFETALRLPSSSVREVPGRSHSLDNPPVTTGSPPEACKQLLFPST  
 GLTHETAKDRGHKEGFLQESVFPFPMMSGDSRPGKQEGSSQDSCRGKPASSCHSELGSGSQEGCGPPSSQSLG  
 SLPPQSLKKELTSCGPLFSEQPQAAPFPTQVSPLLGSAKEQPQDGLSEGPVVPVSSSPGSASQVDASLDTEG  
 LSEAGDTCDFTPPPQRPQEQATTRKFSLESRGGYAGVAGYGTFAFGGDAGGMLGQGPLWARMAWAVS QSSEEQ  
 DEAAETSPQPLESLGPIAEASGVPLRTPSLTPWEEVEVYGLTVQIRDLSGDAEAADTISLDISEVDPAYLNL  
 DLYDIKYL PFEFMI FRRVPKPIEQPESPGSETEAGQGLADFL EEAAPWPWGPGLGLRAGLEITEEPEEPGDLEA  
 LLGEAAVGRKRKWSPSRGLFQFPGRCLSGEEPVELGLRQRVKASMAHISRI LKGRPEGPERE GP RRKAGLAS  
 FRLSGLKGRDQELSDEAVVLGQSVTLACQVLAQPTAQATWSKDGVLLESSGHLLISSTLKNFQLLTI L VVKEE  
 DLGTYTCCVSNPLGTAVTTGVLKKAERPSSSPRPEVGEYKDAVLLVWKPVESECGPVTYIYQCCIEGGSWTTL  
 ASDISDCCYL TGKLSRGGMYIFRTACVSKAGMPYSSPSEQVLLGGPNHLASEEESRGRPAQLLPSTKTF AF  
 QMQIRRGFRSVVRQCREKASGRALAAKIVPYQPEDKTA VLREYEALKRLHHPHLAQLHAAYLS PRHLVLI LEL  
 CSGPELLPSLAERESYSESDVKDYLWQMSATQYLHAQHILHLDLRSENMMVTEYNLLKVIDLGNASLDQEK  
 VPAPENFKDYLETMAPELLEGQAVPQTDIWAIGVTA FIMLSGEY P ESSEGETRDLQKGLRKLIRLSRCYAGL  
 SGGAVAFQLSSSLCAQPWGRPCASTCLQCGWLT EEGPTGSRPTPVTFPTVRLRAFVREKRRRALLYKKNH LAQ  
 VR\*

>rs50800163\_ENSMUSP00000049737\_c.2807:G>A\_p.M936I  
 ENSMUST00000052872.15|Obscn-203|ENSMUSG00000061462|-|chr11:g.59019004:C>T  
 MDHSFSGAPRFLTRPKAFVSVGKDATLSCQIVGNPTPHVSWEKDRQFVEAGARFRLAQDGDVYRLTILDLAL  
 GDSGQYVCRARNAIGEAFVAVGLRVDSEGTCAEQAPHLLRPTSIRVREGADATFRCRVGGSPQPAVSWSKDG  
 RRLGPPDAPHVRVEEHGESSALRIR SARPRDGGTYEVRAENPLGSASAAAALVVDSAEVAGPPGTSTATLLA  
 HLQORREAMRAEGIPSPPPGAGTRTCTVTEGKHARLSCFVTGEPKPEVWKKDQGLVTEGRRHVVEDEQENF  
 VLKILFCKQSDRGLTYCTASNLVGQTYSSVLVVVREPTVPFKKRLQDLEVREKESATFQCEVAQPA TEAAWFK  
 EETRLWASAKYDIEEGTERRLTVRNVSADDDAVYICETTEGSRVVAELSVQGNLTKLPRKTAVRTGDTAIF  
 WVELAVPEGPVRWLRNQEEMVAGGRVAITAEGTCHTLTI FQCTLEDMGEVAFVSGGCRTTTQFCVSAPRRPPL  
 YPPADPVVKAKTESVTL SWSAPPHGDRPVTIDGYVLEKRKLGAYAWSRCHEAGWLATTEFTITGVAAEEGDFQ  
 FRVSAINHFGQGPYLEFPGMTMLVPLAVKTPLKAVEAVEGGEVTFVSDLTVASSGEWFLDGEALKASSIYVI  
 RCDRTRHMLTIREV PARLHGAQLK FVANGIETS IQMVVRAALGLPSSKLPAAAAREVLAQLHEEAQLLAELSD  
 QAAAVTWLKDGRELSLGPKEYMQVSAGRRALLVRDVAQDDAGLYECVSRGSR TAYQLLVQEPKLVFAKQQAH  
 SEVKAEAGNSATLSCEVTQAQTEVTFWFKDGKLLSSSSKVRMEASGCSRRLVVQQAGKADAGEYSCEAGGQKLS  
 FRLDVAEPKLVFAKQQAHSEVKAEAGASATLSCEVAQAQTEVTFWFKDGKLLSSSSKVRMEASGCSRRLVVQQ  
 AGKADAGEYSCEAGGQKLSFRLDVAEPKLVFAKEQARSEVKAEAGASATLSCEVAQAQTEVTFWFKDGKLLSS  
 SSKVRMEASGCSRRLVVQQAGKADAGEYSCEAGGQKLSFRLDVTEPKLVFAKEQARSEVKAEVGN SATLSCE  
 VAQAQTEVTFWFKDGKLLSSSSKVRMEASGCSRRLVVQQAGKADAGEYSCEAGGQKLSFRLDVAEPKLVFAKEQ  
 QARSEVKAEAGNSATLSCEVAQAQTEVTFWFKDGKLLSSSSKVRMEASGCSRRLVVQQAGKADAGEYSCEAGGQ  
 KLSFHLDVTEPKLVFAKEQAHSEVKAEAGASATLSCEVAQAQTEVTFWFKDGKLLSSSSKVRMEASGCSRRLV  
 VQQAGKADAGEYSCEAGGQKLSFRLDVAEPKLVFAKEQARSEVKAEAGASATLSCEVAQAQTEVTFWFKDGK

LSSSSKVRVEASGCSRRLVVQQAGKADAGEYSCEAGGQKLSFRLDVAEPKLVFAKEQQANSEVKAEEAGASATL  
SCEVAQAQTEVTWFKDGKKLSSSSKVRVEASGCSRRLVVQQAGKADAGEYSCEAGGQKLSFRLDVAEPKLAFA  
KEQQAHSEVKAEEAGASATLSCEVAQAQTEVTWFKDGKKLSSSSKVRVEASGCSRRLVVQQAGKADAGEYSCEA  
GGQKLSFRLDVAEPKLAFAKEQQAHSEVKAEEAGASATLSCEVAQAQTEVTWFKDGKKLSSSSKVRVEASGCSR  
RLVVQQAGKADAGEYSCEAGGQKLSFRLDVAEPKLAFAKEQQAHSEVKAEEAGASATLSCEVAQAQTEVTWFKD  
GKKLSSSSKVRVEASGCSRRLVVQQAGKADAGEYSCEAGGQKLFRLDVAEPKLMFAKEQQAHSEVKAEEAGAS  
ATLSCEVAQAQTEVTWFKDGKKLSSSSKVRVEASGCSRRLVVQQAGKADAGEYSCEAGGQKLSFRLDVAEPK  
VFAKEQQAHSEVKAEEAGASATLSCEVAQAQTEVTWFKDGKKLSSSSKVRVEASGCSRRLVVQQVKGADAGEYS  
CEARGQKLSFRLDVAEPKLMFAKEQQAHSEVKAEEAGASATLSCEVAQAQTEVTWFKDGKKLSSSSKVRVEASG  
CSRRLVVQQAGKADAGEYSCEAGGQKLSFRLDVAEEAESQIPERPSRREPLVVKEHETIILTATIAAPSVAAVT  
WLKDGVEIRRSKRHEATS LGDTHLTVRGAQVLD SAIYSCRVGKEGQDFPVQVEEVAAKFSKPLEPVEGELGG  
TVMLVCELSPEQAEEVWRCGNTQLRPGKRFQMTSEGPRRTLTVSGLREDDAEYVCESTRDRTSARLTVKVPR  
VVKFTSGLSAMVAEEGQEATFQCVVSPSDAGVTWYKDGMLQLPSEKFMVVESEGASRSLTILGLTLEDAGQVTV  
EAEGASSAALRVREAPVLFKKLEPQTVEERTSVTLEVELTRPWEVKWTRNAAVLTPSENVEIRAEGARHC  
LVLRVGFADRGFFGCETPDDKTQAKLVNEMRQVRLVVRGLQVEEAKQGTASMDVELSHAEVEGSWTRDGLRL  
QPGPKCHLAVQGPVHILTLALSALQPQDSGLVAFRAEGVHTSARLIVTELPVSFTRVLQDVVATQKEKVTLECEL  
SRPVDVWRWLKDGVELRAGKAIGIVAQGTCSRSLVIYRCETGDQGVYVCDALDAQTSASLRVQGRTYTLIFRRVL  
AEDAGEVVFVAENAESRAHLRVKELPVTLLRPLRDKIAMEKHRGVLEECQVSRASAVRWFKGGVLEQSGPKYE  
VVSDGLYRKLVINVDVQPEDEDYTCDAENVKTSAQFFVVEEQSITIVRGLKDMTVMPEPAPAWFECETSIPSVRP  
PKWLLGKTVLQAGGNVLEQDGTVHRLTLHKTCSTMTGPVHFTIGKSRSSAQLVVS D I PVVLRTRPLEPKAGRE  
LQSVVLSCDFRPAPKAVQWYKDDTPLSPSEKFKMALEGQMAELRILRLTPADAGVYRCQAGSAQSSAEVTVEA  
REVTVIQPLQDAEAMEEGRVCFSCELSHKDEDI EWSLNGTPLYNDSFHEISHEGCLHTLVLSVQRADTGTVC  
ATSPKVSVSARLVVKGKPVVFLKALDDVSAEERGTTLTQCEVSDPEARVVWRKDGVELGPSDKYDFLHKAGAR  
GLTVHDLSDHEDAGLYTCQVGSKETQSKVSVHDLHVGITKRLKTVEVLEGESECSFECVLSHESPSDPVAVTVGG  
KTVGGSGHFHAVRQGRKYTLTVKDAALSDAGEVVFVSLGLTSKASLIRERPVDTIKPLEDQRTTLGEDVMLS  
CELSRAGTSVRWLKDGKAIKRSQKYDLLSEGTRAVLVRKASLKDSGEYTCETEASKSTAKLCEVEKANRFT  
ELADLQVEEKGRVFTCKTEHPASVVVTRKGLLELRASGKHVPSQEGTLKLTINALERTSDSTYTCDIGQAR  
TQARLLVHGQKVRVIEDLED TAVQEGSSAKFCCRIAPADYGPVHWF LDKTPLHSNELNEITVQPGGYHVLT  
QLALKDSGTVYFEAGDQRTSAAALRVTEKPSIFSRPLTDVTVTEGEDLTLVCETTTVDSSVRWTKDGKTLRPSA  
RCQLSHEGCAQLLITATTPQDGGRYKCEIGGASSSSIVRVHALPVRFRESLKDVEVPEGKAATLRCVLSVA  
APVEWRHGDDVLKSSNKYSLRQEGAVLELVIRDLQPDGSGQYSCSFGDQTTSATLTVKTSQAQFVGKLRNKEA  
TEGTTVTLRCELTKAEAPVEWKKGTETLRNGDKYSLKQDGAVCELQICSLLVADAGEYSCVCGQEKTSATLTVK  
ALLVHFVRRRLRSKEATEGDTTLQCELSKAAPVEWRKGTETLRDGDYSLKQDGAVCELQIRSLTIADAGEYL  
CTCGQEKTSATLTVRALPAKFKDSLKNEEATEGTTATLSCELSKAAPVTWKKGPKTLQSGDKYVLRQDGAVCG  
LQIHGLTMADAGEYSCVCGQEKTSATLTVRGLPAKFIEDLRSQEATEGATAILRCELSSKAAPVEWRKGS  
DGDYTLRQDGAVCELQIRGLAVVDGTGTYSSSLPTKFTTEGLRNEEATEGTMATLRCQMSKAAPVEWRKGS  
DGDYSLRQDGAMCELQIRGLTIEDSGEYTCVCGQEKTSATLSVKALPPRFIEDLRSQEATEGTMATLRCQMS  
KTAPVEWKKGSETLRDGGYSLRQDGPVCELQICDLAVEDAGEYSCVCGQEKTSATLSIKALPPRFIEDLRSQ  
EATEGTMATLRCQMSKAAPVEWRKGSSETLGDGGYSLRQNGAVCELQIHDLAVEDTGEYSCVCGQEKTSATLN  
VKALPPRFIEDLRSQEATEGTMATLRCQMSKAAPVEWRKGSSETLRDGGYSLRQDGAVCELQIHDLVEDAGQ  
YSCVCGQEKTSAVLTVDALPPKFTTEGLKKEEATEGTMVTLRQMSKEATVEWRKGAKTSLDGGYSLRQDGAM  
CELQICGLAVEDAGEYSCVCGQEKTSATLSVKALPPRFIEDLRSQEATEGTMATLRCQMSKAAPVEWRKGS  
LRDGDYSLRQDGAVCELQIRDLAVEDAGEYLCVCGQEKTSATLSVKALPPRFIEDLRSQEATEGTMATLRCQ  
MSKAAPVEWRKGSKTLRQDGGYSLRQDGAMCELQICDLAVEDTGDYSCVCGQEKTSATLSVKALPPRFIEDL  
SQEAREGTVATLRCRMSKAAPVEWRKGSSETLKDGDYSLRQEGNLCELQIRDLAVEDTGEYSCVCGQEKTSAT  
LSVKALPAKFIEDLRSQEAPESSTVTLRCKLSKASVWKKGSETLRNGARYSLRQDGAVCELEIRDLTVEDT  
GEYSCTCGQERTSATLSIMAPQVVFQPLQNLQAEEGSMASLRCELSVPNAAMVWSKGGLELQGDTRREARQQ  
GCVAELLLRDLRREDAGEYSCTCGSQTTSATLMVTAAPVRFLRELQAQDVDEGATARLRCELSREAVSVEWRK  
GSLQLFPCAKYQMVQEGTTAELLVHGVEQEDAGEYTCDAHTQS IARLSVRAPKPKFKTDLQSTEQEAGGTAR  
LCCQLSEAEPTPVQWLKEGVELHVGSKYEMRRQGAVCELLIHGLEAKDTGEYACLVGQKTLASLRVKEPEV  
TIVRGLVDMEVQADEDEFTCKVSQAGATDVQWHLQGLPLQSNVTEVAVLADGCTHVLQKGVTLLEDAGTVS  
FHVGGSSSAQLTTRVPEVTVLEPLKDVQLSEGQDAHFRCRLSRASGQEARWALGGVPLQCNEMNDITVEQGT  
LYLLTLHKVTELDAGTITLQVGSSEAEQLKVTAKNTVLGRLENVDALEGGALFECQLSQPEVAHATWLLDD  
EPVHTSEKVEVVEYFENGLRHLKLNKLPQDSCRVTFLAGDVVTS AFLTVRGRWLEVLPPHDASVKAGMQVR  
FTCILSEAVPVGEATWYINGAATQPD DTDWTVTTDGS HHALTLSNAQPQHAGEVTF AARDAVASARLSVLALP  
DPPEDAEEVGRSDHSVTLVWVAPMSDGGGGLCGYRVMKEASTGQWQLCHDLVPGPECVDDLVPGKTYRFRV  
AAVGPAGAGEPVHLPQMVKIAPAPAPAPAPAPAPAPETRQAVVGEDICLELEVAADGGEVVWHKGTERTIQPGG  
HFEVLSRGRQMLVIKGFRTEDQGEYRCGPIQGLPSSGAATFNVVMTSGSGDEVPAQPSLPPEAAQEGDLHLL



WEALARKRRMSREPTLDSISELPEEDSRVQHLRQEAEEETAPDLSEGYSTADELARTGEADLSHTSSDDES RAG  
TPSLVTYLKKAGGPGISPLASKHEAQVTTSVKPKQKQEPVVPTCPPPGDLSAADLMDPSLDKAAVKIQAAFKG  
YKVRKEMKQOEGPVFSRTFGDTEAQVGDVLRLECVLATKTDMRACWLKDGIELTDGRHYHIDQLKDGTC SLLV  
TGLAPTDSGRYTCQVSTKSGRVSHSACVVVSGTESEAESSSGGELDDAFRRAARRLHRLFRTKSPAELSEEEL  
FLSADEGPGPEEPADWQTYREDENFVCIRFESLAEARQAVTCFRNMFATMIGVEISLGEQGPVEMRIGK  
VAPTPTPAVPLAKTPGLQTSDAAPVFLTELQNDVQDGYPMSFDCVVTGQPVPSVRWFKDKLLEEDDHYMIN  
EDQQGGHQLIITAVVPADMGVYRCLAENSMGVSSTKAELRVELTSTDYDTAADATETSSYFSAQGYLSSREQE  
GTESDEGQLPQVLEELKDLQVAPGTRLAKFQLKVKVGPAPKLYWFKDGOPLTSSDHIRMTDKKTLHTLEIVSV  
TREDSGQYAAAYISNAVGAAYSARLLVRGPSEPEEKPASDVHERLVPFRILEKFTPKKVKRGSSTFSVKVEG  
HPAPSVHWLKEEAKEGVLWIGPDTPGYTMASSSKQHSLVLLDVGQRHQGTYTTCIATNPAGQALCSASLHISGL  
AKEEEQERVKEALISSFLQGTSQAVSAQMSEASAGFADLVGQSKGESLVAEEAHSHLSLAEVGTTEEFLQKLSQ  
ITEMVSAKISQAKLQVPGGDSDEETKTPSASPRHGRSRPSSSVQESSSESEDGDSRGEIFDIYVVTADYLP L G  
AEQDAIILREGQYVEVLDSAHPLRWLVRTKPTKSSPSRQGWVSPAYLDKRLKLSPEWGPTEAPEFPGEAVSED  
EYRTRLSSVIQELLSSEQAFVGLQFLESHMKHLERSPRVPAAVASQKTVI FRNVQDISHFHSSFLKELQGC  
GTDDDVAMCFIKNQEAFAKEYLEFLVGRVQAESVVVSTPVQEFYKKYAEETLSAKDPTQPPPPPLQHYLEQ PVE  
RVQKYQALLKELIRNKARNRQNCALLEQAYAVVSALPQRAENKLVSLMENYPGTLEALGEPFIRQGHFIVWEG  
APGARMPWKGNHRHVF LFRNYLVICKPRRDSRTDTFSYVFRNMMKLSSIDLNDQVEGDRAFEVWHEREDSVR  
KYLQARTVI IKNSWVKEICGIQQLAQPVWRPPEFEELADCTAELGETVKLACRVTGTPKPIVSWYKDGKP  
VEVDPHHILIEDPDGSC TLI LDNLTGIDSGQYMCFAASAAGNASTLGKILVQVPPRFVNVKVRATPFVEGEDAQ  
ITCTVEGAPYPQIRWYKDGTL L LAPGNRYRMLNEPRSGVLV LVIQAASKEDLGHYECELVNRLGSTRGGGELYM  
QSPALRARDQHHREQIVAAVEVTEQETKVPKKTVI I EETITTVVKS PRGRRQSPGKSPSRSPRRSASPRRPG  
LLAPERLYPPGTSPSRRLVEVEQGRKAPVPALYVTEAEVHAPASQSPKWLEVEETIEVRVKKTGSRGASPVRE  
MTRSGEGILFTLPGGI PGRDPNANNNSNKS SVYQEA RTWGPVAVHVGE PFI FQVDSVGNVDWVAASPEPEQVRA  
SQKEENTERQEGCSDG DENTFLMEEPQD TDSLQGRDPKILTHNGRVLTLADLEDYVPQEGETFGCGDSTPSTP  
DEPPCEVSVLQREI SEPTVGQPVLLNVGRPPGTGATPSFFRPGSQVHSPESVSFLLREAWSGPVSAAPWTSS F  
HTHVQSSVDGSHGSKTEVSTQTVSFGAVGETVTLHIDPDGGEAPGPSQ\*

>rs50800163\_ENSMUSP00000020732\_c.3008:G>A\_p.M1003I  
ENSMUST00000020732.13|Obscn-201|ENSMUSG00000061462|-|chr11:g.59019004:C>T  
MDHSFSGAPRFLTRPKAFVSVGKDATLSCQIVGNPTPHVSWEKDRQPV EAGARFRLAQDGDVYRLTILDLAL  
GDSGQYVCRARNAIGEAFAAVGLRVDSEGTCAEQAPHLLRPTSIRVREGADATFRCRVGGSPQPAVSWSKDG  
RRLGPPDAPHVRVEEHGESSALRIRSARPRDGGTYEVRAENPLGSASAAAALVVDSDAEVAGPPGTSTATLLA  
HLQQRREAMRAEGIPSPPGAGTRTCTVTEGKHARLSCFVTGEPKPKETVWKKDGLVTEGRRHVYDEQENF  
VLKILFCKQSDRGLYTCTASNLVGQTYSSVLVVVREPTVPFKKRLQDLEVREKESATFQCEVAQ PATEAAWFK  
EETRLWASAKYDIEEGTERRLTVRNVSADDDAVYICETTEGSRVAELSVQGNLTKLPRKTAVRTGDTAIF  
WVELAVPEGPVTRWLRNQEEMVAGGRVAITAEGTCHTLTI FQCTLEDMGEVAFVSGGCRTTTFQCVSAPRRPPL  
YPPADPVVKAKTESVTLSSW SAPPHGDRPVTIDGYVLEKRKLGA YAWSRCEAGWLATTEFTITGVAEEDGFQ  
FRVSAINHFGQGPYLEFPGMTMLVPLAVKTPKAVEAVEGGEVTFVSDLTVASSGEWFLDGEALKASSIYVI  
RCDRTRHMLTIREV PARLHGAQLKFVANGIETS IQMVVRAALGLPSSKLPAAAAREVLAQLHEEAQLLAELSD  
QAAA VTWLKDGRELSLGPKEYMQVSAGRRALLVRDVAQDDAGLYECVSRGSR TAYQLLVQDITDGYRDWGPAG  
PQKHMCKCAGAKIARYLGSSCYRFLQYDKGVWHWLEAALDTRQKGTSSCSLHEKPKLVFAKQQAHSEVKA E  
AGNSATLSCEVTQAQTEVTWFKDGKLLSSSSKVRMEASGCSRRLVVQQAGKADAGEYSCEAGGQKLSFRLDVA  
EPKLVFAKQQAHSEVKA EAGASATLSCEVAQAQTEVTWFKDGKLLSSSSKVRMEASGCSRRLVVQQAGKADA  
GEYSCEAGGQKLSFRLDVAEPKLVFAKEQQARSEVKA EAGASATLSCEVAQAQTEVTWFKDGKLLSSSSKVRM  
EASGCSRRLVVQQAGKADAGEYSCEAGGQKLSFRLDVTEPKLVFAKEQQARSEVKA EAGASATLSCEVAQAQ T  
EVTWFKDGKLLSSSSKVRMEASGCSRRLVVQQAGKADAGEYSCEAGGQKLSFRLDVAEPKLVFAKEQQARSEV  
KAEAGNSATLSCEVAQAQTEVTWFKDGKLLSSSSKVRMEASGCSRRLVVQQAGKADAGEYSCEAGGQKLSFHL  
DVTEPKLVFAKEQQAHSEVKA EAGASATLSCEVAQAQTEVTWFKDGKLLSSSSKVRMEASGCSRRLVVQQAGK  
ADAGEYSCEAEGQKLSFRLDVAEPKLVFAKEQQARSEVKA EAGASATLSCEVAQAQTEVTWFKDGKLLSSSSK  
VRVEASGCSRRLVVQQAGKADAGEYSCEAGGQKLSFRLDVAEPKLVFAKEQQANSEVKA EAGASATLSCEVAQ  
AQTEVTWFKDGKLLSSSSKVRVEASGCSRRLVVQQAGKADAGEYSCEAGGQKLSFRLDVAEPKLVFAKEQQAH  
SEVKA EAGASATLSCEVAQAQTEVTWFKDGKLLSSSSKVRVEASGCSRRLVVQQAGKADAGEYSCEAGGQKLS  
FRLDVAEPKLVFAKEQQAHSEVKA EAGASATLSCEVAQAQTEVTWFKDGKLLSSSSKVRVEASGCSRRLVVQQ  
AGKADAGEYSCEAGGQKLSFRLDVAEPKLVFAKEQQAHSEVKA EAGASATLSCEVAQAQTEVTWFKDGKLLSS  
SSKVRVEASGCSRRLVVQQAGKADAGEYSCEAGGQKLFRLDVAEPKLVFAKEQQAHSEVKA EAGASATLSCE  
VAQAQTEVTWFKDGKLLSSSSKVRVEASGCSRRLVVQQAGKADAGEYSCEAGGQKLSFRLDVAEPKLVFAKEQ  
QAHS EVKA EAGASATLSCEVAQAQTEVTWFKDGKLLSSSSKVRVEASGCSRRLVVQQV GKADAGEYSCEARGQ  
KLSFRLDVADTRLMFAKEQQARTEVKA EAGNSATLSCEVAQAQTEVTWFKDGKLLSSSSKVRVEASGCSRRLV  
VQQAGKADAGEYSCEAGGQKLSFRLDVAEAE SQIPERPSRREPLVVKEHETIILTATIAPSVAAVTW LKDG V

EIRRSKRHEATSLGDTHTLTVRGAQVLDLSAIYSCRVGKEGQDFPVQVEEVAAKFSKPLEPVEGELGGTVMLVC
ELSPQEAEVWRCGNTQLRPGKRFQMTSEGPRTTLTVSGLREDDAEYVCESRDDRTSARLTVKVPVVKFTS
GLSAMVAEEGQEATFQCVVSPSDAGVTWYKDGMLQLPSEKFMVMEVSGASRSLTILGLTLEDAGQVTEAEGAS
SSAALRVREAPVLFKKKLEPQTVERTSVTLEVELTRPWPEVKWTRNAAVLTPSENVEIRAEGARHCLVLRV
GFADRGFFGCETPDDKTQAKLNVEMRQVRLVVRGLQEVEAKEQGTASMDVELSHAEEVGSWTRDGLRLQPGPKC
HLAVQGPVHILTLALSALQPDQSGLVAFRAEGVHTSARLIVTELPVSFTRVLQDVVATQKEKVTLECELSRPVDV
RWLKDGVLELRAGKAIGIVAQGTCSRSLVIYRCETGDQGVYVCDALDAQTSASLRVQGRTYTLIFRRVLAEDAGE
VKFVAENAESRAHLRVKELPVTLLRPLRDKIAMEKHRGVLECCQVSRASAQVRWFKGGVELQSGPKYEVVSDGL
YRKLVINLVQPEDEDTYTCDAENVKTSAQFFVEEQSITIVRGLKDMTVMEPAPAWFECETSIPSVRPPKWLIG
KTVLQAGGNVGLQDGTVHRLTLHKTCSTMTGPVHFTIGKSRSSAQLVSDIPVVLTRPLEPKAGRELQSVVL
SCDFRPAPKAVQWYKDDTPLSPSEKFKMALEGQMAELRILRLTPADAGVYRCQAGSAQSSAEVTEAREVTVI
QPLQDAEAMEEGRVCFSCELSHKDEDIEWSLNGTPLYNDSFHEISHEGCLHTLVLSVRQADTGTVCATSPKV
SVSARLVVKGKPVVFLKALDDVSAEERGTTLTQCEVSDPEARVVWRKDGVELGSPDKYDFLHKAGARGLTVHD
LSHEDAGLYTCQVGSKETQSKVSVHDLHVGITKRLKTVLEVLEGECSFECVLSHESPSDPAVWTVGGKTVGGS
GHFHAVRQGRKYTLTVKDAALSDAGEVVSVLGLTSKASLIIRERPVDITKPLEDQRTTLGEDVMLSCELSRA
GTSVRWLKDGKAIRKSQKYDLLSEGTRAVLVVRKASLKDSGEYTCETEASKSTAKLCVEEKANRFTTEELADLQ
VEEKGRAVFTCKTEHPASVVTWRKGLLELRASGKHVPSQEGTLTKLTINALERTSDSPTYTCIDIGQARTQARLL
VHGQKVRVIEDLEDTAVQEGSSAKFCCRIAPADYGPVHWFLDKTPLHSNELNEITVQPGGYHVLTLRQLALKD
SGTVYFEAGDQRTSAALRVTEKPSIFSRPLTDVTVTEGEDTLVCEETTVDSSVRWTKDGKTLRPSARCQLSH
EGCQAQLLITATTPQDGGRYKCEIGGASSSSIVRVHALPVRFRRESLKDVEVPEGKAATLRCVLSVAAPVEWR
HGDDVLKSSNKYSLRQEGAVLELVIRDLQPDQSGQYSCSFGDQTTSATLTVKTSQAQFVGLRNKEATEGTTV
TLRCELTKEAPVEWKKGTETLRNGDKYSLKQDGAVCELQICSLVADAGEYSCVCGQEKTSATLTVKALLVHF
VRRLRSKEATEGDTTTLQCELSKAAPVEWRKGTETLRDGDYSLKQDGAVCELQIRSLTIADAGEYLCTCGQE
KTSATLTVRALPAKFKDSLKNEEATEGTTATLSCELSKAAPVWKKGPKTLQSGDKYVLRQDGAVCGLQIHGL
TMADAGEYSCVCGQEKTSATLTVRGLPAKFIEDLRSQEATEGATAILRCELSKAAPVEWRKGSSETLKDGDYR
LRQDGAVCELQIRGLAVDTGTYSPLTKFTEGLRNEEATEGTMATLRCQMSKAAPVEWRKGSSETLRDGDYR
LRQDGAVCELQIRGLTIEDSGEYTCVCGQEKTSATLSVKALPSRFIEDLRSQEATEGTMATLRCQMSKAPVE
WKKGSETLRDGGYSLRQDGPVCELQICDLAVEDAGEYSCVCGQEKTSATLSIKALPPRFIEDLRSQEATEGT
MATLRCQMSKAAPVEWRKGSSETLGDGGYSLRQNGAVCELQIHDLAVEDTGEYSCVCGQEKTSATLNVKALPP
RFIEDLRSQEATEGTMATLRCQMSKAAPVEWRKGSSETLRDGGYSLRQDGAVCELQIHDLVEDAGQYSCVCG
QEKTSAVLTVDALPPKFTEGLKKEEATEGTMVTLRCQMSKEATVEWRKGAKTLSDGGRYSLRQDGAMCELQIC
GLAVEDAGEYSCVCGQEKTSATLSVKALPPRFIEDLRSQEATEGTMATLRCQMSKAAPVEWRKGSSETLRDGD
YSLRQDGAVCELQIRDLAVEDAGEYLCVCGQEKTSATLSVKALPPRFIEDLRSQEATEGTMATLRCQMSKAAP
VEWRKGSKTLRDGDYSLRQDGAMCELQICDLAVEDTGDYSCVCGQEKTSATLSVKALPPRFIEDLRSQEARE
GTVATLRCRMSKAAPVEWRKGSSETLKDGDYSLRQEGNLCELQIRDLAVEDTEEYSCVCGQEKTSATLSVKAL
PAKFIEDLRSQEAPESSTVTLRCKLSKASVWVWKKGSETLRNGARYSLRQDGAVCELEIRDLTVEYDTEYSCT
CGQERTSATLSIMAPQVVFQQLQNLQAEEGSMASLRCELSVNAAMVWSKGGLELQGDTRREARQQGCVAEL
LLRDLRREDAGEYSCGQTTSATLMVTAAPVRFRLRELQAQDVDEGATARLRCELSREAVSVEWRKGSQQLF
PCAKYQMVQEGTTAELLVHGVEQEDAGEYTCDAHTQSIARLSVRAPKPKFKTDLQSTEQEAAGTARLCCQLS
EAEPGTPVQWLKEGVELHVGSKYEMRRQGAVCCELLIHGLEAKDTGEYACLVGGQKTLASLRVKEPEVTIVRGL
VDMEVQADEDVEFTCKVSQAGATDVQWHLQGLPLQSNVTEVAVLADGCTHVLQLKGVTLLEDAGTVSFHVGGL
SSSAQLTVRVPEVTVLEPLKDVQLSEGQDAHFRCRLSRASGQEARWALGGVPLQCNEMNDITVEQGTLYLLTL
HKVTLEDAGTITLQVGSCSSEALQKVTAKNTVLRGLENVDALEGGELFECQLSQPEVAHAHTWLLDDEPVHTS
EKVEVVYFENGLRHLLLLKLNKLPQDSCRVTFLAGDVVTS AFLTVRGRWRLEVLEPPHDASVKAGMQVRFTCILS
EAVPVGEATWYINGAAIQPDDTDWTVTTDGSHHALTLNAQPPQHAGEVTF AARDAVASARLSVLALPDPEDA
EAVVGRSDHSVTLVSWAPMSDGGGGLCGYRVMKEASTGQWQLCHDLVPGPECVDDLVPGKTYRFRVAAVGPA
GAGEPVHLPQMVKIAPAPAPAPAPAPAPAPETRQAVVGEDICLELEVAADGGEVVWHKGTERRIQPGGHFEVLS
RGQRQMLVIKGFRTEDQGEYRCGPIQGLPSSGAATFNVMVMTSGSGDEVPAQPSLPPEAAQEGDLHLLWEALAR
KRRMSREPTLDSISELPEEDSRVQHLRQEAETAPDLSEGYSTADELARTGEADLSHTSSDDESAGTPSLVT
YLKAGGPGISPLASKHEAQVTTSVKPKQKQEPVPTCP PPGDLAADMPSLDKAAVKIQAAFQYKVRKE
MKQQEGPVFSRTFGDTEAQVGDVLRLECVLATKTDMRACWLKDGIELTDGRHYHIDQLKDGTCSSLVVTGLAPT
DSGRYTCQVSTKSGRVSHSACVVVSGTESEAESSSGGELDDAFRAARRLHRLFRTKSPAELSEELFLSADE
GPGEPEEPADLQTYREDENFVCIRFESLAEARQAVTCFRNMVFMATMIGIVEISLGEQGRGVEMRIGKVAPTVT
PAVPLAKTPGLQTSDAAPVFLTELQNDQVQDGYPMSFDCVMTGQPVPSVRWFKDGKLEEDDHVMINEDDQGG
HQLIITAVVPADMVYRCLAENSMGVSSTKAELRVELTSTDYDTAADATETSSYFSAQGYLSRREQEGTESDE
GQLPQVLEELKDLQVAPGTRLAKFQLKVKGYPAKLYWFKDQGPLTSDHIRMTDKKTLHTLEIVSVTREDSG
QYAAIYISNAVGAAYSSARLLVRGPSEPEEKPASDVHERLVPPRILEKFTPKKVKRGSSTIFSVKVEGHPAPSV
HWLKEEAKEKGLVLIWIPDTPGYTMASSSKQHSVLVLLDVGRQHGTYTIC IATNPAGQALCSASLHISGLAKEEQ



NGDKYSLKQDGAVCELQICSLLVADAGEYSCVCGQEKTSATLTVKALLVHFVRRRLRSKEATEGDTTTLQCELS
KAAPVEWRKGTETLRDGDYSLKQDGAVCELQIRSLTIADAGEYLCTCGQEKTSATLTVRGLPAKFIEDLRSQ
EATEGATAILRCELSKAAPVEWRKGTETLRDGDYSLKQDGAVCELQIRGLAVVDTGTYSLPTKFTGLRNE
EATEGMATLRCQMSKAAPVEWRKGTETLRDGDYSLRQDGMCELQIRGLTIEDSGEYTCVCGQEKTSATLS
VKALPPRFIEDLRSQEATEGMATLRCQMSKAAPVEWRKGTETLRDGGGRYSLRQNGAVCELQIHDLAVEDTGE
YSCVCGQEKTSATLNVKALPPKFTEGLKKEEATEGTMVTLRCQMSKEATVEWRKGAKTSLDGGGRYSLRQDGM
CELQICGLAVEDAGEYSCVCGQEKTSATLSVKALPPRFIEDLRSQEATEGMATLRCQMSKAAPVEWRKGTET
LRDGDYSLRQDGMCELQIRDLAVEDAGEYLCVCGQEKTSATLSVKALPPRFIEDLRSQEATEGMATLRCQ
MSKAAPVEWRKGTETLRDGDYSLRQDGMCELQICDLAVEDTGDYSCVCGQEKTSATLSVKAPQVVFQQPLQ
NLQAEEGSMASLRCELSVPAAMVWSKGGLELQGDTRREARQQGCVAELLLRDLRREDAGEYSCVCGQEKTS
TLMVTAAPVRFRLRELQAQDVDEGATARLRCELSREAVSVEWRKGSILQFPCAKYQMVQEGTTAELLVHGVEQE
DAGEYTC DAGHTQSIARLSVRAPKPKFKTDLQSTEQEAGGTARLCCQLSEAEPTPVQWLKEGVELHVGSKYE
MRRQGAVCELLIHGLEAKDTGEYACLVGQKTLASLRVKEPEVTIVRGLVDMEVQADEDEFTCKVSOAGATD
VQWHLQGLPLQSNVTEVAVLADGCTHVLQKGVTLDEAGTVSFHVGGSSSAQLTVRVPVTVLEPLKDVQL
SEGQDAHFRCRLSRASGQEARWALGGVPLQCNEMNITVEQGTLYLLTLHKVTLDEAGTITLQVGSSESAQL
KVTAKNTVLRGLENVDALLEGGEALFECQLSQPEVAHTWLLDDEPVHTSEKVEVVYFENGLRHLLLLKLNKLPQ
DSCRVTFLAGDVVTS AFLTVRGWRLEVLEPPHDASVKAGMQVRFTCILSEAVPVGEATWYINGAAIQPDDTDW
TVTTDGS HHALTLSNAQPQHAGEVTF AARDAVASARLSV LALPDPPEDAEVVGRSDHSVTL SVWAPMSDGGGG
LCGYR VEMKEASTGQWQLCHDLVPGPECVVDDLVP GKTYRFRVA AVGPAGAGEPVHLPQMVKIAPAPAPAPAP
APAPETRQAVVGEDICLELEVAADGGEV VWHKGTERRIQPGGHFEVLSRGRQMLVIKGFRTEDQGEYRCGPIQ
GLPSSGAATFNVVMTSGSGDEVPAQPSLPPEAAQEGDLHLLWEALARKRRMSREPTLDSISELPEEDSRVQHL
RQEABETAPDLSEGYSTADELARTGEADLSHTSSDDES RAGTPSLVTYLKKAGGPGISPLASKHEAQVTTSVK
PQKQQEPVVPTCPPPGDLSAADLMDPSLDKAAVKIQAAF KGYKVRKEMKQQEGPVFSRTFGDTEAQVGDVLR
ECVLATKTD MRACWLKDGIELTDGRHYHIDQLKDGTC SLLVTGLAPTD SGRYTCQVSTKSGRVSHSACVVVSG
TESEAESSSGGLED DAFRRARRLHRLFRTKSPAELSEELFLSADEGPGPEEPADWQTYREDEFVCIRFE
SLAEARQAVTCFRNMFATMGIGVEISLGEQGRGVMRIGKVA PTVTPAVPLAKT PGLQTS DAAPVFLTELQN
QDVQDGYPMSFDCVVTGQPVPSVRWFKDGKLLLEDHEDDHYMINEDQQGGHQLIITAVVPADMPVRC LAENSMGV
SSTKAELRVELTSTDYDTAADATETSSYFSAQGYLSSREQEGTESDEGQLPQVLEELKDLQVAPGTRLAKFQL
KVKGY PAKLYWFKDQGPLTTS DHIRMTDKKTLHTLEIVSVTREDSGQYAA YISNAVGAAYSSARLLVRGPSE
PEEKPASDVHERLVP PPRILEKFTPKKVKRGSSITFSVKVEGHPAPSVHWLKEEA EKGLWIGPDTPGYTMAS
SKQHSVLVLLDVG RQHGT YTCIATNPAGQALCSASLHISGLAKEEEQERVKEALISSFLQGTSQAVSAQMS
AGFADLVGQSKGESLVAEEAHSLSLAEVGTEEF LQKLT SQITEMVSAKISQAKLQVPGGDSDEETKTPSASP
RHGRSRPSSSVQESSSESEDGDSRGEIFDIYVVTADYLP LGAEQDAIILREGQYVEVLDSAHPLRWLVRTKPT
KSSPSRQGWVSPAYLDKRLKLSPEWGPTEAPEFPGEAVSEDEYRTRLSSV IQELLSSEQAFVGE LQFLESHM
KHLERSPRVPAVASQKTVIFRNVDI SHFHSSFLKELQCGCTDDDVAMCFIKNQEAFEKYLEFLVGRVQAES
VVVSTPVQEFYKKYAEETLSAKDPTQPPPPPLQHYLEQPV ERVQKYQALLKELIRNKARNRQNCALLEQAYAV
VSALPQRAENKLVSLMENYPGTLEALGEP IRQGHFIVWEGAPGARMPWKGHNRHVFLFRNYLVICKPRRDSR
TDTFSYVFRNMMKLSSIDLNDQVEGDDRAFEVWHERE DSVRKYLLQARTVIKNSWVKEICGIQQRLAQPVWR
PPEFEEELADCTAELGETVKLACRVTGTPKPIVSWYKDGK PVEVDPHILIEDPDGSC TLI LDNLTGIDSGQY
MCF AASAAGNASTLGKILVQVPPRFV NKVRATPFVEGEDAQITCTVEGAPYPQIRWYKDG TLLAPGNRYRMLN
EPRSGVLV LVIQAASKEDLGHYECELVNRLGSTRGGGEL YMQSPALRARDQHHRQI VAAVEVTEQETKVPKK
TVIIEETITTVVKS PRGRRQSPGKSPSRSPRRSASPRR PGLLAPERLYPPGTS PSRRLEVEQGRKAPVPALY
VTEAEVHAPASQSQPKWLEVEETIEVRVKKTGSRGASPVREMTSRGEGILFTLPGGIPGRDPNANN SNKSVY
QEARTWGP AVVHVGE PFI FQVDSVGNVDWVAASPEPEQVRASQKEENTERQEGCSDGDENTFLMEEPQD TDSL
QGRDPKILTHNGRVLTLADLEDYVPOEGETFGCGDSTPSTPDEPPCEVSVLQREI SEPTVGPVLLN VGRPPG
TGATPSFFRPGSQVHSPESVSFLLREAWSGPVSAAPWTSSFH THVQSSVDGSHGSFKTEVSTQTVSFGAVGET
VTLHIDPDGGEAPGPSQG\*

>rs50033377\_ENSMUSP00000158795\_c.2637:A>G\_p.S880G
ENSMUST00000238536.2|Obscn-210|ENSMUSG00000061462|-|chr11:g.59020606:T>C
MDHSFSGAPRFLTRPKAFVSVGKDATLSCQIVGNPTPHVSWEKDRQPVEAGARFLAQDGDVYRLTILDLAL
GDSGQYVCRARNAIGEAFAAVGLRVDSEGTCAEQAPHLLRPTSIRVREGADATFRCRVGGSPQPAVSWSKDG
RRLGPPDAPHVRVEEHGESSALRIRSARPRDGGTYEVRAENPLGSASAAAAALVVDSDAEVAGPPGTSTATLLA
HLQORREAMRAEGIPPSPPGAGTRTCTVTEGKHARLSCFVTGEPKPEVWKKDGLVTEGRRHVVEDEQENF
VLKILFCKQSDRGLTYTASNLVGQTYSSVLVVVREPTVPFKKRLQDLEVRKEKESATFQCEVAQPA TEAAWFK
EETRLWASAKYDIEEETERRLTVRNVSADDDAVYICETTEGSR TVAELSVQGNLTRKLRKTAVRTGD TAI F
WVELAVPEGPVRWLRNQEEMVAGGRVAITAEGTCHTLTIFQCTLEDMGEVAFVSGGCRTTTQFCVSAPRRPPL
YPPADPVVKA KTESVTL SWSAPPHGDRPV TIDGYVLEKRKLGAYAWSRCHEAGWLATTEFTITGVAAEEDGFQ
FRVSAINHFGQGPYLEFPGMTMLVPLAVKTP LKAVEAVEGGEVTF SVDLTVASSGEWFLDGEALKASSIYVI

RCDRTRHMLTIREV PARLHGAQLK FVANGIETS IQMVVRAALGLPSSKLPAAAAREVL AQLHEEAQLLAE LSD
QAAA V TWLKD GRELSLGP KYEMQVSAGRRALLVRDVAQDDAGLYECVSRGSR TAYQLLVQDITDGYRDWGPAG
PQKHMCKCAGAKIARYL GSSCYRFLQYDKGVVHWEALDTRQKGKTS SCSLHEKPKLVFAKQQAHSEVKA E
AGNGATLSCEVTQAQTEV TWFKDGKLLSSSSKVRMEASGCSRRLVVQQAGKADAGEYSCEAGGQKLSFR LDVA
EPKLVFAKQQAHSEVKA EAGASATLSCEVAQAQTEV TWFKDGKLLSSSSKVRMEASGCSRRLVVQQAGKADA
GEYSCEAGGQKLSFR LDVAEPKMFVFAKEQQARSEVKA EAGASATLSCEVAQAQTEV TWFKDGKLLSSSSKVRM
EASGCSRRLVVQQAGKADAGEYSCEAGGQKLSFR LDVTEPKLVFAKEQQARSEVKA EVGNSATLSCEVAQAQ T
EVTWFKDGKLLSSSSKVRMEASGCSRRLVVQQAGKADAGEYSCEAGGQKLSFR LDVAEPKLVFAKEQQARSEV
KAEAGNSATLSCEVAQAQTEV TWFKDGKLLSSSSKVRMEASGCSRRLVVQQAGKADAGEYSCEAGGQKLSFHL
DVTEPKLVFAKEQQAHSEVKA EAGASATLSCEVAQAQTEV TWFKDGKLLSSSSKVRMEASGCSRRLVVQQAGK
ADAGEYSCEAEGQKLSFR LDVAEPKLVFAKEQQARSEVKA EAGASATLSCEVAQAQTEV TWFKDGKLLSSSSK
VRVEASGCSRRLVVQQAGKADAGEYSCEAGGQKLSFR LDVAEPKLVFAKEQQANSEVKA EAGASATLSCEVAQ
AQTEV TWFKDGKLLSSSSKVRVEASGCSRRLVVQQAGKADAGEYSCEAGGQKLSFR LDVAEPKLAFAKEQQAH
SEVKA EAGASATLSCEVAQAQTEV TWFKDGKLLSSSSKVRVEASGCSRRLVVQQAGKADAGEYSCEAGGQKLS
FR LDVAEPKLAFAKEQQAHSEVKA EAGASATLSCEVAQAQTEV TWFKDGKLLSSSSKVRVEASGCSRRLVVQQ
AGKADAGEYSCEAGGQKLSFR LDVAEPKLAFAKEQQAHSEVKA EAGASATLSCEVAQAQTEV TWFKDGKLLSS
SSKVRVEASGCSRRLVVQQAGKADAGEYSCEAGGQKLFRLDVAEPKLMFAKEQQAHSEVKA EAGASATLSCE
VAQAQTEV TWFKDGKLLSSSSKVRVEASGCSRRLVVQQAGKADAGEYSCEAGGQKLSFR LDVAEPKLVFAKEQ
QAHSEVKA EAGASATLSCEVAQAQTEV TWFKDGKLLSSSSKVRVEASGCSRRLVVQQV GKADAGEYSCEARGQ
KLSFR LDVADTRLMFAKEQQARTEVKA EAGNSATLSCEVAQAQTEV TWFKDGKLLSSSSKVRVEASGCSRRLV
VQQAGKADAGEYSCEAGGQKLSFR LDVAEAE SQIPERPSRREPLVVKHEHETIILTATI AAPSVAAVTWLKDGV
EIRRSKRHEATSLG DHTLTVRGAQVLD SAIYSCRVGKEGQDFPVQVEEVA AKFSKPLEPVEGELGGTVMLVC
ELSP EQAEV VWR CGNTQLRPGKRFQMTSEGP RRTLTVSGLREDDAE EYVCE SRDDRTSARLT VKVPRVVKFTS
GLSAMVAEEGQEATFQCVVSPSDAGVTWYKDGMLQLPSEK FVMVESGASRSLTILGLTLEDAGQVTVAEAGAS
SSAALRVREAPVLFKKKLEPQTEVERTSVTLEVELTRPWPEVKWTRNAAVLTPSENVEIRAEGARHCLVLR SV
GFADRGGFFGCETPDDKTQAKLNVEMRQVRLV RGLVEVAEQGTASMDVELSHA EVEGSWTRDGLRLQFPGPKC
HLAVQGPVHILTLVKSALQPQDSGLVA FRAEGVHTSARLIVTELPVSFTRVLQD VVATQKEKVTLECELSR PVDV
RWLKDGV ELRAGKAI GIVAQGTCSRSLVIYRCETGDQGVYVCDALDAQTSASLRVQGRTYTLIFRRLAEDAGE
VKFVAENAESRAHLRVKELPVTLRLRDKIAMEKHRGVLECCQVSRASAQVRWFKGGVELQSGPKYEVVSDGL
YRKLVIN DVQPEDEDTYTC DAGNVKTSAQFFVEEQSITIVRGLKDMTVM EPAPAWFECETSIPSVRPPKWL LG
KTVLQAGGNVGL EQDGTVHRLTLHKTCSTMTGPVHFTIGKSRSSAQLVVSDI PVVLRTRPLEPKAGRELQSVVL
SCDFRPAPKAVQWYKDDT PLSPEKFKMALEGGMAELRILRLTPADAGVYRCQAGSAQSSAEVTV EAREVTVI
QPLQDAEAMEEGRVCFSC ELSHKDEDI EWSLNGTPLYNDSFHEI SHEGCLHTLV LKSVRQADTGTVCATSPKV
SVSARLVVKGKPVVFLKALDDVSAEERGLTLTQCEVSDPEARV VWRKDGVELGPSDKYDFLHKAGARGLTVHD
LSHEDAGLYTCQVGSKETQSKVSVHDLHVGITKRLKTVEVLEGE SCSFECVLSHESPSDPAVWTVGGKT VGGG
GHFHAVRQGRKYTLTVKDAALS DAGEV VFSVLG LTVSKASLI IRERPVDITKPLEDQRTTLGEDVMLSC ELSRA
GTSVRWLKDGKAIRKSQKYDLLSEGTRAVLVVRKASLKDSGEYTCETEASKSTAKLCVEEKANRFT EELADLQ
VEEKGRAVFTCKTEHPASVVTWRKGLLELRASGKHVPSQEGLTLKLTINALERTSDTYTCDIGQARTQARLL
VHGQKVRVIEDLED TAVQEGSSAKFCRIAPADYGPVHWF LDKTPLHSNELNEITVQPGGYHVLTLRQLAL KD
SGTVYFEAGDQRTS AALRVTEKPSIFSRPLTDVTVTEGEDLTLVCETTTVDSSVRWTKDGKTLRPSARCQLSH
EGCQAQLLITATTPQDGGRYKCEIGGASSSIVRVHALPVRFRESLKDVEVPEGKAATLRCVLSVAAPVEWR
HGDDVLKSSNKYSLRQEGAVLELVIRDLQPQDSGQYSCSFGDQTT SATLTVKTS SAQFV GKLNRKEATEGTTV
TLRCELTK EAPVEWKKGTETLRNGDKYSLKQDGAVCELQICSLLVADAGEYSCVCGQEKTSATLTVKALLVHF
VRLRSKEATEGDTTLTQCELSKAAPVEWRKGTETLRDGD RYSLKQDGAVCELQIRSLTIADAGEYLCTCGQE
KTSATLTVRALPAKFKDSLKNEEATEGTTATLSCELSKAAPVWKKGPKTLQSGDKYVLRQDGA VCGGLQIHGL
TMADAGEYSCVCGQEKTSATLTVRGLPAKFIEDLRSQEATEGATAILRCELSKAAPVEWRKGS ETLKDGDRYT
LRQDGA VCELQIRGLAVVDGTGYSSLP TKFTEGLRNEEATEGTMATLRCQMSKAAPVEWRKGS ETLRDGDRYS
LRQDGA MCELQIRGLTIEDSGEYTCVCGQEKTSATLSVKALPSRFIEDLRSQEATEGTMATLRCQMSKTAPVE
WKKGSETLRDGGRYSLRQDGPVCELQICDLAVEDAGEYSCVCGQEKTSATLSIKALPPRFIEDLRSQEATEGT
MATLRCQMSKAAPVEWRKGS ETLGDGGRYSLRQNGAVCELQIHDLAVEDTGEYSCVCGQEKTSATLNVKALPP
RFIEDLRSQEATEGTMATLRCQMSKAAPVEWRKGS ETLRDGGRYSLRQDGA VCELQIHDL DVEDAGQYSCVCG
QEKTSAVLTVDALPPKFTEGLKKEEATEGTMVTLRCQMSKEATVEWRKGAKT LSDGGRYSLRQDGA MCELQIC
GLAVEDAGEYSCVCGQEKTSATLSVKALPPRFIEDLRSQEATEGTMATLRCQMSKAAPVEWRKGS ETLRDGDR
YSLRQDGA VCELQIRDLAVEDAGEYLCVCGQEKTSATLSVKALPPRFIEDLRSQEATEGTMATLRCQMSKAAP
VEWRKGS KTLRDGDRYSLRQDGA MCELQICDLAVEDTGDYSCVCGQEKTSATLSVKALPPRFIEDLRSQEARE
GTVATLRCRMSKAAPVEWRKGS ETLKDGDRYSLRQEGNLCELQIRDLAVEDTEEYSCVCGQEKTSATLSVKAL
PAKFIEDLRSQEAPESSTVTLRCKLSKKASVWKKGSETLRNGARYSLRQDGA VCELEIRDLTVEDTGEYSCT
CGQERTSATLSIMAPQVVFQQPLQNLQAEEGSMASLRCELSVPNAAMVWSKGGLELQGDTRREARQQGCV AEL



LLRDLRREDAGEYSCTCGSQTTSATLMVTAAPVRFLELQAQDQVDEGATARLRCELSREAVSVEWRKGSQQLF  
 PCAKYQMVQEGTTAELLVHGVEQEDAGEYTCDAHTQSIARLSVRAPKPKFKTDLQSTEQEAGGTARLCCQLS  
 EAEPGTPVQWLKEGVELHVGSKYEMRRQGAVCELLIHGLEAKDTGEYACLVGQKTLASLRVKEPEVTIVRGL  
 VDMEVQADEDVEFTCKVSOAGATDVQWHLQGLPLQSNVTEVAVLADGCTHVLQKGVTLLEDAGTVSFHVGGL  
 SSSAQLTVRVPEVTVLEPLKDVQLSEGQDAHFRCRLSRASGQEARWALGGVPLQCNEMNDITVEQGTLYLLTL  
 HKVTLEDAGTITLQVGSSESQAQLKVTAKNTVLRGLENVDALEGGEALFECQLSQPEVAHAHTWLLDDEPVHTS  
 EKQEVVYFENGLRHLLLLKLNKPKQDSCRVTFLAGDVVTS AFLTVRGWRLEVLEPPHDASVKAGMQVRFCTILS  
 EAVPVGEATWYINGAAIQPDDTDWTVTTDGSHHALTLNAQPQHAGEVTF AARDAVASARLSVLALPDPPEDA  
 EVVGRSDHSVTL SWVAPMSDGGGGLCGYRVEMKEASTGQWQLCHDLVPGPECVDDLVPGKTYRFRVAAVGPA  
 GAGEPVHLPQMVKIAPAPAPAPAPAPAPAPAPAPETRQAVVGEDICLELEVAADGGGEVVWHKGTERTIQPGGHFEVLS  
 RGQRQMLVIKGFRTEDQGEYRCGPIQGLPSSGAATFNVMVMTSGSGDEVPAQPSLPPEAAQEGDLHLLWEALAR  
 KRRMSREPTLDSISELPEEDSRVQHLRQEAETAPDLSEGYSTADELARTGEADLSHTSSDDESRACTPSLVT  
 YLKKAGGPGISPLASKHEAQVTSVKPQKQEQEPVVPTCPPPGDLSAADLMDPSLDKAAVKIQAAFQYKVKRKE  
 MKQQEGPVFSRTFGDTEAQVGDVLRLECVLATKTD MRACWLKDGIELTDGRHYHIDQLKDGTCSSLVVTGLAPT  
 DSGRYTCQVSTKSGRVSHSACVVVSGTESEAESSSGGELDDAFRAARRLHRLFRTKSPAELSEELFLSADE  
 GPGEPEPADWQTYREDENFVCIRFESLAEARQAVTCFRNMFATMGIGVEISLGEQGPGRVEMRIGKVAPTVT  
 PAVFLAKTPGLQTSDAAPVFLTELQNDVQDGYPMDFDCVVTGQVPVPSVRWFKDGKLEEDDHVMINEDQQGG  
 HQLLIITAVVPADMGVYRCLAENSMGVSSTKAELRVELTSTDYDTAADATETSSYFSAQGYLSSREQLETSEDE  
 GQLPQVLEELKDLQVAPGTRRLAKFQLKVKGYPAKLYWFKDGGPLTSDHIRMTDKKTLHTLEIVSVTREDSG  
 QYAAYSNAVGAAYSSARLLVRGPSEPEEKPASDVHERLVPPRILEKFTPKKVKRGSSITFSVKVEGHPAPSV  
 HWLKEEAKEKGVLIWIPDTPGYTMASSSKQHSLLVLDVGRQHGTYTIC IATNPAGQALCSASLHISGLAKEEEQ  
 ERVKEALISSFLQGTSAQVSAQMSASAGFADLVGQSKGESLVAEEAHSHLSLAEVGTTEFLQKLTQITMVVS  
 AKISQAKLQVPGGDSDEETKTPSASPRHGRSRPSSSVQESSSEEDGDSRGEIFDIYVVTADYLP LGAEQDAI  
 ILREGQYVEVLDSAHPLRWLVRTKPTKSSPSRQGWVSPAYLDKRLKLSPEWGPTEAPEFPGEAVSEDEYRTRL  
 SSVIQELLSSEQAFVGLQFLESHHMKHLERSPRVPAAVASQKTVIFRNVQDISHFHSSFLKELQCGCTDDD  
 AMCFIKNQAEFAKYLEFLVGRVQAESVVVSTPVQEFYKKYAEETLSAKDPTQPPPPPLQHYLEQPVVERQKYQ  
 ALLKELLRNARNRNCALLEQYAVVVSALPQRAENKLVSLMENYPGTLEALGEPFIVWEGAPGARM  
 PWKGNHRHVF LFRNYLVICPRRDSRTD TFSYVFRNMMKLSSIDLNDQVEGDDRAFEVWHEREDESVRKYLLQA  
 RTVI IKNSWVKEICGIQQLRAQPVWRPPEFEEELADCTAELGETVKLACRVTGT PKPIVSWYKDGKPVVDPH  
 HILIEDPDGSC TLI LDNLTGIDSGQYMCFAASAAGNASTLGKILVQVPPRFVNVKVRATPFVEGEDAQITCTVE  
 GAPYQIRWYKDG TLLAPGNRYRMLNEPRSGVLV LVIQAASKEDLGHYECELVNRLGSTRGGELYMQSPALR  
 ARDQHHREQIVAAVEDTSVEGSAHSAQDQADQQAASVLWRLLGSEALGPS PGDLPNTRQSEPPAFEEAASQIP  
 GAASGTPEVSPQPGTHKGLEQETTSSGSQGWTVPIRVEGTAWPGAGTGQLLLDVHSQVIMETTQRTYVCQAPDT  
 GVTRAPSMQVTIEDVQVQVGDMAQF DAVIEGHPPP IVTWYKGSTQLTSSARLSQRQDGTYSVLVTDVAPHDA  
 GVTYCVANNAGGQVLC KAELLVHGGDKLDAENQVYRRLKLSHFYDVQEEIGRGVFGFVKRVQHKGNMFCAAKF  
 IPLRSKTRAQAYQERDILATLGHPLVTGLLDQFETRKTLLIILELCSSEELLDRLFKKGVVTEAEVKVYIQQL  
 VEGHLHLHSHGILHLDIKPPNILMVHPAREDIKICDFGFAQKITPSEPQYSKYGSPEFVSPEIIEQNPVSEGS  
 DIWAMGVISYLSLTCSPPFAGESDRATLLNVLEGRVSWSSPTAAHLSSEDAKDFIKATLQRTPRARPSTSQCLA  
 HPWFLKSMPAEEAHFINTKQLKFL LARSRWQRSLMSYKSI LVMRSIPELLQGPPDSPSLGVARHLRGEASGAS  
 SSSSSSDNELAPFARAKSLPPSPVTHSPLLHPRGFLRPSASLPEETEASMP TADA AVPAS PQSAGPPASPGCV  
 PRHSVSISSLFYQQAGEGAERGNKTS GAKRHPARRRHLLKGGYIARALPGLREPLMEYSLLEEEAAREEQASIM  
 TKTPSFETALRLPSSSVREVPGRSHSLDNPPVT TGPSPEACKEQLLFPSTGLTHETTAKDRGHKEGFLQESV  
 PFPMSGDSRPGKQEGSSQDSCRGKPASSCHSELGSGSQEGC GPPSSQSLGSLPPQSLKKELTSCGPLFSEQ  
 PQAAPFPPTQVSPLLGSEKEPQDGS LSEGPVVPSSSPGSASQVDASLDTEGLSEAGDTCDFTPPPQRPEQAT  
 TRKFSLESRGGYAGVAGYGTFAFGDAGGMLGQGPLWARMWAVSQSSEEQDEAATESQPLES LGPIAEASG  
 VPLRTSPSLTPWEEVEQVSLVQIRDLSGDAEAADTISL DISEVDPAYLNLSDLYDIKYL PFEFMI FRRVPKPI  
 EQPESPGSETEAGQGLADFL EEAAWPWPGE LGLRAGLEITEEPEEPGDLEALLGEAAVGRKRKWSPSRGLFQF  
 PGRCLSGEEPVELGLRQRVKASMAHISRILKGRPEGPERE GPPRKKAGLASFRLSGLKGRDQELSDEAVVLGQ  
 SVTLACQVLAQPTAQTWSKDGVLLESSGHLLI SSSLKNFQLLTI LVVKEEDLGTYTCCVSNPLGTA VTTGVL  
 RKAERPSSSPREVGELYKDAVLLVWKPVESCGPVTYIVQCCIEGGSWTTLASDISDCCYLTGKLSRGGMYIF  
 RTACVSKAGMGPISSPSEQVLLGGPNHLASEEESRGRPAQLLPSTKTF AFQMQIRRRGRFSVVRQCREKASGR  
 ALAAKIVPYQPEDKTAVLREYEAALKRHLHHPHLAQLHAAYLSPRHLVLI LELCSGPELLPSLAERESYSES DVK  
 DYLWQMSATAYLHAHQHILHLDLRSENMMVTEYNLLKVIDLGN AQSLDQEKVPAPENFKDYLETMAPELLEGG  
 GAVPQTDIWAIGYTAGFIMLSGEY PESSSEGTRDLQKRLKRLGRLIRLSRCYAGLSGGAVFLQSSLCAQWPGRPCA  
 STCLQCGWLTEEGPTAFSRPTPVTFPTVRLRAFVREKERKRALLYKHNLAQVR\*  
 >rs50033377\_ENSMUSP00000049737\_c.2436:A>G\_p.S813G  
 ENSMUST00000052872.15|Obscn-203|ENSMUSG00000061462|-|chr11:g.59020606:T>C



VKALPPRFIEDLRSQEATEGTMATLRCQMSKAAPVEWRKGSSETLRDGGRYSLRQDGA VCELQIHDLVDVEDAGQ  
YSCVCGQEKTSAVLTVDALPPKFTEGLKKEEATEGTMVTLRCQMSKEATVEWRKGAKTSLDGGRYSLRQDGA  
MCELQICGLAVEDAGEYSCVCGQEKTSATLSVKALPPRFIEDLRSQEATEGTMATLRCQMSKAAPVEWRKGS  
LRDGDYSLRQDGA VCELQIRDLAVEDAGEYLCVCGQEKTSATLSVKALPPRFIEDLRSQEATEGTMATLRCQ  
MSKAAPVEWRKGSKTLRDGDYSLRQDGA MCELQICDLAVEDTGDYSCVCGQEKTSATLSVKALPPRFIEDLR  
SQEAREGTVATLRCRMSKAAPVEWRKGSSETLKDGDYSLRQEGNLCELQIRDLAVEDTEEYSCVCGQEKTSAT  
LSVKALPAKFIEDLRSQEAPESSTVTLRCKLSKKASVWKKGSSETLRNGARYSLRQDGA VCELEIRDLTVEDT  
GEYSCTCGQERTSATLSIMAPQVVFPQPLQNLQAEEGSMASLRCELSVPNAAMVWSKGGLELQGDTRREARQQ  
GCVAELLLRDLRREDAGEYSCTCGSQTTSATLMVTAAPVRFRLRQLAQDQVDEGATARLRCELSREAVSVEWRK  
GSLQLFPCAQYQMVQEGTAEALLVHGVEQEDAGEYTC DAGHTQS IARLSVRAPKPKFKTDLQSTEQEAGGTAR  
LCCQLSEAEPTPVQWLKEGVELHVGSKYEMRRQGA VCELLIHGLEAKDTGEYACLVGQKTLASLRVKEPEV  
TIVRGLVDMVEQADEDEFTCKVSOAGATDVQWHLQGLPLQSNVTEVAVLADGCTHVLQKGVTL EDAGTVS  
FHVGLSSSAQLTVRVPEVTVLEPLKDVQLSEGQDAHFRCRLSRASQGEARWALGGVPLQCNEMNDITVEQGT  
LYLLTLHKVTLEDAGTITLQVGSSEAEQLKVTAKNTVLRGLENVDALEGGAEALFECQLSQPEVAHTWLLDD  
EPVHTSEKVEVVYFENGLRHLLLLLNKLPQDSCRVTFLAGDVVTS AFLTVRGWRLEVLEPPHDASVKAGMQVR  
FTCILSEAVPVGEATWYINGAAIQPDDTWTVTDDGSHHALTSLNAQPPHAGEVTF AARDAVASARLSVLALP  
DPPEDA EVVGRSDHSVTL SWVAPMSDGGGGLCGYRVMKEASTGQWQLCHDLVPGPECVVDDLVP GKTYRFRV  
AAVGPAGAGEPVHLPQMVKIAPAPAPAPAPAPAPAPETRQAVVGEDICLELEVAADGGEVWVKGTERRIQPGG  
HFEVLSRGRQMLVIKGFRTEDQGEYRCGPIQGLPSSGAATFNVMVMTSGSGDEVPAQPSLPPEAAQEGDLHLL  
WEALARKRRMSREPTLDSISELPEEDSRVQHLRQEAEEETAPDLSEGYSTADELARTGEADLSHTSSDDESRA  
TPSLVTYLKKAGGPGISPLASKHEAQVTT SVKPKQKQEPVPTCPPPGDL SAADLMDPSLDKAAVKIQAAFKG  
YKVRKEMKQQEGPVFSRTFGDTEAQVGDVLRLECVLATKTD MRACWLKDGIELTDGRHYHIDQLKDGTC SLIV  
TGLAPTDSGRYTCQVSTKSGRVSHSACVVVSGTESEAESSGGELDDAFRRAARRLHRLFRTKSPAELSEEEL  
FLSADEGPGEPEPADWQTYREDENFVICIRFESLAEARQAVTCFRNMFATMGIGVEISLGEQGPGRVEMRIGK  
VAPTVT PAVPLAKT PGLQTS DAAPVFLTELQNDVQDGYPMSFDCVVTGQPVPSVRWFKDGKLEEDDHMIN  
EDQQGGHQLIITAVVPADMGVYRCLAENSMGVSSTKAELRVELTSTDYDTAADATETSSYFSAQGYLSSREQE  
GTESEDEGLPQVLEELKDLQVAPGTRLAKFQLKVKGY PAKLYWFKDQGPLTSDHIRMTDKKTLHTLEIVSV  
TREDSGQYAAIYISNAVGAAYSSARLLVRGPSEPEEK PASDVHERLVP PRILEKFTPKKVKRGSSTIFSVKVEG  
HPAPSVHVLKEEA EKGV LWIGPDTPGYTMASSSKQHSLVLLDVG RQHGTYTCIATNPAGQALCSASLHISGL  
AKEEEQERVKEALISSFLQTSQAVSAQMSSEAGFADLVGQSKGESLVAEEAHSHLSLAEVGT EEFLOKLT SQ  
ITEMVSAKISQAKLQVPGGDSDEETKTPSASPRHGRSRPSSSVQESSSESEDGDSRGEIFDIYVVTADYLPLG  
AEQDAIILREGQYVEVLDSAHPLRWLVRTKPTKSSPSRQGWVSPAYLDKRLKLSPEWGPTEAPEPFGEAVSED  
EYRTRLSSVIQELLSSEQAFVGELEQFLESHHMKHLERSPRVPAVASQKTVIFRNVQDISHFHSSFLKELQGC  
GTDDDVAMCFIKNQEA FEKYLEFLVGRVQAESVVVSTPVQEFYKKYAEETLSAKDPTQPPPPLOHYLEQVVE  
RVQKYQALLKELIRNKARNRQNCALLEQAYAVVSALPQRAENKLVSLMENYPGTLEALGEP IRQGHFIVWEG  
APGARMPWKGNRHFVLFNRNYLVICKPRRDSRTDTFSYVFRNMMKLSSIDLNDQVEGDDRAFEVWHEREDSVR  
KYLQARTVI IKNSWVKEICGIQQR LAQPVWRPPEFEELADCTAELGETVKLACRVTGTPKPIVSWYKDGKP  
VEVDPHHILIEDPDG SCTLILDNLTGIDSGQYMCFAASAAGNASTLGKILVQVPPRFVNVKVRATPFVEGEDAQ  
ITCTVEGAPYPQIRWYKDGTL LAPGNRYRMLNEPRSGVLV LVIQAASKEDLGHYECELVNR LGSTRGGGELYM  
QSPALRARDQHHREQIVAAVEVTEQETKVPKKTVI IETITTVVKS PRGRRQSPGKSPSRSPRRSASPRRPG  
LLAPERLYPPGTS PSRRLEVEQGRKAPVPALYVTEAEVHAPASQSQPKWLEVEETIEVRVKKTGSRGASPVRE  
MTRSREGILFTLPGGIPGRDPNANNNSNKS SVYQEARTWGP AVVHVGEFPFI FQVDSVGNVDWVAASPEPEQVRA  
SQKEENTERQEGCSDG DENTFLMEEPQD TDSLQGRDPKILTHNGRVLTLADLEDYVPQEGETF GCGDSTPSTP  
DEPPCEVSVLQREI SEPTVGGQPVLLNVGRPPGTGATPSFFRPGSQVHSPESV SFLLEAWSGPVSAAPWTSSF  
HTHVQSSVDGSHGSEFKTEVSTQTVSFGAVGETVTLHIDPDGGEAPGPSQG\*

>rs50033377\_ENSMUSP00000020732\_c.2637:A>G\_p.S880G  
ENSMUST00000020732.13|Obscn-201|ENSMUSG00000061462|-|chr11:g.59020606:T>C  
MDHSFSGAPRFLTRPKAFVSVGKDATLSCQIVGNPTPHVSWEKDRQVVEAGARFRLAQDGDVYRLTILDLAL  
GDSGQYVCRARNAIGEAFAAVGLRVDSEGTCAEQAPHLLRPTSIRVREGADATFRCRVGGSPQPAVSWSKDG  
RRLGPPDAPHVRVEEHGESSALRIRSARPRDGGTYEVRAENPLGSASAAAALVVDSDAEVAGPPGTSTATLLA  
HLQQRREAMRAEGIPSPPGAGTRTCTVTEGKHARLSCFVTGEPKPEVWKKDGQLVTEGRRHVVEDEQENF  
VLKILFCKQSDRGLYTCTASNLVGQTYSSVLVVVREPTVPFKKRLQDLEVREKESATFQCEVAQPATEAAWFK  
EETRLWASAKYDIEEGETERRLTVRNVSADDDAVYICETTEGSRVAELSVQGNLTKRKLPRKTAVRTGDTAIF  
WVELAVPEGPVRWLRNQEEMVAGGRVAITAEGTCHTLTIFQCTLEDMGEEVAFVSGGCRATTTQFCVSAAPRRPPL  
YPPADPVVKAKTESVTLSSAPPHGDRPVTIDGYVLEKRLGAYAWSRCHEAGWLATTEFTITGVAAEEGDFQ  
FRVSAINHFGQGPYLEFPGMTMHLVPM LAVKTPLKAVEAVEGGEVTFVSDLTVASSGEWFLDGEALKASSIYVI  
RCDRTRHMLTIREV PARLHGAQLKFVANGIETS IQMVVRAALGLPSSKLPAAAAREVLAQLHEEAQLLAELSD  
QAAA VTWLKDGRELSLGPKYEMQVSAGRRALLVRDVAQDDAGLYECVSRGSR TAYQLLVQDITDGYRDWGPAG

PQKHMCKCAGAKIARYLGSSCYRFLQYDKGVWHLEAALDTRQGKGTSSCSLHEKPKLVFAKGQQAHEVKA  
AGNGATLSCEVTQAQTEVTFWKDGKLLSSSSKVRMEASGCSRRLVVQQAGKADAGEYSCEAGGQKLSFRLDVA  
EPKLVFAKGQQAHEVKAEGASATLSCEVAQAQTEVTFWKDGKLLSSSSKVRMEASGCSRRLVVQQAGKADA  
GEYSCEAGGQKLSFRLDVAEPKMFVFAKEQQARSEVKAEGASATLSCEVAQAQTEVTFWKDGKLLSSSSKVRM  
EASGCSRRLVVQQAGKADAGEYSCEAGGQKLSFRLDVTEPKLVFAKEQQARSEVKAEVGNSATLSCEVAQAQ  
EVTWFKDGKLLSSSSKVRMEASGCSRRLVVQQAGKADAGEYSCEAGGQKLSFRLDVAEPKLVFAKEQQARSEV  
KAEAGNSATLSCEVAQAQTEVTFWKDGKLLSSSSKVRMEASGCSRRLVVQQAGKADAGEYSCEAGGQKLSFHL  
DVTEPKLVFAKEQQAHSEVKAEGASATLSCEVAQAQTEVTFWKDGKLLSSSSKVRMEASGCSRRLVVQQAGK  
ADAGEYSCEAGGQKLSFRLDVAEPKLVFAKEQQARSEVKAEGASATLSCEVAQAQTEVTFWKDGKLLSSSSK  
VRVEASGCSRRLVVQQAGKADAGEYSCEAGGQKLSFRLDVAEPKLVFAKEQQANSEVKAEGASATLSCEVAQ  
AQTEVTFWKDGKLLSSSSKVRVEASGCSRRLVVQQAGKADAGEYSCEAGGQKLSFRLDVAEPKLAFAKEQQA  
SEVKAEGASATLSCEVAQAQTEVTFWKDGKLLSSSSKVRVEASGCSRRLVVQQAGKADAGEYSCEAGGQKLS  
FRLDVAEPKLAFAKEQQAHEVKAEGASATLSCEVAQAQTEVTFWKDGKLLSSSSKVRVEASGCSRRLVVQQ  
AGKADAGEYSCEAGGQKLSFRLDVAEPKLAFAKEQQAHEVKAEGASATLSCEVAQAQTEVTFWKDGKLLSS  
SSKVRVEASGCSRRLVVQQAGKADAGEYSCEAGGQKLFRLDVAEPKLMFAKEQQAHEVKAEGASATLSCE  
VAQAQTEVTFWKDGKLLSSSSKVRVEASGCSRRLVVQQAGKADAGEYSCEAGGQKLSFRLDVAEPKLVFAKEQ  
QAHEVKAEGASATLSCEVAQAQTEVTFWKDGKLLSSSSKVRVEASGCSRRLVVQQAGKADAGEYSCEARGQ  
KLSFRLDVADTRLMFAKEQQAHEVKAEGASATLSCEVAQAQTEVTFWKDGKLLSSSSKVRVEASGCSRRLV  
VQQAGKADAGEYSCEAGGQKLSFRLDVAEAEESQIPERPSRREPLVVKEHETIILTATIAAPSVAAVTWLKDG  
EIRRSKRHEATSLGDTHTLTVRGAQVLDIAIYSCRVGKEGQDFPVQVEEVAAKFSKPLEPVEGELGGTVMLVC  
ELSPQAEVWRCGNTQLRPGKRFQMTSEGPRTTLTVSGLREDDAEYVCESRDDRTSARLTVKVPVVKFTS  
GLSAMVAEEGQEQATFQCVVSPSDAGVTWYKDGMLQPSKFKVMVESGASRSLTILGLTLEDAGQVTVAEAGS  
SSAALRVREAPVLFKKLEPQTVERTSVTLEVELTRPWPEVKWTRNAAVLTPSENVEIRAEGARHCLVLRV  
GFADRGGFFGCETPDDKTQAKLNVEMRQVRLVRLGQVEEAKEQGTASMDVELSHAEVEGSWTRDGLRLQPGPK  
HLAVQGPVHILTLALSALQPDQSGLVAFRAEGVHTSARLIVTELPVSTFTRVLQDVVATQKEKVTLECELSRPV  
RWLKDGVLELRAGKAIGIVAQGTCSRSLVIYRCETGDKQGVVCDALDAQTSASLRVQGRVYTLIFRVLAEADAGE  
VKFVAENAESRAHLRKLPTLLRPLRDKIAMEKHRGVLEQVSRASQVVRWFKGGVELQSGPKYEVVSDGL  
YRKLVINVDQPEDEDTYTCDAENVKTSAQFFVEEQSITIVRGLKDMTVMPEPAPAWFECETSIPSVRPPKWL  
KTVLQAGGNVLEQDGTVHRLTLHKTCSTMTGPVHFTIGKSRSSAQLVSDIPVVLTRPLEPKAGRELQSVVL  
SCDFRPAPKAVQWYKDDTPLSPSEKFKMALEGQMAELRILRLTPADAGVYRCQAGSAQSSAEVTVAREVTVI  
QPLQDAEAMEEGRVCFSCELSHKDEDIEWSLNGTPLYNDSFHEISHGCLHTLVLSVRQADTGTVCATSPKV  
SVSARLVVKGKPVVFLKALDDVSAEERGTTLTQCEVSDPEARVVWRKDGVELGPSDKYDFLHKAGARGLTVH  
LSHEDAGLYTCQVGSKETQSKVSVHDLHVGITKRLKTVEVLEGESECSFECVLSHESPSDPAVWTVGGKTVGGS  
GHFHAVRQGRKYTLTVKDAALSDAGEVVFVGLTSLKASLIIRERPVDITKPLEDQRTTLGEDVMLSCELSRA  
GTSVRWLKDGKAIKRSKYDLLSEGTAVLVVRKASLKDSGEYTCETEASKSTAKLCEVEKANRFTBELADLQ  
VEEKGRAVFTCKTEHPASVVTWRKGLLELRASGKHVPSQEGTLTKLTINALERTSDSTYTCDIGQARTQARLL  
VHGQKVRVIEDLEDTAVQEGSSAKFCCRIAPADYGPVHWFLLDKTPLHSNELNEITVQPGGYHVLTRQLALKD  
SGTVYFEAGDQRTSALRVTEKPSIFSRPLTDVTVTEGEDTLVCEETTVDSSVRWTKDGKTLRPSARCQLSH  
EGCQAQLLITATTPQDGGRYKCEIGGASSSSIVRVHALPVRFRESLKDVEVPEGKAATLRCVLSVAAPVEWR  
HGDDVLKSSNKYSLRQEGAVLELVIRDLQPDQSGQYSCSFGDQTTSATLTVKTSQAQFVGLRNKEATEGTTV  
TLRCELTKAEPVEWKKGTETLRNGDKYSLKQDGAVCELQICSLLVADAGEYSCVCGQEKTSAITLVKALLVH  
VRRLSKEATEGDTTLQCELSKAAPVEWRKGTETLRDGDYSLKQDGAVCELQIRSLTIADAGEYLCTCGQE  
KTSATLTVRALPAKFKDSLKNEEATEGTTATLSCELSKAAPVWKKGPKTLQSGDKYVLRQDGAVCGLQIHGL  
TMADAGEYSCVCGQEKTSAITLTVRGLPAKFIEDLRSQEATEGATAILRCELSKAAPVEWRKGSSETLKDGDYR  
LRQDGAVCELQIRGLAVVDGTYSLSLPTKFTTEGLRNEEATEGTMATLRCQMSKAAPVEWRKGSSETLRDGDYR  
LRQDGAMCELQIRGLTIEDSGEYTCVCGQEKTSAITLTVKALPSRFIEDLRSQEATEGTMATLRCQMSKTAPVE  
WKKGSETLRDGGYSLRQDGPVCELQICDLAVEDAGEYSCVCGQEKTSAITLTVKALPPRFIEDLRSQEATEG  
MATLRCQMSKAAPVEWRKGSSETLGDGGYSLRQNGAVCELQIHDLAVEDTGEYSCVCGQEKTSAITLNVKALPP  
RFIEDLRSQEATEGTMATLRCQMSKAAPVEWRKGSSETLRDGGYSLRQDGAVCELQIHDLVEDAGQYSCVCG  
QEKTSAVLTVDALPPKFTTEGLKKEEATEGTMVTLRCQMSKEATVEWRKGAKTLSDGGRYSLRQDGAMCELQIC  
GLAVEDAGEYSCVCGQEKTSAITLTVKALPPRFIEDLRSQEATEGTMATLRCQMSKAAPVEWRKGSSETLRDGD  
YSLRQDGAVCELQIRDLAVEDAGEYLCVCGQEKTSAITLTVKALPPRFIEDLRSQEATEGTMATLRCQMSKAAP  
VEWRKGSSETLRDGDYSLRQDGAMCELQICDLAVEDTGDYSCVCGQEKTSAITLTVKALPPRFIEDLRSQEARE  
GTATLRCRMSKAAPVEWRKGSSETLKDGDYSLRQEGNLCELQIRDLAVEDTEEYSCVCGQEKTSAITLTVKAL  
PAKFIEDLRSQEAPESSTVTLRCKLSKASVWVWKKGSETLRNGARYSLRQDGAVCELEIRDLTVEEDTGEYSCT  
CGQERTSATLSIMAPQVVFQQLQNLQAEEGSMASLRCELSVPNAAMVWSKGGLELQGDTRREARQQGCVAEL  
LLRDLRREDAGEYSCVCGQTTSATLMVTAAPVRFLELQAQDVDEGATARLRCELSREAVSVEWRKGSLLQF  
PCAKYQMVQEGTTAELLVHGVEQEDAGEYTCDAHTQSIARLSVRAPKPKFKTDLQSTEQEAGGTARLCCQLS

EAEPTGTPVQWLKEGVELHVGSKYEMRRQGA VCELLIHGLEAKDTGEYACL VGGQKT LASLRVKEPEVTIVRGL
VDMEVQADEDEFTCKV S QAGATDVQWHLQGLPLQSNEVTEVAVLADGCTHVLQ LKGVTL EDAGTVSFHVGG
SSSAQLTVRVPEVTVLEPLKDVQLSEGD A HFRCRLSRASGQEARWALGGVPLQCNEMNDITVEQGTLYLLTL
HKVTLE DAGTITLQVGS CSSEAQLKVTAKNTVLRGLENVDAL EGG EALFECQLSQPEVA AHTWLLDDEPVHTS
EKVEVVFENGLRHLL L L L L L KNLKPQDSCRVTFLAGDVVTS AFLTVRGWRLEVLEPPHDASVKAGMQVRFTCILS
EAVPVGEATWYINGAAIQPDDTDWTVTTD GSHHALTLSNAQPQHAGEVTF AARDAVASARLSVLALPDPPEDA
E VVGRSDHSVTL SWVAPMS DGGGGLCGYR VEMKEASTGQWQLCHDLVPGPECVVDDLVP GKTYRFRVA AVGPA
GAGEPVHL PQMVKIAPAPAPAPAPAPAPAPETRQAVVMG DICLELEVAADGGEVVWHKGT ERIQPGGHFEVLS
RQQRQMLVIKGFRTEDQGEYRCGPIQGLPSSGAATFNVMVTSGSGDEVPAQPSLPPEAAQEGDLHLLWEALAR
KRRMSREPTLDSISELPEEDSRVQHLRQEA EETAPDLSEGYSTADELARTGEADLSHTSSDDES RAGT PSLVT
YLK KAGGPGI S PLASKHEA QVTT SVKPKQKQEPV VPTCPPPGDLSAADLMDPSLDKAAVKIQAAFKGYKVRKE
MKQQEGPVFSRTFGDTEAQVGDVLRLECVLATK TDMRACWLKDGIELTDGRHYHIDQLKDGTC SLLVTGLAPT
DSGRYTCQVSTKSGRVSHSACVVVSGTESEAESSSGGELDDAFRAARRLHRLFRTKSPAELSEEELFLSADE
GPGEPEEPADWQTYREDEFVCI RFESLAEARQAVTCFRNMFATMGIGVEISLGEQGP RGVEMRI GKVAPTVT
PAVPLAKTPGLQTS DAAPVFLTE LQNQDVQDGYPMSFDCVVTGQP VPSVRWFKD GKLEEDDHYMINEDQQGG
HQLIITAVVPADMGVYRCLAENSMGVSSTKAELRVELTSTDYDTAADATETSSYFSAQGYLSSREQEGTESDE
GQLPQVLEELKDLQVAPGTR LAKFQLKVKGYPA PKLYWFKD GQPLTSDHIRMTDKKTLHTEI VSVTREDSG
QYAA Y I S NAVGAA Y SARLLVRGPSEPEEK PASDVHERL VPPRI LEKFTPKKVKRGSSITFSVKVGH PAPS V
HWLKEEA EKGV LWIGPDTPGYTMAS SSKQHSLVLLDVGRQH QGTYTCIATNPAGQALCSASLHISGLAKEEEQ
ERVKEALISSFLQGT SQAVSAQMS ESAGFADLVGQSKGESLVAAEHA SHLSLA E VGT EEF LQKLSQIT E MVS
AKISQAKLQVPGGDSDEETKTPSASPRHGRSRPSSSVQESSSEEDGDSRGEIFDIYVVTADYLP LGAEQDAI
ILREGQYVEVLD SAHPLR WLVRTKPTKSSPSRQGWVSPAYL DKRLKLSPEWGPTEAPEFPGEAVSEDEYRTRL
SSVIQELLSSEQAFV GELQFLESHHMKHLERSPRVPA AVASQKTVIFRNVQDISHFHSSFLKELQCGCTDDDDV
AMCFIKNQEA FEKYLEFLVGRVQAESVVVSTPVQEFYKKYAEETLSAKDPTQPPPPPLQHYLEQPVERVQKYQ
ALLKELIRNKARNRQNCALLEQAYAVVSALPQRAENK LHVSLMENY PGTLEALGEP I RQGHFIVWEGAPGARM
PWKGHN RVLF RNYLVICKPRRDSRTDTFSYVFRNMK LSSIDLNDQVEGD DRAFEVWHEREDS VRKYL LQA
RTVILKNSWVKEICG IQRLAQPVWRPPEFE EELADCTAE LGETVKLACRVTGTPKPIVSWYKDKGKPEVVDPH
HILIEDPDG SCTLILDNLTGIDSGQYMCFAASAAGNASTLGKILVQVPPRFVNVKVRATPFVEGEDAQITCTVE
GAPYPQIRWYKDG TLLAPGNRYRMLNEPRSGVLV LVIQAASKEDLGHYECELVNRLGSTRGGGELYMQSPALR
ARDQHHREQIVAAVEERRPSP\*
>rs50033377\_ENSMUSP00000151217\_c.2637:A>G\_p.S880G

ENSMUST00000219084.3|Obscn-207|ENSMUSG00000061462|-|chr11:g.59020606:T>C
MDHSFSGAPRFLTRPKAFVVS VGKDATLSCQIVGNPTPHVSWEKDRQPV EAGARFLAQDGDVYRLTILDLAL
GDSGQYVCRARNAIGEAF AAVGLRVDSEGTCAEQAPHFLLRPTSIRVREGADATFRCRVGSGSPQPAVSWSKDG
RRLGPPDAPHVRVEEHGESSALRIR SARPRDGGTYEVR AENPLGSASAAAALVVDSDAEVAGPPGTSTATLLA
HLQQRREAMRAEGIPPSPPGAGTRTCTVTEGKHARLSCFVTGEPKPE TVWKKDGLVTEGRRHVVEDEQENF
VLKILFCKQSDRGLYTCTASNLVQGTYSSVLVVREPTVPFKKRLQDLEVREKESATFQCEVAQPATEAAWFK
EETRLWASAKYDIEEGTERRLTVRNVSADDDAVYICETTEGSR TVAELSVQGNLTRKLPKRTAVRTGDTAIF
WVELAVPEGPVRWLRNQ EEMVAGGRVAITAEGTCHTLTIFQCTLEDMGEVAFVSGGCRTTTQFCVSAPRRPPL
YPPADPVVKA KTES SVT LSW SAPPHGDRPVTIDGYVLEKRKLGAYAWSRCHEAGWLATTEFTITGV AEEGDFQ
FRVSAINHFGQGPYLEFP GTMHLVPM LAVKTP LKAVEAVEGGEVTF SVDLTVASSGEWFLDGEALKASSIYVI
RCDRTRHMLTIREV PARLHGAQLKFVANGIETS IQMVVRAALGLPSSKLPAAAAREVLAQLHEEAQLLAE LSD
QAAA V TWLKD GRELSLGP KYEMQVSAGRRALLVRDVAQDDAGLYECVSRGSR TAYQLLVQDITDGYRDWGPAG
PQKHMCKCAGAKIARYL GSSCYRFLQYDKGVWHWLEAALDTRQKGKTS SCSLHEKPKLVFAKQQAHSEVKA E
AGNATLSCEVTQAQTEVTWFKDGKLLSSSSKVRMEASGC SRRLVVQQAGKADAGEYSCEAGGQKLSFRLDVA
EPKLVFAKQQAHSEVKA EAGASATLSCEVAQAQTEVTWFKDGKLLSSSSKVRMEASGC SRRLVVQQAGKADA
GEYSCEAGGQKLSFRLDVAEPKMF AKEQQARSEVKA EAGASATLSCEVAQAQTEVTWFKDGKLLSSSSKVRM
EASGC SRRLVVQQAGKADAGEYSCEAGGQKLSFRLDVTEPKLVFAKEQQARSEVKA EAGNSATLSCEVAQAQ T
EVTWFKDGKLLSSSSKVRMEASGC SRRLVVQQAGKADAGEYSCEAGGQKLSFHLDVTEPKLVFAKEQQAHSEV
KAEAGASATLSCEVAQAQTEVTWFKDGKLLSSSSKVRMEASGC SRRLVVQQAGKADAGEYSCEAE GQKLSFR L
DVAEPKLVFAKEQQARSEVKA EAGASATLSCEVAQAQTEVTWFKDGKLLSSSSKVRVEASGC SRRLVVQQAGK
ADAGEYSCEAGGQKLSFRLDVAEPKLVFAKEQQANSEVKA EAGASATLSCEVAQAQTEVTWFKDGKLLSSSSK
VRVEASGC SRRLVVQQAGKADAGEYSCEAGGQKLSFRLDVAEPKLAFAKEQQAHSEVKA EAGASATLSCEVAQA
QTEVTWFKDGKLLSSSSKVRVEASGC SRRLVVQQAGKADAGEYSCEAGGQKLSFRLDVAEPKLVFAKEQQAH
SEVKA EAGASATLSCEVAQAQTEVTWFKDGKLLSSSSKVRVEASGC SRRLVVQQVGVKADAGEYSCEARGQKLS
FRLDVAEAESQIPERPSRREPLVVKHEHETIILTATIAAPSVAAVTWLKD GVEIRRSKRHEATSLGDTHLT LTVR
GAQVLD SAIYSCR V GKEGQDFPVQVEEVA AKFSKPLEPVEGELGGTVMLVCELSPEQAEV VWRGNTQLRPGK
RFQMTSEGPRRTLTVSGLREDDAEYVCE SRDDRTSARLTVK VPRVVKFTSGLS AMVAEEGQEATFQC VVSPS



DAGVTWYKDGMLQOPSEKFMVSESGASRSLTILGLTLEDAGQVTVAEAGASSAALRVREAPVLFKKKLEPQT
VEERTSVTLEVELTRPWPEVKWTRNAAVLTPSENVEIRAEGARHCLVLRVSGFADRGFFGCETPDDKTQAKLN
VEMRQVRLVVRGLQEVEAKEQGTASMDVELSHAEVEGSWTRDGLRLQPGPKCHLAVQGPVHILTLALSALQFQDSG
LVAFRAEGVHTSARLIVTELPVSFTRVLQDVVATQKEKVTLECELSRPVDVRWLKDGVELRAGKAIGIVAQGT
CRSLVIYRCETGDQGVYVCDALDAQTSASLRVQGRYTLIFRRVLAEDAGEVKFVAENAESRAHLRVKELPVT
LLRPLRDKIAMEKHRGVLECVSRASAQVRWFKGGVELQSGPKYEVVSDGLYRKLVINVDVQPEDEDTYTC DAG
NVKTSAQFFVEEQSITIVRGLKDMTVMEPAPAWFECETSIPSVRPPKWLLGKTVLQAGGNVGLQDGTVHRILT
LHKTCTMTGTPVHFTIGKSRSSAQLVVSVDIPVVLTRPLEPKAGRELQSVVLSCDFRPAPKAVQWYKDDTFLSP
SEKFKMALEGQMAELRILRLTPADAGVYRCQAGSAQSSAEVTVAREVTVIQPLQDAEAMEEGRVCFSCELSH
KDEDIEWSLNGTPLYNDSFHEISHEGCLHTLVLKSVRQADTGTVCATSPKVSVSARLVVKGPVVFLLKALDDV
SAEERGTTLTQCEVSDPEARVVWRKDGVELGSPDKYDFLHKAGARGLTVHDLSHEDAGLYTCVQGSKETQSKV
SVHDLHVGITKRLKTVEVLEGESECFEVLSSHESPSDPAVWTVGGKTVGGSGHFHAVRQGRKYTLTVKDAALS
DAGEVVSFVGLTSLKASLIIRERPVDTITKPLEDQRTTLGEDVMLSCELSRAGTSVRWLKDGKAIKRSQKYDLL
SEGTRAVLVVRKASLKDSGEYTCETEASKSTAKLCVEEKANRFTEELADLQVEEKGRAVFTCKTEHPASVVTW
RKGLLELRASGKHVPSQEGTLTKLTINALERTSDSYTCDIGQARTQARLLVHGQKVRVIEDLEDTAVQEGSS
AKFCCRIAPADYGPVHWFLDKTPHLSNELNEITVQPGGYHVLTLRQLALKDSGTVYFEAGDQRTSAAALRVTEK
PSIFSRPLTDVTVTEGEDTLTVCETTTVDSVSRWTKDGKTLRPSARCQLSHEGCAQQLLITATTPQDGGRYKC
EIGGASSSSIVRVHALPVRFRSLKDVVEVPEGKAATLRCVLSVAAPVVEWRHGDDVLKSSNKYSLRQEGAVLE
LVIRDLQFQDSGQYSCSFGDQTSATLTVKTSQAQFVGLKRNKEATEGTTVTLRCELTKEAPVEWKKGTETLR
NGDKYSLKQDGAVCELQICSLLVADAGEYSCVCGQEKTSATLTVKALLVHFVRRLRSKEATEGDTTTLQCELS
KAAPVEWRKGTETLRDGDYSLKQDGAVCELQIRSLTIADAGEYLCTCGQEKTSATLTVRGLPAKFIEDLRSQ
EATEGATAILRCELSKAAPVEWRKGSSETLKDGDYTLRQDGAVCELQIRGLAVVDTGTYSLPTKFTGLRNE
EATEGTMATLRCQMSKAAPVEWRKGSSETLRDGDYSLRQDGAMCELQIRGLTIEDSGEYTCVCGQEKTSATLS
VKALPPRFIEDLRSQEATEGTMATLRCQMSKAAPVEWRKGSSETLGDGGYSLRQNGAVCELQIHDLAVEDTGE
YSCVCGQEKTSATLNVKALPPKFTTEGLKKEEATEGTMVTLRQMSKEATVEWRKGAKTLSDDGGYSLRQDGAM
CELQICGLAVEDAGEYSCVCGQEKTSATLSVKALPPRFIEDLRSQEATEGTMATLRCQMSKAAPVEWRKGSSET
LRDGDYSLRQDGAVCELQIRDLAVEDAGEYLKQDGAVCELQIRGLTIEDSGEYTCVCGQEKTSATLSVKALPPRF
MSKAAPVEWRKGSSETLRDGDYSLRQDGAMCELQICDLAVEDTGDYSCVCGQEKTSATLSVKAPQVVFQQLQ
NLQAEEGSMASLRCELSVPNAAMVWSKGGLELQGDTRREARQQGCVAELLLRDLRREDAGEYSCVCGSQTSA
TLMVTAAPVRFRLRELQAQDVDEGATARLRCELSREAVSVEWRKGSLLQFPKAKYQMVQEGTTAELLVHGVEQE
DAGEYTC DAGHTQSIARLSVRAPKPKFKTDLQSTEQEAGGTARLCCQLSEAPGTPVQWLKEGVELHVGSKYE
MRRQGAVCELLIHGLEAKDTGEYACLVGGQKTLASLRVKEPEVTIVRGLVDMEVQADEDVEFTCKVQAGATD
VQWHLQGLPLQSNEVTEVAVLADGCTHVLQKGVTLLEDAGTVSFHVGGSSSAQLTVRVPEVTVLEPLKDVQL
SEGQDAHFRCLSRASGQEARWALGGVPLQCNEMNDITVEQGTLYLLTLHKVTLLEDAGTITLQVGSSESAQL
KVTAKNTVLRGLNVDALLEGGEALFECQLSQPEVAHTWLLDDEPVHTSEKVEVVYFENGLRHLLLLKLNKLPQ
DSRVTFFLAGDVVTS AFLTVRGWRLEVLEPPHDASVKAGMQVRFTCILSEAVPVGEATWYINGAAIQPDDTDW
TVTTDGSHHALTLNAQPQHAGEVTFFAARDAVASARLSVLALPDPPEDAEVVGRSDHSVTLVSWVAPMSDGGGG
LCGYRVEMKEASTGQWQLCHDLVPGPECVVDDLVPKTYRFRVAAVGPAGAGEPVHLPQMVKIAPAPAPAPAP
APAPETROAVVGEDICLEVAADGGEVWHKGTERRIQPGGHFEVLSRQORQMLVIKGFRTEDQGEYRCGPIQ
GLPSSGAATFNVVMTSGSGDEVPAQPSLPPEAAQEGDLHLLWEALARKRRMSREPTLDSISELPEEDSRVQHL
RQEAETAPDLSEGYSTADELARTGEADLSHTSSDDESRAGTPSLVTYLKKAGGPGISPLASKHEAQVTTSVK
PQKQQEPVVPPTCPPPGDLSAADLMDPSLDKAAVKIQAAFQKGYKVRKEMKQOQEGPVFSRTFGDTEAQVGDVLR
ECVLATKTDMRACWLKDGIELTDGRHYHIDQLKDGTCSLLVTLGLAPTDSGRYTCQVSTKSGRVSHSACVVVSG
TESEAESSSGGELDDAFRRAARRLHRLFRTKSPAELSEELFLSADEGPGEPEEPADWQTYREDENFVCIRFE
SLAEARQAVTCFRNMFMATMIGIVEISLGEQGPVEMRIGKVAPTVTPAVPLAKTPGLQTSDAAPVFLTELQN
QDVQDGYPMSFDCVVTGQPVPSVRWFKDGKLLLEDDHYMINEDQQGGHQLIITAVVPADMGVYRCLAENSMGV
SSTKAELRVELTSTDYDADAATETSSYFSAQGYLSSREQEGTESDEGQLPVLEELKDLQVAPGTRLAKFQL
KVKGYPAKLYWFKDGQPLTSDHIRMTDKKTLHTLEIVSVTREDSGQYAAIISNAVGAAYSSARLLVVRGPSE
PEEKPASDVHERLVPPRILEKFTPKKVKRGSSITFSVKVEGHPAPSVHWLKEEAEGVLWIGPDTPGYTMAS
SKQHSVLVLLDVGQRHQGTYTICATNPAGQALCSASLHISGLAKEEEQERVKEALISSFLQGTSAQVSAQMS
AGFADLVGQSKGESLVAEEAHSHLSLAEVGTTEFLQKLTSTIEMVSAKISQAKLQVPGGDSDEETKTPSASP
RHGRSRPSSSVQESSSEEDGDSRGEIFDIYVVTADYLLPLGAEQDAIILREGQYVEVLDSAPHLRVLVTRKPT
KSSPSRQGVVSPAYLDRKRLKLSPEWGPTEAPEFPEAVESEGYRTRLSVVIQELLSSEQAFVQELQFLES
HMLERSPRVPAAVASQKTVIFRNVDISHFHSSFLKELQVCEGTDVDDVAMCFIKNQEAFAKEYLEFLVGRVQAES
VVVSTPVQEFYKKAETLSAKDPTQPPPPPLQHYLEQPVVERVQKYQALLKELIRNKARNRQNCALLEQAYAV
VSALPQRAENKLVSLMENYPGTLEALGEPTRQGHFIVWEGAPGARMWPWKGNHRHVFLFRNYLVICPVRDR
TDTFSYVFRNMMKLSIDLNDQVEGDDRAFEVWHEREDESVRKYLLQARTVVIKNSWVKEICGIQORLAQPVWR
PPEFEEELADCTAELGETVKLACRVGTGPKPIVSWYKDGKPEVDPHLLIEDPDGSCSTLILDNLTGIDSGQY



SGTVYFEAGDQRTSAAALRVTEKPSIFSRPLTDVTVTEGEDLTLVCETTTVDSSVRWTKDGKTLRPSARCQLSH  
EGCQAQLLITATTPQDGGRYKCEIGGASSSSIVRVHALPVRFRRESLKDVEVPEGKAATLRCVLSVAAPVEWR  
HGDDVLKSSNKYSRQEGAVLELVIRDLQPDQSGQYSCSFGDQTTSATLTVKTSQAQFVQKLNKEATEGTTV  
TLRCELTKAEAPVEWKKGTETLRNGDKYSLKQDGAVCELQICSLLVADAGEYSCVCGQEKTSAITLVKALLVHF  
VRRLSKEATEGDTTTLQCELSKAAPVEWRKGTETLRDGDYSLKQDGAVCELQIRSLTIADAGEYLCTCGQE  
KTSATLTVRALPAKFKDSLKNEEATEGTTATLSCELSKAAPVWKKGPKTLQSGDKYVLRQDGAVCGLQIHGL  
TMADAGEYSCVCGQEKTSAITLVVRLPAKFIEDLRSQEATEGATAILRCLELSKAAPVEWRKGTETLRDGDYSL  
LRQDGAVCELQIRGLAVVDTGTYSLSLPTKFTTEGLRNEEATEGTMATLRCQMSKAAPVEWRKGTETLRDGDYSL  
LRQDGAMCELQIRGLTIEDSGEYTCVCGQEKTSAITLVKALPSRFIEDLRSQEATEGTMATLRCQMSKTAPVE  
WKKGSETLRDGGYSLRQDGPVCELQICDLAVEDAGEYSCVCGQEKTSAITLVKALPPRFIEDLRSQEATEG  
MATLRCQMSKAAPVEWRKGTETLRDGGYSLRQNGAVCELQIHDLAVEDTGEYSCVCGQEKTSAITLVKALPP  
RFIEDLRSQEATEGTMATLRCQMSKAAPVEWRKGTETLRDGGYSLRQDGAVCELQIHDLVEDAGQYSCVCG  
QEKTSAVLTVDALPPKFTTEGLKKEEATEGTMVTLRCQMSKEATVEWRKGAKTLSDGGRYSLRQDGAMCELQIC  
GLAVEDAGEYSCVCGQEKTSAITLVKALPPRFIEDLRSQEATEGTMATLRCQMSKAAPVEWRKGTETLRDGD  
YSLRQDGAVCELQIRDLAVEDAGEYLCVCGQEKTSAITLVKALPPRFIEDLRSQEATEGTMATLRCQMSKAAP  
VEWRKGTETLRDGDYSLRQDGAMCELQICDLAVEDTGDYSCVCGQEKTSAITLVKALPPRFIEDLRSQEARE  
GTVATLRMSKAAPVEWRKGTETLRDGDYSLRQEGNLCELQIRDLAVEDTEEYSCVCGQEKTSAITLVKAL  
PAKFIEDLRSQEAPESSTVTLRCKLSKKASVWKKGSETLRNGARYSLRQDGAVCELEIRDLTVEDTGEYSCT  
CGQERTSATLSIMAPQVVFQQLQNLQAEEGSMASLRCELSVNAAMVWSKGGLELQGDTRREARQQGCVAEL  
LLRDLRREDAGEYSCVCGQEKTSAITLVKALPPRFIEDLRSQEATEGTMATLRCQMSKAAPVEWRKGTETLRD  
PCAKYQMVQEGTTAELLVHGVEQEDAGEYTCDAHTQSIARLSVRAPKPKFKTDLQSTEQEAGGTARLCCQLS  
EAEFGTPVQWLKEGVELHVGSKYEMRRQGAVALLEHGLEAKDTGEYACLVGGQKTLASLRVKEPEVTVIRGL  
VDMVQADEDEFTCKVSQAGATDVQWHLQGLPLQSNVTEVAVLADGCTHVLQKGVTLLEDAGTVSFHVGGL  
SSSAQLTVRVPEVTVLEPLKDVQLSEGQDAHFRCLRSRASGQEARWALGGVPLQCNEMNDITVEQGTLYLLTL  
HKVTLLEDAGTITLQVGSSEEAQLKVTAKNTVLRGLENVDALEGGELFECQLSQPEVAHTWLLDDEPVHTS  
EKVEVYFENGLRHLKLNKLPQDSCRVTFLAGDVVTSFAITVTRGWRLEVPHPHDASARVSKAGMQRVFTCILS  
EAVPVGEATYINGAAIQPDDTWTVTDDGSHHALTSLNAQPPQHAGEVTFFAARDAVASARLSVLLALPDPEDA  
EAVGRSDHSVTLVSWVAPMSDGGGGLCGYRVMKEASTGQWQLCHDLVPGPECVDDLVPGKTYRFRVAAVGPA  
GAGEPVHLPQMVKIAPAPAPAPAPAPAPAPAPETRAVVEDICLELEVAADGGEVVWHKGTERRIQPGHFVLS  
RGQRQMLVIKGFRTEDQGEYRCGPIQGLPSSGAATFNVVMTSGSGDEVPAQPSLPPEAAQEGDLHLLWEALAR  
KRRMSREPTLDSISELPEEDSRVQHLRQEAETAPDLSEGYSTADELARTGEADLSHTSSDDESAGTPSLVT  
YLKAGGPGISPLASKHEAQVTTSVKPKQKQEPVPTCP PGDL SAADLMPSLDKAAVKIQAAFKGYKVRKE  
MKQQEGPVFSRTFGDTEAQVGDVLRLECVLATKTDMRACWLKDGIELTDGRHYHIDQLKDGTCSSLVVTGLAPT  
DSGRYTCQVSTKSGRVSHSACVVVSGTESEAESSSGGELDDAFRAARRLHRLFRTKSPAELSEELFLSADE  
GPGEPEPADWQTYREDENFVCIRFESLAEARQAVTCFRNMFATMGI GVEISLGEQGRGVEMRIGKVAPTVT  
PAVPLAKTPGLQTSDAAPVFLTELQNDVQDGYPMSFDCVVTGQVPSVSRWFKDGKLEEDHYMINEDQQGG  
HQLIITAVVPADMGVYRCLAENSMGVSSKAELRVELTSTDYDTAADATETSSYFSAQGYLSSREQEGTESDE  
GQLPQVLEELKDLQVAPGTRLAKFQLKVKGYPAKLYWFKDGGPLTSDHIRMTDKKTLHTLEIVSVTREDSG  
QYAAYSNAVGAAYSSARLLVRGPSEPEEKPASDVHERLVPPRILEKFTPKKVKRGSSITFSVKVEGHPAPSV  
HWLKEEAKEKGLVWIGPDTPGYTMASSSKQHSLLVLDVGRQHGTYYTCIATNPAGQALCSASLHISGLAKEEEQ  
ERVKEALISSFLQGTSAVSAQMSSESAGFADLVGQSKGESLVAEEAHSHLSLAEVGTEEFQKLTLSQITEMVS  
AKISQAKLQVPGGDSDEETKTPSASPRHRSRSPSSSVQESSSESEDGDSRGEIFDIYVVTADYLPGLAEQDAI  
ILREGQYVEVLDSAHPLRWLVRTKPKSSPSRQGWVSPAYLDKRLKLSPEWGPTEAPEFPGEAVSEDEYRTRL  
SSVIQELLSSQAFVQELQFLESHHMKHLERSPRVPAVASQKTVIFRNVQDISHFHSSFLKELQCGCTDDDV  
AMCFIKNQEAFEEKYLEFLVGRVQAESVVVSTPVQEFYKKYAEETLSAKDPTQPPPPPLQHYLEQVPERVQKYQ  
ALLKELIRNKARNRQNCALLEQAYAVVSALPQRAENKLVSLMENYPGTLEALGEPYRQGHFIVWEGAPGARM  
PWKGHNHRVFLFRNYLVICKPRRDSRTDFTSYVFRNMMKLSSIDLNDQVEGDDRAFEVWHEREDSVRKYLLQA  
RTVVIKNSWVKEICGIQQLAQPVWRPPEFEEELADCTAELGETVKLACRVTGTPKPIVSWYKDGKPVVDPH  
HILIEDPDGCTLILDLNLTGIDSGQYMCFAASAAGNASTLGKILVQVPPRFVNVKVRATPFVEGEDAQITCTVE  
GAPYPIRQYKDGTLTLLAPGNRYRMLNEPRSGVLVVIQAASKEDLGHYECLELVNRLGSTRGGGELYMQSPALR  
ARDQHHREQIVAAVEDTSVEGSAHSAQDQAAASVLWRLGSEALGPSPGDLPNTRQSEPPAFEEAASQIP  
GAASGTPVSPQPGTHKGLEQETTSSGSQGWVPIRVEGTAWPGAGTGQLLLDVHSQVIMETTQRTYVCQAPDT  
GVTRAPMSQVITIEDVQVQVGDMAQFDAVIEGHPPYIVTWYKGSTQLTSSARLSQRQDGTYSVLVTDVAPHDA  
GVYTCVANNAGGQVLCQAEELLVHGGDKLDAENQVYRRLKLSFYDYVQEEIGRGVFGFVKRVYHKGKMKMCAAKF  
IPLRSKTRAQAYQERDILATLGHPLVTGLLDQFETRKTLLIILILELCSSEELLDRLFKKGVVTEAEVKVYIQQL  
VEGLHYLHSHGILHLDIKPPNIMVHPAREDIKICDFGFAQKITPSEPQYSKYGSPEFVSPEIEQNPVSEGS  
DIWAMGVISYLSLTCSSPFAGESDRATLLNVLEGRVSWSSPTAAHLSEDAKDFIKATLQRTPRARPSTSQCLA  
HPWFLKSMPAEEAHFINTKQLKFLARSRWQRSLMSYKSILVMRSIPPELLQGPDPSPSLGVARHLRGEASGAS

SSSSSSDNELAPFARAKSLPPSPVTHSPLLHPRGFLRPSASLPEETEASMPPTADAAVPASPQASAGPPASPGCV  
PRHSVISSLFYQQAGEGAERGNKTSGAKRHPARRRHLLKGGYIARALPGLREPLMEYSLLEEEAAREEQASLM  
TKTPSFETALRLPSSSVREVPGRSHSLDNPPVTTGPSPEACKEQLLFPSTGLTHETTAKDRGHKEGFLQESV  
PFPMSGDSRPGKQEGSSQDSCRKPASSCHSELGSGSQEGCGPPSSQSLGSLPPQSLKELSTSCGPLFSEQ  
PQAAPFPTQVSPLLGESEKQDGSLSGEPVVPVSSSPGSASQVDASLDTEGLSEAGDTCDFTPPPQRPQEQAT  
TRKFSLESRGGYAGVAGYGTFAFGGDAGGMLGQGPLWARMAWAVSQSSEEQDEAATESPQPLES LGPIAEASG  
VPLRTSPSLTPWEEVEQVSLVQIRDLSGDAEAADTISLDISEVDPAYLNLSLDYDIKYLPFEFMI FRRVPKPI  
EQPESPGSETEAGQGLADFLLEAAWPWPGELGLRAGLEITEEPEEPGDLEALLGEAAVGRKRKWSPSRGLFQF  
PGRCLSGEEPVELGLRQVRKASMAHISRILKGRPEGPEREGPPRRKAGLASFRLSGLKGRDQELSDEAVVLGQ  
SVTLACQVLAQPTAQATWSKDGVLLESSGHLISSTLKNFQLLTIILVVKEEDLGTYTCCVSNPLGTAVTTGVL  
RKAERPSSSPREVEGELYKDAVLLVWKPVESECGPVTYIVQCCIEGGSWTTLASDISDCCYLTKLSRGGMYIF  
RTACVSKAGMGPISSPSEQVLLGGPNHLASEEESRRGRPAQLLPSTKTFAFQMQIRRGFRFSVVRQCREKASGR  
ALAAKIVPYQPEDKTAVLREYEALRHLHPHLAQLHAAYLSPRHLVLI LELCSGPELLPSLAERESYSESDVK  
DYLWQMLSATQYLHAQHILHLDLRSENMMVTEYNLLKVIDLGNASLDQEKVPAPENFKDYLETMAPELLEGG  
GAVPQTDIWAIGVTA FIMLSGEY PESSSEGTRDLQKGLRKLIRLSRCYAGLSGGAVAFQSSSLCAQPWGRPCA  
STCLQCGLWTEEGPTGSRPTPVTFPTVRLRAVFREREKRALLYKKNLAQVR\*  
>rs262091051\_ENSMUSP00000038264\_c.1696:G>A\_p.W566\*  
ENSMUST00000047441.14|Obscn-202|ENSMUSG00000061462|-|chr11:g.59023972:c>T  
MDHSFSGAPRFLTRPKAFVSVGKDATLSCQIVGNPTPHVSWEKDRQPVEAGARFRLAQDGDVYRLTILDLAL  
GDSGQYVCRARNAIGEAFVAVGLRVDSEGTCAEQAPHFLLRPTSIRVREGADATFRCRVGGSPQPAVSWSKDG  
RRLGPPDAPHVRVEEHGESSALRIRSARPRDGGTYEVRAENPLGSASAAAALVVDSDAEVAGPPGTSTATLLA  
HLQQRREAMRAEGIPPSPPGAGTRTCTVTEGKHARLSCFVTGEPKPEVWKKDQGLVTEGRRHVVEDEQENF  
VLKILFCKQSDRGLYTCTASNLVGQTYSSVLVVVREPTVPFKKRLQDLEVREKESATFQCEVAQPAEAAWFK  
EETRLWASAKYDIEEEGTERRLTVRNVSADDDAVYICETTEGSRVAELSVQGNLTKLPRKTAVRTGDTAIF  
WVELAVPEGPRWLRNQEEMVAGGRVAITAEGTCHTLTI FQCTLEDMGEVAFVSGGCRTTTQFCVSAPRRPPL  
YPPADPVVKKTESVTLWSAPPHGDRPVTIDGYVLEKRLGAYAWSRCHEAG\*LATTEFTITGVAEEGDFQ  
FRVSAINHFQGTLEFPGTMHLVPLAVKTPKAVEAVEGGEVTFVSDLTVASSGEWFLDGEALKASSIYVI  
RCDRTRHMLTIREVPARLHGAQLKFVANGIETSIQMVVRAALGLPSSKLPAAAAAREVLAQLHEEAQLLAE LSD  
QAAA VTLKDGRELSLGPKEYMQVSAGRRALLVRDVAQDDAGLYECVSRGSR TAYQLLVQDITDGYRDWGPAG  
PQKHMCKCAGAKIARYLGSSCYRFLQYDKGVWHLEAALDTRQKGTSSCSLHEKPKLVFAKQQAHSEVKA  
AGASATLSCEVAQAQTEVTFWKDGKLLSSSSKVRMEASGCSRRLVVQQAGKADAGEYSCEAGGQKLSFRLDVA  
EPKMFVFAKEQQARSEVKA EAGASATLSCEVAQAQTEVTFWKDGKLLSSSSKVRMEASGCSRRLVVQQAGKADA  
GEYSCEAGGQKLSFRLDVTEPKLVFAKEQQARSEVKA EAGASATLSCEVAQAQTEVTFWKDGKLLSSSSKVRM  
EASGCSRRLVVQQAGKADAGEYSCEAGGQKLSFRLDVAE PKLVFAKEQQARSEVKA EAGASATLSCEVAQAQ  
EVTWTFKDGKLLSSSSKVRMEASGCSRRLVVQQAGKADAGEYSCEAGGQKLSFHLDVTEPKLVFAKEQQAHSEV  
KAEAGASATLSCEVAQAQTEVTFWKDGKLLSSSSKVRMEASGCSRRLVVQQAGKADAGEYSCEAGGQKLSFR  
DVAE PKLVFAKEQQARSEVKA EAGASATLSCEVAQAQTEVTFWKDGKLLSSSSKVRVEASGCSRRLVVQQAGK  
ADAGEYSCEAGGQKLSFRLDVAE PKLVFAKEQQANSEVKA EAGASATLSCEVAQAQTEVTFWKDGKLLSSSSK  
VRVEASGCSRRLVVQQAGKADAGEYSCEAGGQKLSFRLDVAE PKLAFAKEQQAHSEVKA EAGASATLSCEVAQ  
AQTEVTFWKDGKLLSSSSKVRVEASGCSRRLVVQQAGKADAGEYSCEAGGQKLSFRLDVAE PKLAFAKEQQAH  
SEVKA EAGASATLSCEVAQAQTEVTFWKDGKLLSSSSKVRVEASGCSRRLVVQQAGKADAGEYSCEAGGQKLS  
FRLDVAE PKLAFAKEQQAHSEVKA EAGASATLSCEVAQAQTEVTFWKDGKLLSSSSKVRVEASGCSRRLVVQQ  
AGKADAGEYSCEAGGQKLFRLDVAE PKLVFAKEQQAHSEVKA EAGASATLSCEVAQAQTEVTFWKDGKLLSS  
SSKVRVEASGCSRRLVVQQVQKADAGEYSCEARGQKLSFRLDVAE AESQI PERPSRREPLVVEKHETIILTAT  
IAAPSVAAVTWLKDGVEIRRSKRHEATSLGDTHTLTVRGAQVLD SAIYSCRVGKEGQDFPVQVEEVAAKFSK  
LEPVEGELGTVTMLVCELSPEQAEVVWRGNTQLRPGKRFQMTSEGPRRTLTVSGLREDDAE EYVCE SRDDRT  
SARLTVKVPVVKFTSGLSAMVAEEGQEATFQCVVSPSDAGVTWYKDGMLQPSSEKFMVMEVGASRSLTILGL  
TLEDAGQVTEAEGASSAALRVREAPVLFKKKLEPQTVEERTSVTLEVELTRPWPEVKWTRNAAVLTPSENV  
EIRAEGARHCLVLRVGFADRGFFGCETPDDKTQAKLNVEMRQVRLVRLGQVEEAKEQGTASMDVELSHAEVE  
GSWTRDGLRLQPGPKHLAVQGVHILTL SALQPQDSGLVAFRAEGVHTSARLIVTEL PVSFTVRLQDVVATQ  
KEKVTLECELSRPVDVRLKDGVELRAGKAI GIVAQGTCSRSLVIYRCETGDQGVYVCDALDAQTSASLRVQGR  
TYTLIFRRVLAEDAGEVKFVAENAESRAHLRVKELPVTLLRPLRDKIAMEKHRGVLECVSRASAQVRWFKGG  
VELQSGPKYEVVSDGLYKRLVINDVQPEDEDYTGCDAGNVKTSAQFFVEEQSITIVRGLKDMTVM EPAPAWFE  
CETSIPSVRPPKWLGLKTVLQAGGNVLEQDGTVHRLTLHKTCSTMTGPVHFTIGKSRSSAQLVVS DIPVLT  
RPLEPKAGRELQSVVLSDFRPAKAVQWYKDDTPLSPSEKFKMALEGMALRILRLTPADAGVYRCQAGSA  
QSSAEVTVAREVTVIQPLQDAEAMEEGRVCFSCELSHKDEDI EWSLNGTPLYNDSFHEISHEGCLHTLVLKS  
VRQADTGTVCATSPKVSVSARLVVKGPVVFLKALDDVSAEERGTLTLQCEVSDPEARVVWRKDGVELGPSDK  
YDFLHKAGARGLTVHDLSDHEDAGLYTCQVGSKETQSKVSVHDLHVGITKRLKTVEVLEGESECSFCVLSHESP

SDPAVWTVGGKTVGGSGHFHAVRQGRKYTLTVKDAALSDAGEVVFVSVLGLTSKASLIIRERPVDTKPLEDQR  
TTLGEDVMLSCELSRAGTSVRWLKDGKAIKRSQKYDLLSEGTRAVLVVRKASLKDSGEYTCETEASKSTAKLC  
VEEKANRFTEELADLQVEEKGRAVFTCKTEHPASVVTWRKGLLELRASGKHVPSQEGTLTKLTINALERTDSD  
TYTCDIGQARTQARLLVHGQKVRVIEDLEDTAVQEGSSAKFCCRIAPADYGPVHWFLLDKTPLHSNELNEITVQ  
PGGYHVLTLRQLALKDSGTVYFEAGDQRTSAALRVTEKPSIFSRPLTDVTVTEGEDTLVCETTTVDSVSRWT  
KDGTKLRPSARCQLSHEGCQAQLLITATTPQDGGRYKCEIGGASSSSIVRVHALPVRFRESLKDVEVPEGKAA  
TLRCVLSVAAPVEWRHGDDVLKSSNKYSLRQEGAVLELVIRDLQPQDSGQYSCSFGDQTTSATLTVKTSQAQ  
FVGKLRNKEATEGTTVTLRCELTKAPVEWKKGTETLRNGDKYSLKQDGAVCELQICSLLVADAGEYSCVCGQ  
EKTSAVTVKALLVHFVRRRLRSKEATEGDTTTLQCELSKAAPVEWRKGTETLRDGDYSLKQDGAVCELQIRS  
LTIADAGEYLCTCGQEKTSATLTVRALPAKFKDSLKNEEATEGTTATLSCELSKAAPVTWKKGPKTLQSGDKY  
VLRQDGAVCGLQIHGLTMADAGEYSCVCGQEKTSATLTVRGLPAKFIEDLRSQEATEGATAILRCELSKAAPV  
EWRKGETLTKDGDYTLRQDGAVCELQIRGLAVVDTGTYSLSLPTKFTTEGLRNEEATEGTMATLRCQMSKAAPV  
EWRKGETLRDGDYSLRQDGAMCELQIRGLTIEDSGEYTCVCGQEKTSATLSVKALPPRFIEDLRSQEATEG  
TMATLRCQMSKAAPVEWRKGETLGDGGYSLRQNGAVCELQIHDLAVEDTGEYSCVCGQEKTSATLNVKALP  
PRFIEDLRSQEATEGTMATLRCQMSKAAPVEWRKGETLRDGGYSLRQDGAVCELQIHDLVEDAGQYSCVC  
GQEKTSAVLTVDALPPKFTTEGLKKEEATEGTMVTLRCQMSKEATVEWRKGAKTLSGGRYSLRQDGAMCELQI  
CGLAVEDAGEYSCVCGQEKTSATLSVKALPPRFIEDLRSQEATEGTMATLRCQMSKAAPVEWRKGETLRDGD  
RYSLRQDGAMCELQICDLAVEDTGDYSCVCGQEKTSATLSVKAPQVVFQQPLQNLQAEEGSMASLRCELSDVPN  
AAMVWSKGGLELQGDTRREARQQGCVAELLLRDLRREDAGEYSCVCGSQTTSATLMVTAAPVRFRLRLQAQDV  
DEGATARLRCELSREAVSVEWRKGSLLFPKAKYQMVQEGTTAEELLVHGVEQEDAGEYTC DAGHTQS IARLSV  
RAPKPKFKTDLQSTEQEAGGTARLCCQLSEAEPTPVQWLKEGVELHVGSKYEMRRQGAVCELLIHGLEAKDT  
GEYAACLVGQKTLASLRVKEPEVTIVRGLVDMEVQADEDEFTCKVSOAGATDVQWHLQGLPLQSNVEVAV  
LADGCTHVLQKGVTLLEDAGTVSFHVGGLSSAQLTVRVPEVTLEPLKDVQLSEGQDAHFRCRLSRASGQEA  
RWALGGVPLQCNEMNDITVEQGTLYLLTLHKVTLEDAGTITLQVGSSESAQLKVTAKNTVLRGLENDVALEG  
GEALFECQDSQPEVAHAHTWLLDDEPVHTSEKVEVVYFENGLRHLLLLKLNKLPQDSCRVTFLAGDVVTSAFITV  
RALPDPPELDAEAVGSRDHSVTLVWVAPMSDGGGLCGYRVMKEASTGQWQLCHDLVPGPEVCVDDLVPGKTY  
RFRVAAVGPAGAGEVPVHLPQMVKIAAPAPAPAPAPAPAPAPETRQAVVGEDICLELEVAADGGEVWHKGTERRI  
QPGGHFEVLSRQQRQMLVIKGFRTEDQGEYRCGPIQGLPSSGAATFNVMVTSVSGSDEVPAPQSLPPEAAQEGD  
LHLLWEALARKRRMSREPTLDSISELPEEDSRVQHLRQEAEEAPDLSEGYSTADELARTGEADLSHTSSDDE  
SRAGTPSLVTYLKKAGGPGISPLASKHEAQVTTSVKPKQKQEPVVPFCPPPGDLAADLMDPSLDKAAVKIQA  
AFKGYKVRKEMKQQEGPVFSRTFGDTEAQVGDVLRLECVLATKTDMRACWLKDGIELTDGRHYHIDQLKDGTC  
SLLVTVGLAPTDSGRYTCQVSTKSGRVSHSACVVVSGTESEAESSGGELDDAFRAARRLHRLFRFKSPAELS  
EEELFLSADEGPGEPEPADWQTYREDENFVCIRFESLAEARQAVTCFRNMFMATMGIGVEISLGEQGPGRVEM  
RIGKVAPTVTPAVPLAKTPGLQTSDAAPVFLTELQNDVQDGYPMSFDCVVTGQPVPSVRWFKDGKLEEDDH  
YMINEDQQGQHQLITAVVPADMGVYRCLAENSMGVSSTKAE LRVELTSTDYDTAADATSETSSYFSAQGYLSS  
REQEGTESDEGQLPQVLEELKDLQVAPGTRLAQFQKLVKGYPAKPLYWFKDQPLTSDHIRMTRDKTLHTLE  
IVSVTREDSGQYAAIISNAVGAAYSSARLLVRGPSEPEEKPASDVHERLVPPRILEKFTPKKVKRGSSTFSV  
KVEGHPAPSVHHLKEEAKEGVLWIGPDTPGYTMASSKQHSVLVLLDVGRQHGGTYTCIATNPAGQALCSASLH  
ISGLAKEEEQERVKEALISSFLQGTSAVSAQMSSEAGFADLVGQSKGESLVAAEAHSHLSLAEVGTTEEFLOK  
LTSQITEMVSAKISQAKLQVPGGDSDEETKTPSASPRHGRSRPSSSVQESSSESEDGDSRGEIFDIYVVTADY  
LPLGAEQDAIILREGQYVEVLDSAHPLRWLVRTKPTKSSPSRQGWVSPAYLDKRLKLSPEWGPTEAPEFPGEA  
VSEDEYRTRLSSVIQELLSSEQAFVGELOFLESHHMKHLERSPRVPAAVASQKTVIFRNVQDISHFHSSFLKE  
LQCGCTDDDVAMCFIKNQEAFAFEKYLEFLVGRVQAESVVVSTPVQEFYKKYAEETLSAKDPTQPPPPLOHYLE  
QPVERVQKYQALLKELIRNKARNRQNCALLEQAYAVVSALPQRAENKLVSLMENYPGTLEALGEPPIRQGHFI  
VWEGAPGARMPWKGNHRHVFLFRNYLVICKPRRDSRTDTFSYVFRNMMKLSSIDLNDQVEGDDRAFVWHERE  
DSVRKYLQARTVIKNSWVKEICGIQORLAQPVWRPPEFEELADCTAELGETVKLACRVTGTPKPIVSWYK  
DGKPEVDPHHILIEDPDGSCSTLILDNLTGIDSGQYMCFAASAAGNASTLGKILVQVPPRFVNVKVRATPFVEG  
EDAQITCTVEGAPYPQIRWYKDGTLAPGNRYRMLNEPRSGVLVLIQAASKEDLGHYECELVNRIGSTRGGG  
ELYMQSPALRARDQHHREQIVAAVEGAPSMQVTIEDVQVQVGDMAQFDAVIEGHPPPPIVTWYKGSTQLTSSAR  
LSQRQDGTYSVLVTDVAPHDAGVYTCVANNAGQVLCCKAELLVHGDKLDAENQVYRRLKHSFYDVQEEIGR  
GVFGFVKRVQHKGNMFCFAAKFIPLRSKTRAQAYQERDILATLGHPLVTGLLDQFETRKTLLILILELCSSEEL  
LDRLFKKGVVTEAEVKVYIQQLVEGLHYLHSHGILHLDIKPPNIMVHPAREDIKICDFGFAQKITPSEPOQS  
KYGSPELVQSPETIEQNPVSEGSDIWAMGVISYLSLTCSSPFAGESDRATLLNVLEGRVSWSSPTAAHLSDEAK  
DFIKATLQRTPRARPSTQCLAHWPFLKSMPEAAEFINTKQLKFLLRARSRWRSLMSYKSIIVMRSIPPELLQ  
GPPDSPSLGVARHLRGEASGSSSSSSSDNELAPFARAKSLPPSPVTHSPLLHPRGFRLRPSASLPEETEASMP  
TADAAPVSPQASAGPPASPGCVPRHSVIVSSLFYQOAGEGAERGNKTSGAKRHPARRRHLKGGYIARALPGLR  
EPLMEYSLLEEEAAREEQASLMTKTPSFETALRLPSSSVREVPGRSHSLDNPPVTTGPSPEACKEQLLFPST  
GLTHEHTAKDRGHKEGFLQESVPPFPMMSGDSRPGKQEGSSQDSCRGPASSCHSELGSGSQEGCGPPSSQSLG



SLPPQSLKKELSTSCGPLFSEQPQAAPFPTQVSPLLGSEKEPQDGSLSSEGPVVPVSSSPGSASQVDASLDTEG  
LSEAGDTCDFTPPPQRPQEQATTRKFSLESRRGGYAGVAGYGTFAFGGDAGGMLGQGPLWARMWAVSOSSEEQ  
DEAATESPQPLESGLPIAEASGVPLRTSPSLTPWEEVEQVSLVQIRDLSDGDAEAADTISLDISEVDPAYLNLS  
DLYDIKYLPEFEMI FRRVPKPIEQPESPGSETEAGQGLADFLLEEAAWPWPGEGLGLRAGLEITEEPEEPGDLEA  
LLGEAAVGRKRKWSPSRGLFQFPGRCLSGEEPVELGLRQVVKASMAHISRILKGRPEGPEREPPRKKAGLAS  
FRLSGLKGRDQELSDEAVVLGQSVTLACQVLAQPTAQTATWSKDGVLLESSEGHLLISSTLKNFQLLTLILVVKEE  
DLGTYTCCVSNPLGTAVTTGVLKKAERPSSSPRPEVGEELYKDAVLLVWKPVESECGPVTYIVQCCIEGGSWTTL  
ASDISDCCYLTKLSRGGMYIFRTACVSKAGMPYSSPSEQVLLGGPNHLASEEESRRRPAQLLPSTKTFAF  
QMQIRRGFRFSVVRQCREKASGRALAAKIVPYQPEDKTAVLREYEAALKRLLHHPHLAQLHAAAYLSPRHLVILEL  
CSGPELLPSLAERESYSESDVKDYLWQMSATQYLHAQHILHLDLRSENMMVTEYNLLKVIDLGNASLDQEK  
VPAPENFKDYLETMAPELLEGQAVPQTDIWAIGVTAIFIMLSGEYPESEGETRDLQKGLRKLIRLSRCYAGL  
SGGAVAFLOSSLCAQPWGRPCASTCLOCGWLTEEGPTGSRPTPVTFTVRLRAFVREKRRALLYKKNHLAG  
VR\*

>rs262091051\_ENSMUSP00000049737\_c.1696:G>A\_p.W566\*

ENSMUST00000052872.15|Obscn-203|ENSMUSG00000061462|-|chr11:g.59023972:C>T  
MDHSFSGAPRFLTRPKAFVSVGKDATLSCQIVGNPTPHVSWEKDRQFVEAGARFRLAQDGDVYRLTILDLAL  
GDSGQYVCRARNAIGEAFAAVGLRVDSEGTCAEQAPHFLLRPTSIRVREGADATFRCRVGGSPQPAVSWSKDG  
RRLGPPDAPHVVRVEEHGESSALRIRSARPRDGGTYEVRAENPLGSASAAAALVVDSDAEVAGPPGTSTATLLA  
HLQQRRREAMRAEGIPPSPPGAGTRTCTVTEGKHARLSCFVTGEPKPEVWKKDGQLVTEGRRHVVEDEQENF  
VLKILFCKQSDRGLYTCTASNLVGQTYSSVLVVVREPTVPFKKRLQDLEVREKESATFQCEVAQPAEAAWFK  
EETRLWASAKYDIEEGTERRLTVRNVSADDDAVYICETTEGSRVVAELSVQGNLTKLPRKTAVRTGDTAIF  
WVELAVPEGPVRWLRNQEEMVAGGRVAITAEGTCHTLTI FQCTLEDMGEVAFVSGGCRTTTQFCVSAPRRPPL  
YYPADPVVKAKTSSVTLWSAPPHGDRPVTIDGYVLEKRLKLGAYAWSRCHEAG\*LATTEFTITGVAAEGDFQ  
FRVSAINHFGQGPYLEFPGTMHLVPLAVKTPKAVEAVEGGEVTFVSDLTVASSGEWFLDGEALKASSIYVI  
RCDRTRHMLTIREVPARLHGAQLKFVANGIETSIQMVVRAALGLPSSKLPAAAAREVLAQLHHEEAQLLAEALS  
QAAAVTWLKDRELSSLGPKYEMQVSAGRRALLVRDQAQDDAGLYECVSRGSRRTAYQLLVQEPKLVFAKGGQAH  
SEVKAEAGNSATLSCEVTQAQTEVTFWFKDGKLLSSSKVRMEASGCRRLLVVQQAGKADAGEYSCEAGGQKLS  
FRLDVAEPKLVFAKGGQAHSEVKAEAGASATLSCEVAQAQTEVTFWFKDGKLLSSSKVRMEASGCRRLLVVQQ  
AGKADAGEYSCEAGGQKLSFRLDVAEPMVFAKEQQARSEVKAEAGASATLSCEVAQAQTEVTFWFKDGKLLSS  
SSKVRMEASGCRRLLVVQQAGKADAGEYSCEAGGQKLSFRLDVTEPKLVFAKEQQARSEVKAEVGN SATLSCE  
VAQAQTEVTFWFKDGKLLSSSKVRMEASGCRRLLVVQQAGKADAGEYSCEAGGQKLSFRLDVAEPKLVFAKEQ  
QARSEVKAEAGNSATLSCEVAQAQTEVTFWFKDGKLLSSSKVRMEASGCRRLLVVQQAGKADAGEYSCEAGGQ  
KLSFHLVDVTEPKLVFAKEQQAHSEVKAEAGASATLSCEVAQAQTEVTFWFKDGKLLSSSKVRMEASGCRRLLV  
VQQAGKADAGEYSCEAGGQKLSFRLDVAEPKLVFAKEQQARSEVKAEAGASATLSCEVAQAQTEVTFWFKDGK  
LSSSKVRVEASGCRRLLVVQQAGKADAGEYSCEAGGQKLSFRLDVAEPKLVFAKEQQANSEVKAEAGASATL  
SCEVAQAQTEVTFWFKDGKLLSSSKVRVEASGCRRLLVVQQAGKADAGEYSCEAGGQKLSFRLDVAEPKLAFA  
KEQQAHSEVKAEAGASATLSCEVAQAQTEVTFWFKDGKLLSSSKVRVEASGCRRLLVVQQAGKADAGEYSCEA  
GGQKLSFRLDVAEPKLAFAKEQQAHSEVKAEAGASATLSCEVAQAQTEVTFWFKDGKLLSSSKVRVEASGC  
RRLLVVQQAGKADAGEYSCEAGGQKLSFRLDVAEPKLAFAKEQQAHSEVKAEAGASATLSCEVAQAQTEVTFWFKD  
GKLLSSSKVRVEASGCRRLLVVQQAGKADAGEYSCEAGGQKLFRLDVAEPKLMFAKEQQAHSEVKAEAGAS  
ATLSCEVAQAQTEVTFWFKDGKLLSSSKVRVEASGCRRLLVVQQAGKADAGEYSCEAGGQKLSFRLDVAEPKLV  
FAKEQQAHSEVKAEAGASATLSCEVAQAQTEVTFWFKDGKLLSSSKVRVEASGCRRLLVVQQVQKADAGEYS  
CEARGQKLSFRLDVADTRLMFAKEQQARTEVKAEAGNSATLSCEVAQAQTEVTFWFKDGKLLSSSKVRVEASG  
CRRLLVVQQAGKADAGEYSCEAGGQKLSFRLDVAEAEESQIPERPSRREPLVVKHEHETIILTATIAAPSVAAVT  
WLKDGVEIRRSKRHEATSLGDTHLTVRGAQVLDSAIYSCRVGKEGQDFPVQVEEVAAKFSKPLEPVEGELGG  
TVMLVCELSPEQAEVWRCGNTQLRPGKRFQMTSEGPRRTTLTVSGLREDDAEYVCESTRDDRTSARLTVKVP  
VVKFTSGLSAMVAEEGQEAFTQCVCVSPSDAGVTWYKDGMLQPSSEKFMVVEGASRSLTILGLTLEDAGQVTV  
EAEGASSAALRVREAPVLFKKLEPQTEVERTSVTLEVELTRPWPEVKWTRNAAVLTPSENVEIRAEGARHC  
LVLSVGFADRGFFGCETPDDKTQAKLNVEMRQVRLVRLQVEVEAKEQGTASMDVELSHAEVEGSWTRDGLRL  
QPGPKCHLAVQGPVHILTLALSALQPQDSGLVAFRAEGVHTSARLIVTELPVSFTRVLQDVVATQKEKVTLECEL  
SRPVDVRWLKDGVELRAGKAI GIVAQGTCSRSLVIYRCETGDQGVYVCDALDAQTSASLRVQGRTYTLIFRRVL  
AEDAGEVKFVAENAESAHLRVKELPVTLRPLRDKIAMEKHRGVLECVSRSASAQVRWFKGGVLEQSGPKYE  
VSDGLYRKLVLINDVQPEDEDYTCDAAGNVKTSAQFTFVEEQSITIVRGLKDMTVMPEPAPWFECETSIPSVRP  
PKWLLGKTVLQAGGNVLEQDGTVHRLTLHKTCSTMTGPVHFTIGKSRSSAQLVVS DIPVFLTRPLEPKAGRE  
LQSVVLSCDFRPAPKAVQWKDDTPLSPSEKFKMALEGQMAELRILRLTPADAGVYRCQAGSAQS SAEVTVEA  
REVTVIQPLQDAEAMEEGRVCFSCELSHKDEDIEWSLNGTPLYNDSFHEISHEGCLHTLVLSVRQADTGTVC  
ATSPKVSVSARLVVKGKPVVFLKALDDVSAEERGTLLTQCEVSDPEARVVWRKDGVELGPSDKYDFLHKAGAR  
GLTVHDLSDHEDAGLYTCQVGSKETQSKVSVHDLHVGITRRLKTVVEVLEGECSFECVLSHESPSDPAVWTVGG

KTVGGSGHFHAVRQGRKYTLTVKDAALSDAGEVVFVSVLGLTSKASLIIRERPVDITKPLEDQRTTLGEDVMLS  
CELSRAGTSVRWLKDGKAIRKSQKYDLLSEGTRAVLVVRKASLKDSGEYTCETEASKSTAKLCVEEKANRFTE  
ELADLQVEEKGRAVFTCKTEHPASVVTWRKGLLELRASGKHVPSQEGTLKLTINALERTDSDTYTCDIGQAR  
TQARLLVHGQKVRVIEDLEDTAVQEGSSAKFCCRIAPADYGPVHWFLDKTPHLSNELNEITVQPGGYHVLTLR  
QLALKDSGTVYFEAGDQRTSAALRVTEKPSIFSRPLTDVTVTEGEDLTLVCETTTVDSSVRWTKDGKTLRPSA  
RCQLSHEGCAQLLITATTPQDGGRYKCEIGGASSSSIVRVHALPVRVFRESLKDVEVPEGKAATLRCVLSVA  
APVEWRHGDDVLKSSNKYSLRQEGAVLELVIDRLQPDQSGQYSCSFGDQTTSATLTVKTSQAQVFGKLRNKEA  
TEGTTVTLRCELTKKEAPVEWKKGTETLRNGDKYSLKQDGA VCELQICSLLVADAGEYSCVCGQEKTSATLTVK  
ALLVHFVRRRLRSKEATEGDTTTLQCELSKAAPVEWRKGTETLRDGDYSLKQDGA VCELQIRSLTIADAGEYL  
CTCGQEKTSATLTVRALPAKFKDSLKNEEATEGTTATLSCELSKAAPVTWKKGPKTLQSGDKYVLRQDGA VCG  
LQIHGLTMADAGEYSCVCGQEKTSATLTVRGLPAKFIEDLRSQEATEGATAILRCELSKAAPVEWRKGETL  
DGDYTLRQDGA VCELQIRGLAVVDGTYSLSLPTKFTTEGLRNEEATEGTMATLRCQMSKAAPVEWRKGETL  
DGDYSLRQDGA MCELQIRGLTIEDSGEYTCVCGQEKTSATLSVKALPSRFIEDLRSQEATEGTMATLRCQMS  
KTAPVEWKKGSETLRDGGYSLRQDGPVCELQICDLAVEDAGEYSCVCGQEKTSATLSIKALPPRFIEDLRSQ  
EATEGTMATLRCQMSKAAPVEWRKGETLGDGGYSLRQNGAVCELQIHDLAVEDTGEYSCVCGQEKTSATLN  
VKALPPRFIEDLRSQEATEGTMATLRCQMSKAAPVEWRKGETLRDGGYSLRQDGA VCELQIHDLVDEDAGQ  
YSCVCGQEKTSAVLTVDALPPKFTEGLKKEEATEGTMVTLRQMSKEATVEWRKGA KTLSDGGYSLRQDGA M  
CELQICGLAVEDAGEYSCVCGQEKTSATLSVKALPPRFIEDLRSQEATEGTMATLRCQMSKAAPVEWRKGET  
LRDGDYSLRQDGA VCELQIRDLAVEDAGEYLCVCGQEKTSATLSVKALPPRFIEDLRSQEATEGTMATLRCQ  
MSKAAPVEWRKGSKTLRQDGDYSLRQDGA MCELQICDLAVEDTGDYSCVCGQEKTSATLSVKALPPRFIEDL  
SQEAREGTVATLRCMSKAAPVEWRKGETLKDGDYSLRQEGNLCELQIRDLAVEDTEEYSCVCGQEKTSAT  
LSVKALPAKFIEDLRSQEAPESSTVTLRCKLSKKASVVWKKGSETLRNGARYSLRQDGA VCELEIRDLTVEDT  
GEYSCTCGQERTSATLSIMAPQVVFQQPLQNLQAEEGSMASLRCELSVPNAAMVWSKGGLELQGDTRREARQ  
GCVAELLLRDLRREDAGEYSCCTCGSQTTATLMVTAAPVRFRELAQDQVDEGATARLRCELSREAVSVEWRK  
GSLQLFPAKAKYQMVQEGTTAELLVHGVEQEDAGEYTC DAGHTQS IARLSVRAPKPKFKTDLQSTEQEAGGTAR  
LCCQLSEAEPTQVQWLKEGVELHVGSKYEMRRQGLVCELLIHGLEAKDTGEYACLGVGGKTLASLRVKEPEV  
TIVRGLVDMEVQADEDEFTCKVQAGATDVQAGHWLQVCEPVVPTCPGDLAADLMDPSLDKAAVKIQAAFQK  
FHVGGLSSSAQLTVRVPEVTVLEPLKDVQLSEGQDAHFRCRLSRASGQEARWALGGVPLQCNEMNDITVEQGT  
LYLLTLHKVTLEDAGTITLQVGSSESQAQLKVTAKNTVLRGLENVDALEGGEALFECQLSQPEVAHAWLLDD  
EPVHTSEKVEVVYFENGLRHLLLLKLNKLPQDSCRVTFLAGDVVTS AFLTVRGWRLEVLPEPHDASVKAGMQR  
FTCILSEAVPVGEATWYINGAAIQPDDTDWTVTTDGSHHALTLSNAQPHAGEVTF AARDAVASARLSVLALP  
DPEPDAEVVGRSDHSVTLSSWVAPMSDGGGGLCGYRVMKEASTGQWQLCHDLVPGPECVDDLVPGKTYRFRV  
AAVGPAGAGEPVHLPQMVKIAPAPAPAPAPAPAPAPETRAVVGEDI CLELEVAADGGVEVWHKGTERRIQPGG  
HFEVLSRGQOMLVIKGFRTEHQGEYRCGPIQGLPSSGAATFNVMVTS GSGDEVPAQPSLPPEAAQEGDLHLL  
WEALARKRRMSREPTLDSISELPEEDSRVQHLRQEAETAPDLSEGYSTADELARTGEADLSHTSSDDESRAG  
TBSLVTYLKKAGGPGISPLASKHEAQVTT SVKPKQKQEPVVPPTCPGDLAADLMDPSLDKAAVKIQAAFQK  
YKVRKEMKQQEGPVFSRTFGDTEAQVGDVLRLECVLATKTD MRACWLKDGIELTDGRHYHIDQLKDGTC SLLV  
TGLAPTDSGRYTCQVSTKSGRVSHSACVVVSGTESEAESSSGGELDDAFRRAARRLHRLFRTKSPAELSEEEL  
FLSADEGPGEPEEPADWQTYREDENFVCIRFESLAEARQAVTCFRNMFATMGIGVEISLGEQGRGVEMRIGK  
VAPTVPAPVPLAKTPGLQTSDAAPVFLTELQNDQVQDGYPMSFDCVVTGQPVPSVRWFKDGKLEEDDHYMIN  
EDQQGGHQLIITAVVPADMGVYRCLAENSMGVSTKAELRVELTSTDYDTAADATETSSYFSAQGYLSSRQE  
GTESDEGQLPQVLEELKDLQVAPGTRLAKFQKLVKGYPAKLYWFKDQGPLTTS DHIRMTDKKTLHTLEIVSV  
TREDSGQYAAIISNAVGAAYSSARLLVRGPSEPEEKPASDVHERLVPRI LEKFTPKKVKRGSSTF SVKVEG  
HPAPSVHWLKEEAKEGVLWIGPDTPGYTMASSSKQHSVLVLDVGRQHOGTYTCIATNPAGVALCSASLHISGL  
AKEEEQERVKEALISSFLQGTSAVSAQMSEAGFADLVGQSKGESLVAEEAHSHLSLAEVGTTEFLQKLT SQ  
ITEMVSAKISQAKLQVPGGDSDEETKTPSASPRHGRSRPSSSVQESSSESEDGDSRGEIFDIYVVTADYLP LG  
AEQDAIILREGQYVEVLDSAHPLRWLVRTKPTKSSPSRQGWVSPAYLDKRLKLSPEWGPTEAPEFPGEAVSED  
EYRTRLSSVIQELLSSEQAFVGELOFLESHHMKHLERSPRVPAAVASQKTVIFRNVQDISHFHSSFLKELQGC  
GTDDDVAMCFIKNQEA FEKYLEFLVGRVQAESVVVSTPVQEFYKKYAETLSAKDPTQPPPPPLQHYLEQ PVE  
RVQKYQALLKELIRNKARNRQNCALLEQAYAVVSALPQRAENKLVSLMENYPGTLEALGEP IRQGHFIVWEG  
APGARMFWKGNHRHVF LFRNYLVICKPRRDSRTDTFSYVFRNMMKLSSIDLNDQVEGDRAFEVWHEREDSVR  
KYLQARTVI IKNSWVKEICGIQQRLAQPVWRPPEFEELADCTAELGETVKLACRVTGTPKPIVSWYKDGK  
VEVDPHHILIEDPDG SCTLILDNLTGIDSGQYMCFAASAAGNASTLGKILVQVPPRFVNKVRATPFVEGEDAQ  
ITCTVEGAPYPQIRWYKDGTL LAPGNRYRMLNEPRSGVVLVLIQAASKEDLGHYECELVNRLGSTRGGGELYM  
QSPALRARDQHREQIVAAVEVTEQETKVPKKTVIEETITTVVKS PRGRRQSPGKSPRSRSPRRSASPRRPG  
LLAPERLYPPGTSPSRRLVEEQGRKAPVPALYVTEAEVHAPASQS QPKWLEVEETIEVRVKKTGSRGASPVRE  
MTRSREGILFTLPGGIPGRDPNANNNSNKS VYQEA RTWGPVAVHVGEFFIFQVDSVGNVDVVAASPEPEQVRA  
SQKEENTERQEGCS DGENTFLMEEPQD TDSLQGRDPKILTHNGRVLTLADLEDYVPQEGETFGCGDSTPSTP

DEPPCEVSVLQREI SEPTVGQP VLLNVGRPPGTGATPSFFRPGSQVHSPESVSFLLREAWSGPVSAAPWTSSSF  
HTHVQSSVDGSHGSFKTEVSTQTVSFGAVGETVTLHIDPDGGEAPGPSQG\*  
>rs262091051\_ENSMUSP00000020732\_c.1696:G>A\_p.W566\*  
ENSMUST00000020732.13|Obscn-201|ENSMUSG00000061462|-|chr11:g.59023972:C>T  
MDHSFSGAPRFLTRPKAFVSVGKDATLSCQIVGNPTPHVSWEKDRQPVEAGARFRLAQDGDVYRLTILDLAL  
GDSGQYVCRARNAIGEAFAAVGLRVDSEGTCAEQAPHFLLRPTSIRVREGADATFRCRVGSGPQPAVSWSKDG  
RRLGPPDAPHVRVEEHGESSALRIR SARPRDGGTYEVRAENPLGSASAAAALVVDSDAEVAGPPGTSTATLLA  
HLQQRREAMRAEGIPSPPGAGTRTCTVTTEGKHARLSCFVTGEPKPEVWKKDGLVTEGRRHVVEDEQENF  
VLKILFCQSDRGLYTCTASNLVGQTYSSVLVVREPTVPFKKRLQDLEVREKESATFQCEVAQPAATEAAWFK  
EETRLWASAKYDIEEEGTERRLTVRNVSADDDAVYICETTEGSRVVAELSVQGNLTKLPRKTAVRTGDTAIF  
WVELAVPEGPVRWLRNQEEMVAGGRVAITAEGTCHTLTI FQCTLEDMGEVAFVSGGCRTTTFQFCVSAPRRPPL  
YPPADPVVKAKTESSVTLWSAPPHGDRPVTIDGYVLEKRKLGAYAWSRCHEAG\*LATTEFTITGVAEEDGFQ  
FRVSAINHFGQGPYLEFPGTMHLVPLAVKTPKAVEAVEGGEVTFVSDTLTVASSGGEVFLDGEALKASSIYVI  
RCDRTRHMLTIREV PARLHGAQLK FVANGIETS IQMVVRAALGLPSSKLPAAAAREVLAQLHHEAQLLAE LSD  
QAAA VTWLKDGRELSLGPKEYMQVSAGRRALLVRDVAQDDAGLYECVSRGSRTAYQLLVQDITDGYRDWGPAG  
PQKHMCKCAGAKIARYLGS SCYRFLQYDKGVWHLEAALDTRQKGTSSCSLHEKPKLVFAKQQAHSEVKA  
AGNSATLSCEVTQAQTEVTWFKDGKLLSSSSKVRMEASGCSRRLVQVQAGKADAGEYSCEAGGQKLSFRLDVA  
EPKLVFAKQQAHSEVKAEGASATLSCEVAQAQTEVTWFKDGKLLSSSSKVRMEASGCSRRLVQVQAGKADA  
GEYSCEAGGQKLSFRLDVAEPKMFVFAKEQQARSEVKAEGASATLSCEVAQAQTEVTWFKDGKLLSSSSKVRM  
EASGCSRRLVQVQAGKADAGEYSCEAGGQKLSFRLDVTEPKLVFAKEQQARSEVKAEGVNSATLSCEVAQAQ  
EVTWFKDGKLLSSSSKVRMEASGCSRRLVQVQAGKADAGEYSCEAGGQKLSFRLDVAEPKLVFAKEQQARSEV  
KAEAGNSATLSCEVAQAQTEVTWFKDGKLLSSSSKVRMEASGCSRRLVQVQAGKADAGEYSCEAGGQKLSFHL  
DVTEPKLVFAKEQQAHSEVKAEGASATLSCEVAQAQTEVTWFKDGKLLSSSSKVRMEASGCSRRLVQVQAGK  
ADAGEYSCEAGGQKLSFRLDVAEPKLVFAKEQQARSEVKAEGASATLSCEVAQAQTEVTWFKDGKLLSSSSK  
VRVEASGCSRRLVQVQAGKADAGEYSCEAGGQKLSFRLDVAEPKLVFAKEQQANSEVKAEGASATLSCEVAQ  
AQTEVTWFKDGKLLSSSSKVRVEASGCSRRLVQVQAGKADAGEYSCEAGGQKLSFRLDVAEPKLVFAKEQQAH  
SEVKAEGASATLSCEVAQAQTEVTWFKDGKLLSSSSKVRVEASGCSRRLVQVQAGKADAGEYSCEAGGQKLS  
FRLDVAEPKLVFAKEQQAHSEVKAEGASATLSCEVAQAQTEVTWFKDGKLLSSSSKVRVEASGCSRRLVQVQ  
AGKADAGEYSCEAGGQKLSFRLDVAEPKLVFAKEQQAHSEVKAEGASATLSCEVAQAQTEVTWFKDGKLLSS  
SSKVRVEASGCSRRLVQVQAGKADAGEYSCEAGGQKLFRLDVAEPKLVFAKEQQAHSEVKAEGASATLSCE  
VAQAQTEVTWFKDGKLLSSSSKVRVEASGCSRRLVQVQAGKADAGEYSCEAGGQKLSFRLDVAEPKLVFAKEQ  
QAHSEVKAEGASATLSCEVAQAQTEVTWFKDGKLLSSSSKVRVEASGCSRRLVQVQVQKADAGEYSCEARGQ  
KLSFRLDVADTRLMFAKEQQARTEVKAEGNSATLSCEVAQAQTEVTWFKDGKLLSSSSKVRVEASGCSRRLV  
VQVQAGKADAGEYSCEAGGQKLSFRLDVAEAE SQIPERPSRREPLVVKEHETIILTATIAAPSVAAVTWLKDV  
EIRRSKRHEATSLGDTHLTVRGAQVLD SAIYSRCVKGEGQDFPVQVEEVAAKFSKPLEPVEGELGGTVMLVC  
ELSP EQAEVWRCGNTQLRPGKRFQMTSEGPRTLT VSGLE REDDAEYVCE SRDDRTSARLTVKVP RVVKFTS  
GLSAMVAEEGQEATFQCVVSPSDAGVTWYKDGMLQLPSEKFMV VESGASRSLTILGLTLEDAGQVTEAEGAS  
SSAALRVREAPVFLFKKLEPQTEVEERTSVTLEVELTRPWPEVKWTRNAAVLTPSENVEIRAEGARHCLVRSV  
GFADRGFFGCETPDDKTQAKLNVEMRQVRLVRGLQVEVEAKEQGTASMDVELSHA EVEG SWTRDGLRLQPGPKC  
HLAVQGPVHILTL SALQPQDSGLVAFRAEGVHTSARLIVTEL PVSFTRVLQDVVATQKEKVTLECELSRPVDV  
RWLKDGV ELRAGKAIGIVAQGT CRSLVIYRCETGDQGVYVCDALDAQTSASLRVQGRTYTLIFRRVLAEDAGE  
VKFVAENAESRAHLRVKELPVTLLRPLRDKIAMEKH RGVLECCQVSRASAQVRWFKGGVELQSGPKYEVVSDGL  
YRKLVIN DVQPEDEDTYTC DAGNVKTS AQFFVEEQSITIVRGLKDMT VMEPAPAWFECETSIPSVRPPKWL LG  
KTVLQAGGNVGL EQDGT VHRLTLHKTCSTMTGPVHFTIGKSRSSAQLVVSDIPVVLTRPLEPKAGRELQSVVL  
SCDFRPAKAVQWYKDDTPLSPSEKFKMALEGQMAELRILRLTPADAGVYRCQAGSAQSSAEVTVAEAREVTVI  
QPLQDAEAMEEGRVCFSCELSHKDEDIEWSLNGTPLYNDSFHEISH EGCLHTLVLSVSRQADTGTVCATSPKV  
SVSARLVVKGKPVVFLKALDDVSAEERGLTLTQCEVSDPEARVVRKDGVELG PSDKYDFLHKAGARGLTVHD  
LSHEDAGLYTCQVGSKETQSKVSVHDLHVGITKRLKTVEVLEGE SCFECVLSHESPSDPAVWTVGGKTVGGS  
GHFHAVRQGRKYTLTVKDAALSDAGEV VSVLGLT SKASLIIRERPV DITKPLEDQRTTLGEDVMLSCELSRA  
GTSVRWLKDGKAIRKSQYD LLESEGTRAVLVVRKASL KDSGEYTCETEASKSTAKLCVEEKANRTEELADLQ  
VEEKGRAVFTCKTEHPASVVTWRKGLLELRASGKHVPSQEGLTLKLTINALERTSDTYTCDIGQARTQARLL  
VHGQKVRVIEDLEDTAVQEGSSAKFCRIAPADYGPVHWFLDKTPLHSNELNEITVQPGGYHVLT LRQLALKD  
SGTVYFEAGDQRTS AALRVTEKPSIFSRPLTDVTVTEGEDLTLVCETTTVDSSVRWTKDGKTLRPSARCQLSH  
EGCQAQLLITATTPQDGGRYKCEIGGASSSIVRVHALPVRFRRESLKDVEVPEGKAATLRCVLSVAAPVEWR  
HGDDVLKSNKYSRLRQEGAVLELVIRDLQPQDSGQYSCSFGDQTT SATLTVKTS SAQFVGLRNKEATEGTTV  
TLRCELTK EAPVEWKKGTETLRNGDKYSLKQD GAVCELQICSLLVADAGEYSCVCGQEKT SATLTVKALLVHF  
VRRLSKEATEGDTTTLQCELSKAAPVEWRKGTETLRDGD RYSLKQD GAVCELQIRSLTIADAGEYLCTCGQE  
KTSATLTVRALPAKFKDSLKNEEATEGTTATLSCELSKAAPVWTKKGP KTLQSGDKYVLRQD GAVCGLQIHGL

TMADAGEYSCVCGQEKTSATLTVRGLPAKFIEDLRSQEATEGATAILRCELSKAAPVEWRKGETLKDGDYR  
 LRQDGA VCELQIRGLAVVDGTGYSLSPTKFTTEGLRNEEATEGTMATLRCQMSKAAPVEWRKGETL  
 LRQDGA MCELQIRGLTIEDSGEYTCVCGQEKTSATLSVKALPSRFIEDLRSQEATEGTMATLRCQMSK  
 TAPVE WKKGSETLRDGGRYSLRQDGPVCELQICDLAVEDAGEYSCVCGQEKTSATLSIKALPPRFIE  
 DLRSQEATEGTMATLRCQMSKAAPVEWRKGETLGDGGRYSLRQNGAVCELQIHDLAVEDTGEYSCV  
 CGQEKTSATLNVKALPPRFIEDLRSQEATEGTMATLRCQMSKAAPVEWRKGETLRDGGRYSLRQD  
 GAVCELQIHDLVDVDAQYSCVCGQEKTSAVLTVDALPPKFTEGLKKEEATEGTMVTLRCQMSKEA  
 TVEWRKGAKTLSDDGGRYSLRQDGA MCELQICGLAVEDAGEYSCVCGQEKTSATLSVKALPPRFIE  
 DLRSQEATEGTMATLRCQMSKAAPVEWRKGETLRDGGRYSLRQDGA MCELQICGLAVEDAGEYLCV  
 CGQEKTSATLSVKALPPRFIEDLRSQEATEGTMATLRCQMSKAAPVEWRKGETLRDGGRYSLRQD  
 GAVCELQICDLAVEDTGDYSCVCGQEKTSATLSVKALPPRFIEDLRSQEAREGTVATLRCRMSKA  
 APVEWRKGETLKDGDYRSLRQEGNLCELQIRDLAVEDTEEYSCVCGQEKTSATLSVKALPAKFIE  
 DLRSQEAPESSTVTLRCKLSKKASVVWKKGSETLRNGARYSLRQDGA VCELEIRDLTVEDTGEYS  
 CTGQERTSATLSIMAPQVVFQQPLQNLQAEEGSMASLRCELSVFNAMVWSKGGLELQGDTRREAR  
 QQGCVAELLLRDLRREDAGEYSCTCGSQTTATLMVTAAPVRFRELQAQDVDEGATARLRCELSRE  
 AVSVEWRKGS LQFPCA KYQMVQEGTTAELLVHGVEQEDAGEYTCDA GHTQSIARLSVRAPKPKFK  
 TDLQSTEQEAGGTARLCCQLSEAEFGTVPVQWLKEGVELHVGSKYEMRRQGA VCELLIHGLEAKD  
 TGEYACLVGGQKTLASLRVKEPEVTIVRGLVDMVEQADEDFEFTCKVSAQAGATDVQWHLQGL  
 PLSNEVTEVAVLADGCTHVLQKGVTLQDAGTVSFHVGGSSSAQLTVRVPEVTVLEPLKDVQL  
 SEGDHAFRCRLSRASGQEARWALGGVPLQCNEMNDITVEQGTLYLLTLHKVTLQVGSCSSE  
 AQLKVTAKNTVLRGLENVDALEGGELFECQLSQPEVA AHTWLLDDEPVHTSEKVEVVYFENGL  
 RHLKLNKLPQDSCRVTFLAGDVVTSFAFLTVRGRLEVLLEPPHDASVKAGMQVRFTCILSEAV  
 PVGEATWYINGAAIQPDDTDWTVTTDGS HHALTLSNAQPQHAGEVTF AARDAVASARLSVLAL  
 PDPEDA EVVGRSDHSVTL SWVAPMSDGGGGLCGYRVMKEASTGQWQLCHDLVPGPECVDDLV  
 PGKTYRFRVA AVGPA GAGEPVHLPQMVKIAPAPAPAPAPAPAPETRQAVVGEDICLELEVAADG  
 GEV VWHKGTERRIQPGHFVLSRGQRQMLVIKGFRTEDQGEYRCGPIQGLPSSGAATFNVMVTS  
 GSGDEVPAQPSLPPEAAQEGDLHLLWEALAR KRRMSREPTLDSISELPEEDSRVQHLRQEA  
 EETAPDLSEGYSTADELARTGEADLSHTSSDDESRAGT PSLVTY LKKAAGPGISPLASKHEA  
 QVTTSVKPKQKQEPVPTCP PPGDLSAADLMDPSLDKAAVKIQAAFKG YKVRKEMKQEGP  
 VSRTEFGDTEAQVGVDLRLECVLAKTKTDMRACWLKDGIELTDGRHYHIDQLKDGCTSLLV  
 TGLAPTDSGRYTCQVSTKSGRVSHSACVVVSGTESEAESSGGELDDAFRRAARRLHRLFR  
 TKSPAELSEELFLSADEGPGEPEEPADWQTYREDFVFCIRFESLAEARQAVTCFRNMFATM  
 GIGVEISLGEQGPGRVEMRIGKVAPTVP PAVPLAKTPGLQTSDAAPVFLTELQNDVQDGY  
 PMSFDCVVTGQPVPSVRWFKDGKLEEDDHVMINEDQGGHQLIITAVVPADMGVYRCLAENS  
 MGVSSTKAELRVELTSTDYDTAADATETSSYFSAQGYLSSREQEGTESDEGQLPQVLEEL  
 KDLQVAPGTRLAKFQLKVKGYPA PKLYWFKDQPLTTSDHIRMTDKKTLHTLEIVSVTRED  
 SGGYAAYSNAVGAAYSSARLLVRGPSEPEEK PASDVHERLVPPRI LEKFTPKVKRGSSIT  
 FSVKVEGHPAPSVHWLKEEA EKGVLWIGPDTPGYTMASSSKQHSVLVLDVGRQHOGTYTCI  
 ATNPAGQALCSASLHISGLAKEEQERVKEALISSFLGQTSQAVSAQMSESA GFADLVGQSK  
 GESLVAEEAHSHLSLAEVGT EEFLOKLTSTQITEMVSAKISQAKLQVPGGDSDEETKTP  
 SASPRHGRSRPSSSVQESSSEEDGDSRGEIFDIYVVTADYLP LGAEQDAIILREGQYVEV  
 LDSAHLRVLRTKPTKSSPSRQGWVSPAYLDRKRLKLSPEWGPTEAPEFPGEAVSEDEYR  
 TRLSSVIQELLSSEQAFV GELQFLESHHMKHLERSPRVPAAVASQKT VIFRNVDISHFHSS  
 FLKELQCGCTDDDVAMCFIKNQEA FEKYLEFLVGRVQAESVVVSTPVQEFYKKYAEETLSA  
 KDPTQPPPPPLQHYLEQPVERVQKYQALLKELIRNKARNRQNCALLEQAYAVVSALPQRAEN  
 KLHVSLMENYPGTLEALGEP I RQGHFIVWEGAPGARM PWKGHNHRVFLFRNYLVIC  
 KPRRDSRTDTFSYVFRNMMKLSSIDLNDQVEGD DRAFEVWHEREDSVRKYLLQARTVI  
 IKNSWVKEICGIQQRLAQPVWRPPEFEEELADCTAELGETVKLACRVTGT PKPIVSWYK  
 DGKPV EVDPHHILIEDPDGSCTLILDNLTGIDSGQYMCFAASAAGNASTLGKILVQVPP  
 RRVNKNVRATPFVEGEDAQITCTVEGAPY PQIRWYKDGTL LAPGNRYRMLNEPRSGVLV  
 LVIQAASKEDLGHYECELVNRLGSTRGGGELYMOSPALRARDQHHREQIVA AVEERRP  
 SPP\*

>rs262091051\_ENSMUSP00000151217\_c.1696:G>A\_p.W566\*  
 ENSMUST00000219084.3|Obscn-207|ENSMUSG00000061462|-|chr11:g.59023972:C>T  
 MDHSFSGAPRFLTRPKAFVSVGKDATLSCQIVGNPTPHVSWEKDRQPV EAGARFRLAQDGDVYR  
 LTILDLALGDSGQYVCRARNAIGEAFAAVGLRVDSEGTCAEQAPHLLRPTSIRVREGADATFRCR  
 VGGSPQPAVSWSKDGRRLGPPDAPHVRVEEHGESSALRIRSARPRDGGTYEVRAENPLGSASAA  
 AALVVDSAEVAGPPGTSTATILLAHLQORREAMRAEGIPPSPPGAGTRTCTVTEGKHARLS  
 CFVTGEPKPETVWKKDQGLVTEGRRHVVEDEQENFVLKILFCKQSDRGLYTCTASNLVGQ  
 TYSSVLVVVREPTVPFKKRLQDLEVREKESATFQCEVAQ PATEAAWFK EETRLWASAKYD  
 IEEGTERRLTVRNVSADDDAVYICETTEGSRVAELSVQGNLTKRLPRKTAVRTGDTAIF  
 WVLEAVPEGPVRWLRNQEEMVAGGRVAITAEGTCHTLIFQCTLEDMG EFAVSVGGCRITTTQ  
 FCVSA PRPPLYPADPVVKAKTESVTL SWSAPPHGDRPVTIDGYVLEKRLGAYAWSRCHEAG\*  
 LATTEFTITGVAAEEGDFQFRVSAINHFGQGPYLEFPGMTMHLVPM LAVKTP LKAVEAVEG  
 GEVTFVSDLTVASSGEWFLDGEALKASSIYVIRCDRTRHMLTIREV PARLHGAQLK FVANGI  
 ETSIQMVVRAALGLPSSKLPAAAAREVLAQLHEEAQLLAE LSDQAAA VTWLKDGRELSL  
 GPKYEMQVSAGRRALLVRDVAQDDAGLYECVSRGSR TAYQLLVQDITDGYRDWGPAG

PQKHMCKCAGAKIARYLGSSCYRFLQYDKGVWHLEAALDTRQGKGTSSCSLHEKPKLVFAKGQQAHSVEKAE
AGNSATLSCEVTQAQTEVTFWKDGKLLSSSSKVRMEASGCSRRLLVQAGKADAGEYSCEAGGQKLSFRLDVA
EPKLVFAKGQQAHSVEKAEAGASATLSCEVAQAQTEVTFWKDGKLLSSSSKVRMEASGCSRRLLVQAGKADA
GEYSCEAGGQKLSFRLDVAEPKMFVFAKEQQARSEVKAEGASATLSCEVAQAQTEVTFWKDGKLLSSSSKVRM
EASGCSRRLLVQAGKADAGEYSCEAGGQKLSFRLDVTEPKLVFAKEQQARSEVKAEGNSATLSCEVAQAQT
EVTWFKDGKLLSSSSKVRMEASGCSRRLLVQAGKADAGEYSCEAGGQKLSFHLDVTEPKLVFAKEQQAHSEV
KAEAGASATLSCEVAQAQTEVTFWKDGKLLSSSSKVRMEASGCSRRLLVQAGKADAGEYSCEAGGQKLSFRL
DVAEPKLVFAKEQQARSEVKAEGASATLSCEVAQAQTEVTFWKDGKLLSSSSKVRVEASGCSRRLLVQAGK
ADAGEYSCEAGGQKLSFRLDVAEPKLVFAKEQQANSEVKAEGASATLSCEVAQAQTEVTFWKDGKLLSSSSK
VRVEASGCSRRLLVQAGKADAGEYSCEAGGQKLSFRLDVAEPKLAFAKEQQAHSEVKAEGASATLSCEVAQ
AQTEVTFWKDGKLLSSSSKVRVEASGCSRRLLVQAGKADAGEYSCEAGGQKLSFRLDVAEPKLVFAKEQQAH
SEVKAEGASATLSCEVAQAQTEVTFWKDGKLLSSSSKVRVEASGCSRRLLVQVQKADAGEYSCEARGQKLS
FRLDVAEAEESQIPERPSRREPLVVKHEHETIILTATIAAPSVAAVTWLKDGVERRSKRHEATSLGDTHTLTVR
GAQVLDSAIYSCRVGKEGQDFPVQVEEVAAKFSKPLEPVEGELGGTVMLVCELSPEQAEVVRWCNTQLRPGK
RFQMTSEGPRRTLTVSGLREDDAEYVCESRDDRTSARLTVKVRVVKFTSGLSAMVAEEGQEAFTQCVVSPS
DAGVTWYKDGMLQVPESEKFMVVEGASRSLTILGLTLEDAGQVTEAEGASSAALRVREAPVLFKFKLEPQT
VEERTSVTLEVELTRPWPEVKWTRNAAVLTPSENVEIRAEGARHCLVLRVSVGFADRGFFGCEPDDKTQAKLN
VEMRQVRLVRLQVEEVAKEQGTASMDVELSHAEEVGSWTRDGLRLQPGPKCHLAVQGPVHIILTSALQPDQSG
LVAFRAEGVHTSARLIVTELPVSFTRVLQDVVATQKEKVTLECELSRPVDVRLWKDGVLELRAGKAIGIVAQGT
CRSLVIYRCETGDQGVYVCDALDAQTSASLRVQGRYTLIFRRVLAEDAGEVKFVAENAESRAHLRVKELPVT
LLRPLRDKIAMEKHRGVLECVSRASAQVRWFKGGVELQSGPKYEVVSDGLYRKLVINQVPEDEDTYCDAG
NVKTSAQFFVVEEQSITIVRGLKDMTVMPEPAPAWFECETSIPSVRPPKWLGLKTVLQAGGNVLEQDGTVHRLT
LHKTCSTMTGPVHFTIGKSRSSAQLVVSDIPVVLTRPLEPKAGRELQSVVLSCDFRPAPKAVQWYKDDTPLSP
SEKFKMALEGQMAELRILRLTPADAGVYRCQAGSAQSSAEVTVAEAREVTVIQPLQDAEAMEEGRVCFSCELSH
KDEDIEWSLNGTPLYNDSFHEISHEGCLHTLVLKSVRQADHTGTVCATSPKVSVSARLVVKGKPVVFLKALDDV
SAERGLTLTQCEVSDPEARVVWRKDGVELGSPDQYDFLHKAGARGLTVHDLSHEDAGLTYCQVGSKETQSKV
SVHDLHVGITKRLKTVEVEKESCFEVLSSHESPSDPAVWTVGGKTVGGSGHFHAVRQGRKYTLTVKDAALS
DAGEVVFVSVLGLTSKASLIIRERPVDITKPLEDQRTTLGEDVMLSCELSRAGTSVRWLKDGKAIKRSQKYDLL
SEGTRAVLVVRKASLKDSGEYTCETEASKSTAKLCVEEKANRFTTELADLQVEEKGRAVFTCKTEHPASVVTW
RKGLLELRASGKHVPSQEGTLTKLTINALERTSDTYTCDIGQARTQARLLVHGQKVRVIEDLEDTAVQEGSS
AKFCCRIPADYGPVHWFLLDKTPLHSNELNEITVQPGGYHVLTLRQLALKDSGTVYFEAGDQRTSAAALRVTEK
PSIFSRPLTDVTVTEGEDTLVCETTTTVDSSVRWTKDGKTLRPSARCQLSHEGCAQLLITATTPQDGGRYKC
EIGGASSSSIVRVHALPVRFRESLKDVEVPEGKAATLRCVLSVAAPVEWRHGDDVLKSSNKYSLRQEGAVLE
LVIRDLQPDQSGQYSCSFGDQTTSATLTVKTSQAQFVGLKRNKEATEGTTVTLRCELTKAPVEWKKGTETLR
NGDKYSLKQDGAVCLELQICSLLVADAGEYSCVCGQEKTSATLTVKALLVHFVRRRLRSKEATEGDTTTLQCELS
KAAPVEWRKGTETLRDGDYSLKQDGAVCLELQIRSLTIADAGEYLCTCGQEKTSATLTVRGLPAKFIEDLRSQ
EATEGATAILRCELSKAAPVEWRKGSSETLKDGDYTLRQDGAVCLELQIRGLAVVDTGTYSLPTKFTTEGLRNE
EATEGTMATLRCQMSKAAPVEWRKGSSETLRDGDYSLRQDGAVCLELQIRGLTIEDSGEYTCVCGQEKTSATLS
VKALPPRFIEDLRSQEATEGTMATLRCQMSKAAPVEWRKGSSETLGDGGYSLRQNGAVCELOIHDLAVEDTGE
YSCVCGQEKTSATLNVKALPPKFTTEGLKKEEATEGTMVTLRQMSKEATVEWRKGAKTLSDGGRYSLRQDGA
MCELQICGLAVEDAGEYSCVCGQEKTSATLSVKALPPRFIEDLRSQEATEGTMATLRCQMSKAAPVEWRKGS
LRDGDYSLRQDGAVCLELQIRDLAVEDAGEYLCVCGQEKTSATLSVKALPPRFIEDLRSQEATEGTMATLRCQ
MSKAAPVEWRKGSKTLRQDGDYSLRQDGAVCLELQICDLAVEDTGDYSCVCGQEKTSATLSVKAPQVVFQQLPQ
NLQAEEGSMASLRCELSVNAAMVWSKGGLELQGDTRREARQQGCVAELLLRDLRREDAGEYSCTCGSQTTSA
TLMVTAAPVRFRLRELQAQDVDEGATARLRCLELSREAVSVEWRKGSLLQFPKAKYQMVQEGTTAELLVHGVEQE
DAGEYTCDAAGHTQSIARLSVRAPKPKFKTDLQSTEQEAAGTARLCCQLSEAEPTPVQWLKEGVELHVGSKYE
MRRQGAVCCELLIHGLEAKDTGEYACLVGQKTLASLRVKEPEVTIVRGLVDMEVQADEDEVEFTCKVSOAGATD
VQWHLQGLPLQSNEVTEVAVLADGCTHVLQKGVTLLEDAGTVSFHVGGSSSAQLTVRVPEVTVLEPLKDVQL
SEGQDAHFRCRLSRASGQEARWALGGVPLQCNEMNDITVEQGTLYLLTLHKVTLEDAGTITLQVGSCEAQL
KVTAKNTVLRGLENVDALEGGEALFECQLSQPEVAHTWLLDDEPVHTSEKVEVVYFENGLRHLLLLKLNLPQ
DSCRVTFLAGDVVTSFALTVRGWRLEVLEPPHDASVKAGMQVRFTCILSEAVPVGEATWYINGAAIQPDDTDW
TVTTDGGSHALTLNSAQPQHAGEVTFAAARDAVASARLSVLALPDPPEDAEAVVGRSDHSVTLVSWVAPMSDGGG
LCGYRVEMKEASTGQWQLCHDLVPGPECVVDDLVPKGYTRFRVAAVGPAGAGEPVHLPQMVKIIAPAPAPAP
APAPETRAQAVNVGEDICLEVAADGGEVVDHKLGTIERIQPGHFVLSRGRQMLVIKGFRTEDQGEYRCGPIQ
GLPSSGAATFNVVMTSGSGDEVPAPQPSLPPPEAAQEGDLHLLWEALARKRRMSREPTLDSISELPEEDSRVQHL
RQEAETAPDLSEGYSTADELARTGEADLSHTSSDDESRAGTPSLVTYLKKAGGPGISPLASKHEAQVTTSVK
PQKQQEPVVPTCPPPGDLSAADLMDPSLDKAAVKIQAFAFKGYKVRKEMKQOEGPVFSRTFGDTEAQVGDVLR
ECVLATKTDMRACWLKDGIELTDGRHYHIDQLKDGTCSSLVTLGLAPTDGGRYTCQVSTKSGRVSHSACVVVSG





SSAALRVREAPVLFKKKLEPQTVVEERTSVTLELEVELTRPWPEVKWTRNAAVLTPSENVEIRAEGARHCLVLRVSV
GFADRGFFGCETPDDDKTQAKLNVEMRQVRLVVRGLQVEVEAKEQGTASMDVELSHAEEVGSWTRDGLRLQPGPKC
HLAVQGPVHILTLALSALQPQDSGLVAFRAEGVHTSARLIVTEL PVSFTRVLQDVVATQKEKVTLECELSRPVDV
RWLKDGVLELRAGKAIGIVAQGTCSRSLVIYRCETGDQGVYVCDALDAQTSASLRVQGRTYTLIFRRVLAEDAGE
VKFVAENAESRAHLRVKELPVTLLRPLRDKIAMEKHRGVLECVSRASAQVRWFKGGVELQSGPKYEVVSDGL
YRKLVINVDVQPEDEDTYTCDAENVKTSAQFFVVEEQSITIVRGLKDMTVMPEPAPAWFECETSIPSVRPPKWL
KTVLQAGGNVGLQDGTVHRLTLHKTCSTMTGPVHFTIGKSRSSAQLVVS D I PVVLRTRPLEPKAGRELQSVVL
SCDFRPAPKAVQWYKDDTPLSPSEKFKMALEGQMAELRILRLTPADAGVYRCQAGSAQSSAEVTVAREVTVI
QPLQDAEAMEEGRVCFSELSHKDEDEIWSLNGTPLYNDSFHEISHEGCLHTLVLKSVRQADTGTVCATSPKV
SVSARLVVKGKPVVFLKALDDVSAEERGLTLTQCEVSDPEARVVWRKDGVELGSPDKYDFLHKAGARGLTVHD
LSHEDAGLYTCQVGSKETQSKVSVHDLHVGITKRLKTVEVLEGESECFEVLSSHESPDPAVWTVGGKTVGGS
GHFHAVRQGRKYTLTVKDAALSDAGEVVSVLGLTSKASLIIRERPV DITKPLEDQRTTLGEDVMLSCELSRA
GTSVRWLKDGKAIRKSQKYDLLSEGTRAVLVVRKASLKDSGEYTCETEASKSTAKLCVEEKANRFTBELADLQ
VEEKGRAVFTCKTEHPASVVTWRKGLLELRASGKHVPSQEGTLTKLTINALERTSDTYTCDIGQARTQARLL
VHGQKVRVIEDLEDTAVQEGSSAKFCCRIAPADYGPVHWF LDKTPLHSNELNEITVQPGGYHVLTLRQLALKD
SGTVYFEAGDQRTSAALRVTEKPSIFSRPLTDVTVTEGEDTLTVCE TTTVDSSVRWTKDGKTLRPSARCQLSH
EGCQAQLLITATTPQDGGRYKCEIGGASSSSIVRVHALPVRFRRESLKDVEVPEGKAATLRCVLSVAAPVEWR
HGDDVLKSSNKYSLRQEGAVLELVIRDLQPQDSGQYSCSFGDQTT SATLTVKTS SAQFVGKLRNKEATEGTTV
TLRCELTKEAPVEWKKGTETLRNGDKYSLKQDGA VCELQICSLLVADAGEYSCVCGQEKTSATLTVKALLVHF
VRLRSKEATEGDTTTLQCELSKAAPVEWRKGTETLRDGD RYSLKQDGA VCELQIRSLTIADAGEYLCTCGQE
KTSATLTVRALPAKFKDSLKNEEATEGTTATLSCELSKAAPVTWKKGPKTLQSGDKYVLRQDGA VCGLQIHGL
TMADAGEYSCVCGQEKTSATLTVRGLPAKFIEDLRSQEATEGATAILRCELSKAAPVEWRKGS ETLKDGD RYT
LRQDGA VCELQIRGLAVVDGTYS SLPKTFTEGLRNEEATEGTMATLRCQMSKAAPVEWRKGS ETLRDGD RYS
LRQDGA MCELQIRGLTIEDSGEYTCVCGQEKTSATLSVKALPSRFIEDLRSQEATEGTMATLRCQMSKTAPVE
WKKGSETLRDGGRYSLRQDGPVCELQICDLAVEDAGEYSCVCGQEKTSATLSIKALPPRFIEDLRSQEATEGT
MATLRCQMSKAAPVEWRKGS ETLGDGGRYSLRQDGA VCELQIHDLAVEDTGEYSCVCGQEKTSATLNVKALPP
RFIEDLRSQEATEGTMATLRCQMSKAAPVEWRKGS ETLRDGGRYSLRQDGA VCELQIHDLVEDAGQYSCVCG
QEKTSAVLTVDALPPKFTTEGLKKEEATEGTMVTLRCQMSKEATVEWRKGAKT LSKDGGRYSLRQDGA MCELQIC
GLAVEDAGEYSCVCGQEKTSATLSVKALPPRFIEDLRSQEATEGTMATLRCQMSKAAPVEWRKGS ETLRDGD R
YSLRQDGA VCELQIRDLAVEDAGEYLCVCGQEKTSATLSVKALPPRFIEDLRSQEATEGTMATLRCQMSKAAP
VEWRKGS KTLRDGD RYSLRQDGA MCELQICDLAVEDTGDYSCVCGQEKTSATLSVKALPPRFIEDLRSQEARE
GTVATLRCRMSKAAPVEWRKGS ETLKDGD RYSLRQEGNLCELQIRDLAVEDTEEYSCVCGQEKTSATLSVKAL
PAKFIEDLRSQEAPESSTVTLRCKLSKKASVVWKKGSETLRNGARYSLRQDGA VCELEIRDLTVEDTGEYSCT
CGQERTSATLSIMAPQVVFQQLQNLQAEEGSMASLRCELSVPNAAMVWSKGGLELQGDTRREARQQGCVAEL
LLRDLRREDAGEYSC TCGSQTT SATLMVTAAPVRFLELQAQDVDEGATARLRCELSREAVSVEWRKGS LQFL
PCAKYQMVQEGTTAELLVHGVEQEDAGEYTC DAGHTQSIARLSVRAPKPKFKTDLQSTEQEAGGTARLCCQLS
EAEFGPTPVQWLKEGVELHVGSKYEMRRQGA VCELLIHGLEAKDTGEYACLVGGQKTLASLRVKEPEVTIVRGL
VDMEVQADEDEFTCKV SQAGATDVQWHLQGLPLQSNEVTEVAVLADGCTHV LQLKGVTL EDAGTVSFHVGGL
SSSAQLTVRVPEVTVLEPLKDVQLSEGQDAHFRCRLSRASGQEARWALGGVPLQCNEMNDITVEQGTLYLLTL
HKVTLEDAGTITLQVGS CSSEAQLKVTAKNTVLRGLENDVALEGGEALFECQLSQPEVA AHTWLLDDEPVHTS
EKVEVVYFENGLRHLL LLLKNLKPQDSCRVTFLAGDVVTS AFLTVRGWRLEVLEPPHDASVKAGMQVRF TCILS
EAVPVGEATWYINGAAIQPDDTDWTVTTDGS HHALTLSNAQPQHAGEVTF AARDAVASARLSVLA LDPDPEDA
EVVGRSDHSVTL SWVAPMSDGGGGLCGYRVMKEASTGQWQLCHDLVPGPECVVDDLVP GKTYRFRVA AVGPA
GAGEPVHLPQMVKIAPAPAPAPAPAPAPAPETRQAVVGEDICLELEVAADGGEV VWHKGTERRIQPGHFVLS
RGQRMLVIKGFRTEDQGEYRCGPIQGLPSSGAATFNVM TSGSGDEVPAQPSPLPPEAAQEGDLHLLWEALAR
KRRMSREPTLDSISELPEEDSRVQHRLRQEA EETAPDLSEGYSTADELARTGEADLSHTSSDDES RAGTPSLVT
YLK KAGGPGISPLASKHEAQV TTSVKPQKQEPVPTCP PPGDLSAADLMDPSLDKAAVKIQA AFKGYKVRKE
MKQQEGPVFSRTFGDTEAQVGDVLRLECVLATKTD MRACWLKDGIELTDGRHYHIDQLKDGTC SLLVTGLAPT
DSGRYTCQVSTKSGRVSHSACVVVSGTESEAE SSSGGELDDAFRAARRLHRLFR TKSPAELSEELFLSADE
GPGEPEEPADWQTYREDEFVCIREFESLAEARQAVTCFRNM FATMIGVEISLGEQGPGRVEMRI GKVAPTVT
PAVPLAKTPGLQTS DAAPVFLTELQNDVQDGYPMSFDCVVTGQVPVPSVRWFKDGKLEEDDHYMINEDQQGG
HQLIITAVVPADMGVYRCLAENSMGVSSTKAELRVELTSTDYDTA ADATETSSYFSAQGYLSSREQEGTESDE
GQLPQVLEAKLDLQVAPGTRLAKFQLKVKGYPA PKLYWFKDGGQPLTSDHIRMTDKKTLHTLEIVSVTRD SG
QYAAYSNAVGAAY SARLLVRGPSEPEEKASPDVHERLVPRI LEKFTPKKVKRGS SITFSVKVEGH PAPS V
HWLKEEA EKGV LWIGPDTPGYTMAS SSKQHS LVL LDVGRQHGT YTCIATNPAGQALCSASLHISGLAKEEEEQ
ERVKEALISSFLQGT SQAVSAQMSE SAGFADLVGQSKGESLVAEEAHSHLSLAEVGT EEF LQKLT SQI TEMVS
AKISQAKLQVPGGDSDEETKTPSASPRHGRSRPSSSVQESSESESDGDSRGEIFDIYVVTADYLP LGAEQDAI
ILREGQYVEVLD SAHPLRWLVRTKPTKSSPSRQGWVSPAYL DKRLKLSPEWGPTEAPEFPGEAVSEDEYRTRL

SSVIQELLSSEQAFVGELOFLESHHMKHLERSPRVPAAVASQKTVI FRNVQDISHFHSSFLKELQCGCTDDDDV  
AMCFIKNQEAFAKEYLEFLVGRVQAESVVVSTPVQEFYKKYAEETLSAKDPTQPPPPPLQHYLEQPVVERVQKYQ  
ALLKELIRNKARNRQNCALLEQAYAVVSALPQRAENKLVSLMENYPGTLEALGEPIRQGHFIVWEGAPGARM  
PWKGHNHRVFLFRNYLVICKPRRDSRTDTFSYVFRNMMKLSSIDLNDQVEGDDRAFEVWHEREDSVRKYLLQA  
RTVI IKNSWVKEICGIQQRLAQPVWRPPEFEEELADCTAELGETVKLACRVTGTGPKPIVSWYKDGKPVVEVDPH  
HILIEDPDGSCTLILDNLGTIDSGQYMCFAASAAGNASTLGKILVQVPPRFVNVKVRATPFVEGEDAQITCTVE  
GAPYPQIRWYKDGTLTLLAPGNRYRMLNEPRSGVLVVIQAASKEDLGHYECELVNRLGSTRGGGELYMQSPALR  
ARDQHHREQIVAAVEDTVEGSAHSAQDQQAASVLRLLGSEALGSPGDLNTRQSEPPAFEEAASQIP  
GAASGTPEVSPGTHKGLEQETTSSGSQGWTVPIRVEGTAWPGAGTGQLLLDVHSQVIMETTQRTYVCQAPDT  
GVTRAPSMQVTIEDVQVQVGDMAQFDAVIEGHPPPIVTVYKGSTQLTSSARLSQRQDGTYSVLVTDVAPHDA  
GVYTCVANNAGGQVLCKAELLVHGGDKLDAENQVYRRKLHSFYDVQEEIGRGVFGFVKRVQHKGNKMFCAAKF  
IPLRSKTRAQAYQERDILATLGHPLVTGLLDQFETRKTLLILILELCSSEELLDRLFKKGVVTEAEVKVYIQQL  
VEGLHYLHSHGILHLDIKPPNIMVHPAREDIKICDFGFAQKITPSEPQYSKYGSPEFVSPEIIEQNPFVSEGS  
DIWAMGVI SYLSLTCSSPFAGESDRATLLNVLEGRVSWSSPTAAHLSSEDAKDFIKATLQRTPRARPSTSQCLA  
HPWFLKSMPEAAHFINTKQLKFLARSRWQRSLMSYKSILVMRSIPELLQGPPDPSPLGVARHLRGEASGAS  
SSSSSSDNELAPFARAKSLPPSPVTHSPLLHPRGFLRPSASLPEETEASMTADAAVPASPQASAGPPASPGCV  
PRHSVSSLFYQQAGEGAERGNKTSKAKRHPARRRHLKGGYIARALPGLREPLMEYSLLEEEAAREEQASLM  
TKTPSFETALRLPSSSVREVPGRSHSLDNPPVTTGPSPEACEKQLLFPSTGLTHETTAKDRGHKEGFLQESV  
PFPPMSGDSRPGKQEGSSQDSCRKPASSCHSELGSGSQEGCGPPSSQSLGSLPPQSLKELSTSCGPLFSEQ  
PQAAPFPTQVSPLLGSEKEPQDGSLEGPVVPSSSPGSASQVDASLDTEGLSEAGDTCDFTPPPQRPQEQAT  
TRKFSLESRGGYAGVAGYGTFAFGGDAGGMLGQGPLWARMAWAVSQSSEEQDEAATESPQPLESIGPIAEASG  
VPLRTSPSLTPWEEVEQVSLVQIRDLSGDAEAADTISLDISEVDPAYLNLSLDYDIKYLPEFEMI FRRVPKPI  
EQPESPGSETEAGQGLADFLBAAWPPGELGLRAGLEITTEPEEPGDLEALLGEEAVGRKRKWSPSRGLFQF  
PGRCLSGEEPVELGLRQVRKASMAHISRI LKGRPEGPEREGPPRKKAGLASFRLSGLKGRDQELSDEAVVLGQ  
SVTLACQVLAQPTAQATWSKDGVLLESSGHLISSTLKNFQLLTILVVKEEDLGTYTCCVSNPLGTAVTTGVL  
RKAERPSSSRPEVSGELYKDAVLLVWKPVESECGPVTVIQVCEIEGGSWTTLASDISDCCYLTGKLSRGGMYIF  
RTACVSKAGMGPVSSPSEQVLLGGPNHLASEEESRRGRPAQLLPSTKTFAFQMQIRRGFRYSVVRQCREKASGR  
ALAAKIVPYQPEDKTAVLREYEALKRHLHPLHAQLHAAYLSPRHLVLIILELCSGPELLPSLAERESYSESDVK  
DYLWQMLSATQYLHAQHILHLDLRSENMMVTEYNLLKVIDLGNASLDQEKVPAPENFKDYLETMAPELLEGQ  
GAVPQTDIWAIGVTAIFIMLSGEYPESESETRDLQKGLRKLIRLSRCYAGLSGGAVAFLOSSLCAQPWGRPCA  
STCLQCGWLTEEGPTGSRPTPVTFTVRLRAFVREKRRALLYKKNLAQVR\*

>rs50432310\_ENSMUSP00000038264\_c.1308:A>G\_p.I437V  
ENSMUST00000047441.14|Obscn-202|ENSMUSG00000061462|-|chr11:g.59024730:T>C  
MDHSFSGAPRFLTRPKAFVSVGKDATLSCQIVGNPTPHVSWEKDRQPVVEAGARFRLAQDGDVYRLTILDLAL  
GDSGQYVCRARNAIGEFAAVGLRVDSEGTCAEQAPHFLLRPTSIRVREGADATFRCRVGSSPQPAVSWSKDG  
RRLGPPDAPHVRVEEHGESSALRIRSARPRDGGTYEVRAENPLGSASAAAALVVDSDAEVAGPPGTSTATLLA  
HLQQRRREAMRAEGIPPSPPGAGTRTCTVTEGKHARLSCFVTGEPKPEVWKKDGQLVTEGRRHVVEDEQENF  
VLKILFCKQSDRGLYTCTASNLVGQTYSSVLVVREPTVPFKKRLQDLEVREKESATFQCEVAQAPATEAAWFK  
EETRLWASAKYDIEEGTERRLTVRNVSADDDAVYICETTEGSRVAELSVQGNLTKLPRKTAVRTGDTAVF  
WVELAVPEGPVRWLRNQEEMVAGGRVAITAEGTCHTLTI FQCTLEDMGEVAFVSGGCRTTTQFCVSAAPRRPPL  
YPPADPVVKAKTESSVTLWSAPPHGDRPVTIDGYVLEKRLGAYAWSRCHEAGWLATTEFTITGVAAEEDGFQ  
FRVSAINHFGQGPYLEFPGTMHLVPMPLAVKTPKAVEAVEGGEVTFVSDLTVASSGEWFLDGEALKASSIYVI  
RCDRTRHMLTIREVPARLHGAQLKVFANGIETSIQMVVRAALGLPSSKLPAAAAREVLAQLHEEAQLLAE LSD  
QAAAVTWLKDGRELSLGPKYEMQVSAGRRALLVRDVAQDDAGLYECVSRGSRRTAYQLLVQDITDGYRDWGPAG  
PQKHMCKCAGAKIARYLGSRYFLQYDKGVVHWEAALDTRQGKGTSSCSLHEKPKLVFAKQQAHSEVKA  
AGASATLSCEVAQAQTEVTWFKDGKLLSSSSKVRMEASGCSRRLVVQQAGKADAGEYSCEAGGQKLSFRLDVA  
EPKMVFAKEQQARSEVKAEGASATLSCEVAQAQTEVTWFKDGKLLSSSSKVRMEASGCSRRLVVQQAGKADA  
GEYSCEAGGQKLSFRLDVTEPKLVFAKEQQARSEVKAEGNSATLSCEVAQAQTEVTWFKDGKLLSSSSKVRM  
EASGCSRRLVVQQAGKADAGEYSCEAGGQKLSFRLDVAEPKLVFAKEQQARSEVKAEGNSATLSCEVAQAQ  
EVTWFKDGKLLSSSSKVRMEASGCSRRLVVQQAGKADAGEYSCEAGGQKLSFHLVDVTEPKLVFAKEQQAHSEV  
KAEAGASATLSCEVAQAQTEVTWFKDGKLLSSSSKVRMEASGCSRRLVVQQAGKADAGEYSCEAGGQKLSFRL  
DVAEPKLVFAKEQQARSEVKAEGASATLSCEVAQAQTEVTWFKDGKLLSSSSKVRVEASGCSRRLVVQQAGK  
ADAGEYSCEAGGQKLSFRLDVAEPKLVFAKEQQANSEVKAEGASATLSCEVAQAQTEVTWFKDGKLLSSSSK  
VRVEASGCSRRLVVQQAGKADAGEYSCEAGGQKLSFRLDVAEPKLVFAKEQQAHSEVKAEGASATLSCEVAQ  
AQTEVTWFKDGKLLSSSSKVRVEASGCSRRLVVQQAGKADAGEYSCEAGGQKLSFRLDVAEPKLVFAKEQQAH  
SEVKAEGASATLSCEVAQAQTEVTWFKDGKLLSSSSKVRVEASGCSRRLVVQQAGKADAGEYSCEAGGQKLS  
FRLDVAEPKLVFAKEQQAHSEVKAEGASATLSCEVAQAQTEVTWFKDGKLLSSSSKVRVEASGCSRRLVVQQ  
AGKADAGEYSCEAGGQKLFRLDVAEPKLVFAKEQQAHSEVKAEGASATLSCEVAQAQTEVTWFKDGKLLSS

SSKVRVEASGCSRRLLVVQQVGKADAGEYSCEARGQKLSFRLDVAEAEQI PERPSRREPLVVKEHETI ILTAT  
IAAPSVAAVTWLKDGEI RRSKRHEATSLGDHTTLTVRGAQVLD SAIYSCRVGKEGQDFPVQVEEVAAKFSKP  
LEPVEGELGGTVMLVCELSPEQAEVWRCGNTQLRPGKRFQMTSEGPRTTLTVSGLREDDAEYVCESRDDRT  
SARLTVKVPVVKFTSGLSAMVAEEGQEATFQCVVSPSDAGVTWYKDGMLQPSEKFMVMEVSGASRSLTILGL  
TLEDAGQVTVEAEGASSAALRVREAPVLFKKKLEPQTVEERTSVTLEVELTRPWPEVKWTRNAAVLTPSENV  
EIRAEGARHCLVLRVSGFADRGFFGCETPDDKTQAKLNVEMRQVRLVVRGLQEVEAKEQGTASMDVELSHAEVE  
GSWTRDGLRLQPGPKCHLAVQGPVHILTL SALQPQDSGLVAFRAEGVHTSARLIVTELPVSFTRVLQDVVATQ  
KEKVTLECELSRPVDVRLKDGVELRAGKAI GIVAQGTCSRSLVI YRCETGDQGVYVCDALDAQTSASLRVQGR  
TYTLIFRRVLAEDAGEVKFVAENAE SRAHLRVKELPVTLLRPLRDKIAMEKHRGVLECVSRASAQVRWFKGG  
VELQSGPKYEVVSDGLYRKLVIN DVQPEDEDTYTC DAGNVKTSAQFFVEEQSITIVRGLKDMTVM EPAPAWFE  
CETSIPSVRPPKWL LGKTVLQAGGNVLEQDGTVHRLTLHKTCSTMTGPHFTIGKSRSSAQLVVS DIPVVL T  
RPLEPKAGRELQSVVLSCDFRPAPKAVQWYKDDTPLSPSEKFKMALEGQMAELRILRLTPADAGVYRCQAGSA  
QSSAEVTVAREVTVIQPLQDAEAMEEGRVCFSCELSHKDEDI EWSLNGTPLYNDSFHEISHEGLHTLVLKS  
VRQADTGTVCATSPKVS SARLVVKGKPVVFLKALDDVSAEERGTTLTQCEVSDPEARVVWRKDGVELGPSDK  
YDFLHKAGARGLTVHDL SHEDAGLYTCQVGSKETQSKVSVHDLHVGITKRLKTVEVLEGESECSFECVLSHESP  
SDPAVWTVGGKTVGGSGHFHAVRQGRKYTLTVKDAALSDAGEVVSVLGLT SKASLI IRERPVDITKPLEDQR  
TTLGEDVMLSCELSRAGTSVRWLKDGKAI RKSQKYDLLSEGTRAVLVRKASLKDSGEYTCETEASKSTAKLC  
VEEKANRFTLEELADLQVEEKGRAVFTCKTEHPASVVTWRKGLLELRASGKHVPSQEGTLTKLTINALERTDSD  
TYTCDIGQARTQARLLVHGQKVRVIEDLEDTAVQEGSSAKFCCR IAPADYGPVHWF LDKTPLHSNELNEITVQ  
PGGYHVLT LRQLALKDSGTVYFEAGDQRTS AALRVTEKPSIFSRPLTDVTVTEGEDLTLVCETTTVDSSVRWT  
KDGKTLRPSARCQLSHEGCQAQLLI TATTPQDGGRYKCEIGGASSSSIVRVHALPVRFRESLKDVEVPEGKAA  
TLRCVLSVAAPVEWRHGDDVLKSSNKYSLRQEGAVLELVIRDLQPD SGQYSCSFGDQTT SATLTVKTS SAQ  
FVGKLRNKEATEGTTVTLRCEL TKEAPVEWKKGTETLRNGDKYSLKQDGAVCELQICSLLVADAGEYSCVCGQ  
EKTSATLTVKALLVHFVRRLSKEATEGDTTTLQCELSKAAPVEWRKGTETLRDGD RYSLKQDGAVCELQIRS  
LTADAGEYLCTCGQEKTSATLTVRALPAKFKDSLKNEEATEGTTATLSCELSKAAPVTWKKGPKTLQSGDKY  
VLRQDGAVCGLQIHGLTMADAGEYSCVCGQEKTSATLTVRGLPAKFIEDLRSQEATEGATAILRCELSKAAPV  
EWRKGETLKDGDRTYTLRQDGAVCELQIRGLAVVDGTGYSSLP TKFTEGLRNEEATEGTMATLRCQMSKAAPV  
EWRKGETL RDGD RYSLRQDGAMCELQIRGLTIEDSGEYTCVCGQEKTSATLSVKALPPRFIEDLRSQEATEG  
TMATLRCQMSKAAPVEWRKGETLGDGGRYSLRQNGAVCELQI HDLAVEDTGEYSCVCGQEKTSATLNVKALP  
PRFIEDLRSQEATEGTMATLRCQMSKAAPVEWRKGETLRDGGRYSLRQDGAVCELQI HDLVEDAGQYSCVC  
GQEKTSAVLTVDALPPKFTEGLKKEEATEGTMVTLRQMSKEATVEWRKGAKTSLDGGRYSLRQDGAMCELQI  
CGLAVEDAGEYSCVCGQEKTSATLSVKALPPRFIEDLRSQEATEGTMATLRCQMSKAAPVEWRKGSKTLRDGD  
RYSLRQDGAMCELQICDLAVEDTGDYSCVCGQEKTSATLSVKAPQVVFQQLQNLQAEEGSMASLRCELSV PN  
AAMVWSKGGLELQGDTRREARQQGCVAELLLRDLRREDAGEYSC TCGSQTTSATLMVTAAPVRFRLQLAQDV  
DEGATARLRCELSREAVSVEWRKGS LQLFPKAKYQMVQEGTTAELLVHGVEQEDAGEYTC DAGHTQS IARLSV  
RAPKPKFKTDLQSTEQEAGGTARLCCQLSEAEPTPVQWLKEGVELHVGSKYEMRRQGVACELLHGLEAKDT  
GEYACL VGGQKTLASLRVKEPEVTIVRGLVDMEVQADEDEFTCKV SQAGATDVQWHLQGLPLQSNEVTEVAV  
LADGCTHV LQKGV TLEDAGTVSFHVGGLSSSAQLTVRVPEVTVLEPLKDVQLSEGD ADFRCRLSRASGQEA  
RWALGGVPLQCNEMNDITVEQGTLYLLTLHKV TLEDAGTITLQVGS CSSEAQLKVTAKNTVLRGLENVDALEG  
GEALFECQLSQPEVA AHTWLLDDEPVHTSEKVEVVYFENGLRHLLLLKNLKPQDSCRVTFLAGDVVTS AFLTV  
RALPDPPEDAEVVGRSDHSVTL SWVAPMSDGGGGLCGYRVEMKEASTGQWQLCHDLVPGPECVVDLVP GKTY  
RFRVAAVGPAGAGEPVHLPQMVKIAPAPAPAPAPAPAPAPETRQAVVGEDICLELEVAADGGEVVWHKGTERRI  
QPGGHFEVLSRGQRQMLVIKGFRTEDQGEYRCGPIQGLPSSGAATFNVMVMTSGSGDEVPAQPSLPPEAAQEGD  
LHLLWEALARKRRMSREPTLDSISELPEEDSRVQHLRQEAEETAPDLSEGYSTADELARTGEADLSHTSSDDE  
SRAGTPSLVTYLKKAGGPGISPLASKHEAQVTT SVKPKQKQEPVVPTCPPPGDL SAADLMDPSLDKAAVKIQA  
AFKGYKVRKEMKQEGPVFSRTFGDTEAQVGDVLRLECVLATKTD MRACWLKDGIELTDGRHYHIDQLKDGTC  
SLLVTGLAPTDSGRYTCQVSTKSGRVSHSACVVVSGTESEAESSSGGELDDAFRRAARLHRLFRTRKSPAELS  
EELFLSADEGPGEPEPADWQTYREDEFVFCIRFESLAEARQAVTCFRNM FATMGIGVEISLGEQGPGRVEM  
RIGKVAPT VTPAVPLAKTPGLQTS DAAPVFLTELQNDQVDQGYPMSFDCVVTGQPVPSVRWFKDGKLEEDDH  
YMINEDQQGGHQLIITAVVPADMGVYRCLAENSMGVSSTKAE LRVELTSTDYDTAADATETSSYFSAQGYLSS  
REQEGTESDEGQLPQVLEELKDLQVAPGTRLAKFQLKVKGY PAPKLYWFKDGQPLTSSDHIRMTDKKTLHTLE  
IVSVTREDSGQYAAI SNAVGAAYSSARLLVRGPSEPEEK PASDVHERLVPPRI LEKFTPKKVKRGSSITFSV  
KVEGHPAPSVHWLKEEA EKGVLWIGPDTPGYTMASSSKQHSLVLLDVG RQHOGTYTCIATNPAGQALCSASLH  
ISGLAKEEESQERKEALISSFLQGTSQAVSAQMSASAGFADLVGQSKGESLVAAEEAHSHLSLAEVGT EEFLOK  
LTSQITEMVSAKISQAKLQVPGGDSDEETKTPSAPRHGRSRPSSSVQESSSESEDGDSRGEIFDIYVVTADY  
LPLGAEQDAIILREGQYVEVLD SAHPLRWLVRTKPTKSSPSRQGWVSPAYLDKRLKLSPEWGPTEAPEFPGEA  
VSEDEYRTRLSSVIQELLSSEQAFV GELQFLESHHMKHLERSPRVPAAVASQKTVIFRNVQDISHFHSSFLKE  
LQCGCTDDDVAMCFIKNQEA FEKYLEFLVGRVQAESVVVSTPVQEFYKKYAEETLSAKDPTQPPPPLOHYLE

QPVERVQKYQALLKELIRNKARNRQNCALLEQAYAVVSALPQRAENKLVSLMENYPGTLEALGEPIRQGHFI  
VWEGAPGARMPWKGHNRHVLFERNYLVI CKPRRDSRTDTFSYVFRNMMKLSSIDLNDQVEGDRAFEVWHERE  
DSVRKYLLQARTVI IKNSWVKEICGIQQRLAQPVWRPPEFEEELADCTAELGETVKLACRVTGTPKPIVSWYK  
DGKPVVEVDPHHILIEDPDGSC TLI LDNLTGIDSGQYMCFAASAAGNASTLGKILVQVPPRFVNVKVRATPFVEG  
EDAQITCTVEGAPYPQIRWYKDG TLLAPGNRYRMLNEPRSGVLVVIQAASKEDLGHYECELVNRLGSTRGGG  
ELYMQSPALRARDQHREQIVAAVEGAPSMQVTIEDVQVQVGDMAQF DAVIEGHPPP I V TWYKGSTQLTSSAR  
LSQRQDGT TYSLVLT D V A P H D A G V Y T C V A N N A G G Q V L C K A E L L V H G G D K L D A E N Q V Y R R K L H S F Y D V Q E E I G R  
GVFGFVKRVQHKGKMFCAAKFIPLRSKTRAQAYQERDILATLGHPLVTGLLDQFETRKTLLILILELCSSEEL  
LDRLFKKGVVTEAEVKVYIQQLVEGLHYLHSHGILHLDIKPPNILMVHPAREDIKICDFGFAQKITPSEFPQYS  
KYGSPFVVSPEIIEQNPNVSEGS DIWAMGVISYLSLTCSSPFAGESDRATLLNVLEGRVSWSSPTAAHLS EDAK  
DFIKATLQRTPRARPSTSQC LAHPWFLKSMPAAEAHFINTKQLKFL LARSRWQRSLMSYKSI LVMRSIPELLQ  
GPPDSPSLGVARHLRGEASGASSSSSSSDNELAPFARAKSLPPSPVTHSPLLHPRGFLRPSASLPEETEASMP  
TADA AV PASPQSAGPPASPGCVPRHSV ISSLFYQQAGEGAERGNKTS GAKRHPARRRHLLKGGYIARALPGLR  
EPLMEYSLLEEEAAREEQASLMTKTPSFETALRLPSSSVREVPGRSHSLDNPPVTTGSPPEACKQLLFPST  
GLTHETAKDRGHKEGFLQESVFPFPMMSGDSRPGKQEGSSQDSCRGKPASSCHSELGSGSQEGCGPPSSQSLG  
SLPPQSLKKELESTSCGPLFSEQPQAAPFPTQVSPLLGSEKEPQDGS LSEGVPVPSSSPGSASQVDASLDT EG  
LSEAGDTCDFTPPPQRPEEQATTRKFSLESRGGYAGVAGYGTFAFGGDAGGMLGQGPLWARMAWAVS QSSEEQ  
DEAATESPQPLESLGPIAEASGVPLRTSPSLTPWEEVEQVSLVQIRDLSGDAEAADTISLDISEVDPAYLNLS  
DLYDIKYL PFEFMI FRRVPKPIEQPESPGSETEAGQGLADFL EEA AWPWPGE LGLRAGLEITEEPEEPGDLEA  
LLGEAAVGRKRKWSPSRGLFQFPGRCLSGEEPVELGLRQRVKASMAHISRILKGRPEGP EREGPPRKKAGLAS  
FRLSGLKGRDQELSDEAVVLGQSVTLACQVLAQPTAQATWSKDGVLLESSGHLLISSTLKNFQLLTLIVVKEE  
DLGTYTCCVSNPLGTAVTTGVLKKAERPSSSPRPEVGEYKDAVLLVWKPVE SCGPVTYIVQCCIEGGSWTTL  
ASDISDCCYL TGKLSRGGMYIFRTACVSKAGMPYSSPSEQVLLGGPNHLASEEESRGRPAQLLPSTKTF AF  
QMQIRRGRFSVVRQCREKASGRALAAKIVPYQPEDKTA VLREYEALKRLHHPHLAQLHAAYLSPRHLV L I L E L  
CSGPELLPSLAERESYSESDVKDYLWQMSATQYLHAQHILHLDLRSENMMVTEYNLLKVIDLGNASLDQEK  
VPAPENFKDYLETMAPELLEGGAVPQTDIWAIGVTA FIMLSGEY P ESSEGETRDLQKGLRKLIRLSRCYAGL  
SGGAVAF LQSSSLCAQPWGRPCASTCLQCGWLT EEGPTGSRPTPVTFPTVRLRAFVREKRRRALLYKKNH LAQ  
VR\*

>rs50432310\_ENSMUSP00000049737\_c.1308:A>G\_p.I437V  
ENSMUST00000052872.15|Obscn-203|ENSMUSG00000061462|-|chr11:g.59024730:T>C  
MDHSFSGAPRFLTRPKAFVVS VGKDATLSCQIVGNPTPHVSWEKDRQFVEAGARFRLAQDGDVYRLTILDLAL  
GDSGQYVCRARNAIGEFAAVGLRVDSEGTCAEQAPHLLRPTSIRVREGADATFRCRVGGSPPAVSWSKDG  
RRLGPPDAPHVRVEEHGESSALRIRSARPRDGGTYEVRAENPLGSASAAAALVVDSDAEVAGPPGTSTATLLA  
HLQQREAMRAEGIPSPPGAGTRTCTVTEGKHARLSCFVTGEPKPE TVWKKDGQLVTEGRRHVVEDEQENF  
VLKILFCKQSDRGLYTCTASNLVGQTYSSVLVVVREPTVPFKKRLQDLEVREKESATFQCEVAQPA TEAAWFK  
EETRLWASAKYDIEEEGTERRLTVRNVSADDDAVYICETTEGSRITVAELSVQGNLTRKLRKTAVRTGDTAVF  
WVELAVPEGPVRWLRNQEEMVAGGRVAITAEGTCHTLTI FQCTLEDMGEVAFVSGGCRTTTQFCVSAPRRPPL  
YPPADPVVKAKTESSVTLWSAPPHGDRPVTIDGYVLEKRKLGAYAWSRCHEAGWLATTEFTITGVAAEEDFQ  
FRVSAINHFGQGPYLEFPGMTMLVPLAVKTPKAVEAVEGGEVTFVSDLTVASSGEWFLDGEALKASSIYVI  
RCDRTRHMLTIREV PARLHGAQLK FVANGIETS IQMVVRAALGLPSSKLPAAAAREVLAQLHEEAQLLAELSD  
QAAAVTWLKDGRELSLGPKEYMQVSAGRRALLVRDVAQDDAGLYECVSRGSR TAYQLLVQEPKLVFAKQQAH  
SEVKAEAGNSATLSCEVTQAQTEVTWFKDGKLLSSSSKVRMEASGCSRRLVVQQAGKADAGEYSCEAGGQKLS  
FRLDVAEPKLVFAKQQAHSEVKAEAGASATLSCEVAQAQTEVTWFKDGKLLSSSSKVRMEASGCSRRLVVQQ  
AGKADAGEYSCEAGGQKLSFRLDVAEPKMFVFAKEQQARSEVKAEAGASATLSCEVAQAQTEVTWFKDGKLLS  
SSKVRMEASGCSRRLVVQQAGKADAGEYSCEAGGQKLSFRLDVTEPKLVFAKEQQARSEVKAEVGN SATLSCE  
VAQAQTEVTWFKDGKLLSSSSKVRMEASGCSRRLVVQQAGKADAGEYSCEAGGQKLSFRLDVAEPKLVFAKEQ  
QARSEVKAEAGNSATLSCEVAQAQTEVTWFKDGKLLSSSSKVRMEASGCSRRLVVQQAGKADAGEYSCEAGGQ  
KLSFHLDVTEPKLVFAKEQQAHSEVKAEAGASATLSCEVAQAQTEVTWFKDGKLLSSSSKVRMEASGCSRRLV  
VQQAGKADAGEYSCEAGGQKLSFRLDVAEPKLVFAKEQQARSEVKAEAGASATLSCEVAQAQTEVTWFKDGK  
LSSSSKVRVEASGCSRRLVVQQAGKADAGEYSCEAGGQKLSFRLDVAEPKLVFAKEQQANSEVKAEAGASATL  
SCEVAQAQTEVTWFKDGKLLSSSSKVRVEASGCSRRLVVQQAGKADAGEYSCEAGGQKLSFRLDVAEPKLAFA  
KEQQAHSEVKAEAGASATLSCEVAQAQTEVTWFKDGKLLSSSSKVRVEASGCSRRLVVQQAGKADAGEYSCEA  
GGQKLSFRLDVAEPKLAFAKEQQAHSEVKAEAGASATLSCEVAQAQTEVTWFKDGKLLSSSSKVRVEASGCSR  
RLVVQQAGKADAGEYSCEAGGQKLSFRLDVAEPKLAFAKEQQAHSEVKAEAGASATLSCEVAQAQTEVTWFKD  
GKLLSSSSKVRVEASGCSRRLVVQQAGKADAGEYSCEAGGQKLFRLDVAEPKLMFAKEQQAHSEVKAEAGAS  
ATLSCEVAQAQTEVTWFKDGKLLSSSSKVRVEASGCSRRLVVQQAGKADAGEYSCEAGGQKLSFRLDVAEPK  
VFAKEQQAHSEVKAEAGASATLSCEVAQAQTEVTWFKDGKLLSSSSKVRVEASGCSRRLVVQQV GKADAGEYS  
CEARGQKLSFRLDVADTRLMFAKEQQARTEVKAEAGNSATLSCEVAQAQTEVTWFKDGKLLSSSSKVRVEASG



CSRRLLVQQAGKADAGEYSCEAGGQKLSFRLDVAEAEESQIPERPSRREPLVVKEHETIILTATIAAPSVAAVT
WLKDGVEIRRSKRHEATS LGDHTLTVRGAQVLD SAIYSCRVGKEGQDFPVQVEEVAAKFSKPLEPVEGELGG
TVMLVCELSPEQAEVWRCGNTQLRPGKRFQMTSEGPRRTLT VSGLREDDAEYVCE SRDDRTSARLTVKVPR
VVKFTSGLSAMVAEEGQEATFQC VVSPSDAGVTWYKDGMLQPSEKFMVVE S GASRS LTI LGLTLEDAGQVTV
EAE GASSAALRVREAPVLFK KLEPQTVEERTSVTLEVELTRPWEVVKWTRNAAVLTPSENVEIRAEGARHC
LVLRSVGFADRGFFGCETPDDKTQAKLNVEMRQVRLVVRGLQEVEAKEQGTASMDVELSHAEEVGSWTRDGLRL
QPGPKCHLAVQGPVHILTL SALQPQDSGLVAFRAEGVHTSARLIVTELPVSFTRVLQDVVATQKEKVTLECEL
SRPVDVRWLKDGVELRAGKAIGIVAQGTCSRSLVIYRCETGDQGVVYCDALDAQTSASLRVQGRYTLIFRRVL
AEDAGEVVKFVAENAESRAHLRVKELPVTLLRPLRDKIAMEKHRGVLECQVSRASAQVRWFKGGVLEQSGPKYE
VVSDGLYRKLVIN DVQPEDEDTYTCDAGNVKTS AQFFVVEEQSITIVRGLKDMTVMEPAPAWFECETSIPSVRP
PKWLLGKTVLQAGGNVLEQDGT VHR LTLHKTCSTMTGPVHFTIGKSRSSAQLVVS D I PVVLRTRPLEPKAGRE
LQSVVLSCDFRPAPKAVQWYKDDTPLSPSEKFKMALEGQMAELRILRLTPADAGVYRCQAGSAQSSAEVTVEA
REVTVIQPLQDAEAMEEGRVCFSCELSHKDEDI EWSLNGTPLYNDSFHEI SHEGCLHTLVLSVQRADTGTVC
ATSPKVS SARLVVKGKPVVFLKALDDVSAEERGTTLQCEVSDPEARVVWRKDGVELGPSDKYDFLHKAGAR
GLTVHDLSDHEDAGLYTCQVGSKETQSKVSVHDLHVGITKRLKTVEVLEGE SCSFECVLSHESPSDPAVTVGG
KTVGGSGHFHAVRQGRKYTLTVKDAALSDAGEVVS VLVGLTSKASLIIRERPVDITKPLEDQRTTLGEDVMLS
CELSRAGTSVRWLKDGKAIRKSQKYDLLSEGTRAVLVRKASL KDSGEYTCETEASKSTAKLCEVEKANRFT E
ELADLQVEEKGRAVFTCKTEHPASVVTWRKGLLELRASGKHVPSQEG LTKLTINALERTSDTYTCDIGQAR
TQARLLVHGQKVRVIEDLED TAVQEGSSAKFCCRIAPADYGPVHWF LDKTPLHSNELNEITVQPGGYHVLT LR
QLALKDSGTVYFEAGDQRTS AALRVTEKPSIFSRPLTDVTVTEGEDLTLVCETTTVDSSVRWTKDGKTLRPSA
RCQLSHEGCAQLLITATTPQDGGRYKCEIGGASSSSIVRVHALPVRFRESLKDVEVPEGKAATLRCVLS SVA
APVEWRHGDDVLKSSNKYSLRQEGAVLELVIRDLQPDGSGQYSCSFGDQTT SATLTVKTS SAQFVGKLRNKEA
TEGTTVTLRCELTK EAPVEWKKGTETLRNGDKYSLKQDGAVCELQICSLLVADAGEYSCVCGQEKTSATLTVK
ALLVHFVRRRLRSKEATEGDTTLQCELSKAAPVEWRKGTETLRDGD RYSLKQDGAVCELQIRSLTIADAGEYL
CTCGQEKTSATLTVRALPAKFKDSLKNEEATEGTTATLSCELSKAAPVTWKKGPKTLQSGDKYVLRQDGAVCG
LQIHGLTMADAGEYSCVCGQEKTSATLTVRGLPAKFIEDLRSQEATEGATAILRCELSKAAPVEWRKGS ETLK
DGDRYTLRQDGAVCELQIRGLAVVDGTGTYSSLPTKFTFTEGLRNEEATEGTMATLRCQMSKAAPVEWRKSETLR
DGDRYSLRQDGAMCELQIRGLTIEDSGEYTCVCGQEKTSATLSVKALPSRFIEDLRSQEATEGTMATLRCQMS
KTAPVEWKKGSETLRDGGRYSLRQDGPVCELQICDLAVEDAGEYSCVCGQEKTSATLSIKALPPRFIEDLRSQ
EATEGTMATLRCQMSKAAPVEWRKGS ETLGDGGRYSLRQNGAVCELQIHDLAVEDTGEYSCVCGQEKTSATLN
VKALPPRFIEDLRSQEATEGTMATLRCQMSKAAPVEWRKGS ETLRDGGRYSLRQDGAVCELQIHDLVEDAGQ
YSCVCGQEKTSAVLTVDALPPKFT EGLKKEEATEGTMVTLRCQMSKEATVEWRKGAKT LSDGGRYSLRQDGAM
CELQICGLAVEDAGEYSCVCGQEKTSATLSVKALPPRFIEDLRSQEATEGTMATLRCQMSKAAPVEWRKGS ETL
LRDGD RYSLRQDGAVCELQIRDLAVEDAGEYLCVCGQEKTSATLSVKALPPRFIEDLRSQEATEGTMATLRCQ
MSKAAPVEWRKGSKTLRDGD RYSLRQDGAMCELQICDLAVEDTGDYSCVCGQEKTSATLSVKALPPRFIEDLR
SQEAREGTVATLRCRMSKAAPVEWRKGS ETLKDGDRYSLRQEGNLCELQIRDLAVEDTEEYSCVCGQEKTSAT
LSVKALPAKFIEDLRSQEAPESSTVTLRCKLSKASV VVWKKGSETLRNGARYSLRQDGAVCELEIRDLTVEDT
GEYSCTCGQERTSATLSIMAPQVVFQQLQNLQAEEGSMASLRCELSVPNAAMVWSKGGLELQGDTRREARQQ
GCVAELLLRDLRREDAGEYSC TCGSQTTSATLMVTAAPVRFLRELQAQDVDEGATARLCELSREAVSVEWRK
GSLQLFPKAKYQMVQEGTTAELLVHGVEQEDAGEYTC DAGHTQS IARLSVRAPKPKFKTDLQSTEQEAGGTAR
LCCQLSEAEPTPVQWLKEGVELHVGSKYEMRRQGAVCELLIHGLEAKDTGEYACLVGGQKTLASLRVKEPEV
TIVRGLVDMEVQADEDFEFTCKVSQAGATDVQWHLQGLPLQSN E VTEVAVLADGCTHV LQLKGVTL EDAGTVS
FHVGG LSSSAQLTVRVPEVTVLEPLKDVQLSEGQDAHFRCRLSRASGQEARWALGGVPLQCNEMNDITVEQGT
LYLLTLHKVTL EDAGTITLQVGS CSSEAQLKVTAKNTVLRGLENVDALEGG EALFECQLSQPEVA AHTWLLDD
EPVHTSEKVEVVFENGLRHLLLLKLNKLPQDSCRVTFLAGDVVTS AFLTVRGWRLEVL EPPHDASVKAGMQVR
FTC I LSEAVPVGEATWYINGAAIQPDDTDWTVTTDGS HHALTLSNAQPQHAGEVTF AARDAVASARLSVLALP
DPPEDA EVVGRSDHSVTL SWVAPMSDGGGGLCGYRVMKEASTGQWQLCHDLVPGPECVDDLVPGKTYRFRV
AAVGPAGAGEPVHLPQMVKIAPAPAPAPAPAPAPAPETRQAVVGEDICLELEVAADGGEVVWHKGTERTIQPGG
HFEVLSRGRQRLVIKGFRTEDQGEYRCGPIQGLPSSGAATFNVVMTSGSGDEVPAQPSLPPEAAQEGDLHLL
WEALARKRRMSREPTLDSISELPEEDSRVQHLRQEA EETAPDLSEGYSTADELARTGEADLSHTSSDDES RAG
TPSLVTYLKKAGGPGISPLASKHEAQVTTSVKPKQKQEPVVP TCPPPGDLSAADLMDPSLDKAAVKIQAAFKG
YKVRKEMKQOEGPVFSRTFGDTEAQVGDVLRLECVLATKTD MRACWLKDGIELTDGRHYHIDQLKDGTC SLLV
TGLAPTDCSRYTCQVSTKSGRVSHSACVVVSGTESAEASSGGELDDA FRRAARRLHRLFRTKSPAELSEEBEL
FLSADEGPEPEEPADWQTYREDEFVCFIRFESLAEARQAVTCFRNMFATMGIGVEISLGEQGPGRVEMRIGK
VAPT VTPAVPLAKTPGLQTS DAA PVFLTELQNQDVQDGY PMSFDCVVTGQPVPSVRWFKDKLLEEDDHYMIN
EDQQGGHQLIITAVVPADMGVYRCLAENSMGVSSTKAELRVELTSTDYDTAADATETSSYFSAQGYLSSREQE
GTESDEGQLPQVLEELKDLQVAPGTR LAKFQLKVKGY PAPKLYWFKDGOPLTTS DHIRMTDKKTLHTLEIVSV
TREDSGQYAAIYISNAVGAAYSARLLVRGPSEPEEK PASDVHERLVPPRI LEKFTPKKVKRGS S ITFSVKVEG

HPAPSVHWLKEEAKEGVLWIGPDTPGYTMASSSKQHSLLVLLDVGRQHOGTYTTCIATNPAGQALCSASLHISGL  
AKEEEEQERVKEALISSFLQGTSAQVSAQMSEASAGFADLVGQSKGESLVAEEAHSHLSLAIEVGTTEEFLQKLTSSQ  
ITEMVSAKISQAKLQVPGGDSDEETKTPSASPRHGRSRPSSSVQESSSESEDGDSRGEIFDIYVVTADYLPLG  
AEQDAIILREGQYVEVLDSAHPLRVLVVRTKPTKSSPSRQGWVSPAYLDKRLKLSPEWGPTEAPEFPGEAVSED  
EYRTRLSSVIQELLSSEQAFVGLQFLESHHMKHLERSPRVPAAVASQKTVI FRNVQDI SHFHSSFLKELQGC  
GTDDDVAMCFIKNQEA FEKYLEFLVGRVQAESVVVSTPVQEFYKKYAEETLSAKDPTQPPPPPLQHYLEQPVE  
RVQKYQALLKELIRNKARNRQNCALLEQAYAVVSALPQRAENKLVSLMENYPGTLEALGEP I RQGHFIVWEG  
APGARMPWKGNHRHVFLFRNYLVICKPRRDSRTDTFSYVFRNMMKLSIDLNDQVEGDDRAFEVWHEREDSVR  
KYLQARTVI IKNSWVKE ICGIQQLAQPVWRPPEFEELADCTAELGETVKLACRVGTGTPKPIVSWYKDGKP  
VEVDPHHILIEDPDGSC TLLIDNLTGIDSGQYMCFAASAAGNASTLGKILVQVPPRFVNVKVRATPFVEGEDAQ  
ITCTVEGAPYPQIRWYKDG TLLAPGNRYRMLNEPRSGVLV LVIQAASKEDLGHYECELVNRGLSTRGGGELYM  
QSPALRARDQHHREQIVAAVEVTEQETKVPKKTVI I EETITTVVKS PRGRRQSPGKSPSRSPSRRSASPRRPG  
LLAPERLYPPGTSPSRRLVEVEQGRKAPVPALYVTEAEVHAPASQSQPKWLEVEETIEVRVKKTGSRGASPVRE  
MTRSGEGILFTLPGGI PGRDPNANNNSNKS SVYQEARTWGPVAVHVGE PFI FQVDSVGNVDWVAASPEPEQVRA  
SQKEENTERQEGCSDG DENTFLMEEPQD TDSLQGRDPKILTHNGRVLTLADLE DYVPQEGETFGCGDSTPSTP  
DEPPCEVSVLQREI SEPTVGQPVLLNVGRPPGTGATPSFFRPGSQVHSPESVSFLLREAWSGPVSAAPWTSSSF  
HTHVQSSVDGSHGSEFKTEVSTQTVSFGAVGETVTLHIDPDGGEAPGPSQG\*

>rs50432310\_ENSMUSTP00000020732\_c.1308:A>G p.1437V  
ENSMUST00000020732.13|Obscn-201|ENSMUSG00000061462|-|chr11:g.59024730:T>C  
MDHSFSGAPRFLTRPKAFVSVGKDATLSCQIVGNPTPHVSWEKDRQVVEAGARFRLAQDGDVYRLTILDLAL  
GDSGQYVCRARNAIGEAFAAVGLRVDSEGTCAEQAPHFLLRPTSIRVREGADATFRCRVGGSPQPAVSWSKDG  
RRLGPPDAPHVRVEEHGESSALRIRSARPRDGGTYEVRAENPLGSASAAAALVVDSDAEVAGPPGTSTATLLA  
HLQQRRREAMRAEGIPSPPGAGTRTCTVTEGKHARLSCFVTGEPKPKETVWKKDQQLVTEGRRHVYVEDEQENF  
VLKILFCKQSDRGLYTCTASNLVGQTYSSVLVVVREPTVPFKKRLQDLEVREKESATFQCEVAQ PATEAAWFK  
EETRLWASAKYDIEEGTERRLTVRNVSADDDAVYICETTEGSRVVAELSVQGNLTKRKLPRKTAVRTGDTAVF  
WVELAVPEGPVTRLRNQEEMVAGGRVAITAEGTCHTLTI FQCTLEDMGVAFVSGGCRTTTTCTVSAAPRRPPL  
YPPADPVVKAKESSVTLSSWSPHPGDRPVTIDGYVLEKRLKLGAYAWSRCHEAGWLATTEFTITVGAEEGDFQ  
FRVSAINHFGQGPYLEFPGTMHLVPLAVKTPKAVEAVEGGEVTFVSDLTVASSGEWFLDGEALKASSIYVI  
RCDRTRHMLTIREV PARLHGAQLKFVANGIETS IQMVVRAALGLPSSKLPAAAAREVLAQLHEEAQLLAE LSD  
QAAA VTWLKDGRELSLGPKYEMQVSAGRRALLVRDVAQDDAGLYECVSRGSR TAYQLLVQDITDGYRDWGPAG  
PQKHMCKCAGAKIARYLGSSCYRFLQYDKGVWHWLEAALDTRQKGTSSCSLHEKPKLVFAKQQAHSEVKA  
AGNSATLSCEVTQAQTEVTWFKDGKLLSSSSKVRMEASGCSRRLVVQQAGKADAGEYSCEAGGQKLSFRLDVA  
EPKLVFAKQQAHSEVKA EAGASATLSCEVAQAQTEVTWFKDGKLLSSSSKVRMEASGCSRRLVVQQAGKADA  
GEYSCEAGGQKLSFRLDVAEPKMFVFAKEQQARSEVKA EAGASATLSCEVAQAQTEVTWFKDGKLLSSSSKVRM  
EASGCSRRLVVQQAGKADAGEYSCEAGGQKLSFRLDVTEPKLVFAKEQQARSEVKA EAGASATLSCEVAQAQ  
EVTWFKDGKLLSSSSKVRMEASGCSRRLVVQQAGKADAGEYSCEAGGQKLSFRLDVAEPKLVFAKEQQARSEV  
KAEAGNSATLSCEVAQAQTEVTWFKDGKLLSSSSKVRMEASGCSRRLVVQQAGKADAGEYSCEAGGQKLSFHL  
DVTEPKLVFAKEQQAHSEVKA EAGASATLSCEVAQAQTEVTWFKDGKLLSSSSKVRMEASGCSRRLVVQQAGK  
ADAGEYSCEAEGQKLSFRLDVAEPKLVFAKEQQARSEVKA EAGASATLSCEVAQAQTEVTWFKDGKLLSSSSK  
VRVEASGCSRRLVVQQAGKADAGEYSCEAGGQKLSFRLDVAEPKLVFAKEQQANSEVKA EAGASATLSCEVAQ  
AQTEVTWFKDGKLLSSSSKVRVEASGCSRRLVVQQAGKADAGEYSCEAGGQKLSFRLDVAEPKLVFAKEQQAH  
SEVKA EAGASATLSCEVAQAQTEVTWFKDGKLLSSSSKVRVEASGCSRRLVVQQAGKADAGEYSCEAGGQKLS  
FRLDVAEPKLVFAKEQQAHSEVKA EAGASATLSCEVAQAQTEVTWFKDGKLLSSSSKVRVEASGCSRRLVVQQ  
AGKADAGEYSCEAGGQKLSFRLDVAEPKLVFAKEQQAHSEVKA EAGASATLSCEVAQAQTEVTWFKDGKLLSS  
SSKVRVEASGCSRRLVVQQAGKADAGEYSCEAGGQKLFRLDVAEPKLMFAKEQQAHSEVKA EAGASATLSCE  
VAQAQTEVTWFKDGKLLSSSSKVRVEASGCSRRLVVQQAGKADAGEYSCEAGGQKLSFRLDVAEPKLVFAKEQ  
QAHSEVKA EAGASATLSCEVAQAQTEVTWFKDGKLLSSSSKVRVEASGCSRRLVVQQVQKADAGEYSCEARGQ  
KLSFRLDVADTRLMFAKEQQARTEVKA EAGNSATLSCEVAQAQTEVTWFKDGKLLSSSSKVRVEASGCSRRLV  
VQQAGKADAGEYSCEAGGQKLSFRLDVAEAE SQIPERPSRREPLVVKEHETIILTATIAAPSVAAVTWLKDG  
EIRRSKRHEATSLGDTHTLTVRGAQVLDSAIYSCRVGKEGQDFPVQVEEVAAKFSKPLEPVEGELGGTVMLVC  
ELSPQAEVWRCGNTQLRPGKRFQMTSEGPRRTLTVSGLREDDAEYVCESRDDRTSARLTVKVPVVKFTS  
GLSAMVAEEGQEATFQCVVSPSDAGVTWYKDGMLQPSKFKVMVESGASRSLTILGLTLEDAGQVTEAEAGAS  
SSAALRVREAPVLFKKKLEPQTEVERTSVTLLEVELRQVRLVPEVKWTRNAAVLTPSENVEIRAEGARHCLVLRV  
GFADRGGFEACETPDDKTQAKLNVEMRQVRLVRLGQLEVEAKEQGTASMDVELSHAEVEGSWTRDGLRLQPGPKC  
HLAVQGPVHILTL SALQPSGLVAFRAEGVHTSARLIVTELPVSFTRVLQDVVATQKEKVTLECELSRQVVDV  
RWLKDGVLELRAGKAI GIVAQGTCSRSLVIYRCETGDQGVYVCDALDAQT SASLRVQGRTYTLIFRRVLAEDAGE  
VKFVAENAESRAHLRVKELPVTLLRPLRDKIAMEKHRGVLECCQVSRASAVRWFKGGVELQSGPKYEVVSDGL  
YRKLVINVDVQPEDEDTYTC DAGNVKTS AQFFVVEQSITIVRGLKDMTVMEPAPAWFECETSIPSVRPPKWL LG

KTVLQAGGNVGLQDGTVHRLTLHKTCSTMTGPVHFTIGKSRSSAQLVVSIDI PVVLTRPLEPKAGRELQSVVL  
SCDFRPAPKAVQWYKDDTPLSPSEKFKMALEGQMAELRILRLTPADAGVYRCQAGSAQSSAEVTVAREVTVI  
QPLQDAEAMEEGRVCFSCELSHKDEDEIWSLNGTPLYNDSFHEI SHEGCLHTLVLSVRQADTGTVCATSPKV  
SVSARLVVKGKPVVFLKALDDVSAEERGTTLTQCEVSDPEARVVWRKDGVELGSPDKYDFLHKAGARGLTVHD  
LSHEDAGLYTCQVGSKETQSKVSVHDLHVGITKRLKTVEVLEGECSFECVLSHESPSDPVWTVGGKTVGGS  
GHFHAVRQGRKYTLTVKDAALSDAGEVVSVLGLTSKASLIIRERPVDITKPLEDQRTTLGEDVMLSCELSRA  
GTSVRWLKDGKAIKRSQKYDLLSEGTRAVLVVRKASLKDSGEYTCETEASKSTAKLCVEEKANRFTEELADLQ  
VEEKGRAVFTCKTEHPASVVTWRKGLLELRASGKHVPSQEGELTKLTINALERTDSDTYTCDIGQARTQARLL  
VHGQKVRVIEDLEDTAVQEGSSAKFCRIAPADYGPVHWFLDKTPLHSNELNEITVQPGGYHVLTLRQLAKD  
SGTVYFEAGDQRTSAALRVTEKPSIFSRPLTDVTVTEGEDTLVCETTTVDSVVRWTKDGKTLRPSARCQLSH  
EGCQAQLLITATTPQDGGRYKCEIGGASSSSIVRVHALPVRFRRESLKDVEVPEGKAATLRCVLSVAAPVEWR  
HGDDVLKSSNKYSLRQEGAVLELVIRDLQPDQSGQYSCSFGDQTTSATLTVKTSQAQFVGLKRNKEATEGTTV  
TLRCELTKAPVEWKKGTETLRNGDKYSLKQDGAVCELQICSLLVADAGEYSCVCGQEKTSATLTVKALLVHF  
VRLRSKEATEGDTTLQCELSKAAPVEWRKGTETLRDGDYSLKQDGAVCELQIRSLTIADAGEYLCTCGQE  
KTSATLTVRALPAKFKDSLKNEEATEGTTATLSCELSKAAPVWKKGPKTLQSGDKYVLRQDGAVCGLQIHGL  
TMADAGEYSCVCGQEKTSATLTVRGLPAKFIEDLRSQEATEGATAI LRCELSKAAPVEWRKGTETLRDGDYR  
LRQDGAVCELQIRGLAVVDTGTYSPLTKFTEGLRNEEATEGTMATLRCQMSKAAPVEWRKGTETLRDGDYR  
LRQDGAVCELQIRGLTIEDSGEYTCVCGQEKTSATLSVKALPSRFIEDLRSQEATEGTMATLRCQMSKTAPVE  
WKKGSETLRDGGYSLRQDGPVCELQICDLAVEDAGEYSCVCGQEKTSATLSIKALPPRFIEDLRSQEATEG  
MATLRCQMSKAAPVEWRKGTETLRDGGYSLRQNGAVCELQIHDLAVEDTGEYSCVCGQEKTSATLNVKALPP  
RFIEDLRSQEATEGTMATLRCQMSKAAPVEWRKGTETLRDGGYSLRQDGAVCELQIHDLVEDAGQYSCVCG  
QEKTSAVLTVDALPPKFTEGLKKEEATEGTMVTLRCQMSKEATVEWRKGAKTLSDGGRYSLRQDGAMCELQIC  
GLAVEDAGEYSCVCGQEKTSATLSVKALPPRFIEDLRSQEATEGTMATLRCQMSKAAPVEWRKGTETLRDGD  
YSLRQDGAVCELQIRDLAVEDAGEYLCVCGQEKTSATLSVKALPPRFIEDLRSQEATEGTMATLRCQMSKAAP  
VEWRKGTETLRDGDYSLRQDGAMCELQICDLAVEDTGDYSCVCGQEKTSATLSVKALPPRFIEDLRSQEARE  
GTVATLRCMSKAAPVEWRKGTETLRDGDYSLRQEGNLCELQIRDLAVEDTEEYSCVCGQEKTSATLSVKAL  
PAKFIEDLRSQEAPESSTVTLRCKLSKKASVWKKGSETLRNGARYSLRQDGAVCELEIRDLTVEDTGEYSCT  
CGQERTSATLSIMAPQVVFQQLQNLQAEEGSMASLRCELSVNAAMVWSKGGLELQGDTRREARQQGCVAEL  
LLRDLRREDAGEYSCTCGSQTTSATLMVTAAPVRFLRELQAQDVDEGATARLRCELSREAVSVEWRKGSQQLF  
PCAKYQMVQEGTTAELLVHGVEQEDAGEYTCDAHTQSIARLSVRAPKPKFKTDLQSTEQEAAGTARLCCQLS  
EAEPGTPVQWLKEGVELHVGSKYEMRRQAVCELLIHGLEAKDTGEYACLVGGQKTLASLRVKEPEVTVRGL  
VDMEVQADEDEVEFTCKVSQAGATDVQWHLQGLPLQSNEVTEVAVLADGCTHVLQKGVTLLEDAGTVSFHVGGL  
SSSAQLTVRVPEVTVLEPLKDVQLSEGQDAHFRCRLSRASGQEARWALGGVPLQCNEMNDITVEQGTLYLLTL  
HKVTLEDAGTITLQVGSSESQAQLKVTAKNTVLRGLENVDALEGGEALFECQLSQPEVAHAHTWLLDDEPVHTS  
EKVEVVYFENGLRHLLLLKLNLPQDSCRVTFLAGDVVTSFAFLTVRGWRLEVLEPPHDASVKAGMQVRFTCILS  
EAVPVGEATWYINGAAIQPDDTDWTVTTDGSHHALTLNSAQLPQHAGEVTFFAARDAVASARLSVLALPDPEDA  
EVVGRSDHSVTLVSWVAPMSDGGGGLCGYRVMKEASTGQWQLCHDLVPGPECVDDLVPGKTYRFRVAAVGPA  
GAGEPVHLPQMVKIAPAPAPAPAPAPAPAPAPETRQAVVGEDICLELEVAADGGEVVWHKGTERRIQPGGHFEVLS  
RGQRQMLVIKGFRTEDQGEYRCGPIQGLPSSGAATFNVVMTSGSGDEVPAQPSLPPEAAQEGDLHLLWEALAR  
KRRMSREPTLDSISELPEEDSRVQHLRQEAETAPDLSEGYSTADELARTGEADLSHTSSDDESAGTPSLVT  
YLKAGGPGISPLASKHEAQVTTSVKPKQKQEPVPTCP PPGDLAADMPSLDKAAVKIQAAFQYKVRKE  
MKQQEGPVFSRTFGDTEAQVGDVLRLECVLATKTDMRACWLKDGIELTDGRHYHIDQLKDGTCSSLVVTGLAPT  
DSGRYTCQVSTKSGRVSHSACVVVSGTESEAESSSGGELDDAFRAARRLHRLFRTKSPAELSEELFLSADE  
GPGEPEPADWQTYREDENFVCIRFESLAEARQAVTCFRNMFATMGI GVEISLGEQGRGVEMRIGKVAPTVT  
PAVPLAKTPGLQTSDAAPVFLTELQNDVQDGYPMSFDCVVTGQVPVSVRWFKDGKLEEDDHYMINEDQQGG  
HQLIITAVVPADMVYRCLAENSMGVSSTKAELRVELTSTDYDTAADATETSSYFSAQGYLSSREQEGTESDE  
GQLPQVLEELKDLQVAPGTRLAKFQLKVKGYPAKLYWFKDGGPLTSDHIRMTDKKTLHTLEIVSVTREDSG  
QYAAYSNAVGAAYSSARLLVRGPSEPEEKPASDVHERLVPPRI LEKFTPKKVKRGSSITFSVKVEGHPAPSV  
HWLKEEAKEKGVLWIGPDTPGYTMASSSKQHSVLVLDVGRQHGTYYTCIATNPAGQALCSASLHISGLAKEEEQ  
ERVKEALISSFLQGTSAQVSAQMSSEAGFADLVGQSKGESLVAEEAHSHLSLAEVGTEEFQKLTLSQITMVS  
AKISQAKLQVPGGDSDEETKTPSASPRHGRSRPSSSVQESSSESEDGDSRGEIFDIYVVVTADYLPGLAEQDAI  
ILREGQYVEVLDSAHPLRWLVRTKPTKSSPSRQGWVSPAYLDKRLKLSPEWGPTEAPEFPGEAVSEDEYRTRL  
SSVIQELLSSEQAFVGLQFLESHHMKHLERSPRVPAVASQKTVIFRNVQDISHFHSSFLKELQCGCTDDDV  
AMCFIKNQEAFAFEKYLEFLVGRVQAESVVVSTPVQEFYKKAEEETLSAKDPTQPPPPPLQHYLEQVVERVQKYQ  
ALLKELIRNKARNRQNCALLEQAYAVVSALPQRAENKLVSLMENY PGTLEALGEPYRQGHFIWEGAPGARM  
PWKGHNHRVFLFRNYLVICKPRRDSRTDTFSYVFRNMMKLSSIDLNDQVEGDDRAFEVWHEREDESVRKYLLQA  
RTVVIKNSWVKEICGIQORLAQPVWRPPEFEEELADCTAELGETVKLACRVTGTPKPIVSWYKDGKPEVDPH  
HILIEDPDGSCTLILDNLTGIDSGQYMCFAASAAGNASTLGKILVQVPPRFVNVKVRATPFVEGEDAQITCTVE

GAPYPQIRWYKDGTLAPGNRYRMLNEPRSGVLVVIQAASKEDLGHYECELVNRLGSTRGGGELYMQSPALR  
ARDQHHREQIIVAAVEERRPSP\*  
>rs50432310\_ENSMUSP00000151217\_c.1308:A>G\_p.I437V  
ENSMUST00000219084.3|Obscn-207|ENSMUSG00000061462|-|chr11:g.59024730:T>C  
MDHSFSGAPRFLTRPKAFVSVGKDATLSCQIVGNPTPHVSWEKDRQPVEAGARFRLAQDGDVYRLTILDLAL  
GDSGQYVCRARNAIGEAFVAVGLRVDSEGTCAEQAPHFLLRPTSIRVREGADATFRCRVGGSPQPAVSWSKDG  
RRLGPPDAPHVRVEEHGESSALRIRRSARPRDGGTYEVRAENPLGSASAAAAALVVDSDAEVAGPPGTSTATLLA  
HLQQRREAMRAEGIPSPGGAGTRTCTVTTEGKHARLSCFVTGEPKPEVWKKDGLVTEGRRHVVEDEQENF  
VLKILFCQSDRGLYTCTASNLVGQTYSSVLVVREPTVPFKKRLQDLEVREKESATFQCEVAQPAEAAWFK  
EETRLWASAKYDIEEGTERRLTVRNVSADDDAVYICETTEGSRVAELSVQGNLTKLPRKTAVRTGDTAVF  
WVELAVPEGPVWRWRNQEEMVAGGRVAITAEGTCHTLTI FQCTLEDMGEVAFVSGGCRTTTFQCVSAPRRPPL  
YPPADPVVKAKTESSVTLWSAPPHGDRPVTIDGYVLEKRKLGAYAWSRCHEAGWLATTEFTITGVAAEGDFQ  
FRVSAINHFGQGPYLEFPGTMHLVPLAVKTPKAVEAVEGGEVTFVSDTLTVASSGEWFLDGEALKASSIYVI  
RCDRTRHMLTIREVPARLHGAQLKVFVANGIETS IQMVVRAALGLPSSKLPAAAAAREVLAQLHHEAQLLAE LSD  
QAAA VTWLKDGRELSLGPKEYMQVSAGRRALLVRDVAQDDAGLYECVSRGSRTAYQLLVQDITDGYRDWGPAG  
PQKHMCKCAGAKIARYLGS SCYRFLQYDKGVWHLEAALDTRQGKGTSSCSLHEKPKLVFAKQQAHSEVKA  
AGNSATLSCEVTQAQTEVTWFKDGKLS SSSSKVRMEASGCSRRLVVQQAGKADAGEYSCEAGGQKLSFRLDVA  
EPKLVFAKQQAHSEVKAEGASATLSCEVAQAQTEVTWFKDGKLS SSSSKVRMEASGCSRRLVVQQAGKAD  
GEYSCEAGGQKLSFRLDVAEPKMFVFAKEQQARSEVKAEGASATLSCEVAQAQTEVTWFKDGKLS SSSSKVRM  
EASGCSRRLVVQQAGKADAGEYSCEAGGQKLSFRLDVTEPKLVFAKEQQARSEVKAEGNSATLSCEVAQAQ  
EVTWFKDGKLS SSSSKVRMEASGCSRRLVVQQAGKADAGEYSCEAGGQKLSFHLDVTEPKLVFAKEQQAHSEV  
KAEAGASATLSCEVAQAQTEVTWFKDGKLS SSSSKVRMEASGCSRRLVVQQAGKADAGEYSCEAGGQKLSFRL  
DVAEPKLVFAKEQQARSEVKAEGASATLSCEVAQAQTEVTWFKDGKLS SSSSKVRVEASGCSRRLVVQQAGK  
ADAGEYSCEAGGQKLSFRLDVAEPKLVFAKEQQANSEVKAEGASATLSCEVAQAQTEVTWFKDGKLS SSSSK  
VRVEASGCSRRLVVQQAGKADAGEYSCEAGGQKLSFRLDVAEPKLAFAKEQQAHSEVKAEGASATLSCEVAQ  
AQTEVTWFKDGKLS SSSSKVRVEASGCSRRLVVQQAGKADAGEYSCEAGGQKLSFRLDVAEPKLVFAKEQQAH  
SEVKAEGASATLSCEVAQAQTEVTWFKDGKLS SSSSKVRVEASGCSRRLVVQQAGKADAGEYSCEAGGQKLS  
FRLDVAEAEESQIPERPSRREPLVVKHEHTIILTATIAAPSVAAVTWLKDGVERRSKRHEATSLGDHTLTVR  
GAQVLD SAIYSCRVGKEGQDFPVQVEEVAKF SKPLEPVEGELGGTVMLVCELSPEQAEVWRCGNTQLRPGK  
RFQMTSEGPRTTLTVSGLREDDAEYVCE SRDDRTSARLTVKVRVVKFTSGLSAMVAEEGQEATFQCVVSPS  
DAGVTWYKDGMLQPSSEKFMVESGASRSLTILGLTLEDAGQVTEAEGASSAALRVREAPVLFK KLEPQT  
VEERTSVTLEVELTRPWPEVKWTRNAAVLTPSENVEIRAEGARHCLVLRVSGFADRGGFCETPDDKTQAKLN  
VEMRQVRLVRGLQEVEAKEQGTASMDVELSHAEVEGSWTRDGLRLQPGPKCHLAVQGPVHILTL SALQPQDSG  
LVAFRAEGVHTSARLIVTELPVSFTRVLQDVVATQKEKVTLECELSRPVDVRWLKDGVELRAGKAI GIVAQGT  
CRSLVIYRCETGQGVYCDALDAQTSASLRVQGRYTLIFRVLAEADAGEVKFVAENAESRAHLRVKELPVT  
LLRPLRDKIAMEKHRGVLECGVSRASAQVRWFKGVELQSGPKYEVVSDGLYRKLVIINDVQPEDETYTCDAG  
NVKTSAQFFVEEQSITIVRGLKDMTVM EPAPAWFECETSIPSVRPPKWL LGKTVLQAGGNVLEQDGTVHRLT  
LHKTCSTMTGVPVHFTIGKSRSSAQLVVDIPVVLTRPLEPKAGRELQSVVLSCDFRPAPKAVQWYKDDTPLSP  
SEKFKMALEGQMAELRILRLTPADAGVYRCQAGSAQSSAEVTVEAREVTVIQPLQDAEAMEEGRVCFSCELSH  
KDEDIEWSLNGTPLYNDSFHEISHEGCLHTLVLKSVRQADTGTVCATSPKVSVSARLVVKGPVVF LKALDDV  
SAEERGTTLTQCEVSDPEARVVWRKDGVELGPSDKYDFLHKAGARGLTVHDL SHEDAGLYTCQVGSKETQSKV  
SVHDLHVGITKRLKTVEVLEGE SCSFECVLSHESPSDPAVWTVGGKTVGGSGHFHAVRQGRKYTLTVKDAALS  
DAGEVVFVSVLGLT SKASLIIRERPV DITKPLEDQRTTLGEDVMLSCELSRAGTSVRWLKDGKAIRKSQKYDLL  
SEGTRAVLVVRKASLKDSGEYTCETEASKSTAKLCVEKANRFT EELADLQVEEKGRAVFTCKTEHPASVVWTW  
RKGLLELRASGKHVPSQEGTLTKLTINALERTSDSYTCDIGQARTQARLLVHGQKVRVIEDLEDTAVQEGSS  
AKFCCR IAPADYGPVHWF LDKTPLHSNELNEITVQPGGYHVLTLRQLALKDSGTVYFEAGDQRTS AALRVTEK  
PSIFSRPLTDVTVTEGEDLTLVCETTTVDSSVRWTKDGKTLRPSARCQLSHEGCQAQLLITATTPQDGGRYKC  
EIGGASSSSIVRVHALPVRFRESLKDVEVPEGKAATLRCVLSVAAPVEWRHGDDVLKSSNKYS LRQEGAVLE  
LVIRDLQPDGQYSCSFGDQTT SATLTVKTSQAQFVGKLRNKEATEGTTVTLRCELTK EAPVEWKKGTETLR  
NGDKYSLKQDGAVCELQICSLLVADAGEYSCVCGQEKTSATLTVKALLVHFVRR LRSKEATEGDTTTLQCELS  
KAAPVEWRKGTETLRDGD RYSLKQDGAVCELQIRSLTIADAGEYLCTCGQEKTSATLTVRGLPAKFIEDLRSQ  
EATEGATAILRCELSKAAPVEWRK GSETLKDGD RYTLRQDGAVCELQIRGLAVVDTGTYS SLPKFTEGLRNE  
EATEGTMATLRCQMSKAAPVEWRK GSETLRDGD RYSLRQDGAMCELQIRGLTIEDSGEYTCVCGQEKTSATLS  
VKALPPRFIEDLRSQEATEGTMATLRCQMSKAAPVEWRK GSETLRDGDGRYSLRQNGAVCELQIHDLAVEDTGE  
YSCVCGQEKTSATLNVKALPPKFTEGLKKEEATEGTMVTLRQMSKEATVEWRKGAKTLS DGGYSLRQDGAM  
CELQICGLAVEDAGEYSCVCGQEKTSATLSVKALPPRFIEDLRSQEATEGTMATLRCQMSKAAPVEWRK GSET  
LRDGD RYSLRQDGAVCELQIRDLAVEDAGEYLCVCGQEKTSATLSVKALPPRFIEDLRSQEATEGTMATLRCQ  
MSKAAPVEWRK GSKTLR DGD RYSLRQDGAMCELQICDLAVEDTGDYSCVCGQEKTSATLSVKAPQVVFQOPLQ

NLQAEEGSMASLRCELSVPNAAMVWSKGGLELQGDTRREARQQGCVAELLRLRDLRREDAGEYSCTCGSQTTSA
TLMVTAAPVRFLRELQAQDVDEGATARLRCELSREAVSVEWRKGSILQFPKAKYQMVQEGTTAELLVHGVEQE
DAGEYTC DAGHTQSIARLSVRAPKPKFKTDLQSTEQEAGGTARLCCQLSEAEPTPVQWLKEGVELHVHVGSKYE
MRRQGAVCELLIHGLEAKDTGEYACLVGQKTLASLRVKEPEVTIVRGLVDMEVQADEDVEFTCKVSOAGATD
VQWHLQGLPLQSNEVTEVAVLADGCTHVLQLKGVTLLEDAGTVSFHVGGSSSAQLTVRVPEVTVLEPLKDVQL
SEGQDAHFRCRLSRASGQEARWALGGVPLQCNEMNNDITVEQGTLYLLTLHKVTLLEDAGTITLQVGSSESQAQL
KVTAKNTVLRGLENDVALEGGALFECQLSQPEVAHTWLLDDEPVHTSEKVEVVYFENGLRHLLLLLKNLKPQ
DSCRVTFLAGDVVTS AFLTVRGWRLEVLEPPHDASVKAGMQVRFTCILSEAVPVGEATWYINGAAIQPDDTDW
TVTTDGS HHALTL SNAQPQHAGEVTF AARDAVASARLSVLALPDPPEDAEVVGRSDHSVTL SWVAPMSDGGGG
LCGYR VEMKEASTGQWQLCHDLVPGPECVVDDLVP GKTYRFRVA AVGPAGAGEPVHLPQMVKIAPAPAPAPAP
APAPETRQAVVGEDICLELEVAADGGEV VWHKGTERRIQPGGHFEVLSRGRQMLVIKGFRTEDQGEYRCGPIQ
GLPSSGAATFNVVMTSGSGDEVPAQPSLPPEAAQEGDLHLLWEALARKRRMSREPTLDSISELPEEDSRVQHL
RQEAEETAPDLS EGYSTADELARTGEADLSHTSSDDES RAGTPSLVTYLKKAGGPGISPLASKHEAQVTT SVK
PQKQQEPVVPTCPPPGDLSAADLMDPSLDKAAVKIQAAFKGYKVRKEMKQQEGPVFSRTFGDTEAQVGDVLR
ECVLATKTKDMRACWLKDGIELTDGRHYHIDQLKDGTC SLLVTGLAPTDSGRYTCQVSTKSGRVSHSACVVVSG
TESEAESSSGGLED DAFRRARRLHRLFRTKSPAELSEELF LSADEGPGPEEPADWQTYREDEFVFCIRFE
SLAEARQAVTCFRNMFATMGIGVEISLGEQGRGVEMRIGKVAPTVTPAVPLAKT PGLQTS DAAPVLAFTLQON
QDVQDGYPMSFDCVVTGQVPVSVRWFKDGKLLLEEDDHYMINEDQQGGHQLIITAVVPADMGVYRCLAENS MG
V SSTKAELRVELTSTDYDTAADATETSSYFSAQGYLSSREQEGTESDEGQLPQVLEELKDLQVAPGTRLAKFQL
KVKGY PAKLYWFKDQGPLTTS DHIRMTDKKTLHTLEIVSVTREDSGQYAA YISNAVGAAYSSARLLVRGPSE
PEEK PASDVHERLVP PPRILEKFTPKKVKRGSSITFSVKVEGHPAPSVHVLKEEA EKVLWIGPDTPGYTMAS
SKQHS LVLDDVGRQHOGTYTCIATNPAGQALCSASLHISGLAKEEEQERVKEALISSFLQGTSQAVSAQMSSES
AGFADLVGQSKGESLVAAEASHLSLAEVGTEEF LKQLTSQITEMVSAKISQAKLQVPGGDSDEETKTPSASP
RHGRSRPSSSVQESSSESEDGDSRGEIFDIYVVVTADYLP LGAEQDAIILREGQYVEVLDSAHPLRWLVRTKPT
KSSPSRQGWVSPAYLDKRLKLSPEWGPTEAPEFPGEAVSEDEYRTRLSSV IQELLSSEQAFV GELQFLESHM
KHLERSPRVPAAVASQETVIFRNVDI SHFHSSFLKELQCGGTDDDVMCFIKNQEAFEKYLEFLVGRVQAES
VVVSTPVQEFYKKYAEKTLTSAKDP TQPPPPPLQHYLEQPVERVQKYQALLKELIRNKARNRQNCALLEQYAV
VSALPQRAENKLVSLMENYPGTLEALGEP IRQGHFIVWEGAPGARM PWKGNHRHVFLFRNYLVIC PRRDSR
TDTFSYVFRNMMKLSSIDLNDQVEGDDRAFEVWHERE DSVRKYLQARTV IKNSWVKEICGIQQRLAQPVWR
PPEFEEELADCTAELGETVKLACRVTGT PKPIVSWYKDGK PVEVDPHHILIEDPDG SCTLIDLNTGIDSGQY
MCF AASAAGNASTLGKILVQVPPRFV NKVRATPFVEGEDAQITCTVEGAPYPQIRWYKDG TLLAPGNRYRMLN
EPRSGVLVLV IQAASKEDLGHYECELVNRLGSTRGGGEL YMQSPALRARDQHHRQI VAAVEVTEQETKVPKK
TVIIEETITTVVKS PRGRRQSPGKSPSRSPRRSASPRR PGLLAPERLYPPGTS PSRRLEVEQGRKAPVPALY
VTEAEVHAPASQS QPKWLEVEETIEVRVKKTGSRGASPVREMTSRGEGILFTLPGGIPGRDPNANN SNNKSVY
QEARTWGP AVVHVGE PFI FQVDSVGNVDWVAASPEPEQVRASQKEENTERQEGCSDG DENTFLMEEPQD TDSL
QGRDPKILTHNGRVLTLADLEDYVPQEGE TFGCGDSTPSTPDEPPCEVSVLQREI SEPTVQPVLLNVRPPG
TGATPSFFRPGSQVHSPESVSFLLREAWSGPVSAAPWTSSFH THVQSSVDGSHGSFKTEVSTQTVSFGAVGET
VTLHIDPDGGEAPGPSQG\*

>rs262160257\_ENSMUSP00000158795\_c.724:C>T\_p.T242M
ENSMUST00000238536.2|Obscn-210|ENSMUSG00000061462|-|chr11:g.59026477:G>A
MDHSFSGAPRFLTRPKAFVSVGKDATLSCQIVGNPTPHVSWEKDRQPVEAGARFRLAQDGDVYRLTILDLAL
GDSGQYVCRARNAIGEAFAAVGLRVDSEGTCAEQAPHLLRPTSIRVREGADATFRCRVGGSPQPAVSWSKDG
RRLGPPDAPHVRVEEHGESSALRIR SARPRDGGTYEVRAENPLGSASAAAALVVDSDAEVAGPPGTSTATLLA
HLQORREAMRAEGIPSPPGAGMRTCTVTEGKHARLSCFVTGEPKPE TVWKKDGLVTEGRRHVVEDEQENF
VLKILFCKQSDRGLYTCASNLVGQTYSSVLVVREPTVPFKKRLQDLEVREKESATFQCEVAQPA TEAAWFK
EETRLWASAKYDIEEEGTERRLTVRNVSADDDAVYICETTEGSR TVAELSVQGNLTRKLPKRTAVRTGDTAIF
WVELAVPEGPVRWLRNQEEMVAGGRVAITAEGTCHTLTIFQCTLEDMGEVAFVSGGCRTTTQFCVSAPRRPPL
YPPADPVVKAKTESSVTL SWSAPPHGDRPVTIDGYVLEKRKLGAYAWSRCHEAGWLATTEFTITGVAAEGDFQ
FRVSAINHFGQGPYLEFPGMTMLVPLAVKTP LKAVEAVEGGEVTF SVDLTVASSGEWFLDGEAL KASSIYVI
RCDRTRHMLTIREV PARLHGAQLKFVANGIETS IQMVVRAALGLPS SKLPAAAAREVLAQLHEEAQLLAE LSD
QAAA VTWLKDGRELSLGPKEYMQVSAGRRALLVRDVAQDDAGLYECVSRGSR TAYQLLVQDITDGYRDWGPAG
PQKHMCKCAGAKIARYLGS SCYRFLQYDKGVWHLEAALDTRQKGKTS SCSLHEKPKLVFAKQQQAHSEVKA
AGNSATLSCEVTQAQTEVTWFKDGKLLSSSSKVRMEASGCSRRLVVQQAGKADAGEYSCEAGGQKLSFRLDVA
EPKLVFAKQQAHSEVKA EAGASATLSCEVAQAQTEVTWFKDGKLLSSSSKVRMEASGCSRRLVVQQAGKAD
GEYSCEAGGQKLSFRLDVAEPKMFVFAKEQQARSEVKA EAGASATLSCEVAQAQTEVTWFKDGKLLSSSSK
EASGCSRRLVVQQAGKADAGEYSCEAGGQKLSFRLDVTEPKLVFAKEQQARSEVKA EVGN SATLSCEVAQAQ
EVTWFKDGKLLSSSSKVRMEASGCSRRLVVQQAGKADAGEYSCEAGGQKLSFRLDVAEPKLVFAKEQQARSE
KAEAGNSATLSCEVAQAQTEVTWFKDGKLLSSSSKVRMEASGCSRRLVVQQAGKADAGEYSCEAGGQKLSFHL



DVTEPKLVFAKEQQAHSEVKAEAGASATLSCEVAQAQTEVTWFKDGKKLSSSSKVRMEASGCSRRLVVQQAGK  
ADAGEYSCEAEGQKLSFRLDVAEPKLVFAKEQQARSEVKAEAGASATLSCEVAQAQTEVTWFKDGKKLSSSSK  
VRVEASGCSRRLVVQQAGKADAGEYSCEAGGQKLSFRLDVAEPKLVFAKEQQANSEVKAEAGASATLSCEVAQ  
AQTEVTWFKDGKKLSSSSKVRVEASGCSRRLVVQQAGKADAGEYSCEAGGQKLSFRLDVAEPKLAFAKEQQAH  
SEVKAEAGASATLSCEVAQAQTEVTWFKDGKKLSSSSKVRVEASGCSRRLVVQQAGKADAGEYSCEAGGQKLS  
FRLDVAEPKLAFAKEQQAHSEVKAEAGASATLSCEVAQAQTEVTWFKDGKKLSSSSKVRVEASGCSRRLVVQQ  
AGKADAGEYSCEAGGQKLSFRLDVAEPKLAFAKEQQAHSEVKAEAGASATLSCEVAQAQTEVTWFKDGKKLSS  
SSKVRVEASGCSRRLVVQQAGKADAGEYSCEAGGQKLFRLDVAEPKLMFAKEQQAHSEVKAEAGASATLSCE  
VAQAQTEVTWFKDGKKLSSSSKVRVEASGCSRRLVVQQAGKADAGEYSCEAGGQKLSFRLDVAEPKLVFAKEQ  
QAHSEVKAEAGASATLSCEVAQAQTEVTWFKDGKKLSSSSKVRVEASGCSRRLVVQQVQKADAGEYSCEARGQ  
KLSFRLDVADTRLMFAKEQQARTEVKAEAGNSATLSCEVAQAQTEVTWFKDGKKLSSSSKVRVEASGCSRRLV  
VQQAGKADAGEYSCEAGGQKLSFRLDVAEAEESQIPERPSRREPLVVKEHETIILTATIAAPSVAAVTWLKDG  
EIRRSKRHEATSLGDTHTLTVRGAQVLDIAIYSCRVGKEGQDFPVQVEEVAAKFSKPLEPVEGELGGTVMLVC  
ELSPQAEVWRCGNTQLRPGKRFQMTSEGPRRTLTVSGLREDDAEYVCESRDDRTSARLTVKVPRVVKFTS  
GLSAMVAEEGQEATFQCVVSPSDAGVTWYKDGMLQPSKFKVMVESGASRSLTILGLTLEDAGQVTEAEGAS  
SSAALRVREAPVLFKKKLEPQTEVEERTSVTLEVELTRPWPEVKWTRNAAVLTPSENVEIRAEGARHCLVLRV  
GFADRGGFFGCETPDDKTQAKLNVEMRQVRLVRLVGLQEVEAKEQGTASMDVELSHAEEVGSWTRDGLRQLQPGPKC  
HLAVQGPVHILTLTALQPDQSLVAFRAEGVHTSARLIVTELPVSFTRVLQDVVATQKEHLCELSRPPVDV  
RWLKDGVLELRAGKAIQIVAQGTCSRSLVIYRCETGDQGVYVCDALDAQTSASLRVQGRTYTLIFRRLAEDAGE  
VKFVAENAESRAHLRVKELPVTLLRPLRDKIAMEKHRGVLECCVSRASAVRWFKGGVELQSGPKYEVVSDGL  
YRKLVINVDQPEDEDTYTCDAGNVKTSAQFFVEEQSITIVRGLKDMTVMPEPAPAWFECETSIPSVRPPKWLIG  
KTVLQAGGNVGLQDGTVHRLTLHKTCSTMTGPHFTIGKSRSSAQLVVSDIPVVLTRPLEPKAGRELQSVVL  
SCDFRPAKAVQWYKDDTPLSPSEKFKMALEGGMAELRILRLTPADAGVYRCQAGSAQSSAEVTEAREVTVI  
QPLQDAEAMEEGRVCFSCELSHKDEDIEWSLNGTPLYNDSFHEISHGCLHTLVLSKSVRQADTGTVCATSPKV  
SVSARLVVKGKPVVFLKALDDVSAEERGLTLQCEVSDPEARVWVRKDGVELGSPDKYDFLHKAGARGLTVHD  
LSHEDAGLYTCQVGTSTKQSVSVHDLHVGITKRLKTVEVLEGESCSFECVLSHESPPDPAVWTVGGKTVGGG  
GHFHAVRQGRKTYLTKVDAALS DAGEVVFVSVLGLTSAKSLIIRERPVDTIKPLEDQRTTLGDVMLSCELSR  
GTSVRWLKDGKAIRKSQKYDLLSEGTRAVLVVRKASLKDSSGEYTCETEASKSTAKLCVEEKANRFTTELADLQ  
VEEKGRAVFTCKTEHPASVVTWRKGLLELRASGKHVPSQEGTLTKLTINALERTSDTYTCDIGQARTQARLL  
VHGQKVRVIEDLEDTAVQEGSSAKFCRIAPADYGPVHWFLLDKTPLHSNELNEITVQPGGYHVLTLRQLALKD  
SGTVYFEAGDQRTSALRVTEKPSIFSRPLTDVTVTEGEDTLVCETTTVDSVVRWTKDGKTLRPSARCQLSH  
EGCQAQLLITATTPQDGGRYKCEIGGASSSSIVRVHALPVRFRESLKDVVEVPEGKAATLRCVLSVAAPVEWR  
HGDDVLKSSNKYSRQEGAVLELVIRDLPQDQSGQYSCSFGDQTTSATLTVKTSQAQFVGLRKNKEATEGTTV  
TLRCELTKAEAPVEWKKGTETLRNGDKYSLKQDGA VCELQICSLLVADAGEYSCVCGQEKTSATLTVKALLVHF  
VRRLSKEATEGDTTLQCELSKAAPVEWRKGTETLRDGDYSLKQDGA VCELQIRSLTIADAGEYLCTCGQE  
KTSATLTVRALPAKFKDSLKNEEATEGTTATLSCELSKAAPVWKKGPKTLQSGDKYVLRQDGA VCGLQIHGL  
TMADAGEYSCVCGQEKTSATLTVRGLPAKFIEDLRSQEATEGATAILRCELSKAAPVEWRKGSSETLRDGDYR  
LRQDGA VCELQIRGLAVVDGTYSLSLPTKFTEGLRNEEATEGTMATLRCQMSKAAPVEWRKGSSETLRDGDYR  
LRQDGA MCELQIRGLTIEDSGEYTCVCGQEKTSATLSVKALPSRFIEDLRSQEATEGTMATLRCQMSKTAPVE  
WKKGSETLRDGGYSLRQDGPVCELQICDLAVEDAGEYSCVCGQEKTSATLSIKALPPRFIEDLRSQEATEG  
MATLRCQMSKAAPVEWRKGSSETLRDGGYSLRQNGAVCELQIHDLAVEDTGEYSCVCGQEKTSATLNVKALPP  
RFIEDLRSQEATEGTMATLRCQMSKAAPVEWRKGSSETLRDGGYSLRQDGA VCELQIHDLVEDAGQYSCVCG  
QEKTSAVLTVDALPPKFTEGLKKEEATEGTMVTLRCQMSKEATVEWRKGAKTLS DGGYSLRQDGA MCELQIC  
GLAVEDAGEYSCVCGQEKTSATLSVKALPPRFIEDLRSQEATEGTMATLRCQMSKAAPVEWRKGSSETLRDGD  
YSLRQDGA VCELQIRDLAVEDAGEYLCVCGQEKTSATLSVKALPPRFIEDLRSQEATEGTMATLRCQMSKAAP  
VEWRKGSSETLRDGDYSLRQDGA MCELQICDLAVEDTGDYSCVCGQEKTSATLSVKALPPRFIEDLRSQEARE  
GTVATLRCMSKAAPVEWRKGSSETLRDGDYSLRQEGNLCELQIRDLAVEDTEEYSCVCGQEKTSATLSVKAL  
PAKFIEDLRSQEAPESSTVTLRCKLSKASVWKKGSETLRNGARYSLRQDGA VCELEIRDLTVEDTGEYSCT  
CGQERTSATLSIMAPQVVFQQPLQNLQAEEGSMASLRCELSVPNAAMVWSKGGLELQGDTRREARQQGCVAEL  
LLRDLRREDAGEYSCTCGSQTTSATLMVTAAPVRFRLRELQAQDQVDEGATARLRCELSREAVSVEWRKGS LQLF  
PCAKYQMVQEGTTAELLVHGVEQEDAGEYTCDAHTQSIARLSVRAPKPKFKTDLQSTEQEAGGTARLCCQLS  
EAEPTFPVQWLKEGVELHVGSKYEMRRQGA VCELLIHGLEAKDTGEYACLVGGQKTASLRVKEPEVTIVRGL  
VDMEVQADEVTEFKVQSAGATDVQWHLQGLPLQSNVEVAVLADGCTHVLQKGMVTLLEDAGTVSFHVGLL  
SSAQLTVRVPEVTLEPLKDVQLSEGQDAHFRCRLSRASGQEARWALGGVPLQCNEMNDITVEQGTLYLLTL  
HKVTLEDAGTITLQVGSSESQAQLKVTAKNTVLRGLENVDALEGGALFECQLSQPEVAHAHTWLLDDEPVHTS  
EKVEVVFENGLRHLLLLKLNKLPQDSCRVTFLAGDVVTS AFLTVRGRVLELVLEPPHDASVKAGMQVRFTCILS  
EAVPVGEATWYINGAAIQPDDTDWTVTTDGS HALTLSNAQPQHAGEVTF AARDAVASARLSVLALPDPPEDA  
E VVGRSDHSVTL SWVAPMSDGGGLCGYRVMKEASTGQWQLCHDLVPGPECVDDLVPGKTYRFRVAAVGPA

GAGEPVHLPQMVKIAPAPAPAPAPAPAPAPETRQAVVGEDICLELEVAADGGGEVVVHKGTERIQPGGHFEVLS  
 RGQRQMLVIKGFRTEDQGEYRCGPIQGLPSSGAATFNVMVMTSGSGDEVPAQPSLPPEAAQEGDLHLLWEALAR  
 KRRMSREPTLDSISELPEEDSRVQHLRQEAETAPDLSEGYSTADELARTGEADLSHTSSDDESRACTPSLVT  
 YLKKAGGPGISPLASKHEAQVTTSVKPKQKQEPVVPTCPPPGDLSAADLMDPSLDKAAVKIQAAFQKGYKVRKE  
 MKQQEGPVFSRTFGDTEAQVGDVLRLECVLATKTDMRACWLKDGIELTDGRHYHIDQLKDGTCSSLVVTGLAPT  
 DSGRYTCQVSTKSGRVSHSACVVVSGTESEAESSGGELDDAFRRAARRLHRLFRTKSPAELSEELFLSADE  
 GPGEPEPADWQTYREDENFVCIRFESLAEARQAVTCFRNMFATMGIGVEISLGEQGPGRVEMRIGKVAPTVT  
 PAVPLAKTPGLQTSDAAPVFLTELQNDVQDGYPMSFDCVVTGQVPSVRWFKDGKLEEDDHVMINEDQOQG  
 HQLIITAVVPADMGVYRCLAENSMGVSSTKAELRVELTSTDYDTAADATETSSYFSAQGYLSSREQEGTESDE  
 GQLPQVLEELKDLQVAPGTRLAKFQLKVKGYPAKLYWFKDGGQPLTSDHIRMTDKKTLHTLEIVSVTREDSG  
 QYAAYSNAVGAAYSSARLLVRGPSEPEEKPASDVHERLVPPRILEKFTPKKVKRGSSITFSVKVEGHPAPSV  
 HWLKEEAKEKGVLWIGPDTPGYTMASSSKQHSVLVLDVGRQHGTYTTCIATNPAGQALCSASLHISGLAKEEEQ  
 ERVKEALISSFLQGTSAQVSAQMSSEAGFADLVGQSKGESLVAEEAHSHLSLAEVGTTEEFLQKLTQITEMVS  
 AKISQAKLQVPGGDSDEETKTPSASPRHGRSRPSSSVQESSSEEDGDSRGEIFDIYVVTADYLPGLAEQDAI  
 ILREGQYVEVLDSAHPLRWLVRTKPKSSPSRQGWVSPAYLDKRLKLSPEWGPTEAPEFPGEAVSEDEYRTRL  
 SSVIQELLSSEQAFVGELOFLESHHMKHLERSPRVPAAVASQKTVIFRNVQDISHFHSSFLKELQCGCTDDDV  
 AMCFIKNQEAFEKYLEFLVGRVQAESVVVSTPVQEFYKKAEEETLSAKDPTQPPPPPLQHYLEQPVVERVQKYQ  
 ALLKELIRNKARNRNCALLEQAYAVVSALPQRAENKHLVSLMENYPGTLEALGEPPIRQGHFIVWEGAPGARM  
 PWKGHNHRVFLFRNYLVICKPRRDSRTDTFSYVFRNMMKLSSIDLNDQVEGDDRAFEVWHEREDSVRKYLLQA  
 RTVIKNSWVKEICGIQORLAQPVWRPPEFEEELADCTAELGETVKLACRVTGTPKPIVSWYKDGKPVVDPH  
 HILIEDPDGSCTLILDNLTGIDSGQYMCFAASAAGNASTLGKILVQVPPRFVNVKVRATPFVEGEDAQITCTVE  
 GAPYPQIRWYKDGTLTLLAPGNRYRMLNEPRSGVLVVIQAASKEDLGHYECELVNRLGSTRGGELYMQSPALR  
 ARDQHHREQIVAAVEDTSVEGSAHSAQDQAAASVLWRLLGSEALGPS PGDLPNTRQSEPPAFEEAASQIP  
 GAASGTPEVSPQPGTHKGLEQETTSSGSQGWVPIRVEGTAWPGAGTGQQLLDVHSQVIMETTQRTYVCQAPDT  
 GVTRAPSMQVITIEDVQVQVGDMAQFDAVIEGHPPPITVWYKGSTQLTSSARLSQRQDGTYSVLVTDVAPHA  
 GVTVCVANNAGGQVLCKAELLVHGGDKLDAENQVYRRKLSHFYDVQEEIGRGVFGFVKRVVHKGNKMFCAAKF  
 IPLRSKTRAQAGYQERDILATLGHPLVTGLLDQFVTRKTLILILELCSSEELLDRFLFKKGVVTEAEVKVYIQQL  
 VEGHLHLHSHGILHLHDIKPPNIMLVHPAREDIKICDFGFAQKITPSEPQYSKYGSPEFVSPEIIEQNPVSEGS  
 DIWAMGVISYLSLTCSSPFAGESDRATLLNVLEGRVSWSSPTAAHLSSEDAKDFIKATLQRTPRARPSTSQCLA  
 HPWFLKSMPAEEAHFINTKQLKFLARSRWQRSLSMSYKSILVMRSIPPELLQGPPDSPSLGVARHLRGEASGAS  
 SSSSSSDNELAPFARAKSLPPSPVTHSPLLHPRGFLRPSASLPEETEASMPPTADA AVPASQASAGPPASPGCV  
 PRHSVSISSLFYQQAGEGAERGNKTSGAKRHPARRRHLLKGGYIARALPGLREPLMEYSLLEEEAAREEQASIM  
 TKTPSFETALRLPSSSVREVPGRSHSLDNPPVTGTPSPEACKEQLLFPSTGLTHEHTAKDRGHKEGFLQESV  
 PFPMPGDSRPGKQEGSSQDSCRKPASSCHSELGSGSQEGCPSQSLGSLPPQSLKKELTSCGPLFSEQ  
 PQAAPFPTQVSPLLGSEKEPQDGSLEGGVVPVSSSPGASQVDASLDTEGLSEAGDTCDFTPPPQRPQEQAT  
 TRKFSLESRGGYAGVAGYGTFAFGDAGGMLQQLWARMWAVSQSSEEQDEAATESQPLES LGPIAEASG  
 VPLRTSPSLTPWEEVEQVSLVQIRDLSDGDAEAADTISLIDISEVDPAYLNLSDLYDIKYLPEFEMI FRRVPKPI  
 EQPESPGSETEAGQGLADFLLEAAWPWPGELGLRAGLEITEEPEEPGDLEALLGEAAVGRKRKWSPSRGLFQF  
 PGRCLSGEEPVELGLRQRVKASMAHISRIKGRPEGPEREPPRKKAGLASFRLSGLKGRDQELSDEAVVLGQ  
 SVTLACQVLAQPTAQTWSKDGVLLESSGHLLISSTLKNFQLLTLVVKKEEDLGTYTCCVSNPLGTAVTTGVL  
 RKAERPSSSRPEVGEYKDAVLLVWKPVESCGPVTYIVQCCIEGGSWTTLASDISDCCYLTGKLSRGGMYIF  
 RTACVSKAGMGPYSSPSEQVLLGGPNHLASEEESRGRPAQLLPSTKTFAFQMQIRRRGRFSVVRQCREKASGR  
 ALAAKIVPYQPEDKTAVREYEAALKRHLHPLHAQLHAAYLSPRHLVLIILELCSGPELLPSLAERESYSESDVK  
 DYLWQMLSATQYLHAQHILHLDLRSNNMMVTEYNLLKVIDLGNQSLDQEKVPAPENFKDYLETMAPELLEGG  
 GAVPQTDIWAIGVTAIFIMLSGEYPESESETRDLQKGLRKLIRLSRCYAGLSGGAVFLQSSSLCAQPWGRPCA  
 STCLQCGLWTEEGPTGSRPTPVTFPTVRLRAFAVREKRRRALLYKKNLAQVR\*  
 >rs262160257\_ENSMUSP00000038264\_c.724:C>T\_p.T242M  
 ENSMUST00000047441.14|Obscn-202|ENSMUSG00000061462|-|chr11:g.59026477:G>A  
 MDHSFSGAPRFLTRPKAFVSVGKDATLSCQIVGNPTPHVSWEKDRQFVEAGARFRLAQDGDVYRLTILDLAL  
 GDSGQYVCRARNAIGEAFAAVGLRVDSEGTCAEQAPHLLRPTSIRVREGADATFRCRVGGSPQPAVSWSKDG  
 RRLGPPDAPHVRVEEHGESSALRIRSARPRDGGTYEVRAENPLGSASAAAAALVVDSAEVAGPPGTSTATLLA  
 HLQORREAMRAEGIPSPPGAGMRTCTVTEGKHARLSCFVTGEPKPEVWKKDQGLVTEGRRHVVEDEQENF  
 VLKILFCKQSDRGLLETCTASNLVGQTYSSVLDVVVREIPTVFFKKRLQDLEVREKESATFQCEVAQVAPATEAAWFK  
 EETRLWASAKYDIIEEGTERRLTVRNVSADDDAVYICETVETTSRVAELSVQGNLTKRLKPRKTAVRTGDTAIF  
 WVLELAVPEGPVRWLRNQEEMVAGGRVAITAEGTCHTLTI FQCTLEDMGEVAFVSGGCRTTTQFCVSAPRRPPL  
 YPPADPVVKAKTESSVTLWSAPPHGDRPVTIDGYVLEKRLKLGAYAWSRCHEAGWLATTEFTITGVAAEEGDFQ  
 FRVSAINHFGQGPYLEFPGMTMHLVPLAVKTPKAVEAVEGGEVTFVSDLTVASSGEWFLDGEALKASSIYVI  
 RCDRTRHMLTIREVPARLHGAQLKVFVANGIETS IQMVVRAALGLPSSKLPAAAAREVLAQLHEEAQLLAE LSD

QAAA V TWLKD GREL S L G P K Y E M Q V S A G R R A L L V R D V A Q D D A G L Y E C V S R G S R T A Y Q L L V Q D I T D G Y R D W G P A G  
P Q K H M C K C A G A K I A R Y L G S S C Y R F L Q Y D K G V W H W L E A A L D T R Q G K G T S S C S L H E K P K L V F A K G Q Q A H S E V K A E  
A G A S A T L S C E V A Q A Q T E V T W F K D G K K L S S S S K V R M E A S G C S R R L V V Q Q A G K A D A G E Y S C E A G G Q K L S F R L D V A  
E P K M V F A K E Q Q A R S E V K A E A G A S A T L S C E V A Q A Q T E V T W F K D G K K L S S S S K V R M E A S G C S R R L V V Q Q A G K A D A  
G E Y S C E A G G Q K L S F R L D V T E P K L V F A K E Q Q A R S E V K A E V G N S A T L S C E V A Q A Q T E V T W F K D G K K L S S S S K V R M  
E A S G C S R R L V V Q Q A G K A D A G E Y S C E A G G Q K L S F R L D V A E P K L V F A K E Q Q A R S E V K A E A G N S A T L S C E V A Q A Q T  
E V T W F K D G K K L S S S S K V R M E A S G C S R R L V V Q Q A G K A D A G E Y S C E A G G Q K L S F H L D V T E P K L V F A K E Q Q A H S E V  
K A E A G A S A T L S C E V A Q A Q T E V T W F K D G K K L S S S S K V R M E A S G C S R R L V V Q Q A G K A D A G E Y S C E A G G Q K L S F R L  
D V A E P K L V F A K E Q Q A R S E V K A E A G A S A T L S C E V A Q A Q T E V T W F K D G K K L S S S S K V R V E A S G C S R R L V V Q Q A G K  
A D A G E Y S C E A G G Q K L S F R L D V A E P K L V F A K E Q Q A N S E V K A E A G A S A T L S C E V A Q A Q T E V T W F K D G K K L S S S S K  
V R V E A S G C S R R L V V Q Q A G K A D A G E Y S C E A G G Q K L S F R L D V A E P K L A F A K E Q Q A H S E V K A E A G A S A T L S C E V A Q  
A Q T E V T W F K D G K K L S S S S K V R V E A S G C S R R L V V Q Q A G K A D A G E Y S C E A G G Q K L S F R L D V A E P K L A F A K E Q Q A H  
S E V K A E A G A S A T L S C E V A Q A Q T E V T W F K D G K K L S S S S K V R V E A S G C S R R L V V Q Q A G K A D A G E Y S C E A G G Q K L S  
F R L D V A E P K L A F A K E Q Q A H S E V K A E A G A S A T L S C E V A Q A Q T E V T W F K D G K K L S S S S K V R V E A S G C S R R L V V Q Q  
A G K A D A G E Y S C E A G G Q K L F F R L D V A E P K L V F A K E Q Q A H S E V K A E A G A S A T L S C E V A Q A Q T E V T W F K D G K K L S S  
S S K V R V E A S G C S R R L V V Q Q V G K A D A G E Y S C E A R G Q K L S F R L D V A E A E S Q I P E R P S R R E P L V V K E H E T I I L T A T  
I A A P S V A A V T W L K D G V E I R R S K R H E A T S L G D T H T L T V R G A Q V L D S A I Y S C R V G K E G Q D F P V Q V E E V A A K F S K P  
L E P V E G E L G G T V M L V C E L S P E Q A E V V W R C G N T Q L R P G K R F Q M T S E G P R R T L T V S G L R E D D A E E Y V C S R D D R T  
S A R L T V K V P R V V K F T S G L S A M V A E E G Q E A T F Q C V V S P S D A G V T W Y K D G M Q L Q P S E K F V M V E S G A S R S L T I L G L  
T L E D A G Q V T V E A E G A S S S A A L R V R E A P V L F K K K L E P Q T V E E R T S V T L E V E L T R P W P E V K W T R N A A V L T P S E N V  
E I R A E G A R H C L V L R S V G F A D R G F F G C E T P D D K T Q A K L N V E M R Q V R L V R G L Q E V E A K E Q G T A S M D V E L S H A E V E  
G S W T R D G L R L Q P G P K C H L A V Q G P V H I L T L S A L Q P Q D S G L V A F R A E G V H T S A R L I V T E L P V S F T R V L Q D V V A T Q  
K E K V T L E C E L S R P V D V R W L K D G V E L R A G K A I G I V A Q G T C R S L V I Y R C E T G D Q G V Y V C D A L D A Q T S A S L R V Q G R  
T Y T L I F R R V L A E D A G E V K F V A E N A E S R A H L R V K E L P V T L L R P L R D K I A M E K H R G V L E C Q V S R A S A Q V R W F K G G  
V E L Q S G P K Y E V V S D G L Y R K L V I N D V Q P E D E D T Y T C D A G N V K T S A Q F F V E E Q S I T I V R G L K D M T V M E P A P A W F E  
C E T S I P S V R P P K W L L G K T V L Q A G N V G L E Q D G T V H R L T L H K T C S T M T G P V H F T I G K S R S S A Q L D V V S D I P V V L T  
R P L E P K A G R E L Q Q V R S E V K A E A G A S A T L S C E V A Q A Q T E V T W F K D G K K L S S S S K V R M E A S G C S R R L V V Q Q A G K  
Q S S A E V T V E A R E V T V I Q P L Q D A E A M E E G R V C F S C E L S H K D E D I E W S L N G T P L Y N D S F H E I S H E G C L H T L V L K S  
V R Q A D T G T V C A T S P K V S V S A R L V V K G K P V V F L K A L D D V S A E E R G T L T L Q C E V S D P E A R V V W R K D G V E L G P S D K  
Y D F L H K A G A R G L T V H D L S H E D A G L Y T C Q V G S K E T Q S K V S V H D L H V G I T K R L K T V E V L E G E S C S F E C V L S H E S P  
S D P A V W T V G G K T V G G S G H F H A V R Q R K Y T L T V K D A A L S D A G E V V F S V L G L T S K A S L I I R E R P V D I T K P L E D Q R  
T T L G E D V M L S C E L S R A G T S V R W L K D G K A I R K S Q K Y D L L S E G T R A V L V R K A S L K D S G E Y T C E T E A S K S T A K L C  
V E E K A N R F T E E L A D L Q V E E K G R A V F T C K T E H P A S V V T W R K G L L E L R A S G K H V P S Q E G L T L K L T I N A L E R T D S D  
T Y T C D I G Q A R T Q A R L L V H G Q K V R V I E D L E D T A V Q E G S S A K F C C R I A P A D Y G P V H W F L D K T P L H S N E L N E I T V Q  
P G G Y H V L T L R Q L A L K D S G T V Y F E A G D Q R T S A A L R V T E K P S I F S R P L T D V T V T E G E D L T L V C E T T T V D S S V R W T  
K D G K T L R P S A R C Q L S H E G C Q A Q L L I T A T T P Q D G G R Y K C E I G G A S S S I V R V H A L P V R F R E S L K D V E V P E G K A A  
T L R C V L S S V A A P V E W R H G D D V L K S S N K Y S L R Q E G A V L E L V I R D L Q P Q D S G Q Y S C S F G D Q T T S A T L T V K T S S A Q  
F V G K L R N K E A T E G T T V T L R C E L T K E A P V E W K K G T E T L R N G D K Y S L K Q D G A V C E L Q I C S L L V A D A G E Y S C V C G Q  
E K T S A T L T V K A L L V H F V R R L S K E A T E G D T T T L Q C E L S K A A P V E W R K G T E T L R D G D R Y S L K Q D G A V C E L Q I R S  
L T I A D A G E Y L C T C G Q E K T S A T L T V R A L P A K F K D S L K N E E A T E G T T A T L S C E L S K A A P V T W K K G P K T L Q S G D K Y  
V L R Q D G A V C G L Q I H G L T M A D A G E Y S C V C G Q E K T S A T L T V R G L P A K F I E D L R S Q E A T E G A T A I L R C E L S K A A P V  
E W R K G S E T L K D G D R Y T L R Q D G A V C E L Q I R G L A V V D T G T Y S S L P T K F T E G L R N E E A T E G T M A T L R C Q M S K A A P V  
E W R K G S E T L R D G D R Y S L R Q D G A M C E L Q I R G L T I E D S G E Y T C V C G Q E K T S A T L S V K A L P P R F I E D L R S Q E A T E G  
T M A T L R C Q M S K A A P V E W R K G S E T L G D G G R Y S L R Q N G A V C E L Q I H D L A V E D T G E Y S C V C G Q E K T S A T L N V K A L P  
P R F I E D L R S Q E A T E G T M A T L R C Q M S K A A P V E W R K G S E T L R D G G R Y S L R Q D G A V C E L Q I H D L D V E D A G Q Y S C V C  
G Q E K T S A V L T V D A L P P K F T E G L K K E E A T E G T M V T L R C Q M S K E A T V E W R K G A K T L S D G G R Y S L R Q D G A M C E L Q I  
C G L A V E D A G E Y S C V C G Q E K T S A T L S V K A L P P R F I E D L R S Q E A T E G T M A T L R C Q M S K A A P V E W R K G S K T L R D G D  
R Y S L R Q D G A M C E L Q I C D L A V E D T G D Y S C V C G Q E K T S A T L S V K A P Q V V F Q Q P L Q N L Q A E E G S M A S L R C E L S V P N  
A A M V W S K G G L E L Q G D T R R E A R Q Q G C V A E L L L R D L R R E D A G E Y S C T C G S Q T T S A T L M V T A A P V R F L R E L Q A Q D V  
D E G A T A R L R C E L S R E A V S V E W R K G S L Q L F P C A K Y Q M V Q E G T T A E L L V H G V E Q E D A G E Y T C D A G H T Q S I A R L S V  
R A P K P K F K T D L Q S T E Q E A G G T A R L C C Q L S E A E P G T P V Q W L K E G V E L H V G S K Y E M R R Q G A V C E L L I H G L E A K D T  
G E Y A C L V G G Q K T L A S L R V K E P E V T I V R G L V D M E V Q A D E D V E F T C K V S Q A G A T D V Q W H L Q G L P L Q S N E V T E V A V  
L A D G C T H V L Q L K G V M T L E D A G T V S F H V G G L S S S A Q L T V R V P E V T V L E P L K D V Q L S E G Q D A H F R C R L S R A S G Q E A  
R W A L G G V P L Q C N E M N D I T V E Q G T L Y L L T L H K V T L E D A G T I T L Q V G S C S S E A Q L K V T A K N T V L R G L E N V D A E G  
G E A L F E C Q L S Q P E V A A H T W L L D D E P V H T S E K V E V V Y F E N G L R H L L L L K N L K P Q D S C R V T F L A G D V V T S A F L T V  
R A L P D P P E D A E V V G R S D H S V T L S W A P M S D G G G L C G Y R V E M K E A S T G Q W Q L C H D L V P G P E C V D D L V P G K T Y  
R F R V A A V G P A G A G E P V H L P Q M V K I A P A P A P A P A P A P A P E T R Q A V V G E D I C L E L E V A A D G G E V V W H K G T E R I  
Q P G G H F E V L S R G Q R Q M L V I K G F R T E D Q G E Y R C G P I Q G L P S S G A A T F N V V M T S G S G D E V P A Q P S L P P E A A Q E G D

LHLLWEALARKRRMSREPTLDSISELPEEDSRVQHLRQEAEEETAPDLSEGYSTADELARTGEADLSHTSSDDE
SRAGTPSLVTYLKKAGGPGISPLASKHEAQVTTSVKPKQKQEPVVPVTPPPGDLAADLMDPSLDKAAVKIQA
AFKGYKVRKEMKQOEGPVFSRTFGDTEAQVGDVLRLECVLATKTDMRACWLKDGIELTDGRHYHIDQLKDGTC
SLLVTGLAPTDSGRYTCQVSTKSGRVSHSACVVVSGTESEAESSSGGELDDAFRRAARRLHRLFRTKSPAELS
EEELFLSADEGPGEPEEPADWQTYREDENFVCIRFESLAEARQAVTCFRNMFATMGIGVEISLGEQGPGRVEM
RIGKVAPTVTPAVPLAKTTPGLQTSDAAPVFLTELQNDVQDGYPMSFDCVVTGQPVVPSVRWFKDKLLEEDDH
YMINEDQOQGGHQLIITAVVPADMGVYRCLAENSMGVSSSTKAELRVELTSTDYDTAADATETSSYFSAQGYLSS
REQEGTESDEGQLPQVLEELKDLQVAPGTRLAKFQKLVKGYPAKPLYWFKDQGPLTSDHIRMTDKKTLHTLE
IVSVTREDSGQYAAAYISNAVGAAYSSARLLVRGPSEPEEKPASDVHERLVPPRILEKFTPKKVKRGSSTITFSV
KVEGHPAPSVHWLKEEAKEKGVLWIGPDTPGYTMASSSKQHSVLVLLDVGRRHQGTYTCTIATNPAGQALCSASLH
ISGLAKEEEQERVKEALISSFLQGTSQAVSAQMSEAGFADLVGQSKGESLVAAEEAHSHLSLAEVGTTEFLQK
LTSQITEMVSAKISQAKLQVPGGDSDEETKTPSASPRHGRSRPSSSVQESSSESEDGDSRGEIFDIYVVTADY
LPLGAEQDAIILREGQYVEVLDSAHPLRWLVRTKPTKSSPSRQGWVSPAYLDKRLKLSPEWGPTEAPEFPGEA
VSEDEYRTRLSSVIQELLSSEQAFVQELQFLESHHMKHLERSPRVPAAVASQKTVIFRNVQDISHFHSSFLKE
LQCGCTDDDVAMCFIKNQEAFAFEKYLEFLVGRVQAESVVVSTPVQEFYKKYAEETLSAKDPTQPPPPPLQHYLE
QPVERVQKYQALLKELIRNKARNRQNCALLEQAYAVVSALPQRAENKLVSLMENYPGTLEALGEPVIRQGHFI
VWEGAPGARMPPWKGNRHFVFRNYLVICLPRRDSRTDTSYVFRNMMKLSIDLNDQVEGDDRAFEVWHERE
DSVRKYLLQARTVVIKNSWVKEICGIQORLAQPVWRPPEFEELADCTAELGETVKLACRVGTGPKPIVSWYK
DGKPVVEVDPHHILIEDPDGSCSTLILDNLTGIDSGQYMCFAASAAGNASTLGKILVQVPPRFVNVKVRATPFVEG
EDAQITCTVEGAPYPQIRWYKDGTLAPGNRYRMLNEPRSGVLVLIQAASKEDLGHYECELVNRGSTRGGG
ELYMOSPALRARDQHHREQIVAAVEGAPSMQVTTIEDVQVQVGDMAQFDAVIEGHPPPVTWYKGSTQLTSSAR
LSQRQDGTYSVLVLTVDVAPHDAGVYTCVANNAGGQVLCCKAELLVHGGDKLDAENQVYRRLKHSFYDVQEEIGR
GVFGFVKRVQHKGNMFCAAKFIPLRSKTRAQAYQERDILATLGHPLVTGLLDQFETRKTLLIILELCSSEEL
LDRLFKKGVVTEAEVKVYIQQLVEGLHYLHSHGILHLDIKPPNIMVHPAREDIKICDFGFAQKITPSEPQYS
KYGSPEFVSPETIEQNPVSEGSIDIWAMGVI SYLSLTCSSPFAGESDRATLLNVLEGRVSWSSPTAAHLSERDAK
DFIKATLQRTPRARPSTQCLAHFWFLKSMPEAAEHFINTKQLKFLLRARSRWQRSLMSYKSIILVMRSIPPELLQ
GPPDSPSLGVARHLRGEASGSSSSSSSDNELAPFARAKSLPPSPVTHSPLLHPRGFLRPSASLPEETEASMP
TADAAPVSPASQAGPPASPGCVPRHSVIVSSLFYQQAGEGAERGNKTSGAKRHPARRRHLKGGYIARALPGLR
EPLMEYSLLEEEAAREEQASLMTKTTPSFETALRLPSSSVREVPGRSHSLDNPPVTTGSPPEACKEQLLFPST
GLTHETAKDRGHKEGFLQESVFPFPPMSGDSRPGKQEGSSQDSCRGKPASSCHSELGSGSQEGCGPPSSQSLG
SLPPQSLKKELESTSCGPLFSEQPQAAPFTQVSPLLGSEKEPQDGSLESGPVPVPPSSSPGSASQVDAASLDTEG
LSEAGDTCDFTPPPQRPQEQATTRKFSLESRGGYAGVAGYGTFAFGGDAGGMLGQGPLWARMWAVVQSSEEQ
DEAATESPQPLESGLPIAEASGVPLRTSPSLTPWEEVEQVSLVQIRDLSGDAEAADTISLDISEVDPAYLNLNLS
DLYDIKYLPFEFMI FRRVPKPIEQPESPGSETEAGQGLADFLLEAAWPWPGEGLGLRAGLEITEEPEEPGDLEA
LLGEAAVGRKRKWSPSRGLFQFPGRCLSGEEPVELGLRQRVKASMAHISRIKGRPEPEREGPPRKKAGLAS
FRLSGLKGRDQELSDAEAVVLGQSVTLACQVLAQPTAQATWSEKDGVLLESSGHLLISSTLKNFQLLTIILVVKEE
DLGTYTCCVSNPLGTAVTTGVLKAERPSSSPRPEVGEYKDAVLLVWKPVESECGPVTYIVQCCIEGGSWTTL
ASDISDCCYLTKLSRGGMYIFRTACVSKAGMPYSSPSEQVLLGGPNHLASEEESSRGRPAQLLPSTKTFAF
QMQIRRRGRFVVRQCREKASGRALAAKIVPYQPEDKTAVREYEALKRLHHPHLAQLHAAYLSPRHLVLI LEL
CSGPELLPSLAERESYSESDVKDYLWQMLSATQYLHAQHILHLDLRSENMMVTEYNLLKVIDLGNASLDQEK
VPAPENFKDYLETMAPELLEGQGAVPQTDIWAIGVTAIFMLSGEY PESSSETRDLQKGLRKGLIRLSRCYAGL
SGGAVAFLOSSLCAQPWGRPCASTCLQCGWLTEEGPTGSRPTPVTFPTVRLRAFVREKRRALLYKKNHNAQ
VR\*

>rs262160257\_ENSMUSP00000049737\_c.724:C>T\_p.T242M

ENSMUST00000052872.15|Obscn-203|ENSMUSG00000061462|-|chr11:g.59026477:G>A
MDHSFSGAPRFLTRPKAFVSVGKDATLSCQIVGNPTPHVSWEKDRQPVEAGARFLAQDGDVYRLTILDLAL
GDSGQYVCRARNAIGEAFVAVGLRVDSEGTCAEQAPHFLLRPTSIRVREGADATFRRCRVGGSPQPAVSWSKDG
RRLGPPDAPHVRVEEHGESSALRIRSARPRDGGTYEVRAENPLGSASAAAALVVDSDAEVAGPPGTSTATLLA
HLQORREAMRAEGIPPSPPGAGMRTCTVTEGKHARLSCFVTGEPKPEVWKKDQGLVTEGRRHVVEDEQENF
VLKILFCKQSDRGLYTCTASNLVGQTYSSVLVVVREPTVPFKKRLQDLEVREKESATFQCEVAQPAEEAAWFK
EETRLWASAKYDIEEEGTERRLTVRNVSADDDAVYICETTEGSRVAELSVQGNLTKLPRKTAVRTGDTAIF
WVELAVPEGPVWRWRNQEEMVAGGRVAITAEGTCHTLTI FQCTLEDMGEVAFVSGGCRTTTQFCVSAPRRPPL
YPPADPVVKKAKTESVTLWSAPPHGDRPVTIDGYLVEKRLKLGAYAWSRCHEAGLWATTEFTITGVAEEGDFQ
FRVSAINHFQGGPYLEFPGTMHLVPMIAVKTPLKAVEAVEGGEVTFVSDLTVASSGEWFLDGEALKASSIYVI
RCDRTRHMLTIRYEPARLHGAQLKFFVANGIETS IQMVVRAALGLPSKLPAAAAREVLAQLHHEAQLLAELSD
QAAAAVTWLKDGRELSLGPKYEMQVSAGRRALLVRDVAQDDAGLYECVSRGSRATAYQLLVQEPKLVFAKQQAH
SEVKAEEAGNSATLSCEVTQAQTEVTFWFKDGKLLSSSSKVRMEASGCSRRLVVQQAGKADAGEYSCEAGGQKLS
FRLDVAEPKLVFAKQQAHSEVKAEEAGASATLSCEVAQAQTEVTFWFKDGKLLSSSSKVRMEASGCSRRLVVQQ

AGKADAGEYSCEAGGQKLSFRLDVAEPKMFVAKEQQARSEVKAEAGASATLSCEVAQAQTEVTFWKDGKLLSS
SSKVRMEASGCSRRLVVQQAGKADAGEYSCEAGGQKLSFRLDVTEPKLVFAKEQQARSEVKAEVGN SATLSCE
VAQAQTEVTFWKDGKLLSSSSKVRMEASGCSRRLVVQQAGKADAGEYSCEAGGQKLSFRLDVAEPKLVFAKEQ
QARSEVKAEAGNSATLSCEVAQAQTEVTFWKDGKLLSSSSKVRMEASGCSRRLVVQQAGKADAGEYSCEAGGQ
KLSFHLVDVTEPKLVFAKEQQAHSEVKAEAGASATLSCEVAQAQTEVTFWKDGKLLSSSSKVRMEASGCSRRLV
VQQAGKADAGEYSCEAEGQKLSFRLDVAEPKLVFAKEQQARSEVKAEAGASATLSCEVAQAQTEVTFWKDGK
LSSSSKVRVEASGCSRRLVVQQAGKADAGEYSCEAGGQKLSFRLDVAEPKLVFAKEQQANSEVKAEAGASATL
SCEVAQAQTEVTFWKDGKLLSSSSKVRVEASGCSRRLVVQQAGKADAGEYSCEAGGQKLSFRLDVAEPKLAFA
KEQQAHSEVKAEAGASATLSCEVAQAQTEVTFWKDGKLLSSSSKVRVEASGCSRRLVVQQAGKADAGEYSCEA
GGQKLSFRLDVAEPKLAFAKEQQAHSEVKAEAGASATLSCEVAQAQTEVTFWKDGKLLSSSSKVRVEASGCSR
RLVVQQAGKADAGEYSCEAGGQKLSFRLDVAEPKLAFAKEQQAHSEVKAEAGASATLSCEVAQAQTEVTFWKD
GKLLSSSSKVRVEASGCSRRLVVQQAGKADAGEYSCEAGGQKLFRLDVAEPKLMFAKEQQAHSEVKAEAGAS
ATLSCEVAQAQTEVTFWKDGKLLSSSSKVRVEASGCSRRLVVQQAGKADAGEYSCEAGGQKLSFRLDVAEPK
LVAKEQQAHSEVKAEAGASATLSCEVAQAQTEVTFWKDGKLLSSSSKVRVEASGCSRRLVVQQVQAGKADAGEYS
CEARGQKLSFRLDVADTRLMFAKEQQARTEVKAEAGNSATLSCEVAQAQTEVTFWKDGKLLSSSSKVRVEASG
CSRRLVVQQAGKADAGEYSCEAGGQKLSFRLDVAEAEESQI PERPSRREPLVVKEHETI I LTATIAAPSVAAVT
WLKDGVEIRRSKRHEATSLGDTHLTVRGAQVLD SAIYSCRVGKEGQDFPVQVEEVAAKFSKPLEPVEGELGG
TVMVLVCELSPEQAEEVWRCGNTQLRPGKRFQMTSEGRRTLT VSGLREDDAEYVCEASRDRTSARLTVKVP
VVKFTSGLSAMVAEEGQEA TFQC VVSPSDAGVTWYKDGMLQ LPSEKFMVMEVGASRSLT I LGLTLEDAGQVTV
EAEGASSAALRVREAPVLFKKKLEPQTVEERTSVTLEVELTRPWPEVKWTRNAAVLTPSENVEIRAEGARHC
LVLRSVGFADRGFFGCETPDDKTQAKLNVEMRQVRLVRGLQVEEAK EQGTASMDVELSHAEVEGSWTRDGLRL
QPGPKCHLAVQGPVHIL T L S A L Q P Q D S G L V A F R A E G V H T S A R L I V T E L P V S F T R V L Q D V V A T Q K E K V T L E C E L
S R P V D V R W L K D G V E L R A G K A I G I V A Q G T C R S L V I Y R C E T G D Q G V Y V C D A L D A Q T S A S L R V Q G R T Y T L I F R R V L
A E D A G E V K F V A E N A E S R A H L R V K E L P V T L L R P L R D K I A M E K H R G V L E C Q V S R A S A Q V R W F K G G V E L Q S G P K Y E
V V S D G L Y R K L V I N D V Q P E D E D T Y T C D A G N V K T S A Q F F V E E Q S I T I V R G L K D M T V M E P A P A W F E C E T S I P S V R P
P K W L L G K T V L Q A G G N V G L E Q D G T V H R L T L H K T C S T M T G P V H F T I G K S R S S A Q L V V S D I P V L T R P L E P K A G R E
L Q S V V L S C D F R P A P K A V Q W Y K D D T P L S P S E K F K M A E L R I L R L T P A D A G V Y R C Q A G S A Q S S A E V T V E A
R E V T V I Q P L Q D A E A M E E G R V C F S C E L S H K D E D I E W S L N G T P L Y N D S F H E I S H E G C L H T L V L K S V R Q A D T G T V C
A T S P K V S V S A R L V V K G P V V F L K A L D D V S A E E R G T L T L Q C E V S D P E A R V V W R K D G V E L G P S D K Y D F L H K A G A R
G L T V H D L S H E D A G L Y T C Q V G S K E T Q S K V S V H D L H V G I T K R L K T V E V L E G E S C S F E C V L S H E S P S D P A V W T V G G
K T V G G S G H F H A V R Q G R K Y T L T V K D A A L S D A G E V V F S V L G L T S K A S L I I R E R P V D I T K P L E D Q R T T L G E D V M L S
C E L S R A G T S V R W L K D G K A I R K S Q Y D L L S E G T R A V L V V R K A S L K D S G E Y T C E T E A S K S T A K L C V E E K A N R F T E
E L A D L Q V E E K G R A V F T C K T E H P A S V V T W R K G L L E L R A S G K H V P S Q E G L T L K L T I N A L E R T D S D T Y T C D I G Q A R
T Q A R L L V H G Q K V R V I E D L E T A V Q E G S S A K F C C R I A P A D Y G P V H W F L D K T P L H S N E L N E I T V Q P G G Y H V L T L R
Q L A L K D S G T V Y F E A G D Q R T S A A L R V T E K P S I F S R P L T D V T V T E G E D L T L V C E T T T V D S S V R W T K D G K T L R P S A
R C Q L S H E G C Q A Q L L I T A T T P Q D G G R Y K C E I G G A S S S I V R V H A L P V R F R E S L K D V E V P E G K A A T L R C V L S S V A
A P V E W R H G D D V L K S S N K Y S L R Q E G A V L E L V I R D L Q P Q D S G Q Y S C S F G D Q T T S A T L T V K T S S A Q F V G K L R N K E A
T E G T T V T L R C E L T K E A P V E W K K G T E T L R N G D K Y S L K Q D G A V C E L Q I C S L L V A D A G E Y S C V C G Q E K T S A T L T V K
A L L V H F V R R L R S K E A T E G D T T T L Q C E L S K A A P V E W R K G T E T L R D G D R Y S L K Q D G A V C E L Q I R S L T I A D A G E Y L
C T C G Q E K T S A T L T V R A L P A K F K D S L K N E E A T E G T T A T L S C E L S K A A P V T W K K G P K T L Q S G D K Y V L R Q D G A V C G
L Q I H G L T M A D A G E Y S C V C G Q E K T S A T L T V R G L P A K F I E D L R S Q E A T E G A T A I L R C E L S K A A P V E W R K G S E T L K
D G D R Y T L R Q D G A V C E L Q I R G L A V V D T G T Y S S L P T K F T E G L R N E E A T E G T M A T L R C Q M S K A A P V E W R K G S E T L R
D G D R Y S L R Q D G A M C E L Q I R G L T I E D S G E Y T C V C G Q E K T S A T L S V K A L P S R F I E D L R S Q E A T E G T M A T L R C Q M S
K T A P V E W K K G S E T L R D G G R Y S L R Q D G P V C E L Q I C D L A V E D A G E Y S C V C G Q E K T S A T L S I K A L P P R F I E D L R S Q
E A T E G T M A T L R C Q M S K A A P V E W R K G S E T L G D G G R Y S L R Q N G A V C E L Q I H D L A V E D T G E Y S C V C G Q E K T S A T L N
V K A L P P R F I E D L R S Q E A T E G T M A T L R C Q M S K A A P V E W R K G S E T L R D G G R Y S L R Q D G A V C E L Q I H D L D V E D A G Q
Y S C V C G Q E K T S A V L T V D A L P P K F T E G L K K E E A T E G T M V T L R C Q M S K E A T V E W R K G A K T L S D G G R Y S L R Q D G A M
C E L Q I C G L A V E D A G E Y S C V C G Q E K T S A T L S V K A L P P R F I E D L R S Q E A T E G T M A T L R C Q M S K A A P V E W R K G S E T
L R D G D R Y S L R Q D G A V C E L Q I R D L A V E D A G E Y L C V C G Q E K T S A T L S V K A L P P R F I E D L R S Q E A T E G T M A T L R C Q
M S K A A P V E W R K G S K T L R D G D R Y S L R Q D G A M C E L Q I C D L A V E D T G D Y S C V C G Q E K T S A T L S V K A L P P R F I E D L R
S Q E A R E G T V A T L R C R M S K A A P V E W R K G S E T L K D G D R Y S L R Q E G N L C E L Q I R D L A V E D T E E Y S C V C G Q E K T S A T
L S V K A L P A K F I E D L R S Q E A P E S S T V T L R C K L S K K A S V V W K K G S E T L R N G A R Y S L R Q D G A V C E L E I R D L T V E D T
G E Y S T C C G Q R T S A T L S I M A P Q V V F Q Q P L Q N L Q A E E G S M A S L R C E L S V P N A A M V W S K G L L E L Q D T R R E A R Q Q
G C V A E L L L R D L R R E D A G E Y S C T C G S Q T T S A T L M V T A A P V R F L R E L Q A Q D V D E G A T A R L R C E L S R E A V S E W R K
G S I Q L F P C A K Y Q M V Q E G T T A E L L V H G V E Q E D A G E Y T C D A G H T Q S I A R L S V R A P K P K F K T D L Q S T E Q E A G G T A R
L C C Q L S E A E P G T P V Q W L K E G V E L H V G S K Y E M R R Q G A V C E L L I H G L E A K D T G E Y A C L V G G Q K T L A S L R V K E P E V
T I V R G L V D M E V Q A D E D V E F T C K V S Q A G A T D V Q W H L Q G L P L Q S N E V T E V A V L A D G C T H V L Q L K G V T L E D A G T V S
F H V G G L S S S A Q L T V R V P E V T V L E P L K D V Q L S E G Q D A H F R C R L S R A S G Q E A R W A L G G V P L Q C N E M N D I T V E Q G T



LYLLTLHKVTLEDAGTITLQVGSSESQAQLKVTAKNTVLRGLENVDALEGGEALFECQLSQPEVAHAHTWLLDD  
 EPVHTSEKVEVVYFENGLRHLLLLKLNKLPQDSCRVTFLAGDVVTS AFLTVRGWRLEVLPPHDASVKAGMQVR  
 FTCILSEAVPVGEATWYINGAAIQPDDTDWTVTTDGSHHALTLSNAQFQHAGEVTF AARDAVASARLSVLALP  
 DPPEDAEVVGRSDHSVTLSSWVAPMSDGGGGLCGYRVMKEASTGQWQLCHDLVPGPECVVDLVP GKTYRFRV  
 AAVGPAGAGEPVHLPQMVKIAPAPAPAPAPAPAPETROAVVGEDICLELEVAADGGEVVVHKGTERIQPGG  
 HFEVLSRGRQMLVIKGFRTEDQGEYRCGPIQGLPSSGAATFNVMVTS GSGDEVPAPQPSLPPEAAQEGDLHLL  
 WEALARKRRMSREPTLDSISELPEEDSRVQHLRQEAETAPDLSEGYSTADELARTGEADLSHTSSDDES RAG  
 TPSLVTYLKKAGGPGISPLASKHEAQVTT SVKPQKQEPVPTCP PPGDL SAADLMDPSLDKAAVKIQAAFKG  
 YKVRKEMKQEGPVFSRTFGDTEAQVGDVLRLECVLATKTD MRACWLKDGIELTDGRHYHIDQLKDGTC SLLV  
 TGLAPTDSGRYTCQVSTKSGRVSHSACVVVSGTESEAESSGGELDDAFRRAARRLHRLFRTKSPAELSEEEL  
 FLSADEGPEPEEPADWQTYREDENFVCIRFESLAEARQAVTCFRNMFATMGIGVEISLGEQGPGRVEMRIGK  
 VAPTVPAPVPLAKTPGLQTS DAAPVFLTELQNDQVQDGYPMSFDCVVTGQPVPSVRWFKDGKLL EEDDHYMIN  
 EDQGGHQLIITAVVPADMGVYRCLAENSMGVSSTKAELRVELTSTDYDTAADATETSSYFSAQGYLSSREQE  
 GTESDEGQLPQVLEELKDLQVAPGTRLAKFQLKVKGY PAKLYWFKDGOPLTTS DHIRMTDKKTLHTLEIVSV  
 TREDSGQYAAIISNAVGAAYSSARLLVRGPSEPEEK PASDVHERLVPRI LEKFTPKKVKRGSSTIFS VKVEG  
 HPAPSVHWLKEEAKEGVLWIGPDTPGYTMASSSKQHSLVLLDVGRQHOGTYT CIATNPAGQALCSASLHISGL  
 AKEEEQERVKEALISSFLQGTSQAVSAQMSE SAGFADLVGQSKGESLVAEEAHSHLSLAEVTEEF LQKLT SQ  
 ITEMVSAKISQAKLQVPGGDSDEETKTPSASPRHGRSRPSSSVQESSSESEDGDSRGEI FDIYVVTADYLP LG  
 AEQDAIILREGQYVEVLDSAHPLRWLVRTKPTKSSPSRQGWVSPAYLDKRLKLSPEWGPTEAPEFPGEAVSED  
 EYRTRLSSVIQELLSSEQAFVGE LQFLESHHMKHLERSPRVPAAVASQKTVI FRNVQDISHFHSSFLKELQGC  
 GTDDVAMCFIKNQEA FEKYLEFLVGRVQAESVVVSTPVQEFYKKYAEETLSAKDPTQPPPPLOHYLEQ PVE  
 RVQKYQALLKELIRNKARNRQNCALLEQAYAVVSALPQRAENKLVSLMENYPGTLEALGEP IRQGHFIVWEG  
 APGAMPWKGNHRHVF LFRNYLVICKPRRDSRTDTFSYVFRNMMKLSSIDLNDQVEGDDRAFEVWHEREDSVR  
 KYLLQARTVI IKNSWVKEICGIQQR LAQPVWRPPEFEEELADCTAELGETVKLACRVTGT PKPIVSWYKDGKP  
 VEVDPHHILIEDPDG SCTLILDNLTGIDSGQYMCFAASAAGNASTLGKILVQVPPRFVNKVRATPFVEGEDAQ  
 ITCTVEGAPYPQIRWYKGTLLAPGNRYRMLNEPRSGVLLVVIQAASKEDLGHYECELVNR LSGTRGGGELYM  
 QSPALRARDQHREQIVAAVEVTEQETKVPKKTVI I EETITTVVKS PRGRRQSPGKSPSRSPSTRSASPRRPG  
 LLAPERLYPPGTSPSRLEVEQGRKAPVPALYVTEAEVHAPASQSQPKWLEVEETIEVRVKKTGSRGASPVRE  
 MTSRGEGLF LFTLPGGIPGRDPNANNNSNNSVYQEAR TWGPAVVHVGE PFI FQVDSVGNVDWVAASPEPEQVRA  
 SQKEENTERQEGCS DG DENTFLMEEPQD TDSLQGRDPKIL THNGRVLT LADLEDYVPQEGE TFGCGDSTPSTP  
 DEPPCEVSVLQREI SEPTVGQP VLLNVGRPPGTGATPSFFRPGSQVHSPESVSFLLREAWSGPVS AAPWTSS F  
 HTHVQSSVDGSHGSFKTEVSTQTVSFGAVGETVTLHIDPDGGEAPGPSQ\*  
 >rs262160257\_ENSMUSP00000020732\_c.724:C>T\_p.T242M  
 ENSMUST00000020732.13|Obscn-201|ENSMUSG00000061462|-|chr11:g.59026477:g>A  
 MDHSFSGAPRFLTRPKAFVSVGKDATLSCQIVGNPTPHVSWEKDRQPV EAGARFLAQDGDVYRLTILDLAL  
 GDSGQYVCRARNAIGEAFAAVGLRVDSEGTCAEQAPHFLLRPTS IRVREGADATFRCRVGGSPQPAVSWSKDG  
 RRLGPPDAPHVRVEEHGESSALRIRSARPRDGGTYEVRAENPLGSASAAAAALVVDSDAEVAGPPGTSTATLLA  
 HLQORREAMRAEGIPSPPGAGMRTCTVTEGKHARLSCFVTGEPK PETVWKKDQGLVTEGRRHVVEDEQENF  
 VLKILFCKQSDRGLYTCTASNLVGTYSVSVLVVREPTVPFKKRLQDLEVREKESATFQCEVAQ PATEAAWFK  
 EETRLWASAKYDIEEEGTERRLTVRNVSADDDAVYICETTEGSRTVAELSVQGNLTKLPRKTAVRTGDTAIF  
 WVELAVPEGPVRWLRNQEEMVAGGRVAITAEGTCHTLTI FQCTLEDMGEVAFVSGGCRTTTQFCVSAPRRPPL  
 YPPADPVVKAKTESVTLSSWAPPHGDRPVTIDGYVLEKRKLGAYAWSRCHEAGWLATTEFTITGVAAEEDGFQ  
 FRVSAINHFGQGPYLEFPGTMHLVPLAVKTP LKAVEAVEGGEVTFVSDLTVASSGEWFLDGEALKASSIYVI  
 RCDRTRHMLTIREV PARLHGAQLKFVANGIETS IQMVVRAALGLPSSKLPAAAAREVLAQLLHEEAQLLAE LSD  
 QAAAVTWLKDGRELSLGPKYEMQVSAGRRALLVRDVAQDDAGLYECVSRGSR TAYQLLVQDITDGYRDWGPAG  
 PQKHMCKCAGAKIARYLGSSCYRFLQYDKGVWHLEAALDTRQKGKTS SCSLHEKPKLVFAKGQQA HSEVKA E  
 AGNSATLSCEVTQAQTEVTWFKDGKLLSSSSKVRMEASGCSRRLVVQQAGKADAGEYSCEAGGQKLSFR LDVA  
 EPKLVFAKGQQA HSEVKA EAGASATLSCEVAQAQTEVTWFKDGKLLSSSSKVRMEASGCSRRLVVQQAGKADA  
 GEYSCEAGGQKLSFR LDVAEPKMFVFAKEQQARSEVKA EAGASATLSCEVAQAQTEVTWFKDGKLLSSSSKVRM  
 EASGCSRRLVVQQAGKADAGEYSCEAGGQKLSFR LDVTEPKLVFAKEQQARSEVKA EVGN SATLSCEVAQAQT  
 EVTWFKDGKLLSSSSKVRMEASGCSRRLVVQQAGKADAGEYSCEAGGQKLSFR LDVAEPKLVFAKEQQARSEV  
 KAEAGNSATLSCEVAQAQTEVTWFKDGKLLSSSSKVRMEASGCSRRLVVQQAGKADAGEYSCEAGGQKLSFHL  
 DVTEPKLVFAKEQQAHSEVKA EAGASATLSCEVAQAQTEVTWFKDGKLLSSSSKVRMEASGCSRRLVVQQAGK  
 ADAGEYSCEAGGQKLSFR LDVAEPKLVFAKEQQARSEVKA EAGASATLSCEVAQAQTEVTWFKDGKLLSSSSK  
 VRVEASGCSRRLVVQQAGKADAGEYSCEAGGQKLSFR LDVAEPKLVFAKEQQANSEVKA EAGASATLSCEVAQ  
 AQTEVTWFKDGKLLSSSSKVRVEASGCSRRLVVQQAGKADAGEYSCEAGGQKLSFR LDVAEPKLAFAKEQQA H  
 SEVKA EAGASATLSCEVAQAQTEVTWFKDGKLLSSSSKVRVEASGCSRRLVVQQAGKADAGEYSCEAGGQKLS  
 FR LDVAEPKLAFAKEQQA HSEVKA EAGASATLSCEVAQAQTEVTWFKDGKLLSSSSKVRVEASGCSRRLVVQQ



GPGPEEPADWQTYREDENFVCIRFESLAEARQAVTCFRNMFATMGIGVEISLGEQGPRGVEMRIGKVAPTVT  
PAVPLAKTPGLQTSDAAPVFLTELQNDVQDGYPMSFDCVVTGQPVPSVRWFKDGKLEEDDHYMINEDQGGG  
HQLIITAVVPADMGVYRCLAENSMGVSSTKAELRVELTSTDYDTAADATETSSYFSAQGYLSSREQEGTESDE  
GQLPQVLEELKDLQVAPGTRLAKFQLKVKGYPAKLYWFKDQPLTSDHIRMTDKKTLHTLEIVSVTREDSDG  
QYAAYSNAVGAAYSSARLLVRGPSEPEEKPASDVHERLVPPRILEKFTPKKVKRGSSITFSVKVEGHPAPSV  
HWLKEEAKEGVLWIGPDTPGYTMASSSKQHSLLVLDVGRQHOGTYTCIATNPAGQALCSASLHISGLAKEEEQ  
ERVKEALISSFLOGTSQAVSAQMSSESAGFADLVGQSKGESLVAEEAHSHLSLAEVGTTEFLQKLTSTQITEMVS  
AKISQAKLQVPGGDSDEETKTPSASPRHGRSRPSSSVQESSSESEDGDSRGEIFDIYVVTADYPLGAEQDAI  
LLREGQYVEVLDSAPLRWLVRTKPTKSSPSRQGWVSPAYLDKRLKLSPEWGPTEAPEFPGEAVSEDEYRTRL  
SSVIQELLSSEQAFVQELQFLESHHMKHLERSPRVPAAVASQKTVIFRNVQDISHFHSSFLKELQCGCTDDDV  
AMCFIKNQEAFAKEYLEFLVGRVQAESVVVSTPVQEFYKKAEEETLSAKDPTQPPPPPLQHYLEQPVVERVQKYQ  
ALLKELIRNKARNRQNCALLEQAYAVVSALPQRAENKLVSLMENYPGTLEALGEPIRQGHFIVWEGAPGARM  
PWKGHNHRVFLFRNYLVICKPRRDSRTDTFSYVFRNMMKLSSIDLNDQVEGDDRAFEVWHEREDSVRKYLLQA  
RTVI IKNSWVKEICGIQQRLAQPVWRPPEFEEELADCTAELGETVKLACRVTGTPKPIVSWYKDGKPVVEVDPH  
HILIEDPDGSCTLILDNLGTIDSGQYMCFAASAAGNASTLGKILVQVPPRFVNVKVRATPFVEGEDAQITCTVE  
GAPYPQIRWYKDGTLTLLAPGNRYRMLNEPRSGVLVLIQAASKEDLGHYECELVNRLGSTRGGGELYMQSPALR  
ARDQHHREQIVAAVEERRRPPPP\*

>rs262160257\_ENSMUSP00000151217\_c.724:C>T\_p.T242M  
ENSMUST00000219084.3|Obscn-207|ENSMUSG00000061462|-|chr11:g.59026477:G>A  
MDHSFSGAPRFLTRPKAFVSVGKDATLSCQIVGNPTPHVSWEKDRQPVEAGARFRLAQDGDVYRLTILDLAL  
GDSGQYVCRARNAIGEFAAVGLRVDSEGTCAEQAPHFLLRPTSIRVREGADATFRCRVGGSPQPAVSWSKDG  
RRLGPPDAPHVRVEEHGESSALRIRSARPRDGGTYEVRAENPLGSASAAAALVVDSDAEVAGPPGTSTATLLA  
HLQQRRREAMRAEGIPSPPGAGMRTCTVTEGKHARLSCFVTGEPKPKETVWKKDQQLVTEGRRHVVEDEQENF  
VLKILFCKQSDRGLYTCTASNLVGQTYSSVLVVVREPTVPFKKRLQDLEVREKESATFQCEVAQAPATEAAWFK  
EETRLWASAKYDIEEGTERRLTVRNVSADDDAVYICETTEGSRVAELSVQGNLTKRKLPRKTAVRTGDTAIF  
WVELAVPEGPVTRWLRNVEEMVAGGRVAITAEGTCHTLTI FQCTLEDMGEVAFVSGGCRTTTFQCVSAPRRPPL  
YPPADPVVAKTSSVTLSSWAPPHGDRPVTIDGYVLEKRLKLGAYAWSRCHEAGWLATTEFTITGVAAEEGDFQ  
FRVSAINHFGQGPYLEFPGTMHLPMLAVKTPKAVEAVEGGEVTFVSDLTVASSGEWFLDGEALKASSIYVI  
RCDRTRHMLTIREVPARLHGAQLKFVANGIETSIQMVVRAALGLPSSKLPAAAAREVLAQLHEEAQLLAE LSD  
QAAAVTWLKDGRELSLGPKEYMQVSAGRRALLVRDVAQDDAGLYECVSRGSRRTAYQLLVQDITDGYRDWGPAG  
PQKHMCKCAGAKIARYLGSSCYRFLQYDKGVWHWLEAALDTRQKGTSSCSLHEKPKLVFAKQQAHSEVKA  
AGNSATLSCEVTQAQTEVTFWKDGGKLSSSSKVRMEASGCSRRLVVQQAGKADAGEYSCEAGGQKLSFRLDVA  
EPKLVFAKQQAHSEVKAEGASATLSCEVAQAQTEVTFWKDGGKLSSSSKVRMEASGCSRRLVVQQAGKADA  
GEYSCEAGGQKLSFRLDVAEPKMFVFAKEQQARSEVKAEGASATLSCEVAQAQTEVTFWKDGGKLSSSSKVRM  
EASGCSRRLVVQQAGKADAGEYSCEAGGQKLSFRLDVTEPKLVFAKEQQARSEVKAEGASATLSCEVAQAQ  
EVTWFKDGGKLSSSSKVRMEASGCSRRLVVQQAGKADAGEYSCEAGGQKLSFHLDVTEPKLVFAKEQQAHSEV  
KAEAGASATLSCEVAQAQTEVTFWKDGGKLSSSSKVRMEASGCSRRLVVQQAGKADAGEYSCEAGGQKLSFR  
LDVAEPKLVFAKEQQARSEVKAEGASATLSCEVAQAQTEVTFWKDGGKLSSSSKVRVEASGCSRRLVVQQAG  
ADAGEYSCEAGGQKLSFRLDVAEPKLVFAKEQQANSEVKAEGASATLSCEVAQAQTEVTFWKDGGKLSSSSK  
VRVEASGCSRRLVVQQAGKADAGEYSCEAGGQKLSFRLDVAEPKLVFAKEQQAHSEVKAEGASATLSCEVAQ  
AQTEVTFWKDGGKLSSSSKVRVEASGCSRRLVVQQAGKADAGEYSCEAGGQKLSFRLDVAEPKLVFAKEQQAH  
SEVKAEGASATLSCEVAQAQTEVTFWKDGGKLSSSSKVRVEASGCSRRLVVQQVQKADAGEYSCEARGQKLS  
FRLDVAEAEQIIPERPSRREPLVVEKETIILTATIAAPSVAAVTWLKDGVERRSKRHEATSLGDHTLTVR  
GAQVLDASAIYSCRVGKEGQDFPVQVEEVAAKFSKPLEPVEGELGGTVMLVCELSPEQAEVWRCGNTQLRPGK  
RFQMTSEGPRRTLTVSGLREDDAEYVCESRDDRTSARLTVKVPVVKFTSGLSAMVAEEGQEAFTQCVVSPS  
DAGVTWYKDGMLQPSSEKFMVVEGASRSLTILGLTLEDAGQVTVAEAGASSAALRVREAPVLFKFKLEPQT  
VEERTSVTLEVELTRPWPEVKWTRNAAVLTPSENVEIRAEGARHCLVLRVGFADRGFFGCETPDDKTQAKLN  
VEMRQVRLVRGLQEVEAKEQGTASMDVELSHAEEVGSWTRDGLRLQPGPKCHLAVQGPVHILTLALSALQPDG  
LVAFRAEGVHTSARLIVTELPVSFTRVLQDVVATQKEKVTLECELSRPVDVRLKDGVELRAGKAI GIVAQGT  
CRSLVIYRCETGDQGVYCDALDAQTSASLRVQGRYTLIFRRLAEDAGEVKFVAENAESRAHLRVKELPVT  
LLRPLRDKIAMEKHRGVLECVSRASAQVRWFKGGVELQSGPKYEVVSDGLYRKLVINQVPEDEDTYTC DAG  
NVKTSAQFFVEEQSITIVRGLKDMTVMEPAPAWFECETSIPSVRPPKWLGLKTVLQAGGNVLEQDGTVHRLT  
LHKTCSTMTGQPVHFTIGKSRSSAQLVVSDIPVVLTRPLEPKAGRELQSVVLSCDFRPAPKAVQWYKDDTFLSP  
SEKFKMALEGQMAELRILRLTPADAGVYRCQAGSAQSAEVTVEAREVTVIQPLQDAEAMEEGRVCFSCELSH  
KDEDIEWSLNGTPLYNDSFHEISHGCLHTLVLKSVRQADTGTVCATSPKVSVSARLVVKGKPVVFLKALDDV  
SAEERGTTLTQCEVSDPEARVVRKDGVELGSPDKYDFLHKAGARGLTVHDLSHEDAGLYTCQVGSKETQSKV  
SVHDLHVGITKRLKTVEVLEGESECFEVLVSHESPSDPAVWTVGGKTVGGSGHFHAVRQGRKYTLTVKDAALS  
DAGEVVFVVLGLTTSKASLIIRERPVDITKPLEDQRTTLGEDVMLSCELSRAGTSVRWLKDGKAIKRSQKYDLL

SEGTRAVLVVRKASLKDSGEYTCETEASKSTAKLCVEEKANRFTEELADLQVEEKGRAVFTCKTEHPASVVTW  
 RKGLLELRASGKHVPSQEGLTLKLTINALERTSDTYTCDIGQARTQARLLVHGQKVRVIEDLEDTAVQEGSS  
 AKFCCRIAPADYGPVHWFLDKTPHLSNELNEITVQPGGYHVLTLRQLALKDSGTVYFEAGDQRTSAAALRVTEK  
 PSIFSRPLTDVTVTEGEDLTLVCETTTVDSSVRWTKDGKTLRPSARCQLSHEGCAQQLLITATTPQDGGRYKC  
 EICGASSSSIVRVHALPVRFRFRESLKDVEVPEGKAATLRCVLSVAAPVEWRHGDDVLKSSNKYSLRQEGAVLE  
 LVIRDLQPQDSGQYSCSFGDQTTSATLTVKTSQAQFVGLKRNKEATEGTTVTLRCELTKEAPVEWKKGTETLR  
 NGDKYSLKQDGAVCELQICSLLVADAGEYSCVCGQEKTSATLTVKALLVHFVRRRLRSKEATEGDTTTLQCELS  
 KAAPVEWRKGTETLRDGDYSLKQDGAVCELQIRSLTIADAGEYLCTCGQEKTSATLTVRGLPAKFIEDLRSQ  
 EATEGATAILRCELSKAAPVEWRKGETLKDGDYTLRQDGAVCELQIRGLAVVDTGTYSSTLPTKFTTEGLRNE  
 EATEGTMATLRCQMSKAAPVEWRKGETLRDGDYSLRQDGAMCELQIRGLTIEDSGEYTCVCGQEKTSATLS  
 VKALPPRFIEDLRSQEATEGTMATLRCQMSKAAPVEWRKGETLGDGGYSLRQNGAVCELQIHDLAVEDTGE  
 YSCVCGQEKTSATLNVKALPPKFTTEGLKKEEATEGTMVTLRQMSKEATVEWRKGAKTSLDGGYSLRQDGAM  
 CELQICGLAVEDAGEYSCVCGQEKTSATLSVKALPPRFIEDLRSQEATEGTMATLRCQMSKAAPVEWRKGET  
 LRDGDYSLRQDGAVCELQIRDLAVEDAGEYLCVCGQEKTSATLSVKALPPRFIEDLRSQEATEGTMATLRCQ  
 MSKAAPVEWRKGSKTLRQDGAMCELQICDLAVEDTGDYSCVCGQEKTSATLSVKAPQVVFQOPLQ  
 NLQAEEGSMASLRCELSVNAAMVWSKGGLELQGDTRREARQQGCVAELLLRDLRREDAGEYSCVCGSQTSA  
 TLMVTAAPVRFRLRELQAQDVEGATARLRCELSREAVSVEWRKGSQQLFPCAKYQMVQEGTTAELLVHGVEQE  
 DAGEYTC DAGHTQSIARLSVRAPKPKFKTDLQSTEQEAGGTARLCCQLSEAEPTVQWLKEGVELHVGSKYE  
 MRRQGA VCELLIHGLEAKDTGEYACL VGGQKTLASLRVKEPEVTIVRGLVDMEVQADEDEFTCKVSOAGATD  
 VQWHLQGLPLQSNEVTEVAVLADGCTHVLQKGVTLLEDAGTVSFHVGLSSSAQLTVRVPEVTVLEPLKDVQL  
 SEGQDAHFRCRLSRASGQEARWALGGVPLQCNEMNDITVEQGTLYLLTLHKVTLEDAGTITLQVGSSESAQL  
 KVTAKNTVLRGLENVDALEGGAEALFECQLSQPEVAHTWLLDDEPVHTSEKVEVVYFENGLRHLLLLKLNKPKQ  
 DSCRVTFLAGDVVTS AFLTVRGRWLEVLEPPHDASVKAGMQVRFTCILSEAVPVGEATWYINGAAIQPDDTDW  
 TVTTDGS HHALTLSNAQPQHAGEVTF AARDAVASARLSVLALPDPPEDAEVVGRSDHSVTLWSVAPMSDGGGG  
 LCGYRVEMKEASTGQWQLCHDLVPGPECVVDDLVPKTYFRVAAVGPAGAGEPVHLPQMVKIAPAPAPAPAP  
 APAPETQAVVGEDICLELEVAADGGEVWVHKGTERIQPGGHFEVLSRGRQMLVIKGFRTEDQGEYRCGPIQ  
 GLPSSGAATFNVMVTSGSGDEVPAQPSLPEAAQEGDLHLLEALARKRRMSREPTLDSISELPEEDSRVQHL  
 RQEAETAPDLSEGYSTADELARTGEADLSHTSSDDESRAGTPSLVTYLKKAGGPGISPLASKHEAQVTTSVK  
 PQKQQEPVVPPTCPPPGDLAADLMDPSLDKAAVKIQAAFQKGYKVRKEMKQOEGPVFSRTFGDTEAQVGDVLR  
 ECVLATKTD MRACWLKDGIELTDGRHYHIDQLKDGTC SLLVTGLAPTDSGRYTCQVSTKSGRVSHSACVVVSG  
 TESEAESSSGGELDDAFRRARLRHLRFRTKSPAELSEEELFLSADEGPGEPEEPADWQTYREDENFVCIRFE  
 SLAEARQAVTCFRNMFATMGI GVEISLGEQGPGRVEMRIKGVAPVTPAVPLAKTPGLQTS DAAVFLTELQN  
 QDVQDGYPMSFDCVVTGQPVPSVRWFKDGKLEEDDH YMINEDQQGGHQLIITAVV PADMGVYRCLAENSMGV  
 SSTKAELRVELTSTDYDTAADATETSSYFSAQGYLSSREQEGTESDEGQLPQVLEELKDLQVAPGTRLAKFQL  
 KVKGYPAKPLYWFKDGPPLTSDHIRM TDKKTLLHLEIVS VTREDSGQYAAIISNAVGAAYSARLLVIRGVPSE  
 PEEKPASDVHERLVPPRI LEKFTPKKVKRGSSITFSVKVEGHPAPSVHWLKEEAEGVLIWGPDPGTPTMASS  
 SKQHSLVLLDVGRQHOGTYTCTIATNPAGQALCSASLHISGLAKEEEQERVKEALISSFLQGT SQAVSAQMSES  
 AGFADLVGQSKGESLVAEEAHSHLSLAEVGT EEFLOKLT SQITEMVSAKISQAKLQVPGGDSDEETKTPSASP  
 RHGRSRPSSSVQESSSESEEDGSRGEIFDIYVVTADY LPLGAEQDAIILREGQYVEVLDSAHPLRWLVRTKPT  
 KSSPSRQGWVSPAYLDKRLKLSPEWGPTEAPEFPGEAVSEDEYRTRLSSVIQELLSSEQAFVQELQFLESHHM  
 KHLERSPRVPAAVASQKTVIFRNVQDISHFHSSFLKELQCGCTDDDVAMCFIKNQEA FEKYLEFLVGRVQAES  
 VVSTPQVEFYKKYAEETLSAKDPTQPPPPPLQHYLEQPVERVQKYQALLKELIRNKARNRQNCALLEQAYAV  
 VSALPQRAENKLVSLMENYPGTLEALGEP I RQGHFIVWEGAPGAMPWKGHNRHVFLFRNYLVI CKPRRDSR  
 TDTFSYVFRNMMKLSSIDLNDQVEGDDRAFEVWHEREDSVRKYLLQARTV I IKNSWVKEICIGIQORLAQPVWR  
 PPEFEEELADCTAELGETVKLACRVTGT PKPIVSWYKDGKPEVDPHHLIEDPDGSC TLIIDLNLGTIDSGQY  
 MCF AASAAGNASTLGKILVQVPPRFVNKVRATPFVEGEDAQITCTVEGAPYPQIRWYKDG TLLAPGNRYRMLN  
 EPRSGVLVLIQAASKEDLGHYECELVNRLGSTRGGGEL YMQSPALRARDQHHREQIVA AAVEVTEQETKVPKK  
 TVIEETITTVVKS PRGRRQSPGKSPSRSPSRRSASPRRPGLLAPERLYPPGTSPSRRLVEVEQGRKAPVPALY  
 VTEAEVHAPASQSQPKWLEVEETIEVRVKKTGSRGASPVREMTSRGEGILFTLPGGIPGRDPNANNNSNKS SVY  
 QEARTWGPVAVHVGEPFI FQVDSVGNVDWAASPEPEQVRASQKEENTERQEGCSDGDENTFLMEFPQD TDSL  
 QGRDPKILTHNGRVLTLADLEDYVPQEGETF GCGDSTPSTPDEPPCEVSVLQREI SEPTVGGQPVLLNVGRPPG  
 TGATPSFFRPGSQVHSPESVSFLLEAWSGPVSAAPWTSSFHHTHVQSSVDGSHGFSFKTEVSTQTVSFGAVGET  
 VTLHIDPDGGEAPGPSQG\*

>rs29383483\_ENSMUSP00000158795\_c.604:C>A\_p.S202\*

ENSMUST00000238536.2|Obscn-210|ENSMUSG00000061462|-|chr11:g.59026597:G>T  
 MDHSFSGAPRFLTRPKAFVSVGKDATLSCQIVGNPTPHVSWEKDRQPVEAGARFLAQDGDVYRLTILDLAL  
 GDSGQYVCRARNAIGEAFVAVGLRVDSEGTCAEQAPHLLRPTSIRVREGADATFRCRVGGSPQPAVSWSKDG  
 RRLGPPDAPHVRVEEHGESSALRIRSARPRDGGTYEVRAENPLGSASAAAALVVD\*DAEVAGPPGTSTATLLA

HLQQRREAMRAEGIPSPPPGAGTRTCTVTEGKHARLSCFVTGEPKPEVWKKDQGLVTEGRRHVVEDEQENF
VLKILFCKQSDRGLYTCTASNLVGQTYSSVLVVVREPTVPFKKRLQDLEVREKESATFQCEVAQPATEAAWFK
EETRLWASAKYDIEEEGETERRLTVRNVSADDDAVYICETTEGSRVVAELSVQGNLTKRKLPRKTAVRTGDTAIF
WVELAVPEGPVWRWRNQEEMVAGGRVAITAEGTCHTLTI FQCTLEDMGEVAFVSGGCRTTTQFCVSAPRRPPL
YPPADPVVKAKTESVTLWSAPPHGDRPVTIDGYVLEKRKLGAWAYSRCHEAGWLATTEFTITGVAAEEDGFQ
FRVSAINHFGQGPYLEFPGTMHLVPLAVKTPKAVEAVEGGEVTFVSDLTVASSGEWFLDGEALKASSIYVI
RCDRTRHMLTIREVPARLHGAQLKFVANGIETSIQMVVRAALGLPSSKLPAAAAREVLAQLHHEEAQLLAELSD
QAAAVTWLKDGRELSLGPKYEMQVSAGRRALLVRDVAQQDDAGLYECVSRGSRRTAYQLLVQDITDGYRDWGPAG
PQKHMCKCAGAKIARYLGSSCYRFLQYDKGVVHWEAALDTRQGKGTSSCSLHEKPKLVFAKGQQAHEVKA
AGNSATLSCEVTQAQTEVTFWKDGKLLSSSSKVRMEASGCSRRLVVQQAGKADAGEYSCEAGGQKLSFRLDVA
EPKLVFAKGQQAHEVKAEGASATLSCEVAQAQTEVTFWKDGKLLSSSSKVRMEASGCSRRLVVQQAGKADA
GEYSCEAGGQKLSFRLDVAEPKMFVFAKEQQARSEVKAEGASATLSCEVAQAQTEVTFWKDGKLLSSSSKVRM
EASGCSRRLVVQQAGKADAGEYSCEAGGQKLSFRLDVTEPKLVFAKEQQARSEVKAEVGNSATLSCEVAQAQ
EVTWTFKDGKLLSSSSKVRMEASGCSRRLVVQQAGKADAGEYSCEAGGQKLSFRLDVAEPKLVFAKEQQARSEV
KAEAGNSATLSCEVAQAQTEVTFWKDGKLLSSSSKVRMEASGCSRRLVVQQAGKADAGEYSCEAGGQKLSFHL
DVTEPKLVFAKEQQAHEVKAEGASATLSCEVAQAQTEVTFWKDGKLLSSSSKVRMEASGCSRRLVVQQAGK
ADAGEYSCEAGGQKLSFRLDVAEPKLVFAKEQQARSEVKAEGASATLSCEVAQAQTEVTFWKDGKLLSSSSK
VRVEASGCSRRLVVQQAGKADAGEYSCEAGGQKLSFRLDVAEPKLVFAKEQQANSEVKAEGASATLSCEVAQ
AQTEVTFWKDGKLLSSSSKVRVEASGCSRRLVVQQAGKADAGEYSCEAGGQKLSFRLDVAEPKLAFAKEQQA
SEVKAEGASATLSCEVAQAQTEVTFWKDGKLLSSSSKVRVEASGCSRRLVVQQAGKADAGEYSCEAGGQKLS
FRLDVAEPKLAFAKEQQAHEVKAEGASATLSCEVAQAQTEVTFWKDGKLLSSSSKVRVEASGCSRRLVVQQ
AGKADAGEYSCEAGGQKLSFRLDVAEPKLAFAKEQQAHEVKAEGASATLSCEVAQAQTEVTFWKDGKLLSS
SSKVRVEASGCSRRLVVQQAGKADAGEYSCEAGGQKLFRLDVAEPKLMFAKEQQAHEVKAEGASATLSCE
VAQAQTEVTFWKDGKLLSSSSKVRVEASGCSRRLVVQQAGKADAGEYSCEAGGQKLSFRLDVAEPKLVFAKEQ
QAHEVKAEGASATLSCEVAQAQTEVTFWKDGKLLSSSSKVRVEASGCSRRLVVQQVKGADAGEYSCEARGQ
KLSFRLDVADATRLMFAKEQQARTEVKAEGANSATLSCEVAQAQTEVTFWKDGKLLSSSSKVRVEASGCSRRLV
VQQAGKADAGEYSCEAGGQKLSFRLDVAEAEASQIPERPRREPLVVKHEHETIILTATIAAPSAAVTWLKDGV
EIRRSKRHEATSLGDHTLTVRGAQVLDIAIYSCRVGKEGQDFPVQVEEVAAKFSKPLEPVEGELGGTVMLVC
ELSPQAEVWRCGNTQLRPGKRFQMTSEGPRRTLTVSGLREDDAEYVCESRDDRTSARLTVKVPVVKFTS
GLSAMVAEEGQEQATFQCVVSPSDAGVTWYKDGMLQPSKFKVMVESGASRSLTILGLTLEDAGQVTEAEGAS
SSAALRVREAPVFLFKKLEPQTVERTSVTLEVELTRPWPEVKWTRNAAVLTPSENVEIRAEGARHCLVLRV
GFADRGFFGCETPDDKTQAKLNVEMRQVRLVRGLQEVEAKEQGTASMDVELSHAEEVGSWTRDGLRQLQPGPKC
HLAVQGPVHILTLALSALQPQDSGLVAFRAEGVHTSARLIVTELPSVSTRVLQDVVATQKEKVTLECELSRPVDV
RWLKDGVLELRAGKAIGIVAQGTCSRSLVIYRCETGDQGVYVCDALDAQTSASLRVQGRTYTLIFRRLAEDAGE
VKFVAENAESRAHLRVELPVTLLRPLRDKIAMEKHRGVLECCQVSRASAQVRWFKGGVELQSGPKYEVVSDGL
YRKLVINADVQPEDEDYTCDAGNVKTSAQFFVEEQSITIVRGLKDMTVMPEPAPAWFECETSIPSVRPPKWL
KTVLQAGGNVLEQDGTVHRLTLHKTCSTMTGPVHFTIGKSRSSAQLVVSDIPVVLTRPLEPKAGRELQSVVL
SCDFRPAPKAVQWYKDDTPLSPSEKFKMALEGQMAELRILRLTPADAGVYRCQAGSAQSSAEVTEAREVTVI
QPLQDAEAMEEGRVCFSCELSHKDEDIEWSLNGTPLYNDSFHEISHEGCLHTLVLSVRQADTGTVCATSPKV
SVSARLVVKGKPVVFLKALDDVSAEERGTLLTQCEVSDPEARVVWRKDGVELGSPDKYDFLHKAGARGLTVHD
LSHEDAGLYTCQVGSKETQSKVSVHDLHVGITKRLKTVEVLEGECSFECVLSHESPSDPAVWTVGGKTVGGS
GHFHAVRQGRKYTLTVKDAALSDAGEVVSVLGLTSKASLIRERPVDTKPLEDQRTTLGEDVMLSCELSRA
GTSVRWLKDGKAIRKSQKYDLLSEGTRAVLVVRKASLKDSGEYTCETEASKSTAKLCVEEKANRFTEELADLQ
VEEKGRAVFTCKTEHPASVVTWRKGLLELRASGKHVPSQEGTLKLTINALERTDSDTYTCDIGQARTQARLL
VHGQKVRVIEDLEDTAVQEGSSAKFCRIAPADYGPVHWFLLDKTPLHSNELNEITVQPGYHVLTLRQLALKD
SGTVYFEAGDQRTSAALRVTEKPSIFSRPLTDVTVTEGEDTLVCETTTTVDSVVRWTKDGKTLRPSARCQLSH
EGCQAQLLITATTPQDGGRYKCEIGGASSSSIVRVHALPVRFRRESLKDVEVPEGKAATLRCVLSVAAPVEWR
HGDDVLKSSNKYSLRQEGAVLELVIRDLQPDQSGQYSCSFGDQTTSATLTVKTSQAQFVGLKRNKEATEGTTV
TLRCELTKAEAPVEWKKGTETLRNGDKYSLKQDGAVCELQICSLLVADAGEYSCVCGQEKTSATLTVKALLVHF
VRLRSKEATEGDTTLTQCELSKAAPVEWRKGTETLRDGDYSLKQDGAVCELQIRSLTIADAGEYLCTCGQE
KTSATLTVRALPAKFKDSLKNEEATEGTTATLSCELSKAAPVWKKGPKTLQSGDKYVLRQDGAVCGLQIHGL
TMADAGEYSCVCGQEKTSATLTVRGLPAKFIEDLRSQEATEGATAILRCELSKAAPVEWRKGSSETLKDGDYR
LRQDGAVCELQIRGLAVDTGTYSPLTKFTEGLRNEEATEGTMATLRCQMSKAAPVEWRKGSSETLRDGDYR
LRQDGAVCELQIRGLTIEDSGEYTCVCGQEKTSATLSVKALPSRFIEDLRSQEATEGTMATLRCQMSKATAPVE
WKKGSETLRDGGYSLRQDGPVCELQICDLAVEDAGEYSCVCGQEKTSATLSIKALPPRFIEDLRSQEATEG
MATLRCQMSKAAPVEWRKGSSETLGDGGYSLRQNGAVCELQIHDLAVEDTGEYSCVCGQEKTSATLNVKALPP
RFIEDLRSQEATEGTMATLRCQMSKAAPVEWRKGSSETLRDGGYSLRQDGAVCELQIHDLVEDAGQYSCVCG
QEKTSAVLTVDALPPKFTEGLKKEEATEGTMVTLRCQMSKAEATVEWRKGAKTLSDGGYSLRQDGAMCELQIC



GLAVEDAGEYSCVCGQEKTSATLSVKALPPRFIEDLRSQEATEGTMATLRCQMSKAAPVEWRKGSSETLRDGD  
YSLRQDGAVCELQIRDLAVEDAGEYLCVCGQEKTSATLSVKALPPRFIEDLRSQEATEGTMATLRCQMSKAAP  
VEWRKGSKTLRDGDYSLRQDGAMCELQICDLAVEDTDYSCVCGQEKTSATLSVKALPPRFIEDLRSQEARE  
GTVATLRCRMSKAAPVEWRKGSSETLKDGDYSLRQEGNLCELQIRDLAVEDTEEYSCVCGQEKTSATLSVKAL  
PAKFIEDLRSQEAPESSTVTLRCKLSKKASVVWKKGSETLRNGARYSLRQDGAVCELEIRDLTVEDTGEYSCT  
CGQERTSATLSIMAPQVVFQQPLQNLQAEEGSMASLRCELSVPNAAMVWSKGGLELQGDTRREARQQGCVAEL  
LLRDLRREDAGEYSCTCGSQTTSATLMVTAAPVRFLELQAQDVDEGATARLRCELSREAVSVEWRKGSLOLF  
PCAKYQMVQEGTTAELLVHGVEQEDAGEYTCDAHTQSIARLSVRAPKPKFKTDLQSTEQEAGGTARLCCQLS  
EAEFGTPVQWLKEGVELHVGSKYEMRRQGAVCELLIHGLEAKDTGEYACLVGGQKTLASLRVKEPEVTIVRGL  
VDMEVQADEDVEFTCKVSQAGATDVQWHLQGLPLQSNVTEVAVLADGCTHVLQKGVTLLEDAGTVSFHVGGL  
SSSAQLTVRVPEVTVLEPLKDVQLESEGQDAHFRCRLSRASGQEARWALGGVPLQCNEMNDITVEQGTLYLLTL  
HKVTLEDAGTITLQVGSSESQAQLKVTAKNTVLRGLENVDALEGGEALFECQLSQPEVAHAHTWLLDDEPVHTS  
EKVEVVYFENGLRHLLLLKLNKPKQDSCRVTFLAGDVVTS AFLTVRGWRLEVLEPPHDASVKAGMQVRFCTILS  
EAVPVGEATWYINGAAIQPDDTWTVTTDGSHHALTLSNAQPQHAGEVTF AARDAVASARLSVLALPDPEDA  
EVVGRSDHSVTLSWVAPMSDGGGGLCGYRVMKEASTGQWQLCHDLVPGPECVDDLVPGKTYRFRVAAVGPA  
GAGEPVHLPQMVKIAPAPAPAPAPAPAPAPETRAVVGEDICLELEVAADGGEVVWHKGTERRIQPGGHFEVLS  
RGQRQMLVIKGFRTEDQGEYRCGPIQGLPSSGAATFNVMVMTSGSGDEVPAQPSLPPEAAQEGDLHLLWEALAR  
KRMSREPTLDSISELPEEDSRVQHLRQEAETAPDLSEGYSTADELARTGEADLSHTSSDDESRAGTFLSVT  
YLKKAAGGPGISPLASKHEAQVTTSVKPKQEQEPVVPTCPPPGDLSAADLMDPSLDKAAVKIQAAFQYKVRKE  
MKQQEGPVFSRTFGDTEAQVGDVLRLECVLATKTD MRACWLKDGIELTDGRHYHIDQLKDGTCSSLVTLGLAPT  
DSGRYTCQVSTKSGRVSHSACVVVSGTESEAESSGGELDDAFRRAARRLHRLFRTKSPAELSEELFLSADE  
GPGEPEEPADWQTYREDENFVCIRFESLAEARQAVTCFRNMFMATMIGVEISLGEQGPGRVEMRIGKVAPTVT  
PAVPLAKTPGLQTSDAAPVFLTELQNDVQDGYPMSFDCVVTGQVPVPSVRWFKDGKLEEDDHVMINEDQQGG  
HQLIITAVVPADMGVYRCLAENSMGVSSTKAELRVELTSTDYDTAADATETSSYFSAQGYLSSREQEGTESDE  
GQLPQVLEELKDLQVAPGTRLAKFQKLVKGYPAKPLYWFKDGGQPLTSDHIRMTDKKTLHLEIVSVTREDSG  
QYAAIYI SNAVGAALYISARLLVRGPSEPEEKPASDVHERLVPRI LEKFTPKKVKRGSSTIFSVKVEGHPAPSV  
HWLKEEAEKGLWIGPDTPGYTMASSSKQHSVLVLDVGRHQGTYYTCIATNPAGQALCSASLHISGLAKEEEQ  
ERVKEALISSFLQGTSAQVSAQMSSEAGFADLVGQSKGESLVAAEAHSHLSLAEVGTEEFQKLTSSQITMVVS  
AKISQAKLQVPGGDSDEETKTPSASPRHGRSRPSSSVQESSSESEDGDSRGEIFDIYVVTADYLP LGAEQDAI  
ILREGQYVEVLDSAHPLRWLVRTKPTKSSPSRQGWVSPAYLDRKRLKLSPEWGPTEAPEFPGEAVSEDEYRTRL  
SSVIQELLSSEQAFVQELQFLESHHMKHLERSPRVPAAVASQKTVIFRNVQDISHFHSSFLKELQCGTDDDDV  
AMCFIKNQEA FEKYLEFLVGRVQAESVVVSTPVQEFYKKYAEETLSAKDPTQPPPPPLQHYLEQPVVERVQKYQ  
ALLKELIRNKARNRQNCALLEQAYAVVSALPQRAENKLVSLMENYPGTLEALGEP I RQGHFIVWEGAPGARM  
PWKGHNHRVFLFRNYLVICKPRRDSRTDTSYVFRNMMLKSSIDLNDQVEGDDRAFEVWHEREDSVRKYLLQA  
RTVIKNSWVKEICIGIQRLAQPVWRPPEFEEELADCTAELGETVKLACRVTGTPKPIVSWYKDGKPEVVDPH  
HILLEDPDGSCSTLILDNLTGIDSGQYMCFAASAAGNASTLGKILVQVPPRFVNVKVRATPFVEGEDAQITCTVE  
GAPYPQIRWYKDGTL LAGPNRYRMLNEPRSGVLV LVIQAASKEDLGHYECELVNRLGSTRGGGELYMQSPALR  
ARDQHHREQIVAAVEDTSVEGSAHSAQDQADQQAASVLWRLGSEALGPS PGDLPNTRQSEPPAFEEAASQIP  
GAASGTPEVSPQPGTHKGLEQETTSSGSQGWTVPIRVEGTAWPGAGTGQLLDVHSQVIMETTQRTYVCQAPDT  
GVTRAPSMQVTIEDVQVQVGDMAQF DAVIEGHPPPIV TWYKGSTQLTSSARLSQRQDGTYSVLVTDVAPHDA  
GVYTCVANNAGGQVLCKAELLVHGDKLDAENQVYRRKLHSFYDVQEEIGRGVFGFVKRVQHKGNMFCAAKF  
IPLRSKTRAQAYQERDILATLGHPLVTGLLDQFETRKTLLILILELCSSEELLDRLFKKGVVTEAEVKVYIQQL  
VEGLHYLHSHGILHLDIKPPNIMLVHPAREDIKICDFGFAQKITPSEPQYSKYGSPEFVSPEIIEQNPVSEGS  
DIWAMGVI SYLSLTCSSPFAGESDRATLLNVLEGRVSWSSPTAAHLS EDAKDFIKATLQRTPRARPSTSQCLA  
HPWFLKSMPAAEAAHFINTKQLKFL LARSRWQRSLMSYKSI LVMRSIPELLQGPDPSPSLGVARHLRGEASGAS  
SSSSSSDNELAPFARAKSLPPSPVTHSPLLHPRGFLRPSASLPEETEASMP TADA AVPAS PQSAGPPASPGCV  
PRHSVISSLFYQQAGEGAERGNKTS GAKRHPARRRHLLKGGYIARALPGLREPLMEYSLLEEEAAREEQASLM  
TKTPSFETALRLPSSSVREVPGRSHSLDNPPVTTGPSPEACKEQLLFPSTGLTHETTAKDRGHKEGFLQESV  
PFPMPGSDSRPGKQEGSSQDSCRGKPASSCHSELGSGSQEGCGPPSSQSLGSLPPQSLKELSTSCGPLFSEQ  
PQAAPFPPTQVSPLLGSEKEPQDGS LSEGPVVPSSSPGSASQVDASLDTEGLSEAGDTCDFTPPPQRPQEQAT  
TRKFSLESRGGYAGVAGYGTFAFGGDAGGMLQGGLWARMMAVVSQSSEEQDEAATESQPPLSGLPIAEASG  
VPLRTSPSLTPWEEVEQVSLVQIRDLSDGAEAAADTISLDISEVDPAYLNLSDLYDIKYL PFEFMI FRRVPKPI  
EQPESPGSETEAGQGLADFL EEAAPWPPELGRAGLEIITEEPEEPGDLEALLGEAAVGRKRKWSPSRGLFQF  
PGRCLSGEETPELGLRQVKASMAHISRILKGRPEGEREPGRKAGLASFRLSGLKGRDQELSDEAVVLGQ  
SVTLACQVLAQPTAQATWSKDGVLLESSGHLIISSTLKNFQLLTILVVKEDLGTYTCCVSNPLGTAVTTGVL  
RKAERPSSSPREVGELYKDAVLLVWKPVE SCGPVTVYIVQCCIEGGSWTTLASDISDCCYLTGKLSRGGMYIF  
RTACVSKAGMGPYSSPSEQVLLGGPNHLASEEESRRGRPAQLLPSTKTF AFQMQIRRRGRFSVVRQCREKASGR  
ALAAKIVPYQPEDKTAVLREYEALKRLHHPHLAQLHAAYLSPRHLVLI LELCSGPELLPSLAERESYSESDVK

DYLWQMLSATQYLHAQHILHLDLRSENMMVTEYNLLKVIDLGNQSLDQEKVPAPENFKDYLETMAPELLEGO  
GAVPQTDIWAIGVTAIFIMLSGEYPESESETRDLQKGLRKLIRLSRCYAGLSGGAVAFLOSSLCAQPWGRPCA  
STCLQCQGWLTEEGPTGSRPTPVTFTVRLRAFVREKRRALLYKKNLAQVR\*  
>rs29383483\_ENSMUSP00000038264\_c.604:C>A\_p.S202\*  
ENSMUST00000047441.14|Obscn-202|ENSMUSG00000061462|-|chr11:g.59026597:G>T  
MDHSFSGAPRFLTRPKAFVSVGKDATLSCQIVGNPTPHVSWEKDRQFVEAGARFRLAQDGDVYRLTILDLAL  
GDSGQYVCRARNAIGEFAAVGLRVDSEGTCAEQAPHFLLRPTSIRVREGADATFRCRVGGSPPAVSWSKDG  
RRLGPPDAPHVRVEEHGESSALRIRSARPRDGGTYEVRAENPLGSASAAAALVVD\*DAEVAGPPGTSTATLLA  
HLQQRREAMRAEGIPPSPPGAGTRTCTVTGKHLRSCFVTGEPKPEVWKKDGLVTEGRRHVVEDEQENF  
VLKILFCKQSDRGLYTCTASNLVGQTYSSVLVVVREPTVPFKKRLQDLEVREKESATFQCEVAQPATEAAWFK  
EETRLWASAKYDIEEGTERRLTVRNVSADDDAVYICETTEGSRVAELSVQGNLTKLPRKTAVRTGDTAIF  
WVELAVPEGPVRWLRNQEEMVAGGRVAITAEGTCHTLTI FQCTLEDMGVAFVSGGCRTTTQFCVSAPRRPPL  
YPPADPVVKAKTESSVTLWSAPPHGDRPVTIDGYVLEKRKLGAYAWSRCHEAGWLATTEFTITGVAEEDGFQ  
FRVSAINHFGQGPYLEFPGMTMLVPLAVKTPKAVEAVEGGEVTFVSVDLTVASSGEWFLDGEALKASSIYVI  
RCDRTRHMLTIREVPARLHGAQLKFVANGIETSIQMVVRAALGLPSSKLPAAAAREVLAQLHEEAQLLAE LSD  
QAAA VTWLKDGRELSLGPYEMQVSAGRRALLVRDVAQDDAGLYECVSRGSRRTAYQLLVQDITDGYRDWGPAG  
PQKHMCKCAGAKIARYLGS SCYRFLQYDKGVWHWLEAALDRQKGTSSCSLHEKPKLVFAKQQAHSEVKAE  
AGASATLSCEVAQAQTEVTWFKDGKLLSSSSKVRMEASGCSRRLLVVQQAGKADAGEYSCEAGGKLSFRLDVA  
EPKMFVFAKEQQARSEVKAEGASATLSCEVAQAQTEVTWFKDGKLLSSSSKVRMEASGCSRRLLVVQQAGKADA  
GEYSCEAGGQKLSFRLDVTEPKLVFAKEQQARSEVKAEGVNSATLSCEVAQAQTEVTWFKDGKLLSSSSKVRM  
EASGCSRRLLVVQQAGKADAGEYSCEAGGQKLSFRLDVAEPKLVFAKEQQARSEVKAEGVNSATLSCEVAQAQ  
EVTWFKDGKLLSSSSKVRMEASGCSRRLLVVQQAGKADAGEYSCEAGGQKLSFRLDVTEPKLVFAKEQQAHSEV  
KAEAGASATLSCEVAQAQTEVTWFKDGKLLSSSSKVRMEASGCSRRLLVVQQAGKADAGEYSCEAGGQKLSFRL  
DVAEPKLVFAKEQQARSEVKAEGASATLSCEVAQAQTEVTWFKDGKLLSSSSKVRMEASGCSRRLLVVQQAGK  
ADAGEYSCEAGGQKLSFRLDVAEPKLVFAKEQQANSEVKAEGASATLSCEVAQAQTEVTWFKDGKLLSSSSK  
VRVEASGCSRRLLVVQQAGKADAGEYSCEAGGQKLSFRLDVAEPKLVFAKEQQAHSEVKAEGASATLSCEVAQA  
AQTEVTWFKDGKLLSSSSKVRVEASGCSRRLLVVQQAGKADAGEYSCEAGGQKLSFRLDVAEPKLVFAKEQQAH  
SEVKAEGASATLSCEVAQAQTEVTWFKDGKLLSSSSKVRVEASGCSRRLLVVQQAGKADAGEYSCEAGGQKLS  
FRLDVAEPKLVFAKEQQAHSEVKAEGASATLSCEVAQAQTEVTWFKDGKLLSSSSKVRVEASGCSRRLLVVQQ  
AGKADAGEYSCEAGGQKLFRLDVAEPKLVFAKEQQAHSEVKAEGASATLSCEVAQAQTEVTWFKDGKLLSS  
SSKVRVEASGCSRRLLVVQQVQKADAGEYSCEARGQKLSFRLDVAEAEBSQI PERPSRREPLVKEHETIILTAT  
IAAPSVAAVTWLKDGV EIRRSKRHEATSLGDTHLTVRGAQVLD SAIYSCRVGKEGQDFPVQVEVAAKFSKP  
LEPVEGELGGTVMLVCELSPEQAEVWRCGNTQLRPGKRFQMTSEGPRRTLTVSGLREDDAEYVCESRDRT  
SARLTVKVPVVKFTSGLSAMVAEEGQEA TFQCVVSPSDAGVTWYKDGMLQOPSEKFMVMEVGASRSLTILGL  
TLEDAGQVTVEAEGASSAALRVREAPVLFKKKLEPQTV EERTSVTLEVELTRPWPEVKWTRNAAVLTPSENV  
EIRAEGARHCLVLRVSGFADRGGFCETPDDKTQAKLNVEMRQVRLVRLVRLQVEVAKEQGTASMDVELSHA EVE  
GSWTRDGLRLQPGPKCHLAVQGPVHILTL SALQPQDSGLVAFRAEGVHTSARLIVTEL PVSFTRVLQDVVATQ  
KEKVTLECELSRPVDVRWLKDGVELRAGKAI GIVAQGTCSRSLVIYRCETGDQGVYVCDALDAQTSASLRVQGR  
TYTLIFRRVLAEDAGEVKFVAENAESRAHLRVKELPVTLLRPLRDKIAMEKHRGVLECVSRASAVRWFKGG  
VELQSGPKYEVVSDGLYRKLVIN DVQPEDEDTYTCDAGNVKTSAQFFVEEQSITIVRGLKDMTVMEPAPAWFE  
CETSI PSVRPPKWL LGKTVLQAGGNVGLQDGT VHRLTLHKTCSTMTGPVHFTIGKSRSSAQLVVS DIPVVL T  
RPLEPKAGRELQSVVLSCDFRPAPKAVQWYKDDTPLSPSEKFKMALEGQMAELRILRLTPADAGVYRCQAGSA  
QSSAEVTVEAREVTVIQPLQDAEAMEEGRVCFSCELSHKDEDI EWSLNGTPLYNDSFHEISHEGCLHTLVLKS  
VRQADTGTVCATSPKVSVSARLVVKGKPVVFLKALDDVSAEERGTTLTQCEVSDPEARVVRWKDGVELGSPDK  
YDFLHKAGARGLTVHDL SHEDAGLYTCQVGSKETQSKVSVHDLHVGITKRLKTVEVLEGECSFCEVL SHESP  
SDPAVWTVGGKTVGGSGHFHAVRQGRKYTLTVKDAALSDAGEVVFVSVLGLTSKASLIIRERPVDTKPLEDQR  
TTLGEDVMLSCELSRAGTSVRWLKDGKAIKRSQKYDLLSEGTRAVLVVRKASLKDSGEYTCETEASKSTAKLC  
VEEKANRFTEELADLQVEEKGRAVFTCKTEHPASVVTWRKGLLELRASGKHVPSQEGTLTKLTINALERTDSD  
TYTCDIGQARTQARLLVHGQKVRVIEDLED TAVQEGSSAKFCCR IAPADYGPVHWF LDKTPLHSNELNEITVQ  
PGYHVLT LRQLALKDSGTVYFEAGDQRTSAALRVTEKPSIFSRPLTDVTVTEGEDTLTV CETTTVDSSVRWT  
KDGTLRPSARCQLSHEGCAQLLITATTPQDGGRYKCEIGGASSSSIVRVHALPVRFRESLKDVEVPEGKAA  
TLRCVLSSVAAPVEWRHGDDVLKSSNKYSLRQEGAVLELVIRDLQPDGSGQYSCSFGDQTT SATLTVKTS SAQ  
FVGKLRNKEATEGTTVTLRCELTK EAPVEWKKGTETLRNGDKYSLKQDGAVCELQICSLLVADAGEYSCVCGQ  
EKTSATLTVKALLVTVFVRRRLRSKEATEGDTTTLQCELSKAAPVEWRKGTETLRDGDRLYSLKQDGAVCELQIRS  
LT IADAGEY LCTCGQEKT SATLTVRALPAKFKDSLKNEEATEGTTATLSCELSKAAPVYVWKKGPKTLQSGDKY  
VLRQDGA VCGLQIHGLTMADAGEYSCVCGQEKT SATLTVRGLPAKFIEDLRSQEATEGATAILRCELSKAAPV  
EWRKGETLKDGD RYTLRQDGA VCELQIRGLAVVD TGTYS SLP TKFTEGLRNEEATEGTMATLRCQMSKAAPV  
EWRKGETL RDGD RYSLRQDGA MCELQIRGLTIEDSGEYTCVCGQEKT SATLSVKALPPRFIEDLRSQEATEG

TMATLRCQMSKAAPVEWRKGSSETLGDGGRYSLRQNGAVCELQIHDLAVEDTGEYSCVCGQEKTSA TLNVKALP  
PRFIEDLRSQEATEGTMATLRCQMSKAAPVEWRKGSSETLRDGGRYSLRQDGAVCELQIHDL DVEDAGQYSCVC  
GQEKTSAVLTVDALPPKFTEGLKKEEATEGTMVTLRCQMSKEATVEWRKGAKT LSDGGRYSLRQDGAMCELQI  
CGLAVEDAGEYSCVCGQEKTSA TL SVKALPPRFIEDLRSQEATEGTMATLRCQMSKAAPVEWRKGSKTLRDGD  
RYSLRQDGAMCELQICDLAVEDTGDYSCVCGQEKTSA TL SVKAPQVVFQQPLQNLQAEEGSMASLRCELSVPN  
AAMVWSKGGLELQGDTRREARQQGCVAELLLRDLRREDAGEYSC TCGSQTT SATLMVTAAPVRFRLRLQAQDV  
DEGATARLRCELSREAVSVEWRKGS LQ LFP CAKYQMVQEGTTAE LLVHGVEQEDAGEYTC DAGHTQSIARLSV  
RAPKPKFKTDLQSTEQEAGGTARLCCQLSEAE PGTPVQWLKEGVELHVGS KYEMRRQGAVCELLIHGLEAKDT  
GEYACLVGQKTLASLRVKEPEVTI VRGLVDMEVQADEDFEFTCKV SQAGATDVQWHLQGLPLQSNVTEVAV  
LADGCTHVLQ LKGV TLEDAGTVSFHVGG LSSSAQLTVRVP ETVLEPLKDVQLSEGD ADFRCRLSRASGQEA  
RWALGGVPLQCNEMNDITVEQGTLYLLTLHKVTLEDAGTITLQV GSCSSEAQLKVTAKNTVLRGLENVDALEG  
GEALFECQLSQPEVA AHTWLLDDEPVHTSEKVEVVYFENGLRHLL LKLNKPKQDSCRVTFLAGDVVTS AFLTV  
RALPDPPEDAEVVGRSDHSVTL SWVAPMSDGGGGLCGYRVMKEASTGQWQLCHDLVPGPECVDDLVPGKTY  
RFRVAAVGPAGAGEPVHLPQMVKIAPAPAPAPAPAPAPAPETRQAVVGEDIC LELEVAADGGEVVWHKGTERRI  
QPGGHFEVLSRQQRQMLVIKGFRTEDQGEYRCGPIQGLPSSGAATFNVMV TSGSGDEVPAQPSLPPEAAQEGD  
LHLLWEALARKRRMSREPTLDSISELPEEDSRVQHLRQEAEETAPDLSEGYSTADELARTGEADLSHTSSDDE  
SRAGT PSLVTYLLKKGAGGPGISPLASKHEAQVTT SVKPKQKQEPVVP TCPPPGDL SAADLMDPSLDKA AVKIQA  
AFKGYKVRKEMKQEGPVFSRTFGDTEAQVGDVLRLECVLTKTDMRACWLKDGIELTDGRHYHIDQLKDGT C  
SLLVVTGLAPTDSGRYTCQVSTKSGRVSHSACVVVSGTSEAE SSSGGELDDAFRRAARRLHRLFRTRKSPAELS  
EEELFLSADEGPGEPEEPADWQTYREDENFVCIRFESLAEARQAVTCFRNM FATMGIGVEISLGEQGP RVEM  
RIGKVAPT VTPAVPLAKTPGLQTS DAAPVFLTELQNDVQDGYPMSFDCVVTGQPVPSVRWFKDGKLL EEDDH  
YMINEDQQGGHQLIITAVVPADMGVYRCLAENSMGVSSTKAE LRVELTSTDYDTAADATETSSYFSAQGYLSS  
REQEGTESDEGQLPQVLEELKDLQVAPGTRLAKFQLKVKGYPA PKLYWFKDGOPLTSDHIRM TDKKT LH TLE  
IVSVTREDSGQYAAI SNAVGAAYSSARLLVRGPSEPEEK PASDVHERLVPPRI LEKFTPKKVKRGSSITFSV  
KVEGHPAPSVHWLKEEA EKGV LWIGPDTPGYTMASSSKQHSLVLLDVGRQHOGTYTCIATNPAGQALCSASLH  
ISGLAKEEEQERKEALISSFLQGT SQAVSAQMSSESAGFADLVGQSKGESLVAAEEAHSHLSLAEVGT EEFLOK  
LTSQITEMVSAKISAKLQVPGGDSDEETKTPSASPRHGRSRPSSSVQESSSESEDESHS GEI FDIYVVTADY  
LPLGAEQDAIILREGQYVEVLDSAHPLRWLVRTKPTKSSPSRQGWVSPAYLDKRLKLSPEWGPTEAPEFPGEA  
VSEDEYRTRLSSVIQELLSSEQAFV GELQFLESHHMKHLERSPRVPAAVASQKTVIFRNVQDISHFHSSFLKE  
LQCGCTDDDVAMCFIKNQEA FEKYLEFLVGRVQAESVVVSTPVQEFYKKYAEETLSAKDPTQPPPPLOHYLE  
QPVERVQKYQALLKELIRNKARNRQNCALLEQAYAVVSALPQRAENKLVSLMENYPGTLEALGEP IROGHFI  
VWEGAPGARMPWKGNHRHVF LFRNYLVICKPRRDSRTDTFSYVFRNMMKLS SIDLNDQVEGDDRAFEVWHERE  
DSVRKYLLQARTVI IKNSWVKEICGIQQRLAQPVWRPPEFEEELADCTAELGETVKLACRVGTGPKPIVSWYK  
DGKPEVEVDPHHILIEDPDGSC TLLDNL TGIDSGQYMCFAASAAGNASTLGKILVQVPPRFVNKVRATPFVEG  
EDAQITCTVEGAPYPQIRWYKDGTL LAPGNRYRMLNE PRSGV LVLV IQAASKEDLGHYCELVNRLGSTRGGG  
ELYMQSPALRARDQHREQIVAAVEGAPSMQVTIEDVQVQVGDMAQF DAVIEGHPPP IVTWYKGSQLTSSAR  
LSQRQDGT TYSLVLT DVA PHDAGVYTCVANNAGQV LCKAELLVHGDKLDAENQVYRRKLHSFYDVQEEIGR  
GVFGFVKRVQHKGKMFCAAKFIPLRSKTRAQAYQERDILATLGHPLVTGLLDQFETRKTLLILILELCSSEEL  
LDRLF KKGVVTEAEVKVYIQQLVEGLHYLHSHGILHLDIKPPNIMVHPAREDIKICDFGFAQKITPSEPOYS  
KYGSPFVSP EII EQNPVSEGS DIWAMGVISYLSLTCSSPFAGESDRATLLNVLEGRVSWSSPTAAHLS EDAK  
DFIKATLQRTPRARPSTSQC LAHPWFLKSMPAEEAHFINTKQLKFL LARSRWQRSLMSYKSI LVMRSIPELLQ  
GPPDPSPLGVARHLRGEASGASSSSSSSDNELAPFARAKSLPPSPVTHSPLLHPRGFRLRPSASLPEETEASMP  
TADAAVPASPQASAGPPASPGCVPRHSV ISSLFYQQAGEGAERGNKTS GAKRHPARRRHL LKGGYIARALPGLR  
EPLMEYSLLEEEAAREEQASLMTKTPSFETALRLPSSSVREV PGRSHSLDNPPVTTGPSPEACKEQLLFPST  
GLTHETTAKDRGHKEGFLQESVFPFPMSGDSRPGKQEGSSQDSRCRGPASSCHSELGSGSQEGCGPPSSQLG  
SLPFPQSLKKELESTSCGPLFSEQPQAAPFPQTQVSP LLGSEKEPQDGS LSEGVPVPSSSPGSASQVDASLDTEG  
LSEAGDTCDFTPPPQRPEQATTRKFSLESRGGYAGVAGYGTFAFGGDAGGMLGQGPLWARM A VWSQSSEEQ  
DEAATESPQPLES LGPIAEASGVPLRTSPSLTPWEEVEQVSLVQIRDL S GDAEAADTISLDISEVDPAYL NLS  
DLYDIKYL PFEFMI FRRV PKPIEQPESPGSETEAGQGLAD FLEEA AWPWP GELGLRAGLEITEEPEEPGDLEA  
LLGEAAVGRKRKWSPSRGLFQFGRCLSGEEPVELGLRQRVKASMAHISRILKGRPEGPEREGP PRKKAGLAS  
FRLSGLKGRDQELSDEAVVLGQSVTLACQVLAQPTAQTATWSKDGVLLES SGHLLISSTLKNFQLLTI L VVKEE  
DLGTYTCCVSNPLGTAVTTGVL RKAERPSSSPRPEV GELYKDAVLLVWKPVESCGPVTYIVQCCIEGGSWTTL  
ASDISDCCYLTKGLSRGGMYIFRTACVSKAGMGPYSSPSEQVLLGGPNHLASEEESSRGRPAQLLPSTKTF AF  
QMQRIRGRFSVVRKREKASGRALAAKIVPYQPEDKTA VLEYEALKRLRHHPHLAQ LHAAYLSRHLVLI LEL  
CSGPELLPSLAERESYSESVDKYLWQMLSATQYLHAQHIHLDLRSENMMVTEYNLLKVIDLGN AQSLDQEK  
VPAPENFKDYLETMAPELLEGQGAVPQTDIWAIGVTA FIMLSGEY P ESSEGETRDLQKGLRKLIRLSRCYAGL  
SGGAVAFLOSSLCAQPWGRPCASTCLQCGWLTEEGPTGSRPTPVTFPTVRLRAFVREREKRRALLYKXHNLAQ  
VR\*

>rs29383483\_ENSMUSP00000049737\_c.604:C>A\_p.S202\*  
ENSMUST00000052872.15|Obscn-203|ENSMUSG00000061462|-|chr11:g.59026597:G>T  
MDHSFSGAPRFLTRPKAFVSVGKDATLSCQIVGNPTPHVSWEKDRQFVEAGARFRLAQDGDVYRLTILDLAL  
GDSGQYVCRARNAIGEFAAVGLRVDSEGTCAEQAPHFLLRPTSIRVREGADATFRCRVGGSPPQPAVSWSKDG  
RRLGPPDAPHVRVEEHGESSALRIRSARPRDGGTYEVRAENPLGSASAAAALVVD\*DAEVAGPPGTSTATLLA  
HLQORREAMRAEGIPSPPPGAGTRTCTVTEGKHARLSCFVTGEPKPEPVVKKDQGLVTEGRRHVVEDEQENF  
VLKILFCKQSDRGLYTCTASNLVGQTYSSVLVVVREPTVPFKKRLQDLEVREKESATFQCEVAQPAEEAAWFK  
EETRLWASAKYDIEEEGTERRLTVRNVSADDDAVYICETTEGSRVAELSVQGNLTKLPRKTAVRTGDTAIF  
WVELAVPEGPVRWLRNQEEMVAGGRVAITAEGTCHTLTI FQCTLEDMGEVAFVSGGCRTTTTQFCVSAAPRRPPL  
YPPADPVVKAKTESSVTLWSAPPHGDRPVITIDGYVLEKRKLGAYAWSRCHEAGWLATTEFTITGVAAEEDGFQ  
FRVSAINHFGQGPYLEFPGTMHLVPLAVKTPKAVEAVEGGEVTFVSDLTVASSGEWFLDGEALKASSIYVI  
RCDRTRHMLTIREVPARLHGAQLKRVANGIETS IQMVVRAALGLPSSKLPAAAAREVLAQLHEEAQLLAE LSD  
QAAA VTWLKDGRELSLGPYEMQVSAGRRALLVRDVAQDDAGLYECVSRGSRRTAYQLLVQEPKLVFAKQQAH  
SEVKAEEAGNSATLSCEVTQAQTEVTWFKDGKLLSSSSKVRMEASGCSRRLVVQQAGKADAGEYSCEAGGQKLS  
FRLDVAEPKLVFAKQQAHSEVKAEEAGASATLSCEVAQAQTEVTWFKDGKLLSSSSKVRMEASGCSRRLVVQQ  
AGKADAGEYSCEAGGQKLSFRLDVAEPKLVFAKEQQARSEVKAEEAGASATLSCEVAQAQTEVTWFKDGKLLSS  
SSKVRMEASGCSRRLVVQQAGKADAGEYSCEAGGQKLSFRLDVTEPKLVFAKEQQARSEVKAEEAGNSATLSCE  
VAQAQTEVTWFKDGKLLSSSSKVRMEASGCSRRLVVQQAGKADAGEYSCEAGGQKLSFRLDVAEPKLVFAKEQ  
QARSEVKAEEAGNSATLSCEVAQAQTEVTWFKDGKLLSSSSKVRMEASGCSRRLVVQQAGKADAGEYSCEAGGQ  
KLSFHLDVTEPKLVFAKEQQAHSEVKAEEAGASATLSCEVAQAQTEVTWFKDGKLLSSSSKVRMEASGCSRRLV  
VQQAGKADAGEYSCEAGGQKLSFRLDVAEPKLVFAKEQQARSEVKAEEAGASATLSCEVAQAQTEVTWFKDGK  
LSSSSKVRVEASGCSRRLVVQQAGKADAGEYSCEAGGQKLSFRLDVAEPKLVFAKEQQANSEVKAEEAGASATL  
SCEVAQAQTEVTWFKDGKLLSSSSKVRVEASGCSRRLVVQQAGKADAGEYSCEAGGQKLSFRLDVAEPKLAFA  
KEQQAHSEVKAEEAGASATLSCEVAQAQTEVTWFKDGKLLSSSSKVRVEASGCSRRLVVQQAGKADAGEYSCEA  
GGQKLSFRLDVAEPKLAFAKEQQAHSEVKAEEAGASATLSCEVAQAQTEVTWFKDGKLLSSSSKVRVEASGCSR  
RLVVQQAGKADAGEYSCEAGGQKLSFRLDVAEPKLAFAKEQQAHSEVKAEEAGASATLSCEVAQAQTEVTWFKD  
GKLLSSSSKVRVEASGCSRRLVVQQAGKADAGEYSCEAGGQKLFRLDVAEPKLMFAKEQQAHSVEVKAEEAGAS  
ATLSCEVAQAQTEVTWFKDGKLLSSSSKVRVEASGCSRRLVVQQAGKADAGEYSCEAGGQKLSFRLDVAEPK  
VFAKEQQAHSEVKAEEAGASATLSCEVAQAQTEVTWFKDGKLLSSSSKVRVEASGCSRRLVVQQVQKADAGEYS  
CEARGQKLSFRLDVADTRLMFAKEQQARTEVKAEEAGNSATLSCEVAQAQTEVTWFKDGKLLSSSSKVRVEASG  
CSRRLVVQQAGKADAGEYSCEAGGQKLSFRLDVAEAEESQIPERPSRREPLVVKEHETIILTATIAAPSVAAVT  
WLKDGVEIRRKRHEATS LGDTHLTVRGAQVLDSAIYSCRVGKEGQDFPVQVEEVAAKFSKPLEPVEGELGG  
TVMLVCELSPEQAEVWRCNGNTQLRPGKRFQMTSEGPRRTLVSGLREDDAEYVCESRDDRTSARLTVKVP  
VVKFTSGLSAMVAEEGQEAFTQC VVSPSDAGVTWYKDGMLQPSSEKFMVMEVGASRSLTILGLTLEDAGQVTV  
EAEGASSAALRVREAPVLFKKKLEPQTVEERTSVTLELVETRPWPEVKWTRNAAVLTPSENVEIRAEGARHC  
LVLRVGFADRGFFGCETPDDKTQAKLNVEMRQVRLVRLVGLQVEVAKEQGTASMDVELSHAEEVGSWTRDGLRL  
QPGPKCHLAVQGPVHILTLALSALQPDQDGLVAFRAEGVHTSARLIVTELPVVFTRVLQDVVATQKEKVTLECEL  
SRPVDVRWLKDGVELRAGKAIGIVAQGTCSRSLVIYRCETGDQGVYVCDALDAQTSASLRVQGRTYTLIFRRVL  
AEDAGEVVFVAENAESAHLRVKELPVTLLRPLRDKIAMEKHRGVLECVSRASAQVRWFVGGVLELQSGPKYE  
VVSDGLYRKLVINVDVQPEDEDTYTC DAGNVKTSAQFFVEEQSITIVRGLKDMTVMPEPAPAWFECETSIPSVRP  
PKWLLGKTVLQAGGNVLEQDGTVHRLTLHKTCSTMTGPVHFTIGKSRSSAQLVSDIPVVLTRPLEPKAGRE  
LQSVVLSCDFRPAPKAVQWYKDDTPLSPSEKFKMALEGQMAELRILRLTPADAGVYRCQAGSAQSSAEVTVEA  
REVTVIQPLQDAEAMEEGRVCFSCELSHKDEDI EWLSLNGTPLYNDSFHEISHEGCLHTLVLSVRQADTGTVC  
ATSPKVSVSARLVVKGKPVVFLKALDDVSAEERGTLLTQCEVSDPEARVWVRKDGVELGSPDKYDFLHKAGAR  
GLTVHDLSHEDAGLYTCQVGSKETQSKVSVHDLHVGITRRLKTVLEVLEGE.SCSFECVLSHESPSDPAVWTVGG  
KTVGGSGHFHAVRQGRKYTLTVKDAALSDAGEVVSVLGLTSKASLIIRERPVDITKPLEDQRTTLGEDVMLS  
CELSRAGTSVRWLKDGKAIRKSQKYDLLSEGTRAVLVVRKASLKDSGEYTCETEASKSTAKLCVEEKANRFT  
ELADLQVEEKGRAVFTCKTEHPASVVTWRKGLLELRASGKHVPSQEGTLKLTINALERTDSDTYTCDIGQAR  
TQARLLVHGQKVRVIEDLEDTA VQEGSSAKFCCRIAPADYGPVHWF LDKTPLHSNELNEITVQPGGYHVLTLR  
QLALKDSGTVYFEAGDQRTS AALRVTEKPSIFSRPLTDVTVTEGEDTLVCE TTTVDSSVRWTKDGKTLRPSA  
RCQLSHEGCAQLLITATTPQDGGRYKCEIGGASSSSIVRVHALPVRVFRESLKDVEVPEGKAATLRCVLSSVA  
APVEWRHGDDVLKSSNKYSLRQEGAVLELVIRDLQPDQSGQYSCSFGDQTTSATLTVKTSQAQVFGKLRNKEA  
TEGTVTLRCELTKKEAPVEWKKGTE TLRNGDKPVYSLKQDGA VCELQICSLLVADAGEYSCVCGQEKTSATLTVK  
ALLVHFVRRRLRSKEATEGDTTTLQCELSKAAPVEWRKGTETLRDGDYRSLKQDGA VCELQIRSLTIADAGEYL  
CTCGQEKTSATLTVRALPAKFKDSLKNEEATEGTTATLSCELSKAAPVTVWKKGPKTLQSGDKYVLRQDGA VCG  
LQIHGLTMADAGEYSCVCGQEKTSATLTVRGLPAKFIEDLRSQEATEGATAILRCELSKAAPVEWRKGSSETLK  
DGDRYTLRQDGA VCELQIRGLAVVDGTYSLLPTKFTEGLRNEEATEGTMATLRCQMSKAAPVEWRKGSSETLR  
DGDRYSLRQDGA MCELQIRGLTIEDSGEYTCVCGQEKTSATLSVKALPSRFIEDLRSQEATEGTMATLRCQMS

KTAPVEWKKGSETLRDGGGRYSLRQDGPVCELQICDLAVEDAGEYSCVCGQEKTSATLSIKALPPRFIEDLRSQ  
EATEGTMATLRCQMSKAAPVEWRKGETLGDGGGRYSLRQNGAVCELQIHDLAVEDTGEYSCVCGQEKTSATLN  
VKALPPRFIEDLRSQEATEGTMATLRCQMSKAAPVEWRKGETLRDGGGRYSLRQDGA VCELQIHDLVEDAGQ  
YSCVCGQEKTSAVLTVDALPPKFTEGLKKEEATEGTMVTLRCQMSKEATVEWRKGAKTLS DGGGRYSLRQDGA  
MCELQICGLAVEDAGEYSCVCGQEKTSATLSVKALPPRFIEDLRSQEATEGTMATLRCQMSKAAPVEWRKGET  
LRDGDGRYSLRQDGA VCELQIRDLAVEDAGEYLCVCGQEKTSATLSVKALPPRFIEDLRSQEATEGTMATLRCQ  
MSKAAPVEWRKGSKTLRDGRYSLRQDGA MCELQICDLAVEDTGDYSCVCGQEKTSATLSVKALPPRFIEDLR  
SQEAREGTVATLRCRMSKAAPVEWRKGETLKDGDGRYSLRQEGNLCELQIRDLAVEDTEEYSCVCGQEKTSAT  
LSVKALPAKFIEDLRSQEAPESSTVTLRCKLSKKASVWKKGSETLRNGARYSLRQDGA VCELQIRDLTVEDT  
GEYSCTCGQERTSATLSIMAPQVVFQQPLQNLQAEEGSMASLRCELSVPNAAMVWSKGGLELQGDTRREARQQ  
GCVAELLLRDLRREDAGEYSCVCGQEKTSATLMVTAAPVRFLELQAQDVDEGATARLRCELSREAVSVEWRK  
GSLQLFPKAKYQMVQEGTAEALLVHGVEQEDAGEYTC DAGHTQS IARLSVRAPKPKFKTDLQSTEQEAGGTAR  
LCCQLSEAEPTPVQWLKEGVELHVGSKYEMRRQGAVCELLIHGLEAKDTGEYACLVGQKTLASLRVKEPEV  
TIVRGLVDMEVQADEDFEFTCKVSOAGATDVQWHLQGLPLQSNVTEVAVLADGCTHVLQKGVTL EDAGTVS  
FHVGGSSSAQLTVRVPEVTVLEPLKDVQLSEGQDAHFRCRLSRASGQEARWALGGVPLQCNEMNDITVEQGT  
LYLLTLHKVTLEDAGTITLQVGSSEAEQLKVTAKNTVLRGLENVDALEGGALFECQLSQPEVAHAHTWLLDD  
EPVHTSEKVEVVYFENGLRHLRLLKLNKPKQDSCRVTFLAGDVVTS AFLTVRGRWLEVL EPHDASVKAGMQLVR  
FTCILLSEAVPVGEATWYINGAAIQPDDTDWTVTTDGS HHALTLSNAQPQHAGEVTF AARDVASARLSVLTALP  
DPPEDA EVVGRSDHSVTL SWVAPMSDGGGGLCGYRVMKEASTGQWQLCHDLVPGPECVVDDLVPGKTYRFRV  
AAVGPAGAGEPVHLPQMVKIAPAPAPAPAPAPAPAPETROAVVGEDICLELEVAADGGEVVWHKGTERTIQPGG  
HFEVLSRGRQRLV IKGFRTE DQGEYRCGPIQGLPSSGAATFNVMVMTSGSGDEVPAQPSLPPEAAQEGDLHLL  
WEALARKRRMSREPTLDSISELPEEDSRVQHLRQEAETAPDLSEGYSTADELARTGEADLSHTSSDDESRAG  
TPSLVTYLKAGGPGI S PLASKHEAQVTT SVKPKQKQEPVVPTCPPPGDLSAADLMDPSLDKAAVKIQAAFKG  
YKVRKEMKQOEGPVFSRTFGDTEAQVGDVLRLECVLATKTMRAWLDKGIELTDGRHYHIDQLKDGTCSSLLV  
TGLAPTDSGRYTCQVSTKSGRVSHSACVVVSGTESEAEASSGGELDDAFRRAARLHRLFRTKSPAELSEEL  
FLSADEGPGEPEEPADWQTYREDEFVCI RFESLAEARQAVTCFRNMFATMIGVEISLGEQGRVEMRIGK  
VAPTVTPAVPLAKT PGLQTS DAA PVFLTELQNDVQDQVAVTMSFDCVVTGQPVPSVRWFKDGKLL EEDDHYMIN  
EDQQGGHQLIITAVVPADMGVYRCLAENSMGVSSTKAELRVELTSTDYDTAADATETSSYFSAQGYLSSREQE  
GTESDEGQLPQVLEELKDLQVAPGTRLAKFQLKVKGYPAKLYWFKDGQPLTSDHIRMTDKKTLHTLEIVSV  
TREDSGQYAAYSNAVGAAYSSARLLVRGPSEPEEKPASDVHERLVPPRI LEKFTPKKVKRGSSTF SVKVEG  
HPAPSVHWLKEEAEGVWLWIGPDTPGYTMASSSKQHSLVLLDVGQRHQGTYT CIATNPAGQALCSASLHISGL  
AKEEEQERVKEALISSFLQGTSAVSAQMSE SAGFADLVGQSKGESLVAAEAHSHLSLAEVGT EEFQLKLSQ  
ITEMVSAKISQAKLQVPGGDSDEETKTPSASPRHGRSRPSSSVQESSSESEDGDSRGEIFDIYVVTADYLPGL  
AEQDAIILREGQYVEVLD SAHPLRWLVRTKPTKSSPSRQGWVSPAYLDKRLKLSPEWGPTEAPEFPGEAVSED  
EYRTRLSSVIQELLSSEQAFVGE LQFLESHHMKHLERSPRVPAVASQKTVIFRNVDI SHFHSSFLKELQGC  
GTDDVAMCFIKNQEA FEKYLEFLVGRVQAESVVVSTPVQEFYKQYAEETLSAKDPTQPPPPPLQHYLEQVVE  
RVQKYQALLKELIRNKARNRQNCALLEQAYAVVSALPQRAENKLVSLMENYPGTLEALGEP IRQGHFIVWEG  
APGARMPWKGNHRHVF LFRNYLVICKPRRDSRTDTFSYVFRNMMKLSSIDLNDQVEGDDRAFEVWHERE SVR  
KYLQARTVI IKNSWVKEICGIQORLAQPVWRPPEFEELADCTAELGETVKLACRVTGTPKPIVSWYKDGKP  
VEVDPHHILIEDPDGSC TLI LDNLTGIDSGQYMCFAASAAGNASTLGKILVQVPPRFVNVKVRATPFVEGEDAQ  
ITCTVEGAPYPQIRWYKDG TLLAPGNRYRMLNEPRSGVLVLIQAASKEDLGHYECELVNRLGSTRGGGELYM  
QSPALRARDQHHREQIVAAVEVTEQETKVPKKTVI I EETITTVVKS PRGRRQSPGKSPSRSPRRSASPRRPG  
LLAPERLYPPGTSPSRRLVEVEQGRKAPVPALYVTEAEVHAPASQSOPKWLEVEETIEVRVKKTGSRGASPVRE  
MTRSGEGILFTLPGGIPGRDPNANNNSNNSVYQEARWGPVAVHVHVEGPFIFQVDSVGNVDVVAASPEPEQVRA  
SQKEENTERQEGCSDG DENTFLMEEPQD TDSLQGRDPKILTHNGRVLTLADLEDYVPQEGETFGCGDSTPSTP  
DEPPCEVSVLQREI SEPTVGQPVLLNVGRPPGTGATPSFFRPGSQVHSPESVSVFLLREAWSGPVS AAPWTSSF  
HTHVQSSVDGSHGSFKTEVSTQTVSFGAVGETVTLHIDPDGGEAPGPSQG\*

>rs29383483\_ENSMUSP00000020732\_c.604:C>A\_p.S202\*

ENSMUST00000020732.13|Obscn-201|ENSMUSG00000061462|-|chr11:g.59026597:G>T  
MDHSFSGAPRFLTRPKAFVSVGKDATLSCQIVGNPTPHVSWEKDRQPVEAGARFLAQDGDVYRLTILDLIAL  
GDSGQYVCRARNAIGEAFAAVGLRVDSEGTCAEQAPHFLLRPTSIRVREGADATFRCRVGGSPQPAVSWSKDG  
RRLGPPDAPHVRVEEHGESSALRIRSARPRDGGTYEVRAENPLGSASAAAAALVVD\*DAEVAGPPGTSTATLLA  
HLQORREAMRAEGIPSPPGAGTRTCTVTEGKHARLSCFVTEGPKPETVWKKDGLVTEGRRHVVEDEQENF  
VLKILFCKQSDRGLTYCTASNLVGQTYSSVLVVVREPTVPFKKRLQDLEVRKEKESATFQCEVAQAPATEAAWFK  
EETRLWASAKYDIEEGTERRLTVRNVSADDDAVYICETTEGSRVVAELSVQGNLTKLPRKTAVRTGDTAIF  
WVELAVPEGPVWRWRNQEEMVAGGRVAITAEGTCHTLTIFQCTLEDMGEVAFVSGGCRTTTQFCVSAPRRPPL  
YPPADPVVKAKTESSVTLWSAPPHGDRPVTIDGYVLEKRKLGAYAWSRCHEAGWLATTEFTITGVAAEEDGFQ  
FRVSAINHFGQGPYLEFPGMTMLVPLAVKTPKAVEAVEGGEVTFVSDLTVASSGEWFLDGEALKASSIYVI



RCDRTRHMLTIREV PARLHGAQLK FVANGIETS IQMVVRAALGLPSSKLPAAAAREVL AQLHEEAQLLAELSD
QAAA V TWLKD GRELSLGP KYEMQVSAGRRALLVRDVAQDDAGLYECVSRGSR TAYQLLVQDITDGYRDWGPAG
PQKHMCKCAGAKIARYLGSSCYRFLQYDKGVVHWEALDTRQKGKTS SCSLHEKPKLVFAKQQAHSEVKA E
AGNSATLSCEVTQAQTEV TWFKDGKLLSSSSKVRMEASGCSRRLVVQQAGKADAGEYSCEAGGQKLSFR LDVA
EPKLVFAKQQAHSEVKA EAGASATLSCEVAQAQTEV TWFKDGKLLSSSSKVRMEASGCSRRLVVQQAGKADA
GEYSCEAGGQKLSFR LDVAEPKMFVFAKEQQARSEVKA EAGASATLSCEVAQAQTEV TWFKDGKLLSSSSKVRM
EASGCSRRLVVQQAGKADAGEYSCEAGGQKLSFR LDVTEPKLVFAKEQQARSEVKA EVGNSATLSCEVAQAQ T
EVTWFKDGKLLSSSSKVRMEASGCSRRLVVQQAGKADAGEYSCEAGGQKLSFR LDVAEPKLVFAKEQQARSEV
KAEAGNSATLSCEVAQAQTEV TWFKDGKLLSSSSKVRMEASGCSRRLVVQQAGKADAGEYSCEAGGQKLSFHL
DVTEPKLVFAKEQQAHSEVKA EAGASATLSCEVAQAQTEV TWFKDGKLLSSSSKVRMEASGCSRRLVVQQAGK
ADAGEYSCEAEGQKLSFR LDVAEPKLVFAKEQQARSEVKA EAGASATLSCEVAQAQTEV TWFKDGKLLSSSSK
VRVEASGCSRRLVVQQAGKADAGEYSCEAGGQKLSFR LDVAEPKLVFAKEQQANSEVKA EAGASATLSCEVAQ
AQTEV TWFKDGKLLSSSSKVRVEASGCSRRLVVQQAGKADAGEYSCEAGGQKLSFR LDVAEPKLAFAKEQQAH
SEVKA EAGASATLSCEVAQAQTEV TWFKDGKLLSSSSKVRVEASGCSRRLVVQQAGKADAGEYSCEAGGQKLS
FR LDVAEPKLAFAKEQQAHSEVKA EAGASATLSCEVAQAQTEV TWFKDGKLLSSSSKVRVEASGCSRRLVVQQ
AGKADAGEYSCEAGGQKLSFR LDVAEPKLAFAKEQQAHSEVKA EAGASATLSCEVAQAQTEV TWFKDGKLLSS
SSKVRVEASGCSRRLVVQQAGKADAGEYSCEAGGQKLFRLDVAEPKLMFAKEQQAHSEVKA EAGASATLSCE
VAQAQTEV TWFKDGKLLSSSSKVRVEASGCSRRLVVQQAGKADAGEYSCEAGGQKLSFR LDVAEPKLVFAKEQ
QAHSEVKA EAGASATLSCEVAQAQTEV TWFKDGKLLSSSSKVRVEASGCSRRLVVQQV GKADAGEYSCEARGQ
KLSFR LDVADTRLMFAKEQQARTEVKA EAGNSATLSCEVAQAQTEV TWFKDGKLLSSSSKVRVEASGCSRRLV
VQQAGKADAGEYSCEAGGQKLSFR LDVAEAE SQIPERPSRREPLVVKHEHETIILTATIAAPSVAAV TWLKDGV
EIRRSKRHEATSLG DHTLTVRGAQVLD SAIYSCRVGKEGQDFPVQVEEVA AKFSKPLEPVEGELGGTVMLVC
ELSP EQAEV VWR CGNTQLRPGKRFQMTSEGP RRTLTVSGLREDDAE EYVCE SRDDRTSARLT VKVPRVVKFTS
GLSAMVAEEGQEATFQCVVSPSDAGVTWYKDG MQLQPSEK FVMVESGASRSLTILGLTLEDAGQVTVAEAGAS
SSAALRVREAPVLFKKKLEPQTV EERTSVTLEVELTRPWPEVKWTRNAAVLTPSENVEIRAEGARHCLVLR SV
GFADRGGFFGCETPDDKTQAKLNVEMRQVRLV RGLVEVEAKEQGTASMDVELSHA EVEGSWTRDGLRLQFPGPKC
HLAVQGPVHILTLTSA LQPD SGLVA FRAEGVHTSARLIVTEL PVSFTRVLQD VVATQKEKVTLECELSR PVDV
RWLKDGV ELRAGKAI GIVAQGTCSRSLVIYRCETGDQGVYVCDALDAQTSASLRVQGR TYTLIFRRLAEDAGE
VKFVAENAESRAHLRVKELPVTLLRPLRDKIAMEKHRGVLECCQVSRASAQVRWFKGGVELQSGPKYEVVSDGL
YRKLVIN DVQPEDEDTYTC DAGNVKTS AQFFVVEQSITIVRGLKDMTVM EPAPAWFECETSIPSVRPPK WLLG
KTVLQAGGNVGL EQDGTVHRLTLHKTCSTMTGPVHFTIGKSRSSAQLV VSDI PVVLRTRPLEPKAGRELQSVVL
SCDFR PAKAVQWYKDDT PLSPEKFKMALE GQMAELRILRLTPADAGVYRCQAGSAQSSAEVTV EAREVTVI
QPLQDAEAMEEGRVCFSC ELSHKDEDI EWSLNGTPLYNDSFHEI SHEGCLHTLV LKSVRQADTGTVCATSPKV
SVSARLVVKGKPVVFLKALDDVSAEERGTLT LQCEVSDPEARV VWRKDGVELGPSDKYDFLHKAGARGLTVHD
LSHEDAGLYTCQVGSKETQSKVSVHDLHVGITKRLKTVEVLEGESCSFECVLSHESPSDPAVWTVGGKT VVGS
GHFHAVRQGRKYTLTVKDAALS DAGEV VFSVLG LTVSKASLI IRERPVDITKPLEDQRTTLGEDVMLSC ELSRA
GTSVRWLKDGKAIRKSQKYDLLSE GTRAVLVVRKASLKDSGEYTCETEASKSTAKLCVEEKANR FTEELADLQ
VEEKGRAVFTCKTEHPASVVTWRKGLLELRASGKHVPSQEGLTLKLTINALERTDSDTYTCDIGQARTQARLL
VHGQKVRVIEDLED TAVQEGSSAKFCRIAPADYGPVHWF LDKTPLHSNELNEITVQPGGYHVLTLRQLAL KD
SGTVYFEAGDQRTS AALRVTEKPSIFSRPLTDVTVTEGEDLTLVCETTTVDSSVRWTKDGKTLRPSARCQLSH
EGCQAQLLITATTPQDGGRYKCEIGGASSSIVRVHALPVRFRESLKDVEVPEGKAATLRCVLSVAAPVEWR
HGDDVLKSSNKYSLRQEGAVLELVIRDLQPDQSGQYSCSFGDQTT SATLTVKTS SAQFV GKLNRKEATEGTTV
TLRCELTK EAPVEWKKGTETLRNGDKYSLKQDGAVCELQICSLLVADAGEYSCVCGQE KTSATLTVKALLVHF
VRLRSKEATEGDTTTLQCELSKAAPVEWRKGTETLRDGD RYSLKQDGAVCELQIRSLTIADAGEY LCTCGQE
KTSATLTVRALPAKFKDSLKNEEATEGTTATLSCELSKAAPVWKKGP KTLQSGDKYVLRQDGA VCGGLQIHGL
TMADAGEYSCVCGQE KTSATLTVRGLPAKFIEDLRSQEATEGATAILRCELSKAAPVEWRK GSETLRDGD RYT
LRQDGA VCELQIRGLAVVDGTGYSSLP TKFTEGLRNEEATEGTMATLRCQMSKAAPVEWRK GSETLRDGD RYS
LRQDGA MCELQIRGLTIEDSGEYTCVCGQE KTSATLSVKALPSRFIEDLRSQEATEGTMATLRCQMSK TAPVE
WKKGSETLRDGGRYSLRQDGPVCELQICDLAVEDAGEYSCVCGQE KTSATLSIKALPPRFIEDLRSQEATEGT
MATLRCQMSKAAPVEWRK GSETLRDGGRYSLRQNGAVCELQIHDLAVEDTGEYSCVCGQE KTSATLNVKALPP
RFIEDLRSQEATEGTMATLRCQMSKAAPVEWRK GSETLRDGGRYSLRQDGA VCELQIHDL DVEDAGQYSCVCG
QE KTSAVLTVDALPPKFTEGLKKEEATEGTMVTLRCQMSKEATVEWRKGAKT LSDGGRYSLRQDGA MCELQIC
GLAVEDAGEYSCVCGQE KTSATLSVKALPPRFIEDLRSQEATEGTMATLRCQMSKAAPVEWRK GSETLRDGD R
YSLRQDGA VCELQIRDLAVEDAGEYLCVCGQE KTSATLSVKALPPRFIEDLRSQEATEGTMATLRCQMSKAAP
VEWRK GSKTLRDGD RYSLRQDGA MCELQICDLAVEDTGDYSCVCGQE KTSATLSVKALPPRFIEDLRSQEARE
GTVATLRCRMSKAAPVEWRK GSETLRDGD RYSLRQEGNLCELQIRDLAVEDTEEYSCVCGQE KTSATLSVKAL
PAKFIEDLRSQEAPESSTVTLRCKLSKKASVWKKGSETLRNGARYSLRQDGA VCELEIRDLTVEDTGEYSCT
CGQERTSATLSIMAPQVVFQQPLQNLQAEEGSMASLRCELSVPNAAMVWSKGGLELQGDTRREARQQGCVAEL

LLRDLRREDAGEYSCTCGSQTTSATLMVTAAPVRFLELQAQDVDEGATARLRCELSREAVSVEWRKGSQQLF  
 PCAKYQMVQEGTTAELLVHGVEQEDAGEYTCDAHTQSIARLSVRAPKPKFKTDLQSTEQEAGGTARLCCQLS  
 EAEPGTPVQWLKEGVELHVGSKYEMRRQGAVCELLIHGLEAKDTGEYACLVGQKTLASLRVKEPEVTIVRGL  
 VDMEVQADEDVEFTCKVSOAGATDVQWHLQGLPLQSNVTEVAVLADGCTHVLQKGVTLLEDAGTVSFHVGGL  
 SSSAQLTVRVPEVTVLEPLKDVQLSEGQDAHFRCRLSRASGQEARWALGGVPLQCNEMNDITVEQGTLYLLTL  
 HKVTLEDAGTITLQVGSCSSEAQLKVTAKNTVLRGLENVDALEGGEALFECQLSQPEVAHAHTWLLDDEPVHTS  
 EKQEVVYFENGLRHLLLLKLNKPKQDSCRVTFLAGDVVTS AFLTVRGWRLEVLEPPHDASVKAGMQVRFTCILS  
 EAVPVGEATWYINGAAIQPDDTDWTVTTDGSHHALTLNAQPQHAGEVTF AARDAVASARLSVLALPDPPEDA  
 EVVGRSDHSVTL SWVAPMSDGGGGLCGYRVMKEASTGQWQLCHDLVPGPECVDDLVPGKTYRFRVAAVGPA  
 GAGEPVHLPQMVKIAPAPAPAPAPAPAPAPAPETRQAVVGEDICLELEVAADGGGEVVWHKGTERRIQPGGHFEVLS  
 RGQRQMLVIKGFRTEDQGEYRCGPIQGLPSSGAATFNVMVMTSGSGDEVPAQPSLPPEAAQEGDLHLLWEALAR  
 KRRMSREPTLDSISELPEEDSRVQHLRQEAETAPDLSEGYSTADELARTGEADLSHTSSDDES RAGT PSLVT  
 YLKKAGGPGISPLASKHEAQVTSVKPQKQEPVPTCPPPGDLSAADLMDPSLDKAAVKIQAAFQYKVRKE  
 MKQQEGPVFSRTFGDTEAQVGDVLRLECVLATKTD MRACWLKDGIELTDGRHYHIDQLKDGTC SLVVTGLAPT  
 DSGRYTCQVSTKSGRVSHSACVVVSGTESEAESSGGELDDAFRAARRLHRLFRTKSPAELSEELFLSADE  
 GPGEPEPADWQTYREDENFVCIRFESLAEARQAVTCFRNMFATMGIGVEISLGEQGPGRVEMRIGKVAPTVT  
 PAVFLAKTPGLQTS DAAPVFLTELQNDVQDGYPMSFDCVVTGQVPVPSVRWFKDGKLLLEDDHYMINEDQQGG  
 HQLLITAVVPADMGVYRCLAENSMGVSTKAELRVELTSTDYDTAADATETSSYFSAQGYLSSREQEGTESDE  
 GQLPQVLEELKDLQVAPGTRRLAKFQLKVKGYPAKLYWFKDGGPLTSDHIRMTDKKTLHLEIVSVTREDSG  
 QYAAYSNAVGAAYSSARLLVRGPSEPEEKPASDVHERLVPPRI LEKFTPKKVKRGSSITFSVKVEGHPAPSV  
 HWLKEEAKEKGLWIGPDTPGYTMASSSKQHSVLVLDVGRQHGTYTIC IATNPAGQALCSASLHISGLAKEEEQ  
 ERVKEALISSFLQGTSAQVSAQMSAESAGFADLVGQSKGESLVAEEAHSHLSLAEVGT EEFQKLT SQITEMVS  
 AKISQAKLQVPGGDSDEETKTPSASPRHGRSRPSSSVQESSSEEDGDSRGEIFDIYVVTADYLP LGAEQDAI  
 ILREGQYVEVLDSAHPLRWLVRTKPTKSSPSRQGWVSPAYLDKRLKLSPEWGPTEAPEFPGEAVSEDEYRTRL  
 SSVIQELLSSEQAFVGLQFLESHHMKHLERSPRVPAVASQKTVIFRNVQDISHFHSSFLKELQCGCTDDD  
 AMCFIKNQEAFAKYLEFLVGRVQAESVVVSTPVQEFYKKAETLSAKDPTQPPPPPLQHYLEQPVVERQYKQ  
 ALLKELLRNKARNRNCALLEQAYAVVSALPQRAENKLVSLMENYPGTLEALGEPHQHGFIVGAVGARM  
 PWKGNHRHVFLFRNYLVICPRRDSRTDTFSYVFRNMMKLSIDLNDQVEGDDRAFEVWHEREDSVRKYLLQA  
 RTVVIKNSWVKEICGIQQLRAQPVWRPPEFEEELADCTAELGETVKLACRVTGT PKPIVSWYKDGKPV EVDPH  
 HILIEDPDG SCTLILDNLGTIDSGQYMCFAASAAGNASTLGKILVQVPPRFVNVKVRATPFVEGEDAQITCTVE  
 GAPYQIRWYKDGTL LAPGNRYRMLNEPRSGVLV LVIQAASKEDLGHYECELVNRLGSTRGGGELYMQSPALR  
 ARDQHHREQIVAAVEERRPSP\*  
 >rs29383483\_ENSMUSP00000151217\_c.604:C>A\_p.S202\*  
 ENSMUST00000219084.3|Obscn-207|ENSMUSG0000061462|-|chr11:g.59026597:G>T  
 MDHSFGSAPRFLTRPKAFVSVGKDATLSCQIVGNPTPHVSWEKDRQPV EAGARFLAQDGDVYRLTILDLAL  
 GDSGQYVCRARNAIGEAFAAVGLRVDSEGTCAEQAPHFLRPTSIRVREGADATFRCRVGGSPQPAVSWSKDG  
 RRLGPPDAPHVRVEEHGESSALRIRSARPRDGGTYEVRAENPLGSASAAAAALVVD\*DAEVAGPPTSTATLLA  
 HLQORREAMRAEGIPSPPGAGTRTCTVTEGKHARLSCFVTGEPKPEVWKKDQGLVTEGRRHVVEDEQENF  
 VLKILFCKQSDRGLYTCTASNLVGQTYSSVLVVREPTVPFKKRLQDLEVREKESATFQCEVAQPAEAAWFK  
 EETRLWASAKYDIEEGTERRLTVRNVSADDDAVYICETTEGSRTVAELSVQGNLTKLPRKTAVRTGDTAIF  
 WVELAVPEGPVRWLRNQEEMVAGGRVAITAEGTCHTLTI FQCTLEDMGEVAFVSGGCRTTTFQFCVSAPRRPPL  
 YPPADPVVKAKTESVTL SWSAPPHGDRPVTIDGYVLEKRLKLGAYAWSRCHEAGWLATTEFTITGVAAEEDFDQ  
 FRVSAINHFGQGPYLEFPGTMHLVPLAVKTPKAVEAVEGGEVTFVSDLTVASSGEWFLDGEALKASSIYVI  
 RCDRTRHMLTIREV PARLHGAQLKFVANGIETS IQMVVRAALGLPSSKLPAAAAREVLAQLHHEAQLLAE LSD  
 QAAAVTWLKDGRELSLGPKYEMQVSAGRRALLVRDVAQDDAGLYECVSRGSR TAYQLLVQDITDGYRDWGPAG  
 PQKHMCKCAGAKIARYLGSSCYRFLQYDKGVWHLEAALDTRQKGTSSCSLHEKPKLVFAKQQAHSEVKA E  
 AGNSATLSCEVTQAQTEVTFWKDGKLLSSSSKVRMEASGCSRRLVVQQAGKADAGEYSCEAGGQKLSFRLDVA  
 EPKLVFAKQQAHSEVKA EAGASATLSCEVAQAQTEVTFWKDGKLLSSSSKVRMEASGCSRRLVVQQAGKADA  
 GEYSCEAGGQKLSFRLDVAEPKMFVFAKEQQARSEVKA EAGASATLSCEVAQAQTEVTFWKDGKLLSSSSKVRM  
 EASGCSRRLVVQQAGKADAGEYSCEAGGQKLSFRLDVTEPKLVFAKEQQARSEVKA EAGNSATLSCEVAQAQ T  
 EVTWFKDGKLLSSSSKVRMEASGCSRRLVVQQAGKADAGEYSCEAGGQKLSFHLDVTEPKLVFAKEQQAHSEV  
 KAEAGASATLSCEVAQAQTEVTFWKDGKLLSSSSKVRMEASGCSRRLVVQQAGKADAGEYSCEAEGQKLSFRL  
 DVAEPKLVFAKEQQARSEVKA EAGASATLSCEVAQAQTEVTFWKDGKLLSSSSKVRVEASGCSRRLVVQQAGK  
 ADAGEYSCEAGGQKLSFRLDVAEPKLVFAKEQQANSEVKA EAGASATLSCEVAQAQTEVTFWKDGKLLSSSSK  
 VRVEASGCSRRLVVQQAGKADAGEYSCEAGGQKLSFRLDVAEPKLAFAKEQQAHSEVKA EAGASATLSCEVAQ  
 AQTEVTFWKDGKLLSSSSKVRVEASGCSRRLVVQQAGKADAGEYSCEAGGQKLSFRLDVAEPKLVFAKEQQAH  
 SEVKA EAGASATLSCEVAQAQTEVTFWKDGKLLSSSSKVRVEASGCSRRLVVQQVQKADAGEYSCEARGQKLS  
 FRLDVAEAESQIPERPSRREPLVVKHEHETIILTATIAAPSVAAVTWLKD GVEIRRSKRHEATSLGDTHLTVR

GAQVLD SAIYSCR V GKEGQDFPVQVEEVA AKFSKPLEPVEGELGGTVMLVCELSPEQAEV VWRGNTQLRPGK
RFQMTSEGP RRTLT V SGLREDDAE EYVCE SRDDRTSARLTVK VPRVVKFTSGLS AMVAEEGQEATFQC VVSPS
DAGVTWYK DGMQLQPSEK FVMVESGASRSLTILGLTLEDAGQV TVEAEGASSS AALRVREAPVLFK KLEPQT
VEERTSVTLEVE LTRPWPVEVKWTRNA AVLTPSENVEIRA EGARHCLVLR SVGFADRGFFGCETPDDKTQAKLN
VEMRQVRLVRGLQEVEAKEQGTASMDVELSHA EVEG SWTRDGLRLQPGPKCHLAVQGGPVH I L T L S A L Q P Q D S G
LVA FRAEGVHTSARLIVTELPVSFTRVLQDVVATQKEKVTLECELSRPVDVRWLKDGVELRAGKAI GIVAQGT
CRSLVIYRCETGDQGVYVCDALDAQTSASLRVQGRYTLIFRRVLAEDAGEVKFVAENAESRAHLRVKELPVT
LLRPLRDKIAMEKHRGVLECCQVSRASAQVRWFKGGVELQSGPKYEVVSDGLYRKLVIINDVQPEDEDTYTC DAG
NVKTSAQFFVEEQSITIVRGLKDMTVM EPAPAWFECETSIPSVRPPK WLLGKTVLQAGGNVGL EQDGT VHRLT
LHKTCSTMTG PVHFTIGKSRSSAQLV VSDIPVVLTRPLEPKAGRELQSVVLSCDFRPAPKAVQWYKDDT PLS P
SEKFKMALEGO MAELRILRLTPADAGVYRCQAGSAQSSAEVTVEAREVTVIQPLQDAEAMEEGRVCFSCELSH
KDEDIEWSLNGTPLYNDSFHEISHEGCLHTLV LKSVRQADTGTVCATSPKVSVSARLVVKGKPVVFLKALDDV
SAERGTTLTQCEVSDPEARV VWRKDGVELG PSDKYDFLHKAGARGLTVHDLSHEDAGLYTCQVGSKETQSKV
SVHDLHVGITKRLKTVEVLEGE SC SFECVLSHESPSDPAVWTVGGKTVGGSGHFHAVRQGRKYTLTVKDAALS
DAGEV VFSVLGLT SKASLIIRERPV DITKPLEDQRTTLGEDVMLSCELSRAGTSVRWLKDGKAIKRSQKYDLL
SEGTRAVLVVRKASLKDSGEYTCETEASKSTAKLCEVEKANRFT EELADLQVEEKGRAVFTCKTEHPASVVTW
RKGLLELRASGKHVPSQEGTLKLTINALERTSDTYTCDIGQARTQARLLVHGQKVRVIEDLEDTAVQEGSS
AKFCCRIAPADYGPVHWFLDKTPLHSNELNEITVQPGYHVLT LRQLALKDSGT VYFEAGDQRTS AALRVTEK
PSIFSRPLTDVTVTEGEDLTLVCETTTVDSSVRWTKDGKTLRPSARCQLSHEGCAQLLITATTPQDGGRYKC
EIGGASSSSIVRVHALPVRFRESLKDVEVPEGKAATLRCVLSVAAPVEWRHGDDVLKSSNKYS LRQEGAVLE
LVIRDLQPDQSGQYSCSFGDQTT SATLTVKTS SAQFV GKLNRKEATEGTTVTLRCELTK EAPVEWKKGTETLR
NGDKYSLKQDGAVCELQICSLLVADAGEYSCVCGQEKTSATLTVKALLVHFVRR LRSKEATEGDTTTLQCELS
KAAPVEWRKGTETLRDGD RYSLKQDGAVCELQIRSLTIADAGEYLCTCGQEKTSATLTVRGLPAKFIEDLRSQ
EATEGATAILRCELSKAAPVEWRK GSETLKDGD RYTLRQDGAVCELQIRGLAVVDTGTYS SLP TKFTEGLRNE
EATEGTMATLRCQMSKAAPVEWRK GSETLRDGD RYSLRQDGAMCELQIRGLTIEDSGEYTCVCGQEKTSATLS
VKALPPRFIEDLRSQEATEGTMATLRCQMSKAAPVEWRK GSETLGDGGRYSLRQNGAVCELQI HDLAVEDTGE
YSCVCGQEKTSATLNVKALPPKFTEGLKKEEATEGTMATLRCQMSKEATVEWRKGA KTLSDGGRYSLRQD GAM
CELQICGLAVEDAGEYSCVCGQEKTSATLSVKALPPRFIEDLRSQEATEGTMATLRCQMSKAAPVEWRK GSET
LRDGD RYSLRQDGAVCELQIRDLAVEDAGEYLCVCGQEKTSATLSVKALPPRFIEDLRSQEATEGTMATLRCQ
MSKAAPVEWRK GSKTLR DGD RYSLRQDGAMCELQICDLAVEDTGDYSCVCGQEKTSATLSVKAPQVVFQOPLQ
NLQAEEGSMASLRCELSVPNAAMVWSKGGLELQGDTRREARQQGCVAELLLRDLRREDAGEYSCTCGSQT TSA
TLMVTAAPVRFLRELQAQDVDEGATARLRCELSREAVSVEWRKGS LQFLPCA KYQMVQEGTTAELLVHGVEQE
DAGEYTC DAGHTQSIARLSVRAPKPKFKTDLQSTEQEAGGTARLCCQLSEAE PGTPVQWLKEGVELHVGS KYE
MRRQGA VCELLIHGLEAKDTGEYACLVGGQKTLASLRVKEPEVTIVRGLVDMEVQADE DVEFTCKV SQAGATD
VQWHLQGLPLQSN E VTEVA VLADGCTHV LQKGVTL EDAGTVSFHVGLSSSAQLTVRVVTEVTVLEPLKDVQL
SEGQDAHFRCLSRASGQEARWALGGVPLQC NEMNDITVEQGLTYLLTLHKVTLEDAGTITL TSGCSSEAQL
KVTAKNTVLRGLE NVDALEGG EALFECQLSQPEVA AHTWLLDDEPVHTSEKVEV VYFENGLRHLL LLLKLNKPKQ
DSCRVTFLAGDVVTS AFLTVRGWRLEVLEPPHDASVKAGMQRVFTCILSEAVPVGEATWYINGAAIQPDDTDW
TVTTDGSHHALT LSNAPQHAGEVTF AARDAVASARLSVLALPDPPEDAEVVGRSDHSVTL SWVAPMSDGGGG
LCGYRVEMKEASTGQWQLCHDLVPGPECVVDLVP GKTYRFRVA AVGPAGAGEPVHLPQMVKIAPAPAPAPAP
APAPETRQAVVGEDICLELEVAADGGEV VWHKGT ERIQPGGHFEVL SRGQRQMLVIKGFRTEDQGEYRCGP IQ
GLPSSGAATFNVMV TSGSGDEVPAQPSLPPEAAQEGDLHLLWEALARKRRMSREPTLDSISELPEEDSRVQHL
RQEAETAPDLSEGYSTADELARTGEADLSHTSSDDES RAGT PSLV TYLKKAGGPGI SPLASKHEAQVTT SVK
PQKQEPV VPTCPPPGDL SAADLMDPSLDKAAVKIQA AFKGYKVRKEMKQOEGPVFSRTFGDTEAQVGDVLR L
ECVLATKTD MRACWLKDGIELTDGRHYHIDQLKDGTC SLVTLGLAPTDSGRYTCQVSTKSGRVSHSACVVVSG
TESEAESSSGELDDA FRRAARLHRLFR TKSPAELSEEEFLSADEGPGPEEPADWQTYREDEFVCIRFE
SLAEARQAVTCFRNM FATMGI GVEISLGEQGP RGVEMRIGKVAPTVTPAVPLAKTPGLQTS DAAPVFLTELQN
QDVQDGY PMSFDCVVTGQPVPSVRWFKDGKLEEDDH YMINEDQQGGHQLIITAVVPADMGVYRCLAENSMGV
SSTKAELRVELTSTDYDTA ADATETSSYFSAQGYLSSREQEGTESDEGQLPQVLEELKDLQVAPGTRLAKFQL
KVKGY PAKLYWFKD GQPLTTS DHIRMTDKKTLHTLEIVSVTREDSGQYAAAYISNAVGAAYSSARLLV RGPSE
PEEKPASDVHERLVPPRI LEKFTPKKVKRGS S ITFSVKVEGHPAPSVH WLKEEA EKGV LWIGPDTPGYTM ASS
SKQHSVLVLLDVGRQH QGT YTCIATNPAGQALCESASLHISGLAKEEEQERVKEALISSFLQGT SQAVSAQMS ES
AGFADL RVSSQKSGESLVAEEAHSHLSLAEVGT EEF LQKLT SQI TEMVSAKISQAKLQVPGGDSDEETKTPSASP
RHGRSRPSSSVQESSSEEDGSRGEIFDIYVVTADYLP LGAEQDAIILREGQYVEVLDSAHPLRWLVRTKPT
KSSPSRQGWVSPAYL DKRLKLSPEWGPTEAEPFGEAVSEDEYRTRLS SVIQELLSSEQAFVGL EQFLESHHM
KHLERSPRVPA AVASQKT VIFRNVQDISHFHSSFLKELQCGCTDDDVAMCFIKNQEA FEKYLEFLVGRVQAES
VVVSTPVQEFYK KYAEETLSAKDPTQPPPPPLQHYLEQPV ERVQKYQALLKELIRNKARNRQNCALLEQAYAV
VSALPQRAENKLVSLMENY PGTLEALGEP I RQGHFIVWEGAPGARM PWKGHNHRHVFLFRNYLVIC PRRDSR

TDTFSYVFRNMMKLSSIDLNDQVEGDDRAFEVWHEREEDSVRKYLLQARTVVIKNSWVKEICGIQQRLAQPVWR  
PPEFEEELADCTAELGETVKLACRVGTGPKPIVSWYKDGKPVVEVDPHHILIEDPDGSCSTLILDNLTGIDSGQY  
MCFASAAGNASTLGKILVQVPPRFVNVKVRATPFVEGEDAQITCTVEGAPYPQIRWYKDGTLTLLAPGNRYRMLN  
EPRSGVLVLIQAASKEDLGHYECELVNRLGSTRGGGELYMQSPALRARDQHHREQIVAAVEVTEQETKVPKK  
TVII EETITTVVKS PRGRRQSPGKSPSRSPRRSASPRRPGLLAPERLYPPGTS PSRRLEVEQGRKAPVPALY  
VTEAEVHAPASQSQPKWLEVEETIEVRVKKTGSRGASPVREMTSRGEGILFTLPGGIPGRDPNANNNSNKS VY  
QEARTWGPVAVVHVGEPFI FQVDSVGNVDWVAASPEPEQVRASQKEENTERQEGCSDGDENTFLMEEPQD TDSL  
QGRDPKILTHNGRVLTLADLEDYVPOEGETFGCGDSTPSTPDEPPCEVSVLQREI SEPTVGGQPVLLNVGRPPG  
TGATPSFFRPGSQVHSPESVSLFLREAWSGPVSAAPWTSSFHTHVQSSVDGSHGSFKTEVSTQTVSFGAVGET  
VTLHIDPDGGEAPGPSQG\*

>rs244484851\_ENSMUSP00000158795\_c.594:G>C\_p.V199L  
ENSMUST00000238536.2|Obscn-210|ENSMUSG00000061462|-|chr11:g.59026607:C>G  
MDHSFSGAPRFLTRPKAFVSVGKDATLSCQIVGNPTPHVSWEKDRQVEAGARFRLAQDGDVYRLTILDLAL  
GDSGQYVCRARNAIGEAFVAVGLRVDSEGTCAEQAPHLLRPTSIRVREGADATFRCRVGGSPPAVSWSKDG  
RRLGPPDAPHVRVEEHGESSALRIRSARPRDGGTYEVRAENPLGSASAAAALLVDSDAEVAGPPGTSTATLLA  
HLQORREAMRAEGIPSPPPGAGTRTCTVTEGKHARLSCFVTGEPKPEVWKKDGQLVTEGRRHVVEDEQENF  
VLKILFCCKQSDRGLYTCTASNLVGQTYSSVLVVVREPTVPFKKRLQDLEVREKESATFQCEVAQAPATEAAWFK  
EETRLWASAKYDIEEGTERRLTVRNVSADDDAVYICETTEGSRVLAELSVQGNLTKLPRKTAVRTGDTAIF  
WVELAVPEGPVRWLRNQEEMVAGGRVAITAEGTCHTLTI FQCTLEDMGEVAFVSGGCRTTTQFCVSAPRRPPL  
YPPADPVVKAKTESSVTLWSAPPHGDRPVTIDGYVLEKRKLGAYAWSRCHEAGWLATTEFTITGVAAEGDFQ  
FRVSAINHFGQGPYLEFPGTMHLVPLAVKTPKAVEAVEGGEVTFVSDLTVASSGEWFLDGEALKASSIYVI  
RCDRTRHMLTIREV PARLHGAQLKFVANGIETS IQMVVRAALGLPSSKLPAAAAREVLAQLHEEAQLLAE LSD  
QAAAVTWLKDGRELSLGPKEYMQVSAGRRALLVRDVAQDDAGLYECVSRGSR TAYQLLVQDITDG YRDWGPAG  
PQKHMCKCAGAKIARYLGS SCYRFLQYDKGVWHWLEAALDTRQKGKTS SCSLHEKPKLVFAKQQAHSEVKA E  
AGNSATLSCEVTQAQTEVTWFKDGKLLSSSSSKVRMEASGCSRRLVVQQAGKADAGEYSCEAGGQKLSFRLDVA  
EPKLVFAKQQAHSEVKA EAGASATLSCEVAQAQTEVTWFKDGKLLSSSSSKVRMEASGCSRRLVVQQAGKADA  
GEYSCEAGGQKLSFRLDVAEPKLVFAKEQQARSEVKA EAGASATLSCEVAQAQTEVTWFKDGKLLSSSSSKVRM  
EASGCSRRLVVQQAGKADAGEYSCEAGGQKLSFRLDVTEPKLVFAKEQQARSEVKA EVGNSATLSCEVAQAQ T  
EVTWFKDGKLLSSSSSKVRMEASGCSRRLVVQQAGKADAGEYSCEAGGQKLSFRLDVAEPKLVFAKEQQARSEV  
KA EAGNSATLSCEVAQAQTEVTWFKDGKLLSSSSSKVRMEASGCSRRLVVQQAGKADAGEYSCEAGGQKLSFHL  
DVTEPKLVFAKEQQAHSEVKA EAGASATLSCEVAQAQTEVTWFKDGKLLSSSSSKVRMEASGCSRRLVVQQAGK  
ADAGEYSCEAAGQKLSFRLDVAEPKLVFAKEQQARSEVKA EAGASATLSCEVAQAQTEVTWFKDGKLLSSSSK  
VRVEASGCSRRLVVQQAGKADAGEYSCEAGGQKLSFRLDVAEPKLVFAKEQQANSEVKA EAGASATLSCEVAQ  
AQTEVTWFKDGKLLSSSSSKVRVEASGCSRRLVVQQAGKADAGEYSCEAGGQKLSFRLDVAEPKLVFAKEQQAH  
SEVKA EAGASATLSCEVAQAQTEVTWFKDGKLLSSSSSKVRVEASGCSRRLVVQQAGKADAGEYSCEAGGQKLS  
FRLDVAEPKLVFAKEQQAHSEVKA EAGASATLSCEVAQAQTEVTWFKDGKLLSSSSSKVRVEASGCSRRLVVQQ  
AGKADAGEYSCEAGGQKLSFRLDVAEPKLVFAKEQQAHSEVKA EAGASATLSCEVAQAQTEVTWFKDGKLLSS  
SSKVRVEASGCSRRLVVQQAGKADAGEYSCEAGGQKLFRLDVAEPKLVFAKEQQAHSEVKA EAGASATLSCE  
VAQAQTEVTWFKDGKLLSSSSSKVRVEASGCSRRLVVQQAGKADAGEYSCEAGGQKLSFRLDVAEPKLVFAKEQ  
QAHSEVKA EAGASATLSCEVAQAQTEVTWFKDGKLLSSSSSKVRVEASGCSRRLVVQQVQKADAGEYSCEARGQ  
KLSFRLDVADTRLMFAKEQQARTEVKAEAGNSATLSCEVAQAQTEVTWFKDGKLLSSSSSKVRVEASGCSRRLV  
VQQAGKADAGEYSCEAGGQKLSFRLDVAEAESQIPERPSRREPLVVKEHETIILTATIAAPSVAAVTWLKDG V  
EIRRSKRHEATSLGDTHTLTVRGAQVLD SAIYSCRVGKEGQDFPVQVEEVA AKFSKPLEPVEGELGGTVMLVC  
ELSPQAEVWVRCGNTQLRPGKRFQMTSEGPRRTLTVSGLREDDAEYVCE SRDDRTSARLTVKVPVVKFTS  
GLSAMVAEEGQEA TFCVVS PSDAGVTWYKDGMLQ PSEKFMVVEGASRSLTILGLTLEDAGQVTVAEAGAS  
SSAALRVREAPVLFKKLEPQTVEERTSVTLEVELTRPWPEVKWTRNAAVLTPSENVEIRAEGARHCLVLR SV  
GFADRGGFFGCETPDDKTQAKLNVEMRQVRLVLRGLQEVEAKEQGTASMDVELSHAEVEG SWTRDGLRLQPGPKC  
HLAVQGPFVHILTL SALQPQDSGLVAFRAEGVHTSARLIVTEL PVSFTRVLQDVVATQKEKVTLECELSRPVDV  
RWLKDGVELRAGKAIGIVAQGTCSRSLVIYRCETGDQGVYCDALDAQTSASLRVQGRTYTLIFRVLAE DAGE  
VKFVAENAESRAHLRVKELPVTLRPLRDKIAMEKHGVLQCVSRASAQVRWFKGGVQLQSGPKYEVVSDGL  
YRKLVIN DVQPEDEDTYTC DAGNVKTS AQFFVVEEQSITIVRGLKDMTVMPEPAPAWFECETSIPSVRPPKWL LG  
KTVLQAGGNVGLQDGTVHRLTLHKTCSTMTGPVHFTIGKSRSSAQLVVSDI PVVLT RPLEPKAGRELQSVVL  
SCDFRPAPKAVEQWYKDDT PLS PSEKFKMALENGTMAELRILRLTPADAGVYRCQAGSAQSSAEVTV EAREVTVI  
QPLQDAEAMVEGRVCFSEL SHKDEDIEWLSLNGTPLYNDSFHEI SHEGCLHTLVLKSVRQADTGTVCATSPKV  
SVSARLVVKGKPVVFLKALDDVSAEERGTTLTQCEVSDPEARVWVRKDGVELGSPDKYDFLHKAGARGLTVHD  
LSHEDAGLYTCQVGSKETQSKVSVHDLHVGITKRLKTVLEVLEGE SCSFECVLSHESPSDPAVWTVGGKTVGGS  
GHFHAVRQGRKYTLTVKDAALSDAGEV VSVLGLT SKASLIIRERPV DITKPLEDQRTTLGEDVMLSCELSRA  
GTSVRWLKDGKAIRKSQYD LLS EGTAVLVVRKASL KDSGEYTCETEASKSTAKLCVEEKANRFT EELADLQ

VEEKGRAVFTCKTEHPASVVTWRKGLLELRASGKHVPSQEGLTLKLTINALERTSDTYTCDIGQARTQARLL
VHGQKVRVIEDLEDTAVQEGSSAKFCCRIAPADYGPVHWFLLDKTPLHSNELNEITVQPGGYHVLTLRQLALKD
SGTVYFEAGDQRTSAALRVTEKPSIFSRPLTDVTVTEGEDTLVCEFTTVVDSVVRWTKDGKTLRPSARCQLSH
EGCQAQLLITATTPQDGGRYKCEIGGASSSSIVRVHALPVRFRESLKDVEVPEGKAATLRCVLSVAAPVEWR
HGDDVLKSSNKYSLRQEGAVLELVIRDLQPQDSGQYSCSFGDQTSATLTVKTSQAQFVQKLRNKEATEGTTV
TLRCELTKAEPVEWKKGTETLRNGDKYSLKQDGAVCELQICSLLVADAGEYSCVCGQEKTSATLTVKALLVHF
VRLRSKEATEGDTTTLQCELSKAAPVEWRKGTETLRDGDYSLKQDGAVCELQIRSLTIADAGEYLCTCGQE
KTSATLTVRALPAKFKDSLKNEEATEGTTATLSCELSKAAPVTWKKGPKTLQSGDKYVLRQDGAVCGLQIHGL
TMADAGEYSCVCGQEKTSATLTVRGLPAKFIEDLRSQEATEGATAILRCELSKAAPVEWRKSETLRDGDYR
LRQDGAVCELQIRGLAVVDGTGYSSLPKFTTEGLRNEEATEGTMATLRCQMSKAAPVEWRKSETLRDGDYR
LRQDGAMCELQIRGLTIEDSGEYTCVCGQEKTSATLSVKALPSRFIEDLRSQEATEGTMATLRCQMSKTA
PVEWKKGSETLRDGGYSLRQDGPVCELQICDLAVEDAGEYSCVCGQEKTSATLSIKALPPRFIEDLRSQEATEG
MATLRCQMSKAAPVEWRKSETLRDGGYSLRQNGAVCELQIHDLAVEDTGEYSCVCGQEKTSATLNVKALPP
RFIEDLRSQEATEGTMATLRCQMSKAAPVEWRKSETLRDGGYSLRQDGAVCELQIHDLVEDAGQYSCVCG
QEKTSAVLTVDALPPKFTTEGLKKEEATEGTMVTLRCQMSKEATVEWRKGAKTSLDGGYSLRQDGAMCELQIC
GLAVEDAGEYSCVCGQEKTSATLSVKALPPRFIEDLRSQEATEGTMATLRCQMSKAAPVEWRKSETLRDGD
YSLRQDGAVCELQIRDLAVEDAGEYLCVCGQEKTSATLSVKALPPRFIEDLRSQEATEGTMATLRCQMSKAAP
VEWRKSKTLRDGDYSLRQDGAMCELQICDLAVEDTGDYSCVCGQEKTSATLSVKALPPRFIEDLRSQEARE
GTVATLRCRMSKAAPVEWRKSETLRDGDYSLRQEGNLCELQIRDLAVEDTEEYSCVCGQEKTSATLSVKAL
PAKFIEDLRSQEAPESSTVTLRCKLSKKASVVWKKGSETLRNGARYSLRQDGAVCELEIRDLTVEDETEYSCT
CGQERTSATLSIMAPQVVFQQLQNLQAEEGSMASLRCELSVPNAAMVWSKGGLELQGDTRREARQQGCVAEL
LLRDLRREDAGEYSCGSGQTSATLMVTAAPVRFLELQAQDVDEGATARLRCELSREAVSVEWRKGSLLQF
PCAKYQMVQEGTTAELLVHGVEQEDAGEYTCDAHTQSIARLSVRAPKPKFKTDLQSTEQEAGGTARLCCQLS
EAEPTGTPVQWLKEGVELHVGSKYEMRRQGAVALLEHGLEAKDTGEYACLVGGQKTLASLRVKEPEVTIVRGL
VDMEVQADEVEFTCKVQAGATDVQWHLQGLPLQSNVTEVAVLADGCTHVLQKGVTLLEDAGTVSFHVGGL
SSSAQLTVRVEFTVLEPLKDVQLSEGQDAHFRCRLSRASGQEARWALGGVPLQCNEMNDITVEQGTLYLLTL
HKVTLEDAGTITLQVGSSEQAQLKVTAKNTVLRGLLENVDALLEGGEALFECQLSQEVAHAHTWLLDEPHTS
EKVEVVYFENGLRHLLLLKLNKPKQDSCRVTFLAGDVVTSFAFLTVRGRLEVLPEPHDASVKAGMQVRFCTILS
EAVPVGEATWYINGAAIQPDDTDWTVTTDGSHHALTLSNAQPQHAGEVTFAAARDAVASARLSVLALPDPEDA
EAVGRSDHSVTLVSWVAPMSDGGGGLCGYRVMKEASTGQWQLCHDLVPGPECVDDLVPGKTYRFRVAAVGPA
GAGEPVHLPQMVKIAPAPAPAPAPAPAPAPETRQAVVGEDICLELEVAADGGEVWVKGTERIQPGHFVLS
RGQRQMLVIKGFRTEDQGEYRCGPIQGLPSSGAATFNVMVMTSGSGDEVPAQPSLPPEAAQEGDLHLLWEALAR
KRRMSREPTLDSISELPEEDSRVQHLRQEAEEETAPDLSEGYSTADELARTGEADLSHTSSDDESAGTPSLVT
YLKAGGPGISPLASKHEAQVTTSVKPKQKQEPVPTCPGGLSAADLMDPSLDKAAVKIQAAFKGYKVRKE
MKQQEGPVFSRTFGDTEAQVGDVLRLECVLATKTDMRACWLKDGIELTDGRHYHIDQLKDGTCSSLLVTLGLAPT
DSGRYTCQVSTKSGRVSHSACVVVSGTESEAESSSGGELDDAFRAARRLHRLFRTKSPAELSEELFLSADE
GPGEPEEPADWQTYREDENFVCIRFESLAEARQAVTCFRNMFATMGIGVEISLGEQGRGVEMRIGKVAPTVT
PAVPLAKTPGLQTSDAAPVFLTELQNDVQDGYPMSFDCVVTGQPVPSVRWFKDGKLEEDDHYMINEDQGGG
HQLIITAVVPADMGVYRCLAENSMGVSSTKAELRVELTSTDYDTAADATETSSYFSAQGYLSSREQEGTESDE
GQLPQVLEELKDLQVAPGTRLAKFQLKVKGYPAKLYWFKDQGPLTSDHIRMTDKKTLHTLEIVSVTREDSG
QYAAYSNAVGAAYSSARLLVRGPSEPEEKPASDVHERLVPPRILEKFTPKKVKRGSSITFSVKVEGHPAPSV
HWLKEEAKEKGLVWIGPDTPGYTMASSSKQHSLLVLDVGRQHGGTYTCIATNPAGQALCSASLHISGLAKEEEQ
ERVKEALISSFLOGTSQAVSAQMSSEAGFADLVGQSKGESLVAEEAHSLSLAEVGTEEFLOKLTSTQITEMVS
AKISQAKLQVPGGDSDEETKTPSASPRHGRSRPSSSVQESSSESEDGDSRGEIFDIYVVTADYLPAGAEQDAI
LLREGQYVEVLDLSDAHLRVLVTRKPTKSSPSRQGWVSPAYLDRKRLKLSPEWGPTEAPEFPGEAUSEDEYRTRL
SSVIQELLSSQAFVQELQFLESHHMKHLERSPRVPAAVASQKTVIFRNVQDISHFHSSFLKELQCCGTDV
AMCFIKNQEAFAKEYLEFLVGRVQAESVVVSTPVQEFYKKAEEETLSAKDPTQPPPPPLQHYLEQPVERVQKYQ
ALLKELIRNKARNRQNCALLEQAYAVVSALPQRAENKLVSLMENYPGTLEALGEPHQGHFIVWEGAPGARM
PWKGHNHRVFLFRNYLVICKPRRDSRTDFTSYVFRNMMKLSSIDLNDQVEGDDRAFEVWHEREDSVRKYLLQA
RTVILKNSWVKEICGIQQLAQPVWRPPEFEEELADCTAELGETVKLACRVTGTPKPIVSWYKDGKPEVDPH
HILIEDPDGSCTLILDNLTGIDSGQYMCFAASAAGNASTLGKILVQVPPRFVNVKVRATPFVEGEDAQITCTVE
GAPYPQIRWYKDGTLAPGNRYRMLNEPRSGVLVLIQAASKEDLGHYECELVNLGSTRGGGELYMQSPALR
ARDQHHREQIVAAVEDTSEVESAHSADQDADQAAVSLWRLLGSEALGPSPGDLPNTRQSEPPAFEEAASQIP
GAASGTPEVSPQPGHTKGLEQETTSSGSQGWTPVIRVEGTAWPGAGTQQLLDVHSQVIMETTQRTYVQAPDT
GVTRAPSMQVTIEDVQVQVGDMAQFDAVIEGHPPPIVTVYKGSTQLTSSARLSQRQDGTYSLVLTVDVAPHDA
GVYTCVANNAGGQVLCKAELLVHGGDKLDAENQVYRRKLSHFYDVQEEIGRGVFGFVKRVQHKGNKMFCAAKF
IPLRSKTRAQAYQERDILATLGHPLVTGLLDQFETRKTLLILILELCSSEELLDRFLKKGVVTEAEVKVYIQQL
VEGLHYLHSHGILHLDIKPPNIMVHPAREDIKICDFGFAQKITPSEFPQYSKYGSPEFVSPEIIEQNPFVSEGS



DIWAMGVI SYLSLTCSPPFAGESDRATLLNVLEGRVSWSSPTAAHLSSEDAKDFIKATLQRTPRARPSTSQCLA  
HPWFLKSMPEAAEHFINTKQLKFLARSRWQRSLMSYKSI LVMRSIPELLQGPPDPSPLGVARHLRGEASGAS  
SSSSSSDNELAPFARAKSLPPSPVTHSPLLHPRGFLRPSASLPEETEASMPPTADA AVPASPOSAGPPASPGCV  
PRHSVSISSLFYQQAGEGAERGNKTS GAKRHPARRRHLLKGGYIARALPGLREPLMEYSLLEEEAAREEQASLM  
TKTPSFETALRLPSSSVREVPGRSHSLDNPPVTTGSPSEACKEQLLFPSTGLTHETAKDRGHKEGFLQESV  
FFPPMSGDSRPGKQEGSSQDSRCRGPASSCHSELGSGSQEGCGPPSSQSLGSLPPQSLKKEKELSTSCGPLFSEQ  
PQAAPFPTQVSPLLGSEKEPQDGSLEGPVVPVSSSPGSASQVDASLDTEGLSEAGDTCDFTPPPQRPQEQAT  
TRKFSLESRGGYAGVAGYGTFAFGGDAGGMLGQGPLWARMAWAVSQSSEEQDEAATESPQPLES LGPIAEASG  
VPLRTSPSLTPWEEVEQVSLVQIRDLSGDAEAADTISLDISEVDPAYLNLSLDYDIKYLPPFEFMI FRRVPKPI  
EQPESPGSETEAGQGLADFL EEAAWPWPGEGLGLRAGLEIT EEP EEPGDLEALLGEAAVGRKRKWSPSRGLFQF  
PGRCLSGEEPVELGLRQRVKASMAHISRILKGRPEGPEREPPRKKAGLASFRLSGLKGRDQELSDEAVVLGQ  
SVTLACQVLAQPTAQATWSKDGVLLESSGHLIISSTLKNFQLLTI LVVKEEDLGTYTCCVSNPLGTA VTTGVL  
RKAERPSSSPRPEVGELYKDAVLLVWKPVEESCGPVTYIVQCCIEGGSWTTLASDISDCCYLTGKLSRGGMYIF  
RTACVSKAGMGPYSSPSEQVLLGGPNHLASEEESRRRPAQLLPSTKTFAFQMQIRRRGRFSVVQRQREKASGR  
ALAAKIVPYQPEDKTA VLREYEAALKRHLHPLHAQLHAAYLSPRHLVLI LELCSGPELLPSLAERESYSESDVK  
DYLWQMLSATQYLHAQHILHLDLRSENMMVTEYNLLKVIDLGN AQSLDQEKVPAPENFKDYLETMAPELLEGO  
GAVPQTDIWAIGVTA FIMLSGEY PESSSEGRDLQGLRKLIRLSRCYAGLSGGAVAFLOSSLCAQPWGRPCA  
STCLQCGWLTEEGTGRPTVTFPTVRLRAFVREREREKRRALLYKHNLAQVR\*  
>rs244484851\_ENSMUSP00000038264\_c.594:G>C\_p.V199L  
ENSMUST00000047441.14|Obscn-202|ENSMUSG00000061462|-|chr11:g.59026607:C>G  
MDHSFSGAPRFLTRPKAFVSVGKDATLSCQIVGNPTPHVSWEKDRQVEAGARFRLAQDGDVYRLTILDLAL  
GDSGQYVCRARNAIGEAFAAVGLRVDSEGTCAEQAPHLLRPTSIRVREGADATFRCRVGGSQPAPVSWSKDG  
RRLGPPDAPHVRVEEHGESSALRIRSARPRDGGTYEVRAENPLGSASAAAALLVDSDAEVAGPPGTSTATLLA  
HLQQRREAMRAEGIPPSPPGAGTRTCTVTEGKHARLSCFVTGEPKPKETVWKKDQGLVTEGRRHVVEDEQENF  
VLKILFCCKQSDRGLYCTASNLVGGTYSSVLVVVREPTVPFKKRLQDLEVREKESATFQCEVAQPA TEAAWFK  
EETRLWASAKYDIEEETERRLTVRNVSADDDAVYICETTEGSRVAELSVQGNLTKRKTAVRTGDTAIF  
WVELAVPEGPVRWLRNQEEMVAGGRVAITAEAGTHTLTI FQCTLEDMGEVAFVSGGCTTTTQFCVSA PRRPPL  
YPPADPVVKAKTESSVTL SWSAPPHGDRPVTIDGYVLEKRKLGAYAWSRCHEAGWLATTEFTITGVAAEGDFQ  
FRVSAINHFGQGPYLEFPGTMHLVPLAVKTPKAVEAVEGGEVTFVSDLTVASSGEWFLDGEALKASSIYVI  
RCDRTRHMLTIREV PARLHGAQLKFVANGIETS IQMVVRAALGLPSSKLPAAAAREVLAQLHEEAQLLAE LSD  
QAAA VTWLKDGRELSLGPYEMQVSAGRRALLVRDVAQDDAGLYECVSRGSR TAYQLLVQDITDGYRDWGPAG  
PQKHMCKCAGAKIARYLGSSCYRFLQYDKGVWHLEAALDTRQKGKTS SCSLHEKPKLVFAKQQAHSEVKAE  
AGASATLSCEVAQAQTEVTFWKDGKLLSSSSKVRMEASGCSRRLVVQQAGKADAGEYSCEAGGQKLSFRLDVA  
EPKMFVFAKEQQARSEVKA EAGASATLSCEVAQAQTEVTFWKDGKLLSSSSKVRMEASGCSRRLVVQQAGKAD  
GEYSCEAGGQKLSFRLDVTEPKLVFAKEQQARSEVKA EAGASATLSCEVAQAQTEVTFWKDGKLLSSSSKVR  
EASGCSRRLVVQQAGKADAGEYSCEAGGQKLSFRLDVAEPKLVFAKEQQARSEVKA EAGASATLSCEVAQAQ  
EVTWFKDGKLLSSSSKVRMEASGCSRRLVVQQAGKADAGEYSCEAGGQKLSFHLVDVTEPKLVFAKEQQAHSEV  
KAEAGASATLSCEVAQAQTEVTFWKDGKLLSSSSKVRMEASGCSRRLVVQQAGKADAGEYSCEAGGQKLSFR  
DVAEPKLVFAKEQQARSEVKA EAGASATLSCEVAQAQTEVTFWKDGKLLSSSSKVRMEASGCSRRLVVQQAG  
ADAGEYSCEAGGQKLSFRLDVAEPKLVFAKEQQANSEVKA EAGASATLSCEVAQAQTEVTFWKDGKLLSSSSK  
VRVEASGCSRRLVVQQAGKADAGEYSCEAGGQKLSFRLDVAEPKLVFAKEQQAHSEVKA EAGASATLSCEVAQ  
AQTEVTFWKDGKLLSSSSKVRMEASGCSRRLVVQQAGKADAGEYSCEAGGQKLSFRLDVAEPKLVFAKEQQAH  
SEVKA EAGASATLSCEVAQAQTEVTFWKDGKLLSSSSKVRMEASGCSRRLVVQQAGKADAGEYSCEAGGQKLS  
FRLDVAEPKLVFAKEQQAHSEVKA EAGASATLSCEVAQAQTEVTFWKDGKLLSSSSKVRMEASGCSRRLVVQQ  
AGKADAGEYSCEAGGQKLSFRLDVAEPKLVFAKEQQAHSEVKA EAGASATLSCEVAQAQTEVTFWKDGKLLSS  
SSKVRMEASGCSRRLVVQQV GKADAGEYSCEARGQKLSFRLDVAEAEESQI PERPSRREPLVVEKHETIILTAT  
IAAPSVAAVTWLKDGV EIRRSKRHEATSLGDHTLTVRGAQVLD SAIYSCRVGKEGQDFPVQVEEVA AKFSKP  
LEPVEGELGGTVMLVCELSPEQAEVWRCGNTQLRPGKRFQMTSEGPRRTLTVSGLREDDAEYVCE SRDDRT  
SARLTVKVPRVVKFTSGLSAMVAEEGQ EATFQCVVSPSDAGVTWYKDGMLQLPSEKFMVME SGASRLTILGL  
TLEDAGQVTVAEAGASSAALRVREAPVLFKKKLEPQTVEERTSVTLEVELTRPWEVKWTRNAAVLTPSENV  
EIRAEGARHCLVLRVGFADRGFFGCETPDDKTQAKLNVEMRQVRLVVRGLQEVEAKEQGTASMDVELSHAEVE  
GSWTRDGLRLQPGPKCHLAVQGPVHILTLSALQPQDSGLVAFRAEGVHTSARLIVTEL PVSFTRVLQDVVATQ  
KEKVTLECELSRPPVDVRLKDGVELRAGKAI GIVAQGTCSRSLVIYRCETGDQGVYVCDALDAQTSASLRVFGG  
TYTLIFRRVLAEDAGEVLFVAENAESRAHLRDKELPVTLLRPLRDKIAMEKHRGVLEKQVMSRASAQVRVFKGG  
VELQSGPKYEVVSDGLYRKLVIN DVQPEDEDTYTCDAGNVKTS AQFFVEEQSITIVRGLKDMTVM EPAPAWFE  
CETSIPSVRPPKWL LGKTVLQAGGNVLEQDGT VHRLTLHKTCSTMTGPVHFTIGKSRSSAQLVVS DIPVVL  
RPLEPKAGRELQSVVLSCDFRPAPKAVQWYKDDTPLSPSEKFKMALEGM AELRILRLTPADAGVYRCQAGSA  
QSSAEVTV EAREVTVIQPLQDAEAMEEGRVCFSCELSHKDEDIEWSLNGTPLYNDSFHEISHEGCLHTLVLSKS

VRQADTGTVCATSPKVSVSARLVVKGKPVVFLKALDDVSAEERGTTLTQCEVSDPEARVVWRKDGVELGSPDK
YDFLHKAGARGLTVHDLSDHEDAGLYTCQVGSKETQSKVSVHDLHVGITKRLKTVEVLEGESECSFECVLSHESP
SDPAVWTVGGKTVGGSGHFHAVRQGRKYTLTVKDAALSDAGEVVFVGLTSSKASLIIRERPVDITKPLEDQR
TTLGEDVMLSCELSRAGTSVRWLKDGKAIKRSQKYDLLSEGTRAVLVVRKASLKDSGEYTCETEASKSTAKLC
VEEKANRFTEELADLQVEEKGRAVFTCKTEHPASVVTWRKGLLELRASGKHVPSQEGTLTKLTINALERTDSD
TYTCDIGQARTQARLLVHGQKVRVIEDLEDTAVQEGSSAKFCCRIPADYGPVHWFLLDKTPLHSNELNEITVQ
PGGYHVLTLRQLALKDSGTVYFEAGDQRTSAALRVTEKPSIFSRPLTDVTVTEGEDTLTVCETTTVDSSVRWT
KDGKTLRPSARCQLSHEGCQAQLLITATTPQDGGRYKCEIGGASSSSIVRVHALPVRFRRESLKDVEVPEGKAA
TLRCVLSVVAAPVEWRHGDDVLKSSNKYSLRQEGAVLELVIRDLQPQDSGQYSCSFGDQTTSATLTVKTSQAQ
FVGKLRNKEATEGTTVTLRCELTKAPVEWKKGTETLRNGDKYSLKQDGAVCELQICSLLVADAGEYSCVCGQ
EKTSATLTVKALLVHFVRRLSKEATEGDTTTLQCELSKAAPVEWRKGTETLRDGDYSLKQDGAVCELQIRS
LTADAGEYLCTCGQEKTSATLTVRALPAKFKDSLKNEEATEGTTATLSCELSKAAPVTWKKGPKTLQSGDKY
VLRQDGAVCGLQIHGLTMADAGEYSCVCGQEKTSATLTVRGLPAKFIEDLRSQEATEGATAILRCELSKAAPV
EWRKGSSETLKDGDYTLRQDGAVCELQIRGLAVVDTGTYSPLPKFTEGLRNEEATEGTMATLRCQMSKAAPV
EWRKGSSETLRDGDYSLRQDGAMCELQIRGLTIEDSGEYTCVCGQEKTSATLSVKALPPRFIEDLRSQEATEG
TMATLRCQMSKAAPVEWRKGSSETLGDGGYSLRQNGAVCELQIHDLAVEDTGEYSCVCGQEKTSATLNVKALP
PRFIEDLRSQEATEGTMATLRCQMSKAAPVEWRKGSSETLRDGGYSLRQDGAVCELQIHDLVEDAGYSCVC
GQEKTSAVLTVDALPPKFTEGLKKEEATEGTMVTLRQMSKEATVEWRKGAKTLSGGYSLRQDGAMCELQI
CGLAVEDAGEYSCVCGQEKTSATLSVKALPPRFIEDLRSQEATEGTMATLRCQMSKAAPVEWRKGSKTLRDGD
RYSLRQDGAMCELQICDLAVEDTGDYSCVCGQEKTSATLSVKAPQVVFQQLQNLQAEEGSMASLRCELSVFN
AAMVWSKGGLELQGDTRREARQQGCVAELLLRDLRREDAGEYSCVCGSQTTSATLMVTAAPVRFRLRQADV
DEGATARLRCELSREAVSVEWRKGSLLQFPCAKYQMVQEGTTAELLVHGVEQEDAGEYTC DAGHTQS IARLSV
RAPKPKFKTDLQSTEQEAGGTARLCCQLSEAEPTPVQWLKEGVELHVGSKYEMRRQGAVCELLIHGLEAKDT
GEYACLVGQKTLASLRVKEPEVTIVRGLVDMEVQADEDEVEFTCKVSQAGATDVQWHLQGLPLQSNVTEVAV
LADGCTHVLQKGVTLLEDAGTVSFHVGGLSSSAQLTTRVPEVTVLEPLKDVQLSEGQDAHFRCLSRASGQEA
RWALGGVPLQCNEMNDITVEQGTLYLLTLHKVTLLEDAGTITLQVGSSEAEQLKVTAKNTVLRGLENVDALLEG
GEALFECQLSQPEVAANTWLLDDEPVHTSEKVEVYFENGLRHLLLLKLNKLPQDSCRVTFLAGDVVTSFAFLTV
RALPDPPEDAEVVGRSDHVSVTLVWVAPMSDGGGGLCGYRVMKEASTGQWQLCHDLVPGPECVDDLVPGKTY
RFRVAAVGPAGAGEPVHLPQMVKIAPAPAPAPAPAPAPAPETRQAVVGEDICLELEVAADGGVEVWHKGTERRI
QPGGHFEVLSRQGRQMLVIKGFRTEDQGEYRCGPIQGLPSSGAATFNVMVMTSGSGDEVPAQPSLPPEAAQEGD
LHLLWEALARKRRMSREPTLDSISELPEEDSRVQHLRQEAEEETAPDLSEGYSTADELARTGEADLSHTSSDDE
SRAGTPSLVTYLKKAGGPGISPLASKHEAQVTTSVKPKQKQEPVVPTCPPPGDLAADLMDPSLDKAAVKIQA
AFKGYKVRKEMKQOEGPVFSRTFGDTEAQVGDVLRLECVLATKTDMRACWLKDGIELTDGRHYHIDQLKDGTC
SLLVTGLAPTDSGRYTCQVSTKSGRVSHSACVVVSGTESEAESSSGGELDDAFRRAARLHRLFRTKSPAELS
EELFLSADEGPEPEEPADWQTYREDENFVCIRFESLAEARQAVTCFRNMFMATMIGVEISLGEQGRGVEM
RIGKVAPTVPAPVPLAKTPGLQTSDAAPVFLTELQNDVQDGYPMSFDCVVTGQPVSVRWFKDGKLEEDDH
YMINEDQQGGHQLIITAVVPADMGVYRCLAENSMGVSSTKAELRVELTSTDYDTAADATETSSYFSAQGYLSS
REQEGTESDEGQLPQVLEELKDLQVAPGTRLAKFQLKVKGYPAKLYWFKDQPLTSDHIRMTDKKTLHTLE
IVSVTREDSGQYAAIYISNAVGAAYSSARLLVRGPSEPEEKPASDVHERLVPPRILEKFTPKKVKRGSITFSV
KVEGHPAPSVHHLKEEAKEKGLVWIGPDTPGYTMASSSKQHSVLVLDVGRQHOGTYTCIATNPAGQALCSASLH
ISGLAKEEEEQERVKEALISSFLQGTSAQVSAQMSESAGFADLVGQSKGESLVAAEAHSHLSLAEVGTTEEFQK
LTSQITEMVSAKISQAKLQVPGGDSDEETKTPSASPRHGRSRPSSSVQESSSESESDGDSRGEIFDIYVVTADY
LPLGAEQDAIILREGQYVEVLDLSDAHPLRWLVRTKPTKSSPSRQGWVSPAYLDKRLKLSPEWGPTEAPEFPGEA
VSEDEYRTRLSSVIQELLSSEQAFVGELOFLESHHMKHLERSPRVPAAVASQKTVIFRNVQDISHFHSSFLKE
LQCGCTDDDDVAMCFIKNQEAPEKYLEFLVGRVQAEVSVVSTPVQEFYKKYAEETLSAKDPTQPPPPPLQHYLE
QPVERVQKYQALLKELIRNKARNRQNCALLEQAYAVVSALPQRAENKLVSLMENYPGTLEALGEPRIQGHFI
VWEGAPGARMPWKGNHRHVFVFRNYLVICKPRRDSRTDTFSYVFRNMMKLSSIDLNDQVEGDDRAFEVWHERE
DSVRKYLQARTVIKNSWVKEICGIQORLAQPVWRPPEFEEELADCTAELGETVKLACRVTGTPKPIVSWYK
DGKPVVEVDPHHILIEDPDGSCCTLILDNLTGIDSGQYMCFAASAAGNASTLGKILVQVPPRFVNVKVRATPFVEG
EDAQITCTVEGAPYPQIRWYKDGTLAPGNRYRMLNEPRSGVLVLIQAASKEDLGHYECELVNLRGSTRGGG
ELYMQSPALRARDQHHREQIVAAVEGAPSMQVTIEDVQVQVGDMAQFDAVIEGHPPPITVWYKGTQLTSSAR
LSQRQDGTYSLVLTVDVAPHDAGVYTCVANNAGGQVLCKAELLVHGGDKLDAENQVYRRKLHSFYDVQEEIGR
GVFGFVKRVVQHKGNKMFCAAKFIPLRSKTRAQAYQERDILATLGHPLVTLGLLDQFETRKTLLIILELCSSEEL
LDRLFKKGVVVHTEAKEMKVYIQQLVEGLHYLHSHGILHLDIKPPNIMVHPAREDIKICDFGFAQKIPSEFPQYS
KYGSPPEFVPEIIEQNPNVSEGSDIWAMGVISYLSLTCSSPFAGESDRATLLNVLEGRVSWSSPTAAHLSYDAK
DFIKATLQRTPRARPSTSQC LAHPWFLKSMPAAEAHFINTKQLKFLARSRWQRSLMSYKSI LVMRSIPELLQ
GPPDPSLGVARHLRGEASGASSSSSSSDNELAPFARAKSLPPSPVTHSPLLHPRGFLRPSASLPEETEASMP
TADAAPASPQASAGPPASPGCVPRHSVISSLFYQQAGEGAERGNKTS GAKRHPARRRHLLKGGYIARALPGLR

EPLMEYSLLEEEAAREEQASLMTKTPSFETALRLPSSSVREVPGRSHSLDNPPVTTGSPPEACKEQLLFPST  
GLTHETAKDRGHKEGFLQESVPPFPPMSGDSRPGKQEGSSQDSCRGKPASSCHSELGSGSQEGCGPPSSQSLG  
SLPPQSLKKELSTSCGPLFSEQPQAAPFPTQVSPLLGSEKEPQDGLSEGPVVPVSSSPGSASQVDAASLDTEG  
LSEAGDTCDFTPPPQRPQEQATTRKFSLESRRGGYAGVAGYGTFAFGGDAGGMLGQGPLWARMWAVSQSSEEQ  
DEAATESPQPLESGLPIAEASGVPLRTSPSLTPWEEVEQVSLVQIRDLSDGAEAAADTISLDISEVDPAYLNLS  
DLYDIKYLPPFEFMI FRRVPKPIEQPESPGSETEAGQGLADFLLEEAAWPWPGEGLGLRAGLEITEEPEEPGDLEA  
LLGEAAVGRKRKWSPSRGLFQFPGRCLSGEEPVELGLRQRVKASMAHISRILKGRPEGPEREGPPRKKAGLAS  
FRLSGLKGRDQELSDEAVVLGQSVTLACQVLAQPTAQATWSKDGVLLESSGHLLISSTLKNFQLLTI LVVKEE  
DLGTYTCCVSNPLGTAVTGTGLRKAERPSSSPRPEVVELYKDAVLLVWKPVEASCGPVYIVQCCIEGGSWTTL  
ASDISDCCYLTKLSRGGMYIFRTACVSKAGMPYSSPSEQVLLGGPNHLASEEESSRGRPAQLLPSTKTFAF  
QMQIRRGRFSVVRQCREKASGRALAAKIVPYQPEDKTAVLRREYALKRLHHPHLAQLHAAYLSPRHLVLI LEL  
CSGPELLPSLAERESYSESDVKDYLWQMLSATQYLHAQHILHLDRSENMMVTEYNLLKVIDLQNAQSLDQEK  
VPAPENFKDYLETMAPELLEGQAVPQTDIWAIGVTAIFIMLSGEY PESSSETRDLQKGLRKLIRLSRCYAGL  
SGGAVAFLOSSLCAQPWGRPCASTCLQCGWLTEEGPTGSRPTPVTFPTVRLRAFVREKRRRALLYKKNHNAQ  
VR\*

>rs244484851\_ENSMUSP00000049737\_c.594:G>C\_p.V199L

ENSMUST00000052872.15|Obscn-203|ENSMUSG00000061462|-|chr11:g.59026607:C>G  
MDHSFSGAPRFLTRPKAFVSVGKDATLSCQIVGNPTPHVSWEKDRQPVEAGARFRLAQDGDVYRLTILDLAL  
GDSGQYVCRARNAIGEAFAAVGLRVDSEGTCAEQAPHFLLRPTSIRVREGADATFRCRVGGSPQPAVSWSKDG  
RRLGPPDAPHVRVEEHGESSALRIRSARPRDGGTYEVRAENPLGSASAAAALLVDSDAEVAGPPGTSTATLLA  
HLQORREAMRAEGIPPSPPGAGTRTCTVTEGKHARLSCFVTGEPKPEVWKKDGQLVTEGRRHVVEDEQENF  
VLKILFCKQSDRGLYCTASNLVQTYSSVLVVREPTVPFKKRLQDLEVREKESATFQCEVAQPAEAAWFK  
EETRLWASAKYDIEEGETERRLTVRNVSADDDAVYICETTEGSRVVAELSVQGNLTKLPRKTAVRTGDTAIF  
WVELAVPEGPVRLRNQEEMVAGGRVAITAEGTCHTLTI FQCTLEDMGEVAFVSGGCRTTTQFCVSAPRRPPL  
YPPADPVVAKTESVTLWSAPPHGDRPVTIDGYVLEKRRKLGAYAWSRCHEAGWLATTEFTITGVAEEGDFQ  
FRVSAINHFGQGPYLEFPGTMHLVPLAVKTKPLKAVEAVEGGEVTFVSDLTVASSGEVFLDGEALKASSIYVI  
RCDRTRHMLTIREVPARLHGAQLKFVANGIETS IQMVRAALGLPSSSKLPAAAAREVLAQLHHEEAQLLAEVSD  
QAAAVTWLKDGRELSLGPKEYMVSAGRRALLVRDVAQDDAGLYECVSRGSRRTAYQLLVQEPKLVFAKQQAH  
SEVKAEEAGNSATLSCEVTQAQTEVTWFKDGKLLSSSSKVRMEASGCSRRLVVQQAGKADAGEYSCEAGGQKLS  
FRLDVAEPKLVFAKQQAHSEVKAEEAGASATLSCEVAQAQTEVTWFKDGKLLSSSSKVRMEASGCSRRLVVQQ  
AGKADAGEYSCEAGGQKLSFRLDVAEPKMFVFAKEQQARSEVKAEEAGASATLSCEVAQAQTEVTWFKDGKLLS  
SSKVRMEASGCSRRLVVQQAGKADAGEYSCEAGGQKLSFRLDVTEPKLVFAKEQQARSEVKAEEVNSATLSCE  
VAQAQTEVTWFKDGKLLSSSSKVRMEASGCSRRLVVQQAGKADAGEYSCEAGGQKLSFRLDVAEPKLVFAKEQ  
QARSEVKAEEAGNSATLSCEVAQAQTEVTWFKDGKLLSSSSKVRMEASGCSRRLVVQQAGKADAGEYSCEAGGQ  
KLSFHLDVTEPKLVFAKEQQAHSEVKAEEAGASATLSCEVAQAQTEVTWFKDGKLLSSSSKVRMEASGCSRRLV  
VQQAGKADAGEYSCEAGGQKLSFRLDVAEPKLVFAKEQQARSEVKAEEAGASATLSCEVAQAQTEVTWFKDGK  
LSSSSKVRVEASGCSRRLVVQQAGKADAGEYSCEAGGQKLSFRLDVAEPKLVFAKEQQANSEVKAEEAGASATL  
SCEVAQAQTEVTWFKDGKLLSSSSKVRVEASGCSRRLVVQQAGKADAGEYSCEAGGQKLSFRLDVAEPKLAFA  
KEQQAHSEVKAEEAGASATLSCEVAQAQTEVTWFKDGKLLSSSSKVRVEASGCSRRLVVQQAGKADAGEYSCEA  
GGQKLSFRLDVAEPKLAFAKEQQAHSEVKAEEAGASATLSCEVAQAQTEVTWFKDGKLLSSSSKVRVEASGCSR  
RLVVQQAGKADAGEYSCEAGGQKLSFRLDVAEPKLAFAKEQQAHSEVKAEEAGASATLSCEVAQAQTEVTWFKD  
GKLLSSSSKVRVEASGCSRRLVVQQAGKADAGEYSCEAGGQKLFRLDVAEPKLMFAKEQQAHSEVKAEEAGAS  
ATLSCEVAQAQTEVTWFKDGKLLSSSSKVRVEASGCSRRLVVQQAGKADAGEYSCEAGGQKLSFRLDVAEPKLV  
FAKEQQAHSEVKAEEAGASATLSCEVAQAQTEVTWFKDGKLLSSSSKVRVEASGCSRRLVVQQVQKADAGEYS  
CEARGQKLSFRLDVADTRLMFAKEQQARTEVKAEAGNSATLSCEVAQAQTEVTWFKDGKLLSSSSKVRVEASG  
CSRRLVVQQAGKADAGEYSCEAGGQKLSFRLDVAEAEESQI PERPSRREPLVVKEHETIILTATIAAPSVAAVT  
WLKDGVEIRRSKRHEATS LGDTHLTVRGAQVLD SAIYSCRVGKEGQDFPVQVEEVAAKFSKPLEPVEGELGG  
TVMLVCELSPEQAEVWRCGNTQLRPGKRFQMTSEGPRRTLVSGLREDDAEYVCESRDDRTSARLTVKVPR  
VVKFTSGLSAMVAEEGQEATFQCVVSPSDAGVTWYKDGMLQPSSEKFMVVEASGASRSLTILGLTLEDAGQVTV  
EAEGASSAALRVREAPVLFKFKLEPQTVEERTSVTLEVELTRPWEVKWTRNAAVLTPSENVEIRAEGARHC  
LVLRVGFADRGFFGCETPDDKTQAKLVNEMRQVRLVVRGLQVEEAKQGTASMDVELSHAEVEGSWTRDGLRL  
QPGPKCHLAVQGPVHILTLALSALQPQDSGLVAFRAEGVHTSARLIVTELVPVSTRVLQDVVATQKEKVTLECEL  
SRPVDVRLKVDGNEELRAGKAIGIVAQGTCSRSLVIYRCETGDQGVVYCDALDAQTSASLRVQGRTYTLIFRRVL  
AEDAGEVYKFAENASRAHLRVKELPVTLLRPLRDKIAMEKHRGVLECCQVSRASAQVRWFKGGVLEQSGPKYE  
VVSDGLYRKLIVINDVQPEDEDTY TCDAGNVKTS AQFFVEEQSITIVRGLKDMTVMPEPAPAWFECETSIPSVRP  
PKWLLGKTVLQAGGNVLEQDGTVHRLTLHKTCSTMTGPVHFTIGKSRSSAQLVVSDIPVVLTRPLEPKAGRE  
LQSVVLSCDFRPAPKAVQWYKDDTPLSPSEKFKMALEGQMAELRILRLTPADAGVYRCQAGSAQSSAEVTVEA  
REVTVIQPLQDAEAMEEGRVCFSCELSHKDEDI EWSLNGTPLYNDSFHEISHEGCLHTLVLSKSVRQADTGTVC

ATSPKVSVSARLVVKGKPVVFLKALDDVSAEERGLTLTQCEVSDPEARVVWRKDGVELGPSDKYDFLHKAGAR
GLTVHDLSDHEDAGLYTCQVGSKETQSKVSVHDLHVGITKRLKTVLEVLEGESECSFECVLSHESPSDPAVWTVGG
KTVGGSGHFHAVRQGRKYTLTVKDAALSDAGEVVSFLGLTSKASLIIRERPVDITKPLEDQRTTLGEDVMLS
CELSRAGTSVRWLKDGKAIRKSQKYDLLSEGTRAVLVVRKASLKDSEYTCETEASKSTAKLCVEEKANRFTE
ELADLQVEEKGRAVFTCKTEHPASVVTWRKGLLELRASGKHVPSQEGTLTKLTINALERTSDTYTCDIGQAR
TQARLLVHGQKVRVIEDLEDTAVQEGSSAKFCCRIAPADYGPVHWFLDKTPHLSNELNEITVQPGGYHVLTLR
QLALKDSGTVYFEAGDQRTSAAALRVTEKPSIFSRPLTDVTVTEGEDTLVLCETTTVDSSVRWTKDGKTLRPSA
RCQLSHEGCGQAQLLITATTPQDGGRYKCEIGGASSSSIVRVHALPVRFRFRESLKDVEVPEGKAATLRCVLSVA
APVEWRHGDDVLKSSNKYSLRQEGAVLELVIRDLQPQDSGQYSCSFGDQTTSATLTVKTSQAQFVQGLRNKEA
TEGTTVTLRCELTKAPVEWKKGTETLRNGDKYSLKQDGAVCELQICSLLVADAGEYSCVCGQEKTSATLTVK
ALLVHFVRRRLRSKEATEGDTTLTQCELSKAAPVEWRKGTETLRDGDYSLKQDGAVCELQIRSLTIADAGEYL
CTCGQEKTSATLTVRALPAKFKDSLKNEEATEGTTATLSCELSKAAPVTWKKGPKTLQSGDKYVLRQDGAFCG
LQIHGLTMADAGEYSCVCGQEKTSATLTVRGLPAKFIEDLRSQEATEGATAILRCELSKAAPVEWRKGETLTK
DGDYTLRQDGAFCVCELQIRGLAVVDGTYSLSLPTKFTTEGLRNEEATEGTMATLRCQMSKAAPVEWRKGETLR
DGDYSLRQDGAFCVCELQIRGLTIEDSGEYTCVCGQEKTSATLSVKALPSRFIEDLRSQEATEGTMATLRCQMS
KTAPVEWKKGSETLRDGGYSLRQDGPVCELQICDLAVEDAGEYSCVCGQEKTSATLSIKALPPRFIEDLRSQ
EATEGTMATLRCQMSKAAPVEWRKGETLGDGGYSLRQNGAVCELQIHDLAVEDTEYSCVCGQEKTSATLN
VKALPPRFIEDLRSQEATEGTMATLRCQMSKAAPVEWRKGETLRCQMSKAAPVEWRKGETLRCQMSKAAPVEWRK
YSCVCGQEKTSAVLTVDALPPKFTTEGLKKEEATEGTMVTLRCQMSKEATVEWRKGAKTLSDDGGYSLRQDGAFC
CELQICGLAVEDAGEYSCVCGQEKTSATLSVKALPPRFIEDLRSQEATEGTMATLRCQMSKAAPVEWRKGET
LRDGDYSLRQDGAFCVCELQIRDLAVEDAGEYLCVCGQEKTSATLSVKALPPRFIEDLRSQEATEGTMATLRCQ
MSKAAPVEWRKGSKTLRQDGDYSLRQDGAFCVCELQICDLAVEDTGDYSCVCGQEKTSATLSVKALPPRFIEDLR
SQEAREGTVATLRCRMSKAAPVEWRKGETLKDGDYSLRQEGNLCVCELQIRDLAVEDTEEYSCVCGQEKTSAT
LSVKALPAKFIEDLRSQEAPESSTVTLRCKLSKASVWKKGSETLRNGARYSLRQDGAFCVCELQIRDLTVEDT
GEYSCTCGQERTSATLSIMAPQVVFQQLQNLQAEEGSMASLRCELSVPNAAMVWSKGGLELQGDTRREARQQ
GCVAELLRDLRREDAGEYSCVCGQEKTSATLTVRGLPAKFIEDLRSQEATEGATAILRCELSKAAPVEWRK
GSLQLFPCAKYQMLVIKGFRTEDQGEYRCGPIQGLPSSGAATFNVVMTSGSGDEVPAQPSLPEAAQEGDLHLL
WEALARKRRMSREPTLDSISELPEEDSRVQHLRQEAEEETAPDLSEGYSTADELARTGEADLSHTSSDDESRA
TPSLVTYLKKAGGPGISPLASKHEAQVTTSVKPKQKQEPVPTCPPPGDLSAADLMDPSLDKAAVKIQAAFKG
YKVRKEMKQOEGPVFSRTFGDTEAQVGDVLRLECVLATKTDMRACWLKDGIELTDGRHYHIDQLKDGTCSLLV
TGLAPTDSGRYTCQVSTKSGRVSHSACVVVSGTESEAESSSGGELDDAFRRAARRLHRLFRTKSPAELSEEEL
FLSADEGPGEPEEPADWQTYREDENFVCIRFESLAEARQAVTCFRNMFATMGIGVEISLGEQGPVEMRIGK
VAPTVPAPVPLAKTPGLQTSDAAPVFLTELQNDVQDGYPMSFDCVVTGQPVPSVRWFKDGKLEEDDHYMIN
EDQQGGHQLIITAVVPADMGVYRCLAENSMGVSSTKAELRVELTSTDYDTAADATETSSYFSAQGYLSSREQE
GTESDEGQLPQVLEELKDLQVAPGTRLAKFQLKVKGYPAKLYWFKDGOPLTTSDHIRMTDKKTLHTLEIVSV
TREDSGQYAAIYISNAVGAAYSSARLLVRGPSEPEEKPASDVHERLVPRILEKFTPKVKRGSSTFVSVKVEG
HPAPSVHWLKEEAKEGVLWIGPDTPGYTMASSSKQHSVLVLDVGRQHGGTYTCIATNPAGQALCSASLHISGL
AKEEEQERVKEALISSFLQTSQAVSAQMSESAGFADLVGQSKGESLVAEEAHSHLSLAEVGTTEEFLQKLSQ
ITEMVSAKISQAKLQVPGGDSDEETKTPSASPRHGRSRPSSSVQESSSESEDGDSRGEIFDIYVVTADYLPGL
AEQDAIILREGQYVEVLDSAHPLRWLVRTKPTKSSPSRQGWVSPAYLDKRLKLSPEWGPTEAPEFPGEAVSED
EYRTRLSSVIQELLSSEQAFVGLQFLESHHMKHLERSPRVPAAVASQKTVI FRNVQDISHFHSSFLKELQGC
GTDDDVAMCFIKNQEAFAKEYLEFLVGRVQAESVVVSTPVQEFYKKYAEETLSAKDPTQPPPPPLQHYLEQVPE
RVQKYQALLKELIRNKARNRQNCALLEQAYAVVSALPQRAENKLVSLMENYPGTLEALGEPVIRQGHFVWEG
APGARMPWKGHNHRVFLFRNYLVICKPRRDSRTDFTSYVFRNMMLSSIDLNDQVEGDDRAFVWHEREDSVR
KYLQARTVI IKNSVWKEICGIQQRLAQPVWRPPEFEEELADCTAELGETVVKLACRVGTGPKPIVSWYKDGK
VEVDPHHILIEDPDGSCSTLILDNLTGIDSGQYMCFAASAAGNASTLGKILVQVPPRFVNVKVRATPEVEGEDAQ
ITCTVEGAPYPQIRWYKDGTLAPGNRYRMLNEPRSGVLVVIQAASKEDLGHYECELVNRLGSTRGGGELYM
QSPALRARDQHHREQIVAAVEVTEQETKVPKKTVIIEETITTVVKS PRGRRQSPGKSPSRSPRRSASPRRPG
LLAPERLYPPGTSPSRRLVEVEQGRKAPVPALYVTEAEVHAPASQSQPKWLEVEETIEVRVKKTGSRGASPVRE

MTSRGEGILFTLPGGIPGRDPNANNNSNNSVYQEQARTWGPVAVHVHVGEPFIFQVDSVGNVDVVAASPEPEQVRA  
SQKEENTERQEGCSDGDENTFLMEEPQDTSLSQGRDPKILTHNGRVLTLADLEDYVPOGETFGCGDSTPSTP  
DEPPCEVSVLQREISEPTVGGQVLLNVGRPPGTGATPSFFRPGSQVHSPESVSFLLREAWSGPVSAAAPWTSSSF  
HTHVQSSVDGSHGSFKTEVSTQTVSFGAVGETVTLHIDPDGGEAPGPSQG\*

>rs244484851\_ENSMUSP00000020732\_c.594:G>C\_p.V199L  
ENSMUST00000020732.13|Obscn-201|ENSMUSG00000061462|-|chr11:g.59026607:C>G  
MDHSFSGAPRFLTRPKAFVSVGKDATLSCQIVGNPTPHVSWEKDRQFVEAGARFRLAQDGDVYRLTILDLAL  
GDSGQYVCRARNAIGEFAAVGLRVDSEGTCAEQAPHFLLRPTSIRVREGADATFRCRVGGSPQPAVSWSKDG  
RRLGPPDAPHVRVEEHGESSALRIRSARPRDGGTYEVRAENPLGSASAAAALLVSDAEVAGPPGTSTATLLA  
HLQQRRREAMRAEGIPPSPPGAGTRTCTVTEGKHARLSCFVTGEPKPEVWKKDGQLVTEGRRHVVEDEQENF  
VLKILFCKQSDRGLYTCTASNLVGQTYSSVLVVVREPTVPFKKRLQDLEVREKESATFQCEVAQPAEAAWFK  
EETRLWASAKYDIEEGTERRLTVRNVSADDDAVYICETTEGSRVVAELSVQGNLTKLPRKTAVRTGDTAIF  
WVELAVPEGPVRWLRNQEEMVAGGRVAITAEGTCHTLTI FQCTLEDMGEVAFVSGGCRTTTQFCVSAAPRRPPL  
YYPADPVVKAKTESVTLWSAPPHGDRPVTIDGYVLEKRKLGA YAWSRCHEAGWLATTEFTITGVAAEEDGFQ  
FRVSAINHFGQGPYLEFPGTMHLVPLAVKTPKAVEAVEGGEVTFVSDLTVASSGEWFLDGEALKASSIYVI  
RCDRTRHMLTIREVPARLHGAQLKVFANGIETSIQMVVRAALGLPSSKLPAAAAREVLAQLHHEEAQLLAE LSD  
QAAA VTLKDGRELSLGPKYEMQVSAGRRALLVRDVAQDDAGLYECVSRGSRRTAYQLLVQDITDGYRDWGPAG  
PQKHMCKCAGAKIARYLGSSCYRFLQYDKGVVHWEAALDTRQKGTSSCSLHEKPKLVFAKQQAHSEVKA  
AGNSATLSCEVTQAQTEVTWFKDGKLLSSSSKVRMEASGCSRRLVVQQAGKADAGEYSCEAGGQKLSFRLDVA  
EPKLVFAKQQAHSEVKAEGASATLSCEVAQAQTEVTWFKDGKLLSSSSKVRMEASGCSRRLVVQQAGKADA  
GEYSCEAGGQKLSFRLDVAEPKMFVFAKEQQARSEVKAEGASATLSCEVAQAQTEVTWFKDGKLLSSSSKVRM  
EASGCSRRLVVQQAGKADAGEYSCEAGGQKLSFRLDVTEPKLVFAKEQQARSEVKAEGVNSATLSCEVAQAQ  
EVTWFKDGKLLSSSSKVRMEASGCSRRLVVQQAGKADAGEYSCEAGGQKLSFRLDVAEPKLVFAKEQQARSEV  
KAEAGNSATLSCEVAQAQTEVTWFKDGKLLSSSSKVRMEASGCSRRLVVQQAGKADAGEYSCEAGGQKLSFHL  
DVTEPKLVFAKEQQAHSEVKAEGASATLSCEVAQAQTEVTWFKDGKLLSSSSKVRMEASGCSRRLVVQQAGK  
ADAGEYSCEAGGQKLSFRLDVAEPKLVFAKEQQARSEVKAEGASATLSCEVAQAQTEVTWFKDGKLLSSSSK  
VRVEASGCSRRLVVQQAGKADAGEYSCEAGGQKLSFRLDVAEPKLVFAKEQQANSEVKAEGASATLSCEVAQ  
AQTEVTWFKDGKLLSSSSKVRVEASGCSRRLVVQQAGKADAGEYSCEAGGQKLSFRLDVAEPKLAFAKEQQAH  
SEVKAEGASATLSCEVAQAQTEVTWFKDGKLLSSSSKVRVEASGCSRRLVVQQAGKADAGEYSCEAGGQKLS  
FRLDVAEPKLAFAKEQQAHSEVKAEGASATLSCEVAQAQTEVTWFKDGKLLSSSSKVRVEASGCSRRLVVQQ  
AGKADAGEYSCEAGGQKLSFRLDVAEPKLAFAKEQQAHSEVKAEGASATLSCEVAQAQTEVTWFKDGKLLSS  
SSKVRVEASGCSRRLVVQQAGKADAGEYSCEAGGQKLFRLDVAEPKLMFAKEQQAHSEVKAEGASATLSCE  
VAQAQTEVTWFKDGKLLSSSSKVRVEASGCSRRLVVQQAGKADAGEYSCEAGGQKLSFRLDVAEPKLVFAKEQ  
QAHSEVKAEGASATLSCEVAQAQTEVTWFKDGKLLSSSSKVRVEASGCSRRLVVQQVQKADAGEYSCEARGQ  
KLSFRLDVADTRLMFAKEQQARTEVKAEGNSATLSCEVAQAQTEVTWFKDGKLLSSSSKVRVEASGCSRRLV  
VQQAGKADAGEYSCEAGGQKLSFRLDVAEAEASQIPEPSSRREPLVVKHEHETIILTATIAAPSVAAVTLKDG  
EIRRSKRHEATSLGDTHTLTVRGAQVLD SAIYSCRVGKEGQDFPVQVEEVAAKFSKPLEPVEGELGGTVMLVC  
ELSPQAEVWRCGNTQLRPGKRFQMTSEGPRRTLTVSGLREDDAEYVCESRDDRTSARLTVKVPVVKFTS  
GLSAMVAEEGQEQATFQCVVSPSDAGVTWYKDGMLQPSKFKVMVESGASRSLTILGLTLEDAGQVTEAEGAS  
SSAALRVREAPVLFKKLEPQTEVEERTSVTLEVELTRPWPEVKWTRNAAVLTPSENVEIRAEGARHCLVLRV  
GFADRGFFGCETPDDKTQAKLNVEMRQVRLVRLGLQEVEAKEQGTASMDVELSHA EVEGSWTRDGLRLQPGPKC  
HLAVQGPVHILTLALSALQPQDSGLVAFRAEGVHTSARLIVTELPVSFTRVLQDVVATQKEKVTLECELSRPVDV  
RWLKDGVLELRAGKAI GIVAQGTCSRSLVIYRCETGDQGVYVCDALDAQTSASLRVQGRTYTLIFRRVLAEDAGE  
VKFVAENAESRAHLRVKELPVTLLRPLRDKIAMEKHRGVLECCQVSRASAQVRWFKGGVELQSGPKYEVVSDGL  
YRKLVIN DVQPEDEDTYTCDAGNVKTSAQFFVEEQSITIVRGLKDMTVMPEPAPAWFECETSIPSVRPPKLLG  
KTVLQAGGNVLEQDGTVHRLTLHKTCSTMTGPVHFTIGKSRSSAQLVVSDIPVVLTRPLEPKAGRELQSVVL  
SCDFRPAPKAVQWYKDDTPLSPSEKFKMALEGQMAELRILRLTPADAGVYRCQAGSAQSSAEVTEAREVTVI  
QPLQDAEAMEEGRVCFSCELSHKDEDIEWLSNGTPLYNDSFHEISHEGCLHTLVLSVRQADTGTVCATSPKV  
SVSARLVVKGKPVVFLKALDDVSAEERGTLLTQCEVSDPEARVVWRKDGVELGSPDKYDFLHKAGARGLTVHD  
LSHEDAGLYTCQVGSKETQSKVSVHDLHVGITKRLKTVEVLEGECSFECVLSHESPSDPAVWTVGGKTVGGS  
GHFHAVRQGRKYTLTVKDAALSDAGEVVSFVGLTSSKASLIIRERPVDITKPLEDQRTTLGEDVMLSCELSRA  
GTSVRWLKDGKAIRKSQKYDLLSEGTRAVLVVRKASLKDSGEYTCETEASKSTAKLCVEEKANRFTEELADLQ  
VEEKGRAVFTCKTEHPASVVTWRKGLLELRASGKHVPSQEGTLTKLTINALERTDSDTYTCDIGQARTQARLL  
VHGQKVRVIEDLEDTASVQEGSSAKFCCRIAPADYGVPHWFLLDKTPLHSNELNEITVQPGGYHVLTLRQLALKD  
SGTVYFEAGDQRTSAALRVTEKPSIFSRPLTDVTVTEGEDTLVCE TTTVDSSVRWTKDGKTLRPSARCQLSH  
EGCQAQLLITATTPQDGGRYKCEIGGASSSSIVRVHALPVRFRFRESLKDVEVPEGKAATLRCVLSVVAAPVEWR  
HGDDVLKSSNKYSLRQEGAVLELVIRDLQPDQSGQYSCSFGDQTTSATLTVKTSQAQFVGLRNKEATEGTTV  
TLRCELTKAEVWKKGTETLRNGDKYSLKQDGA VCELQICSLLVADAGEYSCVCGQEKTSATLTVKALLVHF



VRRLRSKEATEGDTTTLQCELSKAAPVEWRKGTETLRDGDYSLKQDQAVCELQIRSLTIADAGEYLCTCGQE  
KTSATLTVRALPAKFKDSLKNEEATEGTTATLSCELSKAAPVTWKKGPKTLQSGDKYVLRQDQAVCGLQIHGL  
TMADAGEYSCVCGQEKTSATLTVRGLPAKFIEDLRSQEATEGATAILRCELSKAAPVEWRKGSSETLKDGDYR  
LRQDQAVCELQIRGLAVVDGTYSLSPTKFTTEGLRNEEATEGTMATLRCQMSKAAPVEWRKGSSETLRDGDYR  
LRQDQAVCELQIRGLTIEDSGEYTCVCGQEKTSATLSVKALPSRFIEDLRSQEATEGTMATLRCQMSKTAPVE  
WKKGSETLRDGGYSLRQDGPVCELQICDLAVEDAGEYSCVCGQEKTSATLSIKALPPRFIEDLRSQEATEG  
MATLRCQMSKAAPVEWRKGSSETLGDGGYSLRQNGAVCELQIHDLAVEDTGEYSCVCGQEKTSATLNVKALPP  
RFIEDLRSQEATEGTMATLRCQMSKAAPVEWRKGSSETLRDGGYSLRQDQAVCELQIHDLVEDAGQYSCVCG  
QEKTSAVLTVDALPPKFTTEGLKKEEATEGTMVTLRCQMSKEATVEWRKGAKTSLDGGYSLRQDQAVCELQIC  
GLAVEDAGEYSCVCGQEKTSATLSVKALPPRFIEDLRSQEATEGTMATLRCQMSKAAPVEWRKGSSETLRDGD  
YSLRQDQAVCELQIRDLAVEDAGEYLCVCGQEKTSATLSVKALPPRFIEDLRSQEATEGTMATLRCQMSKAAP  
VEWRKGSKTALRDGDYSLRQDQAVCELQICDLAVEDTGDYSCVCGQEKTSATLSVKALPPRFIEDLRSQEARE  
GTVATLRCRMSKAAPVEWRKGSSETLKDGDYSLRQEGNLCELQIRDLAVEDTEEYSCVCGQEKTSATLSVKAL  
PAKFIEDLRSQEAPESSTVTLRCKLSKKASVVWKKGSETLRNGARYSLRQDQAVCELEIRDLTVEEDTGEYSCT  
CGQERTSATLSIMAPQVVFQQLQNLQAEEGSMASLRCELSVPAAMVWSKGGLELQGDTRREARQQGCVAEL  
LLRDLRREDAGEYSCVCGQEKTSATLMVTAAPVRFLELQAQDVDEGATARLRCELSREAVSVEWRKGSQQLF  
PCAKYQMVQEGTTAELLVHGVEQEDAGEYTCDAHTQSIARLSVRAPKPKFKTDLQSTEQEAGGTARLCCQLS  
EABPGTPVQWLKEGVELHVGSKYEMRRQGAVERCELLIHGLEAKDTGEYACLVGQKTLASLRVKEPEVTI VRGL  
VDMEVQADEDVEFTCKVSAQATDVQWHLQGLPLQSNVTEVAVLADGCTHVLQKGVTLLEDAGTVSFHVGGL  
SSSAQLTVRVPEVTVLEPLKDVQVLESEGQDAHFRCLRSRAGQEARWALGGVPLQCNEMNDITVEQGTLYLLTL  
HKVTLLEDAGTITLQVGSSEEAQLKVTAKNTVLRGLENVDALEGGEALFECQLSQPEVAHAHTWLLDDEPVHTS  
EKVEVVYFENGLRHLLLLKLNKPKQDSCRVTFLAGDVVTSFAFLTVRGWRLEVLEPPHDASVKAGMQVRFCTILS  
EAVPVGEATWYINGAAIQPDDTWTVTDDGSHHALTLSNAQPQHAGEVTFFAARDAVASARLSVLALPDPEDA  
EUVGRSDHSVTLVSWVAPMSDGGGGLCGYRVMKEASTGQWQLCHDLVPGPECVVDDLVPGKTYRFRVAAVGPA  
GAGEPVHLPQMVKIAPAPAPAPAPAPAPAPETRAVAVGDEDICILEVAADGGEVVWHKGTERRIQPGGHFEVLS  
RGQRQMLVIKGFRTEDQGEYRCGPIQGLPSSGAATFNVMTSGSGDEVPAQPSLPPEAAQGLDHLHLWEALAR  
KRMSREPLTDSISELPEEDSRVQHLRQEAETAPDLSEGYSTADELARTGEADLSHTSSDDESAGTPELSVT  
YLKKAAGGPGISPLASKHEAQVTTSVKPKQKQEPVPTCPGGDLAADLMDPSLDKAAVKIQAAFKGYKVRKE  
MKQQEGPVFSRTFGDTEAQVGDVLRLECVLATKTDMRACWLKDGIELTDGRHYHIDQLKDGTCSSLVTLGLAPT  
DSGRYTCQVSTKSGRVSHSACVVVSGTESEAESSSGGELDDAFRRAARRLHRLFRTKSPAELSEELFLSADE  
GPGEPEEPADWQTYREDENFVCIRFESLAEARQAVTCFRNMFMATMGIGVEISLGEQGPGRVEMRIGKVAPTVT  
PAVPLAKTPGLQTSDAAPVFLTELQNDVQDGYPMSFDCVVTGQVPSVRWFKDGKLEEDDHVMINEDQQGG  
HQLIITAVVPADMGVYRCLAENSMGVSSTKAELRVELTSTDYDTAADATETSSYFSAQGYLSSREQEGTESDE  
GQLPQVLEELKDLQVAPGTRLAKFQLKVKGYPAKLYWFKDGGQPLTSDHIRMTDKKTLHLEIVSVTREDSG  
QYAAIYI SNAVGAAYSSARLLVRGPSEPEEKPASDVHERLVPRILEKFTPKKVKRGSSTIFSVKVEGHPAPS  
HWLKEEAEGVVLWIGPDTPGYTMASSSKQHSVLVLLDVGRQHQTGYTCIATNPAGQALCASLHISGLAKEEEQ  
ERVKEALISSFLQGTSAQVSAQMSSEAGFADLVGQSKGESLVAAEAHSHLSLAEVGTEEFQKLTSSQITEMVS  
AKISQAKLQVPGGDSDEETKTPSASPRHGRSRPSSSVQESSESEDGDSRGEIFDIYVVTADYLPPLGAEQDAI  
ILREGQYVEVLDSAHPLRWLVRTKPTKSSPSRQGWVSPAYLDRKRLKLSPEWGPTEAPEFPGEAVSEDEYRTRL  
SSVIQELLSSEQAFVQELQFLESHHMKHLERSPRVPAAVASQKTVIFRNVQDISHFHSSFLKELQCGTDDDDV  
AMCFIKNQEAFAEKYLEFLVGRVQAESVVVSTPVQEFYKKYAEETLSAKDPTQPPPPPLQHYLEQPVVERVQKYQ  
ALLKELIRNKARNRQNCALLEQAYAVVSALPQRAENKLVSLMENYPGTLEALGEPHQGHFIVWEGAPGARM  
PWKGHNHRVFLFRNYLVICKPRRDSRTDFTSYVFRNMMKLSSIDLNDQVEGDDRAFEVWHEREDSVRKYLLQA  
RTVILKNSWVKEICIGIQORLAQPVWRPPEFEEELADCTAELGETVKLACRVTGTPKPIVSWYKDGKPEVVDPH  
HILIEDPDGSLTILDLNLTGIDSGYMCFAASAAGNASTLTKLILVQVPPRFVNVKVRATPFVEGEDAQITCTVE  
GAPYPQIRWYKDGTLTLLAPGNRYRMLNEPRSGVLVVIQAASKEDLGHYECELVNLRLGSTRGGGELYMQSPALR  
ARDQHHREQIIVAAVEERRPSP\*

>rs244484851\_ENSMUSP00000151217\_c.594:G>C\_p.V199L  
ENSMUST00000219084.3|Obscn-207|ENSMUSG00000061462|-|chr11:g.59026607:C>G  
MDHSFSGAPRFLTRPKAFVSVGKDATLSCQIVGNPTPHVSWEKDRQVEAGARFLAQDGDVYRLTILDLAL  
GDSGQYVCRARNAIGEAFAAVGLRVDSEGTCAEQAPHFLLRPTSIRVREGADATFRCRVGGSPQPAVSWSKDG  
RRLGPPDAPHVRVEEHGESSALRIRRSARPRDGGTYEVRAENPLGSASAAAALLVDSAEVAGPPGTSTATLLA  
HLQORREAMRAEGIPSPPGAGTRTCTVTEGKHARLSCFVTGEPKPEVWKKDGLVTEGRRHVVEDEQENF  
VLKILFCKQSDRGLTYCTASNLVGQTYSSVLVVVREPTVPFKKRLQDLEVRKEKESATFQCEVAQPAATEAAWFK  
EETRLWASAKYDIEEGTERRLTVRNVSAADDAVICETTEGSRVVAELSVQGNLTKLPRKTAVRTGDTAIF  
WVELAVPEGPVWRWRNQEEMVAGGRVAITAEGTCHTLTIFQCTLEDMGEVAFVSGGCRTTTQFCVSAPRRPPL  
YPPADPVVKAKTESVTLVSWAPPHGDRPVTIDGYVLEKRKLGAYAWSRCHEAGWLATTEFTITGVAAEEDGFQ  
FRVSAINHFGQGPYLEFPGMTMLVPLAVKTPKAVEAVEGGEVTFVSDTLTVASSGEWFLDGEALKASSIYVI

RCDRTRHMLTIREVPARLHGAQLKFFVANGIETSIQMVVRAALGLPSSKLPAAAAREVLAQLHEEAQLLAELSD  
 QAAAVTWLKDGRELSLGPKEYMQVSAGRRALLVRDVAQDDAGLYECVSRGSRRTAYQLLVQDITDGYRDWGPAG  
 PQKHMCKCAGAKIARYLGSSCYRFLQYDKGVVHLEAALDTRQKGTSSCSLHEKPKLVFAKQQAHSEVKA  
 AGNSATLSCEVTQAQTEVTFWKDGKLLSSSSKVRMEASGCSRRLVVQQAGKADAGEYSCEAGGQKLSFRLDVA  
 EPKLVFAKQQAHSEVKAEGASATLSCEVAQAQTEVTFWKDGKLLSSSSKVRMEASGCSRRLVVQQAGKADA  
 GEYSCEAGGQKLSFRLDVAEPMVFAKEQQARSEVKAEGASATLSCEVAQAQTEVTFWKDGKLLSSSSKVRM  
 EASGCSRRLVVQQAGKADAGEYSCEAGGQKLSFRLDVTEPKLVFAKEQQARSEVKAEGNSATLSCEVAQAQ  
 EVTWFKDGKLLSSSSKVRMEASGCSRRLVVQQAGKADAGEYSCEAGGQKLSFHLVDVTEPKLVFAKEQQAHSEV  
 KAEAGASATLSCEVAQAQTEVTFWKDGKLLSSSSKVRMEASGCSRRLVVQQAGKADAGEYSCEAGGQKLSFR  
 DVAEPMVFAKEQQARSEVKAEGASATLSCEVAQAQTEVTFWKDGKLLSSSSKVRVEASGCSRRLVVQQAGK  
 ADAGEYSCEAGGQKLSFRLDVAEPMVFAKEQQANSEVKAEGASATLSCEVAQAQTEVTFWKDGKLLSSSSK  
 VRVEASGCSRRLVVQQAGKADAGEYSCEAGGQKLSFRLDVAEPMVFAKEQQAHSEVKAEGASATLSCEVAQ  
 AQTEVTFWKDGKLLSSSSKVRVEASGCSRRLVVQQAGKADAGEYSCEAGGQKLSFRLDVAEPMVFAKEQQAH  
 SEVKAEGASATLSCEVAQAQTEVTFWKDGKLLSSSSKVRVEASGCSRRLVVQQVQKADAGEYSCEARGQKLS  
 FRLDVAEAEQIIPERPSRREPLVVEKHETIILTATIAAPSVAAVTWLKDGVIEIRRSKRHEATSLGDHTLTVR  
 GAQVLDIAIYSCRVGKEGQDFPVQVEEVAAKFSKPLEPVEGELGGTVMLVCELSPEQAEVWRCGNTQLRPGK  
 RFQMTSEGRRTLTVSGLEDDAEYVCESRDDRTSARLTVKVPRVVKFTSGLSAMVAEEGQEAFTQCVVSPS  
 DAGVTWYKDGMLQPSKPFVMEVSGASRSLTILGLTLEDAGQVTVAEAGASSAALRVREAPVLFKFKKLEPQT  
 VEERTSVTLEVELTRPWPVEVWTRNAAVLTPSENVEIRAEGARHCLVLRVSGFADRGFFGCETPDDKTQAKLN  
 VEMRQVRLVRLQVEEAKQGTASMDVELSHAEVEGSWTRDGLRLQPGPKCHLAVQGPVHILTLALQPDQSG  
 LVAFRAEGVHTSARLIVTELPVSFTRVLQDVVATQKEKVTLECELSRPVDVRLKDGVELRAGKAIIGIVAQGT  
 CRSLVIYRCETGDQGVYCDALDAQTSASLRVQGRYTLIFRVLAEADAGEVKFVAENAESRAHLRVKELPVT  
 LLRPLRDKIAMKHRGVLECVSRASAQVRWFKGGVELQSGPKYEVVSDGLYRKLVIINDVQPEDEDTYTC DAG  
 NVKTSAQFFVVEEQSITIVRGLKDMTVMEMPAPAWFECETSIPSVRPPKWLGLKTVLQAGGNVGLQDGTVHRLT  
 LHKTCSTMTGVPVHFTIGKSRSSAQLVSDIPVVLTRPLEPKAGRELQSVVLSCDFRPAPKAVQWYKDDTPLSP  
 SEKFKMAELGQMAELRILRLTPADAGVYRCQAGSAQVSAEVTVEAREVTVIQPLQDAEAMEEGRVCFSCELSH  
 KDEDIEWSLNGTPLYNDSFHEISHGCLHTLVLSKVRQADTGTVCATSPKVSVSARLVVKGKPVVFLKALDDV  
 SAEERGTTLTQCEVSDPEARVVWRKDGVELGSPDKYDFLHKAGARGLTVHDLSDHEDAGLYTCQVGSKETQSKV  
 SVHDLHVGITKRLKTVEVLEGESECFEVLSSHESPSDPAVWTVGGKTVGGSGHFHAVRQGRKYTLTVKDAALS  
 DAGEVVFVSVLGLTSKASLIIRERPVDITKPLEDQRTTLGEDVMLSCELSRAGTSVRWRLKDGKAIKRSQKYDLL  
 SEGTRAVLVVRKASLKDSGEYTCETEASKSTAKLCVEEKANRFTBELADLQVEEKGRAVFTCKTEHPASVVTW  
 RGLLELRASGKHVPSQEGTLKLTINALERTSDTYTCDIGQARTQARLLVHGQKVRVIEDLEDTAVQEGSS  
 AKFCCRIPADYGPVHWFLLDKTPLHSNELNEITVQPGGYHVLTLRQLALKDSGTVYFEAGDQRTSAAALRVTEK  
 PSIFSRPLTDVTVTEGEDTLVCETTTVDSSVRWTKDGKTLRPSARCQLSHEGCQAQLLITATTPQDGGRYKC  
 EIGGASSSSIVRVHALPVRFRESLKDVEVPEGKAATLRCVLSVAAPVEWRHGDDVLKSSNKYSRLRQEGAVLE  
 LVIRDLQPDQSGQYCSFQDQTSATLTVKTSQAQFVGLKRNKEATEGTTVTLRCELTKAPVEWKKGTETLR  
 NGDKYSLKQDGAVCELQICSLLVADAGEYSCVCGQEKTSATLTVKALLVHFVRRRLRSKEATEGDTTTLQCELS  
 KAAPVEWRKGTETLRDGDYSLKQDGAVCELQIRSLTIADAGEYLCTCGQEKTSATLTVRGLPAKFIEDLRSQ  
 EATEGATAILRCELSKAAPVEWRKGSSETLKDGDYTLRQDGAVCELQIRGLAVVDTGTYSLLPTKFTTEGLRNE  
 EATEGTMATLRCQMSKAAPVEWRKGSSETLRDGDYSLRQDGAAMCELQIRGLTIEDSGEYTCVCGQEKTSATLS  
 VKALPPRFIEDLRSQEAETEGTMATLRCQMSKAAPVEWRKGSSETLGDGGYSLRQNGAVCELQIHDLAVEDTGE  
 YSCVCGQEKTSATLNVKALPPKFTTEGLKKEEATEGTMVTLRCQMSKEATVEWRKGAKTLSDDGGYSLRQDGA  
 MCELQICGLAVEDAGEYSCVCGQEKTSATLSVKALPPRFIEDLRSQEAETEGTMATLRCQMSKAAPVEWRKGS  
 SETLRDGDYSLRQDGAAMCELQIRDLAVEDAGEYLCVCGQEKTSATLSVKALPPRFIEDLRSQEAETEGTMATLRC  
 QMSKAAPVEWRKGSSETLRDGDYSLRQDGAAMCELQICDLAVEDTGDYSCVCGQEKTSATLSVKAPQVVFQPLQ  
 NLQAEEGSMASLRCELSVPNAAMVWSKGGLELQGDTRREARQQGCVAELLLRDLRREDAGEYSCTCGSQTTSA  
 TLMVTAAPVRFRLRELQAQDVDEGATARLRCLESAVSVWRKGSLLQFPCAKYQMVQEGTTAELLVHGVEQE  
 DAGEYTC DAGHTQSIARLSVRAPKPKFKTDLQSTEQEAAGGTARLCCQLSEAEPTPVQWLKEGVELHVGSKYE  
 MRRQGAVALLEHGLEAKDTGEYACLVGQKTLASLRVKEPEVTIVRGLVDMEVQADEDEFTCKVSOAGATD  
 VQWHLQGLPLQSNVETEVAVLADGCTHVLQKGVTLDEAGTVSFHVGGSSSAQLTVRVPEVTLEPLKDVQ  
 SEGQDAHFRCLSRASGQEARWALGGVPLQCNEMNDITVEQGTLYLLTLHKVTLDEAGTITLQVGSSESQAQL  
 KVTAKNTVLRGLENDVALEGGALFECQLSQPEVAHTWLLDDEPVHTSEKVEVVYFENGLRHLLLLLKNLKPQ  
 DSCRVTFLAGDVVTSFAFLTVRGWRLEVLEPPHDASVKGALQVRFCTILSEAVPVGEATVYINGAAIQPDDTDW  
 TVTTDGHSHALTLNSAQPQHAGEVTFARADAVASARLSVLMALPDPPEDAEVVGRSDHVSYTLWSVAPMSDGGG  
 LCGYRVEMKEASTGQWQLCHDLVPGPECVVDDLVPKTYRFRVAVGPAAGAPVHLPQMVKIAPAPAPAPAP  
 APAPETRQAVVGEDICLELEVAADGGVEVWHKGTERRIQPGGHFEVLSRGRQMLVIKGFRTEDQGEYRCGPIQ  
 GLPSSGAATFNVVMTSGSGDEVPAQPSLPPEAAQEGDLHLLWEALARKRRMSREPTLDSISELPEEDSRVQHL  
 RQEAETAPDLSEGYSTADELARTGEADLSHTSSDDESRAGTPSLVTYLKKAGGPGISPLASKHEAQVTTSVK



ELSPEQAEVWRCGNTQLRPGKRFQMTSEGPRTTLTVSGLREDDAEYVCESTRDDRTSARLTVKVPVVKFTS  
GLSAMVAEEGQEQATFQCVVSPSDAGVTWYKDGMLQOPSEKFMVVEGASRSLTILGLTLEDAGQVTEAEGAS  
SSAALRVREAPVLFKKKLEPQTVVEERTSVTLEVELTRPWPEVKWTRNAAVLTPSENVEIRAEGARHCLVLRV  
GFADRGFFGCETPDDKTQAKLNVEMRQVRLVVRGLQEVEAKEQGTASMDVELSHAEEVGSWTRDGLRLQPGPKC  
HLAVQGPVHILTLALSALQPQDSGLVAFRAEGVHTSARLIVTELPVSFTRVLQDVVATQKEKVTLECELSRPVDV  
RWLKDGVLELRAGKAIGIVAQGTCSRSLVIYRCETGDQGVYVCDALDAQTSASLRVQGRTYTLIFRRVLAEDAGE  
VKFVAENAESRAHLRVKELPVTLLRPLRDKIAMEKHRGVLECCQVSRASAQVRWFKGGVELQSGPKYEVVSDGL  
YRKLVINVDVQPEDEDTYTCDAENVKTSAQFFVVEEQSITIVRGLKDMTVMEPAPAWFECETSIPSVRPPKWL  
KTVLQAGGNVGLQDGTVHRLTLHKTCSTMTGPVHFTIGKSRSSAQLVVSIDI PVVLRPPEPKAGRELQSVVL  
SCDFRPAPKAVQWYKDDTPLSPSEKFKMALEGQMAELRILRLTPADAGVYRCQAGSAQSSAEVTEAREVTVI  
QPLQDAEAMEEGRVCFSCELSHKDEDEIWSLNGTPLYNDSFHEISHGCLHTLVLSVRQADTGTVCATSPKV  
SVSARLVVKGKPVVFLKALDDVSAEERGTTLTQCEVSDPEARVVWRKDGVELGSPDKYDFLHKAGARGLTVHD  
LSHEDAGLYTCQVGSKETQSKVSVHDLHVGITKRLKTVEVLEGESECSFECVLSHESPSDPAVWTVGGKTVGGS  
GHFHAVRQGRKYTLTVKDAALSDAGEVVFVSVLGLTSKASLI IRERPVDITKPLEDQRTTLGEDVMLSCELSRA  
GTSVRWLKDGKAIRKSQKYDLLSEGTRAVLVVRKASLKDSEYTCETEASKSTAKLCVEEKANRFTEELADLQ  
VEEKGRAVFTCKTEHPASVVTWRKGLLELRASGKHVPSQEGTLTKLTINALERTDSDTYTCDIGQARTQARLL  
VHGQKVRVIEDLEDTAVQEGSSAKFCRIAPADYGPVHWFLDKTPHLSNELNEITVQPGGYHVLTLRQLALKD  
SGTVYFEAGDQRTSAALRVTEKPSIFSRPLTDVTVTEGEDLTVCEVTVVDSVVRWTKDGTGKTLRPSARCQLSH  
EGCQAQLLITATTPQDGGRYKCEIGGASSSSIVRVHALPVRFRFESLKDVEVPEGKAATLRCVLSVAAPVEWR  
HGDDVLKSSNKYSLRQEGAVLELVIRDLQPDQSGQYSCSFGDQTTSATLTVKTSQAQFVGLKRNKEATEGTTV  
TLRCELTKAPVEWKKGTETLRNGDKYSLKQDGAVCELQICSLLVADAGEYSCVCGQEKTSATLTVKALLVHF  
VRLRSKEATEGDTTTLQCELSKAAPVEWRKGTETLRDGDYSLKQDGAVCELQIRSLTIADAGEYLCTCGQE  
KTSATLTVRALPAKFKDSLKNEEATEGTTATLSCELSKAAPVWKKGPKTLQSGDKYVLRQDGAFCGLQIHGL  
TMADAGEYSCVCGQEKTSATLTVRGLPAKFIEDLRSQEATEGATAILRCELSKAAPVEWRKGSSETLKDGDYR  
LRQDGA VCELQIRGLAVVDGTYSLSLPTKFTTEGLRNEEATEGTMATLRCQMSKAAPVEWRKGSSETLRDGDYR  
LRQDGA MCELQIRGLTIEDSGEYTCVCGQEKTSATLSVKALPSRFIEDLRSQEATEGTMATLRCQMSKATAPVE  
WKKGSETLRDGGYSLRQDGPVCELQICDLAVEDAGEYSCVCGQEKTSATLSIKALPPRFIEDLRSQEATEG  
MATLRCQMSKAAPVEWRKGSSETLGDGGYSLRQNGAVCELQIHDLAVEDTGEYSCVCGQEKTSATLNVKALPP  
RFIEDLRSQEATEGTMATLRCQMSKAAPVEWRKGSSETLRDGGYSLRQDGA VCELQIHDLVEDAGQYSCVCG  
QEKTSAVLTVDALPPKFTTEGLKKEEATEGTMVTLRCQMSKEATVEWRKGAKTLSDDGGYSLRQDGA MCELQIC  
GLAVEDAGEYSCVCGQEKTSATLSVKALPPRFIEDLRSQEATEGTMATLRCQMSKAAPVEWRKGSSETLRDGD  
YSLRQDGA VCELQIRDLAVEDAGEYLCVCGQEKTSATLSVKALPPRFIEDLRSQEATEGTMATLRCQMSKAAP  
VEWRKGSKTLRQDGDYSLRQDGA MCELQICDLAVEDTGDYSCVCGQEKTSATLSVKALPPRFIEDLRSQEARE  
GTVATLRCRMSKAAPVEWRKGSSETLKDGDYSLRQEGNLCELQIRDLAVEDTEEYSCVCGQEKTSATLSVKAL  
PAKFIEDLRSQEAPESSTVTLRCKLSKASVWKKGSETLRNGARYSLRQDGA VCELEIRDLTVEDTGEYSCT  
CGQERTSATLSIMAPQVVVQQLQNLQAEEGSMASLRCELSVNAAMVWSKGGLELQGDTRREARQQGCVAEL  
LLRDLRREDAGEYSCTCGSQTTSATLMVTAAPVRFLRELQAQDVDEGATARLRCELSREAVSVEWRKGSQQLF  
PCAKYQMVQEGTTAELLVHGVEQEDAGEYTCDAHTQSIARLSVRAPKPKFKTDLQSTEQEAAGGTARLCCQLS  
EAEPGTPVQWLKEGVELHVGSKYEMRRQGA VCELLIHGLEAKDTGEYACLVGQKTLASLRVKEPEVTIVRGL  
VDMEVQADEDEFTCKVQAGATDVQWHLQGLPLQSNVTEVAVLADGCTHVLQKGVTLLEDAGTVSFHVGGL  
SSAQLTVRVPEVTVLEPLKDVQLSEGQDAHFRCRLSRASGQEARWALGGVPLQCNEMNDITVEQGTLYLLTL  
HKVTLLEDAGTITLQVGSSESQAQLKVTAKNTVLRGLENVDALEGGEALFECQLSQPEVAHAHTWLLDDEPVHTS  
EKVEVVYFENGLRHLLLLKNLKPQDSCRVTFLAGDVVTSFAFLTVRGWRLEVLEPPHDASVKAGMQVRFTCILS  
EAVPVGEATWYINGAAIQPDDTDWTVTTDGSHHALTLNAQPQHAGEVTFFAARDAVASARLSVLALPDPPEDA  
EVRGRSDHSVTLWSVAPMSDGGGLCGYRVEMKEASTGQWQLCHDLVPGPECVVDDLVPKTYRFRVAAVGP  
GAGEPVHLPQMVKIAPAPAPAPAPAPAPAPETRAVVGEDICLELEVAADGGEVWVHKGTERIQPGGHFEVLS  
RGQRQMLVIKGFRTEDQGEYRCGPIQGLPSSGAATFNVMVMTSGSGDEVPAQPSLPPEAAQEGDLHLLWEALAR  
KRRMSREPTLDSISELPEEDSRVQHLRQEAEEETAPDLSEGYSTADELARTGEADLSHTSSDDESRACTPSLVT  
YLKAGGPGISPLASKHEAQVTSVKPQKQEPVPTCPPPGDLSAADLMDPSLDKAAVKIQAQAFKGYKVRKE  
MKQQEGPVFSRTFGDTEAQVGDVLRLECVLATKTDMRACWLKDGIELTDGRHYHIDQLKDGTCSLLVTVGLAPT  
DSGRYTCQVSTKSGRVSHSACVVVSGTESEAESSSGGELDDAFRAARRLHRLFRKTPAELSEELFLSADE  
GPGEPEPADWQTYREDENFVCIRFESLAEARQAVTCFRNMFATMGIGVEISLGEQGPGRVEMRIGKVAPT  
PAVPLAKTPGLQTSDAAPVFLTELQNDQVQDGYPMSFDCVSTYDQVPSVVRWFKDGKLEEDDHVMINEDQGG  
HQLIITAVVPADMVGYRCLAEENSMGVSSTKAELVELTSTDYDTAADATETSSYFSAQGYLSSREQEGTESDE  
GQLPVLEELKDLQVAPGTRLAKFQLKVKYAPKLYWFKDGGQPLTSDHIRMTDKKTLHTLEIVSVTREDSG  
QYAAYSNAVGAAYSSARLLVRGPSEPEEKPASDVHERLVPPRILEKFTPKKVKRGSSTIFSVEGHPAPSV  
HWLKEEAKEKGLWIGPDTPGYTMASSSKQHSVLVLDVGRQHGTQYTCIATNPAGQALCSASLHISGLAKEEEQ  
ERVKEALISSFLQGTSAQVSAQMSSEAGFADLVGQSKGESLVAEEAHSHLSLAEVGTTEFLQKLTSTQITEMVS

AKISQAKLQVPGGDSDEETKTPSASPRHGRSRPSSSVQESSSESEDGDSRGEIFDIYVVTADYLPPLGAEQDAI  
 ILREGQYVEVLDSAHPLRWLVRTKPTKSSPSRQGWVSPAYLDRKRLKLSPEWGPTEAPEFPGEAVSEDEYRTRL  
 SSVIQELLSSEQAFVQELQFLESHHMKHLERSPRVPAAVASQKTVIFRNVQDISHFHSSFLKELQCGCTDDDV  
 AMCFIKNQEAFAKEYLEFLVGRVQAESVVVSTPVQEFYKKYAEETLSAKDPTQPPPPPLQHYLEQPVVERVQKYQ  
 ALLKELIRNKARNRQNCALLEQAYAVVSALPQRAENKLHVSLMENYPGTLEALGEPTRQGHFIVWEGAPGARM  
 PWKGNHRHVFLFRNYLVICKPRRDSRTDTFSYVFRNMMKLSSIDLNDQVEGDRAFEVWHEREDSVRKYLLQA  
 RTVIKNSWVKEICGIQORLAQPVWRPPEFEEELADCTAELGETVKLACRVTGTPKPIVSWYKDGKPVVEVDPH  
 HILIEDPDGSCCTLILDNLGTIDSGQYMCFAASAAGNASTLGKILVQVPPRFVNVKVRATPFVEGEDAQITCTVE  
 GAPYPQIRWYKDGTLAPGNRYRMLNEPRSGVLVVIQAASKEDLGHYECELVNRLGSTRGGGELYMQSPALR  
 ARDQHHREQIVAAVEDTSVEGSAHSAQDQADQQAASVLWRLLGSEALGSPSPGDLPNTRQSEPPAFEEAASQIP  
 GAASGTPEVSQPGTHKGLEQETTSSGSQGWTPVIRVEGTAWPGAGTGQLLDVHSQVIMETTQRTYVCQAPDT  
 GVTRAPSMQVTIEDVQVQVGDMAQFDAVIEGHPPPVTWYKGSTQLTSSARLSQRQDGTYSVLVTDVAPHDA  
 GVYTCVANNAGGQVLCKAELLVHGGDKLDAENQVYRRKLHSFYDVQEEIGRGVFGFVKRVQHKGNKMFCAAKF  
 IPLRSKTRAQAYQERDILATLGHPLVTGLLDQFETRKTLLIILELCSSEELLDRLFKKGVVTEAEVKVYIQQL  
 VEGHLHLHSHGILHLDIKPPNIMVHPAREDIKICDFGFAQKITPSEPQYSKYGSPEFVSPETIEQNPVSEGS  
 DIWAMGVISYLSLTCSSPFAGESDRATLLNVLEGRVSWSSPTAAHLSSEDAKDFIKATLQRTPRARPSTSQCLA  
 HPWFLLKSMPAAEEAHFINTKQLKFLARSRWQRSLMSYKSI LVMRSIPPELLQGPDPSPSLGVARHLRGEASGAS  
 SSSSSDNELAPFARAKSLPPSPVTHSPLLHPRGFLRPSASLPEETEASMTADAAVPASPOQAGPPASPGCV  
 PRHSVSISSLFYQQAGEGAERGKNTSGAKRHPARRRHLLKGGYIARALPGLREPLMEYSLLEEEAAREEQASLM  
 TKTPSFETALRLPSSSVREVPGRSHSLDNPPVTTGPSPEACKEQLLFPSTGLTHETTAKDRGHKEGFLQESV  
 PFPMSGDSRPGKQEGSSQDSCRGPASSCHSELGSGSQEGCPSQSLGSLPPQSLKELSTSCGFLFSEQ  
 PQAAPFPPTQVSPLLGSEKEPQDGLSEGPVVPSSSPGSASQVDASLDTEGLSEAGDTCDFTPPPQRQEQAT  
 TRKFSLESRGGYAGVAGYGTFAFGGDAGGMLQGGLWARMWAVVQSSEEQDEAATESQPPLSGLPIAEASG  
 VPLRTSPSLTPWEEVEQVSLVQIRDLSGDAEAADTISLDISEVDPAYLNLSDLYDIKYLPEFEMI FRRVPKPI  
 EQPESPGSETEAGQGLADFLLEAAWPWPGELGLRAGLEITEEPEEPGDLEALLGEAAVGRKRKWSPSRGLFQF  
 PGRCLSGEEPVELGLRQVRKASMAHISRIKGRPEPERGPPRKKAGLASFRLSGLKGRDQELSDEAVVLGQ  
 SVTLACQVLAQVTAQATWSKDGVLLESSGHLLISSTLKNFQLLTILVVKEEDLGTYTCCVSNPLGTAVTTGVL  
 RKAERPSSSPREVEGELYKDAVLLVWKPVEESCGPVTVYIVQCCIEGGSWTTLASDISDCCYLTGKLSRGGMYIF  
 RTACVSKAGMGPISSPSEQVLLGGPNHLASEEESSRGRPAQLLPSTKTFAFQMQIRRRGRFSVVRQCREKASGR  
 ALAAKIVPYQPEDKTAVLREYEAALKRLHHPHLAQLHAAYLSPRHLVLIILELCSGPELLPSLAERESYSESDVK  
 DYLWQMLSATQYLHAQHILHLDLRSENMMVTEYNLLKVIDLGNQSLDQEKVPAPENFKDYLETMAPELLEGQ  
 GAVPQTDIWAIGVTAIFIMLSGEYPESSSEGTRDLQKGLRKLIRLSRCYAGLSGGAVAFLOSSLCAQPWGRPCA  
 STCLQCGLWTEEGPTGSRPTVTFPTVRLRAFVREKRRALLYKKNLAQVR\*  
 >rs46635685\_ENSMUSP00000038264\_c.514:C>A\_p.S172\*  
 ENSMUST00000047441.14|Obscn-202|ENSMUSG00000061462|-|chr11:g.59026687:G>T  
 MDHSFSGAPRFLTRPKAFVVSVGKDATLSCQIVGNPTPHVSWEKDRQPVVEAGARFRLAQDGDVYRLTILDLAL  
 GDSGQYVCRARNAIGEAFAAVGLRVDSEGTCAEQAPHFLLRPTSIRVREGADATFRCRVGGSPQPAVSWSKDG  
 RRLGPPDAPHVRVEEHGESSALRIR\*ARPRDGGTYEVRAENPLGSASAAAALVVDSDAEVAGPPGTSTATLLA  
 HLQORREAMRAEGIPPSPPGAGTRTCTVTEGKHARLSCFVTGEPKPEVWKKDGQLVTEGRRHVVEDEQENF  
 VLKILFCKQSDRGLYTCTASNLVGQTYSSVLVVVREPTVPFKKRLQDLEVREKESATFQCEVAQAPATEAAWFK  
 EETRLWASAKYDIEEEGTERRLTVRNVSADDDAVYICETTEGSRTVAELSVQGNLTKLPRKTAVRTGDTAIF  
 WVELAVPEGPVWRWRNQEEMVAGGRVAITAEGTCHTLTI FQCTLEDMGEVAFVSGGCRTTTQFCVSAPRRPPL  
 YPPADPVVKAKTESSVTLWSAPPHGDRPVTIDGYVLEKRKLGAWAYSRCHEAGWLATTEFTITGVAAEEDGFQ  
 FRVSAINHFGQGPYLEFPGTMHLVPMPLAVKTPLKAVEAVEGGEVTFVSDLTVASSGEWFLDGEALKASSIYVI  
 RCDRTRHMLTIREVPARLHGAQLKFEVANGIETSIQMVRAALGLPSSKLPAAAAREVLAQLHEEAQLLAELSD  
 QAAAVTWLKDGRELSLGPKYEMQVSAGRRALLVRDVAQDDAGLYECVSRGSRRTAYQLLVQDITDGYRDWGPAG  
 PQKHMCKCAGAKIARYLGSSCYRFLQYDKGVWHWLEAALDTRQKGKTS SCSLHEKPKLVFAKQQAHSEVKA  
 AGASATLSCEVAQAQTEVTWFKDGKLLSSSSKVRMEASGCSRRLVVQQAGKADAGEYSCEAGGQKLSFRLDVA  
 EPKMFVFAKEQQARSEVKAEGASATLSCEVAQAQTEVTWFKDGKLLSSSSKVRMEASGCSRRLVVQQAGKAD  
 GEYSCEAGGQKLSFRLDVTEPKLVFAKEQQARSEVKAEGVNSATLSCEVAQAQTEVTWFKDGKLLSSSSKVRM  
 EASGCSRRLVVQQAGKADAGEYSCEAGGQKLSFRLDVAEPKLVFAKEQQARSEVKAEGVNSATLSCEVAQAQ  
 EVTWFKDGKLLSSSSKVRMEASGCSRRLVVQQAGKADAGEYSCEAGGQKLSFRLDVTEPKLVFAKEQQAHSEV  
 KAEAGASATLSCEVAQAQTEVTWFKDGKLLSSSSKVRMEASGCSRRLVVQQAGKADAGEYSCEAGGQKLSFRL  
 DVAEPKLVFAKEQQARSEVKAEGASATLSCEVAQAQTEVTWFKDGKLLSSSSKVRMEASGCSRRLVVQQAGK  
 ADAGEYSCEAGGQKLSFRLDVAEPKLVFAKEQQANSEVKAEGASATLSCEVAQAQTEVTWFKDGKLLSSSSK  
 VRVEASGCSRRLVVQQAGKADAGEYSCEAGGQKLSFRLDVAEPKLAFAKEQQAHSEVKAEGASATLSCEVAQ  
 AQTEVTWFKDGKLLSSSSKVRVEASGCSRRLVVQQAGKADAGEYSCEAGGQKLSFRLDVAEPKLAFAKEQQAH  
 SEVKAEGASATLSCEVAQAQTEVTWFKDGKLLSSSSKVRVEASGCSRRLVVQQAGKADAGEYSCEAGGQKLS



FRLDVAEPKLAFAKEQQAHSEVKAEGASATLSCEVAQAQTEVTFWFKDGKLLSSSSKVRVEASGCSRRLVVQQ  
AGKADAGEYSCEAGGQKLFRLDVAEPKLVFAKEQQAHSEVKAEGASATLSCEVAQAQTEVTFWFKDGKLLSS  
SSKVRVEASGCSRRLVVQQVKGADAGEYSCEARGQKLSFRLDVAEAEESQI PERPSRREPLVVEKHET I I LTAT  
IAAPSVAAVTWLKDGV EIRRSKRHEATSLGDTHTLTVRGAQVLDSAIYSCRVGKEGQDFPVQVEEVAAKFSKP  
LEPVEGELGGTVMLVCELSPEQAEVWRCNGTQLRPGKRFQMTSEGPRRTLTVSGLREDDAEYVCESRDDRT  
SARLTVKVPRVVKFTSGLSAMVAEEGQEATFQCVVSPSDAGVTWYKDGMLQVQSEKFMVMEVGASRSLTILGL  
TLEDAGQVTVEAEGASSAALRVREAPVLFKKKLEPQTVEERTSVTLEVELTRPWPEVKWTRNAAVLTPSENV  
EIRAEGARHCLVLRVSGFADRGGFCETPDDKTQAKLVNEMRQVRLVRLGLQEVEAKEQGTASMDVELSHAEVE  
GSWTRDGLRLQPGPKCHLAVQGPVHILTLTSAALQPQDSGLVAFRAEGVHTSARLIVTELPVSTFRVLQDVVATQ  
KEKVTLECELSRPVDVRWLKDGVELRAGKAI GIVAQGTCSRSLVIYRCETGDQGVYVCDALDAQTSASLRVQGR  
TYTLIFRRVLAEDAGEVKFVAENAESRAHLRVKELPVTLLRPLRDKIAMEKHRGVLECVSRASAQVRWFKGG  
VELQSGPKYEVVSDGLYRKLVINOVQPEDEDTYTC DAGNVKTSAQFFVEEQSITIVRGLKDMTVMEPAPAWFE  
CETSI PSVRPPKWL LGKTVLQAGNVGLEQDGTVHRLTLHKTCSTMTGVPVHFTIGKSRSSAQLVSDIPVVL  
RPLEPKAGRELQSVVLSCDFRPAPKAVQWYKDDTPLSPSEKFKMALEGQMAELRILRLTPADAGVYRCQAGSA  
QSSAEVTVAREVTVIQPLQDAEAMEEGRVCFSCELSHKDEDI EWSLNGTPLYNDSFHEISHEGCLHTLVLKS  
VRQADTGTVCATSPKVSVSARLVVKGKPVVFLKALDDVSAEERGTLTLQCEVSDPEARVWVRKDGVELGSPDK  
YDFLHKAGARGLTVHDLSHEDAGLYTCQVGSKETQSKVSVHDLHVGITKRLKTVEVLEGECSFCVLSHES  
SDPAVWTVGGKLVGGSGHFHAVRQGRKYTLTVKDAALSDAGEVVFVSVLGLTSKASLIIRERPVDITKPLEDQR  
TTLGEDVMLSCELSRAGTSVRWLKDGKAIKRSQKYDLLSEGTRAVLVVRKASLKDSGEYTCETEASKSTAKLC  
VEEKANRFTEELADLQVEEKGRAVFTCKTEHPASVVTWRKGLLELRASGKHVPSQEGTLTKLTINALERTDSD  
TYTCDIGQARTQARLLVHGQKVRVIEDLEDTAVQEGSSAKFCCRIPADYGPVHWFLDKTPLHSNELNEITVQ  
PGGYHVLTLRQLALKDSGTVYFEAGDQRTSALRVTEKPSIFSRPLTDVTVTEGEDTLTV CETTTVDSSVRWT  
KDGKTLRPSARCQLSHEGCAQLLITATTPQDGGRYKCEIGGASSSSIVRVHALPVRFRESLKDVEVPEGKAA  
TLRCVLSVAAPVEWRHGDDVLKSSNKYSLRQEGAVLELVIRDLQPDQSGQYSCSFGDQTTSATLTVKTSSAQ  
FVGKLRNKEATEGTTVTLRCELTK EAPVEWKKGTETLRNGDKYSLKQDGAVCELQICSLLVADAGEYSCVCGQ  
EKTSATLTVKALLVHFVRRRLRSKEATEGDTTLQCELSKAAPVEWRKGTETLRDGDYVSLKQDGAVCELQIRS  
LTIADAGEYLCGCEKTSATLTVRALPAKFKDLSKNEEATEGTTATLSCELSKAAPVTVWKKGPKTLQSGDKY  
VLRQDGAVCGLQIHGLTMADAGEYSCVCGQEKTSATLTVRGLPAKFIEDLRSQEATEGATAILRCELSKAAPV  
EWRKGETLTKDGDRTYTLRQDGAVCELQIRGLAVVDGTYSLSLPTKFTTEGLRNEEATEGTMATLRCQMSKAAPV  
EWRKGETLRDGDYSLRQDGAMCELQIRGLTIEDSGEYTCVCGQEKTSATLSVKALPPRFIEDLRSQEATEG  
TMATLRCQMSKAAPVEWRKGETLGDGGYSLRQNGAVCELQIHDLAVEDTGEYSCVCGQEKTSATLNVKALP  
PRFIEDLRSQEATEGTMATLRCQMSKAAPVEWRKGETLRDGGYSLRQDGAVCELQIHDLVDEAGQYSCVC  
GQEKTSAVLTVDALPPKFTTEGLKKEEATEGTMVTLRQMSKEATVEWRKGAKTSLDGGYSLRQDGAMCELQI  
CGLAVEDAGEYSCVCGQEKTSATLSVKALPPRFIEDLRSQEATEGTMATLRCQMSKAAPVEWRKGSKTLRQDG  
RYSRLQDGAMCELQICDLAVEDTGDYSCVCGQEKTSATLSVKAPQVVFQQLQNLQAEEGSMASLRCELSVFN  
AAMVWSKGGLELQGDTRREARQQGCVAELLLRDLRREDAGEYSCVCGQEKTSATLTVRGLPAKFIEDLRSQE  
DEGATARLRCELSREAVSVEWRKGSLLQFPKAKYQMVQEGTTAELLVHGVEQEDAGEYTC DAGHTQS IARLSV  
RAPKPKFKTDLQSTEQEAGGTARLCCQLSEAEPTPVQWLKEGVELHVGSKYEMRRQGAVCELLIHGLEAKDT  
GEYACLVGQKTLASLRVKEPEVTIVRGLVDMVEQADEDEFTCKVSQAGATDVQWHLQGLPLQSNVTEVAV  
LADGCTHVLQKGVTLLEDAGTVSFHVGGSSSAQLTVRVPEVTVLEPLKDVQLSEGQDAHFRCRLSRASGQEA  
RWALGGVPLQCNEMNDITVEQGTLYLLTLHKVTLEDAGTITLQVGSSESAQLKVTAKNTVLRGLLENVDALEG  
GEALFECQLSQPEVAHAHTWLLDDEPVHTSEKVEVVYFENGLRHLLLLLKNLKPQDSCRVTFLAGDVVTSAFITV  
RALPDPPEDAEVVGRSDHSVTLVWVAPMSDGGGGLCGYRVMKEASTGQWQLCHDLVPGPECVDDLVPGKTY  
RFRVAAVGPAGAGEPVHLPQMVKIA PAPAPAPAPAPAPAPETRQAVVGEDICLELEVAADGGEVVWHKGT  
QPGGHFEVLSRGRQMLVIKGFRTEDQGEYRCGPIQGLPSSGAATFNVMVMTSGSGDEVPAQPSLPPEAAQEGD  
LHLLWEALARKRRMSREPTLDSISELPEEDSRVQHLRQEAEEETAPDLSEGYSTADELARTGEADLSHTSSDDE  
SRAGTPSLVTYLKKAGGPGISPLASKHEAQVTTSVKPKQKQEPVPTCPPPGDLSAADLMDPSLDKAAVKIQA  
AFKGYKVRKEMKQOEGPVFSRTFGDTEAQVGDVLRLECVLATKTD MRACWLKDGIELTDGRHYHIDQLKDGTC  
SLLVTGLAPTDSGRYTCQVSTKSGRVSHSACVVVSGTESEAESSSGGELDDAFRRAARRLHRLFRTKSPAELS  
EELFLSADEGPGEPEPADWQTYREDENFVCIRFESLAEARQAVTCFRNMFMATMGIGVEISLGEQGRGVEM  
RIGKVAPTVPAPVPLAKTPGLQTSDAAPVFLTELQNDVQDGYPMSFDCVVTGQPVPSVRWFKDGKLL EEDH  
YMINEDQQGGHQLIITAVVPADMGVYRCLAENSMGVSSTKAE LRVELTSTDYD TAADATETSSYFSAQGYLSS  
REQEGTESDEGQLPVLEELKDLQVAPGTRLAKFLKVKGY PAPKLYWFKDGQPLTSDHIRM TDKKTLLHTE  
IVSVTREDSDGQYAAIY SNAVGAAYSARLLVRGPSEPEEKPSADVHERLVPPRILEKFTPKVKRGSISITFSV  
KVEGHPAPSVHLLKEEAEGVLIWIGPDTPGYTMASSSKQHSLLVLLDVGRQHQQGTYTTCIATNPAGQALCSASLH  
ISGLAKEEEQERVKEALISSFLQGTSAQVSAQMSEAGFADLVGQSKGESLVAAEEAHSHLSLAEVGTETEEFLQK  
LTSQITEMVSAKISQAKLQVPGGDSDEETKTPSASPRHGRSRPSSSVQESSSESEDGDSRGEIFDIYVVTADY  
LPLGAEQDAIILREGQYVEVLDSAHPLRVLVVRTKPTKSSPSRQGWVSPAYLDKRLKLSPEWGPTEAEPFPGA

VSEDEYRTRLSSVIQELLSSEQAFVGELOFLESHHMKHLERSPRVPAAVASQKTVIFRNVQDISHFHSSFLKE
LQCGCTDDDVAMCFIKNQEAFEKYLEFLVGRVQAESVVVSTPVQEFYKKYAEETLSAKDPTQPPPPLOHYLE
QPVERVQKYQALLKELIRNKARNRQNCALLEQAYAVVSALPQRAENKLVSLMENYPGTLEALGEPTRQGHFI
VWEGAPGARMPPWKGNHRHVFLFRNYLVICKPRRDSRTDTFSYVFRNMMKLSSIDLNDQVEGDRAFEVWHERE
DSVRKYLLQARTVIKNSWVKEICGIQORLAQPVWRPPEFEELADCTAELGETVKLACRVGTGPKPIVSWYK
DGKPEVEVDPHHILIEDPDGSCSTLILDNLGTIDSGQYMCFAASAAGNASTLGKILVQVPPRFVNVKVRATPFVEG
EDAQITCTVEGAPYPQIRWYKDGTLAPGNRYRMLNEPRSGVVLVLIQAASKEDLGHYCELVNRLGSTRGGG
ELYMOSPALRARDQHHREQIVAAVEGAPSMQVTIEDVQVQVGDMAQFDAVIEGHPPPPIVTWYKGSTQLTSSAR
LSQRQDGTYSVLVTDVAPHDAGVYTCVANNAGGQVLCCKAELLVHGGDKLDAENQVYRRKLSHFYDVQEEIGR
GVFGFVKRVQHKGNMFCAAKFIPLRSKTRAQAYQERDILATLGHPLVTGLLDQFETRKTLLILELCSSEEL
LDRLFKKGVVTEAEVKVYIQQLVEGLHYLHSHGILHLDIKPPNIMVHPAREDIKICDFGFAQKITPSEPOYS
KYGSPFVSPETIEQNPVSEGSDIWAMGVISYLSLTCSSPFAGESDRATLLNVLEGRVSWSSPTAAHLSEDA
DFIKATLQRTPRARPSTSQC LAHPWFLKSMPAAEAHFINTKQLKFLARSRWQRSLMSYKSI LVMRSIPPELLQ
GPPDSPSLGVARHLRGEASGASSSSSSSDNELAPFARAKSLPPSPVTHSPLLHPRGFLRPSASLPEETEASMP
TADAAPVSPQASAGPPASPGCVPRHSVSISSLFYQQAGEGAERGNKTS GAKRHPARRRHLKGGYIARALPGLR
EPLMEYSLLEEEAAREEQASLMTKTPSFETALRLPSSSVREVPGRSHSLDNPVTTGSPPEACKEQLLFPST
GLTHETTAKDRGHKEGFLQESVFPFPMGDSRPGKQEGSSQDSCRKGPASSCHSELGSGSQEGCGPPSSQSLG
SLPPQSLKELSTSCGPLFSEQPQAAPFPTQVSPLLGSEKEPIHLLDLRSENMMVTEYNLLKVIDLNAQSLDQEK
LSEAGDTCDFTPPPQRPQEQATTRKFSLESRGGYAGVAGYGTFAFGGDAGGMLGQGPLWARMWAVSQSSEEQ
DEAATESPQPLESLGPIAEASGVPLRTSPSLTPWEEVEQVSLVQIRDLSGDAEAADTISLDISEVDPAYLNL
DLYDIKYLPFEFMIFRRVPKPIEQPESPGSETEAGQGLADFL EEAAWPWPGEGLGLRAGLEITEEPEEPGDLEA
LLGEAAVGRKRKWSPSRGLFQFPGRCLSGEEPVELGLRQRVKASMAHISRILKGRPEGPEREGPPRKKAGLAS
FRLSGLKGRDQELSDEAVVLGQSVTLACQVLAQPTAQATWSKDGVLLES SGHLLISSTLKNFQLLTIILVVKEE
DLGTYTCCVSNPLGTAVTTGVLKRAERPSSSPRPEVGEYKDAVLLVWKPVESECGPVTYIVQCCIEGGSWTTL
ASDISDCCYLTKLSRGGMYIFRTACVSKAGMGPYSSPSEQVLLGGPNHLASEEESSRGRPAQLLPSTKTF
QMQIRRRGRFVVRQCREKASGRALAAKIVPYQPEDKTAHLREYEAALKRHLHHPHLAQLHAAVYLSRHLVLI
CSGPELLPSLAERESYSESVDKDYLVQMLSATQYLAHQVILHLDLRSENMMVTEYNLLKVIDLNAQSLDQEK
VPAPENFKDYLETMAPELLEGQAVPQTDIWAIGVTAIFIMLSGEY P ESSEGETRDLQKGLRKLIRLSRCYAGL
SGGAVAFLQSSSLCAQPWGRPCASTCLQCGWLTEEGPTGSRPTVPTVPTVRLRAVFREREKRRALLYKKNLAQ
VR\*

>rs46635685\_ENSMUSP00000049737\_c.514:C>A\_p.S172\*
ENSMUST00000052872.15|Obscn-203|ENSMUSG00000061462|-|chr11:g.59026687:G>T
MDHSFSGAPRFLTRPKAFVVSVGKDATLSCQIVGNPTPHVSWEKDRQPVEAGARFLAQDGDVYRLTILDLAL
GDSGQYVCRARNAIGEFAAVGLRVDSEGTCAEQAPHFLLRPTSIRVREGADATFRCRVGSGSPQPAVSWSKDG
RRLGPPDAPHVRVEEHGESSALRIR\*ARPRDGGTYEVRANENPLGSASAAAALVVDSDAEVAGPPGTSTATLLA
HLQQREAMRAEGI PPSPPGAGTRTCTVTEGKHARLSCFVTGEPKPEPTVWKKDQGLVTEGRRHVVEDEQENF
VLKILFCQSDRGLYTCTASNLVGQTYSSVLVVREPTVPFKKRLQDLEVREKESATFQCEVAQPAEEAAWFK
EETRLWASAKYDIEEGETERRLTVRNVSADDDAVYICETTEGSRVVAELSVQGNLTKLPRKTAVRTGDTAIF
WVELAVPEGPVRWLRNQEEMVAGGRVAITAEGTCHTLTI FQCTLEDMGEVAFVSGGCRTTTQFCVSAPRRPPL
YPPADPVVKAKTESSVTL SWSAPPHGDRPVTIDGYVLEKRKLGAYAWSRCHEAGWLATTEFTITGVAAEGDFQ
FRVSAINHFGQGPYLEFPGTMHLVPM LAVKTPLKAVEAVEGGEVTFVSDLTVASSGEWFLDGEALKASSIYVI
RCDRTRHMLTIREV PARLHGAQLKFVANGIETSIQMVVRAALGLPSSKLPAAAAREVLAQLHEEAQLLAE LSD
QAAA VTWLKDGRELSLGPKEYMQVSAGRRALLVRDVAQDDAGLYECVSRGSR TAYQLLVQEPKLVFAKGQQA
SEVKAEAGNSATLSCEVTQAQTEVTWFKDGKLLSSSSKVRMEASGCSRRLVVQQAGKADAGEYSCEAGGQKLS
FRLDVAEPKLVFAKGQQAHEVKA EAGASATLSCEVAQAQTEVTWFKDGKLLSSSSKVRMEASGCSRRLVVQQ
AGKADAGEYSCEAGGQKLSFRLDVAEPKMFVFAKEQQARSEVKA EAGASATLSCEVAQAQTEVTWFKDGKLLS
SSKVRMEASGCSRRLVVQQAGKADAGEYSCEAGGQKLSFRLDVTEPKLVFAKEQQARSEVKA EAGNSATLSCE
VAQAQTEVTWFKDGKLLSSSSKVRMEASGCSRRLVVQQAGKADAGEYSCEAGGQKLSFRLDVAEPKLVFAKEQ
QARSEVKA EAGNSATLSCEVAQAQTEVTWFKDGKLLSSSSKVRMEASGCSRRLVVQQAGKADAGEYSCEAGGQ
KLSFHLDVTEPKLVFAKEQQAHSEVKA EAGASATLSCEVAQAQTEVTWFKDGKLLSSSSKVRMEASGCSRRLV
VQQAGKADAGEYSCEAGGQKLSFRLDVAEPKLVFAKEQQARSEVKA EAGASATLSCEVAQAQTEVTWFKDGK
LSSSSKVRVEASGCSRRLVVQQAGKADAGEYSCEAGGQKLSFRLDVAEPKLVFAKEQQANSEVKA EAGASATL
SCEVAQAQTEVTWFKDGKLLSSSSKVRVEASGCSRRLVVQQAGKADAGEYSCEAGGQKLSFRLDVAEPKLAFA
KEQQAHSEVKA EAGASATLSCEVAQAQTEVTWFKDGKLLSSSSKVRVEASGCSRRLVVQQAGKADAGEYSCEA
GGQKLSFRLDVAEPKLAFAKEQQAHSEVKA EAGASATLSCEVAQAQTEVTWFKDGKLLSSSSKVRVEASGCSR
RLVVQQAGKADAGEYSCEAGGQKLSFRLDVAEPKLAFAKEQQAHSEVKA EAGASATLSCEVAQAQTEVTWFKD
GKLLSSSSKVRVEASGCSRRLVVQQAGKADAGEYSCEAGGQKLFRLDVAEPKLMFAKEQQAHSEVKA EAGAS
ATLSCEVAQAQTEVTWFKDGKLLSSSSKVRVEASGCSRRLVVQQAGKADAGEYSCEAGGQKLSFRLDVAEPKLV

VFAKEQQAHSEVKAEGASATLSCEVAQAQTEVTFWFKDGKLLSSSSKVRVEASGCSRRLLVVQQVQKADAGEYS  
CEARGQKLSFRLDVADTRLMFAKEQQARTEVKAEGNSATLSCEVAQAQTEVTFWFKDGKLLSSSSKVRVEASG  
CSRRLLVVQQAGKADAGEYSCEAGGQKLSFRLDVAEAEESQIPERPSRREPLVVKEHETIILTATIAAPSVAAVT  
WLKDGVEIRRSKRHEATS LGDTHLTVRGAQVLD SAIYSCRVGKEGQDFPVQVEEVAAKFSKPLEPVEGELGG  
TVMLVCELSPEQAEEVWRCGNTQLRPGKRFQMTSEGPRTTLTVSGLREDDAEYVCESRDDRTSARLTVKVPR  
VVKFTSGLSAMVAEEGQEATFQCVVSPSDAGVTWYKDGMLQPSSEKFMVESGASRSLTILGLTLEDAGQVTV  
EAEGASSAALRVREAPVLFKKKLEPQTVEERTSVTLEVELTRPWPVEVKWTRNAAVLTPSENVEIRAEGARHC  
LVLRVSGFADRGGFFGCETPDDKTQAKLNVEMRQVRLVRGLQEVEAKEQGTASMDVELSHAEEVGSWTRDGLRL  
QPGPKCHLAVQGPVHILTLALSALQPQDSGLVAFRAEGVHTSARLIVTELPVSFTRVLQDVVATQKEKVTLECEL  
SRPVDVRWLKDGVELRAGKAI GIVAQGTCSRSLVIYRCETGDQGVYVCDALDAQTSASLRVQGRTYTLIFRRVL  
AEDAGEVKFVAENAESRAHLRVKELPVTLLRPLRDKIAMEKHRGVLECVSRASAQVRWFKGGVLEQSGPKYE  
VVSDGLYRKLVIN DVQPEDEDTYTCDAGNVKTSAQFFVVEEQSITIVRGLKDMTVMPEPAPAWFECETSIPSVRP  
PKWLLGKTVLQAGGNVGLQDGTVHRLTLHKTCSTMTGPVHFTIGKSRSSAQLVVSDIPVVLTRPLEPKAGRE  
LQSVVLSCDFRPAPKAVQWYKDDTPLSPSEKFKMALEGQMAELRILRLTPADAGVYRCQAGSAQSSAEVTVEA  
REVTVIQPLQDAEAMEEGRVCFSCELSHKDEDIEWSLNGTPLYNDSFHEISHEGCLHTLVLSVRQADTGTVC  
ATSPKVSVSARLWVGKPVVFLKALDDVSAEERGTLTLQCEVSDPEARVVWRKDGVELGPSDKYDFLHKAGAR  
GLTVHDLSHEDAGLYTCQVGSKETQSKVSVHDLHVGITKRLKTEVELEGECSFECVLSHESPSDPVAVVTVGG  
KTVGGSGHFHAVRQGRKYTLTVKDAALSDAGEVVFVSVLGLTSKASLIIRERPVDITKPLEDQRTTLGEDVMLS  
CELSRAGTSVRWLKDGKAIKRSQKYDLLSEGTRAVLVVRKASLKDSGEYTCETEASKSTAKLCVVEEKANRFTTE  
ELADLQVEEKGRAVFTCKTEHPASVVTWRKGLLELRASGKHVPSQEGTLKLTINALERTDSDTYTCDIGQAR  
TQARLLVHGQKVRVIEDLEDTAVQEGSSAKFCCRIAPADYGPVHWF LDKTPLHSNELNEITVQPGGYHVLT LR  
QLALKDSGTVYFEAGDQRTS AALRVTEKPSIFSRPLTDVTVTEGEDTLVCETTTTVDSSVRWTKDGKTLRPSA  
RCQLSHEGCQAQLLITATTPQDGGRYKCEIGGASSSIVRVHALPVRFRRESLKDVEVPEGKAATLRVLSVA  
APVEWRHGDDVLKSSNKYSLRQEGAVLELVIRDLQPDQSGQYSCSFGDQTTSATLTVKTSQAQVFGKLRNKEA  
TEGTTVTLRCELTKEAPVEWKKGTETLRNGDKYSLKQDGA VCELQICSLLVADAGEYSCVCGQEKTSATLTVK  
ALLVHFVRRRLRSKEATEGDTTTLQCELSKAAPVEWRKGTETLRDGDYSLKQDGA VCELQIRSLTIADAGEYL  
CTCGQEKTSATLTVRALPAKFKDSLKNEEATEGTTSETLCELSKAAPVTWKKGPKTLQSGDKYVLRQDGA VCG  
LQIHGLTMADAGEYSCVCGQEKTSATLTVRGLPAKFIEDLRSQEATEGATAILRCELSKAAPVEWRKGS ETLK  
DGDRYTLRQDGA VCELQIRGLAVVDGTYS LPTKFTTEGLRNEEATEGTMATLRCQMSKAAPVEWRKGS ETLR  
DGDRYSLRQDGA MCELQIRGLTIEDSGEYTCVCGQEKTSATLSVKALPSRFIEDLRSQEATEGTMATLRCQMS  
KTAPVEWKKGSETLRDGGRYSLRQDGPVCELQICDLAVEDAGEYSCVCGQEKTSATLSIKALPPRFIEDLRSQ  
EATEGTMATLRCQMSKAAPVEWRKGS ETLGDGGRYSLRQNGAVCELQIHDLAVEDTGEYSCVCGQEKTSATLN  
VKALPPRFIEDLRSQEATEGTMATLRCQMSKAAPVEWRKGS ETLRDGGRYSLRQDGA VCELQIHDL DVEDAGQ  
YSCVCGQEKTSAVLTVDALPPKFTEGLKKEEATEGTMVTLRCQMSKEATVEWRKGA KTLSDGGRYSLRQDGA M  
CELQICGLAVEDAGEYSCVCGQEKTSATLSVKALPPRFIEDLRSQEATEGTMATLRCQMSKAAPVEWRKGS ETL  
LRDGDYSLRQDGA VCELQIRDLAVEDAGEYLCVCGQEKTSATLSVKALPPRFIEDLRSQEATEGTMATLRCQ  
MSKAAPVEWRKGS KTLRDGDYSLRQDGA MCELQICDLAVEDTGDYSCVCGQEKTSATLSVKALPPRFIEDLR  
SQEAREGTVATLRCMSKAAPVEWRKGS ETLKDGDRYSLRQEGNLCELQIRDLAVEDTEEYSCVCGQEKTSAT  
LSVKALPAKFIEDLRSQEAPESSTVTLRCKLSKKASVWKKGSETLRNGARYSLRQDGA VCELEIRDLTVEDT  
GEYSCTCGQERTSATLSIMAPQVVFQOPLQNLQAEEGSMASLRCELSVPNAAMVWSKGGLELQGDTRREARQQ  
GCVAE LLLRDLRREDAGEYSC TCGSQTTSATLMVTAAPVRFRLRELQAQDVDEGATARLRCELSREAVSVEWRK  
GSLQLFPKAKYQMVQEGTTAE LLVHGVQE DAGEYTC DAGHTQS IARLSVRAPKPKFKTDLQSTEQEAGGTAR  
LCCQLSEAE PGTPVQWLKEGVELHVGSKYEMRRQGA VCELLIHGLEAKDTGEYACL VGGQKTLASLRVKEPEV  
TIVRGLVDMVEQADEDFEFTCKVSQAGATDVQWHLQGLPLQSNVTEVAVLADGCTHVLQ LKGVTL EDAGTVS  
FHVGG LSSSAQLTVRVPEVTVLEPLKDVQLSEGDHFRCLRSRASGQEARWALGGVPLQCNE MNDITVEQGT  
LYLLTLHKVTLEDAGTITLQVGS CSSEAQLKVTAKNTVLRGLENVDALEGG EALFECQLSQPEVA AHTWLLDD  
EPVHTSEKVEVVYFENGLRH LLLKLNKLPQDSCRVTFLAGDVVTS AFLTVRGRWLEVLEPPHDASVKAGMQVR  
FTCILSEAVPVGEATWYINGAAIQPDDTDWTVTTDGS HHALTLSNAQPQHAGEVTF AARDAVASARLSVLALP  
DPPEDA EVVGRSDHSVTL SWVAPMS DGGGGLCGYR VEMKEASTGQWQLCHDLVPGPECVDDLVPGKTYRFRV  
AAVGPAGAGEPVHLPQMVKIAPAPAPAPAPAPAPAPETRQAVVGEDICLELEVAADGGEV VWHKGTERRIQPGG  
HFEVLSRGRQMLVIKGFRTEDQGEYRCGPIQGLPSSGAATFNVVMTSGSGDEVPAQPSLPPEAAQEGLDHL L  
WEALARKRRMSREPTLDSISELPEEDSRVQHLRQEA EETAPDLSEGYSTADELARTGEADLSHTSSDDES RAG  
TPSLVYTKLKKAGGPGISPLASKHEAQVTTSVKPKQKQLEPVVPTCPPPGDLSAADLMDPSLDKAAVKIQAAFKG  
YKVRKEMKQYEGPVSRTFGDTEAQVGDVLRLECVLQATKTD MRACWLKDGIELTDGRHYHIDQLKDGTC SLLV  
TGLAPTD SGRYTCQVSTKSGRVSHSACVVVSGTESEAE SSGGELDDAFRRAARRLHRLFRTKSPAELSEEEL  
FLSADEGPGEPEEPADWQTYREDENFVCIRFESLAEARQAVTCFRNMFATMGIGVEISLGEQGP RGVEMRIGK  
VAPTVPAPVPLAKTPGLQTS DAAPVFLTELQNDQDVQDGYPMSFDCVV TGQPVPSVRWFKDGKLL EEDDHYMIN  
EDQQGGHQLIITAVVPADMGVYRCLAENSMGVSSTKAELRVELTSTDYDTAADATETSSYFSAQGYLSSREQE

GTESDEGQLPQVLEELKDLQVAPGTRLAKFQKLVKGYPAKLYWFKDQPLTSDHIRMTDKKTLHTLEIVSV  
TREDSGQYAAIYISNAVGAAYSSARLLVVRGPSEPEEKPASDVHERLVPRILEKFTPKKVKRGSSITFSVKVEG  
HPAPSVHWLKEEAKEKGLVWIGPDTPGYTMASSSKQHSVLVDVGRQHOGTYTCIATNPAGQALCSASLHISGL  
AKEEEQERVKEALISSFLQGTSQAVSAQMSSESAGFADLVGQSKGESLVAEEAHSHLSLAEVGTTEEFLQKLT SQ  
ITEMVSAKISQAKLQVPGGDSDEETKTPSASPRHGRSRPSSSVQESSSESEDGDSRGEIFDIYVVTADYLP LG  
AEQDAIILREGQYVEVLD SAHPLRWLVRTKPTKSSPSRQGWVSPAYLDKRLKLSPEWGPTEAPEFPGEAVSED  
EYRTRLSSVIQELLSSEQAFVGELOFLESHHMKHLERSPRVPAAVASQKTVIFRNVQDISHFHSSFLKELQGC  
GTDDDVAMCFIKNQEA FEKYLEFLVGRVQAESVVVSTPVQEFYKKYAEETLSAKDPTQPPPPPLQHYLEQPV E  
RVQKYQALLKELIRNKARNRQNCALLEQAYAVVSALPQRAENKLVSLMENYPGTLEALGEP IRQGHFIVWEG  
APGARMPWKGNHRHVF LFRNYLVICKPRRDSRTDTFSYVFRNMMKLSSIDLNDQVEGDDRAFEVWHERE SVR  
KYLQARTVIKNSWVKEICGIQQRLAQPVWRPPEFEEELADCTAELGETVKLACRVTGTPKPIVSWYKDGKP  
VEVDPHHILIEDPDGSC TLI LDNL TGIDSGQYMCFAASAAGNASTLGKILVQVPPRFVNVKVRATPFVEGEDAQ  
ITCTVEGAPYPQIRWYKDG TLLAPGNRYRMLNEPRSGVLV LVIQAASKEDLGHYECELVNRLGSTRGGGELYM  
QSPALRARDQHHREQIVAAVEVTEQETKVPKKTVIEETITTVVKSPRGRRQSPGKSPSRSPRRSASPRRPG  
LLAPERLYPPGTSPSRRLVEVEQGRKAPVPALYVTEAEVHAPASQSQPKWLEVEETIEVRVKKTGSRGASPVRE  
MTSRGEGLFTLPGGIPGRDPNANNNSNKS SVYQEARTWGPVAVHVGEFFIFQVDSVGNVDVVAASPEPEQVRA  
SQKEENTERQEGCSDGDENTFLMEEFQD TDSLQGRDPKILTHNGRVLTADLEDYVPQEGETF GCGDSTPSTP  
DEPPCEVSVLQREI SEPTVGQPVLLNVGRPPGTGATPSKFFRPGSQVHSPESV SFLLEAWSGPVSAAPWTSSF  
HTHVQSSVDGSHGSFKTEVSTQTVSFGAVGETVTLHIDPDGGEAPGPSQG\*  
>rs46635685\_ENSMUSP00000020732\_c.514:C>A\_p.S172\*  
ENSMUST00000020732.13|Obscn-201|ENSMUSG00000061462|-|chr11:g.59026687:G>T  
MDHSFSGAPRFLTRPKAFVSVGKDATLSCQIVGNPTPHVSWEKDRQV EAGARFRLAQDGDVYRLTILDLAL  
GDSGQYVCRARNAIGEAFAAVGLRVDSEGTCAEQAPHFLLRPT SIRVREGADATFRCRVGGSPPAVSWSKDG  
RRLGPPDAPHVRVEEHGESSALRIR\*ARPRDGGTYEVRAENPLGSASAAAAALVVDSDAEVAGPPGTSTATLLA  
HLQORREAMRAEGIPSPPGAGTRTCTVTEGKHARLSCFVTGEPKPE TVWKKDQGLVTEGRRHVVEDEQENF  
VLKILFCKQSDRGLYCTASNLVGGTYSSVLVVVREPTVFFKKRLQDLEVREKESATFQCEVAQ PATEAAWFK  
EETRLWASAKYQLEIEEECTERRLTVRNVSADDDAVYICETPETEGSR TVAELSVQGNLTKLPRKTAVRTGDTAIF  
WVELAVPEGPVRWLRNQEEMVAGGRVAITAEGTCHTTLIFQCTLEDMGEVAFVSGGCRTTTQFCVSAPRRPPL  
YPPADPVVKAKTESSVTL SWSAPPHGDRPVTIDGYVLEKRKLGAYAWSRCHEAGWLATTEFTITGVAAEGDFQ  
FRVSAINHFGQGPYLEFPGMTMLVPLAVKTPKAVEAVEGGEVTFVSDLTVASSGEWFLDGEALKASSIYVI  
RCDRTRHMLTIREV PARLHGAQLK FVANGIETS IQMVVRAALGLPSSKLPAAAAREVLAQLHEEAQLLAE LSD  
QAAAVTWLKDGRELSLGPKEYMQVSAGRRALLVRDVAQDDAGLYECVSRGSR TAYQLLVQDITDGYRDWGPAG  
PQKHMCKCAGAKIARYLGS SCYRFLQYDKGVWHWLEAALDTRQKGK TSSCSLHEKPKLVFAKQQAHSEVKA E  
AGNSATLSCEVTQAQTEVTFWKD GKKLSSSSSKVRMEASGCSRRLVVQQAGKADAGEYSCEAGGQKLSFR LDVA  
EPKLVFAKQQAHSEVKA EAGASATLSCEVAQAQTEVTFWKD GKKLSSSSSKVRMEASGCSRRLVVQQAGKAD A  
GEYSCEAGGQKLSFR LDVAEPKLVFAKEQQARSEVKAEAGASATLSCEVAQAQTEVTFWKD GKKLSSSSSKVRM  
EASGCSRRLVVQQAGKADAGEYSCEAGGQKLSFR LDVTEPKLVFAKEQQARSEVKAEVGN SATLSCEVAQAQT  
EVTWFKDGKKLSSSSSKVRMEASGCSRRLVVQQAGKADAGEYSCEAGGQKLSFR LDVAEPKLVFAKEQQARSEV  
KAEAGNSATLSCEVAQAQTEVTFWKD GKKLSSSSSKVRMEASGCSRRLVVQQAGKADAGEYSCEAGGQKLSFHL  
DVTEPKLVFAKEQQAHSEVKA EAGASATLSCEVAQAQTEVTFWKD GKKLSSSSSKVRMEASGCSRRLVVQQAGK  
ADAGEYSCEAGGQKLSFR LDVAEPKLVFAKEQQARSEVKAEAGASATLSCEVAQAQTEVTFWKD GKKLSSSSK  
VRVEASGCSRRLVVQQAGKADAGEYSCEAGGQKLSFR LDVAEPKLVFAKEQQANSEVKA EAGASATLSCEVAQ  
AQTEVTFWKD GKKLSSSSSKVRVEASGCSRRLVVQQAGKADAGEYSCEAGGQKLSFR LDVAEPKLVFAKEQQAH  
SEVKA EAGASATLSCEVAQAQTEVTFWKD GKKLSSSSSKVRVEASGCSRRLVVQQAGKADAGEYSCEAGGQKLS  
FR LDVAEPKLVFAKEQQAHSEVKA EAGASATLSCEVAQAQTEVTFWKD GKKLSSSSSKVRVEASGCSRRLVVQQ  
AGKADAGEYSCEAGGQKLSFR LDVAEPKLVFAKEQQAHSEVKA EAGASATLSCEVAQAQTEVTFWKD GKKLSS  
SSKVRVEASGCSRRLVVQQAGKADAGEYSCEAGGQKLFRLDVAEPKLVFAKEQQAHSEVKA EAGASATLSCE  
VAQAQTEVTFWKD GKKLSSSSSKVRVEASGCSRRLVVQQAGKADAGEYSCEAGGQKLSFR LDVAEPKLVFAKEQ  
QAHSEVKA EAGASATLSCEVAQAQTEVTFWKD GKKLSSSSSKVRVEASGCSRRLVVQQV GADAGEYSCEARGQ  
KLSFR LDVADTRLMFAKEQQARTEVKAEAGNSATLSCEVAQAQTEVTFWKD GKKLSSSSSKVRVEASGCSRRLV  
VQQAGKADAGEYSCEAGGQKLSFR LDVAEAE SQIPERPSRREPLVVKEHETIILTATIAAPSVAAVTWLKDG V  
EIRRSKRHEATSLGDTHTLTVRGAQVLD SAIYSCRVGKEGQDFPVQVEEVA AKFSKPLEPVEGELGGTVMLVC  
ELSP EQAEVWQRCNTQLRPGKRFQMTSEGPRTLT VSGLE REDDAEYVCE SRDDRTSARLTVKVP RVVVKFTS  
GLSAMVAEEGGQEFATFQC VVSPSDAGVTWYKDGMLQLPSEK FVMVESGASRSLTILGLTLEDAGQVTEAE GAS  
SSAALRVREAPQVLFKKLEPQTVEERTSVTLEVELTRPWPEV KWRNAAVLTPSENVEIRAEGARHCLVLR SV  
GFADRGGFFGCETPDDKTQAKLNVEMRQVRLVVRGLQEVEAKEQGTASMDVELSHAEVEG SWTRDGLRLQPGPKC  
HLAVQGPVHIL TLSALQPQDSGLVAFRAEGVHTSARLIVTELPVSFTRVLQDVVATQKEKVTLECELSRPVDV  
RWLKDGVLELRAGKAIGIVAQGTCSRLVIYRCETGDQGVYVCDALDAQTSASLRVQGRTYTLIFRRLAEDAGE

VKFVAENAESRAHLRVKELPVTLLRPLRDKIAMEKHRGVLECCQVSRASQVRWFKGGVELQSGPKYEVVSDGL
YRKLVINVDQPEDEDTYTC DAGNVKTS AQFFVVEEQSITIVRGLKDMTVMEPAPAWFECETSIPSVRPPKWL
KTVLQAGGNVGLQDGTVHRLTLHKTCSTMTGVPVHFTIGKSRSSAQLVVS D I PVVLRPLEPKAGRELQSVVL
SCDFRPAPKAVQWYKDDT PLS PSEKFKMALEGQMAELRILRLTPADAGVYRCQAGSAQSSAEVTVEAREVTVI
QPLQDAEAMEEGRVCFSCELSHKDEDEI EWSLNGTPLYNDSFHEI SHEGCLHTLVLSVSRQADTGTVCATSPKV
SVSARLVVKGKPVVFLKALDDVSAEERGLTLTQCEVSDPEARVVRKDGVELGSPDKYDFLHKAGARGLTVHD
LSHEDAGLYTCQVGSKETQSKVSVHDLHVGITKRLKTVEVLEGESECSFECVLSHESPSDPAVWTVGGKTVGG
GHFHAVRQGRKYTLTVKDAALSDAGEVVFVSVLGLTSKASLIIRERPV DITKPLEDQRTTLGEDVMLSCELSRA
GTSVRWLKDGKAIRKSQKYDLLSEGETRAVLVVRKASLKDSGEYTCETEASKSTAKLCVEEKANRFTEELADLQ
VEEKGRAVFTCKTEHPASVVTWRKGLLELRASGKHVPSQEGTLTKLTINALERTSDTYTCDIGQARTQARLL
VHGQKVRVIEDLEDTAVQEGSSAKFCRIAPADYGPVHWF LDKTPLHSNELNEITVQPGGYHVLT LTRQLALKD
SGTVYFEAGDQRTSAALRVTEKPSIFSRPLTDVTVTEGEDLTLCVETTTVDSSVRWTKDGKTLRPSARCQLSH
EGCQAQLLITATTPQDGGRYKCEIGGASSSSIVRVHALPVRFRESLKDVEVPEGKAATLRCVLSVAAPVEWR
HGDDVLKSSNKYSRQEGAVLELVIRDLQPQDSGQYSCSFGDQTTSATLTVKTSQAQFVGLRNKEATEGTTV
TLRCELTKEAPVEWKKGTETLRNGDKYSLKQDGAVCELQICSLLVADAGEYSCVCGQEKTSATLTVKALLVHF
VRRLSKEATEGDTTLQCELSKAAPVEWRKGTETLRDGDYSLKQDGAVCELQIRSLTIADAGEYLCTCGQE
KTSATLTVRALPAKFKDSLKNEEATEGTTATLSCELSKAAPVTWKKGPKTLQSGDKYVLRQDGA VCGLQIHGL
TMADAGEYSCVCGQEKTSATLTVRGLPAKFIEDLRSQEATEGATAILRCELSKAAPVEWRKGTETLRDGRYT
LRQDGA VCELQIRGLAVVDGTGYSSLPKFTTEGLRNEEATEGTMATLRCQMSKAAPVEWRKGTETLRDGRYS
LRQDGAMCELQIRGLTIEDSGEYTCVCGQEKTSATLSVKALPSRFIEDLRSQEATEGTMATLRCQMSKTAPVE
WKKGSETLRDGGRYSLRQDGPVCELQICDLAVEDAGEYSCVCGQEKTSATLSIKALPPRFIEDLRSQEATEGT
MATLRCQMSKAAPVEWRKGTETLRDGGRYSLRQNGAVCELQIHDLAVEDTGEYSCVCGQEKTSATLNVKALPP
RFIEDLRSQEATEGTMATLRCQMSKAAPVEWRKGTETLRDGGRYSLRQDGA VCELQIHDLVEDAGQYSCVCG
QEKTSAVLTVDALPPKFTTEGLKKEEATEGTMVTLRCQMSKEATVEWRKGAKTSLDGGRYSLRQDGA MCELQIC
GLAVEDAGEYSCVCGQEKTSATLSVKALPPRFIEDLRSQEATEGTMATLRCQMSKAAPVEWRKGTETLRDGR
YSLRQDGA VCELQIRDLAVEDAGEYLCVCGQEKTSATLSVKALPPRFIEDLRSQEATEGTMATLRCQMSKAAP
VEWRKGTETLRDGGRYSLRQDGA MCELQICDLAVEDTGDYSCVCGQEKTSATLSVKALPPRFIEDLRSQEARE
GTVATLRCRMSKAAPVEWRKGTETLRDGGRYSLRQEGNLCELQIRDLAVEDTEEYSCVCGQEKTSATLSVKAL
PAKFIEDLRSQEAPESSTVTLRCKLSKKASVVWKKGSETLRNGARYSLRQDGA VCELEIRDLTVEDTGEYSCT
CGQERTSATLSIMAPQVVFQQLQNLQAEEGSMASLRCELSVPNAAMVWSKGGLELQGDTRREARQQGCVAEL
LLRDLRREDAGEYSCVCGQEKTSATLMVTAAPVRFLRELQAQDVDEGATARLRCELSREAVSVEWRKGS LQLF
PCAKYQMVQEGTTAELLVHGVEQEDAGEYTCDAQHTQSIARLSVRAPKPKFKTDLQSTEQEAGGTARLCCQLS
EAEPTGPVQWLKEGVELHVGSKYEMRRQGA VCELLIHGLEAKDTGEYACLVGGQKTLASLRVKEPEVTIVRGL
VDMEVQADEVEFTCKVSAQATDVQWHLQGLPLQSNVTEVAVLADGCTHVLQKGVTL EDAGTVSFHVGGL
SSSAQLTVRVPEVTVLEPLKDVQLSEGQDAHFRCRLSRASGQEARWALGGVPLQCNEMNDITVEQGTLYLLTL
HKVTLEDAGTITLQVGSSEEAQLKVTAKNTVLRGLENVDALLEGGEALFECQLSQPEVAHTWLLDDEPVHTS
EKVEVVYFENGLRHLLLLKLNKLPQDSCRVTFLAGDVVTS AFLTVRGRLEVLVLEPPHDASVKAGMQVRF TCILS
EAVPVGEATWYINGAAIQPDDTDWTVTTDGS HALTLSNAQPQHAGEVTF AARDAVASARLSVLALPDPPEDA
EAVGRSDHSVTL SWVAPMSDGGGGLCGYRVMKEASTGQWQLCHDLVPGPECVVDDLVPGKTYRFRVAAVGPA
GAGEPVHLPQMVKIAPAPAPAPAPAPAPAPETRQAVVGEDICLELEVAADGGEVVWHKGTERRIQPGHFVLS
RGQRQMLVIKGFRTEDQGEYRCGPIQGLPSSGAATFNVMVMTSGSGDEVPAQPSLPPEAAQEGDLHLLWEALAR
KRRMSREPTLDSISELPEEDSRVQHLRQEAEEETAPDLSEGYSTADELARTGEADLSHTSSDDES RAGT PSLVT
YLK KAGGPGISPLASKHEAQVTSVKPKQKQEPVPTCP PPGDLSAADLMDPSLDKAAVKIQA AFKGYKVRKE
MKQQEGPVFSRTFGDTEAQVGDVLRLECVLATKTD MRACWLKDGIELTDGRHYHIDQLKDGTCSSLVTVGLAPT
DSGRYTCQVSTKSGRVSHSACVVVSGTESEAESSGGELDDAFRRAARRLHRLFRTKSPAELSEELFLSADE
GPGEPEEPADWQTYREDENFVCIRFESLAEARQAVTCFRNMFMGIGVEISLGEQGRGVEMRIGKVAPTVT
PAVPLAKTPGLQTSDAAPVFLTELQNDVQDGYPMSFDCVVTGQPVPSVRWFKDGKLEEDDHYMINEDQGGG
HQLIITAVVPADMGVYRCLAENSMGVSSTKAELRVELTSTDYDTAADATETSSYFSAQGYLSSREQEGTESDE
GQLPQVLEELKDLQVAPGTRLAKFQLKVKGYPA PKLYWFKDGGPLTSDHIRMTDKKTLHTLEIVSVTREDSG
QYAAYSNAVGAAYSARLLVRGPSEPEEK PASDVHERLVPPRI LEKFTPKKVKRGSSITFSVKVEGHPAPSV
HWLKEEA EKGV LWIGPDTPGYTMASSSKQHSLVLLDVGRQHQTGTYTCIATNPAGQALCSASLHISGLAKEEQ
ERVKEALISSFLQGTSAVSAQMS ESAGFADLVGQSKGESLVAEEAHSHLSLAEVGT EEF LQKLTSTQITMVS
AKISQAKLQVPGGDSDEETKTPSASPRHGRSRPSSSVQSESSSESEDGDSRGEIFDIYVVTADYLP LGAEQDAI
LLREGQYVEVLD SAHPLRVLRTKTPKSSPSRQGVVSPAYLDRKRLKLSPEWGPTEAPEFPGEAVSEDEYRTRL
SSVIQELLSS EQAFV GELQFLESHMKHLERSPRVPAAVASQKTVI FRNVQDISHFHSSFLKELQCGCTDDDV
AMCFIKNQEA FEKYLEFLVGRVQAESVVVSTPVQEFYKKYAEETLSAKDPTQPPPPPLQHYLEQPVERVQKYQ
ALLKELIRNKARNRQNCALLEQAYAVVSALPQRAENKLVSLMENYPGTLEALGEP I RQGHFIVWEGAPGARM
PWKGHNRHVFLFRNYLVICKPRRDSRTD TFSYVFRNMMKLSSIDLNDQVEGDDRAFEVWHEREDSVRKYLLQA



RTVI IKNSWVKEICGIQQRLAQPVWRPPEFEEELADCTAELGETVVKLACRVTGTGPKPIVSWYKDGKPVVEVDPH  
HILIEDPDGSCCTLLILDNLGTIDSGQYMCFAASAAGNASTLGKILVQVPPRFVNVKVRATPFVEGEDAQITCTVE  
GAPYPQIRWYKDGTLTLLAPGNRYRMLNEPRSGVLVLIQAASKEDLGHYECELVNRLGSTRGGGELYMOSPALR  
ARDQHHREQIVAAVEERRPSP\*  
>rs46635685\_ENSMUSP00000151217\_c.514:C>A\_p.S172\*  
ENSMUST00000219084.3|Obscn-207|ENSMUSG0000061462|-|chr11:g.59026687:G>T  
MDHSFSGAPRFLTRPKAFVSVGKDATLSCQIVGNPTPHVSWEKDRQFVEAGARFRLAQDGDVYRLTILDLAL  
GDSGQYVCRARNAIGEFAAVGLRVDSEGTCAEQAPHFLLRPTSIRVREGADATFRCRVGGSPQPAVSWSKDG  
RRLGPPDAPHVRVEEHGESSALRIR\*ARPRDGGTYEVRAENPLGSASAAAALVVDSDAEVAGPPGTSTATLLA  
HLQQRRREAMRAEGIPPSPPGAGTRTCTVTEGKHARLSCFVTGEPKPEVWKKDGQLVTEGRRHVVEDEQENF  
VLKILFCKQSDRGLYTCTASNLVGQTYSSVLVVVREPTVPFKKRLQDLEVREKESATFQCEVAQPAEAAWFK  
EETRLWASAKYDIEEGTERRLTVRNVSADDDAVYICETTEGSRVVAELSVQGNLTKLPRKTAVRTGDTAIF  
WVELAVPEGPVRWLRNQEEMVAGGRVAITAEGTCHTLTI FQCTLEDMGEVAFVSGGCRTTTQFCVSAAPRRPPL  
YPPADPVVKAKTSSVTLWSAPPHGDRPVTIDGYVLEKRKLGA YAWSRCHEAGWLATTEFTITGVAAEGDFQ  
FRVSAINHFGQGPYLEFPGTMHLVPLAVKTPKAVEAVEGGEVTFVSDLTVASSGEWFLDGEALKASSIYVI  
RCDRTRHMLTIREVPARLHGAQLKVFANGIETSIQMVVRAALGLPSSKLPAAAAREVLAQLHHEEAQLLAE LSD  
QAAAATWTKDRELSTLGPKYEMQVSAGRRALLVRDVAQDDAGLYECVSRGSRRTAYQLLVQDITDGYARDWGPAG  
PQKHMCKCAGAKIARYLGSSCYRFLQYDKGVVHWLEAALDTRQKGTSSCSLHEKPKLVFAKGQQAHSVEKAE  
AGNSATLSCEVTQAQTEVTFWKDGKLLSSSSKVRMEASGCSRRLVVQQAGKADAGEYSCEAGGQKLSFRLDVA  
EPKLVFAKGQQAHSVEKAEAGASATLSCEVAQAQTEVTFWKDGKLLSSSSKVRMEASGCSRRLVVQQAGKADA  
GEYSCEAGGQKLSFRLDVAEPKMFVFAKEQQARSEVKAEGASATLSCEVAQAQTEVTFWKDGKLLSSSSKVRM  
EASGCSRRLVVQQAGKADAGEYSCEAGGQKLSFRLDVTEPKLVFAKEQQARSEVKAEGASATLSCEVAQAQ  
EVTWFKDGKLLSSSSKVRMEASGCSRRLVVQQAGKADAGEYSCEAGGQKLSFHLVDVTEPKLVFAKEQQAHSEV  
KAEAGASATLSCEVAQAQTEVTFWKDGKLLSSSSKVRMEASGCSRRLVVQQAGKADAGEYSCEAGGQKLSFR  
DVAEPKLVFAKEQQARSEVKAEGASATLSCEVAQAQTEVTFWKDGKLLSSSSKVRVEASGCSRRLVVQQAGK  
ADAGEYSCEAGGQKLSFRLDVAEPKLVFAKEQQANSEVKAEGASATLSCEVAQAQTEVTFWKDGKLLSSSSK  
VRVEASGCSRRLVVQQAGKADAGEYSCEAGGQKLSFRLDVAEPKLVFAKEQQAHSEVKAEGASATLSCEVAQ  
AQTEVTFWKDGKLLSSSSKVRVEASGCSRRLVVQQAGKADAGEYSCEAGGQKLSFRLDVAEPKLVFAKEQQAH  
SEVKAEGASATLSCEVAQAQTEVTFWKDGKLLSSSSKVRVEASGCSRRLVVQQVKGADAGEYSCEARGQKLS  
FRLDVAEAEESQIPERPSRREPLVVKHEHETIILTATIAAPSVAAVTWLKDGV EIRRSKRHEATSLGDTHTLTVR  
GAQVLD SAIYSCRVGKEGQDFPVQVEEVAAKFSKPLEPVEGELGGTVMLVCELSPEQAEVWRCGNTQLRPGK  
RFQMTSEGPRRTLTVSGLREDDAEYVCE SRDDRTSARLTVKVPVVKFTSGLSAMVAEEGQEATFQCVVSPS  
DAGVTWYKDGMLQLPSEKFMVVESEGASRSLTILGLTLEDAGQVTVAEAGASSAALRVREAPVLFKFKLEPQT  
VEERTSVTLEVELTRPWPEVKWTRNAAVLTPSENVEIRAEGARHCLVLRVSGFADRGFFGCETPDDKTQAKLN  
VEMRQVLRGLVEVAKEQGTASMDVELSHAEEVGSWTRDGLRLQPGPKCHLAVQGPVHILTL SALQFQDSG  
LVAFRAEGVHTSARLIVTELPVSFTRVLQDVVATQKEKVTLECELSRPVDVWRWLKDGVELRAGKATGIVAQGT  
CRSLVIYRCETGDQGVYCDALDAQTSASLRVQGRYTLIFRRVLAEDAGEVKFVAENAESRAHLRVKELPVT  
LLRPLRDKIAMEKHRGVLECVSRASAQVRWFVGGVLELQSGPKYEVVSDGLYRKLVIINDVQPEDEDTYTC DAG  
NVKTSAQFFVEEQSITIVRGLKDMTVMEPAPAWFECETSIPSVRPPKWL LGKTVLQAGGNVLEQDGTVHRLT  
LHKTCSTMTGVPVHFTIGKSRSSAQLVVS DIPVVLTRPLEPKAGRELQSVVLSCDFRPAPKAVQWYKDDTPLSP  
SEKFKMALEGQMAELRILRLTPADAGVYRCQAGSAQSSAEVTV EAREVTVIQPLQDAEAMEEGRVCFSCELSH  
KDEDIEWSLNGTPLYNDSFHEISHEGCLHTLVLKSVRQADTGTVCATSPKVS SARLVVKGKPVVFLKALDDV  
SAEERGLTLTQCEVSDPEARVWVRKDGVELGSPDKYDFLHKAGARGLTVHDLSHEDAGLYTCQVGSKETQSKV  
SVHDLHVGITKRLKTVEVLEGECSFECVLSHESPSDPAVWTVGGKTVGGSGHFHAVRQGRKYTLTVKDAALS  
DAGEVVSVLGLTSKASLIIRERPV DITKPLEDQRTTLGEDVMLSCELSRAGTSVRWLKDGKAIRKSQKYDLL  
SEGTRAVLVVRKASLKDSGEYTCETEASKSTAKLCVEEKANRFTEELADLQVEEKGRAVFTCKTEHPASVVTW  
RKGLLELRASGKHVPSQEGLTLKLTINALERTSDTYTCDIGQARTQARLLVHGQKVRVIEDLEDTAVQEGSS  
AKFCCR IAPADYGPVHWF LDKTPLHSNELNEITVQPGYHVLT LRLQALKDSGTVYFEAGDQRTSAAALRVTEK  
PSIFSRPLTDVTVTEGEDLTLVCETTTVDSSVRWTKDGKTLRPSARCQLSHEGCAQQLLITATTPQDGGRYKC  
EIGGASSSSIVRVHALPVRFRESLKDVEVPEGKAATLRCVLSVAAPVEWRHGDDVLKSSNKYS LRQEGAVLE  
LVIRDLPQDQSGQYSCSFGDQTTSATLTVKTSQAQFVGLKRNKEATEGTTVTLRCELTK EAPVEWKKGTETLR  
NGDKYSLKQDGA VCELQICSLLVADAGEYSCVCGQEKTSATLTVKALLVHFVRRRLRSKEATEGDTTTLQCELS  
KAAPVEWRKGTETLRLDGD RYSLKQDGA VCELQIRSLTIADAGEYLCTCGQEKTSATLTVRGLPAKFIEDLRSQ  
EATEGATAILRCELSKAAPVEWRK GSETLKDGD RYTLRQDGA VCELQIRGLAVVDGTGTYSSLP TKFTEGLRNE  
EATEGTMATLRCQMSKAAPVEWRK GSETLRLDGD RYSLRQDGA MCELQIRGLTIEDSGEYTCVCGQEKTSATLS  
VKALPPRFIEDLRSQEATEGTMATLRCQMSKAAPVEWRK GSETLGDGGRYSLRQNGAVCELQI HDLAVEDTGE  
YSCVCGQEKTSATLNVKALPPKFTEGLKKEEATEGTMVTLRCQMSKEATVEWRKGAKT LSDGGRYSLRQDGA M  
CELQICGLAVEDAGEYSCVCGQEKTSATLSVKALPPRFIEDLRSQEATEGTMATLRCQMSKAAPVEWRK GSET

LRDGDYSLRQDGA VCELQIRDLAVEDAGEYLCVCGQEKTSATLSVKALPPRFIEDLRSQEATEGTMATLRCQ
MSKAAPVEWRKGSKTLRDGDYSLRQDGA MCELQICDLAVEDTDYSCVCGQEKTSATLSVKAPQVVFQOPLQ
NLQAEEGSMASLRCELSVPNAAMVWSKGGLELQGDTRREARQQGCVAELLLRDLRREDAGEYSCTCGSQTTSA
TLMVTAAPVRFLRELQAQDVDEGATARLRCELSREAVSVEWRKGSLLQFPCAKYQMVQEGTTAELLVHGVEQE
DAGEYTC DAGHTQS IARLSVRAPKPKFKTDLQSTEQEAGGTARLCCQLSEAE PGTPVQWLKEGVELHVGSKYE
MRRQGAVCELLIHGLEAKDTGEYACL VGGQKTLASLRVKEPEVTIVRGLVDMEVQADEDEVEFTCKV SQAGATD
VQWHLQGLPLOSNEVTEVAVLADGCTHVLQ LKGVTL EDAGTVSFHVGG LSSSAQLTVRVPEVTVLEPLKDVQL
SEGQDAHFRCRLSRASGQEARWALGGVPLQC NEMNDITVEQGTLYLLTLHKVTLEDAGTITLQVGS CSSEAQL
KVTAKNTVLRGLENVDALEGG EALFECQLSQPEVA AHTWLLDDEPVHTSEKVEVVFENGLRHLLLLK NLKPQ
DSCRVTFLAGDVVTS AFLTVRGWRLEVL EPPHDASVKAGMQVRFTCILSEAVPVGEATWYINGAAIQPDDTDW
TVTTDGSHHALTLSNAQPQHAGEVTF AARDAVASARLSVLALPDPPEDAEVVGRSDHSVTL SVWVAPMSDGGGG
LCGYRVEMKEASTGQWQLCHDLVPGPECV VDDLVP GKTYRFRVA AVGPAGAGEPVHLPQMVKIAPAPAPAPAP
APAPETRQAVVGEDICLELEVAADGGEV VVWHKGTERRIQPGGHFEVLSRGQRQMLVIKGFRTEDQGEYRCGPIQ
GLPSSGAATFNVVMTSGSGDEVPAQPSLPPEAAQEGDLHLLWEALARKRRMSREPTLDSISELPEEDSRVQHL
RQEAETAPDLSEGYSTADELARTGEADLSHTSSDDESRAGTPSLVTYLKKAGGPGISPLASKHEAQVTTSVK
PQKQQEPVVPTCPPPGDLSAADLMDPSLDKAAVKIQAAF KGYKVRKEMKQQEGPVFSRTFGDTEA QVGDVLRRL
ECVLATKTD MRACWLKDGIELTDGRHYHIDQLKDGTC SLLVTGLAPTDSGRYTCQVSTKSGRVSHSACVIVVSG
TESEAESSSGGELDDAFRRAARLRHLRFR TKSPAELSEELF LSADEGPGPEEPADWQTYREDNFVCIRFE
SLAEARQAVTCFRNMFATMGIGVEISLGEQ GPRGVEMRIGKVAPT VTPAVPLAKTPGLQTSDAAPVFLTELQN
QDVQDGYPMSFDCVVTGQPVPSVRWFKDGK LLEEDDH YMINEDQQGGHQLIITAVVPADMGVYRCLAENSMGV
SSTKAELRVELTSTDYDTAADATETSSYFSAQGYLSSREQEGTESDEGQLPQVLEELKDLQVAPGTRLAKFQL
KVKGY PAKPLYWFKDGQPLTSDHIRMTDKKTLHTLEIVSVT REDSGQYAAYISNAVGAA YSSARLLVGRPSE
PEEKPASDVHERLVPPRI LEKFTPKKVGRGSSITFSVKVEGHPAPSVHWLKEEA EKGLWIGPDPGYTMASS
SKQHSVLVLDVGRQHOGTYTCIATNPAGQALCSASLHISGLAKEEEQERVKEALISSFLQGT SQAVSAQMSES
AGFADLVGQSKGESLVAAEEAHSHLSLAEVGT EEFLOKLT SQITEMVSAKISQAKLQVPGGDSDEETKTPSASP
RHGRSRPSSSVQESSESEDGSRGEIFDIYVV TADYLP LPGAEQDAIILREGQYVEVLD SAHPLRVLVTRTKPT
KSSPSRQGVWSPAYL DKRLKLSPEWGPTEAEPF PGEAVSEDEYRTRLS SVIQE LLSSEQAFVGLQLFLESHHM
KHLERSPRVPAAVASQKTVIFRNVQDISHFHSSFLKELQCGCTDDDVAMCFIKNQEA FEKYLEFLVGRVQAES
VVVSTPVQEFYKKYAEETLSAKDPTQPPPPPLQHYLEQPVERVQKYQALLKELIRNKARNRQNCALLEQAYAV
VSALPQRAENKLVSLMENYPGTLEALGEP IROGHFIVWEGAPGARMPWKGNHRHVFLFRNYLVICKPRRDSR
TDTFSYVFRNMMKLSSIDLNDQVEGDDRAFEV WHEREDSVRKYLLQARTVIKNSWVKEICGIQQR LAQPVWR
PEFEFEELADCTAELGETVKLACRVGTGPKPIVSWYKDGK PVEVDPHHILIEDPDGSC TLI LDNLTGIDSGQY
MCF AASAAGNASTLGKILVQVPPRFV NKVRATPFVEGEDAQITCTVEGAPYPQIRWYKDG TLLAPGNRYRMLN
EPRSGVLV LVIQAASKEDLGHYEC ELVNRLGSTRGGGEL YMQSPALRARDQHHR EQIVA AVEVTEQETKVPKK
TVIIBETITTVVKS PRGRRQSPGKSPSRSPRRSASPRRPGLLAPERLYPPGTSPSRRLEVEVQGRKAPV PLY
VTEAEVHAPASQSPKWLVEETIEVRVKKTGSRGASPVREMTSRGEGILFTLPGGI PGRDPNANN SNKSVY
QEARTWGP AVVHVGE PFI FQVDSVGNVDVAASPEPEQVRASQKEENTERQEGCSDG DENTFLMEEPQD TDSL
QGRDPKILTHNGRVLT LADLEDYVPQEGE TFGCGDSTPSTPDEPPCEVSVLQREI SEPTVQGPVLLNVGRPPG
TGATPSFFRPGSQVHSPESVSFLLREAWSGPVSAAPWTSSFH THVQSSVDGSHGSFKTEVSTQTVSF GAVGET
VTLHIDPDGGEAPGPSQG\*

>rs262337383\_ENSMUSP00000065882\_c.484:C>T\_p.T162I
ENSMUST00000069631.3|Iba57-202|ENSMUSG00000049287|-|chr11:g.59052155:G>A
MSHGRHPGCASYLHRALCLGPQPVKSEASGVIFKMGASALS LPPHFLERFRWLLLNCSAVASAVRQLAGLPSL
QLWLVNCSAAAATTAVPPPLTSAVSAASFCYQPSPHYRKQEKKMERSLFSGLLLPHWGKAQESLPTTSLSEP
SQPVCIAPERMFGPIIDLPIGNLRND\*

>rs50539781\_ENSMUSP00000065882\_c.37:T>C\_p.L13S
ENSMUST00000069631.3|Iba57-202|ENSMUSG00000049287|-|chr11:g.59053933:A>G
MSHGRHPGCASYSHRALCLGPQPVKSEASGVIFKMGASALS LPPHFLERFRWLLLNCSAVASAVRQLAGLPSL
QLWLVNCSAAAATTAVPPPLTSAVSAASFCYQPSPHYRKQEKKMERSLFSGLLLPHWGKAQESLPTTSLSEP
SQPVCIAPERMFGPIIDLPIGNLRND\*

>rs26955657\_ENSMUSP00000104421\_c.1096:T>C\_p.V366A
ENSMUST00000108793.9|Gjc2-202|ENSMUSG00000043448|-|chr11:g.59067384:A>G
MTNMSWFLTRLLVEIHNHSTFVGKVVLTVLVVFRI VLTAVGGESIYSDEQSKFTCNTRQPGCDNVCYDAFAP
LSHVRFVVFQIVVISTPSVMYLYAVHRLARASEQGERRALRRRPGTRRLPRAQLRPPPPGWPDTDLGEAEP
ILLALEEDED EEPGAPEGPEDTEEERAEDVA AKGGGGDGKTVVTPGPAGQHDGRRRIQREGLMRVYVAQLVVR
AAFEVAFLVGYLLYGFVPPFFACSRQPCPHVVD CFVSRPTEKTVFLLVMYVVSC LLLLNLCEMAHLGLGS
AQDAVRGRRGASAAGPGPTPRPPPCAFPA AAGLACPPDYSLVVRAAERARAHDQNLANLALQALRDGA AVAA

ASADRDSPPCAGLNATSRGAPRVGGLASGTGSATSGGTVGEQSRPGAQEQQLATKPRAGSEKSGTGSRDGKATV  
WI\*  
>rs26955657\_ENSMUSP00000104418\_c.1096:T>C\_p.V366A  
ENSMUST00000108790.2|Gjc2-201|ENSMUSG00000043448|-|chr11:g.59067384:A>G  
MTNMSWSFLTRLLEEIHNHSTFVGKVVLTVLVVFRIVLTAVGGESIYSDEQSKFTCNTRQPGCDNVCYDAFAP  
LSHVRVWFVQIVVISTPSVMYLYAVHRLARASEQERRRALRRRPGTRRLPRAQLPPPPPGWPDTTDLGEAEP  
ILALEEDEDDEEPGAPEGPGEDETEERAEDVAAKGGGGDGKTVVTPGPAGQHDGRRRIQREGLMRVYVAQLVVR  
AAFEVAFLVGQYLLYGFEVPPFFACSRQPCPHVVDCFVSRPTEKTVFLLVMYVVSCLCLLLNLCEMAHLGLGS  
AQDAVRGRRGASAAAGPGPTPRPPPCAFPAAAAAGLACPPDYSLVVRAAERARAHQNLANLALQALRDGAAVAA  
ASADRDSPPCAGLNATSRGAPRVGGLASGTGSATSGGTVGEQSRPGAQEQQLATKPRAGSEKSGTGSRDGKATV  
WI\*  
>rs262797552\_ENSMUSP00000104421\_c.651:G>A\_p.V218I  
ENSMUST00000108793.9|Gjc2-202|ENSMUSG00000043448|-|chr11:g.59067829:C>T  
MTNMSWSFLTRLLEEIHNHSTFVGKVVLTVLVVFRIVLTAVGGESIYSDEQSKFTCNTRQPGCDNVCYDAFAP  
LSHVRVWFVQIVVISTPSVMYLYAVHRLARASEQERRRALRRRPGTRRLPRAQLPPPPPGWPDTTDLGEAEP  
ILALEEDEDDEEPGAPEGPGEDETEERAEDVAAKGGGGDGKTVVTPGPAGQHDGRRRIQREGLMRVYVAQLVIR  
AAFEVAFLVGQYLLYGFEVPPFFACSRQPCPHVVDCFVSRPTEKTVFLLVMYVVSCLCLLLNLCEMAHLGLGS  
AQDAVRGRRGASAAAGPGPTPRPPPCAFPAAAAAGLACPPDYSLVVRAAERARAHQNLANLALQALRDGAAVAA  
VSADRDSPPCAGLNATSRGAPRVGGLASGTGSATSGGTVGEQSRPGAQEQQLATKPRAGSEKSGTGSRDGKATV  
WI\*  
>rs262797552\_ENSMUSP00000104418\_c.651:G>A\_p.V218I  
ENSMUST00000108790.2|Gjc2-201|ENSMUSG00000043448|-|chr11:g.59067829:C>T  
MTNMSWSFLTRLLEEIHNHSTFVGKVVLTVLVVFRIVLTAVGGESIYSDEQSKFTCNTRQPGCDNVCYDAFAP  
LSHVRVWFVQIVVISTPSVMYLYAVHRLARASEQERRRALRRRPGTRRLPRAQLPPPPPGWPDTTDLGEAEP  
ILALEEDEDDEEPGAPEGPGEDETEERAEDVAAKGGGGDGKTVVTPGPAGQHDGRRRIQREGLMRVYVAQLVIR  
AAFEVAFLVGQYLLYGFEVPPFFACSRQPCPHVVDCFVSRPTEKTVFLLVMYVVSCLCLLLNLCEMAHLGLGS  
AQDAVRGRRGASAAAGPGPTPRPPPCAFPAAAAAGLACPPDYSLVVRAAERARAHQNLANLALQALRDGAAVAA  
VSADRDSPPCAGLNATSRGAPRVGGLASGTGSATSGGTVGEQSRPGAQEQQLATKPRAGSEKSGTGSRDGKATV  
WI\*  
>rs46382342\_ENSMUSP00000104421\_c.210:T>C\_p.F71L  
ENSMUST00000108793.9|Gjc2-202|ENSMUSG00000043448|-|chr11:g.59068270:A>G  
MTNMSWSFLTRLLEEIHNHSTFVGKVVLTVLVVFRIVLTAVGGESIYSDEQSKFTCNTRQPGCDNVCYDALAP  
LSHVRVWFVQIVVISTPSVMYLYAVHRLARASEQERRRALRRRPGTRRLPRAQLPPPPPGWPDTTDLGEAEP  
ILALEEDEDDEEPGAPEGPGEDETEERAEDVAAKGGGGDGKTVVTPGPAGQHDGRRRIQREGLMRVYVAQLVVR  
AAFEVAFLVGQYLLYGFEVPPFFACSRQPCPHVVDCFVSRPTEKTVFLLVMYVVSCLCLLLNLCEMAHLGLGS  
AQDAVRGRRGASAAAGPGPTPRPPPCAFPAAAAAGLACPPDYSLVVRAAERARAHQNLANLALQALRDGAAVAA  
VSADRDSPPCAGLNATSRGAPRVGGLASGTGSATSGGTVGEQSRPGAQEQQLATKPRAGSEKSGTGSRDGKATV  
WI\*  
>rs46382342\_ENSMUSP00000104418\_c.210:T>C\_p.F71L  
ENSMUST00000108790.2|Gjc2-201|ENSMUSG00000043448|-|chr11:g.59068270:A>G  
MTNMSWSFLTRLLEEIHNHSTFVGKVVLTVLVVFRIVLTAVGGESIYSDEQSKFTCNTRQPGCDNVCYDALAP  
LSHVRVWFVQIVVISTPSVMYLYAVHRLARASEQERRRALRRRPGTRRLPRAQLPPPPPGWPDTTDLGEAEP  
ILALEEDEDDEEPGAPEGPGEDETEERAEDVAAKGGGGDGKTVVTPGPAGQHDGRRRIQREGLMRVYVAQLVVR  
AAFEVAFLVGQYLLYGFEVPPFFACSRQPCPHVVDCFVSRPTEKTVFLLVMYVVSCLCLLLNLCEMAHLGLGS  
AQDAVRGRRGASAAAGPGPTPRPPPCAFPAAAAAGLACPPDYSLVVRAAERARAHQNLANLALQALRDGAAVAA  
VSADRDSPPCAGLNATSRGAPRVGGLASGTGSATSGGTVGEQSRPGAQEQQLATKPRAGSEKSGTGSRDGKATV  
WI\*  
>rs48912348\_ENSMUSP00000127566\_c.152:C>A\_p.S51R  
ENSMUST00000170202.9|Guk1-204|ENSMUSG00000020444|-|chr11:g.59077622:G>T  
MLRRPLVGLAVAALGRVPADGMAGPRPVVLSGSPGAGKSTLLKKLFQEHSRIFGFSVSHTRNPRPGEEDGKD  
YYFVTREMMQRDIAAGDFIEHAEFSGNLYGTSKEAVRAVQAMNRCVLDVDLQGVRSIKKTDLCPIYIFVQPP  
SLDVLEQRLRLRNTETEEESLAKRLAAARTDMESSKEPGLFDLVI INDDLKAYATLKQALSEEIKKAQGTGHA  
\*  
>rs48912348\_ENSMUSP00000130214\_c.116:C>A\_p.S39R  
ENSMUST00000170895.3|Guk1-205|ENSMUSG00000020444|-|chr11:g.59077622:G>T  
MEAAATHQVGMAGPRPVVLSGSPGAGKSTLLKKLFQEHSRIFGFSVSHTRNPRPGEEDGKDYFVTREMMQRD  
IAAGDFIEHAEFSGNLYGTSKEAVRAVQAMNRCVLDVDLQGVRSIKKTDLCPIYIFVQPPSLDVLEQRLRLR  
NTETEEESLAKRLAAARTDMESSKEPGLFDLVI INDDLKAYATLKQALSEEIKKAQGTGHA\*

>rs48912348\_ENSMUSP00000134236\_c.89:C>A\_p.S30R ENSMUST00000172714.2|Guk1-206|ENSMUSG00000020444|-|chr11:g.59077622:G>T  
MAGPRPVVLSGSPGAGKSTLLKKLQEHRSI  
>ENSMUSP00000127566\_c.145:CA>TG\_p.H49L ENSMUST00000170202.9|Guk1-204|ENSMUSG00000020444|-|chr11:g.59077629:TG>CA  
MLRRPLVGLAVAALGRVPADGMAGPRPVVLSGSPGAGKSTLLKKLQELQQHLRLQRVSYKEPTTW\*RRWQR  
LLLCDQGDAA\*YCSRGLH\*AC\*VLREPVRDKQGSCSGCAGHEPHLRARCRPTRCAQHQED\*SVSHLHLCAAS  
LAGRAGATTATAQH\*D\*GESGKAAGSCTDRHGEQQGAWLV\*PGDHQ\*RPG\*SLCNPEAGAL\*GNQESTGNWPR  
L  
>ENSMUSP00000130214\_c.109:CA>TG\_p.H37L ENSMUST00000170895.3|Guk1-205|ENSMUSG00000020444|-|chr11:g.59077629:TG>CA  
MEAATHQVGMAGPRPVVLSGSPGAGKSTLLKKLQELQQHLRLQRVSYKEPTTW\*RRWQRLLLCDQGDAA\*  
YCSRGLH\*AC\*VLREPVRDKQGSCSGCAGHEPHLRARCRPTRCAQHQED\*SVSHLHLCAASLAGRAGATTATA  
QH\*D\*GESGKAAGSCTDRHGEQQGAWLV\*PGDHQ\*RPG\*SLCNPEAGAL\*GNQESTGNWPR  
>ENSMUSP00000134236\_c.82:CA>TG\_p.H28L ENSMUST00000172714.2|Guk1-206|ENSMUSG00000020444|-|chr11:g.59077629:TG>CA  
MAGPRPVVLSGSPGAGKSTLLKKLQELQQH  
>rs45683162\_ENSMUSP00000127566\_c.126:A>G\_p.K43E  
ENSMUST00000170202.9|Guk1-204|ENSMUSG00000020444|-|chr11:g.59077648:T>C  
MLRRPLVGLAVAALGRVPADGMAGPRPVVLSGSPGAGKSTLLEKLFQEHSSIFGFSVSHHTTRNPRPGEEDGKD  
YFVVTREMMQRDIAAGDFIEHAEFSGNLYGTSKEAVRAVQAMNRCVLDVLDLQGVRSIKKTDLCPIYIFVQPP  
SLDVLEQRLRLRNTETEEESLAKRLAAARTDMESSKEPGLFDLVI INDDLKAYATLKQALSEEIKKAQGTGHA  
\*  
>rs45683162\_ENSMUSP00000130214\_c.90:A>G\_p.K31E ENSMUST00000170895.3|Guk1-205|ENSMUSG00000020444|-|chr11:g.59077648:T>C  
MEAATHQVGMAGPRPVVLSGSPGAGKSTLLEKLFQEHSSIFGFSVSHHTTRNPRPGEEDGKDYFVVTREMMQRD  
IAAGDFIEHAEFSGNLYGTSKEAVRAVQAMNRCVLDVLDLQGVRSIKKTDLCPIYIFVQPPSLDVLEQRLRLR  
NTETEEESLAKRLAAARTDMESSKEPGLFDLVI INDDLKAYATLKQALSEEIKKAQGTGHA\*  
>rs45683162\_ENSMUSP00000134236\_c.63:A>G\_p.K22E ENSMUST00000172714.2|Guk1-206|ENSMUSG00000020444|-|chr11:g.59077648:T>C  
MAGPRPVVLSGSPGAGKSTLLEKLFQEHSSI  
>rs6206862\_ENSMUSP00000020719\_c.444:A>G\_p.T149A  
ENSMUST00000020719.7|2310033P09Rik-  
201|ENSMUSG00000020441|+|chr11:g.59100024:A>G  
MFGSNRGGVRRGGQDFNWEDVKTQRENILGNLMAVPVGRWQKGRDLTWYAKDRAPCTGPSREEELAAVREA  
EREALLAALGYKNVRKQPTGLSKEDFVEICKREGGDPEEKGVDRLLGLGSASGSAGRVALSREDKEAAKLGSL  
VFAHHRVDSEGPSTAPTAPRKKPRAEDKVEPDAESHKSKKKEKKKKKKKKKKKKKKKDKHEKRAADSCSSSPS  
PPRPRHRHSDFSKCRKREHSQDSGRNPSRRRQDRSSDD\*  
>rs6223610\_ENSMUSP00000020719\_c.628:A>C\_p.E210A  
ENSMUST00000020719.7|2310033P09Rik-  
201|ENSMUSG00000020441|+|chr11:g.59100894:A>C  
MFGSNRGGVRRGGQDFNWEDVKTQRENILGNLMAVPVGRWQKGRDLTWYAKDRAPCTGPSREEELAAVREA  
EREALLAALGYKNVRKQPTGLSKEDFVEICKREGGDPEEKGVDRLLGLGSASGSAGRVALSREDKEAAKLGSL  
VFTHHRVDSEGPSTAPTAPRKKPRAEDKVEPDAESHKSKKKEKKKKKKKKKKKKKKKDKHEKRAADSCSSSPS  
PPRPRHRHSDFSKCRKREHSQDSGRNPSRRRQDRSSDD\*  
>rs49968039\_ENSMUSP00000079905\_c.249:A>C\_p.N84H  
ENSMUST00000061242.8|Arf1-201|ENSMUSG00000048076|-|chr11:g.59103978:T>G  
MGNIFANLFFKGLFGKKEMRIIMVGLDAAGKTTILYKLLKLGIVTTIPTIGFNVETVEYKNISFTVWDVGGQDK  
IRPLWRHYFQHTQGLIFVVDNSDRERVNEAREELMRMLAEDELDRDAVLLVFANKQDLPNAMNAAEITDKLGLH  
SLRHRNWIQATCATSGDGLYEGLDWLSNQLRNQK\*  
>rs49968039\_ENSMUSP00000126120\_c.249:A>C\_p.N84H  
ENSMUST00000163300.8|Arf1-202|ENSMUSG00000048076|-|chr11:g.59103978:T>G  
MGNIFANLFFKGLFGKKEMRIIMVGLDAAGKTTILYKLLKLGIVTTIPTIGFNVETVEYKNISFTVWDVGGQDK  
IRPLWRHYFQHTQGLIFVVDNSDRERVNEAREELMRMLAEDELDRDAVLLVFANKQDLPNAMNAAEITDKLGLH  
SLRHRNWIQATCATSGDGLYEGLDWLSNQLRNQK\*  
>rs50087235\_ENSMUSP00000079905\_c.30:G>A\_p.G11S ENSMUST00000061242.8|Arf1-201|ENSMUSG00000048076|-|chr11:g.59104283:C>T

MGNIFANLFKSLFGKEMRILMVGLDAAGKTTILYKLLKGEIVTTIPTIGFNVETVEYKNISFTVWVDVGGQDK  
 IRPLWRHYFQNTQGLIFVVDSDNDRERVNEAREELMRMLAEDELDRDAVLLVFANKQDLPNAMNAEITDKLGLH  
 SLRHRNWYIQATCATSGDGLYEGLDWLSNQLRNQK\*

>rs50087235\_ENSMUSP00000126120\_c.30:G>A\_p.G11S ENSMUST00000163300.8|Arf1-  
 202|ENSMUSG00000048076|-|chr11:g.59104283:C>T

MGNIFANLFKSLFGKEMRILMVGLDAAGKTTILYKLLKGEIVTTIPTIGFNVETVEYKNISFTVWVDVGGQDK  
 IRPLWRHYFQNTQGLIFVVDSDNDRERVNEAREELMRMLAEDELDRDAVLLVFANKQDLPNAMNAEITDKLGLH  
 SLRHRNWYIQATCATSGDGLYEGLDWLSNQLRNQK\*

>rs26955564\_ENSMUSP00000010044\_c.669:T>C\_p.F224L  
 ENSMUST00000010044.8|Wnt3a-201|ENSMUSG00000009900|-|chr11:g.59140845:A>G  
 MAPLGYLLVLCSLKQALGYSPIWWSLAVGPQYSSLSTQPILCASIPGLVPKQLRFRCRYVEIMPVSAEYVAGKAG  
 IQECQHQRFRGRWNCTTVSNSLAIFGPVLDKATRESAFVHAIASAGVAFVTRSCAEGSAAICGSSRLQSGP  
 GEGWKWGGCSEDIIEFGGMVSRFADARENRPDARSAMNRHNEAGRQAIASHMHLKCKCHGLSGSCEVKTCCWW  
 SQPDLRTIGDFLKDKYDSASEMVVEKHRESRGWVETLRPRYTYFKVPTERDLVYYEASPNFCEPNPETGSGFT  
 RDRTCNVSSHGIDGCDLLCCGRGHNARTERRREKCHCVFHWCCYVSCQECTRVYDVHTCK\*

>rs52569485\_ENSMUSP00000071081\_c.1326:A>T\_p.K443\*  
 ENSMUST00000066330.15|Mrip-201|ENSMUSG00000005417|+|chr11:g.59640417:A>T  
 MSAAKENPCRKFQANIFNKSKCQNCFKPRESHLNDEDLTQAKPIYGGWLLLAPDGTDFDNPVHRSRKWQRRF  
 FLYEHGLLRYALDEMPTTLPQGTINMNQCTDVVDGEARTGQKFSLCILTPDKEHFIRAETKEIISGWLEMLM  
 VYPRTNKQNKKKRKEVPTPQEPGPAKMAVTSSSGSSGSSSSIPSAEKVPTTKSTLWQEEEMRAKDQPDGTS  
 LSPAQSPSQSPPAACTPREPGLESKEDESTISGDRVDGGRKVRVESGYFSLEKAKQDLRAEEQLPPLLSPPS  
 PSTPHSRRSQVIEKFEALDIEKAHEMETNMLILTPSSDTRQGRSERRAI PRKRPDLLNFKKGWLTQYEDGQ  
 WKKHWFVLADQSLRYYRDSVAEEAADLDGEINLSTCYDVTEYPVQRNYGFQIHTKEGEFTLSAMTSGIRRNWI  
 QTIM\*HVLPAAPDVTSSLPPEGKKNKSTSFETCSRSTEKQEAEPGEPDPEQKKSRRARERRREGRSKTFDWAEFR  
 PIQQALAQERASAVGSSSDGDPGCLAEPELELERARRRERKRFRGMLDTIDGPGMEDTALRMDIDRSPGL  
 LGTPDLKTQNVHVEIEQRWHQVETTPLEEEKQVPIAPLHLSLEDRSERLSTHELTSLLEKELEEQSQKEASDLL  
 EQNRLLDQDLRVALGREQSAREGYVLQTEVATSPSGAWQLRHRVNQDLQSELEAQCRREQELITQQIQTLLKHSY  
 GEAKDAIRHHEAEIQTLLQTRLGNAAAEALAIKEQALAKLKGELKMEQKQVREQLEEWQHSKAMLSGQLRASEQK  
 LRSTEARLLEKTQELRDLETQQALQRDRQKEVQRLQECIAELSQQLGTSEQAQRLMEKKLKRNYTLLLESCEQ  
 EKQALLQNLKEVEDKASAYEDQLQGHVQQVEALQKEKLESETCKGSEQVHKLEEELEAREASIRQLAQHVQSLH  
 DERDLIKHQFQELMERVATSDGDVAELQEKLRGKEVDYQNLHSHHRVSVQLQSVRTLLREKEEELKHIKETH  
 ERVLEKKDQDLNEALVKMIALGSSLEETEIKLQEKEECLRRFVSDSPKDAKEPLSTTEPTEEGSGILPLGSVT  
 RVFPGFPHSQPEDEDPASAGLGEEGSSGSLSREENTILPKSADMPEREGHLQSTSKSDPGAPIKRPRIRFSTIQ  
 CQRYIHPEGCAKAWTSSTSSDTSQDQSPSEDSVSSEATPNTLPAAADAETYISIIHSLKLYVTEEKLKDV  
 VRLESQQGQSQEALLALHQWAGTEAQLREQLRASLLQASALASQLEQERQKATNIEHHPGELEDFQAKNSQ  
 ALTCLENCWKKLRSLPWADQEEGQDACAASLANIESMLVSAIKALQPWASPASRTQAEQEKEHPIESGMAAP  
 VQQPCQPILNEQEHRKLLSAQIVLEASLINQIADSLKNTTSDVYGVLCELTQSGEWPLKEESAAPSAGAPVEI  
 WAKKVLVNGEFWSQVESLSKHLGTLGEETACTSGDRQOHTPQSLADATWIRAELSYATQSVRELFFHRLQSIQ  
 ETLQGTQAALQOHKMLGEILGAYQTPDFERVIQIILETLRHPTGREDQVQTSWDQNPPLGEILRPGTDGSOEP  
 LQALHQSPPEVLAAIQDELAQQLEKASILEEISAALPVLPPTEPLGGCQRLLRMSQHLSYESCLEGLGOYSSL  
 LVQDAIIQAQVCYAACRIRLEYEKELRFYKACQEAQGASGQKRAQAVGALKEEYEEELLHKQKSEYQKVITLI  
 EKENTELKAKVSMQDHQQRCLQEAENKHSESMFALQGRYEEERCMVEQLSHTENTLQAEERSVLSQLDASVK  
 DRQAMEQHVVQMKMLDRFQLKQVRELQAVHQEELRALQEHYIWSLRGALSQYQPSHPDSSLAPGPSEPRAVP  
 AAKDEAESMSGLRERIQELEAQMGMVREELGHKELEGDVAALQEKYQRDFESLQKATCERGFAMEETHQKKIE  
 DLQRQHORELEKLRREKDRLLAEETAATISAIEMKNAREEMERELEKSQRSQISSINSNDIEALRRQYLEEL  
 QSVQRELEVLSEQYSQKCLENAHLAQALEAERQALRQCQRENQELNAHNQELNNRLAAEITRLRLLTGDGGG  
 ESTGLPLTQGKDAYELEVLLRVKESEIQYLKQEISSLKDELQTLALRDKKYASDKYKDIYTELSIAKAKADCDI  
 SRLKEQLKAATEALGEKSPGTTVSGYDIMKSKSNPDFLKKDRSCVTRQLRNIRSKSLKEGLTVQERLKLFE  
 RDLKKD\*

>rs52569485\_ENSMUSP00000104382\_c.1320:A>T\_p.K441\*  
 ENSMUST00000108751.8|Mrip-203|ENSMUSG00000005417|+|chr11:g.59640417:A>T  
 MSAAKENPCRKFQANIFNKSKCQNCFKPRESHLNDEDLTQAKPIYGGWLLLAPDGTDFDNPVHRSRKWQRRF  
 FLYEHGLLRYALDEMPTTLPQGTINMNQCTDVVDGEARTGQKFSLCILTPDKEHFIRAETKEIISGWLEMLM  
 VYPRTNKQNKKKRKEVPTPQEPGPAKMAVTSSSGSSGSSSSIPSAEKVPTTKSTLWQEEEMRAKDQPDGTS  
 LSPAQSPSQSPPAACTPREPGLESKEDESTISGDRVDGGRKVRVESGYFSLEKAKQDLRAEEQLPPLLSPPS  
 PSTPHSRRSQVIEKFEALDIEKAHEMETNMLILTPSSDTRQGRSERRAI PRKRDFASEAPTAPLSDACPLSPHRRAKSLDRRSTESSMTPDLLNFKKGWLTQYEDGQWK  
 KHWFVLADQSLRYYRDSVAEEAADLDGEINLSTCYDVTEYYPVQRNYGFQIHTKEGEFTLSAMTSGIRRNWIQT  
 IM\*HVLPAAPDVTSSLPPEGKKNKSTSFETCSRSTEKQEAEPGEPDPEQKKSRRARERRREGRSKTFDWAEFRPI



QQALAQERASAVGSSDSGDPGCLEAEPGELERERARRREERRKFRGMLDITDGPDMEDTALRMDIDRSPGLLG  
 TPDLKTQNVHVEIEQRWHQVETTPLEEKQVPIAPLHLSLEDRSERLSTHELTSLEKELEQSQKEASDLLEQ  
 NRLLQDQLRVALGREQSAREGYVLQATCERGFAMEETHQKKIEDLQRQHORELEKLRREEKDRLLAEETAATI  
 SAIEAMKNAHREEMERELEKSQRSQISSINSDIEALRRQYLEELQSVQRELEVLSQYSQKCLENAHLAQALE  
 AERQALRQCQRENQELNAHNQELNNRLAAEITRLRLLTGDGGGESTGLPLTQGKDAYELEVLLRVKESI QY  
 LKQEISSLKDELQALRDKKYASDKYKDIYTELSIAKAKADCDISRLKEQLKAATEALGEKSPGTTVSGYDI  
 MKSKSNPDLKDRSCVTRQLRNIRSKSVIEQVSWDN\*

>rs52569485\_ENSMUSP00000112072\_c.1434:A>T\_p.K479\*  
 ENSMUST00000116371.8|Mrip-204|ENSMUSG00000005417|+|chr11:g.59640417:A>T  
 MSAAKENPCRKFQANIFNKSKCQNCFKPRESHLNDEDLTQAKPIYGGWLLLAPDGTDFDNPVHRSRKWQRRF  
 FIIYEHGLLRYALDEMPPTLPQGTINMNQCTDVVDGEARTGQKFSLCILTPDKEHFIRAETKEIISGWLEMLM  
 VYPRTNKQNKKKRQVEPPTPQEPGPAKMAVTSSSGSSGSSSSIPSAEKVPTTKSTLWQEEMRAKDQPDGTS  
 LSPAQSPSQSPPAACTPREPGLESKEDESTISGDRVDGGRKVRVESGYFSLEKAKQDLRAEEQLPPLLSPPS  
 PSTPHSRRSQVIEKFEALDIEKAEHMETNMLILTPSSDTRQGRSERRAI PRKRDFASEAPTAPLSDACPLSP  
 HRRAKSLDRRSTESSMTPDLLNFKKGWLTQYEDGQWKKHWFVLADQSLRYRDSVAEEAADLDGEINLSTCY  
 DVTEYVPQRNYGFQIHTKEGEFTLSAMTSGIRRNWIQTIM\*HVL PASAPDVTSSLPEGKKNKSTSFETCSRSTE  
 KQEAEPGEPDPEQKSRARERRREGRSKTFDWAEFRPIQQALAQERASAVGSSDSGDPGCLEAEPGELERER  
 RREERRKFRGMLDITDGPDMEDTALRMDIDRSPGLLGTDLKTQNVHVEIEQRWHQVETTPLEEKQVPIAP  
 LHLSLEDRSERLSTHELTSLEKELEQSQKEASDLLEQNRLQDQLRVALGREQSAREGYVLQATCERGFAM  
 EETHQKKIEDLQRQHORELEKLRREEKDRLLAEETAATISAIEAMKNAHREEMERELEKSQRSQISSINSDIEA  
 LRRQYLEELQSVQRELEVLSQYSQKCLENAHLAQALEAERQALRQCQRENQELNAHNQELNNRLAAEITRLR  
 TLLTGDGGGESTGLPLTQGKDAYELEVLLRVKESI QY LKQEISSLKDELQALRDKKYASDKYKDIYTELSI  
 AKAKADCDISRLKEQLKAATEALGEKSPGTTVSGYDIMKSKSNPDLKDRSCVTRQLRNIRSKSVIEQVSW  
 DN\*

>rs52569485\_ENSMUSP00000119562\_c.1392:A>T\_p.K465\*  
 ENSMUST00000133861.8|Mrip-206|ENSMUSG00000005417|+|chr11:g.59640417:A>T  
 ETKEIISGWLEMLMVYPRTNKQNKKKRQVEPPTPQEPGPAKMAVTSSSGSSGSSSSIPSAEKVPTTKSTLW  
 QEEMRAKDQPDGTSLSPAQSPSQSPPAACTPREPGLESKEDESTISGDRVDGGRKVRVESGYFSLEKAKQDL  
 RAEEQLPPLLSPPSPSTPHSRYGCPGSPSQELSHPLHSPGLPAPSRMVYSICPASLGEASRSPNHMDSSSAGG  
 WGTIELGSTFAFKASRQYAALADVPKAIRISHREAFQVERRRLEHRTRARSPGEEVARLFGNERRRSQVIEK  
 FEALDIEKAEHMETNMLILTPSSDTRQGRSERRAI PRKRDFASEAPTAPLSDACPLSPHRRAKSLDRRSTES  
 SMTDLLNFKKGWLTQYEDGQWKKHWFVLADQSLRYRDSVAEEAADLDGEINLSTCYDVTEYVPQRNYGFQ  
 IHTKEGEFTLSAMTSGIRRNWIQTIM\*HVL PASAPDVTSSLPEGKKNKSTSFETCSRSTEKQEAEPGEPDPEQK  
 KSRARERRREGRSKTFDWAEFRPIQQALAQERASAVGSSDSGDPGCLEAEPGELERERARRREERRKFRGMLD  
 TIDGPDMEDTALRMDIDRSPGLLGTDLKTQNVHVEIEQRWHQVETTPLEEKQVPIAPLHLSLEDRSERLST  
 HELTSLEKELEQSQKEASDLLEQNRLQDQLRVALGREQSAREGYVLQATCERGFAMEETHQKKIEDLQRQ  
 HQRELEKLRREEKDRLLAEETAATISAIEAMKNAHREEMERELEKSQRSQISSINSDIEALRRQYLEELQSVQR  
 ELEVLSQYSQKCLENAHLAQALEAERQALRQCQRENQELNAHNQELNNRLAAEITRLRLLTGDGGGESTGL  
 PLTQGKDAYELEVLLRVKESI QY LKQEISSLKDELQALRDKKYASDKYKDIYTELSIAKAKADCDISRLKE  
 QLKAATEALGEKSPGTTVSGYDIMKSKSNPDLKDRSCVTRQLRNIRSKSVIEQVSWDN\*

>rs52569485\_ENSMUSP00000119422\_c.867:A>T\_p.K290\*  
 ENSMUST00000132620.8|Mrip-205|ENSMUSG00000005417|+|chr11:g.59640417:A>T  
 XNQKKRQVEPPTPQEPGPAKMAVTSSSGSSGSSSSIPSAEKVPTTKSTLWQEEMRAKDQPDGTSLSPAQSP  
 SQSPPAACTPREPGLESKEDESTISGDRVDGGRKVRVESGYFSLEKAKQDLRAEEQLPPLLSPPSPSTPHSR  
 RSQVIEKFEALDIEKAEHMETNMLILTPSSDTRQGRSERRAI PRKRDPDLLNFKKGWLTQYEDGQWKKHWFV  
 LADQSLRYRDSVAEEAADLDGEINLSTCYDVTEYVPQRNYGFQIHTKEGEFTLSAMTSGIRRNWIQTIM\*HV  
 LPASAPDVTSSLPEGKKNKSTSFETCSRSTEKQEAEPGEPDPEQKSRARERRREGRSKTFDWAEFRPIQQALA  
 QERASAVGSSDSGDPGCLEAEPGELERERARRREERRKFRGMLDITDGPDMEDTALRMDIDRSPGLLGTDLK  
 TQNVHVEIEQRWHQVETTPLEEKQVPIAPLHLSLEDRSERLSTHELTSLEKELEQSQKEASDLLEQNRLQ  
 DQLRVALGREQSAREGYVLQATCERGFAMEETHQKKIEDLQRQHORELEKLRREEKDRLLAEETAATISAIEA  
 MNAHREEMERELEKSQRSQISSINSDIEALRRQYLEELQSVQRELEVLSQYSQKCLENAHLAQALEAERQA  
 LRQCQRENQELNAHNQELNNRLAAEITRLRLLTGDGGGESTGLPLTQGKDAYELEVLLRVKESI QY LKQEI  
 SSLKDELQALRDKKYASDKYKDIYTELSIAKAKADCDISRLKEQLKAATEALGEKSPGTTVSGYDIMKSKS  
 NPDLKDRSCVTRQLRNIRSKSLKEGLTVQERLKL FESRDLLKDD\*

>rs52569485\_ENSMUSP00000071914\_c.1434:A>T\_p.K479\*  
 ENSMUST00000072031.13|Mrip-202|ENSMUSG00000005417|+|chr11:g.59640417:A>T  
 MSAAKENPCRKFQANIFNKSKCQNCFKPRESHLNDEDLTQAKPIYGGWLLLAPDGTDFDNPVHRSRKWQRRF  
 FIIYEHGLLRYALDEMPPTLPQGTINMNQCTDVVDGEARTGQKFSLCILTPDKEHFIRAETKEIISGWLEMLM

VYPRTNKQNKKKRKEVPPPTQEPGPAKMAVTSSSGGSSGSSSSIPSAEKVPTTKSTLWQEEMRAKDQPDGTS  
LSPAQSPSQSOPPACTPREPGLESKEDESTISGDRVDGGRKVRVESGYFSLEKAKQDLRAEEQLPPLLSPPS  
PSTPHSRRSQVIEKFEALDIEKAEHMETNMLILTTSSDTRQGRSERRAI PRKRDFASEAPTAPLSDACPLSP  
HRAKSLDRRSTESSMTPDLLNFKKGWLTKQYEDGQWKKHWFVLADQSLRYRDSVAEEAADLDGEINLSTCY  
DVTEYPVQRNYGFQIHTKEGETLSAMTSGIRRNWIQTIM\*HVL PASAPDVTSSLPEGKNKSTSFETCSRSTE  
KQEAEPGEPDPEQKKSRRERREGRSKTFDWAEFRPIQQALAQERASAVGSSSDSGDPCLEAEPGELERERA  
RRREERRKRFGMLDTIDGPGMEDTALRMDIDRS PGLLGT PDLKTQNVHVEIEQRWHQVETTPLEEKQVPIAP  
LHLSLEDRSERLSTHELTSLEKELEQSQKEASDLLEQNRLLDQDLRVALGREQSAREGYVLQATCERGFAM  
EETHQKKIEDLQRHQRELEKLRKDRLLAEETAATISAIEAMKNAHREEMERELEKSQRSQISSINSDIEA  
LRRQYLEELQSVQRELEVLSQKCLENAHLAQALEAERQALRQCQRENQELNAHNQELNNRLAAEITRLR  
TLLTGDGGGESTGLPLTQGKDAYELEVLLRVKESEIQYLKQEISSLKDELQALRDKKYASDKYKDIYELSI  
AKAKADCDISRLKEQLKAATEALGEKSPGTTVSGYDIMKSKSNPDLKDRSCVTRQLRNIRSKSLKEGLTV  
QERLKLFE SRDLKKD\*

>rs26957343\_ENSMUSP00000018568\_c.759:G>A\_p.E254K  
ENSMUST00000018568.4|Drq2-201|ENSMUSG00000020537|+|chr11:g.60353414:G>A  
MGILEKISEIEKEIARTQKNKATEYHLGLLKAKLAKYRAQLLEPSKSASSKGEFDMKSGDARVALIGFPPS  
GKSTFSLSLMTSTASEAASYEFTTLTCIPGVIEYKGANIQLDLPGIIEGAAQGRGRQVIARVATADVMM  
LDATKGDVQRSLLEKELESVGI RLNKHKNPIYFKPKKGGGISFNSTVTLTQCSEKLVQLILHEYKIFNAEVLF  
REDDCSPDDFDIVIVGNRVYMPCLYVYNKIDQISMKEVDRLARKPNSVVISCGMKNLDYLLEMLWEYLALTCI  
YTKKRGRQRPDFTDAIILRKGASVEHVCHRIHRSLASQFKYALVWGTSTKYSPQRVGLTHTMEHEDVIQIVKK\*  
>rs26942560\_ENSMUSP00000071777\_c.97:T>C\_p.L33P  
ENSMUST00000071880.9|Myo15-201|ENSMUSG00000042678|+|chr11:g.60367339:T>C  
MADEEKKAKKGGKKAPEPEKPKRSLKGTSRPFMGRDRTPKISKKGQFRSASAFFWGLHTGPQTKRKKKA  
RTVLKSTSKLMTQMRVGGKKRAMKGGKPSFMVIRFPGRRGYGRRLRPAQSLSKASTAINWLTKKFLKKAES  
GSEQATVDAWLQRSSSRVGSRKLPFPGAEILRHGGRLRRFPRSHSIYSSGEPVGFLLPFDEAPFRHAGSRKS  
LYGLGEQDLGEYDYHREGDDYDQQSLYHYEEQEPYLAIEFGGYSFAWPPYDDYGYPPGDPYNYHYHPPYDYG  
TLYPGYAYGYGYYDDFPPYAPPSGYSSPYSYHDSFESEAYPYSYLLDPYATHHMPYPPYDFPYDTPYDI  
FDPYGVPYAEVYGGGAEAIYPPGMPYVYPEEPAFMYPWVPPIMSPHNPYAHPMDDIAELEPEETGEERQS  
TSFRLPSAAFFEQGMDKPARSKLSLIRKFRLLFPQVKLFGKEKLEVPLPPSLDIPPLGDAEGEEEEEMP  
PVPTMPYTHPYWSFLTTPRQNLQRALSFAFGARQGLFGFPEFGHPTPRPATSLARFLKKTLEKPIPRLRGSQ  
KARGRPPVREAAAYKRFYKLAGMDPDRPNTPIVLRSSQPQARNNNNSHGPPSPRPAPRALTHWSALISPPMP  
APSPPASPLTPPFSPTFSRPPRLASPYGSLRQHPPPWAAPAHVFPFPQANWWGFAEPPGTSPEVAPDLA  
VPRPSFRASRSRRAAYGFPSPLIGSRRRPHLPSPQPSLRSPLPGQYHSPGLPLSPQLSLRRGPFQPPFP  
PPRRPQSLREAFSLRRASGRLLGPPRSPVLGSPRPPSPPLLKHGPRHRSNLNPSRLPRTWRRLSEPPTRAVK  
VWHRAYPPPPSAGPWGASTGALEQQENQREAEADSETPWTVPPLAPSVDVMPPTQRPSPWPPEGIGSLR  
PPVPENPLLEHTSPKCEPQSEDRVSNLTGIFLGHHDGPGQLTKSADPSLEKPEEVTLTGDPPAEPEAL  
NPTPNKNVVSERKVLRLSASYPLVTCKQARATWPQWHRWKTVSRTPAPLAPTRAPGPLLKAGEQPRAEPGRF  
AVVMPQVRGVSSFRPKGPAPVQPEHPDQDPEQGPAPQACSLRWPRLWPPTDAHCLWSRIRTYSSQSHLRGHG  
GDCHKSLWKKTRPQSWQNMHSIRNLPSMRSREQHREDGVEDMTQLEDLQETTLANLKRFRERNLIYTYIGS  
ILVSNVNYRMFAIYGPEQVQYSGRALGENPPLFAIANLAFKMLDAKQNCVVISGESSGKTEATKLIILR  
CLAAMNQRRDVMQIKILEATPLLEAFGNAKTVRNDNSSRFGKFEIFLEGGVICGAIITSQYLLEKSRIVFQA  
KNERNYHIFYELLAGLPAQLRQAFSLQEAETYYLNLQGGNCEIAGKSDADDFRLLAAEVLGFTSEDQDSIF  
RILASILHLGNVYFEKHETDAQEVASVVSAREIQAVAELLQVSPPEGLQKAITFKVTETIREKIFTPLTVESAV  
DARDAIAKVLYALLFGWLI TRVNALVSPKQDTLSIAILDIYGFEDLSFNSFEQLCINYANENLQYLFNKIVFQ  
EEQEEYIREQMDWREIAFADNQPCINLISLKPYGILRILDDQCCFPQATDHTFLQKCHYHGANPLYSKPKMP  
LPEFTIKHYAGKVTYQVHKFLDKNHDQVRQDVLDFVHSRTRVVAHLFSSHAAQTAPPRLGKSSSITRLYKAH  
TVAAKFQQLDLVEKMERCNPLFVRCLKPNHKKPEPLFEPDVMMAQLRYSGVLETVIRKEGFPVRLPFQVF  
IDRYRCLVALKLNVPADGDMCVSLLSRLCTVTPDMYRVGISKFLKEHLHQLLESMRERVQNRAALTQRYLR  
GFFIQRHFRSLRRKIIILLQSRARGFLARQRYQMRQSLLKFRSLVHTYVNRRLYLKLAERQRRRAQEAWLREQ  
EELSKREVVPVRHLEVPAEVAGLLQAAAGLKLSSGPRVAVVRAPRLQAEPCVTLPLDINNYPMAKFI RCHFKE  
PSFGMLTVPLKMP LTRLPVEHHAESAISVFKLILRFMGDPHLHGTQEMILGNYIVHQGLVEPALRDEILAQLAN  
QVWRNPNAYNKRGWLLLAACLSGFAPSPHLDFLLKFFVSDYQNGFQAVCQHRLQLAMGSGAARTFPPTQLE  
WTAIQEKASMDLDFVSCFYFVIGAEGLLAGRGDTRGVGNCWSDSDEDTPTRPQPQDHVAKMPDLGDCSHKEDGT  
NGETEQRWTSNRQAVDSIGESTVPPRELDGYLDLSLFDVPLACGDADLEKPTAIAYRMKGGGQGGGGSTSE  
DTSRRPPEPKLKPIPLDASTLALQQAFIHRQAVLLAREMTLQALALQQQPLSATSRPQLPERPLAPEARPKT  
VVGTPPAKPVLRPTPQSWAPGSAKAPKIPSKPVAVPILAQDWTAPESISASPELVRYSTLNSEHFPOPTQ  
QIRSIKQYKQPPWAGHPEARRTDGGKVFRRPPDPHEEALMILKGQKTQLAVVPGTQVSREAVAMVKPVTSAP

RPCMGPTPVQPSRSLEPPEDPVQTLHRLVNPNFYGYQDIPWRIFLRKEVFYPKDNYSHPVQLDLLFRQILHD  
TFSEACLRI SEDERLQMKALFAQNQLDTRPLVTESVKRAAISMARDSWEIYFSRFLPAMGSVGTGVQILAVS  
HTGIKLLQMVKGSKEASRRRLVLCAYSFADILFVTMPSQNMLEFNLSNEKLILFSARAQQVKTLDVDFILELK  
KSDYVAVRNFLESDPELLSFHKGDI IHLQSLEPTRVGY SAGCVVRKKLVYLEELRRRGPDFGWRFGAVHGR  
VGRFPSELVQPAAPDFLQPAEPGRGRAAAVAASAAAAQEVGRRREGPPVRRARSADSGEDSIALPPSTM  
LEFAQKYFRDPRRRPRDGLKLSKEDRESKTLEDVLCFTKVP IQESLIELSDSNLNKMAVDMFVAVMRFMGDA  
PLKGQSELDVLTLLKLCGDHEVMRDECYQIVKQITDNSSPKQDSCQRGWRLLY IMAAAYSCSEVFYPIYLR  
FLQHVSWTPGLPFQGI AKACEQNLQKTLRFGRLEFP SNMELRAMLAGRSSKRQLFLLPGGLERHLKIKTCTV  
ALDVIEGLCTEMALTRPEAFDEYVIFVVTNRGQHVCP LSCRAYILDVASEMEQVDGGYTLWFRRLVLDQPLKF  
ENELYVTMHNQVLPDYLGKLFSSVVARQPTQQQLQVSKLASLQHRADHFYLPVSVREVQEYI PAQLYHTTA  
GDTWLNLSQHRQQTQALS PHQARAQFLGLLSAFPLFGSSFFF IQSCSNVLPAPCILA VNNHNLNLFSTKTH  
ELIVKIPLKEIQSTWTQQPTANSYPYVEISLGDVAAQRTMQIQLEQGLELCRVVAVHVESMLSAREERLTL P  
PSEITLL\*

>rs26942560\_ENSMUSP00000091686\_c.97:T>C\_p.L33P

ENSMUST00000094135.9|Myo15-203|ENSMUSG00000042678|+|chr11:g.60367339:T>C  
MADEEKKAKKGGKKAPEPEKPKRSLKGTSRPFMGFRDRTPKISKKGQFRSASAFFWGLHTGPQKTKRKKKA  
RTVLKSTSKLMTQMRVGGKKRAMKGGKPSFMVIRFPGRRGYGRLRPRAQSLSKASTAINWLTKKFLKKAES  
GSEQATVDAWLQRSSSRVGSRKLPFP SGAELRHGGRLRRFP RSHSIYSSGEPVGFLEPFEDEAPFRHAGSRKS  
LYGLEGFQDLGEYYDYHREGDDYDQQSLYHYEEQEPYLA EFGGYS PAWPPYDDYGYPPGDPYNYHPDYGD  
TLYPGYAYGYGYDDFEPYAPPSGYSSPYSYHDSFESEAYPYSYLDPYATHHMPYPPYDFPYDTPYDI PY  
FDPYGVPYAEGVYGGGAEAIYPPGMPYVYPEEPAFMYPWVPPP IMSPHNPHYAHPMDDIAELEPEETGEERQS  
TSFRLPSAAFFEQQGMDKPARSKLSLIRKFRFLFRPQVKLFGKEKLEVPLPPSLDIPLPLGDAEGEEEEEEMP  
PVPTMPYTHPYWSFLT PRQRNLQRALS AFGARQGLFGFGEFGHPTPRPATSLARFLKKTLEK KPI PRLRGSQ  
KARGGRPPVREAA YKRFYKLAGMDPDRPNTPIVLRSSQPQARNNNNSHGPPSPRPAPRALTHWSALISPPMP  
APSPSPASPLTPPFSPTFSRPPRLASPYGSLRQHPPWAA PAHVFPFPQANWWGFAEPPGTSPEVAPDLLAFP  
VPRPSPFRASRSRRAAYGFPPSPSLIGSRRRPHLPSPPSLRSLPGQGYHSPLGPLSPQLSRRRGPFPFPFP  
PRRRQSLREAFSLRRASGRLGPPRSFVLGSPRPPSPPLLLKHGPRHRSLNPLSRLPRTWRRLESEPTRAVKP  
WVHRAYPPPPSAGPWGASTGALEQQENQREAE DSETPWTVPPLAPSVDVMPPTQRPPSPWPEGIGSLRGFSR  
PPPVPENPLLEHTSPSCEPQSEDRVSNLTGIFLGQHHDPGGQLTKSADPSLEKPEEVVTLGDPQPPAEPEAL  
NPTPPNKNVVSERKVLRLSASYPLVTCQARATWPQWHRWKTVSRTPAPLAPTRAPGPLLKAGEQRAEPGRF  
AVVMQVQVGVSSFRPKGPAPVQPEHPDQDPEQGPAPQACSLRWPRLWPPTDAHCLWSRIRTYSSQSHLRGHG  
GDCHKSLWKKTRPQSWQNKMHSIRNLPSMRSREQHRE DGVEDMTQLEDLQETTIVLANLKRFRERNLITYYIGS  
ILVSVNPFYRMFAIYGPEQVQYSGRALGENP PHLFAIANLAFKMLDAKQNCV IISGESGSGKTEATKLI LR  
CLAAMNQRRDVMQIKILEATPLLEAFGNAKTVRNDNSSRFGKFVEIFLEGGVICGAITSQYLLEKSRI VFQA  
KNERNYHIFYELLAGLPAQLRQAFSLQEAETYYLNLQGGNCEIAGKSDADDFRLLAAMEVLFGTSEDQDSIF  
RILASILHLGNVYFEKHETDAQEVASVVSAREIQAVAELLQVSP EGLQKAITFKVTETIREKI FTPLTVE SAV  
DARDAIAKVLYALLFGWLITRVNALVSPKQDTLSIAILDIYGFEDLSFNSFEQLCINYANENLQYLFNKIVFQ  
EEQEEYIREQMDWREIAFADNQP CINLISLKPYGILRILDDQCCFPQATDHTFLQKCHYHGANPLYSKPKMP  
LPEFTIKHYAGKVTYQVHKFLDKNHDQVRQDVLDFVHSRTRVVAHLFSSHAAQTAPPRLGKSSSITRKYKAH  
TVAAKFQOQLLDLVEKMERCNPLFVRCLKPNHKKEPGLFEPDVMMAQLRYSGVLETVIRIRKEGFPVRLFPQVF  
IDRYRCLVALKLNVPADGDMCVSLLSRLCTVTPDMYRVG I SKLFLKEHLHQLLES MRERVQNRAALTLQRYLR  
GFFIQRHFRSLRKKI ILLQSRARGFLARQRYQOMRQSL LKFRSLVHTYVNRRLYLKELSKREVVPVRHLEVPA  
EVAGLLQAAAGLKLSSGPRVAVVRAPRLQAEPCVTLP LDINNYMAKFIRCHFKEPSFGMLTVPLKMPLTRLP  
VEHHAEBASVFKLILRFMGDPHLHGTQEMILGN YIVHQGLVEPALRDEILAQLANQVWRNPNAYNSKRGWLLL  
AACLSGFAPSPHLDFLLKFVSDYQNGFQAVCQHRL LQAMGSGAARTFPPTQLEWTAIQEKASMALDVSCFN  
GDQFSCPVHTWSTGEAVAGDILKHRGLADGWRGWTVMKNGVQWAE LAGHDYVLDLVS DLELLRDFRQKSYF  
IVGAEGPLAGRGDTRGVFGNCWDSDEDTPTRPQPQDHVAKMPDL DGYCSHKEDGTNGETEAQRWTSNRQAVDS  
IGESTVPPRELDGYLDSLFDPVLACGDADLEKPTAIAYRMKGGGQPGGGG GSTSEDTSTRPPEPKLPI PGLD  
ASTLALQQAFIHRQAVLLAREMTLQALALQQQPLSATS RPQLPERPLAPEARPKTVVGTGPPAKPVLVRPTPQ  
SWAPGSVAKAPKIPSKPVAVPILAQDWTAPESISASPELVRYSTLNSEHFQPTQQIRSI IKYKQPWAGHP  
EARRTDGGKVFRPPDPHEEALMILKGQKTQLAVVPGTQVSREAVAMVKPVT SAPRPCMGPTPVQPSRSLEPP  
EDPVQTLHRLVNPNFYGYQDIPWRIFLRKEVFYPKDNYSHPVQLDLLFRQILHDTFSEACLRI SEDERLQMK  
ALFAQNQLDTRPLVTESVKRAAISMARDSWEIYFSRFLPAMGSVGTGVQILAVSHTGIKLLQMVKGSKEASR  
RLRVLCAYSFADILFVTMPSQNMLEFNLSNEKLILFSARAQQVKTLDVDFILELKKDSYVAVRNFLESDPE  
LLSFHKGDI IHLQSLEPTRVGY SAGCVVRKKLVYLEELRRRGPDFGWRFGAVHGRVGRFPSELVQPAAPDFL  
QLPAEPGRGRAAAVAASAAAAQEVGRRREGPPVRRARSADSGEDSIALPPSTMLEFAQKYFRDPRRRPRDGL  
KLSKEDRESKTLEDVLCFTKVP IQESLIELSDSNLNKMAVDMFVAVMRFMGDAPLKGQSELDVLTLLKLC  
GDHEVMRDECYQIVKQITDNSSPKQDSCQRGWRLLY IMAAAYSCSEVFYPIYLRFLQHVSWTPGLPFQGI AK

ACEQNLOKQTLRFGGRLFPSPNMELRAMLGRSSKRQLFLLPGGLERHLKIKTCTVALDVIEGLCTEMALTRPE  
 AFDEYVIVVVTNRGQHVCLPSCRAYILDVASEMEQVDGGYTLWFRVLWDQPLKFENELYVTMHNQVLPDYL  
 KGLFSSVPARQPTQQQLQVSKLASLQHRAKDHFYLPVREVQEYIPAQLYHTTAGDTWLNLSQHRQQTQAL  
 SPHQARAQFLGLLSAFPLFGSSFFFIQSCSNVLPAPCILAVNHNGLNFLSTKTHELIVKIPLKEIQSTWTQQ  
 PTANSSYPYVEISLGDVAAQRTMQLQLEQGLELCRVVAVHVESMLSAREERLTLPPSEITLL\*  
 >rs51923482\_ENSMUSP00000071777\_c.3663:G>T\_p.V1222L  
 ENSMUST00000071880.9|Myo15-201|ENSMUSG00000042678|+|chr11:g.60373141:G>T  
 MADEEKKAKKGGKKAPEPEKPKRSLKGT SRLFMGFRDRTPKI SKKGQFRSASAFFWGLHTGPQKTKRKKKA  
 RTVLKSTSKLMTQMRVGGKKRAMKGGKPSFMVIRFPGRRGYGRLRPRAQSLSKASTAINWLTKKFLLKKAES  
 GSEQATVDAWLQRSSSRVGSRKLPFPAGAEILRHGGRLLRFPSSHISYSSGEPVGFPLFEDEAPFRHAGSRKS  
 LYGLEGFQDLGEYYDYHREGDDYDQQSLYHYEEQEPYLAFFGGYSPAWPPYDDYGYPPGDPYNYHPDYDGD  
 TLYPGYAYGYGYDDFEPYAPPSGYSSPYSYHDSFESEAYPYSYLLDPYATHMPPYPPYDFPYDTPYDIPY  
 FDPYGVVYAEVYGGGAEAIYPPGMPYVYPEEPAFMYPWVPPIMSPHNPYAHMDDIAELEPEEETGEERQS  
 TSFRLPSAAFFEQQGMKPARSKLSLRKFRFLFRPQVKLFGKEKLEVPLPPSLDIPPLPLGDAEGEEEEEMP  
 PVPTMPYTHPYWSFLTQRNLQRALSFAFGARQGLGFGPEFGHPTPRPATSLARFLKKTLEKKIPRLRGSQ  
 KARGGRPPVREAAKRFYKLAGMDPDRPNTPIVLRSSQPQARNNNNSHGPPSPRPAPRALTHWSALISPPMP  
 APSPSPASPLTPPFSPTFSRPPRLASPYGSLRQHPPWAAPAHVFPFPQANWWGFAEPPGTSPEVAPDLLAFP  
 VPRPSFRASRSRRAAYGFPSPLIGSRRRPHLSPQPSLRLPGQGYHSPGLPLSPQLSLRRGPFQPPFP  
 PRRRQSLREAFSLRRASGRLLGPPRSPVLGSPRPPSPPLLLKHGPRHRSNLPSRLPRTWRRLSEPPTRAVKP  
 WVHRAYPSPSAGPWGASTGALEQQENQREAEADSETPWTVPPLAPSWDMDPPTQRPPSPWPEGIGSLRGFSR  
 PPPVFNPLEHTSPSCEPQSEDRVSNLTGIFLGQHHDPGGQLTKSADPSLEKPEEVTLGDPQPPAEPEAL  
 NPTPPKNVVSERKVLRLSASYPLVTCKQARATWPQWHRWKTVSRTPAPLAPTRAPGPLLKAGEQPAEPGRF  
 AVVMPQVRGVSSFRPKGPAPVQPEHPDQDPEQGPAPQACSLRWPRLWPPTDAHCLWSRIRTYSSQSHLRGHG  
 GDCHKSLWKKTRPQSWQNMHSIRNLPSMRSREQHREDGVEDMTQLEDLQETTLANLKRFRERNLIYTYIGS  
 ILLSVNPNYRMFAIYGPEQVQYSGRALGENPHLFAIANLAFKMLDAKQNCVIGESGSGKTEATKILIR  
 CLAAMNQRRDVMQIKILEATPLLEAFGNKTYRNDNSRFGKFEIFLEGGVICGAITSQYLLEKSRIVFQA  
 KNERNYHI FYELLAGLPAQLRQAFSLQEAETYYLNGGNCIEIAGKSDADDFRRLLAAMEVLGFTSEDQDSIF  
 RILASILHLGNVYFEKHETDAQEVASVVSAREIQAVAELLQVSPEGLQKAITFKVTETIREKIFTPPLTVESAV  
 DARDAIAKVLVYALLFGWLITRVNALVSPKQDTLSIAILDIYGFEDLSFNSFEQLCINYANENLQYLFNKIVFQ  
 EEQEEYIREQMDWREIAFADNQPCINLISLKPYGILRILDDQCCFPQATDHTFLQKCHYHGANPLYSKPKMP  
 LPEFTIKHYAGKVTYQVHKFLDKNHQVRQDVLDFVHSRTRVVAHLFSSHAAQTAPPRLGKSSITRKYKAH  
 TVAAKFQQLDLVEKMERCNPLFVRCCLKPNHKEPGLFEPDVMMAQLRYSVLETVRIKKEGFPVRLPFQVF  
 IDRYRCLVALKLNVPADGDMCVSLLSRLCTVTPDMYRVGISKFLKEHLHLQLES MRERVQNRAALTQRYLR  
 GFFIQRHFRSLRKKIILLQSRARGFLARQRYQMRQSLKFRSLVHTYVNRRLYLKLRAEQRRRAQEAWLREQ  
 EELSKREVVPVRHLRPAEVLGQAAAGLKLSSGPRVAVRAPRLQAEPCVTLPLDINNYPMAKFI RCHFKE  
 PSFGMLTVPLKMPPLTRLPVEHHAELSVFKLILRFMGDPHLHGTQEMILGNIVHQLVEPALRDEILAQLAN  
 QVWRNPAYNSKRGWLLLAACLSGFAPSPHLDFLLKFSVSDYQNGFQAVCQHRLLQAMGSGAARTFPPTQLE  
 WTAIQEKASMALDVSCFNGDQFSCPVHTWSTGEAVAGDILKHRGLADGWRGWTVMKNGVQWAE LAGHDYVLD  
 LVSDLELLRDFPRQKSYFIVGAEGLAGRGDTRGVFGNCWSDSDPTPRPQPDHVAKMPDLGYSCHKEDGT  
 NGETEQRWTSNRQAVDSIGESTVPPRELDGYLDSLDFPVLACGDADLEKPTAIAYRMKGGGQPGGGGGSTSE  
 DTSRRPPEPKLKPI PGLDASTLALQQA F IHRQAVLLAREMTLQALALQQQPLSATSRPQLPERPLAPEARPKT  
 VVGTGPPAKPVLVRPTPQSWAPGSAKAPKIPSKPVAVPILAQDWTAPESISASPELVRYSTLNSEHFQPTQ  
 QIRSI IKQYKQPPWAGHPEARRTDGGKVFRPPDPHEEALMI LKGQKTQLAVVPGTQVSREAVAMVKPVTSAP  
 RPCMGPTPVQPSRSLPEPDPVQTLHRLVNPNFYGYQDI PWRIFLRKEVFYPKDNYSHPVQLDLLFRQILHD  
 TFSEACLRI SEDERLQMKALFAQNQLDTRPLVTVESVKRAAISMRDSWEIYFSRFLPAMGVSVTGQVQILAVS  
 HTGIKLLQMVKGSKEASRRLRVLCAYSFADILFVTMPSQNMLEFNLSNEKLI LFSARAQQVKTLVDTFI LELK  
 KDSYVAVRNFLESDPELLSFHKGDI IHLQSLPTRVGY SAGCVVRKLVYLEELRRRGPDFGWRFGAVHGR  
 VGRFPSELVQPAAPDFLQLPAPGRGRAAAVAAVASAAAAQEVGRRREGPPVRARSADSGEDSIALPPSTM  
 LEFAQKYFRDPRRRPRDGLKLSKEDRESKTLEDVLCFTKVPIQESLIELSDSNLNKMAVDMFVAVMRFMGDA  
 PLKGQSELDVLC TLLKLCGDHEVMRDECYQIVKQITDNSSPKQDSCQRGWRLLYIMAAAYSCSEVFYPYLIR  
 FLQHVSWTPGLPFQGIKACEQNLOKQTLRFGGRLFPSPNMELRAMLGRSSKRQLFLLPGGLERHLKIKTCTV  
 ALDVIEGLCTEMALTRPEAFDEYVIVVVTNRGQHVCLPSCRAYILDVASEMEQVDGGYTLWFRVLWDQPLKF  
 ENELYVTMHNQVLPDYL KGLFSSVPARQPTQQQLQVSKLASLQHRAKDHFYLPVREVQEYIPAQLYHTTA  
 GDTWLNLSQHRQQTQALSPHQARAQFLGLLSAFPLFGSSFFFIQSCSNVLPAPCILAVNHNGLNFLSTKTH  
 ELIVKIPLKEIQSTWTQQPTANSSYPYVEISLGDVAAQRTMQLQLEQGLELCRVVAVHVESMLSAREERLTL  
 PSEITLL\*  
 >rs51923482\_ENSMUSP00000080507\_c.102:G>T\_p.V35L  
 ENSMUST00000081823.12|Myo15-202|ENSMUSG00000042678|+|chr11:g.60373141:G>T

MHSIRNLPMSRSREQHREDGVEDMTQLEDLQETTLLANLKTFRERNLIYTYIGSILVSNPYRMFAIYGPEQV  
 QQYSGRALGENPPLLFAIANLAFKMLDAKQNCV IISGESGSGKTEATKILIRCLAAMNQRRDVMQKILE  
 ATPLLEAFGNKTVRNDNSSRFGKFEIFLEGGVICGAI TSQYLLEKSRI VFQAKNERNYHIFYELLAGLPAQ  
 LRQAFSLQEAETYYL NQGGNCEIAGKSDADDFRLLAAMEVLGFTSEDQDSIFRILASILHLGNVYFEKHET  
 DAQEVASVVSAREIQAVAELLQVSP EQLQKAITFKVTETIREKI FTPLTVESAVDARDAIAKVL YALLFGWLI  
 TRVNALVSPKQD TLSIAI LD IYGFEDLSFNSFEQLCIN YANENLQYLFNKIVFQEEQEEYIREQMDWREIAFA  
 DNQPCINLISLKPYGILRILDDQCCFPQATDHTFLQKCHYHGGANPLYSKPKMPLPEFTIKHYAGKVTYQVHK  
 FLDKNHDQVRQDVLDFVHSTRVVAHLFSSHAAQTAPPRLGKSSITRLYKAHTVAAKFQOSLDDLVEKMER  
 CNPLFVRCLKPNHKKEPGLFEPDVMAQLRYSGLVIRLETVRIRKEGFPVRLPFQVVIDRYRCLVALKLNVPADGD  
 MCVSLLSRLCTVTPDMYRVGISKLF LKEHLHLQLES MRERVQNRAALTQRYLRGFFIQRHFRSLRRKI ILLQ  
 SRARGFLARQRYQMRQSLKFRSLVHTYVNRRLYLKELSKREVVPVRHLEVPAEVAGLLQAAAGLKLSSGPR  
 VAVVRAPRLQAEPCVTLPLDINNYMAKFI RCHFKEPSFGMLTVPLKMP LTRLPVEHHAEAISVFKLILRFMG  
 DPHLHGTQEMILGN IYVHQLVEPALRDEILAQLANQVWRNP NAYNSKRGWLLLAACLSGFAPS PHLDKFLK  
 FVSDYQNGFQAVCQHRL LQAMGSGAARTFPPTQLEWTAIQEKASMALDVSCFNGDQFSCP VHTWSTGEAVAG  
 DILKHRGLADGWRGWTVMKNGVQWAE LAGHDYVLDLVS DLELLRDFPRQKSYFIVGAEGPLAGRGDTRGVFG  
 NCWDSDEDTPTRPQPDHVAKMPDL DGYCSHKEDGTNGETEAQRWTSNRQAVDSIGESTVPPRELDGYLDSLF  
 DPVLACGDADLEKPTAIAYRMKGGGQPGGGGGS TSEDTSRRPPEPKLKIPIGLDASTLALQQA F IHRQAVLLA  
 REMTLQALALQQQLSATSRLPERPLAPEARPKTVVGTGPPAKPVLVRPTPQSWAPGSVAKAPKIPSKPVA  
 VPILAQDWTAPESISASPELVRYSTLNSEHFQPTQOIRSIIKQYKQPPWAGHPEARRTDGGKVFRPPDPHE  
 EALMILKGQKTQLAVVPGTQVSREAVAMKPVTSAPRPCMGP TPVQPSRSLEPPEDPVQ TQLHRLVNPNFYGY  
 QDIPWRI FLRKEVFYPKDNYSHPVQLDLLFRQILHDTFSEACLR ISEDERLQMKALFAQNQLDTRPLVTE SV  
 KRAAISMARDSWEIYFSRLFPAMG SVGTGVQILAVSHTGIKLLQMVKGSKEASRRLRVLCAYSFADILFVTMP  
 SQNMLEFNLSNEKLILFSARAQQVKT LVDTF ILELKKDSDYVVAVRNFLSEDPELLSFHKGDIHLQSLPTR  
 VGYSAGCVVRKLVYLEELRRRGPDFGWRFGAVHGRVGRFPSELVQPAAPDFLQLPAEPGRGAAAAVA  
 SAAAAQEVGRRREGPPVARSADSGEDSIALP PSTMLEFAQKYFRDPRRRPRDGLKLSKEDRESKTLEDVLC  
 FTKVPIQESLIELSDSNLNMMAVDMFVAVMRFMG DAPLQHQSELDVLC TLLKLCGDHEVMRDECYQIVKQIT  
 DNSSPKQDSCQRWRLLYIMAAAYSCSEVFPYLI RFLQHVSWT PGLPFQGI AKACEQN LKTLRFGRLEFP  
 SNMELRAMLAGRSSKRQLFLLPGGLERHLKIKTCTVALDVIEGLCTEMALTRPEAFDEYVIFVVTNRGQHVCP  
 LSCRAYILDVASEMEQVDGGYTLWFRRLWDQPLKFENEL YVTMHNQVLPDY LKGLFSSV PARQPTEQQLQQ  
 VSKLASLQHRAKDHFYLPVREVQEYI PAQLYHTTAGDTWLN LVSQHRQQTQALS PHQARAQFLGLLSA FPLF  
 GSSFFFIQSCSNVLPAPC I LAVNHNLNFLSTKTHELIVKI PLKEIQSTWTQOPTANSSYPYVEISLGDVAA  
 QRTMQLQLEQGLELCRVVAVHVESMLSAREERLTLPPSEITLL\*  
 >rs51923482\_ENSMUSP00000091686\_c.3663:G>T\_p.V1222L  
 ENSMUST00000094135.9|Myo15-203|ENSMUSG00000042678|+|chr11:g.60373141:G>T  
 MADEEKKAKKGGKKAPEPEKPKRSLKGT SRLFMGFRDRTPKISKKGQFRSASAFFWGLHTGPQKTKRKKKA  
 RTVLKSTSKLMTQMRVGGKKRAMKGGKPSFMVIRFPGRRGYGR LRPRAQSLSKASTAINWLT KFKLLKKAES  
 GSEQATVDAWLQRSSSRVGSRKLPFP SGAEILRHGGR LRRFP RSHSIYSSGEPVGF LFPFEDEAPFRHAGSRKS  
 LYGLEGFQDLGEYYDYHREGDDYDQQSLYHYEEQEPYLA EFGGYS PAWPPYDDYGYPPGDPYNYHPDYD  
 TLYPGYAYGYGYDDFEPPYAPPSGYSSPYSYHDSFESEAYPYSYLDPYATHHMPYPPYDFPYDTPYDI PY  
 FDPYGVPPYAEVYGGGAEAIYPPGMPYVYPEEPAFMYPWVPP IMSPHNYPYAHPMDDIAELEPEEETGEERQS  
 TSFRLPSAAFFEQQGMDKPARSKLSLIRKFR LFP RPQVKLFGKEKLEVPLPPLSLDIP LPLGDAEGEEEEEMP  
 PVPTMPYTHPYWSFLT PRQRNLQRALSAFGARQGLGFGPEFGHPTPRPATSLARFLKKT LSEKPI PRLRGSQ  
 KARGGRPPVREAA YKRFYKLAGMDPDRPNTPIVLRRSQPQARNNNNSHGPPSPRPAPRALTHWSALISPPMP  
 APSPSPASPLTPPFSPTFSRPPRLASPYGSLRQHPPWAA PAHVFPFPQANWWGFAEPPGTSPEVAPDLLAFP  
 VPRPSFRASRSRRRAAYGFPSPLIGSRRRPHLSPQPSLRSLPGQGYHSP LGLPLSPQLSLRRGFQPPFP  
 PRRRPQSLREAFSLRRASGR LGPPRSPVLGSPRPPSPPL LKHGPRHRSNLPSRLPRTWRRLSEPPTRAVKP  
 WVHRAYP PPSAGPWGASTGALEQQENQREAE DSETPWTVPPLAPSWD VMDPPTQRPPSPWPPEGIGSLRGFSR  
 PPPVPENP LLEHTSPSCEPQSEDRVSNLTGIFLGQHHDPGPGQLTKSADPSLEKPEEVVTLGDPQPPAEPEAL  
 NPTFPNKNVVSERKVLRLSASYPLVTCKQARATWPQWHRWKT VSRTPAPLAPTRAPG PLLKAGEQPRAE PGRF  
 AVVMPQVRGVSSFRPKGPAPVQPEHPDQDPEQGPAPQACSLRW PRLWPPTDAHCLWSRIRTYSSQSHLRGHG  
 GDCHKSLWKKTRPQSWQNMHSIRNLPMSRSREQHREDGVEDMTQLEDLQETTLLANLKTFRERNLIYTYIGS  
 ILSVSNPYRMFAIYGPEQVQQYSGRALGENPPLLFAIANLAFKMLDAKQNCV IISGESGSGKTEATKILIR  
 CLAAMNQRRDVMQKILEATPLLEAFGNKTVRNDNSSRFGKFEIFLEGGVICGAI TSQYLLEKSRI VFQAK  
 NERNYHIFYELLAGLPAQLRQAFSLQEAETYYL NQGGNCEIAGKSDADDFRLLAAMEVLGFTSEDQDSIF  
 RILASILHLGNVYFEKHETDAQEVASVVSAREIQAVAELLQVSP EQLQKAITFKVTETIREKI FTPLTVESAV  
 DARDAIAKVL YALLFGWLI TRVNALVSPKQD TLSIAI LD IYGFEDLSFNSFEQLCIN YANENLQYLFNKIVFQ  
 EEQEEYIREQMDWREIAFADNQP CINLISLKPYGILRILDDQCCFPQATDHTFLQKCHYHGGANPLYSKPKM  
 PLPEFTIKHYAGKVTYQVHKFLDKNHDQVRQDVLDFVHSTRVVAHLFSSHAAQTAPPRLGKSSITRLYKAH



TVAAKFQOSSLDDLVEKMERCNPLFVRCCLKPNHKKEPGLFEPDVMMAQLRYSGVLETVRIRKEGFPVRLPFQVF  
 IDRYRCLVALKLNVPADGDMCVSLLSRLCTVTPDMYRVGISKFLKEHLHQLLES MRERVQNRAALTQRYLR  
 GFFIQRHFRLRRKIILLQSRARGFLARQRYQOMRQSLLKFRSLVHTYVNRRLRYLKELSKREVVPVRHLEVPA  
 EVAGLLQAAAGLKLSSGPRVAVVRAPRLQAEPCVTLPDINNYPMAKFI RCHFKEPSFGMLTVPLKMP LTRLP  
 VEHHAEAISVFKLILRFMGDPHLHGTQEMILGNIVHQGLVEPALRDEILAQLANQVWRNPNA YNSKRGWLLL  
 AACLSGFAPSPHLDKFLLKFVSDYQNGFQAVCQHRLQAMGSGAARTFPPTQLEWTAIQEKASMALDVSCFN  
 GDQFSCPVTWSTGEAVAGDILKHRGLADGWRGWTVMKNGVQWAE LAGHDYVLDLVS DLELLRDFPRQKSYF  
 IVGAEGPLAGRGDTRGVFGNCWDSDEDTPTRPQPQDHVAKMPDL DGYCSHKEDGTNGETEAQRWTSNRQAVDS  
 IGESTVPPRELDGYLDSLFDPLVACGDADLEKPTAIAYRMKGGGQPGGGGGSTSEDT SRRPPEPKLKP I PGLD  
 ASTLALQQAFIHRQAVLLAREMTLQALALQQOPLSATSRPQLPERPLAPEARPKT VVGTGPPAKPVLVRPTPQ  
 SWAPGSVAKAPKIPSKPVAVPILAQDWTAPESISASPELVRYSTLNSEHFPPQPTQQIRSI IKQYKQPPWAGHP  
 EARRTDGGKVFRRPPDPHEEALMILKGQKTQLAVVPGTQVSREAVAMVKPVT SAPRPCMGPTPVQPSRSLEPP  
 EDPVQTLHRLVNPNFYGYQDIPWRIFLRKEVFYPKDNYSHPVQLDLLFRQILHDTFSEACLRISEDERLQMK  
 ALFAQNQLDTRPLVTESVKRAAISMARDSWEIYFSRFLPAMG SVGTGVQILAVSHTGIKLLQMVKSKEASR  
 RLRVLCAYSFADILFVTMPSQNMLEFNLSNEKLILFSARAQQVKTLDVDTFILELKKDSDYVAVRNF LSEDPE  
 LLSFHKGDI IHLQSLEPTRVGY SAGCVVRKLLVYLEELRRRGPDFGWRFGAVHGRVGRFPSELVQ PAAAPDFL  
 QLP AEPGRGAAA VAAVASAAAAQEVGRRREGPPVRARSADSGEDSIALPPSTMLEFAQKYFRDPRRRPRDG  
 LKLSKEDRESKTLEDVLCFTKVP IQESLIELSDSNLNKMAVDMFVAVMRFMGDAPLKGQSELDVLC TLLKLC  
 GDHEVMRDECYQIVKQITDNSSPKQDSCQRGWRLLY IMAAYYSCSEVFYPYLIRFLQHVSWTPGLPFQGI AK  
 ACEQNLQKTLRFGRLEFP SNMELRAMLAGRSSKRQLFLLPGGLERHLKIKTCTVALDVIEGLCTEMALTRPE  
 AFDEYVIFVVTNRGQHVCPLSCRAYILDVASEMEQVDGGYTLWFRVLWDQPLKFENELYVTMHNQVLPDYL  
 KGLFSSVPARQPTQQQLQVSKLASLQHRAKDHFYLP SVREVQEYI PAQLYHTTAGDTWLNLSVQHRQQTQAL  
 SPHQARAQFLGLLSAFPLFGSSFFF IQSCSNVLVPAPCI LAVNHG LNFLSTKTHELIVKI PLKEIQSTWTQQ  
 PTANSSYPYVEISLGDVAAQRTMQLQLEQGLELCRVVAVHVESMLSAREERLTLPPSEITLL\*  
 >rs51923482\_ENSMUSP00000120839\_c.165:G>T\_p.V56L  
 ENSMUST00000126522.4|Myo15-205|ENSMUSG00000042678|+|chr11:g.60373141:G>T  
 XGGDCHKSLWKKTRPSWQNKMH SIRNLP SMRSREQHREDGVEDMTQLEDLQETTLANLKTFRERNLIYTYI  
 GSILVSNPYRMFAIYGPEQVQQYSGRALGENPPLLFAIANLAFKMLDAKQNCV IISGESGSGKTEATKLI  
 LRCLAAMNQRRDVMQQI LEATPLLEAFGNAKTVRNDNSSRFGKFVEIFLEGGVICGAITSQYLLEKSRI VFQA  
 KNERNYHI FYELLAGLPAQLRQAFSLQEAETYYL NQGGNCEIAGKSDADDFRLLAAMEVLGFTSEDQDSIF  
 RILASILHLGNVYFEKHETDAQEVASVVSAREIQAVAELLQVSPEGLQKAITFKVTETIREKI FTPLTVESAV  
 DARDAIAKVLYALLFGWLITRVNALVSPKQDTLSIAILDIYGFEDLSFN SFEQLCINYANENLQYLFNKIVFQ  
 EEQEEYIREQMDWREIAFADNQPCINLISLKPYGILRILDDQCCFPQATDHTFLQKCHYHGANPLYSKPKMP  
 LPEFTIKHYAGKVTYQVHKFLDKNHDQVRQDVLDFVHSRTRVVAHLFSSHAAQTAPPRLGKSSSITRLYKAH  
 TVAAKFQOSSLDDLVEKMERCNPLFVRCCLKPNHKKEPGLFEPDVMMAQLRYSGVLETVRIRKEGFPVRLPFQVF  
 IDRYRCLVALKLNVPADGDMCVSLLSRLCTVTPDMYRVGISKFLKEHLHQLLES MRERVQNRAALTQRYLR  
 GFFIQRHFRLRRKIILLQSRARGFLARQRYQOMRQSLLKFRSLVHTYVNRRLRYLKELSKREVVPVRHLEVPA  
 EVAGLLQAAAGLKLSSGPRVAVVRAPRLQAEPCVTLPDINNYPMAKFI RCHFKEPSFGMLTVPLKMP LTRLP  
 VEHHAEAISVFKLILRFMGDPHLHGTQEMILGNIVHQGLVEPALRDEILAQLANQVWRNPNA YNSKRGWLLL  
 AACLSGFAPSPHLDKFLLKFVSDYQNGFQAVCQHRLQAMGSGAARTFPPTQLEWTAIQEKASMALDVSCFN  
 GDQFSCPVTWSTGEAVAGDILKHRGLADGWRGWTVMKNGVQWAE LAGHDYVLDLVS DLELLRDFPRQKSYF  
 IVGAEGPLAGRGDTRGVFGNCWDSDEDTPTRPQPQDHVAKMPDL DGYCSHKEDGTNGETEAQRWTSNRQAVDS  
 IGESTVPPRELDGYLDSLFDPLVACGDADLEKPTAIAYRMKGGGQPGGGGGSTSEDT SRRPPEPKLKP I PGLD  
 ASTLALQQAFIHRQAVLLAREMTLQALALQQOPLSATSRPQLPERPLAPEARPKT VVGTGPPAKPVLVRPTPQ  
 SWAPGSVAKAPKIPSKPVAVPILAQDWTAPESISASPELVRYSTLNSEHFPPQPTQQIRSI IKQYKQPPWAGHP  
 EARRTDGGKVFRRPPDPHEEALMILKGQKTQLAVVPGTQVSREAVAMVKPVT SAPRPCMGPTPVQPSRSLEPP  
 EDPVQTLHRLVNPNFYGYQDIPWRIFLRKEVFYPKDNYSHPVQLDLLFRQILHDTFSEACLRISEDERLQMK  
 ALFAQNQLDTRPLVTESVKRAAISMARDSWEIYFSRFLPAMG SVGTGVQILAVSHTGIKLLQMVKSKEASR  
 RLRVLCAYSFADILFVTMPSQNMLEFNLSNEKLILFSARAQQVKTLDVDTFILELKKDSDYVAVRNF LSEDPE  
 LLSFHKGDI IHLQSLEPTRVGY SAGCVVRKLLVYLEELRRRGPDFGWRFGAVHGRVGRFPSELVQ PAAAPDFL  
 QLP AEPGRGAAA VAAVASAAAAQEVGRRRE  
 >rs241240387\_ENSMUSP00000071777\_c.8937:G>GCT\_p.D2980ins-fs  
 ENSMUST00000071880.9|Myo15-  
 201|ENSMUSG00000042678|+|chr11:g.60400785:G>GCT  
 MADEEKKAKKGGKGGKKAPEPEPKRSLKGT SRLFMGFRDRTPKISKKGQFRSASAFFWGLHTGPQKTKRKKKA  
 RTVLKSTSKLMTQMRVGGKKRAMKGGKPSFMVIRFPGRRGYGR LRPRAQSLSKASTAINWLTKKFL LKKA EES  
 GSEQATVDAWLQRSSSRVGSRKLPFSGAEILRHGGRLRRFP RSHSIYSSGEPVGF LFPFEDEAPFRHAGSRKS  
 LYGLEGFQDLGEYYDYHREGDDYDQOSLYHYEEQEPYLA EFGGYS PAWPPYDDYGYPPGDPYNYHPDYD

TLYPGYAYGYGYDDFEPPYAPPSGYSSPYSYHDSFESEAYPYSYLLDPYATHHMPYPPYDFPYDTPYDI PY  
 FDPYGVVYAEVYGGGAEAIYPPGMPYVYPEEPAFMYPWVPPPIMSPHNPYAHMDDIAELEEPEETGEERQS  
 TSFRLPSAAFFEQQGMKPARSKLSLRKFRFLFRPQVKLFGKEKLEVPLPPSLDIPPLPLGDAEGEEEEEEMP  
 PVPTMPYTHPYWSFLTFRQRNLQRALSAFGARQGLGFGPEFGHPTPRPATSLARFLKKTLEKKPIPRLRGSQ  
 KARGGRPPVREAAAYKRFYKLAGMDPDRPNTPIVLRSSQPQARNNNNSHGPPSPRPAPRALTHWSALISPPMP  
 APSPPASPLTPPFSPTFSRPPRLASPYGSLRQHPPWAAPAHVFPFPQANWWGFAEPPGTSPEVAPDLLAFP  
 VPRPSFRASRSRRAAYGFPPSLIGSRRRPHLPSQPQSLRSLPGQYHSPLGPLSPQLSLRRGPFQPPFP  
 PPRRQSLREAFSLRRASGRGPPRSPVLSRPPSPPPPLKKGPRHRSNLPSRLPRTWRRLSEPPTRAVKP  
 WVHRAYPSPSAGPWGASTGALEQQENQREAEDETPWTVPLAPSWDVMPTQRPSPWPEGIGSLRGSR  
 PPPVPEPPLLEHTSPSCEPQSEDRVSNLTGIFLQGHDPGPGQLTKSADPSLEKPEEVVTLGDQPPEAEPEAL  
 NPTPPNKNVVSERKVLRLSASYPLVTCKQARATWPQWHRWKTVSRTPAPLAPTRAPGPLLKAGEQPAEPGRF  
 AVVMPQVRGVSSFRPKGPAPVQPEHPDQDPEQGPAPQACSLRWPRLWPPPTDAHCLWSRIRTYSSQSHLRGHG  
 GDCHKSLWKKTRPQSWQNKMHSIRNLPSMRSREQHREDGVEDMTQLEDLQETTTLANLKTFRERNLIYTYIGS  
 ILVSVNRYMFAIYGPEQVQYSGRALGENPPLHFAIANLAFKMLDAKQNCV IISGESGSGKTEATKLI LR  
 CLAAMNQRDVMQQIKILEATPLLEAFGNAKTVRNDNSSRFGKFEVIFLEGGVICGAITSQYLLEKSRI VFQA  
 KNERNYHIFYELLAGLPAQLRQAFSLQEAETYYLQGGNCEIAGKSDADDFRLLAAMEVLGFTSEDQDSIF  
 RILASILHLGNVYFEKHETDAQEVASVVSAREIQAVAELLQVSEGLQKAITFKVTETIREKI FTPLTVESAV  
 DARDATAKVLVYALLFGWLITRVNALVSPKQDTPLSIAILDIYGFEDLSFNSEQLCINYANENLQYLFNKIVFQ  
 EEQEEYIREQMDWREIAFADNQCINLISLKPYGILRILDDQCCFPQATDHTFLQKCHYHHGANPLYSKPKMP  
 LPEFTIKHYAGKVITYQVHKFLDKNHQVRQDVLDFVHSRTRVVAHLFSSHAAQTAPPRLGKSSITRKYKAH  
 TVAAKFQOQLDLVEKMERCNPLFVRCLKPNHKKEPGLFEPDVMMAQLRYSGVLETVIRKEGFPVRLPFQVF  
 IDRYRCLVALKLNVPADGDMCVSLLSRLCTVTPDMYRVGISKFLKEHLHQLLES MRERVQNRRAALTQRYLR  
 GFFIQRHFRSLRKKIILLQSRARGFLARQRYQOMRQSLKFRSLVHTYVNRRLYLKLRAEQRRRAQEAWLREQ  
 EELSKREVVPVRHLEVPAEVAGLLQAAAGLKLSSGPRVAVVRAPRLQAEPCVTLPLDINNYMAKFI RCHFKE  
 PSFGMLTVPLKMP LTRLPVEHHAEAISVFKLILRFMGDPHLHGTEMI LGNYIVHQGLVEPALRDEILAQLAN  
 QVWRNPNAYNSKRGWLLLAACL SGFAPSPHLDKFLLK FVSDYQNGFQAVCQHRLQAMGSGAARTFPPTQLE  
 WTAIQEKASMLDVSCFNGDQFSCPVHTWSTGEAVAGDILKHRGLADGWRGWTVMKNGVQWAE LAGHDYVLD  
 LVSDLELLRDFPRQKSYFIVGAEGPLAGRGDTRGVFGNCWDSDEDTPTRPQPQDHVAKMPDLGDYCSHKEDGT  
 NGETEQRWTSNRQAVDSIGESTVPPRELDGYLDSLFDVPLACGDADLEKPTAIAYRMKGGGQPGGGGGSTSE  
 DTSRRPPEPKLKI PGLDASTLALQQA FTHRQAVLLAREMTLQALALQQQPLSATSRLPQLPERPLAPEARPKT  
 VVGTGPPAKPVLVRPTPQSWAPGSVAKAPKIPSKPVAVPI LAQDWTAPESISASPELVRYSTLNSEHFPOPTQ  
 QIRSI IKQYKQPWAGHPEARRTDGGKVFRRPPDPHEALMI LKQKQTLAVVPGTQVSREAVAMVKPVT SAP  
 RPCMGP TPVQPSRSLEPPEDPVQTQLHRLVNPNFYGYQDIPWRI FLRKEVFYPKDNYSHPVQLDLLFRQILHD  
 TFSEACLRI SEDERLQMKALFAQNQLDTRPLVTE SVKRAAIS MARD SWEIYFSRFLPAMGSVGTGVQILAVS  
 HTGIKLLQMVKGSKEASRRLRVLCAYSFADILFVTPMSQNMLEFNLSNEKILIF SARAAQVKTLDVDFILELK  
 KDSYVVAVRNFLESDPELLSFHKGDI IHLQSLFLEPTRVGYSAGCVVRKKLVYLEELRRRGPFQWRF GAVHGR  
 VGRFPSELVQPAAPDFLQLP AE PGRGRAAAVAAVASAAAAQEVGRRREGPPVRARSATAERIP  
 >rs241240387\_ENSMUSP00000080507\_c.5322:G>GCT\_p.D1775ins-fs  
 ENSMUST00000081823.12|Myo15-  
 202|ENSMUSG00000042678|+|chr11:g.60400785:G>GCT  
 MHSIRNLPSMRSREQHREDGVEDMTQLEDLQETTTLANLKTFRERNLIYTYIGSILVSVNRYMFAIYGPEQV  
 QQYSGRALGENPPLHFAIANLAFKMLDAKQNCV IISGESGSGKTEATKLI LRCLAAMNQRDVMQQIKILE  
 ATPLLEAFGNAKTVRNDNSSRFGKFEVIFLEGGVICGAITSQYLLEKSRI VFQAKNERNYHIFYELLAGLPAQ  
 LRQAFSLQEAETYYLQGGNCEIAGKSDADDFRLLAAMEVLGFTSEDQDSIFRILASILHLGNVYFEKHET  
 DAQEVASVVSAREIQAVAELLQVSEGLQKAITFKVTETIREKI FTPLTVESAVDARDAIAKVLVYALLFGWLI  
 TRVNALVSPKQDTPLSIAILDIYGFEDLSFNSEQLCINYANENLQYLFNKIVFQEEQEEYIREQMDWREIAFA  
 DNQPCINLISLKPYGILRILDDQCCFPQATDHTFLQKCHYHHGANPLYSKPKMPLPEFTIKHYAGKVITYQVHK  
 FLDKNH QVRQDVLDFVHSRTRVVAHLFSSHAAQTAPPRLGKSSITRKYKAHTVAAKFQOQLDLVEKMER  
 CNPLFVRCLKPNHKKEPGLFEPDVMMAQLRYSGVLETVIRKEGFPVRLPFQVFIDRYRCLVALKLNVPADGD  
 MCVSLLSRLCTVTPDMYRVGISKFLKEHLHQLLES MRERVQNRRAALTQRYLRGFFIQRHFRSLRKKIILLQ  
 SRARGFLARQRYQOMRQSLKFRSLVHTYVNRRLYLKELSKREVVPVRHLEVPAEVAGLLQAAAGLKLSSGPR  
 VAVVRAPRLQAEPCVTLPLDINNYMAKFI RCHFKEPSFGMLTVPLKMP LTRLPVEHHAEAISVFKLILRFMG  
 DPHLHGTEMI LGNYIVHQGLVEPALRDEILAQLANQVWRNPNAYNSKRGWLLLAACL SGFAPSPHLDKFLLK  
 FVSDYQNGFQAVCQHRLQAMGSGAARTFPPTQLEWTAIQEKASMLDVSCFNGDQFSCPVHTWSTGEAVAG  
 DILKHRGLADGWRGWTVMKNGVQWAE LAGHDYVLDLVSDLELLRDFPRQKSYFIVGAEGPLAGRGDTRGVFG  
 NCWDSDEDTPTRPQPQDHVAKMPDLGDYCSHKEDGTNGETEQRWTSNRQAVDSIGESTVPPRELDGYLDSLFD  
 DPVLACGDADLEKPTAIAYRMKGGGQPGGGGGSTSEDTTSRRPPEPKLKI PGLDASTLALQQA FTHRQAVLLA  
 REMTLQALALQQQPLSATSRLPQLPERPLAPEARPKTVVGTGPPAKPVLVRPTPQSWAPGSVAKAPKIPSKPVA

VPILAQDWTAPESISASPELVRYSTLNSEHFPOPTQQIRSIKQYKQPPWAGHPEARRTDGGKVFRRPPDPHE  
EALMILKQKQTLAVVPGTQVSREAVAMVKPVTSAAPRPMGPTPVQPSRSLEPPDPVQTLHLRVNPNFYGY  
QDIPWRIFLRKEVFYPKDNYSHPVQLDLLFRQILHDTFSEACLRISEDERLQMKALFAQNQLDTRPLVTE  
SVKRAAISMARDSWEIYFSRLFPAMGSGVTGVQILAVSHTGIKLLQMVKGSKEASRRLRVLCAYSFADILFVTMP  
SQNMLEFNLSNEKLILFSARAQQVKTLDVDFILELKKDSDYVAVRNFLSEDPELLSFHKGDI IHLQSLP  
TRVGYAGCVVRKLLVYLEELRRRGPDFGWRFGAVHGRVGRFPSELVQPAAPDFLQPAEPGRGAAAAVA  
AAAAQEVGRRREGPPVRRARSATAERIP  
>rs241240387\_ENSMUSP00000091686\_c.8883:G>GCT\_p.D2962ins-fs  
ENSMUST00000094135.9|Myo15-  
203|ENSMUSG00000042678|+|chr11:g.60400785:G>GCT  
MADEEKKAKKGGKKAPEPEKPKRSLKGTSLRFLMGRDRTPKISKKGQFRSASAFFWGLHTGPQKTKRKKKA  
RTVLKSTSKLMTQMRVGGKKRAMKGGKPSFMVIRFPGRRGYGRLRPRAQSLSKASTAINWLTKKFLKKAES  
GSEQATVDLAWLQRSSSRVGSRLPFPAGAEILRHGGRLRRFPSSHISYSSGEPVGFLLPFEDEAPFRHAGSRKS  
LYGLEGFQDLGEYYDYHREGDDYDQQSLYHYEEQEPYLAFFGGYSPAWPYDDYGYPPGDPYNYYPDYD  
TLYPGYAYGYGYDDFEPYAPPYSGYSSPYSYHDSFESEAYPYSYLLDPYATHHMPYPPYDFPYDTPYDIPY  
FDPYGVFYAEGVYGGGAEIYPPGMPYVYPEEPAFMYPWVPPIMSPHNPHYAHPMDIAELEPEETGEERQS  
TSFRLPSAAFFEQGMDKPARSKLSLIRKFRLLFRPQVKLFGKEKLEVPLPPLSLDIPPLGDAEGE  
EEMPPVPTMPYTHPYWSFLTFRQRNLQRALSAGARQGLGFGPEFGHPTRPATSLARFLKKTLEK  
KPIPRLRGSQKARGRPPVREAAKRFYKLAGMDPDRPNTPIVLRSSQPQARNNNNSHGPPSPRPA  
PRALTHWSALISPPMPAPSPSPASPLTPPFSPTFSRPPRLASPYGSLRQHPPWAAPAHVFPFPQAN  
WGWFAEPPGTSPEVAPDLLAFPVPRPSFRASRSRRAAYGFPSPLIGSRRRPHLPSQP  
SLRSLPGQGYHSPGLPLSPQLSLRRGPFQPPFP  
PPRRPQSLREAFSLRRASGRLPSPVLSRPPSPPLLLKHGPRHRSNLPSRLPRTWRRLSEPPTRAVK  
PWHRAYPPPSAGPWGASTGALEQQENQREAESETPWTVPPLAPSWDMDPPTQRPPSPWPEGI  
GSLRGSPPVPENPLLEHTSPSCEPQSEDRVSNLTGIFLGQHHDPGGQLTKSADPSLEKPEEVV  
TLGDPQPAEPEALNPTPPNKNVVSERKVLRLSASYPLVTCKQARATWPQWHRWKTVSRT  
PAPLAPTRAPGPLLKAGEQPRAEPGRFVAVMPQVRGVSFRPKGPAPVQPEHPDQDPEQ  
GAPQACSLRWPRLWPPPTDAHCLWSRIRTYSSQSHLRGHG  
GDCHKSLWKKTRPQSWQNMHSIRNLPSMRSREQHRDGVEDMTQLEDLQETTVLANLKRTR  
FERNLIYTYIGSILVSNPYRMFAIYGPEQVQYSGRALGENP  
PHLFAIANLAFKMLDAKQNCVVISGEGSGKTEATKILR  
CLAAMNQRDVMQIKILEATPLLEAFGNAKTVRNDNSSRFGK  
FVEIFLEGGVICGAITSQYLLEKSRIVFQA  
KNERNYHIFYELLAGLPAQLRQAFSLQEAETYYL  
NQGNCEIAGKSDADDFRLLAAMEVLGFTSE  
DQDSIFRILASILHLGNVYFEKHETDAQE  
VASVVSAREIQAVAELLQVSPEGLQKAITFK  
VTETIREKI FTPLTVESAVDARDAIAKVL  
YALLFGWLITRVNALVSPKQDTLSIAILDI  
YGFEDLSFNSFEQLCINYANENLQYLFNKI  
VFQEEQEEYIREQMDWREIAFADNQPCIN  
LISLKPYGILRILDDQCCFPQATDHTFLQK  
CHYHHGANPLYSKPKMPLPEFTIKHYAGK  
VTYQVHKFLDKNHDQVRQDVLDFVHSRTR  
VVAHLFSSHAAQTAPPRLGKSSSITRLYKA  
HTVAAKFQOQLDLVEKMERCNPLFVRCLK  
PNHKKEPGLFEPDVMMAQLRYSGVLET  
VRIKEGFPVRLPFQVFI DRYRCLVALKLN  
VPADGDMCVSLLSRLCTVTPDMYRVGISK  
LFLKEHLHQLLESMRERVQNRAALTLQRY  
LRRGFFIQRHFRSLRRKIILLQSRARGFL  
ARQRYQOMRQSLKFRSLVHTYVNRRLYL  
KELSKREVVPVRHLEVPAEVAGLLQAAAGL  
KLSSGPRVAVVRAPRLQAEPCVTLPLDIN  
NYPMKAFIRCHFKEPSFGMLTVPLKMP  
LTRLPVEHHAETSVFKLILRFMGDPHLHGT  
QEMILGNYIVHQGLVEPALRDEILAQLAN  
QVWRNPNAYNSKRGWLLAACLSGFAPSP  
PHLDKFLKFVSDYQNGFQAVCQHRLQAM  
GSGAARTFPPTQLEWTAIQEKASMA  
LDVSCFN GDQFSCPVHTWSTGEAVAGDI  
LKHRGLADGWRGWTVMKNGVQWAE  
LAGHDYVLDLVSDELLRDFPRQKSYF  
IVGAEGPLAGRGDTRGVFGNCWDS  
DEDTPTRPQPQDHVAKMPDLGYS  
SHKEDGTNGETEAQRWTSNRQAVDS  
IGESTVPPRELDGYLDSLFDPLACGD  
ADLEKPTAIAYRMKGGGQPGGGG  
STSEDTSTRPPEPKLPIPLDASTLAL  
QQAFIHRQAVLLAREMTLQALALQQ  
QPLSATSRPQLPERPLAPEARPKTV  
VGTGPPAKPVLVRPTQSWAPGSVAKAP  
KIPSKPVAVPILAQDWTAPESISASPELV  
RYSTLNSEHFPOPTQQIRSIKQYKQPP  
WAGHPEARRTDGGKVFRRPPDPHEEAL  
MILKQKQTLAVVPGTQVSREAVAMVKP  
VTSAPRPMGPTPVQPSRSLEPPDPVQ  
TLHLRVNPNFYGYQDIPWRIFLRKEV  
FYPKDNYSHPVQLDLLFRQILHDTF  
SEACLRISEDERLQMKALFAQNQLD  
TRPLVTE SVKRAAISMARDSWEIYFS  
RLFPAMGSGVTGVQILAVSHTGIKLL  
QMVKGSKEASRRLRVLCAYSFADIL  
FVTMP SQNMLEFNLSNEKLILFSARA  
QQVKTLDVDFILELKKDSDYVAVRN  
FLSEDPELLSFHKGDI IHLQSLP  
TRVGYAGCVVRKLLVYLEELRRRGP  
DFGWRFGAVHGRVGRFPSELVQPA  
AAPDFLQPAEPGRGAAAAVA  
AAAAQEVGRRREGPPVRRARSATAERIP  
>rs217883643\_ENSMUSP00000071777\_c.9370:C>T\_p.A3124V  
ENSMUST00000071880.9|Myo15-201|ENSMUSG00000042678|+|chr11:g.60405766:C>T  
MADEEKKAKKGGKKAPEPEKPKRSLKGTSLRFLMGRDRTPKISKKGQFRSASAFFWGLHTGPQKTKRKKKA  
RTVLKSTSKLMTQMRVGGKKRAMKGGKPSFMVIRFPGRRGYGRLRPRAQSLSKASTAINWLTKKFLKKAES  
GSEQATVDLAWLQRSSSRVGSRLPFPAGAEILRHGGRLRRFPSSHISYSSGEPVGFLLPFEDEAPFRHAGSRKS  
LYGLEGFQDLGEYYDYHREGDDYDQQSLYHYEEQEPYLAFFGGYSPAWPYDDYGYPPGDPYNYYPDYD  
TLYPGYAYGYGYDDFEPYAPPYSGYSSPYSYHDSFESEAYPYSYLLDPYATHHMPYPPYDFPYDTPYDIPY  
FDPYGVFYAEGVYGGGAEIYPPGMPYVYPEEPAFMYPWVPPIMSPHNPHYAHPMDIAELEPEETGEERQS  
TSFRLPSAAFFEQGMDKPARSKLSLIRKFRLLFRPQVKLFGKEKLEVPLPPLSLDIPPLGDAEGE  
EEMPPVPTMPYTHPYWSFLTFRQRNLQRALSAGARQGLGFGPEFGHPTRPATSLARFLKKTLEK  
KPIPRLRGSQKARGRPPVREAAKRFYKLAGMDPDRPNTPIVLRSSQPQARNNNNSHGPPSPRPA  
PRALTHWSALISPPMPAPSPSPASPLTPPFSPTFSRPPRLASPYGSLRQHPPWAAPAHVFPFPQAN  
WGWFAEPPGTSPEVAPDLLAFPVPRPSFRASRSRRAAYGFPSPLIGSRRRPHLPSQP  
SLRSLPGQGYHSPGLPLSPQLSLRRGPFQPPFP  
PPRRPQSLREAFSLRRASGRLPSPVLSRPPSPPLLLKHGPRHRSNLPSRLPRTWRRLSEPPTRAVK  
PWHRAYPPPSAGPWGASTGALEQQENQREAESETPWTVPPLAPSWDMDPPTQRPPSPWPEGI  
GSLRGSPPVPENPLLEHTSPSCEPQSEDRVSNLTGIFLGQHHDPGGQLTKSADPSLEKPEEVV  
TLGDPQPAEPEALNPTPPNKNVVSERKVLRLSASYPLVTCKQARATWPQWHRWKTVSRT  
PAPLAPTRAPGPLLKAGEQPRAEPGRFVAVMPQVRGVSFRPKGPAPVQPEHPDQDPEQ  
GAPQACSLRWPRLWPPPTDAHCLWSRIRTYSSQSHLRGHG  
GDCHKSLWKKTRPQSWQNMHSIRNLPSMRSREQHRDGVEDMTQLEDLQETTVLANLKRTR  
FERNLIYTYIGSILVSNPYRMFAIYGPEQVQYSGRALGENP  
PHLFAIANLAFKMLDAKQNCVVISGEGSGKTEATKILR  
CLAAMNQRDVMQIKILEATPLLEAFGNAKTVRNDNSSRFGK  
FVEIFLEGGVICGAITSQYLLEKSRIVFQA  
KNERNYHIFYELLAGLPAQLRQAFSLQEAETYYL  
NQGNCEIAGKSDADDFRLLAAMEVLGFTSE  
DQDSIFRILASILHLGNVYFEKHETDAQE  
VASVVSAREIQAVAELLQVSPEGLQKAITFK  
VTETIREKI FTPLTVESAVDARDAIAKVL  
YALLFGWLITRVNALVSPKQDTLSIAILDI  
YGFEDLSFNSFEQLCINYANENLQYLFNKI  
VFQEEQEEYIREQMDWREIAFADNQPCIN  
LISLKPYGILRILDDQCCFPQATDHTFLQK  
CHYHHGANPLYSKPKMPLPEFTIKHYAGK  
VTYQVHKFLDKNHDQVRQDVLDFVHSRTR  
VVAHLFSSHAAQTAPPRLGKSSSITRLYKA  
HTVAAKFQOQLDLVEKMERCNPLFVRCLK  
PNHKKEPGLFEPDVMMAQLRYSGVLET  
VRIKEGFPVRLPFQVFI DRYRCLVALKLN  
VPADGDMCVSLLSRLCTVTPDMYRVGISK  
LFLKEHLHQLLESMRERVQNRAALTLQRY  
LRRGFFIQRHFRSLRRKIILLQSRARGFL  
ARQRYQOMRQSLKFRSLVHTYVNRRLYL  
KELSKREVVPVRHLEVPAEVAGLLQAAAGL  
KLSSGPRVAVVRAPRLQAEPCVTLPLDIN  
NYPMKAFIRCHFKEPSFGMLTVPLKMP  
LTRLPVEHHAETSVFKLILRFMGDPHLHGT  
QEMILGNYIVHQGLVEPALRDEILAQLAN  
QVWRNPNAYNSKRGWLLAACLSGFAPSP  
PHLDKFLKFVSDYQNGFQAVCQHRLQAM  
GSGAARTFPPTQLEWTAIQEKASMA  
LDVSCFN GDQFSCPVHTWSTGEAVAGDI  
LKHRGLADGWRGWTVMKNGVQWAE  
LAGHDYVLDLVSDELLRDFPRQKSYF  
IVGAEGPLAGRGDTRGVFGNCWDS  
DEDTPTRPQPQDHVAKMPDLGYS  
SHKEDGTNGETEAQRWTSNRQAVDS  
IGESTVPPRELDGYLDSLFDPLACGD  
ADLEKPTAIAYRMKGGGQPGGGG  
STSEDTSTRPPEPKLPIPLDASTLAL  
QQAFIHRQAVLLAREMTLQALALQQ  
QPLSATSRPQLPERPLAPEARPKTV  
VGTGPPAKPVLVRPTQSWAPGSVAKAP  
KIPSKPVAVPILAQDWTAPESISASPELV  
RYSTLNSEHFPOPTQQIRSIKQYKQPP  
WAGHPEARRTDGGKVFRRPPDPHEEAL  
MILKQKQTLAVVPGTQVSREAVAMVKP  
VTSAPRPMGPTPVQPSRSLEPPDPVQ  
TLHLRVNPNFYGYQDIPWRIFLRKEV  
FYPKDNYSHPVQLDLLFRQILHDTF  
SEACLRISEDERLQMKALFAQNQLD  
TRPLVTE SVKRAAISMARDSWEIYFS  
RLFPAMGSGVTGVQILAVSHTGIKLL  
QMVKGSKEASRRLRVLCAYSFADIL  
FVTMP SQNMLEFNLSNEKLILFSARA  
QQVKTLDVDFILELKKDSDYVAVRN  
FLSEDPELLSFHKGDI IHLQSLP  
TRVGYAGCVVRKLLVYLEELRRRGP  
DFGWRFGAVHGRVGRFPSELVQPA  
AAPDFLQPAEPGRGAAAAVA  
AAAAQEVGRRREGPPVRRARSATAERIP

FDPYGVVYAEVYGGGAEAIYPPGMPYVYPEEPAFMYPWVPPPIMSPHNPYAHMDDIAELEEEPEETGEERQS  
TSFRLPSAAFFEQQGMKPARSKLSLIRKFRLLFRPQVKLFGKEKLEVPLPPSLDIPPLGDAEGEEEEEMP  
FVPTMPYTHPYWSFLTTPRQRNLQRALSAFGARQGLGFGPEFGHPTPRPATSLARFLKKTLEKKPIRRLRGSQ  
KARGRPPVREAAAYKRFYKLAGMDPDRPNTPIVLRSSQPQARNNNNSHGPPSPRPAPRALTHWSALISPPMP  
APSPSPASPLTPPFSPTFSRPPRLASPYGSLRQHPPPWAAPAHVFPFPQANWWGFAEPPGTSPEVAPDLLAFP  
VPRPSFRASRSRRAAYGFPSLSIGSRRRPHLPSQPQSLRSLPGQGYHSPLGPLSPQLSLRRGPFQPPFP  
PRRPQSLREAFSLRRASGRLLGPPRSPVLGSPRPPSPPLKKGPRHRSNLPSRLPRTWRRLSEPPTRAVKP  
WVHRAYPPPPSAGPWGASTGALEQQENQREAEADSETPWTVPPLAPSWDMDPPTQRPSPWPPEGIGSLRGFSR  
PPVPENPLLEHTSPSCEPQSEDRVSNLTGIFLGQHHDPGPGQLTKSADPSLEKPEEVVTLGDPQPPAEPEAL  
NPTPPNKNVVSERKVLRLSASYPLVTCKQARATWPQWHRWKTVSRTAPAPLAPTRAPGPLLKAGEQAPRAEPGRF  
AVVMPQVRGVSSFRPKGPAPVQPEHPDQDPEQGPAPQACSLRWPRLWPPTDAHCLWSRIRTYSSQSHLRGHG  
GDCHKSLWKKTRPQSWQNKMHSIRNLPMSRSREQHREDGVEDMTQLEDLQETTTLANLKTFRERNLIYTYIGS  
ILVSVNRYMFAIYGPEQVQYSGRALGENPPHLFAIANLAFKMLDAKQNCV IISGESGSGKTEATKLIILR  
CLAAMNQRDVMQQIKILEATPLLEAFGNAKTVRNDNSSRFGKFVEIFLEGGVICGAIITSQYLLEKSRIVFA  
KNERNYHIFYELLAGLPAQLRQAFSLQEAETYYLQGGNCEIAGKSDADDFRLLAAMEVLGFTSEDQDSIF  
RILASILHLGNVYFEKHETDAQEVASVVSAREIQAVAELLQVSP EGLQKAITFKVTETIREKIFTPLTVESAV  
DARDAIAKVLVYALLFGWLI TRVNALVSPKQDTLSIAILDIYGFEDLSFNSFEQLCINYANENLQYLFNKIVFQ  
EEQEEYIREQMDWREIAFADNQP CINLISLKPYGILRILDDQCCFPQATDHTFLQKCHYHHGANPLYSKPKMPL  
LPEFTIKHYAGKVTYQVHKFLDKNHDQVRQDVLDFVHSRTRVVAHLFSSHAAQTAPPRLGKSSSITRLYKAH  
TVAAKFQQLDLVEKMERCNPLFVRCLKPNHKKPEGLFEPDVMMAQLRYSVLETVIRKEGFPVRLPFQVF  
IDRYRCLVALKLNVPADGDMCVSLLSRLCTVTPDMYRVGISKFLKEHLHQLLES MRERVQNRAALTQRYLR  
GFFIQRHFRSLRRKIILLQSRARGFLARQRYQMRQSLKFRSLVHTYVNRRLYLKLRAEQRRRAQEAWLREQ  
EELSKREVVPVRHLEVPAEVAGLLQAAAGLKLSSGPRVAVVRAPRLQAEPCVTLPLDINNYPMAKFI RCHFKE  
PSFGMLTVPLKMPLTRLPVEHHAEAISVFKLILRFMGDPHLHGTEMI LGNYIVHQGLVEPALRDEILAQLAN  
QVWRNPNAYNKRGWLLLAACLSGFAPSPHLDFKLLKFVSDYQNGFQAVCQHRLQAMGSGAARTFPPTQLE  
WTAIQEKASMALDVSCFNGDQFSCPVHTWSTGEAVAGDILKHRGLADGWRGWTVAMKNGVQWAE LAGHDYVLD  
LVSDLELLRDFPRQKSYFIVGAEGLAGRGDTRGVFNDCWSDSEDETPTRPQPQDQHVAKMPDLGVCYSHKEDGT  
NGETEAQRWTSNRQAVDSIGESTVPPRELDGYLDSLDFPVLACGDADLEKPTAIAYRMKGGGQPGGGGGSTSE  
DTSRRPPEPKLKPIPLGDASTLALQQA F IHRQAVLLAREMTLQALALQQPLSATSRLPRLPERPLAPEARPKT  
VVGTPPAKPVLRPTPQSWAPGSVAKAPKIPSKPVAVPILAQDWTAPESISASPELVRYSTLNSEHFPOPTQ  
QIRSIKQYKQPPWAGHPEARTRDGGKVFRRPPDPHEEALMI LKGQKTQLAVVPGTQVSREAVAMVKPVTSAP  
RPCMGPVPQPSRSLEPPEDPVQTLHRLVNPNFYGYQDI PWRIFLRKEVFYPKDNYSHPVQLDLLFRQILHD  
TFSEACLRI SEDERLQMKALFAQNQLDTQRPLVTE SVKRAAISMARDSWEIYFSRFLFPAMGSVGTGVQILAVS  
HTGIKLLQMVKGSKEASRRLRVLCAYSFADILFVTMPSQNMLEFNLSNEKLI LFSARAQQVKTLVDTFILELK  
KDSDYVAVARNFLSEDPILLSFHKGDI IHLQSLPETRVGY SAGCVVRKKLVYLEELRRRGPDFGWRFGAVHGR  
VGRFVSELVQPAAPDFLQLP AEPGRGRAAAVAAVASAAAAQEVGRRRREGPPVRARSADSGEDSIALPSTM  
LEFAQKYFRDPRRRPRDGLKLSKEDRESKTLEDVLCFTKVP IQESLIELSDSNLNKMAVDMFVAVMRFMGDA  
PLKGQSEL DVLCTLLKLCGDHEVMRDECYQIVKQITDNSSPKQDSCQRGWRLLYIMVAYYSCSEVFYPYLIR  
FLQHVSWTPGLPFQGI AKACEQNLQKTLRFGGRLEFP SNMELRAMLAGRSSKRQLFLLPGGLERHLKIKTCTV  
ALDVEGLCTEMALTRPEAFDEYVIFVVTNRGQHVCPLSCRAYILDVASEMEQVDGGYTLWFRRVLWDQPLKF  
ENELYVTMHNQVLPDY LKGLFSSVPARQPTQQQLQVSKLASLQHRAKDHFYLP SVREVQEYI PAQLYHTTA  
GDTWLNLSQHRQQTQALS PHQARAQFLGLLSAFLFGSSFFF IQSCSNVLPAPCILA VNHNGLNFLSTKTH  
ELIVKIPLKEIQSTWTQQPTANSYPYVEISLGDVAAQRTMQLQLEQGLELCRVVAVHVESMLSAREERLTL P  
PSEITLL\*

>rs217883643\_ENSMUSP00000080507\_c.5755:C>T\_p.A1919V  
ENSMUST00000081823.12|Myo15-202|ENSMUSG00000042678|+|chr11:g.60405766:C>T  
MHSIRNLPMSRSREQHREDGVEDMTQLEDLQETTTLANLKTFRERNLIYTYIGSILVSVNRYMFAIYGPEQV  
QQYSGRALGENPPHLFAIANLAFKMLDAKQNCV IISGESGSGKTEATKLIILRCLAAMNQRDVMQQIKILE  
ATPLLEAFGNAKTVRNDNSSRFGKFVEIFLEGGVICGAIITSQYLLEKSRIVFAKNERNYHIFYELLAGLPAQ  
LRQAFSLQEAETYYLQGGNCEIAGKSDADDFRLLAAMEVLGFTSEDQDSIFRILASILHLGNVYFEKHET  
DAQEVASVVSAREIQAVAELLQVSP EGLQKAITFKVTETIREKIFTPLTVESAVDARDAIAKVLVYALLFGWLI  
TRVNALVSPKQDTLSIAILDIYGFEDLSFNSFEQLCINYANENLQYLFNKIVFQEEQEEYIREQMDWREIAFA  
DNQPCINLISLKPYGILRILDDQCCFPQATDHTFLQKCHYHHGANPLYSKPKMPLPEFTIKHYAGKVTYQVHK  
FLDKNHDQVRQDVLDFVHSRTRVVAHLFSSHAAQTAPPRLGKSSSITRLYKAHTVAAKFQQLDLVEKMER  
CNPLFVRCLKPNHKKPEGLFEPDVMMAQLRYSVLETVIRKEGFPVRLPFQVVIDRYRCLVALKLNVPADGD  
MCVLSLLSRLCTVTPDMYRVGISKFLKEHLHQLLES MRERVQNRAALTQRYLRGFFIQRHFRSLRRKIILLQ  
SRARGFLARQRYQMRQSLKFRSLVHTYVNRRLYLKELSKREVVPVRHLEVPAEVAGLLQAAAGLKLSSGPR  
VAVVRAPRLQAEPCVTLPLDINNYPMAKFI RCHFKEPSFGMLTVPLKMPLTRLPVEHHAEAISVFKLILRFMG

DPHLHGTQEMILGNIVHOGQGLVEPALRDEILAQLANQVWRNPAYNSKRGWLLLAACLSGFAPSPHLDKFLK  
FVSDYGQNGFQAVCQHRLQLAMGSGAARTFPPTQLEWTAIQEKASMALDVSCFNGDQFSCPVTHTWSTGEAVAG  
DILKHRGLADGWRGWTVAMKNGVQWAEFLAGHDYVLDLVSDELLRDFPRQKSYFIVGAEGPLAGRGDTRGVFG  
NCWDSDEDTPTRPQPDHVAKMPDLGDCYCSHKEDGTNGETEAQRWTSNRQAVDSIGESTVPPRELDGYLDSLF  
DPVLACGDADLEKPTAIAYRMKGGGQPGGGGGSTSEDTSTRPPEPKLKIPIGLDASTLALQQAFIHRQAVLLA  
REMTLQALALQQQPLSATSRLPERPLAPEARPKTVVGTGPPAKPVLVRPTPQSWAPGSAKAPKIPSKPVA  
VPI LAQDWTAPESISASPELVRYSTLNSEHFPOPTQOIRSIIKQYKQPPWAGHPEARRTDGGKVFRRPPDPHE  
EALMILKGQKTQLAVVPGTQVSREAVAMVKPVTAPRPCMGPPTVQPSRSLEPPEDPVQTLHRLVNPVYGY  
QDIPWRIFLRKEVYFKPDNYSHPVQLDLLFRQILHDTFSEACLRISEDERLQMKALFAQNQLDTPRPLVTSV  
KRAAISMARDSWEIYFSRLFPAMGVSVTGQVILAVSHTGIKLLQMVKGSKEASRRLRVLCAYSFADILFVTMP  
SQNMLEFNLSNEKLILFSARAQQVKTLDVTFILELKKDSYVAVRNFLSEDPILLSFHKGDI IHLQSLPTR  
VGYSAGCVVRKLVYLEELRRRGPDPGWRFGAVHGRVGRFPSELVQAAAAPDFLQLPAEPGRGAAAVAAVA  
SAAAQEVGRRREGPPVRARSADSGEDSIALPPSTMLEFAQKYFRDPRRRPRDGLKLSKEDRESKTLLEDVLC  
FTKVP IQESLIELSDSNLKNMVDVAVMRFMGDAPLKGQSELVLCITLLKLCGDHEVMRDECYQCIVKQIT  
DNSSPKQDSCQRGWRLLYIMVAYYSCSEVFYPYLIRFLQHVSWTPGLPFQGIKACEQNLQKTLRFGRLEFP  
SNMELRAMLAGRSSKRQLFLLPGGLERHLKIKTCTVALDVIEGLCTEMALTRPEAFDEYVIFVVTNRGQHVCP  
LSCRAYILDVASEMEQVDGGYTLWFRRLVLDQPLKFNELVVMHYNQVLPDYLGKLFSSVPARQPTQQLOO  
VSKLASLQHRADHFFYLPVSVREVQYIIPAQLYHTTAGDTWLNLVSQHRQQTQALSHPHQAQFLGSSAFPLF  
GSSFFFIQSCSNVLPAPCILA VNHNGLNFLSTKTHELIVKIPLKEIQSTWTQOPTANSSYPYVEISLGDVAA  
QRTMQLQLEQGLELCRVVAVHVESMLSAREERLTLPPSEITLL\*  
>rs217883643\_ENSMUSP00000091686\_c.9316:C>T\_p.A3106V  
ENSMUST00000094135.9|Myo15-203|ENSMUSG00000042678|+|chr11:g.60405766:C>T  
MADEEKKAKKGGKKAPEPEKPKRSLKGT SRLFMGFRDRTPKISKKGQFRSASAFFWGLHTGPKTKRKKKA  
RTVLKSTSKLMTQMRVGGKKRAMKGGKPSFMVIRFPGRRGYGRLRPRAQSLSKASTAINWLTKKFLKKAEEES  
GSEQATVDAWLQRSSSRVGSRKLPFPGAELRHGGRLRRFRSHSIYSSGEPVGFLLPFDEAPFRHAGSRKS  
LYGLEGFQDLGEYYDYHREGDDYDQQSLYHYEEQEPYLAEFGGYSPAWPPYDDYGPYDPYNYHPDYDYG  
TLYPGYAYGYGDDFPPYAPPSGYSSPYSYHDSFESEAYPYSYLLDPYATHMPYPYDTPYDIPIY  
FDPYGVPYAEVYGGGAEAIYPPGMPYVYPEEPAFMYPWVPPIMSPHNPYAHPMDDIAELEPEEETGEERQS  
TSFRLPSAAFFEQGMDKPARSKLSLIRKFRLLFRPQVKLFGKEKLEVPLPPSLDIPPLGDAEGEEEEEMP  
PVPTMPYTHPYWSFLTTPRQNLQRALSFAFGARQGLFGFPEFGHPTPRPATSLARFLKKTLEKPIPRLRGSQ  
KARGRPPVREAAAYKRFYKLAGMDPDRPNTPIVLRSSQPQARNNNNSHGPPSPRPAPRALTHWSALISPPMP  
APSPSPASPLTPPFSPTFSRPPRLASPYGSLRQHPPWAAAHVFPFPQANWWGFAEPPGTSPEVAPDLAFA  
VPRPSFRASRSRRAAYGFPSPLIGSRRRPHLPSPQPSLRSPLPGQYHSPGLPLSPQLSLRRGPFQPPFP  
PPRRPQSLREAFSLRRASGRLLGPPRSPVLGSPRPPSPPLLKHGPRHRSNLNPSRLPRTWRRLSEPPTRAVK  
VWHRAYPPPPSAGPWGASTGALEQQENQREAEADSETPWTVPPLAPSVDVMDPPTQRPPSPWGEDIGSLRGS  
PPVPENPLLEHTSPQSEDRVSNLTGIFLQGHDPGPGQLTKSADPSLEKPEEVTLGDFPQPAEPEAL  
NPTPNKNVVSERKVLRLSASYPLVTCKQARATWPQWHRWKTVSRTPAPLAPTRAPGPLLKAGEQPRAEPGRF  
AVVMPQVRGVSSFRPKGPAPVQPEHPDQDPEQGPAPQACSLRWPRLWPPTDAHCLWSRIRTYSSQSHLRGHG  
GDCHKSLWKKTRPQSWQNMHSIRNLPSMRSREQHREDGVEDMTQLEDLQETTIVLANLKRFRERNLIYTYIGS  
ILVSNVNYRMFAIYGPEQVQYSGRALGENPPLFAIANLAFKMLDAKQNCVIIISGESGSGKTEATKLIILR  
CLAAMNQRRDVMQIKILEATPLLEAFGNAKTVRNDNSSRFGKVEIFLEGGVICGAIYSQYLLEKSRIVFQA  
KNERNYHIFYELLAGLPAQLRQAFSLQEAETYYLNLQGGNCEIAGKSDADDFRLLAAMEVLGFTSEDQDSIF  
RILASILHLGNVYFEKHETDAQEVASVVSAREIQAVAELLQVSPEGLQKAITFKVTETIREKIFTPLTVESAV  
DARDAIAKVLVYALLFGWLI TRVNALVSPKQDTLSIAILDIYGFEDLSFNSFEQLCINYANENLQYLFNKIVFQ  
EEQEEYIREQMDWREIAFADNQPCINLISLKPYILRILDDQCCFPQATDHTFLQKCHYHGANPLYSKPKMP  
LPEFTIKHYAGKVTYQVHKFLDKNHDQVRQDVLDFVHSRTRVVAHLFSSHAAQTAPPRLGKSSSITRLYKAH  
TVAAKFQQLDLVLEKMERCNPLFVRCLKPNHKKEPGLFEPDVMMAQLRYSGVLETVIRIRKEGFPVRLPFQVF  
IDRYRCLVALKLNVPADGDMCVSLLSRLCTVTPDMYRVGISKFLKEHLHQLLES MRERVQNRAALTQRYLR  
GFFIQRHFRSLRRKIIILLQSRARGFLARQRYQMRQSLLKFRSLVHTYVNRRLRYLKELSKREVVPVRHLEVPA  
EVAGLLQAAAGLKLSSGPRVAVVRAPRLQAEPCVTLPDINNYPMAKFI RCHFKEPSFGMLTVP LKMP LTRLP  
VEHHAEEAISVFKLILRFMGDPHLHGTQEMILGNIVHOGQGLVEPALRDEILAQLANQVWRNPAYNSKRGWLL  
AACLSGFAPSPHLDKFLK FVSDYGQNGFQAVCQHRLQLAMGSGAARTFPPTQLEWTAIQEKASMALDVSCFN  
GDQFSCPVTHTWSTGEAVAGDILKHRGLADGWRGWTVAMKNGVQWAEFLAGHDYVLDLVSDELLRDFPRQKSYF  
IVGAEGPLAGRGDTRGVFGNCWDSDEDTPTRPQPDHVAKMPDLGDCYCSHKEDGTNGETEAQRWTSNRQAVDS  
IGESTVPPRELDGYLDSLFDPVLACGDADLEKPTAIAYRMKGGGQPGGGGGSTSEDTSTRPPEPKLKIPIGLD  
ASTLALQQAFIHRQAVLLAREMTLQALALQQQPLSATSRLPERPLAPEARPKTVVGTGPPAKPVLVRPTPQ  
SWAPGSAKAPKIPSKPVAVPI LAQDWTAPESISASPELVRYSTLNSEHFPOPTQOIRSIIKQYKQPPWAGHP  
EARRTDGGKVFRRPPDPHEEALMILKGQKTQLAVVPGTQVSREAVAMVKPVTAPRPCMGPPTVQPSRSLEPP



EDPVQTLHRLVNPNFYGYQDIPWRIFLRKEVFYPKDNYSHPVQLDLLFRQILHDTFSEACLRISEDERLQMK  
ALFAQNQLDTRPLVTVESVKRAAISMARDSWEIYFSRLFPAMGVSQVGTGVLAVSHTGIKLLQMVKGSKEASR  
RLRVLCAYSFADILFVTPMPSQNMLEFNLSNEKLILFSARAQQVKTLDVDFILELKKDSDYVAVRNFLSEDPE  
LLSFHKGDI IHLQSLEPTRVGYAGCVVRKLVYLEELRRRGPDFGWRFGAVHGRVGRFPSELVQPAAPDFL  
QLPAEPGRGAAAVAAVASAAAQEVGRRREGPPVRARSADSGEDSIALPPSTMLEFAQKYFRDRRRRPRDG  
LKLKSKEDRESKTLEDVLCFTKVP IQESLIELSDSNLNMMAVDMFVAVMRFMGDAPLKGQSELDVLCITLLKLC  
GDHEVMRDECYQIVKQITDNSSPKQDSCQRGWRLLYIMVAYYSCSEVFYPIRLRFLQHVSWTPGLPFQGIKAK  
ACEQNLOKTLRFGGRLFFPSNMELRAMLGRSSKRQLFLLPGGLERHLKIKTCTVALDVIEGLCTEMALTRPE  
AFDEYVIFVVTNRGQHVCP LSCRAY ILDVASEMEQVDGGYTLWFRVRLWDQPLKFENELVYTMHYNQVLPDYL  
KGLFSSVPARQPTQQQLQVSKLASLQHRAKDHFYLPVREVQEIYPAQLYHTTAGDTWLNLSVQHRQQTQAL  
SPHQARAQFLGLLSAFPLFGSSFFFIQSCSNVLPAPCILA VNHNLNLFSTKTHELIVKIPLKEIQSTWTQQ  
PTANSSYPYVEISLGDVAQRQMQLQLEQGLELCRVVAVHVESMLSAREERLTLPPSEITLL\*  
>ENSMUSP00000060749\_c.1965:A>C\_p.K656Q ENSMUST00000052346.10|L1g11-  
201|ENSMUSG00000020536|+|chr11:g.60600871:A>C  
MMKFRFRRQGADPQREKQELFAFHKTVEHGFNPQPSALAFDPELRIMAIGTRSGAVKIYGAPGVEFTGLHR  
DAATVTQMHLFPGQGRLLTLLDDSSHLWEI IHHNGCAHLEEGLSFHPPSRPSFDNASFPASLTRVTVLLVA  
GNTAALGTESGSIFFLDVATLALLEGQTLSPDVVLRSPDDYRCGKALGPVESLQGHLDPSKILIGYSRGLL  
VIEWSQATQSVDNVFLGNQLES LCWGRDGSIISSHSDGSYAIWSTDTGSPPTLQPTVVTTPYGFPCAKINK  
ILWRSCESGDHFIIFSGGMPRASYGDRHCVSVLRAETLVTLDFTSRVIDFFTVHSTQPEDECDNPQALAVLLE  
EELVVLDLQTPGWPAVPAPYLAPLHSSAITCSAHVANVPSKLRWARIVSAGEQQSPQPASSALSWPITGGRNLA  
QEPSQRGLLLTGHEGDTVRFWDASGVALRPLYKLTSTAGLFTDCEHADSLAQAVEDDWPFPFRKVGCFDPYSDD  
PRLGIQKVALCKYTAQMVVAGTAGQVLVLELSEVPAEHAVSVANVDLLQDREGFTWKGHERLNPHTGLLPWPA  
GFQPRMLIQCLPPAAVTAVTLHAEWSLVAFGTSHGFGLFDYQRKSPVLARCTLHPNDSLAMEGPLSRVKSQK  
SLRQSFRRIRKSRVSGKKRTPAASSKLQEANAQLAEQTCPHDLEMTVPQRRIEPRSADDSLSGVVRCLYFADT  
FLRDATHHGPTMWAGTNSGVSFAYALEVPAATAGGEKRPQAVEAVLGKEVQLMHRAPVVAIAVLDGRGRPLP  
EPYEASRDLAQAPDMQGGHAVLIASEEQFKVFTLTKVSAKTKFKLTAHEGCRVRKVALATFASVMSDYAETC  
LACLTLNLDGVHVFVSPGLRPQVHYSCIRKEDISGIASCVFTRHGQGFYLI SPSEFERFSLSARNITEPLCSLD  
ISWPQONATQPRLQESPKLSQANGTRDIILAPESCEGSPSSAHSKRADTMEPPEAALSPVSI DSAASGDTMLDT  
TGDVTVEYVKDFLGSPEDSEKNLRNLEADDACRAYTLLIK\*  
>ENSMUSP00000104359\_c.1965:A>C\_p.K656Q ENSMUST00000108719.4|L1g11-  
202|ENSMUSG00000020536|+|chr11:g.60600871:A>C  
MMKFRFRRQGADPQREKQELFAFHKTVEHGFNPQPSALAFDPELRIMAIGTRSGAVKIYGAPGVEFTGLHR  
DAATVTQMHLFPGQGRLLTLLDDSSHLWEI IHHNGCAHLEEGLSFHPPSRPSFDNASFPASLTRVTVLLVA  
GNTAALGTESGSIFFLDVATLALLEGQTLSPDVVLRSPDDYRCGKALGPVESLQGHLDPSKILIGYSRGLL  
VIEWSQATQSVDNVFLGNQLES LCWGRDGSIISSHSDGSYAIWSTDTGSPPTLQPTVVTTPYGFPCAKINK  
ILWRSCESGDHFIIFSGGMPRASYGDRHCVSVLRAETLVTLDFTSRVIDFFTVHSTQPEDECDNPQALAVLLE  
EELVVLDLQTPGWPAVPAPYLAPLHSSAITCSAHVANVPSKLRWARIVSAGEQQSPQPASSALSWPITGGRNLA  
QEPSQRGLLLTGHEGDTVRFWDASGVALRPLYKLTSTAGLFTDCEHADSLAQAVEDDWPFPFRKVGCFDPYSDD  
PRLGIQKVALCKYTAQMVVAGTAGQVLVLELSEVPAEHAVSVANVDLLQDREGFTWKGHERLNPHTGLLPWPA  
GFQPRMLIQCLPPAAVTAVTLHAEWSLVAFGTSHGFGLFDYQRKSPVLARCTLHPNDSLAMEGPLSRVKSQK  
SLRQSFRRIRKSRVSGKKRTPAASSKLQEANAQLAEQTCPHDLEMTVPQRRIEPRSADDSLSGVVRCLYFADT  
FLRDATHHGPTMWAGTNSGVSFAYALEVPAATAGGEKRPQAVEAVLGKEVQLMHRAPVVAIAVLDGRGRPLP  
EPYEASRDLAQAPDMQGGHAVLIASEEQFKVFTLTKVSAKTKFKLTAHEGCRVRKVALATFASVMSDYAETC  
LACLTLNLDGVHVFVSPGLRPQVHYSCIRKEDISGIASCVFTRHGQGFYLI SPSEFERFSLSARNITEPLCSLD  
ISWPQONATQPRLQESPKLSQANGTRDIILAPESCEGSPSSAHSKRADTMEPPEAALSPVSI DSAASGDTMLDT  
TGDVTVEYVKDFLG\*

>ENSMUSP00000002891\_c.2872:AA>GC\_p.K958S ENSMUST00000002891.11|Top3a-  
201|ENSMUSG00000002814|-|chr11:g.60631488:TT>GC  
MIFPVTLALAFQWHRPGRALSRAMEVAFRGRVVKVLCVAEKNDAAKGIADLLSNGRMRRKEGLSKFNKIYEF  
DYHLYGQNVMTMIMTSVSGHLLAHDFQMQRKQWQSCNPLVLFEAIEKYCPENFIDIKKTLERETHHCQALVIW  
TDCDREGENIGFEI IHVCKAVKPNLRVLRARFSEITPHAVRTACENLTPDQRVSDAVDVRQELDLRIGAAFT  
RFQTLRLQRI FPEVLAEQLISYGSCQFPGLGFVVERFKAIQAFVPEVFHKIKVTHDHDGTVFENWKRYRFLN  
HTACLVLVQLCMEDPMATVVEVRSKPKSKWRPQALDVELEKLASRKLRIINAKETMRIAELKLYTQGYI SYPR  
ETNIFPKLDNLVALVEQQTVDPHWGAFAQITILERGGPTPRNGSKSDQAHPPIHPTKYTSGLQGDDRRLYEFIV  
RHFLLACCSQDAQGVETTVEIDIAQERFVAHGLIILARNYLDVYPYDHWSDKLLPVYEQGSHFQPS TVEMVDGE  
TSPQQLLEADLIALMEKHGIGTDATHAEHIETIKARMYVGLTSDKRFLPGHLMGLVEGYDSMGYEMSKPDL  
RAELEADLKLICEGKKDKFQVLRQQVQKYKQVFIEAVAKAKKLEALSQYLGERTEMAQQEEIYPAMPPEVRK  
CPQCNKDMVLKTKKSGGFYLSMGFPECRSVAVWFPDSVLEASRDNSVCSVCQPPPVYRLKLFKRGSLPPAMP

LEFVGCIGGCDETLKEIFGLRFPRALPRASQPSGHLQASQALNRMDSSQHNLSQLPLVNRHTRPSKTVAQALLP  
PTTAGESNSVTCNCGREAVLLTVRKQGPNGRHFYKCSNGDCNFFLWADSSHSTGGGTPTSASGPPGSSVGC  
SSVSGSHMDGFGSLGSDSDGGTPCCLCGQPAVTRTVQKDGPNKGRQFHTCAKPREQQCGFFQWVDENVAPGSFAA  
PAWPGGRGSSPETRGCKQKTKSWFLRCRVHSSKASEM\*PLSPAETHPNLLSSEQM  
>ENSMUSP00000002891\_c.2151:T>G\_p.L718V ENSMUST00000002891.11|Top3a-  
201|ENSMUSG00000002814|-|chr11:g.60633943:A>C  
MIFPVTLLAFQWHRPGRALSRAMEVAFRGVRKVLCAEKNDAAKGIADLLSNGRMRRKEGLSKFNKIYEF  
DYHLYGQNVMTMIMTSVSGHLLAHDFQMQRKQWQSCNPLVLFEAIEKYCPENFIDIKKTLERETHHCQALVIW  
TDCDREGENIGFEIIHVCKAVKPNLRVLRARFSEITPHAVRTACENLTPDQRVSDAVDVRQELDLRIGAAFT  
RFQTLRLQRIFFPEVLAEQLISYGSCQFPPTLGFVVERFKAIQAFVPEVVFHKIKVTHDHDGTVFEFNWKRYRLFN  
HTACLVLVYQLCMEDPMATVVEVRSKPKSKWRPQALDVELEKLSRKLRLINAKETMRIAIEKLYTQGYISYPR  
ETNIFPKDLNLVALVEQQTVDPHWGAFQITILERGGPTPRNGSKSDQAHPPIHPTKYTSGLQDDRRLYEFIV  
RHFLACCSQDAQGQETTVEIDIAQERFVAHGLIILARNYLDVYPYDHWSDKLLPVYEQGSHFQPSVEMVDGE  
TSPQQLLEADLIALMEKHGIGTDATHAEHIETIKARMYVGLTSDKRFLPGHLMGLVEGYDSMGYEMSKPDL  
RAELEADLKLICEGKKDKFQVLRQQVQKYQVFIKAVAKAKLDEALSQYLGERTEMAQEEIYPAMPEPVRK  
CPQCNKDMVLKTKKSGGFYLSMGMGFPECRSAVWFPDSVLEASRDNSVCSVCQPPPVYRLKVKFKRGLPAMP  
LEFVGCIGGCDETLKEIFGLRFPRALPRASQPSGHLQASQALNRMDSSQHNLSQLPLVNRHTRPSKTVAQALLP  
PTTAGESNSVTCNCGREAVLLTVRKQGPNGRHFYKCSNGDCNFFLWADSSHSTGGGTPTSASGPPGSSVGC  
SSVSGSHMDGFGSLGSDSDGGTPCCLCGQPAVTRTVQKDGPNKGRQFHTCAKPREQQCGFFQWVDENVAPGSFAA  
PAWPGGRGKAQRPEAASKRPRAGSSDAGSTVKKPRKCSLCHQPGHTRTFCPQNR\*  
>ENSMUSP00000113057\_c.2076:T>G\_p.L693V ENSMUST00000117743.8|Top3a-  
203|ENSMUSG00000002814|-|chr11:g.60633943:A>C  
MEVAFRGVRKVLCAEKNDAAKGIADLLSNGRMRRKEGLSKFNKIYEFDYHLYGQNVMTMIMTSVSGHLLAHDF  
QMQRKQWQSCNPLVLFEAIEKYCPENFIDIKKTLERETHHCQALVIWTDREGENIGFEIIHVCKAVKPNL  
RVLRARFSEITPHAVRTACENLTPDQRVSDAVDVRQELDLRIGAAFTRFQTLRLQRIFFPEVLAEQLISYGSC  
QFPPTLGFVVERFKAIQAFVPEVVFHKIKVTHDHDGTVFEFNWKRYRLFNHTACLVLVYQLCMEDPMATVVEVRSK  
PKSKWRPQALDVELEKLSRKLRLINAKETMRIAIEKLYTQGYISYPRTETNIFPKDLNLVALVEQQTVDPHWG  
AFAQITILERGGPTPRNGSKSDQAHPPIHPTKYTSGLQDDRRLYEFIVRHFLACCSQDAQGQETTVEIDIAQ  
RFVAHGLIILARNYLDVYPYDHWSDKLLPVYEQGSHFQPSVEMVDGETSPPQQLLEADLIALMEKHGIGTDA  
THAEHIETIKARMYVGLTSDKRFLPGHLMGLVEGYDSMGYEMSKPDLRAELEADLKLICEGKKDKFQVLRQ  
VQKYQVFIKAVAKAKLDEALSQYLGERTEMAQEEIYPAMPEPVRKCPQCNKDMVLKTKKSGGFYLSMGMGF  
PECRSAVWFPDSVLEASRDNSVCSVCQPPPVYRLKVKFKRGLPAMPLEFVGCIGGCDETLKEIFGLRFPR  
LRAASKRPRAGSSDAGSTVKKPRKCSLCHQPGHTRTFCPQNR\*  
>ENSMUSP00000099729\_c.2151:T>G\_p.L718V ENSMUST00000102668.10|Top3a-  
202|ENSMUSG00000002814|-|chr11:g.60633943:A>C  
MIFPVTLLAFQWHRPGRALSRAMEVAFRGVRKVLCAEKNDAAKGIADLLSNGRMRRKEGLSKFNKIYEF  
DYHLYGQNVMTMIMTSVSGHLLAHDFQMQRKQWQSCNPLVLFEAIEKYCPENFIDIKKTLERETHHCQALVIW  
TDCDREGENIGFEIIHVCKAVKPNLRVLRARFSEITPHAVRTACENLTPDQRVSDAVDVRQELDLRIGAAFT  
RFQTLRLQRIFFPEVLAEQLISYGSCQFPPTLGFVVERFKAIQAFVPEVVFHKIKVTHDHDGTVFEFNWKRYRLFN  
HTACLVLVYQLCMEDPMATVVEVRSKPKSKWRPQALDVELEKLSRKLRLINAKETMRIAIEKLYTQGYISYPR  
ETNIFPKDLNLVALVEQQTVDPHWGAFQITILERGGPTPRNGSKSDQAHPPIHPTKYTSGLQDDRRLYEFIV  
RHFLACCSQDAQGQETTVEIDIAQERFVAHGLIILARNYLDVYPYDHWSDKLLPVYEQGSHFQPSVEMVDGE  
TSPQQLLEADLIALMEKHGIGTDATHAEHIETIKARMYVGLTSDKRFLPGHLMGLVEGYDSMGYEMSKPDL  
RAELEADLKLICEGKKDKFQVLRQQVQKYQVFIKAVAKAKLDEALSQYLGERTEMAQEEIYPAMPEPVRK  
CPQCNKDMVLKTKKSGGFYLSMGMGFPECRSAVWFPDSVLEASRDNSVCSVCQPPPVYRLKVKFKRGLPAMP  
LEFVGCIGGCDETLKEIFGLRFPRALPRASQPSGHLQASQALNRMDSSQHNLSQLPLVNRHTRPSKTVAQALLP  
PTTAGESNSVTCNCGREAVLLTVRKQGPNGRHFYKCSNGDCNFFLWADSSHSTGGGTPTSASGPPGSSVGC  
SSVSGSHMDGFGSLGSDSDGGTPCCLCGQPAVTRTVQKDGPNKGRQFHTCAKPREQQCGFFQWVDENVAPGEAAG  
QGIST\*  
>ENSMUSP00000002891\_c.1920:A>C\_p.M641L ENSMUST00000002891.11|Top3a-  
201|ENSMUSG00000002814|-|chr11:g.60636743:T>G  
MIFPVTLLAFQWHRPGRALSRAMEVAFRGVRKVLCAEKNDAAKGIADLLSNGRMRRKEGLSKFNKIYEF  
DYHLYGQNVMTMIMTSVSGHLLAHDFQMQRKQWQSCNPLVLFEAIEKYCPENFIDIKKTLERETHHCQALVIW  
TDCDREGENIGFEIIHVCKAVKPNLRVLRARFSEITPHAVRTACENLTPDQRVSDAVDVRQELDLRIGAAFT  
RFQTLRLQRIFFPEVLAEQLISYGSCQFPPTLGFVVERFKAIQAFVPEVVFHKIKVTHDHDGTVFEFNWKRYRLFN  
HTACLVLVYQLCMEDPMATVVEVRSKPKSKWRPQALDVELEKLSRKLRLINAKETMRIAIEKLYTQGYISYPR  
ETNIFPKDLNLVALVEQQTVDPHWGAFQITILERGGPTPRNGSKSDQAHPPIHPTKYTSGLQDDRRLYEFIV  
RHFLACCSQDAQGQETTVEIDIAQERFVAHGLIILARNYLDVYPYDHWSDKLLPVYEQGSHFQPSVEMVDGE

TSPQQLLTEADLIALMEKHGIGTDATHAEHIETIKARMYVGLTSDKRFLPGHLMGLVEGYDSMGYEMSKPDL  
RAELEADLKLICEGKKDKFQVLRQQVQKYKQVFI EAVAKAKKLDEALSQYLGERTELAQQEEIYPAMPEPVRK  
CPQCNKDMVLKTKKSGGFYLSMGMFPECRSVAVFPDSVLEASRDNSVCSVCQPPPVYRLKLFKRGSLPPAMP  
LEFVGCIGGCDETLKEIFGLRFPRALPRASQPSGHLQASQALNRMDSSQHNSLQPLVNRHTRPSKTVAQALLP  
PTTAGESNSVTCNCGREAVLLTVRKQGNQGRHFYKCSNGDCNFFLWADSSHSTGGGTPTSASGPPGSSVGC  
SSVGSMDGFGSLGSDSDGGTPCLCGQPAVTRTVQKDGPNKGRQFHTCAKPREQQCGFFQWVDENVAPGSFAA  
PAWPGGRGKAQRPEAASKRPRAGSSDAGSTVKKPRKCSLCHQPGHTRTFCPQNR\*

>ENSMUSP00000113057\_c.1845:A>C\_p.M616L ENSMUST00000117743.8|Top3a-  
203|ENSMUSG00000002814|-|chr11:g.60636743:T>G  
MEVAFRGRVRLVLCVAEKNDAAKGIADLLSNGRMRRKEGLSKFNKIYEFDYHLYGQNVMTMIMTSVSGHLLAHDF  
QMQRFRKWQSCNPLVLFEAIEIKYCPENFIDIKKTLERETHHCQALVIWTDREGENIGFEI IHVCKAVKPNL  
RVLRLARFSEITPHAVRTACENLTPDQRVSDAVDVRQELDLRIGAAFTRFQTLRLQRI FPEVLAEQLISYGSC  
QFPTLGFVVERFKAIQAFVPEVFHFIKVTHDHDGTVFENWKRYRLFNHTACLVLVLYQLCMEDPMATVVEVRSK  
PKSKWRPQALDVELEKLSRKLRLINAKETMRIA EKLYTQGYISYPRTEETNIFPKDLNLVALVEQQTVDPHWG  
AFAQTILERGGPTPRNGSKSDQAHPPIHPTKYTSGLQGD RRLYEFIVRHFLACCSQDAQQGQETTVEIDIAQE  
RFVAHGLIILARNYLDVYPYDHWSDKLLPVYEQGSHFQPS TVEMVDGETSPPQLLTEADLIALMEKHGIGTD  
ATHAEHIETIKARMYVGLTSDKRFLPGHLMGLVEGYDSMGYEMSKPDLRAELEADLKLICEGKKDKFQVLRQQ  
VQKYKQVFI EAVAKAKKLDEALSQYLGERTELAQQEEIYPAMPEPVRKCPQCNKDMVLKTKKSGGFYLSMGMF  
PECRSVAVFPDSVLEASRDNSVCSVCQPPPVYRLKLFKRGSLPPAMPLEFVGCIGGCDETLKEIFGLRFPRA  
LPRAASKRPRAGSSDAGSTVKKPRKCSLCHQPGHTRTFCPQNR\*

>ENSMUSP00000099729\_c.1920:A>C\_p.M641L ENSMUST00000102668.10|Top3a-  
202|ENSMUSG00000002814|-|chr11:g.60636743:T>G  
MIFPVTLLAFQWHRPGRALSRAMEVAFRGRVRLVLCVAEKNDAAKGIADLLSNGRMRRKEGLSKFNKIYEF  
DYHLYGQNVMTMIMTSVSGHLLAHDFQMQRFRKWQSCNPLVLFEAIEIKYCPENFIDIKKTLERETHHCQALVIW  
TDCDREGENIGFEI IHVCKAVKPNLRVLRLARFSEITPHAVRTACENLTPDQRVSDAVDVRQELDLRIGAAFT  
RFQTLRLQRI FPEVLAEQLISYGSCQFPTLGFVVERFKAIQAFVPEVFHFIKVTHDHDGTVFENWKRYRLFN  
HTACLVLVLYQLCMEDPMATVVEVRSKPKSKWRPQALDVELEKLSRKLRLINAKETMRIA EKLYTQGYISYPRTE  
ETNIFPKDLNLVALVEQQTVDPHWGAFQAQTILERGGPTPRNGSKSDQAHPPIHPTKYTSGLQGD RRLYEFIV  
RHFLACCSQDAQQGQETTVEIDIAQERFVAHGLIILARNYLDVYPYDHWSDKLLPVYEQGSHFQPS TVEMVDGE  
TSPQQLLTEADLIALMEKHGIGTDATHAEHIETIKARMYVGLTSDKRFLPGHLMGLVEGYDSMGYEMSKPDL  
RAELEADLKLICEGKKDKFQVLRQQVQKYKQVFI EAVAKAKKLDEALSQYLGERTELAQQEEIYPAMPEPVRK  
CPQCNKDMVLKTKKSGGFYLSMGMFPECRSVAVFPDSVLEASRDNSVCSVCQPPPVYRLKLFKRGSLPPAMP  
LEFVGCIGGCDETLKEIFGLRFPRALPRASQPSGHLQASQALNRMDSSQHNSLQPLVNRHTRPSKTVAQALLP  
PTTAGESNSVTCNCGREAVLLTVRKQGNQGRHFYKCSNGDCNFFLWADSSHSTGGGTPTSASGPPGSSVGC  
SSVGSMDGFGSLGSDSDGGTPCLCGQPAVTRTVQKDGPNKGRQFHTCAKPREQQCGFFQWVDENVAPGEAAG  
QGIST\*

>ENSMUSP00000113653\_c.1845:A>C\_p.M616L ENSMUST00000120417.8|Top3a-  
204|ENSMUSG00000002814|-|chr11:g.60636743:T>G  
MEVAFRGRVRLVLCVAEKNDAAKGIADLLSNGRMRRKEGLSKFNKIYEFDYHLYGQNVMTMIMTSVSGHLLAHDF  
QMQRFRKWQSCNPLVLFEAIEIKYCPENFIDIKKTLERETHHCQALVIWTDREGENIGFEI IHVCKAVKPNL  
RVLRLARFSEITPHAVRTACENLTPDQRVSDAVDVRQELDLRIGAAFTRFQTLRLQRI FPEVLAEQLISYGSC  
QFPTLGFVVERFKAIQAFVPEVFHFIKVTHDHDGTVFENWKRYRLFNHTACLVLVLYQLCMEDPMATVVEVRSK  
PKSKWRPQALDVELEKLSRKLRLINAKETMRIA EKLYTQGYISYPRTEETNIFPKDLNLVALVEQQTVDPHWG  
AFAQTILERGGPTPRNGSKSDQAHPPIHPTKYTSGLQGD RRLYEFIVRHFLACCSQDAQQGQETTVEIDIAQE  
RFVAHGLIILARNYLDVYPYDHWSDKLLPVYEQGSHFQPS TVEMVDGETSPPQLLTEADLIALMEKHGIGTD  
ATHAEHIETIKARMYVGLTSDKRFLPGHLMGLVEGYDSMGYEMSKPDLRAELEADLKLICEGKKDKFQVLRQQ  
VQKYKQVFI EAVAKAKKLDEALSQYLGERTELAQQEEIYPAMPEPVRKCPQCNKDMVLKTKKSGGFYLSMGMF  
PECRALRCLFPCC\*

>ENSMUSP00000002891\_c.1131:G>C\_p.A378P ENSMUST00000002891.11|Top3a-  
201|ENSMUSG00000002814|-|chr11:g.60641551:C>G  
MIFPVTLLAFQWHRPGRALSRAMEVAFRGRVRLVLCVAEKNDAAKGIADLLSNGRMRRKEGLSKFNKIYEF  
DYHLYGQNVMTMIMTSVSGHLLAHDFQMQRFRKWQSCNPLVLFEAIEIKYCPENFIDIKKTLERETHHCQALVIW  
TDCDREGENIGFEI IHVCKAVKPNLRVLRLARFSEITPHAVRTACENLTPDQRVSDAVDVRQELDLRIGAAFT  
RFQTLRLQRI FPEVLAEQLISYGSCQFPTLGFVVERFKAIQAFVPEVFHFIKVTHDHDGTVFENWKRYRLFN  
HTACLVLVLYQLCMEDPMATVVEVRSKPKSKWRPQALDVELEKLSRKLRLINAKETMRIA EKLYTQGYISYPRTE  
ETNIFPKDLNLVPLVEQQTVDPHWGAFQAQTILERGGPTPRNGSKSDQAHPPIHPTKYTSGLQGD RRLYEFIV  
RHFLACCSQDAQQGQETTVEIDIAQERFVAHGLIILARNYLDVYPYDHWSDKLLPVYEQGSHFQPS TVEMVDGE  
TSPQQLLTEADLIALMEKHGIGTDATHAEHIETIKARMYVGLTSDKRFLPGHLMGLVEGYDSMGYEMSKPDL

RAELEADLKLICEGKKDKFQVLRQQVQKYKQVFI EAVAKAKKLDEALSQYLGERTEMAQEEIYPAMPEPVRK  
 CPQCNKDMVLKTKKSGGFYLSMGMFPECRSVAVWFPDSVLEASRDNSVCSVCQPPPVYRLKLFKRGSLPPAMP  
 LEFVGCIGGCDETLKEIFGLRFPRALPRASQPSGHLQASQALNRMDSSQHNSLQPLVNRHTRPSKTVAQALLP  
 PTTAGESNSVTCNCGREAVLLTVRKQGNQGRHFYKCSNGDCNFFLWADSSHSTGGGTPTSASGPPGSSVGC  
 SSVGSHMDGFGSLGSDSDGGTPCLCGQPAVTRTVQKDGPNKGRQFHTCAKPREQQCGFFQWVDENVAPGSFAA  
 PAWPGGRGKAQRPEAASKRPRAGSSDAGSTVKKPRKCSLCHQPGHTRTFCPQNR\*

>ENSMUSP00000113057\_c.1056:G>C\_p.A353P ENSMUST00000117743.8|Top3a-  
 203|ENSMUSG00000002814|-|chr11:g.60641551:C>G

MEVAFRGVRKVLCAEKNDAAKGIADLLSNGRMRRKEGLSKFNKIYEFDYHLYGQNVMTMIMTSVSGHLLAHDF  
 QMQFRKWQSCNPLVLFEAIEKYCPENFIDIKKTLERETHHCQALVIWTDREGENIGFEIIHVCKAVKPNL  
 RVLRARFSEITPHAVRTACENLTPDQRVSDAVDVRQELDLRIGAAFTRFQTLRLQRIFFPEVLAEQLISYGSC  
 QFPTLGFVVERFKAIQAFVPEVFHKIKVTHDHKDGTFEFNWKRYRLFNHTACLVLVLYQLCMEDPMATVVEVRSK  
 PKSKWRPQALDTVELEKLASRKLINAKETMRIA EKLYTQGYISYPRTEETNIFPKDLNLVPLVEQQTVDPHWG  
 AFAQTILERGGPTPRNGSKSDQAHPPIHPTKYTSGLQGDDRRLYEFIVRHFLACCSQDAQGQETTVEIDIAQE  
 RFVAHGLIILARNYLDVYPYDHWSDKLLPVYEQGSHFQPSSTVEMVDGETSPPQLL TEADLIALMEKHGIGTDA  
 THAEHIETIKARMYVGLTSDKRFLPGHLMGLVEGYDSMGYEMSKPDLRAELEADLKLICEGKKDKFQVLRQQ  
 VQKYKQVFI EAVAKAKKLDEALSQYLGERTEMAQEEIYPAMPEPVRKCPQCNKDMVLKTKKSGGFYLSMGMF  
 PECRSVAVWFPDSVLEASRDNSVCSVCQPPPVYRLKLFKRGSLPPAMPLEFVGCIGGCDETLKEIFGLRFPRA  
 LPRAASKRPRAGSSDAGSTVKKPRKCSLCHQPGHTRTFCPQNR\*

>ENSMUSP00000099729\_c.1131:G>C\_p.A378P ENSMUST00000102668.10|Top3a-  
 202|ENSMUSG00000002814|-|chr11:g.60641551:C>G

MIFFVTL LAFQWHRPGRAL SRAAMEVAFRGVRKVLCAEKNDAAKGIADLLSNGRMRRKEGLSKFNKIYEF  
 DYHLYGQNVMTMIMTSVSGHLLAHDFQMQFRKWQSCNPLVLFEAIEKYCPENFIDIKKTLERETHHCQALVIW  
 TDCDREGENIGFEIIHVCKAVKPNLRVLRARFSEITPHAVRTACENLTPDQRVSDAVDVRQELDLRIGAAFT  
 RFQTLRLQRIFFPEVLAEQLISYGSCQFPTLGFVVERFKAIQAFVPEVFHKIKVTHDHKDGTFEFNWKRYRLFN  
 HTACLVLVLYQLCMEDPMATVVEVRSKPKSKWRPQALDTVELEKLASRKLINAKETMRIA EKLYTQGYISYPRTE  
 ETNIFPKDLNLVPLVEQQTVDPHWGAFQAQTILERGGPTPRNGSKSDQAHPPIHPTKYTSGLQGDDRRLYEFIV  
 RHFLACCSQDAQGQETTVEIDIAQERFVAHGLIILARNYLDVYPYDHWSDKLLPVYEQGSHFQPSSTVEMVDGE  
 TSPPQLL TEADLIALMEKHGIGTDATHAEHIETIKARMYVGLTSDKRFLPGHLMGLVEGYDSMGYEMSKPDL  
 RAELEADLKLICEGKKDKFQVLRQQVQKYKQVFI EAVAKAKKLDEALSQYLGERTEMAQEEIYPAMPEPVRK  
 CPQCNKDMVLKTKKSGGFYLSMGMFPECRSVAVWFPDSVLEASRDNSVCSVCQPPPVYRLKLFKRGSLPPAMP  
 LEFVGCIGGCDETLKEIFGLRFPRALPRASQPSGHLQASQALNRMDSSQHNSLQPLVNRHTRPSKTVAQALLP  
 PTTAGESNSVTCNCGREAVLLTVRKQGNQGRHFYKCSNGDCNFFLWADSSHSTGGGTPTSASGPPGSSVGC  
 SSVGSHMDGFGSLGSDSDGGTPCLCGQPAVTRTVQKDGPNKGRQFHTCAKPREQQCGFFQWVDENVAPGEAAG  
 QGIST\*

>ENSMUSP00000113653\_c.1056:G>C\_p.A353P ENSMUST00000120417.8|Top3a-  
 204|ENSMUSG00000002814|-|chr11:g.60641551:C>G

MEVAFRGVRKVLCAEKNDAAKGIADLLSNGRMRRKEGLSKFNKIYEFDYHLYGQNVMTMIMTSVSGHLLAHDF  
 QMQFRKWQSCNPLVLFEAIEKYCPENFIDIKKTLERETHHCQALVIWTDREGENIGFEIIHVCKAVKPNL  
 RVLRARFSEITPHAVRTACENLTPDQRVSDAVDVRQELDLRIGAAFTRFQTLRLQRIFFPEVLAEQLISYGSC  
 QFPTLGFVVERFKAIQAFVPEVFHKIKVTHDHKDGTFEFNWKRYRLFNHTACLVLVLYQLCMEDPMATVVEVRSK  
 PKSKWRPQALDTVELEKLASRKLINAKETMRIA EKLYTQGYISYPRTEETNIFPKDLNLVPLVEQQTVDPHWG  
 AFAQTILERGGPTPRNGSKSDQAHPPIHPTKYTSGLQGDDRRLYEFIVRHFLACCSQDAQGQETTVEIDIAQE  
 RFVAHGLIILARNYLDVYPYDHWSDKLLPVYEQGSHFQPSSTVEMVDGETSPPQLL TEADLIALMEKHGIGTDA  
 THAEHIETIKARMYVGLTSDKRFLPGHLMGLVEGYDSMGYEMSKPDLRAELEADLKLICEGKKDKFQVLRQQ  
 VQKYKQVFI EAVAKAKKLDEALSQYLGERTEMAQEEIYPAMPEPVRKCPQCNKDMVLKTKKSGGFYLSMGMF  
 PECRALRCLFPCC\*

>ENSMUSP00000002891\_c.1123:A>G\_p.N375S ENSMUST00000002891.11|Top3a-  
 201|ENSMUSG00000002814|-|chr11:g.60641559:T>C

MIFFVTL LAFQWHRPGRAL SRAAMEVAFRGVRKVLCAEKNDAAKGIADLLSNGRMRRKEGLSKFNKIYEF  
 DYHLYGQNVMTMIMTSVSGHLLAHDFQMQFRKWQSCNPLVLFEAIEKYCPENFIDIKKTLERETHHCQALVIW  
 TDCDREGENIGFEIIHVCKAVKPNLRVLRARFSEITPHAVRTACENLTPDQRVSDAVDVRQELDLRIGAAFT  
 RFQTLRLQRIFFPEVLAEQLISYGSCQFPTLGFVVERFKAIQAFVPEVFHKIKVTHDHKDGTFEFNWKRYRLFN  
 HTACLVLVLYQLCMEDPMATVVEVRSKPKSKWRPQALDTVELEKLASRKLINAKETMRIA EKLYTQGYISYPRTE  
 ETNIFPKDLSLVALVEQQTVDPHWGAFQAQTILERGGPTPRNGSKSDQAHPPIHPTKYTSGLQGDDRRLYEFIV  
 RHFLACCSQDAQGQETTVEIDIAQERFVAHGLIILARNYLDVYPYDHWSDKLLPVYEQGSHFQPSSTVEMVDGE  
 TSPPQLL TEADLIALMEKHGIGTDATHAEHIETIKARMYVGLTSDKRFLPGHLMGLVEGYDSMGYEMSKPDL  
 RAELEADLKLICEGKKDKFQVLRQQVQKYKQVFI EAVAKAKKLDEALSQYLGERTEMAQEEIYPAMPEPVRK

CPQCNDKMDVLKTKKSGGFYLSMCMGFPECRSAVWFPDSVLEASRDNSVCSVCQPPPVYRLKLFKRGSLPPAMP  
LEFVGCIGGCDETLKEIFGLRFPRALPRASQPSGHLQASQALNRMDSQHNLSQPLVNRHTRPSKTVQALLP  
PTTAGESNSVTCNCGREAVLLTVRKQGNQGRHFYKCSNGDCNFFLWADSSHSTGGGTPTSASGPPGSSVGC  
SSVGSMDGFGSLGSDSDGGTPCLCGQPAVTRTVQKDGPNKGRQFHTCAKPREQQCGFFQWVDENVAPGSFAA  
PAWPGGRGKAQRPEAASKRPRAGSSDAGSTVKKPRKCSLCHQPGHTRTFPCQNR\*

>ENSMUSP00000113057\_c.1048:A>G\_p.N350S ENSMUST00000117743.8|Top3a-  
203|ENSMUSG00000002814|-|chr11:g.60641559:T>C  
MEVAFRGVRKVLCAEKNDAAKGIADLLSNGRMRRKEGLSKFNKIYEFDYHLYGQNVMTMIMTSVSGHLLAHDF  
QMQRKQWQSCNPLVLFEAIEKYCPENFIDIKKTLERETHHCQALVIWTDREGENIGFEIIHVCKAVKPNL  
RVLRARFSEITPHAVRTACENLTPDQRVSDAVDVRQELDLRIGAAFTRFQTLRLQRIFFPEVLAEQLISYGSC  
QFPTLGFVVERFKAIQAFVPEVFHKIKVTHDHDGTVFENWKRYRFLNHTACLVLVYQLCMEDPMTVVEVRSK  
PKSKWRPQALDVELEKLASRKLRLINAKETMRIAELKLYTQGYISYPRTEETNIFPKDLSLVALVEQQTVDPHWG  
AFAQTILERGGPTPRNGSKSDQAHPPIHPTKYTSGLQGDDRRLYEFIVRHFLACCSQDAQQGETTVEIDIAQE  
RFVAHGLIILARNYLDVYPYDHWSDKLLPVYEQGSHFQPSVTEMVDGETSPPQLLLEADLIALMEKHGIGTDA  
THAEHIETIKARMYVGLTSDKRFLPGHLMGLVEGYDSMGYEMSKPDLRAELEADLKLICGKDKFQVLRQQ  
VQKYQVFIKAVAKAKKLEALSQYLGERTEMAQEEIYPAMPEPVRKCPQCNDKMDVLKTKKSGGFYLSMCMGF  
PECRSAVWFPDSVLEASRDNSVCSVCQPPPVYRLKLFKRGSLPPAMPLEFVGCIGGCDETLKEIFGLRFPRA  
LPRAASKRPRAGSSDAGSTVKKPRKCSLCHQPGHTRTFPCQNR\*

>ENSMUSP00000099729\_c.1123:A>G\_p.N375S ENSMUST00000102668.10|Top3a-  
202|ENSMUSG00000002814|-|chr11:g.60641559:T>C  
MIFPVTLAFQWHRPGRALSRAAMEVAFRGVRKVLCAEKNDAAKGIADLLSNGRMRRKEGLSKFNKIYEF  
DYHLYGQNVMTMIMTSVSGHLLAHDFQMQRKQWQSCNPLVLFEAIEKYCPENFIDIKKTLERETHHCQALVIW  
TDCDREGENIGFEIIHVCKAVKPNLRVLRARFSEITPHAVRTACENLTPDQRVSDAVDVRQELDLRIGAAFT  
RFQTLRLQRIFFPEVLAEQLISYGSCQFPTLGFVVERFKAIQAFVPEVFHKIKVTHDHDGTVFENWKRYRFLN  
HTACLVLVYQLCMEDPMTVVEVRSKPKSKWRPQALDVELEKLASRKLRLINAKETMRIAELKLYTQGYISYPRTE  
ETNIFPKDLSLVALVEQQTVDPHWGAFQAQTILERGGPTPRNGSKSDQAHPPIHPTKYTSGLQGDDRRLYEFIV  
RHFLLACCSQDAQQGETTVEIDIAQERFVAHGLIILARNYLDVYPYDHWSDKLLPVYEQGSHFQPSVTEMVDGE  
TSPPQLLLEADLIALMEKHGIGTDA THAEHIETIKARMYVGLTSDKRFLPGHLMGLVEGYDSMGYEMSKPDL  
RAELEADLKLICGKDKFQVLRQQVQKYQVFIKAVAKAKKLEALSQYLGERTEMAQEEIYPAMPEPVRK  
CPQCNDKMDVLKTKKSGGFYLSMCMGFPECRSAVWFPDSVLEASRDNSVCSVCQPPPVYRLKLFKRGSLPPAMP  
LEFVGCIGGCDETLKEIFGLRFPRALPRASQPSGHLQASQALNRMDSQHNLSQPLVNRHTRPSKTVQALLP  
PTTAGESNSVTCNCGREAVLLTVRKQGNQGRHFYKCSNGDCNFFLWADSSHSTGGGTPTSASGPPGSSVGC  
SSVGSMDGFGSLGSDSDGGTPCLCGQPAVTRTVQKDGPNKGRQFHTCAKPREQQCGFFQWVDENVAPGEAAG  
QGIST\*

>ENSMUSP00000113653\_c.1048:A>G\_p.N350S ENSMUST00000120417.8|Top3a-  
204|ENSMUSG00000002814|-|chr11:g.60641559:T>C  
MEVAFRGVRKVLCAEKNDAAKGIADLLSNGRMRRKEGLSKFNKIYEFDYHLYGQNVMTMIMTSVSGHLLAHDF  
QMQRKQWQSCNPLVLFEAIEKYCPENFIDIKKTLERETHHCQALVIWTDREGENIGFEIIHVCKAVKPNL  
RVLRARFSEITPHAVRTACENLTPDQRVSDAVDVRQELDLRIGAAFTRFQTLRLQRIFFPEVLAEQLISYGSC  
QFPTLGFVVERFKAIQAFVPEVFHKIKVTHDHDGTVFENWKRYRFLNHTACLVLVYQLCMEDPMTVVEVRSK  
PKSKWRPQALDVELEKLASRKLRLINAKETMRIAELKLYTQGYISYPRTEETNIFPKDLSLVALVEQQTVDPHWG  
AFAQTILERGGPTPRNGSKSDQAHPPIHPTKYTSGLQGDDRRLYEFIVRHFLACCSQDAQQGETTVEIDIAQE  
RFVAHGLIILARNYLDVYPYDHWSDKLLPVYEQGSHFQPSVTEMVDGETSPPQLLLEADLIALMEKHGIGTDA  
THAEHIETIKARMYVGLTSDKRFLPGHLMGLVEGYDSMGYEMSKPDLRAELEADLKLICGKDKFQVLRQQ  
VQKYQVFIKAVAKAKKLEALSQYLGERTEMAQEEIYPAMPEPVRKCPQCNDKMDVLKTKKSGGFYLSMCMGF  
PECRALRCLFPCC\*

>rs52242570\_ENSMUSP00000018744\_c.525:A>C\_p.N176H  
ENSMUST00000018744.15|Shmt1-201|ENSMUSG00000020534|-|chr11:g.60689477:T>G  
MADRDATLWASHEKMLSQPLKSDAEVYSIIKKESNRQVRGLELIASENFASRAVLEALGSCLNKYSSEGYPG  
QRYGGTEFIDELEMLCQKRALQAYHLDPQCWGVNVQPYSGSPANFAVYTALVEPHGRIMGLDLPDGGHLLTHG  
FMTDKKISATSIFFESEMPYKVPETGYIHYDQLEENASLFHPKLI IAGTSCYSRNLDYARLRKIADDNGAYL  
MADMAHISGLVAAGVVPSPFEHCHVVTTHKTLRGCRAGMIFYRKGVRSDPKTGKETYYELESINSVAVFP  
GLQGGPHNHAIAAGVAVALKQAMTTEFKIYQLQVLANCRALSALTELGYKIVTGGSDNHLIIMDLRSKGTG  
RAEKVLEACSIACNKNTCPGDKSALRPSGLRLQTLPALTSRGLLEEDFQKVAHFHRGIELTLQIQSHMATKAT  
LKEFKEKLAGDEKIQSAVATLREEVENFASNFSLPGLPDF\*

>rs52242570\_ENSMUSP00000134318\_c.525:A>C\_p.N176H  
ENSMUST00000174719.8|Shmt1-211|ENSMUSG00000020534|-|chr11:g.60689477:T>G



XADRDATLWASHEKMLSQPLKSDAEVYSIIKKESNRQVRGLELIASENFASRAVLEALGSCLNKYSEGYPG
QRYGGTEFIDELEMLCQKRALQAYHLDPOCWGVNVQPYSGSPANFAVYTALVEPHGRIMGLDLPDGGHLTHG
FMTDKKKISATSIFFESMPYKVYPETGYIHYDQLEENASLFHPKLI IAGTSCYSRNLDYARLRKIADDNGAYL
MADMAHISGLVAAGVVPSPFEHCHVVTTHKTLRGCRAGMI FYRKGVAVALKQAMTTEFKIYQLQVLANCRA
LSDALTELGYKIVTGGSDNHLI LMDLRSKGTDGGRAEKVLEACS IACNKNTCPGDKSALRPSGLRLGTPALTS
RGLLEEDFQKVAHFHIRGIELTLQIQSHMATKATLKEFKEKLAGDEKIQSAVATLREEVENFASNFSLPGLPD
F\*

>rs52242570\_ENSMUSP00000134269\_c.525:A>C\_p.N176H
ENSMUST00000174214.2|Shmt1-210|ENSMUSG00000020534|-|chr11:g.60689477:T>G
XADRDATLWASHEKMLSQPLKSDAEVYSIIKKESNRQVRGLELIASENFASRAVLEALGSCLNKYSEGYPG
QRYGGTEFIDELEMLCQKRALQAYHLDPOCWGVNVQPYSGSPANFAVYTALVEPHGRIMGLDLPDGGHLTHG
FMTDKKKISATSIFFESMPYKVYPETGYIHYDQLEENASLFHPKLI IAGTSCYSRNLDYARLRKIADDNGAYL
MADMAHISGLVAAGVVPSPFEHCHVVTTHKTLRGCRAGMI FYRKGVRSVDPKTKETTYELESINSVAVFP
GLQGGPHNHA IAGVAVALKQAMTTEFKIYQLQVLANCRALS DALTELGYKIVTGGSDNHLI LMDLRSKGTDGG
RAEKVLEACS IACNKNTCPGIELTLQIQSHMATKATLKEFKEKLAGDEKIQSAVATLREEVENFASNFSLPGL
PDF\*

>ENSMUSP00000086588\_c.43:C>T\_p.S15L ENSMUST00000089184.11|Kcnj12-
202|ENSMUSG00000042529|+|chr11:g.60960053:C>T
MTAASRANPYSIVSLEEDGLHLVTMSGANGFGNGKVHTRRRRCRNFVKKNGQCNI EFANMDEKSQRYLADMFT
TCVDIRWRMYLLIFSLAFLASWLLFGIIFWVIAVAHGDLEPAEGRGRTPCVLQVHGFMAAFLFSIETQTTIGY
GLRCVTEECPVAVFMVVAQSIVGCIIDSFMIGAIMAKMARPKKRAQTLLFSHNAVVALRDGKLCIMWRVGNLR
KSHIVEAHVRAQLIKPRVTEEGEYIPLDQIDIDVGFDKGLDRIFLVSPITILHEIDEASPLFGISRQDLETD
FEIVVILEGMVEATAMTTQARSSYLANEILWGHRFEPVLFEEKNQYKIDYSHFHKTYEVPSTPRCSAKDLVEN
KFULLPSANSFCYENELAFLSRDEEDEVATDRDGRSPQPEHDFDRLQASSAALERPYPYRRESEI\*

>ENSMUSP00000041696\_c.349:C>T\_p.S117L ENSMUST00000041944.9|Kcnj12-
201|ENSMUSG00000042529|+|chr11:g.60960053:C>T
MTRWTSLKASRPHKPGSWDLAASPRRLSTPTLATFPWKAQEPGAEMSSQNAPRVPQPRQPSASWPRQKQHPPL
QPQASAKQAHEVPPPGVSLGAGQPPDPGMTAASRANPYSIVSLEEDGLHLVTMSGANGFGNGKVHTRRRRCRNF
RVVKKNGQCNI EFANMDEKSQRYLADMFTTCVDIRWRMYLLIFSLAFLASWLLFGIIFWVIAVAHGDLEPAEG
RGRTPCVLQVHGFMAAFLFSIETQTTIGYGLRCVTEECPVAVFMVVAQSIVGCIIDSFMIGAIMAKMARPKK
AQTLLFSHNAVVALRDGKLCIMWRVGNLRKSHIVEAHVRAQLIKPRVTEEGEYIPLDQIDIDVGFDKGLDRIF
LVSPITILHEIDEASPLFGISRQDLETD DFEIVVILEGMVEATAMTTQARSSYLANEILWGHRFEPVLFEEKN
QYKIDYSHFHKTYEVPSTPRCSAKDLVENKFULLPSANSFCYENELAFLSRDEEDEVATDRDGRSPQPEHDFDR
LQASSAALERPYPYRRESEI\*

>ENSMUSP00000104357\_c.43:C>T\_p.S15L ENSMUST00000108717.3|Kcnj12-
203|ENSMUSG00000042529|+|chr11:g.60960053:C>T
MTAASRANPYSIVSLEEDGLHLVTMSGANGFGNGKVHTRRRRCRNFVKKNGQCNI EFANMDEKSQRYLADMFT
TCVDIRWRMYLLIFSLAFLASWLLFGIIFWVIAVAHGDLEPAEGRGRTPCVLQVHGFMAAFLFSIETQTTIGY
GLRCVTEECPVAVFMVVAQSIVGCIIDSFMIGAIMAKMARPKKRAQTLLFSHNAVVALRDGKLCIMWRVGNLR
KSHIVEAHVRAQLIKPRVTEEGEYIPLDQIDIDVGFDKGLDRIFLVSPITILHEIDEASPLFGISRQDLETD
FEIVVILEGMVEATAMTTQARSSYLANEILWGHRFEPVLFEEKNQYKIDYSHFHKTYEVPSTPRCSAKDLVEN
KFULLPSANSFCYENELAFLSRDEEDEVATDRDGRSPQPEHDFDRLQASSAALERPYPYRRESEI\*

>rs247867498\_ENSMUSP00000104356\_c.660:A>T\_p.K221\*
ENSMUST00000108716.8|Aldh3a1-
202|ENSMUSG00000019102|+|chr11:g.61105556:A>T
MSNISSIVNRARDAFN SGKTRPLQFRVEQLEALQRMINENLKGISKALASNLKNEWTSYEEVAHVLD EIDF
TIKGLSDWAEDEPVAKTRQTQEDDLYIHSEPLGVVLVIGAWNYPFNLTIQPMVGAI AAGNAVVLKPEVSDHM
ADLLSTLIPQYMDKDLYPVIKGGVPETTELLKEKFDHIMYTGSTAVGKIVMAAAKHLTPVTLELGGKSPCYV
D\*DCDLDVACRRIAWGKFMNSGQTCVAPDYILCDPSIQNEIVEKLLKSLKDFYGEDAKQSHDYGRI INDRHFQ
RVINLIDSKKVAHGGTWDQPSRYIAPTILVDVDPQSPVMQEEIFGVPMPVICVRSLEAIKF INQREKPLALY
VFSNNDKVIKMI AETSSGGVTANDVIVHITVPTL PFGG VNGSGMGAYHGKKS FETFSHRRSCLVRS LRNEEA
NKARYPPSPAKMPRH\*

>rs247867498\_ENSMUSP0000019246\_c.660:A>T\_p.K221\*
ENSMUST00000019246.4|Aldh3a1-
201|ENSMUSG00000019102|+|chr11:g.61105556:A>T
MSNISSIVNRARDAFN SGKTRPLQFRVEQLEALQRMINENLKGISKALASNLKNEWTSYEEVAHVLD EIDF
TIKGLSDWAEDEPVAKTRQTQEDDLYIHSEPLGVVLVIGAWNYPFNLTIQPMVGAI AAGNAVVLKPEVSDHM
ADLLSTLIPQYMDKDLYPVIKGGVPETTELLKEKFDHIMYTGSTAVGKIVMAAAKHLTPVTLELGGKSPCYV

D\*DCDLDVACRIAWGKFMNSGQTCVAPDYILCDPSIQNEIVEKLLKSLKDFYGEDAKQSHDYGRI INDRHFQ  
RVINLIDSKKVAHGGTWDQPSRYIAPTILVDVDPQSPVMQEEIFGPMPIVCVRSLEAIFINQREKPLALY  
VFSNNDKVIKMKIAETSSGGVTANDVIVHITVPTLPGGGVNGSMGAYHGKKSFETFSHRRSCLVRSRNEEA  
NKARYPPSPAKMPRH\*

>rs46423086\_ENSMUSP00000004959\_c.513:C>G\_p.Q172E  
ENSMUST00000004959.3|Grap-201|ENSMUSG00000004837|+|chr11:g.61562544:C>G  
MESVALYSFQATESDELA FNKGD TLKILNMEDDQNWYKAELRGAEGFV PKNYIRVKPHWPYSGRISRQLAEET  
LMKRNHLGAF LIRESESSPGFEFSVSVNYGDQVQHFVKVLR EASGKYFLWEEKFNLSNELVDFYR TTTIAKRRQI  
FLCDEQPLIKPSRACFAQAQFDFSAEDPSQLSLRRGDIVFVVEREDPHWWRGRAGGRLGFFPRSYVQPVHL\*  
>ENSMUSP00000090697\_c.476:G>GAGGAAGGA\_p.P159ins-fs  
ENSMUST00000093019.6|Fam83g-  
202|ENSMUSG00000042377|+|chr11:g.61575836:G>GAGGAAGGA  
MAFSQVQCLDDNHVNWRSSSESKPEFFYSEEQRLALEALVARGRDAFYEV LKRENIRDFLSELELSRIVEAIEV  
YDPGSEDP RVSGRRPEPDNGGADASEETSAAGPPATETLPSLEYW POKSDRSIPQLDLGW PDIAYRGVTR  
ASVYMOPP IDGQPRKDTSRKWCARWSARRR  
>ENSMUSP00000090697\_c.1895:C>A\_p.H632Q ENSMUST00000093019.6|Fam83g-  
202|ENSMUSG00000042377|+|chr11:g.61594363:C>A  
MAFSQVQCLDDNHVNWRSSSESKPEFFYSEEQRLALEALVARGRDAFYEV LKRENIRDFLSELELSRIVEAIEV  
YDPGSEDP RVSGRRPEPDNGGADASEETSAAGPPATETLPSLEYW POKSDRSIPQLDLGW PDIAYRGVTR  
ASVYMOPP IDGQPHIKEVVRKMVSQAQKVI AVVMDMFTD VDI FKDLLDAGFKR KVAVYII VDES NVKYFLHMC  
ERARMHLGHLK NLRVRSSGGTEFFTRSATKFKGVLAQKFMFVDG DRAVCGSYSFTWSAARTDRNVI SVLSGQV  
VEMFDRQFQELYLMSQSVSLKDI PMEKEPEPEPIV LPSV VPLVPTGTMAKKLVNPKYALVKAKS VDEIAKSSS  
DKQEVTRPPGLRGP AVAERPGLSEL LPPVHPGLLNLERANMFEY LPTWVEPDPEPGSDILGYINI IDPNIWN  
PQPNQMNR IKIRDTAHASAQHQLWKQS QGARPCPAPCPPAPRDSQGVVPAENGFPQGNPEPQAPV PKPRTVP  
VASVLARDGSDIGWALDTP EKETPQNGIDPRLPSTASESEVPQQQHSSMTQDDPDGLERGLPNGLDEDEDDDD  
DYVTLSDQDLSGSSGPGPHRRPSVASSMSDEYFEVRRERSVPLQRRQSEQMANGP GHPPRRQLSAPHVTRGT  
FGGPLSSPLWAQGRSVA AIHPSLEIPMLIPKEKPPITVVG DVGGRIAIIVDDI IDDVDSFLAAAE TLKERGAYK  
AGPHHWQPKGSPTPRMLPDPGSPRPTRNTRLRAELRATEEHASPF GIPYSKLSQSKHLKARAGGSQWAPSDSK  
RRARDHKEP\*

>rs108194317\_ENSMUSP00000004955\_c.426:A>G\_p.I143V  
ENSMUST00000004955.14|Prpsap2-201|ENSMUSG00000020528|-  
|chr11:g.61635872:T>C  
MFCVAPPELETKMNITKGGVLVLF SANSNSSCMELSK KIAERLGVEMGKVQVYQEPNRETRVQIQESVRGKDV F  
IIQTISKDVNTTIMELLIMVYACKTSCAKSII GVIPIYFPYSKQCKMRKRGSI VSKLLASMMCKAGLTHLVTMD  
LHQKEIQGFFNIPVDNLRAS PFLQYIQEEIPDYRNAVIVAKSPASAKRAQSFAERLRLGIAVIHGEAQDAES  
DLVDGRHSPPMVRSVA AIHPSLEIPMLIPKEKPPITVVG DVGGRIAIIVDDI IDDVDSFLAAAE TLKERGAYK  
IFVMATHGLLSSDAPRLIEESA IDEVVVTNTIPHEIQKLQCPKIKTVDISMILSEAIRRIHNGESMSYLF RNI  
GLDD\*

>rs108194317\_ENSMUSP00000126274\_c.426:A>G\_p.I143V  
ENSMUST00000168115.8|Prpsap2-204|ENSMUSG00000020528|-  
|chr11:g.61635872:T>C  
MFCVAPPELETKMNITKGGVLVLF SANSNSSCMELSK KIAERLGVEMGKVQVYQEPNRETRVQIQESVRGKDV F  
IIQTISKDVNTTIMELLIMVYACKTSCAKSII GVIPIYFPYSKQCKMRKRGSI VSKLLASMMCKAGLTHLVTMD  
LHQKEIQGFFNIPVDNLRAS PFLQYIQEEIPDYRNAVIVAKSPASAKRAQSFAERLRLGIAVIHGEAQDAES  
DLVDGRHSPPMVRSVA AIHPSLEIPMLIPKEKPPITVVG DVGGRIAIIVDDI IDDVDSFLAAAE TLKERGAYK  
IFVMATHGLLSSDAPRLIEESA IDEVVVTNTIPHEIQKLQCPKIKTVDISMILSEAIRRIHNGESMSYLF RNI  
GLDD\*

>rs47320288\_ENSMUSP00000004920\_c.2977:A>G\_p.Y993C  
ENSMUST00000004920.4|Ulk2-201|ENSMUSG00000004798|-|chr11:g.61670577:T>C  
MEVVGDFFEYCKRDLVGHGAF AVVFRGRHRQKTDWEVAIKS INKKNLSK SQILLGKEIKILKELQHENIVALYD  
VQELPNSVFLVMEYCN GGD LADY LQAKGTLSEDTIRVFLHQIAAAMRILHSGKI IHRDLKPQNILLSYANRRK  
SNVSGIRIKIADFGFARYLHSNTMAATLCGSPMYMAPEVIMS QHYDAKADLWSIGTVIYQCLVKGKPPFQANSP  
QDLRMFYEKNRSLMPSI PRETSPYLANLLGLLQRNQKDRMDFEAF FSHPFLEQVVPVKKSCPVVPVYSGPVP  
GSSCSSSPSCRFA SPPSLPDMQHIQEENLSSPPLGPPNYLQVSKDSASNSKNSCDDTDFVLPVPHNISSDHS  
YDMPMGT TARRASNEFFMCGGQCQPTVSPHSETAPIPVPTQVRNYQR IEQNLISTASSGTNPHGSPRS AVVRR  
SNTSPMGFLRVGSCSPVPGD TVQTGGRRLLSTGSSRPYSPSPLVGTIPEQFSQCCCGHPQGHEARSRHSSGSPV  
PQTQAPQSLLLGARLQSAPT LTDIYQNKQKLRKQHS DPVCP SHAGAGYSYSPQPSRPGSLGTSPTKHTGSSPR  
NSDWF FKTPLPTIIGSPTKT TAPFKIPKTQASSNLLALVTRHGP AESSQSKDGNDPRECSHCLSVQGSERHRSE

QQQSKAVFGRSVSTGKLSEQQVKAPLGGHQGSTDSLNTERPMDVAPAGACGVMMLALPAGTAASARAVLFTVGS  
PPHSATAPTCTHMLVLRTRTTSVGSSSSSGGSLCSASGRVCGVSPPGPGLGSSPPGAEGAPSLRYVYPYASPPSL  
EGLITFEAPELPEETLMEREHTDTRLRHLNMMMLMFTCEVLDLTAVRGGNPELCTSAVSLYQIQESVVVDQISQL  
SKDWGRVEQLVLYMKAQAQLLAASLHLAKAQVKSGLKSPMAVKQVVKLNERNERYKFCITMCKKLTEKLNRRFFSD  
KQRFIDEINSVTAEKLIYNCAVEMVQSAALDEMFOQTEDIVYRCHKAALLLEGLSKILQDPTDVENVHKYKCS  
IERRLSALCCSTATV\*  
>rs6201756\_ENSMUSP00000004920\_c.2610:G>A\_p.D871N  
ENSMUST00000004920.4|Ulk2-201|ENSMUSG00000004798|-|chr11:g.61674394:C>T  
MEVVGDFFEYCKRDLVGHGAFVFRGRHRQKTDWEVAIKSINKKNLSKSKQILLGKEIKILKELQHENIVALYD  
VQELPNSVFLVMEYCNGGDLADYLQAKGTLS EDTIRVFLHQIAAAMRILHSGKGIHRDLKPQNILLSYANRRK  
SNVSGIRIKIADFGFARYLHSNTMAATLCGSPMYMAPEVIMSQHYDAKADLWSIGTVIYQCLVGKPPFQANSP  
QDLRMFYEKNRSLMPSIPRETSPLYLANLLLGLLQRNQKDRMDFEAFSSHFPFLEQVPVKKSCPVPVPVYSGPVP  
GSSC SSSPSCRFASPPSLPDMQHIQEENLSSPPLGPPNYLQVSKDSASNSKNSSCDTDDFVLVPHNISSDHS  
YDMPMGTTARRASNEFFMCGGCQPTVSPHSETAPIPVPTQVRNYQRIEQNLISTASSGTNPHGSPRSVAVRR  
SNTSPMGFLRVGSCSPVPGDTVQGTGRRRLSTGSSRPYSPSPPLVGTIPEQFSQCCCGHPQGHEARSRHSSGSPV  
PQTQAPQSLLLGARLQSAPTLTDIYQNKQKLRKQHS DPVCP SHAGAGYSYSPQPSRPGSLGTSPTKHTGSSPR  
NSDWFFKTPLEPTIIGSPTKTTAPFKIPKTQASSNLLALVTRHGPAESQSKDGNPRECSHCLSVQGSEHRSE  
QQQSKAVFGRSVSTGKLSEQQVKAPLGGHQGSTDSLNTERPMDVAPAGACGVMMLALPAGTAASARAVLFTVGS  
PPHSATAPTCTHMLVLRTRTTSVGSSSSSGGSLCSASGRVCGVSPPGPGLGSSPPGAEGAPSLRYVYPYASPPSL  
EGLITFEAPELPEETLMEREHTDTRLRHLNMMMLMFTCEVLDLTAVRGGNPELCTSAVSLYQIQESVVVNQISQL  
SKDWGRVEQLVLYMKAQAQLLAASLHLAKAQVKSGLKSPMAVKQVVKLNERNERYKFCITMCKKLTEKLNRRFFSD  
KQRFIDEINSVTAEKLIYNCAVEMVQSAALDEMFOQTEDIVYRYHKAALLLEGLSKILQDPTDVENVHKYKCS  
IERRLSALCCSTATV\*  
>rs6201768\_ENSMUSP00000004920\_c.2604:G>A\_p.V869I  
ENSMUST00000004920.4|Ulk2-201|ENSMUSG00000004798|-|chr11:g.61674400:C>T  
MEVVGDFFEYCKRDLVGHGAFVFRGRHRQKTDWEVAIKSINKKNLSKSKQILLGKEIKILKELQHENIVALYD  
VQELPNSVFLVMEYCNGGDLADYLQAKGTLS EDTIRVFLHQIAAAMRILHSGKGIHRDLKPQNILLSYANRRK  
SNVSGIRIKIADFGFARYLHSNTMAATLCGSPMYMAPEVIMSQHYDAKADLWSIGTVIYQCLVGKPPFQANSP  
QDLRMFYEKNRSLMPSIPRETSPLYLANLLLGLLQRNQKDRMDFEAFSSHFPFLEQVPVKKSCPVPVPVYSGPVP  
GSSC SSSPSCRFASPPSLPDMQHIQEENLSSPPLGPPNYLQVSKDSASNSKNSSCDTDDFVLVPHNISSDHS  
YDMPMGTTARRASNEFFMCGGCQPTVSPHSETAPIPVPTQVRNYQRIEQNLISTASSGTNPHGSPRSVAVRR  
SNTSPMGFLRVGSCSPVPGDTVQGTGRRRLSTGSSRPYSPSPPLVGTIPEQFSQCCCGHPQGHEARSRHSSGSPV  
PQTQAPQSLLLGARLQSAPTLTDIYQNKQKLRKQHS DPVCP SHAGAGYSYSPQPSRPGSLGTSPTKHTGSSPR  
NSDWFFKTPLEPTIIGSPTKTTAPFKIPKTQASSNLLALVTRHGPAESQSKDGNPRECSHCLSVQGSEHRSE  
QQQSKAVFGRSVSTGKLSEQQVKAPLGGHQGSTDSLNTERPMDVAPAGACGVMMLALPAGTAASARAVLFTVGS  
PPHSATAPTCTHMLVLRTRTTSVGSSSSSGGSLCSASGRVCGVSPPGPGLGSSPPGAEGAPSLRYVYPYASPPSL  
EGLITFEAPELPEETLMEREHTDTRLRHLNMMMLMFTCEVLDLTAVRGGNPELCTSAVSLYQIQESVIVDQISQL  
SKDWGRVEQLVLYMKAQAQLLAASLHLAKAQVKSGLKSPMAVKQVVKLNERNERYKFCITMCKKLTEKLNRRFFSD  
KQRFIDEINSVTAEKLIYNCAVEMVQSAALDEMFOQTEDIVYRYHKAALLLEGLSKILQDPTDVENVHKYKCS  
IERRLSALCCSTATV\*  
>rs30579133\_ENSMUSP00000004920\_c.262:G>A\_p.C88Y  
ENSMUST00000004920.4|Ulk2-201|ENSMUSG00000004798|-|chr11:g.61730968:C>T  
MEVVGDFFEYCKRDLVGHGAFVFRGRHRQKTDWEVAIKSINKKNLSKSKQILLGKEIKILKELQHENIVALYD  
VQELPNSVFLVMEYYNGGDLADYLQAKGTLS EDTIRVFLHQIAAAMRILHSGKGIHRDLKPQNILLSYANRRK  
SNVSGIRIKIADFGFARYLHSNTMAATLCGSPMYMAPEVIMSQHYDAKADLWSIGTVIYQCLVGKPPFQANSP  
QDLRMFYEKNRSLMPSIPRETSPLYLANLLLGLLQRNQKDRMDFEAFSSHFPFLEQVPVKKSCPVPVPVYSGPVP  
GSSC SSSPSCRFASPPSLPDMQHIQEENLSSPPLGPPNYLQVSKDSASNSKNSSCDTDDFVLVPHNISSDHS  
YDMPMGTTARRASNEFFMCGGCQPTVSPHSETAPIPVPTQVRNYQRIEQNLISTASSGTNPHGSPRSVAVRR  
SNTSPMGFLRVGSCSPVPGDTVQGTGRRRLSTGSSRPYSPSPPLVGTIPEQFSQCCCGHPQGHEARSRHSSGSPV  
PQTQAPQSLLLGARLQSAPTLTDIYQNKQKLRKQHS DPVCP SHAGAGYSYSPQPSRPGSLGTSPTKHTGSSPR  
NSDWFFKTPLEPTIIGSPTKTTAPFKIPKTQASSNLLALVTRHGPAESQSKDGNPRECSHCLSVQGSEHRSE  
QQQSKAVFGRSVSTGKLSEQQVKAPLGGHQGSTDSLNTERPMDVAPAGACGVMMLALPAGTAASARAVLFTVGS  
PPHSATAPTCTHMLVLRTRTTSVGSSSSSGGSLCSASGRVCGVSPPGPGLGSSPPGAEGAPSLRYVYPYASPPSL  
EGLITFEAPELPEETLMEREHTDTRLRHLNMMMLMFTCEVLDLTAVRGGNPELCTSAVSLYQIQESVVVDQISQL  
SKDWGRVEQLVLYMKAQAQLLAASLHLAKAQVKSGLKSPMAVKQVVKLNERNERYKFCITMCKKLTEKLNRRFFSD  
KQRFIDEINSVTAEKLIYNCAVEMVQSAALDEMFOQTEDIVYRYHKAALLLEGLSKILQDPTDVENVHKYKCS  
IERRLSALCCSTATV\*













NVWTDHEKEIFKDKFIQHPKNFGLIASYLERKSVPCVLYYYLTKKNENYKALVRRNYGKRRGRNQIARPSQ  
 EEKVEEKEEDKAEKTEKKEEEEKDDDEEKDDKEDSKETTKEKDRTEATAEPEEREQVTPRGRKTANSQGRK  
 RVTRSMTSEAAAAANAAAAATEEPPPLPPPEPISTEPVETSRWTEEMEVAKKGLVEHGRNWAAIAKMGVTK  
 SEAQCKNFYFNYKRRHNLNLLQHQKQVSRRAVVASRKPREEERDVSQCESVASTVSAQEDEDIAEASNEEENPE  
 DSEAVPTTKPAERESVEAQVTDASAETAEPMDVDHEECGAEGSSVLDPPAPTKADSDVPEMQVPENTASKGE  
 GDAKERDLESTSEKTEARDEDVVAEQIERPEPQSDDDSSATCSADEGVDGEPERQRVFPMDAKPSLLTPPGS  
 ILISSPIKPNPLDLPQLQHRAAVIPPMVCTPCNIPIGTPVSGYALYQRHIKAMHESALLEEQRQREQVDLE  
 CRSSTSPCSTSKSPNREWEVLQAPHQVITNLPEGVRLPTRTRPPPLIPSSKTTVASEKPSFIMGGSISQ  
 GTPGTYLSSHNQAYPQEAPKPSVGSISLGLPRQESTKAAPLTYIKQEEFSPRSQNSQPEGLLVRAQHEGTAG  
 AVQEGSITRGTASKISVETISSLRGSITQGTALPQAGIPTEALVKGVPVSRMPIEESPEKVVREEAASKGHV  
 IYEGKSGHILSYDNIKNAREGTRSPRTAHEMSLKRSYEAVEGSIKQGLICRALPRGSPHSDLKERTVLSGSIM  
 QGTPRATAESFEDGLKYPKQIKRESPIRAFEGAITKGKPYDGIITTIKEMGRSIEHEIPRODILTQESRKTPEV  
 VQSTRPIIEGSIQGTPIKFDNNSGQSAIKHNKSLITGPKLPRGMLEIVPENIKVVERGKYEDVKAGEPVR  
 ARHTSVVSSGSPVLRSTLHEAPKAQLSPGLYDDSSARRTPVSYQNTISRGSPMMNRTSDVSSSKSASHERKST  
 LPTPTQRESIPAKSPVPGVDPVSHSPFDPHRRSSAAGEVYRSHLPHLDPAMPFHRALDPAAYLLQRLSP  
 TPGYPSQYQLYAMENTRQTIINDYITSQQMVNLRPDVTRGLSPREQLGLPYPATRGIIDLNTMPPITLVPH  
 AGGTSTPPMDRITYIPGTQVTFPPRPNAAASLSPGHPTHAAAAAEREREREREREKERERERERERERERER  
 AAAPADLYLRPGSEQPGRPGSHGYVRSVSPSVRTQETILQQRPSVFGTNGTSVITPLDPTAQLRIMPLPSGG  
 PSISQGLPASRYNTAADALAAALVDAASAPQMDVSKTKESKHEAARLEENLRSRRAAVSEQQQLEQINLEVEK  
 RSVQCVCTSSALPSGKAQPHASVVYSEAGKDKGPPPKSRYEEELRTRGKTTITAAANFIDVITRQIASDKDAR  
 ERGSQSDSSSSSLSHRYETASDAIEVISPASSPAPPQEKQAYQPDVMKANQAENESTRQYEGPLHHYRSQQ  
 ESPSPQQPPLPSSSQSEGMQVPRTHRLITLADHICQIITQDFARNQVPSQPSTSTFTQTSALSSTPVRTK  
 TSSRYSPESQSVTLHPRPGPRVSPENLVDKSRGRPGKSPERSHIPSEYEPISPPQGPVAVHEKQDSMLLSQ  
 RGVDPAEQRSDSRSPGSI SYLPSFFTKLESTSPMVKSKKQEIFRKLNSGGGSDMAAAQPGTEIFNLPAVTT  
 SGAVSSRSHSFADPASNLGLEDIRKALMGSFDDKVEDHGVMSHPVGMIPGASASTSVVTSSEARRDEGEPS  
 HAGVCKPKLINKSNRSKSPPIPGQSYLGTERRPSSVSSVHSEGDIYHRQTPGWAWEDRPSSTGSTQFPYNPLTI  
 RMLSTPPTQIACAPSAITQAAPHQQRNIWEREPAPLLSAQYETLSDSD\*  
 >rs29483194\_ENSMUSP00000098627\_c.5656:A>T\_p.K1886I  
 ENSMUST00000101066.10|Ncor1-204|ENSMUSG00000018501|-|chr11:g.62224764:T>A  
 MSSSGYPPNQAFSTEQSRYPESHVQYTFPSTRHQQEFVAVPDYRSSHIEVVSQASQLLQQQQQQQLRRRPSLL  
 SEFHFGSDRPPQERRTGYEQFHSGSPVDHDSLESKRPRLEPVSDAHFQRVSAAVLPLVHSLPEGLRSSADAKK  
 DSAFSGKHEAPSSPLAGQPCGDDQNASPKLSKEELIQSMDRVREIAKVEQQIILKLLKQQQLEEEAAKPE  
 PEKPVSPPPVEQKHSIVQIIYDENRKAEEAHKIFEGLGPKVELPLYNQPSDTKVYHENIKTNQVMRKKLIL  
 FFKRRNHARKQREQKICQRYDQLEAWEKKVDRIENNRKAKESKTREYYEKQFPFEIRKQREQQERFQRVGQ  
 RGAGLSATIAESEHEISEIIDGLSEQENNEKQMRQLSVIPMMFDAEQRRVKFINMNGLMEDPMKVYKDRQFM  
 NVWTDHEKEIFKDKFIQHPKNFGLIASYLERKSVPCVLYYYLTKKNENYKALVRRNYGKRRGRNQIARPSQ  
 EEKVEEKEEDKAEKTEKKEEEEKDDDEEKDDKEDSKETTKEKDRTEATAEPEEREQVTPRGRKTANSQGRK  
 RVTRSMTSEAAAAANAAAAATEEPPPLPPPEPISTEPVETSRWTEEMEVAKKGLVEHGRNWAAIAKMGVTK  
 SEAQCKNFYFNYKRRHNLNLLQHQKQKASRKPREEERDVSQCESVASTVSAQEDEDIAEASNEEENPEDSEGAE  
 NSSDTEASAPSPVEAAKSSSEDSSENAASRGNTEPVAELEATDPAPCASPSSAVPTTKPAERESVEAQVTD  
 ASAETAEPMDVDHEECGAEGSSVLDPPAPTKADSDVPEMQVPENTASKGEGDAKERDLESTSEKTEARDEDV  
 VAEQIERPEPQSDDDSSATCSADEGVDGEPERQRVFPMDAKPSLLTPPGSILISSPIKPNPLDLPQLQHRAAV  
 IPPMVCTPCNIPIGTPVSGYALYQRHIKAMHESALLEEQRQREQVDLECRSSTSPCSTSKSPNREWEVLQ  
 APHQVITNLPEGVRLPTRTRPPPLIPSSKTTVASEKPSFIMGGSISQGTPTGTYLSSHNQAYPQEAPKPSV  
 GSISLGLPRQESTKAAPLTYIKQEEFSPRSQNSQPEGLLVRAQHEGVVVRGTAGAVQEGSITRGTASKISVE  
 TISSLRGSITQGTALPQAGIPTEALVKGVPVSRMPIEESPEKVVREEAASKGHV IYEGKSGHILSYDNIKNAR  
 EGTRSPRTAHEMSLKRSYEAVEGSIKQGMRESVPSAPLEGLICRALPRGSPHSDLKERTVLSGSIMQGT  
 PRATAESFEDGLKYPKQIKRESPIRAFEGAITKGKPYDGIITTIKEMGRSIEHEIPRODILTQESRKTPEV  
 VQSTRPIIEGSIQGTPIKFDNNSGQSAIKHNKSLITGPKLPRGMLEIVPENIKVVERGKYEDVKAGEPVRARHTS  
 VVSSGSPVLRSTLHEAPKAQLSPGLYDDSSARRTPVSYQNTISRGSPMMNRTSDVSSSKSASHERKSTLPTPT  
 QRESIPAKSPVPGVDPVSHSPFDPHRRSSAAGEVYRSHLPHLDPAMPFHRALDPAAYLLQRLSPTPGYPS  
 QYQLYAMENTRQTIINDYITSQQMVNLRPDVTRGLSPREQLGLPYPATRGIIDLNTMPPITLVPHAGGTST  
 PPMDRITYIPGTQVTFPPRPNAAASLSPGHPTHAAAAAEREREREREREKERERERERERERERERERERER  
 IAAAPADLYLRPGSEQPGRPGSHGYVRSVSPSVRTQETILQQRPSVFGTNGTSVITPLDPTAQLRIMPLPSGG  
 PSISQGLPASRYNTAADALAAALVDAASAPQMDVSKTKESKHEAARLEENLRSRRAAVSEQQQLEQINLEVEK  
 RSVQCVCTSSALPSGKAQPHASVVYSEAGKDKGPPPKSRYEEELRTRGKTTITAAANFIDVITRQIASDKDAR  
 ERGSQSDSSSSSLSHRYETASDAIEVISPASSPAPPQEKQAYQPDVMKANQAENESTRQYEGPLHHYRSQQ  
 ESPSPQQPPLPSSSQSEGMQVPRTHRLITLADHICQIITQDFARNQVPSQPSTSTFTQTSALSSTPVRTKTS  
 SRYSPESQSVTLHPRPGPRVSPENLVDKSRGRPGKSPERSHIPSEYEPISPPQGPVAVHEKQDSMLLSQ

PESQSQTVLHPRPGPRVSPENLVDKSRGSRPGKSPERSHIPSEPYEPI SPPQGPVHEKQDSMLLLSQRGVDP  
 AEQRSDSRSPGISISYLP SFFTKLESTSPMVKSKKQEI FRKLNSGGGSDMAAAQPGTEIFNLPAVTTSGAVS  
 SRSHSFADPASNLGLEDI IRKALMG SFDDKVEDHGVVMSHPV GIMP GSASTSVVTSSEARRDEGEPS PHAGVC  
 KPCLINKSNSRKS KSPI PGQSYLGT ERPSSVSSVHSEGDYHRQTPGWAWEDRPSSTGSTQFPYNPLTIRMLSS  
 TPPTQIACAPSAITQAAPHQQNR IWEREPAPLLSAQYETLSDSDD\*  
 >rs29483194\_ENSMUSP00000038900\_c.2494:A>T\_p.K832I  
 ENSMUST00000037575.15|Ncor1-202|ENSMUSG00000018501|-|chr11:g.62224764:T>A  
 MSAARYSVPPVLPQAPHQVITNLP EGVRLPTTRPTRPPPPLIPSSKTTVASEKPSFIMGGSISQGTPTGTYLSS  
 HNQAYPQEAPKPSVGSISLGLPRQQUESTKAAPLTYIKQEEFS PRSQNSQPEGLLVRAQHEGVVRGTAGAVQEG  
 SITRGT PASKISVETISSLRG SITQGT PALPQAGI PTEALVKG PVS RMP I EESSPEK VREEAASKGHVIYEGK  
 SGHILSYDSLICRALPRGSPHSDLKERTVLSGSIMQGT PRATAESFEDGLKYPKQIKRESPIRAFEGAITKG  
 KPYDGITTIKEMGRS IHEI PRQDILTQESRKTPEVVQSTRPIIEGSI SQGTPIKFDNNSGQSAIKHNVKSLIT  
 GPSKLP RGMLEIVPENIKVVERGKYEDVKAGEPVRARHTSVVSSG P SVLRSTLHEAPKAQLSPGLYDDSSARR  
 TPVSYQNTISRGSPMMNRTSDVSSSKSASHERKSTLTPTQRESIPAKSPVPGVDPVVSHPFDPHRRSSAAGE  
 VYRSHLP THLDPAMPFHRALDPAAAAYLLQRQLSPTPGYPSQYQLYAMENRQTILNDYITSQQMQVNLRPDV  
 TRGLSPREQLGLPYPATRGIIDL TNMPPTILVPHAGGTSTPPMDRITYIPGTQVTFPPRPYNAASLSPGHPT  
 HLAASAEREREREKERERERERERERERERERERERERERERERERERERERERERERERERERERERERER  
 LQQRPSVFGTNGTSVITPLDPTAQLRIMPLPSGGPSISQGLPASRYNTAADALAAALVDAASAAPQMDVSKTK  
 ESKHEAARLEENLRSR SAAVSEQQQLEQINLEVEKRSVQCVCTSSALPSGKAQPHASVVYSEAGKDKGPPPKS  
 RYEEELRTRGKTTITAA NFIDVIITRQIASDKDARERGSQSSDSSSSLS SHRYETASDAIEVISPASSPAPPQ  
 EKPQAYQPD MVKANQAENESTRQYEGPLH HYSQQESPSPQQQPPLPSSQSEGMGQVPRTHRLITLADHICQ  
 IITQDFARNQVPSQPSTSTFQTS PSALSSTPVRTKTSSRYS PESQSQTVLHPRPGPRVSPENLVDKSRGRPGK  
 SPERSHIPSEPYEPI SPPQGPVHEKQDSMLLLSQRGVDPAEQRSDSRSPGISISYLP SFFTKLESTSPMVKSK  
 KQEI FRKLNSGGGSDMAAAQPGTEIFNLPAVTTSGAVSSRSHSFADPASNLGLEDI IRKALMG SFDDKVED  
 HGVVMSHPV GIMP GSASTSVVTSSEARRDEGEPS PHAGVC KPCLINKSNSRKS KSPI PGQSYLGT ERPSSVSS  
 VHSEGDYHRQTPGWAWEDRPSSTGSTQFPYNPLTIRMLSS TPPTQIACAPSAITQAAPHQQNR IWEREPAPLL  
 SAQYETLSDSDD\*  
 >rs26968161\_ENSMUSP00000018645\_c.5334:A>G\_p.R1779G  
 ENSMUST00000018645.13|Ncor1-201|ENSMUSG00000018501|-|chr11:g.62225425:T>C  
 MSSSGYPPNQGFSTEQSRYP SHSVQYTFPSTRHQQEF AVPDYRSSHIEV SQASQLLQQQQQQQLRRRPSLL  
 SEFHPGSDR PQERRTG YEQFHSGSPVDHDSLESKRPRLEPVSDAHFQRVSAAVLPLVHSLPEGLRSSADAKK  
 DSAF GSKHEAPSSPLAGQPCGDDQNASPSKLSKEELIQSMDRVDREIAKVEQQIILK LKKKQQQLEEEEA KPPE  
 PEKPVSPPPVEQKHSIVQIIYDENRKKAEAEAHKIFEGLGPKVELPLYNQPSDTKVYHENIKTNQVMRKKLIL  
 FFKRRNHARKQREQKICQRYDQLMEAW EKVDRIENNPRRKAKESKTREYYEKQFP EIRKQREQQERFQRVGQ  
 RGAGLSATIARSEHEISEIIDGLSEQENNEKQMRQLSVIPMMFDAEQRRVKFINMNGLMEDPMKVYKDRQFM  
 NWWTDHEKEIFKDKFIQHPKNFGLIASYLERKSVDPDCVLYYLT KKNENYKALVRRNYGKRRGRNQIARPSQ  
 EEKVEEKEEDKA EKTEKKEEEEKDDDEEKDDKEDSKETTKEKDRTEATAEPEEREQVTPRGRKTANSQGRK  
 RVTRSMTSEAAAAANA AAAATEEPPPLPPPEPISTEPVETS RWTEEMEVAKKGLVEHGRNWAAIAKMGTK  
 SEAQCKNFYFNYKRRHNL DNLLQ QHKQASRKP REERDVSQCESVASTVSAQED EDIEASNEENPEDSEGAE  
 NSSDTE SAPSPVEAAKSS EDSSENAASRGNTEPVAELEATDPAPCAS PSSAVPTTKPAERESVEAQVTD S  
 ASAETAEPMDVDHEECGAEGSVLDPPAPTKADSVDP EMQVPENTASKGEGDAKERDLESTSEKTEARDEDVV  
 VAEQIERPEPQSDDDSSATCSA DEGV DGE PERQ RVFPMDAKPSLLTPPGSILISSPIKPNPLDLPQLQHRAAV  
 IPPMV SCTPCNIPIGTPVSGYALYQRHIKAMHESALLEEQRQREQVDLECRSSTSPCSTSKSPNREWEVLQP  
 APHQVITNLP EGVRLPTTRPTRPPPPLIPSSKTTVASEKPSFIMGGSISQGTPTGTYLSSHNQAYPQEAPKPSV  
 GSISLGLPRQQUESTKAAPLTYIKQEEFS PRSQNSQPEGLLVRAQHEGVVRGTAGAVQEGSITRGT PASKISVE  
 TISSLRG SITQGT PALPQAGI PTEALVKG PVS RMP I EESSPEK VREEAASKGHVIYEGKSGHILSYDN IKNAR  
 EGTRSPRTAHEMSLKR SYEAVEGSIKQGM SMRESPVSAPLEGLICRALPRGSPHSDLKERTVLSGSIMQGT PR  
 ATAESFEDGLKYPKQIKRESPIRAFEGAITKGKPYDGITTIKEMGRS IHEI PRQDILTQESRKTPEVVQSTR  
 PIIEGSI SQGTPIKFDNNSGQSAIKHNVKSLITGPSKLP RGMLEIVPENIKVVERGKYEDVKAGEPVRARHTS  
 VVSSG P SVLRSTLHEAPKAQLSPGLYDDSSARRTPVSYQNTISRGSPMMNRTSDVSSSKSASHERKSTLTPTQ  
 RESIPAKSPVPGVDPVVSHPFDPHRRSSAAGEVYRSHLP THLDPAMPFHRALDPAAAAYLLQRQLSPTPGYPS  
 QYQLYAMENRQTILNDYITSQQMQVNLRPDVTRGLSPREQLGLPYPATRGIIDL TNMPPTILVPHAGGTST  
 PPMDRITYIPGTQVTFPPRPYNAASLSPGHPTHLAAAASAEREREREREKERERERERERERERERERERERER  
 LYLRPGSEQPGRPGSHGYVRS PPSVGTQETILQQRPSVFGTNGTSVITPLDPTAQLRIMPLPSGGPSISQGL  
 LPASRYNTAADALAAALVDAASAAPQMDVSKTKESKHEAARLEENLRSR SAAVSEQQQLEQKNLEVEKRSVQCV  
 CTSSALPSGKAQPHASVVYSEAGKDKGPPPKSR YEEELRTRGKTTITAA NFIDVIITRQIASDKDARERGSQ  
 SDSSSSLS SHRYETASDAIEVISPASSPAPPQEKQAYQPD MVKANQAENESTRQYEGPLH HYSQQESPSPQ  
 QQPPLPSSQSEGMGQVPRTHRLITLADHICQIITQDFARNQVPSQPSTSTFQTS PSALSSTPVRTKTSSRYS





PEKPVSPPPVEQKHSIVQIIYDENRKKAEAAHAKIFEGLGPKVELPLYNQPSDTKVYHENIKTNQVMRKKLIL  
FFKRRNHARKQREQKICQRYDQLMEAWKVKVDRIENNRKAKEKSTREYYEKQFPEIRKQREQQERFQRVGQ  
RGAGLSATIARSEHEISEIIDGLSEQENNEKQMRQLSVIPMMFDAEQRRVKFINMNGLMEDPMKVYKDRQFM  
NVWTDHEKEIFKDKFIQHPKNFGLIASYLERKSVPCVLYYYLTKKKNENYKALVRRNYGKRRGRNQIARPSQ  
EEKVEEKEDKAEKTEKKEEEKDDEEKDDKEDSKETTKEKDRTEATAEPEEREQVTPRGRKTANSQGRKRG  
RVTRSMTSEAAAAANAAAAATEEPPPLPPPEPISTEPVETSRTWTEEMEVAKKGLVEHGRNWAAIAKMGVTK  
SEAQCKNFYFNYKRRHNLNLLQQHKQKVSRAVVASRKPREEERDVSQCESVASTVSAQEDEDIAEASNEEENPE  
DSEAVPTTKPAERESVEAQVTDASAETAEPMDVDHEECGAEGSSVLDPPAPTAKADSVDPQMPENTASKGE  
GDAKERDLESTSEKTEARDEDVVVAEQIERPEPQSDDDSSATCSADEGVDGEPERQRVFPMDAKPSSLTTPPGS  
ILISSPIKPNPLDLPQLQHRAAVIPPMVCTPCNIPIGTPVSGYALYQRHIKAMHESALLEEQRQREQVDLE  
CRSSTSPCSTSKSPNREWEVLQPAHQVITNLPEGVRLPTTRTRPPPLIPSSKTTVASEKPSFIMGGSISQ  
GTPGTYLSSHQAYPQEAQKPSVGSISLGLPRQOESTKAAPLTYIKQEEFSPRSQNSQPEGLLVRAQHEGTAG  
AVQEGSITRGTASKISVETISSLRGSITQGTALPQAGIPTEALVKGPVSRMPIEESSEKVRREEAASKGHV  
IYEGKSGHILSYDNIKNAREGTRSPRTAHEMSLKRSEAVEGSIKQGLICRALPRGSPHSDLKERTVLSGSIM  
QGTPRATAESFEDGLKYPKQIKRESPIRAFEGAITKGKPYDGIITTIKEMGRSIEIIPRODILTQESRKTPEV  
VQSTRPIIEGSIQGTPIKFDNNSGQSAIKHNKSLITGPKLPRGMLEIVPENIKVVERGKYEDVKAGEPVR  
ARHTSVVSSGVSRLRSTLHEAPKAQLSPGLYDDSSARRTPVSYQNTISRGSPMMNRTSDVSSKSASHERKST  
LTPTRQRESIPAKSPVPGVDPVSHSPFDPHRRSSAAGEVYRSHLPTHLDPAMPFHRALDPAAYLLQRQLSP  
TPGYPSQYQLYAMENTRQITILNDYITSQQMQVNLRPDVTGRGLSPREQLPLGLPYPATRGIIDLTMNPPTILVPH  
AGGTSTPPMDRITYIPGTQVTFPPRPYNAASLSPGHPTHAAAAASAEREREREREKERERERERERERERERI  
AAAPADLYLRPGSEQPGRPGSHGYVRSPPSVGTQETILQORPSVFGTNGTSVITPLDPTAQLRIMPLPSGG  
PSISQGLPASRYNTAADALAAALVDAASAPQMDVSKTKESKHEAARLEENLRSRSAAVSEQQQLEQKNLEVEK  
RSVQCVCTSSALPSGKAQPHASVVYSEAGKDKGPPKSRYEELRTRGKTTITAAFIIDVIITRQIASDKDAR  
ERGSQSSDSSSSLSHRYETASDAIEVISPASSPAPPQEKQAYQPDVMKANQAENESTROYEGLHHYRSQQ  
ESPSPQQPPLPSSQSEGMGQVPRTHRLITLADHICQIITQDFARNQVPSQPSTSTFTQTSALSSTPVRTK  
TSSRYSPESSQSTVLRHPRGPRVSPENLVDKSRGRPGKSPERSHIPSEPYEPISTPPQGPVAVHEKQDSMLLSQ  
RGVDPAEQRSDSRSPGSIYLSFFTKLESTSPMVSKKQEIIFRKLNSGGGSDMAAAQPGTEIFNLPAVTT  
SGAVSSRSHSFADPASNLGLEDIRKALMGSFDDKVEDHGVVMSHPVGMGASASTSVVTSSEARRDEGEPSP  
HAGVCKPKLINKSNRKSXSPIPGQSYLGTERTSSVSVHSEGDYHRQTPGWAWEDRPSSTGSTQFFYNPLTI  
RMLSSPTPTQIACAPSAITQAAPHQQNRIWEREPAPLLSAQYETLSDSD\*  
>rs26968161\_ENSMUSP0000098627\_c.5334:A>G\_p.R1779G  
ENSMUST00000101066.10|Ncor1-204|ENSMUSG0000018501|-|chr11:g.62225425:T>C  
MSSSGYPPNQGFASTEQSRYPSHSVQYTFPSTRHQQEFVAVPDYRSSHIEVVSQASQLLQQQQQQQLRRRPSLL  
SEFHGSDRDPQERRTGYEQFHSGSPVDHDSLESKRPRLEPVSDAHFQVSAAVLPLVHSLPEGLRSSADAKK  
DSAFGSKHEAPSSPLAGQPCGDDQNASPKLSKEELIQMDRVDREIAKVEQILKLLKKKQQQLEEEAAKPE  
PEKPVSPPPVEQKHSIVQIIYDENRKKAEAAHAKIFEGLGPKVELPLYNQPSDTKVYHENIKTNQVMRKKLIL  
FFKRRNHARKQREQKICQRYDQLMEAWKVKVDRIENNRKAKEKSTREYYEKQFPEIRKQREQQERFQRVGQ  
RGAGLSATIARSEHEISEIIDGLSEQENNEKQMRQLSVIPMMFDAEQRRVKFINMNGLMEDPMKVYKDRQFM  
NVWTDHEKEIFKDKFIQHPKNFGLIASYLERKSVPCVLYYYLTKKKNENYKALVRRNYGKRRGRNQIARPSQ  
EEKVEEKEDKAEKTEKKEEEKDDEEKDDKEDSKETTKEKDRTEATAEPEEREQVTPRGRKTANSQGRKRG  
RVTRSMTSEAAAAANAAAAATEEPPPLPPPEPISTEPVETSRTWTEEMEVAKKGLVEHGRNWAAIAKMGVTK  
SEAQCKNFYFNYKRRHNLNLLQQHKQKASRKPREEERDVSQCESVASTVSAQEDEDIAEASNEEENPEDSEGAE  
NSSDTEASAPSPVEAAKSSSEDSSENAASRGNTEPVAELEATDTPAPCASPSSAVPTTKPAERESVEAQVTD  
ASAETAEPMDVDHEECGAEGSSVLDPPAPTAKADSVDPQMPENTASKGEGDAKERDLESTSEKTEARDEDVV  
VAEQIERPEPQSDDDSSATCSADEGVDGEPERQRVFPMDAKPSSLTTPPGSILISSPIKPNPLDLPQLQHRAAV  
IPPMVCTPCNIPIGTPVSGYALYQRHIKAMHESALLEEQRQREQVDLECRSSTSPCSTSKSPNREWEVLQ  
PAHQVITNLPEGVRLPTTRTRPPPLIPSSKTTVASEKPSFIMGGSISQGTGTYLSSHQAYPQEAQKPSV  
GSISLGLPRQOESTKAAPLTYIKQEEFSPRSQNSQPEGLLVRAQHEGVVVRGTAGAVQEGSITRGTASKISVE  
TISSLRGSITQGTALPQAGIPTEALVKGPVSRMPIEESSEKVRREEAASKGHVITYEGKSGHILSYDNIKNAR  
EGTRSPRTAHEMSLKRSEAVEGSIKQGMRESVPSAPLEGLICRALPRGSPHSDLKERTVLSGSIMQGT  
PRATAESFEDGLKYPKQIKRESPIRAFEGAITKGKPYDGIITTIKEMGRSIEIIPRODILTQESRKTPEVVQSTR  
PIIEGSIQGTPIKFDNNSGQSAIKHNKSLITGPKLPRGMLEIVPENIKVVERGKYEDVKAGEPVRARHTS  
VVSSGVSRLRSTLHEAPKAQLSPGLYDDSSARRTPVSYQNTISRGSPMMNRTSDVSSKSASHERKSTLTPTQ  
RESIPAKSPVPGVDPVSHSPFDPHRRSSAAGEVYRSHLPTHLDPAMPFHRALDPAAYLLQRQLSPTPGYPS  
QYQLYAMENTRQITILNDYITSQQMQVNLRPDVTGRGLSPREQLPLGLPYPATRGIIDLTMNPPTILVPHAGGT  
STPPMDRITYIPGTQVTFPPRPYNAASLSPGHPTHAAAAASAEREREREREKERERERERERERERERI  
AAAPADLYLRPGSEQPGRPGSHGYVRSPPSVGTQETILQORPSVFGTNGTSVITPLDPTAQLRIMPLPSGG  
PSISQGLPASRYNTAADALAAALVDAASAPQMDVSKTKESKHEAARLEENLRSRSAAVSEQQQLEQKNLEVEKRSVQCV



>rs45844362\_ENSMUSP00000048844\_c.390:T>C\_p.F131L  
ENSMUST00000035854.4|Cdr4-201|ENSMUSG00000042200|+|chr11:g.62883690:T>C  
MISRPESSLSGLESSQEVQKKTWNPRNYSARLTENIGLPLILLEKHNFPWPAYVAYISPAVTRITEKWARDLE  
YIYAAEKNGKPVKRSKHSVLLKRRKPSKPSSELMMLKETLSETMLPTWECSTIYVSPTLVPEPAQLQMDVREGP  
TSNYNKIIFSKRPAMRKLPGFLLQASKEMHTKD\*

>rs26940990\_ENSMUSP00000048844\_c.450:A>G\_p.N151D  
ENSMUST00000035854.4|Cdr4-201|ENSMUSG00000042200|+|chr11:g.62883750:A>G  
MISRPESSLSGLESSQEVQKKTWNPRNYSARLTENIGLPLILLEKHNFPWPAYVAYISPAVTRITEKWARDLE  
YIYAAEKNGKPVKRSKHSVLLKRRKPSKPSSELMMLKETLSETMLPTWECSTIYVSPTFVPEPAQLQMDVREGP  
TSNYDKIIFSKRPAMRKLPGFLLQASKEMHTKD\*

>rs253908463\_ENSMUSP00000042063\_c.139:G>A\_p.S47N  
ENSMUST00000035732.5|Tekt3-201|ENSMUSG00000042189|+|chr11:g.62960972:G>A  
MELLGSTLTATYAHPPPASASFLPAIGTITSSYKDRFPHRNLTHSLNLPWRPNTYYKTAYNYPTLAPYSSRSQ  
RVCESTMLPFVSNRTTFFTRYTPDDWYRSNLVVFQESNSSRHNSERLRVDTSRLIQDKYQQIRKTAHSTQNL  
GERVNDLAFWKSEITHELDEMIGETNALTDIKRRLERGLIETEGPLQVSRECLFHREKRMGIDLHVHDEAEKEL  
LAEVDTILCCQERMRQHLDKANAQLASDRSAQHELEKDLSDKQALRIDDKQOHLRNTSEGVSYFRGVERVDA  
TVSVPETWAKFTDDNVLRSSQSERAAASAKLREETENLLIVTANEMWNQFNKVNLAFTNRIAETVDAKNKIHTHL  
TKTLQEIFQIEMTIESIKKAIKEKSAFLKVAQTRLDERTRRPNVVELCRDMAQLRLVNEVYEVDETIQTLQOQL  
RDESEDTLQSLAHTKATLEHDLAVKANTLYIDQEKCMSMRNSYPSTLRLVGYC\*

>rs49442878\_ENSMUSP00000042063\_c.316:G>A\_p.S106N  
ENSMUST00000035732.5|Tekt3-201|ENSMUSG00000042189|+|chr11:g.62961149:G>A  
MELLGSTLTATYAHPPPASASFLPAIGTITSSYKDRFPHRNLTHSLSLPWRPNTYYKTAYNYPTLAPYSSRSQ  
RVCESTMLPFVSNRTTFFTRYTPDDWYRSNLVNFQESNSSRHNSERLRVDTSRLIQDKYQQIRKTAHSTQNL  
GERVNDLAFWKSEITHELDEMIGETNALTDIKRRLERGLIETEGPLQVSRECLFHREKRMGIDLHVHDEAEKEL  
LAEVDTILCCQERMRQHLDKANAQLASDRSAQHELEKDLSDKQALRIDDKQOHLRNTSEGVSYFRGVERVDA  
TVSVPETWAKFTDDNVLRSSQSERAAASAKLREETENLLIVTANEMWNQFNKVNLAFTNRIAETVDAKNKIHTHL  
TKTLQEIFQIEMTIESIKKAIKEKSAFLKVAQTRLDERTRRPNVVELCRDMAQLRLVNEVYEVDETIQTLQOQL  
RDESEDTLQSLAHTKATLEHDLAVKANTLYIDQEKCMSMRNSYPSTLRLVGYC\*

>rs50972714\_ENSMUSP00000099695\_c.2554:A>G\_p.E852G  
ENSMUST00000102635.10|Myocd-202|ENSMUSG00000020542|-|chr11:g.65069524:T>C  
MTLLGSEHSLLRKFRSVLQRLRQRRTOEQLANQGLIPPLKGPTEFHDPRKQLDSAKTEDSLRRKGRNRS  
RASLVTMHILQASTAERSIPTAQMKLKRARLADDLNEKIALRPGPLELVEKNILPMDSSVKEAIKGEVSLSK  
AADAFAFEDDSSRDGLSPDQARSEDPOGSGTSTPDIKSTEAPLDTIQDLTPGSESDKNDAAASQPGNQSDPGKQ  
VLGPLSTPIPVHTAVKSKSLGDSKNRHKPKDPKPKVKKLKYHQYIPPDQKAEKSPPMDSAYARLLQQQQLF  
LQLQILSQQQQQQQQQQQQQQQQQQQQQRFSPYGMHQTHLKEPNEQMARNPNPSSSTPLSNTPLSPVKNSISGQ  
TGVSSLKPGPLPPNLDLKVSELRQQLRIRGLPVSGTKTALVDRLRPFQDCAGNPVNFVDITVTFVPTPNT  
LPSYQSSPTGFYHFGSTSSSPPISSPASSDLAAGSLPDTFTDASPGFGLHASVPVACTDESLLSSNLGGSGPS  
EPDGLDSEKDKMLVEKQKVINQLTWKLRQEQRQVEELRMQLQKQKSSCSDQKPLPFLATTIKQEDVSSCPFAP  
QQASGKGQGHSSDSSPPACETAQLLPHCVESGQTHVLSSTFLSPQCSPQHSPLGGLKSPQHSISLPPSPNNHY  
FLASSSSGAQRENHGVSSPSSSQGCAQMTGLQSSDKVGPTFSIPSPPTFSKSSSAVSDITQPPSYEDAVKQOMTR  
SQQMDELLDVLIESGEMPADAREDHSLQKIPKIPGSSCSPTAIPKPSASFEQASSGGQMAFDHYANDSDEH  
LEVLLNSHSPIGKVSVDVTLKIGSEPPFDSIMDGFPGKAAEDLFSAGHLLPGPLSPMHAQLSPSPVDSGLQ  
LSFTESPWETMEWLDLTPSSSTPGFSNLTSSGSPSIFNIDFLDVTDLNLSNPMDLHLQW\*

>rs50972714\_ENSMUSP00000098603\_c.2314:A>G\_p.E772G  
ENSMUST00000101042.9|Myocd-201|ENSMUSG00000020542|-|chr11:g.65069524:T>C  
MDSSVKEAIKGEVSLSKAADAFAFEDDSSRDGLSPDQARSEDPOGSGTSTPDIKSTEAPLDTIQDLTPGSES  
DKNDAAASQPGNQSDPGKQVLGPLSTPIPVHTAVKSKSLGDSKNRHKPKDPKPKVKKLKYHQYIPPDQKAEK  
PPMDSAYARLLQQQQLFQLQILSQQQQQQQQQQQQQQQQQQQQQRFSPYGMHQTHLKEPNEQMARNPNPSS  
TPLSNTPLSPVKNSISGQTGVSSLKPGPLPPNLDLKVSELRQQLRIRGLPVSGTKTALVDRLRPFQDCAGNP  
VNFVDITVTFVPTPNTLPSYQSSPTGFYHFGSTSSSPPISSPASSDLAAGSLPDTFTDASPGFGLHASVPV  
ACTDESLLSSNLGGSGPSEPDGLDSEKDKMLVEKQKVINQLTWKLRQEQRQVEELRMQLQKQKSSCSDQKPLP  
FLATTIKQEDVSSCPFAPQQASGKGQGHSSDSSPPACETAQLLPHCVESGQTHVLSSTFLSPQCSPQHSPLG  
GLKSPQHISLPPSPNNHYFLASSSSGAQRENHGVSSPSSSQGCAQNSGAHEGHSSSFSSPASSLHQPFSGTQAD  
SSHSAQNLNPPKSPSIPHKMTGLQSSDKVGPTFSIPSPPTFSKSSSAVSDITQPPSYEDAVKQOMTRSQQMDEL  
LDVLIESGEMPADAREDHSLQKIPKIPGSSCSPTAIPKPSASFEQASSGGQMAFDHYANDSDEHLEVLLNS  
HSPIGKVSVDVTLKIGSEPPFDSIMDGFPGKAAEDLFSAGHLLPGPLSPMHAQLSPSPVDSGLQLSFTESP  
WETMEWLDLTPSSSTPGFSNLTSSGSPSIFNIDFLDVTDLNLSNPMDLHLQW\*

>rs50972714\_ENSMUSP00000104335\_c.2698:A>G\_p.E900G  
ENSMUST00000108695.9|Myocd-203|ENSMUSG00000020542|-|chr11:g.65069524:T>C  
MTLLGSEHSLIRRKFRSVLQRLRQRRRTQEQLANQGLI PPLKGPTEFHDPRKQLDSAKTEDSLRRKGRNRSD  
RASLVTMHILQASTAERSIPTAQMKLKRARLADDLNEKIALRPGPLELVEKNILPMDSSVKEAIKGTVEVLSK  
AADAFAFEDDSSRDGLSPDQARSED PQGSTGSTPDIKSTEAPLDTIQDLTPGSESDKNDAASQPGNQSDPGKQ  
VLGPLSTPIPVHTAVKSKSLGDSKNRHHKPKDKPKVKVKKLKYHQYIPPDQKAEKSPPPMDSAYARLLQQQQLF  
LQLQILSQQQQQQQQQQQQQQQQQQQQQRFSSYPGMHQTHLKEPNEQMARNPNPSSSTPLSNTPLSPVKNSISGQ  
TGVSSSLKPGPLPPNLDLKVSELRQQLRIRGLPVSQTKTALVDRLRPFQDCAGNPVPNFGDITTVTFVPTPNT  
LPSYQSSPTGFYHFGSTSSSPPISPASSDLAAGSLPDTFTDASPGFGLHASVPACTDESLSSLNNGSGPS  
EPDGLDSEKDKMLVEKQKVINQLTWKLRQEQRQVEELRMQLQKQKSSCSQKPLPFLATTIKQEDVSSCPFAP  
QQASGKGQGHSSDSPPPACETAQLLPHCVESGQTHVLSSTFLSPQCSPQHSPLGGLKSPQHISLPPSPNNHY  
FLASSSGAQRENHGVSSPSSSQGCAQNSGAHEGHSSSFSSPASSLHQPFSGTQADSSHSAGLNPCPKSPSIHP  
KMTGLQSSDKVGPTFSIPSPPTFSKSSSAVSDITQPPSYEDAVKQMQMTRSQQMDEL LDVLIESGEMPADAREDH  
SCLQKIPKIPGSSCSPTAIPPKPSASFEQASSGGQMAFDHYANDSDEHLEVLLNSHSPIGKVS DVTLLKIGSE  
EPPFDSIMDGFPGKAAEDLFSAGLLPGPLSPMHAQLSPPSVDSSGLQLSFTESPWETMEWLDLTPPSSTPGF  
SNLTSSGSPSIFNIDFLDVTDLNLSNPMDLHLQQW\*

>rs241577521\_ENSMUSP00000099695\_c.592:G>A\_p.G198D  
ENSMUST00000102635.10|Myocd-202|ENSMUSG00000020542|-|chr11:g.65091732:C>T  
MTLLGSEHSLIRRKFRSVLQRLRQRRRTQEQLANQGLI PPLKGPTEFHDPRKQLDSAKTEDSLRRKGRNRSD  
RASLVTMHILQASTAERSIPTAQMKLKRARLADDLNEKIALRPGPLELVEKNILPMDSSVKEAIKGTVEVLSK  
AADAFAFEDDSSRDGLSPDQARSED PQGSTGSTPDIKSTEAPLDTIQDLTPDSESDKNDAASQPGNQSDPGKQ  
VLGPLSTPIPVHTAVKSKSLGDSKNRHHKPKDKPKVKVKKLKYHQYIPPDQKAEKSPPPMDSAYARLLQQQQLF  
LQLQILSQQQQQQQQQQQQQQQQQQQQQRFSSYPGMHQTHLKEPNEQMARNPNPSSSTPLSNTPLSPVKNSISGQ  
TGVSSSLKPGPLPPNLDLKVSELRQQLRIRGLPVSQTKTALVDRLRPFQDCAGNPVPNFGDITTVTFVPTPNT  
LPSYQSSPTGFYHFGSTSSSPPISPASSDLAAGSLPDTFTDASPGFGLHASVPACTDESLSSLNNGSGPS  
EPDGLDSEKDKMLVEKQKVINQLTWKLRQEQRQVEELRMQLQKQKSSCSQKPLPFLATTIKQEDVSSCPFAP  
QQASGKGQGHSSDSPPPACETAQLLPHCVESGQTHVLSSTFLSPQCSPQHSPLGGLKSPQHISLPPSPNNHY  
FLASSSGAQRENHGVSSPSSSQGCAQMTGLQSSDKVGPTFSIPSPPTFSKSSSAVSDITQPPSYEDAVKQMQMTR  
SQMDEL LDVLIESGEMPADAREDH SCLQKIPKIPGSSCSPTAIPPKPSASFEQASSGGQMAFDHYANDSDEH  
LEVLLNSHSPIGKVS DVTLLKIGSE EPPFDSIMDGFPGKAAEDLFSAGLLPGPLSPMHAQLSPPSVDSSGLQ  
LSFTESPWETMEWLDLTPPSSTPGFNSLTSSGSPSIFNIDFLDVTDLNLSNPMDLHLQQW\*

>rs241577521\_ENSMUSP00000098603\_c.208:G>A\_p.G70D  
ENSMUST00000101042.9|Myocd-201|ENSMUSG00000020542|-|chr11:g.65091732:C>T  
MDSSVKEAIKGTVEVLSKAADAFAFEDDSSRDGLSPDQARSED PQGSTGSTPDIKSTEAPLDTIQDLTPDSES  
DKNDAASQPGNQSDPGKQVLGPLSTPIPVHTAVKSKSLGDSKNRHHKPKDKPKVKVKKLKYHQYIPPDQKAEKS  
PPMDSAYARLLQQQQLF LQLQILSQQQQQQQQQQQQQQQQQQQQQRFSSYPGMHQTHLKEPNEQMARNPNPSS  
TPLSNTPLSPVKNSISGQTGVSSSLKPGPLPPNLDLKVSELRQQLRIRGLPVSQTKTALVDRLRPFQDCAGNP  
VPNFGDITTVTFVPTPNTLPSYQSSPTGFYHFGSTSSSPPISPASSDLAAGSLPDTFTDASPGFGLHASVP  
ACTDESLSSLNNGSGPSEPDGLDSEKDKMLVEKQKVINQLTWKLRQEQRQVEELRMQLQKQKSSCSQKPLP  
FLATTIKQEDVSSCPFAPQQASGKGQGHSSDSPPPACETAQLLPHCVESGQTHVLSSTFLSPQCSPQHSPLG  
GLKSPQHISLPPSPNNHYFLASSSGAQRENHGVSSPSSSQGCAQNSGAHEGHSSSFSSPASSLHQPFSGTQAD  
SSHSAGLNPCPKSPSIHPKMTGLQSSDKVGPTFSIPSPPTFSKSSSAVSDITQPPSYEDAVKQMQMTRSQQMDEL  
LDVLIESGEMPADAREDH SCLQKIPKIPGSSCSPTAIPPKPSASFEQASSGGQMAFDHYANDSDEHLEVLLNS  
HSPIGKVS DVTLLKIGSE EPPFDSIMDGFPGKAAEDLFSAGLLPGPLSPMHAQLSPPSVDSSGLQLSFTESP  
WETMEWLDLTPPSSTPGFNSLTSSGSPSIFNIDFLDVTDLNLSNPMDLHLQQW\*

>rs241577521\_ENSMUSP00000115572\_c.217:G>A\_p.G73D  
ENSMUST00000144399.3|Myocd-204|ENSMUSG00000020542|-|chr11:g.65091732:C>T  
XFLPTPHSLRHGHGTEVLSLSKAADAFAFEDDSSRDGLSPDQARSED PQGSTGSTPDIKSTEAPLDTIQDLTPD  
SESDKNDAASQPGNQSDPGKQVLGPLSTPIPVHTAVKSKSLGDSKNRHHKPKDKPKVKVKKLKYHQYIPPDQKA  
EKSPPPMDSAYARLLQQQQLF LQLQILSQQQQQQQQQQQQQQQQQQQQQRFSSYPGMHQTHL

>rs241577521\_ENSMUSP00000104335\_c.592:G>A\_p.G198D  
ENSMUST00000108695.9|Myocd-203|ENSMUSG00000020542|-|chr11:g.65091732:C>T  
MTLLGSEHSLIRRKFRSVLQRLRQRRRTQEQLANQGLI PPLKGPTEFHDPRKQLDSAKTEDSLRRKGRNRSD  
RASLVTMHILQASTAERSIPTAQMKLKRARLADDLNEKIALRPGPLELVEKNILPMDSSVKEAIKGTVEVLSK  
AADAFAFEDDSSRDGLSPDQARSED PQGSTGSTPDIKSTEAPLDTIQDLTPDSESDKNDAASQPGNQSDPGKQ  
VLGPLSTPIPVHTAVKSKSLGDSKNRHHKPKDKPKVKVKKLKYHQYIPPDQKAEKSPPPMDSAYARLLQQQQLF  
LQLQILSQQQQQQQQQQQQQQQQQQQQQRFSSYPGMHQTHLKEPNEQMARNPNPSSSTPLSNTPLSPVKNSISGQ  
TGVSSSLKPGPLPPNLDLKVSELRQQLRIRGLPVSQTKTALVDRLRPFQDCAGNPVPNFGDITTVTFVPTPNT



LPSYQSSPTGFYHFGSTSSSPPI SPASSDLSAAGSLPDTFTDASPGFGLHASVVPACTDESLLSSLNNGSGSPS  
EPDGLDSEKDKMLVEKQKVINQLTWKLRQEQRQVEELRMQLQKQKSSCSQKPLPFLATTIKQEDVSSCPFAP  
QQASGKGQGHSSSDSPACETAQLLPHCVESGQTHVLSSTFLSPQCSPQHSPLGGLKSPQHISLPPSPNNHY  
FLASSSSGAQRENHGVSPPSSSQGCAQNSGAHEGHSSSSFPASSLHQPFSGTQADSSHSAGLNPCPKSPSIHP  
KMTGLQSSDKVGPTFSIPSPTFKSSSAVSDITQPPSYEDAVKQOMTRSQQMDELDDVLI ES GEMPADAREDH  
SCLQKIPKIPGSSCSPTAIPPKPSASFEQASSGGQMAFDHYANDSDEHLEVLLNSHSPIGKVSVDVTLKIGSE  
EPPFDSIMDGFPGKAAEDLFSHELLPGPLSPMHAQLSPSPVSDSSGLQLSFTESPWETMEWLDLTPPSSTPGF  
SNLTSSGSPSIFNIDFLDVTDLNLSFMDLHLQQW\*

>rs29427208\_ENSMUSP00000019625\_c.3615:C>T\_p.L1206F  
ENSMUST00000019625.12|Myh8-201|ENSMUSG00000055775|+|chr11:g.67189441:C>T  
MSAGSDAEMAI FGEAAPYLKSEKERIEAQNKPFDAKTSVFVAEPKESYVKSVIQSKDGGKVTVKTESGATLT  
VKEDQVFPMPNPKYDKIEDMAMMTHLHEPGVLYNLKERYAAMMIYYSGLFCVTVNPKWLPVYNPEVVAAYR  
GKKRQEAPPHIFSI SDNAYQFMLTDRENQSILITGESGAGKTVNTRKVIQYFATIAVTGDKKKEESGKMQGT  
EDQIISANPLLEAFGNAKTVRNDNSRFGKFI R IHFGTTGKLASADIETYLLKSRVTFQLKAERSYHIFYQI  
TSNKKPELIEMLLITNPNYDYAFVSQGEITVPSIDDEELMATDSAI DILGFSPEEKVSIYKLTGAVMHYGNM  
KFKQKQREEQAEPDGTVEADKAAYLQCLNSADLLKALCYPRVKVGNVYVTKGQTVQVYNAV GALAKAVYEKM  
FLWMVTRINQQLDTKQPRQYFIGVLDIAGFEIFDFNSLEQLCINFTNEKLQOFFNHHMFVLEQEEYKKEGIEW  
TFIDFGMDLAACIELIEKPLGIFSI LEEECMFPKATDTSFKNKLYDQHLGKSNNFQKPKPTKGKAEAHFSLVH  
YAGTVDYNITGWLDKNKDPNDTVVGLYQKSAMKTLASLSTYASAEADGGAKKGAKKKGSSFQTVSALFREN  
LNKLMTNLRSTHPPHFVRCIIPNETKTPGAMEHELVLHQLRCNGVLEGI R ICRKGFPSRILYGDFKQRYKVLNA  
SAIPEGQFIDSKKASEKLLGSDIDHTQYKFGHTKVFVKAGLLGLEEMRDEKLAQIITRTQAVCRGYLMRVE  
YQKMLLRRESIFCIQYNVRAF MNVKHWPWMKLFKIKPLLKSAETEKEMATMKEEFQKTKDELAKSEAKRKEL  
EEKMVTLLKEKNLQQLVQSEADSLADAEERCEQLIKNKIQLEAKI KEVTERAEDEEEINAELTAKRKLDE  
CSELKDDIDLELTLAKVEKEKHATENKVNKLT EEMAGLDENIAKLTKEKKALQEAHQQTLDLQAEEDKVNT  
LTKAKTKLEQQVDDLEGSLEQEKKLRMDLERAKRKLGDGLKLAQESTMDIENDKQQLDEKLKKEFEISNLIS  
KIEDEQAVEIQLQKKIKELQARIEELEEIEAERASRAKAEKQRSDLSRELEEISERLEEAGGATSAQVEMNK  
KRETEFQKLRRLDLEEATLQHEATAAALRKKHADSVAEFGEQIDNLQRVKQKLEKEKSELKMEIDDLSSNAEAI  
AKAKGNLEKMCRTLEDQVSELKSKEEQRLINELTAQRARLQTEAGEYSRQLDEKDALVSQLSRSKQASTQQ  
IEELKRQLEEEETKAKNALAHALQSSRHDCDLLREQYEEQEGKAE LQRALSKANSEVAQWRKYETDAIQRTE  
ELEEAKKKLAQRLQAAEEHVEAVNAKASLEKTKQRLQNEVEDLMI DVERTNAACAALDKKQRFNDKVLSEWR  
QKYBETQAELESCQKESRTLSTELFKVKNAYEESLDHLETLRRENKNLQOEISDLTEQIAEGGKHIHELEKIK  
KQVEQEKCEIQAALEEAEEASLEHEEGKILRIQLELNQVKSEIDRKIAEKDEEIDQLKRNVVVTMQRSTLDA  
EIRSRNDALRVKKKMEGDLNEMEQLNHANRLAAESLRNYRNTQGI LKDTQLHLDDALRGQEDLKEQLAIVER  
RANLLQAEIEELRATLEQTERSRIAEQELLDASERVQLLHTQNTSLINTKKKLENDVSQLQSEVEEVIQESR  
NAEEKAKKAITDAAMMAEELKKEQDTSALHERMKNMEQTVKDLQHLRDEAEQLALKGGKQIQKLEARVREL  
EGEVENEQKRNAEAVKGLRKHERRVKELTYQTEEDRKNVRLQDLVDKQLQAKVKS YKRQAEAEAEQSNANLAK  
FRKLQHELEEAERADIAESQVNKL RVKSREVTKISAE\*

>rs247358899\_ENSMUSP00000019625\_c.5374:C>CT\_p.T1792ins-fs  
ENSMUST00000019625.12|Myh8-201|ENSMUSG00000055775|+|chr11:g.67196743:C>CT  
MSAGSDAEMAI FGEAAPYLKSEKERIEAQNKPFDAKTSVFVAEPKESYVKSVIQSKDGGKVTVKTESGATLT  
VKEDQVFPMPNPKYDKIEDMAMMTHLHEPGVLYNLKERYAAMMIYYSGLFCVTVNPKWLPVYNPEVVAAYR  
GKKRQEAPPHIFSI SDNAYQFMLTDRENQSILITGESGAGKTVNTRKVIQYFATIAVTGDKKKEESGKMQGT  
EDQIISANPLLEAFGNAKTVRNDNSRFGKFI R IHFGTTGKLASADIETYLLKSRVTFQLKAERSYHIFYQI  
TSNKKPELIEMLLITNPNYDYAFVSQGEITVPSIDDEELMATDSAI DILGFSPEEKVSIYKLTGAVMHYGNM  
KFKQKQREEQAEPDGTVEADKAAYLQCLNSADLLKALCYPRVKVGNVYVTKGQTVQVYNAV GALAKAVYEKM  
FLWMVTRINQQLDTKQPRQYFIGVLDIAGFEIFDFNSLEQLCINFTNEKLQOFFNHHMFVLEQEEYKKEGIEW  
TFIDFGMDLAACIELIEKPLGIFSI LEEECMFPKATDTSFKNKLYDQHLGKSNNFQKPKPTKGKAEAHFSLVH  
YAGTVDYNITGWLDKNKDPNDTVVGLYQKSAMKTLASLSTYASAEADGGAKKGAKKKGSSFQTVSALFREN  
LNKLMTNLRSTHPPHFVRCIIPNETKTPGAMEHELVLHQLRCNGVLEGI R ICRKGFPSRILYGDFKQRYKVLNA  
SAIPEGQFIDSKKASEKLLGSDIDHTQYKFGHTKVFVKAGLLGLEEMRDEKLAQIITRTQAVCRGYLMRVE  
YQKMLLRRESIFCIQYNVRAF MNVKHWPWMKLFKIKPLLKSAETEKEMATMKEEFQKTKDELAKSEAKRKEL  
EEKMVTLLKEKNLQQLVQSEADSLADAEERCEQLIKNKIQLEAKI KEVTERAEDEEEINAELTAKRKLDE  
CSELKDDIDLELTLAKVEKEKHATENKVNKLT EEMAGLDENIAKLTKEKKALQEAHQQTLDLQAEEDKVNT  
LTKAKTKLEQQVDDLEGSLEQEKKLRMDLERAKRKLGDGLKLAQESTMDIENDKQQLDEKLKKEFEISNLIS  
KIEDEQAVEIQLQKKIKELQARIEELEEIEAERASRAKAEKQRSDLSRELEEISERLEEAGGATSAQVEMNK  
KRETEFQKLRRLDLEEATLQHEATAAALRKKHADSVAEFGEQIDNLQRVKQKLEKEKSELKMEIDDLSSNAEAI  
AKAKGNLEKMCRTLEDQVSELKSKEEQRLINELTAQRARLQTEAGEYSRQLDEKDALVSQLSRSKQASTQQ  
IEELKRQLEEEETKAKNALAHALQSSRHDCDLLREQYEEQEGKAE LQRALSKANSEVAQWRKYETDAIQRTE

ELEEAKKKLAQRLQAAEEHVEAVNAKASLEKTKQRLQNEVEDLMI DVERTNAACAALDKKQRNFDKVLSEWR  
 QKYEETQAELESCQKESRTLS TELFKVKNAYEESLDHLET LRRENKNLQOEI SDLTEQIAEGGKHIHELEKIK  
 KQVEQEKCEIQAALEEAEEASLEHEEGKILRIQLELNQVKSEIDRKIAEKDEEIDQLKRNVHRVVE TMQSTLDA  
 EIRSRNDALRVKKKMEGDLNEMEIQLNHANRLAAESLRNYRNTQGI LKDTQLHLDDALRGQEDLKEQLAIVER  
 RANLLQAEIEELRATLEQTERSRIAEQELLDASERVQLLHTQNTSLINTKKKLENDVSQLQSEVEEVIQESR  
 NAEKAKKAITDAAMMAEELKKEQD TSAHLERMKNMEQTGEGPAAPSGRG  
 >rs52024280\_ENSMUSP00000104324\_c.910:T>C\_p.L304P  
 ENSMUST00000108684.8|Myh13-202|ENSMUSG00000060180|+|chr11:g.67225734:T>C  
 MSSDAEMAI FGEAAPYLKPEKERIEAQNRPFDSKKACFAVDDKEMYVKGMIQSRENDKVI VKTLDRELTN  
 SDQVFPMPNPPKFDKIEDMAMMTHLHEPAVLYNLKERYAAMMI YTYSGLFCVTVNPKWLPVYNPEVVAAYRGK  
 KRQEAPPHIFSI SDNAYQFMLTDRDNQSILITGESGAGKTVNTRKVIQYFATIAVTGDKKKEQQPGKMQGTLE  
 DQIIQANPLLEAFGNAKTVRNDNSSRFGKFI RIFHGATGKLASADIETYLLEKSRVTFQLSSERSYHIFYQIM  
 SNKKPELIDLLPISTNPFDFPFVVSQGEVTVASIDDSEELLATDNAIDILGFSPEEKVGIYKLTGAVMHYGNMK  
 FKQKQREEQAEPDGTVEADKAGYLMGLNSAEMLKGLCCPRVKVGNVYVTKGQNVQVTVNSV GALAKAVYEKMF  
 LWMVTRINQQLDTKQPRQYFIGVLDIAGFEI FDFNSLEQLCINF TNEKLQOFFNHHMFVLEQEEYKKEGIEWE  
 FIDFGMDLAACIELIEKPMGIFSI LEEECMF PKATDTSFKNKLYDQHLGKSNNFQKPKPTKGKAEAHFSLVHY  
 AGTVDYNIAGWLDKNKDP LNETVVGLYQKSSLLKLSFLFSNYAGAEAGDSAGGKKGKGGSSFQTVSAVFRE  
 NLNKLMTNLRSTHPHFVRCLIPNETKTPGVMDHYLVMHQLRCNGVLEGI RICKRGFPSRILYADFKQRYRILN  
 ASAIPEGQFIDSKNASEKLLNSIDVDREQFRFGHTKVF FFKAGLLGLLEEMRDEKLVTLMTRTQAVCRGYLMRV  
 EFKKMMERRESIFCIQYNVRSFMNVKHWPWMLFFKIKPLLSAEAEKEMATMKEDFERAKEDLARSEARRKE  
 LEEKMVSLLEQEKNDLQVQSE TENLMDAEEERCEGLIKSKIQLEAKVKELNERLEEEEMNSELVAKKRNL  
 KCSSLKRDIDDLLETLTKVEKEKHATENKVKNLSEEMTALEETISKLTKEKKSLEAHQQTLDLQVEEDKVN  
 GLIKINVKLEQQTDDLEGSLEQEKKLRADLERVVRKLEGLDKMSQESIMDLENDTQQLEEKLKKKEFEMSQLO  
 TRIDDEQVLSLQLOKKIKELQARTEEELEEIEAEHTVRAKIEKQRSDLARELEEISERLEEASGATSQIEMN  
 KKRESEFQKLRDRLEEATLQHEATAATLRKKHADTV AELGEQIDNLQRVKQKLEKEKSELKMEIDDMASNIET  
 VSKSKNMRMCRSVEDQFNEIKAKDDQQTQLIHDLNMQKARLQTQNGELSHQVEEKESLVSQLTKSKQALTQ  
 QLEELKRQLEEEETKAKNALAHALQSSRHCDLLREQYEEEQEGKAE LQRALSKANSEVAQWRTKYETDAI QRT  
 EELEEAKKKLAQRLQEAEE NTEASNSKASLEKTKQRLQGEVDDLMLDLERANTACATLDKKQRNFDKVLAEW  
 KQKLDSESQAELEAAQKESRSLSTEIFKMRNAYEEVVDQLET LRRENKNLQOEI SDLTEQIAETGKNLQEV EKT  
 KKQVEQEKSDLAEEVEGSLHEESKILRVQLELSQV KSELDRKVTEKDEEIEQIKRNSQRAVEAMQSVLD  
 AEIRSRNDALRLKKKMEGDLNEMEIQLSHANRQVAETQKHLRTVQGGQLKDSQLHLDDAQRSNEDLKEQLAIVE  
 RRNGLLQEELEEMKVALEQTERRLSEQELLDSSDRVQLLHSQNTSLINTKKKLEADLAQCQAEVENS IQES  
 RNAEEKAKKAITDAAMMAEELKKEQD TSAHLERMKNLEQTVKDLQHRLDAAEQ LALKGGKKQIQKLEARVRE  
 LESELDAAEQRGAEALKGAKYERKVKEMTYQAEEDRKNILRLQDLVDK LQAKVKS YKRQAEAEAEQANTQLS  
 RRRVQHELEEAERADIAESQVNLRAKSRDVGQKMEE\*  
 >rs52024280\_ENSMUSP00000137731\_c.910:T>C\_p.L304P  
 ENSMUST00000180845.8|Myh13-203|ENSMUSG00000060180|+|chr11:g.67225734:T>C  
 MSSDAEMAI FGEAAPYLKPEKERIEAQNRPFDSKKACFAVDDKEMYVKGMIQSRENDKVI VKTLDRELTN  
 SDQVFPMPNPPKFDKIEDMAMMTHLHEPAVLYNLKERYAAMMI YTYSGLFCVTVNPKWLPVYNPEVVAAYRGK  
 KRQEAPPHIFSI SDNAYQFMLTDRDNQSILITGESGAGKTVNTRKVIQYFATIAVTGDKKKEQQPGKMQGTLE  
 DQIIQANPLLEAFGNAKTVRNDNSSRFGKFI RIFHGATGKLASADIETYLLEKSRVTFQLSSERSYHIFYQIM  
 SNKKPELIDLLPISTNPFDFPFVVSQGEVTVASIDDSEELLATDNAIDILGFSPEEKVGIYKLTGAVMHYGNMK  
 FKQKQREEQAEPDGTVEADKAGYLMGLNSAEMLKGLCCPRVKVGNVYVTKGQNVQVTVNSV GALAKAVYEKMF  
 LWMVTRINQQLDTKQPRQYFIGVLDIAGFEI FDFNSLEQLCINF TNEKLQOFFNHHMFVLEQEEYKKEGIEWE  
 FIDFGMDLAACIELIEKPMGIFSI LEEECMF PKATDTSFKNKLYDQHLGKSNNFQKPKPTKGKAEAHFSLVHY  
 AGTVDYNIAGWLDKNKDP LNETVVGLYQKSSLLKLSFLFSNYAGAEAGDSAGGKKGKGGSSFQTVSAVFRE  
 NLNKLMTNLRSTHPHFVRCLIPNETKTPGVMDHYLVMHQLRCNGVLEGI RICKRGFPSRILYADFKQRYRILN  
 ASAIPEGQFIDSKNASEKLLNSIDVDREQFRFGHTKVF FFKAGLLGLLEEMRDEKLVTLMTRTQAVCRGYLMRV  
 EFKKMMERRESIFCIQYNVRSFMNVKHWPWMLFFKIKPLLSAEAEKEMATMKEDFERAKEDLARSEARRKE  
 LEEKMVSLLEQEKNDLQVQSE TENLMDAEEERCEGLIKSKIQLEAKVKELNERLEEEEMNSELVAKKRNL  
 KCSSLKRDIDDLLETLTKVEKEKHATENKVKNLSEEMTALEETISKLTKEKKSLEAHQQTLDLQVEEDKVN  
 GLIKINVKLEQQTDDLEGSLEQEKKLRADLERVVRKLEGLDKMSQESIMDLENDTQQLEEKLKKKEFEMSQLO  
 TRIDDEQVLSLQLOKKIKELQARTEEELEEIEAEHTVRAKIEKQRSDLARELEEISERLEEASGATSQIEMN  
 KKRESEFQKLRDRLEEATLQHEATAATLRKKHADTV AELGEQIDNLQRVKQKLEKEKSELKMEIDDMASNIET  
 VSKSKNMRMCRSVEDQFNEIKAKDDQQTQLIHDLNMQKARLQTQNGELSHQVEEKESLVSQLTKSKQALTQ  
 QLEELKRQLEEEETKAKNALAHALQSSRHCDLLREQYEEEQEGKAE LQRALSKANSEVAQWRTKYETDAI QRT  
 EELEEAKKKLAQRLQEAEE NTEASNSKASLEKTKQRLQGEVDDLMLDLERANTACATLDKKQRNFDKVLAEW  
 KQKLDSESQAELEAAQKESRSLSTEIFKMRNAYEEVVDQLET LRRENKNLQOEI SDLTEQIAETGKNLQEV EKT

KKQVEQEKSDLQAALAEVEGSLHEEESKILRVQLELSQVKSELDRKVTEKDEEIEQIKRNSQRAVEAMQSVLD  
AEIRSRNDALRLKKKMEGDLNEMEIQLSHANRQVAETQKHLRVTQGGQLKDSQLHLDDAQRSNEDLKEQLAIVE  
RRNGLLQEELEEMKVALEQTERTRRLSEQELLDSSDRVQLLHSQNTSLINTKKKLEADLAQCQAEVENS IQES  
RNAEEKAKKAITDAAMMAEELKKEQDTS AHLERMKKNLEQTVKDLQHRLEAEQLALKGGKKQIQKLEARVRE  
LESELDAEQKRGAEALKGAKHYERKVKEMTYQAEEDRKNILRLQDLVDKLOAKVKS YKRQAEAEAEQANTQLS  
RCRRVQHELEEAERADIAESQVNLKRAKSRDVGQKMEE\*  
>rs52024280\_ENSMUSP00000080584\_c.910:T>C\_p.L304P  
ENSMUST00000081911.12|Myh13-201|ENSMUSG00000060180|+|chr11:g.67225734:T>C  
MSSDAEMAI FGEAAPYLRKPEKERIEAQNRPFDSKKACFAVDDKEMYVKGMIQSRENDKVI VKTLDRELTN  
SDQVFPMPNPPKFDKIEDMAMMTHLHEPAVLYNLKERYAAMMIYTYSGLFCVTVNPKWLPVYNPEVVAAYRGK  
KRQEAPPHIFISISDNAYQFMLTDRDNQSILITGESGAGKTVNTRKVIQYFATIAVTGDKKKEQQPGKMQGTLE  
DQIIQANPLLEAFGNAKTVRNDNSSRFGKFIIRIHFGATGKLASADIETYLLEKSRVTFQLSSERSYHIFYQIM  
SNKKPELIDLLPISTNPFDFPFVVSQGEVTVASIDDSEELLATDNAIDILGFSPEEKVGIYKLTGAVMHYGNMK  
FKQKQREEQAEPDGTVEADKAGYLMGLNSAEMLKGLCCPRVKVGNVYVTKGQNVQVTVNSV GALAKAVYEKMF  
LWMVTRINQQLDTPRQYFIGVLDIAGFEIFDFNSLEQLCINFNEKLQOFFNHHMFVLEQEEYKKEGIEWE  
FIDFGMDLAACIELIEKPMGIFSI LEEECMF PKATDTSFKNKLYDQHLGKSNNFQKPKPTKGKAEAHFSLVHY  
AGTVDYNIAGWLDKNKDP LNETVVGLYQKSSLLKLSFLFSNYAGAEAGDSAGGKGGKGGSSFFQTVSAVFRE  
NLNKLMTNLRSTHHPFVRCLIPNETKTPGVMDHYLVMHQLRCNGVLEGI RICKRGFPSRILYADFQR YRILN  
ASAIPEGQFIDSKNASEKLLNSIDVDREQFRFGHTKVFVKAGLLGLLEEMRDEKLVTLMTRTQAVCRGYLMRV  
EFKKMMERRESIFCIQYNVRSFMNVKHPWMMNLFKIKPLLSAEAEKEMATMKEDFERAKEDLARSEARRKE  
LEEKMVSLLEQEKNDLQVQSE TENLMDAEERCEGLIKSKIQLEAKVKELNERLEEEEMNSELVAKRNLED  
KCSSLKRDI DDLELTLTKVEKEKHATENKVKNLSEEMTALEETISKLTKEKKSLEAHQQTLDLQVEEDKVN  
GLIKINVKLEQQTDDLEGSLEQEKLRADLERVVRKLEGLDKMSQESIMDLENDTQQLEEKLKKKEFEMS QLO  
TRIDDEQVLSLQLOKKIKELQARTEEELEEIEAEHTVRAKIEKQRS DLARELEEISERLEEASGATS AQIEMN  
KKRESEFQKLRDRLEEATLQHEATAATLRKKHADTV AELGEQIDNLQRVKQKLEKEKSELKMEIDDMASNIET  
VSKSKNMRMCRSVEDQFNEIKAKDDQQTQLIHDLNMQKARLQTQNGELSHQVEEKE SLVSQLTKSKQALTQ  
QLEELKRQLEEEETKAKNALAHALQSSRHCDLLREQYEEEEEQEGKAE LQRALSKANSEVAQWRTKYETDAI QRT  
EELEEAKKLAQRLQEAEE NTEASNSKASLEKTKQRLQGEVDDLMLDLERANTACATLDKKQRNF DKVLAEW  
KQKLDSESQAELEAAQKESRSLSTEIFKMRNAYEEVVDQLET LRRENKNLQEEISDLTEQIAETGKNLQEV EKT  
KKQVEQEKSDLQAALAEVEGSLHEEESKILRVQLELSQVKSELDRKVTEKDEEIEQIKRNSQRAVEAMQSVLD  
AEIRSRNDALRLKKKMEGDLNEMEIQLSHANRQVAETQKHLRVTQGGQLKDSQLHLDDAQRSNEDLKEQLAIVE  
RRNGLLQEELEEMKVALEQTERTRRLSEQELLDSSDRVQLLHSQNTSLINTKKKLEADLAQCQAEVENS IQES  
RNAEEKAKKAITDAAMMAEELKKEQDTS AHLERMKKNLEQTVKDLQHRLEAEQLALKGGKKQIQKLEARVRE  
LESELDAEQKRGAEALKGAKHYERKVKEMTYQAEEDRKNILRLQDLVDKLOAKVKS YKRQAEAEAEQANTQLS  
RCRRVQHELEEAERADIAESQVNLKRAKSRDVGQKMEE\*  
>rs29409817\_ENSMUSP00000104324\_c.1147:C>T\_p.A383V  
ENSMUST00000108684.8|Myh13-202|ENSMUSG00000060180|+|chr11:g.67231152:C>T  
MSSDAEMAI FGEAAPYLRKPEKERIEAQNRPFDSKKACFAVDDKEMYVKGMIQSRENDKVI VKTLDRELTN  
SDQVFPMPNPPKFDKIEDMAMMTHLHEPAVLYNLKERYAAMMIYTYSGLFCVTVNPKWLPVYNPEVVAAYRGK  
KRQEAPPHIFISISDNAYQFMLTDRDNQSILITGESGAGKTVNTRKVIQYFATIAVTGDKKKEQQPGKMQGTLE  
DQIIQANPLLEAFGNAKTVRNDNSSRFGKFIIRIHFGATGKLASADIETYLLEKSRVTFQLSSERSYHIFYQIM  
SNKKPELIDLLL ISTNPFDFPFVVSQGEVTVASIDDSEELLATDNAIDILGFSPEEKVGIYKLTGAVMHYGNMK  
FKQKQREEQAEPDGTVEVVDKAGYLMGLNSAEMLKGLCCPRVKVGNVYVTKGQNVQVTVNSV GALAKAVYEKMF  
LWMVTRINQQLDTPRQYFIGVLDIAGFEIFDFNSLEQLCINFNEKLQOFFNHHMFVLEQEEYKKEGIEWE  
FIDFGMDLAACIELIEKPMGIFSI LEEECMF PKATDTSFKNKLYDQHLGKSNNFQKPKPTKGKAEAHFSLVHY  
AGTVDYNIAGWLDKNKDP LNETVVGLYQKSSLLKLSFLFSNYAGAEAGDSAGGKGGKGGSSFFQTVSAVFRE  
NLNKLMTNLRSTHHPFVRCLIPNETKTPGVMDHYLVMHQLRCNGVLEGI RICKRGFPSRILYADFQR YRILN  
ASAIPEGQFIDSKNASEKLLNSIDVDREQFRFGHTKVFVKAGLLGLLEEMRDEKLVTLMTRTQAVCRGYLMRV  
EFKKMMERRESIFCIQYNVRSFMNVKHPWMMNLFKIKPLLSAEAEKEMATMKEDFERAKEDLARSEARRKE  
LEEKMVSLLEQEKNDLQVQSE TENLMDAEERCEGLIKSKIQLEAKVKELNERLEEEEMNSELVAKRNLED  
KCSSLKRDI DDLELTLTKVEKEKHATENKVKNLSEEMTALEETISKLTKEKKSLEAHQQTLDLQVEEDKVN  
GLIKINVKLEQQTDDLEGSLEQEKLRADLERVVRKLEGLDKMSQESIMDLENDTQQLEEKLKKKEFEMS QLO  
TRIDDEQVLSLQLOKKIKELQARTEEELEEIEAEHTVRAKIEKQRS DLARELEEISERLEEASGATS AQIEMN  
KKRESEFQKLRDRLEEATLQHEATAATLRKKHADTV AELGEQIDNLQRVKQKLEKEKSELKMEIDDMASNIET  
VSKSKNMRMCRSVEDQFNEIKAKDDQQTQLIHDLNMQKARLQTQNGELSHQVEEKE SLVSQLTKSKQALTQ  
QLEELKRQLEEEETKAKNALAHALQSSRHCDLLREQYEEEEEQEGKAE LQRALSKANSEVAQWRTKYETDAI QRT  
EELEEAKKLAQRLQEAEE NTEASNSKASLEKTKQRLQGEVDDLMLDLERANTACATLDKKQRNF DKVLAEW  
KQKLDSESQAELEAAQKESRSLSTEIFKMRNAYEEVVDQLET LRRENKNLQEEISDLTEQIAETGKNLQEV EKT

KKQVEQEKSDLOAALEVEEGSLEHEESKILRVQLELSQVKSELDRKVTEKDEEIEQIKRNSQRAVEAMQSVLD  
AEIRSRNDALRLKKKMEGDLNEMEIQLSHANRQVAETQKHLRVTQGGQLKDSQLHLDDAQRSNEDLKEQLAIVE  
RRNGLLQEELEEMKVALEQTERTRRLSEQELLDSSDRVQLLHSQNTSLINTKKKLEADLAQCQAEVENS IQES  
RNAEEKAKKAITDAAMMAEELKKEQDTS AHLERMKKNLEQTVKDLQHRLEAEQLALKGGKKQIQKLEARVRE  
LESELDAEQKRGAEALKGAHKYERKVKEMTYQAEEDRKNILRLQDLVDKLOAKVKS YKRQAEAEAEQANTQLS  
RCRRVQHELEEAERADIAESQVNLKRAKSRDVGQKMEE\*  
>rs29409817\_ENSMUSP00000137731\_c.1147:C>T\_p.A383V  
ENSMUST00000180845.8|Myh13-203|ENSMUSG00000060180|+|chr11:g.67231152:C>T  
MSSDAEMAI FGEAAPYLKPEKERIEAQNRPFDSKKACFAVDDKEMYVKGMIQSRENDKVI VKTLDRELTN  
SDQVFPMPNPPKFDKIEDMAMMTHLHEPAVLYNLKERYAAMMIYTYSGLFCVTVNPKWLPVYNPEVVAAYRGK  
KRQEAPPHIFISISDNAYQFMLTDRDNQSILITGESGAGKTVNTRKVIQYFATIAVTGDKKKEQQPGKMQGTLE  
DQIIQANPLLEAFGNAKTVRNDNSSRFGKFI RIFHGATGKLASADIETYLLKSRVTFQLSSERSYHIFYQIM  
SNKKPELIDLLL ISTNPFDFPFVVSQGEVTVASIDDSEELLATDNAIDILGFSPEEKVGIYKLTGAVMHYGNMK  
FKQKQREEQAE PDGTEVVDKAGYLMGLNSAEMLKGLCCPRVKVGN EYVTKGQNVQV TNSV GALAKAVYEKMF  
LWMVTRINQQLDTKQPRQYFIGVLDIAGFEIFDFNSLEQLCINF TNEKLQOFFNHHMFVLEQEEYKKEGIEWE  
FIDFGMDLAACIELIEKPMGIFSI LEEECMF PKATDTSFKNKLYDQHLGKSNNFQKPKPTKGKAEAHFSLVHY  
AGTVDYNIAGWLDKNKDP LNETVVGLYQKSSLLKLSFLFSNYAGAEAGDSAGGKGGKGGKSSFFQTVSAVFRE  
NLNKLMTNLRSTHPHFVRCLIPNETKTPGVMDHYLVMHQLRCNGVLEGI R ICRKGFPSRILYADFQRYRILN  
ASAIPEGQFIDSKNASEKLLNSIDVDREQFRFGHTKVFVKAGLLGLLEEMRDEKLVTLMTRTQAVCRGYLMRV  
EFKKMMERRESIFCIQYNVRSFMNVKHWPWMNLFKIKPLLSAEAEKEMATMKEDFERAKEDLARSEARRKE  
LEEKMVSL LQEKNDLQVQSE TENLMDAEERCEGLIKSKIQL EAKVKELNERLEEEEEEMNSELVAKKRNL E D  
KCSSLKRDI DDLELTLTKVEKEKHATENKVKNLSEEMTALEETISKLTKEKKS LQEAHQQT LDDLQVEEDKVN  
GLIKINVKLEQQTDDLEGSLEQEKKLRADLERVVRKLEGLDKMSQESIMDLENDTQQLEEK LKKKEFEMS QLQ  
TRIDDEQVLSLQ LQKKIKELQARTEEELEEEIEAEHTVRAKIEKQRS DLARELEEISERLEEASGATS AQIEMN  
KKRESEFQKLRDRLEEATLQHEATAATLRKKHADTV AELGEQIDNLQRVKQKLEKEKSELKMEIDDMASNIET  
VSKSKNMRMERRSV EDQFNEIKAKDDQQTQLIHDLNMQKARLQTQNGELSHQVEEKE SLVSQLTKSKQALTQ  
QLEELKRQLEEEETKAKNALAHALQSSRHCDLLREQYEEEQEGKAE LQRALSKANSEVAQWRTKYETDAI QRT  
EELEEAKK KLAQRLQEA EENTEASNSK CASLEKTKQRLQGEVDDMLDLERANTACATLDKKQRNF DKVLAEW  
KQKLD ESQAELEAAQKESRSLSTEIFKMRNAYEEVVDQLET LRRENKNLQEEISDLTEQIAETGKNLQEV EKT  
KKQVEQEKSDLOAALEVEEGSLEHEESKILRVQLELSQVKSELDRKVTEKDEEIEQIKRNSQRAVEAMQSVLD  
AEIRSRNDALRLKKKMEGDLNEMEIQLSHANRQVAETQKHLRVTQGGQLKDSQLHLDDAQRSNEDLKEQLAIVE  
RRNGLLQEELEEMKVALEQTERTRRLSEQELLDSSDRVQLLHSQNTSLINTKKKLEADLAQCQAEVENS IQES  
RNAEEKAKKAITDAAMMAEELKKEQDTS AHLERMKKNLEQTVKDLQHRLEAEQLALKGGKKQIQKLEARVRE  
LESELDAEQKRGAEALKGAHKYERKVKEMTYQAEEDRKNILRLQDLVDKLOAKVKS YKRQAEAEAEQANTQLS  
RCRRVQHELEEAERADIAESQVNLKRAKSRDVGQKMEE\*  
>rs29409817\_ENSMUSP00000080584\_c.1147:C>T\_p.A383V  
ENSMUST00000081911.12|Myh13-201|ENSMUSG00000060180|+|chr11:g.67231152:C>T  
MSSDAEMAI FGEAAPYLKPEKERIEAQNRPFDSKKACFAVDDKEMYVKGMIQSRENDKVI VKTLDRELTN  
SDQVFPMPNPPKFDKIEDMAMMTHLHEPAVLYNLKERYAAMMIYTYSGLFCVTVNPKWLPVYNPEVVAAYRGK  
KRQEAPPHIFISISDNAYQFMLTDRDNQSILITGESGAGKTVNTRKVIQYFATIAVTGDKKKEQQPGKMQGTLE  
DQIIQANPLLEAFGNAKTVRNDNSSRFGKFI RIFHGATGKLASADIETYLLKSRVTFQLSSERSYHIFYQIM  
SNKKPELIDLLL ISTNPFDFPFVVSQGEVTVASIDDSEELLATDNAIDILGFSPEEKVGIYKLTGAVMHYGNMK  
FKQKQREEQAE PDGTEVVDKAGYLMGLNSAEMLKGLCCPRVKVGN EYVTKGQNVQV TNSV GALAKAVYEKMF  
LWMVTRINQQLDTKQPRQYFIGVLDIAGFEIFDFNSLEQLCINF TNEKLQOFFNHHMFVLEQEEYKKEGIEWE  
FIDFGMDLAACIELIEKPMGIFSI LEEECMF PKATDTSFKNKLYDQHLGKSNNFQKPKPTKGKAEAHFSLVHY  
AGTVDYNIAGWLDKNKDP LNETVVGLYQKSSLLKLSFLFSNYAGAEAGDSAGGKGGKGGKSSFFQTVSAVFRE  
NLNKLMTNLRSTHPHFVRCLIPNETKTPGVMDHYLVMHQLRCNGVLEGI R ICRKGFPSRILYADFQRYRILN  
ASAIPEGQFIDSKNASEKLLNSIDVDREQFRFGHTKVFVKAGLLGLLEEMRDEKLVTLMTRTQAVCRGYLMRV  
EFKKMMERRESIFCIQYNVRSFMNVKHWPWMNLFKIKPLLSAEAEKEMATMKEDFERAKEDLARSEARRKE  
LEEKMVSL LQEKNDLQVQSE TENLMDAEERCEGLIKSKIQL EAKVKELNERLEEEEEEMNSELVAKKRNL E D  
KCSSLKRDI DDLELTLTKVEKEKHATENKVKNLSEEMTALEETISKLTKEKKS LQEAHQQT LDDLQVEEDKVN  
GLIKINVKLEQQTDDLEGSLEQEKKLRADLERVVRKLEGLDKMSQESIMDLENDTQQLEEK LKKKEFEMS QLQ  
TRIDDEQVLSLQ LQKKIKELQARTEEELEEEIEAEHTVRAKIEKQRS DLARELEEISERLEEASGATS AQIEMN  
KKRESEFQKLRDRLEEATLQHEATAATLRKKHADTV AELGEQIDNLQRVKQKLEKEKSELKMEIDDMASNIET  
VSKSKNMRMERRSV EDQFNEIKAKDDQQTQLIHDLNMQKARLQTQNGELSHQVEEKE SLVSQLTKSKQALTQ  
QLEELKRQLEEEETKAKNALAHALQSSRHCDLLREQYEEEQEGKAE LQRALSKANSEVAQWRTKYETDAI QRT  
EELEEAKK KLAQRLQEA EENTEASNSK CASLEKTKQRLQGEVDDMLDLERANTACATLDKKQRNF DKVLAEW  
KQKLD ESQAELEAAQKESRSLSTEIFKMRNAYEEVVDQLET LRRENKNLQEEISDLTEQIAETGKNLQEV EKT

KKQVEQEKSDLQAALAEVEGSLHEEESKILRVQLELSQVKSELDRKVTEKDEEIEQIKRNSQRAVEAMQSVLD  
AEIRSRNDALRLKKKMEGDLNEMEIQLSHANRQVAETQKHLRTVQGQLKDSQLHLDDAQRSNEDLKEQLAIVE  
RRNGLLQEELEEMKVALEQTERTRRLSEQELLDSSDRVQLLHSQNTSLINTKKKLEADLAQCQAEVENS IQES  
RNAEEKAKKAITDAAMMAEELKKEQDTS AHLERMKKNLEQTVKDLQHRLEAEQLALKGGKKQIQKLEARVRE  
LESELDAEQKRGAEALKAHKEYERKVKEMTYQAEEDRKNILRLQDLVDKLOAKVKS YKRQAEAEAEQANTQLS  
RCRRVQHELEEAERADIAESQVNLKRAKSRDVGQKMEE\*  
>rs46409593\_ENSMUSP00000104324\_c.1708:C>A\_p.P570H  
ENSMUST00000108684.8|Myh13-202|ENSMUSG00000060180|+|chr11:g.67233191:C>A  
MSSDAEMAI FGEAAPYLKPEKERIEAQNRPFDSKKACFAVDDKEMYVKGMIQSRENDKVI VKTLDRELTN  
SDQVFPMPNPPKFDKIEDMAMMTHLHEPAVLYNLKERYAAMMIYTYSGLFCVTVNPKWLPVYNPEVVAAYRGK  
KRQEAPPHIFISISDNAYQFMLTDRDNQSILITGESGAGKTVNTRKVIQYFATIAVTGDKKKEQQPGKMQGTLE  
DQIIQANPLLEAFGNAKTVRNDNSSRFGKFI RIFHGATGKLASADIETYLLEKSRVTFQLSSERSYHIFYQIM  
SNKKPELIDLLL ISTNPFDFPFVVSQGEVTVASIDDSEELLATDNAIDILGFSPEEKVGIYKLTGAVMHYGNMK  
FKQKQREEQAEPDGEVADKAGYLMGLNSAEMKGLCCPRVKVGN EYVTKGQNVQVTVNSVGALAKAVYEKMF  
LWMVTRINQQLDTKQPRQYFIGVLDIAGFEIFDFNSLEQLCINF TNEKLQOFFNHHMFVLEQEEYKKEGIEWE  
FIDFGMDLAACIELIEKPMGIFSI LEEECMF PKATDTSFKNKLYDQHLGKSNNFQPKKHTKGKAEAHFSLVHY  
AGTVDYNIAGWLDKNKDP LNETVVGLYQKSSLLKLSFLFSNYAGAEAGDSAGGKGGKGGKSSFFQTVSAVFRE  
NLNKLMTNLRSTHPHFVRCLIPNETKTPGVMDHYLVMHQLRCNGVLEGI RICKRGFPSRILYADFQRYRILN  
ASAIPEGQFIDSKNASEKLLNSIDVDREQFRFGHTKVFVKAGLLGLLEEMRDEKLVTLMTRTQAVCRGYLMRV  
EFKKMMERRESIFCIQYNVRSFMNVKHPWMMNLFKIKPLLSAEAEKEMATMKEDFERAKEDLARSEARRKE  
LEEKMVSL LQEKNDLQVQSE TENLMDAEERCEGLIKSKIQL EAKVKELNERLEEEEMNSELVAKKRNL E D  
KCSSLKRDI DDLELTLTKVEKEKHATENKVKNLSEEMTALEETISKLTKEKKS LQEAHQQTLDLQVEEDKVN  
GLIKINVKLEQQTDDLEGSLEQEKKLRADLERVVRKLEGLDKMSQESIMDLENDTQQLEEK LKKKEFEMS Q LQ  
TRIDDEQVLSLQ LQKKIKELQARTEEELEEEIEAEHTVRAKIEKQRS DLARELEEISERLEEASGATS AQIEMN  
KKRESEFQKLRDL EEA TLQHEATAATLRKKHADTV AELGEQIDNLQRVKQKLEKEKSELKMEIDDMASNIET  
VSKSKNMRMCRSVEDQFNEIKAKDDQQTQLIHDLNMQKARLQTQNGELSHQVEEKE SLVSQ LTKSKQALTQ  
QLEELKRQLEEEETKAKNALAHALQSSRHCDLLREQYEEEQEGKAE LQRALSKANSEVAQWRTKYETDAI QRT  
EELEEAKK KLAQRLQEA EENTEASNSK CASLEKTKQRLQGEVDDMLDLERANTACATLDKKQRNF DKVLAEW  
KQKLD ESQAELEAAQKESRSLSTEIFKMRNAYEEVVDQLET LRRENKNLQEEISDLTEQIAETGKNLQEV EKT  
KKQVEQEKSDLQAALAEVEGSLHEEESKILRVQLELSQVKSELDRKVTEKDEEIEQIKRNSQRAVEAMQSVLD  
AEIRSRNDALRLKKKMEGDLNEMEIQLSHANRQVAETQKHLRTVQGQLKDSQLHLDDAQRSNEDLKEQLAIVE  
RRNGLLQEELEEMKVALEQTERTRRLSEQELLDSSDRVQLLHSQNTSLINTKKKLEADLAQCQAEVENS IQES  
RNAEEKAKKAITDAAMMAEELKKEQDTS AHLERMKKNLEQTVKDLQHRLEAEQLALKGGKKQIQKLEARVRE  
LESELDAEQKRGAEALKAHKEYERKVKEMTYQAEEDRKNILRLQDLVDKLOAKVKS YKRQAEAEAEQANTQLS  
RCRRVQHELEEAERADIAESQVNLKRAKSRDVGQKMEE\*  
>rs46409593\_ENSMUSP00000137731\_c.1708:C>A\_p.P570H  
ENSMUST00000180845.8|Myh13-203|ENSMUSG00000060180|+|chr11:g.67233191:C>A  
MSSDAEMAI FGEAAPYLKPEKERIEAQNRPFDSKKACFAVDDKEMYVKGMIQSRENDKVI VKTLDRELTN  
SDQVFPMPNPPKFDKIEDMAMMTHLHEPAVLYNLKERYAAMMIYTYSGLFCVTVNPKWLPVYNPEVVAAYRGK  
KRQEAPPHIFISISDNAYQFMLTDRDNQSILITGESGAGKTVNTRKVIQYFATIAVTGDKKKEQQPGKMQGTLE  
DQIIQANPLLEAFGNAKTVRNDNSSRFGKFI RIFHGATGKLASADIETYLLEKSRVTFQLSSERSYHIFYQIM  
SNKKPELIDLLL ISTNPFDFPFVVSQGEVTVASIDDSEELLATDNAIDILGFSPEEKVGIYKLTGAVMHYGNMK  
FKQKQREEQAEPDGEVADKAGYLMGLNSAEMKGLCCPRVKVGN EYVTKGQNVQVTVNSVGALAKAVYEKMF  
LWMVTRINQQLDTKQPRQYFIGVLDIAGFEIFDFNSLEQLCINF TNEKLQOFFNHHMFVLEQEEYKKEGIEWE  
FIDFGMDLAACIELIEKPMGIFSI LEEECMF PKATDTSFKNKLYDQHLGKSNNFQPKKHTKGKAEAHFSLVHY  
AGTVDYNIAGWLDKNKDP LNETVVGLYQKSSLLKLSFLFSNYAGAEAGDSAGGKGGKGGKSSFFQTVSAVFRE  
NLNKLMTNLRSTHPHFVRCLIPNETKTPGVMDHYLVMHQLRCNGVLEGI RICKRGFPSRILYADFQRYRILN  
ASAIPEGQFIDSKNASEKLLNSIDVDREQFRFGHTKVFVKAGLLGLLEEMRDEKLVTLMTRTQAVCRGYLMRV  
EFKKMMERRESIFCIQYNVRSFMNVKHPWMMNLFKIKPLLSAEAEKEMATMKEDFERAKEDLARSEARRKE  
LEEKMVSL LQEKNDLQVQSE TENLMDAEERCEGLIKSKIQL EAKVKELNERLEEEEMNSELVAKKRNL E D  
KCSSLKRDI DDLELTLTKVEKEKHATENKVKNLSEEMTALEETISKLTKEKKS LQEAHQQTLDLQVEEDKVN  
GLIKINVKLEQQTDDLEGSLEQEKKLRADLERVVRKLEGLDKMSQESIMDLENDTQQLEEK LKKKEFEMS Q LQ  
TRIDDEQVLSLQ LQKKIKELQARTEEELEEEIEAEHTVRAKIEKQRS DLARELEEISERLEEASGATS AQIEMN  
KKRESEFQKLRDL EEA TLQHEATAATLRKKHADTV AELGEQIDNLQRVKQKLEKEKSELKMEIDDMASNIET  
VSKSKNMRMCRSVEDQFNEIKAKDDQQTQLIHDLNMQKARLQTQNGELSHQVEEKE SLVSQ LTKSKQALTQ  
QLEELKRQLEEEETKAKNALAHALQSSRHCDLLREQYEEEQEGKAE LQRALSKANSEVAQWRTKYETDAI QRT  
EELEEAKK KLAQRLQEA EENTEASNSK CASLEKTKQRLQGEVDDMLDLERANTACATLDKKQRNF DKVLAEW  
KQKLD ESQAELEAAQKESRSLSTEIFKMRNAYEEVVDQLET LRRENKNLQEEISDLTEQIAETGKNLQEV EKT



KKQVEQEKSDLQAALAEVEGSLHEEESKILRVQLELSQVKSELDRKVTEKDEEIEQIKRNSQRAVEAMQSVLD  
AEIRSRNDALRLKKKMEGDLNEMEIQLSHANRQVAETQKHLRVTQGGQLKDSQLHLDDAQRSNEDLKEQLAIVE  
RRNGLLQEELEEMKVALEQTERTRRLSEQELLDSSDRVQLLHSQNTSLINTKKKLEADLAQCQAEVENS IQES  
RNAEEKAKKAITDAAMMAEELKKEQDTS AHLERMKKNLEQTVKDLQHRLEAEQLALKGGKKQIQKLEARVRE  
LESELD AEQKRGAEALKG AHKYERKVKEMTYQAEEDRKNILRLQDLVDK LQAKVKS YKRQAEAEAEQANTQLS  
RCRRVQHELEEAERADIAESQVNLKRAKSRDVGQKMEE\*  
>rs46409593\_ENSMUSP00000080584\_c.1708:C>A\_p.P570H  
ENSMUST00000081911.12|Myh13-201|ENSMUSG00000060180|+|chr11:g.67233191:C>A  
MSSDAEMAI FGEAAPYL RKPEKERIEAQNRPFDSKKACFAVDDKEMYVKGMIQSRENDKVI VKTLDRELTN  
SDQVFPMPNPKFKDIEDMAMMTHLHEPAVLYNLKERYAAMMIYTYSGLFCVTVNPKWLPVYNPEVVAAYRGK  
KRQEAPPHIFISISDNAYQFMLTDRDNQSILITGESGAGKTVNTRKVIQYFATIAVTGDKKKEQQPGKMQGTLE  
DQIIQANPLLEAFGNAKTVRNDNSSRFGKFIRIHFGATGKLASADIETYLLKSRVTFQLSSERSYHIFYQIM  
SNKKPELIDLLL ISTNPFDFPFVVSQGEVTVASIDDSEELLATDNAIDILGFSPEEKVGIYKLTGAVMHYGNMK  
FKQKQREEQAEPDGTVEADKAGYLMGLNSAEMLKGLCCPRVKVGN EYVTKGQNVQVTVNSVGALAKAVYEKMF  
LWMVTRINQQLDTKQPRQYFIGVLDIAGFEIFDFNSLEQLCINFTNEKLQOFFNHHMFVLEQEEYKKEGIEWE  
FIDFGMDLAACIELIEKPMGIFSI LEEECMF PKATDTSFKNKLYDQHLGKSNNFQKPKHTKGAEAHFSLVHY  
AGTVDYNIAGWLDKNKDP LNETVVGLYQKSSLLKLSFLFSNYAGAEAGDSAGGKGGKSSFFQTVSAVFRE  
NLNKLMTNLRSTHPHFVRCLIPNETKTPGVMDHYLVMHQLRRCNGVLEGI RICKRGFPSRILYADFQRIRILN  
ASAIPEGQFIDSKNASEKLLNSIDVDREQFRFGHTKVFVKAGLLGLLEEMRDEKLVTLMTRTQAVCRGYLMRV  
EFKKMMERRESIFCIQYNVRSFMNVKHWPWMNLFKIKPLLSAEAEKEMATMKEDFERAKEDLARSEARRKE  
LEEKMVSLLOEKNDLQVQSE TENLMDAEERCEGLIKSKIQLEAKVKELNERLEEEEMNSELVAKKRLED  
KCSSLKRDI DDLELTLTKVEKEKHATENKVKNLSEEMTALEETISKLTKEKKS LQEAHQQTLDLQVEEDKVN  
GLIKINVKLEQQTDDLEGSLEQEKLRADLERVVRKLEGLDKMSQESIMDLENDTQQLEEKLKKKEFEMS QLQ  
TRIDDEQVLSLQ LQKKIKELQARTEEELEEIEAEHTVRAKIEKQRS DLARELEEISERLEEASGATS AQIEMN  
KKRESEFQKLRDRLEEATLQHEATAATLRKKHADTVAE LGEQIDNLQRVKQKLEKEKSELKMEIDDMASNIET  
VSKSKSNMERMCRSVDEQFNEIKAKDDQQTQLIHDLNMQKARLQTQNGELSHQVEEKESELVSLQTKSKQALTO  
QLEELKRQLEEEETKAKNALAHALQSSRHDCDLLREQYEEEQEGKAELQRALSKANSEVAQWRTKYETDAIQRT  
EELEEAKKLAQRLQEAEE NTEASNSK CASLEKTKQRLQGEVDDLMLDLERANTACATLDKKQRNF DKVLAEW  
KQKLD ESQAELEAAQKESRSLSTEIFKMRNAYEEVVDQLET LRRENKNLQEEISDLTEQIAETGKNLQEV EKT  
KKQVEQEKSDLQAALAEVEGSLHEEESKILRVQLELSQVKSELDRKVTEKDEEIEQIKRNSQRAVEAMQSVLD  
AEIRSRNDALRLKKKMEGDLNEMEIQLSHANRQVAETQKHLRVTQGGQLKDSQLHLDDAQRSNEDLKEQLAIVE  
RRNGLLQEELEEMKVALEQTERTRRLSEQELLDSSDRVQLLHSQNTSLINTKKKLEADLAQCQAEVENS IQES  
RNAEEKAKKAITDAAMMAEELKKEQDTS AHLERMKKNLEQTVKDLQHRLEAEQLALKGGKKQIQKLEARVRE  
LESELD AEQKRGAEALKG AHKYERKVKEMTYQAEEDRKNILRLQDLVDK LQAKVKS YKRQAEAEAEQANTQLS  
RCRRVQHELEEAERADIAESQVNLKRAKSRDVGQKMEE\*  
>rs212817599\_ENSMUSP00000104324\_c.1712:CA>C\_p.T571del-fs  
ENSMUST00000108684.8|Myh13-202|ENSMUSG00000060180|+|chr11:g.67233195:CA>C  
MSSDAEMAI FGEAAPYL RKPEKERIEAQNRPFDSKKACFAVDDKEMYVKGMIQSRENDKVI VKTLDRELTN  
SDQVFPMPNPKFKDIEDMAMMTHLHEPAVLYNLKERYAAMMIYTYSGLFCVTVNPKWLPVYNPEVVAAYRGK  
KRQEAPPHIFISISDNAYQFMLTDRDNQSILITGESGAGKTVNTRKVIQYFATIAVTGDKKKEQQPGKMQGTLE  
DQIIQANPLLEAFGNAKTVRNDNSSRFGKFIRIHFGATGKLASADIETYLLKSRVTFQLSSERSYHIFYQIM  
SNKKPELIDLLL ISTNPFDFPFVVSQGEVTVASIDDSEELLATDNAIDILGFSPEEKVGIYKLTGAVMHYGNMK  
FKQKQREEQAEPDGTVEADKAGYLMGLNSAEMLKGLCCPRVKVGN EYVTKGQNVQVTVNSVGALAKAVYEKMF  
LWMVTRINQQLDTKQPRQYFIGVLDIAGFEIFDFNSLEQLCINFTNEKLQOFFNHHMFVLEQEEYKKEGIEWE  
FIDFGMDLAACIELIEKPMGIFSI LEEECMF PKATDTSFKNKLYDQHLGKSNNFQKPKPTKARPKPTSPWCTM  
RALWITTS LAGWIRTRTH  
>rs212817599\_ENSMUSP00000137731\_c.1712:CA>C\_p.T571del-fs  
ENSMUST00000108045.8|Myh13-203|ENSMUSG00000060180|+|chr11:g.67233195:CA>C  
MSSDAEMAI FGEAAPYL RKPEKERIEAQNRPFDSKKACFAVDDKEMYVKGMIQSRENDKVI VKTLDRELTN  
SDQVFPMPNPKFKDIEDMAMMTHLHEPAVLYNLKERYAAMMIYTYSGLFCVTVNPKWLPVYNPEVVAAYRGK  
KRQEAPPHIFISISDNAYQFMLTDRDNQSILITGESGAGKTVNTRKVIQYFATIAVTGDKKKEQQPGKMQGTLE  
DQIIQANPLLEAFGNAKTVRNDNSSRFGKFIRIHFGATGKLASADIETYLLKSRVTFQLSSERSYHIFYQIM  
SNKKPELIDLLL ISTNPFDFPFVVSQGEVTVASIDDSEELLATDNAIDILGFSPEEKVGIYKLTGAVMHYGNMK  
FKQKQREEQAEPDGTVEADKAGYLMGLNSAEMLKGLCCPRVKVGN EYVTKGQNVQVTVNSVGALAKAVYEKMF  
LWMVTRINQQLDTKQPRQYFIGVLDIAGFEIFDFNSLEQLCINFTNEKLQOFFNHHMFVLEQEEYKKEGIEWE  
FIDFGMDLAACIELIEKPMGIFSI LEEECMF PKATDTSFKNKLYDQHLGKSNNFQKPKPTKARPKPTSPWCTM  
RALWITTS LAGWIRTRTH

```

>rs212817599_ENSMUSP00000080584_c.1712:CA>C_p.T571del-fs
ENSMUST00000081911.12|Myh13-
201|ENSMUSG00000060180|+|chr11:g.67233195:CA>C
MSSDAEMAI FGEAAPYL RKP EKERIEAQNRPFDSK KACFAVDDKEMYVKGMIQSRENDKVI VKTLD DRELTLN
SDQVFP MNPPKFDKIEDMAMMTHLHEPAVLYNLKERYAAWMIYTYSGLFCVTVNPKWLPVYNPEVVAAYRGK
KRQEAPPHIFSI SDNAYQFMLTDRDNQSILITGESGAGKTVNTRKVIQYFATIAVTGDKKKEQQPGKMQGTLE
DQIIQANPLLEAFGNAKTVRNDNSSRFGKFI RHFHGATGKLASADIETYLLEKSRVTFQLSSERSYHIFYQIM
SNKKPELIDLLL ISTNPFDFPFVVSQGEVTVASIDDSEELLATDNAIDILGFSPEEKVGIYKLTGAVMHYGNMK
FKQKQREEQAEPDGTEVADKAGYLMGLNSAEMLKGLCCPRVKVGN EYVTKGQNVQVTVNSVGALAKAVYEKMF
LWMVTRINQQLDTKQPRQYFIGVLDIAGFEIFDFNSLEQLCINF TNEKLQQFFNHHMFVLEQEEYKKEGIEWE
FIDFGMDLAACIELIEKPMGIFSI LEEECMF PKATDTSFKNKLYDQHLGKSNNFQKPKPTKARPKPTSPWCTM
RALWITTSLAGWIRTRTH
>rs51090810_ENSMUSP00000104324_c.1779:G>T_p.G594C
ENSMUST00000108684.8|Myh13-202|ENSMUSG00000060180|+|chr11:g.67233262:G>T
MSSDAEMAI FGEAAPYL RKP EKERIEAQNRPFDSK KACFAVDDKEMYVKGMIQSRENDKVI VKTLD DRELTLN
SDQVFP MNPPKFDKIEDMAMMTHLHEPAVLYNLKERYAAWMIYTYSGLFCVTVNPKWLPVYNPEVVAAYRGK
KRQEAPPHIFSI SDNAYQFMLTDRDNQSILITGESGAGKTVNTRKVIQYFATIAVTGDKKKEQQPGKMQGTLE
DQIIQANPLLEAFGNAKTVRNDNSSRFGKFI RHFHGATGKLASADIETYLLEKSRVTFQLSSERSYHIFYQIM
SNKKPELIDLLL ISTNPFDFPFVVSQGEVTVASIDDSEELLATDNAIDILGFSPEEKVGIYKLTGAVMHYGNMK
FKQKQREEQAEPDGTEVADKAGYLMGLNSAEMLKGLCCPRVKVGN EYVTKGQNVQVTVNSVGALAKAVYEKMF
LWMVTRINQQLDTKQPRQYFIGVLDIAGFEIFDFNSLEQLCINF TNEKLQQFFNHHMFVLEQEEYKKEGIEWE
FIDFGMDLAACIELIEKPMGIFSI LEEECMF PKATDTSFKNKLYDQHLGKSNNFQKPKPTKGAEAHFSLVHY
AGTVDYNIACWLDKNKDP LNETVVGLYQKSS LKLLSFLFSNYAGAEAGDSAGGKKGKGGKSS FQTVSAVFRE
NLNKLMTNLRSTH PHFVRCLIPNETKTPGVMDHYLVMHQ LRCNGVLEGI RICKRGFP SRI LYADFKQRYRILN
ASAIPEGQFIDSKNASEKLLNSIDVDREQFRFGHTKVFFKAGLLGLLEEMRDEKLVTLMTRTQAVCRGYLMRV
EFKKMMERRESIFCIQYNVRSFMNVKHW PWNLF FFKIKPL LKSAEAEKEMATMKEDFERAKEDLARSEARRKE
LEEKMVSL LQEKNDLQVQSE TENLMDAEERCEGLIKSKIQL EAKVKELNERLEEEEMNSELVAKKRNL E
KCSSLKRDI DDLELTLTKVEKEKHATENKVKNLSEEMTALEETISKLTKEKKS LQEAHQQTLDL DQVEEDKVN
GLIKINVKLEQQTDDLEGSLEQEKKLRADLERV KRKLEGLKMSQESIMDLENDTQQLEEK LKKKEFEMS QLQ
TRIDDEQVLSLQ LQKKIKELQARTEELEEEIEAEHTVRAKIEKQRSD LARELEEISERLEEASGATS AQIEMN
KKRESEFQKLRRDLEEATLQHEATAATLRKKHADTV AELGEQIDNLQRVKQKLEKEKSELKMEIDDMASNIET
VSKSKSNMERMCRSVEDQFNEIKAKDDQQTQLI HDLNMQKARLQTQNGELSHQVEEKE SLSVSLTKSKQALTQ
QLEELKRQLEEEETKAKNALAHALQSSRHDCDLLREQYEEEQEGKAE LQRALSKANSEVAQWRTKYETDAI QRT
EELEEAKK KLAQRLQEA EENTEASNSK CASLEKTKQRLQGEVDDLMLDLERANTACATL DKKQRNF DKVLAEW
KQKLDESQAEL EAAQKESRSLSTEIFKMRNAYEEVVDQLET LRRENKNLQEEISDLTEQIAETGKNLQEV EKT
KKQVEQEKSDLQA ALEEVESLEHEESKILRVQLELSQVKS ELDRKVTEKDEEIEQIKRNSQRAVEAMQSVLD
AEIRSRNDALRLK KMEGDLNEMEIQLSHANRQVAETQKHLRTVQ GQLKDSQLHLDDAQRSNEDLKEQLAIVE
RRNGLLQEELEEMKVALEQTERTRRLSEQELL DSSDRVQLLHSQNTSLINTKKKLEADLAQCQAEVENS IQES
RNAEEKAKKAITDAAMMAEELKKEQD TSAHLERMKNLEQTVKDLQHR LDEAEQLALKGGKKQIQKLEARVRE
LESELDAEQKRGAEALKG AHKYERKVKEMTYQAEEDRKNILRLQDLVDK LQAKVKSYKRQAE EAEQANTQLS
RCRRVQHELEEAERADIAESQVNKLRAKSRDVG GQKMEE*
>rs51090810_ENSMUSP00000137731_c.1779:G>T_p.G594C
ENSMUST00000180845.8|Myh13-203|ENSMUSG00000060180|+|chr11:g.67233262:G>T
MSSDAEMAI FGEAAPYL RKP EKERIEAQNRPFDSK KACFAVDDKEMYVKGMIQSRENDKVI VKTLD DRELTLN
SDQVFP MNPPKFDKIEDMAMMTHLHEPAVLYNLKERYAAWMIYTYSGLFCVTVNPKWLPVYNPEVVAAYRGK
KRQEAPPHIFSI SDNAYQFMLTDRDNQSILITGESGAGKTVNTRKVIQYFATIAVTGDKKKEQQPGKMQGTLE
DQIIQANPLLEAFGNAKTVRNDNSSRFGKFI RHFHGATGKLASADIETYLLEKSRVTFQLSSERSYHIFYQIM
SNKKPELIDLLL ISTNPFDFPFVVSQGEVTVASIDDSEELLATDNAIDILGFSPEEKVGIYKLTGAVMHYGNMK
FKQKQREEQAEPDGTEVADKAGYLMGLNSAEMLKGLCCPRVKVGN EYVTKGQNVQVTVNSVGALAKAVYEKMF
LWMVTRINQQLDTKQPRQYFIGVLDIAGFEIFDFNSLEQLCINF TNEKLQQFFNHHMFVLEQEEYKKEGIEWE
FIDFGMDLAACIELIEKPMGIFSI LEEECMF PKATDTSFKNKLYDQHLGKSNNFQKPKPTKGAEAHFSLVHY
AGTVDYNIACWLDKNKDP LNETVVGLYQKSS LKLLSFLFSNYAGAEAGDSAGGKKGKGGKSS FQTVSAVFRE
NLNKLMTNLRSTH PHFVRCLIPNETKTPGVMDHYLVMHQ LRCNGVLEGI RICKRGFP SRI LYADFKQRYRILN
ASAIPEGQFIDSKNASEKLLNSIDVDREQFRFGHTKVFFKAGLLGLLEEMRDEKLVTLMTRTQAVCRGYLMRV
EFKKMMERRESIFCIQYNVRSFMNVKHW PWNLF FFKIKPL LKSAEAEKEMATMKEDFERAKEDLARSEARRKE
LEEKMVSL LQEKNDLQVQSE TENLMDAEERCEGLIKSKIQL EAKVKELNERLEEEEMNSELVAKKRNL E
KCSSLKRDI DDLELTLTKVEKEKHATENKVKNLSEEMTALEETISKLTKEKKS LQEAHQQTLDL DQVEEDKVN
GLIKINVKLEQQTDDLEGSLEQEKKLRADLERV KRKLEGLKMSQESIMDLENDTQQLEEK LKKKEFEMS QLQ

```

TRIDDEQVLSLQLOKKIKELQARTEEELEEIEAEHTVRAKIEKQRSDLARELEEISERLEEASGATSAQIEMN  
KKRESEFQKLRRDLEEATLQHEATAATLRKKHADTVAEELGEQIDNLQRVKQKLEKEKSELKMEIDDMASNIET  
VSKSKSNMERMCRSVEDQFNEIKAKDDQQTQLIHDLNMQKARLQTQNGELSHQVEEKESLVSQLTKSKQALTO  
QLEELKRQLEEEETKAKNALAHALQSSRHDCDLLREQYEEEQEGKAEQALRALSKANSEVAQWRTKYETDAIQRT  
EELEEAKKLAQRLQEAENTEASNSKSCASLEKTKQRLQGEVDDMLDLERANTACATLDKKQRNFQVLAEW  
KQKLDSEQAEEAAQKESRSLSTEIFKMRNAYEEVVDQLETLRRENKNLQEEISDLTEQIAETGKNLQEVKKT  
KKQVEQEKSDLQAALAEVEGSLHEEESKILRVQLELSQVKSELDRKVTEKDEEIEQIKRNSQRAVEAMQSVLD  
AEIRSRNDALRLKKKMEGDLNEMEIQLSHANRQVAETQKHLRTVQGGQLKDSQLHLDDAQRSNEDLKEQLAIVE  
RRNGLLQEELEEMKVALEQTERTRRLSEQELLDSSDRVQLLHSQNTSLINTKKKLEADLAQCCQAEVENSIQES  
RNAEEKAKKAITDAAMMAEELKKEQDTS AHLERMKNLEQTVKDLQHRLEAEQLALKGGKKQIQKLEARVRE  
LESELDAEQKRGAEALKGAKHYERKVKEMTYQAEEDRKNILRLQDLVDKQAKVKS YKRQAEAEAEQANTQLS  
RCRRVQHELEEAERADIAESQVNLRAKSRDVGQKMEE\*

>rs51090810\_ENSMUSP00000080584\_c.1779:G>T\_p.G594C

ENSMUST00000081911.12|Myh13-201|ENSMUSG00000060180|+|chr11:g.67233262:G>T  
MSSDAEMAI FGEAAPYLKPEKERIEAQNRPFDSKKACFAVDDKEMYVKGMIQSRENDKVI VKTLDRELTN  
SDQVFPMPNPKFDKIEDMAMMTHLHEPAVLYNLKERYAAMIYTYSGLFCVTVNPKWLPVYNPEVVAAYRGK  
KRQEAPPHIFSI SDNAYQFMLTDRDNQSILITGESGAGKTVNTRKVIQYFATIAVTGDKKKEQQPGKMGTLE  
DQIIQANPLLEAFGNAKTVRNDNSSRFKGFIRIHFGATGKLASADIETYLLEKSRVTFQLSSERSYHIFYQIM  
SNKKPELIDLILLISTNPFDFPFVVSQGEVTVASIDDSEELLATDNAIDILGFSPEEKVGIYKLTGAVMHYGNMK  
FKQKQREEQAEPDGTVEADKAGYLMGLNSAEMLKGLCCPRVKVGNVYVTKGQNVQVTVNSVGLAKAVYKMF  
LWMVTRINQQLDTKQPRQYFIGVLDIAGFEIFDFNSLEQLCINFTEKLLQOFFNHHMFVLEQEEYKKEGIEWE  
FIDFGMDLAACIELIEKPMGIFSI LEEECMF PKATDTSFKNKLYDQHLGKSNNFQKPKPTKGKAEAHFSLVHY  
AGTVDYNIACWLDKNKDP LNETVVGLYQKSSLLKLSFLFSNYAGAEAGDSAGGKGGKGGSSSFQTVSAVFRE  
NLNKLMTNLRSTHPPFVRCLIPNETKTPGVMDHYLVMHQLRNCGVLEGI R ICRKGFPSRILYADFKQRYRILN  
ASAIPEGQFIDSKNASEKLLNSIDVDREQFRFGHTKVFVKAGLLGLLEEMRDEKLVTLMTRTQAVCRGYLMRV  
EFKKMMERRESIFCIQYNVRSFMNVKHWPMNLFKIKPLLKSABAEKEMATMKEDFERAKEDLARSEARRKE  
LEEKMVSLLEQEKNDLQVQSE TENLMDAEERCEGLIKSKIQLLEAKVKELNERLEEEEMNSELVAKKRNL  
KCSSLKRDIDDLLETLTKVEKEKHATENKVKNLSEEMTALEETISKLTKEKKSLEAHQQTLDLQVEEDKVN  
GLIKINVKLEQQTDDLEGSLEQEKLRADLERVVRKLEGLKMSQESIMDLENDTQQLEEKLKKKEFEMSQLO  
TRIDDEQVLSLQLOKKIKELQARTEEELEEIEAEHTVRAKIEKQRSDLARELEEISERLEEASGATSAQIEMN  
KKRESEFQKLRRDLEEATLQHEATAATLRKKHADTVAEELGEQIDNLQRVKQKLEKEKSELKMEIDDMASNIET  
VSKSKSNMERMCRSVEDQFNEIKAKDDQQTQLIHDLNMQKARLQTQNGELSHQVEEKESLVSQLTKSKQALTO  
QLEELKRQLEEEETKAKNALAHALQSSRHDCDLLREQYEEEQEGKAEQALRALSKANSEVAQWRTKYETDAIQRT  
EELEEAKKLAQRLQEAENTEASNSKSCASLEKTKQRLQGEVDDMLDLERANTACATLDKKQRNFQVLAEW  
KQKLDSEQAEEAAQKESRSLSTEIFKMRNAYEEVVDQLETLRRENKNLQEEISDLTEQIAETGKNLQEVKKT  
KKQVEQEKSDLQAALAEVEGSLHEEESKILRVQLELSQVKSELDRKVTEKDEEIEQIKRNSQRAVEAMQSVLD  
AEIRSRNDALRLKKKMEGDLNEMEIQLSHANRQVAETQKHLRTVQGGQLKDSQLHLDDAQRSNEDLKEQLAIVE  
RRNGLLQEELEEMKVALEQTERTRRLSEQELLDSSDRVQLLHSQNTSLINTKKKLEADLAQCCQAEVENSIQES  
RNAEEKAKKAITDAAMMAEELKKEQDTS AHLERMKNLEQTVKDLQHRLEAEQLALKGGKKQIQKLEARVRE  
LESELDAEQKRGAEALKGAKHYERKVKEMTYQAEEDRKNILRLQDLVDKQAKVKS YKRQAEAEAEQANTQLS  
RCRRVQHELEEAERADIAESQVNLRAKSRDVGQKMEE\*

>rs29389516\_ENSMUSP00000104324\_c.5735:G>T\_p.E1912D

ENSMUST00000108684.8|Myh13-202|ENSMUSG00000060180|+|chr11:g.67261814:G>T  
MSSDAEMAI FGEAAPYLKPEKERIEAQNRPFDSKKACFAVDDKEMYVKGMIQSRENDKVI VKTLDRELTN  
SDQVFPMPNPKFDKIEDMAMMTHLHEPAVLYNLKERYAAMIYTYSGLFCVTVNPKWLPVYNPEVVAAYRGK  
KRQEAPPHIFSI SDNAYQFMLTDRDNQSILITGESGAGKTVNTRKVIQYFATIAVTGDKKKEQQPGKMGTLE  
DQIIQANPLLEAFGNAKTVRNDNSSRFKGFIRIHFGATGKLASADIETYLLEKSRVTFQLSSERSYHIFYQIM  
SNKKPELIDLILLISTNPFDFPFVVSQGEVTVASIDDSEELLATDNAIDILGFSPEEKVGIYKLTGAVMHYGNMK  
FKQKQREEQAEPDGTVEADKAGYLMGLNSAEMLKGLCCPRVKVGNVYVTKGQNVQVTVNSVGLAKAVYKMF  
LWMVTRINQQLDTKQPRQYFIGVLDIAGFEIFDFNSLEQLCINFTEKLLQOFFNHHMFVLEQEEYKKEGIEWE  
FIDFGMDLAACIELIEKPMGIFSI LEEECMF PKATDTSFKNKLYDQHLGKSNNFQKPKPTKGKAEAHFSLVHY  
AGTVDYNIAGWLDKNKDP LNETVVGLYQKSSLLKLSFLFSNYAGAEAGDSAGGKGGKGGSSSFQTVSAVFRE  
NLNKLMTNLRSTHPPFVRCLIPNETKTPGVMDHYLVMHQLRNCGVLEGI R ICRKGFPSRILYADFKQRYRILN  
ASAIPEGQFIDSKNASEKLLNSIDVDREQFRFGHTKVFVKAGLLGLLEEMRDEKLVTLMTRTQAVCRGYLMRV  
EFKKMMERRESIFCIQYNVRSFMNVKHWPMNLFKIKPLLKSABAEKEMATMKEDFERAKEDLARSEARRKE  
LEEKMVSLLEQEKNDLQVQSE TENLMDAEERCEGLIKSKIQLLEAKVKELNERLEEEEMNSELVAKKRNL  
KCSSLKRDIDDLLETLTKVEKEKHATENKVKNLSEEMTALEETISKLTKEKKSLEAHQQTLDLQVEEDKVN  
GLIKINVKLEQQTDDLEGSLEQEKLRADLERVVRKLEGLKMSQESIMDLENDTQQLEEKLKKKEFEMSQLO

TRIDDEQVLSLQLOKKIKELQARTEEELEEIEAEHTVRAKIEKQRSDLARELEEISERLEEASGATSAQIEMN  
KKRESEFQKLRRDLEEATLQHEATAATLRKKHADTVAEELGEQIDNLQRVKQKLEKEKSELKMEIDDMASNIET  
VSKSKSNMERMCRSVEDQFNEIKAKDDQQTQLIHDLNMQKARLQTQNGELSHQVEEKESSLVSQLTKSKQALTO  
QLEELKRQLEEEETKAKNALAHALQSSRHDCDLLREQYEEEQEGKAEQALRALSKANSEVAQWRTKYETDAIQRT  
EELEEAKKLAQRLQEAEEENTEASNSKSCASLEKTKQRLQGEVDDMLDLERANTACATLDKKQRNFDKVLAEW  
KQKLDSEQAEEAAQKESRSLSTEIFKMRNAYEEVVDQLETLRRENKNLQEEISDLTEQIAETGKNLQEVVEKT  
KKQVEQEKSDLQAALAEVEGSLHEEESKILRVQLELSQVKSELDRKVTEKDEEIEQIKRNSQRAVEAMQSVLD  
AEIRSRNDALRLKKKMEGDLNEMEIQLSHANRQVAETQKHLRTVQGQLKDSQLHLDDAQRSNEDLKEQLAIVE  
RRNGLLQEELEEMKVALEQTERTRRLSEQELLDSSDRVQLLHSQNTSLINTKKKLEADLAQCQAEVENS IQES  
RNAEEKAKKAITDAAMMAEELKKEQDTS AHLERMKKNLEQTVKDLQHRLDAAEQALALGGKKQIQKLEARVRE  
LESELDAEQKRGAEALGGAHKYERKVKEMTYQAEEDRKNILRLQDLVDKQLQAKVKS YKQAEAEAEQANTQLS  
RCRRVQHELEEAEDRADI AESQVNLRAKSRDVGQKMEE\*

>rs29389516\_ENSMUSP00000137731\_c.5735:G>T\_p.E1912D

ENSMUST00000180845.8|Myh13-203|ENSMUSG00000060180|+|chr11:g.67261814:G>T  
MSSDAEMAI FGEAAPYLKPEKERIEAQNRPFDSKKACFAVDDKEMYVKGMIQSRENDKVI VKTLDRELTN  
SDQVFPMPNPPKFDKIEDMAMMTHLHEPAVLYNLKERYAAWMIYTYSGLFCVTVNPKWLPVYNPEVVAAYRGK  
KRQEAPPHIFSI SDNAYQFMLTDRDNQSILITGESGAGKTVNTRKVIQYFATIAVTGDKKKEQQPGKMQGTLE  
DQIIQANPLLEAFGNAKTVRNDNSSRFGKFI R IHFGATGKLASADIETYLLKSRVTFQLSSERSYHIFYQIM  
SNKKPELIDLLL ISTNPFDFPFVSQGEVTVASIDDSEELLATDNAIDILGFSPEEKVGIYKLTGAVMHYGNMK  
FKQKQREEQAEPDGTEVADKAGYLMGLNSAEMLKGLCCPRVKVGNVYVTKQNVQVQVTVNSVGLAKAVYKMF  
LWMVTRINQQLDTKQPRQYFIGVLDIAGFEIFDFNSLEQLCINF TNEKLQOFFNHHMFVLEQEEYKKEGIEWE  
FIDFGMDLAACIELIEKPMGIFSI LEEECMF PKATDTSFKNKLYDQHLGKSNNFQKPKPTKGKAEAHFSLVHY  
AGTVDYNIAGWLDKNKDP LNETVVGLYQKSS LKLSFLFSNYAGAEAGDSAGGKGGKGGKSS FQTVSAVFRE  
NLNKLMTNLRSTH P HVRC LI PNETKTPGVMDHYLVMHQLRNCGVLEGI R ICRKGFPSRILYADFKQRYRILN  
ASAIPEGQFIDSKNASEKLLNSIDVDREQFRFGHTKVFVKAGLLGLLEEMRDEKLVTLMTRTQAVCRGYLMRV  
EFKMMERRESIFCIQYNVRSFMNVKHWPMNLFFKIKPLLKSABAEKEMATMKEDFERAKEDLARSEARRKE  
LEEKMVSL LQEKNDLQVQSE TENLMDAEERCEGLIKSKIQL EAKVKELNERLEEEEMNSELVAKKRNL E D  
KCSSLKRDID DLELTLTKVEKEKHATENKVKNLSEEMTALEETISKLTKEKKS LQEAHQQTLDLQVEEDKVN  
GLIKINVKLEQQTDDLEGSLEQEKKLRADLERVVRKRLKGLKMSQESIMDLENDTQQLEEKLKKKEFEMS QLO  
TRIDDEQVLSLQLOKKIKELQARTEEELEEIEAEHTVRAKIEKQRSDLARELEEISERLEEASGATSAQIEMN  
KKRESEFQKLRRDLEEATLQHEATAATLRKKHADTVAEELGEQIDNLQRVKQKLEKEKSELKMEIDDMASNIET  
VSKSKSNMERMCRSVEDQFNEIKAKDDQQTQLIHDLNMQKARLQTQNGELSHQVEEKESSLVSQLTKSKQALTO  
QLEELKRQLEEEETKAKNALAHALQSSRHDCDLLREQYEEEQEGKAEQALRALSKANSEVAQWRTKYETDAIQRT  
EELEEAKKLAQRLQEAEEENTEASNSKSCASLEKTKQRLQGEVDDMLDLERANTACATLDKKQRNFDKVLAEW  
KQKLDSEQAEEAAQKESRSLSTEIFKMRNAYEEVVDQLETLRRENKNLQEEISDLTEQIAETGKNLQEVVEKT  
KKQVEQEKSDLQAALAEVEGSLHEEESKILRVQLELSQVKSELDRKVTEKDEEIEQIKRNSQRAVEAMQSVLD  
AEIRSRNDALRLKKKMEGDLNEMEIQLSHANRQVAETQKHLRTVQGQLKDSQLHLDDAQRSNEDLKEQLAIVE  
RRNGLLQEELEEMKVALEQTERTRRLSEQELLDSSDRVQLLHSQNTSLINTKKKLEADLAQCQAEVENS IQES  
RNAEEKAKKAITDAAMMAEELKKEQDTS AHLERMKKNLEQTVKDLQHRLDAAEQALALGGKKQIQKLEARVRE  
LESELDAEQKRGAEALGGAHKYERKVKEMTYQAEEDRKNILRLQDLVDKQLQAKVKS YKQAEAEAEQANTQLS  
RCRRVQHELEEAEDRADI AESQVNLRAKSRDVGQKMEE\*

>rs29389516\_ENSMUSP00000080584\_c.5735:G>T\_p.E1912D

ENSMUST00000081911.12|Myh13-201|ENSMUSG00000060180|+|chr11:g.67261814:G>T  
MSSDAEMAI FGEAAPYLKPEKERIEAQNRPFDSKKACFAVDDKEMYVKGMIQSRENDKVI VKTLDRELTN  
SDQVFPMPNPPKFDKIEDMAMMTHLHEPAVLYNLKERYAAWMIYTYSGLFCVTVNPKWLPVYNPEVVAAYRGK  
KRQEAPPHIFSI SDNAYQFMLTDRDNQSILITGESGAGKTVNTRKVIQYFATIAVTGDKKKEQQPGKMQGTLE  
DQIIQANPLLEAFGNAKTVRNDNSSRFGKFI R IHFGATGKLASADIETYLLKSRVTFQLSSERSYHIFYQIM  
SNKKPELIDLLL ISTNPFDFPFVSQGEVTVASIDDSEELLATDNAIDILGFSPEEKVGIYKLTGAVMHYGNMK  
FKQKQREEQAEPDGTEVADKAGYLMGLNSAEMLKGLCCPRVKVGNVYVTKQNVQVQVTVNSVGLAKAVYKMF  
LWMVTRINQQLDTKQPRQYFIGVLDIAGFEIFDFNSLEQLCINF TNEKLQOFFNHHMFVLEQEEYKKEGIEWE  
FIDFGMDLAACIELIEKPMGIFSI LEEECMF PKATDTSFKNKLYDQHLGKSNNFQKPKPTKGKAEAHFSLVHY  
AGTVDYNIAGWLDKNKDP LNETVVGLYQKSS LKLSFLFSNYAGAEAGDSAGGKGGKGGKSS FQTVSAVFRE  
NLNKLMTNLRSTH P HVRC LI PNETKTPGVMDHYLVMHQLRNCGVLEGI R ICRKGFPSRILYADFKQRYRILN  
ASAIPEGQFIDSKNASEKLLNSIDVDREQFRFGHTKVFVKAGLLGLLEEMRDEKLVTLMTRTQAVCRGYLMRV  
EFKMMERRESIFCIQYNVRSFMNVKHWPMNLFFKIKPLLKSABAEKEMATMKEDFERAKEDLARSEARRKE  
LEEKMVSL LQEKNDLQVQSE TENLMDAEERCEGLIKSKIQL EAKVKELNERLEEEEMNSELVAKKRNL E D  
KCSSLKRDID DLELTLTKVEKEKHATENKVKNLSEEMTALEETISKLTKEKKS LQEAHQQTLDLQVEEDKVN  
GLIKINVKLEQQTDDLEGSLEQEKKLRADLERVVRKRLKGLKMSQESIMDLENDTQQLEEKLKKKEFEMS QLO

TRIDDEQVLSLQLOKKIKELQARTEEELEEEIEAEHTVRAKIEKQRSDLARELEEISERLEEASGATSAQIEMN  
KKRESEFQKLRRDLEEATLQHEATAATLRKKHADTVAEELGEQIDNLRVQKQLEKEKSELKMEIDDMASNIET  
VSKSKSNMERMCRSVEDQFNEIKAKDDQQTQLIHDLNMQKARLQTONGELSHQVEEKESLVSQTLTKSQALTO  
QLEELKRQLEEEETKAKNALAHALQSSRHDCDLLREQYEEEQEGKAEQORALSKANSEVAQWRTKYETDAIQRT  
EELEEAKKKLAQRLQEAEEENTEASNSKASLEKTKQRLQGEVDDMLDLERANTACATLDKKQRNFDKVLAEW  
KQKLDSEQAEELEAAQKESRSLSTEIFKMRNAYEEVVDQLETLLRRENKNLQEEISDLTEQIAETGKNLQVEEKT  
KKQVEQEKSDLQAALVEVEGSLHEEESKILRVQLELSQVKSELDKRVTEKDEEIEQIKRNSQRAVEAMQSVLD  
AEIRSRNDALRLKKKMEGDLNEMEIQLSHANRQVAETQKHLRRTVQGGQLKDSQLHLDDAQRSNEDLKEQLAIVE  
RRNGLLQEELEEMKVALEQTERTRRLSEQELLDSSDRVQLLHSQNTSLINTKKKLEADLAQCQAEVENSIQES  
RNAEEKAKKAITDAAMMAEELKKEQDTS AHLERMKNLEQTVKDLQHRLEDAEQALKGGKKQIQKLEARVRE  
LESELDAEQKRGAEALKGAHKYERKVKEMTYQAEEDRKNILRLQDLVDKLQAKVKS YKROAEEAEEQANTQLS  
RCRRVQHELEEAEDRADIAESQVNKLRAKSRDVGQKMEE\*

>rs29473020\_ENSMUSP00000137895\_c.694:A>G\_p.Q232R  
ENSMUST00000181566.2|Gsg112-202|ENSMUSG00000097886|+|chr11:g.67680261:A>G  
MDRARWQRMLTLLPICLALAFSLTAMGSSHWCEGIRRMTKPLCQDLLGGLNCHIFSRSSSSSTGSKHDDSQAVQ  
YIWETGDDKFIQRRFHAGLWQSCSESLNSTGERCRCFLGIVPAEQGVWLWSIGAEVLDIFLIITGVILLGFS  
MSCYSSGCSWLNVDASVAIILMVLAGLLGMVAHMYTTSFQITVNLGPEWDWRPQTWDYDGSYCLAWGSFALCMA  
VSVATMSRYTTARAIEVPRAQKGGYPQHNTPPQPGSRKVVWQTGATPHFVGHIFTNVPVGHPPPGTGKVKSMC\*

>rs29446266\_ENSMUSP00000130924\_c.162:C>G\_p.R55G  
ENSMUST00000168612.8|Dhrs7c-205|ENSMUSG00000033044|+|chr11:g.67700617:C>G  
MGLMAVLMPLLLLLGISGLLFIYQEA SRLWSKSAVQNKVVVITDAISGLGKECAGVFHAGGARLVLCGNWEG  
LESYATLTSVADPSKTFTPKLVLLDLSDISCVQDVAKEVLDCYGCVDILINNASVKVKGPAHKISLELDKKI  
MDANYFGPITLTKVLLPNMISRRTGQIVLVNNIQAKFGIPFRTYAASKHAVMGFFDCLRAEVEEYDVVVSTV  
SPTFIRSYRASPEQRNWEETSICKFFCRKLAYGVHPVEVAEEVMRTVRRKKQEVFMANPVPKAAVFI RTFFPEF  
FFAVVACGVKEKLNVPPEG\*

>rs50129546\_ENSMUSP00000021288\_c.2518:G>A\_p.R840K  
ENSMUST00000021288.10|Usp43-201|ENSMUSG00000020905|-|chr11:g.67747187:C>T  
MDPGVGNALGEGPPAPRRRRSLRLLNRLLALGSRSRSGDSPRRPPAQPSPYDGDGEGGFACAPGPAPAS  
AGSPGPDRPPGSQPQISSGDGARPPGAQGLKNHGNTCFMNAVQCLSN TDLLAEFLALGRYRAAPGRAEVTEQ  
LAALVRALWTREYTPQLSAEFKNAVSKYGSQFQGN SQHDALEFLLWLLDRVHEDLEGSAGHLVSEQLPPEVSK  
ISEDLRPSAAPTSLGSPFVQSHFQAQYRSSLT CPHCLKQSNTFDFPFCVSLPIPLRQTRFLSVTLVFP SKSQR  
FLRVGLAVPILSTVAALRKMVAEEGGVPAEEVILVELYPNGFQRSFFDEEDLNTIAEGDNVYAFQVPPSPGLG  
TLSAHPGSLSVSPRLPVRDSQRFSGPLHSEN RVVFLFCNLVGSQQASRF GPPFLIREDRTISWAQLQQCILS  
KVRCLMRSEVSAQDLGTLF SIRVVGLSLACS YLSPKDNRP LCHWAVDRALHLRRPGGPPHVKLAVEW DSSVTE  
RLFGLQEEERVQDADSVWRQQAHQ QP SCTLDECFQSYTKEEQLAQDDAWKCPHCQVLCQQGVV KLSLWTL PDI  
LI IHLKRFCQVGERRNKLSTLVKFPLSGLNMAPHVARRSTNSKAGPGPWSSWKQPICLPTTYPLDFLYDLYAV  
CNHHGSLQGGHYTAYCRNSLDGQWYSYDDSTVEALREDEVNTRGAYILFYQKRNSIPPWSASSMRGSTSSSL  
SDHWLMRLGSLNNSTRGSLLSWSSAPCPSMARVPD SPVFTNGVCHQDKGGVETRPLVRGVGGRSISMKASPAS  
RSRHGPFKTMPLRWSFGHREKRPGASVELVEYLESRKRPRSTSQSIVPLLTRAAGGEETSASPRSDGTLPAKS  
EDSGRAIGQTTGVPLSSCHLNHPALGSLD DS LHTARTRTGNVSQDIRLPK KFDLPLTVMP SVGDEKPARPE  
GQKMPWKSSQVGSQSSPPSPSTG LLRNFKDSGPGTLPKMKSKAAMEERAPDKDRGQGTFTLLKSVFWKKEH  
KRTV RTESSPPAPPISLGSDRLSPAAMNEQALRIRESPAKGLGNHMERDIRSAPSSLHLPRKASRPPRASTAG  
TSQRTIPGEQISYGT LQRVKYHTLSLGRKKSLPESSF\*

>rs50129546\_ENSMUSP00000104317\_c.2503:G>A\_p.R835K  
ENSMUST00000108677.2|Usp43-202|ENSMUSG00000020905|-|chr11:g.67747187:C>T  
MDPGVGNALGEGPPAPRRRRSLRLLNRLLALGSRSRSGDSPRRPPAQPSPYDGDGEGGFACAPGPAPAS  
AGSPGPDRPPGSQPQISSGDGARPPGAQGLKNHGNTCFMNAVQCLSN TDLLAEFLALGRYRAAPGRAEVTEQ  
LAALVRALWTREYTPQLSAEFKNAVSKYGSQFQGN SQHDALEFLLWLLDRVHEDLEGSAGHLVSEQLPPEVSK  
ISEDLRPSAAPTSLGSPFVQSHFQAQYRSSLT CPHCLKQSNTFDFPFCVSLPIPLRQTRFLSVTLVFP SKSQR  
FLRVGLAVPILSTVAALRKMVAEEGGVPAEEVILVELYPNGFQRSFFDEEDLNTIAEGDNVYAFQVPPSPGLG  
TLSAHPGSLSVSPRLPVRDSQRFSGPLHSEN RVVFLFCNLVGSQQASRF GPPFLIREDRTISWAQLQQCILS  
KVRCLMRSEVSAQDLGTLF SIRVVGLSLACS YLSPKDNRP LCHWAVDRALHLRRPGGPPHVKLAVEW DSSVTE  
RLFGLQEEERVQDADSVWRQQAHQ QP SCTLDECFQSYTKEEQLAQDDAWKCPHCQVLCQQGVV KLSLWTL PDI  
LI IHLKRFCQVGERRNKLSTLVKFPLSGLNMAPHVARRSTNSKAGPGPWSSWKQPICLPTTYPLDFLYDLYAV  
CNHHGSLQAYCRNSLDGQWYSYDDSTVEALREDEVNTRGAYILFYQKRNSIPPWSASSMRGSTSSSLSDHWL  
MRLGSLNNSTRGSLLSWSSAPCPSMARVPD SPVFTNGVCHQDKGGVETRPLVRGVGGRSISMKASPASRSRHG  
PFKTMPLRWSFGHREKRPGASVELVEYLESRKRPRSTSQSIVPLLTRAAGGEETSASPRSDGTLPAKSEDSGR  
AIGQTTGVPLSSCHLNHPALGSLD DS LHTARTRTGNVSQDIRLPK KFDLPLTVMP SVGDEKPARPEGQKMT



PWKGSSQVGSQSSPPSPSTGLLRNFKDSGPGTLPKMKSKAAMEERAPDKDRGQGTFTLLKSVFWKKEHKRTVR  
TESSPPAPPISLGSDRLSPAAMNEQALRIRESAPKGLGNHMERDIRSAPSSLHLPRKASRPPRASTAGTSQRT  
IPGEQISYGTLLQRVKYHTLSLGRKKSLEPSSSF\*  
>rs47734460\_ENSMUSP00000021288\_c.2199:T>C\_p.W734R  
ENSMUST00000021288.10|Usp43-201|ENSMUSG00000020905|-|chr11:g.67766224:A>G  
MDPGVGNALGEGPPAPRPRRRRSLRRLNRFLLALGSRSRSGDSPRPPAQPSPYDGDGEGGFACAPGPAPAS  
AGSPGPDPPGSPQPISSGDGARPPGAQGLKNHGNCTCFMNAVVCLSNTDLLAEFLALGRYRAAPGRAEVTEQ  
LAALVRLWLTREYTPQLSAEFKNAVSKYGSQFQGNHQDALEFLLWLLDRVHEDLEGSAGHLVSEQLPPEVSK  
ISEDLRPSAAPTSLGSPFVQSHFQAQYRSSLTCHPCLKQSNTPDFPFCVSLPIPLRQTRFLSVTLVFPKSKQR  
FLRVGLAVPILSTVAALRKMVAEEGGVPAEEVILVELYPNGFQRSFFDEEDLNTIAEGDNVYAFQVPPSPGLG  
TLSAHPGSLSVSPRLPVRDSQRFSGPLHSENRVVFLFCNLVSGGQASRFGPPFLIREDRTISWAQLQCCILS  
KVRCLMRSEVSAQDLGTLF SIRVVGLSLACSYLSPKDNRP LCHWAVDRALHLRRPGGPPHVKLAVEWDSVTE  
RLFGLQEEERVQDADSVWRQQQAHQQPSCTLDECFQSYTKEEQLAQDDAWKCPHCQVQLQGGVVKLSLWTLDPDI  
LI IHLKRFQVGERNKLSLTKVFP LSGLNMAPHVARRSTNSKAGPGPWSWKQPICLPTTYPLDFLYDLYAV  
CNHHGSLQGGHYTAYCRNSLDGQWYSYDDSTVEALREDEVNTRGAYILFYQKRNSIPPWSASSSMRGSTSSSL  
SDHRLMRLGSLNNSRGSLLSWSAPCPSMARVPDSPVFTNGVCHQDKGGVETRPLVRGVGGRSISMKASPAS  
RSRHGPFKTMPLRWSFGHREKRP GASVELVEYLESRRRRPRSTSQSI VPLLTRAAGGEETSASPRSDGTLPAKS  
EDSGRAIGQGTGTVPLSSCHLNHPALGSLDSDSLHTARTRTGNVSDIRLPKFFDLPLTVMPSVGDEKPARPE  
GQKMPWKGSSQVGSQSSPPSPSTGLLRNFKDSGPGTLPKMKSKAAMEERAPDKDRGQGTFTLLKSVFWKKEH  
KRTVRTESSPPAPPISLGSDRLSPAAMNEQALRIRESAPKGLGNHMERDIRSAPSSLHLPRKASRPPRASTAG  
TSQRTIPGEQISYGTLLQRVKYHTLSLGRKKSLEPSSSF\*  
>rs47734460\_ENSMUSP00000104317\_c.2184:T>C\_p.W729R  
ENSMUST00000108677.2|Usp43-202|ENSMUSG00000020905|-|chr11:g.67766224:A>G  
MDPGVGNALGEGPPAPRPRRRRSLRRLNRFLLALGSRSRSGDSPRPPAQPSPYDGDGEGGFACAPGPAPAS  
AGSPGPDPPGSPQPISSGDGARPPGAQGLKNHGNCTCFMNAVVCLSNTDLLAEFLALGRYRAAPGRAEVTEQ  
LAALVRLWLTREYTPQLSAEFKNAVSKYGSQFQGNHQDALEFLLWLLDRVHEDLEGSAGHLVSEQLPPEVSK  
ISEDLRPSAAPTSLGSPFVQSHFQAQYRSSLTCHPCLKQSNTPDFPFCVSLPIPLRQTRFLSVTLVFPKSKQR  
FLRVGLAVPILSTVAALRKMVAEEGGVPAEEVILVELYPNGFQRSFFDEEDLNTIAEGDNVYAFQVPPSPGLG  
TLSAHPGSLSVSPRLPVRDSQRFSGPLHSENRVVFLFCNLVSGGQASRFGPPFLIREDRTISWAQLQCCILS  
KVRCLMRSEVSAQDLGTLF SIRVVGLSLACSYLSPKDNRP LCHWAVDRALHLRRPGGPPHVKLAVEWDSVTE  
RLFGLQEEERVQDADSVWRQQQAHQQPSCTLDECFQSYTKEEQLAQDDAWKCPHCQVQLQGGVVKLSLWTLDPDI  
LI IHLKRFQVGERNKLSLTKVFP LSGLNMAPHVARRSTNSKAGPGPWSWKQPICLPTTYPLDFLYDLYAV  
CNHHGSLQAYCRNSLDGQWYSYDDSTVEALREDEVNTRGAYILFYQKRNSIPPWSASSSMRGSTSSSLSDHRL  
MRLGSLNNSRGSLLSWSAPCPSMARVPDSPVFTNGVCHQDKGGVETRPLVRGVGGRSISMKASPASRSRHG  
PFKTMPLRWSFGHREKRP GASVELVEYLESRRRRPRSTSQSI VPLLTRAAGGEETSASPRSDGTLPAKSEDSGR  
AIGQGTGTVPLSSCHLNHPALGSLDSDSLHTARTRTGNVSDIRLPKFFDLPLTVMPSVGDEKPARPEGQKMT  
PWKGSSQVGSQSSPPSPSTGLLRNFKDSGPGTLPKMKSKAAMEERAPDKDRGQGTFTLLKSVFWKKEHKRTVR  
TESSPPAPPISLGSDRLSPAAMNEQALRIRESAPKGLGNHMERDIRSAPSSLHLPRKASRPPRASTAGTSQRT  
IPGEQISYGTLLQRVKYHTLSLGRKKSLEPSSSF\*  
>rs29401189\_ENSMUSP00000021288\_c.1796:G>T\_p.R599S  
ENSMUST00000021288.10|Usp43-201|ENSMUSG00000020905|-|chr11:g.67770836:C>A  
MDPGVGNALGEGPPAPRPRRRRSLRRLNRFLLALGSRSRSGDSPRPPAQPSPYDGDGEGGFACAPGPAPAS  
AGSPGPDPPGSPQPISSGDGARPPGAQGLKNHGNCTCFMNAVVCLSNTDLLAEFLALGRYRAAPGRAEVTEQ  
LAALVRLWLTREYTPQLSAEFKNAVSKYGSQFQGNHQDALEFLLWLLDRVHEDLEGSAGHLVSEQLPPEVSK  
ISEDLRPSAAPTSLGSPFVQSHFQAQYRSSLTCHPCLKQSNTPDFPFCVSLPIPLRQTRFLSVTLVFPKSKQR  
FLRVGLAVPILSTVAALRKMVAEEGGVPAEEVILVELYPNGFQRSFFDEEDLNTIAEGDNVYAFQVPPSPGLG  
TLSAHPGSLSVSPRLPVRDSQRFSGPLHSENRVVFLFCNLVSGGQASRFGPPFLIREDRTISWAQLQCCILS  
KVRCLMRSEVSAQDLGTLF SIRVVGLSLACSYLSPKDNRP LCHWAVDRALHLRRPGGPPHVKLAVEWDSVTE  
RLFGLQEEERVQDADSVWRQQQAHQQPSCTLDECFQSYTKEEQLAQDDAWKCPHCQVQLQGGVVKLSLWTLDPDI  
LI IHLKRFQVGERNKLSLTKVFP LSGLNMAPHVARRSTNSKAGPGPWSWKQPICLPTTYPLDFLYDLYAV  
CNHHGSLQGGHYTAYCRNSLDGQWYSYDDSTVEALREDEVNTRGAYILFYQKRNSIPPWSASSSMRGSTSSSL  
SDHWMRLGSLNNSRGSLLSWSAPCPSMARVPDSPVFTNGVCHQDKGGVETRPLVRGVGGRSISMKASPAS  
RSRHGPFKTMPLRWSFGHREKRP GASVELVEYLESRRRRPRSTSQSI VPLLTRAAGGEETSASPRSDGTLPAKS  
EDSGRAIGQGTGTVPLSSCHLNHPALGSLDSDSLHTARTRTGNVSDIRLPKFFDLPLTVMPSVGDEKPARPE  
GQKMPWKGSSQVGSQSSPPSPSTGLLRNFKDSGPGTLPKMKSKAAMEERAPDKDRGQGTFTLLKSVFWKKEH  
KRTVRTESSPPAPPISLGSDRLSPAAMNEQALRIRESAPKGLGNHMERDIRSAPSSLHLPRKASRPPRASTAG  
TSQRTIPGEQISYGTLLQRVKYHTLSLGRKKSLEPSSSF\*

>rs29401189\_ENSMUSP00000104317\_c.1796:G>T\_p.R599S  
ENSMUST00000108677.2|Usp43-202|ENSMUSG00000020905|-|chr11:g.67770836:C>A  
MDPGVGNALGEGPPAPRRRRSLRRLNRFLLALGSRSRSGDSPRRPPAQPSPYDGDGEGGFACAPGPAPAS  
AGSPGPDPPGSPQPISSGDGARPPGAQGLKNHGNTCFMNAVVCLSNTDLLAEFLALGRYRAAPGRAEVTEQ  
LAALVRALWTREYTPQLSAEFKNAVSKYGSQFQGN SQHDALEFLLWLLDRVHEDLEGSAGHLVSEQLPPEVSK  
ISEDLRPSAAPTSLGSPFVQSHFQAQYRSSLTCPHCLKQSNFDFPFLCVSLPIPLRQTRFLSVTLVFPKSKQR  
FLRVGLAVPILSTVAALRKMVAEEGGVPAEEVILVELYPNGFQORSFFDEEDLNTIAEGDNVYAFQVPPSPGLG  
TL SAHPSGLSVSPRLPVRDSQRFSGPLHSEN RVVFLFCNLVSGQQASRF GPPFLIREDRTISWAQLQQCILS  
KVRCLMRSEVSAQDLGTLFSIRVVGLSLACSYLSPKDNRP LCHWAVDRALHLRRPGGPPHVKLAVEWDSVTE  
RLFGSLQEERVQDADSVWRQQQAHQQPSC TLD ECFQSYTKEEQLAQDDAWKCPHCQV LQQGVV KLSLWTL PDI  
LI IHLKRFQV GERSNKLSTLVKFP LSGLNMAPHVARRSTNSKAGPGPWSWKQPICLPTTYPLDFLYDYAV  
CNHHGSLQAYCRNSLDGQWYSYDDSTVEALREDEVNTRGAYILFYQKRNSIPPWSASSSMRGSTSSLS DHWL  
MRLGSLNNSTRGSLLSWSSAPCP SMARVPDSPVFTNGVCHQDKGGVETRPLVRGVGGRSISMKASPASRSRHG  
PFKTmplrwsFGHREKRP GASVELVEYLESRRRPRSTQSIVPLLTRAAGGEETSASPRSDGTLPAKSEDSGR  
AIGQGTGVP LSSCHLNHPALGSLDDSLHTARTRTGNVSQDIRLPKFKDLP LTVMP SVGDEKPARPEGQKMT  
PWKGSQVGSQSSPPSPSTGLLRNFKDSGPGTLPKMKSKAAMEERAPDKDRGQGTFTLLKSVFWKKEHKRTVR  
TESSPPAPPI SLGSDRLSPAAMNEQALRIRESPAKGLGNHMERDIRSAPSSLHLPRKASRPPRASTAGTSQRT  
IPGEQISYGT LQRVKYHTLSLGRKKS LPESSF\*  
>rs29466030\_ENSMUSP00000021286\_c.339:T>A\_p.S114T  
ENSMUST00000021286.11|Stx8-202|ENSMUSG00000020903|+|chr11:g.67877167:T>A  
MAPDPWFSTYDSTCQIAQEAIEKIQERNQCERRGEKTPKLT LTRTLKLNKVKIDLLKDLLLRAVSTRQITQ  
LEGDRRQNLDDLVTRERLLLASFKNEGAEPDLISLGISVTLYLSPVPAEHQWQH LG\*  
>rs29407333\_ENSMUSP00000099671\_c.3764:G>T\_p.K1255N  
ENSMUST00000102611.10|Myh10-203|ENSMUSG00000020900|+|chr11:g.68689189:G>T  
MAQRTGLEDPERYL FVDRAVIYNPATQADWTA KKLWVIPSERHGF EAASIKEERGDEVMV ELAEN GKAMV NK  
DDIQKMNP PKFSKVEDMAELTCLNEASVLHNLKDRYYSGLIYTYSGLFCVVINPYKNLPIYSENI IEMYRGKK  
RHEMPPHIYAI SEAYRCMLQDREDQSILCTGESGAGKTENTKKVIQYLAHVASSHKGRKDHNI PQESPKPVK  
QGELELRLQANPILESFGNAKTVKNDNSSRFGK FIRINFDV TGYIVGANIETYLLEKSRAVRQAKDERTFH  
FIYQLLSGAG EHLKSDLLLEGFNNYRFLSNGYIPIPGQQDKDNFQETMEAMHIMGFSHEEILSMLKVVSSVLQFGNISFKKER  
NTDQASMPENTVAQKLCHLLGMNVMEFTRAILTPRIKVG RDYVQKAQTKEQADFAVEALAKATYERLFRWL VH  
RINKALDRTKRQGASFIGILDIA GFEIFELNSFEQLCIN YTNEKQLQLFNHTMFILEQE EYQREGIEWNFIDF  
GLDLQPCIDLIERPANPPGVLALLDEECWF PKATDKTFVEKLVQE QGSHSKFQKPRQLKDKADFCI IHYAGKV  
DYKADEWLMKNMDPLNDNVATLLHQSSDRFVAELW KDVDRIVGLDQVTGMTETA FGSAKYTKKGMFR TVGQLY  
KESLTKLMATLRNTNPNFVRCIIPNHEKRAGKLD PHLVLDQLRCNGVLEGI RIRICRQGF PNRIVFQEF RQRYE I  
LTPNAIPKGFMDGKQACERMIRALELDPNLYRIGQSKI FFRAGVLAHLEEEERDLKITDIIIF FQAVCRGYLAR  
KAFAKKQQLSALKV LQRNCAAYLKL RHWQWVRVFTKVKPL LQVTRQEELQAKDEELLKVKKEQTKVGELE  
EMERKHQQLLEEKNILAEQLQAE TELFAEAEMRARLA AKKQEELEELHDLES RVEEEEEERNQILQNEK KKMQ  
AHIQDLEEQLDEE EGARQKLQLEKVTA EAKIKKMEEEV LLEDQNSKFIKEKKLMEDRIAECSSQLAE EEEKA  
KNLAKIRNKQEVMI SDLEERLKKEEKTRQELEKAKR KLDGETTDLQDQIAELQAQVDELKVQLTKKEEELQGA  
LARGDDETLHKNNALKVARELQAQIAELQEDFESEKASRNKA EKQRDLSEELEALKTELED TLDTAAQOEL  
RTKREQEVAELKKALEDETKNHEAQIQDMRQRHATALEELSEQL EQAKRFKANLEKNKQGLETDNKELACEVK  
VLQQVKAESEHKRNKLD AQVQELHAKVSEGDRLRVELAEKANKLQNELDNVSTLLEEA EKKGIFAKDAAGLE  
SQLQDTQELLQEETRQKLNLSRIRQLEEEKNLSLQEQE EEEEEARKNLEKQV LALQSQLADTKKKVDDDLGTI  
ESLEEAKKKLLKDV EALSQRLEEKV LAYDKLEKTKNRLQEQELDDLTVDLDHQRQIVSNLEKKQKFKDQLLAE  
KGISARYAEERDRAEA EAAREKETKALSLARALEEALEAEEFERQNKQLRADMEDLMSSKDDVGNVHELEKS  
KRALEQQVEEMRTQLEEELEDELQATEDAKLRLEVNMQAMKAQFERDLQTRDEQNEEKRLLLKQVRELEAELE  
DERKQRALAVASKKMEIDLKDLEAQIEAANKARDEV IKQLRKLQAQMKDYQRELEEARASRDEIFAQSKESE  
KKLKSLEAEI LQLEELASSERARRHAEQERDELADE IANSASGKSALLDEKRRLEARIAQLEEELEEEQSNM  
ELLNDRFRKTTLQVDTLNT ELAAERSAAQKSDNARQQLERQNKELKAKLQELEGA VKSKFKATISALEAKIGQ  
LEEQLQEAKERAAANKLVR RTEKKLKEIFMQVEDERRHADQYKEQMEKANARMKQLKRQLEEAEEEA TRANA  
SRRKLQRELDDATEANEGLSREVSTLKNRLRRGGPISFSSRSRGRQLHIEGASLELSDDDTESKTS DVNDTQ  
PPQSE\*  
>rs29407333\_ENSMUSP00000018887\_c.3857:G>T\_p.K1286N  
ENSMUST00000018887.15|Myh10-201|ENSMUSG00000020900|+|chr11:g.68689189:G>T  
MAQRTGLEDPERYL FVDRAVIYNPATQADWTA KKLWVIPSERHGF EAASIKEERGDEVMV ELAEN GKAMV NK  
DDIQKMNP PKFSKVEDMAELTCLNEASVLHNLKDRYYSGLIYTYSGLFCVVINPYKNLPIYSENI IEMYRGKK  
RHEMPPHIYAI SEAYRCMLQDREDQSILCTGESGAGKTENTKKVIQYLAHVASSHKGRKDHNI PQESPKPVK  
QGELELRLQANPILESFGNAKTVKNDNSSRFGK FIRINFDV TGYIVGANIETYLLEKSRAVRQAKDERTFH









GVALVPWGPCGTRAAGTTAPAVTPAADALYVLLRAFRWARVALITAPQDLWEAGRALSTALRARGLPVALVT  
SMETSDRSGAREALGRIRDGPRVRVVMVMSVLLGGEEQRYLLEAAEELALTDGSLVFLPFDTLHYALSPGP  
EALAAFVNSSQLRRAHDAVLTLTRCPCPGGSVQDSLRRRAQEHQELPLDLNLKQVSPFLGTIYDAVFLLAGGVK  
RARTAVGGGWVSGASVARQVREAQVSGFCGVLGRTEEPSFVLLD TDASGEQLFATHLLDPVLGSLRSAGTPMH  
FPRGGPAPGPDPCWFDPDVICNGGVEPGLVFGVLLVIGMGLTGAF LAHYLRHRLHMQMASGPNKIILTLE  
DVTFLHPPGGSSRKVVQGSRS SLATRSASDIRSVSPQPQESTNVGLYEGDWVWLKFKFGEHHMAIRPATKTAF  
SKLREL RHENVALYLGLFLAGTADSPATPGE GILAVVSEHCARGSLHDL LAQREIKLDWMFKSLLLDLIKGM  
RYLHHRGVAHGRLKSRNCVVDGRFVLKVTDHGHGRLLLEAQRVLEPPSAEDQLWTAPELLRDP SLERRGTLAG  
DVFS LAIIMQEVVCRSTPYAMLELTP EEVIQRVRSPPPLCRPLVSM DQAPMECIQLMTQCWAEHPEL RPSMDL  
TFDLFKSINKGRKTNIIDSMLRMLEQYSSNLEDLIRERTEELEQEKQKTDRLLTQMLPPSVAEALKMGT SVEP  
EYFEEVTLYFS DIVGFTTISAMSEPIEVVDLLNDLYTLFDAIIGAHDVYKVETIGDAYMVASGLPQRNGQRHA  
AEIANMSLDILSAVGSFRMRHMEVPVRIRIRIGLHSGPCVAGVVGLTMPRYCLFGDTVNTASRMESTGLPYRIH  
VKMSTVRILRALDQGFQMECRGRTELKKGKIEDTYWLVGRLGFNKPIPKPPDLQPGASNHGISLQEIPPERRK  
KLEKARPGQFTGK\*

>rs52051157\_ENSMUSP00000021259\_c.3071:C>G\_p.N1024K

ENSMUST00000021259.9|Gucy2e-201|ENSMUSG00000020890|-|chr11:g.69114456:G>C  
MSAWLLPAGGLPGAGFCV PARQSPSSFSRVLRWPRPGLPGLLLLLLLPSPSALS AVFKVGVLPWACDPIFAR  
ARPD LAARLANRNLNRDFALDGGPRFEVALLPEPCLTPGSLGAVSSALS SRVSGLVGPVNPAACRPAELLAQEA  
GVALVPWGPCGTRAAGTTAPAVTPAADALYVLLRAFRWARVALITAPQDLWEAGRALSTALRARGLPVALVT  
SMETSDRSGAREALGRIRDGPRVRVVMVMSVLLGGEEQRYLLEAAEELALTDGSLVFLPFDTLHYALSPGP  
EALAAFVNSSQLRRAHDAVLTLTRCPCPGGSVQDSLRRRAQEHQELPLDLNLKQVSPFLGTIYDAVFLLAGGVK  
RARTAVGGGWVSGASVARQVREAQVSGFCGVLGRTEEPSFVLLD TDASGEQLFATHLLDPVLGSLRSAGTPMH  
FPRGGPAPGPDPCWFDPDVICNGGVEPGLVFGVLLVIGMGLTGAF LAHYLRHRLHMQMASGPNKIILTLE  
DVTFLHPPGGSSRKVVQGSRS SLATRSASDIRSVSPQPQESTNVGLYEGDWVWLKFKFGEHHMAIRPATKTAF  
SKLREL RHENVALYLGLFLAGTADSPATPGE GILAVVSEHCARGSLHDL LAQREIKLDWMFKSLLLDLIKGM  
RYLHHRGVAHGRLKSRNCVVDGRFVLKVTDHGHGRLLLEAQRVLEPPSAEDQLWTAPELLRDP SLERRGTLAG  
DVFS LAIIMQEVVCRSTPYAMLELTP EEVIQRVRSPPPLCRPLVSM DQAPMECIQLMTQCWAEHPEL RPSMDL  
TFDLFKSINKGRKTNIIDSMLRMLEQYSSNLEDLIRERTEELEQEKQKTDRLLTQMLPPSVAEALKMGT SVEP  
EYFEEVTLYFS DIVGFTTISAMSEPIEVVDLLNDLYTLFDAIIGAHDVYKVETIGDAYMVASGLPQRNGQRHA  
AEIANMSLDILSAVGSFRMRHMEVPVRIRIRIGLHSGPCVAGVVGLTMPRYCLFGDTVNTASRMESTGLPYRIH  
VKMSTVRILRALDQGFQMECRGRTELKKGKIEDTYWLVGRLGFNKPIPKPPDLQPGASNHGISLQEIPPERRK  
KLEKARPGQFTGK\*

>rs45683389\_ENSMUSP00000104305\_c.3033:A>G\_p.M1012V

ENSMUST00000108665.8|Gucy2e-203|ENSMUSG00000020890|-|chr11:g.69114613:T>C  
MSAWLLPAGGLPGAGFCV PARQSPSSFSRVLRWPRPGLPGLLLLLLLPSPSALS AVFKVGVLPWACDPIFAR  
ARPD LAARLANRNLNRDFALDGGPRFEVALLPEPCLTPGSLGAVSSALS SRVSGLVGPVNPAACRPAELLAQEA  
GVALVPWGPCGTRAAGTTAPAVTPAADALYVLLRAFRWARVALITAPQDLWEAGRALSTALRARGLPVALVT  
SMETSDRSGAREALGRIRDGPRVRVVMVMSVLLGGEEQRYLLEAAEELALTDGSLVFLPFDTLHYALSPGP  
EALAAFVNSSQLRRAHDAVLTLTRCPCPGGSVQDSLRRRAQEHQELPLDLNLKQVSPFLGTIYDAVFLLAGGVK  
RARTAVGGGWVSGASVARQVREAQVSGFCGVLGRTEEPSFVLLD TDASGEQLFATHLLDPVLGSLRSAGTPMH  
FPRGGPAPGPDPCWFDPDVICNGGVEPGLVFGVLLVIGMGLTGAF LAHYLRHRLHMQMASGPNKIILTLE  
DVTFLHPPGGSSRKVVQGSRS SLATRSASDIRSVSPQPQESTNVGLYEGDWVWLKFKFGEHHMAIRPATKTAF  
SKLREL RHENVALYLGLFLAGTADSPATPGE GILAVVSEHCARGSLHDL LAQREIKLDWMFKSLLLDLIKGM  
RYLHHRGVAHGRLKSRNCVVDGRFVLKVTDHGHGRLLLEAQRVLEPPSAEDQLWTAPELLRDP SLERRGTLAG  
DVFS LAIIMQEVVCRSTPYAMLELTP EEVIQRVRSPPPLCRPLVSM DQAPMECIQLMTQCWAEHPEL RPSMDL  
TFDLFKSINKGRKTNIIDSMLRMLEQYSSNLEDLIRERTEELEQEKQKTDRLLTQMLPPSVAEALKMGT SVEP  
EYFEEVTLYFS DIVGFTTISAMSEPIEVVDLLNDLYTLFDAIIGAHDVYKVETIGDAYMVASGLPQRNGQRHA  
AEIANMSLDILSAVGSFRMRHMEVPVRIRIRIGLHSGPCVAGVVGLTMPRYCLFGDTVNTASRMESTGLPYRIH  
VNMSTVRILRALDQGFQMECRGRTELKKGKIEDTYWLVGRLGFNKPIPKPPDLQPGASNHGISLQEIPPERRK  
KLEKARPGQFTGK\*

>rs45683389\_ENSMUSP00000104304\_c.3033:A>G\_p.M1012V

ENSMUST00000108664.2|Gucy2e-202|ENSMUSG00000020890|-|chr11:g.69114613:T>C  
MSAWLLPAGGLPGAGFCV PARQSPSSFSRVLRWPRPGLPGLLLLLLLPSPSALS AVFKVGVLPWACDPIFAR  
ARPD LAARLANRNLNRDFALDGGPRFEVALLPEPCLTPGSLGAVSSALS SRVSGLVGPVNPAACRPAELLAQEA  
GVALVPWGPCGTRAAGTTAPAVTPAADALYVLLRAFRWARVALITAPQDLWEAGRALSTALRARGLPVALVT  
SMETSDRSGAREALGRIRDGPRVRVVMVMSVLLGGEEQRYLLEAAEELALTDGSLVFLPFDTLHYALSPGP  
EALAAFVNSSQLRRAHDAVLTLTRCPCPGGSVQDSLRRRAQEHQELPLDLNLKQVSPFLGTIYDAVFLLAGGVK  
RARTAVGGGWVSGASVARQVREAQVSGFCGVLGRTEEPSFVLLD TDASGEQLFATHLLDPVLGSLRSAGTPMH

FPRGGPAPGPDPCWFDPDVICNGGVEPGLVFGVGLLVIGMGLTGAFLAHYLRHRLHMQMASGPNKIILTLE  
DVTFLHPPGGSSRKVVQGSRSLSLATRSASDIRSVSPQPQESTNVGLYEGDWVWLKFKFGEHHMAIRPATKTAF  
SKLREL RHENVALYLGLFLAGTADSPATPGEGLAVVSEHCARGSLHDLLAQREIKLDWMFKSSLLLDLIKGM  
RYLHHRGVAHGRLKSRNCVVDGRFVLKVTDHGHGRLLEAQRVLEPPSAEDQLWTAPELLRDPSSLERRGTLAG  
DVFSLAIIMQEVVCRSTPYAMLELTPPEEVIQRVRSPPPLCRPLVSMQAPMECIQLMTQCWAEHPPELRPMSDL  
TFDLFKSINKGRKTNIIDSMLRMLEQYSSNLEDLIRERTEEELEQEKQKTDRLLTQMLPPSVAEALKMGTSVPEP  
EYFEEVTLYFSDIVGFTTISAMSEPIEVVDLLNDLYTLFDAIIGAHDVYKQVETIGDAYMVASGLPQRNGQRHA  
AEIANMSLDILSAVGSFRMRHMPEVPVIRIRIGLHSGPCVAGVVGLTMPRYCLFGDTVNTASRVESTGLPYRIH  
VNMSTVRILRALDQGFQMECRGRTELKKGKIEDTYWLVGRLGFNKPIPKPPDLQPGASNHGISLQEI PPERRK  
KLEKARPGQFTGK\*

>rs45683389\_ENSMUSP00000021259\_c.3033:A>G\_p.M1012V

ENSMUST00000021259.9|Gucy2e-201|ENSMUSG00000020890|-|chr11:g.69114613:T>C  
MSAWLLPAGGLPGAGFCVPARQSPSSFSRVLRWPRPGLPGLLLLLLLPSPSALS AVFKVGLGPWACDPI FAR  
ARPDLAARLAANRLNRDFA LDGGPRFEVALLPEPCLTPGSLGAVSSALSRVSGLVGPNPAACRPAELLAQEA  
GVALVPWGPCGPTRAAGTTAPAVTPAADALYVLLRAFRWARVALITAPQDLWVEAGRALSTALRARGLPVALVT  
SMETSDRSGAREALGRIRDGPRVRVVMVMSVLLGGEEQRYLLEAAEELALTDGSLVFLPFDTLHYALSPGP  
EALAAFVNSSQLRRAHDAVLTLTRC PPGGSVQDSLRAAQEHQELPLDLNLKQVSPFLGTIYDAVFLLAGGVK  
RARTAVGGGWVSGASVARQVREAQVSGFCVGLGRTEEPSFVLLD TDASGEQLFATHLLDPVLGSLRSAGTPMH  
FPRGGPAPGPDPCWFDPDVICNGGVEPGLVFGVGLLVIGMGLTGAFLAHYLRHRLHMQMASGPNKIILTLE  
DVTFLHPPGGSSRKVVQGSRSLSLATRSASDIRSVSPQPQESTNVGLYEGDWVWLKFKFGEHHMAIRPATKTAF  
SKLREL RHENVALYLGLFLAGTADSPATPGEGLAVVSEHCARGSLHDLLAQREIKLDWMFKSSLLLDLIKGM  
RYLHHRGVAHGRLKSRNCVVDGRFVLKVTDHGHGRLLEAQRVLEPPSAEDQLWTAPELLRDPSSLERRGTLAG  
DVFSLAIIMQEVVCRSTPYAMLELTPPEEVIQRVRSPPPLCRPLVSMQAPMECIQLMTQCWAEHPPELRPMSDL  
TFDLFKSINKGRKTNIIDSMLRMLEQYSSNLEDLIRERTEEELEQEKQKTDRLLTQMLPPSVAEALKMGTSVPEP  
EYFEEVTLYFSDIVGFTTISAMSEPIEVVDLLNDLYTLFDAIIGAHDVYKQVETIGDAYMVASGLPQRNGQRHA  
AEIANMSLDILSAVGSFRMRHMPEVPVIRIRIGLHSGPCVAGVVGLTMPRYCLFGDTVNTASRVESTGLPYRIH  
VNMSTVRILRALDQGFQMECRGRTELKKGKIEDTYWLVGRLGFNKPIPKPPDLQPGASNHGISLQEI PPERRK  
KLEKARPGQFTGK\*

>rs48904557\_ENSMUSP00000104305\_c.2221:A>G\_p.E741G

ENSMUST00000108665.8|Gucy2e-203|ENSMUSG00000020890|-|chr11:g.69118363:T>C  
MSAWLLPAGGLPGAGFCVPARQSPSSFSRVLRWPRPGLPGLLLLLLLPSPSALS AVFKVGLGPWACDPI FAR  
ARPDLAARLAANRLNRDFA LDGGPRFEVALLPEPCLTPGSLGAVSSALSRVSGLVGPNPAACRPAELLAQEA  
GVALVPWGPCGPTRAAGTTAPAVTPAADALYVLLRAFRWARVALITAPQDLWVEAGRALSTALRARGLPVALVT  
SMETSDRSGAREALGRIRDGPRVRVVMVMSVLLGGEEQRYLLEAAEELALTDGSLVFLPFDTLHYALSPGP  
EALAAFVNSSQLRRAHDAVLTLTRC PPGGSVQDSLRAAQEHQELPLDLNLKQVSPFLGTIYDAVFLLAGGVK  
RARTAVGGGWVSGASVARQVREAQVSGFCVGLGRTEEPSFVLLD TDASGEQLFATHLLDPVLGSLRSAGTPMH  
FPRGGPAPGPDPCWFDPDVICNGGVEPGLVFGVGLLVIGMGLTGAFLAHYLRHRLHMQMASGPNKIILTLE  
DVTFLHPPGGSSRKVVQGSRSLSLATRSASDIRSVSPQPQESTNVGLYEGDWVWLKFKFGEHHMAIRPATKTAF  
SKLREL RHENVALYLGLFLAGTADSPATPGEGLAVVSEHCARGSLHDLLAQREIKLDWMFKSSLLLDLIKGM  
RYLHHRGVAHGRLKSRNCVVDGRFVLKVTDHGHGRLLEAQRVLEPPSAEDQLWTAPELLRDPSSLERRGTLAG  
DVFSLAIIMQGVVCRSTPYAMLELTPPEEVIQRVRSPPPLCRPLVSMQAPMECIQLMTQCWAEHPPELRPMSDL  
TFDLFKSINKGRKTNIIDSMLRMLEQYSSNLEDLIRERTEEELEQEKQKTDRLLTQMLPPSVAEALKMGTSVPEP  
EYFEEVTLYFSDIVGFTTISAMSEPIEVVDLLNDLYTLFDAIIGAHDVYKQVETIGDAYMVASGLPQRNGQRHA  
AEIANMSLDILSAVGSFRMRHMPEVPVIRIRIGLHSGPCVAGVVGLTMPRYCLFGDTVNTASRMESTGLPYRIH  
VNMSTVRILRALDQGFQMECRGRTELKKGKIEDTYWLVGRLGFNKPIPKPPDLQPGASNHGISLQEI PPERRK  
KLEKARPGQFTGK\*

>rs48904557\_ENSMUSP00000104304\_c.2221:A>G\_p.E741G

ENSMUST00000108664.2|Gucy2e-202|ENSMUSG00000020890|-|chr11:g.69118363:T>C  
MSAWLLPAGGLPGAGFCVPARQSPSSFSRVLRWPRPGLPGLLLLLLLPSPSALS AVFKVGLGPWACDPI FAR  
ARPDLAARLAANRLNRDFA LDGGPRFEVALLPEPCLTPGSLGAVSSALSRVSGLVGPNPAACRPAELLAQEA  
GVALVPWGPCGPTRAAGTTAPAVTPAADALYVLLRAFRWARVALITAPQDLWVEAGRALSTALRARGLPVALVT  
SMETSDRSGAREALGRIRDGPRVRVVMVMSVLLGGEEQRYLLEAAEELALTDGSLVFLPFDTLHYALSPGP  
EALAAFVNSSQLRRAHDAVLTLTRC PPGGSVQDSLRAAQEHQELPLDLNLKQVSPFLGTIYDAVFLLAGGVK  
RARTAVGGGWVSGASVARQVREAQVSGFCVGLGRTEEPSFVLLD TDASGEQLFATHLLDPVLGSLRSAGTPMH  
FPRGGPAPGPDPCWFDPDVICNGGVEPGLVFGVGLLVIGMGLTGAFLAHYLRHRLHMQMASGPNKIILTLE  
DVTFLHPPGGSSRKVVQGSRSLSLATRSASDIRSVSPQPQESTNVGLYEGDWVWLKFKFGEHHMAIRPATKTAF  
SKLREL RHENVALYLGLFLAGTADSPATPGEGLAVVSEHCARGSLHDLLAQREIKLDWMFKSSLLLDLIKGM  
RYLHHRGVAHGRLKSRNCVVDGRFVLKVTDHGHGRLLEAQRVLEPPSAEDQLWTAPELLRDPSSLERRGTLAG

DVFS LAIIMQGVVCRSTPYAMLELTPEEVIQVRVSPPLCRPLVSMQAPMECIQLMTQCWAEHPPELRPSMDL  
TFDLFKSINKGRKTNIIDSMLRMLEQYSSNLEDLIRERTEEELEQEKQKTDRLLTQMLPPSVAEALKMGT SVEP  
EYFEEVTLYFSDIVGFTTISAMSEPIEVVDLLNDLYTLFDAIIGAHDVYK VETIGDAYMVASGLPQRNGQRHA  
AEIANMSLDILSAVGSFRMRHMPEVPVRIRIRIGLHSGPCVAGVVGLTMPRYCLFGDVTNTASRMESTGLPYRIH  
VNMSTVRILRALDQGFQMECRGRTTELKKGIEDTYWLVGRLGFNKPIPKPPDLQPGASNHGISLQEI PPERRK  
KLEKARPGQFTGK\*

>rs48904557\_ENSMUSP00000021259\_c.2221:A>G\_p.E741G

ENSMUST00000021259.9|Gucy2e-201|ENSMUSG00000020890|-|chr11:g.69118363:T>C  
MSAWLLPAGGLPGAGFCV PARQSPSSFSRVLRWPRPGLPGLLLLLLLPSALSASAVFKVGVLPWACDPI FAR  
ARPDLAARLAANRLNRD FALDGGPRFEVALLPEPCLTPGSLGAVSSALSRVSGLVGPNPAACRPAELLAQEA  
GVALVPWGPCPGTRAAGTTAPAVTPAADALYVLLRAFRWARVALITAPQDLWEAGRALSTALRARGLPVALVT  
SMETSDRSGAREALGRIRDGPRVRVIMVMH SVLLGGEEQRYLLEAAEELALTDGSLVFLPFDTLHYALSPGP  
EALAAFVNSSQLRRAHDAVLT LTRC PPGGSVQDSL RRAQEHQELPLDLNLKQVSPLFGTIYDAVFLLAGGVK  
RARTAVGGGWVSGASVARQVREAVSGFCV LGRTEEPSFVLLD TDASGEQLFATHLLDPVLGSLRSAGTPMH  
FPRGGPAPGPD PSCWFDPDVICNGGVEPGLVFVGFLLVIGMGLTGAF LAHYLRHRLHMQMASGPNKI ILLTLE  
DVTFLHPPGGSSRKVVQGSRS SLATRSASDIRSVSPQPESTNVGLYEGDWVWLKFFPGEHMAIRPATKTAF  
SKLREL RHENVALYLGFLAGTADSPATPGE GILAVVSEHCARGSLHDLLAQREIKLDWMFKSLLLLDLIKGM  
RYLHHRGVAHGRLKSRNCVVDGRFV LKVDHGHGRLL EAQRVLEPPSAEDQLWTAPELLRDP SLERRGTLAG  
DVFS LAIIMQGVVCRSTPYAMLELTPEEVIQVRVSPPLCRPLVSMQAPMECIQLMTQCWAEHPPELRPSMDL  
TFDLFKSINKGRKTNIIDSMLRMLEQYSSNLEDLIRERTEEELEQEKQKTDRLLTQMLPPSVAEALKMGT SVEP  
EYFEEVTLYFSDIVGFTTISAMSEPIEVVDLLNDLYTLFDAIIGAHDVYK VETIGDAYMVASGLPQRNGQRHA  
AEIANMSLDILSAVGSFRMRHMPEVPVRIRIRIGLHSGPCVAGVVGLTMPRYCLFGDVTNTASRMESTGLPYRIH  
VNMSTVRILRALDQGFQMECRGRTTELKKGIEDTYWLVGRLGFNKPIPKPPDLQPGASNHGISLQEI PPERRK  
KLEKARPGQFTGK\*

>rs51261336\_ENSMUSP00000104305\_c.2216:G>T\_p.M739I

ENSMUST00000108665.8|Gucy2e-203|ENSMUSG00000020890|-|chr11:g.69118368:C>A  
MSAWLLPAGGLPGAGFCV PARQSPSSFSRVLRWPRPGLPGLLLLLLLPSALSASAVFKVGVLPWACDPI FAR  
ARPDLAARLAANRLNRD FALDGGPRFEVALLPEPCLTPGSLGAVSSALSRVSGLVGPNPAACRPAELLAQEA  
GVALVPWGPCPGTRAAGTTAPAVTPAADALYVLLRAFRWARVALITAPQDLWEAGRALSTALRARGLPVALVT  
SMETSDRSGAREALGRIRDGPRVRVIMVMH SVLLGGEEQRYLLEAAEELALTDGSLVFLPFDTLHYALSPGP  
EALAAFVNSSQLRRAHDAVLT LTRC PPGGSVQDSL RRAQEHQELPLDLNLKQVSPLFGTIYDAVFLLAGGVK  
RARTAVGGGWVSGASVARQVREAVSGFCV LGRTEEPSFVLLD TDASGEQLFATHLLDPVLGSLRSAGTPMH  
FPRGGPAPGPD PSCWFDPDVICNGGVEPGLVFVGFLLVIGMGLTGAF LAHYLRHRLHMQMASGPNKI ILLTLE  
DVTFLHPPGGSSRKVVQGSRS SLATRSASDIRSVSPQPESTNVGLYEGDWVWLKFFPGEHMAIRPATKTAF  
SKLREL RHENVALYLGFLAGTADSPATPGE GILAVVSEHCARGSLHDLLAQREIKLDWMFKSLLLLDLIKGM  
RYLHHRGVAHGRLKSRNCVVDGRFV LKVDHGHGRLL EAQRVLEPPSAEDQLWTAPELLRDP SLERRGTLAG  
DVFS LAIIMQGVVCRSTPYAMLELTPEEVIQVRVSPPLCRPLVSMQAPMECIQLMTQCWAEHPPELRPSMDL  
TFDLFKSINKGRKTNIIDSMLRMLEQYSSNLEDLIRERTEEELEQEKQKTDRLLTQMLPPSVAEALKMGT SVEP  
EYFEEVTLYFSDIVGFTTISAMSEPIEVVDLLNDLYTLFDAIIGAHDVYK VETIGDAYMVASGLPQRNGQRHA  
AEIANMSLDILSAVGSFRMRHMPEVPVRIRIRIGLHSGPCVAGVVGLTMPRYCLFGDVTNTASRMESTGLPYRIH  
VNMSTVRILRALDQGFQMECRGRTTELKKGIEDTYWLVGRLGFNKPIPKPPDLQPGASNHGISLQEI PPERRK  
KLEKARPGQFTGK\*

>rs51261336\_ENSMUSP00000104304\_c.2216:G>T\_p.M739I

ENSMUST00000108664.2|Gucy2e-202|ENSMUSG00000020890|-|chr11:g.69118368:C>A  
MSAWLLPAGGLPGAGFCV PARQSPSSFSRVLRWPRPGLPGLLLLLLLPSALSASAVFKVGVLPWACDPI FAR  
ARPDLAARLAANRLNRD FALDGGPRFEVALLPEPCLTPGSLGAVSSALSRVSGLVGPNPAACRPAELLAQEA  
GVALVPWGPCPGTRAAGTTAPAVTPAADALYVLLRAFRWARVALITAPQDLWEAGRALSTALRARGLPVALVT  
SMETSDRSGAREALGRIRDGPRVRVIMVMH SVLLGGEEQRYLLEAAEELALTDGSLVFLPFDTLHYALSPGP  
EALAAFVNSSQLRRAHDAVLT LTRC PPGGSVQDSL RRAQEHQELPLDLNLKQVSPLFGTIYDAVFLLAGGVK  
RARTAVGGGWVSGASVARQVREAVSGFCV LGRTEEPSFVLLD TDASGEQLFATHLLDPVLGSLRSAGTPMH  
FPRGGPAPGPD PSCWFDPDVICNGGVEPGLVFVGFLLVIGMGLTGAF LAHYLRHRLHMQMASGPNKI ILLTLE  
DVTFLHPPGGSSRKVVQGSRS SLATRSASDIRSVSPQPESTNVGLYEGDWVWLKFFPGEHMAIRPATKTAF  
SKLREL RHENVALYLGFLAGTADSPATPGE GILAVVSEHCARGSLHDLLAQREIKLDWMFKSLLLLDLIKGM  
RYLHHRGVAHGRLKSRNCVVDGRFV LKVDHGHGRLL EAQRVLEPPSAEDQLWTAPELLRDP SLERRGTLAG  
DVFS LAIIMQGVVCRSTPYAMLELTPEEVIQVRVSPPLCRPLVSMQAPMECIQLMTQCWAEHPPELRPSMDL  
TFDLFKSINKGRKTNIIDSMLRMLEQYSSNLEDLIRERTEEELEQEKQKTDRLLTQMLPPSVAEALKMGT SVEP  
EYFEEVTLYFSDIVGFTTISAMSEPIEVVDLLNDLYTLFDAIIGAHDVYK VETIGDAYMVASGLPQRNGQRHA  
AEIANMSLDILSAVGSFRMRHMPEVPVRIRIRIGLHSGPCVAGVVGLTMPRYCLFGDVTNTASRMESTGLPYRIH

VNMSTVRILRALDQGFQMECRGRTELKKGKIEDTYWLVGRLGFNKP I PKPPDLQPGASNHGISLQE I PPERRK  
KLEKARPGQFTGK\*  
>rs51261336\_ENSMUSP00000021259\_c.2216:G>T\_p.M739I  
ENSMUST00000021259.9|Gucy2e-201|ENSMUSG00000020890|-|chr11:g.69118368:C>A  
MSAWLLPAGGLPGAGFCV PARQSPSSFSRVLRWPRPGLPGLLLLLLLPSPSALS AVFKVGVLPWACDPI FAR  
ARPDLAARLAANRLNRDFALDGGPRFEVALLPEPCLTPGSLGAVSSALSRSVGLVGPVNPAACRPAELLAQEA  
GVALVPWGPCPGTRAAGTTAPAVTPAADALYVLLRAFRWARVALITAPQDLWVEAGRALSTALRARGLPVALVT  
SMETSDRSGAREALGRIRDGPRVRVVMVMH SVLLGGEEQRYLLEAAEELALTDGSLVFLPFDTLHYALSPGP  
EALAAFVNSSQLRRAHD AVLTLTRC PPGSVQDSL RRAQEHQELPLDLNLKQVSP LFGTIYDAVFLLAGGVK  
RARTAVGGGWVSGASVARQVREAVSGFCV LGRTEEPSFVLLD TDASGEQLFATHLLDPVLSRSAGTPMH  
FPRGGPAGPDPSCWFDPDVICNGGVEPGLV FVGVLLVIGMGLTGAF LAHYLRHRLHMQMASGPNKI I LTLE  
DVTFLHPPGGSSRKVVQGSRS SLATRSASDIRSVSPQPQESTNVGLYEGDWVWLKFKFGEHHMAIRPATKTAF  
SKLREL RHENVALYLGLFLAGTADSPATPGE GILAVVSEHCARGSLHDLLAQREIKLDW MFKSSLLLDLIKGM  
RYLHHRGV AHGRLKSRNCVVDGRFV LKVTDHGHGR LLEAQRVLP EPPSAEDQLWTAPELLRDP SLERRGTLAG  
DVFS LAII IQEVVCRSTPYAMLELTPEEVIQRVRSPPPLCRPLVSM DQAPMECIQLMTQCWAEHP ELRPSMDL  
TFDLFKSINKGRKTNIIDSMLRMLEQYSSNLEDLIRERTEEELEQEKQKTDRLLTQMLPPSVAEALKMGT SVEP  
EYFEEVTLYFSDIVGFTTISAMSEPIEVVDLLNDLYTLFDAI GAHDVYK VETIGDAYMVASGLPQRNGQRHA  
AEIANMSLDILSAVGSFRMRHMEVPVRIRIGLHSGPCVAGVGLTMPRYCLFGDTVNTASRMESTGLPYRIH  
VNMSTVRILRALDQGFQMECRGRTELKKGKIEDTYWLVGRLGFNKP I PKPPDLQPGASNHGISLQE I PPERRK  
KLEKARPGQFTGK\*  
>rs45916145\_ENSMUSP00000104305\_c.735:A>G\_p.I246V  
ENSMUST00000108665.8|Gucy2e-203|ENSMUSG00000020890|-|chr11:g.69126643:T>C  
MSAWLLPAGGLPGAGFCV PARQSPSSFSRVLRWPRPGLPGLLLLLLLPSPSALS AVFKVGVLPWACDPI FAR  
ARPDLAARLAANRLNRDFALDGGPRFEVALLPEPCLTPGSLGAVSSALSRSVGLVGPVNPAACRPAELLAQEA  
GVALVPWGPCPGTRAAGTTAPAVTPAADALYVLLRAFRWARVALITAPQDLWVEAGRALSTALRARGLPVALVT  
SMETSDRSGAREALGRIRDGPRVRVVMVMH SVLLGGEEQRYLLEAAEELALTDGSLVFLPFDTLHYALSPGP  
EALAAFVNSSQLRRAHD AVLTLTRC PPGSVQDSL RRAQEHQELPLDLNLKQVSP LFGTIYDAVFLLAGGVK  
RARTAVGGGWVSGASVARQVREAVSGFCV LGRTEEPSFVLLD TDASGEQLFATHLLDPVLSRSAGTPMH  
FPRGGPAGPDPSCWFDPDVICNGGVEPGLV FVGVLLVIGMGLTGAF LAHYLRHRLHMQMASGPNKI I LTLE  
DVTFLHPPGGSSRKVVQGSRS SLATRSASDIRSVSPQPQESTNVGLYEGDWVWLKFKFGEHHMAIRPATKTAF  
SKLREL RHENVALYLGLFLAGTADSPATPGE GILAVVSEHCARGSLHDLLAQREIKLDW MFKSSLLLDLIKGM  
RYLHHRGV AHGRLKSRNCVVDGRFV LKVTDHGHGR LLEAQRVLP EPPSAEDQLWTAPELLRDP SLERRGTLAG  
DVFS LAII IQEVVCRSTPYAMLELTPEEVIQRVRSPPPLCRPLVSM DQAPMECIQLMTQCWAEHP ELRPSMDL  
TFDLFKSINKGRKTNIIDSMLRMLEQYSSNLEDLIRERTEEELEQEKQKTDRLLTQMLPPSVAEALKMGT SVEP  
EYFEEVTLYFSDIVGFTTISAMSEPIEVVDLLNDLYTLFDAI GAHDVYK VETIGDAYMVASGLPQRNGQRHA  
AEIANMSLDILSAVGSFRMRHMEVPVRIRIGLHSGPCVAGVGLTMPRYCLFGDTVNTASRMESTGLPYRIH  
VNMSTVRILRALDQGFQMECRGRTELKKGKIEDTYWLVGRLGFNKP I PKPPDLQPGASNHGISLQE I PPERRK  
KLEKARPGQFTGK\*  
>rs45916145\_ENSMUSP00000104304\_c.735:A>G\_p.I246V  
ENSMUST00000108664.2|Gucy2e-202|ENSMUSG00000020890|-|chr11:g.69126643:T>C  
MSAWLLPAGGLPGAGFCV PARQSPSSFSRVLRWPRPGLPGLLLLLLLPSPSALS AVFKVGVLPWACDPI FAR  
ARPDLAARLAANRLNRDFALDGGPRFEVALLPEPCLTPGSLGAVSSALSRSVGLVGPVNPAACRPAELLAQEA  
GVALVPWGPCPGTRAAGTTAPAVTPAADALYVLLRAFRWARVALITAPQDLWVEAGRALSTALRARGLPVALVT  
SMETSDRSGAREALGRIRDGPRVRVVMVMH SVLLGGEEQRYLLEAAEELALTDGSLVFLPFDTLHYALSPGP  
EALAAFVNSSQLRRAHD AVLTLTRC PPGSVQDSL RRAQEHQELPLDLNLKQVSP LFGTIYDAVFLLAGGVK  
RARTAVGGGWVSGASVARQVREAVSGFCV LGRTEEPSFVLLD TDASGEQLFATHLLDPVLSRSAGTPMH  
FPRGGPAGPDPSCWFDPDVICNGGVEPGLV FVGVLLVIGMGLTGAF LAHYLRHRLHMQMASGPNKI I LTLE  
DVTFLHPPGGSSRKVVQGSRS SLATRSASDIRSVSPQPQESTNVGLYEGDWVWLKFKFGEHHMAIRPATKTAF  
SKLREL RHENVALYLGLFLAGTADSPATPGE GILAVVSEHCARGSLHDLLAQREIKLDW MFKSSLLLDLIKGM  
RYLHHRGV AHGRLKSRNCVVDGRFV LKVTDHGHGR LLEAQRVLP EPPSAEDQLWTAPELLRDP SLERRGTLAG  
DVFS LAII IQEVVCRSTPYAMLELTPEEVIQRVRSPPPLCRPLVSM DQAPMECIQLMTQCWAEHP ELRPSMDL  
TFDLFKSINKGRKTNIIDSMLRMLEQYSSNLEDLIRERTEEELEQEKQKTDRLLTQMLPPSVAEALKMGT SVEP  
EYFEEVTLYFSDIVGFTTISAMSEPIEVVDLLNDLYTLFDAI GAHDVYK VETIGDAYMVASGLPQRNGQRHA  
AEIANMSLDILSAVGSFRMRHMEVPVRIRIGLHSGPCVAGVGLTMPRYCLFGDTVNTASRMESTGLPYRIH  
VNMSTVRILRALDQGFQMECRGRTELKKGKIEDTYWLVGRLGFNKP I PKPPDLQPGASNHGISLQE I PPERRK  
KLEKARPGQFTGK\*  
>rs45916145\_ENSMUSP00000021259\_c.735:A>G\_p.I246V  
ENSMUST00000021259.9|Gucy2e-201|ENSMUSG00000020890|-|chr11:g.69126643:T>C

MSAWLLPAGGLPGAGFCVPARQSPSSFSRVLRWPRPGLPGLLLLLLLLLLPSALSASAVFKVGLGPWACDPIFAR  
 ARPDLAARLANRDLNRDGFALDGGPRFEVALLPEPCLTPGSLGAVSSALSRSVGLVGPVNPAACRPAELLAQEA  
 GVALVPWDCPGTRAAGTTAPAVTPAADALYVLLRAFRWARVALITAPQDLWEAGRALSTALRARGLPVALVT  
 SMETSDRSGAREALGRIRDGPRVRVVMVMSVLLGGEEQRYLLEAAEELALTDGSLVFLPFDTLHYALSPGP  
 EALAAFVNSSLRRAHDAVLTTLTRCPCPGGSVQDSLRRRAQEHQELPLDLNLKQVSPLFGTTIYDAVFLLAGGVK  
 RARTAVGGGWVSGASVARQVREAVQVSGFCVGLGRTEEPSFVLLD TDASGEQLFATHLLDPVLGSLRSAGTPMH  
 FPRGGPAGGPDPCWFDPDVICNGGVEPGLVFGVGLLIGMGLTGAF LAHYLRHLLHMOMASGPNKIILTLE  
 DVTFLHPPGGSSRKVVQGSRS SLATRSASDIRSVSPQPESTNVGLYEGDWVWLKFFPGEHHMAIRPATKTAF  
 SKLREL RHENVALYLGFLAGTADSPATPGE GILAVVSEHCARGSLHDLLAQREIKLDWMFKSSLLLDLIKGM  
 RYLHHRGVVAHGR LKSRNCVVDGRFVLKVTDHGHGR LLEAQRVLPPEPPSAEDQLWTAPELLRDP SLERRGTLAG  
 DVFSLAIIMQEVVCRSTPYAMLELTPEEVIQRVRSPPPLCRPLVSMQAPMECIQLMTQCWAEHP ELRPSMDL  
 TFDL FKSINKGRKTNIIDSMLRMLQYSSNLEDLIRERTEELEQEKQKTDRLLTQMLPPSVAEALKMGT SVEP  
 EYFEEVTLYFSDIVGFTTISAMSEPIEVVDLLNDLYTLFDAIIGAHDVYK VETIGDAYMVASGLPQRNGQRHA  
 AEIANMSLDILSAVGSFRMRHMEVVPVIRIRIGLHSGPCVAGVVGLTMPRYCLFGDVTNTASRMESTGLPYRIH  
 VMNSTVRILRALDQGFQMECRGRTELKKGKIEDTYWL VGRGLGFNKPIPKPPDLQPGASNHGISLQEI PPERRK  
 KLEKARPGQFTGK\*

>rs29470592\_ENSMUSP00000104305\_c.460:G>A\_p.G154D

ENSMUST00000108665.8|Gucy2e-203|ENSMUSG0000020890|-|chr11:g.69127011:C>T  
 MSAWLLPAGGLPGAGFCVPARQSPSSFSRVLRWPRPGLPGLLLLLLLLLLPSALSASAVFKVGLGPWACDPIFAR  
 ARPDLAARLANRDLNRDGFALDGGPRFEVALLPEPCLTPGSLGAVSSALSRSVGLVGPVNPAACRPAELLAQEA  
 GVALVPWDCPGTRAAGTTAPAVTPAADALYVLLRAFRWARVALITAPQDLWEAGRALSTALRARGLPVALVT  
 SMETSDRSGAREALGRIRDGPRVRVVMVMSVLLGGEEQRYLLEAAEELALTDGSLVFLPFDTLHYALSPGP  
 EALAAFVNSSLRRAHDAVLTTLTRCPCPGGSVQDSLRRRAQEHQELPLDLNLKQVSPLFGTTIYDAVFLLAGGVK  
 RARTAVGGGWVSGASVARQVREAVQVSGFCVGLGRTEEPSFVLLD TDASGEQLFATHLLDPVLGSLRSAGTPMH  
 FPRGGPAGGPDPCWFDPDVICNGGVEPGLVFGVGLLIGMGLTGAF LAHYLRHLLHMOMASGPNKIILTLE  
 DVTFLHPPGGSSRKVVQGSRS SLATRSASDIRSVSPQPESTNVGLYEGDWVWLKFFPGEHHMAIRPATKTAF  
 SKLREL RHENVALYLGFLAGTADSPATPGE GILAVVSEHCARGSLHDLLAQREIKLDWMFKSSLLLDLIKGM  
 RYLHHRGVVAHGR LKSRNCVVDGRFVLKVTDHGHGR LLEAQRVLPPEPPSAEDQLWTAPELLRDP SLERRGTLAG  
 DVFSLAIIMQEVVCRSTPYAMLELTPEEVIQRVRSPPPLCRPLVSMQAPMECIQLMTQCWAEHP ELRPSMDL  
 TFDL FKSINKGRKTNIIDSMLRMLQYSSNLEDLIRERTEELEQEKQKTDRLLTQMLPPSVAEALKMGT SVEP  
 EYFEEVTLYFSDIVGFTTISAMSEPIEVVDLLNDLYTLFDAIIGAHDVYK VETIGDAYMVASGLPQRNGQRHA  
 AEIANMSLDILSAVGSFRMRHMEVVPVIRIRIGLHSGPCVAGVVGLTMPRYCLFGDVTNTASRMESTGLPYRIH  
 VMNSTVRILRALDQGFQMECRGRTELKKGKIEDTYWL VGRGLGFNKPIPKPPDLQPGASNHGISLQEI PPERRK  
 KLEKARPGQFTGK\*

>rs29470592\_ENSMUSP00000104304\_c.460:G>A\_p.G154D

ENSMUST00000108664.2|Gucy2e-202|ENSMUSG0000020890|-|chr11:g.69127011:C>T  
 MSAWLLPAGGLPGAGFCVPARQSPSSFSRVLRWPRPGLPGLLLLLLLLLLPSALSASAVFKVGLGPWACDPIFAR  
 ARPDLAARLANRDLNRDGFALDGGPRFEVALLPEPCLTPGSLGAVSSALSRSVGLVGPVNPAACRPAELLAQEA  
 GVALVPWDCPGTRAAGTTAPAVTPAADALYVLLRAFRWARVALITAPQDLWEAGRALSTALRARGLPVALVT  
 SMETSDRSGAREALGRIRDGPRVRVVMVMSVLLGGEEQRYLLEAAEELALTDGSLVFLPFDTLHYALSPGP  
 EALAAFVNSSLRRAHDAVLTTLTRCPCPGGSVQDSLRRRAQEHQELPLDLNLKQVSPLFGTTIYDAVFLLAGGVK  
 RARTAVGGGWVSGASVARQVREAVQVSGFCVGLGRTEEPSFVLLD TDASGEQLFATHLLDPVLGSLRSAGTPMH  
 FPRGGPAGGPDPCWFDPDVICNGGVEPGLVFGVGLLIGMGLTGAF LAHYLRHLLHMOMASGPNKIILTLE  
 DVTFLHPPGGSSRKVVQGSRS SLATRSASDIRSVSPQPESTNVGLYEGDWVWLKFFPGEHHMAIRPATKTAF  
 SKLREL RHENVALYLGFLAGTADSPATPGE GILAVVSEHCARGSLHDLLAQREIKLDWMFKSSLLLDLIKGM  
 RYLHHRGVVAHGR LKSRNCVVDGRFVLKVTDHGHGR LLEAQRVLPPEPPSAEDQLWTAPELLRDP SLERRGTLAG  
 DVFSLAIIMQEVVCRSTPYAMLELTPEEVIQRVRSPPPLCRPLVSMQAPMECIQLMTQCWAEHP ELRPSMDL  
 TFDL FKSINKGRKTNIIDSMLRMLQYSSNLEDLIRERTEELEQEKQKTDRLLTQMLPPSVAEALKMGT SVEP  
 EYFEEVTLYFSDIVGFTTISAMSEPIEVVDLLNDLYTLFDAIIGAHDVYK VETIGDAYMVASGLPQRNGQRHA  
 AEIANMSLDILSAVGSFRMRHMEVVPVIRIRIGLHSGPCVAGVVGLTMPRYCLFGDVTNTASRMESTGLPYRIH  
 VMNSTVRILRALDQGFQMECRGRTELKKGKIEDTYWL VGRGLGFNKPIPKPPDLQPGASNHGISLQEI PPERRK  
 KLEKARPGQFTGK\*

>rs29470592\_ENSMUSP0000021259\_c.460:G>A\_p.G154D

ENSMUST0000021259.9|Gucy2e-201|ENSMUSG0000020890|-|chr11:g.69127011:C>T  
 MSAWLLPAGGLPGAGFCVPARQSPSSFSRVLRWPRPGLPGLLLLLLLLLLPSALSASAVFKVGLGPWACDPIFAR  
 ARPDLAARLANRDLNRDGFALDGGPRFEVALLPEPCLTPGSLGAVSSALSRSVGLVGPVNPAACRPAELLAQEA  
 GVALVPWDCPGTRAAGTTAPAVTPAADALYVLLRAFRWARVALITAPQDLWEAGRALSTALRARGLPVALVT  
 SMETSDRSGAREALGRIRDGPRVRVVMVMSVLLGGEEQRYLLEAAEELALTDGSLVFLPFDTLHYALSPGP



EALAAFVNSSQLRRAHDAVLTTLTRRCPPGGSVQDSLRRRAQEHQELPLDLNLKQVSPFLFGTIYDAVFLLAGGVK  
RARTAVGGGWVSGASVARQVREAQVSGFCVGLGRTEEPSFVLLD TDASGEQLFATHLLDPVLGSLRSAGTPMH  
FPRGGPAPGPDPCWFDPDVICNGGVEPGLVFGVGLLVI GMGLTGAF LAHYLRHRLHMQMASGPNKI ILLTLE  
DVTFLHPPGGSSRKVVQGSRS SLATRSASDIRSVSPQPQESTNVGLYEGDWVWLKFKFPGEHMAIRPATKTAF  
SKLREL RHENVALYLGLFLAGTADSPATPGE GILAVVSEHCARGSLHDL LAQREIKLDW MFKSSLLLDLIKGM  
RYLHHRGVAHGRLKSRNCVVDGRFVLKVTDHGHGRLL EAQRVLP EPPSAEDQLWTAPELLRDP SLERRGTLAG  
DVFS LAIIMQEVVCRSTPYAMLELTPEEVIQRVRSPP LCRPLVSM DQAPMECIQLMTQCWAEHP ELRPSMDL  
TFDLFKSINKGRKTNIIDSMLRMLEQYSSNLEDLIRERTEE LEQE KQKTDRLLTQMLPPSVAEALKMGT SVEP  
EYFEEVTLYFSDIVGFTTISAMSEPIEVVDLLNDLYTLFD AIIGAHDVYK VETIGDAYMVASGLPQRNGQRHA  
AEIANMSLDILSAVGSFRMRHMEVVPVRIRIGLHSGPCVAGVVGLTMPRYCLFGD TVNTASRMESTGLPYRIH  
VNMSTVRILRALDQGFQMECRGRTELKKGIEDTYWLVGRLGFNKPIPKPPDLQPGASNHGISLQEIPPERRK  
KLEKARPGQFTGK\*

>rs29447827\_ENSMUSP00000104305\_c.429:C>T\_p.Q144\*

ENSMUST00000108665.8|Gucy2e-203|ENSMUSG00000020890|-|chr11:g.69127042:G>A  
MSAWLLPAGGLPGAGFCV PARQSPSSFSRVLRWPRPGLPGLLLLLLLPSPSALS AVFKVGLGPWACDPI FAR  
ARPDLAARLANRLNRDFALDGGPRFEVALLPEPCLTPGSLGAVSSALS RVSGLVGPNPAACRPAELLA\*EA  
GVALVPWGC PGTRAAGTTAPAVT PAADALYVLLRAFRWARVALI TAPQDLWEAGRALSTALRARGLPVALVT  
SMETSDRSGAREALGRIRDGPRVRVVMVMH SVLLGGEEQRYLLEAAEELALTDGSLVFLPFDTLHYALS PGP  
EALAAFVNSSQLRRAHDAVLTTLTRRCPPGGSVQDSLRRRAQEHQELPLDLNLKQVSPFLFGTIYDAVFLLAGGVK  
RARTAVGGGWVSGASVARQVREAQVSGFCVGLGRTEEPSFVLLD TDASGEQLFATHLLDPVLGSLRSAGTPMH  
FPRGGPAPGPDPCWFDPDVICNGGVEPGLVFGVGLLVI GMGLTGAF LAHYLRHRLHMQMASGPNKI ILLTLE  
DVTFLHPPGGSSRKVVQGSRS SLATRSASDIRSVSPQPQESTNVGLYEGDWVWLKFKFPGEHMAIRPATKTAF  
SKLREL RHENVALYLGLFLAGTADSPATPGE GILAVVSEHCARGSLHDL LAQREIKLDW MFKSSLLLDLIKGM  
RYLHHRGVAHGRLKSRNCVVDGRFVLKVTDHGHGRLL EAQRVLP EPPSAEDQLWTAPELLRDP SLERRGTLAG  
DVFS LAIIMQEVVCRSTPYAMLELTPEEVIQRVRSPP LCRPLVSM DQAPMECIQLMTQCWAEHP ELRPSMDL  
TFDLFKSINKGRKTNIIDSMLRMLEQYSSNLEDLIRERTEE LEQE KQKTDRLLTQMLPPSVAEALKMGT SVEP  
EYFEEVTLYFSDIVGFTTISAMSEPIEVVDLLNDLYTLFD AIIGAHDVYK VETIGDAYMVASGLPQRNGQRHA  
AEIANMSLDILSAVGSFRMRHMEVVPVRIRIGLHSGPCVAGVVGLTMPRYCLFGD TVNTASRMESTGLPYRIH  
VNMSTVRILRALDQGFQMECRGRTELKKGIEDTYWLVGRLGFNKPIPKPPDLQPGASNHGISLQEIPPERRK  
KLEKARPGQFTGK\*

>rs29447827\_ENSMUSP00000104304\_c.429:C>T\_p.Q144\*

ENSMUST00000108664.2|Gucy2e-202|ENSMUSG00000020890|-|chr11:g.69127042:G>A  
MSAWLLPAGGLPGAGFCV PARQSPSSFSRVLRWPRPGLPGLLLLLLLPSPSALS AVFKVGLGPWACDPI FAR  
ARPDLAARLANRLNRDFALDGGPRFEVALLPEPCLTPGSLGAVSSALS RVSGLVGPNPAACRPAELLA\*EA  
GVALVPWGC PGTRAAGTTAPAVT PAADALYVLLRAFRWARVALI TAPQDLWEAGRALSTALRARGLPVALVT  
SMETSDRSGAREALGRIRDGPRVRVVMVMH SVLLGGEEQRYLLEAAEELALTDGSLVFLPFDTLHYALS PGP  
EALAAFVNSSQLRRAHDAVLTTLTRRCPPGGSVQDSLRRRAQEHQELPLDLNLKQVSPFLFGTIYDAVFLLAGGVK  
RARTAVGGGWVSGASVARQVREAQVSGFCVGLGRTEEPSFVLLD TDASGEQLFATHLLDPVLGSLRSAGTPMH  
FPRGGPAPGPDPCWFDPDVICNGGVEPGLVFGVGLLVI GMGLTGAF LAHYLRHRLHMQMASGPNKI ILLTLE  
DVTFLHPPGGSSRKVVQGSRS SLATRSASDIRSVSPQPQESTNVGLYEGDWVWLKFKFPGEHMAIRPATKTAF  
SKLREL RHENVALYLGLFLAGTADSPATPGE GILAVVSEHCARGSLHDL LAQREIKLDW MFKSSLLLDLIKGM  
RYLHHRGVAHGRLKSRNCVVDGRFVLKVTDHGHGRLL EAQRVLP EPPSAEDQLWTAPELLRDP SLERRGTLAG  
DVFS LAIIMQEVVCRSTPYAMLELTPEEVIQRVRSPP LCRPLVSM DQAPMECIQLMTQCWAEHP ELRPSMDL  
TFDLFKSINKGRKTNIIDSMLRMLEQYSSNLEDLIRERTEE LEQE KQKTDRLLTQMLPPSVAEALKMGT SVEP  
EYFEEVTLYFSDIVGFTTISAMSEPIEVVDLLNDLYTLFD AIIGAHDVYK VETIGDAYMVASGLPQRNGQRHA  
AEIANMSLDILSAVGSFRMRHMEVVPVRIRIGLHSGPCVAGVVGLTMPRYCLFGD TVNTASRMESTGLPYRIH  
VNMSTVRILRALDQGFQMECRGRTELKKGIEDTYWLVGRLGFNKPIPKPPDLQPGASNHGISLQEIPPERRK  
KLEKARPGQFTGK\*

>rs29447827\_ENSMUSP00000021259\_c.429:C>T\_p.Q144\*

ENSMUST00000021259.9|Gucy2e-201|ENSMUSG00000020890|-|chr11:g.69127042:G>A  
MSAWLLPAGGLPGAGFCV PARQSPSSFSRVLRWPRPGLPGLLLLLLLPSPSALS AVFKVGLGPWACDPI FAR  
ARPDLAARLANRLNRDFALDGGPRFEVALLPEPCLTPGSLGAVSSALS RVSGLVGPNPAACRPAELLA\*EA  
GVALVPWGC PGTRAAGTTAPAVT PAADALYVLLRAFRWARVALI TAPQDLWEAGRALSTALRARGLPVALVT  
SMETSDRSGAREALGRIRDGPRVRVVMVMH SVLLGGEEQRYLLEAAEELALTDGSLVFLPFDTLHYALS PGP  
EALAAFVNSSQLRRAHDAVLTTLTRRCPPGGSVQDSLRRRAQEHQELPLDLNLKQVSPFLFGTIYDAVFLLAGGVK  
RARTAVGGGWVSGASVARQVREAQVSGFCVGLGRTEEPSFVLLD TDASGEQLFATHLLDPVLGSLRSAGTPMH  
FPRGGPAPGPDPCWFDPDVICNGGVEPGLVFGVGLLVI GMGLTGAF LAHYLRHRLHMQMASGPNKI ILLTLE  
DVTFLHPPGGSSRKVVQGSRS SLATRSASDIRSVSPQPQESTNVGLYEGDWVWLKFKFPGEHMAIRPATKTAF

SKLRELHREVALYLGFLAGTADSPATPGEGLAVVSEHCARGSLHDLAQQREIKLDWMFKSLLLDLIKGM  
RYLHHRGVAHGRKLSRNCVVDGRFVLKVTDHGHGRLLLEAQRVLEPPSAEDQLWTAPELLRDPSELRERRGLAG  
DVFS LAIIMQEVVCRSTPYAMLELTPEEVIQVRVSPPLCRPLVSMQAPMECIQLMTQCWAEHPPELRPMSDL  
TFDLFKSINKGRKTNIIDSMLRMLEQYSSNLEDLIRERTEELEQEKKQKTDRLLTQMLPPSVAEALKMGTSVEP  
EYFEEVTLYFSDIVGFTTISAMSEPIEVVDLLNDLYTLFDALIGAHVDYKVTETIGDAYMVASGLPQRNGQRHA  
AEIANMSLDILSAVGSFRMRHMEVFPVIRIRIGLHSGPCVAGVVGLTMPRYCLFGDVTNTASRMESTGLPYRIH  
VNMTSVRILRALDQGFQMECRGRTELKKGIEDTYWLVGRLGFNKPIPKPPDLQPGASNHGISLQEI PPERRK  
KLEKARPGQFTGK\*

>rs26890046\_ENSMUSP00000090651\_c.1221:C>T\_p.R408W  
ENSMUST00000092973.6|Cntrob-201|ENSMUSG00000032782|-|chr11:g.69205611:G>A  
MATAAPSPSSPLRPEDLLSDSSEPPGLNQVSSEVTSQLYTSLHLSRQAEATARAQLYLAPTSSPPNEGLDLSLA  
QELSRSLSVGLENNLKKKDGSKHIFEMESVRGQLQTMHTSRDTAYRTGSRERREEDSFSDSTATLLNTRPLQ  
DLSPSSAPALEELFPRYTSLRPGPPTNPPDFQGLRDALDAELTRRKHCHERHIQSLQTRVLELQQQLAVAVAA  
DHKKDLMI EQLDKTLARVVEGWNRHEAERTEVLRGLQEERQAAELTRSKQOQETVTRLEQSLSEAMEALSREQE  
GARLQOREKEALEEERQALTLRLEVEQQQCRTLQEERDEARAGQLSEHRKLEALQVALQEERQAWIKQEHQLK  
ERLQALQEEGQAQLEREKGN SQREAAAWETQQQFALLQTEVVRLEGLDLDTVRRERDALQLEMSLVQARYESQ  
RIQMESELAVQLEQRVTERLAEAQENSLRQAASLRDHRKQLQELSGQHQQELAAQLAQFKVEMADREERQQQ  
VAQDYELRLAREQARVRDLKSGNQQLLEEQRaelVERLQAMLQAHWEEANQLLSTLLPPNPQAPLAEPPSSPGP  
LEPEKGERRTWAMPMAVALKPVLQQSREVKGDVPGAPSVLCSTSPDLSLLGPPFQNFQNSFPLEPKPDVTP  
PTAGPFSALEAFTDDHRAERPFPEEDPGSDGDARLPPASQLEGLKNFLQQLLETAPQSNGNPSADLLLPKAGS  
RAVSSWEEAPQVPRLPVHKT KVPLAMASSLFRVHGLPSTNLQSGSLSTGSPKDG LNLVDVSELLRLYQAR  
GWGALPAEDLLLYLKRLEHSGTDGQGELVPRRNTDSRLGETTRKEIPSQAVPRRLASVPKTEKPARKKSGHPG  
PSMRSRGGIWR\*

>rs50969537\_ENSMUSP00000090651\_c.309:C>T\_p.R104W  
ENSMUST00000092973.6|Cntrob-201|ENSMUSG00000032782|-|chr11:g.69212723:G>A  
MATAAPSPSSPLRPEDLLSDSSEPPGLNQVSSEVTSQLYTSLHLSRQAEATARAQLYLAPTSSPPNEGLDLSLA  
QELSRSLSVGLENNLKKKDGSKHIFEMESVWGQLQTMHTSRDTAYRTGSRERREEDSFSDSTATLLNTRPLQ  
DLSPSSAPALEELFPRYTSLRPGPPTNPPDFQGLRDALDAELTRRKHCHERHIQSLQTRVLELQQQLAVAVAA  
DHKKDLMI EQLDKTLARVVEGWNRHEAERTEVLRGLQEERQAAELTRSKQOQETVTRLEQSLSEAMEALSREQE  
GARLQOREKEALEEERQALTLRLEVEQQQCRTLQEERDEARAGQLSEHRKLEALQVALQEERQAWIKQEHQLK  
ERLQALQEEGQAQLEREKGN SQREAAAWETQQQFALLQTEVVRLEGLDLDTVRRERDALQLEMSLVQARYESQ  
RIQMESELAVQLEQRVTERLAEAQENSLRQAASLRDHRKQLQELSGQHQQELAAQLAQFKVEMADREERQQQ  
VAQDYELRLAREQARVRDLKSGNQQLLEEQRaelVERLQAMLQAHWEEANQLLSTLLPPNPQAPLAEPPSSPGP  
LEPEKGERRTWAMPMAVALKPVLQQSREVKGDVPGAPSVLCSTSPDLSLLGPPFQNFQNSFPLEPKPDVTP  
PTAGPFSALEAFTDDHRAERPFPEEDPGSDGDARLPPASQLEGLKNFLQQLLETAPQSNGNPSADLLLPKAGS  
RAVSSWEEAPQVPRLPVHKT KVPLAMASSLFRVHGLPSTNLQSGSLSTGSPKDG LNLVDVSELLRLYQAR  
GWGALPAEDLLLYLKRLEHSGTDGQGELVPRRNTDSRLGETTRKEIPSQAVPRRLASVPKTEKPARKKSGHPG  
PSMRSRGGIWR\*

>rs218677001\_ENSMUSP00000122205\_c.16:C>T\_p.P6L  
ENSMUST00000123176.8|Cntrob-202|ENSMUSG00000032782|-|chr11:g.69213772:G>A  
MATAALSPSSPLRPEDLLSDSSEPPGLNQVSSEVTSQLYTSLHLSRQAEATARAQLYLAPTSSPPNEGLDLSLA  
QELSRSLSVGLENNLKKKELVQRDGRKTPVTIAQLPCSTPGLCKTCLHPALPRHWKSCFPATLAFGPAPPPT  
PQIFRG\*

>rs218677001\_ENSMUSP00000090651\_c.16:C>T\_p.P6L  
ENSMUST00000092973.6|Cntrob-201|ENSMUSG00000032782|-|chr11:g.69213772:G>A  
MATAALSPSSPLRPEDLLSDSSEPPGLNQVSSEVTSQLYTSLHLSRQAEATARAQLYLAPTSSPPNEGLDLSLA  
QELSRSLSVGLENNLKKKDGSKHIFEMESVRGQLQTMHTSRDTAYRTGSRERREEDSFSDSTATLLNTRPLQ  
DLSPSSAPALEELFPRYTSLRPGPPTNPPDFQGLRDALDAELTRRKHCHERHIQSLQTRVLELQQQLAVAVAA  
DHKKDLMI EQLDKTLARVVEGWNRHEAERTEVLRGLQEERQAAELTRSKQOQETVTRLEQSLSEAMEALSREQE  
GARLQOREKEALEEERQALTLRLEVEQQQCRTLQEERDEARAGQLSEHRKLEALQVALQEERQAWIKQEHQLK  
ERLQALQEEGQAQLEREKGN SQREAAAWETQQQFALLQTEVVRLEGLDLDTVRRERDALQLEMSLVQARYESQ  
RIQMESELAVQLEQRVTERLAEAQENSLRQAASLRDHRKQLQELSGQHQQELAAQLAQFKVEMADREERQQQ  
VAQDYELRLAREQARVRDLKSGNQQLLEEQRaelVERLQAMLQAHWEEANQLLSTLLPPNPQAPLAEPPSSPGP  
LEPEKGERRTWAMPMAVALKPVLQQSREVKGDVPGAPSVLCSTSPDLSLLGPPFQNFQNSFPLEPKPDVTP  
PTAGPFSALEAFTDDHRAERPFPEEDPGSDGDARLPPASQLEGLKNFLQQLLETAPQSNGNPSADLLLPKAGS  
RAVSSWEEAPQVPRLPVHKT KVPLAMASSLFRVHGLPSTNLQSGSLSTGSPKDG LNLVDVSELLRLYQAR  
GWGALPAEDLLLYLKRLEHSGTDGQGELVPRRNTDSRLGETTRKEIPSQAVPRRLASVPKTEKPARKKSGHPG  
PSMRSRGGIWR\*



VEERITQVAKRKMMLTHLVVRPGLGSKAGSMSKQELDDILKFGTEELFKDENEGENKEEDSSVIHYDNEAIARLLDRNQDATEDTDVQNMNEYLSSFKVAQYVVREEDKIEEIEREIIKQENVDPDYWEKLLRHHYEQQEDLARNLGKGRVVRKQVNYNDAAQEDQDNQSEYVSGSEEEDEDFDERPEGRRQSKRQLRNEKDKPLPPLLARVGGNIEVLGFNTRQRKAFLNAVMRWGMPPQDAFTTQWLVRDLRGKTEKEFKAYVSLFMRHLCEPGADGSETFADGVPREGLSRQQVLTRIGVMSLVKKKQVEFEHINGRWSMPELMPDPSAESKRSSRASSPTKTSPTTPEASTTNSPCTSKPATPAPSEKGDGVRTPLDKDDTENQEEKPEKNSKVGEKMAEVDSPSPAPSLGERLEHRKILLEDEAPGVPGETEPEPGYRGDREKSASEPTPGERGEEKPLDVQEHRETEGETGDLGKREDVKADRELRLGPPRDEPRPNGRREKVEKPRFMFNIADGGFTELHTLWQNEERAAISSGKLNIEWHRHDYWLLAGIVLHGYPARWQDIQNDQAQFAIINEPFKTEANKGNFLEMKNKFLARRFKLLEQALVIEEQLRRAAYLNLSQLPAHPAMALHARFAEAELAESHQHLSKESLAGNKPANAVLHKVLNQLLELLSDMKADVTRLPATLSRIPIAARLQMSERSILSRLASKGTEPHPTPAFPPGYPATPPGYGAAFSAAPVGALAAAGANYSQMPAGSFITATTTNGPPVLVKKEKEMVGLVSDGLGLDRKEPRAGEVICIDD\*

>rs26889931\_ENSMUSP00000122137\_c.2700:G>A\_p.E901K  
ENSMUST00000128981.8|Chd3-204|ENSMUSG00000018474|-|chr11:g.69247187:C>T  
XSALGVKKRKRKRGPKKQKENKPKPRKRKLDSEEEFGSERDEYREKSESGSEYGTGPRKRRRKHREKKEKTKRRKRGEEDGGHKQVEQKSSATLLLTWGLEDEHVVFSEEDYHTLTNYKAQFSQFMRPLIAKKNPKIPMSKMMTILGAKWREFSANNPFKGSAAAVAAAAAQAQVSAVSSATPIAPSGPPALPPPAPAIQPPPPIRAKTEGKGGPGHKRRNKS PRVPDGRKLRGKKMAPLKI KLGLLGGKRRKAGSCAFQSEEGHEPEAEESDLDSDGSVHSASGWPDPVRAKLRGRPRGKRRKVLGCPAVTGEEDVGYETDHDQDYCEVCQQGGEIILCDTDCPRAYHLVCLDPELDRAPEGKWSCPHCEKEGVQWEAKEEEEEEEYEEGEEGEEKEEEDDHMEYCRVCKDGGELLCCDACISSYHIHCLNPPLPDIPNGEWLCPRCTCPVLKGRVQKILHWRWGEPPVAVPAPQQADGNPDVPPRPLQGRSEREFFVWVGLSYWHCSWAKELQLEIFHLVMYRNYQRKNDMDEPPPLDYSGGEDDGKSDKRKVKDPHYAEMEEKYRFGIKPEWMTVHRIINHSMDDKGNHYLVKWKDLPYDQSTWEEDEMNIPEYDDHKQSYWRHRELIMGEDPAQPRKYKKKKKELQGDGPPSSPTNDPTVKYETQPRFITATGGTLHMYQLEGLNWLRFWSWAQGTDTILADEMGLGKTIQTVFLYSLYKEGHTKGFVLSAPLSTIINWEREFQMWAPKFYVVTYTGDKDSRAIIRENEFSFEDNAIKGGKKAFKMKREAQVKFHVLLTSYELITIDQAALGSIRWACLIVDEAHLKNNQSKFFRVNLNGYKIDHKLTLTGTPLQNLLEELFHLNFLTPERFNNLEGFLEKFADISKEDQIKKLDLHLLGPHMLRRLKADVFKNMPAKTELIVRVELSPMQKKYKYILTRNFEALNSRGGGNQVSLNIMMDLKKCCNHPYLFVPAAMESPKLPSGAYEGGALIKSSGKLLLLQKMLRKLKEQGHRVLIIFSQMTKMLDLEDFLDYEGYKYERIDGGITGALRQEAIDRFNAPGAQQFCFLSTRAGGLGINLATADTVIIFDSDWNPHNDIQAFSRAHRIGQANKVMIYRFVTRASVEERITQVAKRKMMLTHLVVRPGLGSKAGSMSKQELDDILKFGTEELFKDENEGENKEEDSSVIHYDNEAIARLLDRNQDATEDTDVQNMNEYLSSFKVAQYVVREEDKIEEIEREIIKQENVDPDYWEKLLRHHYEQQEDLARNLGKGRVVRKQVNYNDAAQEDQDNQSEYVSGSEEEDEDFDERPEGRRQSKRQLRNEKDKPLPPLLARVGGNIEVLGFNTRQRKAFLNAVMRWGMPPQDAFTTQWLVRDLRGKTEKEFKAYVSLFMRHLCEPGADGSETFADGVPREGLSRQQVLTRIGVMSLVKKKQVEFEHINGRWSMPELMPDPSAESKRSSRASSPTKTSPTTPEASTTNSPCTSKPATPAPSEKGDGVRTPLDKDDTENQEEKPEKNSKVGEKMAEVDSPSPAPSLGERLEHRKILLEDEAPGVPGETEPEPGYRGDREKSASEPTPGERGEEKPLDVQEHRETEGETGDLGKREDVKADRELRLGPPRDEPRPNGRREKVEKPRFMFNIADGGFTELHTLWQNEERAAISSGKLNIEWHRHDYWLLAGIVLHGYPARWQDIQNDQAQFAIINEPFKTEANKGNFLEMKNKFLARRFKLLEQALVIEEQLRRAAYLNLSQLPAHPAMALHARFAEAELAESHQHLSKESLAGNKPANAVLHKVLNQLLELLSDMKADVTRLPATLSRIPIAARLQMSERSILSRLASKGTEPHPTPAFPPGYPATPPGYGAAFSAAPVGALAAAGANYSQMPAGSFIT

>rs26889931\_ENSMUSP00000118172\_c.96:G>A\_p.E33K  
ENSMUST00000151436.2|Chd3-209|ENSMUSG00000018474|-|chr11:g.69247187:C>T  
XTGTPLQNNLEELFHLNFLTPERFNNLEGFLEKFADISKEDQIKKLDLHLLGPHMLRRLKADVFKNMPAKTELIVRVELSPMQKLLFYSLLYIPTLVFRKYKYILTRNFEALNSRGGGNQVSLNIMMDLKKCCNHPYLFVPAAMESPKLPSGAYEGGALIKSSGKLLLLQKMLRKLKEQGHRVLIIFSQMTKMLD

>rs26889931\_ENSMUSP00000090649\_c.2979:G>A\_p.E994K  
ENSMUST00000092971.13|Chd3-201|ENSMUSG00000018474|-|chr11:g.69247187:C>T  
MASPLRDEEEEEEMVSEEEEEEEEGDEEEEEVEAADEDEEEDDEEGLVLRGPGHRSRDRHSPSCHLFP PPPPLPPPPPPDKDDIRLLPSALGVKKRKRKRGPKKQKENKPKPRKRKLDSEEEFGSERDEYREKSESGSEYGTGPRKRRRKHREKKEKTKRRKRGEEDGGHKQVEQKSSATLLLTWGLEDEHVVFSEEDYHTLTNYKAQFSQFMRPLIAKKNPKIPMSKMMTILGAKWREFSANNPFKGSAAAVAAAAAQAQVSAVSSATPIAPSGPPALPPPAPAIQPPPPIRAKTEGKGGPGHKRRNKS PRVPDGRKLRGKKMAPLKI KLGLLGGKRRKAGSCAFQSEEGHEPEAEESDLDSDGSVHSASGWPDPVRAKLRGRPRGKRRKVLGCPAVTGEEDVGYETDHDQDYCEVCQQGGEIILCDTDCPRAYHLVCLDPELDRAPEGKWSCPHCEKEGVQWEAKEEEEEEEYEEGEEGEEKEEEDDHMEYCRVCKDGGELLCCDACISSYHIHCLNPPLPDIPNGEWLCPRCTCPVLKGRVQKILHWRWGEPPVAVPAPQQADGNPDVPPRPLQGRSEREFFVWVGLSYWHCSWAKELQLEIFHLVMYRNYQRKNDMDEPPPLDYSGGEDDGKSDKRKVKDPHYAEMEEKYRFGIKPEWMTVHRIINHSMDDKGNHYLVKWKDLPYDQSTWEEDEMNIPEYDDHKQSYWRHRELIMGEDPAQPRKYKKKKKELQGDGPPSSPTNDPTVKYETQPRFITATGGTLHMYQLEGLNWLRFWS

AQGTDTILADEMGLGKTIQTIIVFLYSLYKEGHTKGPFLVSAPLSTI INWEREFQMWAPKFYVVTYTGDKDSRA  
I IRENEFSFEDNAIKGGKAFKMKREAQVKFHVLLTSYELITIDQAALGSIRWACLVDVAHRLKNNQSKFFR  
VLNGYKIDHKLLLTGTPLQNNLEELFHLNFLTPERFNNLEGFLEEFADISKEDQIKKLDLGLPHMLRRLKA  
DVFNMPAKTELIIVRVELSPMQKYYKYILTRNFALNSRGGGNQVSLNIMMDLKKCCNHPYLFVVAAMESP  
KLPSPGAYEGGALIKSSGKLLLLQKMLRKLKEQGHRVLI F SQMTKMLDLLEDFLDYEGYKYERIDGGITGALRQ  
EAIDRFNAPGAQQFCFLSTRAGGLGINLATADTVIIFDSDWNPHNDIQAFSRAHRIGQANKVMIYRFVTRAS  
VEERITQVAKRKMMLTHLVVRPGLGSKAGSMSKQELDDILKFGTEELFKDENEGENKEEDSSVIHYDNEAIAR  
LLDRNQDATEDTDVQNMNEYLSSFKVAQYVVREEDKIEEIEREIIKQENVDPDYWEKLLRHHYEQQQEDLAR  
NLGKGRVRKQVNYNDAAQEDQDNQSEYSVGSSEEEDEDFDERPEGRRQSKRQLRNEKDKPLPPLLARVGGNIE  
VLGFNTRQRKAFLNAVMRWGMPPQDAFTTQWLVRDLRGKTEKEFKAYVSLFMRHLCEPGADGSETFADGVPRE  
GLSRQQLVTRIGVMSLVKKKQVEFEHINGRWSMPELMPDPSAESKRSSRASPTKTSPTTPEASTTNSPCTSK  
PATPAPSEKGDGVRTPLDKDDTENQEEKPEKNSKVGEKMEAEVDSPPAPSLGERLEHRKILLEDEAPGVPGE  
TEPEPGYRGDREKSEVDKADRELRLGPPRDEPRPNGRREEKVEKPRFMFNIADGGFTELHTLWQNEERAAISS  
GKLNIEIWHRRHDYWLLAGIVLHGYPARWQDIQNDAAQFAI INEPFKTEANKGNFLEMKNKFLARRFKLLEQALVI  
EEQLRRAAYLNLNSQEPAPAMALHARFAEAECLEASHQHSKESLAGNKPANAVLHKVLNQLLEELSDMKADV  
TRLPATLSRIPIAARLQMSERSILSRASKGTEPHPTPAFPFGPYATPPGYGAAFSAAPVGAALAAAGANYSQ  
MPAGSFITATTNGPPVLVKKKEKEMVGVSDGLGLDRKEPRAGEVICIDD\*

>ENSMUSP00000104301\_c.2679:A>TCACACACACGCACACACA\_p.K894SHTRTHK-ins  
ENSMUST00000108661.8|Chd3-202|ENSMUSG00000018474|-  
|chr11:g.69248211:T>TGTGTGTGCGTGTGTGTGA  
MASPLRDEEEEEEMVSEEEEEEEEGDEEEEEVEAAEDDEEEDEEGVLGRGPGHDSRDRHSPPSCHLFP  
PPPPPLPPPPPPDKDDIRLLPSALGVKKRKRKGRPKKQENKPKGPRKRKLDSEEEFGSERDEYREKSESGGSE  
YGTGPGKRRRKHREKKEKTKRRKRGEEDGGHKQVEQKSSATLLLTWGLEDEHVSEEDYHTLTNYKAFSQ  
FMRPLIAKKNPKIPMSKMMTILGAKWREFSANNPFKGSAAAVAAAAAAAVAEQVSAAVSSATPIAPSGPP  
PALPPPPAPEIQPPPIRRRAKTKEGKGPGRKRRNKS PRVPDGRKLLRGKKMAPLKI KLGLLGGKRRKAGSCAFQ  
SEEGHEPEAEESDLDSGSVHSASGWPDPVRAKLLKRGPRGRKLLVLCGPAVTGEEVVDGYETDHQDYCEVC  
QQGGEIILCDTCPRAYHLVCLDPELDRAPGKWSCPHCEKEGVQWEAKEEEEEEEYEEGEEGEKEEEDDHMEYC  
RVCKDGGELLCCDACISSYHIHCLNPLPDI PNGEWLCPCTCPVLKGRVQKILHWRWGEPPVAVPAPQQADG  
NPDVPPRPLQGRSREFFVKWVGLSYWHCSWAKELQLEIFHLVMYRNYQRKNDMDEPPPLDYSGGEDDGKSD  
KRKVKDPHYAEMEEKYYRFGIKPEWMTVHRI INHSMDDKGNHYLVKWKDLPYDQSTWEEDEMNIPEYDDHKQ  
SYWRHRELIMGEDPAQPRKYKKKKELQGDGPPSSPTNDPTVKYETQPRFITATGGTLHMYQLEGLNWLRFWS  
AQGTDTILADEMGLGKTIQTIIVFLYSLYKEGHTKGPFLVSAPLSTI INWEREFQMWAPKFYVVTYTGDKDSRA  
I IRENEFSFEDNAIKGGSHTRTHKAFKMKREAQVKFHVLLTSYELITIDQAALGSIRWACLVDVAHRLKNN  
QSKFFRVLNGYKIDHKLLLTGTPLQNNLEELFHLNFLTPERFNNLEGFLEEFADISKEDQIKKLDLGLPHM  
LRLKADVFNMPAKTELIIVRVELSPMQKYYKYILTRNFALNSRGGGNQVSLNIMMDLKKCCNHPYLFV  
AAMESPKLPSPGAYEGGALIKSSGKLLLLQKMLRKLKEQGHRVLI F SQMTKMLDLLEDFLDYEGYKYERIDGGI  
TGALRQEAIDRFNAPGAQQFCFLSTRAGGLGINLATADTVIIFDSDWNPHNDIQAFSRAHRIGQANKVMIYR  
FVTRASVEERITQVAKRKMMLTHLVVRPGLGSKAGSMSKQELDDILKFGTEELFKDENEGENKEEDSSVIHYD  
NEAIARLLDRNQDATEDTDVQNMNEYLSSFKVAQYVVREEDKIEEIEREIIKQENVDPDYWEKLLRHHYEQQ  
QEDLARNLGKGRVRKQVNYNDAAQEDQDNQSEYSVGSSEEEDEDFDERPEGRRQSKRQLRNEKDKPLPPLLAR  
VGGNIEVLGFNTRQRKAFLNAVMRWGMPPQDAFTTQWLVRDLRGKTEKEFKAYVSLFMRHLCEPGADGSETFA  
DGVPREGLSRQQLVTRIGVMSLVKKKQVEFEHINGRWSMPELMPDPSAESKRSSRASPTKTSPTTPEASTTN  
SPCTSKPATPAPSEKGDGVRTPLDKDDTENQEEKPEKNSKVGEKMEAEVDSPPAPSLGERLEHRKILLEDEA  
PGVPGETEPEPEGYRGDREKSEASEPTPGERGEEKPLDVQEHRETEGETDLGKREDVKADRELRLGPPRDEPR  
PNGRREEKVEKPRFMFNIADGGFTELHTLWQNEERAAISSGKLNIEIWHRRHDYWLLAGIVLHGYPARWQDIQND  
AQFAI INEPFKTEANKGNFLEMKNKFLARRFKLLEQALVIEEQLRRAAYLNLNSQEPAPAMALHARFAEAECLE  
ASHQHSKESLAGNKPANAVLHKVLNQLLEELSDMKADVTRLPATLSRIPIAARLQMSERSILSRASKGT  
EPHPTPAFPFGPYATPPGYGAAFSAAPVGAALAAAGANYSQMPAGSFITATTNGPPVLVKKKEKEMVGVSDGL  
GLDRKEPRAGEVICIDD\*

>ENSMUSP00000122137\_c.2400:A>TCACACACACGCACACACA\_p.K801SHTRTHK-ins  
ENSMUST00000128981.8|Chd3-204|ENSMUSG00000018474|-  
|chr11:g.69248211:T>TGTGTGTGCGTGTGTGTGA  
XSALGVKKRKRKGRPKKQENKPKGPRKRKLDSEEEFGSERDEYREKSESGGSEYGTGPRKRRRKHREKKEKK  
TKRRKRGEEDGGHKQVEQKSSATLLLTWGLEDEHVSEEDYHTLTNYKAFSQFMRPLIAKKNPKIPMSKMMT  
ILGAKWREFSANNPFKGSAAAVAAAAAAAVAEQVSAAVSSATPIAPSGPPPALPPPPAPEIQPPPIRRRAK  
TKEGKGPGRKRRNKS PRVPDGRKLLRGKKMAPLKI KLGLLGGKRRKAGSCAFQSEEGHEPEAEESDLDSGSVH  
SASGWPDPVRAKLLKRGPRGRKLLVLCGPAVTGEEVVDGYETDHQDYCEVCQQGGEIILCDTCPRAYHLVCL  
DPELDRAPGKWSCPHCEKEGVQWEAKEEEEEEEYEEGEEGEKEEEDDHMEYCRVCKDGGELLCCDACISSYH



IHCLNPPLPDI PNGEWLCPRCTCPVLKGRVQKILHWRWGEPPVAVPAPQQADGNPDVPPRPLQGRSEREFFV  
KWVGLSYWHCSWAKELQLEIFHLVMYRNYQRKNDMDEPPPLDYSGGEDDGKSDKRKVKDPHYAEMEEKYRFG  
IKPEWMTVHRIINHSMDDKGNHYLVKWKDLPYDQSTWEEDEMNIPEYDDHKQSYWRHRELIMGEDPAQPRKY  
KKKKKELQGDGPPSSPTNDPTVKYETQPRFITATGGTLHMYQLEGLNWLRFWSWAQGTDTILADEMGLGKTIQT  
IVFLYSLYKEGHTKGPFLVSAPLSTIINWEREFQMWAPKFYVVTYTGDKDSRAIIRENEFSFEDNAIKGGSHT  
RTHKKAFKMKREAQVKFHVLLTSYELITIDQAALGSIRWACLVDVAHRLKNNQSKFFRVLNQYKIDHKLKLLT  
GTPLOQNNLEELFHLNFLTPERFNNLEGFLEEFADISKEDQIKKLHDLGPHMLRRLKADVFNKMPAKTELIV  
RVELSPMQKYYKYILTRNFEALNSRGGGNQVSLNIMMDLKKCCNHPYLFPPVAAMESPKLPSGAYEGGALIK  
SSGKLLLLQKMLRKLKEQGHRVLI F SQMTKMLDLLEDFLDYEGYKYERIDGGITGALRQEAIDRFNAPGAQQF  
CFLSTRAGGLGINLATADTVIIFDSDWNPHNDIQAFSRAHRIGQANKVMIYRFVTRASVEERITQVAKRMM  
LTHLVVRPGLGSKAGSMSKQELDDILKFGTEELFKDENEGENKEEDSSVIHYDNEAIARLLDRNQDATEDTDV  
QNMNEYLSSFKVAQYVVREEDKIEEIEREIIKQEENVDPDYWEKLLRHHYEQQQEDLARNLGKGRVVKQVNY  
NDAAQEDQDNQSEYSVGSEEEDEDFDERPEGRRQSKRQLRNEKDKPLPPLLARVGGNIEVLGFNTRQKAFLN  
AVMRWGMPPQDAFTTQWLVRDLRGKTEKEFKAYVSLFMRHLCEPGADGSETFADGVPREGLSRQQVLTRIGVM  
SLVKKKQVEFEHINGRWSMPELMPDPSAESKRSSRASSPTKTSPTTPEASTTNSPCTSKPATPAPSEKGDGVR  
TPLDKDDTENQEEKPEKNSKVGEKMAEVDSPSPAPSLGERLEHRKILLEDEAPGVPGETEPEPGYRGDREKS  
EDVKADRELRLGPPRDEPRPNGRREEKVEKPRFMFNIADGGFTELHTLWQNEERAAISSGKLEIWHRRHDY  
LLAGIVLHGYARWQDIQNDQAQFAINEPFKTEANKGNFLEMKNKFLARRFKLLEQALVIEEQLRRAAYLNLSQ  
EPAHPAMALHARFAEAECLEASHQHLSKESLAGNKPANAVLHKVNLQLEELLSDMKADVTRLPATLSRIPIIA  
ARLQMSERSILSRLASKGTEPHPTPAFPFGPYATPPGYGAAFSAAPVGALAAAGANYSQMPAGSFIT  
>ENSMUSP00000090649\_c.2679:A>TCACACACACGCACACACA\_p.K894SHTRTHK-ins  
ENSMUST00000092971.13|Chd3-201|ENSMUSG00000018474|-  
|chr11:g.69248211:T>TGTGTGTGCGTGTGTGTA  
MASPLRDEEEEEEMVSEEEEEEEEGDEEEEEVEAAEDDEEEDEEGVLGRGPGHDSRDRHSPPSCHLFP  
PPPPPLPPPPPKDDIRLLPSALGVKKRKRGPKKQKENKPKGPKRKRKLDSEEEFGSERDEYREKSES  
YGTGPGRRRRKHREKKEKTKRRKRGEEDGGHKQVEQKSSATLLLTWGLEDEHVHVFSEEDYHTLTNYKAFS  
QFMRPLI AKKNPKIPMSKMMTILGAKWREFSANNPFKGSAAAVAAAAA AVAEQVSAAVSSATPIAPSGPP  
PALPPPPAPEIQPPPI RRAKTKEGKPGHKRRNKS PRVPDGRKKLRGKKMAPLKI KLGLLGGKRRKAGSCAFQ  
SEEGHEPEAEESDLDGSGVHSASGWPDPVRAKLRGRPRGKRRKVLGCPAVTGEEDVDGYETDHDQDYCEVC  
QQGGEIILCDTTPRAYHLVCLDPELDRAPEGKWSCPHCEKEGVQWEAKEEEEEEEYEEEGEEGEEEDDHMEYC  
RVCKDGGELLCCDACISSYHIHCLNPPLPDI PNGEWLCPRCTCPVLKGRVQKILHWRWGEPPVAVPAPQQADG  
NDVPPRPLQGRSEREFFV KWVGLSYWHCSWAKELQLEIFHLVMYRNYQRKNDMDEPPPLDYSGGEDDGKSD  
KRKVKDPHYAEMEEKYRFGIKPEWMTVHRIINHSMDDKGNHYLVKWKDLPYDQSTWEEDEMNIPEYDDHKQ  
SYWRHRELIMGEDPAQPRKYKKKKKELQGDGPPSSPTNDPTVKYETQPRFITATGGTLHMYQLEGLNWLRFWS  
AQGTDTILADEMGLGKTIQTIVFLYSLYKEGHTKGPFLVSAPLSTIINWEREFQMWAPKFYVVTYTGDKDSRA  
IIRENEFSFEDNAIKGGSHTRTHKKAFKMKREAQVKFHVLLTSYELITIDQAALGSIRWACLVDVAHRLKNN  
QSKFFRVLNQYKIDHKLKLLTGTPLQNNLEELFHLNFLTPERFNNLEGFLEEFADISKEDQIKKLHDLGPHM  
LRLKADVFNKMPAKTELIVRVELSPMQKYYKYILTRNFEALNSRGGGNQVSLNIMMDLKKCCNHPYLFPPV  
AAMESPKLPSGAYEGGALIKSSGKLLLLQKMLRKLKEQGHRVLI F SQMTKMLDLLEDFLDYEGYKYERIDGGI  
TGALRQEAIDRFNAPGAQQFCFLSTRAGGLGINLATADTVIIFDSDWNPHNDIQAFSRAHRIGQANKVMIYR  
FVTRASVEERITQVAKRMMMLTHLVVRPGLGSKAGSMSKQELDDILKFGTEELFKDENEGENKEEDSSVIHYD  
NEAIARLLDRNQDATEDTDVQNMNEYLSSFKVAQYVVREEDKIEEIEREIIKQEENVDPDYWEKLLRHHYEQQ  
QEDLARNLGKGRVVKQVNYNDAAQEDQDNQSEYSVGSEEEDEDFDERPEGRRQSKRQLRNEKDKPLPPLLAR  
VGGNIEVLGFNTRQKAFLNAMRWMPPQDAFTTQWLVRDLRGKTEKEFKAYVSLFMRHLCEPGADGSETFA  
DGPVREGLSRQQVLTRIGVMSLVKKKQVEFEHINGRWSMPELMPDPSAESKRSSRASSPTKTSPTTPEASTT  
NSPCTSKPATPAPSEKGDGVRTPLDKDDTENQEEKPEKNSKVGEKMAEVDSPSPAPSLGERLEHRKILLEDEA  
PGVPGETEPEPGYRGDREKSEDKADRELRLGPPRDEPRPNGRREEKVEKPRFMFNIADGGFTELHTLWQNEE  
RAAISSGKLEIWHRRHDYWLLAGIVLHGYARWQDIQNDQAQFAINEPFKTEANKGNFLEMKNKFLARRFKLL  
EQALVIEEQLRRAAYLNLSQEPAPAMALHARFAEAECLEASHQHLSKESLAGNKPANAVLHKVNLQLEELLS  
DMKADVTRLPATLSRIPIIAARLQMSERSILSRLASKGTEPHPTPAFPFGPYATPPGYGAAFSAAPVGALAAA  
GANYSQMPAGSFITATTTNGPPVLVKKKEKEMV GALVSDGLGLDRKEPRAGEVICIDD\*  
>rs46291748\_ENSMUSP00000104301\_c.910:A>G\_p.Q304R  
ENSMUST00000108661.8|Chd3-202|ENSMUSG00000018474|-|chr11:g.69252903:T>C  
MASPLRDEEEEEEMVSEEEEEEEEGDEEEEEVEAAEDDEEEDEEGVLGRGPGHDSRDRHSPPSCHLFP  
PPPPPLPPPPPKDDIRLLPSALGVKKRKRGPKKQKENKPKGPKRKRKLDSEEEFGSERDEYREKSES  
YGTGPGRRRRKHREKKEKTKRRKRGEEDGGHKQVEQKSSATLLLTWGLEDEHVHVFSEEDYHTLTNYKAFS  
QFMRPLI AKKNPKIPMSKMMTILGAKWREFSANNPFKGSAAAVAAAAA AVAEQVSAAVSSATPIAPSGPP  
PALPPPPAPEIRPPPI RRAKTKEGKPGHKRRNKS PRVPDGRKKLRGKKMAPLKI KLGLLGGKRRKAGSCAFQ

SEEGHEPEAEESDLDSSGVSASGWPDPVRAKLLKGRPRGRKKKKVLGCPAVTGEEEVDGYETDHQDYCEVC
QQGGEIILCDTCPRAYHLVCLDPELDRAPGKWCSPHCEKEGVQWEAKEEEEEEEEEEGEEGEEKEEEDDHMEYC
RVCKDGGELLCCDACISSYHIHCLNPPPLPDI PNGEWLCPRCTCPVLKGRVQKILHWRWGEPPVAVPAPQQADG
NPDVPPPRPLQGRSREFFVKWVGLSYWHCSWAKELQLEIFHLVMYRNYQRKNDMDEPPPLDYSGGEDDGKSD
KRVKDPHYAEMEEKYRFGIKPEWMTVHRIINHSMDDKGNHYLVKWKDLPYDQSTWEEDEMNIPEYDDHKQ
SYWRHRELIMGEDPAQPRKYKKKKKELQGDGPPSSPTNDPTVKYETQPRFITATGGTLHMYQLEGLNWLRFWS
AQGTDITLADEMGLKGTIQTIVFLYSLYKEGHTKGFVLSAPLSTIINWEREFQMWAPKFYVVTYTGDKDSRA
IIRENEFSFEDNAIKGGKAFKMKREAVKVFHVLTSYELITIDQAALGSIWACLVDVAHRLKNNQSKFFR
VLNGYKIDHKLLLTGTPLQNNLEELFHLNFLTPERFNNLEGFLEEFADISKEDQIKKLDLHLLGPHMLRRLKA
DVFNMPAKTELIVRVELSPMQKYYKYILTRNFEALNSRGGGNQVSLNIMMDLKKCCNHPYLPFVAAMESP
KLPSGAYEGGALIKSSGKLLLLQKMLRKLKEQGHRVLI FSQMTKMLDLEDFLDYEGYKYERIDGGITGALRQ
EAI DRFNAPGAQQFCFLSTRAGGLGINLATADTVIIFDSDWNPNDIQAFSRAHRIGQANKVMIYRFVTRAS
VEERITQVAKRMMMLTHLVVRPGLGSKAGSMSKQELDDILKFGTEELFKDENEGENKEEDSSVIHYDNEAIAR
LLDRNQDATEDTDVQNMNEYLSSFVAQYVVREEDKIEEIEREIKQEENVDPDYWEKLLRHHYEQQEDLAR
NLGKGRVRKQVNYNDAAQEDQDNQSEYSVGSSEEEDEDFDERPEGRRQSKRQLRNEKDKPLPPLLARVGGNIE
VLGFNTRQRKAFLNAVMRWGMPPQDAFTTQWLVRDLRGKTEKEFKAYVSLFMRHLCEPGADGSETFADGVPRE
GLSRQQVLRIGVMSLVKVKVQEFEHINGRWSMPELMPDPSAESKRSSRASSPTKTSPTTPEASTNSPCTSK
PATPAPSEKGDGVRTPLDKDDTENQEEKPEKNSKVGEKMEAEVDSPPAPSLGERLEHRKILLEDEAPGVPE
TEPEPGYRGDREKSASEPTPGERGEEKPLDVQEHRETEGETDGLGKREDVKADRELRLGPPRDEPRPNGRRE
EKVEKPRFMFNIADGGFTELHTLWQNEERAAISSGKLEIWHRRHDYWLLAGIVLHGYARWQDIQNDAQFAII
NEPFKTEANKGNFLEMKNKFLARRFKLLEQALVIEEQLRRAAYLNLSEQEPAHPAMALHARFAEAECLAESHQH
LSKESLAGNKPANAVLHKVNLQLEELLSDMKADVTRLPATLSRIPIAARLQMSERSILSRLASKGTEPHPTP
AFPPGPYATPPGYGAAFSAAPV GALAAAAGANYSQMPAGSFITAT TNGPPVLVKKKEKEMV GALVSDGLGLDRKE
PRAGEVICIDD\*

>rs46291748\_ENSMUSP00000122137\_c.631:A>G\_p.Q211R
ENSMUST00000128981.8|Chd3-204|ENSMUSG00000018474|-|chr11:g.69252903:T>C
XSALGVKKRKRKRGPKKQKENKPGKPRKRKLDSEEEFGSERDEYREKSESGGSEYGTGPRKRRRHREKKEKK
TKRRKRGEEDGGHKQVEQKSSATLLLTWGLEDEHVFSEEDYHTLTNYKAFSQFMRPLIAKKNPKIPMSKMMT
ILGAKWREFSANNPFKGSAAAVAAAAA AVAEQVSAAVSSATPIAPSGPPPALPPPAPAIRPPPIRAK
TKEGKPGHKKRNRKSPRVPDGRKKLRGKKMAPLKIKLGLLGGKRRKAGSCAFQSEEGHEPEAEESDLDSSGVS
SASGWPDPVRAKLLKGRPRGRKKKKVLGCPAVTGEEEVDGYETDHQDYCEVCQQGGEIILCDTCPRAYHLV
LDPELDRAPGKWCSPHCEKEGVQWEAKEEEEEEEEEEGEEGEEKEEEDDHMEYCRVCKDGGELLCCDACISSY
IHCLNPPPLDIPNGEWLCPRCTCPVLKGRVQKILHWRWGEPPVAVPAPQQADGNPDVPPPRPLQGRSREFFV
KWVGLSYWHCSWAKELQLEIFHLVMYRNYQRKNDMDEPPPLDYSGGEDDGKSDKRVKDPHYAEMEEKYRFG
IKPEWMTVHRIINHSMDDKGNHYLVKWKDLPYDQSTWEEDEMNIPEYDDHKQSYWRHRELIMGEDPAQPRKY
KKKKELQGDGPPSSPTNDPTVKYETQPRFITATGGTLHMYQLEGLNWLRFWSAQGTDITLADEMGLKGTIQT
IVFLYSLYKEGHTKGFVLSAPLSTIINWEREFQMWAPKFYVVTYTGDKDSRAIIRENEFSFEDNAIKGGKKA
FKMKREAVKVFHVLTSYELITIDQAALGSIWACLVDVAHRLKNNQSKFFRVLNGYKIDHKLLLTGTPLQN
NLEELFHLNFLTPERFNNLEGFLEEFADISKEDQIKKLDLHLLGPHMLRRLKADVFNMPAKTELIVRVELSP
MQKYYKYILTRNFEALNSRGGGNQVSLNIMMDLKKCCNHPYLPFVAAMESPKLPSGAYEGGALIKSSGKLL
LLQKMLRKLKEQGHRVLI FSQMTKMLDLEDFLDYEGYKYERIDGGITGALRQEAIDRFNAPGAQQFCFLST
RAGGLGINLATADTVIIFDSDWNPNDIQAFSRAHRIGQANKVMIYRFVTRASVEERITQVAKRMMMLTHLVV
RPLGSKAGSMSKQELDDILKFGTEELFKDENEGENKEEDSSVIHYDNEAIARLLDRNQDATEDTDVQNMNEY
LSSFVAQYVVREEDKIEEIEREIKQEENVDPDYWEKLLRHHYEQQEDLARNLGKGRVRKQVNYNDAAQE
DQDNQSEYSVGSSEEEDEDFDERPEGRRQSKRQLRNEKDKPLPPLLARVGGNIEVLGFNTRQRKAFLNAVMRW
MPPQDAFTTQWLVRDLRGKTEKEFKAYVSLFMRHLCEPGADGSETFADGVPREGLSRQQVLRIGVMSLVKVK
VQEFEHINGRWSMPELMPDPSAESKRSSRASSPTKTSPTTPEASTNSPCTSKPATPAPSEKGDGVRTPLDKD
DTENQEEKPEKNSKVGEKMEAEVDSPPAPSLGERLEHRKILLEDEAPGVPEETEPEPGYRGDREKSDVKAD
RELRLGPPRDEPRPNGRREKVEKPRFMFNIADGGFTELHTLWQNEERAAISSGKLEIWHRRHDYWLLAGIV
LHGYARWQDIQNDAQFAIINEPFKTEANKGNFLEMKNKFLARRFKLLEQALVIEEQLRRAAYLNLSEQEPAHPA
MALHARFAEAECLAESHQHLSKESLAGNKPANAVLHKVNLQLEELLSDMKADVTRLPATLSRIPIAARLQMS
ERSILSRLASKGTEPHPTPAFPPGPYATPPGYGAAFSAAPV GALAAAAGANYSQMPAGSFIT

>rs46291748\_ENSMUSP0000090649\_c.910:A>G\_p.Q304R
ENSMUST0000092971.13|Chd3-201|ENSMUSG00000018474|-|chr11:g.69252903:T>C
MASPLRDEEEEEEMVSEEEEEEEEGDEEEEEEVAADEDDEEEDDEEGVLGRGPGHDRSRDRHSPSCHLFP
PPPPPLPPPPPKDDIRLLPSALGVKKRKRKRGPKKQKENKPGKPRKRKLDSEEEFGSERDEYREKSESGGSE
YGTGPRKRRRKHREKKEKTKRRKRGEEDGGHKQVEQKSSATLLLTWGLEDEHVFSEEDYHTLTNYKAFSQ
FMRPLIAKKNPKIPMSKMMTILGAKWREFSANNPFKGSAAAVAAAAA AVAEQVSAAVSSATPIAPSGPP

PALPPPPAPEIRPPPIIRAKTKEGKGPGRKRRNKSPRVPDGRKKLRGKKMAPLKIKLGLLGGKRRKKAGSCAFQ  
SEEGHEPEAEESDLDGSGSVHSASGWPDPVRAKLLKRRPGRKKKKVLGCPAVTGEEVVDGYETHDQDYCEVC  
QQGGEIILCDTDCPRAYHLVCLDPELDRAPEGKWSCPHCEKEGVQWEAKEEEEEEEEEEGEEGEKEEEDDHMEYC  
RVCKDGGELLCCDACISSYHIHCLNPPLPDI PNGEWLCPRCTCPVLKGRVQKILHWRWGEPPVAVPAQQADG  
NPDVPPPRPLQGRSEREFFVKWVGLSYWHCSWAKELQLEIFHLVMYRNYQRKNDMEPPPLDYSGGEDDGKSD  
KRKVKDPHYAEMEEKYRFGIKPEWMTVHRI INHSMDDKKNYHYLVKWKDLPYDQSTWEEDEMNIPEYDDHKQ  
SYWRHRELIMGEDPAQPRKYKKKKKELQGDGPPSSPTNDPTVKYETQPRFITATGGTLLHMYQLEGLNWLRFWS  
AQGTDTILADEMGLKGTIQTIVFLYSLYKEGHTKGFPLVSAPLSTI INWEREFQMWAPKFYVVTYTGDKDSRA  
I IRENEFSFEDNAIKGGKKAFAKMKREAQVKFHVLLTSYELITIDQAALGSIRWACLVVDEAHLKNNQSKFFR  
VLNGYKIDHKLTLTGTPLQNNLEELFHLNFLTPERFNNLEGFLEEFADISKEDQIKKLHDLGPHMLRRLKA  
DVFNKMPAKTELIVRVELSPMQKYYKYILTRNFREALNSRGGGNQVSLNIMMDLKKCCNHPYLPVAAMESP  
KLPSGAYEGGALIKSSGKLLLQKMLRKLKEQGHVLI F SQMTKMLDLEDFLDYEGYKYERIDGGITGALRQ  
EAI DRFNAPGAQQFCFLSTRAGGLGINLATADTVIIFDS DWNPHNDIQAFSRAHRIGQANKVMIYRFVTRAS  
VEERITQVAKRKMMLTHLVVRPLGSGKAGSMSKQELDDILKFGTEELFKDENEGENKEEDSSVIHYDNEAIAR  
LLDRNQDATEDTDVQNMNEYLSSFKVAQYVVREEDKIEEIEREIKQEENVDPDYWEKLLRHHYEQQEDLAR  
NLGKGRVVRKQVNYNDAQEDQDNQSEYSVGSEEEDEDFDERPEGRQSKRQLRNEKDKPLPPLARVGGNIE  
VLGFNTRQRKAFNLAVMRWGMPPQDAFTTQWLVRDLRGKTEKFKAYVSLFMRHLCEPGADGSETFADGVPRE  
GLSRQVLRITRIGVMSLVKKKQVEFEHNGRWSMPELMPDPSAESKRSSRASPTKTSPTTPEASTNSPCTSK  
PATPAPSEKGDGVRTPLDKDDTENQEEKPEKNSKVGEKMAEAVDSPSPAPSLGERLEHRKILLEDEAPGVPE  
TEPEPGYRGDREKSEVDKADRELRLGPPRDEPRPNGRREEKVEKPRFMFIADGGFTELHTLWQNEERAAISS  
GKLNIEIWHRRHDYWLLAGIVLHG YARWQDIQNDQAQFAI INEPFKTEANKGNFLEMKNKFLARRFKLLEQALVI  
EEQLRRAAYLNL SQEPAHPAMALHARFAEAEC LAESHQHL SKESLAGNK PANAVLHKVLNQLLEELSDMKADV  
TRLPATLSRIPIAARLQMSERSILSRLASKGTEPHPTPAFFPGPYATPPGYGAAFSAAPV GALAAAGANYSQ  
MPAGSFITATTNGPPVLVKKKEKEMV GALVSDGLGLDRKEPRAGEVICIDD\*

>rs51556817\_ENSMUSP00000104300\_c.421:T>A\_p.I141N  
ENSMUST00000108660.8|Cyb5d1-202|ENSMUSG00000044795|-|chr11:g.69285488:A>T  
MPRRGLVAGPDLDFNQRRYFTPSEVAEHNQLEDLWVSYLGFVYNLTPLVVEEFKGDLLKPILEVAGQDISHWF  
DPQTRDIRKHIDPLTGCMRYRTPRGRFVHI P PPLPRSDWANDFGVPWWKGANYQVGRLSARTRNIRINNTLAT  
QEHTLQLHMEIRWEEFEHGSNPGKRDPG\*

>rs51556817\_ENSMUSP00000059709\_c.421:T>A\_p.I141N  
ENSMUST00000051620.5|Cyb5d1-201|ENSMUSG00000044795|-|chr11:g.69285488:A>T  
MPRRGLVAGPDLDFNQRRYFTPSEVAEHNQLEDLWVSYLGFVYNLTPLVVEEFKGDLLKPILEVAGQDISHWF  
DPQTRDIRKHIDPLTGCMRYRTPRGRFVHI P PPLPRSDWANDFGVPWWKGANYQVGRLSARTRNIRINNTLAT  
QEHTLQVGAQESMWEILHRYLPYNAHAASYTWKYDGKLNLMQDTLEENGIRDEEEEFDYLNM DGKLT PAILL  
YFNDDLTEL\*

>rs29390830\_ENSMUSP00000055528\_c.123:A>G\_p.N42D  
ENSMUST00000050140.6|Tmem88-201|ENSMUSG00000045377|-|chr11:g.69288928:T>C  
MAEVPGAQRVPLAGGPEPRDPLDCWACAVLVTAQNLLVAVFDLLLLLALVLGTILLPAVIMLGFGLCHSQFLR  
SQAPLCTSHLRDPGFTALLVTGFLLLVPLLVLALATYRRLCLRLRLADCLVPYSRALYRRRRI PQPKQIPVSP  
GSRVPTPGKVWV\*

>rs29384625\_ENSMUSP00000047329\_c.6046:C>T\_p.A2016V  
ENSMUST00000035539.12|Dnah2-201|ENSMUSG00000005237|-|chr11:g.69364589:G>A  
MASKAEKKRKVAGRGGARAGRVRAPQSTAGPGATEASLLPDGQEPPEPESGKEDSVLGLQAFASWRLTPALHG  
EANTPPTLLHPQLFHRRLTTLNLI LS CSRAGTRDLALKPFPLSRTMLTGLADATWTGEHDMVLEHFVQDPAV  
PALTI FIDPVFGLKLELGMPVQTQNIQIVYFIRQAPVPI TPENFEETVQYGTVRGAYI PALLRLLSGVYVPPQIF  
MNKSWPESIRNHFVSHLRFLASLTDTRYKLEGHTVLYI PAEAVQMDPEVVVKDELVQRLETSMIHWTRQIK  
EVLSAQESVETGENLGPLLEEIEFWHNRCMDLSSISKQLVKKGVKHIESILFLAKSSYLTPFRKLAQQIQDGSR  
QAQSNLTFLSILREPYQELAFMKPKDI SEKLPKLI SLIRI I WVN SPHYNTRERLTALFRKVCCEQYHFARWED  
GKQGPLPCFFGAQGPQITRNLEIEDIFHKNLQTLRAVRGGILDVKNTSWHEDYNKFRGGIKDLEVMTQNLIT  
SAFELVRDVEHGVLLLDTFHRLATREAIMRTYEKAVDLYMLFNSELALVNRELNKKWPYLEPYMTQYSGQAH  
WVRI LRRRIDRVMNCLSGAHFLPHIGTGEESIHTYQQAQAI DEMVRKTFQEWATLTKDCIRRLDMSLLRIS  
QEKVGLMDVNFDKTLLILFAEIDYWERLLFETPHYVMNVAERAEDLRILRENLLLVARDYNRI IAMLSPDEQA  
LFKERIRFLDKKIHPGLKKNWALKGASAFFITECRMHASKVQMI V NDFKASTLTI GWKAQEMSELLLVHITG  
KQVYRDLEFEFEAQREHRMAAQQKLVKLHQDVVNIMTNSYEVFKNDGPEIQQQWLLYTI RLDHMMEDALRLNVK  
WSLLELSKAINGDGKTTNPLFRVLVILQNDVVRGGSSQVEFSPTLQTLASVVDNDIGSHLFATISVFRHLPDIL  
TKRKMNREPIYV LVERDEDIRKIQAQISSGMTNNASLLQNYLKTWDMYREIWEINKDSFIRRYQRLNPPVSSF  
DADIARYTEVANNVQKEETV LNIQFVMLDCSHLKFSLVQHCNEWQNKFTLLKEMAAGRLADLH SYLKDNAEK  
ISHPPQTL EELGVSLQLMDTLQHDLPNLETQIPPIHEQFTILEKYEVPVDPDTVLEMLES LNGEWLT FQQILLD

SEQMLKHKHEKFKTGLIHAADDFKKAHNLEDFEFKGPFTSTVGHATAALDQIAQMRAMLAMRDEENNLRSN
LGIFKIEQPVSKDLQILEKELDALQQVWEITRDWEESWNQWKMGCFTLQTEAMESMAHGLFRRLTRLAKEYK
DRNWEI IETTRSKIEQFKRTMPLISDLRNPALRERHWDQVKEEVQREFDQESSESFTLEQIVKLGMDQHVEKIA
EISASATKELAEVGLQNIKTWDSSTQLDIVPYKDKGHHRLRGTEEVFQALEDNQVALSTMKASRFVKAFAEKD
VDHWERCLSLILEVIEMVLTQVQWYLENIFLGEDIRKQLPNEALFDQVNNNWKAIMDRMNKDNALRSTH
YPGLETLEIEMNAILEDIQKSLDMYLETKRHIFPRFYFLSNDDLEILGQSRNPEAVQPHLKKCFDNIKLLKI
QKVGSSSSKWEAVGMFSGDGEYIDFLHPVLLGEPVESWLGDERAMRMTLRDLLRNCRVALKKFLNKRDKWVK
DWAGQVITASQIQWTADVTKCLMTAKERSDKKILKVSILNKYSEAIRGNLTKIMRLKIVALVTIEIHARDVL
EKLYKSGLMDVSSFDWLSQLRFYWEKDVDDCIIRQTNTQFQYGYEYLGNSGRLVITPLTDRCYMTLTALHLH
RGGSPKGPAGTGKTETVKDLGKALGIYVIVVNCSEGLDYKSMGRMYSGLAQSGAWGCFDEFNRINIEVLSVVA
QQILSILSALTANLTRYFEGFEINLVWSCGIFITMNPYAGRTELPENLKSMPFIAMVVPDSTLIAEIIILF
GEGFGNCKILAKKVYTYLSLAVQQLSRQDHYDFGLRALTSLLRYVGKRRRLQPDLSDEEVLLLSMRDMNIAKL
TSVDVPLFNAIVQDLFPNIELPVIDYKGLRDTIEQEIREMGLQITPFTLTKVLQLYETKNSRHSTMIVGGTGS
SKTTSWKILQASLTSCLRAGEPNYNIVREFPLNPKALSGLGELYGEYDLNTNEWTGILSSVMRACADEKPDE
KWILFDGPDVDTLWIESMNSVMDDNKVLTILINGERIAMPEQVSLLEFEVENLAVASPATVSRCGMVYTDYVDLW
KPYVQSWLEKRPKTEVEPLQRMFEKFINKILSFKKDNCELVPVPEYSGIISLCKLYTVLATPENGVPADAE
NYSFMVEMTFVFSMIWSVCASVDEDGRKKIDSYLREIEGSPFNKDTVYEVVNPKNMRTWTSFEEKLPKSWRYP
PNAPFYKIMVPTVDTVRYNYLVSTLVANQNPVLLVGPVGTGKTSIAQSVLQSLPSSQWSVLVNMSAQTTSN
VQSIIESRVEKRTKGVYVYVPGGKSMITFMDDLNPAPKDMFGSQPPELIRLWIDYGFWDYRDKQS IKHIRDMF
LMAAMGPPGGGRTVISPRLQSRFNIINMTFPTESQIIRIFGTMINQKLDQFEEVVKPIGNVVTEATLDVYNTV
VQRFPLTPAKIHVFNLRDISKVFQGLRANKDFHDTKASITRLWIHECFRVFSDRLVDTADMEAFMGILSDK
LGTFFDLTFHHLCPNKRPIIFGDFLKEPKVYEDLVDLTVLKTAMETALNEYNLSPSVVPMQLVLFREAIHIT
RIVRVIGQPRGNMLLVGIGGSGRQSLARLASSICDYNTFQIEVTKHYRKQEFRRDIIKRLYRQAGVELQTTSTFL
FVDTQIADSFLEDINNILSSGEVFNLYKSDEFEEIQNHIDQARAEQIPESSDSLFAYLIERVRNHLHIVLC
LSPVGDFFRNWIRYYPALVNCCTINWFSEWPREALLEVAEKYIIGVDLGTQENIHRKVAQIFVTMHSVAQYS
QKMLLELRRYNYVTPTYLELVSGYKLLGEKREQLLDQANKLRTGLFKIDETREKVEVMSLELEDAKKVAE
FQKQCEEYLVIVVQKREADEQQKAVTANSEKIAIEEVKCCALADNAQKDLEEALPALEEAMRALESLNKKDI
GEIKSYGRPPAQVEIVMQAVMILRGNEPTWAEAKRQLGEQNFIKSLINFDKDNI SDKVLKKIGAYCAQPDFQP
DIIGRVSLAAKSLCMWVRAMELYGRLYRVVEPKRIRMNAAMAQLQEKQAALAEAEQEKLEVAEKLEMLKKQYD
EKLAQKEELRKKSEEMELKLERAGMLVSGLAGEKARWEETVQGLEEDLGYLVGDCLIAAFLSYMGPFLTNYR
DEIINQIWIWKIRELQVPCSPRFAIDNFLTNPQKVRDWNIIQGLPSDAFSTENGIIVTRGNRWALMIDPQQAL
KWIKNMEGNQGLKIIDLQMHYLRVLEHAIQFGFVLLQNVQEYLDPTLNPVLNKSVARIGGRMLIRIGDKEV
EYNPNFRFYLTTKLSNPHYNPETSAKTTIVNFAVKEQGLEAQLLGIIVRKRERPELEEQKDSLVINIAAGKRKL
KELEDEILRLLNEATGSLDDVQLVNTLQTSKITATEVTEQLETSETTEINIDLAREAYRPCAQRASVLFVVL
NDMGRIDPMYQFSLDAYIGLFIILSDKSHRSNKLEDRIEYLYNDYHTYAVYRYTCRDLFRHKLKLF SFHMC AKI
LETSGKLNMDYNYFFLRGGVLDREGQMDNPTSLWADAYWNI TELDKLTNFHGLMNSFEQYPRDWHLWYTN
SSPEKAMLPGEWENACNEMQRMLIVRSLRQDRVAFVTSFIVSNLGSRFIEPPVLNKMKSVMEDSTPRSPVFI
LSPGVDPTSALLQLAEHTGMAHRFHALS LGQGQAPIAARLLREGVNGHWVFLANCHLSLSWMPNLDKLVQ
QVEDPHPSFRLWLS SSPHPDFPISILQASIKMTTEPPKGLKANMTRLYQLMTEAQFTHCSKPAKYKLLFALC
FFHSILLERKKFLQLGWNIIYGFNDSDFEVSENLLSLYLDEYEEETPWDALKYLIAGVNYGGHVTDDWDRLLT
TYINDYFCDSLTTFFYRLSVLDTYYIPKDGSLASYKEYISMLPSMDPEAFGQHPNADVASQITEARTLFET
LLSLQPQITPTRVGGQSREEKVLLEAADVKQKIPEMIDYEGTRKLLALDPSPLNVVLLQEIQRYNKLMKTI LF
SLTDLEKGIQGLIVMSTSLLEIFNCIFDAHVPLWGWVYPSQKPLASWTRDLAVRVEQFETWASRARPPVLFW
LSGFTFPTGFLTAVLQSAARQNNISVDSLSEWEIFVSTVDDSNLVYPPKDGWVVRGLYLEGAGWDRKNSCLVEA
EPMQLVCLMPTIIFRPAESRKKSAKGMYS CPCYYYPNRAGSTDRASFVIGIDLRSGSMTSDHWIKRGTALLMS
LDS\*

>rs29384625\_ENSMUSP00000104299\_c.6064:C>T\_p.A2022V
ENSMUST00000108659.2|Dnah2-202|ENSMUSG00000005237|-|chr11:g.69364589:G>A
MASKAEKKRKVAGRGGARAGRVVRAPOSTAGPGATEASLLPDGQEPPEPESGKEDSVLGLQAFASWRLTPALHG
EANTPPTLLHPQPLFHRRLTTLNLILSCSRAGTRDLALKPFFLSRTMLTGLADATWTGEHDMVLEHVFQDPAV
PALTIFIDPVFGLKLELGMVPVQTQNIQIVYFIRQAPVPIPTPENFEETVQYGTVRGAYIPALLRLLSGVYVQIF
MNKSWPESIRNHVSVHLHRFLASLTDTRYKLEGHTVLYIPAEAVQMDPEVVVKDELVQRLETSMIHWTRQIK
EVLSAQESVTEGENLGPLEEIEFWHNRCMDLSSISKQLVKKGVKHIESILFLAKSSYLTFRFKLAQQIQDGSR
QAQSNLTFLSILREPYQELAFMKPKDISEKLPKLSLIRIIVWNSPHYNTRERLTALFRKVCCECYHFARWED
GKQGPLPCFFGAQGPQITRNLEIEDIFHKNLQTLRAVRGGILDVKNTSWHEDYNKFRGGIKDLEVMTONLIT
SAFELVRDVEHGVLDDTFHRLATREAIMRTYEKKAVDLYMLFNSELALVNRELNKKWYPYEPYMTQYSGQAH
WVRI LRRRIDRVMNCLSGAHFLPHIGTGEESIHTYQQAQAI DEMVRKTFQEWATATLDKDCIRRLDMSLLRIS
QEKVGLMDVNFDKTLLILFAEIDYWERLLFETPHYVMVAERAEDLRILRENLLLVARDYNRIIAMLSPDEQA

LFKERIRFLDKKIHPGLKKNLWALKGASAFFITECRMHASKVQMI V NDFKASTLTIGWKAQEMSELLLVHITG  
KQVYRDLEFEEAQREHRMAAQQKLVKHLQDVVNIMTNSYEVFKNDGPEIQQQWLLYTIRLDHMMEDALRLNVK  
WSLLELSKAINGDGKTTTPNPLFRVLVILQNDVRRGGGSQVEFSPTLQTLASVVNDIGSHLFATISVFRHLPDIL  
TKRKMNRPEPIYVVERDEDIRKIQAQISSGMTNNASLLQNYLKTWDMYREIWEINKDSFIRRYQRLNPPVSSF  
DADIARYTEVANNVQKEETV LNIQFVMLDCSHLKFSLVQHCNEWQNKFTLLKEMAAGRLADLHSHYKDNAEK  
ISHPPQTLEELGVSLQ LMDTLQHDLPNLETQIPPIHEQFTILEKYEVPVPTVLEMLESLNGEWLTFQQILLD  
SEQMLKKHKEKFKTGLIHAADDFKKKAHNLEDFEFKGPFTSTVGHATAALDQIAQMRAMLAMRDEENNLRSN  
LGI F KIEQPVSKDLQILEKELDALQQVWEITRDWEESWNQWKMGCFO TLQTEAMESMAHGLFRRLTRLAKEYK  
DRNWEI IETTRSKIEQFKRTMPLISDLRNPALRERHWDQVKEEVQREFDQESSEFTLEQIVKLGMDQHVEKIA  
EISASATKELAEVGLQNI AKTW DSTQLDIVPYKDKGHHRLRGTEEVFQALEDNQVALSTMKASRFVKA FEKD  
VDHWERCLSLILEVIEMVLT VQRQWMYLENI FLGEDIRKQLPNESALFDQVNNNWKAIMDRMNKDNALRSTH  
YPGLLETLIEMNAILEDIQKSLDMYLETKRHI FPRFYFLSNDDLEILGQSRNPEAVQPHLKKCFDNIKLLKI  
QKVGSSSSKWEAVGMFSGDGEYIDFLHPVLLLEGPVESWLG DVERAMRMTLRD LLRNCRVALKKFLNKRDKWVK  
DWAGQVVI TASQIQWTADVT KCLMTAKERSDKKILKVMKKKQVSI LNKYSEAIRGNLTKIMRLKIVALVTIEI  
HARDVLEKLYKSGLMDVSSFDWLSQLRFYWEKDVDDCIIRQTN TQFQYGYEYLGNSGRLVITPLTDRCYMTLT  
TALHLHRGGSPKGPAGTGTETVKDLGKALGIYVIVVNCSEGLDYKSMGRMYSGLAQSGAWGCFDEFNRINIE  
VLSVVAQQILSILSALTANLTRFYFEGFEINLVWSCGIFITMNPYAGRTELPENLKS MFRPIAMVVPDSTLI  
AEIILFGEFGNCKILAKKVYTYLSLAVQQLSRQDHYDFGLRALTSLLRYVGGKRRRLQPDLSDEEVL LLSMRD  
MNI AKLTSVDVPLFNAIVQDLFPNIE LPVIDY GKL RDTIEQEIREMGLQITPFTLT KVLYETKNSRHSTMI  
VGGTGS SKTTSWKILQASLTS LCRAGEPNYNIVREFPLNPKALSIGELYGEYDLNTNEWT DGI LSSVMRVACA  
DEKPDEKWI LFDGPVDTLWIESMNSVMDDNKVLT LINGERIAMPEQV SLLFEVENLAVAS PATVSRGMYVTD  
YVDLGWKP YVQSWLEKRPKTEVEPLQRMFEK FINKILSFKKDN CNELVPVPEYSGIISLCKLYTVLATPENG V  
NPADAENYSFMVEMTFVFSMIWVCASVDEDGRKKIDSYLREIEGSFPNKDTVY EYVNPKMRTWTSFEEKLP  
KSWRYPPNAPFYKIMVPTVDTVRYNLVSTLVANQN PVLVGPVGTGKTSIAQSVLQSLPSSQWSVLVNNMSA  
QTTSNNVQSIIESRVEKRTKGVYVFPFGGKSMITFMDDL NMPAKDMFGSQPPELIRLWIDYGFWDYRVKQSIK  
HIRDMFLMAAGMPGGGRTVISPRLQSRFNIINMTFPTESQIIRIFGTMINQKLDQDFEEVVKPIGNVVT EATL  
DVYNTVVFQALPTPAKIH YLFNLRDISKVFQGM L RANKDHFDTKASITRLWIHECFRVFSDRLVDTADMEAFM  
GILSDKLGTFFDLTFHHLCPNKRPPIFGDFLKEPKVYEDLVDLTVLKTAMETALNEYNLSPSVPMQLVLFRE  
AIEHITRIVRVIGQPRGNMLLVGIGGSGRQSLARLASSICDYN TFQIEVTKHYRKQEFRRD IKRLYRQAGVEL  
QTTSFLFVDTQI ADES FLEDINNILSSGEV PNLKYSDEFEEIQNHIDQARAEQIPESSDSLFAYLIERVRNN  
LHIVLCLSPVGD PFRNWIRQY PALVNCTTINWFSEWPREALLEVAEKYIIGVDLGTQENIHRKVAQIFVTMHW  
SVAQYSQKMLLELRRYNYVTPTNYLELVSGYKLLGEKRQELLDQANKLRTGLFKIDETREKVEVMSLELEDA  
KKKVAEFQKQCEEYLVIVVQKREADEQQKAVTANSEKIAIEEVKQCALADNAQKDLEEALPALEEAMRALES  
LNK KDIGEIKSYGRPPAQVEIVMQAVMILRGNEPTWAEAKRQLGEQNFIKSLINFDKDNISDKVLK KIGAYCA  
QPDFQPD IIGRVSLA AKSLCMWVRAMELYGRLYRVVEPKRIRMNAAQAQLEKQAAALAEAEQKLEVAEKLEM  
LKKQYDEKLAQKEELRKKSEEMELKLERAGMLVSLGSLAGEKARWEETVQGLEEDLGYLVGDCLIAAFLSYMGP  
FLTNYRDEIINQI WIRKIRELQVPCSPRFAIDNFLTNP TKVRDWN IQGLPSDAFSTENGIIVTRGNR WALMID  
PQQQALKWIKNMEGNQGLKIIDLQMHYLRVLEHAIQFGFPVLLQNVQEYLDPTLNPV LNKSVARIGGRMLIR  
IGDKEVEYNPNFRFYLTTKLSNPHYNPETS AKTTIVNFAVKEQGLEAQLLGI VVRKERPELEE QKDSLVINIA  
AGKRKLELEDEILRLLNEATGSLDDVQLVNTLQTSKITATEVTEQLETSETTEINIDLAREAYRCAQRAS  
VLFVFLNDMGRIDPMYQFSLDAYIGLFI LSI DKS HRSNKLEDRIEY LNDYHTYAVYRYTCRTL FERHKL LFSF  
HMC AKI LETSGKLNMD EYNFFLRGGVVDREGQMDNPCTSWLADAYWDNI TELDKLTNFHGLMNSFEQYPRDW  
HLWYTNSSPEKAMLPGEWENACNEMQRMLIVRSLRQDRVAF CVTSFIVSNLGSRFIEPPV LNMKSVMEDSTPR  
SPLVFI LSPGVDPT SALLQLAEHTGMAHRFH ALSLGQQAPIAARLLREGV NQGHVFLANCHLSLSWMPNLD  
KLVEQLQVEDPHPSFRLWLS SSPHPDFPISILQASIKMTTEPPKGLKANMTRLYQLMTEAQFTHCSKPAKYK  
LLFALCFFHSILLERKKFLQLGWNIIYGFNDSDFEVSENLLS LYLDEYEETPWDALKYLIAGVNYGGHVTDDW  
DRRLTTYINDYFCDLSLTTFFYRLSVLDTYYIIPKDGSLASYKEYISMLPSMDPPEAFGQHPNADVASQITEA  
RTLFETLLSLOPQITPTRVGGQSREEKVLELAADV KQKIPEMIDYEGTRKLLALDPSPLNVLLQEIQRYNKL  
MKTILFSLTDLEKGIQGLIVMSTSL EEIFNCIFDAHV PPLWGKVYPSQKPLASWTRDLAVRVEQFETWASRAR  
PPVLFWLSGFTFPTGFLTAVLQSAARQNNISVDSLSWEFIVS TVDDSNLVYPPKDG VVVRGLYLEGAGWDRKN  
SCLVEAEPMLVCLMPTIHFRAESRKKSAKGMYS CPCYYYPNRAGSTDRAS FVIGIDLRS G SMTSDHWIKRG  
TALLMSLDS\*

>rs48439754\_ENSMUSP00000047329\_c.3583:C>T\_p.A1195V  
ENSMUST00000035539.12|Dnah2-201|ENSMUSG00000005237|-|chr11:g.69382978:G>A  
MASKA EKKR KVAGRGGARAGRVVRAPQSTAGPGATEASLLPDGQEP EPESGKEDSVLGLQAFASWRLTPALHG  
EANTPPTLLHPQPLFHRRLTTLNLI LSCSRAGTRDLALK PFFLSRTMLTGLADATWTGEHDMVLEHFVQDPAV  
PALTIFIDPVFGLKLELGMPVQTQNQIVYFIRQAPVPITPENFEETVQYGTVRGAYIPALLRLLSGVYVPOIF  
MNKSWPESIRNHFVSHLHRFLASLTDTRYKLEGHTVLYIPAEAVQMDPEVVVKDELVQRLETSMIHWTRQIK



EVLSAQESVETGENLGPLEEIEFWHNRCDLSSISKQLVKKGVKHIESILFLAKSSYLTPFRKLAQQIQDGSR
QAQSNLTFLSILREPYQELAFMKPKDISEKLPKLI SLIRI I WVNSPHYNTRERLTALFRKVCECQYHFARWED
GKQGPLPCFFGAQGPQITRNLEIEDIFHKNLQTLRAVRGGILDVKNTSWHEDYNKFRGGIKDLEVMTONLIT
SAFELVRDVEHGVLLLDLTFHRLATREAIMRTYEKKAVDLYMLFNSELALVNRELNKKWPYLEPYMTQYSGQAH
WVRILRRRIDRVMNCLSGAHFLPHIGTGEESIHTYQQMAQAI DEMVRKTFQEWTATLDKDCIRRLDMSLLRIS
QEKVGLMDVNFDKTLLILFAEIDYWERLLFETPHYVMNVAERAEDLRILRENLLLVARDYNRI IAMLSPDEQA
LFKERIRFLDKKIHPGLKKNWALKGASAFFITECRMHASKVQMI V NDFKASTLTIGWKAQEMSELLLVHITG
KQVYRDLEFEEAQRHRAAAQQKLVKLHQDVVNIMTNSYEVFKNDGPEIQQQWLLYTI RLDHMMEDALRLNVK
WSLLELSKAINGDGKTTNPNLFRVLVILQNDVVRGGGSQVEFSPTLQTLASVVNDIGSHLFATISVFRHLPDIL
TKRKMNREPIYVVERDEDIRKIQAQISSGMTNNASLLQNYLKTWDMYREIWEINKDSFIRRYQRLNPPVSSF
DADIARYTEVANNVQKEETVLNIQFVMLDCSHLKFSLVQHCNEWQNKFTTLKEMAAGRLADLHSLYKDNAEK
ISHPPQTLLEELGVSLQLMDTLQHDLPNLETQIPPIHEQFTILEKYEVPVDPDTVLEMLESNGEWLTFQOILLD
SEQMLKKHKEKFKTGLIHAADDFFKKVHNLLEDDEFKGPFTSTVGHATAALDQIAQMRAMLAMRDEENNLRSN
LGI F KIEQPVSKDLQILEKELDALQQVWEITRDWEESWNQWKMGCFTLQTEAMESMAHGLFRRLTRLAKEYK
DRNWEI IETTRSKIEQFKRTMPLISDLRNPALRERHWDQVKEEVQREFDQESSEFTLEQIVKLGMDQHVEKIA
EISASATKELATEVGLQNI AKTW DSTQLDIVPYKDKGHHRLRGTEEVFQALEDNQVALSTMKASRFVKA FEKD
VDHWERCLSLILEVIEMLTVQRQWMYLENI FLGEDI R KQLP NESALFDQVNNNKAIMDRMNKDNALRSTH
YGLLETLIEMNAILEDIQKSLDMYLETKRHFPRFYFLSNDDLEILGQSRNPEAVQPHLKKCFDNIKLLKI
QKVGSSSKWEAVGMFSGDGEYIDFLHPVLLGEPVESWLGDVERAMRMTLRDLLRNCRVALKKFLNKRDKWVK
DWAGQVITASQIQWTADVTKCLMTAKERSDKKILKVSILNKYSEAIRGNLTKIMRLKIVALVTIEIHARDVL
EKLYKSGLMDVSSFDWLSQLRFYWEKDVDDCIIRQTNTQFQYGYEYLGNSGRLVITPLTDRCYMTLTALHLH
RGGSPKGPAGTGKTETVKDLGKALGIYVIVVNCSEGLDYKSMGRMYSGLAQSGAWGCFDEFNRINIEVLSVVA
QQILSILSALTANLTRYFEGFENLVWSCGIFITMNPYAGRTEL PENLKSMPFIAMVVPDSTLIAEII LF
GEGFGNCKILAKKVYTYLSLAVQQLSRQDHYDFGLRALTSLLRYAGKKRRLQPDLSDEEVLLSMRDMNIAKL
TSVDVPLFNAIVQDLFPNIELPVIDYGLKRDITIEQEI REMGLQITPFTLTQVLYETKNSRHSTMI VGGTGS
SKTTSWKILQASLTLSCRAGEPNYNIVREFPLNPKALSGLVGEYDLNTNEWTDGILSSVMRVACADEKPD
KWILFDGPVDTLWIESMNSVMDNKVLTILINGERIA MEQVSLLEFEVENLAVASPATVSRCGMVYTDYVLDLW
KPYVQSWLEKRPKTEVEPLQRMFEKFINKILSFKKDNCELVPVPEYSGIISLCKLYTVLATPENGVPADAE
NYSFMVEMTFVFSMIWSVCASVDEDGRKKIDSYLREIEGSFPNKDTVY EYVNPKMRTWTSFEEKLPKSWRYP
PNAPFYKIMVPTVDTVRYNYLVSTLVANQNPLVLPVGTGKTSIAQSVLQSLPSSQSVLVNMSAQTT SNN
VQSIIESRVEKRTKGVYVPPFGGKSMITFMDDL NMPAKDMFGSQPPELIRLWIDYGFWDYRVKQSIKHIRD MF
LMAAMGPPGGGRTVISPRLQSRFNIINMTFPTESQIIRIFGTMINQKLQDFEEVVKPIGNVVTEATLDVYNTV
VQRFLETPAKIHYLFNLRDISKVFQGLMRANKDFHDTKASITRLWIHECFRVFSDRLVDTADMEAFMGILSDK
LGTFFDLTFHHLCPNKRPIIFGDFLKEPKVYEDLVLTVLKTAMETALNEYNLSPSVVPMQLVLFREAI E HIT
RIVRVIGQPRGNMLLVGIGSGRQSLARLASSICDYNTFQIEVTKHYRKQEFRRDDIKRLRYQAGVELQTT SFL
FVDTQIADSFLEINNI LSGEVPNLYKSDEFEEIQNHIIDQARAEQIPESSDSLFAYLIERVNNLHIVLC
LSPVGDPPFRNWIRQYPALVNCTTINWFSEWPREALLEVAEKYIIGVDLGTQENIHRKVAQIFVTMHWSVAQYS
QKMLLELRRYNYVTPNTNYLELVSGYKLLGKQELLDQANKLRTGLFKI DETREKVEVMSLELEDAKKKVAE
FQKQCEEYLVIVQOKREADEQQKAVTANSEKIAIEEVKQCALADNAQKDLEALPALEAMRALESLNKKDI
GEIKSYGRPPAQVEIVMQAVMILRGNEPTWAEAKRQLGEQNFIKSLINFDKDNISDKVLKKGAYCAQPDFQP
DIIGRVSLAAKSLCMWVRAMELYGRLYRVVEPKRIRMNAAMAQLQEKQAALAEAEKLEVAEKLEMLKKQYD
EKLAQKEELRKKSEEMELKLERAGMLVSGLAGEKARWEETVQGLEEDLGYLVGDCLIAAFLSYMGPFLTNYR
DEIINQIWI R KIRELQVPCSPRFAIDNFLTNP TKVRDWN IQGLPSDAFSTENGIIVTRGNRWALMIDPQGQAL
KWIKNMEGNQGLKIDLQMHDYLRVLEHAIQFGFPVLLQNVQEYLDPTLNPVLNKSVARIGRMLIRIGDKEV
EYNPNFRFYLTTKLSNPHYNPETSAKTTIVNFAVKEQGLEAQLLGLVVRKERPELEEQKDSLVINIAAGKRKL
KELEDEILRLLNEATGSLDDVQLVNTLQTSKITATEVTEQLETSETTEINIDLAREAYRPCAQRASVLFVFL
NDMGRIDPMYQFSLDAYIGLFI L SIDKSHRSNKLEDRIEYLN DYHTYAVYRYTCRTL FERHKL LFSFHMCAKI
LETSGKLNMEYNNFFLRGGVVDREGQMDNPTSWLADAYWDNITELDKLTNFHGLMNSFEQYPRDWHLWYTN
SSPEKAMPLPEWENACNEMQRMLIVRSLRQDRVAFCVTSFIVSNLGSRFIEPPVLNKMKSVMEDSTPRSPVFI
LSPGVDPT SALLQLAEHTGMARFHALSLGQGQAPIAARLLREGVNGHWFVLANCHLSLSWMPNLDKLV EQL
QVEDPHPSFRLWLSSSPHPDFPISILQASIKMTTEPPKGLKANMTRLYQLMTEAQFTHCSKPAKYKLLFALC
FFHSILLERKKFLQLGWNIIYGFNDSDFEVS ENLLS LYLDEYEE TPWDALKYLIAGVNYGGHVTDWDRLLT
TYINDYFCDLSLTPFYRLSVLDTYYPKDGSLASYKEYI SMLPSMDPPEAFGQHPNADVASQITEARTLFET
LLSLQPQITPTRVGGQSRREEKLELAADV KQKIPEMIDYEGTRKLLALDPSPLNVLLQFEIQRYNKLMTILF
SLTDLEKGIQGLIVMSTSL EEFNCIFDAHV PPLWGKVYPSQKPLASWTRDLAVRVEQFETWASRARPPVLFW
LSGFTFPTGFLTAVLQSAARQNNISVDSLSEFIVSTVDDSNLVYPPKDGWVRGLYLEGAGWDRKNSCLVEA
EPMQLVCLMPTIHFRAESRKKSAKGMYS C P C Y Y Y P N R A G S T D R A S F V I G I D L R S G S M T S D H W I K R G T A L L M S
LDS\*

>rs48439754\_ENSMUSP00000104299\_c.3583:C>T\_p.A1195V  
ENSMUST00000108659.2|Dnah2-202|ENSMUSG00000005237|-|chr11:g.69382978:G>A  
MASHAEKKRKKVAGRGGARAGRVVRAPOSTAGPGATEASLLPDGQEPPEPESGKEDSVLGLQAFASWRLTPALHG  
EANTPPTLLHPQPLFHRRLLTTLNLILSCSRAGTRDLALKPFLLSRTMLTGLADATWTGEHDMVLEHFVQDPAV  
PALTIFIDPVFGLKLELGMPVQTQNNQIVYFIRQAPVPITPENFEETVQYGTVRGAYIPALLRLLSGVYVPQIF  
MNKSWPESIRNHVSVHLHRFLASLTDTRYKLEGHTVLYIPAEAVQMDPEVVVKDKELVQRLETSMIHWTRQIK  
EVLSAQESVETGENLGPLLEEIEFWHNRCMDLSSISKQLVKKGVKHIESILFLAKSSYLTPFRKLAQQIQDGSR  
QAQSNLTFLSILREPYQELAFMKPKDISSEKLPKLI SLIRI IWNVSPHYNTRERLTALFRKVCCEQYHFARWED  
GKQGPLPCFFGAQGPQITRNLEIEDIFHKNLQTLRAVRGGILDVKNTSWHEDYNKFRGGIKDLEVMTQNLIT  
SAFELVRDVEHGVLLDFTFHRLATREAIMRTYEKKAVDLYMLFNSELALVNRELNKKWYPYLYMTQYSGQAH  
WVRI LRRRIDRVMNCLSGAHFLPHIGTGEESIHTYQMQAQAI DEMVRKTFQEWATLTKDCIRRLDMSLLRIS  
QEKVGLMDVNFDKTLLILFAEIDYWERLLFETPHYVMNVAERAEDLRILRENLLLVARDYNRI IAMLSPDEQA  
LFKERIRFLDKKIHPGLKKNLWALKGASAFFITECRMHASKVQMI VDNDFKASTLTIGWKAQEMSELLLVHITG  
KQVYRDLEFEEAQREHRMAAQKLVKLHQDVVNIMTNSYEVFKNDGPEIQQQWLLYTI RLDHMMEDALRLNVK  
WSLLELSKAINGDGKTPNPLFRVLVILQNDVRGGGSQVEFSPTLQTLASVVNDIGSHLFATISVFRHLPDIL  
TKRKMNREPIYVVERDEDIRKIQAQISSGMTNNASLLQNYLKTWDMYREIWEINKDSFIRRYQRINPPVSSSF  
DADIARYTEVANNVQKEETVLNIQFVMLDCSHLKFSLVQHCNEWQNKFTLLKEMAAGRLADLHSLYKDNAEK  
ISHPPQTLEELGVSLQMLDTLQHDLPLNETQIPPIHEQFTILEKYEVPVDPDTVLEMLESINGEWLTFQQILLD  
SEQMLKKHKEKFKTGLIHAADDFKKKVHNLLDFEFKGPFTSTVGHATAALDQIAQMRAMLAMRDEENNLRSN  
LGIFKIEQPVSKDLQILEKELDALQQVWEITRDWEESWNQWKMGCFTLQTEAMESMAHGLFRRLTRLAKEYK  
DRNWEI IETTRSKIEQFKRTMPLISDLRNPALRERHWDQVKEEVQREFDQESSESFTLEQIVKLGMDQHVEKIA  
EISASATKELAEIVGLQNI AKTWDSTQLDIVPYKDKGHHRLRGTEEVFQALEDNQVALSTMKASRFVKAFEKD  
VDHWERCLSLILEVIEMVLTVQRQWMYLENI FLGEDI RKQLPNE SALFDQVNNNWKAIMDRMNKDNALRSTH  
YPGLETLEIEMNAILEDIQKSLDMYLETKRHIFFPRFYFLSNDDLEILGQSRNPEAVQPHLKKCFDNIKLLKI  
QKVGSSSSKWEAVGMFSGDGEYIDFLHPVLLLEGPVESWLGDVERAMRMTLRDLLRNCRVALKKFLNKRDKWVK  
DWAGQVVI TASQIQWTADVTKCLMTAKERSDKKILKVMKKKQVSI LNKYSEAIRGNLTKIMRKLIVALVTIEI  
HARDVLEKLYKISGLMDVSSFDWLSQLRFYWEKDVDDCI IRQNTQFQYGYEYLGNSGRLVITPLTRCYMTLT  
TALHLHRGGSPKGPAGTGKTE TVKDLGKALGIYVIVVNCSEGLDYKSMGRMYSGLAQSGAWGCFDEFNRINIE  
VLSVVAQQILSILSALTANLTRFYFEGFEINLVWSCGIFITMNPYAGRTEL PENLKSMPFRIAMVVPDSTLI  
AEIILFGEFGNCKILAKKVYTYLSLAVQQLSRQDHYDFGLRALTSLLRYAGKKRRLQPDLSDEEVLVLLSMRD  
MNI AKLTSVDVPLFNAIVQDLFPNIE LPVIDYGLRDTIEQEIREMGLQITPFTLTQVLYETKNSRHSTMI  
VGGTGSSKTT SWKILQASLTS LCRAGEPNYNIVREFPLNPKALSLGELYGEYDLNTNEWT DGI LSSVMRVACA  
DEKPDEKWILFDGVPD TLWIESMNSVMDDNKVLT LINGERIAMPEQVSLLEFEVENLAVASPATVSRGMYVTD  
YVDLGWKPYVQSWLEKRPKTEVEPLQRMFEKFINKILSFKKDNCELVPVPEYSGIISLCKLYTVLATPENG  
NPADAENYSFMVEMTFVFSMIWSVCASVDEDGRKKIDSYLREIEGSFPNKDVTVEYVYVNPKMTWTSFEEKLP  
KSWRYPPNAPFYKIMVPTVDTVRYNLVSTLVANQNPVLLVGPVGTGKTSIAQSVLQSLPSSQVSVLVVMSA  
QTTSNNVQSIIESRVEKRTKGVYVFPFGGKSMITFMDDL NMPAKDMFGSQPPELIRLWIDYGFYDRVKQSIK  
HIRDMFLMAAMGPPGGRTVISPRLQSRFNI INMTFPTESQIIRIFGTMINQKLQDFEEVVKPIGNVVTATL  
DVYNTVVQRFLPTPAKIHVFNLRDISKVFQGM L RANKDFHDTKASITRLWIHECFRVFSDRLVDTADMEAFM  
GILSDKLGTFDFLTFHHLCPNKRPIFGDFLKEPKVYEDLVDLTVLKTAMETALNEYNLSPSVVPMQLVLFRE  
AIEHITRIVRVIGQPRGNMLLVGIGGSGRQSLARLASSICDYNFQIEVTKHYRKQEFRDDIKRLYRQAGVEL  
QTTSFLFVDTQIADESFL EDINNILSSGEVPNLYKSDEFEEIQNHIIDQARAEQIPESSDSLFAYLIERVRNN  
LHIVLCLSPVGD PFRNWIRQYPALVNCTTINWFSEWPREALLEVAEKYIIGVDLGTQENIHRKVAQIFVTMHW  
SVAQYSQKMLLELRRYNYVPTNYLELVSGYKLLGEKREQLELDQANKLRTGLFKIDETREKVEVMSLELEDA  
KKKVAEFQKCEEYLVIVVQKREADEQQKAVTANSEKIAIEEVKCALADNAQKDLEALPALEAMRALES  
LNKKDIGEIKSYGRPPAQVEIVMQAVMILRGNEPTWAEAKRQLGEQNFIKSLINFDKDNISDKVLKKGAYCA  
QPDFQPDIGRVSLAASKLCMWRAMELYGRLYRVVEPKRIRMNAMAQLQEKQAALAEAEKLEVAEKLEM  
LKKQYDEKLAQKEELRKKSEEMELKLERAGMLVSGLAGEKARWEETVQGLEEDLGYLVGDCLIAAFLSYMGP  
FLTNYRDEIINQIWIWKIRELQVPCSPRFAIDNFLTNP TKVRDWNIQGLPSDAFSTENGIIVTRGNRWALMID  
PQQQALKWIKNMEGNQGLKIIDLQMHYLRVLEHAIQFGFPVLLQNVQYLDPTLNPVLNKSVARIGGRMLIR  
IGDKEVEYNPNFRFYLTTKLSNPHYNPETS AKTTIVNFAVKEQGLEAQLLGIVVRKERPELEEQKDSLVINIA  
AGKRKLELEDEILRLLNEATGSLDDVQLVNTLQTSKITATEVTEQLETSETTEINIDLAREAYRCAQRAS  
VLFVFLNDMGRIDPMYQFSLDAYIGLFI LSIKSHRSNKLEDRIEYLN DYHTYAVYRYTCTRLFERHKL LFSF  
HMCALILETSGLNMDEYNFFLRGGVVDLREGQMDNPTSWLADAYWDNI TELDKLNTFHMNSFEQYPRDW  
HLWYTNSSPEKAMLPGEWENACNEMQRMLIVRSLRQDRVAFCVTSFIVSNLGSRFIEPPVLNMXSVMEDSTPR  
SPLVFI LSPGVDPTSALLQLAEHTGMAHRFHALS LGQGQAPIAARLLREGVNGHVVFLANCHLSLSWMPNLD  
KLVEQLQVEDPHPSFRLLWSSSPHPDFPISILQASIKMTTEPPKGLKANMTRLYQLMTEAQFTHCSKPAKYKK  
LLFALCFFHSSILLERKKFLQLGWNIIYGFNDSDFEVSENLLS LYLDEYEETPWDALKYLIAGVNYGGHVTDDW

DRRLTTYINDYFCDLSLTPFYRLSVLDTYIIPKDGSLASYKEYISMLPSMDPPEAFGQHPNADVASQITEA  
 RTLFETLLSLQPQITPTRVGGQSREEKVLLEAADVKQKIPEMIDYEGTRKLLALDPSPLNVVLLQEIQRYNKL  
 MKTILFSLTDLEKGIQGLIVMSTSLLEIFNCIFDAHVPLWGKVPYPSQKPLASWTRDLAVRVEQFETWASRAR  
 PPVLFWLSGFTFPTGFLTAVLQSAARQNNISVDSLSWEFIVSTVDDSNLVYPPKDGWVVRGLYLEGAGWDRKN  
 SCLVEAEPMLVCLMPTIHFRAESRKKSAKGMYS CPCYYYPNRAGSTDRASFVIGIDLRSGMTSDHWIKRG  
 TALLMSLDS\*

>rs262313948\_ENSMUSP00000051204\_c.1187:T>ATGT\_p.R396C-ins  
 ENSMUST00000056941.3|Spem2-201|ENSMUSG00000044084|-  
 |chr11:g.69707776:A>ACAT  
 MENQLWQNTLRCCQYQESPQDAENILFLLLGLIILVNISINVATAMWQGLQNAIDKMI FWMNQKTEVVQVTE  
 CPPKEPQANVQDVHIHCILDVQVKMAQPTQCSSSSSHYFCKRSNDRSRRRYGYQQGNLQIHQSSQQQGCL  
 SHQQLRNRPLSRGYPPFRKQPQGHKMSQMRPMPFFDME DRDSLPEGHSCPHAKQPRRGWGS LCKPVRLASNV  
 GLWGRQGGILASLPLPSLYLSPELRRLPKRVEAKSELRLQGFPHYQSRIWGTVEAEQWASSPPPPRRLLPN  
 PSWTVVGYSSFPSSGGHIPYDARDQWRRGTEGCEPPAFVPRNPREVQGYRDHNSQAHRQNFSSHTSQPNHSP  
 PQSMGHVGYSSRESHEVRRRAPDWIEVFP SRCHPLTSTSLTALGEASYQRAPPASSGLMIPHSSQRLAEVQI  
 SDPTPPPTTFVPLSRNPGGNATYQVYDSLELKRQVQENRGRASSLPPPSTASRPSLHRSTGKLN\*

>rs48684437\_ENSMUSP00000072389\_c.208:T>C\_p.L70P  
 ENSMUST00000072581.9|Gps2-202|ENSMUSG00000023170|+|chr11:g.69805763:T>C  
 MPALLERPKLSNAMARALHRHIMMERERKRQEEEEVDKMMEQKMKEEQERRKKKEMEERMSLEETKEQIPKLQ  
 EKLSALQEEKHQLFLQLKVKVLEEEKRRRKEQSDLTTLTSAAYQQSLTVHTGTHLLSMQGS PGGHNRPGTLMA  
 ADRAKQMFQVQLTTRHYVGSAAAFAGTPEHGQFQGS PGGAYGTAQPPPHYGPTQPAYSPSQQLRAPSAFPAV  
 QYLSQPQPQPYAVHGHFQPTQTGFLQPGSTLSLQKQMEHANQQTSFSDSSSLRPMHPQALHPAPGLLASPQLP  
 VQIQAAAGKSGFATTSQPGPRLPFIQHSQNPRFYHK\*

>rs48684437\_ENSMUSP00000054072\_c.208:T>C\_p.L70P  
 ENSMUST00000057884.6|Gps2-201|ENSMUSG00000023170|+|chr11:g.69805763:T>C  
 MPALLERPKLSNAMARALHRHIMMERERKRQEEEEVDKMMEQKMKEEQERRKKKEMEERMSLEETKEQIPKLQ  
 EKLSALQEEKHQLFLQLKVKVLEEEKRRRKEQSDLTTLTSAAYQQSLTVHTGTHLLSMQGS PGGHNRPGTLMA  
 ADRAKQMFQVQLTTRHYVGSAAAFAGTPEHGQFQGS PGGAYGTAQPPPHYGPTQPAYSPSQQLRAPSAFPAV  
 QYLSQPQPQPYAVHGHFQPTQTGFLQPGSTLSLQKQMEHANQQTSFSDSSSLRPMHPQALHPAPGLLASPQLP  
 VQIQAAAGKSGFATTSQPGPRLPFIQHSQNPRFYHK\*

>rs48684437\_ENSMUSP00000112062\_c.208:T>C\_p.L70P  
 ENSMUST00000116358.8|Gps2-203|ENSMUSG00000023170|+|chr11:g.69805763:T>C  
 MPALLERPKLSNAMARALHRHIMMERERKRQEEEEVDKMMEQKMKEEQERRKKKEMEERMSLEETKEQIPKLQ  
 EKLSALQEEKHQLFLQLKVKVLEEEKRRRKEQSDLTTLTSAAYQQSLTVHTGTHLLSMQGS PGGHNRPGTLMA  
 ADRAKQMFQVQLTTRHYVGSAAAFAGTPEHGQFQGS PGGAYGTAQPPPHYGPTQPAYSPSQQLRAPSAFPAV  
 QYLSQPQPQPYAVHGHFQPTQTGFLQPGSTLSLQKQMEHANQQTSFSDSSSLRPMHPQALHPAPGLLASPQLP  
 VQIQAAAGKSGFATTSQPGPRLPFIQHSQNPRFYHK\*

>rs52043377\_ENSMUSP00000072389\_c.934:G>A\_p.R312Q  
 ENSMUST00000072581.9|Gps2-202|ENSMUSG00000023170|+|chr11:g.69807280:G>A  
 MPALLERPKLSNAMARALHRHIMMERERKRQEEEEVDKMMEQKMKEEQERRKKKEMEERMSLEETKEQILKLQ  
 EKLSALQEEKHQLFLQLKVKVLEEEKRRRKEQSDLTTLTSAAYQQSLTVHTGTHLLSMQGS PGGHNRPGTLMA  
 ADRAKQMFQVQLTTRHYVGSAAAFAGTPEHGQFQGS PGGAYGTAQPPPHYGPTQPAYSPSQQLRAPSAFPAV  
 QYLSQPQPQPYAVHGHFQPTQTGFLQPGSTLSLQKQMEHANQQTSFSDSSSLRPMHPQALHPAPGLLASPQLP  
 VQIQAAAGKSGFATTSQPGPQLPFIQHSQNPRFYHK\*

>rs52043377\_ENSMUSP00000054072\_c.934:G>A\_p.R312Q  
 ENSMUST00000057884.6|Gps2-201|ENSMUSG00000023170|+|chr11:g.69807280:G>A  
 MPALLERPKLSNAMARALHRHIMMERERKRQEEEEVDKMMEQKMKEEQERRKKKEMEERMSLEETKEQILKLQ  
 EKLSALQEEKHQLFLQLKVKVLEEEKRRRKEQSDLTTLTSAAYQQSLTVHTGTHLLSMQGS PGGHNRPGTLMA  
 ADRAKQMFQVQLTTRHYVGSAAAFAGTPEHGQFQGS PGGAYGTAQPPPHYGPTQPAYSPSQQLRAPSAFPAV  
 QYLSQPQPQPYAVHGHFQPTQTGFLQPGSTLSLQKQMEHANQQTSFSDSSSLRPMHPQALHPAPGLLASPQLP  
 VQIQAAAGKSGFATTSQPGPQLPFIQHSQNPRFYHK\*

>rs52043377\_ENSMUSP00000112062\_c.934:G>A\_p.R312Q  
 ENSMUST00000116358.8|Gps2-203|ENSMUSG00000023170|+|chr11:g.69807280:G>A  
 MPALLERPKLSNAMARALHRHIMMERERKRQEEEEVDKMMEQKMKEEQERRKKKEMEERMSLEETKEQILKLQ  
 EKLSALQEEKHQLFLQLKVKVLEEEKRRRKEQSDLTTLTSAAYQQSLTVHTGTHLLSMQGS PGGHNRPGTLMA  
 ADRAKQMFQVQLTTRHYVGSAAAFAGTPEHGQFQGS PGGAYGTAQPPPHYGPTQPAYSPSQQLRAPSAFPAV  
 QYLSQPQPQPYAVHGHFQPTQTGFLQPGSTLSLQKQMEHANQQTSFSDSSSLRPMHPQALHPAPGLLASPQLP  
 VQIQAAAGKSGFATTSQPGPQLPFIQHSQNPRFYHK\*

>rs217925426\_ENSMUSP00000104250\_c.391:A>GTTTA\_p.E131ins-fs  
ENSMUST00000108610.8|Eif5a-207|ENSMUSG00000078812|-  
|chr11:g.69808433:T>TAAAC  
MADDLDFETGDAGASATFFPMQCSALRKNQFVVLKGRPCKIVEMSTSKTGKHHGAKVHLVGIDIFTGKKYEDIC  
PSTHNMDVPNIKRNDQFLIGIQDGYLSLLQDSGEVREDLRLPEGDLGKEIEQKYDCGGLRDPDHSVCHDRGG  
SCCNQGHGKI  
>rs217925426\_ENSMUSP00000104252\_c.391:A>GTTTA\_p.E131ins-fs  
ENSMUST00000108612.8|Eif5a-209|ENSMUSG00000078812|-  
|chr11:g.69808433:T>TAAAC  
MADDLDFETGDAGASATFFPMQCSALRKNQFVVLKGRPCKIVEMSTSKTGKHHGAKVHLVGIDIFTGKKYEDIC  
PSTHNMDVPNIKRNDQFLIGIQDGYLSLLQDSGEVREDLRLPEGDLGKEIEQKYDCGGLRDPDHSVCHDRGG  
SCCNQGHGKI  
>rs217925426\_ENSMUSP00000104251\_c.391:A>GTTTA\_p.E131ins-fs  
ENSMUST00000108611.8|Eif5a-208|ENSMUSG00000078812|-  
|chr11:g.69808433:T>TAAAC  
MADDLDFETGDAGASATFFPMQCSALRKNQFVVLKGRPCKIVEMSTSKTGKHHGAKVHLVGIDIFTGKKYEDIC  
PSTHNMDVPNIKRNDQFLIGIQDGYLSLLQDSGEVREDLRLPEGDLGKEIEQKYDCGGLRDPDHSVCHDRGG  
SCCNQGHGKI  
>rs217925426\_ENSMUSP00000104253\_c.391:A>GTTTA\_p.E131ins-fs  
ENSMUST00000108613.10|Eif5a-210|ENSMUSG00000078812|-  
|chr11:g.69808433:T>TAAAC  
MADDLDFETGDAGASATFFPMQCSALRKNQFVVLKGRPCKIVEMSTSKTGKHHGAKVHLVGIDIFTGKKYEDIC  
PSTHNMDVPNIKRNDQFLIGIQDGYLSLLQDSGEVREDLRLPEGDLGKEIEQKYDCGGLRDPDHSVCHDRGG  
SCCNQGHGKI  
>rs217925426\_ENSMUSP00000047008\_c.391:A>GTTTA\_p.E131ins-fs  
ENSMUST00000043419.10|Eif5a-201|ENSMUSG00000078812|-  
|chr11:g.69808433:T>TAAAC  
MADDLDFETGDAGASATFFPMQCSALRKNQFVVLKGRPCKIVEMSTSKTGKHHGAKVHLVGIDIFTGKKYEDIC  
PSTHNMDVPNIKRNDQFLIGIQDGYLSLLQDSGEVREDLRLPEGDLGKEIEQKYDCGGLRDPDHSVCHDRGG  
SCCNQGHGKI  
>rs217925426\_ENSMUSP00000067077\_c.391:A>GTTTA\_p.E131ins-fs  
ENSMUST00000070996.11|Eif5a-202|ENSMUSG00000078812|-  
|chr11:g.69808433:T>TAAAC  
MADDLDFETGDAGASATFFPMQCSALRKNQFVVLKGRPCKIVEMSTSKTGKHHGAKVHLVGIDIFTGKKYEDIC  
PSTHNMDVPNIKRNDQFLIGIQDGYLSLLQDSGEVREDLRLPEGDLGKEIEQKYDCGGLRDPDHSVCHDRGG  
SCCNQGHGKI  
>rs217925426\_ENSMUSP00000068651\_c.391:A>GTTTA\_p.E131ins-fs  
ENSMUST00000071026.10|Eif5a-203|ENSMUSG00000078812|-  
|chr11:g.69808433:T>TAAAC  
MADDLDFETGDAGASATFFPMQCSALRKNQFVVLKGRPCKIVEMSTSKTGKHHGAKVHLVGIDIFTGKKYEDIC  
PSTHNMDVPNIKRNDQFLIGIQDGYLSLLQDSGEVREDLRLPEGDLGKEIEQKYDCGGLRDPDHSVCHDRGG  
SCCNQGHGKI  
>rs217925426\_ENSMUSP00000104249\_c.391:A>GTTTA\_p.E131ins-fs  
ENSMUST00000108609.8|Eif5a-206|ENSMUSG00000078812|-  
|chr11:g.69808433:T>TAAAC  
MADDLDFETGDAGASATFFPMQCSALRKNQFVVLKGRPCKIVEMSTSKTGKHHGAKVHLVGIDIFTGKKYEDIC  
PSTHNMDVPNIKRNDQFLIGIQDGYLSLLQDSGEVREDLRLPEGDLGKEIEQKYDCGGLRDPDHSVCHDRGG  
SCCNQGHGKI  
>rs217925426\_ENSMUSP00000104248\_c.391:A>GTTTA\_p.E131ins-fs  
ENSMUST00000108608.8|Eif5a-205|ENSMUSG00000078812|-  
|chr11:g.69808433:T>TAAAC  
MADDLDFETGDAGASATFFPMQCSALRKNQFVVLKGRPCKIVEMSTSKTGKHHGAKVHLVGIDIFTGKKYEDIC  
PSTHNMDVPNIKRNDQFLIGIQDGYLSLLQDSGEVREDLRLPEGDLGKEIEQKYDCGGLRDPDHSVCHDRGG  
SCCNQGHGKI  
>rs217925426\_ENSMUSP00000104247\_c.391:A>GTTTA\_p.E131ins-fs  
ENSMUST00000108607.8|Eif5a-204|ENSMUSG00000078812|-  
|chr11:g.69808433:T>TAAAC

MADDLDFETGDAGASATFPMQCSALRKNQFVVLKGRPCKIVEMSTSKTGKHGKAVHLVGDIDIFTGKKYEDIC  
PSTHNDVFNKRNDFQLIGIQDGYLSLLQDSGEVREDLRLPEGDLGKEIEQKYDCGGLRDPDHSVCHDRGG  
SCCNQGHGKI  
>rs217925426\_ENSMUSP00000137459\_c.157:A>GTTTA\_p.E53ins-fs  
ENSMUST00000153652.8|Eif5a-212|ENSMUSG00000078812|-  
|chr11:g.69808433:T>TAAAC  
MDVFNKRNDFQLIGIQDGYLSLLQDSGEVREDLRLPEGDLGKEIEQKYDCGGLRDPDHSVCHDRGGSCCNQ  
GHGKI  
>rs217925426\_ENSMUSP00000123402\_c.391:A>GTTTA\_p.E131ins-fs  
ENSMUST00000152589.2|Eif5a-211|ENSMUSG00000078812|-  
|chr11:g.69808433:T>TAAAC  
MADDLDFETGDAGASATFPMQCSALRKNQFVVLKGRPCKIVEMSTSKTGKHGKAVHLVGDIDIFTGKKYEDIC  
PSTHNDVFNKRNDFQLIGIQDGYLSLLQDSGEVREDLRLPEGDLGKEIEQKYDCGGLRDPDHSVCHDRGG  
SCCN  
>rs217925426\_ENSMUSP00000132717\_c.391:A>GTTTA\_p.E131ins-fs  
ENSMUST00000164359.8|Eif5a-213|ENSMUSG00000078812|-  
|chr11:g.69808433:T>TAAAC  
MADDLDFETGDAGASATFPMQCSALRKNQFVVLKGRPCKIVEMSTSKTGKHGKAVHLVGDIDIFTGKKYEDIC  
PSTHNDVFNKRNDFQLIGIQDGYLSLLQDSGEVREDLRLPEGDLGKEIEQKYDCGGLRDPDHSVCHDRGG  
SCCNQGHGKI  
>rs46539509\_ENSMUSP0000018711\_c.197:G>T\_p.K66N  
ENSMUST0000018711.15|Gabarap-  
201|ENSMUSG0000018567|+|chr11:g.69883436:G>T  
MKFVYKEEHPFEKRRSEGEKIRKKYPDRVPVIVEKAPKARIGDLDKPKYLVPDLDVTGQFYFLIRNRIHLRAE  
DALFFFVNNVIPPTSATMGQLYQEHHEEDFFLYIAYSDESVMYGL\*  
>ENSMUSP0000019362\_c.245:T>G\_p.N82K ENSMUST0000019362.15|Dv12-  
201|ENSMUSG0000020888|+|chr11:g.69895682:T>G  
MAGSSAGGGVGETKVIYHLDEEETPYLVKIPVPAERITLGDVFKSVLQRPAGAKYFFKSMQDFGVVKEEISD  
DNARLPCFKGRVSVLWVSSDTPQPEVAPPAHESRTELVPPPPPLPPLPPERTSGIGDSRPPSFHPNVSSSHEN  
LEPETETESVSVLRRDRPRRRDSSEHGAGGHRPGGSPRLERHLAGYESSSTLMTSELESTSLGSDDEDDTMSR  
FSSSTEQSSASRLLKRHRRRRKQRPFRMERTSSFSVTDSTMSLNIITVTLNMEKYNFLGISIVGQSNERGDG  
GIYIGSIMKGGAVAADGRIEPEGDMLLQVNDMNFENMSNDDAVRVLRLDIVHKPGPIVLTVAKCWDPSQAYFTL  
PRNEPIQPIDPAAWVSHSAALTGAFPAYPGSSSMSTITSGSSLPDGCGRGLSVHMDMASVTKAMAAPESGLE  
VRDRMWLKITIPNAFLGSDVVDWLYHHVEGFPERREARKYASGLLKAGLIRHTVNKITFSEQCYVFGDLSGG  
CESYLVNLSLNDNDGSSGASDQDTLAPLPGATPWPLLPFTFSYQYPAPHPYSPQPPPYHELSSYTYGGGSASSQ  
HSEGRSSGSTRSDGGAGRTGRPEERAPESKSGSGSESELSSRGGSLRRGGEPPGTGDDGPPSRGSTGAPPN  
LRALPGLHPYGAPSGMALPYNPMMVMMPPPPPPVSTAVQPPGAPPVVDLGSVPPPELTASRQSFHMAMGNPSE  
FFVDVM\*  
>ENSMUSP00000099635\_c.245:T>G\_p.N82K ENSMUST00000102575.9|Dv12-  
202|ENSMUSG0000020888|+|chr11:g.69895682:T>G  
MAGSSAGGGVGETKVIYHLDEEETPYLVKIPVPAERITLGDVFKSVLQRPAGAKYFFKSMQDFGVVKEEISD  
DNARLPCFKGRVSVLWVSSDTPQPEVAPPAHESRTELVPPPPPLPPLPPERTSGIGDSRPPSFHPNVSSSHEN  
LEPETETESVSVLRRDRPRRRDSSEHGAGGHRPGGSPRLERHLAGYESSSTLMTSELESTSLGSDDEDDTMSR  
FSSSTEQSSASRLLKRHRRRRKQRPFRMERTSSFSVTDSTMSLNIITVTLNMEKYNFLGISIVGQSNERGDG  
GIYIGSIMKGGAVAADGRIEPEGDMLLQVNDMNFENMSNDDAVRVLRLDIVHKPGPIVLTVAKCWDPSQAYFTL  
PRNEPIQPIDPAAWVSHSAALTGAFPAYPGSSSMSTITSGSSLPDGCGRGLSVHMDMASVTKAMAAPESGLE  
VRDRMWLKITIPNAFLGSDVVDWLYHHVEGFPERREARKYASGLLKAGLIRHTVNKITFSEQCYVFGDLSGG  
CESYLVNLSLNDNDGSSGASDQDTLAPLPGATPWPLLPFTFSYQYPAPHPYSPQPPPYHELSSYTYGGGSASSQ  
HSEGRSSGSTRSDGGAGRTGRPEERAPESKSGSGSESELSSRGGSLRRGGEPPGTGDDGPPSRGSTGAPPN  
LRALPGLHPYGAPSGMALPYNPMMVMMPPPPPPVSTAVQPPGAPPVVDLGSVPPPELTASRQSFHMAMGNPSE  
FFVDVM\*  
>ENSMUSP00000140073\_c.245:T>G\_p.N82K ENSMUST00000190940.2|Dv12-  
207|ENSMUSG0000020888|+|chr11:g.69895682:T>G  
MAGSSAGGGVGETKVIYHLDEEETPYLVKIPVPAERITLGDVFKSVLQRPAGAKYFFKSMQDFGVVKEEISD  
DNARLPCFKGRVSVLWVSSDTPQPEVAPPAHESRTELVPPPPPLPPLPPERTSGIGDSRPPSFHPNVSSSHEN  
LEPETETESVSVLRRDRPRRRDSSEHGAGGHRPGGSPRLERHLAGYESSSTLMTSELESTSLGSDDEDDTMSR  
FSSSTEQSSASRLLKRHRRRRKQRPFRMERTSSFSVTDSTMSLNIITVTLNMEKYNFLGISIVGQSNERGDG  
GIYIGSIMKGGAVAADGRIEPEGDMLLQVNDMNFENMSNDDAVRVLRLDIVHKPGPIVLTVAKCWDPSQAYFTL



PRNEPIQPIDPAAWVSHSAALTGAFFPAYPGSSSMSTITSGSSLPDGCEGRGLSVHMDMASVTKAMAAPESGLE  
VRDRMWLKITIPNAFLGSDVVDWLYHHVEGFPERREARKYASGLLKAGLRHTVKNITFSEQCYVFGDLSGG  
CESYLVNLSLNDNDGSSGASDQDTLAPLPGATPWPLLPFTFSYQYPAPHPYSPQPPPYHELSSYTYGGGSASSQ  
HSEGRSSGSTRSDGGAGRTGRPEERAPESKSGSGSESELSSRGGSLRRGGEPGGTGDGGPPPSRGSTGAPPN  
LRALPGLHPYGAPSGMALPYNPMMVMMPPPPPPVSTAVQPPGAPPVRDLGSPPELTASRQSFHMAMGNPSE  
FFVDVM\*

>ENSMUSP00000155973\_c.603:A>T\_p.K202\* ENSMUST00000231506.2|D1g4-  
217|ENSMUSG00000020886|+|chr11:g.69922063:A>T

MSQRPRAPRSALWLLAPPLLRWAPLLTLVHSDLFQALLDILDYIEACISESQKYRYQDEDTPPLEHSPAHL  
NQANSPPVIVNTDTLEAPGYVNGTEGEMEYEEITLERGNSGLGFSIAGGTDNPHIGDDPSIFITKIIPGGAAA  
QDGRLRVND SILFVNEVDVREVTHSAAVEALKEAGSIVRLYVMRRKPPAEKIIIEI\*LIKGPKGLGFSIAGG  
VGNQHIPGDNSIYVTKIIEGGAHKDGRQLQIGDKILAVNSVGLDVMHEDAVAALKNTYDVVYLKVAKPSNAYLS  
DSYAPPDITTSYSQHLNDNEISHSSYLGTDYPTAMTPTSPRRYSPVAKDLLGEEDIIPREPRRIVIH  
RSTGLGFNIVGGEDGEGIFISFILAGGPADLSGELRKGQDILSVNGVDLRNASHEQAAIALKNAGQTVTIIAQYKPEEYS  
RFEAKIHDRLREQLMNSSLSGSGTASLRSNPKRGFYIRALFDYDKTKDCGFLSQALS FHFQDVLHVIDASDEE  
WQARRVHSDSETDDIGFIPSKRRVERREWSRLKAKDWGSSSGSQGREDSVLSYETVTQMEVHYARPIIILG  
PTKDRANDLLSEFPDKFGSCVPHTTRPKREYEIDGRDYHVFVSSREKMEKDIQAHKFIEAGQYN  
SHLYGTSVQSVREVAEQGKHCILDVSNANAVRRLQAAHLHPIAIFIRPRLENVLEINKRITEEQARKAFDRATKLEQEFTECFSA  
IVEGDSFEEIYHKVKRVIEDLSGPYIWPAPERL\*

>ENSMUSP00000134545\_c.612:A>T\_p.K205\* ENSMUST00000123687.3|D1g4-  
205|ENSMUSG00000020886|+|chr11:g.69922063:A>T

MSQRPRAPRSALWLLAPPLLRWAPLLTLVHSDLFQALLDILDYIEACISESQKYRYQDEDTPPLEHSPAHL  
NQANSPPVIVNTDTLEAPGYELQVNGTEGEMEYEEITLERGNSGLGFSIAGGTDNPHIGDDPSIFITKIIPGG  
AAAQDGRLRVND SILFVNEVDVREVTHSAAVEALKEAGSIVRLYVMRRKPPAEKIIIEI\*LIKGPKGLGFSIAG  
GVGNQHIPGDNSIYVTKIIEGGAHKDGRQLQIGDKILAVNSVGLDVMHEDAVAALKNTYDVVYLKVAKPSNA  
YLSDSYAPPDITTSYSQHLNDNEISHSSYLGTDYPTAMTPTSPRRYSPVAKDLLGEEDIIPREPRRIVIH  
RSTGLGFNIVGGEDGEGIFISFILAGGPADLSGELRKGQDILSVNGVDLRNASHEQAAIALKNAGQTVTIIAQYKPE  
EYSRFEAKIHDRLREQLMNSSLSGSGTASLRSNPKRGFYIRALFDYDKTKDCGFLSQALS FHFQDVLHVIDASDE  
EWWQARRVHSDSETDDIGFIPSKRRVERREWSRLKAKDWGSSSGSQGREDSVLSYETVTQMEVHYARPIIILG  
PTKDRANDLLSEFPDKFGSCVPHTTRPKREYEIDGRDYHVFVSSREKMEKDIQAHKFIEAGQYN  
SHLYGTSVQSVREVAEQRDQ\*

>ENSMUSP00000104230\_c.612:A>T\_p.K205\* ENSMUST00000108589.10|D1g4-  
204|ENSMUSG00000020886|+|chr11:g.69922063:A>T

MSQRPRAPRSALWLLAPPLLRWAPLLTLVHSDLFQALLDILDYIEACISESQKYRYQDEDTPPLEHSPAHL  
NQANSPPVIVNTDTLEAPGYELQVNGTEGEMEYEEITLERGNSGLGFSIAGGTDNPHIGDDPSIFITKIIPGG  
AAAQDGRLRVND SILFVNEVDVREVTHSAAVEALKEAGSIVRLYVMRRKPPAEKIIIEI\*LIKGPKGLGFSIAG  
GVGNQHIPGDNSIYVTKIIEGGAHKDGRQLQIGDKILAVNSVGLDVMHEDAVAALKNTYDVVYLKVAKPSNA  
YLSDSYAPPDITTSYSQHLNDNEISHSSYLGTDYPTAMTPTSPRRYSPVAKDLLGEEDIIPREPRRIVIH  
RSTGLGFNIVGGEDGEGIFISFILAGGPADLSGELRKGQDILSVNGVDLRNASHEQAAIALKNAGQTVTIIAQYKPE  
EYSRFEAKIHDRLREQLMNSSLSGSGTASLRSNPKRGFYIRALFDYDKTKDCGFLSQALS FHFQDVLHVIDASDE  
EWWQARRVHSDSETDDIGFIPSKRRVERREWSRLKAKDWGSSSGSQGREDSVLSYETVTQMEVHYARPIIILG  
PTKDRANDLLSEFPDKFGSCVPHTTRPKREYEIDGRDYHVFVSSREKMEKDIQAHKFIEAGQYN  
SHLYGTSVQSVREVAEQGKHCILDVSNANAVRRLQAAHLHPIAIFIRPRLENVLEINKRITEEQARKAFDRATKLEQEFTECFSA  
IVEGDSFEEIYHKVKRVIEDLSGPYIWPAPERL\*

>ENSMUSP00000156345\_c.474:A>T\_p.K159\* ENSMUST00000231415.2|D1g4-  
215|ENSMUSG00000020886|+|chr11:g.69922063:A>T

MDCLCIVTTKKYRYQDEDTPPLEHSPAHLPNQANSPPVIVNTDTLEAPGYVNGTEGEMEYEEITLERGNSGLG  
FSIAGGTDNPHIGDDPSIFITKIIPGGAAAQDGRLRVND SILFVNEVDVREVTHSAAVEALKEAGSIVRLYV  
MRRKPPAEKIIIEI\*LIKGPKGLGFSIAGGVGNQHIPGDNSIYVTKIIEGGAHKDGRQLQIGDKILAVNSVGLD  
VMHEDAVAALKNTYDVVYLKVAKPSNAYLSDSYAPPDITTSYSQHLNDNEISHSSYLGTDYPTAMTPTSPRRYS  
PVAKDLLGEEDIIPREPRRIVIH  
RSTGLGFNIVGGEDGEGIFISFILAGGPADLSGELRKGQDILSVNGVDLRNASHEQAAIALKNAGQTVTIIAQYKPEEYSRFEAKIHDRLREQLMNSSLSGSGTASLRSNPKRGFYIRALFDYDK  
TKDCGFLSQALS FHFQDVLHVIDASDEEWWQARRVHSDSETDDIGFIPSKRRVERREWSRLKAKDWGSSSGSQ  
GREDSVLSYETVTQMEVHYARPIIILGPTKDRANDLLSEFPDKFGSCVPHTTRPKREYEIDGRDYHVFVSSRE  
KMEKDIQAHKFIEAGQYN  
SHLYGTSVQSVREVAEQGKHCILDVSNANAVRRLQAAHLHPIAIFIRPRLENVLEINKRITEEQARKAFDRATKLEQEFTECFSAIVEGDSFEEIYHKVKRVIEDLSGPYIWPAPERL\*

>ENSMUSP00000104229\_c.483:A>T\_p.K162\* ENSMUST00000108588.9|D1g4-  
203|ENSMUSG00000020886|+|chr11:g.69922063:A>T

MDCLCIVTTKKYRYQDEDTPPLEHSPAHLPNQANSPPVIVNTDTLEAPGYELQVNGTEGEMEYEEITLERGNS  
 GLGFSIAGGTDNPHIGDDPSIFITKIIPGGAAAQDGRRLRVNDSILFVNEVDVREVTHSAAVEALKEAGSIVRL  
 YVMRRKPPAEKIIIEI\*LIKGPKGLGFSIAGGVGNQHIPGDNSIYVTKIEGGAAHKDGRLLQIGDKILAVNSVG  
 LEDVMHEDAVAALKNTYDVVYLKVAKPSNAYLSDSYAPPDITTSYSQHLNEISHSSYLGTDYPTAMTPTSPR  
 RYSPVAKDLLGEEDI PREPRRIVIHGSGTGLGFNIVGGEDGEGIFISFILAGGPADLSGELRKGQILSVNGV  
 DLRNASHEQAAIALKNAGQVTVIIAQYKPEEYSRFEAKIHDLREQLMNSSLGSGTASLRSNPKRGFYIRALFD  
 YDKTKDCGFLSQALSFFHFGDVLHVIDASDEEWWQARRVHSDSETDDIGFIPSKRRVERREWSRLKAKDWGSSS  
 GSQGREDSVLSYETVTVQMEVHYARPIIILGPTKDRANDDLLSEFPDKFGSCVPHTTRPKREYEIDGRDYHFVS  
 SREKMEKDIQAHKFI EAGQYNHLYGTSVQSVREVAEQGKHCILDVSANAVRRLQAAHLHPAIAIFIRPRLEN  
 VLEINKRITTEEQARKAFDRATKLEQEFTECFSAIVEGDSFEEIYHKVKRVIDLSGPYIWPARERL\*  
 >ENSMUSP00000156019\_c.417:A>T\_p.K140\* ENSMUST00000232002.2|D1g4-  
 219|ENSMUSG00000020886|+|chr11:g.69922063:A>T

MDCLCIVTTKANSPPVIVNTDTLEAPGYELQVNGTEGEMEYEEITLERGNSGLGFSIAGGTDNPHIGDDPSIF  
 ITKIIPGGAAAQDGRRLRVNDSILFVNEVDVREVTHSAAVEALKEAGSIVRLYVMRRKPPAEKIIIEI\*LIKGPK  
 GLGFSIAGGVGNQHIPGDNSIYVTKIEGGAAHKDGRLLQIGDKILAVNSVGLLEDVMHEDAVAALKNTYDVVYL  
 KVAKPSNAYLSDSYAPPDITTCESPPNLKAPPDPP\*  
 >ENSMUSP00000115206\_c.573:A>T\_p.K192\* ENSMUST00000134376.10|D1g4-  
 210|ENSMUSG00000020886|+|chr11:g.69922063:A>T

MDCLCIVTTKKYRYQDEDTPPLEHSPAHLPNQVNAPELVHVAERNLSHLEAVHGVVGHAAHLSLANSPPVIV  
 NTDLEAPGYVNGTEGEMEYEEITLERGNSGLGFSIAGGTDNPHIGDDPSIFITKIIPGGAAAQDGRRLRVNDS  
 ILFVNEVDVREVTHSAAVEALKEAGSIVRLYVMRRKPPAEKIIIEI\*LIKGPKGLGFSIAGGVGNQHIPGDNSI  
 YVTKIEGGAAHKDGRLLQI  
 >ENSMUSP00000155975\_c.474:A>T\_p.K159\* ENSMUST00000231221.2|D1g4-  
 214|ENSMUSG00000020886|+|chr11:g.69922063:A>T

MDCLCIVTTKKYRYQDEDTPPLEHSPAHLPNQANSPPVIVNTDTLEAPGYVNGTEGEMEYEEITLERGNSGLG  
 FSIAGGTDNPHIGDDPSIFITKIIPGGAAAQDGRRLRVNDSILFVNEVDVREVTHSAAVEALKEAGSIVRLYVM  
 RRPKPPAEKIIIEI\*LIKGPKGLGFSIAGGVGNQHIPGDNSIYVTKIEGGAAHKDGRLLQIGDKILAVNSVGL  
 VMHEDAVAALKNTYDVVYLKVAKPSNAYLSDSYAPPDITTCESPPNLKAPPDPP\*  
 >ENSMUSP00000155942\_c.303:A>T\_p.K102\* ENSMUST00000231452.2|D1g4-  
 216|ENSMUSG00000020886|+|chr11:g.69922063:A>T

MEYEEITLERGNSGLGFSIAGGTDNPHIGDDPSIFITKIIPGGAAAQDGRRLRVNDSILFVNEVDVREVTHSAA  
 VEALKEAGSIVRLYVMRRKPPAEKIIIEI\*LIKGPKGLGFSIAGGVGNQHIPGDNSIYVTKIEGGAAHKDGRLL  
 QIGDKILAVNSVGLLEDVMHEDAVAALKNTYDVVYLKVAKPSNAYLSDSYAPPDITTSYSQHLNEISHSSYL  
 TDYPTAMTPTSPRRYSPVAKDLLGEEDI PREPRRIVIHGSGTGLGFNIVGGEDGEGIFISFILAGGPADLSGE  
 LRKGDQILSVNGVDLRNASHEQAAIALKNAGQVTVIIAQYKPEEYSRFEAKIHDLREQLMNSSLGSGTASLR  
 NPKRGFYIRALFDYDKTKDCGFLSQALSFFHFGDVLHVIDASDEEWWQARRVHSDSETDDIGFIPSKRRVERRE  
 WSRLKAKDWGSSSGSQGREDSVLSYETVTVQMEVHYARPIIILGPTKDRANDDLLSEFPDKFGSCVPHTTRPKR  
 EYEIDGRDYHFVSSREKMEKDIQAHKFI EAGQYNHLYGTSVQSVREVAEQGKHCILDVSANAVRRLQAAHLH  
 PIAIAFIRPRLENVLEINKRITTEEQARKAFDRATKLEQEFTECFSAIVEGDSFEEIYHKVKRVIDLSGPYI  
 WPARERL\*  
 >ENSMUSP00000156059\_c.303:A>T\_p.K102\* ENSMUST00000231628.2|D1g4-  
 218|ENSMUSG00000020886|+|chr11:g.69922063:A>T

MEYEEITLERGNSGLGFSIAGGTDNPHIGDDPSIFITKIIPGGAAAQDGRRLRVNDSILFVNEVDVREVTHSAA  
 VEALKEAGSIVRLYVMRRKPPAEKIIIEI\*LIKGPKGLGFSIAGGVGNQHIPGDNSIYVTKIEGGAAHKDGRLL  
 QIGDKILAVNSVGLLEDVMHEDAVAALKNTYDVVYLKVAKPSNAYLSDSYAPPDITTSYSQHLNEISHSSYL  
 TDYPTAMTPTSPRRYSPVAKDLLGEEDI PREPRRIVIHGSGTGLGFNIVGGEDGEGIFISFILAGGPADLSGE  
 LRKGDQILSVNGVDLRNASHEQAAIALKNAGQVTVIIAQYKPEEYSRFEAKIHDLREQLMNSSLGSGTASLR  
 NPKRGFYIRALFDYDKTKDCGFLSQALSFFHFGDVLHVIDASDEEWWQARRVHSDSETDDIGFIPSKRRVERRE  
 WSRLKAKDWGSSSGSQGREDSVLSYETVTVQMEVHYARPIIILGPTKDRANDDLLSEFPDKFGSCVPHTTRPKR  
 EYEIDGRDYHFVSSREKMEKDIQAHKFI EAGQYNHLYGTSVQSVREVAEQGKHCILDVSANAVRRLQAAHLH  
 PIAIAFIRPRLENVLEINKRITTEEQARKAFDRATKLEQEFTECFSAIVEGDSFEEIYHKVKRVIDLSGPYI  
 WPARERL\*  
 >ENSMUSP0000018700\_c.303:A>T\_p.K102\* ENSMUST0000018700.14|D1g4-  
 201|ENSMUSG00000020886|+|chr11:g.69922063:A>T

MEYEEITLERGNSGLGFSIAGGTDNPHIGDDPSIFITKIIPGGAAAQDGRRLRVNDSILFVNEVDVREVTHSAA  
 VEALKEAGSIVRLYVMRRKPPAEKIIIEI\*LIKGPKGLGFSIAGGVGNQHIPGDNSIYVTKIEGGAAHKDGRLL  
 QIGDKILAVNSVGLLEDVMHEDAVAALKNTYDVVYLKVAKPSNAYLSDSYAPPDITTSYSQHLNEISHSSYL  
 TDYPTAMTPTSPRRYSPVAKDLLGEEDI PREPRRIVIHGSGTGLGFNIVGGEDGEGIFISFILAGGPADLSGE

LRKGDQILSVNGVDLRNASHEQAAIALKNAGQTVTIIAQYKPEEYSRFEAKIHDLREQLMNSSLGSGTASLRS  
 NPKRGFYIRALFDYDKTKDCGFLSQALS FHF GDVLHVIDASDEEWWQARRVHSDSETDDIGFIPSKRRVERRE  
 WSRLKAKDWGSSSSGSGREDVLSYETVTQMEVHYARPIIILGPTKDRANDDLLSEFPDKFGSCVPHTTRPKR  
 EYEIDGRDYHFVSSREKMEKDIQAHKFIEAGQYNHLYGTSVQSVREVAEQGKHCILDVSANAVRRLQAAHLH  
 PIAIFIRPRSLLENVLEINKRITEEQARKAFDRATKLEQEFTECFSAIVEGDSFEEIYHKVKRVIEDLSGPYI  
 WPARERL\*

>ENSMUSP00000156189\_c.390:A>T\_p.K131\* ENSMUST00000232266.2|D1g4-  
 221|ENSMUSG00000020886|+|chr11:g.69922063:A>T  
 MYAKANSPPVIVNTDTLEAPGYVNGTEGEMEYEEITLERGNSGLGFSIAGGTDNPHIGDDPSIFITKIIIPGGA  
 AAQDGRRLRVNDSILFVNEVDVREVTHSAAVEALKEAGSIVRLYVMRRKPPAEKIIIEI\*LIKGPKGLGFSIAGG  
 VGNQHIPGDNSIYVTKIIIEGGAHKDGRLQIGDKILAVNSVGLDVMHEDAVAALKNTY

>ENSMUSP00000114165\_c.399:A>T\_p.K134\* ENSMUST00000132597.5|D1g4-  
 208|ENSMUSG00000020886|+|chr11:g.69922063:A>T  
 MYAKANSPPVIVNTDTLEAPGYELQVNGTEGEMEYEEITLERGNSGLGFSIAGGTDNPHIGDDPSIFITKIIP  
 GGAAAQDGRRLRVNDSILFVNEVDVREVTHSAAVEALKEAGSIVRLYVMRRKPPAEKIIIEI\*LIKGPKGLGFSI  
 AGGVGNQHIPGDNSIYVTKIIIEGGAHKDGRLQIGDKILAVNSVGLDVMHEDAVAALKNTYDVVYLKVAKPS  
 NAYLSDSYAPPDITTSYSQHLDN

>ENSMUSP00000136419\_c.303:A>T\_p.K102\* ENSMUST00000143920.4|D1g4-  
 213|ENSMUSG00000020886|+|chr11:g.69922063:A>T  
 MEYEEITLERGNSGLGFSIAGGTDNPHIGDDPSIFITKIIPGAAAQDGRRLRVNDSILFVNEVDVREVTHSAA  
 VEALKEAGSIVRLYVMRRKPPAEKIIIEI\*LIKGPKGLGFSIA

>ENSMUSP00000156246\_c.303:A>T\_p.K102\* ENSMUST00000232115.2|D1g4-  
 220|ENSMUSG00000020886|+|chr11:g.69922063:A>T  
 MEYEEITLERGNSGLGFSIAGGTDNPHIGDDPSIFITKIIPGAAAQDGRRLRVNDSILFVNEVDVREVTHSAA  
 VEALKEAGSIVRLYVMRRKPPAEKIIIEI\*LIKGPKGLGFSIAGGVGNQHIPGDNSIYVTKIIIEGGAHKDGRL  
 QIGDKILAVNSVGLDVMHEDAVAALKNTYDVVYLKVAKPSNAYLSDSYAPP

>ENSMUSP00000121842\_c.197:G>GC\_p.R66ins-fs ENSMUST00000146411.9|Asgr1-  
 205|ENSMUSG00000020884|+|chr11:g.69947076:G>GC  
 MTKDYQDFQHLDNDNDHHLRRGPPPTPRLLQRLCSGSRLLLLSSLSILLLVVVCVITSQNSQLRRRSAGSK  
 AEFQQPHCEH

>ENSMUSP00000104226\_c.197:G>GC\_p.R66ins-fs ENSMUST00000108585.9|Asgr1-  
 203|ENSMUSG00000020884|+|chr11:g.69947076:G>GC  
 MTKDYQDFQHLDNDNDHHLRRGPPPTPRLLQRLCSGSRLLLLSSLSILLLVVVCVITSQNSQLRRRSAGSK  
 AEFQQPHCEH

>ENSMUSP00000018699\_c.197:G>GC\_p.R66ins-fs ENSMUST00000018699.13|Asgr1-  
 201|ENSMUSG00000020884|+|chr11:g.69947076:G>GC  
 MTKDYQDFQHLDNDNDHHLRRGPPPTPRLLQRLCSGSRLLLLSSLSILLLVVVCVITSQNSQLRRRSAGSK  
 AEFQQPHCEH

>ENSMUSP00000090637\_c.197:G>GC\_p.R66ins-fs ENSMUST00000092959.11|Asgr1-  
 202|ENSMUSG00000020884|+|chr11:g.69947076:G>GC  
 MTKDYQDFQHLDNDNDHHLRRGPPPTPRLLQRLCSGSRLLLLSSLSILLLVVVCVITSQNSQLRRRSAGSK  
 AEFQQPHCEH

>ENSMUSP00000104037\_c.1578:A>C\_p.K527Q ENSMUST00000108400.8|Efcab5-  
 201|ENSMUSG00000050944|-|chr11:g.77028159:T>G  
 MLMQVEKKKLLSQADIPTKFDPINYLGEYLMRHNTHYIKDPGVSQYQRMKEITEELKTHVPDITNRI SKMK  
 EKVKREKREQREYISTVKVKVAGMRKQALEEQFNEWVLNPKGMPIVVYISSYITDLKSEVFEEFLKHLCHSAE  
 EFREIILTDMMRQMFAELFLQCDSGKVMALDRQRTLALLEAFYDQCSSTTRSLLRNPRQWPFVEFEEIELIEF  
 WGDMDIKKHIYEDFDALLKMNMLVAEKLAGKLAENKDLPOQQRDQELSSDSTTEPETATQLTQQRSRRVSL  
 TGQGGQKGRKTSASKQGASRGVSAEQGSRSSGVNQTQQRGVSAEQGSRSSSAVEQTQQRGVSAEQGSRSS  
 TVEQTRQGSVAEQGSRSSSTVEQTQRRGSVAEQGSRSSGVNQTQQRGVSAEQGSRSSSAVEQTQQRGVSAE  
 QGSRSSSAMEQEPQTAQDPNSDSLPEQESHRSITEGSHRSISEPGQRRASVTGQRRKSSVDDSGSAGSRRG  
 SGTDQGGHRSVQQRQGSGERKMSASEYGPHESESITTEPLTASEPGPQIDTIQELDEDSTPQLEDDSAKESK  
 TSELTKIETQEEKPLLLINEEQVPRDSKQPEVPTSSKKERPSGSPKKGRLSGTSKRDSQKDKACEPKPQHVEG  
 KKSSEFLICDWKIKHVKSEEEEEQAKLICDDTRFTDLHATIRNFQTYKGIKGRSAFNGVSLDQLQFVQLLET  
 VGEDTSFSLKDLASFFQKNYSETKQEKIKALEQARQNSRIRRRILLQAI FEKWDNDGSGFLDLNEVDLLY  
 TYKEGMERESMKKAKLHINFPEPSPGHEVKLSSKQFQRYIELVSELRGNEDEVLESVVEFLMGLSLERSHVEG  
 LRNCARRKWLHQIQYAAETSQVSLPEVYTETFRVLTQDAEAHGNKISAHISLLEENVFLPERGHVLLRNAC  
 TLDDAPFVNLKVLRYRDMKGISFTVVDEGKPIHVPQVQHGNIFFWNSFRSKNEYNGSFLALPLQDAYMRFV



SFKTRSSRHTQGAQPGLADQAAKLSYASAESLETMSEAEPLGFSRMRFRQSLPLSRSASQTKLRS PGVLF L  
 QFGEETRRVHITHEVSSLDTLHALIAHMFPQKLTMGMLKSPNTAILIKDEARNVFYELEDVRDIQDRSIIKIY  
 RKEPLYAFAFPGSHLTNGDLRREMVYASRESSPTRRLNNSPASHLASSPPPGPLPSGLPSGLPSGSPSRRLS  
 YAGGRPPSYAGSPVHHAERLGGAPTQGVSPSPSAILERRDVKPDEDLAGKAGGMVLVKGEGLYADPYGLLH  
 EGRLSLAAAAGDPFAYPGAGGLYKRGSVRSLSTYSAAALQSDLEDSLYKAGAGGPLYGDGYGFRLPPSSPQKL  
 ADVSAPSGGPPPHSPYSGPPSRGSPVRQSFRRKDSGSSSVFAESP GGKARSTGSASTAGAPPSELEFPGPGERS  
 LVGF GPPVPAKDTETREMEAMEKQIASLTGLVQSALLRGSEPETPSEKVEGSNGAATPSAPVCGSGSKSSGA  
 TPVSGPPPPSASSTPAGQPTAVSR LQMQLHLRGLQNSASDLRGQLQQLRKLQLQONQESVRALLKRTEAELSMR  
 VSEAARRQEDPLQRQRTLVEEERLRYLNDEELITQQLNDLEKSVKIQRDVAHNHRLVPGPELEEKALVLKQL  
 GETLTELKAHFPGQLSKMRVVL RVEVEAVKFLKEEPQRLDGLLKRRCRGVTDTLAQIRRVQDEGMWPPNNLLN  
 QSPKKVAAETDFSKGLDFEIPPPSPPLNLHELSGPAEGTPLTPKSTNPTKGLDASSKRNTDKAVSVEAAERDW  
 EEKRAALTQYSAKDINRLLEETQAE LLKAI PDLCASKTHPGPAPT PDHKPPKAPHGQKAAPRTEPSGRRGSD  
 ELTVPRYRTEKPSKSPPPPPRRSFPSSHGLTTTTRTGEVVVT SKKDSVFIKKAESSEELEVQKPQVKLRRAVSE  
 VVRPASTPPIMASAIKDEDDEERI IAELESGSSVPPMKVVT PGASRLKAAQGPAGSPDKGKHGKQRT EYMRI  
 QAQQQATKPSKEVSGPNETSSPGSEKPSGSRTSIPVLT SFGARNSSISF\*

>ENSMUSP00000116444\_c.438:A>C\_p.T147P ENSMUST00000126287.2|Srcin1-  
 204|ENSMUSG00000038453|-|chr11:g.97439792:T>G

MQPWQCLRRFALAWWERTAEGRARSPREEVGPDPGGRGEPDPERS SPPMLSADDAEYPREYRTLGGGGGGGS  
 GRRF SNVGLVHTSERRHTVIAAQSLEALSGLQKADADRKRDAFMDHLKSKYPQHALALRGQQDRMREQVGGW  
 PVDPVCLLSSLCSHLHGDSTPSGAGQPAQTRSSRHTQGAQPGLADQAAKLSYASAESLETMSEAEPLGFSRMR  
 NRFRQSLPLSRSASQTKLRS PGVLF LQFGEETRRVHITHEVSSLDTLHALIAHMFPQKLTMGMLKSPNTAILI  
 KDEARNVFYELEDVRDIQDRSIIKIYRKEPLYAFAFPGSHLTNGDLRREMVYASRESSPTRRLNNSPASHLAS  
 SSPPPGLPSGLPSGLPSGSPSRRLSYAGGRPPSYAGSPVHHAERLGGAPTQGVSPSPSAILERRDVKPDE  
 DLAGKAGGMVLVKGEGLYADPYGLLHEGRLSLAAA

>ENSMUSP00000121919\_c.1239:A>G\_p.S414G ENSMUST00000138977.8|Marchf10-  
 204|ENSMUSG000000078627|-|chr11:g.105281044:T>C

MLHETRDRQKQFVSDVQYL RDMQHKVDSEYQACLKRQENKKEPNKKEQQLWVRDTSDRSRFSSGSSCKQSSCE  
 EDSRSEARLSTKTSSAKCEPRLPAIDQASVKQKHKGTMTLKKSEKVS P SKSPVAPKILSRKRPNLGRRLTVS  
 PEMHSPRASAERSRQKQPLSTKASGLLGADPVVQVESLLCANETK LKKPARERRK LAPSSQLMRTAGKPREKQ  
 KKGDL SAHPQNEPHTALSQTFQPMNGSQMLNESLGPSLLPATVVGPRRTPFRFHDEDFYSAISLNNEQESYDT  
 EEETHMEEELLSGMRSPPSYKRSRFLGTSTAQNRNVEENAENLRGNSLRWSESPSGSPRKTSTTEPATKQPS  
 PGQRMLQDTRLPSELAKENPSGDQDEKTPVLGDAKSDGVIQVSADDSVGGGTVEDRS AVQNHEDWQHYYSGS  
 RTSFDCLLSGRPTAPRSMNPPYSAHGSLLSALIDDI PANLSMSSILVPSDDLEENLRFNVRPLSPIRNRN  
 PLAAAEGRSDEAQTQEMASTSHIQEPPLADLPNPQSSVALGDS P SSPTRRHLQGHFYMPGSLQENIPFTFF  
 AVSDFANQNDNGTTRVRSVGMDEKATEIKADPEKLRKLQESLLEEDSEEEEGDLCRICQIAGGSPANPLLEPC  
 GCVGSLQFVHQECLKKWLVKKITSGADLGTVKTCCEMCKQGLLVDLDDFNMT E FYHKKHQQSRAQSELMNSGLYL  
 VLLLHLIYEQRFAELMALNYRRASRERLSRNYPPRPEENESSSES G DGNASNIYPGRVI\*

>ENSMUSP00000063198\_c.1239:A>G\_p.S414G ENSMUST00000049995.10|Marchf10-  
 201|ENSMUSG000000078627|-|chr11:g.105281044:T>C

MLHETRDRQKQFVSDVQYL RDMQHKVDSEYQACLKRQENKKEPNKKEQQLWVRDTSDRSRFSSGSSCKQSSCE  
 EDSRSEARLSTKTSSAKCEPRLPAIDQASVKQKHKGTMTLKKSEKVS P SKSPVAPKILSRKRPNLGRRLTVS  
 PEMHSPRASAERSRQKQPLSTKASGLLGADPVVQVESLLCANETK LKKPARERRK LAPSSQLMRTAGKPREKQ  
 KKGDL SAHPQNEPHTALSQTFQPMNGSQMLNESLGPSLLPATVVGPRRTPFRFHDEDFYSAISLNNEQESYDT  
 EEETHMEEELLSGMRSPPSYKRSRFLGTSTAQNRNVEENAENLRGNSLRWSESPSGSPRKTSTTEPATKQPS  
 PGQRMLQDTRLPSELAKENPSGDQDEKTPVLGDAKSDGVIQVSADDSVGGGTVEDRS AVQNHEDWQHYYSGS  
 RTSFDCLLSGRPTAPRSMNPPYSAHGSLLSALIDDI PANLSMSSILVPSDDLEENLRFNVRPLSPIRNRN  
 PLAAAEGRSDEAQTQEMASTSHIQEPPLADLPNPQSSVALGDS P SSPTRRHLQGHFYMPGSLQENIPFTFF  
 AVSDFANQNDNGTTRVRSVGMDEKATEIKADPEKLRKLQESLLEEDSEEEEGDLCRICQIAGGSPANPLLEPC  
 GCVGSLQFVHQECLKKWLVKKITSGADLGTVKTCCEMCKQGLLVDLDDFNMT E FYHKKHQQSRAQSELMNSGLYL  
 VLLLHLIYEQRFAELMALNYRRASRERLSRNYPPRPEENESSSES G DGNASNIYPGRVI\*

>ENSMUSP00000138742\_c.322:G>T\_p.R108M ENSMUST00000147326.9|Milr1-  
 203|ENSMUSG000000040528|+|chr11:g.106645782:G>T

MGDGDS PMCLSAVSVFGIRCWLDKLLWALTISITLQNAAVDCTRVENNELPSPNLNSMNVVRMGQNVSLSC  
 STKNTSDVITYSLFWGTYLESKRRRGGAVDFHLMISNANESGPYKCKVNVSNL MKYSQDFNFTMAKDESCPS  
 CRLSLLLPGLLLGILVIVLVLAYLIHLKYKGGKKTQREDQSKGSGDAPAQDELYVNACKTQTEQPQEIHYATP  
 VFKEMAPMEEEGGTDGKADYIYSELTH\*

>ENSMUSP00000138617\_c.322:G>T\_p.R108M ENSMUST00000182896.8|Milr1-  
 206|ENSMUSG000000040528|+|chr11:g.106645782:G>T



MGDGDSPMCLSAVSFKGIRCWLDKLLWALTISITLQNAAVDCTRVENNELPSPNLNSSMNVVRMGQNVLSLSC  
STKNTSVDITYSLFWGTYKYLESKRRRGGAVDFHLMISNANESGPYKCKVNVSNLMKYSQDFNFTMARGRHKTQ  
TNGSQAVPAVVKDTSTVWRKARHEEGTTWERRLRERTSPRVLEMRLHRTSCMSTPARLRQSNPRRYTMPLQSS  
RRWHPWKKKVVVRMEKLITSTLNSPTEV\*  
>ENSMUSP00000138678\_c.322:G>T\_p.R108M ENSMUST00000182908.8|Milr1-  
207|ENSMUSG00000040528|+|chr11:g.106645782:G>T  
MGDGDSPMCLSAVSFKGIRCWLDKLLWALTISITLQNAAVDCTRVENNELPSPNLNSSMNVVRMGQNVLSLSC  
STKNTSVDITYSLFWGTYKYLESKRRRGGAVDFHLMISNANESGPYKCKVNVSNLMKYSQDFNFTMARKKTQRE  
DQSKGSGDAPAQDELYVNACKTQTEQPQEIHYATPVFKEMAPMEEEGGTDGKADYIYSELTH\*  
>ENSMUSP00000083538\_c.322:G>T\_p.R108M ENSMUST00000086353.11|Milr1-  
201|ENSMUSG00000040528|+|chr11:g.106645782:G>T  
MGDGDSPMCLSAVSFKGIRCWLDKLLWALTISITLQNAAVDCTRVENNELPSPNLNSSMNVVRMGQNVLSLSC  
STKNTSVDITYSLFWGTYKYLESKRRRGGAVDFHLMISNANESGPYKCKVNVSNLMKYSQDFNFTMAKDESCPS  
CRLSLLLPLGLLLGILVIVLVLAYLIHLKYKKGKKTQREDQSKGSGDAPAQDELYVNACKTQTEQPQEIHYATP  
VFKEMAPMEEEGGTDGKADYIYSELTH\*  
>ENSMUSP00000138513\_c.322:G>T\_p.R108M ENSMUST00000183111.8|Milr1-  
208|ENSMUSG00000040528|+|chr11:g.106645782:G>T  
MGDGDSPMCLSAVSFKGIRCWLDKLLWALTISITLQNAAVDCTRVENNELPSPNLNSSMNVVRMGQNVLSLSC  
STKNTSVDITYSLFWGTYKYLESKRRRGGAVDFHLMISNANESGPYKCKVNVSNLMKYSQDFNFTMARKKTQRE  
DQSKGSGDAPAQDELYVNACKTQTEQPQEIHYATPVFKEMAPMEEEGGTDGKADYIYSELTH\*  
>ENSMUSP00000102406\_c.322:G>T\_p.R108M ENSMUST00000106794.9|Milr1-  
202|ENSMUSG00000040528|+|chr11:g.106645782:G>T  
MGDGDSPMCLSAVSFKGIRCWLDKLLWALTISITLQNAAVDCTRVENNELPSPNLNSSMNVVRMGQNVLSLSC  
STKNTSVDITYSLFWGTYKYLESKRRRGGAVDFHLMISNANESGPYKCKVNVSNLMKYSQDFNFTMANESCPSC  
RLSLLLPLGLLLGILVIVLVLAYLIHLKYKKGKKTQREDQSKGSGDAPAQDELYVNACKTQTEQPQEIHYATPV  
FKEMAPMEEEGGTDGKADYIYSELTH\*  
>ENSMUSP00000138286\_c.322:G>T\_p.R108M ENSMUST00000182023.2|Milr1-  
204|ENSMUSG00000040528|+|chr11:g.106645782:G>T  
MGDGDSPMCLSAVSFKGIRCWLDKLLWALTISITLQNAAVDCTRVENNELPSPNLNSSMNVVRMGQNVLSLSC  
STKNTSVDITYSLFWGTYKYLESKRRRGGAVDFHLMISNANESGPYKCKVNVSNLMKYSQDFNFTMARGRHKTQ  
TNGSQAVPAVVKDTSTVWRKARHEEGTTWVRR\*  
>ENSMUSP00000138386\_c.13:G>T\_p.R5M ENSMUST00000182479.2|Milr1-  
205|ENSMUSG00000040528|+|chr11:g.106645782:G>T  
DFHLMISNANESGPYKCKVNVSNLMKYSQDFNFTMAKDESCPSCRLSLLLPLGLLLGILVIVLVLAYLIHLKYK  
KGKKTQREDQSKGSGDAPAQDELYVNACKTQTEQPQEIHYATPVFKEMAPMEEEGGTDGKADYIYSELTH\*  
>ENSMUSP00000062392\_c.1818:A>T\_p.N607Y ENSMUST00000059595.11|Prkca-  
201|ENSMUSG00000050965|-|chr11:g.107842327:T>A  
MADVYPANDSTASQDVANRFARKGALRQKNVHEVKDKHFIARFFKQPTFCSHCTDFIWFGFGKQGFQCQVCCFV  
VHKRCHEFVTFSCPGADKGPDTDDPRSKHKFKIHTYGSPTFCDHCGSLLYGLIHQGMKCDTCDMNVHKQCVIN  
VPSLCGMDHTEKRGRIYLKAEVTDEKLHVTVRDAKNLIPMDPNGLSDPYVKLKLIPDPKNESKQKTKTIRSTL  
NPQWNESFTFKLKPDKDRRLSVEIWDWDRTRRNDFMGSLSGVSELMKMPASGWYKLLNQEEGEYYNVPIPE  
GDEEGNMELRQKFEKAKLGPAGNKVISPSEDRKQPSNNLDRVKLTDNFNLMVLGKGSFGKVMADRKGTEELY  
AIKILKKDVVIQDDDVECTMVEKRVLALLDKPPFLTQLHSCFQTVDRLYFVMEYVNGGDLMYHIQQVGFKEP  
QAVFYAAEISIGLFFLHKRGI IYRDLKLDNVMLDSEGHIKIADFGMCKEHMMDGVTTRTFCGTPDYIAPEIIA  
YQPYGKSDVWWAYGVLLYEMLAGQPPFDGEDEDELFSIMEHNVSYPKSLSKEAVSICKGLMTKHPAKRLGCG  
PEGERDVREHAFFRRIDWEKLEYREIQPPFKPKVCGKGAENFDKFFTRGQPVLTTPDQLVIANIDQSDFEFGS  
YVNPQFVHPILQSAV\*  
>ENSMUSP00000097875\_c.546:A>T\_p.N183Y ENSMUST00000100302.4|Prkca-  
202|ENSMUSG00000050965|-|chr11:g.107842327:T>A  
MKRQVQMOSQLWKAREGFYAAEISIGLFFLHKRGI IYRDLKLDNVMLDSEGHIKIADFGMCKEHMMDGVTTRT  
FCGTPDYIAPEIIAYQPYGKSDVWWAYGVLLYEMLAGQPPFDGEDEDELFSIMEHNVSYPKSLSKEAVSICK  
GLMTKHPAKRLGCGPEGERDVREHAFFRRIDWEKLEYREIQPPFKPKVCGKGAENFDKFFTRGQPVLTTPDQL  
VIANIDQSDFEFGSYVNPQFVHPILQSAV\*  
>ENSMUSP00000036338\_c.4384:T>G\_p.I1462S ENSMUST00000044850.4|Abca9-  
201|ENSMUSG00000041797|-|chr11:g.109998402:A>C  
MRKRHLRLGQQMALLCKNWLKFRMRRETLLEWLFSLLLILFVYQLSSNLHQVHDAPEMSVDLGRVDNFND  
SNYMMVFAPSEATHEIMNKVASAPFMKGRITIVACPDEKSMNELDLNYSIDAVRVIKDTFSYHLKFSWGQRI  
PKTKEHKDHSAPCEPLNNKMICENSAFWEKGFVAFQAAINAGI IEMITNHSVMEELMSVIGSNMKMPFFIAQG

GVATDFFIFFCVISFSSLIYYLSVNIQTQERQYMTTLMAMMGLRESAFWLSWSLMYAGFILVAVLMSLIVKSA  
 QVVVLTGFMVVFLFLFYGLSLITLSFLMSVLIKKPFLTGLAIFILTVFWGSLGFTALYKHLPAFVEWTLFCFL  
 SPFAFTTGMAQLIHLDDYVNSNVNLNSPNNSYLIMATLFLMLVLDALLYLVLALYFDKITLSKYGHQSRPLFFL  
 KSSYWFKRRGASHVVLENEIDSDPSLNDLSLEPVSPFEFQGKEAIRIKNLKKEYSGKHGKVEALRGLGFDIYEGQ  
 ITALLGHSGAGKTTLINTLSGLSPPTTGSVTIYNQTVSEMDDSDAVLTIITGVCPQSNVQFGFLTRENLRIFA  
 KIKGILPHEVEQEVEVQVLQDLEMENIQDILAQNLSGGQKRKLTGLIAILGDPQVLLLDEPTAGLDPLSRHRIW  
 NLLKERRAGRIVFSTQFMDEADILADRKFVINSNRLKACAGSSFLKKKWIGYHLSLHLNEACDEPETSILV  
 KKHISDARLTTQSEERLVYILPLERTNKFPDLYRDLDRCSNQGIEDYGVSMTTLNEVFLKLEGKSMADESDVG  
 ICGRLQSDGARDMESLVELEQVLSLDSGSSVSGMALWRQQLCAVAKVRFKLNKNERKSLMTVLLLFGISFVP  
 QLEHLVYKVVHKSYSWGLSPSMYFLSPGQPPQDPLTHLLVINRTGSSIDNFVHALRQQGIALDLDALGTRNG  
 TEEALYNGAITVLGEEKALRFSVACNAKRLNCFVLMIDIISNGLLGFNSERIQTDRSTVFEEHMLYEGFM  
 SNAFFWIPIVAASLTPYIAMGSI SDHKKVLSQLWTSGLYPSAYWCGQALVDIPIYFLILFLMQIMDSVFSSEE  
 FISVMESLLIQIPCSIGYASSLIFMTYVIFSIFRNGRKNKSGIWSFFFLIVTIFFIATDINEYGFLELLICTF  
 LVPPFTLIGSLLIFSEVSYSDVYLGTSSEQLVFLALLIPYLHFLFFFIILRCLERYLRKSLRVDPVFRISP  
 RSCPAVNPPEEPGEEDVQMERVRTTGAMATLQTDKPVIIASCLRKEYIGRTKRCFSKMKKKIATRNI SFC  
 VKKGEVLGLLGHNGAGKSTTISMITGDTIPTAGQVFLKGGGGAALGFLGYCPQENVLWPNLTVKEHLELYAA  
 VKGLKKKDAVVTITRLVNAKQLQDHLKALVRTLSEGVKRLKCFVLSILGNPPVLLDEPSTGMDPEGQQMWQ  
 ASRATFTNTERGALLTTHYMAEAEAVCDRVAIMVSGRLRCIGSIQHLKSKFGKDYLLKMKVTPSQVEPLNTE  
 IMRLFPQAARQERYSSLMVYKLPVEDVRPLSEAFFKLERLKENFDLEEYSLSQSTLEQVFLELSKEQELDDDFG  
 EEANSSVKWKLPPQEEL\*

>ENSMUSP00000036338\_c.3688:C>A\_p.S1230\* ENSMUST00000044850.4|Abca9-201|ENSMUSG00000041797|-|chr11:g.110007909:G>T

MRKRHLRLGQQMWALLCKNWLKFRMRRETLLLEWLFSLLLILFVYQLSSNLHQVHDAPEMSVVDLGRVDNFND  
 SNYMMVFAPSEATHEIMNKVASAPFMKGRITIVACPDEKSMNELDLNYSIDAVRVI FKDTFSYHLKFSWGQRI  
 PKTKEHKDHSAPCEPLNNKMICENSAFWEKGFVAFQAAINAGI IEMI TNHNSVMEELMSVIGSNMKMPPIAQQ  
 GVATDFFIFFCVISFSSLIYYLSVNIQTQERQYMTTLMAMMGLRESAFWLSWSLMYAGFILVAVLMSLIVKSA  
 QVVVLTGFMVVFLFLFYGLSLITLSFLMSVLIKKPFLTGLAIFILTVFWGSLGFTALYKHLPAFVEWTLFCFL  
 SPFAFTTGMAQLIHLDDYVNSNVNLNSPNNSYLIMATLFLMLVLDALLYLVLALYFDKITLSKYGHQSRPLFFL  
 KSSYWFKRRGASHVVLENEIDSDPSLNDLSLEPVSPFEFQGKEAIRIKNLKKEYSGKHGKVEALRGLGFDIYEGQ  
 ITALLGHSGAGKTTLINTLSGLSPPTTGSVTIYNQTVSEMDDSDAVLTIITGVCPQSNVQFGFLTRENLRIFA  
 KIKGILPHEVEQEVEVQVLQDLEMENIQDILAQNLSGGQKRKLTGLIAILGDPQVLLLDEPTAGLDPLSRHRIW  
 NLLKERRAGRIVFSTQFMDEADILADRKFVINSNRLKACAGSSFLKKKWIGYHLSLHLNEACDEPETSILV  
 KKHISDARLTTQSEERLVYILPLERTNKFPDLYRDLDRCSNQGIEDYGVSMTTLNEVFLKLEGKSMADESDVG  
 ICGRLQSDGARDMESLVELEQVLSLDSGSSVSGMALWRQQLCAVAKVRFKLNKNERKSLMTVLLLFGISFVP  
 QLEHLVYKVVHKSYSWGLSPSMYFLSPGQPPQDPLTHLLVINRTGSSIDNFVHALRQQGIALDLDALGTRNG  
 TEEALYNGAITVLGEEKALRFSVACNAKRLNCFVLMIDIISNGLLGFNSERIQTDRSTVFEEHMLYEGFM  
 SNAFFWIPIVAASLTPYIAMGSI SDHKKVLSQLWTSGLYPSAYWCGQALVDIPIYFLILFLMQIMDSVFSSEE  
 FISVMESLLIQIPCSIGYASSLIFMTYVIFSIFRNGRKNKSGIWSFFFLIVTIFFIATDINEYGFLELLICTF  
 LVPPFTLIGSLLIFSEVSYSDVYLGTSSEQLVFLALLIPYLHFLFFFIILRCLERYLRK\*LRVDPVFRISP  
 RSCPAVNPPEEPGEEDVQMERVRTTGAMATLQTDKPVIIASCLRKEYIGRTKRCFSKMKKKIATRNI SFC  
 VKKGEVLGLLGHNGAGKSTTISMITGDTIPTAGQVFLKGGGGAALGFLGYCPQENVLWPNLTVKEHLELYAA  
 VKGLKKKDAVVTITRLVNAKQLQDHLKALVRTLSEGVKRLKCFVLSILGNPPVLLDEPSTGMDPEGQQMWQ  
 AIRATFTNTERGALLTTHYMAEAEAVCDRVAIMVSGRLRCIGSIQHLKSKFGKDYLLKMKVTPSQVEPLNTE  
 IMRLFPQAARQERYSSLMVYKLPVEDVRPLSEAFFKLERLKENFDLEEYSLSQSTLEQVFLELSKEQELDDDFG  
 EEANSSVKWKLPPQEEL\*

>rs242693285\_ENSMUSP00000036338\_c.1181:AC>C\_p.N394del-fs ENSMUST00000044850.4|Abca9-201|ENSMUSG00000041797|-|chr11:g.110042866:GT>G

MRKRHLRLGQQMWALLCKNWLKFRMRRETLLLEWLFSLLLILFVYQLSSNLHQVHDAPEMSVVDLGRVDNFND  
 SNYMMVFAPSEATHEIMNKVASAPFMKGRITIVACPDEKSMNELDLNYSIDAVRVI FKDTFSYHLKFSWGQRI  
 PKTKEHKDHSAPCEPLNNKMICENSAFWEKGFVAFQAAINAGI IEMI TNHNSVMEELMSVIGSNMKMPPIAQQ  
 GVATDFFIFFCVISFSSLIYYLSVNIQTQERQYMTTLMAMMGLRESAFWLSWSLMYAGFILVAVLMSLIVKSA  
 QVVVLTGFMVVFLFLFYGLSLITLSFLMSVLIKKPFLTGLAIFILTVFWGSLGFTALYKHLPAFVEWTLFCFL  
 SPFAFTTGMAQLIHLDDYVNSNVNLNSPNTT

>ENSMUST00000035458\_c.4273:C>A\_p.T1425N ENSMUST00000044003.14|Abca6-201|ENSMUSG00000044749|-|chr11:g.110073860:G>T

MKELSVHVRQQTRALLHKILLKWRKRESLLEWSIPIIIGLHMGLFSYLARNIQVLEVPQDLGSLNEFNFS  
 SLVVVYTPISNITQQIMNKTTFAPTMKGTRIIGVPSIEDLDEVLLHNI PDALGVIFNDSFSYQLKVLRMYGNP

FLKEDLLAHCWDTHSQAFCSLSKYWERGFVALQTAINAGIIEVTTNHSVMEELMSIDGINMKTLPFIPRDLSD
YEIFILFCLLYFSSFIYFASSNVTKERKQCKEVMKVMGLQDSAFWLSWGLIYVGFIFIIISIFIAIIITSTQII
MMTGFLVIFTLFFLYGLSLIAVTFMLAVLLQKAVLTNLIVLFFTLFWGCVGFVTLHKELPPSLEWVLSIFSPF
AFTSGMAKVI FQDYNLNGVVPDPDSGESYVMIAVFFILAFDSSLYLVLALYFDKILLYGAEHRSAPLFFLNPT
SCFRKTANRNKVIERDLDPPELPSDEYFEPVDPEYQKKEAIRIRNIKKEYKKGKSGKVKALKGLFLDIYESQITA
ILGHSGAGKSSLLNILSGLYVPTAGSVTVYNKNLSMDQLKEIRKAIGVCPQHNVPQFDALTVKENLTLFAKIK
GILPQDVEQEVQILSELDMQNI RDDLAEHLSEGQKRKLTFGIATVGDPOILLLDEPTVGLDPFSRQRIWGF
KERRADHVILFSTQFMDEADILADRKVLIANGALKCTGSSVFLKRKWLGYHLSLFMDETCDSERLTSFINHH
IPYAKLKAKTKEKLVYILPLERTSEFPEFFSDLDKYSQGGLMSYEVSMSTLNDVFLNLEGEPTKQDFEKRET
ATDSESLNDMEVAYPSLSQVQETVSTMSLWRMQVCAIARLRIKLRERKAFLIILLLLGIALPLVIEYVAN
ALLEVKNNWEFKTDLYFLSPGQLPQGLRTSLLVINNTESNIEDFLQSLKHQNI VLEVDDFENRNATNSLSYNG
AIIVSGRQKDYRFSAVCNTKRLHCFPIILMNVISNGILHMLNHTQYIRIKEDIFSPFIVLVWTGIQETCLFILC
VICSLSPHIAMSSVSDYKKKADSQLWISGLYPSAYWCGQAVVDISLFSGMLLTSYFTSYTSKLLNIDMTSEIV
FSVIVLALGCAASLVFLTYVISFVFGKRKKNSTLWSICFLIVIAITFEKVANGPFNEALVISATMLVPSFALN
GLLVVLEMRAYQYYIEFEEIKHGLSAVDLLLCLIPYIHTLLFIFVLRCLLEKYGKNVVRDPFI RIA PQSLKA
QNPPEPIDEDEENVQAERLRTSDALSTPNLDEKPVIIASCLHKEYAGQKKHCCSRTRNMAVRNVSFVKNKE
ILGLLPGPDGAGKSSSIRMIAGITKPTAGQVELKRLSSAVGHQGDSRAEFGYCPQENGLWPNLTVKEHLELYAA
VKGLRKEGDVVAISRVLNALKLHDQNLVQVQNLVAGANRKLCLFVLSILGNPVLILDEPSTGLDVS GKHQVWQ
AIQAVVKDNEKGVLLSTHDLAEAEALCDRAAIMVSGRLRCIGPIQHLLKRKFGQDYVLELRVKDVSQEPVHRE
ILKLFPPAARQDRCFSLTYKLPVTDVHPLSQAFHKLEAVKHGFDELDYSLSQCTLDRVILELSKEQELGTVY
EADMTLGRKLLPPSDEL\*

>ENSMUSP00000053033\_c.162:G>A\_p.V55M ENSMUST00000058109.9|Mrps7-
201|ENSMUSG00000046756|+|chr11:g.115495626:G>A
MAAPALRAPLRWSGLALGVRCVWNLPLGLTQVRGSRYPAEFREPLIDKEYYRKPMAELTEEEKYDQELKKTQF
IKAAAATETSSVFADPVI SKFTNMMKGGNKVLARSLMAQTLEAVKRKQFEKYRAASAEEQATIERNPYRIFH
EALKNCEPVI GLVPI LKGGHFYQVPVPLADRRRRFLAMKMMI TEARENKPRRTLMPKLSHELLEAFHNRGPV
IKRKHNMHKMAEANRALAHYRWW\*

>ENSMUSP00000091439\_c.1544:G>T\_p.R515S ENSMUST00000093911.11|Myo15b-
202|ENSMUSG00000034427|+|chr11:g.115750776:G>T
MGRSKGKAPHRPRPGRPASAELESGSASADCAPSPDRRPARSKARKNKPATEHEATGGKGTAGGQRKHTGEG
NHRCRTSQETQERQSSSQRLRHGPTESRSDSGDCGEHTEEQGIPREEVRTGKRRRRRGRKDRGPLTRRGHGET
PGRDGDTSGGDGGSSCLDSEAREAQDSSSQGGGAPERPPKMEPSDPRSEGAPIRGPSSTQVQKCPGNSHPGS
EGHALELQSKEGSSGTGPQRASDDSRDTDTSSPGWAGHRHL PQKIPGTSSGIPESQEI ELGREAAASSVPRGS
QSPQDSSAIVDTSVGAQPKAELLGTEPETAGAPGAQLLQVGEVTRKALVVAGESDAGARERSRAGDPGPRDR
TPLAALVLRRLRPRPPAGASPQFAGGIRVGLKARLQVARALGFLRWLRVRERRRTEARAASPRECKERGR
ERALEARGRVPGPRRRLARLACRLVGLRGTPRALPGGGPSPQALSSSVSNDASAIEDPADDPKFAVVPRI
HKASKESGSSSGTSAGAPTAGAEDREEQEANGEGVARACQVPSFFPSARNGTTPNENRSQAEPETLEAKTG
VHWAQDSNPSEDPELGADTLLPQLTLETRLRQNSPCRSRPRERWEPEDDTEAALERDLELSLQRNLEMPFFLGA
KTGSLPESLEDIEDLARLRLVCDSSVLLCLKKRFHLGRIYTFGGPLLLALNPHRSLPLFSSEVLASYHPRKAP
NTTPHIFAIGAAAYSLSQSTGQDSCILGGHSGSGKTEGAKKILEFLSSSLGQKPMEANLAQLEDILPVLGSFG
HAKTILNANASRFGQEIRLCLQQGLIVGASVSHYLLET SRVVFQAQERSFHVVFYELLAGLDPTEREQLSLQG
PEAYYYLNQGGACRLQ GKEDAQDFKELMKALRGLGLCAEELTAVWAVLATILHLGNICFSSSERESQEVAAVS
SWAEIHLAARLLQVPPERLEGAVTKRVMDTPYGPVSRPLPVEGAIDARDALAKTLYTRLFTWLLKHINARLSP
PREADSVATI AVVDAFGFEALRVNGLEQLCSNLASERLQLFSSQKLLAQEEVVCQEQELLKWVPI PQPPRQSC
DLLVGPQHSLNILDQTWLSQATDHTFLQKCHYHGDHPSYAKQLPLPIFTVRHYAGTVTYQVHKFINRNR
GHLDPVAVLEMLRQSQLQLMGSLFQEAEPQAGTEQNKPTLASRFQQT LGDLLARLGRGHVYVIHCLNPTPGKIP
GLLDVGHVAEQLRQAGILEIIGTRSTHFPVRVSFQVFLARFHALGSGRQKAASDQERC GAILSEVLGAESPLY
HLGVTQVLLQEQGWQLEQLWAQRSSQALLTLHRGLRACITRQRLRLLPRMQARVRGLQARKRYLQRRSALGQ
LNTILLVARPLLRRLRRRQKLRCA PPHSGEPWGVKVSNDLGRLEIPAQLATLLERAEGHQALLTGSITESLPPEV
PARPSLTLPPDIDQFPFSSVSTSFQKPFPRPGQPLDEPLTRLDGENPQQALEINRVMLRLLGEGSLQSWQE
QTMGTFLVQQAQRPPGLRDELFSQLVAQLWRNPDEQQNQRGWALMVI LLSSFAPTPALEKPLLKFVSDQAPSG
MAALCQHKL LGALEQTPLAPMASRSHPTQLEWKAGLRRGRMALDVFTFNESYSAEVESWTTGEQFAGWILQ
SRGLEAPRPGVSVLSHSGDAWRDLPGCDFVLDLIGETEDLGDPA GPHNYPI TPLGLAESIPPAGVQAPSLPP
GLPPGPAPILASSRPPGEASKPENLDGFVDHLFEPALAPGDSLEQGWALSRRMKGGVSGPTQQGYPMVYPG
MVQAPSYQPAMI PAPMPVMPAMGAVPTMPAMHVPVPPQPQLVPSLDSRQLALQQQNF INQQAMI LAQQMTTQAM
SLSLEQQNQQRHQQAQTS GATSQPPSTTAPKAKKPPAPQEKPE SNLEPSGVGLREDTPEEAESKPPQRPKSFQ
QKRDFYQKMGQEP I RVKTVKPPAKVQIQOEEMEETEEEEETAE LSPPPPPPVVKKPLKASRPKAVKEDEAE
PAQEEVPTQGEDPPVHSSNSAPQHFKPSRVPPVQSSNSAPPRPQPSREIRNIIRMYQSRPGPVAVPVQPTRPI

KTFQKKNDPKDEALAKLGINGVHPLSTSPNQKSSPPAVVPRPKARPRLEPSLSIQEKQGPLRDLFGPCSPN  
PPTAPAPPPPPALPPPLSGEPKTPSVESHALTEPMEDKNI STKLLVPSGSVCFSYANAPWKFLRKEVFYPRE  
NFSHPYCLSLLCQQILRDTFTESCTRI SQDERHKMKGLLDGDEVLETLDIVEDSIKKRIVVAARDNWNANYFS  
RIFPVSGESGSDVQLLGVSHRGLRLLKVTQSPSFHLDQLKTLCSYSYAEVLTVQCRGRSTLESLKNEQLILH  
TAWARAIKAMVDLFLSELRKDSGYVIALRSYITDDNSLLSFHRGDLIRLLPVTALEPGWQFGSAGGRSGLFPD  
DVVQPAAPDLFSFLGKRNSWQRKSKLGPQERPTHPRKQEPSEDESEATSFTTYSLSADPHNYTMQEFALRY  
FRKPHTWLTQMSRDTKEKAANLIQYTKDPIQESLTSFCNGDTNSKAVAGFKALMQFMGDQPKPRGKDELSLL  
YELLKLCQDDLRDEMYCQVIKQVTHGHPQPKHCALGWSVLSLFTGFFAPSTTLMPYVTKFLQDSSPSEELARRS  
QENLQRTVVKYGGRRQLPLPGEMNAFLKQAVRLLLIHLPGGVYRTNSQFTTVAGEVLEELCGQMGITDLEEV  
QEFALFLIKGEGELVRPLSPHEY INNVVTDQDMSLHSRRLGWETPLHFDHSTYETETHYQVLRDYLQGKLIVS  
TQAEALLAQLAAFQHFDTGTSSPPSEQELLSYIPKPLQWQVNTANIKSLVTQELRQMQGYSKQRAQIGFIES  
TAQLPLFGYTVYVVLVRSKALALPGPGLLGLNRQHLVLMDPSSQELCCSVMLKDLKQLHLLSPLQEDGPPGLEL  
NYGSVDNPQTIWLELPAQELQHTIIFLLGSMSTQWPGLL\*

>ENSMUSP0000005173\_c.1102:A>C\_p.H368P ENSMUST0000005173.11|Sgsh-  
201|ENSMUSG0000005043|-|chr11:g.119237510:T>G  
MHCPLGACCTILLVLGLCGAHSRNVLLIVADDGGFESGVYNNTAIATPHLDALSRSILIFRNAFTSVSSCSPS  
RASLLTGLPQHONGMYGLHQDVHFFNSFDKQVSLPLLLNQAGVRTGII GKKHVGPETVYPFDFAFTEENSSVM  
QVGRNITRIKQLVQKFLQTDPRFFLYVAFHDPHRCGHSQPQYGTFCFKFNGESGMGYIPDWTQIYDQD  
VMVYFVVPDTPAARADLAAQYTTIGRMDQGVGLVQLQELRGAGVLDNTLIIFTSDNGIIPFSGRNTLYWPGTAE  
PLLVSPEHPQRWGVSDAYVSLDLTPTILDWFSIPYPSYAFGSKTIQLTGRSLLPALEAEPLWATVSSQ  
SHPEVTMSYPMRSVYHQNFRLIHNLSFKMPFPIDQDFYVSPFTQDLLNRRTTGRPTGWYKDLHRYYYRERWEL  
YDISRDPRETRNLAADPDLAQVLEMLKAQLVKWQWETHDPWVCAPDGVLEEKLTPOCRPLHNEL\*

>ENSMUSP00000047445\_c.2473:C>T\_p.A825V ENSMUST00000045664.7|Atad2b-  
201|ENSMUSG00000052812|+|chr12:g.5056619:C>T  
MVNTRKSSLRLLGSKSPGPGPGGAGAGAEPGATGGSSHFISSTRSSKTRAASCPAAKAGGSGGALDEARKA  
EVDGSLSDSHVSPPAKRTLKQPDVCKDKSKSRSTQGREWNIPSGQTRLTSQPGATLNGHSSLSLRSHPLR  
GEKKGDGDLSCINGDIEVRKSCRSRKNRFESVNSQLLFDQLVNSTAEAVLQEMDNINIRNRNRSGEVERLRMW  
TDTEFENMDMYSRVKRRRKSLLRNSYGIQNHHEVSTEGEEESQEEEDGDI EVEEAEGEENDRPNLQRKTV  
RYQAPPVPAHQKKRENTLFDIHRSPARRSHIRKKHAIHSSDTSSEERFERRKS KSMARARNRCLPMNFR  
AEDLASGILRERVKVGASLADVDPMNIDKSVRFDSIGGLSHHIALKEMVVFPLLYPEIFEKFKIQPPRGCLF  
YGPPTGKTLVARALANEC SQGDKKVAFFMRKGADCLSKWVGESERQLRLLFDQAYLMRPSIIFFDEIDGLAP  
VRSRQDQIHSSIVSTLLALMDGLDNRGEIVVIGATNRLDSIDPALRRPGRFDREFLNLDPQARAKHILQIH  
TRDWNPKLSDAFLGELAEKCVGYCGADIKALCTEAALTALRRRYPQIYASSHKLQLDVTISIVLSAHDYHAMQ  
NIVPASQRAVMSSGQALSPIIRPLERSFNNILAVLQKIFPHAETSQNFVAGSDLNCPSLEISSDYEETSIP  
VKSSGKCFGLGKCLSKDSQGSTFVHLNFMNMAFGPTSYRPRLLSGERGSGQTSHLAPALLHLERFSVHRDL  
PALYSVSAKTPEESCAQIFREVRRTVPSIVYMPHIGDWDWDAVSDTVRATFLLQDIPSFSPIFLLSTSETMY  
SELPEEVKICIFRIQYEEVLYIQRP I EEDRRKFFQELILHQASMAPPRRKH TALRAMEVLPALPSPPRQLSES  
EKNRMEDQEENTLRELRLFLRDVTKRLATDKRFNIFSKPVDIEEVSDYLEVIKEPMDLSTVITKIDKHNLYTA  
KDFLQDIDLICSNALYENPKDPGDKIRHRACTLKDTAHAI IAAELDPEFNKLCEEI KEARIKRGLSVTAEQ  
ITPHGAGARKTETRVEEAFRHKQRNPMDAWHNSANKCAFRVRRKSRRSQWGKGI IKRKRVNLLKDEEDTKF  
TDYDHTEDRKLLLENGEFEVSTDCHEENGEETGDL SMTNDESSCDIMDMDQQRNLNSGAGTKENFASTEESSN  
ESLLVHSSSSLNPEQTSKKEPFLKGTCLNGEASTDSSEGI PVLECCQNGRVLEVVPDPGGEKSSSEQKIALEE  
QLKDKPETWENNRGDAAEKLEVL E C S S S E K P E P G P D A E G K E T E L D R E G A S K V K Y R K L L L E Q A K P T N L E L V P E  
EPSEPAPLVVDHERLQKLLDLLVDKSNLNTVDQLERLYSLLSQSIYRHRKDYDKSQLVEEMERTVHMFEFTFL  
\*

>ENSMUSP00000132778\_c.2865:G>C\_p.D956H ENSMUST00000169088.8|Lamb1-  
205|ENSMUSG00000002900|+|chr12:g.31355777:G>C  
MGLLQVFAFGVLALWGTRVCAQEPEFYSYCAEGSCYPATGDL LIGRAQKLSVTSTCGLHKPEPYCIVSHLQED  
KKCFICDSRDPYHETLNPDSHLIENVVTTFAPNRLKIWWQSENGVENVTIQLDLEAEFHFTHLIMTFKTFRPA  
AMLIERSSDFGKAWGVYRYFAYDCESSFPGISTGPMKKVDDICDSRYSDIEPSTEGEVIFRALDPAFKIEDP  
YSPRIQNLKITNLRIKFVKLHTLGDNLLDSRMEIREKYYYYAVYDMVVRGNCFCYGHASECAPVDGVNEEVEG  
MVHGHCMCRHNTKGLNCELCMDFYHDL PWRPAEGRNSNACKKCNCEHSSSCHFDMAVFLATGNVSGGVCDCN  
QHNTMGRNCEQCKPFYFQHPERDIRDPNLCEPCTCDPAGSENGGICDGYTDFSVGLIAGQCRCRKLHVEGERCD  
VCKEFGYDLSAEDPYGKSCACNPLGTIPGGNVECDSETGYCYCKRLVTGQRCDQCLPQHWSLNDLDGCRPCD  
CDLGGALNNSCEDSGQCSCLPHMIGRQCNEVESYFTTLDHYIYEAEANLGPVIVVERQYIQDRI PSWT  
GPGFVRVPEGAYLEFFIDNIPYSMEYEILIRYEPQLPDHWEKAVITVQRPGKIPASSRCGNTVPDDDNQVVS  
SPGSRVVLPRPVC FEKGMNYTVRLELPQYTAGSDVESPYTFIDSLVLMPYCKSLDIFTVGGSGDGEVNTNSA  
WETFQRRCLENSRSVVKTPMTDVCRNII F S I S A L I H Q T G L A C E C D P Q G S L S S V C D P N G G Q C Q C R P N V V G R T C

NRCAPGTFGFGPNGCKPCDCHLQGSASAFCDAITGQCHCFQGIYARQCDRCLPGYWGFPSQCPCQCNHALDC  
 DTVTGECLSCQDYTTGHNCRCLAGYYGDP IIGSGDHCRCPCPCPDGPDGRQFARSCYQDPVTLQLACVCDPG  
 YIGSRCHDCASGFFGNPSPDFGGSCQPCQCHHNI DTTDPEACDKETGRCLKCLYHTEGDHCQCLCQYGYGDALR  
 QDCRKCVCNYLGTVKEHCNGSDCHCDKATGQCSCLPNVIGQNCDCRCPNTWQLASGTGCGPCNCNAAHSFGPS  
 CNEFTGQCQCMPGFGGRTCESECQELFWGDPDVECRACDCDPRGIETPQCDQSTGQCVCVEGVEGPRCDKCTRG  
 YSGVFPDCTPCHQCFALWDAIIGELTNRTHKFLEKAKALKISGVIGPYRETVDVSEKVVNEIKDILAQSPAEE  
 PLKNIGILFEEAEKLT KDVT EKMAQVEVKLTDTASQSNSTAGELGALQAEAESL DKT VKELAEQLEFIKNSDI  
 QGALDSITKYFQMSLEAEKRVNASTTDPNSTVEQSSALTRDRVEDLMLERESPFKEQQEEQARLDELDELAKLQS  
 LDLSAVAQMT CGT PPGADCSESECGGPNCR TDEGEKKCGGPGCGGLVTVAHSAWQKAMDFDRDVL SALAEVEQ  
 LSKMVSEAKVRADEAKQNAQDVLKTNATKEKVDKSNEDLRNLIKQIRNFLTEDSADLDSIEAVANEVLKMEM  
 PSTPQQLQNLTEDIRERVETLSQVEVILQQAADIARAELLLLEEAKRASKSATDVKVTADMVKEALEEAEKAQ  
 VAAEKAIKQADEDIQGTQNLTSIESETAASEETLTNASQRISKLERNVEELKRKAAQNSGEAEYIEKVVYSV  
 KQNAADDVKKTLDELGEDEKYYKVESLIAQKTEESADARRKAELLQNEAKTLLAQANSKLQLEDELKERKYEDNQK  
 YLEDKAQELVRLEGEVRSLLKDISEKVAVYSTCL\*  
 >ENSMUSP00000002979\_c.2865:G>C\_p.D956H ENSMUST00000002979.16|Lamb1-  
 201|ENSMUSG00000002900|+|chr12:g.31355777:G>C  
 MGLLQVFAFGVLALWGTRVCAQEPEFYSYGCAEGSCYPATGDLIGRAQKLSVTSTCGLHKPEPYCIVSHLQED  
 KKCFCIDSRDPYHETLNPDSHLIENVVTTTFAPNRLKIWWQSENGVENVTIQLDLEAEFHFTHLIMTFKTRPA  
 AMLIERSSDFGKAWGVYRYFAYDCESSFPGISTGPMKKVDDIICDSRYSDIEPSTEGEVIFRALDPAFKIEDP  
 YSPRIQNLK I TNLRIKFVKLHTLGDNLLDSRMEIREKYYYAVYDMVVRGNCFCYGHASECAPVDGVNEEVEG  
 MVHGHCMCRHNTKGLNCELCMDFYHDL PWRPAEGRNSNACKKCNENHSSSCHFDMAVFLATGNVSGGVCDCN  
 QHNTMGRNCEQCKPFYFQHPERDIRDPNLCEPCTCDPAGSENGGICDGYTDFSVGLIAGQCRCKLHVEGERCD  
 VCKEGFYDLSAEDPYGCKSCACNPLGTIPGGNPCDSETGYCYCKRLVTVGQRCDQCLPQHWGLSNDLDGCRPCD  
 CDLGGALNNSCEDSGQCSCPLHMIGRQCNEVESGYYFTTLDHYIYEAEANLPGVIVVERQYIQDRIPSWT  
 GPGFVRVPEGAYLEFFIDNIPYSMEYEILIRYEQPLPDHWEKAVITVQRPGKIPASSRCGNTVPDDNQVVS  
 LSPGSRVYVLP RPVC FEKGMNYTVRLELPQYTAGSDVESPYTFIDSLVLMYPYCKSLDIFTVGGSGDGEVNTSA  
 WETFQRYRCLENSRSFVKTPMTDVCRNII FSI SALIHQTGLACECDPQGSLSVCDPNGGQCQRPNVVGRT  
 NRCAPGTFGFGPNGCKPCDCHLQGSASAFCDAITGQCHCFQGIYARQCDRCLPGYWGFPSQCPCQCNHALDC  
 DTVTGECLSCQDYTTGHNCRCLAGYYGDP IIGSGDHCRCPCPCPDGPDGRQFARSCYQDPVTLQLACVCDPG  
 YIGSRCHDCASGFFGNPSPDFGGSCQPCQCHHNI DTTDPEACDKETGRCLKCLYHTEGDHCQCLCQYGYGDALR  
 QDCRKCVCNYLGTVKEHCNGSDCHCDKATGQCSCLPNVIGQNCDCRCPNTWQLASGTGCGPCNCNAAHSFGPS  
 CNEFTGQCQCMPGFGGRTCESECQELFWGDPDVECRACDCDPRGIETPQCDQSTGQCVCVEGVEGPRCDKCTRG  
 YSGVFPDCTPCHQCFALWDAIIGELTNRTHKFLEKAKALKISGVIGPYRETVDVSEKVVNEIKDILAQSPAEE  
 PLKNIGILFEEAEKLT KDVT EKMAQVEVKLTDTASQSNSTAGELGALQAEAESL DKT VKELAEQLEFIKNSDI  
 QGALDSITKYFQMSLEAEKRVNASTTDPNSTVEQSSALTRDRVEDLMLERESPFKEQQEEQARLDELDELAKLQS  
 LDLSAVAQMT CGT PPGADCSESECGGPNCR TDEGEKKCGGPGCGGLVTVAHSAWQKAMDFDRDVL SALAEVEQ  
 LSKMVSEAKVRADEAKQNAQDVLKTNATKEKVDKSNEDLRNLIKQIRNFLTEDSADLDSIEAVANEVLKMEM  
 PSTPQQLQNLTEDIRERVETLSQVEVILQQAADIARAELLLLEEAKRASKSATDVKVTADMVKEALEEAEKAQ  
 VAAEKAIKQADEDIQGTQNLTSIESETAASEETLTNASQRISKLERNVEELKRKAAQNSGEAEYIEKVVYSV  
 KQNAADDVKKTLDELGEDEKYYKVESLIAQKTEESADARRKAELLQNEAKTLLAQANSKLQLEDELKERKYEDNQK  
 YLEDKAQELVRLEGEVRSLLKDISEKVAVYSTCL\*  
 >ENSMUSP00000159366\_c.3009:G>C\_p.D1004H ENSMUST00000239496.2|Lamb1-  
 208|ENSMUSG00000002900|+|chr12:g.31355777:G>C  
 MEGPLSSLP TFAFSPRYLSRKEDPKKRQAACLLRPPSRAASPRLRGLDMGLLQVFAFGVLALWGTRVCAQEPE  
 FSYGCAEGSCYPATGDLIGRAQKLSVTSTCGLHKPEPYCIVSHLQEDKKCFIDSRDPYHETLNPDSHLIEN  
 VVTTTFAPNRLKIWWQSENGVENVTIQLDLEAEFHFTHLIMTFKTRPAAMLIERSDFGKAWGVYRYFAYDCE  
 SSFPGISTGPMKKVDDIICDSRYSDIEPSTEGEVIFRALDPAFKIEDPYSPRIQNLK I TNLRIKFVKLHTL  
 DNLLDSRMEIREKYYYAVYDMVVRGNCFCYGHASECAPVDGVNEEVEGMVHGHCMCRHNTKGLNCELCMDFYH  
 DLPWRPAEGRNSNACKKCNENHSSSCHFDMAVFLATGNVSGGVCDCNQHNTMGRNCEQCKPFYFQHPERDIR  
 DPNLCEPCTCDPAGSENGGICDGYTDFSVGLIAGQCRCKLHVEGERCDVCKEGFYDLSAEDPYGCKSCACNPL  
 GTIPGGNPCDSETGYCYCKRLVTVGQRCDQCLPQHWGLSNDLDGCRPCDCDLGGALNNSCEDSGQCSCPLHMI  
 GRQCNEVESGYYFTTLDHYIYEAEANLPGVIVVERQYIQDRIPSWTGPGFVRVPEGAYLEFFIDNIPYSME  
 YEILIRYEQPLPDHWEKAVITVQRPGKIPASSRCGNTVPDDNQVVSLSPGSRVYVLP RPVC FEKGMNYTVR  
 LELPQYTAGSDVESPYTFIDSLVLMYPYCKSLDIFTVGGSGDGEVNTSAWETFQRYRCLENSRSFVKTPMTDVC  
 RNII FSI SALIHQTGLACECDPQGSLSVCDPNGGQCQRPNVVGRTCNRCAPGTFGFGPNGCKPCDCHLQGS  
 ASAFCDAITGQCHCFQGIYARQCDRCLPGYWGFPSQCPCQCNHALDCDTVTGECLSCQDYTTGHNCRCLAG  
 YYGDP IIGSGDHCRCPCPCPDGPDGRQFARSCYQDPVTLQLACVCDPGYIGSRCHDCASGFFGNPSPDFGGSCQ  
 PCQCHHNI DTTDPEACDKETGRCLKCLYHTEGDHCQCLCQYGYGDALRQDCRKCVCNYLGTVKEHCNGSDCHC



DKATGQCSCLPNVIGQNCDCRCPNTWQLASGTGCGPCNCNAAHSGFPCSCNEFTGQCQCMPGFGGRTRCSECQEL  
 FWGDPDVECRACDCDPRGIETPQCDQSTGQCVCVEGVEGPRCDKCTRGYSGVFPDCTPCHQCFCALWDAIIGEL  
 TNRTHKFLEKAKALKISGVIGPYRETVDSVEKVVNEIKDILAQSPAEPKLNIGILFEEAEKLTQDVTAKMAQ  
 VEVKLTDTASQSNSTAGELGALQAEAESLTKVKELAEQLEFIKNSDIQALDSITKYFQMSLEAEKRVNAST  
 TDPNSTVEQSALTRDRVEDMLERESPFKEQQEEQARLLDELAKGLQSLDLSAVAQMTCTGTPPGADCSESECG  
 GPNCRTEDEGEKCKGPGCGGLVTVVAHSAWQKAMDFDRDVLVSALAEVEQLSKMVSEAKVRADEAKQNAQDVLK  
 TNATKEKVDKSNEDLRNLIKQIRNFLTEDSADLDSIEAVANEVLMEMPSTPQQLQNLTEDIRERVETLSQVE  
 VILQQSAADIARAELLLEEAKRASKSATDVKVTADMVKEALEEAEKAQVAEAKAIKQADEDIQGTQNLTSIE  
 SETAASEETLTNASQRISKLERNVVELKRAAQNSEAEYIEKVYVSVKQNAADDVKKTLTDGELDEKYYKVESL  
 IAQKTEESADARRKAELLQNEAKTLLAQANSKQLLEDLERKYEDNQKYLEDKAQELVRLEGEVRSLLKDI SE  
 KVAVYSTCL\*

>ENSMUSP00000044866\_c.2175:A>C\_p.K726Q ENSMUST00000035773.14|Sos2-  
 201|ENSMUSG00000034801|-|chr12:g.69654172:T>G

MQQAPQPYEFFSEENSPKWRGLLVLPALRKVQEQVHPTLSANEESLYYIEELIFQLLNKLCMAQPRTVQDVEER  
 VQKTFPHPIDKWAIAADAQSAIEKRKRRNPLLLPVDKIHPSLKEVLGYKVDYHVSIVAVLEYISADILKLAG  
 NYVFNIRHYEISQQDIKVMCADKVLMDMFDQDDDIGLVSLCEDEPCSSGELNYYDLVRTEIAEERQYLRELN  
 MIKVFREAFLLDRKLFKPEIEKIFSNISDIHELTVKLLGLIEDTVEMTDESSPHPLAGSCFEDLAEQAFD  
 PYETLSQDILAPEFNDHFSKLMARPAVALHFQSIADGFKEAVRYVLPRLMLVPVYHCWHYFELLKQKACSEEQ  
 EDKECLNQAITALMNLQGSMDRIYKQHSRRRPGDPVCLFYNRQLRSKHLAIKMMNEIQKNIDGWEGKDIGQC  
 CNEFIMEGPLTRIGAKHERHIFLFDGLMISCKPNHGQTRLPGYSSAEYRLKEKFMVKIQCICDEKEDACEYRHA  
 FELVSKDENSVIFAAKSAEKNWMAALISLHYRSTLDRMLDSVLLKEENEQPLRLPSPDMYRFVVTDSEENI  
 VFEDNLQSRSGIPIIKGGTVVKLIERLTYHMYADPNFVRTFLT TYRSFCKPQELNLLIERFEIPEPEPTAD  
 KLALAEKGEQPIASADLKRFRKEYVQPVQLRVLNVFRHWVEHHYDFERDLELLERLESFISVVRGKAMKQWVES  
 IAKIKRKKQAQANGISHNITFESSPPVWEHISRTGQFETFDLMTLHPHIEIARQLTLLES DLYRKVQPSSELV  
 GSVWTKEDKEINSPNLLKMRHTNLTWFEKCIIVEAENFEERVAVLSRIVEILQVFDLNNFNGVLEIVSAV  
 NSVSVYRLDHTFEALQERKRRILDDAVELSQDHFKKYLVLKLSINPPCVFFFGIYLTNLIKTEEGNSDFLKR  
 GKDLINFSKRRKVAEITGEIQYQNPYCLRTEPEMRRFFENLPMGILSEKEFTDYLFNKSLIEPRNCKQ  
 PPRFPRKSTFSLKSPGIRPNAGRHGSTSGTLRGHPTPLEREPYKISFSRIAETELESTVSAPTSPNTPSTPPVS  
 ASSDHSVFLDVLNSSCGSNTIFAPVLLPHSKTFFSSCGSLHKLSEEPLIPPLPPRKKFDHDLNLSKGA VKS  
 DDDPPAIPPRQPPPKVKPRVPVLMGTFDGVPVSPPPPPRDPDLPDTPPPVPLRPPEHFINCPFNLPQPPPLGH  
 PHRDPDWLRDVTCPNSPSTPPTTSPRI PRSCHLLSSSHSLAHL PAPPVPPRQNSSPLLKPLPKTYKREL  
 SHPPLYRLPLENAETPQ\*

>ENSMUSP00000138793\_c.2178:A>C\_p.K727Q ENSMUST00000183277.8|Sos2-  
 206|ENSMUSG00000034801|-|chr12:g.69654172:T>G

MQQAPQPYEFFSEENSPKWRGLLVLPALRKVQEQVHPTLSANEESLYYIEELIFQLLNKLCMAQPRTVQDVEER  
 VQKTFPHPIDKWAIAADAQSAIEKRKRRNPLLLPVDKIHPSLKEVLGYKVDYHVSIVAVLEYISADILKLAG  
 NYVFNIRHYEISQQDIKVMCADKVLMDMFDQDDDIGLVSLCEDEPCSSGELNYYDLVRTEIAEERQYLRELN  
 MIKVFREAFLLDRKLFKPEIEKIFSNISDIHELTVKLLGLIEDTVEMTDESSPHPLAGSCFEDLAEQAFD  
 PYETLSQDILAPEFNDHFSKLMARPAVALHFQSIADGFKEAVRYVLPRLMLVPVYHCWHYFELLKQKACSEEQ  
 QEDKECLNQAITALMNLQGSMDRIYKQHSRRRPGDPVCLFYNRQLRSKHLAIKMMNEIQKNIDGWEGKDIGQ  
 CCNEFIMEGPLTRIGAKHERHIFLFDGLMISCKPNHGQTRLPGYSSAEYRLKEKFMVKIQCICDEKEDACEYRHA  
 AFELVSKDENSVIFAAKSAEKNWMAALISLHYRSTLDRMLDSVLLKEENEQPLRLPSPDMYRFVVTDSEENI  
 IVFEDNLQSRSGIPIIKGGTVVKLIERLTYHMYADPNFVRTFLT TYRSFCKPQELNLLIERFEIPEPEPTAD  
 DKLALAEKGEQPIASADLKRFRKEYVQPVQLRVLNVFRHWVEHHYDFERDLELLERLESFISVVRGKAMKQWVE  
 SIAKIKRKKQAQANGISHNITFESSPPVWEHISRTGQFETFDLMTLHPHIEIARQLTLLES DLYRKVQPSSELV  
 VGSVWTKEDKEINSPNLLKMRHTNLTWFEKCIIVEAENFEERVAVLSRIVEILQVFDLNNFNGVLEIVSA  
 VNSVSVYRLDHTFEALQERKRRILDDAVELSQDHFKKYLVLKLSINPPCVFFFGIYLTNLIKTEEGNSDFLKR  
 KGDLINFSKRRKVAEITGEIQYQNPYCLRTEPEMRRFFENLPMGILSEKEFTDYLFNKSLIEPRNCKQ  
 PPRFPRKSTFSLKSPGIRPNAGRHGSTSGTLRGHPTPLEREPYKISFSRIAETELESTVSAPTSPNTPSTPPV  
 SASDHSVFLDVLNSSCGSNTIFAPVLLPHSKTFFSSCGSLHKLSEEPLIPPLPPRKKFDHDLNLSKGA VKS  
 SDDPPAIPPRQPPPKVKPRVPVLMGTFDGVPVSPPPPPRDPDLPDTPPPVPLRPPEHFINCPFNLPQPPPLG  
 HHRDPDWLRDVTCPNSPSTPPTTSPRI PRSCHLLSSSHSLAHL PAPPVPPRQNSSPLLKPLPKTYKRE  
 LSHPPLYRLPLENAETPQ\*

>ENSMUSP00000138589\_c.2079:A>C\_p.K694Q ENSMUST00000182396.2|Sos2-  
 203|ENSMUSG00000034801|-|chr12:g.69654172:T>G

MQQAPQPYEFFSEENSPKWRGLLVLPALRKVQEQVHPTLSANEESLYYIEELIFQLLNKLCMAQPRTVQDVEER  
 VQKTFPHPIDKWAIAADAQSAIEKRKRRNPLLLPVDKIHPSLKEVLGYKVDYHVSIVAVLEYISADILKLAG  
 NYVFNIRHYEISQQDIKVMCADKVLMDMFDQDDDIGLVSLCEDEPCSSGELNYYDLVRTEIAEERQYLRELN

MI IKVFREAFLLDRKLFKPSIEIKI FSNISDIHELTVKLLGLIEDTVEMTDESSPHPLAGSCFEDLAEQAFD  
PYETLSQDILAPEFNDHFSKLMARPAVALHFQQLKACSEEQEDKECLNQAITALMNLQGSMDRIYKQHSRRR  
PGDPVCLFYNRQLRSKHLAIKKMNEIQKNIDGWEGKDIGQCCNEFIMEGPLTRIGAKHERHIFLFDGLMISCK  
PNHGQTRLPGYSSAEYRLKEKFMVKIQICDKEDACEYRHAFELVSKDENSVI FAKSAEKKNNWMAALISLH  
YRSTLDRMLDSVLLKEENEQPLRLPSPDMYRFVVTDEENIVFEDNLQSRSGIPIIKGGTVVKLIERLTYHMY  
ADPNFVRTFLTTYRSFCKPQELLNLLIERFEIPEPEPTKADKLALEKGEQPI SADLKRFRKEYVQPVQLRVLN  
VFRHWVEHHYDFERDLELLERLESFISSVRGKAMKQWVESIAKIKRKKQAQANGISHNITFESSPPVVEWH  
ISRTGQFETFDLMTLHPHIEIARQLTLLSDLYRKVQPSSELVGSVWTKEDKEINSPNLLKMI RHTTNLTLWFEK  
CIVEAENFEERVAVLSRIVEILQVFDLNNFNGVLEIVSAVNSVSVYRLDHTFEALQERKRRILDDAVELSDQ  
HFKKYLVLKLSINPPCVPPFFGIYLTNLIKTEEGNSDFLKRKGDLDLINFSKRRKVAEITGEIQQYQNPYCLRT  
EPEMRRFFENLNPMLILSEKEFTDYLFNKSLIEPRNCKQPPRFPKSTFSLKSPGIRPNAGRHGSTSGTLRG  
HPTPLEREPYKISFSRIAETELESTVSAPTSNPSTPPVSASSDHSVFLDVLNSSCGSNTIFAPVLLPHSK  
TFSSCGSLHKLSEEPLIPPLPRKKFDHDALNSKGAVKSDDDPPAIPPRQPPPKVKPRVPVLMGTDFGPV  
PSPPPPPRDPLPDTPPPVLRRPEHFINCPFNLPPLGHPHRDPDWRDVTCPNSPSTPPTTPSPRI PRS  
CHLLSSSHSLAHL PAPPVPPRQNSSPLLKLPKTYKRELSHPPLYRLPLENAETPQ\*  
>ENSMUSP00000021458\_c.4720:c>A\_p.A1574D ENSMUST00000021458.13|Sptb-  
201|ENSMUSG00000021061|-|chr12:g.76653141:g>T  
MTSATEFENVGNQPPFSRINARWDAPDDELNDNNSARLFERSRIKALADEREVVQKKTFTKWNVNSHLARVSC  
RISDLYKDLRDGRMLIKLLEVLSEGMPLRPTKGMRIHCLENVDKALQFLKEQRVHLENMGSHDIVDGNHRLV  
LGLIWTIILRFQIQDIVVQQTQEGRETRSAKDALLLWCQMKTAGYPHVNTNFTSSWKDGLAFNALIHKHRPDL  
IDFDKLDKSNARHNLEHAFDVAERQLGIIPLLDPEDEVFTENPDEKSIITYVVAFYHYFSKMKVLAVEGKRVGK  
VIDHAIETEKMIKYSGLASDLLTWIEQTI SVLNSRKFANSLSGVQQQLQAFSTYRTVEKPPKFQEKGNLEVL  
LFTIQSRMRANNQKVYTPHDGKLVSDINRAWESLEEAEYQRELALRSELIRQEKLEQLARRFDRKAAMRETWL  
NENQRLVTDQDNFGYDLAAVEAAKKKHEAIETDTAAYEERVKALEDLAQELEKENYHDQKRI IARKDNILRLWS  
YLQELLRSRRQLEATLALQKLFQDMLHSIDWMDIEKAHILSAEFGKHLLEVEDLLQKHKLEADIAIQGDKV  
KAITAATLQFAEGKGYQPCDPQVIQDRVSHLEQCFSSELSMAAGRKAQLEQSKRLWKF FWMDEAESWIKEKE  
QIYSSLDYGGKDLTSLVILQRKHKA FEDELRLDHLKQIFQEADDMVAQKQFGHPQIETRVKVESVQADWHLKE  
LAAFRKKDLQDAENFFQFGDADDLKAWLQDAHRLLSGEDVGGQDEGATRALGKHKHEFLLEELESRGVMEHLE  
HQAQGFPEEFRDSDPVTNRLQALRKLQYQVLTQAEALRGHKLQEAALDLYTVFGESDACE LWMTEKGLDQMDI  
PNTLEDLEVVQHRFDILDQEMKTLMAQIDGVNLAANNLVE SGHPRSSEVVKQYQDRLNKRWQAFQAVVSEQREA  
VDSALRVNNYCVDCETSKWIMDKTKVVESTKDLGQDLGAVIAIQRKL SGLERDVLAIRDRVSALERESQYLM  
ESHPEQKEDIQORQADVEKLVKGLQDALQGQELSLGEASKLQAFIQDLDDFKAWLSMAQKAVASEDMPE SLPE  
AEQLLQQAHAIKEEIDAHRDDYHRVKASGEKVI EGQTDPDYQLLQGRLEGLD TDWDALRRMWESRGNTLTQCL  
GFQEFQKDAKQAEAILSNQEYTLAHLEPPDSLAAA EAGIRKFEDFLVSMENNRDKILSPVDSGNKLVAEGNLY  
SNKIMEKVQLIEDRHKKNEKAQEATVLLKDNLELQNF LQNKELTLWINDKLLTSPDVS YDEARNLHNKWMK  
HQAFAELASHQGWLENI DAEGRQLMAEKPFKDVV SERLEALHKLWEELQSTAKAKAEQLSAARSDDLRLQT  
HADLNKWI GAMEDQLRSDDLGKDLTTVNRMLAKLKRVEEQVNL RKEELEELFADAPSLGAEAGDTDMSIEKRF  
LDLLEPLGRKKQLELSKAKLQISRDLEDETLWVEERLPLAQSADYGTNLQTVQLFMKKNQTLQNEILGHAPR  
VEDVLRGQELVKA AEIDCQDIEERLGH LQSSWDTLREAADGR LQRLRDAHEAQYYLDAGEAEAWI SEQELY  
VFSDEPPKDEEGAIVMLKRHLRQQRVVEEYGRNIKQLAGRAQSLLSAGHPGEQIIRLQGVQDKQYAGLKDMA  
EERRRRLENMYHLFQLKREADDLEQWITEKEMVASSQEMGQDFDHTMLRDKFRDFARETGAIQERVDNVNT  
I IERLIDAGHSEAAIAEWDKGLNDMWADLLELIDTRMQLLAASYDLHRYFYTGTEILGLIDEKHREL PEDVG  
LDASTAESFHRVHTAFERELHLLGVQVQQFQDVATRLQTAYAGEKADAIQSKEQEVSAAWQALLDACAGRAQ  
LVDTADKFRFFSMVRDLLSWMESIIRQIETQERPRDVSSVELLLKYHQGIKAEINTRAKNFSTCLELGE SLLQ  
RQHQASDEIREKLLQVVISRRQEMNDKWEARS DRLHMLLEVCQFSRDASVAEAWLIAQEPY LASRDFGHTVDSV  
EKLIKRHEAFEKSTASWAERFAALEKPTTLELKERQTPERPTEEPGPQEEGETAGEAPQVHHAATERTSPGE  
ERGPWPQDLQPPPLPGHKKDEQEKS VGDERPATEPLFKVLDTP LSEGDEPTTLPAQRDLGHTVQMEGYLGRKH  
DLEGPNKKASNRSWNNLYCVLRNSQLTFYKDAKNLALGVPYHGEEPLALRHAI CEIAVNYKKKKHVFKLRLSN  
GSEWLFHGKDEEEMLMWLQSMSTAINESQSIRVKAQSLPLPSLAGPDASVGGKKEKRF SFFPKKK\*  
>ENSMUSP00000129782\_c.4720:c>A\_p.A1574D ENSMUST00000166101.2|Sptb-  
202|ENSMUSG00000021061|-|chr12:g.76653141:g>T  
MTSATEFENVGNQPPFSRINARWDAPDDELNDNNSARLFERSRIKALADEREVVQKKTFTKWNVNSHLARVSC  
RISDLYKDLRDGRMLIKLLEVLSEGMPLRPTKGMRIHCLENVDKALQFLKEQRVHLENMGSHDIVDGNHRLV  
LGLIWTIILRFQIQDIVVQQTQEGRETRSAKDALLLWCQMKTAGYPHVNTNFTSSWKDGLAFNALIHKHRPDL  
IDFDKLDKSNARHNLEHAFDVAERQLGIIPLLDPEDEVFTENPDEKSIITYVVAFYHYFSKMKVLAVEGKRVGK  
VIDHAIETEKMIKYSGLASDLLTWIEQTI SVLNSRKFANSLSGVQQQLQAFSTYRTVEKPPKFQEKGNLEVL  
LFTIQSRMRANNQKVYTPHDGKLVSDINRAWESLEEAEYQRELALRSELIRQEKLEQLARRFDRKAAMRETWL  
NENQRLVTDQDNFGYDLAAVEAAKKKHEAIETDTAAYEERVKALEDLAQELEKENYHDQKRI IARKDNILRLWS

YLQELLRSRRQRLEATLALQKLFQDMLHSIDWMDEIKAHILSAEFGKHLLEVEDLLQKHKLMEADIAIQGDKV  
KAITAATLQFAEGKGYQPCDPQVIQDRVSHLEQCFSELSNMAAGRKAQLEQSKRLWKKFFWEMDEAESWIKEKE  
QIYSSLDYGDKDLTSVLILQRKHKAFEDLRGLDAHLKQIFQEADDMVAQKQFGHPQIETRVKEVSAQWDHLKE  
LAAFRRKDLQDAENFFQFQGDADDLQAWLQDAHRLLSGEDVQDEGATRALGKKHKEFLEELEESRGMVMEHLE  
HQAQGFPEEFRDSDVVTNRLQALRKLQYQVLTQAEELRGHKLQEAALDLYTVFVGFSDACELWMTTEKGLWLDQMDI  
PNTLEDLEVVQHRFDILDQEMKTLMAQIDGVNLAANNLVESEGHPRSGEVKQYQDRLNKRWQAFQAVVSEQREA  
VDSALRVNNYCVDCDEETSKWIMDKTKVVESTKDLGQDLGAVIAIQRKLSGLERDVLAIKDRVSALERESQYLM  
ESHPEQKEDIQRQADVEKLVKGLQDALQGEQELSLGEASKLQAFQDLDDFKAWLSMAQKAVASEDMPEESLPE  
AEQLLQQHAAIKKEEIDAHRDDYHRVKASGEKVIQEGQTDPDYQLLQQRLEGLDLDWDALRRMWESRGNLTQCL  
GFQEFQKDAKQAEAILSNQEYTLAHLPEPPDSLAAAEEAGIRKFEFDFVSMENNRDKILSPVDSGNKLVAEENLY  
SNKIMEKVQLIEDRHKKNNKAQEATVLLKDNLELQNFQNLCKELTLWINDKLLTSPDVSDEARNLHNKWMK  
HQAFMAELASHQGWLENI DAEGRQLMAEKPOFKDVSERLEALHKLWEELQSTAKAKAEQLSAASSDLRLQT  
HADLNKWI GAMEDQLRSDDLQKDLT TVNRMLAKLKALEEQVNLKKEEELFADAPSLGAEAGDTMSIEKRF  
LDLLEPLGRRKQLELSKAKLQISRDLEDETLWVEERLPLAQASADYGTNLQTVQVLFMKNQTLQNEILGHAPR  
VEDVLRGQELVKAEEIDCQDIEERLGHQLSSWDTLREAADGRLQRLRDAHEAQYYLDAGEAEAWISEQELY  
VFSDEPPKDEEGAIVMLKRHLRQRTVEEYGRNIKQLAGRAQSLLSAGHPPEGEQIIRLQGGVQKQYAGLKDMA  
EERRRLENMYHLFQLKREADDLEQWITEKEMVASSQEMGQDFDHTMLRDKFRDFARETGAIGQERVDNVNT  
IERLIDAGHSEAATIAEWKGLNDMWADLLELIDTRMQLLAASYDLHRYFYTGTEILGLIDEKHRELPELVG  
LDASTAESFHRVHTAFERELHLLGVQVQFQDVATRLQTAAYAGEKADAIQSKEQEVSAAWQALLDACAGRAQ  
LVDTADKFRFFSMVRDLSWMEIIRQIETQERPRDVSSVELLLKYHQGIKAEINTRAKNFSTCDELGESLLQ  
RQHQASDEIREKLQQVISRRQEMNDKWEARSRLHMLLEVCQFSRDASVAEAWLIAQEPYLASRDFGHTVDSV  
EKLIKREHAEFEKSTASWAERFAALEKPTTLELKERQTPERPTEEPGQEEGETAGEAPQVHHAATERTSPVS  
FMSRLSSSWESLLPEPAHPF\*

>ENSMUSP00000137146\_c.423:G>A\_p.D142N ENSMUST00000180053.2|Eif1ad14-  
201|ENSMUSG00000096619|-|chr12:g.87886204:C>T  
MPKNKGKGGKNRRRGNENESKRELVFKEYGQEYAAQVTKMLGCGRLEAMCFDGVRRRLCNIRGKLRKKVWINT  
SDIILIGLRDYQDNKADVILKYNQDEARSLKAYGELPEHAKINETDFTFGAGDDDEIVFDDIGDEDEDINDI\*  
>rs236684668\_ENSMUSP00000137146\_c.358:C>A\_p.T120K  
ENSMUST00000180053.2|Eif1ad14-201|ENSMUSG00000096619|-  
|chr12:g.87886269:G>T  
MPKNKGKGGKNRRRGNENESKRELVFKEYGQEYAAQVTKMLGCGRLEAMCFDGVRRRLCNIRGKLRKKVWINT  
SDIILIGLRDYQDNKADVILKYNQDEARSLKAYGELPEHAKINETDKFGAGDDDEIVFDDIGDEDEDIDDI\*  
>ENSMUSP00000082190\_c.282:C>A\_p.P95T ENSMUST00000085109.10|Ttc8-  
202|ENSMUSG00000021013|+|chr12:g.98909609:C>A  
MGSEMEPLLRASVYFRRRKFQLCADLCTQMLEKSPYDQAAWILKARALTEMVYIDEIDVDQEGIAEMILDENA  
IAQVPRPGTSLKLPGTNQTGGTTQAVRPITQAGRPITGFLRPSTQSGRPGTMEQAIRTPRTAYTARPITSSSG  
RFVRLGTASMLTSPDGPFFINLSRLNLTKYSQKPKLAKALFEYILHHENDVKMALDLASLSTEYSQYKDWKVV  
QIGKCYRRLGMYREAEKQFKSALKQEQEMVDTFLYLAKVYIILDQPVTAALNLFKQGLDKFPGEVTLGCIARIY  
EEMNNSSSAAEYKVLKQDNTHVEAIAACIGSNHFYSQPEVALRFYRRLQMGVYNCQLFNNLGLCCFYAQQ  
YDMTTLTSFERALSALAEENEEAADVWYNLGHIAVIGDNLAHQCFRALVHNNHHAEAYNNLAVLEMRRKGHVE  
QARALLQTASSLAPHMYEPHFNFATVSDKIGDLQRSYVAAQKSEVAFPEHVDTQHLLIKQLKQHFAML\*  
>ENSMUSP00000078148\_c.312:C>A\_p.P105T ENSMUST00000079146.13|Ttc8-  
201|ENSMUSG00000021013|+|chr12:g.98909609:C>A  
MGSEMEPLLRASVYFRRRKFQLCADLCTQMLEKSPYDQEPAPDLPVSAWILKARALTEMVYIDEIDVDQEG  
IAEMILDENAIQVPRPGTSLKLPGTNQTGGTTQAVRPITQAGRPITGFLRPSTQSGRPGTMEQAIRTPRTAY  
TARPITSSSGRFVRLGTASMLTSPDGPFFINLSRLNLTKYSQKPKLAKALFEYILHHENDVKMALDLASLSTEY  
SQYKDWKVVQIGKCYRRLGMYREAEKQFKSALKQEQEMVDTFLYLAKVYIILDQPVTAALNLFKQGLDKFPGEV  
TLGCIARIYEEMNNSSSAAEYKVLKQDNTHVEAIAACIGSNHFYSQPEVALRFYRRLQMGVYNCQLFNN  
LGLCCFYAQQYDMTTLTSFERALSALAEENEEAADVWYNLGHIAVIGDNLAHQCFRALVHNNHHAEAYNNLA  
VLEMRRKGHVEQARALLQTASSLAPHMYEPHFNFATVSDKIGDLQRSYVAAQKSEVAFPEHVDTQHLLIKQLKQ  
FAML\*

>ENSMUSP00000115828\_c.132:C>A\_p.P45T ENSMUST00000132878.2|Ttc8-  
204|ENSMUSG00000021013|+|chr12:g.98909609:C>A  
MVYIDEIDVDQEGIAEMILDENAIQVPRPGTSLKLPGTNQTGGTTQAVRPITQAGRPITGFLRPSTQSGRPG  
TMEQAIRTPRTAYTARPITSSSGRFVRLGTASMLTSPDGPFFINLSRLNLTKYSQKPKLAKALFEYILHHENDV  
KMALDLASLSTEYSQYKDWKVVQIGKCYRRLGMYREAEKQFKSALKQEQEMVDTFLYLAKV

>ENSMUSP00000116004\_c.1024:A>T\_p.K342M  
ENSMUST00000141572.8|D130043K22Rik-  
202|ENSMUSG00000006711|+|chr13:g.25046624:A>T  
MVSPPGVLSSLLLLAAMAGGSSQQCSEGRTYSDAIISPNETIRIMRVSQTFVSGDCTAACDLLTCDLAWWF  
EGSCYLVKCMRSENCEPRTTGPIRSYLTFFVRRPVQRPGQLLDYGMMLSRGSPSGAWGDSLEDLRKDLFFLGK  
DGGPEETTEYSDEYKDLERGLLQPSNQDPRGSAEYPDWSLLPSNEGGFNATATGDNSAASMEKLQDPTPHPL  
DQEQQLQALNESTWSPTPGHSSISSVWPSSASPLPTEEGLEGEETLQEQPSNSSGKEVPMPSHNPSPASLES  
SPATTEKNSNFTVTPRSRRKHSPTFFPTSTVLTGLTPPPWPLSPTASRTVMALAVSAGDNLVLTLPDREAELKA  
SVEPAPPADTTYSYEWLSMHPVDFQGKIKQENKPTLHLSQLSVGLYAFRVAVSSENAFGEYVNVTVMPAAR  
VNQPPVAVVSPQTQELSVPLTSALIDGSQSTDDTEIVSYHWEEDVGPFLGEEFPADTPI LRRLSNLVPGN YTFR  
LTITDSDGATNSTTASLVIRDAVDYPPVANAGPNQTTITLQNTI ILNGNQSSDDHQIVLYEWFAGPGGESKEM  
VMQGAQTPYLHLSELQEGEYTFQLMVTDSGQOSTALVAVTVQAENNQAPVAVAGPDKELVFPVQSATLDGSR  
SSDDHGIVCYHWEHIRGPSAVEMENVDKAIATVTGLQVGIYHFRLTVRDQQGLSSTSTLTAVKKENNSPPRA  
QAGGRHVLILPNNSITLDGSRSTDDRGIVSYLWIRDGQSPAAGTPRRMAWWS\*  
>ENSMUSP00000006893\_c.1024:A>T\_p.K342M  
ENSMUST00000006893.9|D130043K22Rik-  
201|ENSMUSG00000006711|+|chr13:g.25046624:A>T  
MVSPPGVLSSLLLLAAMAGGSSQQCSEGRTYSDAIISPNETIRIMRVSQTFVSGDCTAACDLLTCDLAWWF  
EGSCYLVKCMRSENCEPRTTGPIRSYLTFFVRRPVQRPGQLLDYGMMLSRGSPSGAWGDSLEDLRKDLFFLGK  
DGGPEETTEYSDEYKDLERGLLQPSNQDPRGSAEYPDWSLLPSNEGGFNATATGDNSAASMEKLQDPTPHPL  
DQEQQLQALNESTWSPTPGHSSISSVWPSSASPLPTEEGLEGEETLQEQPSNSSGKEVPMPSHNPSPASLES  
SPATTEKNSNFTVTPRSRRKHSPTFFPTSTVLTGLTPPPWPLSPTASRTVMALAVSAGDNLVLTLPDREAELKA  
SVEPAPPADTTYSYEWLSMHPVDFQGKIKQENKPTLHLSQLSVGLYAFRVAVSSENAFGEYVNVTVMPAAR  
VNQPPVAVVSPQTQELSVPLTSALIDGSQSTDDTEIVSYHWEEDVGPFLGEEFPADTPI LRRLSNLVPGN YTFR  
LTITDSDGATNSTTASLVIRDAVDYPPVANAGPNQTTITLQNTI ILNGNQSSDDHQIVLYEWFAGPGGESKEM  
VMQGAQTPYLHLSELQEGEYTFQLMVTDSGQOSTALVAVTVQAENNQAPVAVAGPDKELVFPVQSATLDGSR  
SSDDHGIVCYHWEHIRGPSAVEMENVDKAIATVTGLQVGIYHFRLTVRDQQGLSSTSTLTAVKKENNSPPRA  
QAGGRHVLILPNNSITLDGSRSTDDRGIVSYLWIRDGQSPAAGDVI GGS DHRAALQLTNLVEGVYTFHLLVTD  
SQGASDSDAATVEVLPDPKKG LVELILQVGVEQLTEQQKETLVRQLAVLLNVLDSDVKV LKIQAH TDVSTVI  
VFYVQSGSPFKVLR AA AVARNLHKRLSKEKEAFLFKVLRVDTAGCLLKCSGHGHCDPITKRCICSQ LWMENL  
IQRYMWDGESNCEWSVFYVAALALTLTLLTGAVSWLCICCCRRRKRTRKIRKKT KYTILDSMDEQERMELRPKY  
GIKHRSTEHNSSLMVSESEFESDQDTLFSRERMERGV LKGS LNCARNGVSFGYYSKDR\*  
>ENSMUSP00000115062\_c.1111:G>T\_p.S371I ENSMUST00000124830.3|Dsp-  
201|ENSMUSG000000054889|+|chr13:g.38361194:G>T  
MSCNGGSHPRINTLGRMTRAESGPD LRYEMTYSGGGGGGGGGGGGT SRTFYSHSRRCTVNDQNSDGYCQTGT  
MSRHQNQNTIQEMLNCSDCLMRAELIAQPELKFEGMQLAWNRELD EYFTQANDQMEIIDGLIREMRQMGQP  
CDAYQKRLQLQEQMRALYKAISVPRVRRASSKAGGYTCQSGSGWDEF TKRLTGECLGWMRQQREEMDLMAW  
GVDAGSVEQHINSHRSIHNTIGDYRWQLDKIKADLREKSAIYQLEEEYENLLKASFERM DHLRQLQNI IQATS  
REIMWINDCEEEELLYDWSKNTNIAQKQEA FSI RMSQLEVKEKELNKLKQESDQLVLNQH PASDKIEAYMDT  
LQTQWIWILQITKCIDVHLKENAAYFQFFEEAQSTEAYL KGLQDSIRKKYPCDKNMPLQHLLEQIKELEKERE  
KII EYKRQVQNLVNKSKKIVQLKPRNPDYRSNKPIILRALCDYKQDQKIVHKGDECILKDN NERSK WYVTGPG  
GVDMLVPSVGLIIPPPNPLAVDL SCKIEQY YEA I LALWNQLYINMKSLSVSWHYCMIDIEKIRAMTIAKLK TMR  
QEDYMKTIEDLELHYQDFIKNSQSEMFGDDDKRRMQS QFTDAQKH YQTLV IQLPGHPQHQT VTKTEITHLGT  
CQDVNHNKVIETNRENDKQETWLLMELQKIRRQMEHCEARMT LKNLLLAEQGSTHHITVKINELKSVQND SQA  
LAEVHLNQLKDMLANFRGSEKYCYLQNEIFGLFQKLENI NGVSDGYLNSLC SVRALLQAILQTEDMLKVYEARL  
TEEETVCLDLDKVEAYRCGLKKIKNDLNLKKSLLATMKTE LQKQQIHSQSSQQYPLYDLDLKGFT EKVTQLT  
DRWQKIDKQIDFRLWDLEKQIKQLRNYRDNYQS FCKWLYDAKRRQDSLES MKFGDSNTVMRFLNEQKNLHSEI  
SGKRDKSEEVHKIAELCANSIKDYELQLAS YTSGL ETLLNIPIKRTMVQSPSGVILQEAADIHARYIELLTRS  
GDYYRFLSEMLKSLEDLKLKNTKIEVLEEEELRLARDANSENCNKNKFLDQNLQKYQAEC SQFKAKLVSL EELK  
RQAE LDGKSAQNLDKCYGQIKELNEKI TRLTYEIEDEKRRRKTVE DRFDQQKNDYDQLQKARQCEKENLSWQ  
KLESEKAIKEKEYEIERLRVLLQEEGARKREYENELAKVRNHYNEEMSNLRNKYETEINITKTTIKEISMQKE  
DDSKNLRNQMDRLSRENRLDKDEIVRLNDSILQATEQRRRAEENALQQKACGSETMQKKQRLEIELKQVIQQR  
SEDNARHKQSELEAAKTIQDNKKEIERLKA EYQEEAKRWEYENELSKVRNSYDEEIIISLKNQFETEINITKT  
TIHQLTMQKEEDTSGYRAQIDNLTRENRS LCEEVKRLKNTLAQTENLRRVEENAQQKATGSEMSQRKQOLE  
IELRQVTQMRTEESMRYKQSLDDAAKTIQDNKKEIERL KQLVDKETNERKCLEDENSKLQRVQYDLQKANN SA  
TEAMSKLKVQEQELTRLRIDYERVSQERTVKDQDITRIQSS LKDLQLQKQAE EELSRLKRTASDESSKRKML  
EEELEAMRRSLKEQAVKITNL TQOLEQASIVKKRSEDDL RQQRDVLDGHVREKQRTQEELRRLSLDVEALRRQ  
LVQEQENVKQAH LRNEHFQKAI EDKSRSLNESKIEIERLQSLTENLTKEHLMLEEEELRNLRL EYDDLRRGRSE

ADSDKNSTISELRSQLOISNNRTLELQGLINDLQRERENLRQEIIEKFQKQALEASNRIQESKSQCTQVVQERE  
 SLLVKIKVLEQDKARLQRLLEDELNRAKATLEAESRVKQRLECEKQIQNDLNQWKTQYSRKEETIRKIESERE  
 KSEREKNSLRSEIERLQAEIKRIEERCRRKLEDSSRETQSQLESERCRLQKEIEKLRQRPYGSRETQTEYEW  
 TVDSSKLVFDGLRKKVTAMQLYECQLIDKTTLDKLLKGGKSVVEEVASEIQPFLRGAGAIAGASASPKEKYSLV  
 EAKRKKFITPESTVMLLEAQAATGGIIDPHRNEKLTVDNAVARDLIDFDDRQOIYTAEKAITGFDDPFSGKT  
 SVSEAIKKNLIDRETGMRLLEAQLASGGVDPVNSVFLPKDVALARGLIDRDLYRSLNDPRDSQKNFVDPITK  
 KKVSYMQLRERCRIEPHTGLLLSVQKRSMSFQGIRQPVTVTELVDGILRPSTVNELESGQISYDEVGERIK  
 DFLQSSCIAGIYNETTKQKLGIEAMKIGLVRPGTALELLEAQAATGFIVDPVSNLRLPVEEAYKRGLVGI  
 FKEKLLSAERAVTGYNDPETGNIISLQAMNKELIEKGGHGRLLLEAQAATGGIIDPKESHRLPVDMAKRGYF  
 NEELSEILSDPSDDTKGFFDPNTEENLTYLQKERCIDDEETGLCLLPLKEKKKQVQTSQKNTLRKRRVVID  
 PETNKEMSVQEAAYKGLIDYDTFKELCEQECEWEEITITGSDGSTRVVLVDRKTSQYDIQDAIDKGLVDRKF  
 FDQYRSGSLSTQFADMI SLKNGVGNSSGLGGSVNDDVFSRRHDSVSKI STISSVRNLTIRSSLSDFLEES  
 SPIAAIFD TENLEKISIAEGIERGIVDSITGQRLLEAQAATGGI IHPTTGQKLSLQDAVNQGLIDQDMATRLK  
 PAQKAFIGFEGVKGKKMSAAEAVKEKWLPEYAGQRFLEFQFLTGGLDPEVHGRI STEEAIRKGFIDGRAAQ  
 RLQDISSYAKILTCPKTKLKI SYKDAMNRS MVEDITGLRLLLEAASVSSKGLPSPYNMSAPGSRSGSRSGSRSG  
 SRSGSRSGSRSGSFDATGNSSYSYSFSSSSIGGY\*

>ENSMUSP00000117252\_c.1111:G>T\_p.S371I ENSMUST00000127906.8|Dsp-  
 202|ENSMUSG00000054889|+|chr13:g.38361194:G>T  
 MSCNGGSHPRINTLGRMTRAESGPDRLRYEMTYSGGGGGGGGGGGT SRTFYSHSRCTVNDQNSDGYCQTGT  
 MSRHQNQNTIQEMLQNCSDCLMRAELIAQPELKFEGMQLAWNRELDEYFTQANDQMEIIDGLIREMRQMGQP  
 CDAYQKRLQLQEQMRALYKAISVPRVRRASSKGGAGGYTCQSGSGWDEFKRLTGECLGWMRQOREMDLMAW  
 GVDAGSVEQHINSHRSIHNTIGDYRWQLDKIKADLREKSAIYQLEEEYENLLKASFERMDHLRQLQNI IQATS  
 REIMWINDCEEEELLYDWSKNTNIAQKQEA FSI RMSQLEVKEKELNKLKQESDQLVLNQH PASDKIEAYMDT  
 LQTQWIIWLQITKCIDVHLKENAAYFOFFEEAQSTEAYLQGLQDSIRKKYPCDKNMPLQHLLEQIKELEKERE  
 KIEYKRVQNLVNSKSKIVQLKPRNPDYRSNKPIILRALCDYKQDQKIVHKGDECILKDNNSKSWYVTGPG  
 GVDMLVPSVGLIIPPPNPLAVDL SCKIEQYEAIALALWNQYI INMKSLSVSWHYCMIDIEKIRAMTIAKLTMR  
 QEDYMKTIEDLELHYDFIKNSQSEMFGDDDKRRMQSQFTDAQKHQTLVIQLPGHPQHRLPVTKTEITHLGT  
 CQDVNHNKVIETNRENDKQETWLLMELQKIRRQMEHCEARMTLKNLLLAEQGSTHHTVTKINELKSVQNSQA  
 LAEVLNQLKDMLANFRGSEKYCYLQNEIFGLFQKLENINGVSDGYLNSLCSVRALLQAILQTEDMLKVYEARL  
 TEEETVCLDLKVEAYRCGLKKIKNDLNLKKSLLATMKTELQKAQQIHSQSSQOYPLYDLDLGKFTKEVQTLT  
 DRWQKIDKQIDFRLWDLEKQIKQLRNYRDNYQSFCWLYDAKRRQDSLES MKFGDSNTVMRFLNEQKNLHSEI  
 SGKRDKSEEVHKIAELCANSIKDYELQLASYS TSGLETLLNIP IKRTMVQSPSGVILQEAADIHARYIELLTRS  
 GDYYRFLSEMLKSLEDLKLKNTKIEVLEELRLARDANSENCNKNKFLDQNLQKYQAEC SQFKAKLVSLLEELK  
 RQAE LDGKSAQNLDKCYGQIKELNEK ITRLTYEIEDEKRRRKTVEDRFDQKNDYDQLQKARQCEKENLSWQ  
 KLESEKAIKEKEYEIERLRVLLQEEGARKREYENELAKASNR IQESKSQCTQVVQERESLLVKIKVLEQDKAR  
 LQRLLEDELNRAKATLEAESRVKQRLECEKQIQNDLNQWKTQYSRKEETIRKIESEREKNSLRSEIER  
 LQAEIKRIEERCRRKLEDSSRETQSQLESERCRLQKEIEKLRQRPYGSRETQTEYEWTVDSSKLVFDGLRKK  
 VTAMQLYECQLIDKTTLDKLLKGGKSVVEEVASEIQPFLRGAGAIAGASASPKEKYSLV EAKRKKFITPESTV  
 MLEAQAATGGIIDPHRNEKLTVDNAVARDLIDFDDRQOIYTAEKAITGFDDPFSGKT VSVSEAIKKNLIDRET  
 GMRLLEAQLASGGVDPVNSVFLPKDVALARGLIDRDLYRSLNDPRDSQKNFVDPITK KKVSYMQLRERCRIE  
 PHTGLLLSVQKRSMSFQGIRQPVTVTELVDGILRPSTVNELESGQISYDEVGERIKDFLQSSCIAGIYNE  
 TTKQKLGIEAMKIGLVRPGTALELLEAQAATGFIVDPVSNLRLPVEEAYKRGLVGI FKEKLLSAERAVTGY  
 NDPETGNIISLQAMNKELIEKGGHGRLLLEAQAATGGIIDPKESHRLPVDMAKRGYFNEELSEILSDPSDDT  
 KGFDPNTEENLTYLQKERCIDDEETGLCLLPLKEKKKQVQTSQKNTLRKRRVVIDPETNKEMSVQEAAYK  
 GLIDYDTFKELCEQECEWEEITITGSDGSTRVVLVDRKTSQYDIQDAIDKGLVDRKFFDQYRSGSLSTQFA  
 DMISLKNGVGNSSGLGGSVNDDVFSRRHDSVSKI STISSVRNLTIRSSLSDFLEESSPIAAIFD TENLEKI  
 SIAEGIERGIVDSITGQRLLEAQAATGGI IHPTTGQKLSLQDAVNQGLIDQDMATRLKPAQKAFIGFEGVKG  
 KKMSAAEAVKEKWLPEYAGQRFLEFQFLTGGLDPEVHGRI STEEAIRKGFIDGRAAQRLQDISSYAKILTCP  
 KTKLKI SYKDAMNRS MVEDITGLRLLLEAASVSSKGLPSPYNMSAPGSRSGSRSGSRSGSRSGSRSGSFD  
 ATGNSSYSYSFSSSSIGGY\*

>ENSMUSP00000115062\_c.8172:G>A\_p.V2725I ENSMUST00000124830.3|Dsp-  
 201|ENSMUSG00000054889|+|chr13:g.38381429:G>A  
 MSCNGGSHPRINTLGRMTRAESGPDRLRYEMTYSGGGGGGGGGGGT SRTFYSHSRCTVNDQNSDGYCQTGT  
 MSRHQNQNTIQEMLQNCSDCLMRAELIAQPELKFEGMQLAWNRELDEYFTQANDQMEIIDGLIREMRQMGQP  
 CDAYQKRLQLQEQMRALYKAISVPRVRRASSKGGAGGYTCQSGSGWDEFKRLTGECLGWMRQOREMDLMAW  
 GVDAGSVEQHINSHRSIHNTIGDYRWQLDKIKADLREKSAIYQLEEEYENLLKASFERMDHLRQLQNI IQATS  
 REIMWINDCEEEELLYDWSKNTNIAQKQEA FSI RMSQLEVKEKELNKLKQESDQLVLNQH PASDKIEAYMDT  
 LQTQWSWIIWLQITKCIDVHLKENAAYFOFFEEAQSTEAYLQGLQDSIRKKYPCDKNMPLQHLLEQIKELEKERE



KIIEYKRQVQNLVNSKSKIVQLKPRNPDYRSNKPIILRALCDYKQDQKIVHKGDECILKDNNERSKWVYVTPGPG  
GVDMLVPSVGLIIPPPNPLAVDLSCKIEQYEAIALALWNQLYINMKSLSVSWHYCMIDIEKIRAMTIAKLKTM  
QEDYMKTIEDLELHYQDFIKNSQSEMFGDDDKRRMQSQFTDAQKHYQTLVIQLPGHPQHQTIVTKTEITHLGT  
CQDVNHNKVIETNRENDKQETWLLMELQKIRRQMEHCEARMTLKNLLLAEQGSTHHTVTKINELKSVQNDQA  
LAEVLNQLKDMLANFRGSEKYCYLQNEIFGLFQKLENINGVSDGYLNSLCSVRALLQAILQTEDMLKVYEARL  
TEETTVCLDLKVEAYRCGLKKIKNDLNLKKSLLATMKTELQKAQQIHSQSSQOYPLYDLDLKGKTEKVTQLT  
DRWQKIDKQIDFRLWDLEKQIKQLRNYRDNYQSFCWKLYDAKRRQDSLESKMGFGDSNTVMRFLNEQKNLHSEI  
SGKRDKSEEVHKAIAELCANSIKDYELQLASYSGLTLLNIPKRTMVQSPSGVILQEAADIHARYIELLTRS  
GDYRFLSEMLKSLEDLKLKNTKIEVLEELRLARDANSENCNKNKFLDQNLQKYQAECQSFKAKLVSLEELK  
RQAEILDGKSAKQNLKCYGQIKELNEKITRLTYEIEDEKRRRKTVEDRFDQKNDYDQLQKARQCEKENLSWQ  
KLESEKAIKEKEYEIERLRVLLQEEGARKREYENELAKVRNHYNEEMSNLRNKYETEINITKTTIKEISMQKE  
DDSKNLRNQMDRLSRENRLKDEIVRLNDSILQATEQRRRAENALQQKACGSETMQKKQRLIEELKQVIQOR  
SEDNARHKQSLEEAAKTIQDKNKEIERLKAQYQEEAKRRWEYENELSKVRNSYDEEIIISLKNQFETEINITKT  
TIHQLTMQKEEDTSGYRAQIDNLTRENRLSCEEVRLKNTLAQTENLRRVEENAQQQKATGSEMSQRKQOLE  
IELRQVTQMRTEESMRYKQSLDDAAKTIQDKNKEIERLQKLVKQKQAEELSRKRTASDESSKRKML  
TEAMSGLKQVQELTRLRIDYERVSQERTVKDQDITRIQSSSLKDLQKQKAEELSRKRTASDESSKRKML  
EEELEAMRRSLKQAVKITNLQQLQEQASIVKRRSEDDLQQRDVLGHVREKQRTQEEELRRLSLDVEALRRQ  
LVQEQENVKQAHLRNEHFQKAIEDKSRSLNESKIEIERLQSLTENLTKHELMLEELRNLRLRYDLRRGRSE  
ADSDKNSTISELRSQLOISNNRTELELQGLINDLQRERENLRQEIIEKFQKQALEASNRIQESKSQCTQVVQERE  
SLLVKIKVLEQDKARLQLEDELNRAKATLEAESRVKQRLCEKQIQNDLNQWKTQYSRKEETIRKIESERE  
KSEREKNSLRSEIERLQAEIKRIEERCRRKLEDSSRETQSQLESECRLOKEIEKLRQRPYGSHTRETQTEYEW  
TVDSKLVFDGLRKKVTAMQLYECQLIDKTTLDKLLKGGKSVVEEVASEIQPFLRGAGAIAGASASPKEKYSLV  
EAKRKKFITPESTVMLLEAQAATGGIIDPHRNEKLTVDNAVARDLIDFDDRQOIYTAEKAITGFDDPFSGKTV  
SVSEAIKKNLIDRETGMRLLEAQLASGGVDPVNSVFLPKDVALARGLIDRDLYRSLNDPRDSQKNFVDPITK  
KKVSYMQLRERCRIEPTGLLLLLSVQKRSMSFQGIQRPVTVTELVDGILRPSTVNELESGQISYDEVGERIK  
DFLQSSCIAGIYNETTKQKLGIEAMKIGLVRPGTALELLEAQAATGFIVDPVNSLRLPVEEAYKRLVGI  
FKEKLLSAERAVTGNPETGNIISLQFQAMNKELIEKGHGIRLLEAQAATGGIIDPKESHRLPVMAYKRGYF  
NEELSEILSDPSDDTKGFFDPNTEENLTYLQKERCIKDEETGLCLLPLKEKKKQVQTSQKNTLRKRRVIVD  
PETNKEMSVQEAAYKGLIDYDTFKELCEQECEWEEITITGSDGSTRVVLVDRKTSQYDIQDAIDKGLVDRKF  
FDQYRSGSLSTQFADMI SLKNGVGNSSGLGGVNDVDFSSSRHDSVSKIISTISSVRNLTIRSSLSDFLEES  
SPIAAIFDTEENLEKISIAEGIERGIVDSITGQRLLEAQAATGGIIPHTTGQKLSLQDAVNQGLIDQDMATRLK  
PAQKAFIFGEGVKGKKMSAAEAIKEKWLPEYAGQRFLEFQFLTGGLVDPEVHGRISTEAIKRGFIDGRAAQ  
RLQDISSYAKILTCKPKTKKISYKDAMNRSVEDITGLRLLLEAASVSSKGLPSPYNMSAPGSRSGSRSGSRSG  
SRSGSRSGSRSGSFDATGNSSYSYSYFSSSSIGGY\*

>ENSMUSP00000117252\_c.6375:G>A\_p.V2126I ENSMUST00000127906.8|Dsp-  
202|ENSMUSG00000054889|+|chr13:g.38381429:G>A

MSCNGGSHPRINTLGRMTRAESGPDLYEMTYSGGGGGGGGGGGGTSRTFYSHSRRCTVNDQNSDGYCQTGT  
MSRHQNQNTIQEMLQNCSDCLMRAELIAQPELKFGEQMQLAWNRELDEYFTQANDQMEIIDGLIREMRQMGQP  
CDAYQKRLQLQEQMRALYKAISVPRVRRASSKGGAGGYTCQSGSGWDEFKRLTGECLGWMRQOREMDLMAW  
GVDAGSVEQHINSHRSIHNTIGDYRWQLDKIKADLREKSAIYQLEEBEYENLLKASFERMDHLRQLQNI IQATS  
REIMWINDCEEEELLYDWSKNTNIAQKQEAFAIRMSQLEVKEKELNKLKQESDQLVLNQHHPASDKIEAYMDT  
LQTQWSWILQITKCIDVHLKENAAYFQFFEEAQSTEAYLKGQLDSIRKKYPCDKNMPLQHLLLEQIKELEKERE  
KIIEYKRQVQNLVNSKSKIVQLKPRNPDYRSNKPIILRALCDYKQDQKIVHKGDECILKDNNERSKWVYVTPGPG  
GVDMLVPSVGLIIPPPNPLAVDLSCKIEQYEAIALALWNQLYINMKSLSVSWHYCMIDIEKIRAMTIAKLKTM  
QEDYMKTIEDLELHYQDFIKNSQSEMFGDDDKRRMQSQFTDAQKHYQTLVIQLPGHPQHQTIVTKTEITHLGT  
CQDVNHNKVIETNRENDKQETWLLMELQKIRRQMEHCEARMTLKNLLLAEQGSTHHTVTKINELKSVQNDQA  
LAEVLNQLKDMLANFRGSEKYCYLQNEIFGLFQKLENINGVSDGYLNSLCSVRALLQAILQTEDMLKVYEARL  
TEETTVCLDLKVEAYRCGLKKIKNDLNLKKSLLATMKTELQKAQQIHSQSSQOYPLYDLDLKGKTEKVTQLT  
DRWQKIDKQIDFRLWDLEKQIKQLRNYRDNYQSFCWKLYDAKRRQDSLESKMGFGDSNTVMRFLNEQKNLHSEI  
SGKRDKSEEVHKAIAELCANSIKDYELQLASYSGLTLLNIPKRTMVQSPSGVILQEAADIHARYIELLTRS  
GDYRFLSEMLKSLEDLKLKNTKIEVLEELRLARDANSENCNKNKFLDQNLQKYQAECQSFKAKLVSLEELK  
RQAEILDGKSAKQNLKCYGQIKELNEKITRLTYEIEDEKRRRKTVEDRFDQKNDYDQLQKARQCEKENLSWQ  
KLESEKAIKEKEYEIERLRVLLQEEGARKREYENELAKASNR IQESKSQCTQVVQERESLLVKIKVLEQDKAR  
LQRLDELNRAKATLEAESRVKQRLCEKQIQNDLNQWKTQYSRKEETIRKIESEREKSEREKNSLRSEIER  
LQAEIKRIEERCRRKLEDSSRETQSQLESECRLOKEIEKLRQRPYGSHTRETQTEYEWTVDSKLVFDGLRKK  
VTAMQLYECQLIDKTTLDKLLKGGKSVVEEVASEIQPFLRGAGAIAGASASPKEKYSLV EAKRKKFITPESTV  
MLEAQAATGGIIDPHRNEKLTVDNAVARDLIDFDDRQOIYTAEKAITGFDDPFSGKTVSVSEAIKKNLIDRET  
GMRLLEAQLASGGVDPVNSVFLPKDVALARGLIDRDLYRSLNDPRDSQKNFVDPITK KKVSYMQLRERCRIE

PHTGLLLLSVQKRSMFQGIRQPVTVTELVDGILRPSTVNELESGQISYDEVGERIKDFLQSSCIAGIYNE  
TTKQKLGIEYAMKIGLVRPGTALELLEAQAATGFIVDPVSNLRLPVVEAYKRGLVGFIEFKEKLLSAERAVTGY  
NDPETGNIISLQAMNKELIEKGGHGRILLEAQIATGGIIDPKESHRLPVDMAKRGYFNEELSEILSDPSSDDT  
KGFDPNTEENLTYLQKERICDEETGLCLLPLKEKKKQVQTSQKNTLRKRRVIVDPETNKEMSVQEAAYKK  
GLIDYDTFKELCEQECEWEEITITGSDGSTRVVLVDRKTSQYDIQDAIDKGLVDRKFFDQYRSGSLSTQFA  
DMISLKNVGNSSGLGGSVNDVDFSSSRHDSVSKISTISSVRNLTIRSSSLSDPLEESSPIAIFDTENLEKI  
SIAEGIERGIVDSITGQRLLEAQAQCTGGI IHPTTGQKLSLQDAVNQGLIDQDMATRLKPAQKAFIGFEGVKGK  
KKMSAAEAIKEKWLPEAGQRFLEFQFLTGGLVDPVHGRISTEEAIRKGFIDGRAAQRLQDISSYAKILTCP  
KTKLKI SYKDAMNRSVEDITGLRLLLEAASVSSKGLPSPYNMSAPGSRSGSRSGSRSGSRSGSRSGSRSGRSGSFD  
ATGNSSYSYSFSSSSIGGY\*

>ENSMUSP00000021930\_c.906:C>A\_p.Q303K ENSMUST00000021930.10|sfxn1-  
201|ENSMUSG00000021474|+|chr13:g.54260560:C>A  
MSGEVPPNINIKEPRWDQSTFIGRASHFFVTVDPRNILLTNEQLENARKVVHDYRQGVIPAGLTENELWRACY  
AYDSAFHPDTEKMTLIGRMSAQVPMNMTITGCMFTFYRTPAVLFWQWINQSFNAVNYTNRSGDAPLTVNE  
LGTAYVSATTGAVATALGLNALTKRVSPILGRFVFPFAAVAAANCINIPLMRQRELKVGIPVTDENGRGEGEST  
NAAKQAITQVVISRILMAAPGMAIPPFIMNTLEKKAFLKRFPMWAPIQVTLVGFCLVFATPLCCALFPQKSS  
MSVTSLEDELKASIQRTHPEIRRVYFNKGL\*

>ENSMUSP00000022036\_c.202:A>C\_p.D68A ENSMUST00000022036.14|Slc28a3-  
201|ENSMUSG00000021553|-|chr13:g.58730512:T>G  
MSRADPGKNSEPESEKMSLELRPTAPSDLGRSNEAFQDEDLERQNTPGNSTVRNRVQSGEQGHAKQADROIT  
IEQEPLGNKEDPEDDSEDEHQKGFLEKRYDTICEFCRKHVRVLRSTIWAVLLTGFLALVIAACAINFHRALPL  
FVITLVTIFFVIWDHLMAYEQRIDDFLSPGRLLDRHWFWLKWVWSSILILAILWLSLDTAKLQQNLVVSF  
GGLIMYLILLFLFSKHPTRVYWRPVFWGIGLQFLGLLILRTRPFGVAFDWMGRQVQTFGLYTDTGARFVFG  
KYTDHFFAFKILPIVFFSTVMSMLYLLGLMQWIIKRVGWLMLVMTGSSPIESVVAAGNIFIGQTESPLLQV  
YLPHTKSELHTIMTAGFATIAGSVLGAYISFGVSSTHLLTASVMSAPAALAVAKLFWPETEKPKITLKSAMK  
MENGDRSFLLEAASQGASSIPLVANIAANLIAFLALLSFVNSALSWSFGSMFNYPSELSFELICYSIFMFPFSM  
MGVDWQDSNEMAKLIGYKTFNFNEFVAYDHLKSLINLRKAAGPKFVNGVQYMSIRSETIATYALCGFANFGSL  
GIVIGGLTSIAPSRKRDIASGAMRALIAGTIACFMTACIAGILSDTPVDINCHHVLENGRVLNNTTEVVSCCQ  
NLFNSTVAKGPNDDVPPGGNFSLYALKSCCNLLKPPTLNLCNWI PNKL\*

>ENSMUSP00000097048\_c.642:A>C\_p.K215Q ENSMUST00000099449.4|Zfp808-  
201|ENSMUSG00000074867|+|chr13:g.62319415:A>C  
MNAVTYRDVHVNFTEEWALLDPSQKKLYKDVMLETYRNLNAIGFNWEAQNIEEHCQSSRRHRCERSQSAEK  
PSEYTRQDKAFALRAHSHAQRHERIHTEKIPSEDIHCVEDVLPYTSLQVHKRTQTGQKPYECKQCGKGFAPKPS  
HLKRHERFHTVEQPFICNECDEVFSFKHHLQTHIRVHTGKPFKCNLQDKSFSKHNHLQSHRRTHTEGQPYKC  
DQCDKAFSEKCNLQTHIRIHTGKPYKCDQCDKTFSEKCHLQKHIRIHTGKPYKCNQCDKAFSQYSTLQTHR  
RTHTEGKPYKCNQCDKAFSQYGNLQTHRRTHTEGKPFKCNQCDKAFSQYSTLQTHRRTHTEGKPYKCNQCDKA  
FSEKCSLQRHIRIHTGKPYKCNQCNKAFSHNYHLHIHRRTHTEGKPYKCNQCDKAFSIHFPLQNHRHTHTGE  
KPYKCNQCDKAFSEKCHLQNHIRIHTGKPYKCNQCDKAFSQYFSLQTHRRIHTGKPFKCNQCDKAFSQYST  
LQTHRRTHTEGKPFKCNQCDKAFSKHSTLQSHRRTHSSEKPFKCSQCDKAFSQYNTLQAHRRTHSSEKPFKCD  
QCDKAFSEKCNLQKHIRIHTGKPYKCNQCDKAFSQYNTLQTHRRIHTGKPFKCNQCDKAFSRHSTLQTHRR  
THTEGKPFKCNQCDKVFSSQYNSLQTHRRTHTEGKPYKCDQCDKAFSMKCNLQNHVRIHTGKPYKCNQCDKAF  
FQYSNLHIHRKTHTEGKPYKCNQ\*

>ENSMUSP00000119114\_c.1692:T>A\_p.S565T ENSMUST00000126879.8|Zfp369-  
202|ENSMUSG00000021514|+|chr13:g.65444551:T>A  
MDPGEGRSAFCLLPLENTEDSMASLTPTTWPHEVSVKFDVSLRFTEEEWALLDRQKCLYREIMMENLNMIS  
VEHHFSKANVMPQLEEVEDCWPMQREIPQDTLPECSGHSLEPEMNSFPAESPLMKIKVVEVLTNLKMDMAGPRN  
ALIQSLYPESGEDLNPGNLKPAQQPSKHLTDTEASRQKFRHFQYEEASAGPQKSVSQRKLRKLCQWLQVQSTRSKK  
QILELLVLEQFLNALPEKLRVWVESQHPEDCKAVVALLENMTSVSKDDAWLACSSEATDELKEKRKDVATLPV  
TVPPEAPVTFQDVAVDFSQEELGPMQRTKYHDMLETLGNLVSVEWPTLGNRELTTPDSPIPVVKPIHDP  
NPKDLRSRNTQSTLFESISPDEVQGRHTIESNPVGLLQEKGHPQQKLSSESKSQNTCIDKSQCSLNEVLPRN  
HVVKVQKGTGKGGKGRNTISMTGGLRIRNQKDSVEWRDRSGSTPVTHGSSIKNQQLGSEQGTQTSRDPITL  
AVPAEFYQEAATGSEGRFRNSSNAMAADAPPKIHQKGPWEHKGAGKSNNSMLQGTSAQNHQMGSRAGRARDNSI  
LTHVKIHQKGYKEGKIQGNNNYLKHVKPHQKSGEERLRELSCTQKHVPYVKQHLKTSRGRGKGRKINASIKCG  
PYIKTYRGSVDGRLRRANNCRAISRHAQQISFIKIHKGSQICQCECGKMFNRNARYFSVHKKIHTGERPYM  
CMSCGKAFVQSSSLTQHLRIHSGERPFECSECGRTFSDRSAASQHLRTHTEGKPYQCCQCHGKAFRQSSHLTRH  
VRIHTGERPYVCTKCGKAFTQSSNLIGHQKTHRKKFKKQPKL\*

>ENSMUSP00000019572\_c.249:A>TA\_p.N84ins-fs ENSMUST00000019572.9|Zfp874b-  
201|ENSMUSG00000059839|-|chr13:g.67623047:T>TA

MEEMLSFRDVAIDFSPEERDYLGAQWDLYRDVMLENYSHLVFLGLAVAKPYLVTFLEQNQGSSGVKSHAAAT  
IPGTTGNEFN  
>ENSMUSP00000153242\_c.261:A>TA\_p.N88ins-fs ENSMUST00000223868.2|Zfp874b-  
203|ENSMUSG00000059839|-|chr13:g.67623047:T>TA  
MESLFFQEMLSFRDVAIDFSPEERDYLGAQWDLYRDVMLENYSHLVFLGLAVAKPYLVTFLEQNQGSSGVKSH  
AAATIPGTTGNEFN  
>ENSMUSP00000022100\_c.672:C>T\_p.Q225\* ENSMUST00000022100.7|Slc6a3-  
201|ENSMUSG00000021609|+|chr13:g.73705183:C>T  
MSKSKCSVGPMSVAPAKEPNAVGPREVLELILVKEQNGVQLTNSSTLINPPQTPVEVQERETWSKKIDFLLSV  
IGFAVDLANVWRFYPYLCYKNGGGAFVLPYLLFMVIAGMPLFYMELALGQFNREGAAGVWKICPVLKGVGFTVI  
LISFYVGFYFNVI IAWALHYFFSSFTMDLPWIHCNNTWNSPNCSDAHSNSDGLGLNDFTFGTTPAAEYFERG  
VLHLH\*SRGIDDLGPPRWQLTACLVLVIVLLYFSLWKGVKTSKGVVWITATMPYVVL TALLRGTLP GAMDG  
IRAYLSVDFYRLCEASVWIDAATQVCFSLGVGFGVLIASFSSYNKFTNNCYRDAIITTSINSLTSFSSGFVVS  
FLGYMAQKHNVPIRDVATDGPGLIFIIYPEAIATLPLSSAWAAVFFLMLLTLGIDSAMGGMESVITGLVDEFQ  
LLHRHRELFTLGIVLATFLLSLFCVTNGGIYVFTLLDHFAAGTSLFGLVLEAIGVAWFYGVQQFSDDIKQMT  
GQRPNLYWRLCWKLVSFCLLYVVVVSIVTFRPPHYGAYIFPDWANALGWIIATSSMAMVPIYATYKFCSLPG  
SFREKLAYAITPEKDRQLVDRGEVRQFTLRHWLLV\*  
>ENSMUSP00000050408\_c.10162:T>A\_p.V3388E ENSMUST00000062122.4|Cmya5-  
201|ENSMUSG00000047419|-|chr13:g.93201798:A>T  
MESGDSGLAAQGFGLGWGADEEVAQELETEEESEGEGETAAESEEEEPDARLSDEDEEGKTKQECIVSDPSFSM  
VAVQREDSGITWETNSSRSSTPWASGESQTSIGCSLEGSALTSPPGSVSFIMDEVKTRKRTQKSKRGSPSLR  
RKGSKKRNSLESQDVL TNQEDGPSISESPVLNIENEKSSIGTYDKTRRKTASNTPPITGAIYKEHKPLVLKP  
VYIGTVQYKIKMFSNVKEELIPLQFYGTLPKGYVIKEIH YRRGKDSISLEPDLNNGGSNI V PQRKLAQSPPEE  
DKVRELAPPWRGALS KGSRTSLFSHEEQKKT YADSNLNVPSSTEHAFPSARNDTADQEEENLSLPQMPPQPA  
DESKTRMEPPSIPATMVLERAKEELEQNAQKESSEDDASVLTGSADDVQOEGLVSVNHSMPWEAEKESLET  
GPPRPAPAIQEKPEPDMEGLEPISTEKTEQASEYVTSSEPIVHREEEHHAPEPIVHREEEHHAPEPIVHREEEHA  
PEPIVHREEEHHAPEPIVHREEEHHAPEPIVQREEEHHAPEPIVHREEEHHAPEPIVHREEEHHAPEPIVHRE  
GEEHHAPEPIVHRDEGHHAPEPIVHREEEHVPEPIVHRDEGHHAPEPIVHREEEHVPEPIVHREEEHHAPEPMVL  
RKAQLERGVETSTPITD TTEPEDSSLEEEI IELDY PESP LASKETS P S PLSPEVEHRKEPI LPTQMTFTPERI  
TLSEEEERENESVSTDSAFVSEY SVLQDLNHTPEKLEVEAVSVSDVKSSNEPAVFSDEDEERESYSPAMTSVS  
EQSLSPSTTEKTSAIQSPLFSTVSPVLSGDEASESVCHSPESESAAEYSVPAHAQELLLKTGDHKLPLKSQRV  
SEPI IQAEDEKEDI GLLPPAALSQAVLSEDESLGSGSFASDSKLPFKPSVSNATRESPQKTIDDM PQFKPRG  
LSDPATLLEEEKEAIGVGLSSNEVSAVECALPPQTTELLSESHAPPPWAISSEQV VQSEEGSRDQQRGSFSS  
TPELGHTSPLLLKGASSPTGLSEQQQEEDNIGPLSPDSAFASEFSFSPYPTQELEKRELGRDSP LCLTSPSEQ  
TVLSDEDETEADL FSPDSASQVSI PYPYRIAE TEQNKVPEDELPRRSAPDYPYFSEADEEEAGSSVVTVPPEH  
SEPSQEREESPCRPVFEDLSLLPSADKTGQAE TMSDVPTISTVSEYLILAQQEKTQASLEPEAE DLVPPPT  
SGWEKRDAKSSLP AVTIAASSSALS SVVKEETTSVLPTSQPSVSP ESTCVLKPEQEPTAPLTLTSADEQMALP  
RVGREKAVLDSQEATAHKSQDQTPEPRLPNVPGSGMKYSVLSDLGDEPKADVKNLAPVTV TSELEQRMLSKNE  
PEVAKPHSPPEETSISGPKVLSAVKTEVKQESKITRELPAASSGRERGAEHSPPAPPALPALMEEMGKDTEAS  
SSATVPVTKLDSNSTKLGRDEVLTDP SLASPV EHPGLKGVGKSELGSGGLPLPSMSTSEVLRPEPKLPVNSGV  
EVEREDNEPPPLQVSP TSKPTVPNDKHEEITRSPDSENVVSDDLAPTLLALRHEMNRQAEETSSVPVGSF LSG  
EQELIKLPPEPEKHKQLSEVPTAGSELIDSRDRDRSLGIEPVKPIGTEPGPSILEKGAELQRRGKEQEENRK  
LPVPASAPLETASF DLPIEQKEPKRTLHEGQAVEVPDESSSADKPELGVKQLAEKKENLEQPKPFV TTERAS  
V TGSKVKESLISPKDNTWMLEKPDGLV NQHEDRKPGTGQLESSESTDLMSEKLGAA PLDTDHTSETRNQETS K  
APVSGEKL SQEP RRVS KAVDDSE EGRK L ASGNVEVLTQSKSVPAVKAKATPQPPE TPEV TQPKSEKSLVTEQ  
GLPAEKGKKGISSFKSWMSLLFGSSIPDSKVS DNEDLETRPGPSVEKAVPAIEPKGTVPAEVNIAEKPAVHS  
LPEVTVKLAEEP KGVSVKSSISQDLKEKLTFLSNEDVLKQPKNSSENYGQKELPGFSEGMGESLATS VGD KHP  
GIHPCSPMGEKVGMEEAQNMAPLHITESQRRQKPEVSSPSMWNISARKEEPS SDHKETWLS SSVVDRMPQKP  
KSAQSAFTRMNSEEPASMI LPVESKGSLSDLGEDRLRQEMPKPTSL EHC EEEVERPTEEKD GWETRSFSLAGK  
RGLAEKQEI MAPLELRENEAVGELQRMPE SRPFKLEESKAAERLEQRISPT EKLMEKPSKTLALDRREKEVQE  
WVFSEGEKQEYPPAAMPVPGASAVSLDKAQPHLLAKPTPVVEKPEHIVTEVYPEIRERKAAETQPHPQEEGKT  
LVEKTKVSRVESPHGEETDGHS LTQEGNLELEKSGESRVDLKEERRRFVMPELS LGASVA AEDGVSQPRPLSK  
DAARVSDMTDETHKHLPTPTQPSAVEPQTLVLGTSVEHTVKKQETWSDRPTVHTFQTSKDYTEMLKQSVLIS  
KHHLEAVDVRNEHPSSAASNYTQFMLSASEISADGVTPMGGTAQEPEGTSVKDEEF SVTQKSKLSEVPDRKI  
AFSII SEGCEILNIHAPAFI PSVDQEESEQM QDKLYLEEKASFKSI SVHDEKKA AASHKTQKSKLEV PDRKI  
TSLKENETKETHKTKKEE IATDSGMGDF TPIQPTVSGEEDYFEKYTLIDYNLSPGSGKQKSTVEESSE EATKTL  
TSFPESAEQALDHEYNLVKLDES FYGPEKDDSKLSHAEMQKSLAIQK PDRNAPKGISRDVDSRSPGMPLFD  
VEEGLVSKRQIFPTTPKAVNPELLEPPALSFFYKDL YEGAGGEKNEGETASEGDSVDSETSFP RRHSDTDDG

PGMYFEKYILKDDILHDETVTQEDQGGLEEKPVGEEESQQLRVAEREIRRKPETSFWEKNLEEQHKVVGREG  
EPTGHMETLDEAAMQQKAPITEQVRAVTQKMSYAVPFQDTRCVLESEPSQGNEAGNASPDVNLNVVQESFP  
EEESAAGATYAPEVLQERLVPVSREERLHNTPVQDEYDFVGSLNQEAASQAILPEEPGSESSPKEVLSQSGSE  
SFEHIREQELTSEGEPRMSASQEVWDRTEQDQSAESVTAKTQKEPKKTQAESYCYTCKSLVSEMDKALDIHKD  
HEVSALDTAISAVKVQLGEFLENLQEKSLRIEAFVSEIESFFNTIEEKCSKNEKRLEMONEEMMKRVLAQYDE  
KAQSFEEVKKKKMEFLHDQMVHFLQSMDTAKDTLETIVREAEELDETVFLASFEEINERLLSAMESASTLENM  
PAAFSLFEHYDDSSARSQMLKQVAVPQPRLPEQEPSSATSTTIAVYWSVNKEDVVDVSFQVYCVVEEPQDDQE  
INELVEEYRLTVKESCCI FEDLEPDRCYQEWVMVAVNFTGCSLPSERAI FRTAPSTAVIHVEDCTVCWNTATVR  
WRPANPEATEYTYLEYCRQHSPEGELRSFSGIKGLQLKVNLPNDNYFFYVRATNASGTSEQSEAAALISTRG  
TRFLLLRETAHPALQISANGTVISFSERRRLTEIPSVLGEELPACGQHYWETTAVADSPAYRLGICTSSAVRAG  
ALGQGETSWYMHCSSEPQRYTFFYSGIVSEVHATERPARVGILLDYTNQRLLFINAESGQLLFIVRHRFNEGVB  
PAFALEKPKGRCTLHLGLEPPDSVRHK\*

>ENSMUSP0000022197\_c.273:G>T\_p.E92\* ENSMUST0000022197.15|Scamp1-  
201|ENSMUSG0000021687|-|chr13:g.94368649:C>A  
MSDFDSNPFADPDLNPNFKDPSVTQVTRNVPPGLDEYNPFSDSRTPPPGSVKMPNVPNTQPAIMKPTEEHPAY  
TQITKEHALAQAEELLKQ\*ELERKAAELDRREREMQNLSQHGRKNNWPPLPSNFPVGPFCFYQDFSVDI PVEFQ  
KTVKLMYYLWMFHAVTLFLNIFGCLAWFCVDSSRAVDGFLSILWFLLFTPCS FVCWYRPLYGAFRSDSSFRFF  
VFFFVYICQFAVHVLQAAGFHNWNGCGWISSLTGLNKNIPVGIIMMIIAALFTASAVISLVMFKKVHGLYRRT  
GASFKAQQEFATGVM SNKTVQTAAANAASTAATSAAQNAFKGNQM\*

>ENSMUSP00000123135\_c.117:G>T\_p.E40\* ENSMUST00000152555.8|Scamp1-  
203|ENSMUSG0000021687|-|chr13:g.94368649:C>A  
MPNVNTQPAIMKPTEEHPAYTQITKEHALAQAEELLKQ\*ELERKAAELDRREREMQNLSQHGRKNNWPPLPS  
NFPVGPFCFYQDFSVDI PVEFQKTVKLMYYLWMFHAVTLFLNIFGCLAWFCVDSSRAVDGFLSILWFLLFTPCS  
FVCWYRPLYGAFRSDSSFRFFVFFFVYICQFAVHVLQAAGFHNWNGCGWISSLTGLNKNIPVGIIMMIIAALF  
TASAVISLVMFKKVHGLYRRTGASFKAQQEFATGVM SNKTVQTAAANAASTAATSAAQNAFKGNQM\*

>ENSMUSP00000120053\_c.117:G>T\_p.E40\* ENSMUST00000153558.8|Scamp1-  
204|ENSMUSG0000021687|-|chr13:g.94368649:C>A  
MPNVNTQPAIMKPTEEHPAYTQITKEHALAQAEELLKQ\*ELERKAAELDRREREMQNLSQHGRKNNWPPLPS  
NFPVGPFCFYQDFSVDI PVEFQKTVKLMYYLWMFHAVTLFLNIFGCLAWFCVDSSRAVDGFLSILWFLLFTPCS  
FVCWYRPLYGAFRSDSSFRFFVFFFVYICQFAVHVLQAAGFHNWNGCGWISSLTGLNKNIPVGIIMMIIAALF  
TASAVISLVMFKKVHGLYRRTGASFKAQQEFATGVM SNKTVQTAAANAASTAATSAAQNAFKGNQM\*

>ENSMUSP00000121039\_c.117:G>T\_p.E40\* ENSMUST00000138255.2|Scamp1-  
202|ENSMUSG0000021687|-|chr13:g.94368649:C>A  
MPNVNTQPAIMKPTEEHPAYTQITKEHALAQAEELLKQ\*ELERKAAELDRREREMQNLSQHGRKNNWPPLPS  
NFPVGPFCFYQDFSVDI PVEFQKTVKLMYYLWMFHAVTLFLNIF

>ENSMUSP00000104890\_c.717:C>T\_p.P240S ENSMUST00000109267.9|Map3k1-  
201|ENSMUSG0000021754|-|chr13:g.111909231:G>A  
MAAAAGDRASSSGFPGAAAASPEAGGGGGGGALQGSGAPAAGAAGLLREPGSAGRERADWRRRQLRKVRSVE  
LDQLPEQPLFLAAASPPCPSTSPSEPADAAAGASRFQPAAGPPPPGAASRCGSHSAELAAARDSGARSPAGA  
EPPSAAAPSGREMNKETLKLGHKMEDRPEERMIREKLKATCMPAWKHEWLERRRNRGPPVVVKPIPIKGDGSE  
MNNLAAEPQEGQAGSAPASKGRRSPSPGSSPSGRSVKPESPGVRRKRVSPVPFQSGRITPPRRAPSPDGF  
PYSPEETSRRVNVKVMRARLYLLQQIGPNSFLIGGDSNDKRYRVFVIGPQNCSCGRGAFCIHLLFVMLRVFQLEP  
SDPMLWRKTLKNFVEVSLFQKYHSRRSSRIKAPSRNTIQKFVSRMSNCHTLSSSSTSTSSSENSIKDEEQMC  
PICLLGMLDEESLTVCEGDCRNLHHHCMSIWAEECRNRNREPLICPLCRSKWRSHDFYSHELSSPVESPTS  
LRAVQPPSSPQQPVAGSQRRNQESSFNLTHTGTTQIPISAYKDLAEPWIVQVGMELVGLFSRNWNVREMLRRLS  
HDVSGALLLANGESTGNSGGGSGSLSAGAASGSSQPSISGDVVEACCSVLSIVCADPVYKVYVAALKTLRAM  
LVYTPCHSLAERIKLQRLLRPVVDITLVKCADANSRSTQSLSISTVLELQKQAGELAVGREILKAGSIGVGGV  
DYVLSICILGNQAESNNWQELLGRCLIDRLLLEFPAEFYPHIVSTDVSOAEPVEIRYKLLSLLTFALQSIDN  
SHSMVGLSRRIYLSSARMVTA VPAVFSKLVMTLNASGSTHTFTRMRRRLMAIADEVEIAEVIQLGVEDTVDGH  
QDSLQVLAPASCLENSSLEHTVHREKTGKGLSATRLSASSEDIDRLAGVSVGLPSTTTTEQPKPAVQTKGRP  
HSQCLNSSPLSHAQLMFPAPSAPCSSAPSVPDISKHRPQAFVPCKIPASAPQTQRKFSLQFQRNCSEHRDSDQ  
LSPVFTQSRPPSSNIHRPKPSRPVPGSTSKLGDATKSSMTLDLGSASRCDDSFSGGGNSGNAVIPSEETVFT  
PVEDKARLDVNSQDALPVPQQLQVENGEDI I I IQQDTPETLPGHTKAKQPYREDAEWLKGQQIGLGAFFSSCYQA  
QDVGTGTLMAVKQVTVYRNTSSEQEEVVEALREIIRMMGHLNHPNIIRMLGATCEKSNYNLFIEWMAGGSVAH  
LLSKYGAFKESVINYTEQLLRGLSYLHENQI IHRDVKGANLLIDSTGQRLRIADFGAAARLASKGTGAGEFQ  
GQLLGTIAFMAPEVLRGQQYGRSCDVWSVGCAT IEMACAKPPWNAEKHSNHLALIFKIASATTAPSI PSHLSP  
GLRDVALRCLLELQPDPRPPSRELLKHPVFRRTTW\*

>ENSMUSP00000117863\_c.243:C>T\_p.P82S ENSMUST00000145055.2|Map3k1-204|ENSMUSG00000021754|-|chr13:g.111909231:G>A  
MENKETLKLGLHKMEDRPEERMIREKLIKATCMPAWKHWEHLERRNRGPFVVVKPIPIKGDGSEMNNLAAEPQEGEG  
QAGSAAPASKGRRSPSPGSSPSGRSVKPESPGVRRKRVSVPVFPQSGRITPPRRAPSPDGFSPYSPEETSRRVN  
KVMRARLYLLQQIGPNSFLIGGDSFDNKYRVFIGPQNCSCGRGAFCIHLLFVMLRVFQLEPSDPLMWRKTLKN  
FEVESLQKYHSRRSSRIKAPSRNTIQKFVSRMSNCHTLSSSST  
>ENSMUSP00000026519\_c.27:G>T\_p.V10L ENSMUST00000026519.10|4833420G17Rik-201|ENSMUSG00000062822|+|chr13:g.119602667:G>T  
MGMAAEVRMLLYEDDSVQVHYACGSTLQLSPCGSEFLFEKALPPSTHPLEQPERIRQRTHFVISNYREQLQRA  
LDFRNSATCPFLSESIIPPERKKHIFIDFSEVEWPSLDRDDCIMYSESGVVKITSLDGHAYLCLPRSQHEFT  
VHFLCKVSRPDSSGILSETQNQDPKNKLVKTRKVCRCGNLSEQTLRNKENEPYQILKSKNASVNTCCVND  
SEGRGELPSLGTNRHRCVYAWVKQAWSVAACPEAWKHPLSLALRFYNKVRAASEIDADFPASSIVTSDCPEERG  
TEVSVLPRALLLSCPAPMHWRWTFCDLLQRPDAEDFSYPELVKVVWYKGVTYRLTHKNVNSIEIFPGDGSV  
FKSEGAHFNGNYFTYYPQEESEKREKTYSVNNLPPDRPGNFFSVRSLIKQATRILQHCAKIRLSLSHNYRVC  
CWKMAPGVSSTILPVLLKESLIPGVGRFLAYSDDKVHAVFLDGVTVTLNWHLSSSAEKKQVDQGLSFGWCRL  
TFPDGQDQLIPTEHPGAYERYVTSVISWCRGLTQTSRQVPTHLSPALKENWSVASELEKIQKFNWLLNSGV  
LNLTSKNEQCSCGHCKSGSSETLLEATNEERVSVALKRTSEILQDIDRLLSLSRK\*  
>ENSMUSP00000153079\_c.27:G>T\_p.V10L ENSMUST00000225186.2|4833420G17Rik-204|ENSMUSG00000062822|+|chr13:g.119602667:G>T  
MGMAAEVRMLLYEDDSVQVHYACGSTLQLSPCGSEFLFEKALPPSTHPLEQPERIRQRTHFVISNYREQLQRA  
LDFRNSATCPFLSESIIPPERKKHIFIDFSEVEWPSLDRDDCIMYSESGVVKITSLDGHAYLCLPRSQHEFT  
VHFLCKVSRPDSSGILSETQNQDPKNKLVKTRKVCRCGNLSEQTLRNKENEPYQILKSKNASVNTCCVND  
SEGRGELPSLGTNRHRCVYAWVKQAWSVAACPEAWKHPLSLALRFYNKVRAASEIDADFPASSIVTSDCPEERG  
TEVSVLPRALLLSCPAPMHWRWTFCDLLQRPDAEDFSYPELVKVVWYKGVTYRLTHKNVNSIEIFPGDGSV  
FKSEGAHFNGNYFTYYPQEESEKREKTYSVNNLPPDRPGNFFSVRSLIKQATRILQHCAKIRLSLSHNYRVC  
CWKMAPGVSSTILPVLLKESLIPGVGRFLAYSDDKVHAVFLDGVTVTLNWHLSSSAEKKQVDQGLSFGWCRL  
TFPDGQDQLIPTEHPGAYERYVTSVISWCRGLTQTSRQVPTHLSPALKENWSVASELEKIQKFNWLLNSGV  
LNLTSKNEQCSCGHCKSGSSETLLEATNEERVSVALKRTSEILQDIDRLLSLSRK\*  
>ENSMUSP00000153273\_c.27:G>T\_p.V10L ENSMUST00000224081.2|4833420G17Rik-202|ENSMUSG00000062822|+|chr13:g.119602667:G>T  
MGMAAEVRMLLYEDDSVQVHYACGSTLQLSPCGSEFLFEKALPPSTHPLEQPERIRQRTHFVISNYREQLQRA  
LDFRNSATCPFLSESIIPPERKKHIFIDFSEVEWPSLDRDDCIMYSESGVVKITSLDGHAYLCLPRSQHEFT  
VHFLCKVSRPDSSGILSETQNQDPKNKLVKTRKVCRCGNLSEQTLRNKENEP  
>ENSMUSP00000153338\_c.27:G>T\_p.V10L ENSMUST00000225726.2|4833420G17Rik-206|ENSMUSG00000062822|+|chr13:g.119602667:G>T  
MGMAAEVRMLLYEDDSVQVHYACGSTLQLSPCGSEFLFEKALPPSTHPLEQPERIRQRTHFVISNYREQLQRA  
LDFRNSATCPFLSESIIPPERKKHIFIDFSEVEWPSLDRDDCIMYSESGVVKITSLDGHAYLCLPRSQHEFT  
VHFLCKVSRPDSSGILSETQNQDPKNKLVKTRKVCRCGNLSEQTLRNKENEPYQILKSKNASVNTCCVND  
SEGRGELPSLGTNRHRCVYAWVKQAWSVAACPEAWKHPLSLALRFYNKVRAASEIDADFPASSIVTSDCPEERG  
TEVSVLPRALLLSCPAPMHWRWTFCDLLQRPDAEDFSYPELVKVVWYKGVTYRLTHKNVNSIEIFPGDGSV  
FKSEGAHFNGNYFTYYPQEESEKVS\*  
>ENSMUSP00000153150\_c.27:G>T\_p.V10L ENSMUST00000224312.2|4833420G17Rik-203|ENSMUSG00000062822|+|chr13:g.119602667:G>T  
MGMAAEVRMLLYEDDSVQVHYACGSTLQLSPCGSEFLFEKALPPSTHPLEQPERIRQRTHFVISNYREQLQRA  
LDFRNSATCPFLSESIIPPERKKHIFIDFSEVEWPSLDRDDCIMYSESGVVKITSLDGHAYLCLPRSQHEFT  
VHFLCKVSRPDSSGILSETQNQDPKNKLVKTRKVCRCGNLSEQTLRNKENEPYQILKSKNASVNTCCVND  
SEGRGELPSLGTNRHRCVYAWVKQAWSVAACPEAWKHPLSLALRFYNKVRAASEIDADFPASSIVTSDCPEERG  
TEVSVLPRALLLSCPAPMHWRWTFCDLLQRPDAEDFSYPELVKVVWYKGVTYRLTHKNVNSIEIFPGDGSV  
FKSEGAHFNGNYFTYYPQEESEKREKTYSVNNLPPDRPGNFFSVRSLIKQATRILQHCAKIRLSLSHNYRVC  
CWKMAPGVSSTILPVLLKESLIPGVGRFLAYSDDKVHAVFLDGVTVTLNWHLSSSAEKKQVDQGLSFGWCRL  
TFPDGQDQLIPTEHPGAYERYVTSVISWCRGLTQTSRQVPTHLSPALKENWSVASELEKIQKFNWLLNSGV  
LNLTSKNEQCSCGHCKSGSSETLLEATNEERVSVALKRTSEILQDIDRLLSLSRK\*  
>ENSMUSP00000026519\_c.61:A>G\_p.Y21C ENSMUST00000026519.10|4833420G17Rik-201|ENSMUSG00000062822|+|chr13:g.119602701:A>G  
MGMAAEVRMLLYEDDSVQVHYACGSTLQLSPCGSEFLFEKALPPSTHPLEQPERIRQRTHFVISNYREQLQRA  
LDFRNSATCPFLSESIIPPERKKHIFIDFSEVEWPSLDRDDCIMYSESGVVKITSLDGHAYLCLPRSQHEFT  
VHFLCKVSRPDSSGILSETQNQDPKNKLVKTRKVCRCGNLSEQTLRNKENEPYQILKSKNASVNTCCVND  
SEGRGELPSLGTNRHRCVYAWVKQAWSVAACPEAWKHPLSLALRFYNKVRAASEIDADFPASSIVTSDCPEERG



TEVSVLPRALLLSCPAPMHHRWTFCDSSLQRQPDADFSEYPELVKVVWYKGVTYRLTHKNVNSIEIFPGDGSV  
FKSEGAHFGNYFTYYPSEEESEKREEKTYSVNNLPPDRPGNFFSVRSLIKQATRILQHCAKIRLSLHSHNYRVC  
CWKMAPGVSVSTILPVLLKESLIPGVGRFLAYSDDKVHAVFLDGVTVTLNWHLSSSAEKKQVDQGLSFGWCRL  
TFPDGQDQLIPTEHPGAYERVYVTSVISWCRGLTQTSRQVPTHLSPALKENWSVASELEKIQKFNWLLNSGV  
LNLTSKNEQCSCGHCKSGSSETLLEATNEERVSVALKRTSEILQDIDRLLSLSRK\*  
>ENSMUSP00000153079\_c.61:A>G\_p.Y21C ENSMUST00000225186.2|4833420G17Rik-  
204|ENSMUSG00000062822|+|chr13:g.119602701:A>G  
MGMAAEVRMVLVEDDSVQVHCACGSTLQLSPCGSEFLFEKALPPSTHPLEQPERIRQRTHFVISNYREQLQRA  
LDFRNSSATCPFLSESIIPPERKKHIFIDFSEVEWPSLDRDDCIMYSESGVVKITSLDGHAYLCLPRSQHEFT  
VHFLCKVSRPDSSGILSETQNQDPKNKLVEKTRKVCRCGNLSEQTLRNKENEPYQILKSKNASVNTCCVND  
SEGRGELPSLGTNRHCYVAVKQAWSVAACPEAWKHPLSLALRFYKVVRAASEIDADFPASSIVTSDCPEERG  
TEVSVLPRALLLSCPAPMHHRWTFCDSSLQRQPDADFSEYPELVKVVWYKGVTYRLTHKNVNSIEIFPGDGSV  
FKSEGAHFGNYFTYYPSEEESEKREEKTYSVNNLPPDRPGNFFSVRSLIKQATRILQHCAKIRLSLHSHNYRVC  
CWKMAPGVSVSTILPVLLKESLIPGVGRFLAYSDDKVHAVFLDGVTVTLNWHLSSSAEKKQVDQGLSFGWCRL  
TFPDGQDQLIPTEHPGAYERVYVTSVISWCRGLTQTSRQVPTHLSPALKENWSVASELEKIQKFNWLLNSGV  
LNLTSKNEQCSCGHCKSGSSETLLEATNEERVSVALKRTSEILQDIDRLLSLSRK\*  
>ENSMUSP00000153273\_c.61:A>G\_p.Y21C ENSMUST00000224081.2|4833420G17Rik-  
202|ENSMUSG00000062822|+|chr13:g.119602701:A>G  
MGMAAEVRMVLVEDDSVQVHCACGSTLQLSPCGSEFLFEKALPPSTHPLEQPERIRQRTHFVISNYREQLQRA  
LDFRNSSATCPFLSESIIPPERKKHIFIDFSEVEWPSLDRDDCIMYSESGVVKITSLDGHAYLCLPRSQHEFT  
VHFLCKVSRPDSSGILSETQNQDPKNKLVEKTRKVCRCGNLSEQTLRNKENEP  
>ENSMUSP00000153338\_c.61:A>G\_p.Y21C ENSMUST00000225726.2|4833420G17Rik-  
206|ENSMUSG00000062822|+|chr13:g.119602701:A>G  
MGMAAEVRMVLVEDDSVQVHCACGSTLQLSPCGSEFLFEKALPPSTHPLEQPERIRQRTHFVISNYREQLQRA  
LDFRNSSATCPFLSESIIPPERKKHIFIDFSEVEWPSLDRDDCIMYSESGVVKITSLDGHAYLCLPRSQHEFT  
VHFLCKVSRPDSSGILSETQNQDPKNKLVEKTRKVCRCGNLSEQTLRNKENEPYQILKSKNASVNTCCVND  
SEGRGELPSLGTNRHCYVAVKQAWSVAACPEAWKHPLSLALRFYKVVRAASEIDADFPASSIVTSDCPEERG  
TEVSVLPRALLLSCPAPMHHRWTFCDSSLQRQPDADFSEYPELVKVVWYKGVTYRLTHKNVNSIEIFPGDGSV  
FKSEGAHFGNYFTYYPSEEESEKVS\*  
>ENSMUSP00000153150\_c.61:A>G\_p.Y21C ENSMUST00000224312.2|4833420G17Rik-  
203|ENSMUSG00000062822|+|chr13:g.119602701:A>G  
MGMAAEVRMVLVEDDSVQVHCACGSTLQLSPCGSEFLFEKALPPSTHPLEQPERIRQRTHFVISNYREQLQRA  
LDFRNSSATCPFLSESIIPPERKKHIFIDFSEVEWPSLDRDDCIMYSESGVVKITSLDGHAYLCLPRSQHEFT  
VHFLCKVSRPDSSGILSETQNQDPKNKLVEKTRKVCRCGNLSEQTLRNKENEPYQILKSKNASVNTCCVND  
SEGRGELPSLGTNRHCYVAVKQAWSVAACPEAWKHPLSLALRFYKVVRAASEIDADFPASSIVTSDCPEERG  
TEVSVLPRALLLSCPAPMHHRWTFCDSSLQRQPDADFSEYPELVKVVWYKGVTYRLTHKNVNSIEIFPGDGSV  
FKSEGAHFGNYFTYYPSEEESEKREEKTYSVNNLPPDRPGNFFSVRSLIKQATRILQHCAKIRLSLHSHNYRVC  
CWKMAPGVSVSTILPVLLKESLIPGVGRFLAYSDDKVHAVFLDGVTVTLNWHLSSSAEKKQVDQGLSFGWCRL  
TFPDGQDQLIPTEHPGAYERVYVTSVISWCRGLTQTSRQVPTHLSPALKENWSVASELEKIQKFNWLLNSGV  
LNLTSKNEQCSCGHCKSGSSETLLEATNEERVSVALKRTSEILQDIDRLLSLSRK\*  
>ENSMUSP00000026519\_c.123:C>G\_p.L42V ENSMUST00000026519.10|4833420G17Rik-  
201|ENSMUSG00000062822|+|chr13:g.119602763:C>G  
MGMAAEVRMVLVEDDSVQVHYACGSTLQLSPCGSEFLFEKAVPPSTHPLEQPERIRQRTHFVISNYREQLQRA  
LDFRNSSATCPFLSESIIPPERKKHIFIDFSEVEWPSLDRDDCIMYSESGVVKITSLDGHAYLCLPRSQHEFT  
VHFLCKVSRPDSSGILSETQNQDPKNKLVEKTRKVCRCGNLSEQTLRNKENEPYQILKSKNASVNTCCVND  
SEGRGELPSLGTNRHCYVAVKQAWSVAACPEAWKHPLSLALRFYKVVRAASEIDADFPASSIVTSDCPEERG  
TEVSVLPRALLLSCPAPMHHRWTFCDSSLQRQPDADFSEYPELVKVVWYKGVTYRLTHKNVNSIEIFPGDGSV  
FKSEGAHFGNYFTYYPSEEESEKREEKTYSVNNLPPDRPGNFFSVRSLIKQATRILQHCAKIRLSLHSHNYRVC  
CWKMAPGVSVSTILPVLLKESLIPGVGRFLAYSDDKVHAVFLDGVTVTLNWHLSSSAEKKQVDQGLSFGWCRL  
TFPDGQDQLIPTEHPGAYERVYVTSVISWCRGLTQTSRQVPTHLSPALKENWSVASELEKIQKFNWLLNSGV  
LNLTSKNEQCSCGHCKSGSSETLLEATNEERVSVALKRTSEILQDIDRLLSLSRK\*  
>ENSMUSP00000153079\_c.123:C>G\_p.L42V ENSMUST00000225186.2|4833420G17Rik-  
204|ENSMUSG00000062822|+|chr13:g.119602763:C>G  
MGMAAEVRMVLVEDDSVQVHYACGSTLQLSPCGSEFLFEKAVPPSTHPLEQPERIRQRTHFVISNYREQLQRA  
LDFRNSSATCPFLSESIIPPERKKHIFIDFSEVEWPSLDRDDCIMYSESGVVKITSLDGHAYLCLPRSQHEFT  
VHFLCKVSRPDSSGILSETQNQDPKNKLVEKTRKVCRCGNLSEQTLRNKENEPYQILKSKNASVNTCCVND  
SEGRGELPSLGTNRHCYVAVKQAWSVAACPEAWKHPLSLALRFYKVVRAASEIDADFPASSIVTSDCPEERG  
TEVSVLPRALLLSCPAPMHHRWTFCDSSLQRQPDADFSEYPELVKVVWYKGVTYRLTHKNVNSIEIFPGDGSV

FKSEGAHFNGNYFTYYPSQEESEKREEKTYSVNNLPPDRPGNFFSVRSLIKQATRILQHCAKIRLSLSHNYRVC  
CWKMAPGVSSTILPVLLKESLIPGVRFLAYSDDKVHAVFLDGVTVTLNWHLSSSAEKKQVDQGLSFGWCRL  
TFPDGQDLIPTEHPGAYERVTSVISWCRGLTQTSRQVPHTLSPALKENWSVASELEKIQKFNWLLNSGV  
LNLTSKNEQCSCGHCKSGSSETLLEATNEERVSVALKRTSEILQDIDRLLSLSRK\*  
>ENSMUSP00000153273\_c.123:C>G\_p.L42V ENSMUST00000224081.2|4833420G17Rik-  
202|ENSMUSG00000062822|+|chr13:g.119602763:C>G  
MGMAAEVRMVLIEDDSVQVHYACGSTLQLSPCGSEFLFEKAVPPSTHPLEQPERIRQRTHFVISNYREQLQRA  
LDFRNSATCPFLSESIIPPERKKHIFIDFSEVEWPSLDRDDCIMYSESGVVKITSLDGHAYLCLPRSQHEFT  
VHFLCKVSRPDSGILSETQNQDPKNKLVKTRKVCRCGNLSEQTLRNKENEP  
>ENSMUSP00000153338\_c.123:C>G\_p.L42V ENSMUST00000225726.2|4833420G17Rik-  
206|ENSMUSG00000062822|+|chr13:g.119602763:C>G  
MGMAAEVRMVLIEDDSVQVHYACGSTLQLSPCGSEFLFEKAVPPSTHPLEQPERIRQRTHFVISNYREQLQRA  
LDFRNSATCPFLSESIIPPERKKHIFIDFSEVEWPSLDRDDCIMYSESGVVKITSLDGHAYLCLPRSQHEFT  
VHFLCKVSRPDSGILSETQNQDPKNKLVKTRKVCRCGNLSEQTLRNKENEPYQILKSKNASVNTCCVND  
SEGRGELPSLGTNRHCYAWVKQAWSVAACEPAWKHPLSLALRFYNKVRASEIDADFPASSIVTSDCPEERG  
TEVSVLPRALLLSCPAPMHHRWTFCDLQRPDAEDFSYPELVKVVWYKGVTYRLTHKNVNSIEIFPGDGSV  
FKSEGAHFNGNYFTYYPSQEESEKVS\*  
>ENSMUSP00000153150\_c.123:C>G\_p.L42V ENSMUST00000224312.2|4833420G17Rik-  
203|ENSMUSG00000062822|+|chr13:g.119602763:C>G  
MGMAAEVRMVLIEDDSVQVHYACGSTLQLSPCGSEFLFEKAVPPSTHPLEQPERIRQRTHFVISNYREQLQRA  
LDFRNSATCPFLSESIIPPERKKHIFIDFSEVEWPSLDRDDCIMYSESGVVKITSLDGHAYLCLPRSQHEFT  
VHFLCKVSRPDSGILSETQNQDPKNKLVKTRKVCRCGNLSEQTLRNKENEPYQILKSKNASVNTCCVND  
SEGRGELPSLGTNRHCYAWVKQAWSVAACEPAWKHPLSLALRFYNKVRASEIDADFPASSIVTSDCPEERG  
TEVSVLPRALLLSCPAPMHHRWTFCDLQRPDAEDFSYPELVKVVWYKGVTYRLTHKNVNSIEIFPGDGSV  
FKSEGAHFNGNYFTYYPSQEESEKREEKTYSVNNLPPDRPGNFFSVRSLIKQATRILQHCAKIRLSLSHNYRVC  
CWKMAPGVSSTILPVLLKESLIPGVRFLAYSDDKVHAVFLDGVTVTLNWHLSSSAEKKQVDQGLSFGWCRL  
TFPDGQDLIPTEHPGAYERVTSVISWCRGLTQTSRQVPHTLSPALKENWSVASELEKIQKFNWLLNSGV  
LNLTSKNEQCSCGHCKSGSSETLLEATNEERVSVALKRTSEILQDIDRLLSLSRK\*  
>ENSMUSP00000026519\_c.221:A>AAAATATAT\_p.L74ins-fs  
ENSMUST00000026519.10|4833420G17Rik-  
201|ENSMUSG00000062822|+|chr13:g.119603423:A>AAAATATAT  
MGMAAEVRMVLIEDDSVQVHYACGSTLQLSPCGSEFLFEKALPPSTHPLEQPERIRQRTHFVISNYREQLQRA  
LKYMIFETLQLHALFYLLKASYLLKEKSISSLSRK  
>ENSMUSP00000153079\_c.221:A>AAAATATAT\_p.L74ins-fs  
ENSMUST000000225186.2|4833420G17Rik-  
204|ENSMUSG00000062822|+|chr13:g.119603423:A>AAAATATAT  
MGMAAEVRMVLIEDDSVQVHYACGSTLQLSPCGSEFLFEKALPPSTHPLEQPERIRQRTHFVISNYREQLQRA  
LKYMIFETLQLHALFYLLKASYLLKEKSISSLSRK  
>ENSMUSP00000153273\_c.221:A>AAAATATAT\_p.L74ins-fs  
ENSMUST00000224081.2|4833420G17Rik-  
202|ENSMUSG00000062822|+|chr13:g.119603423:A>AAAATATAT  
MGMAAEVRMVLIEDDSVQVHYACGSTLQLSPCGSEFLFEKALPPSTHPLEQPERIRQRTHFVISNYREQLQRA  
LKYMIFETLQLHALFYLLKASYLLKEKSISSLSRK  
>ENSMUSP00000153338\_c.221:A>AAAATATAT\_p.L74ins-fs  
ENSMUST00000225726.2|4833420G17Rik-  
206|ENSMUSG00000062822|+|chr13:g.119603423:A>AAAATATAT  
MGMAAEVRMVLIEDDSVQVHYACGSTLQLSPCGSEFLFEKALPPSTHPLEQPERIRQRTHFVISNYREQLQRA  
LKYMIFETLQLHALFYLLKASYLLKEKSISSLSRK  
>ENSMUSP00000153150\_c.221:A>AAAATATAT\_p.L74ins-fs  
ENSMUST00000224312.2|4833420G17Rik-  
203|ENSMUSG00000062822|+|chr13:g.119603423:A>AAAATATAT  
MGMAAEVRMVLIEDDSVQVHYACGSTLQLSPCGSEFLFEKALPPSTHPLEQPERIRQRTHFVISNYREQLQRA  
LKYMIFETLQLHALFYLLKASYLLKEKSISSLSRK  
>ENSMUSP00000026519\_c.227:TC>AA\_p.F76L  
ENSMUST00000026519.10|4833420G17Rik-  
201|ENSMUSG00000062822|+|chr13:g.119603429:TC>AA  
MGMAAEVRMVLIEDDSVQVHYACGSTLQLSPCGSEFLFEKALPPSTHPLEQPERIRQRTHFVISNYREQLQRA  
LDLTKLFSYMPFFI\*KHHTS\*KKKAYLH\*FLGSRMAQP\*QR\*LHHVLGEWRGEDNIPGWTRVPLSAQISA\* IY

STFFV\*SEPEARFIWHTIRNTESGPQK\*TS\*EDQKSLQMWKFIRTNVKE\*RKRTSLPDLEI\*KRFSEHMLCE\*  
Q\*GERGASFPGHKSQMCVVMGKAGLVCCRLSRGVETPSVFSTSF\*QSSCCI\*N\*CRFPCE\*HCDF\*LS\*RKR  
NGGFCPSQGLVTLPCPTHAQVDLL\*LTSTETARCRLFLS\*ACEGGVV\*GCYIQAYP\*KCKLNRDFSWRRIG  
FQVRRGSFW\*LFYILSKSRRIRKERRENLLCK\*PSSRQTRKFLLCAFSD\*TGNQNSSTLCQDKAFPKPQLQSV  
LLENGTWSKC\*HYPARASEGIPHRERGEIPCLLR\*QSPCCFLGWRHSNTELASQLLC\*EETSRSRAQLRLVQI  
NFS\*WTGSVNSN\*TPWSV\*KICDISNIMVQRTNTD\*PKTGAHTSLTCSQRKLVCCF\*A\*ENTEI\*LAVGKQWC  
PQPNF\*QE\*AVFWSL\*IRIFRNLAGSNQ\*REGIGSIEKNF\*NPPGY\*PSSVTL\*KV  
>ENSMUSP00000153079\_c.227:TC>AA\_p.F76L  
ENSMUST00000225186.2|4833420G17Rik-  
204|ENSMUSG00000062822|+|chr13:g.119603429:TC>AA  
MGMAAEVRMVLIEDDSVQVHYACGSLQLSPCGSEFLFEKALPPSTHLEQPERIRQRTHFVISNYREQLQRA  
LDLTKLFSYMPFFI\*KHHTS\*KKKAYLH\*FLGSRMAQP\*QR\*LHHVLGEWRGEDNIPGWTRVPLSAQISA\* IY  
STFFV\*SEPEARFIWHTIRNTESGPQK\*TS\*EDQKSLQMWKFIRTNVKE\*RKRTSLPDLEI\*KRFSEHMLCE\*  
Q\*GERGASFPGHKSQMCVVMGKAGLVCCRLSRGVETPSVFSTSF\*QSSCCI\*N\*CRFPCE\*HCDF\*LS\*RKR  
NGGFCPSQGLVTLPCPTHAQVDLL\*LTSTETARCRLFLS\*ACEGGVV\*GCYIQAYP\*KCKLNRDFSWRRIG  
FQVRRGSFW\*LFYILSKSRRIRKERRENLLCK\*PSSRQTRKFLLCAFSD\*TGNQNSSTLCQDKAFPKPQLQSV  
LLENGTWSKC\*HYPARASEGIPHRERGEIPCLLR\*QSPCCFLGWRHSNTELASQLLC\*EETSRSRAQLRLVQI  
NFS\*WTGSVNSN\*TPWSV\*KICDISNIMVQRTNTD\*PKTGAHTSLTCSQRKLVCCF\*A\*ENTEI\*LAVGKQWC  
PQPNF\*QE\*AVFWSL\*IRIFRNLAGSNQ\*REGIGSIEKNF\*NPPGY\*PSSVTL\*KV  
>ENSMUSP00000153273\_c.227:TC>AA\_p.F76L  
ENSMUST00000224081.2|4833420G17Rik-  
202|ENSMUSG00000062822|+|chr13:g.119603429:TC>AA  
MGMAAEVRMVLIEDDSVQVHYACGSLQLSPCGSEFLFEKALPPSTHLEQPERIRQRTHFVISNYREQLQRA  
LDLTKLFSYMPFFI\*KHHTS\*KKKAYLH\*FLGSRMAQP\*QR\*LHHVLGEWRGEDNIPGWTRVPLSAQISA\* IY  
STFFV\*SEPEARFIWHTIRNTESGPQK\*TS\*EDQKSLQMWKFIRTNVKE\*RKRTS  
>ENSMUSP00000153338\_c.227:TC>AA\_p.F76L  
ENSMUST00000225726.2|4833420G17Rik-  
206|ENSMUSG00000062822|+|chr13:g.119603429:TC>AA  
MGMAAEVRMVLIEDDSVQVHYACGSLQLSPCGSEFLFEKALPPSTHLEQPERIRQRTHFVISNYREQLQRA  
LDLTKLFSYMPFFI\*KHHTS\*KKKAYLH\*FLGSRMAQP\*QR\*LHHVLGEWRGEDNIPGWTRVPLSAQISA\* IY  
STFFV\*SEPEARFIWHTIRNTESGPQK\*TS\*EDQKSLQMWKFIRTNVKE\*RKRTSLPDLEI\*KRFSEHMLCE\*  
Q\*GERGASFPGHKSQMCVVMGKAGLVCCRLSRGVETPSVFSTSF\*QSSCCI\*N\*CRFPCE\*HCDF\*LS\*RKR  
NGGFCPSQGLVTLPCPTHAQVDLL\*LTSTETARCRLFLS\*ACEGGVV\*GCYIQAYP\*KCKLNRDFSWRRIG  
FQVRRGSFW\*LFYILSKSRRIRKGL  
>ENSMUSP00000153150\_c.227:TC>AA\_p.F76L  
ENSMUST00000224312.2|4833420G17Rik-  
203|ENSMUSG00000062822|+|chr13:g.119603429:TC>AA  
MGMAAEVRMVLIEDDSVQVHYACGSLQLSPCGSEFLFEKALPPSTHLEQPERIRQRTHFVISNYREQLQRA  
LDLTKLFSYMPFFI\*KHHTS\*KKKAYLH\*FLGSRMAQP\*QR\*LHHVLGEWRGEDNIPGWTRVPLSAQISA\* IY  
STFFV\*SEPEARFIWHTIRNTESGPQK\*TS\*EDQKSLQMWKFIRTNVKE\*RKRTSLPDLEI\*KRFSEHMLCE\*  
Q\*GERGASFPGHKSQMCVVMGKAGLVCCRLSRGVETPSVFSTSF\*QSSCCI\*N\*CRFPCE\*HCDF\*LS\*RKR  
NGGFCPSQGLVTLPCPTHAQVDLL\*LTSTETARCRLFLS\*ACEGGVV\*GCYIQAYP\*KCKLNRDFSWRRIG  
FQVRRGSFW\*LFYILSKSRRIRKERRENLLCK\*PSSRQTRKFLLCAFSD\*TGNQNSSTLCQDKAFPKPQLQSV  
LLENGTWSKC\*HYPARASEGIPHRERGEIPCLLR\*QSPCCFLGWRHSNTELASQLLC\*EETSRSRAQLRLVQI  
NFS\*WTGSVNSN\*TPWSV\*KICDISNIMVQRTNTD\*PKTGAHTSLTCSQRKLVCCF\*A\*ENTEI\*LAVGKQWC  
PQPNF\*QE\*AVFWSL\*IRIFRNLAGSNQ\*REGIGSIEKNF\*NPPGY\*PSSVTL\*KV  
>ENSMUSP00000026519\_c.234:T>C\_p.S79P ENSMUST00000026519.10|4833420G17Rik-  
201|ENSMUSG00000062822|+|chr13:g.119603436:T>C  
MGMAAEVRMVLIEDDSVQVHYACGSLQLSPCGSEFLFEKALPPSTHLEQPERIRQRTHFVISNYREQLQRA  
LDFRNPSATCPFLSESIIPPERKKHIFIDFSEVEWPSLDRDDCIMYSESGVVKITSLDGHAYLCLPRSQHEFT  
VHFLCKVSRPDSSGILSETQNDPKNKLVKTRKVCRCGNLSEQLTRNKENEPPYQILKSKNASVNTCCVND  
SEGRGELPSLGTNHRVYAWVKQAWSVAACEPAWKHPLSLALRFYNKVRAASEIDADFPASSIVTSDCPEERG  
TEVSVLPRALLLSCPAPHMHRWTFCDLQRPDAEDFSYPELVKVVVYKGVTYRLTHKNVNSIEIFPGDGSV  
FKSEGAHFNYYFTYPSQEESKREKTYSVNNLPPDRPGNFVSRSLIKQATRILQHC AKIRLSLSHNYRVC  
CWMAPGVSVSTILPVLLKESLIPGVGRFLAYSDDKVHAVFLDGVTVTLNWHLSSSAEKKQVDQGLSFGWCRL  
TFPDGDQDLIPTEHPGAYERYVTSVISWCRGLTQTSRQVPHLSPALKENWSVASELEKIQKFNWLLNSGV  
LNLTSKNEQCSGHCKSGSSETLLEATNEERVSVALKRTSEILQDIDRLLSLSRK\*

>ENSMUSP00000153079\_c.234:T>C\_p.S79P ENSMUST00000225186.2|4833420G17Rik-204|ENSMUSG00000062822|+|chr13:g.119603436:T>C  
 MGMAAEVRMVLIEDDSVQVHYACGSTLQLSPCGSEFLFEKALPPSTHPLEQPERIRQRTHFVISNYREQLQRALDFRNPSTATCPFLSESIIPPERKKHIFIDFSEVEWPSLDRDDCIMYSESGVVKITSLDGHAYLCLPRSQHEFTVHFLCKVSRPDSGILSETQNQDPKNKLVKTRKVCRCGNLSEQTLRNKENEPYQILKSKNASVNTCCVNDSEGRGELPSLGTNRHCYAWVKQAWSVAACPEAWKHPLSLALRFYNKVRASEIDADFPASSIVTSDCPEERGTEVSVLPRALLLSCPAPMHWRWTFCDLLQRPDAEDFSYPELVKVVWYKGVTYRLTHKNVNSIEIFPGDGSVFKSEGAHFNGNYFTYYPSQEESEKREKTYSVNNLPPDRPGNFFSVRSLIKQATRILQHCAKIRLSLSHNYRVCWKMAPGVSVSTILPVLLKESLIPGVGRFLAYSDDKVHAVFLDGVTVTLNWHLSSSAEKKQVDQGLSFGWCRLTFPDGQDQLIPTEHPGAYERYVTSVISWCRGLTQTSRQVPVTHLSPALKENWSVASELEKIQKFNWLLNSGV LNLTSKNEQCSCGHCKSGSSETLLEATNEERVSVALKRTSEILQDIDRLLSLSRK\*  
 >ENSMUSP00000153273\_c.234:T>C\_p.S79P ENSMUST00000224081.2|4833420G17Rik-202|ENSMUSG00000062822|+|chr13:g.119603436:T>C  
 MGMAAEVRMVLIEDDSVQVHYACGSTLQLSPCGSEFLFEKALPPSTHPLEQPERIRQRTHFVISNYREQLQRALDFRNPSTATCPFLSESIIPPERKKHIFIDFSEVEWPSLDRDDCIMYSESGVVKITSLDGHAYLCLPRSQHEFTVHFLCKVSRPDSGILSETQNQDPKNKLVKTRKVCRCGNLSEQTLRNKENEP  
 >ENSMUSP00000153338\_c.234:T>C\_p.S79P ENSMUST00000225726.2|4833420G17Rik-206|ENSMUSG00000062822|+|chr13:g.119603436:T>C  
 MGMAAEVRMVLIEDDSVQVHYACGSTLQLSPCGSEFLFEKALPPSTHPLEQPERIRQRTHFVISNYREQLQRALDFRNPSTATCPFLSESIIPPERKKHIFIDFSEVEWPSLDRDDCIMYSESGVVKITSLDGHAYLCLPRSQHEFTVHFLCKVSRPDSGILSETQNQDPKNKLVKTRKVCRCGNLSEQTLRNKENEPYQILKSKNASVNTCCVNDSEGRGELPSLGTNRHCYAWVKQAWSVAACPEAWKHPLSLALRFYNKVRASEIDADFPASSIVTSDCPEERGTEVSVLPRALLLSCPAPMHWRWTFCDLLQRPDAEDFSYPELVKVVWYKGVTYRLTHKNVNSIEIFPGDGSVFKSEGAHFNGNYFTYYPSQEESEKVS\*  
 >ENSMUSP00000153150\_c.234:T>C\_p.S79P ENSMUST00000224312.2|4833420G17Rik-203|ENSMUSG00000062822|+|chr13:g.119603436:T>C  
 MGMAAEVRMVLIEDDSVQVHYACGSTLQLSPCGSEFLFEKALPPSTHPLEQPERIRQRTHFVISNYREQLQRALDFRNPSTATCPFLSESIIPPERKKHIFIDFSEVEWPSLDRDDCIMYSESGVVKITSLDGHAYLCLPRSQHEFTVHFLCKVSRPDSGILSETQNQDPKNKLVKTRKVCRCGNLSEQTLRNKENEPYQILKSKNASVNTCCVNDSEGRGELPSLGTNRHCYAWVKQAWSVAACPEAWKHPLSLALRFYNKVRASEIDADFPASSIVTSDCPEERGTEVSVLPRALLLSCPAPMHWRWTFCDLLQRPDAEDFSYPELVKVVWYKGVTYRLTHKNVNSIEIFPGDGSVFKSEGAHFNGNYFTYYPSQEESEKREKTYSVNNLPPDRPGNFFSVRSLIKQATRILQHCAKIRLSLSHNYRVCWKMAPGVSVSTILPVLLKESLIPGVGRFLAYSDDKVHAVFLDGVTVTLNWHLSSSAEKKQVDQGLSFGWCRLTFPDGQDQLIPTEHPGAYERYVTSVISWCRGLTQTSRQVPVTHLSPALKENWSVASELEKIQKFNWLLNSGV LNLTSKNEQCSCGHCKSGSSETLLEATNEERVSVALKRTSEILQDIDRLLSLSRK\*  
 >ENSMUSP00000041199\_c.393:C>A\_p.H132N ENSMUST00000038956.12|Lrrc18-201|ENSMUSG00000041673|+|chr14:g.32730856:C>A  
 MAKGGKGPKGKKITLNVAKNCIKITFDGRKRLDLSKMGITTFPKCILRLSDIDELEDLRSNMIRKIPDSIAKFQNLRWLDLHSNYIDKLPESIGQMTSLLFLNVSNNRLTTNGLPVELNQLKNI RTVNGLNNLDSVPTTLGALKELHEVGLHDNLLTTIPASIAKLPKLLKLNKRNPFNADESEMFDVSIKRENLYLVEEKDMCSSCLQRCQQARDKLNKIKSMAPSAPRKALFSLVSPNSTAKDAQEEWRLRSPSTF\*  
 >ENSMUSP00000113608\_c.393:C>A\_p.H132N ENSMUST00000120866.8|Lrrc18-203|ENSMUSG00000041673|+|chr14:g.32730856:C>A  
 MAKGGKGPKGKKITLNVAKNCIKITFDGRKRLDLSKMGITTFPKCILRLSDIDELEDLRSNMIRKIPDSIAKFQNLRWLDLHSNYIDKLPESIGQMTSLLFLNVSNNRLTTNGLPVELNQLKNI RTVNGLNNLDSVPTTLGALKELHEVGLHDNLLTTIPASIAKLPKLLKLNKRNPFNADESEMFDVSIKRENLYLVEEKDMCSSCLQRCQQARDKLNKIKSMAPSAPRKALFSLVSPNSTAKDAQEEWR\*  
 >ENSMUSP00000113965\_c.393:C>A\_p.H132N ENSMUST00000120951.2|Lrrc18-204|ENSMUSG00000041673|+|chr14:g.32730856:C>A  
 MAKGGKGPKGKKITLNVAKNCIKITFDGRKRLDLSKMGITTFPKCILRLSDIDELEDLRSNMIRKIPDSIAKFQNLRWLDLHSNYIDKLPESIGQMTSLLFLNVSNNRLTTNGLPVELNQLKNI RTVNGLNNLDSVPTTLGALKELHEVGLHDNLLTTIPASIAKLPKLLKLNKRNPFNADESEMFDVSIKRENLYLVEEKDMCSSCLQRCQQARDKLNKIKSMAPSAPRKALFSLVSPNSTAKDAQEEWSVLRQKRLRAQCCLDILGMVMCMTQSVTSELPGEVMMVASFLQNCTVTTLTIHLL\*  
 >ENSMUSP00000153580\_c.612:G>A\_p.D205N ENSMUST00000224730.2|Gm7929-202|ENSMUSG00000091740|-|chr14:g.41469265:C>T

XRYSWVPKQACCPSSGYFREKIEYTQTPDQGRRRPTAHGGKQETTGRGEGCAGEASIQAPTINEQEKRHE  
 RLEKLRKRELQNIKNARDELQGILANYTNKDLNDRINFETFMLEMQHDQVMTDLKRMPODISEALSKCKQLTKE  
 NQFYCFRNCQLLIESNLIQHVKRMLRKENRQRLREQIALEECNIETKTLTNEGSQKIKNHYTKQQQV\*  
 >ENSMUSP00000136129\_c.597:G>A\_p.D200N ENSMUST00000178711.2|Gm7929-  
 201|ENSMUSG00000091740|-|chr14:g.41469265:C>T  
 QAGMLSMMLLRVQRENRIHTDTRPRQKEADRPSSWWRARNNSWRRHRCAGEASIQAPTINEQEKRHERLEKL  
 KRELQNIKNARDELQGILANYTNKDLNDRINFETFMLEMQHDQVMTDLKRMPODISEALSKCKQLTKENQFYC  
 FRNCQLLIESNLIQHVKRMLRKENRQRLREQIALEECNIETKTLTNEGSQKIKNHYTKQQQV  
 >ENSMUSP00000153580\_c.606:A>G\_p.I203V ENSMUST00000224730.2|Gm7929-  
 202|ENSMUSG00000091740|-|chr14:g.41469271:T>C  
 XRYSWVPKQACCPSSGYFREKIEYTQTPDQGRRRPTAHGGKQETTGRGEGCAGEASIQAPTINEQEKRHE  
 RLEKLRKRELQNIKNARDELQGILANYTNKDLNDRINFETFMLEMQHDQVMTDLKRMPODISEALSKCKQLTKE  
 NQFYCFRNCQLLIESNLIQHVKRMLRKENRQRLREQIALEECNIETKTLTNEGSQKVKDHYTKQQQV\*  
 >ENSMUSP00000136129\_c.591:A>G\_p.I198V ENSMUST00000178711.2|Gm7929-  
 201|ENSMUSG00000091740|-|chr14:g.41469271:T>C  
 QAGMLSMMLLRVQRENRIHTDTRPRQKEADRPSSWWRARNNSWRRHRCAGEASIQAPTINEQEKRHERLEKL  
 KRELQNIKNARDELQGILANYTNKDLNDRINFETFMLEMQHDQVMTDLKRMPODISEALSKCKQLTKENQFYC  
 FRNCQLLIESNLIQHVKRMLRKENRQRLREQIALEECNIETKTLTNEGSQKVKDHYTKQQQV  
 >ENSMUSP00000044675\_c.2217:A>G\_p.S740G ENSMUST00000043112.9|Fbxo34-  
 201|ENSMUSG00000037536|+|chr14:g.47768706:A>G  
 MGFASVGLRRSALSSWSASVSGSEGLPPPRAAAAPGQALARQKHRASVMHLKLYWKLQKKERPLEVSRDT  
 LRTPMSHGKANGDVKARASYMKPTVLPASLVKASSRKPFGILSPNVLCMSGKSPVENS LNVAKKNVLSAA  
 VHQSEGLPGTWAIVKPGNTKEKIAFFAAHQYSNRIGSMKIKSSWDIDGRATKRKKSGDLKAKLQLEMMRE  
 INSQCYQSEPFVCGVEHCSVHYMSDSGDGVCARPLSVIQMVAFLQKATALLASCTKNCTNSPAIVKISGQS  
 RGIPPAPEPFSAPETCEEPKEQENPETGRSQGEPVRLDMVARLESECLKHQGGQREPGSLSRNNSFRNVGRV  
 LLTNGSQASDKSEEGSADTADPQENPLQPVSVGEEPSVTEHHSVGEQAWDGTSSQSCPSLPATVVSFHMSTDL  
 PGQQTAMKSCSRDDVEMVEEFDELPTDAVRRIRRELVTVTKHSPEQRQDPLCISITVCTVEKDRPAALDSLEE  
 PLPGMLFFLSSGQDQQAHPQLREHPAPEASEASQPQDAAEGSSAGEEKDASVEPLLPAASPGGSTSQVLEAAT  
 CKKQVSQDFLETRFKIQQLLEPQQYMACLPHHIIVKIFRLLPTLSLAILKCTCRYFKSII EYYNIRPADSRWV  
 RDPYREDPCKQCKKKYVKGDVSLCRWHPKPYCQALPYGPGYWMCCHQSQKGFPGCKLGLHDNHWPACHSFN  
 RAIHKKTRGGETEETEEY\*  
 >ENSMUSP00000132271\_c.2064:A>G\_p.S689G ENSMUST00000168833.9|Fbxo34-  
 205|ENSMUSG00000037536|+|chr14:g.47768706:A>G  
 MHLKLYWKLQKKERPLEVSRDTLRTPMSHGKANGDVKARASYMKPTVLPASLVKASSRKPFGILSPNVLCMS  
 SGKSPVENS LNVAKKNVLSAAVHQSEGLPGTWAIVKPGNTKEKIAFFAAHQYSNRIGSMKIKSSWDIDGRA  
 TKRRKKSGLKAKLQLEMMREINSQCYQSEPFVCGVEHCSVHYMSDSGDGVCARPLSVIQMVAFLQKATA  
 LLASCTKNCTNSPAIVKISGQSRGIPPAPEPFSAPETCEEPKEQENPETGRSQGEPVRLDMVARLESECLKH  
 QGQREPGSLSRNNSFRNVGRVLLTNGSQASDKSEEGSADTADPQENPLQPVSVGEEPSVTEHHSVGEQAWD  
 TSQSCPSLPATVVSFHMSTDLPGQQTAMKSCSRDDVEMVEEFDELPTDAVRRIRRELVTVTKHSPEQRQDPL  
 CISITVCTVEKDRPAALDSLEEPLPGMLFFLSSGQDQQAHPQLREHPAPEASEASQPQDAAEGSSAGEEKDAS  
 VEPLLPAASPGGSTSQVLEAATCKKQVSQDFLETRFKIQQLLEPQQYMACLPHHIIVKIFRLLPTLSLAILK  
 TCRYFKSII EYYNIRPADSRWVRDPYREDPCKQCKKKYVKGDVSLCRWHPKPYCQALPYGPGYWMCCHQSQK  
 GFPGCKLGLHDNHWPACHSFNRAIHKKTRGGETEETEEY\*  
 >ENSMUSP00000093634\_c.2064:A>G\_p.S689G ENSMUST00000095941.9|Fbxo34-  
 202|ENSMUSG00000037536|+|chr14:g.47768706:A>G  
 MHLKLYWKLQKKERPLEVSRDTLRTPMSHGKANGDVKARASYMKPTVLPASLVKASSRKPFGILSPNVLCMS  
 SGKSPVENS LNVAKKNVLSAAVHQSEGLPGTWAIVKPGNTKEKIAFFAAHQYSNRIGSMKIKSSWDIDGRA  
 TKRRKKSGLKAKLQLEMMREINSQCYQSEPFVCGVEHCSVHYMSDSGDGVCARPLSVIQMVAFLQKATA  
 LLASCTKNCTNSPAIVKISGQSRGIPPAPEPFSAPETCEEPKEQENPETGRSQGEPVRLDMVARLESECLKH  
 QGQREPGSLSRNNSFRNVGRVLLTNGSQASDKSEEGSADTADPQENPLQPVSVGEEPSVTEHHSVGEQAWD  
 TSQSCPSLPATVVSFHMSTDLPGQQTAMKSCSRDDVEMVEEFDELPTDAVRRIRRELVTVTKHSPEQRQDPL  
 CISITVCTVEKDRPAALDSLEEPLPGMLFFLSSGQDQQAHPQLREHPAPEASEASQPQDAAEGSSAGEEKDAS  
 VEPLLPAASPGGSTSQVLEAATCKKQVSQDFLETRFKIQQLLEPQQYMACLPHHIIVKIFRLLPTLSLAILK  
 TCRYFKSII EYYNIRPADSRWVRDPYREDPCKQCKKKYVKGDVSLCRWHPKPYCQALPYGPGYWMCCHQSQK  
 GFPGCKLGLHDNHWPACHSFNRAIHKKTRGGETEETEEY\*  
 >ENSMUSP00000131708\_c.2064:A>G\_p.S689G ENSMUST00000163324.8|Fbxo34-  
 203|ENSMUSG00000037536|+|chr14:g.47768706:A>G



MHLKLYWKLQKKERPLEVSRDTRLRTPMSHGKANGDVKARASYMKPTVLPASLVKASSRKPFGILSPNVLCSM  
SGKSPVENSLNVKAKKNVLSAAVHQSEEGLPGTWAIIVKPGNTKEKIAFFAAHQYSNRIGSMKIKSSWDIDGRA  
TKRRKKSGLKAKLQLEMMREINSQCYQSEPFVCGVEHCSVHYMSDSGDGVCAARPLSVIQMVAFLQKATA  
LLASCTKNCTNSPAIVKISGQSRGIPPAPEPFSAPETCEEPKEQENPETGRSQGEPVRLDMVARLESECLKH  
QQQREPGSLSRNNSFRNVGRVLLTNGSQASDKSEEGSADTADPQENPLQPVSVGEEPSVTEHHSVGEQAWDG  
TSQSCPSLPATVFSHMDSTDLEPGQQTAMKSCSRDDVEMVEEFDELPTDAVRRIRRELVTVTKHSPEQRDPL  
CISITVCTVEKDRPAALDSLEELPGMLFFLSSGDQQAHPQLREHPAPEASEASQPQDAAEGSSAGEEKDAS  
VEPLLPAAASPGGSTSQVLEAATCKKQVSQDFLETRFKIQQLLEPQQYMACLPHHIIVKIFRLLPTLSLAILKC  
TCRYFKSII EYYNIRPADSRWVRDPYREDPCKQCKKKYVKGVDVSLCRWHPKPYCQALPYGPGYMWCCHQSQK  
GFPGCKLGLHDNHWPACHSFNRAIHKKTRGGETEETEEY\*  
>ENSMUSP00000130036\_c.2064:A>G\_p.S689G ENSMUST00000165714.2|Fbxo34-  
204|ENSMUSG00000037536|+|chr14:g.47768706:A>G  
MHLKLYWKLQKKERPLEVSRDTRLRTPMSHGKANGDVKARASYMKPTVLPASLVKASSRKPFGILSPNVLCSM  
SGKSPVENSLNVKAKKNVLSAAVHQSEEGLPGTWAIIVKPGNTKEKIAFFAAHQYSNRIGSMKIKSSWDIDGRA  
TKRRKKSGLKAKLQLEMMREINSQCYQSEPFVCGVEHCSVHYMSDSGDGVCAARPLSVIQMVAFLQKATA  
LLASCTKNCTNSPAIVKISGQSRGIPPAPEPFSAPETCEEPKEQENPETGRSQGEPVRLDMVARLESECLKH  
QQQREPGSLSRNNSFRNVGRVLLTNGSQASDKSEEGSADTADPQENPLQPVSVGEEPSVTEHHSVGEQAWDG  
TSQSCPSLPATVFSHMDSTDLEPGQQTAMKSCSRDDVEMVEEFDELPTDAVRRIRRELVTVTKHSPEQRDPL  
CISITVCTVEKDRPAALDSLEELPGMLFFLSSGDQQAHPQLREHPAPEASEASQPQDAAEGSSAGEEKDAS  
VEPLLPAAASPGGSTSQVLEAATCKKQVSQDFLETRFKIQQLLEPQQYMACLPHHIIVKIFRLLPTLSLAILKC  
TCRYFKSII EYYNIRPADSRWVRDPYREDPCKQCKKKYVKGVDVSLCRWHPKPYCQALPYGPGYMWCCHQSQK  
GFPGCKLGLHDNHWPACHSFNRAIHKKTRGGETEETEEY\*  
>ENSMUSP00000137214\_c.10:T>G\_p.L4R ENSMUST00000180359.8|Abhd4-  
202|ENSMUSG00000040997|+|chr14:g.54499142:T>G  
MSQRKNVEARILQCLQNKFLARYVSLPNQNKIWTVTVSPEQKDRTPLMVMHGFVGGVGLWILNMDLSARRTL  
HTFDLLGFGRRSRPTFPRDPEGAEDEFFVASIETWRETMGIPTMILLGHSLGGFLATSYSIKYPERVKHLILVD  
PWGFPLRPTDPSEIRAPPTWVKAVASVLRNSPLAVLRVAGPWGPGLVQFRFRPDFKRFADFFEDDTISEYIY  
HCNAQNPSGETAFKAMMESFGWARRPMLERIHILIRKDVPIITMIYGANTWIDTSTGKKVKMQRPDYSYVRDMEIE  
GASHHVVADQPHIFNAVVEEICNSVD\*  
>ENSMUSP00000044134\_c.82:T>G\_p.L28R ENSMUST00000041197.13|Abhd4-  
201|ENSMUSG00000040997|+|chr14:g.54499142:T>G  
MADDLEQQPQGWLSSWLPTWRPTSMSQRKNVEARILQCLQNKFLARYVSLPNQNKIWTVTVSPEQKDRTPLMV  
VHGFVGGVGLWILNMDLSARRTLHTFDLLGFGRRSRPTFPRDPEGAEDEFFVASIETWRETMGIPTMILLGH  
LGGFLATSYSIKYPERVKHLILVDPWGFPLRPTDPSEIRAPPTWVKAVASVLRNSPLAVLRVAGPWGPGLVQ  
RFRPDFKRFADFFEDDTISEYIYHCNAQNPSGETAFKAMMESFGWARRPMLERIHILIRKDVPIITMIYGANTW  
IDTSTGKKVKMQRPDYSYVRDMEIEGASHHVVADQPHIFNAVVEEICNSVD\*  
>ENSMUSP00000143121\_c.82:T>G\_p.L28R ENSMUST00000196699.3|Abhd4-  
203|ENSMUSG00000040997|+|chr14:g.54499142:T>G  
MADDLEQQPQGWLSSWLPTWRPTSMSQRKNVEARILQCLQNKFLARYVSLPNQNKIWTVTVSPEQKDRTPLMV  
LKANIPKGPRRS\*  
>ENSMUSP00000142722\_c.10:T>G\_p.L4R ENSMUST00000197605.3|Abhd4-  
204|ENSMUSG00000040997|+|chr14:g.54499142:T>G  
MSQRKNVEARILQCLQNKFLARYVSLPNQNKIWTVTVSPEQKDRTPLMVMHGFVGGVGLWILNMDLSARRTL  
HTFDLLGFGRRSRPTFPRDPEGAEDEFFVASIETWRETMGIPTMILLGHSLGGFLATSYSIKYPERVKHLILVD  
PWGFPLRPTDPSEIRAPPTWVKAVASVLRNSPLAVLRVAGPW  
>ENSMUSP00000159351\_c.121:T>G\_p.L41R ENSMUST00000239403.2|Abhd4-  
209|ENSMUSG00000040997|+|chr14:g.54499142:T>G  
MGWLSSTRQGLFTMADDLEQQPQGWLSSWLPTWRPTSMSQRKNVEARILQCLQNKFLARYVSLPNQNKIWTVT  
VSPEQKDRTPLMVMHGFVGGVGLWILNMDLSARRTLHTFDLLGFGRRSRPTFPRDPEGAEDEFFVASIETWRE  
TMGIPTMILLGHSLGGFLATSYSIKYPERVKHLILVDPWGFPLRPTDPSEIRAPPTWVKAVASVLRNSPLAV  
LRVAGPWGPGLVQFRFRPDFKRFADFFEDDTISEYIYHCNAQNPSGETAFKAMMESFGWARRPMLERIHILIRK  
DVPITMIYGANTWIDTSTGKKVKMQRPDYSYVRDMEIEGASHHVVADQPHIFNAVVEEICNSVD\*  
>rs245458704\_ENSMUSP00000061834\_c.145:A>G\_p.D49G  
ENSMUST00000058240.14|9930012K11Rik-201|ENSMUSG00000044551|-  
|chr14:g.70395007:T>C  
MLSRRRVFAVERLGGRDGAFEDLAQGCVVPGVTCTYRRI PDNTHECSLGFREGQNELRGLERQMPLLKLASQD  
SGMEMVVGDSLATLSGLSQDSLNLPEMGSPELPPAQLDRLLARQKLEEVLEERSREFPSSAQRGPIQLLNKP  
VDGVPIFAGEQESTEADTELEAGLEEAKEVGNMESAACCTCLPGQGLRYLEHLCLVLEQMVRLQQLYLQLQTOR

PSRDPEEEVLAPALSSSHIPDNRVQEHREELSQTkdPEGAEAAASLPEVGVLVTSpsRLPEALLEPTHILPPSQ  
EPKQDLSHWDKVKVLLNRLRWRSPRLPEPPVPPDGSGSRMEFRNLSDRTPCHSQKRTFIPALVVKKPRAKNLS  
V\*

>rs245458704\_ENSMUSP00000122309\_c.145:A>G\_p.D49G  
ENSMUST00000153871.2|9930012K11Rik-205|ENSMUSG00000044551|-  
|chr14:g.70395007:T>C

MLSRRRVFAVERLGGRDGAfEDLAQGCVVPGVTCTYRRIpDNTHECSLGFREGQNELRGLERQmPLlKLASQD  
SGMEMVVGDSsSLATLSGLSQDSLNLepMGsPELPPAQLDRLLARQKLEEVLERSREfPSSLAQRGPlQLLNKP  
VDGVPIFAGEQESTeADTELEAGLEEAKEVGNMESAaACTCLPGQGLRYLEHLCLVLEQMVRLQQLYLQLQTQR  
PSRDPEEEVLAPALSSSHIPDNRVQEHREELSQTkdPEGAEAAASLPEVGVLVTSpsRLPEALLEPTHILPPSQ  
EPKDLSHWDKVKVLLNRLRWRSPRLPEPPVPPDGSGSRMEFRNLSDRTPCHSQKRTFIPALVVKKPRAKNLSV  
\*

>ENSMUSP00000086411\_c.69:C>T\_p.P24S ENSMUST00000089017.12|Fndc3a-  
201|ENSMUSG00000033487|-|chr14:g.72921103:G>A

MAEHpPLLDTAQILSSDISLLSASIVSADGTQQVILVQVNPGEAFTIRREDGQFQCITGPAQVPMMSpNGSVP  
PIYVPPGYAPQVIEDNGVRRVvVVPQsPEFHpgGHTVIHRSPhPPLPGFIpVPTMMPPpPRHMYSPVTGAGDM  
ATQYMPQYQSSQVYADVDAHSTHGRSNFRDERSsKTYERLQKlKDRQGTQKDKMSSPPSPQKCPSPiSEHN  
GLIKGNASGGNTGSARNRSGRGRSCTQVDPEMEEKDEETKAFEAFLSNiVKPVASDIQARTVLLTWSPSSf  
INGEVNETAVPELfnYEVlVSSTGKEGKYRSVYIgeETSvTLNLDLkPATDYHAKVQAESNSIKGIPSEAESfT  
TLsCEPDPPNAPRIANRTKNSLTlQWKAPSDNGSKIQsFIlEWDEGKGNGEFCQCYMGsQKQFKITKLSpAMG  
CKFRLSAKNDYGVSDfSEEVLyTSGCAPSVpASPVLTKAGVTWLSLQWTKPSGTPSDEGISYIleMEEETSG  
YGFkPKYDGEDLAYTVKNLRRSTKYKfKVIAYNSEGKSNPSEVVEfSTCPDKPGVPVKPSVKGIHSHGfKIT  
WDPFKDNGGAPINKYVvEMAEGSNGNKWDMIYSgTTREHLCDRLTPGCYRRLRVYCI SDGGQSAVSESLlVQT  
PAVPPGpCLPpRLQGRPKAKEIQLRWGPPQVDGGSPISCYAVEMTPADKDEPRDVYQgSEVECTVGSLLPGKT  
YSFRlRANRIGFGPFSEKYDITTApgPPDQCRPPQVTCRSATCAQVNWEIPLSNGTDVTEYRleWGGVEGSM  
QMCYCGPGLSCELKGLSPATTYICRVQAMSVVgAGPFSEVACVTPPSVPAIVTCLQEI SDDDieYPhYSPST  
CLAIswKEPYDhGSEILAYSIDLGDkQPLTVGKMtSYIIDSLQpDPTTYRIRIQALNSLgAGPFShTIKlKTKP  
LPPDPPRLEcVAFNHQNLKlKWEGEtpKTLSTDAVQYHLQMEDRNgrFVSLYRGpCHTYKvQRlSESTSYKfC  
IQACNEAGEGpLSQeYVfTTPKSLPAALKAPKIEKINDHICEITWeyLQPMKGDpVIYNLQVMVGKDSEfKQI  
YKGPDTsFRYSSlQLNCEYFRVCAIRQCQDPTGHQDLVGPYSTTVFFISQRTEPPASSNKDSVDSARTRRTL  
SDEQCAAVILVVFaffSILIAFI IQYfVIK\*

>ENSMUSP00000124637\_c.69:C>T\_p.P24S ENSMUST00000162478.8|Fndc3a-  
204|ENSMUSG00000033487|-|chr14:g.72921103:G>A

MAEHpPLLDTAQILSSDISLLSASIVSADGTQQVILVQVNPGEAFTIRREDGQFQCITGPAQVPMMSpNGSVP  
PIYVPPGYAPQVIEDNGVRRVvVVPQsPEFHpgGHTVIHRSPhPPLPGFIpVPTMMPPpPRHMYSPVTGAGDM  
ATQYMPQYQSSQVYADVDAHSTHGRSNFRDERSsKTYERLQKlKDRQGTQKDKMSSPPSPQKCPSPiSEHN  
GLIKGNASGGNTGSARNRSGRGRSCTQVDPEMEEKDEETKAFEAFLSNiVKPVASDIQARTVLLTWSPSSf  
INGEVNETAVPELfnYEVlVSSTGKEGKYRSVYIgeETSvTLNLDLkPATDYHAKVQAESNSIKGIPSEAESfT  
TLsCEPDPPNAPRIANRTKNSLTlQWKAPSDNGSKIQsFIlEWDEGKGNGEFCQCYMGsQKQFKITKLSpAMG  
CKFRLSAKNDYGVSDfSEEVLyTSGCAPSVpASPVLTKAGVTWLSLQWTKPSGTPSDEGISYIleMEEETSG  
YGFkPKYDGEDLAYTVKNLRRSTKYKfKfV

>ENSMUSP00000131542\_c.1812:G>A\_p.A605T ENSMUST00000169504.8|Tdrd3-  
203|ENSMUSG00000022019|+|chr14:g.87743866:G>A

MAEVSGAALSQAGWYLSDEGVEACTSSPGKGSINDIILIALNTDLRTIGKKFLPSDINGGKVEKLEGPCVLQI  
QKVRNVAAPKDNEESQAAPRMLRVQMTDGHTSCTAVEFSYISKISLNTPPGTKVKLSGTVDIKNGFLLSdSN  
TTVLGGEVEHLIDKwALQRsLLKHNRsNIGAEgPPpPFLPFgQKcASNVQVDSRELDrrKTLQVSLPAKpAND  
NDEFEKQRTAAIAEVAKSKEtKTFGGGGGARSNLNIGAAghRNREVLQKEKASKSESKNEGVYRELvDEKAL  
KHITeMGFSKEASRQALMDNANNLEAALNVLLNssKQKPAVGPPARGRGKGRGRGRSEDEEDLGTARPSAPST  
LFDfLESKMGTLNVeEPKsQPQHLHQGHrgWNAEQNGMKDGTQSRHLPRNDTRQPRNERPPRFQKDTPTsKS  
TVENSVLSRNRGSERPSSSSGSdVWAEERIKCDRPySRyDRTKDASHPLGLQHNDGAFKKRENSMQNRpGRGP  
LYAEAKENPLPPEfVDYNNQRGRRENQGTGHPDHcyERKPRtMnSEAVSGLKIEKHfSVNTDYPRVQsNSLg  
VPNGETAPPLKGRrvGPIKSTGPVTAVPYDDKI fYNSGPKRRSGPIKPEKVIeSSI pVEYAKVVKPGDECFAL  
YwEDNKfYRAEVEALHSSGmtAVVKfTDYGNyEEVLLSNiKpVQTEAWVRDPNSVQRLL\*

>ENSMUSP00000129019\_c.1812:G>A\_p.A605T ENSMUST00000168275.9|Tdrd3-  
202|ENSMUSG00000022019|+|chr14:g.87743866:G>A

MAEVSGAALSQAGWYLSDEGVEACTSSPGKGSINDIILIALNTDLRTIGKKFLPSDINGGKVEKLEGPCVLQI  
QKVRNVAAPKDNEESQAAPRMLRVQMTDGHTSCTAVEFSYISKISLNTPPGTKVKLSGTVDIKNGFLLSdSN  
TTVLGGEVEHLIDKwALQRsLLKHNRsNIGAEgPPpPFLPFgQKcASNVQVDSRELDrrKTLQVSLPAKpAND

NDEFEKQRTAAIAEVAKSKETKTFGGGGGGARSNLNIGAAGHRNREVLQKEKASKSESKNEGVIYRELVDKAL  
KHITEMGFSKEASRQALMDNANNLEAALNVLNLSKQKPAVGGPPARGRGKGRGRSEDEEDLGTARPSAPST  
LFDLFLESKMGTLNVVEPKSQPQHLLHQGHRGWNAEQNGMKDGTQSRHLPRNDTRQPRNERPPRFQKDTPTS  
TVENSVLSRNRGSRPSSSSGSDVWAEERIKCDRYPYSRYDRTKDASHPLGLQHNDGAFKKRENSMQNRPGRGP  
LYAEAKENPLPPEFVDYNNQRRGRRENQGTGHPDHCYERKPRMTNSEAVSGLKIEKHFVNTDYPRPVQSNLSG  
VPNGETAPPLKGRRVGPIKSTGPVAVPYDDKIFYNNGPKRRSGPIKPEKVIESSIPVEYAKVWPKGDECFA  
YWEDNKFYRAEVEALHSSGMTAVVKFTDYGNYEEVLLSNIKPVQTEAWEEEGTYDHTIEFRGGDGQPRRSTR  
PTQQFYQPPRARN\*

>ENSMUSP00000126189\_c.1794:G>A\_p.A599T ENSMUST00000170865.8|Tdrd3-  
205|ENSMUSG00000022019|+|chr14:g.87743866:G>A

MLFIFLFRYLSDEGVEACTSSPGKGSINDIILIALNTDLRTIGKKFLPSDINGGKVEKLEGPCVLQIQKVRNV  
AAPKDNEESQAAPRMLRVQMTDGHSTCTAVEFSYISKISLNTPPGTQVKLSGTVDIKNGFLLSNTTVLGG  
EVEHLIDKQALQRSLLKHNRSNIGAEGGPPFPFPGQKCSNVQVDSRELDRRKTLQVSLPAKPANDNDEFEK  
QRTAAIAEVAKSKETKTFGGGGGGARSNLNIGAAGHRNREVLQKEKASKSESKNEGVIYRELVDKALKHITEM  
GFSKEASRQALMDNANNLEAALNVLNLSKQKPAVGGPPARGRGKGRGRSEDEEDLGTARPSAPSTLFDLFLE  
SKMGTLNVVEPKSQPQHLLHQGHRGWNAEQNGMKDGTQSRHLPRNDTRQPRNERPPRFQKDTPTSSTVENS  
LSRNRGSRPSSSSGSDVWAEERIKCDRYPYSRYDRTKDASHPLGLQHNDGAFKKRENSMQNRPGRGP  
ENLPLPEFVDYNNQRRGRRENQGTGHPDHCYERKPRMTNSEAVSGLKIEKHFVNTDYPRPVQSNLSGVPNGE  
TAPPLKGRRVGPIKSTGPVAVPYDDKIFYNNGPKRRSGPIKPEKVIESSIPVEYAKVWPKGDECFA  
LYWEDNKFYRAEVEALHSSGMTAVVKFTDYGNYEEVLLSNIKPVQTEAWEEEGTYDHTIEFRGGDGQPRRSTR  
PTQQFYQPPRARN\*

>ENSMUSP00000051809\_c.2266:T>G\_p.V756G ENSMUST00000061656.8|Rictor-  
201|ENSMUSG00000050310|+|chr15:g.6807499:T>G

MAAIGRGRSLKNLRIRGRNDSGEENVPLDLTREPSDNREILQNVAKLQGVSNMRKLGHLNFTKLLCDIGHS  
EEKLGFNYEDIICLRLLALLEAKEVRAAGLRALRYLIQDSSILQKVLKLVLDYLIARCIDIQSNEVERTQA  
LRLVRKMITVNASLFPSSVANSIAVGNLQERDRMVRACIAICELALQNEVVALRGGGLNTILKNVIDCQ  
LSRINEALITTLHLNHPKTRQYVRADVELERILAPYDFHYRHSPTAEGQLKEDREARFLASKMGIATF  
RSWAGIINLCKPGNSGIQSLIGVLCIPNMEIRRGLLEVLYDIFRPLPVPVTDDEFIEALLSVDPRGFQDSWRLS  
DGFVAEAKTILPHRARSRPDLMDNYLALILSAFIRNGLLEGLVEVITNSDDHISVRATILLGELLHMANTIL  
PHSHSHHLHCLPTLMNMAASFDIPKEKRLRASAALNLRNFHEMKKRGPKPYSLHLDHIQKAIATHHKRDQY  
LRVQKIDIFVLKDTTEALLINLRDSQVLQHKENLDWDWNLIGTILKWPVNLNRNYKDEQLHRFVRRLLYFYKPS  
SKLYASLDLDAKSKQLTVVGCQFTEFLESEEDGQGYLEDLVKDIVQWLNASSGVKPERSLQNNGLLTTLSQ  
HYFLFIGTSLCHPHGVKMLEKCSVFQCLLNLCSLKNQDHLIKLTVSSLDYSRDGLARVILSKIILTAATDACRL  
YATKHLRVLLRANVEFFNNGIELLGTQLHDKNKTISSSEALDILDEACEDKANLHALIQMKPALSHLGDKGLL  
LLRFLSIPKGFSYLNERGYVAKQLEKWHKEYNSKYVDLIEEQLNEALTTYRKPIDGDNVRRSNQRLQRPV  
YLPVHLYGQLVHHKTGCHLLEVQSIITELCHNVRTPDLKWEDEIKKLLKASLWALGNIGSSNWGLNLLQENVI  
PDILKLAQCEVLSIRGTCVYVGLIAKTKQGCILKCHSWDSVRHSRKHLPVVPDDVEQLCNELSSVPSTL  
SLNSESTSSRHNSESESAPSSMFLEDDRFSTSTSTFFLDINEDAEPAFYDRPGPIKDKNSFPFFGSSKLVK  
NRILNSLTLPTKHKRSSSDPKGGKLSSENKTSNRRIRTLTEPSVDLNHSEDFTSSSAQKSLQLEPSFVGNKHL  
EDAGSTPSIGENDLKFPKSFGEETHRENTSRERLVVEGSASSHIKIRSQSFNTDTTTSGISMSSSPSRETVA  
VDPTAMDTDCGSLSTVVSTKTVKTSHYLTPQSNHLSLKSNSVSLVPPGSSHTLPRRAQSLKAPS IATIKSLA  
DCNFSYTSRDAFGYATLKRLLQQRMHPSLSHSEALASPAKDVLFDTITMKANSFESRLTPSRFMKALS  
YASLDKEDLLSPINHNLTQRSSSVRSMVSSATYGGSDDYIGLALPVDINDIFQIKDVYPYFQSKHVPPDDRGAR  
MFDGAGLSSGAGGLVKNFHLRQMSLTEIMNSVHSDASLFLESTEDTGLQEHTDDNCLYCVCIELLLGFQPS  
NQLSSICSHSDLQDIPYSDWCEQTIHNPLEVVPKFSGISGSDGASQEEGSASSTKSTELLGVKTIIPDDTP  
MCRILLRKEVLRLLVNLSSSVSTKCHETGLLTIKEKYPQTFDDICLYSEVSHLLSHCTFRLQCRRFIQELFQD  
VQFLQMHEEAVALAIPPIQPIVDESAES\*

>ENSMUSP00000106087\_c.3401:T>G\_p.S1134R ENSMUST00000110457.8|Myo10-  
202|ENSMUSG00000022272|+|chr15:g.25781908:T>G

MDSFFPEGARVWLRENGQHFPSTVNSCAEGVVVFQTDYGVFTYKQSTITNQKVTAMHPLHEEGVDDMASLAE  
LHGGSIMYNLFQRYKRNQIYTYIGSIIASVNPYQPIAGLYERATMEEYSRCHLGELPPHIFAIANECYRCLWK  
RHDNQCVLISGESGAGKTESTKLILKFLSVISQQTLDLGLQEKTSSEVQAILQSSPIMEAFGNAKTVYNNNS  
RFGKRVQLNICQGGNIQGGRIVDYLLEKNRVVRNPGERNYHIFYALLAGLDQGEREEFYLSLPENYHYLNQS  
GCTEDKTIHQESFRQVITAMEVMQFSKEEVREVLRLLAGILHLGNIEFITAGGAQIPFKTALGRSADLLGLD  
PTQLTDALTRQSMILRGEIILTPLSVQQAVDSRDSLAMALYARCFEWWIKKINSRIKGGKDDFKSIGILDFGF  
ENFEVNHFEQFNINYANEKLEQYFNKHFISLEQLEYSREGLVWEDIDWIDNGECLDLIEKKLGLLALINEESH  
FPQATDSTLLEKLSQHANNHFYVKPRVAVNNFGVKHYAGEVQYDVRGILEKNRDTFRDLDLNLRESRFDI  
YDLFEHVSSRNNQDTLCKGSKHRRPTVSSQFKDSLHSLMATLSSSNPFFVRCIKPNTQKMPDQFDQVVVNLQ

RYSGMLETVRIRKAGYAVRRPFQDFYKRYKVLMRNLALPDDIRGKCTVLLQVYDASNSEWQLGKTKVFLRESL  
 EQKLEKRREEEIDRAAMVIRAHILGYLARKQYRKVLCGVVTIQKNYRAFLARKKFLHLKKAIVFQKQLRGQL  
 ARRVYRQLLAEKRELEEKRRREEEKKREEEERERERERAQREADLLRAHQEAETRRQOELEALQKSQREADLTRE  
 LEKQRENKQVEEILRLEKEIEDLQRMKERQELSLTEASLQKLQQLRDEELRRLEDEACRAAQEFLESLNFDEI  
 DECVRNIERSLSVGSEISGEELSELAEASASGEKPNFNFSQPYPAEEEVDEGFEADDDAFKDSPNPSEHGHSQ  
 RTSGIRTSDDSSSEEDPYMNYTVVPTSPSADSTVLLAASMQDSASLHNSSSGESTYCMPPQNNGDLPSPDGDYDY  
 DQDDYEDGAITSGSSVTFNSYGSQWSPDYRYSVGTYNRSAYRFSSEGAQSSFEDESEDFDSRFDTDELSY  
 RRDVSVYSCVTLPLYFHSFLYMKGGLMNSWKRRWCVLKDETFWFRSKQEALKQGWLHKKGGSSSTLSRRNWKKR  
 WFVLRQSKLMYFENDSEEKLGTVEVRTAKEIIDNTSKENGIDIILADRTFHLLIAESPEDASQWFSVLSQVHSS  
 STDQEIEMHDEQANPQNAVGLTDVGLIDSVCASDSPDRPNSFVITANRVLHCNADTPEEMHHWITLLQRSK  
 GDTRVEGQEFIVRGWLHKEVKNSPKMSSLKLLKRWVFLTHNSLDYKSSSEKNALKGLTLVNLVSLCSVVPDEK  
 IFKETGYWNVTVYGRKHCHYRLYTKLLNEATRWSAIONVTDTKAPIDTPTQQLIQDIKENCLNSDVVEQIYKR  
 NPILRYTHHPLHSPLLPLPYGDINLNLKDKGYTTLQDEAIKIFNSLQQLLESMSDPIPIIQGILQTHDLRPL  
 RDELYCQLIKQTNKVPHPGSGVNLVSWQILTCLSCFTLPSRGIKLYLKFHLKRIREQFPGTEMEKYALFIYES  
 LKKTCKREFVPSRDEIEALHRQEMTSTVYCHGGGSKITINSHTTAGEVVEKLIRGLAMEDSRNMFALFEYN  
 GQVDKAIERTIVADVLAKEFLAATSEAGDAPWKFYFKLYCFLDTSMPKDSVEFAFMFEQAHEAVIHGHP  
 APEESLQVLAALRLQYLQGDYTPHTSIPPLEEVYSVQRLRARIQSSTKTFTPYERLEKRRTSFLEGLTRRSFR  
 TGSVVRQKAEQMLDMWIKEEVCARTSIIIDKWKKLQGMNQEQAMAKYMALIKWPGYGSTLFDVECKEGGF  
 PQELWLGVSADAVSVYKRGEKPLEVFQYEHILSFGAPLANTYKIVVDERELLFETSEVVDVAKLMKAYISMI  
 VKKRYSTTRSVSSQSSR\*

>ENSMUSP00000022882\_c.1163:T>G\_p.S388R ENSMUST00000022882.12|Myo10-  
 201|ENSMUSG0000002272|+|chr15:g.25781908:T>G

MVIRAHILGYLARKQYRKVLCGVVTIQKNYRAFLARKKFLHLKKAIVFQKQLRGQLARRVYRQLLAEKRELE  
 EKKRREEEKKREEEERERERAQREADLLRAHQEAETRRQOELEALQKSQREADLTRELEKQRENKQVEEILRL  
 EKEIEDLQRMKERQELSLTEASLQKLQQLRDEELRRLEDEACRAAQEFLESLNFDEIDECVRNIERSLSVGSE  
 ISGEELSELAEASASGEKPNFNFSQPYPAEEEVDEGFEADDDAFKDSPNPSEHGHSQRTSGIRTSDDSSSEEDP  
 YMNYTVVPTSPSADSTVLLAASMQDSASLHNSSSGESTYCMPPQNNGDLPSPDGDYDYDQDDYEDGAITSGSSV  
 TFSNSYGSQWSPDYRYSVGTYNRSAYRFSSEGAQSSFEDESEDFDSRFDTDELSYRRDVSVCVTLPLYFHS  
 FLYMKGGLMNSWKRRWCVLKDETFWFRSKQEALKQGWLHKKGGSSSTLSRRNWKKRWVLRQSKLMYFENDS  
 EEKLGTVEVRTAKEIIDNTSKENGIDIILADRTFHLLIAESPEDASQWFSVLSQVHSSSTDQEIEMHDEQANP  
 QNAVGLTDVGLIDSVCASDSPDRPNSFVITANRVLHCNADTPEEMHHWITLLQRSKGDTRVEGQEFIVRGWL  
 HKEVKNSPKMSSLKLLKRWVFLTHNSLDYKSSSEKNALKGLTLVNLVSLCSVVPDEKIFKETGYWNVTVYGRK  
 HCHYRLYTKLLNEATRWSAIONVTDTKAPIDTPTQQLIQDIKENCLNSDVVEQIYKRNPILRYTHHPLHSPLL  
 PLPYGDINLNLKDKGYTTLQDEAIKIFNSLQQLLESMSDPIPIIQGILQTHDLRPLRDELYCQLIKQTNKVP  
 HPGSGVNLVSWQILTCLSCFTLPSRGIKLYLKFHLKRIREQFPGTEMEKYALFIYESLKKTCKREFVPSRDEI  
 EALHRQEMTSTVYCHGGGSKITINSHTTAGEVVEKLIRGLAMEDSRNMFALFEYNGQVDKAIERTIVADV  
 LAKFEKLAATSEAGDAPWKFYFKLYCFLDTSMPKDSVEFAFMFEQAHEAVIHGHPAPEESLQVLAALRLQY  
 LQGDYTPHTSIPPLEEVYSVQRLRARIQSSTKTFTPYERLEKRRTSFLEGLTRRSFRTGSVVRQKAEQMLD  
 MWIKEEVCARTSIIIDKWKKLQGMNQEQAMAKYMALIKWPGYGSTLFDVECKEGGFQELWLGVSADAVSVY  
 KRGEKPLEVFQYEHILSFGAPLANTYKIVVDERELLFETSEVVDVAKLMKAYISMIVKKRYSTTRSVSSQGS  
 SR\*

>ENSMUSP0000002603\_c.528:G>A\_p.E177K ENSMUST0000002603.12|Scrib-  
 201|ENSMUSG00000022568|-|chr15:g.75938881:C>T

MLKCIPLWRCNRHVESVDKRHCSLQVVPPEEIIYRYSRSLLELLLDANQLRELKPKFFRLLNLRKLGSLDNEIQR  
 LPPEVANFMQLVELDVSNDIPEIPESIKFKCALEIADFSGNPLSRLPDGFTQLRSLAHLALNDVSLQALPGD  
 VGNLANLVTLLELRENLLKSLPASLSFLVKLQDLGGNDLEVLDPDTLGALPNLRELWLDRNQLSALPPELGNL  
 RRLVCLDVSENREELPVELGGLALLTDLLLSQNLQRLPEGIGQLKQLSILKVDQNRLECEVTEAIGDCENLS  
 ELILTENLLTALPHSLGKLTKLTLNLDNRHLEVLPEIGGCVALSVLSLRDNRLAVLPPELAHTAEHLVLDV  
 AGNRLRSLPFALHNLKALWLAENQAQPMLRFQTEDDAQTGEKVLTCYLLPQQPLPSLEDAGQQSSPSESCS  
 DAPLSRVSVIQFEDTLEGEEDAEEAAAERKGLQRRATPHPSSELKVMKRGIEERRNEAFVCKPDPSPPSPSEEE  
 KRLSAESALSQSVSPASTASEGEPEILPAEVQGLGQHEAMPAQEYTEDDYNEPTVHFAEDTLIPREDGESE  
 EGQPEAAWPLPSGRQLIRKDTPHYKHKFKISKLPQPEAVVALLQGVQTDREGPTAGWHNGPHTPWAPRAHEE  
 EEEEEENRDEEGEATTEEDDKEEAVASAPSVGKVSFVQANLLIEPARIEEEELTLTIVRQTGGLGISIAG  
 GKGSTPYKGDDEGIFISRVSEEGPAARAGVRVGDKLELVNGVALQDAEHHEAVEALRGAGAAVQMRVWRMVB  
 EPENAVTITPLRPEDDYSPREWRGGGLRPLLPQPETPVSLRQRHAACLVRSEKGLGFSIAGGKSTPYRAGDG  
 GIFISRIAEGGAHRAGTLQVGDVRLSINGVDMTEARHDHVAVSLTAASPTISLLERETGGTYPPSPPHSS  
 PTPAATVAATVSTAVPGEPLPRLSPSLLATALEGYPVEEICLPRAGGPLGLSIVGSDHSSHPFGVQDPGV  
 FISKVLPRGLAARCGLRVGDRILAVNGQDVREATHQEAVSALLRPCLELCLLVRRDPPPPGMRELCIQKAPGE

KLGISIRGGAKGHAGNPCDPTDEGIFISKVSPGAAAGRDGRLRVGLRLLLEVNQQSLLGLTHAEAVQLLRSVGD  
 TLTVLVCDGFDSTTTTAALEVSPGVIANPFAAGLGHNSLESISSIDRELSPEGPGKEKELASQALPWESESAE  
 TTGRNLEPLKLDYRALAALPSAGSLQRGPSATTGGKTTEAPCSPGSGQTKPGVIQPLAQAWPRNSPAPRGRGG  
 PCSPPSPDEL PANVKQAYRAFAAVPTVHPPENSATQPPTPGPAASPEQLSFRERQKYFELEVRVPPAEGPPKR  
 VSLVGADDLRKMQEEEEARKLQKRAQMLREEAVTSGPDMGLASDRESRDDQAEQWAVPSHAGGSSPSSPP  
 PLGGNAPVRTAKAERRHQRERLRMQSPPELPAERALS PAERRALEAEKRALWRAARMKSLEQDALRAQMVLKS  
 QEGRGKRGP LERLAEAPSAPTSPPTPLEDFGLQTSASPGRLPLSGKKFDYRAFAALPSSRPVYDIQSPDFVE  
 ELRTEASPSPGSQEEDGEVALVLLGRPSPGAVGPEDMTLCSRRSVRPGRRGLGPVPS\*  
 >ENSMUSP0000068056\_c.528:G>A\_p.E177K ENSMUST0000063747.12|Scrib-  
 202|ENSMUSG00000022568|-|chr15:g.75938881:C>T  
 MLKCIPLWRCNRHVESVDKRHCSLQVVPEEIIYRYSRSLLELLLDANQLRELKPKFFRLLNLRKLGSDNEIQR  
 LPPEVANFMQLVELDVS RNDIPEIPESIKFCKALEIADFSGNPLSRLPDGFTQLRSLAHLALNDVSLQALPGD  
 VGNLANLVTLLELRENLLKSLPASLSFLVKLQDLGGNDLEVL PDTLGALPNLRELWLDRNQLSALPPELGNL  
 RRLVCLDVSENRL EELPVELGGLALLTDLLLSQNLQRLPEGIGQLKQLSILKVDQNLCEVTEAIGDCENLS  
 ELILTENLLTALPHSLGKLTKLTNLNVDRNHLEVL PPEIGGCVALSVLSLRDNRLAVLPPELAHTAELHVL DV  
 AGNRLRSLPFALTHLNLKALWLAENQAQPM LRFQTEDDAQTGEKVLTCYLLPQQPLPSLEDAGQQSSPSESCS  
 DAPLSRVSVIQFEDTLEGEEDAEEAAA EKRLQRRATPHPSELKVMKRGIEERRNEAFVCKPDPSPSPSEEE  
 KRLSAESALS GGSVPSASTASEGEPEILPAEVQGLGQHEAMPAQE EYTEDDYNEPTVHFAEDTLIPREDGESE  
 EGQPEAAWPLPSGRQRLIRKDTPHYKHKFKISKLPQPEAVVALLQGVQTDREGPTAGWHNGPHTPWAPRAHEE  
 EEEEEENRDEEEGEATTEEDDKEEAVASAPSVKGV SFDQANLLIEPARIEEEELTLTIVRQTGGLGIS IAG  
 GKGSTPYKGDDEGIFISRVSEEGPAARAGVRVGD KLLLEVNGVALQDAEHHEAVEALRGAGA AVQMRVWRERMV  
 EPENAVTITPLRPEDDYS PREWRGGGLR LPLLPETPVSLRQRHAACLRSEKGLGFSIAGGKSTPYRAGDG  
 GIFISRIAEGGAHRAGTLQV GDRVLSINGVDMTEARHDH AVSLLTAASPTISLLLERETGGTYPPSPPHSS  
 PTPAATVAATVSTAVPGEPLLR LPSLLLATALEGYPVVEEICLPRAGGPLGLSIVGGSDHSSHPFVQDPGV  
 FISKVLPRGLAARCGLRVGDRILAVNGQDVREATHQEA VSALLRPCLELCLLVRRDPPPPGMREL CIQKAPGE  
 KLGISIRGGAKGHAGNPCDPTDEGIFISKVSPGAAAGRDGRLRVGLRLLLEVNQQSLLGLTHAEAVQLLRSVGD  
 TLTVLVCDGFDSTTTTAALEVSPGVIANPFAAGLGHNSLESISSIDRELSPEGPGKEKELASQALPWESESAE  
 TTGRNLEPLKLDYRALAALPSAGSLQRGPSATTGGKTTEAPCSPGSGQPPSPDEL PANVKQAYRAFAAVPTVH  
 PPENSATQPPTPGPAASPEQLSFRERQKYFELEVRVPPAEGPPKR VSLVGADDLRKMQEEEEARKLQKRAQML  
 REEAVTSGPDMGLASDRESRDDQAEQWAVPSHAGGSSPSSPPPLGGNAPVRTAKAERRHQRERLRMQSPPEL  
 PAPERALS PAERRALEAEKRALWRAARMKSLEQDALRAQMVLKS QEGRGKRGP LERLAEAPSAPTSPPTPL  
 EDFGLQTSASPGRLSPDFVEELRTEASPSPGSQEEDGEVALVLLGRPSPGAVGPEDMTLCSRRSVRPGRRG  
 LGPVPS\*  
 >ENSMUSP00000105572\_c.528:G>A\_p.E177K ENSMUST00000109946.9|Scrib-  
 203|ENSMUSG00000022568|-|chr15:g.75938881:C>T  
 MLKCIPLWRCNRHVESVDKRHCSLQVVPEEIIYRYSRSLLELLLDANQLRELKPKFFRLLNLRKLGSDNEIQR  
 LPPEVANFMQLVELDVS RNDIPEIPESIKFCKALEIADFSGNPLSRLPDGFTQLRSLAHLALNDVSLQALPGD  
 VGNLANLVTLLELRENLLKSLPASLSFLVKLQDLGGNDLEVL PDTLGALPNLRELWLDRNQLSALPPELGNL  
 RRLVCLDVSENRL EELPVELGGLALLTDLLLSQNLQRLPEGIGQLKQLSILKVDQNLCEVTEAIGDCENLS  
 ELILTENLLTALPHSLGKLTKLTNLNVDRNHLEVL PPEIGGCVALSVLSLRDNRLAVLPPELAHTAELHVL DV  
 AGNRLRSLPFALTHLNLKALWLAENQAQPM LRFQTEDDAQTGEKVLTCYLLPQQPLPSLEDAGQQSSPSESCS  
 DAPLSRVSVIQFEDTLEGEEDAEEAAA EKRLQRRATPHPSELKVMKRGIEERRNEAFVCKPDPSPSPSEEE  
 KRLSAESALS GGSVPSASTASEGEPEILPAEVQGLGQHEAMPAQE EYTEDDYNEPTVHFAEDTLIPREDGESE  
 EGQPEAAWPLPSGRQRLIRKDTPHYKHKFKISKLPQPEAVVALLQGVQTDREGPTAGWHNGPHTPWAPRAHEE  
 EEEEEENRDEEEGEATTEEDDKEEAVASAPSVKGV SFDQANLLIEPARIEEEELTLTIVRQTGGLGIS IAG  
 GKGSTPYKGDDEGIFISRVSEEGPAARAGVRVGD KLLLEVNGVALQDAEHHEAVEALRGAGA AVQMRVWRERMV  
 EPENAVTITPLRPEDDYS PREWRGGGLR LPLLPETPVSLRQRHAACLRSEKGLGFSIAGGKSTPYRAGDG  
 GIFISRIAEGGAHRAGTLQV GDRVLSINGVDMTEARHDH AVSLLTAASPTISLLLERETGGTYPPSPPHSS  
 PTPAATVAATVSTAVPGEPLLR LPSLLLATALEGYPVVEEICLPRAGGPLGLSIVGGSDHSSHPFVQDPGV  
 FISKVLPRGLAARCGLRVGDRILAVNGQDVREATHQEA VSALLRPCLELCLLVRRDPPPPGMREL CIQKAPGE  
 KLGISIRGGAKGHAGNPCDPTDEGIFISKVSPGAAAGRDGRLRVGLRLLLEVNQQSLLGLTHAEAVQLLRSVGD  
 TLTVLVCDGFDSTTTTAALEVSPGVIANPFAAGLGHNSLESISSIDRELSPEGPGKEKELASQALPWESESAE  
 TTGRNLEPLKLDYRALAALPSAGSLQRGPSATTGGKTTEAPCSPGSGQPPSPDEL PANVKQAYRAFAAVPTVH  
 PPENSATQPPTPGPAASPEQLSFRERQKYFELEVRVPPAEGPPKR VSLVGADDLRKMQEEEEARKLQKRAQML  
 REEAVTSGPDMGLASDRESRDDQAEQWAVPSHAGGSSPSSPPPLGGNAPVRTAKAERRHQRERLRMQSPPEL  
 PAPERALS PAERRALEAEKRALWRAARMKSLEQDALRAQMVLKS QEGRGKRGP LERLAEAPSAPTSPPTPL  
 EDFGLQTSASPGRLPLSGKKFDYRAFAALPSSRPVYDIQSPDFVEELRTEASPSPGSQEEDGEVALVLLGRP  
 SPGAVGPEDMTLCSRRSVRPGRRGLGPVPS\*



>ENSMUSP00000094084\_c.484:C>A\_p.P162Q ENSMUST00000096357.12|Ncf4-201|ENSMUSG00000071715|+|chr15:g.78139666:C>A  
MALAQQLRSESDFEQLPDDVAVSANIADIEEKRGFTSHFVVFVIEVKTGKGGSKYLIYRRYRQFYALQSKLEERF  
GPESKNSPFTCSLPTLPKAVYMGAKQEIATRIIPALNAYMKNLLSLPVCVLMDDPVDVRIFFYQSAYDAEQVPQA  
LRRLRPRTKIKIGVSSQQGAIMDRMEAPRAEALFDFTGNSKLELSFKAGDVI FLLSKINKDWLEGT SQGATGIF  
PGSFVKILKDFPEDEDTTNWLRCYFYEDTGKTIKDIAVEEDLSSTPLFKDLLALMRREFQREDIALSYQDAEG  
DLVRLSDEDEVGLMVKQARGLPSQKRLFPWKLHVTKQDNYSVYNTVP\*  
>ENSMUSP00000121191\_c.484:C>A\_p.P162Q ENSMUST00000133618.3|Ncf4-203|ENSMUSG00000071715|+|chr15:g.78139666:C>A  
MALAQQLRSESDFEQLPDDVAVSANIADIEEKRGFTSHFVVFVIEVKTGKGGSKYLIYRRYRQFYALQSKLEERF  
GPESKNSPFTCSLPTLPKAVYMGAKQEIATRIIPALNAYMKNLLSLPVCVLMDDPVDVRIFFYQSAYDAEQVPQA  
LRRLRPRTKIKIGVSSQQGAIMDRMEAPRAEALFDFTGNSKLELSFKAGDVI FLLSKINKDWLEGT SQGATGIF  
PGSFVKILKDFPEDEDTTNWLRCYFYEDTGKTI  
>rs231005795\_ENSMUSP00000113341\_c.808:G>A\_p.R270H  
ENSMUST00000117786.9|Csnk1e-201|ENSMUSG00000022433|-|chr15:g.79309116:C>T  
MELRVGNKYRLGRKIGSGSFGDIYLGANIASGEEVAIKLECVKTKHPQLHIESKFYKMMQGGVGI PSIKWCGA  
EGDYNVMVMELLGPSLEDLDFNFC SRKFS LKTVLLADQMISRIEYIHSKNFIHRDVKPDNFMGLGKKNLVY  
IIDFGLAKKYRDARTHQHI PYRENKNTGTARYASINTHLGIEQSRDDLES LGYVLMYFNLGSLPWQGLKAA  
TKRQKYERISEKKMSTPIEVLCKGYPSEFSTYLNFCRSLRFDDKPDYSYLHQLFRNLFRHQGFSYDYVFDWNM  
LKFGAARNPEDVDREHEREHEREERMQLRGSATRALPPGPPTGATANRLRSAAEPVASTPASRIQQTGNTSPR  
AISRADREKRVSMRLHRGAPANVSSDLTGRQEVSRLAASQTSVFPDHLGK\*  
>rs231005795\_ENSMUSP00000113975\_c.808:G>A\_p.R270H  
ENSMUST00000120859.9|Csnk1e-202|ENSMUSG00000022433|-|chr15:g.79309116:C>T  
MELRVGNKYRLGRKIGSGSFGDIYLGANIASGEEVAIKLECVKTKHPQLHIESKFYKMMQGGVGI PSIKWCGA  
EGDYNVMVMELLGPSLEDLDFNFC SRKFS LKTVLLADQMISRIEYIHSKNFIHRDVKPDNFMGLGKKNLVY  
IIDFGLAKKYRDARTHQHI PYRENKNTGTARYASINTHLGIEQSRDDLES LGYVLMYFNLGSLPWQGLKAA  
TKRQKYERISEKKMSTPIEVLCKGYPSEFSTYLNFCRSLRFDDKPDYSYLHQLFRNLFRHQGFSYDYVFDWNM  
LKFGAARNPEDVDREHEREHEREERMQLRGSATRALPPGPPTGATANRLRSAAEPVASTPASRIQQTGNTSPR  
AISRADREKRVSMRLHRGAPANVSSDLTGRQEVSRLAASQTSVFPDHLGK\*  
>rs231005795\_ENSMUSP00000113096\_c.808:G>A\_p.R270H  
ENSMUST00000122044.8|Csnk1e-203|ENSMUSG00000022433|-|chr15:g.79309116:C>T  
MELRVGNKYRLGRKIGSGSFGDIYLGANIASGEEVAIKLECVKTKHPQLHIESKFYKMMQGGVGI PSIKWCGA  
EGDYNVMVMELLGPSLEDLDFNFC SRKFS LKTVLLADQMISRIEYIHSKNFIHRDVKPDNFMGLGKKNLVY  
IIDFGLAKKYRDARTHQHI PYRENKNTGTARYASINTHLGIEQSRDDLES LGYVLMYFNLGSLPWQGLKAA  
TKRQKYERISEKKMSTPIEVLCKGYPSEFSTYLNFCRSLRFDDKPDYSYLHQLFRNLFRHQGFSYDYVFDWNM  
LKFGASSSQAQPRDNEALAPPCPRPWPCAGPAYSPTYWCPAPLGTQGPDPDRPVEEEVEQLPPQRYWVWVTPG  
PQF\*  
>rs231005795\_ENSMUSP00000159272\_c.430:G>A\_p.R144H  
ENSMUST00000156513.3|Csnk1e-210|ENSMUSG00000022433|-|chr15:g.79309116:C>T  
XDVKPDNFMGLGKKNLVYIIDFGLAKKYRDARTHQHI PYRENKNTGTARYASINTHLGIEQSRDDLES  
GYVLMYFNLGSLPWQGLKAATKRQKYERISEKKMSTPIEVLCKGYPSEFSTYLNFCRSLRFDDKPDYSYLHQL  
FRNLFRHQGFSYDYVFDWNMLKFVSHRQAKAGLDWTGQALHTHKARVTWWAGLPLNGRYELDTVNDVTGVPE  
PLVSSHLDIDRACRHGGQGPGEAPPARWERTWCGLSLCTCGKWMALAGPSAALIAVCILLFLLCVSQVVA  
LSEASLASLDPVRVASLFLVIGPWVLLGSCSVSLF\*  
>ENSMUSP00000105007\_c.2289:C>A\_p.P764T ENSMUST00000109381.9|Brd1-203|ENSMUSG00000022387|-|chr15:g.88591306:G>T  
MRRKGRCHRGSAARHPSSPCSIKHSPTRETLTYAQAQRMVEIEIEGRLHRISIFDPLEIILEDLDTAQEMSEC  
NSNKENSERPPVCLRTKRHKNNRVKKNVLPSTHGT PASASALPEPKVRIVEYSPPSAPRRPPVYKFKIEKS  
AEELDNEVEYDMDEEDYAWLEI INEKRKGDVSAVSQNMFEFLMDRFEKESYCNQKQGEQSLI DEEAVCCI  
CMDGECQNSNVILFCDMCNLAHVHQEYGVPIPEGQWLCRHCLQSRARPADCVLC PNKGGAFKKTDDDRWGHV  
VCALWIPEVGFANTVFIEPIDGVRNIPPARWKLTCYLCKQKGVGACIQCHKANCYTA FHVTCAQKAGLYMKME  
PVKELTGGSATFSVRKTAYCDVHTPPGCTRRPLNIYGDVEMKNGVCRKESVKTVRSTSKVRKKAKKAKKTLA  
EPCAVLPTVCAPYI PPQRLNR IANQVAIQKQKQFVERAHSYLLKRLSRNGAPLLRRLQSSLSQSRNTQQRN  
DEEMKAAKEKLYWQRLRHDLERARLLIELLRKREKLRKREQVKEQMAMELRLTPLTVLLRSVLEQLQEKDPA  
KIFAQPVSLKEVPDYLDHIKHPMDFATMRKRLEAQGYKLNHAFEEFNLI VDNCKMYNAKDTVFYRAAVRLRD  
QGGVVLQARREVESIGLEEASGMHLPERPIAAPRRPFSWEEVDRLLDPANRAHMSLEEQLRELLDKLDLTC  
MKSSGSRSKRAKLLKKEIALLRNKLSSQHSQAPTTGAGTGGFEDEAAPLAPDTAEEGANSPPKLEPSDALPLP  
SNSETNSEPPTLNPVELHPEQSKLFKRVTFDNESHSTCTQSALVSGHPPEPTLASSGDVPAAAAASAVAEPSSD



>ENSMUSP00000113498\_c.3840:T>G\_p.L1281V ENSMUST00000117801.8|Adcy9-202|ENSMUSG00000005580|-|chr16:g.4105983:A>C  
 MASSPHQQLLHHHSTEVSCDSSGDSNSVRVKINPKQLSSNTHPKHKYSISSSCSSSGDSSGGLPRRVGGGGRL  
 RRQKKLPQLFERASSRWWDPKFDMSNLEEACLERCFPQTQRRFRYALFYVGFACLLWSIYFAVHMKSKVIVMV  
 VPALCFLVVCVGFLLFTFTTKLYARHYAWTSLALTLVLFALTLAAQFQVWTPLSGRVDSSNHTLTATPADTCLS  
 QVGSFISICIEVLLLLLYTVMQLPLYLSLFLGVVYSVLFETFGYHFRNEDCYPSPGPGALHWELLSRALLHVCIH  
 AIGIHLFVMSQVRSRSTFLKVGQSIMHGKDLEVEKALKERMIHSVMPRIIADDLMKQGDEESENSVKRHATSS  
 PKNRKKKSSIQKAPIAFRPFKMQQIEEVSILFADIVGFTKMSANKSAHALVGLLNDLFGFRDRLCEQTKCEKI  
 STLGDCCYCVAGCPEPRADHAYCCIEMGLGMKAIEQFCQEKEMVMNRVGVHTGTVLCGILGMRRFKFDVWS  
 NDVNLANLMEQLGVAGKVHISEATAKYLDDRYEMEDGRVIERLQGSVVADQLKGLKTYLISGQRAKESHCSA  
 EALLSGFEVIDDSRESSGPRGQGTASPGSVSDLAQTVKTFDNLKTCPCSGITFAPKSEAGAEGGTVQNGCQDE  
 PKTSTKASGGPNSKTQNGLLSPPAEKLTNSQTSLCEILQEKGRWAGVSLDQSALLPLRFKNIREKTDHFVD  
 VIKEDSLMKDYFFKPPINQFSLNFLDQELERSYRTSYQEEVIKNSPVKTFASATFSSLLDVFLSTTVFLILSI  
 TCFLKYGATATPPPPAALAVFGADLLLEVL SLIVSIRMVFFLEDVMTCTKWLLEWIAGWLPRHCIGAILVSLP  
 ALAVYSHITSEFETNIHVTFMFTGSAVLVAVVHYCNFCQLSSWMRSSLATIVGAGLLLLLHISLCQDSSIVMSP  
 LDSAQNFSAQRNPNCSVLDGRRPASLIGKELILTFLLLLLVWFLNREFEVSYRLHYHGDVEADLHRTKIQ  
 SMRDQADWLLRNIIPYHVAEQLKVSQTYSKNHDSGGVIFASIVNFSEFYEENYEGGKECYRVLNELIGDFDEL  
 LSKPDYNSIEKIKTIGATYMAASGLNTAQCEGGHPQEHRLILFEFAKEMMRVDDFNMMMLWFNFKLRVGFN  
 HGPLTAGVIGTTKLLYDIWGDVTNIASRMDTTGVECRIQVSEESYRVLSKMGYDFDYRGTVNVKKGQMKTYL  
 YPKCTDNGVVPQHQLSISPDIRVQVDGSIGRSPTDEIANVVPVQYSDKASLGSDDSTQAKEARLSSKRSWRE  
 PVKAEERFPFGKAIEKDSCEDIGVEEASELSKLNVSXSV\*

>ENSMUSP00000113421\_c.3129:T>G\_p.L1044V ENSMUST00000120080.8|Adcy9-203|ENSMUSG00000005580|-|chr16:g.4105983:A>C  
 MQLPLYLSLFLGVVYSVLFETFGYHFRNEDCYPSPGPGALHWELLSRALLHVCIIAIGIHLFVMSQVRSRSTF  
 LKVGQSIMHGKDLEVEKALKERMIHSVMPRIIADDLMKQGDEESENSVKRHATSSPKNRKKKSSIQKAPIAFR  
 PFKMQQIEEVSILFADIVGFTKMSANKSAHALVGLLNDLFGFRDRLCEQTKCEKISTLGDCCYCVAGCPEPRA  
 DHAYCCIEMGLGMKAIEQFCQEKEMVMNRVGVHTGTVLCGILGMRRFKFDVWSNDVNLANLMEQLGVAGKV  
 HISEATAKYLDDRYEMEDGRVIERLQGSVVADQLKGLKTYLISGQRAKESHCSAEALLSGFEVIDDSRESSG  
 PRGQGTASPGSVSDLAQTVKTFDNLKTCPCSGITFAPKSEAGAEGGTVQNGCQDEPKTSTKASGGPNSKTQNG  
 LLSPPAEKLTNSQTSLCEILQEKGRWAGVSLDQSALLPLRFKNIREKTDHFVDVIKEDSLMKDYFFKPPIN  
 QFSLNFLDQELERSYRTSYQEEVIKNSPVKTFASATFSSLLDVFLSTTVFLILSITCFLKYGATATPPPPAAL  
 AVFGADLLLEVL SLIVSIRMVFFLEDVMTCTKWLLEWIAGWLPRHCIGAILVSLPALAVYSHITSEFETNIHV  
 TMFTGSAVLVAVVHYCNFCQLSSWMRSSLATIVGAGLLLLLHISLCQDSSIVMSP LDSAQNFSAQRNPNCSV  
 LDGRRPASLIGKELILTFLLLLLVWFLNREFEVSYRLHYHGDVEADLHRTKIQSMRDQADWLLRNIIPYHV  
 AEQLKVSQTYSKNHDSGGVIFASIVNFSEFYEENYEGGKECYRVLNELIGDFDELLSKPDYNSIEKIKTIGAT  
 YMAASGLNTAQCEGGHPQEHRLILFEFAKEMMRVDDFNMMMLWFNFKLRVGFNHGPLTAGVIGTTKLLYDI  
 WGDVTNIASRMDTTGVECRIQVSEESYRVLSKMGYDFDYRGTVNVKKGQMKTYLYPKCTDNGVVPQHQLSIS  
 PDIRVQVDGSIGRSPTDEIANVVPVQYSDKASLGSDDSTQAKEARLSSKRSWREPVKAEERFPFGKAIEKDS  
 CEDIGVEEASELSKLNVSXSV\*

>ENSMUSP00000005719\_c.3840:T>G\_p.L1281V ENSMUST00000005719.4|Adcy9-201|ENSMUSG00000005580|-|chr16:g.4105983:A>C  
 MASSPHQQLLHHHSTEVSCDSSGDSNSVRVKINPKQLSSNTHPKHKYSISSSCSSSGDSSGGLPRRVGGGGRL  
 RRQKKLPQLFERASSRWWDPKFDMSNLEEACLERCFPQTQRRFRYALFYVGFACLLWSIYFAVHMKSKVIVMV  
 VPALCFLVVCVGFLLFTFTTKLYARHYAWTSLALTLVLFALTLAAQFQVWTPLSGRVDSSNHTLTATPADTCLS  
 QVGSFISICIEVLLLLLYTVMQLPLYLSLFLGVVYSVLFETFGYHFRNEDCYPSPGPGALHWELLSRALLHVCIH  
 AIGIHLFVMSQVRSRSTFLKVGQSIMHGKDLEVEKALKERMIHSVMPRIIADDLMKQGDEESENSVKRHATSS  
 PKNRKKKSSIQKAPIAFRPFKMQQIEEVSILFADIVGFTKMSANKSAHALVGLLNDLFGFRDRLCEQTKCEKI  
 STLGDCCYCVAGCPEPRADHAYCCIEMGLGMKAIEQFCQEKEMVMNRVGVHTGTVLCGILGMRRFKFDVWS  
 NDVNLANLMEQLGVAGKVHISEATAKYLDDRYEMEDGRVIERLQGSVVADQLKGLKTYLISGQRAKESHCSA  
 EALLSGFEVIDDSRESSGPRGQGTASPGSVSDLAQTVKTFDNLKTCPCSGITFAPKSEAGAEGGTVQNGCQDE  
 PKTSTKASGGPNSKTQNGLLSPPAEKLTNSQTSLCEILQEKGRWAGVSLDQSALLPLRFKNIREKTDHFVD  
 VIKEDSLMKDYFFKPPINQFSLNFLDQELERSYRTSYQEEVIKNSPVKTFASATFSSLLDVFLSTTVFLILSI  
 TCFLKYGATATPPPPAALAVFGADLLLEVL SLIVSIRMVFFLEDVMTCTKWLLEWIAGWLPRHCIGAILVSLP  
 ALAVYSHITSEFETNIHVTFMFTGSAVLVAVVHYCNFCQLSSWMRSSLATIVGAGLLLLLHISLCQDSSIVMSP  
 LDSAQNFSAQRNPNCSVLDGRRPASLIGKELILTFLLLLLVWFLNREFEVSYRLHYHGDVEADLHRTKIQ  
 SMRDQADWLLRNIIPYHVAEQLKVSQTYSKNHDSGGVIFASIVNFSEFYEENYEGGKECYRVLNELIGDFDEL  
 LSKPDYNSIEKIKTIGATYMAASGLNTAQCEGGHPQEHRLILFEFAKEMMRVDDFNMMMLWFNFKLRVGFN  
 HGPLTAGVIGTTKLLYDIWGDVTNIASRMDTTGVECRIQVSEESYRVLSKMGYDFDYRGTVNVKKGQMKTYL

YPKCTDNGVVPQHQLSISPDIRVQVDGSIGRSPTDEIANVVPVSVQYSDKASLGSDDSTQAKEARLSSKRSWRE  
PVKAEERFPFGKAIEKDSCEDIGVEEASELSKLVNKS SV\*  
>ENSMUSP00000148509\_c.163:T>C\_p.155T ENSMUST00000202157.2|Gm5767-  
202|ENSMUSG00000107252|+|chr16:g.8501498:T>C  
MPTSIPVQAVCPYCGNRIMTVTYTPGLLTWLLCSGLFVFGSPSLLLPRNRGLSTALSPAENCQPRTETHAE  
V\*

>ENSMUSP00000055969\_c.1294:A>G\_p.D432G ENSMUST00000058884.10|Parn-  
201|ENSMUSG00000022685|-|chr16:g.13425117:T>C  
MEIIRSNFKINLHKVYQAIEEADFFAIDGEGFSGISNGPSVTALTSGFDTPPEERYQKLLKXSMDFLLFQFGLCA  
FKYDHTDSKHVTKSFNFYVFPKPFSSRSPDVKFVQCSSSIDFLASQGFDFNKFVFCSGIPYLNQEEERQLREQF  
DEKRSQANGAGALAKCPVTIPEDQKKFIDQVIEKIEDFLQSEEKRSLELDPCTGFQRKLIYQTLNWKYPKGIH  
VETLETDKKERHIVISKVDEEERKRREQEKYTKQEELNDAVGFSRVIAHAIANSGLLVGHNMLLDVMHTIHQ  
FYCPLPADLNEFKEMAICVFPRLDTKLMASQTQPKDIINNTSLAELEKRLKETPFDPKVESAEAGFP SYDTA  
SEQLHEAGYDAYITGLCFISMANYLGSLLSPPKMCVSARSKLIBPFNKLFLMRVMDIPYLNLEGPGLQPKRD  
HVLHVTFPKEWKTSDLYQLFSAFGNIQISWIDDTSAFVLSLQPEQVQIAVNTSKYAESYRIQTYAEYVGGKQK  
GKQVKRWKTESDWEKVDKRPHMQGPCYHSNSFTAAGMLGKRTLSPPDREAALDRESEEVSDSELEQTDSC  
DPLPEGRKSKKLRMKKELSLAGSVSDSPAFLFEVPTDW\*

>ENSMUSP00000036162\_c.5278:A>G\_p.E1760G ENSMUST00000036161.12|Pi4ka-  
201|ENSMUSG00000041720|-|chr16:g.17102319:T>C  
MCPVDFHGFQDLERRRDAVIALGIFLIESDLQHKDCVVPYLLRLLRGLPKVYWVEESTARKGRGNLPVAESF  
SFCLVTLSDVACRDPPLRDEILEAILQVLHVLLGMCQALEIQEKEYLCKYAI PCLIGISRSFGRYSNSEESL  
LSKLFPKVSPHSLRIPEELEGVRRRSFNDFRSILPSNLLTVCQEGTLKRKTSVSSISQVSPERGI PPPSSPG  
GSAFHYFEASCLPDGTALEPEYFSTISSSFSISPLFNGIT YKEFCI PLEMLRELLNLVKKIVEEPVLKSLDA  
IVAGVMEANPSADLYTTFS DPPLYLTMFKMLRDTLYMKDLPTS FVKEIHDFVLEQFNMSQGELQKILHDADR  
IHSEMSPLKLRCAANAACVDLMVWAVKDEQGAENLCIKLSEKLSKTSKVI IAHPLLLICCLQGLGRLCERF  
PVVVHVSPTSLRDFLVI PPSVLVKLYKYHSQYHTVAGSDIKISVTNEHSESTLNVLPGKKNQPSMYEQLRDIA  
IDNICRCLKAGLTVDPVIVEAFLASLSNRLYISQESDKDAHLIPDHTIRALGHIAVALRDTPKVMEPILQILQ  
QKFCQPPSPLDVLIIDQLGCLVITGNQYIYQEVWNLFQQISVKASSVVYSATKDYKDHGHRHCSLAVINALAN  
IAANIQEEHLVDELLMNLLELQVGLGLEGKRASERASEKGPALKASSAGNLGVLIPVIAVLRRLRPPIKEAK  
PRLQKLFDFWLYSVLMGFAVEGSLWPEEWYEGVCEIATKSPLLTFPSKEPLRSVLQYNSAMKNDTVPAPL  
SELRSTIINLLDPPPEVSALINKLDFAMSTYLLSVYRLEYMRVLRSTDPDRFQVMFCYFEDKAIQKDKSGMMQ  
CVIADVADKVFDAFLNMAEKAKTKENEELERHAQFLLVFNHIIHKRIRRVADKYL SGLVDKFPHLLWSGTVL  
KTMLDILQTLSSLSADIHKDQPYDIPDAPYRITVPDITYEARESIVKDFAAARCGMILQEAMKWAPT VTKSHL  
QEYLNKHQNWVSGLSQHTGLAMATESILHFAGYNKQNTT LGATQLTERPACVKKDYSNFMASLNLRNRYAGEV  
HGMIRFSGATGQMSDLNKMVQDLITALDHSHPQHYTQAMFKLTAMLISSKDCDPQLLHLLCWGPLRMFNEHG  
METALACWEWLLAGKNGVEVPPFMREMAGAWHMTVEQKFLGFSVETKEADPLAASEASQPRCPPEVTPHYIWI  
DFLVQRFEIAKYCSSDQVEIFSSLLQRSMNLNIGGARGSMNRHVAAIGPRFKLLTLGLSLLHADVVPNATIRN  
VLREKIYSTAFDYFSCPPKFPPTQGEKRLREDISIMIKFWTAMFSDKYL TASFQVLPDPNDQDTRSNLDITVGS  
QQATQGWINTYPLSSGMSTISKSGMSKKTNRGSQLHKYMKRRTLLLSLLATEIERLITWYNPLSAPELELD  
QAGENSVANWRSKYISLSEKQWKDNVNLAWSISPYLAVQLPARFKNTEAIGNEVTRLVRLDPGAVSDVPEAIK  
FLVTWHTIDADAPELSHVLCWAPTDPPTGLSYFSSMYPPHPLTAQYGVKVLRSFPDAIFLYIPIQIVQALRYD  
KMGYVREYILWAAAKSOLLAHQFIWNMKTNIYLDEEGHQKDPDIDGDLLEQLVEEITGSLSGPAKDFYQREFDF  
FNKITNVSAILKPYPKGDERKKACL SALSSEVKVQPGCYLPSNPEAIVLDIDYKSGTPMQSAAKAPYLAKFKVK  
RCGVSELGKEGLQCRSDAEDECF SQEADGKKICWQAAIFKVGDDCRQDMLALQIIDLFKNI FQLVGLDLFVFP  
YRVVATAPGCGVIECIPDCTSRDQLGRQTD FGM YDYFTROYGDESTLAFQQARYNFIRSMAAYSLLFLLLQIK  
DRHNGNIMLDKKGHIHIDFGFMFESSPGGNLWEPDIKLTDEMVMIMGGKMEATPFKWFMEMCVRGYLAVRP  
YMDAVVSLVTLMLDGTGLPCFRGQTIKLLKHRFSPNMTEREANFIMKVIQNCFLSNRSRTYDMIQYQNDIPY  
\*

>ENSMUSP00000156049\_c.5278:A>G\_p.E1760G ENSMUST00000232232.2|Pi4ka-  
209|ENSMUSG00000041720|-|chr16:g.17102319:T>C  
MCPVDFHGFQDLERRRDAVIALGIFLIESDLQHKDCVVPYLLRLLRGLPKVYWVEESTARKGRGNLPVAESF  
SFCLVTLSDVACRDPPLRDEILEAILQVLHVLLGMCQALEIQEKEYLCKYAI PCLIGISRSFGRYSNSEESL  
LSKLFPKVSPHSLRIPEELEGVRRRSFNDFRSILPSNLLTVCQEGTLKRKTSVSSISQVSPERGI PPPSSPG  
GSAFHYFEASCLPDGTALEPEYFSTISSSFSISPLFNGIT YKEFCI PLEMLRELLNLVKKIVEEPVLKSLDA  
IVAGVMEANPSADLYTTFS DPPLYLTMFKMLRDTLYMKDLPTS FVKEIHDFVLEQFNMSQGELQKILHDADR  
IHSEMSPLKLRCAANAACVDLMVWAVKDEQGAENLCIKLSEKLSKTSKVI IAHPLLLICCLQGLGRLCERF  
PVVVHVSPTSLRDFLVI PPSVLVKLYKYHSQYHTVAGSDIKISVTNEHSESTLNVLPGKKNQPSMYEQLRDIA  
IDNICRCLKAGLTVDPVIVEAFLASLSNRLYISQESDKDAHLIPDHTIRALGHIAVALRDTPKVMEPILQILQ

QKFCQPPSPDLVLIIDQLGCLVITGNQYIYQEVWNLFQQISVKASSVVYSATKDYKDHGHRHCSLAVINALAN  
IAANIQEEHLVDELLMNLLELFLVQLGLEGKRASERASEKGPALKASSSAGNLGVLPVIAVLRRLPPIKEAK  
PRLQKLFDRDFWLYSVLMGFAVEGSLWPEEWYEGVCEIATKSPLLTFPSKEPLRSVLQYNSAMKNDTVPAPL  
SELRSTIINLLDPPPEVSALINKLDFAMSTYLLSVYRLEYMRVLRSTDPDRFQVMFCYFEDKAIQKDKSGMMQ  
CVIAVADKVFDAFLNMMAEKAKTKENEEELERHAQFLLVNFNHHKRIRRVADKYLSSGLVDKFPHLLWSGTVL  
KTMLDILQTLSSLSADIHKDQPYDIPDAPYRITVPDITYEARESIVKDFAAARCGMILQEAMKWAPTVTKSHL  
QEYLNKHQNWVSGLSQHTGLAMATESILHFAGYNKQNTTLGATQLTERPACVKKDYSNFMASLNLNRNRYAGEV  
HGMIRFSGATGQMSDLNKMMVQDLITALDHSHPQHMYTQAMFKLTAMLISSKDCDPQLLHHLWCWGPLRMFNEHG  
METALACWEWLLAGKNGVEVPMREMAGAWHMTVEQKFLFSVETKEADPLAASEASQPRPCPEEPTPHYIWI  
DFLVQRFEIAKYCSSDQVEIFSSLLQRSMNLNIGGARGSMNRHVAAIGPRFKLLTLGLSLLHADVVPNATIRN  
VLREKIYSTAFDYFSCPPKFPPTQGEKRLREDISIMIKFWTAMFSDKKYLTASQLVPPDNQDTRSNLDITVGSR  
QQATQGWINTYPLSSGMSTISKSGMSKKTNRGSQLHKYMKRRRLLLSLLATEIERLITWYNPLSAPELELD  
QAGENSVANWRSKYISLSEKQWKDNVNLAWSISPYLAVQLPARFKNTEAIGNEVTRLVRLDPGAVSDVPEAIK  
FLVTWHTIDADAPELSHVLCWAPTDPPTGLSYFSSMYPPHPLTAQYGVKVLRSFPPDAIFYIPIQIVQALRYD  
KMGYVREYILWAAAKSOLLAHQFIWNMKTNIYLDEEGHQKDPDIDGDLLEQLVEEITGSLSGPAKDFYQREFDF  
FNKITNVSAILKPYPKGDERKKAACLSALSEVKVQPGCYLPSNPEAIVLDIDYKSGTPMQSAAKAPYLAKFKVK  
RCGVSELGKEGLQCRSDAEDECFSEQEADGKKICWQAAIFKVGDDCRQDMLALQIIDLTKNIQVLVGLDLFVFP  
YRVVATAPGCGVIECIPDCTSRDQLGRQTDGFMYDYFTRQYGDSTLAFQQARYNFIIRSMAYSLLELFLQIK  
DRHNGNIMLDKKGHIHIDFGFMFESSPGGNLWEPDIKLTDEMVMIMGGKMEATPFKWFMEMCVRGYLAVRP  
YMDAVVSLVTLMLDGTGLPCFRGQTIKLLKHRFSPNMTEREANFIMKVIQNCFLSNRSRTYDMIQYQNDIPY  
\*

>ENSMUSP00000087506\_c.2193:A>T\_p.N732Y ENSMUST00000090052.11|Yeats2-  
201|ENSMUSG00000041215|+|chr16:g.20024986:A>T  
MKNKEHEIDVIDQRLIEARRMMDKLRACIVANYASAGLLKVVSEGLKTFDPMFANHPAIAKKFLESPPSRSSSPT  
NQRSETPSANHSESDLSQHNDFLSDKDNNNSVDVEERPPSTGEQRPSRKAGRDTSSISGSHKRELRNADLTG  
DETSRFLVKKTIIVGNVSKYIIPDKREENDQSTHKWVMVYVGRSRREPSINHFVKKVWFFLHPSYKPNDLVEVR  
EPPFHLTRRGWGEFVVRVQVHFKDSQNKRIDIIHNLKLDRTYTGQTLGAETVVDVELHRHSLGEDSVYYPQSS  
ESDVCDAPPPTLTLPAAVKASAVAQSPPEAAAAAPVGEFPEPTEAERHSTFYSLPSSLERTPTKVTTAQKVTF  
SSHGNSAFQPIASSCKIVPQSQVNPESPGKSFQPIITMSCKIVSGSPISTPSPSPLPRTPTSTPVHLKQGTAS  
SGVSNPHVIVDKPGQVIGASTPSTGSPTSCLPVASQASQGTGSPIPKIHGSSFLTSTVKQEESELFASMPPLCP  
IGSHPKVQSPKAVTGGLGAFTKVIKQEPGEAPHVSTTGAASQSAFPQYVTVKGGHMIAVSPQKQVISAGEGT  
TQSPKIAPSKVGVVPGSALPSTVKQAVAISSGQILVAKASSSVTKAVGPKQVVTQGVAKAIVSGGGGTIVAQ  
PVQTLTKTQVTAAGPQKSGSQGSMATLQLPATNLANLANLPPGTKLYLTTNSKNPSGKGLLLIPQGAILRA  
TYNANLQSGSAAAGSGSSGAGGGSGGGGGSGAGGTPSTSGPGGGPQHLTYTSYILKQTPQGTFLVGGPSPQT  
PGKQLTTASVVQTLGVSSSSAQGQQLKVISGQKTTLFTQAATAGQASLLKLPDNTLKSVPAAAPQLAKPGTT  
MLRVAGGVIITAAPSPAVAFSANGAVHQSEGSTPVSSSVGSIKTPGQPVQCVSQATMATCKGPAAVAGTAASL  
VSAPSSISGKATVSGLLKVVHSAQSSPQAVLTIIPSQLKPLSINTSGGVQTVLMPVNKVVQSFSTSKLPTTVLP  
ISVNPQAAPSSAPVAIAKVKTEPETPGPNCISQENQVAVKTEESSELSNYVIKVDHLETIQQLLTAVVKKIPL  
ITAKGDDASCFSAKSLEQYYGWNIGKRRAAEWQRAMTVRKLQEIILEKNPRFHHLTPLKTKHIAHWCRCHGYT  
PPDPESLRHDGDSIEDVLTQIDSEPECLSSSFSTADDLCKRLEDLQQFQKREPENEEVDILSLSEPLKTNIKK  
EQEEKQEEMRFYLPPTPGSGFVGDITQKIGITLQPVALHRNMYASVVEDMILKATEQLVSDILRQALAVGYQT  
ASPNRIPKEITVSNIHQAICNIPFLDFLTNKHMGRLNEDQ\*

>ENSMUSP00000111222\_c.2352:A>T\_p.N785Y ENSMUST00000115560.4|Yeats2-  
202|ENSMUSG00000041215|+|chr16:g.20024986:A>T  
MSGIKRTIKETDPDYEDVSVALPNKRHKAIESSARDAAVQKIETIIKEQFALEMKNKEHEIDVIDQRLIEARR  
MMDKLRACIVANYASAGLLKVVSEGLKTFDPMFANHPAIAKKFLESPPSRSSSPTNQRSETPSANHSESDLSQ  
NDFLSDKDNNNSVDVEERPPSTGEQRPSRKAGRDTSSISGSHKRELRNADLTGDETSRFLVKKTIIVGNVSKY  
IIPDKREENDQSTHKWVMVYVGRSRREPSINHFVKKVWFFLHPSYKPNDLVEVREPPFHLTRRGWGEFVVRVQV  
HFKDSQNKRIDIIHNLKLDRTYTGQTLGAETVVDVELHRHSLGEDSVYYPQSSSESDVCDAPPPTLTLPAAVKA  
SAVAQSPPEAAAAAPVGEFPEPTEAERHSTFYSLPSSLERTPTKVTTAQKVTFSSHGNSAFQPIASSCKIVPQ  
SQVNPESPGKSFQPIITMSCKIVSGSPISTPSPSPLPRTPTSTPVHLKQGTASSGVSNPHVIVDKPGQVIGAS  
TPSTGSPTSCLPVASQASQGTGSPIPKIHGSSFLTSTVKQEESELFASMPPLCPIGSHPKVQSPKAVTGGLGAF  
TKVIKQEPGEAPHVSTTGAASQSAFPQYVTVKGGHMIAVSPQKQVISAGEGTTQSPKIAPSKVGVVPGSAL  
PSTVKQAVAISSGQILVAKASSSVTKAVGPKQVVTQGVAKAIVSGGGGTIVAQPVTTLTKTQVTAAGPQKSGS  
QGSVMATLQLPATNLANLANLPPGTKLYLTTNSKNPSGKGLLLIPQGAILRATYNANLQSGSAAAGSGSSG  
AGGGSGGGGGSGAGGTPSTSGPGGGPQHLTYTSYILKQTPQGTFLVGGPSPQTPGKQLTTASVVQTLGVSSS  
SAQGQQLKVISGQKTTLFTQAATAGQASLLKLPDNTLKSVPAAAPQLAKPGTTMLRVAGGVIITAAPSPAVAFS  
ANGAVHQSEGSTPVSSSVGSIKTPGQPVQCVSQATMATCKGPAAVAGTAASLVSAAPSSISGKATVSGLLKVVH



SAQSSPQQAVLTIPSQKPLSINTSGGVQTVLMPVNVKVVQSFSTSKLPTTVLPIVSNQAAPSSAPVAIAKVK  
TEPETPGPNCISQENQVAVKTEESSELSNYVIKVDHLETIQQLLTAVVKKIPLITAKGDDASCFSAKSLEQYY  
GWNIGKRRAAEWQRAMTVRKVLQEI LEKNPRFHHLTPLKTKHIAHWCRCHGYTPPDPESLRHDGDSIEDVLTQ  
IDSEPECLSSFSTADDLCKRLEDLQQFQKREPENEEVDILSLSEPLKTNIKKEQEEKQEEMRFYLPPTPGSG  
FVGDITQKIGITLQPVALHRNMYASVVEDMILKATEQLVSDILRQALAVGYQTASPNRI PKEITVSNIHQAIC  
NIPFLDFLTNKHMGRLNEDQ\*

>ENSMUSP00000155891\_c.2184:A>T\_p.N729Y ENSMUST00000232338.2|Yeats2-  
212|ENSMUSG00000041215|+|chr16:g.20024986:A>T  
MKNKEHEIDVIDQRLIEARRMMDKLRACIVANYASAGLLKVVSEGLKTFDPMFVNHPAIKKFLESPPSRSSSPT  
NQRSETPSANHSESDSLSQHNDFLSDKDNNSNV DVEERPPSTGEQRP SRKDTSSISGSHKRELNRADLTGDET  
SRLFVKKTI VVGNSKYI PPKREENDQSTHKWVMVYVGRSRREPSINHFKVWVFFLHPSYKPNLDLVEVREPP  
FHLTRRGWGEFPPVRVQVHFVFKDSQNKRIDIIHNLKLDRTYTGLOTLGAETVVDVDELHRHSLGEDSVYQSSSED  
VCDAPPPTLTLPAAVKASAVAQSPPEAAAAPVGEFPEPTEAERHSTFYSLPSSLETPTKVTTAQKVTFFSSH  
GNSAFQPIASSCKIVPQSQVNPPESPGKSFQPI TMCKIVSGSPISTPSPSPLPRTPTSTPVHLKQGTASSGV  
SNPHVIVDKPGQVIGASTPSTGSPSTSKLPVASQASQGTGSP I PKIHGSSFLTSTVKQEEESLFASMPPLCPIGS  
HPKVQSPKAVTGGLGAFTKVI IKQEPGEAPHVSTTGAASQSAFPQYVTVKGGHMI AVSPQKQVISAGEGTTQS  
PKIAPSKVVGVPVGSALPSTVKQAVAISSGQILVAKASSSVTKAVGPKQVVTQGVAKAIVSGGGTIVAQPVQ  
TLTKTQVTAAGPQKSGSQSVMATLQLPATNLANLANLPPGT KLYLTNTSKNPSGKGLLLIPQGAILRATYN  
ARYIFSWPTITPNTWKTTDYCIGGSRNTG SQFI ICTGTDTESH LWTENHFVYTGSHCWAGIAAEVTRQHPEV  
SASSSTARQAWDHDASSGRGGDHSCSLPCSGLLSKWCCTPV\*

>ENSMUSP00000155892\_c.2238:A>T\_p.N747Y ENSMUST00000232019.2|Yeats2-  
208|ENSMUSG00000041215|+|chr16:g.20024986:A>T  
RDAAVQKIETIIKEQFALEMKNKEHEIDVIDQRLIEARRMMDKLRACIVANYASAGLLKVVSEGLKTFDPMFV  
NHPAIKKFLESPPSRSSSPTNQRSETPSANHSESDSLSQHNDFLSDKDNNSNV DVEERPPSTGEQRP SRKDTSS  
ISGSHKRELNRADLTGDETSRLFVKKTI VVGNSKYI PPKREENDQSTHKWVMVYVGRSRREPSINHFKVW  
VFFLHPSYKPNLDLVEVREPPFHLTRRGWGEFPPVRVQVHFVFKDSQNKRIDIIHNLKLDRTYTGLOTLGAETVVDV  
DELHRHSLGEDSVYQSSSEDVCDAPPPTLTLPAAVKASAVAQSPPEAAAAPVGEFPEPTEAERHSTFYSLPSS  
LETPTKVTTAQKVTFFSHGNSAFQPIASSCKIVPQSQVNPPESPGKSFQPI TMCKIVSGSPISTPSPSPLP  
RTPPTSTPVHLKQGTASSGVSNPHVIVDKPGQVIGASTPSTGSPSTSKLPVASQASQGTGSP I PKIHGSSFLTST  
VKEESLFASMPPLCPIGSHPKVQSPKAVTGGLGAFTKVI IKQEPGEAPHVSTTGAASQSAFPQYVTVKGGHMI  
AVSPQKQVISAGEGTTQSPKIAPSKVVGVPVGSALPSTVKQAVAISSGQILVAKASSSVTKAVGPKQVVTQGV  
AKAIVSGGGGTIVAQPVQTLTKTQVTAAGPQKSGSQSVMATLQLPATNLANLANLPPGT KLYLTNTSKNPSG  
KGLLLIPQGAILRATYNANLQSGSAAAGGSGSSGAGGGSGGGGGSGAGGTPSTSGPGGGPQHLYTYSYILKQ  
TPQGTFLVQGPSPQTPGKQLTTASVVQGT LGVSSSSAQGGQTLKVISGQKTLFTQAATAGQASLLKLPDNTL  
KSVPAAPQALAKPGTMTLRVAGGVITAAPSPAVAFSANGAVHQSEGSTPVSSSVGSI IKTPGQPQVCVSQATMA  
TCKGPAAVAGTAASLVSAPSSISGKATVSGLLKLVHSAQSSPQAVLTIPSQKPLSINTSGGVQTVLMPVNVK  
VQSFSTSKLPTTVLPIVSNQAAPSSAPVAIAKVKTEPETPGPNCISQENQVAVKTEESSELSNYVIKVDHLE  
TIQQLLTAVVKKIPLITAKGDDASCFSAKSLEQYYGWNIGKRRAAEWQRAMTVRKVLQEI LEKNPRFHHLTPL  
KTKHIAHWCRCHGYTPPDPESLRHDGDSIEDVLTQIDSEPECLSSFSTADDLCKRLEDLQQFQKREPENEEVD  
DILSLSEPLKTNIKKEQEEKQEEMRFYLPPTPGSGFVGDITQKIGITLQPVALHRNMYASVVEDMILKATEQL  
VSDILRQALAVGYQTASPNRI PKEITVSNIHQAICNIPFLDFLTNKHMGRLNEDQ\*

>ENSMUSP00000023599\_c.419:T>A\_p.N140K ENSMUST00000023599.13|Eif4a2-  
201|ENSMUSG00000022884|+|chr16:g.22928806:T>A  
MSGGSADYNREHGGPEGMDPDGVIESNWNEIVDNFDDMNLKESLLRGIYAYGF EKPSAIQQRAIIPCIKGYDV  
IAQAQSGTGKTATFAISILQOLEIEFKETQALVLA PTRELAQQIQKVILALGDYMGATCHACIGGTKVRNEMQ  
KLQAEAPHIVVGT PGRVFDMLNRRYLSPKWIKMFVLDEADEMLSRGFKDQIYEIFQKLN TSIQVLLSATMPT  
DVLEVTKKFM RDP I RILV KKEELTLEGIKQFYINVEREEWKLDL TCDLYETLTITQAVIFLNTRRKVDWLTEK  
MHARDFTVSALHGDMDQKERDVIMREFRSGSSRVLITD L LARGIDVQQVSLVINYDLPTNRENYIHRIGRG  
RFRGRKGVAINFVTEEDKRILRDIETFYNTTVEEMP MNVADLI\*

>ENSMUSP00000121745\_c.279:T>A\_p.C94S ENSMUST00000147117.8|Eif4a2-  
216|ENSMUSG00000022884|+|chr16:g.22928806:T>A  
MSGGSADYNREHGGPEGMDPDGVIESNWNEIVDNFDDMNLKESLLRGIYAYGF EKPSAIQQRAIIPCIKDPKG  
NFGSWRLYGSNL SCLHWRNKSSK\*

>ENSMUSP00000156170\_c.422:T>A\_p.N141K ENSMUST00000232287.2|Eif4a2-  
224|ENSMUSG00000022884|+|chr16:g.22928806:T>A  
MSGGSADYNSREHGGPEGMDPDGVIESNWNEIVDNFDDMNLKESLLRGIYAYGF EKPSAIQQRAIIPCIKGYD  
VIAQAQSGTGKTATFAISILQOLEIEFKETQALVLA PTRELAQQIQKVILALGDYMGATCHACIGGTKVRNEM  
QKLQAEAPHIVVGT PGRVFDMLNRRYLSPKWIKMFVLDEADEMLSRGFKDQIYEIFQKLN TSIQVLLSATMPT

TDVLEVTKKFMRDPIRILVKKEELTLEGIKQFYINVEREEWKLDTLCDLYETLTITQAVIFLNTRRKVDWLTE  
KMHARDFTVSALHGDMQKQKRDVIMREFRS  
>ENSMUSP00000090876\_c.419:T>A\_p.N140K ENSMUST00000077605.12|Eif4a2-  
202|ENSMUSG00000022884|+|chr16:g.22928806:T>A  
MSGGSADYNREHGGPEGMDPDGVIESNWNEIVDNFDDMNLKESLLRGIYAYGFKEKPSAIQQRAIIPCIKGYDV  
IAQAQSGTGKTATFAISILQQLEIEFKETQALVLAAPTRELAQQIQKVLALGDYMGATCHACIGGTVKRNEMQ  
KLQAEAPHIVVGTGPRVFDMLNRRYLSPKWKMFVLDEADEMLSRGFKDQIYEIFQKLNNTSIQVLLSATMPT  
DVLEVTKKFMRDPIRILVKKEELTLEGIKQFYINVEREEWKLDTLCDLYETLTITQAVIFLNTRRKVDWLTEK  
MHARDFTVSALHGDMQKQKRDVIMREFRSQSSRVLITDILLARGIDVQQVSLVINYLPTNRENYIHRSR\*  
>ENSMUSP00000115649\_c.419:T>A\_p.N140K ENSMUST00000123413.8|Eif4a2-  
203|ENSMUSG00000022884|+|chr16:g.22928806:T>A  
MSGGSADYNREHGGPEGMDPDGVIESNWNEIVDNFDDMNLKESLLRGIYAYGFKEKPSAIQQRAIIPCIKGYDV  
IAQAQSGTGKTATFAISILQQLEIEFKETQALVLAAPTRELAQQIQKVLALGDYMGATCHACIGGTVKRNEMQ  
KLQAEAPHIVVGTGPRVFDMLNRRYLSPKWKMFVLDEADEMLSRGFKDQIYEIFQKLNNTSIQVLLSATMPT  
DVLEVTKKFMRDPIRILVKKEELTLEGIKQFYINVEREEWKLDTLCDLYETLTITQAVIFLNTRRKVDWLTEK  
MHARDFTVSALHGDMQKQKRDVIMREFRSQSSRVLITDILLARGIDVQQVSLVINYLPTNRENYIHRSR\*  
>ENSMUSP00000118141\_c.282:T>A\_p.C95S ENSMUST00000131871.8|Eif4a2-  
209|ENSMUSG00000022884|+|chr16:g.22928806:T>A  
MSGGSADYNSREHGGPEGMDPDGVIESNWNEIVDNFDDMNLKESLLRGIYAYGFKEKPSAIQQRAIIPCIKDPK  
GNFGSWRLYGSNLSCLHWRNKSSK\*  
>ENSMUSP00000127030\_c.134:T>A\_p.N45K ENSMUST00000168891.8|Eif4a2-  
222|ENSMUSG00000022884|+|chr16:g.22928806:T>A  
MHMVLRLSLQLFSKELLSVLKIQKVLALGDYMGATCHACIGGTVKRNEMQKLQAEAPHIVVGTGPRVFDMLN  
RRYLSPKWKMFVLDEADEMLSRGFKDQIYEIFQKLNNTSIQVLLSATMPTDVLEVTKKFMRDPIRILVKKEE  
LTLEGIKQFYINVEREEWKLDTLCDLYETLTITQAVIFLNTRRKVDWLTEKMHARDFTVSALHGDMQKQKRDV  
IMREFRSQSSRVLITDILLARGIDVQQVSLVINYLPTNRENYIHRIGRGRFGRKGVAINFVTEEDKRILRD  
IETFYNTTVEEMPNNVADLI\*  
>ENSMUSP00000140809\_c.419:T>A\_p.N140K ENSMUST00000187168.7|Eif4a2-  
223|ENSMUSG00000022884|+|chr16:g.22928806:T>A  
MSGGSADYNREHGGPEGMDPDGVIESNWNEIVDNFDDMNLKESLLRGIYAYGFKEKPSAIQQRAIIPCIKGYDV  
IAQAQSGTGKTATFAISILQQLEIEFKETQALVLAAPTRELAQQIQKVLALGDYMGATCHACIGGTVKRNEMQ  
KLQAEAPHIVVGTGPRVFDMLNRRYLSPKWKMFVLDEADEMLSRGFKDQIYEIFQKLNNTSIQVLLSATMPT  
DVLEVTKKFMRDPIRILVKKEELTLEGIKQFYINVEREEWKLDTLCDLYETLTITQAVIFLNTRRKVDWLTEK  
MHARDFTVSALHGDMQKQKRDVIMREFRSQSSRVLITDILLARGIDVQQVSLVINYLPTNRENYIHRSR\*  
>ENSMUSP00000067445\_c.187:T>A\_p.I63K ENSMUST00000068182.3|Stfa3-  
201|ENSMUSG00000054905|-|chr16:g.36271095:A>T  
MSQENLKIKGGLSEARPATPEIQMIADKVRPLLEEQTNEKYEFKFEAVEYKQVAVAGQNLFIKDKVNGCFLHM  
KVFRGLSGEDDLKLGKYQTNKTKTDELTSM\*  
>ENSMUSP00000113908\_c.2427:G>A\_p.G810R ENSMUST00000120049.8|Cfap44-  
202|ENSMUSG00000071550|+|chr16:g.44252320:G>A  
MKEPDDQDTS DGGSRNEGKLAHKSILKSSQDTTADS YTDGEE SYLGDDLDDMD ESSHSSQEYVQAPAP  
SQEPPVEVKEEPEADVKKVLS ETFYDYPELVSI PYVSSEERIPLYFLTLNHSFGYDCRKRANLQLLDSNTLL  
YVAGNQMVLLDFKDKTQIYLQSSSGQIGAI GVHPKKT YFAVAEKGSFPKII IYEYPSLKP YRILRDGAEKAY  
AYVDFNNEGNLLASVGCHPDYTITIWGWKEEQPILRTKAFSQDVFVKVTFNPDNDEQLTSSGSGHIKFWEMAFT  
FTGLKLQGS LGRFGKTSTSDIEGYAELPDGKVLSGSEWGNLLWEGSLIKVELCRTGMKSCSHSGSINQIMLDE  
GEVITAGSDG SVRIWDFETIDTADV IDDTGLLEIEPINELHIDKSVNLF SMIKMNEVGNFWLAQDANGAIWK  
LDLSFSNITQDPECLFSFHSGPIAALAVSPLTYLMATTAMDCSVRVYDFSSKNPLVHMKFKQGGTSLIWAPRS  
VSVSASQIVVGFQDGVVRVLELFDPKGLTVYAGRKKI PDAELHLKYVFKPHTDEVTALAYERDGDILATGSED  
KTVFFFDFVEKEYKPIGFFNTPGPIQQLMWSPASHPEKTLIIICENGYILES LCPTIKDVDDQNVITFAIPNVF  
LRCFHFTSVKSKILRFLEVQRREQQKMLKEKEKLERMKLAEEERAFGEEEIPEEETSEEGEEEEPLPEIFM  
PPTPSPILCGFYSEPGKFWVSLGN YDAGFLYHCQFPSYLHNSDFQKQENEPDFFRVLENTEDNPIRNI TFSND  
QTMMFCRMTNGAIRVYVLS ENDPFLVSLQHYWHFNVDNNGYSIKSITSSFDDQYLLTAGEDGNIFVFDIFSE  
FIVPKGIAKAVPSPRFGIESEAAPEDIEDPKAYS IENARKKREHDKLMKKVEELKAHKHREQIKILRNEFWKLL  
ELNKE LPAHQFQRTDFNIDAKIHA EIHKKTSLKIEQVEKELAWEKQKHELGLKLLQDRFREPLES DTVVYA  
TQSDHQIASYRLVKPSKYSKLRPSQSERRQSKMERLEKEGPGKESQRDTGGSISLQEE SVLEKGGKFRPRT  
LSEIMVENQIEKTKKLIQQAERAQFKILQRKKEWEELYKSKPDDDYEDPKDVQAIKEAQTYMGDFNLKTAPDY  
KIPEHMRINA AKKEELGYLDTMAHGKKRYMNCILSLRDLKLAVIEEIQCLVQELKNIQSSIPASKHMP IPQ  
VPQIYPEEV PERRFQYDEETLLRFQRKQKQRQDKSSSKQSGTGSGGSAGGGLVGLKLSGKEGDLTTRDSLS

RSSKASALLELPKPVEFEKAEPSSDAELEIMKRDEVKHLVMQQLFCNRINELTVTFDAELHLLRHQKLLDTKM  
KLSLDLHLLTLFQEMLLLNFEKQENILQERVNSLDKEEQDMQWKINETLKEMEEKKNEITKLQDQEKALYAGF  
QAALGENNKFANFLMKVLKIKRACKKEVEGDADEDEESESEESSESSLESDEDEDASGSEDDVFDSDICPTNC  
DVSLEFELALQLREKRLDIEEALVEEKKIVDNLKKEYDTISKKVKVAVATNLNAAEEALEAYQREKQQRNLNELLV  
VIPLKLHQIEYMEFGEVPELDSGTLVFSNHSLDRLQERIVQLQEENAKQQKLNKECRERRKLLIREKREMAKT  
ISKMEETVRELMISKFGRVIDLEALQTLVNTTLEELKIKKLRKELSNAKELRMWEEKIAQVRWDLMMKTKEH  
TKKLHQMNLDLCLEKKKLDRLNTLQNGQNAFQGLRKADIVAKQKQVTELVTQLEKITALKEEIEELLRKKGGGL  
LLPPIITPKPKNEMKPMDT\*

>ENSMUSP00000097331\_c.2427:G>A\_p.G810R ENSMUST00000099742.9|Cfap44-  
201|ENSMUSG00000071550|+|chr16:g.44252320:G>A

MKEPDDQDTS DGGSRGSRNEGKLAHKSILKSSQD TTADS YTDGEESYLGDDLDDMDDESSHSSQEVYQAPAP  
SQEPPEVVEKPEADVKKVLESETFYDYPELVSIPIVVSSEERIPLYFLTLNHSFGYDCRKRANLQLLDSNTLL  
YVAGNQMVLLDFKDKTQIYLQSSSGQIGAIQVHPKTYFAVAEKGSFPKIIIEYEPSLKPYPYRILRDGAEKAY  
AYVDFNNEG NLLASVGCHPDYTTITWGWKEEQPILRTKAFS QDVFKVTFNPDNDEQLTSSGSGHIKFWEMAFT  
FTGLKQLQGS LGRFGKTSTSDIEGYAELPDGKVLGSEWGNLLWEGSLIKVELCRTGMKSCHSGSINQIMLDE  
GEVITAGSDG SVRIWDFETIDTADVIDDTGLEIEPINELHIDKSVNLF SMIKMNEVGNFWLAQDANGAIWK  
LDLSF SNI TQDPECLF SFHSGPIAALAVSPLTYLMATTAMD C SVRVYDFSSKNPLVHMKFKGGTSLIWA PRS  
VSVSASQIVVGFQDGVVRVLELDFPKGLTVYAGRKKIPDAELHLLK YVFKPHTDEV T ALAYERDGDILATGSED  
KTVFFFVDEKEYKPIGFFNTPGPICQLM WSPASHPEKTLIIICENGYILESLCPTIKDVDDQNVITFAIPNVF  
LRCFHFTSVKSKILRFLEVRREQQKMLKEKEKLERRMKLAEEERAFGEEIPEEETSEEGEEEEPLPEIFM  
PPTPSPILCGFYSEPGKFWVSLGNYDAGFLYHCQFP SYLHNSDFQKQENEPDFRVLNTE DNP IRNITFSND  
QTM MF CRMTNGAIRVYVLS ENDPFLVSLQHYWHFNVDHNNYGSIKSITSSFDQYLLTAGEDGNI FVFDIFSE  
FIVPKGIKAKVSPRFGIESEAAPEDIEDPKAYS IENARKKREHDKLMKKVEELKAHKREQIKILRNEFWKLL  
ELNKELPAHMQFQRTDFNIDAKIHAEIHKKTS LKIEQVEKELAWEKQKHELGLKQLDRFREPLESDTIVVYA  
TQSDHQIASYRLVKPSKYSKLRPSQSERRQSKMERLEKEGPGKESQRDTGGSISLQEE SVLEKGGKFRPRT  
LSEIMVENQIEKTKKLIQQAERAQFKILQRKKKEWEEELYKSKPDDDYEDPKDVQAIKEAQTYMGDFNLKTAPDY  
KIPEHMRINA AKKEEELGYLDTMAHGK KRYMNKCILSLRDLKLA VIEEIQCLVQELKNIQSSIPASKHMP IPQ  
VPQIYPEEVPERRFQYDEETLLRFQRKQKQRQDKSSSKQSGTSGSGSAGGGLVGF LKLSGKEGDLTTRDSLS  
RSSKASALLELPKPVEFEKAEPSSDAELEIMKRDEVKHLVMQQLFCNRINELTVTFDAELHLLRHQKLLDTKM  
KLSLDLHLLTLFQEMLLLNFEKQENILQERVNSLDKEEQDMQWKINETLKEMEEKKNEITKLQDQEKALYAGF  
QAALGENNKFANFLMKVLKIKRACKKEVEGDADEDEESESEESSESSLESDEDEDASGSEDDVFDSDICPTNC  
DVSLEFELALQLREKRLDIEEALVEEKKIVDNLKKEYDTISKKVKVAVATNLNAAEEALEAYQREKQQRNLNELLV  
VIPLKLHQIEYMEFGEVPELDSGTLVFSNHSLDRLQERIVQLQEENAKQQKLNKECRERRKLLIREKREMAKT  
ISKMEETVRELMISKFGRVIDLEALQTLVNTTLEELKIKKLRKELSNAKELRMWEEKIAQVRWDLMMKTKEH  
TKKLHQMNLDLCLEKKKLDRLNTLQNGQNAFQGLRKADIVAKQKQVTELVTQLEKITALKEEIEELLRKKGGGL  
LLPPIITPKPKNEMKPMDT\*

>ENSMUSP00000097097\_c.1825:A>T\_p.K609M ENSMUST00000099498.10|Ccdc80-  
202|ENSMUSG00000022665|+|chr16:g.44917071:A>T

MMWKMGPHTTLLAMWLVCGSASHSPALDS SHTGRKVPLVSPISRSARYLRHTGRSGGVEKSTQEEPNPQP  
FQRRKSVPLRLAHPTRPPSPGINGVVRPEVRPIARSSAREMVRDEGSSARTRMLRFPSSSPNIIASFA  
GKNRVWVISA PHASEGYRLMMSLLKDDVYCELAERHIQQIVLFHQAGEEGGKVRRIITNEGQILEQPLDPNLI  
PKLMSFLKLEKGF SMVLLKKT LQVEERYPYPVRLEAMYEVIDQGP IRRIEKIRQKGFVQCKKASGIEGHVVQ  
EGNEGGGAGGTGLGGDKRKEDPRRTQVHPTREAPRQATSKAATPQPPTPRATTLPPAPVTTATRATSRVV  
TIAARPTTTTAYPATQRPWTSRLHPFSVSHRPPATAEVT TARGPSVSEQLYPLPRKEQQREKQATRPRSKAT  
NYGSAFATPPP TLWEVSARVVGTSRFRDNRD KREHGHQDPNAVGP HPKPVKGLPKKKDRILSNEYEDKYDL  
SQPTSSQGEERQVDSVPSQNAKESKLEKLEKPEKEK KKKGSAKQDKLLKSEKQAKKAEKTKQEKDKNKK  
KKAGKTEQDDNQKPTAKHLAPS PKMSVADLLGSFEGKRLLLLITTPKAENMYVQQRDEYLESFCKMATRIS  
VVTIFGPVNNSSMKIDHFQLDNEKPMRVVDDDDLDVQHLISELRKEYGMTYDDFFMVLTLDVLDLVKQYEVPI  
AMKSVFDLIDTFQSRIKMEKQKKEGIACKEDKRQSL ENFLSRFRWRRLLVISA PND EDWAYSQQLSALNGQ  
ACNFGLRHITILKLLGVGEEVGVLELFPINGSSIVEREDVPAHLVKDIRNYFQVSP EYF SMLLVGKDG NVKS  
WYPSPMWMSVIVYDLIDSMQLRRQEMAIQQSLGMRCPEDEYAGYGYHSYHQYQDGYQDDYRHHESYHHGYPY  
\*

>ENSMUSP00000058752\_c.1825:A>T\_p.K609M ENSMUST00000061050.6|Ccdc80-  
201|ENSMUSG00000022665|+|chr16:g.44917071:A>T

MMWKMGPHTTLLAMWLVCGSASHSPALDS SHTGRKVPLVSPISRSARYLRHTGRSGGVEKSTQEEPNPQP  
FQRRKSVPLRLAHPTRPPSPGINGVVRPEVRPIARSSAREMVRDEGSSARTRMLRFPSSSPNIIASFA  
GKNRVWVISA PHASEGYRLMMSLLKDDVYCELAERHIQQIVLFHQAGEEGGKVRRIITNEGQILEQPLDPNLI  
PKLMSFLKLEKGF SMVLLKKT LQVEERYPYPVRLEAMYEVIDQGP IRRIEKIRQKGFVQCKKASGIEGHVVQ

EGNEGGGGAGGTGLGGDKRKEDPRRTQVHPTREAPRKQATSKAATPQPPTPRATTLPPAPVTTATRATSRVV  
TIAARPTTTTAYPATQRPWTSRLHPFSVSHRPPATAEVTTARGPSVSEQLYPLPRKEQQREKQPATRPRPSKAT  
NYGSFTATPPPTLWEVSARVVGTSRFRDNRTDKREHGHQDPNAVPGPHKPVKGLPKKKDRILSNEYEDKYDL  
SQPTSSQGEERQVDSVPSQNAKESKKLEKLEKPEKEKKEKKSQAKQDKLLKSEKQAKKAEKKTQEKDKNKK  
KKAGKTEQDDNQKPTAKHLAPSPKMSVADLLGSFEGKRLLLIITPKAENNMVYVQRDEYLESFCMATRRIS  
VVTIFGPVNNSSMKIDHFDLNEKPMRVVDDDDLDVQHLISELRKEYGMTYDDFFMVLTLDVLRVKQYVEVPI  
AMKSVFDLIDTFQSRIKMEKQKKEGIACKEDKRSLENFLSRFRWRRRLVVISAPNDEDWAYSQQLSALNGQ  
ACNFGRLRHITILKLLGVGEEVGGVLELFPINGSSIVEREDVPAHLVKDIRNYFQVSPPEYFMSMLLVGKDGNVKS  
WYSPMWSMVIVYDLIDSMQLRRQEMAIQQSLGMRCPEDEYAGYGYHSYHQGYQDGYQDDYRHHSYHHGYPY  
\*

>ENSMUSP00000155928\_c.495:G>A\_p.G166R ENSMUST00000232600.2|Gm17783-  
201|ENSMUSG00000116542|-|chr16:g.45348040:C>T  
MDFLLHCILHLLMLPPCAQESGSLQRIRHKNYETAVLGRNVTLFCNFSSLANVLIQITWQKIQGSPLPHNIGTYS  
HTYGEKILPPYVNRQLCKTLEPSASFMTIQGVTFEDEACYKCLFNI FPRGSHGGQTCLTILTVSELVTELQSA  
PGSEDLHSLCSAVGKPPAPRISIYPSQVTVQAPQEYFVQANANATVTVTKIYNISLKTARSLGLQNLVSMTHP  
VRNEEKIVHLPVNVQGGTTNPNCLNWMITAIAFIILFFVSCIISAVLYIYFQKKRSEKVPKPSPTQDPYKTSTLM  
PPPPSTESENLIHTTRQILEVYMFLCH\*

>ENSMUSP00000124179\_c.1884:G>GAAAAA\_p.E629EKK-ins  
ENSMUST00000159816.8|Filip11-  
203|ENSMUSG00000043336|+|chr16:g.57391298:G>GAAAAA  
MRSRSSNAEGSAPKQIPRHSKFQDSIQDMKHRTHKKDPSCSEGVLPVSEKSHGKHHTEDLSRDDLLFL  
LSILEGELQARDEVIGILRAEKIDLALLEAQYGFVTPKKVLEALQRDAFQAKSAPWQEDIYKPMNELDKVVE  
KHKESHRRILEQLLMVERSHRQTIMEMEEKRRKHKEYMKKSEDEFINLLEQECERLKKLIDQETASQEKKEQEK  
EKRIKTLKEELTKLKSFALMVVDEQQRRLTAQLALQRQKIQUALTTSAKETQGGKLALAEARAQEEEEQKATRLEKE  
LQTQTTEFHONQDKIMAKLTNEDSQNRQLRQKLAALSQIDELEETNRSRKAEEELQDIKDKINKGEYGNNG  
IMDEVDELKRKRVLDMEGKDEELIKMEEQCRDLNKRLEKETVQSKDFKLEVDKLSVRITALEKLEDALDKSKQE  
CYSLKCNLEKEMTTKQLSEELSLNARIKELEAIESRLEKTEITLKDDLTKLKTTLTVMLVDERKTMSEKLLQ  
TEDKQLQSTTSQLOAEQNKVTTVTEKLIETKRALSKTDAAEKMYSVTKERDDLNRKLAEEEEKGHDLKSKVT  
ILKNRQLSLEAIEKDFVKNLNQDSSKSTAALHQENNKIKELSQEKVENLKLKDKMKAIEDDLMKTEDEYE  
TLERRYANERDKAQFLSQELEHAKMELAKYKLAEKTESSEHWLFRRLQEEEEAKSGHLSREVDALKEKHEYM  
ATEDLICHLQGDHSLQKLNQENNRDLGREIENLTKELERYRHFSKSLRPSLNERRISDPQVFSKEVQTE  
AADSEPPDYKSLIPLERAVINGQFYENEDQDDDPNEEESVLSFRCSQSSSLPMNRKLWI PVMKSKGHPQNG  
KIQTKSNGNFVQPGDLVLSHTPGQPLHIKVTDPHIQNTATLEITSPTTESPHSYTSTAVIPNCGTPKQRITIL  
QNASITPIKSKSSTESLMNLEQSMSPVTMATFARAQTPESCGVSPTPERTMSPIQVLAMTGPSPEQGCSEPEP  
IEISAKHAI FRVSPDRQSSWQFQRSNSNSSSSVITTEDNKIHIHLGSPYMQAVAGPMPRPASPSAPLQDNRTQGL  
TNGALNKTNNKVTSSITITPTATPLPRQSQITVSNIIYN\*

>ENSMUSP00000124069\_c.1170:G>GAAAAA\_p.E391EKK-ins  
ENSMUST00000159414.2|Filip11-  
202|ENSMUSG00000043336|+|chr16:g.57391298:G>GAAAAA  
MVVDEQQRRLTAQLALQRQKIQUALTTSAKETQGGKLALAEARAQEEEEQKATRLEKELQQTTEFHONQDKIMAKL  
TNEDSQNRQLRQKLAALSQIDELEETNRSRKAEEELQDIKDKINKGEYGNNGIMDEVDELKRKRVLDMEGKD  
EELIKMEEQCRDLNKRLEKETVQSKDFKLEVDKLSVRITALEKLEDALDKSKQECYSLKCNLEKEMTTKQLS  
EELESLNARIKELEAIESRLEKTEITLKDDLTKLKTTLTVMLVDERKTMSEKLLQTEDEKQLQAEQNKV  
TTVTEKLIETKRALSKTDAAEKMYSVTKERDDLNRKLAEEEEKGHDLKSKVTILKNRQLSLEAIEKDFVKN  
KLNQDSSKSTAALHQENNKIKELSQEKVENLKLKDKMKAIEDDLMKTEDEYETLERRYANERDKAQFLSQE  
LEHAKMELAKYKLAEKTESSEHWLFRRLQEEEEAKSGHLSREVDALKEKHEYMATEDLICHLQGDHSLQK  
LNQENNRDLGREIENLTKELERYRHFSKSLRPSLNERRISDPQVFSKEVQTEAADSEPPDYKSLIPLERAV  
INGQFYENEDQDDDPNEEESVLSFRCSQSSSLPMNRKLWI PVMKSKGHPQNGKIQTKSNGNFVQPGDLVLS  
HTPGQPLHIKVTDPHIQNTATLEITSPTTESPHSYTSTAVIPNCGTPKQRITILQNASITPIKSKSSTESLMN  
LEQSMSPVTMATFARAQTPESCGVSPTPERTMSPIQVLAMTGPSPEQGCSEPEPIEISAKHAI FRVSPDRQSS  
WQFQRSNSNSSSSVITTEDNKIHIHLGSPYMQAVAGPMPRPASPSAPLQDNRTQGLTNGALNKTNNKVTSSITIT  
PTATPLPRQSQITVSNIIYN\*

>ENSMUSP00000124179\_c.1884:G>GGAAAA\_p.E629ins-fs  
ENSMUST00000159816.8|Filip11-  
203|ENSMUSG00000043336|+|chr16:g.57391298:G>GGAAAA  
MRSRSSNAEGSAPKQIPRHSKFQDSIQDMKHRTHKKDPSCSEGVLPVSEKSHGKHHTEDLSRDDLLFL  
LSILEGELQARDEVIGILRAEKIDLALLEAQYGFVTPKKVLEALQRDAFQAKSAPWQEDIYKPMNELDKVVE  
KHKESHRRILEQLLMVERSHRQTIMEMEEKRRKHKEYMKKSEDEFINLLEQECERLKKLIDQETASQEKKEQEK

EKRKIKTLKEELTKLKSFALMVVDEQQRLTAQALQORQKIQUALTTSAKETQGKLALAEARAQEEEEQKATRLEKE  
LQTQTTEFHONQDKIMAKLTNEDSQNRQLRQKLAALSQRIDELEETNRSRKAEEELQDIKDKINKGEYGN  
IMDEVDELRRKRVLDMEGKDEELIKMEEQCRDLNKRLEKETVQSKDFKLEVDKLSVRITALEKLEDALDKSKQE  
CYSLKCNLEKEKMTTKQLSEELESLNARIKELEAIESRLEKTEITLKDDLTKLKTTLVMLVDERKTMSEKQ  
TEDKQSTTSQQLQAEQNKVTTVTEKLIETTKRALSKTDAEEKMYSVTKERDDLNRKKAEEEEKGHDL  
ILKNRQSLQSLAEIEKDFVKNKLQDSSKSTAALHQENNIKELSQGKKWKI  
>ENSMUSP00000124069\_c.1170:G>GGAAA\_p.E391ins-fs  
ENSMUST00000159414.2|Filip11-  
202|ENSMUSG00000043336|+|chr16:g.57391298:G>GGAAA  
MVVDEQQRLTAQALQORQKIQUALTTSAKETQGKLALAEARAQEEEEQKATRLEKELEQTQTTEFHONQDKIMAKL  
TNEDSQNRQLRQKLAALSQRIDELEETNRSRKAEEELQDIKDKINKGEYGN  
IMDEVDELRRKRVLDMEGKDEELIKMEEQCRDLNKRLEKETVQSKDFKLEVDKLSVRITALEKLEDALDKSKQE  
CYSLKCNLEKEKMTTKQLSEELESLNARIKELEAIESRLEKTEITLKDDLTKLKTTLVMLVDERKTMSEKQ  
TEDKQSTTSQQLQAEQNKVTTVTEKLIETTKRALSKTDAEEKMYSVTKERDDLNRKKAEEEEKGHDL  
ILKNRQSLQSLAEIEKDFVKNKLQDSSKSTAALHQENNIKELSQGKKWKI  
>ENSMUSP00000124179\_c.1884:G>GGAAA\_p.E629ins-fs  
ENSMUST00000159816.8|Filip11-  
203|ENSMUSG00000043336|+|chr16:g.57391298:G>GGAAA  
MRSRSSNAEGSAPKQIPRHSKFQDSIQDMKHRTHKKDPSCSESEGLPRPVSEKSHTGKGHHTEDLSRDDLLFL  
LSILEGELQARDEVIGILRAEKIDLALLEAQYGFVTPKKVLEALQDAFQAKSAPWQEDIYEKPMNELDKVVE  
KHKESHRRILEQLLMVERSHRQTIMEMEEKRRKHKEYMKKSEDEFINLLEQECERLKKLIDQETASQEKKEQEK  
EKRKIKTLKEELTKLKSFALMVVDEQQRLTAQALQORQKIQUALTTSAKETQGKLALAEARAQEEEEQKATRLEKE  
LQTQTTEFHONQDKIMAKLTNEDSQNRQLRQKLAALSQRIDELEETNRSRKAEEELQDIKDKINKGEYGN  
IMDEVDELRRKRVLDMEGKDEELIKMEEQCRDLNKRLEKETVQSKDFKLEVDKLSVRITALEKLEDALDKSKQE  
CYSLKCNLEKEKMTTKQLSEELESLNARIKELEAIESRLEKTEITLKDDLTKLKTTLVMLVDERKTMSEKQ  
TEDKQSTTSQQLQAEQNKVTTVTEKLIETTKRALSKTDAEEKMYSVTKERDDLNRKKAEEEEKGHDL  
ILKNRQSLQSLAEIEKDFVKNKLQDSSKSTAALHQENNIKELSQGKSGKSETAEAKGYESH  
>ENSMUSP00000124069\_c.1170:G>GGAAA\_p.E391ins-fs  
ENSMUST00000159414.2|Filip11-  
202|ENSMUSG00000043336|+|chr16:g.57391298:G>GGAAA  
MVVDEQQRLTAQALQORQKIQUALTTSAKETQGKLALAEARAQEEEEQKATRLEKELEQTQTTEFHONQDKIMAKL  
TNEDSQNRQLRQKLAALSQRIDELEETNRSRKAEEELQDIKDKINKGEYGN  
IMDEVDELRRKRVLDMEGKDEELIKMEEQCRDLNKRLEKETVQSKDFKLEVDKLSVRITALEKLEDALDKSKQE  
CYSLKCNLEKEKMTTKQLSEELESLNARIKELEAIESRLEKTEITLKDDLTKLKTTLVMLVDERKTMSEKQ  
TEDKQSTTSQQLQAEQNKVTTVTEKLIETTKRALSKTDAEEKMYSVTKERDDLNRKKAEEEEKGHDL  
ILKNRQSLQSLAEIEKDFVKNKLQDSSKSTAALHQENNIKELSQGKSGKSETAEAKGYESH  
>ENSMUSP00000149646\_c.70:T>C\_p.V24A ENSMUST00000213228.2|Olfr194-  
202|ENSMUSG00000063020|-|chr16:g.58940361:A>G  
MEVNRSQVSDFVLKGITDHTELQAPLFLFFFIYVTTMVGNLGLIFLIWKDPHLHTPMYYFLGSLAFADACTS  
SSVTPRMLVNILDNGKMISLSECMAQYVFGSSATTECFLLVAMAYDRYVAICNPLLYLVMSNRVCTCLISG  
SYIIGFLHPLIHVGLLFRFLTFCCKSNIIDHFYCEILPLYTISCTDPSINAFVVFIFSAVIQAVTFMSIAVSYAH  
VLFSILKTKSERGRRKAFSTCSAHLSSVSLFYGTFFMYVSPGSGPSKYKNKMYSLFYTTIVIPLLNPFYISLR  
NKEVLGALRKIIKS\*  
>ENSMUSP00000149379\_c.70:T>C\_p.V24A ENSMUST00000216519.2|Olfr194-  
203|ENSMUSG00000063020|-|chr16:g.58940361:A>G  
MEVNRSQVSDFVLKGITDHTELQAPLFLFFFIYVTTMVGNLGLIFLIWKDPHLHTPMYYFLGSLAFADACTS  
SSVTPRMLVNILDNGKMISLSECMAQYVFGSSATTECFLLVAMAYDRYVAICNPLLYLVMSNRVCTCLISG  
SYIIGFLHPLIHVGLLFRFLTFCCKSNIIDHFYCEILPLYTISCTDPSINAFVVFIFSAVIQAVTFMSIAVSYAH  
VLFSILKTKSERGRRKAFSTCSAHLSSVSLFYGTFFMYVSPGSGPSKYKNKMYSLFYTTIVIPLLNPFYISLR  
NKEVLGALRKIIKS\*  
>ENSMUSP00000072407\_c.70:T>C\_p.V24A ENSMUST00000072608.2|Olfr194-  
201|ENSMUSG00000063020|-|chr16:g.58940361:A>G  
MEVNRSQVSDFVLKGITDHTELQAPLFLFFFIYVTTMVGNLGLIFLIWKDPHLHTPMYYFLGSLAFADACTS  
SSVTPRMLVNILDNGKMISLSECMAQYVFGSSATTECFLLVAMAYDRYVAICNPLLYLVMSNRVCTCLISG  
SYIIGFLHPLIHVGLLFRFLTFCCKSNIIDHFYCEILPLYTISCTDPSINAFVVFIFSAVIQAVTFMSIAVSYAH  
VLFSILKTKSERGRRKAFSTCSAHLSSVSLFYGTFFMYVSPGSGPSKYKNKMYSLFYTTIVIPLLNPFYISLR  
NKEVLGALRKIIKS\*



>ENSMUSP00000156047\_c.2337:G>T\_p.A780S ENSMUST00000172910.3|Crybg3-205|ENSMUSG00000022723|-|chr16:g.59378915:C>A  
MSGRRRGSAPWHSFRRFFAPRNP SRDKEEEEEEEKPGTGQPAGVSRSAASVENEPVSTSQKKNALSSSEAVKI  
PQAEDRRNHAEQPAILPMVDDLKPKDLDPDSTPEAKTGESDRQPKESFFQFLGNLFNISGKSSLGEVKQSSFK  
DDQEKPEKDPQTPWGPPEEGSQREEEAASHPARTQVLLGGQQUESTSSELSDAFSLDSTQDSEQETTEMPKKDT  
VGKPEKPSVTYATYRGATQIRKYLQQQPVLETMNLHDGEDGSSDSSPQAHAGRSRIRDVTVTPLSTDSKDVAT  
KGYLLGGPLEASGYSQINTNRESHQESVPLQDIASSKCILNKNSHGGLRSSWASPSVSNPSYVVGEPDSQT  
ESVLCSSVFRGSKSSQGPCPEFQRKTPDTPPRVNSSAVTDGLPSVPGEEPAPRQRPSPVDFSRKSDGSDT  
TKMESTNLSSPHKSI RHEDARLPEHKCGDKPAVDNPSRRTVNHACIMALQGHAVTDSELVNEGKLPARDSQK  
NMVSEILKETECASGREPTTTLSHVRTPEVRIESLPKETEPPEPPCETETKRLGLELHVKTPEMGTQEDPGS  
VKGVSDSVVVACTESETAHELKSELNRNPTSESPFLENSQQGGVASDAEAPLHLDCKTSDYSASPPTLASRI  
NRLGQLGFSGLKGERSSSSKTGQKVFSHPNECQEEGVGTHSEATDRENPPALYLGHASSTLESKEFLPHGK  
CQSPSGPETAGTQLAGVALNFEHGDTSEDLNSVPSHGPKKEELMSSNAKSRKSTVEKSDSFPLETQTAKMLGK  
GEVCDQSSFPVSESSGRRKALSTPSVQAEPDVPQCNISSSQVTVAEKLAETVLSLNYLGMKEDEDVQPV  
RKEIKQLCFSGGFKENHQTGISPASEHHGQETEMNTPDRSAAVLTSNLPGLPLPPEEESTRHRPQNCEAST  
CLITPSLAICVTKKSSSISETEGLSLDNIFFPKFQETDNTRVYTSFLSSDAHLEKNVFAPEGSSSLTVPSSLGL  
EKEASSRRDNAYFQSAGTGNTPSFCHTKGESTAVNSHDLPSNFESLKVTVNLTCEGASVIDPLGHNSFYLLAL  
DTPSPKEAEVTSLQCGVGTHTRKACLDSPPTAYFDNLKMAETGTVAGAPVSVNRSCQOCSEASADTDSRRRA  
RDPLLLRSGLPKRADTLTEEILSSVREELKSKHTVGTQCEHLAQEDVMNPGTVKEAIPSEVVLQIQLKESLD  
EKGVDMSMGVKEEETS SVSSAVGETSLLDFDFDRGNSSWMLERARELVNEVIYAAQENLIRDAFDEIEDTRVS  
EPQANTSKNWNNGSGGNPHAVVREFLVSEQAVNQSTCEISENEVLSKLSVSVYLVSGTESIKGREIVPYQEC  
DFGSGAGQSASVKLETLETVFQGEVPRTRLDKAVKTGFLVSEDIYKVAETECVDNHKMAAADTRTLVNLNFN  
PFARDDIHVPSTSKNSFSDSLVCISEKSPFGHNKSTPLAMSDLGKAHKNDNEVNVGKMALTPSMLEIGKTNKR  
DVELNIMKHEAAPLMPHREKACKVDPELNSMKAPEANVFARGSVYQMDAQMYVEKPEELPITLGMKAFKTD  
SEGDIGKAEVMPAMSELKTVHLKDAEGAIVKTEVAPISIEMESFYQKRAEGDVGKAGVASVMPEVEIFYQSDG  
VGSASEAEATTVTLMGMDTYQKDEESTVAETDVIDMVPAALEMESIYPKDEGDTDSISEGMPAKLDVVNAYQ  
KYSDRVTAETRIPLRDAEDVLGNAETVPFVLDVKETYQETVYPLDILEKRIQRDTEESNGTTEPVPSKI  
EMEVMAPESSGSTENRELLPMEVAMERTNGTTPGVTIMQTDALGPAFENTKDPREYMEKSIGEIEEPPGEVK  
KGLILHDDRLASHFRGYESPTLSKDYEGYPASAIIPDVQEEDTVVRLKIMSVVVDKRRNLDCREEKEESNL  
AFVSQDEQDSSSFTILYEEPLQEDRYTSAELRGSQSLLFPDTSMPGLACERSESRDLVHHEKEGKLG  
FDGDNSEMFLSVEAKRYKIYPLALSPIYEDDSSQEDVLSSEVSPGHGSSKSRRESANQPSSVLSLLQSVSERL  
QRNFDGDDRQEAEEEEEEAVASGKDWRTKREHVTFHLDPDPIPFYPEDNQEHAGIFKSYVEFSEPTSSSLQ  
GRWSEKELFLQKSDMTSKLHSSLSAYHQYLQTSRTHSSETGTRFGGTLQEPVSKYFRVQDHAGRLSPYVENV  
DKQTLKCNPRPGKMIYDLHGSKYKQEVYCNIPDATTWSPNGALIKVVRGCWILYKPHFQGGQKCVLEEGE  
VLDRDWLLQNRKHPERNFVLGSIKRVLKDCSIPVIELCPKTDPGCSPYIHRVSNVEELNPKSTSVTVKSG  
VWLAYPDIHFKGATILEEDQGLFEISAAEMKSLHPLQMGGLKVEMPMNLKVILYKPHFLGHTKEFSHIDS  
VPTFLKSDKDFHIGSIRVIGGVVWVAYEKEHFQKQQLLEEGDFEDSSACGALS GPIMSFYRLQANFISSIT  
LFESSHLESGKFIDITNQEISDLEEIGFGSETRSIHVKSGVWVAYHQKFFCGDQYILEKGYKCFDWDGSSN  
TILSIRPIQLEPLGINEPTHLLKAFSKAGFQGECIDFVKECADLTSFTPASFKVLRGCWLLLYQEDGFYHQ  
VLEEGLYVDLTS CGCPSARIRALQPIDYVFEEPSISLFALEHCEGRELHLEDVNSVLNKLHFTYQSVWIKS  
GLWIAYESNFLGRQILLTPKEIPNWTAFSGWKTIGSVRPMKQPAVYIRIRNRAQDEYLTVTGNPADARTMSV  
CISPYSGKDTQIWHYCRGLFKSKASHTCLDVIGGRDTPGAKVALWTEHGQLRQKWRMSRNGTISSYLSDELVL  
DVKGGNYDKTHVIVNQPLEGEETQKWDIEIL\*

>ENSMUSP00000049394\_c.25:T>C\_p.L9P ENSMUST00000039659.9|Cbr1-201|ENSMUSG00000051483|+|chr16:g.93404879:T>C  
MSSSRPVAVPTGANKGIGFAITRDLCKRFSGDVVLAARDEERGQTAVQKLQAEGLSPRFHQDLIDNPPQSIRAL  
RDFLLKEYGGLDVLVNNAGIAFKVNDTDPFHIAEVTMKTNFFGTRDVCKELLPLIKPQGRVVNVSSMVSLRA  
LKNCRLELQOKFRSETITEEELVGLMNKFVEDTKKGVHAEEGWPNSAYGVTKIGVTVLSRILARKLNEQRRGD  
KILLNACCPGWVRTDMAGPKATKSPEEGAETPVYLLALLPPDAEGPHGQFVQDKKVEPW\*

>ENSMUSP00000155872\_c.25:T>C\_p.L9P ENSMUST00000231762.2|Cbr1-203|ENSMUSG00000051483|+|chr16:g.93404879:T>C  
MSSSRPVAVPTGANKGIGFAITRDLCKRFSGDVVLAARDEERGQTAVQKLQAEGLSPRFHQDLIDNPPQSIRAL  
RDFLLKEYGGLDVLVNNAGIAFKVNDTDPFHIAEVTMKTNFFGTRDVCKELLPLIKPQEW\*

>ENSMUSP00000159158\_c.204:C>G\_p.Q69E ENSMUST00000238835.2|Smok2a-202|ENSMUSG00000073458|+|chr17:g.13444689:C>G  
MENFHAQYEMLGTIGHGGSTKVKLARHRLTGTHVAVKMI PKREYWKPLMSEAEELMMADHPNIISSLEVIET  
KKKVYLIMELCEGKSLSYQHIRNAGYLOEDEARALFKQLLSAINYCHNQIGIVHRDLKPDNIMVEKDGVRKIIDF  
GLGIQVKPGQKLNLCFGTYPFSAPEVLLSRPYDGPKIDVWTLGVVLYFMVVTGKIPFDAASIEKLRKQIVAGKY

SVPCRLSVKLHHLITLLMTPDNPRLRPTVAEVMHPVWTKGSGVFPDPCCEEQIPLKPDPAIVKAMGHIGFQAQD  
IEDSLRQRKFNETMASYCLLKKQILKECDRPIRAQPMNPSVTPFPPLVDTPTFHLGLRRRETEPTSLRLSANR  
QMSVCGRSTSKKRDRSFSWPGVLSRPINITPTMDQTHCTRSVPCINSNFCIIHPNSSDESTEGHTSASAEDK  
PVRSRGWPRGIGWTSKIGNAMRKLCCIPSNETSHLGQRRVSPKK\*

>ENSMUSP00000094432\_c.264:C>G\_p.Q89E ENSMUST00000080647.5|Smok2a-  
201|ENSMUSG00000073458|+|chr17:g.13444689:C>G

MGSGSQKSEKLRSKPPFSEMENFHAQYEMLGTIGHGGSTKVKLARHRLTGTHVAVKMIKREYWKPLMSEA  
ELLMADHPNIIISLLEVIETKKKVYLIMELCEGKSLYQHIRNAGYLQEDEARALFKQLLSAINYCHNQGIVHR  
DLKPDNIMVEKDGRVKIIDFGLGIQVKPGQKLNLFVCGTYPFSAPEVLLSRPYDGPKIDVWTLGVVLYFMVTGK  
IPFDAASIEKLRKQIVAGKYSVPCRLSVKLHHLITLLMTPDNPRLRPTVAEVMHPVWTKGSGVFPDPCCEEQIP  
LKPDPVAIVKAMGHIGFQAQDIEDSLRQRKFNETMASYCLLKKQILKECDRPIRAQPMNPSVTPFPPLVDTPTF  
HLGLRRRETEPTSLRLSANRQMSVCGRSTSKKRDRSFSWPGVLSRPINITPTMDQTHCTRSVPCINSNFCII  
HPNSSDESTEGHTSASAEDKPVRSRGWPRGIGWTSKIGNAMRKLCCIPSNETSHLGQRRVSPKK\*

>ENSMUSP00000095015\_c.1081:C>T\_p.T361I ENSMUST00000097403.4|Tcpl0c-  
201|ENSMUSG00000052469|+|chr17:g.13590485:C>T

MHEPSSLQPESSLVTVWRLNSQQRQAMLEDLSQKGSNHKKRKMESTAQITEEDSKLDEVVGLQKQICDLGTEL  
TRQSSWWCVAHKDLQSQIDALIKENQEIIRAEHLKTLKKQDAEATKACIGSPTSARASNTLPVYIKIEGIDSSERT  
TSWDERDELSGSPPNRSTMATGGTDSQDERLSFTSVDEKPVYIKIEGIDSSERTTSWDERDELSGSPPNRSTMA  
TGGTDSQDERLSFTSVDEKVIHMSKFLQRSFGRMSPEPLSDSTFLDTESLADIWSSNSETSDGELLLHAQAS  
RVIPCFSPNALWVQVERMLSDGRTIITFPNGTRKEISADKKTTLIRFFNGDMKIKSDQKAIYYADAQIMHTT  
YPDGVEVVQFPNKWTEKFYDPGSKETVFPDGTQKLDGCEETVFPDGTFTVTKRNGDKTIMFSNGEKEIHTA  
RFRKKEFPDGTTKTVYCNQCQETKYASGRVVRVDEKGTIVILDWK\*

>ENSMUSP00000095015\_c.1129:A>G\_p.N377S ENSMUST00000097403.4|Tcpl0c-  
201|ENSMUSG00000052469|+|chr17:g.13590533:A>G

MHEPSSLQPESSLVTVWRLNSQQRQAMLEDLSQKGSNHKKRKMESTAQITEEDSKLDEVVGLQKQICDLGTEL  
TRQSSWWCVAHKDLQSQIDALIKENQEIIRAEHLKTLKKQDAEATKACIGSPTSARASNTLPVYIKIEGIDSSERT  
TSWDERDELSGSPPNRSTMATGGTDSQDERLSFTSVDEKPVYIKIEGIDSSERTTSWDERDELSGSPPNRSTMA  
TGGTDSQDERLSFTSVDEKVIHMSKFLQRSFGRMSPEPLSDSTFLDTESLADIWSSNSETSDGELLLHAQAS  
RVIPCFSPNALWVQVERMLSDGRTIITFPNGTRKEISADKKTTLIRFFNGDMKIKSDQKAIYYADAQIMHTT  
YPDGVEVVQFPNKWTEKFYDPGSKETVFPDGTQKLDGCEETVFPDGTFTVTKRNGDKTIMFSNGEKEIHTA  
RFRKKEFPDGTTKTVYCNQCQETKYASGRVVRVDEKGTIVILDWK\*

>ENSMUSP00000156686\_c.522:A>G\_p.K175E ENSMUST00000232810.2|Vmn1r229-  
202|ENSMUSG00000117148|+|chr17:g.21035279:A>G

MDFGNLAMGIVLSLQSLGILGNFSLFYLVLYNKERTLKIIDIILIHVFTSNSLIIFSKGLPEVLAVFGWN  
DLFDDVGCKLIMYVRRVSRMSISMTCLLSVFQAITISTRNSCWKEFKQAKFMGLFISLCWILFMLVNMLF  
PVYVSTNRNSKNKTQKKDIEFCHSVGRDEMVDIMYAFVFPVPEVLFSLLVSSSTTMIVILYGHKKRVQHILH  
THASPR TSAENRATQTILILVCTFLAFYTLSSVVLQGYVALSHDPSWVWMNITTIISMGFPAIGPFVMSRDFTV  
SRFCFTCIGNLKLKLP\*

>ENSMUSP00000156596\_c.522:A>G\_p.K175E ENSMUST00000233712.2|Vmn1r229-  
205|ENSMUSG00000117148|+|chr17:g.21035279:A>G

MDFGNLAMGIVLSLQSLGILGNFSLFYLVLYNKERTLKIIDIILIHVFTSNSLIIFSKGLPEVLAVFGWN  
DLFDDVGCKLIMYVRRVSRMSISMTCLLSVFQAITISTRNSCWKEFKQAKFMGLFISLCWILFMLVNMLF  
PVYVSTNRNSKNKTQKKDIEFCHSVGRDEMVDIMYAFVFPVPEVLFSLLVSSSTTMIVILYGHKKRVQHILH  
THASPR TSAENRATQTILILVCTFLAFYTLSSVVLQGYVALSHDPSWVWMNITTIISMGFPAIGPFVMSRDFTV  
SRFCFTCIGNLKLKLP\*

>ENSMUSP00000156964\_c.522:A>G\_p.K175E ENSMUST00000232852.2|Vmn1r229-  
203|ENSMUSG00000117148|+|chr17:g.21035279:A>G

MDFGNLAMGIVLSLQSLGILGNFSLFYLVLYNKERTLKIIDIILIHVFTSNSLIIFSKGLPEVLAVFGWN  
DLFDDVGCKLIMYVRRVSRMSISMTCLLSVFQAITISTRNSCWKEFKQAKFMGLFISLCWILFMLVNMLF  
PVYVSTNRNSKNKTQKKDIEFCHSVGRDEMVDIMYAFVFPVPEVLFSLLVSSSTTMIVILYGHKKRVQHILH  
THASPR TSAENRATQTILILVCTFLAFYTLSSVVLQGYVALSHDPSWVWMNITTIISMGFPAIGPFVMSRDFTV  
SRFCFTCIGNLKLKLP\*

>ENSMUSP00000076045\_c.522:A>G\_p.K175E ENSMUST00000076759.3|Vmn1r229-  
201|ENSMUSG00000117148|+|chr17:g.21035279:A>G

MDFGNLAMGIVLSLQSLGILGNFSLFYLVLYNKERTLKIIDIILIHVFTSNSLIIFSKGLPEVLAVFGWN  
DLFDDVGCKLIMYVRRVSRMSISMTCLLSVFQAITISTRNSCWKEFKQAKFMGLFISLCWILFMLVNMLF  
PVYVSTNRNSKNKTQKKDIEFCHSVGRDEMVDIMYAFVFPVPEVLFSLLVSSSTTMIVILYGHKKRVQHILH

THASPRSAENRATQTILILVCTFLAFYTLSSVVLQGYVALSHDPSWVWMNITTIISMGFPAIGPFVMSRDFTV  
SRFCFTCIGNLKL\*  
>ENSMUSP00000135186\_c.1564:T>C\_p.F522S ENSMUST00000175853.3|Vmn2r130-  
201|ENSMUSG00000095658|+|chr17:g.23293560:T>C  
MFTLILLLFLLNIPLIVADFIYSRCFWRIKQNKDKDGNLGSICALFIQAVQWPVEKEYFSPILNTQTYTENYK  
YILVFMFSINEVNRNSDLLPNMSLIFFTSALSCNESQLKSFHLSLQDHDYFPNYICNDYICGVALVGLKWET  
TLTYLILNFMSSHQFLFLNYGPFHPAMSDHEEFPIYQMAEEDTSLALAMVSFIIHFSWNWVGLAISDNDEG  
IQFLSHLRREMEKNTVCFVSMIPVNMHLYMTRTEVYVYQIMTSSTNVVVIYGDSTDSTLAVSFRMWESLDIK  
RIWVWTSQWDIITSKKDFTFNLYGTFAFGHHHEIGSGKFNQVQTLDDLKFSDEYLVKLEWYFNCEDSAPKC  
KTLKNCSSNHLEWLMVTRFDMAFTEGSYAIYNAVYAVAHALHELTFQKFDNLRPDNVKQKYACNKLGSLR  
KIHFVTPVGDVNMNRNKLQENYDIFYVWVFPQGLRLKVKIGIFSPYFINGQQLHLSLSEDMLEWARGSTQMLT  
SVCSADCGPGSRKFRNGMPACCFDCRCPENEISNETNVELCVPCPEDQYANTEQNNCIQRAVIFLTYKDPL  
GMALSLMALCFSFTAFTAVLLVFKHHSTPIVKANNRNLTYILLISLIFCFLCPLLFIGHPNVSVTCVQLQVTFG  
VAFTVAVPTVLAKTITIVLAFRVTAPQRMMKYFLVSGASIYIPICTLIQVIVCAVWLGAAPPVSDIDARSEH  
GHIIIVCNKGSVSAFYCVLGLYLAFLAFSGFTLAFLSRNLPSFTNEAKSITFSMLVFCVWVTFPLPVYHSTKKG  
VMVAVEIFSTLASGAGMLICIFVPKCYIILFMPDRNSLQMIKKSSSHALS\*  
>ENSMUSP00000049296\_c.5775:G>T\_p.V1926L ENSMUST00000035565.5|pkd1-  
201|ENSMUSG00000032855|+|chr17:g.24794090:G>T  
MPLGAPALLALALGLLWLGALAGDPGRGCGPCPLPCFCGPAPDAACRVNCSGRWLQTLGPSLRIPADATLALD  
LSHNLQTLDIGLLVNLALVELDLNSNRISTLEEGVFANLNLSEINLSGNPFECNCGLAWLPRWAKEHQVH  
VVQSEATTCRGPPIPLAGQPLLSIPLLDNACGEEYVACLDPNDSGAVAAVFFYFAHEGPLETEACSAFCFSAGE  
GLAALSEQNQCCLCGAGQASNSAACSWSWSSISLSLNSACGGPTLLQHTFPASPGATLVGPHGPLASGQPADF  
HITSSLPISSTRWNFGDGSPEVDMASPAATHFYVLPGSYHMTVVLALGAGSALLETEVQVEATPTVLELVCPS  
FVHSNESLELGIHRHGGSALEVTYSIALLDKEPAQVHPLCLDTEIFPGNGHCYRLVAEKAPWLQAQEQCRT  
WAGAALAMVDSPAIQHFLVSKVTRSLDVWIGFSSVEGTEGLDPRGEAFSLESCQNWLPGEHPATAEHCVRG  
PAGQNTDLCSAPHSYVCELPRGGPVWDTENFVMGMSGGGLSGPLHPLAQOETVQGPLRPEVVMVFPGLSPSR  
EAFLLTAAEFSTQKLEEPAQMRLQVYRPSGGAAAVPEGSPEPNRTEPAPKCVPEELWPCGANVCIFFDASCNS  
HVCINGSVSRGLSRASYTLWKEFFFSVPAGPPTQYLVTLHSDVPMPLPGDLIGLQHDAGPGTLLQCPLASSC  
PGQALYLSTNASDWMNTLNVHLEEAWAGPVCSLQLLLVTERTLPLLLGLGNPGLQHPGHYEVTRATVGNVSRQ  
NLSCSFSVVSPIAGLRVIHPIPLDGHYVPTNGSVLVLQVDSGANATATAQWFGGNI SAPFEDACPEVDFLK  
QDCTEEANGTLFSVLMPLRLKEGDHTEIVAQNGASQANLSLRVTAEPEICGLRAVPSPEARVLQGIIVRYSP  
MVEAGSDVAFRWTIDDKQSLTFHNTVFVNIYQSAAIKFLSLTASNHVSNITVNYNVTVERMNMHGLWVSAVP  
TVLPPNATLALTGGVLVDSAVEVAFLWNFGDGEQVLRQFKPPYDESFOVDPDTVAQVLVEHNTHTIYTPGEY  
NLTVLVSNYENLTQQVTVSVRTPVLPNVAIGMSSNVLVAGQPITFSYPLPSTDGVLYTWFDFGDSVPLIQSQ  
PVLNHTYSMTGAYRITLEVNNTVSSVTAHADIRVQELHGLTVYLSPSVEQGAPMVVSASVESGDNI TWTFTDM  
GDGTVFTGPEATVQHVLRAQNFVTVEAANPAGHLSQSLHVQVFLVLEVLHIEPSTCIPTQPSAQLMAHVTGD  
PVHYLFDWTFGDSSNVTVHGHPSVTHNFTRSGIFPLALVLSHVNKAHYFTSICVEPEIRNITLQPERQFVK  
LGDEARLVAYSWPPFPYRYTWDFGTEDTHTQTGGSEVKFIYREPGSYLVIVTVSNNISSTNDSAFVEVQEPV  
LVTGIRINGSHVLELQQPYLLSAMGSGPATYLLWELGDGSGQSEGPEVTHIYSSTGDFTVRVSGWNEVSRSEAQ  
LNIITVKQRVRLTINASRTVPLNGSVSFSSTLLEVGSDVHYSWVLCRDRCTPIPGGPTISYTFRSVGTFNIIVT  
AENEVGSQAQDSIFIYVLQFIEGLQVAGGDNGCCFPTNYTLQLQAAVRDGTNISYSWTAQQEGSLITLFGSGKC  
FSLTSLKASTYYVHLRATNMLGSAANRTIDFVEPVESLILSASPNAAVNMSLTLCAELAGGSGVVYTWYLE  
EGLSWKTSMPSTHTTFAAPGLHLVRVTAENQLGVSVNATVEVAIQVPVGGLSIRTSEPDSIFVAAGSTLPFWGQ  
LAEGTNVTWCWTLPGGSKDSQYIAVRFSTAGSFSLQLNASNAVSWVSAMYNLTVVEEPIVNLMLWASSKVVAPG  
QPVHFEILLAAGSALTFRLQVGGSVPELLPSPHFSHFVFRVGDHLVNVQAEHNVSHAQAQVRIIVLEAVVGLQ  
VPNCCEPGMATGTEKNFTARVQRGSRVAYAWYFSLQKQVQDLSVILSGRDVYTPVAAGLLEIHVRAFNEGG  
VNLTLMVEVQDIIQYVTLQSGRCFTNRSARFEAATSPSPRRVYHWFDFGDTVPVQKTEEFWADHYLRPGDYH  
VEVNATNLVSFFVAQATVTVQVLACREPEVEVALPLQVLMRRSQRNYLEAHVDLRNCVSYQTEYRWEIYRTAS  
CQRPRMAQMVLPVGDVSRPQLVVPRLALPVGHYCFVFFVVSFGDTPPLARSIQANVTVAERLVIIEGGSYRV  
WSDTQDLVLDGSKSYDPNLEDGQTPLNHFHWACVASTQSETGGCVLNFGRGSSVVTIPLERLEAGVEYTFNL  
IVWKAGRKEEATNQTVLIRSGRVPVIVSLECVSCKAQAVYEVSRSSYVYLEGHCHNCSRGYKQGCWAARTFSNK  
TLVLNETTTSTGSTGMNLVVRP GALRDGEGYIFTTLVLGHSGEEEGCASIRLSPNRPLGGSCRLFPPLDSVRG  
LTTKVHFECTGWRDAEDGGAPLVYALLLKRCSRQSYACENFCIYKGSLSYTGAVLPPGFQPLFVVS LAVVVQDL  
GAAVVALNRSLTIVLPEPSGNPADLVPLWHLSTLASVPLGLLQADPQHVIEYSLALITVLNEYEQAPDVSEPN  
VEQQRAQMRKNITETLISLRVNTVDDIQQITAAALQCMVSSRELMCRSCLKMLQKLEGMRIQAEETEGT  
LTPTTIADSI LNITGDLIHLASLDMQGPQPLELGVPEPPLMVASKAYNLSALMRLMRSRVLNNEEPLTLAGE  
EIVALGKRS DPLSLLCYGKALGPSCHFSIPEAFSGALSNLSDVVQLIFLVDSNPFPGYISNYTVSTKVASMA  
FQTQTGTQIPIEQLAERAITVKVPNNSDQAAQSSHPVGGSTIVQPQTSVSAVVTADNSNPQAGLHLRITYTV

LNERYLAEPEPYLAVYLHSVSPNEYNCSASRRISLEVLEGADHRLYTFFIAPGTGTLDRSYYLNLTSHFHW  
 SALEVSVGLYTSCLQYFSEEMMMWRTEGIVPLEETSQAVCLTRHLTAFGASLFPVPPSHVQFIFPEPSASIN  
 YIVLLTCVICLVTVYVMMAMILRKLQDLVSRVRVIFPCGKGRFKYELVKTGWSRSGSTTAHVIMLYGEDN  
 RSGHRHLDGDRAFHRNSLDIFQIATPHSLGVSVKIRVWHDNKGLSPAFLQHIIVRDLQASARSTFFLVNDWLS  
 VETEANGGLVEKEVLAANEALWQFQRLLVLAELQRGFFDKHIWLSIWRPFRSRFTRVQRVTCCVLLLCFLA  
 ANAVWYGVVDRDITYSMGPVSSLSIPGVDTVAIGLVSSVVVYPVYLAVLFLFRMSRSKVSQDQNPPTGQQALD  
 VDSYLDPSVLDSSLLTSLGLEAFAGQVKNDFLEDAKSLVCWPSSEGLTSLWPDLLSDPSVVSSTLQRLTQGR  
 PGCMLGSEEDGASLVSPSLPAKYLSASDEDLIHQVLADGANNLPTQDTLLETDLTSLSSVPEKTEFLILQ  
 TVGEERPASMGLSWEQSPVTRLSRTGLVGEFQKRLLPACPLAHGLSLLLVAVAVAVSVGWIGASFPPSVSM  
 WLLSSSSSFLASFLGWEPLKVLLEALYFSLVAKRLHPDEDDTLVESPAVTPVSEVRVPRVPPHGFALFLAKEE  
 ARKVKRLHDMKRLLVYMLFLLVTLANYGDASCHGHAYRLQSAIKQELDSQAFLAITRSEDFWPWMSHVFLP  
 YVHGNQSSPELGPRLRQVRLQEAFCPDPSSSEHMCSAAGSLSTSDYGIWQSVVQNGSETWAYSAPDLLGAW  
 YWGYCAVYDSGGYIQELGLSLEESRARLGFLQLHNWLDLRSRAVVELTRYSPAVGLHAAVTLRLEFPVAGHA  
 LAAFVSRPFALRRLSTGLSLPLLTSVCLLLFALYFSMAEVQTRKDGCACTARPDTWARCLLIVLTAATGLVR  
 LAQLGIADRQWTHFVQDHPRHFTSFQVAQLGVSARGLAASLLFLLLVKAAQQLRFVQRQSVFGKTLCRALPE  
 IMGATLGLVLLGVAYAQMALLISSGADTLNMARAFVLVCPGARVPTLCPSESWYLSPLLCVGLWALRVWGA  
 LRLGAILLRWRYHALRGELYRPAWEPQDYEMVELFLRRLRMLWGMGFSKVKEFRHKVRFEGMDPLPSRSGSKS  
 SPVVLPPSSGSEASHPSTSSSQPDGPSASLSRSTLKLPEPSRLHAVFESLLVQFDRLNQATEDVYQLEQQQLQ  
 SLQGHGHNPPSSPSPGCFPGSQPALPSRLSRASQGLDQTVGPNRVSLWPNKVVHPSST\*  
 >ENSMUSP00000078426\_c.3924:A>G\_p.N1309D ENSMUST00000079461.15|wdr90-  
 201|ENSMUSG00000073434|-|chr17:g.26068551:T>C  
 MAGGSGARETRCRQGSRPGSPGSEVPAASVTGPRAEARPAGGGGSRRAAPDRCSGGVPSAAWQHHPFLNVFRH  
 FRVDEWKRSSKEGDVAVVTDKVLKSAVYRIRGSVSASNYIQLPRTSTQSLGLTGRLYLVFRPVPTKHFVIHL  
 DVSTEDGQVIRVFSNFLKFKSSTTWLQFPFVFETKTPRRGGDIWSKRDGLNEGLKRDDLAGVALPRARWTC  
 LQLDLRDIIMFYLGHRHSHLKSIRLCASLLVRNLYTSDLCFDPAVTVTEARRAKLSVNPMPREMAFFVPKGES  
 WHDNYIHVRFPSDCSKVPDEQDEKSCSPPEAVFLGRMSRHLPHPGVLGKPLLSSKSPVAQCSSALPCQVLSA  
 SSRLPEVSRPTRYREVS SVSASSIQSRPSVRDEVPDAHTVSGERHVLADRSSGVMALEDIGSCLFLPDPV  
 LRLKGVIGFGHSTQWALWTKDGVAVVYPCHAVIIVLQIDTGGQRRFFLGHTDKVSALALNGSDTLASAQVQP  
 PSMVRLWDFQTGSCLSLFRSPLHTICSLFSFGSGALLCGVGKDRHGRTVVVAWSTEQAGLGGEVVVLAHVHTD  
 FDIRAFQVAFFDETRMASCGRGSVRLWRLRGGVLRSCAVDLGEYCSLELTDLAFQAALDGHCAPSAGTLFVCS  
 HSGHILEIDHQMSVQHVRLLPARSPGAPLAEKQNFVSGSGIAISSLSVSTATCAVGSSEDGYLRWPLDFSS  
 VLEAEHGDGPVSSVSFSFDGLRVLSTTTSGHLGFLDVPREYTVLARSHMAPVLALSTEPNRGMATVSLDHT  
 VRIWDLATLQQLYDFSSSEDTPCAVAFHPTMPNFFCGFSSGAVRSFSLESSGVLVEHTRHRGAIITSLVITLDG  
 RFLFSSCSQGLSVQYSCADSQCCLVLRVAANMVCQDGRPNPNI LAVSGDSCRLAFVGP SKCMVTIVESASLDEL  
 LRVDVSTLNLSNHLWDVAICFSPGNSGHLLVSTSSNKVVLDVAVSGHTLRELSVRSRACCSLASEDAHL  
 LLAATDRTITVWDYPTQANPSCQVYIGHSEPVHVAFTPDQVLQVLSVGDALFLWDILATPERDGGDEAPPGH  
 EAGSSSQGLDDLASGASGLPRQVPIPFQALPPLSSHDRLLDGGSTGTFSTSDDEEGLCEENHVSEALLQQQAP  
 TPHVLVDREASGAGDAPRETAGSSWTPAERPSPHSHMSEWSLRSGKAGLPTRPDSYKHFTPRYKTSRPRVSVY  
 FPPIGRERLRLKAIIVGNGNRRANMVWRPDTGFFAYTCGRLLVVEDLHSGTQRHHLGHSQEI STLALDQDGOI  
 LASASCCGNTAARCQIRIWDVPKGLCRHLLSHHDTAVQALAFSPDDEFVLVTLGDYADRNLALWSMATYELLSS  
 TRLLEPVHGVAFNPWDANELICVGTNAITFWLLQHHGADTCFQVHREPIPEELGASELTSCLYGASPLLYCGS  
 SSGQVCVWDTGTGHCFLAWEADDGEGVLLCSGSRILSGSNTKRLRLWAVGVVPELRRKGS SARSSSVFMERE  
 LTLDGAVVSASFDSGMDMGVGTAGTIWYISWTEGTSTRLISGHRTKVNEVVFSPGESHCATCGEDGSRVW  
 SLASMELVIQFQVLNQSCCLAWTPPSCLEPEQQQVAGYSDGTLRVFVSI SRTAMELKMHPHRTALTAIAFST  
 DGQTIILSGDKDLVAISHPCTGMTFRVLSDRHGAISAIQSTKEYGDLGVEGVELWLAASGDQVRSI WVS DW  
 LRDRCELLEWLSFPAPAVSEAPGLLPPSLAAFCPWDKAILVCVGLGAHEEVI FYSRLRQKQVIQKTPLPFFFAMS  
 LSLSPGSQMLVVGFAECMMRLLDCASGTAQDLEGHDDSVHLCRFPTPSGRLLFTA AHNEILVWEVTD\*  
 >ENSMUSP00000135420\_c.3870:A>G\_p.N1291D ENSMUST00000176923.9|wdr90-  
 205|ENSMUSG00000073434|-|chr17:g.26068551:T>C  
 MAGGSGARETRCRQGSRPGSPGSEVPAASVTGPRAEARPAGGGGSRRAAPDRCSGGVPSAAWQHHPFLNVFRH  
 FRVDEWKRSSKEGDVAVVTDKVLKSAVYRIRGSVSASNYIQLPRTSTQSLGLTGRLYLVFRPVPTKHFVIHL  
 DVSTEDGQVIRVFSNFLKFKSSTTWLQFPFVFETKTPRRDLAGVALPRARWTCQLDLRDIIMFYLGHRYS  
 HLKSIRLCASLLVRNLYTSDLCFDPAVTVTEARRAKLSVNPMPREMAFFVPKGES WHDNYIHVRFPSDCSKVP  
 DEQDEKSCSPPEAVFLGRMSRHLPHPGVLGKPLLSSKSPVAQCSSALPCQVLSASSRLPEVSRTRYREVS  
 VSASSIQSRPSVRDEVPDAHTVSGERHVLADRSSGVMALEDIGSCLFLPDPVLRKGVIGFGHSTQWAL  
 WTKDGVAVVYPCHAVIIVLQIDTGGQRRFFLGHTDKVSALALNGSDTLASAQVQPPSMVRLWDFQTGSCLSL  
 RSPLHTICSLFSFGSGALLCGVGKDRHGRTVVVAWSTEQAGLGGEVVVLAHVHTDFDIRAFQVAFFDETRMAS  
 CGRGSVRLWRLRGGVLRSCAVDLGEYCSLELTDLAFQAALDGHCAPSAGTLFVCSHSGHILEIDHQMSVQH

RRLLPARSPGAPLAEKQNFVSGVSGIAISSLSVSTATCAVGSSEGYLRRLWPLDFSSVLEAEHDPVSSVSFSP  
DGLRVLSTTTSGHLGLFDVPSREYTVLARSHMAPVLALSTEPNRRGMATVSLDHTVRIWDLATLQQLYDFSSS  
EDTPCAVAFHPTMPNFFCGFSSGAVRSFSLESSGVLEHTRHRGAI TSLVITLDGRFLFSSCSQGSIVQYSCA  
DSQCCVLRVAANMVCQDGRPNPNILAVSGDSCRLAFVGP SKCMVTIVESASLDELRLVDVSTLNLASNHL DWA  
VAICFSPGNSGHLVSTSSNKVVVLDVAVSGHTLRELSSVRSRACCSLALSEDAHLLLAATDRITVWDYPTQA  
NPSCQVYIGHSEPVHAVAFTPDQLQVISVGD AIFLWDILATPERDGGDHEAPPGHEAGSSSGQLDDLASGASG  
LPRQQVPIPFQALPPLSSSHDRLLDGTGTFTSDEEGLCEENHVSEALLOQQAPT PHVLVDREASGAGDAPR  
ETAGSSWTPAERPSPHSHMSEWSLRSGKAGLPTRPDSYKHFTPRYKTS PRVKSVYFPPIGRERLRKAIVGYN  
GNGRANMVWRPDTGFFAYTCGRLVVVEDLHSGTQRHHLGHSQEISTLALDQDQILASASCCGN TAARCQIRI  
WDVPGKGLCRHLLSHHDTAVQALAFSPDDEFLVT LGDYADRNLALWSMATYELLSSTRLLEPVHGVAFNPWDAN  
ELICVGTNAITFWLLQHHGADTCFQVHREPIPEELGASELTS L CYGASPLLYCGSSSGQVCVWDTGTGHCFLA  
WEADDGEIGVLLCSGSR LISGNTKRLRLWAVGVVPELRRKGS SARSSVFMERELTLDGAVVSASFDSGMDM  
GVVGT TAGTIWYISWTEGTSTR LISGHRTKVNEVVFSPGESH CATCGEDG SVRVWSLASMELVIQFQVLNQSC  
LCLAWTPPSCPELPEQQQV VAGYSDGTLRVF SISR TAMELKMHPHRTALTAIAFSTDGQ TILSGDKDGLVAISH  
PCTGMTFRVLSDRHGAPISAIQSTSKEYGDLGVEGVELWLAASGDQRVSIWVSDWLRDRCELLEWLSFPAPAV  
SEAPGLLPPLSAAFCPWDKAILVCVGLGAHEEVI FYSLRQKQVIQKTPLPFFAMSLSLSPGSQLMVVGFAECM  
MRLLD CASGTAQDLEGHDDSVHL CRFTPSGRLLFTA AHNEILVWEVTD P\*

>ENSMUSP00000156959\_c.517:G>A\_p.C173Y ENSMUST00000232862.2|Lhfp15-  
202|ENSMUSG00000062252|+|chr17:g.28799010:G>A  
MVKLLPAQEAAKIYHTNYVRNSRAVGMWGTLTICF SVLVMALFIQPYWIGDSVSTPQAGYFGLFSYCVGNVL  
SSELICKGGPLDFSSIPSAFKTAMFFVALAMFLIIGS IICFSLFFVCNTATVYKICAWMQLAAATGLMIGCL  
VYPDGWDSSEVRRMCGEQTGKYTLGHYTIRWAFMLA ILSIGDALILSFLAFVLGYRQDKLLPDDYKADGNEEV  
\*

>ENSMUSP00000079598\_c.517:G>A\_p.C173Y ENSMUST00000080780.8|Lhfp15-  
201|ENSMUSG00000062252|+|chr17:g.28799010:G>A  
MVKLLPAQEAAKIYHTNYVRNSRAVGMWGTLTICF SVLVMALFIQPYWIGDSVSTPQAGYFGLFSYCVGNVL  
SSELICKGGPLDFSSIPSAFKTAMFFVALAMFLIIGS IICFSLFFVCNTATVYKICAWMQLAAATGLMIGCL  
VYPDGWDSSEVRRMCGEQTGKYTLGHYTIRWAFMLA ILSIGDALILSFLAFVLGYRQDKLLPDDYKADGNEEV  
\*

>ENSMUSP00000156557\_c.517:G>A\_p.C173Y ENSMUST00000232974.2|Lhfp15-  
203|ENSMUSG00000062252|+|chr17:g.28799010:G>A  
MVKLLPAQEAAKIYHTNYVRNSRAVGMWGTLTICF SVLVMALFIQPYWIGDSVSTPQAGYFGLFSYCVGNVL  
SSELICKGGPLDFSSIPSAFKTAMFFVALAMFLIIGS IICFSLFFVCNTATVYKICAWMQLAAATGLMIGCL  
VYPDGWDSSEVRRMCGEQTGKYTLGHYTIRWAFMLA ILSIGDALILSFLAFVLGYRQDKLLPDDYKADGNEEV  
\*

>rs228620946\_ENSMUSP00000050123\_c.1636:A>C\_p.H546P  
ENSMUST00000056866.8|Pnpla1-201|ENSMUSG00000043286|+|chr17:g.29104582:A>C  
MDEQVFKGDPDTPHSISFSGSGFLSYQAGAVDALRDLAPRMLDTAHRFAGTSAGAVIAALVCGIEMEKEYLR  
VLNMGLAEVKKFFLGLPLSPCKMVQMMRQFLYDVLPEDSYKFATGKLVSLTRVTDGENVVVSEYRSKEELIE  
ALYCSCFVPVYCGFIPPTYRGERYIDGGFTSMQPCSFWTD SITIISTFSSQQDICPRDCPTIFHDFRMFNFSFQ  
FSL ENITRMTALFPDLVILQEYYRYRGYNDAVSYLRRLNAA YLDSPSKRVI FPRVEVYCQIEVALGHEPPPP  
SLQNL PALRRSPADSSQTHA QGSPKKDRKDSHSSAAPS VQTPESGCKESVESPVSLRV SISKQPSVSP LSPAQ  
PVPVMRPTGPRDSCPINVQTPNPERGVK GALDSATERGMKDALASATDEQSTTTLPVLLPAADSRGSKTGSS  
VPIGSPESPRLLL RSSQGATASRATLGLPPLSPSTPPAGPPVEDL GPERPTATGSPALSQLTGS AAPGTGKKA  
PHKPLLVEGPGEDSNTAKTMFKRKQKT NATRECFPRNAQSKKPASKLKSAPCPLNFPVLPKR VVWV TYKPHPSR  
IQDYSYPEGVSGQNS\*

>ENSMUSP00000050123\_c.1770:C>G\_p.P591A ENSMUST00000056866.8|Pnpla1-  
201|ENSMUSG00000043286|+|chr17:g.29105917:C>G  
MDEQVFKGDPDTPHSISFSGSGFLSYQAGAVDALRDLAPRMLDTAHRFAGTSAGAVIAALVCGIEMEKEYLR  
VLNMGLAEVKKFFLGLPLSPCKMVQMMRQFLYDVLPEDSYKFATGKLVSLTRVTDGENVVVSEYRSKEELIE  
ALYCSCFVPVYCGFIPPTYRGERYIDGGFTSMQPCSFWTD SITIISTFSSQQDICPRDCPTIFHDFRMFNFSFQ  
FSL ENITRMTALFPDLVILQEYYRYRGYNDAVSYLRRLNAA YLDSPSKRVI FPRVEVYCQIEVALGHEPPPP  
SLQNL PALRRSPADSSQTHA QGSPKKDRKDSHSSAAPS VQTPESGCKESVESPVSLRV SISKQPSVSP LSPAQ  
PVPVMRPTGPRDSCPINVQTPNPERGVK GALDSATERGMKDALASATDEQSTTTLPVLLPAADSRGSKTGSS  
VPIGSPESPRLLL RSSQGATASRATLGLPPLSPSTPPAGPPVEDL GPERPTATGSPALSQLTGS AAPGTGKKA  
PHKPLLVEGPGEDSNTAKTMFKRKQKT NATRECFHRNAQSKKPASKLKSAPCPLNFPVLPKR VVWV TYKPHPSR  
IQDYSYAEVSGQNS\*



>ENSMUSP00000093077\_c.493:C>A\_p.T165N ENSMUST00000095427.12|Mtch1-  
201|ENSMUSG00000024012|-|chr17:g.29559784:G>T  
MGASDPEVAPWAPGGAAGMAGAGAGARGGAPAGVEARARDPPPAHRAHPRHPRPAAQPSARRMDGGPGAPG  
SGDNAPTTEALFVALGAGVTALSHPLLYVKLLIQVGHEPMPPTLGTNVLGRKVLVYLPSSFFTYAKYIVQVDGKI  
GLFRGLSPRLMSNALSTVNRGSMKKVFPDMEQVSNKDDMKTSLKKVVKETS YEEMMQCVSRMLAHPLHVIS  
MRCMVQFVGREAKYSGVLSSIGKIFKEEGLLGFVGLIPHLLGDVVFLWGCNLLAHFINAYLVDDSVSDTPGG  
LGNDQNPQSQFSQALAIRSYTKFVMGIAVSMLTYPFLLVGDLMVNNCGLRAGLPPYSPVFKSWIHCWKYLSV  
QGQLFRGSSLLFRRVSSGSCFALE\*

>ENSMUSP00000157010\_c.157:C>A\_p.T53N ENSMUST00000234507.2|Mtch1-  
211|ENSMUSG00000024012|-|chr17:g.29559784:G>T  
MPPTLGTNVLGRKVLVYLPSSFFTYAKYIVQVDGKIGLFRGLSPRLMSNALSTVNRGSMKKVFPDMEQVSNKD  
DMKTSLKKVVKETS YEEMMQCVSRMLAHPLHVISMRCMVQFVGREAKYSGVLSSIGKIFKEEGLLGFVGLIP  
HLLGDVVFLWGCNLLAHFINAYLVDDSVSDTPGGGLGNDQNPQSQFSQALAIRSYTKFVMGIAVSMLTYPFLLV  
GDLMAVNNCGLRAGLPPYSPVFKSWIHCWKYLSVQGQLFRGSSLLFRRVSSGSCFALE\*

>ENSMUSP00000157094\_c.157:C>A\_p.T53N ENSMUST00000235088.2|Mtch1-  
217|ENSMUSG00000024012|-|chr17:g.29559784:G>T  
MPPTLGTNVLGRKVLVYLPSSFFTYAKYIVQVDGKIGLFRGLSPRLMSNALSTVNRGSMKKVFPDMEQVSNKD  
DMKTSLKKVVKETS YEEMMQCVSRMLAHPLHVISMRCMVQFVGREAKYSGVLSSIGKIFKEEGLLGFVGLIP  
HLLGDVVFLWGCNLLAHFINAYLVDDSVSDTPGGGLGNDQNPQSQFSQALAIRSYTKFVMGIAVSMLTYPFLLV  
GDLMAVNNCGLRAGLPPYSPVFKSWIHCWKYLSVQGQLFRGSSLLFRRVSSGSCFALE\*

>ENSMUSP00000157218\_c.223:C>A\_p.T75N ENSMUST00000235021.2|Mtch1-  
216|ENSMUSG00000024012|-|chr17:g.29559784:G>T  
XVTALSHPLLYVKLLIQVGHEPMPPTLGTNVLGRKVLVYLPSSFFTYAKYIVQVDGKIGLFRGLSPRLMSNALST  
VNRGSMKKVFPDMEQVSNKDDMKTSLKKVVKETS YEEMMQCVSRMLAHPLHVISMRCMVQFVGREAKYSGV  
LSSIGKIFKEEGLLGFVGLIPHLLGDVVFLWGCNLLAHFINAYLVDDSVSDTPGGGLGNDQNPQSQFSQALAI  
RSYTKFVMGIAVSMLTYPFLLVGDLMVNNCGLRAGLPPYSPVFKSWIHCWKYLSVQGQLFRGSSLLFRRVSS  
GSCFALE\*

>ENSMUSP00000115027\_c.259:C>A\_p.T87N ENSMUST00000153658.3|Mtch1-  
207|ENSMUSG00000024012|-|chr17:g.29559784:G>T  
XTTEALFVALGAGVTALSHPLLYVKLLIQVGHEPMPPTLGTNVLGRKVLVYLPSSFFTYAKYIVQVDGKIGLFRG  
LSPRLMSNALSTVNRGSMKKVFPDMEQVSNKDDMKTSLKKVVKETS YEEMMQCVSRMLAHPLHVISMRCMV  
QFVGREAKYSGVLSSIGKIFKEEGLLGFVGLIPHLLGDVVFLWGCNLLAHFINAYLVDDSVSDTPGGGLGNDQ  
NPQSQFSQALAIRSYTKFVMGIAVSMLTYPFLLVGDLMVNNCGLRAGLPPYSPVFKSWIHCWKYLSVQGQLFRGSSLLFRRVSSGSCFA  
LE\*

>ENSMUSP00000157035\_c.259:C>A\_p.T87N ENSMUST00000234129.2|Mtch1-  
208|ENSMUSG00000024012|-|chr17:g.29559784:G>T  
XTTEALFVALGAGVTALSHPLLYVKLLIQVGHEPMPPTLGTNVLGRKVLVYLPSSFFTYAKYIVQVDGKIGLFRG  
LSPRLMSNALSTVNRGSMKKVFPDMEQVSNKDDMKTSLKKVVKETS YEEMMQCVSRMLAHPLHVISMRCMV  
QFVGREAKYSGVLSSIGKIFKEEGLLGFVGLIPHLLGDVVFLWGCNLLAHFINAYLVDDSVSDTPGGGLGNDQ  
NPQSQFSQALAIRSYTKFVMGIAVSMLTYPFLLVGDLMVNNCGLRAGLPPYSPVFKSWIHCWKYLSVQGQLFRGSSLLFRRVSSGSCFA  
LE\*

>ENSMUSP00000113021\_c.493:C>A\_p.T165N ENSMUST00000118366.9|Mtch1-  
202|ENSMUSG00000024012|-|chr17:g.29559784:G>T  
MGASDPEVAPWAPGGAAGMAGAGAGARGGAPAGVEARARDPPPAHRAHPRHPRPAAQPSARRMDGGPGAPG  
SGDNAPTTEALFVALGAGVTALSHPLLYVKLLIQVGHEPMPPTLGTNVLGRKVLVYLPSSFFTYAKYIVQVDGKI  
GLFRGLSPRLMSNALSTVNRGSMKKVFPDMEQVSNKDDMKTSLKKVVKETS YEEMMQCVSRMLAHPLHVIS  
MRCMVQFVGREAKYSGVLSSIGKIFKEEGLLGFVGLIPHLLGDVVFLWGCNLLAHFINAYLVDDSVSDTPGG  
LGNDQNPQSQFSQALAIRSYTKFVMGIAVSMLTYPFLLVGDLMVNNCGLRAGLPPYSPVFKSWIHCWKYLSVQGQLFRGSSLLFRRVSS  
GSCFALE\*

>ENSMUSP00000157469\_c.2584:A>G\_p.K862R ENSMUST00000236140.2|Dnah8-  
210|ENSMUSG00000033826|+|chr17:g.30896172:A>G  
MESEEGNAEPPPPSEEAPPVVEEAPPPLPPEDTAPPPEEQAPPPEGDAAPPPTGDAFQLTVEGEAPHPEDP  
KLLSEQGPATSVTDYRSLIPSDDEEVTLPEDDEESGQARVARHTRPAQSVLSDGISQSSRRPSKFRRSMTGIP  
NLQETLKEKQARFREARENRMKIGPSHKYIFEVLGKELGLDLVTVVEELILDPCSLDPFTSFFEKGGCKTLKF  
LYQEGEVPGFECGRITIGVPKGGKMMRIYVDNAAPDKLGLCLFVRCRNDVAINSKTIHEDVLFSLDASKG  
LLEGIKHMLKSIFLPAILATSNWGALNQSQGESEKHIFIETIHRYLASLDDATISIEGTVMKKVDNIDFSK  
LHTFEEVTAASSEMVMHOLEEVLVMVWYKQIEQVLIIESEQMRKEADDSGPLTELEHWKMSAKFNFIIEQIKG  
SNCKAVINVLNVAHSKLLKNWRDLARITDSANESKDNVRYLYTLEKVCQPLYNYDLVSMAGIQNLINAI RM

IHSVSRYYNTSERMTSLFIKVTNQMV TACKAYITDGGTNHVWDQETPAVLKKIQDCIFLFKEYQASFHKTRKQ  
I LESSGEKSFEVSEMYIFGKFEAFCKRLEKITEMITIVQTYALSNSSTIEGIDILGKFKNIYQGIIKKNQYDI  
LDRPRTEFDTDFTEFMGKINILEIQIQAFMNSTFGKILSSQQALQLLQRFQKLNIPCLHLEINH TIERILQCY  
VAELEFTKKLYLSQKDDPPLARNMPP IAGKILWVRQLFRRINEP INYFFKNSDILSSTEGKAVIRQYNRIAYV  
LVEFEVAYHTAWFKEVSQLQYALQATL FVRHPETGKLLVNFDPKILEVVRETCKMIKMRLDVPEQAKNLLKLE  
SKLKADKLYLQGLLQYYDDLQCEVPSVFNLMTPKMKKVESVLRQGLTVL TWSSLMLESFFKEVESVLDMFNQ  
LLKKNVNDLCEMHIDTVLKEIAKTL LLSLSDSGTTKVEDMLTLNETYTKECADILNHKSRHVEEA VKELILIFE  
QIYEVKYTGKA AKSVKEQRKR VVFGSEAEETEGLD FSESTMEVDTNDKEDEFKKECKEVEYAFFSHQLLDSLQK  
ATRLSLDTMKRRIFVGSQGRRRSEDI VSFIKTEVHLAI PNVVMVPSLDDIQQAINRMIQLTTFVSRGV AHWGQ  
QQVRQIKSFQNNRSGSDQPPASGKPLKKEERSFEETI PARKLKNFYPGVAEHKDISKLVLLLSSSVNSLRKAA  
TEALQDFQKYKTLWIEDRHVKVKEFLANNPSL TEIRSEILHYATLEQEI KELKPIIVVGSLELHTEPMKLALS  
IEAKAWKMLLCRYLNEEYKKKMSDMI TFINEYLK KLSRPIRDLDDVRFAMEALSCIRDNEIQMDMTLGP IEEA  
YGI LNRFEVVKVTKEESEGVDTL RYSFNKLQSKAVSVQGELVKVQPKFKSNLLESVKVFCEDVINFT EAYETEG  
PMV PNI PPQEASNRLQIFQANFDDLWRKFV TYSSGEQLFGLPVTDYEV LHKTRKELNLLQKLYGLYD TVMGS I  
SGYYEILWGDVDIEKINAELQEFQNR CRKLPRALKDWQAF LLDLKKRIDDFSESCPLEMMTNKAMQRHWDR I  
SELTGTPFDVESDTFCLRNIMEAPLLKNKDDIEDICISAIKEKDIEAKLTQVIENW TYQNL SFAAFKKGK GELL  
LKGTESGEIITLMEDSLMVLGSLLSNRYNTPFKKNIQNWVFKLSTSSDIIEEWLIVQNLWVYLEAVFVGGDIA  
KQLPQEAKRFQNI DKS WIKIMQRAHENPNVI SCCVGDETMGQLLPHLHEQLEVCQKSLTGYLEKRLLPFRFF  
FVSDPVLLEILGQASDSHTIQPHLPAVSDNINEVTFHAKDYDRMTAVI SREGEKIMLDT PVMAGPVEIWL LD  
LLKVQMSSLHNIIRSAFYQISDSGFLLLPFLNHFP AQVGLLGIQMLWTHDSEALNNAKDDRIMQITNQKFL  
DILN TLI SQTT HDLTKFDRVKFETLITIHVHQ RDI FDDLVKMH IKSVD FEWLQSRFYFKEDLDQTVVSI TD  
VDFIYQNEFLGCTDRLVITPLTDRCYITLAQALGMNMGGAPAGPAGTGKTETTTKDMGRCLGKYVVVFNCS DQM  
DFRGLGRI FKGLAQSGSWGCFDEFNRIELPVLSVAAQQIYIVLTARKERKKQFIFSDGDCVDL NPEFGI FLTM  
NPGYAGRQELPENLKI QFRTVAMMVPDRQIMRVKLASC GFLENVILAQKFYVLYKLC EEEQLTKQVHYDFGLR  
NILSVLRTLGSQNRKARPEDSELSTVMRGLRDMNLSKLVDEDEPLFSLINDLFPGLQLDSSTYAE LQSAVDNQ  
VNLEGLINHPPWNKLVLQLYETS LVRHGLM LTPSGSGKTTVITILMKS LTECGRPHREMRMNPKAITAPQMF  
GRLDATNDMTRDGIKSTLWRKTLKAKKGENIFLILDGPVDAIWIENLNSVLDDNKTLTLANGDRI PMAPTCKL  
LFEVHN IENAS PATVSRMGMYI SSSALS WRPILQAWLKKRSQQEASVFLS LDKVFE DAYTYMKLSLNPKMQ  
LLECNYIMQSLN LLEGLIPSKEEGGVSSGDHLHKL FVFGLMWSLGALLELDSREKLEVFLRGHGSKLNLP EIP  
KGSQQTMYEFYVTDYGDWEHWNKRIQPYFYPTDSIPEYSSILV PNVNIRTNFLIDTIAKQHKAVLLTGEQGT  
AKTVMVKAYLKKYDPEVQLSKSLNFSSATEPMMFQRTIESYVDKRMGSTYGP PGGRKMTVFIDDI NMPVIN EW  
GDQITNEIVRQMMEMEGMYS LDKPGDFTTIVDVQLIAAMIHPGGGRNDIPQRLKRQFTVFNCTLP SNTSIDKI  
FGIIGCGYFDPCRKFRPEICDMVGNLVSVSRVLWQWTKVKMMLTPSKFHYIFNL RDLRSRIWQGM LTVKAE ECS  
SIPILLSLFKHECNRVIADRFITPDDEQWFNSQLIRAVEENISPEVAANILPEPYFVDFLRDMPEPTGDEPED  
TMFEVPK IYELVPSFEFLSEKLQFYQRQFNEIIRGTSLDLVFFKDAMTHLVKISRIIRTS CGNALLVGVGGSG  
KQLSKLA SFIAGYQIFQITL TRSYNVSNLIEDLNKLYKVAGAEKGITTFIFTDNEIKDEAFLEYLNNLLSSG  
EISNLFARDEMEITQGLISVMKRELPRHPPTFDNLYEYFITRSRKNLHVVLCFSPVGEKFRARS LKFPGLIS  
GCTMDWFSRWPKEALIAVASYFLLDYNI VCS IETKRHVETMGLFHD MVSESCENYFQRYRRRAHVTPKSYLS  
FINGYKSIYTDKVKYINEQAERMNIGLDKLM EASEVAKLSQDLAVKEKELAVASIKADEVLA ETVTSAQASA  
KVKNEVQEVKDKAQKIVDEIDSEKVKAE TKLEAAKPALEEAEALNTIKPNDIATVRKLAKP PHLIMRIMDCV  
LLLFQKKIDPVTMDPEKPCCKPSWGESLKLMSATGFLFSLQQFPKDTINEETVELLQPYFNMDDYTFESAKKV  
CGNVAGLLSWTLAMVIFYGINREVLPLKANLAKQEGR LAVANVELGKAQALLDEKQAE LDKVQAKFDAAMKEK  
MDLLNDADMCRKKMQAAS TLIDGLS GEKVRWTTQSKF KQTQINRLVGDVLLCTGFLSYLGP FNQIFRNYLLKD  
QWEL ELKARKIPFTENLNL IAMLVDPPTIGEWGLQGLPGD DLSIQNGIIVTKATRYPLLI DPQTQGTWIKSK  
EKENDLQV TSLNHKYFRTHLEDSLSLGRPLLI EDIREELDPALDNVLEKNFIKSGTAFKVKVGDK ECDIMDTF  
KLYITTKLPNPAFTPEINAKTSVIDFTVTMKGLENQLLRRVILTEKQELESERVKLLEDVTFNKRKMELEDN  
LLYKLSATKGLVDDES LIGVLRITKQTAAEVSEKLVHAAETEIKINTAQEEFRPAATRGSILYFLIT EMSV  
NIMYQTS LAQFLK LFDQSMARSEKSP LPQKRITNIEYLT YEVFTYSVRGLYENHKFLVLLMTLKI DLQRT  
VKHKEFQALIKGGAALDLKACPPKFRWILDMT WLNVLVLSKLPQFAEIMNQISRNEKGWKNWFDK DAP EEEI  
IPDGYNDSLDTCRKLLIRS WCPRDTVFQARKYIADSLEEKYTEPVI LNLEKTWEESDTH TPLICFLSMGSDP  
TIQIDALAKK LKLECRTISMGQQEVHARKLIQLSMQGGWVLLQ NCHLGLFMEELLEMLMVTE TTEDSFRV  
WITTEPHDRFPITLLQTSIKFTNEPPQGV RAGLKRTFAGINQD LLDISNLPMWKPMLYTVAFLHSTVQERRKF  
GPLGWNIPYEFNSADFSASVQFIQNH LDECDIKKGVSVSTVRYMIGEVQYGGRVTD DFKRLLNCFARVWFSE  
KMFEPNSFCYTYGKIPICKTLDQYFEFIQSLPSLDNPEVFTGLHPNADITYQNTASDVLETITNIQPKESGGG  
VGETREAI VYRLSEDMLSKLP PNYVPHEVKARLMKMGHLNSMNI FLRQEIDRMQKVISLRSSLS DLKLAIEG  
TIIMSENLRDALDNMYDARI PQLWKRVS WDSSTLGFWFTELLERNAQFSTWIFEGRPNVFWMTGF FNPQGF LT  
AMRQEVTRAHKGWALDVTVIHNEVLRQTKEE IITPPAEGVYIYGLYMDGASWDRRNGKLT ESTPKVLF TQLPV  
LHIFAINSTAPKDPKLYVCP IYKKPRRTDLTFITV VYLR TVLSPDHWILRGVALLCDIK\*

>ENSMUSP00000158051\_c.2584:A>G\_p.K862R ENSMUST00000235390.2|Dnah8-  
205|ENSMUSG00000033826|+|chr17:g.30896172:A>G  
MESEEGNAEPPPPSEEAPPVVEEAPPPLPPEDTAPPPPEEQAPPEGDAAPPPTGDAFQLTVEGEAPHPEDP  
KLLSEQGPATSVTDYRSLIPSDVEEVTLPEDDEESGQARVRARHTPRPAQSVLSDGISQSSRRPSKFRRSMTGIP  
NLQETLKEKQARFREARENRMKIGPSHKYIFEVLGKGLGLDLVTVVEELILDPCSLDPFTSFFFEKGGCKTLKF  
LYQEGEVPGFECGRITITGVPKGGKMMRIYVDNAAPDKLGLCLFFVRCRNDVAINSKTIHEDVLFSLDASKG  
LLEGIKHMLKSIIFLPAILATSNWALNQSQKGESEKHIFETIHRYLASLDDATISIEGTVMKKVDNIDFSK  
LHTFEEVTAASSEMVMHQLLEEVLMVWYKQIEQVLIIESEQMRKEADDSGPLETELEHWKRMSAKFNFIIEQIKG  
SNCKAVINVLNVASHKLLKNWRDLARITDSANESKDNVRYLYTLEKVCQPLYNVDLVSMAGIQNLINAIARM  
IHSVSRYYNTSERMTSLFIKVTNQMTACKAYITDGGTNHVWDQETPAVLKKIQDCIFLFKEYQASFHKTRKQ  
ILESSGEKSFEVSEMYIFGKFEAFCKRLEKITEMITIVQTYALSNSSTIEGIDILGKFKNIYQGIKKNQYDI  
LDRPRTEFDTDFTEFMGKINILEIQIQAFMNSTFGKILSSQALQLLQRFQKLNIPCLHLEINHTIERILQCY  
VAELEFTKKLYLSQKDDPPLARNMPPIAGKILWVRQLFRRINEPINYFFKNSDILSSTEGKAVIRQYNRIAYV  
LVEFEVAYHTAWFKEVSQLQYALQATLFRVHPETGKLLVNFDPKILEVVRETCKMIKMRDLVPEQAKNLLKLE  
SKLKADKLYLQGLLQYYDDLQCEVPSVFNLMTPKMKKVESVLRQGLTVLTVSSLMLESFFKEVESVLDMFNQ  
LLKKNVDLCEMHIDTVLKEIAKTLILSLSDSGTTKVEDMLTLNETYTKCADILNHKSRHVEEAVKELILIFE  
QIYEVKTYTGKAASVKEQRKRVRVFGSEAEETGLDFESTTMEVDTNDKEDEFKKECKEVEYAFFSHQLLDSLQK  
ATRLSLDTMKRRIIFVGSQGRRRSEDIVSFIKTEVHLAIPNVVMVPSLDDIQQAINRMIQLTLEVSRGVAHWGQ  
QQVRQIKSFQNNRSGSDQPPASGKPLKKEERSFEETIPARKLKNFYPGVAEHKDISKLVLLLSSSVNSLRKAA  
TEALQDFQKYKTLWIEDRHVKVKEFLANNPSLTEIRSEILHYATLEQEKELKPIIVVGSLELHTEPMKLALS  
IEAKAWKMLLCRYLNEEYKMKSDMITFINEYLKLSRPIRDLDDVRFAMEALSCIRDNEIQMDMTLGPTEEA  
YGI LNRFEVVKVTKEESEGVDTLRYSFNKLQSKAVSVQGELVKVQPKFKSNLLESVKVFCEDVINFTAYETEG  
PMVNI PPQEAASNLQIFQANFDDLWRKFVITYSSGEQLFGLPVTDYEVLHKTRKELNLLQKLYGLYDVTVMGSI  
SGYYEILWGDVDIEKINAELQEFQNRCKLPRALKDWQAFLLDKKRIDDSESCPLEMMTNKAMQRHWDR  
SELTGTPFDVESDTFCLRNIMEAPLLKNKDDIEDICISAIKEKDEAKLTQVIENWYQNLVFAAFKGGKELL  
LKGTESEGIITLMDLSMLVGLSLLSNRYNTPFKKNQINWVFKLSTSSDIIEEWLIVQNLVYLEAVFVGGDIA  
KQLPQEAQRKRIIFVGSQGRRRSEDIVSFIKTEVHLAIPNVVMVPSLDDIQQAINRMIQLTLEVSRGVAHWGQ  
FVSDPVLLEILGQASDSHTIQPHLPAVSDNINEVTFHAKDYDRMTAVISREGEKIMLDTPVMAKGPVEIWLDD  
LLKVQMSSLHNIIRSAFYQISDSGFLLLPFLNHFPQVGLLGIQMLWTHDSEALNNAKDDRKIMQITNQKFL  
DILNLTLSQTTHTDLTKFDRVKFETLITIHVHQORDIFDDLVKMHIKSVTDFEWLQSRFYFKEDLDQTVVSI TD  
VDFIYQNEFLGCTDRLVITPLTDRCYITLAQALGMNMGAPAGPAGTGKTETTKDMGRCLGKYVVVFNCSQDQ  
DFRGLGRIFKGLAQSGSWGCFDEFNRIELPVLVAAQQIYIVLTARKERKKQFIFSDGDCVDLNEPEFGIFLTM  
NPGYAGRQELPENLKIQFRVAMVPDRQIMRVKVLASCGLFENVILAQKFYVLYKLCEEQLTKQVHYDFGLR  
NILSVLRTLGSQKRARPEDELSVTMRGLRDMNLSKLVDEDEPLFSLINDLFPGLQLDSSTYAELOSQAVDNQ  
VNLEGLINHPWNLLKLVQLYETSLSVRHGLMTLGPSSGKTTVITILMKSLTECGRPHREMRMNPKAITAPQMF  
GRLDATNDWTDGIFSTLWRKTLKAKKGENIFLILDGVPDAIWIENLNSVLDDNKTLLTLANGDRI PMAPTCKL  
LFEVHNIENASPATVSRMGMYI SSSALSWRPILQAWLKKRSQQEASVFLSLYDKVFEFDAYTYMKLSLNPKMQ  
LLECNYIMQSLNLEGLIPSKKEGGVSSGDHLHKL FVFGLMWSLGALLELDSREKLEVFRLRHGSKLNLP EIP  
KGSQQTMYEFYVTDYGDWEHWNKRIQPYFYPTDSIPEYSSILVNVNIRTNFLIDTIAKQHKAVLLTGEQGT  
AKTVMVKAYLKKYDPEVQLSKSLNFSSATEPMMFQRTIESYVDKRMGSTYGPGRKMTVFIDDINMPVINW  
GDQITNEIVRQMMEMEGMYSLDKPGDFTTIVDVQLIAAMIHPGGGRNDIPQRLKRQFTVFNCTLPNNTSIDKI  
FGIIGCGYFDPCRKFRPEICDMVGNLVSVSRVLWQWTKVKMLPTPSKFHYIFNLRDLRSRIWQGM LTVKAECS  
SIPILLSLFKHECNRVIADRFITPDDEQWFNSQLIRAVEENISPEVAANILPEPYFVDFLRDMPEPTGDEPED  
TMFEVPKIYELVPSFEFLSEKLQFYQRQFNEIIRGTSLDLVFFKDAMTHLVKISRIIRTSNGNALLVGVGGSG  
KQSLSKLASFIAGYQIFQITLTRYNVSNLIEDLNKLYKVAGAEKGITTFIFTDNEIKDEAFLEYLNNLLSSG  
EISNLFARDEMEITQGLISVMKRELPRHPPTFDNLYEYFITRSRKNLHVVLCFSPVGEKFRARS LKFPGLIS  
GCTMDWFSRWPKEALIAVASYFLLDYNI VCS IETKRHVETMGLFHDVSESCENYFQYRRRAHVTPKSYLS  
FINGYKSIYTDKVKYINEQAERMNIGLDKLM EASESVAKLSQDLAVKEKELAVASIKADEVLA ETVTSAQASA  
KVKNEVQEVKDKAQKIVDEIDSEKVKAE TKLEAAKPALEEAEALNTIKPNDIATVRKLAKPHLIMRIMDCV  
LLLFQKKIDPVTMDPEKPCCKPSWGESLKLMSATGFLFSLQFPKDTINEETVELLQPYFNMDDYTFESAKKV  
CGNVAGLLSWTLAMVIFYGINREVLPLKANLAKQEGRLAVANVELGKAQALLDEKQAE LDKVQAKFDAAMKEK  
MDLLNDADMCRKKMQAAS TLIDGLS GEKVRWTQOSKEFKTQINRLVGDVLLCTGFLSYLGPFNQIFRNYLLKD  
QWELELKARKIPHTENLNLIAMLVDPPTIGEWGLQGLPGDDLSIQNGIIVTKATRYPLLI DPQTQGTWIKSK  
EKENDLQVTSLNHKYFRTHLEDLSLGRPLLI EDIREELDPALDNVLEKNFIKSGTAFKVKVGDKECDIMDTF  
KLYITTKLPNPAFTPEINAKTSVIDFTVTMKGLLENQLRRVILTEKQELESERVKLLEDVTFNKRKMKELDN  
LLYKLSATKGLVDDES LIGVLRITKQTAAEVSEKLVHAAETEIKINTAQEEFRPAATRGSILYFLITEMSMV  
NIMYQTS LAQFLKLFQDSMARSEKSPLPQKRITNIEYLYTEVFTYSVRGLYENHKFLVLLMTLKI DLQRT  
VKHKEFQALIKGGAALDLKACPPKFRWILDMTWNLVELSKLPQFAEIMNQISRNEKGWKNWFDKDAPEEEI

IPDGYNDSLDTCRKLLLRWCPCDRTVFQARKYIADSLEEKYTEPVI LNLEKTWEESDTHTP LICFLSMGSDP  
TIQIDALAKKLEKERTISMGQGGQEVHARKLIQLSMQGGWVLLQNLCHLGLFMEELLEMLMVTETTEDSFRV  
WITTEPHDRFPITLLQTSIKFTNEPPOGVRAGLKRTRFAGINQDLLDI SNLPMWKPMLYTVAFHSTVQERRKF  
GPLGWNIPYEFNSADFSASVQFIQNLHLEDCIKKGVSWSTVRYMIGEVQYGGRTVDDDFDKRLNCFARVWFSE  
KMFEPSCFYTYGKIPICKTLDQYFEFIQSLPSLDNPEVFGFLHPNADITYQSNTASDVLETITNIQPKESGGG  
VGETREAIYVRLSEDMLSKLPNYPVPEVKARLMKMGHLNSMNI FLRQEI DRMQKVISILRSSSLDKLAIIEG  
TIIMSENLRDALDNMYDARI PQLWKRVSWSSTLGFWFTELLERNAQFSTWIFEGRPNVFVMTGFFNPQGF LT  
AMRQEVTRAHKGWALDVTVIHNEVLRQTKEEII TTPAEGVYIYGLYMDGASWDRRNGKLTTESTPKVLF TQLPV  
LHIFAINSTAPKDPKLYVCPIYKKPRRTDLTFITVVYLRVTVLSPDHWILRGVALLCDIK\*  
>ENSMUSP00000127878\_c.2584:A>G\_p.K862R ENSMUST00000170651.2|Dnah8-  
201|ENSMUSG00000033826|+|chr17:g.30896172:A>G  
MESEEGNAEPPPPSEEAPPVVEEAPPPLPPEDTAPPPPEEQAPPEGDAAPPPTGDAFQLTVEGEAPHPEDP  
KLLSEQGPATSVTDYRSLIP SDEEVTLPEDDEESGARVRARHTPRPAQSVLSDGISQSSRRPSKFRRSMTGIP  
NLQETLKEKQARFREARENRMKIGPSHKYIFEVLGEKLGDLVTVVEELI LDPCSLDPFTSFFEKGGCKTLKF  
LYQEGEVPGFECGRITITGVPKGGKMMRIYVDNAAPDKLGLCLFFVRCRNDVAINSKTIHEDVLF SFLDASKG  
LLEGIKHMLKSI FLPAI LATSNGALNQSQKGESEKHIF IETIHRYLASLDDATISIEGTVM LKKVDNIDFSK  
LHTFEEVTAASSEMVMHQLEEVLMVWYKQIEQVLI ESEQMRKEADDSGPLETELEHWKMSAKFNFI IEQIKG  
SNCKAVINVLNVASHKLLKNWRDL DARITDSANESKDNVRYLYTLEKVCQPLYNLDLVSMAGHICQNLINAIM  
IHSVSRYYNTSERMTSLFIKVTNQMTACKAYITDGGTNHVWDQETPAVLKKI QDCIFL FKEYQASFHKTRKQ  
ILESSGEKSFEVSEMYIFGKFEAFCKRLEKITEMITIVQTYALSNSSTIEGIDILGKFKNIYQGIKKNQYDI  
LDPRRTEFDTDFTEFMGKINILEIQIQAFMNSTFGKILSSQALQLLQRFQKLNIPCLHLEINHTIERILQCY  
VAELEFTKKLYLSQKDDPPLARNMPP IAGKILWVRQLFRRINEP INYFFKNSDILSSTEGKAVIRQYNRIAYV  
LVEFEVAYHTAWFKEVSQLQYALQATL FVRHPETGKLLVNFDPKILEVVRETCKMIKMRLDVPEQAKNLLKLE  
SKLKADKLYLQGLLQYYDDLQCEVPSVFNLMTPKMKKVESVLRQGLTVL TWSSLMLESFFKEVESVLDMFNQ  
LLKKNVDLCEMHIDTVLKEIAKTL LLSLSDSGTTKVEDMLTLNETYTKECADILNHKSRHVEEAVKELILIFE  
QIYEVKYDTGKAASVKEQRKR RVVFGSEAEETGLDFESTMEVDTNDKEDEFKKECKEYAFVFSHQLLDSLQK  
ATRLSLDNTMKRRI FVSGQRRRSEDI VSFIKTEVHLAIPNVVMVPSLDDIQQAINRMIQLTLEVSRGVAHWGQ  
QQVRQIKSFQNNRSGSDQPPASGKPLKKEERSFEETI PARKLKNFYPGVAEHKDISKLVLLLSSSVNSLRKAA  
TEALQDFQKYKTLWIEDRHVKVKEFLANNPSL TEIRSEILHYATLEQEIKELKPIIVVGSLELHTEPMKLALS  
IEAKAWKMLLCRYLNEEYKMKMSDMITFINEYLK KLSRPIRDLDDVRFAMEALSCIRDNEIQMDMTLGP IEEA  
YGI LNRFEVVKVTKEESEGVDTLRY SFNKLQSKAVSVQGELVKVQPKFKSNLLESVKVFCEDVINFT EAYETEG  
PMVNI PPQEASNRLQIFQANFDDLWRKFV TYSSGQLFGLPVTDYEV LHKTRKELNLLQKLYGLYDVTVMGSI  
SGYYEILWGDVDIEKINAELQE FQNRCKLPRALKDWQAF LDKKRIDDSESCPLEMMTNKAMQRHWDR I  
SELTGTPFDVESDTFCLRNIMEAPLLKNKDDIEDICISAIKEKDIEAKLTQVIENWTYQNL SFAAFKGGK GELL  
LKGTESEGEIITLMEDSLMVLGSLLSNRYNTPFKKNIQNWVFKLSTSSDIIEEWLIVQNLWVYLEAVFVGGDIA  
KQLPQEAKRFDIKSWIKIMQRAHENPNVISCCVGDETMGQLLPHLHEQLEVCQKSLTWYLEKKRLLFP RFF  
FVSDPVLEILGQASDSHTIQPHLPAVSDNINEVTFHAKDYDRMTAVISREGEKIMLDTPVMAKGPVEIWLLD  
LLKVQMSSLHNIIRSAFYQISDSGFLLLPFLNHFP AQVGLLGIQMLWTHDSEEALNNAKDDRIMQITNQKFL  
DILNTLISQTT HDLTKFDRVKFETLITIHVHQ RDI FDDLVKMHIKSVTDFEWLQSRFYFKEDLDQTVVSI TD  
VDFIYQNEFLGCTDRLVITPLTDRCYITLAQALGMNMGGAPAGPAGTGKTETTTKDMGRCLGKYVVVFNCS DQM  
DFRGLGRI FKGLAQSGSWGCFDEFNRIELPVLSVAAQIYIVLTARKERKKQFIFSDGDCVDLNPEFGIFLTM  
NPGYAGRQELPENLKI QFRTVAMMVPDRQIMRVKLA SCGFLENVILAQKFYVLYKLCEEQLTKQVHYDFGLR  
NILSVLRTLGSQKRARPEDESEL TVMRGLRDMNLSKLVDEDEPLFSLINDLFPGLQLDSSTYAE LQSAVDNQ  
VNLEGLINHPWNKLVQLYETS LVRHGLMTLGP SSGSKTTVITILMKS LTECGRPHREMRMNPKAITAPQMF  
GRLDTATNDWTDGIFSTLWRKTLKAKKGENIFLILDGPVDAIWIENLNSVLDDNKTLT LANGDRI PMAPTCKL  
LFEVHNIENASPATVSRMGMVYISSALSWRPILQAWLKKRSQQEASVFLS LDKVFE DAYTYMKLSLNPKMQ  
LLECNYIMQSLNLEGLIPSKEEGGVSSGDHLHKL FVFGLMWSLGALLELDSREKLEVF LRGHGSKLNLP EIP  
KGSQQTMYEFYVTDYGDWEHWNKRIQPYFYPTDSIPEYSSILVPNDNIRTNFLIDTIAKQHKAVLLTGEQGT  
AKTVMVKAYLKKYDPEVQLSKSLNFSSATEPMMFQRTIESYVDKRMGSTYGP PGGRKMTVFID DINMPVIN EW  
GDQITNEIVRQMMEMEGMYS LDKPGDFTTIVDVQLIAAMIHPGGGRNDIPQRLKRQFTVFNCTLP SNTSIDKI  
FGIIGCGYFDPCRKFRPEICDMVGNLVSVSRVLWQWTKVKMLPTPSKFHYIFNLRLSRIWQGM LTVKAE ECS  
SIPILLSLFKHECNRV IADR FITPDDEQWFNSQLIRAVEENISPEVAANILPEPYFVDFLRDMPEPTGDEPED  
TMFEVPKIYELVPSFEFLSEKIQFYQRQFNEIIRGTS LDFVFKDAMTHLVKISRIIRTS CGNALLVGVGGSG  
KQSLSKLASFIAGYQIFQITLTRSYNVSNLIEDLNKLYK VAGAEKGITFI FTDNEIKDEAFLEYLNLLSSG  
EISNLFARDEMEITQGLISVMKRELPRHPPTFDNLYEYFITRSRKNLHVVLCFSPVGEKFRARS LKFPGLIS  
GCTMDWFSRWPKEALIAVAS YFLLDYNI VCS IETKRHVETMGLFHD MVSESCENYFQRYRRRAHVTPKSYLS  
FINGYKSIYTDKVKYINEQAERMNIGLDKLMEASESVAKLSQDLAVKEKELAVASIKADEVLAEVTVSAQASA  
KVKNEVQEVKDKAQKIVDEIDSEKVKAE TKLEAAKPALEEAEALNTIKPNDIATVRKLAKP PHLIMRIMDCV

LLLFQKKIDPVTMDPEKPCCKPSWGESLKLMSATGFLFSLQQFPKDTINEETVELLQPYFNMDDYTFESAKKV  
 CGNVAGLLSWTLAMVIFYGINREVLPLKANLAKQEGRLAVANVELGKAQALLDEKQAELEDKVQAKFDAAMKEK  
 MDLLNDADMCRRKMQAASSTLIDGLSGEKVRWTQOSKEFKTQINRLVGDVLLCTGFLSYLGFNFQIFRNYLLKD  
 QWELELKARKIPFTENLNLIAMLVDPPTIGEWGLQGLPGDDLSIQNGIIVTKATRYPLLDIPQTQGKTWIKSK  
 EKENDLQVTSLNHKYFRTHLEDSLSLGRPLLIEDIREDLDPALDNVLEKNFIKSGTAFKVKVGDKECDIMDTF  
 KLYITTKLPNPAFTPEINAKTSVIDFTVTMKGLENQLLRVILTEKQELESERVKLLEDVTFNKRKMKLEEDN  
 LLYKLSATKGSVLDDESLIGVLRITKQTAAEVSEKLVHAAETEIKINTAQEEFRPAATRGSILYFLITEMSMV  
 NIMYQTSLAQFLKLFQSMARSEKSPFPQKRITNIEYLYEYVFTYSVRGLYENHKFLFVLLMTLKI DLQRGT  
 VKHKEFQALIKGGAALDLKACPPKFRWILDMTWLNVLVLSKLPQFAEIMNQISRNEKGWKNWFDKDAPEEEI  
 IPDGYNDSLDTCRKLLLRWCPRDRTVFQARKYIADSLEEKYTEPVILNLEKTWEESDHTHTPLICFLSMGSDP  
 TIQIDALAKKLEKCRITISMGQGEVHARKLIQLSMQGGWVLLQNLCHLGLFMEELLEMLMVTETTEDSFRV  
 WITTEPHDRFPITLLQTSIKFTNEPPQGVRAGLKRTFAGINQDILLISNLPMPWKPMPLYTVAFLHSTVQERRKF  
 GPLGWNIPYEFNSADFSASVQFIQNLHLEDCIKKGVSWSTVRYMIGEVQYGGVRTDDDFDKRLNCFARVWFSE  
 KMFEPSCFYTYGKIPICKTLDQYFEFIQSLPSLDNPEVFGHLHPNADITYQSNASDVLETITNIQPKESGGG  
 VGETREAIYVRLSEDMLSKLPNYPVPEVKARLMKMGHLNSMNI FLRQEI DRMQKVISILRSSLSDLKLAIEG  
 TIIMSENLRDALDNMYDARI PQLWKRVSWSSTLGFWFTELLERNAQFSTWIFEGRPNVFVMTGFFNPQGF LT  
 AMRQEVTRAHKGWALDVTIHNELRQTKEEIITPPAEGVYIYGLYMDGASWDRRNGKLTSTPKVLF TQLPV  
 LHFAINSTAPKDPKLYCPIYKPRRTDLTFITVYLRVTLSPDHWILRGVALLCDIK\*  
 >ENSMUSP00000157469\_c.2584:A>T\_p.K862M ENSMUST00000236140.2|Dnah8-  
 210|ENSMUSG00000033826|+|chr17:g.30896172:A>T  
 MESEEGNAEPPPPSEEAPPVVEEAPPPLPPEDTAPPPPEEQAPPPEGDAAPPPTGDAFQLTVEGEAPHPEDP  
 KLLSEQGPATSVTDYRSLIPSDPEEVTLPEDDEESGARVRARHTPRPAQSVLSDGISQSSRRPSKFRSMTGIP  
 NLQETLKEKQARFREARENKMKIGPSHKYIFEVLGEKLGDLVTVVEELILDCPSLDPFTSFFFEKGGCKTLKF  
 LYQEGEVPGFECGRITITGVPKGGKMMRIYVDNAAPDKLGLCLFFVRCRNDVAINSKTIHEDVLF SFLDASKG  
 LLEGIKHMLKSI FLPAI LATSNGALNQSQKGESEKHIF IETIHRYLASLDDATISIEGTVMKKVDNIDFSK  
 LHTFEVNTAASSSEMVMHQLEEVLMVWYKQIEQVLI ESEQMRKEADDSGPLTELEHWKRMKSAKFNFI IEQIKG  
 SNCKAVINVLNVAHSKLLKNWRDLDARITDSANESKDNVRYLYLEKVCQPLYNLDVSMAGIQLNINAIRM  
 IHSVSRYYNTSERMTSLFIKVTNQMTACKAYITDGGTNHVWDQETPAVLKKI QDCIFL FKEYQASFHKTRKQ  
 ILESSGEKSFEVSEMYIFGKFEAFCKRLEKITEMITIVQTYALSNSSTIEGIDILGKFKNIYQGIKKNOYDI  
 LDPRRTEFDTDFTEFMGKINILEIQIQAFMNSTFGKILSSQQALQLLQRFQKLNIPCLHLEINHTIERILQCY  
 VAELEFTKLYLSQKDDPPLARNMPP IAGKILWVRQLFRRINEP INYFFKNSDILSSTEGKAVIRQYNRIAYV  
 LVEFEVAYHTAWFKEVSQLQYALQATL FVRHPETGKLLVNFDPKILEVVRETCKMIKMLLDVPEQAKNLLKLE  
 SKLKADKLYLQGLLQYYDDLQCEVPSVFNLMTPKMKKVESVLRQGLTVL TWSSLMLESFFKEVESVLDMFNQ  
 LLKKNVDLCEMHIDTVLKEIAKTL LLSLSDSGTTKVEDMLTLNETYTKCADILNHKSRHVEEAVKELILIFE  
 QIYEVKYTGKAASVKEQRKR VVFGSEAEETEGLDFESTMEVDTNDKEDEFKKECKEYVAFFSHQLLDSLQK  
 ATRLSDTMKRRIFVGSQGRRRSEDI VSFIKTEVHLAI PNVVMVPSLDDIQQAINRMIQLTLEVSRGVAHWGQ  
 QQVRQIKSFQNNRSGSDQPPASGKPLKKEERSFEETI PARKLKNFYPGVAEHKDISKLVLLLSSSVNSLRKAA  
 TEALQDFQKYKTLWIEDRHVKVKEFLANNPSL TEIRSEILHYATLEQEI KELKPIIVVGSLELHTEPMLKALS  
 IEAKAWKMLLCRYLNEEYKMKSDMITF INEYLKLSRPIRDLDDVRFAMEALSCIRDNEIQMDMTLGP IEEA  
 YGILNRFVVKVTKEESEGVDTLRY SFNKLQSKAVSVQGELVKVQPKFKSNLLESVKVFCEDVINFT EAYETEG  
 PMVPNIPPPQEASNRLQIFQANFDDLWRKFV TYSSGEQLFGLPVTDYEVVLHKTRKELNLLQKLYGLYDTVMGSI  
 SGYYEILWGDVDIEKINAELQEFQNRCKLPRALKDWQAF LLDLKKRIDDFSESCPLEMMTNKAMQRHWDR I  
 SELTGTPFDVESDTFCLRNIMEAPLLKNKDDIEDICISAIKEKDEIAKLTQVIENWTYQNL SFAAFKKGK GELL  
 LKGTESGEIITLMEDSLMVLGSLLSNRYNTPFKKNIQNWVFKLSTSSDIIEEWLIVQNLWVYLEAVFVGGDIA  
 KQLPQEAARFNIDKSWIKIMQRAHENPNVISCCVGDTEMGQLLPHLHEQLEVCQKSLTGYLEKKRLLFPRFF  
 FVSDPVLLEILGQASDSHTIQPHLPAVSDNINEVTFHAKDYDRMTAVISREGEKIMLDT PVMAGPVEIWL LD  
 LLKVQMSSLHNIIRSAFYQISDSGFLLLPFLNHFP AQVGLLGIQMLWTHDSEEALNNAKDDRKIMQITNQKFL  
 DILNTLISQTT HDLTKFDRVKFETLITIHVHQRDIFDDLVKMHIKSVTDFEWLQSRFYFKEDLDQTVV SITD  
 VDFIYQNEFLGCTDRLVITPLTDRCYITLAQALGMNMGGAPAGPAGTGKTETTKDMGRCLGKYVVVFNCS DQM  
 DFRGLGRIFKGLAQSGSWGCFDEFNRIELPVL SVAQQIYIVLTARKERKKQFIFSDGDCVDLNEPFGIFLTM  
 NPGYAGRQELPENLKI QFRTVAMMVPDRQIMRVKLASCGFLENVILAQKFYVLYKLC EEQLTKQVHYDFGLR  
 NILSVLRTLGSQKRARPEDSELSTVMRGLRDMNLSKLVDEDEPLFSLINDLFPGLQLDSSTYAE LQSAVDNQ  
 VNLEGLINHPWNLLKVLQLYETS LVRHGLMTLFGPSGSGKTTVITILMKSLTECGRPHREMRMNPKAITAPQMF  
 GRLDTATNDWTDGIFSTLWRKTLKAKKGENIFLILDGPVDAIWIENLNSVLDNKTLLT LANGDRI PMAPTCKL  
 LFEVHNENASPATVSRMGMVYISSSALSWRPILQAWLKKRSQQEASVFLS LYDKVFEDAYTYMKLSINPKMQ  
 LLECNYIMQSLNLEGLIPSKEEGGVSSGDHLHKL FVFGMLMWSLGALLELDSREKLEVF LRGHGSKLNLP EIP  
 KGSQQTMYEFYVTDYGDWEHWNKRIQPYFYPTDSIPEYSSILV PNVNIRTNFLIDTIAKQHKAVLLTGEQGT  
 AKTVMVKAYLKKYDPEVQLSKSLNFSSATEPMMFQRTIESYVDKRMGSTYGP PGRKMTVFID DINMPVINEW



GDQITNEIVRQMMEMEGMYSLDKPGDFTTIVDVQLIAAMIHPGGGRNDIPQRLKRQFTVFNCTLPSNTSIDKI  
FGIIGCGYFDPCRKRPEICDMVGNLVSRSRVLWQWTKVKMLPTPSKFHYIFNLRDLSRIWQGM LTVKAECS  
SIPILLSLFKHECNRVIADRFITPDDEQWFNSQLIRAVEENISPEVAANILPEPYFVDFLRDMPEPTGDEPED  
TMFEVPKIYELVPSFEFLSEKLFYQRFNEIIRGTSLDLVFFKDAMTHLVKISRIIRTSCGNALLVGVGGSG  
KQSLSKLASFIAGYQIFQITLRSYNVSNLIEDLKNLYKVAGAEKGITTFIFTDNEIKDEAFLEYLNNLLSSG  
EISNLFARDEMDEITQGLISVMKRELPRHPPTFDNLYEYFITRSRKNLHVVLFCFSPVGEKFRARSLKFPGLIS  
GCTMDWFSRWPKEALIAVASFYLLDYNIVCSIETKRHVETMGLFHDVSESCENYFQRYRRRAHVTPKSYLS  
FINGYKSIYTDKVKYINEQAERMNIGLDKLEMEASESVAKLSQDLAVKEKELAVASIKADEVLAEVTVSAQASA  
KVKNEVQEVKDKAQKIVDEIDSEKVKAEATKLEAAKPALEEEAALNTIKPNDIATVRKLAKPPLHLMRIMDCV  
LLLFQKKIDPVTMDPEKPCCKPSWGESLKLMSATGFLFSLQQFPKDTINEETVELLQPYFNMDDYTFESAKKV  
CGNVAGLLSWTLAMVIFYGINREVLPLKANLAKQEGRLAVANVELGKAQALLDEKQAE LDKVQAKFDAAMKEK  
MDLLNDADMCRKKMQAAS TLIDGLSGEKVRWTQOSKEFKTQINRLVGDVLLCTGFLSYLGFNFQIFRNYLLKD  
QWELELKARKIPFTENLNLIAMLVDPPTIGEWGLQGLPGDDLSIQNGIIVTKATRYPLLDIPQTQGTWIKSK  
EKENDLQVTSLNHKYFRTHLEDSLGRPLLEDIREELDPALDNVLEKNFIKSGTAFKVKVGDKECDIMDTF  
KLYITTKLPNPAFTPEINAKTSVIDFTVTMKGLENQLLRVILTEKQELESERVKLEEDVTFNKRKMELEDN  
LLYKLSATKGLVDDESLIGVLRITKQTAAEVSEKLVHAAETEIKINTAQEEFRPAATRGSILYFLITMSMV  
NIMYQTSLAQFLKLFQSMARSEKSPFPQKRITNIIEYLTYEVFTYSVRGLYENHKFLFVLLMTLKI DLQRGT  
VKHKEFQALIKGGAALDLKACPPKPFWRWILDMTWLNVELSKLPQFAEIMNQISRNEKGVKNWFDKDAPEEEI  
IPDGYNDSLDTCRKLLLRWCPCDRTVFQARKYIADSLEEKYTEPVI LNLEKTWEESDHTHTPLICFLSMGSDP  
TIQIDALAKKLEKCR TISMGGQEVHARKLIQLSMQGGWVLLQNLCHLGFMEELLEM LMTVETTEDSFRV  
WITTEPHDRFPITLLQTSIKFTNEPQGVRAGLKRTFAGINQDLDLISNLP MWKPMPLYTVAFLHSTVQERRKF  
GPLGWNIPYEFNSADFSASVQFIQNLHDECDIKKGVSWSTVR YMIGEVQYGGVRTDDFDKRLNLCFARVWFSE  
KMFEP SFCFYTGKIPICKTLDQYFEFIQSLPSLDNPEVFLGHPNADITYQSNTASDVLETITNIQPKESGGG  
VGETREAI VYRLSEDMLSKLPNYPVPEVKARLMKMGHLNSMNI FLRQEI DRMQKVISILRSSLSDLKLAIEG  
TIIMSENLRDALDNMYDARI PQLWKRVSWSSTLGFWFTELLERNAQFSTWIFEGRPNVFWM TGFFNPQGF LT  
AMRQEVINSTRAHKGDALDVTI HNEVLRQTKEEITPPAEVYIYGLYMDGASWDRRNGKLETESTPKVLF TQLPV  
LHIFAINSTAPKDPKLYVCPIYKPRRTDLTFITVYLRVTLSPDHWILR GVALLCDIK\*

>ENSMUSP00000158051\_c.2584:A>T\_p.K862M ENSMUST00000235390.2|Dnah8-  
205|ENSMUSG00000033826|+|chr17:g.30896172:A>T

MESEEGNAEPPPPSEEAPPVVEEAPPPLPPEDTAPPPPEEQAPPPEGDAAPPPTGD AFQLTVEGEAPHPEDP  
KLLSEQGPATSVTDYRSLIP SDEEVTLPEDDEESGARVRARHTPRPAQSVLSDGISQSSRRPSKFRRSMTGIP  
NLQETLKEKQARFREARENRMKIGPSHKYIFEVLGEKLGDLVTVVEELILD CPSLDPFTSFFFEKGGCKTLKF  
LYQEGEVPGFECGRITITGVPKGGKMMRIYVDNAAPDKLGLCLFFVRCRNDVAINSKTIHEDVLF SFLDASKG  
LLEGIKHMLKSI FLPAI LATS NWGALNQS KQGESEKHIF IETIHRYLASLDDATISIEGTVM LKKVDNIDFSK  
LHTFEEVTA AASSSEM VHQLEEVLMVWYKQIEQVLI ESEQMRKEADDSGPLTELEHWKRMSAKFNFI IEQIKG  
SNCKAVINVLNVASHKLLKNWRDL DARI TDSANESKDNVRYLYLEKVCQPL YNYDLVSM AHGIQNLINAI RM  
IHSVSRYYNTSERMTSLFIKVTNQMTACKAYITDGGTNHVWDQETPAVLKKI QDCIFL FKEYQASFHKTRKQ  
ILESSGEKSFEVSEMYIFGKFEAFCKRLEKITEMITIVQTY SALSNSTIEGIDILG IKFKNIYQG IKNQYDI  
LDRRTEFD TDFTEFMGKINILEIQIQA FMNSTFGKILSSQQALQLLQRFQKLNIPCLHLEINH TIERILQCY  
VAELEFTKKLYLSQKDDPPLARNMPPIAGKILWVRQLFRRINEP INYFFKNSDILSSTEGKAVIRQYNR IAYV  
LVEFEVAYHTAWFKEVSQLQYALQATL FVRHPETGKLLVNFDPKILEVVRET KCMIKMMLDVPEQAKNLLKLE  
SKLKADKLYLQGLLQY YDDLQCEVPSVFNLMTPKMKKVESVLRQGLTVL TWSSLMLESFFKEVESVLD MFNQ  
LLKKVNDLCEMHIDTVLKEIAKTL LISLSDSGTTKVEDMLTLNETYTKECADILNHKSRHVEEAVKELILIFE  
QIYEVKYTGKAAKSVKEQRKR VVFGSEAEETEGLDFESTTMEVDTNDKED EFKKECKEYVAF FSHQLLDSLQK  
ATRLSLDTMKRRIFVGSQGRRRSEDI VSFIKTEVHLAIPNVVMVPSLDDIQQAINRMIQLTLEVSRGV AHWGQ  
QQVRQIKSFQNNRSGSDQPPASGKPLKKEERSFEETI PARKLKNFYPGVAEHKDISKLVLLLSSSVNSLRKAA  
TEALQDFQKYKTLWIEDRHVKVKEFLANNPSLTEIRSEILHYATLEQEIKELKPIIVVGSLELHTEPMKLALS  
IEAKAWKMLLCRYLNEEYK KMSDMI TFINEYLK KLSRPIRDLDDVRFAMEALS CIR DNEIQMDMTLGP IEEA  
YGILNRFVVKVTKEESEGVDTLRY SFNKLQSKAVSVQGELVKVQPKFKSNLLESVKVFCEDVINFT EAYETEG  
PMVNI PPQEASNLQIFQANFDDLWRKFV TYSSGEQLFGLPVTDYEV LHKTRKELNLLQKLYGLYD TVMGS I  
SGYYEILWGDVDIEKINAELQEFQNR CRKLPRALKDWQAF LDKKRIDD FSESCPLEMMTNKAMQRHWDR I  
SELTGTPFDVESDTFCLRNIMEAPLLKNKDDIEDICISAIKEKDEAKLTQVIENW TYQNL SFAAFKKGK GELL  
LKGTESEGIITLMEDSLMVLGSLSNRYNTPFKCVNIQNWVFKLSTSSDIIEEWLIVQNLWVYLEAVFVGGDIA  
KQLPQEA KRQNI DKS WIKIMQRAHENPNVISCCVGD ETMGQLLPHLHEQLEVCQKSLTGYLEKKRLLFPRFF  
FVSDPVLLEILGQASDSHTIQPHLPAVSDNINEVTFHAKDYDRMTAVI SREGEKIMLDTPVMAKGPVEIWL LD  
LLKVQMSLSLHNIIRSAFYQISDSGFLLLPFLNHFP AQVGLLGIQMLWTHDSEALNNAKDDR KIMQITNQKFL  
DILNTLISQTT HDLTKFDRVKFETLITIHVHQ RDI FDDLVKMH IKSVDTFEWLQSRFYFKEDLDQTVVSI TD  
VDFIYQNEFLGCTDRLVITPLTDRCYITLAQALGMNMGGAPAGPAGTGKTETTKDMGRCLGKYVVVFNCS DQM

DFRGLGRI FKGLAQSGSWGCFDEFNRIELPVLVSAQQIYIVLTARKERKKQFIFSDGDCVDLNEPFGIFLTM  
 NPGYAGRQELPENLKIQFRTVAMMVPDRQIIMRVKLASCGLFENVILAQKFYVLYKLCEEQLTKQVHYDFGLR  
 NILSVLRTLGSQKRARPEDSELSTVMRGLRDMNLSKLVDEDEPLFSLINDLFPGLQLDSSTYAELOQSAVDNQ  
 VNLEGLINHPPWNLKLVQLYETSLVRHGLMTLGPSSGSKTTVITILMKSLTECGRPHREMRMNPKAITAPQMF  
 GRLDATANDWTGIFSTLWRKTLKAKKGENIFLILDGPVDAIWIENLNSVLDNKTTLTLANGDRI PMAPTCKL  
 LFEVHNINENASPATVSRMGMYISSALSWRPILQAWLKKRSQQEASVFLSLYDKVFEDAYTYMKLSLNPQM  
 LLECNYIMQSLNLEGLIPSKKEGGVSSGDHLHKLFFVGLMWSLGALELDSREKLEVFRLRGHGSKLNLPEIP  
 KGSQQTMYEYFYVTDYGDWEHWNKRIQPYFYPTDSIPEYSSILVNVNDNIRTNFLIDTIAKQHKAVLLTGEQGT  
 AKTVMVKAYLKKYDPEVQLSKSLNFSSATEPMMFQRTIESYVDKRMGSTYGGPPGGRKMTVFIDINMPVIN  
 GDQITNEIVRQMEMEGMYSLDKPGDFTTIVDVQLIAAMIHPGGGRNDIPQRLKRQFTVFNCTLPSNTSIDKI  
 FGIIGCGYFDPCRKFRPEICDMVGNLVSRSRVLWQWTKVKMLPTPSKFHYIFNLRDLRSRIWQGLTVKAECS  
 SIPILLSLFKHECNRVIA DRFITPDEQWFNSQLIRAVEENISPEVAANILPEPYFVDFLRDMPEPTGDEPED  
 TMFEVPKIYELVPSFEFLSEKLFYQRFNEIIRGTSLDLVFFKDAMTHLVKISRIIRTSCGNALLVGVGGSG  
 KQSLSKLASFIAGYQIFQITLRSYNVSNLIEDLKNLYKVAGAEKGITFTIFTDNEIKDEAFLEYLNNLLSSG  
 EISNLFARDEMEITQGLISVMKRELPRHPPTFDNLYEYFITRSRKNLHVVLCSFSPVGEKFRARSLKFPGLIS  
 GCTMDWFSRWPKEALIAVASYFLLDYNI VCS IETKRHVETMGLFHDVSESCENYFQYRRAHVTPKSYLS  
 FINGYKSIYTDKVKYINEQAERMNIGLDKLEMEASESVAKLESQDLAVKEKELAVASIKADEVLAEVTVSAQASA  
 KVKNEVQEVKDKAQKIVDEIDSEKVKAEKPALEAEAEALNTIKPNDIATVRKLAQPHLIMRIMDCV  
 LLLFQKKIDPVTMDPEKPCCKPSWGESLKLMSATGFLFSLQQFPKDTINEETVELLQPYFNMDDYTFESAKKV  
 CGNVAGLLSWTLAMVIFYGINREVLPLKANLAKQEGRLAVANVELGKAQALLDEKQAEKLVQAKFDAAMKEK  
 MDLLNDADMCRKKMQAAS TLIDGLS GEKVRWTTQSKFQKQINRLVGDVLLCTGFLSYLGFNFQIFRNYLLKD  
 QWELELKARKIPFTENLNLIAMLVDPPTIGEWGLQGLPGDLSIQNGIIVTKATRYPLLDIPQQTQKQTKWIKSK  
 EKENDLQVTSLNHKYFRTHLEDSLGRPLIEDIREELDPALDNVLEKNFIKSGTAFKVKVGDKECDIMDTF  
 KLYITTKLPNPAFTPEINAKTSVIDFTVTMKGLENQLLRVILTEKQELESERVKLEEDVTFNKRKMELEDN  
 LLYKLSATKGLVDDDESIGVLRITKQTAAEVSEKLVHAAETEIKINTAQEEFRPAATRGSILYFLITMSMV  
 NIMYQTSLAQFLKLFQDSMARSEKSLPQKRITNIIEYLTYEVFTYSVRGLYENHKFLVLLMTLKIIDLQGT  
 VKHKEFQALIKGGAALDLKACPPKPFRWILDMTWNLVLELSKLPQFAEIMNQISRNEKGVKFNWFDKDAPEEEI  
 IPDGYNDSLDTCRKLLLRWCPRDRTVFQARKYIADSLEEKYTEPVILNLEKTWEESDHTHTPLICFLSMGSDP  
 TIQIDALAKKLEKCR TISMGQGEVHARKLIQLSMQGGWVLLQNCHLGLFMEELLEMLMVTETTEDSFRV  
 WITTEPHDRFPITLLQTSIKFTNEPPQGVRAGLKRTFAGINQDLLDISNLPMMWKPMPLYTVAFLHSTVQERRKF  
 GPLGWNIPYEFNSADFSASVQFIQNLHDECIDKKGVSWSVTRVYMI GEVQYGGVTDVDFDKRLNCFARVWFSE  
 KMFEPSCFYTGKIPICKTLDQYFEFIQSLPSLDNPEVFLGHPNADITYQSNTASDVLETITNIQPKESGGG  
 VGETREAIYVRLSEDMLSKLPNYPVPEVKARLMKMGHLNSMNI FLRQEI DRMQKVISILRSSLSDLKLAIEG  
 TIIMSENLRDALDNMYDARI PQLWKRVSWSSTLGFWFTELLERNAQFSTWIFEGRPNVFVMTGFFNPQGF LT  
 AMRQEVTRAHKGWALDVTI HNEVLRQTKEEITTPPAEGVYIYGLYMDGASWDRRNGKLTTESTPKVLF TQLPV  
 LHIFAINSTAPKDPKLYVCPIYKPRRTDLTFITVYVLRVTLVSPDHWILRGVALLCDIK\*  
 >ENSMUSP00000127878\_c.2584:A>T\_p.K862M ENSMUST00000170651.2|Dnah8-  
 201|ENSMUSG00000033826|+|chr17:g.30896172:A>T  
 MESEEGNAEPPPPSEEAPPVVEEAPPPLPPEDTAPPPPEEQAPPPEGDAAPPPTGD AFQLTVEGEAPHPEDP  
 KLLSEQGPATSVTDYRSLIPSD EEVTLPEDEESGARVRARHTPRPAQSVLSDGISQSSRRPSKFRRSMTGIP  
 NLQETLKEKQARFREARENRMKIGPSHKYIFEVLGEKLGDLVTV EELIILDCPSLDPFTSFFEKGGCKTLKF  
 LYQEGEVPGFECGRITITGVPKGGKMMRIYVDNAAPDKLGLCLFFVRCRNDVAINSKT IHEDEVLSFLDASKG  
 LLEGIKHMLKSI FLPAI LATS NWGALNQS KQGESEKHIF IETIHRYLASLDDATISIEGTVMKKVDNIDFSK  
 LHTFEVTAASSEMVMHQLEEVLMVWYKQIEQVLI ESEQMRKEADDSGPLTELEHWKRMSAKFNFIIEQIKG  
 SNCKAVINVLNVASHKLLKNWRDL DARI TDSANESKDNVRYLYTLEKVCQPLYNLDLVSMAHGIQNLINAI RM  
 IHSVSRYYNTSERMTSLFIKVTNQMTACKAYITDGGTNHVWQETPAVLKKI QDCIFL FKEYQASFHKTRKQ  
 ILESSGEKSFEVSEMYIFGKFEAFCKRLEKITEMITIVQTYALS NSTIEGIDILGKFKNIYQGIKKNQYDI  
 LDPRRTEFD TDFTEFMGKINILEIQIQAFMNSTFGKILSSQQALQLLQRFQKLNIPCLHLEINHTIERILQCY  
 VAELEFTTKKLYLSQKDDPPLARNMPPIAGKILWVRQLFRRINEPIN YFFKNSDILSSTEGKAVIRQYNRIAYV  
 LVEFEVAYHTAWFKEVSQLQYALQATL FVRHPETGKLLVNFDPKILEVVRETCKMIKMLLDVPEQAKNLLKLE  
 SKLKADKLYLQGLLQYYDDLQCEVPSVFNLMTPKMKKVESVLRQGLTVL TWSSLMLESFFKEVESVLDMFNQ  
 LLKKNVDLCEMHIDTVLKEIAKTL LISLSDSGTTKVEDMLTLNETYTKCADILNHKSRHVEEAVKELILIFE  
 QIYEVYDTGKAASVQKRKR VVFGSEAEETEGLFESTMVEVDTNDKED EFKKECKEYVAFFSHQLLDSLQK  
 ATRLSDTMMKRIIFVSGRRRSEDIVSFIKTEVHLAIPNVVMVPSLDDIQQAINRMIQLTLEVSRGVAHWGQ  
 QQVRLQKSFQNNRSGDQPPASGKPLKKEERSFEETIPARKLKNFYPGVAEHKDISKLVLLSSSVNSLRKAA  
 TEALQDFQKYKTLWIEDRHVKVKEFLANNPSL TEIRSEILHYATLEQEIKELKPIIVVGSLELHTEPMKLALS  
 IEAKAWKMLLCRYLNEEYKMKMSDMITFINEYLKLSRPIRDLDDVRFAMEALS CIR DNEIQMDMTLGP IEEA  
 YGILNRFVVKVTKEESEGVDTLRYSFNKLQSKAVSVQGELVKVQPKFKSNLLESVKVFCEDVINFT EAYETEG

PMVFNIPPPQAEASNLQIFQANFDDLWRKFVITYSSGEQLFGLPVTDYEVVLHKTREKLNLLQKLYGLYDVTVMGSI  
SGYYEILWGDVDIEKINAELQEFQNRCKLPRALKDWQAFDLKKRIDDFSESCPLEMMTNKAMKQRHWDRI  
SELTGTPFDVESDTFCLRNIMEAPLLKNKDDIEDICISAIKEKDEAKLTQVIENWTYQNLNSFAAFKKGKCELL  
LKGTESGEIIITLMEDSLMVLGSLLSNRYNTPFKKNIQNWVFKLSTSSDIIEEWLIVQNLWVYLEAVFVGGDIA  
KQLPQEAQRFNIDKSWIKIMQRAHENPNVISCCVGDETMGQLLPHLHEQLEVCQKSLTGYLEKKRLLFPRFF  
FVSDPVLLEILGQASDSHTIQPHLPAVSDNINEVTFHAKDYDRMTAVISREGEKIMLDTPVMAGPVEIWLDD  
LLKVQMSLSLHNIIRSAFYQISDSGFLLLPFLNHFFPAQVGLLGIQMLWTHDSEEALNNAKDDRIMQITNQKFL  
DILNLTISQTTHTDLTKFDRVKFETLITIHVHQDIFDDLKMHKISVTDFEWLKQSRFYFKEDLDQTVVVSITD  
VDFIYQNEFLGCTDRLVITPLTDRCYITLAQALGMNMGGAPAGPAGTGKTETTKDMGRCLGKYVVVFNCSQDM  
DFRGLGRIFFKGLAQSGSWGCFDEFNRIELPVLVSAQQIYIVLTARKERKKQFIFSDGDCVDLNPFGIFLTM  
NPGYAGRQELPENLKIQFRTVAMVPDRQIMRVKLASCGLFENVILAQKFYVLYKLCEEQLTKQVHYDFGLR  
NILSVLRTLGSQKRARPEDSELSTVMRGLRDMNLSKLVDEDEPLFSLINDLFPGLQLDSSTYAELOSAVDNQ  
VNLEGLINHPPWNLKLVQLYETSLVRHGLMTLGPSSGSKTTVITILMKSLTECGRPHREMRMNPKAITAPQMF  
GRLDTATNDWTDGIFSTLWRKTLKAKKGENIFLILDGPVDAIWIENLNSVLDDNKTLTLANGDRI PMAPTCKL  
LFEVHNINENASPATVSRMGMYISSALSWRPILQAWLKKRSQQEASVFLSLYDKVFEDAYTYMKLSLNPQM  
LLECNYIMQSLNLEGLIPSKKEGGVSSGDHLHLKFLVFGMLMWSLGALLELDSREKLEVFRLRGHGSKLNLPEIP  
KGSQQTYMEFYVTDYGDWEHWNKRIQPYFYPTDSIPEYSSILVNVNDNIRTNFLIDTIAKQHKAVLLTGEQGT  
AKTVMVKAYLKKYDPEVQLSKSLNFSATEPMMFQRTIESYVDRKMGSTYGPGRKMTVFIDINMPVINEW  
GDQITNEIVRQMEMEGMYSLDKPGDFTTIVDVQLIAAMIHPGGGRNDIPQRLKRQFTVFNCTLPSNTSIDKI  
FGIIGCGYFDPCRKFRPEICDMVGNLVSRSRVLWQWTKVKMLPTPSKFHYIFNLRDLSRIWQGLTVKAECS  
SIPILLSLFKHECNRVIAADRITPDEQWFNSQLIRAVEENISPEVAANILPEPYFVDFLRDMPEPTGDEPED  
TMFEVPKIYELVPSFEFLSEKLFYQRFNEIIRGTSLDLVFFKDAMTHLVKISRIIRTSCGNALLVGVGGSG  
KQSLSKLASFIAGYQIFQITLRSYNVSNLIEDLKNLYKVAGAEKGITFTFTDNEIKDEAFLEYLNNLLSSG  
EISNLFARDEMDEITQGLISVMKRELPRHPPTFDNLYEYFITRSRKNLHVVLFCFSPVGEKFRARSLKFPGLIS  
GCTMDWFSRWPKEALIAVASYFLLDYNI VCS IETKRHVVEVMGLFHDVSESCENYFQYRRRAHVTPKSYLS  
FINGYKSIYTDKVKYINEQAERMNIGLDKLEASESVAKLSQDLAVKEKELAVASIKADEVLAEVTVSAQASA  
KVKNEVQEVKDKAKYIVDEIDSEKVAETKLEAAKPALEAEAAALNTIKPNDIATVRKLAAPHLIMRIMDCV  
LLLFQKKIDPVTMDPEKPCCKPSWGESLKLMSATGFLFSLQQFPKDTINEETVELLQPYFNMDDYTFESAKKV  
CGNVAGLLSWTLAMVIFYGINREVLPLKANLAKQEGRLAVANVELGKAQALLDEKQAEKLVQAKFDAAMKEK  
MDLLNDADMCRRKMQAASLTIDGLSGEKVRWTOQSKEFKTQINRLVGDVLLCTGFLSYLGFNFQIFRNYLLKD  
QWELKARKARKIPFTENLNLIAMLVDPPTIGEWGLQGLPGDLSIQNGIIVTKATRYPLLDIPQTOGKTWIKSK  
EKENDLQVTSLNHKYFRTHLEDSLSLGRPLLIEDIREDLPAIDNVLEKNFIKSGTAFKVKVGDKECDIMDTF  
KLYITTKLPNPAFTPEINAKTSVIDFTVTMKGLENQLLRVILTEKQELESERVKLEEDVTFNKRKMKLEEDN  
LLYKLSATKGLVDDESLIGVLRITKQTAAEVSEKLVHAAETEIKINTAQEEFRPAATRGSILYFLITMSMV  
NIMYQTSLAQFLKLFQDSMARSEKSLPQKRITNIEYLTYEVFTYSVRGLYENHKFLVLLMTLKIIDLQRT  
VKHKEFQALIKGGAALDLKACPKPFRWILDMTWLNLELSKLPQFAEIMNQISRNEKGWKNWFDKDAPEEEI  
IPDGYNDSLDTCRKLLLRISWCPRDRTVFQARKYIADSLEEKYTEPVILNLEKTWEESDHTHTPLICFLSMGSDP  
TIQIDALAKKLEKCRITISMGQGEVHARKLIQLSMQGGWVLLQNLCHLGFMEELLEMLMVTETTEDSFRV  
WITTEPHDRFPITLLQTSIKFTNEPPQGVRAGLKRTFAGINQDLDLISNLPMPKPMPLYTVAFLHSTVQERRKF  
GPLGWNIPYEFNSADFSASVQFIQNLHDECDIKKGVSWSTVRMYIGEVQYGGRVTDGDKRLLNCFARVWFSE  
KMFEPSPFCFYTYGKIPICKTLDQYFEFIQSLPSLDNPEVFLGHPNADITYQSNASDVLETITNIQPKESGGG  
VGETREAIYVRLSEDMLSKLPNYPVPEVKARLMKMGHLNSMNI FLRQEI DRMQKVISILRSSLSDLKLAIEG  
TIIMSENLRDALDNMYDARIPLWKRVSWSSTLGFWFTELLERNAQFSTWIFEGRPNVFWMTGFFNPQGF  
AMRQEVTRAHKGWALDVTIHNEVLRQTKEEITTPAEGVYIYGLYMDGASWDRRNGKLTTESTPKVLFTQLPV  
LHIFAINSTAPKDPKLYVCPIYKPRRTDLTFTITVYLRVTLVSPDHWILRGVALLCDIK\*

>ENSMUSP00000110202\_c.1950:G>T\_p.G651\* ENSMUST00000114555.3|Umod11-  
203|ENSMUSG00000054134|+|chr17:g.31205357:G>T

MMSRTVRLVLLALACTVDLSQASGFTENGLSLLSYQLCSYPVTRSVQKLQAVQTSHTAYVYCGGWIPWKKCPK  
TVYRTQYLAMDVPESRNVTDCCAGFEQLGLYCVLSLNRSEFASRPGVCPTAEAEPLSPSCSLDTCSSGLQKC  
CSWPGGRHCVSPTPTGTEKSMVSWYNVTVLVKVGFEDLQREDPGLRNHTRLLYSLVTSALQPLNPAVHYLTST  
GGKDTFTTVSWLLMGFPRMLTVANVSVMLDDMVNRVYEVVSIQVQDVNECLHSELQACSVREQCRNLEGSYQC  
VSSQRLNHTDEDCPPIRDVALNVTSSSFHVSWSLNSTQNYNFHIQVYKGEILRSAWTRGHTMAVSDLEAGV  
LYRVRTSYLGGCANVATLVVKTDAQVFQVTRIGMNRNLTQIILDCSSGEFWNFSRQLFHEVQNSFPQAIISDL  
YRQGRMLQIVSLQAGSLVTLRLTLQDPDFSVGVHTLTPMLPVLVSVNVFQVDQQRFTFVQDWDECAHSSEHD  
CHPSARCINLEGSYTCQCLTARDASPSRAGRVCEDMVIPTGDELSVTTKVTVPAASTGITTFGPETLTSLS  
SKHPRSTPARSQTWTPVPPSVRDGGSIVRQDRNSTGQGMVNPVTPNLGKTHRSTSGVTSVWPAP\*QTHGTH  
QGTTDAPLHTTRESQELITKDPFPLTATTTGYVVVHSSPTWKTTPNSTRLQONEDPRSSSFPGPPSAPTVDVTP  
SPACVPGPIGKVTVSNVTSTSFSLWEPADIRLSPAFHLLTVSPRGPAMTETQNNNVTLGSLWGTLYLVEIV

AKVCGKEGARTQLKVRTVAQKLAGNVRITSMQYSESFNLTSSREHREFVELFFRTVRDSLDPATLRQHMDAGRI  
RVDI INITNGSIVVEFNLLMTADLDVREVSAGFLNALQNTSMLEVVVRGKTFMQDYNECDMKEDDCAPGTCRNT  
FGSFTCSDEGGPDSQVEYSGRSCDGDPSGNMTQTPGSEWSPTPAGTRGVVPPIASSTAQDLPLRLNLMDAVS  
VSCEIETVITITIQKRFLQQAAP EASLYLGEPCSNVSRNSTHVFLVAGWGECGTILQSNMTTTVVTTTLRNN  
LSPEGVIIHHPQFLSPIHCAFQNDVLTSSGYTPQWGVYTVIEDLHGTGNFVTEMQLYIGDSPIPQNYSVSASDE  
IKIEVGLHRQKSSSLKVVLTECWATPSSNAKDPVTF SFINNSCPVNTYTSVIQNGHSSKAQFKLRIFSFINNS  
IVYLHCKLRVCMENPRNSCRISCNDFRSLRSSEALHQMTWGPLHRTEGAQACTKPVLTGYIIILLAAAALLVV  
AGATLLILRYQVRVQKYNLRIQTDDFSYQVFSQ\*

>ENSMUSP0000067443\_c.1950:G>T\_p.G651\* ENSMUST0000066554.13|Umod11-  
201|ENSMUSG00000054134|+|chr17:g.31205357:G>T  
MMSRTVRLVLLALACTVDLSQASGFTENGLSLLSYQLCSYPVTRSVQKLQAVQTSHTAYVYCGGWIPWKKCPK  
TVYRTOYLAMDVPESRNVTDCCAGFEQLGLYCVLSLNRSEFASRPGVCPTAEAEPLSPSCSLDTCSSGLQKC  
CSWPGRHCVSPTPTGTEKSMVSWYNVTVLVKGVFEDLQREDPGLRNHTRLLYSLVTSALQPLNPAVHYLTST  
GGKDTFTTVSWLLMGFPRMLMTVANVSVMLDDMVNRVYEVVSIQVQDVNECLHSELQACSVREQCNRLEGSYQC  
VSSQRLNHTDEDCCPIIRDVFNVTSSSFHVSWSLNSTQNYNFHIQVYKGEILRSAWTRGHTMAVSDLEAGV  
LYRVRTSYLGGGANVSATLVVKTDQVVFQVTIRIMDRNLTEQILDCSSGEFWNFSRQLFHEVQNSFPQAI SDL  
YRQGRLRMQIVSLQAGSLVTLRLTLQDPDFSVGVHTLTPMLPVLSVSNVQVDQRTFVQDWDECAHSSEHD  
CHPSARCINLEGSYTCQCLTARDASPSRAGRVCCEGDMVIPTGDELSVTTKVTVPAASTGITTFGPETLLESLS  
SKHPRSTPARSQTTWTPVPPSVRDGGSIVRQDRNSTGQGMVNPVTPNLGKTHRSTSGVTSSVPWAP\*QTHGTH  
QGTDDAPLHTTRESQELITKDPFLTATTTGYVVWHSSPTWKTTPNSTRLQNE DPRSSSFPGPSAPT DVTPE  
SPACVPGPIGKVTVSNVTSTSFSLWEPADIRLSPAFHLLVSPRGPAMTETQNNNVTLSGLEWGTLYLVEIV  
AKVCGKEGARTQLKVRTVAQKLAGNVRITSMQYSESFNLTSSREHREFVELFFRTVRDSLDPATLRQHMDAGRI  
RVDI INITNGSIVVEFNLLMTADLDVREVSAGFLNALQNTSMLEVVVRGKTFMQDYNECDMKEDDCAPGTCRNT  
FGSFTCSDEGGPDSQVEYSGRSCDGDPSGNMTQTPGSEWSPTPAGTRGVVPPIASSTAQDLPLRLNLMDAVS  
VSCEIETVITITIQKRFLQQAAP EASLYLGEPCSNVSRNSTHVFLVAGWGECGTILQSNMTTTVVTTTLRNN  
LSPEGVIIHHPQFLSPIHCAFQNDVLTSSGYTPQWGVYTVIEDLHGTGNFVTEMQLYIGDSPIPQNYSVSASDE  
IKIEVGLHRQKSSSLKVVLTECWATPSSNAKDPVTF SFINNSCPVNTYTSVIQNGHSSKAQFKLRIFSFINNS  
IVYLHCKLRVCMENPRNSCRISCNDFRSLRSSEALHQMTWGPLHRTEGAQACTKPVLTGYIIILLAAAALLVV  
AGATLLILRYQVRVQKYNLRIQTDDFSYQVFSQ\*

>ENSMUSP0000085013\_c.398:C>A\_p.C133\* ENSMUST0000087721.10|Ephx3-  
201|ENSMUSG00000037577|-|chr17:g.32408024:G>T  
MRGGSICPSRASVSSTGPVDSSTVESQNKGGGLLAPAPLAQSPDHGGSVVVPERKDMPEFVVTALLAPSRLS  
LKLRLALVMSLVYLAALVAAFVYSCIALTHVMCRPRRGCCGRQLSPPECLRDPTLGEH\*FLTLRVSVPPVKS  
SGLRLHYVSAGHGNGLMLFLHGFENWFSWRYQLREFQSHFHVVAVDMRGYSPSDAPKEVDCYTI D L L L D D I  
KDTILGLGYSKCILVSHDWGASLAWEF SIYPSLVERMVVANGPPMSV IQEYSIHHIGQIFRSNYMFLFQLPW  
LPEKLLSMSDFQILKDTFTTHRKNGLPGLTPSELEAFLYHFSQPGCLTGPINYYRNVFRNFLEPKKLSPTLL  
LWGEKDFAFQQLVEAIGRHFVPGRLSHILPGSGHWIPQSHPQEMHQYMWAFQLDLLG\*

>ENSMUSP00000124600\_c.398:C>A\_p.C133\* ENSMUST00000162117.3|Ephx3-  
202|ENSMUSG00000037577|-|chr17:g.32408024:G>T  
MRGGSICPSRASVSSTGPVDSSTVESQNKGGGLLAPAPLAQSPDHGGSVVVPERKDMPEFVVTALLAPSRLS  
LKLRLALVMSLVYLAALVAAFVYSCIALTHVMCRPRRGCCGRQLSPPECLRDPTLGEH\*FLTLRSGRLRHY  
VSAGHGNGLMLFLHGFENWFSWRYQLREFQSHFHVVAVDMRGYSPSDAPKEVDCYTI D L L L D D I K D T I L G L  
GYSKCILVSHDWGASLAWEF SIYPSLVERMVVANGPPMSV IQEYSIHHIGQIFRSNYMFLFQLPWLPEKLLS  
MSDFQILKDTFTTHRKNGLPGLTPSELEAFLYHFSQPGCLTGPINYYRNVFRNFLEPKKLSPTLL L L L W G E K D F  
AFQQLVEAIGRHFVPGRLSHILPGSGHWIPQSHPQEMHQYMWAFQLDLLG\*

>ENSMUSP00000134026\_c.303:A>C\_p.N102H ENSMUST00000172934.8|Marchf2-  
204|ENSMUSG00000079557|-|chr17:g.33922055:T>G  
MTTGDCCHLPGSLCDCSSPAFVKVVEATGLGPPQYVAQVTSRDGRLLSTVIRALDSQSDCPFCRICHEGANG  
ENLLSPCGCTGTLGAVHKSCLEKWLSSSHTSYCELCHTEFAVEKRPRPLTEWLKDPGRTEKRTLCCDMVCFV  
FITPLAAISGWLCLRGAQDHLRLHSRLEAVGLIALTIALFTIYVLWTL L Q R F S P L S L R Q E H G S I Q G G M V Q V E L  
RVLHLRLKEASGRLLTPRH LGQVH\*

>ENSMUSP0000065225\_c.303:A>C\_p.N102H ENSMUST0000066121.13|Marchf2-  
201|ENSMUSG00000079557|-|chr17:g.33922055:T>G  
MTTGDCCHLPGSLCDCSSPAFVKVVEATGLGPPQYVAQVTSRDGRLLSTVIRALDSQSDCPFCRICHEGANG  
ENLLSPCGCTGTLGAVHKSCLEKWLSSSHTSYCELCHTEFAVEKRPRPLTEWLKDPGRTEKRTLCCDMVCFV  
FITPLAAISGWLCLRGAQDHLRLHSRLEAVGLIALTIALFTIYVLWTLVSVFRYHCQLYSEWRKTNQKVR L K I R  
EADGSEDPHHSLLATGLLKKLQRFSPLSLRQEHGSIQGGMVQVELRVLHLRLKEASGRLLTPRH LGQVH\*

>ENSMUSP00000127601\_c.303:A>C\_p.N102H ENSMUST00000167611.8|Marchf2-202|ENSMUSG00000079557|-|chr17:g.33922055:T>G  
 MTTGDCCHLPGSLCDCSSSPAFSKVVEATGLGPPQYVAQVTSRDGRLLSTVIRALDSQSDCPFCRICHEGANG  
 ENLLSPCGCTGTLGAVHKSCLEKWLSSSHTSYCELCHTEFAVEKRPRPLTEWLKDPGPRTEKRTLCCDMVCFV  
 FITPLAAISGWLCLRGAQDHLRLHSRLEAVGLIALTIALFTIYVLWTLVSVFRYHCQLYSEWRKTNQKVRKIR  
 EADGSEDPHHSLLATGLLKKLQRFSPLSLRQEHGSIQGGMVQVELRVLHLRLKEASGRLLTPRHLLGQVH\*

>ENSMUSP00000133802\_c.303:A>C\_p.N102H ENSMUST00000173015.8|Marchf2-205|ENSMUSG00000079557|-|chr17:g.33922055:T>G  
 MTTGDCCHLPGSLCDCSSSPAFSKVVEATGLGPPQYVAQVTSRDGRLLSTVIRALDSQSDCPFCRICHEGANG  
 ENLLSPCGCTGTLGAVHKSCLEKWLSSSHTSYCELCHTEFAVEKRPRPLTEWLKDPGPRTEKRTLCCDMVCFV  
 FITPLAAISGWLCLRGAQDHLRLHSRLEAVGLIALTIALFTIYVLWTLGGGLSLPPHPLQDCPRRSLSDTIAS  
 CTRNGGRQIRKSA\*

>ENSMUSP00000134220\_c.303:A>C\_p.N102H ENSMUST00000172767.9|Marchf2-203|ENSMUSG00000079557|-|chr17:g.33922055:T>G  
 MTTGDCCHLPGSLCDCSSSPAFSKVVEATGLGPPQYVAQVTSRDGRLLSTVIRALDSQSDCPFCRICHEGANG  
 ENLLSPCGCTGTLGAVHKSCLEKWLSSSHTSYCELCHTEFAVEKRPRPLTEWLKDPGPRTEKRTLCCDMVCFV  
 FITPLAAISGWLCLRGAQDHLRLHSRLEAVGLIALTIALFTIYVLWTLVSVFRYHCQLYSEWRKTNQKVRKIR  
 EADGSEDPHHSLLATGLLKKVAEETPV\*

>ENSMUSP00000133940\_c.120:A>C\_p.N41H ENSMUST00000173454.2|Marchf2-208|ENSMUSG00000079557|-|chr17:g.33922055:T>G  
 PFCRICHEGANGENLLSPCGCTGTLGAVHKSCLEKWLSSSHTSYCELCHTEFAVEKRPRPLTEWLKDPGPRTE  
 KRTLCCDMVCFVFITPLAAISGWLCLRGAQDHLRLHSRLEAVGLIALTIALFTIYVLWTLVSEWRKTNQKVR  
 LKIREADGSEDPHHSLLATGLLKKVAEETPV\*

>ENSMUSP00000133825\_c.303:A>C\_p.N102H ENSMUST00000173329.8|Marchf2-206|ENSMUSG00000079557|-|chr17:g.33922055:T>G  
 MTTGDCCHLPGSLCDCSSSPAFSKVVEATGLGPPQYVAQVTSRDGRLLSTVIRALDSQSDCPFCRICHEGANG  
 ENLLSPCGCTGTLGAVHKSCLEKWLSSSHTSYCELCHTEFAVEKRPRPLTEWLKDPGPRTEKRTLCCDMVCFV  
 FITPLAAISGWLCLRGAQDHLRLHSRLEAVGLIALTIALFTIYVLWTLVSG\*

>ENSMUSP00000134437\_c.363:A>C\_p.N122H ENSMUST00000174040.2|Marchf2-209|ENSMUSG00000079557|-|chr17:g.33922055:T>G  
 MCMFLGPWASGPEDRRRLPVAMTTGDCCHLPGSLCDCSSSPAFSKVVEATGLGPPQYVAQVTSRDGRLLSTVIR  
 ALDSQSDCPFCRICHEGANGENLLSPCGCTGTLGAVHKSCLEKWLSSSHTSYCELCHTEFAVEKRPRPLTEWL  
 KDPGPRTEKRTLCCDMVCFVFITPLAAISGWLCLRGAQDHLRLHSRLEAVGLIALTIALFTIYVLWTLVSG

>ENSMUSP00000139724\_c.303:A>C\_p.N102H ENSMUST00000186022.7|Marchf2-210|ENSMUSG00000079557|-|chr17:g.33922055:T>G  
 MTTGDCCHLPGSLCDCSSSPAFSKVVEATGLGPPQYVAQVTSRDGRLLSTVIRALDSQSDCPFCRICHEGANG  
 ENLLSPCGCTGTLGAVHKSCLEKWLSSSHTSYCELCHTEFAVEKRPRPLTEWLKDPGPRTEKRTLCCDMVCFV  
 FITPLAAISGWLCLRGAQDHLRLHSRLEAVGLIALTIALFTIYVLWTLVSVFRYHCQLYSEWRKTNQKVRKIR  
 EADGSEDPHHSLLATGLLKKLQRFSPLSLRQEHGSIQGGMVQVELRVLHLRLKEASGRLLTPRHLLGQVH\*

>ENSMUSP00000025266\_c.142:T>G\_p.L48R ENSMUST00000025266.6|Lta-201|ENSMUSG00000024402|-|chr17:g.35423404:A>C  
 MTLGLRLHLLRVLGTPPVFLLGLLALPLGAQGLSGVRFSAARTAHPRPQKHLTHGILKPAAHLVGYPSKQNS  
 LLWRASTDRAFLRHGFSLNNSLLIPTSGLYFVYSQVVFSGESCPRAIPTPIYLAHEVQLFSSQYPFHVPLL  
 SAQKSVYVPLGQGPWVRSMYQGAFFLLSKGDQLSTHTDGIHSHLHFSPPSSVFFGAFAL\*

>rs265087281\_ENSMUSP00000136148\_c.45:C>CG\_p.P16ins-fs  
 ENSMUST00000178037.2|Esp16-201|ENSMUSG00000096345|+|chr17:g.39848753:C>CG  
 MASFPLMYFLIFLVFRNNTS

>ENSMUSP00000049206\_c.261:G>T\_p.E88\* ENSMUST00000039366.11|Kcnh8-201|ENSMUSG00000035580|+|chr17:g.53032976:G>T  
 MPVMKGLLAPQNTFLDTIATRFDGTHSNFILANAQVAKGFPIVYCSDFCELAFARTEVMQKSCCKFLFGV  
 ETNEQLMLQIEKSL\*EKVEFKGEIMFYKKNAGAPFWCLLDIVPIKNEKGDVVLFLASFKDITDTKVKITSEDKK  
 EDRTKGRSRAGSHFDSARRRSRAVLYHISGHLQRREKNKLNINNVFVDKPAFPEYKVSDAKKSKFILLHFST  
 FKAGWDWILLATFYVAVTVPYNVCFIGNEDLSTRSTTVSDIAVEILFIIDIILNFRHTYVSKSGQVIFEAR  
 SICIHYVTTFWFIIDLIAALPFDLLYAFNVTVSVLHLLKTVSRLLRLLRLLQKLDKDRYSQHSTIVLTLMSMFAL  
 LAHWMACIWIYVIGKMEREDNSLLKWEVWGLHELKGRLESPPYGNNTLGGPSIRSAYIAALYFTLSLTSVGF  
 NVSANTDAEKIFSICTMLIGALMHALVFGNVTAI IQRMYSRWSLYHTRTKDLKDFIRVHLLPQQLKQRMLEYF  
 QTTWSVNNGIDSNELLKDFPDELRSDITMHLNKEILQLSLFECASRGCLRSLSLHIKTSFCAPGEYLLRQGDA  
 LQAIYFVCSGSMEVLKDSMVLAILGKGDILIGANLSIKDQVIKTNADV KALTYCDLQCIILKGLFEVLGLYPEY



AHKFVEDIQHDLTYNLREGHESDVISRLSNKSTVSOAEPKNGSINKRLPSIVEDEEEEEVEEEEETSLSPIY  
TRGSSVSHSKKTGSNKTYLGLSLKQLASGTVPFFHSPIRVSSANS PKTKQEADPPNHGRKKEKNLKVQLSSLGS  
AGTPELSPRIVDGIEDGNSNEETQTFDFGSEQIRPEPRISPLAESEIGAAFLFIKAEETKQKQINKLNSEVTT  
LTQEVSQLGRDMRSIMQLENILSPQQPSQFCSLHPTPMCPSRESLQTRVSWSAHQPCLLHLQAGGAHLYHGNV  
ASGIWSVDPVSLVGSPPQRTAEHQNPADSELHHSPLNDYSPSHCQVIOEGHLQFLRCISPHSDTTLTPLQSSIS  
ATLSSSVCSSETSLHLVLPSSRSEEGSITHGVPVSSFSLNLPGSWDREQMMSASSERLENFPVEVVTSTADVK  
DSKAINV\*  
>ENSMUSP00000011623\_c.183:C>G\_p.P62A ENSMUST00000011623.9|Dennd1c-  
201|ENSMUSG00000002668|-|chr17:g.57382481:G>C  
MGSTETRHPAMPFDWFFFEAGCPNSLEEDPPILRQFPDFQEQEAMQVPRFCFPFDIEREPASPAVQHFTFAL  
TDLVGNRRFGFCRLRAGARSCILSHFPWFVEVFKILNNVGDLLAQNVAAEAEELLQNLQHPHLLGPRFSGR  
SEMDSSITVRSECGILPPALGNSKLLSCFVAPDAASLPSIPENRNLTLLVAVTDENIVGLFAALLAERRVLL  
TASKLSTLTACVHASCALLYPMRWEHVLIPTLPPHLLDYCCAMPYLVGVHGLAERVREKALEDVVVLNADS  
NTLETFFDDVQALPPDVVSLRLRLRKLVALSPGEGVSRFLKQVALLFGGYRDALVCI PGQPVTFSEEAFLAQ  
KPGAPLQAFHKKAVHLQLFKQFIESRLEKLNAGEGFSDDQFEQEI IACRGASSGTLRSYQLWVDSLKKGSDALL  
HSMKTKTQPAVRNMYRSGDSLQEYCAKAKSGLKGMQNLTLTKDGDGSLQRGGLRTPSLTSTRSDRLQQLRPI  
SQHFQQRPLRPSRRLKTEEGPSEPLRERSPTLSPGDTQNPWAEEDTLDGSLGSGEELDLSEILDSLVNVEK  
SGDLQRASQSLDCCQRGAASESCSSLPDIPVGLPWQLEEDKRSQDPQWPSLPGDLSLLQDTPFSEVVSYSKNS  
CSQFPQQSPSPQDGPSPSLKLDPRPSQSPCKLLRVPTRHSPPEPQLLVSTEPNSDAVQRLQSISSPSCSH  
SAENPRNQPPQVLLGQACVQPLEELGAPTYVSHVSTQQRPDQKQPRVADLKKCFEN\*  
>rs253959868\_ENSMUSP00000024858\_c.1648:C>T\_p.S550L  
ENSMUST00000024858.12|Galnt14-201|ENSMUSG00000024064|-  
|chr17:g.73801172:G>A  
MRRLTRRALPIFGVLWITVLLFFWVTKRKLEVPVLPGEVQTPKPSDADWDDLWEQFDERRYLNAAKWRVGGDP  
YKLYAFNQRESERISSNRAVPDTRHKRCSLLVYCTDLPPTSIIITFHNEARSTLLRTIRSVLNRTPMHLIQEI  
ILVDDFNSDEPCKQLIKLPVKCLRNNERQGLVRSRMRGADIAQGTTLTFLDSHCEVNRDQLPLLRVKED  
YTRVVCVIDIINLDTFNIESASELRGGFDWSLHFQWEQLSLEQKALRLDPTPIRTPI IAGGLFVIDKAWF  
DYLKGYDVMIDIWGGENFEISFRVWMC GGLEIIPCSRVGHVFRKHPYVFPDGNANTYIKNTRKTAEVWMD  
YKQYAAARPFALERPFNGNIENRNLNRKNLHCQTFKWYLENVYPELVRVPPDSSIQKGNIRQRKCLESQKQK  
QEILRLSPCAKVKGDGAKSQVWAFYTYQIIQEELCLSVVTLFPGAPVVLALCKNGDERQLWTKTGARIEHIA  
SHLCLDMDMGDSTEDGKEVVVNPCSSLMSSHWDIVSL\*  
>ENSMUSP00000039628\_c.100:T>TAAAAA\_p.I34ins-fs  
ENSMUST00000047206.7|Plekhh2-  
201|ENSMUSG00000040852|+|chr17:g.84829231:T>TAAAAA  
MEEPSEPEGLIDWKERCVALEAQLMKFRVQASKIKTASS  
>ENSMUSP00000069495\_c.1500:G>T\_p.G501\* ENSMUST00000066175.10|Abcg5-  
201|ENSMUSG00000040505|-|chr17:g.84972271:C>A  
MGELPFLSPEGARGPHINRGSLSLEQGSVTGTEARHSLGVLHVSYSVSNRVGPWWNIKSCQQKQWDRQILKDV  
SLYIESGQIMCILGSSGSGKTTLLDAISGRLRRTGTLEGEVFNVCCELRRDQFQDCFSYVLQSDVFLSSLTVR  
ETLRYTAMLALCRSSADFYNNKVEAVMTELSLSHVADQMIGSYNFGGISSGERRRVSIAAQLLQDPKVMMLDE  
PTGLDCMTANQIVLLLAELARRDRIVVTIHQPRSELFQHFDKIAILTYGELVFCGTPPEMLGFFNCCGYPC  
PEHSNPFDFYMDLTSVDTQSREREIETYKRVQMLECAFKESDIYHKILENIERARYLKTLPVFPKTKDPPGM  
FGKLGVLRRVTRNLMRNKQAVIMRLVQNLIMGLFLIFYLLRVQNNLTKGAVQDRVGLLYQLVGATPYTGMLN  
AVNLFPMRLRAVSDQESQDGLYHKWQMLLAYVHLVLPFSVIATVIFSSVCYWTGLGYPEVARF\*YFSAALLAPH  
LIGEFLLVLLGIVQNPINIVNSIVALLSISGLLIGSGFIRNIQEMPIPLKILGYFTFQKYCEILVNEFYGL  
NFTCCGSNTSMLNHPMCAITQGVQFIEKTCPGATSRTANFLILYGFIPALVILGIVIFKVRDYLISR\*  
>ENSMUSP00000130783\_c.984:G>T\_p.G329\* ENSMUST00000163375.2|Abcg5-  
202|ENSMUSG00000040505|-|chr17:g.84972271:C>A  
MCILGSSGSGKTTLLDAISGRLRRTGTLEGEVFNVCCELRRDQFQDCFSYVLQSDVFLSSLTVRETLRYTAML  
ALCRSSADFYNNKVEAVMTELSLSHVADQMIGSYNFGGISSGERRRVSIAAQLLQDPMDLTSVDTQSREREIE  
TYKRVQMLECAFKESDIYHKILENIERARYLKTLPVFPKTKDPPGMFGKLGVLRRVTRNLMRNKQAVIMRL  
VQNLIMGLFLIFYLLRVQNNLTKGAVQDRVGLLYQLVGATPYTGMLNAVNLFPMLRAVSDQESQDGLYHKWQ  
MLLAYVHLVLPFSVIATVIFSSVCYWTGLGYPEVARF\*YFSAALLAPHLIGEFLLVLLGIVQNPINIVNSIVAL  
LSISGLLIGSGFIRNIQEMPIPLKILGYFTFQKYCEILVNEFYGLNFTCCGSNTSMLNHPMCAITQGVQFI  
EKTCPGATSRTANFLILYGFIPALVILGIVIFKVRDYLISR\*  
>rs107598382\_ENSMUSP00000129804\_c.309:G>C\_p.V104L  
ENSMUST00000165255.3|Vmn1r238-201|ENSMUSG00000091539|-  
|chr18:g.3123103:C>G

MKMDPGNFAIETFLFCQITVGMFGNSSILFYFIFLIFTEKHLTPKVLII EHLTFANYLTVILRGFPQTMSYFG  
 FKNFLDDMECKLIVYISRITRGVSLYAMCLLSCFQAITISPNNRWIKLKYRATKYIGPSCSVSWLVHLLLN  
 LTPLRSEGTNYKKNATNRLSYGYCSLFASDSVATTLYISLVCFSDFVCLGLMACSSISMVSILYRHKRQVKHN  
 HSAQHFLKVPEDRATQTILILLCTFVISYSFSSIVAIIRTYLNYPVIWGVNIFTSLIEIFFPMFCPFVLITNM  
 RSSNLFLPCLGKR\*

>ENSMUSP00000129804\_c.283:G>A\_p.G95E ENSMUST00000165255.3|Vmn1r238-  
 201|ENSMUSG00000091539|-|chr18:g.3123129:C>T

MKMDPGNFAIETFLFCQITVGMFGNSSILFYFIFLIFTEKHLTPKVLII EHLTFANYLTVILRGFPQTMSYFG  
 FKNFLDDMECKLIVYISRITRGVSLYAMCLVSCFQAITISPNNRWIKLKYRATKYIGPSCSVSWLVHLLLN  
 LTPLRSEGTNYKKNATNRLSYGYCSLFASDSVATTLYISLVCFSDFVCLGLMACSSISMVSILYRHKRQVKHN  
 HSAQHFLKVPEDRATQTILILLCTFVISYSFSSIVAIIRTYLNYPVIWGVNIFTSLIEIFFPMFCPFVLITNM  
 RSSNLFLPCLGKR\*

>rs108088649\_ENSMUSP00000129804\_c.244:A>G\_p.E82G  
 ENSMUST00000165255.3|Vmn1r238-201|ENSMUSG00000091539|-  
 |chr18:g.3123168:T>C

MKMDPGNFAIETFLFCQITVGMFGNSSILFYFIFLIFTEKHLTPKVLII EHLTFANYLTVILRGFPQTMSYFG  
 FKNFLDDMGCKLIVYISRITRGVSLYAMCLVSCFQAITISPNNRWIKLKYRATKYIGPSCSVSWLVHLLLN  
 LTPLRSEGTNYKKNATNRLSYGYCSLFASDSVATTLYISLVCFSDFVCLGLMACSSISMVSILYRHKRQVKHN  
 HSAQHFLKVPEDRATQTILILLCTFVISYSFSSIVAIIRTYLNYPVIWGVNIFTSLIEIFFPMFCPFVLITNM  
 RSSNLFLPCLGKR\*

>ENSMUSP00000025073\_c.988:T>C\_p.L330P ENSMUST00000025073.12|Cu12-  
 201|ENSMUSG00000024231|+|chr18:g.3423580:T>C

MSLKPRVDFDETWNKLLTTIKAVVMLEYVERATWNRFSDIYALCVAYPEPLGERLYAETKIFLESHVRHLY  
 KRVLESEEQVLVVMYHRYWEEYSKGADYMDCLYRNLNTQYIKKNKLT EADIQYGYGGVDMNEPLMEIGELALDM  
 WRKLMVEPLQNILIRMLLREIKNDRGGEDPNQKVIHGVSINSFVHVEQYKKKFP LKQYQIFVSPFLTETGEYY  
 KQEASNLLQESNCSQYMEKVLGRLKDEEIRCRKYLHPSSYTKVIEHCQQRMVADHLQFLHSECHSIIQQERKN  
 DMANMYVLLRAVSSGLPHMIEELQKHIHDEGLRATSNPTQEHMPTLFVSVLEVHGKQFVQLINTVLNGDQHF  
 SALDKALTSVVNYREP KSVCKAPELLAKYCDNLLKKSAGGMTENEVEDKLT SFITVFKYIDDKDVFQKQFYARM  
 LAKRLIHGLSMSMDSEAMINKLKQACGYEFTSKLHRMYTDM SVSADLNNKFNNFIRNQD TVIDLGISFQIYV  
 LQAGAWPLTQAPSSTFAIPQELEKSVQMFELFYSQHFSGRKLTLWLH YLCTGEVKMNYLGKPYVAMVTTYQMAV  
 LLAFNNSETVSYKELQDSTQ MNEKELTKTIKSLLDVKMINHDSEKEDI DAESSFSLNMSFSSKRKTKFKITTS  
 QKDT PQVISQSRARFNPSISMIKKCIEVLIDKQYIERSQASADEYSYVA\*

>ENSMUSP00000125403\_c.988:T>C\_p.L330P ENSMUST00000162301.8|Cu12-  
 205|ENSMUSG00000024231|+|chr18:g.3423580:T>C

MSLKPRVDFDETWNKLLTTIKAVVMLEYVERATWNRFSDIYALCVAYPEPLGERLYAETKIFLESHVRHLY  
 KRVLESEEQVLVVMYHRYWEEYSKGADYMDCLYRNLNTQYIKKNKLT EADIQYGYGGVDMNEPLMEIGELALDM  
 WRKLMVEPLQNILIRMLLREIKNDRGGEDPNQKVIHGVSINSFVHVEQYKKKFP LKQYQIFVSPFLTETGEYY  
 KQEASNLLQESNCSQYMEKVLGRLKDEEIRCRKYLHPSSYTKVIEHCQQRMVADHLQFLHSECHSIIQQERKN  
 DMANMYVLLRAVSSGLPHMIEELQKHIHDEGLRATSNPTQEHMPTLFVSVLEVHGKQFVQLINTVLNGDQHF  
 SALDKALTSVVNYREP KSVCKAPELLAKYCDNLLKKSAGGMTENEVEDKLT SFITVFKYIDDKDVFQKQFYARM  
 LAKRLIHGLSMSMDSEAMINKLKQACGYEFTSKLHRMYTDM SVSADLNNKFNNFIRNQD TVIDLGISFQIYV  
 LQAGAWPLTQAPSSTFAIPQELEKSVQMFELFYSQHFSGRKLTLWLH YLCTGEVKMNYLGKPYVAMVTTYQMAV  
 LLAFNNSETVSYKELQDSTQ MNEKELTKTIKSLLDVKMINHDSEKEDI DAESSFSLNMSFSSKRKTKFKITTS  
 QKDT PQELEQTRSAVEDRKM YLQAAIVRIMKARKVLRHNALIQEVISQSRARFNPSISMIKKCIEVLIDKQY  
 IERSQASADEYSYVA\*

>ENSMUSP00000123903\_c.799:T>C\_p.L267P ENSMUST00000161317.2|Cu12-  
 204|ENSMUSG00000024231|+|chr18:g.3423580:T>C

MSLKPRVDFDETWNKLLTTIKAVVMLEYVERATWNRFSDIYALCVAYPEPLGERLYAETKIFLESHVRHLY  
 KRVLESEEQVLVVMYHRYWEEYSKGADYMDCLYSDRGGEDPNQKVIHGVSINSFVHVEQYKKKFP LKQYQIFV  
 PFLTETGEYYKQEASNLLQESNCSQYMEKVLGRLKDEEIRCRKYLHPSSYTKVIEHCQQRMVADHLQFLHSEC  
 HSIQQERKNDMANMYVLLRAVSSGLPHMIEELQKHIHDEGLRATSNPTQEHMPTLFVSVLEVHGKQFVQLIN  
 TVLNGDQHFMSALDKALTSVVNYREP KSVCKAPELLAKYCDNLLKKSAGGMTENEVEDKLT SFITVFKYIDDK  
 DVFQKQFYARMLAKRLIHGLSMSMDSEAMINKLKQACGYEFTSKLHRMYTDM SVSADLNNKFNNFIRNQD TVI  
 DLGISFQIYV LQAGAWPLTQAPSSTFAIPQELEKSVQMFELFYSQHFSGRKLTLWLH YLCTGEVKMNYLGKPYV  
 AMVTTYQMAVLLAFNNSETVSYKELQDSTQ MNEKELTKTIKSLLDVKMINHDSEKEDI DAESSFSLNMSF  
 SSKRKT

>ENSMUSP00000094326\_c.27:A>T\_p.I10F ENSMUST00000096575.5|Map3k2-  
 201|ENSMUSG00000024383|+|chr18:g.32329916:A>T

MDDQQALNSFMQDLAVLHKASRPALSLOETRKAQKSSPKKQNDVVRVKFEHRGKRIQVTRPVKLEDLRSKSK  
IAFGQSMDLHYTNNELVIPLTTQDDLDKAVELLDRSIHMKSLKILLVNGSTQATNLEPSPSPEDLNNTPLGA  
ERKKRLSVVGGPPNRDRSSPPPGYIPDELHQIARNGSFTSINSEGEFIPESMDQMLDPLSLSSPENSNGSGCPS  
LDSPLDGE.SYPKSRMPRAQSYPDNHQEFQFTDYDNPIFEKFGKGGTYPRRYHVSYYHQEYNDGRKTFPRARRTQG  
TSFRSPVFSPTDHSLSSTSSGSSVFTPEYDSDRIRRRGSDIDNPTLTVTDISPSPRSRAPPTNWRLGKLLGQG  
AFGRVYLCYDVTGRELAVKQVQFNPEPETSKEVNALECEIQLLKNLLHERIVQYYGCLRDPQEKTLISIFME  
YMPGGSIKDQLKAYGALTENVTRKYTRQILEGVHYLHNSMIVHRDIKGANILRDSTGNIKLDFGASKRLQTI  
CLSGTGMKSVTGTTPYWMSPEVISGEGYGRKADIWSVACTVVEMLTEKPPWAEFEAMAAIFKIATQPTNPKLPP  
HVS DYTRDFLKRIFVEAKLRPSAEELLRHMVFVYH\*

>ENSMUSP00000053326\_c.93:A>G\_p.R32G ENSMUST00000059571.7|Pcdhb19-  
201|ENSMUSG00000043313|+|chr18:g.37630300:A>G  
MENQEGLYLQTRQVLLLFVFLGMSQAHSEAGGLSVVEEMLSGALVGNLVKDLGLQVDELSAREAQVASSDNKL  
PLQLNINTGDLLESEPLDREELCGSTPCVLHFQVLLKNPLKILQAEQVTDVNDNSPVFLEKEMVLEIPENS  
PVGAVFLLESALDLDVGINAVKSYEISQNSHFHVTMRVNDGRKYPELVLDKALDYEEQHELRLILTALDGGT  
PPRSGTALVRVEVIDINDNSPEFDHMFYEVTVPENSMGLSLLITASAWDLDSGINGEVSYAFSHASEDIRKTF  
AINEHSGEIRLKGYLDFETTESYSIIKATDRGGFLGKSTVRIQVMDVNDNFPEIIVSSFISPIPENTAETLV  
MIFSIIRDKDSGENGKVMCTIPEGLPFVLKSSIENYHLETDGALDRESIAEYNITISVTDLGTPLRTQHTII  
VQVADINDNAPAFQTQTSYTMFFHENNSPALHIGTISATDSAGSNAHITYSLMSAQDLQMLSLISINADNG  
QLFALRALDYEVQLAFEFQVGATDRGSPALSSQALVRVVLDNDNAPFVLYPMQNASAPCTELLPRAAEPGY  
LVTKVAVDRDSGQNAWLSFQLLKATEPGLFSVWAHNGEVRTTRLLSERDAPKHRLLLLVKNDGDPPRSASVT  
LHVLVVDGFSQPYPPLPEVARNPAHEEDALTLYLVTALASVSSLFLLSVMLFVGVRLCRRARAASLGCTVPE  
GHFPDHLMGINSAGTLSQSYQYEVCLMGGSGTNEFRFLKPVSPNLQPQFPGKEIEESSTLRNSFGLFRDCN\*

>ENSMUSP00000125576\_c.709:A>C\_p.Q237P ENSMUST00000161701.3|Pcdh1-  
204|ENSMUSG00000051375|-|chr18:g.38332292:T>G  
NDNTPNFASPVITLAI PENTNIGSLFPIPLATDRDAGPNGVASYELQAGPEAQELFGLQVAEDQEEKQPQLIV  
MGNLDRERWDSYDLTIKVDGNGNPPRASSALLRVTVLDTNDNAPKFERPTYEAELSENSPIGHSVIQVKANDS  
DQGANAIEDYTFHQAPEVVRLLRLDRNTGLITVQGPVDREDLSTLRFVSLAKDRGATPKSARAQVVVTVKDM  
NDNAPTIEIRGIGLVTHPDGMANISEDVAEETAVALVQVSDRDEGENAAVTCVVAGDVFPQLRQASETGSDSK  
KKYFLQTTTPLDYEKVKDYTIEIVAVDSGNPPLSSTNSLKVQVVDVNDNAPVFTQSITEVAF PENNK PGEVVA  
EVTASDADSGSNAELVYSLEPEPAAQGLFTISPENGEIRVKTSLDREQRDSYELKVVAADRGS PSLQGTATVL  
VNVLDNDNDPKFMLS GYNFVSMENMPALSPVGMVTVIDGDKGENARVQLSVEQDNGDFVIQNGTGTILSSLS  
FDREQQSTYTFQLKAVDGGVPPRSAYVGVTVINVL DENDNAPFITAPSNTSHRLLTPQTRLGETVSVQVTAEDID  
SGINAELTYSIAGGNPYGLFQIGSHSGAITLEKEIERRHHGLHRLVVKVSDRGKPPRYGTALVHLYVNETLAN  
RTLLETLLVHSLDTPLDIDIADGPEYERSKQRGNILFGVVAGVVAVALLIALAVLVRYCRQREAKSGYQAGKK  
ETKDLYAPKPSGKAAGSKSKGKSKSPKPKVKEDEDDTGLQKSLKFNLMSDAPGDSPRIHLPLNYPGSPD  
LGRHYRSNSPLPSIQLPQSPSASKKHQVVDLPPANTFVGTGDTTSTGSEQYSDYSYRTNPPKYPSKQLPHR  
RVTFSAQSQAQELQDPSQHSYD SGLEESETPSSKSSSGPRLGPLALPEDHYERTTPDGSIGEMEHENDLRP  
LPDVAMTGTCTRECSEFGHSDTCWMPGQSSPSRRTKSSALKLSTFVVPYQDRGGQEPAGAGSPSPPEDRNTKTA  
PVRLLPYSYSAFSSSHDCKDSATLEEIPLTQTSDFPPTATPASAQTAAKREIYL\*

>ENSMUSP00000055199\_c.1126:A>C\_p.Q376P ENSMUST00000057185.13|Pcdh1-  
201|ENSMUSG00000051375|-|chr18:g.38332292:T>G  
MGPLRPSPGPGGQRLLLP LLLLALLLLLAPSASHTTQVVYKVPPEEQPPNTLIGSLAADYGLPDVGHLYKLEVG  
APYL RVDGKTGDI FTTETSIDREGLRECQNQIPGNPCILEFEV SITDLVQNGSPRLLEGQIEVQDINDNTPNF  
RWDSDYDLTIKVDGNGNPPRASSALLRVTVLDTNDNAPKFERPTYEAELSENSPIGHSVIQVKANDSDQANA  
IDYTFHQAPEVVRLLRLDRNTGLITVQGPVDREDLSTLRFVSLAKDRGATPKSARAQVVVTVKDMNDNAPT  
EIRGIGLVTHPDGMANISEDVAEETAVALVQVSDRDEGENAAVTCVVAGDVFPQLRQASETGSDSKKYYFLQ  
TTPLDYKVKDYTIEIVAVDSGNPPLSSTNSLKVQVVDVNDNAPVFTQSITEVAF PENNK PGEVVAEVTASDA  
DSGSNAELVYSLEPEPAAQGLFTISPENGEIRVKTSLDREQRDSYELKVVAADRGS PSLQGTATVLNVLDN  
DNDPKFMLS GYNFVSMENMPALSPVGMVTVIDGDKGENARVQLSVEQDNGDFVIQNGTGTILSSLSFDREQQS  
TYTFQLKAVDGGVPPRSAYVGVTVINVL DENDNAPFITAPSNTSHRLLTPQTRLGETVSVQVTAEDIDSGINAEL  
TYSIAGGNPYGLFQIGSHSGAITLEKEIERRHHGLHRLVVKVSDRGKPPRYGTALVHLYVNETLANRTLLET  
LVHSLDTPLDIDIADGPEYERSKQRGNILFGVVAGVVAVALLIALAVLVRYCRQREAKSGYQAGKKE TKDLYA  
PKPSGKAAGSKSKGKSKSPKPKVKEDEDDTGLQKSLKFNLMSDAPGDSPRIHLPLNYPGSPDLGRHYRS  
NSPLPSIQLPQSPSASKKHQVVDLPPANTFVGTGDTTSTGSEQYSDYSYRTNPPKYPSKQVQGPFRLLSTPQ  
PPHPYHGAIWTEVWE\*

>ENSMUSP00000125309\_c.1126:A>C\_p.Q376P ENSMUST00000159405.3|Pcdh1-  
202|ENSMUSG00000051375|-|chr18:g.38332292:T>G

MGPLRPSPPGGQRLLLPPLLLALLLLLAPSASHTTQVVYKVPPEEQPPNTLIGSLAADYGLPDVGHLYKLEVG  
 APYLVRVDGKTGDIFFTETSIDREGLRECQNQIPGNPCILEFEVSI TDLVQNGSPRLLEGQIEVQDINDNTPNF  
 ASPVITLAI PENTNIGSLFPI PLATDRDAGPNGVASVELQAGPEAQELFGLQVAEDQEEKQPQLIVMGNLDRE  
 RWDSYDLTIKVDGGNPPRASSALLRVTVLDTNDNAPKFERPTYEAELSENSPIGHSVIQVKANDSDQGANAE  
 IDYTFHQAPEVVRLLRLDRNTGLITVQGPVDREDLSTLRFVSLAKDRGATPKSARAQVVVTVKDMNDNAPT  
 EIRGIGLVTHPDGMANISEDVAEETAVALVQVSDRDEGENAAVTCVVGADVPFQLRQASETGSDSKKKYFLQT  
 TTPLDYEKVKDYTIEIVA VDSGNPPLSSTNSLKVQVVDVNDNAPVFTQSITEVAF PENNK PGEVVAEVTASDA  
 DSGSNAELVYSLEPEPAAQGLFTISPENGEIRVKTSLDREQRDSYELKVVAADRGS PSLQGTATVLVNVLD  
 DNDPKFMLS GYNFV MENMPALSPVGMVTVIDGDKGENARVQLSVEQDNGDFVIQNGTGTILSSLSFDREQQS  
 TYTFQLKAVDGGVPPRSAYVGVTVINVL DENDNAPFITAPSNTSHRLLTPQTRLGETVSVQVTAEDIDSGINAEL  
 TYSIAGGNPYGLFQIGSHSGAITLEKEIERRHHGLHRLVVKVSDRGKPPRYGTALVHLYVNETLANRTLLETL  
 LVHSLDTPLDIDIAGDPEYERSKQRGNILFGVVAGVVAALLIALAVLVRYCRQREAKSGYQAGKKE TKDLYA  
 PKPSGKAAGKSKGKSKGKSKPKPVKVEDEDDTGLQKSLKFNLMSDAPGDSPRIHLPLNYPGSPDLGRHYRS  
 NSPLPSIQLPQSPSASKKHQVVQDLPPANTFVGTGDTTSTGSEQYSDYSYRTNPPKYPSPKQVQGPFRSTPQ  
 PPPHPYHGAIWTEVWE\*

>ENSMUSP00000133372\_c.533:C>TC\_p.A178ins-fs ENSMUST00000174518.8|Aldh7a1-  
 208|ENSMUSG00000053644|-|chr18:g.56681551:G>GA  
 MSTLLIHHPQYAWLQDLGLREDNEGVYNGSWGGRGEVITTYCPANNEPIARVRQASLKDYEETIGKAKKAWNI  
 WADIPAPKRGEIVRKIGDAFREKIQLLGRVLSLEMGIKILVEGIGEVQEVVDVCDYAAGLSRMIGGPTLP SERP  
 GHALIEMWNPLGLVGIITAFNFPVAVFGWNAHSSDHRECLPLERSTDYVPR

>ENSMUSP00000134192\_c.617:C>TC\_p.A206ins-fs ENSMUST00000172734.8|Aldh7a1-  
 206|ENSMUSG00000053644|-|chr18:g.56681551:G>GA  
 MWRVPRRLCVQSVKTSKLSGPWSRPAAHMSTLLIHHPQYAWLQDLGLREDNEGVYNGSWGGRGEVITTYCPAN  
 NEPIARVRQASLKDYEETIGKAKKAWNIWADIPAPKRGEIVRKIGDAFREKIQLLGRVLSLEMGIKILVEGIGE  
 VQEVVDVCDYAAGLSRMIGGPTLP SERPGHALIEMWNPLGLVGIITAFNFPVAVFGWNAHSSDHRECLPLER  
 STDYVPR

>ENSMUSP00000065089\_c.617:C>TC\_p.A206ins-fs  
 ENSMUST00000066208.13|Aldh7a1-201|ENSMUSG00000053644|-  
 |chr18:g.56681551:G>GA  
 MWRVPRRLCVQSVKTSKLSGPWSRPAAHMSTLLIHHPQYAWLQDLGLREDNEGVYNGSWGGRGEVITTYCPAN  
 NEPIARVRQASLKDYEETIGKAKKAWNIWADIPAPKRGEIVRKIGDAFREKIQLLGRVLSLEMGIKILVEGIGE  
 VQEVVDVCDYAAGLSRMIGGPTLP SERPGHALIEMWNPLGLVGIITAFNFPVAVFGWNAHSSDHRECLPLER  
 STDYVPR

>ENSMUSP00000133970\_c.611:C>TC\_p.A204ins-fs ENSMUST00000174704.8|Aldh7a1-  
 209|ENSMUSG00000053644|-|chr18:g.56681551:G>GA  
 RVPRRLCVQSVKTSKLSGPWSRPAAHMSTLLIHHPQYAWLQDLGLREDNEGVYNGSWGGRGEVITTYCPANNE  
 PIARVRQASLKDYEETIGKAKKAWNIWADIPAPKRGEIVRKIGDAFREKIQLLGRVLSLEMGIKILVEGIGEVQ  
 EYVDVCDYAAGLSRMIGGPTLP SERPGHALIEMWNPLGLVGIITAFNFPVAVFGWNAHSSDHRECLPLERST  
 DYVPR

>ENSMUSP00000075174\_c.3438:G>C\_p.E1147Q ENSMUST00000075770.13|Megf10-  
 201|ENSMUSG00000024593|+|chr18:g.57427122:G>C  
 MAISSSSCLGLICSLCHWVGTASSLNLEDPNVCSHWESYSVTVQESYPHPFDQIYYTSTCTDILNWFKCTRHR  
 ISYRTAYRHGEKTM YRRKSQCCPGFYESRDMCVPHCADKCVHGRCIAPNTCQCEPGWGGTNCSSACDGDHWGP  
 HCSSRCQCKNRALCNPI TGACHCAAGYRGWRCEDRCEQGT YGNDCHQRCQCQNGATCDHITGECRCSPGYTGA  
 FCEDLCPGKHPHCEQRCPCQNGGVCHHVTGECSCPSGWMGTVCQQPCPEGRFGKNCSEQCQCHNGGTCDDAA  
 TGQCHCSPGYTGERCQDECPVGSYGVRC AEACRCVNGGKCYHVS GTCLCEAGFSGELCEARLCP EGLYGIKCD  
 KRCPCHLDNTHSCHPMSGEGCKPGWSGLYCNETCSPGFYGEACQQICSCQNGADCDSVTGRCACAPGFKGTD  
 CSTPCPLGRYGINCSSRCGCKNDVAVCS PVDGSCICKAGWHGVDCSIRCPSGTWGFGCNLTCQCLNGGACNTLD  
 GTCTCAPGWRGAKCEFPQDGT YGLNCAERCDCSHADGCHPTTGHCRCLPGWSGVHCD SVCAEGRWGPNC SLP  
 CYCKNGASCSPDDGICECAPGFRGTTCQRICSPGFYGHRCSTCPCQCVHSSGPCHHITGLCDCLPGFTGALCN  
 EVCPSGRFGKNCAGVCTCTNNGTCNPIDRSCQCYPGWIGSDCSQPCPPAHWGPNCIHTCNCHNGAFCSAYDGE  
 CKCTPGWTGLYCTQRCPLGFYKDCALICQCNQNGADCDSHISGQCTCRTGFMGRHCEQKCPAGTYGYGCRQICD  
 CLNNSCTDHI TGTCTCYSPGWKGARCDQAGVIVGNLNSLRSRTALP ADSYQIGAIAGIIVLVLVVFL LALF  
 IIRHKQKRKESM PAVTYTPAMRVINADY TIAETLPHSNNGNANSHYFTNPSYHTLSQCATS PHVNNRDRMT  
 IAKSKNNQLFVN LKNVNPGRGTLVDCTGTL PADWKQGGYLNELGAFGLDRSYMGKSLKDLGKNSEYNSSTCS  
 LSSSENPYATIKDPPALLPKSSECGYVEMKSPARRDSPYAEINNSTPANRNVYEVEPTVSVVQGVFSNSGHVT  
 QDPYDLPKNSHIPCHYDLLPVRDSSSSPKREDGGGSNSTSSNSTSSSSSSSQ\*

>ENSMUSP00000025497\_c.516:A>C\_p.T173P ENSMUST00000025497.8|Fbn2-201|ENSMUSG00000024598|-|chr18:g.58333697:T>G  
MGRRRRLCLQPYFVWLGCVALWAQGTGQPPPPKTLRQPQQVVRPAVAGSEGGFMGPEYRDEGAVAASR  
VRRRGGQIEILRGNVCGSRFHSYCCPGWKTLPGGNQCIIVPICRNSCGDGFCSRPNMCTCSSGQISPTCGAKSI  
QQCSVRCMNGGTCAADHCCQCKGYIGPYCGQPVCENGCCQNGGRCIGPNRCACVYGFSTGQCERDYRTGPCFTQ  
VNNQMCQGGTIGIVCTKTLCCATIGRAWGHPCCEMCPAQPPQPCRRGFIPNIIRTGACQDVDECQAIPLGCQGGNC  
INTVGSFECRCPAGHKQSETTQKCEDIDECSVIPGVCEGTDCSNTVGSYFCLCPRGFVSTSDGSRCIDQRAGT  
CFSGLVNGRCAQELPGRMAKAQCCCEPGRCSWISGTIPEACVVRGSEYRRLCLDGLPMGGIPGSSVSRPGGTG  
STNGYGGPGGTGFLPIPGDNGFSPGVGGAGVAGGGQGPITGLTILNQTIIDICKHHANLCLNGRCIPTVSSYR  
CECNMGYKQDANGDCIDVDECTSNPCSNAGDCVNTPGSYCKCHAGFQRTPTKQACIDIDECIQNGVLCCKNGRC  
VNTDGSFQICINAGFELTDDGKNCVDHDECTTTNMCLNGMCINEDGSFKCVCKPGFILAPNGRYCTDDECQT  
PGICMNGHCINNEGSFRCDPCPPGLAVGVDGRVCDVTHMRSTCYGEIKKGVVVRPFPFPAVTKSECCANPDYGF  
GEPCCPCPAKNSAEFHGLCSSGIGITVDGRDINECALDPDICANGICENLRGSYRCNCSNGYEPDASGRNCID  
IDDECLVNRLLCDNGLCRNTPGSYSCTCPPGYVFRTEETETCEDVNECESNPCVNGACRNLLGSFHCECSPGSKL  
SSTGLICIDSLKGTCLWLNIDNRCEVNINGATLKSECCATLGAAGWSPCERCELDAAACPRGFARIKGVTCEDEV  
NECEVFPVGVCPNGRVCNSKGSFHCECEGLTLDGTGRVCLDIRMEHCFKWEDEDECIPVPGKFRMDACCAV  
GAAWGTECEECPKPGTKEYETLCPRGPGFANRGDILTRPFYKIDINECKAFPMGCTYKCRNITGSFKRCRNN  
GFALDMEERNCTDIDECRISPDLCGSGICVNTPGSFECECFEGYESGFMMMKNCMDIDECERNPLLCRGGTGV  
NTEGSFQDCPLGHELSPSREDCVDINECSLSDNLCRNGKCVNMIGTYQCSCNPGYQATPDRQGTIDIDECMI  
MNGGCDTQCTNSEGSYECSCSEGYALMPDGRSCADIDECENNPDICDGGQCTNIPGEYRCLCYDGFMASMDMK  
TCIDVNECDLNPNICMFGECENTKGSFICHQQLGYSVKKGTGTCTDVDECEIGAHNCDMHASCLNVPVGSFKCS  
CREGWVNGIKCIDLDECANGTHQCSINAQCVNTPGSYRCACSEGF TGDGFTCSDVDECAENTNLCENGQCLN  
VPGAYRCECEMGFTPASDSRSCQDIDECSFQNICVFGTCNNLPGMFHCICDDGYELDRGTGGNCTDIDECADPI  
NCVNGLCVNTPGRYECNCPDFQLNPTGVGCVDNRVGNCYLKFGPRGDGSLSCNTEVGVGVSRSSSCCSLGKA  
WGNPCETCPPVNSTEYITLCPGGEGFRPNPITILELIDECQELPGLCQGGNCINTFGSFQCECPQGYLLSEE  
TRICEDIDECFAHNVKCPGTCYNTLGNITCICPEYMQVNGHNCMDMRKSFCYRSYNTGTENELPFNVTK  
RMCCCTYNVKGAWNKPCPEPCPTPGTADFKTICGNI PGFTFDIHTGKAVIDI DECKEIPGICANGVCINQIGSFR  
CECPTGFSYNDLLLVCEDIDECNSGDNLCQRNADCINSPGSYRCECAAGFKLSPNGACVDRNECLEIPNVCSH  
GLCVDLQGSYQICCNNGFKASQDQTMCMVDDECERHPCGNGTCKNTPVGSYNCLCYPGFELTHNNDCLDIDEC  
SFFGQVCRNGRCFNEIGSFKCLCNEGYELTPDGKNCIDTNECVLPGSCSPGTCQNLGSGFRICPPGYEVRS  
ENCIDINECEDDPNICLFGSCTNTPGGFQICPPGFVLSDNGRCFDTRQSFCTNFENGKCSVPKAFNTTKA  
KCCSKMPGEGWGDPELCPKDEVAFAQDLCPYGHGTVPSLHDTREDVNECLESPGICSNQGCINTDGSFRCE  
CPMGYNLDYTGVRVCDTDECSIGNPCGNGTCTNVI GSFECTCNEGFEPGPMNCEIDINECAQNPLLCAFRCMN  
TFGSYECTCPVGYALREDQMKCKDLDECAEGLHDCESRGMMCKNLIGTFMCI CPPGMARRPDGEGCVDENECR  
TKPGICENGRVCNIGSYRCECNEGFQSSSSGTECLDNRQGLCAEVLQTMCMASSSRNLVTKSECCDGGGR  
GWGHQCELCPLPGTAQYKKIKCPHGPGYATDGRDIDECKVMPSLCTNGQCVNTMGSFRFCFKVGYTTDIDSGTAC  
VDLDECSQSPKPCNFICKNTKGSYQCSCPRGYVLQEDGKTCCKDLDECQTKQHNCQFLCVNTLGGFTCKCPPGF  
TQHHTACIDNNECGSQPSLCGAKGICQNTPGSFSCECQRGFSLDASGLNCEVDDEC DGNHRCQHGCQNILGGY  
RCGCPQGYVQHYQWNQCVDENECNPGACGSASCYNTLGSYKACAPSGFSFDQFSSACHDVNECSSSKNPCSY  
GCSNTEGGYLCGCPPGYFRVQGHCVSGMGFNKGQYLSVDAEAEEDENALSPEACYECKINGYTKKDGRRKRS  
AQEPEPASAEQISLESVAMDSPVNMKFNL SGLGSKEHILELVAIEPLNNHIRYVISQGNEDGVFRIHQRNG  
LSYLHTAKKKLAPGTYTLEITSIPLYGKKELRKLEEHNEDDYLLGVLGEALRMRLQIQLY\*

>ENSMUSP00000025468\_c.2129:T>G\_p.I710M ENSMUST00000025468.15|Pde6a-201|ENSMUSG00000024575|+|chr18:g.61398131:T>G  
MGEVTAEEVEKFLDSNIGFAKQYYNFHYRGKVISDLLGAKEAAVDFSNYHDVNSVEESEIIFDLLRDVQENLQ  
AEKCTFNVMKKLCLFLLRADRMSLFMYRTRNGIAELATRLFNHVKDAVLEDCLVMPDSEIVFPLDMGVVGHVAH  
SKKIANVPNTEEDEHFCDVDNLTEYQTKNILASPI MNGKDVVAIIMAVNKIDEPHFTKRDEEILLKYLNFVN  
LIMKVFHLSYLHNCETRGGQILLWSGSKVFEELTDIERQFHKALYTVRAFLNCDRYSVGLLDMTKQKEFFDVW  
PVLMEAPAYSGPRTPDGREINFYKVIDYILHGKEDIKVI PNPPADHWALVSGLPITYVAQNGLICNIMNAPAE  
DFFEFQKEPLDESGWMIKNVLSMPIV NKKEEIVGVATFYNRKDGKPFDDMDETLMESLTQFLGWSVLNPDTYE  
SMNKLENRKDIFQDIVKYHVKCDNEEI QKILKTREYVYKPEWECEEEELAEILQGELPDAESYEINKFHFSDL  
PLTELELVKCGIQMYELRVVDFHIFQEAALVRFMYSLSKGYRRITYHNWRHGFVNGQTMFSLLVVTGKLRKYF  
TDLEALAMVTAAFCHDIDHRGTNNLYQMKSQNPLAKLHGSSILERHHLEFGKTLRDESLNIFQNLNRRQHEH  
AIHMDIAIATDLALYFKKRTMFQKIVDQSKTYESTQEWYQYMMLEQTRKEMVMAMMMTACDLSAITKPWEV  
QSKVALLVAEEFWEQGDLERTVLQQNPIMPMDRNKADEL PKLQVGFIDFVCTFVYKEFSRFHEITPMLDGIT  
NNRKEWKALADEYEAKMKALEEEKQKQAAKQAASGNQPGGNPTPGGAPASKSCCIQ\*

>ENSMUSP00000025468\_c.2134:T>G\_p.M712R ENSMUST00000025468.15|Pde6a-201|ENSMUSG00000024575|+|chr18:g.61398136:T>G



MGEVTAEEVEKFLDSNIGFAKQYYNFHYRGKVISDLLGAKEAAVDFSNYHDVNSVEESEIIFDLLRDVQENLQ  
AEKCTFNVMMKCLCFLLRADRMSLFMYRTRNGIAELATRLFNVHKDAVLEDCLVMPDSEIVFPLDMGVVGHVAH  
SKKIANVPNTEEDEHFCDFVDNLTQTKNILASPIMNGKDVVAIIMAVNKIDEPHFTKRDEEILLKYLNQFN  
LIMKVFHLSYLHNCETRGGQILLWSGSKVFEELTDIERQFHKALYTVRAFLNCDRYSVGLLDMTKQKEFFDVW  
PVLMEAPAYSGPRTPDGREINFYKVIDYILHGKEDIKVINPPADHWALVSGLPYVAQNGLICNIMNAPAE  
DFFEFQKEPLDESGWMIKNVLSMPIVNKKEEIVGVATFYNRKDGKPFDDMETLMESLTQFLGWSVLNPDTYE  
SMNKLENRKDIFQDIVKYHVKCDNEEQKILKTREYVYKPEWCEEEELAEILQGELPDAESYEINKFHFSDL  
PLTELELVKCGIQMYEYLRVVDKFIHQEALVRFMYSLSKGYRRTIYHNWRHGFVNGQTMFSLVTKLKRYP  
TDLEALAMVTAAFCHDIDHRGTNNLYQMKSQNPLAKLHGSSILERHHLEFGKTLRDESLNIFQNLNRRQHEH  
AIHMDIAIIATDLALYFKKRTMFQKIVDQSKTYESTQEWQYMMLEQTRKEIVRAMMTACDLSAITKPWEV  
QSKVALLVAAEFWEQGDLETLVQQNPIPMMDRNKADELPLKLVGFIDFVCTFVYKEFSRFHEEITPMLDGIT  
NNRKEWKALADEYEAKMKALEEKKQQAQAAQASGNQPGGNPTPGGAPASKSCCIQ\*  
>ENSMUSP00000135692\_c.1082:T>TATAC\_p.V361ins-fs  
ENSMUST00000175965.10|Onecut2-  
201|ENSMUSG00000045991|+|chr18:g.64474533:T>TATAC  
MKAAYTAYRCLTKDLEGCAMNPELTMESLGLHGPVGGSGGGGGGGGGGGGGGGGHEQELLASPSPHHAGRG  
AAGSLRGPPPTAHQELGTAAAAAASRSAMVTSMASILDGSDYRPELSIPLHHAMSMSCDSSPPGMGMSNT  
YTTLTLPQLPPISTVSDKFHHPHHPHHPHHPHHPHHPHHPHHPHHPHHPHHPHHPHHPHHPHHPHHPHHPHHPH  
SMSQSLSPLAATPLGNLGLLHNAQQSLPNYGPFGHDKMLSPNFDAHHTAMLTRGEQHLRGLTTPAAMMSH  
LNLGHHPGHTQSHGPVLAPSRERPPSSSSGSQVATSGQLEEINTKEVAQRITAEALKRYSIPQAIFAQRVIPMP  
VSGDSL RPAPESQTL E  
>ENSMUSP00000025856\_c.3376:T>C\_p.F1126S ENSMUST00000025856.17|Lrp5-  
201|ENSMUSG00000024913|-|chr19:g.3654049:A>G  
METAPTRAPPPPPPLLLLLLVYCSLVPAAASPLLLFANRRDVRVDAGGVKLESTIVASGLEDAAAVDFQFSK  
GAVYWTDVSEEAIKQTYLNLQGTAAAQNIIVISGLVSPDGLACDWDVGGKLYWTDSETNRIEVANLNGTSRKVLFW  
QDLDDQFRAIALDPAHQYMYWTDWGEAPRIERAGMDGSTRKIIIVDSDIYWPNGLTIDLEEQLKWADAKLSFIH  
RANLDGFSFRQKVVEGSLTHPFALTLSGDTLYWTDWQTRS IHACNKWTGEQRKEILSALYSPMDIQVLSQERQP  
PFHTPCEEDNGGCSHLCLLSPREPFYSCACPTGVQLQDNGKTKCTGAEVLLLLARRTDLRRIISLDTPDFTDIV  
LQVGDIRHAI AIDYDPLEGYVYWTDDEVRAIRRAYLDGSGAQTLVNTTEINDPDGIADVWVARNLYWTDGTDR  
IEVTRLNGTSRKILVSEDLDEPRAIVLHPVMGLMYWTDWGENPKIECANLDGRDRHVLVNTSLGWPNGLALDL  
QEGKLYWGDAKTDKIEVINIDGTRKKTLEDKLPHIFGFTLLGDFIYWTDWQRRS IERVHKVKASRDVIIDQL  
PDLMLGKAVNVAKVVGTPCADNGGCSHLCFEFTPRATKCGCPIGLELLSDMKTCI IPEAFLVFTSRATIHRI  
SLETNNNDVAIPLTGVKEASALDFDVSNNHIYWTDVSLKTI SRAFMNGSSVEHVIEFGLDYPEGMAVDWMGKN  
LYWADTGTNRIEVARLDGQFRQVLVWRDLNPRSLALDPTKGYIYWTEWGGKPRIVRAFMDGTNCMTLVDKVG  
RANDLTIYDADQRLYWTDLDTNMI ESNMLGQERMV IADDL PYPFLGTQYSDYIYWTDWNLHSIERADKTSGR  
NRTL IQGHLDVFM DILVFHSSRQDGLNDCVHNSNGCQGLCLAIPGGHRCGCASHYTLDPSSRNCSPPSTFLLF  
SQKFAISRMI PDDQLSPDLVLP LHLGLRNVKAINYDPLDKFIYWVDGRQNIKRAKDDGTQPSMLTSPS QSLSPD  
RQPHDLSIDIYSRTLFWTCEATNTINVHRLDGDAMGVVLRGDRDKPRAI AVNAERGYMYFTNMQDHAAKIERA  
SLDGTEREVLFTTGLIRPVALVVDNALGKLSWVDADLKRIESCDSLGANRLTLEDANIVQPVGLTVLGRHLYW  
IDRQQOMIERVEKTTGDKRTRVQGRVTHLTGIIHAVEEVSLEEFSAHPCARDNGGCSHICIAKGDGTPRCSCPV  
HLVLLQNL LTCGEPPTCS PDQFACTTGEIDCIPGAWRCDFPECADQSDEEGCPVCSASQFPCARGQCVDLRL  
RCDGEADCQDRSDEANCDAVCLPNQFRCTSGQCVLIKQCCDSFPDCADGSDCELMCEINKPPSDDI PAHSSAIG  
PVIGIILSLFVMGGVYFVCQRVMCQRYTGASGPFPEHYVGGAPHVPLNFIAPGGSQHGFPGIPCSKSVMSM  
SLVGGRGSVPLYDRNHVTGASSSSSSSTKATLYPPIPNPPSPATDPSLYNVDFVYSSGIPATARPYRYPVIR  
GMAPPTPCSTDVDCSDYSTSRWKSSKYLDLNSDSDPYPPPTPHSQYLSAEDSCPPSPGTERS YCHLFPPP  
PSPCTDSS\*  
>ENSMUSP00000138475\_c.1212:C>A\_p.L405I ENSMUST00000182102.8|Slc22a27-  
202|ENSMUSG00000067656|-|chr19:g.7843165:G>T  
MSFQELLNQVGLGRFQILQIVFLLLNIAIVVPHIAMENFTAAPNHRCWVPI LDNDTASDNGSRILSQD DLL  
RISIPLDNSLRPEKCRFAQPQWHLHLNGTFSNVSEPDTEPCVDGWYDRSNFLSTIVTEWDLVCE SQALNS  
VTKFSFMIGLFIGGIICGHLSDRWLSEARWLIVTNKPQKGLKELRKVAHMNGMKNSGDLTMEIVRTSMKAEL  
EAAKTKPSLRDLFHTSILRKRICVLSFMRLFFTVSIFGLAVHLQHLSSNIILLQFLISALAILVSVIGPFVLN  
HIGRRITYLVLM SLRGIFILIAVFPQEMQTLRIIMATLAEGISSLCVGVSRRLHTNELLPTTLRATAVGVIGF  
FGNSGFTLSPLFMLLATYYANMPWIFYGGFSIFNAFTVFILPETKNQPLPDSTHDVGNWDKESRKGKEDPII  
KVTRF\*

MSFQELLNQVGLGRFQILQIVFLLLLLNAIVVPHIAMENFTAAPNHRCWVPILDNDTASDNRSRILSQDDLL  
RISIPLDSNLRPEKCRRAFPQWHLHLNGTFSNVSEPDTEPCVDGWVYDRSNFLSTIVTEWDLVCEQALNS  
VTKFSFMIGLFIGGIICGHLSDRLGRKFILTCALLQFAITETCVAFAPSFYICSLRFLAGLSVEPILVNSHL  
LMLEWTSFKFLTMMALLSCAPNIGYMSAGLAFRLFRIWHHLQLTMSVPIFFFLILTRWLSSESARWLIVTNKP  
QKGLKELRKVAHMNGMKNSGDLTMEIVRTSMKAELEAAKTKPSLRDLFHTSILRKRICVLSFMRLFFTVSIFG  
LAVHLQHLSSNIILLQFLISALAILVSVIGPFVNLHIGRRITYLVLMSLRGIIFILIAVFPQEMQTLRIIMAT  
LAEGISSLCVGVSRRLHTNELLPRTLRAVGVIGFFGNSGFSPLFMLLATYYANMPWIFYGGFSIFNAFTV  
FILPETKNQPLPDSTHDVGNWKEKSRKGGKEDPIIKVTRF\*

>ENSMUSP00000026045\_c.2055:C>G\_p.P686A ENSMUST00000026045.14|Co117a1-  
201|ENSMUSG00000025064|-|chr19:g.47652829:G>C

MDVTKSKRDGTEVTERIVTETVTRTLTSLPPKGSTSNGYAKTGSLLGGSRLEKQSLTHGSSGYINSSGSIRG  
NASTSSYRRTHSPASTLPNSPGSTFERKAHMTRHGTYEGSSSGNSSPEYPRKELASSSTRGRSQTRESEIRVR  
LQASASPSTRWTELDEVKRLKGRSASASPTRNTSNTLPIPKKGTVEKTKVTASSHSVSGTYDSAILDTNFPP  
HMWSSTLPAGSSLGTYQNNITAQSTSLNNTNAYSTGSVFGVNNMASCPTLHPGLSSCSSVFGMQNNLAPSS  
SVLSHGTTTASTAYGAKKNVQPPTVTSTGVSTSATCTTSVQSDDLLHKDCKFLILEKDNTPAKKEMELLIMT  
KDSGKVFTASPATISSTSFSEDTLKKEKQAAAYAADTCLKADVNGDLNVTSTKSKMTSAENHGVDGSGGGGRGK  
GGAGGGGGGGGASGGGAWGAAAPAWCPCGSCCSWKKWLLGLLLTLWLLLGLLFLGLIALAEVVRKLRARVEEL  
EKTkVLYHDVQMDKSNRDLQAEAPSLGPGGLGKAEALDGYEQEAIWLFVRNKLMTQENGNLRGSPGPKGDMGS  
QGPKGDRGLPGTPIPGPLGHPGPEGPKGQKGSIGDPMGEGPIGQRGLAGPMGRPEGPPGSGEKDGRGIAG  
EQGPQGLPGVPGPPGLRGHSGSPGPQGPAGAVGPQGLRGDVGVLPGVKGDGKGLMPPGPKGDQGEKGRGLTGE  
PGIRGLPGAVGEPGAKGAMGPAGADGQQGSRGEQGLTGMPGTRGPPGAGDPGKPLTGPQGPQGLPGSPGRP  
GKGEPPGAPGRVMTSEGSSTITVPGPPGPPGAMGPPGPPGTPGPAGPAGLPQGGPRGEPGLAGDSFLSSGSS  
ISEVLSAQGVDLRGGPPGPPGPRGPPGPSIPGPPGPRGPPGEGVPGPPGPPGPFSLTDSETFFTGPPGPPGPPG  
KGDQGDGVPVGTPISSGSLSHGASSSTLYMQGPPGPPGPPGPPGPPGSLSSSGQDIQHYIAEYMQSDNIRTYLSGV  
QGPVPPGPPGPPGPPVITITGETFDYSQLASQVVSYLRSYAGLSSASSSEDI LAMLRNDVWQYLRQNLVGGP  
GPPGPPGVSGDGLSLSDYGELSRHILNYMSSSGISFGHPGPPGPPGPPGPPGPPGPPGPPGPPGPPGPPGPPG  
PPGPPGPPGPPGPPGPPGPPGPPGPPGPPGPPGPPGPPGPPGPPGPPGPPGPPGPPGPPGPPGPPGPPGPPG  
TSPDVRSFIVGPPGPPGPPGPPGPPGPPGPPGPPGPPGPPGPPGPPGPPGPPGPPGPPGPPGPPGPPGPPG  
GTDIGPPGGYGAAAGGGIYGTNGDSFRDGFTGDLNKLAVRVSESMQRQGLLQGMAYTVQGGPPGPPGPPGIS  
RVFSAYSNTVQDLMDFFQTYGTIPGPPGQKGDVGTGPKGDRGPAGPRGPPGPPGPPGPPGPPGPPGPPGPPG  
RRKRSIAIKP\*

>ENSMUSP00000084141\_c.2055:C>G\_p.P686A ENSMUST00000086923.6|Co117a1-  
202|ENSMUSG00000025064|-|chr19:g.47652829:G>C

MDVTKSKRDGTEVTERIVTETVTRTLTSLPPKGSTSNGYAKTGSLLGGSRLEKQSLTHGSSGYINSSGSIRG  
NASTSSYRRTHSPASTLPNSPGSTFERKAHMTRHGTYEGSSSGNSSPEYPRKELASSSTRGRSQTRESEIRVR  
LQASASPSTRWTELDEVKRLKGRSASASPTRNTSNTLPIPKKGTVEKTKVTASSHSVSGTYDSAILDTNFPP  
HMWSSTLPAGSSLGTYQNNITAQSTSLNNTNAYSTGSVFGVNNMASCPTLHPGLSSCSSVFGMQNNLAPSS  
SVLSHGTTTASTAYGAKKNVQPPTVTSTGVSTSATCTTSVQSDDLLHKDCKFLILEKDNTPAKKEMELLIMT  
KDSGKVFTASPATISSTSFSEDTLKKEKQAAAYAADTCLKADVNGDLNVTSTKSKMTSAENHGVDGSGGGGRGK  
GGGAGGGGGGGGASGGGAWGAAAPAWCPCGSCCSWKKWLLGLLLTLWLLLGLLFLGLIALAEVVRKLRARVEEL  
EKTkVLYHDVQMDKSNRDLQAEAPSLGPGGLGKAEALDGYEQEAIWLFVRNKLMTQENGNLRGSPGPKGDMGS  
QGPKGDRGLPGTPIPGPLGHPGPEGPKGQKGSIGDPMGEGPIGQRGLAGPMGRPEGPPGSGEKDGRGIAG  
EQGPQGLPGVPGPPGLRGHSGSPGPQGPAGAVGPQGLRGDVGVLPGVKGDGKGLMPPGPKGDQGEKGRGLTGE  
PGIRGLPGAVGEPGAKGAMGPAGADGQQGSRGEQGLTGMPGTRGPPGAGDPGKPLTGPQGPQGLPGSPGRP  
GKGEPPGAPGRVMTSEGSSTITVPGPPGPPGAMGPPGPPGTPGPAGPAGLPQGGPRGEPGLAGDSFLSSGSS  
ISEVLSAQGVDLRGGPPGPPGPRGPPGPSIPGPPGPRGPPGEGVPGPPGPPGPFSLTDSETFFTGPPGPPGPPG  
KGDQGDGVPVGTPISSGSLSHGASSSTLYMQGPPGPPGPPGPPGPPGPPGPPGPPGPPGPPGPPGPPGPPG  
QGPVPPGPPGPPGPPVITITGETFDYSQLASQVVSYLRSYAGLSSASSSEDI LAMLRNDVWQYLRQNLVGGP  
GPPGPPGVSGDGLSLSDYGELSRHILNYMSSSGISFGHPGPPGPPGPPGPPGPPGPPGPPGPPGPPGPPG  
PPGPPGPPGPPGPPGPPGPPGPPGPPGPPGPPGPPGPPGPPGPPGPPGPPGPPGPPGPPGPPGPPGPPGPPG  
TSPDVRSFIVGPPGPPGPPGPPGPPGPPGPPGPPGPPGPPGPPGPPGPPGPPGPPGPPGPPGPPGPPGPPG  
KLA VRVSESMQRQGLLQGMAYTVQGGPPGPPGPPGISRVFSAYSNTVQDLMDFFQTYGTIPGPPGQKGDVGTG  
PKGDRGPAGPRGPPGPPGPPGPPGPPGPPGPPGPPGPPGPPGPPGPPGPPGPPGPPGPPGPPGPPGPPG  
PKGDRGPAGPRGPPGPPGPPGPPGPPGPPGPPGPPGPPGPPGPPGPPGPPGPPGPPGPPGPPGPPGPPG

>ENSMUSP00000141118\_c.316:T>A\_p.V106E ENSMUST00000185755.2|Btd35f16-  
201|ENSMUSG00000101381|-|chrX:g.3861626:A>T

MGLLVSRLRCRDSLLPEQPEAIAGASYIPGSRKRKRNLSLEELATSSNVHGPQNGMYPHQVNLNIIYWKRVK  
ISSNDAYQNLFLDGHSDIKIRALGKTWCLHKEFLCQSGYFANILKGTWRESHHGVINLIKKNEDIDTRSLLF  
VFGALYTDADLSITPLEVPQVLAACLRLVDRVIQQCEGIMKETINRNTVCSYLLAAETRYLKA VKTRCFEWL

LCNLMVHPSVALYKEVDLKLMLYLLALSSDLLVMQKEIDVYTTLKIWMFLYLNPWCWNGTMKQLLQHANNWLSTH  
MAYVDNISFLESEEGLIHQVVFKKLRFQHIICDLTSTTILEQDRILPMAWLSPIYKQQWLTLLRTQYEGVIGP  
QVINEQELEEECTMRCGTMI PKDGRYTWKWSVGRLLGFPLRVTFTRQCIVLRQRCQRCDCGSACHNHIRNVI FRIT  
LVCFDNSKRVTFRKTTGYKILTFEYKKEEQIVMKLDSVDLNFPMCFICNFVNLGNAENK\*  
>ENSMUSP00000064516\_c.1215:C>A\_p.L406M ENSMUST00000069763.3|Lanc13-  
201|ENSMUSG00000047344|+|chrX:g.9131877:C>A  
MDTKRCFANRFDDYQGSLLAGQCEEAVAPLVSTTIERILQELPPLGGGAEARGATGAGSSCQGGLYSGVAGVA  
YMLYHVSQSPLFAAARERYLRFKRLIDACLRAEEWGETDADTRAAFLGGAGVYAVATLVYHALGRPDYVQP  
LGFALCAVCAPVSFLDCGSDLELFGVGRAGYLCAALVLKQKLAQEVLTPTQIKAICQAILDSGKQYALKKRKP  
FPLMYSYYGTEYLGAAHGLSSILQMLLSYQEHLKPSDRELWQSVDFLMEQEONCNWPPPELGETIERENELVH  
WCHGAPGIAYLFAKAYLISKPKQYLDTCIRCGELTQWKGLLKKGPGICHGVAGSAYVFLLLYRLTGNSKYIYR  
AQRFAQFLFTEEFKSGSRVLESIIYSLYEGFSGTVCFIDLMPNQAEFFLFSVVFV\*  
>ENSMUSP00000111021\_c.1242:G>T\_p.G415W ENSMUST00000115364.8|Cdk16-  
202|ENSMUSG00000031065|+|chrX:g.20563422:G>T  
MYTNGYDEEIIYYIGKRVFLTPKAWPFPLPTPEIVHEDMKMGSDGESDQASATSSDEVQSPVRVVRMRNHPPRK  
ISTEDINKRLSLPADIRLPEGYLEKLTNLNSPIFDKPLSRRLRRVSLSEIGFGKLETYIKLDKLGEGTYATVYK  
GSKLTDNLVALKEIRLEHEEGAPCTAIREVSLKDLKHANIVTLHDI IHTEKSLTLVFEYLDKDLKQYLDCC  
GNVINMHNKVLFLFQLLRGLAYCHRQKVLHRDLKPNLLINERGELKLADFLARAKSIPTKTYSNVVTWLY  
RPPDILLGSTDYDSTQIDMWGVGCI FYEMATGRPLFPSTVEEQHLHFIFRILGTPTEETWPGILSNEEFRTYNY  
PKYRAEALLSHAPRLSDGADLLTKLLQFEGRNRISAEDARKHPFFLSLWERIHKLPDPTTSIFALKEVQLQKE  
ANIRSTSMPDSGRPAFRVVDTEF\*  
>ENSMUSP00000033380\_c.1347:G>T\_p.G450W ENSMUST00000033380.7|Cdk16-  
201|ENSMUSG00000031065|+|chrX:g.20563422:G>T  
MDRMKKIKRQLSMTLRGGRGIDKTNVPEQIGLDESGGGGSDLGEAPTRIAPGELRSVRGPLSSAPEIVHED  
MKMGSDGESDQASATSSDEVQSPVRVVRMRNHPPRKISTEDINKRLSLPADIRLPEGYLEKLTNLNSPIFDKPLS  
RRLRRVSLSEIGFGKLETYIKLDKLGEGTYATVYKSKLTDNLVALKEIRLEHEEGAPCTAIREVSLKDLK  
HANIVTLHDI IHTEKSLTLVFEYLDKDLKQYLDCCGNVINMHNKVLFLFQLLRGLAYCHRQKVLHRDLKPNL  
LINERGELKLADFLARAKSIPTKTYSNVVTWLYRPPDILLGSTDYDSTQIDMWGVGCI FYEMATGRPLFPST  
VVEEQHLHFIFRILGTPTEETWPGILSNEEFRTYNYPKYRAEALLSHAPRLSDGADLLTKLLQFEGRNRISAE  
DARKHPFFLSLWERIHKLPDPTTSIFALKEVQLQKEANIRSTSMPDSGRPAFRVVDTEF\*  
>ENSMUSP00000158732\_c.655:T>TG\_p.L219ins-fs  
ENSMUST00000238528.2|Btbd35f22-  
201|ENSMUSG00000118402|+|chrX:g.31609251:T>TG  
MGLLVSRVLRCDSSSLLPEQPEAIAGASYIPGSRKRKRNLSLEELATSSNVHGPQNQGMYPHQVNLNIIYWKRVK  
ISSNDAYQNLFLDGHSDIKIRALGRTWCLHKVFLCQSGYFANILKGTWRESHHGVINLI IKNEDIDTRSLHF  
VFGALYTDADLSITPLEVPPQVLAACLLRVDRVIQQCEGIMKETINRNTVCSYLLAAETRYLKA VKTRCFEWL  
SLQFDGTSKCGTLQGSRYEVDVSSSTVF  
>ENSMUSP00000100634\_c.102:A>G\_p.K35E ENSMUST00000105017.5|Btbd35f21-  
201|ENSMUSG00000099711|+|chrX:g.32237063:A>G  
MGLLVSRVLRCDSSSLLPEQPEAIAGASYIPGSRKRKRNLSLEELATSSNVHGPQNQGMYPHQVNLNIIYWKRVK  
ISSNDAYQNLFLDGHSDIKIRALGRTWCLHKVFLCQSGYFANILKGTWRESHHGVINLI IKNEDIDTRSLHF  
VFGALYTDADLSITPLEVPPQVLAACLLRVDRVIQQCEGIMKETINRNTVCSYLLAAETRYLKA VKTRCFEWL  
LCNLMVHPSVALYKEVDMKMLYLLALSSDLLVMQKEIDVYTTLKIWMILYLNPWCWNGTMKQLLQHANNWLSTH  
MAYIDNISFLESEEGLIHQVVFKKLRFQHIICDLTSTTILEQDRILPMAWLSPIYKQQWLTLLRTQYEGVIGP  
QVINEQELEEECTMRCGTMI PKDGRYTWKWSVGRLLGFPLRVTFTRQCIVLRQRCQRCDCGSACHNHIRNVI FRIT  
LVCFDNSKRVTFRKTTGYKILTFEYNEEQIVMKLDSVDLTFPMCFICNFVNLGNAENK\*  
>ENSMUSP00000100634\_c.231:G>A\_p.D78N ENSMUST00000105017.5|Btbd35f21-  
201|ENSMUSG00000099711|+|chrX:g.32237192:G>A  
MGLLVSRVLRCDSSSLLPEQPEAIAGASYIPGSRKRKRNLSLEELATSSNVHGPQNQGMYPHQVNLNIIYWKRVK  
ISSNNAYQNLFLDGHSDIKIRALGRTWCLHKVFLCQSGYFANILKGTWRESHHGVINLI IKNEDIDTRSLHF  
VFGALYTDADLSITPLEVPPQVLAACLLRVDRVIQQCEGIMKETINRNTVCSYLLAAETRYLKA VKTRCFEWL  
LCNLMVHPSVALYKEVDMKMLYLLALSSDLLVMQKEIDVYTTLKIWMILYLNPWCWNGTMKQLLQHANNWLSTH  
MAYIDNISFLESEEGLIHQVVFKKLRFQHIICDLTSTTILEQDRILPMAWLSPIYKQQWLTLLRTQYEGVIGP  
QVINEQELEEECTMRCGTMI PKDGRYTWKWSVGRLLGFPLRVTFTRQCIVLRQRCQRCDCGSACHNHIRNVI FRIT  
LVCFDNSKRVTFRKTTGYKILTFEYNEEQIVMKLDSVDLTFPMCFICNFVNLGNAENK\*  
>ENSMUSP00000110908\_c.319:A>T\_p.D107V ENSMUST00000115253.3|Gm6268-  
201|ENSMUSG00000079642|+|chrX:g.35665573:A>T

MSTTSDQDPAIESRDNPLTLEGEWVQEALESQAVDLGSSATTESEEIVVDCPREVEDVAGSPEEEGDRGDS  
VDVEEDSEIEAVTEEEEEEGEEVGLGRQNVVVVAHHFPMAGFRFMFLDLVHAILNRVYYNDHILARDPRNEM  
DTPNTESEDNSSERQTSPEPI PSTVRASEYEHQGPDLPEVISTFPELEEPAAFEAAADHYLQETTAGAAGQAI  
EEMAAAAAEVAAEASEEEI AKEIEQAVASEGENRCARQYEEDETI DEGEKKGEEKKNEEALDEMDDAANY  
TNKFS\*

>ENSMUSP00000134224\_c.330:G>A\_p.A111T ENSMUST00000173574.2|RhoX2c-  
202|ENSMUSG00000079637|+|chrX:g.36651186:G>A  
XVADLMDNSNQEDLGATGCDQEKEKQPEEPVDPDSMGDLENVVKRVSGPWSTVNPVRLVLPKFRHWQQSFNVLQ  
LQELLESIFQCNHYISTKEANRLARSMGVSEATVQGINHG\*

>ENSMUSP00000052929\_c.66:A>C\_p.T23P ENSMUST00000054147.11|RhoX11-  
201|ENSMUSG00000051038|-|chrX:g.37173788:T>G  
MSRKYFYFDYDYYGMSFCEEEIPTEPEEKVAYTNSGGFADEVGTGPKEGHQSSIGEHSCVMPNTQDTGREEP  
EETSKVAETSEQSLFRIPRKAYRTPGQLWELQAVFVENQYPDALKRRELKAGLLNVDEQKIKDWFNNKRAKYR  
KIQRREILGGKNITPTQEELRMKTLVESKIIIFQEQEGDGLFWEHQNIDTQNSPLSLLFS\*

>ENSMUSP00000035379\_c.1083:T>A\_p.Y362N ENSMUST00000039374.9|Ints61-  
201|ENSMUSG00000035967|+|chrX:g.55534390:T>A  
MPILLFLIDTSASMNQRTDLGTSYLDIAKGAVELFLKLRARDPASRGDRYMLVTYDEPPYCIKAGWKENHATF  
MNELKNLQASGLTTLGQALRSSFDLLNLNRLISGIDNYGQGRNPFFLEPSILITITDGNKLTSTASVQEELHL  
PLNSPLPGSELTKPEFRWDQRLFALVLRPLPGVASTEPEQLGVSVPDESATQMCVETGGRSYCVRTQRMNLQC  
LESVLQKVQSGVVINFEKTGPDPLVGEDTLMELCRPSNLFAPWHSCHKLIYVRPNSKTGVPVGHWPPIES  
FWPEQNLPSLPPRTSHPVVRFSVDCPEMVIDKLPFDKYELEPSPLTQYILERKSPHTCWQVFTVSSSKNNEL  
GYPFYGLKASTTTLTCVNLVMPYNYPVLLPLLDLDFKVKHLKPNLKWQAFDSYKTLPPYYLITKLESQIL  
ASVGGKPPQIEGKIKVNHSAACGLPLAHNKSFRKLLKEIIGESAPRLTELNPKEFAGFQVGLLNKDLKPQTYRN  
AYDIPRRGLLDQLTRMRSNLLQTRKFIVGQDEDSLHVPVVAQMGNYQYELKMLASPLRELPDQPKRLHTFGN  
PFKQDKKGMIDEADEFVVGPNKVKRPGEPNSPMSSKRRRSMSSLLRRAQTAPTVTNHVGGKGPLSASWFFPS  
CPSLVKHTFGHPDTTVIHDTHEEKMENGOQSPDGFLKSAPEAFMNVSGESFISQLDLSLDDFTGLRKDGFI  
HKPGNILLGGAKTCSLSVADQKITMASALETVPNMQITPAMAQGINADIKHQLMKEVRKFGRYERIFILL  
EEVQGPLETEKQFVEFTI KEAARFKRRVLIQYLEKLVLEKIDSHHLLNNVNHINSRSC\*

>ENSMUSP00000099089\_c.1083:T>A\_p.Y362N ENSMUST00000101553.9|Ints61-  
202|ENSMUSG00000035967|+|chrX:g.55534390:T>A  
MPILLFLIDTSASMNQRTDLGTSYLDIAKGAVELFLKLRARDPASRGDRYMLVTYDEPPYCIKAGWKENHATF  
MNELKNLQASGLTTLGQALRSSFDLLNLNRLISGIDNYGQGRNPFFLEPSILITITDGNKLTSTASVQEELHL  
PLNSPLPGSELTKPEFRWDQRLFALVLRPLPGVASTEPEQLGVSVPDESATQMCVETGGRSYCVRTQRMNLQC  
LESVLQKVQSGVVINFEKTGPDPLVGEDTLMELCRPSNLFAPWHSCHKLIYVRPNSKTGVPVGHWPPIES  
FWPEQNLPSLPPRTSHPVVRFSVDCPEMVIDKLPFDKYELEPSPLTQYILERKSPHTCWQVFTVSSSKNNEL  
GYPFYGLKASTTTLTCVNLVMPYNYPVLLPLLDLDFKVKHLKPNLKWQAFDSYKTLPPYYLITKLESQIL  
ASVGGKPPQIEGKIKVNHSAACGLPLAHNKSFRKLLKEIIGESAPRLTELNPKEFAGFQVGLLNKDLKPQTYRN  
AYDIPRRGLLDQLTRMRSNLLQTRKFIVGQDEDSLHVPVVAQMGNYQYELKMLASPLRELPDQPKRLHTFGN  
PFKQDKKGMIDEADEFVVGPNKVKRPGEPNSPMSSKRRRSMSSLLRRAQTAPTVTNHVGGKGPLSASWFFPS  
CPSLVKHTFGHPDTTVIHDTHEEKMENGOQSPDGFLKSAPEAFMNVSGESFISQLDLSLDDFTGLRKDGFI  
HKPGNILLGGAKTCSLSVADQKITMASALETVPNMQITPAMAQGINADIKHQLMKEVRKFGRYERIFILL  
EEVQGPLETEKQFVEFTI KEAARFKRRVLIQYLEKLVLEKIDSHHLLNNVNHINSRSC\*

>ENSMUSP00000138630\_c.1083:T>A\_p.Y362N ENSMUST00000132428.8|Ints61-  
203|ENSMUSG00000035967|+|chrX:g.55534390:T>A  
MPILLFLIDTSASMNQRTDLGTSYLDIAKGAVELFLKLRARDPASRGDRYMLVTYDEPPYCIKAGWKENHATF  
MNELKNLQASGLTTLGQALRSSFDLLNLNRLISGIDNYGQGRNPFFLEPSILITITDGNKLTSTASVQEELHL  
PLNSPLPGSELTKPEFRWDQRLFALVLRPLPGVASTEPEQLGVSVPDESATQMCVETGGRSYCVRTQRMNLQC  
LESVLQKVQSGVVINFEKTGPDPLVGEDTLMELCRPSNLFAPWHSCHKLIYVRPNSKTGVPVGHWPPIES  
FWPEQNLPSLPPRTSHPVVRFSVDCPEMVIDKLPFDKYELEPSPLTQYILERKSPHTCWQVFTVSSSKNNEL  
GYPFYGLKASTTTLTCVNLVMPYNYPVLLPLLDLDFKVKHLKPNLKWQAFDSYKTLPPYYLITKLESQIL  
ASVGGKPPQIEGKIKVNHSAACGLPLAHNKSFRKLLKEIIGESAPRLTELNPKEFAGFQVGLLNKDLKPQTYRN  
AYDIPRRGLLDQLTRMRSNLLQTRKFIVGQDEDSLHVPVVAQMGNYQYELKMLASPLRELPDQPKRLHTFGN  
PFKQDKKGMIDEADEFVVGPNKVKRPGEPNSPMSSKRRRSMSSLLRRAQTAPTVTNHVGGKGPLSASWFFPS  
CPSLVKHTFGHPDTTVIHDTHEEKMENGOQSPDGFLKSAPEAFMNVSGESFISQLDLSLDDFTGLRKDGFI  
HKPGNILLGGAKTCSLSVADQKITMASALETVPNMQITPAMAQGINADIKHQLMKEVRKFGRYERIFILL  
EEVQGPLETEKQFVEFTI KEAARFKRRVLIQYLEKLVLEKIDSHHLLNNVNHINSRSC\*

>ENSMUSP00000118865\_c.303:T>A\_p.Y102N ENSMUST00000143142.8|Ints61-  
206|ENSMUSG00000035967|+|chrX:g.55534390:T>A  
XAQPWHSCHKLIYVRPNSKTGVPVGHWPPIESFWPEQNLPSLPPRTSHPVVRFSVDCPEMVIDKLPFDKYEL  
EPSPLTQYILERKSPHTCWQVFTVSSSKNNELGYPFYGLKASTTTLTCVNLVMPYNYPVLLPLLDLDFKVKHL  
KPNLKWQAFDSYKTLPPYYLITKLESQILASVGGKPPQIEGKIKVNHSAACGLPLAHNKSFRKLLKEIIGESAPRLTELNPKEFAGFQVGLLNKDLKPQTYRNAYDI  
PRRGLLDQLTRMRSNLLQTRKFIVGQDEDSLHVPVVAQMGNYQYELKMLASPLRELPDQPKRLHTFGNPFKQ

DKKGMIDEADEFVVGPNKVKRPGEPNSPMSSKRRRSMSLLLRRRAQTAPTVTNHHVGGKGPLSASWFPSCPSL  
VKHTFGHPDPTVIHDTHEEKMENGQSPDGLLKSAPAEFMNVSGESFISQDLSLSDFTGLRKDGFHFKPG  
NNILLGGAKTCSLSVADQKITMASALETVPNMQITPAMAQGINADIKHQMLKEVRKFRKYERIFILLLEVQ  
GPLETKKQFVEFTIKEAARFKRRVLIQYLEKVKLEKIDSHHLLNNVNHINSRSSC\*

>ENSMUSP00000139507\_c.1083:T>A\_p.Y362N ENSMUST00000186445.7|Ints61-  
207|ENSMUSG00000035967|+|chrX:g.55534390:T>A  
MPIILLFLIDTSASMNQRTDLGTSYLDIAKGAVELFLKLRARDPASRGDRYMLVTYDEPPYCIKAGWKENHATF  
MNELKNLQASGLTTLGQALRSSFDLLNLNRLISGIDNYGQGRNPFLEPSILITITDGNKLTSTASVQEELHL  
PLNSPLPGSELTKEPFRWDQRLFALVLRPLPGVASTEPEQLGSPVPSDESAITQMCEVTGGRSYCVRTQRMNLQC  
LESLVQKVQSGVVINFECTGPDPLVGEDTLMELCRPSNLFAPWHSCHKLIYVRPNKSTGVPVGHWPPIPES  
FWPEQNLPSLPPRTSHPVVRFSVDCEPMVIDKLPFDKYELEPSPLTQYILERKSPHTCWQVFTSSSKNNEL  
GYPFGYLKASTTTLTCVNLVMPYNYVLLPLDLDLKFVHKLKNLKWQAFDSYKLTLPYYLITKLESQIL  
ASVGKPPQEIGIKVKNHSACGLPLAHNKSFRKLLKEIIGESAPRLTELNPKEFAGFQVGLLNKDLKPQTYRN  
AYDIRRGLLDQLTRMRSNLLQTRKFIVGQDEDSLHSPVAQMGNYQEYKMLASPLRELDPDQPKRLHTFGN  
PFKQDKKGMIDEADEFVVGPNKVKRPGEPNSPMSSKRRRSMSLLLRRRAQTAPTVTNHHVGGKGPLSASWFP  
CPSLVKHTFGHPDPTVIHDTHEEKMENGQSPDGLLKSAPAEFMNVSGESFISQDLSLSDFTGLRKDGFH  
HKPGNILLGGAKTCSLSVADQKITMASALETVPNMQITPAMAQGINADIKHQMLKEVRKFRKYERIFILL  
EEVQGPLETEKQFVEFTIKEAARFKRRVLIQYLEKVKLEKIDSHHLLNNVNHINSRSSC\*

>ENSMUSP00000002080\_c.1866:C>A\_p.P623T ENSMUST00000002080.12|Pdzd4-  
201|ENSMUSG00000002006|-|chrX:g.72838440:G>T  
MGCNMCVVQKPEEQYKVMLQVNGKELSKLSQEQTLEALARASKEPLVIQVLRSPRLRGDSSCHDLQLVDSGTQ  
TDITFEHIMALGKLRPPTPPMGIPEYVLSLPPISHEYYDPAEFMEGGPQEAERMDELEYEEVELCKNSHQD  
KGLMVCYRTDEEEDLGIYVGEVNPNSIAAKDGRIREGDRIQINGMDVQNREEAVAILSQEENTNISLLVAR  
PESQLAKRWKDSDRDDFLDDFGSENEGDLRARKLKSPVQOIGNDEKQAPDGGPGLNNSQDLDSDGVGRTDEST  
RNEESSEHDLGDEPPSTTNTPGSLRKFGLQGDALQSRDFHFSMDSLLAEGAGLGGADLPLGTDEEYERYREL  
LEIKCHLENGNQLGIFFSRASSGNSALDVNRNESLGHEMAMLEELRHLEFKCRNILRAQKMQQLRERCMAKAW  
LLEESLYDLAASEPKKHELSDISELPEKSDKDSSTAYNTGESCRSTPLLVEPLPESPLKRSAGNSNLNRT  
SGPPVTTHLKGAPSPGSPAKFRSLSRDPEVGRRQHTTEERVRRSTKTSVTLERVGPEGSPYLSRRHRGQIEQY  
HSCVQLAPPRTLEDLGHGSLSLASGPRVGGVAAAAVEATRMEWKVVRSDGTRYVAKRPVRDRLLKARALKIR  
EERSGMTTDDDAVSEMKGGRYWSKEERKQHLIRAREQRKRREFMMQSRLECLREQQNGDQSKPELNI IALSHRK  
TMKRNKKILDNWIITIQEMLAHGARSADGKRIYNPLLSVTTV\*

>ENSMUSP00000110081\_c.1521:C>A\_p.P508T ENSMUST00000114438.3|Pdzd4-  
202|ENSMUSG00000002006|-|chrX:g.72838440:G>T  
MGCNMCVVQKPEEQYKVMLQVEVELCKNSHQDKLGLMVCYRTDEEEDLGIYVGEVNPNSIAAKDGRIREGDRI  
QINGMDVQNREEAVAILSQEENTNISLLVARPESQLAKRWKDSDRDDFLDDFGSENEGDLRARKLKSPVQOIG  
NDEKQAPDGGPGLNNSQDLDSDGVGRTDESTRESEHDLGDEPPSTTNTPGSLRKFGLQGDALQSRDFH  
SMDSLLAEGAGLGGADLPLGTDEEYERYRELLEIKCHLENGNQLGIFFSRASSGNSALDVNRNESLGHEMAM  
LEELRHLEFKCRNILRAQKMQQLRERCMAKAWLLEESLYDLAASEPKKHELSDISELPEKSDKDSSTAYNTGE  
SCRSTPLLVEPLPESPLKRSAGNSNLNRTPSGPPVTTHLKGAPSPGSPAKFRSLSRDPEVGRRQHTTEERVRR  
STKTSVTLERVGPEGSPYLSRRHRGQIEQYHSCVQLAPPRTLEDLGHGSLSLASGPRVGGVAAAAVEATRME  
WKVVRSDGTRYVAKRPVRDRLLKARALKIREERSGMTTDDDAVSEMKGGRYWSKEERKQHLIRAREQRKRRE  
FMMQSRLECLREQQNGDQSKPELNI IALSHRKTMKRNKKILDNWIITIQEMLAHGARSADGKRIYNPLLSVTTV  
\*

>ENSMUSP00000109649\_c.996:G>A\_p.E333K ENSMUST00000114016.10|Mageb16-  
202|ENSMUSG00000046942|-|chrX:g.78667388:C>T  
MSQSSECAADQQTCEETQKLQVAAAASIDVEEPCSSPHLMATSLKDQTSSEETQVSKDVEEPCSSSQLLMASD  
QDDSEDETASTSSDLQHPYDSSSESTEDLDDQEVQGSPIPPDQSDSTDLPVMTVDGKVDLNVNMYLYKYQVK  
EVMSMNDIMTLIVREDEDRFHEILMRASERMEMVFGLDVKEVDPINHACYALFIKLGITYDGMNDEYSFPKTG  
LLILILGVVFMKGNRATEEEIWEVNLNPMGIYAGMTHFMFGDPRELITDEFVREQYLEYQPIANSDFIQEYVW  
GLRAKAETSKMRVLEFVAKVHGS DPTVFLSQYEEALIEEEKRTLTMLEHADSSSTSGESSSDTSSNFSQV\*

>ENSMUSP00000087292\_c.996:G>A\_p.E333K ENSMUST00000052283.7|Mageb16-  
201|ENSMUSG00000046942|-|chrX:g.78667388:C>T  
MSQSSECAADQQTCEETQKLQVAAAASIDVEEPCSSPHLMATSLKDQTSSEETQVSKDVEEPCSSSQLLMASD  
QDDSEDETASTSSDLQHPYDSSSESTEDLDDQEVQGSPIPPDQSDSTDLPVMTVDGKVDLNVNMYLYKYQVK  
EVMSMNDIMTLIVREDEDRFHEILMRASERMEMVFGLDVKEVDPINHACYALFIKLGITYDGMNDEYSFPKTG  
LLILILGVVFMKGNRATEEEIWEVNLNPMGIYAGMTHFMFGDPRELITDEFVREQYLEYQPIANSDFIQEYVW  
GLRAKAETSKMRVLEFVAKVHGS DPTVFLSQYEEALIEEEKRTLTMLEHADSSSTSGESSSDTSSNFSQV\*



>ENSMUSP00000109649\_c.992:A>T\_p.E331D ENSMUST00000114016.10|Mageb16-  
202|ENSMUSG00000046942|-|chrX:g.78667392:T>A  
MSQSSEECADQGQTCEETQKLQVAAASIDVEEPCSSPHLMATSLKDQTSEETQVSKDVVEEPCSSSOLLMASD  
QDDSEDETASTSSDLQHPYDSSSESTEDLDDQEVQGSVPVPPDQSDSTDLPVMTVDGKVDLNVNMLYKYQVK  
EVMSMNDIMTLIVREDEDRFHEILMRASERMEMVFGLDVKEVDPINHACYALFIKLGTYDGMRNDEYSFPKGTG  
LLILILGVVFMKGNRATEEEIWEVLNPMGIYAGMTHFMFGDPRELITDEFVREQYLEYQPIANSDP IQEYEVW  
GLRAKAETSKMRVLEFVAKVHGS DPTVFLSQYEEALIEDEERTLTMLLEHADSSSTS GESSSDTSSNFSQV\*  
>ENSMUSP00000087292\_c.992:A>T\_p.E331D ENSMUST00000052283.7|Mageb16-  
201|ENSMUSG00000046942|-|chrX:g.78667392:T>A  
MSQSSEECADQGQTCEETQKLQVAAASIDVEEPCSSPHLMATSLKDQTSEETQVSKDVVEEPCSSSOLLMASD  
QDDSEDETASTSSDLQHPYDSSSESTEDLDDQEVQGSVPVPPDQSDSTDLPVMTVDGKVDLNVNMLYKYQVK  
EVMSMNDIMTLIVREDEDRFHEILMRASERMEMVFGLDVKEVDPINHACYALFIKLGTYDGMRNDEYSFPKGTG  
LLILILGVVFMKGNRATEEEIWEVLNPMGIYAGMTHFMFGDPRELITDEFVREQYLEYQPIANSDP IQEYEVW  
GLRAKAETSKMRVLEFVAKVHGS DPTVFLSQYEEALIEDEERTLTMLLEHADSSSTS GESSSDTSSNFSQV\*  
>ENSMUSP00000109633\_c.957:C>G\_p.P320A ENSMUST00000114000.8|Dmd-  
203|ENSMUSG00000045103|+|chrX:g.82672296:C>G  
MLWVEEVEDCYEREDVQKKTFTKWINAQFSKFGKQHIDNLFSDLQDGKRLDLLLEGLTGQKLPKEKGSTRVHA  
LNNVNKALRVLQKNNVDLVNIGSTDIVDGNHKLTLGLIWNILHWQVKNVMKTIMAGLQQTNSEKILLSWVRQ  
STRNYPQVNVINFTSSWS DGLALNALIHSRHPDLFDWNSVVSQHSATQRLEHAFNIAKQCQLGIEKLLDPEDVA  
TTYDPDKKSILMYITSLFQVLPQQVSI EAIQEVEMLPRTSSKVTREEHFQLHHQMHSYQQITVSLAQGYEQTSS  
SPKPRFKSYAFTQAAYVATS DSTQSPYASQHL EAPRDKSLDSSLMETE VNLDSYQTALEEVLSWLLSAEDTLR  
AQGEISNDVEEVKEQFHAHEGFMMDLTS HQGLVGNVQLGSQLVKGKGLSEDEEA EVQE QMNLNLSRWECLRV  
ASMEKQSKLHKVLMDLQNQKLELDDWLT KTEERTKKMEEEPFGPDLEDLKCQVQKHVQLQEDLEQE QVRVNS  
LTHMVVVVDESSGDHATAALEEQ LKVLGDRWANICRWTE DRWIVLQDILLKWQHFTEEQCLFSTWLSEKEDAM  
KNIQTS GFKDQNE MSSLHKISTL KIDLEKKKPTMEKLS SLNQDLLSALKNKSVTQKMEIWMENFAQRWDNLT  
QKLEKSSAQISQAVTTTQPSLTQTVMETVTMVT TREQIMVKHAQEELPPPPQKQRQITV DSELRKRLDVDI  
TELHSWITRSEAVLQSSEFAVYRKEGNISDLQEKNVAIAREKAEKFRKLQDASRSAQALVEQMANEGVNAESI  
RQASEQLNSRWTEFCQLLSERVNWLEYQTNITTFYNQLQQLEQMTT TAENLLKTQSTTLSEPTA IKSQKICK  
DEVNRLSALQPQIEQLKIQSLQLKEKGQGMFLDADFVAFTNHFNHIFDGVRAKEKELQTI FDTLPPMYQET  
MSSIRTWIQOSES KLSVPYLSVTEYEIMEERLGLKQALQSSLKEQQNGFNYS DTVKEMAKKAPSEICQK YLS  
EFEEIEGHWKKLSSQLVESCQKLEEHMKNLKRKFQNHIKTLQKWMAEVDVFLKEEWPALGDAEILKKQLKQCRL  
LVGDIQTIQPSLNSVNEGGQKIKSEAELEFASRLETELELNTQWDHICRQVYTRKEALKAGLDRKTVSLQKDL  
SEMHEWMTQAE EYLERDFEYKTPDELQTA VEEMKRAKEEALQKETKVKLLTETVNSVIAHAPPSAQEALKE  
LETTLTNYQWLCTRLNGKCKTLEEVWACWHELLSYLEKANKWLNEVELK LKTMENVPAGPEEITEVLESLENL  
MHHSEENPNQIRLLAQTLDGGVMDLEINEELETFSNRWRELHEEA VRKQKLLQESIQSAQIEKSLHLIQES  
LEFIDKQLAAYITDKVDAAQMPQEAQKIQSDLTSHEISLEEMKKNQ GKDANQRVLSQIDVAQKQLQVSMKF  
RLFQK PANFEQRLEESKMILDEVKMHLPAL ETKSVEQEV IQSLSHCVNLYKSLSEVSEVEMV IKTGRQIVQ  
KKQ TENPKELDERVTALKLHYNELGAKVTERKQ QLEKCLKLSRMRKEMNVLTEWLAATDTELTKRS AVEGMP  
SNLDSEVAVGKATQKEIEKQKAHLKSVTELGESLKMVLGKKETLVEDKLSLLNSNWI AVTSRVEEWNLLLEY  
QKHMETFQDQIEQITKWI IHADELLESEK KKPQKEDI LKRLKAEMNMRPKVDSTRDQA AKLMANRGDHC  
KVVPEQI SELNRRFAAISHRIKTGKAS IPLKELEQFN SDIQKLEPLEAEIQQGVNLKEEDFNKDMSEDNEGT  
VNELLQRGDNLQQRITDERKREEIKIKQQLLQTKHNA LKDLRSQRRKALEISHQWYQYKRQADDLLKCLDEI  
EKKLASLPEPRDERKLEIDRELQKKKEELNAVRRQA EGLSENGAAMAVEPTQIQLSKRWRQIESNFAQFRRL  
NFAQIHTLHEETMVVTTEDMPLDVS YVPSTYLTEISHILQALSEVDHLLNTPELCAKDFEDL FKQEE SLKNIK  
DNLQQISGRIDI IHKKKTAALQSATSMEKVKVQEAVA QMDFQGEKLRMYKERQGRFDRSVEKWRHFHYDMKV  
FNQWLNEVEQFFKKTQNPENWEHAKYKWLKELQD GIGQRQAVVRTLNATGEEIIQQSSKTDVNI IQEKLGS  
SLRWHDICKELAERRKRIEEQKNV LSEFQRDLNEFVLWLEEADNIAITPLGDEQQLEQLEQVLLAEELPLR  
QGILKQLNETGGAVLVSAPIRPEEQDKLEKKLQTNLQWIKVSRALPEKQGELEVHLKDFRQLEEQDLHLLW  
LSPIRNQLEIYNQPSQAGPFDIKEIEVTVHGKQADVERLLSKGQHLYKEKPSTQPVKRKLEDLRSEWAVNHL  
LRELRTKQPDRA PGLSTTGASASQTVTLVTQSVVTKETV ISKLEMPSSLLLEVPALADFNRAWTELT DWLSLL  
DRVIKSQRVMVG DLEDINEMI KQKATLQDLEQRRPQLEELITAAQN LKNKTSNQEARTIITDRIERI QIQWD  
EVQEQQLQNRQQLNEMLKDSTQWLEAKEEAEQVIGQVRGKLD SWKEGPHTVDAIQKKITETKQLAKDLRQRI  
SVDVANL DALKLRDY SADDTRKVHMI TENINTSWGNIH KRVSQEAALEETHRLLQQFPLDLEKFLSWITEA  
ETTANVLQDASRKEKLED SRGVRELMKWPQDLQGEIETHTDIYHNL DENGQKILRSLEGSDEAPLLQRRLDN  
MNFKWSLQKSLNIRSHLEASDQWKRHLSLQELLVWLQKDEL SRQAPIGGDFPAVQKQNDI HRAFKRE  
LKTKEPVMSTLETVRIFLTEQPLEGLEKLYQEPREL PPEERAQNVTRLLRKQAE EVNAEWDKLNLSADWQR  
KIDEALERLQELQEA ADEL DLKLRQAEVIKGSWQPVGDLLIDSLQDHLEKVKALRGEIAPLKENVNRVNDLAH  
QLTTLGIQLSPYNLSTLEDLNRWRLLQVAVEDRVRQLHEAHRDFGPASQHFLSTSVQGPWERAISP NKVPPY

INHETQTTCDWHPKMTELYQSLADLNNVRFSAAYRTAMKLRRLQKALCLDLSLSAACDALDQHNLKQNDQPM  
 IILQIINCLTTIYDRLEQEHNNLVNPLCVDMLNLLNVYDTGRTGRIRVLSFKTGIISLCKAHLEDKYRYLF  
 KQVASSSTGFCDQRRLLGLLHDSIQIPRQLGEVASFGGSNIEPSVRSQFQFANNKPEIEAALFDWMLRLEPQSM  
 VWLPLVHRVAAAETAHQAACNICKECPIIGFRYRSLKHFNYDICQSCFFSGRVAKGHKMHYPMVEYCTPTTS  
 GEDVRDFAKVLKKNKFRTRYFAKHPRMGYLPVQTVLEGDNMETPVTLINFWPVDAPASSPQLSHDDTHSRIE  
 HYASRLAEMENSNGSYLNDISIPNESIDDEHLLIQHYCQSLNQDPSLQSPRPAQILISLESEERGERELILA  
 DLEENRNLAQAEYDRKQOQHEHKGLSPLPSPPEMMPTSPQSPRDAELIAEAKLLRQHKGRLEARMQILEDHMK  
 QLESQHLRLRQLLEQPQAEAKVNGTTVSSPSTSLQRSDDSSQPMLLRVVGSTSESMEEDLLSPPQDTSTGLE  
 EVMEQLNNSFPSSRGRNAPGKPMREDTM\*  
 >rs237452396\_ENSMUSP00000080820\_c.1095:T>A\_p.C366S  
 ENSMUST00000082183.8|zc3h12b-201|ENSMUSG00000035045|+|chrX:g.94970164:T>A  
 MTATAAVETPKMEKSASKEEKQQPKQEDSTDRGNADPEEWANSESDPEQMCKSGHTSYQATDIQLKKKEMPS  
 KPHRPLCRSPCLDRPSFSQSSILQDGKLDLEKEYQAKMDFALKLGYAEEQIQSVLNKLGPESLINDVLAELVR  
 LGNKGDSEAQVNLSSLLPRGASSREIASPELSLEDEIDNSDNLRPVIDGNSVAMSHGNKEEFSCRGIQLAVD  
 WFLDKGHKIDITVFPVPAWRKEQSRPDAPITDQDILRKLEKEKILVFTPSRRVQGRRVVYDDRIVKLAFDSDG  
 IIVSNDNYRDLQVEKPEWKKFIEERLLMYSFVNDKFMPPDDPLGRHGSPLENFLRKRPPVPEHKKQPCPYGKK  
 STYGHKCKYYHPERANQPQRSVADELRI SAKLSTVKIMSEDTLAKCGAGMSTAKGEITSEIKRVASKRQSDPS  
 IRSVAVEPEEWL SIARKPEASSVPSLVTALSVP TIPP KSHAVGALNTRSASSPVP GSSHPHQKASLEHMVS  
 MQYPPILVTNSHGTPINYTEQYPKFETMGDHDYYSVLSDFSKLSINN MHNHEYYMAEANQGVYVRNPG LCTDS  
 HSMSTRNDNYSSYN NLYLAVADAHPEGTLKLRHSASHNHLQPF SHGYHEALARVQSYGSEDSKQAPHKQSVPH  
 LAVHTQNPATGAHSSCPGDYTMPPSIHPVGPSQPGRALVMTRMDSISDSRLYDSNPMRQRPPICREQHASWD  
 PLPCTADSYGYHSYPLGNSLMQPCYEPVMVRSMPKMEQLWRNPWVGMCNDSREHMIPEHQYQTYKNLCNIFP  
 SNIVLAVMEKNPHTADAQQLAALIVAKLRAAR\*  
 >ENSMUSP00000080820\_c.1365:C>T\_p.P456S ENSMUST00000082183.8|zc3h12b-  
 201|ENSMUSG00000035045|+|chrX:g.94970434:C>T  
 MTATAAVETPKMEKSASKEEKQQPKQEDSTDRGNADPEEWANSESDPEQMCKSGHTSYQATDIQLKKKEMPS  
 KPHRPLCRSPCLDRPSFSQSSILQDGKLDLEKEYQAKMDFALKLGYAEEQIQSVLNKLGPESLINDVLAELVR  
 LGNKGDSEAQVNLSSLLPRGASSREIASPELSLEDEIDNSDNLRPVIDGNSVAMSHGNKEEFSCRGIQLAVD  
 WFLDKGHKIDITVFPVPAWRKEQSRPDAPITDQDILRKLEKEKILVFTPSRRVQGRRVVYDDRIVKLAFDSDG  
 IIVSNDNYRDLQVEKPEWKKFIEERLLMYSFVNDKFMPPDDPLGRHGSPLENFLRKRPPVPEHKKQPCPYGKK  
 CTYGHKCKYYHPERANQPQRSVADELRI SAKLSTVKIMSEDTLAKCGAGMSTAKGEITSEIKRVASKRQSDPS  
 IRSVAVEPEEWL SIARKSEASSVPSLVTALSVP TIPP KSHAVGALNTRSASSPVP GSSHPHQKASLEHMVS  
 MQYPPILVTNSHGTPINYTEQYPKFETMGDHDYYSVLSDFSKLSINN MHNHEYYMAEANQGVYVRNPG LCTDS  
 HSMSTRNDNYSSYN NLYLAVADAHPEGTLKLRHSASHNHLQPF SHGYHEALARVQSYGSEDSKQAPHKQSVPH  
 LAVHTQNPATGAHSSCPGDYTMPPSIHPVGPSQPGRALVMTRMDSISDSRLYDSNPMRQRPPICREQHASWD  
 PLPCTADSYGYHSYPLGNSLMQPCYEPVMVRSMPKMEQLWRNPWVGMCNDSREHMIPEHQYQTYKNLCNIFP  
 SNIVLAVMEKNPHTADAQQLAALIVAKLRAAR\*  
 >ENSMUSP00000080820\_c.1508:G>T\_p.K503N ENSMUST00000082183.8|zc3h12b-  
 201|ENSMUSG00000035045|+|chrX:g.94970577:G>T  
 MTATAAVETPKMEKSASKEEKQQPKQEDSTDRGNADPEEWANSESDPEQMCKSGHTSYQATDIQLKKKEMPS  
 KPHRPLCRSPCLDRPSFSQSSILQDGKLDLEKEYQAKMDFALKLGYAEEQIQSVLNKLGPESLINDVLAELVR  
 LGNKGDSEAQVNLSSLLPRGASSREIASPELSLEDEIDNSDNLRPVIDGNSVAMSHGNKEEFSCRGIQLAVD  
 WFLDKGHKIDITVFPVPAWRKEQSRPDAPITDQDILRKLEKEKILVFTPSRRVQGRRVVYDDRIVKLAFDSDG  
 IIVSNDNYRDLQVEKPEWKKFIEERLLMYSFVNDKFMPPDDPLGRHGSPLENFLRKRPPVPEHKKQPCPYGKK  
 CTYGHKCKYYHPERANQPQRSVADELRI SAKLSTVKIMSEDTLAKCGAGMSTAKGEITSEIKRVASKRQSDPS  
 IRSVAVEPEEWL SIARKPEASSVPSLVTALSVP TIPP KSHAVGALNTRSASSPVP GSSHPHQNASLEHMVS  
 MQYPPILVTNSHGTPINYTEQYPKFETMGDHDYYSVLSDFSKLSINN MHNHEYYMAEANQGVYVRNPG LCTDS  
 HSMSTRNDNYSSYN NLYLAVADAHPEGTLKLRHSASHNHLQPF SHGYHEALARVQSYGSEDSKQAPHKQSVPH  
 LAVHTQNPATGAHSSCPGDYTMPPSIHPVGPSQPGRALVMTRMDSISDSRLYDSNPMRQRPPICREQHASWD  
 PLPCTADSYGYHSYPLGNSLMQPCYEPVMVRSMPKMEQLWRNPWVGMCNDSREHMIPEHQYQTYKNLCNIFP  
 SNIVLAVMEKNPHTADAQQLAALIVAKLRAAR\*  
 >rs52152841\_ENSMUSP00000080820\_c.1597:A>T\_p.Y533F  
 ENSMUST00000082183.8|zc3h12b-201|ENSMUSG00000035045|+|chrX:g.94970666:A>T  
 MTATAAVETPKMEKSASKEEKQQPKQEDSTDRGNADPEEWANSESDPEQMCKSGHTSYQATDIQLKKKEMPS  
 KPHRPLCRSPCLDRPSFSQSSILQDGKLDLEKEYQAKMDFALKLGYAEEQIQSVLNKLGPESLINDVLAELVR  
 LGNKGDSEAQVNLSSLLPRGASSREIASPELSLEDEIDNSDNLRPVIDGNSVAMSHGNKEEFSCRGIQLAVD  
 WFLDKGHKIDITVFPVPAWRKEQSRPDAPITDQDILRKLEKEKILVFTPSRRVQGRRVVYDDRIVKLAFDSDG  
 IIVSNDNYRDLQVEKPEWKKFIEERLLMYSFVNDKFMPPDDPLGRHGSPLENFLRKRPPVPEHKKQPCPYGKK

CTYGHKCKYYHPERANQPQRSVADELRI SAKLSTVKIMSEDTLAKCGAGMSTAKGEITSEIKRVASKRQSDPS  
 IRSAVEPEEWL SIARKPEASSVPSLVTALSVP TIPP KSHAVGALNTRSASSPVP GSSSHFP HQASLEHMVS  
 MQYPPILVTNSHGTPINYTEQY PKFETMGDHDY SVLSDFSKLS INN MNHNHEYYMAEANQGVYVRN PGLCTDS  
 HMSHTRNDNYSSYN NLYLAVADAHPEGTLK LHR SASHNHLQPF SHGYHEALARVQSYGSEDSKQAPHKQSVPH  
 LAVHTQN PATGAHSSCPGDYTMP PPSIHPV GSPQGRALVMTRMDSI SDSRLYDSNPMRQRRPPLCREQHASWD  
 PLPCTADSYGYHSYPLGN SLMQPCYEPVMVRSMPEKMEQLWRNPWVGMCNDSREHMIPEHQYQTYKNLCNIFP  
 SNIVLAVMEKNPHTADAQQLAALIVAKLRAAR\*  
 >rs108555986\_ENSMUSP00000080820\_c.1704:G>C\_p.A569P  
 ENSMUST00000082183.8|zc3h12b-201|ENSMUSG00000035045|+|chrX:g.94970773:G>C  
 MTATAAVETPKMEKSASKEEKQQPKQEDSTDRGNADPEEWANSESDPEQMCKSGHTSYQATDIQLKKKEMPS  
 KPHRPLCRSPCLDRPFSFSQSSILQDGKLDLEKEYQAKMDFALKLGYAEEQIQSVLNKLGPESELINDVLAELVR  
 LGNKGDSEAQVNL SLLLPRGASSREI ASPELSLEDEIDNSDNLRPIVIDGNSVAMSHGNKEEFSCRGIQLAVD  
 WFLDKGHKDI TVFVPAWRKEQSRDAPITDQDILRKLEKEKILVFTPSRRVQGRRVVCYDDRFIVKLAFDSDG  
 IIVSNDNYRDLQVEKPEWKKFIEERLLMYSFVNDKFMPPDDPLGRHGPSLENFLRKRVPVPEHKKQPCPYGKK  
 CTYGHKCKYYHPERANQPQRSVADELRI SAKLSTVKIMSEDTLAKCGAGMSTAKGEITSEIKRVASKRQSDPS  
 IRSAVEPEEWL SIARKPEASSVPSLVTALSVP TIPP KSHAVGALNTRSASSPVP GSSSHFP HQASLEHMVS  
 MQYPPILVTNSHGTPINYTEQY PKFETMGDHDY SVLSDFSKLS INN MNHNHEYYMAEPNQGVYVRN PGLCTDS  
 HMSHTRNDNYSSYN NLYLAVADAHPEGTLK LHR SASHNHLQPF SHGYHEALARVQSYGSEDSKQAPHKQSVPH  
 LAVHTQN PATGAHSSCPGDYTMP PPSIHPV GSPQGRALVMTRMDSI SDSRLYDSNPMRQRRPPLCREQHASWD  
 PLPCTADSYGYHSYPLGN SLMQPCYEPVMVRSMPEKMEQLWRNPWVGMCNDSREHMIPEHQYQTYKNLCNIFP  
 SNIVLAVMEKNPHTADAQQLAALIVAKLRAAR\*  
 >ENSMUSP00000080820\_c.1781:T>A\_p.Y594\* ENSMUST00000082183.8|zc3h12b-  
 201|ENSMUSG00000035045|+|chrX:g.94970850:T>A  
 MTATAAVETPKMEKSASKEEKQQPKQEDSTDRGNADPEEWANSESDPEQMCKSGHTSYQATDIQLKKKEMPS  
 KPHRPLCRSPCLDRPFSFSQSSILQDGKLDLEKEYQAKMDFALKLGYAEEQIQSVLNKLGPESELINDVLAELVR  
 LGNKGDSEAQVNL SLLLPRGASSREI ASPELSLEDEIDNSDNLRPIVIDGNSVAMSHGNKEEFSCRGIQLAVD  
 WFLDKGHKDI TVFVPAWRKEQSRDAPITDQDILRKLEKEKILVFTPSRRVQGRRVVCYDDRFIVKLAFDSDG  
 IIVSNDNYRDLQVEKPEWKKFIEERLLMYSFVNDKFMPPDDPLGRHGPSLENFLRKRVPVPEHKKQPCPYGKK  
 CTYGHKCKYYHPERANQPQRSVADELRI SAKLSTVKIMSEDTLAKCGAGMSTAKGEITSEIKRVASKRQSDPS  
 IRSAVEPEEWL SIARKPEASSVPSLVTALSVP TIPP KSHAVGALNTRSASSPVP GSSSHFP HQASLEHMVS  
 MQYPPILVTNSHGTPINYTEQY PKFETMGDHDY SVLSDFSKLS INN MNHNHEYYMAEANQGVYVRN PGLCTDS  
 HMSHTRNDNYSSYN NLYLAVADAHPEGTLK LHR SASHNHLQPF SHGYHEALARVQSYGSEDSKQAPHKQSVPH  
 LAVHTQN PATGAHSSCPGDYTMP PPSIHPV GSPQGRALVMTRMDSI SDSRLYDSNPMRQRRPPLCREQHASWD  
 PLPCTADSYGYHSYPLGN SLMQPCYEPVMVRSMPEKMEQLWRNPWVGMCNDSREHMIPEHQYQTYKNLCNIFP  
 SNIVLAVMEKNPHTADAQQLAALIVAKLRAAR\*  
 >ENSMUSP00000080820\_c.1855:C>A\_p.A619E ENSMUST00000082183.8|zc3h12b-  
 201|ENSMUSG00000035045|+|chrX:g.94970924:C>A  
 MTATAAVETPKMEKSASKEEKQQPKQEDSTDRGNADPEEWANSESDPEQMCKSGHTSYQATDIQLKKKEMPS  
 KPHRPLCRSPCLDRPFSFSQSSILQDGKLDLEKEYQAKMDFALKLGYAEEQIQSVLNKLGPESELINDVLAELVR  
 LGNKGDSEAQVNL SLLLPRGASSREI ASPELSLEDEIDNSDNLRPIVIDGNSVAMSHGNKEEFSCRGIQLAVD  
 WFLDKGHKDI TVFVPAWRKEQSRDAPITDQDILRKLEKEKILVFTPSRRVQGRRVVCYDDRFIVKLAFDSDG  
 IIVSNDNYRDLQVEKPEWKKFIEERLLMYSFVNDKFMPPDDPLGRHGPSLENFLRKRVPVPEHKKQPCPYGKK  
 CTYGHKCKYYHPERANQPQRSVADELRI SAKLSTVKIMSEDTLAKCGAGMSTAKGEITSEIKRVASKRQSDPS  
 IRSAVEPEEWL SIARKPEASSVPSLVTALSVP TIPP KSHAVGALNTRSASSPVP GSSSHFP HQASLEHMVS  
 MQYPPILVTNSHGTPINYTEQY PKFETMGDHDY SVLSDFSKLS INN MNHNHEYYMAEANQGVYVRN PGLCTDS  
 HMSHTRNDNYSSYN NLYLAVADAHPEGTLK LHR SESHNHLQPF SHGYHEALARVQSYGSEDSKQAPHKQSVPH  
 LAVHTQN PATGAHSSCPGDYTMP PPSIHPV GSPQGRALVMTRMDSI SDSRLYDSNPMRQRRPPLCREQHASWD  
 PLPCTADSYGYHSYPLGN SLMQPCYEPVMVRSMPEKMEQLWRNPWVGMCNDSREHMIPEHQYQTYKNLCNIFP  
 SNIVLAVMEKNPHTADAQQLAALIVAKLRAAR\*  
 >rs223327872\_ENSMUSP00000108408\_c.64:A>C\_p.E22A  
 ENSMUST00000112788.4|Gm15114-  
 201|ENSMUSG00000079395|+|chrX:g.147281450:A>C  
 MENHEDEIRQLRRLYEANSEAYNEENDIQSESSRGQAFFPGHPRGRGHRDRSRGRNGHFFRQRF SANHPLLH  
 LTRQVNL ESLTRRNGNQSEERQLQQERIQLF FFRSLHGLSQSHDHHI GRSHGHDSRRSRNRFRRAPVHSERSHV  
 YSGRTNNYTD RPHHDLSDRPHNQLSVRPHPDLSGRPLHDYSGRPHQNHAVRLQHGHSDRYHLHTHTERVL PNN  
 GIAHPGHTERDNQVQRGRAHDNQSGLAHNNHDGRSHHDHSGRAYHGHARRAHNNQSWRS DNNQSWRDLKQSWR  
 GQNNQSQRGHDNQSQRGHDNQSQRGHDNQSWRAHNIRSRDRYHTSLRSSSIQSWMLHERERYHGPRGRNGPR  
 DASPPGSEPEIDRSSAIRERTDYLWVQEHRRNETVELNVALEDGYSSAEESDESFDRLTCS SMLDITLY\*

>rs29276208\_ENSMUSP000000108408\_c.213:C>T\_p.L72F  
ENSMUST000000112788.4|Gm15114-  
201|ENSMUSG000000079395|+|chrX:g.147282319:C>T  
MENHEDEIRQLRYLEAANSEEEYNEENDIQSESSRGQAFFPGHPRGRGRHRRDSRGRNGHFFRQRFSANHPLFH  
LTRQVNLESLTRRNGNQSEERLQQERIQLFRRSLHGLSQSHDHHIGRSHGHDSRRSRNRFRRAPVHSEERSHV  
YSGRTNNYTDRPHHDLSDRPHNQLSVRPHPLDSGRPLHDYSGRPHQNHAVRLQHGHSDDRYHLHTHTEVLPNNS  
GIAHPGHTERDNQVQRGRAHDNQSLAHHNHDDGRSHDDHDSGRAYHGHARRAHNNQSWRSDNNQSWRDLKQSWR  
GQNNQSQRGHDNQSRGHNDQSWRAHNIRSRDRYHTSLRSSSIQSWMLHERERYHGPRGRNGPR  
DASPPGSEPEIDRSSAIRERTDYLWVQEHRRNETVELNVALEDGYSSAEESDESFDRLTCCSSMLDLY\*

>rs227496273\_ENSMUSP000000056888\_c.69:G>GC\_p.A24ins-fs  
ENSMUST000000060714.10|Ubqln2-  
201|ENSMUSG000000050148|+|chrX:g.152281519:G>GC  
MAENGESSGPPRPSRGPAAAPGAAQPAGRAQNHQSHCEDPQREGGVRGAREQHRAAVQGSDFQTLQIADRSAR  
ADFRKDPERSRYLDAAWHP  
>ENSMUSP000000043215\_c.16:C>A\_p.A6D ENSMUST000000037928.9|Siah1b-  
201|ENSMUSG000000040749|-|chrX:g.162855062:G>T  
MSRQADTALSTGTSTKCPPSQRPALDTTASNNDLASLFECPCFDYVLPPIQCGSHLVCNSCRPKLTCCP  
TCRGPLGSIRNLAMEKVANSVLFPCYASAGCEITLPHTKKAEHEELCEFRPYSCPCPGASCKWQGSGLDAMP  
HLMHQHKSITTLQGEDIVFLATDINLPGAVDWMMQSCFGFHFMLVLEKQEKYDGHQQFFAIVQLIGTRKQAE  
NFAYRLELNGHRRRLTWEATPRSIHEGIATAIMNSDCLVFDTSIAQLFAENGLGINVTISMC\*  
>ENSMUSP000000071592\_c.16:C>A\_p.A6D ENSMUST000000071667.9|Siah1b-  
202|ENSMUSG000000040749|-|chrX:g.162855062:G>T  
MSRQADTALSTGTSTKCPPSQRPALDTTASNNDLASLFECPCFDYVLPPIQCGSHLVCNSCRPKLTCCP  
TCRGPLGSIRNLAMEKVANSVLFPCYASAGCEITLPHTKKAEHEELCEFRPYSCPCPGASCKWQGSGLDAMP  
HLMHQHKSITTLQGEDIVFLATDINLPGAVDWMMQSCFGFHFMLVLEKQEKYDGHQQFFAIVQLIGTRKQAE  
NFAYRLELNGHRRRLTWEATPRSIHEGIATAIMNSDCLVFDTSIAQLFAENGLGINVTISMC\*  
>ENSMUSP000000114867\_c.16:C>A\_p.A6D ENSMUST000000134272.2|Siah1b-  
203|ENSMUSG000000040749|-|chrX:g.162855062:G>T  
MSRQADTALSTGTSTKCPPSQRPALDTTASNNDLASLFECPCFDYVLPPIQCGSHLVCNSCR  
>ENSMUSP000000136023\_c.228:T>G\_p.F77V ENSMUST000000179056.2|Gm21820-  
201|ENSMUSG000000095693|-|chrY:g.5249213:A>C  
MSQRPSLSAQGVLETSISSQSLTENSLFPQEPGPGCLEKKALGYSPSNPEDLGLSDSSQDTLETRACMONSAE  
IPPVTQEVIESLSATQDSPKLPASSPLSPEAEPLTYTQSSIKSSSESVPGTPEALASVGLSLCLLKPNEGAMG  
PLVSEQGILRTTAFPPQESLELSQPAKGPLKVPSPQETVGNFSFTEFKGLSLCAEGDIPTTPHEDGRRNSSY  
LKSPRRFKNRILKHPVPEPEDIYCLSELDAKLISSAESLTSKYAEKSSPTSTPQRSISPLKSSQL  
SFRSSILCKRGLSHSPPPGDCPTPSKLRKTRPSPSCVDQEGGLKSVCSKHGWIHCHSSKMWVRACKSKK  
>ENSMUSP000000154142\_c.840:C>T\_p.P281S ENSMUST000000226198.2|Vmn1r2-  
202|ENSMUSG000000115072|+|chr4:g.3172923:C>T  
MKMDPGNFAIETFLFCQITVGMFGNSSILFYIILIFTEKHLTSKDLIEHLTFANYLTVILRGFPQTMSYFG  
FKNFLDDMGCKLIVYISRITRGVSLYALCLLSCFQAITTSPPNNSRWIKLYRATKYIGPSCSVSLVHLLLN  
LTPLRSGTNYKKNATNRLSYGYCSLFASDSVATTLYISLVCFSDFVCLGLMACSSISMVSIYRHRQVKHI  
HSAQYFLKVPEDRATQTILILLCTFVISYSFSSIVAIIRTYLNYPVIWGVNIFTSLEIFFSMFCPFVLITNM  
RSSNLFLPCLGKR\*  
>ENSMUSP000000100791\_c.840:C>T\_p.P281S ENSMUST000000105160.5|Vmn1r2-  
201|ENSMUSG000000115072|+|chr4:g.3172923:C>T  
MKMDPGNFAIETFLFCQITVGMFGNSSILFYIILIFTEKHLTSKDLIEHLTFANYLTVILRGFPQTMSYFG  
FKNFLDDMGCKLIVYISRITRGVSLYALCLLSCFQAITTSPPNNSRWIKLYRATKYIGPSCSVSLVHLLLN  
LTPLRSGTNYKKNATNRLSYGYCSLFASDSVATTLYISLVCFSDFVCLGLMACSSISMVSIYRHRQVKHI  
HSAQYFLKVPEDRATQTILILLCTFVISYSFSSIVAIIRTYLNYPVIWGVNIFTSLEIFFSMFCPFVLITNM  
RSSNLFLPCLGKR\*  
>ENSMUSP000000100790\_c.840:C>T\_p.P281S ENSMUST000000105159.5|Vmn1r3-  
201|ENSMUSG000000115466|-|chr4:g.3184465:G>A  
MKMGPGNFAIETFLFCQITVGMFGNSSIPFYIILIFTEKHLTPKDLIEHLTFANYLTVILRGFPQTMSYFG  
FKNFLDDMGCKLIVYISRITRGVSLYALCLLSCFQAITTSPPNNSRWIKLYRATKYIGPSCSVSLVHLLLN  
LTPLRSGTNYKKNATNRLSYGYCSLFASDSVATTLYISLVCFSDFVCLGLMACSSISMVSIYRHRQVKHI  
HSAQHFLKVPEDRATQTILILLCTFVISYSFSSIVAIIRTYLNYPVIWGVNIFTSLEIFFSMFCPFVLITNM  
RSSNLFLPCLGKR\*

>ENSMUSP00000100790\_c.531:G>A\_p.V178I ENSMUST00000105159.5|Vmn1r3-  
 201|ENSMUSG00000115466|-|chr4:g.3184774:C>T  
 MKMGPGNFAIETFLFCQITVGMFGNSSIPFYIILIFTEKHLTPKDLIEHLLTFANYLTVILRGFPQTSYFG  
 FKNFLDDMGCKLLVYISRITRGVSLYAMCLLSCFQAITTSPNNSRWIKLKYRATKYIGPSCSVSCLVHLLLLNI  
 LTPLRSGTNYKKNATNRLSYGYCSLFASDSIATTLYISLVCFSDFVCLGLMACSSISMVSILYRHKRQVKHI  
 HSAQHFLKVPEDRATQTILILLCTFVISYSFSSIVAIIRTYLNYPVIWGVNIFTSLEIFFPMFCPFVLITNM  
 RSSNLFLPCLGKR\*

>ENSMUSP00000100790\_c.283:G>A\_p.G95E ENSMUST00000105159.5|Vmn1r3-  
 201|ENSMUSG00000115466|-|chr4:g.3185022:C>T  
 MKMGPGNFAIETFLFCQITVGMFGNSSIPFYIILIFTEKHLTPKDLIEHLLTFANYLTVILRGFPQTSYFG  
 FKNFLDDMGCKLLVYISRITREVSLYAMCLLSCFQAITTSPNNSRWIKLKYRATKYIGPSCSVSCLVHLLLLNI  
 LTPLRSGTNYKKNATNRLSYGYCSLFASDSVATTLYISLVCFSDFVCLGLMACSSISMVSILYRHKRQVKHI  
 HSAQHFLKVPEDRATQTILILLCTFVISYSFSSIVAIIRTYLNYPVIWGVNIFTSLEIFFPMFCPFVLITNM  
 RSSNLFLPCLGKR\*

>ENSMUSP00000062039\_c.547:G>A\_p.G183D ENSMUST00000058183.9|Ndufaf6-  
 201|ENSMUSG00000050323|-|chr4:g.11062082:C>T  
 MATSMLGVSVRGPRPFLANLFRQPPRDAWERVRRLLPGPSAVRRSVAASGPGIPGSHLYCLELLRKRKYDYESY  
 LCSSLFPAECQRSASALRAFNVELAQVKDSVSEKTIGLMRMQFWKKAVEDMYCDNPPHQVPAIELWKAVKKNH  
 LTKRWLMRIIDEREKNLDDKAYRSMQELENYAENTQDSSLYLTLEVLGVKDLHADHAASHIGKAQGIVTCLRA  
 TPYHSSRRQVFLPMDVCVQHGVSQEDFLRRNQDKNVRDVYDIASQAHLHLKHARSFHRSVPAEAFPAFLQTV  
 SLEDYLLKKIQRVDFDIFHPSLQQKNMLLPLSLYIQSWRKRY\*

>ENSMUSP00000115154\_c.267:A>G\_p.N90D ENSMUST00000131145.9|Tmem67-  
 203|ENSMUSG00000049488|-|chr4:g.12085959:T>C  
 XMVTRTRPVAAMAVRSRSSSRTGTAYLLLVLCEVSWAQIFSFPPFRPETCDFNQYFDISALSCAPCGANQRRD  
 ALGTSCVCLPGYHMISDNNGGPSICKKCPENMKGVTKDGWDCISCPGLTAEKGKCHCPTGHILVERNVSGLL  
 AQATCELCEDESENSFTKANALGTRCVRCEPTFVNTSRSCSCSEPHTLVVDYVSATQGFIFINV\*

>ENSMUSP00000103928\_c.471:A>G\_p.N158D ENSMUST00000108293.3|Tmem67-  
 202|ENSMUSG00000049488|-|chr4:g.12085959:T>C  
 METTLPSPGPKPMHRLSAHAQSRPNQPPLGALNARAQTYCFGYSDWRVSADSPRLLGWSRLRQDMGMTMVTR  
 TRPVAAMAVRSRSSSRTGTAYLLLVLCEVSWAQIFSFPPFRPETCDFNQYFDISALSCAPCGANQRRDALGTS  
 CVCLPGYHMISDNNGGPSICKKCPENMKGVTKDGWDCISCPGLTAEKGKCHCPTGHILVERNVSGLLQAQATC  
 ELCEDESENSFTKANALGTRCVRCEPTFVNTSRSCSCSEPHTLTGGLCFSTNTGNFHQRVISTARYGELGMSLNS  
 EWFAYLQATAAACWTHANLTSCQALGNMCMVMNMSYDSTTLDACRLFHYIFESTAGLISVHVSVPFWRQNLFP  
 LFYGDQPLAPQVLSTTLPNTNFSFKGQNLKQFVAASYDIRGNFIKWQPLEGGVLQQLCPDTERRLDAAAFGT  
 TYQQNCEISLSKLLVDFSSPVFYDVYLEYTDDEEQHRYLWPIPVLNLLQHNKLFVNQDSSSSKWLTRRIFLV  
 DAVSGRENDLGNQPRVIRVATQISLSIRLVPNTKNGNIYTPLLTIAYSDDIDIKNAHSQSAKISFSVKYEMNQ  
 DASVHTDIALGVLGGLAVLSSLLKTAGWKRRIGSPMIDLQTMKFLLYAGDLANVFFIITVGTGLYWLIFFK  
 AQKSVSVLLPMPVQEEERFVTVYGCAFAMKALQFLHKFISQISIDIFFIDWERPKGKVLKAVEGEGGVSATVP  
 VSIWRTYFVANEWNEIQTVRKINPLFQVLTTLFFLEVVGFKNLALMDSSSSLSRNPSDYTAPYSRILRYAVAT  
 AIWLVIIGIQVVFVFAAFYERFIEDKIRQFVDLCSMSNVSVFLLSHRCFGYYIHGRSVHGHADTNMEEMNMLK  
 REAENLCSQRGLVPNTDGQTFQIAVSSQMRQHYDRIHETLTRRNGPARLLSSSGSTFEQSIKAYHAMNKFLGS  
 FIDHVKEMDYFIKDKLLERILGMEFMPEKSI FYNDEGHFSFSSVLYYGNEATLLIFDLLLLFCVVDLACQD  
 FVLASFLTYLQOEIFRFIRNTVGQKNLATKTLVDERFLI\*

>ENSMUSP00000052644\_c.273:A>G\_p.N92D ENSMUST00000050686.10|Tmem67-  
 201|ENSMUSG00000049488|-|chr4:g.12085959:T>C  
 MGMTVTRTRPVAAMAVRSRSSSRTGTAYLLLVLCEVSWAQIFSFPPFRPETCDFNQYFDISALSCAPCGANQR  
 RDALGTSCVCLPGYHMISDNNGGPSICKKCPENMKGVTKDGWDCISCPGLTAEKGKCHCPTGHILVERNVSGL  
 LLAQATCELCEDESENSFTKANALGTRCVRCEPTFVNTSRSCSCSEPHTLTGGLCFSTNTGNFHQRVISTARYGE  
 LGMSLNSEWFAYLQATAAACWTHANLTSCQALGNMCMVMNMSYDSTTLDACRLFHYIFESTAGLISVHVSVPF  
 WRQNLFPWLFYGDQPLAPQVLSTTLPNTNFSFKGQNLKQFVAASYDIRGNFIKWQPLEGGVLQQLCPDTERRLD  
 AAYAFGTTYQQNCEISLSKLLVDFSSPVFYDVYLEYTDDEEQHRYLWPIPVLNLLQHNKLFVNQDSSSSKWL  
 TRRIFLVDAVSGRENDLGNQPRVIRVATQISLSIRLVPNTKNGNIYTPLLTIAYSDDIDIKNAHSQSAKISFSV  
 KYEMNQDASVHTDIALGVLGGLAVLSSLLKTAGWKRRIGSPMIDLQTMKFLLYAGDLANVFFIITVGTGL  
 YWLIFFKAQKSVSVLLPMPVQEEERFVTVYGCAFAMKALQFLHKFISQISIDIFFIDWERPKGKVLKAVEGEGG  
 VRSATVPVSIWRTYFVANEWNEIQTVRKINPLFQVLTTLFFLEVVGFKNLALMDSSSSLSRNPSDYTAPYSRI  
 LRYAVATAIWLVIIGIQVVFVFAAFYERFIEDKIRQFVDLCSMSNVSVFLLSHRCFGYYIHGRSVHGHADTNME  
 EMNMLKREAENLCSQRGLVPNTDGQTFQIAVSSQMRQHYDRIHETLTRRNGPARLLSSSGSTFEQSIKAYHA



MNKFLGSGFIDHVKEMDYFIKDKLLLERILGMEFMPEKSI FYNDEGHSFSSVLYYGNEATLLIFDLLFFCV  
VDLACQDFVLASFLTYLQOEI FRFIRNTV GQKNLATKTLVDERFLI\*  
>ENSMUSP00000041789\_c.217:C>G\_p.S73C ENSMUST00000042221.14|Slc26a7-  
201|ENSMUSG00000040569|-|chr4:g.14593896:G>C  
MTGAKRKKRSVLWGKMHTPHREDIKQWCKRRLPILEWAPQYNLKENLLPDTVSGIMLAVQQVAQGLSFAMLSC  
VHPVFGLYGSFLPAAIIYAI FGMGRHVATGTFALTSLISANAVERLVPQSSRNLTQSNSSVLGLSEFELQRIG  
VAAAVSFLGGVIQLVMFVLQLSATFLLTEPVISAMTTGAATHVVT SQVKYLLGKMPYISGPLGFFYIYAYV  
FENIKSVQLEALLFSLLSIIIVLVLVKELNEQFKRKIKVVL PVDLVLIIAASFACYCTNMENTYGLEVVGHIPN  
GIPPPRAPPMNILSAVLTEAFGVALVGYVASLALAQGSAKKFKYSVDDNQEF LAHGLSNVIPSFLFCIPSA  
MGRTAGLYSTGAKTQVACLISCFVLIVIIYAIGPLLYWLP MCVLASSIIVVGLKGM LIQFRDLKKYWNVDKIDW  
GIWISTYIFTICFAANVGLLFGVICTIAIVLGRFPRAKTL SITDMKEMELKVKTEMHDETSQQIKIISINNPL  
VFLNAKKFSADLMKIIILKESDSNQPLDDVSKCEQNTLLSSLSNGNCNEEASQPCSSSEKCSLVLNCSGLTFFDY  
TGVSTLVELYLDCKRSRVDVFLANCTASLIKAMTYGDLDEKPIFFDSVPA AISIIQSNKNLSKASDHSEV\*  
>ENSMUSP00000116157\_c.217:C>G\_p.S73C ENSMUST00000149633.2|Slc26a7-  
204|ENSMUSG00000040569|-|chr4:g.14593896:G>C  
MTGAKRKKRSVLWGKMHTPHREDIKQWCKRRLPILEWAPQYNLKENLLPDTVSGIMLAVQQVAQGLSFAMLSC  
VHPVFGLYGSFLPAAIIYAI FGMGRHVATGTFALTSLISANAVERLVPQSSRNLTQSNSSVLGLSEFELQRIG  
VAAAVSFLGGVIQLVMFVLQLSATFLLTEPVISAMTTGAATHVVT SQVKYLLG  
>ENSMUSP00000122870\_c.217:C>G\_p.S73C ENSMUST00000143105.2|Slc26a7-  
203|ENSMUSG00000040569|-|chr4:g.14593896:G>C  
MTGAKRKKRSVLWGKMHTPHREDIKQWCKRRLPILEWAPQYNLKENLLPDTVSGIMLAVQQVAQGLSFAMLSC  
VHPVFGLYGSFLPAAIIYAI FGMGRHV  
>ENSMUSP00000055293\_c.105:C>T\_p.R36C ENSMUST00000054538.13|Arhgef39-  
201|ENSMUSG00000051517|-|chr4:g.43499502:G>A  
MESSGSAACCPVLQQRARWERKRVCTARELLETERCYQEQLGLVATYFLRILKAKGTLRPPPELQTLFGTWELI  
YAASLELLPYLEEGQWGLGLQGFPHLELYAQFAANAERSQTTLQAQLKKNKRFRFRVVKLQEGRPEFRGLQLQ  
DLLPLPLQRLQENVALAENTV PNSPDYQQLTRARLVSETAQKVHAIQSQKNDQHLLRVQALLSGRKA  
KGLTSGRWFLRQGWLLVVPPTGEPRPRMFFLFS DVLLMAKPRPPLHLLKSGTFVCRALYPMSQCHLSRVFGHS  
GGPCGGLLSLSPHEKLLMSTDQEELSQWHHSLTLAIRSQKSSTHRSVTAT\*  
>ENSMUSP00000103497\_c.324:C>A\_p.H109N ENSMUST00000107865.9|Tmem8b-  
202|ENSMUSG00000078716|+|chr4:g.43685342:C>A  
MNM PQSLGTQPLPPEPPSLGTPIEGSGAIAPTEHCWPVRPTLRNELDTFSVHFYIFFGPSVALPPERPAVFAL  
RLLPVLD SGGVLSLELQLNASSLRQENVTVFGLTNEVPLSLGDAAVTCSKESLAGFLLSVSATS RVARLRIP  
FPQTGTWFLTLRSLCGVGRFVRCRNATAEVR LR TFLSPCVDDCGPYGQCKLLRTHNYLYAACECKAGWRGWG  
CTDSADALTYGFQLLSTLLCLSNLMFLPPVVLAI RSRVLEAAVYTFMFFSTFYHACDQPGI VVFCIMDYD  
VLQFCDFLGSLSMSVWVTVIAMARLQPVIKQVLYLLGAMLLSMALQLDRHGLWNLLGPSLFALGILATAWTVRS  
VRRRHCPPTWRRWLFYLCPGSLIAGSAVLLYAFVETRDNYFYIHSIWHMLIAGSVGFLLP PRAKTRRRVPSG  
ARARGCGYQLCINEQEELGLVGP GGTTVSSICVS\*  
>ENSMUSP00000129760\_c.324:C>A\_p.H109N ENSMUST00000167153.8|Tmem8b-  
209|ENSMUSG00000078716|+|chr4:g.43685342:C>A  
MNM PQSLGTQPLPPEPPSLGTPIEGSGAIAPTEHCWPVRPTLRNELDTFSVHFYIFFGPSVALPPERPAVFAL  
RLLPVLD SGGVLSLELQLNASSLRQENVTVFGLTNEVPLSLGDAAVTCSKESLAGFLLSVSATS RVARLRIP  
FPQTGTWFLTLRSLCGVGRFVRCRNATAEVR LR TFLSPCVDDCGPYGQCKLLRTHNYLYAACECKAGWRGWG  
CTDSADALTYGFQLLSTLLCLSNLMFLPPVVLAI RSRVLEAAVYTFMFFSTFYHACDQPGI VVFCIMDYD  
VLQFCDFLGSLSMSVWVTVIAMARLQPVIKQVLYLLGAMLLSMALQLDRHGLWNLLGPSLFALGILATAWTVRS  
VRRRHCPPTWRRWLFYLCPGSLIAGSAVLLYAFVETRDNYFYIHSIWHMLIAGSVGFLLP PRAKTRRRVPSG  
ARARGCGYQLCINEQEELGLVGP GGTTVSSICVS\*  
>ENSMUSP00000103496\_c.324:C>A\_p.H109N ENSMUST00000107864.8|Tmem8b-  
201|ENSMUSG00000078716|+|chr4:g.43685342:C>A  
MNM PQSLGTQPLPPEPPSLGTPIEGSGAIAPTEHCWPVRPTLRNELDTFSVHFYIFFGPSVALPPERPAVFAL  
RLLPVLD SGGVLSLELQLNASSLRQENVTVFGLTNEVPLSLGDAAVTCSKESLAGFLLSVSATS RVARLRIP  
FPQTGTWFLTLRSLCGVGRFVRCRNATAEVR LR TFLSPCVDDCGPYGQCKLLRTHNYLYAACECKAGWRGWG  
CTDSADALTYGFQLLSTLLCLSNLMFLPPVVLAI RSRVLEAAVYTFMFFSTFYHACDQPGI VVFCIMDYD  
VLQFCDFLGSLSMSVWVTVIAMARLQPVIKQVLYLLGAMLLSMALQLDRHGLWNLLGPSLFALGILATAWTVRS  
VRRRHCPPTWRRWLFYLCPGSLIAGSAVLLYAFVETRDNYFYIHSIWHMLIAGSVGFLLP PRAKTRRRVPSG  
ARARGCGYQLCINEQEELGLVGP GGTTVSSICVS\*  
>ENSMUSP00000103498\_c.1701:C>A\_p.H568N ENSMUST00000107866.9|Tmem8b-  
203|ENSMUSG00000078716|+|chr4:g.43685342:C>A

MAQPLSRPLILSQFQPWPPATPSPRFPNLSRPRPVSQRMSRSRSLPQPRSLPPAWPLSPPRPLFHPLSQFPAQ  
HLTSLHSPRLLKPLAQPLLQSPSHPLLPSSHLLPLFEPKRSVQRHPKKAQSLPPSLCLPKSLPLGPRLSHTL  
PLSQPRLRSLGLQPLPALLLLLLFVSLGPGAGGLFLTDYSTCSPRKLSPFRSFASTELFHFHVPEDTFLAVWNL  
IIFKEQGGTFGDHCPDQSVTVYFRSGAPPVINPLHTHFPADTAVPGVFSLTLSWTLPNRTSGIFNVSSPLPGD  
WFLAAHLPAQAHGHSVKGLQDECQYLLQPQLIVRRLLDVAVLVGRPSEQTLSSHNRSAKYKVFVPSFTYRVS  
AQLVCVGGRGASVCPLTLRLRPKAPPLHNSSSVACGGASVCQLELALPPWGHVWVYRVETPSRGPRTISFQL  
CVRLQECQPQPSLSRALVPGAAMNPQSLGTQPLPEPPSLGTPIEGSGAIAPTEHCWPVRPTLRNELDTFSVH  
FYIFFGPSVALPPERPAVFALRLLPVLDSGGVLSLELQLNASSLRQENVTVFGCLTNEVPLSLGDAAVTCSKE  
SLAGFLLSVSATSRLRIPFPQTGTWFLTLRSLCGVGRFVRCRNATAEVRRLRTFLSPCVDDCGPYGQCKL  
LRTHNYLYAAACECKAGWRGWGCTDSADALTYGFQLLSTLLCLSNLMFLPPVVLAIRSRYVLEAAVYFTTMFF  
STFYHACDQPGIVVFCIMDYDVLQFCDFLGLSLSVWVTVIAMARLQPVIKQVLYLLGAMLLSMALQLDRHGLW  
NLLGPSLFALGILATAWTVRSVRRRHCCYPTWRRLWFLYLCPGSLIAGSAVLLYAFVETRDNYFYIHSIWHMLI  
AGSVGFLLPRAKTRRRVPSGARARGCGYQLCINEQEELGLVGPGGTTVSSICVS\*  
>ENSMUSP00000130133\_c.324:C>A\_p.H109N ENSMUST00000143339.8|Tmem8b-  
206|ENSMUSG00000078716|+|chr4:g.43685342:C>A  
MNMPQSLGTQPLPEPPSLGTPIEGSGAIAPTEHCWPVRPTLRNELDTFSVHFYIFFGPSVALPPERPAVFAL  
RLLPVLDSGGVLSLELQLNASSLRQENVTVFGCLTNEVPLSLGDAAVTCSKVPGRPLPSLGQCHLQSGQASNP  
PTDGDVLP  
>ENSMUSP00000158111\_c.547:T>C\_p.F183S ENSMUST00000202355.2|Vmn1r261-  
201|ENSMUSG00000106893|-|chr6:g.3143954:A>G  
MFGNSSILFYIILIFTEKHLTPKDLIEHLTFANYLTVILRGFPQTMSYFGFKNFLDDMGCKLIVYIS\*ITR  
GVSLYAMCLLSCFQAITTSNNRSWIKLKYRATKYIGPSCSVSWLVHLLLNILTPRESGTNYKKNATNRLSY  
GYSLFASDSVATTLYISLVCFSDFVCLGLMACSSISMVSIYRHKRQVKHIHSAQHFLKVSPEDRATQTILI  
LLCTFVISYSFSSIVAIIRTYLNYPIWGVNIFTSLEIFFPFCPFVLITNMRSSSNLFLPCLGKR\*  
>ENSMUSP00000135076\_c.862:C>A\_p.P288Q ENSMUST00000176551.3|Peg10-  
203|ENSMUSG00000092035|+|chr6:g.4756288:C>A  
MLQIHMPGRPTLFFVRAMIDSGASGNFIDQDFVIQNAIPLRIKDWPMVEAIDGHPIASGPIILETHHLIVDLG  
DHREILSFDVTSQSPFFPIVLGIRWLSTHDPHITWSTRSIVFNSDYCRLRCRMFAQIPSNLLFTVPQPNLHPYL  
LHHVHPHVHPHMHQHLHQHLHQFLHPDPHQYHPDPHYHHHQQADMQHQLQQYLYQYLYHYLHPVMHHHLPPD  
QHEHLHEYLHQYLYHQYLYHQYLYLHHLHPDLHQYLYQYLYLHNHMNPDPHHHHPDPDPDPHPPHQPDPHQD  
DPHQPDPHQDPPHQPDPHQDPPHQPDPHQDPPHQPDPHQDPPHQPDPHQDPPHQPDPHQDPPHQPDPHQD  
HPQPQHPQHPNHPQPPFFYHMAGFRIYHPVRYYYIQNVYTPVDEHVYPGHRVVDPNIEMIPGAHSLPSGH  
LYSMSESEMNALRNFDVDRNVKDGMLTPTVAPNGAQVLQVVRGWKLQVTYNCRAPQSGTIQNQYLRMSLPMGD  
PAHLASYGEFVQVPGYPYPAYVYYTSPHMMTAWYPVGRDVGRIIVVPVITWSQNTNRQPPVPQYPPPPQPP  
PPPPPPPPPPASSCSAA\*  
>ENSMUSP00000127306\_c.2065:C>A\_p.P689Q ENSMUST00000166678.2|Peg10-  
201|ENSMUSG00000092035|+|chr6:g.4756288:C>A  
MAAAGSSNCPPPPPPPPPNNNNNNNTPKSPGVPDAEDDDERRHDELPEIDNNFDEDMNRQFENMNLDDQVEL  
LAQSYSLDDHLDLDDFDDDDDEDDDFDEPDQDELPEYSDDDDLQGAAPIPNFFSDDDCLEDLPEKFDGNPD  
MLGPFMYQCQLFMEKSTRDFSVDRIRVCFVTSMLIGRAARWATAKLQRCTYLMHNYTAFMMELKHVFEDPQR  
EAAKRKIRRLRQGGPGPVVDYSNAFQMIQDLDWTEPALMDQFQEGLNPDIRAELSRQEAPKTLAALITACIHI  
ERRLARDAAAKPDPSPRALVMPNSQTDPTPEVGGARMRLSKEEKERRRKMNLCLYCGNGGHFADTCPAKASK  
NSPPGLPGPAVGGPSATGPERIRSPSEASTQHLQVMLQIHMPGRPTLFFVRAMIDSGASGNFIDQDFVIQNAI  
PLRIKDWPMVEAIDGHPIASGPIILETHHLIVDLGDHREILSFDVTSQSPFFPIVLGIRWLSTHDPHITWSTR  
SIVFNSDYCRLRCRMFAQIPSNLLFTVPQPNLHPYLLHHVHPHVHPHMHQHLHQHLHQFLHPDPHQYHPDPH  
YHHHQQADMQHQLQQYLYQYLYHYLHPVMHHHLPPDQHEHLHEYLHQYLYHQYLYLHHLHPDLHQYLYQYL  
HNHMNPDPHHHHPDPDPDPHPPHQPDPHQDPPHQPDPHQDPPHQPDPHQDPPHQPDPHQDPPHQPDPHQD  
HQDAHQDHPHQDAHQDHPHQDAHQDHPMDPHLHQHQPQPQHPNHPQPPFFYHMAGFRIYHPVRYYY  
IQNVYTPVDEHVYPGHRVVDPNIEMIPGAHSLPSGHLYSMSESEMNALRNFDVDRNVKDGMLTPTVAPNGAQVL  
QVVRGWKLQVTYNCRAPQSGTIQNQYLRMSLPMGDPAHLASYGEFVQVPGYPYPAYVYYTSPHMMTAWYPV  
RDVHGRIIVVPVITWSQNTNRQPPVPQYPPPPPPPPPPPPPPPPPPPPASSCSAA\*  
>ENSMUSP00000132394\_c.216:A>G\_p.M73V ENSMUST00000151376.3|Gm10722-  
201|ENSMUSG00000091028|+|chr9:g.3001142:A>G  
SCHIPCPTVDISFPFVSFLAIFHVLKCVFLIFRDFQFYRQIPGPTVCIFHISRFSVILSFFKLSTACFSFSV  
IFSFLAIFHVLQWTFNLFPFVSFLAIFHVLKCVFLIFSDFLFSRHIPGPTVCISHFSRFSVISSFFKLSSGC  
FSFSMIFSLAIFHVLQWTFNLFPFSSSIFSPYSRSYSVHFSFFTFSSDFVIFQVVKWMFLIFHDFQFSC  
>ENSMUSP00000137273\_c.373:A>T\_p.Q125L ENSMUST00000178348.2|Gm11168-  
203|ENSMUSG00000096385|+|chr9:g.3004834:A>T

MFLIFNDFHFSCHIPRPIVDISFPPFSVFFAIFHVPKCVFLIFRDFQFPRHIPGPTVCISHFSRFSVSISSFFK  
SSSGCFSFSMIFSLAIFHVLQWTFNLNFPFVSFLAIFHVLKCVFLIYRDFLQFSCYIPSPPTVCISHFSRFSLI  
LSLFLKSTACFSFSMIFSLAIFHVLQWKFLYFPTFSVSPYSRSYSVHFSFPTFFSDFVIFQVVKWMFLIFLD  
FQFSC  
>ENSMUSP00000137273\_c.535:T>C\_p.F179S ENSMUST00000178348.2|Gm11168-  
203|ENSMUSG00000096385|+|chr9:g.3004996:T>C  
MFLIFNDFHFSCHIPRPIVDISFPPFSVFFAIFHVPKCVFLIFRDFQFPRHIPGPTVCISHFSRFSVSISSFFK  
SSSGCFSFSMIFSLAIFHVLQWTFNLNFPFVSFLAIFHVLKCVFLIYRDFQFSCYIPSPPTVCISHFSRFSLI  
LSLFLKSTACFSFSMIFSLAIFHVLQWKFLYFPTFSVSPYSRSYSVHFSFPTFFSDFVIFQVVKWMFLIFLD  
FQFSC  
>ENSMUSP00000136598\_c.617:T>G\_p.S206R ENSMUST00000177722.8|Gm11168-  
201|ENSMUSG00000096385|+|chr9:g.3005128:T>G  
MFLIFHDFQFSCHIPCPTVDISFPPFSVFLAIFHVLKCVFLIFSDQFQSRHIPGPTVCISHFSRFSVILSFFK  
LSSGCFSFSLIIFSFLAIFHVLQWTFNLNFPFVSFLAIFHVLKCVFLIFRDFQFPRHIPGPTVCISHFSRFSV  
ISSFFKSSSGCFSFSMIFSLAIFHVLQWTFNLNFPFSSYSFSPYSRSYSVHFSFPTFFRDFVIFQVVKWMFL  
IFLDFQFSC  
>ENSMUSP00000136761\_c.617:T>G\_p.S206R ENSMUST00000178077.2|Gm11168-  
202|ENSMUSG00000096385|+|chr9:g.3005128:T>G  
MFLIFLDFQFSCHIPCPTVDISFPPFSVFLAIFHVLKCVFLIFSDQFQSRHIPGPTVCISHFFRFFMISFFFT  
LSSGCFSFSIIIFTFLAIFHVLQWTFNLNFPFVSFLAIFHILKCCVFLIFRDFQFPRHIPGPTVCISHFSRFSV  
ISSFFKSSSGCFSFSMIFSLAIFHVLQWTFNLNFPFSSYSFSPYSRSYSVHFSFPTFFRDFVIFQVVKWMFL  
IFLDFQFSC  
>ENSMUSP00000137273\_c.605:T>G\_p.S202R ENSMUST00000178348.2|Gm11168-  
203|ENSMUSG00000096385|+|chr9:g.3005128:T>G  
MFLIFNDFHFSCHIPRPIVDISFPPFSVFFAIFHVPKCVFLIFRDFQFPRHIPGPTVCISHFSRFSVSISSFFK  
SSSGCFSFSMIFSLAIFHVLQWTFNLNFPFVSFLAIFHVLKCVFLIYRDFQFSCYIPSPPTVCISHFSRFSLI  
LSLFLKSTACFSFSMIFSLAIFHVLQWKFLYFPTFSVSPYSRSYSVHFSFPTFFRDFVIFQVVKWMFLIFLD  
FQFSC  
>ENSMUSP00000136541\_c.165:A>T\_p.T56S ENSMUST00000179881.2|Gm11168-  
204|ENSMUSG00000096385|+|chr9:g.3005328:A>T  
MFLIFLDFQFSCHIPCPTVDISFPPFSVFLAIFHVLKCVFLIFSDQFQSRNIPGPSVCISHFFRFFMILSFFK  
LSTACFSFSMIFSLAIFHVLQWTFNLNFPFVSFLAIFHVLKCVFLIFSDFLFSRHIPGPTVCISNFSRFSVI  
SSFFKLSSGCFSFSMIFSLAIFHVLQWTFNLNFPFTSIFPYFTSYSVHFSFPTFFSDFVIFQVVKWMFLIFHD  
FQFSC  
>ENSMUSP00000136541\_c.571:A>T\_p.Y191F ENSMUST00000179881.2|Gm11168-  
204|ENSMUSG00000096385|+|chr9:g.3006848:A>T  
MFLIFLDFQFSCHIPCPTVDISFPPFSVFLAIFHVLKCVFLIFSDQFQSRNIPGPTVCISHFFRFFMILSFFK  
LSTACFSFSMIFSLAIFHVLQWTFNLNFPFVSFLAIFHVLKCVFLIFSDFLFSRHIPGPTVCISNFSRFSVI  
SSFFKLSSGCFSFSMIFSLAIFHVLQWTFNLNFPFTSIFPYFTSYSVHFSFPTFFSDFVIFQVVKWMFLIFHD  
FQFSC  
>ENSMUSP00000136541\_c.660:C>A\_p.Q221K ENSMUST00000179881.2|Gm11168-  
204|ENSMUSG00000096385|+|chr9:g.3006937:C>A  
MFLIFLDFQFSCHIPCPTVDISFPPFSVFLAIFHVLKCVFLIFSDQFQSRNIPGPTVCISHFFRFFMILSFFK  
LSTACFSFSMIFSLAIFHVLQWTFNLNFPFVSFLAIFHVLKCVFLIFSDFLFSRHIPGPTVCISNFSRFSVI  
SSFFKLSSGCFSFSMIFSLAIFHVLQWTFNLNFPFTSIFPYFTSYSVHFSFPTFFSDFVIFQVVKWMFLIFHD  
FKFSC  
>ENSMUSP00000137330\_c.14:C>A\_p.F5L ENSMUST00000143083.3|Gm10721-  
201|ENSMUSG00000096519|+|chr9:g.3013154:C>A  
LFLILHDFQFSCHIPCPTLDISFPPFSVFLAIFHVLKCVFLIFRDFQFSCYIPSPPTVCISHFSRFSVILSFFK  
LSTACFSFSMIFSLAIFHVLQWKFLNFPFVSFLAIFHVLKCVFLIFRDFQFSCYIPSPPTVCISHFSRFSVILSFFK  
SSFFKSSSGCFSFSMIFSLAIFHVLQWTFNLNFPFSPYSRSYSVHFSFPTFFSDFVIFQVVKWMFLIFHDF  
QFSC  
>ENSMUSP00000137330\_c.15:C>T\_p.H6Y ENSMUST00000143083.3|Gm10721-  
201|ENSMUSG00000096519|+|chr9:g.3013155:C>T  
LFLIFYDFQFSCHIPCPTLDISFPPFSVFLAIFHVLKCVFLIFRDFQFSCYIPSPPTVCISHFSRFSVILSFFK  
LSTACFSFSMIFSLAIFHVLQWKFLNFPFVSFLAIFHVLKCVFLIFRDFQFSCYIPSPPTVCISHFSRFSVILSFFK  
SSFFKSSSGCFSFSMIFSLAIFHVLQWTFNLNFPFSPYSRSYSVHFSFPTFFSDFVIFQVVKWMFLIFHDF  
QFSC

>ENSMUSP00000137330\_c.36:C>A\_p.H13N ENSMUST00000143083.3|Gm10721-  
201|ENSMUSG00000096519|+|chr9:g.3013176:C>A  
LFLIFHDFQFSCNIPCPPTLDISFPPFSVFLAIFHVLKCVFLIFRDFQFSCHIPGPTVCISHFSRFSVILSFFK  
LSTACFSFSMIFSFLAIFHVLQWKFLNFPFVSFLAIFHVLKCVFLIFRDFQFSRHIPGPTVCISHFSGFSVI  
SSFFKSSSGCFSFSMIFSFLAIFHVLQWTFNLNFPFSPYSRSYSVHFSFFTFSSDFVIFQVVKWMFLIFHDF  
QFSC  
>ENSMUSP00000137330\_c.491:T>A\_p.S164R ENSMUST00000143083.3|Gm10721-  
201|ENSMUSG00000096519|+|chr9:g.3014102:T>A  
LFLIFHDFQFSCHIPCPPTLDISFPPFSVFLAIFHVLKCVFLIFRDFQFSCHIPGPTVCISHFSRFSVILSFFK  
LSTACFSFSMIFSFLAIFHVLQWKFLNFPFVSFLAIFHVLKCVFLIFRDFQFSRHIPGPTVCISHFSGFSVI  
SSFFKSSSGCFSFSMIFRFLAIFHVLQWTFNLNFPFSPYSRSYSVHFSFFTFSSDFVIFQVVKWMFLIFHDF  
QFSC  
>ENSMUSP00000096649\_c.90:G>T\_p.A31S ENSMUST00000099050.4|Gm10720-  
201|ENSMUSG00000074564|+|chr9:g.3015748:G>T  
MFLIFNDFHFSCHIPCPPTVDISKFPFSVFLSIFHVLKCVFLIFSDQFSRHIPGPTVCISHFSRFSVILSFFK  
LSSGCFSSFLIFSFLAIFHVLQWTFNLNFPFVSFLAIFHVLKCVFLIFSDQFSRHIPGPTVCISHFFRFFMI  
SSFFTLSSGCFSFSMIFTFLLAIFHVLQWTFNLNFPFPLPYSRSYSVHFSFFTFSSDFVIFQVVKWMFLIFHDF  
QFSR  
>ENSMUSP00000096649\_c.439:C>T\_p.S147L ENSMUST00000099050.4|Gm10720-  
201|ENSMUSG00000074564|+|chr9:g.3016916:C>T  
MFLIFNDFHFSCHIPCPPTVDISKFPFSVFLAIFHVLKCVFLIFSDQFSRHIPGPTVCISHFSRFSVILSFFK  
LSSGCFSSFLIFSFLAIFHVLQWTFNLNFPFVSFLAIFHVLKCVFLIFSDQFSRHIPGPTVCISHFFRFFMI  
LSFFTLSSGCFSFSMIFTFLLAIFHVLQWTFNLNFPFPLPYSRSYSVHFSFFTFSSDFVIFQVVKWMFLIFHDF  
QFSR  
>ENSMUSP00000096648\_c.16:A>G\_p.N6S ENSMUST00000099049.4|Gm10719-  
202|ENSMUSG00000095547|+|chr9:g.3017424:A>G  
MFLIFSDHFHFSCHIPCPPTVDISFPPFSVFLAIFHVLKCVFLIFRDFQFSRHIPGPTVCISHFFRFFMISFFFT  
LSSGCFSSMIFTFLAIFHVLQWTFNLNFPFVSFLAIFHILKCVFLIFRDFQFSCHIPGPTVCISHFSRFSVI  
SSFFKSSSGCFSFSMIFSFLAIFQVLQTLTFLNFPFLSFSYRSYSVHFSFFTFSSDFVIFQVVKWLFLLIFL  
DFQFSC  
>ENSMUSP00000096648\_c.430:C>T\_p.S144L ENSMUST00000099049.4|Gm10719-  
202|ENSMUSG00000095547|+|chr9:g.3018018:C>T  
MFLIFNDFHFSCHIPCPPTVDISFPPFSVFLAIFHVLKCVFLIFRDFQFSRHIPGPTVCISHFFRFFMISFFFT  
LSSGCFSSMIFTFLAIFHVLQWTFNLNFPFVSFLAIFHILKCVFLIFRDFQFSCHIPGPTVCISHFSRFLVI  
SSFFKSSSGCFSFSMIFSFLAIFQVLQTLTFLNFPFLSFSYRSYSVHFSFFTFSSDFVIFQVVKWLFLLIFL  
DFQFSC  
>ENSMUSP00000096648\_c.533:T>A\_p.N178K ENSMUST00000099049.4|Gm10719-  
202|ENSMUSG00000095547|+|chr9:g.3018121:T>A  
MFLIFNDFHFSCHIPCPPTVDISFPPFSVFLAIFHVLKCVFLIFRDFQFSRHIPGPTVCISHFFRFFMISFFFT  
LSSGCFSSMIFTFLAIFHVLQWTFNLNFPFVSFLAIFHILKCVFLIFRDFQFSCHIPGPTVCISHFSRFSVI  
SSFFKSSSGCFSFSMIFSFLAIFQVLQTLTFLNFPFLSFSYRSYSVHFSFFTFSSDFVIFQVVKWLFLLIFL  
DFQFSC  
>ENSMUSP00000096648\_c.574:A>T\_p.Y192F ENSMUST00000099049.4|Gm10719-  
202|ENSMUSG00000095547|+|chr9:g.3018922:A>T  
MFLIFNDFHFSCHIPCPPTVDISFPPFSVFLAIFHVLKCVFLIFRDFQFSRHIPGPTVCISHFFRFFMISFFFT  
LSSGCFSSMIFTFLAIFHVLQWTFNLNFPFVSFLAIFHILKCVFLIFRDFQFSCHIPGPTVCISHFSRFSVI  
SSFFKSSSGCFSFSMIFSFLAIFQVLQTLTFLNFPFLSFSYRSRSVHFSFFTFSSDFVIFQVVKWLFLLIFL  
DFQFSC  
>ENSMUSP00000136170\_c.165:A>T\_p.T56S ENSMUST00000179272.2|Gm10719-  
203|ENSMUSG00000095547|+|chr9:g.3018922:A>T  
MFLIFHDFQFSCHIPCPPTVEISFPTFSVFLAIFHVLKCVFLIFRVFQVSRHIPGPSVCISHFSRFSVILSFFK  
LSSGCFSSFLIFSFLAIFHVLQWTFNLNFPFVSFLAIFHVLKCCVFLIFRDFQFSRHIPSPPTVCISHFSRFSV  
ISSFFKLSSGCFSFSMIFSFLAIFKVLQWTFNLNFRPLSFSYRSYSVHFSFFRFFSDFVFFQVVKWMFLIFH  
DFQFSC  
>ENSMUSP00000136170\_c.526:C>A\_p.T176K ENSMUST00000179272.2|Gm10719-  
203|ENSMUSG00000095547|+|chr9:g.3020681:C>A  
MFLIFHDFQFSCHIPCPPTVEISFPTFSVFLAIFHVLKCVFLIFRVFQVSRHIPGPTVCISHFSRFSVILSFFK  
LSSGCFSSFLIFSFLAIFHVLQWTFNLNFPFVSFLAIFHVLKCCVFLIFRDFQFSRHIPSPPTVCISHFSRFSV

ISSFFKLSSGCFSSMIFSLAIFKVLQWKFLNFRPLSFSPPYSRSYSVHFSFFRFFSDFVFFQVVKWMFLIFH  
DFQFSC  
>ENSMUSP00000136170\_c.541:G>A\_p.R181Q ENSMUST00000179272.2|Gm10719-  
203|ENSMUSG00000095547|+|chr9:g.3020696:G>A  
MFLIFHDFQFSCHIPCPTVEISFPFVSFLAIFHVLKCVFLIFRDFQVSRHIPGPTVCISHFSRFSVILSFFK  
LSSGCFSSFLIFSLAIFHVLWTFLNFPFVSFLAIFHVLKCCVFLIFRDFQFSRHIPSPPTVCISHFSRFSV  
ISSFFKLSSGCFSSMIFSLAIFKVLQWTFLNFPFVSFLAIFHVLKCVFLIFRDFQFSRHIPGPTVCISHFSRFSV  
DFQFSC  
>ENSMUSP00000096646\_c.553:A>T\_p.Y185F ENSMUST00000099047.4|Gm10719-  
201|ENSMUSG00000095547|+|chr9:g.3021259:A>T  
MFLIFHDFQFSCHIPCPTMDISFPFVSFLAIFHVLKCVFLIFRDFQFSRHIPGPTVCISHFSRFSVILSFFK  
SSSGCFSSMIFSLAIFHVLQWTFLNFPFVSFLAIFHVLKCVFLIFRDFQFSRHIPGPTVCISHFSRFSVI  
SSFFKLSSGCFSSMIFSLAIFHVLQWTFLNFPFVSFLAIFHVLKCVFLIFRDFQFSRHIPGPTVCISHFSRFSVI  
FLDFQFSC  
>ENSMUSP00000096645\_c.159:G>C\_p.G54R ENSMUST00000099046.4|Gm10718-  
201|ENSMUSG00000095186|+|chr9:g.3023710:G>C  
MFLIFHDFQFSCHIPCPTVDISFPFVSFLAIFHVLKCVFLIFRDFQFSCHIPRPTVCISHFSRFSLILSFFK  
LSTACFSFSMIFSLAIFHVLQWKFLNFPFVSFLAIFHVLKCVFLIFRDFQFSRHIPGPTVCISHFSRFSVI  
SSFFKSSSGCFSSMIFSLAIFHVLQWTFLNFPFVSFLAIFHVLKCVFLIFRDFQFSRHIPGPTVCISHFSRFSVI  
FHDFQLSC  
>ENSMUSP00000096645\_c.165:A>T\_p.T56S ENSMUST00000099046.4|Gm10718-  
201|ENSMUSG00000095186|+|chr9:g.3023716:A>T  
MFLIFHDFQFSCHIPCPTVDISFPFVSFLAIFHVLKCVFLIFRDFQFSCHIPGPTVCISHFSRFSLILSFFK  
LSTACFSFSMIFSLAIFHVLQWKFLNFPFVSFLAIFHVLKCVFLIFRDFQFSRHIPGPTVCISHFSRFSVI  
SSFFKSSSGCFSSMIFSLAIFHVLQWTFLNFPFVSFLAIFHVLKCVFLIFRDFQFSRHIPGPTVCISHFSRFSVI  
FHDFQLSC  
>ENSMUSP00000096645\_c.339:C>A\_p.L114M ENSMUST00000099046.4|Gm10718-  
201|ENSMUSG00000095186|+|chr9:g.3023890:C>A  
MFLIFHDFQFSCHIPCPTVDISFPFVSFLAIFHVLKCVFLIFRDFQFSCHIPGPTVCISHFSRFSLILSFFK  
LSTACFSFSMIFSLAIFHVLQWKFLNFPFVSFLAIFHVMKCVFLIFRDFQFSRHIPGPTVCISHFSRFSVI  
SSFFKSSSGCFSSMIFSLAIFHVLQWTFLNFPFVSFLAIFHVLKCVFLIFRDFQFSRHIPGPTVCISHFSRFSVI  
FHDFQLSC  
>ENSMUSP00000096645\_c.399:A>T\_p.T134S ENSMUST00000099046.4|Gm10718-  
201|ENSMUSG00000095186|+|chr9:g.3024417:A>T  
MFLIFHDFQFSCHIPCPTVDISFPFVSFLAIFHVLKCVFLIFRDFQFSCHIPGPTVCISHFSRFSLILSFFK  
LSTACFSFSMIFSLAIFHVLQWKFLNFPFVSFLAIFHVLKCVFLIFRDFQFSRHIPGPTVCISHFSRFSVI  
SSFFKSSSGCFSSMIFSLAIFHVLQWTFLNFPFVSFLAIFHVLKCVFLIFRDFQFSRHIPGPTVCISHFSRFSVI  
FHDFQLSC  
>ENSMUSP00000096645\_c.430:C>T\_p.S144L ENSMUST00000099046.4|Gm10718-  
201|ENSMUSG00000095186|+|chr9:g.3024448:C>T  
MFLIFHDFQFSCHIPCPTVDISFPFVSFLAIFHVLKCVFLIFRDFQFSCHIPGPTVCISHFSRFSLILSFFK  
LSTACFSFSMIFSLAIFHVLQWKFLNFPFVSFLAIFHVLKCVFLIFRDFQFSRHIPGPTVCISHFSRFLVI  
SSFFKSSSGCFSSMIFSLAIFHVLQWTFLNFPFVSFLAIFHVLKCVFLIFRDFQFSRHIPGPTVCISHFSRFLVI  
FHDFQLSC  
>ENSMUSP00000096645\_c.580:A>T\_p.Y194F ENSMUST00000099046.4|Gm10718-  
201|ENSMUSG00000095186|+|chr9:g.3025118:A>T  
MFLIFHDFQFSCHIPCPTVDISFPFVSFLAIFHVLKCVFLIFRDFQFSCHIPGPTVCISHFSRFSLILSFFK  
LSTACFSFSMIFSLAIFHVLQWKFLNFPFVSFLAIFHVLKCVFLIFRDFQFSRHIPGPTVCISHFSRFSVI  
SSFFKSSSGCFSSMIFSLAIFHVLQWTFLNFPFVSFLAIFHVLKCVFLIFRDFQFSRHIPGPTVCISHFSRFSVI  
FHDFQLSC  
>ENSMUSP00000096644\_c.0:A>C\_p.M1L ENSMUST00000075573.7|Gm10717-  
201|ENSMUSG00000095891|+|chr9:g.3025417:A>C  
LFLIFHDFQFSCHIPCPTVEICKFPFVSFLAIFHVLKYVFLIFRDFQFSRHIPGPTVCISHFSRFSVILSFF  
KFSSGCFSSFLIFSLAIFHVLQWTFLNFPFVSFLAIFHVLKCVFLIFRDFQFSRHIPGPTVCISHFSRFSV  
ISSFFKVSSGCFSSMIFSLAIFHVLQWTFLNFPFVSFLAIFHVLKCVFLIFRDFQFSRHIPGPTVCISHFSRFSV  
IFLDFQFSC  
>ENSMUSP00000096644\_c.143:G>C\_p.Q48H ENSMUST00000075573.7|Gm10717-  
201|ENSMUSG00000095891|+|chr9:g.3025560:G>C



MFLIFHDFQFSCHIPCPTVEICKFPPFSVFLAIFHVLKYVFLIFRDFHFSRHIPGPTVCISHFSRFSVILSFF  
KFSSGCFSSFLIFSFLAIFHVLQWTFLNFPFSSVFLAIFHVLKCVFLIFSDQFSRHIPGPTVCISHFSRFSV  
ISSFFKVSSGCFSSMIFSFLAIFHVLQWTFLNFPFSSYSFSPYSRSYSVHFSFSTFFSDFVIFQVFKWMFL  
IFLDFQFSC  
>ENSMUSP00000096644\_c.168:A>T\_p.T57S ENSMUST00000075573.7|Gm10717-  
201|ENSMUSG00000095891|+|chr9:g.3025585:A>T  
MFLIFHDFQFSCHIPCPTVEICKFPPFSVFLAIFHVLKYVFLIFRDFQFSRHIPGPTVCISHFSRFSVILSFF  
KFSSGCFSSFLIFSFLAIFHVLQWTFLNFPFSSVFLAIFHVLKCVFLIFSDQFSRHIPGPTVCISHFSRFSV  
ISSFFKVSSGCFSSMIFSFLAIFHVLQWTFLNFPFSSYSFSPYSRSYSVHFSFSTFFSDFVIFQVFKWMFL  
IFLDFQFSC  
>ENSMUSP00000096644\_c.202:T>G\_p.V68G ENSMUST00000075573.7|Gm10717-  
201|ENSMUSG00000095891|+|chr9:g.3025619:T>G  
MFLIFHDFQFSCHIPCPTVEICKFPPFSVFLAIFHVLKYVFLIFRDFQFSRHIPGPTVCISHFSRFSGILSFF  
KFSSGCFSSFLIFSFLAIFHVLQWTFLNFPFSSVFLAIFHVLKCVFLIFSDQFSRHIPGPTVCISHFSRFSV  
ISSFFKVSSGCFSSMIFSFLAIFHVLQWTFLNFPFSSYSFSPYSRSYSVHFSFSTFFSDFVIFQVFKWMFL  
IFLDFQFSC  
>ENSMUSP00000136365\_c.348:G>A\_p.V117I ENSMUST00000179982.2|Gm10717-  
209|ENSMUSG00000095891|+|chr9:g.3027875:G>A  
MFLIFHDFQFSCHIPCPTVDISFPFSSVFLAIFHVLKCVFLIFRDFQFSCHIPGPTVCISHFSRFSVILSFFN  
LSTACFSFSIIIFSFLAIFHVLQWTFLNFPFSSVFLAIFHVLKCVFLIFRDFQFSCHIPGPTVCISHFSRFSV  
LSFFNLSTACFSFSMIFSFLAIFHVLQWTFLNFPFSSYSFSPYSRSYSVHFSFSTFFSDFVIFQVVKWKF  
FHDFQLSS  
>ENSMUSP00000137419\_c.366:C>T\_p.R123C ENSMUST00000177875.8|Gm10717-  
206|ENSMUSG00000095891|+|chr9:g.3028826:C>T  
MFLIFHDFQFSCHIPCPTVDISFPFSSVFLAIFHVLKCVFLIFRDFQFSCHIPGPTVCISHFSRFSVILSFFN  
LSTACFSFSIIIFSFLAIFHVLQWTFLNFPFSSVFLAIFHVLKCVFLIFCDFQFSCHIPGPTVCISHFSRFSV  
ILSFFNLSTACFSFSMIFSFLAIFHVLQWTFLNFPFSSVSPYSRSYSVHFSFSTFFSDFVIFQVVKWMP  
IFLDFQFSY  
>ENSMUSP00000137419\_c.367:G>A\_p.R123H ENSMUST00000177875.8|Gm10717-  
206|ENSMUSG00000095891|+|chr9:g.3028827:G>A  
MFLIFHDFQFSCHIPCPTVDISFPFSSVFLAIFHVLKCVFLIFRDFQFSCHIPGPTVCISHFSRFSVILSFFN  
LSTACFSFSIIIFSFLAIFHVLQWTFLNFPFSSVFLAIFHVLKCVFLIFHDFQFSCHIPGPTVCISHFSRFSV  
ILSFFNLSTACFSFSMIFSFLAIFHVLQWTFLNFPFSSVSPYSRSYSVHFSFSTFFSDFVIFQVVKWMP  
IFLDFQFSY  
>ENSMUSP00000137419\_c.384:T>C\_p.C129R ENSMUST00000177875.8|Gm10717-  
206|ENSMUSG00000095891|+|chr9:g.3028844:T>C  
MFLIFHDFQFSCHIPCPTVDISFPFSSVFLAIFHVLKCVFLIFRDFQFSCHIPGPTVCISHFSRFSVILSFFN  
LSTACFSFSIIIFSFLAIFHVLQWTFLNFPFSSVFLAIFHVLKCVFLIFRDFQFSRHIPGPTVCISHFSRFSV  
ILSFFNLSTACFSFSMIFSFLAIFHVLQWTFLNFPFSSVSPYSRSYSVHFSFSTFFSDFVIFQVVKWMP  
IFLDFQFSY  
>ENSMUSP00000137419\_c.396:G>C\_p.G133R ENSMUST00000177875.8|Gm10717-  
206|ENSMUSG00000095891|+|chr9:g.3028856:G>C  
MFLIFHDFQFSCHIPCPTVDISFPFSSVFLAIFHVLKCVFLIFRDFQFSCHIPGPTVCISHFSRFSVILSFFN  
LSTACFSFSIIIFSFLAIFHVLQWTFLNFPFSSVFLAIFHVLKCVFLIFRDFQFSCHIPRPTVCISHFSRFSV  
ILSFFNLSTACFSFSMIFSFLAIFHVLQWTFLNFPFSSVSPYSRSYSVHFSFSTFFSDFVIFQVVKWMP  
IFLDFQFSY  
>ENSMUSP00000137419\_c.402:A>T\_p.T135S ENSMUST00000177875.8|Gm10717-  
206|ENSMUSG00000095891|+|chr9:g.3028862:A>T  
MFLIFHDFQFSCHIPCPTVDISFPFSSVFLAIFHVLKCVFLIFRDFQFSCHIPGPTVCISHFSRFSVILSFFN  
LSTACFSFSIIIFSFLAIFHVLQWTFLNFPFSSVFLAIFHVLKCVFLIFRDFQFSCHIPGPTVCISHFSRFSV  
ILSFFNLSTACFSFSMIFSFLAIFHVLQWTFLNFPFSSVSPYSRSYSVHFSFSTFFSDFVIFQVVKWMP  
IFLDFQFSY  
>ENSMUSP00000137419\_c.426:C>T\_p.R143C ENSMUST00000177875.8|Gm10717-  
206|ENSMUSG00000095891|+|chr9:g.3028886:C>T  
MFLIFHDFQFSCHIPCPTVDISFPFSSVFLAIFHVLKCVFLIFRDFQFSCHIPGPTVCISHFSRFSVILSFFN  
LSTACFSFSIIIFSFLAIFHVLQWTFLNFPFSSVFLAIFHVLKCVFLIFRDFQFSCHIPGPTVCISHFSRFSV  
ILSFFNLSTACFSFSMIFSFLAIFHVLQWTFLNFPFSSVSPYSRSYSVHFSFSTFFSDFVIFQVVKWMP  
IFLDFQFSY

>ENSMUSP00000137419\_c.436:T>G\_p.V146G ENSMUST00000177875.8|Gm10717-206|ENSMUSG00000095891|+|chr9:g.3028896:T>G  
MFLIFHDFQFSCHIPCPTVDISFPFVFLAIFHVLKCVFLIFRDFQFSCHIPGPTVCISHFSRFSVILSFFN  
LSTACFSFSIIFSFLAIFHVLQWTFLNFPFVFLAIFHVLKCCVFLIFRDFQFSCHIPGPTVCISHFSRFSG  
ILSFFNLSTACFSFSMIFSFLAIFHVLQWKFLNFPFVSPYSRSYSVHFSFSTFFSDFVIFQVVKWMFLIFLDFQFSY

>ENSMUSP00000096640\_c.449:T>G\_p.N150K ENSMUST00000099042.4|Gm10717-202|ENSMUSG00000095891|+|chr9:g.3030790:T>G  
FLIFHDFQLSSHIPGPTVDISFRPLSVFLAIFHVPKCVFLIFHDFQFPRHIPGPTVCISHFSRFSVISSFFKT  
SSGCFSSFMIFSFLAIFHVLQWTFLNFPFVFLAIFHVLKCVFLIFRDFQFSCHIPGPTVCISHFSRFSVIL  
SFFKLSTACFSFSMIFSFLAIFHVLQWTFLNFPFVSPYSRSYSVHFSFSTFFSDFVIFQVVKWMFLIFLDF  
HFSC

>ENSMUSP00000137451\_c.218:T>G\_p.N73K ENSMUST00000179264.2|Gm10717-207|ENSMUSG00000095891|+|chr9:g.3030790:T>G  
MFLIFHDFQFSCHIPCPTVDISFPFVFLAIFHVLKCVFLIFRDFQFSCHIPGPTVCISHFSRFSVILSFFK  
LSTACFSFSMIFSFLAIFHVLQWTFLNFPFVFLAIFHVLKCVFLIFRVFQFPRHIPGPTVCYHFSRFSVI  
SSFFKTSSGCFSSFMIFSFLAIFHVLQWTFLNFPFVSPYSRSYSVHFSFSTFFSDFVIFQVVKWMFLIFLD  
FHSC

>ENSMUSP00000096640\_c.537:C>A\_p.P180T ENSMUST00000099042.4|Gm10717-202|ENSMUSG00000095891|+|chr9:g.3030878:C>A  
FLIFHDFQLSSHIPGPTVDISFRPLSVFLAIFHVPKCVFLIFHDFQFPRHIPGPTVCISHFSRFSVISSFFKT  
SSGCFSSFMIFSFLAIFHVLQWTFLNFPFVFLAIFHVLKCVFLIFRDFQFSCHIPGPTVCISHFSRFSVIL  
SFFNLSTACFSFSMIFSFLAIFHVLQWTFLNFPFVSPYSRSYSVHFSFSTFFSDFVIFQVVKWMFLIFLDF  
HFSC

>ENSMUSP00000137451\_c.306:C>A\_p.P103T ENSMUST00000179264.2|Gm10717-207|ENSMUSG00000095891|+|chr9:g.3030878:C>A  
MFLIFHDFQFSCHIPCPTVDISFPFVFLAIFHVLKCVFLIFRDFQFSCHIPGPTVCISHFSRFSVILSFFN  
LSTACFSFSMIFSFLAIFHVLQWTFLNFPFVFLAIFHVLKCVFLIFRVFQFPRHIPGPTVCYHFSRFSVI  
SSFFKTSSGCFSSFMIFSFLAIFHVLQWTFLNFPFVSPYSRSYSVHFSFSTFFSDFVIFQVVKWMFLIFLD  
FHSC

>ENSMUSP00000096650\_c.559:T>C\_p.F187S ENSMUST00000099051.11|Gm10717-203|ENSMUSG00000095891|+|chr9:g.3030992:T>C  
CHIPCPTVEISFPFVFLAIFHVLKCVFLIFRVFQVSRHIPGPTVCISHFSRFSVILSFFKLSSGCFPFSLI  
FSFLTIFHVLQWTFLNFPFVFLAIFHVLKCVFLIFSDQFPRHIPGPTVCISHFSRFSVISSFFKTSSGCF  
SFFMIFSFLAIFHVLQWTFLNFPFVSPYSRSYSVHFSFSTFFSDFVIFQVVKWMFLIFLDFHFSC

>ENSMUSP00000096640\_c.589:T>C\_p.F197S ENSMUST00000099042.4|Gm10717-202|ENSMUSG00000095891|+|chr9:g.3030992:T>C  
FLIFHDFQLSSHIPGPTVDISFRPLSVFLAIFHVPKCVFLIFHDFQFPRHIPGPTVCISHFSRFSVISSFFKT  
SSGCFSSFMIFSFLAIFHVLQWTFLNFPFVFLAIFHVLKCVFLIFRDFQFSCHIPGPTVCISHFSRFSVIL  
SFFNLSTACFSFSMIFSFLAIFHVLQWTFLNFPFVSPYSRSYSVHFSFSTFFSDFVIFQVVKWMFLIFLDF  
HFSC

>ENSMUSP00000137451\_c.389:T>G\_p.I130M ENSMUST00000179264.2|Gm10717-207|ENSMUSG00000095891|+|chr9:g.3032010:T>G  
MFLIFHDFQFSCHIPCPTVDISFPFVFLAIFHVLKCVFLIFRDFQFSCHIPGPTVCISHFSRFSVILSFFN  
LSTACFSFSMIFSFLAIFHVLQWTFLNFPFVFLAIFHVLKCVFLIFRVFQFPRHMPGPTVCYHFSRFSVI  
SSFFKTSSGCFSSFMIFSFLAIFHVLQWTFLNFPFVSPYSRSYSVHFSFSTFFSDFVIFQVVKWMFLIFLD  
FHSC

>ENSMUSP00000137451\_c.399:A>T\_p.T134S ENSMUST00000179264.2|Gm10717-207|ENSMUSG00000095891|+|chr9:g.3032020:A>T  
MFLIFHDFQFSCHIPCPTVDISFPFVFLAIFHVLKCVFLIFRDFQFSCHIPGPTVCISHFSRFSVILSFFN  
LSTACFSFSMIFSFLAIFHVLQWTFLNFPFVFLAIFHVLKCVFLIFRVFQFPRHIPGPTVCYHFSRFSVI  
SSFFKTSSGCFSSFMIFSFLAIFHVLQWTFLNFPFVSPYSRSYSVHFSFSTFFSDFVIFQVVKWMFLIFLD  
FHSC

>ENSMUSP00000137451\_c.406:G>A\_p.C136Y ENSMUST00000179264.2|Gm10717-207|ENSMUSG00000095891|+|chr9:g.3032027:G>A  
MFLIFHDFQFSCHIPCPTVDISFPFVFLAIFHVLKCVFLIFRDFQFSCHIPGPTVCISHFSRFSVILSFFN  
LSTACFSFSMIFSFLAIFHVLQWTFLNFPFVFLAIFHVLKCVFLIFRVFQFPRHIPGPTVYIYHFSRFSVI

SSFFKTSSGCFSFFMIFSFLAIFHVLQWTFLNFPFVSVPYSRSYSVHFSFSTFFSDFVIFQVVKWMFLIFLD  
FHFSC  
>ENSMUSP00000137451\_c.605:T>G\_p.S202R ENSMUST00000179264.2|Gm10717-  
207|ENSMUSG00000095891|+|chr9:g.3032522:T>G  
MFLIFHDFQFSCHIPCPTVDISFPFVSFLAIFHVLKCVFLIFRDFQFSCHIPGPTVCISHFSRFSVILSFFN  
LSTACFSFSMIFSFLAIFHVLQWTFLNFPFVSFLAIFHVLKCVFLIFRVFQFPRHIPGPTVCIIYHSRFSVI  
SSFFKTSSGCFSFFMIFSFLAIFHVLQWTFLNFPFVSVPYSRSYSVHFSFSTFFRDFVIFQVVKWMFLIFLD  
FHFSC  
>ENSMUSP00000136837\_c.433:T>G\_p.V145G ENSMUST00000179839.8|Gm10717-  
208|ENSMUSG00000095891|+|chr9:g.3032522:T>G  
MFLIFHDFQFSCHIPCPTVDISFPFVSFLAIFHVLKCVFLIFRDFQFSCHIPGPTVCISHFSRFSVILSFFK  
LSSGCFSSSLIFTFLAIFHVLQWTFLYFPFVSFLAIFHVLKCVFLIFRDFQVSRHIPGPTVCISHFSRFSGI  
LSFFKLSSGCFSFSLIFTFLAIFHVLQWTFLNFPFVSFLYFSPYSKSYSVHFSFSTFFSDFVIFQVVKWMFLI  
FHDFQLSC  
>ENSMUSP00000096655\_c.433:T>G\_p.V145G ENSMUST00000099056.4|Gm10717-  
204|ENSMUSG00000095891|+|chr9:g.3032522:T>G  
MFLIFHDFQFSCHIPCPTVDISFPFVSFLAIFHVLKCVFLIFRDFQFSCHIPGPTVCISHFSRFSVILSFFK  
LSSGCFSSSLIFTFLAIFHVLQWTFLYFPFVSFLAIFHVLKCVFLIFRDFQVSRHIPGPTVCISHFSRFSGI  
LSFFKLSSGCFSFSLIFTFLAIFHVLQWTFLNFPFVSFLYFSPYSKSYSVHFSFSTFFSDFVIFQVVKWMFLI  
FHDFQLSC  
>ENSMUSP00000096655\_c.602:T>G\_p.S201R ENSMUST00000099056.4|Gm10717-  
204|ENSMUSG00000095891|+|chr9:g.3032756:T>G  
MFLIFHDFQFSCHIPCPTVDISFPFVSFLAIFHVLKCVFLIFRDFQFSCHIPGPTVCISHFSRFSVILSFFK  
LSSGCFSSSLIFTFLAIFHVLQWTFLYFPFVSFLAIFHVLKCVFLIFRDFQVSRHIPGPTVCISHFSRFSVI  
LSFFKLSSGCFSFSLIFTFLAIFHVLQWTFLNFPFVSFLYFSPYSKSYSVHFSFSTFFRDFVIFQVVKWMFLI  
FYDF  
QFSC  
>ENSMUSP00000135988\_c.16:A>G\_p.H6R ENSMUST00000178641.2|Gm17535-  
201|ENSMUSG00000096736|+|chr9:g.3034615:A>G  
MFLIFRDFQFSCHIPCPTVDISFPFVSFLAIFHVLKCVFLIFRVFQVSRHIPGPTVCISHFSRFSVILSFFK  
LSSGCFSSSLIFTFLAIFHVLQWTFLNFPFVSFLAIFHVLKCVFLIFSDQFSRHIPGPTVCISHFSRFSVI  
SSFFKTSSGCFSFSMIFSFLAIFHVLQWTFLNFPFVSVPYSRSYSVHFSFSTFFCDFVIFQVVKWMFLIFLD  
FQFSY  
>ENSMUSP00000135988\_c.573:A>C\_p.S192R ENSMUST00000178641.2|Gm17535-  
201|ENSMUSG00000096736|+|chr9:g.3035707:A>C  
MFLIFHDFQFSCHIPCPTVDISFPFVSFLAIFHVLKCVFLIFRVFQVSRHIPGPTVCISHFSRFSVILSFFK  
LSSGCFSSSLIFTFLAIFHVLQWTFLNFPFVSFLAIFHVLKCVFLIFSDQFSRHIPGPTVCISHFSRFSVI  
SSFFKTSSGCFSFSMIFSFLAIFHVLQWTFLNFPFVSVPYSRSYSRVHFSFSTFFCDFVIFQVVKWMFLIFLD  
FQFSY  
>ENSMUSP00000135988\_c.592:T>C\_p.F198S ENSMUST00000178641.2|Gm17535-  
201|ENSMUSG00000096736|+|chr9:g.3035726:T>C  
MFLIFHDFQFSCHIPCPTVDISFPFVSFLAIFHVLKCVFLIFRVFQVSRHIPGPTVCISHFSRFSVILSFFK  
LSSGCFSSSLIFTFLAIFHVLQWTFLNFPFVSFLAIFHVLKCVFLIFSDQFSRHIPGPTVCISHFSRFSVI  
SSFFKTSSGCFSFSMIFSFLAIFHVLQWTFLNFPFVSVPYSRSYSVHFSFSTFFCDFVIFQVVKWMFLIFLD  
FQFSY  
>ENSMUSP00000135988\_c.661:A>T\_p.Q221L ENSMUST00000178641.2|Gm17535-  
201|ENSMUSG00000096736|+|chr9:g.3035795:A>T  
MFLIFHDFQFSCHIPCPTVDISFPFVSFLAIFHVLKCVFLIFRVFQVSRHIPGPTVCISHFSRFSVILSFFK  
LSSGCFSSSLIFTFLAIFHVLQWTFLNFPFVSFLAIFHVLKCVFLIFSDQFSRHIPGPTVCISHFSRFSVI  
SSFFKTSSGCFSFSMIFSFLAIFHVLQWTFLNFPFVSVPYSRSYSVHFSFSTFFCDFVIFQVVKWMFLIFLD  
FLFSY  
>ENSMUSP00000136448\_c.166:C>A\_p.T56K ENSMUST00000155807.3|Gm10715-  
201|ENSMUSG00000096201|+|chr9:g.3037047:C>A  
MFLIFNDFHFSCLIPRPIVDISFPFVSFLAIFHVPKCVFLIFHDFQFPRHIPGPKVCISHFSRFSVISSFFK  
TSSGCFSSFFMIFSFLAIFPVLQWTFLNFPFVSFLAIFHVLKCVFLIFRDFQFSRQIPGPTVCISHFSRFSVI  
LSFFNLSTACFSLSMIFSFLAIFHVLQWTFLNFPFVSFFSPYFTSYSVHFSFSTFFSDFVFFQDVVKWMFLIFH  
DFQFSC  
>ENSMUSP00000136448\_c.171:T>G\_p.C58G ENSMUST00000155807.3|Gm10715-  
201|ENSMUSG00000096201|+|chr9:g.3037052:T>G

MFLIFNDFHFHFSCLIPRPIVDISFPPFSVFLAIFHVPKCVFLIFHDFQFPRHIPGPTVGIHSHFSRFSVSISSFFK  
TSSGCFSSFFMIFSFSLAIFPVLQWTFLNFPFVSFLAIFHVLKCVFLIFRDFQFSRQIPGPTVCISHFSRFSVI  
LSFFNLSTACFSLSMIFSFLAIFHVLQWTFLNFPFVSFFSPYFTSYSVHFSFFTFSSDFVFFQDVKWMFLIFH  
DFQFSC  
>ENSMUSP00000136448\_c.399:A>T\_p.T134S ENSMUST00000155807.3|Gm10715-  
201|ENSMUSG00000096201|+|chr9:g.3037280:A>T  
MFLIFNDFHFHFSCLIPRPIVDISFPPFSVFLAIFHVPKCVFLIFHDFQFPRHIPGPTVCISHFSRFSVSISSFFK  
TSSGCFSSFFMIFSFSLAIFPVLQWTFLNFPFVSFLAIFHVLKCVFLIFRDFQFSRQIPGPTVCISHFSRFSVI  
LSFFNLSTACFSLSMIFSFLAIFHVLQWTFLNFPFVSFFSPYFTSYSVHFSFFTFSSDFVFFQDVKWMFLIFH  
DFQFSC  
>ENSMUSP00000137129\_c.165:A>T\_p.T56S ENSMUST00000177969.2|Gm10715-  
202|ENSMUSG00000096201|+|chr9:g.3037280:A>T  
MFLIFHDFQFSCHIPCPTVDISFPPFSVFLAIFHVLKCVFLIFRDFQFSRQIPGPTVCISHFSRFSVILSFFN  
LSTACFSLSMIFSFLAIFHVLQWTFLNFPFVSFLAIFHVLKCVFLIFRVFQFPRHIPGPTVCISHFSRFSVI  
SSFFKTSSGCFSSFFMIFSFSLAIFPVLQWTFLNFPFSSSIFLPSYRSYSVHFSFFTFSSDFVIFQVVKWFLI  
FHDFQLSS  
>ENSMUSP00000136448\_c.433:T>G\_p.V145G ENSMUST00000155807.3|Gm10715-  
201|ENSMUSG00000096201|+|chr9:g.3037314:T>G  
MFLIFNDFHFHFSCLIPRPIVDISFPPFSVFLAIFHVPKCVFLIFHDFQFPRHIPGPTVCISHFSRFSVSISSFFK  
TSSGCFSSFFMIFSFSLAIFPVLQWTFLNFPFVSFLAIFHVLKCVFLIFRDFQFSRQIPGPTVCISHFSRFSGI  
LSFFNLSTACFSLSMIFSFLAIFHVLQWTFLNFPFVSFFSPYFTSYSVHFSFFTFSSDFVFFQDVKWMFLIFH  
DFQFSC  
>ENSMUSP00000137129\_c.199:T>G\_p.V67G ENSMUST00000177969.2|Gm10715-  
202|ENSMUSG00000096201|+|chr9:g.3037314:T>G  
MFLIFHDFQFSCHIPCPTVDISFPPFSVFLAIFHVLKCVFLIFRDFQFSRQIPGPTVCISHFSRFSGILSFFN  
LSTACFSLSMIFSFLAIFHVLQWTFLNFPFVSFLAIFHVLKCVFLIFRVFQFPRHIPGPTVCISHFSRFSVI  
SSFFKTSSGCFSSFFMIFSFSLAIFPVLQWTFLNFPFSSSIFLPSYRSYSVHFSFFTFSSDFVIFQVVKWFLI  
FHDFQLSS  
>ENSMUSP00000137129\_c.580:A>T\_p.Y194F ENSMUST00000177969.2|Gm10715-  
202|ENSMUSG00000096201|+|chr9:g.3038216:A>T  
MFLIFHDFQFSCHIPCPTVDISFPPFSVFLAIFHVLKCVFLIFRDFQFSRQIPGPTVCISHFSRFSVILSFFN  
LSTACFSLSMIFSFLAIFHVLQWTFLNFPFVSFLAIFHVLKCVFLIFRVFQFPRHIPGPTVCISHFSRFSVI  
SSFFKTSSGCFSSFFMIFSFSLAIFPVLQWTFLNFPFSSSIFLPSYRSYSVHFSFFTFSSDFVIFQVVKWFLI  
FHDFQLSS  
>ENSMUSP00000129804\_c.283:G>A\_p.G95E ENSMUST00000165255.3|Vmn1r238-  
201|ENSMUSG00000091539|-|chr18:g.3123129:C>T  
MKMDPGNFAIETFLFCQITVGMFGNSSILFYFILIFTEKHLTPKVLII EHLTFANYLTVILRGFPQTMSYFG  
FKNFLDDMECKLIVYISRITREVSLEYAMCLVSCFQAITISPNNSRWIKLYRATKYIGPSCSVSWLVHLLLN  
LTPLRSGTNYKKNATNRLSYGYCSLFASDSVATTLYISLVCFSDFVCLGLMACSSISMVSIYRHKRQVKHN  
HSAQHFLKVPEDRATQTILILLCTFVISYSFSSIVAIIRTYLNYPIVIGVNIFTSLEIFFPMFCPFVLITNM  
RSSNLFLPCLGKR\*  
>ENSMUSP00000025073\_c.988:T>C\_p.L330P ENSMUST00000025073.12|Cu12-  
201|ENSMUSG00000024231|+|chr18:g.3423580:T>C  
MSLKPRVVDDEFTWKNLLTTIKAVVMLEYVERATWNRDSDIYALCVAYPEPLGERLYAETKIFLESHVRHLY  
KRVLESEEQVLVYHRYWEEYSKGADYMDCLYRYLNTQYIKKNKLTEADIQYGYGGVDMNEPLMEIGELALDM  
WRKLMVEPLQNILIRMLLREIKNDRGGEDPNQKVIHGVINSFVHVEQYKKKFPLKFYQGIFVSPFLTETGEYY  
KQEASNLLQESNCSQYMEKVLGRLKDEEIRCRKYLHPSYTKVIHECQQRMVADHLQFLHSECHSIIQQERKN  
DMANMYVLLRAVSSGLPHMIEELQKHIHDEGLRATSNPTQEHMPTLFVESVLEVHGKVFQVLINTVNLGDQHF  
SALDKALTSVVNYREP KSVCKAPELLAKYCDNLLKKSAGGMTENEVEDKLT SFITVFKYIDDKDVFQKFYARM  
LAKRLIHGLSMSMDSEAMINKLKQACGYEFTSKLHRMYTDM SVSADLNNKFNNFIRNQD TVIDLGISFQIYV  
LQAGAWPLTQAPSSTFAIPQELEKSVQMFELFY SQHFSGRKLTLWHYLCTGEVKMNYLGKPYVAMVTTYQMAV  
LLAFNNSETVSYKELQDSTQMNEKELTKTIKSLLDVKMINHDSEKEDI DAESSFSLNMSFSSKRKTKFKITTS  
M QKDT PQVISQSRARFNPSISMIKKCIEVLIDKQYIERSQASADEYSVA\*  
>ENSMUSP00000125403\_c.988:T>C\_p.L330P ENSMUST00000162301.8|Cu12-  
205|ENSMUSG00000024231|+|chr18:g.3423580:T>C  
MSLKPRVVDDEFTWKNLLTTIKAVVMLEYVERATWNRDSDIYALCVAYPEPLGERLYAETKIFLESHVRHLY  
KRVLESEEQVLVYHRYWEEYSKGADYMDCLYRYLNTQYIKKNKLTEADIQYGYGGVDMNEPLMEIGELALDM  
WRKLMVEPLQNILIRMLLREIKNDRGGEDPNQKVIHGVINSFVHVEQYKKKFPLKFYQGIFVSPFLTETGEYY

KQEASNLLQESNCSQYMEKVLGRLKDEEIRCRKYLHPSSYTKVIHECQORMVADHLQFLHSECHSI IQQERKN  
 DMANMYVLLRAVSSGLPHMIEELQKHIHDEGLRATSNPTQEHMPTLFVESVLEVHGKQVQLINTVNLNGDQHFM  
 SALDKALTSVVNYREPKSVCKAPELLAKYCDNLLKKSAGMTENEVEDKLTSTFIVFKYIDDKDVFQKQFYARM  
 LAKRLIHGLSMSMDSEEAMINKLKQACGYEFTSKLHRMYTDMSSVADLNNKFNNFIRNQDTVIDLGISFQIYV  
 LQAGAWPLTQAPSSTFAIQELEKSVQMFELFYSQHFSGRKLTLWHLCTGEVKMNYLGKPYVAMVTTYQMAV  
 LLAFNNSETVSYKELQDSTQMNEKELTKTIKSLLDVKMINHDSEKEDI DAESSFSLNMSFSSKRKTKFKITTSM  
 QKDTPQELEQTRS AVDEDRKMYLQAAIVRIMKARKVLRHNALIQEVISQSRARFNPSISMIKKCIEVLIDKQY  
 IERSQASADEYSYVA\*

>ENSMUSP00000123903\_c.799:T>C\_p.L267P ENSMUST00000161317.2|Cu12-  
 204|ENSMUSG00000024231|+|chr18:g.3423580:T>C  
 MSLKPRVDFDETWKLLTTIKAVVMLEYVERATWNRFSDIYALCVAYPEPLGERLYAETKIFLESHVRHLY  
 KRVLESEEQVLVVMYHRYWEEYSKGADYMDCLYSDRGGEDPNQKVIHGVINSFVHVEQYKPKFKFYQGI FVS  
 PFLTETGEYKQEASNLLQESNCSQYMEKVLGRLKDEEIRCRKYLHPSSYTKVIHECQORMVADHLQFLHSEC  
 HSI IQQERKNDMANMYVLLRAVSSGLPHMIEELQKHIHDEGLRATSNPTQEHMPTLFVESVLEVHGKQVQLIN  
 TVNLNGDQHFM SALDKALTSVVNYREPKSVCKAPELLAKYCDNLLKKSAGMTENEVEDKLTSTFIVFKYIDDK  
 DVFQKQFYARMLAKRLIHGLSMSMDSEEAMINKLKQACGYEFTSKLHRMYTDMSSVADLNNKFNNFIRNQDTVI  
 DLGISFQIYV LQAGAWPLTQAPSSTFAIQELEKSVQMFELFYSQHFSGRKLTLWHLCTGEVKMNYLGKPYV  
 AMVTTYQMAVLLAFNNSETVSYKELQDSTQMNEKELTKTIKSLLDVKMINHDSEKEDI DAESSFSLNMSFS  
 >ENSMUSP00000002080\_c.1866:C>A\_p.P623T ENSMUST00000002080.12|Pdzd4-  
 201|ENSMUSG00000002006|-|chrX:g.72838440:G>T  
 MGCNMCVVQKPEEQYKVMLQVNGKELSKLSQEQTLEALRASKEPLVIQVLRSPRLRGDSSCHDLQLVDSGTQ  
 TDITFEHIMALGKLRPPTPPMGI LEPYVLSLPPISHEYYDPAEFMEGGPQEAERMDELEYEEVELCKNSHQD  
 KGLMVCYRTDEEEDLGIYVGEVNPNSIAAKDGRIREGDRI IQINGMDVQNREEAVAILSQEENTNISLLVAR  
 PESQLAKRWKDSDRDDFLDDFGSENEGDLRARKLKSPVQQIGNDEKQAPDGGPGLNNSQDLDSGVGRTDEST  
 RNEESSEHDLLGDEPPSTTNTPGSLRKFLGQDALQSRDFHFMSDLSLAEGAGLGGADLPGLTDEEYERYREL  
 LEIKCHLENGNQLGIFFSRASSGNSALDVNRNESLGHEMAMLEEELRHLEFKCRNILRAQKMQQLRERCMKAW  
 LLEESLYDLAASEPKKHELSDISELPEKSDKDST SAYNTGESCRSTPLLVEPLPESPLKRSAGNSNLNRT  
 SGPPVTTHLKGAPSPGSPAKFRSLSRDPEVGRRQHTTEERVRRSTKTSVTLERVGPEGSPYLSRRHRGQEI EQY  
 HSCVQLAPPRTLEDLGHGSLSLASGPRVGGVAAA AVEATRMEWKVVRSDGTRYVAKRPVRDRLLKARALKIR  
 EERSGMTTDDDAVSEMKGRYWSKEERKQHLIRAREQRKRRE FMMQSRLECLREQQNGD SKPELNI IALSHRK  
 TMKRNKKILDNWI TIQEMLAHGARSADGKRIYNPLLSVTTV\*

>ENSMUSP00000110081\_c.1521:C>A\_p.P508T ENSMUST00000114438.3|Pdzd4-  
 202|ENSMUSG00000002006|-|chrX:g.72838440:G>T  
 MGCNMCVVQKPEEQYKVMLQVEVELCKNSHQDKLGLMVCYRTDEEEDLGIYVGEVNPNSIAAKDGRIREGDRI I  
 QINGMDVQNREEAVAILSQEENTNISLLVARPESQLAKRWKDSDRDDFLDDFGSENEGDLRARKLKSPVQQI  
 GNDEKQAPDGGPGLNNSQDLDSGVGRTDESTRNEESSEHDLLGDEPPSTTNTPGSLRKFLGQDALQSRDFHF  
 MSDLSLAEGAGLGGADLPGLTDEEYERYRELLEIKCHLENGNQLGIFFSRASSGNSALDVNRNESLGHEMAM  
 LEEELRHLEFKCRNILRAQKMQQLRERCMKAWLLEESLYDLAASEPKKHELSDISELPEKSDKDST SAYNTGE  
 SCRSTPLLVEPLPESPLKRSAGNSNLNRTPSGPPVTTHLKGAPSPGSPAKFRSLSRDPEVGRRQHTTEERVRR  
 STKTSVTLERVGPEGSPYLSRRHRGQEI EQYHSCVQLAPPRTLEDLGHGSLSLASGPRVGGVAAA AVEATRME  
 WKVVRSDGTRYVAKRPVRDRLLKARALKIREERSGMTTDDDAVSEMKGRYWSKEERKQHLIRAREQRKRRE  
 FMMQSRLECLREQQNGD SKPELNI IALSHRKTMKRNKKILDNWI TIQEMLAHGARSADGKRIYNPLLSVTTV  
 \*
