# Supplementary material
Source: HighWire-hosted journal article supplement (https://gut.bmj.com/content/73/1/131)
Supplement: inline-supplementary-material-14 [file inline-supplementary-material-14.pdf]

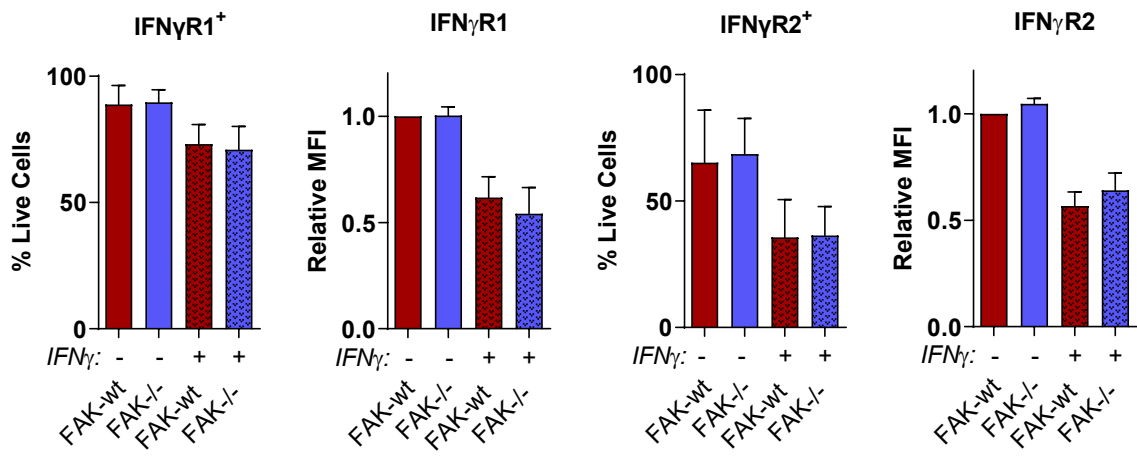

Supplementary Figure 6. FAK does not regulate surface expression of the IFN $\gamma$  receptors.
