# Supplementary material
Source: HighWire-hosted journal article supplement (https://gut.bmj.com/content/73/1/131)
Supplement: inline-supplementary-material-16 [file inline-supplementary-material-16.pdf]

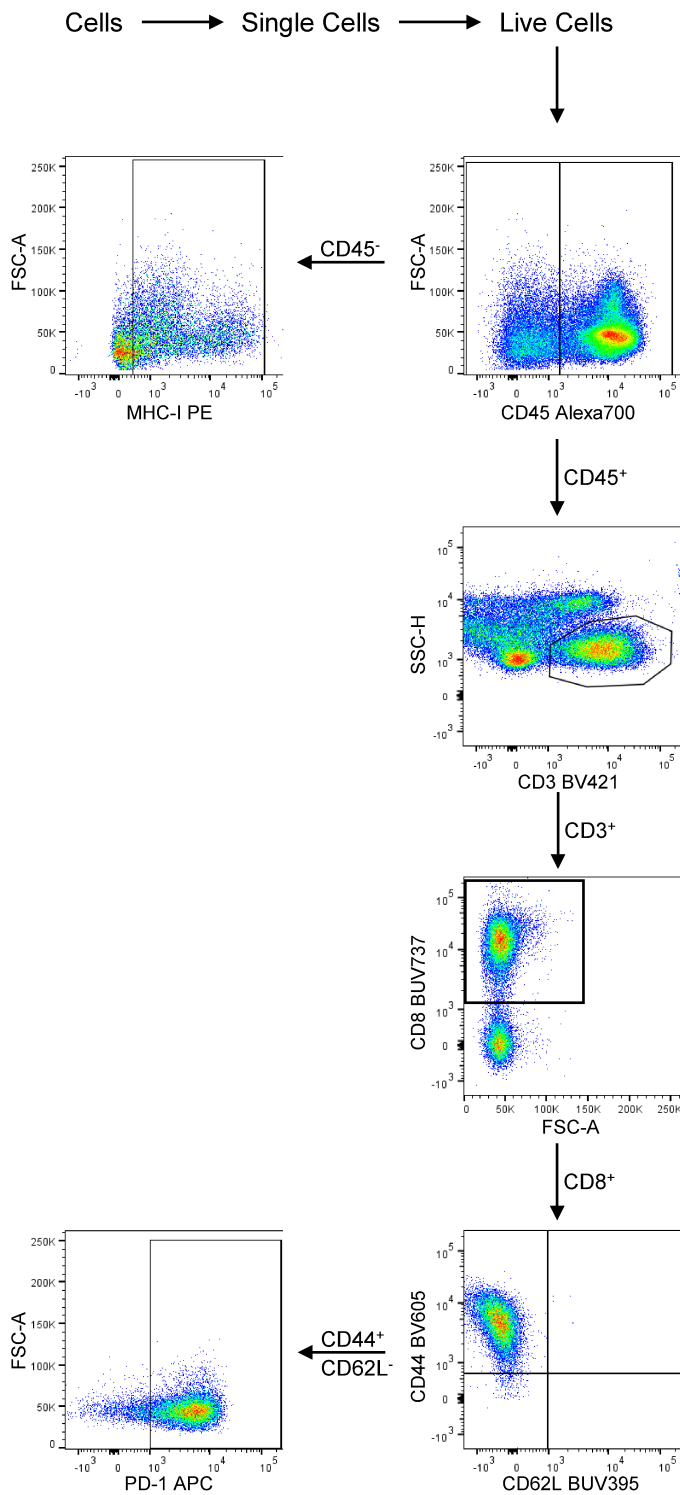

Supplementary Figure 8. Flow cytometry gating strategy for data in Figure 5.
