# Supplementary material
Source: HighWire-hosted journal article supplement (https://gut.bmj.com/content/73/1/131)
Supplement: inline-supplementary-material-17 [file inline-supplementary-material-17.pdf]

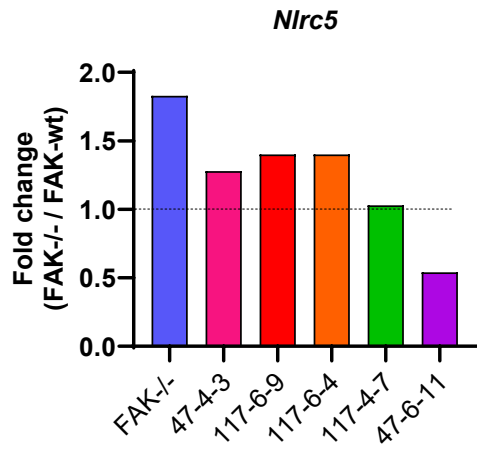

**Supplementary Figure 9. Fold-change in *Nlrc5* gene expression in FAK-/- cells relative to their FAK-wt counterparts.**
