# Supplementary material
Source: HighWire-hosted journal article supplement (https://gut.bmj.com/content/73/1/131)
Supplement: inline-supplementary-material-18 [file inline-supplementary-material-18.pdf]

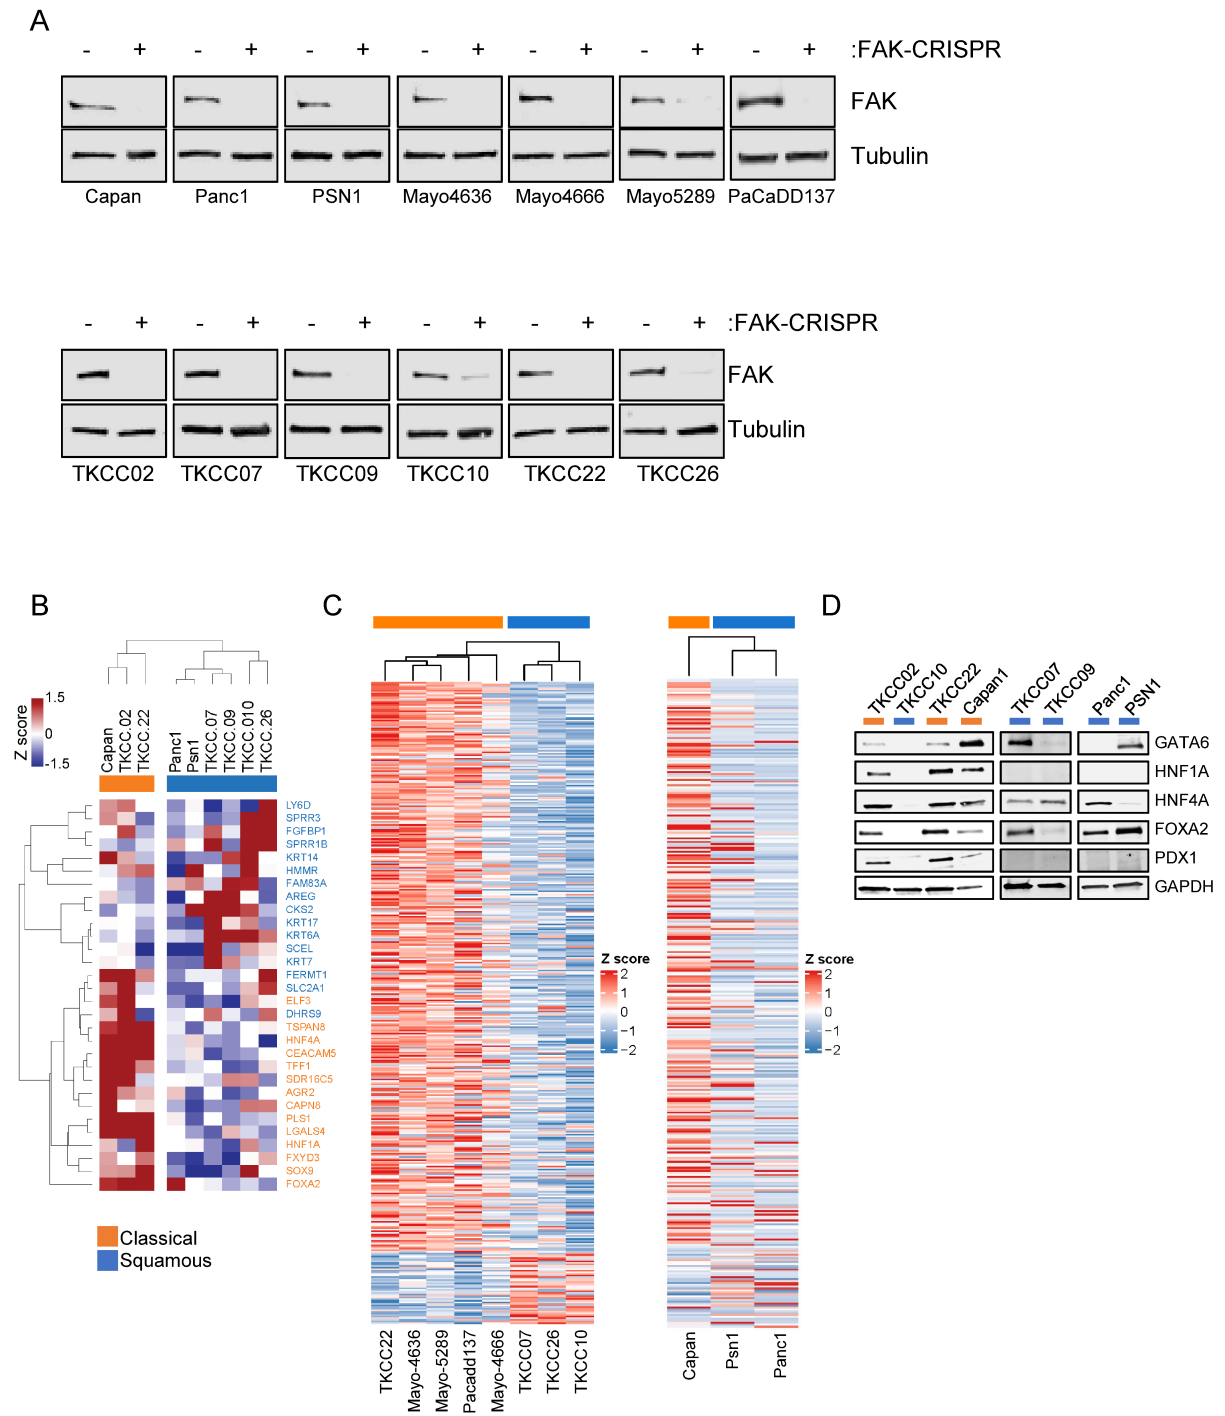

Supplementary Figure 10. Proteomic analysis of FAK function in human PDCLs.
